# Supplementary material for: Genome survey sequencing and characterization of simple sequence repeat (SSR) markers in Platostoma palustre (Blume) A.J.Paton (Chinese mesona)
Source: PubMed Central journal article supplement (PMC8748427; doi:10.1038/s41598-021-04264-x), 2022-01-10
Supplement: 41598_2021_4264_MOESM1_ESM.pdf [file 41598_2021_4264_MOESM1_ESM.pdf]

# Genome Survey Sequence and Characterization of Simple Sequence Repeat (SSR) Markers in *Mesona chinensis* Benth (Chinese Mesona)

Zhao Zheng <sup>1,2,#</sup>, Nannan Zhang <sup>1,#</sup>, Zhenghui Huang <sup>1,2</sup>, Qiaoying Zeng <sup>1</sup>, Yonghong Huang <sup>1</sup> and Yongwen Qi <sup>1,2,\*</sup>

<sup>1</sup> Guangdong sugarcane Genetic Improvement Engineering Center, Guangdong Provincial Bioengineering Institute (Guangzhou Sugarcane Industry Research Institute), Guangzhou 510316, China ;

<sup>2</sup> Zhongkai University of Agriculture and Engineering, Guangzhou 510225, China

\* Correspondence: yongwen2001@163.com; Tel.: +86 20 84168434 (F.L.)

# These authors contributed equally to this work

## Authors list

### Zhao Zheng

**Email:** 13710053962@163.com

**Affiliation:**

Guangdong Sugarcane Genetic Improvement Engineering Center, Guangdong Provincial Bioengineering Institute (Guangzhou Sugarcane Industry Research Institute), Guangzhou 510316, China ;

Zhongkai University of Agriculture and Engineering, Guangzhou 510225, China

### Nannan Zhang

**Email:** zhangnn23@mail2.sysu.edu.cn

**Affiliation:**

Guangdong Sugarcane Genetic Improvement Engineering Center, Guangdong Provincial Bioengineering Institute (Guangzhou Sugarcane Industry Research Institute), Guangzhou 510316, China ;

### Zhenghui Huang

**Email:** hzh85501@foxmail.com

**Affiliation:**

Guangdong Sugarcane Genetic Improvement Engineering Center, Guangdong Provincial Bioengineering Institute (Guangzhou Sugarcane Industry Research Institute), Guangzhou 510316, China ;

Zhongkai University of Agriculture and Engineering, Guangzhou 510225, China

### Qiaoying Zeng

**Email:** zengqiaoying123@163.com

**Affiliation:**

Guangdong Sugarcane Genetic Improvement Engineering Center, Guangdong Provincial Bioengineering Institute (Guangzhou Sugarcane Industry Research Institute), Guangzhou 510316, China ;

**Yonghong Huang**

**Email:** bear20081013@126.com

**Affiliation:**

Guangdong Sugarcane Genetic Improvement Engineering Center, Guangdong Provincial Bioengineering Institute (Guangzhou Sugarcane Industry Research Institute), Guangzhou 510316, China ;

**Yongwen Qi**

**Email:** yongwen2001@163.com

**Affiliation:**

Guangdong Sugarcane Genetic Improvement Engineering Center, Guangdong Provincial Bioengineering Institute (Guangzhou Sugarcane Industry Research Institute), Guangzhou 510316, China ;  
Zhongkai University of Agriculture and Engineering, Guangzhou 510225, China

Supplementary Table 1. The predict genome size of *Mesona chinensis* Benth with different tools.

| Software     | Kmer size | Genome size (bp) |
|--------------|-----------|------------------|
| GenomeScope2 | 21        | 1258798638       |
| GenomeScope2 | 23        | 1258743939       |
| GenomeScope2 | 25        | 1258153982       |
| GenomeScope2 | 27        | 1257443508       |
| FindGSE      | 21        | 1387232711       |
| FindGSE      | 23        | 1406061078       |
| FindGSE      | 25        | 1384082434       |
| FindGSE      | 27        | 1403375561       |
| MGSE         | -         | 1346321495       |
| Gce          | 21        | 2196260000       |
| Gce          | 23        | 2180150000       |
| Gce          | 25        | 2128670000       |
| Gce          | 27        | 2219320000       |

Supplementary Table 2. Details of all the SSR markers that identified from *Mesona chinensis* Benth

| ID                | SSR nr. | SSR type | SSR    | size | start | end   | FORWARD PRIMER1 (5'-3')   |
|-------------------|---------|----------|--------|------|-------|-------|---------------------------|
| scaffold61_15.9   | 1       | p2       | (AT)9  | 18   | 1483  | 1500  | AACGAATTGAAATGAATTCTACG   |
| scaffold84_14.4   | 1       | p2       | (TA)9  | 18   | 50    | 67    | CGAACGCTCCAAATTAGAATG     |
| scaffold124_12.6  | 1       | p2       | (AT)7  | 14   | 277   | 290   | GGCTATAGGTCAACGGACCA      |
| scaffold127_13.5  | 1       | p2       | (TA)9  | 18   | 132   | 149   | CTGAGCTTCAGAGCCCAGTT      |
| scaffold219_12.9  | 1       | p2       | (TA)8  | 16   | 644   | 659   | TGAATTCATAACCTTCCCATTCA   |
| scaffold343_12.1  | 1       | p2       | (CT)11 | 22   | 423   | 444   | GCTCCACCTCCAAACAAGAG      |
| scaffold367_15.0  | 1       | p2       | (AT)6  | 12   | 15141 | 15152 | CTGGAGCAGCATCCAAAGTT      |
| scaffold407_11.5  | 1       | p2       | (AT)9  | 18   | 47    | 64    | TGTGTTGTGTGGAATAAAAAGTTTG |
| scaffold441_16.0  | 1       | p2       | (CT)6  | 12   | 694   | 705   | TCTTCGTTTCTGGTCTGCCT      |
| scaffold452_15.0  | 1       | p2       | (AT)10 | 20   | 48    | 67    | TGCAGCAATGGTTGTGATTT      |
| scaffold509_17.8  | 1       | p2       | (AT)6  | 12   | 183   | 194   | CGAGACACTTGGCAACTTCA      |
| scaffold549_11.1  | 1       | p2       | (AC)6  | 12   | 65    | 76    | CCCTCGACACACACTCACAT      |
| scaffold642_16.5  | 1       | p2       | (TC)6  | 12   | 301   | 312   | TAAATCATCAGCCCACGTCA      |
| scaffold820_12.7  | 1       | p2       | (AT)9  | 18   | 375   | 392   | CAGTAATCATGCGGAAAAA       |
| scaffold851_10.9  | 1       | p2       | (AG)6  | 12   | 302   | 313   | TGACCGGAAGGTATGAACAA      |
| scaffold900_11.1  | 1       | p2       | (TA)7  | 14   | 523   | 536   | TCGCTGACATCATCTTATGGA     |
| scaffold909_11.1  | 1       | p2       | (GA)6  | 12   | 532   | 543   | CAAGGGTTCAAGCATTGGAG      |
| scaffold914_14.0  | 1       | p2       | (GA)7  | 14   | 586   | 599   | AAGCATTTGAGGGGTTTTCC      |
| scaffold992_13.1  | 1       | p2       | (GC)6  | 12   | 61    | 72    | CGGGGACACATAAACCTCAC      |
| scaffold1174_17.5 | 1       | p2       | (CT)6  | 12   | 54    | 65    | TTCCCCTTTGCCCTCTATTT      |
| scaffold1268_20.1 | 1       | p2       | (GA)7  | 14   | 75    | 88    | CCCCTGATTTGTGTGAGGA       |
| scaffold1316_13.6 | 1       | p2       | (AG)8  | 16   | 52    | 67    | AGTTTTTCATGGATGGATGCC     |
| scaffold1359_13.2 | 1       | p2       | (AT)7  | 14   | 694   | 707   | TCCAAGTTTTTACCCACCA       |
| scaffold1398_10.7 | 1       | p2       | (TA)6  | 12   | 54    | 65    | TGACCATATCTCGGTTTAGCA     |
| scaffold1420_11.1 | 1       | p2       | (TC)6  | 12   | 695   | 706   | TTTTAATGGGCGGTTATGGA      |
| scaffold1450_12.4 | 1       | p2       | (AG)7  | 14   | 263   | 276   | GACATATCGTCGATCGGCTT      |
| scaffold1683_20.2 | 1       | p2       | (AT)6  | 12   | 107   | 118   | GGGTGGATGACTTTGGTGTT      |
| scaffold1739_11.1 | 1       | p2       | (CT)6  | 12   | 44    | 55    | TCTAACCCAAACCCAAACCC      |
| scaffold2019_12.7 | 1       | p2       | (TA)6  | 12   | 94    | 105   | TTTCGTCCCGAAATTTTGT       |
| scaffold2112_11.2 | 1       | p2       | (TA)9  | 18   | 209   | 226   | GACAACCTTCGGCTTGAAAA      |
| scaffold2138_14.4 | 1       | p2       | (CT)6  | 12   | 185   | 196   | AACCTGGCCCCCTAAGCTTGT     |
| scaffold2197_15.4 | 1       | p2       | (TA)7  | 14   | 52    | 65    | CCATCTATAGCGGTTAGCGTG     |
| scaffold2272_15.8 | 1       | p2       | (TA)6  | 12   | 54    | 65    | CCCCTTAGGAACATTTAGGGA     |
| scaffold2610_13.8 | 1       | p2       | (AT)10 | 20   | 401   | 420   | TTGATACCTCCTCCCACGAC      |
| scaffold2693_15.1 | 1       | p2       | (AT)8  | 16   | 375   | 390   | GTTAGCGGAGTGAATGAGGG      |
| scaffold2696_12.8 | 1       | p2       | (CT)7  | 14   | 104   | 117   | AATTGATCATGGCTTCTGGC      |
| scaffold2789_10.8 | 1       | p2       | (TC)6  | 12   | 208   | 219   | GGGAGTTTGACACCTAAAGCC     |
| scaffold2800_12.0 | 1       | p2       | (AT)6  | 12   | 388   | 399   | ACAGGCTCTTTGGAAGACGA      |
| scaffold2816_18.4 | 1       | p2       | (TA)9  | 18   | 100   | 117   | TGGTTACTTGGAAACGCGA       |
| scaffold2829_15.3 | 1       | p2       | (CT)7  | 14   | 2222  | 2235  | ACAGGTCCTGAAACAAACG       |
| scaffold2857_14.5 | 1       | p2       | (TC)6  | 12   | 2399  | 2410  | ACGTGAAGGCTGGGACATAC      |
| scaffold2889_11.2 | 1       | p2       | (AT)6  | 12   | 54    | 65    | ATTTGACATCTAATACCCAATTTTT |
| scaffold3055_12.9 | 1       | p2       | (CT)10 | 20   | 266   | 285   | TTTATTGCAGGCGCTCTCTT      |
| scaffold3064_11.0 | 1       | p2       | (TG)6  | 12   | 54    | 65    | GGATACCCTCTCAAACCCTAGT    |
| scaffold3164_15.8 | 1       | p2       | (TC)7  | 14   | 209   | 222   | GGGGCGTGACAAGTTATGTT      |
| scaffold3415_18.4 | 1       | p2       | (GA)7  | 14   | 1148  | 1161  | ATCAAACAGCTGAGGCTCGT      |
| scaffold3600_10.3 | 1       | p2       | (GA)6  | 12   | 106   | 117   | TGATGAAGGTCCAAATGCAA      |
| scaffold3641_11.1 | 1       | p2       | (AT)6  | 12   | 54    | 65    | AATTCTAACCATCTTCTTTTGCC   |
| scaffold3739_12.5 | 1       | p2       | (TA)7  | 14   | 238   | 251   | ATCCTCCCACCCCACTTAAC      |
| scaffold3746_15.6 | 1       | p2       | (GA)6  | 12   | 490   | 501   | AGAAAAGGGGAGAGAGCAGG      |
| scaffold3844_17.5 | 1       | p2       | (TC)6  | 12   | 139   | 150   | GACTGTTTCGAGCTTATCCGC     |
| scaffold3968_15.2 | 1       | p2       | (AT)6  | 12   | 417   | 428   | CACGTAAGGCTAAATAATGTCA    |
| scaffold4045_13.5 | 1       | p2       | (AT)10 | 20   | 818   | 837   | GAGAGCATGAAGAATGAACCC     |
| scaffold4135_23.5 | 1       | p2       | (AG)6  | 12   | 54    | 65    | TGGTGAGATTTGTGGTTTGG      |
| scaffold4211_12.1 | 1       | p2       | (AT)6  | 12   | 176   | 187   | TCGGTCGAAACCGAATAAAC      |



|                   |      |        |    |      |      |                           |
|-------------------|------|--------|----|------|------|---------------------------|
| scaffold4517_11.1 | 1 p2 | (TA)8  | 16 | 485  | 500  | ATTGGCAAATATCACCGGA       |
| scaffold4547_12.1 | 1 p2 | (AT)6  | 12 | 55   | 66   | CAATAATTTTGTTCACCAA       |
| scaffold4626_12.8 | 1 p2 | (AC)7  | 14 | 236  | 249  | AAGTCCACCACGATGTCCTC      |
| scaffold4628_13.4 | 1 p2 | (TA)9  | 18 | 1079 | 1096 | TTTCACAAACCACGTTGACA      |
| scaffold4661_18.0 | 1 p2 | (CT)7  | 14 | 341  | 354  | CCCTAACTCGACCCAGATCA      |
| scaffold4751_14.3 | 1 p2 | (TC)8  | 16 | 1454 | 1469 | GCTGAGTTTTGAGGATTGGG      |
| scaffold4790_16.1 | 1 p2 | (AG)6  | 12 | 3258 | 3269 | CGCTAAGATGGAGTTTTCGG      |
| scaffold4808_11.4 | 1 p2 | (TC)6  | 12 | 34   | 45   | GGGATGCCATTCGTTAGTCC      |
| scaffold5156_12.2 | 1 p2 | (AT)7  | 14 | 1019 | 1032 | TGGAAGATTAAGAGGCCCAA      |
| scaffold5238_13.0 | 1 p2 | (TC)6  | 12 | 48   | 59   | CCCCTTTGTCAACTTAGGCA      |
| scaffold5329_11.0 | 1 p2 | (AT)6  | 12 | 587  | 598  | ATTCCTAGGCGGCATTCTGT      |
| scaffold5553_14.7 | 1 p2 | (TG)10 | 20 | 302  | 321  | CGGTGGAGTGGTTTCACAGT      |
| scaffold5614_15.9 | 1 p2 | (TA)8  | 16 | 1933 | 1948 | CAGAGGATCCAAATCCGAAG      |
| scaffold5636_13.9 | 1 p2 | (AT)6  | 12 | 54   | 65   | GCTACCTTATTGATCCATTCTC    |
| scaffold5978_13.4 | 1 p2 | (AC)8  | 16 | 42   | 57   | GCATGAAATTGTGATTTTTGGTG   |
| scaffold6020_16.6 | 1 p2 | (GA)8  | 16 | 2628 | 2643 | TGCCATGCACAGTTTTTCTC      |
| scaffold6052_11.1 | 1 p2 | (CT)8  | 16 | 52   | 67   | TCTCTCTTTTTGGTTGGTGGA     |
| scaffold6064_14.9 | 1 p2 | (TA)8  | 16 | 1004 | 1019 | TGTGAATTGGGTATGTGAATCAT   |
| scaffold6255_13.3 | 1 p2 | (AT)7  | 14 | 756  | 769  | TGCAATCTCAGCCACTCATT      |
| scaffold6310_14.4 | 1 p2 | (TG)7  | 14 | 4263 | 4276 | TGGTCGTTGACACGACAGAT      |
| scaffold6349_13.7 | 1 p2 | (AT)7  | 14 | 466  | 479  | TGCAAGAATGGGTTTTTGAAT     |
| scaffold6381_11.9 | 1 p2 | (AT)7  | 14 | 250  | 263  | TTTCGTGTTGCCATTGATCT      |
| scaffold6512_15.5 | 1 p2 | (AG)9  | 18 | 231  | 248  | GAGCACTCGAAAAGTAGCGG      |
| scaffold6602_12.8 | 1 p2 | (TA)6  | 12 | 95   | 106  | CGAGGAGAACCTTGGAGTGA      |
| scaffold6618_10.5 | 1 p2 | (AG)6  | 12 | 54   | 65   | TGAGTTTCAATTGCGTAGTCAAA   |
| scaffold6619_15.4 | 1 p2 | (AG)6  | 12 | 415  | 426  | TCACAGACGGAGAGAGACACA     |
| scaffold6738_16.2 | 1 p2 | (AT)7  | 14 | 1345 | 1358 | TCTCATTCTCCATCAGCCAA      |
| scaffold6920_13.8 | 1 p2 | (TA)6  | 12 | 156  | 167  | TATTTTGGACGATTTTGCCC      |
| scaffold6952_14.0 | 1 p2 | (CT)6  | 12 | 493  | 504  | TCGTCCGCTGCAGTAATATG      |
| scaffold7013_13.2 | 1 p2 | (TA)7  | 14 | 550  | 563  | TGTCTTGCAGGCAATTCATAA     |
| scaffold7196_16.8 | 1 p2 | (TA)6  | 12 | 627  | 638  | ACGGAAATGACCCTCATTCA      |
| scaffold7245_14.4 | 1 p2 | (TA)6  | 12 | 239  | 250  | CCGATCCCACCTTGTTTTTA      |
| scaffold7348_15.5 | 1 p2 | (TA)8  | 16 | 380  | 395  | TTCATTTGCCTAAAATGCCC      |
| scaffold7671_15.8 | 1 p2 | (CT)6  | 12 | 1325 | 1336 | AAGGTGAAC TCAAACGGCTC     |
| scaffold7698_16.2 | 1 p2 | (GA)7  | 14 | 1656 | 1669 | ACAAC TGGTTTCATCCGTGG     |
| scaffold7781_16.5 | 1 p2 | (TA)6  | 12 | 1023 | 1034 | CTTGTT CAGCGTCACAAGGA     |
| scaffold7789_12.7 | 1 p2 | (TA)6  | 12 | 151  | 162  | CAGATATTACGGTTGGCGCT      |
| scaffold7795_12.6 | 1 p2 | (TG)6  | 12 | 54   | 65   | TGGAAATTAGACGATTTACACAAAA |
| scaffold7872_13.4 | 1 p2 | (TA)8  | 16 | 1620 | 1635 | ATTGGACACAACCCACACCT      |
| scaffold7881_14.8 | 1 p2 | (AT)6  | 12 | 1056 | 1067 | CCTCTCTTTCCCTCCATTC       |
| scaffold7900_13.9 | 1 p2 | (AG)9  | 18 | 71   | 88   | AAAAGGTGGTGGTGGTGTTC      |
| scaffold7903_15.7 | 1 p2 | (AG)7  | 14 | 316  | 329  | GTTCTGCCCTCCTTTTCCTC      |
| scaffold7944_15.0 | 1 p2 | (AG)6  | 12 | 466  | 477  | ATTC CCCCCAAAACCGAATAA    |
| scaffold7956_13.3 | 1 p2 | (TA)9  | 18 | 266  | 283  | ACTAGATCACTCGGCCAACCC     |
| scaffold8351_16.2 | 1 p2 | (AG)6  | 12 | 55   | 66   | TGGA AATTCATCCACGTTCA     |
| scaffold8352_11.8 | 1 p2 | (TA)7  | 14 | 76   | 89   | GCATACATGAATGGATGTGATTT   |
| scaffold8401_11.5 | 1 p2 | (AG)6  | 12 | 157  | 168  | TTGGGCTCGAGTGAAAAGAT      |
| scaffold8559_13.9 | 1 p2 | (GA)6  | 12 | 265  | 276  | TCCCAA ACTTCGTGTGTGTT     |
| scaffold8644_10.7 | 1 p2 | (AC)8  | 16 | 47   | 62   | GAAAAGCTTGGCCATTCAAC      |
| scaffold8647_13.5 | 1 p2 | (TA)6  | 12 | 831  | 842  | CCCCCTTAATTACTTTGTCACG    |
| scaffold9000_15.0 | 1 p2 | (TC)6  | 12 | 1431 | 1442 | GAAACCCGCTGTTTGGTTTA      |
| scaffold9015_16.4 | 1 p2 | (AG)6  | 12 | 78   | 89   | TTTTGTTTGTTC CAGGTTG      |
| scaffold9063_17.2 | 1 p2 | (TC)8  | 16 | 5059 | 5074 | GCCCAT TATGGAATCTCACG     |
| scaffold9386_16.2 | 1 p2 | (TA)6  | 12 | 398  | 409  | ACTTTGAATCACAGCCGTCC      |
| scaffold9656_15.1 | 1 p2 | (CT)7  | 14 | 53   | 66   | AAACAACAATTCATCAAATATCCG  |
| scaffold9734_14.4 | 1 p2 | (CT)6  | 12 | 273  | 284  | ACTTTGCATCCCAGTCAGGA      |
| scaffold9750_14.4 | 1 p2 | (AG)9  | 18 | 2311 | 2328 | TCCTGCATATTTGAGGTCCC      |
| scaffold9825_15.2 | 1 p2 | (AG)7  | 14 | 639  | 652  | TCACCGGAGAAGCTTAGGAA      |

|                    |      |       |    |      |                             |
|--------------------|------|-------|----|------|-----------------------------|
| scaffold9930_12.2  | 1 p2 | (TC)6 | 12 | 154  | 165 GGCTGCGATTTGACTCTCC     |
| scaffold9955_16.7  | 1 p2 | (GT)8 | 16 | 2157 | 2172 GCAAATGTAGCACGCAGAAA   |
| scaffold10006_19.5 | 1 p2 | (TA)6 | 12 | 725  | 736 TTGTGCACTTCATATCGCGT    |
| scaffold10021_17.7 | 1 p2 | (TC)7 | 14 | 53   | 66 AAGTGAGAATGATGAGGGCG     |
| scaffold10026_12.8 | 1 p2 | (GA)7 | 14 | 674  | 687 TTCCTTTAGGCCATCCACAG    |
| scaffold10202_18.3 | 1 p2 | (TA)9 | 18 | 102  | 119 CACTGACATCCATCCATTGC    |
| scaffold10504_12.8 | 1 p2 | (AT)6 | 12 | 745  | 756 GATAGTATGCCAATTTTTCGTGA |
| scaffold10505_13.1 | 1 p2 | (AT)9 | 18 | 391  | 408 TGGCACATTATTGGTCTCTCA   |
| scaffold10509_11.7 | 1 p2 | (AT)7 | 14 | 209  | 222 CGTACGTGTGTGTGTGCATT    |
| scaffold10556_13.4 | 1 p2 | (AG)6 | 12 | 1050 | 1061 AGAAGAGCAAATGGTGGTGG   |
| scaffold10610_13.9 | 1 p2 | (GA)6 | 12 | 103  | 114 CGAATTTGGTGTGGAAATTG    |
| scaffold10725_10.5 | 1 p2 | (TA)9 | 18 | 442  | 459 CAACGGTTGTCATTGTTTCT    |
| scaffold10927_11.0 | 1 p2 | (GT)6 | 12 | 950  | 961 AACATTTTCGTGGCCTTGATT   |
| scaffold11109_15.2 | 1 p2 | (AT)8 | 16 | 205  | 220 CGGCCGGAATATCTAAAGTG    |
| scaffold11245_15.3 | 1 p2 | (AT)6 | 12 | 100  | 111 AATATTGGATGTCTTGCGGC    |
| scaffold11632_13.4 | 1 p2 | (GT)6 | 12 | 147  | 158 TTCCCAAATTTTGATTCCGA    |
| scaffold12076_16.0 | 1 p2 | (TC)7 | 14 | 212  | 225 TTGCTTTCCAAAAAGTTGTACG  |
| scaffold12338_19.0 | 1 p2 | (TA)7 | 14 | 185  | 198 CGTGGTTCGGGTATTCACTT    |
| scaffold12523_15.6 | 1 p2 | (TC)7 | 14 | 1289 | 1302 CAATTTCCATGTTCCGCTCT   |
| scaffold12579_14.6 | 1 p2 | (TC)9 | 18 | 54   | 71 CATCCCAAACCTCTCTCGCTC    |
| scaffold12584_13.1 | 1 p2 | (GA)9 | 18 | 194  | 211 CAACATTCCCCTCAACACCT    |
| scaffold12609_15.7 | 1 p2 | (TC)7 | 14 | 53   | 66 CGTCGATCCTTCCTCATCTC     |
| scaffold12818_12.8 | 1 p2 | (TC)6 | 12 | 406  | 417 TGCACCTTGAGTTGCTTTTGC   |
| scaffold12829_13.2 | 1 p2 | (CT)6 | 12 | 190  | 201 CAATAACCCTTGGCTCGAAA    |
| scaffold13262_12.2 | 1 p2 | (CT)9 | 18 | 641  | 658 TCTTTATTTCCACCCCCTCC    |
| scaffold13418_14.1 | 1 p2 | (TC)6 | 12 | 461  | 472 TCTTCCCAAATTGGTTTCC     |
| scaffold13611_11.1 | 1 p2 | (CT)6 | 12 | 250  | 261 CGTTGTTTGTCTCCAATTCA    |
| scaffold13755_15.4 | 1 p2 | (AT)7 | 14 | 1110 | 1123 AACGGACGTGTTTTGGCTAC   |
| scaffold13867_12.0 | 1 p2 | (GT)7 | 14 | 53   | 66 TCTGTGCTCTCTTCTCAGTCG    |
| scaffold14014_13.2 | 1 p2 | (CT)6 | 12 | 257  | 268 TTCACCACCTAAAGAAGGGC    |
| scaffold14047_13.9 | 1 p2 | (TC)7 | 14 | 53   | 66 TTGGGAGGATTTTCTCTTGC     |
| scaffold14058_10.3 | 1 p2 | (CA)6 | 12 | 339  | 350 TTCCTTCATCTGTCACGTCG    |
| scaffold14070_14.4 | 1 p2 | (TA)9 | 18 | 542  | 559 TTATGAAATCCGACGAGCA     |
| scaffold14173_11.4 | 1 p2 | (GA)9 | 18 | 641  | 658 TGACGAGAGCAGAGCAGAGA    |
| scaffold14271_15.7 | 1 p2 | (GA)6 | 12 | 63   | 74 TGTCTGTGAGGTGGAACA       |
| scaffold14290_16.7 | 1 p2 | (TA)6 | 12 | 1980 | 1991 TCCCACGTAACGAATTTTCC   |
| scaffold14393_18.3 | 1 p2 | (GA)7 | 14 | 1373 | 1386 ACAAAAAGCAGCACAACGTG   |
| scaffold14571_15.9 | 1 p2 | (TA)8 | 16 | 328  | 343 ACTGTCCTCTTAGACCGCCA    |
| scaffold14576_13.7 | 1 p2 | (AT)6 | 12 | 737  | 748 GATCGGCACGATAAGGACAC    |
| scaffold14583_17.9 | 1 p2 | (AT)7 | 14 | 696  | 709 TGGTAGGCCGAACCTCGTAACC  |
| scaffold14676_12.1 | 1 p2 | (AT)7 | 14 | 320  | 333 GTTGCCACCAATGTGTTTCA    |
| scaffold14735_14.1 | 1 p2 | (CT)6 | 12 | 1641 | 1652 TCAATGTTTTGCGTTTCCAA   |
| scaffold14770_13.8 | 1 p2 | (AT)6 | 12 | 138  | 149 AACAATGCAAGTGATATTCATCG |
| scaffold14976_15.1 | 1 p2 | (CT)6 | 12 | 167  | 178 GAGCTTGCACTCAGAGAGCTT   |
| scaffold15213_14.6 | 1 p2 | (AG)7 | 14 | 53   | 66 GTGACCCTATGACGCCAAGT     |
| scaffold15319_15.4 | 1 p2 | (TA)6 | 12 | 942  | 953 TCCCGCTTCATAGCAAATTC    |
| scaffold15396_15.5 | 1 p2 | (AG)8 | 16 | 1941 | 1956 ATAAGGGTTTGTGCTCCGTG   |
| scaffold15494_19.2 | 1 p2 | (CT)8 | 16 | 580  | 595 AGTGC GTGCTTGTTC AATG   |
| scaffold15586_14.3 | 1 p2 | (TA)6 | 12 | 533  | 544 TGGCGTTTGATATTTGAGAAGA  |
| scaffold15592_15.7 | 1 p2 | (TG)7 | 14 | 1084 | 1097 TTTCCACACCACGTCAGCTA   |
| scaffold15604_13.1 | 1 p2 | (TC)7 | 14 | 636  | 649 CGGTTGTGATAACGATGACG    |
| scaffold15653_13.1 | 1 p2 | (TG)6 | 12 | 251  | 262 CGTGTTCTTCACTCATCCCA    |
| scaffold15658_16.5 | 1 p2 | (AT)6 | 12 | 1223 | 1234 GCACTGAAACGCCAAAAGAT   |
| scaffold15744_15.0 | 1 p2 | (TC)6 | 12 | 108  | 119 CTCCCAAACCCACTATCAC     |
| scaffold15796_16.2 | 1 p2 | (CA)6 | 12 | 2254 | 2265 GGCATGAAGGAAACCAAAGA   |
| scaffold16102_19.0 | 1 p2 | (AG)7 | 14 | 1097 | 1110 GTGACTGTGAGGGAGTGGGT   |
| scaffold16183_16.3 | 1 p2 | (AG)6 | 12 | 42   | 53 GATGAACTCTTGGGTGGG       |
| scaffold16380_14.5 | 1 p2 | (AG)8 | 16 | 2267 | 2282 AGAATGGCACAGACTCCAGAA  |

|                    |      |        |    |      |      |                             |
|--------------------|------|--------|----|------|------|-----------------------------|
| scaffold16415_18.1 | 1 p2 | (GA)6  | 12 | 298  | 309  | TCCGACTTACCACCACACAA        |
| scaffold16429_15.3 | 1 p2 | (GA)7  | 14 | 54   | 67   | AACCCAGAAGAAAGACAGCAA       |
| scaffold16490_10.1 | 1 p2 | (AT)9  | 18 | 714  | 731  | AGACTCATGCGGCTCTTGAT        |
| scaffold16617_19.7 | 1 p2 | (TA)6  | 12 | 510  | 521  | TCTGTGATCAACACCACAAA        |
| scaffold16628_13.0 | 1 p2 | (AT)8  | 16 | 712  | 727  | TCGAGTGAGCATTTTGGATG        |
| scaffold16695_15.3 | 1 p2 | (CT)9  | 18 | 460  | 477  | CCTCCAAATCTAACCCCTCC        |
| scaffold16976_13.7 | 1 p2 | (GA)7  | 14 | 665  | 678  | AAACACACACACCGTCTCCA        |
| scaffold16993_17.1 | 1 p2 | (TA)6  | 12 | 145  | 156  | CGTGCATTCTACCCTATTTG        |
| scaffold17025_17.7 | 1 p2 | (TC)6  | 12 | 106  | 117  | TCTCATTACGCTTTTCAGC         |
| scaffold17035_13.6 | 1 p2 | (CT)6  | 12 | 2315 | 2326 | AAGGAGTCTCTCAGTTTCATCA      |
| scaffold17725_11.1 | 1 p2 | (AG)6  | 12 | 277  | 288  | CCTTGAAGACAATGAAATTTTGG     |
| scaffold17815_12.7 | 1 p2 | (AG)6  | 12 | 146  | 157  | TGTTATCCTTTGTGAGCCCC        |
| scaffold17887_14.0 | 1 p2 | (GC)6  | 12 | 210  | 221  | GTTCAAGTCCGGCTCTTCAG        |
| scaffold17896_15.4 | 1 p2 | (TC)6  | 12 | 128  | 139  | GATTTGCACCTTCCACGAAT        |
| scaffold17935_10.1 | 1 p2 | (AT)7  | 14 | 185  | 198  | GTCGGAACACTTCGTGTTGA        |
| scaffold18182_11.5 | 1 p2 | (TA)7  | 14 | 184  | 197  | ACACATTTTTCTTTGGGCG         |
| scaffold18195_18.3 | 1 p2 | (GA)7  | 14 | 54   | 67   | CATGAGAGAGAGGGCTGGAA        |
| scaffold18226_11.3 | 1 p2 | (CT)6  | 12 | 75   | 86   | CCCCCAAAGTTATGGTAAA         |
| scaffold18386_13.8 | 1 p2 | (GT)6  | 12 | 109  | 120  | AGTGCACGTCAGAGTTGGC         |
| scaffold18474_15.9 | 1 p2 | (TA)7  | 14 | 400  | 413  | CAATCAATCTCAGCCGTTTG        |
| scaffold18527_15.1 | 1 p2 | (AT)8  | 16 | 105  | 120  | AAACATTTTACCACATGATTAAGACC  |
| scaffold18576_15.8 | 1 p2 | (TA)6  | 12 | 477  | 488  | ACCAATTGCCATCTGCTAC         |
| scaffold18624_12.6 | 1 p2 | (AT)8  | 16 | 2083 | 2098 | CACCAAATGATTAATAATCCCAA     |
| scaffold18640_12.5 | 1 p2 | (TA)7  | 14 | 54   | 67   | GTTTTACGTCGGAATATTGA        |
| scaffold18659_17.0 | 1 p2 | (AT)6  | 12 | 1468 | 1479 | TCCGAATATGAAATCGGGTT        |
| scaffold18668_12.8 | 1 p2 | (TG)7  | 14 | 1222 | 1235 | TCGAGAAGTTGTTTGTCTCAACA     |
| scaffold18787_12.1 | 1 p2 | (CA)6  | 12 | 208  | 219  | GGTCCCCTCCTAACTTTGCT        |
| scaffold18794_15.1 | 1 p2 | (TG)6  | 12 | 461  | 472  | CCCCGAGGAAGCTAGAAAAA        |
| scaffold19150_15.0 | 1 p2 | (TC)6  | 12 | 109  | 120  | TAATCCACTCCCCTTTCCG         |
| scaffold19158_15.9 | 1 p2 | (GA)6  | 12 | 56   | 67   | CGGGCAGAGAGAGAGAACC         |
| scaffold19324_12.0 | 1 p2 | (AG)11 | 22 | 374  | 395  | GGGTGGGTTTGGAGAAGAGT        |
| scaffold19347_14.4 | 1 p2 | (AT)7  | 14 | 416  | 429  | GGACATTCCGTGGAGTTTGA        |
| scaffold19477_14.8 | 1 p2 | (CT)6  | 12 | 314  | 325  | GTCACGTCAGCAAACCATTG        |
| scaffold19491_14.8 | 1 p2 | (AT)6  | 12 | 1301 | 1312 | GAGATAGGGGTTGGGGTGTT        |
| scaffold19757_16.2 | 1 p2 | (TC)10 | 20 | 102  | 121  | ACGTTGGACCTGAAAGAGCA        |
| scaffold19937_15.1 | 1 p2 | (TA)6  | 12 | 195  | 206  | AACCTTAACAAAATGAATCATCAAA   |
| scaffold19974_18.0 | 1 p2 | (AT)6  | 12 | 81   | 92   | TTCCAATCCATTTGCAATACT       |
| scaffold20002_17.4 | 1 p2 | (TA)7  | 14 | 152  | 165  | AAAGCCTACCTTGCTTCCGT        |
| scaffold20074_13.5 | 1 p2 | (GA)8  | 16 | 172  | 187  | GGAGAACTTGCTTCTTGGC         |
| scaffold20104_13.2 | 1 p2 | (TA)10 | 20 | 1093 | 1112 | GATCCACATGCATGAAATCG        |
| scaffold20185_15.1 | 1 p2 | (AG)6  | 12 | 570  | 581  | AATAACAAATGGCCACGGAA        |
| scaffold20444_16.2 | 1 p2 | (AC)6  | 12 | 322  | 333  | CAAAGGAAGGGCAGAAACAA        |
| scaffold20565_11.9 | 1 p2 | (GA)9  | 18 | 486  | 503  | TGCATTCTTTCCAGTCTCA         |
| scaffold20626_15.3 | 1 p2 | (AT)6  | 12 | 1201 | 1212 | CCGTTCCGTTCCATAAATGA        |
| scaffold20660_14.1 | 1 p2 | (AG)7  | 14 | 900  | 913  | CAGGCCAACTCCTATCTGGA        |
| scaffold20704_12.8 | 1 p2 | (TC)6  | 12 | 182  | 193  | TAAAAATGGGAGATGAGGCG        |
| scaffold20825_11.7 | 1 p2 | (TA)7  | 14 | 729  | 742  | TTTTAATTCATTAATCATATTTGCATC |
| scaffold20936_12.9 | 1 p2 | (CT)6  | 12 | 46   | 57   | CTCTCTCTGCGTCTCTCTCA        |
| scaffold21030_12.2 | 1 p2 | (AT)9  | 18 | 831  | 848  | TGCTATTGAAAATGATCCCACA      |
| scaffold21236_14.6 | 1 p2 | (AG)7  | 14 | 1914 | 1927 | CAAGACCTACCGAGCTTCTGA       |
| scaffold21289_15.3 | 1 p2 | (TA)6  | 12 | 3727 | 3738 | TCGAAGGGGATTTTATGTGG        |
| scaffold21314_13.4 | 1 p2 | (TA)8  | 16 | 151  | 166  | TAGAAATGGGATACGGACGG        |
| scaffold21318_16.3 | 1 p2 | (CT)6  | 12 | 2654 | 2665 | TTTGACAGACAAATCGCTCG        |
| scaffold21423_10.9 | 1 p2 | (TA)10 | 20 | 111  | 130  | CGCAGATCTAATGGTCCAGA        |
| scaffold21430_13.6 | 1 p2 | (TA)8  | 16 | 105  | 120  | GCACCACAAACATGTCACAA        |
| scaffold21500_15.1 | 1 p2 | (TA)7  | 14 | 326  | 339  | CGGATTGTAAATCGGGAGAA        |
| scaffold21518_14.4 | 1 p2 | (TA)7  | 14 | 313  | 326  | TCTTCGTCTGTAACACTCGTCA      |
| scaffold21688_15.8 | 1 p2 | (GA)9  | 18 | 536  | 553  | ATGCCCATTCCAAAACACAC        |

|                    |      |        |    |      |      |                            |
|--------------------|------|--------|----|------|------|----------------------------|
| scaffold21713_11.3 | 1 p2 | (AG)7  | 14 | 54   | 67   | CGCCTTTTCACCTCAAATTC       |
| scaffold21799_14.1 | 1 p2 | (AT)7  | 14 | 143  | 156  | GCTACTTCCGACTCTCTCGC       |
| scaffold21832_12.9 | 1 p2 | (TA)8  | 16 | 1049 | 1064 | TCTTCCACGATCTCCCATAACA     |
| scaffold21974_19.3 | 1 p2 | (TC)6  | 12 | 55   | 66   | TGCTAATCAGAAACTTGGAGCA     |
| scaffold22095_13.0 | 1 p2 | (AT)9  | 18 | 6948 | 6965 | CATGGTTTGAGACGGATTGA       |
| scaffold22126_16.2 | 1 p2 | (GA)6  | 12 | 267  | 278  | GATATTGACGGTTGGTTGGC       |
| scaffold22303_17.6 | 1 p2 | (AG)7  | 14 | 510  | 523  | ACGCAAGCGATATGGAAAAG       |
| scaffold22306_11.5 | 1 p2 | (CG)6  | 12 | 52   | 63   | CATGGGTGGTATGGTGTGG        |
| scaffold22391_13.0 | 1 p2 | (GA)6  | 12 | 86   | 97   | GATCGGTGAGGAGATGAAGG       |
| scaffold22631_14.2 | 1 p2 | (AT)8  | 16 | 1517 | 1532 | AAGTTGGCTAGGTGGCCTCT       |
| scaffold22751_13.1 | 1 p2 | (AT)6  | 12 | 54   | 65   | TTTACGTGTTAAGCCTTGGGA      |
| scaffold22868_14.3 | 1 p2 | (AG)11 | 22 | 168  | 189  | ATGCGTGTGTGTCTGCATGT       |
| scaffold23028_10.7 | 1 p2 | (CT)6  | 12 | 24   | 35   | CTTCTCTCCACATCCGGTA        |
| scaffold23082_15.0 | 1 p2 | (CT)6  | 12 | 100  | 111  | TTCGATGTTGTAACGGAGACA      |
| scaffold23170_14.8 | 1 p2 | (TC)7  | 14 | 52   | 65   | TGGCTCTCACTCACTCTCA        |
| scaffold23350_12.1 | 1 p2 | (TC)6  | 12 | 737  | 748  | TCGATCGATAATAACGCTTTCA     |
| scaffold23417_14.4 | 1 p2 | (AG)9  | 18 | 240  | 257  | AGATTCCGTCCGATTTAGCA       |
| scaffold23575_15.8 | 1 p2 | (GA)6  | 12 | 3568 | 3579 | CTTCCCACATGTCGTTCTT        |
| scaffold23652_15.3 | 1 p2 | (TC)6  | 12 | 664  | 675  | GTGGGTGCAGTTGGATTACC       |
| scaffold23713_17.6 | 1 p2 | (AG)6  | 12 | 1626 | 1637 | GCTGCGAAGAACAATCAA         |
| scaffold23732_15.9 | 1 p2 | (TC)8  | 16 | 315  | 330  | TGTGGAAACAAGTGCAGAGG       |
| scaffold23750_12.1 | 1 p2 | (AG)6  | 12 | 151  | 162  | TCGAAACAGAAAATCCGAGG       |
| scaffold23881_16.2 | 1 p2 | (TA)6  | 12 | 56   | 67   | GGGGCGTGACAATATCCTAA       |
| scaffold23894_10.3 | 1 p2 | (TA)7  | 14 | 107  | 120  | GTCGCTTGAATTGCGACATA       |
| scaffold23961_11.5 | 1 p2 | (TC)6  | 12 | 271  | 282  | ATGTGGTCCCAAATCTCCA        |
| scaffold23963_13.3 | 1 p2 | (TA)6  | 12 | 875  | 886  | CCGGCTCTGGGTACAGATTA       |
| scaffold24071_10.1 | 1 p2 | (CT)7  | 14 | 47   | 60   | CACTCACTCTCACTAGCCGC       |
| scaffold24205_16.1 | 1 p2 | (TC)7  | 14 | 54   | 67   | ACGCATTCAAAGCTGAAGAT       |
| scaffold24355_15.5 | 1 p2 | (TC)8  | 16 | 3453 | 3468 | AGACTGGGGAATGGCTTCTT       |
| scaffold24430_13.8 | 1 p2 | (TA)9  | 18 | 325  | 342  | TTGGGAATTCAAAATGATTCCG     |
| scaffold24613_13.4 | 1 p2 | (AG)6  | 12 | 162  | 173  | ACTCGCATTAAATGAGCCGTC      |
| scaffold24667_14.6 | 1 p2 | (AC)7  | 14 | 3151 | 3164 | TTTGTCAACTTCCCTCACCC       |
| scaffold24685_16.0 | 1 p2 | (AC)8  | 16 | 1605 | 1620 | AGCACTGTGAGACTGAGGCA       |
| scaffold24712_11.9 | 1 p2 | (TA)7  | 14 | 84   | 97   | AAGGCATCAAAGTTGTCGAT       |
| scaffold24832_10.0 | 1 p2 | (TC)6  | 12 | 77   | 88   | CGAGGGCATTATGGGAAGT        |
| scaffold24883_15.3 | 1 p2 | (CT)10 | 20 | 194  | 213  | AATGATAATCTTCGCCGTGG       |
| scaffold24945_16.0 | 1 p2 | (TA)7  | 14 | 90   | 103  | GCAATAAATCCACGTACAGGAAA    |
| scaffold24992_12.5 | 1 p2 | (TA)9  | 18 | 276  | 293  | AAAACACCTCCTTAGGTGCAAA     |
| scaffold25112_16.3 | 1 p2 | (TC)7  | 14 | 54   | 67   | GGAAATGAAAGGCCAAGTCA       |
| scaffold25265_10.5 | 1 p2 | (TA)6  | 12 | 334  | 345  | CGAAGAACACACACTTTTGGG      |
| scaffold25281_11.2 | 1 p2 | (AT)7  | 14 | 54   | 67   | ATCACCAACTGGCGAGAAAT       |
| scaffold25398_17.5 | 1 p2 | (CT)6  | 12 | 499  | 510  | ACCCTATCTGCCCAATACC        |
| scaffold25401_17.5 | 1 p2 | (CT)6  | 12 | 71   | 82   | CAAATGGCCAAGAAAGTTTACA     |
| scaffold25421_14.5 | 1 p2 | (CT)6  | 12 | 56   | 67   | GGGGACTTTTCACTTTTGGC       |
| scaffold25507_12.4 | 1 p2 | (GA)6  | 12 | 107  | 118  | TGAAGAATTCCTTGGGTTG        |
| scaffold25519_19.2 | 1 p2 | (AG)7  | 14 | 192  | 205  | TTTCTAACGATGATGGAAAAACAA   |
| scaffold25718_12.1 | 1 p2 | (AT)7  | 14 | 564  | 577  | TCAATGGTTTTGTTTTGTTCC      |
| scaffold25729_16.1 | 1 p2 | (CA)6  | 12 | 2978 | 2989 | ATTCACCTGCAGAAACGCT        |
| scaffold25792_13.9 | 1 p2 | (GA)10 | 20 | 1178 | 1197 | TTGGCCTTTCTTGATTGTCA       |
| scaffold25870_21.8 | 1 p2 | (TC)7  | 14 | 496  | 509  | TCCACTTAGGTTGGCTTTGC       |
| scaffold25893_16.0 | 1 p2 | (AT)6  | 12 | 6106 | 6117 | TTTCTTTCACACGTTTGGATT      |
| scaffold26018_11.9 | 1 p2 | (GA)6  | 12 | 297  | 308  | AGACAAGAGCCGAAAAGTCG       |
| scaffold26053_16.5 | 1 p2 | (CT)6  | 12 | 38   | 49   | ACTCTATAGCAAGATCTCACGCA    |
| scaffold26077_14.0 | 1 p2 | (AT)8  | 16 | 3308 | 3323 | ACATGATTCGTCGGGTCTTC       |
| scaffold26197_13.9 | 1 p2 | (TA)8  | 16 | 464  | 479  | CACATTAAGAGGAGGTATCATTTGAA |
| scaffold26225_17.2 | 1 p2 | (TC)6  | 12 | 270  | 281  | AAGTTGGGCTAAGTGGAGGG       |
| scaffold26343_18.6 | 1 p2 | (GA)6  | 12 | 914  | 925  | AGTAGTCCGGTCCGGTGAT        |
| scaffold26943_13.7 | 1 p2 | (TC)7  | 14 | 538  | 551  | CTGTTAGGCCCATGTCGTTT       |

|                    |      |        |    |      |                                 |
|--------------------|------|--------|----|------|---------------------------------|
| scaffold27238_15.1 | 1 p2 | (TA)8  | 16 | 779  | 794 TATGTTGGACCAAAAAGCCC        |
| scaffold27243_17.9 | 1 p2 | (CT)8  | 16 | 507  | 522 CGTTGTTTCCTCACACCCTT        |
| scaffold27244_13.3 | 1 p2 | (AT)6  | 12 | 50   | 61 CATTTCATTTTCAGGAGCTTCG       |
| scaffold27248_10.3 | 1 p2 | (AT)7  | 14 | 309  | 322 TCCATTTTTATCTTCTCTATCTTCCC  |
| scaffold27280_11.3 | 1 p2 | (AC)6  | 12 | 328  | 339 GGCAGCAATCAATTGGAAAT        |
| scaffold27421_16.2 | 1 p2 | (TA)9  | 18 | 290  | 307 AGATCATCACGTAAACGGGG        |
| scaffold27545_16.5 | 1 p2 | (AT)7  | 14 | 355  | 368 ACAGCTTACACCGTTGAGCA        |
| scaffold27709_16.3 | 1 p2 | (GA)6  | 12 | 517  | 528 GAGCAAGGAGAAGTTTCGTGG       |
| scaffold27756_17.8 | 1 p2 | (AT)12 | 24 | 1058 | 1081 GGTGAACATTGGGAGCAAAT       |
| scaffold28165_11.9 | 1 p2 | (TA)7  | 14 | 340  | 353 ACCGATTGTTGCATTTTAAGTT      |
| scaffold28175_14.2 | 1 p2 | (AT)6  | 12 | 824  | 835 AAGTTGTGTCCCCCAACACT        |
| scaffold28277_17.2 | 1 p2 | (AG)6  | 12 | 55   | 66 TGTATTTAATTGAATGCTAGAGAGAG.  |
| scaffold28322_13.6 | 1 p2 | (GT)6  | 12 | 55   | 66 GGGTAACTTGGTTCTGTAACCG       |
| scaffold28370_12.0 | 1 p2 | (TC)6  | 12 | 55   | 66 CCCACTAACCCCTTCATCACC        |
| scaffold28421_10.0 | 1 p2 | (TC)6  | 12 | 285  | 296 TGTGGAATATTGTCCCGGAT        |
| scaffold28565_10.2 | 1 p2 | (TA)9  | 18 | 102  | 119 CTTAGCCGAGAAGAACCGTG        |
| scaffold28616_10.2 | 1 p2 | (TA)6  | 12 | 55   | 66 CTCCAAATGATAAAATCGTGG        |
| scaffold28682_12.6 | 1 p2 | (TA)6  | 12 | 408  | 419 AGTCTTCACAAGCGGGTGTC        |
| scaffold28700_12.6 | 1 p2 | (TA)8  | 16 | 1029 | 1044 TCAATTTGTGTCTTATAAATTAATGC |
| scaffold28762_11.4 | 1 p2 | (TA)6  | 12 | 185  | 196 TTCCTAGGATGAAAACCTTGC       |
| scaffold28851_15.9 | 1 p2 | (AT)6  | 12 | 55   | 66 CGAACGGTTGGAATATCTAAAG       |
| scaffold28911_16.2 | 1 p2 | (CT)7  | 14 | 781  | 794 CAAAACCCAAATCCCCTTTT        |
| scaffold29014_12.6 | 1 p2 | (TA)6  | 12 | 55   | 66 AGTTATGCGTATTGTTACCTTCATT    |
| scaffold29070_10.9 | 1 p2 | (GA)7  | 14 | 147  | 160 CTTTGCAGCGTAATTCCCAT        |
| scaffold29112_15.1 | 1 p2 | (CT)6  | 12 | 461  | 472 TGTATCAGTCACCACCTCCACT      |
| scaffold29162_11.8 | 1 p2 | (AT)8  | 16 | 106  | 121 TTGTGCCTTTTATTTGAGTAAGACA   |
| scaffold29163_13.4 | 1 p2 | (AT)8  | 16 | 488  | 503 TTCAGCCTTTTTCATGTGGA        |
| scaffold29164_10.9 | 1 p2 | (TA)6  | 12 | 126  | 137 GCTTGTAAATTTTGGCTGGC        |
| scaffold29178_12.8 | 1 p2 | (TA)10 | 20 | 74   | 93 CGGGTTATTACCTGATTGCG         |
| scaffold29216_14.0 | 1 p2 | (CT)6  | 12 | 280  | 291 ACCAACCCATCAAGAATCCA        |
| scaffold29242_16.6 | 1 p2 | (CA)7  | 14 | 149  | 162 AAACGAAAAAGCCGAAACTG        |
| scaffold29377_19.5 | 1 p2 | (GA)6  | 12 | 55   | 66 TCAAGATGAGGAATGAAAAAGAGA     |
| scaffold29487_13.1 | 1 p2 | (TA)7  | 14 | 54   | 67 GGAAATAAGGAGGTGTTATGAAAGG    |
| scaffold29563_10.8 | 1 p2 | (GA)6  | 12 | 55   | 66 GGTGATGGTTGGTGTGATG          |
| scaffold29678_12.7 | 1 p2 | (AG)6  | 12 | 55   | 66 AGGGGAAGAGGTTGAAGAC          |
| scaffold29824_16.7 | 1 p2 | (AG)6  | 12 | 213  | 224 TTTGATAGAGCCGGATTTGG        |
| scaffold29880_16.2 | 1 p2 | (AT)9  | 18 | 1913 | 1930 CGAAGTTTGCATTTTAAGATGAGTT  |
| scaffold30087_15.1 | 1 p2 | (AT)8  | 16 | 626  | 641 TGTTTTGTCTTTGTGGTGCG        |
| scaffold30637_10.1 | 1 p2 | (AT)10 | 20 | 50   | 69 TGGTTACTGTTACGTATGCCAA       |
| scaffold30666_11.8 | 1 p2 | (CT)9  | 18 | 569  | 586 TAACCGTTGTTTTCCCCTCC        |
| scaffold30669_16.5 | 1 p2 | (CT)7  | 14 | 1482 | 1495 ACCATCAAGGTCAAACCTGC       |
| scaffold30692_17.7 | 1 p2 | (AT)9  | 18 | 1571 | 1588 GCTGTTGTGTTGGCATTAGC       |
| scaffold30807_14.9 | 1 p2 | (AT)9  | 18 | 349  | 366 AATGGGGACATCTGGTGTGT        |
| scaffold30864_10.4 | 1 p2 | (AT)6  | 12 | 254  | 265 AGGGAGAAGATGAGGAGGGA        |
| scaffold30982_16.9 | 1 p2 | (AT)6  | 12 | 3530 | 3541 CGCCGTTTCACCATTTTATT       |
| scaffold30986_16.9 | 1 p2 | (TA)7  | 14 | 3593 | 3606 GGGCCCACATTAGCTGTCT        |
| scaffold31055_16.3 | 1 p2 | (CT)9  | 18 | 5870 | 5887 AATTTAGTCGGCCGATTTT        |
| scaffold31144_12.9 | 1 p2 | (AT)9  | 18 | 103  | 120 TTGAACCGTGTTACCCTTCC        |
| scaffold31172_13.2 | 1 p2 | (TA)7  | 14 | 489  | 502 GATTCTCCAAATCTGACGGC        |
| scaffold31482_14.2 | 1 p2 | (TA)8  | 16 | 2153 | 2168 TTTTCCCCAAAACACCTCTG       |
| scaffold31497_16.4 | 1 p2 | (TG)7  | 14 | 843  | 856 TCTTCTCCAACCCACAAACC        |
| scaffold31576_15.2 | 1 p2 | (AT)6  | 12 | 55   | 66 TCCTAACAACAAAAGATAAAGTCAAC   |
| scaffold31729_17.7 | 1 p2 | (CT)9  | 18 | 196  | 213 ACCACCACCACCTCAACATT        |
| scaffold31755_12.2 | 1 p2 | (GT)9  | 18 | 103  | 120 TCTGCGGTACATCCAAATGA        |
| scaffold31756_16.4 | 1 p2 | (CT)7  | 14 | 202  | 215 TCACACTCACTCTCACTAGCTGC     |
| scaffold31788_15.6 | 1 p2 | (TC)7  | 14 | 492  | 505 AGATGTTCCCAGAGTGGTGG        |
| scaffold31824_14.6 | 1 p2 | (TA)8  | 16 | 485  | 500 ATTACCTCCACGCCGAGAG         |
| scaffold31917_14.4 | 1 p2 | (TC)8  | 16 | 1963 | 1978 GTTGAAAATGGTGGAAATGG       |

|                    |      |        |    |      |                               |
|--------------------|------|--------|----|------|-------------------------------|
| scaffold32086_13.9 | 1 p2 | (TC)9  | 18 | 493  | 510 TGCACCCCAAGATGGTAAAC      |
| scaffold32184_12.1 | 1 p2 | (TA)7  | 14 | 488  | 501 GCTTGCTGAGTTGGCATGTA      |
| scaffold32321_10.7 | 1 p2 | (TA)12 | 24 | 482  | 505 ATTTCTGAAGATCAACGGACG     |
| scaffold32385_13.2 | 1 p2 | (TA)10 | 20 | 770  | 789 AAAAATGTGCATGCAACTGA      |
| scaffold32440_15.7 | 1 p2 | (CT)7  | 14 | 63   | 76 TCTCTCTTTTTGGTTGGTGGGA     |
| scaffold32447_13.2 | 1 p2 | (AT)6  | 12 | 203  | 214 GAGGTTTTGGGAGAAGGAGG      |
| scaffold32610_11.9 | 1 p2 | (TG)8  | 16 | 821  | 836 TCAGTGCTGAACGTGTCAAA      |
| scaffold32640_17.1 | 1 p2 | (AT)7  | 14 | 302  | 315 CGGTCTACCAGTCCGTGAAT      |
| scaffold32686_10.9 | 1 p2 | (AT)10 | 20 | 48   | 67 AGTGTTTTGACATGATTACTCGTC   |
| scaffold32799_13.2 | 1 p2 | (TA)12 | 24 | 1740 | 1763 AAATATCGGCCGTCAGATTG     |
| scaffold32886_15.2 | 1 p2 | (TC)9  | 18 | 95   | 112 ACTGCAGAAAAATTCACGCC      |
| scaffold33031_10.2 | 1 p2 | (CT)6  | 12 | 119  | 130 ACACATGGCCACTAACACCA      |
| scaffold33109_14.7 | 1 p2 | (TA)6  | 12 | 1223 | 1234 TTTGTTCTCGTTCAAACCCC     |
| scaffold33135_11.2 | 1 p2 | (CA)6  | 12 | 55   | 66 CTCTCACACACGCAGTTAGACA     |
| scaffold33204_15.2 | 1 p2 | (AT)9  | 18 | 3309 | 3326 ATTTAATGTCCCACCCCGAG     |
| scaffold33339_13.1 | 1 p2 | (TA)8  | 16 | 2780 | 2795 CTCGCCGCTTAAAATTGTGT     |
| scaffold33458_10.0 | 1 p2 | (AT)7  | 14 | 230  | 243 TTCTTGGCATCCAGTTCCTT      |
| scaffold33501_18.8 | 1 p2 | (TA)7  | 14 | 52   | 65 AAGGGGGTTATTAGTGGATCA      |
| scaffold33588_14.5 | 1 p2 | (AT)6  | 12 | 995  | 1006 TTGGTGTTATGGATTGTGTGA    |
| scaffold33613_14.8 | 1 p2 | (TA)6  | 12 | 55   | 66 ACTATGTGCCCTCGCCAATA       |
| scaffold34095_15.5 | 1 p2 | (AG)7  | 14 | 215  | 228 CTGAACATTGCCTGCTTGAA      |
| scaffold34230_15.7 | 1 p2 | (TC)13 | 26 | 510  | 535 AGCCTCACTGCAGCTGTCTA      |
| scaffold34316_18.1 | 1 p2 | (TA)6  | 12 | 55   | 66 TCGTCATTTATACAAAACAATTCC   |
| scaffold34388_14.5 | 1 p2 | (TA)9  | 18 | 163  | 180 CCCCTCGTATGCACTCAACT      |
| scaffold34491_19.2 | 1 p2 | (GA)8  | 16 | 216  | 231 CACCATCATCCTCAGAGCAA      |
| scaffold34494_17.0 | 1 p2 | (TA)8  | 16 | 623  | 638 CGTGAATGAAAGTGATTGCG      |
| scaffold34497_12.4 | 1 p2 | (TA)6  | 12 | 91   | 102 AGATTTGGGCAGTGTGGTGT      |
| scaffold34548_16.8 | 1 p2 | (CA)7  | 14 | 38   | 51 GCGAATCGAACGAATCTGA        |
| scaffold34600_12.6 | 1 p2 | (AT)8  | 16 | 2999 | 3014 AACACCTCCTTATTTCTAACTTCA |
| scaffold34616_11.1 | 1 p2 | (CT)6  | 12 | 284  | 295 CTCTCAGCTCTTTTGCCTGG      |
| scaffold34701_10.7 | 1 p2 | (AG)6  | 12 | 219  | 230 TGTTTCGTTGGTGGAGTTGAG     |
| scaffold34734_14.6 | 1 p2 | (GA)6  | 12 | 55   | 66 GTCGGAAAAGCTTGGATGAA       |
| scaffold34894_11.4 | 1 p2 | (TC)6  | 12 | 47   | 58 TCTTTTGGTAGGTTGAATGTATTGAA |
| scaffold35174_11.2 | 1 p2 | (AC)6  | 12 | 219  | 230 TCGTGTCAGAAATCGTCAGC      |
| scaffold35218_15.9 | 1 p2 | (AT)8  | 16 | 540  | 555 TCGCCTTGTTTAGGAGAGGA      |
| scaffold35323_14.5 | 1 p2 | (CT)6  | 12 | 215  | 226 ATATGGCAATGGGACCAAGA      |
| scaffold35350_13.8 | 1 p2 | (GA)7  | 14 | 460  | 473 TTCATCAACATGCAGCCATT      |
| scaffold35374_12.7 | 1 p2 | (AT)6  | 12 | 75   | 86 GGTGCTTGGTGAAGGAAGTG       |
| scaffold35399_14.9 | 1 p2 | (AT)10 | 20 | 283  | 302 TGCAGTTGAGATGTCCTTGC      |
| scaffold35412_13.8 | 1 p2 | (AT)6  | 12 | 2772 | 2783 ACATGGGCCAAATGAGAGAC     |
| scaffold35419_14.1 | 1 p2 | (CT)8  | 16 | 3146 | 3161 TTTTCAAGGAGGGGTGAATG     |
| scaffold35439_10.6 | 1 p2 | (AT)7  | 14 | 271  | 284 TATGGATTATCACCGGATCG      |
| scaffold35482_20.2 | 1 p2 | (GA)6  | 12 | 191  | 202 TAAATGGCAGTGTGGGTTGA      |
| scaffold35966_10.2 | 1 p2 | (AT)6  | 12 | 181  | 192 TCAACAAAATTCTAAAATTGCAGG  |
| scaffold36081_12.6 | 1 p2 | (TA)8  | 16 | 40   | 55 CGGATTTAAGGGTTATTACCTGAT   |
| scaffold36127_11.0 | 1 p2 | (TC)7  | 14 | 252  | 265 GAACACGAGAGGAAGAACGC      |
| scaffold36213_15.1 | 1 p2 | (TA)9  | 18 | 341  | 358 GGCGAATGATGTTTCTAGGG      |
| scaffold36244_16.4 | 1 p2 | (AG)9  | 18 | 293  | 310 CGCATTATGTTATGCGAAA       |
| scaffold36295_13.7 | 1 p2 | (AT)7  | 14 | 1698 | 1711 AACGGTTTGAGCCTATTGAGT    |
| scaffold36339_12.6 | 1 p2 | (GT)6  | 12 | 445  | 456 CTTGGAAGAAAAACCCACA       |
| scaffold36392_21.6 | 1 p2 | (AT)8  | 16 | 622  | 637 CTATTCGAATGCGAGGGAAA      |
| scaffold36445_15.4 | 1 p2 | (TA)6  | 12 | 1273 | 1284 CATTCCAACCTCCTAATCAAGAA  |
| scaffold36447_15.7 | 1 p2 | (AC)9  | 18 | 1076 | 1093 AATGTCGCCATCATATTTTGC    |
| scaffold36452_14.7 | 1 p2 | (TA)7  | 14 | 684  | 697 GCTCATTCTGCTTCTTCCGT      |
| scaffold36489_15.8 | 1 p2 | (TA)6  | 12 | 1083 | 1094 GAGTTTCGATCTGGAACCTCG    |
| scaffold36504_15.6 | 1 p2 | (AG)6  | 12 | 1477 | 1488 CTTGACCGCAAGAAAGGTTTC    |
| scaffold36545_14.3 | 1 p2 | (TA)8  | 16 | 1789 | 1804 TTCGGGCTAAACGAGTCAAT     |
| scaffold36548_14.1 | 1 p2 | (TA)9  | 18 | 654  | 671 GGGCACTCAACCTTCAATA       |

|                    |      |        |    |      |      |                             |
|--------------------|------|--------|----|------|------|-----------------------------|
| scaffold36648_10.7 | 1 p2 | (GT)8  | 16 | 50   | 65   | AGGATGTAAATACGGTCTGTGC      |
| scaffold36658_13.4 | 1 p2 | (GA)6  | 12 | 569  | 580  | CGTTCATTCGTATTGGGCTT        |
| scaffold36735_11.1 | 1 p2 | (AT)6  | 12 | 218  | 229  | AAGTGACGACTCACGACCCT        |
| scaffold36905_16.0 | 1 p2 | (TA)7  | 14 | 1210 | 1223 | TGTATGGTCTCCTTCCCTTTG       |
| scaffold37028_13.0 | 1 p2 | (TC)6  | 12 | 376  | 387  | CTCCAACACCTCCAACCTTGC       |
| scaffold37093_16.9 | 1 p2 | (AT)6  | 12 | 143  | 154  | TCTTTAGCCCAAGTTGTATCCAT     |
| scaffold37106_10.5 | 1 p2 | (CT)10 | 20 | 112  | 131  | AAAAATGGCGATGAAACCAG        |
| scaffold37279_16.1 | 1 p2 | (TA)6  | 12 | 54   | 65   | TGAGCTGTTATGCGTTTTGA        |
| scaffold37396_11.8 | 1 p2 | (CA)6  | 12 | 137  | 148  | GAACACCGGATTTACGTGGT        |
| scaffold37402_11.1 | 1 p2 | (CT)7  | 14 | 351  | 364  | TAAGCAATGAGCGAAAAGCA        |
| scaffold37499_11.9 | 1 p2 | (GA)6  | 12 | 56   | 67   | GTTAAGTAACCGGAGAGGCG        |
| scaffold37527_15.9 | 1 p2 | (GA)8  | 16 | 539  | 554  | TCAGAAATTGTAGTCGCCCA        |
| scaffold37548_13.2 | 1 p2 | (AT)6  | 12 | 93   | 104  | TTGGAACCTTGAGCAACTGGA       |
| scaffold37569_11.9 | 1 p2 | (GA)11 | 22 | 969  | 990  | TCTGGGGTTTCAGGTAGTCG        |
| scaffold37624_15.6 | 1 p2 | (AT)7  | 14 | 1029 | 1042 | ATAGGGGCATATTCAGGTGC        |
| scaffold37664_12.5 | 1 p2 | (AC)6  | 12 | 56   | 67   | AGAGGTAGAAGCACTTGTGTGG      |
| scaffold37683_12.8 | 1 p2 | (TA)6  | 12 | 226  | 237  | AGGGCAACATTCGTCAAAAA        |
| scaffold37761_10.4 | 1 p2 | (AT)6  | 12 | 220  | 231  | CGCACGTCGAGAATTGAATA        |
| scaffold37815_13.5 | 1 p2 | (GA)7  | 14 | 160  | 173  | CGGGTTTTAGTGGAGAACGA        |
| scaffold37878_10.9 | 1 p2 | (AT)6  | 12 | 145  | 156  | GCCACCCTTAAGTGATTTCG        |
| scaffold37889_13.4 | 1 p2 | (AT)6  | 12 | 574  | 585  | GCTGCGAAAAAGTGCATCAT        |
| scaffold37905_14.1 | 1 p2 | (AG)8  | 16 | 1601 | 1616 | GCTTACTCCCACCGATGTTT        |
| scaffold37935_15.4 | 1 p2 | (TA)9  | 18 | 371  | 388  | CACATGCATGCTCGTACTCA        |
| scaffold38074_13.9 | 1 p2 | (AT)8  | 16 | 576  | 591  | TCCTTTTTGTCTTTCATTCGG       |
| scaffold38219_16.5 | 1 p2 | (CT)6  | 12 | 626  | 637  | GAAGGGAAACCGTTAGGAC         |
| scaffold38234_12.2 | 1 p2 | (TC)9  | 18 | 635  | 652  | TCAGCCGGAGAACTCATCT         |
| scaffold38307_15.4 | 1 p2 | (GA)7  | 14 | 2060 | 2073 | CAGCGCAGATAACAATTGGA        |
| scaffold38377_17.6 | 1 p2 | (AT)6  | 12 | 56   | 67   | ACACTCGACAATTTGGGAGG        |
| scaffold38415_16.6 | 1 p2 | (TG)6  | 12 | 82   | 93   | TGCTTTTCAACTTAGAATTCAATCA   |
| scaffold38622_10.0 | 1 p2 | (GT)7  | 14 | 300  | 313  | GTGAGCTGAAGCGAGCTGAT        |
| scaffold38717_15.0 | 1 p2 | (AT)6  | 12 | 56   | 67   | AAAACCTATAGGTGTTTGGTAAACGTC |
| scaffold38766_16.9 | 1 p2 | (AG)7  | 14 | 39   | 52   | CAATTACAATGTTTATCCAATCCC    |
| scaffold38991_10.0 | 1 p2 | (CA)6  | 12 | 56   | 67   | CAGGATCTCATCGGAACCAT        |
| scaffold39087_13.1 | 1 p2 | (AC)7  | 14 | 816  | 829  | TTTCCGATTCTCAATTCCCA        |
| scaffold39139_16.8 | 1 p2 | (TA)8  | 16 | 857  | 872  | TTGTGCATGCGGACTATGTT        |
| scaffold39253_17.1 | 1 p2 | (AG)7  | 14 | 612  | 625  | GCAGCGTCGTTCTTCAGAG         |
| scaffold39351_20.9 | 1 p2 | (CT)6  | 12 | 56   | 67   | AATCTCACAAACCCACACCC        |
| scaffold39404_10.6 | 1 p2 | (TC)6  | 12 | 56   | 67   | TGGTCACTTACACAGCAATCAA      |
| scaffold39519_18.2 | 1 p2 | (CT)6  | 12 | 281  | 292  | CTCGTCAACTGCTCGGTACA        |
| scaffold39522_18.4 | 1 p2 | (TA)6  | 12 | 142  | 153  | TGCAGTAGGTTGTAGGTACTAAAATA  |
| scaffold39545_12.3 | 1 p2 | (AT)6  | 12 | 125  | 136  | TGAATTTGGGTCATGAATTTTG      |
| scaffold39578_13.5 | 1 p2 | (TA)6  | 12 | 1046 | 1057 | GGATTTTCTCGATTGCCAGA        |
| scaffold39580_10.9 | 1 p2 | (TA)8  | 16 | 130  | 145  | GTGGCTAGATGCAAGCCTTT        |
| scaffold39635_12.6 | 1 p2 | (TA)7  | 14 | 406  | 419  | GGGCAGTAAGTTGAGTCCGA        |
| scaffold39779_14.2 | 1 p2 | (AT)7  | 14 | 341  | 354  | TTGATTGGTTGTTGGGCATA        |
| scaffold39902_11.9 | 1 p2 | (TA)8  | 16 | 1373 | 1388 | GGCTTACCCTGCACTTATG         |
| scaffold40050_12.7 | 1 p2 | (AG)6  | 12 | 56   | 67   | TCGCACTAAAGCAGAACGAA        |
| scaffold40145_11.0 | 1 p2 | (GC)7  | 14 | 869  | 882  | TCAGCCCAGCCCAATATTAC        |
| scaffold40299_10.4 | 1 p2 | (TA)9  | 18 | 104  | 121  | CCCCTATTTTTGGAGGGAAA        |
| scaffold40302_14.9 | 1 p2 | (AT)7  | 14 | 3753 | 3766 | GCACCACCATCTTCTTCGAT        |
| scaffold40385_16.2 | 1 p2 | (AC)6  | 12 | 1606 | 1617 | CAGCAACCTGAAAGCATGTG        |
| scaffold40409_17.2 | 1 p2 | (TA)6  | 12 | 204  | 215  | TTAAGGGGCGGTATCATTTG        |
| scaffold40443_15.1 | 1 p2 | (AT)6  | 12 | 967  | 978  | AATTTGGTGGATGGGACAAA        |
| scaffold40508_17.2 | 1 p2 | (AG)8  | 16 | 1050 | 1065 | CATGCAATGCGATGTGTTTT        |
| scaffold40511_12.5 | 1 p2 | (TC)8  | 16 | 1435 | 1450 | GCCACCTCAGAAGATGGAAG        |
| scaffold40583_10.0 | 1 p2 | (CA)8  | 16 | 54   | 69   | CAATTCATAAAATACATAGAAAGGTC  |
| scaffold40611_13.6 | 1 p2 | (AT)6  | 12 | 83   | 94   | CCCCATCAACACACATACACA       |
| scaffold40637_16.6 | 1 p2 | (TC)6  | 12 | 39   | 50   | CAAACCCCATCACCAACTCT        |

|                    |      |        |    |      |                               |
|--------------------|------|--------|----|------|-------------------------------|
| scaffold40681_13.1 | 1 p2 | (TA)6  | 12 | 81   | 92 GAAGTTTTCGGCCTTTTGAA       |
| scaffold40726_11.4 | 1 p2 | (CA)7  | 14 | 913  | 926 TTCAGGCAATACCAGTTCCC      |
| scaffold40747_16.6 | 1 p2 | (AG)6  | 12 | 37   | 48 GAAGAACAATTACAATGTTTATCCAA |
| scaffold40752_20.5 | 1 p2 | (AT)8  | 16 | 655  | 670 TGTTTGCAATTATTTTCGTGG     |
| scaffold40921_19.5 | 1 p2 | (AT)6  | 12 | 56   | 67 TGCATCAAGTTCTCTTCTAATTTT   |
| scaffold40926_10.3 | 1 p2 | (AT)6  | 12 | 129  | 140 TTGAACCGATGAACTAAAATCAA   |
| scaffold40985_14.7 | 1 p2 | (TC)6  | 12 | 308  | 319 GTTGAAGTGC GAATGTTCA      |
| scaffold41039_18.8 | 1 p2 | (AG)8  | 16 | 2884 | 2899 AGAATGGGGAAGCTCCAAC      |
| scaffold41047_10.5 | 1 p2 | (AT)6  | 12 | 176  | 187 AGTTGAACCTCGAACCGTTG      |
| scaffold41081_15.8 | 1 p2 | (TA)6  | 12 | 690  | 701 AATCATTGTGCGCATGTGTT      |
| scaffold41215_13.5 | 1 p2 | (TA)6  | 12 | 2325 | 2336 CTAGGCCCAAGGTAGTGGTG     |
| scaffold41519_16.8 | 1 p2 | (AC)6  | 12 | 2182 | 2193 ACGTGTTC AAGGTTGAAGGG    |
| scaffold41908_11.3 | 1 p2 | (CA)6  | 12 | 462  | 473 AAAGGCATCTGAGCCGTTAC      |
| scaffold41963_12.2 | 1 p2 | (AG)6  | 12 | 151  | 162 TCGGCTGGGGTAGTAATTTG      |
| scaffold41965_17.8 | 1 p2 | (GA)7  | 14 | 195  | 208 CCGAGATAGGAGCAAGCACT      |
| scaffold41971_15.8 | 1 p2 | (GA)8  | 16 | 234  | 249 GGAAGAAAAACGACGAGAG       |
| scaffold41989_15.1 | 1 p2 | (TC)8  | 16 | 1837 | 1852 GTTTCCCAAAGCCACAAAAA     |
| scaffold42065_17.4 | 1 p2 | (CT)8  | 16 | 971  | 986 AAAATGAGGAAATCCCTCGG      |
| scaffold42288_20.7 | 1 p2 | (TC)6  | 12 | 156  | 167 CTCCAACACCTCCAACCTTGC     |
| scaffold42290_16.0 | 1 p2 | (CT)8  | 16 | 2188 | 2203 ATTTCTGCCCAAATTACC       |
| scaffold42291_10.7 | 1 p2 | (AT)6  | 12 | 210  | 221 TGAAACTCCATCAAAACCTCTTT   |
| scaffold42364_11.5 | 1 p2 | (AC)7  | 14 | 74   | 87 GGCAGCAATCAATTGGAAAT       |
| scaffold42625_17.2 | 1 p2 | (GA)6  | 12 | 1056 | 1067 AGATTGGAGCGAAGAGTGGA     |
| scaffold42762_12.4 | 1 p2 | (AG)6  | 12 | 67   | 78 TGTTTTGTAATTTCCCATGTTTG    |
| scaffold42948_16.5 | 1 p2 | (CT)8  | 16 | 54   | 69 TCAATTTTCTCAAGAAACCTCC     |
| scaffold43012_12.3 | 1 p2 | (AT)6  | 12 | 259  | 270 AGAAACGCATCGTTTTCTGG      |
| scaffold43292_10.5 | 1 p2 | (AT)6  | 12 | 56   | 67 CCGATACGGTATAATTTCCAAAA    |
| scaffold43398_15.6 | 1 p2 | (TC)6  | 12 | 235  | 246 ATAACCCACCATCCTAGCC       |
| scaffold43419_13.8 | 1 p2 | (AG)6  | 12 | 521  | 532 AGGCAACTTGGTGGAGAAGA      |
| scaffold43445_16.4 | 1 p2 | (TC)6  | 12 | 2766 | 2777 TTTCAGTTTCGCCATTTTCC     |
| scaffold43964_12.6 | 1 p2 | (TC)8  | 16 | 188  | 203 AAACAAGCCAATAAAGGCCA      |
| scaffold43975_15.8 | 1 p2 | (CT)6  | 12 | 1805 | 1816 GGCTAGATGCAGTGGACCAT     |
| scaffold44077_15.7 | 1 p2 | (TA)6  | 12 | 591  | 602 AGGATGGTGATGTTGAAGCC      |
| scaffold44096_12.8 | 1 p2 | (TA)10 | 20 | 474  | 493 GTATACACGGTCCGTTTGG       |
| scaffold44104_11.2 | 1 p2 | (AT)10 | 20 | 463  | 482 GTGCGTGTGTATGCTGAGGT      |
| scaffold44276_13.6 | 1 p2 | (TA)6  | 12 | 1524 | 1535 CCTATATCAGCGGCCAAAAA     |
| scaffold44489_16.4 | 1 p2 | (TG)6  | 12 | 240  | 251 TGCATTCATGTACTCAGCCC      |
| scaffold44540_13.3 | 1 p2 | (TA)6  | 12 | 393  | 404 CCATGGAGTCCAATCTACCG      |
| scaffold44589_12.4 | 1 p2 | (AT)9  | 18 | 313  | 330 TGCAACAAATATCTGCACACG     |
| scaffold44611_10.8 | 1 p2 | (AG)6  | 12 | 94   | 105 TTCTGTTTCATCATCTTCGTCT    |
| scaffold44613_13.9 | 1 p2 | (GA)8  | 16 | 724  | 739 TCAGCTTGCAAAGAGAGGA       |
| scaffold44759_10.9 | 1 p2 | (CT)6  | 12 | 38   | 49 CACTCTCCCTCTTCTCTCTCG      |
| scaffold44771_13.8 | 1 p2 | (CT)6  | 12 | 82   | 93 TCGAAATCGTAATAATCGGACA     |
| scaffold44778_13.4 | 1 p2 | (CT)7  | 14 | 169  | 182 CTTCAATTCCTTCCCCTTC       |
| scaffold45060_11.2 | 1 p2 | (TC)8  | 16 | 54   | 69 TGTTCTCATTCGTTTGCTCTAA     |
| scaffold45274_10.4 | 1 p2 | (GT)6  | 12 | 56   | 67 TTGTCTGCGTAATGCTTTG        |
| scaffold45337_10.2 | 1 p2 | (AG)6  | 12 | 512  | 523 GTTAAAATGTGTGCCGCTT       |
| scaffold45611_10.7 | 1 p2 | (GA)8  | 16 | 54   | 69 TGGAGTTGGAGTTGAGAGGAG      |
| scaffold45757_15.2 | 1 p2 | (AT)6  | 12 | 208  | 219 GCCTTCAATTTTATACCCGAGA    |
| scaffold45982_15.6 | 1 p2 | (TC)6  | 12 | 444  | 455 CTTGGTAAGCGGAGAGAACG      |
| scaffold46113_15.5 | 1 p2 | (GT)6  | 12 | 220  | 231 GCCTAACGTGGCTCTGATGT      |
| scaffold46130_12.1 | 1 p2 | (CT)6  | 12 | 56   | 67 AGCCTTCTAGCATCTCTTGCTC     |
| scaffold46265_13.7 | 1 p2 | (TC)6  | 12 | 936  | 947 CATTCTCTGCCTGTGTCTGC      |
| scaffold46398_13.1 | 1 p2 | (CA)9  | 18 | 1121 | 1138 ACTGGTTTCGACAAAATGGC     |
| scaffold46882_17.0 | 1 p2 | (TG)6  | 12 | 1177 | 1188 TTCGCAAGAACAACGACAAC     |
| scaffold47031_12.8 | 1 p2 | (AT)10 | 20 | 306  | 325 TTGATAAATAGTGCAATCCCAAC   |
| scaffold47072_15.7 | 1 p2 | (AT)6  | 12 | 56   | 67 GATTGTCTAAAACGTAAAGCTTGATT |
| scaffold47105_15.4 | 1 p2 | (TA)6  | 12 | 94   | 105 GGGACAAAACCGAAGGAAT       |



|                    |      |        |    |      |                                |
|--------------------|------|--------|----|------|--------------------------------|
| scaffold47160_11.4 | 1 p2 | (TC)6  | 12 | 1030 | 1041 CGAAATTCACCGACTCAAC       |
| scaffold47168_16.1 | 1 p2 | (AG)6  | 12 | 232  | 243 ATCTTGGGGAATGTGTGCAT       |
| scaffold47242_15.0 | 1 p2 | (TA)7  | 14 | 3783 | 3796 TCCGTAGACCTTCCAACCAC      |
| scaffold47262_12.7 | 1 p2 | (TA)8  | 16 | 353  | 368 CATGGATATGTGGAAGCACG       |
| scaffold47301_13.3 | 1 p2 | (TC)7  | 14 | 2153 | 2166 GGTGCCCATTTCTGTTCACTT     |
| scaffold47469_14.1 | 1 p2 | (TA)6  | 12 | 267  | 278 TGAAAGAAAGAGAAAAGGAATTTTT  |
| scaffold47593_14.0 | 1 p2 | (TG)7  | 14 | 364  | 377 CAGTGGATCGTTCTGCTTCA       |
| scaffold47614_13.4 | 1 p2 | (AT)11 | 22 | 766  | 787 TTGATTGCAATAAGCAAATTTTTA   |
| scaffold47664_15.2 | 1 p2 | (AT)6  | 12 | 603  | 614 TCGCGGATATCAATTATCAACA     |
| scaffold47763_14.3 | 1 p2 | (TA)8  | 16 | 824  | 839 TTCTGTAATCGAGTTCAAGAGAGAGA |
| scaffold47947_14.6 | 1 p2 | (AT)6  | 12 | 145  | 156 GCAAGGTGAGGAAGGAAGAA       |
| scaffold48158_13.7 | 1 p2 | (GA)6  | 12 | 449  | 460 CGAGGAATGAAATCGATGGT       |
| scaffold48249_13.1 | 1 p2 | (TA)8  | 16 | 157  | 172 GCAAACCCGTGTTCTTCAAT       |
| scaffold48356_14.3 | 1 p2 | (GA)10 | 20 | 371  | 390 GCCTGCAGACAGACAAACAA       |
| scaffold48387_14.9 | 1 p2 | (TC)7  | 14 | 272  | 285 TGCCATGGATATGATTGTTGA      |
| scaffold48402_20.5 | 1 p2 | (AT)7  | 14 | 713  | 726 GCATAAATTCATCTGAACAAGGG    |
| scaffold48491_13.6 | 1 p2 | (TA)10 | 20 | 331  | 350 GGATGAACGTCGGTCGTATT       |
| scaffold48501_12.6 | 1 p2 | (AT)10 | 20 | 1202 | 1221 GAATGTCATTGTTCCGGACCC     |
| scaffold48671_14.0 | 1 p2 | (GA)8  | 16 | 723  | 738 CCGGTTTTGTTGACGAACTT       |
| scaffold48765_14.5 | 1 p2 | (AG)7  | 14 | 286  | 299 AAGCAAAGAGTCAGCCGAA        |
| scaffold48824_12.3 | 1 p2 | (CT)6  | 12 | 463  | 474 CCGCATGTCATGTTATTGGA       |
| scaffold48828_15.0 | 1 p2 | (TA)6  | 12 | 1142 | 1153 CAAAAATACCCCGAAAACCC      |
| scaffold48859_10.0 | 1 p2 | (AT)8  | 16 | 74   | 89 AATCTCCCACTTGGGCAAC         |
| scaffold48975_17.7 | 1 p2 | (AG)6  | 12 | 318  | 329 CCGGGTTCAAGTTCCTATCA       |
| scaffold48987_14.8 | 1 p2 | (TA)6  | 12 | 919  | 930 ATGCCAGTCTTGAGCCAGAT       |
| scaffold49021_16.1 | 1 p2 | (TA)11 | 22 | 1350 | 1371 GGTCTTTTACTTTTCAGACAACGA  |
| scaffold49032_10.2 | 1 p2 | (CT)7  | 14 | 1189 | 1202 GAGTCGAGCCGAGTAGTTGC      |
| scaffold49325_14.3 | 1 p2 | (AT)9  | 18 | 953  | 970 AAGTTCGAGCGGAGTTTCAA       |
| scaffold49339_10.5 | 1 p2 | (AT)10 | 20 | 334  | 353 GCATTCATGCAGCATTCAAC       |
| scaffold49375_12.4 | 1 p2 | (GA)7  | 14 | 874  | 887 GGGAGAGATGCGTCAGAAGA       |
| scaffold49397_15.6 | 1 p2 | (AG)6  | 12 | 1245 | 1256 CTTCCCAAAGTCATTTCCCA      |
| scaffold49410_16.5 | 1 p2 | (AG)6  | 12 | 2347 | 2358 CGAGGATCCGAGGATACAGA      |
| scaffold49414_13.9 | 1 p2 | (AT)7  | 14 | 164  | 177 GCCATATGTGGAACCTTCT        |
| scaffold49582_14.7 | 1 p2 | (AT)7  | 14 | 767  | 780 GTCACGCCCCGACTATCTTA       |
| scaffold49596_10.9 | 1 p2 | (TA)7  | 14 | 224  | 237 CCAATTTGCCCTTATATGC        |
| scaffold49789_17.1 | 1 p2 | (CT)7  | 14 | 446  | 459 TCTGTTGTTGGCAGTTCTCG       |
| scaffold49842_17.5 | 1 p2 | (AT)6  | 12 | 664  | 675 TGGGGGTCTGTCAAAAATTC       |
| scaffold49899_14.7 | 1 p2 | (AT)6  | 12 | 821  | 832 TCGATTTTCGTGGAGATTGAA      |
| scaffold49910_11.0 | 1 p2 | (CA)6  | 12 | 131  | 142 GTGAAACCCCAATTGTGTC        |
| scaffold49957_14.6 | 1 p2 | (GT)7  | 14 | 2299 | 2312 GCGTTTGACATCCTCAACCT      |
| scaffold50057_16.6 | 1 p2 | (TC)6  | 12 | 589  | 600 ATGGTTCGCCATAAAAATGC       |
| scaffold50117_10.2 | 1 p2 | (AT)6  | 12 | 317  | 328 TGATAGTGGGTTGGGTGTCA       |
| scaffold50215_14.7 | 1 p2 | (TA)7  | 14 | 51   | 64 CCCACTTTTGGGTTATTACCTG      |
| scaffold50337_17.1 | 1 p2 | (TC)7  | 14 | 2396 | 2409 TACGTGGATTTGACAGTGGC      |
| scaffold50406_14.4 | 1 p2 | (GA)6  | 12 | 489  | 500 GAGAGAGGAAGAGGGATGGG       |
| scaffold50603_15.1 | 1 p2 | (CT)10 | 20 | 221  | 240 TGTCCAAGCAAATTGACGA        |
| scaffold50898_10.7 | 1 p2 | (AG)7  | 14 | 53   | 66 AAAGCTCAAATGAAGAGGGC        |
| scaffold50982_12.0 | 1 p2 | (CT)6  | 12 | 157  | 168 CGCGACACCTCTAGAACACA       |
| scaffold51119_15.4 | 1 p2 | (TG)6  | 12 | 1145 | 1156 GGGAGGAAATTTTGAGGCTT      |
| scaffold51332_14.1 | 1 p2 | (TA)10 | 20 | 1017 | 1036 TCATAGTTTTCATTTGGACACCTC  |
| scaffold51539_13.8 | 1 p2 | (CT)8  | 16 | 380  | 395 CATAAGCCTACGAGCCCAAA       |
| scaffold51591_12.0 | 1 p2 | (AT)7  | 14 | 178  | 191 CCGAAAACCAAACCGAATTA       |
| scaffold51800_11.1 | 1 p2 | (CA)6  | 12 | 49   | 60 TTTTGGAGAATTTTCTCTTGCTC     |
| scaffold51817_15.4 | 1 p2 | (AG)6  | 12 | 378  | 389 TGTTTGAGTTAGCAGCCAGG       |
| scaffold51942_11.2 | 1 p2 | (TA)9  | 18 | 655  | 672 ACAAATTTGCCCTCGTATGC       |
| scaffold52146_11.1 | 1 p2 | (CT)6  | 12 | 295  | 306 CTGCATGGAGACTTGCATCA       |
| scaffold52335_14.7 | 1 p2 | (AT)6  | 12 | 1456 | 1467 TGCATAAACCTGCATACCCA      |
| scaffold52435_13.4 | 1 p2 | (AC)7  | 14 | 382  | 395 AAAAATCGTGCATTTTTGGC       |

|                    |      |        |    |      |                                |
|--------------------|------|--------|----|------|--------------------------------|
| scaffold52523_10.0 | 1 p2 | (AT)10 | 20 | 288  | 307 CAATATCCCAATGTTTGAATCG     |
| scaffold52705_12.4 | 1 p2 | (TA)8  | 16 | 260  | 275 TCACCAAAAGGAGGGGTTATC      |
| scaffold52807_13.4 | 1 p2 | (AT)7  | 14 | 814  | 827 TTGGGCCTGAATGGACTTTA       |
| scaffold52845_19.2 | 1 p2 | (TC)6  | 12 | 1114 | 1125 GGAGGAGATGGAGACAGTCG      |
| scaffold52868_16.5 | 1 p2 | (AG)6  | 12 | 131  | 142 ACGTCGTCTCAAAGGGTGTC       |
| scaffold52894_16.0 | 1 p2 | (AT)6  | 12 | 263  | 274 GCTGGATATTTGGGCTTGAA       |
| scaffold53005_15.6 | 1 p2 | (AG)7  | 14 | 110  | 123 AAATGCTCGCTCTCACACCT       |
| scaffold53126_14.0 | 1 p2 | (TA)9  | 18 | 845  | 862 CGCGTCCCTTTTTACATGAT       |
| scaffold53272_15.5 | 1 p2 | (CT)6  | 12 | 577  | 588 TCCAGACTCAACCGGGTACT       |
| scaffold53274_11.5 | 1 p2 | (TA)10 | 20 | 100  | 119 TCAGATCTGCGCTGAAAATAAA     |
| scaffold53345_15.8 | 1 p2 | (CT)6  | 12 | 1388 | 1399 CACATGCACACACGTGATTC      |
| scaffold53462_12.0 | 1 p2 | (AT)8  | 16 | 704  | 719 ATGGAAACAATCACATCGCA       |
| scaffold53484_14.4 | 1 p2 | (TC)8  | 16 | 2474 | 2489 CTTGGCCAGCTCTAGGAATG      |
| scaffold53634_15.9 | 1 p2 | (TC)8  | 16 | 432  | 447 TGCATGGTAGTTGGGTGGTA       |
| scaffold53859_10.3 | 1 p2 | (TA)9  | 18 | 181  | 198 ACACATTTTTCTTTTGGGCG       |
| scaffold54193_11.0 | 1 p2 | (AT)10 | 20 | 513  | 532 GACTTCGTGGCGGTATTCTC       |
| scaffold54246_20.6 | 1 p2 | (AC)6  | 12 | 99   | 110 TGTCTCCATTTGTGTGTGTGT      |
| scaffold54270_17.0 | 1 p2 | (AG)8  | 16 | 125  | 140 ACCGACCTCCACTTCAACAC       |
| scaffold54349_10.7 | 1 p2 | (AT)7  | 14 | 184  | 197 TGGCCTATGAAGGAAAATGC       |
| scaffold54599_14.6 | 1 p2 | (AT)6  | 12 | 514  | 525 TTGCTAACCAACTACGTTGAGA     |
| scaffold54716_14.5 | 1 p2 | (AG)7  | 14 | 3513 | 3526 AAATGGGCAGACATACTCGG      |
| scaffold54783_15.3 | 1 p2 | (AG)6  | 12 | 131  | 142 ACACGCCTTTATCCGATGAG       |
| scaffold54940_10.3 | 1 p2 | (AG)6  | 12 | 53   | 64 AACCAATTACAATGTTTGTGAAATCAA |
| scaffold54960_10.7 | 1 p2 | (AG)6  | 12 | 492  | 503 TGTACCTCTCGCTGCTCTGA       |
| scaffold55381_17.5 | 1 p2 | (GA)9  | 18 | 6557 | 6574 GCAATGGCAAACCATTACCT      |
| scaffold55384_10.4 | 1 p2 | (CG)6  | 12 | 86   | 97 GGGTCCAGTCAATGAAACGA        |
| scaffold55500_14.1 | 1 p2 | (AT)6  | 12 | 1384 | 1395 CGGTGAAGATAAATTGCACGTA    |
| scaffold55533_15.9 | 1 p2 | (GA)6  | 12 | 918  | 929 AACACAATGGCGGGAATAAG       |
| scaffold55771_11.4 | 1 p2 | (GA)6  | 12 | 67   | 78 GAAACACGCAACGCAAGTAG        |
| scaffold55892_15.1 | 1 p2 | (TA)9  | 18 | 312  | 329 CCATCCAGCGCTATAAAATCA      |
| scaffold55951_15.6 | 1 p2 | (TC)6  | 12 | 200  | 211 TGCCATTTTGAGACCAGACA       |
| scaffold56133_17.7 | 1 p2 | (AT)7  | 14 | 194  | 207 GGTTGTAATGAGGCTTTCCGG      |
| scaffold56254_10.5 | 1 p2 | (TA)8  | 16 | 50   | 65 AAGGGGAGTATCACTTGAATGC      |
| scaffold56284_15.4 | 1 p2 | (GA)6  | 12 | 2560 | 2571 AGCTGGAAAAGGCTATGCAA      |
| scaffold56303_13.8 | 1 p2 | (GA)6  | 12 | 2106 | 2117 GGGCTACTTCCAACACAAA       |
| scaffold56673_16.3 | 1 p2 | (AT)9  | 18 | 271  | 288 CAACACGAATGTGCTGATGA       |
| scaffold56746_16.8 | 1 p2 | (TG)7  | 14 | 869  | 882 CACGGGTCTTCATCCATTTT       |
| scaffold56794_14.0 | 1 p2 | (GA)6  | 12 | 576  | 587 GAGCAAGAGAAAATTCTCCCAA     |
| scaffold56796_16.6 | 1 p2 | (GT)8  | 16 | 1219 | 1234 TGAAAGTGCCAACTTACGGA      |
| scaffold56807_12.9 | 1 p2 | (GA)6  | 12 | 3585 | 3596 TTTTGGCCCAATCCATTTA       |
| scaffold56831_16.5 | 1 p2 | (TC)8  | 16 | 986  | 1001 CCAACCTTGTGCGAACAGTC      |
| scaffold56849_16.0 | 1 p2 | (TG)8  | 16 | 513  | 528 TGTCCAGCACATCAAAGCTC       |
| scaffold57139_14.2 | 1 p2 | (TG)6  | 12 | 482  | 493 ATGCAGGTTAGCGACGTTTT       |
| scaffold57167_13.7 | 1 p2 | (AG)6  | 12 | 95   | 106 TTCTGTTTCATCATCTTCGTCCT    |
| scaffold57169_11.1 | 1 p2 | (CT)6  | 12 | 253  | 264 TCTTTTCCAGCCTGCAACTT       |
| scaffold57170_11.3 | 1 p2 | (GA)7  | 14 | 109  | 122 CATCAACTCTGATGCGGAGA       |
| scaffold57258_12.2 | 1 p2 | (AT)7  | 14 | 109  | 122 TCTTATCTCATCAACCGCCA       |
| scaffold57325_15.2 | 1 p2 | (TC)6  | 12 | 152  | 163 CAATCCCAATTGTAGCCTGC       |
| scaffold57488_11.2 | 1 p2 | (GA)9  | 18 | 291  | 308 TGCTGAGACATAGCGGACAC       |
| scaffold57547_16.3 | 1 p2 | (AG)6  | 12 | 57   | 68 AAAGAAGAATAAAGCTTCGGAAA     |
| scaffold57611_11.2 | 1 p2 | (CT)6  | 12 | 63   | 74 TGTGAACACAGCCTCACCTT        |
| scaffold57798_17.3 | 1 p2 | (AG)9  | 18 | 1909 | 1926 CAGCCATGGATCAGCAGTAA      |
| scaffold57902_19.1 | 1 p2 | (AT)6  | 12 | 109  | 120 TCAGAAAAGTTCGAGCGTGA       |
| scaffold58112_16.5 | 1 p2 | (AT)6  | 12 | 521  | 532 ATCACCAACTGGCGAGAAAT       |
| scaffold58242_13.0 | 1 p2 | (AT)7  | 14 | 55   | 68 TGGACGTGGAACAATTACGA        |
| scaffold58399_10.7 | 1 p2 | (GA)7  | 14 | 252  | 265 AAGGTGTAGATCTGGCGGTG       |
| scaffold58401_15.6 | 1 p2 | (CT)6  | 12 | 949  | 960 GGCTCAGATTTTCCCAATCA       |
| scaffold58491_13.2 | 1 p2 | (TA)8  | 16 | 108  | 123 TGGTGTA AAAAGGGGTTGATG     |

|                    |      |        |    |      |                              |
|--------------------|------|--------|----|------|------------------------------|
| scaffold58561_10.2 | 1 p2 | (AT)6  | 12 | 66   | 77 TAACGACACGAACGGTTTTG      |
| scaffold58654_13.7 | 1 p2 | (CT)8  | 16 | 95   | 110 TTTGCACAAATTCGTTTAGGC    |
| scaffold58657_16.1 | 1 p2 | (AT)6  | 12 | 3245 | 3256 CTTGCGATCGTTTCTGTAC     |
| scaffold58720_12.9 | 1 p2 | (TA)6  | 12 | 241  | 252 TTTCTTTTGTCAATGGAGCATCT  |
| scaffold58853_15.1 | 1 p2 | (GA)6  | 12 | 418  | 429 TGCAATAACAAATTTGGGAAA    |
| scaffold58861_15.5 | 1 p2 | (TG)7  | 14 | 2513 | 2526 ATGAGGCTGCTTTGCAAGTT    |
| scaffold58925_16.1 | 1 p2 | (GA)8  | 16 | 361  | 376 AAATGCGAGAGTGGTACGCT     |
| scaffold59114_16.1 | 1 p2 | (AC)6  | 12 | 4337 | 4348 GATTTCCCAACCCAGTTCT     |
| scaffold59129_14.6 | 1 p2 | (TC)10 | 20 | 3160 | 3179 CAACTTTCTGCCCATCCATT    |
| scaffold59205_10.3 | 1 p2 | (AG)6  | 12 | 111  | 122 TGAATAAGCACAAAGAGACGAAGA |
| scaffold59218_16.9 | 1 p2 | (TC)6  | 12 | 611  | 622 ACATACCCTGTTCCCTCGTGC    |
| scaffold59358_11.6 | 1 p2 | (TA)7  | 14 | 271  | 284 ATACCCTTGCATGCACAACA     |
| scaffold59589_13.1 | 1 p2 | (CT)8  | 16 | 405  | 420 GATGCATCAAGTCGACAATCA    |
| scaffold59673_16.0 | 1 p2 | (AG)6  | 12 | 1258 | 1269 GATGTCCCCATTGAGACTCG    |
| scaffold59807_17.8 | 1 p2 | (TC)6  | 12 | 231  | 242 TAGAATCCGATGTATGGCCC     |
| scaffold60005_12.4 | 1 p2 | (TA)6  | 12 | 523  | 534 CACCTGAAGGCGAAAAAGAG     |
| scaffold60017_15.9 | 1 p2 | (GA)7  | 14 | 326  | 339 ACATACTCCACCAACTCGGC     |
| scaffold60137_10.7 | 1 p2 | (TA)7  | 14 | 45   | 58 TTTCCAAGTCACCTTCCATT      |
| scaffold60211_16.2 | 1 p2 | (CT)6  | 12 | 297  | 308 CCAAAGGGGCTGCAATACTA     |
| scaffold60282_10.4 | 1 p2 | (TA)8  | 16 | 48   | 63 ACCATATTTAAGGGTTATCACCTG  |
| scaffold60545_10.7 | 1 p2 | (AT)6  | 12 | 119  | 130 AGCACGAATCACACAGCAAC     |
| scaffold60673_17.7 | 1 p2 | (AG)6  | 12 | 195  | 206 TCCCCATGTATATTGCCGTT     |
| scaffold61001_14.0 | 1 p2 | (TC)10 | 20 | 51   | 70 ACTGAGCCCTGATTTGGAAG      |
| scaffold61042_16.3 | 1 p2 | (AG)7  | 14 | 1474 | 1487 ATTTGGTATCAGAGCCACGG    |
| scaffold61066_14.9 | 1 p2 | (AG)6  | 12 | 2747 | 2758 TCTTTCAACCTGAATTGCC     |
| scaffold61119_11.3 | 1 p2 | (AT)6  | 12 | 811  | 822 AGCTATCAAGCACCGGAAAA     |
| scaffold61168_16.1 | 1 p2 | (AT)7  | 14 | 272  | 285 CGGGTCCACATTTAACAA       |
| scaffold61186_14.6 | 1 p2 | (GA)7  | 14 | 87   | 100 TTTTATCAAGCGCAACCTCC     |
| scaffold61355_10.3 | 1 p2 | (TA)8  | 16 | 157  | 172 TTGTCGTATGCTGTCCGAAA     |
| scaffold61357_10.3 | 1 p2 | (TG)9  | 18 | 808  | 825 GGGATAGTACCTGATCATCTCCA  |
| scaffold61549_14.2 | 1 p2 | (TA)11 | 22 | 1125 | 1146 GCAGCCTTCTTGTCTCCTGT    |
| scaffold61642_11.3 | 1 p2 | (AT)8  | 16 | 648  | 663 CCGCCTGATTTGTTTCTCAT     |
| scaffold61826_13.1 | 1 p2 | (TA)6  | 12 | 807  | 818 CAAAGCATAAACATCCCAGC     |
| scaffold61843_13.7 | 1 p2 | (GA)9  | 18 | 441  | 458 TGATGGCATTATCGTCAGT      |
| scaffold61977_12.5 | 1 p2 | (TA)9  | 18 | 82   | 99 ACGCCCCAGATTGTTTCTTA      |
| scaffold62095_18.0 | 1 p2 | (AT)9  | 18 | 245  | 262 GGGGAGATGTTCTTTAGTCG     |
| scaffold62187_11.9 | 1 p2 | (AT)8  | 16 | 315  | 330 ACTTATTTGCATTGGGCCAC     |
| scaffold62244_12.1 | 1 p2 | (TG)7  | 14 | 143  | 156 CATTTCGTACCCCAAACCTTGC   |
| scaffold62265_14.2 | 1 p2 | (TA)7  | 14 | 936  | 949 AAACCTCGACTGCCCTTTTT     |
| scaffold62278_16.9 | 1 p2 | (TC)6  | 12 | 432  | 443 CATCACTCTGAGCCTCTCCC     |
| scaffold62317_10.1 | 1 p2 | (CA)7  | 14 | 183  | 196 TCGTGCGGTCAATGATTTTA     |
| scaffold62360_14.3 | 1 p2 | (TC)6  | 12 | 153  | 164 GGATTCAGTTGCTTCAAGAGC    |
| scaffold62374_17.7 | 1 p2 | (CT)7  | 14 | 265  | 278 CAATATTACAATGGGCAAGAGAG  |
| scaffold62410_15.1 | 1 p2 | (TG)6  | 12 | 3061 | 3072 TGGAATGCTTCTTTCTTGGG    |
| scaffold62431_14.7 | 1 p2 | (TA)6  | 12 | 443  | 454 GATCGACGTCCAGATTTGT      |
| scaffold62474_12.3 | 1 p2 | (TC)6  | 12 | 732  | 743 CTCGTCTCCTCCACTTCTCTG    |
| scaffold62639_13.4 | 1 p2 | (AC)6  | 12 | 83   | 94 AAAGAACAATAATGACACGAAGAA  |
| scaffold63015_14.5 | 1 p2 | (AT)10 | 20 | 638  | 657 AATGGTTCGTTCCAGTTTC      |
| scaffold63163_14.9 | 1 p2 | (AG)7  | 14 | 65   | 78 TTTTGTGATTTCCCATGTTTG     |
| scaffold63191_13.9 | 1 p2 | (GT)6  | 12 | 2778 | 2789 CTCTCAACACTTCAACGGGAG   |
| scaffold63399_14.7 | 1 p2 | (AT)9  | 18 | 405  | 422 CCCGGCAACTTCTCAAATAA     |
| scaffold63424_15.7 | 1 p2 | (TA)8  | 16 | 3194 | 3209 CTGCAACAGCATAGTGGCAT    |
| scaffold63688_13.4 | 1 p2 | (TA)6  | 12 | 504  | 515 AGGAAATTGGGGGAAAATTG     |
| scaffold63740_11.3 | 1 p2 | (AG)7  | 14 | 272  | 285 CTCTTCCATTTTCCCAACA      |
| scaffold63772_16.0 | 1 p2 | (GA)12 | 24 | 7241 | 7264 TCTCTCTGCAGGGGAGTCAC    |
| scaffold63886_10.5 | 1 p2 | (TA)6  | 12 | 371  | 382 CGAAGGAGACTGGAACCGTA     |
| scaffold63970_14.3 | 1 p2 | (AT)8  | 16 | 442  | 457 GGGCCCCTAGTCTGTCTCTT     |
| scaffold64133_13.7 | 1 p2 | (TC)6  | 12 | 254  | 265 ACCTAAACCCAAAACCCAC      |

|                    |      |        |    |      |                                 |
|--------------------|------|--------|----|------|---------------------------------|
| scaffold64202_15.3 | 1 p2 | (AT)8  | 16 | 161  | 176 TGCAACATTCAATCACAGCC        |
| scaffold64267_10.4 | 1 p2 | (AT)9  | 18 | 204  | 221 TCCCACCACTGGTTTCTTTC        |
| scaffold64348_14.7 | 1 p2 | (TA)7  | 14 | 391  | 404 TGAATCCCATCGATCCATTT        |
| scaffold64461_13.7 | 1 p2 | (AG)7  | 14 | 1082 | 1095 GGCTCTTCTCTGTCCGCTAA       |
| scaffold64467_17.4 | 1 p2 | (AG)6  | 12 | 2396 | 2407 GGTCACAGAGGTCGTCCCTA       |
| scaffold64917_14.6 | 1 p2 | (TA)6  | 12 | 1852 | 1863 GCTTGGTTTGCAGTCTCCTC       |
| scaffold65164_13.0 | 1 p2 | (AT)6  | 12 | 192  | 203 TTCTGAACGTGCAACTCGTC        |
| scaffold65248_18.0 | 1 p2 | (AG)6  | 12 | 806  | 817 TCCCTTACCAACATTCACGA        |
| scaffold65405_10.6 | 1 p2 | (AT)7  | 14 | 65   | 78 TCAAAAGCAAGAAAATGTGATTC      |
| scaffold65470_13.6 | 1 p2 | (AG)6  | 12 | 1578 | 1589 CCACAAGCATTGCAGAGAGA       |
| scaffold65495_10.5 | 1 p2 | (AG)6  | 12 | 207  | 218 GGGGTTAATGATTGGTGTCTG       |
| scaffold65564_11.2 | 1 p2 | (TC)6  | 12 | 23   | 34 ATACCACTCGTTAATCCGGC         |
| scaffold65574_16.3 | 1 p2 | (AG)6  | 12 | 3495 | 3506 AGAGGGAGTTTCCGGAGAGA       |
| scaffold65640_17.7 | 1 p2 | (TA)6  | 12 | 425  | 436 TGGTTCAATGGGTTATTCGAC       |
| scaffold65643_19.0 | 1 p2 | (TA)9  | 18 | 107  | 124 GTGCATCAACTTATGCCAAA        |
| scaffold65647_12.9 | 1 p2 | (AT)10 | 20 | 105  | 124 TGAAGTTAGGAAATAAGGAGGTGTT   |
| scaffold65648_11.0 | 1 p2 | (AT)9  | 18 | 564  | 581 ACGCGATTTCACTACAACA         |
| scaffold65649_15.9 | 1 p2 | (AT)7  | 14 | 111  | 124 ATGATGGGCACATGGATTTT        |
| scaffold65650_13.3 | 1 p2 | (AT)7  | 14 | 174  | 187 GGTGTTGGATGGAAAATGCT        |
| scaffold65651_15.9 | 1 p2 | (AT)6  | 12 | 113  | 124 CGCTTTGGGACAGCAATTAG        |
| scaffold65760_10.7 | 1 p2 | (CA)7  | 14 | 379  | 392 ACTCCATCGATATTCACCGC        |
| scaffold65783_10.2 | 1 p2 | (AG)6  | 12 | 1582 | 1593 ATCCGCCATTGTTGAAACTC       |
| scaffold65975_15.9 | 1 p2 | (TC)12 | 24 | 43   | 66 CTTAGGCCACCACAAAGGAA         |
| scaffold65986_16.2 | 1 p2 | (TC)6  | 12 | 590  | 601 TTTCCCTCTCCTCCTCCATT        |
| scaffold66008_15.3 | 1 p2 | (GA)8  | 16 | 1590 | 1605 GACCAATTCGGTTTGGTGAC       |
| scaffold66195_16.6 | 1 p2 | (TA)6  | 12 | 2846 | 2857 CACGTGTCATCTTCTTCAGCA      |
| scaffold66342_17.4 | 1 p2 | (GA)6  | 12 | 837  | 848 GGTGGTGCAATGGGTAAAAC        |
| scaffold66411_11.7 | 1 p2 | (AT)7  | 14 | 139  | 152 ATTTTCAATCTCCGGGCTCT        |
| scaffold66442_15.5 | 1 p2 | (TA)6  | 12 | 1324 | 1335 CTTGGACCAGATTGTCCCTC       |
| scaffold66569_11.9 | 1 p2 | (GA)7  | 14 | 470  | 483 GCTGGAGCAGGTCTCTTGTC        |
| scaffold66707_14.1 | 1 p2 | (TA)6  | 12 | 181  | 192 GGGGAAGTGTGATGTTTGGT        |
| scaffold66711_14.1 | 1 p2 | (AT)9  | 18 | 467  | 484 AAGTAGGGTTGGGGTGCATA        |
| scaffold66715_13.9 | 1 p2 | (TA)9  | 18 | 1017 | 1034 GGGTACGGGTTGAGACAAAA       |
| scaffold66757_11.4 | 1 p2 | (TA)13 | 26 | 420  | 445 TGA AAAATAAAAATGGAGTGATGTGA |
| scaffold66776_11.3 | 1 p2 | (AG)7  | 14 | 147  | 160 TTTTACGAGATGGAAGAAGCTG      |
| scaffold66851_10.1 | 1 p2 | (TA)10 | 20 | 63   | 82 GCGAAATTCATGTTGACCCT         |
| scaffold66911_10.3 | 1 p2 | (AT)8  | 16 | 447  | 462 GAAATGCAAGGATTTCCCAA        |
| scaffold66914_12.1 | 1 p2 | (TA)7  | 14 | 93   | 106 GGCATTGCTAGAGCCATTGA        |
| scaffold66961_21.4 | 1 p2 | (AT)10 | 20 | 164  | 183 CCCTCGGATGCTAGTGTTC         |
| scaffold67058_10.3 | 1 p2 | (TA)8  | 16 | 390  | 405 ATGCTAACTCCCCTTCCCAT        |
| scaffold67350_12.3 | 1 p2 | (AT)8  | 16 | 127  | 142 CCTCCGAACTCATGGTGTTC        |
| scaffold67562_10.8 | 1 p2 | (TA)10 | 20 | 693  | 712 GATGGGAATGGGAGGTATGA        |
| scaffold67614_11.4 | 1 p2 | (AG)7  | 14 | 113  | 126 AAAAGAGAGGGATGGGGAGA        |
| scaffold67678_17.9 | 1 p2 | (AG)6  | 12 | 1919 | 1930 TTGTGGCAGTCAGTGAGGAG       |
| scaffold67698_13.4 | 1 p2 | (GA)8  | 16 | 523  | 538 AGGATTCCAGCCACATGAAC        |
| scaffold67727_11.1 | 1 p2 | (AT)8  | 16 | 341  | 356 TGGGCTAATCATTCTCAGCA        |
| scaffold67751_15.6 | 1 p2 | (AG)7  | 14 | 2186 | 2199 GTCCTCTTTCTTCGCCTCCT       |
| scaffold68014_16.6 | 1 p2 | (GA)6  | 12 | 791  | 802 GTTCCGAATGCGAGTTTGTT        |
| scaffold68050_11.4 | 1 p2 | (TA)9  | 18 | 84   | 101 ATCAACCGCCTGATTTGTTC        |
| scaffold68147_12.1 | 1 p2 | (AG)6  | 12 | 141  | 152 GAATGAGTTTGCCGTGTTGA        |
| scaffold68232_10.3 | 1 p2 | (TA)6  | 12 | 86   | 97 TTGGTGCATATTTTGTTCG          |
| scaffold68284_15.2 | 1 p2 | (AG)7  | 14 | 283  | 296 CAATCTCAACCCAAACCCAT        |
| scaffold68324_10.7 | 1 p2 | (AC)7  | 14 | 38   | 51 GAAAAGCTTGGCCATTCAAC         |
| scaffold68365_16.8 | 1 p2 | (TC)7  | 14 | 1529 | 1542 AGCTATGATGCTGATGCGTG       |
| scaffold68439_13.4 | 1 p2 | (GA)8  | 16 | 374  | 389 GTTTTCCACCGAATCAAGC         |
| scaffold68509_16.6 | 1 p2 | (CT)6  | 12 | 529  | 540 TGCTGCTAATTATCCCTCCAA       |
| scaffold68725_11.5 | 1 p2 | (CT)8  | 16 | 178  | 193 ATGATTGGCTAGACATCGCC        |
| scaffold68785_14.4 | 1 p2 | (AT)6  | 12 | 58   | 69 TTCATCCATTTTGCACCTGA         |

|                    |      |        |    |      |                               |
|--------------------|------|--------|----|------|-------------------------------|
| scaffold68837_16.2 | 1 p2 | (GA)6  | 12 | 206  | 217 ATTTTGATCCTTGTGGCCTG      |
| scaffold68883_15.6 | 1 p2 | (AG)7  | 14 | 675  | 688 GATGGTAGAAGAAGCGCAGC      |
| scaffold68889_13.6 | 1 p2 | (AT)9  | 18 | 697  | 714 TGGATGGCTAAGACAACAACA     |
| scaffold68919_15.6 | 1 p2 | (AG)6  | 12 | 221  | 232 CACGTCAAATCCTCCCAAAT      |
| scaffold68965_13.2 | 1 p2 | (TA)6  | 12 | 1542 | 1553 CTACAGCTCTATCCCGTCGC     |
| scaffold69138_13.4 | 1 p2 | (TC)6  | 12 | 67   | 78 ATTTGCAAGTTCAGCGATT        |
| scaffold69210_18.3 | 1 p2 | (GA)6  | 12 | 1063 | 1074 GTCGAGGCGTAAGTTTGAGC     |
| scaffold69241_13.5 | 1 p2 | (AG)8  | 16 | 109  | 124 AGCCAGGGCTTTTATCATGT      |
| scaffold69326_15.6 | 1 p2 | (TC)6  | 12 | 2664 | 2675 ATCAGGAGACAACGGAGTGG     |
| scaffold69338_14.5 | 1 p2 | (CT)6  | 12 | 112  | 123 GCTTCATAGCATCTCTTGCTCA    |
| scaffold69450_10.7 | 1 p2 | (GA)6  | 12 | 134  | 145 GGTAAGCAGACTGCCAGGAC      |
| scaffold69456_16.5 | 1 p2 | (TA)7  | 14 | 2708 | 2721 TGTGGCTGAATTTGACGATG     |
| scaffold69613_14.8 | 1 p2 | (TA)7  | 14 | 49   | 62 GCACACAAGTTATTGGTTTCTATTTG |
| scaffold69649_14.2 | 1 p2 | (GA)7  | 14 | 873  | 886 ACGGGCGATAGTAAGAGGGT      |
| scaffold69713_10.2 | 1 p2 | (TA)9  | 18 | 194  | 211 ATTTCGAAGATCAACGGACG      |
| scaffold69879_10.8 | 1 p2 | (TA)8  | 16 | 109  | 124 AATTGAGCCTTTACAACTCTCTACA |
| scaffold70086_15.6 | 1 p2 | (TC)6  | 12 | 2737 | 2748 GAGTTACCGCTTGCTCCTTG     |
| scaffold70201_13.9 | 1 p2 | (AT)10 | 20 | 246  | 265 TGCATGTCTATGTGACGGT       |
| scaffold70478_13.3 | 1 p2 | (GA)6  | 12 | 208  | 219 AAGTCGGACTCTTGTTTCGGA     |
| scaffold70516_10.1 | 1 p2 | (GA)6  | 12 | 199  | 210 TTCATCCTCCCTCATTTTCG      |
| scaffold70547_16.7 | 1 p2 | (CT)6  | 12 | 1487 | 1498 GGTGTCTACACGGTCCTCCT     |
| scaffold70648_17.1 | 1 p2 | (GA)8  | 16 | 698  | 713 AGAAAGGTGGGCATGAATTG      |
| scaffold70700_15.4 | 1 p2 | (AT)10 | 20 | 1874 | 1893 ACATCCATCTCAAACAATATCAA  |
| scaffold70754_15.3 | 1 p2 | (AG)7  | 14 | 3082 | 3095 GCAGTTTGGCATCAGAGTCA     |
| scaffold70765_14.9 | 1 p2 | (GA)7  | 14 | 1269 | 1282 TGTGACAGAGCTGAAATGGG     |
| scaffold70908_12.0 | 1 p2 | (TC)6  | 12 | 326  | 337 GTTTCGTTTTGTTGCGGATT      |
| scaffold71009_11.3 | 1 p2 | (CT)6  | 12 | 833  | 844 CAACTGCTCCGCATCTGTA       |
| scaffold71097_11.0 | 1 p2 | (TC)7  | 14 | 126  | 139 TTGCTTCAATGCAAGCTGTC      |
| scaffold71188_15.8 | 1 p2 | (AT)7  | 14 | 2060 | 2073 CCCCCTAACATTTTCCCCT      |
| scaffold71421_10.6 | 1 p2 | (TC)8  | 16 | 238  | 253 CAGCCCGGTACAGAAGGTAA      |
| scaffold71441_17.3 | 1 p2 | (AG)6  | 12 | 390  | 401 TGCAAAGGCTGAAGATCTGA      |
| scaffold71536_14.5 | 1 p2 | (TA)6  | 12 | 837  | 848 TTGTTTTCTTTTTGCATAATCAAT  |
| scaffold71577_13.5 | 1 p2 | (GA)7  | 14 | 293  | 306 CGTGCTTGGCTTGGAGTAGT      |
| scaffold71803_14.6 | 1 p2 | (GT)6  | 12 | 474  | 485 TATGAGCCCGCACATTATCA      |
| scaffold71837_15.2 | 1 p2 | (TA)6  | 12 | 1309 | 1320 TTTTGTGCCTTCATTATGCC     |
| scaffold71942_17.3 | 1 p2 | (TA)8  | 16 | 989  | 1004 TTGGAAGGTATGTGAAATTTGG   |
| scaffold71983_11.7 | 1 p2 | (AT)6  | 12 | 172  | 183 ATCTTGGCAAGGCTCTGAAA      |
| scaffold72090_10.4 | 1 p2 | (TA)7  | 14 | 111  | 124 TCTGTTACTCTATCTGCATGCTCTG |
| scaffold72103_12.0 | 1 p2 | (AT)6  | 12 | 301  | 312 AAAGGGAGTTGCAGTCAGGA      |
| scaffold72139_15.3 | 1 p2 | (CT)6  | 12 | 240  | 251 ACTTCTCCCCCTCTCTCTCG      |
| scaffold72250_15.6 | 1 p2 | (CT)6  | 12 | 65   | 76 CATACTCACGCATTCCCAGA       |
| scaffold72400_10.0 | 1 p2 | (TA)9  | 18 | 150  | 167 AAAGCCTACCTTGCTTCCGT      |
| scaffold72443_13.1 | 1 p2 | (CT)6  | 12 | 222  | 233 AGGATATCCCACGCCTCTTT      |
| scaffold72497_12.9 | 1 p2 | (TA)9  | 18 | 292  | 309 GACCGAACCGAAACTGGTAA      |
| scaffold72610_14.2 | 1 p2 | (TA)10 | 20 | 79   | 98 ATTTTGCAAGATCCAAGGGA       |
| scaffold72933_12.5 | 1 p2 | (AT)8  | 16 | 504  | 519 CAAACATTTATCTTGCACTTGG    |
| scaffold72943_20.0 | 1 p2 | (GA)6  | 12 | 113  | 124 ACAGCAGGGTGTTTGTGTGA      |
| scaffold73058_16.7 | 1 p2 | (AT)9  | 18 | 949  | 966 ACTCGCTCTCTCATCCATT       |
| scaffold73241_12.4 | 1 p2 | (TA)8  | 16 | 786  | 801 GGGAGTATCACTGGAATGCG      |
| scaffold73261_15.6 | 1 p2 | (GA)7  | 14 | 407  | 420 TAACGACGCATAAAGAGGCA      |
| scaffold73330_13.1 | 1 p2 | (TA)7  | 14 | 314  | 327 CAGTCGCTGTTTACCATTG       |
| scaffold73359_14.6 | 1 p2 | (AG)8  | 16 | 537  | 552 CCGCCATTAAGTCCATAGT       |
| scaffold73547_18.4 | 1 p2 | (TC)6  | 12 | 178  | 189 AAGGTTACCAAAGTACGCAA      |
| scaffold73577_15.8 | 1 p2 | (AG)9  | 18 | 433  | 450 CGTGGTTCAGCCATTTTGTAT     |
| scaffold73627_15.8 | 1 p2 | (CT)7  | 14 | 1062 | 1075 AAAGAAGCGCGCTAAATCAG     |
| scaffold73645_10.6 | 1 p2 | (GA)6  | 12 | 82   | 93 GAACCAGAGGAGAAATAGGGAGA    |
| scaffold73653_13.7 | 1 p2 | (TA)11 | 22 | 182  | 203 TGACCACTTTTTACGGATTTGA    |
| scaffold73752_15.2 | 1 p2 | (CT)7  | 14 | 629  | 642 TTCTTTTGAACCAGGCAACC      |

|                    |      |        |    |      |                               |
|--------------------|------|--------|----|------|-------------------------------|
| scaffold73766_15.0 | 1 p2 | (CT)7  | 14 | 3631 | 3644 CCAATCATGCTGGTTTTTCA     |
| scaffold73768_16.2 | 1 p2 | (GT)9  | 18 | 694  | 711 ATGCAACCAGATTCAAAGGG      |
| scaffold73777_13.6 | 1 p2 | (AT)9  | 18 | 556  | 573 AAATTGCAAAACCCAATAAGC     |
| scaffold74002_13.1 | 1 p2 | (AT)6  | 12 | 185  | 196 AAGGTTTGGCTTGACCTTGA      |
| scaffold74026_10.3 | 1 p2 | (TC)8  | 16 | 182  | 197 GGAAATGACACCCAAACCAC      |
| scaffold74468_12.1 | 1 p2 | (TA)7  | 14 | 179  | 192 TCTCCACTCTCTTCTCTCTCCC    |
| scaffold74505_17.1 | 1 p2 | (AT)7  | 14 | 52   | 65 ACCATATTTAAGGGTTATCACCTG   |
| scaffold74655_15.5 | 1 p2 | (TA)7  | 14 | 223  | 236 TAACTCAAAATCTTGCCCCG      |
| scaffold74691_15.7 | 1 p2 | (AT)8  | 16 | 362  | 377 ATGCACGCCCTTAATATTGC      |
| scaffold74821_12.4 | 1 p2 | (TA)10 | 20 | 418  | 437 CAAGCCATGAGCCTTTGATT      |
| scaffold74999_11.6 | 1 p2 | (TA)8  | 16 | 174  | 189 AAAAATGGGGGAAATTTGATT     |
| scaffold75004_11.1 | 1 p2 | (AT)7  | 14 | 1663 | 1676 AAACCGTCCAAAATCGTATCC    |
| scaffold75110_14.4 | 1 p2 | (GA)6  | 12 | 1538 | 1549 TAGTGGCCATTCTTCAGGCT     |
| scaffold75161_14.5 | 1 p2 | (AT)8  | 16 | 1743 | 1758 CGTTTCGCAAATTAATCGGT     |
| scaffold75322_12.4 | 1 p2 | (GA)6  | 12 | 99   | 110 GTTAATGTGGATTGTGGGGG      |
| scaffold75331_13.8 | 1 p2 | (AT)6  | 12 | 1185 | 1196 CAATGAAACCAAACCATCCA     |
| scaffold75332_16.5 | 1 p2 | (TC)9  | 18 | 5652 | 5669 ATATGCCAATTTGGTTCCGA     |
| scaffold75351_10.9 | 1 p2 | (TA)9  | 18 | 349  | 366 TGCACITTAAGAGGTGGTTGC     |
| scaffold75530_10.9 | 1 p2 | (TA)10 | 20 | 212  | 231 TCGAAAATCAAAGGCACACA      |
| scaffold75602_15.4 | 1 p2 | (AG)11 | 22 | 4802 | 4823 ATCGGAACGCTCATCAAATC     |
| scaffold75683_15.9 | 1 p2 | (AG)6  | 12 | 835  | 846 GCATTTGTCCCGTATGGCTA      |
| scaffold75870_16.1 | 1 p2 | (AC)6  | 12 | 1135 | 1146 CCCTCTTGATGGATTTTTGA     |
| scaffold75920_13.8 | 1 p2 | (CT)9  | 18 | 1794 | 1811 TTGGCAGACTACTTTGTGGG     |
| scaffold75965_12.1 | 1 p2 | (AT)9  | 18 | 619  | 636 CATTTATTTCTGCCCTCCA       |
| scaffold76005_15.8 | 1 p2 | (TA)8  | 16 | 383  | 398 TGACATTAGACCTACCAGCACG    |
| scaffold76059_16.4 | 1 p2 | (TA)8  | 16 | 729  | 744 TCGCTGGTTTTGTAGTCGTG      |
| scaffold76061_12.2 | 1 p2 | (TC)6  | 12 | 31   | 42 ATTCTGTCCGATAGGTGCGT       |
| scaffold76151_14.4 | 1 p2 | (AG)6  | 12 | 1746 | 1757 TCATTTGGTTTGCAGTCAGC     |
| scaffold76276_18.4 | 1 p2 | (TA)11 | 22 | 42   | 63 GCGTTTTGACGATATATAGTGTGTTG |
| scaffold76979_11.3 | 1 p2 | (TA)11 | 22 | 316  | 337 AATCAATCTTTGAAACCGGC      |
| scaffold77023_14.2 | 1 p2 | (TA)9  | 18 | 380  | 397 CTCTAACAAATGCCAGCCGT      |
| scaffold77310_12.3 | 1 p2 | (CT)6  | 12 | 297  | 308 TTTAACTAGCGTCTGTGCC       |
| scaffold77357_12.1 | 1 p2 | (CA)7  | 14 | 197  | 210 GCTTCACTCACTCACGCAGA      |
| scaffold77360_14.8 | 1 p2 | (CT)6  | 12 | 2075 | 2086 CACTGCTCTTTTTCTCGG       |
| scaffold77455_15.9 | 1 p2 | (AG)6  | 12 | 312  | 323 TGATTTTCGATGGTTTTGGGT     |
| scaffold77486_15.2 | 1 p2 | (CT)8  | 16 | 856  | 871 GGCACACCTGTATACCCAC       |
| scaffold77561_15.4 | 1 p2 | (TG)6  | 12 | 1481 | 1492 TTGATGCACCCTCTTTTTCC     |
| scaffold77651_14.8 | 1 p2 | (TA)8  | 16 | 241  | 256 AAAATCGACCGCACATTTTA      |
| scaffold77708_13.1 | 1 p2 | (TC)6  | 12 | 708  | 719 CCCTAACTCGACCCAGATCA      |
| scaffold77732_13.0 | 1 p2 | (TA)6  | 12 | 170  | 181 CGTTGTCTGAGCACGTTAG       |
| scaffold77796_12.0 | 1 p2 | (AT)6  | 12 | 635  | 646 ATCGTGGGAGAGAGATCG        |
| scaffold78146_15.2 | 1 p2 | (TA)6  | 12 | 805  | 816 TTCAATCATCTCAAGGCGAC      |
| scaffold78188_14.5 | 1 p2 | (GA)6  | 12 | 52   | 63 TGATGAAGTTGGGTGTTGGA       |
| scaffold78227_10.1 | 1 p2 | (AT)7  | 14 | 136  | 149 CCTAAAATTGAACGAAACTCGAA   |
| scaffold78392_10.0 | 1 p2 | (AC)8  | 16 | 276  | 291 TAGCCCCTTTGAGACCATTG      |
| scaffold78396_13.6 | 1 p2 | (AG)6  | 12 | 661  | 672 TCCAGTGTGCTCTTGCATC       |
| scaffold78453_13.0 | 1 p2 | (TG)6  | 12 | 349  | 360 TTCCGATGGAATGCATTTTT      |
| scaffold78461_10.9 | 1 p2 | (TA)7  | 14 | 211  | 224 AGGCACATGCCAAACTTTTC      |
| scaffold78530_17.2 | 1 p2 | (TC)6  | 12 | 139  | 150 TCCCAGTTCAACTCTTTCTCG     |
| scaffold78563_12.0 | 1 p2 | (AG)6  | 12 | 345  | 356 GTGTGGTTCCTCTCGTGTT       |
| scaffold78622_17.0 | 1 p2 | (TC)6  | 12 | 357  | 368 TTCCACTAGGGGTACCAAATG     |
| scaffold78859_10.5 | 1 p2 | (AG)6  | 12 | 102  | 113 AAAGCCAATCGAGTCTTGGA      |
| scaffold78947_15.0 | 1 p2 | (GA)8  | 16 | 85   | 100 GGATGGGGCTGTGATTGTAG      |
| scaffold79075_14.2 | 1 p2 | (AT)6  | 12 | 298  | 309 CAATTCCGAACCGAATAAGC      |
| scaffold79112_10.0 | 1 p2 | (AT)10 | 20 | 45   | 64 CGAATAGAGTGATGAGCCAAC      |
| scaffold79127_20.0 | 1 p2 | (TC)6  | 12 | 96   | 107 GCAACGGAATACCACTCGTT      |
| scaffold79379_15.8 | 1 p2 | (CT)6  | 12 | 2695 | 2706 ACACCATACCCAAAAGCCTG     |
| scaffold79413_19.3 | 1 p2 | (TC)6  | 12 | 556  | 567 TCTCAATCATGCGATCCAAA      |

|                    |      |        |    |      |                               |
|--------------------|------|--------|----|------|-------------------------------|
| scaffold79543_13.0 | 1 p2 | (AT)9  | 18 | 323  | 340 GGAAGCGCAATTAATACGGA      |
| scaffold79547_20.3 | 1 p2 | (TA)8  | 16 | 158  | 173 ACGATTTTGCCTTGTATGC       |
| scaffold79728_13.6 | 1 p2 | (TA)6  | 12 | 185  | 196 CACGATAAGGGATGGATTAC      |
| scaffold79739_13.7 | 1 p2 | (AG)6  | 12 | 1235 | 1246 ACGAGGGAGTGATCAAGTGG     |
| scaffold80293_13.2 | 1 p2 | (GT)8  | 16 | 166  | 181 TGTTCAAATGATTTTGGGGG      |
| scaffold80295_13.1 | 1 p2 | (AC)6  | 12 | 143  | 154 ACTCTCAGCCACGCACTCTC      |
| scaffold80667_14.1 | 1 p2 | (TA)7  | 14 | 1762 | 1775 CGCGCCTTGCCTAATAATAA     |
| scaffold80688_13.0 | 1 p2 | (AT)6  | 12 | 244  | 255 TAATCGTTGCTGGAGCGTC       |
| scaffold80703_16.5 | 1 p2 | (AT)6  | 12 | 153  | 164 ACAGCCATCGCTCAACCTAC      |
| scaffold80711_14.1 | 1 p2 | (TA)9  | 18 | 284  | 301 TCATGGGATCAGTTTCAATCC     |
| scaffold80726_11.0 | 1 p2 | (AG)7  | 14 | 247  | 260 ACTGTGCTGCTGGAAAATTG      |
| scaffold80753_12.9 | 1 p2 | (CT)7  | 14 | 80   | 93 ACAAATGACCAAGGAGGAGTT      |
| scaffold80774_12.7 | 1 p2 | (TA)6  | 12 | 201  | 212 TGGATTGTATGTGTCCCCAG      |
| scaffold80812_13.9 | 1 p2 | (TA)9  | 18 | 190  | 207 GTTATGTGGCCCGAATGACT      |
| scaffold81113_22.3 | 1 p2 | (AG)7  | 14 | 50   | 63 TCCCATGTTTGTAAATTATTGTAGGG |
| scaffold81146_18.6 | 1 p2 | (CT)7  | 14 | 3436 | 3449 CAGGGACGGGCATGTTACTA     |
| scaffold81182_18.9 | 1 p2 | (TA)6  | 12 | 593  | 604 TTCACGACCCTGTATGTCCA      |
| scaffold81228_11.2 | 1 p2 | (TA)6  | 12 | 494  | 505 CTTATTTGATGCACGGACC       |
| scaffold81275_18.3 | 1 p2 | (GA)6  | 12 | 476  | 487 AGAAGTCTGCGAAGGTCAGC      |
| scaffold81313_15.2 | 1 p2 | (AG)8  | 16 | 272  | 287 GCCAACTATGAGACATGCGA      |
| scaffold81406_13.5 | 1 p2 | (TA)7  | 14 | 484  | 497 GCGTGACGCACAGTTTCTTA      |
| scaffold81510_16.9 | 1 p2 | (TA)7  | 14 | 844  | 857 CTGATGTCAATTTCCATATCCA    |
| scaffold81530_18.7 | 1 p2 | (TC)6  | 12 | 964  | 975 ATTCAGGCATATGCTTTGGC      |
| scaffold81719_15.3 | 1 p2 | (GA)6  | 12 | 4130 | 4141 GGGTTTGGTTGGAGACGTAA     |
| scaffold81773_10.9 | 1 p2 | (TC)6  | 12 | 215  | 226 GAGTTCGTCAAACCTCCCAA      |
| scaffold81873_14.1 | 1 p2 | (TC)6  | 12 | 39   | 50 GGCAACGGAATACCATTTGT       |
| scaffold81933_15.9 | 1 p2 | (AC)6  | 12 | 1686 | 1697 AGATGCTCCCTCTCCCATCT     |
| scaffold82011_15.6 | 1 p2 | (AG)7  | 14 | 2392 | 2405 TCCAAGGGAAAGTGTTCAAGA    |
| scaffold82102_14.1 | 1 p2 | (TC)6  | 12 | 1070 | 1081 AAGGAGGGGCAAAGAAAAGA     |
| scaffold82158_17.4 | 1 p2 | (TC)6  | 12 | 113  | 124 TCAAACACTAGCCTTTGCCTC     |
| scaffold82302_16.3 | 1 p2 | (CT)6  | 12 | 89   | 100 AACAAACACCTGGGACCACT      |
| scaffold82381_15.2 | 1 p2 | (AT)6  | 12 | 343  | 354 TGAAGAGTACAACCTACACCCCA   |
| scaffold82405_14.2 | 1 p2 | (AC)10 | 20 | 472  | 491 CGAAAGCTGAAGAGCGAGAT      |
| scaffold82466_10.0 | 1 p2 | (AT)6  | 12 | 560  | 571 GACTACTGGTCCGGGAACAA      |
| scaffold82718_17.8 | 1 p2 | (CT)6  | 12 | 56   | 67 CATGTGGCCTAACTTGACACA      |
| scaffold82736_14.0 | 1 p2 | (CT)7  | 14 | 381  | 394 ATCAAACGCTTTGTTTTCCG      |
| scaffold82741_10.0 | 1 p2 | (AT)6  | 12 | 422  | 433 AATTCCATGCACAGTGACCA      |
| scaffold82925_14.9 | 1 p2 | (AG)8  | 16 | 284  | 299 CAATCTCAACCCAAACCCAT      |
| scaffold83013_17.1 | 1 p2 | (CT)7  | 14 | 80   | 93 GTTCTCACCGGAGTTGGTTC       |
| scaffold83070_11.6 | 1 p2 | (TA)7  | 14 | 185  | 198 TCCCACTAAAATTTTCCCGTT     |
| scaffold83254_16.4 | 1 p2 | (AC)6  | 12 | 1418 | 1429 TTGATGCTGCAAGAAGCCTA     |
| scaffold83389_10.0 | 1 p2 | (AG)6  | 12 | 139  | 150 GCATGCTAGTGCTGTTGTG       |
| scaffold83423_13.2 | 1 p2 | (AG)6  | 12 | 931  | 942 TCAAAGAAGAGGCTGGCAT       |
| scaffold83586_14.3 | 1 p2 | (AG)8  | 16 | 380  | 395 AGGAAGGAGGCAGAGAGGAC      |
| scaffold83612_16.1 | 1 p2 | (TA)6  | 12 | 308  | 319 TGAAATGGTGATTTGAGGGG      |
| scaffold83641_13.7 | 1 p2 | (GT)9  | 18 | 695  | 712 AATGGATCTATAGAGCGCCG      |
| scaffold83653_16.9 | 1 p2 | (TA)6  | 12 | 219  | 230 GCCTAGTGAGGAGTTCACGG      |
| scaffold83790_14.6 | 1 p2 | (AT)10 | 20 | 2162 | 2181 TCTCAAACCCACAACAAACCC    |
| scaffold84019_13.5 | 1 p2 | (AT)7  | 14 | 544  | 557 CGACTACTCAATCATCCAACCA    |
| scaffold84188_14.7 | 1 p2 | (GA)6  | 12 | 680  | 691 TCCAAGATTGAAGTCGCAGA      |
| scaffold84201_13.9 | 1 p2 | (TA)10 | 20 | 191  | 210 CTCCTCAATCAAACCTTCG       |
| scaffold84225_13.9 | 1 p2 | (AC)11 | 22 | 2421 | 2442 CCGTGGTTGATCCAGAGAAT     |
| scaffold84249_17.6 | 1 p2 | (TA)6  | 12 | 80   | 91 GGGGAAAATTTGCAAGATGA       |
| scaffold84367_16.1 | 1 p2 | (AG)10 | 20 | 4252 | 4271 CGTCCGTGTTCTATTGCAGA     |
| scaffold84561_12.1 | 1 p2 | (AT)7  | 14 | 443  | 456 TCATCTGCTGAAAGGAGGGT      |
| scaffold84577_10.1 | 1 p2 | (TC)6  | 12 | 100  | 111 ATCGGCGAATTTATCTGCAA      |
| scaffold84595_11.8 | 1 p2 | (AT)11 | 22 | 699  | 720 CAGGTGCAGGGAAGAAATGT      |
| scaffold84671_16.8 | 1 p2 | (GA)7  | 14 | 1871 | 1884 CAACCAGACCCCTACCAAGA     |

|                    |      |        |    |      |                                 |
|--------------------|------|--------|----|------|---------------------------------|
| scaffold84675_10.7 | 1 p2 | (TA)8  | 16 | 72   | 87 ATGGGAAGAGGGGGTATGAG         |
| scaffold85082_13.5 | 1 p2 | (AC)6  | 12 | 401  | 412 TAGAGCCAACCAAATGGTCC        |
| scaffold85248_14.4 | 1 p2 | (TA)9  | 18 | 237  | 254 TTAGGGTTTAAAATCGCGCA        |
| scaffold85249_10.0 | 1 p2 | (TA)8  | 16 | 131  | 146 CGTTGAGCCGAATGTGTTTA        |
| scaffold85335_13.8 | 1 p2 | (AG)6  | 12 | 1079 | 1090 ATTCACGTCCACGTTTCTCC       |
| scaffold85607_14.8 | 1 p2 | (AG)6  | 12 | 45   | 56 CCTTTCCTAACAGTTTGGCATC       |
| scaffold85613_14.5 | 1 p2 | (AG)7  | 14 | 112  | 125 CGCCATTCTCTCTCCACTCT        |
| scaffold85756_13.2 | 1 p2 | (AT)6  | 12 | 286  | 297 GCGTGTTCCTGGTGTTCCTG        |
| scaffold86034_10.8 | 1 p2 | (GA)10 | 20 | 238  | 257 AATCGCAAATCACACCATGA        |
| scaffold86089_11.0 | 1 p2 | (CT)9  | 18 | 129  | 146 TTGCTTCAATGCAAGCTGTC        |
| scaffold86147_14.0 | 1 p2 | (GA)8  | 16 | 1072 | 1087 TGA CTGCGCGTAGAATCCTT      |
| scaffold86450_17.3 | 1 p2 | (TG)7  | 14 | 2655 | 2668 AGGCCTCTCACATCTTCACC       |
| scaffold86573_11.2 | 1 p2 | (AG)7  | 14 | 190  | 203 GATATTGACGGTTGGTTGGC        |
| scaffold86741_16.1 | 1 p2 | (TA)6  | 12 | 94   | 105 AATGAACCAAGTCATTGCAGC       |
| scaffold86750_10.6 | 1 p2 | (AT)6  | 12 | 169  | 180 AGTGAAGCCAAGCCAAAAGA        |
| scaffold86829_14.3 | 1 p2 | (TA)7  | 14 | 553  | 566 AGGTTGGAGGGAATGGAGAG        |
| scaffold86867_10.4 | 1 p2 | (AT)11 | 22 | 55   | 76 AAATACCATTTTCATTTTGTAAACTCTT |
| scaffold86965_15.3 | 1 p2 | (CT)8  | 16 | 3590 | 3605 AAAAACATGGAGCAACGACA       |
| scaffold87030_13.0 | 1 p2 | (GA)6  | 12 | 35   | 46 CACGAGTGAAGAAAGGGAGAG        |
| scaffold87093_14.4 | 1 p2 | (TC)6  | 12 | 913  | 924 TTGATTGATCGACAGCATCC        |
| scaffold87127_17.6 | 1 p2 | (AC)6  | 12 | 1051 | 1062 TGGGATTAATTTCCACCATGA      |
| scaffold87146_10.6 | 1 p2 | (TC)6  | 12 | 60   | 71 TCAAATCATAGTCTTTCCTCGTTTC    |
| scaffold87264_15.1 | 1 p2 | (TA)9  | 18 | 47   | 64 TGAAGTTAGGAAATAAGGAGGTGTT    |
| scaffold87358_13.9 | 1 p2 | (TC)6  | 12 | 866  | 877 TCCACAAATCGCATAAACA         |
| scaffold87503_11.0 | 1 p2 | (GT)9  | 18 | 214  | 231 GAAATTTTCGCTAAGTCGAGAATAA   |
| scaffold87510_15.6 | 1 p2 | (CT)9  | 18 | 2258 | 2275 AGGGACAGCTGTGGACTCTG       |
| scaffold87547_12.3 | 1 p2 | (TA)6  | 12 | 365  | 376 TTGTCGTGGTTCGGTATTCA        |
| scaffold87549_19.0 | 1 p2 | (TG)7  | 14 | 181  | 194 GCATTTATGTGTCAGCCCT         |
| scaffold87635_17.8 | 1 p2 | (CT)6  | 12 | 365  | 376 TGGTGAACGTGTTTTGTTGC        |
| scaffold87819_17.1 | 1 p2 | (CT)7  | 14 | 148  | 161 TTTGTTGGCTAACAGGTCCC        |
| scaffold87836_15.3 | 1 p2 | (AG)6  | 12 | 232  | 243 TGTTTCGTTGGTGGAGTTGAG       |
| scaffold87992_12.1 | 1 p2 | (AT)6  | 12 | 138  | 149 CATCCTAAAGATAAGAATGGTAATCA  |
| scaffold88024_14.1 | 1 p2 | (TC)7  | 14 | 294  | 307 GGCAACATGAATTCGTTCC         |
| scaffold88025_14.0 | 1 p2 | (GA)6  | 12 | 114  | 125 TGGGAGAAGTTGGTGAATTTG       |
| scaffold88033_10.2 | 1 p2 | (TA)6  | 12 | 250  | 261 CTTTCTCCCCCGTAAATTCC        |
| scaffold88052_12.9 | 1 p2 | (TA)10 | 20 | 99   | 118 GCCCTTGATTTCCAAGATCC        |
| scaffold88060_10.7 | 1 p2 | (TC)6  | 12 | 111  | 122 CCTCCATCCTTACTCCACCA        |
| scaffold88373_19.1 | 1 p2 | (TA)6  | 12 | 334  | 345 TGAGTTTTGAATTCGGACCC        |
| scaffold88663_15.0 | 1 p2 | (AG)6  | 12 | 619  | 630 AGACAGCAATACCAGGGGTG        |
| scaffold88725_13.9 | 1 p2 | (GA)7  | 14 | 2448 | 2461 GAAGGTAACGTCGCTGAAGG       |
| scaffold88735_15.0 | 1 p2 | (AG)6  | 12 | 449  | 460 ACCGACTTCTGCACCATTTT        |
| scaffold88775_12.0 | 1 p2 | (TA)8  | 16 | 158  | 173 TCGGTTCTTGCTCCATTACC        |
| scaffold88848_10.1 | 1 p2 | (TC)8  | 16 | 119  | 134 TTTTTCTTTCCACAAACCCC        |
| scaffold88855_15.6 | 1 p2 | (TC)6  | 12 | 114  | 125 CAGGAAGGGAAAAGCATCTG        |
| scaffold88921_11.0 | 1 p2 | (TG)8  | 16 | 647  | 662 GGTAGGAAATTTTTGGCTAAGTGA    |
| scaffold88926_15.0 | 1 p2 | (AC)6  | 12 | 2077 | 2088 GGGTTTCAAATTTTGAATGCTT     |
| scaffold88990_16.1 | 1 p2 | (TA)8  | 16 | 574  | 589 CTTGAAAATCTGAGCGTCC         |
| scaffold89043_10.5 | 1 p2 | (TA)7  | 14 | 329  | 342 GATTTGGCTAGGAATGGCAA        |
| scaffold89126_17.5 | 1 p2 | (GA)8  | 16 | 308  | 323 TCGTCCGAACACATTGAAGA        |
| scaffold89226_16.9 | 1 p2 | (CT)7  | 14 | 109  | 122 G TACTCGGACGGGATCTTGA       |
| scaffold89596_15.0 | 1 p2 | (TC)9  | 18 | 2078 | 2095 TAGGGCAGATTTATGCCAGG       |
| scaffold89612_12.1 | 1 p2 | (TC)6  | 12 | 190  | 201 CACGTCTCGTGTTCCTTCCA        |
| scaffold89630_13.7 | 1 p2 | (GA)6  | 12 | 67   | 78 CGAGTGGTTGTGAGGTGAGT         |
| scaffold89631_11.9 | 1 p2 | (TC)6  | 12 | 529  | 540 TCGCACAAATGATAGCGAAT        |
| scaffold89673_14.1 | 1 p2 | (TA)6  | 12 | 1348 | 1359 TGAACCACCTCTGCAAACAA       |
| scaffold89677_12.5 | 1 p2 | (TC)9  | 18 | 249  | 266 TGCATAAGACACCTAGCCCA        |
| scaffold89747_16.3 | 1 p2 | (GT)6  | 12 | 368  | 379 AGCAATATTGGTGGGACGAG        |
| scaffold89787_12.3 | 1 p2 | (TC)6  | 12 | 770  | 781 TCATCTCCATCCCCCAATAA        |



|                    |      |        |    |      |                                |
|--------------------|------|--------|----|------|--------------------------------|
| scaffold89854_12.9 | 1 p2 | (AT)7  | 14 | 564  | 577 CCTGGGTTTAAAAATGCGAA       |
| scaffold90114_10.9 | 1 p2 | (TA)7  | 14 | 461  | 474 TGCAAATCTGGATCCTTCGT       |
| scaffold90191_11.0 | 1 p2 | (TA)9  | 18 | 258  | 275 AAACCTTGAGCAGTCAGTTCGATT   |
| scaffold90198_11.7 | 1 p2 | (GA)6  | 12 | 205  | 216 TCTCCACCAGATCATCACCA       |
| scaffold90221_15.6 | 1 p2 | (AC)9  | 18 | 3195 | 3212 CTCCAACCTCCCTGTACTGC      |
| scaffold90289_17.0 | 1 p2 | (GA)6  | 12 | 1907 | 1918 TAGTTGGAGGGAATGCTTCG      |
| scaffold90295_19.0 | 1 p2 | (AT)8  | 16 | 380  | 395 TGGCTCCTGAATCTCACAGA       |
| scaffold90477_14.5 | 1 p2 | (TA)7  | 14 | 145  | 158 TCACACAGAATCCCTGTTGC       |
| scaffold90480_20.7 | 1 p2 | (AG)7  | 14 | 56   | 69 ATAAATATCAGGTGTTTTCTGAGTTG  |
| scaffold90540_16.9 | 1 p2 | (AT)6  | 12 | 53   | 64 CCCTTTTAGGCTCAAATCTCTTT     |
| scaffold90609_12.5 | 1 p2 | (AT)9  | 18 | 355  | 372 TTTTCGCCTCCCCTAAAAA        |
| scaffold90611_10.6 | 1 p2 | (TA)8  | 16 | 329  | 344 TTTTGGCCACCTATGCACAA       |
| scaffold90630_11.6 | 1 p2 | (AT)9  | 18 | 65   | 82 TCGGCCAGAGAGAAAAAGAA        |
| scaffold90656_22.4 | 1 p2 | (TC)7  | 14 | 144  | 157 AGTGCCTTGCAGAGCTTTT        |
| scaffold90675_16.7 | 1 p2 | (AT)8  | 16 | 131  | 146 TCATGATATTTTTCTAAATTTTCCTT |
| scaffold90762_10.9 | 1 p2 | (AT)7  | 14 | 142  | 155 CTCACCGTGGACGTAGATCA       |
| scaffold90841_16.8 | 1 p2 | (AG)9  | 18 | 1248 | 1265 AGCGGCAGACGTTTCTAGTC      |
| scaffold90872_11.4 | 1 p2 | (TA)8  | 16 | 531  | 546 CGGAGATGAGGATGCTTAGG       |
| scaffold91053_15.4 | 1 p2 | (CT)6  | 12 | 24   | 35 CCACAAACCGAGCTCACC          |
| scaffold91226_20.8 | 1 p2 | (AT)9  | 18 | 225  | 242 CATGGATAGAGCGTGCAATG       |
| scaffold91237_10.8 | 1 p2 | (AT)10 | 20 | 218  | 237 TCCGTGCGTGATTCAAGAGT       |
| scaffold91306_10.8 | 1 p2 | (CA)7  | 14 | 155  | 168 ATTCCCGGGCTGAGATAGTT       |
| scaffold91539_12.7 | 1 p2 | (AT)9  | 18 | 46   | 63 AAGGAACAAATGAGAATGTTAGTGC   |
| scaffold91625_11.1 | 1 p2 | (CT)6  | 12 | 93   | 104 GGGATTTGGGACGATTTTCT       |
| scaffold92324_14.2 | 1 p2 | (AT)8  | 16 | 567  | 582 GTAACGCGCAATGCTACTT        |
| scaffold92325_16.1 | 1 p2 | (TC)9  | 18 | 30   | 47 GGTGTTCTTGGCAACAGGTC        |
| scaffold92365_10.7 | 1 p2 | (TA)6  | 12 | 83   | 94 TCAGTTTCGAGTTATGAAGTTAGGAA  |
| scaffold92386_15.5 | 1 p2 | (TG)9  | 18 | 1971 | 1988 GTGGATTGAAGCATGAGCCT      |
| scaffold92435_14.6 | 1 p2 | (GA)6  | 12 | 238  | 249 ATGGGGCTGTGGTTGTAGAG       |
| scaffold92521_11.7 | 1 p2 | (TA)6  | 12 | 474  | 485 AGTGAATCACCTGAAACGCC       |
| scaffold92650_14.7 | 1 p2 | (AG)8  | 16 | 581  | 596 CACCTGCAACAGAGGAGTCA       |
| scaffold92855_10.4 | 1 p2 | (TA)6  | 12 | 186  | 197 TCACATCAATTTTCACACCCA      |
| scaffold92942_14.4 | 1 p2 | (AT)8  | 16 | 297  | 312 CCTGTTGCATCAATCAATGG       |
| scaffold92968_11.7 | 1 p2 | (GA)6  | 12 | 530  | 541 TGCAAGCATCAAACAACACA       |
| scaffold93104_17.3 | 1 p2 | (AT)8  | 16 | 247  | 262 ATGAGACAGTCCGGGATTTG       |
| scaffold93263_13.9 | 1 p2 | (TC)6  | 12 | 429  | 440 ACCTTACCCAACCCACTTCC       |
| scaffold93321_15.8 | 1 p2 | (AG)7  | 14 | 688  | 701 ATTCATTCCCACCAGAATGC       |
| scaffold93480_10.8 | 1 p2 | (TG)6  | 12 | 142  | 153 ACGTCTTGATGTGAAACCC        |
| scaffold93632_13.3 | 1 p2 | (AG)6  | 12 | 934  | 945 CTAGGGTTAGCATGCTTGGG       |
| scaffold93749_11.5 | 1 p2 | (AT)7  | 14 | 312  | 325 TCAACCGCCAGGATTATTTT       |
| scaffold93774_19.0 | 1 p2 | (GA)6  | 12 | 302  | 313 CGTGGTTTCGATCGTAAATGA      |
| scaffold93780_11.7 | 1 p2 | (TA)7  | 14 | 210  | 223 ACCCCACCTTTCTTGGATTC       |
| scaffold93792_20.9 | 1 p2 | (AG)6  | 12 | 516  | 527 GGTGGAGTGTGGAAAAGGA        |
| scaffold93947_13.8 | 1 p2 | (TG)6  | 12 | 620  | 631 GCGTACATTTGCCCTAAGA        |
| scaffold93967_16.1 | 1 p2 | (AT)7  | 14 | 250  | 263 ATCCAGGTTTCGGTTTCAATG      |
| scaffold94001_16.5 | 1 p2 | (AT)7  | 14 | 242  | 255 TTGACTTGGGCTTTCGATTA       |
| scaffold94218_15.7 | 1 p2 | (TA)8  | 16 | 286  | 301 CTCTTGTAACAAAACCCCATGT     |
| scaffold94308_10.5 | 1 p2 | (CT)7  | 14 | 178  | 191 TATGGGGTGAGTGGGCTAAG       |
| scaffold94373_15.2 | 1 p2 | (CT)7  | 14 | 442  | 455 CCAATGGAGAACCCTTTGTC       |
| scaffold94724_15.3 | 1 p2 | (CA)6  | 12 | 3862 | 3873 CCAAGTCAATTCCTAGTGCG      |
| scaffold94884_10.2 | 1 p2 | (CT)8  | 16 | 415  | 430 TTGACTTGTGACCCTCTCCC       |
| scaffold95089_18.1 | 1 p2 | (CA)6  | 12 | 213  | 224 CATACCAAGTCCCAGGGAGA       |
| scaffold95093_14.8 | 1 p2 | (TC)6  | 12 | 400  | 411 TGAGACTGCCTTCGTACAC        |
| scaffold95133_15.2 | 1 p2 | (GA)6  | 12 | 651  | 662 TGCTTCACTGCAAAAACAAGG      |
| scaffold95134_12.5 | 1 p2 | (CT)6  | 12 | 78   | 89 CAAATGGCCGAGAGAGAGTT        |
| scaffold95302_15.1 | 1 p2 | (TC)6  | 12 | 1143 | 1154 CCCCACAGATATCCCACCTA      |
| scaffold95343_12.1 | 1 p2 | (TA)6  | 12 | 698  | 709 TCATCATTCGACTTCCATGC       |
| scaffold95449_16.8 | 1 p2 | (AT)7  | 14 | 79   | 92 AATCTCCATGTTTCAGGACTTCA     |

|                     |      |        |    |      |                               |
|---------------------|------|--------|----|------|-------------------------------|
| scaffold95502_16.0  | 1 p2 | (AT)6  | 12 | 3670 | 3681 TGTGACACCAATGTGATGGA     |
| scaffold95592_14.0  | 1 p2 | (TA)6  | 12 | 518  | 529 GCAAAGTGTGCGGTCAAAT       |
| scaffold95628_14.2  | 1 p2 | (TA)7  | 14 | 112  | 125 GAAGGAGCAATGAGAGGTGC      |
| scaffold95630_14.4  | 1 p2 | (AT)8  | 16 | 111  | 126 AATCTTCATAAGTGGAGGGGC     |
| scaffold95669_14.9  | 1 p2 | (AT)8  | 16 | 1027 | 1042 CAAAACGTCCGTATCGACAA     |
| scaffold95717_10.8  | 1 p2 | (AG)6  | 12 | 231  | 242 TGAAGATTTTCATGGTGGATT     |
| scaffold95781_13.6  | 1 p2 | (CT)7  | 14 | 616  | 629 ATGTTTCAATGACACGTGGG      |
| scaffold95826_18.3  | 1 p2 | (TG)7  | 14 | 266  | 279 CTGGGTCTGGTGTGTTGTG       |
| scaffold95907_12.2  | 1 p2 | (AG)6  | 12 | 1333 | 1344 TTACATTTTTCTGGCTCCCAA    |
| scaffold96034_14.8  | 1 p2 | (TA)9  | 18 | 71   | 88 TCAGTTTCGAGTTATGAAGTTAGGAA |
| scaffold96357_15.2  | 1 p2 | (TC)10 | 20 | 4238 | 4257 TCATCATCGTGCTTTCCTTG     |
| scaffold96416_14.0  | 1 p2 | (AG)6  | 12 | 232  | 243 ACCATCATCGTCATCCACCT      |
| scaffold96508_17.0  | 1 p2 | (CT)7  | 14 | 2597 | 2610 CAACAAAAAGCTCGCAATCA     |
| scaffold96755_16.6  | 1 p2 | (AT)8  | 16 | 1512 | 1527 TTCATGCTGAGGTGTTGTGCG    |
| scaffold96796_15.4  | 1 p2 | (CT)6  | 12 | 1670 | 1681 GGCTGAACCATTACCTGAT      |
| scaffold96934_17.3  | 1 p2 | (AT)7  | 14 | 1280 | 1293 TTATATTTGGTCGGTGGGGA     |
| scaffold97005_14.6  | 1 p2 | (CT)7  | 14 | 441  | 454 CCTTCATTTTATCGGCTCCA      |
| scaffold97045_10.2  | 1 p2 | (AT)9  | 18 | 680  | 697 ATTGGTGACGAGAGAGTGGG      |
| scaffold97071_12.4  | 1 p2 | (AT)6  | 12 | 58   | 69 TTGCAATTAGTCATACAATGATAA   |
| scaffold97146_10.5  | 1 p2 | (TA)10 | 20 | 176  | 195 ATCGCAAATAAAACAACCGC      |
| scaffold97172_17.7  | 1 p2 | (AT)7  | 14 | 1995 | 2008 ATTGCCCCATCATAACAAA      |
| scaffold97502_13.9  | 1 p2 | (TC)6  | 12 | 114  | 125 CTGATTCGCACAAATGATCG      |
| scaffold97673_12.0  | 1 p2 | (AT)12 | 24 | 236  | 259 GACGTGTGTGTGATTGAGGG      |
| scaffold97704_13.0  | 1 p2 | (TA)13 | 26 | 417  | 442 TGGTTACTCTCGAACGCGA       |
| scaffold97943_12.0  | 1 p2 | (AG)6  | 12 | 275  | 286 GACCGTGTAGGAAGGCTGAG      |
| scaffold98089_12.9  | 1 p2 | (AC)8  | 16 | 316  | 331 TTCTAGGCACAAAACCCACC      |
| scaffold98248_13.8  | 1 p2 | (CT)6  | 12 | 204  | 215 AATGGCAGATTTGAAGACGG      |
| scaffold98287_15.2  | 1 p2 | (AT)8  | 16 | 400  | 415 GCCAACATCAACTGCGAGTA      |
| scaffold98322_16.2  | 1 p2 | (AT)6  | 12 | 928  | 939 GTTCAAGAAAGCCGTGGAAG      |
| scaffold98487_12.0  | 1 p2 | (AT)6  | 12 | 309  | 320 CATCCTCATAACCCCCACAC      |
| scaffold98557_14.8  | 1 p2 | (AT)6  | 12 | 2293 | 2304 CTTAAGACCCGATGCCTTTG     |
| scaffold98577_13.9  | 1 p2 | (AG)6  | 12 | 1016 | 1027 TTCTCTATCAATCGGCTGGG     |
| scaffold98867_15.7  | 1 p2 | (GA)7  | 14 | 488  | 501 AAACCACCCCGTCTTTTCTT      |
| scaffold98871_13.8  | 1 p2 | (AG)7  | 14 | 270  | 283 TCCTTCCATCTTCCCTCCT       |
| scaffold99059_14.3  | 1 p2 | (CA)6  | 12 | 1933 | 1944 AAATGAGACAAATGTGGGGG     |
| scaffold99064_15.8  | 1 p2 | (TC)6  | 12 | 1078 | 1089 AATCTTGTGCACTGTGTGCC     |
| scaffold99164_15.5  | 1 p2 | (CA)6  | 12 | 1410 | 1421 GCGGCATCATCTTCTCTCTC     |
| scaffold99432_16.3  | 1 p2 | (CT)8  | 16 | 550  | 565 CGTCCGTCCATAAACAACCT      |
| scaffold99434_15.6  | 1 p2 | (AT)6  | 12 | 4425 | 4436 TCCGTACAATAACATCCTCCC    |
| scaffold99474_16.4  | 1 p2 | (GA)8  | 16 | 176  | 191 GGCCTGATTTGCAATACTGTG     |
| scaffold99531_15.1  | 1 p2 | (CT)6  | 12 | 698  | 709 ACCCTCAAGCATCAGCATTC      |
| scaffold99667_14.1  | 1 p2 | (TC)9  | 18 | 2024 | 2041 CTACCTTAGGCCAACCCACA     |
| scaffold99668_12.1  | 1 p2 | (TG)6  | 12 | 341  | 352 GATTTTGCACGAAGCAATGA      |
| scaffold99774_13.8  | 1 p2 | (AG)6  | 12 | 394  | 405 TGAAAATGGGTACCACACACA     |
| scaffold99932_15.6  | 1 p2 | (CT)6  | 12 | 1455 | 1466 GCGCTACATGCTTTGTGAAT     |
| scaffold100046_12.2 | 1 p2 | (TA)10 | 20 | 328  | 347 GCAGGTTCGAAGTAGGGTGT      |
| scaffold100151_15.2 | 1 p2 | (AT)9  | 18 | 3923 | 3940 ATCTTTTTCGATGCCTCAAG     |
| scaffold100153_13.4 | 1 p2 | (TA)6  | 12 | 399  | 410 CCCCTTTGAGCTTTTTAGCC      |
| scaffold100162_13.0 | 1 p2 | (TA)7  | 14 | 171  | 184 CGATTGGCCTATCCTATCA       |
| scaffold100272_11.4 | 1 p2 | (AG)6  | 12 | 79   | 90 GGATTTTCGAAATTTTCTCGC      |
| scaffold100288_16.6 | 1 p2 | (AT)8  | 16 | 457  | 472 GCGAAACAATGATCGCATT       |
| scaffold100746_10.9 | 1 p2 | (AT)8  | 16 | 463  | 478 CTTTTTCGGGTTTGGACGTA      |
| scaffold100776_13.0 | 1 p2 | (AG)6  | 12 | 65   | 76 ACAATACAATGTCGAGCTGAA      |
| scaffold100999_13.4 | 1 p2 | (CA)7  | 14 | 295  | 308 GGCCACGATGTTATTA          |
| scaffold101406_11.1 | 1 p2 | (AT)7  | 14 | 450  | 463 TGGAATTCAATGGCAGATGA      |
| scaffold101547_12.0 | 1 p2 | (TA)6  | 12 | 378  | 389 AACCGTGTGTACAACAATAGCAA   |
| scaffold101660_12.7 | 1 p2 | (GA)10 | 20 | 95   | 114 CCTCTCCTCTCAACTTGCTTG     |
| scaffold101684_13.4 | 1 p2 | (TG)9  | 18 | 99   | 116 TAATTGGCCCTTGATCTCCA      |

|                     |      |        |    |      |                              |
|---------------------|------|--------|----|------|------------------------------|
| scaffold101705_13.2 | 1 p2 | (CT)7  | 14 | 126  | 139 GCATCTCTTGCTCTCTCGTTG    |
| scaffold101726_19.2 | 1 p2 | (GA)9  | 18 | 1618 | 1635 GCAGAAGGAACTGATGGCTC    |
| scaffold101865_18.2 | 1 p2 | (TC)6  | 12 | 668  | 679 CCCTCAAACCTACTGTCCGA     |
| scaffold101888_19.2 | 1 p2 | (GA)7  | 14 | 559  | 572 CCAATTCTAGCAGCAGAGC      |
| scaffold102077_17.4 | 1 p2 | (AT)8  | 16 | 234  | 249 CTCTTGACTTCTGATCCGGC     |
| scaffold102318_10.6 | 1 p2 | (CA)7  | 14 | 337  | 350 CTTATGAAAAACGTTGGGG      |
| scaffold102497_12.0 | 1 p2 | (AT)7  | 14 | 64   | 77 GAGCCTCGGATTTCTGT         |
| scaffold102773_14.2 | 1 p2 | (AG)6  | 12 | 300  | 311 CTAGGGTTAGCATGCTTGGG     |
| scaffold102849_12.5 | 1 p2 | (AT)7  | 14 | 258  | 271 ACGGATGCATTCGACATTTA     |
| scaffold102891_15.2 | 1 p2 | (AG)6  | 12 | 109  | 120 ACTGAATTTGGGGTTGTTGG     |
| scaffold103040_11.3 | 1 p2 | (AT)7  | 14 | 241  | 254 GGATTGGGCTTTGAGAATGA     |
| scaffold103208_12.6 | 1 p2 | (TA)6  | 12 | 326  | 337 CTTTTGCCCTCGTATGCTC      |
| scaffold103262_10.7 | 1 p2 | (TC)7  | 14 | 43   | 56 CAGAAATTGCCTTGGTTGTT      |
| scaffold103433_12.3 | 1 p2 | (TA)7  | 14 | 365  | 378 TTGACGCTGAAGTTAATGCAA    |
| scaffold103583_13.6 | 1 p2 | (CT)6  | 12 | 162  | 173 GGTCTTCTAGCCTCTCTCGCT    |
| scaffold103610_17.8 | 1 p2 | (TA)9  | 18 | 349  | 366 CGAATCGCATTGCTATCATC     |
| scaffold103622_10.9 | 1 p2 | (TC)6  | 12 | 183  | 194 TTACTTTCCGTTTTGGGACG     |
| scaffold103869_16.7 | 1 p2 | (CT)6  | 12 | 357  | 368 GAAACACTTTCACCTCCCCA     |
| scaffold104571_10.2 | 1 p2 | (CT)7  | 14 | 174  | 187 GGCAAACAGGTCCCTAAACA     |
| scaffold104583_13.6 | 1 p2 | (TC)6  | 12 | 1378 | 1389 ATGGGATAGCACTTTTGCCA    |
| scaffold104709_11.5 | 1 p2 | (TA)9  | 18 | 43   | 60 CGGATTTAAGGGTTATTACCTGAT  |
| scaffold104722_11.0 | 1 p2 | (AT)6  | 12 | 612  | 623 TTCTCCTCCCCTTAGCTTCC     |
| scaffold104808_15.6 | 1 p2 | (CT)6  | 12 | 226  | 237 CGTCGAAAGGGAAAGAAACA     |
| scaffold104827_14.3 | 1 p2 | (AT)6  | 12 | 254  | 265 TTTTGGGGTACATGCCACTT     |
| scaffold104838_12.2 | 1 p2 | (CT)8  | 16 | 675  | 690 CACAAAATGGATCGAAACGA     |
| scaffold105003_13.3 | 1 p2 | (GT)6  | 12 | 760  | 771 AAAAGCGTTATGCGTCGAGT     |
| scaffold105045_11.7 | 1 p2 | (GT)6  | 12 | 202  | 213 TTCCACAACCTGCAATTTACTGTG |
| scaffold105151_16.4 | 1 p2 | (CT)6  | 12 | 355  | 366 AGGATTGGAAGCAGTGCCTA     |
| scaffold105170_17.4 | 1 p2 | (AG)8  | 16 | 3103 | 3118 GAGACACGTTGGGTCTGGTT    |
| scaffold105173_15.0 | 1 p2 | (GA)6  | 12 | 2248 | 2259 CACAACAGGAGGAGGCACTT    |
| scaffold105290_16.2 | 1 p2 | (CT)9  | 18 | 1011 | 1028 CCAAGATTGAGGTCCGTTTC    |
| scaffold105314_16.2 | 1 p2 | (AG)6  | 12 | 4149 | 4160 TATCCCAATCTGGGCACTC     |
| scaffold105325_13.7 | 1 p2 | (AT)6  | 12 | 287  | 298 GGACGCACCAGATTGTTTTT     |
| scaffold105496_12.8 | 1 p2 | (TA)7  | 14 | 176  | 189 TTTGACATCAACGGATGGAA     |
| scaffold105518_16.2 | 1 p2 | (AT)6  | 12 | 105  | 116 GAAAGTGGCTTTGATGGAGA     |
| scaffold105585_11.9 | 1 p2 | (TA)6  | 12 | 218  | 229 TGCAATATGTTTATTTCCGGA    |
| scaffold105617_13.7 | 1 p2 | (AT)6  | 12 | 139  | 150 CCACATTTTTCCGACTGTT      |
| scaffold105757_15.5 | 1 p2 | (TG)7  | 14 | 174  | 187 GCCTGAATGTAATGCCGAAA     |
| scaffold105937_13.6 | 1 p2 | (TC)7  | 14 | 97   | 110 CCCCTTTGTCAACTTAGGCA     |
| scaffold106235_14.3 | 1 p2 | (CT)7  | 14 | 806  | 819 CAGCTTTCGGCTTCTTCTTG     |
| scaffold106473_13.2 | 1 p2 | (AG)10 | 20 | 179  | 198 GGAAATCCCGTACGCTATCA     |
| scaffold106474_15.5 | 1 p2 | (AG)6  | 12 | 2320 | 2331 TAAGCAATACACGCACAGGG    |
| scaffold106499_16.3 | 1 p2 | (TA)8  | 16 | 1052 | 1067 TGATATGCAAGAATTGTCACCC  |
| scaffold106528_20.0 | 1 p2 | (TC)7  | 14 | 764  | 777 GGCCTCAGCAGCTTCTCTAC     |
| scaffold106593_10.7 | 1 p2 | (TA)6  | 12 | 327  | 338 CGTGCGACCAAATGTGACT      |
| scaffold106603_15.4 | 1 p2 | (AT)6  | 12 | 4496 | 4507 TGTAGGCTTTGGTTTCCATTG   |
| scaffold106633_16.4 | 1 p2 | (AG)8  | 16 | 746  | 761 TGGTGTCTTGATTGAGCGAG     |
| scaffold106666_13.5 | 1 p2 | (GA)6  | 12 | 31   | 42 GAAGATGGAGTAGAGAGAGATTT   |
| scaffold106678_12.0 | 1 p2 | (TA)6  | 12 | 466  | 477 CATTTCAACCCACCATCTCC     |
| scaffold106707_13.4 | 1 p2 | (GT)7  | 14 | 257  | 270 GAACCGGATTTAGAGCAATCA    |
| scaffold106769_13.9 | 1 p2 | (TA)9  | 18 | 639  | 656 GAACAAATCTGGGCCATCAG     |
| scaffold106778_18.3 | 1 p2 | (TA)6  | 12 | 351  | 362 GGTGTGGTGGGGACATTTTA     |
| scaffold106974_15.5 | 1 p2 | (CT)7  | 14 | 1596 | 1609 ACACCCATTGCTGTGTGAGA    |
| scaffold107088_13.0 | 1 p2 | (AT)6  | 12 | 1588 | 1599 ATCCAACACCCGATCTTCTC    |
| scaffold107115_12.5 | 1 p2 | (TG)6  | 12 | 90   | 101 AGACTAGAACGTAGACCTGGCA   |
| scaffold107221_12.7 | 1 p2 | (AT)6  | 12 | 188  | 199 CAATTTAGCCCGAAATGAGC     |
| scaffold107252_16.7 | 1 p2 | (TA)6  | 12 | 4607 | 4618 GAGGTGGCGCTCTGCTATAC    |
| scaffold107257_14.5 | 1 p2 | (TA)7  | 14 | 750  | 763 TCAACAATCTCAAACCTGCAACC  |

|                     |      |        |    |      |      |                             |
|---------------------|------|--------|----|------|------|-----------------------------|
| scaffold107337_15.4 | 1 p2 | (TA)6  | 12 | 310  | 321  | ACAACCTGGGTATCCCAAAA        |
| scaffold107459_15.5 | 1 p2 | (AT)8  | 16 | 285  | 300  | ACGGAATTGAATTTGGGACA        |
| scaffold107504_10.1 | 1 p2 | (AT)12 | 24 | 458  | 481  | CATGCCAAGTGGTGTGATCT        |
| scaffold107603_10.1 | 1 p2 | (AT)6  | 12 | 102  | 113  | GCTTGGTGAAGGAAGTGAGG        |
| scaffold107689_12.5 | 1 p2 | (AG)6  | 12 | 204  | 215  | GAAACGACGGGAAGATGAAA        |
| scaffold107806_11.7 | 1 p2 | (AC)6  | 12 | 155  | 166  | GCGCAGATCTAATGGTCCAG        |
| scaffold107931_15.4 | 1 p2 | (GA)11 | 22 | 2966 | 2987 | ACCGGAGAGTGGTGGTGTAG        |
| scaffold108279_15.4 | 1 p2 | (TA)6  | 12 | 222  | 233  | CCGAATGATGTGCATTTTTG        |
| scaffold108368_11.0 | 1 p2 | (TA)6  | 12 | 92   | 103  | ACATTCAGGCCTTTTGAACA        |
| scaffold108577_20.9 | 1 p2 | (AT)6  | 12 | 108  | 119  | TTCTAACTCCATTTGTAATAGTAAGGC |
| scaffold108710_15.7 | 1 p2 | (AT)8  | 16 | 141  | 156  | AGAAAGGAGATGGAGCGTGA        |
| scaffold108812_10.5 | 1 p2 | (GA)6  | 12 | 160  | 171  | GGGTGATGAGGCTTGAAGAA        |
| scaffold108860_14.0 | 1 p2 | (AT)11 | 22 | 2438 | 2459 | CATGCATGCAAACTGAGGT         |
| scaffold109050_14.4 | 1 p2 | (AC)7  | 14 | 1232 | 1245 | TGGGTGGAACCTTCTTGCTTT       |
| scaffold109061_17.0 | 1 p2 | (AT)8  | 16 | 1609 | 1624 | TTTCAAACGAATTGCAGCAG        |
| scaffold109161_15.9 | 1 p2 | (AG)7  | 14 | 2428 | 2441 | AGCTGGTAGCCATTCTCCTG        |
| scaffold109174_17.6 | 1 p2 | (AG)8  | 16 | 327  | 342  | TGCCTGAAAATGTCTGCAAG        |
| scaffold109379_14.4 | 1 p2 | (AT)7  | 14 | 233  | 246  | CTCGTTCCCAAGCCTCCTAT        |
| scaffold109456_15.4 | 1 p2 | (CG)6  | 12 | 2690 | 2701 | CACTGGGTTATTCCAATCCG        |
| scaffold109463_16.4 | 1 p2 | (TC)10 | 20 | 753  | 772  | ATTAATCCCCGAAGAAGC          |
| scaffold109545_14.2 | 1 p2 | (TA)13 | 26 | 412  | 437  | TGGGATATCGTCTAACCAGCA       |
| scaffold109557_15.4 | 1 p2 | (GC)6  | 12 | 125  | 136  | GCAAATCCCAAAACCGAATA        |
| scaffold109834_20.1 | 1 p2 | (CT)6  | 12 | 459  | 470  | ATCGAAAAGAGGTGAGCGAA        |
| scaffold110045_10.5 | 1 p2 | (AG)7  | 14 | 365  | 378  | GACCGCGAAGTTTACATGGT        |
| scaffold110087_15.8 | 1 p2 | (CT)7  | 14 | 299  | 312  | ACCAACCCAACCCATTATCA        |
| scaffold110177_14.0 | 1 p2 | (AC)7  | 14 | 1182 | 1195 | GGCAGGTCATGTGTATGTGG        |
| scaffold110178_10.9 | 1 p2 | (TC)7  | 14 | 86   | 99   | TGAAATGCCTCCGGTTAGTC        |
| scaffold110196_15.5 | 1 p2 | (AG)6  | 12 | 272  | 283  | TTGGTTTGTGCTTGATTGC         |
| scaffold110232_13.7 | 1 p2 | (AT)6  | 12 | 175  | 186  | CCTTCTCCACCACCTTTG          |
| scaffold110245_15.4 | 1 p2 | (AT)7  | 14 | 114  | 127  | CCAGGTGAGCTAGCCCATAA        |
| scaffold110366_15.5 | 1 p2 | (GA)6  | 12 | 652  | 663  | GGTGTGTGGAAGGAAGGTGT        |
| scaffold110486_12.6 | 1 p2 | (AC)7  | 14 | 277  | 290  | AAATTCCATGGCCTTTCACA        |
| scaffold110519_10.9 | 1 p2 | (GT)9  | 18 | 389  | 406  | GAGTGTGTGTGCTGGGTGTC        |
| scaffold110535_14.8 | 1 p2 | (CT)6  | 12 | 2021 | 2032 | GGGATTTAGCGACGATTTA         |
| scaffold110711_12.6 | 1 p2 | (AT)6  | 12 | 375  | 386  | AGAGGAGGGCTTCAACATGA        |
| scaffold110847_12.0 | 1 p2 | (CT)6  | 12 | 163  | 174  | CAAAGGATCGAAAAACGAGG        |
| scaffold110891_10.4 | 1 p2 | (TC)8  | 16 | 371  | 386  | TAATGTGGAACCATAGGGGC        |
| scaffold111070_16.3 | 1 p2 | (AG)6  | 12 | 113  | 124  | ACCTATCGTCTCCTCCCGAT        |
| scaffold111248_15.1 | 1 p2 | (CT)7  | 14 | 35   | 48   | GCCTCTTCTCTGCTAAAAGCC       |
| scaffold111277_14.2 | 1 p2 | (TG)7  | 14 | 226  | 239  | TGAAAAGATTTGAAAAACATTCAAC   |
| scaffold111400_11.6 | 1 p2 | (CA)6  | 12 | 260  | 271  | CTCTCGCCATCTTCGACACT        |
| scaffold111409_20.9 | 1 p2 | (CT)6  | 12 | 306  | 317  | TAGGCATGGCCTCAACTACC        |
| scaffold111442_16.6 | 1 p2 | (GA)6  | 12 | 114  | 125  | GATGGAACGGGGATTTGTTA        |
| scaffold111456_15.9 | 1 p2 | (GA)6  | 12 | 458  | 469  | TCGAGCATAAACACATCCCC        |
| scaffold111468_21.7 | 1 p2 | (TC)6  | 12 | 61   | 72   | AGCTACACTCACCGTCTGAGAA      |
| scaffold111671_15.9 | 1 p2 | (CT)6  | 12 | 895  | 906  | CGATTGCTCTCCGATCTCTC        |
| scaffold111690_14.2 | 1 p2 | (CT)8  | 16 | 327  | 342  | GCAAGACATGCAAGGCAGT         |
| scaffold111946_19.4 | 1 p2 | (AG)7  | 14 | 360  | 373  | TTGGGTTGTCCCTTGATCTC        |
| scaffold111984_16.3 | 1 p2 | (TA)8  | 16 | 366  | 381  | CAGCAAAGTGCTAAATGGTTCA      |
| scaffold112119_15.4 | 1 p2 | (TA)9  | 18 | 200  | 217  | TTGGTGGTTTGTATGCTATCG       |
| scaffold112224_14.1 | 1 p2 | (AT)10 | 20 | 4280 | 4299 | GCCCCTCTAGCAATTTGA          |
| scaffold112265_10.6 | 1 p2 | (AT)9  | 18 | 110  | 127  | ACTCCGCATGTGTGTTGAAA        |
| scaffold112267_10.4 | 1 p2 | (AT)8  | 16 | 63   | 78   | TTGGGATTAAGGCTTTGGTG        |
| scaffold112270_13.2 | 1 p2 | (AT)6  | 12 | 116  | 127  | GAAACAACGAATCCATTAAGTGAAG   |
| scaffold112290_15.2 | 1 p2 | (AT)7  | 14 | 481  | 494  | TTTCGGGACACGTTCTCTCT        |
| scaffold112382_16.8 | 1 p2 | (CT)6  | 12 | 309  | 320  | CCCCTCATTTTCATTCCAAA        |
| scaffold112447_13.6 | 1 p2 | (CA)6  | 12 | 2553 | 2564 | TGTCATTGGTTGTGGCTGTT        |
| scaffold112464_15.4 | 1 p2 | (TA)7  | 14 | 1726 | 1739 | AATGCCCTATTTTTGGAGG         |

|                     |      |        |    |      |                                |
|---------------------|------|--------|----|------|--------------------------------|
| scaffold112500_11.3 | 1 p2 | (AT)7  | 14 | 204  | 217 ATGGACGTCGTGACCACATA       |
| scaffold112660_13.6 | 1 p2 | (GA)6  | 12 | 116  | 127 CACAATGGGGGTATTTGCTT       |
| scaffold112791_17.2 | 1 p2 | (CT)8  | 16 | 953  | 968 CCCTAACTCGACCCAGATCA       |
| scaffold112990_15.0 | 1 p2 | (TA)9  | 18 | 1315 | 1332 TCGAGTTTGTGGCGAGATG       |
| scaffold113105_11.7 | 1 p2 | (TC)6  | 12 | 175  | 186 TCCCAATCAAGACAAGTCCC       |
| scaffold113114_15.9 | 1 p2 | (AG)6  | 12 | 644  | 655 TAATTTGGTTGGCCCATTGT       |
| scaffold113121_15.9 | 1 p2 | (TA)7  | 14 | 111  | 124 CCATTTGCAACTAAGGCTTTT      |
| scaffold113201_16.0 | 1 p2 | (CT)6  | 12 | 861  | 872 TTTCAAGAAAAGGGTGCCAT       |
| scaffold113205_12.8 | 1 p2 | (TA)7  | 14 | 186  | 199 ACGTCGGTTTGGTTTAAAGG       |
| scaffold113231_10.6 | 1 p2 | (TA)7  | 14 | 99   | 112 GACCCATTTAGAACCCACGTT      |
| scaffold113488_17.0 | 1 p2 | (TA)8  | 16 | 210  | 225 TGGAACAATTTTTGCCACAT       |
| scaffold113630_13.3 | 1 p2 | (GA)6  | 12 | 126  | 137 GAAAAACGACGTGAGGGAGA       |
| scaffold113781_17.2 | 1 p2 | (AT)9  | 18 | 163  | 180 TTTTGGAGTATTCCGTGCCT       |
| scaffold113924_12.5 | 1 p2 | (AT)9  | 18 | 730  | 747 CACTTGACGAGGTCACTGGA       |
| scaffold114052_13.8 | 1 p2 | (AG)7  | 14 | 386  | 399 AATATTTTCATTCATGCCACGC     |
| scaffold114239_12.9 | 1 p2 | (TC)6  | 12 | 1733 | 1744 GTCGAGGAGTATACGGAGCG      |
| scaffold114339_10.8 | 1 p2 | (TA)7  | 14 | 162  | 175 ACGTAAAAACCCCTCCACCC       |
| scaffold114404_16.2 | 1 p2 | (TA)6  | 12 | 195  | 206 ATGCATGCACGTGAATATGG       |
| scaffold114476_10.6 | 1 p2 | (TA)7  | 14 | 218  | 231 ACGGATATGCCCTTGATGC        |
| scaffold114555_13.5 | 1 p2 | (GA)8  | 16 | 50   | 65 GATGCTTACCTGAACAGCACA       |
| scaffold114904_11.2 | 1 p2 | (TC)6  | 12 | 115  | 126 ACAAGGATTGCGAACTCAGC       |
| scaffold114905_10.3 | 1 p2 | (TC)7  | 14 | 113  | 126 CCCCTCTCAACAACCACAAT       |
| scaffold115033_17.0 | 1 p2 | (CT)12 | 24 | 4753 | 4776 AGAAATTGCCTGCTTCCAAA      |
| scaffold115143_15.1 | 1 p2 | (GA)7  | 14 | 258  | 271 CCGGGTTTAAAGCAATCAAA       |
| scaffold115376_15.9 | 1 p2 | (CT)9  | 18 | 3613 | 3630 CCACTTCCTAGGCCAAACACC     |
| scaffold115419_14.1 | 1 p2 | (CT)8  | 16 | 296  | 311 GGGACTGGACCAAGAATTGA       |
| scaffold115517_18.5 | 1 p2 | (TA)8  | 16 | 706  | 721 GGTGCAGTGGTAGAGCATCA       |
| scaffold115672_15.6 | 1 p2 | (GA)6  | 12 | 388  | 399 TTGACCACAATCAAACACCAA      |
| scaffold115696_14.1 | 1 p2 | (CT)6  | 12 | 583  | 594 TTGATTTCCCACCACCATTT       |
| scaffold116113_10.0 | 1 p2 | (AG)6  | 12 | 52   | 63 GGTGGTGTGGAGGAGAGAAG        |
| scaffold116128_11.9 | 1 p2 | (AT)7  | 14 | 762  | 775 TGATTTTCCATTATTTTCGTTGG    |
| scaffold116210_14.4 | 1 p2 | (GT)7  | 14 | 2457 | 2470 TTAATGCTTTGAAGGGGTGC      |
| scaffold116266_12.5 | 1 p2 | (AT)6  | 12 | 659  | 670 ACAAATCCCACCTGCGTAAG       |
| scaffold116286_18.1 | 1 p2 | (CT)6  | 12 | 115  | 126 TAATTCGTATTTTCGGTCCGC      |
| scaffold116335_13.1 | 1 p2 | (TA)6  | 12 | 226  | 237 CCCAAAAATTTAACGACCCA       |
| scaffold116391_14.8 | 1 p2 | (AT)7  | 14 | 327  | 340 TGTTACATGGTTGTTCGGTTCA     |
| scaffold116554_10.4 | 1 p2 | (AG)7  | 14 | 54   | 67 CCATGTTGTTTGTAAATTATTGTAGGG |
| scaffold116716_16.3 | 1 p2 | (AT)7  | 14 | 736  | 749 ATTTGGAAACCTCCCCTCC        |
| scaffold117227_10.1 | 1 p2 | (TC)6  | 12 | 335  | 346 CTCTCGCTAGGCGACTTTGT       |
| scaffold117620_17.0 | 1 p2 | (TC)8  | 16 | 190  | 205 GCAGCTAGGCTCCCTCCTAT       |
| scaffold117645_10.3 | 1 p2 | (GA)6  | 12 | 75   | 86 GGGGTCGGTGAAAAATAGA         |
| scaffold117924_15.6 | 1 p2 | (AT)7  | 14 | 2134 | 2147 CAAAGAACCAACATCCACACA     |
| scaffold118160_16.0 | 1 p2 | (CT)14 | 28 | 396  | 423 ATGTCACGTCAAGCATCAGC       |
| scaffold118164_10.7 | 1 p2 | (GC)6  | 12 | 359  | 370 CGCTATGAGTCACGGGTACA       |
| scaffold118256_12.4 | 1 p2 | (AT)8  | 16 | 274  | 289 TGAAACAATGCCTGGAAACA       |
| scaffold118351_14.3 | 1 p2 | (TA)7  | 14 | 160  | 173 GCAACTGTACACGTGTGGCT       |
| scaffold118603_16.9 | 1 p2 | (AG)7  | 14 | 316  | 329 CGAAGAATTTTGTGCCATGA       |
| scaffold118763_12.1 | 1 p2 | (AT)9  | 18 | 566  | 583 TTGTTGAACGCATAAATTCGATA    |
| scaffold118777_15.1 | 1 p2 | (AT)6  | 12 | 148  | 159 CGTTCCTCAGAGTTTCCAGC       |
| scaffold118901_12.2 | 1 p2 | (AG)6  | 12 | 66   | 77 CACAACTTTCTGGATTGACTTTG     |
| scaffold118931_18.1 | 1 p2 | (AC)7  | 14 | 62   | 75 TCAACACTCTGTTTTCTCTCACA     |
| scaffold119077_11.0 | 1 p2 | (GA)6  | 12 | 537  | 548 CGTGTCTCTCAAACCTGGT        |
| scaffold119101_14.7 | 1 p2 | (AT)9  | 18 | 45   | 62 TCTATTATATGTCATGTTTTGCATTTT |
| scaffold119124_17.9 | 1 p2 | (TC)6  | 12 | 103  | 114 CCCATCCCTTAATCAACCCT       |
| scaffold119131_10.0 | 1 p2 | (GA)6  | 12 | 68   | 79 GACGCGAGATTTACGTGGTT        |
| scaffold119299_16.5 | 1 p2 | (GA)6  | 12 | 381  | 392 TTTTCATGTTTAGCATTGCGG      |
| scaffold119359_14.2 | 1 p2 | (TC)7  | 14 | 226  | 239 CAATCCGGTGATGTGTCAAG       |
| scaffold119453_13.9 | 1 p2 | (GA)7  | 14 | 543  | 556 CTTTGCGACGTAATCCCAT        |

|                     |      |        |    |      |                                |
|---------------------|------|--------|----|------|--------------------------------|
| scaffold119511_16.2 | 1 p2 | (CA)8  | 16 | 1252 | 1267 GCAGGAAGTCATGGTTGCTT      |
| scaffold119593_14.2 | 1 p2 | (TA)11 | 22 | 1250 | 1271 ATTTAATCACGTGCAACGCA      |
| scaffold120058_15.3 | 1 p2 | (CA)10 | 20 | 1031 | 1050 CATCCAATAGCCGAACAAAA      |
| scaffold120216_16.8 | 1 p2 | (TC)6  | 12 | 1531 | 1542 AACTGCGATGCTCCAAAAGT      |
| scaffold120263_12.8 | 1 p2 | (AG)10 | 20 | 613  | 632 AGAAAGATCCCTGCGGTTTT       |
| scaffold120352_15.2 | 1 p2 | (TA)10 | 20 | 39   | 58 AGCACAATACAAACATGTCCAC      |
| scaffold120409_11.9 | 1 p2 | (GT)6  | 12 | 105  | 116 TTGTGTGTTATACGTGTGGGTG     |
| scaffold120583_11.2 | 1 p2 | (AT)7  | 14 | 194  | 207 TCAAGGTCTTCGCTGGTTCT       |
| scaffold120643_14.9 | 1 p2 | (TA)9  | 18 | 356  | 373 TATATGATGTAGGCCGCGTG       |
| scaffold120882_14.8 | 1 p2 | (TG)7  | 14 | 1075 | 1088 TGGACATGGCAATTATTCTTGA    |
| scaffold120953_15.0 | 1 p2 | (AG)7  | 14 | 564  | 577 ATGGGTTCCCTACCCCTTTG       |
| scaffold121065_18.7 | 1 p2 | (GA)6  | 12 | 290  | 301 GACAGAGGTCCCCTGGTTTT       |
| scaffold121079_20.0 | 1 p2 | (AT)9  | 18 | 330  | 347 CCAAGTCTCACCTACAAATCCA     |
| scaffold121135_12.0 | 1 p2 | (AG)6  | 12 | 56   | 67 GCAAGGGAAACTGATGGTGT        |
| scaffold121210_15.3 | 1 p2 | (TA)9  | 18 | 45   | 62 CGGATTTAGCGGTTATTACCTGA     |
| scaffold121646_16.7 | 1 p2 | (AT)7  | 14 | 1132 | 1145 GTTTAGATTCCGCATCAGGC      |
| scaffold121793_12.6 | 1 p2 | (GT)7  | 14 | 138  | 151 CAGTTGTGTTGTGGCAGCTT       |
| scaffold121822_11.9 | 1 p2 | (TC)6  | 12 | 82   | 93 TTTGAGATCGGAGTGGCTCT        |
| scaffold121845_16.0 | 1 p2 | (TA)7  | 14 | 616  | 629 ATCCGACGGTTGTAGTGGAG       |
| scaffold121887_16.9 | 1 p2 | (AG)6  | 12 | 3958 | 3969 TTCAACCGTGCGTGTATGTT      |
| scaffold122450_16.6 | 1 p2 | (GA)6  | 12 | 165  | 176 AAGATGATGGTGAAAGGGGA       |
| scaffold122524_10.6 | 1 p2 | (AT)6  | 12 | 91   | 102 ACTCACTTAGGGATATATTTAGGGAA |
| scaffold122594_10.8 | 1 p2 | (TA)7  | 14 | 286  | 299 GACATGCATCGTTTGTACTCTTC    |
| scaffold122648_10.4 | 1 p2 | (AT)11 | 22 | 852  | 873 GGCTCAATTTTAATGGGCCT       |
| scaffold122699_12.7 | 1 p2 | (AC)6  | 12 | 324  | 335 GATCAACGCCCCATATTGTT       |
| scaffold122819_16.2 | 1 p2 | (TC)7  | 14 | 2446 | 2459 GATATTTTCAGGGTCCCCGTT     |
| scaffold122877_13.2 | 1 p2 | (AC)6  | 12 | 389  | 400 TCTCCTTCTCAGGATCTCCG       |
| scaffold123109_10.7 | 1 p2 | (TC)7  | 14 | 63   | 76 GAACGGGCAGTACTCCAAAA        |
| scaffold123324_13.3 | 1 p2 | (CT)6  | 12 | 216  | 227 AAATGAAGGGTTGAGCATCG       |
| scaffold123673_11.2 | 1 p2 | (GA)7  | 14 | 232  | 245 AAGAACGTTGGGAGGGAAAGT      |
| scaffold123681_15.6 | 1 p2 | (TA)7  | 14 | 807  | 820 CTGAACCTGAACCACCAACC       |
| scaffold123762_14.3 | 1 p2 | (AT)9  | 18 | 379  | 396 GTTGATAAATTACAAAAATTTAAGCG |
| scaffold123928_14.9 | 1 p2 | (AG)6  | 12 | 556  | 567 ACACCAACCCATTTGCTCTC       |
| scaffold123946_16.3 | 1 p2 | (GA)6  | 12 | 70   | 81 TGTGTATATCTGATAGCCGTAGCA    |
| scaffold124340_10.0 | 1 p2 | (TA)8  | 16 | 47   | 62 AGGGGAGTTATCACTGGATCA       |
| scaffold124770_14.3 | 1 p2 | (AG)6  | 12 | 1431 | 1442 TAGAGATGCCAAGATGGCCT      |
| scaffold124784_10.9 | 1 p2 | (GA)8  | 16 | 756  | 771 GTCCCCAGCCTCAGATACAA       |
| scaffold124800_15.2 | 1 p2 | (TA)7  | 14 | 1157 | 1170 CAGATGATCACACGCTGCTT      |
| scaffold124869_16.9 | 1 p2 | (AT)8  | 16 | 6182 | 6197 TCCTCTGCCTTATTGATGGG      |
| scaffold124892_10.0 | 1 p2 | (AT)13 | 26 | 215  | 240 CGTGTTACCTCTCAATTTATCA     |
| scaffold124952_14.7 | 1 p2 | (GT)6  | 12 | 705  | 716 TTTAGGCATTCCCACCTTTG       |
| scaffold125082_19.0 | 1 p2 | (CT)6  | 12 | 171  | 182 CCAACTCTTCGGCTCAATA        |
| scaffold125401_11.6 | 1 p2 | (AT)9  | 18 | 49   | 66 GTCTGCAAGAAAATGGGTGG        |
| scaffold125498_15.4 | 1 p2 | (TC)6  | 12 | 206  | 217 AGAGATTGTGGGGCTTGATG       |
| scaffold125582_10.7 | 1 p2 | (TC)6  | 12 | 383  | 394 ACCAACCCAAACCCACTTTC       |
| scaffold125628_17.8 | 1 p2 | (CT)6  | 12 | 101  | 112 AGCATCTCTCTTGCTGTCA        |
| scaffold125686_10.8 | 1 p2 | (TA)9  | 18 | 297  | 314 CTTTTGACATGATCGACGG        |
| scaffold125739_20.2 | 1 p2 | (AT)8  | 16 | 802  | 817 CGTGTCTACAAAACCTTGCTGC     |
| scaffold125758_11.3 | 1 p2 | (AG)8  | 16 | 424  | 439 TTCAAGGCATGGGAGGATAG       |
| scaffold125767_14.8 | 1 p2 | (AT)6  | 12 | 957  | 968 CACACGATAGAGGCAGACGA       |
| scaffold125781_15.7 | 1 p2 | (TA)11 | 22 | 293  | 314 TCAACTTTTCGGAAGCGTACA      |
| scaffold125784_10.8 | 1 p2 | (AT)6  | 12 | 581  | 592 CGTCCTATTGGCCCATTTAT       |
| scaffold125793_13.6 | 1 p2 | (AT)8  | 16 | 1538 | 1553 TGCGCTTGGTTTGTAGACTTT     |
| scaffold125849_13.7 | 1 p2 | (TA)6  | 12 | 560  | 571 CTGTCTCCGGTCCATGAAAT       |
| scaffold125852_15.0 | 1 p2 | (TC)9  | 18 | 750  | 767 GCGAAAACAACAGACAGCAA       |
| scaffold126248_15.2 | 1 p2 | (AG)7  | 14 | 5697 | 5710 GGCTTGTGTGCATCTTCTTTC     |
| scaffold126303_13.4 | 1 p2 | (AT)6  | 12 | 267  | 278 TGTCGTGGTTCGGATATTCA       |
| scaffold126342_15.7 | 1 p2 | (AT)6  | 12 | 2128 | 2139 ACATATTTTTCCCTTTCCACA     |

|                     |      |        |    |      |      |                             |
|---------------------|------|--------|----|------|------|-----------------------------|
| scaffold126470_15.2 | 1 p2 | (AG)6  | 12 | 2681 | 2692 | CAA AATTGCGTTTTATGGGG       |
| scaffold126743_11.8 | 1 p2 | (CT)8  | 16 | 423  | 438  | TCGCCATTTCCCTGTCTTAC        |
| scaffold126855_12.7 | 1 p2 | (TA)7  | 14 | 40   | 53   | TCGTGATATTGGGAAACAATG       |
| scaffold126879_14.3 | 1 p2 | (TA)10 | 20 | 419  | 438  | GCA TAAAATTGTTGGTCCCT       |
| scaffold126943_10.6 | 1 p2 | (GT)6  | 12 | 89   | 100  | TAGGATACCCTCCCAAACCC        |
| scaffold127066_15.0 | 1 p2 | (AT)8  | 16 | 685  | 700  | GCGGATTTTATTCTCGTTCA        |
| scaffold127079_10.0 | 1 p2 | (AT)6  | 12 | 390  | 401  | TGGAAAAGGTAGGGACAAAA        |
| scaffold127175_16.1 | 1 p2 | (AT)6  | 12 | 427  | 438  | CAAGCAACAAGCCAATAGCA        |
| scaffold127388_15.0 | 1 p2 | (GT)7  | 14 | 263  | 276  | AGTTATCAAGATGGCCACGG        |
| scaffold127434_12.7 | 1 p2 | (TA)8  | 16 | 130  | 145  | TTTACCCAAAACACCCCTGA        |
| scaffold127499_18.1 | 1 p2 | (TG)8  | 16 | 282  | 297  | TTTTTGGGAAATCCTTGAC         |
| scaffold127512_11.3 | 1 p2 | (AT)6  | 12 | 602  | 613  | TATCGATTCACCACACGAGG        |
| scaffold127733_15.0 | 1 p2 | (TC)6  | 12 | 388  | 399  | ACGAAAGTGA ACTCAACCCG       |
| scaffold127784_15.9 | 1 p2 | (TA)8  | 16 | 48   | 63   | TGCTCCTAGTTAGCACACA ACTT    |
| scaffold127801_12.5 | 1 p2 | (TA)8  | 16 | 45   | 60   | TGAAGTTAGGAAATAAGGAGGTGTT   |
| scaffold128053_15.2 | 1 p2 | (TA)7  | 14 | 2149 | 2162 | GCCCCATTTTCTTAGGGTTT        |
| scaffold128141_16.3 | 1 p2 | (AG)6  | 12 | 2128 | 2139 | CTTGGAGGCTCAGAGGTTTG        |
| scaffold128227_15.0 | 1 p2 | (TC)7  | 14 | 2564 | 2577 | GCATCACCTCTTCTACGGGT        |
| scaffold128276_13.4 | 1 p2 | (TG)6  | 12 | 317  | 328  | GTGCTTTTAGCTTGGGCAA         |
| scaffold128364_10.3 | 1 p2 | (AT)7  | 14 | 219  | 232  | CACGAACGGCTGGAATATCT        |
| scaffold128431_14.4 | 1 p2 | (CT)6  | 12 | 163  | 174  | TAATAGGTGCGGGTTTGAGG        |
| scaffold128731_12.2 | 1 p2 | (GA)7  | 14 | 52   | 65   | TGGAGGAATGAAGGTGAAGG        |
| scaffold128748_16.0 | 1 p2 | (GA)9  | 18 | 589  | 606  | ATGGAGAGAGGGAGGGAGAA        |
| scaffold128752_13.3 | 1 p2 | (TA)7  | 14 | 106  | 119  | CCCTTGGTATTCTCCCTGTG        |
| scaffold128901_13.3 | 1 p2 | (AT)6  | 12 | 547  | 558  | TGCTGTGGCAATATGATGCT        |
| scaffold128937_14.9 | 1 p2 | (AT)10 | 20 | 5618 | 5637 | TGACATACATGGTTTGGGGA        |
| scaffold129128_14.2 | 1 p2 | (CT)7  | 14 | 610  | 623  | GCTAATGCTTCAGCACCACA        |
| scaffold129149_14.0 | 1 p2 | (AG)6  | 12 | 459  | 470  | ACACACCCACACCATTGAAA        |
| scaffold129229_14.5 | 1 p2 | (TA)7  | 14 | 415  | 428  | TAAGGAGATGTGTGCATGGG        |
| scaffold129814_13.0 | 1 p2 | (AT)10 | 20 | 684  | 703  | CACCTCACTTTCAATGCTCG        |
| scaffold129952_14.3 | 1 p2 | (TA)6  | 12 | 116  | 127  | CCAAA ACTCCACCTTCAACTG      |
| scaffold130133_11.8 | 1 p2 | (CT)7  | 14 | 246  | 259  | GTTGGCAAACAGGTCCCTTA        |
| scaffold130197_10.2 | 1 p2 | (TA)8  | 16 | 491  | 506  | TCATGGGGAAAAGAGTTATCA       |
| scaffold130364_10.0 | 1 p2 | (CT)11 | 22 | 54   | 75   | TTGATTCATACAAGTCATCTTTATGTT |
| scaffold130409_13.5 | 1 p2 | (TA)12 | 24 | 37   | 60   | GGA AATAAGGAGGTGTTATGATATG  |
| scaffold130514_15.2 | 1 p2 | (AG)6  | 12 | 1189 | 1200 | TGTTGTGACTGGATTGGCAT        |
| scaffold130608_15.7 | 1 p2 | (TA)8  | 16 | 270  | 285  | AAA AATGAACCGTAACCGGC       |
| scaffold130800_14.4 | 1 p2 | (TA)6  | 12 | 1214 | 1225 | GTGAGAGGAAGACAGGCGAC        |
| scaffold130880_13.6 | 1 p2 | (TA)7  | 14 | 219  | 232  | ATGCAACTCAAAGGGAGGAA        |
| scaffold130998_12.5 | 1 p2 | (TA)10 | 20 | 108  | 127  | ATCAATGGCCACAAATGGTT        |
| scaffold131001_11.5 | 1 p2 | (TA)7  | 14 | 114  | 127  | TGATTTTGGTGTGTTGGCAT        |
| scaffold131003_14.4 | 1 p2 | (AT)6  | 12 | 513  | 524  | CATAAAACATACCTCGGCATCA      |
| scaffold131096_14.3 | 1 p2 | (AT)10 | 20 | 485  | 504  | AATCACGTCAATTCCGAACC        |
| scaffold131183_12.9 | 1 p2 | (TA)6  | 12 | 670  | 681  | TGCCACTATAATTGTATGGTCTCG    |
| scaffold131323_10.2 | 1 p2 | (CT)6  | 12 | 235  | 246  | CACCTTACCCACCCAACCTA        |
| scaffold131332_14.7 | 1 p2 | (TC)6  | 12 | 98   | 109  | CACAAACACACTTGGGAGGA        |
| scaffold131342_15.6 | 1 p2 | (AT)7  | 14 | 849  | 862  | AGCTCTTGAGCATATTGCCGA       |
| scaffold131424_17.5 | 1 p2 | (TC)6  | 12 | 495  | 506  | CTGTGTGCTGGTGCTGATTT        |
| scaffold131576_14.0 | 1 p2 | (AT)7  | 14 | 165  | 178  | ACGTTTTTGTAAACGTTGTCTT      |
| scaffold131710_12.3 | 1 p2 | (AT)9  | 18 | 396  | 413  | GTGGACGCTCCAGATTGTTT        |
| scaffold131968_17.8 | 1 p2 | (GA)6  | 12 | 105  | 116  | ATGGTGCATGCAGTCAAATC        |
| scaffold132012_12.9 | 1 p2 | (CT)7  | 14 | 447  | 460  | TGGCACCTAAACCATAAGGC        |
| scaffold132029_11.7 | 1 p2 | (TA)6  | 12 | 50   | 61   | CATTTAGGATATTTTCTATTCTTGCAT |
| scaffold132146_13.8 | 1 p2 | (AG)6  | 12 | 467  | 478  | AGGATACCGGAGTGTTACG         |
| scaffold132174_12.9 | 1 p2 | (TA)7  | 14 | 739  | 752  | CTCCGCCAGTTGGATACTA         |
| scaffold132394_14.6 | 1 p2 | (AT)10 | 20 | 275  | 294  | CACCACCTGTCCACTCAAAT        |
| scaffold132412_16.4 | 1 p2 | (AT)11 | 22 | 33   | 54   | T TACTCACACGCACACCCAC       |
| scaffold132432_14.3 | 1 p2 | (AG)7  | 14 | 802  | 815  | CTAGGGCCAAGGAGTTAGGG        |

|                     |      |        |    |      |                              |
|---------------------|------|--------|----|------|------------------------------|
| scaffold132695_11.6 | 1 p2 | (AT)10 | 20 | 417  | 436 AATCACGTCCTTATTAACCAAGTT |
| scaffold132735_14.4 | 1 p2 | (AT)9  | 18 | 580  | 597 GTGATGCATGATGGGTATCG     |
| scaffold132854_10.0 | 1 p2 | (TA)9  | 18 | 236  | 253 GGTCTCCGGTCCATGAAATA     |
| scaffold132924_13.0 | 1 p2 | (TA)6  | 12 | 209  | 220 GTGAATAGCCGTTGAGGCAT     |
| scaffold132936_13.1 | 1 p2 | (CT)8  | 16 | 998  | 1013 AAGCAAAAATCAGACCTAACCG  |
| scaffold133005_13.9 | 1 p2 | (AT)9  | 18 | 331  | 348 ACAGAAACATTGACTCCGGG     |
| scaffold133012_14.6 | 1 p2 | (AT)11 | 22 | 249  | 270 TTGTGCGAACCATGAAAAAC     |
| scaffold133044_15.7 | 1 p2 | (AT)7  | 14 | 250  | 263 GCAAAGGTGCGGAAAGATAC     |
| scaffold133325_13.4 | 1 p2 | (TA)6  | 12 | 113  | 124 TATTGGTTATCACCGGATCG     |
| scaffold133413_10.6 | 1 p2 | (CT)8  | 16 | 234  | 249 CGACAGAAAGTAACCCCAA      |
| scaffold133602_11.8 | 1 p2 | (AT)7  | 14 | 928  | 941 TGTTACCCCACTTCATTCA      |
| scaffold133928_18.3 | 1 p2 | (AG)6  | 12 | 164  | 175 CGTTTCCATTGTTTAGCCGT     |
| scaffold134022_15.2 | 1 p2 | (AT)6  | 12 | 205  | 216 ATTGGTCGAGAGAAAGGGCT     |
| scaffold134090_14.0 | 1 p2 | (GT)6  | 12 | 37   | 48 AAGTGATCTACGTCCACGGG      |
| scaffold134151_16.4 | 1 p2 | (GT)7  | 14 | 721  | 734 GTATGTCCGGTGCAAGGAGT     |
| scaffold134369_15.7 | 1 p2 | (AT)6  | 12 | 6372 | 6383 ATTGCACAAGTTTGGCCTTC    |
| scaffold134409_14.3 | 1 p2 | (CT)8  | 16 | 239  | 254 GTTGGCAAACAGGTCCCTTA     |
| scaffold134698_15.2 | 1 p2 | (AT)6  | 12 | 1643 | 1654 ATTCAACACACGACATGGGA    |
| scaffold134717_14.1 | 1 p2 | (AT)6  | 12 | 1177 | 1188 TAAATAATGATTGGGGGCCA    |
| scaffold134784_11.6 | 1 p2 | (CT)7  | 14 | 62   | 75 AGCATCTATTTTCGACCACTGA    |
| scaffold134872_10.1 | 1 p2 | (TA)7  | 14 | 291  | 304 CTGCTTAAAGCCCAGTCCAG     |
| scaffold135133_12.8 | 1 p2 | (AC)6  | 12 | 571  | 582 CCGCGTTGAGGATAGATAG      |
| scaffold135138_10.7 | 1 p2 | (TA)8  | 16 | 172  | 187 TTTGCTGAGAAATCTAATGCG    |
| scaffold135165_10.0 | 1 p2 | (TC)6  | 12 | 248  | 259 CCAACCCATTATCAAACCC      |
| scaffold135207_10.9 | 1 p2 | (TA)6  | 12 | 72   | 83 CCACCTTGAGTTACATGCTCC     |
| scaffold135210_11.1 | 1 p2 | (AC)8  | 16 | 519  | 534 TGACGAATTCTCAAGTTTGTAC   |
| scaffold135252_17.0 | 1 p2 | (AG)6  | 12 | 662  | 673 CACTCCCGACCATCTCACTT     |
| scaffold135415_14.4 | 1 p2 | (TG)7  | 14 | 2382 | 2395 GAGAGAGAGTCGGCAATTTCG   |
| scaffold135523_12.1 | 1 p2 | (GA)6  | 12 | 241  | 252 TTCATTCTCTCCAGCTCGT      |
| scaffold135589_15.2 | 1 p2 | (AT)9  | 18 | 252  | 269 TACGATGGGCTTTAAGCAGG     |
| scaffold135600_14.7 | 1 p2 | (AT)8  | 16 | 112  | 127 TTTCTGCATTGTTGCATAGC     |
| scaffold135755_10.4 | 1 p2 | (TC)6  | 12 | 320  | 331 CCTCAAATCGTTGACACGAA     |
| scaffold135790_14.0 | 1 p2 | (TG)6  | 12 | 2369 | 2380 GTGCGCATTGATGTTCTTAA    |
| scaffold135819_14.6 | 1 p2 | (TA)7  | 14 | 1507 | 1520 AATGGTCCGGGGTGATT       |
| scaffold135911_14.9 | 1 p2 | (GC)6  | 12 | 58   | 69 TCACAGGCATTGTCAGTGTGT     |
| scaffold136059_11.1 | 1 p2 | (CT)6  | 12 | 212  | 223 TGTGCCAAGAACAACCTCTCT    |
| scaffold136111_16.2 | 1 p2 | (AT)11 | 22 | 274  | 295 TAGGGATTGAGGGTGATTGG     |
| scaffold136205_15.8 | 1 p2 | (AG)6  | 12 | 161  | 172 TGGATAGACTCATAGCCCGTG    |
| scaffold136448_13.8 | 1 p2 | (AT)10 | 20 | 152  | 171 TGACATTGCCTAGAAAGTGGG    |
| scaffold136763_15.1 | 1 p2 | (AT)9  | 18 | 58   | 75 AGGGCTGAGTACACGAATGC      |
| scaffold137230_16.2 | 1 p2 | (TA)9  | 18 | 455  | 472 AAGAACACACAATTCATGTGGAA  |
| scaffold137346_10.7 | 1 p2 | (AT)6  | 12 | 410  | 421 TGGATGTCTTTGATTTGCGA     |
| scaffold137390_11.9 | 1 p2 | (AG)7  | 14 | 251  | 264 CTATAGCCCCCGATTCACAA     |
| scaffold137438_12.1 | 1 p2 | (AG)6  | 12 | 607  | 618 ATTGGGAGAAAAGAGGGGAA     |
| scaffold137780_11.8 | 1 p2 | (AT)7  | 14 | 219  | 232 AAGAGGGTTGATGGGTGATT     |
| scaffold137789_10.6 | 1 p2 | (CA)10 | 20 | 130  | 149 TCCATTCCGAAAATCAAAGG     |
| scaffold137813_16.1 | 1 p2 | (AC)6  | 12 | 706  | 717 AAATGAAACATCAACAATCCAAA  |
| scaffold137897_14.8 | 1 p2 | (AG)9  | 18 | 566  | 583 TTAATTTTCAGTCCGGGAACG    |
| scaffold137920_18.0 | 1 p2 | (TA)6  | 12 | 72   | 83 AAAATCAAAGGCCCACAATG      |
| scaffold138057_13.0 | 1 p2 | (GA)8  | 16 | 488  | 503 TGTGTATGTGTGAGTGTTCGTGA  |
| scaffold138194_18.8 | 1 p2 | (TC)6  | 12 | 948  | 959 AATCCATGATCCGAAAATGC     |
| scaffold138213_13.0 | 1 p2 | (AG)6  | 12 | 157  | 168 CCAATGGAACAGTAGCCGAT     |
| scaffold138330_14.0 | 1 p2 | (GA)8  | 16 | 346  | 361 AACACAGAGACAAGCACCCC     |
| scaffold138477_14.6 | 1 p2 | (GT)7  | 14 | 32   | 45 TTGTGAGTGAAGTGCAGTGTGA    |
| scaffold138478_16.1 | 1 p2 | (AT)7  | 14 | 401  | 414 ACGGTCGAGAAAGAGTCGTG     |
| scaffold138523_14.7 | 1 p2 | (AG)7  | 14 | 313  | 326 GGTCTTGAACAGGACAGGA      |
| scaffold138569_11.3 | 1 p2 | (AT)6  | 12 | 1608 | 1619 CCCATCCTCATTTTTCTTTCA   |
| scaffold138639_10.4 | 1 p2 | (TA)6  | 12 | 194  | 205 CACGTGTCAGCCGAAAGATA     |



|                     |      |        |    |      |      |                              |
|---------------------|------|--------|----|------|------|------------------------------|
| scaffold138708_10.2 | 1 p2 | (AG)6  | 12 | 212  | 223  | GAATTTTTCGGGTTTTGGGT         |
| scaffold138744_14.1 | 1 p2 | (AG)6  | 12 | 51   | 62   | CCCATGTTGTAATTAATGTAGGGA     |
| scaffold139049_13.3 | 1 p2 | (TA)7  | 14 | 115  | 128  | CCTTAAATCAATCCCAGCCA         |
| scaffold139129_15.0 | 1 p2 | (TA)8  | 16 | 872  | 887  | CTCCCACGCACACATACATC         |
| scaffold139144_10.7 | 1 p2 | (AG)6  | 12 | 222  | 233  | TGGTTACTGTTCCCTCAGCCC        |
| scaffold139226_15.7 | 1 p2 | (CT)8  | 16 | 515  | 530  | TTCTCAGTTCTCCCCTCAA          |
| scaffold139487_12.5 | 1 p2 | (TC)6  | 12 | 172  | 183  | TTCACGTGGACTGCTTTCAG         |
| scaffold139578_12.8 | 1 p2 | (TA)7  | 14 | 234  | 247  | ACTCCGTTGAATCTTGCCAT         |
| scaffold139640_10.7 | 1 p2 | (TA)6  | 12 | 317  | 328  | TCAGGGGCATATGTGTCAA          |
| scaffold139797_11.8 | 1 p2 | (GA)8  | 16 | 72   | 87   | GTCCACGGTGGTTTGAGAGT         |
| scaffold140267_12.1 | 1 p2 | (CT)8  | 16 | 590  | 605  | CCAAGTTTGGGACTTAAGCG         |
| scaffold140311_14.1 | 1 p2 | (AG)7  | 14 | 281  | 294  | TATATTGTGGGGTGGATGGG         |
| scaffold140332_13.5 | 1 p2 | (AT)6  | 12 | 754  | 765  | CCAGCATTGTTTCCCATTTC         |
| scaffold140346_15.3 | 1 p2 | (CA)6  | 12 | 124  | 135  | AATATCCGATCCCTTGAGC          |
| scaffold140372_11.3 | 1 p2 | (AT)9  | 18 | 429  | 446  | CCACATTTGAAGGTGATCTTTC       |
| scaffold140654_10.6 | 1 p2 | (AT)6  | 12 | 116  | 127  | CCAATCTAGGGTTCATCACCA        |
| scaffold140657_12.7 | 1 p2 | (AT)6  | 12 | 395  | 406  | CGAACGAATATGTTGCATCC         |
| scaffold140788_19.2 | 1 p2 | (AT)6  | 12 | 112  | 123  | AACTACGAGCATCATCATGTGTTT     |
| scaffold140801_14.9 | 1 p2 | (AG)7  | 14 | 100  | 113  | TCCACTGCCAATGAAATGAA         |
| scaffold140806_10.1 | 1 p2 | (AT)11 | 22 | 757  | 778  | GATTGGATGAGAAGAACCGC         |
| scaffold140823_20.7 | 1 p2 | (TC)6  | 12 | 245  | 256  | TTTGTGGGTCATTACTATTACGA      |
| scaffold140863_16.0 | 1 p2 | (CT)10 | 20 | 186  | 205  | AGATCATCTCGGGTCCAAGG         |
| scaffold140891_16.1 | 1 p2 | (AT)8  | 16 | 2916 | 2931 | ACGGTCCGAGTTCATAGGTG         |
| scaffold140953_14.8 | 1 p2 | (TA)10 | 20 | 109  | 128  | ACCATGTTTCCATCGGTTGT         |
| scaffold141180_14.8 | 1 p2 | (GA)6  | 12 | 117  | 128  | TCTCTCTCAAACGCATGTGG         |
| scaffold141436_14.1 | 1 p2 | (AG)8  | 16 | 93   | 108  | TCTCTCTTGACGCCATTCA          |
| scaffold141497_14.5 | 1 p2 | (GA)6  | 12 | 32   | 43   | TGAGTAAAACGTGTTTGTGAGAA      |
| scaffold141554_18.0 | 1 p2 | (CT)7  | 14 | 138  | 151  | GGATCGAAAAGAGAGGGGAGG        |
| scaffold141808_16.3 | 1 p2 | (CT)6  | 12 | 113  | 124  | TCTGCTACACCCAAAATCCC         |
| scaffold141860_12.4 | 1 p2 | (TC)6  | 12 | 190  | 201  | AATGGATGAAAAGCTGCCAC         |
| scaffold141889_12.6 | 1 p2 | (AT)7  | 14 | 610  | 623  | AGCCTTCAGATCCCCTGTTT         |
| scaffold142090_15.9 | 1 p2 | (TG)6  | 12 | 498  | 509  | TGCAAAATACCTTTTGTCCG         |
| scaffold142252_15.9 | 1 p2 | (AT)6  | 12 | 3169 | 3180 | TGGAGTCCTAAACTAAACCTCTAAAA   |
| scaffold142265_10.0 | 1 p2 | (AC)6  | 12 | 173  | 184  | GCTGCAATTCCTATTCAGCA         |
| scaffold142291_17.5 | 1 p2 | (CT)10 | 20 | 6690 | 6709 | ACCCTATTTTGGCGTAGCCT         |
| scaffold142434_16.5 | 1 p2 | (AT)9  | 18 | 46   | 63   | TCTTGATAGTACTTTTTCATGGAACCTT |
| scaffold142840_16.2 | 1 p2 | (AT)7  | 14 | 4138 | 4151 | ATTGTTGCTTGAATGAGGGC         |
| scaffold142854_11.2 | 1 p2 | (AT)7  | 14 | 64   | 77   | TTTTATTTTTGTGTGGTTTTGATTT    |
| scaffold142899_16.3 | 1 p2 | (GA)6  | 12 | 316  | 327  | AGAGATCGACGCCTTGACAT         |
| scaffold142945_12.0 | 1 p2 | (TA)7  | 14 | 1263 | 1276 | CATATCAGCCAAAGGGAGGA         |
| scaffold142970_11.5 | 1 p2 | (GA)7  | 14 | 50   | 63   | AAATGCAGGGAAGATTGTGG         |
| scaffold143391_14.7 | 1 p2 | (GA)6  | 12 | 848  | 859  | GGAACATGTGTGTGCTCCAG         |
| scaffold143536_11.0 | 1 p2 | (GA)6  | 12 | 107  | 118  | CCGAGATGGCTGCATTA            |
| scaffold143599_16.0 | 1 p2 | (TA)6  | 12 | 1213 | 1224 | GATTCGTGTCGGATTAGCGT         |
| scaffold143600_13.4 | 1 p2 | (AT)7  | 14 | 49   | 62   | TTGCACAGTACATGCGTTCA         |
| scaffold143614_14.9 | 1 p2 | (AT)10 | 20 | 1100 | 1119 | ATTCTGAGCTGGCGTGAAAG         |
| scaffold143806_15.1 | 1 p2 | (AG)8  | 16 | 172  | 187  | GGTGGAGTTGGTTCGAAGTT         |
| scaffold143875_12.3 | 1 p2 | (AG)7  | 14 | 170  | 183  | TGAAAACAGAAACCGAGATCA        |
| scaffold143997_13.4 | 1 p2 | (TC)6  | 12 | 26   | 37   | GGGATGCCATTCGTAAGTCC         |
| scaffold144094_17.9 | 1 p2 | (CT)8  | 16 | 112  | 127  | CGCTAAATTTGATCGTCTTCC        |
| scaffold144329_10.2 | 1 p2 | (CT)12 | 24 | 46   | 69   | CACGTTGGACTTTGGATTGA         |
| scaffold144450_12.0 | 1 p2 | (AT)6  | 12 | 204  | 215  | GAAGGCAGATGGACGGTAGA         |
| scaffold144549_12.9 | 1 p2 | (TA)8  | 16 | 488  | 503  | CCTTCTTTGAATAGCGTGCC         |
| scaffold144565_10.8 | 1 p2 | (AT)10 | 20 | 328  | 347  | CCCCCTCTTGAACCTTCTCT         |
| scaffold144585_15.5 | 1 p2 | (AT)6  | 12 | 1568 | 1579 | CCCGAAAGGTTTGTCTCTGA         |
| scaffold144594_14.6 | 1 p2 | (TC)7  | 14 | 1108 | 1121 | AACTCCACTGCCATCTCACC         |
| scaffold144598_18.0 | 1 p2 | (AG)6  | 12 | 1117 | 1128 | GCATCAGCATGCTCAACAAA         |
| scaffold144600_16.9 | 1 p2 | (AG)9  | 18 | 852  | 869  | ACGGTTGTGATCATTCGTCA         |

|                     |      |        |    |      |      |                             |
|---------------------|------|--------|----|------|------|-----------------------------|
| scaffold144618_12.5 | 1 p2 | (CA)9  | 18 | 67   | 84   | GCACTCGCCACAATGTCA          |
| scaffold144634_13.4 | 1 p2 | (AT)10 | 20 | 849  | 868  | CCCTTCTTCAAAAAGTCCGA        |
| scaffold144635_14.1 | 1 p2 | (GT)7  | 14 | 122  | 135  | TTTTTGAGATTAGGCTATAAGGAATT/ |
| scaffold144817_14.1 | 1 p2 | (AG)6  | 12 | 303  | 314  | AGTTTTCTCCCTTCGTTGC         |
| scaffold144838_16.8 | 1 p2 | (TA)6  | 12 | 635  | 646  | ACATGATGGACAAGTCGCAA        |
| scaffold144868_15.9 | 1 p2 | (CT)6  | 12 | 277  | 288  | AGGGACCTAATATGCCACC         |
| scaffold144915_13.9 | 1 p2 | (GA)6  | 12 | 345  | 356  | GGATTGAAAAGACATCCCA         |
| scaffold144924_13.8 | 1 p2 | (AG)9  | 18 | 375  | 392  | GGCCTATCGATGTCGGTAAA        |
| scaffold145058_16.0 | 1 p2 | (CT)7  | 14 | 821  | 834  | TCTGTACGTGTGTGAATGGCT       |
| scaffold145073_13.4 | 1 p2 | (TA)8  | 16 | 281  | 296  | GGTGGGGTTACATTGGAGAA        |
| scaffold145227_13.6 | 1 p2 | (AG)6  | 12 | 955  | 966  | TATTACAGAATGCACCGCCA        |
| scaffold145254_13.8 | 1 p2 | (CT)6  | 12 | 1778 | 1789 | GATTGAAGGGGTGCTTGA          |
| scaffold145382_16.8 | 1 p2 | (GA)7  | 14 | 110  | 123  | AAACACGCAACACAAAGCAG        |
| scaffold145391_11.1 | 1 p2 | (TA)9  | 18 | 47   | 64   | ACCATCCCACCAGCATTTAG        |
| scaffold145398_14.9 | 1 p2 | (TA)7  | 14 | 409  | 422  | GAGCCTCTGCTATTGGCATC        |
| scaffold145462_17.8 | 1 p2 | (AT)6  | 12 | 2672 | 2683 | CCCAGCCAATGGAGATTACA        |
| scaffold145663_14.7 | 1 p2 | (CT)7  | 14 | 366  | 379  | GCAGCTGAGGTGCATAACAA        |
| scaffold145674_15.3 | 1 p2 | (TA)7  | 14 | 115  | 128  | TGAACATGCTCCTATTTAATACACC   |
| scaffold145867_14.4 | 1 p2 | (AT)7  | 14 | 609  | 622  | AAAATGCCCTTGTATGCTGC        |
| scaffold145894_16.7 | 1 p2 | (AG)6  | 12 | 391  | 402  | ACAGCAAATTTGGCAGAGG         |
| scaffold146060_13.7 | 1 p2 | (TA)6  | 12 | 398  | 409  | CCAACGCTACTTGGCCTTAC        |
| scaffold146115_16.0 | 1 p2 | (AT)7  | 14 | 218  | 231  | TGCATTCTTGAAAGCTGGTG        |
| scaffold146234_17.3 | 1 p2 | (CA)7  | 14 | 1019 | 1032 | GTAAGAACGAAAGCAGGCCA        |
| scaffold146402_14.1 | 1 p2 | (CT)7  | 14 | 376  | 389  | AGTCACTCACCAGTCCCCAC        |
| scaffold146485_16.1 | 1 p2 | (TC)6  | 12 | 346  | 357  | TGACATCTTTTGATTTGTTTTGC     |
| scaffold146534_10.4 | 1 p2 | (CG)6  | 12 | 236  | 247  | ATAGTGGTATGGTGTGGGGG        |
| scaffold146662_14.0 | 1 p2 | (CT)6  | 12 | 3679 | 3690 | AGGGCAATACGTTTTTCGTG        |
| scaffold146665_14.9 | 1 p2 | (TC)9  | 18 | 286  | 303  | GCATGCTTCTGACCAATTCA        |
| scaffold146887_15.8 | 1 p2 | (CT)7  | 14 | 76   | 89   | ATTACAAATGGCCAAGAGGG        |
| scaffold146904_10.2 | 1 p2 | (CT)11 | 22 | 599  | 620  | AATAATCCACGCCAAACTGC        |
| scaffold146937_12.2 | 1 p2 | (TA)6  | 12 | 557  | 568  | GAGAAAGCATGTTCTGCACG        |
| scaffold146994_13.9 | 1 p2 | (TC)6  | 12 | 173  | 184  | TAGTTGGGCTTAGTGGGGGT        |
| scaffold147222_17.4 | 1 p2 | (TA)6  | 12 | 175  | 186  | ATGCCATCTGCAATCATCAA        |
| scaffold147274_14.8 | 1 p2 | (GA)8  | 16 | 1269 | 1284 | AGGGCTGAGAGCCTGAAACT        |
| scaffold147313_14.9 | 1 p2 | (TC)6  | 12 | 53   | 64   | ATGAGAATGGCCGAGAGTTT        |
| scaffold147451_15.9 | 1 p2 | (TC)7  | 14 | 386  | 399  | CCTCTCAACGCTTGGCTAAC        |
| scaffold147458_13.8 | 1 p2 | (TA)9  | 18 | 171  | 188  | TCTTTGTCCGTTTTTCGTGA        |
| scaffold147622_14.2 | 1 p2 | (TC)6  | 12 | 117  | 128  | TGAGGGGTGCCAAGACTTTA        |
| scaffold147638_13.9 | 1 p2 | (AT)8  | 16 | 67   | 82   | GTGCCGTAATAAATTGGATCA       |
| scaffold147689_10.7 | 1 p2 | (AT)6  | 12 | 65   | 76   | CGTTAATGCACACAGCTTCAA       |
| scaffold148474_12.9 | 1 p2 | (GA)7  | 14 | 335  | 348  | TATTGATGGTGCAGCAATGG        |
| scaffold148539_11.0 | 1 p2 | (AT)8  | 16 | 78   | 93   | CACCAAAAACACACATTGGA        |
| scaffold148550_13.8 | 1 p2 | (TC)6  | 12 | 114  | 125  | GTCAACTTTGGCAACGGAAT        |
| scaffold148606_18.3 | 1 p2 | (CT)7  | 14 | 171  | 184  | TCCCATAGCATCTTTTGCTCT       |
| scaffold148639_11.0 | 1 p2 | (TA)7  | 14 | 566  | 579  | TTTTGGGCAAAAATACCCCT        |
| scaffold148722_16.4 | 1 p2 | (TA)8  | 16 | 1658 | 1673 | ACCGCCATATTTGGTTGACT        |
| scaffold148784_15.7 | 1 p2 | (AG)6  | 12 | 1567 | 1578 | GGTGTGACTGAAGTGATTTGCT      |
| scaffold148963_18.1 | 1 p2 | (CT)6  | 12 | 71   | 82   | TGGTACAAAATTTAGGTTATTACAG,  |
| scaffold149080_10.9 | 1 p2 | (AT)10 | 20 | 543  | 562  | GAGATTGACGGCTGGAAAGT        |
| scaffold149123_11.9 | 1 p2 | (CT)6  | 12 | 1026 | 1037 | CGCATACCACATATCATCGC        |
| scaffold149304_15.1 | 1 p2 | (AT)6  | 12 | 429  | 440  | TGGCTCCAACCTTGTGTTTTG       |
| scaffold149368_10.7 | 1 p2 | (TC)6  | 12 | 67   | 78   | TACCAACCCAACCCACTCAT        |
| scaffold149466_14.9 | 1 p2 | (AG)6  | 12 | 1110 | 1121 | CGATTGGAAGAAATGCATCA        |
| scaffold149488_13.1 | 1 p2 | (CT)6  | 12 | 114  | 125  | CAAATCCGAAATTCTCCCA         |
| scaffold150017_14.1 | 1 p2 | (GA)6  | 12 | 410  | 421  | CATTCTCAAGCCACTCCCTC        |
| scaffold150168_11.7 | 1 p2 | (AT)9  | 18 | 46   | 63   | TGGGTGAGAAAGAGAGATAGAGA     |
| scaffold150331_14.3 | 1 p2 | (AT)6  | 12 | 241  | 252  | GCAAAAGTAATAAAGAGCGACACA    |
| scaffold150397_17.3 | 1 p2 | (CT)7  | 14 | 49   | 62   | GGAAATTTTCTTCTCCTCACG       |

|                     |      |        |    |      |      |                             |
|---------------------|------|--------|----|------|------|-----------------------------|
| scaffold150477_18.0 | 1 p2 | (AG)7  | 14 | 1599 | 1612 | CCATTACTCACCCCCACAAA        |
| scaffold150496_15.8 | 1 p2 | (AT)9  | 18 | 909  | 926  | GCTCAGGACCGATGAATGAT        |
| scaffold150509_10.2 | 1 p2 | (AT)7  | 14 | 116  | 129  | TGTAGCCGGAATATGAGCCT        |
| scaffold150651_15.9 | 1 p2 | (AC)7  | 14 | 2638 | 2651 | TGGACTGTGGGAATACTGGA        |
| scaffold150785_12.1 | 1 p2 | (TA)8  | 16 | 67   | 82   | TTCGATGATAACTATGGGTTTTG     |
| scaffold150787_11.9 | 1 p2 | (TA)9  | 18 | 79   | 96   | TCGAAATTTGGCAAACAATCT       |
| scaffold150796_12.9 | 1 p2 | (AT)9  | 18 | 673  | 690  | GCCTATCCGTTACCCTCCAC        |
| scaffold150813_15.7 | 1 p2 | (TA)8  | 16 | 5265 | 5280 | CGTTTCGATTACGGTTTTA         |
| scaffold150856_15.2 | 1 p2 | (GA)8  | 16 | 1127 | 1142 | CATTGTTTGTGTGTCGGAGG        |
| scaffold151144_17.3 | 1 p2 | (TA)8  | 16 | 43   | 58   | ATCGGTTATTACCGGATCGC        |
| scaffold151270_13.6 | 1 p2 | (TG)6  | 12 | 59   | 70   | TTGAATTAATGATGTCAGATATTGTTG |
| scaffold151488_14.7 | 1 p2 | (AT)6  | 12 | 199  | 210  | AATTTTCTACAAAACAAGACCAATC   |
| scaffold151535_14.6 | 1 p2 | (AC)6  | 12 | 333  | 344  | TTGCTCTAAGCTTCATCCGC        |
| scaffold151586_16.0 | 1 p2 | (GA)6  | 12 | 357  | 368  | CCTCCGATTTTCGTCTTCAA        |
| scaffold151648_15.3 | 1 p2 | (AT)6  | 12 | 72   | 83   | TCCGAAAATCGGTCAAAAAC        |
| scaffold151895_11.2 | 1 p2 | (TA)7  | 14 | 335  | 348  | TGCTCTTATGCTTTGTAAATTAGG    |
| scaffold151909_15.6 | 1 p2 | (TA)6  | 12 | 1180 | 1191 | CAAGCTATTTTCGAGGCAACA       |
| scaffold151962_15.4 | 1 p2 | (CT)7  | 14 | 41   | 54   | TGAAAGTAGCCGAGAGTTTACAA     |
| scaffold152054_11.2 | 1 p2 | (TA)6  | 12 | 374  | 385  | CCCCATCCAAGAAAAGATCA        |
| scaffold152099_15.4 | 1 p2 | (GA)7  | 14 | 214  | 227  | TCGAGAAATGCCACATGCTA        |
| scaffold152389_17.1 | 1 p2 | (GA)9  | 18 | 804  | 821  | AAAATCACCCGCGAAAAATTG       |
| scaffold152474_14.7 | 1 p2 | (TA)12 | 24 | 41   | 64   | ACCATATTTAAGGGTTATCACCTG    |
| scaffold152541_12.4 | 1 p2 | (AT)8  | 16 | 384  | 399  | GGATTAATAGGCTGCCCTC         |
| scaffold152609_16.8 | 1 p2 | (TA)6  | 12 | 207  | 218  | TGCCAAGTCTAAAGCCACTG        |
| scaffold152773_11.3 | 1 p2 | (CT)8  | 16 | 370  | 385  | TCCAACCTGTTCCCTCATTTG       |
| scaffold152781_15.0 | 1 p2 | (TA)6  | 12 | 82   | 93   | ACAATATTTAACGCAGCTAAACG     |
| scaffold152796_15.6 | 1 p2 | (TA)10 | 20 | 2427 | 2446 | AGGCCTACCGATCCAACTT         |
| scaffold153004_19.6 | 1 p2 | (AT)7  | 14 | 560  | 573  | TCCCACTCGCCTGATACCTA        |
| scaffold153193_18.2 | 1 p2 | (TC)6  | 12 | 168  | 179  | TCATTCTCTCCCTCATTTTTGAA     |
| scaffold153246_16.3 | 1 p2 | (AT)8  | 16 | 241  | 256  | CCCTAAATTTTGTATCCGAATG      |
| scaffold153417_13.4 | 1 p2 | (TA)9  | 18 | 1455 | 1472 | TTTTAGAAGTAAGTGGTGTTCGG     |
| scaffold153569_16.7 | 1 p2 | (CA)6  | 12 | 1386 | 1397 | CATGCAGGAATTTTACCAA         |
| scaffold153614_17.1 | 1 p2 | (CT)6  | 12 | 68   | 79   | AGCATCTCTTGCTCTCTCATTG      |
| scaffold153636_11.8 | 1 p2 | (AG)9  | 18 | 324  | 341  | ATTTCTTTCAATGGGGGAC         |
| scaffold153643_15.7 | 1 p2 | (TA)6  | 12 | 523  | 534  | GGCGGGGGAGATATAGAGAG        |
| scaffold153665_12.3 | 1 p2 | (AT)6  | 12 | 185  | 196  | GCATGCTCTATCTGTTACAGGG      |
| scaffold153666_12.4 | 1 p2 | (TA)8  | 16 | 79   | 94   | GATTGCCCAAGATCTACGGTT       |
| scaffold153685_13.5 | 1 p2 | (CA)6  | 12 | 832  | 843  | TGCAGATGTCCTCCTTTCT         |
| scaffold153692_13.9 | 1 p2 | (AG)10 | 20 | 405  | 424  | TGCCATCTCGAAAAACAATG        |
| scaffold154134_15.3 | 1 p2 | (AG)7  | 14 | 99   | 112  | TGGAATCCGAGAAATTCAGG        |
| scaffold154251_12.5 | 1 p2 | (GA)6  | 12 | 37   | 48   | GACTTAAATTGCTGCAGACGC       |
| scaffold154489_14.5 | 1 p2 | (TA)8  | 16 | 232  | 247  | TGCACTAACCACCCTTGATTT       |
| scaffold154687_12.1 | 1 p2 | (TA)8  | 16 | 1103 | 1118 | ATTAGGGTTGAGGTTGACCG        |
| scaffold154694_14.3 | 1 p2 | (GA)6  | 12 | 153  | 164  | CACTAGGCCTACGTCGCATT        |
| scaffold154719_15.4 | 1 p2 | (AG)10 | 20 | 360  | 379  | GAATGCTGGGCTGATAAGGA        |
| scaffold154724_12.4 | 1 p2 | (TA)9  | 18 | 257  | 274  | TTCTCTCTGGTTGGCTGCTT        |
| scaffold154962_15.1 | 1 p2 | (AG)6  | 12 | 1627 | 1638 | TGGCAATGGAAAGAAACACA        |
| scaffold155233_15.3 | 1 p2 | (TC)6  | 12 | 39   | 50   | GGCAACGGAATACCATTTGT        |
| scaffold155274_14.8 | 1 p2 | (AT)8  | 16 | 3561 | 3576 | CAACCATCCAACCACAACAA        |
| scaffold155476_14.0 | 1 p2 | (GA)9  | 18 | 517  | 534  | TTGCTCTTGTGACATGGTT         |
| scaffold155617_12.1 | 1 p2 | (AT)8  | 16 | 151  | 166  | TGCAACCTCAATGCTTCTCA        |
| scaffold155618_12.0 | 1 p2 | (TA)8  | 16 | 846  | 861  | TGAATCCGTATCCTTATTGTTGC     |
| scaffold155625_11.4 | 1 p2 | (TA)7  | 14 | 140  | 153  | TGTCAACATTTTGTGCATTGG       |
| scaffold155659_11.7 | 1 p2 | (TA)7  | 14 | 52   | 65   | TGATTGGTCAGTTTGTCCGA        |
| scaffold155763_13.9 | 1 p2 | (CT)6  | 12 | 180  | 191  | CCCAGCTCTCTCACTCTGCT        |
| scaffold155795_11.7 | 1 p2 | (AT)7  | 14 | 1960 | 1973 | TATGGAGTGGAGCAAAACGG        |
| scaffold156140_10.2 | 1 p2 | (TA)12 | 24 | 311  | 334  | TTTAAACCCTAAAACGCGCA        |
| scaffold156367_15.6 | 1 p2 | (AT)6  | 12 | 2418 | 2429 | TCACCTAATTGCATCCCCAT        |

|                     |      |        |    |      |      |                            |
|---------------------|------|--------|----|------|------|----------------------------|
| scaffold156398_14.5 | 1 p2 | (AG)6  | 12 | 1417 | 1428 | AGAGAGAGGCGATGCAAAAA       |
| scaffold156563_14.9 | 1 p2 | (AT)9  | 18 | 727  | 744  | CAAACCTAATTGGGGAGCAAA      |
| scaffold156607_14.7 | 1 p2 | (GA)6  | 12 | 3519 | 3530 | CGGATAATATAGCTCCGGCA       |
| scaffold156718_14.0 | 1 p2 | (TA)6  | 12 | 1098 | 1109 | CATTCATCATCATCAATATCACAGTC |
| scaffold156806_15.9 | 1 p2 | (AT)8  | 16 | 85   | 100  | AATCTGACGGCCGATATTTG       |
| scaffold156819_12.0 | 1 p2 | (TA)7  | 14 | 1141 | 1154 | TCAGATCTGCGCTGAAAATG       |
| scaffold157076_15.9 | 1 p2 | (CT)7  | 14 | 151  | 164  | GTGTGCATGCATGGTTTAGG       |
| scaffold157090_11.7 | 1 p2 | (AT)9  | 18 | 132  | 149  | TTAGCCCTTAATGGCCTGCT       |
| scaffold157091_16.0 | 1 p2 | (AG)6  | 12 | 841  | 852  | TGGTGACTTTGAGGAGGGAG       |
| scaffold157159_12.9 | 1 p2 | (AT)11 | 22 | 894  | 915  | AGTGAGGCCCTTTTACGTT        |
| scaffold157268_13.6 | 1 p2 | (TA)6  | 12 | 111  | 122  | AATTGAAATAAAGGCGCCAG       |
| scaffold157292_14.8 | 1 p2 | (AT)6  | 12 | 1028 | 1039 | AATCGTGGTTCAAAAATCGG       |
| scaffold157305_13.1 | 1 p2 | (AT)9  | 18 | 308  | 325  | TTCGGTTGCAATTTTAGTTGTTT    |
| scaffold157428_13.4 | 1 p2 | (TA)8  | 16 | 1065 | 1080 | CAGGGGCATATGTGTCAAAA       |
| scaffold157502_11.4 | 1 p2 | (AG)8  | 16 | 284  | 299  | AAGTTGGAGTGGAGGTGTCG       |
| scaffold157515_10.9 | 1 p2 | (AT)8  | 16 | 319  | 334  | ATTTGAAACCGGACCGAACT       |
| scaffold157516_13.0 | 1 p2 | (AT)8  | 16 | 146  | 161  | GGTCCATTGGTCTTTTGTATTGA    |
| scaffold157555_12.7 | 1 p2 | (CA)6  | 12 | 824  | 835  | GATACGACCTGTAATGCCCC       |
| scaffold157729_16.2 | 1 p2 | (AT)6  | 12 | 129  | 140  | TCATGGGGCAATGGGATA         |
| scaffold157754_13.8 | 1 p2 | (AT)8  | 16 | 2216 | 2231 | GTGGTGAAGAGGCAATGTT        |
| scaffold157829_12.0 | 1 p2 | (AT)7  | 14 | 555  | 568  | AATAGGTCATCCCTGCCTT        |
| scaffold157849_14.7 | 1 p2 | (AT)7  | 14 | 376  | 389  | AAAAGGAGTTTTGACGGGATT      |
| scaffold157932_13.6 | 1 p2 | (TA)9  | 18 | 289  | 306  | GTAATAAAGGCGGTGGGTGA       |
| scaffold157942_10.0 | 1 p2 | (CT)6  | 12 | 63   | 74   | AAAAGTAATGCATATGTTTTCTAAG  |
| scaffold157980_16.9 | 1 p2 | (TA)9  | 18 | 47   | 64   | CATGCACCTGAACATGCC         |
| scaffold157989_11.5 | 1 p2 | (AT)6  | 12 | 486  | 497  | TGGTTGAATTTTCGTACCCGT      |
| scaffold158113_11.5 | 1 p2 | (TC)6  | 12 | 54   | 65   | CCTACCCAAACCCACTACCA       |
| scaffold158303_14.8 | 1 p2 | (CT)6  | 12 | 275  | 286  | AAGCACTCAACCAACACCC        |
| scaffold158405_10.3 | 1 p2 | (AG)6  | 12 | 605  | 616  | TGATGGTTTGATGGGGTTTT       |
| scaffold158455_19.1 | 1 p2 | (TA)9  | 18 | 301  | 318  | ATAAATGTTCAAACCGGCCA       |
| scaffold158511_16.6 | 1 p2 | (TC)6  | 12 | 479  | 490  | GCACCGAGGGAATCAAATAA       |
| scaffold158537_12.7 | 1 p2 | (GA)6  | 12 | 220  | 231  | CAAAGAAGAGTGGGCTTTGG       |
| scaffold158730_13.6 | 1 p2 | (AT)10 | 20 | 2214 | 2233 | GTCAATCCAACGTCCCAAAT       |
| scaffold159213_16.3 | 1 p2 | (AG)7  | 14 | 272  | 285  | CCTCTCGCATTCTCTTGCT        |
| scaffold159314_13.3 | 1 p2 | (TA)6  | 12 | 246  | 257  | AATCACATCAACACCTCAGCC      |
| scaffold159372_12.6 | 1 p2 | (AG)9  | 18 | 311  | 328  | TCCCCTACTACACTCGCCAC       |
| scaffold159433_12.7 | 1 p2 | (TC)6  | 12 | 628  | 639  | AGCAAATCCTCCCCAATCT        |
| scaffold159750_14.9 | 1 p2 | (AG)10 | 20 | 2049 | 2068 | CATCGCCCTTGATCTCTCTC       |
| scaffold159899_13.6 | 1 p2 | (AT)7  | 14 | 2248 | 2261 | ACTAGAGGGGTCAGCCATT        |
| scaffold160005_12.4 | 1 p2 | (AC)7  | 14 | 425  | 438  | AACCACATTAGGCCATGCAC       |
| scaffold160181_16.2 | 1 p2 | (AG)10 | 20 | 490  | 509  | CAACGTCGCTTTTAGGGTTG       |
| scaffold160267_12.2 | 1 p2 | (AT)7  | 14 | 115  | 128  | TATGCATTTGCACCTGAGGA       |
| scaffold160303_13.7 | 1 p2 | (AG)6  | 12 | 664  | 675  | AGGGGTGTAGGCAAAAGACC       |
| scaffold160488_13.9 | 1 p2 | (AT)7  | 14 | 2704 | 2717 | TAGGGCAATTGGTAGGTTTCG      |
| scaffold160560_15.9 | 1 p2 | (CA)6  | 12 | 581  | 592  | CTCCAGAGTCAATCCAGGC        |
| scaffold160605_15.0 | 1 p2 | (AG)6  | 12 | 139  | 150  | GCTTCCAAAAGAAAGAGCCC       |
| scaffold160831_16.1 | 1 p2 | (TA)10 | 20 | 430  | 449  | TGTTTCCCGTTTTATCAGCA       |
| scaffold160961_10.7 | 1 p2 | (TA)6  | 12 | 75   | 86   | TCATTTATGAAGCAAGGGGG       |
| scaffold161261_14.1 | 1 p2 | (AG)7  | 14 | 290  | 303  | TGCAAATTGATGAGCCATA        |
| scaffold161421_14.9 | 1 p2 | (CT)8  | 16 | 67   | 82   | CAACCCTACCTCCTTCTCCC       |
| scaffold161559_13.7 | 1 p2 | (TC)6  | 12 | 2167 | 2178 | GGTGGCAAAAAGTGAGGAAA       |
| scaffold161750_14.2 | 1 p2 | (AG)7  | 14 | 2721 | 2734 | TATAGGGCGGTGGTAGTTGC       |
| scaffold161818_15.6 | 1 p2 | (GA)6  | 12 | 797  | 808  | TGGTGAAGATGTGGGTTGAG       |
| scaffold161932_14.0 | 1 p2 | (TC)7  | 14 | 1459 | 1472 | GCACGTAACATACATTGCC        |
| scaffold161946_15.0 | 1 p2 | (GA)10 | 20 | 748  | 767  | GGCTCACTGCTTCTTCTCG        |
| scaffold161969_19.0 | 1 p2 | (TA)7  | 14 | 117  | 130  | CAATTGGTAGCAAACCATGAA      |
| scaffold161992_15.1 | 1 p2 | (CT)6  | 12 | 56   | 67   | TTTGAAAACCCCATTTCTGC       |
| scaffold162156_13.8 | 1 p2 | (TA)10 | 20 | 43   | 62   | CCCAAAAATGGGTTATTATTGA     |

|                     |      |        |    |      |                               |
|---------------------|------|--------|----|------|-------------------------------|
| scaffold162356_10.3 | 1 p2 | (TA)15 | 30 | 447  | 476 CACCGTTGTCTTTAAGCCGT      |
| scaffold162372_16.6 | 1 p2 | (TC)6  | 12 | 852  | 863 GCTGATCTCCATCTCCAAGC      |
| scaffold162517_16.0 | 1 p2 | (AT)6  | 12 | 286  | 297 TTGGGAAAAATAAAGAGGAAACC   |
| scaffold162570_12.8 | 1 p2 | (TC)6  | 12 | 219  | 230 AAATCCCACCTACCCAAACC      |
| scaffold162670_12.7 | 1 p2 | (TA)6  | 12 | 828  | 839 GCAATCCCCACTGCATCTTA      |
| scaffold162709_12.6 | 1 p2 | (TA)7  | 14 | 497  | 510 CCCTCCCTCTCTCTTTTCGT      |
| scaffold162802_15.3 | 1 p2 | (TA)7  | 14 | 1752 | 1765 TCCTAATTTGGAAAGTACTGGGTT |
| scaffold163064_12.9 | 1 p2 | (TC)6  | 12 | 132  | 143 GCTCGAAATCGGAAAATCTG      |
| scaffold163117_13.5 | 1 p2 | (CT)6  | 12 | 46   | 57 GTTGGCTGGATCTCCTGAAA       |
| scaffold163260_13.6 | 1 p2 | (AT)11 | 22 | 213  | 234 TCATTCCGAAAATCAAAGGC      |
| scaffold163280_13.8 | 1 p2 | (TG)6  | 12 | 226  | 237 GCATTTAAGTTTACGGGGGA      |
| scaffold163287_15.0 | 1 p2 | (TA)10 | 20 | 456  | 475 TGCACGTTTCAAAGCATAGG      |
| scaffold163360_10.4 | 1 p2 | (TA)7  | 14 | 566  | 579 TCTCAGAATCCCATTAGAAGGGT   |
| scaffold163625_11.4 | 1 p2 | (AT)8  | 16 | 310  | 325 GAAATTGAAGGGATAAGAATTTCAA |
| scaffold163693_10.5 | 1 p2 | (TA)6  | 12 | 371  | 382 ACCTGATTCCAGTTGGATGG      |
| scaffold163908_15.9 | 1 p2 | (TA)7  | 14 | 3076 | 3089 ACCGATCTTTTGGCATTCAA     |
| scaffold163927_15.7 | 1 p2 | (TC)7  | 14 | 581  | 594 AAATCCTATCCGGTCAACCC      |
| scaffold163959_13.0 | 1 p2 | (AG)6  | 12 | 227  | 238 GGGTCAAAGGAGAGGGAGAG      |
| scaffold164119_16.3 | 1 p2 | (AT)8  | 16 | 3020 | 3035 TTGTCGGGCTCGAATTTATC     |
| scaffold164141_13.6 | 1 p2 | (AT)9  | 18 | 873  | 890 CCCATACACAATTTGGGGTC      |
| scaffold164177_13.0 | 1 p2 | (TG)8  | 16 | 181  | 196 ATCTCGGCTACGAAGTGCAT      |
| scaffold164195_13.6 | 1 p2 | (AT)6  | 12 | 342  | 353 GCTTGGTGAAGGAAGTGAGG      |
| scaffold164259_16.8 | 1 p2 | (AT)6  | 12 | 53   | 64 GTCCTCCGAACATCATGGTGT      |
| scaffold164403_16.5 | 1 p2 | (AT)6  | 12 | 508  | 519 TTACCCGGACAATAAATCCG      |
| scaffold164476_14.6 | 1 p2 | (AT)12 | 24 | 1265 | 1288 GCTTCTTCTTCTCCGCATTG     |
| scaffold164500_13.4 | 1 p2 | (AG)9  | 18 | 997  | 1014 TCCCATTCAACCATTTTCAA     |
| scaffold164622_15.2 | 1 p2 | (AT)6  | 12 | 196  | 207 CAACGCACGGGTAAAAGACT      |
| scaffold164636_15.2 | 1 p2 | (AT)7  | 14 | 763  | 776 GAGCATTTTTCATGCCATTTTT    |
| scaffold164668_12.2 | 1 p2 | (TA)7  | 14 | 51   | 64 GCACACAAGTTATTGGTTTCTATTTG |
| scaffold164671_10.2 | 1 p2 | (AT)10 | 20 | 198  | 217 TTTTACTGCCTTGTGTTGCG      |
| scaffold164825_12.9 | 1 p2 | (TA)9  | 18 | 292  | 309 AATTGTGGAGTTGCCGTTTT      |
| scaffold165037_11.4 | 1 p2 | (TA)10 | 20 | 95   | 114 ACCAATTTGATGAGGGTCCA      |
| scaffold165231_15.2 | 1 p2 | (AT)9  | 18 | 167  | 184 TTCTGGATTATCCTGCGGTC      |
| scaffold165239_11.2 | 1 p2 | (AG)6  | 12 | 271  | 282 GTGTCGGGGGTACAAAAGTG      |
| scaffold165276_15.8 | 1 p2 | (GC)7  | 14 | 75   | 88 AAAATTATATTCTCGCTTCTTCGC   |
| scaffold165283_17.5 | 1 p2 | (TA)8  | 16 | 181  | 196 AAAGCCTACCTTGCTTCCGT      |
| scaffold165428_13.2 | 1 p2 | (TA)7  | 14 | 285  | 298 TGTCGGAAGCTCAACACTTG      |
| scaffold165437_13.5 | 1 p2 | (GA)7  | 14 | 145  | 158 CGCGTTTTTGGGGTTAAATA      |
| scaffold165564_13.8 | 1 p2 | (TA)8  | 16 | 286  | 301 AAGGTGGGAAAGAATTTGGC      |
| scaffold165753_12.8 | 1 p2 | (TA)7  | 14 | 376  | 389 CGAAATTGAATGGCAAGGAT      |
| scaffold165755_13.2 | 1 p2 | (TA)10 | 20 | 385  | 404 ATCGAGGCGTGACATCTACC      |
| scaffold165819_10.4 | 1 p2 | (AT)10 | 20 | 196  | 215 CGGAAGAATAAGAAACGGCA      |
| scaffold165857_11.3 | 1 p2 | (TA)6  | 12 | 262  | 273 TCAAAAGTGCAACAAATCTGC     |
| scaffold165998_15.5 | 1 p2 | (AT)7  | 14 | 682  | 695 GGAATGTAGTGTGCGCAAGA      |
| scaffold166171_14.9 | 1 p2 | (TC)6  | 12 | 184  | 195 TGAGCTCGGACCTCCAGTAT      |
| scaffold166249_15.4 | 1 p2 | (AT)7  | 14 | 167  | 180 TGCAACGAACAAATCTCATTG     |
| scaffold166484_14.3 | 1 p2 | (AT)8  | 16 | 726  | 741 CGTCAATCAATGATGCGATTA     |
| scaffold166540_16.0 | 1 p2 | (TC)12 | 24 | 2259 | 2282 AGTTTTGGACGAATTCCACG     |
| scaffold166703_15.0 | 1 p2 | (AT)6  | 12 | 925  | 936 ATCCAACACCCACCACATTT      |
| scaffold166787_10.6 | 1 p2 | (AG)6  | 12 | 66   | 77 ACTCGGAACAACGAAAATCG       |
| scaffold166871_11.3 | 1 p2 | (TA)6  | 12 | 213  | 224 GGCCATGATTCATTTTCTGC      |
| scaffold166895_12.3 | 1 p2 | (AT)6  | 12 | 324  | 335 TTCCATTTTCAGACCCAAAAGA    |
| scaffold166935_15.8 | 1 p2 | (GA)6  | 12 | 2212 | 2223 CGAAAATTGAAAATTTATTCCCC  |
| scaffold166938_15.2 | 1 p2 | (AT)13 | 26 | 1314 | 1339 TCATGGACCTCATATGTCATAACC |
| scaffold167156_13.0 | 1 p2 | (AT)6  | 12 | 212  | 223 CGTATACTTGCGGGGTTGTT      |
| scaffold167161_18.7 | 1 p2 | (AC)8  | 16 | 115  | 130 AAGTCTCTCACCCCTTCGCAA     |
| scaffold167215_16.3 | 1 p2 | (CT)6  | 12 | 157  | 168 TCGATGTTGTAATTCATCCGAG    |
| scaffold167506_10.5 | 1 p2 | (CG)8  | 16 | 1164 | 1179 TATGCCCATGGAGGTATGGT     |

|                     |      |        |    |      |                               |
|---------------------|------|--------|----|------|-------------------------------|
| scaffold167528_16.9 | 1 p2 | (TC)7  | 14 | 1237 | 1250 GCATCCATTCTGAATCACTCAA   |
| scaffold167619_17.1 | 1 p2 | (GA)6  | 12 | 229  | 240 GAGTCAGCTGCTCTTGGCTT      |
| scaffold167624_15.8 | 1 p2 | (CT)6  | 12 | 302  | 313 CATGGATTCGGGTAAACACC      |
| scaffold167675_10.0 | 1 p2 | (TA)10 | 20 | 45   | 64 AATTTACTAATTTATCCACCTCGATT |
| scaffold167759_10.9 | 1 p2 | (CT)6  | 12 | 151  | 162 ATGAGGTGGCATGTAGACCC      |
| scaffold168086_10.7 | 1 p2 | (TC)6  | 12 | 317  | 328 TCTCCTTCTCTCCCCATT        |
| scaffold168186_16.5 | 1 p2 | (TA)6  | 12 | 1098 | 1109 TTGCCGACCTTATCTCCATC     |
| scaffold168314_11.2 | 1 p2 | (AG)6  | 12 | 217  | 228 CGACATTGAGTAGCCGTCTG      |
| scaffold168373_17.1 | 1 p2 | (TC)10 | 20 | 67   | 86 GCTCTTCGAATTCTCCTCCC       |
| scaffold168587_14.2 | 1 p2 | (TA)8  | 16 | 51   | 66 AAAACCGTTCTCACCCCTTC       |
| scaffold168626_17.6 | 1 p2 | (TA)11 | 22 | 196  | 217 ACGGTTAAGATTACAGCACGC     |
| scaffold168975_11.6 | 1 p2 | (CT)7  | 14 | 170  | 183 ACTTCAATTTTCGAGCCCAA      |
| scaffold169133_10.0 | 1 p2 | (TA)10 | 20 | 66   | 85 CATGTTAAATAATCGTCAAGTTGAGT |
| scaffold169243_10.2 | 1 p2 | (TA)8  | 16 | 411  | 426 TGTCGAATGCTAATGGGAGA      |
| scaffold169520_15.0 | 1 p2 | (AG)12 | 24 | 216  | 239 TTTTCTTTTTCCCGGTGATG      |
| scaffold169548_11.4 | 1 p2 | (GA)6  | 12 | 209  | 220 TTCGTGTCTATCCTCACCCC      |
| scaffold169595_17.6 | 1 p2 | (TC)6  | 12 | 733  | 744 TGATCGTTCCTCACTCTCTTGC    |
| scaffold169652_12.3 | 1 p2 | (AT)8  | 16 | 717  | 732 CCAGATCGCGACCCTATAGAT     |
| scaffold169687_10.2 | 1 p2 | (AT)8  | 16 | 198  | 213 AAAATCAAAGGCCACAATG       |
| scaffold169790_13.8 | 1 p2 | (TA)7  | 14 | 277  | 290 TCATTAGCAGCTGGGGATT       |
| scaffold169889_11.3 | 1 p2 | (CT)6  | 12 | 176  | 187 CATAGTTGACGCCCTTCTC       |
| scaffold170158_10.7 | 1 p2 | (TG)6  | 12 | 224  | 235 ATTTGGGTCAAACCCCTTTT      |
| scaffold170328_14.4 | 1 p2 | (TA)8  | 16 | 414  | 429 TTTTACCAATTTGCCCTCG       |
| scaffold170418_16.8 | 1 p2 | (TA)7  | 14 | 320  | 333 GAGCTGTTACCTCCGTGGAC      |
| scaffold170502_16.8 | 1 p2 | (AG)7  | 14 | 286  | 299 AGACATGGCGATACGACGTT      |
| scaffold170506_11.0 | 1 p2 | (CT)6  | 12 | 118  | 129 GTGTCCAACATCCCATTTCC      |
| scaffold170509_16.0 | 1 p2 | (CT)6  | 12 | 84   | 95 AGCATCTTGTCTCTCTCATTG      |
| scaffold170605_13.8 | 1 p2 | (AT)8  | 16 | 189  | 204 TATTTTGGACGATTTTGCCC      |
| scaffold170672_13.6 | 1 p2 | (AG)9  | 18 | 85   | 102 TTTTGTGTTTCCCAAGTTGC      |
| scaffold170974_10.9 | 1 p2 | (TA)10 | 20 | 64   | 83 TTTGCTTGATCCAATGGTGT       |
| scaffold170977_18.1 | 1 p2 | (AT)7  | 14 | 117  | 130 TGCCTGATGCAGACATATTG      |
| scaffold170979_17.2 | 1 p2 | (AT)6  | 12 | 1684 | 1695 TGTCATCTCGTGTGTA         |
| scaffold171007_15.2 | 1 p2 | (TA)6  | 12 | 484  | 495 CATGCAGTCATGCACAATCA      |
| scaffold171067_13.1 | 1 p2 | (AT)7  | 14 | 702  | 715 TTTGACCTTGCAATGCTGTC      |
| scaffold171092_13.0 | 1 p2 | (TA)7  | 14 | 181  | 194 AAGGAGGTGTTATGAAGGGATT    |
| scaffold171093_17.5 | 1 p2 | (GA)6  | 12 | 224  | 235 AATTGATGGAAGAAGGCACG      |
| scaffold171246_13.5 | 1 p2 | (AC)6  | 12 | 180  | 191 CTCCATCGTCAAGTCATCA       |
| scaffold171255_16.3 | 1 p2 | (TA)9  | 18 | 211  | 228 GTGCGTGTGTATGCTGAGGT      |
| scaffold171486_16.1 | 1 p2 | (TA)9  | 18 | 407  | 424 TGGCGCATTTTACTGATATTTG    |
| scaffold171628_16.7 | 1 p2 | (AC)6  | 12 | 208  | 219 CGCAACGTTCTGAAACTGAA      |
| scaffold172005_12.5 | 1 p2 | (CT)6  | 12 | 52   | 63 TCTTGCCTCGTCTCTGTCTG       |
| scaffold172073_15.1 | 1 p2 | (AT)6  | 12 | 657  | 668 GGAAGGAATATTTATCACACCTT   |
| scaffold172121_12.8 | 1 p2 | (AT)8  | 16 | 104  | 119 TCGATAATGCACCTTATCAGAGTT  |
| scaffold172144_13.1 | 1 p2 | (TA)8  | 16 | 281  | 296 TGGATGTGGTTGGTGAGTTG      |
| scaffold172398_16.6 | 1 p2 | (AT)6  | 12 | 638  | 649 GATGATCACGATGAAGCCAA      |
| scaffold172559_11.6 | 1 p2 | (AT)7  | 14 | 750  | 763 CATGCACGGAAAACCTGAAA      |
| scaffold172844_12.7 | 1 p2 | (AG)6  | 12 | 918  | 929 TTGGTTCAAGCCATTGTGAA      |
| scaffold172854_13.6 | 1 p2 | (GT)6  | 12 | 1914 | 1925 TCGTTTTACAGCCAAAAGA      |
| scaffold172948_15.9 | 1 p2 | (TA)6  | 12 | 510  | 521 CGAATAGTAGAAGCTGCGGG      |
| scaffold172974_20.1 | 1 p2 | (AT)7  | 14 | 76   | 89 TTGGTGTATACTTTTGTAGTGATCAA |
| scaffold173074_11.2 | 1 p2 | (CT)6  | 12 | 161  | 172 ACCCGAATTTTTCGGATACC      |
| scaffold173396_16.5 | 1 p2 | (GA)7  | 14 | 32   | 45 GAGAATAGATAGTTAGAGAGAGACC  |
| scaffold173428_12.4 | 1 p2 | (AG)6  | 12 | 282  | 293 CTTCTACCGTCGACCAAAT       |
| scaffold173472_12.3 | 1 p2 | (TA)9  | 18 | 247  | 264 TTCTCAGCATATGGGAAGGG      |
| scaffold173508_18.3 | 1 p2 | (CA)6  | 12 | 1523 | 1534 TGACTGGACTGCCTTTTTCC     |
| scaffold173509_14.6 | 1 p2 | (TA)8  | 16 | 126  | 141 TGAGCCTATCTTGAGCACA       |
| scaffold173530_13.2 | 1 p2 | (AC)7  | 14 | 140  | 153 TTCTTTGAATCATCTTCCACCTT   |
| scaffold173658_11.0 | 1 p2 | (AT)6  | 12 | 267  | 278 ACTCGTGCTGGCAATCTTCT      |

|                     |      |        |    |      |                                |
|---------------------|------|--------|----|------|--------------------------------|
| scaffold173740_18.5 | 1 p2 | (CT)6  | 12 | 106  | 117 AACAAAAATGGCCAAAATCG       |
| scaffold173862_10.6 | 1 p2 | (TA)6  | 12 | 479  | 490 CAACTCCACATGTTGCCATC       |
| scaffold173933_14.6 | 1 p2 | (AG)7  | 14 | 49   | 62 TTTTATAGCATGCGAGAGGAA       |
| scaffold173949_11.2 | 1 p2 | (GA)7  | 14 | 171  | 184 TCAACAACATGCAAGCATCA       |
| scaffold173981_18.0 | 1 p2 | (GA)9  | 18 | 471  | 488 GGATGAGAGACTCGGGTTCA       |
| scaffold174269_13.2 | 1 p2 | (GA)7  | 14 | 1289 | 1302 CCATTTCTTTGGCAAGTTGA      |
| scaffold174392_10.2 | 1 p2 | (GC)6  | 12 | 576  | 587 TCAGCCAGCCCAATATTAC        |
| scaffold174455_14.3 | 1 p2 | (CT)11 | 22 | 771  | 792 GACATTTGGTTCAGCGCTTT       |
| scaffold174523_17.0 | 1 p2 | (AG)8  | 16 | 2585 | 2600 TGATCATCGAGGCAGAGAAA      |
| scaffold174754_10.0 | 1 p2 | (TC)7  | 14 | 169  | 182 GGGCAAACCTTGAACAGCTC       |
| scaffold174974_14.0 | 1 p2 | (CT)6  | 12 | 916  | 927 CCCTGTCTTAGGTACTGGCG       |
| scaffold175116_11.3 | 1 p2 | (TC)7  | 14 | 40   | 53 GCACAACCACTCCACAAAGA        |
| scaffold175173_12.5 | 1 p2 | (TC)6  | 12 | 741  | 752 TTCCTACTCCCCTAGGCCAT       |
| scaffold175292_14.9 | 1 p2 | (AT)6  | 12 | 334  | 345 ACCGTTCATTTTCGGTTGAG       |
| scaffold175294_15.7 | 1 p2 | (GA)6  | 12 | 309  | 320 TCGAAGGTGAACTCGGTCTT       |
| scaffold175297_16.7 | 1 p2 | (CT)10 | 20 | 578  | 597 CCCTAACTCGACCCAGATCA       |
| scaffold175387_13.0 | 1 p2 | (AT)8  | 16 | 49   | 64 AGAGTTCACCAAGGTACTTTAATATG  |
| scaffold175434_14.4 | 1 p2 | (TA)8  | 16 | 1479 | 1494 TGGGCACATTTGAATCTTGA      |
| scaffold175442_13.5 | 1 p2 | (GA)7  | 14 | 925  | 938 CCAAACGAAGTGACTTGAGC       |
| scaffold175544_11.0 | 1 p2 | (TC)7  | 14 | 354  | 367 TAGCCGATAAAAATGGCACC       |
| scaffold175572_14.2 | 1 p2 | (AT)10 | 20 | 554  | 573 ACACACACTCACTCACTCCCA      |
| scaffold175836_13.3 | 1 p2 | (GA)6  | 12 | 188  | 199 GTTCCGGGAATCACACCATA       |
| scaffold176052_12.0 | 1 p2 | (TA)12 | 24 | 40   | 63 AAGGGTTATCACCTGATTTTCTC     |
| scaffold176180_14.4 | 1 p2 | (GA)10 | 20 | 663  | 682 AAGGATCTTGTACGGGCCT        |
| scaffold176280_14.6 | 1 p2 | (GA)7  | 14 | 1884 | 1897 TTGACTGATTGGAGCAGTGG      |
| scaffold176320_10.8 | 1 p2 | (GA)7  | 14 | 177  | 190 TCAAATCTTCAACATGCAAGC      |
| scaffold176511_10.8 | 1 p2 | (TA)10 | 20 | 457  | 476 TTTTCTTGGACCAGATTGCC       |
| scaffold176747_14.2 | 1 p2 | (GC)6  | 12 | 425  | 436 CACGTGCGTCAACTCCTTTA       |
| scaffold176848_11.8 | 1 p2 | (GA)7  | 14 | 116  | 129 AAACACGCAACACAAAGCAG       |
| scaffold177379_14.8 | 1 p2 | (CA)7  | 14 | 806  | 819 AGCCCTGTAGAGGAGCATCA       |
| scaffold177501_18.9 | 1 p2 | (AT)8  | 16 | 337  | 352 TGGGGTTATCACTGGATCGT       |
| scaffold177572_13.9 | 1 p2 | (TA)6  | 12 | 590  | 601 TAAACCGTTGTTTTGGCTCC       |
| scaffold177580_10.5 | 1 p2 | (AT)8  | 16 | 212  | 227 CACCAAATCTGTTAGTTACCAA     |
| scaffold178175_10.5 | 1 p2 | (AG)6  | 12 | 368  | 379 AGATGCCCATTTTGATCAGG       |
| scaffold178465_15.2 | 1 p2 | (TC)6  | 12 | 586  | 597 CCCGATTATCGCAAGAACAT       |
| scaffold178502_11.2 | 1 p2 | (AT)6  | 12 | 311  | 322 TTTTTCACGCACAAGCTGAG       |
| scaffold178523_13.4 | 1 p2 | (AT)10 | 20 | 204  | 223 TTTGTGCTTTGCTGCTGTTT       |
| scaffold178540_14.0 | 1 p2 | (TC)6  | 12 | 119  | 130 CGATCTCCTCTCTCTCGTCG       |
| scaffold178544_15.5 | 1 p2 | (GA)6  | 12 | 52   | 63 CACGAGTGAAGAAAGGGAGAG       |
| scaffold178585_14.3 | 1 p2 | (TA)8  | 16 | 162  | 177 AATACTTTCCGTCACCGTCG       |
| scaffold178813_14.9 | 1 p2 | (CT)8  | 16 | 1249 | 1264 CCCATTACAAGACCTCCTC       |
| scaffold179106_11.0 | 1 p2 | (AT)8  | 16 | 491  | 506 GAGGAAGATAAATGTGGGACG      |
| scaffold179397_16.2 | 1 p2 | (TA)8  | 16 | 258  | 273 TTTGGCCGAATTGTCTTTTC       |
| scaffold179684_12.9 | 1 p2 | (AT)6  | 12 | 856  | 867 AAGGGGAAGTTCTGCATGTG       |
| scaffold179886_14.9 | 1 p2 | (AT)7  | 14 | 67   | 80 CGTCAGAAACCTCTCGCATT        |
| scaffold179887_17.7 | 1 p2 | (AT)6  | 12 | 385  | 396 AAACATCCCAATCCCATCAA       |
| scaffold179890_14.2 | 1 p2 | (CT)8  | 16 | 147  | 162 GAACACGAGGGATATTGGGA       |
| scaffold179959_12.2 | 1 p2 | (TA)8  | 16 | 67   | 82 TGTGTTGTCTTTTATGATCAATGTTTG |
| scaffold180081_16.4 | 1 p2 | (AT)6  | 12 | 4881 | 4892 TCAAGGGTAATTTTTTCAGGCA    |
| scaffold180421_12.7 | 1 p2 | (AT)7  | 14 | 300  | 313 TAGTTAGCATGGGGGAATGC       |
| scaffold180599_12.2 | 1 p2 | (TA)6  | 12 | 115  | 126 TAATTTGGCCGATTGTCTC        |
| scaffold180618_14.2 | 1 p2 | (TA)8  | 16 | 1888 | 1903 TGCGCGTTGATTAATCTCAA      |
| scaffold180702_19.0 | 1 p2 | (AT)8  | 16 | 1094 | 1109 CCTCCAAGCACAGGTACAGG      |
| scaffold180784_12.8 | 1 p2 | (TA)6  | 12 | 305  | 316 CCACTTAGGAATTTTATCAAATGATA |
| scaffold180893_14.7 | 1 p2 | (AC)6  | 12 | 432  | 443 TGGACACAAGTATGGCTCTCA      |
| scaffold180916_14.7 | 1 p2 | (GA)9  | 18 | 1009 | 1026 TCAATCAAACCTGCACCCAA      |
| scaffold180957_15.5 | 1 p2 | (GA)7  | 14 | 1155 | 1168 ACAGATGAGCGAAAATTGGG      |
| scaffold181000_15.4 | 1 p2 | (AG)6  | 12 | 704  | 715 AGTGAACAACAATCCCCACC       |

|                     |      |        |    |      |                                |
|---------------------|------|--------|----|------|--------------------------------|
| scaffold181082_16.1 | 1 p2 | (GA)9  | 18 | 187  | 204 CTGAAATTGGGATTTGTGGC       |
| scaffold181160_12.3 | 1 p2 | (AT)6  | 12 | 116  | 127 TGTAATGCTACAGTTCTTAATTTGGT |
| scaffold181185_13.8 | 1 p2 | (TA)8  | 16 | 2272 | 2287 TAGTGGAAAACCCAACGACC      |
| scaffold181192_15.7 | 1 p2 | (GA)6  | 12 | 326  | 337 TCCCTAATCGACCTGACACC       |
| scaffold181228_19.2 | 1 p2 | (AC)10 | 20 | 641  | 660 GCAAACGATTGACCCGAAT        |
| scaffold181299_11.0 | 1 p2 | (TA)9  | 18 | 69   | 86 GCTTAAACAAAATGGCATTAAAAA    |
| scaffold181301_10.9 | 1 p2 | (TA)6  | 12 | 36   | 47 ACGGTTAAGATTACAGCACGC       |
| scaffold181377_11.3 | 1 p2 | (AC)6  | 12 | 53   | 64 TCACGAAAACACACGCACTC        |
| scaffold181378_16.9 | 1 p2 | (TC)6  | 12 | 774  | 785 ATTGGGCATTTTGACGATA        |
| scaffold181525_14.7 | 1 p2 | (TA)7  | 14 | 93   | 106 CAGTTATCACCGGATCACGA       |
| scaffold181809_17.8 | 1 p2 | (AT)9  | 18 | 152  | 169 CTCAACGGTATGCTCGGATT       |
| scaffold181864_14.4 | 1 p2 | (TA)6  | 12 | 344  | 355 GCACCCCGTATTTTAGGACC       |
| scaffold182113_12.4 | 1 p2 | (TA)7  | 14 | 1314 | 1327 AATCACAACCTTCACCCGGAA     |
| scaffold182478_14.8 | 1 p2 | (AG)6  | 12 | 182  | 193 GCCCTTGCAGAGAAAAGAGT       |
| scaffold182751_16.4 | 1 p2 | (AT)6  | 12 | 176  | 187 CAACCTATAAATAAGATCTCAACCTG |
| scaffold182813_14.6 | 1 p2 | (TA)6  | 12 | 810  | 821 CCTGCTGGTTCTTGCTTCTC       |
| scaffold182903_13.3 | 1 p2 | (TA)6  | 12 | 413  | 424 CATTTCGCACACAGAGATGC       |
| scaffold182924_10.6 | 1 p2 | (TA)10 | 20 | 571  | 590 CAAATTACCCCGTATGCAG        |
| scaffold182933_10.1 | 1 p2 | (AG)8  | 16 | 303  | 318 TCAATGGTGACATTTGGGTG       |
| scaffold182986_14.4 | 1 p2 | (TA)7  | 14 | 691  | 704 CGGTTAGAAACCAGACCGAA       |
| scaffold183028_15.2 | 1 p2 | (TC)7  | 14 | 1284 | 1297 CATGCATTCAACCCTCTTGA      |
| scaffold183053_13.7 | 1 p2 | (AT)9  | 18 | 304  | 321 GGCATAAATGCCAATTTTTTA      |
| scaffold183085_13.3 | 1 p2 | (AT)7  | 14 | 207  | 220 TTAACCTTTGTGCGGTTGC        |
| scaffold183253_15.6 | 1 p2 | (TA)9  | 18 | 520  | 537 TGTCTGGTCCAAACCCAAT        |
| scaffold183308_13.6 | 1 p2 | (TA)7  | 14 | 782  | 795 CTTGACCGGATGAATCCTA        |
| scaffold183318_12.7 | 1 p2 | (CT)11 | 22 | 812  | 833 TATGATGGAAAAGGCCGAG        |
| scaffold183512_14.9 | 1 p2 | (AC)6  | 12 | 1002 | 1013 CCAGTGTA AAAAGATCGAGCAA   |
| scaffold183586_14.1 | 1 p2 | (TA)10 | 20 | 1084 | 1103 CGAAGATGGTTTCGTGTAAGC     |
| scaffold183606_13.7 | 1 p2 | (AT)8  | 16 | 749  | 764 CATGTAGTACGCCTCGCTGA       |
| scaffold183608_16.2 | 1 p2 | (CT)6  | 12 | 2152 | 2163 CTGTATCCCTGGATGCCTGT      |
| scaffold183616_14.5 | 1 p2 | (TA)9  | 18 | 325  | 342 AGCACGTGTTCTTGCTCGTA       |
| scaffold183807_14.0 | 1 p2 | (TC)6  | 12 | 187  | 198 CAACATCACCAAAAACCCCT       |
| scaffold183817_16.9 | 1 p2 | (TA)8  | 16 | 145  | 160 GCACACTCAGATCACACAGGA      |
| scaffold183868_13.9 | 1 p2 | (TA)7  | 14 | 131  | 144 ACCAAGATTTGATCATGGGC       |
| scaffold184487_13.8 | 1 p2 | (TC)6  | 12 | 278  | 289 ATGGAGGCAAGCTACTCGAT       |
| scaffold184538_12.2 | 1 p2 | (AT)8  | 16 | 2855 | 2870 CGGGAAACATGATCCGAATA      |
| scaffold184721_11.2 | 1 p2 | (CT)6  | 12 | 107  | 118 ATATTGCAAATGGCCGAGAG       |
| scaffold184867_17.3 | 1 p2 | (GA)7  | 14 | 285  | 298 GCCGAGTGATCCTCTCAT         |
| scaffold184874_16.9 | 1 p2 | (AG)8  | 16 | 3399 | 3414 AGGATCATGGCCACGTAGAG      |
| scaffold185187_10.7 | 1 p2 | (TA)12 | 24 | 475  | 498 GAGAAGGAGGTTGGGAGGAA       |
| scaffold185243_14.8 | 1 p2 | (AT)6  | 12 | 1205 | 1216 TCCACCTCACTTTTCCCTTG      |
| scaffold185247_12.8 | 1 p2 | (AT)6  | 12 | 399  | 410 CAGCTCTTCAAACCTGGACACA     |
| scaffold185293_15.8 | 1 p2 | (TA)7  | 14 | 1179 | 1192 AACCGGTTAAAAATCGGACC      |
| scaffold185421_16.5 | 1 p2 | (TC)6  | 12 | 114  | 125 CAAACACCTGGGACCTCAAT       |
| scaffold185738_16.2 | 1 p2 | (CT)7  | 14 | 75   | 88 CAACCTACCTCCTTCTCCC         |
| scaffold185757_10.0 | 1 p2 | (GA)7  | 14 | 411  | 424 CAACTGTTCTGAATGCGAGC       |
| scaffold185915_15.6 | 1 p2 | (TC)6  | 12 | 1907 | 1918 CTGGCAAAGATTCTTGGGAT      |
| scaffold186032_16.7 | 1 p2 | (TA)7  | 14 | 172  | 185 TGACATTGCCTAGAAAGTGGG      |
| scaffold186114_11.0 | 1 p2 | (AT)8  | 16 | 241  | 256 TGTTGCCAATTAAGATTGCG       |
| scaffold186192_13.5 | 1 p2 | (TC)6  | 12 | 82   | 93 TCATTCACATCGTCTCTGCAA       |
| scaffold186385_14.5 | 1 p2 | (AT)7  | 14 | 774  | 787 CCCTCGAATGCACTCAAACCT      |
| scaffold186705_14.3 | 1 p2 | (TC)6  | 12 | 1246 | 1257 GCCGCATTGTATGAAAATTG      |
| scaffold186741_10.2 | 1 p2 | (TA)7  | 14 | 553  | 566 GGAGAACCGTCGACATGATT       |
| scaffold187029_15.6 | 1 p2 | (AT)7  | 14 | 293  | 306 TCGAATCTATGCATCCACCA       |
| scaffold187070_12.3 | 1 p2 | (AT)10 | 20 | 69   | 88 TCCATAGAAAATGTTGTTAGCAGG    |
| scaffold187138_13.9 | 1 p2 | (AT)6  | 12 | 158  | 169 CAGATTTTGAAACCTGTAAGTGAAA  |
| scaffold187175_11.8 | 1 p2 | (AT)7  | 14 | 349  | 362 TCAATTCATAAATATGTCGAAGAACA |
| scaffold187195_14.3 | 1 p2 | (CT)9  | 18 | 802  | 819 CCCTCATCTTTTGCGAATTG       |



|                     |      |        |    |      |                                |
|---------------------|------|--------|----|------|--------------------------------|
| scaffold187238_16.4 | 1 p2 | (AT)6  | 12 | 1679 | 1690 TGCTGCAAGCATGTATTTGTC     |
| scaffold187445_14.6 | 1 p2 | (TA)8  | 16 | 1129 | 1144 AACTCAAGTTCCGATCGTGC      |
| scaffold187508_10.2 | 1 p2 | (TA)8  | 16 | 380  | 395 CGTCGATGTTTGTCCATTTG       |
| scaffold187813_20.6 | 1 p2 | (AT)9  | 18 | 226  | 243 TTCTGACGAAATTGCCCTTC       |
| scaffold187863_12.5 | 1 p2 | (TC)6  | 12 | 493  | 504 CCTCTCCTTGCCCTCCTTAC       |
| scaffold187951_18.3 | 1 p2 | (AT)7  | 14 | 3323 | 3336 CGCCATATCGGACAAACTCT      |
| scaffold187966_16.0 | 1 p2 | (TA)7  | 14 | 1005 | 1018 CGTCCAACGAATCAAGACAA      |
| scaffold188087_14.2 | 1 p2 | (TA)7  | 14 | 39   | 52 GGAGCCTCCGAACCTTGA          |
| scaffold188126_15.3 | 1 p2 | (AC)6  | 12 | 1740 | 1751 TTGTGTACCAAGACATTTGTGTG   |
| scaffold188252_16.9 | 1 p2 | (AT)6  | 12 | 197  | 208 C GACTATCTGCAGGAGGCAT      |
| scaffold188270_14.3 | 1 p2 | (AC)9  | 18 | 430  | 447 ATTTTCATCTCCCCACAGACG      |
| scaffold188698_15.2 | 1 p2 | (AT)10 | 20 | 47   | 66 TGGATAAGTCTATCAAGATTTAATTG  |
| scaffold188824_14.7 | 1 p2 | (AC)6  | 12 | 103  | 114 CACCGTTTATTTCCCATGTC       |
| scaffold188826_14.2 | 1 p2 | (AG)6  | 12 | 613  | 624 ACTTTTGTGGAAAAGTGGCG       |
| scaffold188877_17.8 | 1 p2 | (TG)6  | 12 | 56   | 67 TGATCATAACTCTCTCTCGCGT      |
| scaffold188966_11.9 | 1 p2 | (AG)6  | 12 | 173  | 184 TTGTGAGTCGTTTGTCTTGG       |
| scaffold189204_11.0 | 1 p2 | (AT)7  | 14 | 578  | 591 TGACCACCCAACCACACTAA       |
| scaffold189325_10.2 | 1 p2 | (AT)6  | 12 | 179  | 190 TTAATCTCCCCGGAATAATTG      |
| scaffold189349_14.7 | 1 p2 | (AT)8  | 16 | 379  | 394 GAGGAATGAGGGGAGGGTAG       |
| scaffold189580_15.4 | 1 p2 | (TA)6  | 12 | 185  | 196 TGTTCAATTGAGGAAATTATAAAGCA |
| scaffold189611_14.3 | 1 p2 | (TA)6  | 12 | 505  | 516 TGTTGAGGGTTGTTTATTATGGG    |
| scaffold189697_11.7 | 1 p2 | (AT)9  | 18 | 1258 | 1275 TTAATGGTGGGGACATGCTT      |
| scaffold189862_16.4 | 1 p2 | (TC)6  | 12 | 532  | 543 AAACCCACTAACCCTAACCC       |
| scaffold190021_10.6 | 1 p2 | (AT)7  | 14 | 652  | 665 AAAAACCTTCCACCCATTT        |
| scaffold190744_10.2 | 1 p2 | (TA)6  | 12 | 971  | 982 TGTGATGTGTGTGTGTGTCGTGT    |
| scaffold190970_13.4 | 1 p2 | (TA)10 | 20 | 224  | 243 TTTTCCGAAGGTAATTTTAGTGTT   |
| scaffold191180_13.6 | 1 p2 | (CT)12 | 24 | 2887 | 2910 TCACCCACCAAAATCAAACA      |
| scaffold191238_13.3 | 1 p2 | (TA)7  | 14 | 271  | 284 CGGACGGTCAATCAATTA         |
| scaffold191276_14.4 | 1 p2 | (AG)7  | 14 | 273  | 286 TTCTCGTGTATCCTCGCC         |
| scaffold191618_15.0 | 1 p2 | (TC)6  | 12 | 49   | 60 GGGAAACAATGGATACTCCTTC      |
| scaffold191636_13.2 | 1 p2 | (AT)8  | 16 | 106  | 121 CATAAATGCGGTGGAGATGT       |
| scaffold191774_13.7 | 1 p2 | (AG)7  | 14 | 135  | 148 TTGCGTACCAAGTTTTTGGC       |
| scaffold191936_10.6 | 1 p2 | (CT)6  | 12 | 769  | 780 TTGGTAGCCTGGATAGCACC       |
| scaffold192015_10.4 | 1 p2 | (TG)6  | 12 | 297  | 308 GAGACTTGCAAACCTCTCGGC      |
| scaffold192053_11.9 | 1 p2 | (GA)6  | 12 | 333  | 344 CAAACCCTAGCCCAAGAACA       |
| scaffold192135_12.5 | 1 p2 | (TA)7  | 14 | 195  | 208 ATCTTTCCATTTTGCCTT         |
| scaffold192188_14.8 | 1 p2 | (TA)9  | 18 | 360  | 377 CGCCCAAAAATCTAACATTCC      |
| scaffold192220_15.2 | 1 p2 | (AT)9  | 18 | 2423 | 2440 CTCTTCTTCGTCCCAAGCAC      |
| scaffold192262_17.7 | 1 p2 | (TA)7  | 14 | 445  | 458 AAAGGGCGGTATCATTTGAA       |
| scaffold192834_15.8 | 1 p2 | (TC)8  | 16 | 135  | 150 CCTTCGGCTTGAAAACAAG        |
| scaffold193013_15.2 | 1 p2 | (AC)6  | 12 | 269  | 280 CTAGCTTCGGTACAAACCGC       |
| scaffold193231_10.2 | 1 p2 | (AG)6  | 12 | 356  | 367 ATGGGATATGATTCCGGTCA       |
| scaffold193337_10.9 | 1 p2 | (GA)6  | 12 | 438  | 449 TGCAGCAGCAGAAGAGAGAG       |
| scaffold193450_10.9 | 1 p2 | (TA)6  | 12 | 444  | 455 TAGCAGGCTGACCGTAGTGC       |
| scaffold193729_11.2 | 1 p2 | (AT)7  | 14 | 434  | 447 TGTGTGGTCTGAAAACCTCGC      |
| scaffold193864_10.5 | 1 p2 | (GC)6  | 12 | 223  | 234 ATATTCTCGCTTCTTCGCCA       |
| scaffold194094_11.8 | 1 p2 | (AT)7  | 14 | 476  | 489 ACCCTCCTTCAGCCAAAAT        |
| scaffold194259_13.7 | 1 p2 | (GC)8  | 16 | 317  | 332 CGTTGCCGGATAAATCAAAC       |
| scaffold194383_17.4 | 1 p2 | (TC)6  | 12 | 235  | 246 ATGTTTTGGCGTTGGCTATC       |
| scaffold194565_16.7 | 1 p2 | (AG)10 | 20 | 298  | 317 ACCAAGAACATTGAGGCTGC       |
| scaffold194603_10.7 | 1 p2 | (TA)8  | 16 | 170  | 185 TGGTAGCTTTGAGACACGATT      |
| scaffold194669_15.6 | 1 p2 | (TA)6  | 12 | 151  | 162 TGGTTCCGACCATGATTTATT      |
| scaffold194676_15.9 | 1 p2 | (GA)6  | 12 | 207  | 218 TTTTTCGATTGTGCTTGCTG       |
| scaffold194855_12.0 | 1 p2 | (TA)7  | 14 | 425  | 438 TTGATGGTGAACAAACGGAA       |
| scaffold195046_13.0 | 1 p2 | (AG)6  | 12 | 185  | 196 GCGTGGAAGAAAAGATCCCT       |
| scaffold195180_11.2 | 1 p2 | (TC)6  | 12 | 193  | 204 CCCATTTCTAACTACCCAAATCC    |
| scaffold195208_11.0 | 1 p2 | (AT)8  | 16 | 1121 | 1136 TGAAACATGGATTGCCACAT      |
| scaffold195262_11.5 | 1 p2 | (AT)7  | 14 | 819  | 832 CGAGTATGCTGACGGGAAAT       |

|                     |      |        |    |      |      |                          |
|---------------------|------|--------|----|------|------|--------------------------|
| scaffold195448_15.3 | 1 p2 | (AT)9  | 18 | 387  | 404  | TGTTAACCAAAAAGAAGAATCGT  |
| scaffold195575_14.7 | 1 p2 | (AT)7  | 14 | 264  | 277  | ATGCCCTTCTATGCTGAGGA     |
| scaffold195687_15.7 | 1 p2 | (TA)6  | 12 | 2344 | 2355 | CGGGCTGTATTTTAACGGTC     |
| scaffold195723_16.5 | 1 p2 | (TA)6  | 12 | 117  | 128  | CCATTTGCAATACTATGGCTTTC  |
| scaffold195724_17.5 | 1 p2 | (CT)6  | 12 | 47   | 58   | TGAAAATGGGCGAGAGTTTT     |
| scaffold195884_13.9 | 1 p2 | (TA)7  | 14 | 53   | 66   | GGTGTCCGAACCTTATATGGC    |
| scaffold195954_12.8 | 1 p2 | (TC)6  | 12 | 159  | 170  | AGATGACAACCTTCGGCTTG     |
| scaffold195995_13.7 | 1 p2 | (AT)7  | 14 | 307  | 320  | TGGTATAGGATCCGTCTGGC     |
| scaffold196067_11.3 | 1 p2 | (CT)9  | 18 | 261  | 278  | AGAAGGAAAAACCACGGGAC     |
| scaffold196121_17.0 | 1 p2 | (AT)6  | 12 | 1457 | 1468 | GCAAATAAAAATTATGGTTTTGGG |
| scaffold196268_14.1 | 1 p2 | (AT)7  | 14 | 69   | 82   | AAACTCGTAAAGTGTCCGCGG    |
| scaffold196353_13.8 | 1 p2 | (GT)6  | 12 | 55   | 66   | GGAAAATATCAAGTCAACACAAAA |
| scaffold196496_13.6 | 1 p2 | (TA)7  | 14 | 738  | 751  | TTTTTACCATTTTGCCTGG      |
| scaffold196632_17.1 | 1 p2 | (TA)6  | 12 | 482  | 493  | GGGACAATGGAGTTCACGTT     |
| scaffold196753_14.6 | 1 p2 | (TA)8  | 16 | 1687 | 1702 | ATGAATTTGGTGTGTTGGCA     |
| scaffold196787_11.4 | 1 p2 | (AT)6  | 12 | 183  | 194  | TGCCAACAGTCAAAGTGACC     |
| scaffold196893_13.4 | 1 p2 | (TA)8  | 16 | 896  | 911  | TGTCGCCATATACGATCACTTC   |
| scaffold196924_14.4 | 1 p2 | (AG)6  | 12 | 93   | 104  | TCTGCTTCAGCTCAGTGTGG     |
| scaffold197312_13.3 | 1 p2 | (TA)11 | 22 | 235  | 256  | TAGGGGTTATCACCGGATCA     |
| scaffold197542_13.2 | 1 p2 | (AT)6  | 12 | 105  | 116  | CCGAAAATCAATCCTCGAT      |
| scaffold197602_12.5 | 1 p2 | (AT)7  | 14 | 40   | 53   | TCCCAACTAAAATATGCTGCAA   |
| scaffold197665_10.2 | 1 p2 | (AG)7  | 14 | 274  | 287  | TGACAGTTTGGCATCAGAGC     |
| scaffold197686_12.0 | 1 p2 | (GA)7  | 14 | 105  | 118  | TGCAGAAAATGGAGAGGAGAA    |
| scaffold197886_13.3 | 1 p2 | (TA)7  | 14 | 1369 | 1382 | CGAACGGTATAGGATCGGAA     |
| scaffold197903_11.4 | 1 p2 | (CT)7  | 14 | 357  | 370  | TAATAGGCTGCCCTCCTCT      |
| scaffold198177_15.0 | 1 p2 | (TA)8  | 16 | 887  | 902  | AGGGCTGAGCAAAAATCAAA     |
| scaffold198463_15.5 | 1 p2 | (TA)8  | 16 | 92   | 107  | CAACACAACAATACCACACAGG   |
| scaffold198470_11.4 | 1 p2 | (AT)6  | 12 | 829  | 840  | TGTAGATGGCCTAAGACGGTG    |
| scaffold198516_10.3 | 1 p2 | (AG)6  | 12 | 363  | 374  | GCTCCAAATCAAAATCCCCT     |
| scaffold198531_10.5 | 1 p2 | (AT)7  | 14 | 51   | 64   | TTTGTTCTACTCACTCACATTA   |
| scaffold198630_14.9 | 1 p2 | (TA)7  | 14 | 152  | 165  | TGAATTAACTTCCCAAAACGTG   |
| scaffold198695_10.4 | 1 p2 | (TA)7  | 14 | 255  | 268  | CAGACATTGAGGTTTGGATGG    |
| scaffold198826_14.6 | 1 p2 | (AG)7  | 14 | 255  | 268  | GTGGGTCCAATTCGTGAAC      |
| scaffold198946_10.6 | 1 p2 | (TA)6  | 12 | 189  | 200  | GGAACCTATGTGACATCCAGC    |
| scaffold198950_13.7 | 1 p2 | (TA)9  | 18 | 77   | 94   | ATACCCTACCCGTTTACCCG     |
| scaffold198951_16.1 | 1 p2 | (AT)11 | 22 | 1156 | 1177 | ATGCACATGTTTATCGCACG     |
| scaffold199179_10.4 | 1 p2 | (TA)11 | 22 | 320  | 341  | TCGCTCATCCAAGTAAGTCG     |
| scaffold199218_16.6 | 1 p2 | (AC)7  | 14 | 389  | 402  | GAAGACGCATGCCAGCTAAT     |
| scaffold199316_10.3 | 1 p2 | (TA)11 | 22 | 849  | 870  | CTCTTTCCTTGCTCCCCTCT     |
| scaffold199527_10.8 | 1 p2 | (TA)12 | 24 | 191  | 214  | TTATCAGCATTTGGGAAGGG     |
| scaffold199716_13.5 | 1 p2 | (AT)9  | 18 | 121  | 138  | ATGTGCGCCTTTTAACCTTG     |
| scaffold199793_10.4 | 1 p2 | (GT)6  | 12 | 95   | 106  | AATACGGTCCGTGCATGTTT     |
| scaffold200082_11.5 | 1 p2 | (TC)6  | 12 | 119  | 130  | AGAACAAGCTAAGGCACCCA     |
| scaffold200146_13.7 | 1 p2 | (TA)7  | 14 | 571  | 584  | CCTCCAAGTCTAAGCAGCCT     |
| scaffold200343_10.1 | 1 p2 | (TA)6  | 12 | 188  | 199  | CCTCAGTTCCGATCTCAAG      |
| scaffold200431_12.4 | 1 p2 | (CA)6  | 12 | 219  | 230  | TCGTTGATTGCATAGTGGGA     |
| scaffold200667_16.0 | 1 p2 | (AC)7  | 14 | 1168 | 1181 | TGTTCTTTGGGATCTGCCTC     |
| scaffold200983_13.9 | 1 p2 | (AG)6  | 12 | 286  | 297  | TCCTCCCCAATTTTGTGTGT     |
| scaffold201012_13.1 | 1 p2 | (TC)6  | 12 | 605  | 616  | ATGTAGCAGTTTTTGTGCC      |
| scaffold201538_15.3 | 1 p2 | (TA)7  | 14 | 708  | 721  | TTGGTGAGTGTATGGAGCCC     |
| scaffold201747_15.0 | 1 p2 | (TA)8  | 16 | 458  | 473  | AAAATCAAAGGCCACAATG      |
| scaffold202245_13.2 | 1 p2 | (TA)6  | 12 | 183  | 194  | GAGTCACACAGTTTGGCACTT    |
| scaffold202365_10.9 | 1 p2 | (AT)6  | 12 | 183  | 194  | GCCTTAAAAGGTGGTGTGGA     |
| scaffold202459_16.0 | 1 p2 | (TA)6  | 12 | 996  | 1007 | AATGCAACACAACCAAGCA      |
| scaffold202841_12.1 | 1 p2 | (GA)6  | 12 | 50   | 61   | TTGCTGTGTTGGATGGAAAA     |
| scaffold202996_15.0 | 1 p2 | (TC)6  | 12 | 371  | 382  | ATGAGCCACAGTTCCAATCC     |
| scaffold203037_12.7 | 1 p2 | (TC)6  | 12 | 305  | 316  | CCTGTCTCTTCGGCGTAGTC     |
| scaffold203116_16.8 | 1 p2 | (GA)7  | 14 | 326  | 339  | TCGTAAGTCTTCCGCTGTTT     |

|                     |      |        |    |      |                               |
|---------------------|------|--------|----|------|-------------------------------|
| scaffold203349_14.1 | 1 p2 | (TA)7  | 14 | 290  | 303 AATGAATGCACCGGATTAGC      |
| scaffold203460_12.4 | 1 p2 | (AT)6  | 12 | 471  | 482 GCAATGTGGGCTGAAATCTT      |
| scaffold203469_14.5 | 1 p2 | (TC)6  | 12 | 1195 | 1206 ATTCGTCAATCAAATTAAGCCT   |
| scaffold203483_10.8 | 1 p2 | (TA)6  | 12 | 546  | 557 GGCGAGAATGGAGGAGAAA       |
| scaffold203486_18.9 | 1 p2 | (AG)8  | 16 | 816  | 831 AGCCAGTCTCCACCTCAAGA      |
| scaffold203983_10.2 | 1 p2 | (TA)8  | 16 | 235  | 250 TCGAATTCGGGATACCAGAG      |
| scaffold204082_17.2 | 1 p2 | (AT)6  | 12 | 251  | 262 GCCTAATAGGGTTGTGTGCC      |
| scaffold204378_12.2 | 1 p2 | (GA)7  | 14 | 162  | 175 GAGACGAGAGAAAAGAGTGCCT    |
| scaffold204428_12.8 | 1 p2 | (AT)7  | 14 | 773  | 786 GGCAAAAAGCTAATATTTTCAGG   |
| scaffold204647_13.6 | 1 p2 | (AT)8  | 16 | 193  | 208 CACCGTTGTCTTTAAGCCGT      |
| scaffold204685_11.0 | 1 p2 | (TC)6  | 12 | 159  | 170 GTCGCAGTGATGTCTTCTCCT     |
| scaffold204743_10.9 | 1 p2 | (AT)6  | 12 | 179  | 190 TCCTCGTATCCGTTCTCCAC      |
| scaffold204769_14.6 | 1 p2 | (AT)7  | 14 | 2054 | 2067 CTAACCAGTGGCATGGGAGT     |
| scaffold205077_13.4 | 1 p2 | (AT)8  | 16 | 1531 | 1546 ATACATGTCATGCCCGTTTG     |
| scaffold205310_15.3 | 1 p2 | (GA)7  | 14 | 581  | 594 AAGCTATGGTGGTTTTGTAAACG   |
| scaffold205493_14.5 | 1 p2 | (TG)7  | 14 | 108  | 121 AACACCTGTGAAAGGGATCG      |
| scaffold205539_12.2 | 1 p2 | (CT)6  | 12 | 419  | 430 GTTGGCAAACAGGTCCTCTAA     |
| scaffold205559_15.1 | 1 p2 | (TA)8  | 16 | 83   | 98 TTCGGAGTTATGAAGTTAGCACC    |
| scaffold205565_10.8 | 1 p2 | (CT)6  | 12 | 257  | 268 GATTAGCAAATTTCTGGGACG     |
| scaffold205620_13.0 | 1 p2 | (CT)6  | 12 | 1527 | 1538 CGACCATAACAAAGAAAACACG   |
| scaffold205673_11.8 | 1 p2 | (TA)7  | 14 | 425  | 438 CGCAGATCTGATGGTCCAG       |
| scaffold205706_12.0 | 1 p2 | (TA)8  | 16 | 124  | 139 GGAGGAGAGGAAATTGAGGG      |
| scaffold205947_10.8 | 1 p2 | (AG)7  | 14 | 508  | 521 GGTGCTCAAAAATCCGAAAA      |
| scaffold206176_11.2 | 1 p2 | (TA)8  | 16 | 253  | 268 TGAGATAAGGGGGTGTTCGC      |
| scaffold206359_11.4 | 1 p2 | (TA)7  | 14 | 175  | 188 ACCCTCCTCAGCCAAAAAT       |
| scaffold206493_10.4 | 1 p2 | (AT)9  | 18 | 333  | 350 TCCCTATTTTTCTGCTCCCA      |
| scaffold206497_17.0 | 1 p2 | (AT)6  | 12 | 385  | 396 CGAAGAGTGTGGAATCAAACC     |
| scaffold206978_13.0 | 1 p2 | (AT)7  | 14 | 623  | 636 CATCGAAAGAATGTAAGATGCG    |
| scaffold207222_15.1 | 1 p2 | (TA)6  | 12 | 548  | 559 TGATTTAAGGGGGTGTTCGC      |
| scaffold207600_14.3 | 1 p2 | (AT)8  | 16 | 185  | 200 TGATTAGTACCGATGAATCAACCA  |
| scaffold207843_14.6 | 1 p2 | (GA)6  | 12 | 91   | 102 ACCTATGGAAGCCCCAACT       |
| scaffold208012_15.7 | 1 p2 | (GA)7  | 14 | 3830 | 3843 TTGGGAGATTTCAAGAACGG     |
| scaffold208063_15.4 | 1 p2 | (GA)6  | 12 | 384  | 395 TCAACATGCAACCAACAAAAA     |
| scaffold208075_22.6 | 1 p2 | (CT)6  | 12 | 282  | 293 CAGGAACCCTTTCTCTCATCC     |
| scaffold208112_13.2 | 1 p2 | (TA)6  | 12 | 1032 | 1043 ATTTTTGGATGCCAATGCTT     |
| scaffold208204_13.8 | 1 p2 | (TA)7  | 14 | 359  | 372 ATTGACATGGCATCGTCTCA      |
| scaffold208354_15.0 | 1 p2 | (CT)8  | 16 | 2025 | 2040 TGGCTCTTGTCTTCTGCTT      |
| scaffold208400_12.5 | 1 p2 | (AG)6  | 12 | 193  | 204 CGTGTCTTTCATCCTTTCCC      |
| scaffold208469_14.6 | 1 p2 | (AG)10 | 20 | 69   | 88 GCATGGTTTGTTCATGCAG        |
| scaffold208631_11.3 | 1 p2 | (AC)6  | 12 | 88   | 99 CCTCGGCTCTGATACCAAAC       |
| scaffold208674_17.7 | 1 p2 | (TC)7  | 14 | 344  | 357 CCTTCCCATTCTCTCTCC        |
| scaffold208726_15.8 | 1 p2 | (TA)6  | 12 | 154  | 165 CATTGGCATTGTAAGCTTCG      |
| scaffold208882_16.2 | 1 p2 | (AT)12 | 24 | 46   | 69 TATCCTCCTCCCAATCGAAA       |
| scaffold209343_18.3 | 1 p2 | (TA)8  | 16 | 119  | 134 TGATGGAGGACGACAATGAA      |
| scaffold209354_21.0 | 1 p2 | (TA)6  | 12 | 241  | 252 TCACTAACGGCCGGAATATC      |
| scaffold209357_16.3 | 1 p2 | (TC)6  | 12 | 667  | 678 AAGGGGTGTTGTGTTGTGCT      |
| scaffold209468_15.5 | 1 p2 | (TA)7  | 14 | 73   | 86 GCGAATGTAGGCTGGATCAT       |
| scaffold209533_15.0 | 1 p2 | (GA)6  | 12 | 951  | 962 GCATGCATATCGCAGAGAGA      |
| scaffold209593_11.9 | 1 p2 | (GA)6  | 12 | 168  | 179 GTTGGAGCTGCTAGGATTCG      |
| scaffold209717_14.8 | 1 p2 | (TA)7  | 14 | 353  | 366 TCAACATCGTTTATCAGTTTTGTT  |
| scaffold209718_14.3 | 1 p2 | (TA)13 | 26 | 1584 | 1609 TTAATACCCAAAATGCCCCA     |
| scaffold209748_11.0 | 1 p2 | (TA)14 | 28 | 42   | 69 TTTTGACAATATTTAGGTGTTTTGA  |
| scaffold209817_13.1 | 1 p2 | (AG)7  | 14 | 344  | 357 CGACTCCCAATCAGCAAAAC      |
| scaffold209969_14.9 | 1 p2 | (AT)10 | 20 | 385  | 404 TCTCTCTCGACGGTGAAGGT      |
| scaffold210204_17.0 | 1 p2 | (AT)6  | 12 | 70   | 81 GTAAGGCTTTTCTAACTTATTGGAAC |
| scaffold210915_18.2 | 1 p2 | (TA)6  | 12 | 154  | 165 CGGCCGGAATATCTAAAGTG      |
| scaffold211083_15.0 | 1 p2 | (AT)7  | 14 | 962  | 975 GGTTCAATTTTGCCAACCAC      |
| scaffold211301_10.3 | 1 p2 | (TA)8  | 16 | 166  | 181 TGGTGGCCATATATACGCAAT     |

|                     |      |        |    |      |                               |
|---------------------|------|--------|----|------|-------------------------------|
| scaffold211408_10.8 | 1 p2 | (TC)6  | 12 | 38   | 49 CTTTGGCAACGGAATACCAC       |
| scaffold211562_14.6 | 1 p2 | (CT)6  | 12 | 964  | 975 TCCAAATACCCAGTCCCAA       |
| scaffold211597_14.3 | 1 p2 | (GA)6  | 12 | 97   | 108 CTCTATCTTCGGCCCCCTTC      |
| scaffold212436_12.0 | 1 p2 | (AG)9  | 18 | 580  | 597 GCGAAGCTTTTCCAACCTCAC     |
| scaffold212590_18.2 | 1 p2 | (CT)6  | 12 | 716  | 727 TACACGAATAGCGGTTGCTG      |
| scaffold212657_14.4 | 1 p2 | (CT)8  | 16 | 428  | 443 CCTTGGAGAAAAGGACGACA      |
| scaffold212700_13.8 | 1 p2 | (GA)6  | 12 | 871  | 882 CCCACAAAACCTAAAGCCAA      |
| scaffold212778_12.7 | 1 p2 | (TA)7  | 14 | 237  | 250 ATGGGTTATTACCGGATCGC      |
| scaffold213144_15.4 | 1 p2 | (AT)8  | 16 | 2022 | 2037 AAAACTTCAAACCACGGGAT     |
| scaffold213406_16.2 | 1 p2 | (TC)7  | 14 | 1293 | 1306 TCACAAGCATGCAAGATAAGG    |
| scaffold213409_10.6 | 1 p2 | (AT)6  | 12 | 106  | 117 GGATGGACCGGATGTTAGAA      |
| scaffold213424_18.1 | 1 p2 | (TA)6  | 12 | 310  | 321 GGAAAATTTGACGTCGGAAA      |
| scaffold213511_14.0 | 1 p2 | (TA)6  | 12 | 23   | 34 ACAAGCACGAACACACACAC       |
| scaffold213638_15.2 | 1 p2 | (CT)10 | 20 | 3974 | 3993 AAGCTAAGGATTGAAGCGCA     |
| scaffold213684_15.0 | 1 p2 | (CT)8  | 16 | 993  | 1008 ACCATCGATTTTCTGCAACC     |
| scaffold213772_12.0 | 1 p2 | (TA)6  | 12 | 162  | 173 CCCATGCATGTAACAAACCA      |
| scaffold213806_14.5 | 1 p2 | (CT)9  | 18 | 851  | 868 GCAGTTGGGAAGGCACTAAA      |
| scaffold214000_16.0 | 1 p2 | (AC)6  | 12 | 141  | 152 AAAATGCCCTTGTATGCTGC      |
| scaffold214055_10.8 | 1 p2 | (AG)6  | 12 | 202  | 213 TTGGATTGAGATCGTGGAAA      |
| scaffold214073_18.4 | 1 p2 | (CT)7  | 14 | 42   | 55 TTAAATTTTCGAACGCCTGC       |
| scaffold214079_16.0 | 1 p2 | (TG)8  | 16 | 138  | 153 TATCACCATAACGCACCCCT      |
| scaffold214314_11.5 | 1 p2 | (CA)8  | 16 | 979  | 994 GTTCGGGGTTGCACTGTATT      |
| scaffold214464_13.1 | 1 p2 | (TA)6  | 12 | 756  | 767 TCTAGTTTCGCCCTGCTTA       |
| scaffold214612_13.4 | 1 p2 | (TA)6  | 12 | 895  | 906 TGAAGGGGATAGCATTITGG      |
| scaffold214689_10.8 | 1 p2 | (TA)8  | 16 | 536  | 551 CTTGGATCACATCAGAACG       |
| scaffold214727_17.5 | 1 p2 | (AT)6  | 12 | 238  | 249 AAGAAAGCCCACCTGATTTG      |
| scaffold215004_16.7 | 1 p2 | (TC)6  | 12 | 1340 | 1351 TAAATTGCTTGCCTCTGCCT     |
| scaffold215094_13.9 | 1 p2 | (CT)6  | 12 | 159  | 170 AGCAAGGAGAATCGAACCTG      |
| scaffold215230_10.5 | 1 p2 | (TC)8  | 16 | 166  | 181 GGGGACCACAAAATATTCCC      |
| scaffold215238_15.4 | 1 p2 | (CA)6  | 12 | 163  | 174 CGTCCACGGAGAGGTTAGAG      |
| scaffold215266_12.9 | 1 p2 | (TC)6  | 12 | 658  | 669 ATGCCATACGGACGTTGAAT      |
| scaffold215457_18.0 | 1 p2 | (TA)7  | 14 | 52   | 65 TCGAGTTATGAAGTTAAGAAATAAGC |
| scaffold215555_10.6 | 1 p2 | (GA)7  | 14 | 78   | 91 CGGTACCATCGTCTCTCGTT       |
| scaffold215666_15.8 | 1 p2 | (GA)13 | 26 | 1384 | 1409 CAAGTTCCACCCAGGTGTCT     |
| scaffold215887_10.4 | 1 p2 | (TA)7  | 14 | 328  | 341 TGCATAGGCTGTCTCTTGGGA     |
| scaffold215951_11.1 | 1 p2 | (TA)9  | 18 | 382  | 399 CCCTTGTATGCAGCCATTTT      |
| scaffold215970_15.9 | 1 p2 | (TA)9  | 18 | 560  | 577 TTCGAGTCATACGGAGGAGG      |
| scaffold216094_11.0 | 1 p2 | (AT)7  | 14 | 175  | 188 TGGGCATCACAAATAGACGA      |
| scaffold216128_19.3 | 1 p2 | (TA)8  | 16 | 754  | 769 TAAAAAGTTGAGCCCACCCA      |
| scaffold216133_17.3 | 1 p2 | (AT)8  | 16 | 171  | 186 TCCTTTCGTTTAACTCCTCCA     |
| scaffold216170_13.1 | 1 p2 | (TC)6  | 12 | 143  | 154 TACCGTTGGTTAATCCTGCC      |
| scaffold216222_15.3 | 1 p2 | (CT)6  | 12 | 1057 | 1068 TATGCGGTGTTTTGGTTTGA     |
| scaffold216402_11.2 | 1 p2 | (AT)10 | 20 | 681  | 700 ATCTTGACCGCTGATTTTGG      |
| scaffold216411_14.4 | 1 p2 | (AT)6  | 12 | 491  | 502 GGATCCCACTGAATTGTGCT      |
| scaffold216421_16.0 | 1 p2 | (TA)6  | 12 | 459  | 470 AAGAGGAATTGAACCCAGGA      |
| scaffold216795_12.2 | 1 p2 | (TA)9  | 18 | 162  | 179 AGGCAATTAAGATTGCCCCCT     |
| scaffold216990_12.1 | 1 p2 | (TC)6  | 12 | 46   | 57 AGGGGGTGAATAGCCTCACT       |
| scaffold217146_12.8 | 1 p2 | (AG)6  | 12 | 455  | 466 GCCCATTTGAGCCAATCTAA      |
| scaffold217414_12.0 | 1 p2 | (TA)8  | 16 | 138  | 153 ATTGCCCTCATATGCAGTC       |
| scaffold217620_13.2 | 1 p2 | (TA)8  | 16 | 809  | 824 GGCTAATTTGATGCACGGAT      |
| scaffold217795_11.9 | 1 p2 | (AT)10 | 20 | 196  | 215 AAAAATCACGCCACCATTAG      |
| scaffold217964_18.0 | 1 p2 | (TA)7  | 14 | 178  | 191 TGGATCAAATGTTTGGTTGC      |
| scaffold218120_13.4 | 1 p2 | (AG)6  | 12 | 139  | 150 AAGCAGCCATTAAGAGTCGG      |
| scaffold218440_13.0 | 1 p2 | (GA)6  | 12 | 149  | 160 GACGCCTGAATATCGGTCAT      |
| scaffold218514_17.8 | 1 p2 | (TC)6  | 12 | 226  | 237 AACCCATGCCAGGAATACAA      |
| scaffold218545_11.9 | 1 p2 | (TA)6  | 12 | 352  | 363 TGCCCTCAATCTCGAAAAAT      |
| scaffold218840_15.7 | 1 p2 | (TC)6  | 12 | 1787 | 1798 GCGGTTAGGCTTCCACCTAT     |
| scaffold218862_10.5 | 1 p2 | (AG)7  | 14 | 65   | 78 AAAACTCCTCCAACTTCTCTCC     |

|                     |      |        |    |      |      |                            |
|---------------------|------|--------|----|------|------|----------------------------|
| scaffold218920_11.6 | 1 p2 | (TA)6  | 12 | 117  | 128  | TCTCCTTACATAATTTGCCCTCA    |
| scaffold219033_11.6 | 1 p2 | (CT)6  | 12 | 110  | 121  | TCCTCACTCTCACTAGCCGC       |
| scaffold219072_13.2 | 1 p2 | (AT)11 | 22 | 1453 | 1474 | TACCTGCCACAACACCAGAG       |
| scaffold219080_14.2 | 1 p2 | (CT)6  | 12 | 73   | 84   | CAGCCCTCTACCCTTCTTCC       |
| scaffold219363_11.0 | 1 p2 | (GA)6  | 12 | 289  | 300  | TTGATGTCCCTTCTCCTTGC       |
| scaffold219370_15.4 | 1 p2 | (CT)6  | 12 | 595  | 606  | CTGTTACGGGAGCTTTGAT        |
| scaffold219783_16.3 | 1 p2 | (TA)7  | 14 | 507  | 520  | CGAGTGCATGAGCTTGAGAG       |
| scaffold219866_16.7 | 1 p2 | (AT)8  | 16 | 5050 | 5065 | TGGTGTGATGATGAATGTTTT      |
| scaffold220072_17.7 | 1 p2 | (CT)6  | 12 | 170  | 181  | CCATGCATGCAAAATTGAAC       |
| scaffold220088_17.5 | 1 p2 | (TA)6  | 12 | 924  | 935  | AACTCTCAATGCCCAAATCC       |
| scaffold220119_14.8 | 1 p2 | (TC)12 | 24 | 203  | 226  | AAGGGGTCAACACAGTGGA        |
| scaffold220264_18.6 | 1 p2 | (AT)10 | 20 | 1341 | 1360 | GAAGTATCAAACCGTCCGT        |
| scaffold220473_14.6 | 1 p2 | (TA)6  | 12 | 274  | 285  | TGATGCAGTATATAATCCTTAATCAA |
| scaffold220553_12.1 | 1 p2 | (AT)10 | 20 | 1101 | 1120 | ATCCAAAGGGACAAAATCCC       |
| scaffold220638_12.2 | 1 p2 | (AC)6  | 12 | 215  | 226  | TTCAAGCTGAGATCGACGAA       |
| scaffold220806_13.0 | 1 p2 | (TA)7  | 14 | 207  | 220  | TGCATGCACCTGATTACAAA       |
| scaffold220855_11.0 | 1 p2 | (AT)6  | 12 | 97   | 108  | TCCATATCATTATCAAATGTTGACTT |
| scaffold220938_10.2 | 1 p2 | (TG)8  | 16 | 280  | 295  | CAGAATCACCATCAACACCG       |
| scaffold220955_10.6 | 1 p2 | (GA)7  | 14 | 384  | 397  | GTAGGAGATGGAGTTGGGCA       |
| scaffold220974_13.2 | 1 p2 | (TA)9  | 18 | 255  | 272  | TCATGCAATGAAATCCGAAA       |
| scaffold220995_10.4 | 1 p2 | (TC)6  | 12 | 169  | 180  | ATATCTGGAGGCGGGAATT        |
| scaffold221261_13.7 | 1 p2 | (TC)7  | 14 | 114  | 127  | TACCCAAACCCACCAACCTA       |
| scaffold221589_16.0 | 1 p2 | (CT)6  | 12 | 232  | 243  | GCACCATCAGAGCAACAGTC       |
| scaffold221668_17.4 | 1 p2 | (TC)6  | 12 | 223  | 234  | AGGTGGGGTGTTAGGAGGAT       |
| scaffold221848_11.9 | 1 p2 | (AT)10 | 20 | 441  | 460  | CGACTCATGTTGTTCCATGC       |
| scaffold221883_16.5 | 1 p2 | (TA)8  | 16 | 3520 | 3535 | TCCTCTAATGGCCGAAAATG       |
| scaffold222102_10.4 | 1 p2 | (CT)7  | 14 | 158  | 171  | TAGATGGGCTAAGTGGGGTG       |
| scaffold222236_13.0 | 1 p2 | (TG)6  | 12 | 232  | 243  | GGAAAGTCTCACTCGCAAGG       |
| scaffold222290_12.0 | 1 p2 | (AT)10 | 20 | 1258 | 1277 | ATCATGCGGTATCATGGTGA       |
| scaffold222358_10.5 | 1 p2 | (AT)7  | 14 | 772  | 785  | TGATCCAGTCACGTTTACAA       |
| scaffold222455_13.1 | 1 p2 | (AG)6  | 12 | 55   | 66   | GATCTCGCCTCAACGAGAAG       |
| scaffold222496_16.0 | 1 p2 | (TA)6  | 12 | 264  | 275  | CATTCAAGGGGCATTTTTGT       |
| scaffold222589_15.6 | 1 p2 | (TA)7  | 14 | 369  | 382  | CTCATTGAGTTGACCCAGCA       |
| scaffold222790_16.2 | 1 p2 | (CT)6  | 12 | 835  | 846  | TCACACCTCTCCCACTCTC        |
| scaffold222824_12.7 | 1 p2 | (TA)7  | 14 | 227  | 240  | ATGCTGTCAATTAGTGGGGG       |
| scaffold222857_10.3 | 1 p2 | (GT)8  | 16 | 52   | 67   | AATTTTCTGGCAGCCTTTGA       |
| scaffold222863_10.1 | 1 p2 | (AT)6  | 12 | 180  | 191  | ATGCAAGCACAATTCGATCA       |
| scaffold223163_11.6 | 1 p2 | (TG)7  | 14 | 610  | 623  | CAACCATTTTAAGCCCTTCG       |
| scaffold223175_16.4 | 1 p2 | (TA)7  | 14 | 157  | 170  | AACGGTATGCTCGGATTTTG       |
| scaffold223291_10.1 | 1 p2 | (AT)11 | 22 | 416  | 437  | TAACCGTTGTCTATGCACGC       |
| scaffold223441_10.9 | 1 p2 | (TC)6  | 12 | 233  | 244  | ATTGCTTTTGGCTTGTGCT        |
| scaffold223497_12.1 | 1 p2 | (AT)8  | 16 | 271  | 286  | AAATATACCCCGCATGCTA        |
| scaffold223658_12.7 | 1 p2 | (GA)7  | 14 | 226  | 239  | AGGGAAGAACGAATTGAGGC       |
| scaffold223795_11.9 | 1 p2 | (TC)7  | 14 | 145  | 158  | ATTCGCACAAATGATCGTGA       |
| scaffold223923_23.0 | 1 p2 | (TA)6  | 12 | 54   | 65   | GGCTTTCTTAACTTGTGGAACC     |
| scaffold224010_10.2 | 1 p2 | (AT)9  | 18 | 378  | 395  | TTGAGCACAGGTTGATCACG       |
| scaffold224042_11.2 | 1 p2 | (CT)6  | 12 | 509  | 520  | ATCTTGCTAGATGTGCGCCT       |
| scaffold224085_11.0 | 1 p2 | (AT)6  | 12 | 181  | 192  | ACAAGGGGCAGAAGGATTTT       |
| scaffold224507_16.8 | 1 p2 | (TC)7  | 14 | 454  | 467  | TAAGAGATCCGAAGCCAAGG       |
| scaffold224830_11.3 | 1 p2 | (AT)11 | 22 | 183  | 204  | GCTACTTCCGACTCTCTCGC       |
| scaffold225025_13.8 | 1 p2 | (AT)7  | 14 | 391  | 404  | GGAAGCAAGGTAGGCTTTTCG      |
| scaffold225086_17.5 | 1 p2 | (TC)9  | 18 | 1286 | 1303 | CTGGAATCGAAATGATGAAGC      |
| scaffold225152_12.4 | 1 p2 | (AT)9  | 18 | 237  | 254  | GGGGAGGGTGGTTAGGTTAG       |
| scaffold225279_11.6 | 1 p2 | (AT)6  | 12 | 377  | 388  | GTGTGCGGTCAAGGGTACTT       |
| scaffold225452_16.1 | 1 p2 | (TC)6  | 12 | 587  | 598  | TTTTTGGTGGGTTTCGTCAT       |
| scaffold225489_12.9 | 1 p2 | (AT)7  | 14 | 242  | 255  | AAGGTGGGAAAGAATTTGGC       |
| scaffold225752_15.1 | 1 p2 | (CT)9  | 18 | 1613 | 1630 | GATGCCCAAACCTTCTACCA       |
| scaffold225753_12.5 | 1 p2 | (AG)7  | 14 | 87   | 100  | TTTTGTTGTTTCCCAAGTTGC      |

|                     |      |        |    |      |      |                             |
|---------------------|------|--------|----|------|------|-----------------------------|
| scaffold225882_14.5 | 1 p2 | (TA)8  | 16 | 887  | 902  | TCATCCCAAAAATACCCTCG        |
| scaffold226074_16.1 | 1 p2 | (TC)6  | 12 | 651  | 662  | TCAAGGACTTACCGCTGGAC        |
| scaffold226076_15.4 | 1 p2 | (TA)6  | 12 | 1474 | 1485 | CAAACCCCCCTTCTCAAT          |
| scaffold226167_14.9 | 1 p2 | (AT)8  | 16 | 1146 | 1161 | CTCGAGCTGGATGAGAATGG        |
| scaffold226282_13.1 | 1 p2 | (CG)6  | 12 | 239  | 250  | GTTGCCGGATAATCAAACG         |
| scaffold226317_11.6 | 1 p2 | (TA)11 | 22 | 109  | 130  | GTCGCTTGAATTGCGACATA        |
| scaffold226548_14.4 | 1 p2 | (TA)11 | 22 | 180  | 201  | TATGGGTTAGCGTGTGATCG        |
| scaffold226561_15.9 | 1 p2 | (AG)9  | 18 | 4215 | 4232 | AAGAACCCCAGCATGAATTG        |
| scaffold226568_15.5 | 1 p2 | (TC)6  | 12 | 711  | 722  | GGAAAATGTCTTGTGGTCCC        |
| scaffold226587_12.2 | 1 p2 | (AT)11 | 22 | 266  | 287  | TTCGGACTTATGAAGTTAGCACC     |
| scaffold226796_16.5 | 1 p2 | (GT)6  | 12 | 57   | 68   | GGCTGTGAGATCTAGCGTGA        |
| scaffold227468_11.8 | 1 p2 | (GA)6  | 12 | 109  | 120  | TGATCTATGGAAGCCCCAAA        |
| scaffold227758_16.8 | 1 p2 | (AG)6  | 12 | 77   | 88   | CCCATGTTGTAATTAATGTAGGGA    |
| scaffold228015_11.5 | 1 p2 | (AT)9  | 18 | 637  | 654  | CGAATTTGCAAACCGAAAT         |
| scaffold228042_10.7 | 1 p2 | (AG)6  | 12 | 147  | 158  | TCCATGAAAGCTCACCTCT         |
| scaffold228253_10.5 | 1 p2 | (GA)6  | 12 | 717  | 728  | ATGGAATTGGGTGTTGGATG        |
| scaffold228272_15.6 | 1 p2 | (GA)6  | 12 | 583  | 594  | AAGTTCACCGCCTGCTCTTA        |
| scaffold228654_10.0 | 1 p2 | (TC)8  | 16 | 181  | 196  | CGCTCAAATCACAACCCCTT        |
| scaffold228698_15.6 | 1 p2 | (AT)8  | 16 | 3097 | 3112 | TTGCCTTGTTAACTTCGGG         |
| scaffold228785_14.9 | 1 p2 | (AT)6  | 12 | 443  | 454  | TCAGTTAATATCCCCCGCAG        |
| scaffold228983_12.7 | 1 p2 | (AG)8  | 16 | 488  | 503  | TTGTTTGTACCGAATGCGAG        |
| scaffold228985_16.3 | 1 p2 | (AT)6  | 12 | 760  | 771  | GAGCTGAATTGGTTCGCTTC        |
| scaffold229230_16.0 | 1 p2 | (TC)6  | 12 | 143  | 154  | TGGAGATTTTCTTTTCCCA         |
| scaffold229298_14.9 | 1 p2 | (TG)7  | 14 | 1331 | 1344 | GCAAGTTTCCGTAGCTGGAG        |
| scaffold229592_10.8 | 1 p2 | (CT)7  | 14 | 319  | 332  | ACACAGATCATCTCGGGTCC        |
| scaffold229625_15.7 | 1 p2 | (AG)6  | 12 | 394  | 405  | ATCGATCGGCTTATGAAACG        |
| scaffold229749_12.4 | 1 p2 | (AG)6  | 12 | 1193 | 1204 | AAGAGATGGTTCGCTCTGA         |
| scaffold230403_11.8 | 1 p2 | (TA)8  | 16 | 211  | 226  | GGAGGTTCCGACGTGGTTTC        |
| scaffold230637_16.8 | 1 p2 | (TA)6  | 12 | 106  | 117  | TCACACCACATCTCAAATGACTC     |
| scaffold230656_16.5 | 1 p2 | (TA)6  | 12 | 355  | 366  | GGCTTCAACCTTGACGAAAC        |
| scaffold230670_14.1 | 1 p2 | (TA)6  | 12 | 239  | 250  | GGCCTCACTCCCTTTTCTC         |
| scaffold230710_12.0 | 1 p2 | (AT)6  | 12 | 220  | 231  | TTTTCAAGCCTTGTTGAGCA        |
| scaffold230888_10.4 | 1 p2 | (TC)6  | 12 | 87   | 98   | AGATGATCCACCGACTCCAC        |
| scaffold230967_17.9 | 1 p2 | (AG)6  | 12 | 44   | 55   | GCGATGAGAGAAGGAAATGG        |
| scaffold231010_17.6 | 1 p2 | (TA)8  | 16 | 867  | 882  | GCACTGCTTTTTGGTGATGA        |
| scaffold231468_10.4 | 1 p2 | (AT)6  | 12 | 208  | 219  | ACCCTAGAAACCCGATCGTT        |
| scaffold232828_10.0 | 1 p2 | (TA)6  | 12 | 169  | 180  | AAACATGCAGGTTAGGTGCC        |
| scaffold233077_10.7 | 1 p2 | (TA)9  | 18 | 48   | 65   | ATTACCATATTTAAGGGTTATCATCTC |
| scaffold233385_12.7 | 1 p2 | (TC)10 | 20 | 483  | 502  | ATTTTTCTCTTTCCCCACG         |
| scaffold233696_14.6 | 1 p2 | (AG)7  | 14 | 2881 | 2894 | AAGGCGTCTCGAGTGAAAAA        |
| scaffold234041_10.0 | 1 p2 | (TA)6  | 12 | 240  | 251  | CAAATACGACACCGAAAGGG        |
| scaffold234359_11.6 | 1 p2 | (AG)7  | 14 | 1025 | 1038 | AGAGTCGGTGGAAATGGATG        |
| scaffold234371_11.5 | 1 p2 | (TA)8  | 16 | 762  | 777  | TGGCCGGCAGTTTATATAGG        |
| scaffold234988_17.3 | 1 p2 | (TC)6  | 12 | 237  | 248  | TGACACCTAGCCCAAACCTC        |
| scaffold235022_11.2 | 1 p2 | (TC)6  | 12 | 71   | 82   | TCTGAGACGACGGTGATACAA       |
| scaffold235045_15.3 | 1 p2 | (TC)6  | 12 | 1128 | 1139 | CCTCGCACATTCAATTTCTT        |
| scaffold235562_15.3 | 1 p2 | (AT)10 | 20 | 36   | 55   | GAAAAAGTCAGCCGAGAGAAAA      |
| scaffold235653_12.6 | 1 p2 | (TA)7  | 14 | 419  | 432  | TGATGTTGATTTGGGTTCAAG       |
| scaffold235891_15.3 | 1 p2 | (CT)8  | 16 | 49   | 64   | CACTCACTCTCACTAGCCGC        |
| scaffold236163_21.5 | 1 p2 | (GA)7  | 14 | 76   | 89   | TGATTTTCTGAAATCGCACG        |
| scaffold236226_15.2 | 1 p2 | (AC)6  | 12 | 1292 | 1303 | GGCTCAAATCCGATGATTCT        |
| scaffold236548_17.8 | 1 p2 | (TA)9  | 18 | 821  | 838  | ACCACGGAAATTACGGAAAA        |
| scaffold236592_15.0 | 1 p2 | (CT)6  | 12 | 566  | 577  | TCTGCTAGGGTTGGGAGAGA        |
| scaffold236645_13.1 | 1 p2 | (AT)9  | 18 | 144  | 161  | TTTGGACGATTTTCCCTTTT        |
| scaffold236858_13.9 | 1 p2 | (AT)6  | 12 | 534  | 545  | GCAAACATCCAACTACGAGC        |
| scaffold236993_11.9 | 1 p2 | (AG)6  | 12 | 306  | 317  | CTTCGGAACCTATCCACCG         |
| scaffold237031_16.5 | 1 p2 | (AT)8  | 16 | 393  | 408  | CCCCAATTTTGTACCCGAA         |
| scaffold237067_12.7 | 1 p2 | (AC)7  | 14 | 632  | 645  | AATTGTGGAGGTTGAAGCG         |

|                     |      |        |    |      |      |                          |
|---------------------|------|--------|----|------|------|--------------------------|
| scaffold237148_16.4 | 1 p2 | (TA)9  | 18 | 397  | 414  | CGGCCTCAACCTATATTTGG     |
| scaffold237226_12.4 | 1 p2 | (TA)8  | 16 | 438  | 453  | TGAAAACCTGAACTAGGAACGAAA |
| scaffold237280_13.9 | 1 p2 | (TA)9  | 18 | 2950 | 2967 | ACCATGCTCGAATATCTGGC     |
| scaffold237837_12.5 | 1 p2 | (AT)7  | 14 | 322  | 335  | CGTCCGTATGAAATTCAGG      |
| scaffold238266_16.3 | 1 p2 | (TC)7  | 14 | 171  | 184  | GTCAACTTTGGCAATGGGAT     |
| scaffold238425_12.2 | 1 p2 | (TA)10 | 20 | 367  | 386  | CGCCTTTAAATCAGGTGCAT     |
| scaffold238583_16.2 | 1 p2 | (AT)11 | 22 | 1228 | 1249 | CGCTACAGTTCACACGTTCCG    |
| scaffold238737_10.6 | 1 p2 | (TG)6  | 12 | 72   | 83   | TCAAAATTTCCAAAAATCAAAGC  |
| scaffold238853_11.0 | 1 p2 | (TA)6  | 12 | 150  | 161  | CTCAGGTTCCGACCTCAAAC     |
| scaffold238983_12.0 | 1 p2 | (TC)6  | 12 | 139  | 150  | TTCAAGGCATTTATCTGGGC     |
| scaffold239219_11.3 | 1 p2 | (TC)7  | 14 | 273  | 286  | GCCCCTTGAAGTTTCGTAGA     |
| scaffold239249_17.9 | 1 p2 | (TA)8  | 16 | 2303 | 2318 | TTCCTTGGGACACAATCCAT     |
| scaffold239432_17.0 | 1 p2 | (AG)7  | 14 | 1157 | 1170 | GGGCTAGTCCTGCAACACAT     |
| scaffold239459_11.4 | 1 p2 | (AT)8  | 16 | 537  | 552  | CCCGATTTGTAAGGTTCCATT    |
| scaffold239647_10.0 | 1 p2 | (CT)6  | 12 | 44   | 55   | GCTCTACAATATTACAATGGGCAA |
| scaffold239769_10.3 | 1 p2 | (TC)6  | 12 | 182  | 193  | TGTGATAGGATAGGGCCAGC     |
| scaffold239846_14.8 | 1 p2 | (TC)6  | 12 | 91   | 102  | AGGACACGTTGGACCTGAAG     |
| scaffold239960_16.5 | 1 p2 | (TA)6  | 12 | 1006 | 1017 | GCTTGA AAAAGCCATGCAAAT   |
| scaffold239998_18.8 | 1 p2 | (AT)9  | 18 | 555  | 572  | AACGTGAATCTCATCCGTCC     |
| scaffold240085_14.8 | 1 p2 | (TA)9  | 18 | 1599 | 1616 | TGATTTCCAAGTGAAGGCTG     |
| scaffold240099_11.5 | 1 p2 | (TA)11 | 22 | 523  | 544  | TTGTCATTGTTAATCCCAAAACA  |
| scaffold240190_12.4 | 1 p2 | (AG)6  | 12 | 334  | 345  | TTATTGAAGCAGCAGCAACG     |
| scaffold240355_16.0 | 1 p2 | (AT)6  | 12 | 177  | 188  | AGCACGGCTTGTGCTATCTT     |
| scaffold240369_13.8 | 1 p2 | (CT)8  | 16 | 2539 | 2554 | CCCAGAAACACCAACTTGT      |
| scaffold240425_11.3 | 1 p2 | (TA)7  | 14 | 323  | 336  | TATAACGACACGGCCATTGA     |
| scaffold240746_14.8 | 1 p2 | (TA)6  | 12 | 83   | 94   | CAAGTGGTAGCAAACCATGAA    |
| scaffold240836_14.3 | 1 p2 | (TA)7  | 14 | 846  | 859  | AGAATTCGTGCCCTCATT       |
| scaffold241004_14.7 | 1 p2 | (AT)8  | 16 | 313  | 328  | GAACGTTAGTGAGGACGGGA     |
| scaffold241339_14.8 | 1 p2 | (TA)6  | 12 | 813  | 824  | CCCGGTATGCTGACGATAAC     |
| scaffold241379_13.2 | 1 p2 | (AG)6  | 12 | 248  | 259  | ACATGTTACCAAGCCACTG      |
| scaffold241664_12.2 | 1 p2 | (GA)6  | 12 | 28   | 39   | GGAGGGAGGGAGAGATAGGA     |
| scaffold241735_16.0 | 1 p2 | (GA)8  | 16 | 37   | 52   | GGAAGAATGATGGAATTGGG     |
| scaffold241806_12.9 | 1 p2 | (TC)7  | 14 | 1053 | 1066 | TGAACAATTGAACACCGGAA     |
| scaffold241938_16.6 | 1 p2 | (TA)8  | 16 | 263  | 278  | ATGACACGCATAAAGGGACC     |
| scaffold241944_15.7 | 1 p2 | (GA)7  | 14 | 349  | 362  | TCACAATAGGGCATGGGACT     |
| scaffold242054_13.2 | 1 p2 | (CA)7  | 14 | 69   | 82   | CACTCACACTTTGCACACTGAA   |
| scaffold242072_13.4 | 1 p2 | (CT)6  | 12 | 389  | 400  | GGCAGATGCCTTTGAAGAAC     |
| scaffold242170_16.3 | 1 p2 | (CT)6  | 12 | 427  | 438  | TTAAAACAAGAAAGCCCACCA    |
| scaffold242351_16.5 | 1 p2 | (CA)6  | 12 | 469  | 480  | TCAAATCTCTAATTGCACCCTTC  |
| scaffold242363_16.8 | 1 p2 | (TA)6  | 12 | 220  | 231  | AGTTGAAAGAGCCATCAGCC     |
| scaffold242477_15.3 | 1 p2 | (AT)7  | 14 | 1046 | 1059 | AAATGGGGAGATGATGAACG     |
| scaffold242486_11.0 | 1 p2 | (AT)6  | 12 | 292  | 303  | CCATTCAAGTCGTGGTCCTT     |
| scaffold242623_10.2 | 1 p2 | (AT)8  | 16 | 267  | 282  | TGGACGTAAATACCTTTTACCA   |
| scaffold242685_15.0 | 1 p2 | (AT)6  | 12 | 116  | 127  | ACACAACAATACCACGCAGG     |
| scaffold242959_13.8 | 1 p2 | (GT)6  | 12 | 208  | 219  | TTGTTGCCGTTAAAGTGTGG     |
| scaffold242962_12.5 | 1 p2 | (AG)7  | 14 | 205  | 218  | GGGAGAGAAGGGAGGAGAGA     |
| scaffold243021_11.3 | 1 p2 | (GA)6  | 12 | 98   | 109  | GGATTTGTCAACCGGAAAAC     |
| scaffold243145_14.8 | 1 p2 | (TC)7  | 14 | 901  | 914  | AAAGCAACACCATCAGACCC     |
| scaffold243199_10.3 | 1 p2 | (GA)6  | 12 | 171  | 182  | TCAACAACATGCAAACACCA     |
| scaffold243221_17.5 | 1 p2 | (CT)6  | 12 | 212  | 223  | CACCCCTCCACTCTCTCATT     |
| scaffold243316_12.0 | 1 p2 | (AT)9  | 18 | 166  | 183  | ACCACGCATGGTTGAGTACA     |
| scaffold243762_14.9 | 1 p2 | (TC)6  | 12 | 412  | 423  | CACCAACATCATCGAACAGG     |
| scaffold243931_16.2 | 1 p2 | (AG)11 | 22 | 1698 | 1719 | TTGTCACATACACGTTGGGAA    |
| scaffold244306_15.3 | 1 p2 | (AT)6  | 12 | 81   | 92   | CACCACAATGAAGTGGATGC     |
| scaffold244372_15.9 | 1 p2 | (TA)10 | 20 | 219  | 238  | ACAACAATGTGCGGAAACAA     |
| scaffold244393_16.2 | 1 p2 | (CA)6  | 12 | 139  | 150  | TCAATCTCTCGTGCTCACTGAT   |
| scaffold244762_11.7 | 1 p2 | (CA)8  | 16 | 569  | 584  | TCAAAAGCAATCAAATATCCCA   |
| scaffold244828_10.3 | 1 p2 | (TA)10 | 20 | 479  | 498  | CAAAGATCGGCTATTTGGTG     |

|                     |      |        |    |      |                                |
|---------------------|------|--------|----|------|--------------------------------|
| scaffold244940_16.2 | 1 p2 | (GA)6  | 12 | 410  | 421 TGGATGCCTTTCATTTAGGTG      |
| scaffold245015_12.5 | 1 p2 | (GT)10 | 20 | 661  | 680 CGGAAGCGCACATTAAGATT       |
| scaffold245367_12.3 | 1 p2 | (AC)7  | 14 | 157  | 170 CACTTGGCAAAAAGCACAAA       |
| scaffold245653_13.3 | 1 p2 | (GA)7  | 14 | 600  | 613 CATTCTCACCGGAACCCTAA       |
| scaffold246200_12.4 | 1 p2 | (TG)6  | 12 | 399  | 410 TCAATAGAAAATGAGTTTGAGTTTCG |
| scaffold246523_14.8 | 1 p2 | (AT)7  | 14 | 291  | 304 ATGCATCCTGGCCTTGTTTA       |
| scaffold246897_13.5 | 1 p2 | (AG)7  | 14 | 2093 | 2106 AGAATGATGAACCCCTTCCC      |
| scaffold246965_12.6 | 1 p2 | (CT)8  | 16 | 611  | 626 GTTCTTGCTTGCTGTCCCTC       |
| scaffold247028_13.7 | 1 p2 | (GT)6  | 12 | 402  | 413 CAAGCTGTCAACCCAAAACA       |
| scaffold247219_13.2 | 1 p2 | (CT)10 | 20 | 398  | 417 GTCGGCAAACCAGAGCTAAC       |
| scaffold247256_15.7 | 1 p2 | (TA)7  | 14 | 176  | 189 TTTTACCCTCCCATGCTTTG       |
| scaffold247353_16.1 | 1 p2 | (TA)6  | 12 | 314  | 325 CCAGGTTCAACTCTCTTCCG       |
| scaffold247459_20.3 | 1 p2 | (TA)8  | 16 | 78   | 93 CCATTTGCAATACTAAGGCTTTC     |
| scaffold247565_14.1 | 1 p2 | (TA)10 | 20 | 1126 | 1145 AGGAATAGGGCCGAGAAAAA      |
| scaffold247692_14.9 | 1 p2 | (TA)8  | 16 | 2165 | 2180 ATCAACTAAATTTGGCGCGT      |
| scaffold247711_16.1 | 1 p2 | (TG)7  | 14 | 2528 | 2541 GACATTGGCATTCTTGCAA       |
| scaffold248051_11.0 | 1 p2 | (GA)6  | 12 | 73   | 84 TCTTGGATGATGAGGCTTGA        |
| scaffold248103_13.7 | 1 p2 | (GA)6  | 12 | 1558 | 1569 TTTTCTCCTTGAGCGTGGG       |
| scaffold248110_14.0 | 1 p2 | (AT)8  | 16 | 240  | 255 TCGTCAAAAATAATTAAGGCCA     |
| scaffold248264_14.5 | 1 p2 | (GA)6  | 12 | 55   | 66 TGAATTACTTGAAGAATGATGAGAGA  |
| scaffold248329_10.4 | 1 p2 | (CT)7  | 14 | 100  | 113 TAACCAAACCCCAATTTCA        |
| scaffold248478_15.4 | 1 p2 | (AT)7  | 14 | 924  | 937 CAGGAAGCTTCAACTCCAGG       |
| scaffold248621_12.7 | 1 p2 | (AG)6  | 12 | 54   | 65 GTGAAATTGCTTTTTGGGGA        |
| scaffold248634_16.0 | 1 p2 | (CT)13 | 26 | 2274 | 2299 GCCAGCTAACACATCAAGCA      |
| scaffold248651_15.6 | 1 p2 | (AC)7  | 14 | 525  | 538 TCAATGCAACTCAAATCCCA       |
| scaffold248670_13.2 | 1 p2 | (TG)6  | 12 | 495  | 506 TGTGTGCAATGTGTGTGTGT       |
| scaffold248820_17.0 | 1 p2 | (CT)6  | 12 | 221  | 232 ACACATGCTCGGCATACAAA       |
| scaffold248988_15.3 | 1 p2 | (AG)8  | 16 | 3697 | 3712 AACCAACTGGCAGAATCC        |
| scaffold249102_16.7 | 1 p2 | (AT)7  | 14 | 2543 | 2556 CACTTCTGCGGCTGAAAAAT      |
| scaffold249107_14.9 | 1 p2 | (TG)6  | 12 | 1211 | 1222 TTTGTTTCCTCCCTTTGTGC      |
| scaffold249134_10.0 | 1 p2 | (AC)6  | 12 | 158  | 169 CAGATACGCGGGTTCATTCT       |
| scaffold249452_10.2 | 1 p2 | (TG)6  | 12 | 67   | 78 TCTGTGCTCTCTTCTCAGTCG       |
| scaffold249548_17.4 | 1 p2 | (TA)7  | 14 | 50   | 63 ATGAAGTTAGAAAATAAGGAGGTGT   |
| scaffold249652_11.6 | 1 p2 | (TG)10 | 20 | 289  | 308 AACTGCCCTCCAATGCTAA        |
| scaffold249770_12.4 | 1 p2 | (TA)9  | 18 | 255  | 272 CACAGAAATCACGTTGCAAAA      |
| scaffold249883_11.9 | 1 p2 | (TA)7  | 14 | 167  | 180 TGTGGCATCCTATCAACCCT       |
| scaffold249933_12.7 | 1 p2 | (AG)6  | 12 | 137  | 148 ACCTCCCTGCTCCATACTT        |
| scaffold250351_12.0 | 1 p2 | (AT)9  | 18 | 874  | 891 GGCCATTCACTTCAATGCTT       |
| scaffold250610_11.5 | 1 p2 | (GA)6  | 12 | 31   | 42 TTGCCGATTAGGATTTTCGTT       |
| scaffold250906_11.0 | 1 p2 | (TA)6  | 12 | 41   | 52 CAAGCACTATGAAAGCTAAATACTAC  |
| scaffold251053_11.1 | 1 p2 | (GT)6  | 12 | 207  | 218 ACGCTTGTCCCCTTAATCCT       |
| scaffold251127_15.4 | 1 p2 | (TA)10 | 20 | 381  | 400 TCAATTCGAAAATCAAGGC        |
| scaffold251245_12.0 | 1 p2 | (GA)6  | 12 | 805  | 816 TCGTGTGTGTGAGTGAACCA       |
| scaffold251435_13.6 | 1 p2 | (TA)10 | 20 | 329  | 348 AGGGAGGAATAGAGCCGAAA       |
| scaffold251609_15.1 | 1 p2 | (TA)6  | 12 | 158  | 169 AACCGTAGGCTTGCTTCTGA       |
| scaffold251710_15.8 | 1 p2 | (TA)6  | 12 | 1319 | 1330 TCCAGTGACAAAACCGACA       |
| scaffold251777_15.8 | 1 p2 | (GA)6  | 12 | 1904 | 1915 CAGACAGAGAGATGCCACCA      |
| scaffold252123_12.6 | 1 p2 | (AT)7  | 14 | 300  | 313 CCAATTGATCGGGAATTGAT       |
| scaffold252167_13.5 | 1 p2 | (AT)6  | 12 | 627  | 638 TTGGAGCTTGCTGCAATTTT       |
| scaffold252283_11.4 | 1 p2 | (TA)8  | 16 | 267  | 282 AGAGTTTTGCGTGCATGTTG       |
| scaffold252301_13.3 | 1 p2 | (AT)6  | 12 | 108  | 119 ATCCATCCTGTTTCTCCCCT       |
| scaffold252337_13.6 | 1 p2 | (AT)11 | 22 | 919  | 940 CAAAATCCGTTACATATCTTGGG    |
| scaffold252587_14.6 | 1 p2 | (AT)9  | 18 | 633  | 650 AACCCAACCCACAATAACG        |
| scaffold252630_13.1 | 1 p2 | (TA)6  | 12 | 109  | 120 CCACCGAGCACCAAGTAAAT       |
| scaffold252825_11.8 | 1 p2 | (TC)6  | 12 | 162  | 173 AGTTGGGCTTAATGGTGTGG       |
| scaffold253319_13.0 | 1 p2 | (AG)6  | 12 | 103  | 114 GGAGATGGAGAGAAAGTGTCG      |
| scaffold253770_11.0 | 1 p2 | (GT)6  | 12 | 218  | 229 GAATCAACTCCAATCCGGTG       |
| scaffold253906_16.6 | 1 p2 | (TA)6  | 12 | 517  | 528 AAGGGGTTTTCTCTGGATCG       |



|                     |      |        |    |      |                              |
|---------------------|------|--------|----|------|------------------------------|
| scaffold254087_16.0 | 1 p2 | (CA)6  | 12 | 635  | 646 AATGGGACCTCCTTTACGCT     |
| scaffold254272_14.8 | 1 p2 | (AG)6  | 12 | 62   | 73 GTGGATGATGAGGAGGAGGA      |
| scaffold254351_14.4 | 1 p2 | (CT)10 | 20 | 604  | 623 TACTGCTCTTGAACCTCGCCA    |
| scaffold254451_12.1 | 1 p2 | (CT)6  | 12 | 38   | 49 TTACAATGGCCAAGAGGATT      |
| scaffold254628_13.9 | 1 p2 | (AG)8  | 16 | 195  | 210 AGTTGGTCATTTGAAGCGAGA    |
| scaffold255067_13.7 | 1 p2 | (AG)6  | 12 | 105  | 116 TTTTGTGGTTCCAGGTTG       |
| scaffold255334_11.9 | 1 p2 | (AG)6  | 12 | 234  | 245 CTTCTCTCCCTCCGTTTC       |
| scaffold255358_14.1 | 1 p2 | (GA)7  | 14 | 409  | 422 AGATTTGAACTTGGAGGGCA     |
| scaffold255458_13.8 | 1 p2 | (CT)6  | 12 | 106  | 117 TGCATGGTTAATGTTGTAAGGG   |
| scaffold255463_13.7 | 1 p2 | (TC)6  | 12 | 201  | 212 TCGTCGTGTTCTGATTTTC      |
| scaffold255507_13.9 | 1 p2 | (AT)7  | 14 | 52   | 65 AGGGCTGAGTACACGAATGC      |
| scaffold255617_18.9 | 1 p2 | (TA)6  | 12 | 171  | 182 GCTTTCAAGGAGTGAGGCAC     |
| scaffold255638_14.2 | 1 p2 | (TA)9  | 18 | 262  | 279 TTGGGATCTAGGCAATCCAG     |
| scaffold255727_14.0 | 1 p2 | (TA)6  | 12 | 3411 | 3422 TCCAGTTTTCAATGGTGCAA    |
| scaffold256399_11.2 | 1 p2 | (AC)6  | 12 | 181  | 192 TTCTCACATCCTTCTCGCT      |
| scaffold256411_11.9 | 1 p2 | (AT)7  | 14 | 601  | 614 TTGCATGCCACCTTTATTTT     |
| scaffold256973_16.1 | 1 p2 | (AG)8  | 16 | 5940 | 5955 ACTGGCCGGCTAAGTTGATA    |
| scaffold257036_13.9 | 1 p2 | (TC)6  | 12 | 37   | 48 GAATACCGCTCGTAAGTCCG      |
| scaffold257089_10.9 | 1 p2 | (TA)8  | 16 | 331  | 346 TGATTTTGGTGTGTTGGCAT     |
| scaffold257472_14.1 | 1 p2 | (CT)6  | 12 | 1522 | 1533 TGATCATACCAAGGCGATCA    |
| scaffold257487_14.0 | 1 p2 | (CT)7  | 14 | 485  | 498 CATATGGCGCTCCACCTACT     |
| scaffold257844_15.7 | 1 p2 | (AT)6  | 12 | 100  | 111 TGAATCTCCCGTACTTCCG      |
| scaffold257958_11.2 | 1 p2 | (TA)6  | 12 | 177  | 188 TGCCATACGGTTGTATGAA      |
| scaffold258004_11.4 | 1 p2 | (TA)8  | 16 | 52   | 67 TTTTATCTGAATGCTAGATGTTTGG |
| scaffold258131_16.7 | 1 p2 | (TC)7  | 14 | 281  | 294 GAAAAATAGCATGCCTTCGC     |
| scaffold258209_14.9 | 1 p2 | (AT)7  | 14 | 358  | 371 ACGGAAATACGAATGCGAAA     |
| scaffold258229_12.1 | 1 p2 | (AC)6  | 12 | 53   | 64 TGTGTACTTCCCTACTCATAAGCAA |
| scaffold258504_11.6 | 1 p2 | (CT)6  | 12 | 272  | 283 GTACAGCCATTCGTCACCT      |
| scaffold258753_15.6 | 1 p2 | (AT)9  | 18 | 1033 | 1050 TTAGCATGTGGGAAGGGTTC    |
| scaffold259181_16.0 | 1 p2 | (AC)6  | 12 | 3523 | 3534 ACCGGCGTATAAAGACATGC    |
| scaffold259281_14.0 | 1 p2 | (TA)9  | 18 | 184  | 201 TATGATGGGAAGGGTGGGTA     |
| scaffold259290_15.8 | 1 p2 | (TA)8  | 16 | 205  | 220 TCACGAAAACACGACACACA     |
| scaffold259505_15.6 | 1 p2 | (AG)7  | 14 | 425  | 438 GGTGGGAGCAGACAGAAAAG     |
| scaffold259609_13.8 | 1 p2 | (TC)7  | 14 | 461  | 474 GAAGCGCAGTCATTTAAGGC     |
| scaffold260213_12.8 | 1 p2 | (CT)6  | 12 | 51   | 62 CTCATTGTAATCTCTCTCCAAAGTT |
| scaffold260377_12.4 | 1 p2 | (GA)6  | 12 | 55   | 66 CACCTTCATCTTCACCACCA      |
| scaffold260493_16.1 | 1 p2 | (CT)7  | 14 | 362  | 375 AACTAAACCCGCGTATTGC      |
| scaffold260799_15.7 | 1 p2 | (GT)6  | 12 | 268  | 279 TAGGATACCCTCCCAAACCC     |
| scaffold260844_12.1 | 1 p2 | (GC)6  | 12 | 223  | 234 ACGAGCCTCGAGGTAGCTG      |
| scaffold260952_17.7 | 1 p2 | (AG)6  | 12 | 74   | 85 GTCCACGGTGGTTGAGAGT       |
| scaffold261186_13.7 | 1 p2 | (AG)6  | 12 | 615  | 626 CGAATGGGAGAGAGTGGATG     |
| scaffold261262_12.9 | 1 p2 | (AG)7  | 14 | 49   | 62 CAATTACAATGTTTATGAAAATCCA |
| scaffold261323_13.8 | 1 p2 | (TA)8  | 16 | 387  | 402 CTCAAACTCAGCCCGTACC      |
| scaffold262190_17.0 | 1 p2 | (CT)7  | 14 | 52   | 65 TCCTCACTCTCACTAGCCGC      |
| scaffold262347_14.6 | 1 p2 | (AG)6  | 12 | 236  | 247 ATATAGCCGTTGGGCTTGTG     |
| scaffold262529_14.0 | 1 p2 | (TC)6  | 12 | 36   | 47 CATCAACTCACCTCACATTTT     |
| scaffold262560_12.9 | 1 p2 | (AT)6  | 12 | 694  | 705 TCCAAGAACTACGCCAACA      |
| scaffold262870_11.9 | 1 p2 | (AT)10 | 20 | 144  | 163 TGGAGTTTTAAATGTAGAGGCGA  |
| scaffold262937_14.4 | 1 p2 | (TA)7  | 14 | 48   | 61 TTTAGTGTGTTTACATGACTACTCG |
| scaffold262944_19.4 | 1 p2 | (CT)9  | 18 | 327  | 344 TTCGAACGAAAACGTGTCAG     |
| scaffold263142_14.2 | 1 p2 | (AC)6  | 12 | 1693 | 1704 GCATTAGCAAATCCCGAAAA    |
| scaffold263490_13.1 | 1 p2 | (TC)6  | 12 | 168  | 179 ATGTTTGAAGCAGCCAACT      |
| scaffold263539_11.1 | 1 p2 | (AG)7  | 14 | 208  | 221 TGTTCCGGTCCGAGTTTATT     |
| scaffold263559_17.1 | 1 p2 | (CT)6  | 12 | 90   | 101 TCCTTCTTAAAGGTCTTAATCGGA |
| scaffold263571_16.9 | 1 p2 | (GA)7  | 14 | 464  | 477 TTGGGGGTTTAGGGTTCTCT     |
| scaffold263572_15.9 | 1 p2 | (AT)6  | 12 | 2900 | 2911 CCGTCGAACTACCGGTTCTA    |
| scaffold263702_11.0 | 1 p2 | (TC)7  | 14 | 262  | 275 ATTGAACTACGTCCACGGG      |
| scaffold263874_14.8 | 1 p2 | (TC)6  | 12 | 232  | 243 AGACCAACTACCAAACCCA      |

|                     |      |        |    |      |      |                            |
|---------------------|------|--------|----|------|------|----------------------------|
| scaffold263950_16.8 | 1 p2 | (AT)7  | 14 | 2151 | 2164 | ACGATCCTACACAATGGCG        |
| scaffold263964_17.0 | 1 p2 | (TG)7  | 14 | 150  | 163  | CATGATTGGGGACTGACCTT       |
| scaffold264109_16.9 | 1 p2 | (AC)6  | 12 | 240  | 251  | TGGCAACAAACAAAGCTGAG       |
| scaffold264305_16.9 | 1 p2 | (AT)8  | 16 | 242  | 257  | GGTGATGATGGAAAACCTGG       |
| scaffold264356_11.2 | 1 p2 | (GA)8  | 16 | 284  | 299  | CCAAGGATCACAAAGTGGATG      |
| scaffold264494_12.5 | 1 p2 | (TA)8  | 16 | 337  | 352  | TTTTGTCTCGGCCATTTTCTTT     |
| scaffold264729_11.8 | 1 p2 | (AT)7  | 14 | 159  | 172  | TGATTGATCTTAACTGCAAAAAGAGA |
| scaffold265133_18.5 | 1 p2 | (AT)6  | 12 | 69   | 80   | TTCACGAATAAACATGTTCCAGA    |
| scaffold265371_13.4 | 1 p2 | (AT)6  | 12 | 199  | 210  | CGCCCAACATCCTGATATTT       |
| scaffold265627_13.3 | 1 p2 | (CT)9  | 18 | 416  | 433  | CGCACCTATTAGGGTCTGGAT      |
| scaffold266076_17.3 | 1 p2 | (CT)7  | 14 | 631  | 644  | TAACGAGAAAATTCGGCCAC       |
| scaffold266140_11.5 | 1 p2 | (TC)6  | 12 | 142  | 153  | CCGAGGTGGAGTAGTATCCG       |
| scaffold266357_14.2 | 1 p2 | (AG)9  | 18 | 2040 | 2057 | CTAGAACCCCTCATCCGA         |
| scaffold266693_12.8 | 1 p2 | (AT)10 | 20 | 448  | 467  | GGATCGTAGGAGCAGATGGA       |
| scaffold266745_10.8 | 1 p2 | (AT)7  | 14 | 257  | 270  | TTTTCGCAAGCCACTAAAAA       |
| scaffold266766_15.4 | 1 p2 | (TA)9  | 18 | 2350 | 2367 | CAGGAAAGAAATGGGCTTCA       |
| scaffold266830_13.4 | 1 p2 | (TA)8  | 16 | 115  | 130  | AAGCGAAACTGTTGTATGCTG      |
| scaffold266838_11.7 | 1 p2 | (TA)6  | 12 | 119  | 130  | TCGAGCTGTTATGCGTTTTG       |
| scaffold266841_15.7 | 1 p2 | (AT)6  | 12 | 120  | 131  | CCCGAGTTGAGGTCCTGATA       |
| scaffold266875_13.5 | 1 p2 | (AT)8  | 16 | 249  | 264  | ACTCAACCGATTGACGATCC       |
| scaffold266923_15.7 | 1 p2 | (CT)6  | 12 | 204  | 215  | TTGGAAGATGGAGAAATAAGGC     |
| scaffold266956_16.8 | 1 p2 | (GA)7  | 14 | 2016 | 2029 | TGTTTTGGTTGTCACTTTCTTG     |
| scaffold267035_12.1 | 1 p2 | (TA)6  | 12 | 169  | 180  | TTAGTTAGCAAGGGGGAGGG       |
| scaffold267046_17.2 | 1 p2 | (CT)7  | 14 | 469  | 482  | AACCCATACTTAATTCATAACCCAA  |
| scaffold267279_10.0 | 1 p2 | (GA)6  | 12 | 198  | 209  | CTGCAGACATTTCTCGGTGA       |
| scaffold267310_14.0 | 1 p2 | (TA)6  | 12 | 70   | 81   | TTCGATGATAACTATGGGTTTTG    |
| scaffold267411_18.0 | 1 p2 | (TA)7  | 14 | 354  | 367  | CTCTCAATGGACCAGCACCT       |
| scaffold267639_13.8 | 1 p2 | (TA)11 | 22 | 504  | 525  | GATGGAGAAGTTACGATGGCA      |
| scaffold267677_15.4 | 1 p2 | (AT)7  | 14 | 51   | 64   | GGTTTTGACATAACTTAGGTGTTTTG |
| scaffold267732_13.1 | 1 p2 | (AG)7  | 14 | 503  | 516  | CTGACACAACCCCTCCATGTG      |
| scaffold267791_15.3 | 1 p2 | (GA)6  | 12 | 632  | 643  | AGGGAAAAGACATCAGCCA        |
| scaffold267839_15.1 | 1 p2 | (TA)8  | 16 | 1839 | 1854 | TGCTCCGAGACCTTAGACTCA      |
| scaffold267868_11.8 | 1 p2 | (AT)8  | 16 | 254  | 269  | AGAATCCCGAGATTTTCATGC      |
| scaffold267874_10.9 | 1 p2 | (TA)6  | 12 | 167  | 178  | GCTGGAAGATAAGATGTGAACG     |
| scaffold267986_13.7 | 1 p2 | (AC)7  | 14 | 429  | 442  | GACAAAGCTAACGGAACCCA       |
| scaffold268090_11.2 | 1 p2 | (TA)7  | 14 | 1187 | 1200 | GTCCAAAATTGTGTTACGGG       |
| scaffold268098_13.3 | 1 p2 | (CT)6  | 12 | 928  | 939  | GAAGAGAAAGCGCGATCATT       |
| scaffold268137_14.6 | 1 p2 | (AT)6  | 12 | 68   | 79   | GTGGGTTAGCACGTGATCG        |
| scaffold268230_18.3 | 1 p2 | (GA)8  | 16 | 3843 | 3858 | GGGATTTAGGCCAAACGATTA      |
| scaffold268422_16.8 | 1 p2 | (GA)8  | 16 | 1713 | 1728 | AATTAGTCGTGGCCGTGAAC       |
| scaffold268616_12.3 | 1 p2 | (TA)9  | 18 | 487  | 504  | GCCATGATCTCATGATTCAAAA     |
| scaffold268741_11.6 | 1 p2 | (TA)8  | 16 | 260  | 275  | TTCGGTTAATCCAAAGGTCAA      |
| scaffold268915_12.1 | 1 p2 | (TA)10 | 20 | 85   | 104  | AATTGAATGGCAAGGATTGG       |
| scaffold268949_10.8 | 1 p2 | (TA)11 | 22 | 716  | 737  | TGTAATAGTACATACAATGCAGGGA  |
| scaffold269277_14.0 | 1 p2 | (GA)6  | 12 | 76   | 87   | AGCCCCAACTTTGCTGAAT        |
| scaffold269502_18.6 | 1 p2 | (TG)6  | 12 | 105  | 116  | GATGTGGAGATGGGCTGACT       |
| scaffold269522_15.8 | 1 p2 | (TC)6  | 12 | 117  | 128  | CGCGCACAAAGAACTTTACA       |
| scaffold269583_17.1 | 1 p2 | (CT)7  | 14 | 72   | 85   | CACTTGGACCTGAAAAGGGA       |
| scaffold269682_13.6 | 1 p2 | (CA)8  | 16 | 3628 | 3643 | GCCTTTTGGCATGCAGTATT       |
| scaffold269694_15.4 | 1 p2 | (TC)7  | 14 | 404  | 417  | CGTGCAAGCATGAATCACTC       |
| scaffold269737_19.7 | 1 p2 | (GT)6  | 12 | 565  | 576  | GGAATGCGAGATGGAAGAAA       |
| scaffold270090_16.1 | 1 p2 | (TA)7  | 14 | 493  | 506  | TGTCTCGGTGTTTCATGGATT      |
| scaffold270168_13.6 | 1 p2 | (TA)8  | 16 | 508  | 523  | GAAAATTGGTTGTTATCCACAAG    |
| scaffold270307_11.6 | 1 p2 | (CT)6  | 12 | 141  | 152  | CAATACCGTGACATGCCTTG       |
| scaffold270452_15.7 | 1 p2 | (AG)8  | 16 | 4383 | 4398 | CAAGAAAATCCACCTCCAA        |
| scaffold270525_11.6 | 1 p2 | (TA)6  | 12 | 178  | 189  | TCATGAGAAGCGTGGATTTG       |
| scaffold270569_12.5 | 1 p2 | (AG)7  | 14 | 53   | 66   | GGCCACCACACGAGTATATCA      |
| scaffold270585_14.9 | 1 p2 | (AC)8  | 16 | 2844 | 2859 | TCCTCTTTCTTTTTCGCGAGC      |

|                     |      |        |    |      |                               |
|---------------------|------|--------|----|------|-------------------------------|
| scaffold271008_12.3 | 1 p2 | (TA)9  | 18 | 330  | 347 TGTAGGCGCCTCTGATCTTT      |
| scaffold271098_10.0 | 1 p2 | (AT)6  | 12 | 117  | 128 TCGCGTTCGACTCCTTAAC       |
| scaffold271239_15.6 | 1 p2 | (CT)6  | 12 | 113  | 124 TGCTCTCTTTGTAATCTCTCCA    |
| scaffold271381_14.6 | 1 p2 | (TG)6  | 12 | 674  | 685 GTCAGCAGAGGAGGAGTTGC      |
| scaffold271462_12.4 | 1 p2 | (CT)7  | 14 | 223  | 236 GCGAAATCAAAGAATCCGAA      |
| scaffold272471_14.9 | 1 p2 | (AT)8  | 16 | 683  | 698 GGAAATCAATCACAGCCGTT      |
| scaffold272573_13.2 | 1 p2 | (TA)9  | 18 | 586  | 603 TAAAAAGATGAGCCCACCCA      |
| scaffold272606_16.2 | 1 p2 | (TA)8  | 16 | 390  | 405 TATGATGGGAAGGGTGGGTA      |
| scaffold272617_14.7 | 1 p2 | (CT)6  | 12 | 293  | 304 GAAATGAAATCCTGGCTTCG      |
| scaffold272685_18.7 | 1 p2 | (TC)8  | 16 | 76   | 91 TCAGAAACTTGGAGCAGAAGAA     |
| scaffold272917_12.5 | 1 p2 | (TC)6  | 12 | 117  | 128 CAAGCCCAAAAGCACAAAGT      |
| scaffold273254_11.4 | 1 p2 | (CA)9  | 18 | 881  | 898 TCTTTTCAATATTTATACCAACCGA |
| scaffold273522_15.0 | 1 p2 | (TC)7  | 14 | 1869 | 1882 CCCCAAACATCACACACAAG     |
| scaffold274081_14.8 | 1 p2 | (TC)6  | 12 | 195  | 206 AAATGGTTGTTTGTCCCCAA      |
| scaffold274090_18.8 | 1 p2 | (TA)11 | 22 | 523  | 544 TACTTGCTCCCGAGCTCAAT      |
| scaffold274243_12.2 | 1 p2 | (TC)7  | 14 | 603  | 616 GATTCCCCATCACCATCATC      |
| scaffold274368_13.6 | 1 p2 | (GT)7  | 14 | 412  | 425 TTGACATGATTTGTAAACGGG     |
| scaffold274576_12.2 | 1 p2 | (TA)6  | 12 | 133  | 144 TTTTTCATCCCGTTTCATCG      |
| scaffold274662_10.2 | 1 p2 | (TC)7  | 14 | 104  | 117 GAGGACACGTTGGACCTGAT      |
| scaffold275039_13.5 | 1 p2 | (CT)6  | 12 | 48   | 59 CTCACTCTCACTAGCCGCAG       |
| scaffold275042_18.0 | 1 p2 | (CT)6  | 12 | 105  | 116 CAATCATCTAGCCCTTAACATCTC  |
| scaffold275207_15.8 | 1 p2 | (GA)7  | 14 | 805  | 818 TTCTCTGTCGCCAGATCCTT      |
| scaffold275653_18.0 | 1 p2 | (GA)6  | 12 | 119  | 130 AGAGCCACGTTAGGCTCAAG      |
| scaffold275672_13.0 | 1 p2 | (AG)8  | 16 | 350  | 365 TGCAAACCCATTTAAAACCC      |
| scaffold275848_11.7 | 1 p2 | (TA)7  | 14 | 905  | 918 GATATGGAAGAGTGGCACCG      |
| scaffold275876_14.4 | 1 p2 | (CT)6  | 12 | 384  | 395 CCGGCTACTTGTGAATTCCT      |
| scaffold276066_11.0 | 1 p2 | (AT)8  | 16 | 744  | 759 ATGTCGATGAACACGGATGA      |
| scaffold276335_17.6 | 1 p2 | (AT)6  | 12 | 1367 | 1378 ATTTTAGAACGGGGGTGGAC     |
| scaffold276343_16.7 | 1 p2 | (TG)7  | 14 | 263  | 276 TGGTTGGAGGAAAATCTTGTG     |
| scaffold276448_12.7 | 1 p2 | (CA)6  | 12 | 104  | 115 CGTGTAAATCACCATCATCGG     |
| scaffold276908_19.2 | 1 p2 | (CT)8  | 16 | 65   | 80 GGAGTCTCTCTCGCTGATGC       |
| scaffold277841_10.5 | 1 p2 | (TA)8  | 16 | 588  | 603 GGGACAAAGCAAACGAAAA       |
| scaffold278081_13.6 | 1 p2 | (GA)6  | 12 | 225  | 236 CGGCTCCTTTGTGTAGTTCC      |
| scaffold278301_13.6 | 1 p2 | (AT)7  | 14 | 374  | 387 GCCACGTGTGTTTCATTGAGA     |
| scaffold278354_13.2 | 1 p2 | (AT)6  | 12 | 1212 | 1223 CGAAAACCTTGAGAGCTCGTT    |
| scaffold278390_13.7 | 1 p2 | (AT)6  | 12 | 660  | 671 CGGAGTTTCGTATCTTGGGA      |
| scaffold278514_14.2 | 1 p2 | (AT)9  | 18 | 2291 | 2308 AGGGGAAAAGAAGAGTGGGA     |
| scaffold278538_12.9 | 1 p2 | (AT)7  | 14 | 787  | 800 TCCATTTGCATATTATTTTTGCAC  |
| scaffold278679_13.5 | 1 p2 | (TA)6  | 12 | 1295 | 1306 TCAAGAGCCTCCGACTTTTC     |
| scaffold278700_12.7 | 1 p2 | (AG)14 | 28 | 326  | 353 CGAGCGAGAGGAGAGAGAAA      |
| scaffold278911_10.2 | 1 p2 | (CT)7  | 14 | 30   | 43 CAAATGGCCAAGAGAGTTTACA     |
| scaffold279147_13.9 | 1 p2 | (AT)6  | 12 | 532  | 543 GCCTGAATCGACGACAAACT      |
| scaffold279349_10.5 | 1 p2 | (TA)10 | 20 | 215  | 234 CGATTTGGATTGGAATTCTGT     |
| scaffold279401_17.2 | 1 p2 | (TC)6  | 12 | 772  | 783 CAAAGAACGTGCACACACAA      |
| scaffold279605_16.0 | 1 p2 | (AG)10 | 20 | 515  | 534 ATGTGAGATGGTGGTGGTCA      |
| scaffold279810_16.4 | 1 p2 | (GA)7  | 14 | 2147 | 2160 AAGGTAAGGGGGTGGGTATG     |
| scaffold279907_12.7 | 1 p2 | (TA)8  | 16 | 272  | 287 TTTGAAATGGATGGTGGTGA      |
| scaffold280012_10.9 | 1 p2 | (GA)7  | 14 | 293  | 306 AGGGGCTTAAGATCCCAGAA      |
| scaffold280044_10.2 | 1 p2 | (TA)8  | 16 | 168  | 183 AAAAACCCCTCCGCCCTT        |
| scaffold280052_18.0 | 1 p2 | (TA)6  | 12 | 408  | 419 CTACTCTCAATTCCCGTCGC      |
| scaffold280205_13.0 | 1 p2 | (CT)6  | 12 | 575  | 586 CTGCGCACCGATATGATAGA      |
| scaffold280254_14.9 | 1 p2 | (CT)6  | 12 | 145  | 156 CCCTAAGATAATGCCACCCA      |
| scaffold280275_13.3 | 1 p2 | (TC)6  | 12 | 322  | 333 GGCCCTAACTTGACCCAGAT      |
| scaffold280276_14.5 | 1 p2 | (AC)6  | 12 | 42   | 53 GAACAAAGCTTGTACACCGG       |
| scaffold280280_15.4 | 1 p2 | (GC)6  | 12 | 732  | 743 CCCAGACTCGATAACTGGCT      |
| scaffold280296_14.8 | 1 p2 | (GT)7  | 14 | 433  | 446 AGGATTTGAGTTGGCTGTGG      |
| scaffold280734_17.2 | 1 p2 | (GA)6  | 12 | 166  | 177 CCAAAGACGATCTGGGATG       |
| scaffold280804_11.4 | 1 p2 | (TA)8  | 16 | 307  | 322 ACGCTGCCTTGTCTTGATTT      |

|                     |      |        |    |      |      |                            |
|---------------------|------|--------|----|------|------|----------------------------|
| scaffold281078_16.6 | 1 p2 | (TA)8  | 16 | 294  | 309  | TGCGAGCCATCAACATGTAA       |
| scaffold281148_16.1 | 1 p2 | (AT)9  | 18 | 3364 | 3381 | TCATGCACGAAACTCTTGGA       |
| scaffold281530_17.8 | 1 p2 | (TA)8  | 16 | 343  | 358  | TGTATTCCTTGAATATGAGAACTTGT |
| scaffold282023_13.7 | 1 p2 | (TC)6  | 12 | 440  | 451  | CCAAACATGGGGATATGAAA       |
| scaffold282127_12.9 | 1 p2 | (TC)6  | 12 | 411  | 422  | TATTTTCCACCAACCCAACC       |
| scaffold282163_14.0 | 1 p2 | (GA)6  | 12 | 183  | 194  | CTTACGATCAGGGTTGTCCG       |
| scaffold282572_17.3 | 1 p2 | (CT)8  | 16 | 4521 | 4536 | TTTTCTTGCCATAGGCATC        |
| scaffold282679_14.7 | 1 p2 | (TG)6  | 12 | 1231 | 1242 | GCATGCATCCACCACTCTAC       |
| scaffold282734_11.7 | 1 p2 | (TA)8  | 16 | 169  | 184  | AAATCTGAATTTTCGATGCCG      |
| scaffold282744_15.1 | 1 p2 | (TC)9  | 18 | 1097 | 1114 | CCCAAATTCACATGCTTTCC       |
| scaffold282970_14.8 | 1 p2 | (TA)9  | 18 | 3304 | 3321 | CCATTAGCACAAACACATCGC      |
| scaffold283163_10.4 | 1 p2 | (AT)11 | 22 | 77   | 98   | TTTAAATGCACACCCCTTTCT      |
| scaffold283293_12.0 | 1 p2 | (TA)7  | 14 | 176  | 189  | TAAAATTCACCCAAGACGGC       |
| scaffold283313_16.2 | 1 p2 | (TC)7  | 14 | 233  | 246  | GAGAGAGTTGATTGTGGGGG       |
| scaffold283358_10.3 | 1 p2 | (GA)6  | 12 | 162  | 173  | GTTGGAATCAGTAATGGCGG       |
| scaffold283626_12.0 | 1 p2 | (GA)6  | 12 | 89   | 100  | ATACAGTGCAGATGCGCGTT       |
| scaffold283810_15.0 | 1 p2 | (TC)9  | 18 | 189  | 206  | ATTTGCTGCACTCCAACAC        |
| scaffold283878_16.2 | 1 p2 | (TA)6  | 12 | 241  | 252  | AAATGTTTCAGCCCATAGAATTT    |
| scaffold283992_12.0 | 1 p2 | (AG)6  | 12 | 99   | 110  | AGCTCACGGTGGAAGAAGAA       |
| scaffold284077_13.0 | 1 p2 | (TA)7  | 14 | 197  | 210  | CTTCTTCCCAAATTGCCCTT       |
| scaffold284078_18.1 | 1 p2 | (TC)6  | 12 | 1450 | 1461 | CATAATGAGAGGCGGTTGGT       |
| scaffold284128_11.9 | 1 p2 | (AT)8  | 16 | 192  | 207  | TGTATGCACCTGAACATGCC       |
| scaffold284468_13.7 | 1 p2 | (TC)6  | 12 | 319  | 330  | GAGTCCCCTTGGTCTGATGA       |
| scaffold284492_12.5 | 1 p2 | (TA)11 | 22 | 845  | 866  | TTACCCCATATGCAGTGGA        |
| scaffold284545_14.4 | 1 p2 | (TA)7  | 14 | 142  | 155  | TTTGGCTTGTTCGACCT          |
| scaffold284750_11.2 | 1 p2 | (TA)8  | 16 | 449  | 464  | CCCAGCTATATTGCATTCACAA     |
| scaffold284883_10.4 | 1 p2 | (CT)6  | 12 | 446  | 457  | AGGGGGCTTTTAGACACGTT       |
| scaffold284909_13.9 | 1 p2 | (AT)9  | 18 | 224  | 241  | GAGGAACCTCTTAAATGCAGTG     |
| scaffold284953_17.4 | 1 p2 | (TG)8  | 16 | 370  | 385  | CCGACGGTTGTAGTGGAGTT       |
| scaffold285210_12.9 | 1 p2 | (TA)12 | 24 | 482  | 505  | TGTAATGCGCACGTTGAAAT       |
| scaffold285289_12.3 | 1 p2 | (GA)7  | 14 | 49   | 62   | TCGGCTGTCAAAGACAAAAA       |
| scaffold285332_15.1 | 1 p2 | (CT)9  | 18 | 791  | 808  | GATGAAGGGGCTATGTGAA        |
| scaffold285381_17.6 | 1 p2 | (TC)6  | 12 | 708  | 719  | GCCCCACCTTCTATCTCTC        |
| scaffold285628_10.7 | 1 p2 | (AT)6  | 12 | 67   | 78   | GGCTTTCTTAACTTGTTGGAACC    |
| scaffold285629_14.8 | 1 p2 | (GA)6  | 12 | 546  | 557  | ATGATGGAATTTGGGTGCTG       |
| scaffold285644_16.4 | 1 p2 | (AC)6  | 12 | 1851 | 1862 | AGGGGTTGATTGCTACGATG       |
| scaffold285829_14.4 | 1 p2 | (GT)6  | 12 | 453  | 464  | CTGGGGGAGATTTGTTGAGA       |
| scaffold285921_12.2 | 1 p2 | (TA)7  | 14 | 103  | 116  | TCTCACGCACCTTCACTCAC       |
| scaffold286109_21.6 | 1 p2 | (GA)6  | 12 | 39   | 50   | CAGATTTAAACAGTGGCTGCG      |
| scaffold286375_10.6 | 1 p2 | (AT)7  | 14 | 246  | 259  | GTTCGAAAGCCTACCTCGCT       |
| scaffold286603_11.3 | 1 p2 | (GA)6  | 12 | 236  | 247  | GGTGTCTGGAACAAGGGAAA       |
| scaffold286753_12.9 | 1 p2 | (TA)6  | 12 | 1348 | 1359 | TGGTTAGTATTGGAACGCGA       |
| scaffold286759_12.6 | 1 p2 | (AG)8  | 16 | 342  | 357  | GTTATGCGATCTGCTCGTGA       |
| scaffold286835_11.6 | 1 p2 | (AT)8  | 16 | 1204 | 1219 | TCTGATTCGGGAAAACATGA       |
| scaffold287109_14.2 | 1 p2 | (TC)11 | 22 | 1469 | 1490 | ATTGGTTTGCAGGTACGAGG       |
| scaffold287184_14.4 | 1 p2 | (AC)6  | 12 | 2263 | 2274 | TAAAAGTGGCCCCAAAATGA       |
| scaffold287248_17.9 | 1 p2 | (AT)7  | 14 | 202  | 215  | AGGAAGCGAGGTAGGCTTTC       |
| scaffold287508_15.2 | 1 p2 | (TC)6  | 12 | 4524 | 4535 | CGAGAGAGGTTTCGGACGTAG      |
| scaffold287640_11.2 | 1 p2 | (AT)6  | 12 | 197  | 208  | CAATTTATTTACCGAGGGTTCG     |
| scaffold287841_11.5 | 1 p2 | (TA)7  | 14 | 436  | 449  | AATTATCGTCCGTCCCCAAG       |
| scaffold287872_11.2 | 1 p2 | (AT)11 | 22 | 352  | 373  | GAAATATCCACCGAACGGAA       |
| scaffold287896_15.0 | 1 p2 | (AG)7  | 14 | 681  | 694  | GGGAAGAGGGGACTGAAAGT       |
| scaffold288123_10.7 | 1 p2 | (AT)7  | 14 | 70   | 83   | TCATTTAGAATTGGTGGAAATGAT   |
| scaffold288599_11.4 | 1 p2 | (AT)10 | 20 | 294  | 313  | TTCGAGTTATGAAGTTTGCACC     |
| scaffold288721_10.3 | 1 p2 | (AT)8  | 16 | 222  | 237  | CCTCCGTGGACGTAGATCAT       |
| scaffold289165_10.4 | 1 p2 | (AT)8  | 16 | 220  | 235  | TAACGTCCAGATTTGCTCC        |
| scaffold289410_15.6 | 1 p2 | (AT)10 | 20 | 5550 | 5569 | TCTCGTAAACTCCCCCTCAA       |
| scaffold289501_12.1 | 1 p2 | (TA)7  | 14 | 355  | 368  | CAATAGTGACGTTGCCTCA        |

|                     |      |        |    |      |      |                            |
|---------------------|------|--------|----|------|------|----------------------------|
| scaffold289506_16.4 | 1 p2 | (AT)8  | 16 | 5484 | 5499 | TGCAGGTTTGTGAATTTTCG       |
| scaffold289566_17.0 | 1 p2 | (GA)6  | 12 | 41   | 52   | CACGAGAGTTGAAAGGGGAGC      |
| scaffold289905_15.2 | 1 p2 | (TA)7  | 14 | 239  | 252  | CAAATGGAGGTGAGAGGTTTTG     |
| scaffold290213_14.3 | 1 p2 | (CA)8  | 16 | 190  | 205  | TTCCTCTCTTTTTCCAGCCA       |
| scaffold290369_11.4 | 1 p2 | (TC)7  | 14 | 753  | 766  | GGCCAGTAACATTACCCACCT      |
| scaffold290517_10.9 | 1 p2 | (GA)6  | 12 | 112  | 123  | AATAGAGCAGCAGACGCGAT       |
| scaffold290802_17.9 | 1 p2 | (CT)7  | 14 | 89   | 102  | GAGGCGGTTAAAGAAACGTG       |
| scaffold290803_12.4 | 1 p2 | (CT)10 | 20 | 159  | 178  | AGATGAAGCTGAACCGGCTA       |
| scaffold291072_10.9 | 1 p2 | (AT)6  | 12 | 276  | 287  | GTCGTATACTGCCGCCACTT       |
| scaffold291225_11.7 | 1 p2 | (CT)6  | 12 | 107  | 118  | GGAGAGGAATCAAGTCGACAA      |
| scaffold291416_16.2 | 1 p2 | (AT)6  | 12 | 166  | 177  | TGATGAAGAAATGGAAGGGG       |
| scaffold291781_14.9 | 1 p2 | (GA)6  | 12 | 1592 | 1603 | CGTGTATCCTCACCCGTT         |
| scaffold291813_14.4 | 1 p2 | (AT)6  | 12 | 941  | 952  | AAGGCTAGCACAGAATGGC        |
| scaffold291860_10.2 | 1 p2 | (CT)6  | 12 | 67   | 78   | CAAATGGCCAAGAGAGTTTACA     |
| scaffold291947_16.6 | 1 p2 | (AT)7  | 14 | 183  | 196  | CAAACATAGAAACATGGACGC      |
| scaffold291962_14.6 | 1 p2 | (TA)6  | 12 | 407  | 418  | ATTCATACCTTTCTGCCCCC       |
| scaffold292006_17.5 | 1 p2 | (AT)10 | 20 | 939  | 958  | TGTCATGTATAGGCGCATCTG      |
| scaffold292035_12.0 | 1 p2 | (TA)11 | 22 | 286  | 307  | TCTCAAGCTTGTCAACCCCT       |
| scaffold292338_14.2 | 1 p2 | (AG)6  | 12 | 1922 | 1933 | AGCGAGTTCCGAAATGAAGA       |
| scaffold292617_10.7 | 1 p2 | (GA)6  | 12 | 88   | 99   | TTCTGTCTTGGATGATGAGGC      |
| scaffold292629_17.6 | 1 p2 | (TG)7  | 14 | 205  | 218  | GGCAATTATGTTGGAGGTGG       |
| scaffold292631_10.9 | 1 p2 | (CT)6  | 12 | 72   | 83   | CACATACCTCACCTTCTCTCCA     |
| scaffold293334_15.3 | 1 p2 | (AC)7  | 14 | 178  | 191  | AAGTCCACCACGATGTCCTC       |
| scaffold293353_13.7 | 1 p2 | (AG)7  | 14 | 363  | 376  | TTTGTCCCATAAAACTCGCC       |
| scaffold293385_18.3 | 1 p2 | (GA)6  | 12 | 282  | 293  | TAGGGGAGACAGGGGGTAAC       |
| scaffold293435_20.6 | 1 p2 | (TC)7  | 14 | 208  | 221  | GGGGTTGAAGTAAATGAGGTG      |
| scaffold293581_10.2 | 1 p2 | (GA)7  | 14 | 256  | 269  | TGTCAAGATTGGTCTCGTTTT      |
| scaffold293743_14.3 | 1 p2 | (TC)6  | 12 | 763  | 774  | TACCCTGGTTTTGGAAGGTG       |
| scaffold293793_12.0 | 1 p2 | (TC)6  | 12 | 167  | 178  | CCTAAGTGCCTACGTGTTGGA      |
| scaffold294082_13.3 | 1 p2 | (AC)10 | 20 | 273  | 292  | CCAGATGCCTTCATTTTTCA       |
| scaffold294170_16.3 | 1 p2 | (AT)9  | 18 | 1194 | 1211 | CGACGAGGCTTGGATTTCTA       |
| scaffold294223_16.3 | 1 p2 | (TA)6  | 12 | 915  | 926  | TCTGGCTCTTTTCCAGAGCA       |
| scaffold294327_14.3 | 1 p2 | (TG)8  | 16 | 211  | 226  | GAAGTTTTGATCAATTTTCACTCG   |
| scaffold294351_11.8 | 1 p2 | (TA)6  | 12 | 176  | 187  | CAACTCCACATGTTGCCATC       |
| scaffold294353_15.5 | 1 p2 | (TA)8  | 16 | 4448 | 4463 | CCATGAGTCCATGACCCTTC       |
| scaffold294394_18.6 | 1 p2 | (CT)8  | 16 | 534  | 549  | GGAGTCTCTCTCGCTGATGC       |
| scaffold294559_15.3 | 1 p2 | (TA)6  | 12 | 750  | 761  | TCTTCTATAAGGGCGGCTGA       |
| scaffold294566_17.2 | 1 p2 | (GA)6  | 12 | 47   | 58   | GGAGAAAAAGAGATTGAGAGGGA    |
| scaffold294622_11.7 | 1 p2 | (TA)6  | 12 | 166  | 177  | TTCAAACGTGAGGTGATGGT       |
| scaffold294677_15.6 | 1 p2 | (GA)6  | 12 | 529  | 540  | TAGTTTTCAGTTCGGGCGAT       |
| scaffold294795_14.8 | 1 p2 | (TC)6  | 12 | 87   | 98   | TACGTTGGACCTGAAAAGGG       |
| scaffold294813_17.3 | 1 p2 | (TC)6  | 12 | 353  | 364  | GGCAAAGGAATACCTCCGAT       |
| scaffold295048_15.0 | 1 p2 | (CT)6  | 12 | 112  | 123  | CCTTGAACCGAGAAAATGGA       |
| scaffold295139_16.9 | 1 p2 | (TC)7  | 14 | 302  | 315  | CCTTGGCGGATCATATCACT       |
| scaffold295140_11.3 | 1 p2 | (AT)6  | 12 | 1100 | 1111 | ATGGACGTCGTGACTGCATA       |
| scaffold295210_13.4 | 1 p2 | (TA)8  | 16 | 105  | 120  | ATGAGTTATCACCGGATCGC       |
| scaffold295275_10.8 | 1 p2 | (TA)8  | 16 | 1018 | 1033 | TATGTGATAGGCTACGGCCC       |
| scaffold295510_14.5 | 1 p2 | (AG)6  | 12 | 52   | 63   | AGCTGTTAGGGTTGTATAGTGAGTAG |
| scaffold295532_18.7 | 1 p2 | (AT)6  | 12 | 209  | 220  | CCCAGTAGTTCATCAAA          |
| scaffold295539_17.5 | 1 p2 | (CT)7  | 14 | 85   | 98   | TACCCAACCCACTAACCCAA       |
| scaffold295704_19.0 | 1 p2 | (AT)6  | 12 | 1225 | 1236 | GAAGCAAAGAGGATCCCA         |
| scaffold295897_10.6 | 1 p2 | (TC)6  | 12 | 47   | 58   | CAATGTTACAAAATGGGCGA       |
| scaffold296494_13.0 | 1 p2 | (AT)6  | 12 | 902  | 913  | CATTTGATAGTTGTTTTGTGGTGA   |
| scaffold296635_14.6 | 1 p2 | (GA)6  | 12 | 93   | 104  | TGACTTATGGGGGCTCAAAC       |
| scaffold296661_10.6 | 1 p2 | (AT)12 | 24 | 267  | 290  | GGGGCGTGACATTATGAAAT       |
| scaffold296714_16.5 | 1 p2 | (TA)10 | 20 | 1249 | 1268 | TTGGATTGATTATGCTTTGCC      |
| scaffold296880_13.2 | 1 p2 | (AT)6  | 12 | 573  | 584  | CCCAGACACCGTAAGGAAAA       |
| scaffold297488_11.4 | 1 p2 | (TC)6  | 12 | 79   | 90   | ATTCCGTTTTTAAGTCCGGC       |

|                     |      |        |    |      |                                  |
|---------------------|------|--------|----|------|----------------------------------|
| scaffold297588_16.4 | 1 p2 | (AT)7  | 14 | 196  | 209 ACCCTTTTGTAAACATAAAAATTCTAA/ |
| scaffold298109_13.5 | 1 p2 | (AT)7  | 14 | 155  | 168 AAGTCCCAACCACTTTTCACTG       |
| scaffold298158_13.6 | 1 p2 | (TA)6  | 12 | 502  | 513 TTTTCTGCAAATTTGAGGGC         |
| scaffold298289_11.4 | 1 p2 | (TA)8  | 16 | 93   | 108 ATTGCCACGAGAGAGATTG          |
| scaffold298920_13.1 | 1 p2 | (GA)6  | 12 | 38   | 49 TCAACAGAGAATGCAAGCAA          |
| scaffold298997_13.2 | 1 p2 | (AG)9  | 18 | 151  | 168 TATGCGGGCTGGAAGACTAC         |
| scaffold299095_17.6 | 1 p2 | (AC)8  | 16 | 2119 | 2134 GAAAAGCACCACACTGCAAA        |
| scaffold299249_14.1 | 1 p2 | (CT)7  | 14 | 177  | 190 CCTAGCAAGGCTTCCATCTG         |
| scaffold299354_10.4 | 1 p2 | (TA)7  | 14 | 216  | 229 ACGCACACACTCTCACGAAC         |
| scaffold299435_17.7 | 1 p2 | (CT)6  | 12 | 4254 | 4265 CCATTTTCAGTTGCAGAAGCA       |
| scaffold299742_13.7 | 1 p2 | (GA)7  | 14 | 192  | 205 CTTGAAGACAATGAAATTTTGG       |
| scaffold299756_12.5 | 1 p2 | (GA)6  | 12 | 162  | 173 AAACACGCAACACAAAGCAG         |
| scaffold299799_18.6 | 1 p2 | (AG)7  | 14 | 243  | 256 TCGGGAGTCTGTATTGAGCC         |
| scaffold299860_16.9 | 1 p2 | (GA)6  | 12 | 1470 | 1481 GGAGAAATCAAGAGGAGGGG        |
| scaffold299876_11.7 | 1 p2 | (GA)8  | 16 | 122  | 137 TTGTGGTTCGATCGTAATTGA        |
| scaffold300019_16.8 | 1 p2 | (CT)6  | 12 | 115  | 126 GGTTCTCACAGGAGGGTTCA         |
| scaffold300023_13.5 | 1 p2 | (TG)6  | 12 | 473  | 484 GCAATTGAGAGTGAGTGCGA         |
| scaffold300209_13.4 | 1 p2 | (AC)6  | 12 | 441  | 452 ACCCTCTCTGGTTCACGAAA         |
| scaffold301074_15.6 | 1 p2 | (TG)7  | 14 | 278  | 291 TTTTACGATTTTGCCCTCG          |
| scaffold301347_16.5 | 1 p2 | (CA)6  | 12 | 1387 | 1398 GGACACGGTTTCTAATGTTTTGA     |
| scaffold301432_11.1 | 1 p2 | (TA)8  | 16 | 250  | 265 CCTTTCATGTTATTCTTTTCTCACC    |
| scaffold301487_10.9 | 1 p2 | (TA)7  | 14 | 165  | 178 AAGTTATCACCGGATCGCTA         |
| scaffold301501_22.1 | 1 p2 | (CT)7  | 14 | 580  | 593 GAACCAAAGTGAGCCCGATA         |
| scaffold301583_19.6 | 1 p2 | (TA)10 | 20 | 349  | 368 GCTGACGAGGTGATGAGTGA         |
| scaffold301959_22.4 | 1 p2 | (TC)6  | 12 | 103  | 114 ATGGATCGTATCACAAGCCC         |
| scaffold301988_10.6 | 1 p2 | (CT)7  | 14 | 142  | 155 TAGCCGATAAAAATGGCACC         |
| scaffold302108_10.9 | 1 p2 | (TC)6  | 12 | 239  | 250 CGATTCCCATAACCATTGAC         |
| scaffold302449_10.5 | 1 p2 | (TA)7  | 14 | 360  | 373 ATCCTTGACGACTGTTTGGC         |
| scaffold303182_17.0 | 1 p2 | (CA)6  | 12 | 893  | 904 TGCCAATTTGATAGAAGCCC         |
| scaffold303184_16.1 | 1 p2 | (TA)9  | 18 | 465  | 482 TCGTGGAAATTCCTTTAATGTG       |
| scaffold303431_11.2 | 1 p2 | (AT)7  | 14 | 457  | 470 TTAGCACCCGAACCAATTC          |
| scaffold303827_10.0 | 1 p2 | (TC)7  | 14 | 155  | 168 CGGAGTGTATTGCGAACTCA         |
| scaffold303941_20.0 | 1 p2 | (CT)6  | 12 | 108  | 119 TTCTCTCTCTCGCTGCACAC         |
| scaffold304124_20.8 | 1 p2 | (CA)8  | 16 | 316  | 331 GTTTCCATGTTTCACCCACC         |
| scaffold304672_16.1 | 1 p2 | (TA)6  | 12 | 1403 | 1414 TTTGACCTCGAAGGATTTGG        |
| scaffold304939_13.0 | 1 p2 | (AT)12 | 24 | 467  | 490 GCAGGTGAGGGACAAGAATG         |
| scaffold305168_16.0 | 1 p2 | (TC)6  | 12 | 2194 | 2205 ACACCGTCAATCACAACACA        |
| scaffold305277_12.2 | 1 p2 | (TC)6  | 12 | 296  | 307 ACTGCGGATGCCCTAATATG         |
| scaffold305452_13.8 | 1 p2 | (TA)9  | 18 | 183  | 200 TGAATCCTTTTTAAACGCGG         |
| scaffold305630_11.6 | 1 p2 | (TA)7  | 14 | 75   | 88 ACCCACACCAGACCAACATA          |
| scaffold305688_14.9 | 1 p2 | (AG)12 | 24 | 1929 | 1952 CCATCTCCTCGAGCTCAATC        |
| scaffold305885_14.2 | 1 p2 | (TG)9  | 18 | 185  | 202 TCCTTTAGGCCGACAACATT         |
| scaffold306069_12.1 | 1 p2 | (CG)8  | 16 | 215  | 230 GCATCGGTTTTCAATACAGA         |
| scaffold306095_11.6 | 1 p2 | (AT)8  | 16 | 244  | 259 CCGCCATAACCTGTTCAACT         |
| scaffold306100_19.0 | 1 p2 | (AT)9  | 18 | 215  | 232 ATTGGTCGAGAGAAAGGGCT         |
| scaffold306172_14.7 | 1 p2 | (AT)11 | 22 | 780  | 801 CCATGGGAAATGTTAGTTGA         |
| scaffold306363_10.2 | 1 p2 | (TA)6  | 12 | 114  | 125 TTGAATGGAAATACCCTTTAGG       |
| scaffold306451_11.8 | 1 p2 | (TC)9  | 18 | 356  | 373 GTGGTATGGAATAATGGGCAC        |
| scaffold306597_13.8 | 1 p2 | (TC)6  | 12 | 1771 | 1782 TGTTTTGTAGGCCTGCCTTT        |
| scaffold306633_15.2 | 1 p2 | (TA)6  | 12 | 92   | 103 ATGCTTTTCCCCTTTTTCGT         |
| scaffold306843_11.7 | 1 p2 | (AT)6  | 12 | 587  | 598 TGACCAAATTTAGCGAGGG          |
| scaffold307006_15.8 | 1 p2 | (TA)7  | 14 | 252  | 265 TACCGGCTTCAACAGCTTCT         |
| scaffold307273_12.3 | 1 p2 | (TA)6  | 12 | 31   | 42 GAATCTTGTACATTTACCAATGTATC    |
| scaffold307296_15.0 | 1 p2 | (TA)8  | 16 | 3336 | 3351 GGTTTTGGGAATCCATCCT         |
| scaffold307602_12.2 | 1 p2 | (AT)7  | 14 | 101  | 114 TTTGCACAAGTGCCAAAGAG         |
| scaffold307896_14.5 | 1 p2 | (AG)9  | 18 | 1772 | 1789 AGGTCAAGGGTACCATCCTG        |
| scaffold308095_15.8 | 1 p2 | (GA)7  | 14 | 1706 | 1719 TCTCAAGCTCCTCCAACGAT        |
| scaffold308408_13.1 | 1 p2 | (AT)6  | 12 | 367  | 378 TGGCTCATTCCCTAACTTGC         |

|                     |      |        |    |      |      |                          |
|---------------------|------|--------|----|------|------|--------------------------|
| scaffold308593_15.0 | 1 p2 | (TG)8  | 16 | 289  | 304  | TGTAAGGGGAGCAATCGAAG     |
| scaffold308613_16.8 | 1 p2 | (AT)9  | 18 | 1329 | 1346 | TCACATTCTGCGATTGCTAA     |
| scaffold308852_12.0 | 1 p2 | (AT)6  | 12 | 184  | 195  | ACTCATGACCCTACCAACGG     |
| scaffold308922_10.5 | 1 p2 | (AT)6  | 12 | 53   | 64   | GACCGGTTAGACCGGATTTT     |
| scaffold308965_17.8 | 1 p2 | (CT)6  | 12 | 230  | 241  | AAGTCCGGCCATCTCTTTCT     |
| scaffold309030_11.9 | 1 p2 | (AC)8  | 16 | 309  | 324  | TGACGAATTCTCAAGTTCCTCAC  |
| scaffold309241_12.2 | 1 p2 | (GA)6  | 12 | 98   | 109  | AAGCTGCTCCTTTCCACAGA     |
| scaffold309624_15.1 | 1 p2 | (AT)11 | 22 | 2110 | 2131 | ACAAGTTGAAGGATGGCCTG     |
| scaffold309717_15.6 | 1 p2 | (TC)6  | 12 | 313  | 324  | AGCCAAGGTATGGTAGCCCT     |
| scaffold309783_17.0 | 1 p2 | (GA)8  | 16 | 143  | 158  | GAGAGAAAAGGTGGCAGGTG     |
| scaffold309788_11.8 | 1 p2 | (TC)6  | 12 | 173  | 184  | CATAGGCCAAAGCCCAAATA     |
| scaffold309906_13.8 | 1 p2 | (AG)6  | 12 | 708  | 719  | TGGCCTGGCTTAGTTGTATTG    |
| scaffold310416_10.1 | 1 p2 | (AG)6  | 12 | 43   | 54   | GTCTTCTCCGCCTTTGTGTG     |
| scaffold312002_10.7 | 1 p2 | (AT)8  | 16 | 442  | 457  | ACGTCAGCATCTACCCCAAC     |
| scaffold312074_10.1 | 1 p2 | (TC)6  | 12 | 53   | 64   | CAACACATTCAATACATTCTCCAA |
| scaffold312178_12.8 | 1 p2 | (AG)8  | 16 | 517  | 532  | AATGTTTGATGCATTTTCGCA    |
| scaffold312298_14.4 | 1 p2 | (TC)7  | 14 | 1914 | 1927 | CTCTCTCGCCTCGCTTTCTA     |
| scaffold312378_13.2 | 1 p2 | (AC)6  | 12 | 336  | 347  | GACGAGATTGTCGAGTGCAA     |
| scaffold312843_15.8 | 1 p2 | (GA)6  | 12 | 1232 | 1243 | CGACGAGAAAGTCGTGTCAA     |
| scaffold312914_10.0 | 1 p2 | (GT)6  | 12 | 136  | 147  | TCATGTAAATTCTTGTCATTCTCA |
| scaffold313011_13.8 | 1 p2 | (TG)7  | 14 | 77   | 90   | CCAAGCTATCACTCATCACC     |
| scaffold313094_14.2 | 1 p2 | (TC)7  | 14 | 445  | 458  | TGTTTTCGCGTTTCTCTCT      |
| scaffold313419_16.2 | 1 p2 | (TC)6  | 12 | 101  | 112  | GCAACGGAATACCACTCGTT     |
| scaffold313480_13.8 | 1 p2 | (TA)6  | 12 | 144  | 155  | AATACGCGAGTTCATGGAGG     |
| scaffold313665_13.2 | 1 p2 | (AT)6  | 12 | 320  | 331  | TGCACGTAGGCATGTTCAAT     |
| scaffold313673_12.9 | 1 p2 | (TA)6  | 12 | 244  | 255  | CATTCAAGGGGCATTTTTGT     |
| scaffold313763_11.9 | 1 p2 | (CT)14 | 28 | 512  | 539  | GGGCTCGAATTCAAAACACTGA   |
| scaffold313781_14.0 | 1 p2 | (TC)8  | 16 | 51   | 66   | GAGGGTTTTAGCGTGATAGGG    |
| scaffold313828_16.1 | 1 p2 | (TC)6  | 12 | 104  | 115  | CACCCAAACCCATTATCACC     |
| scaffold314026_10.8 | 1 p2 | (GA)10 | 20 | 209  | 228  | GCATTTGGAGCAAGGCTAAG     |
| scaffold314032_15.0 | 1 p2 | (AG)7  | 14 | 99   | 112  | CCCATGTTGTCATTAATGTAGGG  |
| scaffold314073_10.7 | 1 p2 | (TA)8  | 16 | 233  | 248  | TTCTCAGCATATGGGAAGGG     |
| scaffold314135_14.7 | 1 p2 | (TA)9  | 18 | 490  | 507  | TCTGGACCATCAGATTTGGA     |
| scaffold314230_12.0 | 1 p2 | (GA)6  | 12 | 107  | 118  | AGAAAATGCATGCGAAGAGC     |
| scaffold314251_15.9 | 1 p2 | (TA)7  | 14 | 176  | 189  | AAAGGGAAAACAGTTGGAAGC    |
| scaffold314688_13.0 | 1 p2 | (CT)6  | 12 | 45   | 56   | CAATATTACAATGGCCAAGAGAG  |
| scaffold314815_10.4 | 1 p2 | (GA)7  | 14 | 202  | 215  | CATTCGGAGCAAGGAGAAGT     |
| scaffold314816_14.9 | 1 p2 | (AT)8  | 16 | 159  | 174  | TTGCCATATTTAAGCCGAGG     |
| scaffold314983_18.6 | 1 p2 | (AG)6  | 12 | 76   | 87   | TGTCTTTTCGTGTTGAGTCGTT   |
| scaffold315188_14.4 | 1 p2 | (TA)6  | 12 | 875  | 886  | CATGATTTTGCAACTTACCATTC  |
| scaffold315253_13.5 | 1 p2 | (AG)6  | 12 | 160  | 171  | CCCTCAACAATGCAAAAAGC     |
| scaffold315266_17.1 | 1 p2 | (AG)6  | 12 | 603  | 614  | TTCGGCCAAAAGAAAAGAAA     |
| scaffold315297_15.0 | 1 p2 | (AT)10 | 20 | 1283 | 1302 | AGTCGTCACCCCGAACATAG     |
| scaffold315303_15.1 | 1 p2 | (TA)7  | 14 | 409  | 422  | GAAATGAGAAGCCCAATGGA     |
| scaffold315351_15.9 | 1 p2 | (CT)6  | 12 | 441  | 452  | CCGTTGCCTCTTTTGAACTC     |
| scaffold315354_10.5 | 1 p2 | (GA)6  | 12 | 83   | 94   | GCCGGAGGTTTGATATGGTT     |
| scaffold315615_14.2 | 1 p2 | (AG)12 | 24 | 1613 | 1636 | CCCTGTCTTCCAAAACCAA      |
| scaffold315657_12.0 | 1 p2 | (TG)6  | 12 | 161  | 172  | GTGGCATGGGGAAGCTACTA     |
| scaffold315702_17.4 | 1 p2 | (GA)8  | 16 | 73   | 88   | CACTGTGTAGAAACATAAACTGCG |
| scaffold315755_15.7 | 1 p2 | (CA)7  | 14 | 1106 | 1119 | AGCCGTGGGACATAAGAGTG     |
| scaffold315912_11.5 | 1 p2 | (TA)6  | 12 | 270  | 281  | GGGTTTTGCAGGATTGTGAT     |
| scaffold316021_14.3 | 1 p2 | (AT)6  | 12 | 843  | 854  | TTGTGTTACAATGATGGGGG     |
| scaffold316027_16.9 | 1 p2 | (CT)8  | 16 | 442  | 457  | GTTGGAGGTGCCAAAACACTGT   |
| scaffold316120_16.8 | 1 p2 | (AT)8  | 16 | 113  | 128  | GGGTGTTTTGACCTAATCGC     |
| scaffold316285_15.2 | 1 p2 | (CA)10 | 20 | 3770 | 3789 | CGAAATAGGGTTGGTGAAGC     |
| scaffold316422_10.0 | 1 p2 | (GA)6  | 12 | 523  | 534  | CGGAACCCTCTCTTACC        |
| scaffold316630_15.2 | 1 p2 | (TA)6  | 12 | 412  | 423  | GAAAACGACGAAGAAATGGC     |
| scaffold316689_15.6 | 1 p2 | (GA)6  | 12 | 515  | 526  | TCAAGTAAAATGGCAACCA      |

|                     |      |        |    |      |      |                           |
|---------------------|------|--------|----|------|------|---------------------------|
| scaffold316940_11.0 | 1 p2 | (AG)6  | 12 | 195  | 206  | AGCTGGAATAGTCCGACACG      |
| scaffold317113_17.1 | 1 p2 | (TC)11 | 22 | 2104 | 2125 | ACCGAAGTTCCTGCTCACAG      |
| scaffold317119_14.9 | 1 p2 | (AG)6  | 12 | 154  | 165  | CCAAACGCATCAAATTCTCA      |
| scaffold317153_18.5 | 1 p2 | (AT)6  | 12 | 1544 | 1555 | TCCATTTACATCCGATGAA       |
| scaffold317265_10.6 | 1 p2 | (TA)7  | 14 | 150  | 163  | AAACAGTCTTCGGGACACCA      |
| scaffold317410_10.3 | 1 p2 | (CA)7  | 14 | 896  | 909  | TCTACGTCCACGGAGAGGTT      |
| scaffold317520_10.0 | 1 p2 | (AT)9  | 18 | 705  | 722  | CCGAACTTTTGGCCTTCATA      |
| scaffold317598_13.6 | 1 p2 | (TC)6  | 12 | 2974 | 2985 | AACTTCTCCTCCCAATCGCT      |
| scaffold317609_11.6 | 1 p2 | (GT)7  | 14 | 89   | 102  | TACGATACCCTCCCAAACCC      |
| scaffold317645_14.4 | 1 p2 | (AT)6  | 12 | 2246 | 2257 | TCTGCATGCAAGATAGTACGG     |
| scaffold317699_16.5 | 1 p2 | (AG)6  | 12 | 535  | 546  | ATTGCCATCACCTTCTCCAC      |
| scaffold317857_14.1 | 1 p2 | (TA)10 | 20 | 772  | 791  | TCAAATCTTTGAAACGGGTG      |
| scaffold317870_10.4 | 1 p2 | (CT)9  | 18 | 422  | 439  | ACTAGAATTCCTCTGCCCC       |
| scaffold317926_19.5 | 1 p2 | (TA)9  | 18 | 447  | 464  | GTCTGTGAGGTGGGCTGAGT      |
| scaffold318201_11.3 | 1 p2 | (AT)6  | 12 | 667  | 678  | GGGGTCCCAGAAAAGTATT       |
| scaffold318303_14.1 | 1 p2 | (GC)6  | 12 | 148  | 159  | ATATTCTCGCTTCTTCGCCA      |
| scaffold318340_15.1 | 1 p2 | (AT)6  | 12 | 554  | 565  | TTTTGCCTCTCGCAAAAAGT      |
| scaffold318363_14.8 | 1 p2 | (AT)6  | 12 | 356  | 367  | TCACCACGAAGTCTACAAAAACA   |
| scaffold318533_14.7 | 1 p2 | (TC)8  | 16 | 49   | 64   | CGCGCCTACAATTCAAAGTA      |
| scaffold318607_18.1 | 1 p2 | (AG)6  | 12 | 449  | 460  | ATCCCCACTTTTTCGCTTTT      |
| scaffold318858_12.4 | 1 p2 | (TA)9  | 18 | 587  | 604  | CATAATGCCCTCGAATGCTAA     |
| scaffold319053_15.1 | 1 p2 | (AG)12 | 24 | 262  | 285  | GGTATATGGAGGAATGCCCA      |
| scaffold319991_15.9 | 1 p2 | (AT)8  | 16 | 2774 | 2789 | GAGAATCTGGTTCTGTGTGGC     |
| scaffold320117_15.1 | 1 p2 | (AT)6  | 12 | 90   | 101  | CACATCAACACACCCACACA      |
| scaffold320125_14.8 | 1 p2 | (AT)6  | 12 | 1553 | 1564 | GACCGATCGAAACACACTGA      |
| scaffold320396_15.9 | 1 p2 | (AT)8  | 16 | 1511 | 1526 | CGGTTTCCACAACAATAGCC      |
| scaffold320407_12.4 | 1 p2 | (TC)6  | 12 | 92   | 103  | ATGAGTCGTAGTTGACGCCC      |
| scaffold320614_12.8 | 1 p2 | (AG)7  | 14 | 230  | 243  | GGAATTGATGGATTTGGGA       |
| scaffold320646_14.1 | 1 p2 | (GT)7  | 14 | 262  | 275  | GGAATGCGTCGAGTACCACT      |
| scaffold320698_14.3 | 1 p2 | (AG)6  | 12 | 71   | 82   | CCCATGTTGTAATTAATGTAGGGA  |
| scaffold320978_15.5 | 1 p2 | (AG)6  | 12 | 983  | 994  | TAGTTGGAGCAGGGGAAGAA      |
| scaffold321005_15.4 | 1 p2 | (AC)6  | 12 | 125  | 136  | CCCCTCCTAACTTTGCTGC       |
| scaffold321194_11.6 | 1 p2 | (CA)7  | 14 | 183  | 196  | TGACCCACCATTGTCAAGAA      |
| scaffold321259_15.5 | 1 p2 | (GA)6  | 12 | 697  | 708  | GTCCACAAAAGCTCAGAGG       |
| scaffold321417_13.4 | 1 p2 | (TA)10 | 20 | 158  | 177  | CTCAGCATTGTTGGGAAGGGTA    |
| scaffold321803_12.6 | 1 p2 | (TA)10 | 20 | 744  | 763  | AACAATACGGAAGCAATTTTATCA  |
| scaffold321960_10.0 | 1 p2 | (GA)8  | 16 | 153  | 168  | TTGATGTCCCTTCTCCTTGC      |
| scaffold321999_15.7 | 1 p2 | (GA)7  | 14 | 1051 | 1064 | TGCCTTCCATGTTTGTTC        |
| scaffold322026_17.0 | 1 p2 | (CA)6  | 12 | 242  | 253  | TCTGTGCCGCATTTATGATT      |
| scaffold322075_10.5 | 1 p2 | (TA)8  | 16 | 82   | 97   | TTTTCGAGTTATGAAGTTAGCACC  |
| scaffold322082_13.6 | 1 p2 | (GA)6  | 12 | 151  | 162  | ACCCAAGGTCAGTGGAAACAA     |
| scaffold322106_15.4 | 1 p2 | (TA)8  | 16 | 517  | 532  | ACATAGCAATTTTCGGGGTG      |
| scaffold322170_17.9 | 1 p2 | (TA)8  | 16 | 1366 | 1381 | TGGTTTTCTCCTTCTCAACGA     |
| scaffold322395_14.8 | 1 p2 | (AT)6  | 12 | 610  | 621  | GCTACCCTTTTTGACCTACGG     |
| scaffold322408_15.6 | 1 p2 | (TA)10 | 20 | 1470 | 1489 | CTTCAATGGACCAGCACCTT      |
| scaffold322936_17.3 | 1 p2 | (AT)8  | 16 | 71   | 86   | CCTGCACGAAGAAAGGATTC      |
| scaffold323072_15.2 | 1 p2 | (TC)6  | 12 | 48   | 59   | TTGGTTCACACAACCACTCC      |
| scaffold323272_16.1 | 1 p2 | (AT)9  | 18 | 151  | 168  | TGAATGATTTAATAACCTATGGTGC |
| scaffold323277_14.4 | 1 p2 | (AT)6  | 12 | 437  | 448  | CGTCGTGCTCAAACCTTCAA      |
| scaffold323464_14.9 | 1 p2 | (CT)6  | 12 | 80   | 91   | CAATGTGAAATGGGCAAGAG      |
| scaffold323820_15.3 | 1 p2 | (CT)6  | 12 | 83   | 94   | GTTTCGACAACTCTCCACT       |
| scaffold323925_15.6 | 1 p2 | (GA)7  | 14 | 803  | 816  | TGCAAGAAAATCCAGCTTCA      |
| scaffold324006_11.5 | 1 p2 | (CT)7  | 14 | 355  | 368  | CAATCCAAGCTACAACGCA       |
| scaffold324010_16.2 | 1 p2 | (AC)8  | 16 | 1231 | 1246 | AACAAAACCACGAATCCAGC      |
| scaffold324194_16.7 | 1 p2 | (TA)6  | 12 | 468  | 479  | TAGCGTGATTTGTGGACGAG      |
| scaffold324215_17.9 | 1 p2 | (CT)6  | 12 | 53   | 64   | CACTCACTCTCACTAGCCGC      |
| scaffold324218_16.0 | 1 p2 | (CT)6  | 12 | 285  | 296  | TGAGCAAAGCATTTTGGATG      |
| scaffold324418_16.0 | 1 p2 | (TA)7  | 14 | 86   | 99   | CCATTTGCAATACTAAGGCTTTC   |



|                     |      |        |    |      |                               |
|---------------------|------|--------|----|------|-------------------------------|
| scaffold324446_16.0 | 1 p2 | (GT)9  | 18 | 855  | 872 GAGCAATAGCAGGTTCCGGAG     |
| scaffold324788_14.7 | 1 p2 | (TA)8  | 16 | 232  | 247 CAAGCATATTGGCAAGAAACA     |
| scaffold324951_10.9 | 1 p2 | (GA)6  | 12 | 116  | 127 AGTTTGGGGCTTGATTGATG      |
| scaffold325007_17.6 | 1 p2 | (TC)6  | 12 | 291  | 302 CAAGCAAACCACTCACTCTCC     |
| scaffold325142_12.8 | 1 p2 | (TA)11 | 22 | 163  | 184 CTGAGATTTACATGGCAACA      |
| scaffold325269_11.9 | 1 p2 | (CT)6  | 12 | 194  | 205 GAAGCAAACACGTCACTCCA      |
| scaffold325313_16.8 | 1 p2 | (CT)6  | 12 | 1948 | 1959 AATTCATTTCCCCTCGACCT     |
| scaffold325338_11.2 | 1 p2 | (AT)9  | 18 | 377  | 394 GGTCCATTGGTCTTTTGTATTGA   |
| scaffold325517_14.9 | 1 p2 | (AT)6  | 12 | 133  | 144 TGCATCACGTCTCCTCAATC      |
| scaffold325695_13.2 | 1 p2 | (CA)6  | 12 | 432  | 443 CTCACGCTCTCTCACTCACG      |
| scaffold325869_12.8 | 1 p2 | (AT)7  | 14 | 372  | 385 GACCACCAACCATCAAATC       |
| scaffold326122_14.9 | 1 p2 | (TA)10 | 20 | 1059 | 1078 CAATCCCAGCCATTCATTTT     |
| scaffold326194_10.7 | 1 p2 | (TC)6  | 12 | 33   | 44 TCTCATTCTCTTCTCTATCTCTCTCG |
| scaffold326712_11.0 | 1 p2 | (GA)6  | 12 | 944  | 955 TAACTGCCATTTCCCATTTC      |
| scaffold326718_12.2 | 1 p2 | (TA)10 | 20 | 349  | 368 TACCTTTTTGCCCTCGAATG      |
| scaffold326912_13.2 | 1 p2 | (TG)7  | 14 | 340  | 353 AATTAATGTGGCATGGGGAA      |
| scaffold326949_14.6 | 1 p2 | (TA)6  | 12 | 76   | 87 ACAGTAGGGTGGAAAACAAAAA     |
| scaffold327064_11.0 | 1 p2 | (AT)6  | 12 | 77   | 88 TGCATTTTCTTCTTTCTTTTCA     |
| scaffold327099_10.7 | 1 p2 | (GA)8  | 16 | 68   | 83 TGGAGAAGAAAGAATGAGGAATG    |
| scaffold327145_12.8 | 1 p2 | (AT)6  | 12 | 62   | 73 CAGATGGAGGGTGTGTGAAA       |
| scaffold327246_14.6 | 1 p2 | (AT)6  | 12 | 643  | 654 CGTTTAGCCGCAAGTTTCTC      |
| scaffold327419_17.8 | 1 p2 | (TA)7  | 14 | 263  | 276 CGAATTTTGTGTGGACCGTA      |
| scaffold327547_12.0 | 1 p2 | (AG)7  | 14 | 158  | 171 AAGCCAAGCAAGGAAAAAT       |
| scaffold328349_13.9 | 1 p2 | (CT)6  | 12 | 119  | 130 TGGCTTCTCTTGCTCTCTCA      |
| scaffold328452_12.2 | 1 p2 | (CT)6  | 12 | 687  | 698 GCCGAGTCTTGTTGATGATG      |
| scaffold328697_15.7 | 1 p2 | (TA)6  | 12 | 776  | 787 GAGTCAAGGGCGGATACAAG      |
| scaffold328755_11.0 | 1 p2 | (TA)6  | 12 | 289  | 300 TTGTAATGTGGCATGCGTTT      |
| scaffold328967_18.9 | 1 p2 | (TA)9  | 18 | 358  | 375 AGGTGGCACGCATCTGTAAC      |
| scaffold329265_11.7 | 1 p2 | (TA)6  | 12 | 344  | 355 TTGATGTTTAAAGTCGTCGGC     |
| scaffold329603_16.9 | 1 p2 | (AG)6  | 12 | 867  | 878 TGTTCATGCTGGCTGATAGG      |
| scaffold329862_16.2 | 1 p2 | (GA)6  | 12 | 901  | 912 TGCAAGCCTATGGTGGGTAT      |
| scaffold330369_12.6 | 1 p2 | (AT)9  | 18 | 136  | 153 GCCGAGAGAGATGAGGAGTG      |
| scaffold330708_16.9 | 1 p2 | (GA)7  | 14 | 3123 | 3136 GGCCCTGATCAGAATCAAAA     |
| scaffold330732_10.2 | 1 p2 | (AT)6  | 12 | 162  | 173 GGAAAAGGGAAGAACAAGGC      |
| scaffold330861_17.9 | 1 p2 | (GA)7  | 14 | 2640 | 2653 CAGAGGGGACCTTCCTTTTC     |
| scaffold331413_16.0 | 1 p2 | (GA)7  | 14 | 2199 | 2212 TGCAAAAGCTTAGGTGGACA     |
| scaffold331432_14.7 | 1 p2 | (GA)8  | 16 | 1168 | 1183 TGATTGCTTTGGCCCTACTC     |
| scaffold331777_12.9 | 1 p2 | (TA)6  | 12 | 73   | 84 CTGACGTCTTGTGGGAGTGA       |
| scaffold332162_11.9 | 1 p2 | (AT)8  | 16 | 470  | 485 TTTCTGCTGCTCTCAACTTCA     |
| scaffold332332_11.9 | 1 p2 | (GA)6  | 12 | 404  | 415 ACCCCAATCTCCGTTCTTCT      |
| scaffold332545_16.9 | 1 p2 | (CT)7  | 14 | 9125 | 9138 TCACCTTTGCCTGGGTATC      |
| scaffold333233_11.9 | 1 p2 | (TA)9  | 18 | 207  | 224 TCGGAATTCACCTCTTTGCTG     |
| scaffold333356_16.9 | 1 p2 | (GA)6  | 12 | 499  | 510 TGTTGGACTGTGTTGGGCTA      |
| scaffold333858_10.9 | 1 p2 | (AG)7  | 14 | 69   | 82 TTGTGGGACTTTGAAAGAGGA      |
| scaffold333865_16.8 | 1 p2 | (TA)9  | 18 | 1027 | 1044 CAACGGTATGCTCGGATTTT     |
| scaffold333989_16.0 | 1 p2 | (GA)6  | 12 | 79   | 90 GGCTCAAGCTTGCTGTTTTTC      |
| scaffold334347_15.8 | 1 p2 | (AT)6  | 12 | 216  | 227 GGTTGTAATGAGGCTTTCGG      |
| scaffold334580_16.4 | 1 p2 | (GA)6  | 12 | 615  | 626 ATCATCCAATCCAATCCA        |
| scaffold334757_15.9 | 1 p2 | (CA)7  | 14 | 279  | 292 GGTGTGGCTCTGTGATTCT       |
| scaffold334891_14.9 | 1 p2 | (TC)6  | 12 | 969  | 980 TGTGAGATTGTGTGTGGCAA      |
| scaffold334969_13.9 | 1 p2 | (TA)7  | 14 | 469  | 482 ATCGGCCGAGATTTGTTATG      |
| scaffold335149_11.9 | 1 p2 | (GA)7  | 14 | 525  | 538 TGAACATCCATGGTCCAAAA      |
| scaffold335722_16.9 | 1 p2 | (TC)7  | 14 | 1205 | 1218 CCCACACCTCTTTGCTTTGT     |
| scaffold335902_13.9 | 1 p2 | (AT)7  | 14 | 505  | 518 AACCCGTTTGCTGCATAGTT      |
| scaffold336129_13.0 | 1 p2 | (AT)9  | 18 | 300  | 317 TCGAAGAGGAAAATAAAATAATCCC |
| scaffold336159_15.2 | 1 p2 | (TG)9  | 18 | 2694 | 2711 TTTTGGAGAGGTTGGAGGTG     |
| scaffold336169_10.2 | 1 p2 | (TA)8  | 16 | 206  | 221 CGTCTAATCCACCGCCTAAA      |
| scaffold336306_11.2 | 1 p2 | (AT)6  | 12 | 329  | 340 TCTTCGATGTTGCTGGATTG      |

|                     |      |        |    |      |      |                            |
|---------------------|------|--------|----|------|------|----------------------------|
| scaffold336327_17.3 | 1 p2 | (AT)6  | 12 | 477  | 488  | AATGGCTGCAATTATCCCTG       |
| scaffold336438_11.2 | 1 p2 | (AT)7  | 14 | 223  | 236  | CATGATCAAATCTTGGTGCG       |
| scaffold336460_12.4 | 1 p2 | (CT)7  | 14 | 68   | 81   | CAAATGCCCAAGAGGGTTTA       |
| scaffold336476_16.6 | 1 p2 | (AG)6  | 12 | 300  | 311  | GGCTGTACCATAAAAAGCCCA      |
| scaffold336568_13.4 | 1 p2 | (TC)6  | 12 | 253  | 264  | CCGAATTTTCCACTCCAGAA       |
| scaffold336742_16.0 | 1 p2 | (AT)7  | 14 | 2427 | 2440 | TTGCCCAAACAAATGAAAAA       |
| scaffold336786_19.9 | 1 p2 | (AT)6  | 12 | 159  | 170  | CGATCAATAAAGCTGCACACA      |
| scaffold336870_13.0 | 1 p2 | (CT)6  | 12 | 296  | 307  | CGCACTACTAGGGTTTGGGA       |
| scaffold337112_19.2 | 1 p2 | (GA)6  | 12 | 150  | 161  | CATTCTCAAGCCACTCCCTC       |
| scaffold337344_17.7 | 1 p2 | (TC)8  | 16 | 104  | 119  | TGAAAAAGGACTCTTGGGCA       |
| scaffold337506_16.5 | 1 p2 | (TC)7  | 14 | 673  | 686  | AGAGGTAGCCATTTACGCGA       |
| scaffold337681_11.8 | 1 p2 | (TC)6  | 12 | 89   | 100  | TAGGCAATGGAATACCTCCG       |
| scaffold337783_11.3 | 1 p2 | (TA)8  | 16 | 320  | 335  | CACCACCACCTCACTGTCC        |
| scaffold337813_10.9 | 1 p2 | (TA)10 | 20 | 563  | 582  | CAAATTCTTGATTGCGCCACC      |
| scaffold338083_14.2 | 1 p2 | (CA)6  | 12 | 1134 | 1145 | GGTTGCTCTCCTTTGAGCAC       |
| scaffold338132_16.6 | 1 p2 | (AG)8  | 16 | 2073 | 2088 | CCTGGCTCGTTAGCTGATCT       |
| scaffold338234_15.0 | 1 p2 | (AC)6  | 12 | 1390 | 1401 | TTCCAAAGCAACGTAACATGA      |
| scaffold338395_11.5 | 1 p2 | (AG)6  | 12 | 615  | 626  | AGGTCGTGGTGAAAAAGGGT       |
| scaffold338474_11.3 | 1 p2 | (TA)6  | 12 | 109  | 120  | TCTGCATGCTCTATGCAAGAAT     |
| scaffold338497_14.3 | 1 p2 | (CT)6  | 12 | 47   | 58   | CAATGATTGTCAAATTAGAGTTCAA  |
| scaffold338688_16.7 | 1 p2 | (GT)7  | 14 | 100  | 113  | TAGGATACCCTCCCAAACCC       |
| scaffold338716_14.2 | 1 p2 | (CT)6  | 12 | 418  | 429  | AAAAGGGGCATTTTGCCTA        |
| scaffold338858_13.7 | 1 p2 | (TA)8  | 16 | 255  | 270  | TGCACAGCATATGCCTTCAT       |
| scaffold338959_16.7 | 1 p2 | (CT)11 | 22 | 436  | 457  | GCTCCTCCTTGGTACTCACAA      |
| scaffold339016_18.1 | 1 p2 | (TC)6  | 12 | 218  | 229  | CGAGATGTCTTCAGGGCATT       |
| scaffold339153_13.8 | 1 p2 | (CA)6  | 12 | 208  | 219  | CTCCTTCTATCTCCCCTGCC       |
| scaffold339183_15.3 | 1 p2 | (TA)6  | 12 | 397  | 408  | ACGCTCTTGAATATGCGCT        |
| scaffold339911_18.9 | 1 p2 | (CT)7  | 14 | 83   | 96   | CTCTCTCACCTCCCAAACCC       |
| scaffold339963_15.9 | 1 p2 | (TC)6  | 12 | 202  | 213  | AAAGGTTAGTGGGCTGAGGAA      |
| scaffold340103_13.5 | 1 p2 | (TA)7  | 14 | 319  | 332  | TGAGCTAGCTTTTGTGGTGG       |
| scaffold340139_10.6 | 1 p2 | (TC)6  | 12 | 448  | 459  | CACGCACAAGTACATCTCGG       |
| scaffold340231_19.1 | 1 p2 | (TA)7  | 14 | 689  | 702  | GCCTTGGTCATGCCATTTAT       |
| scaffold340387_11.0 | 1 p2 | (TA)6  | 12 | 211  | 222  | CGACGGTTGAGGAAGAAACA       |
| scaffold340409_12.7 | 1 p2 | (TA)7  | 14 | 145  | 158  | CACCGTCCAATAAACCCGAAG      |
| scaffold340809_10.4 | 1 p2 | (TA)7  | 14 | 254  | 267  | GAAAATCAAAGGCCACAAA        |
| scaffold340813_14.2 | 1 p2 | (CT)6  | 12 | 345  | 356  | AGAAGGCAATCTATCCCGTG       |
| scaffold340821_17.1 | 1 p2 | (TC)9  | 18 | 507  | 524  | TCGTCGTTGTTACTGGCCTA       |
| scaffold340852_12.5 | 1 p2 | (TA)9  | 18 | 861  | 878  | TCTGATAAGGTTCGAATTCACG     |
| scaffold340956_16.9 | 1 p2 | (TA)14 | 28 | 1108 | 1135 | ATGGGCTTCGAGTTTGGATA       |
| scaffold341328_13.9 | 1 p2 | (AG)6  | 12 | 424  | 435  | GTAGCGGTGGTTGACTGGTT       |
| scaffold341543_13.2 | 1 p2 | (AG)8  | 16 | 649  | 664  | TGGTAGTGTGAGTTGGCGA        |
| scaffold341822_16.2 | 1 p2 | (AT)10 | 20 | 584  | 603  | TGCAGATTCAGGATGAGACG       |
| scaffold342015_13.6 | 1 p2 | (TA)7  | 14 | 193  | 206  | CAAGATTCGAAATCACATTCAA     |
| scaffold342495_16.0 | 1 p2 | (AG)8  | 16 | 110  | 125  | GTCCACGGTGGTGCTAGAGT       |
| scaffold343175_14.6 | 1 p2 | (TC)7  | 14 | 1140 | 1153 | ATTCTTCTCAACCTCCGCC        |
| scaffold343896_16.3 | 1 p2 | (CT)8  | 16 | 379  | 394  | TGCCCTTAAGTTAGGACTACTAA    |
| scaffold344024_11.5 | 1 p2 | (TA)6  | 12 | 298  | 309  | TTTTAGGGGTGCGAAAGTTG       |
| scaffold344062_14.5 | 1 p2 | (CT)6  | 12 | 46   | 57   | TCATCTTGGCATGGTCAAAG       |
| scaffold344160_15.0 | 1 p2 | (CT)6  | 12 | 73   | 84   | CCTAGTTCCTACCGCGTGTC       |
| scaffold344442_13.9 | 1 p2 | (GA)7  | 14 | 120  | 133  | ACTTGAGCGTAACCCAGTCC       |
| scaffold344486_12.2 | 1 p2 | (TA)6  | 12 | 139  | 150  | CTGCTTAAAGCCCAGTCCAG       |
| scaffold345111_16.4 | 1 p2 | (TA)6  | 12 | 265  | 276  | AGGGCATTATTTAAACCCCG       |
| scaffold345129_10.6 | 1 p2 | (TC)6  | 12 | 409  | 420  | ATTGAATCTACGTCCACGGG       |
| scaffold345147_18.3 | 1 p2 | (GA)6  | 12 | 38   | 49   | GAGTTTAGAGAGAGGAAATGGTATTC |
| scaffold345172_16.0 | 1 p2 | (TC)6  | 12 | 2068 | 2079 | TCGAAATCCCATCTACCCAC       |
| scaffold345277_15.4 | 1 p2 | (CT)6  | 12 | 2308 | 2319 | TGACAACCATCACCTCGAAA       |
| scaffold345489_12.7 | 1 p2 | (TC)6  | 12 | 53   | 64   | TCCTGCCATCTCTCAATGTG       |
| scaffold345774_15.4 | 1 p2 | (GT)6  | 12 | 653  | 664  | GACACCAAACGGAGGAAAA        |

|                     |      |        |    |      |      |                             |
|---------------------|------|--------|----|------|------|-----------------------------|
| scaffold345781_15.7 | 1 p2 | (GA)7  | 14 | 351  | 364  | GCCAACACTCCAAAGAAATGA       |
| scaffold345835_17.9 | 1 p2 | (CT)7  | 14 | 76   | 89   | TTCCTCCTCAATATTTTCAACACA    |
| scaffold345880_14.4 | 1 p2 | (GA)6  | 12 | 224  | 235  | CAAGCCATGAAACAACACGA        |
| scaffold346132_10.2 | 1 p2 | (CT)8  | 16 | 308  | 323  | GCGTGTGGAAGAGGACAAA         |
| scaffold346164_16.2 | 1 p2 | (GA)6  | 12 | 2946 | 2957 | AGCTTCAGTGTGTGTGCGAG        |
| scaffold346510_10.2 | 1 p2 | (TA)7  | 14 | 326  | 339  | TGCAATGCATGGAGGAAATA        |
| scaffold346752_16.6 | 1 p2 | (TA)6  | 12 | 98   | 109  | TCCATTCCGAAAATCAAAGG        |
| scaffold346987_10.2 | 1 p2 | (AG)6  | 12 | 312  | 323  | TCTGGAAATGGGGAAAACAG        |
| scaffold347086_12.9 | 1 p2 | (TA)6  | 12 | 227  | 238  | ATCTTGACCGCTGATTTTGG        |
| scaffold347321_15.8 | 1 p2 | (AT)6  | 12 | 108  | 119  | TCTGAAACCCTTCCCATCTG        |
| scaffold347380_18.8 | 1 p2 | (CT)7  | 14 | 443  | 456  | TCGGAAGACACCTATTTGCC        |
| scaffold347437_14.0 | 1 p2 | (AC)6  | 12 | 663  | 674  | CCACCATCTCTCATCCCTCT        |
| scaffold347530_13.0 | 1 p2 | (AT)11 | 22 | 1631 | 1652 | GAACGCAAATGCGATATGAA        |
| scaffold347858_15.7 | 1 p2 | (AT)6  | 12 | 1407 | 1418 | AAACCTTACTGTCACGCGCT        |
| scaffold348045_17.0 | 1 p2 | (CT)6  | 12 | 635  | 646  | TATCCCCGCCAACTTAACTG        |
| scaffold348283_11.0 | 1 p2 | (AT)9  | 18 | 29   | 46   | TCTATATACAACTCGCATACCCAAA   |
| scaffold348289_16.0 | 1 p2 | (TA)6  | 12 | 349  | 360  | CATGATTTCAGAATCGTGCG        |
| scaffold348322_12.3 | 1 p2 | (CT)9  | 18 | 528  | 545  | CTGAGCAGACCAGTCCAACA        |
| scaffold348369_10.2 | 1 p2 | (AG)7  | 14 | 272  | 285  | CTCGTCCCTTTGTGCTTGTT        |
| scaffold348410_13.5 | 1 p2 | (AT)7  | 14 | 195  | 208  | AAAGGTATGGGGAAAATGCC        |
| scaffold348498_12.3 | 1 p2 | (AG)6  | 12 | 238  | 249  | GCCCCACGTATGATTGTCTT        |
| scaffold348513_12.4 | 1 p2 | (AG)7  | 14 | 51   | 64   | TTTCTCATGTTGTAATTAATGTAGGGA |
| scaffold348556_17.7 | 1 p2 | (GA)6  | 12 | 119  | 130  | GCCACTTTCCTTAAACCAAAA       |
| scaffold348569_16.0 | 1 p2 | (CT)6  | 12 | 57   | 68   | TGTCCTCACTCGTTTCCTCT        |
| scaffold348571_13.6 | 1 p2 | (CT)6  | 12 | 743  | 754  | AGATGTGAACCAAGAACCCG        |
| scaffold348599_10.5 | 1 p2 | (CA)7  | 14 | 51   | 64   | CTAACCTTGGGCTCTGATGC        |
| scaffold348650_14.1 | 1 p2 | (GA)6  | 12 | 147  | 158  | GCATCAGAGCCCAAGGTTAG        |
| scaffold348911_14.7 | 1 p2 | (TA)8  | 16 | 407  | 422  | TGAGGAATCGAACAAGGACA        |
| scaffold349088_16.8 | 1 p2 | (CA)6  | 12 | 4609 | 4620 | GGAATTTGATCCCCACACAC        |
| scaffold349526_18.0 | 1 p2 | (TC)6  | 12 | 252  | 263  | CATCACCTCCATTTTCCAC         |
| scaffold349549_14.1 | 1 p2 | (TG)7  | 14 | 448  | 461  | ATGCCAAAGGGGAAACAAAT        |
| scaffold349946_10.3 | 1 p2 | (AT)11 | 22 | 173  | 194  | ATAAACTGTTACTCCTGGGTGC      |
| scaffold350008_15.8 | 1 p2 | (GA)6  | 12 | 1507 | 1518 | TCGAACCATTACATCCTGA         |
| scaffold350079_11.1 | 1 p2 | (AT)6  | 12 | 279  | 290  | TGTGCCATAAAAATGGTTCAT       |
| scaffold350124_10.7 | 1 p2 | (TC)6  | 12 | 274  | 285  | GGGGTGGTAACCGATGTATG        |
| scaffold350195_12.0 | 1 p2 | (TA)11 | 22 | 376  | 397  | AGAGTTTTGCGTGCATGTTG        |
| scaffold350315_10.2 | 1 p2 | (TA)10 | 20 | 87   | 106  | TGTTGCGCGTGCTTTAAATA        |
| scaffold350387_14.4 | 1 p2 | (AT)6  | 12 | 1540 | 1551 | TATTATGATTCCGGGTTCCG        |
| scaffold350624_16.3 | 1 p2 | (GA)7  | 14 | 283  | 296  | TGTGCTTCCACCAATCAGA         |
| scaffold351156_12.1 | 1 p2 | (TC)6  | 12 | 72   | 83   | GCTCTTTTGATCGATCTGCC        |
| scaffold351651_13.5 | 1 p2 | (TA)13 | 26 | 471  | 496  | CACGCATGAATTCTGTTGGA        |
| scaffold351933_13.2 | 1 p2 | (CT)6  | 12 | 1097 | 1108 | CCCACCCCAGATCATAGAAA        |
| scaffold351935_15.0 | 1 p2 | (TC)7  | 14 | 591  | 604  | TTGAGCATTGAGGTTGCTTG        |
| scaffold352010_16.0 | 1 p2 | (TA)7  | 14 | 133  | 146  | GAAGGAGGAGAAGTTTGGGG        |
| scaffold352266_11.2 | 1 p2 | (AG)7  | 14 | 27   | 40   | AGAATGAGGGAGGGAGGAGA        |
| scaffold352290_13.2 | 1 p2 | (AT)6  | 12 | 598  | 609  | GCCCCTGATCATAACTCGAA        |
| scaffold352456_14.3 | 1 p2 | (AG)6  | 12 | 401  | 412  | GGCATGTGTTGTGTGGACTC        |
| scaffold352567_10.4 | 1 p2 | (TA)8  | 16 | 240  | 255  | TCACAAATCGATGGTCTGGA        |
| scaffold352700_10.1 | 1 p2 | (AG)6  | 12 | 199  | 210  | CGAGTGCCATTCTGACAGTG        |
| scaffold352946_10.6 | 1 p2 | (GA)6  | 12 | 41   | 52   | GAACCAACTCTGTGAGAACCAA      |
| scaffold353094_11.6 | 1 p2 | (AG)6  | 12 | 104  | 115  | TCATCGTGTCTTCGCTCAC         |
| scaffold353137_18.9 | 1 p2 | (CT)6  | 12 | 406  | 417  | CTTCCAACCTCGACAGCTCC        |
| scaffold353197_15.0 | 1 p2 | (AG)6  | 12 | 462  | 473  | CGGAACGCTTAATGCAAAAC        |
| scaffold353403_12.7 | 1 p2 | (CT)6  | 12 | 278  | 289  | GCACACCTCGTCTCTCACAA        |
| scaffold353862_14.1 | 1 p2 | (CT)6  | 12 | 231  | 242  | TCCACGGAGAGGTAAAAAGC        |
| scaffold354188_15.6 | 1 p2 | (CT)9  | 18 | 218  | 235  | GGGCTTGTGCGATTATATT         |
| scaffold354245_17.3 | 1 p2 | (AC)9  | 18 | 967  | 984  | GCATTTGCCTTTAGGAGCTG        |
| scaffold354354_15.0 | 1 p2 | (TA)6  | 12 | 161  | 172  | AAATGCGCAATTTTAAACCC        |

|                     |      |        |    |      |      |                           |
|---------------------|------|--------|----|------|------|---------------------------|
| scaffold354359_14.7 | 1 p2 | (AT)9  | 18 | 61   | 78   | CCGAAATCTGTAATCCTAGCC     |
| scaffold354581_13.3 | 1 p2 | (AG)7  | 14 | 93   | 106  | CATTAATGCGCCTACACTTT      |
| scaffold354707_15.6 | 1 p2 | (CA)6  | 12 | 2912 | 2923 | GATAACCGTGTGGCATTGA       |
| scaffold355276_12.9 | 1 p2 | (AT)8  | 16 | 1433 | 1448 | TGCCAATGATCACCAAACC       |
| scaffold355557_12.8 | 1 p2 | (TA)6  | 12 | 73   | 84   | TTCAAATGCACGTGTTGGAT      |
| scaffold355899_11.8 | 1 p2 | (TC)6  | 12 | 67   | 78   | GCTGATGCACCGAGCTAGTA      |
| scaffold356064_15.8 | 1 p2 | (AC)6  | 12 | 431  | 442  | GTGCTGAAAGCCCAATTTA       |
| scaffold356309_17.1 | 1 p2 | (CA)6  | 12 | 4376 | 4387 | GAGTTCTAGCCTCAAGCAACG     |
| scaffold356606_14.4 | 1 p2 | (CA)7  | 14 | 332  | 345  | ATTCATTCTGCCACCTCTGG      |
| scaffold356760_15.3 | 1 p2 | (AT)9  | 18 | 277  | 294  | CATTCAAGGGGCATTTTTGT      |
| scaffold356797_18.0 | 1 p2 | (CA)6  | 12 | 297  | 308  | CTGTCACCATCACCAACCAC      |
| scaffold356813_11.5 | 1 p2 | (AC)6  | 12 | 126  | 137  | TCTGTTGGCAAATAGGCACA      |
| scaffold356981_10.1 | 1 p2 | (TC)6  | 12 | 305  | 316  | TTTCTCTCGATGCACTCTCG      |
| scaffold357004_14.6 | 1 p2 | (TA)8  | 16 | 48   | 63   | TTCGATGATAACTATGGGTTTGT   |
| scaffold357095_14.7 | 1 p2 | (GA)7  | 14 | 442  | 455  | TAGGCAAAAACCTCCGTTCCA     |
| scaffold357116_11.3 | 1 p2 | (AT)8  | 16 | 272  | 287  | CAATGAAAATGCCACGTCTG      |
| scaffold357152_13.5 | 1 p2 | (AG)6  | 12 | 164  | 175  | TAGTTGACGGTGGTGGTTCA      |
| scaffold357274_13.7 | 1 p2 | (AT)8  | 16 | 423  | 438  | CCACATTTTTCCCGACTGTT      |
| scaffold357307_13.2 | 1 p2 | (CT)7  | 14 | 110  | 123  | CCCACCAACTCTCGTCACTT      |
| scaffold357980_10.2 | 1 p2 | (TC)7  | 14 | 245  | 258  | TTTTAGGGCATTCAACTGGG      |
| scaffold358049_11.1 | 1 p2 | (TC)6  | 12 | 155  | 166  | AGGGCTGAGGAAAACCTGAT      |
| scaffold358318_12.0 | 1 p2 | (TG)6  | 12 | 193  | 204  | CGAGTGAGAGAGTGAGTGCG      |
| scaffold358450_10.2 | 1 p2 | (AT)6  | 12 | 264  | 275  | TCACACAGCACCTGATCACA      |
| scaffold358681_12.5 | 1 p2 | (AT)11 | 22 | 865  | 886  | TACGATCCGAGTGCCTCTTT      |
| scaffold358892_13.7 | 1 p2 | (AT)8  | 16 | 659  | 674  | TCGAATACCCTAATAACCCGAA    |
| scaffold358974_13.5 | 1 p2 | (AT)8  | 16 | 1740 | 1755 | AGTTTGATGAGGGGCATCCAC     |
| scaffold359031_12.8 | 1 p2 | (CT)6  | 12 | 67   | 78   | CTCCACAAAGATCTCGCACA      |
| scaffold359042_15.2 | 1 p2 | (TA)8  | 16 | 422  | 437  | TTGTTTTGTCCACACTTGGC      |
| scaffold359242_16.1 | 1 p2 | (AT)6  | 12 | 165  | 176  | CATGCAGACATGGGAGTTTC      |
| scaffold359290_14.1 | 1 p2 | (TA)13 | 26 | 621  | 646  | GTGGACGTCCCAGATTGTTT      |
| scaffold359358_10.9 | 1 p2 | (GA)8  | 16 | 180  | 195  | CGCGAACTTAGATGGGCTAC      |
| scaffold359487_13.6 | 1 p2 | (TA)6  | 12 | 1727 | 1738 | CGAAAACCTCAATTTAAAAGGCTTG |
| scaffold359575_13.6 | 1 p2 | (TA)10 | 20 | 553  | 572  | CAC TTGTCAAATCTCCTTAATTTG |
| scaffold359726_13.8 | 1 p2 | (CT)6  | 12 | 536  | 547  | GCTCATCGTCATTCTCCACC      |
| scaffold359728_16.3 | 1 p2 | (CT)8  | 16 | 1060 | 1075 | GAGGAGAGGGGGATCGATAG      |
| scaffold359752_15.4 | 1 p2 | (AT)7  | 14 | 685  | 698  | CCTGCACCAAATTTAGCCAT      |
| scaffold359771_12.8 | 1 p2 | (TC)6  | 12 | 56   | 67   | CACGCTATCTCGTTGCTCTCT     |
| scaffold359834_14.3 | 1 p2 | (TC)8  | 16 | 3864 | 3879 | CCTTTTGCTTCAACCACCAT      |
| scaffold360089_13.8 | 1 p2 | (AT)9  | 18 | 1929 | 1946 | TTTTTGCGGTGTGCATTTAG      |
| scaffold360400_13.6 | 1 p2 | (CT)11 | 22 | 1047 | 1068 | TAGTTGCAGGCCCTCTTGAT      |
| scaffold360547_12.3 | 1 p2 | (TA)8  | 16 | 786  | 801  | TCATGCACAAAATAAAAAGGGA    |
| scaffold360592_12.0 | 1 p2 | (TA)9  | 18 | 42   | 59   | TCTCACACACGTTTACACCCA     |
| scaffold360611_14.7 | 1 p2 | (TA)7  | 14 | 1392 | 1405 | GCCATCTTCTTTCCCATTT       |
| scaffold360654_16.2 | 1 p2 | (TC)6  | 12 | 489  | 500  | CCCTCTGTTCTCTCTCACCG      |
| scaffold360688_14.8 | 1 p2 | (AG)6  | 12 | 1589 | 1600 | ATGTAGGTGCCTGTGCCTCT      |
| scaffold360789_10.5 | 1 p2 | (TC)6  | 12 | 385  | 396  | TAGCCGTCCTCTCCATCACT      |
| scaffold360894_16.0 | 1 p2 | (TA)8  | 16 | 479  | 494  | GCGATTGACACGAAATGAAA      |
| scaffold361048_14.8 | 1 p2 | (CA)8  | 16 | 447  | 462  | TCGGATCGGATACCCAAATA      |
| scaffold361190_11.8 | 1 p2 | (AT)10 | 20 | 350  | 369  | CCACGGAAGGAACTGACAAT      |
| scaffold361588_12.1 | 1 p2 | (AT)7  | 14 | 218  | 231  | GGTCTGACAGGTTGAGAGGC      |
| scaffold361716_11.7 | 1 p2 | (GT)7  | 14 | 98   | 111  | TCTTTCAGGTCCAGGTGTCC      |
| scaffold361740_14.0 | 1 p2 | (AT)6  | 12 | 202  | 213  | CCTTCTCCATCACCACTTG       |
| scaffold361995_15.5 | 1 p2 | (AC)6  | 12 | 944  | 955  | CTTTGTCCACCCACCACTT       |
| scaffold362057_17.3 | 1 p2 | (TA)8  | 16 | 59   | 74   | CCGGTCTAAACCCGGAATA       |
| scaffold362379_16.5 | 1 p2 | (TC)9  | 18 | 791  | 808  | AACACAAACGCTAAACCCGT      |
| scaffold362560_14.1 | 1 p2 | (TG)6  | 12 | 1280 | 1291 | TGTAGTCATCCATGGGGGTT      |
| scaffold362651_17.9 | 1 p2 | (CT)6  | 12 | 313  | 324  | TTGAGATCCATTCCTCAAA       |
| scaffold363042_12.0 | 1 p2 | (TG)6  | 12 | 126  | 137  | GGTTATCACCTGATTTTCTCCC    |

|                     |      |        |    |      |      |                            |
|---------------------|------|--------|----|------|------|----------------------------|
| scaffold363404_15.1 | 1 p2 | (TA)11 | 22 | 969  | 990  | GCCGAAGATTTACTCCTAATTAACAC |
| scaffold363441_11.7 | 1 p2 | (TA)9  | 18 | 177  | 194  | GGCTAGATGCAAGCCTTTGA       |
| scaffold363486_13.8 | 1 p2 | (AT)6  | 12 | 65   | 76   | TCAAATCTTCGAGTACAGAAATGG   |
| scaffold363619_12.9 | 1 p2 | (TG)7  | 14 | 854  | 867  | GCAGCTGATGCACATATTCC       |
| scaffold363720_13.2 | 1 p2 | (TA)7  | 14 | 212  | 225  | CTTCACTTGAATTGAGGGGG       |
| scaffold363724_10.8 | 1 p2 | (CT)7  | 14 | 238  | 251  | TTATTTTCTTGGGTCGCTGG       |
| scaffold363943_15.8 | 1 p2 | (TA)7  | 14 | 234  | 247  | ATGCCGTTTTTTAGGGTTTA       |
| scaffold364125_17.9 | 1 p2 | (TA)6  | 12 | 148  | 159  | TCCATTCCGAAAATCAAAGG       |
| scaffold364236_13.4 | 1 p2 | (AT)6  | 12 | 56   | 67   | TTTTGTGAAACAATAATGACTTTGA  |
| scaffold364374_17.8 | 1 p2 | (TA)6  | 12 | 774  | 785  | TGGGCGTTTATTATTCCAGC       |
| scaffold364596_15.1 | 1 p2 | (GA)7  | 14 | 452  | 465  | CCACTCTCTCACACGCAGAA       |
| scaffold364664_12.1 | 1 p2 | (TA)10 | 20 | 555  | 574  | GCAAAAGGCAGCCTAAAGAG       |
| scaffold364797_14.6 | 1 p2 | (TG)6  | 12 | 2113 | 2124 | TTATGGGAAGAGGGGGGAGAC      |
| scaffold364819_12.6 | 1 p2 | (TA)8  | 16 | 897  | 912  | CAATGCACCAGATTTGTTCT       |
| scaffold364875_19.8 | 1 p2 | (TC)7  | 14 | 993  | 1006 | AAAGGTCACGCCCTACAAAA       |
| scaffold365151_15.4 | 1 p2 | (TC)6  | 12 | 270  | 281  | TTGGTGCATGCCTTTTGTTA       |
| scaffold365250_13.7 | 1 p2 | (TA)6  | 12 | 2312 | 2323 | TGAAAAACAAGCGAGCAACA       |
| scaffold365268_12.7 | 1 p2 | (TA)8  | 16 | 502  | 517  | GGCGAATGCTATGCATTTTT       |
| scaffold365275_17.3 | 1 p2 | (TG)6  | 12 | 238  | 249  | CACAACACACATCCTTCATGC      |
| scaffold365457_14.8 | 1 p2 | (TA)10 | 20 | 1896 | 1915 | AGTTGATGGTGTTCCTTG         |
| scaffold365480_16.0 | 1 p2 | (CT)6  | 12 | 2090 | 2101 | TGTGCATTCCACATTTCCAC       |
| scaffold365654_13.4 | 1 p2 | (TA)7  | 14 | 44   | 57   | TCCCAGGTGTGAATAGCATT       |
| scaffold365696_13.6 | 1 p2 | (TA)11 | 22 | 497  | 518  | GGAAATGATCACAGGCCATC       |
| scaffold365997_14.0 | 1 p2 | (TA)6  | 12 | 26   | 37   | AGCGGTTATTACCGGATCG        |
| scaffold366151_13.5 | 1 p2 | (AT)10 | 20 | 859  | 878  | AGTGGTTAGCACATGATCGC       |
| scaffold366341_10.6 | 1 p2 | (AG)6  | 12 | 102  | 113  | GTCGGCAGTGAGCTTCTAGC       |
| scaffold366548_13.9 | 1 p2 | (AG)6  | 12 | 678  | 689  | TGGGCAAACCAAGATACACA       |
| scaffold366746_13.6 | 1 p2 | (AT)6  | 12 | 740  | 751  | TCCTTAAACATAACGAGATCAAAAA  |
| scaffold367089_10.4 | 1 p2 | (TA)7  | 14 | 300  | 313  | TTTTTACCAATTTGCCCTCG       |
| scaffold367132_16.9 | 1 p2 | (CT)6  | 12 | 80   | 91   | CTCTTCTCTCTCCGCCCTT        |
| scaffold367201_15.1 | 1 p2 | (TA)9  | 18 | 502  | 519  | CAAATCCACCAGAAACCCAC       |
| scaffold367394_14.3 | 1 p2 | (CT)8  | 16 | 222  | 237  | ATCTCTTTTCCCCACGAGT        |
| scaffold367424_11.8 | 1 p2 | (AT)9  | 18 | 422  | 439  | ATTACGGCCACGCTAAGTTG       |
| scaffold367446_13.1 | 1 p2 | (TC)7  | 14 | 453  | 466  | ATCCCCTCTCATTCAACACC       |
| scaffold367502_14.4 | 1 p2 | (TA)6  | 12 | 137  | 148  | ACCTACTGCCGTGTTTCGATT      |
| scaffold367612_12.1 | 1 p2 | (TA)9  | 18 | 73   | 90   | TTCATGAATGGATGTGTTTTGTT    |
| scaffold367760_13.0 | 1 p2 | (TA)11 | 22 | 38   | 59   | TTTAGTGTTTTGACATGATTACTCG  |
| scaffold367767_17.0 | 1 p2 | (TA)7  | 14 | 118  | 131  | ATTTGCTTGATCCAACGGTC       |
| scaffold367849_10.8 | 1 p2 | (TA)7  | 14 | 706  | 719  | TCTACCCTTCATTGTCATTCTCA    |
| scaffold367932_16.8 | 1 p2 | (CT)6  | 12 | 1914 | 1925 | GTGAGATTCGATGCCCATTC       |
| scaffold367983_11.6 | 1 p2 | (TA)10 | 20 | 84   | 103  | TGGCCGTGAATGTATGAGAG       |
| scaffold368078_13.5 | 1 p2 | (TC)6  | 12 | 145  | 156  | TGAAGAAAATAGGACTAATGAGGTG  |
| scaffold368148_13.8 | 1 p2 | (TA)11 | 22 | 299  | 320  | ATCGTGAGAAGCGTCGATCT       |
| scaffold368239_13.1 | 1 p2 | (CA)11 | 22 | 599  | 620  | GCTTCTCGTTTTCTTGTCGG       |
| scaffold368277_10.3 | 1 p2 | (AT)9  | 18 | 207  | 224  | TTTTCGGATCGGTAGAAGGA       |
| scaffold368315_11.9 | 1 p2 | (AG)9  | 18 | 619  | 636  | CAAATGCATGCAGCTTCTA        |
| scaffold368360_14.4 | 1 p2 | (AG)7  | 14 | 258  | 271  | CCTGTAGACGGCAAATGTT        |
| scaffold368405_10.8 | 1 p2 | (TC)6  | 12 | 462  | 473  | TGGAAGCCATGCAAAATAAA       |
| scaffold368503_17.4 | 1 p2 | (CT)7  | 14 | 1436 | 1449 | CTCCATCGAACATCTCACGA       |
| scaffold368639_13.6 | 1 p2 | (TG)7  | 14 | 2276 | 2289 | TTTCTTTTGTGACGCAATCG       |
| scaffold368710_17.3 | 1 p2 | (TA)11 | 22 | 4860 | 4881 | TGGCGAAGCAGAAAGAACT        |
| scaffold368855_16.7 | 1 p2 | (CT)6  | 12 | 31   | 42   | CAAATGGCCAAGAGAGTTTACA     |
| scaffold368911_10.0 | 1 p2 | (TA)9  | 18 | 515  | 532  | TCAAAGATGGAGGTTGGAGG       |
| scaffold368992_16.2 | 1 p2 | (TA)6  | 12 | 6490 | 6501 | GTCTCACGCGGGTAAGTGAT       |
| scaffold369003_13.6 | 1 p2 | (AT)6  | 12 | 62   | 73   | CGTTCGATTTGCCGTTTTAT       |
| scaffold369209_16.0 | 1 p2 | (TC)8  | 16 | 1173 | 1188 | GCAAGAAAAATAAAGGGCAGC      |
| scaffold369467_14.8 | 1 p2 | (GA)7  | 14 | 271  | 284  | AGAAATCAGACGGGCAGTTG       |
| scaffold369547_13.6 | 1 p2 | (TA)7  | 14 | 1280 | 1293 | TTAGGGTTTAAAATCGCGCA       |

|                     |      |        |    |      |                                |
|---------------------|------|--------|----|------|--------------------------------|
| scaffold369554_12.5 | 1 p2 | (TC)7  | 14 | 74   | 87 GAGGACACTTGGACCTGAAAA       |
| scaffold369608_10.9 | 1 p2 | (GA)8  | 16 | 618  | 633 AAGTCACCCGCCGTTTCATATC     |
| scaffold369711_17.7 | 1 p2 | (AT)8  | 16 | 511  | 526 CCGTGATTTAAGGAGTCGGT       |
| scaffold370064_14.9 | 1 p2 | (AG)6  | 12 | 48   | 59 AGCTGTTAGGGTTGTATAGTGAGTAG  |
| scaffold370280_12.2 | 1 p2 | (TC)6  | 12 | 193  | 204 AGTGATGTGGTGTGGAAACATT     |
| scaffold370431_14.4 | 1 p2 | (TA)8  | 16 | 2578 | 2593 CACCAAGTCCAGCCTTCTTC      |
| scaffold370466_18.7 | 1 p2 | (CT)6  | 12 | 483  | 494 CACGTGGAGGATCGTTTTCT       |
| scaffold370601_15.9 | 1 p2 | (TA)10 | 20 | 164  | 183 GGAGTGTCGGTCTGAAGGTC       |
| scaffold370749_17.2 | 1 p2 | (AG)6  | 12 | 1436 | 1447 AGACGGGAGTGCGAGAAGTA      |
| scaffold370930_16.5 | 1 p2 | (AG)11 | 22 | 261  | 282 GCAAGCTTCTCTAACACGGC       |
| scaffold370934_17.1 | 1 p2 | (AT)6  | 12 | 401  | 412 TGCATGTTGCGATTTTCATTT      |
| scaffold370940_19.4 | 1 p2 | (TA)8  | 16 | 4025 | 4040 TCTACCTGTTGCTGTGTGCC      |
| scaffold371293_12.3 | 1 p2 | (TA)6  | 12 | 117  | 128 TCAAATGAACATAATCCTGTAATGC  |
| scaffold371622_13.2 | 1 p2 | (TA)11 | 22 | 706  | 727 CCAAATCATTGTATTTTCATGTTTCA |
| scaffold371784_12.1 | 1 p2 | (AT)10 | 20 | 640  | 659 CACCAAATTTTCATCATTTTCAA    |
| scaffold371909_17.7 | 1 p2 | (CA)10 | 20 | 1795 | 1814 AGCTTTTATGCGTTTGCAGGT     |
| scaffold372201_10.1 | 1 p2 | (GA)6  | 12 | 372  | 383 TCATCAACATGCAACCAACA       |
| scaffold372353_14.5 | 1 p2 | (TA)9  | 18 | 1176 | 1193 ATTATCAACGGCTGCAAAG       |
| scaffold372390_15.7 | 1 p2 | (GA)7  | 14 | 3003 | 3016 TGCCAGTTGCCATATTTTCA      |
| scaffold372437_15.5 | 1 p2 | (GA)10 | 20 | 50   | 69 TTGAGAGGAAGAAAGAAGATGGA     |
| scaffold372474_14.3 | 1 p2 | (AT)8  | 16 | 738  | 753 TCTAAAGAAAACAAAAGAAGTTCAA/ |
| scaffold372585_14.9 | 1 p2 | (AT)6  | 12 | 362  | 373 TGGAGCAACAAAGATGGAAA       |
| scaffold372698_14.4 | 1 p2 | (TA)7  | 14 | 468  | 481 TCCTAACAAAGAAAGGCGGA       |
| scaffold372885_16.9 | 1 p2 | (TA)6  | 12 | 559  | 570 ATCCCTTTTGCTTTTGCTGA       |
| scaffold372897_16.1 | 1 p2 | (GA)6  | 12 | 1642 | 1653 TGATCCTTGCTCTCTTGCCCT     |
| scaffold373129_13.6 | 1 p2 | (CA)6  | 12 | 1115 | 1126 AACGCAAGATGGGAAAAATG      |
| scaffold373236_15.0 | 1 p2 | (AT)7  | 14 | 277  | 290 CAAGCAGGTAATATCAGTTTTCG    |
| scaffold373293_14.0 | 1 p2 | (TC)6  | 12 | 557  | 568 AGGATCCCAAATCACCAACA       |
| scaffold373316_14.3 | 1 p2 | (AG)8  | 16 | 848  | 863 CCACCAACTCCGGTAAAGAA       |
| scaffold373380_10.0 | 1 p2 | (TA)8  | 16 | 293  | 308 ATAACCGACCACGACACCAT       |
| scaffold373479_10.1 | 1 p2 | (TA)8  | 16 | 50   | 65 GGTTATCACCGGATCACGAC        |
| scaffold373565_10.4 | 1 p2 | (AG)6  | 12 | 151  | 162 GCGGTAGGAGTTGATGATGG       |
| scaffold373581_15.0 | 1 p2 | (AT)6  | 12 | 848  | 859 CGGAATGTGATCGAATAGCA       |
| scaffold373636_13.2 | 1 p2 | (TA)8  | 16 | 2765 | 2780 GCTGCTGTGCGTTGATTTT       |
| scaffold373789_16.9 | 1 p2 | (CT)10 | 20 | 1103 | 1122 TGTCGAATGCAGGGTTGATA      |
| scaffold373818_10.1 | 1 p2 | (AT)8  | 16 | 303  | 318 CAAGAAACGCGCCATGTAT        |
| scaffold373830_13.8 | 1 p2 | (AG)6  | 12 | 2335 | 2346 TCAGGAAGATCATCTGCGG       |
| scaffold373870_15.4 | 1 p2 | (TC)6  | 12 | 752  | 763 AGCAGCAATTTCCGAAAAGA       |
| scaffold373874_11.4 | 1 p2 | (CA)6  | 12 | 153  | 164 AACACTGCACGCATTTTGAG       |
| scaffold374115_11.2 | 1 p2 | (GA)6  | 12 | 234  | 245 GACGGAGAAATCAGACGAGC       |
| scaffold374390_14.9 | 1 p2 | (GA)6  | 12 | 369  | 380 TCCAGTGTCTCCATCTCGTG       |
| scaffold374392_16.8 | 1 p2 | (AT)9  | 18 | 1724 | 1741 CACATTCTTGCTTCTGCTGC      |
| scaffold374575_11.2 | 1 p2 | (TA)9  | 18 | 67   | 84 TTCAACAAAGCAACAAAACATTG     |
| scaffold374684_11.8 | 1 p2 | (AG)6  | 12 | 229  | 240 CTTGAGCATGTGGAGAGCAA       |
| scaffold374704_13.7 | 1 p2 | (AT)9  | 18 | 66   | 83 TTTTGAATGGCACAGATTGG        |
| scaffold374974_16.9 | 1 p2 | (AT)6  | 12 | 483  | 494 AGAGATGCTGGTAGAGGCGA       |
| scaffold375227_12.1 | 1 p2 | (AG)6  | 12 | 236  | 247 CCATAAACACCGTGTCCAAA       |
| scaffold375266_12.0 | 1 p2 | (TG)7  | 14 | 570  | 583 TTTGGCATCAATGCATCCTA       |
| scaffold375467_16.3 | 1 p2 | (CT)6  | 12 | 373  | 384 AAAATGGTGCACAAACCCAT       |
| scaffold375768_17.0 | 1 p2 | (TG)6  | 12 | 3495 | 3506 ACACATCGGCACAGGTACAA      |
| scaffold375824_15.4 | 1 p2 | (AC)6  | 12 | 1262 | 1273 TTTTATTGCAGCTGTCACGC      |
| scaffold376233_17.0 | 1 p2 | (TA)9  | 18 | 242  | 259 GCAGACGAACCAGTAGAGGC       |
| scaffold376275_16.1 | 1 p2 | (AT)7  | 14 | 3186 | 3199 TCCGTTTTGCTAAGCCTTGT      |
| scaffold376691_10.1 | 1 p2 | (AT)6  | 12 | 194  | 205 GTCCTCCGAACTCATGGTGT       |
| scaffold377186_13.6 | 1 p2 | (TA)6  | 12 | 65   | 76 CCTCTCGCATTTCTCTTGCT        |
| scaffold377467_18.8 | 1 p2 | (TA)6  | 12 | 318  | 329 CCAAAGTGCCCTTTTATGCT       |
| scaffold377571_15.5 | 1 p2 | (TC)10 | 20 | 151  | 170 GGTGACCACATGTCGAAAAA       |
| scaffold377819_14.8 | 1 p2 | (TA)8  | 16 | 1080 | 1095 GGATCTACGAGATTTGCTCCC     |

|                     |      |        |    |      |                               |
|---------------------|------|--------|----|------|-------------------------------|
| scaffold377922_15.1 | 1 p2 | (AT)9  | 18 | 539  | 556 TGAAGCGTGAAAGTCAATCG      |
| scaffold377960_12.4 | 1 p2 | (CT)6  | 12 | 1206 | 1217 TGAAATTATACGAAGCCGGAA    |
| scaffold378185_12.2 | 1 p2 | (TC)6  | 12 | 154  | 165 GATGCAGTGGGGTTTTGTTC      |
| scaffold378623_13.1 | 1 p2 | (TA)6  | 12 | 1138 | 1149 CAAAATGGGCGGCATAAATA     |
| scaffold378659_12.1 | 1 p2 | (TA)8  | 16 | 310  | 325 CACCGAGTACCGAAGGGATA      |
| scaffold378687_14.3 | 1 p2 | (AC)6  | 12 | 357  | 368 TTCCCTTCTCATTTCCATGC      |
| scaffold378818_11.0 | 1 p2 | (CT)6  | 12 | 183  | 194 AAGGCAACATCTATCGAGGG      |
| scaffold378868_10.9 | 1 p2 | (GA)6  | 12 | 370  | 381 AGTACTGCAATTCTGCCCGT      |
| scaffold379478_16.9 | 1 p2 | (CT)7  | 14 | 315  | 328 TGGTTGGAGATCTTTGGAGG      |
| scaffold379905_16.6 | 1 p2 | (AT)9  | 18 | 389  | 406 TGGGTTTTAGGTGTCATTGCT     |
| scaffold380203_10.6 | 1 p2 | (GA)6  | 12 | 254  | 265 CGGTTGGATTGCTGAAAACCT     |
| scaffold380377_16.0 | 1 p2 | (TC)6  | 12 | 121  | 132 AGCAGCGAAGGAAAACTTG       |
| scaffold380904_13.9 | 1 p2 | (CT)8  | 16 | 448  | 463 TTTCTCTCCGACCACATTCC      |
| scaffold380999_18.8 | 1 p2 | (AG)7  | 14 | 642  | 655 GACAGGGAGATGGGGAATTT      |
| scaffold381047_13.2 | 1 p2 | (AG)7  | 14 | 295  | 308 TGGAACCATGTTCAATCCCT      |
| scaffold381070_11.4 | 1 p2 | (AT)6  | 12 | 751  | 762 GGATAGTGGGCAGAGATGGA      |
| scaffold381136_12.1 | 1 p2 | (AT)7  | 14 | 634  | 647 GCCCACCTGATTTTCTTCAA      |
| scaffold381164_11.9 | 1 p2 | (TC)9  | 18 | 243  | 260 TATGACTCGCCACCTCTTCC      |
| scaffold381240_11.9 | 1 p2 | (TA)6  | 12 | 337  | 348 AAGGGTTGGTATCATTTGAACA    |
| scaffold381274_14.6 | 1 p2 | (TC)6  | 12 | 160  | 171 CCGGGTATCGGAAATTAGGT      |
| scaffold381365_16.9 | 1 p2 | (TA)10 | 20 | 181  | 200 GTGAAACCCCAATTGTGTC       |
| scaffold381517_17.7 | 1 p2 | (AT)6  | 12 | 197  | 208 TCTGCGTTTAAACAACCCAA      |
| scaffold381663_13.6 | 1 p2 | (TA)6  | 12 | 167  | 178 TTTATTTTTCTCAAATGCTATGCAA |
| scaffold381873_10.6 | 1 p2 | (TC)6  | 12 | 185  | 196 AGCACCAATTCTTCCAAACG      |
| scaffold381903_15.3 | 1 p2 | (GA)8  | 16 | 163  | 178 TTGGGAGAATTTGTGGGAGA      |
| scaffold381921_12.2 | 1 p2 | (TA)9  | 18 | 770  | 787 TAACCCCGGAGTGAAGAAT       |
| scaffold382176_16.7 | 1 p2 | (CT)6  | 12 | 215  | 226 AGCATAACAGCTGGCAAACA      |
| scaffold382189_15.9 | 1 p2 | (AT)8  | 16 | 329  | 344 TTAGCTCTGGTTTGGTTCCG      |
| scaffold382261_13.8 | 1 p2 | (TA)7  | 14 | 486  | 499 CAGATTACTGTGTGCGGCTG      |
| scaffold382322_18.4 | 1 p2 | (AT)6  | 12 | 1781 | 1792 AACTTCCGAATTCCAATTACCA   |
| scaffold382684_11.8 | 1 p2 | (AG)6  | 12 | 251  | 262 TGAGCTCATTCCGCATTAAA      |
| scaffold382792_17.1 | 1 p2 | (CT)6  | 12 | 55   | 66 TTGCCCTTCACTCTCATCT        |
| scaffold383021_15.8 | 1 p2 | (AT)7  | 14 | 542  | 555 TGGTTGGAGTTGTCAAGTTCCT    |
| scaffold383144_12.6 | 1 p2 | (GA)6  | 12 | 168  | 179 TTGACCAAGGTGAGAATTTGAA    |
| scaffold383190_12.8 | 1 p2 | (TA)8  | 16 | 135  | 150 CTTTTTCTATGTGTGACAAAGC    |
| scaffold383281_15.1 | 1 p2 | (CT)6  | 12 | 395  | 406 AGCATTTACCTGGGCATTTG      |
| scaffold383354_13.1 | 1 p2 | (TG)7  | 14 | 239  | 252 CATGCTCCGAAACATGAAAA      |
| scaffold383463_15.7 | 1 p2 | (GT)6  | 12 | 343  | 354 TCATGCTGGAAGCACGTAAC      |
| scaffold384039_13.3 | 1 p2 | (TA)7  | 14 | 1456 | 1469 CGCACTGATCCAACCTTTTCA    |
| scaffold384261_13.8 | 1 p2 | (TC)7  | 14 | 79   | 92 CCCTAAGTTTGCATCTCCCA       |
| scaffold384332_10.0 | 1 p2 | (CT)8  | 16 | 239  | 254 CCACCTCTCACTTCCACTC       |
| scaffold384389_14.0 | 1 p2 | (TA)8  | 16 | 251  | 266 CTTGGCCGATGAAGAAAGAG      |
| scaffold384639_16.1 | 1 p2 | (CT)6  | 12 | 3513 | 3524 TAGTTCCTTTGCCAACGGTC     |
| scaffold384660_10.8 | 1 p2 | (TA)7  | 14 | 145  | 158 TGTCCCGTTTTCTTCGTTTT      |
| scaffold384887_18.7 | 1 p2 | (AT)6  | 12 | 717  | 728 ATGTGGAGAAAGCTCTGCGT      |
| scaffold385095_12.0 | 1 p2 | (TA)8  | 16 | 248  | 263 CGATGGCCAAGATTGCTCTA      |
| scaffold385414_13.8 | 1 p2 | (AT)7  | 14 | 101  | 114 TCCTTTTCTTTTTCTGAGCACC    |
| scaffold385530_18.6 | 1 p2 | (TC)8  | 16 | 368  | 383 CATGCTGTGCAGCAGTAGGT      |
| scaffold385563_20.6 | 1 p2 | (TA)8  | 16 | 229  | 244 TACCGGACCTTGGTCTGAAC      |
| scaffold385653_14.3 | 1 p2 | (TA)12 | 24 | 571  | 594 TTTCTACCAAATCTCCCCA       |
| scaffold385747_14.6 | 1 p2 | (GT)9  | 18 | 3487 | 3504 TGGATCTCGGAATATCCAGC     |
| scaffold385874_17.4 | 1 p2 | (GA)7  | 14 | 728  | 741 CATCCCTACCTGTTGCCACT      |
| scaffold385922_15.9 | 1 p2 | (CT)6  | 12 | 602  | 613 CCAAGAAAATATCGGCAGC       |
| scaffold386012_10.3 | 1 p2 | (AT)6  | 12 | 340  | 351 TCACTCACGCAGACAACACA      |
| scaffold386094_13.4 | 1 p2 | (TA)7  | 14 | 344  | 357 GCGTGGAAAAGAAGATGCTC      |
| scaffold386210_10.6 | 1 p2 | (GT)6  | 12 | 191  | 202 CCGTGAATGAAGGGATTTCA      |
| scaffold386375_13.9 | 1 p2 | (GA)6  | 12 | 51   | 62 GCGAAGCACCGAGACTACTG       |
| scaffold386471_15.4 | 1 p2 | (TA)6  | 12 | 401  | 412 CCGTAAGGCTCGTATGCTGT      |

|                     |      |        |    |      |                               |
|---------------------|------|--------|----|------|-------------------------------|
| scaffold386689_13.2 | 1 p2 | (AT)11 | 22 | 342  | 363 AATGCACTGACTTGGCATGA      |
| scaffold386807_12.4 | 1 p2 | (TA)7  | 14 | 257  | 270 TGATCGATTTTCAGCCATGA      |
| scaffold386919_10.8 | 1 p2 | (TG)10 | 20 | 163  | 182 CTTGGCCTAAAATCCCAACA      |
| scaffold387006_12.6 | 1 p2 | (AG)7  | 14 | 53   | 66 CGAACTCAATTTGATCCGAAA      |
| scaffold387041_13.0 | 1 p2 | (AT)6  | 12 | 204  | 215 CCACTTTGGTGACTAACGCA      |
| scaffold387052_17.7 | 1 p2 | (CT)8  | 16 | 390  | 405 TATTTCCGGTTCAAACCTCCG     |
| scaffold387091_11.8 | 1 p2 | (TC)6  | 12 | 92   | 103 TACCCAACCCACTAACCCAA      |
| scaffold387146_13.0 | 1 p2 | (TC)7  | 14 | 287  | 300 TTTTCGTCAAATCGACAACG      |
| scaffold387158_12.3 | 1 p2 | (AG)9  | 18 | 507  | 524 GGTGAAGACGGATCGTCAAT      |
| scaffold387251_20.6 | 1 p2 | (TC)6  | 12 | 474  | 485 CGAATCCGTTTTCCAACAGT      |
| scaffold387422_11.1 | 1 p2 | (TA)7  | 14 | 71   | 84 TTGATTCAAAGGCTGATAATGG     |
| scaffold387594_12.0 | 1 p2 | (TA)9  | 18 | 203  | 220 TGTGATCGACGATTGGAAG       |
| scaffold387840_13.6 | 1 p2 | (AT)9  | 18 | 210  | 227 GGAAATTATTGGGAGGGAATG     |
| scaffold387854_12.6 | 1 p2 | (CT)6  | 12 | 83   | 94 CACGCACAAAGAAGATCTCTACA    |
| scaffold387911_14.7 | 1 p2 | (TA)8  | 16 | 172  | 187 CAATTTGCCCTTTCATGCTT      |
| scaffold387941_15.3 | 1 p2 | (GA)10 | 20 | 1506 | 1525 CCTGTATGTTGGGGTGTGTG     |
| scaffold388098_13.3 | 1 p2 | (TA)10 | 20 | 148  | 167 TTTCTCCAGCTTCTACCA        |
| scaffold388245_10.9 | 1 p2 | (CT)6  | 12 | 452  | 463 TCCCACTTTGTCTCCCAATC      |
| scaffold388298_16.3 | 1 p2 | (GA)6  | 12 | 283  | 294 CAGGAGAACTCGGCTGAATC      |
| scaffold389022_18.0 | 1 p2 | (CT)6  | 12 | 3086 | 3097 CATTCAAGTAAAACATGGCG     |
| scaffold389075_10.0 | 1 p2 | (GA)6  | 12 | 192  | 203 TCTACTAATGGGCCAAAGG       |
| scaffold389132_14.7 | 1 p2 | (TC)7  | 14 | 774  | 787 AAGTTCGAATTCTCCCCACC      |
| scaffold389181_10.8 | 1 p2 | (TA)7  | 14 | 669  | 682 TTGTTGTTTCACAAAATTTAAGCTG |
| scaffold389191_13.3 | 1 p2 | (TA)7  | 14 | 252  | 265 TGGACGAAATTGGTGTGTTG      |
| scaffold389243_15.1 | 1 p2 | (GC)7  | 14 | 170  | 183 CACGTGCGTCAACTCCTTTA      |
| scaffold389600_15.8 | 1 p2 | (AG)6  | 12 | 67   | 78 CAATTACAATGTTTATCCAATCTCA  |
| scaffold389897_20.3 | 1 p2 | (TA)8  | 16 | 592  | 607 TTCACGTACCCCTCATGTCA      |
| scaffold389990_14.7 | 1 p2 | (TA)6  | 12 | 381  | 392 GATCCAGTTC AAGTGCCCAT     |
| scaffold390145_11.9 | 1 p2 | (TA)8  | 16 | 65   | 80 AAATGCATGCACCTGATTACA      |
| scaffold390368_12.3 | 1 p2 | (TA)13 | 26 | 581  | 606 ACGCAACAGCTCATGACAAG      |
| scaffold390395_14.2 | 1 p2 | (TC)6  | 12 | 517  | 528 ACGAACCCTGGCTGAAATC       |
| scaffold390458_15.9 | 1 p2 | (TA)9  | 18 | 67   | 84 TGAAGTGTATGCGTTTTGACA      |
| scaffold390624_13.1 | 1 p2 | (TC)6  | 12 | 439  | 450 TTCAACTGCATTGTTTCCCA      |
| scaffold390643_17.3 | 1 p2 | (TA)10 | 20 | 132  | 151 TGATCTTACGCGCACATCTT      |
| scaffold390808_11.9 | 1 p2 | (CT)6  | 12 | 403  | 414 GAAGAGACCAGAAGTCCCCC      |
| scaffold391188_10.6 | 1 p2 | (TA)8  | 16 | 265  | 280 GGTGGGCTTTTCTGACTCAA      |
| scaffold391745_14.1 | 1 p2 | (AT)8  | 16 | 231  | 246 CCCC AATGAGGA ACTTTGA     |
| scaffold391772_16.0 | 1 p2 | (CT)6  | 12 | 201  | 212 CACACATGCGTTCATT CACA     |
| scaffold391820_15.9 | 1 p2 | (AT)6  | 12 | 179  | 190 TAAAACCATGCACGTAGGCA      |
| scaffold392025_13.6 | 1 p2 | (AG)8  | 16 | 640  | 655 TTCGAGTTTGATTCCATCCA      |
| scaffold392142_11.8 | 1 p2 | (TA)8  | 16 | 567  | 582 GATTTTCTGTCTCCTTTCTCAA    |
| scaffold392160_11.2 | 1 p2 | (TA)7  | 14 | 156  | 169 TACCTTTTTGCCCTCGAATG      |
| scaffold392489_16.4 | 1 p2 | (TG)7  | 14 | 103  | 116 AACACCTGTGAAAGGGATCG      |
| scaffold392571_15.0 | 1 p2 | (TC)6  | 12 | 375  | 386 TCGGAATTTTACGTGGTTTGA     |
| scaffold393129_13.9 | 1 p2 | (TA)6  | 12 | 164  | 175 AAACGAAGGAGACGATCGAA      |
| scaffold393488_19.1 | 1 p2 | (GT)6  | 12 | 85   | 96 AGTGGGCTTTGGCACAAGTA       |
| scaffold393678_14.6 | 1 p2 | (GA)6  | 12 | 423  | 434 GCTGGTTTGAGGGAGATGAG      |
| scaffold393822_10.1 | 1 p2 | (GA)6  | 12 | 433  | 444 TCAAAAATCCAAGGGTGGAG      |
| scaffold393882_14.0 | 1 p2 | (TC)8  | 16 | 216  | 231 CAAACCGTTGTGGATCTGAA      |
| scaffold394585_13.9 | 1 p2 | (CG)8  | 16 | 303  | 318 ATGGTGGTATGGTGTGGAGG      |
| scaffold394634_18.8 | 1 p2 | (TA)8  | 16 | 177  | 192 CGGAAATGACCCCAT AATGA     |
| scaffold394761_11.4 | 1 p2 | (TC)7  | 14 | 80   | 93 CAGAAATGGCATTGGTTGTTT      |
| scaffold394922_14.8 | 1 p2 | (AT)7  | 14 | 611  | 624 CGCATGATGTAACGTGAAGG      |
| scaffold394982_16.4 | 1 p2 | (TG)7  | 14 | 401  | 414 TTGATTATTCCGCTTACGTTTTT   |
| scaffold395246_13.4 | 1 p2 | (AC)6  | 12 | 73   | 84 TCACATCCTCAGCACAAACC       |
| scaffold395910_15.4 | 1 p2 | (CT)6  | 12 | 613  | 624 TGTTACGGGTGCTTTGATA       |
| scaffold396150_14.2 | 1 p2 | (AT)8  | 16 | 79   | 94 CAGAATTAGCCTTACCAAGATGG    |
| scaffold396192_15.9 | 1 p2 | (CT)6  | 12 | 175  | 186 AGATCAACGCTCCTCGTGAT      |



|                     |      |        |    |      |                                 |
|---------------------|------|--------|----|------|---------------------------------|
| scaffold396458_11.0 | 1 p2 | (TA)6  | 12 | 374  | 385 AAGAGTTATCACCGGATCGC        |
| scaffold396597_14.2 | 1 p2 | (GA)6  | 12 | 163  | 174 GGATGCAAGGTGAACTTGGT        |
| scaffold396652_11.0 | 1 p2 | (GA)7  | 14 | 814  | 827 AGAAGAAGCAGAGACCGACG        |
| scaffold396874_10.0 | 1 p2 | (TG)9  | 18 | 449  | 466 TGGGGTTGGAGGTTTTTGT         |
| scaffold397028_12.8 | 1 p2 | (TA)11 | 22 | 841  | 862 AACTAACGCTCGACCTCGT         |
| scaffold397140_15.7 | 1 p2 | (AT)6  | 12 | 2264 | 2275 TCGGATTATCACATTGAGG        |
| scaffold397338_10.3 | 1 p2 | (TA)8  | 16 | 199  | 214 AATACCCTTCGCATCCACTG        |
| scaffold397502_15.6 | 1 p2 | (GT)7  | 14 | 268  | 281 CGCCGACTATTCTCTGAAG         |
| scaffold397641_18.0 | 1 p2 | (AG)7  | 14 | 755  | 768 CGGGCTTGCATGAGTTTAAAT       |
| scaffold398006_14.6 | 1 p2 | (TG)6  | 12 | 659  | 670 TCAATCAAATTTTATCAAACAAGAA   |
| scaffold398020_15.0 | 1 p2 | (AT)12 | 24 | 493  | 516 ACAACCCCGGACTATCGAAT        |
| scaffold398025_12.5 | 1 p2 | (AT)6  | 12 | 298  | 309 AAAAGATTACTCATGTGATATTGCG   |
| scaffold398093_12.7 | 1 p2 | (GC)8  | 16 | 170  | 185 TCCGGTCCAATTCCAATAAG        |
| scaffold398360_15.7 | 1 p2 | (AT)8  | 16 | 1856 | 1871 GCTGACGTAGTAGTTCCGGC       |
| scaffold398756_16.7 | 1 p2 | (AT)11 | 22 | 3005 | 3026 TGGTTTTCGTACACAATTGAG      |
| scaffold399077_15.5 | 1 p2 | (AC)7  | 14 | 5432 | 5445 TGGAACCAAGACATATGGGAA      |
| scaffold399165_15.9 | 1 p2 | (CT)8  | 16 | 126  | 141 TACGTGATCGGACACGAGAA        |
| scaffold399410_14.2 | 1 p2 | (TG)10 | 20 | 4683 | 4702 ATCCTCCTTGCTTCTCCAT        |
| scaffold399472_10.5 | 1 p2 | (AG)6  | 12 | 1001 | 1012 CGAAGGTTCTGCGATTTGTT       |
| scaffold399622_13.7 | 1 p2 | (TA)6  | 12 | 250  | 261 CGTCAAAATGCAAGACGTGA        |
| scaffold399990_11.3 | 1 p2 | (AT)8  | 16 | 230  | 245 AAAAATCAAACCTCAACCCG        |
| scaffold400138_14.2 | 1 p2 | (GA)6  | 12 | 4229 | 4240 GGTAGAGGAGCTGATGTGGC       |
| scaffold400146_10.0 | 1 p2 | (AT)8  | 16 | 479  | 494 CCCCTTACTGCTAACACCGA        |
| scaffold400149_15.2 | 1 p2 | (GC)7  | 14 | 1056 | 1069 TCAGTTTTGCAAGGATTGAGAG     |
| scaffold400153_10.2 | 1 p2 | (GA)6  | 12 | 382  | 393 GTGGTGGGAAACAAGAACCT        |
| scaffold400154_15.8 | 1 p2 | (CT)7  | 14 | 677  | 690 CGCTAAGGAGAGGCCAAAATG       |
| scaffold400157_15.3 | 1 p2 | (TA)9  | 18 | 695  | 712 CCCTACAGATGGCAGGTTGT        |
| scaffold400164_14.6 | 1 p2 | (AG)6  | 12 | 2764 | 2775 AAATGCTCCTGCACCTTCTCG      |
| scaffold400185_13.6 | 1 p2 | (TA)9  | 18 | 483  | 500 ATGTGTCAATTCCTGGGCTT        |
| scaffold400186_15.5 | 1 p2 | (GA)9  | 18 | 1932 | 1949 CACCAATTCCATCAGCCTCT       |
| scaffold400208_13.2 | 1 p2 | (TA)8  | 16 | 1435 | 1450 CGGTTGCAAGTTTGGAAAA        |
| scaffold400220_13.4 | 1 p2 | (TC)6  | 12 | 205  | 216 TACTAAAATACCCCGCGAA         |
| scaffold400238_11.6 | 1 p2 | (CT)6  | 12 | 340  | 351 GGCTTAATGGGGTGGAAAAT        |
| scaffold400281_10.6 | 1 p2 | (TA)8  | 16 | 198  | 213 ACGAAAAACGAAGGAGACGA        |
| scaffold400647_15.8 | 1 p2 | (AT)6  | 12 | 604  | 615 TTGATTTTAAGAGGTGATATGATACG, |
| scaffold400735_14.4 | 1 p2 | (AT)10 | 20 | 235  | 254 GCAGAAATCTTTCTTCTGTTTTAGG   |
| scaffold400851_10.6 | 1 p2 | (AT)6  | 12 | 387  | 398 GTTTTTGTACATCGGCGGAG        |
| scaffold400989_10.3 | 1 p2 | (CT)7  | 14 | 69   | 82 ACAATGGCCAAGAGAGAGTT         |
| scaffold401005_16.6 | 1 p2 | (GA)6  | 12 | 601  | 612 GGAGGTGCGGTGTTAGAGAG        |
| scaffold401012_14.7 | 1 p2 | (AT)7  | 14 | 1707 | 1720 TTATCAAGCCCACCGTAAGTG      |
| scaffold401018_11.2 | 1 p2 | (AT)6  | 12 | 416  | 427 CAACGAAAAGAGAAAGAGGGC       |
| scaffold401057_13.2 | 1 p2 | (AT)11 | 22 | 45   | 66 TGAATTCATGTACACATTTGGAA      |
| scaffold401142_10.5 | 1 p2 | (TA)7  | 14 | 260  | 273 GAGATATACGCAGGGGACGA        |
| scaffold401234_14.2 | 1 p2 | (TA)8  | 16 | 290  | 305 TCGTTTTGACAAGATTTGC         |
| scaffold401311_19.9 | 1 p2 | (TA)8  | 16 | 68   | 83 CGGAAGAAACAACTAGAAAGAACA     |
| scaffold401380_11.2 | 1 p2 | (TC)7  | 14 | 151  | 164 AGCGATGAAATGTACGTTAGAGA     |
| scaffold401429_12.3 | 1 p2 | (GA)7  | 14 | 314  | 327 GCTACTAACTTGATGCGGGG        |
| scaffold401436_10.9 | 1 p2 | (GA)6  | 12 | 46   | 57 GGAGGGATGATGAAGATGGA         |
| scaffold401490_12.9 | 1 p2 | (TC)6  | 12 | 313  | 324 GCACCAGATGTCGTGGATTT        |
| scaffold401514_15.4 | 1 p2 | (GT)6  | 12 | 1214 | 1225 TGAATGGATTTTTGGCATGT       |
| scaffold401696_15.0 | 1 p2 | (CT)6  | 12 | 176  | 187 TGTTTTATTAACCTCAATTGTGAAA   |
| scaffold401812_13.8 | 1 p2 | (AC)6  | 12 | 1354 | 1365 GAAGATGGGAAACCCCTTGT       |
| scaffold401915_13.9 | 1 p2 | (TC)7  | 14 | 1094 | 1107 CCGAAATTTTACGTGGTTCCG      |
| scaffold402069_12.6 | 1 p2 | (AT)9  | 18 | 195  | 212 GATGCATGCACGTGAATAAGA       |
| scaffold402088_16.3 | 1 p2 | (CT)6  | 12 | 279  | 290 TAGGGTTTTCAAACATCGCC        |
| scaffold402250_16.2 | 1 p2 | (AC)6  | 12 | 121  | 132 TCTTTCGGGTTCTCAACCAC        |
| scaffold402276_16.2 | 1 p2 | (TA)6  | 12 | 442  | 453 AGCGATTCTTCCGTATGCTG        |
| scaffold402344_16.2 | 1 p2 | (AG)6  | 12 | 110  | 121 ATGGTGGTTTGGTGGAAAGAA       |

|                     |      |        |    |      |                                |
|---------------------|------|--------|----|------|--------------------------------|
| scaffold402366_15.2 | 1 p2 | (CG)6  | 12 | 185  | 196 TTTGCATACTGCATGGGCTA       |
| scaffold402473_10.6 | 1 p2 | (TC)6  | 12 | 37   | 48 GGCAACGGAATACCATTTGT        |
| scaffold402522_16.2 | 1 p2 | (CA)9  | 18 | 362  | 379 TACCAAAGCCGCTCCTAATG       |
| scaffold402653_19.4 | 1 p2 | (AT)8  | 16 | 77   | 92 GCTTAAACAATTATTGAACCCG      |
| scaffold402863_16.5 | 1 p2 | (TC)6  | 12 | 285  | 296 CCAGTTCGGCGATATATGGTA      |
| scaffold402887_17.2 | 1 p2 | (GA)6  | 12 | 1664 | 1675 GATGGGAAAAGAAGGGAAGG      |
| scaffold403408_11.2 | 1 p2 | (TC)7  | 14 | 96   | 109 TAATGGCTGCCTATCAACCC       |
| scaffold403506_14.9 | 1 p2 | (AT)7  | 14 | 1526 | 1539 CATGTGAGAAACGTCCCCTT      |
| scaffold403665_18.9 | 1 p2 | (TA)10 | 20 | 68   | 87 CAAAATTTAAGGGTTATTATTGGATC/ |
| scaffold403865_16.4 | 1 p2 | (CT)6  | 12 | 2656 | 2667 CCCCTCATTTTTTCGTTTTCA     |
| scaffold403875_19.8 | 1 p2 | (GT)6  | 12 | 333  | 344 TCAGTTTCCACACGCCAATA       |
| scaffold403911_10.0 | 1 p2 | (CT)7  | 14 | 80   | 93 TCATCATGAAACACCCTAGAAAA     |
| scaffold404001_14.7 | 1 p2 | (TA)6  | 12 | 264  | 275 TTGACCCACCTTTGACCAAT       |
| scaffold404029_10.0 | 1 p2 | (TG)6  | 12 | 340  | 351 ATCGTAGTGAAGTAGCCGCC       |
| scaffold404095_13.2 | 1 p2 | (TA)7  | 14 | 145  | 158 TGTGAGTTGGTGAGGCAAAG       |
| scaffold404858_14.7 | 1 p2 | (CT)6  | 12 | 71   | 82 TGTTGCTGATGCAGACAGGT        |
| scaffold404867_16.0 | 1 p2 | (AG)6  | 12 | 167  | 178 TGGAGTAGGGAGCCTCGTAA       |
| scaffold404901_13.6 | 1 p2 | (AT)10 | 20 | 46   | 65 TGTTATTACCTGATCACCATCC      |
| scaffold404903_12.7 | 1 p2 | (AT)8  | 16 | 181  | 196 GTGGACCGGTGGAAAGAATA       |
| scaffold404905_15.3 | 1 p2 | (TC)6  | 12 | 374  | 385 TTTAATGGACACCTCTGCGG       |
| scaffold405055_12.6 | 1 p2 | (TA)6  | 12 | 228  | 239 GTTTTGTTTCTGGGTTTGG        |
| scaffold405121_10.3 | 1 p2 | (AT)6  | 12 | 387  | 398 AATACATCCAGTCATCCCGC       |
| scaffold405149_13.2 | 1 p2 | (GT)6  | 12 | 1046 | 1057 ACCACTCGTGCATCACTCAA      |
| scaffold405486_15.3 | 1 p2 | (CT)8  | 16 | 986  | 1001 AGTCAAATTGGCATTACGGG      |
| scaffold405603_16.7 | 1 p2 | (TA)6  | 12 | 3021 | 3032 CCCTTCCATTTTGTATATGGG     |
| scaffold405673_17.2 | 1 p2 | (CA)6  | 12 | 2666 | 2677 GGGGCTTTGAATCTACCAAA      |
| scaffold405790_10.5 | 1 p2 | (AT)6  | 12 | 198  | 209 ATCCATCTCATGTTGGGCAC       |
| scaffold405888_15.5 | 1 p2 | (GA)6  | 12 | 2307 | 2318 TAGAGGGAGGGGAGGGTTTA      |
| scaffold405920_21.2 | 1 p2 | (TA)7  | 14 | 77   | 90 TGAACTAAGGAGGTGTTATGACAGA   |
| scaffold406006_11.9 | 1 p2 | (AT)10 | 20 | 207  | 226 AAACAAACCGTGTTAACATCCC     |
| scaffold406051_15.9 | 1 p2 | (CT)9  | 18 | 89   | 106 TCTCATCTCTCGCTCTCCCT       |
| scaffold406089_20.2 | 1 p2 | (GA)7  | 14 | 118  | 131 CCCGTTCCATCACACTTCTT       |
| scaffold406177_16.3 | 1 p2 | (AT)8  | 16 | 946  | 961 TGCTTGAAAGACAATTGAATG      |
| scaffold406516_10.7 | 1 p2 | (AG)11 | 22 | 546  | 567 CGAGCCAAGCCAGAAGTATT       |
| scaffold406583_17.8 | 1 p2 | (GA)6  | 12 | 1118 | 1129 CGAAGGTTGGGTGGTAGAGA      |
| scaffold406618_12.2 | 1 p2 | (AG)6  | 12 | 51   | 62 CAATACAACCTGCCGAGCTGA       |
| scaffold406732_12.3 | 1 p2 | (TA)6  | 12 | 121  | 132 TGCTTGATCCAACGGGTTAT       |
| scaffold406850_22.9 | 1 p2 | (AT)14 | 28 | 1180 | 1207 CCCAAATCCGTGGATAAAAA      |
| scaffold406994_11.9 | 1 p2 | (CT)6  | 12 | 256  | 267 CTTTCTCAACCGAGCTCACC       |
| scaffold407041_13.7 | 1 p2 | (AG)8  | 16 | 793  | 808 TAATGGCCACCAAGCTTTTC       |
| scaffold407116_15.4 | 1 p2 | (AG)6  | 12 | 1514 | 1525 GAACGACGGAAATATGGAGC      |
| scaffold407164_21.5 | 1 p2 | (CT)6  | 12 | 474  | 485 ACACTTGCCAAGGGCATAAC       |
| scaffold407591_16.3 | 1 p2 | (TA)10 | 20 | 64   | 83 TGATGGTTGTGATTTGTTAGAGG     |
| scaffold407660_12.4 | 1 p2 | (TA)10 | 20 | 784  | 803 CGGCTGAGGACGAGAATTAG       |
| scaffold407672_16.0 | 1 p2 | (TG)6  | 12 | 516  | 527 CGGGTTGAACCCTCAATAA        |
| scaffold407690_15.3 | 1 p2 | (AG)8  | 16 | 571  | 586 ACTGCCCAACAATGGCTTAC       |
| scaffold407708_13.8 | 1 p2 | (AT)9  | 18 | 68   | 85 TAAGGGCGGTATCACCTGAA        |
| scaffold407715_16.7 | 1 p2 | (CT)7  | 14 | 984  | 997 CCAACACTCTGCTCTCTCCC       |
| scaffold407854_13.7 | 1 p2 | (AT)8  | 16 | 964  | 979 ACGTAAACCCCTGGTCAAAA       |
| scaffold407950_10.5 | 1 p2 | (CT)9  | 18 | 328  | 345 TCCCAAATTATATCCTCTCCCA     |
| scaffold407995_14.4 | 1 p2 | (AT)6  | 12 | 156  | 167 AAAAATCAAGTTTAGGTGCGTCA    |
| scaffold408020_15.3 | 1 p2 | (TA)7  | 14 | 77   | 90 TCCATTCCGAAAATCGAAAG        |
| scaffold408070_16.2 | 1 p2 | (AG)6  | 12 | 214  | 225 ATGTCCGTCGTTGGTTCTTC       |
| scaffold408124_14.4 | 1 p2 | (AT)6  | 12 | 575  | 586 CCACTGATGTGAGCCAACCTG      |
| scaffold408141_17.5 | 1 p2 | (AT)8  | 16 | 493  | 508 CTTGCCGATGTTTACCGTTT       |
| scaffold408275_13.8 | 1 p2 | (AT)9  | 18 | 211  | 228 GACTCTCAATGCCTTCTACCC      |
| scaffold408388_14.0 | 1 p2 | (CT)13 | 26 | 1926 | 1951 TCAAAGAATCCACCATGCAA      |
| scaffold408495_15.4 | 1 p2 | (AG)6  | 12 | 52   | 63 AGCTGTTAGGGTTGTATAGTGAGTAG  |

|                     |      |        |    |      |                               |
|---------------------|------|--------|----|------|-------------------------------|
| scaffold408515_16.4 | 1 p2 | (GA)6  | 12 | 282  | 293 GCATTAGGTTGAGGGGGAAT      |
| scaffold408630_16.4 | 1 p2 | (GA)7  | 14 | 51   | 64 GCGGTGGTAGGAAGAACTG        |
| scaffold408683_10.1 | 1 p2 | (TA)8  | 16 | 203  | 218 TGCATGTGGGCATGTTTAAT      |
| scaffold408704_14.7 | 1 p2 | (TG)6  | 12 | 245  | 256 ATTTTATGGGACGGAGGGAG      |
| scaffold408751_13.8 | 1 p2 | (TA)7  | 14 | 1372 | 1385 GGAATTGAATGTGGGAGTGC     |
| scaffold408798_15.9 | 1 p2 | (AG)6  | 12 | 2838 | 2849 CAATGTGGCCTGCCTATCTT     |
| scaffold408805_16.8 | 1 p2 | (TA)10 | 20 | 186  | 205 CCCAGTACCCCTCTTTGGAC      |
| scaffold408850_15.9 | 1 p2 | (TA)7  | 14 | 120  | 133 AAAAATGCAGATTATGCTCCAC    |
| scaffold408928_14.6 | 1 p2 | (CA)8  | 16 | 679  | 694 TCAATATCATCGCCATTTTGAA    |
| scaffold408939_12.4 | 1 p2 | (AT)11 | 22 | 853  | 874 GGCCGGTTTAAGATTTCATCA     |
| scaffold408949_13.6 | 1 p2 | (TA)9  | 18 | 461  | 478 GGCGACAAAATGGATGACTT      |
| scaffold409011_14.8 | 1 p2 | (GA)6  | 12 | 772  | 783 AGGTGCATATTGAACCCGAG      |
| scaffold409174_17.0 | 1 p2 | (CA)6  | 12 | 189  | 200 TGCACAATATGTTGGGAGGA      |
| scaffold409209_14.2 | 1 p2 | (TA)7  | 14 | 256  | 269 GTGTCAAACCTGTTCCGCTCA     |
| scaffold409317_13.6 | 1 p2 | (AT)6  | 12 | 260  | 271 GCATCGTTAGAAGCGTCGAT      |
| scaffold409322_15.9 | 1 p2 | (GA)6  | 12 | 121  | 132 CAAACGAGGAGCAAAAATCA      |
| scaffold409342_11.9 | 1 p2 | (TA)7  | 14 | 514  | 527 TTTGTCCAAACAAATGAAAACA    |
| scaffold409368_10.0 | 1 p2 | (GA)7  | 14 | 53   | 66 GTGAGGGATGGACGAGAGAG       |
| scaffold409407_16.2 | 1 p2 | (AT)9  | 18 | 2608 | 2625 CCTCACTGAAGTTCGAAAACG    |
| scaffold409485_15.0 | 1 p2 | (TA)8  | 16 | 269  | 284 AGCCACGATTCTGATTTTG       |
| scaffold409598_14.9 | 1 p2 | (GA)6  | 12 | 89   | 100 AAACACGCAACACAAAGCAG      |
| scaffold409613_20.9 | 1 p2 | (GT)7  | 14 | 748  | 761 GTTCCTCATGCACCTTGGAT      |
| scaffold409660_12.9 | 1 p2 | (TA)6  | 12 | 162  | 173 ATCATCGGGGTGTAACGAGA      |
| scaffold409697_14.6 | 1 p2 | (TC)7  | 14 | 925  | 938 CACTGCCAGCAGTCGATAAA      |
| scaffold409751_13.7 | 1 p2 | (AT)8  | 16 | 66   | 81 AATGGATGGTTGTGATTGAGTT     |
| scaffold409755_15.9 | 1 p2 | (CT)7  | 14 | 526  | 539 GTCCACGTGCTTTCCTCTGT      |
| scaffold409765_11.9 | 1 p2 | (TA)11 | 22 | 220  | 241 AGTCGAAGGTCGCGTGTAAAT     |
| scaffold409969_15.9 | 1 p2 | (AG)6  | 12 | 844  | 855 GCTGGCAATCCTTTCTTCT       |
| scaffold410086_11.9 | 1 p2 | (AT)7  | 14 | 154  | 167 TTTTGCCCTCGAATGCTATC      |
| scaffold410087_14.1 | 1 p2 | (GA)7  | 14 | 75   | 88 TCCCACATTGCATGAGAGAG       |
| scaffold410118_18.9 | 1 p2 | (TG)7  | 14 | 42   | 55 CATTGTGTTTTCTCCATATTTTCA   |
| scaffold410162_14.4 | 1 p2 | (AG)7  | 14 | 822  | 835 ACACAATGGTGATGGCAGAA      |
| scaffold410219_12.1 | 1 p2 | (AG)7  | 14 | 53   | 66 TGTTTGAGTGGTTTTTCCTTGA     |
| scaffold410233_13.7 | 1 p2 | (CT)7  | 14 | 29   | 42 CCTCTCACTCCCACTCCATC       |
| scaffold410279_15.9 | 1 p2 | (GT)7  | 14 | 56   | 69 CCTGAAACTCCAAATATTCTTCTTG  |
| scaffold410312_12.4 | 1 p2 | (GA)9  | 18 | 742  | 759 CTTGCCTTACATCAGCCCTC      |
| scaffold410595_14.0 | 1 p2 | (CA)6  | 12 | 470  | 481 CCGGTGAACTTCTCCAACCTC     |
| scaffold410606_15.7 | 1 p2 | (AG)6  | 12 | 136  | 147 AGAAAAAGTTGGGACGGAGG      |
| scaffold410696_14.0 | 1 p2 | (TA)6  | 12 | 268  | 279 TTGTTCGAAACCTAATGCCA      |
| scaffold410788_10.4 | 1 p2 | (TA)8  | 16 | 371  | 386 AAAAAGGAAGGAGGGAGCTAA     |
| scaffold411136_20.8 | 1 p2 | (AT)6  | 12 | 121  | 132 TGTA AACATGTATGGGATTGAAGA |
| scaffold411195_17.6 | 1 p2 | (AT)7  | 14 | 3901 | 3914 TGTGGTTGCGTCCTTATGAA     |
| scaffold411312_16.1 | 1 p2 | (TA)8  | 16 | 1885 | 1900 CATGGAGGGGTCAAACATTC     |
| scaffold411410_14.9 | 1 p2 | (AT)7  | 14 | 637  | 650 GGGGTGAAATTGGGAGAGTT      |
| scaffold411492_12.1 | 1 p2 | (GT)7  | 14 | 35   | 48 GGATACCCTCCCAAACCCTA       |
| scaffold411532_21.2 | 1 p2 | (CT)6  | 12 | 97   | 108 TCTCATTACGCTTTTTCAGC      |
| scaffold411615_15.0 | 1 p2 | (TA)9  | 18 | 1060 | 1077 TTTTGAGCTTCCGCGAGTAT     |
| scaffold411763_16.4 | 1 p2 | (TA)10 | 20 | 173  | 192 TGGACTTAAGTACCCTTTTACCAA  |
| scaffold411790_15.0 | 1 p2 | (GA)7  | 14 | 1563 | 1576 GGGGTGGTTAAGTTGTGGTG     |
| scaffold411810_13.4 | 1 p2 | (AT)8  | 16 | 336  | 351 TTTGCTAGGACCGAAACC        |
| scaffold412001_14.7 | 1 p2 | (TA)12 | 24 | 471  | 494 AGTATGCTGACGCTGGGTTT      |
| scaffold412042_14.4 | 1 p2 | (CT)8  | 16 | 117  | 132 CTTGGGCTAAAATCCCAACA      |
| scaffold412086_16.6 | 1 p2 | (GA)6  | 12 | 1819 | 1830 GGTTGATTGGTTTTTCATGGC    |
| scaffold412159_10.9 | 1 p2 | (AG)7  | 14 | 69   | 82 CAAATATTTTGTAGTTTCCCATGTTG |
| scaffold412247_17.0 | 1 p2 | (GA)12 | 24 | 4389 | 4412 TTCGAGCTCTCCTTTTTGGA     |
| scaffold412258_10.4 | 1 p2 | (AG)6  | 12 | 360  | 371 CCCACCCAGAAGTCCAACCTA     |
| scaffold412459_11.1 | 1 p2 | (AG)6  | 12 | 86   | 97 GGATTTTCGAAATTTTCTCGC      |
| scaffold412476_14.9 | 1 p2 | (AT)6  | 12 | 1414 | 1425 CTGCATCGAGTATCGCTCAA     |

|                     |      |        |    |      |      |                             |
|---------------------|------|--------|----|------|------|-----------------------------|
| scaffold412534_10.6 | 1 p2 | (GA)6  | 12 | 55   | 66   | CGTGGTTCGATCGTAATTGA        |
| scaffold412841_15.7 | 1 p2 | (AT)6  | 12 | 1033 | 1044 | TTTCTTTAATCACCCGACCA        |
| scaffold412863_13.8 | 1 p2 | (GA)6  | 12 | 463  | 474  | TCTGGTCGAGCTGGAAGATT        |
| scaffold412869_12.2 | 1 p2 | (CA)9  | 18 | 55   | 72   | TGTGATTTGTTCCCAAGAA         |
| scaffold413066_20.3 | 1 p2 | (CG)6  | 12 | 60   | 71   | GCACTGTGTTACGCCGATTA        |
| scaffold413130_16.9 | 1 p2 | (CT)7  | 14 | 295  | 308  | AAAAGAAAAAGTGAAGGGCTCA      |
| scaffold413146_13.4 | 1 p2 | (CA)6  | 12 | 743  | 754  | TTCCTAAAAACGTTCCGCTG        |
| scaffold413147_11.1 | 1 p2 | (AG)7  | 14 | 35   | 48   | GAAGAACAATTACAATGTTTATCCAA  |
| scaffold413223_17.4 | 1 p2 | (TC)13 | 26 | 2490 | 2515 | CTGCAGAGCTCCATGACAGA        |
| scaffold413315_18.0 | 1 p2 | (GA)6  | 12 | 53   | 64   | TCAACAGAGAATGCAAGCAA        |
| scaffold413360_13.9 | 1 p2 | (TA)8  | 16 | 181  | 196  | AACATGATTTGATGGTGCCTC       |
| scaffold413363_11.9 | 1 p2 | (TA)9  | 18 | 45   | 62   | TGCGTTTTGACAATATATAGGTGTTT  |
| scaffold413392_16.6 | 1 p2 | (TC)6  | 12 | 122  | 133  | CTTCCCAGGATCGATTTGAA        |
| scaffold413411_16.0 | 1 p2 | (AT)9  | 18 | 609  | 626  | AATGCAAAAATATGAGGCCG        |
| scaffold413460_16.4 | 1 p2 | (GA)6  | 12 | 72   | 83   | TTGGTGGAAAAAGGTTAACGA       |
| scaffold413678_11.7 | 1 p2 | (TA)7  | 14 | 51   | 64   | GGTTTCTGGTGAAGATGACGA       |
| scaffold413693_15.4 | 1 p2 | (TA)9  | 18 | 45   | 62   | AAGGGGGTTATTAGTGGATCA       |
| scaffold413719_12.0 | 1 p2 | (AT)7  | 14 | 169  | 182  | TGTGCGTGTATGCAATGTGT        |
| scaffold413983_23.9 | 1 p2 | (AT)9  | 18 | 1048 | 1065 | ATGGAACGTTGATTGCCATT        |
| scaffold414075_11.6 | 1 p2 | (GA)6  | 12 | 217  | 228  | TCCTGCATCCTATCACATGG        |
| scaffold414101_14.1 | 1 p2 | (CA)6  | 12 | 65   | 76   | TCTCGACTAATTATTATGCCTACCA   |
| scaffold414271_10.6 | 1 p2 | (AT)11 | 22 | 67   | 88   | AATTAATAATTTGGGGAGGGG       |
| scaffold414329_13.4 | 1 p2 | (GA)12 | 24 | 1026 | 1049 | CAGACCGTCGAATTTAGACCA       |
| scaffold414359_12.9 | 1 p2 | (CT)6  | 12 | 81   | 92   | TTTGGGACGATTTTCTCTCTATG     |
| scaffold414787_12.6 | 1 p2 | (AG)6  | 12 | 952  | 963  | TGCTGCAGAGAAGGTAGGGT        |
| scaffold414830_10.8 | 1 p2 | (TG)6  | 12 | 108  | 119  | CTCGTTTGTGTGTTCTTCGTG       |
| scaffold414890_15.2 | 1 p2 | (GA)6  | 12 | 306  | 317  | TGGTTGTTTTAATTTGCTCCC       |
| scaffold414923_15.6 | 1 p2 | (CT)6  | 12 | 577  | 588  | CTTTTCTTTACACCACAAGGA       |
| scaffold414974_17.3 | 1 p2 | (TA)8  | 16 | 70   | 85   | TCAATGGCTCAAAAAGTTTCA       |
| scaffold414982_14.8 | 1 p2 | (TA)8  | 16 | 235  | 250  | AAATGAAATAGAATTCGCGAGG      |
| scaffold415123_11.7 | 1 p2 | (AT)6  | 12 | 122  | 133  | CACACACATTACATTAAACCGATG    |
| scaffold415129_14.1 | 1 p2 | (AT)6  | 12 | 532  | 543  | GATCGCATGTTGATCTTCA         |
| scaffold415154_16.9 | 1 p2 | (TC)7  | 14 | 62   | 75   | CACATCCCACCCAACTCTCT        |
| scaffold415294_14.4 | 1 p2 | (AT)6  | 12 | 592  | 603  | TGGACGTAATACCTTTTACCA       |
| scaffold415324_15.6 | 1 p2 | (CT)7  | 14 | 270  | 283  | GAGCCCAAACCTCAATCAAC        |
| scaffold415374_14.3 | 1 p2 | (AT)9  | 18 | 660  | 677  | GGGCATGAATTCAAAACCTC        |
| scaffold415578_17.2 | 1 p2 | (TA)6  | 12 | 2523 | 2534 | CTCGAAAAGTCTACCGGC          |
| scaffold415641_15.2 | 1 p2 | (AG)6  | 12 | 881  | 892  | AGTGAGCCTACACCACCACC        |
| scaffold415744_13.1 | 1 p2 | (AT)6  | 12 | 190  | 201  | CCCCAATGCTATGGACAAAC        |
| scaffold415894_10.3 | 1 p2 | (GT)7  | 14 | 199  | 212  | CGTCTGAGCTCGGTAGAAGC        |
| scaffold416075_16.9 | 1 p2 | (AT)7  | 14 | 325  | 338  | AGATCCGATGTCCCAAACAC        |
| scaffold416092_16.1 | 1 p2 | (CT)6  | 12 | 3138 | 3149 | ATGTGCTCTTCATGGGGAAG        |
| scaffold416164_15.8 | 1 p2 | (TG)9  | 18 | 116  | 133  | CATCCCAACCACTCATTTCG        |
| scaffold416549_13.8 | 1 p2 | (AT)6  | 12 | 1990 | 2001 | AACTGGTATGTGCGTGTGGA        |
| scaffold416621_16.6 | 1 p2 | (CA)7  | 14 | 48   | 61   | GGTTAATCTCTCTATCTCTCTCACACA |
| scaffold416719_10.3 | 1 p2 | (TA)7  | 14 | 120  | 133  | GCAGTGTAAGTTAGGCGGTTTG      |
| scaffold416903_13.3 | 1 p2 | (TA)7  | 14 | 867  | 880  | TTGTCGGTCATTGAATTGTGA       |
| scaffold417101_11.2 | 1 p2 | (TG)7  | 14 | 79   | 92   | TTTTCATTTGATCACCTCCC        |
| scaffold417120_13.0 | 1 p2 | (TA)9  | 18 | 264  | 281  | GATCTGCGAAATGCTTAGCC        |
| scaffold417421_16.7 | 1 p2 | (CT)6  | 12 | 626  | 637  | ACATCATCTTCCTTACGCGG        |
| scaffold417455_11.3 | 1 p2 | (AT)8  | 16 | 223  | 238  | CTGGAACAACAGCTACGCTC        |
| scaffold417477_11.2 | 1 p2 | (TA)10 | 20 | 514  | 533  | GCTCACAGATCCCACCTGAT        |
| scaffold417608_11.0 | 1 p2 | (TA)9  | 18 | 44   | 61   | AAGGAGGTGTTATGAAGGGATT      |
| scaffold417668_10.9 | 1 p2 | (TA)10 | 20 | 77   | 96   | CCCCTGTATGCACCTCATT         |
| scaffold417669_11.8 | 1 p2 | (CT)6  | 12 | 623  | 634  | TTCTGTCCTCAACCACCCTC        |
| scaffold417751_16.6 | 1 p2 | (TA)6  | 12 | 406  | 417  | TTGGCACTGAGTACCCATTTT       |
| scaffold417866_10.3 | 1 p2 | (CT)6  | 12 | 38   | 49   | CCCAGGTCTCAATCTTTTTGG       |
| scaffold418001_16.9 | 1 p2 | (GT)7  | 14 | 120  | 133  | TGCTGCTATTGAAGCCATTG        |

|                     |      |        |    |      |                                |
|---------------------|------|--------|----|------|--------------------------------|
| scaffold418271_19.6 | 1 p2 | (AT)6  | 12 | 1501 | 1512 GAAGGTGAACGTCGGTAGGA      |
| scaffold418293_16.6 | 1 p2 | (TA)7  | 14 | 486  | 499 TGATAGAAACACTTCGCGAGC      |
| scaffold418387_14.7 | 1 p2 | (CT)6  | 12 | 324  | 335 CACGCATCTCTCTCTCCCT        |
| scaffold418652_17.6 | 1 p2 | (TA)7  | 14 | 823  | 836 TGAGGCTCCAGATTTGCTCT       |
| scaffold418660_11.2 | 1 p2 | (TA)6  | 12 | 158  | 169 GAGGCCTACTTCCTGGATCA       |
| scaffold418727_12.0 | 1 p2 | (CT)6  | 12 | 180  | 191 GGAGTTTCTATCCGCCCTTC       |
| scaffold418728_17.8 | 1 p2 | (AG)6  | 12 | 123  | 134 CGATGGTCTGAGTTATCCTCTG     |
| scaffold418969_17.7 | 1 p2 | (AT)7  | 14 | 120  | 133 TCGTGTGTAGGAAAAACATCG      |
| scaffold418971_15.2 | 1 p2 | (TA)7  | 14 | 46   | 59 CGATCACGTTTTCCAGTTCC        |
| scaffold419114_17.5 | 1 p2 | (TG)9  | 18 | 307  | 324 CGTTTTGATGATGAGCTGGA       |
| scaffold419138_12.0 | 1 p2 | (AT)8  | 16 | 165  | 180 GCGGTTTGAGCCTAATTTTG       |
| scaffold419196_16.6 | 1 p2 | (TA)6  | 12 | 159  | 170 TTCGTTTACAGCATAACACCGA     |
| scaffold419210_16.2 | 1 p2 | (AG)7  | 14 | 385  | 398 GAGTGCTGCAGCGTATGTGT       |
| scaffold419272_14.8 | 1 p2 | (TA)12 | 24 | 534  | 557 CAATTGCTATAAATGAAACCGGA    |
| scaffold419294_12.0 | 1 p2 | (TA)7  | 14 | 197  | 210 AAACCTTGCTCCGTTGGATG       |
| scaffold419457_12.5 | 1 p2 | (AG)6  | 12 | 76   | 87 TCCTCAATTTTCAGTGTGAAAA      |
| scaffold419514_16.3 | 1 p2 | (TC)7  | 14 | 262  | 275 CACGGGGTTTTCCAGACTTTA      |
| scaffold419515_12.2 | 1 p2 | (TA)6  | 12 | 97   | 108 AAATTAAGTGGGGGTGGAGG       |
| scaffold419849_19.5 | 1 p2 | (TC)6  | 12 | 236  | 247 CCCAAATCTAGAAGCCACGA       |
| scaffold419894_15.2 | 1 p2 | (AT)6  | 12 | 1423 | 1434 TTCGATACGAATTTTCATACCAT   |
| scaffold420131_15.9 | 1 p2 | (CT)6  | 12 | 84   | 95 GATTTTGGGACGATTTTCTCTC      |
| scaffold420137_20.9 | 1 p2 | (CT)6  | 12 | 86   | 97 GCGAGTGTGCCTAGTGTAG         |
| scaffold420231_16.6 | 1 p2 | (AT)7  | 14 | 542  | 555 TGAGCACGTATGGACACGAT       |
| scaffold420236_16.3 | 1 p2 | (AG)7  | 14 | 2638 | 2651 GAGCCACGGCCTATTACAGA      |
| scaffold420243_12.2 | 1 p2 | (TA)6  | 12 | 563  | 574 TTGAATCCAGGATCTTGAGC       |
| scaffold420246_12.0 | 1 p2 | (AT)7  | 14 | 215  | 228 CCCAAGCCAGAGTGAGAGAG       |
| scaffold420279_12.0 | 1 p2 | (AT)7  | 14 | 54   | 67 TTTGCTAGAGGTTTTGACGAGA      |
| scaffold420446_18.0 | 1 p2 | (AG)6  | 12 | 2478 | 2489 TGGATTGAAGAATGGAAGCA      |
| scaffold420448_14.2 | 1 p2 | (GA)8  | 16 | 2338 | 2353 CATTCACTTGAGGAATGGGG      |
| scaffold420479_15.1 | 1 p2 | (GA)7  | 14 | 1799 | 1812 ATCCCGTCTGCGTTTATCAC      |
| scaffold420492_15.6 | 1 p2 | (AT)6  | 12 | 2491 | 2502 TTCAAACGTGGCACCAATTA      |
| scaffold420502_14.9 | 1 p2 | (TA)9  | 18 | 50   | 67 CACAAGATTTATGGGTTATCATTTG   |
| scaffold420506_11.3 | 1 p2 | (AT)10 | 20 | 369  | 388 AAAAGGTTAAGGGTGGGGTG       |
| scaffold420516_15.9 | 1 p2 | (TA)6  | 12 | 215  | 226 TTCCCATCAGTCAAGATCTACC     |
| scaffold420555_16.1 | 1 p2 | (TA)8  | 16 | 584  | 599 TCCTCGACTGTTTTTCCAC        |
| scaffold420617_13.7 | 1 p2 | (AT)8  | 16 | 1637 | 1652 GCAATGGTGTTCATATGTGT      |
| scaffold420686_14.6 | 1 p2 | (TC)6  | 12 | 2224 | 2235 TGCTACGAAGACATCCACCA      |
| scaffold420693_15.3 | 1 p2 | (AT)6  | 12 | 267  | 278 GCCTCCTTTTCTTTTTCTCG       |
| scaffold420864_10.0 | 1 p2 | (CA)6  | 12 | 61   | 72 TGGGAGAATTTTCTGCTCTTG       |
| scaffold420921_10.2 | 1 p2 | (AG)6  | 12 | 114  | 125 CCTCCCAACCCCAAATTTAT       |
| scaffold420938_15.2 | 1 p2 | (AT)10 | 20 | 43   | 62 ATCGGTTATTACCGGATCGC        |
| scaffold420988_14.2 | 1 p2 | (GA)6  | 12 | 895  | 906 CTAAATCCACCGCCATTGT        |
| scaffold421052_14.2 | 1 p2 | (TG)6  | 12 | 1275 | 1286 TGAGGGACTTGGGTAGTTGC      |
| scaffold421219_15.2 | 1 p2 | (AG)6  | 12 | 1193 | 1204 ACAGAAGAACGGGCTTTGAA      |
| scaffold421249_10.3 | 1 p2 | (AC)6  | 12 | 691  | 702 TTTTTAATTCATCTTAACTGATGCAA |
| scaffold421276_17.8 | 1 p2 | (TC)6  | 12 | 364  | 375 GCGCAAAAATACTCGCTTTC       |
| scaffold421297_11.6 | 1 p2 | (CT)6  | 12 | 209  | 220 ATCTACCCCTCATTCCCGAC       |
| scaffold421350_12.5 | 1 p2 | (CT)6  | 12 | 43   | 54 GATCTTTCCACAAACCGAGC        |
| scaffold421401_10.9 | 1 p2 | (AT)6  | 12 | 221  | 232 ACATTTTCGGCCATGACAAT       |
| scaffold421501_17.7 | 1 p2 | (TC)6  | 12 | 330  | 341 TCCACATTGGTTTGGCCTAT       |
| scaffold421528_11.1 | 1 p2 | (TA)9  | 18 | 1212 | 1229 CCAATTCGAAAACCGGTA        |
| scaffold421589_16.1 | 1 p2 | (TA)8  | 16 | 69   | 84 GGGCTAAGTGTGAGATTGGA        |
| scaffold421735_14.2 | 1 p2 | (GA)6  | 12 | 731  | 742 TCGTTTTGATCGTTAGCTGT       |
| scaffold421831_13.3 | 1 p2 | (AT)7  | 14 | 189  | 202 TGCACGTAGGCATGTTCAAT       |
| scaffold421857_14.9 | 1 p2 | (GA)9  | 18 | 1035 | 1052 CCATCCATGCCTTGGTACTT      |
| scaffold421859_11.6 | 1 p2 | (TA)7  | 14 | 67   | 80 CGAGTGATCGTGAGACAGTGA       |
| scaffold421881_18.6 | 1 p2 | (GA)8  | 16 | 306  | 321 GCGAAGAAACATTCAGGGAA       |
| scaffold421989_16.8 | 1 p2 | (TC)7  | 14 | 692  | 705 ATCGAGTAACTAGGCGCGA        |

|                     |      |        |    |      |                                |
|---------------------|------|--------|----|------|--------------------------------|
| scaffold422116_16.7 | 1 p2 | (TA)8  | 16 | 119  | 134 ATGCATGTGTGCCAAGTGTC       |
| scaffold422117_14.2 | 1 p2 | (AT)8  | 16 | 1849 | 1864 CAAAATGTCCGAAAAATTCGC     |
| scaffold422118_15.8 | 1 p2 | (TA)6  | 12 | 123  | 134 TATCCATGGAATGCCCAAAT       |
| scaffold422119_17.0 | 1 p2 | (AG)6  | 12 | 898  | 909 TTACATGGATGGATGGGTTG       |
| scaffold422224_13.2 | 1 p2 | (AT)6  | 12 | 63   | 74 GCAAACCAAACATGTATCAAAA      |
| scaffold422267_10.2 | 1 p2 | (TA)8  | 16 | 306  | 321 GAATCCATTTTGTGTTGGGC       |
| scaffold422280_15.8 | 1 p2 | (TA)6  | 12 | 4265 | 4276 TCTGGACCTTTCGGTTCTTG      |
| scaffold422353_15.2 | 1 p2 | (AT)9  | 18 | 241  | 258 AAGCAGGAGGTCCACAGTTG       |
| scaffold422364_12.3 | 1 p2 | (AT)7  | 14 | 920  | 933 GTGCTCTCAAGTTCTTGCC        |
| scaffold422520_16.5 | 1 p2 | (TA)6  | 12 | 481  | 492 GCTGGTGCATCCTCTTCCTA       |
| scaffold422748_15.0 | 1 p2 | (TA)9  | 18 | 491  | 508 TGC GTTGGATCAATTTGTGT      |
| scaffold422789_17.2 | 1 p2 | (TG)8  | 16 | 663  | 678 ATCGCACGTGCTAGATCCTT       |
| scaffold422798_14.3 | 1 p2 | (AT)7  | 14 | 1356 | 1369 TTGCAATCCGGATCAAAAGT      |
| scaffold422812_16.5 | 1 p2 | (TG)6  | 12 | 1406 | 1417 TGCAACATGATTTTGTTCGGT     |
| scaffold423108_15.7 | 1 p2 | (AT)6  | 12 | 71   | 82 TGAGCAAAAGTAATAAGAGCGACA    |
| scaffold423140_15.2 | 1 p2 | (AG)7  | 14 | 42   | 55 TTGTAATTATTGTAGGGAATAAAAGG  |
| scaffold423167_10.7 | 1 p2 | (TG)6  | 12 | 177  | 188 ATCTCAGTGC GTGTGAGTGC      |
| scaffold423191_17.3 | 1 p2 | (TA)6  | 12 | 503  | 514 TAGACGCCCCAGACTGTTTC       |
| scaffold423248_13.9 | 1 p2 | (TA)9  | 18 | 44   | 61 AAGGGTTATCACCTGATTTTCTC     |
| scaffold423264_12.5 | 1 p2 | (AC)7  | 14 | 447  | 460 CTCAACGGTATGCTCGGATT       |
| scaffold423388_16.2 | 1 p2 | (CT)9  | 18 | 105  | 122 CACTCACTCTCACTAGCCGC       |
| scaffold423463_14.2 | 1 p2 | (CT)8  | 16 | 341  | 356 ACGGCTATAGCAAGGGTCAA       |
| scaffold423534_14.0 | 1 p2 | (GA)6  | 12 | 152  | 163 CACGATGGACGATTGAACAC       |
| scaffold423746_15.2 | 1 p2 | (AT)6  | 12 | 764  | 775 TGGCTGTGAATCATTGTTCCG      |
| scaffold423864_15.9 | 1 p2 | (TA)7  | 14 | 224  | 237 AAATGCGCAATTTTAAACCC       |
| scaffold424034_10.2 | 1 p2 | (TC)8  | 16 | 355  | 370 CGGCACCAATTTATTGTGAA       |
| scaffold424097_15.8 | 1 p2 | (AG)8  | 16 | 120  | 135 GGTTGGTCCACAAGATTTACAG     |
| scaffold424539_13.3 | 1 p2 | (CT)7  | 14 | 299  | 312 CATACTCCCCTTACCATCG        |
| scaffold424560_17.8 | 1 p2 | (AT)7  | 14 | 612  | 625 TCCGAAATTTAAGGAGTCGG       |
| scaffold424609_11.7 | 1 p2 | (AC)6  | 12 | 234  | 245 AAGGAGATCATGGGATCGTG       |
| scaffold424652_18.2 | 1 p2 | (TC)7  | 14 | 122  | 135 TCTCAGGTGACAATAGGGGG       |
| scaffold424791_15.3 | 1 p2 | (CT)6  | 12 | 1294 | 1305 CTCATTTTGCACGTCTTCCA      |
| scaffold424806_14.9 | 1 p2 | (TA)6  | 12 | 199  | 210 AGAAACGTTTTCCCTGAGCA       |
| scaffold424825_17.0 | 1 p2 | (CT)6  | 12 | 846  | 857 AATGGTGGTGCAC TTTTGGT      |
| scaffold425061_10.0 | 1 p2 | (AT)9  | 18 | 146  | 163 CCGGGGTATGCTATAAACGA       |
| scaffold425067_13.3 | 1 p2 | (TA)8  | 16 | 212  | 227 CCCTTCGCATCTTACTGCAT       |
| scaffold425087_11.2 | 1 p2 | (TA)8  | 16 | 267  | 282 TTCTACAAGCAAAGACCCA        |
| scaffold425112_15.9 | 1 p2 | (TA)7  | 14 | 2022 | 2035 GAGCGTAATATCAAATTTTGGG    |
| scaffold425153_15.0 | 1 p2 | (TA)6  | 12 | 123  | 134 TCGAAAATCAAAGAGCCTCAA      |
| scaffold425160_14.8 | 1 p2 | (AT)6  | 12 | 69   | 80 TTCTTAATTTGCATGTTTCGTTATACA |
| scaffold425173_11.9 | 1 p2 | (TA)8  | 16 | 48   | 63 GGTGCAAGTGTCAATAGAAGAGTT    |
| scaffold425283_13.3 | 1 p2 | (AG)7  | 14 | 48   | 61 AGAAACTTGACGTGTGCGTG        |
| scaffold425316_13.5 | 1 p2 | (CT)11 | 22 | 667  | 688 TCTGAAGTCCAGCAACAGGA       |
| scaffold425420_11.2 | 1 p2 | (GC)6  | 12 | 361  | 372 GTGGAGAGGCAAGAACTGC        |
| scaffold425461_15.6 | 1 p2 | (GA)7  | 14 | 111  | 124 CATTCTCAAGCCACTCCCTC       |
| scaffold425615_17.0 | 1 p2 | (AC)6  | 12 | 307  | 318 TCCAGGTTTGCTGCTAGGTT       |
| scaffold425741_13.0 | 1 p2 | (GA)6  | 12 | 68   | 79 TGATACGAGATTCGGGAAG         |
| scaffold425790_15.8 | 1 p2 | (CT)6  | 12 | 2595 | 2606 TTTTGGTAAAGTTTGTGATTCCA   |
| scaffold425805_15.4 | 1 p2 | (GA)9  | 18 | 892  | 909 GATCCACGGGTCTCTTAAA        |
| scaffold425813_10.2 | 1 p2 | (TC)7  | 14 | 412  | 425 TTCAACCTTTTCCTTGTCTCC      |
| scaffold425837_19.7 | 1 p2 | (TA)8  | 16 | 72   | 87 ACCAATTTGATGAGGGACCA        |
| scaffold425850_11.8 | 1 p2 | (GA)7  | 14 | 145  | 158 TGGTTGAAAATCATTGTGGG       |
| scaffold425858_14.2 | 1 p2 | (AT)7  | 14 | 560  | 573 AAAGGGAATTTTGTCAACTGGA     |
| scaffold425875_16.6 | 1 p2 | (CA)6  | 12 | 1829 | 1840 TGGAGCCTACCATGACCATT      |
| scaffold425897_14.3 | 1 p2 | (CA)7  | 14 | 1181 | 1194 AACCGAAGAACAAGAGG         |
| scaffold426067_16.7 | 1 p2 | (TA)6  | 12 | 382  | 393 ACACGTGCCTCGTTTGAAT        |
| scaffold426141_15.4 | 1 p2 | (AC)7  | 14 | 5809 | 5822 GAAAAAGGCAGAAATGCAGC      |
| scaffold426235_18.9 | 1 p2 | (TG)6  | 12 | 824  | 835 GGCCAACATATGGGATTTG        |

|                     |      |        |    |       |                               |
|---------------------|------|--------|----|-------|-------------------------------|
| scaffold426255_20.5 | 1 p2 | (AT)8  | 16 | 510   | 525 CAGAAGCCTCCAACACCAAT      |
| scaffold426258_11.9 | 1 p2 | (AT)6  | 12 | 56    | 67 CGACGTTGTCTTAACCTTGGA      |
| scaffold426344_13.8 | 1 p2 | (AT)7  | 14 | 2172  | 2185 TAGTTAAACTCACGCACGGC     |
| scaffold426406_15.2 | 1 p2 | (AT)6  | 12 | 407   | 418 TTTCCCTTCTTTTGGGAGGT      |
| scaffold426448_15.0 | 1 p2 | (GA)6  | 12 | 189   | 200 GTTGGAGGAGAGCTGTAGCG      |
| scaffold426483_11.0 | 1 p2 | (TA)10 | 20 | 46    | 65 CACCCAAAATGGGTTATTATTG     |
| scaffold426514_13.8 | 1 p2 | (TA)6  | 12 | 164   | 175 GCACGTTTTTGGCCTGATA       |
| scaffold426515_18.5 | 1 p2 | (TA)9  | 18 | 112   | 129 GCGGGGTTGTTGAAGAATTA      |
| scaffold426557_13.1 | 1 p2 | (CA)11 | 22 | 291   | 312 TTA CTGTTGCATGGACTGGG     |
| scaffold426572_14.3 | 1 p2 | (AT)11 | 22 | 72    | 93 GGTATTCGTGATCGTGATTCT      |
| scaffold426666_19.4 | 1 p2 | (AT)6  | 12 | 34    | 45 GGGTTCGTAACCTAGGAGCTG      |
| scaffold426740_15.9 | 1 p2 | (CT)7  | 14 | 123   | 136 CAAGCGGAACAAACAAACAA      |
| scaffold426812_14.7 | 1 p2 | (AT)6  | 12 | 206   | 217 TGCTCAGCATA CATGAAGGG     |
| scaffold426859_13.0 | 1 p2 | (TA)11 | 22 | 940   | 961 ATCAAGCCTGATATGTTTGACTC   |
| scaffold426865_14.8 | 1 p2 | (TC)6  | 12 | 3005  | 3016 GGCTGTT CAGCAATATGCAA    |
| scaffold426905_12.4 | 1 p2 | (TA)6  | 12 | 53    | 64 CGGATTTAAGGGTTATTACATGA    |
| scaffold426947_13.2 | 1 p2 | (CT)6  | 12 | 293   | 304 CTTTTTCCACCTTGTGCCT       |
| scaffold426952_15.1 | 1 p2 | (AT)8  | 16 | 255   | 270 GGAGGGCTGTGTGATTGATT      |
| scaffold426959_15.7 | 1 p2 | (CA)6  | 12 | 59    | 70 ATCGTCGCCTCTAGCCACTA       |
| scaffold427000_11.0 | 1 p2 | (AT)7  | 14 | 67    | 80 GGTTTTACGAACCACAATCCA      |
| scaffold427267_14.2 | 1 p2 | (TA)8  | 16 | 121   | 136 TTTGCACCTGAGGAGGTGTT      |
| scaffold427325_16.5 | 1 p2 | (TG)6  | 12 | 1077  | 1088 TCTTTGCAGCTTGACATTC      |
| scaffold427377_12.4 | 1 p2 | (TC)6  | 12 | 607   | 618 TTCTCCTATCTTCCCCAGCC      |
| scaffold427419_15.3 | 1 p2 | (AT)7  | 14 | 389   | 402 AACTGGCATCCATACGAAGC      |
| scaffold427532_13.2 | 1 p2 | (CT)9  | 18 | 895   | 912 AATCTCTCAATCGGCACACC      |
| scaffold427668_14.6 | 1 p2 | (TA)8  | 16 | 151   | 166 AGGGTTAAAATCGCGCATA       |
| scaffold427679_16.3 | 1 p2 | (CT)6  | 12 | 517   | 528 TCCATTGGTTATGGGAAGA       |
| scaffold427836_14.6 | 1 p2 | (TA)8  | 16 | 627   | 642 ACACAGGAGTTTGC GGATTC     |
| scaffold427838_10.8 | 1 p2 | (TA)9  | 18 | 143   | 160 ACACCCACAAATCAACCACA      |
| scaffold427860_15.3 | 1 p2 | (AT)9  | 18 | 449   | 466 CAAACCAAGGTCGAGAGTTGA     |
| scaffold427929_13.7 | 1 p2 | (AG)7  | 14 | 89    | 102 CTTACGTGACTTGCTTCCA       |
| scaffold427936_13.9 | 1 p2 | (CT)6  | 12 | 446   | 457 AGGTGATTTGGCATTAAAGG      |
| scaffold427997_13.5 | 1 p2 | (TA)10 | 20 | 365   | 384 AAAGCAATTTCAACATAGGTCGT   |
| scaffold428103_17.4 | 1 p2 | (CT)6  | 12 | 125   | 136 ACTCGCCCCTCAAGTTTCTT      |
| scaffold428155_16.1 | 1 p2 | (AG)7  | 14 | 431   | 444 CTGTAGTCGTGGTGGGCTTT      |
| scaffold428381_15.7 | 1 p2 | (TA)8  | 16 | 574   | 589 TTCACAAACCCAGATATCATAATCA |
| scaffold428453_13.9 | 1 p2 | (AT)9  | 18 | 1317  | 1334 CTTCTAAAGAACCCTCCCCG     |
| scaffold428478_11.7 | 1 p2 | (AG)9  | 18 | 221   | 238 AAGCACCGGTA CTGACATC      |
| scaffold428564_16.9 | 1 p2 | (AT)6  | 12 | 53    | 64 TGTGATGTTGTATTTTGGTACATGA  |
| scaffold428615_16.0 | 1 p2 | (CT)6  | 12 | 200   | 211 ACAACCGGTAATTCCCCTCC      |
| scaffold428663_17.3 | 1 p2 | (TC)6  | 12 | 72    | 83 GCAACGGAATACCACTCGTT       |
| scaffold428783_10.8 | 1 p2 | (AT)11 | 22 | 291   | 312 TGCTATTGCATGCTAAGAAGTGA   |
| scaffold428850_12.7 | 1 p2 | (TA)9  | 18 | 526   | 543 TGTGGAATGGGAGATAACAGAA    |
| scaffold428853_11.8 | 1 p2 | (AG)6  | 12 | 73    | 84 GTGTTGGACGCATCAGGTAT       |
| scaffold428904_12.2 | 1 p2 | (CT)6  | 12 | 486   | 497 ACAACAATCCGGAGGTGAAG      |
| scaffold429019_12.5 | 1 p2 | (TA)6  | 12 | 205   | 216 ATCAAATCTTGGTGCGGAAC      |
| scaffold429064_16.1 | 1 p2 | (GA)9  | 18 | 115   | 132 TTACCTTTCTCGATCGGGTG      |
| scaffold429075_15.9 | 1 p2 | (TA)6  | 12 | 293   | 304 TCGCTTAATTGGTGATTGTGA     |
| scaffold429223_15.6 | 1 p2 | (AT)8  | 16 | 299   | 314 ATTTTTCGGCGAGATTGCTA      |
| scaffold429241_11.4 | 1 p2 | (TA)7  | 14 | 55    | 68 TCAATCAATTAGATTTTTCGGCTC   |
| scaffold429341_11.9 | 1 p2 | (AG)7  | 14 | 123   | 136 AACAGCAGGTGAGTTGGAGG      |
| scaffold429349_17.1 | 1 p2 | (TA)6  | 12 | 1849  | 1860 TTTCACTGTTTCCACACATGC    |
| scaffold429418_13.2 | 1 p2 | (CT)7  | 14 | 410   | 423 AGAGCCATGTCTCCTCACG       |
| scaffold429574_18.0 | 1 p2 | (CT)6  | 12 | 1150  | 1161 CTTTGAGTTGGATGGCTGGT     |
| scaffold429637_10.4 | 1 p2 | (AC)6  | 12 | 169   | 180 TCTTTTCTCTCCCTCCCCTG      |
| scaffold429645_14.6 | 1 p2 | (CT)6  | 12 | 877   | 888 GCTTCTATCGCGCTCTCTCT      |
| scaffold429765_11.8 | 1 p2 | (TG)6  | 12 | 39    | 50 TGTTCTTCGTGTTCTATATTTCTCG  |
| scaffold429849_15.5 | 1 p2 | (CT)8  | 16 | 10638 | 10653 TGAAATGTGTTGGCTGGGTA    |

|                     |      |        |    |      |      |                           |
|---------------------|------|--------|----|------|------|---------------------------|
| scaffold429899_18.0 | 1 p2 | (TA)7  | 14 | 936  | 949  | CATGTTTCAGTTTTTGGGGCT     |
| scaffold429909_14.5 | 1 p2 | (AT)7  | 14 | 72   | 85   | TATCAAAACAACCCCCGGAC      |
| scaffold429923_20.0 | 1 p2 | (TC)7  | 14 | 225  | 238  | GAGGAGAATTCATGGGGTGA      |
| scaffold430155_10.7 | 1 p2 | (CT)8  | 16 | 331  | 346  | CAAGTCAAGCAAGGTGGACA      |
| scaffold430183_11.5 | 1 p2 | (GA)6  | 12 | 53   | 64   | GCGACAAGTCTGCGTGTTAT      |
| scaffold430184_11.5 | 1 p2 | (TC)7  | 14 | 288  | 301  | CACATTCTCCGGTTTTTCGT      |
| scaffold430292_14.9 | 1 p2 | (TA)7  | 14 | 254  | 267  | TAACATGGAGGACAGGGGTC      |
| scaffold430432_16.4 | 1 p2 | (TC)7  | 14 | 556  | 569  | TCTCAAGATGAGAACTCGGAGA    |
| scaffold430448_16.9 | 1 p2 | (AC)6  | 12 | 587  | 598  | CAATAAAGTGGGGCCAAAAC      |
| scaffold430506_15.0 | 1 p2 | (GA)10 | 20 | 5349 | 5368 | CCTCTGGTTGTTGGAATGGT      |
| scaffold430547_16.2 | 1 p2 | (CT)6  | 12 | 536  | 547  | CAAAGAAGGCAATCTATCCCA     |
| scaffold430793_15.2 | 1 p2 | (TC)10 | 20 | 253  | 272  | AATCCCAATTTCCCAACCTC      |
| scaffold430851_13.6 | 1 p2 | (TA)6  | 12 | 2322 | 2333 | ATGGACCCACCTGTCATAA       |
| scaffold430971_13.4 | 1 p2 | (CT)6  | 12 | 181  | 192  | CTCACCTTGTTCATCACCT       |
| scaffold430995_10.4 | 1 p2 | (TA)6  | 12 | 349  | 360  | CGCACTCACACTCTGACA        |
| scaffold431008_16.7 | 1 p2 | (AT)11 | 22 | 491  | 512  | TGCACCGTTAACAAAAATGA      |
| scaffold431020_14.3 | 1 p2 | (TA)7  | 14 | 741  | 754  | ATTGCTAGGGTAGCCTCCTT      |
| scaffold431075_14.9 | 1 p2 | (AC)6  | 12 | 1527 | 1538 | AAACGCCATGCAAAAATACG      |
| scaffold431142_14.5 | 1 p2 | (CT)6  | 12 | 120  | 131  | AAGCTGCACGTGTTACACCTAA    |
| scaffold431283_14.0 | 1 p2 | (TC)6  | 12 | 126  | 137  | AAATAAAAGAGGAAGGCTGAGCTA  |
| scaffold431315_14.2 | 1 p2 | (CA)6  | 12 | 2916 | 2927 | TCTTCCCCTTCCCACATC        |
| scaffold431376_16.5 | 1 p2 | (CT)6  | 12 | 92   | 103  | CAGTCACTCTCACTAGCCGC      |
| scaffold431464_16.0 | 1 p2 | (TC)10 | 20 | 283  | 302  | CTGAATGCTCGTTGTCTCCA      |
| scaffold431640_14.1 | 1 p2 | (AT)6  | 12 | 628  | 639  | CGCGCACACACTTACAAACT      |
| scaffold431694_17.4 | 1 p2 | (CT)7  | 14 | 750  | 763  | TCTTCTCCCTCTCTCCCTCC      |
| scaffold431723_13.5 | 1 p2 | (CT)6  | 12 | 583  | 594  | TGCCCAAAAGATTTTCATCA      |
| scaffold431801_15.3 | 1 p2 | (CT)6  | 12 | 52   | 63   | GCATCTCTTGCTCTCTCGTTG     |
| scaffold431913_16.6 | 1 p2 | (AT)6  | 12 | 126  | 137  | AGGCATCCATCCTTTACTGC      |
| scaffold432000_15.6 | 1 p2 | (AT)6  | 12 | 1369 | 1380 | AAGGTAAACAACAATCAAGGGA    |
| scaffold432031_13.6 | 1 p2 | (TA)6  | 12 | 65   | 76   | TCCACCGTTGTCTTTAAGTCG     |
| scaffold432050_12.4 | 1 p2 | (GA)8  | 16 | 346  | 361  | GAAAAACGACGTGAGGGGAGA     |
| scaffold432181_13.5 | 1 p2 | (CA)6  | 12 | 1152 | 1163 | ATCGTTGGAAATATGCTGCC      |
| scaffold432269_14.3 | 1 p2 | (CT)6  | 12 | 125  | 136  | AGCATCTCTTGCTCTCTCATTG    |
| scaffold432282_16.7 | 1 p2 | (AG)6  | 12 | 256  | 267  | CCTTTTCTTCCCAAACAACA      |
| scaffold432431_15.9 | 1 p2 | (TG)6  | 12 | 674  | 685  | GCACCAAGACAATGCCCTAT      |
| scaffold432486_13.9 | 1 p2 | (TC)6  | 12 | 114  | 125  | CGTGTTTTACCGAAATGCGT      |
| scaffold432512_15.5 | 1 p2 | (TA)6  | 12 | 73   | 84   | CAATCCTTTGAGTATGGATTGATG  |
| scaffold432518_16.2 | 1 p2 | (AT)8  | 16 | 1069 | 1084 | CGATCCGTCGACTAAACCAT      |
| scaffold432525_15.3 | 1 p2 | (AT)9  | 18 | 1201 | 1218 | ATGCGAGAACGGAAAGAAAA      |
| scaffold432570_11.2 | 1 p2 | (TA)12 | 24 | 399  | 422  | CCTATGCCGCTTACCTTTTT      |
| scaffold432878_15.3 | 1 p2 | (TA)8  | 16 | 606  | 621  | CCAATACTGATGGTCCAAGC      |
| scaffold432885_11.0 | 1 p2 | (TC)6  | 12 | 347  | 358  | CCCACTCCACCTTCTCCTAA      |
| scaffold433106_15.0 | 1 p2 | (AG)7  | 14 | 1286 | 1299 | TCTAACACGCGAATCTGACG      |
| scaffold433413_12.1 | 1 p2 | (AT)6  | 12 | 98   | 109  | TCGTGAATGGCATGACTGAT      |
| scaffold433759_18.4 | 1 p2 | (TA)7  | 14 | 110  | 123  | GAGGTACGGTGATATCATGCTTAGT |
| scaffold433773_16.1 | 1 p2 | (GA)8  | 16 | 1965 | 1980 | ATGGGGAGTTCAATGTCGTC      |
| scaffold433954_13.5 | 1 p2 | (TA)10 | 20 | 333  | 352  | CCACGAAACATCAGCATACG      |
| scaffold433958_17.0 | 1 p2 | (TA)8  | 16 | 250  | 265  | CATATCTGACGGCCAGATT       |
| scaffold433975_11.8 | 1 p2 | (TA)8  | 16 | 533  | 548  | TGGACGCCCAATATTGTTTC      |
| scaffold434190_14.7 | 1 p2 | (AG)7  | 14 | 212  | 225  | TGTAGAGGAAGTTGGGGGTG      |
| scaffold434340_12.6 | 1 p2 | (AC)7  | 14 | 164  | 177  | CGTTAGTCCGTCCATCACT       |
| scaffold434418_15.4 | 1 p2 | (AG)7  | 14 | 445  | 458  | GGATCGCGTCAATTAGTGT       |
| scaffold434439_16.8 | 1 p2 | (GA)6  | 12 | 603  | 614  | ATCAGCATCTTACC GCCAC      |
| scaffold434554_15.4 | 1 p2 | (GA)6  | 12 | 1177 | 1188 | CTATGGCACTATGCCGGATT      |
| scaffold434622_11.6 | 1 p2 | (TG)7  | 14 | 231  | 244  | ACGCACACTTACGCATT CAG     |
| scaffold434730_15.2 | 1 p2 | (GA)14 | 28 | 198  | 225  | TGCAGCTGAATGAAAAATGTG     |
| scaffold434785_10.1 | 1 p2 | (TA)9  | 18 | 284  | 301  | AATCATCTCCTCACTAATTCCATC  |
| scaffold434864_12.9 | 1 p2 | (TG)7  | 14 | 1316 | 1329 | TACGTGTGTGCAGTTGCTGA      |



|                     |      |        |    |      |      |                            |
|---------------------|------|--------|----|------|------|----------------------------|
| scaffold434867_13.4 | 1 p2 | (TA)9  | 18 | 120  | 137  | GACCGCAGGATAATCCAGAA       |
| scaffold434869_14.9 | 1 p2 | (TA)6  | 12 | 799  | 810  | TTGGACTTTTTCGAAGAGCAT      |
| scaffold434870_12.4 | 1 p2 | (TA)6  | 12 | 260  | 271  | CCCGATTTCCATGCTTAAAA       |
| scaffold434873_13.3 | 1 p2 | (AT)6  | 12 | 561  | 572  | GTCAAGGAAGGCATCCACAT       |
| scaffold434908_14.4 | 1 p2 | (AT)6  | 12 | 2259 | 2270 | TTAGCTCCAAGGGCCCTAAT       |
| scaffold435013_10.8 | 1 p2 | (AT)7  | 14 | 226  | 239  | CTTCTGTTGGGGCGAAATTA       |
| scaffold435172_13.7 | 1 p2 | (TA)7  | 14 | 139  | 152  | CCAATTGACTTCGTGGAGGT       |
| scaffold435260_16.9 | 1 p2 | (TA)9  | 18 | 209  | 226  | AGACCATGGTTCGGAGAGTG       |
| scaffold435404_19.1 | 1 p2 | (AC)7  | 14 | 2069 | 2082 | TCGCTGATCCCCAATATAGC       |
| scaffold435427_11.9 | 1 p2 | (AT)12 | 24 | 410  | 433  | TCACGTTATGGGGAGAATCC       |
| scaffold435448_11.9 | 1 p2 | (AC)7  | 14 | 1226 | 1239 | CAACGATGGTTGTTGAAACG       |
| scaffold435474_13.7 | 1 p2 | (AT)9  | 18 | 48   | 65   | TGCGTTTTGACAATATATAGGTGTTT |
| scaffold435490_13.9 | 1 p2 | (AT)8  | 16 | 301  | 316  | TTCAGTGGAACATGGTTTGC       |
| scaffold435531_12.7 | 1 p2 | (AT)7  | 14 | 346  | 359  | GGTTGCCGCCTTCATTATTA       |
| scaffold435561_14.6 | 1 p2 | (GA)9  | 18 | 487  | 504  | GCATGCATCAACTGCAAATC       |
| scaffold435569_10.5 | 1 p2 | (TA)7  | 14 | 104  | 117  | CTTTAGGGCCCTTGATTTCC       |
| scaffold435630_11.5 | 1 p2 | (TA)7  | 14 | 402  | 415  | GTTGCTTCCATCGTCACCTT       |
| scaffold435741_15.1 | 1 p2 | (TA)9  | 18 | 257  | 274  | GCAGAAATTTGGCCTTTGAT       |
| scaffold435941_15.6 | 1 p2 | (TC)6  | 12 | 449  | 460  | TCTCGTCTCCCTTGTTTGCT       |
| scaffold435951_12.2 | 1 p2 | (AT)8  | 16 | 73   | 88   | GGGTGCTTGAAGATAAACATGA     |
| scaffold436007_12.8 | 1 p2 | (CT)6  | 12 | 540  | 551  | CTAAATTCGCATGGGAAGGA       |
| scaffold436135_18.6 | 1 p2 | (TC)7  | 14 | 247  | 260  | CGCGAAGAACACAAGAGGAT       |
| scaffold436190_12.7 | 1 p2 | (CT)6  | 12 | 343  | 354  | CGCGAACTCAAATACCCTTC       |
| scaffold436372_10.4 | 1 p2 | (AG)6  | 12 | 307  | 318  | GTAGCCGTCTATTCCGAACG       |
| scaffold436384_18.6 | 1 p2 | (GA)6  | 12 | 832  | 843  | TCCAAACAAGGCTCTATGGC       |
| scaffold436389_14.7 | 1 p2 | (AG)7  | 14 | 582  | 595  | ATTGTGTCACCGTCGTCTCA       |
| scaffold436456_16.6 | 1 p2 | (CA)6  | 12 | 1746 | 1757 | TTCATGCCCGTTTTATTTGA       |
| scaffold436479_14.3 | 1 p2 | (AT)8  | 16 | 205  | 220  | GGATATCCGATCCGGTTTTT       |
| scaffold436550_15.1 | 1 p2 | (CT)7  | 14 | 49   | 62   | TTGCTCTCATTGTAATCTCTCTCAA  |
| scaffold436577_14.6 | 1 p2 | (CT)6  | 12 | 543  | 554  | ATGCTTAGGTGGATTTCCCA       |
| scaffold436602_14.4 | 1 p2 | (TA)6  | 12 | 163  | 174  | CACCATAATTTGACACACACACA    |
| scaffold436607_15.4 | 1 p2 | (TA)6  | 12 | 97   | 108  | GCATATGATGTGCATATACGAAA    |
| scaffold436609_11.3 | 1 p2 | (CT)8  | 16 | 363  | 378  | GCTTATCCCTTACCCTTCA        |
| scaffold436611_14.9 | 1 p2 | (CT)6  | 12 | 377  | 388  | CGAAATGTGAAGCGTTTGAA       |
| scaffold436645_15.2 | 1 p2 | (TC)7  | 14 | 335  | 348  | TTGAACTCACCACGTGAAGG       |
| scaffold436675_15.6 | 1 p2 | (AT)8  | 16 | 2927 | 2942 | GGACAAAGGGTTTGCGATAA       |
| scaffold436740_13.1 | 1 p2 | (GA)7  | 14 | 328  | 341  | CAGGGGTAAAGTAGTCATTGTCC    |
| scaffold436750_13.4 | 1 p2 | (GA)9  | 18 | 391  | 408  | AGCGTACATGGAATCCCAAC       |
| scaffold436786_10.1 | 1 p2 | (AT)10 | 20 | 227  | 246  | TCTGTCACGTCATTGTGTCCG      |
| scaffold436888_10.5 | 1 p2 | (GA)9  | 18 | 71   | 88   | GGTGGTGGCAGAGTGATTGT       |
| scaffold436936_12.3 | 1 p2 | (TC)6  | 12 | 99   | 110  | CACTAGCCGCAGCTCTCTCT       |
| scaffold437346_13.0 | 1 p2 | (GA)6  | 12 | 174  | 185  | GAGAAATTGGCAATCGGAAA       |
| scaffold437365_11.1 | 1 p2 | (TA)12 | 24 | 48   | 71   | CACGTTATATTTATAGTTTTGTGGGG |
| scaffold437427_17.6 | 1 p2 | (TA)6  | 12 | 105  | 116  | CGGTTGTATGAAACCGTTAGTTG    |
| scaffold437595_13.8 | 1 p2 | (AT)6  | 12 | 55   | 66   | TCGGAGCTAAAACGGAGAAA       |
| scaffold437597_16.6 | 1 p2 | (AG)6  | 12 | 223  | 234  | CTGCTCGAGAGATGCAAGAG       |
| scaffold437761_14.0 | 1 p2 | (AG)6  | 12 | 127  | 138  | CCTTCCAACAGAACAACACTCG     |
| scaffold438096_10.4 | 1 p2 | (AT)8  | 16 | 332  | 347  | ATGCGCGTTTTTLAGGGTTTA      |
| scaffold438109_15.1 | 1 p2 | (GT)7  | 14 | 1951 | 1964 | TGCTCTTTGACCAGCTGTTTT      |
| scaffold438126_14.3 | 1 p2 | (TC)7  | 14 | 124  | 137  | TCTTACTTGCTTGACCCTGA       |
| scaffold438230_11.3 | 1 p2 | (AT)6  | 12 | 216  | 227  | AAGGGGGTTATCATGAGATCAA     |
| scaffold438314_12.2 | 1 p2 | (AT)8  | 16 | 54   | 69   | AACGGTAGCCATCACAATTTTT     |
| scaffold438372_10.8 | 1 p2 | (AT)13 | 26 | 137  | 162  | ACGACTGTCGATCCACACAA       |
| scaffold438470_18.2 | 1 p2 | (TG)6  | 12 | 2418 | 2429 | TCGAAACAGATCAAACTGCC       |
| scaffold438640_13.4 | 1 p2 | (TA)7  | 14 | 160  | 173  | AGTCCCAACTTGCTCATTTCA      |
| scaffold438733_15.5 | 1 p2 | (CT)12 | 24 | 1832 | 1855 | TTCGATCTTCATCGCCTCTT       |
| scaffold438849_12.5 | 1 p2 | (TG)8  | 16 | 49   | 64   | AAACTCTGAAAGTTGTGCGAGCAG   |
| scaffold438850_14.7 | 1 p2 | (AG)6  | 12 | 155  | 166  | AGCGAGTTTCGAAATGGAGA       |

|                     |      |        |    |      |                               |
|---------------------|------|--------|----|------|-------------------------------|
| scaffold438895_12.3 | 1 p2 | (TA)8  | 16 | 210  | 225 TGATAGCGTCATTGTTTGGC      |
| scaffold439017_15.9 | 1 p2 | (TC)6  | 12 | 1913 | 1924 GTTCTTCTGCCAGCACCTC      |
| scaffold439280_17.6 | 1 p2 | (TG)6  | 12 | 2461 | 2472 TGTTTACGGCTGCAAATTCA     |
| scaffold439316_10.0 | 1 p2 | (GA)6  | 12 | 36   | 47 CGTGGTTCGATCGTAATTGA       |
| scaffold439522_17.6 | 1 p2 | (TA)9  | 18 | 441  | 458 TAAAACCATGCACGTAGGCA      |
| scaffold439577_14.4 | 1 p2 | (TA)10 | 20 | 453  | 472 TGCATCTTTGTA CT CAGCCCT   |
| scaffold439758_11.6 | 1 p2 | (AT)8  | 16 | 276  | 291 GCCGAGTGTCACCCATATCT      |
| scaffold439771_15.6 | 1 p2 | (AT)9  | 18 | 120  | 137 TTAAAGCTCGGTTCAATTTCA     |
| scaffold439773_17.7 | 1 p2 | (AT)7  | 14 | 124  | 137 ATTGTTTGTGTGGCCAGAT       |
| scaffold439903_16.4 | 1 p2 | (TA)8  | 16 | 74   | 89 TTGATCCAAGGGTGTATAATGG     |
| scaffold440161_10.1 | 1 p2 | (TA)9  | 18 | 596  | 613 TCATGACTCCATCCTTCACTTC    |
| scaffold440214_13.3 | 1 p2 | (TA)7  | 14 | 74   | 87 GTTGACAACCTTGACATCAAATACAT |
| scaffold440217_13.5 | 1 p2 | (TC)6  | 12 | 112  | 123 TGACACGTTGGACCTGAAAG      |
| scaffold440247_10.7 | 1 p2 | (AT)9  | 18 | 572  | 589 TGTAGTCAATGCTTTTGAGATTATG |
| scaffold440356_16.4 | 1 p2 | (TA)6  | 12 | 543  | 554 CGGATTTAATCGTGGCTGTT      |
| scaffold440453_14.8 | 1 p2 | (AT)6  | 12 | 719  | 730 TTCAACCCGAACAACAATGA      |
| scaffold440521_17.1 | 1 p2 | (TC)6  | 12 | 127  | 138 TCTTTCAATTTTCAGCCCTCA     |
| scaffold440572_15.6 | 1 p2 | (CT)8  | 16 | 3210 | 3225 TGCTTGCAATTTGAAGTAGCG    |
| scaffold440690_11.1 | 1 p2 | (GA)6  | 12 | 262  | 273 TGGTGTCTTGGTGT TTTGG      |
| scaffold440894_15.5 | 1 p2 | (TA)7  | 14 | 260  | 273 TCACCTTATCAACGATCCGA      |
| scaffold440943_15.8 | 1 p2 | (AT)6  | 12 | 156  | 167 TGGAAATTTTCGGGGAATAA      |
| scaffold440980_15.8 | 1 p2 | (GA)8  | 16 | 480  | 495 GTGCCTATTGCCGACGTAGT      |
| scaffold441052_18.3 | 1 p2 | (GA)6  | 12 | 195  | 206 CGCTGTAGATCCAACAAGCA      |
| scaffold441171_13.2 | 1 p2 | (TA)8  | 16 | 340  | 355 TTCGATTCGACGCTTTTTG       |
| scaffold441178_10.8 | 1 p2 | (AG)7  | 14 | 77   | 90 CGCCCATGGAGAAGTTTAT        |
| scaffold441226_15.6 | 1 p2 | (TC)6  | 12 | 740  | 751 CGTGT CATAGGAAAACGAGC     |
| scaffold441269_15.7 | 1 p2 | (AG)7  | 14 | 1965 | 1978 CAGCATGGCCATTACAACAG     |
| scaffold441278_16.0 | 1 p2 | (TA)10 | 20 | 531  | 550 ATAATCGTGGTGATAGGCGG      |
| scaffold441329_20.3 | 1 p2 | (CT)6  | 12 | 1044 | 1055 AAACGAGAAGAAAGCAGCCA     |
| scaffold441540_14.4 | 1 p2 | (TA)8  | 16 | 484  | 499 ATACAAAGTCCCACGACCGA      |
| scaffold441568_14.0 | 1 p2 | (CT)6  | 12 | 342  | 353 ACTTGCTTGACTTGCAACGA      |
| scaffold441570_16.7 | 1 p2 | (CA)8  | 16 | 429  | 444 ATCAACGCTTTGGATGTGCT      |
| scaffold441612_10.5 | 1 p2 | (CT)6  | 12 | 362  | 373 CGCCGAGTTGGTCTCTCTA       |
| scaffold441635_15.9 | 1 p2 | (TC)7  | 14 | 3918 | 3931 CCAAGCTTGCCCTTTCATCT     |
| scaffold441796_11.6 | 1 p2 | (AT)9  | 18 | 737  | 754 TTCAGGATAAATATCAGTTTCATGG |
| scaffold441928_14.7 | 1 p2 | (AT)6  | 12 | 127  | 138 TGCAATCACACAATAACAAGCA    |
| scaffold441941_10.7 | 1 p2 | (AT)9  | 18 | 345  | 362 CAACGCTAATATCAACCGCA      |
| scaffold441967_15.9 | 1 p2 | (AT)6  | 12 | 71   | 82 ATCCGGAGTAAGTTCGAGGA       |
| scaffold441970_14.1 | 1 p2 | (GA)6  | 12 | 341  | 352 TTCCAAACCTTTGTTCCGAG      |
| scaffold441990_12.1 | 1 p2 | (GA)6  | 12 | 605  | 616 CGATCCTTGAGTAAAAGCCG      |
| scaffold441993_17.0 | 1 p2 | (AT)7  | 14 | 2201 | 2214 CCGAAACCGTGTCTTCAGT      |
| scaffold442403_13.0 | 1 p2 | (GC)6  | 12 | 432  | 443 CAACGGCTCTTTTCTCCAAC      |
| scaffold442518_15.6 | 1 p2 | (GA)7  | 14 | 411  | 424 GCATTGTTTTGTGCGCTTT       |
| scaffold442531_14.5 | 1 p2 | (AT)6  | 12 | 503  | 514 CTGGGGGTTAGGTTGGTTTT      |
| scaffold442532_10.2 | 1 p2 | (TC)6  | 12 | 128  | 139 AGAGTTGGGCTAGGTGGGAT      |
| scaffold442534_16.2 | 1 p2 | (TC)6  | 12 | 1316 | 1327 CCTTCTTGAGTTTCAACCCC     |
| scaffold442614_18.0 | 1 p2 | (CT)6  | 12 | 1502 | 1513 ATTCACAAGCGGCACTTCTT     |
| scaffold442704_17.9 | 1 p2 | (AG)9  | 18 | 2441 | 2458 CTGAGGCAGTTTTCAGAGCC     |
| scaffold442736_14.7 | 1 p2 | (CT)8  | 16 | 351  | 366 TGGCATAGTTTGGTTGTGGA      |
| scaffold442746_16.0 | 1 p2 | (TC)6  | 12 | 1371 | 1382 TGGCCGAAGTAATTGAAAAA     |
| scaffold442753_14.8 | 1 p2 | (GT)9  | 18 | 565  | 582 ACATACCACCGATTTTTCCG      |
| scaffold442792_12.3 | 1 p2 | (AC)6  | 12 | 1279 | 1290 TGCAAGGAAGAAAAACAAACAA   |
| scaffold442903_13.4 | 1 p2 | (CT)7  | 14 | 449  | 462 ATGGGACGGAGGGAGTATTT      |
| scaffold443037_15.9 | 1 p2 | (AG)8  | 16 | 73   | 88 TCCCATGTTGTAATTAATGTAAGGAA |
| scaffold443178_16.6 | 1 p2 | (TC)7  | 14 | 71   | 84 TGAGAATGGCCGAGAGTTTT       |
| scaffold443386_16.4 | 1 p2 | (CA)6  | 12 | 4710 | 4721 TGCAAACATCAGCCATTTTC     |
| scaffold443489_16.1 | 1 p2 | (GA)7  | 14 | 4672 | 4685 TGGGAAGAGGAAATGGACAG     |
| scaffold443506_14.0 | 1 p2 | (AG)7  | 14 | 73   | 86 GAATCAGGGGAGGGAGAGAG       |

|                     |      |        |    |      |                              |
|---------------------|------|--------|----|------|------------------------------|
| scaffold443552_15.8 | 1 p2 | (AT)9  | 18 | 2185 | 2202 TTCATACACACCCTTGCAGC    |
| scaffold443560_12.6 | 1 p2 | (TA)7  | 14 | 415  | 428 TCTCCAGGAGTCGTGCTTGT     |
| scaffold443562_16.8 | 1 p2 | (AT)6  | 12 | 45   | 56 TTTGGTCCCTCAACAAATAATAAA  |
| scaffold443611_12.9 | 1 p2 | (AT)9  | 18 | 379  | 396 TTCCTGTGCTTTCAATTTGG     |
| scaffold443731_12.2 | 1 p2 | (TA)12 | 24 | 1033 | 1056 AGTCCCTGATTCTTCCCTCG    |
| scaffold443754_12.2 | 1 p2 | (AG)12 | 24 | 52   | 75 GCTTCAGCCATCGAGTTTTC      |
| scaffold443838_13.9 | 1 p2 | (AG)6  | 12 | 53   | 64 AGCTTCCGAACTTATGGGCT      |
| scaffold443929_16.8 | 1 p2 | (CT)6  | 12 | 1591 | 1602 CGAAAAATGGTGGGAAAGAA    |
| scaffold443950_11.2 | 1 p2 | (CA)6  | 12 | 226  | 237 AGTTTCATTTCCGGCTTCT      |
| scaffold444027_11.7 | 1 p2 | (TA)10 | 20 | 158  | 177 TGTAGTCCGCTTTGCTGATG     |
| scaffold444098_16.9 | 1 p2 | (CT)11 | 22 | 442  | 463 AGCATAATAACCACGCAGCC     |
| scaffold444228_12.2 | 1 p2 | (TA)6  | 12 | 868  | 879 ACGAACACTCACGCACTCAC     |
| scaffold444229_14.3 | 1 p2 | (AC)6  | 12 | 9157 | 9168 TGGTGACCAGATCAGGGAAT    |
| scaffold444285_19.0 | 1 p2 | (CT)6  | 12 | 85   | 96 CGAGGAACTTGGGACGATT       |
| scaffold444499_15.2 | 1 p2 | (TA)6  | 12 | 5587 | 5598 CTCCTGCCTCGTAGCAGTTC    |
| scaffold444506_13.9 | 1 p2 | (AT)8  | 16 | 226  | 241 GACAACAGAAAAACCACGCA     |
| scaffold444525_16.0 | 1 p2 | (CT)7  | 14 | 777  | 790 TGGCAGGTTGGAGACACATA     |
| scaffold444563_15.4 | 1 p2 | (TA)7  | 14 | 1269 | 1282 TGCCTGCCCTACTAGAAAA     |
| scaffold444568_15.4 | 1 p2 | (AG)6  | 12 | 54   | 65 TGTGCACTGTTTCTCTCTCTCA    |
| scaffold444683_15.4 | 1 p2 | (AT)10 | 20 | 4189 | 4208 GTCGGTGGCTGAAAGAAAAC    |
| scaffold444818_16.8 | 1 p2 | (GA)6  | 12 | 128  | 139 TGATTCAGATGTCAGCGAGC     |
| scaffold444820_16.6 | 1 p2 | (CA)6  | 12 | 57   | 68 TTTGATGTCCAAAGTGGCTG      |
| scaffold444989_10.0 | 1 p2 | (AT)7  | 14 | 84   | 97 AGTCGATTGTGTAGTTGTGGG     |
| scaffold445019_13.6 | 1 p2 | (TA)6  | 12 | 713  | 724 TGGTTCTAAATTCATGTTTCTTGG |
| scaffold445118_14.3 | 1 p2 | (CT)8  | 16 | 1344 | 1359 TGTGAGAGGTGTGAAGCAGG    |
| scaffold445135_16.3 | 1 p2 | (CT)6  | 12 | 260  | 271 CTCTCTTGCCCTCCTCCTCC     |
| scaffold445177_12.7 | 1 p2 | (TC)6  | 12 | 590  | 601 ACCCTCATCCCTCAATTTCC     |
| scaffold445375_16.2 | 1 p2 | (TG)7  | 14 | 2343 | 2356 AAGAAACGGAGGGTGTGTG     |
| scaffold445519_14.4 | 1 p2 | (CT)6  | 12 | 873  | 884 TCTCTTTGCAAACCCTCGT      |
| scaffold445535_13.6 | 1 p2 | (TA)10 | 20 | 45   | 64 TCACGTTAAAGGAGGGTATCA     |
| scaffold445544_14.3 | 1 p2 | (TG)6  | 12 | 1289 | 1300 AATTTCACTCTAGCGGGGCT    |
| scaffold445546_11.6 | 1 p2 | (TA)10 | 20 | 407  | 426 GGCGCAGCATATACACGA       |
| scaffold445673_16.7 | 1 p2 | (CT)6  | 12 | 220  | 231 AATTGCCATCCCTCACACTC     |
| scaffold445695_12.2 | 1 p2 | (TA)9  | 18 | 1985 | 2002 TCGATCGGCCTATTTTTCTG    |
| scaffold445706_16.3 | 1 p2 | (AT)6  | 12 | 439  | 450 TCGACTCCATAGTAGCCGAGT    |
| scaffold445707_16.7 | 1 p2 | (CT)7  | 14 | 479  | 492 TTCCATCCTTTCTTCCATGC     |
| scaffold445864_13.5 | 1 p2 | (AT)6  | 12 | 384  | 395 ATTTTGGTCGAAACCGAATG     |
| scaffold445930_15.0 | 1 p2 | (AG)9  | 18 | 521  | 538 CCCCTGTCCTCGACAGAAT      |
| scaffold446002_16.0 | 1 p2 | (TA)7  | 14 | 1054 | 1067 TTGGCAGGTTGATCATAAATTG  |
| scaffold446039_16.2 | 1 p2 | (AT)8  | 16 | 7721 | 7736 TGATTCTAGGATATCGCGGC    |
| scaffold446141_14.2 | 1 p2 | (AT)7  | 14 | 323  | 336 GCTGATCTTGGTCAGGCTCT     |
| scaffold446386_15.6 | 1 p2 | (AT)9  | 18 | 54   | 71 CCCTTTTATGCTCACATCTCTTTT  |
| scaffold446522_14.0 | 1 p2 | (TG)7  | 14 | 770  | 783 TTACGTGCCTGGCTTAGGTT     |
| scaffold446803_18.5 | 1 p2 | (AG)9  | 18 | 1155 | 1172 TTATTGCGTCACCTCATCCA    |
| scaffold446921_14.0 | 1 p2 | (AT)6  | 12 | 129  | 140 ATTTTAAACATTGTTGGCGGC    |
| scaffold446922_14.7 | 1 p2 | (TA)9  | 18 | 1509 | 1526 AAACCGTGTTTTTACTGGCG    |
| scaffold446976_17.2 | 1 p2 | (CT)6  | 12 | 1075 | 1086 GGAAATGGCGTGAAGTGT      |
| scaffold447069_15.5 | 1 p2 | (GA)6  | 12 | 122  | 133 CGATTTGCAAGTCTATGGCA     |
| scaffold447084_13.9 | 1 p2 | (TA)7  | 14 | 51   | 64 CATTGGTTAGCACTTGAATGAGA   |
| scaffold447203_11.8 | 1 p2 | (AT)6  | 12 | 143  | 154 TGCACCATAACAATATTCGACA   |
| scaffold447313_15.5 | 1 p2 | (CT)9  | 18 | 1421 | 1438 CGAAACGAGTTGCTGCTGTA    |
| scaffold447412_14.6 | 1 p2 | (AG)7  | 14 | 1253 | 1266 AACACACAGCCGCTACTCCT    |
| scaffold447449_12.9 | 1 p2 | (CG)7  | 14 | 48   | 61 ATAGTGGTATGGTGTGGGGG      |
| scaffold447606_14.0 | 1 p2 | (TC)8  | 16 | 790  | 805 GCCCTCCTTGATACCAAAA      |
| scaffold447776_13.6 | 1 p2 | (GA)8  | 16 | 444  | 459 AAAGGACCCGACTTTTTCAT     |
| scaffold447938_15.0 | 1 p2 | (CT)6  | 12 | 789  | 800 TCCTTGATGAACTGTGGGTG     |
| scaffold448015_12.6 | 1 p2 | (TA)9  | 18 | 587  | 604 ACGACGTGCATCAATTTCTCA    |
| scaffold448164_17.3 | 1 p2 | (CA)7  | 14 | 1073 | 1086 CATTTCAGGCCAAATCCTGT    |

|                     |      |        |    |      |      |                          |
|---------------------|------|--------|----|------|------|--------------------------|
| scaffold448181_12.9 | 1 p2 | (CT)6  | 12 | 558  | 569  | CCTTCTTCTTGGCGTCAACT     |
| scaffold448215_16.8 | 1 p2 | (AT)6  | 12 | 136  | 147  | TCTACGGAGGACGAGCTGTT     |
| scaffold448332_16.5 | 1 p2 | (GA)6  | 12 | 353  | 364  | CTCGACTCAGGGACCTTCAC     |
| scaffold448399_14.5 | 1 p2 | (AT)9  | 18 | 1370 | 1387 | GCGCCACATCTTGTGAATA      |
| scaffold448405_10.2 | 1 p2 | (AT)6  | 12 | 148  | 159  | TGTGATCAGGTGCTGTGTGA     |
| scaffold448413_13.6 | 1 p2 | (TA)6  | 12 | 657  | 668  | TTCTCAGCATATGGGAAGGG     |
| scaffold448444_10.4 | 1 p2 | (GT)7  | 14 | 409  | 422  | ATGCATGTGTGCAGGTGTTT     |
| scaffold448513_17.2 | 1 p2 | (CT)9  | 18 | 545  | 562  | TCGTTGACCGTATGGGATTT     |
| scaffold448672_13.2 | 1 p2 | (CT)10 | 20 | 220  | 239  | CAAACAAAGTCTGCAACCCC     |
| scaffold448718_11.8 | 1 p2 | (AT)10 | 20 | 732  | 751  | TGTTTTGCGAGCTTTTATTGG    |
| scaffold448783_10.4 | 1 p2 | (TA)8  | 16 | 48   | 63   | CGGATTTAAGGGTTATTACCTGAT |
| scaffold448805_17.2 | 1 p2 | (AT)6  | 12 | 1114 | 1125 | CCTGCCCTCCAAGATCATAA     |
| scaffold448840_10.5 | 1 p2 | (TA)7  | 14 | 51   | 64   | ATTTCTCACGCTGAAATGCC     |
| scaffold449111_14.6 | 1 p2 | (CT)6  | 12 | 54   | 65   | CAATGGCCAAGAACGTAACT     |
| scaffold449133_13.0 | 1 p2 | (AG)7  | 14 | 1268 | 1281 | TTTCCTTTTGCAGCTGGAGT     |
| scaffold449178_14.0 | 1 p2 | (TA)13 | 26 | 39   | 64   | CCAATTTGAATGGTTATCACCTG  |
| scaffold449266_18.2 | 1 p2 | (AG)8  | 16 | 348  | 363  | GCACAATCAAACCTTGCCTT     |
| scaffold449471_10.3 | 1 p2 | (TA)6  | 12 | 76   | 87   | AACAATTGCACCTTTAATAGCAA  |
| scaffold449525_10.9 | 1 p2 | (CT)6  | 12 | 60   | 71   | AATGTCTCTTCTCCTCGCA      |
| scaffold449528_15.2 | 1 p2 | (CT)6  | 12 | 284  | 295  | GCACCGGAGTATAACCCAGA     |
| scaffold449560_13.0 | 1 p2 | (AG)6  | 12 | 2777 | 2788 | GCTTTTATCAATGCCCTCCA     |
| scaffold449704_11.2 | 1 p2 | (TG)9  | 18 | 47   | 64   | GTTATCACCGGATCGCAAC      |
| scaffold449710_15.4 | 1 p2 | (TA)7  | 14 | 942  | 955  | TGTTTATTTGAAGGGGCAGG     |
| scaffold449770_14.9 | 1 p2 | (AT)7  | 14 | 6969 | 6982 | TGGCGGCATTCTATATGACA     |
| scaffold449968_14.6 | 1 p2 | (TA)7  | 14 | 3281 | 3294 | TTGATGTTTTCCCATTTTTG     |
| scaffold450103_19.2 | 1 p2 | (AG)9  | 18 | 414  | 431  | CCCATCTTCTGCAAAAATCC     |
| scaffold450162_14.2 | 1 p2 | (CA)6  | 12 | 1085 | 1096 | TATTTTTGGGTTTGGGGTCA     |
| scaffold450194_16.9 | 1 p2 | (GA)6  | 12 | 1190 | 1201 | GCACCTTTTGGTGGTAGAA      |
| scaffold450199_14.2 | 1 p2 | (TA)8  | 16 | 178  | 193  | TGTGTCATTCTTCCACTGC      |
| scaffold450227_14.0 | 1 p2 | (AT)13 | 26 | 555  | 580  | TCATTTAATATGGTCTGTGCGAA  |
| scaffold450238_10.2 | 1 p2 | (TA)8  | 16 | 209  | 224  | TTAGGGTTTAAAATCGCGCA     |
| scaffold450239_15.9 | 1 p2 | (AG)7  | 14 | 1417 | 1430 | TGGGTTAGCCCAAAAATGAG     |
| scaffold450311_15.7 | 1 p2 | (TA)6  | 12 | 153  | 164  | TTGTATTAGATTGTGGCTCCG    |
| scaffold450336_10.0 | 1 p2 | (CT)7  | 14 | 55   | 68   | CACTCACTCTCACTAGCCGC     |
| scaffold450354_14.8 | 1 p2 | (TG)6  | 12 | 1014 | 1025 | AAGCAATGGTGGTCTTCTCG     |
| scaffold450522_14.9 | 1 p2 | (CT)7  | 14 | 154  | 167  | CACCATCGTTCCTCACACAC     |
| scaffold450655_14.2 | 1 p2 | (AT)9  | 18 | 521  | 538  | TCTGCCTGTGCATCTCACAC     |
| scaffold450701_14.2 | 1 p2 | (AT)8  | 16 | 528  | 543  | GCATTGGTAAAACCGGGATA     |
| scaffold450732_16.7 | 1 p2 | (TG)7  | 14 | 65   | 78   | TGGTTATTACCTGAATACTCCCA  |
| scaffold450777_10.3 | 1 p2 | (AG)6  | 12 | 130  | 141  | TGGTCGTCCAAATCTCCTTC     |
| scaffold450909_12.7 | 1 p2 | (AT)8  | 16 | 257  | 272  | GGATAAACCACCTCACCCAAA    |
| scaffold450970_10.2 | 1 p2 | (TC)6  | 12 | 295  | 306  | ATCGTAGTTGATGCCCTTCG     |
| scaffold451112_15.4 | 1 p2 | (TG)7  | 14 | 127  | 140  | TGTTGTCGATCTGGCACTCT     |
| scaffold451162_11.8 | 1 p2 | (AT)8  | 16 | 50   | 65   | ACCCAGATCGCACTCGAATA     |
| scaffold451184_11.5 | 1 p2 | (AT)8  | 16 | 161  | 176  | AGTCATTGCGGCCACATAAT     |
| scaffold451291_10.7 | 1 p2 | (CT)6  | 12 | 331  | 342  | TGAGCACGTACAGATAAAAAGGG  |
| scaffold451480_13.0 | 1 p2 | (CT)6  | 12 | 994  | 1005 | CGACACCACTCCACCTTTTT     |
| scaffold451526_12.7 | 1 p2 | (TA)9  | 18 | 123  | 140  | GTGGCAGCATATCAACCCTT     |
| scaffold451527_11.6 | 1 p2 | (AT)8  | 16 | 126  | 141  | CGTGGCAGGCTAATATCCAT     |
| scaffold451531_12.9 | 1 p2 | (TA)10 | 20 | 48   | 67   | ATTGTTTCGATGTCAGCTTCG    |
| scaffold451545_11.3 | 1 p2 | (CT)7  | 14 | 1271 | 1284 | ATCGACATTCTTCTGCAGGC     |
| scaffold451554_16.0 | 1 p2 | (AG)8  | 16 | 126  | 141  | CTCATTATTTCTCACTACCAAGA  |
| scaffold451758_11.3 | 1 p2 | (GT)6  | 12 | 116  | 127  | TTCTGCTCTCTCTCGGTGGT     |
| scaffold451814_14.8 | 1 p2 | (TA)9  | 18 | 1035 | 1052 | ACTTAGGACCAAAGCCCGAT     |
| scaffold451830_14.4 | 1 p2 | (AG)6  | 12 | 859  | 870  | TGGATTTTAGGGCTCATGCT     |
| scaffold451861_14.9 | 1 p2 | (TC)13 | 26 | 3204 | 3229 | CCAGTAAAGGACCATTGCGGA    |
| scaffold451894_13.3 | 1 p2 | (TA)9  | 18 | 1493 | 1510 | CAGTTTCACCAAGTCACCCA     |
| scaffold451914_11.3 | 1 p2 | (TA)8  | 16 | 79   | 94   | AAAATCAAAGGCCACAATG      |

|                     |      |        |    |      |      |                             |
|---------------------|------|--------|----|------|------|-----------------------------|
| scaffold451938_13.8 | 1 p2 | (CT)7  | 14 | 279  | 292  | CCGTGTCCAGTCTGTGTTTG        |
| scaffold451963_17.0 | 1 p2 | (TG)6  | 12 | 476  | 487  | AATTACACAATCCTCGTGGA        |
| scaffold451998_15.0 | 1 p2 | (AT)11 | 22 | 1265 | 1286 | GCCTAATGTCATTGCCTGCT        |
| scaffold452414_11.9 | 1 p2 | (TC)6  | 12 | 556  | 567  | GGACCCACATGGAAGAGAGA        |
| scaffold452548_17.2 | 1 p2 | (GA)7  | 14 | 153  | 166  | CTCCCTCCGTCCCATAAAAT        |
| scaffold452601_11.5 | 1 p2 | (AT)6  | 12 | 179  | 190  | ATTGTTGGGTATTGTTGGCG        |
| scaffold452701_12.2 | 1 p2 | (TA)6  | 12 | 998  | 1009 | GGGAAGAGAAGAGTGAGGC         |
| scaffold452897_19.5 | 1 p2 | (AT)6  | 12 | 57   | 68   | CGGATTTATTGTTATTACATGATT    |
| scaffold452900_14.9 | 1 p2 | (AG)6  | 12 | 82   | 93   | CTTCGGAACTCTATCCGCC         |
| scaffold452909_15.2 | 1 p2 | (TC)7  | 14 | 128  | 141  | GCAGATCCAGATGCTCCAAT        |
| scaffold452911_12.4 | 1 p2 | (AG)7  | 14 | 267  | 280  | GCAACGTGCCAACTTCATA         |
| scaffold452914_15.4 | 1 p2 | (CT)6  | 12 | 1350 | 1361 | TCTTGCCTTCGTTCCAAGTT        |
| scaffold452934_10.7 | 1 p2 | (TA)6  | 12 | 51   | 62   | ATCCTAAGTTCGCCCTGAT         |
| scaffold452953_14.9 | 1 p2 | (TA)9  | 18 | 108  | 125  | CGAAATTGAATGGCAAGGAT        |
| scaffold453079_14.3 | 1 p2 | (AT)6  | 12 | 600  | 611  | GCAGGTTAACTCTAATTAATCCGTAC, |
| scaffold453153_14.5 | 1 p2 | (TA)6  | 12 | 999  | 1010 | CTTCCCCCACATTCAAAAGA        |
| scaffold453157_16.6 | 1 p2 | (GA)6  | 12 | 1128 | 1139 | TGAAGAGAAATGGCAATGGA        |
| scaffold453247_11.2 | 1 p2 | (TA)6  | 12 | 461  | 472  | CCCCGGTTTCATTTATAGCA        |
| scaffold453268_15.3 | 1 p2 | (CA)6  | 12 | 122  | 133  | CCGGTGAACCTTCTCCAACCTC      |
| scaffold453311_14.3 | 1 p2 | (TA)6  | 12 | 524  | 535  | ATGAGTTATCACCCGGATCGC       |
| scaffold453467_11.4 | 1 p2 | (AG)8  | 16 | 75   | 90   | CCCATGTTGTAATTAATGTAGGGA    |
| scaffold453518_13.7 | 1 p2 | (TA)7  | 14 | 173  | 186  | CCGTGCATCCTATCCTGTTT        |
| scaffold453528_13.0 | 1 p2 | (AT)9  | 18 | 261  | 278  | TCAATCGCAACCATCAATTT        |
| scaffold453594_16.0 | 1 p2 | (TA)7  | 14 | 304  | 317  | GGCCGATATTTGCTCGTAGT        |
| scaffold453666_12.7 | 1 p2 | (AG)6  | 12 | 261  | 272  | AATGGTGAGAGTGGAATGGG        |
| scaffold453672_12.7 | 1 p2 | (TA)8  | 16 | 220  | 235  | AAGATCTACCTTTGGGTAACCG      |
| scaffold453704_14.5 | 1 p2 | (AT)7  | 14 | 276  | 289  | TTTTCCCGCAATAACCACTC        |
| scaffold453751_14.0 | 1 p2 | (TC)6  | 12 | 273  | 284  | ACAGAACAAGCATACGCACG        |
| scaffold453822_15.6 | 1 p2 | (TC)9  | 18 | 2818 | 2835 | TCGTGCACTGGTGTCTCTC         |
| scaffold453921_15.4 | 1 p2 | (TA)8  | 16 | 288  | 303  | GTGACCCTTTGTGGGAAGAA        |
| scaffold453926_15.3 | 1 p2 | (TA)6  | 12 | 281  | 292  | GGACTGGTTTGACACCTTTGA       |
| scaffold453957_10.5 | 1 p2 | (AT)6  | 12 | 275  | 286  | CCCATTACTCCAAACCCAAA        |
| scaffold454024_13.8 | 1 p2 | (GA)6  | 12 | 2383 | 2394 | ACGATCCATGAAAGCAAACA        |
| scaffold454039_15.4 | 1 p2 | (AT)6  | 12 | 77   | 88   | TGCTCAAACCTTGAACCTGAATAAA   |
| scaffold454052_12.0 | 1 p2 | (GT)8  | 16 | 256  | 271  | ATGCCTTGGTCTTCCTCATC        |
| scaffold454063_15.0 | 1 p2 | (TC)6  | 12 | 170  | 181  | TGATGAATGAAAGATGAAATGGA     |
| scaffold454095_12.0 | 1 p2 | (AT)7  | 14 | 383  | 396  | TCTTTCACCCGCTTTAGGTG        |
| scaffold454144_10.7 | 1 p2 | (AT)9  | 18 | 257  | 274  | GGAGAAGAGGGAGGATCGAG        |
| scaffold454300_11.2 | 1 p2 | (AT)8  | 16 | 169  | 184  | ACCGATTGCTGAGCATTCT         |
| scaffold454347_15.2 | 1 p2 | (TC)8  | 16 | 492  | 507  | TGGAAAACCAAAGCAAACA         |
| scaffold454399_14.4 | 1 p2 | (CT)8  | 16 | 354  | 369  | CCAATGAAGCTCGTCAGGTT        |
| scaffold454403_11.2 | 1 p2 | (TA)7  | 14 | 491  | 504  | CGAGCTGGCTTGAGCTACTT        |
| scaffold454421_18.0 | 1 p2 | (CT)6  | 12 | 502  | 513  | AATACACCCTGTGCGACTC         |
| scaffold454491_12.9 | 1 p2 | (AT)6  | 12 | 353  | 364  | TAATGGGTGTTTGTGCGAAG        |
| scaffold454620_15.8 | 1 p2 | (GA)6  | 12 | 369  | 380  | ACCGTTGCAGTAAACCTTGG        |
| scaffold454627_14.7 | 1 p2 | (AT)7  | 14 | 4420 | 4433 | TGGGGTAAATATTTTGGGAGG       |
| scaffold454637_16.8 | 1 p2 | (TA)8  | 16 | 2708 | 2723 | GCGGGACAACCTACCAACAGT       |
| scaffold454692_17.0 | 1 p2 | (GA)8  | 16 | 2446 | 2461 | GCTTCCCCTAGTGAACACA         |
| scaffold454816_18.6 | 1 p2 | (TA)6  | 12 | 130  | 141  | GGCAATGTCTTATGCGCT          |
| scaffold454869_10.8 | 1 p2 | (TA)9  | 18 | 577  | 594  | TTAGGGTTTAAAATCGCGCA        |
| scaffold454955_14.5 | 1 p2 | (TA)6  | 12 | 815  | 826  | CCTCAATGGTATGCTCGGAT        |
| scaffold455058_16.4 | 1 p2 | (TC)6  | 12 | 33   | 44   | GCAACGGAATACCCCTCTT         |
| scaffold455230_19.8 | 1 p2 | (GA)8  | 16 | 1554 | 1569 | GGTGCTCCATGTTTGTGAGA        |
| scaffold455253_17.8 | 1 p2 | (AT)6  | 12 | 418  | 429  | GCTCAAAAGGTGATGGGTGT        |
| scaffold455261_18.1 | 1 p2 | (AT)8  | 16 | 332  | 347  | CCAAAATTCAGTAAGGGTAACAAAA   |
| scaffold455299_12.8 | 1 p2 | (TA)8  | 16 | 68   | 83   | TTATCACTTGATCATCCCC         |
| scaffold455343_10.9 | 1 p2 | (AG)8  | 16 | 86   | 101  | GAAGTTCGGCCATTCTTACG        |
| scaffold455446_13.7 | 1 p2 | (AT)6  | 12 | 775  | 786  | TTGGTGGATTTTTGGAATGTC       |

|                     |      |        |    |      |                              |
|---------------------|------|--------|----|------|------------------------------|
| scaffold455593_15.3 | 1 p2 | (AT)7  | 14 | 427  | 440 CTGCAACCATAGCTCGATCA     |
| scaffold455606_16.2 | 1 p2 | (GA)6  | 12 | 165  | 176 TTGGGCTTTGATTCTTGCTT     |
| scaffold455616_14.9 | 1 p2 | (TC)6  | 12 | 52   | 63 CAGAAATTGCCTTGGTTGTTG     |
| scaffold455678_15.0 | 1 p2 | (AG)6  | 12 | 247  | 258 GCCGAGGTCACACCATACTT     |
| scaffold455917_16.4 | 1 p2 | (AG)7  | 14 | 129  | 142 CCTCGGATAAATTATGGGAAAA   |
| scaffold455958_13.4 | 1 p2 | (AG)7  | 14 | 78   | 91 TGTGCAAGGTTGAACCAAGA      |
| scaffold455975_18.4 | 1 p2 | (TA)6  | 12 | 130  | 141 TCTTGCCATTGATTTTGGTG     |
| scaffold455976_15.4 | 1 p2 | (AT)9  | 18 | 125  | 142 CGTTTTTGTGAATGTTGCCA     |
| scaffold455977_14.3 | 1 p2 | (GA)9  | 18 | 687  | 704 AAGGTGTAGATCTGGCGGTG     |
| scaffold456219_13.9 | 1 p2 | (GA)6  | 12 | 130  | 141 TTTGAGAATGGGGAGGTGAG     |
| scaffold456238_14.9 | 1 p2 | (TA)10 | 20 | 703  | 722 AACAGTTTCAATTCGCCACC     |
| scaffold456257_10.1 | 1 p2 | (TA)8  | 16 | 421  | 436 CACTCAAGGGGCATTTTTGT     |
| scaffold456278_16.2 | 1 p2 | (TC)8  | 16 | 347  | 362 GAGTTCGTCAAACCTCCCAA     |
| scaffold456322_11.1 | 1 p2 | (TA)8  | 16 | 52   | 67 TTTGTTCTACTCACTCACATTAAGA |
| scaffold456326_10.1 | 1 p2 | (GA)6  | 12 | 53   | 64 GAGGAGAGTTGATGGTGAGGA     |
| scaffold456540_11.1 | 1 p2 | (TA)11 | 22 | 225  | 246 GCAGGGGTTGCACAATATG      |
| scaffold456619_11.4 | 1 p2 | (TA)6  | 12 | 212  | 223 TTAGGTTGGACCAAAAAGCC     |
| scaffold456821_18.0 | 1 p2 | (CT)6  | 12 | 535  | 546 TACTCCGTGGTGTTCCCAGT     |
| scaffold456822_19.7 | 1 p2 | (AT)6  | 12 | 529  | 540 ACAATGGAGGCTGGAGGAG      |
| scaffold456897_12.0 | 1 p2 | (AG)6  | 12 | 130  | 141 TGAGAAATGCTCCAAAGCCT     |
| scaffold456906_14.5 | 1 p2 | (AT)8  | 16 | 370  | 385 CTTATTTGCATTTGGCCAC      |
| scaffold456934_10.3 | 1 p2 | (TA)6  | 12 | 158  | 169 ACCGGATACCGAAGGGATAG     |
| scaffold457006_16.5 | 1 p2 | (TC)6  | 12 | 389  | 400 GTTGTACGCGGTGTGATAG      |
| scaffold457007_17.7 | 1 p2 | (TA)6  | 12 | 490  | 501 TTGACCAAATTAGCCCCAAC     |
| scaffold457127_13.2 | 1 p2 | (AG)11 | 22 | 234  | 255 TTGAGTGGTTTGGTTGGAGA     |
| scaffold457186_12.8 | 1 p2 | (TA)9  | 18 | 76   | 93 TTCCTCAATTTTCGAATTCTCC    |
| scaffold457194_17.1 | 1 p2 | (TA)6  | 12 | 578  | 589 TGTGCCATTGATTTCTGAGG     |
| scaffold457267_15.6 | 1 p2 | (GA)6  | 12 | 2005 | 2016 AGGGAGAATCTATGGCAGCA    |
| scaffold457577_20.2 | 1 p2 | (AG)6  | 12 | 131  | 142 GAATGCTTAATGGGAAGCCA     |
| scaffold457579_15.6 | 1 p2 | (CT)8  | 16 | 256  | 271 TCAAGTTGAGCCTCCAAATCT    |
| scaffold457838_19.3 | 1 p2 | (TA)7  | 14 | 209  | 222 TATGGGAAGGACATTTTCGG     |
| scaffold458004_10.4 | 1 p2 | (AT)6  | 12 | 264  | 275 TCCCTTTATGATCATTCCGGC    |
| scaffold458129_11.8 | 1 p2 | (TA)6  | 12 | 366  | 377 AATGTGATGTGGGTTGGGTT     |
| scaffold458162_18.3 | 1 p2 | (CT)8  | 16 | 323  | 338 GGAGGTGCAATGCGATATTT     |
| scaffold458203_17.5 | 1 p2 | (TC)6  | 12 | 2693 | 2704 CAAGCAAGCATTTCTCTCCTC   |
| scaffold458350_18.3 | 1 p2 | (AG)6  | 12 | 524  | 535 TCACCTTTCTTCATGGCTCC     |
| scaffold458514_12.4 | 1 p2 | (TC)7  | 14 | 332  | 345 CGTTGTGCTTCTTTTCTCCC     |
| scaffold458561_13.9 | 1 p2 | (TC)7  | 14 | 460  | 473 TGGTTTAAACAAATCGTGTTCG   |
| scaffold458611_17.8 | 1 p2 | (GA)6  | 12 | 2835 | 2846 AAGAGGCTACGGTGAGGTGA    |
| scaffold458616_13.8 | 1 p2 | (AT)7  | 14 | 283  | 296 AGGTTGCTCTAAGGTGCCAA     |
| scaffold458646_13.9 | 1 p2 | (TA)8  | 16 | 48   | 63 TGGTTATTACTGGAACGCGA      |
| scaffold458647_12.1 | 1 p2 | (AT)11 | 22 | 47   | 68 GGGGTTATCACTGGATCACG      |
| scaffold458667_15.4 | 1 p2 | (CT)6  | 12 | 2297 | 2308 AAACAATCCTCCAATTCCCC    |
| scaffold458714_12.7 | 1 p2 | (AT)12 | 24 | 207  | 230 TGGGAAGAGTGGGTATGAGG     |
| scaffold458731_11.3 | 1 p2 | (AT)7  | 14 | 235  | 248 CGAACGACAATGTTTTGAGA     |
| scaffold458741_16.4 | 1 p2 | (AG)6  | 12 | 437  | 448 ACGAACATCACCATTCCTC      |
| scaffold458743_14.5 | 1 p2 | (AT)7  | 14 | 499  | 512 GCAGATTCCCAAATCCAAAA     |
| scaffold458771_17.9 | 1 p2 | (CT)6  | 12 | 205  | 216 TCACGCATTCTCTCTTCGAC     |
| scaffold458798_19.9 | 1 p2 | (CT)9  | 18 | 804  | 821 AAGTTATTGCGAAACCCACG     |
| scaffold458839_16.5 | 1 p2 | (TG)7  | 14 | 246  | 259 TGATGCACGATGTATGTGCGAT   |
| scaffold458934_16.0 | 1 p2 | (AG)6  | 12 | 3090 | 3101 GGAGAGAAAAGGGAAATCGG    |
| scaffold458952_10.2 | 1 p2 | (AT)6  | 12 | 239  | 250 AACACCCTGTGTATCCCAGC     |
| scaffold459041_14.2 | 1 p2 | (TA)12 | 24 | 493  | 516 TGGTTGGGCATTCCATTATT     |
| scaffold459115_15.1 | 1 p2 | (TA)6  | 12 | 1143 | 1154 AAACATATTCATCCAAAGGTT   |
| scaffold459175_17.2 | 1 p2 | (CT)6  | 12 | 56   | 67 CAATATTACAAATGGCCAAGAGA   |
| scaffold459181_12.8 | 1 p2 | (AC)6  | 12 | 431  | 442 AGTGCTTTGGAAAATCATGC     |
| scaffold459406_16.3 | 1 p2 | (CT)6  | 12 | 239  | 250 ATGGGAAGAAAACGCAACAC     |
| scaffold459449_15.6 | 1 p2 | (AG)6  | 12 | 2389 | 2400 CATTTGAGACGGACACATGC    |

|                     |      |        |    |      |                               |
|---------------------|------|--------|----|------|-------------------------------|
| scaffold459494_16.4 | 1 p2 | (GA)10 | 20 | 192  | 211 CGTGGTTCGATCGTAATTGA      |
| scaffold459505_14.4 | 1 p2 | (AT)6  | 12 | 264  | 275 TCACATGAATGGACCCCTATC     |
| scaffold459518_15.9 | 1 p2 | (CT)7  | 14 | 107  | 120 GGGATTTGGGACGATTTTCT      |
| scaffold459519_14.0 | 1 p2 | (GA)6  | 12 | 2362 | 2373 GTGTGAAAGCCGAGAGAAGG     |
| scaffold459565_12.0 | 1 p2 | (AT)6  | 12 | 415  | 426 GCCTCAATAACATGAGGCGT      |
| scaffold459568_13.2 | 1 p2 | (TC)7  | 14 | 1468 | 1481 TTCGAGATGATGGTTGGTGA     |
| scaffold459607_10.2 | 1 p2 | (TA)11 | 22 | 498  | 519 TAACAATCGCAATGCCAAGA      |
| scaffold459624_12.0 | 1 p2 | (AT)7  | 14 | 196  | 209 CATCGATCAGTTATCATGGGA     |
| scaffold459641_16.0 | 1 p2 | (AT)6  | 12 | 79   | 90 CAACCGAGTACCTAACCACAA      |
| scaffold459669_15.7 | 1 p2 | (CT)6  | 12 | 744  | 755 AGGATAGGGGAATAGCGTCCC     |
| scaffold459741_11.5 | 1 p2 | (TA)12 | 24 | 437  | 460 ATGAAACAGAGAGCCCCCTT      |
| scaffold459753_10.5 | 1 p2 | (GC)7  | 14 | 225  | 238 TATGGCAGGTGTGCGGTATCA     |
| scaffold459779_14.7 | 1 p2 | (TA)6  | 12 | 667  | 678 TTGAACTTGAAAGCCCAACA      |
| scaffold459885_16.9 | 1 p2 | (TC)12 | 24 | 3463 | 3486 CTTTCTCCATCAACTGTGGG     |
| scaffold460109_17.3 | 1 p2 | (TC)6  | 12 | 123  | 134 TCCATTTTCAGGTCCTCACC      |
| scaffold460190_14.8 | 1 p2 | (TA)9  | 18 | 418  | 435 TAGCCGATAAAAATGGCACC      |
| scaffold460257_13.0 | 1 p2 | (CT)6  | 12 | 229  | 240 CTCACCCTTGTCATCACCT       |
| scaffold460381_13.8 | 1 p2 | (GA)8  | 16 | 371  | 386 AGTATGCAACATGCCACCAA      |
| scaffold460386_15.4 | 1 p2 | (TA)10 | 20 | 123  | 142 TATGCAGTGGGTTTTTGGTG      |
| scaffold460387_11.7 | 1 p2 | (AT)8  | 16 | 128  | 143 TAGGACCACATTTTGTGCGC      |
| scaffold460389_15.4 | 1 p2 | (CT)13 | 26 | 1113 | 1138 CAGATGGTGGTGTACGGTTG     |
| scaffold460542_15.3 | 1 p2 | (CT)6  | 12 | 573  | 584 GCAGTGAGACCGAGTTGACA      |
| scaffold460583_15.8 | 1 p2 | (CT)9  | 18 | 947  | 964 ACAATGACCGTTGCAAATGA      |
| scaffold460635_14.0 | 1 p2 | (CT)6  | 12 | 562  | 573 TGCAAATCGTTACCAACCAA      |
| scaffold460662_17.0 | 1 p2 | (TA)9  | 18 | 408  | 425 GCCAACCTTCAATCAACACA      |
| scaffold460663_14.5 | 1 p2 | (TA)8  | 16 | 399  | 414 TCAGAACC GTTGTCTTTTCAGC   |
| scaffold460731_17.6 | 1 p2 | (TA)7  | 14 | 173  | 186 TGATCCCTAAATTGCCCTTC      |
| scaffold460752_10.5 | 1 p2 | (CT)6  | 12 | 131  | 142 GCCTATCTCTCTTGCTGAAATTG   |
| scaffold460764_12.7 | 1 p2 | (TA)10 | 20 | 44   | 63 GGCTGATATCACCATAACGCA      |
| scaffold460802_15.2 | 1 p2 | (TA)6  | 12 | 54   | 65 TCACACACGTTTATTCGAGACA     |
| scaffold460841_11.0 | 1 p2 | (GC)7  | 14 | 113  | 126 ATATTCTCGCTTCTTCGCCA      |
| scaffold460850_16.8 | 1 p2 | (AG)7  | 14 | 3737 | 3750 ATCGGAAGGAGCCTTGTCT      |
| scaffold460927_13.6 | 1 p2 | (TC)8  | 16 | 1248 | 1263 GCCATTATGCACTTCCCAAT     |
| scaffold460934_19.2 | 1 p2 | (AG)7  | 14 | 726  | 739 ATGTGGAATGAGGGTGAAGG      |
| scaffold460950_13.2 | 1 p2 | (TA)7  | 14 | 779  | 792 CATCGTATGTTGCTTGGGAA      |
| scaffold460959_15.6 | 1 p2 | (AG)7  | 14 | 897  | 910 TTCTGTGATCGCAAAGGTG       |
| scaffold460968_10.6 | 1 p2 | (AT)11 | 22 | 47   | 68 TGACAAATAAATGAAATACAAGACA/ |
| scaffold461007_15.7 | 1 p2 | (CT)6  | 12 | 132  | 143 CTTTCATGGGTGATGGAAGC      |
| scaffold461013_16.9 | 1 p2 | (AG)6  | 12 | 2904 | 2915 GACGCTTCCAGAAGTATCGC     |
| scaffold461019_13.2 | 1 p2 | (TC)8  | 16 | 49   | 64 TCGGTTGACTCTTTTACTTTAGCC   |
| scaffold461125_14.6 | 1 p2 | (TA)6  | 12 | 363  | 374 CAATTGGGCCTTTCGTAAAT      |
| scaffold461194_13.5 | 1 p2 | (AT)7  | 14 | 51   | 64 GATCTAGGAGAAAAGTGACATTCTTG |
| scaffold461260_16.5 | 1 p2 | (TG)7  | 14 | 945  | 958 CTGCACGTTACAACACCGAC      |
| scaffold461366_14.3 | 1 p2 | (TC)6  | 12 | 744  | 755 CTTGCCGAATGTTTGTCTCC      |
| scaffold461445_14.4 | 1 p2 | (AT)8  | 16 | 957  | 972 CATGGGGAATATGCATCCAC      |
| scaffold461458_17.5 | 1 p2 | (AT)6  | 12 | 370  | 381 GCTTGGTCCGAAAATTTCAA      |
| scaffold461508_16.3 | 1 p2 | (AT)6  | 12 | 252  | 263 CGTTTCGCGTGCTAATTTCT      |
| scaffold461571_13.5 | 1 p2 | (AT)7  | 14 | 136  | 149 CGTCGCGTTGGATTAATTTT      |
| scaffold461601_16.3 | 1 p2 | (AG)8  | 16 | 609  | 624 TGCTTGTGGTTTTTGTTTTG      |
| scaffold461692_14.6 | 1 p2 | (GA)6  | 12 | 248  | 259 TGCACTGATGAATGATGCTG      |
| scaffold461694_14.8 | 1 p2 | (GA)8  | 16 | 124  | 139 CAGAGGAGATGGGAATGGAA      |
| scaffold461882_13.0 | 1 p2 | (AT)8  | 16 | 504  | 519 GGACAAGCTGTCCGATAAGC      |
| scaffold461924_15.7 | 1 p2 | (AG)9  | 18 | 4523 | 4540 TACATGCCACATGTTGGGTC     |
| scaffold461947_16.8 | 1 p2 | (AG)7  | 14 | 851  | 864 TCCGATGATCAAGTCAGTGC      |
| scaffold461953_11.2 | 1 p2 | (CT)7  | 14 | 129  | 142 CCATCAAAAATTCCTCCCT       |
| scaffold461976_15.6 | 1 p2 | (TA)7  | 14 | 130  | 143 CAACGGACGCTATCGGTTAT      |
| scaffold462053_14.5 | 1 p2 | (GA)6  | 12 | 94   | 105 CATCTCAATCCCGTCACCTT      |
| scaffold462111_10.9 | 1 p2 | (CT)7  | 14 | 277  | 290 GGGGGATGCCACTGTAGATA      |

|                     |      |        |    |      |                                |
|---------------------|------|--------|----|------|--------------------------------|
| scaffold462145_13.5 | 1 p2 | (AT)8  | 16 | 438  | 453 GGAGAATTCGAGAGATTGCG       |
| scaffold462246_18.1 | 1 p2 | (AG)7  | 14 | 371  | 384 TTCGTACAGCCGTTTGTATGA      |
| scaffold462254_16.3 | 1 p2 | (TG)7  | 14 | 187  | 200 TAGATGCACCCGTTAGGAGG       |
| scaffold462301_17.9 | 1 p2 | (AG)6  | 12 | 671  | 682 AGTTCTCCAACATCATCGCC       |
| scaffold462328_16.0 | 1 p2 | (CT)6  | 12 | 649  | 660 GCCATGCCATTTTCTTCACT       |
| scaffold462532_14.4 | 1 p2 | (TC)6  | 12 | 755  | 766 CTTTCTCACAGTCGCTGCAC       |
| scaffold462626_16.1 | 1 p2 | (AG)10 | 20 | 123  | 142 TTCAACCTGATTTTCCCCAC       |
| scaffold462642_12.6 | 1 p2 | (CA)11 | 22 | 75   | 96 TGTGCGTAAATTAGCGTTCG        |
| scaffold462732_12.8 | 1 p2 | (TA)10 | 20 | 219  | 238 AACGGCCGAGATTTGTTATG       |
| scaffold462766_11.3 | 1 p2 | (TA)6  | 12 | 391  | 402 GCATGTGCTCCTGCTCATAG       |
| scaffold462954_15.0 | 1 p2 | (AT)7  | 14 | 1165 | 1178 TATTGGTTGGGTACGGGTTG      |
| scaffold462955_15.9 | 1 p2 | (AG)6  | 12 | 53   | 64 TTTCTCATGTTGTAATTAATGTAGGGA |
| scaffold463052_12.6 | 1 p2 | (CT)6  | 12 | 536  | 547 AAATCAACGAAATCGAACCG       |
| scaffold463338_13.1 | 1 p2 | (TA)7  | 14 | 837  | 850 GGAACAAATGAGACTGTTTCTGC    |
| scaffold463342_18.0 | 1 p2 | (TC)7  | 14 | 352  | 365 AACATTCCCTTTCTTCCACG       |
| scaffold463353_14.3 | 1 p2 | (AT)7  | 14 | 476  | 489 TTTTTCTTCTATCTTTTGATTACCG  |
| scaffold463367_15.7 | 1 p2 | (AG)7  | 14 | 320  | 333 ATTCCACATGGGGTGTCACT       |
| scaffold463370_15.9 | 1 p2 | (GA)7  | 14 | 753  | 766 TGCAACAAATGATCCCAGAA       |
| scaffold463424_15.0 | 1 p2 | (AT)6  | 12 | 734  | 745 AAAGTTTGGTGAAGTCCGCA       |
| scaffold463437_19.9 | 1 p2 | (TA)6  | 12 | 330  | 341 GTGTTGTGCCTTAGCCCAT        |
| scaffold463617_16.5 | 1 p2 | (TC)10 | 20 | 610  | 629 TTGTGGAGGTGATGTGGA         |
| scaffold463694_15.6 | 1 p2 | (AG)7  | 14 | 3230 | 3243 TGCAAGAAATTGACATGTTGG     |
| scaffold463773_13.2 | 1 p2 | (TA)8  | 16 | 64   | 79 GGGAAATTCTGTACCTCCTCC       |
| scaffold463826_13.6 | 1 p2 | (GA)6  | 12 | 171  | 182 AGCGTAAACACGTCCCCATA       |
| scaffold463842_10.8 | 1 p2 | (TA)10 | 20 | 155  | 174 CCGGAATCGCATCAATACTT       |
| scaffold463892_12.6 | 1 p2 | (GA)6  | 12 | 361  | 372 TCTTCTGAAGTTGCGACCT        |
| scaffold463919_20.9 | 1 p2 | (AC)6  | 12 | 51   | 62 CTCCTATCTCCAATCCATGC        |
| scaffold464095_15.8 | 1 p2 | (TA)6  | 12 | 1300 | 1311 TTTGGGCTCTTTGAATGAC       |
| scaffold464137_14.1 | 1 p2 | (TA)6  | 12 | 527  | 538 CACCGACGATCACTCCCTAT       |
| scaffold464150_14.9 | 1 p2 | (AT)9  | 18 | 963  | 980 AATGGGAAAGGGGCTGTAAT       |
| scaffold464161_15.1 | 1 p2 | (CT)7  | 14 | 3114 | 3127 TATTTGGTGGTGGGAGTGGT      |
| scaffold464176_14.7 | 1 p2 | (AT)7  | 14 | 221  | 234 GGGTCGTATCATTAGCCAT        |
| scaffold464200_12.4 | 1 p2 | (AG)7  | 14 | 1097 | 1110 GAGTGGGGAGAAAGGAAAGG      |
| scaffold464262_14.3 | 1 p2 | (CT)9  | 18 | 538  | 555 CTTGACTTCACGCCTTCTC        |
| scaffold464366_14.6 | 1 p2 | (GA)6  | 12 | 437  | 448 CGGACAAAATGTACCCCAAC       |
| scaffold464381_13.2 | 1 p2 | (TC)8  | 16 | 187  | 202 TATGGTGGACCGATACATGC       |
| scaffold464389_12.8 | 1 p2 | (TA)6  | 12 | 1961 | 1972 GTCGAAATTGCCCCCTGTAT      |
| scaffold464524_14.0 | 1 p2 | (TA)6  | 12 | 132  | 143 CGTGTTAAGCCTTGGGAAAA       |
| scaffold464593_14.0 | 1 p2 | (CT)8  | 16 | 208  | 223 AACCATTCACATGAGACGA        |
| scaffold464626_16.7 | 1 p2 | (TA)6  | 12 | 133  | 144 AAAGGATTGAAACCCAGGAT       |
| scaffold464628_12.7 | 1 p2 | (TA)7  | 14 | 130  | 143 GCCATCCATTCTGAAGATCAA      |
| scaffold464686_18.1 | 1 p2 | (AG)7  | 14 | 272  | 285 TGGGACTGTTAAGTTTCCGC       |
| scaffold464695_15.4 | 1 p2 | (AT)7  | 14 | 81   | 94 AATATGAAACCCAACGTGCGC       |
| scaffold464715_13.0 | 1 p2 | (GA)7  | 14 | 447  | 460 ATGGAACCACTTGTTGACCG       |
| scaffold464730_10.3 | 1 p2 | (AT)8  | 16 | 167  | 182 GAACTGCAGACGCGTGAAT        |
| scaffold464764_12.4 | 1 p2 | (AT)7  | 14 | 1507 | 1520 ACGTAAGTTCGCAACAACCA      |
| scaffold464864_11.9 | 1 p2 | (TA)6  | 12 | 68   | 79 AACCGAACTCGAGCTTCTCA        |
| scaffold464917_11.7 | 1 p2 | (TA)8  | 16 | 684  | 699 TTTTGAACCTTAAAACTCGC       |
| scaffold464940_13.3 | 1 p2 | (AC)6  | 12 | 154  | 165 TTGTGTCTTAAAGTATAAAGGCATGA |
| scaffold465068_12.0 | 1 p2 | (AT)9  | 18 | 995  | 1012 TCAAGGGTTTTTCGAGAGAC      |
| scaffold465112_11.2 | 1 p2 | (CT)6  | 12 | 106  | 117 AACCCCTACACCACCCTAC        |
| scaffold465175_17.6 | 1 p2 | (TA)6  | 12 | 802  | 813 TACATGCTTTGTTGGGGACA       |
| scaffold465255_14.1 | 1 p2 | (AT)8  | 16 | 546  | 561 TCACCTTCTCCTCCAAATGA       |
| scaffold465413_15.7 | 1 p2 | (GA)6  | 12 | 132  | 143 CATAGGATTTGTGAAGGCCG       |
| scaffold465504_14.1 | 1 p2 | (AC)7  | 14 | 1188 | 1201 TCCATTCAACCAATAGCCC       |
| scaffold465569_10.0 | 1 p2 | (CT)7  | 14 | 53   | 66 GCATCTCTCTTGTCTTATTG        |
| scaffold465579_14.8 | 1 p2 | (AG)7  | 14 | 2076 | 2089 GCGTACGAATCCAAACCCTA      |
| scaffold465809_13.9 | 1 p2 | (AG)6  | 12 | 868  | 879 AGAGATCGGGTTTGTGAAA        |



|                     |      |        |    |      |      |                             |
|---------------------|------|--------|----|------|------|-----------------------------|
| scaffold465823_17.2 | 1 p2 | (CT)6  | 12 | 123  | 134  | CTTCCCCACCATTTTTCCT         |
| scaffold465937_16.6 | 1 p2 | (TA)7  | 14 | 67   | 80   | TCAGTTTCGAGTTATGAAGTTAGGAA  |
| scaffold466310_18.9 | 1 p2 | (TA)7  | 14 | 858  | 871  | GGTTATAGCTACGTGGGCGA        |
| scaffold466337_13.2 | 1 p2 | (AG)14 | 28 | 1138 | 1165 | GAAACCGAGTGTGCATCTCA        |
| scaffold466365_12.8 | 1 p2 | (AC)8  | 16 | 73   | 88   | CACCCACGCATATACACACA        |
| scaffold466389_10.8 | 1 p2 | (CT)8  | 16 | 374  | 389  | TCATGCTGAAATCGTTTCGAG       |
| scaffold466441_19.2 | 1 p2 | (TA)6  | 12 | 319  | 330  | TAGGTCACGGGTTCGAATTT        |
| scaffold466463_10.2 | 1 p2 | (AG)8  | 16 | 76   | 91   | TCTACGTCCACGGAGAAAGG        |
| scaffold466570_14.2 | 1 p2 | (AG)6  | 12 | 1962 | 1973 | AAAACGTCATTTTTGGCCTG        |
| scaffold466606_12.0 | 1 p2 | (TA)6  | 12 | 350  | 361  | AATTGAGGGAGTGGGTGTTG        |
| scaffold466630_14.9 | 1 p2 | (TA)8  | 16 | 128  | 143  | GGAAGCTAGGCGTTTTGAT         |
| scaffold466647_10.4 | 1 p2 | (TC)12 | 24 | 235  | 258  | CTTCAGCCCCTCTAGGTTTG        |
| scaffold466653_14.8 | 1 p2 | (AT)9  | 18 | 2212 | 2229 | TGTTGTATTGTAAAGCCGCAA       |
| scaffold466656_13.4 | 1 p2 | (AT)6  | 12 | 1568 | 1579 | AATCCGTAAGAATAATCCATGC      |
| scaffold466667_10.7 | 1 p2 | (AT)8  | 16 | 164  | 179  | ACGCGCGTTTTTTGGATTTA        |
| scaffold466686_17.0 | 1 p2 | (AG)8  | 16 | 4973 | 4988 | GGCGGATGAATAAACCTCTG        |
| scaffold466706_15.0 | 1 p2 | (CT)7  | 14 | 1474 | 1487 | GTCAA AACCTGCCTTCAA         |
| scaffold466737_14.2 | 1 p2 | (TA)8  | 16 | 320  | 335  | TACTTGTTGAGCTTGGCG          |
| scaffold466773_13.7 | 1 p2 | (TG)7  | 14 | 415  | 428  | CGATATGGACGCCTCAGATT        |
| scaffold466826_16.2 | 1 p2 | (AT)6  | 12 | 2855 | 2866 | ACATTTAACTTCGCCCTGA         |
| scaffold466935_14.0 | 1 p2 | (TA)7  | 14 | 145  | 158  | ATTTGCTCCAACAAACCTCC        |
| scaffold467017_11.0 | 1 p2 | (TA)7  | 14 | 369  | 382  | GCTTGCTGATTGTGGTTCAA        |
| scaffold467115_17.0 | 1 p2 | (AG)7  | 14 | 296  | 309  | GCCAATTCATATTTATTTGTGATCTTT |
| scaffold467144_13.4 | 1 p2 | (AG)9  | 18 | 225  | 242  | AAAAATCTTGCTGCACCCAC        |
| scaffold467178_15.0 | 1 p2 | (AT)14 | 28 | 52   | 79   | TTGACATTCGCATTTTAAGAGTAG    |
| scaffold467184_15.0 | 1 p2 | (TA)10 | 20 | 2210 | 2229 | ACTTGTGGCTATGCCTTTGG        |
| scaffold467263_13.0 | 1 p2 | (TA)9  | 18 | 179  | 196  | TGGCTATCATGGATGCAAAA        |
| scaffold467355_21.8 | 1 p2 | (TA)12 | 24 | 2221 | 2244 | GCAACCAAACACACACACA         |
| scaffold467417_17.7 | 1 p2 | (TC)6  | 12 | 1483 | 1494 | TCTGTCTCGAATTTGCGATG        |
| scaffold467443_14.2 | 1 p2 | (TA)7  | 14 | 1820 | 1833 | ACCGGGCACTAAGGGATTAT        |
| scaffold467669_14.4 | 1 p2 | (TA)7  | 14 | 267  | 280  | ACCTTGACCTTCAGGCTTCA        |
| scaffold467676_13.6 | 1 p2 | (AT)10 | 20 | 577  | 596  | TATGTGCGGTTTTCAATGAT        |
| scaffold467753_15.7 | 1 p2 | (CT)7  | 14 | 2133 | 2146 | TGAAAATCTGACGAGCATGG        |
| scaffold467817_17.6 | 1 p2 | (GA)6  | 12 | 4116 | 4127 | TGTGAGAGTGAGAGAGGGGG        |
| scaffold467875_13.7 | 1 p2 | (TC)8  | 16 | 121  | 136  | CTGATTCGCACAAATGATCG        |
| scaffold467887_11.3 | 1 p2 | (TA)10 | 20 | 41   | 60   | CGGATTTAAGGGTTATTACCTGATT   |
| scaffold467902_13.9 | 1 p2 | (TC)6  | 12 | 711  | 722  | TTCCCCTCATCTTCAAGTGG        |
| scaffold467922_14.6 | 1 p2 | (AT)9  | 18 | 177  | 194  | TTGCGTGTCAGTGTTTTTCC        |
| scaffold467952_15.4 | 1 p2 | (AT)8  | 16 | 327  | 342  | CTTCATCCCTCAATCCCTCA        |
| scaffold468007_10.8 | 1 p2 | (GA)6  | 12 | 348  | 359  | CGCGAAATGAGGAGCTTAAC        |
| scaffold468115_11.8 | 1 p2 | (TC)6  | 12 | 188  | 199  | GGAAACCCACAATCATCACC        |
| scaffold468146_15.7 | 1 p2 | (AG)9  | 18 | 1724 | 1741 | TTACAACCCGAAAGAAACCG        |
| scaffold468164_12.6 | 1 p2 | (AT)10 | 20 | 730  | 749  | CCCCCTATTTTATCCCAACA        |
| scaffold468420_11.7 | 1 p2 | (AT)6  | 12 | 401  | 412  | CCGTTGCTTTCTCTCTCGTT        |
| scaffold468591_11.4 | 1 p2 | (CT)10 | 20 | 511  | 530  | CTCAGAAATCAAGCCGAACC        |
| scaffold468609_20.2 | 1 p2 | (TC)6  | 12 | 307  | 318  | CAGCGAGGAGTTGAGGTAG         |
| scaffold468615_14.5 | 1 p2 | (AT)9  | 18 | 202  | 219  | CAGTATTACAGCCGTGGCAA        |
| scaffold468639_17.2 | 1 p2 | (AT)6  | 12 | 1565 | 1576 | TTCCCTTCCAGTTACACCGT        |
| scaffold468658_16.5 | 1 p2 | (AT)7  | 14 | 1998 | 2011 | TCAAGTCCTCACACACTGATGA      |
| scaffold468668_12.6 | 1 p2 | (GT)7  | 14 | 747  | 760  | CACGAGCTCTTATTTGGCCT        |
| scaffold468669_12.2 | 1 p2 | (AT)8  | 16 | 365  | 380  | GGATGGAACGCACAAAATT         |
| scaffold468740_15.2 | 1 p2 | (TA)6  | 12 | 1678 | 1689 | TGGACAATTCAATAGAAAACCG      |
| scaffold468785_14.6 | 1 p2 | (TA)9  | 18 | 664  | 681  | GGTTTGGTAAAATGATGGC         |
| scaffold468805_10.3 | 1 p2 | (CT)6  | 12 | 299  | 310  | GCTTCTTTCGCTTCTCATTG        |
| scaffold468828_11.4 | 1 p2 | (TA)9  | 18 | 150  | 167  | GTATCCCGGGTTTCTCCAG         |
| scaffold468909_13.8 | 1 p2 | (AC)6  | 12 | 1271 | 1282 | GGACGTTTCCTCGTTTTTCA        |
| scaffold468921_18.2 | 1 p2 | (AG)9  | 18 | 4646 | 4663 | GGCTTTTTGCTAATTGGCTG        |
| scaffold468936_13.7 | 1 p2 | (CT)6  | 12 | 319  | 330  | AACCAGCTCGGTGATATATGG       |

|                     |      |        |    |      |      |                             |
|---------------------|------|--------|----|------|------|-----------------------------|
| scaffold469003_19.2 | 1 p2 | (TA)8  | 16 | 39   | 54   | TGACGGGATTTAGGTGTTTTG       |
| scaffold469083_15.2 | 1 p2 | (CG)6  | 12 | 202  | 213  | CACTCATTTGGGGGATTGTT        |
| scaffold469108_17.0 | 1 p2 | (CT)9  | 18 | 1112 | 1129 | CACTGACATTTCCCTCGCTCA       |
| scaffold469290_12.0 | 1 p2 | (GA)6  | 12 | 1248 | 1259 | TGGCCACCTCCATTTCTAAC        |
| scaffold469291_16.2 | 1 p2 | (AT)8  | 16 | 338  | 353  | TCCCCTTAGGAAAACCGTTC        |
| scaffold469304_18.8 | 1 p2 | (AG)8  | 16 | 130  | 145  | ACACACGCCACCTTTTTAGG        |
| scaffold469357_15.8 | 1 p2 | (CA)7  | 14 | 3774 | 3787 | AGTCACCAAAGCTCCCCTC         |
| scaffold469366_11.3 | 1 p2 | (CT)8  | 16 | 409  | 424  | AAAGTATGCAAGGCCACAC         |
| scaffold469468_12.0 | 1 p2 | (CT)6  | 12 | 122  | 133  | GGATCGAAAAGAGAGGGAGG        |
| scaffold469580_13.8 | 1 p2 | (GA)7  | 14 | 572  | 585  | AGTCACCTTGTTCAAACGGG        |
| scaffold469620_20.1 | 1 p2 | (GA)6  | 12 | 227  | 238  | GCGGTGTTGTCTGAGTGTGT        |
| scaffold469651_14.3 | 1 p2 | (GA)6  | 12 | 426  | 437  | GGTTGCTTCTTACAGGCTGG        |
| scaffold469720_11.4 | 1 p2 | (TA)7  | 14 | 609  | 622  | GCATATCGGTTCCGGTCTCAC       |
| scaffold469818_14.1 | 1 p2 | (GT)6  | 12 | 917  | 928  | CATCAGTCCAGCCTTCTTGG        |
| scaffold469847_11.2 | 1 p2 | (TA)7  | 14 | 406  | 419  | TGATGTTTGCATTTGAAGAGG       |
| scaffold469952_10.7 | 1 p2 | (TA)11 | 22 | 51   | 72   | CGTTTTGACAATATATAGGTGTTTTGA |
| scaffold469953_13.7 | 1 p2 | (TA)6  | 12 | 329  | 340  | ATCAACGCCCATGATCAAAT        |
| scaffold469956_14.2 | 1 p2 | (CT)6  | 12 | 48   | 59   | TTTCTCAGCCAAGCTCACCT        |
| scaffold470011_15.2 | 1 p2 | (AT)6  | 12 | 659  | 670  | TTCCCCTTTATCTCCTCATTCA      |
| scaffold470052_18.7 | 1 p2 | (CT)7  | 14 | 311  | 324  | TCTAAAACCCTCGCCTCTCA        |
| scaffold470085_16.3 | 1 p2 | (AT)6  | 12 | 1852 | 1863 | TGATTCCATTCCATGCTTCA        |
| scaffold470181_17.7 | 1 p2 | (TA)6  | 12 | 719  | 730  | GATTTTCGTAATCCCCTTTTCA      |
| scaffold470248_11.5 | 1 p2 | (AT)8  | 16 | 431  | 446  | GTTTCCTGTTCCGGCTGTTGT       |
| scaffold470271_10.8 | 1 p2 | (TA)11 | 22 | 305  | 326  | AGACCACCGAAAAATGTTGG        |
| scaffold470304_15.4 | 1 p2 | (CT)6  | 12 | 2820 | 2831 | AGGCTTGCAAGAAGCTGAAG        |
| scaffold470381_14.5 | 1 p2 | (AT)10 | 20 | 685  | 704  | TCAGCGCCACGTATCCTAGT        |
| scaffold470409_13.2 | 1 p2 | (AG)6  | 12 | 415  | 426  | TCATTTCCGGTTATTTTCGG        |
| scaffold470459_13.9 | 1 p2 | (CT)6  | 12 | 212  | 223  | ACAGGTCCCTGAAACAAACG        |
| scaffold470540_15.4 | 1 p2 | (CT)7  | 14 | 109  | 122  | TCCTTTCAGAGGCAGAAACC        |
| scaffold470544_10.7 | 1 p2 | (AT)9  | 18 | 154  | 171  | GCATGCAAATCAAGCTCAA         |
| scaffold470585_14.4 | 1 p2 | (TC)6  | 12 | 53   | 64   | CCTGCCATTTCTCTCGTGT         |
| scaffold470587_14.3 | 1 p2 | (CT)6  | 12 | 33   | 44   | ACAAAATGGCCAAGAGAGTTT       |
| scaffold470597_13.9 | 1 p2 | (GA)6  | 12 | 429  | 440  | TTGAACAACAAGGCCAGTGA        |
| scaffold470660_16.4 | 1 p2 | (TA)8  | 16 | 624  | 639  | CAGAACCCGAAGTGAAGAGG        |
| scaffold470702_14.6 | 1 p2 | (TC)8  | 16 | 130  | 145  | TCCACAGCAGAGTCTCCTCA        |
| scaffold470708_16.3 | 1 p2 | (AC)7  | 14 | 2283 | 2296 | ACAGAAAACCTTTCATGCCGC       |
| scaffold470795_15.4 | 1 p2 | (TA)6  | 12 | 2063 | 2074 | CGAGCTCACCTTGTTGAA          |
| scaffold470874_15.8 | 1 p2 | (TG)6  | 12 | 2687 | 2698 | CCAGCAAGTGCAGAGTGTA         |
| scaffold470877_14.4 | 1 p2 | (TA)6  | 12 | 437  | 448  | TTTCTCTCCCGTGGACGTAG        |
| scaffold470992_10.4 | 1 p2 | (CT)6  | 12 | 815  | 826  | AGCAAGGTGATGCGAGACTT        |
| scaffold471041_15.9 | 1 p2 | (CA)6  | 12 | 1291 | 1302 | CGGGTATACTTGGAGAAACACA      |
| scaffold471121_17.5 | 1 p2 | (TG)6  | 12 | 812  | 823  | TGCACATGTAACACGATCCA        |
| scaffold471175_13.6 | 1 p2 | (AT)8  | 16 | 86   | 101  | GGACGGTTAAATTTTGTCCC        |
| scaffold471176_14.8 | 1 p2 | (GA)6  | 12 | 714  | 725  | GGTGCAGAAGAGAAATTCGG        |
| scaffold471351_11.0 | 1 p2 | (AG)6  | 12 | 205  | 216  | TCGAATCCACATCAGATCCA        |
| scaffold471425_15.4 | 1 p2 | (TC)6  | 12 | 393  | 404  | CATGGGCCTTGCATGTATAA        |
| scaffold471453_15.2 | 1 p2 | (CT)6  | 12 | 133  | 144  | TCTCGTTGCTATTCTTGCCA        |
| scaffold471519_12.3 | 1 p2 | (TC)7  | 14 | 77   | 90   | GAAAGGATGAAAATCATTGGC       |
| scaffold471536_14.4 | 1 p2 | (AT)6  | 12 | 223  | 234  | CCAATGGTTATCATCCCACC        |
| scaffold471557_15.9 | 1 p2 | (CT)11 | 22 | 470  | 491  | ACTCTCTCTACCCGCCACAT        |
| scaffold471578_16.3 | 1 p2 | (TA)6  | 12 | 206  | 217  | AATTAGCGTGTATGCTGGGG        |
| scaffold471586_16.2 | 1 p2 | (CA)6  | 12 | 272  | 283  | TAAAGGCAGAAAACGGAGGA        |
| scaffold471610_16.6 | 1 p2 | (AC)6  | 12 | 584  | 595  | CACTGGAAAATGGCACCTT         |
| scaffold471622_12.7 | 1 p2 | (GA)6  | 12 | 687  | 698  | GAACGAGGGCCTTCTTCATT        |
| scaffold471656_15.2 | 1 p2 | (TA)6  | 12 | 1664 | 1675 | GGTAAATCAATGTGAAATGATGGA    |
| scaffold471667_17.0 | 1 p2 | (TA)6  | 12 | 2158 | 2169 | CTATGGACCCTTGCAGGAAC        |
| scaffold471777_10.7 | 1 p2 | (CT)7  | 14 | 424  | 437  | GAAGAATCACCCGACTGAGC        |
| scaffold471800_17.7 | 1 p2 | (TC)6  | 12 | 638  | 649  | CTTGTGACCCTCACACCTT         |

|                     |      |        |    |      |                                 |
|---------------------|------|--------|----|------|---------------------------------|
| scaffold471822_10.6 | 1 p2 | (AG)10 | 20 | 288  | 307 TCTTTGCGCCTAGATTTCTCA       |
| scaffold471955_13.7 | 1 p2 | (TA)6  | 12 | 134  | 145 CCCAAAGATTTATAGGTTTTATTTCAA |
| scaffold472039_14.8 | 1 p2 | (TA)8  | 16 | 148  | 163 AACACAGCCCTACATCTCG         |
| scaffold472141_13.0 | 1 p2 | (TA)6  | 12 | 52   | 63 CCAATTTGAATGGTTATCACCTG      |
| scaffold472148_18.2 | 1 p2 | (TC)6  | 12 | 68   | 79 GATAATATGGCCGAGAGTTTGC       |
| scaffold472149_12.8 | 1 p2 | (TA)9  | 18 | 294  | 311 AGCCACACATGTCACAAATGA       |
| scaffold472183_11.7 | 1 p2 | (TA)10 | 20 | 42   | 61 CGGATTTAAGGGTTATTACCTGAT     |
| scaffold472273_16.3 | 1 p2 | (CT)6  | 12 | 409  | 420 TGGAGAGCTCGAGAGAGAGG        |
| scaffold472312_13.8 | 1 p2 | (AT)6  | 12 | 217  | 228 GCAAAGCTTTCTCGACCAC         |
| scaffold472600_10.7 | 1 p2 | (CT)6  | 12 | 351  | 362 CTTCAAGCGGTCTTGATTCC        |
| scaffold472606_13.2 | 1 p2 | (AG)6  | 12 | 307  | 318 TAGGGGGTGGTTGGTGTTTA        |
| scaffold472691_16.7 | 1 p2 | (GA)6  | 12 | 2033 | 2044 ATCGTCGTCGTCTTCTTCGT       |
| scaffold472806_11.2 | 1 p2 | (AT)8  | 16 | 605  | 620 TTCAATTAATGTTGTCATTATTCCAAG |
| scaffold472807_17.2 | 1 p2 | (TA)7  | 14 | 545  | 558 GACTTGCCAACGGTCAATCT        |
| scaffold472925_14.0 | 1 p2 | (TC)6  | 12 | 208  | 219 GACTCATGCTCGGCATACAA        |
| scaffold472941_12.9 | 1 p2 | (AT)9  | 18 | 48   | 65 TCAAGGCCGATAAGATGGAT         |
| scaffold473012_15.6 | 1 p2 | (AT)9  | 18 | 323  | 340 TAACGATGGACTAGGGGCTG        |
| scaffold473018_12.5 | 1 p2 | (GA)6  | 12 | 87   | 98 TAAATATGCAGCAGACGCGA         |
| scaffold473142_10.4 | 1 p2 | (AT)8  | 16 | 257  | 272 TCGGAAAGGAAAACCGTAAA        |
| scaffold473266_15.0 | 1 p2 | (TC)6  | 12 | 134  | 145 ATCGGCTGAATAGCCGTATG        |
| scaffold473401_17.0 | 1 p2 | (AT)7  | 14 | 294  | 307 ACCTCGTCGTCCAACACTACT       |
| scaffold473465_16.0 | 1 p2 | (TC)9  | 18 | 180  | 197 CAGCTCCACTACTTCTCCA         |
| scaffold473475_11.4 | 1 p2 | (AT)6  | 12 | 324  | 335 GAAAGGGCTGAGGTATGGTG        |
| scaffold473491_12.6 | 1 p2 | (TA)10 | 20 | 69   | 88 AAAAATGGTTATTATTGGATCGC      |
| scaffold473547_14.7 | 1 p2 | (TC)6  | 12 | 154  | 165 CGTAGAGAATGTTGCCACGA        |
| scaffold473586_15.0 | 1 p2 | (TA)6  | 12 | 525  | 536 GTTTTTGAACCCCTCCTTC         |
| scaffold473603_13.9 | 1 p2 | (AT)7  | 14 | 1357 | 1370 ATGCGCGGGTGTAAAGTTAG       |
| scaffold473664_10.0 | 1 p2 | (AC)7  | 14 | 80   | 93 AGCCTCGGATTTCTGTCT           |
| scaffold473793_12.0 | 1 p2 | (TC)6  | 12 | 577  | 588 GCCTTCGGATCTGGGTATTT        |
| scaffold473955_11.4 | 1 p2 | (AG)8  | 16 | 1004 | 1019 GCTTCAGTCATGTCGTTCCA       |
| scaffold474132_13.6 | 1 p2 | (AG)6  | 12 | 795  | 806 GCAACGAAGATGGGAAATTG        |
| scaffold474140_15.2 | 1 p2 | (TA)6  | 12 | 62   | 73 CATCACACCACAAATGACTCTCT      |
| scaffold474259_15.9 | 1 p2 | (AT)6  | 12 | 3913 | 3924 CGGCGTAACTACCATTACC        |
| scaffold474486_16.0 | 1 p2 | (TA)8  | 16 | 152  | 167 TGTGGTTTGTAGACATCGC         |
| scaffold474566_18.7 | 1 p2 | (CT)8  | 16 | 82   | 97 GGACCTGAAAAGGACTTTGG         |
| scaffold474623_15.4 | 1 p2 | (AT)6  | 12 | 2506 | 2517 ATGGCTGCTCCAATATACC        |
| scaffold474648_15.9 | 1 p2 | (GA)10 | 20 | 74   | 93 ATTCAGAAATGGCGATGACA         |
| scaffold474851_16.2 | 1 p2 | (AT)7  | 14 | 583  | 596 AAAAGCCGATCGAGTTCGTA        |
| scaffold474929_13.2 | 1 p2 | (CT)6  | 12 | 44   | 55 TCCACCCTCTCACTTCCACT         |
| scaffold475149_10.7 | 1 p2 | (TG)6  | 12 | 177  | 188 ACCACGAGATGGGGACATAA        |
| scaffold475165_14.5 | 1 p2 | (TC)7  | 14 | 282  | 295 ATTTGCGGAAACAATCCAGA        |
| scaffold475200_23.6 | 1 p2 | (AT)6  | 12 | 350  | 361 TCGATTCGACTGGATTTCGTT       |
| scaffold475308_12.0 | 1 p2 | (CT)6  | 12 | 134  | 145 TATAGTCCACCCAACCCGAG        |
| scaffold475369_19.5 | 1 p2 | (CT)6  | 12 | 1230 | 1241 TTGGAGTTGGAGATGAAGGC       |
| scaffold475474_14.4 | 1 p2 | (TG)7  | 14 | 71   | 84 CTAGCGGATTTCTCTGGCTC         |
| scaffold475525_11.0 | 1 p2 | (TA)8  | 16 | 46   | 61 ATCGGTTATTACCGGATCGC         |
| scaffold475712_12.0 | 1 p2 | (AC)7  | 14 | 898  | 911 TCAATACCGAGAATTGCAT         |
| scaffold475714_17.4 | 1 p2 | (AT)6  | 12 | 185  | 196 TCCAATTTAGTTAAACACACCA      |
| scaffold475720_12.3 | 1 p2 | (CT)9  | 18 | 50   | 67 CACTCACTCTCTAGCCGC           |
| scaffold475833_10.2 | 1 p2 | (GA)6  | 12 | 127  | 138 AGATATGTCGGCAAGCGAAT        |
| scaffold475932_12.2 | 1 p2 | (TA)8  | 16 | 83   | 98 GCATCCAATACCAATATCTCAGC      |
| scaffold475937_14.9 | 1 p2 | (TA)9  | 18 | 478  | 495 TTCCACATTGATTCTGGGT         |
| scaffold476008_17.0 | 1 p2 | (GA)6  | 12 | 721  | 732 AGTGCTTCTGAAGCTGGGA         |
| scaffold476039_11.3 | 1 p2 | (TA)7  | 14 | 496  | 509 GTAATAGAACGTGCCCCCAA        |
| scaffold476154_17.7 | 1 p2 | (TC)6  | 12 | 594  | 605 GGAGGATTTTCTTTCCCAA         |
| scaffold476203_12.5 | 1 p2 | (TA)6  | 12 | 129  | 140 GAATGCGGAGTTGGAATCAT        |
| scaffold476209_16.3 | 1 p2 | (TA)8  | 16 | 361  | 376 TTTTTCCTAACCGGACCACA        |
| scaffold476319_11.4 | 1 p2 | (CT)6  | 12 | 251  | 262 TCCCCATTGTTCTACCCAAA        |

|                     |      |        |    |      |      |                           |
|---------------------|------|--------|----|------|------|---------------------------|
| scaffold476333_10.3 | 1 p2 | (GA)6  | 12 | 42   | 53   | TTTGTGTGAGGAATTGTTGAAGA   |
| scaffold476452_16.2 | 1 p2 | (TA)8  | 16 | 308  | 323  | TTTTTGGGTTGAAAATAGCG      |
| scaffold476505_16.6 | 1 p2 | (TC)9  | 18 | 716  | 733  | CCAACCATTGCAGAATCCTT      |
| scaffold476601_14.0 | 1 p2 | (TA)6  | 12 | 135  | 146  | GCACACATTTTTCTCCCCAT      |
| scaffold476603_15.0 | 1 p2 | (AT)8  | 16 | 132  | 147  | TTACTTTTCCGGCAACATCC      |
| scaffold476649_15.2 | 1 p2 | (TC)9  | 18 | 354  | 371  | CCTAGCCAAGTTTCACGAGC      |
| scaffold476674_14.4 | 1 p2 | (TA)8  | 16 | 112  | 127  | ATACCGGGATCGAATCTTCC      |
| scaffold476922_17.7 | 1 p2 | (AG)7  | 14 | 180  | 193  | GAAAAGAAAAAGAAGGCACTCG    |
| scaffold476982_12.8 | 1 p2 | (AT)6  | 12 | 331  | 342  | CCATCATGGGGTTTTCTTACA     |
| scaffold477044_13.7 | 1 p2 | (TC)6  | 12 | 136  | 147  | CAAATCAACGCGAATTCAAC      |
| scaffold477161_10.9 | 1 p2 | (TC)12 | 24 | 483  | 506  | CTTCTTCAAACACCCCCAGA      |
| scaffold477283_10.0 | 1 p2 | (GA)7  | 14 | 279  | 292  | ATTTGGATGGTGATTGTGGC      |
| scaffold477406_13.6 | 1 p2 | (TC)6  | 12 | 552  | 563  | GAGGAGCCCAAGATGTCAAG      |
| scaffold477464_15.7 | 1 p2 | (TA)10 | 20 | 803  | 822  | ACAAGAATGCCCTGTATGC       |
| scaffold477485_14.4 | 1 p2 | (TA)7  | 14 | 318  | 331  | ATCCACTGCCAACCTCATTC      |
| scaffold477491_13.3 | 1 p2 | (TC)9  | 18 | 46   | 63   | CAAGCCCAAAGCACAAAGT       |
| scaffold477517_18.2 | 1 p2 | (GA)6  | 12 | 936  | 947  | GAGGATTTGTCAACCGGAAA      |
| scaffold477630_13.2 | 1 p2 | (TA)6  | 12 | 542  | 553  | GATGCTTTTCCCCTTCTTCC      |
| scaffold477650_17.0 | 1 p2 | (CT)6  | 12 | 1200 | 1211 | CTCCCTTACCTCCCCAAAG       |
| scaffold477723_16.4 | 1 p2 | (GA)6  | 12 | 399  | 410  | ATATGGTTTGACGCCTTTGC      |
| scaffold477735_15.6 | 1 p2 | (TC)6  | 12 | 322  | 333  | GAAGGAGGAGAAGTTTGGGG      |
| scaffold477748_11.9 | 1 p2 | (CT)6  | 12 | 55   | 66   | CCAATACTCTTCCAACC         |
| scaffold477768_19.0 | 1 p2 | (AG)7  | 14 | 90   | 103  | TGAGGACGGTGAGGATTAGG      |
| scaffold477770_16.0 | 1 p2 | (AG)7  | 14 | 133  | 146  | ATCCCGACTGATTTGATTG       |
| scaffold477802_15.2 | 1 p2 | (GA)6  | 12 | 865  | 876  | GCACAACCTGCAGACCAAGAA     |
| scaffold477993_12.4 | 1 p2 | (CT)7  | 14 | 109  | 122  | CACTTTCTCTCTCCGACCG       |
| scaffold478000_11.2 | 1 p2 | (AG)6  | 12 | 149  | 160  | GAATATTGTGCGTCCCATC       |
| scaffold478024_15.5 | 1 p2 | (TA)10 | 20 | 1302 | 1321 | GCGTGCGAATTTAATGATGA      |
| scaffold478034_17.6 | 1 p2 | (AT)8  | 16 | 672  | 687  | AAGCCGCATTTAATCGAGA       |
| scaffold478044_10.0 | 1 p2 | (TA)7  | 14 | 72   | 85   | GATCGGATACGGATCGAAAAT     |
| scaffold478075_14.8 | 1 p2 | (AT)7  | 14 | 44   | 57   | TGCTTTTCTAAATGGAGAGTTGG   |
| scaffold478111_14.7 | 1 p2 | (AT)7  | 14 | 83   | 96   | TGCTGTAATGAACTGTTGTATGC   |
| scaffold478135_12.9 | 1 p2 | (AT)6  | 12 | 179  | 190  | CCAACTGAAACCGGAAAAA       |
| scaffold478152_13.7 | 1 p2 | (TC)6  | 12 | 1559 | 1570 | GGCGGGATATACTAATGTCCAA    |
| scaffold478305_12.0 | 1 p2 | (TA)6  | 12 | 34   | 45   | ACTTTTAAGGATCAAGGATATTCG  |
| scaffold478362_15.8 | 1 p2 | (GA)6  | 12 | 250  | 261  | CTCGAGTGTAACACGTCCCT      |
| scaffold478378_11.2 | 1 p2 | (TA)8  | 16 | 332  | 347  | TCCGGATACCTACTACTGCCA     |
| scaffold478448_14.7 | 1 p2 | (CT)6  | 12 | 297  | 308  | TTGGTATACAACTTTGATTCCCC   |
| scaffold478586_18.2 | 1 p2 | (TG)7  | 14 | 880  | 893  | ATGCACACCGAGATGTGGTA      |
| scaffold478666_14.0 | 1 p2 | (AG)7  | 14 | 550  | 563  | TTCAACGGAGTGGAAGATCC      |
| scaffold478755_12.3 | 1 p2 | (AT)10 | 20 | 442  | 461  | CAGGTTGAGCTTCCATAGG       |
| scaffold478879_11.8 | 1 p2 | (TA)9  | 18 | 361  | 378  | AGCCTTTAATCAGCAATATAAGTCA |
| scaffold478890_16.6 | 1 p2 | (AT)6  | 12 | 265  | 276  | AGGGCTACAAATTGCAAGAA      |
| scaffold478967_14.4 | 1 p2 | (AT)7  | 14 | 355  | 368  | TATCGGTTATCATCGGATCG      |
| scaffold479173_10.6 | 1 p2 | (TC)7  | 14 | 130  | 143  | GCACAACCACTCCACAAAGA      |
| scaffold479248_15.5 | 1 p2 | (TA)9  | 18 | 1389 | 1406 | CGATGTTTGTGGCTGTCTG       |
| scaffold479312_15.9 | 1 p2 | (GA)7  | 14 | 1169 | 1182 | TTGGAACCAACTAATTGCCA      |
| scaffold479338_17.0 | 1 p2 | (AT)6  | 12 | 109  | 120  | ACGTTTCATACCTTTGTGGCA     |
| scaffold479341_16.7 | 1 p2 | (CT)6  | 12 | 234  | 245  | TCATTTTCATCGATTTTCTCTC    |
| scaffold479345_15.9 | 1 p2 | (TA)6  | 12 | 214  | 225  | TTCAATTTCTTGGCTCAGGG      |
| scaffold479655_15.5 | 1 p2 | (GA)6  | 12 | 6101 | 6112 | AAAGCAAATAACCACCACGC      |
| scaffold479701_17.9 | 1 p2 | (GA)6  | 12 | 2931 | 2942 | GAGCTAACTGCATTCCAGACG     |
| scaffold479715_10.8 | 1 p2 | (AG)12 | 24 | 667  | 690  | GGGATCGGTTTATGTGTTGG      |
| scaffold479734_17.0 | 1 p2 | (AT)6  | 12 | 86   | 97   | AGAATCACGGCCATTTTCAG      |
| scaffold479803_15.2 | 1 p2 | (TA)6  | 12 | 1047 | 1058 | TCTTGTTGGCATGAGCTTGT      |
| scaffold479806_12.2 | 1 p2 | (GA)7  | 14 | 442  | 455  | AAGGACGGAGAGAGAGAGCA      |
| scaffold479996_16.0 | 1 p2 | (AT)6  | 12 | 428  | 439  | CGCATTCAATTAGCTACACC      |
| scaffold480058_11.0 | 1 p2 | (AT)6  | 12 | 331  | 342  | AAATGAATGTTGTGTTTGTGTA    |

|                     |      |        |    |      |                                 |
|---------------------|------|--------|----|------|---------------------------------|
| scaffold480164_16.4 | 1 p2 | (AG)8  | 16 | 528  | 543 AAACCCACCTGCTGCATAAT        |
| scaffold480179_10.2 | 1 p2 | (GA)6  | 12 | 108  | 119 ATATCGTCGTCTCCCGATGA        |
| scaffold480225_14.0 | 1 p2 | (TG)7  | 14 | 1041 | 1054 TCTCAAATCGTTTCTATCGTGC     |
| scaffold480380_11.3 | 1 p2 | (AG)10 | 20 | 78   | 97 TGTGCAAGGTTGAACCAAGA         |
| scaffold480407_17.4 | 1 p2 | (TA)6  | 12 | 786  | 797 GAAGAGGAGGAAAGAAAACGC       |
| scaffold480425_14.4 | 1 p2 | (AT)7  | 14 | 1389 | 1402 AATTGCGTTAGGGATTTGATT      |
| scaffold480443_14.5 | 1 p2 | (TA)7  | 14 | 564  | 577 GACTTGCCAACGGTCAATCT        |
| scaffold480473_12.4 | 1 p2 | (GA)9  | 18 | 80   | 97 ATGGAACCACTTGTTGACCG         |
| scaffold480525_18.2 | 1 p2 | (AG)9  | 18 | 52   | 69 CGAAGAACAATTACAATGTTTATCCA   |
| scaffold480654_14.2 | 1 p2 | (TA)6  | 12 | 55   | 66 TGCACCTGATCATGAACCTA         |
| scaffold480660_13.8 | 1 p2 | (CT)7  | 14 | 1434 | 1447 TGA CTCTCCCCTTCCATCAC      |
| scaffold480678_12.1 | 1 p2 | (TA)10 | 20 | 1090 | 1109 TTTTTAGAAGGATACTCACTACTCCA |
| scaffold480754_15.0 | 1 p2 | (AT)8  | 16 | 389  | 404 ATATTCCCCGGTATGCCAAC        |
| scaffold480777_14.6 | 1 p2 | (AG)7  | 14 | 487  | 500 ATCAAAGAAAACGGTGGTGG        |
| scaffold480831_14.8 | 1 p2 | (AT)6  | 12 | 1302 | 1313 ATCTCCCACCAATGCACTTC       |
| scaffold480839_16.7 | 1 p2 | (TA)6  | 12 | 1279 | 1290 AGCACATTTAATTCCAGGTGC      |
| scaffold480889_12.1 | 1 p2 | (CT)6  | 12 | 157  | 168 CGAGCTCTGAAAATTCTCCC        |
| scaffold480928_16.0 | 1 p2 | (CT)6  | 12 | 137  | 148 GGCGGATAGCAAATCAAAAA        |
| scaffold480930_18.2 | 1 p2 | (CT)6  | 12 | 165  | 176 CAGCCTCCATTTTGTTACCG        |
| scaffold480954_16.6 | 1 p2 | (GA)11 | 22 | 3796 | 3817 AAAGAGAAAACGAGGGGTGC       |
| scaffold480979_16.3 | 1 p2 | (GA)7  | 14 | 737  | 750 GGACAACCCATAACCCACAC        |
| scaffold481059_17.1 | 1 p2 | (AT)6  | 12 | 736  | 747 AGTTTGGAGCACACGAGCTT        |
| scaffold481083_16.4 | 1 p2 | (AC)7  | 14 | 237  | 250 TATTCAACTCCATCTCCCCG        |
| scaffold481239_13.7 | 1 p2 | (AT)11 | 22 | 2240 | 2261 TTCAACGGTCCCACAAATTA       |
| scaffold481407_14.9 | 1 p2 | (AT)9  | 18 | 175  | 192 CATCAGATCTGCGCTGAAAA        |
| scaffold481541_10.6 | 1 p2 | (AT)10 | 20 | 300  | 319 TCACTGGCAGCGAATATGAA        |
| scaffold481564_12.6 | 1 p2 | (TC)6  | 12 | 182  | 193 GTCCAATGTTTAGGCCCGTA        |
| scaffold481807_16.5 | 1 p2 | (GA)12 | 24 | 5944 | 5967 GCAATAAAGAGGCTGGTGCT       |
| scaffold481870_15.6 | 1 p2 | (CT)9  | 18 | 623  | 640 AGCCCTCATTCTCCCTTTA         |
| scaffold481939_13.6 | 1 p2 | (TA)8  | 16 | 133  | 148 GGCAATATGCTGACAGACGA        |
| scaffold482126_14.7 | 1 p2 | (CA)7  | 14 | 54   | 67 GGAGTCTGGAAAAGAGAGATTG       |
| scaffold482141_14.1 | 1 p2 | (CT)8  | 16 | 515  | 530 CATTCTTCTCTCCCCACA          |
| scaffold482147_16.3 | 1 p2 | (AT)6  | 12 | 121  | 132 AAACGACATCATGACGCAAC        |
| scaffold482179_12.6 | 1 p2 | (TA)10 | 20 | 42   | 61 AAGGGTTATCACCTGATTTTCTC      |
| scaffold482219_13.4 | 1 p2 | (AT)7  | 14 | 60   | 73 TCTAAATTGCGAGAATATGAGAGTTT   |
| scaffold482271_11.8 | 1 p2 | (AT)9  | 18 | 610  | 627 TGCTTCAAGGTAGGTTTATTAGGC    |
| scaffold482306_15.3 | 1 p2 | (TG)9  | 18 | 236  | 253 TCGTATTGACGGGAGAAACC        |
| scaffold482356_11.5 | 1 p2 | (TA)10 | 20 | 734  | 753 TGGCTGCTCCTCATCCTTAT        |
| scaffold482531_14.3 | 1 p2 | (GA)6  | 12 | 4017 | 4028 ACTCGCGAAGTTCCTTCAGA       |
| scaffold482608_12.4 | 1 p2 | (GA)7  | 14 | 227  | 240 AGAACTCCACTTGACAGCA         |
| scaffold482617_16.5 | 1 p2 | (GC)6  | 12 | 3215 | 3226 CACCACATAATGGACGTTGG       |
| scaffold482656_14.2 | 1 p2 | (GA)8  | 16 | 1414 | 1429 CGAGCTTTTATCGAACGGAG       |
| scaffold482744_14.1 | 1 p2 | (TC)8  | 16 | 3120 | 3135 GCTATGGTGGCCAATGTCTT       |
| scaffold482749_15.0 | 1 p2 | (AG)6  | 12 | 1196 | 1207 AACTCCCCTTTCCTTTGCAT       |
| scaffold482821_12.7 | 1 p2 | (TA)6  | 12 | 682  | 693 GGCAAATGATTGATTGCCTT        |
| scaffold482961_11.5 | 1 p2 | (AT)6  | 12 | 1054 | 1065 TGA CTTTCATGTAGCGTGGC      |
| scaffold483020_17.6 | 1 p2 | (AG)6  | 12 | 8248 | 8259 TTTGCTGTGCGTCGTATTTT       |
| scaffold483083_11.9 | 1 p2 | (GA)6  | 12 | 112  | 123 TGCCACTTATTTTCAAGGAGGT      |
| scaffold483092_17.9 | 1 p2 | (GA)9  | 18 | 3339 | 3356 TTAGCACCTGATTACTCCCGA      |
| scaffold483164_16.2 | 1 p2 | (TG)6  | 12 | 91   | 102 CCGTGGACGTAGATCCTTGT        |
| scaffold483239_15.1 | 1 p2 | (TC)8  | 16 | 1021 | 1036 TCTGGTGTGCTTTCTGCAAC       |
| scaffold483247_10.5 | 1 p2 | (GA)6  | 12 | 30   | 41 GGGGGAGAATTGAATTGCAG         |
| scaffold483367_12.1 | 1 p2 | (TA)9  | 18 | 2452 | 2469 TGCAAATACGAATATCATTATCAA   |
| scaffold483414_13.2 | 1 p2 | (CA)6  | 12 | 234  | 245 TTCAATCCAAAAAGACACATGC      |
| scaffold483446_16.7 | 1 p2 | (AT)6  | 12 | 307  | 318 ACATTGTATCTTGTCTTGCCCT      |
| scaffold483487_13.7 | 1 p2 | (AT)7  | 14 | 712  | 725 ATTACCTTGATCGACGACGC        |
| scaffold483599_14.9 | 1 p2 | (CT)6  | 12 | 1969 | 1980 CCTCTCAGCCCTAGCTTCCT       |
| scaffold483707_11.3 | 1 p2 | (CT)6  | 12 | 267  | 278 TTTAAATGGGCGGGAAAATA        |

|                     |      |        |    |      |      |                             |
|---------------------|------|--------|----|------|------|-----------------------------|
| scaffold483770_15.7 | 1 p2 | (CT)6  | 12 | 1193 | 1204 | CATCCTCAATTCAGCACCC         |
| scaffold483772_16.2 | 1 p2 | (TA)8  | 16 | 359  | 374  | TGCTGACCCTCTGCTGTATG        |
| scaffold483878_13.9 | 1 p2 | (TA)8  | 16 | 4861 | 4876 | CCTCTCCTCGTCTTGTGCTT        |
| scaffold483924_11.6 | 1 p2 | (TA)7  | 14 | 464  | 477  | ATTTGTTTGCATACGGCCTC        |
| scaffold484129_11.7 | 1 p2 | (TA)7  | 14 | 136  | 149  | GGCTTGTTGAACCATTTTGA        |
| scaffold484163_14.2 | 1 p2 | (AT)8  | 16 | 251  | 266  | CATGTCAATATCATCACGAGTTTGT   |
| scaffold484191_13.9 | 1 p2 | (TA)8  | 16 | 526  | 541  | TTTTGGAGGGAAAACCACTG        |
| scaffold484194_14.2 | 1 p2 | (TA)8  | 16 | 133  | 148  | AAAATCAAGGGCTGTGATGG        |
| scaffold484195_15.1 | 1 p2 | (AT)8  | 16 | 1784 | 1799 | TAGGATCCCGGATAATCCAT        |
| scaffold484295_13.4 | 1 p2 | (AC)8  | 16 | 1006 | 1021 | GCTGAGCATATTTTTACACCA       |
| scaffold484331_13.5 | 1 p2 | (CT)6  | 12 | 106  | 117  | TGCATTGTTTCGACGATGTAAC      |
| scaffold484469_15.7 | 1 p2 | (AT)8  | 16 | 71   | 86   | TTAACACCAAACCATCTAATTAGTAC, |
| scaffold484521_12.9 | 1 p2 | (GA)6  | 12 | 235  | 246  | GGTTACCGTCGTGGTTATGG        |
| scaffold484528_11.1 | 1 p2 | (AT)10 | 20 | 43   | 62   | TGGCAGAAAGATTTTAGATATAGACC  |
| scaffold484720_17.0 | 1 p2 | (AG)7  | 14 | 1162 | 1175 | GCAGTCTGTAAGGCCTGGTC        |
| scaffold484887_17.9 | 1 p2 | (TA)8  | 16 | 147  | 162  | ACCCAACCACCCTTTATTCC        |
| scaffold484888_14.9 | 1 p2 | (TA)10 | 20 | 1860 | 1879 | TTTTACAATTTTGCCCCTCG        |
| scaffold484957_15.2 | 1 p2 | (TA)9  | 18 | 881  | 898  | GGCAAGTTGAAGGAACAAGG        |
| scaffold484995_11.6 | 1 p2 | (AG)6  | 12 | 116  | 127  | TTCCTCTCGTGTTCATCCC         |
| scaffold485004_10.6 | 1 p2 | (AT)7  | 14 | 81   | 94   | GGACAAAAGAAAACACCGC         |
| scaffold485103_13.6 | 1 p2 | (AT)9  | 18 | 286  | 303  | CCGAAAATCAAAGGCCTACA        |
| scaffold485222_12.0 | 1 p2 | (TA)7  | 14 | 222  | 235  | TGGCACAGAGAGTACATAGTTTCC    |
| scaffold485296_15.3 | 1 p2 | (AT)6  | 12 | 1036 | 1047 | TCATGCACAAGGTGGAATGT        |
| scaffold485325_18.1 | 1 p2 | (GA)9  | 18 | 259  | 276  | AAAGGTGAGGGAGAGTGGGT        |
| scaffold485502_15.9 | 1 p2 | (TA)6  | 12 | 661  | 672  | TTTGTGCAAATATCAGGTCTTTT     |
| scaffold485528_11.8 | 1 p2 | (AT)6  | 12 | 725  | 736  | TGCTGACCCTCTGCTGTATG        |
| scaffold485542_12.9 | 1 p2 | (TA)7  | 14 | 828  | 841  | ATAACAGTGGTGGCCGAAAA        |
| scaffold485569_14.8 | 1 p2 | (GA)6  | 12 | 165  | 176  | GGGTGCTTGAGGGAGTTGTA        |
| scaffold485715_17.8 | 1 p2 | (TG)6  | 12 | 638  | 649  | TTGCTTGGGATTTATTTTGA        |
| scaffold485769_10.8 | 1 p2 | (AT)6  | 12 | 30   | 41   | TTTGTATGGGTCATTGGACG        |
| scaffold485863_14.2 | 1 p2 | (GA)7  | 14 | 95   | 108  | GGATTTGGGGTGAGAAGAT         |
| scaffold485868_10.4 | 1 p2 | (AT)6  | 12 | 334  | 345  | AGGAGCAAATTGAGGCTGTC        |
| scaffold486007_10.8 | 1 p2 | (AT)7  | 14 | 192  | 205  | TTCGGGACCTCTTTGTATCG        |
| scaffold486057_19.6 | 1 p2 | (AC)7  | 14 | 319  | 332  | GCGCATTTTCTGCTGTTAGA        |
| scaffold486154_16.2 | 1 p2 | (CT)6  | 12 | 106  | 117  | TTCGATGTTGTAAGGGAGGA        |
| scaffold486203_16.0 | 1 p2 | (CT)7  | 14 | 270  | 283  | TCCACCGTAATGAATGACA         |
| scaffold486204_11.5 | 1 p2 | (GA)6  | 12 | 138  | 149  | GGTGCAAGGGTTTCAAAGAG        |
| scaffold486205_12.9 | 1 p2 | (AT)9  | 18 | 226  | 243  | CATATTTCAAATGCATGCCG        |
| scaffold486206_21.5 | 1 p2 | (GA)7  | 14 | 136  | 149  | TAACACCAGCCTCTCTGCCT        |
| scaffold486222_11.5 | 1 p2 | (AT)7  | 14 | 400  | 413  | TCGGCTATATTAGCGATCCG        |
| scaffold486247_16.3 | 1 p2 | (AT)11 | 22 | 51   | 72   | ATGAAGTTAGGAAATAAAGAGGTGTI  |
| scaffold486299_15.1 | 1 p2 | (TA)8  | 16 | 333  | 348  | TCTGATTCCAAACCCAGTC         |
| scaffold486692_16.8 | 1 p2 | (TA)8  | 16 | 865  | 880  | CTATTCCAACCTCGGGACCA        |
| scaffold486706_10.7 | 1 p2 | (TC)6  | 12 | 70   | 81   | TTTCAGAAATTGCCTTGGTTG       |
| scaffold486719_16.6 | 1 p2 | (TA)6  | 12 | 2886 | 2897 | GGGAACCATCATGGA AATTG       |
| scaffold486816_17.7 | 1 p2 | (AT)9  | 18 | 136  | 153  | TTCGGAGCATGATTTAAGTGG       |
| scaffold486903_14.8 | 1 p2 | (CT)7  | 14 | 136  | 149  | CCAATGCCAATCATCCTCTT        |
| scaffold486948_16.5 | 1 p2 | (GA)6  | 12 | 138  | 149  | AAGGAAAAACATGAGTTTAGGGG     |
| scaffold486991_12.4 | 1 p2 | (AG)6  | 12 | 245  | 256  | GCTGTTGCATTTTCGATGTTG       |
| scaffold487025_15.3 | 1 p2 | (TC)7  | 14 | 1003 | 1016 | ATCCAGATCCTTGTGGTTGG        |
| scaffold487054_15.9 | 1 p2 | (TC)6  | 12 | 168  | 179  | TCCTATCTTCTGCGACGCTT        |
| scaffold487173_18.7 | 1 p2 | (AC)6  | 12 | 479  | 490  | TTCCCTTCTCATTTCCATGC        |
| scaffold487404_12.1 | 1 p2 | (TA)7  | 14 | 234  | 247  | TCAACGATTTTGGTTTGTTC        |
| scaffold487557_16.8 | 1 p2 | (CT)8  | 16 | 5335 | 5350 | ATTCTCCACCACCCACATA         |
| scaffold487593_16.9 | 1 p2 | (AT)9  | 18 | 368  | 385  | TGGAGAAGCTTTACGGCAT         |
| scaffold487797_11.1 | 1 p2 | (GA)10 | 20 | 636  | 655  | AATGGTTGTGGATCGCCTAA        |
| scaffold487885_11.8 | 1 p2 | (GC)7  | 14 | 261  | 274  | TCCGGTCCAATTCCAATAAG        |
| scaffold487974_14.8 | 1 p2 | (AT)9  | 18 | 133  | 150  | TTGCAGTAAATATCGGTTTTTCG     |

|                     |      |        |    |      |      |                           |
|---------------------|------|--------|----|------|------|---------------------------|
| scaffold487992_16.1 | 1 p2 | (TA)6  | 12 | 352  | 363  | AAAAATGAAACCGGCCAAA       |
| scaffold488063_16.0 | 1 p2 | (AT)8  | 16 | 2775 | 2790 | GCCCTTCGAACAACAAAAAG      |
| scaffold488176_15.2 | 1 p2 | (TC)7  | 14 | 95   | 108  | CCTCCACTGTTTTGTGCCAT      |
| scaffold488196_16.4 | 1 p2 | (GA)6  | 12 | 925  | 936  | CTCGTGAAGCGACGTGAATA      |
| scaffold488227_13.4 | 1 p2 | (GA)6  | 12 | 736  | 747  | ATGATGGAATTGGGTGTTGG      |
| scaffold488246_18.7 | 1 p2 | (AT)9  | 18 | 464  | 481  | TGCTTTGATGTGTTGGCATT      |
| scaffold488248_14.1 | 1 p2 | (TC)6  | 12 | 242  | 253  | ACAAGATCGAACGGAACGAG      |
| scaffold488249_10.4 | 1 p2 | (TC)7  | 14 | 46   | 59   | GAAAATTCGAAAATCCCCA       |
| scaffold488306_11.3 | 1 p2 | (GT)10 | 20 | 236  | 255  | AGATAACGGCCTAGGCGAAG      |
| scaffold488321_16.0 | 1 p2 | (TC)6  | 12 | 295  | 306  | TCACTCAATCTGATGCACACTC    |
| scaffold488369_12.6 | 1 p2 | (AT)6  | 12 | 307  | 318  | TAATCTTGGCCGCTGATTTT      |
| scaffold488429_14.0 | 1 p2 | (GT)6  | 12 | 138  | 149  | TAATTTTCGTCGGGATGGTT      |
| scaffold488447_10.5 | 1 p2 | (TC)8  | 16 | 84   | 99   | TCTTTCTCGACGTTTCCTGC      |
| scaffold488488_11.6 | 1 p2 | (AT)6  | 12 | 1116 | 1127 | TCAAATTTTGCGTAGCATCTC     |
| scaffold488511_16.7 | 1 p2 | (CT)6  | 12 | 60   | 71   | TGAATCTGACTTCGATTATTTGTGA |
| scaffold488512_14.3 | 1 p2 | (AG)6  | 12 | 917  | 928  | CAATTGGTGCAAGAAGACGA      |
| scaffold488592_16.4 | 1 p2 | (CT)8  | 16 | 288  | 303  | CTTGGGCTAAAATCCCAACA      |
| scaffold488891_16.7 | 1 p2 | (AT)10 | 20 | 486  | 505  | CCAGGCAAAAATGCGCTA        |
| scaffold488918_12.1 | 1 p2 | (TA)6  | 12 | 1896 | 1907 | CAAAAACCGGTGAAAAATCG      |
| scaffold488989_16.6 | 1 p2 | (CT)9  | 18 | 382  | 399  | CACGCATTCTTCCAAACAAA      |
| scaffold488994_19.3 | 1 p2 | (CT)7  | 14 | 914  | 927  | TTGGTAAATGTTTGGGCAGA      |
| scaffold489067_16.2 | 1 p2 | (TA)6  | 12 | 1332 | 1343 | GGCGTGGTTTGCAGACTATT      |
| scaffold489079_13.7 | 1 p2 | (CT)11 | 22 | 155  | 176  | TATGGTTTTTGGCCACTTCC      |
| scaffold489104_14.6 | 1 p2 | (CT)8  | 16 | 81   | 96   | CATTCACATGGTCCCCTCTT      |
| scaffold489143_16.1 | 1 p2 | (CT)6  | 12 | 1362 | 1373 | ATAGAGCCCCACGTTACAG       |
| scaffold489194_10.3 | 1 p2 | (AG)6  | 12 | 245  | 256  | AGGGTGCCAAGATTAACACG      |
| scaffold489276_17.0 | 1 p2 | (TA)6  | 12 | 132  | 143  | ATATTCGAACGGCCTTGTTG      |
| scaffold489281_15.1 | 1 p2 | (AT)8  | 16 | 353  | 368  | CACACTCAAGCACACACACG      |
| scaffold489583_12.1 | 1 p2 | (TG)7  | 14 | 1481 | 1494 | AGCATTTGATTAATCCCCCA      |
| scaffold489584_12.5 | 1 p2 | (AC)6  | 12 | 422  | 433  | AACAGCACGGACAGCTTCTT      |
| scaffold489639_13.3 | 1 p2 | (TC)6  | 12 | 482  | 493  | CGTAGCGAAGAAGCGAGAAT      |
| scaffold489656_14.7 | 1 p2 | (GA)9  | 18 | 1137 | 1154 | TGAGAGAGGAGACGCCATTT      |
| scaffold489675_14.3 | 1 p2 | (TA)9  | 18 | 772  | 789  | TGATTGTAAATGAATTGAGTCGAA  |
| scaffold489686_12.0 | 1 p2 | (TA)8  | 16 | 535  | 550  | AACAGGAACCGCTGATTTTG      |
| scaffold489687_14.1 | 1 p2 | (AT)6  | 12 | 138  | 149  | GGTGCTTTGACTTATGTAAAGTTG  |
| scaffold489894_12.0 | 1 p2 | (GA)6  | 12 | 283  | 294  | TGGAGATATGGTAGCGGTCC      |
| scaffold489924_10.5 | 1 p2 | (TC)6  | 12 | 65   | 76   | TTGTTTTCTGTTCTGGCGTC      |
| scaffold489950_15.5 | 1 p2 | (CT)6  | 12 | 54   | 65   | CGCGAGTTCATAACTCTCTCTC    |
| scaffold490102_10.0 | 1 p2 | (TG)8  | 16 | 176  | 191  | AACTCAGCATAACAGCAGTTTCA   |
| scaffold490116_13.2 | 1 p2 | (GA)8  | 16 | 1060 | 1075 | GAATAATGGGGGTGATGTGC      |
| scaffold490162_14.7 | 1 p2 | (AG)10 | 20 | 460  | 479  | TGGTTTCAATTTGGGTGGAT      |
| scaffold490276_10.3 | 1 p2 | (GA)10 | 20 | 184  | 203  | ATTCGGAGCGAGGCTAAGTT      |
| scaffold490293_10.1 | 1 p2 | (GT)6  | 12 | 228  | 239  | TCCCAACTCGTCAATCCTTC      |
| scaffold490471_13.6 | 1 p2 | (GA)6  | 12 | 93   | 104  | GCTTCCATTTCACTTGAATGTTT   |
| scaffold490493_15.5 | 1 p2 | (TA)9  | 18 | 6282 | 6299 | ATTGGGCCTATCAATGCAAG      |
| scaffold490501_11.5 | 1 p2 | (AT)6  | 12 | 832  | 843  | AAGTGGTATAAACGGGCGTG      |
| scaffold490513_12.5 | 1 p2 | (GA)6  | 12 | 242  | 253  | CGTTTGAGAGGAATCATGGC      |
| scaffold490523_17.5 | 1 p2 | (AG)10 | 20 | 48   | 67   | GAATTAGCATACTGGCTCATTTATT |
| scaffold490557_15.1 | 1 p2 | (AT)7  | 14 | 274  | 287  | CGTTGAAGAGATTACGCAACA     |
| scaffold490585_18.6 | 1 p2 | (GA)6  | 12 | 87   | 98   | AAAACGAATTTGGTGTGGAA      |
| scaffold490590_10.4 | 1 p2 | (TA)10 | 20 | 685  | 704  | CGCCATCAGATATGGAGAT       |
| scaffold490612_17.8 | 1 p2 | (AT)7  | 14 | 3470 | 3483 | TAACCACTCAAGGCCGGTAG      |
| scaffold490622_10.5 | 1 p2 | (TA)8  | 16 | 34   | 49   | ACAACTAATCAAGTTCCGCA      |
| scaffold490635_15.9 | 1 p2 | (AT)6  | 12 | 235  | 246  | CTTTTCACACGAGGTCACGA      |
| scaffold490652_17.4 | 1 p2 | (AG)6  | 12 | 544  | 555  | CACAGGATGATGCAGAGGAA      |
| scaffold490705_15.2 | 1 p2 | (TA)7  | 14 | 1036 | 1049 | CGCGATTTTAAACCCTAAAGAA    |
| scaffold490719_17.5 | 1 p2 | (AT)6  | 12 | 87   | 98   | GAAATTTTATTATTCGTCGTTATT  |
| scaffold490725_17.4 | 1 p2 | (AT)7  | 14 | 138  | 151  | CCAAAGAAAAGTGCATTACAAA    |

|                     |      |        |    |      |                               |
|---------------------|------|--------|----|------|-------------------------------|
| scaffold490744_16.5 | 1 p2 | (TA)7  | 14 | 964  | 977 TGGGAAAATTGAAGAACATTTG    |
| scaffold490752_11.7 | 1 p2 | (AT)7  | 14 | 1140 | 1153 CAAGCTGATTTCCCACCCTA     |
| scaffold490840_12.5 | 1 p2 | (GA)6  | 12 | 246  | 257 GATTTCTTGGTTCCGGATGA      |
| scaffold490859_16.2 | 1 p2 | (TC)6  | 12 | 1007 | 1018 ATTTGATCAACAGGCGATCC     |
| scaffold491074_12.3 | 1 p2 | (AG)6  | 12 | 752  | 763 CCAATGTGCACGCAAATAC       |
| scaffold491383_14.2 | 1 p2 | (AT)6  | 12 | 361  | 372 AGCTGGGAGGCTTGGTAAGT      |
| scaffold491520_13.2 | 1 p2 | (TG)6  | 12 | 734  | 745 GTTCCCgcgcTATAAAAAGA      |
| scaffold491538_15.4 | 1 p2 | (CA)6  | 12 | 1702 | 1713 TGGAGAGGGGCTAAACAGTCG    |
| scaffold491562_12.3 | 1 p2 | (GA)6  | 12 | 120  | 131 GAAGCGAGAAGGGAGGAAC       |
| scaffold491578_14.6 | 1 p2 | (TA)7  | 14 | 137  | 150 TATGCTCCTTTTGGTTTGGG      |
| scaffold491579_17.3 | 1 p2 | (AT)6  | 12 | 1773 | 1784 GGGCGCTTGTAGACTTTTCA     |
| scaffold491600_13.0 | 1 p2 | (TA)9  | 18 | 2131 | 2148 ACAACACATTGCCACACCAA     |
| scaffold491613_11.3 | 1 p2 | (TA)6  | 12 | 258  | 269 GCGTTGACGTACACAGCTTC      |
| scaffold491696_15.3 | 1 p2 | (TA)6  | 12 | 446  | 457 TGAATATGTCTCCTCCGGC       |
| scaffold491700_15.2 | 1 p2 | (TC)10 | 20 | 1925 | 1944 ATCTCCACCTCAATGTGCC      |
| scaffold491790_20.4 | 1 p2 | (CT)7  | 14 | 289  | 302 CAGCTGTGCAATCTGCTCTG      |
| scaffold491806_10.3 | 1 p2 | (CA)7  | 14 | 1066 | 1079 TGAGTGGTGTGAGAAACGC      |
| scaffold491910_15.8 | 1 p2 | (AT)7  | 14 | 295  | 308 TTGAATTTGTTGAAATTGGGA     |
| scaffold492031_15.2 | 1 p2 | (AT)8  | 16 | 3307 | 3322 AACCGGATATGGATGAAACC     |
| scaffold492129_10.5 | 1 p2 | (TA)7  | 14 | 121  | 134 GATATGAAGTGTCAATATAAGCAT  |
| scaffold492255_17.4 | 1 p2 | (GA)6  | 12 | 153  | 164 CTCAGAGAGGTTCCACGGTCC     |
| scaffold492310_13.4 | 1 p2 | (TA)6  | 12 | 140  | 151 ATTACATGAATGCCGAGCTG      |
| scaffold492379_13.8 | 1 p2 | (TC)7  | 14 | 174  | 187 AAGACCTTGTGACCACGAAC      |
| scaffold492455_16.5 | 1 p2 | (AT)6  | 12 | 2148 | 2159 CGACGACTCAGTCAAACCAA     |
| scaffold492474_13.4 | 1 p2 | (CT)9  | 18 | 414  | 431 GGAACAAACCATCCTCAACC      |
| scaffold492658_10.4 | 1 p2 | (GA)7  | 14 | 54   | 67 GCGAAGCACCGAGACTACTG       |
| scaffold492865_10.9 | 1 p2 | (TC)6  | 12 | 309  | 320 TGGACTTGGCTAAGAATGGC      |
| scaffold493039_17.2 | 1 p2 | (TG)8  | 16 | 2472 | 2487 TCATTTCCGGATGGAAGGAAC    |
| scaffold493090_17.6 | 1 p2 | (AT)6  | 12 | 54   | 65 CAGCACGAATCACACAGTAACA     |
| scaffold493143_16.2 | 1 p2 | (TC)7  | 14 | 4550 | 4563 AACTGACGGGTGATCAAAGG     |
| scaffold493238_15.0 | 1 p2 | (AT)9  | 18 | 133  | 150 TTATGAGTTTGTCTCCTGGGG     |
| scaffold493240_15.8 | 1 p2 | (AT)8  | 16 | 135  | 150 TATATCACGGGGGACTCGAC      |
| scaffold493258_13.7 | 1 p2 | (AT)9  | 18 | 802  | 819 TGCCTCAATCTCATAAATCAA     |
| scaffold493345_10.7 | 1 p2 | (GT)7  | 14 | 330  | 343 GCGTAGACGGAATAAAATTCG     |
| scaffold493384_13.5 | 1 p2 | (AT)6  | 12 | 222  | 233 CCAGGGAATCTTTTGTAGCAC     |
| scaffold493642_17.4 | 1 p2 | (AT)7  | 14 | 585  | 598 CCAAATCGGGGACACATTAC      |
| scaffold493686_13.5 | 1 p2 | (TA)6  | 12 | 1557 | 1568 TGCATAATTGTAGATAATGGACCG |
| scaffold493704_14.8 | 1 p2 | (CT)9  | 18 | 345  | 362 GGGAGTGAAGATTGGCAGAG      |
| scaffold493801_19.9 | 1 p2 | (TA)8  | 16 | 891  | 906 ACGGTGGGCACTACAAGAAC      |
| scaffold493810_15.9 | 1 p2 | (AG)6  | 12 | 538  | 549 GAAGCGGGATGAAGAATTGA      |
| scaffold493822_11.4 | 1 p2 | (TA)6  | 12 | 154  | 165 AAATATCGGCCGTCAGATTG      |
| scaffold493907_10.7 | 1 p2 | (TC)6  | 12 | 157  | 168 GCTTGGTTGGCTTGAGTTTC      |
| scaffold493967_12.5 | 1 p2 | (CT)7  | 14 | 431  | 444 CGGTCAACATGTGAGTGTCC      |
| scaffold493993_14.6 | 1 p2 | (CT)6  | 12 | 47   | 58 TCTCTCTGGTTGGTGAAGAAA      |
| scaffold494079_17.0 | 1 p2 | (TC)9  | 18 | 497  | 514 CCTCTTGATTTTCTCGCTCC      |
| scaffold494116_16.9 | 1 p2 | (GA)8  | 16 | 301  | 316 TATGGTGTACGGGTTTGACA      |
| scaffold494172_14.7 | 1 p2 | (AT)6  | 12 | 72   | 83 CAAAACCTCACGAAGAAAACACA    |
| scaffold494225_12.2 | 1 p2 | (AG)11 | 22 | 31   | 52 AGAAACTTGACGTGTGCGTG       |
| scaffold494246_10.7 | 1 p2 | (TA)10 | 20 | 332  | 351 ATGCTTAAAAGAAAGCGGCA      |
| scaffold494302_14.8 | 1 p2 | (CT)8  | 16 | 2800 | 2815 CGGTGGATGTCTTGGTCTTT     |
| scaffold494310_13.8 | 1 p2 | (GA)6  | 12 | 114  | 125 AGATTTTCCGACATCGCATT      |
| scaffold494403_10.0 | 1 p2 | (GC)7  | 14 | 238  | 251 CGTTGCCGGATAATTCAAAC      |
| scaffold494446_15.5 | 1 p2 | (GA)6  | 12 | 69   | 80 TCCAGTATACAATTCCAACAGGAG   |
| scaffold494453_10.9 | 1 p2 | (CA)6  | 12 | 685  | 696 TAGTTTGTTCCTCCGCAAAA      |
| scaffold494489_14.4 | 1 p2 | (AG)6  | 12 | 93   | 104 TTTCTTCTTGGATTATGCCA      |
| scaffold494559_14.4 | 1 p2 | (TC)6  | 12 | 70   | 81 CACCACACCCTCACTCTCCT       |
| scaffold494580_11.5 | 1 p2 | (AT)8  | 16 | 136  | 151 GGGGAATGTAACAGGGGATT      |
| scaffold494593_10.7 | 1 p2 | (AG)8  | 16 | 65   | 80 TGTTTTGTAATTTCCCATGTTG     |



|                     |      |        |    |      |                                   |
|---------------------|------|--------|----|------|-----------------------------------|
| scaffold494604_10.3 | 1 p2 | (TA)9  | 18 | 260  | 277 TGGTATCACATCACAACCTTTTCA      |
| scaffold494683_15.0 | 1 p2 | (GT)7  | 14 | 1207 | 1220 CCGCTTTCTCATTCTTCCA          |
| scaffold494748_13.0 | 1 p2 | (CT)6  | 12 | 557  | 568 CCCTTAGATGTCTTCATCCCA         |
| scaffold494793_12.3 | 1 p2 | (AT)8  | 16 | 534  | 549 AAAATGGTCCACATGTTGTAAAAA      |
| scaffold494826_14.7 | 1 p2 | (AG)7  | 14 | 197  | 210 TCAAAGTGGAGAAGGCATGA          |
| scaffold494921_15.6 | 1 p2 | (TA)9  | 18 | 172  | 189 TCGTATGCTGCCCTAAAAAC          |
| scaffold495194_15.2 | 1 p2 | (AT)9  | 18 | 649  | 666 TGTGCTATCCTAACCAAAAAGC        |
| scaffold495255_10.2 | 1 p2 | (TA)10 | 20 | 91   | 110 GAAAAATCAAAGGCCCAAA           |
| scaffold495354_18.1 | 1 p2 | (TG)8  | 16 | 118  | 133 ATGAATTTTCTGCGAATGGG          |
| scaffold495798_12.3 | 1 p2 | (CT)7  | 14 | 237  | 250 GGGTGAATTTTTGGGGTCTT          |
| scaffold495834_15.5 | 1 p2 | (AC)6  | 12 | 67   | 78 ATTGCCCATGAATGTCACCT           |
| scaffold496019_12.1 | 1 p2 | (GA)6  | 12 | 471  | 482 AGAAATCAACCAATCGGCAC          |
| scaffold496036_10.3 | 1 p2 | (GA)6  | 12 | 70   | 81 CACAGAAGGAAAAGAGCGAGA          |
| scaffold496548_15.0 | 1 p2 | (TA)6  | 12 | 154  | 165 CTAGGCATGGAATCCGAGAA          |
| scaffold496587_14.7 | 1 p2 | (GA)7  | 14 | 79   | 92 CCACAAAGTTCCAATCTTTTAGC        |
| scaffold496753_12.7 | 1 p2 | (AT)10 | 20 | 86   | 105 TTACGGCATTAGAGATAATGATTA      |
| scaffold496760_17.7 | 1 p2 | (TA)6  | 12 | 164  | 175 TTCTAACAGAATAGAGCTTGGGG       |
| scaffold496839_17.2 | 1 p2 | (GA)6  | 12 | 583  | 594 ATATACGCCACATGCGATT           |
| scaffold496843_14.0 | 1 p2 | (TA)8  | 16 | 137  | 152 TATGGCCAATCCGAACCTT           |
| scaffold496880_18.6 | 1 p2 | (AT)6  | 12 | 91   | 102 TTTGAGCAGTTCCAATCTCTTG        |
| scaffold496922_14.8 | 1 p2 | (TA)8  | 16 | 694  | 709 TCTCGTACACGTGTCCAGTTTT        |
| scaffold496962_14.8 | 1 p2 | (AT)6  | 12 | 895  | 906 GAGGGTGGTATTTCTGTGTCG         |
| scaffold496983_14.4 | 1 p2 | (TA)7  | 14 | 65   | 78 GGGTCATCATGGGATCAAGT           |
| scaffold496994_15.3 | 1 p2 | (GA)6  | 12 | 196  | 207 CTTAAGCCGAAAATCCACG           |
| scaffold497065_15.1 | 1 p2 | (AT)6  | 12 | 787  | 798 TGGTGATTGAAATGATTAGCAAC       |
| scaffold497090_14.1 | 1 p2 | (AT)6  | 12 | 999  | 1010 ACATCCGGGAGAAGGGTTAG         |
| scaffold497190_15.7 | 1 p2 | (TC)7  | 14 | 1148 | 1161 GAAGCAACTTTCTTGGCTGC         |
| scaffold497235_21.9 | 1 p2 | (AG)8  | 16 | 193  | 208 GGCAAGCTTTCTCCTTCTT           |
| scaffold497267_12.9 | 1 p2 | (TA)6  | 12 | 503  | 514 CAATTCCTCCCTTGGAGACA          |
| scaffold497528_17.2 | 1 p2 | (CT)6  | 12 | 1217 | 1228 ATCATCAGCCGCTTATTGG          |
| scaffold497539_11.6 | 1 p2 | (AT)8  | 16 | 349  | 364 CATAAACCGTGCACCTGTA           |
| scaffold497540_16.0 | 1 p2 | (GA)6  | 12 | 5527 | 5538 TGTTGCTTGTTTCTTGCACC         |
| scaffold497601_13.1 | 1 p2 | (TA)14 | 28 | 39   | 66 ATTAAAACCTCGCTCGGATG           |
| scaffold497615_15.2 | 1 p2 | (AC)6  | 12 | 2135 | 2146 CATAATAGTGCAGGTGGGGG         |
| scaffold497649_15.6 | 1 p2 | (AT)6  | 12 | 2529 | 2540 TAGGGGCCTGCTAAAATTCA         |
| scaffold497663_10.2 | 1 p2 | (TA)12 | 24 | 249  | 272 TTCGCTACATTTACGGATTGTG        |
| scaffold497668_14.9 | 1 p2 | (CT)6  | 12 | 342  | 353 GCGAGAACCACAAAGCTCTC          |
| scaffold497695_16.0 | 1 p2 | (AT)6  | 12 | 538  | 549 CAATTGTTGCAAACAACCAAA         |
| scaffold497741_11.3 | 1 p2 | (AT)6  | 12 | 411  | 422 TCGGTTGTTCCATCTCTAATCC        |
| scaffold497742_12.3 | 1 p2 | (AT)9  | 18 | 197  | 214 TGTTGGCGTTTTAATCTCCC          |
| scaffold497882_16.0 | 1 p2 | (AT)9  | 18 | 699  | 716 TCCCATCTTCTTCAGTTGG           |
| scaffold497895_11.3 | 1 p2 | (TA)10 | 20 | 46   | 65 CCACATTTAAGGGTTATCACCTG        |
| scaffold498040_20.9 | 1 p2 | (TC)6  | 12 | 122  | 133 GGGATTCAATCTAGTCGACAATC       |
| scaffold498167_14.7 | 1 p2 | (GT)8  | 16 | 234  | 249 AGGGTGGTGAATGCTGAGAG          |
| scaffold498519_12.2 | 1 p2 | (AT)10 | 20 | 2042 | 2061 GAAATTAAGAATGTGGAGTGCAA      |
| scaffold498665_11.6 | 1 p2 | (TA)6  | 12 | 142  | 153 CCAAAGGTGAAAATCGCACT          |
| scaffold498672_10.8 | 1 p2 | (TA)6  | 12 | 141  | 152 TGAATTC AATTTATTTATTGTGCGATGA |
| scaffold498673_15.0 | 1 p2 | (AT)9  | 18 | 136  | 153 ATGTGTGATGTATCCCCGCT          |
| scaffold498769_12.4 | 1 p2 | (AT)6  | 12 | 126  | 137 GTTTTGCAGGATGGAACCTCA         |
| scaffold498841_13.0 | 1 p2 | (TG)9  | 18 | 888  | 905 ATAACCCGGTCAACAAGCTG          |
| scaffold498890_15.7 | 1 p2 | (AT)6  | 12 | 1937 | 1948 CCACGTGGAAGGACTGAAAG         |
| scaffold498933_16.1 | 1 p2 | (AT)6  | 12 | 1153 | 1164 TTTGAGGGGTGGATTTGTTT         |
| scaffold498995_17.1 | 1 p2 | (AT)6  | 12 | 85   | 96 TCCGGAGTAAGTTCGAGGAT           |
| scaffold499012_10.7 | 1 p2 | (AT)6  | 12 | 89   | 100 TTGAGGCGGTACAAAGGAAC          |
| scaffold499044_11.8 | 1 p2 | (TA)8  | 16 | 281  | 296 CAAAGGATGAAAACGAGGGA          |
| scaffold499085_10.3 | 1 p2 | (AT)6  | 12 | 188  | 199 ATTGGCTGAGGCATTTGAAC          |
| scaffold499133_13.0 | 1 p2 | (TA)11 | 22 | 1641 | 1662 AGCCGTAGAGCCCTGTATGA         |
| scaffold499136_15.4 | 1 p2 | (AG)6  | 12 | 432  | 443 TCCTTTAGAGTCGTTGCACAAA        |

|                     |      |        |    |      |      |                          |
|---------------------|------|--------|----|------|------|--------------------------|
| scaffold499167_14.2 | 1 p2 | (TC)6  | 12 | 3263 | 3274 | GAAAGATCTGGTCACGACAGC    |
| scaffold499341_10.3 | 1 p2 | (AT)9  | 18 | 324  | 341  | AGAGGGGGTATGATGGGAAC     |
| scaffold499418_12.4 | 1 p2 | (CA)6  | 12 | 287  | 298  | TGATTTGGCAGTTTGAGAGG     |
| scaffold499517_10.2 | 1 p2 | (AT)6  | 12 | 731  | 742  | AACGTAAATGAGAAACATGCAA   |
| scaffold499644_13.8 | 1 p2 | (TC)6  | 12 | 2245 | 2256 | ATTTGAGCCAGACACTGCT      |
| scaffold499710_13.7 | 1 p2 | (TA)6  | 12 | 584  | 595  | TTCCCTACAAAACGAGACCAA    |
| scaffold499800_11.5 | 1 p2 | (TA)10 | 20 | 169  | 188  | TACGTAAAAACCCTTTCGCC     |
| scaffold499852_15.0 | 1 p2 | (AG)6  | 12 | 142  | 153  | TTCCATGATCAGAACGGATTC    |
| scaffold499993_16.3 | 1 p2 | (TA)6  | 12 | 269  | 280  | ATCACATCGGAAATTCGTCC     |
| scaffold500074_17.1 | 1 p2 | (AT)9  | 18 | 1224 | 1241 | GGTGGGCAAATCAAATGTTC     |
| scaffold500116_14.4 | 1 p2 | (TG)9  | 18 | 3262 | 3279 | GCAGAAGCGGGAACACTG       |
| scaffold500121_13.4 | 1 p2 | (TA)10 | 20 | 47   | 66   | GGTGACAGGCAGCTGAATCTA    |
| scaffold500173_16.8 | 1 p2 | (AG)6  | 12 | 1296 | 1307 | TTTGAACGAGGCGGATTTAG     |
| scaffold500254_16.6 | 1 p2 | (TG)8  | 16 | 476  | 491  | TTTGACGGGGTAAAATAAAACAA  |
| scaffold500268_11.4 | 1 p2 | (TC)10 | 20 | 89   | 108  | AAAAACATCGCTCTCTCCCC     |
| scaffold500393_21.0 | 1 p2 | (TA)6  | 12 | 113  | 124  | TGGAACAGTTTGACACAACCA    |
| scaffold500534_16.1 | 1 p2 | (TC)6  | 12 | 290  | 301  | TCGTAGTCCCCTTCAGATCG     |
| scaffold500546_15.4 | 1 p2 | (TC)11 | 22 | 587  | 608  | ATGCTTGAAGCTATGGGTGC     |
| scaffold500550_12.9 | 1 p2 | (AT)11 | 22 | 573  | 594  | TTCCCATCGCCCTACTTATG     |
| scaffold500626_16.6 | 1 p2 | (AT)7  | 14 | 3286 | 3299 | ATCCCTCTACCGCCTTAGGA     |
| scaffold500637_14.7 | 1 p2 | (AG)9  | 18 | 4280 | 4297 | CAAATTTACCAAGAACGCA      |
| scaffold500648_16.7 | 1 p2 | (TA)8  | 16 | 3490 | 3505 | AATCGAAAATAACGTTGGCG     |
| scaffold500684_13.5 | 1 p2 | (AT)9  | 18 | 807  | 824  | CTTTTTGCTATGCAGCCTCC     |
| scaffold500698_11.4 | 1 p2 | (AT)9  | 18 | 608  | 625  | AATCATAGCCACGCATGTCA     |
| scaffold500701_14.9 | 1 p2 | (AG)6  | 12 | 562  | 573  | CCAATCGTCCTTGCTTCATT     |
| scaffold500706_15.1 | 1 p2 | (AT)6  | 12 | 2545 | 2556 | TTTCGCTGTGCAATTCATTC     |
| scaffold501002_10.8 | 1 p2 | (TA)6  | 12 | 190  | 201  | CTCACACACCCATATGTCCC     |
| scaffold501014_15.0 | 1 p2 | (CT)6  | 12 | 524  | 535  | AAATTGATTTCCCTCCACCC     |
| scaffold501038_11.4 | 1 p2 | (AT)6  | 12 | 927  | 938  | AACACATATGGGGACACGCT     |
| scaffold501049_15.9 | 1 p2 | (TC)7  | 14 | 3899 | 3912 | TGCGACGTATTGAGAAGCAG     |
| scaffold501077_18.4 | 1 p2 | (AG)6  | 12 | 1563 | 1574 | ATGTTCTCTCAGGCCACCAC     |
| scaffold501119_15.7 | 1 p2 | (AG)7  | 14 | 219  | 232  | TGGGTGAAAAGAAAAGGCAC     |
| scaffold501146_13.3 | 1 p2 | (TC)7  | 14 | 1206 | 1219 | AATATCGCCAAACACCTTGC     |
| scaffold501159_11.4 | 1 p2 | (AG)10 | 20 | 137  | 156  | CAAGTCAACAAGCAAGCCAA     |
| scaffold501161_16.1 | 1 p2 | (AG)8  | 16 | 2477 | 2492 | CCATCTCGAAAAGATGGGAA     |
| scaffold501214_13.0 | 1 p2 | (TA)7  | 14 | 453  | 466  | TGGCTAAAGATCGATGTGACTT   |
| scaffold501282_13.6 | 1 p2 | (TA)9  | 18 | 662  | 679  | CGTGAATATGCTGATGCTGG     |
| scaffold501288_11.8 | 1 p2 | (AT)6  | 12 | 56   | 67   | TACAAGTGCAGCGGAAATGA     |
| scaffold501475_16.0 | 1 p2 | (CT)14 | 28 | 197  | 224  | GGTTATGGTTCTTGATGGGG     |
| scaffold501482_16.3 | 1 p2 | (CT)9  | 18 | 202  | 219  | GCGGTGGTGGAGAGAAAATA     |
| scaffold501598_12.8 | 1 p2 | (TA)8  | 16 | 772  | 787  | ATGCATCGGGGCAATATTTA     |
| scaffold501608_15.9 | 1 p2 | (TC)8  | 16 | 659  | 674  | CCTCCCTCAGATGCAAACCTC    |
| scaffold501615_14.7 | 1 p2 | (CT)8  | 16 | 221  | 236  | ATAAGGTGGCGATGAGTTGG     |
| scaffold501624_11.7 | 1 p2 | (TC)6  | 12 | 106  | 117  | AGGACACGTTGGACCTGAAA     |
| scaffold501678_16.0 | 1 p2 | (TC)6  | 12 | 123  | 134  | GTACCGCTGGATAATCCCCT     |
| scaffold501687_14.7 | 1 p2 | (TA)7  | 14 | 693  | 706  | TTACGGGAGAATTCACGACC     |
| scaffold501754_16.4 | 1 p2 | (TG)7  | 14 | 140  | 153  | TGTTGTACATCTTCATGC       |
| scaffold501867_16.5 | 1 p2 | (CT)8  | 16 | 1872 | 1887 | GTCAATGTGGGTGCTGTGTC     |
| scaffold501958_18.1 | 1 p2 | (TA)9  | 18 | 1395 | 1412 | TGCATGGTCTTCGAAGTAGG     |
| scaffold502044_15.4 | 1 p2 | (CT)7  | 14 | 271  | 284  | TCGCATGCAACGATAGTAGG     |
| scaffold502048_12.6 | 1 p2 | (GA)8  | 16 | 232  | 247  | TCAACGTCTTCAACGCAAAG     |
| scaffold502063_18.6 | 1 p2 | (AC)6  | 12 | 574  | 585  | ACTTCACCGCCAAAACCTCTG    |
| scaffold502098_14.6 | 1 p2 | (TA)9  | 18 | 326  | 343  | TGATACATAGTGTATTCTTTGGCG |
| scaffold502136_10.6 | 1 p2 | (AT)8  | 16 | 86   | 101  | GGATCTATTACTAACCGCCCC    |
| scaffold502171_18.3 | 1 p2 | (AT)6  | 12 | 809  | 820  | TATCAGGCTGCCTACTCGGT     |
| scaffold502221_14.0 | 1 p2 | (AG)6  | 12 | 749  | 760  | GCAGGACAACCTACCATACGGA   |
| scaffold502222_13.9 | 1 p2 | (TC)8  | 16 | 1577 | 1592 | TGAGGAAGAAGGGATGATGG     |
| scaffold502297_14.1 | 1 p2 | (AT)8  | 16 | 1679 | 1694 | ATTGAGGCGTGTTTAGGCAT     |

|                     |      |        |    |      |                                |
|---------------------|------|--------|----|------|--------------------------------|
| scaffold502410_15.7 | 1 p2 | (TA)8  | 16 | 2420 | 2435 TTTGAGGTGGGCCAAAATAG      |
| scaffold502515_13.2 | 1 p2 | (AT)9  | 18 | 533  | 550 AAAGCAAACCCATGTTCTTCA      |
| scaffold502589_14.9 | 1 p2 | (TC)8  | 16 | 4487 | 4502 GTGCTGTAAAGCATCCCCAT      |
| scaffold502636_16.0 | 1 p2 | (AT)7  | 14 | 141  | 154 GTCCTCCGAACTCATGGTGT       |
| scaffold502669_15.4 | 1 p2 | (GA)7  | 14 | 424  | 437 CGCAATCGATTTTCAAACCT       |
| scaffold502792_12.6 | 1 p2 | (AG)7  | 14 | 98   | 111 AAATGCGCCTATCACTTTAATTC    |
| scaffold502861_18.6 | 1 p2 | (TC)6  | 12 | 625  | 636 CCCAACTTGGTTGCTCTTC        |
| scaffold503032_17.9 | 1 p2 | (TG)6  | 12 | 2089 | 2100 GCTATGAATGGCATCGAAGA      |
| scaffold503122_17.7 | 1 p2 | (TA)7  | 14 | 401  | 414 TGCAACTTTTGTACTCAGCCC      |
| scaffold503129_17.0 | 1 p2 | (TA)6  | 12 | 2315 | 2326 TTCCCAAATAACCGTCAGC       |
| scaffold503262_14.8 | 1 p2 | (GT)8  | 16 | 32   | 47 ACTGACATTCACAGGCATTGT       |
| scaffold503293_10.2 | 1 p2 | (AT)6  | 12 | 265  | 276 TTGTAGCCCCTTTGAGCCTA       |
| scaffold503315_10.3 | 1 p2 | (TG)6  | 12 | 138  | 149 TCCTCAGAACTTCAACGCTT       |
| scaffold503338_19.9 | 1 p2 | (TC)6  | 12 | 333  | 344 ACTATCGACGTCCGGAGCTA       |
| scaffold503385_11.9 | 1 p2 | (CT)6  | 12 | 88   | 99 GTCGTTTACTCTTCCGGCT         |
| scaffold503389_11.0 | 1 p2 | (CT)7  | 14 | 581  | 594 TGAAATGGATCACATGCAAAA      |
| scaffold503415_16.3 | 1 p2 | (TA)8  | 16 | 204  | 219 TGACGAAAATTGCTTTGATCC      |
| scaffold503417_14.9 | 1 p2 | (GA)10 | 20 | 981  | 1000 ACCCAAACCTCCCATATCC       |
| scaffold503544_12.5 | 1 p2 | (AT)7  | 14 | 53   | 66 AGATTGGGCTATTCGAGCCT        |
| scaffold503698_16.2 | 1 p2 | (TA)8  | 16 | 139  | 154 GGAAACAAGTGGATGACGGT       |
| scaffold503721_15.7 | 1 p2 | (TC)8  | 16 | 1647 | 1662 CAGTTTTGTGTGCCATGTGC      |
| scaffold503724_13.2 | 1 p2 | (CT)6  | 12 | 247  | 258 GTTGATAATACATGGCGGG        |
| scaffold503840_14.2 | 1 p2 | (CT)12 | 24 | 38   | 61 TTTCGAATTTTTCTCTTTTGTG      |
| scaffold503850_14.7 | 1 p2 | (TA)8  | 16 | 1483 | 1498 TTGATCCTTCCTAGGATAACCG    |
| scaffold503862_10.3 | 1 p2 | (GT)6  | 12 | 25   | 36 GCGTGTGTGTAACCGTGTGT        |
| scaffold503887_13.9 | 1 p2 | (TA)10 | 20 | 875  | 894 AAATCGAGGAGCTGTATCC        |
| scaffold503971_10.0 | 1 p2 | (AT)7  | 14 | 857  | 870 ACTACGTCGATCCAACGGTC       |
| scaffold504093_15.2 | 1 p2 | (CT)6  | 12 | 254  | 265 GGCTCGGTATAAAAATGGCA       |
| scaffold504119_15.8 | 1 p2 | (TA)7  | 14 | 1505 | 1518 CACAATCCATCTTCAACCCA      |
| scaffold504136_17.5 | 1 p2 | (GA)6  | 12 | 4755 | 4766 GACCCAAATGATTGTACGGG      |
| scaffold504224_22.0 | 1 p2 | (AT)6  | 12 | 358  | 369 GCTTAAAGTGGGCCAAA          |
| scaffold504275_17.0 | 1 p2 | (TG)7  | 14 | 689  | 702 GTATGGCGTGGTCCAGTTT        |
| scaffold504299_17.7 | 1 p2 | (AG)6  | 12 | 768  | 779 TAAGTTGGCCTCTCGATCA        |
| scaffold504329_10.6 | 1 p2 | (AT)8  | 16 | 104  | 119 ACGAAACACGGAAAAGCAT        |
| scaffold504357_11.6 | 1 p2 | (TA)12 | 24 | 477  | 500 CAATGATGATGCCAATCCAG       |
| scaffold504370_11.2 | 1 p2 | (TC)6  | 12 | 106  | 117 CAAATGGCCGAGAGGATTTA       |
| scaffold504413_13.4 | 1 p2 | (AG)7  | 14 | 210  | 223 CGCAGCAAAGTAGCATACGA       |
| scaffold504424_10.9 | 1 p2 | (TA)8  | 16 | 47   | 62 TTTAGTGTTTTGACATGATTACTCG   |
| scaffold504517_10.7 | 1 p2 | (AT)7  | 14 | 449  | 462 GCGTGTGGGAGTTGGTAAAT       |
| scaffold504529_21.6 | 1 p2 | (TA)7  | 14 | 64   | 77 ATGAACTAATCAAGTTCGCA        |
| scaffold504533_15.6 | 1 p2 | (AT)8  | 16 | 3402 | 3417 TAGTAGGGTGCAGGGGATTG      |
| scaffold504565_12.4 | 1 p2 | (TA)7  | 14 | 206  | 219 CCCGATAGGCTTGAAGGATT       |
| scaffold504687_11.6 | 1 p2 | (AT)8  | 16 | 91   | 106 TTACCTACATGGCCCTGCTC       |
| scaffold504752_15.2 | 1 p2 | (TC)8  | 16 | 871  | 886 CGTGAAGTCCATCTCCCACT       |
| scaffold504790_16.2 | 1 p2 | (TC)6  | 12 | 308  | 319 ATTAATAAAATTTGGAATGATAGAGG |
| scaffold504791_12.5 | 1 p2 | (TA)7  | 14 | 227  | 240 AAACTACCCTTGATCGCACG       |
| scaffold504801_16.8 | 1 p2 | (AT)7  | 14 | 405  | 418 CGACTCAGTCATGCACCATT       |
| scaffold504806_18.0 | 1 p2 | (AT)10 | 20 | 46   | 65 TGAAGTTAGGAATTAAGGAGGTGTT   |
| scaffold504837_15.4 | 1 p2 | (TA)6  | 12 | 5356 | 5367 TTCCTCACGAATAAACCAAGC     |
| scaffold504907_16.7 | 1 p2 | (TG)8  | 16 | 832  | 847 GAACGATTTGTTATCGAGGGA      |
| scaffold504910_16.9 | 1 p2 | (TA)6  | 12 | 143  | 154 TTTGACTATGTCTGCGTGCC       |
| scaffold505032_13.0 | 1 p2 | (AT)6  | 12 | 1345 | 1356 CCTACAAAGCCACTCTAAGCG     |
| scaffold505057_15.0 | 1 p2 | (CA)11 | 22 | 2040 | 2061 TCGAGTTGTACCGACACTGC      |
| scaffold505394_15.7 | 1 p2 | (AG)6  | 12 | 817  | 828 CTGAAAAGTGCAGCACGAGA       |
| scaffold505496_11.0 | 1 p2 | (TA)10 | 20 | 547  | 566 TCACAAGTGAAGCACAAATTC      |
| scaffold505505_10.8 | 1 p2 | (TA)6  | 12 | 221  | 232 CTCGTCTCAAGAAGGTGCTTT      |
| scaffold505643_16.0 | 1 p2 | (TA)7  | 14 | 743  | 756 AGCGCTGAATGTCATTGGAT       |
| scaffold505737_12.8 | 1 p2 | (TA)10 | 20 | 382  | 401 TGGGAAGGGTTGTTACTGGA       |

|                     |      |        |    |      |      |                             |
|---------------------|------|--------|----|------|------|-----------------------------|
| scaffold505831_15.3 | 1 p2 | (TA)6  | 12 | 1282 | 1293 | TGATGGCTGTGAATTGGAGA        |
| scaffold505873_23.0 | 1 p2 | (TC)7  | 14 | 78   | 91   | CCCTAGCTTTGCCCTCTTTC        |
| scaffold505889_11.5 | 1 p2 | (AT)8  | 16 | 1400 | 1415 | TCAAGTAAGCGAGATTTTCTACATTG  |
| scaffold506111_17.2 | 1 p2 | (AG)8  | 16 | 50   | 65   | TGATATCTTTGAAGAACAATTACAATC |
| scaffold506223_17.4 | 1 p2 | (AC)7  | 14 | 5021 | 5034 | TTTGGCCGAGTTCGGTATAG        |
| scaffold506265_13.5 | 1 p2 | (AT)12 | 24 | 1247 | 1270 | AAAAAGGGAACAAAAACGGC        |
| scaffold506456_16.8 | 1 p2 | (AT)6  | 12 | 51   | 62   | TGATGATGAGATTTTAGTCCAAGG    |
| scaffold506478_16.2 | 1 p2 | (TG)6  | 12 | 2987 | 2998 | CCTTCTCCGTCTGCAAACCTC       |
| scaffold506694_14.2 | 1 p2 | (GA)6  | 12 | 143  | 154  | CACAGCCCTAATGCTACGTG        |
| scaffold506824_16.2 | 1 p2 | (TA)8  | 16 | 658  | 673  | AGATCTGGGCAATGTGTGGT        |
| scaffold506871_17.6 | 1 p2 | (GA)8  | 16 | 55   | 70   | GAGCTGGTTTGAGGGAGATG        |
| scaffold506980_12.8 | 1 p2 | (AT)6  | 12 | 55   | 66   | CCAATTTACTAATTCTTGATGAATCC  |
| scaffold507005_14.2 | 1 p2 | (AT)6  | 12 | 1533 | 1544 | GTGGTCTAGGATGGGAGCTG        |
| scaffold507055_10.6 | 1 p2 | (TA)6  | 12 | 186  | 197  | GGGGTGGGAATTAACACCT         |
| scaffold507056_14.2 | 1 p2 | (AT)10 | 20 | 81   | 100  | CGCATCCGACTCCTCAATTA        |
| scaffold507062_15.7 | 1 p2 | (AT)12 | 24 | 1396 | 1419 | TGAATGGGGATCAATTCCTT        |
| scaffold507138_18.5 | 1 p2 | (TC)6  | 12 | 195  | 206  | CGCCCTCCACTGTTAATGTT        |
| scaffold507150_15.8 | 1 p2 | (CT)8  | 16 | 139  | 154  | AGGGATCCCAAGGCACTACT        |
| scaffold507161_13.9 | 1 p2 | (TA)7  | 14 | 192  | 205  | GGCATTTTGGGAAAGACAAA        |
| scaffold507240_12.7 | 1 p2 | (TC)6  | 12 | 237  | 248  | ATGATCGCCACAAACATCAA        |
| scaffold507312_19.2 | 1 p2 | (AC)7  | 14 | 656  | 669  | CACCATCAACCTCACCACT         |
| scaffold507569_10.8 | 1 p2 | (TA)8  | 16 | 50   | 65   | TGAAAGAAGTGGTGGTGGAG        |
| scaffold507847_12.6 | 1 p2 | (TA)9  | 18 | 170  | 187  | GACATGCAGAGTTCAACAGCA       |
| scaffold507850_14.2 | 1 p2 | (AC)7  | 14 | 307  | 320  | GGGGTAAGACCCACCTCATT        |
| scaffold507862_18.3 | 1 p2 | (CT)6  | 12 | 109  | 120  | TAGCAGCCACAATTCAACA         |
| scaffold508070_14.7 | 1 p2 | (GA)6  | 12 | 835  | 846  | CCGGAGAAGTTTGTGGAGAG        |
| scaffold508180_16.2 | 1 p2 | (AT)7  | 14 | 1091 | 1104 | GGACGCTGACCATCACTGTA        |
| scaffold508197_17.7 | 1 p2 | (TC)6  | 12 | 144  | 155  | TCAACATTTTTCCAGAATCG        |
| scaffold508364_14.5 | 1 p2 | (TA)7  | 14 | 660  | 673  | ATCATCAGTAGCGCCACCTT        |
| scaffold508417_10.5 | 1 p2 | (AT)9  | 18 | 503  | 520  | TCAAATTCGAAATTCGGACC        |
| scaffold508434_12.2 | 1 p2 | (TA)7  | 14 | 135  | 148  | TCTGAAAATCAAAGGCCAC         |
| scaffold508517_14.3 | 1 p2 | (CT)7  | 14 | 414  | 427  | TACGTTCTTCCCGTTTTTG         |
| scaffold508523_10.0 | 1 p2 | (TA)6  | 12 | 211  | 222  | TGTTGGAGTTGTCAAGTTCCT       |
| scaffold508668_17.2 | 1 p2 | (GA)6  | 12 | 532  | 543  | CGAAACCCCTTCTCTCTCC         |
| scaffold508676_20.9 | 1 p2 | (CA)6  | 12 | 211  | 222  | TCTCCCTCGTAATTCCTT          |
| scaffold508826_16.8 | 1 p2 | (AT)9  | 18 | 194  | 211  | GGGGTGATTAATAATAGGAGCA      |
| scaffold508912_16.2 | 1 p2 | (GA)8  | 16 | 2696 | 2711 | CCTCCATCATGAAAACCGAG        |
| scaffold508935_15.2 | 1 p2 | (CT)6  | 12 | 457  | 468  | CTCCTCTGCACCAACCTCTC        |
| scaffold508982_16.9 | 1 p2 | (AT)7  | 14 | 644  | 657  | CACAAAACCTCATAACCGTGC       |
| scaffold509015_13.2 | 1 p2 | (AG)6  | 12 | 100  | 111  | CCAAAATAGATGGCATTCAAGA      |
| scaffold509043_14.6 | 1 p2 | (CT)6  | 12 | 72   | 83   | TGGAAGTTCTCTCCTCTCGC        |
| scaffold509125_16.4 | 1 p2 | (AT)9  | 18 | 398  | 415  | ATCGTGGGCGTAAATCATGT        |
| scaffold509145_13.7 | 1 p2 | (AT)7  | 14 | 71   | 84   | GGTTATGACTTGATCATGACCCT     |
| scaffold509161_10.2 | 1 p2 | (TA)8  | 16 | 209  | 224  | GCATATCAAATGGTGTGGG         |
| scaffold509190_13.9 | 1 p2 | (TA)10 | 20 | 218  | 237  | GGTGGCGTATGCTGAGAGAT        |
| scaffold509321_17.6 | 1 p2 | (TC)6  | 12 | 365  | 376  | TCTCTTTCGTCTTTTTTCCC        |
| scaffold509346_15.3 | 1 p2 | (TA)8  | 16 | 141  | 156  | TCCCGAGTAAGATGGATGG         |
| scaffold509350_14.8 | 1 p2 | (TC)6  | 12 | 269  | 280  | TCCCTCACTCCTCTTCTGC         |
| scaffold509352_18.8 | 1 p2 | (CA)6  | 12 | 73   | 84   | GAACACACGAAGATTGGGAGA       |
| scaffold509453_10.6 | 1 p2 | (CT)7  | 14 | 661  | 674  | CAAATACGACGGAAAATCGG        |
| scaffold509514_16.5 | 1 p2 | (AT)8  | 16 | 70   | 85   | AATGAAATCTTACTACTCCAAAAATC, |
| scaffold509822_12.7 | 1 p2 | (TA)8  | 16 | 301  | 316  | TCTTTCGGCTGACTTTTTCTTT      |
| scaffold509990_13.5 | 1 p2 | (TA)6  | 12 | 309  | 320  | AAGATCTACGTCCACGGGAG        |
| scaffold510106_11.7 | 1 p2 | (TA)8  | 16 | 482  | 497  | TGACTGCCCAAGAAATCACA        |
| scaffold510120_20.6 | 1 p2 | (AG)6  | 12 | 993  | 1004 | TGATTACTTCCGCACCATTG        |
| scaffold510258_19.2 | 1 p2 | (GA)7  | 14 | 1703 | 1716 | AACAGAAAGCCACACATGTCA       |
| scaffold510339_12.2 | 1 p2 | (TA)9  | 18 | 44   | 61   | CGGATTTAAGGGTTATTACCTGAT    |
| scaffold510348_16.0 | 1 p2 | (CT)6  | 12 | 88   | 99   | CCTTCTTTCACGCATTTC          |

|                     |      |        |    |      |      |                          |
|---------------------|------|--------|----|------|------|--------------------------|
| scaffold510359_17.3 | 1 p2 | (TA)8  | 16 | 576  | 591  | TTTGCCGACCTTATCTCCAC     |
| scaffold510432_13.3 | 1 p2 | (AC)9  | 18 | 559  | 576  | TGGCTTCAGCAGACAATGAG     |
| scaffold510436_10.4 | 1 p2 | (TA)7  | 14 | 143  | 156  | ACGAGATCGAAGGGAGACAA     |
| scaffold510443_15.5 | 1 p2 | (GC)6  | 12 | 516  | 527  | TCACGATGCGTCACAAGTTT     |
| scaffold510476_17.8 | 1 p2 | (AG)6  | 12 | 3397 | 3408 | TGTTTGGTAGCCACACAAT      |
| scaffold510607_11.8 | 1 p2 | (TC)7  | 14 | 257  | 270  | TAAGGCAAAGCACGTGAGTG     |
| scaffold510664_13.0 | 1 p2 | (AG)7  | 14 | 1425 | 1438 | TCAGATGAGTTGAATGGAACAGA  |
| scaffold510665_12.3 | 1 p2 | (TA)8  | 16 | 711  | 726  | CACTCGCATAAGTATGCATGAAA  |
| scaffold510688_15.5 | 1 p2 | (AT)8  | 16 | 501  | 516  | CACTCACACACACGCACTTG     |
| scaffold510755_14.2 | 1 p2 | (TA)6  | 12 | 92   | 103  | CAAGAGCTTGAGCTCGGAGT     |
| scaffold510875_12.4 | 1 p2 | (AT)9  | 18 | 399  | 416  | TTTCAAATTGCATCCTAGCAAA   |
| scaffold511000_16.2 | 1 p2 | (CA)6  | 12 | 145  | 156  | GAGAGTGGAGGCCATTTCTG     |
| scaffold511062_19.8 | 1 p2 | (CT)9  | 18 | 519  | 536  | TCAACAACCACTCCACTCCA     |
| scaffold511146_10.0 | 1 p2 | (TA)9  | 18 | 327  | 344  | TGCGTCAAAAGCTCTTCAAA     |
| scaffold511185_10.4 | 1 p2 | (TA)8  | 16 | 145  | 160  | TCCAGATTTGTTCTACGCA      |
| scaffold511230_15.5 | 1 p2 | (GT)6  | 12 | 238  | 249  | CCACAAATCCCTTCATTTGG     |
| scaffold511392_14.8 | 1 p2 | (AT)9  | 18 | 699  | 716  | CTCAAATTGGAATTGGGCTG     |
| scaffold511413_16.9 | 1 p2 | (GA)9  | 18 | 47   | 64   | GGGAGAAGAGAGAGTTAGGGTGA  |
| scaffold511442_16.6 | 1 p2 | (GA)6  | 12 | 233  | 244  | TGGAGCTTTGATCCTTGCTT     |
| scaffold511512_13.8 | 1 p2 | (AG)6  | 12 | 55   | 66   | AACCACCTTTACAAATGAGCTAGT |
| scaffold511567_17.4 | 1 p2 | (CT)7  | 14 | 56   | 69   | TCACTTCATTACGAAAAACACCA  |
| scaffold511640_14.0 | 1 p2 | (AC)7  | 14 | 2437 | 2450 | TGTGTCATCTAGTCCGGTGG     |
| scaffold511663_15.0 | 1 p2 | (TC)7  | 14 | 2401 | 2414 | TCCATTTCTCCACCGTTAG      |
| scaffold511734_13.0 | 1 p2 | (AT)11 | 22 | 1312 | 1333 | CACCGACCAAACATATGCAC     |
| scaffold511842_15.2 | 1 p2 | (TA)9  | 18 | 241  | 258  | AAAGTCATCCGCTATCTCGAA    |
| scaffold511891_13.8 | 1 p2 | (TA)9  | 18 | 104  | 121  | TTTTATTCTTGACCCCTTCTC    |
| scaffold511919_10.2 | 1 p2 | (TG)9  | 18 | 50   | 67   | AAGCTGCATGCATTTGAGAG     |
| scaffold512007_14.9 | 1 p2 | (AG)6  | 12 | 129  | 140  | GCGCCGCCTATCACTTTAAT     |
| scaffold512067_16.7 | 1 p2 | (AT)8  | 16 | 782  | 797  | AGCGACGAACGGAAAAAGTA     |
| scaffold512207_18.3 | 1 p2 | (AT)7  | 14 | 144  | 157  | CCACATTTTTCCCGATTGTT     |
| scaffold512216_15.3 | 1 p2 | (GA)9  | 18 | 1327 | 1344 | AATGAGCAAAACGGTCCTTG     |
| scaffold512392_13.2 | 1 p2 | (CT)7  | 14 | 62   | 75   | ACAAAAAGGGATGAGCGACA     |
| scaffold512399_21.2 | 1 p2 | (AG)9  | 18 | 140  | 157  | TGTTTCCCATTTTACCACA      |
| scaffold512434_14.7 | 1 p2 | (TC)8  | 16 | 96   | 111  | CATGAGGCCCAAGATAATG      |
| scaffold512565_18.2 | 1 p2 | (TA)6  | 12 | 252  | 263  | TCTGCAAATGTCACACGTCA     |
| scaffold512604_13.0 | 1 p2 | (AC)8  | 16 | 1184 | 1199 | CCAAGAGGAGTTGAAGTCGC     |
| scaffold512679_10.6 | 1 p2 | (TA)7  | 14 | 487  | 500  | CACCGCCAAATATCACCTCT     |
| scaffold512742_17.6 | 1 p2 | (CA)6  | 12 | 253  | 264  | ACGTGGTCTCTCCCCTTTTT     |
| scaffold512772_17.3 | 1 p2 | (CT)6  | 12 | 1280 | 1291 | AAGAGGAGAGACGGAGAGGC     |
| scaffold513022_10.1 | 1 p2 | (TA)10 | 20 | 172  | 191  | TGCTGTGAATTGTCCAGCTC     |
| scaffold513095_13.9 | 1 p2 | (CT)6  | 12 | 436  | 447  | GAAGTAAACGGCCAAAGTGC     |
| scaffold513106_11.4 | 1 p2 | (AT)7  | 14 | 66   | 79   | CGAAATCTTACTTTGCGGCT     |
| scaffold513134_13.8 | 1 p2 | (GA)6  | 12 | 1557 | 1568 | CATCAAGTTTCCCAAGGCAT     |
| scaffold513238_14.6 | 1 p2 | (TC)7  | 14 | 30   | 43   | TGGTTGGTGAAGAAATCAA      |
| scaffold513266_15.2 | 1 p2 | (TA)6  | 12 | 704  | 715  | TTAAATACGACCGGGCTCAC     |
| scaffold513300_14.7 | 1 p2 | (CT)13 | 26 | 2032 | 2057 | TGCCCAAAAACATTTCAACA     |
| scaffold513337_12.2 | 1 p2 | (TA)12 | 24 | 87   | 110  | AGGGTTATCACCTGAATGC      |
| scaffold513383_13.2 | 1 p2 | (AG)6  | 12 | 168  | 179  | TGTTATCCTTTGTGAGCCCC     |
| scaffold513562_12.0 | 1 p2 | (GA)6  | 12 | 830  | 841  | ACCATCGCTGTTACCACCTC     |
| scaffold513704_13.0 | 1 p2 | (TA)10 | 20 | 138  | 157  | CTGACATTTGACCTGAGCGA     |
| scaffold513706_18.4 | 1 p2 | (AG)6  | 12 | 94   | 105  | TTGGAAAATAACATGCATAGAAAA |
| scaffold513797_13.1 | 1 p2 | (TA)9  | 18 | 278  | 295  | CCGAAACCAGAATGAGAACC     |
| scaffold513800_10.7 | 1 p2 | (TC)6  | 12 | 542  | 553  | GCCGTAGTAACTCCAGCCAC     |
| scaffold513804_12.5 | 1 p2 | (TA)6  | 12 | 547  | 558  | CACTAGCAGGTCGACACGAA     |
| scaffold513852_16.7 | 1 p2 | (AT)6  | 12 | 468  | 479  | TTCATCTCAAATTTTATTGTGGA  |
| scaffold513959_16.0 | 1 p2 | (GA)10 | 20 | 2736 | 2755 | TAGCTTTCCCCACATACCA      |
| scaffold513983_14.4 | 1 p2 | (TA)7  | 14 | 348  | 361  | CGAATGAAATTATTTGTTTTCCC  |
| scaffold514008_11.0 | 1 p2 | (TA)8  | 16 | 198  | 213  | CCCACATTAACACCCAATCC     |

|                     |      |        |    |      |      |                           |
|---------------------|------|--------|----|------|------|---------------------------|
| scaffold514093_13.6 | 1 p2 | (TA)7  | 14 | 572  | 585  | GGCCAAGTTGGTGAAGTAGG      |
| scaffold514102_15.1 | 1 p2 | (TC)6  | 12 | 585  | 596  | TAAAAACACAGCCTCCCTGC      |
| scaffold514257_18.6 | 1 p2 | (AT)6  | 12 | 237  | 248  | CGTCGTTTCGTGTTCTTTCA      |
| scaffold514268_13.2 | 1 p2 | (TA)6  | 12 | 236  | 247  | TCATGGTTGGGTGTTTTATCA     |
| scaffold514361_13.7 | 1 p2 | (AT)9  | 18 | 93   | 110  | TTGATCCAAGGGTGTATAATGG    |
| scaffold514373_13.4 | 1 p2 | (TA)9  | 18 | 406  | 423  | CGCTCAGGTTTGAATCTGTTT     |
| scaffold514392_15.7 | 1 p2 | (CT)6  | 12 | 1253 | 1264 | CATGGTTGCAAAGGTGATTG      |
| scaffold514411_12.9 | 1 p2 | (CT)6  | 12 | 2164 | 2175 | GGAACAACCTGCACCGAATTT     |
| scaffold514424_16.5 | 1 p2 | (TA)7  | 14 | 5081 | 5094 | CTGGTGCAATGCTTGAGAAA      |
| scaffold514512_17.8 | 1 p2 | (AT)6  | 12 | 501  | 512  | GAATGTCATGAGTTGAGGCG      |
| scaffold514571_12.2 | 1 p2 | (TA)7  | 14 | 569  | 582  | AAACTCCCCTCAAATAGCA       |
| scaffold514639_15.5 | 1 p2 | (AT)7  | 14 | 1623 | 1636 | TCTGTTTGCGAAATTTGTTGA     |
| scaffold514667_13.3 | 1 p2 | (TA)6  | 12 | 168  | 179  | TGTTTCGGACTAAACTGGCG      |
| scaffold514668_16.6 | 1 p2 | (AT)6  | 12 | 881  | 892  | AGATTGGGCTATTCGAGCCT      |
| scaffold514758_18.2 | 1 p2 | (TC)6  | 12 | 302  | 313  | ACTTTTGCGTCTTTGTCGT       |
| scaffold514788_13.2 | 1 p2 | (TA)8  | 16 | 50   | 65   | ATGAGTTATCACCGGATCGC      |
| scaffold514794_15.2 | 1 p2 | (AG)6  | 12 | 92   | 103  | TGCTACGGTTTCTTCTCCG       |
| scaffold514822_15.0 | 1 p2 | (GA)8  | 16 | 2999 | 3014 | ACGATCGCCCACTTATTGAG      |
| scaffold515106_12.9 | 1 p2 | (AT)8  | 16 | 143  | 158  | AGCTTGTAGAACGAGCCGAG      |
| scaffold515216_16.7 | 1 p2 | (GT)7  | 14 | 2903 | 2916 | CAAAGCATGAACAAATGCGT      |
| scaffold515220_17.8 | 1 p2 | (TA)10 | 20 | 250  | 269  | AATTGCTGGCAAATCGTAGC      |
| scaffold515228_13.4 | 1 p2 | (AG)6  | 12 | 418  | 429  | TGAAGCAATCAAAAACGGTG      |
| scaffold515241_18.3 | 1 p2 | (AT)7  | 14 | 691  | 704  | GGTCCAACCTCCGATTCAAAA     |
| scaffold515309_17.8 | 1 p2 | (CT)8  | 16 | 52   | 67   | TTGATTGTAATTCTCTGCACCA    |
| scaffold515425_10.5 | 1 p2 | (GA)6  | 12 | 55   | 66   | AAAAACTGTAGTGGGTTAAAATTCA |
| scaffold515431_13.7 | 1 p2 | (AT)7  | 14 | 145  | 158  | TGTGACGAGCTTATGAAACTATACG |
| scaffold515448_11.4 | 1 p2 | (AT)8  | 16 | 143  | 158  | TATTAACCCTTCATTGTTTTAAATG |
| scaffold515502_10.0 | 1 p2 | (AG)8  | 16 | 52   | 67   | CAAATGAGCATGAGGGAGGT      |
| scaffold515512_16.2 | 1 p2 | (TA)8  | 16 | 88   | 103  | AACGGCCGAGATTTGTTATG      |
| scaffold515658_21.4 | 1 p2 | (CT)6  | 12 | 40   | 51   | TTGATTCCTCCCCACAATTC      |
| scaffold515689_15.7 | 1 p2 | (TG)6  | 12 | 481  | 492  | GTATGCTGACGTCTCACGA       |
| scaffold515852_18.1 | 1 p2 | (TC)7  | 14 | 4205 | 4218 | CAGAAGCAAGATTCGACCAA      |
| scaffold515866_11.0 | 1 p2 | (TA)7  | 14 | 266  | 279  | TTTCTCCCCATCGATAACCA      |
| scaffold515898_16.4 | 1 p2 | (CT)8  | 16 | 1073 | 1088 | CTTGGGATGGGGGAGTATTT      |
| scaffold516004_13.0 | 1 p2 | (AG)6  | 12 | 440  | 451  | CCCAGTATCCCAAACCTCGAA     |
| scaffold516047_15.2 | 1 p2 | (GA)8  | 16 | 1030 | 1045 | TGCTTTTCCATGGTGACTGA      |
| scaffold516215_17.2 | 1 p2 | (AT)6  | 12 | 2072 | 2083 | TGAGAACCAAACACAAATGTCA    |
| scaffold516234_18.8 | 1 p2 | (GA)8  | 16 | 898  | 913  | CCGAGAATCAGGACTCGAAA      |
| scaffold516363_11.6 | 1 p2 | (AG)11 | 22 | 295  | 316  | GGTATTGGCAAATGCAGGTT      |
| scaffold516543_16.8 | 1 p2 | (TC)7  | 14 | 246  | 259  | AAACGCACCAATTTCTTCA       |
| scaffold516577_15.1 | 1 p2 | (GT)6  | 12 | 318  | 329  | TTTGACATGATCACACCCT       |
| scaffold516598_15.0 | 1 p2 | (AG)6  | 12 | 147  | 158  | CGACTGGGCCTATCCTATCA      |
| scaffold516654_13.3 | 1 p2 | (CT)6  | 12 | 102  | 113  | GCCTTCTAGCTTCTCTTGCTTTC   |
| scaffold516814_12.4 | 1 p2 | (AG)8  | 16 | 690  | 705  | TAGATGCGTGCATAATTGCC      |
| scaffold516967_13.6 | 1 p2 | (AT)9  | 18 | 221  | 238  | TGTTTAAATGCACACCCTTT      |
| scaffold517060_15.9 | 1 p2 | (AG)6  | 12 | 1873 | 1884 | ATCGAACCGTTTTTCTGTCTG     |
| scaffold517061_14.8 | 1 p2 | (CT)6  | 12 | 55   | 66   | GCCTTCTAGCATCTCTTGCTC     |
| scaffold517082_14.0 | 1 p2 | (CT)7  | 14 | 50   | 63   | CACTCAATTCATTTACCTCCA     |
| scaffold517277_10.7 | 1 p2 | (AT)10 | 20 | 180  | 199  | TCTCTCCACCAAATGTCCAA      |
| scaffold517291_13.5 | 1 p2 | (AG)6  | 12 | 109  | 120  | GCGGCACACGAGGTATAAAA      |
| scaffold517306_17.5 | 1 p2 | (TA)6  | 12 | 436  | 447  | TTTGTGGTATCAGAGCCACG      |
| scaffold517487_12.2 | 1 p2 | (CT)6  | 12 | 69   | 80   | TCTTTTGCTATGTCCTCACTCG    |
| scaffold517510_15.9 | 1 p2 | (GA)6  | 12 | 98   | 109  | CAGGGAGGCAAAAAGAGGTT      |
| scaffold517547_16.0 | 1 p2 | (AT)6  | 12 | 169  | 180  | TGGGATATAGCGAGTTTGGTG     |
| scaffold517585_10.2 | 1 p2 | (TA)6  | 12 | 165  | 176  | TGGGGTTTTACAAGAATGCC      |
| scaffold517610_10.1 | 1 p2 | (GT)7  | 14 | 1677 | 1690 | GTGCGTGTGAGTGTGTGTCA      |
| scaffold517667_14.1 | 1 p2 | (CT)9  | 18 | 1349 | 1366 | CCGTCTTCTTCTCCATTCCA      |
| scaffold517741_14.4 | 1 p2 | (TA)8  | 16 | 1571 | 1586 | TGGGATGAAAATAGGGGAAA      |

|                     |      |        |    |      |      |                          |
|---------------------|------|--------|----|------|------|--------------------------|
| scaffold517769_20.3 | 1 p2 | (TA)6  | 12 | 51   | 62   | TGACGGGATTTAGGTGTTTTG    |
| scaffold517790_11.4 | 1 p2 | (CT)6  | 12 | 76   | 87   | AAGGGGGATCAAATCTAGTCTTTT |
| scaffold517856_12.5 | 1 p2 | (TA)8  | 16 | 395  | 410  | CATTCAAGGGGCATTTTTGT     |
| scaffold517861_16.2 | 1 p2 | (CA)9  | 18 | 2609 | 2626 | GCATAGTGCTCCAAAAAGGC     |
| scaffold517907_12.4 | 1 p2 | (CT)6  | 12 | 93   | 104  | GCCATCTCTCCCTAACCTCC     |
| scaffold518056_15.6 | 1 p2 | (TC)6  | 12 | 95   | 106  | AGCATCTCTTGCTCTCTCGTT    |
| scaffold518062_13.3 | 1 p2 | (AG)6  | 12 | 503  | 514  | TCGTCTTCGTTCTCCGTCTT     |
| scaffold518123_14.3 | 1 p2 | (TA)6  | 12 | 53   | 64   | TTTCTCACTATAAGGTGGTGTCC  |
| scaffold518166_15.7 | 1 p2 | (TG)8  | 16 | 1352 | 1367 | GAATACTTGCCTCAGCTCCG     |
| scaffold518253_11.3 | 1 p2 | (TC)6  | 12 | 368  | 379  | ATTGAATCTACGTCCACGGG     |
| scaffold518271_14.3 | 1 p2 | (AG)7  | 14 | 494  | 507  | GCCAGCTTTTTTCTTCTCCAA    |
| scaffold518297_17.7 | 1 p2 | (TA)6  | 12 | 147  | 158  | CCCTTTACCTCACTGGTGA      |
| scaffold518305_13.8 | 1 p2 | (CT)6  | 12 | 365  | 376  | TCACCCCATCTTCTCTCAC      |
| scaffold518461_15.1 | 1 p2 | (GA)6  | 12 | 1040 | 1051 | CAGGTTCTCATCGCTCTGTG     |
| scaffold518562_16.7 | 1 p2 | (AG)6  | 12 | 889  | 900  | CATGGTGATAGAGCCGGATT     |
| scaffold518631_16.0 | 1 p2 | (AT)6  | 12 | 48   | 59   | CTTCTCGTGTCCGACTCCTC     |
| scaffold518633_16.7 | 1 p2 | (AT)7  | 14 | 146  | 159  | AATCGAGGGCGAAGAGAAAT     |
| scaffold518685_15.4 | 1 p2 | (AT)6  | 12 | 682  | 693  | AAAATATGGGGTTTTCCCAA     |
| scaffold518832_17.8 | 1 p2 | (AT)6  | 12 | 4862 | 4873 | CTTGGGCTTTCATGACGAAT     |
| scaffold518849_13.4 | 1 p2 | (TA)8  | 16 | 244  | 259  | AACCCAAGACCTCAAGCTCA     |
| scaffold518856_16.0 | 1 p2 | (TG)7  | 14 | 1387 | 1400 | TGTTGAAATCTTGAACGGGTC    |
| scaffold518881_10.0 | 1 p2 | (TA)8  | 16 | 181  | 196  | AAAAACGCGAATTTTTAGGG     |
| scaffold518886_14.6 | 1 p2 | (AT)10 | 20 | 39   | 58   | TATTTGTGCGTGCACCTGAT     |
| scaffold519004_15.3 | 1 p2 | (AT)7  | 14 | 1051 | 1064 | AGCACTGAGCAGAAAAGGGA     |
| scaffold519034_10.6 | 1 p2 | (TA)7  | 14 | 49   | 62   | ATCGGTTATTACCGGATCGC     |
| scaffold519053_16.5 | 1 p2 | (CT)7  | 14 | 146  | 159  | GCGTTGAGAAGAAGGGAGAA     |
| scaffold519056_13.8 | 1 p2 | (CT)9  | 18 | 261  | 278  | TCCCCTAATCCCTCATTCA      |
| scaffold519132_13.6 | 1 p2 | (AG)6  | 12 | 756  | 767  | GGTGAACCTGAACAACCCC      |
| scaffold519194_14.5 | 1 p2 | (GA)6  | 12 | 1013 | 1024 | TGGAACAAGGTGGTGGAAAT     |
| scaffold519237_14.8 | 1 p2 | (GA)7  | 14 | 358  | 371  | GGAGATCAGCTACGGTCTGC     |
| scaffold519306_15.2 | 1 p2 | (CT)6  | 12 | 1524 | 1535 | GCTCCCCTTGTGACACTGTT     |
| scaffold519325_13.9 | 1 p2 | (AG)12 | 24 | 460  | 483  | TCCATCAGACAGTTTCTTGCAT   |
| scaffold519551_17.7 | 1 p2 | (CT)7  | 14 | 312  | 325  | TCCCTCCTCAAATTTACCCC     |
| scaffold519559_16.7 | 1 p2 | (TA)8  | 16 | 517  | 532  | CGGGATCTTCATCCAATTCA     |
| scaffold519655_11.3 | 1 p2 | (AT)9  | 18 | 423  | 440  | TTGGAATAGGGTTTTAGGG      |
| scaffold519867_11.9 | 1 p2 | (TA)9  | 18 | 347  | 364  | GAAAGGCACAAAGCGATAGG     |
| scaffold519926_14.1 | 1 p2 | (AT)11 | 22 | 1367 | 1388 | CGGCGTTTATTTTGTGTTGCT    |
| scaffold519946_15.6 | 1 p2 | (AG)8  | 16 | 93   | 108  | GCTCGTACGAAACCCTTGAG     |
| scaffold520102_15.4 | 1 p2 | (TC)6  | 12 | 606  | 617  | AATTTCCCGGTGGACTCATT     |
| scaffold520310_11.3 | 1 p2 | (GT)6  | 12 | 319  | 330  | GCATGAGAAACCTCAAAGGC     |
| scaffold520362_14.9 | 1 p2 | (TC)7  | 14 | 901  | 914  | ATGCAACCCTCCCTTCTCT      |
| scaffold520396_10.5 | 1 p2 | (AT)6  | 12 | 63   | 74   | GACCTACAGACCGATCATGAAA   |
| scaffold520468_20.0 | 1 p2 | (AT)6  | 12 | 56   | 67   | TGCTCACATCTTTTTTCTTTTT   |
| scaffold520495_13.2 | 1 p2 | (AT)6  | 12 | 72   | 83   | TGCCTTATAAGCTCGAGAAAA    |
| scaffold520516_17.2 | 1 p2 | (TA)6  | 12 | 564  | 575  | TGAGCCCAATTTAGTCAGCC     |
| scaffold520533_12.2 | 1 p2 | (AT)6  | 12 | 1344 | 1355 | CATCGCATTGACACATAATCG    |
| scaffold520538_15.7 | 1 p2 | (AT)10 | 20 | 1323 | 1342 | TAGCCGTTTATGACCGTTGA     |
| scaffold520641_14.1 | 1 p2 | (TC)8  | 16 | 1612 | 1627 | TTTTGGGATGGACCAAGTTT     |
| scaffold520747_17.0 | 1 p2 | (TC)9  | 18 | 2108 | 2125 | TCAAAGCCTTTTTGCCTCAT     |
| scaffold520886_18.1 | 1 p2 | (TG)7  | 14 | 2414 | 2427 | CGATGCTTTAAAAGATGTCAACC  |
| scaffold520938_11.5 | 1 p2 | (AT)6  | 12 | 123  | 134  | AAGAAAGAAATAGAGCTGCTGGAA |
| scaffold520954_10.2 | 1 p2 | (AT)7  | 14 | 353  | 366  | TCGTCCTGGTTGTTCCAAAT     |
| scaffold520955_16.3 | 1 p2 | (AT)7  | 14 | 1034 | 1047 | CGACTTGGCTCCATGTTGTT     |
| scaffold521129_17.7 | 1 p2 | (AT)7  | 14 | 2201 | 2214 | TGCATCCAGTGGCGTATCTA     |
| scaffold521220_11.0 | 1 p2 | (AT)9  | 18 | 117  | 134  | GAATTCGGATTCGAGTCATATAAT |
| scaffold521286_12.4 | 1 p2 | (AT)9  | 18 | 679  | 696  | CAGGATGAAGACGATGCTGA     |
| scaffold521408_12.5 | 1 p2 | (GA)6  | 12 | 55   | 66   | GAAGCTTCAATGGAGGTGATTC   |
| scaffold521482_18.9 | 1 p2 | (GA)6  | 12 | 889  | 900  | TTCGGAATTGGATTATGTTGC    |

|                     |      |        |    |      |                                |
|---------------------|------|--------|----|------|--------------------------------|
| scaffold521593_18.6 | 1 p2 | (TA)7  | 14 | 147  | 160 ACCCTCGAATGCTATGACCA       |
| scaffold521658_13.3 | 1 p2 | (CT)7  | 14 | 359  | 372 TCCCCTTATTTGTCCACACC       |
| scaffold521670_16.4 | 1 p2 | (TA)6  | 12 | 522  | 533 ACACATCTTGCAACCCACAG       |
| scaffold521699_14.4 | 1 p2 | (TA)6  | 12 | 53   | 64 CCAATTTGAATGGTTATCACCTG     |
| scaffold521706_16.1 | 1 p2 | (AT)6  | 12 | 809  | 820 GAGGCTTAAAGCTGTGCTGG       |
| scaffold521806_11.4 | 1 p2 | (AT)7  | 14 | 147  | 160 GGATAAATGTGGCGAATGCT       |
| scaffold521816_15.5 | 1 p2 | (CT)10 | 20 | 59   | 78 TCCATCATCATAGGCGTCAC        |
| scaffold521843_10.4 | 1 p2 | (CA)7  | 14 | 290  | 303 CCATCATCCTCTCTCCCAA        |
| scaffold521862_14.8 | 1 p2 | (AT)9  | 18 | 1753 | 1770 AGGTGGCACTCTGAAATCAA      |
| scaffold521863_14.2 | 1 p2 | (AG)8  | 16 | 245  | 260 TTTGGTTCAAGGATTTGATGC      |
| scaffold522013_17.4 | 1 p2 | (AT)6  | 12 | 215  | 226 GCGTATGGGTAGAGCGAGAG       |
| scaffold522123_13.8 | 1 p2 | (AT)9  | 18 | 1207 | 1224 GAAGAAGCCGACAATTTGCT      |
| scaffold522237_15.1 | 1 p2 | (CA)8  | 16 | 673  | 688 TTCTACCGCAACACAAGGTG       |
| scaffold522319_15.6 | 1 p2 | (TA)6  | 12 | 1335 | 1346 GCTACGTGGGAGCTCAAGTC      |
| scaffold522440_11.9 | 1 p2 | (TA)6  | 12 | 921  | 932 CGACTCCATTTGGGTTTTGT       |
| scaffold522484_13.0 | 1 p2 | (CT)11 | 22 | 444  | 465 CAGATCTTGGCAACTCCCTC       |
| scaffold522508_16.9 | 1 p2 | (AT)9  | 18 | 2851 | 2868 ATGTCGAAGAATCCGAATGG      |
| scaffold522528_18.3 | 1 p2 | (AT)6  | 12 | 573  | 584 TGGACCGTTAGATCGGATA        |
| scaffold522531_14.7 | 1 p2 | (CT)6  | 12 | 916  | 927 CATCCCCACCGTGGTATTTA       |
| scaffold522566_16.0 | 1 p2 | (AC)7  | 14 | 1664 | 1677 ACCGTTTGTGAAAAGAACGC      |
| scaffold522588_13.5 | 1 p2 | (TA)6  | 12 | 317  | 328 TCATTTTTCTGTAGCGTACTCA     |
| scaffold522605_16.1 | 1 p2 | (AG)7  | 14 | 323  | 336 CGTTCATCCCCTTTGTGTCT       |
| scaffold522698_14.7 | 1 p2 | (TA)7  | 14 | 92   | 105 GTTGTGTTTGTAGCCACTGTGA     |
| scaffold522715_18.5 | 1 p2 | (AT)8  | 16 | 92   | 107 GACTGTAATGCATGGCTGGA       |
| scaffold522847_12.9 | 1 p2 | (TA)6  | 12 | 2470 | 2481 CCATCGATGCCGATAGATTT      |
| scaffold522869_15.1 | 1 p2 | (GA)9  | 18 | 147  | 164 AAATTGGATCGTTGCCAGAG       |
| scaffold522989_14.8 | 1 p2 | (AT)6  | 12 | 683  | 694 ATCTCGTTGAGGATGCTTGC       |
| scaffold523075_14.0 | 1 p2 | (CT)10 | 20 | 2281 | 2300 AACACCACCTCCCTCACTG       |
| scaffold523079_11.0 | 1 p2 | (GA)6  | 12 | 144  | 155 CACGGTTAGGCTCGAGAGAG       |
| scaffold523160_14.2 | 1 p2 | (AG)6  | 12 | 352  | 363 TTTACGAAAATGCCACCACC       |
| scaffold523224_19.2 | 1 p2 | (CT)6  | 12 | 133  | 144 AGCATCTCTCCATCACTCTCA      |
| scaffold523268_10.5 | 1 p2 | (TA)7  | 14 | 215  | 228 TTCGAACCTGGTTTTCGTTC       |
| scaffold523277_15.9 | 1 p2 | (TA)6  | 12 | 99   | 110 TACCTTGATGTGGTGGTGCT       |
| scaffold523306_15.9 | 1 p2 | (TA)6  | 12 | 1410 | 1421 AAAACTCCCAATTTCCACCA      |
| scaffold523356_15.4 | 1 p2 | (GA)8  | 16 | 791  | 806 TCCCCTAGTCTAAGCCGAAA       |
| scaffold523390_16.1 | 1 p2 | (AT)6  | 12 | 313  | 324 GTGGGAGATGGTGGAGAGAG       |
| scaffold523630_16.4 | 1 p2 | (GA)7  | 14 | 4354 | 4367 GCTTTTGCTTTTGCTTTTGG      |
| scaffold523684_16.0 | 1 p2 | (GA)9  | 18 | 113  | 130 TTTGAAGGGTACTGCCATCA       |
| scaffold523898_11.3 | 1 p2 | (AG)6  | 12 | 961  | 972 TCACCTTTTCCCTCTTCCCT       |
| scaffold523962_14.9 | 1 p2 | (GA)7  | 14 | 740  | 753 ACTCCCATCCGAGGTCCTAA       |
| scaffold524079_16.9 | 1 p2 | (CA)7  | 14 | 2361 | 2374 TAGTCCGTGGGTTTACCGAG      |
| scaffold524086_16.1 | 1 p2 | (GA)6  | 12 | 1970 | 1981 TGGTGCAGATGGAAGTGAAG      |
| scaffold524131_18.9 | 1 p2 | (AT)6  | 12 | 56   | 67 AGCAAAGAAGGAATGCAACC        |
| scaffold524160_13.5 | 1 p2 | (TG)6  | 12 | 302  | 313 GCGCGATTATCGAAGAGAGA       |
| scaffold524199_11.2 | 1 p2 | (TA)10 | 20 | 249  | 268 GCATGAGAGCCAAGCAAAAT       |
| scaffold524201_16.1 | 1 p2 | (TA)12 | 24 | 1388 | 1411 CAGATCTGATGGCCCAGATT      |
| scaffold524290_15.6 | 1 p2 | (AG)6  | 12 | 1903 | 1914 CGTGTTCTAATCCCCATGT       |
| scaffold524333_12.1 | 1 p2 | (AT)6  | 12 | 573  | 584 TTTTACGGGCAACGTACTCC       |
| scaffold524368_13.4 | 1 p2 | (TA)6  | 12 | 146  | 157 AGCTATAAGATTGACTAGATCAACGA |
| scaffold524582_11.7 | 1 p2 | (AT)6  | 12 | 293  | 304 TCGCGTCAGACTCCTCACTA       |
| scaffold524704_11.9 | 1 p2 | (TA)9  | 18 | 530  | 547 CTCAATGATGGCCGAAAAT        |
| scaffold524729_16.0 | 1 p2 | (TC)6  | 12 | 1067 | 1078 GCCGTTGATCATTACCTCGT      |
| scaffold524753_14.2 | 1 p2 | (GT)7  | 14 | 294  | 307 TGCCCTTTCTTTTAGGAGCA       |
| scaffold524816_15.1 | 1 p2 | (CA)6  | 12 | 94   | 105 AACGAACACGAGAGGTTTGG       |
| scaffold524854_13.2 | 1 p2 | (AT)9  | 18 | 1393 | 1410 ACGGTGAAAATGGATCTTGG      |
| scaffold524905_12.0 | 1 p2 | (AT)7  | 14 | 270  | 283 AAATGACCAAAAAGGGACGA       |
| scaffold524947_20.9 | 1 p2 | (AT)6  | 12 | 356  | 367 AACGGCGCGACAGTTATAGA       |
| scaffold524998_12.5 | 1 p2 | (AG)7  | 14 | 546  | 559 TGCATGAGCACTAATGAGCC       |



|                     |      |        |    |      |      |                             |
|---------------------|------|--------|----|------|------|-----------------------------|
| scaffold525042_13.9 | 1 p2 | (TA)10 | 20 | 837  | 856  | GAATGGCCCCGAGATTTGTTA       |
| scaffold525077_13.9 | 1 p2 | (TA)6  | 12 | 1353 | 1364 | AGTGCCGTAGCCACAAAAAT        |
| scaffold525332_14.3 | 1 p2 | (TA)8  | 16 | 428  | 443  | TTTTGCCCTCGAATGCTATC        |
| scaffold525619_17.4 | 1 p2 | (CT)7  | 14 | 269  | 282  | AACCGTGATGGTTGGGATTA        |
| scaffold525657_17.5 | 1 p2 | (TA)9  | 18 | 761  | 778  | TCCTCAACTCTGAGCCGAAT        |
| scaffold525662_14.4 | 1 p2 | (TA)7  | 14 | 354  | 367  | TTTAATGATGCGTTTTGGCA        |
| scaffold525811_11.6 | 1 p2 | (TA)8  | 16 | 1351 | 1366 | ATGGGATAGTACCGGAACGC        |
| scaffold525881_14.8 | 1 p2 | (CA)7  | 14 | 415  | 428  | TCACTCACACACACTCGCA         |
| scaffold525897_13.4 | 1 p2 | (TC)6  | 12 | 94   | 105  | AATGAGGCTTTTGGATCGAC        |
| scaffold525934_15.0 | 1 p2 | (AT)7  | 14 | 649  | 662  | AATGGCACACAGGTGAATGA        |
| scaffold525956_12.2 | 1 p2 | (AG)8  | 16 | 717  | 732  | AATCATCCAATTTGCTTGCC        |
| scaffold525990_14.9 | 1 p2 | (AG)6  | 12 | 150  | 161  | GCAACAACAACAACACTGACGC      |
| scaffold526002_16.5 | 1 p2 | (AC)13 | 26 | 6219 | 6244 | TGGAGATCATTTTCAGGCACA       |
| scaffold526101_14.7 | 1 p2 | (TC)6  | 12 | 537  | 548  | CACCATTTTGGTATTTGCC         |
| scaffold526115_16.8 | 1 p2 | (TA)10 | 20 | 648  | 667  | AGGGGGTCAAACCTCCTTGAA       |
| scaffold526144_15.7 | 1 p2 | (TA)10 | 20 | 330  | 349  | TTTTCCATCAACTAACCCGC        |
| scaffold526272_12.3 | 1 p2 | (TA)6  | 12 | 112  | 123  | TCATTTACCCATGAGCTTT         |
| scaffold526273_13.6 | 1 p2 | (CT)8  | 16 | 1073 | 1088 | TCCAACCTTTCACACTCCCC        |
| scaffold526306_15.0 | 1 p2 | (CT)6  | 12 | 138  | 149  | TCATACACGATGGGATCGAA        |
| scaffold526347_16.4 | 1 p2 | (TC)6  | 12 | 2828 | 2839 | AACGTCAAGTATTCCGCCAC        |
| scaffold526358_17.4 | 1 p2 | (TC)6  | 12 | 376  | 387  | TCCGCGAGAGAATTAAGGAA        |
| scaffold526371_14.8 | 1 p2 | (AC)6  | 12 | 1582 | 1593 | TGACATGGAAGGAAAAAGGG        |
| scaffold526395_12.5 | 1 p2 | (TA)8  | 16 | 71   | 86   | TCTCAAATTTGAGGGTTATCA       |
| scaffold526456_13.4 | 1 p2 | (CT)6  | 12 | 41   | 52   | CAAATGGCCAAGAGAGTTACAA      |
| scaffold526473_20.6 | 1 p2 | (GA)9  | 18 | 213  | 230  | TCGTGTTTATCATCACCCCA        |
| scaffold526572_12.6 | 1 p2 | (TA)9  | 18 | 43   | 60   | CGGTTATTACCGGATCGCT         |
| scaffold526602_16.2 | 1 p2 | (CT)6  | 12 | 69   | 80   | TACAAATGGCCAAGGGAGTT        |
| scaffold526623_16.9 | 1 p2 | (GA)6  | 12 | 1261 | 1272 | GGGTTTGAGTGAGTGGAGGA        |
| scaffold526674_14.0 | 1 p2 | (TA)10 | 20 | 377  | 396  | AGAAATGACATCACCACGCA        |
| scaffold526719_11.2 | 1 p2 | (AT)7  | 14 | 54   | 67   | TCAAACAACCTAGATTAGTCCATATCC |
| scaffold526732_17.0 | 1 p2 | (TC)6  | 12 | 3500 | 3511 | AAACAGCAGGTTTTTGGTGG        |
| scaffold526842_15.7 | 1 p2 | (AG)8  | 16 | 3266 | 3281 | AGAGAAAGTAAAGGGGCTCG        |
| scaffold526844_14.3 | 1 p2 | (CT)6  | 12 | 72   | 83   | ACAATGGCAAGAGAGTTGCT        |
| scaffold526854_14.2 | 1 p2 | (GA)13 | 26 | 424  | 449  | CGAATACCTACCCCGTGAGA        |
| scaffold526855_13.2 | 1 p2 | (CT)7  | 14 | 1425 | 1438 | CACTCCGCTCTCATTCCCTTC       |
| scaffold526990_14.8 | 1 p2 | (TC)6  | 12 | 150  | 161  | TCTCTTCAATAAGGTAACAACCCAAA  |
| scaffold526998_17.9 | 1 p2 | (TA)7  | 14 | 658  | 671  | GGGTGTGGAAGCAAAGAAAA        |
| scaffold526999_14.7 | 1 p2 | (AT)6  | 12 | 866  | 877  | TTCAACATGATGGTGCCAAT        |
| scaffold527086_10.6 | 1 p2 | (CT)7  | 14 | 96   | 109  | CAAATTTAAAAGTGTTCCATCCC     |
| scaffold527201_16.3 | 1 p2 | (CT)13 | 26 | 4467 | 4492 | GACCAGTTCAAGGGAGGTGA        |
| scaffold527218_15.9 | 1 p2 | (TA)8  | 16 | 888  | 903  | ATGGCCACAAATGGTTCCTA        |
| scaffold527220_18.5 | 1 p2 | (TA)8  | 16 | 248  | 263  | CATTCAAGGGGCATTTTTGT        |
| scaffold527235_15.7 | 1 p2 | (TC)6  | 12 | 445  | 456  | CCACGGGAGAAAGGTGTTTA        |
| scaffold527498_14.2 | 1 p2 | (TA)8  | 16 | 1308 | 1323 | TTGACACGCAAGATTTGCTC        |
| scaffold527557_15.2 | 1 p2 | (GA)6  | 12 | 834  | 845  | CTACGCGACCCATTCTTGAT        |
| scaffold527689_13.9 | 1 p2 | (AT)7  | 14 | 2126 | 2139 | CCAGTATTTGAGAGATGGGCA       |
| scaffold527736_10.2 | 1 p2 | (GA)6  | 12 | 96   | 107  | TGTCTTTAGCTCTGGTGTGGC       |
| scaffold527849_10.5 | 1 p2 | (AC)6  | 12 | 295  | 306  | ACTCCAGCCACCATCTTCAC        |
| scaffold527888_14.9 | 1 p2 | (TC)6  | 12 | 319  | 330  | GGGACGGAGGGAGTAGTTTC        |
| scaffold527929_14.7 | 1 p2 | (TA)7  | 14 | 295  | 308  | CGATGTTTTAACGCCGAGAT        |
| scaffold528044_17.2 | 1 p2 | (TC)8  | 16 | 147  | 162  | GACCAAGCATGTGGTTCCTT        |
| scaffold528063_16.4 | 1 p2 | (TA)6  | 12 | 321  | 332  | CCGTTAAATTACATGATTTCCCT     |
| scaffold528107_15.4 | 1 p2 | (TA)7  | 14 | 1904 | 1917 | AACCACGTTTTGGCTAGTTCA       |
| scaffold528184_18.0 | 1 p2 | (GA)6  | 12 | 1028 | 1039 | CAAGAAACAACAGGGGGAAA        |
| scaffold528219_12.4 | 1 p2 | (TG)6  | 12 | 53   | 64   | TGTTCCCTCGTGTTCCTCCTC       |
| scaffold528321_11.0 | 1 p2 | (TA)8  | 16 | 194  | 209  | GTGCGTGTGTATGCTGAGGT        |
| scaffold528405_13.8 | 1 p2 | (AT)6  | 12 | 284  | 295  | GACAAGATCGTGCCAACAAA        |
| scaffold528419_12.2 | 1 p2 | (TA)8  | 16 | 1395 | 1410 | TCGATTCGAATTATGAGGGC        |

|                     |      |        |    |      |                                |
|---------------------|------|--------|----|------|--------------------------------|
| scaffold528502_11.8 | 1 p2 | (AC)9  | 18 | 465  | 482 ATGGCAAAGGCATCAAAG         |
| scaffold528634_13.6 | 1 p2 | (TC)7  | 14 | 1300 | 1313 CTTACGCGCTCAATAACA        |
| scaffold528669_13.7 | 1 p2 | (AT)6  | 12 | 54   | 65 CATGGTAAGCAGATTGGTTTTAAT    |
| scaffold528677_10.2 | 1 p2 | (TA)6  | 12 | 54   | 65 TCAGATTTGTTATGTGTTTTGACA    |
| scaffold528684_15.3 | 1 p2 | (AG)8  | 16 | 863  | 878 GACCAGGAGTTGAAGATGCC       |
| scaffold528879_16.2 | 1 p2 | (AT)6  | 12 | 94   | 105 CAACTTGAACCCGATTCTC        |
| scaffold528925_15.2 | 1 p2 | (CT)8  | 16 | 1390 | 1405 TGGTCTCCATCTCCGTCTC       |
| scaffold528950_16.1 | 1 p2 | (AT)6  | 12 | 426  | 437 TGAAAATGCAACCAATGGA        |
| scaffold529057_18.2 | 1 p2 | (AG)7  | 14 | 360  | 373 AGGCCGTGTTTCGTATTGTGT      |
| scaffold529086_13.1 | 1 p2 | (CT)6  | 12 | 486  | 497 ACTCATGTCACGGCACACAT       |
| scaffold529088_15.2 | 1 p2 | (AT)7  | 14 | 235  | 248 AAAAGCTCCTCCACAATTTGA      |
| scaffold529093_12.5 | 1 p2 | (TC)7  | 14 | 116  | 129 GATTCGCACAAATGAACACG       |
| scaffold529096_17.8 | 1 p2 | (TA)6  | 12 | 79   | 90 TTGTCGATCAGCGTTACAG         |
| scaffold529132_13.0 | 1 p2 | (TA)11 | 22 | 600  | 621 TCAACCGCCAGGATTATTTT       |
| scaffold529221_15.2 | 1 p2 | (AC)7  | 14 | 184  | 197 CACGTGGCATGATAATAGCG       |
| scaffold529264_12.6 | 1 p2 | (TA)6  | 12 | 96   | 107 TACTCAAGCCCACGATCTCC       |
| scaffold529327_14.4 | 1 p2 | (TA)6  | 12 | 256  | 267 TTGTTTCGTATTTGGAAGTCGTG    |
| scaffold529373_21.4 | 1 p2 | (TC)6  | 12 | 44   | 55 TGCCCTCTTTCTCTATCTCTCTTG    |
| scaffold529422_10.3 | 1 p2 | (AT)9  | 18 | 56   | 73 TCCACCGCTTAAATTGCTT         |
| scaffold529497_15.2 | 1 p2 | (AT)6  | 12 | 759  | 770 CGACCAAACCTCATAGCGTCA      |
| scaffold529506_16.9 | 1 p2 | (TA)10 | 20 | 2858 | 2877 AAAATGCAGTTCGGTTGGAG      |
| scaffold529512_16.2 | 1 p2 | (TA)7  | 14 | 266  | 279 CTTTTTCCATCAACCAACCC       |
| scaffold529531_12.3 | 1 p2 | (AC)7  | 14 | 365  | 378 TCACGGAATTAAGCCCC          |
| scaffold529560_13.4 | 1 p2 | (GA)10 | 20 | 54   | 73 TCTCCGATCTCAGTTTTTCAA       |
| scaffold529580_17.7 | 1 p2 | (GT)7  | 14 | 653  | 666 AACAAGCTGGGTTTCTGCAC       |
| scaffold529615_15.9 | 1 p2 | (GA)8  | 16 | 475  | 490 GCCTGCAAGAAAGCAATCTC       |
| scaffold529655_12.1 | 1 p2 | (CT)8  | 16 | 41   | 56 CATACTCACTCTACTAGCCGC       |
| scaffold529681_12.3 | 1 p2 | (AT)7  | 14 | 164  | 177 GTTGGAGGAATGGAGGGAAT       |
| scaffold529705_17.5 | 1 p2 | (CA)6  | 12 | 279  | 290 GATCTTTTCACTCGAGCCCA       |
| scaffold529936_13.7 | 1 p2 | (CT)11 | 22 | 106  | 127 TTGCATTGCAGCAGTAGAGG       |
| scaffold529942_16.8 | 1 p2 | (AT)6  | 12 | 749  | 760 CTTGTTTTGGAACCAGCCAT       |
| scaffold529962_14.6 | 1 p2 | (AG)9  | 18 | 1149 | 1166 GACTCCTGCAACTTGCCTTC      |
| scaffold530007_12.9 | 1 p2 | (CT)11 | 22 | 1743 | 1764 ATGTTCCCATTTACCTTGC       |
| scaffold530214_13.8 | 1 p2 | (TG)7  | 14 | 184  | 197 GCTGCCTACAACAGCAACAA       |
| scaffold530217_10.9 | 1 p2 | (GT)6  | 12 | 479  | 490 TTACTIONGTGGTTGCGGTGC      |
| scaffold530231_15.0 | 1 p2 | (AT)9  | 18 | 3411 | 3428 ATCAGGCCCATATTTTCGATG     |
| scaffold530431_13.3 | 1 p2 | (TA)8  | 16 | 409  | 424 TTTTCGCCTCCACTAAAAA        |
| scaffold530576_13.9 | 1 p2 | (AT)7  | 14 | 95   | 108 GCAATGCTCCATTTTCCAAC       |
| scaffold530636_16.8 | 1 p2 | (TC)6  | 12 | 2563 | 2574 TGGCTGTAGTGGAATGTGG       |
| scaffold530746_15.9 | 1 p2 | (TG)7  | 14 | 1002 | 1015 GGTTAGCGTGTCGTGTCAGA      |
| scaffold530850_12.6 | 1 p2 | (AT)6  | 12 | 1265 | 1276 TCCCTTGCTAGATGGCAGTT      |
| scaffold530856_14.5 | 1 p2 | (AT)7  | 14 | 150  | 163 CGGCCATCAATATACACCAA       |
| scaffold530894_11.8 | 1 p2 | (TA)6  | 12 | 79   | 90 TCGGTTACCCTATAGCATTTCG      |
| scaffold530932_15.6 | 1 p2 | (TC)9  | 18 | 4429 | 4446 TAACCACGGATGCCACTGTA      |
| scaffold530963_11.4 | 1 p2 | (GC)7  | 14 | 78   | 91 CTACGAGCCACGGCTACAC         |
| scaffold531126_14.8 | 1 p2 | (CT)6  | 12 | 334  | 345 TATCGCCGTTAAGCTGCTCT       |
| scaffold531227_16.3 | 1 p2 | (AG)7  | 14 | 1040 | 1053 AAAGATGGGAAAATGGGACC      |
| scaffold531228_12.8 | 1 p2 | (AG)9  | 18 | 32   | 49 AGAACTTGACGTGTGCGTG         |
| scaffold531273_15.0 | 1 p2 | (AT)6  | 12 | 2102 | 2113 AATGAGGTAAATTTGAGAATGATGA |
| scaffold531296_10.0 | 1 p2 | (TA)9  | 18 | 67   | 84 CAAAGGCCCAATGGTTAT          |
| scaffold531314_10.7 | 1 p2 | (AG)9  | 18 | 146  | 163 GTGTTTGGTCTCCCCTCCTT       |
| scaffold531380_15.3 | 1 p2 | (GA)6  | 12 | 77   | 88 GTGGTTCGATCAAGGTGAGC        |
| scaffold531386_12.5 | 1 p2 | (TC)6  | 12 | 245  | 256 TGGGCATTTGTATACCCGTT       |
| scaffold531528_11.7 | 1 p2 | (AG)7  | 14 | 209  | 222 AATTTGCCCTCTCCCTCTTC       |
| scaffold531532_14.3 | 1 p2 | (TA)8  | 16 | 838  | 853 CAAAACAGTATACAACGGGCA      |
| scaffold531535_11.7 | 1 p2 | (AT)6  | 12 | 457  | 468 TGCTATCGGCTAACGGTTTT       |
| scaffold531609_13.3 | 1 p2 | (GA)6  | 12 | 331  | 342 CACAATCGATCAATAAAGCTGC     |
| scaffold531706_13.8 | 1 p2 | (TA)10 | 20 | 99   | 118 TGAGGCTTAGAGGGTGTTTTG      |

|                     |      |        |    |      |                               |
|---------------------|------|--------|----|------|-------------------------------|
| scaffold531730_15.0 | 1 p2 | (GA)8  | 16 | 1202 | 1217 AGCCTTACCAAAGGGGAAAA     |
| scaffold531751_10.4 | 1 p2 | (CT)6  | 12 | 199  | 210 GGAAGAATTGGAAACTCGTGA     |
| scaffold531765_18.8 | 1 p2 | (TA)6  | 12 | 196  | 207 ATGATCTACGTCCACGGGAG      |
| scaffold531768_18.0 | 1 p2 | (AT)7  | 14 | 149  | 162 CCTTCCAATGGACTTCTCA       |
| scaffold531854_11.0 | 1 p2 | (AT)7  | 14 | 209  | 222 GCAAAAGCTTTCTCGACCAC      |
| scaffold531873_15.0 | 1 p2 | (CT)6  | 12 | 140  | 151 GCATGATCGACATTGTAAAGGA    |
| scaffold531924_13.6 | 1 p2 | (AG)6  | 12 | 152  | 163 ATTGCTTCCCCTCTTCCATT      |
| scaffold531925_17.4 | 1 p2 | (CT)9  | 18 | 1740 | 1757 CATGCCATGGAGTCGTTCTA     |
| scaffold531939_10.9 | 1 p2 | (TC)6  | 12 | 85   | 96 GTTGATGCCCTTCGTCAACT       |
| scaffold531952_16.1 | 1 p2 | (GA)9  | 18 | 146  | 163 AACGCTTTCTGCTTCTGCAT      |
| scaffold532051_18.4 | 1 p2 | (GA)7  | 14 | 937  | 950 CTCGTTGGAGGCCAATAAAA      |
| scaffold532075_15.0 | 1 p2 | (TA)10 | 20 | 69   | 88 GGAAATAAGAAGGTGTTATGAAGGG  |
| scaffold532213_14.4 | 1 p2 | (AT)6  | 12 | 227  | 238 TCGCAGAAAATCAACTTCTCAA    |
| scaffold532235_12.1 | 1 p2 | (AT)8  | 16 | 3036 | 3051 CTTACACAGTGCCTGCTCCA     |
| scaffold532243_12.4 | 1 p2 | (AT)8  | 16 | 170  | 185 GGAGAAAATCAGGTGATAACCCTT  |
| scaffold532336_14.4 | 1 p2 | (AC)6  | 12 | 152  | 163 TCGGAATCAATTAGTGTGAGAA    |
| scaffold532425_10.6 | 1 p2 | (AG)7  | 14 | 184  | 197 TGGTGTCTTGGGGTTTTGT       |
| scaffold532428_10.1 | 1 p2 | (TC)6  | 12 | 414  | 425 TTTGAGATCGGAGTGGCTCT      |
| scaffold532453_14.0 | 1 p2 | (GT)7  | 14 | 52   | 65 TCTTGGGAGTGAACATACATACA    |
| scaffold532728_16.4 | 1 p2 | (TA)6  | 12 | 2863 | 2874 ACAGCAAGCATCCAGAAAGC     |
| scaffold532772_11.0 | 1 p2 | (AC)8  | 16 | 225  | 240 AGAATATGCGTGATCGCCTT      |
| scaffold532773_13.9 | 1 p2 | (AC)6  | 12 | 225  | 236 AGAATATGCGTGATCGCCTT      |
| scaffold532833_16.4 | 1 p2 | (AG)13 | 26 | 80   | 105 ACCACGGCTGAATAAATTGC      |
| scaffold532867_12.4 | 1 p2 | (GC)6  | 12 | 275  | 286 GTTGACGGATAACCCAAACG      |
| scaffold532896_13.2 | 1 p2 | (CT)6  | 12 | 1921 | 1932 GGGTTTAGGGGACAGGTGAT     |
| scaffold532957_20.6 | 1 p2 | (AT)6  | 12 | 299  | 310 TCGGCCCTTTAAACTAAGG       |
| scaffold532958_13.2 | 1 p2 | (AT)9  | 18 | 348  | 365 TTGTCCAAACAATGAAACATTC    |
| scaffold532975_14.0 | 1 p2 | (AT)9  | 18 | 673  | 690 TGGATTTGGGATTCTTCAA       |
| scaffold532979_13.2 | 1 p2 | (AT)10 | 20 | 734  | 753 ACAATTTTGCCTTGAATGC       |
| scaffold533009_21.4 | 1 p2 | (GA)7  | 14 | 624  | 637 TCGTTTTACATTCAAGCAGTG     |
| scaffold533036_17.1 | 1 p2 | (TC)6  | 12 | 638  | 649 CCTCCCACTCCTCACTTCAA      |
| scaffold533091_12.7 | 1 p2 | (AG)6  | 12 | 145  | 156 GTGTGTGTGCATGAGTGTG       |
| scaffold533209_12.0 | 1 p2 | (TG)8  | 16 | 98   | 113 TGATTTTTAATGCCTTTCAGCTT   |
| scaffold533237_15.6 | 1 p2 | (TA)10 | 20 | 199  | 218 TTCAAAGGTTTGGGCTTTTT      |
| scaffold533258_13.9 | 1 p2 | (TA)7  | 14 | 749  | 762 TGCACCTCCTCCTAATTAATCC    |
| scaffold533371_15.0 | 1 p2 | (TC)6  | 12 | 40   | 51 TCTCTTTTTGGTTGGTGAAGA      |
| scaffold533416_21.0 | 1 p2 | (AG)6  | 12 | 334  | 345 TGCAGCTGAAATCAATGAAAA     |
| scaffold533428_14.4 | 1 p2 | (GA)9  | 18 | 831  | 848 TCTACGCATGGAATCAGTCG      |
| scaffold533512_15.6 | 1 p2 | (GA)6  | 12 | 750  | 761 CTTGATTCATCGAACGCAA       |
| scaffold533568_17.7 | 1 p2 | (AT)7  | 14 | 1762 | 1775 ATGCGATGTTTTGCATTTTT     |
| scaffold533584_13.6 | 1 p2 | (AT)7  | 14 | 28   | 41 CCAAAGTTTATTTAACACGGAAGAA  |
| scaffold533624_10.1 | 1 p2 | (AT)6  | 12 | 710  | 721 TTCTTTCAATCGACGCTCCT      |
| scaffold533631_14.8 | 1 p2 | (CT)6  | 12 | 136  | 147 TTGCTAAGCTCCAGCAACG       |
| scaffold533796_15.9 | 1 p2 | (TC)7  | 14 | 100  | 113 CAATCTGGACGATACTCAATCG    |
| scaffold533971_16.7 | 1 p2 | (CT)9  | 18 | 2810 | 2827 ATCTGTTTCTTCTGCGGCTC     |
| scaffold533976_12.8 | 1 p2 | (AG)6  | 12 | 440  | 451 AAATTGATGGCAAGAGCAGG      |
| scaffold533977_16.1 | 1 p2 | (AG)12 | 24 | 4211 | 4234 GGTTGGTTTGGATTCTCCA      |
| scaffold534145_11.0 | 1 p2 | (AG)8  | 16 | 50   | 65 TCCATACACACCAAATAAAAAGACA  |
| scaffold534511_19.0 | 1 p2 | (GA)9  | 18 | 156  | 173 TTGGGGAAATAATGTGCATCT     |
| scaffold534587_14.9 | 1 p2 | (CT)8  | 16 | 4379 | 4394 GCATAAAGCTCATCTGCACA     |
| scaffold534592_12.6 | 1 p2 | (AG)6  | 12 | 241  | 252 GATCGGTGAAGATTGGAGGA      |
| scaffold534624_12.2 | 1 p2 | (GA)6  | 12 | 399  | 410 CCGCATTCTGTTTGTGTTG       |
| scaffold534675_16.4 | 1 p2 | (GA)6  | 12 | 1520 | 1531 GTACAACGAGGATGTGGGCT     |
| scaffold534749_20.6 | 1 p2 | (GA)6  | 12 | 53   | 64 CCTTTGGTCTCGGTTGAAAT       |
| scaffold534819_11.6 | 1 p2 | (TA)6  | 12 | 112  | 123 CATGAAAGACTCTATAGACAAGAAA |
| scaffold534878_18.7 | 1 p2 | (GA)8  | 16 | 148  | 163 AGGGTGTGTGAGAGACCGAG      |
| scaffold534921_19.1 | 1 p2 | (TG)8  | 16 | 306  | 321 TGGCTTGTATGTTCTGATCACC    |
| scaffold534955_12.8 | 1 p2 | (AT)6  | 12 | 169  | 180 GTTCGAAAGCCACAAATGGT      |

|                     |      |        |    |      |                               |
|---------------------|------|--------|----|------|-------------------------------|
| scaffold534973_13.5 | 1 p2 | (GA)10 | 20 | 58   | 77 GCTAGGGCGATTGTATTGATG      |
| scaffold534988_14.9 | 1 p2 | (TA)11 | 22 | 370  | 391 TGATGTTGAAGAATCAGCGG      |
| scaffold535061_11.0 | 1 p2 | (TC)7  | 14 | 65   | 78 TACCGTTGGTTAATCCTGCC       |
| scaffold535282_14.0 | 1 p2 | (TA)13 | 26 | 167  | 192 TTTGAAAACATGCAATGGA       |
| scaffold535311_16.2 | 1 p2 | (AG)6  | 12 | 697  | 708 ATCACCCCTCACAAGAACCA      |
| scaffold535348_18.9 | 1 p2 | (GA)6  | 12 | 148  | 159 AGAAGGGCAATGAATTGGTG      |
| scaffold535466_15.0 | 1 p2 | (AT)7  | 14 | 225  | 238 AAATATCGGCCGTCAGATTG      |
| scaffold535493_15.1 | 1 p2 | (AG)7  | 14 | 796  | 809 AGCAAATGCCAATAAGGTGG      |
| scaffold535580_13.7 | 1 p2 | (AG)7  | 14 | 159  | 172 ATTGAGTCCCAATCTCGTGG      |
| scaffold535615_14.8 | 1 p2 | (CT)6  | 12 | 102  | 113 CACTCTGCTAGGGTTGGGAG      |
| scaffold535662_11.0 | 1 p2 | (TC)6  | 12 | 149  | 160 AACTGTGGCAAGATCCATCC      |
| scaffold535695_12.8 | 1 p2 | (CA)7  | 14 | 197  | 210 TTCGAATTTTATTATTGATTGAGCA |
| scaffold535748_16.0 | 1 p2 | (TC)7  | 14 | 372  | 385 GCAATTTTAAGATCGAATCCCA    |
| scaffold535940_14.8 | 1 p2 | (TC)6  | 12 | 190  | 201 TTGCATGAACAACGTGGAAT      |
| scaffold535998_10.8 | 1 p2 | (TA)10 | 20 | 325  | 344 TGTCACCTTGAAAGAATTACAAACA |
| scaffold535999_15.2 | 1 p2 | (TA)7  | 14 | 57   | 70 GAGTGACATCTTCGAGTGTTTCG    |
| scaffold536032_14.3 | 1 p2 | (TA)7  | 14 | 564  | 577 TTAGCAGCTTATACGTGTGAAAA   |
| scaffold536055_16.7 | 1 p2 | (TA)11 | 22 | 2079 | 2100 TCCTTCTAATCGATTCTTCCACA  |
| scaffold536076_17.0 | 1 p2 | (TA)6  | 12 | 9802 | 9813 TGAAGAAGACGTGGTTCGAGA    |
| scaffold536227_15.2 | 1 p2 | (TC)10 | 20 | 2582 | 2601 ATCCCTTCTGGTTCTCCAC      |
| scaffold536347_11.2 | 1 p2 | (TA)7  | 14 | 103  | 116 GAAGCGACACGGGTTATTTT      |
| scaffold536501_17.8 | 1 p2 | (AG)9  | 18 | 148  | 165 GGGACTCGGATAAAAAGGGA      |
| scaffold536690_15.6 | 1 p2 | (TA)6  | 12 | 2905 | 2916 GCTGAGGCTTCTTCCATGTC     |
| scaffold536760_16.8 | 1 p2 | (TA)8  | 16 | 40   | 55 CACACTCACTCACAACACACAA     |
| scaffold536837_12.8 | 1 p2 | (TA)9  | 18 | 1195 | 1212 CGTTGAACGTACCCTCGATT     |
| scaffold536838_17.9 | 1 p2 | (AT)7  | 14 | 152  | 165 TCCCTAGACTCCGTAATTGGAA    |
| scaffold536849_19.9 | 1 p2 | (CG)7  | 14 | 395  | 408 TGTCCACATTGGAAAATGA       |
| scaffold536949_12.3 | 1 p2 | (AG)8  | 16 | 228  | 243 AAAACAAAACCTGGTGCTCG      |
| scaffold536955_15.1 | 1 p2 | (TA)9  | 18 | 1240 | 1257 ATCATGTAGTCGCGTGCTGT     |
| scaffold537069_10.4 | 1 p2 | (TC)6  | 12 | 222  | 233 TGAACAATTGAACACCGGAA      |
| scaffold537092_13.8 | 1 p2 | (CT)9  | 18 | 1010 | 1027 TGCTGTCCCTCTAGCAGGTT     |
| scaffold537140_15.7 | 1 p2 | (TA)9  | 18 | 45   | 62 TGCGTTTTGACAATATATAGGTGTTT |
| scaffold537198_18.7 | 1 p2 | (GA)6  | 12 | 252  | 263 TATGCAAGAGCGAGCAGAGA      |
| scaffold537238_12.9 | 1 p2 | (GT)6  | 12 | 297  | 308 TGCCAAGCCGATCCTTATC       |
| scaffold537291_12.2 | 1 p2 | (TG)6  | 12 | 1102 | 1113 AATTATGTGCAAGCTCATCCG    |
| scaffold537352_15.0 | 1 p2 | (TC)6  | 12 | 233  | 244 ACACCCACAAAATCGAGAG       |
| scaffold537491_16.4 | 1 p2 | (TA)7  | 14 | 328  | 341 TCACGTGTCATTGTAACCGC      |
| scaffold537565_15.6 | 1 p2 | (AG)10 | 20 | 2369 | 2388 AATTGATTGCTGCTGCTGTG     |
| scaffold537615_14.9 | 1 p2 | (TG)6  | 12 | 561  | 572 TCTCCCCCTTCTGTGGTATG      |
| scaffold537707_16.2 | 1 p2 | (CT)6  | 12 | 4125 | 4136 CGGAGAATTGATGTTCCCAT     |
| scaffold537803_12.5 | 1 p2 | (AG)10 | 20 | 352  | 371 TGCAGCTAATTTTCTGCTGG      |
| scaffold537808_15.6 | 1 p2 | (CT)9  | 18 | 46   | 63 CGCCTTTCTCTTTCTAACCTCC     |
| scaffold538092_13.7 | 1 p2 | (TG)6  | 12 | 294  | 305 TCTCAACCAATGATGAGCCA      |
| scaffold538481_12.6 | 1 p2 | (AT)10 | 20 | 388  | 407 CGGATCGAAAATTCTCCTTATG    |
| scaffold538790_12.7 | 1 p2 | (GA)8  | 16 | 258  | 273 CCACGAGATGGGGACATTTA      |
| scaffold538824_13.2 | 1 p2 | (AG)11 | 22 | 383  | 404 TACCCTCTCCTCCTCCGATT      |
| scaffold538862_15.7 | 1 p2 | (TG)6  | 12 | 1393 | 1404 GAAATGCATCTCATTCCGGT     |
| scaffold538950_12.7 | 1 p2 | (AT)11 | 22 | 1303 | 1324 TACGGTTCGGTTCCAGTTTC     |
| scaffold539112_12.7 | 1 p2 | (GA)6  | 12 | 428  | 439 CAATGGAAAACACGCAACAC      |
| scaffold539188_14.9 | 1 p2 | (AC)6  | 12 | 770  | 781 CGCTGAGGGATCTGGTATGT      |
| scaffold539258_13.3 | 1 p2 | (TA)8  | 16 | 1777 | 1792 GCTGGATTTTTGGCATTCAAT    |
| scaffold539313_18.5 | 1 p2 | (TC)9  | 18 | 1240 | 1257 TTTTTCGGTTCGGTTCAAAG     |
| scaffold539453_12.5 | 1 p2 | (TA)6  | 12 | 256  | 267 GTTTCACTTTGGTACCCGGA      |
| scaffold539480_12.0 | 1 p2 | (AG)6  | 12 | 432  | 443 AAGTCGGCCAAGAAGAGAAA      |
| scaffold539543_11.6 | 1 p2 | (AG)6  | 12 | 123  | 134 CTAAGCGATGCCTAAGGCTG      |
| scaffold539547_17.6 | 1 p2 | (CT)6  | 12 | 89   | 100 CTCACTAGCCGCAGCTCTCT      |
| scaffold539558_12.6 | 1 p2 | (TG)6  | 12 | 66   | 77 GGAAAATATCAAGTCAACACAAA    |
| scaffold539586_14.2 | 1 p2 | (TA)7  | 14 | 716  | 729 TGATTAGCATCACAGCCCAA      |

|                     |      |        |    |      |                                |
|---------------------|------|--------|----|------|--------------------------------|
| scaffold539681_15.1 | 1 p2 | (TA)6  | 12 | 144  | 155 CAACGCTAAAACATCTGAGAACA    |
| scaffold539845_14.4 | 1 p2 | (TA)7  | 14 | 338  | 351 GATATGGATGCCCCAGATTG       |
| scaffold539847_15.7 | 1 p2 | (AG)7  | 14 | 145  | 158 TGATTTTGGACGTTCTGCAC       |
| scaffold539861_13.3 | 1 p2 | (AG)8  | 16 | 159  | 174 GACGATGGAAGGAGGTGAGA       |
| scaffold539911_11.5 | 1 p2 | (TA)8  | 16 | 136  | 151 TTTTCCGAAGTACGAGCTGC       |
| scaffold539915_11.4 | 1 p2 | (AT)7  | 14 | 281  | 294 GGATTAGAATTCGGAACACTCG     |
| scaffold539974_11.9 | 1 p2 | (CA)6  | 12 | 131  | 142 TCAAATGCACAAATTCATGG       |
| scaffold539996_15.3 | 1 p2 | (GT)7  | 14 | 472  | 485 AAGTAGGGGGCTTCAATCCA       |
| scaffold540025_12.3 | 1 p2 | (TA)8  | 16 | 680  | 695 ACATTTTCGATTAGGTGTGACAA    |
| scaffold540038_19.0 | 1 p2 | (AC)6  | 12 | 750  | 761 TACAAATCGTGAGCAGCAGG       |
| scaffold540104_15.9 | 1 p2 | (AT)7  | 14 | 926  | 939 TTTTCTTTGTCTTCAATGCCA      |
| scaffold540209_10.1 | 1 p2 | (AT)8  | 16 | 68   | 83 CACAATAAGGGTTGGTATCATTTG    |
| scaffold540216_15.3 | 1 p2 | (AT)6  | 12 | 911  | 922 GGATAAAGTACGATGATTGACCA    |
| scaffold540268_17.5 | 1 p2 | (TC)6  | 12 | 1275 | 1286 TGAAGGAGGCAGGCTTTAGA      |
| scaffold540326_14.0 | 1 p2 | (GT)11 | 22 | 610  | 631 TCATTTTGCTTGCAGTGTCC       |
| scaffold540344_14.2 | 1 p2 | (TA)7  | 14 | 126  | 139 ATAGGTGTGGCCCAGTTTGA       |
| scaffold540391_13.2 | 1 p2 | (TC)6  | 12 | 100  | 111 ACGTTGGACCTGAAAGAGGA       |
| scaffold540409_18.6 | 1 p2 | (TA)9  | 18 | 48   | 65 CATGGGTTATCACTTGAATGAGAC    |
| scaffold540461_15.1 | 1 p2 | (AC)6  | 12 | 208  | 219 TTAGATGTGCAGCCGACAAG       |
| scaffold540534_14.0 | 1 p2 | (GA)6  | 12 | 544  | 555 TCCCGTAATATAGGTCCCAAAA     |
| scaffold540681_12.2 | 1 p2 | (AC)6  | 12 | 115  | 126 GGTTCTGAAACCGGATAGG        |
| scaffold540711_16.1 | 1 p2 | (AT)8  | 16 | 464  | 479 CCTAAAAGGAACTGTGGAGGC      |
| scaffold540728_12.9 | 1 p2 | (TA)6  | 12 | 1138 | 1149 TTGACCTTTTACCTTGCCCA      |
| scaffold540984_17.0 | 1 p2 | (GA)6  | 12 | 285  | 296 GTCCGCGAAGAAACTCAC         |
| scaffold541174_10.4 | 1 p2 | (AT)6  | 12 | 155  | 166 AGGAGCAATACTGCTTGTGGA      |
| scaffold541255_16.5 | 1 p2 | (TA)6  | 12 | 234  | 245 GAGAGGGCTTCTTCTGGGAT       |
| scaffold541271_16.4 | 1 p2 | (GA)7  | 14 | 184  | 197 TTGGGTAGAAGGCATTGAGAG      |
| scaffold541320_13.5 | 1 p2 | (AT)8  | 16 | 798  | 813 AACATCAATCATAGTTCAACTTTAGG |
| scaffold541387_16.6 | 1 p2 | (CA)6  | 12 | 417  | 428 AGACTCCAAGCCCTGTTGTG       |
| scaffold541395_14.9 | 1 p2 | (TA)9  | 18 | 202  | 219 ATTATGTGGCCCGAATGACT       |
| scaffold541485_11.9 | 1 p2 | (TA)6  | 12 | 752  | 763 ATATTCGATCCGGAAGGGTC       |
| scaffold541594_13.2 | 1 p2 | (TA)11 | 22 | 869  | 890 GATCCAGTAATTTGGGAAGGC      |
| scaffold541711_11.0 | 1 p2 | (TC)6  | 12 | 73   | 84 CCTTTGGATATGGTGATTTGG       |
| scaffold541780_14.7 | 1 p2 | (TA)8  | 16 | 425  | 440 CCCGAGCTTCCATAAATCAA       |
| scaffold541845_15.3 | 1 p2 | (AT)6  | 12 | 1666 | 1677 ACCGCACAAATCATTTCCTC      |
| scaffold541858_14.5 | 1 p2 | (TA)13 | 26 | 515  | 540 AACCTCTATCCCGTGCAATG       |
| scaffold541881_13.9 | 1 p2 | (TC)7  | 14 | 54   | 67 CATGGCCCTTTCTTCACATT        |
| scaffold541913_15.7 | 1 p2 | (AG)7  | 14 | 102  | 115 TTCCATAAAAAGTTAGGCAAGTCT   |
| scaffold541955_16.7 | 1 p2 | (AT)7  | 14 | 331  | 344 ACAACATTCATCGTTCCT         |
| scaffold542003_10.2 | 1 p2 | (TA)6  | 12 | 889  | 900 TTGTTTCCACACCCATGTTG       |
| scaffold542038_11.4 | 1 p2 | (GA)8  | 16 | 723  | 738 GGCTGGCTCCAGTAGTTGTT       |
| scaffold542086_16.3 | 1 p2 | (GA)6  | 12 | 249  | 260 TCTGTGTGTTGAGAGATCAGTGAG   |
| scaffold542128_16.8 | 1 p2 | (AG)6  | 12 | 93   | 104 CAAAAACAGAGTGAGGGGGA       |
| scaffold542231_15.8 | 1 p2 | (TA)6  | 12 | 263  | 274 TGTCTTTTGGATCCAGTCC        |
| scaffold542295_14.3 | 1 p2 | (TC)9  | 18 | 76   | 93 TTGCTGCCCTATTTTCTTTGA       |
| scaffold542375_15.4 | 1 p2 | (TC)6  | 12 | 455  | 466 ATTGGCAGCAGAAGGAATTG       |
| scaffold542381_15.8 | 1 p2 | (GA)12 | 24 | 830  | 853 CGCTCATTTTCTCACACCAA       |
| scaffold542432_16.1 | 1 p2 | (AT)9  | 18 | 1635 | 1652 TATGCAAGAAACATGGCTGC      |
| scaffold542816_14.0 | 1 p2 | (CT)6  | 12 | 333  | 344 TAAACACTTCGCGCAGACAA       |
| scaffold542999_15.4 | 1 p2 | (TG)8  | 16 | 151  | 166 AACTCACATCAGATTCCCCAA      |
| scaffold543162_13.7 | 1 p2 | (GA)9  | 18 | 227  | 244 GCTTGGTTCGAGACTTGAGG       |
| scaffold543204_17.2 | 1 p2 | (TA)6  | 12 | 875  | 886 TCAGCGGCTTAACATGTTTCT      |
| scaffold543227_12.6 | 1 p2 | (GA)9  | 18 | 865  | 882 TCCAAATGACCAACCAAACA       |
| scaffold543234_15.3 | 1 p2 | (TA)6  | 12 | 61   | 72 CGGCTGGATTTTCATCCCTAT       |
| scaffold543418_15.0 | 1 p2 | (GT)7  | 14 | 970  | 983 GCCCTGTTTCGTTTCATGTCTT     |
| scaffold543507_17.7 | 1 p2 | (TA)10 | 20 | 68   | 87 TCCAATGGATGAGGATGGTT        |
| scaffold543524_17.4 | 1 p2 | (TA)6  | 12 | 194  | 205 TATTTTGGACGATTTTGCCC       |
| scaffold543708_18.3 | 1 p2 | (AG)6  | 12 | 399  | 410 GGCTTTTGGAGGATGGAGAT       |

|                     |      |        |    |      |                                 |
|---------------------|------|--------|----|------|---------------------------------|
| scaffold543803_11.3 | 1 p2 | (GA)6  | 12 | 364  | 375 GGCGAGTCTCGTCCTTGTAG        |
| scaffold543910_19.2 | 1 p2 | (TC)6  | 12 | 1278 | 1289 GTTCCTTGCTGCTGTCCATT       |
| scaffold544054_16.2 | 1 p2 | (AG)7  | 14 | 45   | 58 CCATGTTTGTAAATTATTGTAGGGAA   |
| scaffold544061_13.2 | 1 p2 | (TA)6  | 12 | 169  | 180 GTGATCGACGGTTGGAAAGT        |
| scaffold544076_22.2 | 1 p2 | (CT)6  | 12 | 556  | 567 GCATGTGAGACCCATTCTCC        |
| scaffold544082_11.3 | 1 p2 | (TC)9  | 18 | 238  | 255 GATTCTGATCGACCAGTGGG        |
| scaffold544117_17.7 | 1 p2 | (TC)6  | 12 | 366  | 377 TCGATTGACCCCTCATCTTC        |
| scaffold544424_11.8 | 1 p2 | (TC)6  | 12 | 56   | 67 GGCTGGGAATTGCTGATATT         |
| scaffold544487_13.2 | 1 p2 | (GA)7  | 14 | 154  | 167 CCTCCCTTAGGGTTCCTCAC        |
| scaffold544646_14.5 | 1 p2 | (TC)9  | 18 | 413  | 430 AGCCCGTCAAGTAGAGGGAT        |
| scaffold544675_14.1 | 1 p2 | (GA)7  | 14 | 150  | 163 CGAGCAAGGAATAGACCGAG        |
| scaffold544766_15.6 | 1 p2 | (TA)6  | 12 | 136  | 147 AATTTAATTCCGTGCAACGC        |
| scaffold544884_14.8 | 1 p2 | (AT)7  | 14 | 99   | 112 ATGTTTCTCTTGGGTGGGT         |
| scaffold545085_15.1 | 1 p2 | (AT)11 | 22 | 423  | 444 CGACCTGAGAGATTCCTTG         |
| scaffold545256_10.6 | 1 p2 | (TC)8  | 16 | 735  | 750 TCTCAACATGCTGTCTTCGG        |
| scaffold545380_12.6 | 1 p2 | (TA)8  | 16 | 49   | 64 TCACCATGAAGAAACCCACA         |
| scaffold545478_16.2 | 1 p2 | (AG)6  | 12 | 1505 | 1516 GAGGGTCCGCAAATGTTAGA       |
| scaffold545524_16.5 | 1 p2 | (CT)9  | 18 | 2587 | 2604 TAGAGAAGCCGGATGCAGAT       |
| scaffold545642_17.8 | 1 p2 | (GA)6  | 12 | 875  | 886 ACCTGGGAGCATGTTTCTTG        |
| scaffold545650_11.7 | 1 p2 | (AT)6  | 12 | 641  | 652 TTCGGTTTTTACTCCCCTATG       |
| scaffold545653_17.9 | 1 p2 | (AG)7  | 14 | 185  | 198 ACCACAGCTACCCCGTCTTA        |
| scaffold545663_14.5 | 1 p2 | (CT)9  | 18 | 1903 | 1920 CCAGAATTTGCTGGGTTAGG       |
| scaffold545676_18.3 | 1 p2 | (CT)6  | 12 | 41   | 52 TCAAGCTTAATTAGAAGAAAAGAATC   |
| scaffold545786_11.3 | 1 p2 | (GA)6  | 12 | 440  | 451 TTGGAAAAAGTGGGTTGGAG        |
| scaffold545832_10.1 | 1 p2 | (TA)6  | 12 | 262  | 273 TTCGTCCGAAATACTCCAC         |
| scaffold545965_11.9 | 1 p2 | (CA)6  | 12 | 1961 | 1972 CTCAAATCTCTGCCCTCTGC       |
| scaffold546043_12.7 | 1 p2 | (AT)6  | 12 | 221  | 232 TGCTGTGGTATGCTTTGATTG       |
| scaffold546051_11.8 | 1 p2 | (AT)8  | 16 | 50   | 65 TTCCCGTATACAAATTCCAACA       |
| scaffold546338_10.5 | 1 p2 | (AT)9  | 18 | 340  | 357 GGATAATCAGAATCCCCGGT        |
| scaffold546431_12.5 | 1 p2 | (TG)6  | 12 | 488  | 499 GTCGTTGTTGAATGTCGGTG        |
| scaffold546483_10.8 | 1 p2 | (TC)6  | 12 | 886  | 897 CCTCTCCTCTCATTCCACCA        |
| scaffold546487_10.4 | 1 p2 | (GA)8  | 16 | 214  | 229 ATTTTCTGTGCAATGGTCCG        |
| scaffold546553_13.3 | 1 p2 | (TC)7  | 14 | 67   | 80 GCTGCATGAACACCAAGAAA         |
| scaffold546579_12.5 | 1 p2 | (TA)7  | 14 | 802  | 815 AATAATAATTCCCTCCTCTCGATT    |
| scaffold546668_10.7 | 1 p2 | (AT)9  | 18 | 151  | 168 CAAATCCCCGTTCCATCATA        |
| scaffold546887_12.3 | 1 p2 | (TA)9  | 18 | 98   | 115 TTTGATATACATGGTATTTAATTTTCG |
| scaffold546894_16.1 | 1 p2 | (TC)6  | 12 | 55   | 66 CCCTAGCTTTGCCCTCTTTC         |
| scaffold546930_14.0 | 1 p2 | (AT)9  | 18 | 51   | 68 TCGATTTGGATTCGAATTTGT        |
| scaffold547078_16.6 | 1 p2 | (GA)6  | 12 | 917  | 928 TTTGGTAGTTCTGCAAGGGG        |
| scaffold547102_13.8 | 1 p2 | (TA)6  | 12 | 592  | 603 TGGTGACGATTATAAAATCAAAAA    |
| scaffold547135_13.7 | 1 p2 | (GA)6  | 12 | 317  | 328 ACTGGACTTCGACCTGGATG        |
| scaffold547231_16.1 | 1 p2 | (CT)7  | 14 | 569  | 582 GCGGTCCTCTCTCAAATG          |
| scaffold547309_12.1 | 1 p2 | (TA)6  | 12 | 53   | 64 CGGACTGAGCTGAGCTAAAA         |
| scaffold547466_18.6 | 1 p2 | (CT)6  | 12 | 222  | 233 CCAGCTCCATCATCTCTTCC        |
| scaffold547470_10.3 | 1 p2 | (TA)6  | 12 | 223  | 234 TCCACCATTGATTTCCAAGA        |
| scaffold547654_15.1 | 1 p2 | (AT)7  | 14 | 91   | 104 GACCCACGTGCACTTCTTTT        |
| scaffold547670_13.4 | 1 p2 | (CA)6  | 12 | 300  | 311 TCGAAAGCATTTCGAGTTC         |
| scaffold547682_13.0 | 1 p2 | (CT)7  | 14 | 425  | 438 CAGCCTGTGAATTGTTGCAT        |
| scaffold547695_10.2 | 1 p2 | (AT)6  | 12 | 94   | 105 GATGAACACCCGAACCACTT        |
| scaffold547850_14.1 | 1 p2 | (TC)6  | 12 | 89   | 100 GGCAACGGTATACCACTCGT        |
| scaffold547944_10.1 | 1 p2 | (TA)6  | 12 | 123  | 134 GACATCTTCGAGTGCTCGTT        |
| scaffold547969_16.2 | 1 p2 | (CT)7  | 14 | 2120 | 2133 CCCTCTTTCCCTCTCCAAAA       |
| scaffold548030_10.5 | 1 p2 | (CT)9  | 18 | 589  | 606 GCAGCAGAAATGAAGGGGAAG       |
| scaffold548080_11.8 | 1 p2 | (TA)6  | 12 | 53   | 64 GATCTCCACCATTTACGGGA         |
| scaffold548088_10.9 | 1 p2 | (AT)7  | 14 | 182  | 195 TGCTAATCTACGAATTTGGGA       |
| scaffold548101_12.4 | 1 p2 | (TA)7  | 14 | 110  | 123 TAAGGGCGGTATCACCTGAA        |
| scaffold548211_17.5 | 1 p2 | (CA)6  | 12 | 31   | 42 TCCACACAGAGACACTGGAACT       |
| scaffold548231_10.9 | 1 p2 | (CT)9  | 18 | 280  | 297 GGAAGATAGGGATAAAAGGCAA      |

|                     |      |        |    |      |      |                            |
|---------------------|------|--------|----|------|------|----------------------------|
| scaffold548317_10.0 | 1 p2 | (AC)6  | 12 | 35   | 46   | TTCTTTATTCACAATGAACTCAGATT |
| scaffold548389_15.6 | 1 p2 | (AT)10 | 20 | 889  | 908  | TCAATGATCACCGGATGAGA       |
| scaffold548394_12.4 | 1 p2 | (TA)6  | 12 | 1197 | 1208 | AGCTAGGGGTCTGCAAATCA       |
| scaffold548420_15.5 | 1 p2 | (TA)11 | 22 | 3532 | 3553 | GAAAGGCTCAGCCACTTCAG       |
| scaffold548439_15.7 | 1 p2 | (TA)6  | 12 | 1277 | 1288 | TCGAGCATTTCAGACAATC        |
| scaffold548492_15.2 | 1 p2 | (TA)7  | 14 | 2009 | 2022 | TCAAGGGCTTTTGTTAATTGTG     |
| scaffold548523_14.7 | 1 p2 | (CT)6  | 12 | 884  | 895  | ATCACGTTGAGGATTCGGAG       |
| scaffold548642_20.7 | 1 p2 | (CA)6  | 12 | 107  | 118  | GCACTCACACACACGAAAGAA      |
| scaffold548688_16.7 | 1 p2 | (TA)7  | 14 | 824  | 837  | AGCTCTCTATCATCCACGCA       |
| scaffold548721_14.2 | 1 p2 | (GA)7  | 14 | 608  | 621  | TCTTTACCCTTGTTGGTGG        |
| scaffold548756_15.9 | 1 p2 | (TA)7  | 14 | 5093 | 5106 | AACAAAAATGATGGTGAAGTGG     |
| scaffold548781_11.6 | 1 p2 | (TC)6  | 12 | 224  | 235  | TTGAACCTTGGGCTAAAGTATT     |
| scaffold548869_16.0 | 1 p2 | (TC)6  | 12 | 576  | 587  | TGACCACCACCTTGTTGAAA       |
| scaffold548871_15.0 | 1 p2 | (AT)10 | 20 | 749  | 768  | TGACAAACTCACATGGGTCAA      |
| scaffold548934_14.8 | 1 p2 | (CA)8  | 16 | 1073 | 1088 | CAAACATTTGAGGAAGGCGT       |
| scaffold549006_11.2 | 1 p2 | (AT)6  | 12 | 218  | 229  | CAAGCTTGGCGTTATGAATG       |
| scaffold549065_16.4 | 1 p2 | (CT)8  | 16 | 357  | 372  | ACCCCTTGTTGCCTTTCTT        |
| scaffold549189_15.7 | 1 p2 | (AT)9  | 18 | 568  | 585  | GCATCGTCTCAACCTTGAT        |
| scaffold549201_15.5 | 1 p2 | (GA)6  | 12 | 1121 | 1132 | AGGCATTTTTGAATTGGGTG       |
| scaffold549206_15.0 | 1 p2 | (AG)6  | 12 | 4751 | 4762 | GGGTACAGCTGCCACAAAAT       |
| scaffold549313_14.9 | 1 p2 | (AT)7  | 14 | 245  | 258  | ATTTTGCCACGAATTAGCA        |
| scaffold549324_15.5 | 1 p2 | (CT)6  | 12 | 381  | 392  | ACCCATCTCCTAACACGCAT       |
| scaffold549403_11.6 | 1 p2 | (TA)6  | 12 | 77   | 88   | GGTCTGTTTTCCATGGCCTA       |
| scaffold549483_10.7 | 1 p2 | (TA)6  | 12 | 182  | 193  | ACGTGTCGCAATCAGAATGT       |
| scaffold549522_20.7 | 1 p2 | (CA)6  | 12 | 136  | 147  | CACAACACACACGGACATCA       |
| scaffold549525_10.8 | 1 p2 | (GA)8  | 16 | 42   | 57   | CACGAGTGAAGAAAGGGAGAG      |
| scaffold549577_15.4 | 1 p2 | (TG)7  | 14 | 371  | 384  | GAACACGACACGATACGCAC       |
| scaffold549595_16.0 | 1 p2 | (CT)6  | 12 | 136  | 147  | GCATCTCTCCCTTGCTCTCTT      |
| scaffold549705_15.0 | 1 p2 | (AT)10 | 20 | 483  | 502  | TGAAGACATGGTTGGACAAAA      |
| scaffold549767_10.3 | 1 p2 | (GA)8  | 16 | 73   | 88   | TGAAACGGAGGGAGTACACA       |
| scaffold549803_13.9 | 1 p2 | (TA)7  | 14 | 155  | 168  | GATGCTGACCTAACCCCAA        |
| scaffold549820_18.7 | 1 p2 | (CT)7  | 14 | 58   | 71   | TGGTTATGCCTTCTTCTCCA       |
| scaffold549902_12.0 | 1 p2 | (TA)6  | 12 | 359  | 370  | ATGCGTTCCCAATAGCATT        |
| scaffold549908_16.9 | 1 p2 | (CT)7  | 14 | 156  | 169  | CTGCAAAAGCATCACCAGAA       |
| scaffold549950_17.8 | 1 p2 | (AT)7  | 14 | 722  | 735  | ATCAATTTTTGAGTTATGATGTTTGT |
| scaffold549977_13.9 | 1 p2 | (TA)10 | 20 | 103  | 122  | GTGGACGCTCCAGATTGTTT       |
| scaffold550135_10.2 | 1 p2 | (CT)7  | 14 | 116  | 129  | GAGGGATTTTGGGACGATTT       |
| scaffold550146_15.9 | 1 p2 | (AT)11 | 22 | 76   | 97   | TTGTGTGGTTGTGATTTAGTTATTTG |
| scaffold550178_19.6 | 1 p2 | (CT)6  | 12 | 235  | 246  | AGACTAAAGGCCAAGAGGGC       |
| scaffold550185_17.3 | 1 p2 | (AG)10 | 20 | 690  | 709  | ATGACAGTTGGGTTTCTGGG       |
| scaffold550186_14.7 | 1 p2 | (CT)7  | 14 | 155  | 168  | ACGTCTTTCATGCACCAAT        |
| scaffold550261_12.3 | 1 p2 | (TA)8  | 16 | 200  | 215  | TTCAACATACAGGCACGAAAA      |
| scaffold550296_12.2 | 1 p2 | (TA)8  | 16 | 198  | 213  | GGAACCCATCCACCCTATTT       |
| scaffold550523_15.6 | 1 p2 | (GA)7  | 14 | 4540 | 4553 | ATTTTGGCGCGAAACATAAG       |
| scaffold550548_18.7 | 1 p2 | (CT)6  | 12 | 59   | 70   | GTCACACACACTCACGGCTT       |
| scaffold550708_13.8 | 1 p2 | (TG)6  | 12 | 309  | 320  | CCGAAATCTCAAATCCGAG        |
| scaffold550971_11.7 | 1 p2 | (AG)6  | 12 | 419  | 430  | ATGGTCCCCTCAACACAAGA       |
| scaffold551117_11.3 | 1 p2 | (TC)7  | 14 | 76   | 89   | CCTAGCCTTTGCCCTCTTTT       |
| scaffold551260_17.5 | 1 p2 | (AT)6  | 12 | 157  | 168  | CAAACATTCATCAATATACACACGA  |
| scaffold551306_10.8 | 1 p2 | (GT)8  | 16 | 76   | 91   | CTGGAAGCACGTGACAGCTA       |
| scaffold551489_12.3 | 1 p2 | (AG)6  | 12 | 393  | 404  | CAGAGAAAAGTGAGCTCGGG       |
| scaffold551538_15.2 | 1 p2 | (TA)11 | 22 | 2161 | 2182 | CAGGTGGAGTTTCATCCACA       |
| scaffold551597_18.5 | 1 p2 | (CT)6  | 12 | 1020 | 1031 | GCTCCTCCCTTACTTGCTT        |
| scaffold551614_15.4 | 1 p2 | (AG)9  | 18 | 880  | 897  | TGGTTCACGTAAAACAGCCA       |
| scaffold551618_11.5 | 1 p2 | (CT)8  | 16 | 313  | 328  | ATAATTC AACCCACACCCCA      |
| scaffold551741_10.2 | 1 p2 | (TA)9  | 18 | 295  | 312  | AAACCCATCACCCACGTTTA       |
| scaffold551754_12.4 | 1 p2 | (TA)9  | 18 | 755  | 772  | TTTGGCGAGCAAATGAATAAGA     |
| scaffold551800_10.2 | 1 p2 | (TA)8  | 16 | 219  | 234  | CCTTACGAGGCCAAGAATGA       |

|                     |      |        |    |      |                                 |
|---------------------|------|--------|----|------|---------------------------------|
| scaffold551848_13.8 | 1 p2 | (TA)6  | 12 | 243  | 254 TTTGGGCTATTTCCCAACAG        |
| scaffold551941_17.1 | 1 p2 | (GA)7  | 14 | 941  | 954 TCATCCCATGCGTGTATGTT        |
| scaffold551952_11.7 | 1 p2 | (AT)7  | 14 | 54   | 67 GGCTTTATGATCCATTCTCAAA       |
| scaffold551965_14.2 | 1 p2 | (TC)6  | 12 | 462  | 473 GTTCCTCAAGCCGAAATCTG        |
| scaffold552111_16.2 | 1 p2 | (GA)10 | 20 | 922  | 941 CCAAACCAATTCAAAAGGGA        |
| scaffold552132_11.9 | 1 p2 | (TA)6  | 12 | 272  | 283 TCCCAGATGTTGAAATGGTG        |
| scaffold552153_14.7 | 1 p2 | (TA)9  | 18 | 294  | 311 ATTCCAAAAATCAAAGGCC         |
| scaffold552264_10.2 | 1 p2 | (CT)8  | 16 | 654  | 669 TCCCTAATTCCAATCCCCT         |
| scaffold552288_11.9 | 1 p2 | (TA)11 | 22 | 43   | 64 TCGTTTTGACAATATTTAGTGTTT     |
| scaffold552360_10.4 | 1 p2 | (TA)8  | 16 | 48   | 63 ATCGTTATTACCGGATCGC          |
| scaffold552395_13.4 | 1 p2 | (AT)11 | 22 | 236  | 257 CACATAAAGGATTCCCCTGG        |
| scaffold552604_11.1 | 1 p2 | (TA)6  | 12 | 139  | 150 TCAAAAACAGAGGAGAAGGGA       |
| scaffold552690_16.5 | 1 p2 | (CT)6  | 12 | 1449 | 1460 GCTTGATCGGCCTTGTAAGA       |
| scaffold552898_13.4 | 1 p2 | (AT)6  | 12 | 133  | 144 GGCCAAGTCTGGCCTATTTA        |
| scaffold552919_12.5 | 1 p2 | (AG)7  | 14 | 190  | 203 CACGGTTAGGCTCGAGAGAG        |
| scaffold553085_28.2 | 1 p2 | (TC)6  | 12 | 292  | 303 TTTGTGGCAACAAGTTTTCG        |
| scaffold553295_16.8 | 1 p2 | (TC)9  | 18 | 106  | 123 TCGATTTTCAGCATCATTGGT       |
| scaffold553331_14.2 | 1 p2 | (CG)6  | 12 | 46   | 57 ACCAATGGTGGTATGGTGTG         |
| scaffold553473_18.3 | 1 p2 | (CT)6  | 12 | 210  | 221 TCGTATGATCCAACCTTCGCA       |
| scaffold553529_11.9 | 1 p2 | (AG)9  | 18 | 255  | 272 GCTAATGGTGTGCTGGGTT         |
| scaffold553545_17.9 | 1 p2 | (GA)8  | 16 | 381  | 396 TGGCAGAACAAAACATCATGC       |
| scaffold553570_16.3 | 1 p2 | (AG)7  | 14 | 157  | 170 TATGAGGCCAAACTGGGAAG        |
| scaffold553589_17.3 | 1 p2 | (AT)6  | 12 | 7942 | 7953 CCATGCCACCTTCTATTGGT       |
| scaffold553785_16.9 | 1 p2 | (GC)6  | 12 | 2420 | 2431 GGTGGTATGGTGTGGAGGAC       |
| scaffold553822_16.0 | 1 p2 | (AT)6  | 12 | 697  | 708 GCGAAAATTCCACCATAGTCA       |
| scaffold553845_14.5 | 1 p2 | (TC)13 | 26 | 994  | 1019 CAACAAATTAGCTGAATGGCA      |
| scaffold554002_14.3 | 1 p2 | (AT)6  | 12 | 440  | 451 AGGGAGATCGACGTGAGAGA        |
| scaffold554140_10.7 | 1 p2 | (GA)7  | 14 | 52   | 65 TGGGGCCTACGAGAAATATG         |
| scaffold554161_20.2 | 1 p2 | (CT)6  | 12 | 296  | 307 GTCACCTCACACCACTCG          |
| scaffold554228_11.8 | 1 p2 | (AT)7  | 14 | 228  | 241 AAACAATGCCCGAAGATTGA        |
| scaffold554469_18.6 | 1 p2 | (GA)7  | 14 | 516  | 529 AGAAACGAAAGCACGACGAT        |
| scaffold554497_15.5 | 1 p2 | (TA)7  | 14 | 91   | 104 TCTTATAGCATCAACCGCCA        |
| scaffold554694_11.1 | 1 p2 | (TA)7  | 14 | 163  | 176 TGCAATCCAGTCGCATTTAG        |
| scaffold554868_17.0 | 1 p2 | (TA)7  | 14 | 52   | 65 GGGGTTATCATGGGATCAAG         |
| scaffold555019_13.7 | 1 p2 | (CT)13 | 26 | 1305 | 1330 AACTGCCCTCTATTCCGAT        |
| scaffold555038_15.3 | 1 p2 | (AG)8  | 16 | 573  | 588 TCAGGATCAGAACACCATCAA       |
| scaffold555065_12.7 | 1 p2 | (TA)6  | 12 | 2168 | 2179 GAATCGTAACATGTAACACACAAAA/ |
| scaffold555076_13.5 | 1 p2 | (TA)7  | 14 | 676  | 689 ACCGTGCAATCCAATTTAGC        |
| scaffold555353_14.1 | 1 p2 | (TA)6  | 12 | 295  | 306 GGCGGCATTCTATGAGGTAA        |
| scaffold555599_16.5 | 1 p2 | (AC)8  | 16 | 47   | 62 GAAAAGCTTGGCCATTCAAC         |
| scaffold555678_10.6 | 1 p2 | (AT)6  | 12 | 52   | 63 TGATTGTAAAACATGTATGGGATTG    |
| scaffold555837_13.0 | 1 p2 | (AT)6  | 12 | 135  | 146 ACCTCGTGATCATTCTTGCC        |
| scaffold555844_14.7 | 1 p2 | (CA)6  | 12 | 81   | 92 TTAGATCCGAGATGGTTGGG         |
| scaffold555903_11.3 | 1 p2 | (TA)7  | 14 | 114  | 127 AATAAGTTCACTTTATGCGAAAGAA   |
| scaffold555974_15.1 | 1 p2 | (CT)6  | 12 | 265  | 276 AACCCCAACCAACTCCTAC         |
| scaffold555981_10.2 | 1 p2 | (TC)6  | 12 | 82   | 93 CCGCCATTGACCTCATACTT         |
| scaffold556006_17.3 | 1 p2 | (CA)7  | 14 | 471  | 484 CGTGTCTGGTGTTCATGG          |
| scaffold556037_15.9 | 1 p2 | (GA)8  | 16 | 1058 | 1073 GAAGCCACAAAGTTGCATT        |
| scaffold556055_13.5 | 1 p2 | (TA)10 | 20 | 46   | 65 TGACGGGATTTAGGTGTTTTG        |
| scaffold556067_17.8 | 1 p2 | (CT)7  | 14 | 410  | 423 CTCTACCAACTCGCTTTCC         |
| scaffold556089_12.0 | 1 p2 | (TC)7  | 14 | 105  | 118 TGCTTCATTGGTGGTAACGA        |
| scaffold556121_10.5 | 1 p2 | (CT)6  | 12 | 420  | 431 AACCATGTCGAGGGTTTCAG        |
| scaffold556174_16.3 | 1 p2 | (AT)6  | 12 | 1325 | 1336 ACGGTTGAAACGTGGGTATG       |
| scaffold556192_15.2 | 1 p2 | (TA)8  | 16 | 197  | 212 TGAATGAAATCATGCCCT          |
| scaffold556269_14.6 | 1 p2 | (AT)6  | 12 | 603  | 614 CTGCTATTGAAACAACCCCG        |
| scaffold556283_10.8 | 1 p2 | (CT)6  | 12 | 215  | 226 ATTCACAATGGCAAGGAACC        |
| scaffold556286_11.5 | 1 p2 | (GA)6  | 12 | 542  | 553 CTCGAGTTTTCTTCGCAACC        |
| scaffold556602_11.1 | 1 p2 | (TA)7  | 14 | 478  | 491 TGGATGCACCAGATTGTTTC        |



|                     |      |        |    |      |      |                           |
|---------------------|------|--------|----|------|------|---------------------------|
| scaffold556686_12.6 | 1 p2 | (TC)10 | 20 | 51   | 70   | CTGCTCCTTCTCACTCTTCCA     |
| scaffold556812_19.4 | 1 p2 | (TG)7  | 14 | 65   | 78   | CGGTTATCACCCGGATCGC       |
| scaffold556875_15.5 | 1 p2 | (AT)7  | 14 | 1219 | 1232 | AGTTGGGAATTGGGATAGGG      |
| scaffold556934_16.5 | 1 p2 | (TA)11 | 22 | 60   | 81   | CCTAAAACTTCAAACCTGTGGGG   |
| scaffold556952_14.2 | 1 p2 | (CT)7  | 14 | 86   | 99   | CTCTTCACTCTCACTAGCCGC     |
| scaffold556985_15.2 | 1 p2 | (CT)8  | 16 | 1738 | 1753 | CTCATTTTCTCCGCATCACA      |
| scaffold557004_14.6 | 1 p2 | (GA)6  | 12 | 159  | 170  | GCACTTAGGAGAGAGATTGTTGG   |
| scaffold557047_10.2 | 1 p2 | (TG)6  | 12 | 291  | 302  | GCTCGAGGCATGTAAGAAGC      |
| scaffold557147_16.3 | 1 p2 | (TA)7  | 14 | 1118 | 1131 | CAACATGTGCAGGTTGAGGT      |
| scaffold557180_10.2 | 1 p2 | (GC)7  | 14 | 268  | 281  | TTCCGAACATTGCACCATTA      |
| scaffold557232_20.2 | 1 p2 | (GA)7  | 14 | 532  | 545  | CTACCCTTTCCGAACATCCC      |
| scaffold557276_13.6 | 1 p2 | (AT)8  | 16 | 935  | 950  | AGGACCGAAAGTAGCGAACA      |
| scaffold557296_12.8 | 1 p2 | (CT)7  | 14 | 392  | 405  | TGCTTATCGAGTTTGGGACA      |
| scaffold557306_11.9 | 1 p2 | (CT)7  | 14 | 261  | 274  | ATTCATTCTCCAACCATCGG      |
| scaffold557313_14.4 | 1 p2 | (TA)6  | 12 | 206  | 217  | GTGGTATAGCGGTTGGCATC      |
| scaffold557332_16.5 | 1 p2 | (TC)6  | 12 | 211  | 222  | CCATCATTTCCCTCACCTCA      |
| scaffold557435_18.7 | 1 p2 | (TC)7  | 14 | 409  | 422  | TTCCATCAATCCACTCCACC      |
| scaffold557470_17.7 | 1 p2 | (AG)9  | 18 | 2321 | 2338 | CGTACACCCATTTTGAAGGG      |
| scaffold557475_12.5 | 1 p2 | (AG)6  | 12 | 159  | 170  | GGGTGAGTAACGGTGCAAGT      |
| scaffold557476_13.7 | 1 p2 | (AG)6  | 12 | 159  | 170  | TTTGGGACTCAACGAAGACA      |
| scaffold557488_11.2 | 1 p2 | (CG)6  | 12 | 164  | 175  | GTGTGGAAAAGGGAGTGCAT      |
| scaffold557500_14.2 | 1 p2 | (AG)7  | 14 | 1341 | 1354 | AGAGGCTCGCCATTGATAGA      |
| scaffold557574_10.6 | 1 p2 | (GT)6  | 12 | 481  | 492  | ATGCGACAGAGTGTGTGAGG      |
| scaffold557614_11.5 | 1 p2 | (AT)7  | 14 | 372  | 385  | TGTTTTGGGCCTAAATGGAC      |
| scaffold557697_14.7 | 1 p2 | (AT)11 | 22 | 220  | 241  | GGAGAGGAAAAATGGGGAAA      |
| scaffold557765_16.0 | 1 p2 | (TA)6  | 12 | 100  | 111  | GCGTTGACGCTATTGAAATG      |
| scaffold557828_11.0 | 1 p2 | (TC)7  | 14 | 158  | 171  | AATCGGAGTGGATTTGATGC      |
| scaffold557920_11.3 | 1 p2 | (TA)6  | 12 | 183  | 194  | AGAAACGTGGTGACCAATC       |
| scaffold557982_13.5 | 1 p2 | (TA)10 | 20 | 47   | 66   | GGATTTAGCGGTTATTACCTGAA   |
| scaffold557989_15.2 | 1 p2 | (AC)6  | 12 | 63   | 74   | CTCTCGAGCCTAACTGTGGC      |
| scaffold558019_14.7 | 1 p2 | (AT)6  | 12 | 93   | 104  | TTTCCAATTTTGGGAAATACTATGA |
| scaffold558075_15.7 | 1 p2 | (GT)6  | 12 | 89   | 100  | GGAGAGTTGTAGAGTCAAGTTGTAA |
| scaffold558294_15.3 | 1 p2 | (TA)6  | 12 | 4394 | 4405 | AAAGAGCATCAAACATCATTTCC   |
| scaffold558310_11.6 | 1 p2 | (AT)9  | 18 | 50   | 67   | TTCCCGTATACAAATTCCAACA    |
| scaffold558330_10.4 | 1 p2 | (CT)6  | 12 | 543  | 554  | AGAACCACCAAAGCAATACCA     |
| scaffold558377_11.9 | 1 p2 | (TA)10 | 20 | 395  | 414  | CGGTACAGATTGCACACGAC      |
| scaffold558501_12.7 | 1 p2 | (TA)6  | 12 | 85   | 96   | TCACTTAGCTCTTGATTTTCATCAC |
| scaffold558671_17.0 | 1 p2 | (GA)6  | 12 | 272  | 283  | TTGGAGTCTCTGAACTCGG       |
| scaffold558710_12.3 | 1 p2 | (TA)8  | 16 | 488  | 503  | CGACCGAATACTCACCCCTA      |
| scaffold558807_14.2 | 1 p2 | (TA)6  | 12 | 160  | 171  | CAAGGAAGGAACCTCCATTTT     |
| scaffold558808_15.9 | 1 p2 | (TA)7  | 14 | 158  | 171  | TTTCGATATGGCTCGGTAGG      |
| scaffold558810_15.7 | 1 p2 | (AT)8  | 16 | 160  | 175  | ACGGCTGGCATTGTGTTAGAG     |
| scaffold558855_14.6 | 1 p2 | (AT)8  | 16 | 267  | 282  | AAACTGCTGTAGCGAACCGT      |
| scaffold558875_13.9 | 1 p2 | (TC)6  | 12 | 571  | 582  | CAATTCTCCATGCACACCAG      |
| scaffold558941_10.3 | 1 p2 | (CT)6  | 12 | 83   | 94   | GCCCTAGAATCTGCCCTCTT      |
| scaffold559054_10.0 | 1 p2 | (AG)8  | 16 | 699  | 714  | GCCAGTCCAATGGTCGTA        |
| scaffold559395_17.0 | 1 p2 | (GT)6  | 12 | 1579 | 1590 | ATCATCAGCTCGTGTGCTTG      |
| scaffold559424_15.6 | 1 p2 | (GT)6  | 12 | 193  | 204  | CTCGTGAGAGTGCCTGAGAG      |
| scaffold559628_16.2 | 1 p2 | (TC)7  | 14 | 106  | 119  | ATTCCCAACTGATTGGCTTG      |
| scaffold559895_15.0 | 1 p2 | (AG)10 | 20 | 153  | 172  | TGAGCAAGGGACAAATGTGA      |
| scaffold559935_15.7 | 1 p2 | (AT)6  | 12 | 612  | 623  | ATTGAAACCATGCCCATTTT      |
| scaffold559963_15.4 | 1 p2 | (TA)12 | 24 | 41   | 64   | CCAAATTTAAGGGTTATCACCTG   |
| scaffold559978_11.8 | 1 p2 | (TC)6  | 12 | 319  | 330  | TATCCCATGATCGAGTTCCG      |
| scaffold559987_18.2 | 1 p2 | (AG)9  | 18 | 154  | 171  | TATGAAGCATAACCATGCCG      |
| scaffold560056_10.2 | 1 p2 | (GA)8  | 16 | 390  | 405  | CTGAGTGCCTGTCACGAAAA      |
| scaffold560209_13.8 | 1 p2 | (TA)7  | 14 | 67   | 80   | TTGAGCTGTTATGCGTTTTGA     |
| scaffold560222_10.0 | 1 p2 | (TA)9  | 18 | 498  | 515  | GTTTTAGAGTTGGCATCGGG      |
| scaffold560259_14.7 | 1 p2 | (AC)7  | 14 | 2118 | 2131 | GGCCAAGGGAAAGCTTTTAT      |

|                     |      |        |    |      |      |                             |
|---------------------|------|--------|----|------|------|-----------------------------|
| scaffold560291_18.9 | 1 p2 | (TC)6  | 12 | 232  | 243  | CGGCTTGAAAACGAGAAATC        |
| scaffold560350_14.1 | 1 p2 | (GA)7  | 14 | 90   | 103  | GCAGGAAAATGAAAAGTGGG        |
| scaffold560464_16.7 | 1 p2 | (CT)6  | 12 | 743  | 754  | CTTCTCCTTGTCGTGCCTTC        |
| scaffold560569_11.7 | 1 p2 | (AT)7  | 14 | 452  | 465  | AGTAAGCAACTCCGGTGGGT        |
| scaffold560607_16.3 | 1 p2 | (AG)6  | 12 | 1332 | 1343 | CTCTGGAAGAAGAGCCATCG        |
| scaffold560639_13.9 | 1 p2 | (TC)9  | 18 | 219  | 236  | AATTTTGACGGCTCCAAGTG        |
| scaffold560740_11.3 | 1 p2 | (CT)6  | 12 | 146  | 157  | GCATCTACTCTGGCTCTCATTG      |
| scaffold560834_16.9 | 1 p2 | (TC)6  | 12 | 2839 | 2850 | AATGGACCGGACGTGAACTA        |
| scaffold560851_13.9 | 1 p2 | (TA)9  | 18 | 139  | 156  | AACATGTTGATCTAAATAACGCAG    |
| scaffold560857_11.9 | 1 p2 | (TA)10 | 20 | 985  | 1004 | CGTATTGCAGTGAAATTTTAGCA     |
| scaffold560899_15.9 | 1 p2 | (TC)10 | 20 | 1794 | 1813 | CAGACATGTGTACCACCCCA        |
| scaffold560969_13.9 | 1 p2 | (AC)6  | 12 | 806  | 817  | ACCGACCACCCTCTTTTTCT        |
| scaffold561070_10.6 | 1 p2 | (AT)7  | 14 | 98   | 111  | CACCTGATCGCGACCCTAT         |
| scaffold561218_17.9 | 1 p2 | (TA)6  | 12 | 1787 | 1798 | TCTACACGCGCATGTCATTT        |
| scaffold561260_13.6 | 1 p2 | (TA)7  | 14 | 160  | 173  | TTACCACAATTTCCCTTGTTTT      |
| scaffold561304_12.3 | 1 p2 | (TG)6  | 12 | 439  | 450  | GTTTCAGTTGGCAGTGCAGA        |
| scaffold561453_12.6 | 1 p2 | (TA)6  | 12 | 94   | 105  | TTTGCCCTTATTTAGCACGG        |
| scaffold561464_12.4 | 1 p2 | (TA)6  | 12 | 535  | 546  | GACAATTGAAAGAGCACTCGC       |
| scaffold561612_15.1 | 1 p2 | (GA)6  | 12 | 347  | 358  | ACCTGCCCAGATCTCTCTGA        |
| scaffold561613_15.8 | 1 p2 | (AG)7  | 14 | 348  | 361  | CGGTTTCGAGAGAGAAGTGG        |
| scaffold561727_13.7 | 1 p2 | (AT)7  | 14 | 67   | 80   | CGTATATTTGCGGGGTTGTT        |
| scaffold561754_19.2 | 1 p2 | (AC)6  | 12 | 1016 | 1027 | GTAAGGCCAGGCACATTCAT        |
| scaffold561839_12.6 | 1 p2 | (TA)6  | 12 | 161  | 172  | TCGAATTTCTAGCGTGATGG        |
| scaffold561840_15.8 | 1 p2 | (TA)6  | 12 | 161  | 172  | GCTTAATGCGTAGCTGGGAT        |
| scaffold561841_10.4 | 1 p2 | (AT)10 | 20 | 53   | 72   | CAAACGTGAGTGGGAGATGT        |
| scaffold561868_12.2 | 1 p2 | (AT)10 | 20 | 654  | 673  | ATGGCGTTAGAATGCCAAAC        |
| scaffold561885_17.3 | 1 p2 | (TG)8  | 16 | 2299 | 2314 | AGTTTTCGTGGCCTCACATT        |
| scaffold562217_14.0 | 1 p2 | (CA)6  | 12 | 317  | 328  | TGATAGCCAAAATTTACAACGTG     |
| scaffold562222_12.0 | 1 p2 | (TA)10 | 20 | 601  | 620  | TGTGCTTATCCACCGACAAA        |
| scaffold562231_14.4 | 1 p2 | (AG)7  | 14 | 94   | 107  | AAAACACTACGATCTGCCACCG      |
| scaffold562239_16.9 | 1 p2 | (CT)8  | 16 | 158  | 173  | TCAATTGCGGCTTAAACTCC        |
| scaffold562316_15.9 | 1 p2 | (GA)7  | 14 | 704  | 717  | GAAATTCGCCCGAGTATAGC        |
| scaffold562358_12.7 | 1 p2 | (AT)9  | 18 | 579  | 596  | AATTTTTGTTTGCTGCCGAT        |
| scaffold562426_18.7 | 1 p2 | (TA)6  | 12 | 258  | 269  | ATTACGTGATCCAACGGTC         |
| scaffold562454_10.4 | 1 p2 | (AG)6  | 12 | 380  | 391  | GGATGGATGAAAAGGCTCAC        |
| scaffold562505_14.2 | 1 p2 | (TA)7  | 14 | 624  | 637  | CACCAAATTTTATCATTTTTAATTCTC |
| scaffold562583_10.0 | 1 p2 | (AT)7  | 14 | 49   | 62   | TTGGAGCTTCAAACCTTAGGC       |
| scaffold562623_12.7 | 1 p2 | (CT)6  | 12 | 1092 | 1103 | CAC TTCACCATTCACCATTT       |
| scaffold562626_13.3 | 1 p2 | (AG)6  | 12 | 572  | 583  | ACTTCGTGGATTGGATTTTCG       |
| scaffold562635_17.7 | 1 p2 | (GA)8  | 16 | 58   | 73   | GCGACAATTCTGCGTGTTAT        |
| scaffold562686_16.6 | 1 p2 | (TC)12 | 24 | 2686 | 2709 | TGAGCATAATCTTGGGGCTC        |
| scaffold562688_12.7 | 1 p2 | (TG)7  | 14 | 67   | 80   | CGGTTATCACCGGATCGC          |
| scaffold562697_11.3 | 1 p2 | (AT)8  | 16 | 78   | 93   | TTCGGAGCATGATTTAAGTGG       |
| scaffold562808_11.0 | 1 p2 | (CT)7  | 14 | 83   | 96   | TTCCCCTTTGCCCTCTATTT        |
| scaffold562856_11.4 | 1 p2 | (TC)6  | 12 | 407  | 418  | ATCAGCGACGAGTCCAAGAC        |
| scaffold562890_14.3 | 1 p2 | (TA)10 | 20 | 526  | 545  | CCAACAAAAGGTGTGTGCAT        |
| scaffold562958_12.1 | 1 p2 | (AG)6  | 12 | 154  | 165  | GCGACAGAAAAGAACGAGG         |
| scaffold562967_15.1 | 1 p2 | (CT)9  | 18 | 829  | 846  | GGGTTGAAAATGGTGTGACG        |
| scaffold562985_16.7 | 1 p2 | (GT)6  | 12 | 3496 | 3507 | TGCTGCTGCTGATCAAATTC        |
| scaffold563044_17.6 | 1 p2 | (TA)8  | 16 | 1544 | 1559 | CGAGGCTTAATGGGGACATA        |
| scaffold563053_15.7 | 1 p2 | (TA)7  | 14 | 719  | 732  | GCCACCTCACTCTTGCTACC        |
| scaffold563133_16.8 | 1 p2 | (GA)6  | 12 | 4354 | 4365 | CGATTGAGTTTCAGCGCATA        |
| scaffold563196_17.5 | 1 p2 | (AT)7  | 14 | 159  | 172  | AAACCGCTCGAATCCGTA          |
| scaffold563197_11.5 | 1 p2 | (TA)7  | 14 | 160  | 173  | CTTTAGGGCCCTTGATTTCC        |
| scaffold563215_11.7 | 1 p2 | (CT)6  | 12 | 95   | 106  | TCTTGGTTGGTGGAAGAACA        |
| scaffold563220_16.9 | 1 p2 | (CA)6  | 12 | 286  | 297  | AGGATTGTGGAGGATGGTGT        |
| scaffold563255_13.2 | 1 p2 | (TA)6  | 12 | 1151 | 1162 | CAATTTTCAATCACAAGTTATAGTGG/ |
| scaffold563510_12.1 | 1 p2 | (AT)9  | 18 | 139  | 156  | AATTATTCGGGCTAACGGG         |

|                     |      |        |    |      |      |                            |
|---------------------|------|--------|----|------|------|----------------------------|
| scaffold563554_13.5 | 1 p2 | (AT)7  | 14 | 168  | 181  | AGTGATGGAACCAACCTTGC       |
| scaffold563620_16.5 | 1 p2 | (AT)6  | 12 | 97   | 108  | TCCCTTGCTTTCTAACCCCT       |
| scaffold563709_11.5 | 1 p2 | (GA)6  | 12 | 242  | 253  | TTCCTTTGTCAATCCAACCA       |
| scaffold563752_15.4 | 1 p2 | (TC)6  | 12 | 162  | 173  | ATAAGTTTGTGCCTCCCGTG       |
| scaffold563879_14.3 | 1 p2 | (AG)10 | 20 | 832  | 851  | TGGGAAAGTGTGGGATTTTC       |
| scaffold563932_13.8 | 1 p2 | (GA)6  | 12 | 2574 | 2585 | TCCTAAGCTTTTCTGCTGTC       |
| scaffold563953_17.2 | 1 p2 | (CT)6  | 12 | 525  | 536  | TGTTTGATGGCTCTTTGCAG       |
| scaffold564036_11.5 | 1 p2 | (AC)6  | 12 | 79   | 90   | CGAAGTGTTGATTGAATTGCC      |
| scaffold564148_16.2 | 1 p2 | (AT)6  | 12 | 2412 | 2423 | GTACAATCTTCCTGCCACCC       |
| scaffold564242_20.4 | 1 p2 | (TA)6  | 12 | 134  | 145  | CTATTGAAACAACCCCGGAC       |
| scaffold564251_12.5 | 1 p2 | (AC)6  | 12 | 469  | 480  | TGGCAGTTACCTATCCCCAC       |
| scaffold564312_12.1 | 1 p2 | (AG)6  | 12 | 231  | 242  | GGAGGTGAATGGAGAGTGA        |
| scaffold564395_13.3 | 1 p2 | (TA)7  | 14 | 221  | 234  | ACACATTTTTCTTTGGGCG        |
| scaffold564462_18.1 | 1 p2 | (AT)9  | 18 | 155  | 172  | TCTTCGGTCCGACCTTGAT        |
| scaffold564465_17.6 | 1 p2 | (GA)6  | 12 | 433  | 444  | GGAACCCATGAATTTGTGCT       |
| scaffold564515_13.0 | 1 p2 | (TC)6  | 12 | 54   | 65   | TCTCTCACCTCACCTCTCCA       |
| scaffold564538_16.7 | 1 p2 | (AG)8  | 16 | 37   | 52   | TGAAGAACGATTACAAAGTTTATCCA |
| scaffold564579_11.7 | 1 p2 | (TA)7  | 14 | 160  | 173  | CACAGAACATAATTCCGCAAAA     |
| scaffold564630_18.5 | 1 p2 | (TA)8  | 16 | 158  | 173  | GAGGGGTGGACTATTTCTTGC      |
| scaffold564646_19.3 | 1 p2 | (TA)8  | 16 | 357  | 372  | CCAGGGCATATACCCATTG        |
| scaffold564706_12.3 | 1 p2 | (TA)8  | 16 | 322  | 337  | GTACCTGGCTGTAGGATGCC       |
| scaffold564717_14.3 | 1 p2 | (CT)6  | 12 | 1596 | 1607 | ACCTACCGTCACAATCTCGG       |
| scaffold564724_15.0 | 1 p2 | (AT)6  | 12 | 1193 | 1204 | ATTGGATGGAATGCTCTGC        |
| scaffold564772_10.8 | 1 p2 | (TA)8  | 16 | 69   | 84   | ACAACTAATCAAGTTCCGCA       |
| scaffold564776_13.4 | 1 p2 | (AG)6  | 12 | 80   | 91   | ACGGTGGGCCGAGTATATTA       |
| scaffold564797_10.9 | 1 p2 | (AG)9  | 18 | 484  | 501  | AGTGAAGGTGACGAAATGGG       |
| scaffold565051_13.3 | 1 p2 | (TG)6  | 12 | 262  | 273  | TGCTCTAGGTAAACCCACGG       |
| scaffold565097_14.3 | 1 p2 | (TC)7  | 14 | 1385 | 1398 | CCATTCTGCAAACCATCTT        |
| scaffold565098_15.0 | 1 p2 | (AG)9  | 18 | 157  | 174  | TTCTTGGCGTGGTGTGTAG        |
| scaffold565111_14.5 | 1 p2 | (GA)8  | 16 | 1156 | 1171 | GAGTCGTTCCGGTACGTGTT       |
| scaffold565137_21.4 | 1 p2 | (TA)9  | 18 | 388  | 405  | TTTCAAATGGAATTCATATAGCCA   |
| scaffold565267_10.6 | 1 p2 | (CT)7  | 14 | 182  | 195  | GCCACTCAGCCTACATCCAC       |
| scaffold565292_11.0 | 1 p2 | (AT)11 | 22 | 245  | 266  | ACGAGACTGTCCGTCAACAA       |
| scaffold565336_10.4 | 1 p2 | (AT)8  | 16 | 200  | 215  | ATTGCAATGACTTGGCATGA       |
| scaffold565357_17.1 | 1 p2 | (CT)6  | 12 | 140  | 151  | GGATCGAAAAGAGAGGGAGG       |
| scaffold565407_11.9 | 1 p2 | (AT)12 | 24 | 906  | 929  | CGGTCGTTTTCCAATTTGTT       |
| scaffold565538_15.3 | 1 p2 | (TA)6  | 12 | 1133 | 1144 | CATCAATTTTCAGGCCAACA       |
| scaffold565619_15.7 | 1 p2 | (AC)7  | 14 | 1696 | 1709 | CCTGCGATATCCTCACCAAT       |
| scaffold565636_18.2 | 1 p2 | (AT)7  | 14 | 1849 | 1862 | TGGTGAGAGAAAATGGAGGG       |
| scaffold565677_16.9 | 1 p2 | (TA)6  | 12 | 1347 | 1358 | CCGCCGAAAAGACAAATAAC       |
| scaffold565809_20.4 | 1 p2 | (TC)6  | 12 | 420  | 431  | CTCCAACCTCCATCACCATCA      |
| scaffold565819_16.4 | 1 p2 | (GA)7  | 14 | 333  | 346  | TTGCAAAGTCAGACGTCATTG      |
| scaffold565878_10.9 | 1 p2 | (AT)8  | 16 | 386  | 401  | CCTCAGTTAGGATTCAGTATCATAT  |
| scaffold565964_16.7 | 1 p2 | (TC)6  | 12 | 192  | 203  | TGACACCTAGCCCATAACCC       |
| scaffold565978_14.3 | 1 p2 | (AT)8  | 16 | 179  | 194  | TCATTTGATCACAAACCCCC       |
| scaffold565995_13.8 | 1 p2 | (AT)6  | 12 | 266  | 277  | TGTGCAGAAAACAGAGCTGG       |
| scaffold566013_14.1 | 1 p2 | (TC)6  | 12 | 708  | 719  | CAGCTGACTGACAGAATGGG       |
| scaffold566026_11.4 | 1 p2 | (GA)7  | 14 | 329  | 342  | TACCCCAATAATCAGCCCAA       |
| scaffold566083_18.1 | 1 p2 | (AT)9  | 18 | 464  | 481  | CGGATTCAAGCTGTGAGAAA       |
| scaffold566115_15.9 | 1 p2 | (TC)8  | 16 | 522  | 537  | GGATGTTGAGATCAGAACCACA     |
| scaffold566295_17.9 | 1 p2 | (CT)6  | 12 | 1854 | 1865 | TTGGGAACCTGGATACAAGGC      |
| scaffold566366_13.7 | 1 p2 | (AT)11 | 22 | 108  | 129  | TGAGAAGGAAATTAATGTGTTTTAAG |
| scaffold566395_11.2 | 1 p2 | (AT)6  | 12 | 89   | 100  | TGTCATGTAATAGCCGTGCAA      |
| scaffold566425_15.5 | 1 p2 | (GA)6  | 12 | 2011 | 2022 | CAGCACTCTGCATTTCCCTT       |
| scaffold566539_13.0 | 1 p2 | (TA)7  | 14 | 287  | 300  | GCTTGAAGGATGAAGGTTGG       |
| scaffold566575_12.2 | 1 p2 | (TA)7  | 14 | 207  | 220  | GCGAGTTGTTTCATGCCATA       |
| scaffold566696_13.6 | 1 p2 | (CA)8  | 16 | 314  | 329  | GCTCAAAGCACATCTGCAA        |
| scaffold566713_18.2 | 1 p2 | (AG)6  | 12 | 164  | 175  | TGGCATTTTCCCACGTTAAT       |

|                     |      |        |    |      |      |                          |
|---------------------|------|--------|----|------|------|--------------------------|
| scaffold566720_14.6 | 1 p2 | (TG)7  | 14 | 135  | 148  | CATTTGGTGAGGAGGGAGAA     |
| scaffold566756_14.8 | 1 p2 | (AC)7  | 14 | 722  | 735  | CATGTTTTTGCGCAATTTCT     |
| scaffold566772_12.9 | 1 p2 | (AT)6  | 12 | 267  | 278  | TTCTCAGCATATGGGAAGGG     |
| scaffold566830_11.6 | 1 p2 | (GA)6  | 12 | 323  | 334  | GAGAGTGGAGAGAGAGAGGGAA   |
| scaffold566861_14.3 | 1 p2 | (TA)11 | 22 | 88   | 109  | CCCTTTATTTGGTTGATCTAATGG |
| scaffold566885_20.0 | 1 p2 | (TC)6  | 12 | 423  | 434  | TGTGCGAGTCGGTAATTCTG     |
| scaffold566929_17.2 | 1 p2 | (TA)6  | 12 | 100  | 111  | TAGCATGCAAAGGAACACG      |
| scaffold566974_13.9 | 1 p2 | (TG)6  | 12 | 1684 | 1695 | GAATTGGTATGCAAACGTGG     |
| scaffold567063_16.0 | 1 p2 | (TC)7  | 14 | 644  | 657  | TTTGACGGCACAATTCTGTT     |
| scaffold567128_10.8 | 1 p2 | (TA)9  | 18 | 475  | 492  | CACGTGGCATGATAATAGCG     |
| scaffold567273_17.0 | 1 p2 | (CA)6  | 12 | 76   | 87   | CCTCACCCATTACACACAC      |
| scaffold567281_16.0 | 1 p2 | (AT)7  | 14 | 262  | 275  | CACATTTGCAGATGACAGCA     |
| scaffold567287_12.2 | 1 p2 | (TA)10 | 20 | 65   | 84   | TCCAATGGATGAGGATGGTT     |
| scaffold567478_14.2 | 1 p2 | (AT)7  | 14 | 990  | 1003 | GCCACTTGAGGGAGTTGAAA     |
| scaffold567594_12.6 | 1 p2 | (TA)13 | 26 | 39   | 64   | TAAGAAATGCATGCACCTGA     |
| scaffold567631_10.2 | 1 p2 | (TA)8  | 16 | 304  | 319  | CTGCTCGTTAATGCGAGTGA     |
| scaffold567690_14.4 | 1 p2 | (TA)12 | 24 | 86   | 109  | CAAAAATCTAACGGCCCAAGA    |
| scaffold567693_10.9 | 1 p2 | (TA)6  | 12 | 337  | 348  | ATTGTGTGACGGGAAAAACC     |
| scaffold567744_21.0 | 1 p2 | (AG)6  | 12 | 42   | 53   | CGCTCTATCTTCTTTCTCTCAGG  |
| scaffold567770_16.3 | 1 p2 | (AT)6  | 12 | 180  | 191  | AAATAGCAAATGTTTAGCATGCAC |
| scaffold567804_15.4 | 1 p2 | (TA)6  | 12 | 2523 | 2534 | TTTTTGGGAACTTGTCTCTGG    |
| scaffold567861_17.9 | 1 p2 | (AT)8  | 16 | 111  | 126  | CATTTTCAATGACCCGAACA     |
| scaffold567942_15.5 | 1 p2 | (TC)7  | 14 | 161  | 174  | CGTGACCTTTTGGTCTCAGG     |
| scaffold567943_16.9 | 1 p2 | (TC)8  | 16 | 159  | 174  | CCTGATCCTCCTCCATTTCA     |
| scaffold567951_13.2 | 1 p2 | (CT)6  | 12 | 70   | 81   | GAGGACATTTGGACCTGAAAA    |
| scaffold568052_14.8 | 1 p2 | (GA)7  | 14 | 4573 | 4586 | AAAATTGCAGTGCCATCACC     |
| scaffold568086_12.6 | 1 p2 | (AT)9  | 18 | 211  | 228  | GTCGCAATCAAGCGACATA      |
| scaffold568170_16.9 | 1 p2 | (CT)6  | 12 | 488  | 499  | TGAGAAATGCAAAAAGCATGA    |
| scaffold568177_12.2 | 1 p2 | (GT)6  | 12 | 163  | 174  | GATATACCGGAAGGGGGAGA     |
| scaffold568178_13.7 | 1 p2 | (CT)8  | 16 | 111  | 126  | CACTACTAGGGTTTGGGAGGG    |
| scaffold568252_12.9 | 1 p2 | (AT)6  | 12 | 243  | 254  | TGTCACCCAAGTCTCATGCT     |
| scaffold568265_12.5 | 1 p2 | (TA)8  | 16 | 365  | 380  | AGGATTTGGGTTGTGAGGTG     |
| scaffold568346_10.5 | 1 p2 | (AT)9  | 18 | 263  | 280  | CCGATTGTGAGCATGAAAAC     |
| scaffold568371_15.2 | 1 p2 | (CT)6  | 12 | 128  | 139  | AAGAGGGGGCGACGAAATTAG    |
| scaffold568405_16.2 | 1 p2 | (TC)6  | 12 | 1216 | 1227 | GCCCCATCTCCATCTATTCA     |
| scaffold568640_14.6 | 1 p2 | (AT)6  | 12 | 408  | 419  | TCGCTGAGAACACAAGCATT     |
| scaffold568703_11.2 | 1 p2 | (CT)6  | 12 | 348  | 359  | GTCAACAGCTCGGTACAGCA     |
| scaffold568707_13.2 | 1 p2 | (TA)8  | 16 | 97   | 112  | TCAATCTAACGAAATCTGCGG    |
| scaffold568719_13.9 | 1 p2 | (AT)10 | 20 | 411  | 430  | GTTTTTGGTTGTCGTGGGTT     |
| scaffold568758_10.0 | 1 p2 | (GC)7  | 14 | 287  | 300  | CACTATTATGGCCGACCGTT     |
| scaffold568823_13.4 | 1 p2 | (AT)6  | 12 | 89   | 100  | GGATATCCGAAACATCCGATT    |
| scaffold568828_14.8 | 1 p2 | (TA)7  | 14 | 162  | 175  | TGCACCCATACCTACACGAA     |
| scaffold568897_10.2 | 1 p2 | (TA)7  | 14 | 201  | 214  | AAACCTTCTGCCCTTCTA       |
| scaffold568922_10.6 | 1 p2 | (AT)6  | 12 | 257  | 268  | AGATGGAACGACCCTGTGAG     |
| scaffold568930_11.2 | 1 p2 | (AG)6  | 12 | 69   | 80   | AACCACCACCATTGAAAGGA     |
| scaffold569112_18.2 | 1 p2 | (TC)6  | 12 | 400  | 411  | TCCAACACATCCCTACAACTTTT  |
| scaffold569140_15.2 | 1 p2 | (GA)6  | 12 | 3243 | 3254 | GGCTGATGTTGTTGTTGGTG     |
| scaffold569145_16.5 | 1 p2 | (AT)10 | 20 | 1070 | 1089 | CAAAAATATGGCCGTGAAC      |
| scaffold569250_12.6 | 1 p2 | (AC)6  | 12 | 65   | 76   | GTTAGGAAACGAAAGGGGGA     |
| scaffold569413_13.9 | 1 p2 | (GA)6  | 12 | 252  | 263  | TGGCTGAGGATGAATGAACA     |
| scaffold569448_14.4 | 1 p2 | (CT)8  | 16 | 2168 | 2183 | TGCATGCATTTATTTGACAGC    |
| scaffold569456_14.2 | 1 p2 | (TA)8  | 16 | 1285 | 1300 | TTTTGGAGATTCTGGGTTCCG    |
| scaffold569605_13.2 | 1 p2 | (TA)9  | 18 | 1076 | 1093 | TTAAGGTGGTGTTCATGG       |
| scaffold569609_16.6 | 1 p2 | (TA)7  | 14 | 1626 | 1639 | AAGGTGATCTACGTCCACGG     |
| scaffold569684_11.8 | 1 p2 | (TA)8  | 16 | 50   | 65   | TAAAAACAGGGGCAAAGGTG     |
| scaffold569781_17.4 | 1 p2 | (AT)7  | 14 | 162  | 175  | AACTCGAATTGCAACGAAAA     |
| scaffold569872_17.0 | 1 p2 | (TG)6  | 12 | 1972 | 1983 | TGGGAGGATCTTCAGATTGG     |
| scaffold569911_16.6 | 1 p2 | (AG)6  | 12 | 122  | 133  | CCCAAACATGCAAACACAG      |

|                     |      |        |    |      |                               |                       |
|---------------------|------|--------|----|------|-------------------------------|-----------------------|
| scaffold569943_18.6 | 1 p2 | (TA)8  | 16 | 46   | 61 TGC                        | TTTTGACGATATATAGTGTTT |
| scaffold570049_17.4 | 1 p2 | (GA)6  | 12 | 2288 | 2299 AAACCTTCTGGCTGAACCAA     |                       |
| scaffold570085_14.9 | 1 p2 | (GA)6  | 12 | 419  | 430 GAAGCACATTGCAGCAAAAA      |                       |
| scaffold570105_18.8 | 1 p2 | (TA)12 | 24 | 306  | 329 TTGTGCTGAAAATCTCCTCAGA    |                       |
| scaffold570235_14.4 | 1 p2 | (GA)6  | 12 | 3089 | 3100 AGCAAGTCAATTGGGGAATG     |                       |
| scaffold570245_19.1 | 1 p2 | (AT)8  | 16 | 161  | 176 GAAGAAAGAGGGGAAGTGGGG     |                       |
| scaffold570287_18.3 | 1 p2 | (TA)8  | 16 | 67   | 82 CGGTTATCACCGGATCGC         |                       |
| scaffold570313_15.0 | 1 p2 | (GA)11 | 22 | 471  | 492 TTGCACTCTGTGGAGCAATC      |                       |
| scaffold570441_16.0 | 1 p2 | (AG)7  | 14 | 58   | 71 GATTTGATTCTTTTGTCCCC       |                       |
| scaffold570591_13.5 | 1 p2 | (TA)6  | 12 | 1015 | 1026 TGCATTACAGCTTGTTGCAG     |                       |
| scaffold570592_12.9 | 1 p2 | (AT)9  | 18 | 601  | 618 GCAATTGATTGAAATGCCCT      |                       |
| scaffold570616_11.9 | 1 p2 | (TC)6  | 12 | 211  | 222 AGAGGCGGCCTTTTTATTCT      |                       |
| scaffold570680_17.4 | 1 p2 | (GT)7  | 14 | 88   | 101 TCCTCTTTCAGGTCCAAGTG      |                       |
| scaffold570721_12.0 | 1 p2 | (GT)6  | 12 | 501  | 512 GATCAAGCTTCAGACCGGAG      |                       |
| scaffold570867_14.0 | 1 p2 | (TC)6  | 12 | 264  | 275 GTGGGCTATGGCTCAAGTGT      |                       |
| scaffold571049_10.9 | 1 p2 | (AT)10 | 20 | 83   | 102 CGTCCACGACCTCCACTATT      |                       |
| scaffold571050_15.0 | 1 p2 | (GA)6  | 12 | 4839 | 4850 CAAGAAACCATGGAGAATGGA    |                       |
| scaffold571122_15.4 | 1 p2 | (TA)7  | 14 | 452  | 465 CCATGAATCTTTCACATTTTTCA   |                       |
| scaffold571314_15.6 | 1 p2 | (TC)6  | 12 | 55   | 66 TCTCTCTTTTTGGTTGGTGA       |                       |
| scaffold571363_16.2 | 1 p2 | (CA)6  | 12 | 2140 | 2151 TTTCCCAAATTATGCTCACTCA   |                       |
| scaffold571404_13.3 | 1 p2 | (GA)6  | 12 | 1331 | 1342 GTGATCTCGCCGCTTTAGAC     |                       |
| scaffold571712_13.2 | 1 p2 | (AC)6  | 12 | 110  | 121 CTCTCTCGAGCCTAACCGTG      |                       |
| scaffold571731_12.8 | 1 p2 | (TA)9  | 18 | 330  | 347 GGTGCATAGAAATTGCTGCC      |                       |
| scaffold571780_13.8 | 1 p2 | (CT)8  | 16 | 270  | 285 TTTAAAGGGTGGTCCCATCA      |                       |
| scaffold571856_10.3 | 1 p2 | (AT)6  | 12 | 280  | 291 ATCACTTCGGCAAATTTGG       |                       |
| scaffold571857_15.6 | 1 p2 | (CT)8  | 16 | 1060 | 1075 GACGTGTAAACCATCACCCC     |                       |
| scaffold571925_12.5 | 1 p2 | (CT)7  | 14 | 53   | 66 AATCCCTTCTCCTCTCCCA        |                       |
| scaffold571966_15.1 | 1 p2 | (TA)6  | 12 | 489  | 500 TTTCAAATTTGGCACTTAGCA     |                       |
| scaffold571992_14.3 | 1 p2 | (AT)10 | 20 | 1311 | 1330 TCTTCTCGCAATCACTTTCT     |                       |
| scaffold572265_15.7 | 1 p2 | (CT)6  | 12 | 1426 | 1437 TTGCTGGCGACATTATCAAG     |                       |
| scaffold572289_14.3 | 1 p2 | (TA)13 | 26 | 41   | 66 GAGGGTTATCATGGGATCAAG      |                       |
| scaffold572297_16.1 | 1 p2 | (TA)12 | 24 | 430  | 453 TCATATGCGTTTCGTCATTCC     |                       |
| scaffold572415_14.9 | 1 p2 | (CT)6  | 12 | 395  | 406 TCTTCCCTCCCTCATTTCCT      |                       |
| scaffold572621_10.0 | 1 p2 | (AT)9  | 18 | 243  | 260 ATGGCGTTAGAATGCCGAAAC     |                       |
| scaffold572622_14.8 | 1 p2 | (AG)7  | 14 | 2440 | 2453 TCATGCAAACAACATGGTG      |                       |
| scaffold572672_18.0 | 1 p2 | (CT)6  | 12 | 1235 | 1246 TGATCGGCCTTGATCACAC      |                       |
| scaffold572762_12.9 | 1 p2 | (AT)9  | 18 | 284  | 301 AATACCACCCGATCATTGAA      |                       |
| scaffold572917_11.7 | 1 p2 | (CT)6  | 12 | 332  | 343 TGGGATGAAAGGCTTCAAAC      |                       |
| scaffold572993_12.7 | 1 p2 | (TA)9  | 18 | 955  | 972 TCCTCCGTTAAAGACTGTTTCATC  |                       |
| scaffold573045_12.8 | 1 p2 | (AT)8  | 16 | 162  | 177 TCCCAACTTTTTCTCAAATCA     |                       |
| scaffold573074_16.5 | 1 p2 | (TA)9  | 18 | 41   | 58 GGAAATAAGGAGGTGTTATGATATG  |                       |
| scaffold573221_16.7 | 1 p2 | (CT)6  | 12 | 1441 | 1452 GCTGGACTTGTC AACAGAA     |                       |
| scaffold573223_11.3 | 1 p2 | (TG)6  | 12 | 342  | 353 CCGAGCTGAAAATCCACAAT      |                       |
| scaffold573226_14.9 | 1 p2 | (TA)8  | 16 | 113  | 128 GCACGCAAATAATGGTTTCTT     |                       |
| scaffold573229_10.7 | 1 p2 | (CA)6  | 12 | 373  | 384 GGATAAATGTGGCGAATGCT      |                       |
| scaffold573319_11.5 | 1 p2 | (TC)6  | 12 | 928  | 939 CAGTGCTGTATTGCAACGGT      |                       |
| scaffold573338_17.0 | 1 p2 | (CT)6  | 12 | 54   | 65 CACGTTAGACCTTGAAGGGG       |                       |
| scaffold573439_15.2 | 1 p2 | (AT)8  | 16 | 1210 | 1225 AATCCTGCAGATGGGATGAC     |                       |
| scaffold573497_11.8 | 1 p2 | (TA)7  | 14 | 571  | 584 TGCGGATCTGTGAAAAATGT      |                       |
| scaffold573586_17.0 | 1 p2 | (TA)7  | 14 | 51   | 64 TGAAGTTAGGAAATAAGGAGGTGC   |                       |
| scaffold573637_15.5 | 1 p2 | (TG)8  | 16 | 1526 | 1541 TTTGGGAGGTTCTTCAGGTG     |                       |
| scaffold573693_14.9 | 1 p2 | (AG)6  | 12 | 47   | 58 CTCTGGATATTGCTCGTCGG       |                       |
| scaffold573732_23.2 | 1 p2 | (TA)7  | 14 | 605  | 618 CAGGCTGGATGAACTGAGTG      |                       |
| scaffold573736_12.8 | 1 p2 | (AT)7  | 14 | 389  | 402 GAATAAAACGGCGCCTACAA      |                       |
| scaffold573831_16.6 | 1 p2 | (TA)11 | 22 | 94   | 115 TTTATTTTGGCGTTTCGTGC      |                       |
| scaffold573991_16.5 | 1 p2 | (TA)6  | 12 | 1026 | 1037 CCACCGAGGAACATACAAGG     |                       |
| scaffold574001_16.0 | 1 p2 | (GA)8  | 16 | 631  | 646 TATAAGCCAACCATCTCCCG      |                       |
| scaffold574175_13.4 | 1 p2 | (AT)6  | 12 | 514  | 525 GGTCATTTCTGTTTATTTTCGATTG |                       |

|                     |      |        |    |      |                                |
|---------------------|------|--------|----|------|--------------------------------|
| scaffold574192_17.5 | 1 p2 | (AG)13 | 26 | 386  | 411 CTGGGGATGGCGTTATTAGA       |
| scaffold574207_16.3 | 1 p2 | (CT)8  | 16 | 906  | 921 ACCAGACCCACACGTTTCTC       |
| scaffold574218_16.2 | 1 p2 | (CT)6  | 12 | 1071 | 1082 ACTTTGCCACCTCATATGCC      |
| scaffold574278_17.2 | 1 p2 | (TA)7  | 14 | 164  | 177 GTGACCCGGTCTGATGAGTT       |
| scaffold574293_14.3 | 1 p2 | (TA)7  | 14 | 111  | 124 TCATCTACAGGTCAATGGTGACA    |
| scaffold574294_11.4 | 1 p2 | (TA)9  | 18 | 47   | 64 ATGGGTTATCACCCGGATCG        |
| scaffold574311_15.2 | 1 p2 | (AT)9  | 18 | 145  | 162 GAAAAATCAAAGGCCACAA        |
| scaffold574553_14.3 | 1 p2 | (GA)6  | 12 | 970  | 981 ATGGCATTCCCCATACACAC       |
| scaffold574601_10.0 | 1 p2 | (TA)8  | 16 | 209  | 224 AAATGCACACCCCTTTCAAT       |
| scaffold574625_14.4 | 1 p2 | (AG)6  | 12 | 135  | 146 ATGAACACCCCTAGTGACCG       |
| scaffold574639_16.2 | 1 p2 | (GA)6  | 12 | 181  | 192 TTATTCTTGATGGAACGGGG       |
| scaffold574869_10.6 | 1 p2 | (TC)9  | 18 | 85   | 102 TGGCCATGTTGGTAGATTCA       |
| scaffold574923_11.7 | 1 p2 | (TC)6  | 12 | 1128 | 1139 TTGCCTACATCATCCACAA       |
| scaffold574942_11.8 | 1 p2 | (TA)10 | 20 | 852  | 871 TGGTTGCACCATAACACACC       |
| scaffold574976_16.5 | 1 p2 | (GC)6  | 12 | 95   | 106 GGTGGTATGGTGTGGAGGAC       |
| scaffold575005_16.0 | 1 p2 | (TC)7  | 14 | 781  | 794 CACCCCCAGATGAGCTAAAG       |
| scaffold575075_11.6 | 1 p2 | (TC)7  | 14 | 74   | 87 TCGCTCACCGAGATAGGTTT        |
| scaffold575114_12.3 | 1 p2 | (TG)6  | 12 | 658  | 669 CTCACCGCCTTAATATGCGT       |
| scaffold575124_15.0 | 1 p2 | (TA)6  | 12 | 65   | 76 TTCTAATCAAATCAAGCGACCA      |
| scaffold575158_16.6 | 1 p2 | (GA)6  | 12 | 145  | 156 ACCACCACATTACTGCCACA       |
| scaffold575222_15.3 | 1 p2 | (AG)6  | 12 | 1409 | 1420 CGTGCGACGACTTAACTGAG      |
| scaffold575250_13.5 | 1 p2 | (AT)6  | 12 | 916  | 927 ATTCGAATGTCTTGCCCTTG       |
| scaffold575273_17.9 | 1 p2 | (TC)6  | 12 | 341  | 352 CGTAGAGAATGTTGCCACGA       |
| scaffold575296_19.0 | 1 p2 | (CT)6  | 12 | 247  | 258 TTCCTGCTGTTCACTCG          |
| scaffold575304_10.9 | 1 p2 | (AT)6  | 12 | 192  | 203 TTTTCTGTTCCCTTTGG          |
| scaffold575361_14.5 | 1 p2 | (AT)8  | 16 | 1200 | 1215 CATCTGGGCCTCTCTGGATA      |
| scaffold575414_17.5 | 1 p2 | (TC)6  | 12 | 211  | 222 CAGGCAAATCAGGCAATTTT       |
| scaffold575493_15.7 | 1 p2 | (GA)6  | 12 | 510  | 521 ATTTGATGGAACGGGGATTT       |
| scaffold575519_10.2 | 1 p2 | (TA)6  | 12 | 88   | 99 TGTGTGATGTTGGAGTTGGG        |
| scaffold575528_15.9 | 1 p2 | (GT)6  | 12 | 1796 | 1807 TGATGGTTTATGCTCGTAAGGTT   |
| scaffold575602_16.5 | 1 p2 | (AT)6  | 12 | 634  | 645 TCCTTGTTGCACTGTGGTGT       |
| scaffold575619_16.9 | 1 p2 | (AG)7  | 14 | 129  | 142 TTCCACTTGAACTATCAGTCCA     |
| scaffold575674_13.4 | 1 p2 | (AG)7  | 14 | 51   | 64 CGGCACGAATCCAGTTTTT         |
| scaffold575683_17.9 | 1 p2 | (CT)7  | 14 | 176  | 189 TCATCTTGCAAGCTCCATCA       |
| scaffold575745_12.2 | 1 p2 | (AT)7  | 14 | 209  | 222 TCTTATAGCATCAACCGCCA       |
| scaffold575761_13.8 | 1 p2 | (AT)6  | 12 | 271  | 282 CCCATCATCTCAATCCAAT        |
| scaffold575764_13.3 | 1 p2 | (AT)6  | 12 | 538  | 549 AAATGAGTGGCTGGATTTTCG      |
| scaffold575774_11.1 | 1 p2 | (AG)7  | 14 | 644  | 657 GAGAGAGGAAGGGAGATGGG       |
| scaffold575780_15.1 | 1 p2 | (TC)6  | 12 | 736  | 747 CCGTGAATTCATGCCTGTC        |
| scaffold575827_14.4 | 1 p2 | (AT)11 | 22 | 228  | 249 TCATCCCCAAAATACCCTCA       |
| scaffold575952_11.5 | 1 p2 | (AT)8  | 16 | 243  | 258 AATTTCTCTGGCCGACACTG       |
| scaffold576028_15.1 | 1 p2 | (TA)6  | 12 | 195  | 206 TCAATAAACCCCTCCGAATGC      |
| scaffold576165_12.1 | 1 p2 | (TA)6  | 12 | 321  | 332 AATCGATTCAACTCATGGGG       |
| scaffold576196_13.6 | 1 p2 | (TA)9  | 18 | 493  | 510 GAAGAAGGTGATGTCATGGGA      |
| scaffold576378_11.3 | 1 p2 | (AT)12 | 24 | 530  | 553 TGCCTGCATGTATATGCTGA       |
| scaffold576439_17.3 | 1 p2 | (TA)10 | 20 | 463  | 482 CCATAACCGTTCGCATAACTC      |
| scaffold576527_14.7 | 1 p2 | (GA)6  | 12 | 67   | 78 GGGGAGGGTTTAGGTAGAGG        |
| scaffold576538_11.2 | 1 p2 | (CT)8  | 16 | 691  | 706 AAAAAGAAAAGGGGTGGGA        |
| scaffold576566_12.9 | 1 p2 | (AG)6  | 12 | 251  | 262 CCGATGATGACGAACCTTCT       |
| scaffold576606_13.8 | 1 p2 | (AT)8  | 16 | 49   | 64 GGGGTGACAACCTATCAACCAA      |
| scaffold576687_10.9 | 1 p2 | (AG)6  | 12 | 112  | 123 CGGCCATTCTCTTTTCTTT        |
| scaffold576693_15.5 | 1 p2 | (GA)7  | 14 | 164  | 177 AAAGGTGAACTTGGGGCTTT       |
| scaffold576740_14.9 | 1 p2 | (CT)7  | 14 | 117  | 130 AAGCTCCACCATCTCTTCCA       |
| scaffold576804_15.2 | 1 p2 | (AT)6  | 12 | 2546 | 2557 TTTTTACAAACCTGCCACCC      |
| scaffold576826_12.3 | 1 p2 | (TA)8  | 16 | 366  | 381 ATTATATTGTACGTAAAAGCGAAAAA |
| scaffold576903_13.5 | 1 p2 | (AC)6  | 12 | 114  | 125 CTTACCCAATCTTGGTGAACA      |
| scaffold576978_14.4 | 1 p2 | (AG)8  | 16 | 683  | 698 ATTTCTCTCAGTCGGTTCGT       |
| scaffold577031_13.2 | 1 p2 | (TA)6  | 12 | 94   | 105 CGGAGGGAATACAATGCTTTT      |

|                     |      |        |    |      |                               |
|---------------------|------|--------|----|------|-------------------------------|
| scaffold577068_15.6 | 1 p2 | (AG)6  | 12 | 166  | 177 TTGGTTTGGTAGCCCTTTTG      |
| scaffold577136_15.7 | 1 p2 | (AT)6  | 12 | 552  | 563 GGAATATTAGCGGTGGCTATG     |
| scaffold577194_11.2 | 1 p2 | (AT)7  | 14 | 357  | 370 GGCACCTTTGGCTACTTTTGC     |
| scaffold577238_14.9 | 1 p2 | (TA)6  | 12 | 100  | 111 GCGCAGATCTAATGGTCCAG      |
| scaffold577306_12.5 | 1 p2 | (AT)8  | 16 | 808  | 823 GACCTTTTTACTCCCAGCCC      |
| scaffold577370_13.0 | 1 p2 | (GA)7  | 14 | 867  | 880 TAGCAATTTGATTCCGTGCT      |
| scaffold577424_13.0 | 1 p2 | (TA)6  | 12 | 398  | 409 CGAGTCCATGGAAACAGATG      |
| scaffold577511_16.7 | 1 p2 | (TC)8  | 16 | 1130 | 1145 CCACAAGTTCTCCACAGCAA     |
| scaffold577513_16.9 | 1 p2 | (AG)8  | 16 | 45   | 60 GAAGAACAATTACAATGTTTATCCAA |
| scaffold577613_15.3 | 1 p2 | (TC)6  | 12 | 1880 | 1891 ATTCGTTCAAAAACGGCAAG     |
| scaffold577637_16.0 | 1 p2 | (TA)6  | 12 | 228  | 239 ACGCAAATACGACTGGCTTT      |
| scaffold577639_18.3 | 1 p2 | (AG)6  | 12 | 2031 | 2042 GAAGATGAAGGCAAGTGGGA     |
| scaffold577642_16.5 | 1 p2 | (AG)10 | 20 | 1305 | 1324 GCATCCTTCCAACAAGTAGCA    |
| scaffold577806_14.0 | 1 p2 | (TC)6  | 12 | 186  | 197 TGCTTCGATTCTCAATGTTCC     |
| scaffold577807_13.2 | 1 p2 | (TC)7  | 14 | 190  | 203 GCTTCGATTCTCAGTGTTCCA     |
| scaffold577811_13.7 | 1 p2 | (GA)6  | 12 | 478  | 489 CGAGAACTTTCAAGGACGC       |
| scaffold578132_17.2 | 1 p2 | (AT)8  | 16 | 455  | 470 CGATGAACTAGGGGCTGAAG      |
| scaffold578155_16.4 | 1 p2 | (TC)6  | 12 | 1159 | 1170 TGCTTACTTTCCGTTTTGGG     |
| scaffold578337_11.2 | 1 p2 | (TA)6  | 12 | 548  | 559 TATTCTGAAACATGCTGGCG      |
| scaffold578340_17.6 | 1 p2 | (TA)8  | 16 | 46   | 61 AAGGGTTATCACCTGATTTTCTC    |
| scaffold578433_14.7 | 1 p2 | (AT)9  | 18 | 331  | 348 TTCAATACTTCCAGCCACCA      |
| scaffold578483_10.0 | 1 p2 | (AT)8  | 16 | 113  | 128 TGTGTTCTTGAGTCGTTTGGA     |
| scaffold578491_21.6 | 1 p2 | (AT)6  | 12 | 467  | 478 ACTTCAATTTTGGTTCCCC       |
| scaffold578596_10.2 | 1 p2 | (CT)6  | 12 | 476  | 487 AGTGAGGGGATGTTGGAGTG      |
| scaffold578642_12.4 | 1 p2 | (AG)6  | 12 | 254  | 265 GCCCATTTGAGCCAATCTAA      |
| scaffold578667_15.6 | 1 p2 | (TA)9  | 18 | 745  | 762 GAATACAGGCCGGCTAACAA      |
| scaffold578727_15.8 | 1 p2 | (AG)9  | 18 | 3622 | 3639 TGCGGTCATGTGATGATTTT     |
| scaffold578810_13.7 | 1 p2 | (AT)7  | 14 | 59   | 72 ACATGCAGGGCTGAGTACAA       |
| scaffold579003_17.4 | 1 p2 | (CT)7  | 14 | 36   | 49 AAAATTTTCTCACTGCACG        |
| scaffold579028_13.4 | 1 p2 | (TC)8  | 16 | 164  | 179 TGGTTTTGTGCTTCTTGCTG      |
| scaffold579038_17.2 | 1 p2 | (TA)7  | 14 | 24   | 37 CAGTTATCACCGGATCGC         |
| scaffold579075_14.7 | 1 p2 | (CT)7  | 14 | 378  | 391 CCCCTTCCCATCTCTACTCC      |
| scaffold579118_11.2 | 1 p2 | (TA)7  | 14 | 52   | 65 TGCCCATGTACACTGCTTA        |
| scaffold579194_16.2 | 1 p2 | (TA)6  | 12 | 816  | 827 ACCTCGACGACAGGAAAAGA      |
| scaffold579231_13.1 | 1 p2 | (TA)6  | 12 | 1158 | 1169 ACTTCATGGGGGAAAACAGA     |
| scaffold579279_16.6 | 1 p2 | (TG)8  | 16 | 463  | 478 CCCATGATTCCATGATCTCC      |
| scaffold579315_11.0 | 1 p2 | (GA)6  | 12 | 167  | 178 CCAAGAGACGTTTTTGTGAAA     |
| scaffold579406_15.4 | 1 p2 | (AC)7  | 14 | 450  | 463 TTGCAGCACTTTCAACATCA      |
| scaffold579468_16.0 | 1 p2 | (AT)6  | 12 | 512  | 523 GAAGCACATGCAAGGATTGA      |
| scaffold579555_18.1 | 1 p2 | (CT)6  | 12 | 33   | 44 TCTCTCTCGTTCTTCTCTCTCT     |
| scaffold579586_14.4 | 1 p2 | (AT)8  | 16 | 163  | 178 GGATCGTACCTTTTGCTTGC      |
| scaffold579587_13.8 | 1 p2 | (AT)8  | 16 | 163  | 178 GAAAAGCCTGTTGGCAGGTA      |
| scaffold579588_16.4 | 1 p2 | (TA)8  | 16 | 176  | 191 CCCAAAAATCTAACGGCCTA      |
| scaffold579632_20.4 | 1 p2 | (CA)6  | 12 | 726  | 737 TTATTCGGTTCGCCATTAC       |
| scaffold579794_10.1 | 1 p2 | (TA)9  | 18 | 308  | 325 CATCATTCAAGGGGCATTTT      |
| scaffold579841_15.1 | 1 p2 | (AT)6  | 12 | 734  | 745 GCATATCGCTCGATCAAAAA      |
| scaffold579980_12.8 | 1 p2 | (TC)6  | 12 | 54   | 65 GGTTCGTAATTTGATCCGC        |
| scaffold580125_16.2 | 1 p2 | (AG)7  | 14 | 1699 | 1712 AAAGGACCGAAGAGGTGGAT     |
| scaffold580128_16.1 | 1 p2 | (TA)6  | 12 | 73   | 84 GTTATCACCGGATCGCAAC        |
| scaffold580132_17.0 | 1 p2 | (TC)10 | 20 | 978  | 997 GTTGGTCTGGCAACCATCTT      |
| scaffold580141_11.7 | 1 p2 | (TG)6  | 12 | 157  | 168 CCGTTGCACAAGTCACAGAG      |
| scaffold580243_16.7 | 1 p2 | (AC)6  | 12 | 1088 | 1099 TATGATAGGCCACCGGTTTG     |
| scaffold580313_20.4 | 1 p2 | (TA)6  | 12 | 378  | 389 CCCATCGAAAAATTAATGCAA     |
| scaffold580327_10.5 | 1 p2 | (AT)9  | 18 | 233  | 250 ATGTGAGAGACCCAGGTTTCG     |
| scaffold580547_17.8 | 1 p2 | (TA)9  | 18 | 862  | 879 TTTCAAATACGGTAGACTTCCCA   |
| scaffold580560_16.8 | 1 p2 | (GA)8  | 16 | 240  | 255 TGATTCACACGAGAGTGACG      |
| scaffold580709_11.2 | 1 p2 | (TA)8  | 16 | 165  | 180 GGGGTTATCACTGGATCACG      |
| scaffold580754_12.3 | 1 p2 | (AT)8  | 16 | 603  | 618 TTCCCTTCATTTTCTGTTTTATTTT |

|                     |      |        |    |      |      |                            |
|---------------------|------|--------|----|------|------|----------------------------|
| scaffold580788_12.6 | 1 p2 | (TA)7  | 14 | 480  | 493  | GGGTTATCCCCGCTATCATT       |
| scaffold580828_13.1 | 1 p2 | (AT)6  | 12 | 137  | 148  | CATTACCCACACACACTTCA       |
| scaffold581004_16.0 | 1 p2 | (TA)7  | 14 | 166  | 179  | AGAAGTTAGCACGTCAAGGGA      |
| scaffold581058_13.7 | 1 p2 | (AT)8  | 16 | 99   | 114  | GTTCCATGTTACCCGTGGAC       |
| scaffold581122_13.9 | 1 p2 | (CT)9  | 18 | 367  | 384  | GGGCCATTATTTTCATCTCA       |
| scaffold581188_12.1 | 1 p2 | (TA)7  | 14 | 411  | 424  | CATGATTTTTTCTATGGACCGA     |
| scaffold581193_12.9 | 1 p2 | (AT)6  | 12 | 264  | 275  | ATCCGATGACTGGATGCTCT       |
| scaffold581236_13.6 | 1 p2 | (AT)7  | 14 | 147  | 160  | TTTTCTTGATAAGCTCGAAGCA     |
| scaffold581369_17.8 | 1 p2 | (CT)8  | 16 | 165  | 180  | TCATCATCACACGCTGCTTT       |
| scaffold581473_10.8 | 1 p2 | (GA)6  | 12 | 219  | 230  | TTCAGTATCGGGCCATTTTC       |
| scaffold581479_19.5 | 1 p2 | (TG)8  | 16 | 102  | 117  | AATGCACTCATGGAAAAGGC       |
| scaffold581722_16.7 | 1 p2 | (AT)6  | 12 | 1385 | 1396 | GCTCAAGGTCACACAAGCAA       |
| scaffold581779_10.1 | 1 p2 | (TC)6  | 12 | 40   | 51   | TTTCTCTGGTGAAAACTCTT       |
| scaffold581840_15.2 | 1 p2 | (GA)6  | 12 | 361  | 372  | AGATTGTTGTGAGGCGGAAG       |
| scaffold581858_12.0 | 1 p2 | (TG)6  | 12 | 77   | 88   | TGGAGTTGAGATAATTTGCTGG     |
| scaffold581910_11.3 | 1 p2 | (TA)9  | 18 | 48   | 65   | TGCGTTTTGACAATATATAGGTGTTT |
| scaffold581929_15.3 | 1 p2 | (AG)8  | 16 | 39   | 54   | GTGCACAAGCAGGGGAAA         |
| scaffold581963_14.1 | 1 p2 | (CT)6  | 12 | 994  | 1005 | TCTACGTTCTCAGGCTGCT        |
| scaffold582130_11.0 | 1 p2 | (GA)7  | 14 | 645  | 658  | GCTTTCCTTCTCCTTGCTT        |
| scaffold582218_20.0 | 1 p2 | (AT)7  | 14 | 116  | 129  | TCTCTCGTTAACGTCCCATTT      |
| scaffold582223_11.1 | 1 p2 | (AT)7  | 14 | 54   | 67   | CATAAACTAAGGTGAGATTGTTATG  |
| scaffold582253_10.7 | 1 p2 | (TC)6  | 12 | 49   | 60   | TTGTTATGTTTCCATGAGCAGA     |
| scaffold582341_12.1 | 1 p2 | (AT)8  | 16 | 199  | 214  | GGATCTTATAGCATCAACCGC      |
| scaffold582389_18.7 | 1 p2 | (AC)6  | 12 | 509  | 520  | CCGTTTTTACACCCCCTACA       |
| scaffold582535_11.3 | 1 p2 | (CT)6  | 12 | 282  | 293  | AATTGCGAGTCGCTGATTTT       |
| scaffold582548_19.8 | 1 p2 | (TA)9  | 18 | 683  | 700  | GGAATAAAACCGTTTCACCG       |
| scaffold582646_15.5 | 1 p2 | (CA)6  | 12 | 38   | 49   | CTCTCACACTTGCACACTGAA      |
| scaffold582727_18.1 | 1 p2 | (AT)7  | 14 | 605  | 618  | TGTATGGCCACTTAGGCAA        |
| scaffold582883_10.9 | 1 p2 | (TA)6  | 12 | 456  | 467  | GTTTCATCGTGAACCTCGCGTA     |
| scaffold582920_11.5 | 1 p2 | (AT)6  | 12 | 658  | 669  | AGCGTGCCATGTGTTATCAG       |
| scaffold582934_17.6 | 1 p2 | (TA)11 | 22 | 67   | 88   | AAATCTTGTTGGATGTTAGTGGTTAG |
| scaffold582977_18.0 | 1 p2 | (TG)6  | 12 | 6939 | 6950 | AAATCTGAAGAGCTCCACGC       |
| scaffold583012_13.4 | 1 p2 | (GA)6  | 12 | 97   | 108  | TCGTTTCGCTCTTCTCTGTT       |
| scaffold583100_16.0 | 1 p2 | (TC)6  | 12 | 315  | 326  | TGATCCACGGTCTTTACGAA       |
| scaffold583106_15.8 | 1 p2 | (AG)7  | 14 | 638  | 651  | ACACACAACCACCACCAGAA       |
| scaffold583165_13.4 | 1 p2 | (AT)9  | 18 | 549  | 566  | AGTTATGATGGGAAGATGGGG      |
| scaffold583337_19.3 | 1 p2 | (GA)6  | 12 | 87   | 98   | GACGATTTGCAAGCCTATGG       |
| scaffold583392_16.4 | 1 p2 | (CA)6  | 12 | 531  | 542  | GGGGATACACACCTACCGTC       |
| scaffold583560_16.8 | 1 p2 | (TC)8  | 16 | 4605 | 4620 | TCCAAAATGGAAATGGGAAA       |
| scaffold583566_22.6 | 1 p2 | (TA)7  | 14 | 167  | 180  | ACTCCCCAAAATCCAAACC        |
| scaffold583646_16.9 | 1 p2 | (GA)8  | 16 | 706  | 721  | CATGAGCAGGCTGTTTTTGA       |
| scaffold583778_10.5 | 1 p2 | (AT)8  | 16 | 69   | 84   | AGTTATGATGGCAGGATGGG       |
| scaffold583935_16.3 | 1 p2 | (TA)8  | 16 | 853  | 868  | GACCAGACCTGGACCTACCA       |
| scaffold583988_11.8 | 1 p2 | (CT)6  | 12 | 113  | 124  | CGACAATCATCTAGTCTCTAGCA    |
| scaffold584103_14.8 | 1 p2 | (TG)6  | 12 | 785  | 796  | CACCAAAAGGAAGCCATCAT       |
| scaffold584156_10.4 | 1 p2 | (AT)6  | 12 | 53   | 64   | ACGACTGTGATCCACACAA        |
| scaffold584194_15.0 | 1 p2 | (CT)6  | 12 | 688  | 699  | CCCTCCATCCAAAGTTGCT        |
| scaffold584230_13.2 | 1 p2 | (TC)7  | 14 | 117  | 130  | AGCTTCTCTTGCTCTCTCATTG     |
| scaffold584319_17.0 | 1 p2 | (TC)6  | 12 | 383  | 394  | AATTTCTGCATGTTTTCGGC       |
| scaffold584324_12.4 | 1 p2 | (TA)7  | 14 | 313  | 326  | TGAGAAATAAGAAACAATCTGGGG   |
| scaffold584328_14.2 | 1 p2 | (GA)6  | 12 | 80   | 91   | TGTTGTGTGAACCAACTCTG       |
| scaffold584341_10.4 | 1 p2 | (AT)7  | 14 | 375  | 388  | TCCATGACTCTCAATGCCTTC      |
| scaffold584538_13.3 | 1 p2 | (AC)6  | 12 | 289  | 300  | CATCTTTCTTCTTCGACGCC       |
| scaffold584646_15.7 | 1 p2 | (TA)6  | 12 | 4341 | 4352 | TGGATCAAACGTCTCTCAC        |
| scaffold584671_11.2 | 1 p2 | (AT)8  | 16 | 437  | 452  | TCTCCGAATTTCAAGAGGGA       |
| scaffold584683_12.0 | 1 p2 | (TG)6  | 12 | 191  | 202  | TTTCGTCCATTGTAAGCAGTTC     |
| scaffold584706_10.8 | 1 p2 | (TA)11 | 22 | 251  | 272  | TTCTCAGCATATGGGAAGGG       |
| scaffold584993_12.0 | 1 p2 | (TA)7  | 14 | 51   | 64   | GCATATGTGCGTTTTATTCTTTC    |



|                     |      |        |    |      |                                  |
|---------------------|------|--------|----|------|----------------------------------|
| scaffold585030_13.8 | 1 p2 | (TA)8  | 16 | 358  | 373 CCCATCGGGAACAAGTCTAA         |
| scaffold585161_15.8 | 1 p2 | (AG)7  | 14 | 755  | 768 GCTCTTATGATGGCCGAAGT         |
| scaffold585165_10.4 | 1 p2 | (TA)7  | 14 | 324  | 337 AAAAGCAATTAATGCGTTCACA       |
| scaffold585280_15.0 | 1 p2 | (AT)6  | 12 | 193  | 204 CATTGCTACTGAATATTGTTCTTGTTCC |
| scaffold585352_17.0 | 1 p2 | (TA)6  | 12 | 348  | 359 CTTCAGTCCGTGAAAGGAGC         |
| scaffold585398_14.4 | 1 p2 | (TA)6  | 12 | 1381 | 1392 GTGGACCGCATAGGAATCAT        |
| scaffold585400_13.4 | 1 p2 | (TG)6  | 12 | 99   | 110 CCCATTTGTGTTTTCTTCGTG        |
| scaffold585420_10.9 | 1 p2 | (AG)6  | 12 | 292  | 303 CCTGCTTTGTGCAATCTTCA         |
| scaffold585507_15.2 | 1 p2 | (TA)6  | 12 | 566  | 577 TCTCACATCGCCATTTTCAA         |
| scaffold585578_16.2 | 1 p2 | (AT)10 | 20 | 77   | 96 AAGAGGAAAATCCATCGGCT          |
| scaffold585592_10.2 | 1 p2 | (AG)14 | 28 | 594  | 621 GGCATCACTGTCAGCAGGTA         |
| scaffold585687_16.1 | 1 p2 | (GA)6  | 12 | 172  | 183 TTGTTGAATTGGTCCTGCAA         |
| scaffold585737_11.5 | 1 p2 | (AT)7  | 14 | 168  | 181 TTCAAATCTTTTTACCGCC          |
| scaffold585774_19.2 | 1 p2 | (AT)7  | 14 | 549  | 562 GAAAGGGCATGGTAGTCAGC         |
| scaffold585816_17.0 | 1 p2 | (TA)6  | 12 | 170  | 181 TGCATCACTACCTCCTTGTTG        |
| scaffold585858_11.9 | 1 p2 | (TA)6  | 12 | 221  | 232 TTGGTTGGATTGGATTTTGG         |
| scaffold585961_16.2 | 1 p2 | (AT)6  | 12 | 727  | 738 CCAAATCGGACTAATGCTGAA        |
| scaffold585979_11.8 | 1 p2 | (AT)6  | 12 | 225  | 236 AACTCGATAACGGATGCTCG         |
| scaffold586020_15.2 | 1 p2 | (TA)8  | 16 | 863  | 878 ATCCCAGCCACACATTTCTT         |
| scaffold586021_16.3 | 1 p2 | (AT)6  | 12 | 171  | 182 CGAGTCCAGGCTACATCACA         |
| scaffold586022_12.5 | 1 p2 | (AT)6  | 12 | 1295 | 1306 AAACCACCACCTTTCTCCCT        |
| scaffold586034_10.3 | 1 p2 | (AT)9  | 18 | 188  | 205 GGTGTTGGTGAGGCTGTTCT         |
| scaffold586126_17.4 | 1 p2 | (CT)6  | 12 | 118  | 129 GCGTGACAACAACAATTTTCG        |
| scaffold586152_17.7 | 1 p2 | (GA)8  | 16 | 506  | 521 TCAGTGAGTTTCAAGCCGTG         |
| scaffold586154_20.5 | 1 p2 | (TC)6  | 12 | 1378 | 1389 ACTATCCAACCACACGCACA        |
| scaffold586214_11.0 | 1 p2 | (CT)6  | 12 | 158  | 169 GAGGATTCGACATTGGGAGA         |
| scaffold586341_14.9 | 1 p2 | (GA)6  | 12 | 256  | 267 TACACAGCCCGTGTTCATTC         |
| scaffold586379_18.1 | 1 p2 | (GA)6  | 12 | 698  | 709 TTCCTCAGATTTCTGCACACT        |
| scaffold586400_12.7 | 1 p2 | (AG)7  | 14 | 184  | 197 CTGCTTTGTGTTGCGTGTTT         |
| scaffold586455_16.7 | 1 p2 | (CT)6  | 12 | 704  | 715 TAGGATCTTTTACGCGGTT          |
| scaffold586466_11.9 | 1 p2 | (GA)6  | 12 | 55   | 66 TTGAAAGATGGGTGTGTTCTTG        |
| scaffold586522_13.3 | 1 p2 | (TA)6  | 12 | 120  | 131 CCCTACCCATTTACCCGTTT         |
| scaffold586645_17.9 | 1 p2 | (AG)8  | 16 | 509  | 524 GGTTCCAACCTCAAGGTGAA         |
| scaffold586750_10.2 | 1 p2 | (AT)6  | 12 | 136  | 147 GTAGTTGGCTGCATTTGTGG         |
| scaffold586752_15.3 | 1 p2 | (TA)7  | 14 | 2246 | 2259 TGCCTTGAAAATGGGAAAAG        |
| scaffold586821_13.3 | 1 p2 | (AT)9  | 18 | 957  | 974 GGATGCGAAATTGGACACTA         |
| scaffold586830_14.3 | 1 p2 | (AT)9  | 18 | 249  | 266 AGGAGAGAGCGAGAGGAGAGA        |
| scaffold586925_14.8 | 1 p2 | (TC)12 | 24 | 3580 | 3603 TAACTGGCCCCAACTTATGC        |
| scaffold586936_12.6 | 1 p2 | (AT)8  | 16 | 334  | 349 GTGAAGCGCTGATCTTGTGA         |
| scaffold587033_12.4 | 1 p2 | (AT)7  | 14 | 423  | 436 TGAGGCAGAATGAATTGTCG         |
| scaffold587102_15.4 | 1 p2 | (AT)6  | 12 | 648  | 659 CGGGTAATGTCGAGAGTGGT         |
| scaffold587105_13.1 | 1 p2 | (TC)10 | 20 | 118  | 137 AAACCAAAGACGATGTTGCC         |
| scaffold587202_15.9 | 1 p2 | (AT)6  | 12 | 170  | 181 TCCCAATCGTTTCAAATTCA         |
| scaffold587246_14.4 | 1 p2 | (TA)6  | 12 | 90   | 101 CGTAGACCTGGCATCTTGTTG        |
| scaffold587270_15.4 | 1 p2 | (AT)6  | 12 | 316  | 327 TTGAAATGTAACACAAAAGGAGAA     |
| scaffold587307_17.5 | 1 p2 | (TC)7  | 14 | 60   | 73 TGATTTGTCATTGTTGGGGTT         |
| scaffold587326_14.2 | 1 p2 | (AT)7  | 14 | 230  | 243 AACGAGAGAACTTTCGACGC         |
| scaffold587377_14.0 | 1 p2 | (TC)6  | 12 | 171  | 182 AAGAGCTTCTGCGTCTTTTCG        |
| scaffold587406_14.8 | 1 p2 | (GA)7  | 14 | 102  | 115 CATGCAAGGGTTTCGCTAGT         |
| scaffold587423_12.0 | 1 p2 | (GA)12 | 24 | 989  | 1012 TGCTGGATTAACGATTTCCC        |
| scaffold587430_14.8 | 1 p2 | (TA)6  | 12 | 705  | 716 CATGCTCCTATTTTAATACACCCC     |
| scaffold587455_13.8 | 1 p2 | (GT)7  | 14 | 720  | 733 AATCGAGCTTACACCCCAA          |
| scaffold587505_10.9 | 1 p2 | (AG)6  | 12 | 66   | 77 GAAGACGACGAGAGGGTGAG          |
| scaffold587521_13.6 | 1 p2 | (TA)6  | 12 | 2093 | 2104 GCAAAAATGTCCCCTGCTAA        |
| scaffold587526_14.8 | 1 p2 | (AT)9  | 18 | 295  | 312 CACCAAATTTTCATCATTTTTAATTC   |
| scaffold587648_13.6 | 1 p2 | (GA)6  | 12 | 375  | 386 TCGGTTTTTCTTGGGAGAGA         |
| scaffold587662_10.2 | 1 p2 | (AT)6  | 12 | 496  | 507 CATAACATGATTTTGCCCCC         |
| scaffold587708_12.8 | 1 p2 | (CA)6  | 12 | 388  | 399 CTTGCAAAATGATCCCCAAC         |

|                     |      |        |    |      |      |                           |
|---------------------|------|--------|----|------|------|---------------------------|
| scaffold587721_17.5 | 1 p2 | (TC)6  | 12 | 155  | 166  | GGCAAACACAGGATCGATTT      |
| scaffold587778_14.5 | 1 p2 | (TG)6  | 12 | 937  | 948  | CTCAAACCTTAAGCACCCCA      |
| scaffold587788_15.9 | 1 p2 | (AG)6  | 12 | 425  | 436  | CCCCTCGGAAAATCCTAGTC      |
| scaffold587811_16.7 | 1 p2 | (GA)6  | 12 | 920  | 931  | TTTCCCTTCCAATTTTGTCTG     |
| scaffold587905_15.7 | 1 p2 | (TG)6  | 12 | 3619 | 3630 | TAACGGCCCAGATCTTGTTT      |
| scaffold588053_14.2 | 1 p2 | (AT)6  | 12 | 66   | 77   | GGGCCGAGATTTGTTAGAGG      |
| scaffold588081_15.4 | 1 p2 | (AC)6  | 12 | 1914 | 1925 | CGTCACTGTTGCTCCGACTA      |
| scaffold588142_15.2 | 1 p2 | (AT)11 | 22 | 1072 | 1093 | TTTTGATTTTCAAGTCCGGC      |
| scaffold588186_13.6 | 1 p2 | (TA)7  | 14 | 852  | 865  | CGAAATTGAAATCGGACCAT      |
| scaffold588235_14.2 | 1 p2 | (AG)8  | 16 | 41   | 56   | AGAAGGATGGCGGAGAGTTT      |
| scaffold588239_11.7 | 1 p2 | (AG)6  | 12 | 262  | 273  | TGTGAAAAACAGTGGCAGGA      |
| scaffold588247_14.8 | 1 p2 | (TC)8  | 16 | 546  | 561  | CAGCAATTGTTTTGAGGGT       |
| scaffold588272_16.4 | 1 p2 | (TA)8  | 16 | 318  | 333  | TGAGTTTGGTGTGTTGGCAT      |
| scaffold588306_18.2 | 1 p2 | (AC)7  | 14 | 1243 | 1256 | CGCGGAGGAAATTTTTTTG       |
| scaffold588492_17.8 | 1 p2 | (TA)6  | 12 | 327  | 338  | AGTTCGGGAGTGAGCTCGTA      |
| scaffold588539_14.9 | 1 p2 | (AT)13 | 26 | 65   | 90   | GGATATGCTCAGTCCGGGTA      |
| scaffold588543_14.8 | 1 p2 | (CT)6  | 12 | 112  | 123  | AGAAACACGTTTTGCTTTTGA     |
| scaffold588780_10.2 | 1 p2 | (GA)9  | 18 | 104  | 121  | CACAATGCGTGTATTGACAGTG    |
| scaffold588793_16.4 | 1 p2 | (TC)6  | 12 | 505  | 516  | GGCATGAATTCTTGATTGC       |
| scaffold588826_14.0 | 1 p2 | (TC)6  | 12 | 546  | 557  | GACCCGGCCTAACATATTCC      |
| scaffold588894_17.3 | 1 p2 | (CT)6  | 12 | 172  | 183  | TGAATTAACAGCGAGCATGG      |
| scaffold588902_15.0 | 1 p2 | (AG)10 | 20 | 1930 | 1949 | TTCCCGTAGTCCTGAGATGG      |
| scaffold588980_13.6 | 1 p2 | (TA)8  | 16 | 119  | 134  | GCGTCCGACACCTCAATTAT      |
| scaffold589079_14.9 | 1 p2 | (GA)7  | 14 | 72   | 85   | GACGCGAGATTTACGTGGTT      |
| scaffold589104_17.2 | 1 p2 | (TG)6  | 12 | 2574 | 2585 | ATCAAAGCACTTGAGCCCAC      |
| scaffold589147_13.7 | 1 p2 | (TA)6  | 12 | 559  | 570  | CCCCATCCATGTTGTTTTTC      |
| scaffold589162_14.7 | 1 p2 | (AG)6  | 12 | 56   | 67   | TAACACCTTCATCGAGCGAG      |
| scaffold589210_15.9 | 1 p2 | (GA)7  | 14 | 402  | 415  | GCTCTCTTTTTGGCTGGATG      |
| scaffold589390_10.2 | 1 p2 | (AT)8  | 16 | 284  | 299  | GTCCCTTTTTACCCCTCAA       |
| scaffold589497_10.4 | 1 p2 | (TA)7  | 14 | 47   | 60   | GGAAATAAGGAGGTGTTATGATATG |
| scaffold589681_15.5 | 1 p2 | (TA)8  | 16 | 168  | 183  | GCAGTAACCCTCTCATCGGA      |
| scaffold589682_12.8 | 1 p2 | (TA)8  | 16 | 315  | 330  | GGAACCAGCTCCGATTAACA      |
| scaffold589683_12.6 | 1 p2 | (TA)7  | 14 | 170  | 183  | TGGACGAAAATGTCCTTCTTG     |
| scaffold589879_13.2 | 1 p2 | (TA)8  | 16 | 305  | 320  | GACCGAATGTAATGAACCCG      |
| scaffold589909_11.2 | 1 p2 | (GA)12 | 24 | 349  | 372  | AGAGCGGGAACAAAAGTGAA      |
| scaffold589962_10.6 | 1 p2 | (TA)11 | 22 | 307  | 328  | TGCATGCACCTGATTACACA      |
| scaffold590006_14.6 | 1 p2 | (TA)6  | 12 | 1414 | 1425 | GGCAGCTAGGGTTGAAAGAA      |
| scaffold590039_11.5 | 1 p2 | (TC)6  | 12 | 166  | 177  | TACACGCACATCAACCCACT      |
| scaffold590117_13.0 | 1 p2 | (TG)6  | 12 | 786  | 797  | TTCATTTGCCTGACCTACCC      |
| scaffold590126_14.9 | 1 p2 | (AT)9  | 18 | 2195 | 2212 | GAATTGCCATGTCCATGTGT      |
| scaffold590233_14.0 | 1 p2 | (GT)7  | 14 | 2003 | 2016 | TGGGGCCAATTTACTCTCTG      |
| scaffold590366_19.0 | 1 p2 | (TA)7  | 14 | 386  | 399  | TCCGTAGGGAGCAAAGTGAT      |
| scaffold590422_16.3 | 1 p2 | (AT)9  | 18 | 454  | 471  | GATTTTGAGTTCATGGGCGT      |
| scaffold590531_11.0 | 1 p2 | (AT)8  | 16 | 225  | 240  | GAACTATCTACAGGCCAGGGG     |
| scaffold590537_16.0 | 1 p2 | (CT)7  | 14 | 126  | 139  | TTGTATGGACGACACGCACT      |
| scaffold590553_15.2 | 1 p2 | (TA)8  | 16 | 500  | 515  | GGGGTACGTGCCATAAAAAC      |
| scaffold590606_17.0 | 1 p2 | (CT)6  | 12 | 972  | 983  | GCATTCTCCAGCGTCTTTTC      |
| scaffold590709_12.4 | 1 p2 | (CT)6  | 12 | 158  | 169  | GCATCTCTCTCGCTCTCATTG     |
| scaffold590746_11.6 | 1 p2 | (TC)6  | 12 | 491  | 502  | TCCATTCAAATCTTTCCA        |
| scaffold590833_16.3 | 1 p2 | (TG)7  | 14 | 358  | 371  | CAATCCAGTTAGTCGGAGCC      |
| scaffold590922_13.6 | 1 p2 | (TA)7  | 14 | 483  | 496  | CCGATCCCCATATAACCGAT      |
| scaffold590940_16.4 | 1 p2 | (GA)9  | 18 | 3699 | 3716 | CTGAATGACCTGCCTCCATT      |
| scaffold590965_10.4 | 1 p2 | (CT)6  | 12 | 140  | 151  | GCTCTCTTTGTAATCTCCCC      |
| scaffold590989_17.7 | 1 p2 | (AT)6  | 12 | 351  | 362  | TCCCTCTTCATCCTCCCTCT      |
| scaffold591004_13.8 | 1 p2 | (TC)6  | 12 | 346  | 357  | CTGGGTTTTCTTCCTCTTCC      |
| scaffold591038_16.4 | 1 p2 | (CT)7  | 14 | 5638 | 5651 | CACAAAACCCTCACACCCTT      |
| scaffold591112_17.6 | 1 p2 | (AG)6  | 12 | 803  | 814  | GACCCAGCACTGCTTCTAGG      |
| scaffold591131_13.4 | 1 p2 | (TC)6  | 12 | 231  | 242  | CAAGGGCTTGAGTAGCTTGG      |

|                     |      |        |    |      |                                |
|---------------------|------|--------|----|------|--------------------------------|
| scaffold591201_18.8 | 1 p2 | (AT)6  | 12 | 241  | 252 AACGCGTCACACGTAATTCA       |
| scaffold591300_16.6 | 1 p2 | (AG)7  | 14 | 1675 | 1688 GTGCCATAGCCACCTGATCT      |
| scaffold591418_13.8 | 1 p2 | (CA)6  | 12 | 258  | 269 CTCTGTCTAGTGGCGAAGCC       |
| scaffold591595_11.2 | 1 p2 | (AG)8  | 16 | 114  | 129 GGGTGAGACAAGATGAGGGT       |
| scaffold591630_13.7 | 1 p2 | (TG)8  | 16 | 65   | 80 CCTTGACCAATCGATTTCTTG       |
| scaffold591659_11.5 | 1 p2 | (GC)6  | 12 | 370  | 381 CACTCGCTACGAGCCACAG        |
| scaffold591722_10.4 | 1 p2 | (GC)6  | 12 | 104  | 115 CCATCACCGCATTTTCTTCT       |
| scaffold591745_10.5 | 1 p2 | (CT)7  | 14 | 67   | 80 TCACCCACAAACTTTTCAACTTC     |
| scaffold591839_11.5 | 1 p2 | (AT)6  | 12 | 392  | 403 CGAGAAGCTTGCTTCAAACC       |
| scaffold591864_15.9 | 1 p2 | (TC)11 | 22 | 5223 | 5244 TGCAAACGGATGGTCTGATA      |
| scaffold591925_15.6 | 1 p2 | (TA)6  | 12 | 53   | 64 AAAATAATCCCAAAACCAATGA      |
| scaffold592066_14.2 | 1 p2 | (AT)8  | 16 | 50   | 65 AACGCACAACAAAATACAAAAGA     |
| scaffold592112_12.7 | 1 p2 | (TA)11 | 22 | 120  | 141 GCATCATTTTGGCCTTTGAT       |
| scaffold592241_18.2 | 1 p2 | (TC)6  | 12 | 370  | 381 ACCCTGCCCAAAACTCTCTT       |
| scaffold592259_15.0 | 1 p2 | (TC)7  | 14 | 744  | 757 CCCATTTCCATGCTTCAACT       |
| scaffold592270_19.6 | 1 p2 | (TA)7  | 14 | 120  | 133 GCGGGTAAATATCAATTTGAG      |
| scaffold592287_13.6 | 1 p2 | (AT)11 | 22 | 1305 | 1326 AATTGTGGCCTCACCTTCAG      |
| scaffold592305_13.4 | 1 p2 | (TA)8  | 16 | 72   | 87 TGGGTTAGCACTTGATCGTG        |
| scaffold592442_15.0 | 1 p2 | (AT)12 | 24 | 1215 | 1238 TCAAACACATTTGGGGGAG       |
| scaffold592531_17.9 | 1 p2 | (AT)6  | 12 | 342  | 353 TCGATTCGAATTTTCATACACA     |
| scaffold592579_15.9 | 1 p2 | (TA)8  | 16 | 286  | 301 TGGTATGACAATTGCAAGCAT      |
| scaffold592611_16.3 | 1 p2 | (AT)7  | 14 | 227  | 240 CAGCCAACCTCGATCTCATCA      |
| scaffold592631_17.6 | 1 p2 | (TA)8  | 16 | 565  | 580 GCTTTGTGCATTCTCCCTT        |
| scaffold592632_15.3 | 1 p2 | (TC)9  | 18 | 49   | 66 TGCTTCTCCAAATCCATCTTC       |
| scaffold592652_12.9 | 1 p2 | (AT)8  | 16 | 574  | 589 AAGTGTGCCCAACACCTTTC       |
| scaffold592676_14.6 | 1 p2 | (TC)6  | 12 | 430  | 441 TTGTTCGAAAAGGAGTTGCC       |
| scaffold592854_12.2 | 1 p2 | (CT)8  | 16 | 40   | 55 CACTCACTCTCACTAGCCGC        |
| scaffold593027_15.8 | 1 p2 | (TC)6  | 12 | 154  | 165 CAATACCGTGACATGCCTTG       |
| scaffold593076_14.3 | 1 p2 | (TA)13 | 26 | 1689 | 1714 ATGGCTGTTGATGTGGACAA      |
| scaffold593214_15.2 | 1 p2 | (TC)8  | 16 | 3492 | 3507 GCCAGAGCTTCTATGGTTGC      |
| scaffold593224_10.8 | 1 p2 | (GA)7  | 14 | 228  | 241 TTCGAACTCCAATAGCAGCA       |
| scaffold593254_17.3 | 1 p2 | (AG)9  | 18 | 439  | 456 ATTTGTGCAAAAGTTGGGG        |
| scaffold593363_13.0 | 1 p2 | (AT)10 | 20 | 397  | 416 TTGGTGAACCTCTCCCAAT        |
| scaffold593364_13.4 | 1 p2 | (AT)9  | 18 | 168  | 185 TGGACAAGACAAGGCTAGGG       |
| scaffold593375_16.5 | 1 p2 | (TA)7  | 14 | 5302 | 5315 ATGGCACACCATAACCAGGAT     |
| scaffold593389_17.3 | 1 p2 | (AG)8  | 16 | 1010 | 1025 GCCCTTTTCATTGCTGTTCAT     |
| scaffold593479_10.0 | 1 p2 | (TC)6  | 12 | 107  | 118 AACGGTGACGAATGGTTCTC       |
| scaffold593504_15.0 | 1 p2 | (AC)6  | 12 | 550  | 561 AATTGGAAACATGGCGAGAC       |
| scaffold593542_13.5 | 1 p2 | (TA)6  | 12 | 538  | 549 GGTCCAAACAACGAACCAAC       |
| scaffold593579_10.6 | 1 p2 | (TC)6  | 12 | 357  | 368 AAAACCCACACTCTCCTCA        |
| scaffold593613_11.4 | 1 p2 | (TA)9  | 18 | 252  | 269 GAATGGTGGTGTGTTGCC         |
| scaffold593649_19.2 | 1 p2 | (AT)8  | 16 | 1537 | 1552 TTAAATGGGGTGACAGGCTC      |
| scaffold593655_10.7 | 1 p2 | (AT)7  | 14 | 308  | 321 CGTGGACAAGTCTCGCCTAT       |
| scaffold593676_10.3 | 1 p2 | (TC)10 | 20 | 358  | 377 TAGTGGTGACAAGTGTGGGG       |
| scaffold593801_10.2 | 1 p2 | (AT)10 | 20 | 165  | 184 CACCCACATTACATTAAACCGA     |
| scaffold593943_13.6 | 1 p2 | (TC)6  | 12 | 425  | 436 TGCCACATCAGCTTCTTCAC       |
| scaffold593970_10.2 | 1 p2 | (CT)6  | 12 | 159  | 170 TCGCTGCCATATTCTTGACA       |
| scaffold593986_18.8 | 1 p2 | (GA)6  | 12 | 710  | 721 AACAGCCATTAAGTCCGGC        |
| scaffold593987_15.2 | 1 p2 | (AG)6  | 12 | 173  | 184 CCTATTCCTCGATTGAGCA        |
| scaffold593988_11.0 | 1 p2 | (TG)8  | 16 | 66   | 81 CTTGACCAATCGATTTCTTG        |
| scaffold594002_10.8 | 1 p2 | (AG)6  | 12 | 499  | 510 ATCCACGAGGATGATGAAGC       |
| scaffold594094_15.4 | 1 p2 | (CT)8  | 16 | 1068 | 1083 TTTTCATTTGATTAGAAGTTCTGGA |
| scaffold594177_15.3 | 1 p2 | (CA)6  | 12 | 500  | 511 TCAGCAAACCTGAAGAACAAGGA    |
| scaffold594189_10.8 | 1 p2 | (TC)7  | 14 | 725  | 738 TAGCCAACCTCGCTTAGCCTC      |
| scaffold594233_13.6 | 1 p2 | (AG)7  | 14 | 146  | 159 GTCTGGTAATGGCCGGACTA       |
| scaffold594246_12.8 | 1 p2 | (TC)6  | 12 | 126  | 137 TTGGCAATGAGATACCGATG       |
| scaffold594267_14.2 | 1 p2 | (TC)8  | 16 | 893  | 908 TGAAATTTGAAGTCCATGCG       |
| scaffold594277_11.6 | 1 p2 | (AT)6  | 12 | 388  | 399 CACACGAACTCATTTGACGG       |

|                     |      |        |    |      |                                |
|---------------------|------|--------|----|------|--------------------------------|
| scaffold594438_16.5 | 1 p2 | (TC)6  | 12 | 728  | 739 GAACAAGTTTGAGGGTGC         |
| scaffold594451_14.5 | 1 p2 | (CT)6  | 12 | 1162 | 1173 GCGTAACATTATGAAGGCGA      |
| scaffold594463_14.7 | 1 p2 | (TA)10 | 20 | 166  | 185 AAAAAGCGCTCGTACATTTTATG    |
| scaffold594573_11.8 | 1 p2 | (CT)6  | 12 | 290  | 301 AATAAATTCAGCGCAAACCG       |
| scaffold594714_15.2 | 1 p2 | (AT)6  | 12 | 721  | 732 TATGAATTCGTTGGGGT          |
| scaffold594764_15.0 | 1 p2 | (AT)6  | 12 | 587  | 598 TCTTTTGACATTTGGGTTCA       |
| scaffold594769_15.2 | 1 p2 | (AG)7  | 14 | 507  | 520 TGGGTTGTTCTGATCTGGGT       |
| scaffold594816_15.6 | 1 p2 | (TG)6  | 12 | 678  | 689 CGCATGGTGACATCAGTACA       |
| scaffold594868_18.0 | 1 p2 | (TA)6  | 12 | 405  | 416 TCGGTTAATGTACACAACCTCCA    |
| scaffold594993_14.0 | 1 p2 | (CT)6  | 12 | 414  | 425 GTTGGGAACGAATTGGAGAA       |
| scaffold595018_14.2 | 1 p2 | (TG)8  | 16 | 240  | 255 GCCATGATCTCCTGATTCAAA      |
| scaffold595036_13.7 | 1 p2 | (TA)6  | 12 | 1376 | 1387 ATCACGTTTGCAGCATGTTT      |
| scaffold595161_14.8 | 1 p2 | (TA)7  | 14 | 70   | 83 AGTGTTACGATAGAATCACGCC      |
| scaffold595242_11.4 | 1 p2 | (TC)6  | 12 | 198  | 209 TCTTGCCTCCACCATCTTCT       |
| scaffold595285_10.7 | 1 p2 | (TA)11 | 22 | 69   | 90 TGACGCTTAGAGGGTGTTTTG       |
| scaffold595297_13.4 | 1 p2 | (TA)9  | 18 | 40   | 57 TTTTGACAATATATAGGTGTTTTGACC |
| scaffold595344_14.8 | 1 p2 | (CT)7  | 14 | 275  | 288 AAATGGCATTGCTCCTCAAC       |
| scaffold595345_15.3 | 1 p2 | (AT)7  | 14 | 235  | 248 CGCGGTGTTTTAACTTGCTT       |
| scaffold595366_15.6 | 1 p2 | (TA)7  | 14 | 552  | 565 CTCGATTAATGGGACCGAA        |
| scaffold595370_14.5 | 1 p2 | (CT)7  | 14 | 548  | 561 CCTCACGACGACTCCAAAAC       |
| scaffold595393_10.9 | 1 p2 | (AG)8  | 16 | 373  | 388 CTCGTTTCGATCCATTTCTG       |
| scaffold595399_11.8 | 1 p2 | (TC)7  | 14 | 435  | 448 TTGTGTGGTTCGATCTGAAA       |
| scaffold595618_12.2 | 1 p2 | (TA)11 | 22 | 1010 | 1031 TGCGGTTTTTAGGGTTAAT       |
| scaffold595708_16.6 | 1 p2 | (TA)8  | 16 | 170  | 185 TTTGAGTTGGGAGAGGGATG       |
| scaffold595743_17.0 | 1 p2 | (AG)9  | 18 | 566  | 583 TTCAGTGGCTACAAATCCCC       |
| scaffold595784_16.2 | 1 p2 | (CT)6  | 12 | 917  | 928 TTGTTCCCTGTGGGATTAGG       |
| scaffold595787_12.8 | 1 p2 | (TA)8  | 16 | 524  | 539 TGACGGTTGGATTTTGTCTT       |
| scaffold595807_11.5 | 1 p2 | (TA)6  | 12 | 171  | 182 AGGCTTGAGTTTCCTCACGA       |
| scaffold595880_11.0 | 1 p2 | (TA)9  | 18 | 169  | 186 ATTGGTGACGTGGCATCATA       |
| scaffold595882_18.2 | 1 p2 | (AC)6  | 12 | 309  | 320 TAAAGACATATCGCGACCCC       |
| scaffold595883_14.2 | 1 p2 | (CT)6  | 12 | 3462 | 3473 TCACATCTCGATCTTCGCAC      |
| scaffold595886_16.7 | 1 p2 | (TC)6  | 12 | 1417 | 1428 ACAGTCTGCAGGCCAAAAC       |
| scaffold595926_10.6 | 1 p2 | (CT)6  | 12 | 561  | 572 GCCCAATAGCCCGTATATCA       |
| scaffold595941_14.2 | 1 p2 | (TA)6  | 12 | 205  | 216 AAACGCGTCATGGATAAACC       |
| scaffold595970_21.2 | 1 p2 | (TA)8  | 16 | 50   | 65 ATGGGAAGAGGGGTATGAGG        |
| scaffold596181_14.9 | 1 p2 | (GA)7  | 14 | 574  | 587 GGGACGATTCTGAAAGGTGA       |
| scaffold596222_14.5 | 1 p2 | (AT)8  | 16 | 170  | 185 TGCAATGCATGGAGGAAATA       |
| scaffold596228_10.4 | 1 p2 | (TC)6  | 12 | 122  | 133 CAATTTGCAGCCCTCATTTT       |
| scaffold596307_15.0 | 1 p2 | (CT)8  | 16 | 835  | 850 ATACCCACCCACCCTCTCTC       |
| scaffold596377_21.3 | 1 p2 | (AG)8  | 16 | 456  | 471 CTCGAATTCGGTTCAGAAA        |
| scaffold596379_10.2 | 1 p2 | (TC)6  | 12 | 38   | 49 ATCTCCTCCTCCACCGTGA         |
| scaffold596380_12.3 | 1 p2 | (TC)6  | 12 | 38   | 49 ATCTCCTCCTCCACCGTGA         |
| scaffold596389_15.6 | 1 p2 | (AC)9  | 18 | 3109 | 3126 CGAGTTGCCAATCATTTCTT      |
| scaffold596409_18.2 | 1 p2 | (CT)6  | 12 | 496  | 507 GTCCACCTTAGGCACGACAT       |
| scaffold596443_22.9 | 1 p2 | (TG)6  | 12 | 1242 | 1253 GACACGGGAAGCGTGATAAT      |
| scaffold596452_13.9 | 1 p2 | (AT)10 | 20 | 633  | 652 CGATCTTGCTCTACGTCTGG       |
| scaffold596523_10.7 | 1 p2 | (TC)8  | 16 | 61   | 76 TCTCGCTCTACACTTTCGGTC       |
| scaffold596573_10.8 | 1 p2 | (TA)10 | 20 | 485  | 504 CGAATCCAGGTAAGGCTTGA       |
| scaffold596627_16.7 | 1 p2 | (AG)8  | 16 | 1092 | 1107 TCTCGACTAGTTGGCGCATA      |
| scaffold596723_13.7 | 1 p2 | (TC)9  | 18 | 657  | 674 CGGCGGCTCTATAAAATTGA       |
| scaffold596762_16.2 | 1 p2 | (AG)8  | 16 | 1356 | 1371 TAGGTCATGGATCGACACGA      |
| scaffold596793_16.2 | 1 p2 | (AT)7  | 14 | 6368 | 6381 TCCAGGGCTACTGGAGGTAA      |
| scaffold596900_16.6 | 1 p2 | (TC)6  | 12 | 358  | 369 TGACTTGGGGTCCATCTCTC       |
| scaffold596976_16.9 | 1 p2 | (CA)7  | 14 | 2438 | 2451 CATGCATCAAGGAAAAACGA      |
| scaffold596991_11.4 | 1 p2 | (AT)7  | 14 | 521  | 534 CATTGCATTTTATGCAGAGCA      |
| scaffold597012_17.2 | 1 p2 | (AT)6  | 12 | 754  | 765 ACTCAGGTGGTTCAAATCGG       |
| scaffold597124_16.0 | 1 p2 | (AT)8  | 16 | 1620 | 1635 GTTGTGTTGCCTGCAGTTTG      |
| scaffold597168_15.4 | 1 p2 | (GA)7  | 14 | 407  | 420 ATCACCCAAAGCCATTTAC        |

|                     |      |        |    |      |                                |
|---------------------|------|--------|----|------|--------------------------------|
| scaffold597246_13.1 | 1 p2 | (AG)6  | 12 | 279  | 290 AGTTTGAAGAAGACCGCACG       |
| scaffold597256_18.9 | 1 p2 | (AG)6  | 12 | 249  | 260 GATGTGTGCCAAAAGGAGT        |
| scaffold597363_14.9 | 1 p2 | (CT)10 | 20 | 52   | 71 AGTGCTCGAATATCTCCCCC        |
| scaffold597440_17.8 | 1 p2 | (AG)6  | 12 | 1685 | 1696 ATTGATGTCCGAATGCAACA      |
| scaffold597663_14.8 | 1 p2 | (AT)6  | 12 | 391  | 402 CACACCTTCAGAAATGCAATG      |
| scaffold597844_13.1 | 1 p2 | (TC)7  | 14 | 141  | 154 CCTAGCTTTGCCCTCCTTCT       |
| scaffold597929_10.8 | 1 p2 | (TC)6  | 12 | 287  | 298 GTCTTGCTCCTCCATTGCAT       |
| scaffold597976_12.2 | 1 p2 | (TG)7  | 14 | 606  | 619 ATTCAAACCACATCCTTCGC       |
| scaffold598058_12.9 | 1 p2 | (TC)6  | 12 | 34   | 45 TGTAATCTCTCTCGAAGTTATAGTGA/ |
| scaffold598091_11.6 | 1 p2 | (GA)6  | 12 | 417  | 428 CGAGATTTACGTGGTTCGGT       |
| scaffold598230_11.4 | 1 p2 | (AT)9  | 18 | 354  | 371 ATTAGAGCCACAGCGGCATA       |
| scaffold598286_13.6 | 1 p2 | (AT)7  | 14 | 604  | 617 AACTCATTAAATGTGCCGCC       |
| scaffold598289_17.0 | 1 p2 | (AC)7  | 14 | 2446 | 2459 ATTTCGAAGATCAAAGGCC       |
| scaffold598327_13.3 | 1 p2 | (TC)8  | 16 | 796  | 811 CATGCCCACAAACACTCAAG       |
| scaffold598350_14.8 | 1 p2 | (AT)6  | 12 | 505  | 516 TGACATTTACGCAGTTTGTGCG     |
| scaffold598357_15.3 | 1 p2 | (GA)7  | 14 | 4641 | 4654 ATTGTTTGAGCTTGGTTGGG      |
| scaffold598366_14.3 | 1 p2 | (TG)7  | 14 | 909  | 922 GGCTCCACAATGAACAAC         |
| scaffold598378_15.1 | 1 p2 | (GA)8  | 16 | 117  | 132 CGAAGACACGATGTTGAACG       |
| scaffold598476_17.3 | 1 p2 | (TA)7  | 14 | 392  | 405 CCCAGAATTGTAAAGCGCAC       |
| scaffold598568_17.8 | 1 p2 | (AC)6  | 12 | 103  | 114 GCACCGAAACAGAGCTGATA       |
| scaffold598605_14.5 | 1 p2 | (AG)10 | 20 | 51   | 70 AGAATGAGGGAGGGAGGAGA        |
| scaffold598702_19.1 | 1 p2 | (AG)9  | 18 | 170  | 187 CTCGGAGACCCATTTCTCTG       |
| scaffold598785_12.3 | 1 p2 | (GA)7  | 14 | 389  | 402 TCTGCAGCTGAGGAAGTTCA       |
| scaffold598802_16.3 | 1 p2 | (TG)7  | 14 | 1593 | 1606 GTTGGGAAGGGAAGAAGGAG      |
| scaffold598939_17.8 | 1 p2 | (CT)6  | 12 | 722  | 733 GCTCTTGAATTTGTCCGAGC       |
| scaffold599037_15.8 | 1 p2 | (GT)6  | 12 | 1611 | 1622 GAGGCTTTTCGTTTCCTTT       |
| scaffold599049_17.0 | 1 p2 | (TA)6  | 12 | 100  | 111 TTTTATCCCATGTTTGTGCAT      |
| scaffold599175_17.8 | 1 p2 | (AG)6  | 12 | 3324 | 3335 CAGCGAATGTAACCGGATCT      |
| scaffold599322_15.9 | 1 p2 | (CA)7  | 14 | 1790 | 1803 GTTAGGTGACCCACCTTCCA      |
| scaffold599337_12.2 | 1 p2 | (AT)7  | 14 | 491  | 504 TCTTTCGAGTCAGGGCATCT       |
| scaffold599361_14.6 | 1 p2 | (CT)6  | 12 | 807  | 818 CTTCAACACATCCATCACCG       |
| scaffold599405_11.8 | 1 p2 | (TA)8  | 16 | 49   | 64 TGCGTTTTGATGATATATAGGTGTTT  |
| scaffold599512_17.1 | 1 p2 | (AG)7  | 14 | 592  | 605 GTGGACCACGGTGATCTTTT       |
| scaffold599525_11.4 | 1 p2 | (TA)13 | 26 | 278  | 303 AAGGGGCACGTAAGCCTAAT       |
| scaffold599559_17.3 | 1 p2 | (TG)8  | 16 | 1073 | 1088 CTTGTTACGGGGAAAGTGGA      |
| scaffold599563_13.4 | 1 p2 | (TC)9  | 18 | 1004 | 1021 AACTCCGCGAGAGAAATTGA      |
| scaffold599567_14.9 | 1 p2 | (CT)7  | 14 | 282  | 295 TTTTTGCACCATTGGTATTG       |
| scaffold599578_12.7 | 1 p2 | (AT)9  | 18 | 527  | 544 TGACGAATGATACCATTTAAGCA    |
| scaffold599600_11.6 | 1 p2 | (TA)7  | 14 | 313  | 326 GAACTAAAAACGATGAAATTTGGTG  |
| scaffold599602_13.1 | 1 p2 | (TA)9  | 18 | 243  | 260 AGTCACAACATTCAAGGGGC       |
| scaffold599635_16.4 | 1 p2 | (AT)6  | 12 | 1036 | 1047 TGTGGTTTACCCGTCTGACA      |
| scaffold599677_14.1 | 1 p2 | (AT)8  | 16 | 1929 | 1944 TTTTCACGAATATACATGTTCCAAA |
| scaffold599755_14.7 | 1 p2 | (TA)6  | 12 | 905  | 916 TGCCCTAACGCCTTATCTTG       |
| scaffold599771_15.7 | 1 p2 | (TG)7  | 14 | 2349 | 2362 TGGAAAATCTGTTGCAGGTG      |
| scaffold599916_12.2 | 1 p2 | (AT)8  | 16 | 51   | 66 GAGAGGAGTGAGATTGAGCGA       |
| scaffold599919_14.3 | 1 p2 | (TA)8  | 16 | 2546 | 2561 CCCTACCCATTTACCCGTTT      |
| scaffold600080_10.1 | 1 p2 | (CT)6  | 12 | 1011 | 1022 TTCTCCCCACTGCTCATCT       |
| scaffold600115_11.4 | 1 p2 | (AG)7  | 14 | 52   | 65 CTGCTCCATTTTCACAACTGA       |
| scaffold600146_12.0 | 1 p2 | (AG)8  | 16 | 297  | 312 TTGGCCGTGAGTTCATTGTA       |
| scaffold600193_11.2 | 1 p2 | (AG)6  | 12 | 110  | 121 TGAGCCGTCAGTGCATTAAA       |
| scaffold600276_11.6 | 1 p2 | (TA)11 | 22 | 208  | 229 TGATGTAGCCCGCATGACTA       |
| scaffold600294_14.1 | 1 p2 | (GA)6  | 12 | 300  | 311 ATGCATACATGACTCGAGCG       |
| scaffold600295_10.0 | 1 p2 | (TC)6  | 12 | 617  | 628 CGGGCCGTGTACTTTACAAT       |
| scaffold600308_18.5 | 1 p2 | (AG)6  | 12 | 107  | 118 CGCGTTACGAATCCAAGTTT       |
| scaffold600309_15.2 | 1 p2 | (TA)9  | 18 | 205  | 222 TTTTATAGGGTTTAAAATCGCGT    |
| scaffold600368_12.9 | 1 p2 | (TA)6  | 12 | 542  | 553 AGATGATGGACAAGGCATCC       |
| scaffold600426_13.2 | 1 p2 | (TA)11 | 22 | 66   | 87 AAGGCCACAATGGTTATTAG        |
| scaffold600532_10.0 | 1 p2 | (GA)6  | 12 | 69   | 80 GAGAGGGGCGAGAGGTAGAG        |

|                     |      |        |    |      |                               |
|---------------------|------|--------|----|------|-------------------------------|
| scaffold600567_12.0 | 1 p2 | (CT)8  | 16 | 102  | 117 TTGTGACGGTGACTAGAGCC      |
| scaffold600707_10.6 | 1 p2 | (TA)6  | 12 | 51   | 62 ACCATATTTAAGGGTTATCACCTG   |
| scaffold600784_17.8 | 1 p2 | (GA)7  | 14 | 336  | 349 AAGGGCTACTGTTCCCGACT      |
| scaffold600812_14.9 | 1 p2 | (AG)6  | 12 | 115  | 126 CGTTTCCCATGTTGCTTGTA      |
| scaffold600826_14.5 | 1 p2 | (TA)7  | 14 | 1000 | 1013 GATTCTCCAATCTGACGGA      |
| scaffold600901_11.6 | 1 p2 | (AT)6  | 12 | 530  | 541 TTTGGTTGTTTGAGATTGTGG     |
| scaffold601142_14.3 | 1 p2 | (TA)7  | 14 | 300  | 313 TGCCTTTCTTTCCCCTCTTT      |
| scaffold601244_15.7 | 1 p2 | (AT)7  | 14 | 460  | 473 ACTGTGAACGGCGCTAATCT      |
| scaffold601248_11.3 | 1 p2 | (TA)10 | 20 | 51   | 70 TTTCTCACATAACTTAGCTGTTCTCA |
| scaffold601249_16.2 | 1 p2 | (TA)7  | 14 | 175  | 188 TTATGATGGGAATGGTGGGT      |
| scaffold601315_13.1 | 1 p2 | (TC)6  | 12 | 86   | 97 TGGCTAATTTGGCAGCTTCT       |
| scaffold601343_16.8 | 1 p2 | (AT)6  | 12 | 1289 | 1300 AACCGGTTAAAACCCAGACC     |
| scaffold601417_16.1 | 1 p2 | (TA)8  | 16 | 457  | 472 GTTATCACCGGATCACGACC      |
| scaffold601452_15.6 | 1 p2 | (AG)7  | 14 | 2063 | 2076 ATTCAGAATTCGCTGGTGG      |
| scaffold601464_14.5 | 1 p2 | (CT)6  | 12 | 194  | 205 GTGTGTGCATGCATTTGTTG      |
| scaffold601503_16.7 | 1 p2 | (CT)14 | 28 | 1099 | 1126 GGTGGGAAGAAGTGTCTGGA     |
| scaffold601628_15.4 | 1 p2 | (TC)6  | 12 | 339  | 350 CCATCCGAGCAAGAAAGGTA      |
| scaffold601691_13.5 | 1 p2 | (TC)7  | 14 | 330  | 343 GCATGATCAATGTTGTAGAGGG    |
| scaffold601750_13.9 | 1 p2 | (AT)9  | 18 | 814  | 831 GTCAACCAATGCAGATGCTC      |
| scaffold601808_12.2 | 1 p2 | (AC)6  | 12 | 782  | 793 CTCACCAGCACCTTCTCTCC      |
| scaffold601837_16.8 | 1 p2 | (GA)6  | 12 | 1709 | 1720 GAACACTCCCTTCTTACGG      |
| scaffold601969_12.7 | 1 p2 | (TA)9  | 18 | 266  | 283 TTAGAAACGGCATACCAGG       |
| scaffold601970_15.5 | 1 p2 | (GA)6  | 12 | 465  | 476 ATTTTCAAGTTGTGCTGCC       |
| scaffold602214_16.3 | 1 p2 | (AT)11 | 22 | 1028 | 1049 GGTTCCCTCTTCTTAACGCT     |
| scaffold602417_12.4 | 1 p2 | (AT)6  | 12 | 93   | 104 AACTCGAGATCGGTCCACCT      |
| scaffold602422_15.2 | 1 p2 | (TA)7  | 14 | 175  | 188 CCCAAAGGTCTCATTTCCAC      |
| scaffold602537_15.0 | 1 p2 | (GA)10 | 20 | 5660 | 5679 GTTGTCAAAAGCACCAGCAA     |
| scaffold602562_20.0 | 1 p2 | (AG)7  | 14 | 1090 | 1103 CGGTCGCAGAAAAGCTAAC      |
| scaffold602610_15.6 | 1 p2 | (TC)9  | 18 | 442  | 459 TCCACAGACAACCTCACCAA      |
| scaffold602630_15.7 | 1 p2 | (CT)7  | 14 | 146  | 159 CACGAGGAACCTTGGACGAT      |
| scaffold602745_17.7 | 1 p2 | (GA)6  | 12 | 137  | 148 TGGGCGATTGAACAATTACA      |
| scaffold602852_20.8 | 1 p2 | (TC)6  | 12 | 155  | 166 GGAAGTGGATAATCCCCT        |
| scaffold602878_14.8 | 1 p2 | (AT)6  | 12 | 379  | 390 ATCACTCCCTGTTACGGCAC      |
| scaffold602884_12.6 | 1 p2 | (TA)7  | 14 | 80   | 93 GCTCGGTAAGTCGTTAATGGA      |
| scaffold602948_10.0 | 1 p2 | (AT)6  | 12 | 167  | 178 CGATGCTGCTGTGAACAAAC      |
| scaffold602989_15.2 | 1 p2 | (TG)6  | 12 | 2828 | 2839 ACGGGAATGGTGTGTTGATT     |
| scaffold603047_13.5 | 1 p2 | (GA)6  | 12 | 1830 | 1841 TGTGGCAACACCAATCACTT     |
| scaffold603104_16.0 | 1 p2 | (AG)6  | 12 | 1310 | 1321 AAACCTCCAGCTACCGAAGCA    |
| scaffold603136_15.0 | 1 p2 | (TC)8  | 16 | 845  | 860 TAGCGATGAAGACGACGATG      |
| scaffold603193_15.7 | 1 p2 | (AG)6  | 12 | 1504 | 1515 CCATCGTTTGGTGGTTCTCT     |
| scaffold603282_10.6 | 1 p2 | (GT)6  | 12 | 56   | 67 TTCGATTTGGGGTGTAAACAA      |
| scaffold603289_14.1 | 1 p2 | (GA)7  | 14 | 2607 | 2620 TTCCGGCGAGGATATATGAG     |
| scaffold603386_16.6 | 1 p2 | (CT)7  | 14 | 53   | 66 ACAAAAAGGGGAAGAGCGACA      |
| scaffold603423_14.5 | 1 p2 | (TA)7  | 14 | 176  | 189 GGATCCGACGTCCAATATACA     |
| scaffold603449_13.1 | 1 p2 | (TG)7  | 14 | 469  | 482 AGTTTCGCGATCTCAACCAG      |
| scaffold603455_11.5 | 1 p2 | (TA)6  | 12 | 483  | 494 AAAAATGATGCCAATCCAGC      |
| scaffold603469_14.3 | 1 p2 | (GA)6  | 12 | 55   | 66 TGATTCTTTTGGTTGGTTTGC      |
| scaffold603471_16.3 | 1 p2 | (AT)6  | 12 | 1331 | 1342 GGTGTTTTTGGATTGGTTGG     |
| scaffold603568_16.3 | 1 p2 | (TA)6  | 12 | 1118 | 1129 CCGCAATAATCCATACCTCAA    |
| scaffold603841_16.2 | 1 p2 | (GA)7  | 14 | 495  | 508 GGTGATTTCGAGATGATCCGT     |
| scaffold603899_14.8 | 1 p2 | (CT)6  | 12 | 1081 | 1092 AAACCTCACCATTTGCCAAC     |
| scaffold603912_14.4 | 1 p2 | (CT)8  | 16 | 728  | 743 TGACGTGGTGTGTGGTTTT       |
| scaffold603920_13.8 | 1 p2 | (AG)6  | 12 | 112  | 123 GTGAATCACACTCCCCATC       |
| scaffold603931_15.3 | 1 p2 | (CA)6  | 12 | 1680 | 1691 CTGCCCAAGAAGGATTTGTC     |
| scaffold603938_14.5 | 1 p2 | (TC)12 | 24 | 412  | 435 CGAACTGGGAAAGGAGAAAA      |
| scaffold603947_15.4 | 1 p2 | (AT)14 | 28 | 420  | 447 GCACTCTTCTTACCCCCA        |
| scaffold604026_16.1 | 1 p2 | (CT)6  | 12 | 266  | 277 CCGTGGACGTAGGTTTCTCT      |
| scaffold604182_12.8 | 1 p2 | (TA)12 | 24 | 751  | 774 CTGCTGCCCAAAACTTAGC       |

|                     |      |        |    |      |      |                           |
|---------------------|------|--------|----|------|------|---------------------------|
| scaffold604267_15.2 | 1 p2 | (CT)6  | 12 | 66   | 77   | CGGGATGCCATTTGTAAGTC      |
| scaffold604337_21.2 | 1 p2 | (GA)6  | 12 | 307  | 318  | GGATTGTTGACTGCCAGGTT      |
| scaffold604360_15.9 | 1 p2 | (GA)6  | 12 | 1872 | 1883 | TCTGGATGTCAAGGCATACG      |
| scaffold604442_16.6 | 1 p2 | (GA)12 | 24 | 4925 | 4948 | AGGTCACCTCCTGCAAGAAA      |
| scaffold604450_12.8 | 1 p2 | (TA)7  | 14 | 302  | 315  | CTGAATGCTTACCGATGCGT      |
| scaffold604503_13.0 | 1 p2 | (CT)8  | 16 | 383  | 398  | TCACCCTTTCTTTGATGGGT      |
| scaffold604560_15.2 | 1 p2 | (TA)8  | 16 | 425  | 440  | GTCATGAATCGGTGCATTTG      |
| scaffold604568_14.9 | 1 p2 | (TA)11 | 22 | 812  | 833  | TTTCGAGAACTCGGGATGAG      |
| scaffold604572_11.7 | 1 p2 | (TA)6  | 12 | 558  | 569  | TCCTTTTCCATTATCCATGTTTTT  |
| scaffold604576_16.7 | 1 p2 | (TA)10 | 20 | 1128 | 1147 | GGTGCATAGGTTAAAGGGCA      |
| scaffold604580_10.4 | 1 p2 | (AG)9  | 18 | 512  | 529  | TGGATTGCATACCAACCAGA      |
| scaffold604583_13.0 | 1 p2 | (TC)6  | 12 | 613  | 624  | TCTCCTTGATCTTGATGGC       |
| scaffold604677_13.9 | 1 p2 | (AC)6  | 12 | 2373 | 2384 | TGAAGGCTTTGATTCATCTCTC    |
| scaffold604775_16.5 | 1 p2 | (AT)7  | 14 | 749  | 762  | CTCCGCCATTCTACAAAA        |
| scaffold604778_14.0 | 1 p2 | (AC)6  | 12 | 364  | 375  | TGGAATTCGCAATATCCAAA      |
| scaffold604910_15.7 | 1 p2 | (AG)6  | 12 | 659  | 670  | CAATGCTGGGATCGATTTTT      |
| scaffold604993_11.0 | 1 p2 | (TA)10 | 20 | 1356 | 1375 | TGGCTTCATTTTGCAGTCAC      |
| scaffold605049_13.0 | 1 p2 | (TG)6  | 12 | 791  | 802  | GGCGGACATCAAAGGAATTA      |
| scaffold605309_17.7 | 1 p2 | (TG)6  | 12 | 398  | 409  | ATCACGGACCCACATACAT       |
| scaffold605417_15.8 | 1 p2 | (CT)7  | 14 | 127  | 140  | ATTTGCAATGGACTGCCTCT      |
| scaffold605521_15.8 | 1 p2 | (AT)6  | 12 | 178  | 189  | GGAATGTTATTGTTTCGTGCG     |
| scaffold605566_10.8 | 1 p2 | (AT)9  | 18 | 335  | 352  | GGATTGTCCCGTCAAGAGAA      |
| scaffold605578_10.6 | 1 p2 | (AT)6  | 12 | 394  | 405  | TGAGCAAGCGCATTGTTTAT      |
| scaffold605583_18.0 | 1 p2 | (TC)8  | 16 | 410  | 425  | CTCCCAACACCACCCTAAA       |
| scaffold605696_12.9 | 1 p2 | (TC)7  | 14 | 1451 | 1464 | TCCTTTCTGCATTTGGGTTT      |
| scaffold605702_11.3 | 1 p2 | (CT)9  | 18 | 644  | 661  | GGCTGGTGTGTGTTTTTGAA      |
| scaffold605779_14.8 | 1 p2 | (GA)7  | 14 | 172  | 185  | AACGGGATGCTTTCAAATG       |
| scaffold605887_11.8 | 1 p2 | (CA)7  | 14 | 1418 | 1431 | TCCATAAACAGGGAAGATGTGA    |
| scaffold605940_13.3 | 1 p2 | (GA)8  | 16 | 898  | 913  | AAAATTCTGAAACCCCCAGG      |
| scaffold605955_17.9 | 1 p2 | (TC)7  | 14 | 129  | 142  | GGCAACGGAATACGATTTGT      |
| scaffold606086_12.8 | 1 p2 | (GA)6  | 12 | 605  | 616  | ATTTGGGGTGATGGGTTTTT      |
| scaffold606093_13.2 | 1 p2 | (CA)6  | 12 | 571  | 582  | GACCGAAATGCAACGATAAA      |
| scaffold606111_12.3 | 1 p2 | (TA)14 | 28 | 128  | 155  | TGCTATGGATGTGGTTGGTG      |
| scaffold606139_12.0 | 1 p2 | (GA)7  | 14 | 410  | 423  | CGAAGTAGCTCGAGCCGTAG      |
| scaffold606208_14.9 | 1 p2 | (CT)6  | 12 | 95   | 106  | CCAAAATTGAACAGCCGATT      |
| scaffold606262_19.0 | 1 p2 | (TA)8  | 16 | 198  | 213  | CAATCTCGAAAATGGATGGC      |
| scaffold606291_11.8 | 1 p2 | (TA)8  | 16 | 372  | 387  | GGGGAAAAGGGTGATGTTTT      |
| scaffold606433_14.4 | 1 p2 | (GA)6  | 12 | 153  | 164  | GCGGGGTTGTTGAAGAATTA      |
| scaffold606469_10.9 | 1 p2 | (GA)6  | 12 | 372  | 383  | GGGGACAACGCCATTTATAG      |
| scaffold606654_15.1 | 1 p2 | (AT)8  | 16 | 2470 | 2485 | TGAGGATATTCCAGTGTGTGAAA   |
| scaffold606655_17.5 | 1 p2 | (AT)6  | 12 | 673  | 684  | TTCAACGTCGGACAAGACAA      |
| scaffold606729_13.4 | 1 p2 | (TA)7  | 14 | 1323 | 1336 | TGAAAGCAGACAGGGGAATC      |
| scaffold606741_10.8 | 1 p2 | (CT)8  | 16 | 151  | 166  | TCCTCTAGCATCTCTTGCTCTC    |
| scaffold606877_12.2 | 1 p2 | (TA)6  | 12 | 180  | 191  | CCGATAGAAGCCACATGTAA      |
| scaffold607125_18.4 | 1 p2 | (TA)8  | 16 | 684  | 699  | TGCAGTGAGTTGCCCAAATA      |
| scaffold607170_16.2 | 1 p2 | (TA)8  | 16 | 1020 | 1035 | TCCCCGCGTATAGAAATCAC      |
| scaffold607201_16.6 | 1 p2 | (TA)6  | 12 | 2960 | 2971 | CAAGATGATGAAGGTCAAACGA    |
| scaffold607266_13.6 | 1 p2 | (TA)8  | 16 | 47   | 62   | GAGAAGGGTTATCACTTGAATAGGA |
| scaffold607304_15.6 | 1 p2 | (TG)7  | 14 | 286  | 299  | ATAGGCACCCCTGGAAAAAG      |
| scaffold607366_16.7 | 1 p2 | (AG)7  | 14 | 178  | 191  | GGTGAACCGCGTAAATCTGT      |
| scaffold607414_14.8 | 1 p2 | (AC)6  | 12 | 313  | 324  | TGCGAATCAGTGCTCCATAG      |
| scaffold607568_10.8 | 1 p2 | (GA)9  | 18 | 343  | 360  | GGCACCATACTGCCGATATT      |
| scaffold607580_15.3 | 1 p2 | (TA)9  | 18 | 174  | 191  | CAACGGATAAACCGATTGCT      |
| scaffold607598_15.3 | 1 p2 | (TG)7  | 14 | 822  | 835  | GCGATGGATTGATTCACGTA      |
| scaffold607634_19.6 | 1 p2 | (TC)7  | 14 | 178  | 191  | TTCACCCATTGTTTGGCGATA     |
| scaffold607735_15.3 | 1 p2 | (GT)7  | 14 | 229  | 242  | TTTTCCGATTGACAAATCCC      |
| scaffold607765_13.9 | 1 p2 | (TA)9  | 18 | 1464 | 1481 | ACGTCAGCATCCACGTGTTA      |
| scaffold607774_10.4 | 1 p2 | (AG)6  | 12 | 181  | 192  | TTGTGCACGAGAATACATCCA     |

|                     |      |        |    |      |                               |
|---------------------|------|--------|----|------|-------------------------------|
| scaffold607777_14.2 | 1 p2 | (AG)10 | 20 | 471  | 490 GAGAAGGTGAGAGGCAGACG      |
| scaffold607854_10.2 | 1 p2 | (AT)11 | 22 | 295  | 316 CATGCCTGATTACATCACCG      |
| scaffold607952_17.5 | 1 p2 | (GA)9  | 18 | 1968 | 1985 GACAATTGCTCGCAAAGGAT     |
| scaffold608060_12.7 | 1 p2 | (TA)7  | 14 | 1388 | 1401 TTCTCATTTGCAACCGATGT     |
| scaffold608110_15.2 | 1 p2 | (CT)7  | 14 | 1338 | 1351 GCTGTTTCTCAGATCCTCGG     |
| scaffold608130_17.3 | 1 p2 | (TC)7  | 14 | 514  | 527 CATGACCCACCAAACATGAC      |
| scaffold608205_12.0 | 1 p2 | (TC)7  | 14 | 29   | 42 TCTCTCTGGTTGGTGAAGAAA      |
| scaffold608255_12.0 | 1 p2 | (AG)12 | 24 | 422  | 445 TTGTTGGCTATTTGTTGCTCA     |
| scaffold608302_15.5 | 1 p2 | (AG)13 | 26 | 1197 | 1222 TGGTACTTGCAATGTTGGGA     |
| scaffold608523_18.6 | 1 p2 | (GA)6  | 12 | 316  | 327 CAAAATTTGGCATCAAATTCAA    |
| scaffold608615_15.2 | 1 p2 | (GA)6  | 12 | 297  | 308 GGATGGGAGTCAATCCAGAA      |
| scaffold608646_11.0 | 1 p2 | (GA)6  | 12 | 320  | 331 CAACGAGATACGCTGCAAGA      |
| scaffold608671_13.7 | 1 p2 | (AT)8  | 16 | 51   | 66 TGTACATCTAGCTCTGTTGAATCTTG |
| scaffold608672_11.0 | 1 p2 | (AT)10 | 20 | 173  | 192 TGGAGATGTGAAACATGCCT      |
| scaffold608790_10.5 | 1 p2 | (TG)8  | 16 | 126  | 141 TCGGTTTGGCCAATATTTCT      |
| scaffold608952_11.4 | 1 p2 | (AG)7  | 14 | 413  | 426 GATATTTGATTTTGCGGGGA      |
| scaffold608958_13.7 | 1 p2 | (TC)6  | 12 | 1359 | 1370 TGCTTTGGTGACTGAATGATG    |
| scaffold609042_16.8 | 1 p2 | (CG)6  | 12 | 100  | 111 ATGGTGGTATGGTATGGGGA      |
| scaffold609074_12.0 | 1 p2 | (TA)8  | 16 | 438  | 453 CAAATTCGGACTTAAGGGCA      |
| scaffold609126_11.2 | 1 p2 | (AT)9  | 18 | 338  | 355 AGGGGGTACCATTGTTCAA       |
| scaffold609371_15.8 | 1 p2 | (TA)6  | 12 | 2056 | 2067 AGCAAGGACACTGGAACAGG     |
| scaffold609482_12.6 | 1 p2 | (TC)7  | 14 | 1120 | 1133 TTCGATCTACTGGGCCACAT     |
| scaffold609516_10.6 | 1 p2 | (AG)7  | 14 | 721  | 734 ATGGACTCGCTGGTCTCTGT      |
| scaffold609568_17.4 | 1 p2 | (TC)6  | 12 | 410  | 421 GGCAAAATTAATAAATGCCAC     |
| scaffold609571_17.2 | 1 p2 | (AC)6  | 12 | 988  | 999 TATCTGCTCCAAAAGCCTGC      |
| scaffold609823_13.2 | 1 p2 | (AT)7  | 14 | 240  | 253 TGCCTACCAAACACTAGGGG      |
| scaffold609837_14.7 | 1 p2 | (AT)6  | 12 | 908  | 919 CCGTACCGGAATTTAACGAA      |
| scaffold609855_17.0 | 1 p2 | (AG)7  | 14 | 2442 | 2455 GCCATGTCTAGCATTGGGAT     |
| scaffold609896_14.2 | 1 p2 | (AT)8  | 16 | 1202 | 1217 CTGCCATAACCCGAAAAAGA     |
| scaffold609899_12.2 | 1 p2 | (AT)6  | 12 | 263  | 274 TGCCGTGTTATTGTGAGTCC      |
| scaffold609975_14.9 | 1 p2 | (TC)6  | 12 | 2162 | 2173 TTTGCCCATCTTCAAACCTCC    |
| scaffold609985_16.6 | 1 p2 | (TC)9  | 18 | 2733 | 2750 CATCATTGCCTGTCATTTCCG    |
| scaffold609992_16.8 | 1 p2 | (AG)7  | 14 | 2600 | 2613 TGGAATCGCGATGAGATTTA     |
| scaffold610007_12.6 | 1 p2 | (TA)9  | 18 | 378  | 395 ACTTGCGAGCCACCAATTAC      |
| scaffold610039_14.0 | 1 p2 | (CT)6  | 12 | 229  | 240 AGTGTGCGCACAAACAAACA      |
| scaffold610092_15.3 | 1 p2 | (AG)6  | 12 | 463  | 474 GGTCTTTTCGAAACACGAGA      |
| scaffold610125_16.0 | 1 p2 | (AC)6  | 12 | 586  | 597 GTGCATTGGGTCAAAGAGGT      |
| scaffold610175_15.8 | 1 p2 | (AC)6  | 12 | 160  | 171 CCATGTCTGGCTTACCTGT       |
| scaffold610209_14.6 | 1 p2 | (GA)6  | 12 | 2831 | 2842 TTTTGATCGAAAGGGAATCG     |
| scaffold610267_17.2 | 1 p2 | (CT)6  | 12 | 759  | 770 GCACACCATCTTCAAGCAA       |
| scaffold610390_15.5 | 1 p2 | (CT)6  | 12 | 684  | 695 GAACGGTTTATTCGGGTTCA      |
| scaffold610506_19.0 | 1 p2 | (AT)6  | 12 | 182  | 193 CACGTGACATAAAATGCATCG     |
| scaffold610560_10.2 | 1 p2 | (TA)6  | 12 | 76   | 87 TGAAACCAGGGGAAAAAGG        |
| scaffold610563_16.8 | 1 p2 | (TC)7  | 14 | 210  | 223 CGGCACAAAATTTTCCACTT      |
| scaffold610664_11.8 | 1 p2 | (TA)6  | 12 | 890  | 901 TTGCTGCGGTACTTTCATTTT     |
| scaffold610696_12.2 | 1 p2 | (TA)9  | 18 | 387  | 404 ACCGAAATACCCCAAACCTC      |
| scaffold610729_14.2 | 1 p2 | (TA)9  | 18 | 106  | 123 TTCACAGTTTTTCATTTGATCACC  |
| scaffold610812_13.9 | 1 p2 | (TG)6  | 12 | 129  | 140 GGCTATAGAGCCGTTGAATG      |
| scaffold610851_19.4 | 1 p2 | (TC)8  | 16 | 177  | 192 ACGGGACCCTCATCTTCTCT      |
| scaffold610882_17.2 | 1 p2 | (CT)6  | 12 | 523  | 534 TACAAACCACCTTAACCTCCGC    |
| scaffold610938_16.2 | 1 p2 | (TG)6  | 12 | 1052 | 1063 CATATATGGTTGCACAGGCG     |
| scaffold610971_16.7 | 1 p2 | (GT)6  | 12 | 130  | 141 CGAGCCACAATACTTCGGAC      |
| scaffold611003_11.2 | 1 p2 | (TA)7  | 14 | 52   | 65 CGGATTTAGCGGTTATTACCTGA    |
| scaffold611010_17.4 | 1 p2 | (GA)7  | 14 | 507  | 520 AACAAGAAGATGCCGAAGGA      |
| scaffold611054_15.2 | 1 p2 | (TA)11 | 22 | 43   | 64 AGGGAGTGCTCTCACCTGAA       |
| scaffold611113_16.6 | 1 p2 | (GT)6  | 12 | 2216 | 2227 TTCTGACATACCGTCCTCCC     |
| scaffold611171_10.0 | 1 p2 | (AT)8  | 16 | 326  | 341 GGGTTCTCGTGATAAGCTCG      |
| scaffold611182_12.7 | 1 p2 | (TA)9  | 18 | 47   | 64 GAGGGTTATCATGGGATCAAG      |



|                     |      |        |    |      |                               |
|---------------------|------|--------|----|------|-------------------------------|
| scaffold611282_17.4 | 1 p2 | (CT)8  | 16 | 274  | 289 GTGGATCTCGGGTAGGGATT      |
| scaffold611283_13.3 | 1 p2 | (AG)7  | 14 | 180  | 193 GGTTGTGGCTCTGGTTCTGT      |
| scaffold611386_10.5 | 1 p2 | (TA)7  | 14 | 53   | 66 TGTGTGATGTTGGAGTTGGG       |
| scaffold611417_16.6 | 1 p2 | (GA)8  | 16 | 2446 | 2461 ATCGCGAGAAATTGAGAAGG     |
| scaffold611462_18.6 | 1 p2 | (TG)7  | 14 | 186  | 199 TTGATGTGGATGACGAGGTC      |
| scaffold611494_21.8 | 1 p2 | (TC)7  | 14 | 121  | 134 CGTTGATTTGAGGCAGGTTT      |
| scaffold611506_14.4 | 1 p2 | (CT)11 | 22 | 1194 | 1215 GGTGTCCGAGTTGTAGGCAT     |
| scaffold611526_15.0 | 1 p2 | (AC)6  | 12 | 444  | 455 TGCCAGTTTACTCCGAAAGG      |
| scaffold611572_17.1 | 1 p2 | (TC)6  | 12 | 68   | 79 GCTTCAAGTTTCTCCTTTTG       |
| scaffold611576_14.8 | 1 p2 | (TC)13 | 26 | 2358 | 2383 GTTGGAGAGTTGACGGTGGT     |
| scaffold611588_12.0 | 1 p2 | (AT)8  | 16 | 466  | 481 TTTTCTCGATCTCACGCCTC      |
| scaffold611598_13.1 | 1 p2 | (AG)6  | 12 | 181  | 192 CATGGACCAATGGGACCTAC      |
| scaffold611724_11.6 | 1 p2 | (TA)9  | 18 | 422  | 439 TTTGTTTCTGGTCCAGTCCC      |
| scaffold611943_14.5 | 1 p2 | (CT)6  | 12 | 333  | 344 AACTCCATGCAAATCACACG      |
| scaffold611952_16.7 | 1 p2 | (TA)8  | 16 | 281  | 296 GCGGGTAGGGTAGGGACTAT      |
| scaffold611973_14.0 | 1 p2 | (TG)6  | 12 | 182  | 193 CGCTTCGAGTTGTTTTACA       |
| scaffold611995_14.3 | 1 p2 | (GA)6  | 12 | 254  | 265 GGAAATGGGAATGGGTTCTT      |
| scaffold612013_15.0 | 1 p2 | (TA)7  | 14 | 2458 | 2471 TGCAAATCTTACAGAATCAGCAAC |
| scaffold612027_17.8 | 1 p2 | (GA)6  | 12 | 1462 | 1473 CCACTCCCTGAGTATCCCCG     |
| scaffold612149_12.9 | 1 p2 | (TA)6  | 12 | 603  | 614 CCATCCCAATTATACGGTCC      |
| scaffold612161_12.6 | 1 p2 | (TA)8  | 16 | 338  | 353 CATGATGTCAATCCAGTGGC      |
| scaffold612194_15.9 | 1 p2 | (TA)9  | 18 | 520  | 537 AGGAGGGGAAATGGATCAAC      |
| scaffold612243_13.8 | 1 p2 | (CT)10 | 20 | 1025 | 1044 CATTTATCCCCGCAACAAC      |
| scaffold612303_13.8 | 1 p2 | (CT)6  | 12 | 106  | 117 AATCCCTTTCTCCTCTCCCA      |
| scaffold612451_16.0 | 1 p2 | (GA)10 | 20 | 2054 | 2073 CACAGCATGGACTTTGTTGG     |
| scaffold612507_15.9 | 1 p2 | (AG)10 | 20 | 2136 | 2155 CAAAGCAACCCTTAAGAGCG     |
| scaffold612548_17.0 | 1 p2 | (TG)9  | 18 | 177  | 194 GTTTTGAGATGGGTGGTTGG      |
| scaffold612565_11.0 | 1 p2 | (AT)6  | 12 | 128  | 139 CCCCAGGAATCTTGTTTTCA      |
| scaffold612803_18.1 | 1 p2 | (AC)6  | 12 | 470  | 481 TAGCCGGGTCTGTGACATAAT     |
| scaffold613039_14.5 | 1 p2 | (CT)7  | 14 | 228  | 241 ACACATGCCTGGAACACAAA      |
| scaffold613074_12.8 | 1 p2 | (TA)11 | 22 | 431  | 452 CCACATGCTATGCCTCAAAC      |
| scaffold613115_12.6 | 1 p2 | (AT)10 | 20 | 592  | 611 TTATCTACAAAACGAGACCAATCTT |
| scaffold613129_13.4 | 1 p2 | (AT)10 | 20 | 1420 | 1439 TCTATCCGCCAGTGCTCTTT     |
| scaffold613180_20.8 | 1 p2 | (TA)6  | 12 | 861  | 872 TGGCATTACAAACTTCAAACCA    |
| scaffold613299_16.3 | 1 p2 | (AC)6  | 12 | 2764 | 2775 CAACACTGCATCAGTCCCAT     |
| scaffold613513_13.8 | 1 p2 | (CA)7  | 14 | 116  | 129 CTTGAGCTCTGATGCCACAA      |
| scaffold613543_13.7 | 1 p2 | (GT)7  | 14 | 277  | 290 AAGACTTCGCATCTCGGAAA      |
| scaffold613592_15.3 | 1 p2 | (TC)6  | 12 | 75   | 86 GAGTTGGTCATTCTCAAGATGG     |
| scaffold613604_10.8 | 1 p2 | (AT)10 | 20 | 280  | 299 GCGGAACTTTCACTTCGCT       |
| scaffold613675_15.0 | 1 p2 | (AC)6  | 12 | 295  | 306 CTCTCCCTTCTGAATGCTG       |
| scaffold613857_10.7 | 1 p2 | (CT)6  | 12 | 54   | 65 TTTGGACTAGGCCATTCAAC       |
| scaffold613976_12.6 | 1 p2 | (AG)7  | 14 | 1896 | 1909 GGCCCATGTGTTAAATCAAGA    |
| scaffold613984_12.0 | 1 p2 | (TA)9  | 18 | 358  | 375 TTAAATGACCTTGGGATGCG      |
| scaffold614031_12.5 | 1 p2 | (TA)12 | 24 | 293  | 316 AGCGCCTAGCGATTTCTACA      |
| scaffold614054_16.7 | 1 p2 | (TA)10 | 20 | 3861 | 3880 CGCTCACCCATCGAAAGTAT     |
| scaffold614067_15.2 | 1 p2 | (CT)6  | 12 | 741  | 752 TCTCTCGCTCACCCCTCTCTC     |
| scaffold614099_13.1 | 1 p2 | (AG)8  | 16 | 785  | 800 TAAGATACGGGCAGCGAAAC      |
| scaffold614225_16.1 | 1 p2 | (TA)8  | 16 | 258  | 273 CTTCCCCTGTTCTTGCATGT      |
| scaffold614277_13.8 | 1 p2 | (TA)8  | 16 | 620  | 635 CGCGGAGCATTGTTTCATAC      |
| scaffold614372_16.1 | 1 p2 | (TC)6  | 12 | 184  | 195 ATTTACCCCCAAGTCTCCT       |
| scaffold614384_10.6 | 1 p2 | (TA)6  | 12 | 53   | 64 TTTTTGTCTATATCGCTCAGTCAAT  |
| scaffold614467_13.9 | 1 p2 | (TA)6  | 12 | 170  | 181 TGCGGAAAAATGTTGACAGA      |
| scaffold614511_10.6 | 1 p2 | (TC)6  | 12 | 264  | 275 GAACCTCTGCACTCTCCAGG      |
| scaffold614541_16.9 | 1 p2 | (TG)6  | 12 | 1068 | 1079 GGAGTCCCTTCTTCCCAGTC     |
| scaffold614549_16.4 | 1 p2 | (TA)6  | 12 | 1079 | 1090 TCTGCAATGAACGAAAATGC     |
| scaffold614562_12.7 | 1 p2 | (AT)9  | 18 | 456  | 473 CATGTGTCCATGAATGAGGG      |
| scaffold614678_10.5 | 1 p2 | (AC)9  | 18 | 63   | 80 CTAACGGGTCTGGGCTAAC        |
| scaffold614820_17.4 | 1 p2 | (AG)6  | 12 | 2397 | 2408 TGAATCCACCATGGAAGAGA     |

|                     |      |        |    |      |      |                             |
|---------------------|------|--------|----|------|------|-----------------------------|
| scaffold614829_11.3 | 1 p2 | (TA)6  | 12 | 324  | 335  | TCCAAAGGTGGCCAAAATAC        |
| scaffold614962_10.0 | 1 p2 | (TA)8  | 16 | 279  | 294  | TAAGGGCGGTATCACCTGAA        |
| scaffold614988_18.7 | 1 p2 | (AT)7  | 14 | 911  | 924  | TGGGCATAAAAACGTGCATA        |
| scaffold615030_17.5 | 1 p2 | (CT)9  | 18 | 50   | 67   | TCATCAACAGCGAAGCAAGT        |
| scaffold615142_10.8 | 1 p2 | (TA)12 | 24 | 290  | 313  | GGCAGCACCAGAATTACTCC        |
| scaffold615163_16.7 | 1 p2 | (GA)7  | 14 | 1141 | 1154 | GGCAAATTGTTGAAGTCGGT        |
| scaffold615235_17.6 | 1 p2 | (AG)7  | 14 | 182  | 195  | GTA AACAGCGCCCGTACAT        |
| scaffold615294_10.5 | 1 p2 | (CT)6  | 12 | 523  | 534  | GATCGGAGCTCTGTTAAGCG        |
| scaffold615323_12.1 | 1 p2 | (AT)7  | 14 | 357  | 370  | AGCGGAAGACTTGTAACGGA        |
| scaffold615334_12.0 | 1 p2 | (TA)6  | 12 | 39   | 50   | GGGACCACTAGACATTCGCT        |
| scaffold615340_15.7 | 1 p2 | (AT)6  | 12 | 766  | 777  | TCGCTTAAACTTCGAGGGTG        |
| scaffold615374_14.7 | 1 p2 | (CT)7  | 14 | 1282 | 1295 | CATTGCGAGAAAAGCAGTCA        |
| scaffold615379_15.1 | 1 p2 | (AG)6  | 12 | 896  | 907  | GGATGAGAGATTTGGGTTTCG       |
| scaffold615445_15.5 | 1 p2 | (TA)9  | 18 | 48   | 65   | TTAGTTAGCATGGGGGAAGG        |
| scaffold615475_11.5 | 1 p2 | (TC)6  | 12 | 350  | 361  | CCGCTCAAATCACTCACTCA        |
| scaffold615477_12.8 | 1 p2 | (TA)8  | 16 | 48   | 63   | ACCCACATTTGTGGCATA          |
| scaffold615562_10.1 | 1 p2 | (TA)9  | 18 | 329  | 346  | ATCTCAACGCATCAACCGTC        |
| scaffold615703_15.6 | 1 p2 | (CT)6  | 12 | 244  | 255  | CTGCCCGAGGTCTGTTTCTA        |
| scaffold615794_13.5 | 1 p2 | (AC)9  | 18 | 178  | 195  | CCAACGAAACCACTGACAAA        |
| scaffold615841_15.9 | 1 p2 | (TA)6  | 12 | 612  | 623  | TTCGATTTCGCAACAATTGAG       |
| scaffold615895_15.5 | 1 p2 | (AG)6  | 12 | 1678 | 1689 | AGCACCTTATTGTGGCTTG         |
| scaffold615926_13.0 | 1 p2 | (TA)8  | 16 | 58   | 73   | GATGGGTTATTATTGGAACGAGA     |
| scaffold615929_14.6 | 1 p2 | (AT)7  | 14 | 1919 | 1932 | TTGTACGTCCAATATGTAAATTATGTT |
| scaffold615938_15.1 | 1 p2 | (AT)6  | 12 | 2961 | 2972 | TTGCATGTGCATAACGGTTT        |
| scaffold616050_10.2 | 1 p2 | (GA)6  | 12 | 248  | 259  | CTTCAATGGAGGTCGGAGAG        |
| scaffold616097_17.2 | 1 p2 | (TA)7  | 14 | 183  | 196  | CAGGACGGTATTTTCCCCTT        |
| scaffold616181_17.1 | 1 p2 | (AC)8  | 16 | 1107 | 1122 | CCAGAATGTACGAGTTGGGG        |
| scaffold616202_16.2 | 1 p2 | (TA)10 | 20 | 177  | 196  | ACCTAAGGGGGTGTTTGCAT        |
| scaffold616209_11.6 | 1 p2 | (TA)6  | 12 | 67   | 78   | AGGGTCAACAATGACGGAAC        |
| scaffold616210_14.2 | 1 p2 | (TA)7  | 14 | 65   | 78   | AGGGTCAACAATGACGGAAC        |
| scaffold616217_14.9 | 1 p2 | (GA)6  | 12 | 1850 | 1861 | TTCTGGTGGAAGGCCTAATG        |
| scaffold616222_12.8 | 1 p2 | (TA)6  | 12 | 381  | 392  | GGTGATAGAAGGCTACGGCA        |
| scaffold616223_15.3 | 1 p2 | (CT)6  | 12 | 577  | 588  | CTCAAATCCTTCCATTCCCA        |
| scaffold616325_17.1 | 1 p2 | (TG)6  | 12 | 1274 | 1285 | TTTTTGCGATGGAACATGAA        |
| scaffold616397_14.0 | 1 p2 | (AT)8  | 16 | 213  | 228  | AAAATAATCGGGTTGGGTCC        |
| scaffold616440_10.2 | 1 p2 | (CT)9  | 18 | 114  | 131  | TCGACGACTTGTTGGAAATG        |
| scaffold616467_16.6 | 1 p2 | (TC)6  | 12 | 658  | 669  | TATTCTTTTACGCATGCCCC        |
| scaffold616479_16.8 | 1 p2 | (TA)9  | 18 | 48   | 65   | TCATCTATAGGGAAGTTATCACTGGA  |
| scaffold616483_13.3 | 1 p2 | (TA)9  | 18 | 96   | 113  | CAACGGATTTGGTTTGTTC         |
| scaffold616484_15.1 | 1 p2 | (AT)6  | 12 | 185  | 196  | TTCAGAAACGAGGGCATTTT        |
| scaffold616514_16.6 | 1 p2 | (CT)6  | 12 | 184  | 195  | TTGGTCATCCCTTTCTGACC        |
| scaffold616516_15.0 | 1 p2 | (GT)6  | 12 | 889  | 900  | TTGAATTGATATTCAGTGAACGTG    |
| scaffold616654_20.0 | 1 p2 | (GA)6  | 12 | 1463 | 1474 | CCCACAATTCAGCATCTCT         |
| scaffold616679_10.0 | 1 p2 | (TA)9  | 18 | 203  | 220  | TGGGGTGTGCATGATAAGTGG       |
| scaffold616817_13.9 | 1 p2 | (AT)11 | 22 | 40   | 61   | CGGATTTAAGGGTTATTACCTGATT   |
| scaffold616830_16.5 | 1 p2 | (TC)6  | 12 | 185  | 196  | CCAATCCCGTAGGAATTTT         |
| scaffold616965_15.5 | 1 p2 | (TA)8  | 16 | 293  | 308  | AAATTACACCTTTGTCAATTTTTCAG  |
| scaffold616966_13.6 | 1 p2 | (TA)9  | 18 | 805  | 822  | TCGTTAAAGGGAATGCACAA        |
| scaffold616993_18.6 | 1 p2 | (AG)6  | 12 | 547  | 558  | GGAGTGGGGGTTTTGAGTTT        |
| scaffold617016_15.4 | 1 p2 | (AT)6  | 12 | 643  | 654  | TTGCAATCCGATATCAACCA        |
| scaffold617133_14.7 | 1 p2 | (CT)6  | 12 | 4366 | 4377 | AACTTGGTTCCACGCAAAAC        |
| scaffold617134_14.5 | 1 p2 | (TA)6  | 12 | 375  | 386  | TTGAAGCATGACCTGCAAAT        |
| scaffold617135_16.7 | 1 p2 | (TA)8  | 16 | 1053 | 1068 | ATGCCGTTACCTTCAACTC         |
| scaffold617185_13.9 | 1 p2 | (TA)6  | 12 | 130  | 141  | GGGATAAGATTGGTGGTGATG       |
| scaffold617208_11.1 | 1 p2 | (TG)6  | 12 | 392  | 403  | AATGCCTGCTTGCCTTAAAA        |
| scaffold617275_16.2 | 1 p2 | (AT)7  | 14 | 299  | 312  | TTTTTCTCCCAAAATTGCC         |
| scaffold617345_16.6 | 1 p2 | (GA)9  | 18 | 473  | 490  | CTGGATGAAGTTATGCGCTG        |
| scaffold617346_15.6 | 1 p2 | (CT)7  | 14 | 392  | 405  | CACATCACCCCTTCGTTTTT        |

|                     |      |        |    |      |      |                             |
|---------------------|------|--------|----|------|------|-----------------------------|
| scaffold617463_10.0 | 1 p2 | (AC)6  | 12 | 118  | 129  | AGCTGGGCACTTGAAACCTA        |
| scaffold617473_16.0 | 1 p2 | (AG)8  | 16 | 180  | 195  | CTCTTCCAGTTGTGTCCTGG        |
| scaffold617543_12.4 | 1 p2 | (AG)7  | 14 | 165  | 178  | GGCATACCGCAAATCAACTT        |
| scaffold617739_10.0 | 1 p2 | (TC)9  | 18 | 610  | 627  | CTTCCTCCCACCTTCGTCTT        |
| scaffold617830_14.5 | 1 p2 | (GA)7  | 14 | 649  | 662  | GCTGCAGCAGTATCAATCCA        |
| scaffold617837_17.0 | 1 p2 | (TA)6  | 12 | 985  | 996  | CCGCTACACCTTTTGGATGT        |
| scaffold617861_12.0 | 1 p2 | (CT)8  | 16 | 82   | 97   | ATCTTCCCGCCATTCTTTCT        |
| scaffold618062_11.0 | 1 p2 | (AT)12 | 24 | 298  | 321  | CCATTTCCCTATCTATACCAATCAA   |
| scaffold618076_13.4 | 1 p2 | (GA)7  | 14 | 403  | 416  | AAGGAGAGGAAGGTTGGCAT        |
| scaffold618099_15.0 | 1 p2 | (TC)7  | 14 | 602  | 615  | AGAGCGAGTTGGAACCTTGA        |
| scaffold618134_17.0 | 1 p2 | (GT)7  | 14 | 1186 | 1199 | CGTTCGCTATCCAAGTCAAT        |
| scaffold618300_15.0 | 1 p2 | (AT)11 | 22 | 580  | 601  | TATAACATCAACCGCCAGCA        |
| scaffold618374_16.4 | 1 p2 | (AT)7  | 14 | 754  | 767  | AATCCCAAGATAATCTCAATCG      |
| scaffold618449_14.0 | 1 p2 | (AG)8  | 16 | 1647 | 1662 | GCTCCCGTAGAACTTTCCCT        |
| scaffold618490_12.4 | 1 p2 | (TA)6  | 12 | 285  | 296  | TGAGGAGCGTTGATCTTGTG        |
| scaffold618502_10.0 | 1 p2 | (TC)6  | 12 | 342  | 353  | TGCAACAAGATGGTGCTCTC        |
| scaffold618541_10.0 | 1 p2 | (TA)9  | 18 | 67   | 84   | AAGGCCGAGATTTGTTAGAGG       |
| scaffold618562_10.0 | 1 p2 | (TA)6  | 12 | 92   | 103  | TGAAGTTCGAAATAAGGAGG        |
| scaffold618568_16.0 | 1 p2 | (TA)6  | 12 | 285  | 296  | TCTTATCCATTTTCGCCATCC       |
| scaffold618714_15.0 | 1 p2 | (TC)10 | 20 | 177  | 196  | TGGAGGGCTGTTTCTTCATC        |
| scaffold618726_13.0 | 1 p2 | (AT)7  | 14 | 289  | 302  | GGTGGGAAATCATCCCTTCT        |
| scaffold618865_18.0 | 1 p2 | (TC)6  | 12 | 235  | 246  | GACCAAGTTGCTCTTCTCGG        |
| scaffold618867_12.0 | 1 p2 | (CA)6  | 12 | 349  | 360  | CACTCCCTCCCTTTTCTTC         |
| scaffold618917_15.0 | 1 p2 | (AG)6  | 12 | 115  | 126  | TGAGCCGTCAGTGCATTA          |
| scaffold618933_13.4 | 1 p2 | (TA)6  | 12 | 2053 | 2064 | ACATAAATTTGGCAAAGAGAAAA     |
| scaffold618956_10.0 | 1 p2 | (TA)10 | 20 | 118  | 137  | CCGGGAATTTTGAATGAACA        |
| scaffold619031_15.0 | 1 p2 | (GA)6  | 12 | 756  | 767  | ACCCGTCTAGCAGAGACGAA        |
| scaffold619067_14.0 | 1 p2 | (CT)6  | 12 | 82   | 93   | TTGCCCTTCACTCTCATCT         |
| scaffold619130_12.0 | 1 p2 | (TG)7  | 14 | 206  | 219  | TGACGTGGGTGTTGGAATAA        |
| scaffold619131_12.0 | 1 p2 | (TG)7  | 14 | 566  | 579  | CGAGATTTGCTCATGTTGGA        |
| scaffold619154_14.0 | 1 p2 | (AG)6  | 12 | 186  | 197  | AAACAGCGCCATAATCTTG         |
| scaffold619162_17.0 | 1 p2 | (TG)8  | 16 | 498  | 513  | CAAGCCATCTGTGGTTGAGA        |
| scaffold619428_16.0 | 1 p2 | (GA)13 | 26 | 296  | 321  | TGTTGAAGGAGGCTTAGGA         |
| scaffold619479_14.4 | 1 p2 | (AG)9  | 18 | 1661 | 1678 | TGATTTATCCGAATGTCCA         |
| scaffold619490_11.0 | 1 p2 | (TA)11 | 22 | 869  | 890  | TGTGGGTTCACTGGATACGA        |
| scaffold619515_10.0 | 1 p2 | (AT)7  | 14 | 446  | 459  | GGACAAATTTGGAATTTTAGGG      |
| scaffold619537_11.4 | 1 p2 | (AG)6  | 12 | 260  | 271  | ATCGATCCACGTTGAAAAC         |
| scaffold619688_15.0 | 1 p2 | (CT)7  | 14 | 668  | 681  | TAATGTCTTCCCATCCAGCC        |
| scaffold619793_12.0 | 1 p2 | (AT)9  | 18 | 185  | 202  | TGGCCGGTTTTGAATCTATC        |
| scaffold619874_16.0 | 1 p2 | (TA)7  | 14 | 1703 | 1716 | GGGTTTCATTTTGATTCCCA        |
| scaffold619876_16.0 | 1 p2 | (CT)14 | 28 | 370  | 397  | CTTCTTGCAGAAACCTTG          |
| scaffold619925_14.0 | 1 p2 | (AT)7  | 14 | 297  | 310  | TTTTTGACCAAATCAATCCCA       |
| scaffold620078_14.0 | 1 p2 | (GA)6  | 12 | 1831 | 1842 | CTCGTCCTATGCAAGCAACA        |
| scaffold620096_15.0 | 1 p2 | (CT)6  | 12 | 164  | 175  | GGATTCAGCATTGTAAGGGG        |
| scaffold620098_16.0 | 1 p2 | (AT)6  | 12 | 399  | 410  | TGAGAAAGCAGCTGGTGAGA        |
| scaffold620187_11.0 | 1 p2 | (TA)6  | 12 | 115  | 126  | AAAAGAGTTGGGAAAAGTTATGAGTC  |
| scaffold620244_14.0 | 1 p2 | (GC)6  | 12 | 140  | 151  | CGCTATGAGTCACGGCTACA        |
| scaffold620289_10.0 | 1 p2 | (AT)7  | 14 | 214  | 227  | CCATAACCGTCGCATAACTC        |
| scaffold620540_13.0 | 1 p2 | (CT)9  | 18 | 1528 | 1545 | TTCAATTACAAGCCGCAGTG        |
| scaffold620561_15.0 | 1 p2 | (AT)7  | 14 | 67   | 80   | TTTTTGCTAGAGGATTTTGTAAATATG |
| scaffold620656_14.0 | 1 p2 | (GA)6  | 12 | 754  | 765  | CGAAAGTTTTGGAATTTGAAGG      |
| scaffold620665_10.0 | 1 p2 | (AC)7  | 14 | 119  | 132  | GCACCATCTTCTCAACACCA        |
| scaffold620809_15.0 | 1 p2 | (AG)6  | 12 | 131  | 142  | GAAAAGGCACTCGAATTTCC        |
| scaffold620813_15.0 | 1 p2 | (TA)8  | 16 | 3485 | 3500 | TTTTACGCTAACGAAACGGG        |
| scaffold620885_16.0 | 1 p2 | (TC)7  | 14 | 1278 | 1291 | GGCTTAGGTGAGGTGGAGTG        |
| scaffold620904_14.4 | 1 p2 | (AT)8  | 16 | 960  | 975  | CAATAGAGCAGGAAGAGCCG        |
| scaffold620983_16.0 | 1 p2 | (TA)7  | 14 | 68   | 81   | CCACACTTTTAAATATTTTAGCTGGC  |
| scaffold620992_13.0 | 1 p2 | (AG)6  | 12 | 134  | 145  | GCTAGAGCTCACTTACGAGC        |

|                     |      |        |    |      |                                |
|---------------------|------|--------|----|------|--------------------------------|
| scaffold621049_16.8 | 1 p2 | (TA)6  | 12 | 1665 | 1676 TTATTCCCCAAGCAGGAATG      |
| scaffold621101_12.5 | 1 p2 | (AG)7  | 14 | 279  | 292 TTTAGAATGCCAATGACGCA       |
| scaffold621114_12.5 | 1 p2 | (AT)8  | 16 | 1189 | 1204 TATCCGATCCGAAGTATCCG      |
| scaffold621155_11.4 | 1 p2 | (TA)6  | 12 | 200  | 211 AGATGCCAATCTTCCATTGT       |
| scaffold621173_10.8 | 1 p2 | (TC)8  | 16 | 995  | 1010 AACCCCAGCAACATCAACTC      |
| scaffold621178_15.2 | 1 p2 | (TA)10 | 20 | 591  | 610 ACTTGAAAATGCGATGAGCA       |
| scaffold621342_13.0 | 1 p2 | (GA)7  | 14 | 437  | 450 TGAGGGGTGAAGACTTTTGG       |
| scaffold621443_15.2 | 1 p2 | (TG)8  | 16 | 2489 | 2504 CCCTTGGTCCTTGAGCATT       |
| scaffold621451_10.6 | 1 p2 | (AT)7  | 14 | 88   | 101 TTCTACTGGAAGTACGCCC        |
| scaffold621454_12.7 | 1 p2 | (TA)9  | 18 | 48   | 65 CACCCAAAAAGGAGTTATTATTTGA   |
| scaffold621473_15.9 | 1 p2 | (TA)7  | 14 | 1639 | 1652 GAGGAGAGAAGAGCGGACCT      |
| scaffold621481_14.0 | 1 p2 | (CT)6  | 12 | 1950 | 1961 TTTTGCTTTGTTTTTGCTGG      |
| scaffold621542_17.2 | 1 p2 | (AT)8  | 16 | 184  | 199 AAAATCAGCGAGGCAGAAAA       |
| scaffold621594_16.4 | 1 p2 | (AT)6  | 12 | 784  | 795 GGTTGTTTAAATGCCCCCTT       |
| scaffold621684_15.5 | 1 p2 | (TG)7  | 14 | 1543 | 1556 GCAAATTCTGTGTGGGTGTG      |
| scaffold621819_17.3 | 1 p2 | (TA)6  | 12 | 3239 | 3250 GAATGACACTCGACGAAGCA      |
| scaffold621872_13.6 | 1 p2 | (AG)8  | 16 | 1495 | 1510 AGAGAGGGGAGGAGATTGGA      |
| scaffold621898_17.7 | 1 p2 | (TC)6  | 12 | 36   | 47 TCTCTCCCTTTCCACACTCG        |
| scaffold621903_12.7 | 1 p2 | (GA)7  | 14 | 454  | 467 TGGACCATTTCGACGGATAAT      |
| scaffold621904_10.3 | 1 p2 | (GA)6  | 12 | 464  | 475 GAAAGCCGTCGATGTAGCTT       |
| scaffold621941_10.5 | 1 p2 | (AT)6  | 12 | 135  | 146 GGATGAAATGGCACCCAATA       |
| scaffold621958_10.2 | 1 p2 | (AT)8  | 16 | 90   | 105 CTCTCAATGCCTTCTACCCAA      |
| scaffold621969_10.0 | 1 p2 | (AT)6  | 12 | 146  | 157 TGGCCACCCATTTTTACTA        |
| scaffold622355_13.7 | 1 p2 | (TA)8  | 16 | 79   | 94 TGATTGCACCATAATGCACC        |
| scaffold622418_11.4 | 1 p2 | (AG)6  | 12 | 135  | 146 CCAGTTATCCATCCATTCCA       |
| scaffold622445_13.8 | 1 p2 | (TA)8  | 16 | 830  | 845 TTCAGATCCACTAGACATTTGAGC   |
| scaffold622473_11.8 | 1 p2 | (TA)6  | 12 | 187  | 198 CTGCGCAGATCTAATGGTCA       |
| scaffold622576_12.2 | 1 p2 | (CT)6  | 12 | 65   | 76 TCCCTCCAATCAATTTTCCA        |
| scaffold622593_18.5 | 1 p2 | (AG)8  | 16 | 363  | 378 TTGGGAGGAGGAGATTGTTG       |
| scaffold622612_10.9 | 1 p2 | (TA)8  | 16 | 1093 | 1108 CGAAACAAGTGGCTGCATAA      |
| scaffold622627_14.2 | 1 p2 | (AT)8  | 16 | 746  | 761 TTATGGGCCAATTATGCTCC       |
| scaffold622748_13.7 | 1 p2 | (AC)6  | 12 | 43   | 54 GGAGAGTTCGCGAAATAACAT       |
| scaffold622754_15.9 | 1 p2 | (TC)7  | 14 | 1093 | 1106 TGGACTGCCTTCATCTTCT       |
| scaffold622771_15.8 | 1 p2 | (AT)8  | 16 | 183  | 198 CGTGCAAGTAAACGAAA          |
| scaffold622782_14.7 | 1 p2 | (TA)6  | 12 | 4780 | 4791 ATTAATGCATCGATGGAGGG      |
| scaffold622906_13.8 | 1 p2 | (AT)8  | 16 | 279  | 294 CTTGCTGGCAACAAAAACAA       |
| scaffold622952_18.4 | 1 p2 | (AG)9  | 18 | 1176 | 1193 AGCTGTTGCAGAAGCCATTT      |
| scaffold623107_17.7 | 1 p2 | (TC)6  | 12 | 188  | 199 AACAAAGCTCTCTTGCGG         |
| scaffold623118_15.3 | 1 p2 | (GA)6  | 12 | 1420 | 1431 AGGGGATTGTAACATGTGGG      |
| scaffold623147_16.6 | 1 p2 | (TC)8  | 16 | 184  | 199 CTGCAACACCATTGCAGAGT       |
| scaffold623210_12.4 | 1 p2 | (TA)7  | 14 | 981  | 994 GGGTGTGAGGATGCACATA        |
| scaffold623236_15.9 | 1 p2 | (GA)6  | 12 | 189  | 200 ACCCTTCACCCCCATAACTC       |
| scaffold623271_15.3 | 1 p2 | (GA)9  | 18 | 2559 | 2576 GGCTGGCTTTCATTCTCAT       |
| scaffold623324_16.3 | 1 p2 | (AT)6  | 12 | 252  | 263 GAGAATTTTAATTCGTTTCATCTTGC |
| scaffold623354_18.7 | 1 p2 | (CG)6  | 12 | 1405 | 1416 TGGTGGTATGGTGTGGAGAA      |
| scaffold623376_11.0 | 1 p2 | (TA)6  | 12 | 245  | 256 GTAGGGGTGTACATGGTCCG       |
| scaffold623431_11.9 | 1 p2 | (GA)6  | 12 | 291  | 302 TGCCGTGTTTCGATATACCT       |
| scaffold623438_18.2 | 1 p2 | (AC)7  | 14 | 1149 | 1162 ACAAATGCGTGGGCTTATTC      |
| scaffold623484_17.0 | 1 p2 | (TA)6  | 12 | 628  | 639 CATCCAAAACCTCGAACCCAT      |
| scaffold623582_14.3 | 1 p2 | (AG)6  | 12 | 920  | 931 CCCGTGCTTCAATATCCTGT       |
| scaffold623651_15.3 | 1 p2 | (AT)6  | 12 | 139  | 150 AATGAGTTTCCAGCGCAAAG       |
| scaffold623689_10.5 | 1 p2 | (AT)8  | 16 | 101  | 116 ATGATTGTGCTCAATGGCAG       |
| scaffold623692_13.6 | 1 p2 | (AC)6  | 12 | 788  | 799 CACTCCACGAATGGTCAACA       |
| scaffold623798_15.5 | 1 p2 | (TG)7  | 14 | 4567 | 4580 TGTTCAACTAAATAATGCAGCG    |
| scaffold623813_12.5 | 1 p2 | (TA)9  | 18 | 259  | 276 TTCGTCCGAAATACTCCAC        |
| scaffold623895_12.2 | 1 p2 | (CT)6  | 12 | 135  | 146 TGCATGATCAATGTTGTAAGGA     |
| scaffold623992_13.2 | 1 p2 | (TA)11 | 22 | 44   | 65 GGGGTATTAGTGGAGTAAGCC       |
| scaffold624028_15.7 | 1 p2 | (GA)9  | 18 | 990  | 1007 AGGTGGTTTCTTGCTGAAG       |

|                     |      |        |    |      |      |                           |
|---------------------|------|--------|----|------|------|---------------------------|
| scaffold624046_11.0 | 1 p2 | (AT)7  | 14 | 105  | 118  | TCGGGAGGAAGAAGAAGAAA      |
| scaffold624130_18.5 | 1 p2 | (CT)7  | 14 | 309  | 322  | GGCCACTTTGTTGTGCTGTA      |
| scaffold624179_10.6 | 1 p2 | (AT)8  | 16 | 1433 | 1448 | TGACTTGAGGATTGTGTGCC      |
| scaffold624231_20.0 | 1 p2 | (AT)6  | 12 | 398  | 409  | GCAGGATCGCCATAAGGATA      |
| scaffold624521_11.7 | 1 p2 | (TA)6  | 12 | 51   | 62   | TTTAGTGTTTTGACATGATTACTCG |
| scaffold624546_14.4 | 1 p2 | (AC)10 | 20 | 205  | 224  | CTCGGAGGCTCCAACATCTA      |
| scaffold624576_16.7 | 1 p2 | (CT)6  | 12 | 391  | 402  | GCACCAGTTCGGTGACATA       |
| scaffold624593_13.5 | 1 p2 | (TC)9  | 18 | 499  | 516  | TTGCTCCTTGCAACTTGATG      |
| scaffold624763_11.5 | 1 p2 | (CG)6  | 12 | 67   | 78   | TATGGTGGTATGGTGTGGGG      |
| scaffold624769_15.7 | 1 p2 | (CA)7  | 14 | 186  | 199  | TATCAGGCCTGTGCAGTCAC      |
| scaffold624789_10.8 | 1 p2 | (AT)9  | 18 | 303  | 320  | TGCTTTTTGACTTGCTCGAA      |
| scaffold624845_11.9 | 1 p2 | (TA)8  | 16 | 103  | 118  | GGCATCGTAAGGAACGTTGA      |
| scaffold624860_17.0 | 1 p2 | (TA)7  | 14 | 1493 | 1506 | TGGCGGTGGAAATAGTAAGG      |
| scaffold624902_10.7 | 1 p2 | (GA)7  | 14 | 373  | 386  | TCACATGCTGAATGACCAACT     |
| scaffold624988_14.8 | 1 p2 | (AT)9  | 18 | 46   | 63   | ATCGGTTATTACCGGATCGC      |
| scaffold625007_12.6 | 1 p2 | (AT)8  | 16 | 1194 | 1209 | GGCGAGGACTGAAATTGGTA      |
| scaffold625011_15.2 | 1 p2 | (TC)7  | 14 | 873  | 886  | TTTTGCCCTTCTTTCTTTT       |
| scaffold625063_11.6 | 1 p2 | (TA)9  | 18 | 47   | 64   | ATCGGTTATTACCGGATCGC      |
| scaffold625214_15.2 | 1 p2 | (AG)7  | 14 | 1029 | 1042 | CGTATCCATGGTTGAGGTCC      |
| scaffold625237_15.7 | 1 p2 | (CT)9  | 18 | 184  | 201  | TACTGAGAGCGACATCGG        |
| scaffold625307_15.4 | 1 p2 | (AT)6  | 12 | 584  | 595  | GGTCCTGTATGCTGTGGGTT      |
| scaffold625315_13.6 | 1 p2 | (AC)7  | 14 | 55   | 68   | ACACAGATCTTTCCTGCGG       |
| scaffold625353_18.8 | 1 p2 | (TC)6  | 12 | 376  | 387  | TTCTGATAAGCCAGGGGATG      |
| scaffold625381_13.0 | 1 p2 | (TA)6  | 12 | 183  | 194  | AAAGCAAAGAGGCGATTGA       |
| scaffold625424_16.8 | 1 p2 | (AT)6  | 12 | 676  | 687  | GGAGATCACTTGCGGAGAAG      |
| scaffold625541_12.9 | 1 p2 | (AT)8  | 16 | 485  | 500  | AAACTGTAATTCAGGCACCTACG   |
| scaffold625621_12.7 | 1 p2 | (AG)6  | 12 | 268  | 279  | TTTTCGATGAACCACCACTTC     |
| scaffold625655_17.5 | 1 p2 | (TA)6  | 12 | 1407 | 1418 | TCAACCTCACAATTTGCTCG      |
| scaffold625681_17.3 | 1 p2 | (CT)8  | 16 | 186  | 201  | CACAAACGCCACCATTTTTA      |
| scaffold625731_14.5 | 1 p2 | (AT)7  | 14 | 783  | 796  | TGGTGCTCTTGTTCGTAC        |
| scaffold625922_11.6 | 1 p2 | (GA)7  | 14 | 146  | 159  | TGTGGCAGATCTGAAAACG       |
| scaffold625937_11.9 | 1 p2 | (AG)6  | 12 | 250  | 261  | GCATTTTGCTACGTGGTTCA      |
| scaffold625943_14.2 | 1 p2 | (GA)8  | 16 | 2324 | 2339 | TGCACACAGCAGTTGTCAAA      |
| scaffold626002_16.6 | 1 p2 | (AT)7  | 14 | 754  | 767  | TGATCATGCTCAACATGCAA      |
| scaffold626022_10.0 | 1 p2 | (AT)6  | 12 | 324  | 335  | ATTCGGGTAAAATTGACGG       |
| scaffold626050_13.5 | 1 p2 | (CT)6  | 12 | 584  | 595  | CGCTAAAACCTGGAGTCAGCA     |
| scaffold626097_14.7 | 1 p2 | (AG)6  | 12 | 2899 | 2910 | ATCAGCCATGTTTGATCAGC      |
| scaffold626277_16.3 | 1 p2 | (CT)7  | 14 | 187  | 200  | ATTCATCCCTTGTGTCATGCT     |
| scaffold626305_11.6 | 1 p2 | (TA)7  | 14 | 247  | 260  | CTGTTTTCTCAAGGCTCCCA      |
| scaffold626362_14.2 | 1 p2 | (CA)10 | 20 | 1461 | 1480 | GAAAGGCAAAGATGGGTTCA      |
| scaffold626395_13.0 | 1 p2 | (AG)7  | 14 | 131  | 144  | CTCTCTCTCAATTGCCACCC      |
| scaffold626399_14.8 | 1 p2 | (AT)6  | 12 | 100  | 111  | TGGTGTATGCTACTTTGAACG     |
| scaffold626406_14.9 | 1 p2 | (AT)8  | 16 | 748  | 763  | TGGAACACGTACCTTCTGATTC    |
| scaffold626426_12.7 | 1 p2 | (AG)7  | 14 | 270  | 283  | GATTCTTCGGCTCTTGTGCT      |
| scaffold626565_15.7 | 1 p2 | (CA)7  | 14 | 188  | 201  | TTTGTACCTGAATGCACCCTT     |
| scaffold626640_17.5 | 1 p2 | (CT)8  | 16 | 94   | 109  | ACGTTGGACCTGAAAGAGGA      |
| scaffold626683_14.5 | 1 p2 | (TC)8  | 16 | 871  | 886  | GCCTGAAAATGAACACCGTA      |
| scaffold626778_15.4 | 1 p2 | (TA)6  | 12 | 113  | 124  | GACATGGAGTTGTGGTGTGCG     |
| scaffold626811_13.8 | 1 p2 | (AT)10 | 20 | 58   | 77   | CTTTCCGGTCAAACCAAAA       |
| scaffold626844_12.7 | 1 p2 | (TA)7  | 14 | 475  | 488  | TCGAAAATTTAAAGGCCCAA      |
| scaffold626927_15.2 | 1 p2 | (TA)9  | 18 | 185  | 202  | GGCTCCATGACCGATAAAAA      |
| scaffold627081_14.8 | 1 p2 | (AT)7  | 14 | 138  | 151  | GGCAACGACTATCGATCCAC      |
| scaffold627084_16.4 | 1 p2 | (CT)7  | 14 | 252  | 265  | ATCCAAACACTTCTCACGGG      |
| scaffold627186_18.5 | 1 p2 | (AT)9  | 18 | 185  | 202  | TTGCAACCGAAGTTTCATTTT     |
| scaffold627418_12.3 | 1 p2 | (AG)7  | 14 | 367  | 380  | CTCACCGTCGATCAAATCCT      |
| scaffold627438_12.8 | 1 p2 | (TC)8  | 16 | 51   | 66   | CATGCAAGACCCGAAGAACT      |
| scaffold627490_15.5 | 1 p2 | (AT)11 | 22 | 774  | 795  | CACACATTTCTTCTACCAAA      |
| scaffold627496_16.5 | 1 p2 | (AG)6  | 12 | 441  | 452  | TTGGATATCGAGATCGAGGG      |

|                     |      |        |    |      |      |                            |
|---------------------|------|--------|----|------|------|----------------------------|
| scaffold627538_10.3 | 1 p2 | (AG)6  | 12 | 155  | 166  | TTATGCGATCTGCACGTGAT       |
| scaffold627594_14.0 | 1 p2 | (AG)6  | 12 | 239  | 250  | GCATGTGTGTGCTGAGTGTG       |
| scaffold627629_15.8 | 1 p2 | (CT)7  | 14 | 2561 | 2574 | TGTATTCATGTGTCAGCGCA       |
| scaffold627743_14.7 | 1 p2 | (CT)9  | 18 | 6412 | 6429 | GTGCACTCCTGGAGGTCAAT       |
| scaffold627751_16.6 | 1 p2 | (TC)9  | 18 | 1405 | 1422 | GCTCAGCTACAAAACCGGAC       |
| scaffold627796_18.6 | 1 p2 | (TA)7  | 14 | 250  | 263  | CCCTCGAATGCACTCAAACCT      |
| scaffold627899_10.5 | 1 p2 | (TA)6  | 12 | 142  | 153  | TTTCAATCCGGGTCTCTCAC       |
| scaffold627916_12.8 | 1 p2 | (TA)7  | 14 | 344  | 357  | TTAATAAATTGTGCGGAACGG      |
| scaffold627950_14.0 | 1 p2 | (AT)6  | 12 | 79   | 90   | AAATACTCAGTAAACCAGATGATGA  |
| scaffold627988_12.0 | 1 p2 | (TA)6  | 12 | 69   | 80   | AAGGGGAGTATCACTTGAATGC     |
| scaffold628001_16.4 | 1 p2 | (CA)7  | 14 | 43   | 56   | CTAACCTTGGGCTCTGATGC       |
| scaffold628013_10.3 | 1 p2 | (AT)9  | 18 | 51   | 68   | CACACTCAATACAATATGAACGACC  |
| scaffold628023_15.0 | 1 p2 | (AT)8  | 16 | 263  | 278  | TTTTCGCCTCCGACTAAAAA       |
| scaffold628121_10.4 | 1 p2 | (AT)9  | 18 | 66   | 83   | GCATCAACGGCGTGTATTATT      |
| scaffold628174_16.9 | 1 p2 | (TA)6  | 12 | 1971 | 1982 | GCATGCAATAGGTTGTGCAG       |
| scaffold628195_11.9 | 1 p2 | (AC)6  | 12 | 258  | 269  | GCATATGCAAGCTCAAATTCA      |
| scaffold628210_11.1 | 1 p2 | (AT)9  | 18 | 223  | 240  | GATGAGTTCCTGAACCAGCAG      |
| scaffold628230_13.7 | 1 p2 | (TG)8  | 16 | 66   | 81   | TGTCGCACAGAATGGTTGA        |
| scaffold628276_12.0 | 1 p2 | (GA)7  | 14 | 669  | 682  | GTTCCGGTGGTCATCTCACCT      |
| scaffold628286_14.4 | 1 p2 | (TC)6  | 12 | 3657 | 3668 | TAACGGGCAGCCTAAGTACG       |
| scaffold628383_15.3 | 1 p2 | (AG)8  | 16 | 805  | 820  | AATTTCCCGCATCACACTTC       |
| scaffold628454_13.6 | 1 p2 | (TA)7  | 14 | 331  | 344  | CGTTCACGTTCTGCGATTTA       |
| scaffold628509_14.2 | 1 p2 | (CT)7  | 14 | 189  | 202  | CACTTTTGGGACCCCTTTTT       |
| scaffold628595_12.8 | 1 p2 | (CT)6  | 12 | 283  | 294  | GCAGGTGTGAATGGAGGAAT       |
| scaffold628622_15.9 | 1 p2 | (TA)6  | 12 | 166  | 177  | TGTTGCATACGATGTGTAGCAG     |
| scaffold628645_12.0 | 1 p2 | (AT)11 | 22 | 2434 | 2455 | TATGGGCCAACTAAAGCGAC       |
| scaffold628726_13.6 | 1 p2 | (AT)6  | 12 | 123  | 134  | GGCGTGACATAGTGGATTGTT      |
| scaffold628742_10.4 | 1 p2 | (AC)6  | 12 | 324  | 335  | ATAAGTTCGGCGGACAACCTG      |
| scaffold628828_16.9 | 1 p2 | (TC)6  | 12 | 642  | 653  | GGGCTTATTCCGTCAATTTCA      |
| scaffold628903_13.9 | 1 p2 | (GA)7  | 14 | 210  | 223  | AAAAATTTCGATCTTGGGGTG      |
| scaffold628989_16.8 | 1 p2 | (AG)6  | 12 | 422  | 433  | GGTGCTGTAAGGGTTGGAGA       |
| scaffold629007_16.1 | 1 p2 | (TA)6  | 12 | 319  | 330  | GCTAGTGTGTTTGCTTGCAACT     |
| scaffold629027_14.4 | 1 p2 | (CT)9  | 18 | 587  | 604  | TTTATTTCTTTCCCGCCTCC       |
| scaffold629032_11.5 | 1 p2 | (TA)7  | 14 | 621  | 634  | AAAAATGAACTTTATCGGATCTATCA |
| scaffold629056_12.6 | 1 p2 | (GA)6  | 12 | 130  | 141  | CTCGTCTCGGGATCTTTGAG       |
| scaffold629097_13.3 | 1 p2 | (GT)7  | 14 | 455  | 468  | GTGTGTGCGTCTGAGTTCGT       |
| scaffold629147_17.8 | 1 p2 | (CT)8  | 16 | 187  | 202  | AAAGCCCATGTTTTGTCTGG       |
| scaffold629165_15.9 | 1 p2 | (TC)8  | 16 | 91   | 106  | CCCAACTGAAAACCTCCCCT       |
| scaffold629228_13.4 | 1 p2 | (CT)7  | 14 | 241  | 254  | CAATCAATCCATCGTCTCCC       |
| scaffold629246_13.7 | 1 p2 | (GT)6  | 12 | 124  | 135  | GCACGTGACATCTAACGGAA       |
| scaffold629268_16.8 | 1 p2 | (AG)11 | 22 | 181  | 202  | GTCACTAACCCACCACACC        |
| scaffold629287_10.7 | 1 p2 | (AT)6  | 12 | 26   | 37   | TCCGTCAAGGAGATCTTGAAA      |
| scaffold629468_14.7 | 1 p2 | (AT)6  | 12 | 460  | 471  | GGGTGGCTTGATTTTGTTCA       |
| scaffold629604_15.0 | 1 p2 | (TG)10 | 20 | 49   | 68   | CGGATCGCGACCCTATACAT       |
| scaffold629624_15.2 | 1 p2 | (CT)10 | 20 | 273  | 292  | TTAAAGCCTGCCCTTTTTGA       |
| scaffold629652_14.0 | 1 p2 | (AT)6  | 12 | 507  | 518  | TGGTAAGTGATAGGTAATGTCAATCC |
| scaffold629674_12.6 | 1 p2 | (CT)6  | 12 | 547  | 558  | CCTATCTTTGCCATACCCGA       |
| scaffold629718_15.5 | 1 p2 | (GA)6  | 12 | 192  | 203  | CATGCCCTAGGGTTTTTACA       |
| scaffold629719_18.0 | 1 p2 | (GA)7  | 14 | 190  | 203  | GGAGGAAGAAGATTGTGCCA       |
| scaffold629745_16.7 | 1 p2 | (AT)8  | 16 | 1047 | 1062 | TGCCTACATCATTTACCCCA       |
| scaffold629831_13.4 | 1 p2 | (AT)8  | 16 | 995  | 1010 | GCCAAATCCTAGCCACACAT       |
| scaffold629832_15.5 | 1 p2 | (AC)6  | 12 | 1384 | 1395 | TTTGGTGACATGACCACGAC       |
| scaffold629840_17.6 | 1 p2 | (CA)7  | 14 | 389  | 402  | CTCACGTTTTTAGCCCAAGC       |
| scaffold629918_16.4 | 1 p2 | (TG)7  | 14 | 899  | 912  | TCTTTTATGTGGGGGTGACAG      |
| scaffold630015_13.8 | 1 p2 | (AT)12 | 24 | 647  | 670  | TCTCCTTTGCGTGGACAAGT       |
| scaffold630038_14.0 | 1 p2 | (CT)11 | 22 | 2022 | 2043 | TGGGGTGTGTGTTCTTGAAA       |
| scaffold630176_15.0 | 1 p2 | (TA)11 | 22 | 1945 | 1966 | AGCAAAGAAATGCAGAAGGC       |
| scaffold630205_14.3 | 1 p2 | (TA)12 | 24 | 719  | 742  | TGTTTCTACTAAAACGCGA        |

|                     |      |        |    |      |      |                           |
|---------------------|------|--------|----|------|------|---------------------------|
| scaffold630212_16.5 | 1 p2 | (TA)6  | 12 | 1123 | 1134 | TCGTTCTTTCTTGCTTCCGT      |
| scaffold630302_14.5 | 1 p2 | (TA)8  | 16 | 674  | 689  | GGGTTTATGTTTGGTGTTC       |
| scaffold630303_11.7 | 1 p2 | (TA)6  | 12 | 312  | 323  | AGCTCCATCGAGTCAAGCTC      |
| scaffold630342_14.8 | 1 p2 | (GA)6  | 12 | 622  | 633  | GTGGGAAGATTTGAGGGGTT      |
| scaffold630522_16.2 | 1 p2 | (TA)7  | 14 | 190  | 203  | ACATCCACTGGCCAAGAATC      |
| scaffold630524_14.7 | 1 p2 | (AT)7  | 14 | 191  | 204  | CGAAAAACCAAAAACCTCA       |
| scaffold630545_14.8 | 1 p2 | (AG)7  | 14 | 54   | 67   | GGCCAGTAACACAAAGGCAT      |
| scaffold630580_11.3 | 1 p2 | (TC)10 | 20 | 896  | 915  | ATTGTCCTGACGACTCCACC      |
| scaffold630603_17.0 | 1 p2 | (GA)7  | 14 | 54   | 67   | TGAGAGATCAGTGAGCACGAG     |
| scaffold630717_12.0 | 1 p2 | (CT)8  | 16 | 52   | 67   | AAGTAACCACCAATAACCGCC     |
| scaffold630718_12.4 | 1 p2 | (TA)9  | 18 | 757  | 774  | TGTTGATCTTATGAGTGTGAAAACA |
| scaffold630842_19.3 | 1 p2 | (GA)6  | 12 | 1845 | 1856 | TGTTCGAAAATGGTGGTTGA      |
| scaffold630856_18.5 | 1 p2 | (AG)7  | 14 | 120  | 133  | CTGATAACAATGGGCGATCA      |
| scaffold630930_16.4 | 1 p2 | (AT)9  | 18 | 470  | 487  | CTGGAGAATTGGGAGGCATA      |
| scaffold630957_11.8 | 1 p2 | (TC)7  | 14 | 251  | 264  | TGGGAATTTTGTGGAGAAGC      |
| scaffold630999_13.2 | 1 p2 | (TA)6  | 12 | 1265 | 1276 | CATCTGAACAGTGTCAATTTTGC   |
| scaffold631052_17.7 | 1 p2 | (TA)6  | 12 | 600  | 611  | CGAACCAAAGCAACACAAGA      |
| scaffold631090_15.0 | 1 p2 | (AT)6  | 12 | 301  | 312  | GCCCTCAACTTTGTACGTGAA     |
| scaffold631137_16.5 | 1 p2 | (AG)7  | 14 | 191  | 204  | TTGATTCGGAGGCTTGTITTT     |
| scaffold631138_15.8 | 1 p2 | (CT)9  | 18 | 2037 | 2054 | AAAGAACTCGTCGCCAGTGT      |
| scaffold631153_14.0 | 1 p2 | (CT)6  | 12 | 240  | 251  | CTCACCCCTCGAGTTTCGTA      |
| scaffold631282_16.2 | 1 p2 | (AG)10 | 20 | 281  | 300  | GCAAATGCATCAGATTCAGG      |
| scaffold631500_13.3 | 1 p2 | (AC)6  | 12 | 2198 | 2209 | TAAAGTGAACGCAGATGCC       |
| scaffold631510_14.6 | 1 p2 | (AG)6  | 12 | 677  | 688  | GAATTGGTCTTCCTTTGCCA      |
| scaffold631732_15.4 | 1 p2 | (AT)6  | 12 | 1803 | 1814 | AGGGCAAACCTCACCATTGTC     |
| scaffold631774_13.3 | 1 p2 | (CT)6  | 12 | 87   | 98   | TCACCACGTTCTACGCTCAA      |
| scaffold631778_12.6 | 1 p2 | (TA)8  | 16 | 49   | 64   | CTCACAGGATTTAGCTGTTCTCA   |
| scaffold631815_10.5 | 1 p2 | (CT)6  | 12 | 333  | 344  | CCTCTCATGTTTTCCCAAA       |
| scaffold631818_18.2 | 1 p2 | (CT)7  | 14 | 333  | 346  | TTCTTTCACCCCTCCCATAA      |
| scaffold631832_12.6 | 1 p2 | (AT)11 | 22 | 1674 | 1695 | CTCCCAAATCTCAATCCCA       |
| scaffold631855_16.3 | 1 p2 | (TC)6  | 12 | 456  | 467  | CCCGTGACATGGAACTCTT       |
| scaffold631932_17.2 | 1 p2 | (CA)6  | 12 | 322  | 333  | AGTAGCAGCTGTGGATTCCC      |
| scaffold632014_18.0 | 1 p2 | (TC)7  | 14 | 1887 | 1900 | ATTTTTGTTTTGCTGCCAC       |
| scaffold632030_10.0 | 1 p2 | (TA)6  | 12 | 429  | 440  | AAGAAAAACAGGGGAAAGGG      |
| scaffold632071_10.2 | 1 p2 | (TA)7  | 14 | 94   | 107  | GGGGGAGGAATGGTAGAGAG      |
| scaffold632124_14.0 | 1 p2 | (AG)6  | 12 | 415  | 426  | ACTATTGTCGGACACTGGGA      |
| scaffold632245_12.3 | 1 p2 | (AT)8  | 16 | 590  | 605  | TCGCCTTTAATTCTAGCAACA     |
| scaffold632287_15.9 | 1 p2 | (AG)9  | 18 | 4321 | 4338 | TCGAGAACTTGCTTGGTGAC      |
| scaffold632471_13.2 | 1 p2 | (AG)7  | 14 | 650  | 663  | TTTGATCGGTTGACGAATGA      |
| scaffold632518_13.6 | 1 p2 | (TA)6  | 12 | 765  | 776  | GCAAACATATGGTGGCATT       |
| scaffold632520_10.2 | 1 p2 | (TA)6  | 12 | 642  | 653  | TCAACAATTGGAGACAACGC      |
| scaffold632632_16.3 | 1 p2 | (GT)7  | 14 | 2126 | 2139 | CCCCCAAATTCTCTCCTCTC      |
| scaffold632734_12.2 | 1 p2 | (AT)6  | 12 | 98   | 109  | CCAACACAAAAACAGGGAAAA     |
| scaffold632824_18.0 | 1 p2 | (TA)7  | 14 | 192  | 205  | CCTTGTGGGGTACAAGTGCT      |
| scaffold632825_14.9 | 1 p2 | (AT)8  | 16 | 805  | 820  | AACTTCAAGCACTGGAATGAGA    |
| scaffold632844_10.7 | 1 p2 | (AG)8  | 16 | 189  | 204  | CTTCCCAGAAATCGAACAA       |
| scaffold632854_11.6 | 1 p2 | (GA)8  | 16 | 321  | 336  | CATGCGAGTAGAGCTCGAAA      |
| scaffold632956_17.2 | 1 p2 | (CT)7  | 14 | 562  | 575  | GAACAAGGGCAACTCGAAAG      |
| scaffold632982_12.5 | 1 p2 | (TA)8  | 16 | 389  | 404  | ATTTGTGTGGGCATGTTCAA      |
| scaffold633054_14.7 | 1 p2 | (CT)7  | 14 | 475  | 488  | TTTTGGAGCATCTCCATTT       |
| scaffold633168_16.4 | 1 p2 | (CT)7  | 14 | 192  | 205  | TTCCGAAGCTCTTCAAGCTC      |
| scaffold633195_17.7 | 1 p2 | (AG)8  | 16 | 1788 | 1803 | CCTTCCCAACAGAGGAAAGA      |
| scaffold633227_14.3 | 1 p2 | (GC)6  | 12 | 269  | 280  | TACCCTAAGGGCATCCACAA      |
| scaffold633239_13.4 | 1 p2 | (TC)6  | 12 | 877  | 888  | GGCCACTAAAACAGGGATCA      |
| scaffold633263_13.8 | 1 p2 | (AG)6  | 12 | 400  | 411  | GGGTTTACCTATCCCGTGCT      |
| scaffold633265_15.5 | 1 p2 | (CT)6  | 12 | 2809 | 2820 | CCTTTGCATAGAGTGCGACA      |
| scaffold633412_17.9 | 1 p2 | (CT)7  | 14 | 1976 | 1989 | ACTTGTGGAAGGAGACGCAT      |
| scaffold633416_14.7 | 1 p2 | (TA)6  | 12 | 1506 | 1517 | TTTGGCTCGTATGCAGTCAG      |

|                     |      |        |    |      |      |                             |
|---------------------|------|--------|----|------|------|-----------------------------|
| scaffold633455_13.9 | 1 p2 | (AT)6  | 12 | 267  | 278  | AAAAATGAACATGGCCGAAG        |
| scaffold633490_13.7 | 1 p2 | (AT)6  | 12 | 431  | 442  | TCGTCACCCTTATCCTACCG        |
| scaffold633514_13.2 | 1 p2 | (AG)6  | 12 | 103  | 114  | TTGCTTGGAACTTAGCCAC         |
| scaffold633628_13.5 | 1 p2 | (TG)6  | 12 | 53   | 64   | CTCATGTACGTTACGATGGCA       |
| scaffold633689_14.6 | 1 p2 | (GA)8  | 16 | 65   | 80   | TGGTAGCTTGAATACACGTATGA     |
| scaffold633697_15.5 | 1 p2 | (AT)6  | 12 | 560  | 571  | TTGATATCAGAGCCACTGCG        |
| scaffold633709_17.6 | 1 p2 | (GT)6  | 12 | 912  | 923  | CAAGGAGTGGAGGTCGGTAA        |
| scaffold633731_14.9 | 1 p2 | (CA)6  | 12 | 2848 | 2859 | GCTTTTCTTTTCGACCCATCA       |
| scaffold633746_11.5 | 1 p2 | (TA)12 | 24 | 39   | 62   | TTGACGATATATAGTGTTTTGACATG/ |
| scaffold633785_14.9 | 1 p2 | (TA)8  | 16 | 45   | 60   | AAGGAGGTGTTATGAAGGGATT      |
| scaffold633874_10.9 | 1 p2 | (TA)8  | 16 | 140  | 155  | TCAAGGTAAATGGGTCTAGCAAA     |
| scaffold633962_12.0 | 1 p2 | (AT)8  | 16 | 796  | 811  | TTTTGGGTAATTGGTGAACCTT      |
| scaffold633964_14.3 | 1 p2 | (CA)6  | 12 | 6190 | 6201 | AATCGGGTCCTCATCATCCT        |
| scaffold634032_13.2 | 1 p2 | (TA)8  | 16 | 289  | 304  | AAACAACCCAAGAAAAATACGG      |
| scaffold634113_15.0 | 1 p2 | (GA)7  | 14 | 1875 | 1888 | AGGGGACTAGGGTTGAAGGA        |
| scaffold634122_15.4 | 1 p2 | (GT)6  | 12 | 366  | 377  | GTAGAATCCGGCGAGTGAAA        |
| scaffold634208_12.9 | 1 p2 | (TC)8  | 16 | 54   | 69   | CCTAGAAAGAGAAGAAACAGAGGC    |
| scaffold634212_13.2 | 1 p2 | (GA)8  | 16 | 1008 | 1023 | CACCATCAGCAGAGAAAGCA        |
| scaffold634219_12.2 | 1 p2 | (CT)7  | 14 | 120  | 133  | GGTTGGTCAACCAAAACCTG        |
| scaffold634244_10.2 | 1 p2 | (TA)9  | 18 | 378  | 395  | ATGGACGCTCCAGATTGTTT        |
| scaffold634370_17.3 | 1 p2 | (TA)7  | 14 | 637  | 650  | TTCCTCCAAAAATATGGGC         |
| scaffold634375_12.2 | 1 p2 | (AT)10 | 20 | 590  | 609  | CGTGATAAGAACACTCATGTCCA     |
| scaffold634431_12.5 | 1 p2 | (CT)7  | 14 | 1153 | 1166 | TACTTCTCACCATCCCCAC         |
| scaffold634568_11.5 | 1 p2 | (AT)10 | 20 | 503  | 522  | CCGATTTTTCGGGTATTGAA        |
| scaffold634579_16.6 | 1 p2 | (CT)8  | 16 | 1732 | 1747 | GCCGGGTAACACTACTGGA         |
| scaffold634597_10.0 | 1 p2 | (AT)9  | 18 | 461  | 478  | TAAACGGCTCGGAAAAGACA        |
| scaffold634642_13.9 | 1 p2 | (AC)7  | 14 | 128  | 141  | AACCATTGAGCAAAAACAATG       |
| scaffold634697_11.0 | 1 p2 | (AG)6  | 12 | 925  | 936  | CCGGGTTTAAAGCAATCAA         |
| scaffold634759_20.2 | 1 p2 | (CT)6  | 12 | 240  | 251  | GGGAGGACAGTCCGTAGACA        |
| scaffold634773_17.3 | 1 p2 | (AG)6  | 12 | 1837 | 1848 | AATATTCCACCACTGTGGGC        |
| scaffold634784_17.2 | 1 p2 | (AG)6  | 12 | 638  | 649  | TTTGACTTGCAGCCACTCTG        |
| scaffold634791_18.7 | 1 p2 | (TC)6  | 12 | 630  | 641  | TCCAACCTCCCTCATTCTTG        |
| scaffold634799_12.4 | 1 p2 | (AC)6  | 12 | 615  | 626  | CGTGGCTTTGTTGAAACTGA        |
| scaffold634801_13.3 | 1 p2 | (TA)11 | 22 | 46   | 67   | AAGGGAGTGCTCCCACATTA        |
| scaffold634806_14.3 | 1 p2 | (AG)6  | 12 | 394  | 405  | TCTTTTTCCACATTTGAAGTTCTTT   |
| scaffold634829_16.2 | 1 p2 | (CT)7  | 14 | 621  | 634  | TCGCAGCGAAACGTGAAC          |
| scaffold634844_16.2 | 1 p2 | (AC)10 | 20 | 747  | 766  | CCATCAACAAATGCAATGGA        |
| scaffold634850_18.0 | 1 p2 | (TC)8  | 16 | 1111 | 1126 | AAAGGAATCAGAGCGCAGAG        |
| scaffold634855_12.6 | 1 p2 | (TA)6  | 12 | 53   | 64   | ATGGGAAGAGGGGGTATGAG        |
| scaffold634881_10.0 | 1 p2 | (AT)10 | 20 | 483  | 502  | CCAAACAAACCGGCATACTT        |
| scaffold634890_13.5 | 1 p2 | (CT)7  | 14 | 292  | 305  | GCACACGTATTAGGACCTCCC       |
| scaffold634931_13.6 | 1 p2 | (AT)6  | 12 | 251  | 262  | CACCCTGTGACAGATACAGCA       |
| scaffold634934_15.9 | 1 p2 | (TA)8  | 16 | 563  | 578  | GCGCATGCACCTAATTACAC        |
| scaffold634957_20.2 | 1 p2 | (AG)6  | 12 | 248  | 259  | CAACAATCAGCAGTGGCAAT        |
| scaffold634960_14.8 | 1 p2 | (AT)8  | 16 | 2328 | 2343 | TGATCAGCGCAGTCCAGTAG        |
| scaffold635009_16.8 | 1 p2 | (AT)6  | 12 | 446  | 457  | AGAGCACTGCCAGATCAAAA        |
| scaffold635012_14.4 | 1 p2 | (AT)8  | 16 | 1165 | 1180 | GGGAAAGTCGATGGTTTCAA        |
| scaffold635134_12.4 | 1 p2 | (TA)7  | 14 | 332  | 345  | TCCTTTGAGGATGGATTGATG       |
| scaffold635223_15.9 | 1 p2 | (AT)8  | 16 | 192  | 207  | TCGTTCTTAAGTCTTCCGC         |
| scaffold635224_14.5 | 1 p2 | (AT)6  | 12 | 196  | 207  | GCCTTGCAAGCCAGTTTATT        |
| scaffold635267_13.6 | 1 p2 | (TA)6  | 12 | 906  | 917  | GCCCTCAACGTTGGTATCTT        |
| scaffold635274_12.3 | 1 p2 | (GA)6  | 12 | 195  | 206  | ATTTGCATGCATAACCCACA        |
| scaffold635290_12.6 | 1 p2 | (TA)6  | 12 | 192  | 203  | AGGCTTGAGTTTCCTCACGA        |
| scaffold635357_13.5 | 1 p2 | (TC)6  | 12 | 1473 | 1484 | GCAGAGTTGTGGGAAAGAG         |
| scaffold635446_15.5 | 1 p2 | (AG)11 | 22 | 2691 | 2712 | CCGAAAAAGGGTATTGGGTT        |
| scaffold635524_16.2 | 1 p2 | (AG)8  | 16 | 3225 | 3240 | AGGCTTAAACCAGGACCGAT        |
| scaffold635558_15.2 | 1 p2 | (TG)6  | 12 | 960  | 971  | GCAACAGTTGTGGTTGATGG        |
| scaffold635611_15.9 | 1 p2 | (TG)10 | 20 | 1017 | 1036 | TCGAAGCTTTGCTACTGGCT        |



|                     |      |        |    |      |                                |
|---------------------|------|--------|----|------|--------------------------------|
| scaffold635625_16.2 | 1 p2 | (CT)6  | 12 | 54   | 65 CAAGATAACCCTTCGATTTAGGAA    |
| scaffold635668_12.4 | 1 p2 | (TA)7  | 14 | 789  | 802 ACTGGCCCAATAACCTTCCT       |
| scaffold635685_14.5 | 1 p2 | (AT)7  | 14 | 1779 | 1792 CGTAAGGCCTACTCGAGCC       |
| scaffold635695_19.2 | 1 p2 | (AT)9  | 18 | 499  | 516 TCTTGGTGGCGGTAGGTAAC       |
| scaffold635724_13.9 | 1 p2 | (GT)6  | 12 | 118  | 129 TGTACGACATTGTTTGCCT        |
| scaffold635771_15.0 | 1 p2 | (TC)6  | 12 | 110  | 121 CTAGCCTTTGCCCTTTTCT        |
| scaffold635893_16.0 | 1 p2 | (AG)9  | 18 | 907  | 924 CCCTTTTGATTCTTGCCTCA       |
| scaffold635903_16.6 | 1 p2 | (GA)11 | 22 | 321  | 342 TGAAATTCATTGATCCGCA        |
| scaffold635916_15.7 | 1 p2 | (TA)8  | 16 | 209  | 224 TTCGAAATATCGGGGCATTA       |
| scaffold635944_19.1 | 1 p2 | (TA)6  | 12 | 196  | 207 TTCCTTGGACCAAATAGCC        |
| scaffold635963_14.3 | 1 p2 | (TA)6  | 12 | 1590 | 1601 TTGTGGTAACCGATTGGGAT      |
| scaffold636040_17.7 | 1 p2 | (CT)6  | 12 | 312  | 323 TCAAAGCGATGGAACATAACA      |
| scaffold636047_15.9 | 1 p2 | (GA)6  | 12 | 141  | 152 GTGAGAGAGGACCGATTGGA       |
| scaffold636268_13.9 | 1 p2 | (TA)8  | 16 | 219  | 234 TGCTGATGTGGGAAAATCTG       |
| scaffold636281_13.2 | 1 p2 | (TC)7  | 14 | 141  | 154 GGATTCCCCCTCGAAGTTT        |
| scaffold636287_13.9 | 1 p2 | (TA)9  | 18 | 48   | 65 AGGGGGTTATCACTGGATCG        |
| scaffold636510_16.2 | 1 p2 | (AT)9  | 18 | 1465 | 1482 CCTTCAATTTTATAACCGAAACA   |
| scaffold636563_13.4 | 1 p2 | (TA)7  | 14 | 253  | 266 TCTAAGGAGGTGTTATGATGGGA    |
| scaffold636568_15.8 | 1 p2 | (GA)8  | 16 | 863  | 878 ACCTCTTCCAATCTGGCCT        |
| scaffold636614_14.3 | 1 p2 | (AG)7  | 14 | 144  | 157 AGAGAGAGAGAAACGCGAGG       |
| scaffold636619_15.4 | 1 p2 | (AT)7  | 14 | 2421 | 2434 AGCGAACCGAACC GA ACTA     |
| scaffold636631_15.4 | 1 p2 | (GT)6  | 12 | 656  | 667 GCGTCGAGTACCACTTTTCC       |
| scaffold636757_15.8 | 1 p2 | (TA)6  | 12 | 1412 | 1423 TTTTCTCTGGATCACACCCC      |
| scaffold636762_18.3 | 1 p2 | (TA)6  | 12 | 908  | 919 GCGTGGCTCAAGATATCAG        |
| scaffold636789_13.5 | 1 p2 | (AT)7  | 14 | 342  | 355 TGCAAAAGTTTTTGTGGGT        |
| scaffold636846_11.5 | 1 p2 | (TC)6  | 12 | 129  | 140 TCTCTCTCCCACTTCCCA         |
| scaffold636860_15.1 | 1 p2 | (CT)8  | 16 | 324  | 339 AAGCCTCCCACCGAGTATT        |
| scaffold636892_13.3 | 1 p2 | (TG)6  | 12 | 565  | 576 CTCTCCATTCTCTCGCTGCT       |
| scaffold636960_12.1 | 1 p2 | (TA)6  | 12 | 228  | 239 CCTCCTTTAACCAAAAATCCG      |
| scaffold636980_15.6 | 1 p2 | (CT)6  | 12 | 197  | 208 CCTTCTCTCTCTTTCCCGT        |
| scaffold636996_12.7 | 1 p2 | (TC)6  | 12 | 401  | 412 GGCAACGAGACAGACAAACA       |
| scaffold637101_16.2 | 1 p2 | (CA)9  | 18 | 2876 | 2893 AGGCCAATTTTGAAGCAGAA      |
| scaffold637124_11.1 | 1 p2 | (AG)6  | 12 | 323  | 334 TTGGGAGGAGGAGATTGTTG       |
| scaffold637128_15.6 | 1 p2 | (AG)6  | 12 | 713  | 724 TGACTGCTGTTT CAGAGACG      |
| scaffold637138_16.6 | 1 p2 | (TA)12 | 24 | 5104 | 5127 TGTGCCCACTTAAAAATTTGG     |
| scaffold637154_10.7 | 1 p2 | (TA)10 | 20 | 1030 | 1049 CTGCAGATCTAAGGGCCAAG      |
| scaffold637163_10.4 | 1 p2 | (AT)8  | 16 | 1340 | 1355 GCGACCAAATCAATCACCTT      |
| scaffold637184_13.6 | 1 p2 | (AC)7  | 14 | 335  | 348 ATTTGGGTTTTAGGCTTGGG       |
| scaffold637204_16.0 | 1 p2 | (GA)9  | 18 | 2354 | 2371 TGCAAGTTCAGACAAACCCA      |
| scaffold637235_14.6 | 1 p2 | (CA)7  | 14 | 4406 | 4419 GGTTCAACCTCCCAGATTCA      |
| scaffold637317_13.5 | 1 p2 | (TC)6  | 12 | 75   | 86 TGATTTCTCACCTTGTTTGTG       |
| scaffold637323_13.3 | 1 p2 | (TG)6  | 12 | 351  | 362 CCCCCAACTCTTCTTCTTCC       |
| scaffold637388_12.8 | 1 p2 | (TA)7  | 14 | 362  | 375 GCATCACCTCAACCCTTGAT       |
| scaffold637390_16.6 | 1 p2 | (AT)11 | 22 | 684  | 705 AAGTTGCACAATCCTAATGATTTA   |
| scaffold637393_17.0 | 1 p2 | (GA)7  | 14 | 1489 | 1502 TTCCAATTGCGTAGTCCAT       |
| scaffold637402_16.6 | 1 p2 | (CT)6  | 12 | 805  | 816 CCAATTGAATGGAGTCAGGG       |
| scaffold637457_16.7 | 1 p2 | (AT)6  | 12 | 1467 | 1478 ATTGTGGGGAAATGATCCAA      |
| scaffold637460_15.1 | 1 p2 | (GA)7  | 14 | 38   | 51 CGTGGTTCGATCGTAAATGA        |
| scaffold637591_12.0 | 1 p2 | (AG)6  | 12 | 346  | 357 CCCGAAATAAGCTGCGTAGA       |
| scaffold637715_17.1 | 1 p2 | (CT)6  | 12 | 77   | 88 ATAACCATACCCACACCCCC        |
| scaffold637807_15.8 | 1 p2 | (GA)6  | 12 | 4488 | 4499 CGCTGCTGTAGTCGGAAGTT      |
| scaffold637842_13.1 | 1 p2 | (TA)6  | 12 | 563  | 574 GAAGAAAAGTCCCGAGTTGC       |
| scaffold637934_14.4 | 1 p2 | (TA)8  | 16 | 417  | 432 TTGACCATAATGCCCTATCA       |
| scaffold637975_10.0 | 1 p2 | (AT)11 | 22 | 401  | 422 ATCTCATGCCTTAGAGGGGG       |
| scaffold638050_17.2 | 1 p2 | (TC)9  | 18 | 3319 | 3336 CAAACCTAACTGAAATAGGAATGGA |
| scaffold638095_14.4 | 1 p2 | (GA)6  | 12 | 456  | 467 GGAAATTGATGGATTTGGGA       |
| scaffold638134_16.4 | 1 p2 | (AG)8  | 16 | 1865 | 1880 TCAAACCTGCCAATCCAAA       |
| scaffold638179_17.8 | 1 p2 | (AT)10 | 20 | 122  | 141 AAATAAGGATGTGTTATGAAGGGA   |

|                     |      |        |    |      |                                |
|---------------------|------|--------|----|------|--------------------------------|
| scaffold638220_16.1 | 1 p2 | (CA)7  | 14 | 778  | 791 CCACCCGAATTGGATAATGT       |
| scaffold638221_13.4 | 1 p2 | (TA)8  | 16 | 193  | 208 ATGTGTCGGCCTGAATATGG       |
| scaffold638240_16.0 | 1 p2 | (AT)6  | 12 | 503  | 514 ATAGTTCGGTCGTCGTTGGT       |
| scaffold638259_14.9 | 1 p2 | (TA)8  | 16 | 246  | 261 TGGTGGGTTGAATGCTATGA       |
| scaffold638550_12.8 | 1 p2 | (AT)6  | 12 | 1084 | 1095 TTCACAAGCTTGAAAGCAACA     |
| scaffold638568_10.3 | 1 p2 | (AT)8  | 16 | 95   | 110 ACGCACTCTCAAGCACACAC       |
| scaffold638709_10.8 | 1 p2 | (AT)7  | 14 | 71   | 84 AAAATCAAAGGCCACATTG         |
| scaffold638816_16.5 | 1 p2 | (CT)6  | 12 | 554  | 565 TGTGCATGCCCATATCATCT       |
| scaffold638835_17.1 | 1 p2 | (TC)6  | 12 | 87   | 98 CTAGCCTTTGCCCTTTTCT         |
| scaffold638877_13.9 | 1 p2 | (TA)7  | 14 | 123  | 136 TGTATGGGGAGGGTTATCCA       |
| scaffold638895_15.5 | 1 p2 | (TG)9  | 18 | 223  | 240 TTGATTTAACTTGCATTCTTTTCA   |
| scaffold638911_19.0 | 1 p2 | (GT)6  | 12 | 486  | 497 GAAGAAGGCGAAGTGGCTTA       |
| scaffold638946_11.5 | 1 p2 | (CT)6  | 12 | 53   | 64 CCTAGCTCCTCCCCCTTAC         |
| scaffold638951_14.9 | 1 p2 | (TC)6  | 12 | 662  | 673 ACAAAGTGGTGAGCATTCCC       |
| scaffold639028_17.0 | 1 p2 | (TA)6  | 12 | 550  | 561 AGACCAAAAGGTCACGGGTT       |
| scaffold639055_15.0 | 1 p2 | (GT)6  | 12 | 3074 | 3085 CCAAGATTTCCCATAGCA        |
| scaffold639078_13.9 | 1 p2 | (TA)12 | 24 | 40   | 63 TTGACGATATATAGTGTTTTGACATG/ |
| scaffold639236_11.6 | 1 p2 | (CT)10 | 20 | 30   | 49 CAGATTTTAGGATTTAGCTCACTG    |
| scaffold639265_19.0 | 1 p2 | (GA)6  | 12 | 199  | 210 CTCGGTCCGGATCTTTCAT        |
| scaffold639291_15.7 | 1 p2 | (AC)6  | 12 | 1222 | 1233 ATGGAAAACCACGAGTGGAG      |
| scaffold639338_15.1 | 1 p2 | (CT)6  | 12 | 199  | 210 GAACCCCTGTGACCATCTGT       |
| scaffold639339_16.5 | 1 p2 | (GA)8  | 16 | 131  | 146 TTGGAATCAAGTAGAACTGAAAA    |
| scaffold639352_14.5 | 1 p2 | (TG)9  | 18 | 1250 | 1267 GCCAAACGCCAAAGAAAAAT      |
| scaffold639404_16.2 | 1 p2 | (AT)6  | 12 | 4321 | 4332 GCGAAATAGTTGGACATCGG      |
| scaffold639455_11.4 | 1 p2 | (AT)9  | 18 | 1221 | 1238 AAAATTTGTTTCCACCAAATAA    |
| scaffold639471_16.0 | 1 p2 | (TA)6  | 12 | 195  | 206 GGATGTGGTCGAGTTTCGTT       |
| scaffold639505_13.0 | 1 p2 | (AT)7  | 14 | 1235 | 1248 TCGAGTATTGCTTCGCTTCA      |
| scaffold639543_12.6 | 1 p2 | (AC)6  | 12 | 216  | 227 TGCTCACTCCTGCACATTTT       |
| scaffold639560_15.1 | 1 p2 | (AG)7  | 14 | 1776 | 1789 GGATTTGACTGGTTGGGAGA      |
| scaffold639606_10.0 | 1 p2 | (AG)6  | 12 | 183  | 194 GTGTAGATCGCCATGGTGTG       |
| scaffold639648_15.0 | 1 p2 | (CT)13 | 26 | 2166 | 2191 CCCCCAAATTCCTTTTCAT       |
| scaffold639686_13.6 | 1 p2 | (AT)9  | 18 | 552  | 569 CGTCACCCTCAACAAAAGGT       |
| scaffold639697_20.2 | 1 p2 | (AT)9  | 18 | 67   | 84 CAAAGGCCCAATGGTTAT          |
| scaffold639704_13.5 | 1 p2 | (TA)6  | 12 | 88   | 99 AACGAATCTTTTCGTGGAGC        |
| scaffold639737_14.9 | 1 p2 | (TC)6  | 12 | 199  | 210 TCCGGTTCACCCATTTAGTC       |
| scaffold639761_10.7 | 1 p2 | (TA)8  | 16 | 242  | 257 AATTACACATACACGTGGGCT      |
| scaffold639863_19.4 | 1 p2 | (AT)12 | 24 | 40   | 63 GGCTAGGCTGGATAAGTTTCA       |
| scaffold639875_13.6 | 1 p2 | (CT)7  | 14 | 197  | 210 TGATGGGGTTTAAATCATCTGG     |
| scaffold639876_10.6 | 1 p2 | (AG)7  | 14 | 41   | 54 CCCATGCATCCATATGAGAGA       |
| scaffold639917_13.6 | 1 p2 | (TA)6  | 12 | 146  | 157 AACATTGTTCTCCCCACAA        |
| scaffold639932_13.3 | 1 p2 | (TA)9  | 18 | 269  | 286 CAAAGAGGAAATTCGAACGC       |
| scaffold639967_13.5 | 1 p2 | (TC)8  | 16 | 194  | 209 ACTGGTGTGTTGTTTATGGCA      |
| scaffold640047_11.5 | 1 p2 | (TC)6  | 12 | 132  | 143 GTA CTCTCATGCGCTCAGCA      |
| scaffold640055_16.0 | 1 p2 | (AG)10 | 20 | 144  | 163 TGCTTTTGACGGAGTGTGAG       |
| scaffold640108_14.2 | 1 p2 | (GA)6  | 12 | 2360 | 2371 AATTAAATGAATGGGTGGCG      |
| scaffold640114_11.0 | 1 p2 | (CT)6  | 12 | 316  | 327 AGAGATCACACAGGCAGTCG       |
| scaffold640121_12.4 | 1 p2 | (AG)6  | 12 | 327  | 338 TCACGGTTCGAGTTTCAAT        |
| scaffold640167_17.6 | 1 p2 | (AT)8  | 16 | 307  | 322 CTAATGGCGAAGTGGATCGT       |
| scaffold640193_11.0 | 1 p2 | (TG)8  | 16 | 129  | 144 CATTTTACCGGCATGGTGTT       |
| scaffold640221_13.1 | 1 p2 | (AT)6  | 12 | 764  | 775 AACCCACATGCAAGTTTCGT       |
| scaffold640264_14.9 | 1 p2 | (AC)9  | 18 | 193  | 210 TCCATCTCCACGTACGACTG       |
| scaffold640287_10.9 | 1 p2 | (CT)7  | 14 | 433  | 446 CCAAGATGAAACGGAGAAA        |
| scaffold640293_11.4 | 1 p2 | (GA)7  | 14 | 51   | 64 TCGATTTCAGTTTCCCCACTC       |
| scaffold640324_14.2 | 1 p2 | (TA)9  | 18 | 307  | 324 TGAATTCGGTCAAGCATCTG       |
| scaffold640329_15.6 | 1 p2 | (CT)7  | 14 | 824  | 837 TGGTGTGGGAAGAATCACA        |
| scaffold640361_15.8 | 1 p2 | (TA)7  | 14 | 197  | 210 GCCTTTCGTCACAAACATCA       |
| scaffold640406_15.4 | 1 p2 | (AC)6  | 12 | 2346 | 2357 AGAAATTCAAACCCGGAACC      |
| scaffold640497_12.6 | 1 p2 | (TA)8  | 16 | 773  | 788 TTCTTCAGTCCCTACCGTCG       |

|                     |      |        |    |      |                                |
|---------------------|------|--------|----|------|--------------------------------|
| scaffold640504_11.4 | 1 p2 | (AT)13 | 26 | 410  | 435 GCGATATGCATCTACCGTGA       |
| scaffold640536_15.4 | 1 p2 | (TG)6  | 12 | 178  | 189 TTGAAGGGGTCTCTTGGATG       |
| scaffold640550_15.6 | 1 p2 | (TA)8  | 16 | 47   | 62 TGCCTTTTGACGATATATAGTGTTT   |
| scaffold640558_15.2 | 1 p2 | (CT)6  | 12 | 252  | 263 GGAAGATTCAAACCCCATCA       |
| scaffold640581_14.0 | 1 p2 | (CT)10 | 20 | 447  | 466 CCAAGATGAAACGGAGAAA        |
| scaffold640654_13.7 | 1 p2 | (TC)9  | 18 | 193  | 210 TTCCATGTGCATGCAGAAAT       |
| scaffold640691_13.5 | 1 p2 | (AG)8  | 16 | 1990 | 2005 GACATGGGCACCTTATTGGT      |
| scaffold640704_13.3 | 1 p2 | (GA)6  | 12 | 992  | 1003 TCATGTCGCCGATCATAAAA      |
| scaffold640717_13.8 | 1 p2 | (TA)8  | 16 | 47   | 62 AAGGAGGTGTTATGAAGGGATT      |
| scaffold640774_10.7 | 1 p2 | (AT)6  | 12 | 66   | 77 ATGAATGGCCCATATTGGTT        |
| scaffold640856_16.5 | 1 p2 | (TA)11 | 22 | 649  | 670 TTTACGATTTTCGATAGCCCG      |
| scaffold640977_13.2 | 1 p2 | (CA)6  | 12 | 227  | 238 GCCCAGTCATTTTGTCCCTA       |
| scaffold640982_17.4 | 1 p2 | (TG)6  | 12 | 679  | 690 GAGAGGGTGATTTTGCCACA       |
| scaffold641023_13.9 | 1 p2 | (TA)7  | 14 | 51   | 64 TGAGATAAGGGGGTGTTC          |
| scaffold641057_18.1 | 1 p2 | (GA)7  | 14 | 1627 | 1640 TGGTCTACTTCTATGGCGGG      |
| scaffold641073_17.3 | 1 p2 | (AT)10 | 20 | 383  | 402 ATTTGGTTTGCTTGGGATTG       |
| scaffold641108_14.8 | 1 p2 | (TA)6  | 12 | 394  | 405 TCCCTTTGATTCCCTTCTCA       |
| scaffold641238_16.5 | 1 p2 | (CT)8  | 16 | 358  | 373 GGCTACCCCTCTCGCTCTAC       |
| scaffold641242_13.5 | 1 p2 | (AT)6  | 12 | 199  | 210 GCTGATGTCGATTTTCCAGA       |
| scaffold641328_14.4 | 1 p2 | (AG)6  | 12 | 27   | 38 CAATTACAATGTTTTCCAATCCC     |
| scaffold641334_15.7 | 1 p2 | (CT)8  | 16 | 321  | 336 CGCATCAAGTCCCTCATCT        |
| scaffold641399_15.5 | 1 p2 | (TA)12 | 24 | 1500 | 1523 TCCCGTATACCTCCAATTTACAA   |
| scaffold641421_11.2 | 1 p2 | (TA)7  | 14 | 350  | 363 TCACATGTGGCGTCTTTTTTC      |
| scaffold641434_14.4 | 1 p2 | (CT)9  | 18 | 1208 | 1225 CTGTGGTGGAAGGGTTGTCT      |
| scaffold641451_18.1 | 1 p2 | (AG)8  | 16 | 129  | 144 AACAACTATCTCCAGCCCCA       |
| scaffold641523_12.4 | 1 p2 | (TA)6  | 12 | 671  | 682 AGGAAAAGGAGGAGCCAGAG       |
| scaffold641543_11.7 | 1 p2 | (AT)9  | 18 | 66   | 83 CAAAGAACTTGGGACGGAG         |
| scaffold641555_15.5 | 1 p2 | (CT)8  | 16 | 52   | 67 AATTCTTCTCCGGAACACC         |
| scaffold641799_12.2 | 1 p2 | (AC)6  | 12 | 658  | 669 CTTACGGGGTTGTCTTTA         |
| scaffold641807_16.8 | 1 p2 | (TA)7  | 14 | 198  | 211 TGATTCTTGGTGGCAGATTG       |
| scaffold641808_11.0 | 1 p2 | (TA)6  | 12 | 79   | 90 CTAGGAGGTTCTCGCATTGG        |
| scaffold641924_15.4 | 1 p2 | (TC)7  | 14 | 198  | 211 CTTCAAATCTAACCGGCCT        |
| scaffold641988_16.2 | 1 p2 | (TC)6  | 12 | 681  | 692 GCGAGAGCTATGTGGAGACC       |
| scaffold642088_10.2 | 1 p2 | (TA)10 | 20 | 261  | 280 AGGGAGCTGGCACTAGATCA       |
| scaffold642140_13.1 | 1 p2 | (AT)9  | 18 | 1204 | 1221 TTGAGATTGCGAATTC AACG     |
| scaffold642208_19.5 | 1 p2 | (AT)8  | 16 | 1526 | 1541 GGGTTGGATCAACCACATTT      |
| scaffold642278_16.9 | 1 p2 | (CA)6  | 12 | 1230 | 1241 ACACAAGCACACACATGCAA      |
| scaffold642334_10.5 | 1 p2 | (TA)10 | 20 | 598  | 617 TTAAACCATGCACGTAGGCA       |
| scaffold642373_10.6 | 1 p2 | (GA)7  | 14 | 52   | 65 CCAACTCAGTGTGTGAGTGGTT      |
| scaffold642596_16.4 | 1 p2 | (AC)6  | 12 | 106  | 117 CCACAGGATCGAATGAACAA       |
| scaffold642656_15.0 | 1 p2 | (TA)11 | 22 | 4093 | 4114 CCATTTGGTGCTGGAGTTCT      |
| scaffold642663_12.6 | 1 p2 | (AT)7  | 14 | 50   | 63 GGTTATTAGTTATTACGGATTAAACGC |
| scaffold642707_18.8 | 1 p2 | (TC)6  | 12 | 172  | 183 CCCCTTTGTCATCTTAGGCA       |
| scaffold642926_17.7 | 1 p2 | (AG)6  | 12 | 201  | 212 CAATAAATTGGGGTCGGCTA       |
| scaffold643009_18.7 | 1 p2 | (AT)12 | 24 | 43   | 66 GACTAGAGTTGGTTTCTTAAATGACTC |
| scaffold643031_11.0 | 1 p2 | (TA)6  | 12 | 526  | 537 AAGAAAATGGGCAGAAACGA       |
| scaffold643073_10.1 | 1 p2 | (AC)6  | 12 | 98   | 109 TCGGGATCTTCACATCTTCC       |
| scaffold643200_12.6 | 1 p2 | (TA)6  | 12 | 2002 | 2013 CGAAAACATTTACATACGATGCC   |
| scaffold643221_13.1 | 1 p2 | (AT)6  | 12 | 261  | 272 AAAAACGAGCATTTTAGGGTTA     |
| scaffold643357_15.0 | 1 p2 | (AG)11 | 22 | 2227 | 2248 CCAGACGACTGCAAAAACAA      |
| scaffold643411_12.6 | 1 p2 | (AT)14 | 28 | 355  | 382 TAGGTGTCGGATTTGGGAGA       |
| scaffold643419_10.5 | 1 p2 | (TC)7  | 14 | 112  | 125 ATTGTTGCTTTGCCATCTCC       |
| scaffold643444_14.7 | 1 p2 | (GA)7  | 14 | 407  | 420 AGAAACAAACGGAATGTCCG       |
| scaffold643448_16.0 | 1 p2 | (TA)6  | 12 | 1512 | 1523 GCATGGACCAGAAATTCCAC      |
| scaffold643464_11.5 | 1 p2 | (TG)8  | 16 | 169  | 184 CTTGTGGAATGAAAGGGTGG       |
| scaffold643556_12.8 | 1 p2 | (AT)9  | 18 | 954  | 971 GGAGGTGAAGATTGGGTGAA       |
| scaffold643665_10.7 | 1 p2 | (AT)7  | 14 | 573  | 586 TCCTTCCTTGCTCCTTTTCC       |
| scaffold643730_15.3 | 1 p2 | (TA)9  | 18 | 244  | 261 GCGCTTTTTGCCTGATATTT       |

|                     |      |        |    |      |      |                             |
|---------------------|------|--------|----|------|------|-----------------------------|
| scaffold643835_16.4 | 1 p2 | (TC)9  | 18 | 840  | 857  | ACCGCTTACATTCCGATTTG        |
| scaffold643874_16.9 | 1 p2 | (GA)9  | 18 | 1122 | 1139 | GCAATACTGTTTCCACCGCT        |
| scaffold643881_11.7 | 1 p2 | (TC)9  | 18 | 330  | 347  | TTCAGCACTCCATCAGCAAG        |
| scaffold643901_15.5 | 1 p2 | (CT)9  | 18 | 50   | 67   | TGGCCAAAACATCAACTCAA        |
| scaffold643902_15.5 | 1 p2 | (AG)7  | 14 | 248  | 261  | TAGAGCCGGGTTTAGAGCAA        |
| scaffold643943_12.7 | 1 p2 | (TA)10 | 20 | 52   | 71   | GGTGACGATGGTGATTGATG        |
| scaffold643944_21.5 | 1 p2 | (AT)8  | 16 | 198  | 213  | TAGTGAGTAGTTCCGCCCGT        |
| scaffold644011_13.9 | 1 p2 | (AT)9  | 18 | 301  | 318  | GGCATTTTTGGGAAAGACAAA       |
| scaffold644044_16.9 | 1 p2 | (TC)6  | 12 | 2014 | 2025 | GGATCGGTGACAAAGGGAAT        |
| scaffold644123_15.0 | 1 p2 | (CT)8  | 16 | 198  | 213  | GATGCAGCTTGGTCTCCTTC        |
| scaffold644303_10.8 | 1 p2 | (TA)9  | 18 | 217  | 234  | AAAATGGTCCCCTCATGGAC        |
| scaffold644328_15.5 | 1 p2 | (TA)6  | 12 | 864  | 875  | TGTCCAAATAATTCATCACCAAA     |
| scaffold644391_17.0 | 1 p2 | (AC)6  | 12 | 2744 | 2755 | CTTCGCCATCTGGTTTTGAT        |
| scaffold644404_15.2 | 1 p2 | (CT)9  | 18 | 1250 | 1267 | ATAAAATGGGCGATTCCCTT        |
| scaffold644420_18.4 | 1 p2 | (GA)10 | 20 | 193  | 212  | TTGCTGCCACTACCTGTGAA        |
| scaffold644432_17.2 | 1 p2 | (TA)7  | 14 | 119  | 132  | ATGGGCTGTCTCTTGGATCA        |
| scaffold644442_14.5 | 1 p2 | (AC)6  | 12 | 1867 | 1878 | TCCATCCGAAATCCGAATAA        |
| scaffold644469_14.0 | 1 p2 | (AT)7  | 14 | 1787 | 1800 | TATACAAATGGGCGCATCAA        |
| scaffold644485_15.4 | 1 p2 | (CA)6  | 12 | 737  | 748  | ATTTTCGCAATCATATCGGG        |
| scaffold644501_15.4 | 1 p2 | (CA)6  | 12 | 530  | 541  | TCCTCCTTTTCACAACCTGGC       |
| scaffold644645_17.1 | 1 p2 | (GA)6  | 12 | 202  | 213  | GTTGGTTACGGGAATTGCAT        |
| scaffold644655_17.7 | 1 p2 | (TA)7  | 14 | 1102 | 1115 | AAAATTC AATGACAATTGGAGGA    |
| scaffold644735_15.7 | 1 p2 | (CT)8  | 16 | 1427 | 1442 | TGGCATTAAATATTAGCCCCC       |
| scaffold644755_15.1 | 1 p2 | (AG)8  | 16 | 34   | 49   | GCCAATAATTTTTAGCAAGCAA      |
| scaffold644805_15.8 | 1 p2 | (GA)6  | 12 | 446  | 457  | GAGAAGTGGCGGACTTTCTG        |
| scaffold644826_12.8 | 1 p2 | (TC)6  | 12 | 747  | 758  | CATGATCCCGTGAGATACCA        |
| scaffold644897_16.2 | 1 p2 | (TC)6  | 12 | 345  | 356  | AGCGTACAATACAGCCCACC        |
| scaffold644967_17.2 | 1 p2 | (AT)9  | 18 | 917  | 934  | GGTATGTCAATTTGCCGCTT        |
| scaffold644988_16.9 | 1 p2 | (TC)8  | 16 | 91   | 106  | CGAATATGCAATCACCAAAGAA      |
| scaffold645028_10.8 | 1 p2 | (GA)6  | 12 | 81   | 92   | CACGAGATTTACGTGGTTCCG       |
| scaffold645087_12.3 | 1 p2 | (AT)9  | 18 | 88   | 105  | CTGCATGCACCTGATTACAA        |
| scaffold645097_11.2 | 1 p2 | (CT)10 | 20 | 188  | 207  | TCACCTTCACTTCTCTGCTCA       |
| scaffold645177_16.7 | 1 p2 | (TG)8  | 16 | 946  | 961  | CATGCATTTGTTGTCTGTTTTC      |
| scaffold645222_10.2 | 1 p2 | (CT)6  | 12 | 255  | 266  | ACACACACCGTGGACGTAGA        |
| scaffold645261_16.9 | 1 p2 | (CT)7  | 14 | 148  | 161  | CCTGTGGAGGGAACTTTTCA        |
| scaffold645374_12.4 | 1 p2 | (TA)9  | 18 | 838  | 855  | AAAGTGCACAGAAAATGACTTTG     |
| scaffold645450_15.1 | 1 p2 | (AT)7  | 14 | 892  | 905  | GGTTGGTAGCTCGGAACAAA        |
| scaffold645454_16.0 | 1 p2 | (CT)9  | 18 | 1958 | 1975 | CTGCCAACTGAATGAAAGCA        |
| scaffold645511_15.9 | 1 p2 | (AT)7  | 14 | 2109 | 2122 | CAAACACGGAGATTTCAACAA       |
| scaffold645647_16.3 | 1 p2 | (AT)11 | 22 | 746  | 767  | GCGCTGTAGATCTAACGGATG       |
| scaffold645652_16.4 | 1 p2 | (GA)6  | 12 | 1622 | 1633 | ATTTGGGTGTAGAGAGGGGG        |
| scaffold645722_13.9 | 1 p2 | (AT)8  | 16 | 243  | 258  | ACACGAAACACCACTCCTCC        |
| scaffold645734_15.8 | 1 p2 | (GA)6  | 12 | 162  | 173  | TTGTTGAAGGGTGGTTGTGA        |
| scaffold645775_13.3 | 1 p2 | (CT)9  | 18 | 539  | 556  | GTTGCTTAGGGTCTGTTGGC        |
| scaffold645776_13.4 | 1 p2 | (CT)7  | 14 | 391  | 404  | TTGCTTAGGGTCTGTTGGC         |
| scaffold645867_12.0 | 1 p2 | (TA)9  | 18 | 553  | 570  | CGGGGCTCACTAAAAACGTA        |
| scaffold645878_14.0 | 1 p2 | (TA)8  | 16 | 130  | 145  | TACCCCGCTACCACCAATAG        |
| scaffold645923_15.0 | 1 p2 | (AT)7  | 14 | 1440 | 1453 | CCTTGATTTCAACTGTCTCCG       |
| scaffold645926_15.1 | 1 p2 | (TC)6  | 12 | 2656 | 2667 | TTAAAACCGACACCCACTCC        |
| scaffold646078_12.6 | 1 p2 | (AT)9  | 18 | 146  | 163  | GTTTCGATAGTTTTCATTTTATTTT   |
| scaffold646166_13.5 | 1 p2 | (AG)6  | 12 | 299  | 310  | GCAATACAAGCGATGTGTGG        |
| scaffold646230_16.4 | 1 p2 | (AG)6  | 12 | 2747 | 2758 | GGGTAGATGCAACATAGGGG        |
| scaffold646252_10.2 | 1 p2 | (TC)7  | 14 | 304  | 317  | GAAAGCATCGTTTTTGGCTC        |
| scaffold646272_12.7 | 1 p2 | (AT)6  | 12 | 341  | 352  | ACAATATGGTGTGGGTATTAAGAT    |
| scaffold646333_10.0 | 1 p2 | (TA)9  | 18 | 144  | 161  | TCAGTTTTTGAGTTATGACGTTTG    |
| scaffold646334_10.5 | 1 p2 | (AT)7  | 14 | 251  | 264  | GAAATATGCATTTGTCGTCACC      |
| scaffold646383_11.6 | 1 p2 | (AT)7  | 14 | 78   | 91   | CAATTC AAAAATGAGTGAACCA     |
| scaffold646412_12.1 | 1 p2 | (AT)8  | 16 | 87   | 102  | TTCTCTACACATAGAGACCAATTTTG/ |

|                     |      |        |    |      |      |                           |
|---------------------|------|--------|----|------|------|---------------------------|
| scaffold646435_11.7 | 1 p2 | (GA)6  | 12 | 203  | 214  | CGGACGGGAAGAGATAAACA      |
| scaffold646494_13.5 | 1 p2 | (GT)7  | 14 | 202  | 215  | CTGCCTCTTTCCACACCATT      |
| scaffold646531_11.0 | 1 p2 | (AG)6  | 12 | 291  | 302  | GCGACAATAACTGTCTGCGA      |
| scaffold646575_16.9 | 1 p2 | (TG)7  | 14 | 1706 | 1719 | GCCTCCATAACGAGCTCATAG     |
| scaffold646577_11.4 | 1 p2 | (GA)6  | 12 | 151  | 162  | TTCTCGATTCCCGATTTTTG      |
| scaffold646596_15.2 | 1 p2 | (GC)6  | 12 | 158  | 169  | GCACAACGGCTATCTGGTTT      |
| scaffold646693_19.3 | 1 p2 | (TA)7  | 14 | 202  | 215  | TGGCTCATTGACCAAAA         |
| scaffold646721_12.7 | 1 p2 | (TC)6  | 12 | 156  | 167  | CTACTTGCGTGCTGGAAGT       |
| scaffold646882_10.0 | 1 p2 | (AT)10 | 20 | 340  | 359  | GGCCATTCAAATTTCAAATCA     |
| scaffold646910_16.3 | 1 p2 | (TA)6  | 12 | 1381 | 1392 | TTGTCTATTCTCCGATGGC       |
| scaffold647051_13.8 | 1 p2 | (CT)7  | 14 | 149  | 162  | GGATCGAAAGGGTGAGTGAA      |
| scaffold647156_11.6 | 1 p2 | (TG)8  | 16 | 327  | 342  | CCATCTTGATGCAGGTGACA      |
| scaffold647184_17.1 | 1 p2 | (AT)10 | 20 | 236  | 255  | CTATTTGCCGCTGAAAAAGC      |
| scaffold647209_15.7 | 1 p2 | (GA)6  | 12 | 838  | 849  | GAGCTGCGACATTTTCAACA      |
| scaffold647349_11.4 | 1 p2 | (AT)6  | 12 | 627  | 638  | AATTCAAGCATTTTCCGCTG      |
| scaffold647449_10.3 | 1 p2 | (CA)6  | 12 | 270  | 281  | GCTGTCCACCATCTCCTCTC      |
| scaffold647565_16.4 | 1 p2 | (CA)8  | 16 | 3764 | 3779 | CCATAGTCCAAGATGTGGTGC     |
| scaffold647873_14.9 | 1 p2 | (GA)11 | 22 | 44   | 65   | TGGATGGATGGATTAGCAGA      |
| scaffold647905_14.2 | 1 p2 | (CT)7  | 14 | 368  | 381  | CATTCTTTCTCATCACCCCC      |
| scaffold647910_10.3 | 1 p2 | (TA)6  | 12 | 204  | 215  | ATGGGAAGAGGGGGTATGAG      |
| scaffold647913_12.9 | 1 p2 | (AT)9  | 18 | 199  | 216  | TTTTAAAAGGATTTATGGCATGAT  |
| scaffold647914_12.8 | 1 p2 | (AT)6  | 12 | 54   | 65   | GGAAGAATGGACCCTAATTCAA    |
| scaffold648038_15.9 | 1 p2 | (AT)6  | 12 | 668  | 679  | CGCTTTCACCAGAATCTTCC      |
| scaffold648061_18.2 | 1 p2 | (GA)6  | 12 | 189  | 200  | AAGTGTTCACACAGACGG        |
| scaffold648103_13.4 | 1 p2 | (TA)7  | 14 | 261  | 274  | CGCCAATTAATCATAGCCGT      |
| scaffold648167_16.8 | 1 p2 | (CA)6  | 12 | 1084 | 1095 | AGGCCATGTGTTTCGAGTTTC     |
| scaffold648208_15.9 | 1 p2 | (TA)13 | 26 | 40   | 65   | AAGGGTTATCACCTGATTTTCTC   |
| scaffold648281_17.3 | 1 p2 | (AG)6  | 12 | 205  | 216  | GATGGTGGACAAGAGAGGGGA     |
| scaffold648306_14.9 | 1 p2 | (TA)6  | 12 | 53   | 64   | GAAGTGTATGCGTTTTGACAAT    |
| scaffold648350_12.9 | 1 p2 | (AG)7  | 14 | 203  | 216  | AGGGGAAAAGAGAGAGGGTG      |
| scaffold648456_11.7 | 1 p2 | (AT)7  | 14 | 445  | 458  | AAGGGGGAACAACACTGAGAAA    |
| scaffold648465_13.0 | 1 p2 | (GT)6  | 12 | 127  | 138  | AGTGTGTGTTTGTGCGTGTG      |
| scaffold648480_14.5 | 1 p2 | (AG)9  | 18 | 415  | 432  | ATTTTTCCTTGTTGGGGTGG      |
| scaffold648481_12.2 | 1 p2 | (AT)6  | 12 | 357  | 368  | TCCGACCGGTTTTTAAATCA      |
| scaffold648494_16.3 | 1 p2 | (TC)6  | 12 | 824  | 835  | CGTTTGATTTTTCACTAGAACCA   |
| scaffold648531_11.9 | 1 p2 | (AG)6  | 12 | 35   | 46   | AACAACACAAAACCCTACAGCA    |
| scaffold648539_14.6 | 1 p2 | (AT)8  | 16 | 1410 | 1425 | TCCATGCTTGAGCAGTTGAG      |
| scaffold648766_11.6 | 1 p2 | (AT)6  | 12 | 390  | 401  | TGCAGGGTATGCATGTTTGT      |
| scaffold648790_15.1 | 1 p2 | (AG)11 | 22 | 3970 | 3991 | AACTCCCTATCCAAGTCCGA      |
| scaffold648830_14.0 | 1 p2 | (TA)6  | 12 | 1444 | 1455 | TGTGGCTTCTGCTGTTATGG      |
| scaffold648834_15.0 | 1 p2 | (GA)6  | 12 | 200  | 211  | AAATGGGGGAGAAGAAATGG      |
| scaffold648850_14.8 | 1 p2 | (AT)6  | 12 | 912  | 923  | ATCGCCTTTACTCCATTCCA      |
| scaffold649020_14.8 | 1 p2 | (TA)8  | 16 | 1172 | 1187 | TTCGTGGAAGGGAGAGATTG      |
| scaffold649132_15.9 | 1 p2 | (AT)6  | 12 | 1305 | 1316 | TGAGAAGGGTGGGTATGAGG      |
| scaffold649147_13.3 | 1 p2 | (AT)10 | 20 | 2606 | 2625 | TTTGTCCGTCAATATTAGGGATTT  |
| scaffold649212_16.7 | 1 p2 | (TA)11 | 22 | 152  | 173  | CGCCCCAAGATTTGATAATG      |
| scaffold649229_16.0 | 1 p2 | (TC)7  | 14 | 203  | 216  | CAACTCTGCGTCTCCTTTCC      |
| scaffold649262_12.8 | 1 p2 | (AT)10 | 20 | 1038 | 1057 | ACCAATGCACATTTCTGCT       |
| scaffold649276_13.9 | 1 p2 | (AG)11 | 22 | 2020 | 2041 | GATTTCCAGGCATGAGGTGT      |
| scaffold649279_16.9 | 1 p2 | (CT)6  | 12 | 163  | 174  | TGCTTTCGGGAAAAGCATAA      |
| scaffold649367_10.0 | 1 p2 | (GA)6  | 12 | 253  | 264  | CTCAAAGCTCCACAAGCTCC      |
| scaffold649579_13.5 | 1 p2 | (TC)10 | 20 | 250  | 269  | TCCCACCTCCATCTCATCTC      |
| scaffold649617_17.3 | 1 p2 | (CT)6  | 12 | 69   | 80   | TTTAGACCAATCCCAGATCCC     |
| scaffold649627_11.8 | 1 p2 | (TA)8  | 16 | 380  | 395  | TGGGAATTGGGTTTTGAATG      |
| scaffold649736_17.8 | 1 p2 | (AT)6  | 12 | 801  | 812  | TGTCGTAGCATTTTTGTATGTTTTT |
| scaffold649739_12.6 | 1 p2 | (AT)6  | 12 | 191  | 202  | TGACGCCTAGAATCATCGAA      |
| scaffold649741_16.6 | 1 p2 | (TG)6  | 12 | 1493 | 1504 | ATGTCGATTTTGCATTGGCA      |
| scaffold649744_16.5 | 1 p2 | (TA)6  | 12 | 717  | 728  | GTGCAACGCACGTGTAAAAT      |

|                     |      |        |    |      |                             |
|---------------------|------|--------|----|------|-----------------------------|
| scaffold649746_13.3 | 1 p2 | (AT)7  | 14 | 442  | 455 GATTTCAATGGACAGGCACC    |
| scaffold649775_11.3 | 1 p2 | (AT)6  | 12 | 338  | 349 AGCCGTTTGTCCGATTTATG    |
| scaffold649780_16.8 | 1 p2 | (GA)6  | 12 | 3887 | 3898 CAGGAAAAAGAAGATTGCACC  |
| scaffold649841_15.0 | 1 p2 | (GT)6  | 12 | 596  | 607 TCCCTTAATTGGAAGCCAAA    |
| scaffold649845_15.0 | 1 p2 | (TA)6  | 12 | 878  | 889 TGCAAGGCATGTGCAATTAT    |
| scaffold649856_13.5 | 1 p2 | (AG)6  | 12 | 37   | 48 TGGGGATTTTAGAGAGTATTGTGA |
| scaffold649889_16.7 | 1 p2 | (CT)6  | 12 | 332  | 343 CCCCCTTCTCTCCCTACAC     |
| scaffold649893_17.1 | 1 p2 | (AG)6  | 12 | 314  | 325 GGCCCACTTCTTGGTAAACA    |
| scaffold649972_16.4 | 1 p2 | (CT)8  | 16 | 201  | 216 TCGACTTTAACCGTGGGTTTC   |
| scaffold649979_14.7 | 1 p2 | (TA)8  | 16 | 736  | 751 CACATGGGCATATGTGTCAA    |
| scaffold650072_10.9 | 1 p2 | (TA)6  | 12 | 394  | 405 GGGTTGACATGGCTTCGTAT    |
| scaffold650114_10.6 | 1 p2 | (TG)6  | 12 | 138  | 149 CTCCCATTTCTGTGTTCTTCG   |
| scaffold650121_13.0 | 1 p2 | (CT)7  | 14 | 414  | 427 GCCTCCTCCTCCCTCTCTT     |
| scaffold650213_14.9 | 1 p2 | (TA)9  | 18 | 201  | 218 TTTTACCCCATTTTGCCT      |
| scaffold650254_12.0 | 1 p2 | (GA)6  | 12 | 302  | 313 GTGAGTACAAGCGGGTGACA    |
| scaffold650419_11.8 | 1 p2 | (AT)6  | 12 | 154  | 165 AATTGAGAGTAGCCGACCCC    |
| scaffold650500_17.5 | 1 p2 | (CT)7  | 14 | 205  | 218 TTCTCATCTTCAACCCCTGG    |
| scaffold650504_17.1 | 1 p2 | (GA)8  | 16 | 84   | 99 GATGAAGTTAGGTGTTGGATGC   |
| scaffold650545_10.8 | 1 p2 | (AT)6  | 12 | 999  | 1010 GCATGTATGCATATCCCTGG   |
| scaffold650576_16.9 | 1 p2 | (TG)9  | 18 | 1313 | 1330 GGTCGGTAAAAAGTGGCAAA   |
| scaffold650722_10.6 | 1 p2 | (CT)6  | 12 | 197  | 208 TCAGGGACTCATTTCCCAAC    |
| scaffold650771_16.0 | 1 p2 | (TC)10 | 20 | 1385 | 1404 AGCAATCAGCTCCTGCAAAT   |
| scaffold650789_16.3 | 1 p2 | (CA)6  | 12 | 547  | 558 CAATCGGCAGAAGTTTGCTA    |
| scaffold650837_17.2 | 1 p2 | (TC)6  | 12 | 1440 | 1451 CGAATGAGCTCGATTTGGTT   |
| scaffold650859_18.8 | 1 p2 | (TA)7  | 14 | 2820 | 2833 ACGGGAGACATTGCCATAAT   |
| scaffold650917_18.6 | 1 p2 | (TA)11 | 22 | 219  | 240 TTTAACCGAACGAAAATGCC    |
| scaffold650973_21.0 | 1 p2 | (AT)10 | 20 | 601  | 620 ATATGGGTTGTCGATCTCGC    |
| scaffold651067_15.5 | 1 p2 | (GA)6  | 12 | 1592 | 1603 TATGAATTTTGGCCCTTGA    |
| scaffold651073_15.0 | 1 p2 | (TG)6  | 12 | 792  | 803 AACTTTTTGGTTGGCAAGGA    |
| scaffold651126_14.1 | 1 p2 | (GT)7  | 14 | 247  | 260 TTGTGATTCGAAAATTGGCA    |
| scaffold651215_14.9 | 1 p2 | (AT)6  | 12 | 335  | 346 TGTTTCCCAATCCACATTT     |
| scaffold651226_15.1 | 1 p2 | (AT)6  | 12 | 838  | 849 GACGACCTTGTCATCCAACA    |
| scaffold651327_16.1 | 1 p2 | (CT)6  | 12 | 119  | 130 AGCATCTCTTGCTCTCTCATTG  |
| scaffold651456_18.5 | 1 p2 | (CT)7  | 14 | 64   | 77 GGAGATGCACTTCACCCAAT     |
| scaffold651487_16.7 | 1 p2 | (AG)8  | 16 | 153  | 168 AGAGGCATTTTGTGGGAGC     |
| scaffold651544_10.0 | 1 p2 | (AT)7  | 14 | 299  | 312 CAAAACCCGTTACATATCTTTGG |
| scaffold651567_16.3 | 1 p2 | (GA)6  | 12 | 1676 | 1687 AGAAGTGGTGGCGGATTATG   |
| scaffold651585_11.3 | 1 p2 | (AT)9  | 18 | 568  | 585 ACTGCGATCACGAATTCACA    |
| scaffold651605_14.1 | 1 p2 | (AT)8  | 16 | 754  | 769 GGAGGAAGAAGAAGAAAAGGC   |
| scaffold651702_23.6 | 1 p2 | (AC)6  | 12 | 206  | 217 TTGGTGCTCCACTATATTGCC   |
| scaffold651841_14.4 | 1 p2 | (CT)7  | 14 | 152  | 165 AGATGCCACTAACCCTTGAA    |
| scaffold651923_16.5 | 1 p2 | (TC)7  | 14 | 991  | 1004 TACCAGTGAGAATCCTGGGC   |
| scaffold651971_13.3 | 1 p2 | (TG)9  | 18 | 148  | 165 GTAACCGTCATGTTCCGGTC    |
| scaffold652029_14.6 | 1 p2 | (CA)6  | 12 | 1217 | 1228 TATGAGATGTGGGGGAGAGG   |
| scaffold652045_16.4 | 1 p2 | (AC)6  | 12 | 2569 | 2580 TCTTCCCTCCCAATTCTGTT   |
| scaffold652111_14.1 | 1 p2 | (CT)6  | 12 | 2134 | 2145 TCAACGGTGAGTTATGGCAA   |
| scaffold652217_11.9 | 1 p2 | (CT)6  | 12 | 297  | 308 TGTTAGAAACAAACGCGGCT    |
| scaffold652248_16.1 | 1 p2 | (AG)6  | 12 | 1675 | 1686 GCTTCAATTGAGCAGAAGCC   |
| scaffold652291_10.3 | 1 p2 | (GT)8  | 16 | 284  | 299 CGCCACAATTTGATACCTT     |
| scaffold652307_16.5 | 1 p2 | (AG)7  | 14 | 515  | 528 ACAACGTGATACGCTGCAAG    |
| scaffold652331_17.2 | 1 p2 | (GA)6  | 12 | 402  | 413 CGTTGCATTCTCTTTCTCA     |
| scaffold652343_14.8 | 1 p2 | (AT)13 | 26 | 45   | 70 ACCATATTTAAGGGTTATCACCTG |
| scaffold652370_10.0 | 1 p2 | (AT)6  | 12 | 365  | 376 CTAACCTTATCCCCACCG      |
| scaffold652373_10.1 | 1 p2 | (AT)7  | 14 | 52   | 65 CAAAATTTGGAACCTGTCTTCA   |
| scaffold652391_15.9 | 1 p2 | (GA)11 | 22 | 1206 | 1227 CCAAGAAAATCCCAGAAGCA   |
| scaffold652468_18.4 | 1 p2 | (CT)6  | 12 | 311  | 322 ATATTCTCCCGAACCGACAC    |
| scaffold652486_19.1 | 1 p2 | (TC)6  | 12 | 330  | 341 GGAAAATTCGTTTTTGCCT     |
| scaffold652495_14.1 | 1 p2 | (TC)6  | 12 | 125  | 136 CTCTTCATTCCCTCATCCCA    |

|                     |      |        |    |      |                             |
|---------------------|------|--------|----|------|-----------------------------|
| scaffold652583_12.2 | 1 p2 | (AG)12 | 24 | 48   | 71 TTCGAAACTGCATGAAAATCA    |
| scaffold652588_17.4 | 1 p2 | (AT)8  | 16 | 102  | 117 CACGTGTAAGGGTTGAAGAAG   |
| scaffold652651_15.9 | 1 p2 | (GA)6  | 12 | 3389 | 3400 AGCTGAAGAGCTGATGGCTT   |
| scaffold652697_15.6 | 1 p2 | (TC)6  | 12 | 1215 | 1226 TGAAGTGGCTACTGGCTGTC   |
| scaffold652699_10.0 | 1 p2 | (AG)6  | 12 | 205  | 216 GTGTAGATCGCCATGGTGTG    |
| scaffold652723_12.7 | 1 p2 | (AT)6  | 12 | 156  | 167 GCGTCGTGGATCAAGGTAAT    |
| scaffold652760_13.9 | 1 p2 | (AT)7  | 14 | 207  | 220 ACGGTTACGGGCTGGTATTT    |
| scaffold652798_14.2 | 1 p2 | (GA)8  | 16 | 1411 | 1426 GGACAGATCAGAAGCAAGGC   |
| scaffold652882_15.2 | 1 p2 | (AT)7  | 14 | 1269 | 1282 AGAGCCACAAATTTTTCTTCAT |
| scaffold652932_14.7 | 1 p2 | (TA)6  | 12 | 54   | 65 TGTGTGTGTGGTTCTATGTTGTG  |
| scaffold652944_16.3 | 1 p2 | (AT)7  | 14 | 620  | 633 TTTCAGGCCATAACTCGGTC    |
| scaffold652958_17.5 | 1 p2 | (GA)7  | 14 | 3164 | 3177 TGCAGATCAATAAAAATGGCG  |
| scaffold653091_12.0 | 1 p2 | (AT)6  | 12 | 825  | 836 CGAAATCAAGCAACCAGTCA    |
| scaffold653094_13.1 | 1 p2 | (CT)7  | 14 | 96   | 109 CACTCTGCTAGGGTTGGGAG    |
| scaffold653108_15.9 | 1 p2 | (TA)7  | 14 | 154  | 167 TCAAGTTCAAATGCCAAGCTC   |
| scaffold653141_13.9 | 1 p2 | (AG)7  | 14 | 556  | 569 TATTGCCCATCACTCCCATT    |
| scaffold653167_16.1 | 1 p2 | (TC)10 | 20 | 322  | 341 CCCGATTTCTACACCCCTCT    |
| scaffold653179_13.0 | 1 p2 | (TG)6  | 12 | 486  | 497 CGCTGCACCTTCAAGTAACA    |
| scaffold653222_11.9 | 1 p2 | (GT)7  | 14 | 127  | 140 GACCACCCTAACGGATTTGA    |
| scaffold653233_13.2 | 1 p2 | (CA)7  | 14 | 677  | 690 TACAGCAGATGCCTCGTTTG    |
| scaffold653275_11.0 | 1 p2 | (AC)6  | 12 | 371  | 382 TTCTTATACCAAACCTCCACTCA |
| scaffold653349_16.1 | 1 p2 | (TA)6  | 12 | 1292 | 1303 TGTTGGACCCCCTAACTCAA   |
| scaffold653358_12.2 | 1 p2 | (GA)6  | 12 | 406  | 417 ATTTGCAAGCCTGTGGTAGG    |
| scaffold653365_10.6 | 1 p2 | (TA)9  | 18 | 320  | 337 TCGACAAGAAGCAACACAGG    |
| scaffold653389_16.4 | 1 p2 | (TC)12 | 24 | 2263 | 2286 AGAGGAAACCACCACCGTTA   |
| scaffold653405_18.3 | 1 p2 | (AT)10 | 20 | 1468 | 1487 TGTGGCATATTGATGATGGTG  |
| scaffold653457_16.4 | 1 p2 | (TA)8  | 16 | 301  | 316 TAGTTCCTCGCGGATCAATG    |
| scaffold653581_10.6 | 1 p2 | (AT)12 | 24 | 583  | 606 TTCCCCAGAGAAGTTGTTG     |
| scaffold653582_20.1 | 1 p2 | (AT)7  | 14 | 208  | 221 CGCCCCAAAGTGCTTTAATA    |
| scaffold653583_17.5 | 1 p2 | (CT)6  | 12 | 1396 | 1407 GTGACAAGCATTCTCCACC    |
| scaffold653589_14.5 | 1 p2 | (AT)6  | 12 | 675  | 686 GCCTTCCTTGGTAGTGGACA    |
| scaffold653603_14.1 | 1 p2 | (CT)7  | 14 | 652  | 665 TGACACATAGCCCGATGAAA    |
| scaffold653648_16.3 | 1 p2 | (AG)7  | 14 | 500  | 513 AAGCTGAAAAGTCGAGAAAATG  |
| scaffold653667_15.2 | 1 p2 | (TC)6  | 12 | 557  | 568 TCGATGAAATAGGGTTCGAGG   |
| scaffold653677_10.7 | 1 p2 | (AT)8  | 16 | 157  | 172 AAGGAGATTGGGAGGAATGG    |
| scaffold653707_13.1 | 1 p2 | (GA)6  | 12 | 210  | 221 ACAGAGCTGAGGAGAGCGAG    |
| scaffold653777_20.0 | 1 p2 | (AT)7  | 14 | 207  | 220 AAATGGACCCACGAGATTTG    |
| scaffold653827_14.2 | 1 p2 | (AG)6  | 12 | 529  | 540 TTTTTGAGGGAACAATTTGAGAA |
| scaffold653858_19.3 | 1 p2 | (TC)6  | 12 | 145  | 156 TGCAATCACCAATGAACTGA    |
| scaffold653864_14.0 | 1 p2 | (AT)6  | 12 | 475  | 486 TTCAATCAGCCAATGGACAA    |
| scaffold653886_17.3 | 1 p2 | (CT)6  | 12 | 477  | 488 GAAAATCGGACGTCAAGAG     |
| scaffold653964_14.9 | 1 p2 | (CT)7  | 14 | 278  | 291 CACTCTCGTTGGCAGATTT     |
| scaffold654011_14.6 | 1 p2 | (TA)12 | 24 | 114  | 137 GTTATCACCGGATCGCTACC    |
| scaffold654038_18.0 | 1 p2 | (TA)7  | 14 | 917  | 930 CCTTGTCCATGATTTCTTTGG   |
| scaffold654087_12.2 | 1 p2 | (AG)7  | 14 | 507  | 520 AAGGGAGGCTCTGCATCATA    |
| scaffold654099_14.3 | 1 p2 | (AT)8  | 16 | 419  | 434 AATCCAACCATCCATTCCA     |
| scaffold654154_14.6 | 1 p2 | (AG)6  | 12 | 133  | 144 GCCCAACTCTGGTTTCTC      |
| scaffold654189_15.3 | 1 p2 | (TA)6  | 12 | 194  | 205 GAACTTATGGGAAGGAGAACCA  |
| scaffold654212_14.7 | 1 p2 | (AT)6  | 12 | 1489 | 1500 CATAGCGAGGAAGTCCCAAG   |
| scaffold654264_16.0 | 1 p2 | (CT)6  | 12 | 210  | 221 GCCTCAAGAATGATCCCAAG    |
| scaffold654315_15.0 | 1 p2 | (TC)6  | 12 | 160  | 171 ATCATTACTGACCGCGAACC    |
| scaffold654424_10.4 | 1 p2 | (GC)6  | 12 | 362  | 373 TCCAATACGAAGCCCAAATC    |
| scaffold654430_16.9 | 1 p2 | (TC)6  | 12 | 2110 | 2121 AAAAAGGGATGAAAAGGGGA   |
| scaffold654437_12.0 | 1 p2 | (TA)8  | 16 | 206  | 221 CTGTAGATCAGAGGGCCGAG    |
| scaffold654461_16.2 | 1 p2 | (CA)10 | 20 | 409  | 428 GTGTCCGGAGCTATTTCTGC    |
| scaffold654482_17.1 | 1 p2 | (AT)6  | 12 | 99   | 110 AGCACACAGGTGAAGACGATT   |
| scaffold654560_16.2 | 1 p2 | (GA)6  | 12 | 2283 | 2294 ACTCCCTCCGTCCCATAAAC   |
| scaffold654583_12.4 | 1 p2 | (AT)8  | 16 | 999  | 1014 GCATTTTCTCCATGTGGGAT   |

|                     |      |        |    |      |      |                            |
|---------------------|------|--------|----|------|------|----------------------------|
| scaffold654586_17.3 | 1 p2 | (CA)8  | 16 | 206  | 221  | GCCACTCCAAATTCTTTCCA       |
| scaffold654602_15.0 | 1 p2 | (CT)6  | 12 | 3906 | 3917 | TCCTCCCGAGGATAGTCTCA       |
| scaffold654608_19.3 | 1 p2 | (TC)8  | 16 | 317  | 332  | CTGCACTCTCCAGGAATCGT       |
| scaffold654729_12.2 | 1 p2 | (AT)9  | 18 | 687  | 704  | TGGGGCGCGTATTTAGATTA       |
| scaffold654741_16.2 | 1 p2 | (CT)6  | 12 | 91   | 102  | CCCACACTCTGCTTTCCATT       |
| scaffold654749_13.8 | 1 p2 | (AT)6  | 12 | 675  | 686  | TATGCATGGCATGAGTGTGA       |
| scaffold654765_17.2 | 1 p2 | (CA)6  | 12 | 911  | 922  | ACCGGAGTGTGAAGACGAAC       |
| scaffold654787_15.4 | 1 p2 | (AT)6  | 12 | 973  | 984  | AATCTGACACGTCGGGAACT       |
| scaffold654839_14.6 | 1 p2 | (AT)7  | 14 | 1495 | 1508 | TCAGCAATGAGTTGCTCCAT       |
| scaffold654908_17.4 | 1 p2 | (CT)6  | 12 | 354  | 365  | GGTTGTCGTCTCTTGCCACT       |
| scaffold654938_10.2 | 1 p2 | (TA)7  | 14 | 160  | 173  | ATGTTCCGATTTTGAACGG        |
| scaffold654952_17.3 | 1 p2 | (GA)8  | 16 | 2995 | 3010 | CCTTACTCGAACAGCCCAAC       |
| scaffold654973_11.2 | 1 p2 | (TA)11 | 22 | 42   | 63   | GCGTTTTGACAATATTTAGTGTTTTG |
| scaffold655030_18.3 | 1 p2 | (TC)6  | 12 | 469  | 480  | AATTTCTCACTCTCCGCTGC       |
| scaffold655058_14.6 | 1 p2 | (AT)6  | 12 | 1404 | 1415 | GAGAGAGAGGTTGTGGCCTG       |
| scaffold655065_10.9 | 1 p2 | (GT)9  | 18 | 43   | 60   | AAGAGTGTGTGTGTGGGTGTG      |
| scaffold655080_16.5 | 1 p2 | (TA)6  | 12 | 210  | 221  | CTACGTGAGGCGGTGATTTT       |
| scaffold655084_15.3 | 1 p2 | (AG)6  | 12 | 55   | 66   | TCACAATAACAAGTCCGAGC       |
| scaffold655203_14.0 | 1 p2 | (TA)7  | 14 | 315  | 328  | TTGACAACCAGGTCACGAAA       |
| scaffold655228_14.2 | 1 p2 | (AG)11 | 22 | 1099 | 1120 | GTTTTGTTTTCGTTCCTCG        |
| scaffold655241_14.4 | 1 p2 | (TA)10 | 20 | 1459 | 1478 | GGACGGCAACAGGAGTTACA       |
| scaffold655260_10.6 | 1 p2 | (TA)7  | 14 | 240  | 253  | AGGTGGCAACATAATCAGCC       |
| scaffold655303_15.2 | 1 p2 | (GA)9  | 18 | 3025 | 3042 | GCTCTGCATTAGCAGCTTCC       |
| scaffold655334_17.1 | 1 p2 | (TG)8  | 16 | 1681 | 1696 | GATTTGGTTGGTCAAGTGGG       |
| scaffold655336_16.0 | 1 p2 | (TG)7  | 14 | 209  | 222  | TCACATTCACACCTAACGCAA      |
| scaffold655406_16.7 | 1 p2 | (AT)6  | 12 | 211  | 222  | CTTACCCACTCCACCACCTG       |
| scaffold655500_10.9 | 1 p2 | (GA)7  | 14 | 208  | 221  | TAAAGGCCGCATCCTATCAC       |
| scaffold655618_13.7 | 1 p2 | (TA)10 | 20 | 42   | 61   | CGTTATCACCGGATCGC          |
| scaffold655723_20.2 | 1 p2 | (TA)7  | 14 | 209  | 222  | CCAAGAATCAGTTAAGCCCG       |
| scaffold655804_13.0 | 1 p2 | (TA)10 | 20 | 2607 | 2626 | AGGCCAAAATGAACCACAC        |
| scaffold655946_15.3 | 1 p2 | (GA)8  | 16 | 1398 | 1413 | TGCTAGGAAGCTGAGGAAGC       |
| scaffold655992_14.2 | 1 p2 | (GC)7  | 14 | 547  | 560  | CGAGTCGGCAGACCTAAGAC       |
| scaffold656032_14.7 | 1 p2 | (CT)7  | 14 | 646  | 659  | GCCAGTGTCCATCCATTCT        |
| scaffold656049_16.1 | 1 p2 | (GA)6  | 12 | 752  | 763  | GGAGGCATGGAAGAGAATGA       |
| scaffold656095_14.8 | 1 p2 | (TA)6  | 12 | 304  | 315  | AGTAGAAGCATTTTCGTCGGG      |
| scaffold656176_13.8 | 1 p2 | (TA)6  | 12 | 1325 | 1336 | TTGACATGGTGTAGTCATCAAGG    |
| scaffold656344_14.2 | 1 p2 | (CA)6  | 12 | 443  | 454  | GTGATTGGCTGGAAGAGCAC       |
| scaffold656386_15.0 | 1 p2 | (CA)6  | 12 | 2195 | 2206 | TGACGGAACACGTCAGATTT       |
| scaffold656448_18.8 | 1 p2 | (TA)6  | 12 | 596  | 607  | CATACTTCCACCGCCTTCAT       |
| scaffold656456_16.6 | 1 p2 | (CA)6  | 12 | 478  | 489  | CAAGCACACCTACACGCACT       |
| scaffold656509_12.9 | 1 p2 | (TA)7  | 14 | 1033 | 1046 | TTCAGGGAATCTTCGAATAAAAA    |
| scaffold656749_11.6 | 1 p2 | (AG)7  | 14 | 394  | 407  | TGAGGCTTGTGGTTCAGGTT       |
| scaffold656932_15.8 | 1 p2 | (AT)7  | 14 | 396  | 409  | GGTTCGGGCATAATGACATC       |
| scaffold656980_13.8 | 1 p2 | (AT)8  | 16 | 586  | 601  | ATTTGGCCCTTGCAAGTATG       |
| scaffold656991_12.7 | 1 p2 | (GA)6  | 12 | 657  | 668  | AAAACCAAGGATATCGGCCT       |
| scaffold657127_15.8 | 1 p2 | (TC)7  | 14 | 211  | 224  | TCTCCCCCGTAAACAGAAT        |
| scaffold657140_16.8 | 1 p2 | (TA)7  | 14 | 79   | 92   | ATGTATGGCCCAGATTGGTT       |
| scaffold657167_16.0 | 1 p2 | (GC)6  | 12 | 180  | 191  | CCAATATCAGGTAAGGGCA        |
| scaffold657174_10.6 | 1 p2 | (AT)7  | 14 | 210  | 223  | TGTTGGGATGAAATGTGAGG       |
| scaffold657226_15.5 | 1 p2 | (TG)6  | 12 | 357  | 368  | GGATATGAAGTGGGAGCCAA       |
| scaffold657239_12.4 | 1 p2 | (AT)6  | 12 | 587  | 598  | TGCCACCAAATCAAATCCT        |
| scaffold657300_13.1 | 1 p2 | (AT)6  | 12 | 265  | 276  | TCAAACCTGTCAATCACCA        |
| scaffold657457_15.8 | 1 p2 | (TA)7  | 14 | 123  | 136  | CCAATTTGCCCTTATATGC        |
| scaffold657464_17.1 | 1 p2 | (TA)8  | 16 | 381  | 396  | AAAATCAATTCGCGATCACA       |
| scaffold657480_14.1 | 1 p2 | (TC)7  | 14 | 655  | 668  | TGCTGCAAGCTTAAGAAACAA      |
| scaffold657509_20.6 | 1 p2 | (AC)6  | 12 | 185  | 196  | TCTTTTTCGAACCGAACCAC       |
| scaffold657551_13.3 | 1 p2 | (TC)6  | 12 | 97   | 108  | GGGACTGCTGGATAATCCCT       |
| scaffold657567_15.2 | 1 p2 | (AT)8  | 16 | 176  | 191  | ACTAACTAGACCGGGCCGT        |



|                     |      |        |    |      |      |                           |
|---------------------|------|--------|----|------|------|---------------------------|
| scaffold657618_15.6 | 1 p2 | (TA)6  | 12 | 1078 | 1089 | TGATTCTGGGTTTCCAGTCC      |
| scaffold657644_15.7 | 1 p2 | (TA)8  | 16 | 2350 | 2365 | AACACCAACATGCTGACGAA      |
| scaffold657865_13.9 | 1 p2 | (AG)7  | 14 | 111  | 124  | AACCTCTCGTGTCCAACAT       |
| scaffold657937_10.9 | 1 p2 | (AT)6  | 12 | 303  | 314  | GAATCGTCCCAAATTCCTT       |
| scaffold657960_15.2 | 1 p2 | (TA)13 | 26 | 652  | 677  | GTTTGGCCTCACTGGTGATT      |
| scaffold657986_10.4 | 1 p2 | (TC)8  | 16 | 684  | 699  | TCAAAATTGGCACGATACGA      |
| scaffold658006_15.4 | 1 p2 | (AT)7  | 14 | 431  | 444  | TCACAACCAAAATCTTGCTCA     |
| scaffold658023_12.2 | 1 p2 | (AT)6  | 12 | 1149 | 1160 | ACCATTCAACGCAACCATT       |
| scaffold658056_12.5 | 1 p2 | (AG)9  | 18 | 1155 | 1172 | ATGCTGCTGTTTTCCATTCC      |
| scaffold658065_10.6 | 1 p2 | (TA)8  | 16 | 94   | 109  | AAATCATTGCTTGAGCTTGAA     |
| scaffold658104_14.8 | 1 p2 | (TA)8  | 16 | 393  | 408  | TCAATCCAAACTCTATTTTATCCGA |
| scaffold658132_19.7 | 1 p2 | (TG)9  | 18 | 68   | 85   | AGACCTGTCACCGTTTTGCT      |
| scaffold658174_11.6 | 1 p2 | (TA)8  | 16 | 67   | 82   | TTTTAGTTATCACAGGATCACCC   |
| scaffold658195_16.9 | 1 p2 | (GA)10 | 20 | 3944 | 3963 | ACTTGGCCACAAGAACAAG       |
| scaffold658213_16.2 | 1 p2 | (AT)6  | 12 | 213  | 224  | ACGGCCAATATTTGCTCCTA      |
| scaffold658298_15.9 | 1 p2 | (AG)6  | 12 | 1011 | 1022 | GTGCTAACGATTTTTCCCCA      |
| scaffold658309_17.9 | 1 p2 | (CT)6  | 12 | 241  | 252  | CACCGATGTTGAGGCCTACT      |
| scaffold658334_14.5 | 1 p2 | (TA)9  | 18 | 325  | 342  | CATGGACGAAAATAGCCTCC      |
| scaffold658337_15.2 | 1 p2 | (CT)6  | 12 | 213  | 224  | GTTTGCTGCTGCTGTTGTGT      |
| scaffold658430_15.2 | 1 p2 | (TA)6  | 12 | 2110 | 2121 | CCATGCGCGGTCTAAATAAT      |
| scaffold658441_17.4 | 1 p2 | (TA)9  | 18 | 39   | 56   | TTTAGTGTTTTGACATGACTACTCG |
| scaffold658444_13.8 | 1 p2 | (TC)6  | 12 | 96   | 107  | GGACCTCTGGACAATCCCTT      |
| scaffold658485_10.2 | 1 p2 | (TG)8  | 16 | 153  | 168  | CAGTGTACAACCCCGGAATC      |
| scaffold658489_14.6 | 1 p2 | (TA)10 | 20 | 63   | 82   | CTACAACATCATGCAAATCAATAGT |
| scaffold658580_16.0 | 1 p2 | (AG)8  | 16 | 1536 | 1551 | TATGGATTTAACTCCCCGCA      |
| scaffold658666_18.0 | 1 p2 | (AT)8  | 16 | 320  | 335  | CAAGAACGAGAGGGTCAAGG      |
| scaffold658747_14.6 | 1 p2 | (AT)6  | 12 | 154  | 165  | CAGCTCCAAGACATTCCACA      |
| scaffold658755_11.2 | 1 p2 | (TA)9  | 18 | 384  | 401  | GACAAATGTGGCGTATGCTG      |
| scaffold659005_13.2 | 1 p2 | (AT)6  | 12 | 430  | 441  | GCATTCTTTCCCATCTTCA       |
| scaffold659011_13.5 | 1 p2 | (AT)6  | 12 | 293  | 304  | TGCTCTAATATTCGGCCGTT      |
| scaffold659016_17.0 | 1 p2 | (TA)8  | 16 | 243  | 258  | TTCGGAGCATGAATTAAGTGG     |
| scaffold659045_14.6 | 1 p2 | (AC)6  | 12 | 49   | 60   | ATTGGCATATGTCCCAAGA       |
| scaffold659106_11.2 | 1 p2 | (AT)9  | 18 | 465  | 482  | TGACCCAGCCTTTTTAGGATT     |
| scaffold659244_13.2 | 1 p2 | (CT)7  | 14 | 1422 | 1435 | ATCCAACGGATGAAAAGCTG      |
| scaffold659245_11.5 | 1 p2 | (TA)10 | 20 | 577  | 596  | TTGCAAAGAAATTGCTTAGCTT    |
| scaffold659261_15.9 | 1 p2 | (TC)6  | 12 | 882  | 893  | TTTGTGCCTCTGATCCCAAT      |
| scaffold659327_14.9 | 1 p2 | (AG)8  | 16 | 160  | 175  | TTGCAGCTGGAAATGAAGAA      |
| scaffold659357_15.2 | 1 p2 | (TC)7  | 14 | 2678 | 2691 | CAACCTTTGAAGACTCCGTCA     |
| scaffold659374_10.9 | 1 p2 | (TA)8  | 16 | 58   | 73   | ATGGATGGAGTCAAAGCCAA      |
| scaffold659386_13.7 | 1 p2 | (TA)7  | 14 | 1104 | 1117 | CGAAAATTCGGATCGGCTA       |
| scaffold659439_17.5 | 1 p2 | (TG)7  | 14 | 212  | 225  | GGTTAGGAATGCATTAATACCAA   |
| scaffold659440_14.2 | 1 p2 | (AT)7  | 14 | 1510 | 1523 | ACCATACGTAACGCCCAAAT      |
| scaffold659527_13.2 | 1 p2 | (AT)6  | 12 | 215  | 226  | TGCATTCATCAATTTTTGGAG     |
| scaffold659558_17.6 | 1 p2 | (TC)8  | 16 | 210  | 225  | CACTCTCTCACCTTCCATCCA     |
| scaffold659629_16.5 | 1 p2 | (CT)6  | 12 | 207  | 218  | AGCCTCCCTCTCTTGCTCTC      |
| scaffold659662_17.2 | 1 p2 | (TA)6  | 12 | 193  | 204  | CGAAGAGCACACTTTTTGG       |
| scaffold659736_14.7 | 1 p2 | (TA)7  | 14 | 416  | 429  | GATCTCGAGCTCAAATCCCA      |
| scaffold659753_12.8 | 1 p2 | (TC)6  | 12 | 203  | 214  | AAAGTTTTCCGCATGAATGG      |
| scaffold659805_15.6 | 1 p2 | (GT)8  | 16 | 1118 | 1133 | AAGGCACTCTGGGCTTGTA       |
| scaffold659937_10.3 | 1 p2 | (TG)8  | 16 | 762  | 777  | TCTGTTTCCCCACACAAACA      |
| scaffold660036_15.7 | 1 p2 | (CT)7  | 14 | 168  | 181  | GTGGGTCGTAGCCTGACTGT      |
| scaffold660056_18.0 | 1 p2 | (AG)6  | 12 | 2900 | 2911 | TTAGTGCCGAAATCGTAGGG      |
| scaffold660074_12.4 | 1 p2 | (AT)8  | 16 | 467  | 482  | AAATTAATCAACGATGGGCG      |
| scaffold660140_19.0 | 1 p2 | (TA)6  | 12 | 496  | 507  | AGATCGACGGTCCGAAATTA      |
| scaffold660174_16.8 | 1 p2 | (TA)7  | 14 | 335  | 348  | TCAGAGTGGCCATAGCAGAA      |
| scaffold660202_12.7 | 1 p2 | (AT)10 | 20 | 494  | 513  | CCGAAAATCTAAAGCCACA       |
| scaffold660241_14.5 | 1 p2 | (AC)6  | 12 | 2974 | 2985 | GTTTCGATGGACCTCGATCAT     |
| scaffold660258_15.7 | 1 p2 | (TC)6  | 12 | 1240 | 1251 | AGCAGAATGCAGTTGTTGGA      |

|                     |      |        |    |      |                              |
|---------------------|------|--------|----|------|------------------------------|
| scaffold660285_15.2 | 1 p2 | (TA)6  | 12 | 80   | 91 GGAAATAAGGAGGTGTTATGATGTG |
| scaffold660330_14.5 | 1 p2 | (AT)12 | 24 | 1748 | 1771 ATGAACTGCTAGAACGTGCG    |
| scaffold660380_11.5 | 1 p2 | (TA)6  | 12 | 59   | 70 TAGGCCGGTCTTTTAGCCTT      |
| scaffold660509_14.6 | 1 p2 | (CT)6  | 12 | 172  | 183 TTCAGCATTGTAAGGGGGAC     |
| scaffold660520_17.5 | 1 p2 | (TA)6  | 12 | 89   | 100 TTGCACCAATAAAATTTGGC     |
| scaffold660551_15.9 | 1 p2 | (TC)9  | 18 | 5572 | 5589 ACAGGGGATTGGTAATGCAA    |
| scaffold660572_14.8 | 1 p2 | (TA)6  | 12 | 341  | 352 ATTCCGAATATCAAAGGCC      |
| scaffold660599_15.8 | 1 p2 | (CT)8  | 16 | 772  | 787 GTCACACAAGCTTGACTCGG     |
| scaffold660640_10.5 | 1 p2 | (TA)6  | 12 | 530  | 541 CGTAAATTGTTGCAACCGAG     |
| scaffold660778_13.6 | 1 p2 | (TG)6  | 12 | 644  | 655 GGTTTTGGATTTTGAGGGGT     |
| scaffold660792_10.9 | 1 p2 | (TA)8  | 16 | 141  | 156 AGAGCCCTTCAATGGACAAT     |
| scaffold660953_19.2 | 1 p2 | (AT)8  | 16 | 163  | 178 AACGGTACGTTCCGATTTTG     |
| scaffold660956_11.4 | 1 p2 | (CA)6  | 12 | 692  | 703 GCCCAACTTATTTGGATATTTGA  |
| scaffold660967_11.0 | 1 p2 | (AT)10 | 20 | 315  | 334 CCCAGTTAAGAGCGTTGGAG     |
| scaffold660979_10.4 | 1 p2 | (AT)10 | 20 | 513  | 532 CACTTCTCGGAACGAACAAA     |
| scaffold661005_11.7 | 1 p2 | (TA)7  | 14 | 312  | 325 TGCTCGTTTTTAACCCGATT     |
| scaffold661093_10.2 | 1 p2 | (AC)8  | 16 | 525  | 540 GGGCTCTATGGATGTGGCTA     |
| scaffold661135_14.4 | 1 p2 | (AT)9  | 18 | 1035 | 1052 CGTGTTCATCCAAACAAATGC   |
| scaffold661140_14.6 | 1 p2 | (TC)6  | 12 | 521  | 532 ACCAGAGTCCACCACCACTC     |
| scaffold661177_12.2 | 1 p2 | (TA)7  | 14 | 338  | 351 TTGGTCTGATCTGTCTACCC     |
| scaffold661193_10.5 | 1 p2 | (TA)7  | 14 | 421  | 434 ACCTTCCTTTCCGTTCTCTGT    |
| scaffold661212_18.5 | 1 p2 | (AT)7  | 14 | 371  | 384 CTCCCAAATTTAGCCGATTG     |
| scaffold661257_13.6 | 1 p2 | (TA)10 | 20 | 417  | 436 GCCACACATGTCAGAAATGAA    |
| scaffold661277_15.6 | 1 p2 | (TC)8  | 16 | 1647 | 1662 ATTTCTGCTCACTGCCTCGT    |
| scaffold661349_15.2 | 1 p2 | (CT)6  | 12 | 2951 | 2962 CCAAATTAAGGTCATATTGCACA |
| scaffold661367_14.4 | 1 p2 | (CT)8  | 16 | 1011 | 1026 GCGAAGTCAAACCACCAGAT    |
| scaffold661368_13.9 | 1 p2 | (GA)7  | 14 | 942  | 955 CTCGCCCTTGGATGAAATA      |
| scaffold661496_19.7 | 1 p2 | (AT)9  | 18 | 640  | 657 CGAATAGTAGCTTCTGCGGG     |
| scaffold661542_12.5 | 1 p2 | (TC)8  | 16 | 429  | 444 ACTTTTGCGCACACAGTCAC     |
| scaffold661555_16.9 | 1 p2 | (TC)9  | 18 | 317  | 334 TTCAAATCCCACAAACGTCA     |
| scaffold661572_12.2 | 1 p2 | (TA)10 | 20 | 142  | 161 ACGCCCCAGATTGTTTCTTA     |
| scaffold661591_15.0 | 1 p2 | (GT)9  | 18 | 2562 | 2579 CACTGGTCCGAGTTCTCCAT    |
| scaffold661625_15.2 | 1 p2 | (TA)6  | 12 | 217  | 228 TGAGGAAGTTGATTTGTTGGG    |
| scaffold661702_11.5 | 1 p2 | (CT)7  | 14 | 215  | 228 CGCCGCTTTTTACGATACTT     |
| scaffold661748_17.8 | 1 p2 | (AT)6  | 12 | 164  | 175 CGAACTAAAGAAATAGGGACGC   |
| scaffold661831_17.2 | 1 p2 | (TC)9  | 18 | 3161 | 3178 CTGATAGGCCAACTGTGCAA    |
| scaffold661849_18.4 | 1 p2 | (AG)6  | 12 | 427  | 438 TCATGGGGAATTCAAAGAGG     |
| scaffold661862_13.2 | 1 p2 | (GC)8  | 16 | 333  | 348 ACGTGTGCTGACTTGTCCAC     |
| scaffold661917_17.5 | 1 p2 | (AG)8  | 16 | 213  | 228 TCGACAAAGAAATCATCGGA     |
| scaffold661993_10.4 | 1 p2 | (TA)6  | 12 | 65   | 76 GGTTATCACCTGATTTTCTCCC    |
| scaffold662039_16.0 | 1 p2 | (AC)8  | 16 | 212  | 227 GCAAATATGATATGCCTGCAA    |
| scaffold662040_15.2 | 1 p2 | (AT)7  | 14 | 214  | 227 CAAGGGTAATCCCAAACCTT     |
| scaffold662046_17.4 | 1 p2 | (TA)7  | 14 | 188  | 201 AACCACAAAAGGATAAGTGGG    |
| scaffold662102_10.4 | 1 p2 | (TA)11 | 22 | 406  | 427 TGAAACGGACAACAAACGAA     |
| scaffold662152_15.9 | 1 p2 | (GA)7  | 14 | 5827 | 5840 TTGCTCTTGCTCCAACACAC    |
| scaffold662159_16.2 | 1 p2 | (TG)8  | 16 | 1100 | 1115 CGTTTTTCAGACAAGCCCAT    |
| scaffold662316_11.3 | 1 p2 | (AG)11 | 22 | 594  | 615 GCTGGCAGCTTCAACAGATA     |
| scaffold662321_18.0 | 1 p2 | (AT)6  | 12 | 66   | 77 GGTTTTGATGGTTGTGATTTGTT   |
| scaffold662371_11.3 | 1 p2 | (AG)8  | 16 | 51   | 66 AACCTTGAGTCCCTTCTCC       |
| scaffold662396_13.7 | 1 p2 | (TA)11 | 22 | 817  | 838 TGGACCCCGATTTATAGGT      |
| scaffold662403_14.2 | 1 p2 | (TA)7  | 14 | 535  | 548 CCGAAACGTGAATACCCCTA     |
| scaffold662426_14.2 | 1 p2 | (TC)8  | 16 | 845  | 860 ATGGCTGTTGGCTTAATTGG     |
| scaffold662496_17.9 | 1 p2 | (AG)7  | 14 | 994  | 1007 GCTTTACACTCCCCTCTCC     |
| scaffold662571_14.5 | 1 p2 | (GT)6  | 12 | 217  | 228 CGCGTTTAGAAAAGGGAAGA     |
| scaffold662579_14.5 | 1 p2 | (TA)6  | 12 | 76   | 87 TTTATCGTGGTGCATGTTTTT     |
| scaffold662648_16.9 | 1 p2 | (AC)6  | 12 | 3585 | 3596 AACTCCAAGTTTGCCTTTG     |
| scaffold662656_14.6 | 1 p2 | (AT)9  | 18 | 525  | 542 TGTGAATTTTCAGATTGTGTTTT  |
| scaffold662674_14.9 | 1 p2 | (AG)6  | 12 | 454  | 465 CCTTCTCAAAGACCGTCTGC     |

|                     |      |        |    |      |      |                          |
|---------------------|------|--------|----|------|------|--------------------------|
| scaffold662838_14.0 | 1 p2 | (GT)6  | 12 | 282  | 293  | ACATTAATGCAGCCGCTCT      |
| scaffold662895_16.4 | 1 p2 | (TC)6  | 12 | 330  | 341  | GCAAATGGTTCACATGGTTG     |
| scaffold662904_11.0 | 1 p2 | (AT)10 | 20 | 259  | 278  | ACCTCGGCACATTTACCAAA     |
| scaffold662955_14.4 | 1 p2 | (AT)8  | 16 | 580  | 595  | CAGTTTTGCTATCGTTTATCTTCG |
| scaffold662973_16.3 | 1 p2 | (CT)7  | 14 | 283  | 296  | ATTATTTTGCGGTTCCAACG     |
| scaffold662997_17.4 | 1 p2 | (AT)7  | 14 | 310  | 323  | TCCAGCCCTAATATTGCACA     |
| scaffold663009_14.1 | 1 p2 | (GT)7  | 14 | 1382 | 1395 | AAACAGGGGTACAAGGGTGA     |
| scaffold663218_17.2 | 1 p2 | (AG)6  | 12 | 2039 | 2050 | TTTTAACAATGCTGCACTCCC    |
| scaffold663350_18.1 | 1 p2 | (TG)10 | 20 | 38   | 57   | TGGTTTTGAAAGTGTGATCTGG   |
| scaffold663359_11.4 | 1 p2 | (TA)7  | 14 | 351  | 364  | AACGGGAGAATCGTGTCAATC    |
| scaffold663399_12.9 | 1 p2 | (AT)9  | 18 | 64   | 81   | TGGATTATCCTGCGGTCACT     |
| scaffold663403_13.9 | 1 p2 | (TG)6  | 12 | 484  | 495  | TCCTCAAGATTGTGCAACCA     |
| scaffold663406_17.1 | 1 p2 | (TG)7  | 14 | 3357 | 3370 | GGCCATCTATCCCTATCCGT     |
| scaffold663423_10.8 | 1 p2 | (TC)6  | 12 | 347  | 358  | GAGACGCGCAAAAGTAGGAC     |
| scaffold663438_15.2 | 1 p2 | (TC)7  | 14 | 3286 | 3299 | TGTCCTCCTTTCCTCTGCAT     |
| scaffold663450_18.0 | 1 p2 | (GA)7  | 14 | 162  | 175  | AATGATAAATCGCGGGTTTG     |
| scaffold663537_13.6 | 1 p2 | (CA)6  | 12 | 1026 | 1037 | CGGTGTAAAGGAGGGGTGTA     |
| scaffold663564_13.3 | 1 p2 | (AG)8  | 16 | 91   | 106  | ACTTCTCCCAAGGCACTCA      |
| scaffold663582_10.6 | 1 p2 | (AT)6  | 12 | 265  | 276  | TGAATCAATTTAACATCATGCAAT |
| scaffold663786_15.2 | 1 p2 | (AG)11 | 22 | 114  | 135  | TGTGAGAGAGTGCCTGTGTG     |
| scaffold663797_18.3 | 1 p2 | (AG)8  | 16 | 983  | 998  | TTCCTTGCACTGGGAAAAAG     |
| scaffold663905_10.5 | 1 p2 | (AG)8  | 16 | 218  | 233  | ACATCAACCGTTCACCACAA     |
| scaffold663921_10.9 | 1 p2 | (AG)7  | 14 | 286  | 299  | GTAGAGGGAGTTGGGGTGT      |
| scaffold663933_15.8 | 1 p2 | (TA)6  | 12 | 219  | 230  | TTATTGAGCGCCATTGATGA     |
| scaffold663948_12.7 | 1 p2 | (TA)7  | 14 | 54   | 67   | ACTTTTAAGGATCAAGGATATTCG |
| scaffold664014_15.7 | 1 p2 | (TA)7  | 14 | 217  | 230  | TTGGTCTAAATTGCCCGTA      |
| scaffold664105_11.9 | 1 p2 | (AG)7  | 14 | 345  | 358  | AGGGGTGGAGGTAAGAGGAA     |
| scaffold664154_13.5 | 1 p2 | (CT)13 | 26 | 809  | 834  | ATCCACGCTGCAGAGAACT      |
| scaffold664159_12.8 | 1 p2 | (TC)6  | 12 | 531  | 542  | TGACCAATAGGATGTTGCCA     |
| scaffold664160_14.2 | 1 p2 | (CA)10 | 20 | 6773 | 6792 | CCATGAATGGAAAATGGAGG     |
| scaffold664189_13.1 | 1 p2 | (TA)7  | 14 | 889  | 902  | AAAAGTCACGCTTGAACCAT     |
| scaffold664247_13.3 | 1 p2 | (AG)7  | 14 | 1170 | 1183 | CCAATGGGTGACCAGTCTTT     |
| scaffold664315_13.1 | 1 p2 | (AT)6  | 12 | 169  | 180  | GTTCGAACCGAACCATGAAC     |
| scaffold664326_11.4 | 1 p2 | (TC)7  | 14 | 1407 | 1420 | ATTGCCATTACCATTCCCAA     |
| scaffold664330_16.9 | 1 p2 | (TG)6  | 12 | 734  | 745  | GATTTTTGGAGGGTCTTGC      |
| scaffold664383_17.4 | 1 p2 | (TG)8  | 16 | 35   | 50   | CAGGAGACGCTCATTATCA      |
| scaffold664386_14.7 | 1 p2 | (AT)9  | 18 | 198  | 215  | CATCCACTCTGAAGTTTGAACAG  |
| scaffold664387_15.8 | 1 p2 | (AT)6  | 12 | 1567 | 1578 | GGACCAGGATTAGCCCAACT     |
| scaffold664457_13.4 | 1 p2 | (AT)8  | 16 | 1576 | 1591 | TCATAAGGCCCACTTCAACC     |
| scaffold664496_16.5 | 1 p2 | (GA)7  | 14 | 725  | 738  | GGGGTTCCCTTACCTTTTG      |
| scaffold664502_15.9 | 1 p2 | (AG)8  | 16 | 5903 | 5918 | TTTTCGGGAATCTTTCATGC     |
| scaffold664615_11.7 | 1 p2 | (AG)8  | 16 | 280  | 295  | CAAAAAGGTCCCAGGTTCAA     |
| scaffold664631_16.8 | 1 p2 | (AT)9  | 18 | 214  | 231  | GGGATTGAACGCACAAAAT      |
| scaffold664766_20.5 | 1 p2 | (AT)6  | 12 | 1492 | 1503 | AAATGAACGTAGCAAAGGGG     |
| scaffold664869_14.1 | 1 p2 | (TC)6  | 12 | 46   | 57   | TCTCTCTATCTTTTTGGTTGGTGA |
| scaffold664897_18.6 | 1 p2 | (GA)6  | 12 | 154  | 165  | CGGACCGTGAAAGCTCTAAG     |
| scaffold664907_17.0 | 1 p2 | (AG)6  | 12 | 359  | 370  | ACTAATGGATATGCGGCGAG     |
| scaffold664910_16.3 | 1 p2 | (GA)6  | 12 | 1241 | 1252 | CAGATTAGGAGATTTGGGCG     |
| scaffold664920_18.6 | 1 p2 | (TA)8  | 16 | 94   | 109  | GCCGATTTTGTCCCTATTT      |
| scaffold664926_14.2 | 1 p2 | (CT)6  | 12 | 219  | 230  | TTTGTGTCCCTGAAAGAGGTG    |
| scaffold664948_14.8 | 1 p2 | (AT)8  | 16 | 215  | 230  | CACGACAAGAATCCAGCTCA     |
| scaffold665028_13.0 | 1 p2 | (AT)8  | 16 | 1230 | 1245 | GCCGAGAAGAGGAAGTGTG      |
| scaffold665075_14.5 | 1 p2 | (TA)7  | 14 | 1305 | 1318 | AGATTACGAGAAGGAGGCGG     |
| scaffold665117_15.2 | 1 p2 | (TA)7  | 14 | 366  | 379  | TGACACGTGGCGTAATCTTC     |
| scaffold665132_10.5 | 1 p2 | (TC)8  | 16 | 167  | 182  | AGAAGACACTTGGGCCTGAA     |
| scaffold665149_15.7 | 1 p2 | (CT)8  | 16 | 2361 | 2376 | TGGTTCGCATTTCAATCTCA     |
| scaffold665165_10.7 | 1 p2 | (TA)8  | 16 | 278  | 293  | AAAGGCTGCATGAGAGAGGA     |
| scaffold665219_10.7 | 1 p2 | (AC)6  | 12 | 262  | 273  | AATGATCCGTTTTTGCCAAG     |

|                     |      |        |    |      |                                |
|---------------------|------|--------|----|------|--------------------------------|
| scaffold665336_18.6 | 1 p2 | (GA)8  | 16 | 981  | 996 TGCTCGAAAGTTGCAACAGA       |
| scaffold665356_15.4 | 1 p2 | (AC)7  | 14 | 392  | 405 TCCAGCCCATTCTTATTTGG       |
| scaffold665372_14.9 | 1 p2 | (CT)6  | 12 | 1058 | 1069 GACGTTGAAAGGAGAGCGAC      |
| scaffold665397_11.9 | 1 p2 | (TA)9  | 18 | 331  | 348 TATCCAGCAGCAACATCTCG       |
| scaffold665399_11.7 | 1 p2 | (AT)7  | 14 | 116  | 129 AAGGAGGTGTTATGAAGGGAG      |
| scaffold665474_15.4 | 1 p2 | (CT)8  | 16 | 588  | 603 TGAAATCCTTTTTCGATTCCG      |
| scaffold665507_14.2 | 1 p2 | (TC)9  | 18 | 819  | 836 CCAAACCCAGTACCAGCATT       |
| scaffold665527_17.7 | 1 p2 | (GA)6  | 12 | 2165 | 2176 CGTCAATCCAGAAGCACTGA      |
| scaffold665568_16.9 | 1 p2 | (AG)7  | 14 | 73   | 86 ACGTGGGTTTACTCAGAGCG        |
| scaffold665596_16.4 | 1 p2 | (AC)7  | 14 | 715  | 728 CGCAGTAATAGCATGCCAAA       |
| scaffold665636_14.5 | 1 p2 | (TC)6  | 12 | 293  | 304 CTTTTCTTCCGACTGCAAAA       |
| scaffold665696_16.2 | 1 p2 | (AG)9  | 18 | 341  | 358 CCACCACTCGAAATATGGCT       |
| scaffold665728_15.1 | 1 p2 | (GA)6  | 12 | 1929 | 1940 ACCGTGGCATCGAAGATTAG      |
| scaffold665858_15.7 | 1 p2 | (AT)6  | 12 | 220  | 231 AAACCAATGCGAGGTAGGTG       |
| scaffold665866_12.1 | 1 p2 | (TA)8  | 16 | 49   | 64 TTTTAAAGTTATCGGTGATGACACA   |
| scaffold665915_18.4 | 1 p2 | (GA)9  | 18 | 4226 | 4243 GGTCATGGACGATAGCTGGT      |
| scaffold665930_15.0 | 1 p2 | (TA)7  | 14 | 178  | 191 CACCCCGACGTAGATTGAGT       |
| scaffold665969_11.0 | 1 p2 | (TA)10 | 20 | 44   | 63 GCGTTTTGATGATATATATGTGTTTTG |
| scaffold665982_15.1 | 1 p2 | (CT)8  | 16 | 211  | 226 GTATCGCTGCAAAAAGCACA       |
| scaffold666110_12.8 | 1 p2 | (AT)7  | 14 | 707  | 720 TCCACCCAAAAACCGAATAA       |
| scaffold666116_11.8 | 1 p2 | (AT)6  | 12 | 157  | 168 CTTTGTGAATGAAATGGTTGCT     |
| scaffold666151_12.6 | 1 p2 | (AG)6  | 12 | 221  | 232 CACCCTCCACACATCAAAT        |
| scaffold666222_12.6 | 1 p2 | (TC)6  | 12 | 304  | 315 TTTCTACGACAACCCTTCG        |
| scaffold666249_11.0 | 1 p2 | (GT)6  | 12 | 459  | 470 ACTCCTCGGGACGGTTTACT       |
| scaffold666250_15.0 | 1 p2 | (CA)6  | 12 | 2556 | 2567 TGTCATGCAGGATTAGTCG       |
| scaffold666291_15.5 | 1 p2 | (TC)6  | 12 | 924  | 935 AGCTCCGACTTTGTTGTGGT       |
| scaffold666402_15.5 | 1 p2 | (GA)9  | 18 | 440  | 457 TGCACACCCGATTAATACCA       |
| scaffold666450_10.9 | 1 p2 | (AT)6  | 12 | 106  | 117 TGGGTTTTGTAATTTGACCCA      |
| scaffold666501_10.5 | 1 p2 | (TA)11 | 22 | 317  | 338 TAACCCGAATGCTGTTAGC        |
| scaffold666646_13.2 | 1 p2 | (AG)6  | 12 | 722  | 733 CTCAGCTCAGGGTGGAGAAA       |
| scaffold666658_15.2 | 1 p2 | (AT)6  | 12 | 307  | 318 CATAAACCTCACTCCGAGC        |
| scaffold666672_11.8 | 1 p2 | (TA)8  | 16 | 573  | 588 GGCCAACTGAAGTTGATCGT       |
| scaffold666700_15.3 | 1 p2 | (TA)7  | 14 | 241  | 254 AAAATGCCCTTGATGCTGC        |
| scaffold666709_17.5 | 1 p2 | (AC)6  | 12 | 1685 | 1696 AGCGAAAGACAGAGCAAAGC      |
| scaffold666755_12.3 | 1 p2 | (AT)9  | 18 | 370  | 387 AGTTTGGGGGAGGAGAAAGA       |
| scaffold666761_13.0 | 1 p2 | (CT)8  | 16 | 378  | 393 ATAAAAATGACACTCGGCGG       |
| scaffold666816_16.2 | 1 p2 | (TA)6  | 12 | 257  | 268 GGCAACCAATTTTCTCTCTGC      |
| scaffold666849_19.6 | 1 p2 | (AG)6  | 12 | 221  | 232 GGCAAACACAAAGACACGAA       |
| scaffold666869_12.2 | 1 p2 | (TA)7  | 14 | 495  | 508 CCCTTATAAATGCGCTTGAA       |
| scaffold666887_13.6 | 1 p2 | (AT)10 | 20 | 3071 | 3090 TCTTTTGCCTTTTCGAGAAT      |
| scaffold666913_14.8 | 1 p2 | (CA)6  | 12 | 257  | 268 AATGCCTTTTGTTCATCC         |
| scaffold667017_13.5 | 1 p2 | (AG)7  | 14 | 764  | 777 GTCCTGCCCTCTCATAGCTG       |
| scaffold667029_17.3 | 1 p2 | (CT)7  | 14 | 2632 | 2645 TTCTAGTCCACCCGACCAAG      |
| scaffold667096_11.5 | 1 p2 | (AG)7  | 14 | 110  | 123 CGTCCACAGTGGTTTGAGAG       |
| scaffold667118_10.9 | 1 p2 | (AT)8  | 16 | 582  | 597 GTCGATACGGCATGACACAC       |
| scaffold667119_17.6 | 1 p2 | (TC)6  | 12 | 3364 | 3375 AAATCTGGTGGCGATCAAAG      |
| scaffold667137_16.3 | 1 p2 | (AT)7  | 14 | 581  | 594 TCGGTCTGGGATTTTTATC        |
| scaffold667278_14.4 | 1 p2 | (TA)9  | 18 | 217  | 234 CGGGTCGAGAGAGGAGAAAT       |
| scaffold667292_14.1 | 1 p2 | (TA)8  | 16 | 49   | 64 TATGGGTTATCACCGATCG         |
| scaffold667335_14.6 | 1 p2 | (CA)7  | 14 | 1122 | 1135 CAACGAAAAGAGAGCCTTGC      |
| scaffold667425_16.2 | 1 p2 | (AT)7  | 14 | 928  | 941 AAATCAATGGCATCCACAT        |
| scaffold667434_14.8 | 1 p2 | (AT)7  | 14 | 894  | 907 TGGTGCGTGAAGGAGATATG       |
| scaffold667614_13.6 | 1 p2 | (CT)6  | 12 | 30   | 41 CTCTATAGCAAGATCTCACGCAG     |
| scaffold667616_20.2 | 1 p2 | (GA)6  | 12 | 203  | 214 TGGAGGTGAAGAGAGGGAGA       |
| scaffold667687_12.7 | 1 p2 | (TA)6  | 12 | 160  | 171 ATCATCCAACCCCATCCAT        |
| scaffold667728_10.1 | 1 p2 | (AC)7  | 14 | 103  | 116 CGCACACACTCTTGATTAC        |
| scaffold667853_14.0 | 1 p2 | (AG)8  | 16 | 395  | 410 GCGTGGAATTCACCTCAAAT       |
| scaffold667872_12.5 | 1 p2 | (AG)6  | 12 | 407  | 418 TCCGATTGGAATACTCACC        |

|                     |      |        |    |      |      |                             |
|---------------------|------|--------|----|------|------|-----------------------------|
| scaffold667876_13.4 | 1 p2 | (GA)7  | 14 | 508  | 521  | AGTACGGATTGATGGAACGG        |
| scaffold667889_12.7 | 1 p2 | (TC)7  | 14 | 782  | 795  | TTACGCCCTCTCCATTTTAC        |
| scaffold667971_14.4 | 1 p2 | (TC)7  | 14 | 49   | 62   | CGTAATGTTTTGGTGGGAAGA       |
| scaffold668030_12.6 | 1 p2 | (TA)6  | 12 | 69   | 80   | ACACAACCTTAGGTGTTCTCATTTG   |
| scaffold668036_14.4 | 1 p2 | (TA)6  | 12 | 377  | 388  | CTTTCGTCAAACCCTGCTTC        |
| scaffold668050_15.9 | 1 p2 | (GT)6  | 12 | 690  | 701  | TGAGCGCTATCATGGAGTTG        |
| scaffold668104_13.3 | 1 p2 | (TA)8  | 16 | 298  | 313  | TGATTGCACCTGAATAAGCC        |
| scaffold668212_15.4 | 1 p2 | (AG)7  | 14 | 1115 | 1128 | TGATTATAGATGCACGAGGAA       |
| scaffold668367_12.9 | 1 p2 | (TC)6  | 12 | 88   | 99   | AAACTTAGGGACCGCTGGAT        |
| scaffold668371_15.6 | 1 p2 | (TA)6  | 12 | 884  | 895  | GAAATTTGTGACCCACACCA        |
| scaffold668397_11.7 | 1 p2 | (AT)9  | 18 | 719  | 736  | CATGGACGAAAATAGCCTCA        |
| scaffold668449_11.3 | 1 p2 | (AC)9  | 18 | 218  | 235  | TCAATCATGACTGCTTTGGTTC      |
| scaffold668465_16.3 | 1 p2 | (AC)7  | 14 | 3748 | 3761 | CCCCCAAGATATTGCAACTG        |
| scaffold668495_19.9 | 1 p2 | (AG)7  | 14 | 661  | 674  | AGCACTCGTGTGGGATTTTC        |
| scaffold668537_16.0 | 1 p2 | (CT)7  | 14 | 417  | 430  | AGGCAATCTAGGCGACAATC        |
| scaffold668553_15.0 | 1 p2 | (TG)6  | 12 | 171  | 182  | TCGTGTTCTTCACTCATTCCA       |
| scaffold668562_16.4 | 1 p2 | (TC)7  | 14 | 2757 | 2770 | AAAAAGTGAGGAGCGGTGAA        |
| scaffold668623_13.1 | 1 p2 | (AT)6  | 12 | 814  | 825  | ACACCGATCCGTTCTACAC         |
| scaffold668765_17.2 | 1 p2 | (TC)6  | 12 | 238  | 249  | CCAGCCATTCAAATCAACCT        |
| scaffold668779_12.5 | 1 p2 | (TC)7  | 14 | 165  | 178  | TGATTAGGCAAGCAGTGGTG        |
| scaffold668788_16.8 | 1 p2 | (TG)7  | 14 | 2506 | 2519 | CCCTCCGCACCTATTATCAA        |
| scaffold668878_11.6 | 1 p2 | (AT)8  | 16 | 141  | 156  | TAAGGCAAGCAGTAAACGCC        |
| scaffold668909_13.3 | 1 p2 | (AT)6  | 12 | 2135 | 2146 | GCAAGGAATCTAACCTGCGA        |
| scaffold669015_10.3 | 1 p2 | (GT)6  | 12 | 526  | 537  | GTTGGCATTCAAATCAACCA        |
| scaffold669048_16.2 | 1 p2 | (TA)6  | 12 | 200  | 211  | TCGGGAAGAATATGAGTGCC        |
| scaffold669060_16.1 | 1 p2 | (TA)6  | 12 | 2048 | 2059 | TCACAATGGCAACTCAAAGC        |
| scaffold669075_17.0 | 1 p2 | (CT)9  | 18 | 3521 | 3538 | CAACGGTCTACTCAAACGGC        |
| scaffold669255_14.2 | 1 p2 | (AG)6  | 12 | 437  | 448  | GCCTTTCTTCATGCTTTCCA        |
| scaffold669313_13.8 | 1 p2 | (TA)6  | 12 | 570  | 581  | TTCGTGAATGACTACCCACG        |
| scaffold669325_15.1 | 1 p2 | (CA)8  | 16 | 1570 | 1585 | GCACAACGTATATCCCCTTTTC      |
| scaffold669364_10.4 | 1 p2 | (TA)7  | 14 | 473  | 486  | AAGGCCAACTCAAAGGGAG         |
| scaffold669386_15.8 | 1 p2 | (AC)7  | 14 | 3581 | 3594 | TCCATCCCCTGAAATAGCTG        |
| scaffold669405_16.1 | 1 p2 | (TG)6  | 12 | 509  | 520  | TGCACATTTAGGCTCTGACG        |
| scaffold669471_16.7 | 1 p2 | (AC)6  | 12 | 214  | 225  | CAACGTTGCTGCGTATGATT        |
| scaffold669491_15.7 | 1 p2 | (AT)8  | 16 | 220  | 235  | TACCGTGATTTCTTCCACC         |
| scaffold669505_12.2 | 1 p2 | (CT)6  | 12 | 923  | 934  | GCATTCTATCTCCTCTCCGC        |
| scaffold669507_13.4 | 1 p2 | (TA)8  | 16 | 316  | 331  | CATCAACAACACCATCACCC        |
| scaffold669749_10.2 | 1 p2 | (TA)7  | 14 | 301  | 314  | GACAGCATAACGCGCTCATT        |
| scaffold669837_11.6 | 1 p2 | (AT)8  | 16 | 173  | 188  | GTTCGAACTGTTGCATGTGG        |
| scaffold669859_15.4 | 1 p2 | (TA)6  | 12 | 225  | 236  | ACAAAAATGCCCTCGTATGC        |
| scaffold669901_16.0 | 1 p2 | (AG)6  | 12 | 665  | 676  | GGTGTGCTCGAATTTTTGGT        |
| scaffold669911_16.9 | 1 p2 | (TA)9  | 18 | 1646 | 1663 | GACAGCCGATATTTGCTCCT        |
| scaffold669928_16.0 | 1 p2 | (AT)6  | 12 | 495  | 506  | TGTTCTCTACTATATGTCATGTTTTGC |
| scaffold669944_12.9 | 1 p2 | (AG)6  | 12 | 458  | 469  | AAGAAAACGGCTGAGCAAGA        |
| scaffold669946_15.1 | 1 p2 | (AT)6  | 12 | 611  | 622  | AAAGAGCTTCTCCACACA          |
| scaffold669985_15.8 | 1 p2 | (AT)11 | 22 | 344  | 365  | ACCTTAACTTGCATGCACCC        |
| scaffold670069_14.9 | 1 p2 | (TA)6  | 12 | 91   | 102  | GGAATTGATTCCATGATAACCC      |
| scaffold670087_12.2 | 1 p2 | (TA)10 | 20 | 218  | 237  | TGCATGCAAGGAAAATGAAA        |
| scaffold670100_16.3 | 1 p2 | (AT)6  | 12 | 291  | 302  | AAAACCCCATATCTGTGGCA        |
| scaffold670133_13.8 | 1 p2 | (AT)9  | 18 | 563  | 580  | GAACCTCGAACCGTTGAGAC        |
| scaffold670140_16.2 | 1 p2 | (CA)11 | 22 | 549  | 570  | AGTCGGGCAAGTCTCCTACA        |
| scaffold670220_13.5 | 1 p2 | (AT)8  | 16 | 2228 | 2243 | CATCCCGCATCATAACAGAA        |
| scaffold670223_12.9 | 1 p2 | (CT)6  | 12 | 468  | 479  | AGCATGTGGTCCCTAACTCAA       |
| scaffold670348_14.5 | 1 p2 | (AT)6  | 12 | 1424 | 1435 | ACGTGTGCGTGTATCCATGA        |
| scaffold670349_11.6 | 1 p2 | (AT)8  | 16 | 428  | 443  | CATCCCAGTTATGTCAAGCG        |
| scaffold670379_14.5 | 1 p2 | (TC)6  | 12 | 1890 | 1901 | CCTTGGATTTTGACGCCTTA        |
| scaffold670403_15.0 | 1 p2 | (TA)9  | 18 | 47   | 64   | TTGGTTATCGCTTGAATGAGA       |
| scaffold670413_15.4 | 1 p2 | (AT)11 | 22 | 2873 | 2894 | AGCTCCTGCTGACTGAGAGC        |

|                     |      |        |    |      |      |                              |
|---------------------|------|--------|----|------|------|------------------------------|
| scaffold670447_16.0 | 1 p2 | (GA)7  | 14 | 2392 | 2405 | GTTTTCTGGAAGGGATGGT          |
| scaffold670575_15.8 | 1 p2 | (GT)7  | 14 | 1053 | 1066 | TCCTTGTTTTCGGATGTTCA         |
| scaffold670587_16.9 | 1 p2 | (TG)6  | 12 | 1592 | 1603 | TTCAGATGCTTGTTTTAGGTTCC      |
| scaffold670618_11.0 | 1 p2 | (AT)9  | 18 | 792  | 809  | AATGGCCGACACTGCTTTAC         |
| scaffold670620_14.2 | 1 p2 | (AT)10 | 20 | 99   | 118  | TTGTA AAAA CTTCCTATACATAACGC |
| scaffold670635_15.3 | 1 p2 | (GT)12 | 24 | 188  | 211  | GTCCCGGAATGAAGAAGTT          |
| scaffold670657_12.2 | 1 p2 | (AC)6  | 12 | 227  | 238  | TCAAATGTTGATCCAGCAGC         |
| scaffold670659_15.6 | 1 p2 | (CT)6  | 12 | 1499 | 1510 | CCCTCCATTTCTCAAACCTT         |
| scaffold670749_16.1 | 1 p2 | (AT)8  | 16 | 2482 | 2497 | ACAAATATCAGTAAAAATGCGCT      |
| scaffold670903_14.3 | 1 p2 | (TC)8  | 16 | 222  | 237  | CCATTTGTTTCAGCTCGTGA         |
| scaffold670924_11.2 | 1 p2 | (AT)10 | 20 | 875  | 894  | ACTTGGACCGTGAACACCTC         |
| scaffold671009_17.4 | 1 p2 | (CT)6  | 12 | 123  | 134  | AACACAAGGA ACTTGGGACG        |
| scaffold671066_12.4 | 1 p2 | (AT)6  | 12 | 122  | 133  | CCCAATTCTCCATCATTATTATTC     |
| scaffold671147_17.3 | 1 p2 | (CT)6  | 12 | 78   | 89   | CCACTCCATCACCATCACTG         |
| scaffold671158_17.1 | 1 p2 | (GA)6  | 12 | 733  | 744  | CCGAATCTCGAGCCTTAACA         |
| scaffold671163_13.2 | 1 p2 | (TC)8  | 16 | 560  | 575  | GTTGAGATTTGGACGGGAGA         |
| scaffold671215_11.1 | 1 p2 | (TA)6  | 12 | 443  | 454  | CCCCTACTTCCTCGTTCTCC         |
| scaffold671221_16.2 | 1 p2 | (TA)6  | 12 | 1334 | 1345 | TGCAAGATTTCAAATCGCAT         |
| scaffold671300_16.4 | 1 p2 | (CT)9  | 18 | 1043 | 1060 | TGAGGCAAGAAAAGTTTGTG         |
| scaffold671303_14.0 | 1 p2 | (AG)6  | 12 | 304  | 315  | TCGGCCAAGAAGAGAGAAAA         |
| scaffold671367_16.1 | 1 p2 | (CT)6  | 12 | 99   | 110  | TCACATACTCATGCAAGCACA        |
| scaffold671420_12.3 | 1 p2 | (TA)7  | 14 | 376  | 389  | TCCATCGTGAAAAACCTTCA         |
| scaffold671445_19.1 | 1 p2 | (TC)6  | 12 | 690  | 701  | GAAGCATGCGAGACATTTCA         |
| scaffold671534_17.2 | 1 p2 | (AT)6  | 12 | 3132 | 3143 | ACGCAATCGATCTTCCATTC         |
| scaffold671580_10.3 | 1 p2 | (GA)6  | 12 | 95   | 106  | TCATGGTTACGAACCTCCAA         |
| scaffold671623_13.5 | 1 p2 | (TA)8  | 16 | 223  | 238  | GTAATCTGTACCGTCCGCGT         |
| scaffold671650_15.6 | 1 p2 | (TA)8  | 16 | 1278 | 1293 | CCACTTGACATTTTTGCCCT         |
| scaffold671681_16.8 | 1 p2 | (TC)6  | 12 | 502  | 513  | CTCCTCAACACCACCACCTT         |
| scaffold671694_11.6 | 1 p2 | (AT)7  | 14 | 369  | 382  | ACCCTAATTGTTTCGGGCTT         |
| scaffold671706_18.1 | 1 p2 | (TA)8  | 16 | 105  | 120  | TCATTCCA ACTTTGTAATCAAGAAA   |
| scaffold671713_11.0 | 1 p2 | (GA)7  | 14 | 56   | 69   | GTGATGATAATAGGCGGCGT         |
| scaffold671745_17.8 | 1 p2 | (TA)9  | 18 | 84   | 101  | CCCAAGACCCCAATTTGATT         |
| scaffold671852_15.2 | 1 p2 | (AT)8  | 16 | 2673 | 2688 | GCAGTGCAACGCATAACAGT         |
| scaffold671918_10.0 | 1 p2 | (TG)7  | 14 | 152  | 165  | TGAATTGGCGTGAGTGTGTT         |
| scaffold671943_13.1 | 1 p2 | (AG)6  | 12 | 2757 | 2768 | ACGATGCCTATGATTCTCCG         |
| scaffold671978_17.7 | 1 p2 | (AT)8  | 16 | 556  | 571  | ATCAGGGACCCAACAACAAA         |
| scaffold672030_15.6 | 1 p2 | (TG)6  | 12 | 644  | 655  | TGTCATGGCAACAAACCCTA         |
| scaffold672054_14.4 | 1 p2 | (AT)6  | 12 | 795  | 806  | ATACCGTACCCTTCGCACC          |
| scaffold672080_17.3 | 1 p2 | (CT)7  | 14 | 71   | 84   | CTCCCTTGAGCAAAGTGGAC         |
| scaffold672088_16.1 | 1 p2 | (TC)7  | 14 | 1809 | 1822 | GGAGAAGTGCTGAAGGCAAC         |
| scaffold672101_14.4 | 1 p2 | (TA)6  | 12 | 302  | 313  | AAAATCCAACCATTACACG          |
| scaffold672112_13.7 | 1 p2 | (AT)6  | 12 | 524  | 535  | TAGAGGAGGAGAAGCACCGA         |
| scaffold672213_14.8 | 1 p2 | (TA)6  | 12 | 1458 | 1469 | AGCTTCCTCCACATACACCG         |
| scaffold672220_14.7 | 1 p2 | (TG)7  | 14 | 52   | 65   | TTGATTGAACTACATTACAACAAGTTT  |
| scaffold672287_15.1 | 1 p2 | (AG)6  | 12 | 228  | 239  | TTGGATTCCCAAGCTTTTTG         |
| scaffold672300_15.9 | 1 p2 | (TA)6  | 12 | 4800 | 4811 | TGATCCATTTTGTGGCAGA          |
| scaffold672315_13.5 | 1 p2 | (TA)9  | 18 | 103  | 120  | GTCTTCCGGAGTACGAGCTG         |
| scaffold672403_16.3 | 1 p2 | (TA)6  | 12 | 915  | 926  | AATCCTCGTAGCTCCCGTTT         |
| scaffold672414_13.5 | 1 p2 | (TA)6  | 12 | 53   | 64   | TTCGAATGCGGTTTATCACC         |
| scaffold672512_10.0 | 1 p2 | (GT)8  | 16 | 320  | 335  | CCGAATACTTTCTTTTGTAGGCTT     |
| scaffold672515_15.0 | 1 p2 | (AT)10 | 20 | 842  | 861  | CAATGCAGAGATGGACGAAA         |
| scaffold672575_18.7 | 1 p2 | (TA)7  | 14 | 176  | 189  | TAATGTTGCGTGGGCTTTTT         |
| scaffold672601_16.3 | 1 p2 | (AT)8  | 16 | 1661 | 1676 | TGATCATCCTGGAGTAAGATTGA      |
| scaffold672615_15.7 | 1 p2 | (AG)8  | 16 | 149  | 164  | AAATCAGTCTCCATCCGTGC         |
| scaffold672721_16.6 | 1 p2 | (AT)9  | 18 | 763  | 780  | ACCCTTGGTCGAATTCCATA         |
| scaffold672728_13.6 | 1 p2 | (TG)8  | 16 | 224  | 239  | GCGCAAACTTCCCTTTATTC         |
| scaffold672750_13.9 | 1 p2 | (TC)10 | 20 | 2252 | 2271 | GATGATGATCGGTGGAGGTC         |
| scaffold672758_13.0 | 1 p2 | (AG)6  | 12 | 229  | 240  | TCCAATCACCATTCAAGTG          |

|                     |      |        |    |      |      |                            |
|---------------------|------|--------|----|------|------|----------------------------|
| scaffold672763_16.9 | 1 p2 | (AC)6  | 12 | 43   | 54   | CCAGGATCGAATGGAGGATA       |
| scaffold672764_17.9 | 1 p2 | (TA)7  | 14 | 95   | 108  | ATTTTCGTTGGAGGAGGGTT       |
| scaffold672768_10.8 | 1 p2 | (TA)6  | 12 | 436  | 447  | GGCAAGCAAGGGAGTCTATG       |
| scaffold672816_16.4 | 1 p2 | (GA)7  | 14 | 227  | 240  | GATGGTAGAAGAAGCAGCGG       |
| scaffold672890_13.6 | 1 p2 | (AT)6  | 12 | 3678 | 3689 | AATTCAGCAAGAATGATAAATCG    |
| scaffold672894_17.5 | 1 p2 | (TC)6  | 12 | 229  | 240  | CCAAAAATTAAGGCCCAACA       |
| scaffold672967_12.9 | 1 p2 | (GA)6  | 12 | 3298 | 3309 | CAAACGTGTTGAAGATTGTTTACGG  |
| scaffold673055_15.9 | 1 p2 | (AG)8  | 16 | 372  | 387  | AAAAGGGCACAAACAGCAAT       |
| scaffold673080_12.7 | 1 p2 | (AT)9  | 18 | 467  | 484  | GTTTCGCGCAAACAATGTTAC      |
| scaffold673085_15.5 | 1 p2 | (CT)7  | 14 | 1074 | 1087 | TAATGGGTGTGGTGCTTTGA       |
| scaffold673093_16.3 | 1 p2 | (GA)7  | 14 | 401  | 414  | CAAATTGATCCAACGACACG       |
| scaffold673201_15.5 | 1 p2 | (GA)6  | 12 | 492  | 503  | GTTTCATCTCCGCCTTTGTGT      |
| scaffold673210_18.4 | 1 p2 | (TC)6  | 12 | 353  | 364  | TTTTCAGACACGGGAACACA       |
| scaffold673213_16.2 | 1 p2 | (AC)7  | 14 | 1455 | 1468 | ATCCATCAAGTTTGCACGGT       |
| scaffold673223_17.7 | 1 p2 | (CT)6  | 12 | 225  | 236  | TGGACCCAAGTATGCACAAA       |
| scaffold673245_11.6 | 1 p2 | (TA)8  | 16 | 518  | 533  | ACCTAATCATGTTTTGGGCG       |
| scaffold673261_17.2 | 1 p2 | (TC)8  | 16 | 599  | 614  | CACCCACCCTTCCCTTTATT       |
| scaffold673289_15.6 | 1 p2 | (AG)8  | 16 | 1978 | 1993 | GCCAGGGAAATGTTATGGAA       |
| scaffold673306_14.6 | 1 p2 | (GA)9  | 18 | 1102 | 1119 | AATGATGGTGGAGCTGACCT       |
| scaffold673308_19.2 | 1 p2 | (AT)6  | 12 | 92   | 103  | TGGGAAGATCTCTCCGTCAT       |
| scaffold673363_13.8 | 1 p2 | (TC)6  | 12 | 2552 | 2563 | ATTGGACAAGTGGCAATGTG       |
| scaffold673388_13.7 | 1 p2 | (AT)9  | 18 | 641  | 658  | TCAACCCCCACGTTATCTCT       |
| scaffold673399_13.4 | 1 p2 | (AG)6  | 12 | 200  | 211  | GTTTTCTGCCGAAGCAAGAG       |
| scaffold673558_15.8 | 1 p2 | (CT)7  | 14 | 1748 | 1761 | GTGGAAGTGTTTTGTGGGGT       |
| scaffold673583_12.5 | 1 p2 | (CA)6  | 12 | 686  | 697  | TTTTTGCCGCCTTTGATTAC       |
| scaffold673622_20.4 | 1 p2 | (GA)6  | 12 | 230  | 241  | TCAAGCCAAGACAAGCAATG       |
| scaffold673792_17.3 | 1 p2 | (AG)8  | 16 | 742  | 757  | TTAGGGAGGGGAGAATTTGG       |
| scaffold673803_22.0 | 1 p2 | (TC)9  | 18 | 225  | 242  | TTGAAGCATGTATCACTCTGCAT    |
| scaffold673833_15.2 | 1 p2 | (TA)6  | 12 | 76   | 87   | TATGGGTTATCACCGGATCG       |
| scaffold673938_12.8 | 1 p2 | (AG)6  | 12 | 618  | 629  | TCTCACGACAAGAACGTGGA       |
| scaffold674004_14.2 | 1 p2 | (AT)8  | 16 | 227  | 242  | TCATGATGATTACATTTGTGTTGA   |
| scaffold674108_15.7 | 1 p2 | (TG)6  | 12 | 832  | 843  | GAAAGGAAACGTCCGAAACA       |
| scaffold674199_13.8 | 1 p2 | (AT)10 | 20 | 27   | 46   | GAATGACACACGCACACACA       |
| scaffold674318_15.6 | 1 p2 | (GA)6  | 12 | 1266 | 1277 | AAAAGCCATCAAACCAACG        |
| scaffold674382_15.2 | 1 p2 | (TC)7  | 14 | 2094 | 2107 | CTCTTCCTTCTGCGGTGTTT       |
| scaffold674407_14.5 | 1 p2 | (AT)7  | 14 | 454  | 467  | CCAAAATCAACGTCCCAGAT       |
| scaffold674410_15.2 | 1 p2 | (CT)14 | 28 | 526  | 553  | CCCGACAACATGTTCCCTG        |
| scaffold674435_15.8 | 1 p2 | (CT)6  | 12 | 230  | 241  | TTCATGGCTTTCTGGGTCTC       |
| scaffold674450_10.2 | 1 p2 | (AT)7  | 14 | 125  | 138  | TGTATGCTGTAAATGAAACTGCTG   |
| scaffold674464_13.0 | 1 p2 | (CA)6  | 12 | 1126 | 1137 | CACTGGCAAAAATGAATCTCTC     |
| scaffold674517_12.2 | 1 p2 | (AG)10 | 20 | 600  | 619  | GAAGGGTGAGGCTAGGGAAG       |
| scaffold674598_14.6 | 1 p2 | (AG)12 | 24 | 4580 | 4603 | GGGCCTTAGTCCATGTCCTT       |
| scaffold674645_14.7 | 1 p2 | (AT)6  | 12 | 1709 | 1720 | TGACCAACTCCATGTTTCCA       |
| scaffold674703_14.0 | 1 p2 | (AT)6  | 12 | 774  | 785  | TCAATTA AAAACTTGCTCTCAATCA |
| scaffold674882_14.5 | 1 p2 | (TG)7  | 14 | 326  | 339  | GTTTCTGCATTTTGGGAAGC       |
| scaffold674895_10.9 | 1 p2 | (TA)8  | 16 | 332  | 347  | TTCAGTAGCACAACCACCCT       |
| scaffold674957_14.0 | 1 p2 | (AT)8  | 16 | 933  | 948  | TGCTATTTT CAGCCCAAACC      |
| scaffold675038_10.2 | 1 p2 | (AT)13 | 26 | 542  | 567  | GTTGCTATTGCGGGCTTTAC       |
| scaffold675057_10.3 | 1 p2 | (TA)8  | 16 | 196  | 211  | ATGGGATATGAGGGGAATGC       |
| scaffold675064_15.6 | 1 p2 | (AT)6  | 12 | 444  | 455  | TTTGAAGTCAAGGGAGCAAA       |
| scaffold675076_15.0 | 1 p2 | (TA)8  | 16 | 228  | 243  | GCGGATGCTCTTAGTTACGC       |
| scaffold675153_14.9 | 1 p2 | (GA)8  | 16 | 755  | 770  | TACCTCCCCAATCAATCCAG       |
| scaffold675158_10.6 | 1 p2 | (CT)6  | 12 | 289  | 300  | AATGCCCATCTTCAGTTTG        |
| scaffold675207_21.0 | 1 p2 | (AG)7  | 14 | 104  | 117  | TTATCATGCAAATGAACGGG       |
| scaffold675235_13.4 | 1 p2 | (AG)7  | 14 | 54   | 67   | AAAGATGGCCAAAACGTGTC       |
| scaffold675279_15.9 | 1 p2 | (GA)6  | 12 | 974  | 985  | ACGTTGCAAGGTCTACCACC       |
| scaffold675328_10.2 | 1 p2 | (TA)9  | 18 | 44   | 61   | TGCGTTTTGACGATATATAGTGT    |
| scaffold675375_19.7 | 1 p2 | (TA)6  | 12 | 232  | 243  | AGGTTGCGTACATCTGACCC       |

|                     |      |        |    |       |                               |
|---------------------|------|--------|----|-------|-------------------------------|
| scaffold675385_13.8 | 1 p2 | (CA)7  | 14 | 297   | 310 TTGCATTGACACAATCAAGTG     |
| scaffold675419_15.9 | 1 p2 | (TG)9  | 18 | 65    | 82 GGGCCGAGATTTGTTAGAGG       |
| scaffold675490_15.8 | 1 p2 | (CT)8  | 16 | 444   | 459 TATGACTTCGGCATTACCGC      |
| scaffold675502_14.7 | 1 p2 | (TA)7  | 14 | 230   | 243 CGTGTCAAAAATCTGTTCATTTG   |
| scaffold675518_13.7 | 1 p2 | (TG)8  | 16 | 64    | 79 TCAACTGGATATCAAACGCAA      |
| scaffold675643_16.2 | 1 p2 | (GT)6  | 12 | 2165  | 2176 CATCCCTCCACATTTGCTCT     |
| scaffold675648_14.9 | 1 p2 | (AT)8  | 16 | 178   | 193 TTTGAATACAATGCTTCATCCA    |
| scaffold675862_10.0 | 1 p2 | (AT)7  | 14 | 419   | 432 GAAATGCTGATGTGGCTGAA      |
| scaffold675910_15.9 | 1 p2 | (CT)7  | 14 | 123   | 136 CTTGAACATGGCCATCACAC      |
| scaffold675919_14.7 | 1 p2 | (GA)11 | 22 | 302   | 323 GTTGTAAAGTGGGGGTTGGTG     |
| scaffold675940_15.9 | 1 p2 | (TC)7  | 14 | 198   | 211 ATTATTTGCATTGCTTGCCC      |
| scaffold675984_15.9 | 1 p2 | (GT)10 | 20 | 1011  | 1030 ATGTGTTGTGATGGGGGATT     |
| scaffold675995_17.8 | 1 p2 | (TC)6  | 12 | 2779  | 2790 ATGGATTGCAGAAAGATGGC     |
| scaffold676028_13.0 | 1 p2 | (TA)10 | 20 | 1194  | 1213 GAATTCTCCCAAACACTGACGG   |
| scaffold676073_14.4 | 1 p2 | (TA)7  | 14 | 581   | 594 GTGTTATGCCTATCCCTATCAAGT  |
| scaffold676155_16.0 | 1 p2 | (AG)8  | 16 | 3993  | 4008 TTTCTCCTTGAGCCTCTTCAA    |
| scaffold676194_17.4 | 1 p2 | (AT)7  | 14 | 747   | 760 ATATCGCGGGCTAAGAACCT      |
| scaffold676221_10.6 | 1 p2 | (TA)8  | 16 | 798   | 813 TCCGGAGAAAATGAAGAAGAA     |
| scaffold676277_15.7 | 1 p2 | (GA)6  | 12 | 405   | 416 TGGGAACTCGAGAGGAAAGA      |
| scaffold676368_17.9 | 1 p2 | (GA)6  | 12 | 234   | 245 TGATTTTGATCCATTGCCCT      |
| scaffold676437_11.7 | 1 p2 | (TA)7  | 14 | 430   | 443 GTCGGACGATTAATCACGCT      |
| scaffold676447_20.9 | 1 p2 | (TA)7  | 14 | 167   | 180 TGCATTTGATCCCTAGAGTGG     |
| scaffold676523_11.9 | 1 p2 | (TG)6  | 12 | 101   | 112 ATTACGTGATCCAACGGTC       |
| scaffold676551_10.9 | 1 p2 | (AT)9  | 18 | 48    | 65 TGAGTGCTAGACTATTGTAAAAACG  |
| scaffold676572_10.0 | 1 p2 | (CT)7  | 14 | 181   | 194 TTTATCCCCACCCTTCACA       |
| scaffold676582_13.7 | 1 p2 | (TA)7  | 14 | 498   | 511 ATGATGGCGTCATGTTTTCA      |
| scaffold676686_13.8 | 1 p2 | (AT)6  | 12 | 847   | 858 CATTGATTTATTGCATAATCTGA   |
| scaffold676697_14.9 | 1 p2 | (AG)6  | 12 | 1426  | 1437 AATCCACGAAACGGTTTGAA     |
| scaffold676729_12.2 | 1 p2 | (CT)6  | 12 | 1207  | 1218 AAACAGCCCATGTGAGAACC     |
| scaffold676731_14.0 | 1 p2 | (GA)6  | 12 | 288   | 299 AAACCAATTGGCAACGAGAG      |
| scaffold676751_14.9 | 1 p2 | (TA)7  | 14 | 317   | 330 CCGAATTTGGCTCTTTTCT       |
| scaffold676780_18.8 | 1 p2 | (AT)7  | 14 | 232   | 245 ATCTGCTCCTCTCCTAGCCC      |
| scaffold676820_18.2 | 1 p2 | (AG)6  | 12 | 591   | 602 GAGGATTTCTTCCCCAAAA       |
| scaffold676823_13.7 | 1 p2 | (TC)7  | 14 | 447   | 460 CTTGAATCCATGACGAGCCT      |
| scaffold676828_16.9 | 1 p2 | (TC)6  | 12 | 105   | 116 TCGGTCTCTGGGACCTTTAG      |
| scaffold676963_16.6 | 1 p2 | (AT)7  | 14 | 15032 | 15045 GTTGGGCGATTTGAAGCTAA    |
| scaffold676972_16.7 | 1 p2 | (CT)6  | 12 | 235   | 246 AGGCAATGGTTTGGTTTCAG      |
| scaffold677015_13.4 | 1 p2 | (TA)6  | 12 | 435   | 446 CTTGAGGCCACACAAGAAG       |
| scaffold677066_15.6 | 1 p2 | (GA)6  | 12 | 107   | 118 TATGCACGTGACTTGCTTCC      |
| scaffold677132_17.2 | 1 p2 | (AC)7  | 14 | 1631  | 1644 TCCCGGAAATAGTTCAAAAT     |
| scaffold677153_13.9 | 1 p2 | (AT)6  | 12 | 146   | 157 GTTGCATAAACCCCTAGGCCA     |
| scaffold677187_13.9 | 1 p2 | (AC)6  | 12 | 425   | 436 AGGTCAGTTCCAACCCACAG      |
| scaffold677317_16.9 | 1 p2 | (AG)6  | 12 | 1230  | 1241 GGTTTCAAGTGGCAAACGAT     |
| scaffold677320_16.6 | 1 p2 | (AT)9  | 18 | 1493  | 1510 CCCTAACCCCTAAAGTAAGGACCA |
| scaffold677391_14.9 | 1 p2 | (AT)6  | 12 | 1638  | 1649 TGCACCAGAGTAAGTTGGAATG   |
| scaffold677394_17.0 | 1 p2 | (TG)9  | 18 | 230   | 247 GATGAAGATCCTGGACGGTG      |
| scaffold677422_18.0 | 1 p2 | (AC)6  | 12 | 346   | 357 TGAAATATCGAGCACCACCA      |
| scaffold677484_11.6 | 1 p2 | (AG)6  | 12 | 425   | 436 TGATCCGAGCTTGGAATAGC      |
| scaffold677557_12.9 | 1 p2 | (TC)6  | 12 | 1191  | 1202 AAACCTCAAACCCAGGCTCA     |
| scaffold677558_12.1 | 1 p2 | (AC)9  | 18 | 369   | 386 CTCCAATCATCGACCGAGTT      |
| scaffold677562_16.9 | 1 p2 | (AT)6  | 12 | 236   | 247 TCGAACACCAACCAATTCA       |
| scaffold677655_15.6 | 1 p2 | (TA)6  | 12 | 222   | 233 TGATGGCAACCAAGAACTCA      |
| scaffold677741_16.4 | 1 p2 | (CT)6  | 12 | 1464  | 1475 AATTGCATTTGGATGCATGA     |
| scaffold677766_17.8 | 1 p2 | (AT)6  | 12 | 804   | 815 GGCTTTTCTGGAATATAAAGCG    |
| scaffold677768_16.2 | 1 p2 | (AG)9  | 18 | 1539  | 1556 TTTCTTCCATTGGCTTCACC     |
| scaffold677773_11.7 | 1 p2 | (AT)8  | 16 | 360   | 375 GGACATGGGATTGGAGAAGA      |
| scaffold677825_17.9 | 1 p2 | (AT)8  | 16 | 249   | 264 TCGAAAACCGGTTAAAGACC      |
| scaffold677854_13.7 | 1 p2 | (TA)8  | 16 | 536   | 551 TGAGAAACGAATGCACATGA      |



|                     |      |        |    |      |      |                          |
|---------------------|------|--------|----|------|------|--------------------------|
| scaffold677886_12.2 | 1 p2 | (TA)6  | 12 | 152  | 163  | GGGCCAAAAGAACAACAAAA     |
| scaffold677929_15.9 | 1 p2 | (AT)6  | 12 | 2360 | 2371 | TTGTTGTACCATTGTGGAAAGA   |
| scaffold677953_10.0 | 1 p2 | (TA)10 | 20 | 411  | 430  | AATGATGCTCAAACCCAAGC     |
| scaffold677965_17.4 | 1 p2 | (AG)6  | 12 | 1109 | 1120 | TCCTGCATGCCCATATACAA     |
| scaffold677968_10.9 | 1 p2 | (CT)6  | 12 | 398  | 409  | AGAGAGAAAATTGCATCGGG     |
| scaffold678079_13.4 | 1 p2 | (TA)7  | 14 | 899  | 912  | AATTCGGAACAGACGTCATTG    |
| scaffold678088_15.6 | 1 p2 | (AG)6  | 12 | 383  | 394  | AAGATCAGCATTTCGGTTTGG    |
| scaffold678114_15.3 | 1 p2 | (CT)9  | 18 | 1347 | 1364 | TGGGGTAATATAAAGGTTTCATCC |
| scaffold678132_17.7 | 1 p2 | (CT)6  | 12 | 1318 | 1329 | CCGATTCAGATACTCCCAA      |
| scaffold678179_16.7 | 1 p2 | (AT)7  | 14 | 333  | 346  | CTCGTGCGCAAAAATTATGA     |
| scaffold678180_15.7 | 1 p2 | (TA)6  | 12 | 208  | 219  | ACAAAACAGGGGACAAGGGT     |
| scaffold678181_13.4 | 1 p2 | (AG)6  | 12 | 125  | 136  | TGGAGAGAGAGAAGATCGGC     |
| scaffold678189_10.1 | 1 p2 | (AT)8  | 16 | 119  | 134  | CAATTGGATTAGTGACATGGCT   |
| scaffold678309_12.8 | 1 p2 | (TC)11 | 22 | 226  | 247  | CACCAAAGGAAAATTGAATGG    |
| scaffold678316_10.0 | 1 p2 | (TG)6  | 12 | 347  | 358  | TTCCCTCCTCATTTCCAACA     |
| scaffold678317_10.9 | 1 p2 | (TG)6  | 12 | 347  | 358  | AAGGTTTTGGTGTGGGGTT      |
| scaffold678346_13.0 | 1 p2 | (AG)6  | 12 | 53   | 64   | TCATTGTTTGAAGAGTGGGAAA   |
| scaffold678403_11.5 | 1 p2 | (AT)7  | 14 | 1099 | 1112 | ATTTTCTTGGCCCAACCTTT     |
| scaffold678444_15.6 | 1 p2 | (TA)7  | 14 | 1353 | 1366 | CCAACCTGTATCGCTCTTTCT    |
| scaffold678467_16.7 | 1 p2 | (AG)8  | 16 | 746  | 761  | GGGTCACCTTTGTGATGCTT     |
| scaffold678511_14.6 | 1 p2 | (CT)6  | 12 | 1240 | 1251 | TGCAAAGATGACAGAAACAAGAA  |
| scaffold678517_11.7 | 1 p2 | (AT)9  | 18 | 1103 | 1120 | TCGTTGTTTCGTGTGAGCAAT    |
| scaffold678565_13.8 | 1 p2 | (CT)8  | 16 | 1071 | 1086 | AAACCCCTCTCAAGAACTCCAAA  |
| scaffold678577_11.9 | 1 p2 | (TA)10 | 20 | 384  | 403  | CATGTTAAGGAGGGGATCCAT    |
| scaffold678582_13.8 | 1 p2 | (TG)6  | 12 | 53   | 64   | TGGCTGGCGGTTTTAAATAAT    |
| scaffold678624_10.6 | 1 p2 | (TA)8  | 16 | 144  | 159  | TTCGGGTCTCAACACATTCA     |
| scaffold678701_14.6 | 1 p2 | (TC)6  | 12 | 1009 | 1020 | AGGGGGAAACTCGCTAATGT     |
| scaffold678771_12.7 | 1 p2 | (TA)6  | 12 | 499  | 510  | TCGAAGTCCCACCTTCAGCTT    |
| scaffold678936_18.5 | 1 p2 | (CT)6  | 12 | 730  | 741  | AAATGTGACCGGATTCATCG     |
| scaffold678975_15.6 | 1 p2 | (AT)13 | 26 | 5282 | 5307 | AGTCTGACCTTCATGGGCAC     |
| scaffold679001_14.4 | 1 p2 | (AT)10 | 20 | 186  | 205  | TGTTGTGTATAAGGAAGTTTTTCG |
| scaffold679022_12.9 | 1 p2 | (TA)7  | 14 | 102  | 115  | TGAAACCTAAGTGGCCTGTCA    |
| scaffold679105_16.3 | 1 p2 | (GT)7  | 14 | 1691 | 1704 | GAGGTTGATGTTGTGCGGGTT    |
| scaffold679179_15.7 | 1 p2 | (AT)6  | 12 | 238  | 249  | TCGATCAAAGTTATGAATTGGAAA |
| scaffold679241_16.8 | 1 p2 | (GA)6  | 12 | 4194 | 4205 | ACCGTACTTCTCCACGAAA      |
| scaffold679267_17.0 | 1 p2 | (CT)6  | 12 | 184  | 195  | GCATCTCTTGCTCTCTCGTTG    |
| scaffold679268_13.2 | 1 p2 | (TG)7  | 14 | 51   | 64   | AGGTCGAGGATTGTCGTCTG     |
| scaffold679319_14.1 | 1 p2 | (TA)7  | 14 | 485  | 498  | GGTGCCACGTGTCATACTCA     |
| scaffold679377_14.8 | 1 p2 | (AT)6  | 12 | 333  | 344  | AAATCCTTGCACCTCCTCCT     |
| scaffold679396_15.6 | 1 p2 | (TC)7  | 14 | 1215 | 1228 | GGATTGGACCTATAATATTGACCG |
| scaffold679420_16.5 | 1 p2 | (TA)6  | 12 | 1055 | 1066 | TTGCAGAATCATAAAGTGCAAAC  |
| scaffold679436_16.6 | 1 p2 | (TC)7  | 14 | 144  | 157  | GGAGAACGCCATTGTTGATT     |
| scaffold679537_17.0 | 1 p2 | (TC)7  | 14 | 279  | 292  | CATGGCGGATTTACAACCTGA    |
| scaffold679720_13.9 | 1 p2 | (AT)8  | 16 | 1170 | 1185 | TTTGCCCTCTTGATACCC       |
| scaffold679746_14.3 | 1 p2 | (GA)6  | 12 | 3884 | 3895 | TGTAATGAAAGCAGCCGTTG     |
| scaffold679880_15.7 | 1 p2 | (CT)6  | 12 | 478  | 489  | CTGTTAGCAAGTTCCACGCA     |
| scaffold679898_11.3 | 1 p2 | (TA)8  | 16 | 235  | 250  | AGCGAAATTGATCTCTGCGT     |
| scaffold679974_16.5 | 1 p2 | (CA)12 | 24 | 1125 | 1148 | CTGGGAAACCAATCTTGTCG     |
| scaffold679975_14.7 | 1 p2 | (AT)9  | 18 | 911  | 928  | CAAAGGCCACAGTGGTTAT      |
| scaffold680003_11.4 | 1 p2 | (AT)6  | 12 | 67   | 78   | GATGATTGCACCATAACGCA     |
| scaffold680004_14.2 | 1 p2 | (TC)6  | 12 | 746  | 757  | AGACCCTCAACCTCACCCCTC    |
| scaffold680063_13.1 | 1 p2 | (TA)6  | 12 | 339  | 350  | CAAGAGGAATTGAACCCAGG     |
| scaffold680099_15.2 | 1 p2 | (TC)8  | 16 | 681  | 696  | GGCAGGAATGAGACACCAAT     |
| scaffold680207_14.4 | 1 p2 | (AT)6  | 12 | 1173 | 1184 | TGGACAAACAAGCCTCACTCT    |
| scaffold680229_18.3 | 1 p2 | (CT)11 | 22 | 230  | 251  | CTCGTAGAAGGGCAGTGGAG     |
| scaffold680315_14.7 | 1 p2 | (AG)6  | 12 | 132  | 143  | ACCTGTCCTGGGTCTGTGAG     |
| scaffold680338_13.5 | 1 p2 | (GA)7  | 14 | 237  | 250  | TGAATTCAATTGTGTTTTGGGA   |
| scaffold680384_13.4 | 1 p2 | (TA)6  | 12 | 74   | 85   | ATCCAAGGGTCAATAATGGTT    |

|                     |      |        |    |      |                             |
|---------------------|------|--------|----|------|-----------------------------|
| scaffold680387_14.7 | 1 p2 | (AT)8  | 16 | 170  | 185 TGGAGGAGTTCTTCCAGGAG    |
| scaffold680390_20.6 | 1 p2 | (CT)6  | 12 | 1213 | 1224 CGAGTATCCTCCCCTCCAA    |
| scaffold680427_12.7 | 1 p2 | (AT)10 | 20 | 590  | 609 TACCCCCAGCATCCAATTTA    |
| scaffold680432_15.8 | 1 p2 | (TG)6  | 12 | 748  | 759 AGGAGAGATTGTAACGACCCA   |
| scaffold680492_16.7 | 1 p2 | (TA)8  | 16 | 81   | 96 CATTATTTAATGTAGGGTGGGTGA |
| scaffold680548_13.2 | 1 p2 | (CT)7  | 14 | 534  | 547 TGCTTCCCTCAATGGTTTTC    |
| scaffold680570_17.8 | 1 p2 | (CA)6  | 12 | 2675 | 2686 CTGGCTGCTCTACGCTCTCT   |
| scaffold680574_13.2 | 1 p2 | (AT)13 | 26 | 461  | 486 TTGAAGATCCCGGACAGTTC    |
| scaffold680578_11.4 | 1 p2 | (GA)8  | 16 | 534  | 549 ATGGACGGCTGTGATTTAGG    |
| scaffold680579_16.3 | 1 p2 | (TA)6  | 12 | 1549 | 1560 TTTGGATCACTAGGGCTTGG   |
| scaffold680601_15.5 | 1 p2 | (TA)6  | 12 | 138  | 149 CACGTGAGATGCTGAGTAGGA   |
| scaffold680634_13.6 | 1 p2 | (TC)6  | 12 | 55   | 66 ACAAGCCCTAGCTCTTTCCC     |
| scaffold680635_11.1 | 1 p2 | (TA)8  | 16 | 92   | 107 AGCGGTTATTACCGGATCG     |
| scaffold680683_11.4 | 1 p2 | (TC)6  | 12 | 950  | 961 CGCTACTCTTCGAGTGC GTT   |
| scaffold680726_18.2 | 1 p2 | (AT)8  | 16 | 733  | 748 ACACCGGTTCCAAGTGATCT    |
| scaffold680734_14.2 | 1 p2 | (TA)12 | 24 | 290  | 313 GGAAGGGGAGTTAGCGTATG    |
| scaffold680885_10.4 | 1 p2 | (CT)6  | 12 | 256  | 267 ATCCGATGGATGAAAAGCTG    |
| scaffold680905_14.9 | 1 p2 | (AC)7  | 14 | 378  | 391 CAATGGCTTGTGTTCTCAA     |
| scaffold680985_16.3 | 1 p2 | (CT)12 | 24 | 504  | 527 AGCCTTTAAGACACGCCAAA    |
| scaffold681070_19.5 | 1 p2 | (TA)6  | 12 | 240  | 251 CGCGTGGGTGATATGCTAGT    |
| scaffold681073_15.2 | 1 p2 | (CT)12 | 24 | 1198 | 1221 TCCAAAGTCACACTTGCTGC   |
| scaffold681076_14.4 | 1 p2 | (CT)8  | 16 | 5591 | 5606 GAATGAGTGATGGCGGATCT   |
| scaffold681093_15.3 | 1 p2 | (CA)6  | 12 | 171  | 182 CATTAAAGCCTCACCCCTCA    |
| scaffold681104_11.3 | 1 p2 | (CT)8  | 16 | 54   | 69 ATCCTTTGCACAACCCACTC     |
| scaffold681110_13.0 | 1 p2 | (TC)6  | 12 | 419  | 430 CAAGAATTCCAAGCTTGCCT    |
| scaffold681119_17.5 | 1 p2 | (AT)8  | 16 | 1433 | 1448 GCTACATCACTTCCCCACAAA  |
| scaffold681177_10.6 | 1 p2 | (GA)6  | 12 | 345  | 356 CGAAGAAAACACCCGGACTA    |
| scaffold681197_15.3 | 1 p2 | (CT)8  | 16 | 2095 | 2110 AAGGGAGCTCCTCAGCCTAC   |
| scaffold681208_16.5 | 1 p2 | (TA)8  | 16 | 2474 | 2489 GAGTGAGTTGGCGAGAATCTG  |
| scaffold681216_11.2 | 1 p2 | (TA)7  | 14 | 1054 | 1067 TATCCCTACACCGCCTCATC   |
| scaffold681219_16.8 | 1 p2 | (GA)6  | 12 | 1954 | 1965 ACGGGAGGAAGACGAAGAGT   |
| scaffold681242_16.3 | 1 p2 | (TA)6  | 12 | 146  | 157 TTGGGATTAAGGCTTTGGTG    |
| scaffold681244_10.3 | 1 p2 | (TA)8  | 16 | 124  | 139 TCAATTCCTCCCTTAGACACAA  |
| scaffold681257_15.3 | 1 p2 | (CT)6  | 12 | 197  | 208 GCATCTCTTGCTCTCTCGTTG   |
| scaffold681304_10.0 | 1 p2 | (CT)8  | 16 | 183  | 198 TTTTGACACGTAGCGACACC    |
| scaffold681324_14.1 | 1 p2 | (TA)6  | 12 | 216  | 227 TGTGCGTTTTTTGGCATAGTG   |
| scaffold681334_18.0 | 1 p2 | (CT)7  | 14 | 909  | 922 TTGCAGAGTGATTGTAGGCG    |
| scaffold681341_13.9 | 1 p2 | (TG)6  | 12 | 241  | 252 CAATAATGCCCCCTTCATGT    |
| scaffold681470_14.9 | 1 p2 | (GA)7  | 14 | 240  | 253 GCGTCTCAAACAGGAGAGAGA   |
| scaffold681503_14.8 | 1 p2 | (GA)6  | 12 | 976  | 987 CGACGTCGTTCTTGATTCTTC   |
| scaffold681544_16.0 | 1 p2 | (AT)6  | 12 | 905  | 916 TACCGTTTCAAGGTGCAATG    |
| scaffold681611_15.8 | 1 p2 | (CT)6  | 12 | 1497 | 1508 GCGCTACAAAACGAGTTCA    |
| scaffold681640_12.7 | 1 p2 | (TA)6  | 12 | 315  | 326 AGTAGTTAGCATGGAAGGGGA   |
| scaffold681682_10.0 | 1 p2 | (TA)7  | 14 | 320  | 333 TTCGAATTGATGTTTGATCCAT  |
| scaffold681738_13.9 | 1 p2 | (GA)8  | 16 | 1188 | 1203 ATCGCATTGCCTCACTTTTT   |
| scaffold681852_15.6 | 1 p2 | (TG)6  | 12 | 2530 | 2541 GATTTGGTACATGGATGGGG   |
| scaffold681897_11.6 | 1 p2 | (AT)9  | 18 | 528  | 545 TTGAGCCCTGCCAAAATATC    |
| scaffold681915_15.0 | 1 p2 | (AG)8  | 16 | 330  | 345 CGAATTTTAGTGGGACATCCA   |
| scaffold681939_13.8 | 1 p2 | (TC)8  | 16 | 797  | 812 ATCAATAGGTCACGGGTTTCG   |
| scaffold681940_21.2 | 1 p2 | (AT)6  | 12 | 415  | 426 GCTATCACGCGAATGGGTAT    |
| scaffold681966_17.6 | 1 p2 | (TA)9  | 18 | 481  | 498 AGTCCTAGCCCCACATCTCA    |
| scaffold682001_20.6 | 1 p2 | (AT)6  | 12 | 243  | 254 TGCGGGCATAAGACCATATT    |
| scaffold682014_17.3 | 1 p2 | (CT)8  | 16 | 1064 | 1079 AGTGGGGAGCCTTACCTTGT   |
| scaffold682217_12.0 | 1 p2 | (AT)8  | 16 | 2326 | 2341 AGGCTGTAAAGGTTTCGGGTT  |
| scaffold682228_14.5 | 1 p2 | (CT)7  | 14 | 240  | 253 AGTCTCCCCATTTGATGCAC    |
| scaffold682235_10.2 | 1 p2 | (GA)6  | 12 | 144  | 155 CTTTTGGTCGAGCCAGCTAC    |
| scaffold682271_17.8 | 1 p2 | (AG)6  | 12 | 242  | 253 GTTGCTCATTCCCCTTTCAA    |
| scaffold682273_15.1 | 1 p2 | (CT)10 | 20 | 594  | 613 CCGAGTTGGAGAGAGAATGC    |

|                     |      |        |    |      |      |                            |
|---------------------|------|--------|----|------|------|----------------------------|
| scaffold682276_17.8 | 1 p2 | (CA)8  | 16 | 432  | 447  | CCCTGCCTGTAATCCAGAA        |
| scaffold682319_16.9 | 1 p2 | (TC)6  | 12 | 2040 | 2051 | TATTTTGATGCCGGGAATGT       |
| scaffold682348_11.2 | 1 p2 | (TA)6  | 12 | 1004 | 1015 | CACGCTGATATCGCACAAC        |
| scaffold682357_14.4 | 1 p2 | (AG)10 | 20 | 511  | 530  | ATCCCAGAATGCCTACACCA       |
| scaffold682366_18.5 | 1 p2 | (AG)6  | 12 | 97   | 108  | TTAAATGCACAGCACAGCTC       |
| scaffold682386_15.6 | 1 p2 | (AT)6  | 12 | 742  | 753  | TCAACTTATATTTTCAGCGACGA    |
| scaffold682390_16.3 | 1 p2 | (TC)6  | 12 | 243  | 254  | TCAACAACAGCAGAAATCGG       |
| scaffold682445_13.6 | 1 p2 | (TG)6  | 12 | 693  | 704  | GAATGCTCGTTGTCCCAAAT       |
| scaffold682519_15.0 | 1 p2 | (AG)6  | 12 | 931  | 942  | CTTTCACGGGTTTGAAGCTC       |
| scaffold682541_14.9 | 1 p2 | (TA)9  | 18 | 47   | 64   | TTTCATATATCACGTTAAGACATGGA |
| scaffold682542_17.7 | 1 p2 | (AT)10 | 20 | 191  | 210  | TAACCCTTGTTAGCCCGTTG       |
| scaffold682556_15.2 | 1 p2 | (GA)8  | 16 | 239  | 254  | TCAGCCAAATGCAGAGATGA       |
| scaffold682563_11.3 | 1 p2 | (AT)6  | 12 | 191  | 202  | GCTATAAGGTTGCACCCACG       |
| scaffold682564_12.8 | 1 p2 | (AT)12 | 24 | 33   | 56   | TCAATTTCTTAACCTGTAAAATGC   |
| scaffold682565_10.6 | 1 p2 | (AT)6  | 12 | 405  | 416  | CCCATTCTCTTCATCCCTCA       |
| scaffold682717_12.2 | 1 p2 | (AT)6  | 12 | 420  | 431  | AATACACCCCAAAGTGGAAACC     |
| scaffold682721_14.3 | 1 p2 | (TA)10 | 20 | 46   | 65   | CCAAATGTTAGGGTTATCACAGG    |
| scaffold682783_19.7 | 1 p2 | (CT)6  | 12 | 1126 | 1137 | CCTTCATCCCCTGTCTTGAA       |
| scaffold682842_15.2 | 1 p2 | (AG)7  | 14 | 2487 | 2500 | CTTTGAAATGACATGGGCCT       |
| scaffold683010_12.4 | 1 p2 | (AT)7  | 14 | 307  | 320  | AAATGCATCATACGGCATAACA     |
| scaffold683017_13.1 | 1 p2 | (TA)7  | 14 | 794  | 807  | TTGATCCTTTTTATGATAACCCAA   |
| scaffold683021_13.9 | 1 p2 | (TA)6  | 12 | 60   | 71   | GAAAGAGAGTTTAGATCAAGTGTGTT |
| scaffold683033_14.0 | 1 p2 | (TG)7  | 14 | 227  | 240  | TTCTTTTTACATTTGGTAGACCATC  |
| scaffold683042_12.4 | 1 p2 | (GC)8  | 16 | 190  | 205  | CAATTCGAAGCCCAAATCAT       |
| scaffold683083_15.8 | 1 p2 | (GA)8  | 16 | 329  | 344  | AATGGGTGGGTTATAATGGGA      |
| scaffold683130_14.3 | 1 p2 | (TA)9  | 18 | 344  | 361  | CACGGGAGGTGAAAATTGAG       |
| scaffold683136_16.5 | 1 p2 | (AG)6  | 12 | 1377 | 1388 | CGAGCAATATCTTGGGCACT       |
| scaffold683191_13.5 | 1 p2 | (AG)9  | 18 | 544  | 561  | TCCAACCGCTATTTGAATCC       |
| scaffold683196_13.4 | 1 p2 | (TA)9  | 18 | 36   | 53   | TTTAGTGTTTTGACATGATTACTCG  |
| scaffold683201_15.2 | 1 p2 | (TC)6  | 12 | 244  | 255  | TGCTGCTTTAGGTCTTTGCC       |
| scaffold683208_16.0 | 1 p2 | (AG)7  | 14 | 5578 | 5591 | CACGAACACATGAGGGAATG       |
| scaffold683240_19.5 | 1 p2 | (TA)6  | 12 | 1081 | 1092 | GATAATGGCAAACCTGCTGC       |
| scaffold683518_12.3 | 1 p2 | (AG)12 | 24 | 498  | 521  | GGGAGAGAGAAGGGAAGAGG       |
| scaffold683521_14.5 | 1 p2 | (AG)7  | 14 | 1192 | 1205 | AAGAAAAGGGGGAAAGGTGA       |
| scaffold683598_10.6 | 1 p2 | (GA)7  | 14 | 678  | 691  | ATTCTAGGTGCACCCCTCCT       |
| scaffold683641_12.0 | 1 p2 | (TG)6  | 12 | 54   | 65   | TCCCCTTTACTTTATTCTTTCAA    |
| scaffold683665_12.1 | 1 p2 | (AT)9  | 18 | 319  | 336  | TAACGATGGACTAGGGGCTG       |
| scaffold683682_15.1 | 1 p2 | (TA)10 | 20 | 309  | 328  | TCAAGGGGTATTTTTGTCCG       |
| scaffold683718_12.9 | 1 p2 | (TC)7  | 14 | 405  | 418  | TGTGACTGTCGATGAAGTAAAGG    |
| scaffold683792_14.5 | 1 p2 | (TA)9  | 18 | 70   | 87   | CGAACGATGACATGCTCCTA       |
| scaffold683848_16.4 | 1 p2 | (GA)7  | 14 | 243  | 256  | ACTTGCAAAAGACTCCAGGC       |
| scaffold683896_15.4 | 1 p2 | (AG)6  | 12 | 245  | 256  | ATTCACACCATTTGCCATCC       |
| scaffold683909_15.1 | 1 p2 | (AG)7  | 14 | 562  | 575  | AATCCCCGCCTATCTAAGGA       |
| scaffold683914_14.2 | 1 p2 | (TA)7  | 14 | 180  | 193  | TGGATACATGGGTGGATAATATG    |
| scaffold684054_18.5 | 1 p2 | (TC)8  | 16 | 515  | 530  | ATATTCGGCTCCATCCCTTC       |
| scaffold684061_13.8 | 1 p2 | (GA)9  | 18 | 2304 | 2321 | ATCTCGCAGTGCAAAATCG        |
| scaffold684070_14.4 | 1 p2 | (TG)6  | 12 | 571  | 582  | TGTACAGGCATGGGTTTCAA       |
| scaffold684076_13.3 | 1 p2 | (GT)7  | 14 | 438  | 451  | CAAGACCACGAGCCGTTAAT       |
| scaffold684146_21.6 | 1 p2 | (TC)7  | 14 | 95   | 108  | CAAACTCTCATACAGCCAAAA      |
| scaffold684154_15.0 | 1 p2 | (TG)6  | 12 | 650  | 661  | TGTAATCTGGGATAACGGGG       |
| scaffold684214_15.5 | 1 p2 | (TC)7  | 14 | 3108 | 3121 | GTAAGCATCGCCCTCCATAA       |
| scaffold684244_14.7 | 1 p2 | (TC)6  | 12 | 778  | 789  | GGGGCATGAATTGTTACAGG       |
| scaffold684247_17.4 | 1 p2 | (AT)10 | 20 | 495  | 514  | GGAGCACCTGATTTTCGCTA       |
| scaffold684254_17.0 | 1 p2 | (CT)7  | 14 | 245  | 258  | AGGGGTTTCGAGTGGAAAATC      |
| scaffold684257_16.6 | 1 p2 | (CT)9  | 18 | 719  | 736  | AGAATTGGAACCCCAAACC        |
| scaffold684271_14.3 | 1 p2 | (TA)8  | 16 | 705  | 720  | AGCCCAAATCACAAACAAC        |
| scaffold684300_11.9 | 1 p2 | (TA)8  | 16 | 323  | 338  | CCCCTCGTATGCAGTCATTT       |
| scaffold684332_13.6 | 1 p2 | (TA)8  | 16 | 424  | 439  | TCAGACGAAACATCCCTTCA       |

|                     |      |        |    |      |      |                          |
|---------------------|------|--------|----|------|------|--------------------------|
| scaffold684366_17.7 | 1 p2 | (AG)6  | 12 | 247  | 258  | TGCTCCTCCTCTTCCTTTCA     |
| scaffold684369_12.0 | 1 p2 | (AG)8  | 16 | 413  | 428  | TCTCGGCCAGAGAGAAGAAA     |
| scaffold684376_17.4 | 1 p2 | (TA)6  | 12 | 645  | 656  | TAACCCACCAAATGCTGTGA     |
| scaffold684408_10.7 | 1 p2 | (AT)7  | 14 | 244  | 257  | GCGTGAGAGATAGCCGAGAG     |
| scaffold684409_16.7 | 1 p2 | (AG)6  | 12 | 243  | 254  | TTCACCTACCAATTCCAGCA     |
| scaffold684438_15.7 | 1 p2 | (TC)9  | 18 | 241  | 258  | CACGCGATACCATTCAATTTT    |
| scaffold684483_20.0 | 1 p2 | (TC)6  | 12 | 67   | 78   | TTAGCTGCTGGGATTTTGCT     |
| scaffold684488_15.0 | 1 p2 | (TC)6  | 12 | 1314 | 1325 | CTAGCAATGGGGTGCTTGTT     |
| scaffold684542_12.1 | 1 p2 | (TA)9  | 18 | 436  | 453  | TGTTTGCTGTCATCGCTAGG     |
| scaffold684580_15.2 | 1 p2 | (AT)9  | 18 | 761  | 778  | ACAAGAATGGATTGGGTTGG     |
| scaffold684591_17.6 | 1 p2 | (AT)6  | 12 | 707  | 718  | TTGGATAAATGGGAGGCTTG     |
| scaffold684693_16.9 | 1 p2 | (TC)6  | 12 | 661  | 672  | ATTGAATACGCGAGACCCAC     |
| scaffold684722_15.3 | 1 p2 | (CT)6  | 12 | 710  | 721  | GGTCAACCTACAGCACCGAT     |
| scaffold684780_11.1 | 1 p2 | (TA)8  | 16 | 302  | 317  | TCATGGGGAATGGAAAAAGA     |
| scaffold684848_13.3 | 1 p2 | (AT)9  | 18 | 776  | 793  | GCCTCCTACCCCACTTCACT     |
| scaffold684864_16.5 | 1 p2 | (AG)6  | 12 | 1077 | 1088 | AACTTTTCAGCCAAGAGCCAA    |
| scaffold684904_11.0 | 1 p2 | (TA)10 | 20 | 581  | 600  | ACGCGCGTTTTTATAGATTTA    |
| scaffold684910_13.3 | 1 p2 | (TA)12 | 24 | 208  | 231  | GTGGCTGGAGGCATACAAC      |
| scaffold685076_14.9 | 1 p2 | (TA)8  | 16 | 1347 | 1362 | TTTCCGAAACTTCCAATCAA     |
| scaffold685105_15.1 | 1 p2 | (AT)6  | 12 | 1323 | 1334 | GGTCCCTAAACCCAAATCGT     |
| scaffold685114_14.0 | 1 p2 | (AG)7  | 14 | 396  | 409  | CATTTGGAGGTGCACACAAC     |
| scaffold685228_13.2 | 1 p2 | (TA)9  | 18 | 1110 | 1127 | GGAAACCTTATGCGATTGGA     |
| scaffold685230_15.2 | 1 p2 | (AT)6  | 12 | 3041 | 3052 | TGCTTGAGAGTGGGAGGAGT     |
| scaffold685260_15.5 | 1 p2 | (TA)6  | 12 | 249  | 260  | CGAATACGTACGGGTGTGCT     |
| scaffold685263_12.8 | 1 p2 | (TC)7  | 14 | 623  | 636  | ATGCCTTTGCAATTTCTGCT     |
| scaffold685364_18.0 | 1 p2 | (TA)8  | 16 | 415  | 430  | GGCCAAATCCTAGCCACATA     |
| scaffold685403_12.1 | 1 p2 | (TA)6  | 12 | 456  | 467  | CTATCAGCGCTTCTTTCCGA     |
| scaffold685431_16.8 | 1 p2 | (CT)8  | 16 | 561  | 576  | ACTCGTCTCGTTTCTTTGC      |
| scaffold685461_16.1 | 1 p2 | (CT)6  | 12 | 1755 | 1766 | TAAATAGTGGCGGATCCAGG     |
| scaffold685484_18.9 | 1 p2 | (AT)8  | 16 | 751  | 766  | CGCCAAGCACTCACAAACTA     |
| scaffold685559_13.3 | 1 p2 | (TA)13 | 26 | 40   | 65   | AAGGGGGTTATTAGTGGATCA    |
| scaffold685568_14.1 | 1 p2 | (AT)8  | 16 | 1449 | 1464 | AGGCTGGTATTTTGGCCTTC     |
| scaffold685656_17.8 | 1 p2 | (AT)8  | 16 | 2682 | 2697 | TGATAATGCACTTCAATACAAGCA |
| scaffold685668_11.7 | 1 p2 | (CT)6  | 12 | 78   | 89   | CATCTCTTCTCCACCAACCG     |
| scaffold685737_15.4 | 1 p2 | (AG)7  | 14 | 2066 | 2079 | ATCAAGAAATTCACCAGGCG     |
| scaffold685751_11.3 | 1 p2 | (TA)9  | 18 | 403  | 420  | TACGATTTTTTCGGTTTTCCG    |
| scaffold685768_12.7 | 1 p2 | (GA)7  | 14 | 450  | 463  | CCATCTTCAACCCGTCCTT      |
| scaffold685770_14.3 | 1 p2 | (AT)7  | 14 | 1070 | 1083 | CGACCTTGGCAATCAACTTT     |
| scaffold685787_13.4 | 1 p2 | (CA)6  | 12 | 38   | 49   | CCCCCTTCTACTTTGGTCAG     |
| scaffold685796_16.4 | 1 p2 | (AG)6  | 12 | 3788 | 3799 | AACGAGAAAAGACTGCTGCC     |
| scaffold685799_10.6 | 1 p2 | (AT)10 | 20 | 71   | 90   | ATCGGTTATTACCGGATCGC     |
| scaffold685838_13.5 | 1 p2 | (AT)8  | 16 | 1092 | 1107 | CAGGTGCGCCTTATCTCTCT     |
| scaffold685928_11.2 | 1 p2 | (AC)6  | 12 | 348  | 359  | TGCATGATTTCTTCAATCTTCG   |
| scaffold685955_10.8 | 1 p2 | (TA)8  | 16 | 831  | 846  | GGGAAAGCCTCAAGTCCAAT     |
| scaffold685983_13.1 | 1 p2 | (TA)7  | 14 | 819  | 832  | TGTTTTGTTCGACAACGACTCT   |
| scaffold685994_10.3 | 1 p2 | (TC)11 | 22 | 31   | 52   | TTTTTGTCTACTAGTGTGTTTTG  |
| scaffold686016_11.8 | 1 p2 | (AG)6  | 12 | 107  | 118  | AGTTTTAGCGTGTGAGGCGT     |
| scaffold686045_16.5 | 1 p2 | (TC)6  | 12 | 108  | 119  | AGGACACGTTGGACCTGAAG     |
| scaffold686111_12.2 | 1 p2 | (AT)6  | 12 | 578  | 589  | ATCACGATATCCACATTTAGCA   |
| scaffold686144_17.0 | 1 p2 | (GA)9  | 18 | 869  | 886  | TGCACAGTCCTAATCAAGCG     |
| scaffold686176_17.3 | 1 p2 | (AG)6  | 12 | 1263 | 1274 | TGAAAGAATTTTTCGGCTGG     |
| scaffold686190_14.6 | 1 p2 | (CT)6  | 12 | 1004 | 1015 | TTGCGAACTAGTTGTCGTCG     |
| scaffold686197_17.0 | 1 p2 | (TA)8  | 16 | 247  | 262  | TCCCACTGCCCAAATTTATT     |
| scaffold686260_13.3 | 1 p2 | (TA)6  | 12 | 530  | 541  | GCAATAACGCTGCAAAATCA     |
| scaffold686315_17.7 | 1 p2 | (TA)7  | 14 | 1693 | 1706 | CGATAAAAATGGCACCCAGT     |
| scaffold686332_11.3 | 1 p2 | (AT)7  | 14 | 249  | 262  | CGCTGCTTTCGTGTTTAGTT     |
| scaffold686341_14.9 | 1 p2 | (TG)12 | 24 | 818  | 841  | GGGGGAGAGTTGGAGATCAT     |
| scaffold686436_14.4 | 1 p2 | (CT)8  | 16 | 430  | 445  | CAGCGGCTTACTAGCTTCGT     |

|                     |      |        |    |      |      |                             |
|---------------------|------|--------|----|------|------|-----------------------------|
| scaffold686476_18.1 | 1 p2 | (TC)6  | 12 | 153  | 164  | CCCCAAATCATTTCAGCATA        |
| scaffold686478_15.6 | 1 p2 | (TA)8  | 16 | 501  | 516  | CCCAAGTGGGATATTGTTGG        |
| scaffold686480_16.9 | 1 p2 | (TA)11 | 22 | 43   | 64   | TCACATAAATAATGGTTTCTTCCTAA  |
| scaffold686487_14.0 | 1 p2 | (AG)6  | 12 | 579  | 590  | AGTGCCTCAGAAGGTGTCCT        |
| scaffold686517_12.9 | 1 p2 | (CT)7  | 14 | 124  | 137  | CCCCCGTGCATTAATAAAAT        |
| scaffold686569_13.9 | 1 p2 | (AG)7  | 14 | 351  | 364  | GGAGGAGAGGCTCTTGGTTT        |
| scaffold686585_17.3 | 1 p2 | (GA)6  | 12 | 961  | 972  | GCAGCATCGTCTGAGAGTGA        |
| scaffold686586_13.0 | 1 p2 | (AT)11 | 22 | 876  | 897  | ATTTGGAAACTTGAACCCCC        |
| scaffold686612_15.0 | 1 p2 | (AT)6  | 12 | 997  | 1008 | TCCACCAACCAACATTCTCT        |
| scaffold686619_17.0 | 1 p2 | (CT)10 | 20 | 54   | 73   | ACCCATTTTCATGTCACCTCC       |
| scaffold686679_23.0 | 1 p2 | (AG)6  | 12 | 252  | 263  | GGCCACTGCGTTTGTAGAG         |
| scaffold686682_17.0 | 1 p2 | (AG)6  | 12 | 251  | 262  | ACTTTTCTCCCCATCATC          |
| scaffold686683_14.9 | 1 p2 | (GA)7  | 14 | 2722 | 2735 | ATCTCCGTCTTTGTTGTGGC        |
| scaffold686695_16.3 | 1 p2 | (TC)8  | 16 | 1226 | 1241 | CCTCTGCAGCCTAAAACCAC        |
| scaffold686730_10.6 | 1 p2 | (CT)6  | 12 | 229  | 240  | GACACCTCCACACCCAATCT        |
| scaffold686753_16.1 | 1 p2 | (TA)7  | 14 | 249  | 262  | GCAAGAAAGCAGTGCACCTA        |
| scaffold686787_13.7 | 1 p2 | (AT)8  | 16 | 248  | 263  | TTGGCGTAGATTCCACTTGA        |
| scaffold686802_16.2 | 1 p2 | (TA)7  | 14 | 2933 | 2946 | CACTCATTTGAGGATGGATTGA      |
| scaffold686846_10.0 | 1 p2 | (TC)6  | 12 | 153  | 164  | GGTGCTTTCTGGTTCATCGT        |
| scaffold686896_12.0 | 1 p2 | (AT)8  | 16 | 500  | 515  | TGTGGCATGGGTCAAGATAA        |
| scaffold686935_13.2 | 1 p2 | (AT)6  | 12 | 1276 | 1287 | CGTCATTTTTCAATCCCAGC        |
| scaffold686962_11.9 | 1 p2 | (TA)6  | 12 | 32   | 43   | ACGTCTCTAGGTGTCGTCC         |
| scaffold686993_15.0 | 1 p2 | (AT)6  | 12 | 878  | 889  | GATTCGTTGCAGAAATCCGT        |
| scaffold687046_12.9 | 1 p2 | (TA)6  | 12 | 2939 | 2950 | CTCACGTGAAAATGCAAGGA        |
| scaffold687051_17.3 | 1 p2 | (TC)6  | 12 | 88   | 99   | TGATTTGCTGATTTTGGTG         |
| scaffold687122_15.1 | 1 p2 | (TC)9  | 18 | 735  | 752  | CTTTCCCATGGAGTTCAGGA        |
| scaffold687124_14.2 | 1 p2 | (AT)6  | 12 | 65   | 76   | GCTTAATTGTAAACCGTTGTCAT     |
| scaffold687140_19.4 | 1 p2 | (GA)6  | 12 | 465  | 476  | TGGCACTCAGTTAAGGGTCC        |
| scaffold687162_11.8 | 1 p2 | (AT)7  | 14 | 454  | 467  | GCGTCGTGGATCAAGGTAAT        |
| scaffold687177_15.7 | 1 p2 | (CT)9  | 18 | 48   | 65   | TGAATCCTTCTTGCTAGTCAC       |
| scaffold687185_15.3 | 1 p2 | (TA)9  | 18 | 498  | 515  | CAATGTATCCAAACATGATGACC     |
| scaffold687190_11.9 | 1 p2 | (AT)6  | 12 | 373  | 384  | ATCAGGCAAAAACGTGCATT        |
| scaffold687225_15.9 | 1 p2 | (TC)7  | 14 | 469  | 482  | CAAAGCGGGTAAAGGAACAA        |
| scaffold687276_13.8 | 1 p2 | (GA)6  | 12 | 1273 | 1284 | TCAGTGCCTGTGATTCTGTG        |
| scaffold687337_16.3 | 1 p2 | (AT)9  | 18 | 1253 | 1270 | CCACTCACATGGGAATTGTT        |
| scaffold687391_13.6 | 1 p2 | (CA)8  | 16 | 1130 | 1145 | TCACTAGCCGGACACATCAG        |
| scaffold687426_16.2 | 1 p2 | (AT)7  | 14 | 3700 | 3713 | AGGGATGTGAATTCGTGCAT        |
| scaffold687429_12.6 | 1 p2 | (AG)6  | 12 | 415  | 426  | GGCATGTCCGAGTTCCTAGC        |
| scaffold687430_14.6 | 1 p2 | (CA)6  | 12 | 1026 | 1037 | TTCCATACGACATTGCAAGC        |
| scaffold687435_16.0 | 1 p2 | (AG)6  | 12 | 899  | 910  | CCAGAACCCAGCTTCTTCAG        |
| scaffold687446_10.0 | 1 p2 | (TA)7  | 14 | 52   | 65   | TCAACGTACCTATTTTGTTCCTAGTTT |
| scaffold687461_10.8 | 1 p2 | (GC)6  | 12 | 276  | 287  | CACACACAAGATTTGGGAGG        |
| scaffold687466_15.9 | 1 p2 | (GA)7  | 14 | 103  | 116  | GGAGTTCGAGCTTCAGGAGA        |
| scaffold687547_18.0 | 1 p2 | (TC)6  | 12 | 366  | 377  | GGGGATAATGACGAGACGAA        |
| scaffold687641_12.2 | 1 p2 | (TA)9  | 18 | 230  | 247  | ATCCTGTCCATCACCCATA         |
| scaffold687693_15.1 | 1 p2 | (TG)7  | 14 | 321  | 334  | CAGCATACGCGAAGGGTATT        |
| scaffold687724_16.9 | 1 p2 | (AG)8  | 16 | 85   | 100  | TCAATAAAATGCTTCCAATCG       |
| scaffold687730_16.8 | 1 p2 | (TC)9  | 18 | 1122 | 1139 | ATCCAAGGAGCACACCTGAG        |
| scaffold687735_12.8 | 1 p2 | (GA)6  | 12 | 1003 | 1014 | TGTGTGTTGTGTGTTACCGG        |
| scaffold687752_18.1 | 1 p2 | (TA)9  | 18 | 46   | 63   | CCAATTTGAATGGTTATCACCTG     |
| scaffold687769_10.4 | 1 p2 | (AT)10 | 20 | 450  | 469  | ATTTGGCCCTATAAAATGCC        |
| scaffold687786_10.7 | 1 p2 | (AT)6  | 12 | 165  | 176  | ACCTCGCAGTCATTCCAGAC        |
| scaffold687822_13.2 | 1 p2 | (TA)8  | 16 | 52   | 67   | GGAGGGGGTATAATTTGAATAGC     |
| scaffold687843_12.6 | 1 p2 | (AG)8  | 16 | 36   | 51   | TTGAAATTGGATATTTTCAGGAGA    |
| scaffold687858_14.6 | 1 p2 | (AG)12 | 24 | 242  | 265  | AACCTAACACCAAGGCAACG        |
| scaffold687882_10.0 | 1 p2 | (AT)8  | 16 | 122  | 137  | CCTCCACCGCCTAACATAA         |
| scaffold688039_14.0 | 1 p2 | (TC)6  | 12 | 544  | 555  | CTGCTCCGATGAACCTCTGT        |
| scaffold688055_10.1 | 1 p2 | (TC)8  | 16 | 715  | 730  | TGACCTCTACGAGGCATACCA       |

|                     |      |        |    |      |                                |
|---------------------|------|--------|----|------|--------------------------------|
| scaffold688116_13.9 | 1 p2 | (TA)9  | 18 | 171  | 188 ATAGGGATTTCCGATTTCCG       |
| scaffold688117_13.8 | 1 p2 | (TA)8  | 16 | 1967 | 1982 CAACGAATTCACACCAAAA       |
| scaffold688192_16.1 | 1 p2 | (TA)6  | 12 | 459  | 470 AAAGTGAAGCTCCATAGCCGA      |
| scaffold688218_15.9 | 1 p2 | (GA)8  | 16 | 271  | 286 GAAGCCCTTTCTTCCCAATC       |
| scaffold688219_17.1 | 1 p2 | (GT)6  | 12 | 2934 | 2945 TGAAACAACACGACCGGATA      |
| scaffold688244_15.8 | 1 p2 | (AT)6  | 12 | 116  | 127 CGGATGAATTTCACTTCACG       |
| scaffold688277_17.3 | 1 p2 | (AC)6  | 12 | 914  | 925 GTGTCGATGCCTGAAATCCT       |
| scaffold688303_15.4 | 1 p2 | (TC)6  | 12 | 358  | 369 ATGGCGAAATCACCAGAAAC       |
| scaffold688304_18.9 | 1 p2 | (TG)7  | 14 | 31   | 44 CCGTCAGTTTCAAGACATTCC       |
| scaffold688334_19.2 | 1 p2 | (TC)9  | 18 | 249  | 266 AATCCCCCAAACCAATTTCT       |
| scaffold688344_18.3 | 1 p2 | (AT)6  | 12 | 255  | 266 CATTTCAGTGGGCACATTGTC      |
| scaffold688347_16.9 | 1 p2 | (GA)7  | 14 | 2000 | 2013 TGCAGAGAAGGGAAGAGGAA      |
| scaffold688373_11.5 | 1 p2 | (TG)6  | 12 | 367  | 378 CGGTTCAACTTCCCATGTTT       |
| scaffold688374_11.8 | 1 p2 | (AC)9  | 18 | 447  | 464 TTGACATTGAATCCCCTCATT      |
| scaffold688474_11.5 | 1 p2 | (AG)6  | 12 | 1613 | 1624 CTTGCTTGCTGAGGTAAGGC      |
| scaffold688520_15.7 | 1 p2 | (AG)9  | 18 | 2153 | 2170 AAGTCCAGTGAATGATGCC       |
| scaffold688548_13.0 | 1 p2 | (AT)7  | 14 | 252  | 265 TAATGGCGCCGCTAATGTA        |
| scaffold688555_10.3 | 1 p2 | (AT)11 | 22 | 576  | 597 ACCCCTACACGCAACTCAAC       |
| scaffold688635_11.8 | 1 p2 | (AT)7  | 14 | 765  | 778 CCACATAAGCGTCATCTCAAAA     |
| scaffold688663_15.3 | 1 p2 | (TA)14 | 28 | 35   | 62 GGGCTGCAGGAATTC AATAA       |
| scaffold688700_13.6 | 1 p2 | (AT)9  | 18 | 1061 | 1078 TTTTGCCATCATAAACTCTATTTCG |
| scaffold688722_17.4 | 1 p2 | (AT)6  | 12 | 136  | 147 CCATTTTCAGCCAAGCTGTTT      |
| scaffold688807_16.0 | 1 p2 | (CA)6  | 12 | 1163 | 1174 TCGGAAGGTTTATCCTCAGTG     |
| scaffold688810_16.9 | 1 p2 | (TC)6  | 12 | 452  | 463 TAAGCAAAGCGTGCACAATC       |
| scaffold688844_16.8 | 1 p2 | (CT)10 | 20 | 792  | 811 CCACTTTCCACAATCCTCGT       |
| scaffold688857_15.3 | 1 p2 | (TG)6  | 12 | 45   | 56 TCCTCTCCTCTCTCTACTCTCTC     |
| scaffold688943_16.4 | 1 p2 | (TA)6  | 12 | 477  | 488 GGGTGGGTCTCCCTTACATT       |
| scaffold688977_13.8 | 1 p2 | (TA)6  | 12 | 2434 | 2445 TACCCTCCGGTACACGAAAA      |
| scaffold689002_13.6 | 1 p2 | (AT)8  | 16 | 422  | 437 TATTTGACCGTGAATTGGCA       |
| scaffold689015_16.4 | 1 p2 | (CT)8  | 16 | 1505 | 1520 TCGCAACTTACCTTTACCC       |
| scaffold689048_17.1 | 1 p2 | (AC)6  | 12 | 743  | 754 ATGTGGAACCAAACGATCAA       |
| scaffold689068_13.3 | 1 p2 | (AT)10 | 20 | 216  | 235 TTGGAATAGGTCCTTGGCTG       |
| scaffold689071_16.0 | 1 p2 | (TA)7  | 14 | 49   | 62 TTTAGTGTTTTGACATGATTACTCG   |
| scaffold689075_11.2 | 1 p2 | (AT)9  | 18 | 193  | 210 GGGTTACCAAATTAGTTCGTGCG    |
| scaffold689115_16.1 | 1 p2 | (CT)7  | 14 | 253  | 266 TTTTCTTTTCGCTGCATGTG       |
| scaffold689128_11.2 | 1 p2 | (TA)7  | 14 | 78   | 91 ATAAGCCACCCAAACAATGC        |
| scaffold689143_15.5 | 1 p2 | (TG)10 | 20 | 3236 | 3255 GGATCATCTTCCCTCTCCCT      |
| scaffold689173_15.6 | 1 p2 | (AG)7  | 14 | 1647 | 1660 CAAGGCAAGGACCAGATCAT      |
| scaffold689281_16.5 | 1 p2 | (AT)8  | 16 | 1953 | 1968 AAGGAGGTGTTATGAAGGGATT    |
| scaffold689286_17.2 | 1 p2 | (TA)10 | 20 | 248  | 267 TCCCAAACCTGATGGAAGGTT      |
| scaffold689290_19.4 | 1 p2 | (AT)7  | 14 | 109  | 122 TGCAAAAAGTTATGGTAACAAGATT  |
| scaffold689296_11.9 | 1 p2 | (TA)7  | 14 | 933  | 946 GAGTTAATCATGCGCGTCAA       |
| scaffold689432_14.9 | 1 p2 | (TA)11 | 22 | 48   | 69 TGGTGAATGATTGACGATGAA       |
| scaffold689502_18.4 | 1 p2 | (TA)6  | 12 | 74   | 85 ATCAATGGTCCACATCGGTT        |
| scaffold689544_15.2 | 1 p2 | (CT)6  | 12 | 56   | 67 TCTCTCTGGTTGGTGAAGGA        |
| scaffold689559_13.0 | 1 p2 | (AG)6  | 12 | 508  | 519 CGTGGTTGGTGTGAGATTTG       |
| scaffold689571_15.4 | 1 p2 | (TC)6  | 12 | 1736 | 1747 TTACGATTCACCAATTTCGCA     |
| scaffold689606_15.5 | 1 p2 | (GA)7  | 14 | 1406 | 1419 GACGACGTGAAGAGACGACA      |
| scaffold689646_11.9 | 1 p2 | (GA)6  | 12 | 551  | 562 GTAGTCGGCAGAACCCAGAA       |
| scaffold689685_20.1 | 1 p2 | (CT)7  | 14 | 1074 | 1087 ATCACTGCATTTTCGTCTCTCC    |
| scaffold689694_10.0 | 1 p2 | (TA)9  | 18 | 154  | 171 TGCCTTTATTTTAGCTCTCC       |
| scaffold689704_16.7 | 1 p2 | (TC)6  | 12 | 2235 | 2246 ATCCTCACATCGCCAAAAAC      |
| scaffold689732_10.5 | 1 p2 | (CT)8  | 16 | 52   | 67 ACCTCATTTTCAACACCCCA        |
| scaffold689793_13.8 | 1 p2 | (GC)7  | 14 | 214  | 227 GCTTCTTTGCTACGAGCCAC       |
| scaffold689905_18.9 | 1 p2 | (AT)9  | 18 | 864  | 881 AAACCGGGCCTACAAGATTT       |
| scaffold689910_17.3 | 1 p2 | (CT)7  | 14 | 503  | 516 ACAAACAGCCCAAGGAAATG       |
| scaffold689943_13.8 | 1 p2 | (CT)10 | 20 | 568  | 587 AGGAACAGAGCTTCAACGGA       |
| scaffold690035_15.9 | 1 p2 | (TC)8  | 16 | 855  | 870 AAACAATTGGGATGAGCAGG       |

|                     |      |        |    |      |                               |
|---------------------|------|--------|----|------|-------------------------------|
| scaffold690100_14.2 | 1 p2 | (AT)10 | 20 | 956  | 975 CAATGGTGGCCGAAAATTAG      |
| scaffold690112_15.6 | 1 p2 | (CA)8  | 16 | 180  | 195 CTAACCCTAGGTGGTGCCAA      |
| scaffold690133_14.5 | 1 p2 | (TA)9  | 18 | 253  | 270 CCCAGGCATAGAAAGAAAAGAA    |
| scaffold690165_14.7 | 1 p2 | (AT)12 | 24 | 1977 | 2000 CGTCGGTGTATGACCTGTTG     |
| scaffold690190_14.5 | 1 p2 | (AG)7  | 14 | 449  | 462 AACTTGACCCAAATTCAC        |
| scaffold690206_14.2 | 1 p2 | (TA)8  | 16 | 1194 | 1209 CAGAACGCTCTTTTGCACAC     |
| scaffold690233_12.7 | 1 p2 | (TA)6  | 12 | 397  | 408 TATCAGTGACCACCCAACCA      |
| scaffold690316_14.9 | 1 p2 | (GA)7  | 14 | 257  | 270 CTA AACCCAGGTGGCAGTGT     |
| scaffold690355_17.0 | 1 p2 | (AG)6  | 12 | 532  | 543 CTGGGAGTGCTGGAGAAGAC      |
| scaffold690369_11.6 | 1 p2 | (TA)8  | 16 | 122  | 137 CGGATCGGAATTTCTCAAAG      |
| scaffold690396_15.8 | 1 p2 | (AT)6  | 12 | 576  | 587 GGGGAAATAAAAGCCCAAAA      |
| scaffold690418_17.1 | 1 p2 | (CT)6  | 12 | 256  | 267 TAGAGGATTCGGCATTGGAG      |
| scaffold690458_18.4 | 1 p2 | (AG)6  | 12 | 513  | 524 GTTGGAAAAAGCCAATCGAG      |
| scaffold690482_14.0 | 1 p2 | (GA)8  | 16 | 707  | 722 TTCCAGGAGCCAGATAGGAC      |
| scaffold690506_15.5 | 1 p2 | (TC)6  | 12 | 224  | 235 CGAAGCCAAACCTAGGAAGG      |
| scaffold690519_15.6 | 1 p2 | (GA)6  | 12 | 565  | 576 TCCATCCACCTCTGCTTTTC      |
| scaffold690523_13.9 | 1 p2 | (AT)9  | 18 | 465  | 482 ATTTGTCCAATGGTGCTTCG      |
| scaffold690546_13.2 | 1 p2 | (GA)6  | 12 | 756  | 767 GGAACCTGAGAATGGGGAAT      |
| scaffold690549_17.0 | 1 p2 | (TA)6  | 12 | 1207 | 1218 CATGTGGATCATAACAGGG      |
| scaffold690566_13.2 | 1 p2 | (AC)9  | 18 | 204  | 221 TCTACCAAGATCCTGCCTGC      |
| scaffold690576_12.6 | 1 p2 | (AT)8  | 16 | 1240 | 1255 C GACTATTGTTTGT CATCGCA  |
| scaffold690579_18.2 | 1 p2 | (TC)7  | 14 | 180  | 193 GAGGTGCTGGGTC ACTGAAT     |
| scaffold690582_15.4 | 1 p2 | (CT)6  | 12 | 716  | 727 GGCAACCCACTTGTGAAACT      |
| scaffold690586_12.3 | 1 p2 | (AT)10 | 20 | 85   | 104 CCGCTCCTCCTTTTCTTTTT      |
| scaffold690632_15.6 | 1 p2 | (TA)9  | 18 | 45   | 62 AAGGAGGTGTTATGAAGGGATT     |
| scaffold690676_15.9 | 1 p2 | (TA)8  | 16 | 255  | 270 GCAGCACATTGTGGTCTTCA      |
| scaffold690704_17.0 | 1 p2 | (AG)6  | 12 | 556  | 567 TTTGGGGGTGCATATTTCTC      |
| scaffold690737_12.8 | 1 p2 | (AT)8  | 16 | 466  | 481 GTGGATCTGGGCTGCATTAT      |
| scaffold690750_13.1 | 1 p2 | (AG)9  | 18 | 914  | 931 TCAACCACACCTCCA ACTCA     |
| scaffold690758_15.5 | 1 p2 | (AT)6  | 12 | 277  | 288 TGCAGTTGAGATAAGGGAGGA     |
| scaffold690803_11.5 | 1 p2 | (TA)8  | 16 | 116  | 131 TGAACATGCTCATATTTAATACACC |
| scaffold690930_13.7 | 1 p2 | (TC)7  | 14 | 217  | 230 CATCTCCAATGCCAGGTACA      |
| scaffold691001_17.5 | 1 p2 | (CA)6  | 12 | 1035 | 1046 TCGCATTCTTATTCCGATGA     |
| scaffold691018_12.0 | 1 p2 | (GT)8  | 16 | 706  | 721 TTA ACTGCTCCTCCACCCAC     |
| scaffold691045_16.1 | 1 p2 | (TA)7  | 14 | 911  | 924 GCCCACC AATTACAACACCT     |
| scaffold691061_16.0 | 1 p2 | (AT)8  | 16 | 1116 | 1131 CGCATGCACATGCATTATTT     |
| scaffold691064_12.3 | 1 p2 | (TA)9  | 18 | 48   | 65 CCAAGAATGGGTTATTATTTGA     |
| scaffold691091_15.2 | 1 p2 | (AG)6  | 12 | 167  | 178 AGACCGCAATAGCCACTGTC      |
| scaffold691099_12.7 | 1 p2 | (AG)6  | 12 | 732  | 743 CATGATCTGATGAGGCAGGA      |
| scaffold691146_15.0 | 1 p2 | (TC)6  | 12 | 219  | 230 TTAATCGGGCTCTGAGCAGT      |
| scaffold691192_14.8 | 1 p2 | (AG)6  | 12 | 1642 | 1653 GCCAAAAATGACGTTTTGCT     |
| scaffold691213_14.5 | 1 p2 | (AT)9  | 18 | 1587 | 1604 GCTAGAAGCAGCCGTGACAT     |
| scaffold691246_10.7 | 1 p2 | (CT)7  | 14 | 316  | 329 ATTGAATCTACGTCCACGGG      |
| scaffold691268_12.4 | 1 p2 | (AT)8  | 16 | 681  | 696 CCCTTAGTATGCTGTCCGAAA     |
| scaffold691280_10.6 | 1 p2 | (TC)7  | 14 | 170  | 183 AACAATCAAGCCCACCTCAG      |
| scaffold691333_15.5 | 1 p2 | (TA)6  | 12 | 918  | 929 TGAATTTGGTCTCCTTTGGC      |
| scaffold691363_16.7 | 1 p2 | (CT)6  | 12 | 508  | 519 GGAGAAATAATGACGGCCAA      |
| scaffold691407_12.2 | 1 p2 | (CT)7  | 14 | 259  | 272 TCGACCTCCATTAGAGCACC      |
| scaffold691474_16.4 | 1 p2 | (TA)6  | 12 | 139  | 150 ATTGTCCATGCAACCTACGA      |
| scaffold691593_15.6 | 1 p2 | (AT)8  | 16 | 258  | 273 GCAGACA ACTGACAATGCAAA    |
| scaffold691646_13.4 | 1 p2 | (AT)6  | 12 | 2611 | 2622 GTGGAAAGAAGCTAACCCCC     |
| scaffold691649_16.3 | 1 p2 | (CT)8  | 16 | 258  | 273 CTAGATTCTTCGTAGCGGCG      |
| scaffold691728_13.9 | 1 p2 | (GA)6  | 12 | 857  | 868 AAGCCAAGTTAGCTCCCAGA      |
| scaffold691762_11.6 | 1 p2 | (TA)6  | 12 | 262  | 273 TTGTTAGAGGTTTTGACGGGA     |
| scaffold691779_11.3 | 1 p2 | (AT)10 | 20 | 87   | 106 ATGAATGGCCCATATTGGTT      |
| scaffold691833_14.8 | 1 p2 | (AT)6  | 12 | 514  | 525 CGAACATGACACAAATTGCC      |
| scaffold691858_16.3 | 1 p2 | (AC)6  | 12 | 1739 | 1750 CCTCCACGAATGGTTTTGAT     |
| scaffold691883_14.2 | 1 p2 | (AT)6  | 12 | 1240 | 1251 CACGGTCATGAATAAAATCGTT   |

|                     |      |        |    |      |      |                            |
|---------------------|------|--------|----|------|------|----------------------------|
| scaffold691914_15.6 | 1 p2 | (GA)6  | 12 | 571  | 582  | ACTGACCAAGCATCCTCGAC       |
| scaffold691937_18.3 | 1 p2 | (GA)6  | 12 | 230  | 241  | TGTTTACATGAAAGCGGTGG       |
| scaffold691994_13.8 | 1 p2 | (CT)6  | 12 | 1111 | 1122 | CTCACCACACATGCACACTG       |
| scaffold691996_14.8 | 1 p2 | (TA)7  | 14 | 686  | 699  | GCCCATCGTAACATGAAGGT       |
| scaffold692049_13.0 | 1 p2 | (AG)7  | 14 | 602  | 615  | CTACATGCTGAGATCGAGCG       |
| scaffold692055_16.7 | 1 p2 | (TA)6  | 12 | 514  | 525  | AAATAAAGGCTGCATGGCAC       |
| scaffold692075_14.3 | 1 p2 | (GA)6  | 12 | 487  | 498  | GTTGCAGGGCAATACCATTT       |
| scaffold692083_17.6 | 1 p2 | (CA)7  | 14 | 3530 | 3543 | TCAAATCCACAATTGCCTTG       |
| scaffold692105_12.2 | 1 p2 | (AC)7  | 14 | 434  | 447  | GTACGCAGAGCTTTCCAGT        |
| scaffold692141_11.3 | 1 p2 | (TA)6  | 12 | 452  | 463  | ATGCCCTTTTCTCGAACATC       |
| scaffold692209_16.1 | 1 p2 | (TC)8  | 16 | 631  | 646  | TCGTGGCTGGTTAAGCTTCT       |
| scaffold692214_11.3 | 1 p2 | (AT)7  | 14 | 787  | 800  | AAACACATCTCGAGGGATCG       |
| scaffold692246_14.2 | 1 p2 | (AT)10 | 20 | 46   | 65   | ATGAAGTTAGGAAATAAGAAGGTGTI |
| scaffold692326_14.1 | 1 p2 | (CT)6  | 12 | 302  | 313  | CCTTGAAGATCAAGACATCTACTCC  |
| scaffold692347_15.2 | 1 p2 | (AT)7  | 14 | 668  | 681  | AGGGCAATTGATCTTGCCTA       |
| scaffold692365_13.7 | 1 p2 | (GA)6  | 12 | 2939 | 2950 | AAAAACAAGAACCCACGCAC       |
| scaffold692395_14.5 | 1 p2 | (CT)6  | 12 | 305  | 316  | AATGAGACCGGAAATGGATG       |
| scaffold692427_18.3 | 1 p2 | (GA)6  | 12 | 421  | 432  | TGGTGGAGGCTCGGTTATTA       |
| scaffold692439_11.2 | 1 p2 | (AG)6  | 12 | 520  | 531  | AGCTTACCAAGCTTTTCCA        |
| scaffold692495_14.6 | 1 p2 | (CT)8  | 16 | 192  | 207  | CAACCTCTGCTGCTTATCC        |
| scaffold692496_13.4 | 1 p2 | (CT)8  | 16 | 260  | 275  | AAAACCTCAAATCCCCAAC        |
| scaffold692534_14.6 | 1 p2 | (CA)7  | 14 | 1866 | 1879 | GAAAATGACCAACCATTCCG       |
| scaffold692561_15.7 | 1 p2 | (AC)8  | 16 | 323  | 338  | TCAGTGATAGAAATTGAGGGGAA    |
| scaffold692606_11.8 | 1 p2 | (AT)9  | 18 | 573  | 590  | TTACGGGTTGGGCTGTAGAC       |
| scaffold692616_13.3 | 1 p2 | (TA)11 | 22 | 44   | 65   | GAGGGTTATCATGGGATCAAG      |
| scaffold692643_18.1 | 1 p2 | (TA)7  | 14 | 209  | 222  | ATGCCGACACCACACATATC       |
| scaffold692655_16.2 | 1 p2 | (CT)6  | 12 | 613  | 624  | GGTGCACCCTCACTTTTGT        |
| scaffold692694_11.5 | 1 p2 | (AG)8  | 16 | 758  | 773  | TAGGGTTCGAATCCCCACTC       |
| scaffold692704_16.8 | 1 p2 | (CT)6  | 12 | 2480 | 2491 | TTTCCAGCAAACATTGACG        |
| scaffold692718_15.6 | 1 p2 | (TC)6  | 12 | 298  | 309  | TGGGAGAATTGGGCTAAGTG       |
| scaffold692734_16.6 | 1 p2 | (TA)6  | 12 | 136  | 147  | TCCATTTTGGGATGAATTT        |
| scaffold692766_17.2 | 1 p2 | (TC)12 | 24 | 1692 | 1715 | GAACCTCTCCATCAGGGCAG       |
| scaffold692777_12.3 | 1 p2 | (TA)9  | 18 | 399  | 416  | TGATCTCAAAGATCAACGGTTT     |
| scaffold692785_17.6 | 1 p2 | (CA)9  | 18 | 6982 | 6999 | TCTACCTAAAGCACGCCAAAA      |
| scaffold692816_13.3 | 1 p2 | (AC)9  | 18 | 582  | 599  | CGATGGTTGGAAACAAATGG       |
| scaffold692841_16.7 | 1 p2 | (AG)6  | 12 | 178  | 189  | ATTCATGAACCACAAAGGGG       |
| scaffold692844_16.0 | 1 p2 | (CA)6  | 12 | 7067 | 7078 | TCACACCAAAGATGCTGCTC       |
| scaffold692873_14.5 | 1 p2 | (AT)8  | 16 | 261  | 276  | CAAGTATTGGGGCAGCAAGT       |
| scaffold692938_11.3 | 1 p2 | (TA)6  | 12 | 907  | 918  | AGTGTGTACGGCGCTAGGT        |
| scaffold692971_12.6 | 1 p2 | (AT)8  | 16 | 1081 | 1096 | CCACATAATGTTGCGCATGT       |
| scaffold693010_14.2 | 1 p2 | (CT)8  | 16 | 621  | 636  | CCTGCTCAAACACATCAGGA       |
| scaffold693084_14.0 | 1 p2 | (AT)6  | 12 | 353  | 364  | TGGCTTCATGCAAATCAAG        |
| scaffold693116_17.4 | 1 p2 | (AC)6  | 12 | 842  | 853  | CACGTTAAATCCCTTGACACA      |
| scaffold693176_13.6 | 1 p2 | (AG)6  | 12 | 456  | 467  | TTTGTGGTATCAGAGCCACG       |
| scaffold693218_10.5 | 1 p2 | (CT)8  | 16 | 320  | 335  | TGCAACAACAGAAGGATCAGA      |
| scaffold693236_15.8 | 1 p2 | (AG)8  | 16 | 251  | 266  | TGTACCGTCCTTGCATTGA        |
| scaffold693248_12.2 | 1 p2 | (TC)7  | 14 | 2015 | 2028 | AATGCAAAGGATTTGATCCG       |
| scaffold693278_16.9 | 1 p2 | (CT)6  | 12 | 3142 | 3153 | CCTCCTTCTTCTGTTCCC         |
| scaffold693286_15.5 | 1 p2 | (AT)8  | 16 | 262  | 277  | GGACGCACCAGATTGTTTCT       |
| scaffold693376_16.9 | 1 p2 | (CA)10 | 20 | 1203 | 1222 | TGTAAGGTGCTCCACCATGA       |
| scaffold693381_17.1 | 1 p2 | (AG)8  | 16 | 238  | 253  | AAAATCTTCTCCGCATTTCC       |
| scaffold693433_14.8 | 1 p2 | (AT)7  | 14 | 435  | 448  | ACATCAAATCGGCATTTCC        |
| scaffold693436_20.0 | 1 p2 | (AG)7  | 14 | 264  | 277  | AAATGGCACTTCAATAATGGC      |
| scaffold693497_11.0 | 1 p2 | (CT)6  | 12 | 41   | 52   | TTTCTCAACCGAGCTCACCT       |
| scaffold693576_16.0 | 1 p2 | (CT)7  | 14 | 3631 | 3644 | TCATGCAGTTGGGAGATGAA       |
| scaffold693603_11.5 | 1 p2 | (AC)8  | 16 | 55   | 70   | TGATGTGATTAATCCCACCATT     |
| scaffold693616_16.1 | 1 p2 | (TA)7  | 14 | 3339 | 3352 | AAGCGTCGTGGGCTTGTAT        |
| scaffold693624_15.5 | 1 p2 | (GA)6  | 12 | 1340 | 1351 | TGAGCAATAAATCCAGGGAGA      |



|                     |      |        |    |      |                               |
|---------------------|------|--------|----|------|-------------------------------|
| scaffold693634_10.8 | 1 p2 | (AG)6  | 12 | 200  | 211 TGCTTATCCAATCTCCGAGG      |
| scaffold693683_17.5 | 1 p2 | (AT)9  | 18 | 261  | 278 CGCCACTCCAAACTTCAAAT      |
| scaffold693684_14.0 | 1 p2 | (AT)7  | 14 | 265  | 278 GGGCTGGATACAATCCATCTT     |
| scaffold693686_10.5 | 1 p2 | (TG)10 | 20 | 416  | 435 GCTGTGCGTCGATTTCTTTA      |
| scaffold693687_12.2 | 1 p2 | (TG)10 | 20 | 405  | 424 GCTGTGCGTCGATTTCTTTA      |
| scaffold693737_15.2 | 1 p2 | (TC)13 | 26 | 456  | 481 CAGCAAATCACCTCATCCCT      |
| scaffold693788_12.6 | 1 p2 | (GC)6  | 12 | 53   | 64 TGGTTAGGTAATGGGCCAG        |
| scaffold693825_11.0 | 1 p2 | (AT)8  | 16 | 160  | 175 GCAGGTTAGCAGGATAAGGG      |
| scaffold693828_13.0 | 1 p2 | (AT)9  | 18 | 1464 | 1481 TCTTGCTAAGAATATTGCAGGAGA |
| scaffold693835_15.7 | 1 p2 | (GA)11 | 22 | 2494 | 2515 TCTGGTTTTCCAAACAAAGCC    |
| scaffold693839_10.2 | 1 p2 | (TA)11 | 22 | 639  | 660 TAACGCGAATATGCTGATGC      |
| scaffold693852_16.5 | 1 p2 | (AT)6  | 12 | 1262 | 1273 AATGCCCACTAATCCCTTC      |
| scaffold693861_17.2 | 1 p2 | (AT)7  | 14 | 264  | 277 GGGAAACTCACTACTCTCATTTTCG |
| scaffold693913_15.7 | 1 p2 | (CT)7  | 14 | 916  | 929 CTCCAGGAAACTCCACTGC       |
| scaffold693956_15.2 | 1 p2 | (AT)6  | 12 | 918  | 929 TTGTTGACGTCACAGCTAA       |
| scaffold693972_16.2 | 1 p2 | (AT)6  | 12 | 108  | 119 CCGAATCCCATAACTAAACA      |
| scaffold693987_15.7 | 1 p2 | (AG)8  | 16 | 271  | 286 TGCTGCCTTAATCCCACTG       |
| scaffold693990_11.2 | 1 p2 | (AT)9  | 18 | 452  | 469 GCTTCAATCCGTCCTCCTC       |
| scaffold694024_13.3 | 1 p2 | (AG)6  | 12 | 648  | 659 AACTAATCGATGCACACCCC      |
| scaffold694026_14.6 | 1 p2 | (AG)6  | 12 | 428  | 439 AGAAGTGGCGGAGGAGTCTT      |
| scaffold694035_15.4 | 1 p2 | (TA)10 | 20 | 69   | 88 GGTTATCACCTGATTTTCTCCC     |
| scaffold694087_10.9 | 1 p2 | (TA)9  | 18 | 1064 | 1081 AGGCCTTACATGCCGATCTA     |
| scaffold694088_13.3 | 1 p2 | (TG)8  | 16 | 1767 | 1782 ATGAAGGACAATGGAAGGCA     |
| scaffold694106_11.2 | 1 p2 | (TA)8  | 16 | 263  | 278 GGCCGATATTTGCTCACATT      |
| scaffold694107_14.0 | 1 p2 | (TA)6  | 12 | 267  | 278 GCACCTCTATGGTTGGGAGA      |
| scaffold694124_15.2 | 1 p2 | (CT)6  | 12 | 268  | 279 CACTGCGAGTTCAAGGATCA      |
| scaffold694190_14.9 | 1 p2 | (AT)6  | 12 | 2480 | 2491 TTTTGTGCGCAATTGTTTGT     |
| scaffold694231_15.7 | 1 p2 | (GT)6  | 12 | 126  | 137 TGAGTGAGTGAGCGTGTGTG      |
| scaffold694269_15.8 | 1 p2 | (AT)8  | 16 | 830  | 845 CAGCCACGATGATATGACAAA     |
| scaffold694304_11.3 | 1 p2 | (CT)9  | 18 | 782  | 799 CCAATCGCACCGTCACTAA       |
| scaffold694343_18.6 | 1 p2 | (AT)12 | 24 | 1068 | 1091 AGAAGCCTTATTGGAAGCCG     |
| scaffold694371_14.4 | 1 p2 | (AG)7  | 14 | 159  | 172 TTCTACCACCACCCATCTCG      |
| scaffold694382_14.6 | 1 p2 | (TA)8  | 16 | 264  | 279 ACGCGCGCTTTTAGAGTTTA      |
| scaffold694394_18.4 | 1 p2 | (AT)6  | 12 | 45   | 56 TTCATTTTTAAATCCTATATCAACGA |
| scaffold694408_15.7 | 1 p2 | (AT)10 | 20 | 375  | 394 CCAACCAGGCTGAATAAGA       |
| scaffold694438_11.5 | 1 p2 | (GA)6  | 12 | 319  | 330 GGTGCTCAAAAATCCGAAAA      |
| scaffold694445_13.2 | 1 p2 | (TA)10 | 20 | 59   | 78 CAGATTTGTTATGCGTTTTGACA    |
| scaffold694489_15.4 | 1 p2 | (AT)6  | 12 | 269  | 280 TTCGCATGGGAATATAATGGA     |
| scaffold694508_18.2 | 1 p2 | (CA)6  | 12 | 720  | 731 TCCTCCACTACCCAAAACAAA     |
| scaffold694509_14.3 | 1 p2 | (TA)6  | 12 | 492  | 503 TGGTGAACAGAAACCCTGAA      |
| scaffold694511_15.5 | 1 p2 | (CT)8  | 16 | 4678 | 4693 TCCTCCTCCCTTCCTTCAAT     |
| scaffold694527_17.9 | 1 p2 | (TG)6  | 12 | 469  | 480 CAACAAAAATGGCACTCTTTCA    |
| scaffold694540_16.3 | 1 p2 | (CA)7  | 14 | 2304 | 2317 CTCAGGAGCAATTGGGTGAT     |
| scaffold694572_12.5 | 1 p2 | (TC)10 | 20 | 877  | 896 ATGATTTTGTGGTGTGGGGT      |
| scaffold694600_16.5 | 1 p2 | (GA)6  | 12 | 187  | 198 AGGGCTGTCTCTCACTCCTG      |
| scaffold694613_12.6 | 1 p2 | (TA)7  | 14 | 501  | 514 TTCACACATGCACCTCACCT      |
| scaffold694620_18.2 | 1 p2 | (AG)6  | 12 | 1213 | 1224 ACTGCACTCAACCACAACCA     |
| scaffold694632_16.6 | 1 p2 | (AG)8  | 16 | 622  | 637 CCTACCCTCTGTTCCGACAA      |
| scaffold694649_14.3 | 1 p2 | (CT)7  | 14 | 868  | 881 GGCCTTTCCATTTTCTCTC       |
| scaffold694670_17.2 | 1 p2 | (TA)11 | 22 | 46   | 67 GGGTGTGTTGACAATATCGC       |
| scaffold694728_15.5 | 1 p2 | (GA)8  | 16 | 1319 | 1334 CCCTTTGGTATGAGAAGCCA     |
| scaffold694789_15.9 | 1 p2 | (TC)8  | 16 | 330  | 345 GCTCTTCTCCCCAACTACC       |
| scaffold694792_14.3 | 1 p2 | (TG)7  | 14 | 725  | 738 TATGCAGACGAAAAAGCGTG      |
| scaffold694882_15.5 | 1 p2 | (AT)8  | 16 | 266  | 281 GCAAGGATTGTAGCAAAGGG      |
| scaffold694884_17.0 | 1 p2 | (AT)6  | 12 | 1137 | 1148 TAGCAATCAAGTCCCTTCGG     |
| scaffold694907_13.2 | 1 p2 | (CT)6  | 12 | 402  | 413 CATTGCTTTCCGACTGTTCA      |
| scaffold694909_10.0 | 1 p2 | (AT)8  | 16 | 403  | 418 TCCTTCCTTGCTCCTTTTCC      |
| scaffold694936_10.8 | 1 p2 | (AT)8  | 16 | 156  | 171 TCGATGAATGATGAGAAGCA      |

|                     |      |        |    |      |      |                           |
|---------------------|------|--------|----|------|------|---------------------------|
| scaffold694945_13.2 | 1 p2 | (AT)11 | 22 | 1051 | 1072 | AACCGAAAAAGAAACCTTTCAA    |
| scaffold695017_13.6 | 1 p2 | (TA)9  | 18 | 264  | 281  | GGTTTGC GTTAGATATGCCC     |
| scaffold695023_16.5 | 1 p2 | (TA)6  | 12 | 627  | 638  | ACTTTGATTTCTTGGTGGCG      |
| scaffold695091_15.6 | 1 p2 | (CT)6  | 12 | 442  | 453  | CCGTAATTTCTCGACACCGT      |
| scaffold695092_16.6 | 1 p2 | (TA)6  | 12 | 267  | 278  | GTGCTTCTGAGTACCCCTGC      |
| scaffold695097_16.6 | 1 p2 | (TC)7  | 14 | 311  | 324  | AAACTGAGTGATGCCAGCCT      |
| scaffold695143_10.0 | 1 p2 | (TA)10 | 20 | 499  | 518  | AAGGCGACATGTTTCAATCC      |
| scaffold695259_18.0 | 1 p2 | (TC)9  | 18 | 264  | 281  | AGAACCCATGGACATGGAAA      |
| scaffold695306_15.0 | 1 p2 | (TA)6  | 12 | 1337 | 1348 | TCGTGGAGCAAAAACATCAA      |
| scaffold695328_12.8 | 1 p2 | (AT)7  | 14 | 269  | 282  | CTTGTGAGCCATGTTGTTGG      |
| scaffold695340_11.9 | 1 p2 | (AT)6  | 12 | 363  | 374  | CTGTGATGCCACTGCTGTCT      |
| scaffold695375_14.0 | 1 p2 | (AT)8  | 16 | 768  | 783  | TCAAACCTTGTGACTCTGCAA     |
| scaffold695514_14.6 | 1 p2 | (AT)6  | 12 | 555  | 566  | CATCTAATGTCCATTTTTGCCA    |
| scaffold695519_15.6 | 1 p2 | (CT)6  | 12 | 39   | 50   | TTTCTCAACCGAGCTCACCT      |
| scaffold695577_16.3 | 1 p2 | (GA)6  | 12 | 685  | 696  | CCATCCTGCACCATCATACA      |
| scaffold695582_15.2 | 1 p2 | (GA)6  | 12 | 1297 | 1308 | AAATTGCACCTCGTCGACTC      |
| scaffold695583_14.7 | 1 p2 | (AT)8  | 16 | 554  | 569  | GGACTTGTTC CCACTTCCAA     |
| scaffold695589_14.2 | 1 p2 | (AT)9  | 18 | 988  | 1005 | TTTGGATCCATAACATGAAAAA    |
| scaffold695611_13.6 | 1 p2 | (GA)7  | 14 | 887  | 900  | GCCAAC TTTCTTCATCCGTC     |
| scaffold695629_15.8 | 1 p2 | (TC)8  | 16 | 1766 | 1781 | TCACCTTCAGGGGACAAAAC      |
| scaffold695676_15.0 | 1 p2 | (TA)8  | 16 | 49   | 64   | ATGGGTTATTACCGGATCGC      |
| scaffold695714_16.4 | 1 p2 | (AT)7  | 14 | 285  | 298  | TGTTGCGATTTTCATTTTCC      |
| scaffold695758_14.2 | 1 p2 | (TC)6  | 12 | 1433 | 1444 | TTCGTCAGTGGATCTTGCTG      |
| scaffold695765_15.3 | 1 p2 | (GA)7  | 14 | 219  | 232  | AATGAATGGAAACGAGGTGC      |
| scaffold695857_18.6 | 1 p2 | (TC)7  | 14 | 952  | 965  | AACCACAACCCTTCTCCCTC      |
| scaffold695895_18.2 | 1 p2 | (TC)6  | 12 | 54   | 65   | CAGAAATTGCCTTGGTTGTTT     |
| scaffold695899_15.5 | 1 p2 | (GA)7  | 14 | 813  | 826  | CTTTCAATTTCTCCGCTCG       |
| scaffold695900_15.6 | 1 p2 | (GA)7  | 14 | 271  | 284  | CGCCAAAACACAAACAAGA       |
| scaffold695928_16.7 | 1 p2 | (AT)6  | 12 | 92   | 103  | GAAACCCCAATTGTCTCAA       |
| scaffold695933_14.2 | 1 p2 | (TA)9  | 18 | 266  | 283  | ATGTTTTCAATCTTGCCCGT      |
| scaffold695939_12.8 | 1 p2 | (TA)6  | 12 | 273  | 284  | GCACCGGATTGTTTCTCATT      |
| scaffold695952_13.2 | 1 p2 | (TA)9  | 18 | 1836 | 1853 | GATTTATCGATCAACCATTTCTTTT |
| scaffold695977_12.9 | 1 p2 | (TA)7  | 14 | 51   | 64   | CCAATTTGAATGGTTATCACCTG   |
| scaffold695991_16.7 | 1 p2 | (CT)9  | 18 | 267  | 284  | GGGTTGCAAGAAACCTTTGA      |
| scaffold696009_16.4 | 1 p2 | (AG)6  | 12 | 940  | 951  | TTCAGAGGCGGAGAACCAACT     |
| scaffold696017_14.6 | 1 p2 | (AT)8  | 16 | 908  | 923  | TGGTTTCA CCAAAAACCGAT     |
| scaffold696040_15.8 | 1 p2 | (TA)8  | 16 | 649  | 664  | TGATTTGCATGCGTACTTGA      |
| scaffold696041_15.6 | 1 p2 | (AC)6  | 12 | 605  | 616  | AGGGAAACGTTTTGGTGTG       |
| scaffold696116_15.9 | 1 p2 | (AG)7  | 14 | 184  | 197  | ATACATGGCACAAAGCGACA      |
| scaffold696118_13.9 | 1 p2 | (TA)9  | 18 | 639  | 656  | CGGATCACCTAGGTTTTGGA      |
| scaffold696155_14.8 | 1 p2 | (CT)7  | 14 | 136  | 149  | ATTCTGCTTTCCACGTGCTT      |
| scaffold696185_14.5 | 1 p2 | (CA)7  | 14 | 494  | 507  | CTTTGGAGTTAATCCGCTGC      |
| scaffold696222_15.2 | 1 p2 | (TC)8  | 16 | 807  | 822  | CAGCTGCACCACAGAAGAAA      |
| scaffold696259_21.4 | 1 p2 | (TA)7  | 14 | 88   | 101  | CACATGAATGGATGTGATTTGTT   |
| scaffold696282_19.6 | 1 p2 | (AT)10 | 20 | 107  | 126  | CCATTTGCAATGGACAAAAA      |
| scaffold696299_13.2 | 1 p2 | (AT)9  | 18 | 488  | 505  | CAACAGGGAGAGATTGAGATTG    |
| scaffold696313_16.2 | 1 p2 | (CT)7  | 14 | 271  | 284  | TCATGTCTCTTGGCCTTGTG      |
| scaffold696314_16.2 | 1 p2 | (TC)6  | 12 | 359  | 370  | GGCAAACCATCCTTTACGA       |
| scaffold696328_13.9 | 1 p2 | (TA)9  | 18 | 267  | 284  | AAAGGCTTGCTAGTGGTTGG      |
| scaffold696364_14.2 | 1 p2 | (TG)7  | 14 | 1178 | 1191 | ATCGAATGCACACACTTCCA      |
| scaffold696392_15.8 | 1 p2 | (AG)9  | 18 | 705  | 722  | GTGCTGTGTTGAAACCCCTT      |
| scaffold696393_16.0 | 1 p2 | (CT)6  | 12 | 274  | 285  | CCCCAAATTGATGGTTTCAT      |
| scaffold696405_20.0 | 1 p2 | (GA)6  | 12 | 190  | 201  | CCTTCCCTTGACGACTTACG      |
| scaffold696407_12.5 | 1 p2 | (TG)7  | 14 | 287  | 300  | TTCCACTTCTTGTGTGATTGC     |
| scaffold696457_11.3 | 1 p2 | (CT)9  | 18 | 672  | 689  | GCATGCGGGGACATAATCTA      |
| scaffold696458_14.0 | 1 p2 | (TA)7  | 14 | 969  | 982  | GCTTATGAGGGTGAGTTGGC      |
| scaffold696459_16.4 | 1 p2 | (TA)7  | 14 | 974  | 987  | TGGCCGAAAATTAGAGATGG      |
| scaffold696479_19.0 | 1 p2 | (TC)6  | 12 | 888  | 899  | GCCTTCTCTCAAATAAGGGTG     |

|                     |      |        |    |      |                               |
|---------------------|------|--------|----|------|-------------------------------|
| scaffold696512_17.0 | 1 p2 | (TC)7  | 14 | 319  | 332 TCCACGTTTCCATCTTCCTC      |
| scaffold696581_17.9 | 1 p2 | (TA)6  | 12 | 370  | 381 AGTCCGAGGATAACCCTTCC      |
| scaffold696598_16.0 | 1 p2 | (GA)6  | 12 | 101  | 112 GCAGAAAGACATTGATAACCACC   |
| scaffold696695_10.9 | 1 p2 | (TC)6  | 12 | 412  | 423 AAATCGAGACACCGACGAAC      |
| scaffold696710_14.4 | 1 p2 | (AT)7  | 14 | 179  | 192 CCCCTCCTCTCGAACTCTTT      |
| scaffold696750_11.9 | 1 p2 | (TA)9  | 18 | 44   | 61 TTTAGTGTTTTGACATGATTACTCG  |
| scaffold696759_12.6 | 1 p2 | (AT)10 | 20 | 356  | 375 AAAGTGGACTGGGTATCAACAA    |
| scaffold696762_16.9 | 1 p2 | (TC)8  | 16 | 270  | 285 CTTTTTGGCAATTCCCTTCA      |
| scaffold696792_11.8 | 1 p2 | (TA)8  | 16 | 252  | 267 CAACAACACATGCTTCGACA      |
| scaffold696857_18.1 | 1 p2 | (AC)8  | 16 | 270  | 285 ACGTGCCAAGACTCAAACA       |
| scaffold696911_15.6 | 1 p2 | (AT)7  | 14 | 1055 | 1068 CTGAGCCCTTCTTATTTCATGTT  |
| scaffold696927_18.0 | 1 p2 | (CA)7  | 14 | 2114 | 2127 TCTGGCTGTGTTCTGTTCTTG    |
| scaffold696941_11.0 | 1 p2 | (CA)7  | 14 | 344  | 357 CGGCCAAACCAATAAATACG      |
| scaffold696975_15.5 | 1 p2 | (AG)6  | 12 | 519  | 530 ACACACCCCAAAAGAAGACG      |
| scaffold696980_13.3 | 1 p2 | (AG)10 | 20 | 1623 | 1642 CTTAGCTTCATTTGCCCAT      |
| scaffold697029_16.0 | 1 p2 | (AG)6  | 12 | 1626 | 1637 GCACATCAACACTCGCAAAT     |
| scaffold697073_15.5 | 1 p2 | (AG)6  | 12 | 3398 | 3409 CCGTGACAGGTCAAACCTT      |
| scaffold697080_18.2 | 1 p2 | (GA)8  | 16 | 762  | 777 TCAGCTGAAGGAGGAGGAAG      |
| scaffold697094_15.5 | 1 p2 | (TG)7  | 14 | 3606 | 3619 CTCCAAGTCTCACCAGAGC      |
| scaffold697124_13.5 | 1 p2 | (AT)6  | 12 | 104  | 115 TCATGCAATCACTATTAAGACTCCA |
| scaffold697131_15.4 | 1 p2 | (TC)6  | 12 | 322  | 333 CAGCGTTCTGTGAAATCAA       |
| scaffold697132_12.2 | 1 p2 | (AT)6  | 12 | 502  | 513 CCAAGGCCGTACTACTCAA       |
| scaffold697140_14.6 | 1 p2 | (CT)8  | 16 | 777  | 792 AGAAAAATGCACACTCGCAA      |
| scaffold697194_15.1 | 1 p2 | (TG)6  | 12 | 868  | 879 GGTCTTGCCGGATTCATCTA      |
| scaffold697224_12.9 | 1 p2 | (AC)8  | 16 | 3087 | 3102 CTGCATTAACCCCGCTTAGA     |
| scaffold697232_15.0 | 1 p2 | (CT)6  | 12 | 395  | 406 TCCCTTCTCTCCCACTCATC      |
| scaffold697267_13.9 | 1 p2 | (TA)10 | 20 | 675  | 694 CTTTTCTTAGGCGTTCTTGC      |
| scaffold697295_15.0 | 1 p2 | (TC)8  | 16 | 2837 | 2852 CCCTCGATTGTCTTAATCGG     |
| scaffold697300_13.9 | 1 p2 | (AT)7  | 14 | 239  | 252 GCGTGAGTCCGTGAGTGTAT      |
| scaffold697323_16.8 | 1 p2 | (GA)9  | 18 | 233  | 250 GCTGAGGGGAGACTACATGG      |
| scaffold697413_12.1 | 1 p2 | (TA)7  | 14 | 835  | 848 CGTTGGCAAGGTATCGATTT      |
| scaffold697448_10.5 | 1 p2 | (AT)10 | 20 | 1384 | 1403 GGATGGAATGGATGTTTGGA     |
| scaffold697449_18.4 | 1 p2 | (GA)6  | 12 | 593  | 604 TCCATTTAATATGTGATGACCA    |
| scaffold697462_17.8 | 1 p2 | (CA)6  | 12 | 93   | 104 CTAACCTTGGGCTTTGATGC      |
| scaffold697511_10.6 | 1 p2 | (CT)7  | 14 | 488  | 501 GGGGGAGGAGAAGATAGCTG      |
| scaffold697522_12.4 | 1 p2 | (TA)6  | 12 | 404  | 415 CTAAGGCTGATGGGGTTTCA      |
| scaffold697531_15.8 | 1 p2 | (CA)6  | 12 | 169  | 180 CTTATCCAACGCTCCGTTA       |
| scaffold697547_14.0 | 1 p2 | (GA)6  | 12 | 4832 | 4843 TTGAGATTCCGTGAGGACTG     |
| scaffold697582_18.9 | 1 p2 | (AT)6  | 12 | 772  | 783 AAAACTTGACCCGATCATTG      |
| scaffold697623_18.5 | 1 p2 | (CT)6  | 12 | 655  | 666 CAGCAAAATCCTTACCTCAG      |
| scaffold697638_13.1 | 1 p2 | (AT)10 | 20 | 330  | 349 GCACCAAAAAGGAAAAATAATCC   |
| scaffold697661_11.2 | 1 p2 | (AT)8  | 16 | 498  | 513 TTACCTCTGTTGGTGCAACTT     |
| scaffold697701_13.6 | 1 p2 | (AG)8  | 16 | 186  | 201 TTTCTTTGTTACCATGGGGG      |
| scaffold697715_16.3 | 1 p2 | (TA)6  | 12 | 625  | 636 GGACAAAACGGGAAATAGCA      |
| scaffold697751_16.7 | 1 p2 | (TA)7  | 14 | 94   | 107 CCCGTATACACACCACGGAT      |
| scaffold697798_15.0 | 1 p2 | (TA)9  | 18 | 271  | 288 CGGCATGTTCTCAACTACA       |
| scaffold697842_13.2 | 1 p2 | (GA)10 | 20 | 692  | 711 TAGACGAAGGTCGAAATGGG      |
| scaffold697898_15.8 | 1 p2 | (TC)6  | 12 | 268  | 279 GTGTTGGGCCGTGTTCTACT      |
| scaffold697926_13.9 | 1 p2 | (AT)6  | 12 | 144  | 155 GTAGCTTCAAACCTCCCGCTG     |
| scaffold697965_15.3 | 1 p2 | (TA)9  | 18 | 2628 | 2645 TGAGTAAAAGCACGATTTTGGA   |
| scaffold697991_13.5 | 1 p2 | (TC)6  | 12 | 452  | 463 AATTTTCGTCCAGCCATTAC      |
| scaffold698043_15.3 | 1 p2 | (AT)7  | 14 | 276  | 289 TGCAAGCACACTCAGACACA      |
| scaffold698057_14.3 | 1 p2 | (CT)6  | 12 | 585  | 596 GAGGCAAAGCAAGGCATAAG      |
| scaffold698059_14.3 | 1 p2 | (GA)12 | 24 | 3524 | 3547 CGAGTTCTTGATGCTGGTCA     |
| scaffold698107_12.3 | 1 p2 | (AT)7  | 14 | 166  | 179 CGATTAATAACAGACCGGA       |
| scaffold698124_13.3 | 1 p2 | (AT)11 | 22 | 1711 | 1732 ACTTACCGTCATTTCCGTCG     |
| scaffold698138_12.0 | 1 p2 | (CA)7  | 14 | 1517 | 1530 CACACTAAATTGGTGATGGATGA  |
| scaffold698179_10.5 | 1 p2 | (AT)9  | 18 | 430  | 447 GGCCTAGTTTCGAGGTAGG       |

|                     |      |        |    |      |      |                            |
|---------------------|------|--------|----|------|------|----------------------------|
| scaffold698215_10.4 | 1 p2 | (AT)8  | 16 | 891  | 906  | TTTTCCCATGAAGCCAAAAC       |
| scaffold698296_15.4 | 1 p2 | (TG)6  | 12 | 690  | 701  | GCGCTCAAACCTTAAGCATCC      |
| scaffold698324_12.6 | 1 p2 | (TA)6  | 12 | 337  | 348  | AAATATCGGCCGTCAGATTG       |
| scaffold698332_16.2 | 1 p2 | (AG)8  | 16 | 868  | 883  | TGCACTCTGTGATGGGAAAA       |
| scaffold698336_15.2 | 1 p2 | (TC)8  | 16 | 715  | 730  | GTGCAGCAAATTGCTTTGA        |
| scaffold698341_14.0 | 1 p2 | (TA)9  | 18 | 576  | 593  | GCCTTCCATTCCAAAAATCA       |
| scaffold698395_15.9 | 1 p2 | (CT)6  | 12 | 2276 | 2287 | AGTGAGGGAAAGTGAAGCGA       |
| scaffold698414_15.2 | 1 p2 | (TA)8  | 16 | 46   | 61   | TGAAGTTAGGAAATAAGGAGGTGTT  |
| scaffold698467_15.9 | 1 p2 | (AG)7  | 14 | 308  | 321  | TTCGTATTTGTCTAGCGCCC       |
| scaffold698479_17.6 | 1 p2 | (AC)8  | 16 | 961  | 976  | CTTGAAATTCGCAACAGCAA       |
| scaffold698504_12.7 | 1 p2 | (AT)7  | 14 | 278  | 291  | AATCTGACGGCCGATATTTG       |
| scaffold698513_11.9 | 1 p2 | (CT)6  | 12 | 174  | 185  | TGGTGAACCATTGGAGATA        |
| scaffold698532_17.5 | 1 p2 | (GA)6  | 12 | 1267 | 1278 | AGTCAGCGGAACCGTATCAC       |
| scaffold698554_13.4 | 1 p2 | (AT)9  | 18 | 75   | 92   | TGAAGTTAGGAAATAAGGAGGTGTT  |
| scaffold698565_14.9 | 1 p2 | (TG)7  | 14 | 618  | 631  | AATTTAAAGCCTTGTGCCCC       |
| scaffold698587_14.5 | 1 p2 | (TA)7  | 14 | 905  | 918  | TTTGATGGCTTGAGTTTCCC       |
| scaffold698596_12.3 | 1 p2 | (AC)6  | 12 | 599  | 610  | CGAAAAGACACGCACACACT       |
| scaffold698639_16.7 | 1 p2 | (TG)6  | 12 | 1399 | 1410 | ATCACAACACTAGGGCTGACCG     |
| scaffold698705_18.2 | 1 p2 | (AG)6  | 12 | 203  | 214  | TTTCATTTGGATTTCCGAGC       |
| scaffold698714_14.5 | 1 p2 | (CT)6  | 12 | 427  | 438  | TCTCCCTCTCTCCCATTT         |
| scaffold698744_15.5 | 1 p2 | (TG)6  | 12 | 907  | 918  | AACTCAAGATTCTGCATCGGA      |
| scaffold698748_17.5 | 1 p2 | (TA)8  | 16 | 151  | 166  | CTGTGTGATGTGGAGTTGGG       |
| scaffold698749_16.7 | 1 p2 | (AT)6  | 12 | 3614 | 3625 | ACAGGAATTCGCTTTCTCCA       |
| scaffold698759_14.2 | 1 p2 | (TA)10 | 20 | 273  | 292  | TCACCCGGACCTCTTCTTAG       |
| scaffold698799_13.9 | 1 p2 | (AT)11 | 22 | 1285 | 1306 | ACTGTCAACCCCTCCCTTCT       |
| scaffold698822_15.4 | 1 p2 | (TA)6  | 12 | 280  | 291  | CGAAATTGAGCTTTTTGGGA       |
| scaffold698829_14.8 | 1 p2 | (AG)7  | 14 | 390  | 403  | ACCACCCCAACACACAAAAT       |
| scaffold698845_16.3 | 1 p2 | (AC)7  | 14 | 357  | 370  | TATATGGGCCGTTAGATCGC       |
| scaffold698906_17.3 | 1 p2 | (TC)8  | 16 | 1052 | 1067 | AAGCATTTTCATTGGGCAGAG      |
| scaffold698943_15.0 | 1 p2 | (CT)8  | 16 | 520  | 535  | TAGCGTGCCTATTGCACATT       |
| scaffold698972_12.7 | 1 p2 | (AT)10 | 20 | 2017 | 2036 | AACGCCGTCTGGATTTTATG       |
| scaffold698973_14.4 | 1 p2 | (TA)10 | 20 | 645  | 664  | AAACCCTGTCGTATCTCATATTACAC |
| scaffold698996_14.8 | 1 p2 | (TC)6  | 12 | 340  | 351  | ATCACGAGTTTTTCCCTTAAAA     |
| scaffold699029_14.8 | 1 p2 | (AT)9  | 18 | 211  | 228  | CACCGGTGAATGGAAAAATC       |
| scaffold699067_12.4 | 1 p2 | (TA)6  | 12 | 208  | 219  | TCACATTAATTTGGCGCAG        |
| scaffold699077_13.2 | 1 p2 | (AT)8  | 16 | 741  | 756  | GATTAGCAAATTTCGGGACG       |
| scaffold699082_14.9 | 1 p2 | (GA)7  | 14 | 492  | 505  | ACAACAATCAGCACACGGAT       |
| scaffold699096_12.4 | 1 p2 | (TA)8  | 16 | 712  | 727  | TCATGATTTGGCTTTAGGGC       |
| scaffold699102_17.5 | 1 p2 | (AT)7  | 14 | 164  | 177  | ATGAACAGAGCATTCCGTCC       |
| scaffold699164_15.9 | 1 p2 | (AG)10 | 20 | 273  | 292  | AGTGCAAGGACAAATGGGAG       |
| scaffold699181_16.2 | 1 p2 | (CT)8  | 16 | 138  | 153  | AAGTTGACGCCTCACTTCGT       |
| scaffold699189_14.4 | 1 p2 | (TG)6  | 12 | 74   | 85   | CAAGAGTTGAAAATCCTCCCA      |
| scaffold699279_13.9 | 1 p2 | (GA)6  | 12 | 418  | 429  | TAGGGTCCCACCACCTAACA       |
| scaffold699298_16.3 | 1 p2 | (TC)6  | 12 | 281  | 292  | TGCTCCGTTTTCGATTCTCT       |
| scaffold699304_12.4 | 1 p2 | (TA)10 | 20 | 45   | 64   | ATCGGTTATTACCGGATCGC       |
| scaffold699331_15.8 | 1 p2 | (CT)6  | 12 | 968  | 979  | AAAGTGCAGCCACCATTAC        |
| scaffold699389_13.4 | 1 p2 | (GA)8  | 16 | 77   | 92   | TCTCAGATGTTTGGTCCGAA       |
| scaffold699394_14.4 | 1 p2 | (CT)8  | 16 | 279  | 294  | TGGGTTTCATCAAGATTGGA       |
| scaffold699411_12.8 | 1 p2 | (TA)9  | 18 | 1127 | 1144 | AGTGGTAGGCCGAGTTCAAA       |
| scaffold699458_12.9 | 1 p2 | (CA)6  | 12 | 164  | 175  | AGTTGGGTTGGAGCATTGAG       |
| scaffold699486_15.0 | 1 p2 | (AG)8  | 16 | 1039 | 1054 | TCAAGAAAGAATGTGGAGCAAG     |
| scaffold699491_14.9 | 1 p2 | (AT)6  | 12 | 2703 | 2714 | GCACATAGCGTCTTCGTCAA       |
| scaffold699495_16.3 | 1 p2 | (CT)7  | 14 | 68   | 81   | TTCCTTTCTTGCTTGTTTCTTTC    |
| scaffold699501_13.3 | 1 p2 | (TA)6  | 12 | 776  | 787  | GCACATTTTATTTGGGGGA        |
| scaffold699523_13.4 | 1 p2 | (CA)6  | 12 | 434  | 445  | TTTCCACCATGATATCGACAC      |
| scaffold699527_10.8 | 1 p2 | (TC)6  | 12 | 41   | 52   | GGCAACGGAATACCATTTGT       |
| scaffold699550_16.4 | 1 p2 | (TG)6  | 12 | 5903 | 5914 | CAAGAGCGCCTCAAAAATTC       |
| scaffold699573_13.4 | 1 p2 | (AT)10 | 20 | 110  | 129  | AGGTTAGCACGATAAGGGCA       |

|                     |      |        |    |      |      |                           |
|---------------------|------|--------|----|------|------|---------------------------|
| scaffold699579_15.5 | 1 p2 | (GT)6  | 12 | 337  | 348  | CGTGTCCATTGAGTACCTCG      |
| scaffold699582_14.1 | 1 p2 | (TA)11 | 22 | 1316 | 1337 | CTATCCTTTGCTTCAACCGC      |
| scaffold699608_14.0 | 1 p2 | (TA)7  | 14 | 50   | 63   | TGAAGTTAGGAAATAAGGAGGTGT  |
| scaffold699617_15.0 | 1 p2 | (AT)8  | 16 | 631  | 646  | TTAGGACCCATAATCTGCCG      |
| scaffold699694_16.6 | 1 p2 | (TA)6  | 12 | 1864 | 1875 | GTGGTTTAGGTGAACCCCTG      |
| scaffold699728_16.0 | 1 p2 | (AT)6  | 12 | 365  | 376  | GGTTCAAAACCATGATTCCA      |
| scaffold699746_16.0 | 1 p2 | (CA)6  | 12 | 4086 | 4097 | GCGGTACAGTTGAACACAC       |
| scaffold699762_13.2 | 1 p2 | (TA)8  | 16 | 128  | 143  | AGCACTGAAAACCCAGCCTA      |
| scaffold699765_17.8 | 1 p2 | (TG)8  | 16 | 279  | 294  | AACAGTTCGCTGCAACAGG       |
| scaffold699767_14.1 | 1 p2 | (TA)7  | 14 | 281  | 294  | CGTAGGAACTTACACAAAGTTGG   |
| scaffold699770_13.7 | 1 p2 | (AT)6  | 12 | 53   | 64   | AAGGGCATTGTTGTACATTGG     |
| scaffold699781_12.7 | 1 p2 | (GA)7  | 14 | 73   | 86   | TTCAAATTTGTTATTGATACCGATG |
| scaffold699784_11.8 | 1 p2 | (TC)6  | 12 | 574  | 585  | TCCTTCCACATCTCTCCGTC      |
| scaffold699796_16.3 | 1 p2 | (AT)6  | 12 | 284  | 295  | ATCAAGTTCCTGCCCTTCT       |
| scaffold699799_14.4 | 1 p2 | (AT)6  | 12 | 864  | 875  | CGTGAATACACCAAACGCAC      |
| scaffold699836_17.5 | 1 p2 | (CT)6  | 12 | 555  | 566  | CTGTCTCCTCCACCTCTTCG      |
| scaffold699854_15.3 | 1 p2 | (AT)6  | 12 | 141  | 152  | GGCTAGCACAAATCTCTGGC      |
| scaffold699868_18.0 | 1 p2 | (TC)8  | 16 | 1826 | 1841 | ATCCTTTATGGCGTTTGCAG      |
| scaffold699932_11.2 | 1 p2 | (TA)7  | 14 | 215  | 228  | TCACGCGGAAATAAATCCAT      |
| scaffold699968_19.7 | 1 p2 | (AT)6  | 12 | 760  | 771  | GCACCTTTCCTGAGACCAAT      |
| scaffold699989_14.0 | 1 p2 | (CT)6  | 12 | 364  | 375  | GTTGCTTTCGAGACCCTCTC      |
| scaffold700021_18.5 | 1 p2 | (GT)8  | 16 | 106  | 121  | CGGAGATCCAATCTCGTTTC      |
| scaffold700025_13.4 | 1 p2 | (AT)6  | 12 | 83   | 94   | CATCCCTATCAACTCTTTCGATG   |
| scaffold700058_12.8 | 1 p2 | (TA)8  | 16 | 328  | 343  | TCAAATGCACTTCATAAGCCC     |
| scaffold700123_12.1 | 1 p2 | (TA)7  | 14 | 283  | 296  | TTGAACACACAGTTCATGCCT     |
| scaffold700129_13.0 | 1 p2 | (AT)7  | 14 | 283  | 296  | GAAATTCTAGGTCCGCCTCC      |
| scaffold700130_16.1 | 1 p2 | (CT)7  | 14 | 644  | 657  | TCGAAGCAAAGTCTCATCC       |
| scaffold700153_12.3 | 1 p2 | (TA)10 | 20 | 518  | 537  | TGACGCCCCAGATTGTTTAT      |
| scaffold700155_15.2 | 1 p2 | (AT)8  | 16 | 562  | 577  | GAGCAACACAACCACGTGAC      |
| scaffold700161_13.6 | 1 p2 | (TA)6  | 12 | 1033 | 1044 | TGGGTTTTACACATTGGCATT     |
| scaffold700191_16.3 | 1 p2 | (GA)9  | 18 | 3351 | 3368 | AATTGCGGACGTAGTTGACC      |
| scaffold700269_15.5 | 1 p2 | (TA)6  | 12 | 119  | 130  | GATCATTTCCAAAACAATGATG    |
| scaffold700275_12.8 | 1 p2 | (AT)6  | 12 | 284  | 295  | GGAACTACCATTTTTGAATTGGA   |
| scaffold700290_11.2 | 1 p2 | (TA)7  | 14 | 458  | 471  | AAATCATGAGCGTCCGTCTT      |
| scaffold700300_10.8 | 1 p2 | (GA)6  | 12 | 618  | 629  | ACCCTTTCATCGTGAGAGA       |
| scaffold700303_11.9 | 1 p2 | (TA)7  | 14 | 161  | 174  | TCCATTCCGAAAATCAAAGG      |
| scaffold700392_17.8 | 1 p2 | (TG)9  | 18 | 980  | 997  | ACCACCACAGTTCACCTGCAA     |
| scaffold700399_17.1 | 1 p2 | (CA)6  | 12 | 1299 | 1310 | GGTGTGAGGCATGTTTGTG       |
| scaffold700408_16.3 | 1 p2 | (AT)6  | 12 | 337  | 348  | CCAGTTCACCTCGAATCTCACC    |
| scaffold700435_15.0 | 1 p2 | (AC)8  | 16 | 730  | 745  | ATCGTGTCTTCTGGCATT        |
| scaffold700446_13.2 | 1 p2 | (GA)8  | 16 | 73   | 88   | TTCAAATTTGTTATTGATACCGATG |
| scaffold700452_15.8 | 1 p2 | (AG)7  | 14 | 284  | 297  | CAGACCATTCGAAAACAGCA      |
| scaffold700474_14.3 | 1 p2 | (AT)9  | 18 | 116  | 133  | GATGTCTTTTGATCAGTTGGTGA   |
| scaffold700522_16.7 | 1 p2 | (TG)6  | 12 | 2329 | 2340 | AACCGAGAGCATAACCTGACA     |
| scaffold700534_16.6 | 1 p2 | (TG)7  | 14 | 1299 | 1312 | TGCATTATCGCATCAGGAAA      |
| scaffold700643_16.0 | 1 p2 | (TA)10 | 20 | 43   | 62   | TTTAGTGTTTTGACATGACTACTCG |
| scaffold700675_16.5 | 1 p2 | (TG)7  | 14 | 519  | 532  | AAAATAAAGCTGGGCTGCTG      |
| scaffold700676_13.5 | 1 p2 | (AT)8  | 16 | 564  | 579  | AACTTCATTATTTGGGGTGC      |
| scaffold700709_14.0 | 1 p2 | (AT)9  | 18 | 2037 | 2054 | CCTCCTCAACAGAGGATATAGGA   |
| scaffold700733_13.5 | 1 p2 | (TA)10 | 20 | 540  | 559  | CCACTCTTTGACTCCCCAAA      |
| scaffold700829_15.4 | 1 p2 | (TA)10 | 20 | 572  | 591  | GTCGGACGAAACCATGAAAC      |
| scaffold700973_15.2 | 1 p2 | (CT)6  | 12 | 659  | 670  | CCCTAACTCTTGCCCCTTTC      |
| scaffold700996_16.1 | 1 p2 | (AG)10 | 20 | 565  | 584  | CGAGCCTCAGCCAAAATCTA      |
| scaffold701008_13.9 | 1 p2 | (TA)7  | 14 | 497  | 510  | TCCACATCACATGACCTTCTG     |
| scaffold701035_15.5 | 1 p2 | (GA)8  | 16 | 590  | 605  | TCTCATCTGCTTGTCTGTTGC     |
| scaffold701119_22.9 | 1 p2 | (GT)6  | 12 | 489  | 500  | GTAGGGGGCAGACATTAGCA      |
| scaffold701120_15.5 | 1 p2 | (AG)6  | 12 | 426  | 437  | AGAATTGAGACCCATGCACC      |
| scaffold701150_16.5 | 1 p2 | (AT)6  | 12 | 1545 | 1556 | GAAATTGCTAGTTCGGGCCT      |

|                     |      |        |    |      |      |                           |
|---------------------|------|--------|----|------|------|---------------------------|
| scaffold701172_11.2 | 1 p2 | (AT)6  | 12 | 74   | 85   | TTACGCTAGTCCGTGGGTTT      |
| scaffold701181_11.8 | 1 p2 | (TA)8  | 16 | 49   | 64   | TGAAGTTAGGAAATAAGGAGGTGTT |
| scaffold701205_11.8 | 1 p2 | (TA)13 | 26 | 754  | 779  | TGCATGCATTTTAGCTTTGG      |
| scaffold701296_14.0 | 1 p2 | (TA)9  | 18 | 282  | 299  | GGATTAGGTGGACATTTGGG      |
| scaffold701333_17.5 | 1 p2 | (TA)8  | 16 | 177  | 192  | AAAATGCCCTTGTATGCTGC      |
| scaffold701353_18.5 | 1 p2 | (AT)7  | 14 | 139  | 152  | ATAAAAATGGCACCTGGCTG      |
| scaffold701393_13.0 | 1 p2 | (AC)7  | 14 | 1012 | 1025 | TGATTCACCTCCCATGATCC      |
| scaffold701399_12.9 | 1 p2 | (AG)6  | 12 | 376  | 387  | ATGGGTTTCGAGTCTCAATGG     |
| scaffold701445_11.8 | 1 p2 | (AT)9  | 18 | 406  | 423  | TCCCGAAATCCGAATAAAAA      |
| scaffold701452_13.9 | 1 p2 | (TA)6  | 12 | 1491 | 1502 | TGGTGATTGATCCACCTACG      |
| scaffold701459_18.9 | 1 p2 | (TA)6  | 12 | 422  | 433  | AAGAGACAAACAAGCATGGGTT    |
| scaffold701464_13.6 | 1 p2 | (AC)6  | 12 | 241  | 252  | GCTTTAGAGATGGGAGCACG      |
| scaffold701485_16.1 | 1 p2 | (CT)14 | 28 | 680  | 707  | CATTCATATGAGGATGGCCC      |
| scaffold701490_10.5 | 1 p2 | (TC)7  | 14 | 490  | 503  | CGGTACGGTAACGGTAAGGA      |
| scaffold701516_14.7 | 1 p2 | (CT)6  | 12 | 94   | 105  | TCTTACCACCTGAAGAGGG       |
| scaffold701541_15.1 | 1 p2 | (TA)6  | 12 | 80   | 91   | ATTTGCTTGATCCAACGGTC      |
| scaffold701583_11.1 | 1 p2 | (TA)6  | 12 | 53   | 64   | CCAATTTGAATGGTTATCACCTG   |
| scaffold701631_15.2 | 1 p2 | (GA)8  | 16 | 551  | 566  | CAGAGGAGCCTCAAGATTGC      |
| scaffold701680_16.8 | 1 p2 | (CA)6  | 12 | 638  | 649  | TCAGAGTGCTCAAACCAAGAA     |
| scaffold701744_15.2 | 1 p2 | (AT)7  | 14 | 1248 | 1261 | CGAAACCCTCTCTAATTTGATTGA  |
| scaffold701747_14.9 | 1 p2 | (AT)8  | 16 | 1157 | 1172 | GGGTTATTATTTGATCACCTCCC   |
| scaffold701749_16.0 | 1 p2 | (TA)10 | 20 | 738  | 757  | ATAAACCGTGGAGCCGAGCAT     |
| scaffold701775_18.1 | 1 p2 | (CT)6  | 12 | 1601 | 1612 | CTGCGAGTCATGCTCGATTA      |
| scaffold701814_16.7 | 1 p2 | (TC)6  | 12 | 290  | 301  | TTTGCATGAGACGCCAATAG      |
| scaffold701909_16.4 | 1 p2 | (GA)7  | 14 | 502  | 515  | AACACCAAATATCGTCCCG       |
| scaffold701924_13.4 | 1 p2 | (AT)7  | 14 | 534  | 547  | TGAAGAAGATTCTCATCCCACA    |
| scaffold701930_17.4 | 1 p2 | (TG)7  | 14 | 528  | 541  | ACATTGTATTGGGCTGCTCC      |
| scaffold702003_16.9 | 1 p2 | (TC)6  | 12 | 782  | 793  | CCACTCGATTTTGCTGGTTT      |
| scaffold702100_15.2 | 1 p2 | (AC)7  | 14 | 1620 | 1633 | TAAAAGTTGATGATCCCCGC      |
| scaffold702171_15.6 | 1 p2 | (AG)8  | 16 | 1031 | 1046 | TGATTCAGAAATTTCTCCAGATGC  |
| scaffold702185_12.9 | 1 p2 | (AG)8  | 16 | 119  | 134  | TGTGAGGGACACAATTCTTGA     |
| scaffold702196_16.6 | 1 p2 | (AC)7  | 14 | 3659 | 3672 | AAATTCCAATGGTGGCCTCT      |
| scaffold702232_14.7 | 1 p2 | (AT)8  | 16 | 1014 | 1029 | ATGCAAGTTTTGCTTCCCAA      |
| scaffold702260_18.3 | 1 p2 | (AG)6  | 12 | 28   | 39   | GAGCAGGGAGATAAGAGAGAGAA   |
| scaffold702277_12.2 | 1 p2 | (GA)6  | 12 | 2226 | 2237 | TGCATTCTTGGAACCACTTG      |
| scaffold702324_12.0 | 1 p2 | (AT)6  | 12 | 490  | 501  | GGAGTTTCCGGTGTGAAGA       |
| scaffold702329_18.0 | 1 p2 | (CT)7  | 14 | 1354 | 1367 | CCACAATTTGATCTCTCCTC      |
| scaffold702355_15.3 | 1 p2 | (AT)8  | 16 | 942  | 957  | GGTAAACATGCACAGGTATAGACG  |
| scaffold702425_13.9 | 1 p2 | (CT)12 | 24 | 3604 | 3627 | AGACCCAAAAAGTAGGCCGT      |
| scaffold702488_14.2 | 1 p2 | (TA)6  | 12 | 292  | 303  | CAACCATTGATTTCCCGAGAT     |
| scaffold702519_17.0 | 1 p2 | (CT)7  | 14 | 2282 | 2295 | TCAATCCTTGTCACCAACCA      |
| scaffold702561_16.0 | 1 p2 | (AT)7  | 14 | 291  | 304  | GGACACGCGGATCAGTATCT      |
| scaffold702579_12.8 | 1 p2 | (AG)12 | 24 | 1220 | 1243 | TGCATTTTAAAGGTCCCAGAA     |
| scaffold702581_14.1 | 1 p2 | (CT)6  | 12 | 1015 | 1026 | GAAATGGGAGAGCCAAACAA      |
| scaffold702602_16.2 | 1 p2 | (AG)7  | 14 | 867  | 880  | CCCAGAAGCAGATCCATGTT      |
| scaffold702605_19.3 | 1 p2 | (TC)7  | 14 | 291  | 304  | TCCTTGACCGCGTAAAGATT      |
| scaffold702683_14.2 | 1 p2 | (AT)8  | 16 | 288  | 303  | TTCATGCATTCACCATACGAA     |
| scaffold702692_16.7 | 1 p2 | (TC)9  | 18 | 2966 | 2983 | AGCACCGTGTACTCTGCCTT      |
| scaffold702733_16.0 | 1 p2 | (TC)6  | 12 | 1338 | 1349 | TCGCTACCACGAACTAACCC      |
| scaffold702762_14.8 | 1 p2 | (GA)10 | 20 | 2652 | 2671 | ATTTGGTCCCGTACAAGCAG      |
| scaffold702813_16.6 | 1 p2 | (AC)6  | 12 | 2850 | 2861 | CGTTTCTTCCCTCATTCCA       |
| scaffold702828_15.8 | 1 p2 | (CA)6  | 12 | 293  | 304  | GACTTGCTTGCAAGAACATACA    |
| scaffold702846_14.8 | 1 p2 | (AT)6  | 12 | 2332 | 2343 | CCACTTCAAGCAGTGCAGTC      |
| scaffold702865_10.8 | 1 p2 | (TA)8  | 16 | 421  | 436  | GAATCTCAGCCACAAAATTCCG    |
| scaffold702867_16.2 | 1 p2 | (TA)8  | 16 | 49   | 64   | GGGTTATCATGGGATCCATTC     |
| scaffold702908_15.1 | 1 p2 | (TA)7  | 14 | 291  | 304  | AAGAAGCAATGGTTCGCAAGT     |
| scaffold702923_15.6 | 1 p2 | (CA)7  | 14 | 397  | 410  | TCCAACGGTTTGGTGGTTT       |
| scaffold702947_15.8 | 1 p2 | (GA)11 | 22 | 51   | 72   | GGAGGAAGCATTGGACTTTG      |

|                     |      |        |    |      |                                  |
|---------------------|------|--------|----|------|----------------------------------|
| scaffold702958_17.3 | 1 p2 | (TA)6  | 12 | 2745 | 2756 CCTTTTTGCTTTATTAGAAACCTG    |
| scaffold702968_14.8 | 1 p2 | (CT)6  | 12 | 690  | 701 TTTTCGGTTTGTCTCATCCC         |
| scaffold702997_17.8 | 1 p2 | (AT)7  | 14 | 108  | 121 GGCGTGACACCATGTAAAAG         |
| scaffold703028_14.5 | 1 p2 | (AT)7  | 14 | 808  | 821 TTTTTGGTGGCGGTAGGTAG         |
| scaffold703079_12.6 | 1 p2 | (TC)8  | 16 | 640  | 655 TTTTGTTCCTTTTCGATGC          |
| scaffold703095_13.8 | 1 p2 | (AG)6  | 12 | 544  | 555 CATTGATGGACCTGCTCTCA         |
| scaffold703124_13.8 | 1 p2 | (AT)10 | 20 | 2027 | 2046 TCTACTATACCCTTGCAAATTATCAG/ |
| scaffold703139_15.2 | 1 p2 | (AC)8  | 16 | 164  | 179 TTTGCATCGAGACCAGTTTG         |
| scaffold703140_14.8 | 1 p2 | (TA)6  | 12 | 294  | 305 TTCACAAGATTGTATGGTCCTTG      |
| scaffold703148_14.4 | 1 p2 | (AT)6  | 12 | 1082 | 1093 TATACACCCCGCATCCATTT        |
| scaffold703157_16.5 | 1 p2 | (TA)9  | 18 | 205  | 222 TCCAATTTGCCTTTTATGC          |
| scaffold703180_17.1 | 1 p2 | (AT)6  | 12 | 2353 | 2364 AAGTTAGGCCTGCCATTGTG        |
| scaffold703225_18.3 | 1 p2 | (TA)9  | 18 | 71   | 88 TTCCAAATGAAATGAAAACCG         |
| scaffold703256_14.4 | 1 p2 | (AG)7  | 14 | 292  | 305 AAAATGGCGGTCAACTCAAG         |
| scaffold703292_14.7 | 1 p2 | (GA)7  | 14 | 1159 | 1172 ACATGACTCGAGCCTGTCCT        |
| scaffold703348_15.9 | 1 p2 | (GA)7  | 14 | 1022 | 1035 CCTACGAAGAAATACTGCGCTT      |
| scaffold703349_16.0 | 1 p2 | (AT)6  | 12 | 1071 | 1082 TCTTTGTGGGGAAGAACAGC        |
| scaffold703360_22.3 | 1 p2 | (CT)6  | 12 | 540  | 551 CACCTCCATCTCTGCTCCTC         |
| scaffold703362_10.5 | 1 p2 | (AG)8  | 16 | 41   | 56 CATGCATGAGCAAGAGACAGA         |
| scaffold703371_15.6 | 1 p2 | (AG)6  | 12 | 295  | 306 TTCCATTTCTGTATTCTCTCC        |
| scaffold703402_16.4 | 1 p2 | (GA)6  | 12 | 62   | 73 CAACCATTATTATCCAATCGAAC       |
| scaffold703406_13.3 | 1 p2 | (GA)6  | 12 | 624  | 635 CATGCATTCGCAAAGAAGAA         |
| scaffold703428_15.1 | 1 p2 | (AT)8  | 16 | 2617 | 2632 CTTTTCCCCCAGATGTCTCA        |
| scaffold703442_16.1 | 1 p2 | (CA)7  | 14 | 3063 | 3076 GGTGGAACACTCAGCAGTCA        |
| scaffold703448_10.0 | 1 p2 | (TA)7  | 14 | 149  | 162 TTTATGCGGCATTCATGTGT         |
| scaffold703463_15.6 | 1 p2 | (TC)9  | 18 | 289  | 306 CTGCATTTTCTGCTGGTTCA         |
| scaffold703489_15.5 | 1 p2 | (TA)6  | 12 | 909  | 920 ACGAAAACAAAAGGTACGGA         |
| scaffold703502_15.8 | 1 p2 | (TA)7  | 14 | 153  | 166 TGCAATGCATGGAGGAAATA         |
| scaffold703586_18.1 | 1 p2 | (AT)7  | 14 | 2880 | 2893 GGCGTTTGAATTAGCCTTGA        |
| scaffold703621_12.9 | 1 p2 | (TA)6  | 12 | 717  | 728 CGGTTTGAACAACATGACC          |
| scaffold703629_14.2 | 1 p2 | (AC)6  | 12 | 4470 | 4481 ATCTTTCTTGGGGCCATCTT        |
| scaffold703634_14.6 | 1 p2 | (AT)9  | 18 | 559  | 576 TGGCACACTCTCATTGCTTC         |
| scaffold703650_10.7 | 1 p2 | (CT)6  | 12 | 310  | 321 TGGAACACATGCCAGAATA          |
| scaffold703673_13.5 | 1 p2 | (AG)12 | 24 | 33   | 56 GTAGATGCGTGTGGTTCGATG         |
| scaffold703695_13.3 | 1 p2 | (AT)7  | 14 | 1036 | 1049 TTTCCCTATGAAAACCGTGC        |
| scaffold703697_13.0 | 1 p2 | (AT)6  | 12 | 162  | 173 GGAATAAACGGCCAATTCAA         |
| scaffold703698_18.8 | 1 p2 | (CT)7  | 14 | 93   | 106 ACAAAGCCACCGTCAGAGTC         |
| scaffold703701_17.1 | 1 p2 | (AG)6  | 12 | 1771 | 1782 CTGCTTTGTCCAGCATTTCA        |
| scaffold703706_19.7 | 1 p2 | (TA)8  | 16 | 434  | 449 AATTGTGCATGCCTGTTTCA         |
| scaffold703716_13.4 | 1 p2 | (AT)8  | 16 | 189  | 204 GATTCCGGTTTCAAATCCAA         |
| scaffold703717_15.9 | 1 p2 | (TC)6  | 12 | 1646 | 1657 TTCATTATCATCCGCCTTCA        |
| scaffold703743_13.8 | 1 p2 | (TC)6  | 12 | 949  | 960 ATGGACCAATGCACCAAAAT         |
| scaffold703754_14.2 | 1 p2 | (AT)6  | 12 | 88   | 99 ACAATTTGCTGTGGCTGATG          |
| scaffold703779_15.7 | 1 p2 | (AG)6  | 12 | 204  | 215 AATAGGCGCTTCGAGAAGGT         |
| scaffold703824_17.3 | 1 p2 | (TG)7  | 14 | 1588 | 1601 CATGTTTGCTGTTTTGTGG         |
| scaffold703847_13.3 | 1 p2 | (AC)6  | 12 | 296  | 307 TGCATCGATGATCTTGAAGG         |
| scaffold703877_13.9 | 1 p2 | (TA)9  | 18 | 69   | 86 TTGAGCGACGTATCTCCTTG          |
| scaffold703881_14.3 | 1 p2 | (AT)13 | 26 | 2014 | 2039 AGGAAAATGTGATAGCAGCG        |
| scaffold703903_12.0 | 1 p2 | (TA)6  | 12 | 340  | 351 TCATATCATTGTTTCCGCGA         |
| scaffold703910_16.3 | 1 p2 | (TA)8  | 16 | 469  | 484 ATCCGGATCTGATTTCGATTG        |
| scaffold703922_16.4 | 1 p2 | (GA)6  | 12 | 403  | 414 TCCACAGAGATTTCCACATC         |
| scaffold703968_16.9 | 1 p2 | (TA)7  | 14 | 52   | 65 GGTGACGATGGTGATTGATG          |
| scaffold703979_17.2 | 1 p2 | (CT)6  | 12 | 298  | 309 TCCAGAACATAAACACCGCA         |
| scaffold703985_11.1 | 1 p2 | (AT)10 | 20 | 322  | 341 CTGGTACGTGCGACGTATTG         |
| scaffold704017_13.8 | 1 p2 | (CT)11 | 22 | 588  | 609 TGACTTGGTGAGTGCAAGAGA        |
| scaffold704024_13.5 | 1 p2 | (TA)7  | 14 | 894  | 907 ACTCAAGTGGGGGATTGTTG         |
| scaffold704079_14.4 | 1 p2 | (AT)9  | 18 | 292  | 309 TGATGATGATGGATTTAGCGA        |
| scaffold704103_13.3 | 1 p2 | (TA)12 | 24 | 874  | 897 GAAGACTCAATCATGGGCGT         |

|                     |      |        |    |      |                                |
|---------------------|------|--------|----|------|--------------------------------|
| scaffold704106_19.6 | 1 p2 | (CT)8  | 16 | 864  | 879 TTGGTGATGTGCGTTTTGAT       |
| scaffold704125_11.4 | 1 p2 | (AT)7  | 14 | 365  | 378 GCTGGTCGGTTAATTCCTCA       |
| scaffold704226_14.7 | 1 p2 | (TA)7  | 14 | 94   | 107 ATCCAAGCCATTAATTCCGA       |
| scaffold704345_13.7 | 1 p2 | (GA)7  | 14 | 968  | 981 GGAAGACTCATTGCCCAAAA       |
| scaffold704372_15.5 | 1 p2 | (AG)6  | 12 | 622  | 633 GCATCTCTCCCATCTTCTGC       |
| scaffold704400_18.6 | 1 p2 | (TC)6  | 12 | 460  | 471 AGTGTTTTGATCGAGTCGCC       |
| scaffold704406_12.4 | 1 p2 | (TG)7  | 14 | 108  | 121 TTATGATATTTCCATAAGTCACACCT |
| scaffold704428_15.8 | 1 p2 | (AG)6  | 12 | 300  | 311 AATGCAGAGACTGAATGGGG       |
| scaffold704466_15.3 | 1 p2 | (GA)9  | 18 | 594  | 611 CACTGGGATTTCCAGACAGCA      |
| scaffold704492_20.6 | 1 p2 | (TA)6  | 12 | 97   | 108 AATGGCAAGCGTCTTTGTTT       |
| scaffold704496_15.6 | 1 p2 | (TA)14 | 28 | 132  | 159 CTTTAGGGCCCTTGATTTCC       |
| scaffold704517_16.8 | 1 p2 | (AG)7  | 14 | 1598 | 1611 GGAACCTTCTCTGGGGCTCT      |
| scaffold704541_10.8 | 1 p2 | (AT)8  | 16 | 480  | 495 TAGGTAACCGGTTTCGACCTC      |
| scaffold704601_15.7 | 1 p2 | (TA)8  | 16 | 296  | 311 CTCTTCATACGAGAAGGGCG       |
| scaffold704625_16.1 | 1 p2 | (AG)7  | 14 | 673  | 686 AGGTGGGCCTAAAGTTTGGT       |
| scaffold704725_14.8 | 1 p2 | (CT)7  | 14 | 1673 | 1686 ACATTGAACGCTCCAAAACC      |
| scaffold704821_16.8 | 1 p2 | (TC)6  | 12 | 1080 | 1091 CCCCTCAATCATCCTCCTTT      |
| scaffold704875_12.0 | 1 p2 | (AT)8  | 16 | 340  | 355 GTTTGGGCCTTTTTATTCCG       |
| scaffold704878_13.1 | 1 p2 | (TA)8  | 16 | 1023 | 1038 ATACTAGTGCCTTGCCCGAG      |
| scaffold704880_11.9 | 1 p2 | (TA)6  | 12 | 177  | 188 TTCTAAAGGGGAAACGACAAA      |
| scaffold704923_14.0 | 1 p2 | (GA)7  | 14 | 1601 | 1614 ATAGTACACGTGGCGGAACC      |
| scaffold704962_16.5 | 1 p2 | (GT)6  | 12 | 1124 | 1135 AACGCCTTTCACCCCTAAAT      |
| scaffold704967_16.4 | 1 p2 | (GA)8  | 16 | 328  | 343 GCTACCCATTTCCAGCATA        |
| scaffold704974_14.2 | 1 p2 | (AC)6  | 12 | 1148 | 1159 TGCAAGGCAGAGTCACATTC      |
| scaffold704977_15.6 | 1 p2 | (AT)7  | 14 | 667  | 680 AAACCACGAAATCAAGCAGG       |
| scaffold704987_16.2 | 1 p2 | (CT)7  | 14 | 200  | 213 TCCCATCAACCCTCAGTTTC       |
| scaffold704992_13.6 | 1 p2 | (TA)6  | 12 | 301  | 312 CAATAGCTGGCCACCCTCTA       |
| scaffold705010_17.1 | 1 p2 | (AT)6  | 12 | 2755 | 2766 GGGAGATGGGTTGAAACAGA      |
| scaffold705023_14.3 | 1 p2 | (AC)7  | 14 | 1729 | 1742 ATCGAACCATTCCTGCTTTG      |
| scaffold705066_19.6 | 1 p2 | (TC)6  | 12 | 606  | 617 CACTTACTTAAAGTCAACTCCCCTG  |
| scaffold705067_10.7 | 1 p2 | (TA)9  | 18 | 754  | 771 AATTTTTGCTCTTTTGATCA       |
| scaffold705103_19.2 | 1 p2 | (AG)7  | 14 | 300  | 313 AAAAGAGAAGCCCTCCAAGC       |
| scaffold705167_16.3 | 1 p2 | (AC)7  | 14 | 1458 | 1471 CGGCAAAGAGTTATTCGGAG      |
| scaffold705175_11.5 | 1 p2 | (TA)8  | 16 | 368  | 383 GCAAGCTGGAGACGAAGATT       |
| scaffold705187_13.8 | 1 p2 | (TG)9  | 18 | 4016 | 4033 TGATTTGGGACACTCACAACA     |
| scaffold705189_13.3 | 1 p2 | (TA)6  | 12 | 112  | 123 TGAATTGAATAATCCCAAATCAA    |
| scaffold705210_14.6 | 1 p2 | (AT)7  | 14 | 100  | 113 TCACCGAAAAGATATGAAAATCAA   |
| scaffold705259_11.0 | 1 p2 | (AC)8  | 16 | 51   | 66 TGCCAATACAAAACCAACCA        |
| scaffold705383_13.5 | 1 p2 | (TA)11 | 22 | 43   | 64 GCGTTTTGACGATATATAGTGTTTG   |
| scaffold705436_14.8 | 1 p2 | (GA)8  | 16 | 4127 | 4142 GACTTCTTTTCGAACGTGCGC     |
| scaffold705524_16.3 | 1 p2 | (AT)6  | 12 | 2902 | 2913 GCAATCGGTGACCTTTTCTT      |
| scaffold705526_16.2 | 1 p2 | (AG)6  | 12 | 2658 | 2669 TATCAGTTGGCAGGGGAGAG      |
| scaffold705546_11.4 | 1 p2 | (AT)6  | 12 | 342  | 353 CAAGTCCAGGTCGTTTGGAT       |
| scaffold705547_19.1 | 1 p2 | (AG)9  | 18 | 1186 | 1203 TGATGCTGCATTTTGTGTGA      |
| scaffold705563_13.6 | 1 p2 | (TG)7  | 14 | 1275 | 1288 CTTCAATCCCACCACCAAGT      |
| scaffold705564_11.0 | 1 p2 | (AC)6  | 12 | 122  | 133 TGGATGTCATACCGGACTCA       |
| scaffold705572_15.4 | 1 p2 | (AT)8  | 16 | 5412 | 5427 GAGCAGGATTCTGTGGAACC      |
| scaffold705655_13.9 | 1 p2 | (TG)7  | 14 | 834  | 847 GGCAGCTCACAATCTCTCC        |
| scaffold705684_11.6 | 1 p2 | (GA)11 | 22 | 415  | 436 TCCCCAGCACAGTTATTTCC       |
| scaffold705699_15.9 | 1 p2 | (TA)8  | 16 | 113  | 128 AAAAGTGGCATTGTCCTA         |
| scaffold705700_11.5 | 1 p2 | (AT)11 | 22 | 62   | 83 GGAAATAAGGGGGTGTATGA        |
| scaffold705822_11.9 | 1 p2 | (CT)9  | 18 | 591  | 608 GGACCAACTATGGCACAACC       |
| scaffold705861_13.9 | 1 p2 | (TA)7  | 14 | 1760 | 1773 CACTTTTCATCTCCAACCCAA     |
| scaffold705864_10.5 | 1 p2 | (CT)6  | 12 | 76   | 87 TCGGCTCTTTTCTTTCTCG         |
| scaffold705867_16.0 | 1 p2 | (AT)10 | 20 | 1024 | 1043 TTATGCAGCAAAAATCCGAG      |
| scaffold705898_17.0 | 1 p2 | (GT)7  | 14 | 1995 | 2008 AGGAGAACCACGCATTTACG      |
| scaffold705906_16.0 | 1 p2 | (CT)7  | 14 | 5092 | 5105 CCATTCCTGAGACCAAAAGG      |
| scaffold705912_14.8 | 1 p2 | (TA)7  | 14 | 1684 | 1697 GGAATGATTTCCCTGAGCAA      |



|                     |      |        |    |      |                                  |
|---------------------|------|--------|----|------|----------------------------------|
| scaffold705915_14.5 | 1 p2 | (CT)6  | 12 | 210  | 221 TGTCCATTGGCAGTTAGCAG         |
| scaffold705937_13.6 | 1 p2 | (TC)6  | 12 | 247  | 258 CCAATAGTTCTTCGGTCCCA         |
| scaffold705997_15.3 | 1 p2 | (GA)6  | 12 | 736  | 747 GCACTCGTTTCTTTCTTCGC         |
| scaffold706009_11.6 | 1 p2 | (AT)6  | 12 | 312  | 323 TGAAATTCAATGATCGGACAA        |
| scaffold706021_15.0 | 1 p2 | (AT)7  | 14 | 866  | 879 CTGCCTTAGGTGGCTTTGAG         |
| scaffold706118_14.5 | 1 p2 | (TG)6  | 12 | 275  | 286 TTTTACGTGTTTGGATTTGGG        |
| scaffold706119_15.5 | 1 p2 | (AT)6  | 12 | 113  | 124 CATTACCCTGGCCAGTCAGT         |
| scaffold706151_14.6 | 1 p2 | (TA)9  | 18 | 860  | 877 TCCGATTTCAAACGAAAACC         |
| scaffold706156_16.5 | 1 p2 | (GA)8  | 16 | 820  | 835 ATTTTCCCCTCAAACGAGC          |
| scaffold706174_15.0 | 1 p2 | (AT)8  | 16 | 524  | 539 GTGGAGAATGAAAGTGTGCG         |
| scaffold706175_17.1 | 1 p2 | (CT)6  | 12 | 721  | 732 TCTTATTCTCCCTCTCGCCC         |
| scaffold706218_10.1 | 1 p2 | (GA)6  | 12 | 185  | 196 CCTTCTTGCTCCTTGCTACG         |
| scaffold706267_16.4 | 1 p2 | (GA)6  | 12 | 1061 | 1072 CTTCAGATGGTGTCAAACCC        |
| scaffold706282_13.4 | 1 p2 | (TA)6  | 12 | 1095 | 1106 TGTAATAAATCTTTAAAATGGGAATG, |
| scaffold706298_13.0 | 1 p2 | (TA)7  | 14 | 734  | 747 CTCAGAATCCACTCCTGCAA         |
| scaffold706369_18.5 | 1 p2 | (AT)6  | 12 | 411  | 422 GGTGTGGTACTTGGGACAGG         |
| scaffold706386_16.4 | 1 p2 | (CT)8  | 16 | 302  | 317 TTTTAGCCACTTTCTTGCCC         |
| scaffold706409_14.2 | 1 p2 | (TA)11 | 22 | 98   | 119 ATGGGTTATCACCGAATCGC         |
| scaffold706451_13.4 | 1 p2 | (AG)8  | 16 | 1724 | 1739 CCGACCTTACATAGCGGAAA        |
| scaffold706470_15.0 | 1 p2 | (TA)6  | 12 | 307  | 318 GAGAAATGGCCCATGACTGT         |
| scaffold706471_12.7 | 1 p2 | (AT)8  | 16 | 128  | 143 GCCTCCTTTCATGCAATGTT         |
| scaffold706486_16.0 | 1 p2 | (GA)8  | 16 | 398  | 413 GAGAAACCCGACATGCAAAT         |
| scaffold706549_15.3 | 1 p2 | (TC)6  | 12 | 53   | 64 CTCCTTCTGCGCACTTTTCT          |
| scaffold706550_15.3 | 1 p2 | (CT)9  | 18 | 251  | 268 GTAGGAACCGTGCAGCACTA         |
| scaffold706560_16.8 | 1 p2 | (TC)7  | 14 | 502  | 515 AACCGCGTCTCTTAGTTTTATGA      |
| scaffold706612_10.0 | 1 p2 | (AC)7  | 14 | 979  | 992 ATGTTGCACGAATGGTTTGA         |
| scaffold706622_12.1 | 1 p2 | (TA)8  | 16 | 1081 | 1096 TCATTTTGATTACTTTTACTATTCGTG |
| scaffold706642_14.2 | 1 p2 | (TC)6  | 12 | 843  | 854 AGTCGATTTTCTGCAACCGT         |
| scaffold706670_16.0 | 1 p2 | (CA)7  | 14 | 776  | 789 TGCAGCGAAAACATGGAGTA         |
| scaffold706671_14.6 | 1 p2 | (CT)6  | 12 | 68   | 79 TTTCTCAACCGAGCTCACCT          |
| scaffold706689_17.2 | 1 p2 | (TA)7  | 14 | 1343 | 1356 AATGCAATCCTTTCACTGCC        |
| scaffold706701_16.0 | 1 p2 | (TA)10 | 20 | 256  | 275 TTGTTCGGGTTGATTTGACA         |
| scaffold706728_15.9 | 1 p2 | (TG)8  | 16 | 1932 | 1947 TTGGCAACTATCCCTAACGG        |
| scaffold706744_17.5 | 1 p2 | (AT)6  | 12 | 309  | 320 TCAAACGGTCAAACGATGA          |
| scaffold706772_15.0 | 1 p2 | (CT)6  | 12 | 1514 | 1525 ATGATAGGGCATGGCATT          |
| scaffold706832_15.4 | 1 p2 | (TA)6  | 12 | 610  | 621 AAGCAGGAAGTCATGCCACT         |
| scaffold706837_14.4 | 1 p2 | (AG)9  | 18 | 1009 | 1026 AGCAATTTGTGAAAGTGGGG        |
| scaffold706839_15.0 | 1 p2 | (AT)8  | 16 | 117  | 132 TTCGAGTTTTGATGGGAACA         |
| scaffold706841_16.3 | 1 p2 | (TC)9  | 18 | 3580 | 3597 AGAGGACTGGTCCGAGGAAT        |
| scaffold706862_14.6 | 1 p2 | (AT)6  | 12 | 116  | 127 CCTCTTTTCGACCTTAATAAGCC      |
| scaffold706873_12.5 | 1 p2 | (TA)10 | 20 | 96   | 115 TGAAGGTAGGAAATAAGGAGGTG      |
| scaffold706887_14.0 | 1 p2 | (AC)6  | 12 | 485  | 496 CTTGCATTATCCGGTCGATT         |
| scaffold706898_12.4 | 1 p2 | (AT)7  | 14 | 307  | 320 CGGTTTTTCACCGATTTTTG         |
| scaffold706901_14.3 | 1 p2 | (CT)6  | 12 | 166  | 177 CGAAGAGAACGATGTCGTGA         |
| scaffold706909_17.1 | 1 p2 | (CT)8  | 16 | 139  | 154 AACCAACGGCCTAATCCTTT         |
| scaffold706914_13.1 | 1 p2 | (TA)10 | 20 | 45   | 64 TCGTTTTGATGATATATAGGTGTTT     |
| scaffold706982_16.7 | 1 p2 | (GA)8  | 16 | 1518 | 1533 ATGTTGCATGAGTGAGCTGC        |
| scaffold707083_14.5 | 1 p2 | (TA)9  | 18 | 202  | 219 ACCACGAACAATGACGAACA         |
| scaffold707092_12.5 | 1 p2 | (TA)11 | 22 | 203  | 224 TATGGGTTATCACCGGATCG         |
| scaffold707098_16.4 | 1 p2 | (AT)8  | 16 | 91   | 106 GGAATTGTGATTAGTGACGGC        |
| scaffold707099_16.6 | 1 p2 | (TA)6  | 12 | 896  | 907 GTTACTCGTGGAGGTGCCAT         |
| scaffold707130_13.5 | 1 p2 | (AG)6  | 12 | 243  | 254 TGCAAGAATGGTGAGAGTGG         |
| scaffold707177_17.0 | 1 p2 | (CT)7  | 14 | 1209 | 1222 CCCACGCCATATTCTCTCTC        |
| scaffold707198_15.9 | 1 p2 | (AT)6  | 12 | 1072 | 1083 ACCACTCATCAAAGGAGGGC        |
| scaffold707199_17.7 | 1 p2 | (AG)6  | 12 | 472  | 483 TCGGATTGTTGATTGGTTGA         |
| scaffold707207_13.0 | 1 p2 | (AT)9  | 18 | 1112 | 1129 TGATGATGGTGGTGGTGAGT        |
| scaffold707224_15.3 | 1 p2 | (GA)7  | 14 | 3055 | 3068 TGAATACGGAGCAAGAACCC        |
| scaffold707307_15.4 | 1 p2 | (GA)6  | 12 | 1495 | 1506 ACCGGATGCTAATTTGTTCG        |

|                     |      |        |    |      |                              |
|---------------------|------|--------|----|------|------------------------------|
| scaffold707338_13.0 | 1 p2 | (AT)6  | 12 | 669  | 680 TCGAGGAGTTTACACGGAAGA    |
| scaffold707351_14.2 | 1 p2 | (GA)8  | 16 | 308  | 323 GGTTCAAAAATCGGACTGGA     |
| scaffold707370_15.8 | 1 p2 | (AT)7  | 14 | 782  | 795 CAAGATGCGATCTATTTTGGC    |
| scaffold707385_12.2 | 1 p2 | (TC)9  | 18 | 306  | 323 CTTGGAAACCTTTTACCCCA     |
| scaffold707412_12.5 | 1 p2 | (AT)9  | 18 | 597  | 614 TGCACGTAGGCATGTTCAAT     |
| scaffold707413_12.7 | 1 p2 | (TC)6  | 12 | 1208 | 1219 CGAGGTTGCCCAAACCTCTTA   |
| scaffold707428_13.9 | 1 p2 | (AG)8  | 16 | 308  | 323 TGGTGGTCTGGTGACTGAAA     |
| scaffold707451_19.0 | 1 p2 | (AT)6  | 12 | 311  | 322 AGGTGCTAAGCCAGCACT       |
| scaffold707472_13.1 | 1 p2 | (TA)8  | 16 | 85   | 100 GCTACATATTTTGTATGCATACGG |
| scaffold707551_14.8 | 1 p2 | (GA)7  | 14 | 743  | 756 CAGCACACGAACAGCTTCAT     |
| scaffold707578_14.2 | 1 p2 | (AT)9  | 18 | 591  | 608 CCTAACCCCTTGACTGCAAGC    |
| scaffold707586_15.2 | 1 p2 | (CT)6  | 12 | 418  | 429 CAACTCCCAAATCCTCCAAA     |
| scaffold707613_15.3 | 1 p2 | (TC)6  | 12 | 312  | 323 ACAAATTGGTTTTGGCGTTC     |
| scaffold707617_15.8 | 1 p2 | (AT)6  | 12 | 1306 | 1317 ATGAATCCACACAAGTGGGC    |
| scaffold707632_18.3 | 1 p2 | (TC)6  | 12 | 2235 | 2246 CAAAATTGGAACGACTTGCAT   |
| scaffold707641_11.6 | 1 p2 | (TG)11 | 22 | 63   | 84 ATGGGAAGGGGAGTTAGCAT      |
| scaffold707689_12.1 | 1 p2 | (CT)7  | 14 | 51   | 64 CAAACAACAATTCAGCAAATACC   |
| scaffold707720_12.3 | 1 p2 | (TC)11 | 22 | 1573 | 1594 CTCCTTCTGTTGATCCCCAA    |
| scaffold707737_14.9 | 1 p2 | (CT)7  | 14 | 874  | 887 TGAAGCAATTGTGCAAGGAC     |
| scaffold707745_13.6 | 1 p2 | (AT)6  | 12 | 56   | 67 CGTTTCTCATCTGATTACCGC     |
| scaffold707757_14.4 | 1 p2 | (TA)9  | 18 | 48   | 65 AGAGGGTTATCATGGGATCAA     |
| scaffold707767_12.7 | 1 p2 | (AT)9  | 18 | 123  | 140 ATATATGGGTTATCGCCGGA     |
| scaffold707776_15.7 | 1 p2 | (CT)6  | 12 | 313  | 324 CTGACTCGTGCCCTTATGGT     |
| scaffold707804_15.5 | 1 p2 | (TA)8  | 16 | 117  | 132 TTCGAAATCTAACGATCCGC     |
| scaffold707869_12.4 | 1 p2 | (AT)8  | 16 | 471  | 486 GGATCGAGTCCATGCCATTA     |
| scaffold707877_15.4 | 1 p2 | (TG)7  | 14 | 193  | 206 TACGTGTATGATGGAGGCCA     |
| scaffold707878_15.6 | 1 p2 | (CT)6  | 12 | 338  | 349 ACCACTGCATCACACCAAAA     |
| scaffold707905_16.5 | 1 p2 | (TC)8  | 16 | 1360 | 1375 GCCACCCCTAGTTTTGATGA    |
| scaffold707928_13.5 | 1 p2 | (TA)9  | 18 | 303  | 320 ACCAAACCAAACCAAGCAAC     |
| scaffold707940_10.4 | 1 p2 | (GA)6  | 12 | 117  | 128 GGGGACCATCTCAAATGTTTT    |
| scaffold707958_16.8 | 1 p2 | (AG)8  | 16 | 30   | 45 GCAAAGTGCCACCAACACT       |
| scaffold707963_15.3 | 1 p2 | (GA)6  | 12 | 2952 | 2963 TGTTTAGGATTTCTCTTTGCC   |
| scaffold707964_15.0 | 1 p2 | (TC)9  | 18 | 2779 | 2796 AAATGGCTGCAACGAAGAGT    |
| scaffold707995_16.8 | 1 p2 | (TA)6  | 12 | 635  | 646 GAGCATTCCGGGGTGCTATAA    |
| scaffold708052_19.3 | 1 p2 | (AC)6  | 12 | 360  | 371 TCTCCTCCCTTCGTCTCTCA     |
| scaffold708079_15.8 | 1 p2 | (AT)6  | 12 | 4207 | 4218 CATTTCATGCATCCAATCTGC   |
| scaffold708095_16.8 | 1 p2 | (TA)8  | 16 | 2090 | 2105 GTTCTCGCGCGACATTATTT    |
| scaffold708097_14.1 | 1 p2 | (AT)7  | 14 | 469  | 482 TTCATGGATTCAAAGGGGA      |
| scaffold708126_14.8 | 1 p2 | (GA)6  | 12 | 272  | 283 TTTGATCCTTGCTTTGCCTT     |
| scaffold708143_16.5 | 1 p2 | (AT)9  | 18 | 95   | 112 TTCAGTTGGCCGAATGATTT     |
| scaffold708146_15.0 | 1 p2 | (AC)6  | 12 | 2903 | 2914 TAAGGCAGCTCAAAGGGAG     |
| scaffold708156_14.3 | 1 p2 | (TA)6  | 12 | 252  | 263 CGATCTAACGGCCAGATT       |
| scaffold708161_16.9 | 1 p2 | (AG)9  | 18 | 569  | 586 CAACGGTTTATCTGCGGAAT     |
| scaffold708185_16.0 | 1 p2 | (AG)6  | 12 | 922  | 933 CCGGACATGCTAACGAGACT     |
| scaffold708217_12.3 | 1 p2 | (TA)7  | 14 | 1221 | 1234 TTTGCACTAGATCACTCCCCTT  |
| scaffold708218_15.1 | 1 p2 | (CT)14 | 28 | 3268 | 3295 GGCGTCGGTTGATAGATTGT    |
| scaffold708219_15.1 | 1 p2 | (GT)6  | 12 | 309  | 320 CGAACTCCAGACACCACCTT     |
| scaffold708236_14.4 | 1 p2 | (AT)6  | 12 | 411  | 422 TGCAGTCTTACAGCCCAACA     |
| scaffold708270_14.5 | 1 p2 | (TA)10 | 20 | 1042 | 1061 CAACCAAATGATGGCGATA     |
| scaffold708291_16.6 | 1 p2 | (GA)6  | 12 | 147  | 158 TTAAGGAACACACTTGCCCC     |
| scaffold708301_14.3 | 1 p2 | (AT)10 | 20 | 530  | 549 GATCTCGCGGATCAGAAGAC     |
| scaffold708344_14.1 | 1 p2 | (AT)6  | 12 | 161  | 172 GCAAGTAATGCGGAGCTAGG     |
| scaffold708351_10.3 | 1 p2 | (AT)13 | 26 | 491  | 516 ACCACTTCTTTCGCTACGGA     |
| scaffold708362_13.5 | 1 p2 | (AG)7  | 14 | 314  | 327 AGTGTTGAGCAAAGGGCAG      |
| scaffold708367_16.2 | 1 p2 | (TC)10 | 20 | 4311 | 4330 TCTTTGCCTTCTTCCATGCT    |
| scaffold708409_16.3 | 1 p2 | (AT)6  | 12 | 712  | 723 CTCGGCCTTGGAACTTGTAG     |
| scaffold708420_11.9 | 1 p2 | (GA)6  | 12 | 547  | 558 ACGTTTGAATGCATTGGGTT     |
| scaffold708427_15.8 | 1 p2 | (TA)11 | 22 | 3435 | 3456 CCCCAACTAGGTACCGTGAA    |

|                     |      |        |    |      |      |                            |
|---------------------|------|--------|----|------|------|----------------------------|
| scaffold708443_15.5 | 1 p2 | (TC)6  | 12 | 115  | 126  | CATCCCTTAATCCCCATCCT       |
| scaffold708457_17.7 | 1 p2 | (GT)6  | 12 | 650  | 661  | AAAGTGATTGTGAAACCGGAA      |
| scaffold708476_16.5 | 1 p2 | (CT)7  | 14 | 1133 | 1146 | TGTTTTTCCACAACCAACCC       |
| scaffold708483_15.3 | 1 p2 | (TA)8  | 16 | 1409 | 1424 | TGTCAGCTACCTAACAGCTGGA     |
| scaffold708537_13.3 | 1 p2 | (AT)6  | 12 | 1989 | 2000 | CTTCCCCATGCATCATCTT        |
| scaffold708559_15.2 | 1 p2 | (AT)7  | 14 | 2305 | 2318 | CCTTATGCGTTCCAAAATGG       |
| scaffold708578_17.2 | 1 p2 | (TC)6  | 12 | 405  | 416  | TGAGGCGGTTAGGAGTTGTC       |
| scaffold708587_18.0 | 1 p2 | (TA)7  | 14 | 614  | 627  | ACCGGAATGAAAATCGGATA       |
| scaffold708720_20.5 | 1 p2 | (TA)8  | 16 | 474  | 489  | TCTTTGTTTTCAACGCCTCC       |
| scaffold708724_13.1 | 1 p2 | (TA)9  | 18 | 130  | 147  | GGAAAAAGAAACCCACATGC       |
| scaffold708731_11.3 | 1 p2 | (AT)6  | 12 | 161  | 172  | GCAAGTAATGCGGAGCTAGG       |
| scaffold708736_15.7 | 1 p2 | (GA)6  | 12 | 646  | 657  | GGACCAGAAATCCCAGTTGA       |
| scaffold708778_12.6 | 1 p2 | (GA)6  | 12 | 177  | 188  | TTGCGAGAACCAACTCTGTG       |
| scaffold708779_13.1 | 1 p2 | (TA)9  | 18 | 590  | 607  | ATGACACGCATAAAGGGACC       |
| scaffold708802_15.4 | 1 p2 | (TA)6  | 12 | 471  | 482  | TGATGATTGCCCCAGTTAT        |
| scaffold708809_18.4 | 1 p2 | (TA)10 | 20 | 202  | 221  | CGGGGTGCGATTATACCTTT       |
| scaffold708833_11.3 | 1 p2 | (AT)8  | 16 | 313  | 328  | TAAATACCAAGCTCCGCCTG       |
| scaffold708864_13.3 | 1 p2 | (GA)6  | 12 | 683  | 694  | CTGTATAGGCGTGGCCAACT       |
| scaffold708898_15.5 | 1 p2 | (AG)6  | 12 | 2545 | 2556 | TTCTTTGGTGACCTGTTGGA       |
| scaffold708907_12.0 | 1 p2 | (TC)6  | 12 | 706  | 717  | GCCCACCACCTGATAACAAA       |
| scaffold708957_13.6 | 1 p2 | (TA)7  | 14 | 316  | 329  | TGCATTTTTAATTTATTTTCTGA    |
| scaffold708972_15.0 | 1 p2 | (TC)7  | 14 | 316  | 329  | AATTATGTGGCCGAGGACAG       |
| scaffold708989_16.1 | 1 p2 | (CT)7  | 14 | 3719 | 3732 | TGAAAATGGACCCCTCTCTC       |
| scaffold709008_11.6 | 1 p2 | (TA)9  | 18 | 47   | 64   | AGGTTTTGACCATATTTACTGTTTTG |
| scaffold709023_14.1 | 1 p2 | (AC)9  | 18 | 312  | 329  | TCATAATGGTCTCCATCGCA       |
| scaffold709053_15.5 | 1 p2 | (AT)8  | 16 | 704  | 719  | GGATTCATGAGATCGACGGT       |
| scaffold709065_13.3 | 1 p2 | (TA)9  | 18 | 134  | 151  | GCATATGCATTAATAAATTGAGAC   |
| scaffold709114_13.2 | 1 p2 | (CT)8  | 16 | 1372 | 1387 | ACAAAACAAAATGTTGGCCC       |
| scaffold709115_14.0 | 1 p2 | (AT)8  | 16 | 2627 | 2642 | TTTTATGCATCGTGCCAAAG       |
| scaffold709119_17.0 | 1 p2 | (TC)9  | 18 | 2208 | 2225 | GGAAGCGCTCTTTTACACG        |
| scaffold709122_15.1 | 1 p2 | (AG)6  | 12 | 319  | 330  | GAACGTCCAGTGCCAAAGTT       |
| scaffold709144_15.4 | 1 p2 | (TA)8  | 16 | 50   | 65   | GGTTATCACCGGATCGCTAC       |
| scaffold709198_16.4 | 1 p2 | (AG)11 | 22 | 1673 | 1694 | CGTAGGTTGAGATCATGGCA       |
| scaffold709208_13.9 | 1 p2 | (AT)8  | 16 | 465  | 480  | AAAATCAAAGGCCACAATG        |
| scaffold709211_12.5 | 1 p2 | (AT)7  | 14 | 408  | 421  | GCACCAATATTAGGCCATCG       |
| scaffold709246_14.2 | 1 p2 | (AT)6  | 12 | 6809 | 6820 | CAGCGTTTGCTTTGAGACAA       |
| scaffold709260_14.5 | 1 p2 | (TA)6  | 12 | 104  | 115  | AATCTCGAAAATGGATGACCC      |
| scaffold709301_15.4 | 1 p2 | (CA)6  | 12 | 1384 | 1395 | ATGGCATCCCACAAGTATCC       |
| scaffold709311_18.7 | 1 p2 | (AG)6  | 12 | 141  | 152  | GCGAAATTCGTTGGTTTGAC       |
| scaffold709363_14.8 | 1 p2 | (TA)7  | 14 | 1040 | 1053 | TATGCATGGATTGATGTGGG       |
| scaffold709380_12.7 | 1 p2 | (TA)10 | 20 | 313  | 332  | TTTTTGGATGAAAACCACT        |
| scaffold709381_16.1 | 1 p2 | (AT)7  | 14 | 67   | 80   | GAGTTATCATTGGAGTAAGCCCC    |
| scaffold709397_15.3 | 1 p2 | (TA)8  | 16 | 1473 | 1488 | AACTTTTCCGGCCTCTCATT       |
| scaffold709399_11.3 | 1 p2 | (AT)6  | 12 | 1127 | 1138 | CGCAAATTAGTGGCTTGCTT       |
| scaffold709457_15.5 | 1 p2 | (GA)11 | 22 | 616  | 637  | ATTTGGGTCTCTTCGACACG       |
| scaffold709476_14.6 | 1 p2 | (GA)6  | 12 | 274  | 285  | AAGCCAGCACATGCATACAC       |
| scaffold709491_10.5 | 1 p2 | (TC)9  | 18 | 315  | 332  | CCTCCAGGACACAAGACGAT       |
| scaffold709510_15.3 | 1 p2 | (TA)9  | 18 | 169  | 186  | GATTGAAGACCGCCTCGATA       |
| scaffold709517_12.4 | 1 p2 | (TA)8  | 16 | 621  | 636  | TTCATATTCACTTGAAGACTTGAAAA |
| scaffold709534_15.8 | 1 p2 | (TA)6  | 12 | 1304 | 1315 | TCTCACCTTCGGTCAAACC        |
| scaffold709557_16.5 | 1 p2 | (TA)10 | 20 | 107  | 126  | CCGGGTATGCTATAAACGA        |
| scaffold709564_11.2 | 1 p2 | (TA)7  | 14 | 319  | 332  | TCGTGAAACACTTCAACCCA       |
| scaffold709580_16.7 | 1 p2 | (AC)11 | 22 | 311  | 332  | TGGACCATGTTTTAACTGTATGC    |
| scaffold709591_15.6 | 1 p2 | (TC)6  | 12 | 321  | 332  | TTAACTCAAAGCACGAGGGG       |
| scaffold709622_14.7 | 1 p2 | (TC)6  | 12 | 641  | 652  | ATTTCTGATGGTCAGGCCAA       |
| scaffold709636_12.2 | 1 p2 | (TA)9  | 18 | 855  | 872  | TTCCAATTTCTTTGGCAATG       |
| scaffold709638_12.6 | 1 p2 | (AT)8  | 16 | 90   | 105  | AAATAGTTCGGGTTTTCGGC       |
| scaffold709674_16.5 | 1 p2 | (TA)6  | 12 | 1064 | 1075 | GACGGCAACGTTTTACGTCT       |

|                     |      |        |    |      |                                |
|---------------------|------|--------|----|------|--------------------------------|
| scaffold709678_17.0 | 1 p2 | (GA)6  | 12 | 734  | 745 TAGAAATGGAGGTTGGGTGG       |
| scaffold709748_15.3 | 1 p2 | (GA)8  | 16 | 414  | 429 CTCCACTTCACCGGCTTTTA       |
| scaffold709760_17.2 | 1 p2 | (TA)6  | 12 | 493  | 504 AATACCCTTGATGCTGCGG        |
| scaffold709767_17.8 | 1 p2 | (CT)6  | 12 | 630  | 641 CACAGCCCCCATAACCCAGTA      |
| scaffold709794_10.8 | 1 p2 | (TC)7  | 14 | 651  | 664 TAAATACCGACAACCCCAA        |
| scaffold709811_15.0 | 1 p2 | (AT)6  | 12 | 488  | 499 AAACAAGCAAGCAATCAGCA       |
| scaffold709867_10.7 | 1 p2 | (AG)6  | 12 | 819  | 830 TGTGATCCGTTGAGGAATGA       |
| scaffold709873_11.9 | 1 p2 | (AT)8  | 16 | 517  | 532 TCTACCCTCAGAATCCTCG        |
| scaffold709874_10.9 | 1 p2 | (AG)6  | 12 | 189  | 200 AAGAAGCAGCACTAAACCCG       |
| scaffold709878_17.3 | 1 p2 | (GA)8  | 16 | 1466 | 1481 GAAAGTTGCAGCCCAGTGAG      |
| scaffold709918_13.4 | 1 p2 | (AC)6  | 12 | 973  | 984 AGTTTTGCATCCAGGGTACG       |
| scaffold709928_11.9 | 1 p2 | (GA)8  | 16 | 433  | 448 CTGTCCGTCACGTTGAACC        |
| scaffold709929_14.1 | 1 p2 | (GA)7  | 14 | 661  | 674 TTCAAATTGCGGATGGATTT       |
| scaffold709956_16.0 | 1 p2 | (TA)7  | 14 | 72   | 85 GAAAATCAAAGGCCACAAA         |
| scaffold709966_16.3 | 1 p2 | (CT)6  | 12 | 2429 | 2440 TGCACTTGTTTTCCCAATATCA    |
| scaffold709975_11.0 | 1 p2 | (AT)6  | 12 | 323  | 334 TTTAAGTCGGCGAAGGAAAA       |
| scaffold709991_14.1 | 1 p2 | (AT)7  | 14 | 321  | 334 GGAAAAACCATCACAAAAATTG     |
| scaffold709998_10.4 | 1 p2 | (TC)6  | 12 | 171  | 182 CAATTCGACGACCAAATCCT       |
| scaffold710033_12.8 | 1 p2 | (CT)10 | 20 | 2855 | 2874 GCACAGAGCAACCAATCTGA      |
| scaffold710043_15.4 | 1 p2 | (AC)6  | 12 | 634  | 645 AAAATGCCGAACTTCCAAGA       |
| scaffold710063_12.2 | 1 p2 | (AC)6  | 12 | 376  | 387 TCAGATCGCTATCGTGTTCTG      |
| scaffold710074_11.1 | 1 p2 | (TA)12 | 24 | 657  | 680 CTATGCAGCCTCCAGCTTCT       |
| scaffold710093_13.6 | 1 p2 | (AT)6  | 12 | 1221 | 1232 GAATAAATATGAACGAAAGCACAAA |
| scaffold710095_15.7 | 1 p2 | (CT)6  | 12 | 920  | 931 TTCGTGGTGTAATGGCAAAA       |
| scaffold710125_11.3 | 1 p2 | (AG)8  | 16 | 488  | 503 GTATCCCAGGCCGAATTTTT       |
| scaffold710135_17.6 | 1 p2 | (AT)6  | 12 | 637  | 648 GCATTACTTTCTGTTTGAGAGGAA   |
| scaffold710151_15.3 | 1 p2 | (CT)9  | 18 | 2238 | 2255 CTGTTGCTGGGAGAGGACAT      |
| scaffold710157_14.7 | 1 p2 | (AG)6  | 12 | 649  | 660 GGCATTGTCAGACGACGTAA       |
| scaffold710166_16.0 | 1 p2 | (GC)6  | 12 | 1873 | 1884 ATATATTGTGCAGGCAGGGC      |
| scaffold710182_17.9 | 1 p2 | (AT)6  | 12 | 498  | 509 TTGGACTTGTGCTTGCCTTA       |
| scaffold710192_19.7 | 1 p2 | (CA)6  | 12 | 1042 | 1053 ACCTGGCAAGATTCATCGAC      |
| scaffold710204_13.6 | 1 p2 | (AT)10 | 20 | 66   | 85 TATGATGGGAAGGGTGGGTA        |
| scaffold710224_15.9 | 1 p2 | (GA)10 | 20 | 3056 | 3075 ATTTTCATCGGAAATGCTGC      |
| scaffold710229_16.6 | 1 p2 | (TG)10 | 20 | 832  | 851 GCCTTCATTCCAGCTGTCTC       |
| scaffold710263_14.2 | 1 p2 | (CA)12 | 24 | 1977 | 2000 TCCATGAAGGAGGAACAAGG      |
| scaffold710266_13.9 | 1 p2 | (TA)6  | 12 | 132  | 143 ACTCAATCTGCAAGCGTGAC       |
| scaffold710281_15.4 | 1 p2 | (AT)10 | 20 | 539  | 558 GGTCAAATCGTGGTCCATTC       |
| scaffold710295_13.4 | 1 p2 | (TG)7  | 14 | 2165 | 2178 ACCAGAACCAACAAGCAAGC      |
| scaffold710305_13.0 | 1 p2 | (AG)7  | 14 | 524  | 537 TTCATTACCCCCACCCACTA       |
| scaffold710335_15.8 | 1 p2 | (AT)6  | 12 | 1985 | 1996 GAAAGCAATGATGACGACGA      |
| scaffold710363_17.9 | 1 p2 | (AT)8  | 16 | 118  | 133 TCCGCCTTAATCCATCAAAC       |
| scaffold710364_12.2 | 1 p2 | (AT)7  | 14 | 722  | 735 GATAGTCCATGCCCATGAT        |
| scaffold710392_12.4 | 1 p2 | (AT)6  | 12 | 685  | 696 TGATTCTTTTATGGCGTCTG       |
| scaffold710402_12.4 | 1 p2 | (CT)7  | 14 | 1212 | 1225 CTCGCCAACGTACCTCTCTC      |
| scaffold710403_14.9 | 1 p2 | (AG)6  | 12 | 1222 | 1233 AAGCAGGACAGTAACAGCCG      |
| scaffold710404_11.4 | 1 p2 | (AT)11 | 22 | 44   | 65 TTCATAACATTTCTATCGGTATTTGC  |
| scaffold710418_18.1 | 1 p2 | (TA)7  | 14 | 77   | 90 TTTGCACCTGAGGAGGTGTT        |
| scaffold710431_14.8 | 1 p2 | (TA)6  | 12 | 841  | 852 ATTGCGGTAAAGACCACGAC       |
| scaffold710471_16.0 | 1 p2 | (GA)7  | 14 | 1220 | 1233 CACGTTGTCCTGGAACATTG      |
| scaffold710474_15.8 | 1 p2 | (TG)6  | 12 | 2329 | 2340 TCTACATATTCCCATTGCG       |
| scaffold710517_10.9 | 1 p2 | (GC)6  | 12 | 271  | 282 GGACCATGAGTCACGAGCTT       |
| scaffold710570_14.9 | 1 p2 | (GA)7  | 14 | 1123 | 1136 TCCGGTCTATTCTCACCTCAA     |
| scaffold710574_14.8 | 1 p2 | (CT)8  | 16 | 582  | 597 TGCTACTTTGTCCCGGATCT       |
| scaffold710588_14.9 | 1 p2 | (TA)8  | 16 | 2600 | 2615 GGAGACAATGCACAGCTCAA      |
| scaffold710662_17.0 | 1 p2 | (GA)7  | 14 | 324  | 337 GGCACCTAACACCAATGCTT       |
| scaffold710673_16.9 | 1 p2 | (CT)6  | 12 | 334  | 345 TCGAAGGTGGATGTCTTTCC       |
| scaffold710695_13.6 | 1 p2 | (AG)6  | 12 | 537  | 548 GACGAAGAAAAGGATGTCCG       |
| scaffold710696_16.1 | 1 p2 | (AC)6  | 12 | 2023 | 2034 GAAAGCAGTGACGAAGGGTC      |

|                     |      |        |    |      |                                 |
|---------------------|------|--------|----|------|---------------------------------|
| scaffold710722_11.4 | 1 p2 | (TA)7  | 14 | 476  | 489 TCATCCTTAATTGGCTGCAA        |
| scaffold710773_15.1 | 1 p2 | (AG)8  | 16 | 693  | 708 TGGTTGGTCACGAAAGATGA        |
| scaffold710778_16.9 | 1 p2 | (CT)11 | 22 | 1200 | 1221 CTGGAAAAGACAGCCATCGT       |
| scaffold710825_14.3 | 1 p2 | (TC)6  | 12 | 2276 | 2287 CTAGTGTGCTGGCTGCTTTG       |
| scaffold710844_15.4 | 1 p2 | (TA)6  | 12 | 162  | 173 TGGCATCATATATGCGGTTG        |
| scaffold710853_13.1 | 1 p2 | (TA)8  | 16 | 50   | 65 TCGTGTTAAAGCACGGTATCA        |
| scaffold710861_15.7 | 1 p2 | (AT)10 | 20 | 788  | 807 TAATGGACGTCATGACCGAA        |
| scaffold710884_21.1 | 1 p2 | (AG)8  | 16 | 537  | 552 TACCAATGGACCACAAGCAA        |
| scaffold710896_14.2 | 1 p2 | (CT)10 | 20 | 316  | 335 CCCTTCAATCCCAAGGTTTT        |
| scaffold710964_15.2 | 1 p2 | (GA)6  | 12 | 787  | 798 GCTGTTTTCCATTTGATCTGC       |
| scaffold710965_14.4 | 1 p2 | (AG)6  | 12 | 221  | 232 CAGTCTGAAGCTTGGGGAAG        |
| scaffold710971_12.2 | 1 p2 | (GA)8  | 16 | 742  | 757 CAAGGTGGCTTCACACACAA        |
| scaffold710990_12.7 | 1 p2 | (TA)7  | 14 | 321  | 334 ATTCAATGGCAATCTCCTGG        |
| scaffold711003_16.4 | 1 p2 | (AC)8  | 16 | 1176 | 1191 CCCCAATGGTTAAGGTGACA       |
| scaffold711010_15.4 | 1 p2 | (AT)9  | 18 | 81   | 98 AATTGAATGGCAAGGATTGG         |
| scaffold711029_15.5 | 1 p2 | (TA)10 | 20 | 159  | 178 TGTGGTATCAAATCCAGCCA        |
| scaffold711053_16.3 | 1 p2 | (TA)8  | 16 | 3090 | 3105 CCAAGGGCATTACACTCGAT       |
| scaffold711073_13.9 | 1 p2 | (TC)8  | 16 | 324  | 339 CCCCACAATCATCACTCTT         |
| scaffold711094_14.7 | 1 p2 | (CT)7  | 14 | 904  | 917 TGTCCCAATTGAAACTCGAA        |
| scaffold711106_10.9 | 1 p2 | (TA)9  | 18 | 1634 | 1651 TGATGCTAATCCAAACGATCC      |
| scaffold711112_13.2 | 1 p2 | (GA)6  | 12 | 1757 | 1768 TGTATTTTTCCCGTGAAGCAC      |
| scaffold711116_15.9 | 1 p2 | (AG)12 | 24 | 196  | 219 GCATTTTCCAAGGCAGACAT        |
| scaffold711137_13.5 | 1 p2 | (CA)6  | 12 | 1138 | 1149 TCCAGGTCCAATGAAAAGG        |
| scaffold711191_14.3 | 1 p2 | (AG)6  | 12 | 815  | 826 CGCACTCTGCAACACTGAAA        |
| scaffold711224_14.7 | 1 p2 | (AT)7  | 14 | 328  | 341 TTCTCTCCGCACAATTCCTT        |
| scaffold711240_15.9 | 1 p2 | (TG)7  | 14 | 1759 | 1772 CCCAATAGTTCAGCACCATC       |
| scaffold711245_14.4 | 1 p2 | (TA)6  | 12 | 1108 | 1119 TGTCAATCGAATTAACCGTACA     |
| scaffold711249_14.3 | 1 p2 | (GT)6  | 12 | 316  | 327 TGCATCTGATTCTGACGAGG        |
| scaffold711263_16.5 | 1 p2 | (AT)9  | 18 | 2824 | 2841 AAGGGGAGAGCAGGAAAATC       |
| scaffold711286_14.6 | 1 p2 | (TG)6  | 12 | 393  | 404 TTTGTTCAATCGCTTTGCTG        |
| scaffold711287_15.2 | 1 p2 | (TC)6  | 12 | 675  | 686 CGTGATAAGCACCCCTCCAAT       |
| scaffold711342_11.6 | 1 p2 | (AG)7  | 14 | 53   | 66 GAGAAAGGGAGGAGGAGGAG         |
| scaffold711375_15.6 | 1 p2 | (GA)9  | 18 | 179  | 196 AGAGCATGGAGCCAAAAGAA        |
| scaffold711422_16.0 | 1 p2 | (AT)7  | 14 | 2831 | 2844 GATTGAATCTCCCCTTCCG        |
| scaffold711426_16.9 | 1 p2 | (GA)8  | 16 | 2330 | 2345 GACTGCTCTCCTCATCTGGG       |
| scaffold711439_13.9 | 1 p2 | (AT)7  | 14 | 711  | 724 CCGGCTATCTCACTCCAGAC        |
| scaffold711480_10.0 | 1 p2 | (AT)6  | 12 | 776  | 787 ATCCCGTATTCTCACCCCTC        |
| scaffold711534_17.7 | 1 p2 | (TA)9  | 18 | 2717 | 2734 CAGTCACAAAAGGGGGAAAA       |
| scaffold711556_15.8 | 1 p2 | (CT)7  | 14 | 2103 | 2116 CCTCCGGTTCAAATCAAGA        |
| scaffold711559_15.0 | 1 p2 | (AG)8  | 16 | 419  | 434 ATTCAGTCCCATCAGCCAG         |
| scaffold711569_14.9 | 1 p2 | (TA)10 | 20 | 1021 | 1040 AATGCGCTTTCTGCAAATCT       |
| scaffold711578_10.6 | 1 p2 | (AT)9  | 18 | 401  | 418 TCAATTTGATAATTTGAAGCTCTATCC |
| scaffold711621_11.3 | 1 p2 | (TA)10 | 20 | 604  | 623 ACGTCAGTCTTCCCACTG          |
| scaffold711666_17.0 | 1 p2 | (AG)9  | 18 | 198  | 215 AAACGTGCGAGGAAAACATC        |
| scaffold711737_16.9 | 1 p2 | (CG)6  | 12 | 46   | 57 TATGGTGGTATGGTGTGGGG         |
| scaffold711758_13.8 | 1 p2 | (TA)10 | 20 | 658  | 677 TGAGGGGAATGCACCACTAT        |
| scaffold711771_15.8 | 1 p2 | (AT)8  | 16 | 1273 | 1288 GCCTTTGACATCCAGGACAT       |
| scaffold711775_17.2 | 1 p2 | (GA)6  | 12 | 5545 | 5556 TCAGTTGGCACCAAAATTGA       |
| scaffold711861_17.6 | 1 p2 | (TC)6  | 12 | 332  | 343 GCCGTTCTTCCCTTCTCTCT        |
| scaffold711865_19.0 | 1 p2 | (CT)8  | 16 | 329  | 344 TTTACGCACATACCCCATC         |
| scaffold711866_14.6 | 1 p2 | (CT)6  | 12 | 333  | 344 CAGGAGCAACCATTTTGTGA        |
| scaffold711870_11.7 | 1 p2 | (CT)9  | 18 | 972  | 989 TCACCCATTTCCACCAAGAT        |
| scaffold711885_15.5 | 1 p2 | (AG)6  | 12 | 2907 | 2918 CCTGAGCGGATAAATCCAGA       |
| scaffold711922_15.0 | 1 p2 | (TA)7  | 14 | 50   | 63 AAGGAGGTGTTATGAAGGGATT       |
| scaffold711972_12.5 | 1 p2 | (AT)9  | 18 | 1059 | 1076 CATCATGTAGGAAAATGTTTACAGA  |
| scaffold712010_16.9 | 1 p2 | (TA)11 | 22 | 2925 | 2946 TTGACACGCATGCTTACACA       |
| scaffold712013_15.3 | 1 p2 | (TA)12 | 24 | 91   | 114 TCAAACCTATTGTTGTTTACAAA     |
| scaffold712061_17.3 | 1 p2 | (AC)7  | 14 | 376  | 389 TCACCTAACCCCTCTCTTGG        |

|                     |      |        |    |      |      |                           |
|---------------------|------|--------|----|------|------|---------------------------|
| scaffold712090_15.1 | 1 p2 | (AT)6  | 12 | 1034 | 1045 | CTCTTCGGTGATCAAGCGTT      |
| scaffold712111_15.1 | 1 p2 | (AG)9  | 18 | 7876 | 7893 | GATCAAAAACCCCTCCATCAA     |
| scaffold712121_16.7 | 1 p2 | (AG)6  | 12 | 860  | 871  | GCTGAAGCAATCGAGAAGGT      |
| scaffold712150_11.2 | 1 p2 | (TA)7  | 14 | 778  | 791  | TACAGCGTGGACGGTACAGA      |
| scaffold712186_10.6 | 1 p2 | (TA)6  | 12 | 129  | 140  | TAGTGGGGGATGATGTGGAT      |
| scaffold712243_17.0 | 1 p2 | (AT)7  | 14 | 114  | 127  | AGGCCTAATTGCCGTCCTAT      |
| scaffold712254_15.0 | 1 p2 | (TC)7  | 14 | 2195 | 2208 | ACAAGAAGGTGGCCATGAAC      |
| scaffold712274_16.9 | 1 p2 | (AT)8  | 16 | 652  | 667  | GAAACACAAAAATTAGCATACAACG |
| scaffold712288_16.9 | 1 p2 | (TA)11 | 22 | 453  | 474  | CAACAAAAATCCTAGTCCATCCA   |
| scaffold712312_16.3 | 1 p2 | (GT)7  | 14 | 738  | 751  | CCTTCCCACATTCCACATCT      |
| scaffold712339_15.1 | 1 p2 | (GA)10 | 20 | 1671 | 1690 | ATCTCTGCGATGCCTTTTCAT     |
| scaffold712385_15.9 | 1 p2 | (TC)6  | 12 | 549  | 560  | ATGTTGCCACCTCAGCTTCT      |
| scaffold712389_14.2 | 1 p2 | (AT)12 | 24 | 2018 | 2041 | TCATGACTCACGAGATGGGA      |
| scaffold712395_15.6 | 1 p2 | (AG)6  | 12 | 118  | 129  | CCAAGCATTAAAGCCATA        |
| scaffold712398_14.0 | 1 p2 | (AC)8  | 16 | 510  | 525  | TCCAAACTTGATCCGAGAGG      |
| scaffold712411_15.3 | 1 p2 | (CA)6  | 12 | 134  | 145  | CCCGTTATGATTGTTAAATCG     |
| scaffold712423_16.8 | 1 p2 | (CT)7  | 14 | 274  | 287  | TCAGACCAAATCAGAAGGCA      |
| scaffold712434_14.9 | 1 p2 | (GT)6  | 12 | 1724 | 1735 | TGAGGGATGATGCATACGAA      |
| scaffold712452_18.4 | 1 p2 | (AG)6  | 12 | 1096 | 1107 | ATCACAAAATTCACACCCCG      |
| scaffold712532_10.6 | 1 p2 | (GA)6  | 12 | 872  | 883  | GGGCTAAAATGGTGTGGAA       |
| scaffold712582_11.3 | 1 p2 | (TG)8  | 16 | 1508 | 1523 | TTCCTGGAGGATCTGCATT       |
| scaffold712584_13.7 | 1 p2 | (GA)8  | 16 | 1647 | 1662 | CTCTCTCATGCGTGGTGAAA      |
| scaffold712639_15.7 | 1 p2 | (AG)8  | 16 | 333  | 348  | TCAAGCTAACCAGCCAACCT      |
| scaffold712655_17.7 | 1 p2 | (CT)8  | 16 | 295  | 310  | ACACAGACAACCCATGGAGA      |
| scaffold712692_17.9 | 1 p2 | (AG)7  | 14 | 5486 | 5499 | CCGTGGAAGACAAGGGATAA      |
| scaffold712728_12.9 | 1 p2 | (TC)7  | 14 | 1144 | 1157 | AACGCAAACACATACGCAAA      |
| scaffold712738_18.7 | 1 p2 | (AT)8  | 16 | 1196 | 1211 | ACGATGTCGTGTAGGGGAAGG     |
| scaffold712780_16.3 | 1 p2 | (TA)6  | 12 | 2918 | 2929 | CGAACATTGTCACCGTCAAC      |
| scaffold712783_15.8 | 1 p2 | (CT)7  | 14 | 1005 | 1018 | TTGGCTCTGGTTTGTACCC       |
| scaffold712784_12.7 | 1 p2 | (GA)9  | 18 | 863  | 880  | ACGTAAGGGTGATGGGTGAA      |
| scaffold712789_16.9 | 1 p2 | (TC)8  | 16 | 907  | 922  | AATCCAAGGTACCCCACTCC      |
| scaffold712812_18.2 | 1 p2 | (AT)6  | 12 | 872  | 883  | TGAAATTGTGTTGCAGGCTC      |
| scaffold712814_15.4 | 1 p2 | (AG)6  | 12 | 152  | 163  | CGAACGCAATGCAATAAATG      |
| scaffold712841_14.9 | 1 p2 | (AT)6  | 12 | 3034 | 3045 | GCAAAAGAAACAAACGGGAA      |
| scaffold712854_11.2 | 1 p2 | (TA)6  | 12 | 100  | 111  | GCAAAATTGGTCTCTATGTGTAGAA |
| scaffold712896_14.3 | 1 p2 | (CT)7  | 14 | 1099 | 1112 | AAAGGAGGTGGATCGGTTCT      |
| scaffold712904_15.9 | 1 p2 | (TA)8  | 16 | 545  | 560  | GAGAAATCAATCTCAGCCGC      |
| scaffold712911_16.1 | 1 p2 | (TA)6  | 12 | 191  | 202  | CCGGTTATCCAATCCATTT       |
| scaffold712920_13.4 | 1 p2 | (TA)10 | 20 | 734  | 753  | TCCTCCTAAAATAACGGCCA      |
| scaffold712941_11.1 | 1 p2 | (AG)7  | 14 | 675  | 688  | CGTGGGTGTAGTGATGGATG      |
| scaffold712968_14.2 | 1 p2 | (AT)7  | 14 | 612  | 625  | GTGGCATCGTGAGGAGTGTT      |
| scaffold712993_10.2 | 1 p2 | (AG)6  | 12 | 282  | 293  | AAAGTCCTACATGCCGGTTG      |
| scaffold713006_14.4 | 1 p2 | (AC)7  | 14 | 2096 | 2109 | ACCCCACTTCCTCTGTTTC       |
| scaffold713008_16.9 | 1 p2 | (TA)6  | 12 | 2511 | 2522 | TGCATGAGAAATGAGCGGTA      |
| scaffold713053_12.9 | 1 p2 | (TA)13 | 26 | 660  | 685  | ATGAGTTATCACCGGATCGC      |
| scaffold713061_16.6 | 1 p2 | (CT)8  | 16 | 525  | 540  | CGAGAATTAGCTGCCACTCC      |
| scaffold713078_15.2 | 1 p2 | (GA)7  | 14 | 337  | 350  | CCGGCTCCGATCTATACAAA      |
| scaffold713091_14.1 | 1 p2 | (TC)6  | 12 | 507  | 518  | AAAACCTCCAATCCCTCCAC      |
| scaffold713129_13.7 | 1 p2 | (GA)7  | 14 | 702  | 715  | GCATTGGCGTTTGAAGAAAT      |
| scaffold713147_16.0 | 1 p2 | (CT)6  | 12 | 309  | 320  | ATCCGCCAAACCTTCTTCTT      |
| scaffold713157_12.3 | 1 p2 | (TA)9  | 18 | 46   | 63   | GAACCACCGAGTACCAAGTGA     |
| scaffold713163_12.4 | 1 p2 | (AG)6  | 12 | 640  | 651  | AAACAATGTAGGGCAAACGG      |
| scaffold713171_14.4 | 1 p2 | (TA)9  | 18 | 47   | 64   | GGTTATCACCGGATCGCTAC      |
| scaffold713175_15.9 | 1 p2 | (AC)6  | 12 | 692  | 703  | TGGCTCTTCAACTCAGCAA       |
| scaffold713262_16.8 | 1 p2 | (AT)6  | 12 | 603  | 614  | TGTGGGTCAGCTATGCATGT      |
| scaffold713304_16.4 | 1 p2 | (CT)6  | 12 | 2752 | 2763 | TAGCGTAGATATGCCAGGGG      |
| scaffold713308_17.1 | 1 p2 | (CA)7  | 14 | 627  | 640  | AATGTTGCGAATGGAAGAAA      |
| scaffold713321_11.0 | 1 p2 | (AT)10 | 20 | 224  | 243  | GTGCGTGGCTCAATCCTATC      |

|                     |      |        |    |      |      |                            |
|---------------------|------|--------|----|------|------|----------------------------|
| scaffold713396_14.0 | 1 p2 | (TA)10 | 20 | 631  | 650  | AATTACATTGGGCCATCCTG       |
| scaffold713405_14.7 | 1 p2 | (AG)6  | 12 | 341  | 352  | ATATTCGGATCAGGAATGCG       |
| scaffold713440_19.9 | 1 p2 | (TA)7  | 14 | 339  | 352  | TCCAAATGCAACTGGTGAAA       |
| scaffold713444_15.2 | 1 p2 | (TA)7  | 14 | 431  | 444  | TGAGTAACGCATCAAGCCAC       |
| scaffold713454_13.4 | 1 p2 | (TA)8  | 16 | 539  | 554  | TTCTCGGGATTTAACGTCCA       |
| scaffold713458_10.9 | 1 p2 | (AT)12 | 24 | 217  | 240  | AGCTTAAAAGGCCGGTCAAT       |
| scaffold713469_15.0 | 1 p2 | (AT)6  | 12 | 341  | 352  | CCCAGATAATTTTATATGTGGTGAAA |
| scaffold713481_10.4 | 1 p2 | (AT)9  | 18 | 536  | 553  | GTGATTGGTGGTTTTGTGGA       |
| scaffold713488_14.0 | 1 p2 | (AT)6  | 12 | 917  | 928  | GGCTTCTTCTCTACCCAATCG      |
| scaffold713497_17.0 | 1 p2 | (CT)7  | 14 | 362  | 375  | CTCTCCAAAAACAGTCCCTCTC     |
| scaffold713502_18.5 | 1 p2 | (GA)6  | 12 | 410  | 421  | GAAC TTCACCGCTTGGACAT      |
| scaffold713510_14.7 | 1 p2 | (CT)7  | 14 | 892  | 905  | AGGCGTCAAAGAGGAAGACA       |
| scaffold713592_19.2 | 1 p2 | (TA)6  | 12 | 2482 | 2493 | TTCGTTCAATTGCATGTGGTT      |
| scaffold713638_14.3 | 1 p2 | (AT)8  | 16 | 932  | 947  | CCCATCTCGAACATTCTCTGT      |
| scaffold713670_16.9 | 1 p2 | (CT)8  | 16 | 338  | 353  | CATGCAGGTTTTGTCCAATG       |
| scaffold713708_12.0 | 1 p2 | (TA)9  | 18 | 755  | 772  | GCCGCAATATACATGGCTTT       |
| scaffold713710_14.0 | 1 p2 | (TA)9  | 18 | 2439 | 2456 | TTCTTTTTGCATTAGCCTTTGA     |
| scaffold713862_14.6 | 1 p2 | (TA)7  | 14 | 510  | 523  | TAGCAAATTCGGGATGAAA        |
| scaffold713868_14.2 | 1 p2 | (AT)14 | 28 | 33   | 60   | GGAGTTTTGACCTAATTAAGACCC   |
| scaffold713877_16.0 | 1 p2 | (CA)6  | 12 | 1549 | 1560 | CTGGAAAACGCTGATGGATT       |
| scaffold713944_14.1 | 1 p2 | (AC)8  | 16 | 1023 | 1038 | GCAAATTGCACTCCCTTTCA       |
| scaffold713953_13.9 | 1 p2 | (TG)8  | 16 | 725  | 740  | TGTTGCCTTGCAAATTATTTCT     |
| scaffold713965_13.2 | 1 p2 | (TC)7  | 14 | 342  | 355  | GCAAAGAAGAGTGGAGGCAC       |
| scaffold713990_14.9 | 1 p2 | (TA)8  | 16 | 86   | 101  | TTTCGTGTTTCTTTTGATTTTCA    |
| scaffold714016_17.1 | 1 p2 | (TA)8  | 16 | 341  | 356  | ACTCAATGGACACATGCCAA       |
| scaffold714042_19.1 | 1 p2 | (CA)6  | 12 | 345  | 356  | CGCAACCTCTAGAAACCCAC       |
| scaffold714055_16.9 | 1 p2 | (TC)9  | 18 | 818  | 835  | CGTCTTAGATCCCTCCCACA       |
| scaffold714065_11.0 | 1 p2 | (AT)8  | 16 | 1040 | 1055 | GGCCTGGGCCTACATAAGTT       |
| scaffold714078_13.7 | 1 p2 | (AT)8  | 16 | 934  | 949  | CCAACATCACACTCGACCAC       |
| scaffold714104_16.0 | 1 p2 | (CT)7  | 14 | 465  | 478  | CCATTCAGCAATAATAGGCCA      |
| scaffold714107_14.7 | 1 p2 | (TA)8  | 16 | 48   | 63   | TGGTTATTAGGGGATGGTGA       |
| scaffold714116_14.0 | 1 p2 | (TA)10 | 20 | 1627 | 1646 | TTTCAAACGAGATCTCAGGG       |
| scaffold714119_10.4 | 1 p2 | (TA)9  | 18 | 339  | 356  | ATTCCAAAAATCAAAGGCC        |
| scaffold714124_14.6 | 1 p2 | (TA)12 | 24 | 1294 | 1317 | GGAATTCAATTGTTTATTTGTTGC   |
| scaffold714162_16.6 | 1 p2 | (TC)7  | 14 | 1891 | 1904 | TGTGTGCGTGTTGTTGTTCAAA     |
| scaffold714265_13.5 | 1 p2 | (GA)10 | 20 | 1319 | 1338 | CCTCACTGGAGGAAGGATCA       |
| scaffold714282_14.9 | 1 p2 | (CT)6  | 12 | 607  | 618  | GGCAACCCACTTGTGAAACT       |
| scaffold714290_12.4 | 1 p2 | (AT)6  | 12 | 332  | 343  | TTTGATATTCTCACCATCCTACTCA  |
| scaffold714293_17.3 | 1 p2 | (AT)10 | 20 | 1520 | 1539 | TGGGACCCTAATACACCATCA      |
| scaffold714306_13.5 | 1 p2 | (CT)7  | 14 | 345  | 358  | CCAAAATTGGCGGATAACTG       |
| scaffold714357_17.3 | 1 p2 | (AG)7  | 14 | 63   | 76   | GAGCGCACTCGAAAAGTAGC       |
| scaffold714369_11.2 | 1 p2 | (TA)7  | 14 | 643  | 656  | AATCCAACGGTAAAACAGCG       |
| scaffold714431_14.2 | 1 p2 | (CT)14 | 28 | 102  | 129  | GGCCTCTTGACAAAAGCTG        |
| scaffold714445_14.1 | 1 p2 | (AT)8  | 16 | 599  | 614  | GTGTGCGTGTTGAATATCGG       |
| scaffold714479_14.5 | 1 p2 | (TA)9  | 18 | 128  | 145  | AATCATAGCCATCCATTCCG       |
| scaffold714482_13.8 | 1 p2 | (AG)9  | 18 | 831  | 848  | ACACACACCCAGAGAGAGGG       |
| scaffold714483_11.2 | 1 p2 | (AT)7  | 14 | 664  | 677  | CCAGGCTTGTCGAAGCTATT       |
| scaffold714491_18.7 | 1 p2 | (TC)7  | 14 | 784  | 797  | AATCACCAAACGTCACACGA       |
| scaffold714495_14.7 | 1 p2 | (CT)10 | 20 | 2133 | 2152 | CAGAAAGAGCCCATAGCCAC       |
| scaffold714497_15.9 | 1 p2 | (TA)6  | 12 | 348  | 359  | TCAGCATGTTGCCATTAGGA       |
| scaffold714501_15.3 | 1 p2 | (TA)10 | 20 | 46   | 65   | AAGGAGGTGTTATGAAGGGATT     |
| scaffold714513_15.9 | 1 p2 | (TA)7  | 14 | 3013 | 3026 | CTTTCTTCTGCCCCACCTA        |
| scaffold714530_10.6 | 1 p2 | (AT)7  | 14 | 719  | 732  | TCACGCACTCTCACTCATCC       |
| scaffold714540_14.5 | 1 p2 | (AT)11 | 22 | 646  | 667  | ATGGGGTTCTTCTCCTTTCC       |
| scaffold714544_11.2 | 1 p2 | (TG)7  | 14 | 378  | 391  | GAGGTGGCTTCTTTAGGGCT       |
| scaffold714545_15.6 | 1 p2 | (AG)6  | 12 | 292  | 303  | TCAGCATGTTCCATGTTCAAG      |
| scaffold714551_15.8 | 1 p2 | (CT)6  | 12 | 121  | 132  | TATCTCTATTTCTCCGCC         |
| scaffold714553_17.2 | 1 p2 | (AC)6  | 12 | 661  | 672  | TTGGCCTCACGATAGCTCTAC      |

|                     |      |        |    |      |      |                           |
|---------------------|------|--------|----|------|------|---------------------------|
| scaffold714558_14.3 | 1 p2 | (TA)8  | 16 | 742  | 757  | GTGCCTGAACCACCAACTTT      |
| scaffold714562_17.4 | 1 p2 | (TC)6  | 12 | 426  | 437  | ACGGCTAGATTCGATCCTGA      |
| scaffold714615_16.0 | 1 p2 | (AG)7  | 14 | 479  | 492  | CACCTTTTTCTTCCCCAGGT      |
| scaffold714619_14.2 | 1 p2 | (TA)6  | 12 | 1670 | 1681 | CACAACGAATTCCTACGGGT      |
| scaffold714626_13.1 | 1 p2 | (CT)10 | 20 | 75   | 94   | TCAAACCTTTGCCACTTCC       |
| scaffold714655_15.2 | 1 p2 | (AC)6  | 12 | 2838 | 2849 | TCAACGAGGAAATCGCTTCT      |
| scaffold714676_17.2 | 1 p2 | (AC)6  | 12 | 3529 | 3540 | TGGAACCAACTCGTCAGACA      |
| scaffold714683_11.1 | 1 p2 | (CT)7  | 14 | 995  | 1008 | AGAAGCAGTTGGGATGATGG      |
| scaffold714692_16.0 | 1 p2 | (TA)6  | 12 | 153  | 164  | ATGCCCATCTCATTTCAAGG      |
| scaffold714694_13.5 | 1 p2 | (TA)9  | 18 | 1029 | 1046 | AAGGGATGGTATCATTTGATCG    |
| scaffold714699_16.8 | 1 p2 | (CT)10 | 20 | 3692 | 3711 | TCTTATTGGGTTGTCCGAGG      |
| scaffold714740_17.2 | 1 p2 | (AG)9  | 18 | 344  | 361  | AAAGAGAGAGTGCATGCGTGT     |
| scaffold714751_12.4 | 1 p2 | (TG)8  | 16 | 35   | 50   | TGAGTGTGTGTCTCGTGTGTG     |
| scaffold714756_16.0 | 1 p2 | (AG)6  | 12 | 349  | 360  | TTTGAAGGAAACTCGTCCC       |
| scaffold714781_16.5 | 1 p2 | (AG)7  | 14 | 348  | 361  | GTGCCTGCTCCACTTTCTTC      |
| scaffold714824_12.7 | 1 p2 | (GA)6  | 12 | 827  | 838  | CTCCATACTAGCTTCGCCG       |
| scaffold714835_12.7 | 1 p2 | (AT)10 | 20 | 1037 | 1056 | TGCAAGTTCGAGTTCAAGTT      |
| scaffold714878_15.7 | 1 p2 | (TA)6  | 12 | 1875 | 1886 | TCTCAGCTCGATAAGTGGCA      |
| scaffold714887_13.9 | 1 p2 | (TA)6  | 12 | 287  | 298  | CATATCCTTTGAACCGGCAC      |
| scaffold714908_17.6 | 1 p2 | (CT)7  | 14 | 349  | 362  | TCGATCTGGGCTCTCTTGT       |
| scaffold714948_18.4 | 1 p2 | (AG)7  | 14 | 324  | 337  | GTGGAGAGTGAGGAAGCAGG      |
| scaffold714956_14.7 | 1 p2 | (GA)8  | 16 | 3692 | 3707 | TTGGAAGAGGAAAGTGGGTG      |
| scaffold714965_14.5 | 1 p2 | (TA)6  | 12 | 685  | 696  | CCACGATGATTCGATACACA      |
| scaffold714981_16.7 | 1 p2 | (TA)8  | 16 | 683  | 698  | ATTCACAGCCCTTCATCTCG      |
| scaffold714990_11.9 | 1 p2 | (TA)8  | 16 | 67   | 82   | GGTCCATAAGTGTTTTGAGTTATGA |
| scaffold715022_20.1 | 1 p2 | (AT)6  | 12 | 966  | 977  | TTGGTCTTGGTCACGATTCTC     |
| scaffold715072_11.7 | 1 p2 | (GA)6  | 12 | 460  | 471  | CGGAGAGATTTGTGGGGTTA      |
| scaffold715088_16.1 | 1 p2 | (TC)6  | 12 | 661  | 672  | TTGGTCAAACCAAGCATGTG      |
| scaffold715100_14.6 | 1 p2 | (AG)6  | 12 | 110  | 121  | CTGGACGCATTAGTGGGTTT      |
| scaffold715124_12.8 | 1 p2 | (TA)10 | 20 | 885  | 904  | TATAAGGATCAACCGCCTGC      |
| scaffold715127_14.5 | 1 p2 | (TG)9  | 18 | 1286 | 1303 | GGGGCTTCAGATGAAATCAA      |
| scaffold715128_14.7 | 1 p2 | (GA)7  | 14 | 349  | 362  | AGCATCAGACCAATGTGCAA      |
| scaffold715180_14.3 | 1 p2 | (TC)6  | 12 | 1116 | 1127 | TGGTGCAGATGTCCTGGTTA      |
| scaffold715184_16.8 | 1 p2 | (AT)7  | 14 | 1330 | 1343 | CTACGCAGGGGCGTATGTAT      |
| scaffold715227_15.7 | 1 p2 | (AG)7  | 14 | 3053 | 3066 | GTGATCGCTGGTCTTTTCGT      |
| scaffold715253_15.5 | 1 p2 | (GA)6  | 12 | 3360 | 3371 | AGGTTGCGTCAGATTGGAAG      |
| scaffold715292_17.2 | 1 p2 | (GT)6  | 12 | 621  | 632  | AGTATGCTTTGGCCGATCC       |
| scaffold715301_12.1 | 1 p2 | (TA)10 | 20 | 717  | 736  | AATGATGTTAATCCAGCGGC      |
| scaffold715305_11.7 | 1 p2 | (TC)6  | 12 | 697  | 708  | GCCACTCCATCACCATAACC      |
| scaffold715329_17.5 | 1 p2 | (AG)7  | 14 | 2663 | 2676 | GCAGCAACATCTCTCGTGAA      |
| scaffold715360_14.3 | 1 p2 | (AT)6  | 12 | 185  | 196  | TGCGAGTATCAAACCGGAGC      |
| scaffold715374_14.2 | 1 p2 | (AG)8  | 16 | 216  | 231  | GTGGGAACGTGTAGTCGGAG      |
| scaffold715418_13.8 | 1 p2 | (TA)12 | 24 | 252  | 275  | TCATATCATTGTTTCCGCGA      |
| scaffold715443_18.7 | 1 p2 | (AG)7  | 14 | 1517 | 1530 | TTCCACCTCAAAAACAAATGG     |
| scaffold715478_15.7 | 1 p2 | (TC)8  | 16 | 901  | 916  | AATCACGCGAGGAAATCAAC      |
| scaffold715479_15.6 | 1 p2 | (TA)6  | 12 | 3963 | 3974 | GGGTGGAATGGTGGTGTAC       |
| scaffold715575_14.2 | 1 p2 | (CT)8  | 16 | 3504 | 3519 | GCATTGGAGATGGAGCAAAT      |
| scaffold715590_14.7 | 1 p2 | (TC)9  | 18 | 999  | 1016 | GGTGGTGTTCCTGTCTCT        |
| scaffold715599_14.0 | 1 p2 | (CT)7  | 14 | 352  | 365  | CCCAACTGGAAGTCCAAA        |
| scaffold715605_11.4 | 1 p2 | (TA)10 | 20 | 333  | 352  | CGCAGATCCCAGATTTGTTT      |
| scaffold715640_14.3 | 1 p2 | (TA)6  | 12 | 1113 | 1124 | TGAAATTGTGTTGCTTGATCG     |
| scaffold715650_17.1 | 1 p2 | (TA)6  | 12 | 705  | 716  | TGAAGTTAGCACCTGAGGATGA    |
| scaffold715713_16.4 | 1 p2 | (GT)8  | 16 | 135  | 150  | CAATGAGGTGTCTGCCCTCT      |
| scaffold715742_17.8 | 1 p2 | (AT)7  | 14 | 1970 | 1983 | CCCGAACTCCGAGTACAAAA      |
| scaffold715746_15.9 | 1 p2 | (GA)6  | 12 | 80   | 91   | TGCTGATCTATTTACATGCTTTTCA |
| scaffold715755_16.5 | 1 p2 | (AG)6  | 12 | 481  | 492  | AGGAGAGTGCAGCTGGTCAT      |
| scaffold715758_14.2 | 1 p2 | (CT)9  | 18 | 687  | 704  | AGATTGAAGCTCGGATGGTG      |
| scaffold715820_15.7 | 1 p2 | (TC)7  | 14 | 1431 | 1444 | TCACGTGGTGGAGACAAAA       |



|                     |      |        |    |      |      |                            |
|---------------------|------|--------|----|------|------|----------------------------|
| scaffold715836_14.3 | 1 p2 | (AT)6  | 12 | 357  | 368  | TGGTTTGAGCAAATTGATATTTTA   |
| scaffold715840_16.2 | 1 p2 | (AT)9  | 18 | 1081 | 1098 | TTGTTGTCCATACATTTTGGAAAT   |
| scaffold715876_14.8 | 1 p2 | (AT)7  | 14 | 2339 | 2352 | ACCCAAGTGGGTAAACCCTT       |
| scaffold715902_16.9 | 1 p2 | (AC)7  | 14 | 580  | 593  | CTGGGGATGGATTGATGAAG       |
| scaffold715953_17.0 | 1 p2 | (TC)7  | 14 | 603  | 616  | AAAATCCTTTCCACAACCCC       |
| scaffold715989_16.6 | 1 p2 | (GA)9  | 18 | 828  | 845  | GATGTGGGTGGTTTGCTTCT       |
| scaffold716007_22.9 | 1 p2 | (GA)9  | 18 | 50   | 67   | AGGGGTCCAAAAGCAGAAGT       |
| scaffold716031_10.7 | 1 p2 | (AT)7  | 14 | 224  | 237  | TTGACATCGCAATCAACCAT       |
| scaffold716048_15.6 | 1 p2 | (AT)10 | 20 | 329  | 348  | TTTCTGCACAGATTTGATGGTC     |
| scaffold716057_16.1 | 1 p2 | (GA)7  | 14 | 1010 | 1023 | AACCGGGCAAGAAGAAAACCT      |
| scaffold716124_16.8 | 1 p2 | (AT)6  | 12 | 565  | 576  | TGAATTTCTGTGCATGCGTT       |
| scaffold716130_16.7 | 1 p2 | (TC)6  | 12 | 1021 | 1032 | GCTTCGATGTTGATGCTTGA       |
| scaffold716133_15.0 | 1 p2 | (TC)8  | 16 | 1252 | 1267 | TTTTGCCATGTGTATCGTTGA      |
| scaffold716153_10.8 | 1 p2 | (TA)11 | 22 | 43   | 64   | CCCAAAAATGGGTTATTATTTGA    |
| scaffold716155_16.0 | 1 p2 | (CT)8  | 16 | 827  | 842  | CCCATACACACAAGGCAGTG       |
| scaffold716180_15.9 | 1 p2 | (CA)8  | 16 | 2317 | 2332 | ATTGATGCCCTGGTTACAGC       |
| scaffold716229_15.6 | 1 p2 | (CT)6  | 12 | 1858 | 1869 | TGCCAGAACTTACCGACCTAA      |
| scaffold716249_10.8 | 1 p2 | (AT)12 | 24 | 936  | 959  | CCAAATTTTGATCAATTTCCAA     |
| scaffold716250_12.3 | 1 p2 | (TA)8  | 16 | 1001 | 1016 | CTCTGTGTGTGATTTCCGCT       |
| scaffold716251_14.2 | 1 p2 | (AG)8  | 16 | 1152 | 1167 | ACGAGGGGTTTCTCTCGTTT       |
| scaffold716269_14.2 | 1 p2 | (AT)10 | 20 | 549  | 568  | ATCTTGCATCGGCAAGAGAC       |
| scaffold716273_21.7 | 1 p2 | (TA)8  | 16 | 83   | 98   | AAAATCGATATTGAATTAAGGCTC   |
| scaffold716275_15.8 | 1 p2 | (AT)6  | 12 | 1709 | 1720 | TTCACAAAGGGCTTTTCAGAC      |
| scaffold716279_14.5 | 1 p2 | (AG)10 | 20 | 134  | 153  | TTGGGTGGAATAGACTTGGG       |
| scaffold716307_14.7 | 1 p2 | (TA)7  | 14 | 32   | 45   | TCAACATCATCATCAACATACCC    |
| scaffold716341_16.0 | 1 p2 | (AG)6  | 12 | 848  | 859  | AGCACTGCAACGCAACATAC       |
| scaffold716344_17.6 | 1 p2 | (AG)6  | 12 | 1019 | 1030 | GGCCGTACTTTCTGTCAAA        |
| scaffold716365_16.2 | 1 p2 | (TA)10 | 20 | 45   | 64   | TAAGGGCGGTATCACCTGAA       |
| scaffold716403_16.0 | 1 p2 | (AG)7  | 14 | 2575 | 2588 | TGAACCGAAAATTGGGTAGG       |
| scaffold716461_16.4 | 1 p2 | (AG)8  | 16 | 835  | 850  | TCAAACCGGTGATTAAGTGC       |
| scaffold716462_16.3 | 1 p2 | (GT)8  | 16 | 694  | 709  | TCTGATCATTGAGGAAGGGG       |
| scaffold716518_17.8 | 1 p2 | (AG)7  | 14 | 452  | 465  | TGTTTTCGTTCTGAGAGGGG       |
| scaffold716564_13.9 | 1 p2 | (TC)6  | 12 | 475  | 486  | GGTCCCAGTTGGCATGTAA        |
| scaffold716609_14.7 | 1 p2 | (GC)6  | 12 | 240  | 251  | CCGAAGCCCAAAAACAAATA       |
| scaffold716610_17.0 | 1 p2 | (CT)6  | 12 | 724  | 735  | AAGTCCATTTCCACCCCTTC       |
| scaffold716635_15.9 | 1 p2 | (CT)6  | 12 | 233  | 244  | GTTTCACAGGAGGCGGTTTA       |
| scaffold716657_14.2 | 1 p2 | (AG)10 | 20 | 1253 | 1272 | CAGATTCAAAGACGGCGTTC       |
| scaffold716687_17.7 | 1 p2 | (CT)7  | 14 | 2466 | 2479 | AGATGCTGAAACCTGGCATT       |
| scaffold716768_17.4 | 1 p2 | (CA)7  | 14 | 173  | 186  | CGTGGTTGTAGGTCGGAGTT       |
| scaffold716774_17.2 | 1 p2 | (AG)6  | 12 | 362  | 373  | ATCGAACAATTCCTTCCACG       |
| scaffold716781_12.9 | 1 p2 | (AT)7  | 14 | 1698 | 1711 | CGCGAGATTCGATGGTAGAG       |
| scaffold716808_12.2 | 1 p2 | (TA)9  | 18 | 177  | 194  | ACTTCGATCACTTCGTTCCC       |
| scaffold716883_20.0 | 1 p2 | (AT)6  | 12 | 626  | 637  | ATATGTTGCAGGCCGAGAAG       |
| scaffold716924_15.5 | 1 p2 | (AT)7  | 14 | 2042 | 2055 | CCCACACACAATGCAAGAAT       |
| scaffold716938_17.4 | 1 p2 | (GA)6  | 12 | 1175 | 1186 | ACCCCTTTTACCCTTTCCCT       |
| scaffold716979_15.8 | 1 p2 | (GA)8  | 16 | 836  | 851  | AGTCAGCACGCAATTTCTCA       |
| scaffold717043_12.9 | 1 p2 | (TA)6  | 12 | 467  | 478  | TCAGACATTTTCGATCCCAGA      |
| scaffold717124_15.3 | 1 p2 | (CT)10 | 20 | 1653 | 1672 | AAGTTCCACTTGTTACCGGC       |
| scaffold717140_15.3 | 1 p2 | (CT)6  | 12 | 1536 | 1547 | CAAGCCCAATCAAGGAAAA        |
| scaffold717150_11.1 | 1 p2 | (TC)6  | 12 | 54   | 65   | CTCCTCTTTCTCCCTCTCCTC      |
| scaffold717156_17.9 | 1 p2 | (TA)6  | 12 | 626  | 637  | GTTCCCTGGAACCATTTCA        |
| scaffold717164_13.5 | 1 p2 | (GA)8  | 16 | 817  | 832  | AGGGAAAGATCCCTGCTTGT       |
| scaffold717169_12.7 | 1 p2 | (GA)6  | 12 | 575  | 586  | TCAATTCCAAACCATATCCA       |
| scaffold717207_15.5 | 1 p2 | (AG)7  | 14 | 544  | 557  | TCAGCTTGTTAGTGTTTCAAGTTGA  |
| scaffold717256_11.6 | 1 p2 | (AT)11 | 22 | 81   | 102  | CCTGCATGTGCAAATTGAAA       |
| scaffold717265_16.9 | 1 p2 | (GA)7  | 14 | 1964 | 1977 | GCAGCATTGATCTAGAGGGC       |
| scaffold717281_16.0 | 1 p2 | (AT)10 | 20 | 663  | 682  | TGTTGCGTCTTGTATTGGAGTT     |
| scaffold717327_12.1 | 1 p2 | (TG)6  | 12 | 342  | 353  | TCAAACATTTATTTATGCACACATTT |

|                     |      |        |    |      |                                 |
|---------------------|------|--------|----|------|---------------------------------|
| scaffold717353_17.7 | 1 p2 | (TG)9  | 18 | 3424 | 3441 CCAATGATGGGTAACGGAAT       |
| scaffold717361_14.3 | 1 p2 | (TA)7  | 14 | 867  | 880 GTTTATGTTGCGAAATCGGC        |
| scaffold717363_12.8 | 1 p2 | (AT)12 | 24 | 1000 | 1023 TTCGCACAAATACAAATCGC       |
| scaffold717381_16.9 | 1 p2 | (AC)6  | 12 | 367  | 378 ACATGCAATGAAAATGCCAA        |
| scaffold717500_14.2 | 1 p2 | (CT)6  | 12 | 368  | 379 ATTCTATGGTGGCCCCCTCTC       |
| scaffold717502_13.6 | 1 p2 | (CA)6  | 12 | 1529 | 1540 CACGAAAATTTTGCATATCGG      |
| scaffold717528_16.2 | 1 p2 | (CT)8  | 16 | 279  | 294 GAATGATGCATGCTCTCACC        |
| scaffold717532_16.0 | 1 p2 | (AT)7  | 14 | 447  | 460 GAAGGTGACGTGTTGCAGAA        |
| scaffold717571_14.6 | 1 p2 | (AT)6  | 12 | 205  | 216 GGATCTTCTCATTCCATCGAG       |
| scaffold717637_18.6 | 1 p2 | (AC)8  | 16 | 730  | 745 CAGCAGCACCATAACCAGAAA       |
| scaffold717700_15.4 | 1 p2 | (TC)6  | 12 | 321  | 332 AATCTGCTGGTGTTCCTTGG        |
| scaffold717733_11.6 | 1 p2 | (AT)7  | 14 | 368  | 381 GAATGAGGGTTTTTGTGGGA        |
| scaffold717737_15.5 | 1 p2 | (AG)6  | 12 | 1744 | 1755 CTTCCCTGCGTTGCATAAT        |
| scaffold717739_15.0 | 1 p2 | (TC)9  | 18 | 355  | 372 TCCCTGACCACCATCAATTT        |
| scaffold717774_13.9 | 1 p2 | (AT)9  | 18 | 891  | 908 TGAGTGGATATATTGGGAAGGG      |
| scaffold717801_15.2 | 1 p2 | (CT)7  | 14 | 1336 | 1349 ATCTACCGTTTTTCCCCATC       |
| scaffold717845_14.6 | 1 p2 | (AG)6  | 12 | 2152 | 2163 CGATTTTGTGGCCGAAAT         |
| scaffold717847_13.6 | 1 p2 | (GT)6  | 12 | 334  | 345 AAGCGATGCTCCAACCTTGAT       |
| scaffold717880_16.3 | 1 p2 | (AT)7  | 14 | 1227 | 1240 ACTGTTGATGCAGATGGTGG       |
| scaffold717884_16.6 | 1 p2 | (TA)6  | 12 | 709  | 720 AGAGAGAACTGGGGTCAGCA        |
| scaffold717932_13.4 | 1 p2 | (CT)7  | 14 | 756  | 769 TCTCTCCCTTCTTCTGCTTCA       |
| scaffold717936_16.3 | 1 p2 | (GA)7  | 14 | 226  | 239 GAAAGAAAAGTGTGGGGGC         |
| scaffold718021_14.0 | 1 p2 | (CA)6  | 12 | 570  | 581 CAAGATGGCATCATCCATTG        |
| scaffold718114_16.3 | 1 p2 | (TA)6  | 12 | 601  | 612 ATAAGCAGCATTTGGCCTTG        |
| scaffold718123_16.2 | 1 p2 | (TA)7  | 14 | 670  | 683 TGTTCTTGTCCGTCGGATTT        |
| scaffold718173_15.5 | 1 p2 | (TA)9  | 18 | 45   | 62 CCAATTTGAATGGTTATCACCTG      |
| scaffold718188_16.4 | 1 p2 | (AG)7  | 14 | 2607 | 2620 CGGGTAAATTTGAGGTGGAA       |
| scaffold718304_15.4 | 1 p2 | (CA)6  | 12 | 509  | 520 TATGCTCGCTGGATTACGTG        |
| scaffold718336_15.4 | 1 p2 | (TC)7  | 14 | 337  | 350 CTTGCAGTTTCTCACCTCC         |
| scaffold718348_18.8 | 1 p2 | (AC)7  | 14 | 372  | 385 AAACAACGATGGCAACAACA        |
| scaffold718362_18.4 | 1 p2 | (CT)6  | 12 | 2439 | 2450 TCATAGATTTGGGCATGCAA       |
| scaffold718389_17.9 | 1 p2 | (CT)6  | 12 | 67   | 78 GCACAACCACTCCACAAAGA         |
| scaffold718410_11.8 | 1 p2 | (TA)10 | 20 | 963  | 982 TTTTGATAATGGTTTTGTACACATTTT |
| scaffold718424_10.0 | 1 p2 | (TA)6  | 12 | 67   | 78 TCTAAGGGCCGAGATTTGTT         |
| scaffold718446_16.9 | 1 p2 | (TC)6  | 12 | 1427 | 1438 TGGATATTGAGAGGCTGGCT       |
| scaffold718451_16.2 | 1 p2 | (TA)8  | 16 | 586  | 601 GGAGCTCGAGAGATATTGCG        |
| scaffold718482_15.6 | 1 p2 | (TC)6  | 12 | 632  | 643 TGCTTTATGCCTTGCTCTT         |
| scaffold718486_13.7 | 1 p2 | (AT)11 | 22 | 178  | 199 GGGGTGTTTTGACAATATTACGA     |
| scaffold718500_14.0 | 1 p2 | (GT)7  | 14 | 64   | 77 GGCAGTCGTTTTGAGACGTT         |
| scaffold718511_13.0 | 1 p2 | (TA)7  | 14 | 260  | 273 TCGCGGGAATCAACTTTATC        |
| scaffold718570_17.3 | 1 p2 | (AT)6  | 12 | 1277 | 1288 CGGCACGTGACTCACTTAAA       |
| scaffold718622_16.4 | 1 p2 | (TC)6  | 12 | 1819 | 1830 TTCCTGAGTTGGTGAAAACG       |
| scaffold718625_14.4 | 1 p2 | (GA)6  | 12 | 2462 | 2473 TGGGGAAGAAAAGGAGAGGT       |
| scaffold718629_12.4 | 1 p2 | (AC)8  | 16 | 492  | 507 TTGCTATTGAGAGGAAGCGA        |
| scaffold718636_12.0 | 1 p2 | (TC)6  | 12 | 989  | 1000 CTTTGGCAAATCAGGCGTAT       |
| scaffold718639_15.2 | 1 p2 | (TG)6  | 12 | 3020 | 3031 AGGCGTCTCTCAGGTGTA         |
| scaffold718648_14.5 | 1 p2 | (AT)10 | 20 | 101  | 120 CGGAAACCGCCATAAAGTT         |
| scaffold718652_14.2 | 1 p2 | (TC)7  | 14 | 792  | 805 CCAGACAAAATCCCCTCTCA        |
| scaffold718662_16.4 | 1 p2 | (CA)6  | 12 | 1620 | 1631 TTCACATGATCTTGGATGGG       |
| scaffold718667_16.3 | 1 p2 | (TA)13 | 26 | 1349 | 1374 TTTTCTGCATGATTTGGATGA      |
| scaffold718678_22.5 | 1 p2 | (CT)10 | 20 | 340  | 359 AAACGATTTTTGATCGTGCC        |
| scaffold718682_16.3 | 1 p2 | (AT)10 | 20 | 2035 | 2054 TTGAGCTGGTTGATTCATTTTG     |
| scaffold718698_16.0 | 1 p2 | (AT)6  | 12 | 87   | 98 GTGGGCGCAAGTAAAGAGAG         |
| scaffold718715_17.2 | 1 p2 | (TG)6  | 12 | 2252 | 2263 TTGAACCTGTTTCAAATCCATGA    |
| scaffold718726_16.2 | 1 p2 | (AG)6  | 12 | 970  | 981 TTTGCTCTCTCACACATGCC        |
| scaffold718757_14.8 | 1 p2 | (CT)6  | 12 | 378  | 389 CAGTGCCTGTGTGTGTCAAG        |
| scaffold718777_15.3 | 1 p2 | (CT)6  | 12 | 845  | 856 ATCACCCCCTCTCCAAGAAT        |
| scaffold718782_14.5 | 1 p2 | (GA)6  | 12 | 72   | 83 TTCGAACCTCCATCCTGCTT         |

|                     |      |        |    |      |      |                           |
|---------------------|------|--------|----|------|------|---------------------------|
| scaffold718786_15.2 | 1 p2 | (GA)7  | 14 | 1403 | 1416 | ACCGCCGTCTGTAATAATGC      |
| scaffold718804_16.2 | 1 p2 | (CT)7  | 14 | 123  | 136  | AATTGCCTTGTGTTTCTGGG      |
| scaffold718817_14.7 | 1 p2 | (CA)6  | 12 | 2597 | 2608 | TGCTGTGGAATACCTGGGTT      |
| scaffold718827_19.2 | 1 p2 | (AG)6  | 12 | 854  | 865  | GAGAGGAGGAGGAGAATGCC      |
| scaffold718856_13.7 | 1 p2 | (GT)6  | 12 | 263  | 274  | GCTGAGATATACGCGGTGGT      |
| scaffold718893_14.5 | 1 p2 | (CT)8  | 16 | 33   | 48   | TGATTCTATTCTGTGCTTCGGA    |
| scaffold718902_14.0 | 1 p2 | (AT)9  | 18 | 1327 | 1344 | GTTCTGCCGAGATGAGGAAG      |
| scaffold718905_10.6 | 1 p2 | (AT)10 | 20 | 189  | 208  | CTATGCTGCCAAGTGCTCAA      |
| scaffold718933_11.4 | 1 p2 | (CT)7  | 14 | 503  | 516  | TGGGCCAAACCTATATCAA       |
| scaffold718943_12.9 | 1 p2 | (GA)8  | 16 | 1385 | 1400 | ATGTCCGAGTTGTTCCCAAG      |
| scaffold718963_14.1 | 1 p2 | (TG)6  | 12 | 1389 | 1400 | AGATCTCGAGCAGCCAACAT      |
| scaffold718990_16.3 | 1 p2 | (AT)8  | 16 | 954  | 969  | GGTTGATCGTAATGGGATGG      |
| scaffold719002_14.8 | 1 p2 | (GA)6  | 12 | 1622 | 1633 | CTCCTTCCGTTTGTGAGGA       |
| scaffold719044_15.3 | 1 p2 | (AG)6  | 12 | 529  | 540  | AGTTTGGAGGCCTGTCAATG      |
| scaffold719046_14.4 | 1 p2 | (AT)6  | 12 | 1603 | 1614 | AATTGTTCAACCTCTCCGCT      |
| scaffold719064_12.4 | 1 p2 | (AC)6  | 12 | 1327 | 1338 | CATGTGGTTGAATTTGTTCA      |
| scaffold719079_17.5 | 1 p2 | (GA)8  | 16 | 4814 | 4829 | CGCAAAGCAAGACACAAAC       |
| scaffold719090_13.1 | 1 p2 | (TA)7  | 14 | 378  | 391  | GAATCAACATTTTCATGCCA      |
| scaffold719091_16.6 | 1 p2 | (TA)10 | 20 | 372  | 391  | CATTGTGATAGGGTCCGCT       |
| scaffold719132_12.6 | 1 p2 | (AT)9  | 18 | 294  | 311  | CACATATAATCAGGGGCGGA      |
| scaffold719152_12.8 | 1 p2 | (TA)6  | 12 | 668  | 679  | AGCGCAAACCAAACAAAAC       |
| scaffold719157_15.6 | 1 p2 | (GA)7  | 14 | 924  | 937  | TGGGTGGGAGATAAGAGGTG      |
| scaffold719203_16.9 | 1 p2 | (TC)9  | 18 | 2585 | 2602 | AAAACCAGCACCAATCCAG       |
| scaffold719206_15.9 | 1 p2 | (AT)9  | 18 | 276  | 293  | CCCCTAGGCATGGATTATCA      |
| scaffold719243_14.6 | 1 p2 | (CT)6  | 12 | 1000 | 1011 | TCATCCAAGTTCATGCAAGG      |
| scaffold719277_15.3 | 1 p2 | (TA)6  | 12 | 2461 | 2472 | CAACTGGCTATGTTGCTCCA      |
| scaffold719304_11.8 | 1 p2 | (GA)11 | 22 | 373  | 394  | AATAATGGCGGGTACGTTGA      |
| scaffold719358_17.8 | 1 p2 | (CA)6  | 12 | 3927 | 3938 | TCAACTGCTGCAAATGATCC      |
| scaffold719361_15.2 | 1 p2 | (TC)8  | 16 | 221  | 236  | GCGTCTCACCTAACCTCACC      |
| scaffold719370_17.0 | 1 p2 | (AT)6  | 12 | 382  | 393  | TCCCCAGAGCTTGAGAGAGA      |
| scaffold719390_12.3 | 1 p2 | (TA)10 | 20 | 42   | 61   | TTTCCATGTAATAAAAAGTTTCCCA |
| scaffold719407_15.0 | 1 p2 | (CA)10 | 20 | 286  | 305  | GGTCCAGATCATGGGTCACT      |
| scaffold719443_13.9 | 1 p2 | (AT)9  | 18 | 68   | 85   | TCCGATGGTTGTAGTGGAGTT     |
| scaffold719448_15.8 | 1 p2 | (AT)7  | 14 | 125  | 138  | GTCGGCGTTTTTCAGCACT       |
| scaffold719457_12.1 | 1 p2 | (TC)6  | 12 | 262  | 273  | CCCTTCACAAGTGGTGACAA      |
| scaffold719460_15.3 | 1 p2 | (TA)6  | 12 | 201  | 212  | ATATGGGATTTTGCATGGGA      |
| scaffold719497_15.7 | 1 p2 | (AT)8  | 16 | 379  | 394  | AATGACTCAGAATTTGGCCG      |
| scaffold719498_17.0 | 1 p2 | (TC)8  | 16 | 4573 | 4588 | ATGGCATGACTCTTGAGCCT      |
| scaffold719535_14.0 | 1 p2 | (TA)9  | 18 | 2305 | 2322 | TTCTGATATGGAAATGCCCC      |
| scaffold719545_15.3 | 1 p2 | (AG)8  | 16 | 1542 | 1557 | GACGTGGTTTGCAGGCTATT      |
| scaffold719565_13.3 | 1 p2 | (TA)7  | 14 | 125  | 138  | GGTTTCCCTCCAAAAACAT       |
| scaffold719586_13.6 | 1 p2 | (AT)6  | 12 | 1018 | 1029 | CCTGAGATTGGTCGAGGGTA      |
| scaffold719616_14.3 | 1 p2 | (CT)6  | 12 | 431  | 442  | TTCAGACTCCAAAAACAAGCA     |
| scaffold719641_15.4 | 1 p2 | (AT)8  | 16 | 380  | 395  | CTAGCCATCCATTCCGAAAA      |
| scaffold719648_15.2 | 1 p2 | (TC)7  | 14 | 93   | 106  | AGAAAGTTGCAGGCTGGCT       |
| scaffold719703_16.9 | 1 p2 | (TC)8  | 16 | 381  | 396  | CCACCATTTTTATTCCCCCT      |
| scaffold719733_15.7 | 1 p2 | (AT)6  | 12 | 1800 | 1811 | TCCAAACTCCAACCTCCATAA     |
| scaffold719739_16.6 | 1 p2 | (TA)6  | 12 | 1158 | 1169 | GCATGATCAAAGAGGCCATT      |
| scaffold719759_16.7 | 1 p2 | (TC)6  | 12 | 849  | 860  | TCCTTGGCATAACATTCTCTCTC   |
| scaffold719777_14.7 | 1 p2 | (CT)6  | 12 | 519  | 530  | AGCAACCAGCTGCATTAACC      |
| scaffold719794_16.0 | 1 p2 | (TC)8  | 16 | 846  | 861  | TCCCACCACCTCTACCCATA      |
| scaffold719805_12.6 | 1 p2 | (CT)6  | 12 | 1093 | 1104 | GGAATGTGATTGGGGAAGAA      |
| scaffold719807_17.7 | 1 p2 | (TA)7  | 14 | 52   | 65   | CACAGCTGTCAATCAACAAGAA    |
| scaffold719813_18.5 | 1 p2 | (TC)8  | 16 | 382  | 397  | CTGTCTCAGTCACCGTCGAA      |
| scaffold719821_10.5 | 1 p2 | (TA)11 | 22 | 358  | 379  | TTACTGTCAGTACGTCGCC       |
| scaffold719856_17.6 | 1 p2 | (AT)6  | 12 | 1432 | 1443 | GACTTCTGGTGGACGACGAT      |
| scaffold719898_16.5 | 1 p2 | (AG)6  | 12 | 526  | 537  | AGTCGCGAGTCTCTCTCTCG      |
| scaffold719933_14.6 | 1 p2 | (TG)12 | 24 | 368  | 391  | TTCGCCATATCCATGTTTCA      |

|                     |      |        |    |      |      |                           |
|---------------------|------|--------|----|------|------|---------------------------|
| scaffold719943_13.9 | 1 p2 | (CT)13 | 26 | 34   | 59   | CCACCCTCCATTGCTCATAA      |
| scaffold719956_18.0 | 1 p2 | (CT)9  | 18 | 2164 | 2181 | TTTGCCTTTGATCGACTG        |
| scaffold719988_15.2 | 1 p2 | (CA)9  | 18 | 723  | 740  | CCCGGTCTATCTATGGGGAT      |
| scaffold719999_12.2 | 1 p2 | (TA)10 | 20 | 2000 | 2019 | ACGCGTGTGACATGTTCTA       |
| scaffold720024_15.2 | 1 p2 | (AC)9  | 18 | 615  | 632  | CGCGAGACATGAACGAATAA      |
| scaffold720031_11.0 | 1 p2 | (TC)6  | 12 | 556  | 567  | TTTGGCCTTGTCTCGTATAA      |
| scaffold720053_15.8 | 1 p2 | (AT)6  | 12 | 1975 | 1986 | TCGATTGTATTTAAGCACGCA     |
| scaffold720067_15.2 | 1 p2 | (TA)6  | 12 | 280  | 291  | TGTCACTGCACTACGAGATGAA    |
| scaffold720078_11.0 | 1 p2 | (GT)7  | 14 | 1113 | 1126 | ACCCCTTTGTGATTCTCT        |
| scaffold720087_17.9 | 1 p2 | (TC)6  | 12 | 374  | 385  | CCCATAAACCCACACTAAAGATGG  |
| scaffold720091_12.8 | 1 p2 | (TA)8  | 16 | 899  | 914  | CAAGGCAAGACTTGTGGTCA      |
| scaffold720162_17.6 | 1 p2 | (CT)6  | 12 | 361  | 372  | TCCCGTGAGGTAACATCCT       |
| scaffold720163_15.7 | 1 p2 | (TC)6  | 12 | 180  | 191  | CCGACATTCAGCAGATGAGA      |
| scaffold720170_14.9 | 1 p2 | (CA)6  | 12 | 1717 | 1728 | GAACCTTCGGACAGCTCTTG      |
| scaffold720176_14.0 | 1 p2 | (TC)7  | 14 | 388  | 401  | AGTGATCACACCTGCCATT       |
| scaffold720209_13.7 | 1 p2 | (TA)6  | 12 | 390  | 401  | AAACATGGAATGAGTTAAGGGAA   |
| scaffold720219_14.0 | 1 p2 | (TC)7  | 14 | 388  | 401  | GGTGTGCCTTGTCCAATTTT      |
| scaffold720224_18.0 | 1 p2 | (TC)8  | 16 | 494  | 509  | AAGAGGGCCAGGAACAAAAT      |
| scaffold720255_15.7 | 1 p2 | (AG)7  | 14 | 1741 | 1754 | CACGCTGGCCATATACCATA      |
| scaffold720298_15.0 | 1 p2 | (TA)6  | 12 | 786  | 797  | TCAAACCATTATACCTACCGCA    |
| scaffold720305_15.3 | 1 p2 | (TG)9  | 18 | 984  | 1001 | CTGCTTATCTTTTCGGGCTG      |
| scaffold720313_12.3 | 1 p2 | (TC)8  | 16 | 613  | 628  | CTACGTAGCTCGGTTCTCCG      |
| scaffold720358_13.2 | 1 p2 | (AT)8  | 16 | 230  | 245  | CTTTCTCCTCACGCTCTGCT      |
| scaffold720386_16.0 | 1 p2 | (GA)6  | 12 | 223  | 234  | GAGTGGAGGATTCGGTGAAA      |
| scaffold720477_16.3 | 1 p2 | (AG)6  | 12 | 3070 | 3081 | TGGAGCAGATCCCAGTCTCT      |
| scaffold720499_17.9 | 1 p2 | (GA)7  | 14 | 6856 | 6869 | TGAGGCCAATTCCTCAGTGT      |
| scaffold720502_11.6 | 1 p2 | (CT)9  | 18 | 121  | 138  | ACTACCACCAGCACCTCCAC      |
| scaffold720507_11.9 | 1 p2 | (TA)9  | 18 | 171  | 188  | AACAAACGAAAGGGACCACA      |
| scaffold720519_14.8 | 1 p2 | (GA)8  | 16 | 855  | 870  | TCAGCAGCCATTGAGACATC      |
| scaffold720581_14.7 | 1 p2 | (AT)6  | 12 | 689  | 700  | ACAAAACAAAACAGGGGCAA      |
| scaffold720585_14.6 | 1 p2 | (TG)6  | 12 | 37   | 48   | CGAACCCACGTAAATCTCTGTG    |
| scaffold720594_17.6 | 1 p2 | (TC)8  | 16 | 923  | 938  | AGCTCAATGCACTTCCCAAT      |
| scaffold720600_16.6 | 1 p2 | (CT)7  | 14 | 159  | 172  | TAATCGTGTTCATTGCCTC       |
| scaffold720617_12.6 | 1 p2 | (GA)6  | 12 | 359  | 370  | AGGAGTCGGAGTGAAAAGCA      |
| scaffold720619_14.6 | 1 p2 | (AT)9  | 18 | 724  | 741  | TTTGGCGATATGCAATCAAA      |
| scaffold720658_14.0 | 1 p2 | (TA)8  | 16 | 1694 | 1709 | AAATCCGTCCCAATATTCCC      |
| scaffold720698_15.9 | 1 p2 | (TC)8  | 16 | 820  | 835  | TGCTGAGACAGTGGAAGGTG      |
| scaffold720701_16.7 | 1 p2 | (AT)7  | 14 | 1458 | 1471 | GCGTGGTTGTGAGCGTATAA      |
| scaffold720705_16.8 | 1 p2 | (GA)7  | 14 | 191  | 204  | CTGCTTTGTGTTGCGTGTTT      |
| scaffold720706_17.9 | 1 p2 | (CT)8  | 16 | 2734 | 2749 | CATGGCAGTTTCACATTTGC      |
| scaffold720716_17.4 | 1 p2 | (TA)9  | 18 | 388  | 405  | TTTACAAGATCAATGGTCCCAA    |
| scaffold720794_15.2 | 1 p2 | (TA)10 | 20 | 80   | 99   | ACGGCTGCAAAAGTTTCCTA      |
| scaffold720839_14.2 | 1 p2 | (AT)6  | 12 | 1458 | 1469 | TCGACGTCTACAAAACGCAC      |
| scaffold720850_16.0 | 1 p2 | (GT)6  | 12 | 768  | 779  | AGGAGGACGAGTGTGGTGAC      |
| scaffold720886_17.6 | 1 p2 | (TA)8  | 16 | 1738 | 1753 | CATTTTTAATTGCAAAATTAATCCA |
| scaffold720915_14.5 | 1 p2 | (AT)7  | 14 | 1270 | 1283 | TGCATGTTCAATTGGGAAA       |
| scaffold720924_15.0 | 1 p2 | (TA)9  | 18 | 44   | 61   | AAGGGTTATCACCTGATTTTCTC   |
| scaffold720941_14.5 | 1 p2 | (TC)6  | 12 | 2816 | 2827 | TAGCAAAAACGAAGCCACCT      |
| scaffold720958_17.0 | 1 p2 | (TA)6  | 12 | 592  | 603  | CCCAAAATCAACGTCCAGAT      |
| scaffold720960_16.5 | 1 p2 | (TG)8  | 16 | 3737 | 3752 | ACGATCATCAAAGAATCGGC      |
| scaffold720978_15.3 | 1 p2 | (GA)12 | 24 | 737  | 760  | TTGCCTCTGCAAGAATTGTG      |
| scaffold721021_16.5 | 1 p2 | (TA)10 | 20 | 3781 | 3800 | ACAAACCACTGAATCGCACA      |
| scaffold721023_19.8 | 1 p2 | (TA)7  | 14 | 237  | 250  | TCTGCGTTACTTGCTTTCCA      |
| scaffold721025_12.5 | 1 p2 | (TA)7  | 14 | 521  | 534  | TGAATATTGATTGGTCCATGC     |
| scaffold721030_16.4 | 1 p2 | (GA)6  | 12 | 1696 | 1707 | TCTGCTTTACACCAAGTCG       |
| scaffold721084_15.0 | 1 p2 | (AG)7  | 14 | 3577 | 3590 | ATGTGCACAGCGAGGTATTG      |
| scaffold721100_18.3 | 1 p2 | (AC)6  | 12 | 931  | 942  | AGGCCAGAACTGCTCAAAA       |
| scaffold721103_15.2 | 1 p2 | (GT)6  | 12 | 2092 | 2103 | CCCCTATGAAGCCAGAAA        |

|                     |      |        |    |      |                                |
|---------------------|------|--------|----|------|--------------------------------|
| scaffold721114_15.4 | 1 p2 | (TC)7  | 14 | 143  | 156 ATCACTTCCGATCGAACCAC       |
| scaffold721167_13.0 | 1 p2 | (TC)7  | 14 | 647  | 660 ACTACGGCCACATGAGCTTT       |
| scaffold721191_19.2 | 1 p2 | (TC)6  | 12 | 1026 | 1037 ATTTGTTACCCTGGACGAT       |
| scaffold721203_17.0 | 1 p2 | (AT)6  | 12 | 109  | 120 AGATTCTCACGCCATTCTCAA      |
| scaffold721213_14.7 | 1 p2 | (TC)8  | 16 | 627  | 642 GCGTGGCATATTTCTGATGA       |
| scaffold721226_14.0 | 1 p2 | (CT)6  | 12 | 722  | 733 TCTGGACAAGAAGCCATTGA       |
| scaffold721287_14.6 | 1 p2 | (AG)8  | 16 | 1473 | 1488 CTGTTTCCTGTCCAATTCCC      |
| scaffold721307_13.2 | 1 p2 | (TA)9  | 18 | 513  | 530 TTTTCATTATTTATTGCAAGTTTTCG |
| scaffold721352_16.2 | 1 p2 | (GA)8  | 16 | 848  | 863 GTCGGCAATTTCTTGATGCT       |
| scaffold721357_13.9 | 1 p2 | (AT)6  | 12 | 585  | 596 TTGTTGAACGTCTCCAACTCC      |
| scaffold721399_14.6 | 1 p2 | (AG)10 | 20 | 1360 | 1379 GGGAGTTGAGGGATCACAAA      |
| scaffold721428_14.2 | 1 p2 | (TG)6  | 12 | 644  | 655 GAGCAGAAACTTGCGGAGTC       |
| scaffold721463_15.2 | 1 p2 | (CT)9  | 18 | 984  | 1001 CCGTGGTGATTCTTTGGACT      |
| scaffold721466_12.9 | 1 p2 | (TA)10 | 20 | 654  | 673 GTTAACCTTGCAAGCTGCCT       |
| scaffold721496_11.9 | 1 p2 | (GA)7  | 14 | 728  | 741 CTTGCTCCTAATCGTCGGTC       |
| scaffold721498_14.2 | 1 p2 | (CT)7  | 14 | 898  | 911 GCCATGAACTATATTGATTTTCCA   |
| scaffold721576_15.3 | 1 p2 | (GA)6  | 12 | 6102 | 6113 GCCTCAAAATATCTGCTCCAA     |
| scaffold721578_11.4 | 1 p2 | (TA)6  | 12 | 347  | 358 ATTGGTTTGGCAAAGCCTC        |
| scaffold721635_11.8 | 1 p2 | (AT)9  | 18 | 1972 | 1989 TCCTTTCTCAAATGAAGAGAAACA  |
| scaffold721671_13.0 | 1 p2 | (AG)7  | 14 | 871  | 884 TGCAGAGATTTGTGGCAGAC       |
| scaffold721673_10.5 | 1 p2 | (AT)6  | 12 | 402  | 413 TTTTCAGTGGTGTTTGTGTTT      |
| scaffold721676_11.5 | 1 p2 | (AT)7  | 14 | 1133 | 1146 TATAAAAATGCAGCCAGGGG      |
| scaffold721688_15.8 | 1 p2 | (AG)9  | 18 | 3466 | 3483 TGCATTTTTCAGCATTTC        |
| scaffold721720_14.5 | 1 p2 | (AT)12 | 24 | 1403 | 1426 AAAAACGCGGAAATCACATC      |
| scaffold721725_16.4 | 1 p2 | (AG)7  | 14 | 1123 | 1136 GTCGTGTTTTCCACCTCTGT      |
| scaffold721728_14.5 | 1 p2 | (CT)7  | 14 | 402  | 415 GCGGCTCTGCAACTTTTAGT       |
| scaffold721781_16.2 | 1 p2 | (TA)8  | 16 | 1424 | 1439 GCCTTGCCGTTGTCAGAAAT      |
| scaffold721823_14.3 | 1 p2 | (CT)12 | 24 | 1036 | 1059 GCCATTCTCCTTCAAACCA       |
| scaffold721828_13.0 | 1 p2 | (AG)9  | 18 | 398  | 415 GCCCAAGATACTCCATCCAA       |
| scaffold721837_16.5 | 1 p2 | (CA)7  | 14 | 3259 | 3272 AGGCATTGGTTTGTGGAAG       |
| scaffold721852_17.5 | 1 p2 | (TA)9  | 18 | 47   | 64 AAGGAGGTGTTATGAAGGGATT      |
| scaffold721854_14.9 | 1 p2 | (GA)9  | 18 | 3391 | 3408 CGCTTGTTCCTTGGTAGGAG      |
| scaffold721863_18.9 | 1 p2 | (GA)6  | 12 | 105  | 116 GGTTGATGTCATCGTCATGG       |
| scaffold721872_13.3 | 1 p2 | (AT)9  | 18 | 202  | 219 ATTTTGACGGGATTCAGGTG       |
| scaffold721878_13.9 | 1 p2 | (GA)10 | 20 | 3282 | 3301 CAAGCAAGAAAAAGCGAACC      |
| scaffold721888_15.3 | 1 p2 | (TG)6  | 12 | 925  | 936 TGAAAGGTAGGGTTTTCGCA       |
| scaffold721889_15.4 | 1 p2 | (TA)6  | 12 | 656  | 667 TGCAAGTAAAATCGTCGTGC       |
| scaffold721919_16.2 | 1 p2 | (AG)6  | 12 | 6480 | 6491 TGAAGTTGACGAAGAAGATGACA   |
| scaffold721938_15.3 | 1 p2 | (TA)6  | 12 | 627  | 638 CCTAAAATTGCCCATCCTA        |
| scaffold721941_10.7 | 1 p2 | (TA)8  | 16 | 566  | 581 TTGAATCTCCGGCTGAAACT       |
| scaffold721958_14.7 | 1 p2 | (AG)7  | 14 | 404  | 417 TTGGCCACAAATTAAGGGG        |
| scaffold721962_16.2 | 1 p2 | (AT)6  | 12 | 2942 | 2953 TGAAACTCTCAACAGATTCCCA    |
| scaffold721978_16.6 | 1 p2 | (TA)9  | 18 | 47   | 64 CACTTAAGGGGGTTATTAGTGGA     |
| scaffold721979_16.6 | 1 p2 | (GT)6  | 12 | 106  | 117 TGGGAACACTCTTCAGGACA       |
| scaffold722010_14.4 | 1 p2 | (AT)8  | 16 | 1086 | 1101 TTTTCATTGGAGTTGTGCCA      |
| scaffold722011_14.7 | 1 p2 | (TA)6  | 12 | 54   | 65 CAGATTTGTTATGTGTTTTGACAAT   |
| scaffold722019_12.3 | 1 p2 | (CT)12 | 24 | 36   | 59 TGGTGGCTGAAATGCTTGTA        |
| scaffold722025_16.7 | 1 p2 | (CT)6  | 12 | 407  | 418 TTCTGCCCTTAAGGCTGTTG       |
| scaffold722040_16.0 | 1 p2 | (AT)6  | 12 | 4010 | 4021 TTCTAAAGCTCCACCACACG      |
| scaffold722078_15.2 | 1 p2 | (TC)7  | 14 | 504  | 517 GAGTCATCAAGAAGGCCAGC       |
| scaffold722135_14.2 | 1 p2 | (TA)6  | 12 | 65   | 76 GACCAAAAATCCAATCCAGG        |
| scaffold722149_17.5 | 1 p2 | (GA)6  | 12 | 1223 | 1234 GGAGAAATCAAGAGGAGGGG      |
| scaffold722186_14.2 | 1 p2 | (TC)6  | 12 | 190  | 201 AGCCTGTACGACTCCGACAC       |
| scaffold722203_14.6 | 1 p2 | (GA)6  | 12 | 170  | 181 ATTTGAGGGGGAAAGGAGAG       |
| scaffold722210_13.3 | 1 p2 | (AT)8  | 16 | 972  | 987 GGCATAGGTTTGGGTTTCAA       |
| scaffold722226_18.3 | 1 p2 | (GA)6  | 12 | 294  | 305 GAGGATCTGTGGGGTGGTAA       |
| scaffold722235_13.3 | 1 p2 | (AT)7  | 14 | 286  | 299 GGAATTCCAGCAACCTCTTG       |
| scaffold722249_16.9 | 1 p2 | (TG)6  | 12 | 3548 | 3559 TTCGAGGCGTTTTCTAGGTG      |

|                     |      |        |    |      |      |                            |
|---------------------|------|--------|----|------|------|----------------------------|
| scaffold722281_13.7 | 1 p2 | (AT)9  | 18 | 351  | 368  | GTGTCAAATTCGCAACGAAG       |
| scaffold722292_14.9 | 1 p2 | (TA)6  | 12 | 1388 | 1399 | TTTGATGGGATGGTATGTTTATG    |
| scaffold722294_12.0 | 1 p2 | (AC)9  | 18 | 328  | 345  | AACCAACATCCCATCTCCAT       |
| scaffold722304_14.8 | 1 p2 | (TA)6  | 12 | 77   | 88   | AAAAATCAAAGGCCCAACAAT      |
| scaffold722334_18.7 | 1 p2 | (CT)6  | 12 | 860  | 871  | GCCATCAAAGAGGAAACGA        |
| scaffold722337_14.6 | 1 p2 | (TG)6  | 12 | 156  | 167  | CACGAATGAAACAAGTTGGG       |
| scaffold722361_14.2 | 1 p2 | (CT)6  | 12 | 633  | 644  | TGATTTCAAGTTGGTAGCAGGAA    |
| scaffold722379_15.9 | 1 p2 | (CA)7  | 14 | 1476 | 1489 | ACATGGCGTGCTACAATCAA       |
| scaffold722386_15.7 | 1 p2 | (TA)7  | 14 | 388  | 401  | CTTCTTCCCAGTTTCCCCTC       |
| scaffold722407_20.0 | 1 p2 | (AT)6  | 12 | 358  | 369  | GGGTTATCATTTGAACGCGA       |
| scaffold722415_15.4 | 1 p2 | (CT)8  | 16 | 148  | 163  | CCAAGCAAAGACGACACT         |
| scaffold722421_11.6 | 1 p2 | (GA)6  | 12 | 800  | 811  | AGCTTCTGACATCCACGCTT       |
| scaffold722433_13.7 | 1 p2 | (AG)7  | 14 | 525  | 538  | ATTCGTGAATTGGCTACGG        |
| scaffold722436_13.8 | 1 p2 | (AG)7  | 14 | 507  | 520  | TCTTTTGCAGCCCTCCTTTA       |
| scaffold722446_16.1 | 1 p2 | (TC)6  | 12 | 840  | 851  | GAAAAATGTATGGGGTCGGA       |
| scaffold722452_14.4 | 1 p2 | (TA)7  | 14 | 1722 | 1735 | AGGGACTTAACAAGCCATCG       |
| scaffold722457_12.0 | 1 p2 | (TA)6  | 12 | 53   | 64   | TTTCTCATACAAAAGACATTTCTCA  |
| scaffold722459_18.0 | 1 p2 | (CT)8  | 16 | 313  | 328  | TGCTCACAAGCAACCAAAAC       |
| scaffold722466_16.8 | 1 p2 | (AG)7  | 14 | 3130 | 3143 | ACCTTAGCAACGAAGGAGCA       |
| scaffold722515_13.8 | 1 p2 | (AT)6  | 12 | 1711 | 1722 | GCAAGTCTGGTACTTGGGGA       |
| scaffold722542_11.7 | 1 p2 | (AT)7  | 14 | 746  | 759  | TTGACTGTCATTTTACCTCTTTATGA |
| scaffold722581_14.7 | 1 p2 | (CA)9  | 18 | 4301 | 4318 | CATAGCTTGCTCACCAACCC       |
| scaffold722606_12.8 | 1 p2 | (TA)8  | 16 | 567  | 582  | CGTTTCTGACCACTAAACGA       |
| scaffold722629_15.0 | 1 p2 | (AT)10 | 20 | 86   | 105  | TTTGGATCTGTTTGTGCGAGTTG    |
| scaffold722630_17.1 | 1 p2 | (TA)6  | 12 | 2291 | 2302 | GATAATCACCGGAAAAGCGA       |
| scaffold722640_19.6 | 1 p2 | (TA)6  | 12 | 1614 | 1625 | CCCACACCTCATCAACCTCT       |
| scaffold722663_15.7 | 1 p2 | (TA)10 | 20 | 44   | 63   | AAGGAGGTGTTATGAAGGGATT     |
| scaffold722664_15.4 | 1 p2 | (CT)9  | 18 | 671  | 688  | ACATGGGCAATAAGTCAGGC       |
| scaffold722678_10.5 | 1 p2 | (TA)9  | 18 | 233  | 250  | GAAAATCTGCAGTGGGGTGT       |
| scaffold722691_17.1 | 1 p2 | (CT)8  | 16 | 714  | 729  | ATGGGAGCTCATGAACGAAC       |
| scaffold722702_14.7 | 1 p2 | (CT)10 | 20 | 993  | 1012 | ATACGGGGCATAAGCTGTCA       |
| scaffold722716_16.4 | 1 p2 | (TA)6  | 12 | 413  | 424  | CCCAGCATCCGTTAGTTACAA      |
| scaffold722717_14.0 | 1 p2 | (TA)7  | 14 | 411  | 424  | CAAATCGATTCCGAGTTTGAA      |
| scaffold722730_16.2 | 1 p2 | (GC)6  | 12 | 168  | 179  | TATAGGCACTTCCACCAGGG       |
| scaffold722757_16.7 | 1 p2 | (TC)7  | 14 | 2450 | 2463 | TCACCTTCTTTCCCCTTCT        |
| scaffold722758_13.4 | 1 p2 | (TA)8  | 16 | 829  | 844  | GCGAAATAGGATCGCCAATA       |
| scaffold722765_14.5 | 1 p2 | (GA)11 | 22 | 3864 | 3885 | TAGCGCTGCAGAATTCAAGA       |
| scaffold722777_16.0 | 1 p2 | (TC)6  | 12 | 746  | 757  | GTAATCACGAGACCGCCAG        |
| scaffold722792_15.7 | 1 p2 | (AT)6  | 12 | 415  | 426  | AGAAATCCAGCAACCAATCG       |
| scaffold722872_10.5 | 1 p2 | (AG)6  | 12 | 1119 | 1130 | TGAGGAATGAGAGCGTAGGG       |
| scaffold722877_14.3 | 1 p2 | (TA)6  | 12 | 320  | 331  | CGTGCAAATAGCACCAAGA        |
| scaffold722890_14.9 | 1 p2 | (TA)9  | 18 | 215  | 232  | TCCAGCGCCCTATAATGTTC       |
| scaffold722916_11.8 | 1 p2 | (AT)7  | 14 | 673  | 686  | CGTTGTCTGCCTTGGAAATTA      |
| scaffold722938_14.7 | 1 p2 | (AT)8  | 16 | 332  | 347  | TAATGGCCCTGAATCTTTTCG      |
| scaffold722980_14.0 | 1 p2 | (GA)6  | 12 | 1165 | 1176 | ACAACAAGATCCCCTGCAAT       |
| scaffold722985_14.2 | 1 p2 | (CT)7  | 14 | 782  | 795  | TGGGTGCTTTTCTTGCTCTT       |
| scaffold722998_15.1 | 1 p2 | (AG)7  | 14 | 985  | 998  | GCCATTGATGAAAGTTGGT        |
| scaffold723014_13.9 | 1 p2 | (TC)7  | 14 | 930  | 943  | AAGAGGGAGAGAATGGGAGC       |
| scaffold723021_11.0 | 1 p2 | (AT)12 | 24 | 692  | 715  | CAGAGCGCACTCGAAGAGTA       |
| scaffold723059_15.0 | 1 p2 | (AT)6  | 12 | 649  | 660  | TTCCCCCTTTTATGGTCAA        |
| scaffold723080_15.3 | 1 p2 | (TA)7  | 14 | 2396 | 2409 | TATGCAGCCATCAGACCAAG       |
| scaffold723082_17.7 | 1 p2 | (AC)6  | 12 | 2012 | 2023 | CAAAAATGCCACTGCTTGAA       |
| scaffold723105_11.0 | 1 p2 | (TA)9  | 18 | 275  | 292  | TTTGAGGAAGGATTTGAGGC       |
| scaffold723108_16.6 | 1 p2 | (TA)8  | 16 | 48   | 63   | GCGGTTATCACCGGATCG         |
| scaffold723119_16.3 | 1 p2 | (TC)7  | 14 | 3796 | 3809 | TTGCTGCTGACACCAATCTC       |
| scaffold723130_16.2 | 1 p2 | (TA)7  | 14 | 1114 | 1127 | TCAACAACGGTAAGTTGCTCTT     |
| scaffold723149_15.9 | 1 p2 | (AC)7  | 14 | 1456 | 1469 | CATGTGCGACTTTGGAGGTA       |
| scaffold723159_17.4 | 1 p2 | (AG)7  | 14 | 3584 | 3597 | TCAAGAATCCCTTTAGCCGA       |

|                     |      |        |    |      |      |                        |
|---------------------|------|--------|----|------|------|------------------------|
| scaffold723162_13.5 | 1 p2 | (TC)9  | 18 | 97   | 114  | CCCCATTACCATCTTTCTCG   |
| scaffold723187_14.9 | 1 p2 | (AG)6  | 12 | 275  | 286  | AGGGAGTTGCTAGGGTGTGA   |
| scaffold723218_17.2 | 1 p2 | (AT)6  | 12 | 977  | 988  | CATGCAGGGGCTGAGTACAGA  |
| scaffold723219_16.2 | 1 p2 | (CT)6  | 12 | 947  | 958  | CTTCCCCTTCGCTCCTACTC   |
| scaffold723225_10.2 | 1 p2 | (AT)9  | 18 | 173  | 190  | TCAAAAACCGAAAACCGAAC   |
| scaffold723245_14.9 | 1 p2 | (GA)6  | 12 | 841  | 852  | TATTGTAGCGGCCAATACC    |
| scaffold723249_11.8 | 1 p2 | (TA)7  | 14 | 1108 | 1121 | GCATCGTAAGGAGCGTTGAT   |
| scaffold723263_15.6 | 1 p2 | (AG)7  | 14 | 417  | 430  | AAATCAGCACCCAACCAAAG   |
| scaffold723290_19.4 | 1 p2 | (TC)6  | 12 | 419  | 430  | GAGTGCTTCGAAAAGGTTGC   |
| scaffold723294_18.7 | 1 p2 | (TC)7  | 14 | 1344 | 1357 | GTTAGGGTTTTTGTCCGGGT   |
| scaffold723295_14.7 | 1 p2 | (TC)6  | 12 | 419  | 430  | GATATTCACCGACGTGCCTT   |
| scaffold723300_13.7 | 1 p2 | (TC)6  | 12 | 62   | 73   | TAAGAGTTGTCCGGAGTCGG   |
| scaffold723305_13.5 | 1 p2 | (CT)8  | 16 | 415  | 430  | CTTGTTGAGAGGTGGCTGTG   |
| scaffold723308_14.9 | 1 p2 | (TA)9  | 18 | 322  | 339  | TCAATCATCCAACACACCAA   |
| scaffold723360_11.1 | 1 p2 | (TC)7  | 14 | 829  | 842  | ACGCGAGGGTTGTGATAAAC   |
| scaffold723469_14.4 | 1 p2 | (CT)7  | 14 | 2275 | 2288 | TGGTATCAGGGTTTCAGCTTC  |
| scaffold723480_14.9 | 1 p2 | (AT)9  | 18 | 575  | 592  | TCCACCACTGTCAGAAAGCA   |
| scaffold723507_12.5 | 1 p2 | (AC)10 | 20 | 248  | 267  | GAACCAGCTGACCATGTGAA   |
| scaffold723517_13.2 | 1 p2 | (CT)7  | 14 | 62   | 75   | AATTTCTTGCTCCAAACCTTTA |
| scaffold723546_16.0 | 1 p2 | (TA)9  | 18 | 1117 | 1134 | AATCAAAGAGCAATGAGCCG   |
| scaffold723552_16.6 | 1 p2 | (GA)6  | 12 | 174  | 185  | GCAACAAATGCCAACGCTAT   |
| scaffold723561_13.8 | 1 p2 | (AT)6  | 12 | 514  | 525  | TTGATGTGAGATGGGCTTGA   |
| scaffold723566_16.1 | 1 p2 | (GA)11 | 22 | 35   | 56   | CCTACCTAAGGAGGGAGGGA   |
| scaffold723603_16.2 | 1 p2 | (AC)10 | 20 | 630  | 649  | CCCTACGCACTCGTTTTTCT   |
| scaffold723608_14.8 | 1 p2 | (AT)6  | 12 | 423  | 434  | CCTGCTGTTGATTTGATGGA   |
| scaffold723613_15.5 | 1 p2 | (AG)7  | 14 | 422  | 435  | AAATGGAATGTGGCGAAGAC   |
| scaffold723723_14.9 | 1 p2 | (TG)9  | 18 | 203  | 220  | GAAAAATTCGTAAGTGGCCG   |
| scaffold723752_15.0 | 1 p2 | (CA)6  | 12 | 165  | 176  | GTAActCAAGGCCATTCCA    |
| scaffold723759_12.3 | 1 p2 | (CT)6  | 12 | 727  | 738  | CCCAACAATTCGGTTTTGAC   |
| scaffold723771_18.3 | 1 p2 | (TA)6  | 12 | 426  | 437  | ACCAAACCCATTCTTGCCA    |
| scaffold723772_14.3 | 1 p2 | (AT)11 | 22 | 708  | 729  | TTGATGGATTTTTCAAGCCC   |
| scaffold723781_17.3 | 1 p2 | (CT)8  | 16 | 897  | 912  | TTTCTTCAAATTTGGGGTGG   |
| scaffold723790_18.9 | 1 p2 | (TA)6  | 12 | 425  | 436  | TGCAAGCAAAAAGACGAAAA   |
| scaffold723810_17.2 | 1 p2 | (AG)6  | 12 | 1340 | 1351 | GAGGGAGCTGCAACAAGAAA   |
| scaffold723824_11.6 | 1 p2 | (TA)9  | 18 | 602  | 619  | TTATGGCCCTTGGATTTGAG   |
| scaffold723831_17.3 | 1 p2 | (AC)8  | 16 | 25   | 40   | TGTGACCTCAATTGCAAAAC   |
| scaffold723864_10.1 | 1 p2 | (TA)8  | 16 | 595  | 610  | ACTGGACCGGACCGTTTT     |
| scaffold723882_10.2 | 1 p2 | (AT)9  | 18 | 1099 | 1116 | TTGGCAAAGTCCCCTATTTG   |
| scaffold723935_19.8 | 1 p2 | (CA)6  | 12 | 370  | 381  | AGCTGCAGCATTCTCACAA    |
| scaffold723948_15.8 | 1 p2 | (AG)6  | 12 | 278  | 289  | GGTCAGTTTCTTGCTTGCA    |
| scaffold724018_11.4 | 1 p2 | (AT)10 | 20 | 1415 | 1434 | TCGTGCATTACTCGGTTACTTG |
| scaffold724043_14.1 | 1 p2 | (CT)7  | 14 | 3112 | 3125 | GGAACCAATCTGGTGCATTC   |
| scaffold724057_10.1 | 1 p2 | (TA)7  | 14 | 269  | 282  | TCAGATCACCACCGGACATA   |
| scaffold724073_15.4 | 1 p2 | (CT)8  | 16 | 1601 | 1616 | CGCACACACCATCTGTGAAT   |
| scaffold724092_15.7 | 1 p2 | (TA)6  | 12 | 219  | 230  | TTCCTCTGAATTTGGTGGG    |
| scaffold724093_15.8 | 1 p2 | (CT)6  | 12 | 428  | 439  | GGGAACCAGATACGAGGACA   |
| scaffold724126_16.3 | 1 p2 | (TC)6  | 12 | 2129 | 2140 | TGGAAATGGAATCCGAAGAC   |
| scaffold724130_15.3 | 1 p2 | (AT)6  | 12 | 660  | 671  | CTTCAAGGATTTGAGCCGAG   |
| scaffold724163_12.1 | 1 p2 | (AG)7  | 14 | 57   | 70   | GCTTCTTCTTGCTGTGAGTGG  |
| scaffold724170_12.9 | 1 p2 | (GA)13 | 26 | 495  | 520  | TGAAATCATGCTGGTTGCAT   |
| scaffold724171_13.8 | 1 p2 | (AT)8  | 16 | 1510 | 1525 | GCCTGTTTGCCACTCAAAT    |
| scaffold724173_12.2 | 1 p2 | (AT)8  | 16 | 426  | 441  | ATTGTCACATGGTCCGCATA   |
| scaffold724175_17.0 | 1 p2 | (AT)10 | 20 | 1849 | 1868 | TGTGCCTTGATTCATTGAAAA  |
| scaffold724197_15.1 | 1 p2 | (CA)6  | 12 | 737  | 748  | TCAAGATTTTGTGTGGCTGC   |
| scaffold724202_17.1 | 1 p2 | (AG)7  | 14 | 428  | 441  | CACCCCTGAAACTCCATCAT   |
| scaffold724206_15.0 | 1 p2 | (AT)8  | 16 | 743  | 758  | GACGACGATGAAAATCGTGA   |
| scaffold724216_17.8 | 1 p2 | (TA)9  | 18 | 267  | 284  | AACGCGCATTTTAGGGTTTA   |
| scaffold724238_17.5 | 1 p2 | (TC)6  | 12 | 51   | 62   | TGTCGGTGGACTGATTTGTG   |

|                     |      |        |    |      |      |                          |
|---------------------|------|--------|----|------|------|--------------------------|
| scaffold724242_13.7 | 1 p2 | (TA)7  | 14 | 126  | 139  | CGTGAGAAGCGTTGATATGG     |
| scaffold724282_13.5 | 1 p2 | (AT)6  | 12 | 552  | 563  | CCTCTCACATGTCTCCACGA     |
| scaffold724302_17.8 | 1 p2 | (TA)6  | 12 | 383  | 394  | GGATCTGCGTCCATTTCACT     |
| scaffold724320_12.6 | 1 p2 | (AT)7  | 14 | 1697 | 1710 | CGAGACATGGAATTAGGGCT     |
| scaffold724339_15.0 | 1 p2 | (GA)9  | 18 | 834  | 851  | CACCAAATGTATGTGCATGAGA   |
| scaffold724386_13.0 | 1 p2 | (AT)6  | 12 | 197  | 208  | GGGGATGGGGGTAAGTAATG     |
| scaffold724392_15.2 | 1 p2 | (TA)6  | 12 | 431  | 442  | TGACCGAAAAATCCAACGAT     |
| scaffold724424_13.6 | 1 p2 | (AG)7  | 14 | 156  | 169  | ATCAGCTGCCAAACCAAGAT     |
| scaffold724457_13.0 | 1 p2 | (AG)9  | 18 | 638  | 655  | AAAGGTCCCTCACCAGTCAA     |
| scaffold724460_15.8 | 1 p2 | (AG)7  | 14 | 940  | 953  | GCTGCTCCTGTCTCTTTGCT     |
| scaffold724500_16.2 | 1 p2 | (GA)6  | 12 | 723  | 734  | GGTGCTGCAACTGAACTGAA     |
| scaffold724512_14.9 | 1 p2 | (CT)6  | 12 | 426  | 437  | CTGTCACGTCTCTTCCACCA     |
| scaffold724530_14.9 | 1 p2 | (AG)10 | 20 | 553  | 572  | TGGCTATAGGACATCGAGGG     |
| scaffold724562_11.7 | 1 p2 | (GA)7  | 14 | 432  | 445  | TTTGCATGGAATAAGAAATTTTGA |
| scaffold724567_13.2 | 1 p2 | (CT)7  | 14 | 430  | 443  | TTAACCGCCAAACTCAAACC     |
| scaffold724572_15.5 | 1 p2 | (AG)8  | 16 | 1553 | 1568 | GGGCTATTGTCATTTGAC       |
| scaffold724573_17.7 | 1 p2 | (CA)6  | 12 | 4009 | 4020 | CCTCTGGCTGTTCTGGATTT     |
| scaffold724593_11.5 | 1 p2 | (GA)8  | 16 | 736  | 751  | CTCCACTGATGTGTGGATGC     |
| scaffold724601_14.2 | 1 p2 | (AG)8  | 16 | 242  | 257  | CATGAATTTTTGGGAAGCTGA    |
| scaffold724637_15.5 | 1 p2 | (TC)8  | 16 | 3806 | 3821 | TTCATGCAAAGCTGGAAC       |
| scaffold724645_14.7 | 1 p2 | (AT)6  | 12 | 1104 | 1115 | TCTGTTCCAGAGAATGCTGGG    |
| scaffold724779_16.6 | 1 p2 | (AG)7  | 14 | 1348 | 1361 | CATGACCCAATCAATGCAAC     |
| scaffold724796_14.7 | 1 p2 | (TG)6  | 12 | 518  | 529  | TGAAAAAGAAAAACGCGTCA     |
| scaffold724813_14.6 | 1 p2 | (AG)6  | 12 | 51   | 62   | TGTACGTGCGTACGTGTGTG     |
| scaffold724814_14.2 | 1 p2 | (GA)6  | 12 | 991  | 1002 | TCCTGTTTGATGAAATGCCA     |
| scaffold724824_14.2 | 1 p2 | (GT)8  | 16 | 51   | 66   | GTCTGAGCGAGAGTGTGTGC     |
| scaffold724856_15.2 | 1 p2 | (AT)7  | 14 | 378  | 391  | CAAATGAGATTGGTTCGAGCTT   |
| scaffold724867_15.7 | 1 p2 | (AT)9  | 18 | 1173 | 1190 | CATACATGTTGAATTGCGGC     |
| scaffold724885_15.4 | 1 p2 | (AT)6  | 12 | 758  | 769  | AAGCTCGGGCCTGAACTATT     |
| scaffold724891_18.4 | 1 p2 | (TA)6  | 12 | 407  | 418  | ACTCAGAAATCCATCCCACG     |
| scaffold724903_17.8 | 1 p2 | (CA)6  | 12 | 1705 | 1716 | AGAAACCCATGTGCAACTCC     |
| scaffold724972_16.4 | 1 p2 | (CT)7  | 14 | 2949 | 2962 | CGCCTTTGCATCTCCTGTAT     |
| scaffold725058_13.3 | 1 p2 | (AT)11 | 22 | 53   | 74   | CATTAATAATGTGTATGCACCTGA |
| scaffold725061_18.6 | 1 p2 | (TG)7  | 14 | 1887 | 1900 | TGTGCATTTCAACTTGGGAA     |
| scaffold725088_13.6 | 1 p2 | (TC)6  | 12 | 1059 | 1070 | CAAAGGGGGAAAAGAAAAG      |
| scaffold725140_14.2 | 1 p2 | (AT)6  | 12 | 537  | 548  | CGGTGGAGATGTGGAGTACA     |
| scaffold725167_15.9 | 1 p2 | (TA)12 | 24 | 81   | 104  | CATTGTGGGCCTTTGATTTT     |
| scaffold725236_13.4 | 1 p2 | (CT)7  | 14 | 1713 | 1726 | TAAAAATGGGAGATGAGGCG     |
| scaffold725238_15.0 | 1 p2 | (AT)7  | 14 | 617  | 630  | GCGGCCAGTTCAATACAAAT     |
| scaffold725254_12.9 | 1 p2 | (AG)7  | 14 | 606  | 619  | AGAGAGAAAAAGCTTCGGGG     |
| scaffold725256_13.9 | 1 p2 | (GA)6  | 12 | 750  | 761  | AAAAACATCAACTGGGACCG     |
| scaffold725257_14.5 | 1 p2 | (TC)6  | 12 | 2289 | 2300 | ACCGATCCATCTCTCGTGAC     |
| scaffold725262_13.3 | 1 p2 | (TA)8  | 16 | 49   | 64   | AGACCGGACCGTTAGGTAAT     |
| scaffold725264_17.4 | 1 p2 | (AG)8  | 16 | 881  | 896  | ACCTCCCTCCTCCTCAGTGT     |
| scaffold725271_16.6 | 1 p2 | (CT)7  | 14 | 439  | 452  | CCAAGATGAATAAATGAAAGGGA  |
| scaffold725283_11.0 | 1 p2 | (CT)6  | 12 | 359  | 370  | GCAAGAGAAGCCCTCACAAAC    |
| scaffold725285_15.5 | 1 p2 | (GA)6  | 12 | 255  | 266  | ACGCAGCTCCCTTTTTACTG     |
| scaffold725298_12.7 | 1 p2 | (CT)6  | 12 | 1385 | 1396 | CGGATTTAACCCCAAATCT      |
| scaffold725309_15.9 | 1 p2 | (TA)6  | 12 | 4479 | 4490 | TCGAAAGTCCAATTTCCACC     |
| scaffold725325_18.7 | 1 p2 | (GA)7  | 14 | 440  | 453  | GAACTGAGAAGCTGCGTG       |
| scaffold725353_17.2 | 1 p2 | (CT)8  | 16 | 439  | 454  | TGCTCCCTCATCTTTTGAC      |
| scaffold725361_14.5 | 1 p2 | (AT)6  | 12 | 132  | 143  | CTTTGATTTCCACCTTCAA      |
| scaffold725362_17.6 | 1 p2 | (TA)6  | 12 | 835  | 846  | TGTTCTGTCTCGAACGAT       |
| scaffold725430_16.4 | 1 p2 | (CT)6  | 12 | 670  | 681  | ACCTGGTGCTGTCCAATAGC     |
| scaffold725451_15.2 | 1 p2 | (AT)6  | 12 | 720  | 731  | AACTTCCGATGGAATGCAG      |
| scaffold725452_14.0 | 1 p2 | (AT)8  | 16 | 115  | 130  | CAACGCGTCTTTGAGAAGTG     |
| scaffold725458_15.3 | 1 p2 | (GA)6  | 12 | 2508 | 2519 | ATTCATTGCAGTTTGGAGC      |
| scaffold725465_13.7 | 1 p2 | (CT)8  | 16 | 544  | 559  | GGGATTGGACCCCTCATTTTT    |



|                     |      |        |    |      |      |                           |
|---------------------|------|--------|----|------|------|---------------------------|
| scaffold725467_14.8 | 1 p2 | (TC)6  | 12 | 841  | 852  | AAACTCGGTTTGGGCTTTTT      |
| scaffold725470_15.7 | 1 p2 | (TC)6  | 12 | 874  | 885  | CGTTGTCTGAGTTGTGAA        |
| scaffold725474_15.4 | 1 p2 | (TA)10 | 20 | 2012 | 2031 | AGTTGCCGATTGGTAAGCAC      |
| scaffold725500_13.2 | 1 p2 | (TA)10 | 20 | 706  | 725  | TATGAGAAGGGCATTTCGG       |
| scaffold725505_15.4 | 1 p2 | (TC)6  | 12 | 1756 | 1767 | AACACATGTCATGATAGCAGTTAGA |
| scaffold725522_16.6 | 1 p2 | (CA)8  | 16 | 169  | 184  | ATGTCAGTCTGCCAAAGGCT      |
| scaffold725540_15.2 | 1 p2 | (CT)9  | 18 | 634  | 651  | TTTCACGAACCCACATTTTT      |
| scaffold725551_11.2 | 1 p2 | (TA)7  | 14 | 444  | 457  | TCGTA AACATGA ACTTCTTTGGA |
| scaffold725602_12.3 | 1 p2 | (GT)10 | 20 | 1213 | 1232 | TACGCAA AATACGCCAATCA     |
| scaffold725613_12.0 | 1 p2 | (AT)6  | 12 | 411  | 422  | GAGGCTATCGAGGCTTTTCC      |
| scaffold725617_12.9 | 1 p2 | (AG)11 | 22 | 109  | 130  | TCCACCTTGAAGCTCTCGAT      |
| scaffold725634_15.2 | 1 p2 | (GT)7  | 14 | 717  | 730  | CTCTGCTGATCCCCTTTTTG      |
| scaffold725638_16.5 | 1 p2 | (GA)6  | 12 | 731  | 742  | TCCACAGACAGATTTCCCAA      |
| scaffold725684_13.2 | 1 p2 | (AT)7  | 14 | 1177 | 1190 | TATACACGTTTCCCTCGCCT      |
| scaffold725707_16.2 | 1 p2 | (CT)6  | 12 | 7547 | 7558 | CCTCCTATACCCCTTCTCGC      |
| scaffold725715_16.6 | 1 p2 | (CT)6  | 12 | 801  | 812  | AAGAAACCCCATTTGAAACC      |
| scaffold725716_16.8 | 1 p2 | (AG)6  | 12 | 449  | 460  | CCACAATGTAAGGAGCACAAA     |
| scaffold725727_12.6 | 1 p2 | (GT)6  | 12 | 534  | 545  | TGCAAACAGAAACAAGGCAC      |
| scaffold725734_17.7 | 1 p2 | (TC)7  | 14 | 920  | 933  | CCTGGTCATAAGTACAAGAACC    |
| scaffold725735_13.3 | 1 p2 | (TA)6  | 12 | 1332 | 1343 | CATTTTCGACCGTCATGAGA      |
| scaffold725756_16.0 | 1 p2 | (AC)7  | 14 | 1031 | 1044 | AATTGCCTGCACCTCCAAT       |
| scaffold725776_15.2 | 1 p2 | (TC)7  | 14 | 447  | 460  | GAGAAATGGAGCAGCCTACG      |
| scaffold725783_15.0 | 1 p2 | (AT)7  | 14 | 928  | 941  | GACGTACGACTCATGCGACA      |
| scaffold725784_16.2 | 1 p2 | (CA)6  | 12 | 1158 | 1169 | CAAATTTCCAATACAAGGCA      |
| scaffold725787_16.3 | 1 p2 | (TC)6  | 12 | 643  | 654  | TCGACATATTTTCTTCCGCC      |
| scaffold725811_11.8 | 1 p2 | (TA)7  | 14 | 156  | 169  | GCGGGGTTGTTAAGAAGAG       |
| scaffold725845_14.7 | 1 p2 | (CT)6  | 12 | 449  | 460  | AAATTCAACCTTGATGCTACA     |
| scaffold725865_15.7 | 1 p2 | (CT)7  | 14 | 437  | 450  | CCGGTTTGCACCAATTCTAT      |
| scaffold725895_14.3 | 1 p2 | (TA)6  | 12 | 360  | 371  | TGGGTCAATTCCAATTCAAAA     |
| scaffold725896_16.6 | 1 p2 | (AT)8  | 16 | 512  | 527  | CAAATCTTGTGCCATGCTG       |
| scaffold725945_16.7 | 1 p2 | (TA)9  | 18 | 1105 | 1122 | ATTGCATGCCACAATTTCAA      |
| scaffold725946_14.0 | 1 p2 | (AG)9  | 18 | 1095 | 1112 | TGATATTCATTGCCTTTGCG      |
| scaffold725982_14.5 | 1 p2 | (AT)9  | 18 | 232  | 249  | TCAATTGGCCATATTAGCACA     |
| scaffold725984_18.4 | 1 p2 | (AG)6  | 12 | 835  | 846  | GGCAAGAAATAACAGCATACCA    |
| scaffold725997_14.5 | 1 p2 | (TA)6  | 12 | 810  | 821  | CCCCACAGACATATTGACTC      |
| scaffold726014_14.5 | 1 p2 | (TC)8  | 16 | 409  | 424  | TGCAAACATGGGACTAATATGAA   |
| scaffold726020_19.8 | 1 p2 | (AG)7  | 14 | 1728 | 1741 | ACCGCTTCAAACAAAAGCAG      |
| scaffold726027_17.8 | 1 p2 | (AG)6  | 12 | 764  | 775  | TGCAAAATGGAATGGACTGA      |
| scaffold726060_15.5 | 1 p2 | (CT)7  | 14 | 473  | 486  | ATCTTGTTCCGTGCATTTCC      |
| scaffold726083_14.8 | 1 p2 | (CT)9  | 18 | 1516 | 1533 | AAACCCAAACCTTAATGCC       |
| scaffold726094_14.4 | 1 p2 | (CT)7  | 14 | 356  | 369  | CGATTTACGAGCATCCCATT      |
| scaffold726101_10.0 | 1 p2 | (TC)6  | 12 | 148  | 159  | CTCCACCTTTAATGTCACCA      |
| scaffold726107_17.5 | 1 p2 | (CT)7  | 14 | 836  | 849  | AATTGCCCATGTTGGTTAGC      |
| scaffold726109_14.7 | 1 p2 | (GA)7  | 14 | 909  | 922  | AGCCAAGAAATGGAGGGAAT      |
| scaffold726132_14.7 | 1 p2 | (CT)6  | 12 | 103  | 114  | GGCCTCCAACGTTTTCAATA      |
| scaffold726150_13.4 | 1 p2 | (AT)9  | 18 | 360  | 377  | CGTCGTTGGTGCTATACCCT      |
| scaffold726157_14.9 | 1 p2 | (TA)9  | 18 | 3852 | 3869 | GGAACGCAGAGGATCAATTC      |
| scaffold726163_14.3 | 1 p2 | (AT)6  | 12 | 206  | 217  | ATCTGGGCTACCGATTTGTG      |
| scaffold726176_15.5 | 1 p2 | (TC)6  | 12 | 231  | 242  | AAGTACATTCCTCCGAAAGG      |
| scaffold726185_13.3 | 1 p2 | (TA)6  | 12 | 454  | 465  | TACCCCATGCCTCAAGAATC      |
| scaffold726193_14.6 | 1 p2 | (CT)8  | 16 | 253  | 268  | CAACGAGAAGTCGAGAAGGG      |
| scaffold726233_15.7 | 1 p2 | (CT)8  | 16 | 1373 | 1388 | CTCCATCCCTGCTCTCTCAC      |
| scaffold726248_14.9 | 1 p2 | (AG)8  | 16 | 1770 | 1785 | TTGATGGGTGGAATGTAAGG      |
| scaffold726278_18.7 | 1 p2 | (CT)6  | 12 | 87   | 98   | ATTAACGCACACACGTGACA      |
| scaffold726298_13.8 | 1 p2 | (AT)6  | 12 | 403  | 414  | GTGTGGCCTACCAAACACG       |
| scaffold726309_14.7 | 1 p2 | (TA)7  | 14 | 1059 | 1072 | TAAAATGAATGAAGGGCGG       |
| scaffold726352_15.6 | 1 p2 | (TA)7  | 14 | 1427 | 1440 | GGTTCTCATTTGAACGCACC      |
| scaffold726353_16.0 | 1 p2 | (TC)7  | 14 | 710  | 723  | TGGGCTGCTAAGAAAGGAAA      |

|                     |      |        |    |      |                              |
|---------------------|------|--------|----|------|------------------------------|
| scaffold726415_14.1 | 1 p2 | (AG)7  | 14 | 311  | 324 CAAATTTGCTGATGCCATTG     |
| scaffold726436_16.4 | 1 p2 | (CA)6  | 12 | 299  | 310 CCGAATTCCGACCTAACAAA     |
| scaffold726437_17.3 | 1 p2 | (GA)6  | 12 | 1322 | 1333 AAGGAGAGTGCAGCGACAGT    |
| scaffold726458_13.9 | 1 p2 | (TA)6  | 12 | 2329 | 2340 TCAATCGGCAAATTCAGGAT    |
| scaffold726461_16.0 | 1 p2 | (CT)6  | 12 | 1629 | 1640 TCGGAAAAAGATTCCCATTG    |
| scaffold726471_17.8 | 1 p2 | (AT)9  | 18 | 1217 | 1234 GGGGCTGAAAAATCAAAGGT    |
| scaffold726472_18.0 | 1 p2 | (AT)7  | 14 | 455  | 468 CATGGCAGTATTGGCATCAC     |
| scaffold726482_16.9 | 1 p2 | (TC)7  | 14 | 2785 | 2798 TTGATGGTCCAACACAATGG    |
| scaffold726498_13.9 | 1 p2 | (CA)6  | 12 | 130  | 141 TTGGTGCTGACTTCCAACAA     |
| scaffold726526_12.7 | 1 p2 | (TA)9  | 18 | 325  | 342 TAATAGCGGCCGATCTGAAG     |
| scaffold726529_13.6 | 1 p2 | (TA)9  | 18 | 935  | 952 ACGTCTACTCGCCCACTT       |
| scaffold726548_15.1 | 1 p2 | (GT)8  | 16 | 3789 | 3804 GCAGGTTTCCATATGTGCGCT   |
| scaffold726559_15.7 | 1 p2 | (AC)7  | 14 | 2481 | 2494 GTGAAAAGTGGCCAACATGA    |
| scaffold726560_11.0 | 1 p2 | (AG)10 | 20 | 483  | 502 TCCACCCACTGTCCCTAGTC     |
| scaffold726617_13.9 | 1 p2 | (AC)6  | 12 | 743  | 754 ATACATATGGACGCCCCAGA     |
| scaffold726639_14.8 | 1 p2 | (GA)9  | 18 | 107  | 124 TTGCCTTGCTTTCTCTCTCC     |
| scaffold726664_17.4 | 1 p2 | (TG)6  | 12 | 339  | 350 CGTTCGGGATCATAAAAACG     |
| scaffold726675_10.2 | 1 p2 | (TA)6  | 12 | 120  | 131 TCATGTCCATTGATCTGAAACA   |
| scaffold726677_16.0 | 1 p2 | (AG)6  | 12 | 122  | 133 CCAAACCAGGTGAAAAGGAA     |
| scaffold726700_21.1 | 1 p2 | (AG)7  | 14 | 878  | 891 TTCTGAAAGCATGAACGGTG     |
| scaffold726707_15.9 | 1 p2 | (GT)10 | 20 | 453  | 472 GTTGTGATGGGGGATTTGAT     |
| scaffold726721_17.9 | 1 p2 | (GA)6  | 12 | 797  | 808 GCATGACCAATGCAGTACCA     |
| scaffold726731_13.4 | 1 p2 | (TA)7  | 14 | 1024 | 1037 TTGTTGGAATACGTGGGAAA    |
| scaffold726739_12.2 | 1 p2 | (AT)7  | 14 | 1143 | 1156 CGAAATCTTGCCCTTCACG     |
| scaffold726746_16.1 | 1 p2 | (TA)6  | 12 | 51   | 62 ATGGGTTATCACCGGATCG       |
| scaffold726749_14.3 | 1 p2 | (AG)11 | 22 | 2049 | 2070 CGAAACCAATTTTTTTCATCCG  |
| scaffold726753_15.2 | 1 p2 | (AT)6  | 12 | 879  | 890 TCTGCCCATAAATTGTGTATGA   |
| scaffold726765_16.2 | 1 p2 | (CA)9  | 18 | 64   | 81 TTTTCTTTTGGGCAGCAACT      |
| scaffold726774_17.2 | 1 p2 | (CT)8  | 16 | 458  | 473 TTTGCCAAACTGAAGAGCCT     |
| scaffold726807_15.7 | 1 p2 | (CG)6  | 12 | 1698 | 1709 ACAAACGGAGTGTTC AAGGG   |
| scaffold726814_15.4 | 1 p2 | (TA)7  | 14 | 111  | 124 ATGAGTTTGCACCTGTGGAG     |
| scaffold726817_10.0 | 1 p2 | (AT)7  | 14 | 130  | 143 TGGAAATCCAAAGCTATTAGACCA |
| scaffold726837_10.9 | 1 p2 | (TC)9  | 18 | 456  | 473 GGGCTGAAGCTCCTTTCTTT     |
| scaffold726839_14.2 | 1 p2 | (CT)6  | 12 | 233  | 244 AAAACGGGAATCGGAATCTT     |
| scaffold726842_13.2 | 1 p2 | (AT)7  | 14 | 1073 | 1086 GAACCAAATCCACAAATCGC    |
| scaffold726860_13.9 | 1 p2 | (TA)10 | 20 | 883  | 902 CATTGGGCCTCTCTGAATA      |
| scaffold726873_18.6 | 1 p2 | (AG)6  | 12 | 329  | 340 GAGAATGGAACCTGCCTCCA     |
| scaffold726887_13.1 | 1 p2 | (AG)11 | 22 | 567  | 588 GAGGATTGCACACTCCCACT     |
| scaffold726894_13.9 | 1 p2 | (AC)6  | 12 | 464  | 475 AAAGTAGAAACCCGTGGCAA     |
| scaffold726981_13.4 | 1 p2 | (CT)7  | 14 | 1058 | 1071 TGGTCCCAATACGTGTCTCA    |
| scaffold727026_13.9 | 1 p2 | (TA)9  | 18 | 43   | 60 GAAATAAGGAGGTGTTATGAAGGG  |
| scaffold727049_15.6 | 1 p2 | (TC)6  | 12 | 838  | 849 AATTTGATCAACACGTCCCC     |
| scaffold727064_15.3 | 1 p2 | (TG)6  | 12 | 363  | 374 AAATTGACACACGCATGCAC     |
| scaffold727066_15.7 | 1 p2 | (GT)10 | 20 | 458  | 477 GCACATGTTCAAACACGCA      |
| scaffold727087_14.2 | 1 p2 | (TA)8  | 16 | 747  | 762 AAAATGCCCTTGTATGCTGC     |
| scaffold727100_16.4 | 1 p2 | (TC)10 | 20 | 414  | 433 AGGCATGAGTTGTC ACTCCC    |
| scaffold727103_15.9 | 1 p2 | (AG)6  | 12 | 4452 | 4463 CTTATGCAGGGATCGTGACC    |
| scaffold727108_12.6 | 1 p2 | (TC)6  | 12 | 1045 | 1056 AGCCAGTGGTCCAGAGAGAA    |
| scaffold727117_13.1 | 1 p2 | (TA)9  | 18 | 240  | 257 GCCACAAATGTCACAAATCAA    |
| scaffold727122_16.7 | 1 p2 | (AG)8  | 16 | 1513 | 1528 GAATTGAGTTCATCCCGGTG    |
| scaffold727152_16.0 | 1 p2 | (CT)6  | 12 | 669  | 680 TGCAAGAAAATGATCCACCA     |
| scaffold727157_13.8 | 1 p2 | (AT)9  | 18 | 169  | 186 TGTGCAATTTGTAAGAAACACG   |
| scaffold727158_14.3 | 1 p2 | (CT)6  | 12 | 466  | 477 TTATGAAGGAGGCGTGGAAC     |
| scaffold727179_15.4 | 1 p2 | (TC)7  | 14 | 684  | 697 TAGCACGTCTGCACTTGGAC     |
| scaffold727200_16.4 | 1 p2 | (CT)9  | 18 | 250  | 267 TTTTCTGCAATTTTGCATTTT    |
| scaffold727201_13.9 | 1 p2 | (TA)8  | 16 | 922  | 937 ACAACTCGCGAGCGTAAATC     |
| scaffold727212_15.9 | 1 p2 | (CT)12 | 24 | 6482 | 6505 TGTTAACGATGGGAGCATTG    |
| scaffold727223_15.4 | 1 p2 | (TA)9  | 18 | 47   | 64 CGGATTTAAGGGTTATTACCTGATT |

|                     |      |        |    |      |      |                           |
|---------------------|------|--------|----|------|------|---------------------------|
| scaffold727225_14.3 | 1 p2 | (AG)9  | 18 | 86   | 103  | GGTTGAGAACAAGGGGTTGA      |
| scaffold727236_16.2 | 1 p2 | (TC)7  | 14 | 1527 | 1540 | AATCATACCGCTTCTCGCTC      |
| scaffold727241_14.7 | 1 p2 | (AG)6  | 12 | 2569 | 2580 | GATTTGGGTTGTTTGATGGG      |
| scaffold727262_16.5 | 1 p2 | (AG)6  | 12 | 195  | 206  | GCACGCCCTTTTCTCTACAC      |
| scaffold727263_17.0 | 1 p2 | (AG)6  | 12 | 710  | 721  | CGGGAAAAGTCTCACAGTTG      |
| scaffold727326_15.7 | 1 p2 | (AT)8  | 16 | 466  | 481  | GCAACTGGCGTGATTATTGA      |
| scaffold727331_16.0 | 1 p2 | (AT)6  | 12 | 63   | 74   | TATGCCCGGATTTTTGTTTT      |
| scaffold727352_13.2 | 1 p2 | (TA)8  | 16 | 1062 | 1077 | GTGCCACCAACTTGTTCA        |
| scaffold727385_16.6 | 1 p2 | (GA)6  | 12 | 154  | 165  | AGTTTAAAGGGGCCTTGCAT      |
| scaffold727386_17.8 | 1 p2 | (AT)7  | 14 | 468  | 481  | TTGATCATAATTTTCGCGCTT     |
| scaffold727390_14.9 | 1 p2 | (AC)7  | 14 | 1084 | 1097 | AACAATAGGACCTTCAGGCAA     |
| scaffold727409_13.6 | 1 p2 | (TA)11 | 22 | 545  | 566  | TCCGTCATATAAATGCCACAA     |
| scaffold727423_13.7 | 1 p2 | (AG)11 | 22 | 58   | 79   | TCGTTGGTCAAGGATAGCAA      |
| scaffold727426_16.9 | 1 p2 | (CA)13 | 26 | 43   | 68   | AACACTCACGCCTTCCAAAC      |
| scaffold727474_12.6 | 1 p2 | (AT)13 | 26 | 436  | 461  | TTCACCAAATCAATGCTCCA      |
| scaffold727477_17.2 | 1 p2 | (TC)6  | 12 | 243  | 254  | CTTTTGAGGGCGCAGTCTAC      |
| scaffold727480_13.5 | 1 p2 | (TA)6  | 12 | 1163 | 1174 | CCATTTCTAGGTCGCGATA       |
| scaffold727497_14.3 | 1 p2 | (TA)9  | 18 | 673  | 690  | AAGGCCCTTGGATTTGAGAT      |
| scaffold727528_15.3 | 1 p2 | (AG)10 | 20 | 464  | 483  | TTGGAGCTGCATTTCTTG TG     |
| scaffold727581_14.3 | 1 p2 | (TG)6  | 12 | 1556 | 1567 | TCACAAAGAGCATGTTACAG      |
| scaffold727593_15.6 | 1 p2 | (AT)9  | 18 | 467  | 484  | AAAAGCTATGGGAAGAACACA     |
| scaffold727599_18.2 | 1 p2 | (TA)8  | 16 | 916  | 931  | GAACCAGACTGCACGTTTCA      |
| scaffold727612_16.6 | 1 p2 | (AG)6  | 12 | 510  | 521  | GTGGACTGGTTTCAGGTGGT      |
| scaffold727615_17.8 | 1 p2 | (TA)6  | 12 | 154  | 165  | TCTCTACAAAACGAGACCAATCTTT |
| scaffold727618_17.2 | 1 p2 | (AG)6  | 12 | 1754 | 1765 | TCTCTCCCTCTCCAACCTCCA     |
| scaffold727646_12.0 | 1 p2 | (AG)9  | 18 | 987  | 1004 | GCTGTGTCACACGGTGCTAA      |
| scaffold727659_11.5 | 1 p2 | (TA)6  | 12 | 422  | 433  | TCAAATGACTTGGGCATGAA      |
| scaffold727670_13.2 | 1 p2 | (AT)7  | 14 | 965  | 978  | TCATCCAAAAGCAAAGGAAAA     |
| scaffold727671_17.7 | 1 p2 | (AT)8  | 16 | 1015 | 1030 | TGCGTTTGTAGCTTTGGTG       |
| scaffold727672_16.3 | 1 p2 | (TC)9  | 18 | 302  | 319  | CGAAGATTTATGCGGGGTTA      |
| scaffold727707_15.0 | 1 p2 | (AT)7  | 14 | 1031 | 1044 | TGGATAAACAAAATTGATGGTTTG  |
| scaffold727714_15.9 | 1 p2 | (GA)7  | 14 | 5143 | 5156 | GCGGAACAGTAGTTGGGATG      |
| scaffold727727_18.0 | 1 p2 | (AT)8  | 16 | 2120 | 2135 | GAGAAGCAGCGGTAGGTGAT      |
| scaffold727746_16.5 | 1 p2 | (AG)6  | 12 | 1063 | 1074 | CGTCCAAAATACCTTTTATTCCA   |
| scaffold727757_17.7 | 1 p2 | (AG)10 | 20 | 1216 | 1235 | ACCCAGAAACAGCACAAATCC     |
| scaffold727769_16.2 | 1 p2 | (AC)6  | 12 | 1714 | 1725 | GATACCGTGGGCAACCTAAA      |
| scaffold727771_16.4 | 1 p2 | (TA)6  | 12 | 1676 | 1687 | GCCATGGATGCGATAAAAGT      |
| scaffold727773_14.9 | 1 p2 | (TA)7  | 14 | 187  | 200  | ATCTAGGGGCCGAGATTTGT      |
| scaffold727806_16.3 | 1 p2 | (AC)7  | 14 | 9455 | 9468 | CGATTGTTGCGTGCATAAAC      |
| scaffold727809_11.4 | 1 p2 | (AT)6  | 12 | 518  | 529  | CCAAGCCATGGAGTAGAAC       |
| scaffold727817_14.8 | 1 p2 | (AG)6  | 12 | 1120 | 1131 | TGAAGTCTAAAGGGAGACGGG     |
| scaffold727849_14.8 | 1 p2 | (AT)6  | 12 | 110  | 121  | CTTAAGCAAATTGCAAGCCA      |
| scaffold727852_14.5 | 1 p2 | (TA)9  | 18 | 305  | 322  | AGTTGGCACCGTATCACTCC      |
| scaffold727861_17.2 | 1 p2 | (TC)6  | 12 | 1284 | 1295 | TTTGAAAGGTATGATTTGGCA     |
| scaffold727889_15.6 | 1 p2 | (AG)11 | 22 | 2768 | 2789 | AAGCAAACATTGTTCCAGGG      |
| scaffold727890_16.2 | 1 p2 | (TA)6  | 12 | 1320 | 1331 | GGTACCCACATGAGAATCAA      |
| scaffold727923_16.2 | 1 p2 | (TC)6  | 12 | 479  | 490  | GGCTCAATTATTTAGGCCCAT     |
| scaffold727929_15.0 | 1 p2 | (TA)10 | 20 | 1865 | 1884 | AATTGGACCGGACCATTAGTT     |
| scaffold727932_15.7 | 1 p2 | (TA)10 | 20 | 45   | 64   | GGGGTTATCATGGGATCAAG      |
| scaffold727940_13.3 | 1 p2 | (CA)7  | 14 | 203  | 216  | GTTCTCTTCTTCTGCCACCG      |
| scaffold727944_15.5 | 1 p2 | (TG)7  | 14 | 1735 | 1748 | GTGTGGATCTAGGGCACGTT      |
| scaffold727947_14.6 | 1 p2 | (AT)9  | 18 | 2409 | 2426 | GAGTTGATCGTCGGTGCATA      |
| scaffold727966_11.8 | 1 p2 | (GA)6  | 12 | 1018 | 1029 | CCCTTGGTATCAAAGGGGT       |
| scaffold727970_13.2 | 1 p2 | (TA)9  | 18 | 474  | 491  | TTTTTACCATTTGCCCTG        |
| scaffold727977_15.4 | 1 p2 | (GA)7  | 14 | 850  | 863  | CAAATGCAAATCTTCTGGCA      |
| scaffold728007_11.5 | 1 p2 | (AG)6  | 12 | 552  | 563  | TGGAAGTGCATGCTAAGTGG      |
| scaffold728008_15.4 | 1 p2 | (GA)9  | 18 | 592  | 609  | GAAGAAATCCCTGCCTTTCC      |
| scaffold728011_15.8 | 1 p2 | (AT)8  | 16 | 731  | 746  | ACACAAGGATTGTTTTCCCG      |

|                     |      |        |    |      |                                |
|---------------------|------|--------|----|------|--------------------------------|
| scaffold728031_14.7 | 1 p2 | (TA)10 | 20 | 780  | 799 CCTATTGCTTAAGACGACATGC     |
| scaffold728033_17.0 | 1 p2 | (AG)7  | 14 | 479  | 492 CTCCATTGGTGGAAACGAGAT      |
| scaffold728047_15.4 | 1 p2 | (TA)6  | 12 | 983  | 994 GGCCCAAGCAAAATAAGTCA       |
| scaffold728064_16.0 | 1 p2 | (AT)9  | 18 | 299  | 316 TGCAATTTATATGCTTTTGAC      |
| scaffold728083_17.3 | 1 p2 | (AT)10 | 20 | 188  | 207 CATAACAAGTGCGAAAGGG        |
| scaffold728097_15.6 | 1 p2 | (CA)9  | 18 | 2099 | 2116 TGCAAGCAATAATAAGCCCC      |
| scaffold728098_15.6 | 1 p2 | (GA)7  | 14 | 134  | 147 CTGGCAATTTGACGGGTAAT       |
| scaffold728120_18.9 | 1 p2 | (TA)9  | 18 | 625  | 642 TGCACAATCGATTTACGTGG       |
| scaffold728132_17.5 | 1 p2 | (AT)6  | 12 | 580  | 591 GTTTCGCAAGGCAAATAACC       |
| scaffold728137_15.0 | 1 p2 | (AG)7  | 14 | 481  | 494 TCATCAAGGCCTCACATTCA       |
| scaffold728155_17.2 | 1 p2 | (AC)7  | 14 | 2004 | 2017 AAACAGCAGAGAAGCCCAAA      |
| scaffold728201_17.3 | 1 p2 | (CT)7  | 14 | 1573 | 1586 GAATTCGGGGTGTTTTGAGA      |
| scaffold728210_14.4 | 1 p2 | (AT)7  | 14 | 263  | 276 TCGGTTGTTTTACCATTGGA       |
| scaffold728212_18.0 | 1 p2 | (TC)6  | 12 | 249  | 260 CTCGTCCAGGACAAATCCAT       |
| scaffold728223_14.1 | 1 p2 | (TC)7  | 14 | 2660 | 2673 CATTGCCGCAAGATCAAGTA      |
| scaffold728226_12.7 | 1 p2 | (TC)6  | 12 | 689  | 700 ATCTGCATGTCTACGTCCCC       |
| scaffold728229_18.0 | 1 p2 | (TA)7  | 14 | 143  | 156 TCCCAACCCCATTTACAAAA       |
| scaffold728235_12.9 | 1 p2 | (AT)10 | 20 | 93   | 112 GTGGGTTTACCTAGAGCGCA       |
| scaffold728248_13.2 | 1 p2 | (GA)7  | 14 | 640  | 653 GGAATGAAGTATGTGGAGGAAGA    |
| scaffold728256_15.0 | 1 p2 | (AT)6  | 12 | 927  | 938 CGCCCTTTTAGTTAAAACCTTG     |
| scaffold728266_15.8 | 1 p2 | (TG)9  | 18 | 354  | 371 ACAATGGGTTTCAATTTGCCAT     |
| scaffold728281_18.4 | 1 p2 | (AT)6  | 12 | 203  | 214 CTATGTTGACTTCGCCGTGA       |
| scaffold728304_16.0 | 1 p2 | (AT)6  | 12 | 3210 | 3221 TCCTCCAGCGAGTCGTAGTT      |
| scaffold728309_13.7 | 1 p2 | (TC)9  | 18 | 721  | 738 TGTGAGTTGCCACTCTCCAC       |
| scaffold728317_15.9 | 1 p2 | (TA)6  | 12 | 741  | 752 CCATGAATTTACCAGCAAT        |
| scaffold728320_17.0 | 1 p2 | (GT)8  | 16 | 3415 | 3430 TTCTTGATGGAAAGGCAAGG      |
| scaffold728324_15.5 | 1 p2 | (CT)6  | 12 | 1845 | 1856 GGCCAGAACTGCCATAAAA       |
| scaffold728325_13.7 | 1 p2 | (TA)8  | 16 | 481  | 496 AAGACTCGGGTCCATGACAG       |
| scaffold728329_16.5 | 1 p2 | (TA)7  | 14 | 983  | 996 GTAACAGTAGCTGCCTGCCC       |
| scaffold728349_16.9 | 1 p2 | (AG)7  | 14 | 953  | 966 CCTTGAGCAATGTGGAGCTT       |
| scaffold728356_16.6 | 1 p2 | (TC)6  | 12 | 257  | 268 GTTAGGCTTCCCATCCCCT        |
| scaffold728360_16.8 | 1 p2 | (TG)6  | 12 | 2767 | 2778 TTCGCTCTGATATCCCCATT      |
| scaffold728369_14.8 | 1 p2 | (AG)8  | 16 | 1453 | 1468 TATCCCGGTATGTAGCCCA       |
| scaffold728388_16.1 | 1 p2 | (AC)6  | 12 | 1799 | 1810 TCTCTCTGCTTACACACGC       |
| scaffold728394_13.9 | 1 p2 | (TG)7  | 14 | 1327 | 1340 CCACAAAGCTCTTGAAATAGG     |
| scaffold728405_16.2 | 1 p2 | (AT)8  | 16 | 193  | 208 TAGTATTGGAGTTGGGGGC        |
| scaffold728408_16.2 | 1 p2 | (AG)11 | 22 | 1397 | 1418 CTCACGCTGGTAAAAGAGCC      |
| scaffold728433_13.0 | 1 p2 | (AT)6  | 12 | 397  | 408 TCGTTCCTACTTTGTGGTGG       |
| scaffold728434_16.3 | 1 p2 | (AT)6  | 12 | 1203 | 1214 GCAGTATCGGGAGTGAGAGG      |
| scaffold728436_15.5 | 1 p2 | (AG)7  | 14 | 1742 | 1755 GATTTGGGGTTTTCGGAGATT     |
| scaffold728458_16.2 | 1 p2 | (TA)7  | 14 | 56   | 69 CCCTACCCATTTACCCGTTT        |
| scaffold728478_13.4 | 1 p2 | (TA)13 | 26 | 614  | 639 ATGGTCGTGATTGTATGCGA       |
| scaffold728487_15.7 | 1 p2 | (TA)7  | 14 | 132  | 145 CCTAGCCACACACGGAATCT       |
| scaffold728494_15.5 | 1 p2 | (AT)6  | 12 | 1431 | 1442 CCAATTTAAGTTCGAATGAGTTTTC |
| scaffold728495_14.8 | 1 p2 | (CT)6  | 12 | 599  | 610 AACCGGTTTGACCGATTTTC       |
| scaffold728514_18.8 | 1 p2 | (AC)6  | 12 | 633  | 644 CTGCACCGGATAAATACAGCA      |
| scaffold728518_16.1 | 1 p2 | (AG)6  | 12 | 390  | 401 CCACAAGATCAGCTTTTCCC       |
| scaffold728533_16.8 | 1 p2 | (TA)10 | 20 | 37   | 56 AAGTTTATATCAATAGTTTTGTGTCGG |
| scaffold728574_15.9 | 1 p2 | (TA)10 | 20 | 972  | 991 TGCAAGTTGAGCAGGTGTAG       |
| scaffold728575_12.4 | 1 p2 | (AT)8  | 16 | 486  | 501 GGAGTTTGAGAGGGGCAAGT       |
| scaffold728595_15.6 | 1 p2 | (AC)6  | 12 | 2528 | 2539 TTTCAATTGCTGCTGCAGTTT     |
| scaffold728628_13.8 | 1 p2 | (TA)6  | 12 | 1089 | 1100 AGTGTTTTCAGGCGTTTACC      |
| scaffold728640_13.6 | 1 p2 | (AT)7  | 14 | 746  | 759 ATTCCTCACGGACCTCACAC       |
| scaffold728687_12.3 | 1 p2 | (GA)6  | 12 | 2022 | 2033 GGTTGAGGCGGATAAAGTCA      |
| scaffold728722_16.4 | 1 p2 | (AC)6  | 12 | 3361 | 3372 GTTCGTACCGAACACACCC       |
| scaffold728724_14.8 | 1 p2 | (AT)6  | 12 | 1043 | 1054 CAAAGCTCAGCCGACCTAGT      |
| scaffold728729_15.6 | 1 p2 | (CT)9  | 18 | 41   | 58 TGCAAGAAAAACAAGCCCTC        |
| scaffold728738_16.0 | 1 p2 | (GT)7  | 14 | 781  | 794 TTGTCGCTGGACACGATAAG       |

|                     |      |        |    |      |                                  |
|---------------------|------|--------|----|------|----------------------------------|
| scaffold728740_15.3 | 1 p2 | (AT)7  | 14 | 286  | 299 TCGACTGAAAATTTTGGCTAATC      |
| scaffold728767_16.0 | 1 p2 | (TG)6  | 12 | 2242 | 2253 CTTATGCCACTCCCCACTGT        |
| scaffold728785_16.7 | 1 p2 | (GT)9  | 18 | 118  | 135 CACGAGCTGTTAATCACCACA        |
| scaffold728809_13.4 | 1 p2 | (TA)8  | 16 | 292  | 307 TGGTTAACTCAATCTCAGCCG        |
| scaffold728836_12.7 | 1 p2 | (TC)11 | 22 | 482  | 503 TTAATCAGATGAGGGCAGGG         |
| scaffold728845_13.6 | 1 p2 | (AT)6  | 12 | 369  | 380 TGGACCACACCTATCATAACCA       |
| scaffold728874_15.2 | 1 p2 | (GA)6  | 12 | 1609 | 1620 TGTGGGCGTCAGATCTCATA        |
| scaffold728875_16.2 | 1 p2 | (AT)12 | 24 | 2156 | 2179 TGTTGGATTGGACATTGGGT        |
| scaffold728888_18.7 | 1 p2 | (TG)7  | 14 | 493  | 506 CACTCCTGTATGTAGTGACACGAA     |
| scaffold728902_15.9 | 1 p2 | (TC)9  | 18 | 794  | 811 TTTGGTTTTTGGTTTGCTCC         |
| scaffold728907_16.4 | 1 p2 | (TA)9  | 18 | 46   | 63 CCAATTTGAATGGTTATCACCTG       |
| scaffold728951_13.9 | 1 p2 | (AT)6  | 12 | 1777 | 1788 CCTGGGCTTTGTTACAGAT         |
| scaffold728957_15.0 | 1 p2 | (GA)6  | 12 | 1197 | 1208 TGAGAGTTTCTGCGTTGGTG        |
| scaffold728958_16.2 | 1 p2 | (TC)6  | 12 | 183  | 194 GTTGGCTTTTTGTTGCCACT         |
| scaffold729004_15.7 | 1 p2 | (AT)7  | 14 | 2507 | 2520 CATCTTGATGTCCCCATTGA        |
| scaffold729039_20.0 | 1 p2 | (TC)6  | 12 | 239  | 250 GCTTCAGTTCTGTGGCATCA         |
| scaffold729050_16.7 | 1 p2 | (TA)6  | 12 | 693  | 704 TCATCAGCAAACCTCCCACA         |
| scaffold729056_14.9 | 1 p2 | (TC)7  | 14 | 564  | 577 TGGATTTAGCCGATTCCAAG         |
| scaffold729057_15.2 | 1 p2 | (AT)8  | 16 | 495  | 510 CACTTGTCGTCATGGGAATG         |
| scaffold729059_11.9 | 1 p2 | (TA)13 | 26 | 169  | 194 GCACTCTCCAGCAATGTTGA         |
| scaffold729063_13.7 | 1 p2 | (TC)9  | 18 | 492  | 509 TGGTGAAGAAAGTGGGCTTC         |
| scaffold729077_14.3 | 1 p2 | (TA)9  | 18 | 1325 | 1342 AGCAGTGAACGAGGAAGAA         |
| scaffold729100_12.6 | 1 p2 | (CT)12 | 24 | 183  | 206 CGCATTTTCATCTGCTTTTCA        |
| scaffold729103_16.3 | 1 p2 | (AT)7  | 14 | 186  | 199 GGGGTGCAACATCATATTC          |
| scaffold729105_12.9 | 1 p2 | (AT)7  | 14 | 1231 | 1244 TTTGTTGGGTCTTGGGCTAC        |
| scaffold729118_14.3 | 1 p2 | (AT)6  | 12 | 741  | 752 CACCGAATATCCCAACTCAA         |
| scaffold729126_15.9 | 1 p2 | (TG)6  | 12 | 918  | 929 CTTCCCTTAAGCCCATCTC          |
| scaffold729136_10.0 | 1 p2 | (AC)8  | 16 | 735  | 750 GATAGCTCTGAGGCTGGTGC         |
| scaffold729138_13.0 | 1 p2 | (AT)6  | 12 | 576  | 587 CCACTTCTCCCATTTGCATT         |
| scaffold729141_15.6 | 1 p2 | (TA)6  | 12 | 31   | 42 CCGTAGCTGTTATTGATGGAA         |
| scaffold729154_16.8 | 1 p2 | (TA)6  | 12 | 267  | 278 CACCAGAATTTAGGCGGAGA         |
| scaffold729176_16.2 | 1 p2 | (TG)8  | 16 | 496  | 511 CCCGAATATCCCCAACTAA          |
| scaffold729179_15.3 | 1 p2 | (AG)7  | 14 | 592  | 605 GAAGCCGAAGGAATCATCAC         |
| scaffold729200_13.8 | 1 p2 | (AC)7  | 14 | 3490 | 3503 TCTGAGCATTGCAAGGATG         |
| scaffold729229_18.7 | 1 p2 | (TC)6  | 12 | 1272 | 1283 TAAGCAATCCCCATTTTTGG        |
| scaffold729235_11.3 | 1 p2 | (TC)9  | 18 | 1056 | 1073 CACAAGCTCGGAAGGGTAAA        |
| scaffold729303_17.4 | 1 p2 | (GA)6  | 12 | 1795 | 1806 CTGCAAACTGGAGGAGAGG         |
| scaffold729309_13.8 | 1 p2 | (AT)6  | 12 | 502  | 513 ATCGATTAGGTCGCACAAGG         |
| scaffold729316_15.0 | 1 p2 | (GT)6  | 12 | 1465 | 1476 GCGCTGTAACCAACAACAGA        |
| scaffold729337_20.0 | 1 p2 | (AT)9  | 18 | 1171 | 1188 CAAAGCCCAATGGGAAACTA        |
| scaffold729384_16.6 | 1 p2 | (AT)13 | 26 | 217  | 242 GCAACTCGACATCAACGTCA         |
| scaffold729414_16.4 | 1 p2 | (TC)7  | 14 | 2087 | 2100 CGTCCCAAGAAATGTGACCT        |
| scaffold729431_13.4 | 1 p2 | (AT)10 | 20 | 490  | 509 TGGTTGATTAGATTACCGTACAA      |
| scaffold729441_18.0 | 1 p2 | (TA)7  | 14 | 503  | 516 TCTCACGAGGATTTTCGATGT        |
| scaffold729462_14.6 | 1 p2 | (AT)11 | 22 | 933  | 954 AAAGGGCCTATATCCAATATGAAA     |
| scaffold729473_16.4 | 1 p2 | (TC)8  | 16 | 3224 | 3239 TGCGAATTTGGAATTATCTGC       |
| scaffold729479_13.3 | 1 p2 | (TA)6  | 12 | 62   | 73 GGGGTTATCATGGGATCAAG          |
| scaffold729500_12.7 | 1 p2 | (AT)10 | 20 | 180  | 199 AACGCAGATCTGATGGCAC          |
| scaffold729504_17.0 | 1 p2 | (CT)7  | 14 | 4612 | 4625 ACGGACCGTGTACTCTACCG        |
| scaffold729518_13.8 | 1 p2 | (AT)6  | 12 | 506  | 517 AACAAATGCAGTAGCTGGTTGG       |
| scaffold729545_14.8 | 1 p2 | (AT)9  | 18 | 1109 | 1126 GGTGATTTTTGATTATAGGAATATGG/ |
| scaffold729628_21.7 | 1 p2 | (AG)14 | 28 | 46   | 73 GGAACAAAGACACCATTGATAAAA      |
| scaffold729648_15.9 | 1 p2 | (TA)8  | 16 | 81   | 96 TTTGATAACGTCAAATCCAACAA       |
| scaffold729654_15.2 | 1 p2 | (AG)10 | 20 | 1294 | 1313 CATTCCAATCATTCCCCAAC        |
| scaffold729657_15.0 | 1 p2 | (TA)7  | 14 | 654  | 667 TGACCCATTTCTCATCATTGG        |
| scaffold729658_16.3 | 1 p2 | (AT)9  | 18 | 1340 | 1357 TTTGTGCCTAAAATGCCCTC        |
| scaffold729671_17.9 | 1 p2 | (CT)7  | 14 | 143  | 156 TCCCAACTCACAATCCATGA         |
| scaffold729676_14.9 | 1 p2 | (AT)10 | 20 | 157  | 176 TTCTGCATGCATTTATTGGG         |

|                     |      |        |    |      |      |                           |
|---------------------|------|--------|----|------|------|---------------------------|
| scaffold729678_12.8 | 1 p2 | (AT)7  | 14 | 1232 | 1245 | ACAAATGAACACTCCGGCAT      |
| scaffold729682_13.0 | 1 p2 | (GA)6  | 12 | 1502 | 1513 | AGGCAGAAAAGAGGAGGGAC      |
| scaffold729688_15.4 | 1 p2 | (TA)9  | 18 | 1012 | 1029 | GGATCCACGTCCACTATGCT      |
| scaffold729692_17.6 | 1 p2 | (AC)7  | 14 | 2941 | 2954 | CTCGTTAGCAAGCAATGCAC      |
| scaffold729700_11.8 | 1 p2 | (TA)9  | 18 | 295  | 312  | GGCTCCACAACCATCTTCTT      |
| scaffold729701_15.2 | 1 p2 | (GT)7  | 14 | 3029 | 3042 | GCTGAAGAGGTCCAGCAATC      |
| scaffold729706_15.3 | 1 p2 | (AG)7  | 14 | 672  | 685  | TCATGTGAGGATATGGCGAA      |
| scaffold729707_16.3 | 1 p2 | (CA)6  | 12 | 827  | 838  | CAATGTCAGAGTGGTGGTGG      |
| scaffold729761_11.8 | 1 p2 | (AT)6  | 12 | 1350 | 1361 | TCTTCTCGCATACCAAAGGT      |
| scaffold729782_15.7 | 1 p2 | (GA)9  | 18 | 503  | 520  | GCGTGGGAATAATGAGAGA       |
| scaffold729810_14.8 | 1 p2 | (TC)7  | 14 | 1091 | 1104 | CCAAGAAGCCCTTCTCTCT       |
| scaffold729813_14.3 | 1 p2 | (AT)6  | 12 | 1607 | 1618 | AAATGGATGCTGATAAATGGA     |
| scaffold729818_17.7 | 1 p2 | (GA)7  | 14 | 1328 | 1341 | CGAGAGAGCTTTTCTTGACA      |
| scaffold729824_15.4 | 1 p2 | (AT)9  | 18 | 1244 | 1261 | GGAAAAGAAGTCCAGAACG       |
| scaffold729825_14.3 | 1 p2 | (CT)10 | 20 | 317  | 336  | TTTCCCCTCCCTCATTTACC      |
| scaffold729839_13.6 | 1 p2 | (AT)9  | 18 | 787  | 804  | CCATTCCGTCGTTGTAGGAA      |
| scaffold729896_13.0 | 1 p2 | (AG)9  | 18 | 1755 | 1772 | TGGCCTCAGATAGTTGGTCC      |
| scaffold729897_14.8 | 1 p2 | (AT)11 | 22 | 4285 | 4306 | TGCAACGTGAGTAGTACTCG      |
| scaffold729919_15.4 | 1 p2 | (TA)7  | 14 | 1204 | 1217 | AAGGTACAAGTGGGTTCCCC      |
| scaffold729940_15.2 | 1 p2 | (AC)6  | 12 | 1953 | 1964 | ATACCCAGACCCAAAGCAAA      |
| scaffold729959_16.0 | 1 p2 | (GA)6  | 12 | 582  | 593  | CAACAAAAGCGTGTTCATGG      |
| scaffold729977_14.4 | 1 p2 | (GA)8  | 16 | 931  | 946  | GTGCCAGAGATCGGAGAAAG      |
| scaffold729991_14.2 | 1 p2 | (AT)10 | 20 | 1643 | 1662 | CACCACAAAGCAATTGGAAA      |
| scaffold730036_14.4 | 1 p2 | (GT)6  | 12 | 1297 | 1308 | TGGGTGCCATTTCTATCACA      |
| scaffold730050_19.9 | 1 p2 | (TC)7  | 14 | 514  | 527  | CTTAATGAGGGGCCACAAAG      |
| scaffold730061_17.7 | 1 p2 | (TA)6  | 12 | 602  | 613  | TGATCTGGAAGTAAGGAATCCTAGA |
| scaffold730064_15.6 | 1 p2 | (TC)9  | 18 | 2331 | 2348 | GCAAAGACCATTCTTGAGGC      |
| scaffold730069_15.7 | 1 p2 | (TC)7  | 14 | 822  | 835  | TTGGGTTGCATCAGAAAACCTC    |
| scaffold730102_12.4 | 1 p2 | (CT)12 | 24 | 505  | 528  | GATGAGAGAGAGAGCGGTGG      |
| scaffold730113_17.3 | 1 p2 | (GA)6  | 12 | 518  | 529  | ACTCTCACGCACCGGAATAC      |
| scaffold730123_17.2 | 1 p2 | (AG)6  | 12 | 518  | 529  | AAGTTGCATGCCATTTACCA      |
| scaffold730145_15.6 | 1 p2 | (GA)6  | 12 | 1614 | 1625 | AATGCCCTCCTATTATGCCC      |
| scaffold730159_16.3 | 1 p2 | (TA)11 | 22 | 820  | 841  | TATGGGTTATCACCGGATCG      |
| scaffold730170_17.5 | 1 p2 | (GA)6  | 12 | 430  | 441  | GGGCGAAGTGATCGAGAATA      |
| scaffold730186_14.9 | 1 p2 | (TA)7  | 14 | 517  | 530  | GGATTTTGGATTGGTCGAGA      |
| scaffold730190_15.4 | 1 p2 | (TC)9  | 18 | 170  | 187  | CAATGTTGGTGACGTCTTGC      |
| scaffold730222_14.4 | 1 p2 | (GA)8  | 16 | 2582 | 2597 | CACAGCTGGCATAACCAAGA      |
| scaffold730227_15.5 | 1 p2 | (GA)6  | 12 | 132  | 143  | TCACGGATTCACCAACTGAA      |
| scaffold730229_16.9 | 1 p2 | (AC)6  | 12 | 2395 | 2406 | TTGCAAACCTTAATTGGTGCG     |
| scaffold730230_13.1 | 1 p2 | (AT)8  | 16 | 1207 | 1222 | GCCCCGATTTTTCAAAGTA       |
| scaffold730246_15.0 | 1 p2 | (AT)6  | 12 | 1189 | 1200 | AATGCCACCATTGTTGGTTC      |
| scaffold730256_16.5 | 1 p2 | (AG)6  | 12 | 926  | 937  | CTGGGTTGGTAGTTGCCAGT      |
| scaffold730274_11.6 | 1 p2 | (AT)13 | 26 | 67   | 92   | AGAATTTCAAGGTAATGGGGA     |
| scaffold730279_15.9 | 1 p2 | (AG)8  | 16 | 103  | 118  | GCACGTCTCTCGGACATACA      |
| scaffold730290_14.3 | 1 p2 | (TA)8  | 16 | 1056 | 1071 | TCGAATTTGTGAACTCCGAA      |
| scaffold730292_15.2 | 1 p2 | (TA)9  | 18 | 2814 | 2831 | TTTGCACCTAAGAGGAGTTTTGAA  |
| scaffold730306_14.2 | 1 p2 | (AG)6  | 12 | 1178 | 1189 | GCATTGCAAGCTTCGATACA      |
| scaffold730314_18.0 | 1 p2 | (CT)6  | 12 | 955  | 966  | GACCAGCGAGTCACACTCAA      |
| scaffold730329_11.3 | 1 p2 | (TA)6  | 12 | 118  | 129  | GCGAAGCTAATGCATTCTGTC     |
| scaffold730343_15.8 | 1 p2 | (AT)8  | 16 | 469  | 484  | GTAAAGCCAAAAGTCGGGC       |
| scaffold730347_13.1 | 1 p2 | (AG)10 | 20 | 3547 | 3566 | CAGCAGCAAGCAATAACGAG      |
| scaffold730361_18.2 | 1 p2 | (CT)6  | 12 | 1181 | 1192 | CGAATGCTTTTTCTTCCACC      |
| scaffold730364_12.8 | 1 p2 | (CT)9  | 18 | 1002 | 1019 | TTGCACTTCTGGAGAACCT       |
| scaffold730371_17.2 | 1 p2 | (TC)6  | 12 | 516  | 527  | ATTTTGTGCGAGTTGATCCC      |
| scaffold730372_14.6 | 1 p2 | (TA)6  | 12 | 2931 | 2942 | CACACATGGAAAAGATCTCCAA    |
| scaffold730402_16.5 | 1 p2 | (TA)6  | 12 | 1242 | 1253 | CTCCCAATTATGGACAGGGA      |
| scaffold730417_14.6 | 1 p2 | (TA)6  | 12 | 2652 | 2663 | TAGTGGGGCAAGAAACAAGC      |
| scaffold730418_12.3 | 1 p2 | (TA)7  | 14 | 522  | 535  | AACACATTTCTTCAACATTCATCA  |

|                     |      |        |    |      |                              |
|---------------------|------|--------|----|------|------------------------------|
| scaffold730423_13.5 | 1 p2 | (TA)9  | 18 | 110  | 127 ATCAACGGTTCACATCGGTT     |
| scaffold730425_15.4 | 1 p2 | (GT)6  | 12 | 731  | 742 TGGAGAACTCATTCTTACTGCC   |
| scaffold730435_11.3 | 1 p2 | (AT)7  | 14 | 959  | 972 ACGAACACACACGCACTCTC     |
| scaffold730479_11.6 | 1 p2 | (TA)7  | 14 | 1155 | 1168 GGCCAGATTTTCGTCCCTATT   |
| scaffold730494_12.3 | 1 p2 | (TA)7  | 14 | 81   | 94 TGTTTGCACGTGAATAAGCC      |
| scaffold730556_17.9 | 1 p2 | (AG)6  | 12 | 143  | 154 GGTTCAACCATTTTGTGGG      |
| scaffold730579_12.0 | 1 p2 | (AT)10 | 20 | 1000 | 1019 CGCCGACCAATCATGTAGA     |
| scaffold730599_15.4 | 1 p2 | (AT)8  | 16 | 3333 | 3348 TTGTGGATGCCCTAACCAAT    |
| scaffold730607_13.0 | 1 p2 | (TC)8  | 16 | 1581 | 1596 CCAAGCTTAAGCAAGCAAGC    |
| scaffold730631_15.9 | 1 p2 | (CT)6  | 12 | 530  | 541 TCTTTGACGTTAATTTTCGGAGA  |
| scaffold730633_15.6 | 1 p2 | (TA)7  | 14 | 2579 | 2592 CCTGAAAGAATTTGGGGGAT    |
| scaffold730660_14.9 | 1 p2 | (AG)6  | 12 | 953  | 964 ATCTCTGCCCCATCTCTCT      |
| scaffold730663_15.3 | 1 p2 | (AC)6  | 12 | 4254 | 4265 ACCCTCCACCCTTTCTCTGT    |
| scaffold730667_15.2 | 1 p2 | (GA)7  | 14 | 715  | 728 CATGTCGTGTCGTGTCAGAA     |
| scaffold730668_16.2 | 1 p2 | (AG)7  | 14 | 4517 | 4530 GTACCTCTGTCCTTGCAGCC    |
| scaffold730672_13.4 | 1 p2 | (TG)6  | 12 | 55   | 66 TTGTGTGATCGAACACGTT       |
| scaffold730678_12.6 | 1 p2 | (CT)11 | 22 | 1385 | 1406 GTCTAGCCGGCATCGATAAT    |
| scaffold730713_15.2 | 1 p2 | (TA)6  | 12 | 2400 | 2411 AAAAGAGATGCGTGCAAGGT    |
| scaffold730761_16.3 | 1 p2 | (AC)8  | 16 | 1365 | 1380 ACGGTGTCTCCGCAATTAAC    |
| scaffold730768_16.4 | 1 p2 | (TC)6  | 12 | 146  | 157 GGCTATGGGTGGTAGGACAA     |
| scaffold730806_14.2 | 1 p2 | (CT)7  | 14 | 615  | 628 CAATAAAGCCCGTCACGTTT     |
| scaffold730834_15.0 | 1 p2 | (TC)6  | 12 | 533  | 544 GTGGTGCGATGATAACGATG     |
| scaffold730836_11.0 | 1 p2 | (AT)11 | 22 | 35   | 56 AGCCGTGAGATTTACTTTAACTT   |
| scaffold730862_15.4 | 1 p2 | (TA)11 | 22 | 43   | 64 GCGTTTTGACAATATATAAGTGTTC |
| scaffold730881_16.8 | 1 p2 | (GA)10 | 20 | 1189 | 1208 CCAAACAAAACACTCATCAACC  |
| scaffold730884_17.7 | 1 p2 | (AG)7  | 14 | 533  | 546 TCTCCCAACACACCTTTTCC     |
| scaffold730888_16.6 | 1 p2 | (AG)9  | 18 | 1153 | 1170 GAGGATAACTGGCCAACCAA    |
| scaffold730906_13.8 | 1 p2 | (AC)8  | 16 | 1969 | 1984 CAACTCCCCCGTAGTTTTCA    |
| scaffold730910_15.9 | 1 p2 | (GA)6  | 12 | 2403 | 2414 GTTGGTGTGTTGCTGGGATTT   |
| scaffold730911_16.5 | 1 p2 | (TC)8  | 16 | 1259 | 1274 TCGAGCTGAACGAAAGAGGT    |
| scaffold730916_18.0 | 1 p2 | (CT)10 | 20 | 525  | 544 CCCCACCTTAGCGTTAAACA     |
| scaffold730932_15.5 | 1 p2 | (AG)9  | 18 | 530  | 547 ACCCAAAACAAAATGCATGA     |
| scaffold730934_14.3 | 1 p2 | (TC)6  | 12 | 506  | 517 TATGGCAAAAACACCAACGA     |
| scaffold730942_17.5 | 1 p2 | (TC)7  | 14 | 534  | 547 ACTCAACTCTGATCGGTGGG     |
| scaffold730951_18.1 | 1 p2 | (AT)6  | 12 | 660  | 671 GGAGATGGAGGGTTCAAGGT     |
| scaffold730956_15.7 | 1 p2 | (TA)6  | 12 | 318  | 329 GGTATTGTGGCGAATGCT       |
| scaffold730964_14.7 | 1 p2 | (AT)14 | 28 | 1099 | 1126 GGTGTTGGGAGGTGAACAAT    |
| scaffold730982_17.0 | 1 p2 | (CT)6  | 12 | 554  | 565 CCAATAGGCCCATTCAAAGA     |
| scaffold730992_15.1 | 1 p2 | (AG)6  | 12 | 1496 | 1507 CTCAATGCGTAGGCTTCTCC    |
| scaffold731000_16.2 | 1 p2 | (TA)8  | 16 | 1095 | 1110 AAACCGCACTTTAGCTCGAA    |
| scaffold731007_11.7 | 1 p2 | (TA)8  | 16 | 534  | 549 AAATTCCCTTGTATGCTGCG     |
| scaffold731011_15.1 | 1 p2 | (AC)7  | 14 | 831  | 844 AGTTTCGATTGATTGACGG      |
| scaffold731028_15.5 | 1 p2 | (AG)8  | 16 | 2523 | 2538 GATTCTAGCATCGTGAGGGC    |
| scaffold731029_13.4 | 1 p2 | (TA)9  | 18 | 913  | 930 TTCCAACAATCTCAGCATCA     |
| scaffold731034_14.1 | 1 p2 | (TA)9  | 18 | 918  | 935 AAGTATTGATCGACGTGGGA     |
| scaffold731049_15.9 | 1 p2 | (CT)6  | 12 | 198  | 209 AACACAGGTCCGCAATAGG      |
| scaffold731054_15.6 | 1 p2 | (GA)8  | 16 | 1529 | 1544 CTGCCTCCCTGTTCTTACG     |
| scaffold731082_14.9 | 1 p2 | (CT)7  | 14 | 793  | 806 TCCCTAATCATCTCCCCTCC     |
| scaffold731100_16.4 | 1 p2 | (CT)8  | 16 | 561  | 576 CCTAGAGCACACTCGAAGGG     |
| scaffold731114_15.6 | 1 p2 | (CA)7  | 14 | 2804 | 2817 CCTCCTTCCATAGCAGCAA     |
| scaffold731121_16.7 | 1 p2 | (AT)9  | 18 | 3464 | 3481 TGATCAAAATCCACACCTCG    |
| scaffold731137_12.3 | 1 p2 | (TG)7  | 14 | 537  | 550 CAGAGTTTGTTCGCAACCC      |
| scaffold731143_12.1 | 1 p2 | (TC)6  | 12 | 77   | 88 ACTGGTGGAACTGGATTGC       |
| scaffold731172_16.0 | 1 p2 | (AG)6  | 12 | 541  | 552 CCACCTCTCTGCTCCACTTC     |
| scaffold731183_14.0 | 1 p2 | (TA)10 | 20 | 255  | 274 TTTGAACCCAAACCTCAAGC     |
| scaffold731192_14.3 | 1 p2 | (AT)9  | 18 | 385  | 402 AGGAAGCGAGGTAGGCTTTC     |
| scaffold731196_14.5 | 1 p2 | (CA)8  | 16 | 235  | 250 GCCAGATTCTCTTGGTGGAG     |
| scaffold731223_15.1 | 1 p2 | (AT)6  | 12 | 54   | 65 CCTTCTCCATGGGCATCT        |

|                     |      |        |    |      |      |                           |
|---------------------|------|--------|----|------|------|---------------------------|
| scaffold731236_15.6 | 1 p2 | (AG)8  | 16 | 1299 | 1314 | TCGTACGTACTGTGATCCGC      |
| scaffold731260_13.2 | 1 p2 | (TC)8  | 16 | 1979 | 1994 | GGACAAAACGACCAAAAGGA      |
| scaffold731278_15.8 | 1 p2 | (TA)6  | 12 | 1195 | 1206 | TCTCTCACCTCCTCCCATGA      |
| scaffold731299_17.5 | 1 p2 | (TG)9  | 18 | 362  | 379  | ATCCAAGCAACAAAATGGC       |
| scaffold731307_14.4 | 1 p2 | (AT)7  | 14 | 253  | 266  | GCATATGCATGGTTCTCACG      |
| scaffold731352_16.0 | 1 p2 | (CA)8  | 16 | 542  | 557  | TGTTGGTCCACCATTCTTTT      |
| scaffold731383_14.3 | 1 p2 | (TA)7  | 14 | 52   | 65   | GAAATTAGATTAAGAAAAGATGGTC |
| scaffold731391_16.3 | 1 p2 | (AG)8  | 16 | 2519 | 2534 | TGGGGTGAATCAGTTCAACA      |
| scaffold731405_14.1 | 1 p2 | (TA)11 | 22 | 129  | 150  | CGAGTTAGGAAATAAGGAGGTGC   |
| scaffold731434_16.3 | 1 p2 | (AC)8  | 16 | 544  | 559  | GCAGCTCAAAAAGACAGTCCA     |
| scaffold731439_14.2 | 1 p2 | (TA)12 | 24 | 402  | 425  | CACTTTTTGTGAAACCCCTCA     |
| scaffold731450_12.6 | 1 p2 | (AT)9  | 18 | 1165 | 1182 | GGGGATTCTGCAATTTTCT       |
| scaffold731515_15.0 | 1 p2 | (TC)7  | 14 | 316  | 329  | ATTCAAACCGCTAGTGTGGC      |
| scaffold731518_16.0 | 1 p2 | (GA)6  | 12 | 549  | 560  | TCCCCATTAATCCCATCAGA      |
| scaffold731525_15.8 | 1 p2 | (GA)8  | 16 | 1204 | 1219 | CCGGTTTCTTTCCATTTTCA      |
| scaffold731528_17.4 | 1 p2 | (AT)8  | 16 | 147  | 162  | TTCCGTGTGCGTATTCTTGA      |
| scaffold731554_17.3 | 1 p2 | (GA)9  | 18 | 545  | 562  | AAATTATTCAACTTGGATCACTCAT |
| scaffold731567_15.9 | 1 p2 | (TG)9  | 18 | 545  | 562  | ACTTGTCAATGCCGGTAAGC      |
| scaffold731570_16.6 | 1 p2 | (TA)8  | 16 | 916  | 931  | TCACAACGGGGTCAAATGTA      |
| scaffold731618_13.4 | 1 p2 | (CA)7  | 14 | 935  | 948  | ATCAGGCTCGAGTCCATGTC      |
| scaffold731620_10.3 | 1 p2 | (GA)6  | 12 | 552  | 563  | CGGCATGAGATGAGATGAGA      |
| scaffold731632_16.0 | 1 p2 | (AG)8  | 16 | 319  | 334  | AACAGAGCAAGACGAGGCAT      |
| scaffold731664_17.4 | 1 p2 | (AG)6  | 12 | 1411 | 1422 | CTGCTTGAGTTGCTCTGCTG      |
| scaffold731683_15.0 | 1 p2 | (TG)7  | 14 | 68   | 81   | GCCAATCACTAACCAACACG      |
| scaffold731705_16.0 | 1 p2 | (TA)8  | 16 | 1496 | 1511 | TCCGCCCTCGTGTTTTATTA      |
| scaffold731706_15.3 | 1 p2 | (TG)6  | 12 | 469  | 480  | TTCATTCATGGTCGTAGGCA      |
| scaffold731712_17.7 | 1 p2 | (TG)6  | 12 | 2533 | 2544 | CATTGCCATTGCAGAAGCTA      |
| scaffold731717_14.9 | 1 p2 | (AT)9  | 18 | 548  | 565  | TTAAGGTGTCAGAGGCGGTT      |
| scaffold731721_16.2 | 1 p2 | (TG)6  | 12 | 2460 | 2471 | TGTACATGATGCATTTTCCCA     |
| scaffold731735_14.9 | 1 p2 | (CA)6  | 12 | 2317 | 2328 | ACCAACCAGCTTAGCGAAAA      |
| scaffold731752_16.9 | 1 p2 | (AG)7  | 14 | 1630 | 1643 | CAAACCCAATATCACAGCCC      |
| scaffold731757_15.0 | 1 p2 | (TC)8  | 16 | 1864 | 1879 | AAAAAGTCCCCAGCCAATCT      |
| scaffold731767_16.4 | 1 p2 | (TA)6  | 12 | 445  | 456  | CCACTAACCTTGTCTCCCCC      |
| scaffold731805_17.1 | 1 p2 | (AG)6  | 12 | 847  | 858  | GGTGTGCTCGGATCTTGATT      |
| scaffold731809_17.0 | 1 p2 | (TA)6  | 12 | 557  | 568  | AAGATTCTCTCTTGATAGTTGTCCA |
| scaffold731830_12.5 | 1 p2 | (CT)6  | 12 | 753  | 764  | GCCCTAGGGTTCCTGATTTT      |
| scaffold731831_20.0 | 1 p2 | (GA)6  | 12 | 1298 | 1309 | CGCAATGATAGACCACAACG      |
| scaffold731834_15.2 | 1 p2 | (CT)7  | 14 | 127  | 140  | AATCCCCCACCCTTTCTCT       |
| scaffold731879_16.9 | 1 p2 | (TC)11 | 22 | 5994 | 6015 | AGTGCATTGACATCGAGACG      |
| scaffold731896_15.7 | 1 p2 | (AT)6  | 12 | 1370 | 1381 | AATCGTGAAATCAAACCAGAA     |
| scaffold731906_11.4 | 1 p2 | (TA)8  | 16 | 555  | 570  | CCACCCGTTTACCTTTTTTCA     |
| scaffold731933_16.6 | 1 p2 | (TG)7  | 14 | 2089 | 2102 | AGAAGCTTGTTGTCCGCTGT      |
| scaffold731939_13.1 | 1 p2 | (AT)9  | 18 | 201  | 218  | GAATTGTTCTGCTCGTGGT       |
| scaffold731949_15.2 | 1 p2 | (AC)7  | 14 | 152  | 165  | CACTGGATCTGCCGATGTTA      |
| scaffold731954_14.2 | 1 p2 | (AC)8  | 16 | 295  | 310  | CCATATGATGCTGATGCGAT      |
| scaffold731998_14.0 | 1 p2 | (AT)8  | 16 | 704  | 719  | AGTCACGTCTATTCATCATTGACA  |
| scaffold732005_16.6 | 1 p2 | (AG)6  | 12 | 1075 | 1086 | TCTCACAATCCACACCCAA       |
| scaffold732031_16.7 | 1 p2 | (TA)13 | 26 | 92   | 117  | TTTAAGATGTGCATGCATTTGA    |
| scaffold732039_14.5 | 1 p2 | (CA)7  | 14 | 3809 | 3822 | CGCAAACGATGGCAATAAT       |
| scaffold732054_14.0 | 1 p2 | (TA)6  | 12 | 749  | 760  | ATTTTGCACCGCCATATCAT      |
| scaffold732066_16.1 | 1 p2 | (CT)6  | 12 | 185  | 196  | AACGCGAAGTAGCATGGTTT      |
| scaffold732086_14.6 | 1 p2 | (CT)7  | 14 | 250  | 263  | ACGACGCAAAAATGGAAAAC      |
| scaffold732089_14.4 | 1 p2 | (GT)6  | 12 | 627  | 638  | ATGCCACCACTTCCCTGATA      |
| scaffold732130_13.2 | 1 p2 | (AT)10 | 20 | 2229 | 2248 | CCAGATGTGAGGAGCAAACA      |
| scaffold732131_15.2 | 1 p2 | (TA)6  | 12 | 309  | 320  | TTCTAACGGCCCAGATTTTG      |
| scaffold732154_13.0 | 1 p2 | (TA)11 | 22 | 185  | 206  | CAAAAATCTAACGGGCCAAA      |
| scaffold732173_16.8 | 1 p2 | (AT)9  | 18 | 399  | 416  | CCACGCTTCATTATCAACCA      |
| scaffold732187_13.5 | 1 p2 | (AT)13 | 26 | 753  | 778  | TGCTCTCAATTAATACACCCG     |



|                     |      |        |    |      |      |                            |
|---------------------|------|--------|----|------|------|----------------------------|
| scaffold732233_14.7 | 1 p2 | (AG)9  | 18 | 561  | 578  | GCCAGCAGTAAAGAGGGTGT       |
| scaffold732238_13.7 | 1 p2 | (TA)9  | 18 | 657  | 674  | AGATCAACGGATGGTATCGG       |
| scaffold732257_15.2 | 1 p2 | (AC)7  | 14 | 1162 | 1175 | TGCCATTATGGTGCATTGTT       |
| scaffold732273_14.6 | 1 p2 | (TC)6  | 12 | 1440 | 1451 | TCCACTCTCTTGCGCTTTTT       |
| scaffold732279_16.2 | 1 p2 | (TA)8  | 16 | 2394 | 2409 | CAAGATGATGAGGGCCAAAT       |
| scaffold732288_16.4 | 1 p2 | (TC)7  | 14 | 664  | 677  | GGAGACCAATTCTTGGCTGA       |
| scaffold732298_16.8 | 1 p2 | (AT)7  | 14 | 2647 | 2660 | CAATAAATTGGGGTCGGCTA       |
| scaffold732299_12.6 | 1 p2 | (TA)7  | 14 | 50   | 63   | TGTTATTACTGGAACGCGA        |
| scaffold732309_16.2 | 1 p2 | (CT)8  | 16 | 454  | 469  | CGGCCTATCGTCTTCCTACC       |
| scaffold732346_16.0 | 1 p2 | (TC)7  | 14 | 5937 | 5950 | TGCAATGCTAATGGCAACTC       |
| scaffold732348_14.8 | 1 p2 | (GA)8  | 16 | 566  | 581  | TGCAACCACCACTGGAGATA       |
| scaffold732355_14.6 | 1 p2 | (TA)6  | 12 | 570  | 581  | GCAAAAGTGCCTACTTCACCA      |
| scaffold732357_14.9 | 1 p2 | (AT)6  | 12 | 744  | 755  | AAACCAACTATCTCGGTGCG       |
| scaffold732360_13.5 | 1 p2 | (TC)7  | 14 | 1008 | 1021 | GACCTGGTGTCCCATCTCTC       |
| scaffold732372_14.0 | 1 p2 | (CT)6  | 12 | 608  | 619  | GCAATCTATCCCATAACAAGGC     |
| scaffold732380_15.5 | 1 p2 | (TC)6  | 12 | 198  | 209  | TCTTCTCTCAGGTGGGGGAT       |
| scaffold732386_16.9 | 1 p2 | (TC)7  | 14 | 569  | 582  | TGCATCAAGAGAACAACACTACATCA |
| scaffold732408_13.5 | 1 p2 | (AT)7  | 14 | 1297 | 1310 | TCCGGATCATTGACATTTGTT      |
| scaffold732420_15.2 | 1 p2 | (TA)10 | 20 | 989  | 1008 | ATCTGTCTCCTGCCCATGAC       |
| scaffold732423_17.9 | 1 p2 | (TA)6  | 12 | 783  | 794  | ACAGTGGCTAAAATGCACCG       |
| scaffold732452_16.2 | 1 p2 | (AC)9  | 18 | 2435 | 2452 | GGGCTTTGTTGCTGGAGTAT       |
| scaffold732460_14.2 | 1 p2 | (CA)7  | 14 | 572  | 585  | CCTGCATCACAAAAGCAAAA       |
| scaffold732478_16.5 | 1 p2 | (TG)11 | 22 | 49   | 70   | TTTCTTGACTGTGGATTTCCAAT    |
| scaffold732503_13.2 | 1 p2 | (CT)8  | 16 | 637  | 652  | TGTTGGTTTGTGAGGTCAGC       |
| scaffold732512_18.6 | 1 p2 | (AG)8  | 16 | 1274 | 1289 | CGTTGTCTCCGCTACTGTTG       |
| scaffold732521_17.2 | 1 p2 | (TA)6  | 12 | 5132 | 5143 | ATCGGATTCTGGGGGATAAC       |
| scaffold732547_15.4 | 1 p2 | (AG)7  | 14 | 1831 | 1844 | GCATGCAAAGTTGCAAACAA       |
| scaffold732557_15.4 | 1 p2 | (TA)9  | 18 | 938  | 955  | GCAGCAACACCAAAACTCAA       |
| scaffold732558_13.2 | 1 p2 | (GA)6  | 12 | 679  | 690  | TGAAGGCACAGAGCATCATC       |
| scaffold732576_15.4 | 1 p2 | (GA)6  | 12 | 147  | 158  | GGTAGAGGAGCTGATGTGGC       |
| scaffold732594_14.4 | 1 p2 | (TA)7  | 14 | 628  | 641  | CATATGGTGTGAGTTTGGG        |
| scaffold732613_17.4 | 1 p2 | (TA)7  | 14 | 651  | 664  | ACATCAGTTGTAGCTGGGGG       |
| scaffold732627_14.5 | 1 p2 | (AT)6  | 12 | 535  | 546  | ACATGCCCTAAAACCGATG        |
| scaffold732630_14.0 | 1 p2 | (CT)6  | 12 | 381  | 392  | AGACCAAACCTCAAGCATGG       |
| scaffold732637_15.3 | 1 p2 | (TG)6  | 12 | 1250 | 1261 | TTGAGCCCCTTTTATGGAAA       |
| scaffold732645_15.8 | 1 p2 | (TA)6  | 12 | 1617 | 1628 | TCCAACAGCTCAAACAGCAT       |
| scaffold732661_15.6 | 1 p2 | (GA)6  | 12 | 755  | 766  | GGTGGAAGTATTGGGAGAA        |
| scaffold732695_16.2 | 1 p2 | (AG)6  | 12 | 579  | 590  | TGCCTTGTGTGTCACGAGTT       |
| scaffold732738_19.3 | 1 p2 | (AG)6  | 12 | 581  | 592  | TCCCTTCTTACATATGGCCC       |
| scaffold732748_16.0 | 1 p2 | (AC)8  | 16 | 577  | 592  | CTGAGTACCCCGTCTTCCAA       |
| scaffold732749_15.2 | 1 p2 | (AG)7  | 14 | 2771 | 2784 | CCATTATGTGTGCGAGTGGT       |
| scaffold732754_15.5 | 1 p2 | (CT)9  | 18 | 568  | 585  | AAAACCACGTCGTTCTTGCT       |
| scaffold732764_15.9 | 1 p2 | (AC)7  | 14 | 1066 | 1079 | CCAATGTATCATCCCTCGCT       |
| scaffold732767_12.0 | 1 p2 | (TA)7  | 14 | 1690 | 1703 | CTGCTCCTCTCATGGTCAAT       |
| scaffold732782_16.4 | 1 p2 | (GT)6  | 12 | 247  | 258  | AAAATCCAATTCGAATCCCC       |
| scaffold732792_18.0 | 1 p2 | (TC)6  | 12 | 2321 | 2332 | TTGATTCCATGAACACCCTTT      |
| scaffold732810_13.8 | 1 p2 | (TC)8  | 16 | 119  | 134  | CAGGGGATCTCAAGCCTGTA       |
| scaffold732833_12.7 | 1 p2 | (CT)7  | 14 | 565  | 578  | CCCGACTCCAAAATGAAGAA       |
| scaffold732856_12.0 | 1 p2 | (AG)7  | 14 | 381  | 394  | CAGCTGAACCAACCATCCTT       |
| scaffold732859_13.4 | 1 p2 | (TA)8  | 16 | 349  | 364  | CCACCATGATTTGACACAC        |
| scaffold732862_15.8 | 1 p2 | (CT)7  | 14 | 254  | 267  | GCGAGCAGACCAGAAGTCA        |
| scaffold732869_15.7 | 1 p2 | (AT)10 | 20 | 599  | 618  | GGAAGGGAAGAATCCTCGAA       |
| scaffold732903_11.4 | 1 p2 | (AT)7  | 14 | 903  | 916  | TCGTGAGAAATTAATGGAACAAAA   |
| scaffold732909_15.0 | 1 p2 | (TA)8  | 16 | 1474 | 1489 | CACTTGCTTGGA AAAAGGGA      |
| scaffold732928_15.7 | 1 p2 | (CT)6  | 12 | 586  | 597  | TTCGGGAAAATGAACTCACC       |
| scaffold732938_14.3 | 1 p2 | (TC)6  | 12 | 2551 | 2562 | GCCAGTTCTTTTTCATGGGA       |
| scaffold732954_15.3 | 1 p2 | (CT)6  | 12 | 918  | 929  | GATCAAACACGCATCACCAC       |
| scaffold732962_14.0 | 1 p2 | (GA)7  | 14 | 1415 | 1428 | ACAACACGGAACCACTAGGC       |

|                     |      |        |    |      |      |                            |
|---------------------|------|--------|----|------|------|----------------------------|
| scaffold732966_15.2 | 1 p2 | (CA)8  | 16 | 90   | 105  | GCCGGACTTTGATTGAGTTC       |
| scaffold732975_15.8 | 1 p2 | (AG)8  | 16 | 1312 | 1327 | ACCTGATCACTTGTCCGAGG       |
| scaffold733003_17.3 | 1 p2 | (AT)7  | 14 | 2227 | 2240 | AGTGAACCATGGGTCCGTTA       |
| scaffold733011_15.9 | 1 p2 | (AG)6  | 12 | 1344 | 1355 | TTCAGCAACAGCTTGACCAC       |
| scaffold733020_13.2 | 1 p2 | (GA)8  | 16 | 2452 | 2467 | TCTCCGATAGGCAAAACGAC       |
| scaffold733058_12.6 | 1 p2 | (AT)11 | 22 | 79   | 100  | GAAAAACCGAAAACCGAACA       |
| scaffold733065_10.2 | 1 p2 | (AT)9  | 18 | 1179 | 1196 | AGAGCAACACATGCCAACAT       |
| scaffold733087_14.4 | 1 p2 | (TA)6  | 12 | 53   | 64   | TCATTTGTTAGAGGTTTTGACCA    |
| scaffold733098_14.6 | 1 p2 | (TA)10 | 20 | 565  | 584  | ACATCGGCTCAAACCTCCAAA      |
| scaffold733100_12.5 | 1 p2 | (TA)9  | 18 | 233  | 250  | CATGAGCCATTATGTGCTGG       |
| scaffold733128_14.8 | 1 p2 | (TA)11 | 22 | 41   | 62   | TTTGATGATATATAGGTGTTTTGACC |
| scaffold733148_14.7 | 1 p2 | (TA)6  | 12 | 259  | 270  | TTGGGGTATGGGAATAGCTT       |
| scaffold733172_15.9 | 1 p2 | (AG)9  | 18 | 6201 | 6218 | GTCACCTGTCACCAGAGCAA       |
| scaffold733187_15.2 | 1 p2 | (TG)11 | 22 | 583  | 604  | GAAAGCCCCCTTTTCTCAAC       |
| scaffold733216_18.4 | 1 p2 | (AT)7  | 14 | 2493 | 2506 | TTGCACAGTACATGCGTTCA       |
| scaffold733238_15.0 | 1 p2 | (AT)9  | 18 | 2470 | 2487 | CGGACAAACACGACAACATC       |
| scaffold733247_16.8 | 1 p2 | (AT)6  | 12 | 595  | 606  | GATTCTGCTGAGGGTCGTTT       |
| scaffold733264_16.8 | 1 p2 | (TC)6  | 12 | 222  | 233  | TACTGCTCCATCTTCAACCG       |
| scaffold733267_14.6 | 1 p2 | (GT)6  | 12 | 54   | 65   | CAAGAGTAGAGAAAATCCTCCCA    |
| scaffold733276_14.4 | 1 p2 | (CT)13 | 26 | 270  | 295  | GGAGTGGAGTGTGAGTGGGT       |
| scaffold733302_13.6 | 1 p2 | (CT)6  | 12 | 2219 | 2230 | CAACTGACCAACAACAGCCA       |
| scaffold733306_14.6 | 1 p2 | (GA)8  | 16 | 186  | 201  | TTTCTCTCCTCTCGCTGC         |
| scaffold733348_16.0 | 1 p2 | (CT)6  | 12 | 206  | 217  | ATCTCGGCCTAGCTGGATTT       |
| scaffold733360_11.3 | 1 p2 | (TA)11 | 22 | 292  | 313  | TAGACCCAGGCTTCGAGGTA       |
| scaffold733374_12.6 | 1 p2 | (CT)6  | 12 | 598  | 609  | ATTCCATCACCCAACCTCTCG      |
| scaffold733396_12.8 | 1 p2 | (TA)11 | 22 | 1967 | 1988 | AGCAACCATGCAATTAAGGG       |
| scaffold733402_14.5 | 1 p2 | (GA)8  | 16 | 1668 | 1683 | TCATCAACGAAGAAACGCTG       |
| scaffold733450_17.0 | 1 p2 | (AG)7  | 14 | 1959 | 1972 | GATGCCCTCCACATCAGATT       |
| scaffold733457_16.8 | 1 p2 | (AT)6  | 12 | 741  | 752  | GTAGTTTACCTGGCTGGCGT       |
| scaffold733479_12.0 | 1 p2 | (AT)10 | 20 | 1172 | 1191 | TGTGAAGGCCTACGAACTGA       |
| scaffold733507_14.9 | 1 p2 | (TA)8  | 16 | 201  | 216  | ATCTTGACCGCTGATTTTGG       |
| scaffold733509_16.7 | 1 p2 | (TG)6  | 12 | 9357 | 9368 | TTCGAGGGGATTAATGATGG       |
| scaffold733510_16.7 | 1 p2 | (AT)6  | 12 | 1895 | 1906 | ATTGGCAATTTTTGAAACGC       |
| scaffold733540_11.3 | 1 p2 | (AT)11 | 22 | 1131 | 1152 | GAAGCAACCTTCTCTGCAT        |
| scaffold733556_17.0 | 1 p2 | (AT)6  | 12 | 2655 | 2666 | TTCCATCCCTCTCCAATGAG       |
| scaffold733573_18.4 | 1 p2 | (TA)6  | 12 | 603  | 614  | AGCAATGAGCAACATTCAGC       |
| scaffold733575_17.0 | 1 p2 | (CT)6  | 12 | 34   | 45   | TTTTAATTCACGCACAATTACATTT  |
| scaffold733588_12.4 | 1 p2 | (AT)11 | 22 | 429  | 450  | TGTTGAATGTTGTGCCTCGT       |
| scaffold733595_16.5 | 1 p2 | (AG)8  | 16 | 203  | 218  | TACAAGCACACAACACGCA        |
| scaffold733610_16.3 | 1 p2 | (CA)6  | 12 | 2608 | 2619 | TCAAACACTGCGCTTCAGTC       |
| scaffold733613_16.4 | 1 p2 | (GA)6  | 12 | 815  | 826  | GGTTGCACCTCTGTTTTCGT       |
| scaffold733617_13.7 | 1 p2 | (AT)7  | 14 | 254  | 267  | CCAACACTGTTGGTGGTTTT       |
| scaffold733647_16.5 | 1 p2 | (AG)6  | 12 | 384  | 395  | CCATCTGGCATTAGTTGCCT       |
| scaffold733669_16.6 | 1 p2 | (AG)6  | 12 | 484  | 495  | TGTTGCAAAATGCTGGTGAT       |
| scaffold733671_17.6 | 1 p2 | (TC)10 | 20 | 149  | 168  | TGTGTTGGTCTGAGAGGCTG       |
| scaffold733674_12.2 | 1 p2 | (TC)8  | 16 | 971  | 986  | AGGTTTTTCAAGGAGTGCCC       |
| scaffold733679_15.4 | 1 p2 | (TC)8  | 16 | 1324 | 1339 | GAGGACAGGAATGTTTCTGGA      |
| scaffold733719_14.7 | 1 p2 | (CT)6  | 12 | 607  | 618  | TAAAGAATGCCCACTCCCAG       |
| scaffold733745_18.2 | 1 p2 | (TC)7  | 14 | 607  | 620  | AGCAGAAGGCACCGAACTTA       |
| scaffold733751_14.2 | 1 p2 | (TC)7  | 14 | 5101 | 5114 | CATGTCTCCCCTACTTGCGT       |
| scaffold733770_15.2 | 1 p2 | (AT)8  | 16 | 1226 | 1241 | TGAAAAGGCCATTCGAGACT       |
| scaffold733778_17.0 | 1 p2 | (GA)10 | 20 | 2343 | 2362 | GCTGACGAAAGGAGTGGAAC       |
| scaffold733802_14.4 | 1 p2 | (GA)9  | 18 | 1493 | 1510 | ATGGCTTACCAACCTTTTG        |
| scaffold733820_16.2 | 1 p2 | (AT)8  | 16 | 66   | 81   | CGGCTTGGATTATTTCTATTTT     |
| scaffold733843_14.2 | 1 p2 | (TA)8  | 16 | 52   | 67   | TTAGTTAGTACCGATTTTCAAGGTT  |
| scaffold733849_15.8 | 1 p2 | (CT)6  | 12 | 45   | 56   | CCGAAAATACAGGCGCATA        |
| scaffold733858_15.0 | 1 p2 | (TG)6  | 12 | 951  | 962  | GGTTTCCTTAACTCTGCGAAA      |
| scaffold733864_11.7 | 1 p2 | (AT)9  | 18 | 70   | 87   | CAAAAACAACCTCAATATGGATCTC  |

|                     |      |        |    |      |      |                            |
|---------------------|------|--------|----|------|------|----------------------------|
| scaffold733882_15.4 | 1 p2 | (TC)6  | 12 | 1828 | 1839 | TGGCTTCTGCACTTTCCTTT       |
| scaffold733884_17.7 | 1 p2 | (AG)6  | 12 | 80   | 91   | CCAATTTTCTCTTCGGGCTA       |
| scaffold733888_16.7 | 1 p2 | (CT)6  | 12 | 133  | 144  | ACCCCGTGATTGTACGAAAA       |
| scaffold733893_11.9 | 1 p2 | (TC)7  | 14 | 610  | 623  | GGCCAAATTGCAAGTTCATT       |
| scaffold733896_13.7 | 1 p2 | (TC)12 | 24 | 900  | 923  | TCATTTTCGCCCCGATACTTC      |
| scaffold733907_16.2 | 1 p2 | (AG)6  | 12 | 1206 | 1217 | TCTGATAGGATTGGCTCGGT       |
| scaffold733910_17.8 | 1 p2 | (CT)10 | 20 | 606  | 625  | GAAGTTCTGCAACGGAAAG        |
| scaffold733913_17.3 | 1 p2 | (CT)6  | 12 | 1794 | 1805 | AGCACGTGTTGAGGCTTCTT       |
| scaffold733920_16.9 | 1 p2 | (AC)7  | 14 | 1673 | 1686 | ACTGTGGATGGAGTTCGGTC       |
| scaffold733958_15.0 | 1 p2 | (AG)6  | 12 | 1549 | 1560 | AAATTGAGAGGCTCCAACGA       |
| scaffold733976_14.8 | 1 p2 | (AT)6  | 12 | 323  | 334  | CCATGCACGTAAGCATGTTC       |
| scaffold733977_14.9 | 1 p2 | (CT)10 | 20 | 2187 | 2206 | TATTAGGCCACCCCTAACC        |
| scaffold733986_14.8 | 1 p2 | (TC)6  | 12 | 8369 | 8380 | GCTTGCTCTTGCAACCTCTT       |
| scaffold734001_14.3 | 1 p2 | (AG)9  | 18 | 876  | 893  | CCCAACAAACCCTTTCTCAA       |
| scaffold734012_13.8 | 1 p2 | (CT)7  | 14 | 1745 | 1758 | AGTACGGCAGTGGTAGGTGG       |
| scaffold734024_17.7 | 1 p2 | (GA)6  | 12 | 1305 | 1316 | AGATGCATAGGTGTCTGCC        |
| scaffold734026_19.9 | 1 p2 | (AG)6  | 12 | 2732 | 2743 | CTCCATTCCATTCCACACC        |
| scaffold734054_14.4 | 1 p2 | (TA)8  | 16 | 1020 | 1035 | CCCAAAAATGGTTTCACACA       |
| scaffold734072_15.8 | 1 p2 | (TA)7  | 14 | 377  | 390  | ATCCGACCTAATGAAAGCGA       |
| scaffold734086_12.2 | 1 p2 | (GA)8  | 16 | 344  | 359  | GTGAGGTGGGCAGAGTCAGT       |
| scaffold734094_16.1 | 1 p2 | (AG)6  | 12 | 4040 | 4051 | TCCAACCAACATCAAATGGA       |
| scaffold734103_16.2 | 1 p2 | (AG)9  | 18 | 440  | 457  | CAAATGGGAATCCATGAAGG       |
| scaffold734105_16.9 | 1 p2 | (AG)8  | 16 | 836  | 851  | CCGACAATAAGAAGAGAGGCA      |
| scaffold734148_14.9 | 1 p2 | (TA)11 | 22 | 166  | 187  | AGCCACTGAACCAAGTGACC       |
| scaffold734151_16.0 | 1 p2 | (TA)7  | 14 | 620  | 633  | ACAATGATATTCGCGAAGGC       |
| scaffold734170_15.1 | 1 p2 | (CT)6  | 12 | 623  | 634  | TGGCCTCTAATCAGTTTCGCT      |
| scaffold734173_15.9 | 1 p2 | (GA)11 | 22 | 3527 | 3548 | TCCAAAAGAGGATCCCAGA        |
| scaffold734193_16.2 | 1 p2 | (TA)6  | 12 | 667  | 678  | GGGTTTCTTACCCGAGCTTC       |
| scaffold734200_14.6 | 1 p2 | (GA)6  | 12 | 1650 | 1661 | ATTCAAAAGCTGGGATGGTG       |
| scaffold734202_12.4 | 1 p2 | (AG)6  | 12 | 958  | 969  | GAGATTTAGTGCGGAAAGG        |
| scaffold734203_13.3 | 1 p2 | (GA)6  | 12 | 3018 | 3029 | TGGAAAAGGCATATTGTGGG       |
| scaffold734208_13.6 | 1 p2 | (GA)7  | 14 | 248  | 261  | ATGGGAAGATGTGATGAGGG       |
| scaffold734228_15.4 | 1 p2 | (TC)6  | 12 | 1184 | 1195 | GCACCACCCTACCCTTCTTT       |
| scaffold734235_16.1 | 1 p2 | (TC)8  | 16 | 2817 | 2832 | GACAAGCAAAGGGTTGGTGT       |
| scaffold734240_13.9 | 1 p2 | (AC)6  | 12 | 283  | 294  | TTGTCAACCAACACCTGCAT       |
| scaffold734253_17.7 | 1 p2 | (AC)6  | 12 | 1160 | 1171 | CCAATGTGCCCAGAGAAGTT       |
| scaffold734269_12.0 | 1 p2 | (AG)7  | 14 | 425  | 438  | TTTCTCGCATTGGTCAATCA       |
| scaffold734309_14.3 | 1 p2 | (AT)12 | 24 | 116  | 139  | GGTGCTGTGTGATGATGGAG       |
| scaffold734349_12.6 | 1 p2 | (TA)6  | 12 | 446  | 457  | GCTCGCTTTCATTTACACA        |
| scaffold734350_16.6 | 1 p2 | (TG)7  | 14 | 1316 | 1329 | CTCTTTTGTTCATGCC           |
| scaffold734352_15.9 | 1 p2 | (GA)6  | 12 | 1114 | 1125 | TTGTGTGAAGCGGAGAGATG       |
| scaffold734354_16.1 | 1 p2 | (AC)8  | 16 | 1286 | 1301 | GAGCTCTTCAGTGGCGAAAC       |
| scaffold734356_14.0 | 1 p2 | (TA)7  | 14 | 1492 | 1505 | TGTTAAACGGACTGGCCAAC       |
| scaffold734360_17.4 | 1 p2 | (GA)7  | 14 | 865  | 878  | CGTGTAAGAATCGCCTTCCTC      |
| scaffold734380_15.0 | 1 p2 | (AT)6  | 12 | 2005 | 2016 | TTTGGGTTGGAGATGGTTTT       |
| scaffold734392_14.8 | 1 p2 | (AT)8  | 16 | 520  | 535  | CAAACGAAAAATTATCAACTGTAGGA |
| scaffold734402_15.7 | 1 p2 | (AT)6  | 12 | 4939 | 4950 | ACCAAGTTGAGGGCATTGAA       |
| scaffold734463_14.8 | 1 p2 | (CT)8  | 16 | 2282 | 2297 | TGACCGGATCTCTCACTCCT       |
| scaffold734469_14.7 | 1 p2 | (CT)6  | 12 | 3323 | 3334 | ACAAAACCATCAGCCACCTC       |
| scaffold734481_14.3 | 1 p2 | (AT)6  | 12 | 1328 | 1339 | GGGGACTTTTTAACCAACCAA      |
| scaffold734484_17.1 | 1 p2 | (AC)9  | 18 | 29   | 46   | TGTGAGTGTGTGTGCAATGA       |
| scaffold734507_16.6 | 1 p2 | (AG)7  | 14 | 631  | 644  | AGGGAATATCAGGGGAATGG       |
| scaffold734517_16.3 | 1 p2 | (AG)12 | 24 | 617  | 640  | TTGAATCGAACTGGAGGAGG       |
| scaffold734524_15.8 | 1 p2 | (AG)7  | 14 | 402  | 415  | GGAATCCAAGGCTACACGA        |
| scaffold734541_14.0 | 1 p2 | (AT)6  | 12 | 2147 | 2158 | ACAGGATAACGGATGCCTTG       |
| scaffold734571_14.9 | 1 p2 | (CT)6  | 12 | 1945 | 1956 | GGGGTGGTCTCATTCTAAA        |
| scaffold734592_16.9 | 1 p2 | (TA)8  | 16 | 1527 | 1542 | TCGCGTGTCACTTAGACCA        |
| scaffold734597_15.3 | 1 p2 | (TA)9  | 18 | 630  | 647  | GGCCTTCAAGCAAAATCAA        |

|                     |      |        |    |      |      |                              |
|---------------------|------|--------|----|------|------|------------------------------|
| scaffold734629_15.5 | 1 p2 | (AG)7  | 14 | 5793 | 5806 | GTCATCGAGCCTAATCGAGC         |
| scaffold734634_15.5 | 1 p2 | (GA)11 | 22 | 55   | 76   | GCGATTTTAAACAAAACGGG         |
| scaffold734642_16.8 | 1 p2 | (CT)6  | 12 | 1126 | 1137 | CATTTTCCCAAACCCACAAC         |
| scaffold734646_15.5 | 1 p2 | (CT)7  | 14 | 468  | 481  | GGTGACAAAGTGGCATGTTTG        |
| scaffold734648_15.5 | 1 p2 | (GT)9  | 18 | 631  | 648  | CATTCAAAAGCTTGCTTCCC         |
| scaffold734651_16.5 | 1 p2 | (GA)9  | 18 | 576  | 593  | TCCCCACGGTCTAATGTAGC         |
| scaffold734656_13.6 | 1 p2 | (GT)7  | 14 | 633  | 646  | CGCATTTGTCTCTCACCTCA         |
| scaffold734657_15.6 | 1 p2 | (CT)9  | 18 | 632  | 649  | AGACTGCACCTGCGGTAACT         |
| scaffold734677_16.2 | 1 p2 | (TG)7  | 14 | 1785 | 1798 | CCTGGTGTCCACTGTGTTTG         |
| scaffold734684_17.4 | 1 p2 | (GA)6  | 12 | 569  | 580  | CGGTTGATATTTGTTGGGG          |
| scaffold734695_14.7 | 1 p2 | (CT)11 | 22 | 1060 | 1081 | TGATGTGGAGCTTCTTCACG         |
| scaffold734734_16.5 | 1 p2 | (CT)12 | 24 | 1965 | 1988 | CAAGGTCTGACGAAGTCGC          |
| scaffold734745_16.4 | 1 p2 | (AC)7  | 14 | 1923 | 1936 | CAGCCCTTGCTCTTTTAGA          |
| scaffold734760_16.5 | 1 p2 | (AG)8  | 16 | 868  | 883  | TTGCACTCTCCTTTGTGTGG         |
| scaffold734771_15.0 | 1 p2 | (TA)6  | 12 | 2903 | 2914 | TTTGCAGTCATACTCCTCGG         |
| scaffold734813_14.0 | 1 p2 | (AT)6  | 12 | 341  | 352  | CCAAGCAAACACTACAAACCCA       |
| scaffold734817_15.5 | 1 p2 | (TA)9  | 18 | 88   | 105  | TCTTCCAACGTCAAAGTTGCT        |
| scaffold734834_17.2 | 1 p2 | (TA)7  | 14 | 985  | 998  | TTGTCTATGCCGGTTTTTGA         |
| scaffold734870_14.5 | 1 p2 | (GA)6  | 12 | 670  | 681  | AATTTCCGTTACATGGCAGC         |
| scaffold734895_15.0 | 1 p2 | (AT)9  | 18 | 50   | 67   | TTGTTAGAGGTCTTGACGGGA        |
| scaffold734911_13.0 | 1 p2 | (TA)10 | 20 | 439  | 458  | TTTGGGGAGGAGAAAAGAGAA        |
| scaffold734917_15.7 | 1 p2 | (TA)7  | 14 | 49   | 62   | CTTATCCAACACTCAATTTATATGATCG |
| scaffold734921_11.2 | 1 p2 | (CA)6  | 12 | 1076 | 1087 | ATGCGATGTGTGGTCGAATA         |
| scaffold734937_14.9 | 1 p2 | (AT)7  | 14 | 70   | 83   | GGGTTATCACCTGATTACTACCCT     |
| scaffold734940_16.5 | 1 p2 | (AT)10 | 20 | 1243 | 1262 | TCGTGCGATGTATGATGTGT         |
| scaffold734951_15.6 | 1 p2 | (CT)7  | 14 | 647  | 660  | GGGAGGAAGATGCAACTCAG         |
| scaffold735003_14.4 | 1 p2 | (GA)8  | 16 | 2237 | 2252 | AAAGGCCACGTGTTAATTGC         |
| scaffold735037_15.6 | 1 p2 | (TG)7  | 14 | 927  | 940  | TTTCCTTTATGATCCCCTGC         |
| scaffold735043_15.5 | 1 p2 | (GA)6  | 12 | 349  | 360  | TTGCTAGGGTTTTCGTTTTCG        |
| scaffold735067_15.5 | 1 p2 | (AC)9  | 18 | 647  | 664  | ATGCATTGCGACCATTATCA         |
| scaffold735091_15.6 | 1 p2 | (AG)7  | 14 | 652  | 665  | ACTAGGTTGTTGTGGCGGAG         |
| scaffold735092_15.7 | 1 p2 | (AG)7  | 14 | 2309 | 2322 | TCATATATGTTTCTGGCGGC         |
| scaffold735150_16.8 | 1 p2 | (AT)7  | 14 | 2192 | 2205 | TCGATCGGGAGTCAGAAATC         |
| scaffold735156_14.2 | 1 p2 | (AT)6  | 12 | 246  | 257  | GATCGGTTGGGAAAAGTCA          |
| scaffold735168_15.6 | 1 p2 | (CT)7  | 14 | 105  | 118  | ATGTGGCTTGCTTGCTTCTT         |
| scaffold735178_18.2 | 1 p2 | (CT)6  | 12 | 367  | 378  | CTACATCCCATCATCACCCC         |
| scaffold735190_13.0 | 1 p2 | (AT)8  | 16 | 591  | 606  | TTTGATTTTTAATGGGGCAAA        |
| scaffold735196_14.6 | 1 p2 | (CT)11 | 22 | 1937 | 1958 | GCTCAATCCTTGGACCTTGC         |
| scaffold735207_16.5 | 1 p2 | (AC)6  | 12 | 1261 | 1272 | GGACTCTGCAGCATGTTCAA         |
| scaffold735212_17.2 | 1 p2 | (AT)6  | 12 | 661  | 672  | GCTCATGATTTGGCCAGTTT         |
| scaffold735235_17.5 | 1 p2 | (TC)7  | 14 | 1109 | 1122 | AATTTGTGTTGGCTTCAGGG         |
| scaffold735254_14.9 | 1 p2 | (AG)8  | 16 | 1656 | 1671 | GCGATCATTCTCGTGAAGAAA        |
| scaffold735260_16.4 | 1 p2 | (TC)8  | 16 | 432  | 447  | GCTTGTACCCGTAGCGTGTT         |
| scaffold735276_14.2 | 1 p2 | (GA)6  | 12 | 1242 | 1253 | AGTAGAGGGCGAGAACGACA         |
| scaffold735290_15.0 | 1 p2 | (TC)6  | 12 | 1222 | 1233 | ATCTCCACGCTCACACTCT          |
| scaffold735292_15.5 | 1 p2 | (TA)7  | 14 | 568  | 581  | TCCCCACCATGACTTCAACA         |
| scaffold735313_16.2 | 1 p2 | (GA)9  | 18 | 384  | 401  | CCCCCAAATCTACAAAAGGG         |
| scaffold735314_16.5 | 1 p2 | (TC)6  | 12 | 632  | 643  | CAATCGAGCAATCTGTAAGGTG       |
| scaffold735318_14.7 | 1 p2 | (GA)6  | 12 | 961  | 972  | ATTCGTAACGTAACACGGGC         |
| scaffold735320_13.4 | 1 p2 | (TA)9  | 18 | 1530 | 1547 | ACCCACCCTTCTTTTTGCTT         |
| scaffold735345_15.4 | 1 p2 | (AT)6  | 12 | 259  | 270  | CTTCAACGGAGGGGAAGATT         |
| scaffold735377_15.4 | 1 p2 | (CT)8  | 16 | 1294 | 1309 | GTGTGGTCTGCAAAGTGTGG         |
| scaffold735386_10.0 | 1 p2 | (AT)6  | 12 | 352  | 363  | AATCGCTGAACTGTTTTCCG         |
| scaffold735395_15.2 | 1 p2 | (TA)9  | 18 | 1234 | 1251 | CACACCTACTTTAATGACGCACA      |
| scaffold735398_17.8 | 1 p2 | (TG)6  | 12 | 2186 | 2197 | GGCCAACATGATTAGCATCC         |
| scaffold735404_14.2 | 1 p2 | (TG)6  | 12 | 1613 | 1624 | CTTGTCAGCGCTTAATGA           |
| scaffold735409_15.0 | 1 p2 | (TC)6  | 12 | 667  | 678  | GATGCTGGAAATTCTGGGAA         |
| scaffold735420_16.2 | 1 p2 | (AG)6  | 12 | 5753 | 5764 | AAATTTAACGGGACACCACG         |

|                     |      |        |    |      |                               |
|---------------------|------|--------|----|------|-------------------------------|
| scaffold735428_15.0 | 1 p2 | (AT)8  | 16 | 681  | 696 GAGACATCAGCTGAGGGGAG      |
| scaffold735430_15.8 | 1 p2 | (CT)6  | 12 | 667  | 678 GCTAAACTCCAGCGCAAAC       |
| scaffold735438_16.9 | 1 p2 | (CT)6  | 12 | 113  | 124 CTCGCTCGGAAAAGCAATAC      |
| scaffold735496_16.6 | 1 p2 | (TC)9  | 18 | 2309 | 2326 GATTGTTGGGTTTTCCGATG     |
| scaffold735529_17.3 | 1 p2 | (CT)6  | 12 | 1368 | 1379 TCTTTGGGATTCTCTCGAA      |
| scaffold735531_15.2 | 1 p2 | (GA)7  | 14 | 669  | 682 ACCTCGGACGCCTAAAGAAT      |
| scaffold735543_17.7 | 1 p2 | (TG)8  | 16 | 1303 | 1318 TCCTTCGAGACTCCATCGTT     |
| scaffold735555_15.1 | 1 p2 | (AT)6  | 12 | 626  | 637 TTTGAACTCCGTAGCAACCA      |
| scaffold735600_17.6 | 1 p2 | (AG)6  | 12 | 675  | 686 CCATGTCTTCTCTTCGAGC       |
| scaffold735624_16.0 | 1 p2 | (TC)6  | 12 | 906  | 917 CTCACCTGCATCGTCTTTCA      |
| scaffold735629_15.3 | 1 p2 | (CT)10 | 20 | 668  | 687 CTGCTCTCCAGAAGCAAACC      |
| scaffold735630_14.3 | 1 p2 | (GA)9  | 18 | 1437 | 1454 CGGAGGCTGAGGCATTATAG     |
| scaffold735638_16.1 | 1 p2 | (AG)9  | 18 | 670  | 687 CGCAGGATTGTACGGTTGTA      |
| scaffold735704_17.2 | 1 p2 | (TA)9  | 18 | 44   | 61 TGAAGTTAGGAAATAAGGAGGTGTT  |
| scaffold735717_16.3 | 1 p2 | (AG)8  | 16 | 1340 | 1355 TGTTGGCATGGTTGATGAGT     |
| scaffold735720_12.8 | 1 p2 | (TC)6  | 12 | 680  | 691 GGATTTCGAGTTTTTGAACCA     |
| scaffold735741_15.1 | 1 p2 | (GA)6  | 12 | 132  | 143 TGGTTGAAAGATGAGGGAGAA     |
| scaffold735748_11.9 | 1 p2 | (TA)7  | 14 | 678  | 691 TCGATTAACTTGACAAGGTTTCAA  |
| scaffold735749_15.1 | 1 p2 | (AG)6  | 12 | 3685 | 3696 AGGCGTGTGTTTTGTTTGAAG    |
| scaffold735750_16.7 | 1 p2 | (CT)7  | 14 | 129  | 142 GAGAGACGAGCTCACGCATA      |
| scaffold735755_12.9 | 1 p2 | (AT)10 | 20 | 348  | 367 TGTTATCATTGTTGTCACAGTTTTT |
| scaffold735763_14.7 | 1 p2 | (AG)12 | 24 | 841  | 864 GGCCACCATAACCACAATAC      |
| scaffold735767_14.8 | 1 p2 | (CT)6  | 12 | 120  | 131 TAGCCTTGCCCTAAGTTT        |
| scaffold735775_16.1 | 1 p2 | (CT)6  | 12 | 78   | 89 AGCAACAGCGGAAGAAGAAG       |
| scaffold735778_15.8 | 1 p2 | (TA)6  | 12 | 2311 | 2322 CATGATACCTACTGGGGCT      |
| scaffold735781_16.0 | 1 p2 | (CT)6  | 12 | 68   | 79 ATTTGTTCAAATCCGCGAC        |
| scaffold735794_13.9 | 1 p2 | (AT)8  | 16 | 679  | 694 AAACCTTTGGAATCGACATTGC    |
| scaffold735796_16.4 | 1 p2 | (AG)7  | 14 | 1791 | 1804 GTCGAGCAACAGCAGGTGTA     |
| scaffold735801_18.7 | 1 p2 | (AT)9  | 18 | 63   | 80 GGTTTACCCATAGCGCACTC       |
| scaffold735814_16.2 | 1 p2 | (AT)7  | 14 | 681  | 694 TTCTCCTCACAATGCTTCCA      |
| scaffold735819_18.2 | 1 p2 | (TG)6  | 12 | 183  | 194 GCTTTGTGATGGGTGAAGGT      |
| scaffold735826_14.6 | 1 p2 | (TC)6  | 12 | 858  | 869 TCCAAGAATGAAGCCACTC       |
| scaffold735830_13.9 | 1 p2 | (GA)8  | 16 | 848  | 863 AAGCTCAGTAGCGTTCTCGC      |
| scaffold735834_16.4 | 1 p2 | (TC)6  | 12 | 857  | 868 CTTGATGCCCCGTTAAACAT      |
| scaffold735835_15.3 | 1 p2 | (GA)7  | 14 | 1042 | 1055 ATGATTCTCCCCTTCCATT      |
| scaffold735880_15.2 | 1 p2 | (TA)6  | 12 | 558  | 569 CCGGTACATTCCGTAGATGG      |
| scaffold735886_15.1 | 1 p2 | (GT)8  | 16 | 755  | 770 TTGAGCATTGATACAGTGGAGA    |
| scaffold735917_16.9 | 1 p2 | (AT)6  | 12 | 1692 | 1703 TCTCGATTCAACTCATCGGA     |
| scaffold735926_17.9 | 1 p2 | (CT)7  | 14 | 5030 | 5043 CTCATTTTCGGAAGGAGCAAC    |
| scaffold735953_14.4 | 1 p2 | (AC)7  | 14 | 2378 | 2391 TGTTAATGAAATTTACGCACACA  |
| scaffold735955_16.4 | 1 p2 | (CT)8  | 16 | 1791 | 1806 GTGTAACCGTGGATCAGGCT     |
| scaffold735956_15.1 | 1 p2 | (AG)6  | 12 | 221  | 232 GGGCTGTACTTCAGAGGCTG      |
| scaffold736006_14.9 | 1 p2 | (AG)12 | 24 | 1980 | 2003 CGGGAAGTGGAGAGAGAGTG     |
| scaffold736018_15.9 | 1 p2 | (AC)8  | 16 | 3000 | 3015 GAATGAGGGATCGGGTGATA     |
| scaffold736064_14.7 | 1 p2 | (TG)6  | 12 | 203  | 214 AGCGATTTTAACCTCCCGTT      |
| scaffold736071_14.4 | 1 p2 | (TC)6  | 12 | 529  | 540 CGGGGAGTAGATGAATCGAA      |
| scaffold736072_21.9 | 1 p2 | (AT)7  | 14 | 348  | 361 TGTGTGCGAATTTGGAAAAG      |
| scaffold736080_15.1 | 1 p2 | (GA)8  | 16 | 460  | 475 GGGGAAAGATTGCAAATTCA      |
| scaffold736083_16.9 | 1 p2 | (CT)7  | 14 | 3936 | 3949 CATCTTCACCGGCTTCTCTC     |
| scaffold736117_15.4 | 1 p2 | (CT)8  | 16 | 1458 | 1473 CATTTTCAGCCACCATCTCT     |
| scaffold736122_14.7 | 1 p2 | (AT)6  | 12 | 2246 | 2257 TTTCCGACCATCTAAGTCGC     |
| scaffold736131_14.2 | 1 p2 | (TA)6  | 12 | 698  | 709 GTGGCTTGTTTTCTTGGT        |
| scaffold736139_16.2 | 1 p2 | (TG)7  | 14 | 3153 | 3166 GAATTTTTGAGATCGACGCC     |
| scaffold736154_18.0 | 1 p2 | (TA)6  | 12 | 285  | 296 TTGATTCTCGCCATGTACAAA     |
| scaffold736159_11.6 | 1 p2 | (GA)6  | 12 | 699  | 710 ATGTGCAGCCCCTGAGTAAG      |
| scaffold736177_16.8 | 1 p2 | (AC)6  | 12 | 74   | 85 GGCGTGCATGTTTTATCTGA       |
| scaffold736179_14.0 | 1 p2 | (AG)13 | 26 | 347  | 372 CCATGTGTCGTCAAGATGCT      |
| scaffold736180_16.3 | 1 p2 | (TG)6  | 12 | 564  | 575 GATTTTGGCAATCAACGGT       |

|                     |      |        |    |      |      |                         |
|---------------------|------|--------|----|------|------|-------------------------|
| scaffold736182_16.5 | 1 p2 | (CT)6  | 12 | 4509 | 4520 | CGCTTCGCCATTGTAATTTT    |
| scaffold736200_17.4 | 1 p2 | (CA)8  | 16 | 528  | 543  | ATGCCAACCCACGCTAATAA    |
| scaffold736209_21.6 | 1 p2 | (AT)6  | 12 | 703  | 714  | TGAGAGCGAGCAAGGGTTAT    |
| scaffold736215_13.0 | 1 p2 | (TG)6  | 12 | 684  | 695  | TGATTA AAAACTGAACCGGACA |
| scaffold736223_16.0 | 1 p2 | (CT)6  | 12 | 1491 | 1502 | AAATTGGTGGGAATGCAGAG    |
| scaffold736243_16.8 | 1 p2 | (AG)6  | 12 | 921  | 932  | CACCGCCTCGTATCTTCATT    |
| scaffold736251_14.9 | 1 p2 | (AC)8  | 16 | 700  | 715  | GGGCTTGGTCAGAAAATTGA    |
| scaffold736262_15.0 | 1 p2 | (TA)9  | 18 | 2535 | 2552 | GGCCTGATCTTACCTAGGGG    |
| scaffold736264_15.8 | 1 p2 | (AT)8  | 16 | 701  | 716  | CGTGATTCATGCCATATTTGA   |
| scaffold736278_16.3 | 1 p2 | (AG)7  | 14 | 3352 | 3365 | GGATCCCGGTCATATACGTG    |
| scaffold736310_14.9 | 1 p2 | (TC)7  | 14 | 704  | 717  | GCTCCTCCTATCCACATCCA    |
| scaffold736320_14.8 | 1 p2 | (TA)8  | 16 | 1202 | 1217 | TTGGATGCGTTGATTGAAAG    |
| scaffold736342_13.4 | 1 p2 | (CT)7  | 14 | 432  | 445  | TTTCACCCAAATCACGAACA    |
| scaffold736345_14.0 | 1 p2 | (AG)14 | 28 | 1260 | 1287 | AACCCTGATCACCAAACGAG    |
| scaffold736350_16.4 | 1 p2 | (AT)8  | 16 | 2785 | 2800 | TCGGTTGGTGAAGTTGTTGA    |
| scaffold736375_15.0 | 1 p2 | (TA)7  | 14 | 683  | 696  | ACACGGATCGGAAATCCATA    |
| scaffold736414_16.6 | 1 p2 | (AT)6  | 12 | 710  | 721  | TCCAACGGAAATCCTTATACTCA |
| scaffold736426_15.9 | 1 p2 | (CT)6  | 12 | 844  | 855  | AACCCACTTCCACAGAATGC    |
| scaffold736503_15.0 | 1 p2 | (GT)7  | 14 | 714  | 727  | TGCACATGCAAAGCTAAAGG    |
| scaffold736522_17.4 | 1 p2 | (TC)6  | 12 | 1323 | 1334 | CGATCACTGTAAGAACCGCA    |
| scaffold736538_15.2 | 1 p2 | (CT)6  | 12 | 340  | 351  | CACCCATGTTTGT TTTTCC    |
| scaffold736558_17.2 | 1 p2 | (CA)9  | 18 | 1111 | 1128 | TCGTTTTGT CGAACTGTTGC   |
| scaffold736606_16.2 | 1 p2 | (AG)6  | 12 | 717  | 728  | CGAGCAGTTTGAATTGGTGA    |
| scaffold736650_16.3 | 1 p2 | (AG)6  | 12 | 644  | 655  | GGCTTATTTCCATCCCGAAT    |
| scaffold736653_14.3 | 1 p2 | (AC)7  | 14 | 718  | 731  | GTGTTGGT GCTTGATGGCTA   |
| scaffold736682_19.9 | 1 p2 | (AC)7  | 14 | 723  | 736  | TGCCATTTGATGGAGAATCA    |
| scaffold736701_10.6 | 1 p2 | (AT)10 | 20 | 344  | 363  | CGAATCCAGGTAAGGCTTGA    |
| scaffold736712_15.5 | 1 p2 | (GA)7  | 14 | 723  | 736  | GGGCAGAAAAGGTGAAACAA    |
| scaffold736713_14.3 | 1 p2 | (GA)6  | 12 | 4841 | 4852 | TCTCTTTC CCCCCTCCTTTTG  |
| scaffold736724_15.4 | 1 p2 | (CT)10 | 20 | 71   | 90   | CTCCCCACTTTCCTTCAACA    |
| scaffold736726_15.0 | 1 p2 | (TC)11 | 22 | 1256 | 1277 | GCCATTGCACTTATGCTCCT    |
| scaffold736750_14.0 | 1 p2 | (AG)7  | 14 | 518  | 531  | TAGTTTTACCAATTGCGACG    |
| scaffold736774_15.6 | 1 p2 | (AT)8  | 16 | 887  | 902  | CGTTTTCCACCTTCAAGACA    |
| scaffold736787_16.0 | 1 p2 | (AT)6  | 12 | 250  | 261  | AACTCAATGGGGACATCAGG    |
| scaffold736819_14.7 | 1 p2 | (TG)11 | 22 | 1558 | 1579 | TGCAACTGCATGGGATAGTC    |
| scaffold736826_16.0 | 1 p2 | (TC)6  | 12 | 2415 | 2426 | GGAGGAACTCCATCTCCCTC    |
| scaffold736850_15.5 | 1 p2 | (AT)6  | 12 | 3308 | 3319 | GAGACAAA AAGCATTGCCC    |
| scaffold736876_14.2 | 1 p2 | (TC)6  | 12 | 151  | 162  | AATGGAGATCCGTGCTTAC     |
| scaffold736882_14.7 | 1 p2 | (CT)7  | 14 | 733  | 746  | GGTGAAAGGCCATGTGAACT    |
| scaffold736884_15.0 | 1 p2 | (TC)6  | 12 | 1211 | 1222 | TACACCAAATCTTGGCTCCC    |
| scaffold736888_14.0 | 1 p2 | (AT)7  | 14 | 1433 | 1446 | TTTCGACCAATGAGAAAGGC    |
| scaffold736900_14.0 | 1 p2 | (AC)6  | 12 | 218  | 229  | TGGTCTGCCTAATTTACTGCAA  |
| scaffold736907_15.2 | 1 p2 | (AG)6  | 12 | 1645 | 1656 | AGAGACTGTTCAAGGGCAGC    |
| scaffold736936_15.2 | 1 p2 | (TA)13 | 26 | 763  | 788  | TTGTCTTGACGCTGACAACC    |
| scaffold736945_14.9 | 1 p2 | (GA)7  | 14 | 4078 | 4091 | CGAAGAAAAGCAGGTTTTGG    |
| scaffold736970_15.0 | 1 p2 | (GT)6  | 12 | 1265 | 1276 | CCAAGCACATCAGCTGAAAA    |
| scaffold736996_16.6 | 1 p2 | (CT)6  | 12 | 960  | 971  | TTCCTGCTTTTCATCGCTCT    |
| scaffold737011_14.6 | 1 p2 | (AT)13 | 26 | 1843 | 1868 | GAGAGGAGACGCACAGAAGG    |
| scaffold737021_15.7 | 1 p2 | (GA)11 | 22 | 2325 | 2346 | TGCACTAAGTGGTGCTTTTCG   |
| scaffold737037_14.0 | 1 p2 | (CT)8  | 16 | 4765 | 4780 | CACGTGGGACTACTGACCCT    |
| scaffold737056_15.0 | 1 p2 | (AC)6  | 12 | 347  | 358  | TTTTAAGTCGTGTTGCGTGC    |
| scaffold737064_15.9 | 1 p2 | (AG)9  | 18 | 1124 | 1141 | TGTCAGCAGACATAGCAGGG    |
| scaffold737100_15.2 | 1 p2 | (AT)8  | 16 | 447  | 462  | CCAGTCGAACCGACAAGATT    |
| scaffold737106_14.0 | 1 p2 | (CT)6  | 12 | 117  | 128  | TCGAACCCAAACAAATTTCC    |
| scaffold737118_14.2 | 1 p2 | (TC)6  | 12 | 1282 | 1293 | GGCTGTTG TAAAACCCTTGC   |
| scaffold737130_16.0 | 1 p2 | (AG)8  | 16 | 38   | 53   | AAAGCAATCAGTCAAAGGGG    |
| scaffold737138_18.0 | 1 p2 | (CA)7  | 14 | 747  | 760  | GAGAGCAAGCAACAATCCAA    |
| scaffold737185_16.4 | 1 p2 | (TA)6  | 12 | 1518 | 1529 | GAGTGAGTTGGCGAGAATCTG   |

|                     |      |        |    |      |      |                           |
|---------------------|------|--------|----|------|------|---------------------------|
| scaffold737211_16.8 | 1 p2 | (AT)6  | 12 | 1335 | 1346 | CTATATAGGTCCCCCGTCCC      |
| scaffold737252_15.7 | 1 p2 | (TA)8  | 16 | 2012 | 2027 | CCTGCGTGGTTTTTCTTTTG      |
| scaffold737275_14.9 | 1 p2 | (TC)7  | 14 | 5085 | 5098 | TATATCGTCCAGCTCCGACC      |
| scaffold737280_15.4 | 1 p2 | (TA)6  | 12 | 516  | 527  | GGAGGTTGAGATTTTGGAGGA     |
| scaffold737296_17.4 | 1 p2 | (GA)7  | 14 | 3113 | 3126 | TGAGAGGAAAATGGTTTGGG      |
| scaffold737300_14.6 | 1 p2 | (CA)9  | 18 | 753  | 770  | GGTAGACATGCAAACCGTGA      |
| scaffold737312_17.0 | 1 p2 | (TC)10 | 20 | 4403 | 4422 | TATGACAAGCAGCAGTGCCT      |
| scaffold737326_14.4 | 1 p2 | (TA)9  | 18 | 40   | 57   | CGGATTTAAGGGTTATTACCTGATT |
| scaffold737327_15.2 | 1 p2 | (AT)10 | 20 | 1491 | 1510 | TTTGGCTTGAACAGCACTTG      |
| scaffold737330_15.6 | 1 p2 | (AT)8  | 16 | 757  | 772  | TTTTGGAGCCGAGAAGAGAA      |
| scaffold737338_13.4 | 1 p2 | (AG)6  | 12 | 128  | 139  | TTGATTAGAGGAAACTGCGGA     |
| scaffold737345_14.6 | 1 p2 | (AT)6  | 12 | 1499 | 1510 | GAATGTGGGCGATCTTGACT      |
| scaffold737369_17.5 | 1 p2 | (CA)6  | 12 | 841  | 852  | GCTGCATATAAACCCGGAAA      |
| scaffold737392_18.6 | 1 p2 | (AT)10 | 20 | 756  | 775  | CACTTTCCATCCAAAATGCAC     |
| scaffold737393_13.8 | 1 p2 | (AC)10 | 20 | 1844 | 1863 | GCACAAATTTTCAATTCACGTT    |
| scaffold737452_15.2 | 1 p2 | (TA)10 | 20 | 2132 | 2151 | TGAGAGGATGATGGTGTTC       |
| scaffold737479_17.0 | 1 p2 | (AT)6  | 12 | 597  | 608  | CCATTTAATTTCCAAAGGGTT     |
| scaffold737494_13.6 | 1 p2 | (TC)8  | 16 | 562  | 577  | GCTTACGTGTTTCAGGGCTC      |
| scaffold737504_15.7 | 1 p2 | (CT)7  | 14 | 121  | 134  | CCTTGCATATGATGGTTAGCA     |
| scaffold737506_14.0 | 1 p2 | (TA)10 | 20 | 1466 | 1485 | GCGCAAGAGCTTTTTCTGAG      |
| scaffold737509_19.4 | 1 p2 | (GA)9  | 18 | 765  | 782  | CACATTCITTAAGCCATGGGA     |
| scaffold737526_15.1 | 1 p2 | (TA)6  | 12 | 753  | 764  | GATCCACGTTAGAACCCCT       |
| scaffold737531_18.1 | 1 p2 | (TC)6  | 12 | 1260 | 1271 | TCCGATCTCTGTTTCGATTTG     |
| scaffold737532_15.6 | 1 p2 | (AT)6  | 12 | 1495 | 1506 | TGCAAATGGTACTAGGGACG      |
| scaffold737543_14.6 | 1 p2 | (AG)6  | 12 | 177  | 188  | CATTTTGAGCCATTGGACCT      |
| scaffold737550_15.7 | 1 p2 | (AG)8  | 16 | 1976 | 1991 | CTGAATGCAATCAATGGGTG      |
| scaffold737556_15.1 | 1 p2 | (TA)10 | 20 | 895  | 914  | TGTAAAGCCCATTTGAACCC      |
| scaffold737575_15.6 | 1 p2 | (TA)11 | 22 | 1303 | 1324 | CGAGTGCCTCAAGTATGCAA      |
| scaffold737576_17.8 | 1 p2 | (TG)6  | 12 | 697  | 708  | CCTCAATTTCTGCAGCCTTC      |
| scaffold737583_14.0 | 1 p2 | (AG)6  | 12 | 1256 | 1267 | TGGATGGGTTACTGGATCAAT     |
| scaffold737585_16.5 | 1 p2 | (TA)7  | 14 | 298  | 311  | ATATTTTATGGGACGGGGGA      |
| scaffold737600_15.6 | 1 p2 | (CT)7  | 14 | 4885 | 4898 | GTGCGTTTTTCGTCCAGAAAT     |
| scaffold737636_14.2 | 1 p2 | (CT)10 | 20 | 2027 | 2046 | ATTCGATGAATGTGCTGCAA      |
| scaffold737650_17.4 | 1 p2 | (CT)8  | 16 | 1527 | 1542 | TTAGAGGTGTCCAACAGGGG      |
| scaffold737678_15.4 | 1 p2 | (TC)8  | 16 | 1614 | 1629 | CCACGCGCTCCTTAACTTAC      |
| scaffold737685_14.8 | 1 p2 | (GA)8  | 16 | 777  | 792  | TTGATGGCATCGATGAGGTA      |
| scaffold737691_13.3 | 1 p2 | (TC)6  | 12 | 1465 | 1476 | AGGCACGGCCAAGATAATAA      |
| scaffold737699_15.3 | 1 p2 | (TC)7  | 14 | 1736 | 1749 | TCTCCGAATTCCGAAAAGAA      |
| scaffold737713_14.3 | 1 p2 | (AT)10 | 20 | 743  | 762  | GTAGGTCGGGGTAGGGTTGT      |
| scaffold737716_10.8 | 1 p2 | (TC)6  | 12 | 1119 | 1130 | AATTCATCACCCACCTCACCC     |
| scaffold737727_16.7 | 1 p2 | (TA)8  | 16 | 203  | 218  | CGTCCTCTCCCTTTCCTTTC      |
| scaffold737729_15.3 | 1 p2 | (TA)6  | 12 | 405  | 416  | GACACTCACGATTTACCGCA      |
| scaffold737734_15.0 | 1 p2 | (TG)6  | 12 | 3259 | 3270 | TTCACGTCATGGTCGTTTGT      |
| scaffold737753_14.8 | 1 p2 | (CT)9  | 18 | 222  | 239  | TGGCAGAGTGGACTTCTCAA      |
| scaffold737773_14.4 | 1 p2 | (TA)6  | 12 | 4558 | 4569 | TTGTATTTGATCCGCAGCCT      |
| scaffold737780_16.6 | 1 p2 | (AG)8  | 16 | 562  | 577  | TAGGTTTGGATACCCGTTTCG     |
| scaffold737787_15.0 | 1 p2 | (CT)6  | 12 | 1204 | 1215 | GGAAGAAATTA AAAACCCCCA    |
| scaffold737807_15.9 | 1 p2 | (TC)8  | 16 | 194  | 209  | TATGGATTCTGGGATGGGAA      |
| scaffold737808_14.9 | 1 p2 | (AT)11 | 22 | 779  | 800  | AATCCTCAAAGCAATAACGC      |
| scaffold737811_15.6 | 1 p2 | (AC)7  | 14 | 786  | 799  | TGTTTCATAATTTGGGCATGA     |
| scaffold737827_15.6 | 1 p2 | (AT)6  | 12 | 790  | 801  | TCAGGCTTACAGCCATCCTC      |
| scaffold737833_15.3 | 1 p2 | (GA)6  | 12 | 480  | 491  | TCATCCATTCCCAGTTCTCC      |
| scaffold737852_16.3 | 1 p2 | (TA)6  | 12 | 1968 | 1979 | CTCGCAGTAGGTAAAAGGCG      |
| scaffold737854_14.9 | 1 p2 | (TA)14 | 28 | 1876 | 1903 | CACAAAAGGATGGGAATTGG      |
| scaffold737862_15.9 | 1 p2 | (CA)7  | 14 | 790  | 803  | ACATTTTCAACGGCACGATT      |
| scaffold737870_13.6 | 1 p2 | (CT)6  | 12 | 2083 | 2094 | AGAAAAAGGAACGCCTCCAT      |
| scaffold737877_15.8 | 1 p2 | (TA)8  | 16 | 2389 | 2404 | CCTTGACAGATGCAAAGACG      |
| scaffold737885_15.3 | 1 p2 | (CT)6  | 12 | 793  | 804  | ACCATTGATAGCATGCGTGA      |

|                     |      |        |    |      |      |                             |
|---------------------|------|--------|----|------|------|-----------------------------|
| scaffold737907_17.0 | 1 p2 | (CA)6  | 12 | 1844 | 1855 | AGGTGGGATTGTTTGCTTTG        |
| scaffold737924_16.6 | 1 p2 | (AG)13 | 26 | 32   | 57   | TTGCTAATCTTCGATGTATCAACC    |
| scaffold737926_16.3 | 1 p2 | (TG)7  | 14 | 270  | 283  | TACTGTCCAGCCTTGCAATTG       |
| scaffold737951_14.3 | 1 p2 | (AG)12 | 24 | 25   | 48   | TGACAGATGCACTGATCCAAA       |
| scaffold737956_16.7 | 1 p2 | (AT)6  | 12 | 1536 | 1547 | TGCATGTGTGCATGTTTGT         |
| scaffold737977_17.0 | 1 p2 | (TC)8  | 16 | 2089 | 2104 | GGATGCTATGATATGGTGATGC      |
| scaffold737988_15.3 | 1 p2 | (TG)6  | 12 | 1797 | 1808 | CGTCAAATTCTGGTTTATCATTCC    |
| scaffold737993_15.6 | 1 p2 | (AC)9  | 18 | 1238 | 1255 | CCGCAGCCTGAGTTGATTTA        |
| scaffold737995_15.7 | 1 p2 | (GA)6  | 12 | 1996 | 2007 | TGTGATGGAACGAGGATTTG        |
| scaffold738001_16.0 | 1 p2 | (AC)7  | 14 | 3296 | 3309 | TGAAGATACGAATCCTGGGC        |
| scaffold738016_14.6 | 1 p2 | (CA)6  | 12 | 1379 | 1390 | CGCATGAACCATGAAATCAG        |
| scaffold738017_17.6 | 1 p2 | (CT)8  | 16 | 962  | 977  | AAACGTCATTTCTGCTGCT         |
| scaffold738057_17.2 | 1 p2 | (AT)9  | 18 | 799  | 816  | AATATGGGGTTTTGCCATCA        |
| scaffold738072_15.2 | 1 p2 | (CT)6  | 12 | 180  | 191  | TTCTGCCCATTTCTTCCACTC       |
| scaffold738080_17.5 | 1 p2 | (AT)7  | 14 | 611  | 624  | TTTTATAGGACTGGGCCACG        |
| scaffold738092_17.1 | 1 p2 | (GA)7  | 14 | 416  | 429  | TGAGAGAGAGAAAAGATAATCCTAAA  |
| scaffold738095_16.1 | 1 p2 | (TA)6  | 12 | 1178 | 1189 | ACACCGAAATCGGAGTTAGC        |
| scaffold738113_16.0 | 1 p2 | (AC)8  | 16 | 312  | 327  | GCATAGGGAGATTTGCGGTA        |
| scaffold738129_16.5 | 1 p2 | (TG)10 | 20 | 82   | 101  | TTCGGTGTATTTAGCCCCTT        |
| scaffold738148_13.4 | 1 p2 | (TA)10 | 20 | 753  | 772  | TCGGTCAATCCACAACCTTCA       |
| scaffold738164_15.9 | 1 p2 | (TA)8  | 16 | 4419 | 4434 | TTTGCCGGACTAGTTATGG         |
| scaffold738172_13.5 | 1 p2 | (CA)10 | 20 | 934  | 953  | TCTATTCTCTTTGCCACGCC        |
| scaffold738186_15.6 | 1 p2 | (GA)8  | 16 | 5354 | 5369 | GATTGGAAAAGGGTGGGTTT        |
| scaffold738204_17.5 | 1 p2 | (AT)6  | 12 | 361  | 372  | ACCCACAATCAACTTGCACA        |
| scaffold738227_14.0 | 1 p2 | (GA)7  | 14 | 42   | 55   | AGAGATCACTGATTATCTTTTCAATTT |
| scaffold738260_17.1 | 1 p2 | (TC)6  | 12 | 2145 | 2156 | GGCTATTGTGGCATGGAGAT        |
| scaffold738262_15.0 | 1 p2 | (CT)7  | 14 | 2125 | 2138 | GATAAAGGTCGGCGTCAAAG        |
| scaffold738329_16.0 | 1 p2 | (AT)6  | 12 | 1471 | 1482 | TCGAATTGACATCTTCGTGC        |
| scaffold738385_15.6 | 1 p2 | (AT)6  | 12 | 1664 | 1675 | TTTGTGCCAAACCACTCTTG        |
| scaffold738426_15.9 | 1 p2 | (CT)8  | 16 | 2033 | 2048 | TTCTCATGCCCTTCAAATC         |
| scaffold738454_19.2 | 1 p2 | (TA)6  | 12 | 115  | 126  | ACATGGTGGTGGGTTTCAAGAT      |
| scaffold738456_13.5 | 1 p2 | (AT)7  | 14 | 787  | 800  | GTCTCGATTGAATTTTCGCC        |
| scaffold738461_14.0 | 1 p2 | (TC)6  | 12 | 1887 | 1898 | CAATGAGACCATGTTGGTGC        |
| scaffold738492_15.0 | 1 p2 | (CT)6  | 12 | 2326 | 2337 | AACATTGGCTGGATTTTCAAG       |
| scaffold738494_16.1 | 1 p2 | (GA)6  | 12 | 5115 | 5126 | GCACCTTACCAACCATCTT         |
| scaffold738495_13.7 | 1 p2 | (TC)10 | 20 | 2260 | 2279 | CATCAGCCACCATTTTCTT         |
| scaffold738499_15.5 | 1 p2 | (CT)7  | 14 | 814  | 827  | TCCCCAGTCAATTTTACACA        |
| scaffold738504_19.0 | 1 p2 | (AC)7  | 14 | 484  | 497  | CAGCGTTTTTGAGTCCATCA        |
| scaffold738511_14.0 | 1 p2 | (TA)6  | 12 | 833  | 844  | CGGTGGTGGAAAAGATGACT        |
| scaffold738516_16.7 | 1 p2 | (TG)6  | 12 | 428  | 439  | TGCATTGAAATTGACAGGGA        |
| scaffold738525_12.2 | 1 p2 | (TC)6  | 12 | 70   | 81   | TTTCCTAGAAATGCTCTCTTTCTGA   |
| scaffold738555_14.7 | 1 p2 | (TC)8  | 16 | 324  | 339  | TGCTAACATACGCATGAGGC        |
| scaffold738572_14.7 | 1 p2 | (CT)12 | 24 | 176  | 199  | ACCTGCTTGATTTTGTGGGA        |
| scaffold738579_15.8 | 1 p2 | (GA)8  | 16 | 834  | 849  | CGACTTGCCTAGAAATCGTT        |
| scaffold738591_15.4 | 1 p2 | (AT)9  | 18 | 2033 | 2050 | CCCCATGATTTTCTTTCTT         |
| scaffold738595_17.9 | 1 p2 | (TG)6  | 12 | 512  | 523  | AAGTCTGGACCTATGTTTGGGA      |
| scaffold738596_15.6 | 1 p2 | (CA)6  | 12 | 1921 | 1932 | CCGGCTCAAGTCATTTTCTC        |
| scaffold738613_17.7 | 1 p2 | (CT)6  | 12 | 337  | 348  | CCTTACCACCTCTTGCATT         |
| scaffold738618_16.8 | 1 p2 | (TG)6  | 12 | 4968 | 4979 | CATCCTACGCATTAACCCA         |
| scaffold738621_16.4 | 1 p2 | (CT)8  | 16 | 4122 | 4137 | GCCCCTGGTTTTGGTCTATT        |
| scaffold738634_14.0 | 1 p2 | (AC)7  | 14 | 410  | 423  | CATCTGCTGCTTTGTTTGGGA       |
| scaffold738639_15.3 | 1 p2 | (GA)6  | 12 | 121  | 132  | AATCGCTTCCGCATTTAAGA        |
| scaffold738652_14.4 | 1 p2 | (CT)6  | 12 | 1927 | 1938 | ACCTGAGGGAGTTGATGTGG        |
| scaffold738656_13.4 | 1 p2 | (AG)6  | 12 | 1610 | 1621 | TGACAGCAAGCCAGATTGTC        |
| scaffold738658_16.5 | 1 p2 | (TC)6  | 12 | 621  | 632  | TATTTGAAGGGAGTGCCCAG        |
| scaffold738679_16.8 | 1 p2 | (GA)7  | 14 | 846  | 859  | CCTGCAGATGACTGGCTACA        |
| scaffold738694_14.1 | 1 p2 | (AC)6  | 12 | 2967 | 2978 | TCATTTCAAGCAAATCGCA         |
| scaffold738708_15.8 | 1 p2 | (TG)6  | 12 | 914  | 925  | TTGGCAATTTATGGTCACCT        |



|                     |      |        |    |       |       |                         |
|---------------------|------|--------|----|-------|-------|-------------------------|
| scaffold738736_19.0 | 1 p2 | (AC)9  | 18 | 846   | 863   | GCTCAGGCTTACATGGGTGT    |
| scaffold738743_13.2 | 1 p2 | (AT)9  | 18 | 5646  | 5663  | AGCTACACCTGAGAGTGCCC    |
| scaffold738761_16.9 | 1 p2 | (CG)6  | 12 | 93    | 104   | CTTATGGTGGTATGGTGTAGAGG |
| scaffold738763_16.3 | 1 p2 | (TA)9  | 18 | 199   | 216   | GCGGGTCAAGTTGAGGAATA    |
| scaffold738768_19.0 | 1 p2 | (CT)7  | 14 | 463   | 476   | TCCCAGAAATTTGCCTTCAAT   |
| scaffold738769_15.9 | 1 p2 | (TA)6  | 12 | 3283  | 3294  | TGATTTTTGGAACCGTAGGC    |
| scaffold738792_16.0 | 1 p2 | (AC)6  | 12 | 1401  | 1412  | TGGTGGTGAATAGGGGACAT    |
| scaffold738810_14.9 | 1 p2 | (GA)6  | 12 | 1284  | 1295  | TGGTATGAGTTGGCTTTTTTG   |
| scaffold738811_17.2 | 1 p2 | (GA)6  | 12 | 240   | 251   | GGCAGGTCTCAGCCAAATTA    |
| scaffold738820_17.3 | 1 p2 | (CT)6  | 12 | 804   | 815   | CGAAACGAGAATAACCGGAA    |
| scaffold738823_16.0 | 1 p2 | (CA)6  | 12 | 1141  | 1152  | GGTGGAAAACATGCACACAG    |
| scaffold738845_15.5 | 1 p2 | (GA)6  | 12 | 7006  | 7017  | GGAACCACAACCCATCACAT    |
| scaffold738846_13.0 | 1 p2 | (AT)10 | 20 | 197   | 216   | TAACGATGGACTAGGGGCTG    |
| scaffold738861_17.1 | 1 p2 | (TC)7  | 14 | 10508 | 10521 | AACGAAATAAACCCCAACC     |
| scaffold738872_12.8 | 1 p2 | (TC)6  | 12 | 185   | 196   | CCAAGTCCCTTCGTTTTCAA    |
| scaffold738886_16.5 | 1 p2 | (AT)6  | 12 | 923   | 934   | TTGCTTTGGTCATACAAACATT  |
| scaffold738895_14.0 | 1 p2 | (TA)7  | 14 | 864   | 877   | TTGGGTATTGTTAGCTCGGG    |
| scaffold738899_16.3 | 1 p2 | (CA)6  | 12 | 1813  | 1824  | TGGAACCTATTTCTCCACG     |
| scaffold738915_14.4 | 1 p2 | (GA)6  | 12 | 171   | 182   | TCACTGGGGACAATCTCACA    |
| scaffold738920_15.2 | 1 p2 | (AG)10 | 20 | 3020  | 3039  | GCTTTGTGCCTGCATTATGA    |
| scaffold738955_17.3 | 1 p2 | (AT)6  | 12 | 615   | 626   | GGGACGTGGTTAGCAGATGT    |
| scaffold738956_14.7 | 1 p2 | (CT)6  | 12 | 2247  | 2258  | ACAGCTGGCCTTGGATGATA    |
| scaffold738970_14.6 | 1 p2 | (AG)9  | 18 | 2899  | 2916  | CAATGGAGCAGAAAGAGGGA    |
| scaffold738973_13.8 | 1 p2 | (AT)8  | 16 | 683   | 698   | AGGTCGGGTTTTCAGCCTTA    |
| scaffold738978_15.6 | 1 p2 | (AG)7  | 14 | 928   | 941   | AGTCAGTGCTCACCGGATCT    |
| scaffold738979_15.8 | 1 p2 | (TG)7  | 14 | 1227  | 1240  | TCCATTTATCGGAGTTACGGTT  |
| scaffold738980_12.7 | 1 p2 | (TG)11 | 22 | 1812  | 1833  | GGTTTATTGGTGCTGGTGCT    |
| scaffold738987_13.7 | 1 p2 | (AT)9  | 18 | 300   | 317   | TTTCTTGTTGAGGAATCGGG    |
| scaffold738995_15.9 | 1 p2 | (TC)6  | 12 | 4019  | 4030  | AATAAGCCTCCACACCCCTC    |
| scaffold739003_14.7 | 1 p2 | (AT)6  | 12 | 164   | 175   | TGAACCAAACACCCCTAAG     |
| scaffold739020_12.3 | 1 p2 | (AT)11 | 22 | 361   | 382   | GCCATGTGGAGTTGATTTT     |
| scaffold739037_15.0 | 1 p2 | (GA)6  | 12 | 675   | 686   | TTGGTGAAGATTTCGATTCCC   |
| scaffold739043_16.4 | 1 p2 | (CT)6  | 12 | 176   | 187   | TTTACTCCGCCACGGTTAAG    |
| scaffold739048_17.0 | 1 p2 | (CA)6  | 12 | 3540  | 3551  | CAAATCGTCAAATCCCCCTA    |
| scaffold739066_15.4 | 1 p2 | (AT)11 | 22 | 872   | 893   | GAAAATGTCGTGAATGCCAA    |
| scaffold739073_14.6 | 1 p2 | (TC)8  | 16 | 1087  | 1102  | TGTGTTGATGCAAGTTTGGAC   |
| scaffold739077_15.3 | 1 p2 | (TG)11 | 22 | 2600  | 2621  | CGATTTACGCCGAGTTAGGT    |
| scaffold739086_15.8 | 1 p2 | (TC)8  | 16 | 103   | 118   | AAGCCTCCAAGTCTCCAAT     |
| scaffold739089_17.6 | 1 p2 | (AG)6  | 12 | 90    | 101   | AGCCCCGAAAAAGTAATGGT    |
| scaffold739092_14.0 | 1 p2 | (TA)8  | 16 | 2386  | 2401  | TTGCGCAAATAAACCAACAA    |
| scaffold739095_17.8 | 1 p2 | (GA)6  | 12 | 200   | 211   | TTGGGGTGGAGAGAAGTGAG    |
| scaffold739106_16.0 | 1 p2 | (CT)7  | 14 | 2441  | 2454  | AGTGGTGTGGACTTGGGTC     |
| scaffold739142_13.7 | 1 p2 | (AT)6  | 12 | 33    | 44    | TCAGTCTGCACAGCTGACAA    |
| scaffold739157_14.7 | 1 p2 | (AG)7  | 14 | 880   | 893   | ACGATGGCTTTGCTGTTCTT    |
| scaffold739167_18.4 | 1 p2 | (TC)6  | 12 | 1703  | 1714  | GGCGTGCCTAATGGTATTTT    |
| scaffold739182_17.0 | 1 p2 | (TC)10 | 20 | 270   | 289   | TGAAGCCCATGTTGAATCTG    |
| scaffold739195_15.4 | 1 p2 | (TC)6  | 12 | 2029  | 2040  | TTTCTGGGGAGTTCATGTCC    |
| scaffold739201_19.2 | 1 p2 | (TA)7  | 14 | 67    | 80    | GGGGTTATCATGGGATCAAG    |
| scaffold739205_15.0 | 1 p2 | (AG)11 | 22 | 135   | 156   | GGCCAGGAGATGAGTCAGAA    |
| scaffold739208_17.0 | 1 p2 | (TA)8  | 16 | 169   | 184   | CCAAGATCAATGGTTCCTAAGTG |
| scaffold739213_15.2 | 1 p2 | (CT)6  | 12 | 188   | 199   | GAATGGCTTCGAGCTTACCA    |
| scaffold739237_16.9 | 1 p2 | (GA)8  | 16 | 4349  | 4364  | AGATGAGCCGAGGAGCAATA    |
| scaffold739254_16.2 | 1 p2 | (TC)7  | 14 | 1768  | 1781  | TCCAATTCCGATACCTGACC    |
| scaffold739261_18.7 | 1 p2 | (AT)8  | 16 | 482   | 497   | GGCTGCAAACATTTGAGGAT    |
| scaffold739270_15.5 | 1 p2 | (CT)10 | 20 | 364   | 383   | TTTATGAAAAATGGCCCAA     |
| scaffold739320_16.5 | 1 p2 | (TA)9  | 18 | 897   | 914   | GTTCCGATACGTCTGAAGGC    |
| scaffold739321_22.5 | 1 p2 | (TA)6  | 12 | 166   | 177   | GGTAGGAACTGCATGACCAA    |
| scaffold739323_12.6 | 1 p2 | (TA)13 | 26 | 78    | 103   | CAGGATAATCCAGAATCAACACA |

|                     |      |        |    |      |      |                             |
|---------------------|------|--------|----|------|------|-----------------------------|
| scaffold739345_17.6 | 1 p2 | (GA)7  | 14 | 2746 | 2759 | GGCCATGACCTCTTCCTGTA        |
| scaffold739346_15.2 | 1 p2 | (CT)9  | 18 | 1846 | 1863 | TCAACATTCAGCCGATCAAA        |
| scaffold739349_16.4 | 1 p2 | (AG)8  | 16 | 5503 | 5518 | TTTCTTCCACGCCTTTCAAT        |
| scaffold739352_14.3 | 1 p2 | (AT)9  | 18 | 1964 | 1981 | GCAGGACAAAGCAGATAGGG        |
| scaffold739374_13.2 | 1 p2 | (AG)7  | 14 | 907  | 920  | AAGAGGGCAGAAAAGAGGAGG       |
| scaffold739380_14.3 | 1 p2 | (GA)6  | 12 | 1437 | 1448 | TGACGCTCGCAGTATTTTTG        |
| scaffold739386_16.9 | 1 p2 | (AT)8  | 16 | 120  | 135  | TTGAGTTGTGATGTTTGCATTTT     |
| scaffold739391_18.6 | 1 p2 | (AT)9  | 18 | 2487 | 2504 | GCTAGAGCCAAGGACATGAAA       |
| scaffold739398_15.2 | 1 p2 | (AT)7  | 14 | 3597 | 3610 | TATGAGATCTCGCCATGACA        |
| scaffold739406_15.4 | 1 p2 | (AG)7  | 14 | 2426 | 2439 | AAAATCGCCCCTCAAACTT         |
| scaffold739410_14.2 | 1 p2 | (GA)10 | 20 | 943  | 962  | AAATATGAGTTTCTCTTCCATGA     |
| scaffold739440_14.7 | 1 p2 | (CT)8  | 16 | 743  | 758  | TCAATCAAATCAAGGGGAGC        |
| scaffold739447_15.8 | 1 p2 | (CT)6  | 12 | 190  | 201  | GCCATCTATCTTGTTCCGTGACA     |
| scaffold739449_14.0 | 1 p2 | (TC)10 | 20 | 2325 | 2344 | TAATGCCACATGAGGAATG         |
| scaffold739470_15.7 | 1 p2 | (CT)11 | 22 | 906  | 927  | TATCCGAGTTTTGCCAGGTC        |
| scaffold739480_14.3 | 1 p2 | (GA)6  | 12 | 2792 | 2803 | AGCTTTTTCCGATGATCCCT        |
| scaffold739491_14.6 | 1 p2 | (TC)6  | 12 | 36   | 47   | TCCAGTCTTCTGCCAATCAA        |
| scaffold739505_15.2 | 1 p2 | (GA)7  | 14 | 654  | 667  | TGCTTTCGTTCAGGACTGTG        |
| scaffold739518_15.3 | 1 p2 | (AG)7  | 14 | 2630 | 2643 | CCCCAGCAATCCTCTCTACA        |
| scaffold739531_16.3 | 1 p2 | (TA)6  | 12 | 1733 | 1744 | TCAAAGCAAATCGGCTAAA         |
| scaffold739533_16.0 | 1 p2 | (TG)6  | 12 | 300  | 311  | GGTCAGAATCACGGCAGTTT        |
| scaffold739535_15.2 | 1 p2 | (AT)7  | 14 | 2176 | 2189 | GTTTGATGACGTGGTTCGTG        |
| scaffold739564_15.6 | 1 p2 | (TG)6  | 12 | 3104 | 3115 | TGTACGCGTATTTGCCAAC         |
| scaffold739569_16.9 | 1 p2 | (CT)6  | 12 | 1099 | 1110 | TACCAGCAACCATGTGGAAG        |
| scaffold739572_15.2 | 1 p2 | (TC)8  | 16 | 2173 | 2188 | GAGAGAAGGGGTGGGGATAG        |
| scaffold739573_14.2 | 1 p2 | (GA)7  | 14 | 292  | 305  | CTGTCTCCAGTGTCTTGCCA        |
| scaffold739602_16.1 | 1 p2 | (AG)11 | 22 | 1785 | 1806 | GCGTCTCATTATGATCGG          |
| scaffold739627_16.5 | 1 p2 | (AG)6  | 12 | 931  | 942  | CCATACGTTGGTAATGCAACC       |
| scaffold739645_15.0 | 1 p2 | (CA)6  | 12 | 410  | 421  | TGCAGGCAGTATTTGACTG         |
| scaffold739647_15.8 | 1 p2 | (AG)7  | 14 | 1509 | 1522 | CCACTGCATCACAACCATTC        |
| scaffold739654_14.7 | 1 p2 | (GA)8  | 16 | 834  | 849  | CAAGGTCGTACTAGCCAGCC        |
| scaffold739670_14.2 | 1 p2 | (TC)7  | 14 | 757  | 770  | ATGTGGGGTTGAGATCTTCG        |
| scaffold739682_15.2 | 1 p2 | (CA)7  | 14 | 910  | 923  | TGAGTCGTTTTCATGATGGC        |
| scaffold739695_13.4 | 1 p2 | (AT)6  | 12 | 121  | 132  | TCTCCTCTCTCAAAGCCA          |
| scaffold739705_14.5 | 1 p2 | (TA)8  | 16 | 50   | 65   | AAATATGTGCTCTCATTTGATTACACT |
| scaffold739718_17.5 | 1 p2 | (TC)8  | 16 | 2078 | 2093 | TCATGCAATACGGCTAGCTT        |
| scaffold739750_15.6 | 1 p2 | (CT)11 | 22 | 618  | 639  | TGATGATTTTTGGCCTTTGTC       |
| scaffold739795_16.0 | 1 p2 | (GA)7  | 14 | 3211 | 3224 | ACAGATTGCATTCTCCCGTT        |
| scaffold739807_18.9 | 1 p2 | (AG)11 | 22 | 1929 | 1950 | TTACAATTACGAACGCGTGG        |
| scaffold739812_15.6 | 1 p2 | (AT)8  | 16 | 1802 | 1817 | CATTCAGTTCATCATTTTCATGG     |
| scaffold739826_14.6 | 1 p2 | (TA)10 | 20 | 292  | 311  | TTGACCGTCCAACAATTCAA        |
| scaffold739833_16.7 | 1 p2 | (GA)14 | 28 | 565  | 592  | TGAAACTGAAGCTTGCATGG        |
| scaffold739834_16.4 | 1 p2 | (CT)6  | 12 | 1475 | 1486 | CCACGACCAATTCTTACAGC        |
| scaffold739841_15.2 | 1 p2 | (CT)8  | 16 | 357  | 372  | ATTCTCTCCAGCCCCTTCAT        |
| scaffold739842_16.5 | 1 p2 | (CT)10 | 20 | 398  | 417  | CCGGTTTATGGATGAGGAGA        |
| scaffold739868_15.7 | 1 p2 | (CT)7  | 14 | 455  | 468  | TAATATCCAAAACGCGCACA        |
| scaffold739879_15.3 | 1 p2 | (TA)6  | 12 | 1505 | 1516 | TCATCATGTGATGCAGACCA        |
| scaffold739880_13.9 | 1 p2 | (TA)9  | 18 | 2247 | 2264 | TGCCTGTATGAAAAAGCATCA       |
| scaffold739934_15.3 | 1 p2 | (AT)9  | 18 | 437  | 454  | TGAATGGAACACACACACCA        |
| scaffold739939_14.0 | 1 p2 | (TA)6  | 12 | 2102 | 2113 | TTCGGTAGGCCTGAATTGAC        |
| scaffold739946_17.3 | 1 p2 | (CT)13 | 26 | 954  | 979  | AGCTGCTTCGAGATGAGAGC        |
| scaffold739958_17.0 | 1 p2 | (TA)8  | 16 | 96   | 111  | AGGCATTGAAAAGCTCATT         |
| scaffold739970_15.6 | 1 p2 | (TC)6  | 12 | 3875 | 3886 | TCCTCTGGTTTCTGTTTGCC        |
| scaffold739996_15.6 | 1 p2 | (AT)7  | 14 | 126  | 139  | GGCTAATTGTTGGCCTTTGA        |
| scaffold740004_15.6 | 1 p2 | (GT)6  | 12 | 2056 | 2067 | GGGAATGATGGAATGGTGAG        |
| scaffold740012_14.4 | 1 p2 | (TA)6  | 12 | 441  | 452  | TTGCAAAACAAGCACGATT         |
| scaffold740016_15.7 | 1 p2 | (GT)10 | 20 | 617  | 636  | AGTACAAGGTGGCGGTTGAC        |
| scaffold740017_17.8 | 1 p2 | (AT)6  | 12 | 399  | 410  | AAAAACAAGTCATCCATGTCCC      |

|                     |      |        |    |      |      |                         |
|---------------------|------|--------|----|------|------|-------------------------|
| scaffold740023_17.5 | 1 p2 | (AG)6  | 12 | 1189 | 1200 | CTCTCTCCCCCTTTCTTGCT    |
| scaffold740028_15.0 | 1 p2 | (AT)9  | 18 | 1913 | 1930 | TTACCTGCGTGTTTTACAAC TG |
| scaffold740029_18.2 | 1 p2 | (GA)7  | 14 | 293  | 306  | GCCACAGTGGAAGAACCAAT    |
| scaffold740032_13.7 | 1 p2 | (AT)9  | 18 | 59   | 76   | GGCCATTGGGCTTATCCTA     |
| scaffold740059_14.4 | 1 p2 | (GA)6  | 12 | 1186 | 1197 | TCAGTCGTCAGTAAACCCGA    |
| scaffold740062_17.9 | 1 p2 | (AG)6  | 12 | 316  | 327  | GCCTCGCATGCTATTGCTA     |
| scaffold740072_15.7 | 1 p2 | (AT)6  | 12 | 115  | 126  | GCTTGAGTGTGGCACATTTAGT  |
| scaffold740077_16.4 | 1 p2 | (AG)8  | 16 | 2818 | 2833 | CTGTATCAGATGTCCGGCCT    |
| scaffold740089_16.7 | 1 p2 | (TG)6  | 12 | 977  | 988  | TGTCCTGAGAGGCAGGAAAT    |
| scaffold740116_17.0 | 1 p2 | (TC)6  | 12 | 991  | 1002 | TGGAATCGTTTGTCCACTTTT   |
| scaffold740121_17.4 | 1 p2 | (AG)7  | 14 | 3023 | 3036 | CTTTGCTGTTCGTGGTTCAA    |
| scaffold740124_16.7 | 1 p2 | (AC)7  | 14 | 988  | 1001 | CCATAGAAAACGGCCAGAAA    |
| scaffold740151_17.2 | 1 p2 | (AG)8  | 16 | 2037 | 2052 | AATTTTTAGCCATGGTCCCAC   |
| scaffold740158_13.6 | 1 p2 | (CT)6  | 12 | 815  | 826  | CTTCGTCTTCTCCAACCTCGC   |
| scaffold740176_20.9 | 1 p2 | (CA)7  | 14 | 302  | 315  | TTCACTGAATTTGCCTGAAAAA  |
| scaffold740180_15.4 | 1 p2 | (TC)8  | 16 | 336  | 351  | ACCACTAATCCAACCCCTC     |
| scaffold740192_13.6 | 1 p2 | (AG)7  | 14 | 1023 | 1036 | GGGAGTTCTTGTGCATGGTT    |
| scaffold740200_16.0 | 1 p2 | (CT)6  | 12 | 1892 | 1903 | TCGCAAAAGTGATCTTCGTG    |
| scaffold740202_13.9 | 1 p2 | (TC)7  | 14 | 714  | 727  | ATGCGTGGGCGATATTATGT    |
| scaffold740209_16.2 | 1 p2 | (TG)9  | 18 | 4240 | 4257 | TCAACACCCATCAAGATGCT    |
| scaffold740212_15.3 | 1 p2 | (GA)6  | 12 | 277  | 288  | CTACCTCAGCCTCGCCATAG    |
| scaffold740216_15.3 | 1 p2 | (GA)6  | 12 | 1087 | 1098 | GACCCAAACGGAGCATCTAA    |
| scaffold740219_13.6 | 1 p2 | (AT)6  | 12 | 1252 | 1263 | CCAGAAGCAGTGAAGCACAA    |
| scaffold740223_15.5 | 1 p2 | (AT)7  | 14 | 5027 | 5040 | TTTTCCACAGAAATGTTGGCT   |
| scaffold740230_17.4 | 1 p2 | (CT)8  | 16 | 4219 | 4234 | TCGTCTTCATGCTCACTTCG    |
| scaffold740237_16.6 | 1 p2 | (AT)8  | 16 | 1972 | 1987 | ATCAATGATGAGCCATGCAA    |
| scaffold740242_16.7 | 1 p2 | (AT)8  | 16 | 2378 | 2393 | CTGTCACGGTCAGCACTTGT    |
| scaffold740265_16.2 | 1 p2 | (GT)8  | 16 | 1006 | 1021 | CGGGGAATAATAAGGGAAG     |
| scaffold740281_17.6 | 1 p2 | (TG)9  | 18 | 3386 | 3403 | TGGGTTTAGGGATTAGCTGC    |
| scaffold740284_17.5 | 1 p2 | (CT)6  | 12 | 2361 | 2372 | GCACTGAAAAAGGGATCCAA    |
| scaffold740288_16.5 | 1 p2 | (CT)8  | 16 | 2607 | 2622 | GTGACGAGTTTGCCTGAGAA    |
| scaffold740294_13.8 | 1 p2 | (CT)6  | 12 | 1088 | 1099 | CAAACACCCATTCAAACCT     |
| scaffold740309_16.4 | 1 p2 | (AT)8  | 16 | 1083 | 1098 | TTCCTTGAATCAGCCACACA    |
| scaffold740311_17.7 | 1 p2 | (AG)6  | 12 | 2268 | 2279 | TGTGGATTCTGTCTCGGATTA   |
| scaffold740321_13.0 | 1 p2 | (TA)10 | 20 | 1825 | 1844 | GAACCTCCTCGTTAGCTCCC    |
| scaffold740335_13.2 | 1 p2 | (CT)7  | 14 | 1565 | 1578 | TTATGCCCTCCATTCTCTGC    |
| scaffold740353_18.5 | 1 p2 | (AT)6  | 12 | 336  | 347  | TTCTTTTATGGGCCATGAGG    |
| scaffold740355_16.2 | 1 p2 | (GA)9  | 18 | 2270 | 2287 | TTTGGAATTCAAGGACTGGG    |
| scaffold740378_16.4 | 1 p2 | (TA)8  | 16 | 1072 | 1087 | TTCGGTCAGATTATGTGGGG    |
| scaffold740382_13.6 | 1 p2 | (TA)6  | 12 | 1410 | 1421 | TGCTTCATGAACCGACAAAA    |
| scaffold740424_15.3 | 1 p2 | (GA)6  | 12 | 1906 | 1917 | GGAAGTGAAGCTTTGAGGGTG   |
| scaffold740448_15.5 | 1 p2 | (CA)6  | 12 | 1226 | 1237 | TGGTTTACACTTTCCGGGTC    |
| scaffold740452_18.2 | 1 p2 | (TC)7  | 14 | 665  | 678  | CACAGGAAAAGGAAACGGAA    |
| scaffold740457_16.5 | 1 p2 | (AT)6  | 12 | 387  | 398  | ATGCACACCAACTGCCATAA    |
| scaffold740485_15.3 | 1 p2 | (GT)8  | 16 | 3885 | 3900 | TGTCAAGTAACCATTGAGGGC   |
| scaffold740524_14.0 | 1 p2 | (TC)7  | 14 | 1328 | 1341 | ACCACCTGCCCAACTATCTG    |
| scaffold740534_16.0 | 1 p2 | (TA)6  | 12 | 91   | 102  | CAACAAGGTACTCGAAGAACACA |
| scaffold740536_17.0 | 1 p2 | (GA)8  | 16 | 1816 | 1831 | GCCTGGTTCCAAATTTTCCT    |
| scaffold740542_17.7 | 1 p2 | (AG)9  | 18 | 259  | 276  | CCTCATTGCTGTGCTATCA     |
| scaffold740573_14.9 | 1 p2 | (TG)6  | 12 | 577  | 588  | ACAATCGGAGTGCCATTTTC    |
| scaffold740580_13.2 | 1 p2 | (TC)11 | 22 | 1410 | 1431 | ACAGGAACAAGCCCATCAAC    |
| scaffold740581_13.2 | 1 p2 | (TA)9  | 18 | 963  | 980  | TCAGCCCTGAGTGGTTTTTC    |
| scaffold740585_15.4 | 1 p2 | (GA)6  | 12 | 384  | 395  | GAGAGGGGTGTTTGGTGCTA    |
| scaffold740594_14.3 | 1 p2 | (AC)7  | 14 | 632  | 645  | TAGACAGTTGCACCCAGCCT    |
| scaffold740607_16.4 | 1 p2 | (TC)6  | 12 | 8655 | 8666 | TTGGCTTTAATCAGGGCATC    |
| scaffold740610_14.5 | 1 p2 | (AT)9  | 18 | 1053 | 1070 | AGTCGGGAGAAATCTCGTTG    |
| scaffold740614_14.7 | 1 p2 | (AT)6  | 12 | 522  | 533  | CGAAACAGCAATCAAAGCA     |
| scaffold740619_15.0 | 1 p2 | (GA)7  | 14 | 3302 | 3315 | AGAATGGGACTCACTGGTGG    |

|                     |      |        |    |      |                                |
|---------------------|------|--------|----|------|--------------------------------|
| scaffold740657_18.4 | 1 p2 | (GA)6  | 12 | 413  | 424 GCAGTGGGAAGAACGAATATGG     |
| scaffold740675_16.0 | 1 p2 | (AT)12 | 24 | 49   | 72 GGAGGTGTTATGAAGGGATTACC     |
| scaffold740683_15.0 | 1 p2 | (GA)6  | 12 | 1882 | 1893 GAGGTAAATGTGGAAGCCCA      |
| scaffold740689_15.8 | 1 p2 | (CA)10 | 20 | 2043 | 2062 GCCATGATGCCTGTGAAGTA      |
| scaffold740690_15.3 | 1 p2 | (AT)9  | 18 | 475  | 492 GGAATTTAGACGATTGATCCGA     |
| scaffold740726_15.6 | 1 p2 | (TA)6  | 12 | 1372 | 1383 TTCCACCAGATACGGAGACC      |
| scaffold740736_15.7 | 1 p2 | (TA)9  | 18 | 46   | 63 CGGATTTATTGGTTATTACCTGA     |
| scaffold740747_13.3 | 1 p2 | (CT)6  | 12 | 616  | 627 CGACACATACGAATTGCCAC       |
| scaffold740759_16.0 | 1 p2 | (TC)8  | 16 | 3536 | 3551 GATACCCTGGTGGTCCATTG      |
| scaffold740767_15.0 | 1 p2 | (TC)6  | 12 | 186  | 197 TGAATTTTGGCTTGCATTTG       |
| scaffold740768_16.4 | 1 p2 | (CT)6  | 12 | 1071 | 1082 TGCTTTATGCAATGTCAGTGTG    |
| scaffold740789_18.0 | 1 p2 | (GA)6  | 12 | 1016 | 1027 ATGCAAAAATTGGTCCAACG      |
| scaffold740812_17.6 | 1 p2 | (TG)8  | 16 | 2619 | 2634 AGAAGGGGGATTGTTGCTTT      |
| scaffold740818_14.3 | 1 p2 | (TC)7  | 14 | 664  | 677 AGGTCTTTCGAACCCCTTA        |
| scaffold740819_14.8 | 1 p2 | (AG)6  | 12 | 337  | 348 TGGGAGCTTTATGATTTGGC       |
| scaffold740821_14.4 | 1 p2 | (TC)6  | 12 | 345  | 356 CCACACCATAGCTGGTCGAT       |
| scaffold740844_16.4 | 1 p2 | (CT)10 | 20 | 783  | 802 TCCCTTTTTCTCAAGGGAGG       |
| scaffold740854_14.2 | 1 p2 | (AG)7  | 14 | 220  | 233 AGCTTGCGAATTCATCATC        |
| scaffold740855_16.6 | 1 p2 | (AG)6  | 12 | 1301 | 1312 GCATGTTTCATGGCTATCATTTG   |
| scaffold740862_15.0 | 1 p2 | (GA)8  | 16 | 1094 | 1109 CAGGAGAATTTGGATTCCGGA     |
| scaffold740865_17.5 | 1 p2 | (AG)8  | 16 | 256  | 271 GTGACCGGTGGTTGTCTTCT       |
| scaffold740876_16.2 | 1 p2 | (TA)8  | 16 | 1095 | 1110 CTAAACTCCGCCAACTGCTC      |
| scaffold740880_14.8 | 1 p2 | (CT)8  | 16 | 118  | 133 CTGACATGGAAAGCACCCCTT      |
| scaffold740902_18.6 | 1 p2 | (AT)6  | 12 | 890  | 901 AAGAATACCACCGCCAACCT       |
| scaffold740923_13.6 | 1 p2 | (AT)6  | 12 | 2314 | 2325 GAGGGTATCACCAATCTGCAA     |
| scaffold740949_16.3 | 1 p2 | (AG)6  | 12 | 1604 | 1615 CCCCTAGGGTTTCCCATTTA      |
| scaffold740958_14.5 | 1 p2 | (AG)8  | 16 | 1111 | 1126 GTTTGCTTTGGTGTGGGATT      |
| scaffold740971_14.5 | 1 p2 | (AT)8  | 16 | 87   | 102 ATTACGTGCATCCAACGGTC       |
| scaffold740986_16.5 | 1 p2 | (TC)6  | 12 | 1598 | 1609 TCCTCAGGAGTAAGAGGGCA      |
| scaffold740988_17.6 | 1 p2 | (AC)6  | 12 | 1996 | 2007 CTTTTCCATTTCCGATCCAA      |
| scaffold740991_14.0 | 1 p2 | (TA)8  | 16 | 3268 | 3283 TTAACCATGCACGTAGGCA       |
| scaffold740996_12.8 | 1 p2 | (CT)9  | 18 | 2450 | 2467 AGATGTGCATTCAGAGGGTG      |
| scaffold740999_16.7 | 1 p2 | (TA)8  | 16 | 476  | 491 CATCGTTAATGTTGATTTTTATTCCG |
| scaffold741004_13.0 | 1 p2 | (AC)7  | 14 | 1973 | 1986 AGCCCTCCACGATAACATTG      |
| scaffold741019_15.3 | 1 p2 | (TG)7  | 14 | 759  | 772 ATGACATGGCCATAACGAGG       |
| scaffold741029_16.2 | 1 p2 | (AG)14 | 28 | 487  | 514 GAGACTGCAGCACTCACAGC       |
| scaffold741032_15.7 | 1 p2 | (TG)6  | 12 | 1568 | 1579 GGTGGTGGTGTGAATAGGG       |
| scaffold741043_15.5 | 1 p2 | (TC)13 | 26 | 75   | 100 CACGTATGGATAAGGCTAAAGATG   |
| scaffold741061_14.6 | 1 p2 | (AG)8  | 16 | 565  | 580 CCGAAATCCGGGTTTTATTT       |
| scaffold741082_15.2 | 1 p2 | (AT)10 | 20 | 2274 | 2293 CTGTGTGCCTCCTCCTTTGT      |
| scaffold741093_13.2 | 1 p2 | (TC)13 | 26 | 618  | 643 TTTTATGCCAAAGCAAAGGC       |
| scaffold741100_14.8 | 1 p2 | (AT)8  | 16 | 1146 | 1161 TCGATTCTTGTGCATCCATGC     |
| scaffold741101_17.0 | 1 p2 | (AT)7  | 14 | 1147 | 1160 GCCTAGCCGGTCAGTTACAC      |
| scaffold741103_14.9 | 1 p2 | (AC)9  | 18 | 1641 | 1658 TTTCTGATGGGGTTGAGGAG      |
| scaffold741105_18.0 | 1 p2 | (GA)6  | 12 | 3879 | 3890 CTGAATGCCTGTTGGTTCCT      |
| scaffold741110_16.3 | 1 p2 | (TC)9  | 18 | 591  | 608 TCAGAAACCACTCCCTCACC       |
| scaffold741121_12.5 | 1 p2 | (AT)8  | 16 | 1676 | 1691 GGCAGCAACACCTTAAAAA       |
| scaffold741122_13.8 | 1 p2 | (AC)7  | 14 | 1932 | 1945 CACATTTCCATTTCCATTGGT     |
| scaffold741129_13.9 | 1 p2 | (AC)10 | 20 | 369  | 388 CACGCTTGCTAGACAACGAC       |
| scaffold741138_15.4 | 1 p2 | (CT)8  | 16 | 419  | 434 AAGAGAGGTCAAAGCTGCCA       |
| scaffold741154_15.9 | 1 p2 | (GA)10 | 20 | 3712 | 3731 GAAGAAGGAGAGGAGGCCAT      |
| scaffold741157_12.5 | 1 p2 | (TA)12 | 24 | 2783 | 2806 ATGGCGGTAGGTAGTTGTCTG     |
| scaffold741167_15.0 | 1 p2 | (AT)8  | 16 | 1263 | 1278 AACCGAAGTGATTCGGGTTA      |
| scaffold741185_15.9 | 1 p2 | (GT)7  | 14 | 2428 | 2441 TTTGCTGAGCATGTCATGTG      |
| scaffold741196_17.7 | 1 p2 | (CT)7  | 14 | 5709 | 5722 GAGCAAAGAAGCCTCGAATG      |
| scaffold741201_14.5 | 1 p2 | (AT)6  | 12 | 511  | 522 TGGATGATGTCTGGGACTTTC      |
| scaffold741212_18.2 | 1 p2 | (AT)7  | 14 | 4661 | 4674 AGCTTCATCTCTGCGTCCAT      |
| scaffold741213_16.5 | 1 p2 | (GA)7  | 14 | 339  | 352 CATCCAGGTCACCCTTTTGT       |

|                     |      |        |    |      |      |                           |
|---------------------|------|--------|----|------|------|---------------------------|
| scaffold741223_14.6 | 1 p2 | (AG)6  | 12 | 2117 | 2128 | AGGCCTCGATAAATCCGTCT      |
| scaffold741235_17.4 | 1 p2 | (CA)11 | 22 | 1163 | 1184 | CTCAGCAATTGCCAAAGACA      |
| scaffold741258_13.0 | 1 p2 | (AT)9  | 18 | 1503 | 1520 | TCCCATTTCAGGCTTGAGGTA     |
| scaffold741277_18.5 | 1 p2 | (CT)7  | 14 | 49   | 62   | TTTAATCGGGATCCGGGC        |
| scaffold741279_13.0 | 1 p2 | (TA)8  | 16 | 2305 | 2320 | GGCTCCATGGAAATGACAGA      |
| scaffold741294_16.0 | 1 p2 | (AG)9  | 18 | 2969 | 2986 | AGCCTCCTCAAATGCAGAAA      |
| scaffold741303_15.4 | 1 p2 | (CT)6  | 12 | 523  | 534  | GTTGCTGTCACTGTGCCACT      |
| scaffold741305_15.1 | 1 p2 | (AG)7  | 14 | 1621 | 1634 | CATTGGTGTTTCGGAATAGGG     |
| scaffold741316_13.4 | 1 p2 | (AC)7  | 14 | 143  | 156  | TCCGACCGGTTTTTAAATCA      |
| scaffold741339_15.0 | 1 p2 | (GA)8  | 16 | 495  | 510  | TCAACTAGTGCTGCGAATGC      |
| scaffold741351_13.9 | 1 p2 | (AC)6  | 12 | 3829 | 3840 | AACTTAGTGCCCCAGTCCCT      |
| scaffold741354_14.2 | 1 p2 | (GA)10 | 20 | 708  | 727  | AAGCAGCCTCACACAAGTCA      |
| scaffold741356_17.3 | 1 p2 | (AG)6  | 12 | 189  | 200  | CCAACGCATCCATATCATCA      |
| scaffold741380_16.1 | 1 p2 | (TC)13 | 26 | 2454 | 2479 | GAATCTGTTGCGTCGTCTGA      |
| scaffold741383_16.1 | 1 p2 | (GC)6  | 12 | 270  | 281  | AAGTGCACCTCGCTACGACCT     |
| scaffold741386_21.2 | 1 p2 | (TA)7  | 14 | 52   | 65   | CACCACATTTAGTGGTTATCATTTG |
| scaffold741411_16.3 | 1 p2 | (CT)6  | 12 | 2345 | 2356 | GGAGGAGAGATGGCATGGTA      |
| scaffold741426_15.2 | 1 p2 | (TC)9  | 18 | 1220 | 1237 | ATTGGTCTCTCAAGCACGGT      |
| scaffold741443_15.2 | 1 p2 | (TC)6  | 12 | 632  | 643  | AATGAAACGGAATCCAGTCG      |
| scaffold741448_14.6 | 1 p2 | (AT)10 | 20 | 214  | 233  | CTTTTGGCTATCTCGCTTCG      |
| scaffold741459_17.1 | 1 p2 | (AT)9  | 18 | 464  | 481  | TGCACTTGCAAATTTAAGCTG     |
| scaffold741462_16.0 | 1 p2 | (AT)8  | 16 | 1229 | 1244 | CAGAGAGAAAATCGGTGGGA      |
| scaffold741472_16.1 | 1 p2 | (TG)6  | 12 | 134  | 145  | ACGACTCCATGTTCCGACAC      |
| scaffold741476_13.2 | 1 p2 | (GA)6  | 12 | 2346 | 2357 | TGTTGGAGACCCTTCTTTGC      |
| scaffold741477_14.4 | 1 p2 | (AT)7  | 14 | 71   | 84   | CCAGACTTTTGGTCTCAATATATCC |
| scaffold741510_17.6 | 1 p2 | (CT)8  | 16 | 1239 | 1254 | TGCGCTCTTGTCTGATTTG       |
| scaffold741512_16.0 | 1 p2 | (AG)6  | 12 | 959  | 970  | TACCAACCGGTTCCCTTGTA      |
| scaffold741518_16.4 | 1 p2 | (CT)6  | 12 | 1063 | 1074 | GGAAGTGCAAAATTCTGGGA      |
| scaffold741532_13.5 | 1 p2 | (CT)8  | 16 | 2003 | 2018 | TTGGGTCTTGAAGAAGACGG      |
| scaffold741535_15.5 | 1 p2 | (CA)11 | 22 | 5578 | 5599 | AAGCACACCACCTCTGCTCT      |
| scaffold741555_15.5 | 1 p2 | (TC)11 | 22 | 2399 | 2420 | GGATCTTCGAGGAGTGGTGA      |
| scaffold741584_15.1 | 1 p2 | (AT)10 | 20 | 1249 | 1268 | CTATGCAATGCCACCACAAC      |
| scaffold741589_16.5 | 1 p2 | (TG)6  | 12 | 1258 | 1269 | TGTCGGAGTTTTGTGAGCTG      |
| scaffold741592_13.6 | 1 p2 | (CT)10 | 20 | 3778 | 3797 | TCAATGATGTTGTGGGTGCT      |
| scaffold741602_16.1 | 1 p2 | (GA)6  | 12 | 1875 | 1886 | TGTGTTTCAGACCGAGTCAGC     |
| scaffold741671_15.6 | 1 p2 | (TC)11 | 22 | 631  | 652  | TATGATGCTGGACAAGTCGG      |
| scaffold741680_16.5 | 1 p2 | (GT)7  | 14 | 2974 | 2987 | TTAAGCCTGTAATGGGGCAC      |
| scaffold741683_15.8 | 1 p2 | (CA)11 | 22 | 9540 | 9561 | TCTTTGATTTGGCTGCTTTG      |
| scaffold741697_16.4 | 1 p2 | (AT)6  | 12 | 1445 | 1456 | TCTGGGATTGGGCTTTATCA      |
| scaffold741700_15.9 | 1 p2 | (CT)7  | 14 | 4196 | 4209 | TGTTGGTGTGATGGTTTTGG      |
| scaffold741701_14.8 | 1 p2 | (CA)7  | 14 | 660  | 673  | AAGCAACAATGGCAGCTTT       |
| scaffold741706_16.0 | 1 p2 | (AG)7  | 14 | 3517 | 3530 | TAAGCAACCGAAAAGATGCC      |
| scaffold741716_16.7 | 1 p2 | (GA)7  | 14 | 1758 | 1771 | TTGCAGCAAATGGATCTGTC      |
| scaffold741720_14.3 | 1 p2 | (CT)8  | 16 | 2281 | 2296 | TCTTCTGCCGTTGATGTCTG      |
| scaffold741727_15.0 | 1 p2 | (CT)6  | 12 | 2677 | 2688 | CAAAGAAACCGGAAGGTTGA      |
| scaffold741733_15.1 | 1 p2 | (TC)6  | 12 | 1303 | 1314 | AGCGAAAAGTCTAGATGCCGAA    |
| scaffold741738_13.5 | 1 p2 | (TC)8  | 16 | 887  | 902  | CGATGTTTCTCGTCTCACCA      |
| scaffold741759_11.9 | 1 p2 | (GA)6  | 12 | 2383 | 2394 | TGCTTTGCCTAGGCCTATTAAG    |
| scaffold741788_17.0 | 1 p2 | (CT)10 | 20 | 391  | 410  | ATCTTGCCGCTGTTAAGGAA      |
| scaffold741810_16.4 | 1 p2 | (AT)12 | 24 | 2652 | 2675 | GTTTCCGGTCAATGATGTCC      |
| scaffold741811_15.3 | 1 p2 | (CT)7  | 14 | 1322 | 1335 | ACAATCTTGGTGGTTACGCC      |
| scaffold741812_15.3 | 1 p2 | (CA)6  | 12 | 2882 | 2893 | TCTGCTTGTCAAAGTCGCAC      |
| scaffold741826_18.0 | 1 p2 | (TC)6  | 12 | 1330 | 1341 | CAAACCCCGAGTCTGATGTT      |
| scaffold741843_14.7 | 1 p2 | (TC)6  | 12 | 1491 | 1502 | GACCCCTCAGCAGTGACAGT      |
| scaffold741868_15.3 | 1 p2 | (GT)6  | 12 | 2298 | 2309 | ATTGCTGAATGTTGATGGCA      |
| scaffold741872_14.1 | 1 p2 | (TG)8  | 16 | 1118 | 1133 | CCGATAAGAATGGATGTGGG      |
| scaffold741875_17.0 | 1 p2 | (AT)7  | 14 | 4062 | 4075 | AAACAAGGGCAAGCATATCG      |
| scaffold741890_16.6 | 1 p2 | (TA)7  | 14 | 122  | 135  | TCGTTAGAGGTTTTGACGGG      |

|                     |      |        |    |      |      |                           |
|---------------------|------|--------|----|------|------|---------------------------|
| scaffold741899_22.3 | 1 p2 | (CA)6  | 12 | 3451 | 3462 | TGGTGAATATAGAAGGGCGG      |
| scaffold741903_16.4 | 1 p2 | (AG)6  | 12 | 4178 | 4189 | AAGCGCCAAATGTAAATCG       |
| scaffold741910_14.9 | 1 p2 | (TA)6  | 12 | 116  | 127  | CACACGCTGGAACGCTTTA       |
| scaffold741912_15.5 | 1 p2 | (AC)7  | 14 | 1873 | 1886 | CCTCACAATTTCCCCCTTTT      |
| scaffold741913_16.0 | 1 p2 | (AG)6  | 12 | 3485 | 3496 | ATCGTCTCAATAGTTGCCCC      |
| scaffold741920_17.0 | 1 p2 | (AT)6  | 12 | 2814 | 2825 | ATAAAGTAGTAGGCCCGCCC      |
| scaffold741926_14.8 | 1 p2 | (AC)6  | 12 | 3793 | 3804 | ACAAGAAACGGTGAGAACCC      |
| scaffold741941_19.0 | 1 p2 | (GT)8  | 16 | 1365 | 1380 | CTGATGCAGATGCAGACAGT      |
| scaffold741948_15.0 | 1 p2 | (AG)7  | 14 | 5572 | 5585 | TTCGTGCTCTTGAACGTGAC      |
| scaffold741958_18.0 | 1 p2 | (GA)8  | 16 | 719  | 734  | AAATGAAGTTGGGCAGTTTCG     |
| scaffold741971_18.9 | 1 p2 | (AG)6  | 12 | 2330 | 2341 | GGCATGCAATTTGTCAAGAA      |
| scaffold741984_14.2 | 1 p2 | (AT)11 | 22 | 3995 | 4016 | CCAAAGAGTGACGACCGAAT      |
| scaffold742012_17.0 | 1 p2 | (GT)6  | 12 | 3487 | 3498 | TCGTGTTCTCAGGATGTTGC      |
| scaffold742020_16.4 | 1 p2 | (TC)6  | 12 | 63   | 74   | GTGCAATGTGAGTGGACGTT      |
| scaffold742021_15.0 | 1 p2 | (TA)7  | 14 | 2840 | 2853 | GGTTCGAGTTTCGATGAGGA      |
| scaffold742032_15.1 | 1 p2 | (GA)6  | 12 | 2682 | 2693 | TCCGAACAAAATGCACAAAA      |
| scaffold742035_17.6 | 1 p2 | (CT)6  | 12 | 3224 | 3235 | CCAAGAAATCAAGGATCGGA      |
| scaffold742061_16.2 | 1 p2 | (AC)9  | 18 | 4743 | 4760 | GATGCCAAGGAACCTGTTGT      |
| scaffold742070_16.3 | 1 p2 | (TA)9  | 18 | 1416 | 1433 | ACAGGATCTGCAGGTGGAAC      |
| scaffold742080_16.5 | 1 p2 | (AG)8  | 16 | 1429 | 1444 | TGACTTTTGGGGTTTTTCGAG     |
| scaffold742085_15.0 | 1 p2 | (TA)7  | 14 | 777  | 790  | TGTTTGTGGTTGAGTACGCC      |
| scaffold742090_14.8 | 1 p2 | (TC)8  | 16 | 3293 | 3308 | CTTCTGTTGAAACCCCGGTA      |
| scaffold742133_15.0 | 1 p2 | (TA)6  | 12 | 2241 | 2252 | TGTTCTTCAAATGGGATGTCA     |
| scaffold742154_17.7 | 1 p2 | (TA)7  | 14 | 1465 | 1478 | TGTGTTGCCAAAAACACGAA      |
| scaffold742165_15.4 | 1 p2 | (AC)10 | 20 | 4075 | 4094 | TGAGCTGGACGGACATTGTA      |
| scaffold742174_14.1 | 1 p2 | (AG)7  | 14 | 2635 | 2648 | CAAGGCGTTGGAAAAATGAT      |
| scaffold742179_15.3 | 1 p2 | (TG)8  | 16 | 696  | 711  | TTTTGCTTCCACTGCTTGAA      |
| scaffold742192_14.8 | 1 p2 | (CT)11 | 22 | 1672 | 1693 | TAGTACCATCGCCACCCTCT      |
| scaffold742197_15.4 | 1 p2 | (GT)7  | 14 | 1513 | 1526 | ATGGAGACTTATGGAGGGGG      |
| scaffold742198_16.5 | 1 p2 | (GA)13 | 26 | 2640 | 2665 | AGAGCGTTAGCTCTTTCGCC      |
| scaffold742211_16.4 | 1 p2 | (AG)6  | 12 | 5152 | 5163 | AACCTGTATTGGGACATCGC      |
| scaffold742218_15.5 | 1 p2 | (AG)7  | 14 | 3402 | 3415 | GTTTATCTTCGGCTTGCTGC      |
| scaffold742221_17.5 | 1 p2 | (CT)7  | 14 | 2119 | 2132 | TGCTCTTATTCATGGTCCCC      |
| scaffold742223_13.4 | 1 p2 | (TA)6  | 12 | 1682 | 1693 | TCAGTTTTCGAGTTATGAATTTGC  |
| scaffold742236_16.0 | 1 p2 | (CT)6  | 12 | 2902 | 2913 | AAGCAGCAATCTCTGCCATT      |
| scaffold742248_16.1 | 1 p2 | (AC)6  | 12 | 587  | 598  | GTGTGGATGTCCATCACTGC      |
| scaffold742253_16.4 | 1 p2 | (TA)7  | 14 | 3250 | 3263 | AAATCTGCATGCACCTGTTT      |
| scaffold742279_15.1 | 1 p2 | (TG)7  | 14 | 856  | 869  | TGTTCAAACCTTTTGTGGGCA     |
| scaffold742280_15.5 | 1 p2 | (GA)8  | 16 | 3022 | 3037 | CACCACAGAAGAGGGAGAATG     |
| scaffold742293_15.2 | 1 p2 | (CA)9  | 18 | 83   | 100  | CTCGAACGGGATCTTGATGT      |
| scaffold742300_16.0 | 1 p2 | (CA)7  | 14 | 1214 | 1227 | AAGCAAACACCACAACACCA      |
| scaffold742309_16.8 | 1 p2 | (CT)6  | 12 | 270  | 281  | ATATATTGTGAGCCCTGGCG      |
| scaffold742329_15.0 | 1 p2 | (AT)7  | 14 | 206  | 219  | GCAGTGCTTCAAGAGGGAAC      |
| scaffold742332_17.5 | 1 p2 | (TC)9  | 18 | 997  | 1014 | TCAATTTGCCTGTGGAAGA       |
| scaffold742343_16.7 | 1 p2 | (AG)7  | 14 | 1193 | 1206 | TCGCCTCTCAAGATTGTGAAT     |
| scaffold742351_17.3 | 1 p2 | (CT)7  | 14 | 155  | 168  | AACACGCACTCTTTCACACG      |
| scaffold742357_16.6 | 1 p2 | (GA)6  | 12 | 819  | 830  | GATGGTAATTGGGAACGGTG      |
| scaffold742366_17.5 | 1 p2 | (AG)9  | 18 | 1945 | 1962 | GAATAAACGGCGGTAATGGA      |
| scaffold742411_17.9 | 1 p2 | (CT)6  | 12 | 211  | 222  | CGTCATCGTATTGGCTTCCT      |
| scaffold742422_15.4 | 1 p2 | (AT)6  | 12 | 2737 | 2748 | CTTTTGGACCTCCCTTCCTC      |
| scaffold742423_14.8 | 1 p2 | (AT)10 | 20 | 4316 | 4335 | TCTCCTCCGTGGACGTAGAT      |
| scaffold742424_17.8 | 1 p2 | (TA)6  | 12 | 167  | 178  | GCTCTGATGCCAAACTGTTG      |
| scaffold742447_14.6 | 1 p2 | (AG)7  | 14 | 1433 | 1446 | GTGGCAAATGAGGAGATGGT      |
| scaffold742451_15.0 | 1 p2 | (TC)9  | 18 | 2661 | 2678 | CAATGAATGACCAGCCGTAA      |
| scaffold742452_13.8 | 1 p2 | (TG)6  | 12 | 1347 | 1358 | TGAGTTGTTCAATTCAGATGTTGTT |
| scaffold742455_15.0 | 1 p2 | (AT)9  | 18 | 1436 | 1453 | CAGTTTTTGAATTATGATGCTTCA  |
| scaffold742465_19.8 | 1 p2 | (GA)7  | 14 | 32   | 45   | TCTCTCTAACACACAAACAGAGAA  |
| scaffold742467_17.3 | 1 p2 | (CT)6  | 12 | 813  | 824  | AGCGACCAACAGGTAACGAT      |

|                     |      |        |    |      |      |                           |
|---------------------|------|--------|----|------|------|---------------------------|
| scaffold742475_15.5 | 1 p2 | (TC)6  | 12 | 3959 | 3970 | CATTTTGCCTTGCAGGAACA      |
| scaffold742477_15.4 | 1 p2 | (TC)6  | 12 | 2147 | 2158 | ACACTATTACGCCTGGCTGC      |
| scaffold742494_14.3 | 1 p2 | (TC)8  | 16 | 2622 | 2637 | AAGCTGATGCCATATCCTCG      |
| scaffold742495_14.2 | 1 p2 | (AT)10 | 20 | 4171 | 4190 | GGCTCGAACCCAAAATATCA      |
| scaffold742517_15.6 | 1 p2 | (TA)6  | 12 | 5860 | 5871 | CCGAATCCTTTCATAGAGCG      |
| scaffold742539_17.3 | 1 p2 | (TC)6  | 12 | 6158 | 6169 | CCGATCCCAATCTCTCCATA      |
| scaffold742546_14.7 | 1 p2 | (AG)7  | 14 | 104  | 117  | GTCCGTTGGTTTACCCAGAG      |
| scaffold742556_16.9 | 1 p2 | (AT)6  | 12 | 624  | 635  | CAAGGAAGGAGGAGTGGTTG      |
| scaffold742557_14.0 | 1 p2 | (AT)10 | 20 | 1150 | 1169 | GAGTGGGTATGAGGGGAACA      |
| scaffold742558_15.5 | 1 p2 | (TC)12 | 24 | 2355 | 2378 | AAAGGCAATCCCACCTTTCT      |
| scaffold742560_15.6 | 1 p2 | (AT)7  | 14 | 2082 | 2095 | CAAAGGTTCCAAGCCGTTTA      |
| scaffold742566_16.6 | 1 p2 | (TA)10 | 20 | 46   | 65   | GGGGTTATCATGGGATCAAG      |
| scaffold742587_15.9 | 1 p2 | (CA)6  | 12 | 6974 | 6985 | ACTTGCGTAGCATCATCCAA      |
| scaffold742595_18.2 | 1 p2 | (CA)7  | 14 | 2364 | 2377 | TCGATGCATACTTGTTGGGA      |
| scaffold742597_15.7 | 1 p2 | (GA)9  | 18 | 1982 | 1999 | TAAACCTGGAGGAATTGCCA      |
| scaffold742625_14.7 | 1 p2 | (CT)8  | 16 | 1869 | 1884 | TCGTCACGTGCGATTTTAAC      |
| scaffold742629_14.6 | 1 p2 | (TA)6  | 12 | 1333 | 1344 | CCCAGTTCGTCGAGAAAGTC      |
| scaffold742640_17.0 | 1 p2 | (GA)6  | 12 | 542  | 553  | CAGACCATCTGGGAACTAATCA    |
| scaffold742651_16.0 | 1 p2 | (CT)9  | 18 | 902  | 919  | TGGAGCGCAGGCTATAAGAT      |
| scaffold742666_15.8 | 1 p2 | (CT)6  | 12 | 2880 | 2891 | AACAGCACTGACTGGCTTCA      |
| scaffold742690_16.5 | 1 p2 | (AG)12 | 24 | 1122 | 1145 | GCAAGAACGAAGATTCCAGC      |
| scaffold742699_15.7 | 1 p2 | (AT)8  | 16 | 759  | 774  | TGCAATAAAAAGACCTTGCATTT   |
| scaffold742709_16.6 | 1 p2 | (GA)9  | 18 | 1367 | 1384 | TCTCTCCACAATCACGCTG       |
| scaffold742713_15.9 | 1 p2 | (AT)7  | 14 | 1855 | 1868 | CCAGGAAGACTCATTGATCC      |
| scaffold742725_15.7 | 1 p2 | (TA)8  | 16 | 197  | 212  | CTCACACCCACATCCATCAG      |
| scaffold742727_16.2 | 1 p2 | (AT)7  | 14 | 1868 | 1881 | ACCTATTGAAAGCCTCCCGT      |
| scaffold742742_14.5 | 1 p2 | (TA)7  | 14 | 793  | 806  | GACGGCTTCTCAACACCTT       |
| scaffold742753_14.8 | 1 p2 | (TC)10 | 20 | 2651 | 2670 | AGCAGACTGGTTCCAAAAGC      |
| scaffold742756_18.3 | 1 p2 | (CT)8  | 16 | 423  | 438  | GGGGCTGCTTCTCTTCTCT       |
| scaffold742761_16.3 | 1 p2 | (AG)10 | 20 | 2999 | 3018 | TACTGCAAATCCGCCTCTT       |
| scaffold742763_16.0 | 1 p2 | (TG)6  | 12 | 5372 | 5383 | TGGGTCTCAGATTCTTGGTCA     |
| scaffold742766_16.4 | 1 p2 | (AG)6  | 12 | 855  | 866  | TATGCATCGCTCAGATTTTCG     |
| scaffold742776_16.7 | 1 p2 | (AG)8  | 16 | 730  | 745  | GGTACTGGTGGAACTGCCAT      |
| scaffold742777_17.7 | 1 p2 | (AT)9  | 18 | 9078 | 9095 | AATGTTTCTGCCACTCAAA       |
| scaffold742780_15.0 | 1 p2 | (AG)6  | 12 | 8006 | 8017 | CCATACAAGCAGTGGCAGAA      |
| scaffold742781_15.0 | 1 p2 | (CT)7  | 14 | 1034 | 1047 | GGAACAACACTATCCCATTTGC    |
| scaffold742797_15.6 | 1 p2 | (TA)6  | 12 | 519  | 530  | ACCTCAGAAACCAGTGGTTCG     |
| scaffold742816_14.9 | 1 p2 | (TG)6  | 12 | 2611 | 2622 | CTTCAGTACTTGGCCCACTTG     |
| scaffold742848_15.2 | 1 p2 | (CT)8  | 16 | 2119 | 2134 | CCATTTTCTTATCTCGCCCA      |
| scaffold742852_16.5 | 1 p2 | (TG)6  | 12 | 1600 | 1611 | TGCTGACAGGATTAATTGATGG    |
| scaffold742877_16.3 | 1 p2 | (CT)9  | 18 | 441  | 458  | GTTGAATCGATTGTACCGCC      |
| scaffold742908_17.8 | 1 p2 | (CA)6  | 12 | 728  | 739  | GGCCACATGCTCAATTACCT      |
| scaffold742937_15.6 | 1 p2 | (TA)6  | 12 | 51   | 62   | TGAAGTTAGGAAATAAGGAGGTGTT |
| scaffold742941_15.5 | 1 p2 | (TC)10 | 20 | 7420 | 7439 | GATCCTTCTCTCGTTATGGC      |
| scaffold742946_14.0 | 1 p2 | (TG)7  | 14 | 2203 | 2216 | TCGCGTAAACAACACGATCT      |
| scaffold742952_18.4 | 1 p2 | (CT)6  | 12 | 319  | 330  | TTATCGGCTGTACTCTCTCGC     |
| scaffold742993_16.0 | 1 p2 | (AT)7  | 14 | 2079 | 2092 | TCCTACAACCTCCGTTTCTTG     |
| scaffold742996_16.7 | 1 p2 | (AT)9  | 18 | 2273 | 2290 | AAGATTTTTGTCCAGTCGGG      |
| scaffold743002_16.5 | 1 p2 | (TC)8  | 16 | 312  | 327  | ATCCCTCGCGCTCACTACTA      |
| scaffold743011_17.9 | 1 p2 | (TC)9  | 18 | 297  | 314  | TATGGGATTGGGTCTTTTGC      |
| scaffold743032_16.0 | 1 p2 | (AG)6  | 12 | 4618 | 4629 | ATTAAAGCACCTTTCGCGTG      |
| scaffold743041_13.5 | 1 p2 | (AT)7  | 14 | 2380 | 2393 | GGGGAAAACCTTTCAGAG        |
| scaffold743047_16.3 | 1 p2 | (AG)8  | 16 | 181  | 196  | CTGGTCCATTCAAACCTGCT      |
| scaffold743049_14.0 | 1 p2 | (AT)6  | 12 | 4783 | 4794 | CCGCATCTTCTAACGAGAGG      |
| scaffold743051_16.6 | 1 p2 | (TC)8  | 16 | 3302 | 3317 | AAGATGTCGCCGTCTCTCAC      |
| scaffold743055_15.9 | 1 p2 | (TC)12 | 24 | 1462 | 1485 | AGGCCAAAGACCTTACGAGT      |
| scaffold743065_15.9 | 1 p2 | (AG)6  | 12 | 5227 | 5238 | CTCGAGGAAGTAATCGCAGG      |
| scaffold743066_15.9 | 1 p2 | (TA)11 | 22 | 93   | 114  | TTTTCGAGTTATGAAGTTAGCACC  |

|                     |      |        |    |      |      |                            |
|---------------------|------|--------|----|------|------|----------------------------|
| scaffold743076_15.8 | 1 p2 | (TA)8  | 16 | 350  | 365  | CCCTCCCTTAAAATCGGAAA       |
| scaffold743078_23.7 | 1 p2 | (TA)8  | 16 | 228  | 243  | GCCAAGTTCACTAACCTTTTTCTC   |
| scaffold743085_16.6 | 1 p2 | (AT)7  | 14 | 1049 | 1062 | AACCAACATGCACAACCAAAA      |
| scaffold743101_16.0 | 1 p2 | (GA)6  | 12 | 2997 | 3008 | GGGTTCTGCGTCATAAAAA        |
| scaffold743107_16.6 | 1 p2 | (GA)6  | 12 | 47   | 58   | GGAGAGAGAGTGTGGGTAGAGA     |
| scaffold743132_15.0 | 1 p2 | (TA)7  | 14 | 2359 | 2372 | ATATCAGAAAGCCACACGGC       |
| scaffold743175_16.5 | 1 p2 | (AT)10 | 20 | 48   | 67   | CGCCGGTGCCTATCATATT        |
| scaffold743185_14.8 | 1 p2 | (AG)8  | 16 | 6900 | 6915 | GAACACCTCTCCAGAGCCAG       |
| scaffold743191_16.0 | 1 p2 | (CT)6  | 12 | 3218 | 3229 | CAGCAAATACTCTGCACCGA       |
| scaffold743198_16.4 | 1 p2 | (TC)6  | 12 | 1295 | 1306 | TATCCGAGTTTCATTCCGGG       |
| scaffold743205_16.5 | 1 p2 | (AT)10 | 20 | 2391 | 2410 | GGAAATTGAAGCTGTTGCCT       |
| scaffold743207_15.8 | 1 p2 | (TA)6  | 12 | 87   | 98   | CAGATGCTCGAACAAGTCCA       |
| scaffold743212_16.5 | 1 p2 | (AC)7  | 14 | 1887 | 1900 | TTACGGATATGGCCGGTTTA       |
| scaffold743221_14.5 | 1 p2 | (TC)7  | 14 | 1824 | 1837 | TTTCATCGTCTGCAACAAGC       |
| scaffold743224_14.8 | 1 p2 | (AT)6  | 12 | 2443 | 2454 | GGTTTGTGGGACAAAAGGAA       |
| scaffold743226_16.0 | 1 p2 | (GA)11 | 22 | 3727 | 3748 | GATCAATGTCTTTGGGCGTT       |
| scaffold743241_16.5 | 1 p2 | (GA)6  | 12 | 328  | 339  | TTTTCTAGAGAGGGAGGGG        |
| scaffold743246_15.0 | 1 p2 | (GA)10 | 20 | 2160 | 2179 | TCACTGTTTATCCCCCTTGC       |
| scaffold743251_14.8 | 1 p2 | (AT)6  | 12 | 674  | 685  | GGAGAAAGTTGATTTGTTGGGA     |
| scaffold743261_16.6 | 1 p2 | (AT)6  | 12 | 1763 | 1774 | TTGTTGCCTTCTGATGCTTG       |
| scaffold812_14.6    | 1 p3 | (ATT)5 | 15 | 903  | 917  | GGCCAACCCATTTGACTTTA       |
| scaffold1098_16.9   | 1 p3 | (ATC)5 | 15 | 248  | 262  | GGGTGGTATGGTGGAAGAAA       |
| scaffold1208_14.5   | 1 p3 | (CTC)5 | 15 | 689  | 703  | CATTCACCACATGAGATGCC       |
| scaffold1331_10.4   | 1 p3 | (ACA)5 | 15 | 334  | 348  | CCTTTGAGAATAATGACATTGG     |
| scaffold1455_15.6   | 1 p3 | (ATT)5 | 15 | 316  | 330  | CGAACCGGAATCGTAGTTGT       |
| scaffold1511_11.7   | 1 p3 | (ATG)5 | 15 | 193  | 207  | GCGACATCCACATAACATGC       |
| scaffold1599_16.9   | 1 p3 | (ATT)7 | 21 | 721  | 741  | CTATTTGGGAGTGGGTGGAA       |
| scaffold1761_16.1   | 1 p3 | (TCA)6 | 18 | 424  | 441  | GCCTTCAAAAACCATGCAAC       |
| scaffold1840_16.0   | 1 p3 | (CCA)5 | 15 | 821  | 835  | GGTGTGATTCCAGCAGCTT        |
| scaffold2512_10.9   | 1 p3 | (TGA)8 | 24 | 235  | 258  | CCAAGACCCCAATTTGATT        |
| scaffold2627_15.0   | 1 p3 | (ATT)5 | 15 | 104  | 118  | TCTTTCGTTGCCAGGGTAAA       |
| scaffold2962_15.4   | 1 p3 | (AAT)5 | 15 | 237  | 251  | TTCCGTTACCCTCGACTTTG       |
| scaffold3235_12.9   | 1 p3 | (CGG)5 | 15 | 184  | 198  | AGTTGCAGCAGCATTCTCT        |
| scaffold3590_15.1   | 1 p3 | (TCT)8 | 24 | 1917 | 1940 | TCTGATCAAAACTGCTTCGG       |
| scaffold3649_15.8   | 1 p3 | (CGG)6 | 18 | 622  | 639  | AGACCCACAATTCCAACCAC       |
| scaffold3663_17.9   | 1 p3 | (ATG)5 | 15 | 103  | 117  | TCGAGTAAGCGGAAATCAAGA      |
| scaffold3668_15.3   | 1 p3 | (CTA)5 | 15 | 1452 | 1466 | TGCATCAATCTCATTTCCCA       |
| scaffold4159_16.1   | 1 p3 | (GAC)5 | 15 | 905  | 919  | TAAAATGGAGAAAATGCGCC       |
| scaffold4441_14.6   | 1 p3 | (GAT)5 | 15 | 5068 | 5082 | GCCATTACATGCAGGGTTCT       |
| scaffold4575_14.6   | 1 p3 | (TCA)6 | 18 | 726  | 743  | GCTCATGTCAACGTTTTCTGG      |
| scaffold5211_16.6   | 1 p3 | (ATT)5 | 15 | 1169 | 1183 | CTGATCCCATGTTTTCTGCAT      |
| scaffold5479_13.8   | 1 p3 | (TTA)5 | 15 | 486  | 500  | TCCCTATAACCGATACACCG       |
| scaffold5712_14.7   | 1 p3 | (CCG)5 | 15 | 121  | 135  | CTTTTTGTATGGGTCGCGTT       |
| scaffold6097_16.9   | 1 p3 | (ACA)5 | 15 | 591  | 605  | TGGAAGTTATGGTCGCAACA       |
| scaffold7149_14.2   | 1 p3 | (TTC)5 | 15 | 428  | 442  | ATCGGGTGGAGATTGTTACC       |
| scaffold7235_13.8   | 1 p3 | (CAC)5 | 15 | 135  | 149  | ATCACCGGCAGCAGATTAAG       |
| scaffold7350_12.3   | 1 p3 | (ATT)5 | 15 | 178  | 192  | ATAAAGTGCGGAGCTAGGG        |
| scaffold7927_17.0   | 1 p3 | (GAT)5 | 15 | 3619 | 3633 | AGAGGAAAATGGAAAGGCGT       |
| scaffold7953_13.9   | 1 p3 | (TTA)6 | 18 | 147  | 164  | CCACAGCATTGACATTAGGG       |
| scaffold8247_15.0   | 1 p3 | (CCG)5 | 15 | 1548 | 1562 | CTGAAATCCCATTTCGCATCT      |
| scaffold8307_13.8   | 1 p3 | (TGT)5 | 15 | 46   | 60   | ATGTAGCCGACCCCAATTTA       |
| scaffold9587_14.7   | 1 p3 | (TTA)5 | 15 | 525  | 539  | CGTTTTATCTGCGGATTTCAA      |
| scaffold9866_15.2   | 1 p3 | (AAT)5 | 15 | 2561 | 2575 | ACAAGTTCGAAACCTGGACC       |
| scaffold9883_12.9   | 1 p3 | (TGA)6 | 18 | 43   | 60   | CCAAGACCCCAATTTGATT        |
| scaffold10562_15.0  | 1 p3 | (AAC)8 | 24 | 1636 | 1659 | AGTATGACGGCCATGGGTAA       |
| scaffold10985_16.8  | 1 p3 | (AAG)5 | 15 | 52   | 66   | TCAATATCTTACAATATCACAATGGC |
| scaffold11170_10.4  | 1 p3 | (AAT)7 | 21 | 211  | 231  | TGTTCCGACTGAACTGGTGA       |
| scaffold11593_14.0  | 1 p3 | (ACA)5 | 15 | 138  | 152  | CGAGGCTGAATTTATGGCAC       |



|                    |      |        |    |       |                                |
|--------------------|------|--------|----|-------|--------------------------------|
| scaffold12446_16.1 | 1 p3 | (CCA)5 | 15 | 4411  | 4425 AACATTCCGCCACAGATAGG      |
| scaffold13512_13.6 | 1 p3 | (AAT)5 | 15 | 131   | 145 GGATGATGGATTTCGAGTGGA      |
| scaffold14589_16.6 | 1 p3 | (CCG)5 | 15 | 1974  | 1988 GATTTTGCGGCGTTTGTATT      |
| scaffold14724_15.1 | 1 p3 | (GAA)5 | 15 | 52    | 66 GCTTCTCACGATTCTTGGTGT       |
| scaffold14863_12.8 | 1 p3 | (ATC)7 | 21 | 223   | 243 TGCAACACTTGAGCTTATGGA      |
| scaffold14883_16.8 | 1 p3 | (ACA)7 | 21 | 1620  | 1640 TGTTCCGGTGAATGTTTTGGA     |
| scaffold14889_13.5 | 1 p3 | (GGA)5 | 15 | 430   | 444 AGCAATGCGAGGATGAAGAT       |
| scaffold14944_10.2 | 1 p3 | (ATA)5 | 15 | 52    | 66 CTACCTCGCCTCGCTATTTG        |
| scaffold15105_16.5 | 1 p3 | (ATC)6 | 18 | 1106  | 1123 TTTATTAGAATGCCGGGGAA      |
| scaffold15303_14.0 | 1 p3 | (TTA)5 | 15 | 115   | 129 GAAAAAGATGGTAAAAACCTCCA    |
| scaffold15875_18.9 | 1 p3 | (GCA)6 | 18 | 31    | 48 CAGCCAAACATTGAGCAGTT        |
| scaffold15940_14.7 | 1 p3 | (TTC)5 | 15 | 970   | 984 AATGCCTTATTTTCCCACCC       |
| scaffold16359_14.2 | 1 p3 | (AAT)6 | 18 | 315   | 332 CAGAGCGCACTCGAATAACA       |
| scaffold16669_13.0 | 1 p3 | (AAC)6 | 18 | 286   | 303 TTCGAACCTTCTGCAAAATATAA    |
| scaffold16827_11.6 | 1 p3 | (TAA)5 | 15 | 58    | 72 AAGAACATTTATGGCAAACAACA     |
| scaffold16963_18.3 | 1 p3 | (GTG)5 | 15 | 539   | 553 CTACCACTGCCGAAAACAT        |
| scaffold17092_16.0 | 1 p3 | (ATA)5 | 15 | 5841  | 5855 TTGAAGAGAGGCAACGAGGT      |
| scaffold17138_15.2 | 1 p3 | (ACT)5 | 15 | 1688  | 1702 TCTAGCCCACAACCTTGGCTT     |
| scaffold17836_16.5 | 1 p3 | (ATG)5 | 15 | 380   | 394 TCATTGAGCATGCTACGACC       |
| scaffold18172_21.9 | 1 p3 | (ATG)5 | 15 | 37    | 51 CCTGAAACGAGTGATGCTCC        |
| scaffold19294_14.7 | 1 p3 | (AAC)5 | 15 | 1911  | 1925 CCGAACCGGAAAAGTCACTA      |
| scaffold19396_18.2 | 1 p3 | (TTA)5 | 15 | 757   | 771 CCACCTACAGGTGCACAAGA       |
| scaffold19406_16.1 | 1 p3 | (CGG)5 | 15 | 1370  | 1384 TTGGCTATCGGTTACTTGGG      |
| scaffold19923_16.4 | 1 p3 | (ATA)5 | 15 | 12235 | 12249 ACCTTCTTGCAACCAACGTA     |
| scaffold20611_15.9 | 1 p3 | (ATA)5 | 15 | 2540  | 2554 ATCGAACCGTGAACACCCTA      |
| scaffold20806_11.9 | 1 p3 | (GAA)5 | 15 | 270   | 284 CTCCTGCTTACCTCGATT         |
| scaffold21294_13.9 | 1 p3 | (GAC)5 | 15 | 53    | 67 ACAAAAATCCAACAAACCCG        |
| scaffold21378_21.3 | 1 p3 | (TAA)6 | 18 | 751   | 768 TGTGATTTCAATCGCATGTT       |
| scaffold21743_14.8 | 1 p3 | (TGT)7 | 21 | 1398  | 1418 TGTCTTCTATTCATCTGGCCG     |
| scaffold21825_14.7 | 1 p3 | (TAT)8 | 24 | 653   | 676 TTGTAAGTGTGGCTTCATGTT      |
| scaffold21902_15.6 | 1 p3 | (GTT)5 | 15 | 53    | 67 TGGTTTTAATTGTGGGCTCTC       |
| scaffold21940_12.3 | 1 p3 | (AGA)5 | 15 | 53    | 67 TTTTTCACGGTTGGAAAGGA        |
| scaffold22365_15.4 | 1 p3 | (ATC)6 | 18 | 61    | 78 TCAATCACCAATCAACACTTGAA     |
| scaffold22515_13.1 | 1 p3 | (ATT)5 | 15 | 504   | 518 TGTTGAAAACCAAGGTGATG       |
| scaffold23725_14.0 | 1 p3 | (TGT)6 | 18 | 41    | 58 CCAATTTATTGGGATTAAGGC       |
| scaffold23989_13.8 | 1 p3 | (TTA)5 | 15 | 526   | 540 CAGCAAAACAACCTTCATGTACGA   |
| scaffold24715_16.6 | 1 p3 | (TCA)5 | 15 | 852   | 866 CAGGCACTCCAAAATCAGGT       |
| scaffold24965_16.0 | 1 p3 | (CTT)5 | 15 | 81    | 95 CGCCGTTAGCAAAGGAATTA        |
| scaffold25050_11.6 | 1 p3 | (TGT)5 | 15 | 47    | 61 TGTAGCCGACCCCAATTTAT        |
| scaffold25213_12.5 | 1 p3 | (GAT)5 | 15 | 118   | 132 TACAAATCAAGCACGCAAGC       |
| scaffold25814_11.1 | 1 p3 | (ATT)5 | 15 | 229   | 243 TGAATTGGGTTTGACAATCG       |
| scaffold25849_12.3 | 1 p3 | (TTC)5 | 15 | 114   | 128 GGCGATTGTCAACTTGGTTT       |
| scaffold25865_17.8 | 1 p3 | (ACC)7 | 21 | 1329  | 1349 TGTCTGAAATAGCTTGGCCC      |
| scaffold25889_18.4 | 1 p3 | (TTC)5 | 15 | 786   | 800 TCATCACTCCACCTGCTCAC       |
| scaffold26004_13.0 | 1 p3 | (CAT)6 | 18 | 868   | 885 CCACAAGTTATCACACCCCC       |
| scaffold26245_16.2 | 1 p3 | (TTA)6 | 18 | 327   | 344 TTTTACGTTGTACGAATCCTATCTTT |
| scaffold26323_10.2 | 1 p3 | (AAT)5 | 15 | 70    | 84 ACATCGCATACGTGTATGTTAAT     |
| scaffold26655_15.0 | 1 p3 | (ATG)6 | 18 | 1001  | 1018 ATCCCAAGATGACCATGAGC      |
| scaffold26685_12.9 | 1 p3 | (TAT)6 | 18 | 2097  | 2114 ACGTGGGACCTTTTCAGTCAC     |
| scaffold27208_17.2 | 1 p3 | (ATA)5 | 15 | 227   | 241 AATGCTGGAAATTCGATTGG       |
| scaffold27305_15.1 | 1 p3 | (CAC)6 | 18 | 2093  | 2110 TCTCCATGATTCCATCGTCA      |
| scaffold28279_12.8 | 1 p3 | (TTC)5 | 15 | 189   | 203 ATTTCCGGTCAACCTTTGAA       |
| scaffold28381_14.5 | 1 p3 | (ATC)5 | 15 | 64    | 78 GTGATGCCATAACATCGTCG        |
| scaffold28526_13.0 | 1 p3 | (TTA)5 | 15 | 224   | 238 TTTAAAATCGGACCGGAGA        |
| scaffold28775_13.4 | 1 p3 | (AAT)5 | 15 | 233   | 247 TCGTGCAATAAACTCGTGC        |
| scaffold29076_18.7 | 1 p3 | (CAG)5 | 15 | 466   | 480 ACATGTTGAGTCCGAGTCCC       |
| scaffold29092_12.0 | 1 p3 | (ATT)5 | 15 | 150   | 164 TGAAGGACCCGTCATACAAC       |
| scaffold30000_12.6 | 1 p3 | (TAT)5 | 15 | 700   | 714 ATTTGGTGCTCAGTGGTTCC       |

|                    |      |        |    |      |                              |
|--------------------|------|--------|----|------|------------------------------|
| scaffold30204_15.3 | 1 p3 | (AGC)6 | 18 | 128  | 145 TACGGCCGGGTAAATTACAT     |
| scaffold30252_15.9 | 1 p3 | (GAG)5 | 15 | 2987 | 3001 ATGGCCAGAGGAAGTAAGCA    |
| scaffold30258_11.0 | 1 p3 | (AGA)5 | 15 | 435  | 449 GATTGTTGAAGGCCGACAGT     |
| scaffold30697_15.9 | 1 p3 | (TGT)5 | 15 | 75   | 89 CATGTAGCCGATCCCAATTT      |
| scaffold30714_14.5 | 1 p3 | (ATG)5 | 15 | 684  | 698 TGGCAACTCAAAAATGCTCA     |
| scaffold30745_12.4 | 1 p3 | (CCG)5 | 15 | 235  | 249 AATACCGATACCCACTCCCC     |
| scaffold31031_15.0 | 1 p3 | (CCA)5 | 15 | 1588 | 1602 CCAGCAGAACAAGAACACCA    |
| scaffold31088_10.2 | 1 p3 | (GTG)7 | 21 | 733  | 753 GGATTTGGGAATGGAACCTTG    |
| scaffold31311_10.3 | 1 p3 | (GCT)5 | 15 | 329  | 343 CCCAGTTTTTGGTCTGACTGG    |
| scaffold31601_14.9 | 1 p3 | (ATC)5 | 15 | 407  | 421 ACCGTCCACGTCAGTATTCC     |
| scaffold31994_14.6 | 1 p3 | (ATA)7 | 21 | 516  | 536 CTTGCTTCCTCGCTTGTCTC     |
| scaffold32356_16.6 | 1 p3 | (CAT)5 | 15 | 382  | 396 TGTTGAAAGAGCCTCCATCC     |
| scaffold32738_15.2 | 1 p3 | (ACA)6 | 18 | 431  | 448 TAGTGTAGGACCCCTCACGC     |
| scaffold32880_15.8 | 1 p3 | (TTA)5 | 15 | 1877 | 1891 TTACCAGGTGGCAACATTCA    |
| scaffold32930_16.0 | 1 p3 | (TTG)5 | 15 | 227  | 241 ACCCTACATAGCGGGGAAAG     |
| scaffold33369_12.1 | 1 p3 | (GGC)6 | 18 | 245  | 262 GAGGGGGAAAAGAGAGGATG     |
| scaffold33812_16.0 | 1 p3 | (GCG)5 | 15 | 711  | 725 CGTTACTTCCATTGACCGCT     |
| scaffold33872_13.8 | 1 p3 | (GGC)5 | 15 | 267  | 281 TCGACCCAAATAGAAGACCG     |
| scaffold33961_10.0 | 1 p3 | (TGA)5 | 15 | 450  | 464 TGTTGTGTATTGACCCCCAA     |
| scaffold34135_16.6 | 1 p3 | (ACA)6 | 18 | 1568 | 1585 GTGGTCCACTCTAATGCCGT    |
| scaffold34209_16.6 | 1 p3 | (TTC)5 | 15 | 330  | 344 GCTGAGTACCCCATCTTCCA     |
| scaffold34421_12.0 | 1 p3 | (AAT)5 | 15 | 701  | 715 TGGAGGAATAAAGGCTGGTG     |
| scaffold34893_10.5 | 1 p3 | (GGC)5 | 15 | 233  | 247 ATCTTCTTCTGGATGCGGTG     |
| scaffold35049_10.4 | 1 p3 | (TGG)6 | 18 | 160  | 177 AACATCCAAGTTATTCACGGA    |
| scaffold35083_15.4 | 1 p3 | (CAA)5 | 15 | 140  | 154 ATTCGCCGACAAGATAATGG     |
| scaffold35166_18.5 | 1 p3 | (GCA)5 | 15 | 1645 | 1659 GTAGACGCCAGCCAGTTAGG    |
| scaffold35388_12.1 | 1 p3 | (CAA)5 | 15 | 310  | 324 ATCAAACACGCCAATCATCA     |
| scaffold35477_15.4 | 1 p3 | (GAT)5 | 15 | 246  | 260 CGCAACCATTTATTGTGAC      |
| scaffold35574_12.5 | 1 p3 | (AAT)6 | 18 | 398  | 415 AATGCGTAACCTTGTTTGC      |
| scaffold35645_15.1 | 1 p3 | (TAT)5 | 15 | 2047 | 2061 GGGTTTGAATTTTGTGGCAT    |
| scaffold35846_10.7 | 1 p3 | (TTA)6 | 18 | 222  | 239 TTTGTGTGCATCAACTTGTGTG   |
| scaffold36287_19.6 | 1 p3 | (GCT)5 | 15 | 286  | 300 GCCAGAACCGAGAGCACTAC     |
| scaffold36382_13.1 | 1 p3 | (TAA)5 | 15 | 1342 | 1356 CATAAATGCCGAAATGGAGA    |
| scaffold36497_17.3 | 1 p3 | (GCT)5 | 15 | 433  | 447 CAATGACGAATAGCAGCCAA     |
| scaffold36522_15.9 | 1 p3 | (AAT)7 | 21 | 221  | 241 CCGGATATCCAGTTTTCATCC    |
| scaffold36721_15.0 | 1 p3 | (ATC)5 | 15 | 928  | 942 CAGCGAATCAATACGTGCAT     |
| scaffold36722_16.1 | 1 p3 | (TCT)5 | 15 | 642  | 656 CGCCGAAGTCATTAGGTCTC     |
| scaffold37851_14.3 | 1 p3 | (GAT)5 | 15 | 115  | 129 ACGAGCAAGAGGATGAGGAA     |
| scaffold37987_13.4 | 1 p3 | (AAT)6 | 18 | 1384 | 1401 CTTTCGTTGATCGATTGGGT    |
| scaffold38130_15.7 | 1 p3 | (CAT)5 | 15 | 1739 | 1753 TAAGGTTGGCTGTAATGCC     |
| scaffold38136_13.2 | 1 p3 | (TGA)5 | 15 | 111  | 125 CCCAAAACCCCAATTTGATT     |
| scaffold38205_12.6 | 1 p3 | (TAT)5 | 15 | 213  | 227 TTTTTCCACCACTTATTCTTTTGA |
| scaffold38441_21.3 | 1 p3 | (TAA)5 | 15 | 159  | 173 TTCGAATGTTGCTGCTCAAG     |
| scaffold38600_15.0 | 1 p3 | (GGC)5 | 15 | 1119 | 1133 AGAAGAGGGAAAAGCCCAAG    |
| scaffold39144_18.3 | 1 p3 | (TGA)5 | 15 | 43   | 57 CCCAAGACCCCAATTTGATT      |
| scaffold39186_10.0 | 1 p3 | (ATC)6 | 18 | 89   | 106 TTTTCATGGGTACACATTTGAGC  |
| scaffold39431_14.6 | 1 p3 | (GAA)5 | 15 | 195  | 209 GGGAAGGGGACAACATTTCT     |
| scaffold39471_13.4 | 1 p3 | (GTG)5 | 15 | 376  | 390 ATCCACTTTTTCTGCTTTGGC    |
| scaffold39673_14.5 | 1 p3 | (ATT)5 | 15 | 190  | 204 TTGATCACACACGAGTCCATT    |
| scaffold39682_16.5 | 1 p3 | (TCA)5 | 15 | 495  | 509 CGTTGGTGAAGAACAACATTTGA  |
| scaffold39754_13.6 | 1 p3 | (TAT)5 | 15 | 710  | 724 GTTTGGAGGTCAGGTGTTCCG    |
| scaffold39984_17.0 | 1 p3 | (AAT)6 | 18 | 471  | 488 ATGGCCTCCCACCTTCTATT     |
| scaffold40059_13.1 | 1 p3 | (TGT)7 | 21 | 50   | 70 TTTGGTTCAATTTAGCCGACC     |
| scaffold40407_12.7 | 1 p3 | (ATA)5 | 15 | 386  | 400 TCTCTTTGCCCAGCATCTT      |
| scaffold40412_17.5 | 1 p3 | (ATG)5 | 15 | 37   | 51 AGGAGGATGACGACGATGAT      |
| scaffold40525_19.1 | 1 p3 | (GAA)5 | 15 | 199  | 213 CCACCAATGACAGCAATCAG     |
| scaffold40587_13.6 | 1 p3 | (CGG)5 | 15 | 50   | 64 CCACCATCGTCTGCTCATC       |
| scaffold40594_12.2 | 1 p3 | (AAT)5 | 15 | 328  | 342 ACGTTTACGCTCTGCGATTT     |

|                    |      |        |    |      |                               |
|--------------------|------|--------|----|------|-------------------------------|
| scaffold40686_10.2 | 1 p3 | (AGA)5 | 15 | 68   | 82 TCTACTTAGAGCAGGGCCGA       |
| scaffold40769_15.6 | 1 p3 | (TCG)5 | 15 | 563  | 577 TTTTGTGTTTGCTGCTTCG       |
| scaffold40883_17.9 | 1 p3 | (CTT)5 | 15 | 2833 | 2847 TTCGAAGCTTGGAGAACGAT     |
| scaffold41212_10.4 | 1 p3 | (ATC)5 | 15 | 867  | 881 CAAAACCTTGGTGAACAGGC      |
| scaffold41535_13.9 | 1 p3 | (TGT)7 | 21 | 39   | 59 TGTAGCCGACCCCAATTTAT       |
| scaffold41659_15.8 | 1 p3 | (TCT)5 | 15 | 886  | 900 TGGGGGAGAAGTATGTGAGG      |
| scaffold41863_14.8 | 1 p3 | (GAA)5 | 15 | 605  | 619 CCGTCAAGCTCTATGCTTCC      |
| scaffold43211_15.3 | 1 p3 | (CCG)5 | 15 | 4494 | 4508 AATCACAAACAAATTCGGC      |
| scaffold43343_13.9 | 1 p3 | (ATG)6 | 18 | 102  | 119 TGGCTCGAATTACAAAACCA      |
| scaffold43373_16.5 | 1 p3 | (ATT)6 | 18 | 725  | 742 TGCACTGCTTATCAGATTCAAG    |
| scaffold43915_17.7 | 1 p3 | (GAT)5 | 15 | 329  | 343 AGTTGAAATGCTTGCATGGG      |
| scaffold44026_10.4 | 1 p3 | (CTC)5 | 15 | 452  | 466 TGCCTCAGACTCTTCCACCT      |
| scaffold44112_12.7 | 1 p3 | (CCT)5 | 15 | 303  | 317 GCTCCTCCACCTCTGTTCTG      |
| scaffold44366_18.4 | 1 p3 | (ACA)6 | 18 | 1943 | 1960 GGTTGTGTGCCATCATCAAG     |
| scaffold44479_13.6 | 1 p3 | (CTT)5 | 15 | 175  | 189 GGCACAAACTTGTGACTCCA      |
| scaffold45283_16.6 | 1 p3 | (TTA)5 | 15 | 188  | 202 TTCTCATCTCCAGTCTCCATGA    |
| scaffold45418_17.1 | 1 p3 | (CAA)7 | 21 | 3618 | 3638 AGAGGTTGGAGCAATGAGCA     |
| scaffold45616_16.5 | 1 p3 | (CCG)5 | 15 | 502  | 516 CAGTCGTCAGCCGTCACCTTA     |
| scaffold45710_12.2 | 1 p3 | (CCA)5 | 15 | 204  | 218 CACCCCTATTCTTTTTGCC       |
| scaffold45763_16.7 | 1 p3 | (CGC)5 | 15 | 295  | 309 AAGAAGATTTTTGCCACCCA      |
| scaffold45971_10.9 | 1 p3 | (AAT)5 | 15 | 107  | 121 TTCCATGACCCTCGACTTTG      |
| scaffold46072_15.4 | 1 p3 | (AAG)5 | 15 | 866  | 880 TGCTGTCTCTGGCTCTTTCTT     |
| scaffold46129_10.0 | 1 p3 | (TTA)6 | 18 | 49   | 66 TTGCCCACTCCACCACTT         |
| scaffold46353_16.5 | 1 p3 | (GCC)6 | 18 | 1115 | 1132 AATGCAGGTTGGAAAAGGTG     |
| scaffold46716_15.8 | 1 p3 | (CAA)6 | 18 | 2651 | 2668 GCTTTCGTTGCACATCTTGT     |
| scaffold46869_13.9 | 1 p3 | (ACA)6 | 18 | 64   | 81 CACATGTTGTCAAATAGATTCCTAGI |
| scaffold46945_12.2 | 1 p3 | (ATG)5 | 15 | 947  | 961 CAATCGGTCATGAGTTCGAG      |
| scaffold47006_15.0 | 1 p3 | (AGG)7 | 21 | 1884 | 1904 GCCCAACTATTGGTGTGTG      |
| scaffold47721_10.5 | 1 p3 | (TGT)5 | 15 | 38   | 52 TGTAGCCGACCCCAATTTAT       |
| scaffold47809_14.2 | 1 p3 | (AAT)5 | 15 | 400  | 414 TCGGATTCTATTAGTGATTCAAGA  |
| scaffold48162_11.6 | 1 p3 | (CAT)6 | 18 | 368  | 385 TCAAATCATCACTCTCCACTCA    |
| scaffold48290_13.9 | 1 p3 | (ATA)6 | 18 | 1993 | 2010 TGGCTCATTACACAAAACG      |
| scaffold48400_16.2 | 1 p3 | (AAC)5 | 15 | 1566 | 1580 CCTTGCAGAAAAGGCTTAGG     |
| scaffold48497_12.7 | 1 p3 | (TTA)5 | 15 | 265  | 279 TGGCAAGATTTGTTTTGACAGT    |
| scaffold48597_10.9 | 1 p3 | (CAA)5 | 15 | 98   | 112 ATTCAAGCCAACAATCCAG       |
| scaffold48673_14.0 | 1 p3 | (CAT)5 | 15 | 1313 | 1327 TCACACATGGAGAACGAAGC     |
| scaffold49007_14.1 | 1 p3 | (AAT)8 | 24 | 100  | 123 TTGTGATGGAGTAGAGGGGC      |
| scaffold49118_17.3 | 1 p3 | (TAA)5 | 15 | 2258 | 2272 TCAGGCCTGTTTACACCCTT     |
| scaffold49163_15.2 | 1 p3 | (TGT)6 | 18 | 39   | 56 ATGTAGCCGACCCCAATTT        |
| scaffold49196_10.8 | 1 p3 | (CGC)6 | 18 | 336  | 353 TTTCCGATGTTTCGATTTTCC     |
| scaffold49741_14.8 | 1 p3 | (CAT)5 | 15 | 361  | 375 CGTACATCCCCAAAGTCCTG      |
| scaffold50181_15.0 | 1 p3 | (CAG)5 | 15 | 2843 | 2857 TCAGCAGCAACTGATCCAAC     |
| scaffold50200_13.6 | 1 p3 | (TGA)5 | 15 | 140  | 154 GAGAATGTACCTTGGGTGCGC     |
| scaffold50278_12.6 | 1 p3 | (TGA)5 | 15 | 45   | 59 CCAAGACCCCAATTTGATT        |
| scaffold50981_15.0 | 1 p3 | (TGA)8 | 24 | 2952 | 2975 GACCCCAATTTGATTGAAA      |
| scaffold51188_16.8 | 1 p3 | (TTA)5 | 15 | 884  | 898 TTGCTCGCAACGATGTTAAA      |
| scaffold51276_12.6 | 1 p3 | (CCG)5 | 15 | 287  | 301 ACGGCTGGCATTGTTAGAG       |
| scaffold51281_17.3 | 1 p3 | (CAT)5 | 15 | 477  | 491 ACCATATGCAAACATGCGAA      |
| scaffold51290_14.6 | 1 p3 | (ATC)5 | 15 | 1537 | 1551 AAATTGGGTTTTCTCTGG       |
| scaffold51751_17.2 | 1 p3 | (ATA)5 | 15 | 2341 | 2355 TGCATGAACTTTGTAAAACCA    |
| scaffold52070_10.8 | 1 p3 | (GAA)5 | 15 | 181  | 195 GATACCACGTCAAGCAACCC      |
| scaffold52203_15.9 | 1 p3 | (ATA)5 | 15 | 445  | 459 AGGATAAAAGAGGCAGGGGA      |
| scaffold52548_14.9 | 1 p3 | (AAC)6 | 18 | 895  | 912 TGTAGCACGAGTGATGAGGC      |
| scaffold52992_10.3 | 1 p3 | (CAG)5 | 15 | 175  | 189 CGATCATCCCTCATCTGACA      |
| scaffold53144_11.2 | 1 p3 | (ATA)5 | 15 | 86   | 100 CACTTTGACGCTGCTTGAAT      |
| scaffold53154_11.3 | 1 p3 | (TCT)6 | 18 | 142  | 159 CGGAGGTGATCTCAAATGGT      |
| scaffold53238_14.3 | 1 p3 | (CAT)5 | 15 | 90   | 104 CAAACCATGAATAAGCAATCCA    |
| scaffold53460_11.3 | 1 p3 | (TTA)5 | 15 | 73   | 87 TTTGCTTACGAAACAGCAA        |

|                    |      |        |    |      |      |                           |
|--------------------|------|--------|----|------|------|---------------------------|
| scaffold53553_14.5 | 1 p3 | (CCA)7 | 21 | 350  | 370  | TTTTCCCCCTCCTCATCT        |
| scaffold53693_18.1 | 1 p3 | (GGT)5 | 15 | 1617 | 1631 | ATGTGTTTTCGGATGGAAGC      |
| scaffold53828_18.4 | 1 p3 | (GGA)6 | 18 | 1754 | 1771 | TGCTGGTGATGCTCAAAGAC      |
| scaffold54151_11.8 | 1 p3 | (AGA)5 | 15 | 281  | 295  | CCCAATTTTCCGCATTTTT       |
| scaffold54459_15.7 | 1 p3 | (ACA)5 | 15 | 63   | 77   | ATGTCCTTGAAGATGCTGGC      |
| scaffold55038_13.4 | 1 p3 | (GCT)6 | 18 | 227  | 244  | AAAGCATACGGGTGAAGTGG      |
| scaffold55284_14.2 | 1 p3 | (ACA)5 | 15 | 1537 | 1551 | CATCTCGGGATTCAAGTGGT      |
| scaffold56112_20.0 | 1 p3 | (GGC)5 | 15 | 283  | 297  | ATATTCTCGCTTCTTCGCCA      |
| scaffold56324_11.3 | 1 p3 | (CAT)5 | 15 | 135  | 149  | ACGTCGCGACTCCTCTCTAA      |
| scaffold56338_16.5 | 1 p3 | (TGA)6 | 18 | 2306 | 2323 | TGGAGATTCCGGAGTTCTTG      |
| scaffold56544_15.7 | 1 p3 | (TTG)6 | 18 | 1022 | 1039 | TCTGAATGTGCTTTGATGGC      |
| scaffold57252_11.8 | 1 p3 | (GCA)5 | 15 | 45   | 59   | TGGGCAGCCAAATATTGAGT      |
| scaffold57542_17.4 | 1 p3 | (AAT)7 | 21 | 776  | 796  | TCGACTTTGTTTGGTTCCGGT     |
| scaffold57553_15.3 | 1 p3 | (GAA)7 | 21 | 2973 | 2993 | TGCTTGCATCCCATAAATCA      |
| scaffold57632_17.5 | 1 p3 | (AAT)9 | 27 | 8943 | 8969 | TTTGTCTTTCCCTTTGATGCT     |
| scaffold57850_15.4 | 1 p3 | (TGT)6 | 18 | 39   | 56   | TGTAGCCGACCCCAATTTAT      |
| scaffold58069_16.9 | 1 p3 | (AGC)5 | 15 | 1677 | 1691 | CTTTCGGAGTCACAGAAGGC      |
| scaffold58175_12.0 | 1 p3 | (ATT)5 | 15 | 471  | 485  | GAATGCGTCGGAAAAGTTGT      |
| scaffold58274_12.4 | 1 p3 | (TTG)8 | 24 | 387  | 410  | TCCATATAGCCGACCTCACA      |
| scaffold58279_12.6 | 1 p3 | (AAC)8 | 24 | 577  | 600  | CAAATCGATCTGCAACCCT       |
| scaffold58280_11.6 | 1 p3 | (CAT)5 | 15 | 64   | 78   | GCATTCTATAAAGAAAATCGCA    |
| scaffold58361_14.2 | 1 p3 | (TGC)5 | 15 | 220  | 234  | CGATCTCGTCGGGTATGAGT      |
| scaffold58539_18.6 | 1 p3 | (TTA)5 | 15 | 326  | 340  | GCTTGTGATGTAGAGAAATGAAGG  |
| scaffold58591_13.0 | 1 p3 | (CGG)6 | 18 | 348  | 365  | TGTCGAGGGTATAAGGGACG      |
| scaffold58797_13.8 | 1 p3 | (GAA)5 | 15 | 148  | 162  | TTCGAAGGTGTTGATCCCAT      |
| scaffold58906_16.6 | 1 p3 | (ATG)5 | 15 | 940  | 954  | GCACAAAATGTTGCTGCTCA      |
| scaffold58938_14.2 | 1 p3 | (CGG)5 | 15 | 190  | 204  | CCAAGATTTCCGAAACCAAA      |
| scaffold59137_11.2 | 1 p3 | (AAG)5 | 15 | 242  | 256  | GGTGAGTTTGAAGCATTGCATA    |
| scaffold59182_16.1 | 1 p3 | (GAT)6 | 18 | 2602 | 2619 | GGCCCAAAGATCTCAAACAA      |
| scaffold59514_16.8 | 1 p3 | (CAT)5 | 15 | 1294 | 1308 | ATTGTCTGCAAACCCGAAAG      |
| scaffold59534_14.4 | 1 p3 | (CGC)5 | 15 | 347  | 361  | TCCTATCTATTCCGCGTGCT      |
| scaffold60035_15.5 | 1 p3 | (CAT)5 | 15 | 548  | 562  | TCTCAAATATACGAAAAACGGTGA  |
| scaffold60232_12.0 | 1 p3 | (ATC)5 | 15 | 64   | 78   | TCCAATTAATACAGTCAGCATTTCA |
| scaffold60240_11.2 | 1 p3 | (TAT)7 | 21 | 281  | 301  | AAGGAGCATCCTTGTTGAA       |
| scaffold60631_16.9 | 1 p3 | (GTT)5 | 15 | 50   | 64   | ACCCTTGAGCTTGCATCTGT      |
| scaffold60646_12.1 | 1 p3 | (GGC)6 | 18 | 53   | 70   | GTCGGTGACGAGGTGGAGT       |
| scaffold60981_14.0 | 1 p3 | (AAT)5 | 15 | 466  | 480  | TGGAACCATTCAGTCAAGA       |
| scaffold61087_15.5 | 1 p3 | (TGT)5 | 15 | 50   | 64   | TGTAGCCGACCCCAATTTAT      |
| scaffold61124_16.7 | 1 p3 | (TTA)5 | 15 | 506  | 520  | TGTGTACGTAGTTGAGCATGTTG   |
| scaffold61228_15.5 | 1 p3 | (ATC)6 | 18 | 763  | 780  | AATGTCACGAGTTGCAGCAG      |
| scaffold61379_19.6 | 1 p3 | (TAT)5 | 15 | 1347 | 1361 | GGTGCAGGCTAAAAATGTTG      |
| scaffold61507_14.5 | 1 p3 | (TGT)6 | 18 | 43   | 60   | ATGTAGCCGACCCCAATTTA      |
| scaffold61600_13.1 | 1 p3 | (TTA)5 | 15 | 365  | 379  | CGATGGTTGATCTTGATTGTTG    |
| scaffold61680_19.1 | 1 p3 | (AAT)7 | 21 | 533  | 553  | GATTAGCAAATTTCCGGACG      |
| scaffold62820_11.9 | 1 p3 | (TGG)5 | 15 | 77   | 91   | TGATGGATCGAATATTCTCACG    |
| scaffold63009_14.7 | 1 p3 | (TTG)6 | 18 | 2035 | 2052 | ACAATGTGGGAAAAATGGCT      |
| scaffold63068_16.5 | 1 p3 | (TTG)5 | 15 | 5738 | 5752 | ACTTGAGCAGAATGGGCAAT      |
| scaffold64028_10.5 | 1 p3 | (GCT)5 | 15 | 452  | 466  | TGGCAGTCCATTCATCTGTC      |
| scaffold64138_10.5 | 1 p3 | (TGA)5 | 15 | 134  | 148  | AGCAGCCCCTCTTTTGAAT       |
| scaffold64143_10.8 | 1 p3 | (AAT)5 | 15 | 369  | 383  | GAATCTGATTTAAACATGGTGGC   |
| scaffold64355_10.8 | 1 p3 | (CAT)6 | 18 | 63   | 80   | TCTTGTGAGACTGTTGTTCTGGA   |
| scaffold64588_16.3 | 1 p3 | (TGA)6 | 18 | 43   | 60   | CCAAGACCCCAATTTGATT       |
| scaffold64589_19.3 | 1 p3 | (TGA)6 | 18 | 43   | 60   | CCAAGACCCCAATTTGATT       |
| scaffold64591_20.3 | 1 p3 | (TGA)6 | 18 | 43   | 60   | CCAAGACCCCAATTTGATT       |
| scaffold64626_10.4 | 1 p3 | (TTA)5 | 15 | 508  | 522  | GATGGATGAAAACCCACACC      |
| scaffold65362_12.5 | 1 p3 | (TGA)7 | 21 | 41   | 61   | CCAAGACCCCAATTTGATT       |
| scaffold65612_11.4 | 1 p3 | (TGT)6 | 18 | 268  | 285  | ATGTAGCCGACCCCAATTTA      |
| scaffold65679_14.7 | 1 p3 | (ATC)7 | 21 | 64   | 84   | ATGATCGGATTTTGTGGAGA      |

|                    |      |        |    |      |      |                            |
|--------------------|------|--------|----|------|------|----------------------------|
| scaffold65777_18.1 | 1 p3 | (ATC)7 | 21 | 3098 | 3118 | TTAAACTGGCACCCATCAAA       |
| scaffold66407_13.4 | 1 p3 | (ATT)5 | 15 | 1206 | 1220 | TCTTCCCTCGTTTGTCCAC        |
| scaffold66509_18.6 | 1 p3 | (CAT)5 | 15 | 63   | 77   | TGCATAGAGGAAATTGCATAGC     |
| scaffold66719_23.0 | 1 p3 | (CGG)5 | 15 | 797  | 811  | CCTATAATTGAAGCCGCCAA       |
| scaffold66929_16.1 | 1 p3 | (CGG)5 | 15 | 3451 | 3465 | GGAGGAGATCGAGAGTGACG       |
| scaffold67462_17.3 | 1 p3 | (TCA)5 | 15 | 65   | 79   | TTGCAAAAGTGATGTGACCG       |
| scaffold67857_11.3 | 1 p3 | (CAG)5 | 15 | 60   | 74   | GGGCAGCCAAATATAGAGCA       |
| scaffold67895_12.0 | 1 p3 | (TGA)5 | 15 | 46   | 60   | CCAAGACCCCAATTTGATT        |
| scaffold68015_14.7 | 1 p3 | (CAT)8 | 24 | 1566 | 1589 | CTCAACTTTCCAAGTATGATG      |
| scaffold68071_10.9 | 1 p3 | (GCT)5 | 15 | 101  | 115  | AGCTGTGTCTCCAAACTCCC       |
| scaffold68075_14.8 | 1 p3 | (TTA)7 | 21 | 1683 | 1703 | AGCTGAAGGAGAGGAGGAGG       |
| scaffold68572_16.1 | 1 p3 | (TGT)5 | 15 | 54   | 68   | CAACGGTTTACAAGTGTGTTG      |
| scaffold68631_10.1 | 1 p3 | (CGA)6 | 18 | 54   | 71   | GCTTAAAGGTGGAGGATAGTGG     |
| scaffold69004_15.2 | 1 p3 | (TAT)6 | 18 | 288  | 305  | CGTTTTTGTCAATGCGTCTG       |
| scaffold69128_10.7 | 1 p3 | (TGA)5 | 15 | 46   | 60   | CCAAGACCCCAATTTGATT        |
| scaffold69200_12.3 | 1 p3 | (GGT)6 | 18 | 192  | 209  | CTCATCCCTCGCACATTTCT       |
| scaffold69821_15.6 | 1 p3 | (CAT)7 | 21 | 64   | 84   | TGGGGTCTACAACAACTGAA       |
| scaffold69862_13.8 | 1 p3 | (CAT)5 | 15 | 67   | 81   | CATATCATAAAGATAAAGACAGCTTC |
| scaffold69961_17.0 | 1 p3 | (TTC)5 | 15 | 66   | 80   | CGAGCTGCATCGAGCTTT         |
| scaffold71059_10.8 | 1 p3 | (TGA)5 | 15 | 46   | 60   | CCAAGACCCCAATTTGATT        |
| scaffold71060_10.8 | 1 p3 | (ATC)5 | 15 | 64   | 78   | TATCAACCCAGCAACCATCA       |
| scaffold71063_15.5 | 1 p3 | (TCA)5 | 15 | 65   | 79   | CAATTAAGTTCTACGAATTCATTTTG |
| scaffold71275_15.0 | 1 p3 | (ACA)5 | 15 | 1996 | 2010 | ATCTTTGCGGTGATTTCTCTG      |
| scaffold71474_17.2 | 1 p3 | (GAG)5 | 15 | 344  | 358  | ATTCGTTGATTTGGCTCCAG       |
| scaffold72269_18.2 | 1 p3 | (TAA)5 | 15 | 108  | 122  | TGCAACACAATCATTATGGCT      |
| scaffold72723_10.7 | 1 p3 | (GCA)6 | 18 | 422  | 439  | ATAACCCTCCCTCTGGTGCT       |
| scaffold73439_14.3 | 1 p3 | (ATC)6 | 18 | 270  | 287  | GCTGAAATTCGTCCCAAAA        |
| scaffold74073_17.1 | 1 p3 | (CTG)5 | 15 | 900  | 914  | GAAATTTGGAAGTGCCTGGA       |
| scaffold74105_15.8 | 1 p3 | (TGG)5 | 15 | 1550 | 1564 | TGATTTTGGATTTTAGGCGG       |
| scaffold74279_12.2 | 1 p3 | (AAT)6 | 18 | 64   | 81   | AATGAATAAGTTTGCATTTAAGAGG  |
| scaffold74361_15.0 | 1 p3 | (AAG)5 | 15 | 471  | 485  | GCTCGTGTCCAATCAAACA        |
| scaffold74425_15.8 | 1 p3 | (CTT)6 | 18 | 5667 | 5684 | GCAATGAACACTTAGCAGCG       |
| scaffold74977_15.4 | 1 p3 | (TAT)5 | 15 | 84   | 98   | TCAGGTTTGACTTTCATTCTCG     |
| scaffold75789_14.4 | 1 p3 | (TTG)5 | 15 | 740  | 754  | ACCGAAATTAACGTGGAGGA       |
| scaffold76051_14.8 | 1 p3 | (GTG)5 | 15 | 76   | 90   | TCACAAACCGCTGTTGTTTC       |
| scaffold76374_11.6 | 1 p3 | (ATC)5 | 15 | 50   | 64   | GCCCGAGGTTGAAGATGATA       |
| scaffold76597_13.8 | 1 p3 | (TCA)6 | 18 | 267  | 284  | TGTGTTGTTTGTATGTCTTTGTGA   |
| scaffold76665_12.0 | 1 p3 | (TTA)6 | 18 | 43   | 60   | TTTCTTTTCTCAACAATTTCCG     |
| scaffold76679_16.1 | 1 p3 | (CCG)5 | 15 | 1005 | 1019 | TTTGGGAGTTCTCCTCCCTT       |
| scaffold76719_18.3 | 1 p3 | (CAT)5 | 15 | 668  | 682  | TGTGTTTTCTTGCCCTTCC        |
| scaffold76983_10.2 | 1 p3 | (TCA)5 | 15 | 65   | 79   | TGAATATGCGGGAAGAAAGC       |
| scaffold77149_15.6 | 1 p3 | (GAG)5 | 15 | 1733 | 1747 | CATGTCATGGCTGAGAGGAA       |
| scaffold77206_15.4 | 1 p3 | (GGC)5 | 15 | 1046 | 1060 | TGCTGAGATGGAAGTGGACG       |
| scaffold77233_15.9 | 1 p3 | (CCG)5 | 15 | 447  | 461  | CACGATCACAATCAAGGTGG       |
| scaffold77300_13.5 | 1 p3 | (TAT)5 | 15 | 1123 | 1137 | CCAGCCCAATAGAGGTGAAA       |
| scaffold77510_13.1 | 1 p3 | (TTG)8 | 24 | 1689 | 1712 | TATGATCGTACACGATGGCG       |
| scaffold77569_13.7 | 1 p3 | (TCA)5 | 15 | 65   | 79   | GCAACGAGGTGTGTGTTCAA       |
| scaffold77653_17.0 | 1 p3 | (CAT)5 | 15 | 859  | 873  | TCAGAACCAGCACGAAATCA       |
| scaffold77932_17.3 | 1 p3 | (TGG)5 | 15 | 3344 | 3358 | CGATTGTGGTGACGAAGATG       |
| scaffold78015_15.9 | 1 p3 | (TTG)8 | 24 | 526  | 549  | ATCGTTGTGAATTTGGGGAA       |
| scaffold78522_11.1 | 1 p3 | (TCC)5 | 15 | 213  | 227  | TTCGGTGCGGAGCTATTATC       |
| scaffold78812_13.1 | 1 p3 | (TCA)6 | 18 | 66   | 83   | TTGGCATAACAAGCTAGGACAT     |
| scaffold79180_11.5 | 1 p3 | (TGT)6 | 18 | 39   | 56   | TGTAGCCGACCCCAATTTAT       |
| scaffold79857_16.9 | 1 p3 | (TTC)7 | 21 | 2157 | 2177 | CGGTGGTTAATGGAGTTGC        |
| scaffold79982_13.4 | 1 p3 | (ATA)5 | 15 | 806  | 820  | GGGCAAAAGCCAATGAAATA       |
| scaffold80009_16.0 | 1 p3 | (ATA)6 | 18 | 2316 | 2333 | AACGAACGAAGCTGAGCAAT       |
| scaffold80115_14.4 | 1 p3 | (TGA)6 | 18 | 43   | 60   | CCAAGACCCCAATTTGATT        |
| scaffold80122_12.0 | 1 p3 | (TGT)6 | 18 | 43   | 60   | ATGTAGCCGACCCCAATTTA       |

|                    |      |        |    |      |                              |
|--------------------|------|--------|----|------|------------------------------|
| scaffold80398_11.9 | 1 p3 | (ATA)5 | 15 | 789  | 803 ATGCAAAATTCGGCAGATTC     |
| scaffold80612_12.6 | 1 p3 | (ATC)5 | 15 | 63   | 77 AAATTTACTCGCTGGTCTATCTATG |
| scaffold80725_11.4 | 1 p3 | (TCA)6 | 18 | 80   | 97 ACCTGAGGTTCCAGGGTCCAT     |
| scaffold81012_15.5 | 1 p3 | (GCA)5 | 15 | 388  | 402 GATGAGATTCCTCGAGGTTGA    |
| scaffold81318_13.5 | 1 p3 | (ATC)7 | 21 | 64   | 84 GAAATGCAAAGACCAAGAACAA    |
| scaffold81500_14.8 | 1 p3 | (ATA)6 | 18 | 694  | 711 TGCAACCATAATATATGCATCGAG |
| scaffold81525_13.9 | 1 p3 | (TGA)6 | 18 | 45   | 62 CCAAGACCCCAATTTGATT       |
| scaffold81673_17.5 | 1 p3 | (TGA)5 | 15 | 810  | 824 CCAAGACCCCAATTTGATT      |
| scaffold82205_14.3 | 1 p3 | (TCA)7 | 21 | 65   | 85 GCGAACACAGTTTTTCAGCC      |
| scaffold82517_15.7 | 1 p3 | (CAA)6 | 18 | 64   | 81 TCTTGAAATTTTCTTATTGTTCCC  |
| scaffold83000_12.3 | 1 p3 | (GAT)5 | 15 | 1632 | 1646 TTGTGTCAGACTTGTTCCGGC   |
| scaffold83214_11.7 | 1 p3 | (CTT)7 | 21 | 716  | 736 CCCCCAACTTATTGACAAATG    |
| scaffold83533_12.6 | 1 p3 | (AAG)5 | 15 | 504  | 518 GTCAGCGAATTGTTGCAGAA     |
| scaffold84374_15.8 | 1 p3 | (AAT)5 | 15 | 5001 | 5015 TTGCATTTTTCATAGCCCAA    |
| scaffold84394_15.9 | 1 p3 | (GCC)5 | 15 | 749  | 763 CCTCCTCAACCAGAGTCTCCT    |
| scaffold84645_14.2 | 1 p3 | (ATG)5 | 15 | 1977 | 1991 GTATTCCACCACGCTCCTTA    |
| scaffold84849_15.6 | 1 p3 | (TGA)6 | 18 | 46   | 63 CCAAGACCCCAATTTGATT       |
| scaffold85214_13.8 | 1 p3 | (CTG)5 | 15 | 801  | 815 AAGAAGGGGGCAAAGTGAAT     |
| scaffold85521_16.7 | 1 p3 | (TGC)7 | 21 | 900  | 920 GAGAGCAAAGAGTTGGCACC     |
| scaffold86132_14.8 | 1 p3 | (TAT)6 | 18 | 32   | 49 GATGGATGGATCAGAACCGA      |
| scaffold86415_16.5 | 1 p3 | (TTA)5 | 15 | 2711 | 2725 CAATTCGTGTCATGGTCGAG    |
| scaffold87418_11.4 | 1 p3 | (TTA)6 | 18 | 149  | 166 CTTGCGGTCTTGAACATGAA     |
| scaffold87509_10.0 | 1 p3 | (TCT)5 | 15 | 653  | 667 GCAGATTCCTTGATTTTGG      |
| scaffold87966_14.5 | 1 p3 | (ATT)5 | 15 | 45   | 59 CAGAATGATTGAAGCAAACATCA   |
| scaffold88286_14.8 | 1 p3 | (CAA)5 | 15 | 667  | 681 TGGGACGATAAGGGATAGTG     |
| scaffold88293_17.4 | 1 p3 | (ATA)5 | 15 | 178  | 192 TGAGATTTTTGGTGTGAGTGG    |
| scaffold88414_12.5 | 1 p3 | (AAT)6 | 18 | 239  | 256 CCCGGTTTGATCTGTGAACT     |
| scaffold88416_10.0 | 1 p3 | (AAG)5 | 15 | 134  | 148 CCGGTTAATGACCCATTTGT     |
| scaffold88719_15.2 | 1 p3 | (TAA)5 | 15 | 1512 | 1526 TGGAATTCAACATCAATGGTTC  |
| scaffold88797_17.5 | 1 p3 | (ACA)5 | 15 | 2315 | 2329 TCGAGATGTGAAGATTGAGGC   |
| scaffold88946_12.6 | 1 p3 | (CTT)5 | 15 | 223  | 237 ATACCTCGGCCTTTGATGTG     |
| scaffold89061_15.8 | 1 p3 | (TAA)5 | 15 | 1116 | 1130 TACGCAAAGGCACTTCTCAA    |
| scaffold89296_12.3 | 1 p3 | (CAG)5 | 15 | 44   | 58 GAAGTACCTGCCTACTCGTCTGA   |
| scaffold89991_17.3 | 1 p3 | (TAT)5 | 15 | 297  | 311 GAGGGAGGCACTAAGAAATGG    |
| scaffold90266_13.4 | 1 p3 | (AAG)6 | 18 | 259  | 276 TCAACAGTTACCCCGAAAGG     |
| scaffold90337_18.2 | 1 p3 | (GCC)7 | 21 | 1899 | 1919 CGCAATTCATCACAACCTGCT   |
| scaffold90348_15.7 | 1 p3 | (GCT)5 | 15 | 2684 | 2698 CCCAGAAGCAGAAGAGGTTG    |
| scaffold90729_12.5 | 1 p3 | (TCT)5 | 15 | 415  | 429 CGAGATTGGGAAATTGGAGA     |
| scaffold90829_16.4 | 1 p3 | (TGT)5 | 15 | 45   | 59 ATGTAGCCGACCCCAATTTA      |
| scaffold91432_12.8 | 1 p3 | (CTT)5 | 15 | 237  | 251 CAGCCGAGAACATCATCAA      |
| scaffold91636_14.0 | 1 p3 | (ATA)5 | 15 | 272  | 286 GGTGGATTAGTTGTCGTTTTGA   |
| scaffold91781_19.5 | 1 p3 | (GAT)6 | 18 | 35   | 52 TGTATATTCCTGAAGACGATGGC   |
| scaffold91968_13.2 | 1 p3 | (CAT)5 | 15 | 999  | 1013 GCATGCATAATGTGACACCC    |
| scaffold92678_11.1 | 1 p3 | (TAT)7 | 21 | 77   | 97 TGATGATTGAGTAAAAACGACAAAA |
| scaffold93016_16.3 | 1 p3 | (CAT)5 | 15 | 3939 | 3953 ACACATGCACATTTACCGGT    |
| scaffold93225_12.5 | 1 p3 | (CAT)5 | 15 | 63   | 77 CCGTATCAAGCCACCAAGTA      |
| scaffold93244_12.9 | 1 p3 | (GAG)5 | 15 | 389  | 403 TCGAGGAAGGAGAGGTGTTG     |
| scaffold93468_14.2 | 1 p3 | (TGA)5 | 15 | 48   | 62 CCAAGACCCCAATTTGATT       |
| scaffold94449_14.9 | 1 p3 | (AGA)8 | 24 | 734  | 757 TCTTTGCGATGAGCTCCTTT     |
| scaffold94746_13.7 | 1 p3 | (CCA)5 | 15 | 246  | 260 TTATCCCATCCCCCTTAACC     |
| scaffold95065_16.0 | 1 p3 | (CAT)7 | 21 | 64   | 84 ATAACTGTTACTCCTGGGTGC     |
| scaffold95204_17.6 | 1 p3 | (ATT)6 | 18 | 2054 | 2071 CTGCCACCGATTTGAACATT    |
| scaffold95447_11.1 | 1 p3 | (TTA)5 | 15 | 411  | 425 GACGCTTGGTTGGATAGCTT     |
| scaffold95703_14.2 | 1 p3 | (AAG)5 | 15 | 3336 | 3350 CCGCCTCCGTAAATAAACAA    |
| scaffold95841_15.2 | 1 p3 | (TGT)5 | 15 | 203  | 217 GATTCGCTACCGTGTGGAGT     |
| scaffold96180_15.5 | 1 p3 | (TGA)5 | 15 | 56   | 70 CGGACAGAAGGATGGCTTTA      |
| scaffold96335_17.1 | 1 p3 | (TCA)5 | 15 | 65   | 79 TTGTTTTATTGTGCTTTGTCATTGT |
| scaffold96336_14.1 | 1 p3 | (TCA)5 | 15 | 65   | 79 CATAAACCACTTCGAACGGC      |

|                     |      |        |    |      |                                |
|---------------------|------|--------|----|------|--------------------------------|
| scaffold96721_13.6  | 1 p3 | (TGT)7 | 21 | 42   | 62 ATGTAGCCGACCCCAATTTA        |
| scaffold96772_13.9  | 1 p3 | (TTA)5 | 15 | 483  | 497 GCTCGATGGAAAGCAGAAAA       |
| scaffold96914_15.8  | 1 p3 | (AAT)5 | 15 | 657  | 671 TGCCACAACCTTAGAATCGCA      |
| scaffold96984_13.8  | 1 p3 | (TAA)5 | 15 | 398  | 412 TGATGTTAAGAAACATTA AAAAGGG |
| scaffold97121_10.4  | 1 p3 | (AAT)7 | 21 | 367  | 387 GCCAAAAGATACTAAACTTCCAAA   |
| scaffold98102_16.3  | 1 p3 | (CAC)5 | 15 | 4818 | 4832 AATGGAAAAGCATGTCAGGG      |
| scaffold98266_17.6  | 1 p3 | (ATG)5 | 15 | 117  | 131 CCAATGTGCTGCTTATGAGG       |
| scaffold98421_14.9  | 1 p3 | (GGA)5 | 15 | 901  | 915 GAAAACGGAATCGAAGGTGA       |
| scaffold98706_10.7  | 1 p3 | (CGG)6 | 18 | 197  | 214 GAAGGATGAGCGAAATGAGG       |
| scaffold98827_16.5  | 1 p3 | (GCC)7 | 21 | 8105 | 8125 AGTGTGAAGGCCATGATTCC      |
| scaffold98865_16.1  | 1 p3 | (GGC)5 | 15 | 142  | 156 TTCAGCCCAGCCCAATAATA       |
| scaffold99241_17.2  | 1 p3 | (ATC)6 | 18 | 722  | 739 CTAGGGCTAGCAGCTCCAGA       |
| scaffold99256_11.4  | 1 p3 | (TAT)7 | 21 | 90   | 110 GGGCCGATCCTATCACTACA       |
| scaffold99551_10.5  | 1 p3 | (CAG)6 | 18 | 94   | 111 ATTCCCGAGACTGAGATGGA       |
| scaffold99744_15.0  | 1 p3 | (TTC)5 | 15 | 554  | 568 TCTGGTGGAGTTCATTGAGATG     |
| scaffold99800_10.3  | 1 p3 | (AGA)5 | 15 | 56   | 70 TTCTCTGTGCTGATCGAAA         |
| scaffold100302_14.7 | 1 p3 | (GAT)5 | 15 | 4695 | 4709 GAAATGTAACAGCCTCCCCA      |
| scaffold100451_13.7 | 1 p3 | (TGA)5 | 15 | 47   | 61 CCAAGACCCCAATTTGATT         |
| scaffold101371_19.6 | 1 p3 | (CGC)5 | 15 | 1428 | 1442 CTATAGGCACGCCGAACAAT      |
| scaffold101828_15.9 | 1 p3 | (TGT)5 | 15 | 48   | 62 ATGTAGCCGACCCCAATTTA        |
| scaffold102165_10.9 | 1 p3 | (CAT)5 | 15 | 65   | 79 CCCTTTAAGATAAAAATGAATATTGG  |
| scaffold102526_13.7 | 1 p3 | (ATC)5 | 15 | 45   | 59 GCCCGAGTTGAAGATGATA         |
| scaffold102969_17.3 | 1 p3 | (ATC)5 | 15 | 1337 | 1351 CAATCCCAATTGTATCCGCT      |
| scaffold103057_14.9 | 1 p3 | (ATC)5 | 15 | 60   | 74 CCAACTCATTTTGCCCACTAA       |
| scaffold103106_16.4 | 1 p3 | (TAA)5 | 15 | 646  | 660 GATTAGCAAATTTGCGGACG       |
| scaffold103110_12.8 | 1 p3 | (AAT)5 | 15 | 351  | 365 ATTTGGGAGTGTTGCGGACTG      |
| scaffold103198_13.3 | 1 p3 | (AAT)5 | 15 | 101  | 115 AAAAATCAGACCAAAACTTTTCAA   |
| scaffold103594_16.6 | 1 p3 | (TAA)7 | 21 | 1150 | 1170 TGGAGCTAGTGAGGGTGGTT      |
| scaffold103833_16.8 | 1 p3 | (CGG)7 | 21 | 595  | 615 CTGACCTCGTGTAACTGGCA       |
| scaffold104959_14.9 | 1 p3 | (ATG)5 | 15 | 998  | 1012 TTCCATGGGTACAGAGGAGC      |
| scaffold104971_16.9 | 1 p3 | (TTA)5 | 15 | 233  | 247 GGAAGATGAAAAGACAAGCGG      |
| scaffold105270_11.2 | 1 p3 | (TCA)6 | 18 | 65   | 82 TGAAGAATTATGCATCAGGCAA      |
| scaffold105354_13.7 | 1 p3 | (ACA)6 | 18 | 1165 | 1182 AGCAGCTACAACGGTAAGGC      |
| scaffold105850_14.4 | 1 p3 | (CTG)6 | 18 | 1219 | 1236 CCAGCAGTGCCTCGTAAAA       |
| scaffold106554_15.6 | 1 p3 | (GCG)5 | 15 | 1004 | 1018 TGTTTATGGAGGAGACGGAG      |
| scaffold106916_15.0 | 1 p3 | (ATT)5 | 15 | 2700 | 2714 GAGTGGATAGGCTCCGTTTG      |
| scaffold106951_12.7 | 1 p3 | (AGA)5 | 15 | 314  | 328 TCCAAGCATGGAATCAAAT        |
| scaffold107049_10.3 | 1 p3 | (ACC)6 | 18 | 178  | 195 ATTCACACCTGCTCCAGTCC       |
| scaffold107966_14.7 | 1 p3 | (TAA)8 | 24 | 1475 | 1498 TGGGATCTATTTGATGAGGGA     |
| scaffold108012_13.0 | 1 p3 | (CTT)5 | 15 | 577  | 591 TGGGTTGTTAAGCCTTGGTC       |
| scaffold108125_14.9 | 1 p3 | (AAG)5 | 15 | 392  | 406 TTATTTCCGCATCTTTTGGG       |
| scaffold108237_16.7 | 1 p3 | (ACA)5 | 15 | 3230 | 3244 ATTTGGCATCAACCTCCAGA      |
| scaffold108252_16.0 | 1 p3 | (CGC)5 | 15 | 774  | 788 CTTGATCGGGTCCGACTTTA       |
| scaffold108350_14.6 | 1 p3 | (GGA)5 | 15 | 2788 | 2802 CCTCCGGA ACTCTCCTAACC     |
| scaffold108594_15.7 | 1 p3 | (CCG)5 | 15 | 204  | 218 AAATTAATAACCTCGCCGGA       |
| scaffold108742_14.9 | 1 p3 | (AAT)5 | 15 | 1872 | 1886 GGCTCGCCAAGGTAGATAAA      |
| scaffold108933_14.4 | 1 p3 | (TGC)5 | 15 | 634  | 648 GAAATGAAGCCAAACCTCA        |
| scaffold108955_19.3 | 1 p3 | (AAG)5 | 15 | 1052 | 1066 CGCACACTTGGAGTTGAAAA      |
| scaffold109303_19.9 | 1 p3 | (AGC)5 | 15 | 49   | 63 TTGTGGAGAAAGGAATGGGA        |
| scaffold110026_10.2 | 1 p3 | (ATC)5 | 15 | 82   | 96 CCATGTAAGAAAAGTGGAAAGGG     |
| scaffold110229_12.0 | 1 p3 | (GGC)5 | 15 | 207  | 221 CAAAATTA AAAATGCCCCCA      |
| scaffold110992_16.6 | 1 p3 | (AAC)6 | 18 | 384  | 401 TGAAGGATGGGTAGAATCGG       |
| scaffold111120_13.7 | 1 p3 | (TAG)7 | 21 | 870  | 890 CTCATTGAACTTGGCAAGCA       |
| scaffold111374_15.2 | 1 p3 | (TCG)5 | 15 | 577  | 591 CATGAGGCTGCTGAACTCAC       |
| scaffold112284_16.9 | 1 p3 | (TGT)6 | 18 | 42   | 59 TGTAGCCGACCCCAATTTAT        |
| scaffold112656_14.8 | 1 p3 | (TAA)5 | 15 | 441  | 455 CGGGGTTGAGTTCATATTG        |
| scaffold113320_16.7 | 1 p3 | (GGC)5 | 15 | 790  | 804 TGCTGCCACACTCTCTCTGT       |
| scaffold113395_12.9 | 1 p3 | (TCA)6 | 18 | 1028 | 1045 AACATCATCCCCATCACCAT      |

|                     |      |        |    |      |      |                             |
|---------------------|------|--------|----|------|------|-----------------------------|
| scaffold113495_13.6 | 1 p3 | (AAT)5 | 15 | 69   | 83   | TGGTTGAGCTAAAATCTTTGAGAA    |
| scaffold113771_14.3 | 1 p3 | (GAG)5 | 15 | 3007 | 3021 | TGGTGGTTTTTGGATGATGA        |
| scaffold114539_16.3 | 1 p3 | (ATA)5 | 15 | 498  | 512  | TGCTAAACGATGAGCTTGGA        |
| scaffold115034_17.9 | 1 p3 | (AAT)6 | 18 | 403  | 420  | CGTCGTCGCTACATGAAGAA        |
| scaffold115356_17.6 | 1 p3 | (GAG)5 | 15 | 1275 | 1289 | GCCGTAGAGTAGATCGGTGG        |
| scaffold115775_15.8 | 1 p3 | (TGA)5 | 15 | 47   | 61   | CCCAAGACCCCAATTTGATT        |
| scaffold116107_13.9 | 1 p3 | (CAA)8 | 24 | 2140 | 2163 | CAAATGCGAAACCGATCTTT        |
| scaffold117130_14.3 | 1 p3 | (ATT)5 | 15 | 1205 | 1219 | CGTGGAGCCTATTTGGATGT        |
| scaffold117230_15.9 | 1 p3 | (GAC)5 | 15 | 82   | 96   | CAAAAACCCCGAATTCATTG        |
| scaffold117330_15.8 | 1 p3 | (GAA)5 | 15 | 307  | 321  | TATGCCCGTGAAAAAGAAGG        |
| scaffold117477_15.1 | 1 p3 | (GGC)7 | 21 | 306  | 326  | AAATGGAGTCGAAGCAGCAT        |
| scaffold117583_15.8 | 1 p3 | (CAT)5 | 15 | 57   | 71   | GCGTCTCAAACGTATCTCC         |
| scaffold117956_17.5 | 1 p3 | (GCA)5 | 15 | 1272 | 1286 | TTTGAAGCAAAGTTTGGGC         |
| scaffold117988_16.0 | 1 p3 | (CAT)6 | 18 | 971  | 988  | TGTGGCTGTTCACTTGGGA         |
| scaffold118044_10.7 | 1 p3 | (TGT)6 | 18 | 41   | 58   | TGTAGCCGACCCCAATTTAT        |
| scaffold118564_16.8 | 1 p3 | (GCG)5 | 15 | 399  | 413  | GTGGTAGAGGCGGTTATGGA        |
| scaffold118788_15.6 | 1 p3 | (ATA)5 | 15 | 673  | 687  | TTTTCAATCATATAGAATCTGCTCTTG |
| scaffold120841_11.7 | 1 p3 | (ACA)5 | 15 | 434  | 448  | AATATGAGAAGAGCAAACCCACA     |
| scaffold121154_11.4 | 1 p3 | (AAT)6 | 18 | 121  | 138  | TCAACGTGATTTGTCATTTGTG      |
| scaffold121498_12.8 | 1 p3 | (GAG)6 | 18 | 265  | 282  | TCATGGATTTAGACTGCCCC        |
| scaffold122425_10.8 | 1 p3 | (AAT)5 | 15 | 382  | 396  | TAAAGTGACCAGTTTGCCCC        |
| scaffold122659_16.3 | 1 p3 | (GGC)5 | 15 | 2221 | 2235 | TTTTGGGGTTGAAATGGTA         |
| scaffold122741_16.0 | 1 p3 | (CAC)5 | 15 | 379  | 393  | TGAAACTCCCCACAATCTCC        |
| scaffold122902_13.4 | 1 p3 | (TTA)7 | 21 | 895  | 915  | ACACACGCATACACACACGA        |
| scaffold122929_17.6 | 1 p3 | (ATC)5 | 15 | 2314 | 2328 | TGTGTGAAACCTCCTTCATGG       |
| scaffold123274_10.8 | 1 p3 | (AAT)6 | 18 | 561  | 578  | TTGCCTCTAATTTGGCTCC         |
| scaffold123912_13.2 | 1 p3 | (GTG)5 | 15 | 49   | 63   | TCTGGTCAACATCAATCTGAGC      |
| scaffold124017_16.2 | 1 p3 | (TAA)5 | 15 | 615  | 629  | CGTTGGCCAGTCGGTTAAT         |
| scaffold124181_11.6 | 1 p3 | (ACA)6 | 18 | 479  | 496  | AATTGCAAAAAGCGCAAAAAT       |
| scaffold124338_14.0 | 1 p3 | (CCG)5 | 15 | 301  | 315  | ACCATTCATCCATAGCGGAG        |
| scaffold124641_14.9 | 1 p3 | (CAA)6 | 18 | 66   | 83   | TCCAGCCTTTACCTCTTTTTG       |
| scaffold125218_15.9 | 1 p3 | (TGA)5 | 15 | 50   | 64   | CCCAAGACCCCAATTTGATT        |
| scaffold125899_14.0 | 1 p3 | (ATC)7 | 21 | 470  | 490  | CCCAAGAATGACTGGGGTAA        |
| scaffold126032_12.0 | 1 p3 | (ATT)7 | 21 | 224  | 244  | CTCTATCAACAACCCAAGGCG       |
| scaffold126241_13.6 | 1 p3 | (TGT)9 | 27 | 38   | 64   | TGTAGCCGACCCCAATTTAT        |
| scaffold126926_15.7 | 1 p3 | (TAG)5 | 15 | 690  | 704  | GGTTCGTCTTCAACCACGAT        |
| scaffold126957_16.2 | 1 p3 | (ATT)6 | 18 | 318  | 335  | TAGCAGGGCATGAACAAACA        |
| scaffold127101_14.7 | 1 p3 | (ATA)7 | 21 | 1625 | 1645 | GAATGGCATTTTAACTTTGATCATT   |
| scaffold127442_12.3 | 1 p3 | (TGT)7 | 21 | 39   | 59   | TGTAGCCGACCCCAATTTAT        |
| scaffold128061_13.7 | 1 p3 | (TCT)5 | 15 | 113  | 127  | CAGCCGAGAACATCATCAA         |
| scaffold128316_17.1 | 1 p3 | (TAT)5 | 15 | 672  | 686  | GCATGAAACTTGGAATGGAAA       |
| scaffold129273_17.0 | 1 p3 | (GGC)5 | 15 | 3353 | 3367 | AGATTTGGCCGTGTACGAAG        |
| scaffold129468_14.6 | 1 p3 | (TAA)5 | 15 | 3946 | 3960 | ATAAAATGGGAGCGGAGAGG        |
| scaffold129614_13.6 | 1 p3 | (AAG)5 | 15 | 174  | 188  | ATGGCATGAAACGGAATAGC        |
| scaffold129760_16.1 | 1 p3 | (CGC)5 | 15 | 509  | 523  | GCCGGACATCTATAACCAGGA       |
| scaffold129887_17.3 | 1 p3 | (CAT)5 | 15 | 163  | 177  | TCTTGGGTTCTACCTTGGACA       |
| scaffold130032_17.0 | 1 p3 | (AAT)6 | 18 | 1954 | 1971 | TCTTGTGTCGCGTTTAATGA        |
| scaffold130071_12.0 | 1 p3 | (CGG)5 | 15 | 533  | 547  | TGCATGAAATCAAACCTCCA        |
| scaffold130338_18.4 | 1 p3 | (CAT)5 | 15 | 67   | 81   | AAAAACCAACTGAATTGCAAAA      |
| scaffold130503_15.2 | 1 p3 | (AAT)6 | 18 | 189  | 206  | CCGATTCGTGGAAACCTGTA        |
| scaffold130545_13.1 | 1 p3 | (GAA)6 | 18 | 436  | 453  | TTAAGACGGAAATCCACACG        |
| scaffold130677_13.1 | 1 p3 | (TTA)6 | 18 | 203  | 220  | GACAGGGGTCTCGCAAGATA        |
| scaffold130768_10.8 | 1 p3 | (TTA)5 | 15 | 409  | 423  | ATCGTATTCCACCGGATCAA        |
| scaffold130853_17.7 | 1 p3 | (TTA)5 | 15 | 354  | 368  | TGTTTGTGTGTGTCTCCCA         |
| scaffold130999_11.7 | 1 p3 | (GAA)5 | 15 | 195  | 209  | TCAAACCTCGGTCTTGCACA        |
| scaffold131057_13.7 | 1 p3 | (GAT)5 | 15 | 22   | 36   | AGTCCGTGTTCCGATGAGT         |
| scaffold131383_12.8 | 1 p3 | (TCA)6 | 18 | 257  | 274  | CTTGTACCACTGGCCTCCAT        |
| scaffold131514_12.0 | 1 p3 | (TAA)6 | 18 | 414  | 431  | GCAACCTGAAAATTGAACATTG      |



|                     |      |        |    |      |                               |
|---------------------|------|--------|----|------|-------------------------------|
| scaffold131570_12.8 | 1 p3 | (CTT)5 | 15 | 156  | 170 CAGGTCAACTGAAATCTGAAAGAA  |
| scaffold132139_13.6 | 1 p3 | (AAT)5 | 15 | 888  | 902 TCCATATTCCTTCGTCGTC       |
| scaffold132189_14.5 | 1 p3 | (TTC)5 | 15 | 632  | 646 ACGAGAACCCTCACATCACC      |
| scaffold132972_18.5 | 1 p3 | (TGA)5 | 15 | 217  | 231 ATTGGTGCAAATGTGTTGA       |
| scaffold133008_14.7 | 1 p3 | (GAT)5 | 15 | 39   | 53 TACAGTCCGTGTTCCGATGA       |
| scaffold133080_14.2 | 1 p3 | (CGC)5 | 15 | 347  | 361 TCCCACATAGGAAAAACAAAAA    |
| scaffold134661_14.4 | 1 p3 | (ATA)6 | 18 | 562  | 579 CCTTGATCATTCCCGAAAAA      |
| scaffold134875_18.5 | 1 p3 | (TTG)5 | 15 | 675  | 689 GTCTTGAATGCCACCCACTC      |
| scaffold134996_16.0 | 1 p3 | (TTG)6 | 18 | 530  | 547 TGGTTCATATAACCGACCCC      |
| scaffold135665_17.2 | 1 p3 | (ATC)5 | 15 | 2784 | 2798 TTCCCACTAATTTACCTGGA     |
| scaffold135855_15.6 | 1 p3 | (CAT)5 | 15 | 1712 | 1726 TACCTTGGGCTCCACCTCTA     |
| scaffold135861_17.6 | 1 p3 | (TAA)5 | 15 | 2190 | 2204 TTGTGCATATTGTTGGGGAA     |
| scaffold135922_14.2 | 1 p3 | (GAC)5 | 15 | 1258 | 1272 CGAGTGGCTGCTACCTGAAT     |
| scaffold136436_12.7 | 1 p3 | (GCA)6 | 18 | 349  | 366 TTGATGAGCCATAACCCCTCC     |
| scaffold136732_16.7 | 1 p3 | (ATT)5 | 15 | 586  | 600 TCCTTGTCACAATCTGCTGC      |
| scaffold137401_11.3 | 1 p3 | (ATT)8 | 24 | 1146 | 1169 TGGTTTGACCATCATTGCTC     |
| scaffold137593_17.4 | 1 p3 | (ATG)5 | 15 | 477  | 491 TGGATGGGTGCACATAATTG      |
| scaffold138160_12.8 | 1 p3 | (AAT)6 | 18 | 182  | 199 TTGGGCAACTTGAAGATTAATAA   |
| scaffold138190_14.3 | 1 p3 | (CTT)6 | 18 | 110  | 127 CCCCCAACTTATTGACAAATG     |
| scaffold138293_12.2 | 1 p3 | (TTA)6 | 18 | 200  | 217 CGGGAGAGAAAATGCAGAAG      |
| scaffold138380_17.3 | 1 p3 | (GCC)5 | 15 | 1092 | 1106 TGCAGCAGCCAAGACTTAGA     |
| scaffold138473_16.5 | 1 p3 | (ATT)5 | 15 | 287  | 301 TCCAATCCATAGCAACCAAA      |
| scaffold138946_12.5 | 1 p3 | (TAT)5 | 15 | 1049 | 1063 GTAACCATGGGCCAAAAAATG    |
| scaffold139070_14.2 | 1 p3 | (CAA)6 | 18 | 66   | 83 TCTGTGACTGAAATGCAAA        |
| scaffold139657_16.8 | 1 p3 | (CTC)5 | 15 | 725  | 739 CCAAATGTGATTGCCCTTTT      |
| scaffold139767_14.8 | 1 p3 | (CTC)5 | 15 | 1633 | 1647 CAGTACGACCAGGGAAAAAGC    |
| scaffold140269_10.6 | 1 p3 | (TTA)6 | 18 | 248  | 265 CGTACGGAATCTGATAGGAAAA    |
| scaffold140486_16.2 | 1 p3 | (ATC)6 | 18 | 64   | 81 CCAAATTTGTAAATGCAAACAAAC   |
| scaffold140839_13.9 | 1 p3 | (TGT)6 | 18 | 2223 | 2240 CCAATGGGTGAAAGAATATGG    |
| scaffold140896_14.4 | 1 p3 | (TGT)6 | 18 | 47   | 64 TGTAGCCGACCCCAATTTAT       |
| scaffold141213_10.3 | 1 p3 | (ATA)5 | 15 | 177  | 191 TACTCCCTCCGTCTCACTCC      |
| scaffold141449_17.2 | 1 p3 | (CAG)5 | 15 | 1468 | 1482 CATTTGTGCCAGATCCATTG     |
| scaffold142004_15.7 | 1 p3 | (ATT)5 | 15 | 6987 | 7001 CCCTGTTGAGCATAACCCCT     |
| scaffold142275_11.5 | 1 p3 | (AGA)5 | 15 | 103  | 117 TCAGTTCCTGCTAGGCTTCAA     |
| scaffold142836_11.3 | 1 p3 | (AAT)5 | 15 | 172  | 186 ATCAGAGCCAGCGTTTGAGT      |
| scaffold142847_17.2 | 1 p3 | (AAG)5 | 15 | 998  | 1012 AGGTCATGTGTTTCGAGTTTCAA  |
| scaffold142901_15.8 | 1 p3 | (ACA)5 | 15 | 549  | 563 TGTATTGAATCCGGTGGGTT      |
| scaffold143093_12.5 | 1 p3 | (GCG)5 | 15 | 305  | 319 CCTTTTATACGGGTCGGGTT      |
| scaffold143192_11.6 | 1 p3 | (TTA)5 | 15 | 609  | 623 CGGAGATTTCGAAGTTCAGT      |
| scaffold143399_17.4 | 1 p3 | (CTT)5 | 15 | 110  | 124 CGTTGGCTCGACGTTATCTT      |
| scaffold143454_13.4 | 1 p3 | (GAT)5 | 15 | 213  | 227 GGTGGCGGTAGTTTCAAAGA      |
| scaffold143463_17.4 | 1 p3 | (GAT)7 | 21 | 1520 | 1540 GCAACGGAAACAACCTCTTT     |
| scaffold143491_11.0 | 1 p3 | (TTC)5 | 15 | 180  | 194 CTGGCCTGATCTACAGCCTC      |
| scaffold143500_10.2 | 1 p3 | (CCG)5 | 15 | 144  | 158 TCTGCTCAGCCCCTTCAG        |
| scaffold143579_14.6 | 1 p3 | (TTG)6 | 18 | 357  | 374 GCTGTAGCTGACCCCAATTT      |
| scaffold143952_14.9 | 1 p3 | (TTA)7 | 21 | 8338 | 8358 GATGCGTTTGAAGGGAAAAA     |
| scaffold144015_15.0 | 1 p3 | (TGA)6 | 18 | 1162 | 1179 CCGAAGAGCATAGTTCAGCC     |
| scaffold144406_13.0 | 1 p3 | (ACC)5 | 15 | 653  | 667 ATAAGGATTCCGGGTTTTTCG     |
| scaffold144410_11.6 | 1 p3 | (CGC)5 | 15 | 146  | 160 GGTTATTTATTAAGTTGGAGGTGGA |
| scaffold144522_12.9 | 1 p3 | (ATT)5 | 15 | 37   | 51 AAAATTGCGTCTCCTATGGC       |
| scaffold144670_17.5 | 1 p3 | (CAT)5 | 15 | 2538 | 2552 ACCTATGCATGTTGCCGTC      |
| scaffold145156_10.4 | 1 p3 | (GGC)5 | 15 | 876  | 890 CACAACGGTCATCTGCTTTG      |
| scaffold145660_15.8 | 1 p3 | (TTA)5 | 15 | 1313 | 1327 TCAGTCACAAGAGCACCCAC     |
| scaffold146323_14.3 | 1 p3 | (TGA)5 | 15 | 91   | 105 TTTGATTGGGAATAATTGGG      |
| scaffold146343_12.2 | 1 p3 | (ATT)7 | 21 | 230  | 250 CCAACCCTAACCCGTTTAT       |
| scaffold146883_14.8 | 1 p3 | (TCA)5 | 15 | 113  | 127 TCGCATCTGGGATAATGAAA      |
| scaffold147220_16.5 | 1 p3 | (TGA)5 | 15 | 138  | 152 CAATTTGATTGGGAATATATTGGG  |
| scaffold147347_15.4 | 1 p3 | (ATT)6 | 18 | 1108 | 1125 CCACACCCCTTTTGACTGAT     |

|                     |      |        |    |      |                               |
|---------------------|------|--------|----|------|-------------------------------|
| scaffold147453_17.9 | 1 p3 | (TTA)5 | 15 | 500  | 514 GGCATGTATTTATTATTGGACCAT  |
| scaffold148028_17.5 | 1 p3 | (ACA)5 | 15 | 5993 | 6007 CCTCGTGCAAGCATTACAAA     |
| scaffold148504_11.4 | 1 p3 | (TAA)6 | 18 | 311  | 328 TTCAAGGTTCTCGCTCTAATCC    |
| scaffold148855_15.4 | 1 p3 | (TCT)5 | 15 | 148  | 162 GCATTATGTAAGCTCAAATAGGCT  |
| scaffold148911_16.8 | 1 p3 | (TAA)6 | 18 | 133  | 150 CTCAAGATGCGAAGCAAACA      |
| scaffold149734_15.0 | 1 p3 | (GTG)6 | 18 | 2399 | 2416 AAGTCACGAAGACGGCAAGT     |
| scaffold150286_14.8 | 1 p3 | (TAT)5 | 15 | 59   | 73 TCGCTTTGATTATTAAATCTTCTTGA |
| scaffold150918_15.3 | 1 p3 | (AAG)5 | 15 | 526  | 540 GAAAGAAGCTCCCGAAGGAC      |
| scaffold151048_15.9 | 1 p3 | (TGA)5 | 15 | 202  | 216 CCAAGACCCCATTTTTGATTG     |
| scaffold151259_17.0 | 1 p3 | (TCA)5 | 15 | 29   | 43 CACCGGTTGGACCGTCTT         |
| scaffold152047_12.1 | 1 p3 | (ATG)5 | 15 | 39   | 53 TCCTGATGGAGGTGATGATG       |
| scaffold153681_10.7 | 1 p3 | (CAA)5 | 15 | 224  | 238 ATGTGTTGGTTGCAGGTTCA      |
| scaffold153738_14.9 | 1 p3 | (AGT)5 | 15 | 667  | 681 CAGTTGACACTTGGGGGACT      |
| scaffold153827_13.0 | 1 p3 | (CGG)7 | 21 | 1343 | 1363 CCATGCTAATTTTCAGGGGAA    |
| scaffold154407_15.4 | 1 p3 | (GCA)5 | 15 | 161  | 175 CAGAGGATGAAATTCCCGAG      |
| scaffold154628_14.2 | 1 p3 | (TCT)5 | 15 | 2125 | 2139 TGTGGAACCAACACGATTTT     |
| scaffold154673_11.1 | 1 p3 | (CCT)5 | 15 | 115  | 129 GGGCTTCTTGTTGGAATTGA      |
| scaffold154678_14.3 | 1 p3 | (AAG)5 | 15 | 678  | 692 CGGATCTTACGGAGTTGAGC      |
| scaffold154855_11.8 | 1 p3 | (TCA)5 | 15 | 65   | 79 ATAGTGCAAAGTTGGTGCCC       |
| scaffold155754_12.0 | 1 p3 | (CCG)5 | 15 | 450  | 464 CCCCAAGCTATTCTCCAACA      |
| scaffold155810_11.2 | 1 p3 | (TAT)5 | 15 | 475  | 489 GTTTGGAGGTCAGGTGTTG       |
| scaffold155880_10.6 | 1 p3 | (AAT)5 | 15 | 263  | 277 CTTGTGCAAATTAATCCCG       |
| scaffold155986_16.7 | 1 p3 | (CGG)5 | 15 | 724  | 738 TAGGGAAAAGTCATCACGGC      |
| scaffold156571_10.2 | 1 p3 | (GCT)5 | 15 | 191  | 205 TTGAATATCGGCGAAGTGCT      |
| scaffold156646_16.7 | 1 p3 | (TGT)6 | 18 | 43   | 60 ATGTAGCCGACCCCAATTTA       |
| scaffold157088_14.5 | 1 p3 | (ACA)6 | 18 | 2032 | 2049 ACATCCATCATCATCAGCCA     |
| scaffold157281_14.9 | 1 p3 | (ATC)6 | 18 | 206  | 223 CTTACATCAACACCCGATG       |
| scaffold157353_16.4 | 1 p3 | (AAT)5 | 15 | 1340 | 1354 ATTATTGAATGGGCCCAAAA     |
| scaffold157360_12.0 | 1 p3 | (CGC)5 | 15 | 65   | 79 TGGCTATCCTCAGCTGCTCT       |
| scaffold157595_13.5 | 1 p3 | (GGC)5 | 15 | 6078 | 6092 TATATGTGGCCTTCTTCCCG     |
| scaffold158421_16.0 | 1 p3 | (CTT)5 | 15 | 619  | 633 CACTGGACACACCTCTCCCT      |
| scaffold158649_10.9 | 1 p3 | (GAT)5 | 15 | 435  | 449 CATTGGCAGCAGCAAACTA       |
| scaffold158758_18.3 | 1 p3 | (TAT)7 | 21 | 727  | 747 TAGCTCTGTTGCAGCCGATA      |
| scaffold158879_10.2 | 1 p3 | (ATC)5 | 15 | 69   | 83 AAGCCAATTTTGGTGGGTTT       |
| scaffold159071_14.6 | 1 p3 | (ACA)6 | 18 | 2584 | 2601 TCCAATCACTTACCAAATGCAC   |
| scaffold159673_11.6 | 1 p3 | (CCG)6 | 18 | 45   | 62 AATTACCTTGCCGGAAATTG       |
| scaffold160644_15.5 | 1 p3 | (TCA)5 | 15 | 2340 | 2354 CTTTCCCAGCATCAACATT      |
| scaffold161086_13.1 | 1 p3 | (CCA)5 | 15 | 961  | 975 AGAACTCGAGCTTGACCCAC      |
| scaffold161700_15.4 | 1 p3 | (TCT)5 | 15 | 107  | 121 TCAGAAGGGGTTATGTCCTCA     |
| scaffold161708_13.2 | 1 p3 | (ATC)6 | 18 | 65   | 82 CAAGTTCTTTCAAATTGGTGG      |
| scaffold161765_17.5 | 1 p3 | (CAG)5 | 15 | 1295 | 1309 CACATGGCTCAGACGACACT     |
| scaffold162708_16.0 | 1 p3 | (TTG)6 | 18 | 135  | 152 GCCAACCTCCTCCTTTATC       |
| scaffold163455_20.1 | 1 p3 | (CAA)5 | 15 | 311  | 325 GGTACAACATCATGCCACCA      |
| scaffold163819_16.0 | 1 p3 | (AGT)6 | 18 | 1929 | 1946 AACCTCTGCCGTGAAATCTG     |
| scaffold163874_11.2 | 1 p3 | (TTG)6 | 18 | 64   | 81 TGACCCTAGTGGTAACACGG       |
| scaffold164227_10.3 | 1 p3 | (CAA)5 | 15 | 39   | 53 CAGCCATGAATGAGAGTGGG       |
| scaffold164578_11.4 | 1 p3 | (CCG)6 | 18 | 147  | 164 CTGTTCTCGCTTACCAAGCC      |
| scaffold164722_10.6 | 1 p3 | (CCG)5 | 15 | 90   | 104 ATAAAACCTGCCGGAATCGT      |
| scaffold165540_14.7 | 1 p3 | (TCT)5 | 15 | 1489 | 1503 TGGAGATCGGAAAATTGGAG     |
| scaffold165855_16.0 | 1 p3 | (CTC)5 | 15 | 4658 | 4672 CAAAATGGGGAGATGAGTG      |
| scaffold165914_14.0 | 1 p3 | (ACC)5 | 15 | 503  | 517 GGGGGCCAAACAAATATACA      |
| scaffold166272_17.1 | 1 p3 | (TCT)5 | 15 | 1435 | 1449 TGTACTTGTTGTTGTTGCC      |
| scaffold166432_16.2 | 1 p3 | (ATA)5 | 15 | 273  | 287 ATGGGTTGAGTCTCAATGG       |
| scaffold167500_17.2 | 1 p3 | (ATC)7 | 21 | 3474 | 3494 GCATTATGTCATGGTTCCCC     |
| scaffold167676_16.0 | 1 p3 | (AAT)5 | 15 | 773  | 787 TGCAAATGAAAAGGGGTAGA      |
| scaffold168439_14.7 | 1 p3 | (CAA)5 | 15 | 370  | 384 TATGGTAGCTGGCTCGACCT      |
| scaffold168792_15.0 | 1 p3 | (AAT)5 | 15 | 276  | 290 TCTCGCCAACTTCTCTGAT       |
| scaffold169730_12.0 | 1 p3 | (CCA)5 | 15 | 93   | 107 GCCCGAATTTTCCCTAACT       |

|                     |      |        |    |      |                                |
|---------------------|------|--------|----|------|--------------------------------|
| scaffold169924_13.0 | 1 p3 | (ACA)6 | 18 | 424  | 441 GTGGGCACCCAACAAAATTA       |
| scaffold170018_19.5 | 1 p3 | (ATC)5 | 15 | 136  | 150 CGTCGGGTAGACCAATGACT       |
| scaffold170983_10.8 | 1 p3 | (CAA)5 | 15 | 170  | 184 AGAAATACATGCAGGGCTGAG      |
| scaffold171005_15.6 | 1 p3 | (TGT)5 | 15 | 713  | 727 ACCAAGGGTGCAGAGAAATATG     |
| scaffold171064_12.7 | 1 p3 | (CCG)6 | 18 | 312  | 329 TCCTCTGGGTTGTTTCACC        |
| scaffold171088_16.3 | 1 p3 | (TCA)6 | 18 | 174  | 191 AGAAAAAGAAGAGGGAGCGG       |
| scaffold171367_19.2 | 1 p3 | (TCA)6 | 18 | 261  | 278 CTTGCCAATGCTCCACACTA       |
| scaffold171500_15.0 | 1 p3 | (CAT)5 | 15 | 39   | 53 ATCATCATCATGTCCACCGA        |
| scaffold171588_12.7 | 1 p3 | (GCG)5 | 15 | 575  | 589 AGGAGGAGGAAGAGGAGTGC       |
| scaffold171913_16.3 | 1 p3 | (AGG)5 | 15 | 576  | 590 GCTTTGCAACACACATTTGG       |
| scaffold172165_14.4 | 1 p3 | (GCC)6 | 18 | 734  | 751 ATAAATCGAACCTCCCCACC       |
| scaffold172672_18.9 | 1 p3 | (CAA)5 | 15 | 657  | 671 TGCAGCAATTATGCAACCAT       |
| scaffold173246_15.2 | 1 p3 | (TTA)5 | 15 | 582  | 596 AGTCAGAAAAGCCCACCTCA       |
| scaffold173742_17.2 | 1 p3 | (TCA)5 | 15 | 169  | 183 TAAGGCCGTATTAACCGTCG       |
| scaffold173758_14.6 | 1 p3 | (TCT)5 | 15 | 36   | 50 GCTACATCCAATGCTGGTGA        |
| scaffold174008_14.4 | 1 p3 | (TAT)6 | 18 | 1008 | 1025 CCGATATTTTGGCCTTCGTA      |
| scaffold174265_14.6 | 1 p3 | (AAC)6 | 18 | 1414 | 1431 AATGTCCCCATTGAGACTCG      |
| scaffold174627_17.3 | 1 p3 | (CAA)6 | 18 | 634  | 651 CGATTTTGCCCAAGAATACC       |
| scaffold174841_17.0 | 1 p3 | (GGC)5 | 15 | 3859 | 3873 ACCAACTTCACCGATCCAAG      |
| scaffold175543_16.3 | 1 p3 | (AAC)7 | 21 | 7296 | 7316 GTTTGGTGGATCAAGCACCT      |
| scaffold175822_13.3 | 1 p3 | (TCA)5 | 15 | 249  | 263 GGTGGTCGAGTTGTTGAGT        |
| scaffold177700_13.4 | 1 p3 | (CAT)6 | 18 | 778  | 795 TATTGTGGCACTCTCCCCTC       |
| scaffold178448_16.8 | 1 p3 | (TGC)6 | 18 | 1070 | 1087 TGGAAGATGGAAGAGGATGG      |
| scaffold178466_16.0 | 1 p3 | (TCA)6 | 18 | 367  | 384 CACCTCAGCCACCCTAGAAG       |
| scaffold179974_16.3 | 1 p3 | (TTC)6 | 18 | 243  | 260 GATCGTGTTCGTGTCTGTCTC      |
| scaffold180284_13.8 | 1 p3 | (TGA)5 | 15 | 107  | 121 ATGAGTCGGTTTGTGAGGC        |
| scaffold180318_11.2 | 1 p3 | (CCA)5 | 15 | 282  | 296 GAAAGACCACGGCGATTTTA       |
| scaffold180842_13.6 | 1 p3 | (ATA)5 | 15 | 306  | 320 ACAAATCCCCTTCCATCAA        |
| scaffold180990_11.5 | 1 p3 | (ATC)6 | 18 | 139  | 156 ACCTGTATTAGTACGGCGGC       |
| scaffold181055_10.8 | 1 p3 | (ATT)6 | 18 | 590  | 607 ACATGCAAATCCATTACCCA       |
| scaffold181231_14.9 | 1 p3 | (TGT)6 | 18 | 358  | 375 AACGTGGAGGACAGTGGTCT       |
| scaffold181269_14.0 | 1 p3 | (ATT)5 | 15 | 229  | 243 ATTTCCCAACTCACTCGC         |
| scaffold181536_11.8 | 1 p3 | (TTA)5 | 15 | 58   | 72 CAGAAGATTCATATTGATTTTGAGG   |
| scaffold181738_15.5 | 1 p3 | (ATT)6 | 18 | 834  | 851 AAGGCGGTGTATTATGTCCG       |
| scaffold182831_16.1 | 1 p3 | (AAC)5 | 15 | 367  | 381 TGATCTCTCCCGTGAAAACAT      |
| scaffold183025_18.5 | 1 p3 | (CAA)5 | 15 | 1014 | 1028 CCTTTTCGGGTGCTTTACAA      |
| scaffold183197_18.9 | 1 p3 | (AGG)6 | 18 | 246  | 263 ATGCAGGATGAGGAGGAATG       |
| scaffold183546_13.9 | 1 p3 | (TCA)5 | 15 | 116  | 130 TTTCCAACAATAACCCCGTG       |
| scaffold183680_16.5 | 1 p3 | (AAG)5 | 15 | 36   | 50 CTCGCTGGATCCCTAGAAGC        |
| scaffold184885_11.3 | 1 p3 | (ATT)6 | 18 | 38   | 55 TTGAAAACCGATTTCCCTT         |
| scaffold184963_10.2 | 1 p3 | (TTC)5 | 15 | 284  | 298 TTCCAAGCATTTGATGCAAG       |
| scaffold185898_16.5 | 1 p3 | (TTA)5 | 15 | 1209 | 1223 TGAGGTTCCAATTATATCCTTATGC |
| scaffold186381_11.9 | 1 p3 | (TTA)7 | 21 | 166  | 186 TGTGATTTGGATGATGTGTAAGC    |
| scaffold186842_16.0 | 1 p3 | (AAC)6 | 18 | 3267 | 3284 TTTTGAATGGCCGTTTACC       |
| scaffold186906_10.5 | 1 p3 | (TAT)5 | 15 | 96   | 110 TTGTCAAGATTGGCTTCGTG       |
| scaffold187133_12.7 | 1 p3 | (TAA)5 | 15 | 543  | 557 TCGGCTTTTGTACATGCTTT       |
| scaffold187166_15.5 | 1 p3 | (CAT)5 | 15 | 35   | 49 AAACATGCCCAACATTCAGC        |
| scaffold187551_14.4 | 1 p3 | (AAT)6 | 18 | 932  | 949 CTCCAAAATAGGGGGTTCC        |
| scaffold187703_10.5 | 1 p3 | (AAT)6 | 18 | 37   | 54 TTTTGAATTAATGGTGAGAAATGA    |
| scaffold187795_14.0 | 1 p3 | (TTA)5 | 15 | 242  | 256 GGGTTTATGTGTTTATCACGTTG    |
| scaffold188397_14.4 | 1 p3 | (AAT)7 | 21 | 734  | 754 CCGGTATCTTACTTTTGGCCG      |
| scaffold188707_14.4 | 1 p3 | (TAA)5 | 15 | 134  | 148 TCTCCCTACTCTTCGTTGCTC      |
| scaffold189167_15.4 | 1 p3 | (CGC)5 | 15 | 1236 | 1250 GCCAACTTTGCTTGCATTTT      |
| scaffold189187_10.5 | 1 p3 | (TAA)5 | 15 | 343  | 357 AAATGTATCCGCCGTGATTG       |
| scaffold189617_16.6 | 1 p3 | (TAT)6 | 18 | 91   | 108 TTTGAAGATCCGGAAATTTGT      |
| scaffold190073_14.0 | 1 p3 | (GAA)5 | 15 | 34   | 48 GGATCGTAAAGCCTGGTGAA        |
| scaffold190114_13.5 | 1 p3 | (AAT)6 | 18 | 222  | 239 GACGCCCAATGATCAAAAAT       |
| scaffold190771_14.2 | 1 p3 | (AAG)5 | 15 | 50   | 64 ACAGTGGAGGAGCTCGCA          |

|                     |      |        |    |      |      |                          |
|---------------------|------|--------|----|------|------|--------------------------|
| scaffold191178_12.1 | 1 p3 | (TAT)6 | 18 | 439  | 456  | CTCGAACACGAGACCTCCAG     |
| scaffold191414_12.9 | 1 p3 | (TAA)5 | 15 | 195  | 209  | CGGACCAGACTCCAACCTTTT    |
| scaffold192041_13.4 | 1 p3 | (TTG)6 | 18 | 600  | 617  | TATAGCCGACCCCACGTAGT     |
| scaffold192964_15.2 | 1 p3 | (CAT)5 | 15 | 262  | 276  | GGGCATCAAAACCTCCAGTA     |
| scaffold193012_15.1 | 1 p3 | (TAA)6 | 18 | 102  | 119  | CTTCATAGTACGCCACCCGT     |
| scaffold194068_11.0 | 1 p3 | (ATC)5 | 15 | 67   | 81   | TTCCTCAATTTTGGGACCAG     |
| scaffold194374_13.3 | 1 p3 | (CTC)5 | 15 | 209  | 223  | GATGTACGCACTTGGTGGTG     |
| scaffold194512_14.3 | 1 p3 | (ATT)5 | 15 | 299  | 313  | GGGGCGTGACAATATCAAAG     |
| scaffold194558_12.4 | 1 p3 | (GAG)6 | 18 | 453  | 470  | GTCGCCACAAGAACGAAAAT     |
| scaffold194772_14.9 | 1 p3 | (ATT)5 | 15 | 1343 | 1357 | GGATTCACGGATTGAGCCTA     |
| scaffold195714_10.2 | 1 p3 | (CTT)6 | 18 | 378  | 395  | AGGCCAACTGACATCTGGAA     |
| scaffold195808_16.2 | 1 p3 | (TCT)5 | 15 | 3274 | 3288 | TCGGAGGCGATTTACATAGG     |
| scaffold196105_15.9 | 1 p3 | (GCA)5 | 15 | 3922 | 3936 | GGGGTTTTGCTGCTACACAT     |
| scaffold196261_14.4 | 1 p3 | (ATG)5 | 15 | 87   | 101  | TTTCATGTGTGCTTATTGTTTTCA |
| scaffold196288_17.6 | 1 p3 | (ATG)5 | 15 | 94   | 108  | TGCAATGGCTTTTTATTGTT     |
| scaffold196384_11.8 | 1 p3 | (ATT)8 | 24 | 272  | 295  | TCATTGTTGGAAATAGGGGC     |
| scaffold196393_12.7 | 1 p3 | (AAT)7 | 21 | 662  | 682  | TCACCACGCTCCCTAAGTGT     |
| scaffold197059_15.8 | 1 p3 | (ATT)5 | 15 | 1201 | 1215 | CGTGAAAATCCGATTAGGGA     |
| scaffold197372_17.1 | 1 p3 | (GCG)5 | 15 | 1337 | 1351 | CCAGCGAGTCTTCTGAGCTT     |
| scaffold197513_15.4 | 1 p3 | (TGA)5 | 15 | 672  | 686  | TTGTTGCGGATTGCAATTA      |
| scaffold197773_16.4 | 1 p3 | (CAT)5 | 15 | 67   | 81   | CCCTGCTCAGTAGATTCCTTTG   |
| scaffold198329_16.2 | 1 p3 | (TCA)6 | 18 | 2570 | 2587 | GGCAAATTCGTCGTCAGACT     |
| scaffold198789_10.5 | 1 p3 | (TAA)5 | 15 | 1018 | 1032 | TGCTGTTGAGAATAGCGAGC     |
| scaffold199206_17.7 | 1 p3 | (GGA)5 | 15 | 658  | 672  | TTGGCCAAACTGATCAACAA     |
| scaffold199703_10.8 | 1 p3 | (ATG)5 | 15 | 298  | 312  | CCCGCTATCAATGTTCCACT     |
| scaffold200363_15.7 | 1 p3 | (ATT)6 | 18 | 1396 | 1413 | GTGTCTACGGCTGCCTCTTC     |
| scaffold201027_11.9 | 1 p3 | (ACA)5 | 15 | 360  | 374  | GGAGAGGATTGGATGGACAA     |
| scaffold201126_15.8 | 1 p3 | (TCT)5 | 15 | 755  | 769  | GACGTATGCCAAGCATTTC      |
| scaffold201387_15.5 | 1 p3 | (ATC)6 | 18 | 525  | 542  | ATTGTGGAGTTGCCCATCA      |
| scaffold202062_18.9 | 1 p3 | (ATG)5 | 15 | 1261 | 1275 | GTGCATGCAGCTGAAGATGT     |
| scaffold202174_12.4 | 1 p3 | (CGG)5 | 15 | 75   | 89   | GGAGGTATACTTTGCTGCAGGT   |
| scaffold202779_10.0 | 1 p3 | (CAT)5 | 15 | 46   | 60   | TTCAGCAAAGAGTAGTTTCCCA   |
| scaffold203553_11.0 | 1 p3 | (GGC)5 | 15 | 90   | 104  | GTTCCGGAGTTGGGTAGTTGC    |
| scaffold204264_15.7 | 1 p3 | (TCA)8 | 24 | 2514 | 2537 | AAGTTGTGGCCAGCAGAAAT     |
| scaffold205423_15.5 | 1 p3 | (TAA)5 | 15 | 1539 | 1553 | CGGTAATATGGTTGGATGGG     |
| scaffold205615_10.5 | 1 p3 | (CGC)5 | 15 | 437  | 451  | ACACCTCCTTCCATGCAAAC     |
| scaffold205832_12.2 | 1 p3 | (CTT)6 | 18 | 211  | 228  | GCCTTTGGTCTTGTCCGTAA     |
| scaffold206820_15.8 | 1 p3 | (CCG)5 | 15 | 1728 | 1742 | TTCTCCACCACCTCCTCCTA     |
| scaffold207002_12.1 | 1 p3 | (TAA)5 | 15 | 322  | 336  | GAAGCTGAGCAACGAGAAGG     |
| scaffold207037_17.4 | 1 p3 | (ATT)5 | 15 | 1198 | 1212 | AAGGTAGGTCTGCCCTGTT      |
| scaffold207385_12.4 | 1 p3 | (TTC)6 | 18 | 77   | 94   | CGTCTCTCCCTATTCCCTCTC    |
| scaffold207395_15.4 | 1 p3 | (ATC)5 | 15 | 419  | 433  | TGGTTTTGGAGCATCATCAA     |
| scaffold207641_10.2 | 1 p3 | (CGC)5 | 15 | 148  | 162  | CCTCGCCTCTTACATCTGCT     |
| scaffold208184_20.4 | 1 p3 | (ACA)5 | 15 | 1491 | 1505 | TCTGTTGATCGACATCCCTG     |
| scaffold209780_14.7 | 1 p3 | (TAT)5 | 15 | 779  | 793  | CGAAAATGATCAGTGCAACG     |
| scaffold210867_16.2 | 1 p3 | (AGA)5 | 15 | 2535 | 2549 | AATCCCTTGGGAAATGAACC     |
| scaffold211281_16.7 | 1 p3 | (AAT)5 | 15 | 232  | 246  | TGGGTCTAAAGATGTTGCCTC    |
| scaffold211472_13.4 | 1 p3 | (CAT)5 | 15 | 191  | 205  | CACAAACCAAGGTGCATGT      |
| scaffold211884_15.0 | 1 p3 | (ACA)6 | 18 | 2487 | 2504 | TACTTTAGCTGGCAGGCACC     |
| scaffold211964_11.7 | 1 p3 | (GGC)5 | 15 | 58   | 72   | ATTTTGAACGGTAACAGCCG     |
| scaffold212278_16.1 | 1 p3 | (TTC)5 | 15 | 1713 | 1727 | CGCAAACACAGAACAGCATT     |
| scaffold212860_10.1 | 1 p3 | (TAT)8 | 24 | 275  | 298  | TCAATGTTACGTTACAGCCA     |
| scaffold213189_14.9 | 1 p3 | (CAG)5 | 15 | 2261 | 2275 | AGCATTGGCTTCAGCTGTTT     |
| scaffold213237_14.6 | 1 p3 | (GAT)5 | 15 | 181  | 195  | GAGAAAGTCAGTCCACGCCT     |
| scaffold214027_10.2 | 1 p3 | (TAT)7 | 21 | 683  | 703  | TGATGGGCCTTTTCAATTTT     |
| scaffold214139_14.3 | 1 p3 | (TAT)6 | 18 | 510  | 527  | CCCTACTCCCCCGTAAATTC     |
| scaffold214306_12.5 | 1 p3 | (CAG)5 | 15 | 74   | 88   | GGGCAGCCAAATATAGAGCA     |
| scaffold214402_11.5 | 1 p3 | (ATT)5 | 15 | 855  | 869  | CGGGAACAATAAATGCCAAG     |

|                     |      |        |    |      |      |                            |
|---------------------|------|--------|----|------|------|----------------------------|
| scaffold214491_13.5 | 1 p3 | (TTC)5 | 15 | 72   | 86   | GGCCAAAACCGTGTAGTTTG       |
| scaffold214746_11.4 | 1 p3 | (ATA)5 | 15 | 436  | 450  | ACTCCGTGTTACCTTCTGC        |
| scaffold215089_15.2 | 1 p3 | (ATT)5 | 15 | 61   | 75   | TGGAGTAATTGCATTACATTCGAG   |
| scaffold215240_19.2 | 1 p3 | (GCC)5 | 15 | 148  | 162  | TGAACATTAAAGAATATCTACTCAGC |
| scaffold215520_11.4 | 1 p3 | (TAA)5 | 15 | 183  | 197  | GAATATTATGGCACCATGGGTA     |
| scaffold215830_14.2 | 1 p3 | (TTG)5 | 15 | 2314 | 2328 | TAGCCGACCCCATTTTATTG       |
| scaffold215960_12.5 | 1 p3 | (GAT)5 | 15 | 206  | 220  | CAAACCATGGCATTTTTGA        |
| scaffold215985_17.6 | 1 p3 | (CGC)5 | 15 | 919  | 933  | TATGGATTCACCTCCTTCGC       |
| scaffold216198_17.0 | 1 p3 | (ATT)5 | 15 | 1141 | 1155 | CGTATCATTTGGTGAGCTTGAA     |
| scaffold218216_15.0 | 1 p3 | (ATT)6 | 18 | 872  | 889  | TAGGCTTGATGGTTGTTGCC       |
| scaffold218381_18.7 | 1 p3 | (TTA)6 | 18 | 51   | 68   | AATTGGGGTGTTGGAACCTG       |
| scaffold218972_11.2 | 1 p3 | (CCG)5 | 15 | 270  | 284  | GAAAAAGGGAATAGGGCCAG       |
| scaffold219240_12.7 | 1 p3 | (AAT)5 | 15 | 51   | 65   | GTACGCAATCATGCATCACC       |
| scaffold219726_16.1 | 1 p3 | (ACA)6 | 18 | 857  | 874  | GGCGTGTGTTTGCCTTAGTT       |
| scaffold220421_14.6 | 1 p3 | (ATC)5 | 15 | 337  | 351  | TTCTTGGTCTCCAAAGTCCG       |
| scaffold221256_16.7 | 1 p3 | (TAT)7 | 21 | 92   | 112  | TTTGAAGATCCGGAAATTTGT      |
| scaffold222115_10.9 | 1 p3 | (TAT)6 | 18 | 230  | 247  | TATTTTCCGGCGATTTTGAG       |
| scaffold222377_10.8 | 1 p3 | (TTA)5 | 15 | 321  | 335  | GATTGAGATTGAGCCCGAAA       |
| scaffold222464_11.2 | 1 p3 | (CAA)5 | 15 | 358  | 372  | TGGTCAATGAACCAAAGCAA       |
| scaffold222611_10.2 | 1 p3 | (TAT)6 | 18 | 180  | 197  | GTAAGTAAGGCGGTGGCAGA       |
| scaffold222940_12.0 | 1 p3 | (CCT)5 | 15 | 103  | 117  | CTTTCGATGCTCCTCTCGAC       |
| scaffold222996_12.0 | 1 p3 | (ATG)6 | 18 | 250  | 267  | CTCCTGATGAACCCACATC        |
| scaffold223478_12.9 | 1 p3 | (AAC)7 | 21 | 227  | 247  | GCTCCAGAGCAAGATTCCAG       |
| scaffold224095_10.5 | 1 p3 | (TTC)7 | 21 | 37   | 57   | CTTTGCCCTCTCTCCATCTG       |
| scaffold224185_11.9 | 1 p3 | (TGT)6 | 18 | 62   | 79   | TTTGGTTCATGTAGCCGACC       |
| scaffold224350_13.5 | 1 p3 | (CCA)5 | 15 | 105  | 119  | TGCAGAAGCATTATTCATCGTC     |
| scaffold224356_15.3 | 1 p3 | (TCT)5 | 15 | 258  | 272  | CAGCCGAGAACATCATCAAA       |
| scaffold224711_11.0 | 1 p3 | (GCT)6 | 18 | 137  | 154  | AGCAGCTAATCGCCTCTCTG       |
| scaffold224875_16.2 | 1 p3 | (TCT)5 | 15 | 377  | 391  | TTTTCCAAATGCTCCAAAGG       |
| scaffold224926_11.3 | 1 p3 | (ACC)5 | 15 | 294  | 308  | GGCTTAAACTCGATTGGCAC       |
| scaffold227230_19.4 | 1 p3 | (TCA)5 | 15 | 297  | 311  | TTTCCCAACCTCAACATTC        |
| scaffold228260_13.1 | 1 p3 | (GAA)5 | 15 | 150  | 164  | GAGGATTCAGAGGAGGACCC       |
| scaffold228855_17.2 | 1 p3 | (GAA)5 | 15 | 335  | 349  | TCAAATTGAATGGCTTGGTG       |
| scaffold229187_14.0 | 1 p3 | (TCT)5 | 15 | 101  | 115  | TCAGAAGGGGTTATGTCCTCA      |
| scaffold229472_14.5 | 1 p3 | (CGT)5 | 15 | 223  | 237  | GATCCCCTGCAAGTGTGACT       |
| scaffold230308_15.9 | 1 p3 | (TAT)6 | 18 | 861  | 878  | GCATCTAAGGAACATGGATACTG    |
| scaffold231319_11.7 | 1 p3 | (CGG)5 | 15 | 116  | 130  | CCGGAAGAAAGAGTGGGTTT       |
| scaffold231826_17.3 | 1 p3 | (TAA)6 | 18 | 41   | 58   | CAATATAAGAACATTTATGGCAAACA |
| scaffold232245_16.8 | 1 p3 | (ATT)5 | 15 | 246  | 260  | TTGTGATTCGTTGTGTTTTGC      |
| scaffold232891_16.7 | 1 p3 | (CAT)5 | 15 | 661  | 675  | TCCCAAACCTGAATCCTTCG       |
| scaffold233919_13.7 | 1 p3 | (AGC)6 | 18 | 767  | 784  | ACATTCCCATTTGCAAGCTC       |
| scaffold234028_13.0 | 1 p3 | (CAA)5 | 15 | 429  | 443  | TAACTGTGATCACGAAATGCG      |
| scaffold234814_13.9 | 1 p3 | (TTC)5 | 15 | 67   | 81   | GATGCAGCAACTTCCTCTCC       |
| scaffold235450_20.3 | 1 p3 | (TTC)5 | 15 | 404  | 418  | GGTTCTCCCTACTCCCCCTC       |
| scaffold235518_10.4 | 1 p3 | (AAG)5 | 15 | 199  | 213  | GTGCCCACTGCTCAACTA         |
| scaffold235758_13.3 | 1 p3 | (CAT)5 | 15 | 157  | 171  | GGGAGCATCATCAACGTTCT       |
| scaffold236079_10.7 | 1 p3 | (TGT)6 | 18 | 47   | 64   | ATGTAGCCGACCCCAATTTA       |
| scaffold236162_16.5 | 1 p3 | (CCG)5 | 15 | 659  | 673  | AATCCGTACCAAATCCCTCC       |
| scaffold236638_18.1 | 1 p3 | (TTC)5 | 15 | 106  | 120  | CTCGCTGACTTCAATCCACA       |
| scaffold237160_12.0 | 1 p3 | (TGT)5 | 15 | 134  | 148  | TTGGCAATTTCTTGAGGAG        |
| scaffold237457_15.6 | 1 p3 | (GGT)6 | 18 | 119  | 136  | TTAACGTCAAATGCGAATGG       |
| scaffold237867_13.3 | 1 p3 | (CAC)7 | 21 | 103  | 123  | CCGAAGTGCTAGACCCAAAG       |
| scaffold238321_14.6 | 1 p3 | (CTT)6 | 18 | 254  | 271  | CCCCAACTTATTGACAAACG       |
| scaffold238467_11.6 | 1 p3 | (TCA)5 | 15 | 172  | 186  | GCAGTACTTGAACCTTCGCC       |
| scaffold238544_16.6 | 1 p3 | (ACC)5 | 15 | 93   | 107  | CTAAAACCTGAAAACGCCGC       |
| scaffold239061_10.7 | 1 p3 | (TGA)5 | 15 | 281  | 295  | AAATTTATTTTGGAGCCGGGG      |
| scaffold239487_16.3 | 1 p3 | (ACA)5 | 15 | 317  | 331  | ACGTTTTCTTGCCCAAAAC        |
| scaffold240471_16.7 | 1 p3 | (AAT)6 | 18 | 371  | 388  | CAGAAAGGGGAACACTCGAA       |

|                     |      |        |    |      |      |                           |
|---------------------|------|--------|----|------|------|---------------------------|
| scaffold240556_16.9 | 1 p3 | (TTA)6 | 18 | 1737 | 1754 | CACTATGTGGACCATCAATCTCA   |
| scaffold241245_17.6 | 1 p3 | (GAT)5 | 15 | 185  | 199  | CTCGAGCGCACAAAACATT       |
| scaffold241498_16.7 | 1 p3 | (CAA)5 | 15 | 3575 | 3589 | GCAAAAGACAATGAAGGGGA      |
| scaffold241682_10.6 | 1 p3 | (ATA)7 | 21 | 152  | 172  | GTCCTTTGTGGAGCGATGTT      |
| scaffold241953_16.2 | 1 p3 | (TCT)5 | 15 | 533  | 547  | CGAACTAGCAAACCGGCTAC      |
| scaffold241989_16.6 | 1 p3 | (TGC)5 | 15 | 544  | 558  | ATACGGGTGAAGTGACCAGC      |
| scaffold242060_14.5 | 1 p3 | (CCG)5 | 15 | 94   | 108  | TCCCCTTTCTCTCTCTCTCG      |
| scaffold242167_15.2 | 1 p3 | (CAA)5 | 15 | 113  | 127  | ACCACTCAAACCCACAAAGG      |
| scaffold242495_15.0 | 1 p3 | (ATT)5 | 15 | 825  | 839  | AGCCGCGCCTAAATAGTTTT      |
| scaffold242545_16.6 | 1 p3 | (GCA)6 | 18 | 826  | 843  | ACATTCCCAAGGCTGAGATG      |
| scaffold244774_16.6 | 1 p3 | (TCT)5 | 15 | 276  | 290  | TAATTGCTGAAGCAGCAAC       |
| scaffold245132_13.2 | 1 p3 | (AAT)5 | 15 | 455  | 469  | TGCAGAAACCATGTATTTACTTTGA |
| scaffold245188_17.2 | 1 p3 | (GTG)5 | 15 | 562  | 576  | TCCACTTTTTCTGCTTTGGCT     |
| scaffold245530_12.5 | 1 p3 | (CAG)5 | 15 | 50   | 64   | CTGGGCAGCCAAACATAGAG      |
| scaffold246144_14.9 | 1 p3 | (TTA)6 | 18 | 571  | 588  | GAAAGCATTTAACCGCCAAA      |
| scaffold246368_13.8 | 1 p3 | (TAA)5 | 15 | 1575 | 1589 | GCACAGGTAGTGTTCATGG       |
| scaffold246939_15.2 | 1 p3 | (AAC)5 | 15 | 899  | 913  | TCAAAGGGTTTGAATGGCTC      |
| scaffold247019_12.6 | 1 p3 | (TTA)5 | 15 | 576  | 590  | AGATCGAGCGATTTGTACGG      |
| scaffold247375_12.0 | 1 p3 | (GAC)5 | 15 | 80   | 94   | CAGAGAGGCACTATACAGTTCGG   |
| scaffold248400_12.2 | 1 p3 | (ATC)7 | 21 | 47   | 67   | TTTTAATTCCCCATATTACCAACA  |
| scaffold249059_18.2 | 1 p3 | (TAT)5 | 15 | 481  | 495  | AATGGGACAACATCATCCTCG     |
| scaffold249220_10.6 | 1 p3 | (ATT)5 | 15 | 139  | 153  | GATAGCCGTTGGTGGTTGAT      |
| scaffold250518_14.4 | 1 p3 | (ACC)7 | 21 | 635  | 655  | CGTCTTTTTCCGTCGACTC       |
| scaffold250584_18.5 | 1 p3 | (GTG)5 | 15 | 131  | 145  | TCGGATCCACTTTTCTGCTT      |
| scaffold250649_13.5 | 1 p3 | (CTC)5 | 15 | 361  | 375  | GGAACCCCTTCAGGATTCTC      |
| scaffold251316_16.7 | 1 p3 | (AAC)6 | 18 | 4158 | 4175 | CGTTGGACAATCTGTAGCCA      |
| scaffold252132_14.6 | 1 p3 | (TTA)5 | 15 | 95   | 109  | TGCGGCTTCCATTTAGATTT      |
| scaffold252319_12.3 | 1 p3 | (GCC)5 | 15 | 68   | 82   | CTTCACTCGCCGAAAAAT        |
| scaffold253256_16.0 | 1 p3 | (CCG)5 | 15 | 197  | 211  | CCAGATCTGCCAACGTTTTT      |
| scaffold253263_10.6 | 1 p3 | (TAT)5 | 15 | 274  | 288  | TTTTCTTTTCTTTTATGCTCG     |
| scaffold255159_16.6 | 1 p3 | (AAC)6 | 18 | 2397 | 2414 | TATAAGGCAATTTGCGAGGC      |
| scaffold256100_10.9 | 1 p3 | (AGA)5 | 15 | 110  | 124  | TATCCTTCATCAGTTCGCC       |
| scaffold256515_14.2 | 1 p3 | (TCA)5 | 15 | 446  | 460  | TTTGGGTCTCCACAAGAAC       |
| scaffold256590_14.2 | 1 p3 | (TCT)6 | 18 | 88   | 105  | GTCTTCGGAAGCGATCTCAA      |
| scaffold256830_12.8 | 1 p3 | (CCA)5 | 15 | 119  | 133  | GTCATAACCAGAGGAGCAGGC     |
| scaffold259633_12.9 | 1 p3 | (TCA)6 | 18 | 1912 | 1929 | CATCACGTCCCATTGTTCTG      |
| scaffold259748_17.4 | 1 p3 | (TAT)5 | 15 | 444  | 458  | CTGCGACAATTGCTCAAAAC      |
| scaffold259833_15.3 | 1 p3 | (TTG)5 | 15 | 2497 | 2511 | TGACCCACATAGTGGGAAAGA     |
| scaffold260297_13.0 | 1 p3 | (GAA)6 | 18 | 73   | 90   | GATGCAGATGAGGACGTGAA      |
| scaffold260857_14.4 | 1 p3 | (GGC)5 | 15 | 477  | 491  | TTCTTCGCTACGGCTACGAG      |
| scaffold260910_16.0 | 1 p3 | (TAT)7 | 21 | 480  | 500  | AAAGGTTGAGAACCATGATGA     |
| scaffold261491_12.9 | 1 p3 | (TTA)6 | 18 | 942  | 959  | ATGCCGTGATTGAAACACAA      |
| scaffold262041_13.8 | 1 p3 | (GAA)5 | 15 | 431  | 445  | GGCTCTGCAAGAATTTGAGC      |
| scaffold262207_16.6 | 1 p3 | (CGC)5 | 15 | 49   | 63   | CCCTCCTCCTTCTTGCTCTT      |
| scaffold262507_17.0 | 1 p3 | (CAT)5 | 15 | 46   | 60   | GAATCAAGTATCTGATCTGAGCCA  |
| scaffold262904_10.5 | 1 p3 | (TCT)5 | 15 | 99   | 113  | TGCTGCTGCTTTCTTCATTG      |
| scaffold263023_17.8 | 1 p3 | (GGC)5 | 15 | 46   | 60   | GAAAACAAAAGATAGATGGAGCAA  |
| scaffold263605_17.5 | 1 p3 | (CTC)5 | 15 | 934  | 948  | TTGCAGAATCCAACCTGCAAG     |
| scaffold263663_18.3 | 1 p3 | (CCG)5 | 15 | 216  | 230  | ACGGTTATTGGGAAATGCAA      |
| scaffold263979_16.2 | 1 p3 | (GAT)5 | 15 | 358  | 372  | GATTGCGACCACCCTTACAT      |
| scaffold264197_12.8 | 1 p3 | (TGT)6 | 18 | 485  | 502  | TGCGATTAAGGCTTTGGTGT      |
| scaffold264535_10.0 | 1 p3 | (GGC)5 | 15 | 418  | 432  | GCGCAAAGTGTAGATCTGGC      |
| scaffold265184_12.7 | 1 p3 | (GGC)5 | 15 | 317  | 331  | GCCAGTCGTATCTAACCCGA      |
| scaffold265537_18.7 | 1 p3 | (TTA)6 | 18 | 1112 | 1129 | TGTTTCATCGGTGAAGACCAA     |
| scaffold266411_13.8 | 1 p3 | (GGC)5 | 15 | 198  | 212  | TGTGTGATCCCTCAACAGGA      |
| scaffold266886_17.2 | 1 p3 | (ATC)5 | 15 | 733  | 747  | TTTCTGGAAATAGGGGGACC      |
| scaffold266915_10.3 | 1 p3 | (TGT)6 | 18 | 51   | 68   | GGTTCATGTAGACGACCCCA      |
| scaffold266976_17.4 | 1 p3 | (GTG)6 | 18 | 837  | 854  | CGATCTCGTTGTGTTTCGTG      |

|                     |      |        |    |      |                                |
|---------------------|------|--------|----|------|--------------------------------|
| scaffold266982_15.8 | 1 p3 | (ATA)5 | 15 | 960  | 974 CCTCTTCCTCGTACTCGGTG       |
| scaffold267446_16.6 | 1 p3 | (TTG)5 | 15 | 1185 | 1199 TGGCTCCACAATTCATAGCA      |
| scaffold267951_17.5 | 1 p3 | (TAT)6 | 18 | 1442 | 1459 TCGTAGTTTGTGGCTCAAGG      |
| scaffold268532_16.0 | 1 p3 | (ATC)5 | 15 | 150  | 164 GAACCTGTGGTAGTACGGCG       |
| scaffold268972_16.2 | 1 p3 | (TTG)5 | 15 | 3261 | 3275 GCCATGCCTTCAGTTTTGAT      |
| scaffold269307_15.0 | 1 p3 | (AAT)5 | 15 | 2142 | 2156 TTGCACGAACAAAATTCGAC      |
| scaffold270782_11.7 | 1 p3 | (TTC)6 | 18 | 296  | 313 TCGAATCAAATCCATCAGGA       |
| scaffold271156_13.2 | 1 p3 | (TAT)5 | 15 | 2199 | 2213 AGCATCAACTGCGGCTAACT      |
| scaffold272205_15.2 | 1 p3 | (ATG)6 | 18 | 38   | 55 GATGATGATGCCACTCTTGG        |
| scaffold273462_17.2 | 1 p3 | (TAA)5 | 15 | 460  | 474 GGATTGGGGCGTGATAAATA       |
| scaffold273485_23.3 | 1 p3 | (TAA)5 | 15 | 1011 | 1025 ATGTTTTCGCGCCTTATTTG      |
| scaffold273576_17.5 | 1 p3 | (GAA)5 | 15 | 327  | 341 AGCCGATTCTGAAGTTCCAA       |
| scaffold273832_10.4 | 1 p3 | (GGT)5 | 15 | 657  | 671 AAATCTGCCCAACACTCAC        |
| scaffold274250_10.1 | 1 p3 | (GCA)5 | 15 | 168  | 182 CCGTGCTATGATGAGCCATA       |
| scaffold275742_10.2 | 1 p3 | (ATA)6 | 18 | 394  | 411 ACACCCCGTATTTTCGAATG       |
| scaffold275832_16.8 | 1 p3 | (TGA)5 | 15 | 3842 | 3856 GAGAGAGTTGTGCATTGGCA      |
| scaffold276474_14.7 | 1 p3 | (TCA)7 | 21 | 1163 | 1183 GGCTTAATGGATCGTGTCTGT     |
| scaffold277111_17.0 | 1 p3 | (TAC)5 | 15 | 824  | 838 GATGTGGGCTTTTTCCGTTA       |
| scaffold277585_14.5 | 1 p3 | (ACC)6 | 18 | 75   | 92 GCGACGACTCTCCGTCTATG        |
| scaffold277947_14.9 | 1 p3 | (TCC)6 | 18 | 371  | 388 ATCTTGATCATGCAGCTCCC       |
| scaffold278106_12.3 | 1 p3 | (TCT)5 | 15 | 266  | 280 TGGGTGGGTACCGATTAATA       |
| scaffold278683_16.3 | 1 p3 | (CCG)5 | 15 | 170  | 184 AAATTCAATTACCTGCCGGA       |
| scaffold279140_13.3 | 1 p3 | (GCT)5 | 15 | 51   | 65 ATGACGTCGGCGGTGATT          |
| scaffold279692_14.6 | 1 p3 | (ATT)5 | 15 | 386  | 400 CTAGTTTCATTGGAGGCGGA       |
| scaffold279735_15.9 | 1 p3 | (CCG)6 | 18 | 1083 | 1100 CATCCTTTCAATGGCAATCC      |
| scaffold279736_11.3 | 1 p3 | (TTA)7 | 21 | 859  | 879 GGTGGGAGTAGCCTCATCAT       |
| scaffold280046_15.7 | 1 p3 | (GGC)5 | 15 | 49   | 63 GAGAACAACAAAGAAGAGAAAAC/    |
| scaffold280177_11.3 | 1 p3 | (ATG)5 | 15 | 470  | 484 AACATGTTTTCAATCTTGACCG     |
| scaffold280767_18.2 | 1 p3 | (TAT)5 | 15 | 660  | 674 TTGCACAGACATTATCGCATC      |
| scaffold280832_16.3 | 1 p3 | (TAA)5 | 15 | 234  | 248 AAACCTCCACCAGAAATTAAGA     |
| scaffold281345_13.2 | 1 p3 | (TCC)6 | 18 | 301  | 318 TCGTAAACGTACACAACCTTCA     |
| scaffold282108_10.3 | 1 p3 | (AAG)5 | 15 | 188  | 202 GGTCCCAAGTAAGGTCCGTT       |
| scaffold282240_19.0 | 1 p3 | (CAG)5 | 15 | 111  | 125 GAGGACGAATCCTTTCCAGC       |
| scaffold282444_14.6 | 1 p3 | (AAT)5 | 15 | 577  | 591 TTCCTACCCCAAATTTTCC        |
| scaffold282574_10.5 | 1 p3 | (AAT)5 | 15 | 212  | 226 GGCAAATAATTGATCGCCTT       |
| scaffold282915_12.3 | 1 p3 | (AAT)5 | 15 | 113  | 127 GCATTTTCAGGATATTAATAACCAA  |
| scaffold283481_15.7 | 1 p3 | (AAC)5 | 15 | 714  | 728 TCGTTCATGGCATATTCAGG       |
| scaffold283870_13.6 | 1 p3 | (TGA)5 | 15 | 161  | 175 ACGCTATGTACCTTGGGTCTG      |
| scaffold283926_10.1 | 1 p3 | (TCT)5 | 15 | 219  | 233 CAAGGATCATGTGCGAGAAA       |
| scaffold284069_12.0 | 1 p3 | (GAG)5 | 15 | 179  | 193 TCATGGATTTAGACAGCCCC       |
| scaffold284440_17.2 | 1 p3 | (TTC)6 | 18 | 418  | 435 CGGGGAATTATATAAGTATGTCTTGA |
| scaffold284611_14.3 | 1 p3 | (CAC)5 | 15 | 82   | 96 ACGAGGGTGATGTTGGAGAG        |
| scaffold285080_10.2 | 1 p3 | (ATT)6 | 18 | 292  | 309 TCAATGCTTTGCCTATGTTCA      |
| scaffold286131_11.5 | 1 p3 | (ATC)6 | 18 | 37   | 54 TGTACCGGTATCATCCCCAC        |
| scaffold286954_14.5 | 1 p3 | (CAA)5 | 15 | 206  | 220 TGCTCCAGTTTGTCTGTAAG       |
| scaffold288377_15.3 | 1 p3 | (GAA)5 | 15 | 542  | 556 CAATTGGTTGACAAGACCCC       |
| scaffold288502_17.0 | 1 p3 | (AGG)6 | 18 | 484  | 501 ACGATCATCCATCCATCCAT       |
| scaffold288737_11.6 | 1 p3 | (TTC)5 | 15 | 673  | 687 TCAACGAATACCTGCTACCAA      |
| scaffold289957_18.4 | 1 p3 | (TGT)5 | 15 | 528  | 542 TGACGGTGTACCAGAAGCAG       |
| scaffold291053_17.7 | 1 p3 | (CGG)6 | 18 | 47   | 64 CCACCATCGTCTCTCATC          |
| scaffold292048_16.0 | 1 p3 | (AAT)5 | 15 | 1774 | 1788 TAGAAATGTCAGGGTTGGGG      |
| scaffold292215_14.5 | 1 p3 | (TAT)5 | 15 | 1760 | 1774 ACGTGGGTTCCATTTTTGAG      |
| scaffold292334_12.0 | 1 p3 | (ATG)6 | 18 | 114  | 131 GATGATGATGCCACTCTTGG       |
| scaffold292844_13.0 | 1 p3 | (CAG)5 | 15 | 85   | 99 GTGGGGCAGCCAAATATAGA        |
| scaffold293464_11.0 | 1 p3 | (TCA)6 | 18 | 79   | 96 GCGTCCGACTCCTCAACTAT        |
| scaffold293507_15.3 | 1 p3 | (CTT)9 | 27 | 298  | 324 TTTGTTGGGAAGGTTCGTAGC      |
| scaffold293811_16.2 | 1 p3 | (ATT)5 | 15 | 239  | 253 CGTAGGCCTAGTTGGCTCTG       |
| scaffold294318_10.9 | 1 p3 | (ATA)5 | 15 | 367  | 381 CATCGGTTAGTTCTCCCACC       |

|                     |      |        |    |      |                               |
|---------------------|------|--------|----|------|-------------------------------|
| scaffold294595_10.6 | 1 p3 | (CTT)5 | 15 | 114  | 128 ATGGTTGCCTTTGTTTGGAG      |
| scaffold295174_10.1 | 1 p3 | (AAT)5 | 15 | 696  | 710 GCTCTAACGATGCCTTTTCG      |
| scaffold296016_11.0 | 1 p3 | (TCT)5 | 15 | 101  | 115 AACTCCACCAAGCCAATC        |
| scaffold296860_17.7 | 1 p3 | (TGA)8 | 24 | 431  | 454 GGGAAATCCAAGTCCCAACT      |
| scaffold297356_17.6 | 1 p3 | (GAA)5 | 15 | 591  | 605 GAAGGTGTGTCGGAATTCGT      |
| scaffold298144_15.6 | 1 p3 | (ATG)5 | 15 | 1133 | 1147 CCCCCAATACCCAAATTAGA     |
| scaffold298858_13.4 | 1 p3 | (ATT)5 | 15 | 370  | 384 CAGTGTGGGTTTCGGTGTTT      |
| scaffold299091_13.7 | 1 p3 | (CGG)7 | 21 | 1197 | 1217 ACACAAGTTATTGGCGAGGG     |
| scaffold299353_16.2 | 1 p3 | (AAC)7 | 21 | 351  | 371 TCTCGAACCAATTTTCAGCC      |
| scaffold299863_17.6 | 1 p3 | (CAT)5 | 15 | 747  | 761 AAGGAGGAAAAGAACCTGCC      |
| scaffold300774_16.9 | 1 p3 | (TCA)5 | 15 | 750  | 764 CATGAGGGGAACTGGTTCAT      |
| scaffold301696_13.9 | 1 p3 | (GAA)5 | 15 | 680  | 694 GGTTTTTGGTGGGAGGAAGT      |
| scaffold301952_13.4 | 1 p3 | (TTA)5 | 15 | 277  | 291 CTCTATAGCCGCCTGCATTT      |
| scaffold302025_16.5 | 1 p3 | (AAT)5 | 15 | 2557 | 2571 AACCTCTTAGGGTGGCAAT      |
| scaffold302455_13.5 | 1 p3 | (TGG)5 | 15 | 890  | 904 TGGAGTTGCATAAATTGTGG      |
| scaffold302573_17.1 | 1 p3 | (GGC)5 | 15 | 123  | 137 ACAATGAATAAACGGGGCTG      |
| scaffold302805_14.5 | 1 p3 | (CCG)5 | 15 | 1085 | 1099 AATATGGCAAAGGCTGCTGT     |
| scaffold303551_12.4 | 1 p3 | (GAT)5 | 15 | 67   | 81 GCTAGGAAGGCTCTTGGGAT       |
| scaffold303804_12.6 | 1 p3 | (TCT)5 | 15 | 40   | 54 GCAGCAACTTCCTCTCCTTC       |
| scaffold304525_14.0 | 1 p3 | (CAT)5 | 15 | 268  | 282 ATCATCAATGTCTCCTGCC       |
| scaffold304604_14.1 | 1 p3 | (AAC)6 | 18 | 980  | 997 ATGACTGCAGGAGATTCGCT      |
| scaffold306052_15.9 | 1 p3 | (TTC)5 | 15 | 2485 | 2499 CGAAAAATGGGATGCTGAGT     |
| scaffold306230_19.1 | 1 p3 | (TAA)5 | 15 | 160  | 174 GAACTAACTGCTGCAAGGAAAA    |
| scaffold306253_18.5 | 1 p3 | (CTC)5 | 15 | 336  | 350 TGGGACAAGCTCTTGTGTTG      |
| scaffold306528_11.2 | 1 p3 | (CCT)6 | 18 | 80   | 97 CTTCTCAGCCTCAGCCTCTG       |
| scaffold306586_15.0 | 1 p3 | (TAA)5 | 15 | 415  | 429 TTGCTTTGGCTCACAGTACG      |
| scaffold307222_10.8 | 1 p3 | (CTT)7 | 21 | 1220 | 1240 ATTTGCAGGAATTGGTGAGC     |
| scaffold307589_16.9 | 1 p3 | (CGC)7 | 21 | 5006 | 5026 CGAGTTGCCTGACACTGAAA     |
| scaffold307773_13.0 | 1 p3 | (AAG)5 | 15 | 166  | 180 CCGGGTTGAGACCTTTGTAA      |
| scaffold308185_15.5 | 1 p3 | (TTA)5 | 15 | 71   | 85 GGGAGTGGGTTATCGGTTTT       |
| scaffold308307_16.0 | 1 p3 | (ATT)5 | 15 | 32   | 46 GGAACCTGATTATGTATCTGATGATG |
| scaffold308739_10.5 | 1 p3 | (AAT)5 | 15 | 416  | 430 AGCCACCTTATTGTTTCGAG      |
| scaffold309330_12.0 | 1 p3 | (GAG)6 | 18 | 335  | 352 CGCGAAGGTGACTGACATAG      |
| scaffold309954_10.5 | 1 p3 | (TGA)5 | 15 | 86   | 100 CATCACGACGAGGAGCATT       |
| scaffold310146_11.4 | 1 p3 | (GCC)5 | 15 | 67   | 81 CCTCCCTCTATTTCCGACC        |
| scaffold311109_14.5 | 1 p3 | (AAG)5 | 15 | 72   | 86 TCCAAGGACTTGTGCGTTCT       |
| scaffold313403_15.8 | 1 p3 | (AAG)5 | 15 | 482  | 496 GCTCGTTGCAAGCATATGAA      |
| scaffold313707_16.1 | 1 p3 | (GGA)5 | 15 | 50   | 64 AGTTGGGAGTTGGGAGTCCT       |
| scaffold314284_10.9 | 1 p3 | (ACA)5 | 15 | 494  | 508 GATCCATGTGTCCACGTGTC      |
| scaffold314514_11.0 | 1 p3 | (ACC)6 | 18 | 180  | 197 CTCACTCTCTCCCTCCCTCC      |
| scaffold314863_10.7 | 1 p3 | (GCA)5 | 15 | 52   | 66 CTTAGCTTGGTTCTGGAGG        |
| scaffold314882_16.8 | 1 p3 | (ACC)6 | 18 | 679  | 696 GGGTCCATCATTCCCTTTCT      |
| scaffold315255_14.1 | 1 p3 | (AAC)7 | 21 | 408  | 428 TTTGCCAAGCTATCCAAAGG      |
| scaffold316231_12.8 | 1 p3 | (AAT)5 | 15 | 379  | 393 GCTGGATCACTATTTGGTGG      |
| scaffold317633_10.7 | 1 p3 | (TAT)5 | 15 | 512  | 526 ACCCGAACCGGAATACAAAT      |
| scaffold317793_12.5 | 1 p3 | (TGA)5 | 15 | 245  | 259 ACGGCACCCACAATAAATTC      |
| scaffold318316_15.5 | 1 p3 | (CAA)5 | 15 | 105  | 119 TACAACCTTCGATCCATCCC      |
| scaffold318417_18.8 | 1 p3 | (GAA)6 | 18 | 29   | 46 TCCTTACTGAATTTGGGGTTG      |
| scaffold318907_13.2 | 1 p3 | (GAA)5 | 15 | 232  | 246 CTCCTGCTTCACCTCGATTC      |
| scaffold319802_11.1 | 1 p3 | (GGC)7 | 21 | 154  | 174 CAGAGTTTTGGAGTTTCCG       |
| scaffold321117_17.3 | 1 p3 | (CTT)5 | 15 | 239  | 253 TTCTCCTCCCTTGTGATTGG      |
| scaffold321268_12.3 | 1 p3 | (GCG)5 | 15 | 181  | 195 GCGGAGGCAATAGACAGAAG      |
| scaffold321664_11.5 | 1 p3 | (CTC)7 | 21 | 37   | 57 TCATCCTCGGAAGCAATCTC       |
| scaffold321826_15.8 | 1 p3 | (TAA)5 | 15 | 932  | 946 AGTACCATTTCCGCCATTTG      |
| scaffold322064_14.2 | 1 p3 | (CGT)5 | 15 | 45   | 59 CGTCGACCACCATCTTAACAC      |
| scaffold322137_17.5 | 1 p3 | (GAG)5 | 15 | 156  | 170 CTTGACGGTGAAGAGGGTTG      |
| scaffold323396_17.5 | 1 p3 | (TTA)5 | 15 | 101  | 115 TTTTCGTTTCTGGTTTCGCT      |
| scaffold324512_18.8 | 1 p3 | (TCT)5 | 15 | 1196 | 1210 AGACCTCGAGTCGGAGATGA     |



|                     |      |        |    |      |      |                          |
|---------------------|------|--------|----|------|------|--------------------------|
| scaffold324909_15.0 | 1 p3 | (CAA)5 | 15 | 2544 | 2558 | CTCGGGGGTCAACACTACAT     |
| scaffold325026_14.0 | 1 p3 | (AAT)5 | 15 | 2623 | 2637 | AAACGAGGGCGAACTGTAGA     |
| scaffold325899_16.9 | 1 p3 | (TGT)5 | 15 | 46   | 60   | ATGTAGCCGACCCCAATTTA     |
| scaffold325900_16.9 | 1 p3 | (ATC)5 | 15 | 5101 | 5115 | TTTCCCTCCAAAGCCAGTAA     |
| scaffold326079_12.8 | 1 p3 | (AAT)6 | 18 | 435  | 452  | TGTTGCAATTCGTGTTAAATCTT  |
| scaffold326219_13.9 | 1 p3 | (TGC)6 | 18 | 157  | 174  | CGCCAGTTCTGGTCATACT      |
| scaffold326522_15.0 | 1 p3 | (CAC)5 | 15 | 568  | 582  | TCACCAACATGCCCGTATAG     |
| scaffold326671_11.8 | 1 p3 | (ATT)6 | 18 | 436  | 453  | TTCCTCTCGATCCTCGTTACA    |
| scaffold327243_14.6 | 1 p3 | (ATC)5 | 15 | 357  | 371  | GGCTTGCATTTGAAAGTACAGA   |
| scaffold327621_16.2 | 1 p3 | (GTT)5 | 15 | 366  | 380  | CGATATGAACGAATGCGATG     |
| scaffold327776_15.0 | 1 p3 | (ATC)5 | 15 | 22   | 36   | ATTGCCACCATCCGAACA       |
| scaffold328875_18.4 | 1 p3 | (CTT)5 | 15 | 1227 | 1241 | CTTTGCTCGATCTATTCCGGC    |
| scaffold329574_14.2 | 1 p3 | (AGT)5 | 15 | 1063 | 1077 | AGCTTCTTTCAATCGCCTCA     |
| scaffold329965_11.8 | 1 p3 | (CGC)5 | 15 | 64   | 78   | TTCAAATATACCTGCCGGA      |
| scaffold330161_10.0 | 1 p3 | (CTG)5 | 15 | 67   | 81   | ATAATTCGCGGCGTCATCAT     |
| scaffold330313_15.9 | 1 p3 | (TAA)5 | 15 | 418  | 432  | GTGTCCAGTCCGAGCAAAT      |
| scaffold330377_11.7 | 1 p3 | (TAA)7 | 21 | 752  | 772  | ATTTTCCCATTGCACCAAAA     |
| scaffold330386_13.8 | 1 p3 | (AGA)6 | 18 | 392  | 409  | GGGGATCTTGGGAAGTGATT     |
| scaffold330605_15.8 | 1 p3 | (TTA)6 | 18 | 3737 | 3754 | CCCGTGGAGACGAGGTATTA     |
| scaffold331266_15.7 | 1 p3 | (TTA)5 | 15 | 773  | 787  | CGTGGTGCACCTTGCATACTT    |
| scaffold332699_15.7 | 1 p3 | (TGA)6 | 18 | 163  | 180  | AGCAGATATGGGAGTGGTGG     |
| scaffold333040_14.4 | 1 p3 | (GTT)5 | 15 | 269  | 283  | GGTGGAGCAAGGTTTGTGTT     |
| scaffold333453_12.9 | 1 p3 | (ACA)5 | 15 | 954  | 968  | CGAGACTCATCCACTTGCAG     |
| scaffold333557_20.1 | 1 p3 | (CAA)5 | 15 | 189  | 203  | GTCAGACCAGCTCTCCTTCG     |
| scaffold333877_12.7 | 1 p3 | (GAT)5 | 15 | 30   | 44   | GAACAAAATAAAAATTTGGGAGGA |
| scaffold334955_15.9 | 1 p3 | (ATG)5 | 15 | 489  | 503  | AAGGGGCACTGGTAAGGTCT     |
| scaffold335564_13.6 | 1 p3 | (ATA)5 | 15 | 71   | 85   | TTGCTCCCGTGTTTTATCCA     |
| scaffold335872_18.3 | 1 p3 | (GTT)5 | 15 | 1313 | 1327 | TCTAGACTGCGGGGTCAATC     |
| scaffold336179_12.6 | 1 p3 | (CGG)6 | 18 | 776  | 793  | AAGAAGAAGCTCCTCCCACC     |
| scaffold336211_11.2 | 1 p3 | (GAG)5 | 15 | 93   | 107  | GTTGGGGGTGACGTAGTCG      |
| scaffold336425_15.4 | 1 p3 | (ATA)5 | 15 | 620  | 634  | ATGTGTGTGGCCATTTTCAA     |
| scaffold336918_13.7 | 1 p3 | (TAA)5 | 15 | 1272 | 1286 | TGCGTCAGAAGATCCATTACA    |
| scaffold337007_12.7 | 1 p3 | (TCT)5 | 15 | 114  | 128  | GATGCAGCAACTTCCTCTCC     |
| scaffold337462_15.2 | 1 p3 | (TAT)6 | 18 | 3218 | 3235 | AAGACGTTACCCACTGGAG      |
| scaffold337500_11.2 | 1 p3 | (GTT)5 | 15 | 175  | 189  | GGGAGAGTTCTCTGGGGAAG     |
| scaffold337517_10.2 | 1 p3 | (ATA)5 | 15 | 314  | 328  | CAGTTCAGCAGCGGAATTTT     |
| scaffold337542_13.4 | 1 p3 | (TTA)5 | 15 | 390  | 404  | CATGAAGTCCTTCCCCTTGA     |
| scaffold338225_15.9 | 1 p3 | (CGT)5 | 15 | 3772 | 3786 | GCGGAATAGCATTACGTTT      |
| scaffold339547_14.9 | 1 p3 | (AGC)5 | 15 | 835  | 849  | AAACCATGCAATGAACACGA     |
| scaffold339616_15.0 | 1 p3 | (AGA)5 | 15 | 2908 | 2922 | GGCGACATCAAACACAACAA     |
| scaffold340330_17.0 | 1 p3 | (TGA)5 | 15 | 1659 | 1673 | GTCGCCAATTATTGATGCCT     |
| scaffold340842_15.4 | 1 p3 | (TTA)5 | 15 | 853  | 867  | ACAGGCCATTAGTTGGCAAT     |
| scaffold340866_10.4 | 1 p3 | (GTT)5 | 15 | 286  | 300  | TGGTTCCCTTCTTGTCTTG      |
| scaffold341209_10.7 | 1 p3 | (TGA)5 | 15 | 82   | 96   | GCGGTTTCGATGGACATAAC     |
| scaffold341636_15.8 | 1 p3 | (ATA)5 | 15 | 491  | 505  | TCCATTTTTCTTCGTGCATTT    |
| scaffold342387_10.3 | 1 p3 | (CTT)5 | 15 | 48   | 62   | ATCGTTCTGCAGGAGCTTGA     |
| scaffold343217_11.7 | 1 p3 | (CAG)6 | 18 | 153  | 170  | CGATCATCCACATCTGACA      |
| scaffold343336_18.3 | 1 p3 | (AGC)5 | 15 | 263  | 277  | AAACTGCTTCAAATGGACCG     |
| scaffold344047_13.7 | 1 p3 | (TAA)5 | 15 | 242  | 256  | TCTTCAAATTTGTTCCGCA      |
| scaffold345357_16.0 | 1 p3 | (TGA)5 | 15 | 109  | 123  | GGTAAGGTTGCGTACATCCG     |
| scaffold345620_15.4 | 1 p3 | (ACA)5 | 15 | 2464 | 2478 | CGTGTGAAAATGAAATCGCA     |
| scaffold346340_16.0 | 1 p3 | (ATC)5 | 15 | 1068 | 1082 | TCCCCTTTCTCCACATTTCA     |
| scaffold346586_18.1 | 1 p3 | (TCG)5 | 15 | 911  | 925  | CGATCGAATGATCCCTGAGT     |
| scaffold346770_14.6 | 1 p3 | (CAA)6 | 18 | 1327 | 1344 | TATAGGTGCTGGGGCTAACG     |
| scaffold346875_18.4 | 1 p3 | (TGA)5 | 15 | 1389 | 1403 | TTCCACGAACCAACCAAAT      |
| scaffold347121_14.8 | 1 p3 | (AAC)5 | 15 | 450  | 464  | TCCTCGCTCCTAATTGCAAT     |
| scaffold347206_14.6 | 1 p3 | (TGA)5 | 15 | 1834 | 1848 | AAACCGAGTGTTCCTGCCTG     |
| scaffold347630_13.1 | 1 p3 | (TAT)5 | 15 | 258  | 272  | TGTTTAAAGTCCATTCGGGC     |

|                     |      |        |    |      |      |                            |
|---------------------|------|--------|----|------|------|----------------------------|
| scaffold348055_13.7 | 1 p3 | (GGT)5 | 15 | 785  | 799  | AGGCAAAAATGGAGGTGTTG       |
| scaffold348394_10.0 | 1 p3 | (CTT)5 | 15 | 33   | 47   | AGGTGCACGTGACTCCAAC        |
| scaffold348692_16.7 | 1 p3 | (ATG)5 | 15 | 567  | 581  | CCCTCCCCCTCTCATATTTT       |
| scaffold349508_13.4 | 1 p3 | (CTT)5 | 15 | 944  | 958  | CATACCTCGGCCTTTGATGT       |
| scaffold350182_20.6 | 1 p3 | (GAA)5 | 15 | 51   | 65   | CATTGAAGAGCTCGCTGGAT       |
| scaffold351426_14.5 | 1 p3 | (AAG)5 | 15 | 117  | 131  | TGAGGTCGCTCACAGATGAC       |
| scaffold352549_18.4 | 1 p3 | (ATT)5 | 15 | 1952 | 1966 | ATTTGGGAAGGCCTTTGT         |
| scaffold352687_13.9 | 1 p3 | (CCG)5 | 15 | 1944 | 1958 | TAGTACTGCAGGCGAAGCG        |
| scaffold352962_17.3 | 1 p3 | (CTT)5 | 15 | 108  | 122  | CCTTTAGAACTTGCTCCACCA      |
| scaffold354674_15.7 | 1 p3 | (ATT)6 | 18 | 281  | 298  | GTTTCGATTCTCCTTGGGGAT      |
| scaffold354863_11.2 | 1 p3 | (GGC)5 | 15 | 177  | 191  | CGATACTGGGCTTCTTCGAC       |
| scaffold355579_12.4 | 1 p3 | (TTA)5 | 15 | 1307 | 1321 | CCCCTTAGGGTTCCTCATGT       |
| scaffold355825_18.5 | 1 p3 | (GAG)5 | 15 | 200  | 214  | CGAAGTATGTGTCCGTGGTG       |
| scaffold356260_12.6 | 1 p3 | (TTA)5 | 15 | 409  | 423  | TGATGTCGAGCTGGATTGAG       |
| scaffold357485_13.6 | 1 p3 | (GAA)5 | 15 | 49   | 63   | GAGGTATTGGGGGATTTGAG       |
| scaffold357571_13.0 | 1 p3 | (CGG)5 | 15 | 215  | 229  | AAATCTCTCAATCTTGCGTGC      |
| scaffold358333_13.7 | 1 p3 | (GAG)6 | 18 | 329  | 346  | TAAGTACTGAGCTGGCGGACTCT    |
| scaffold358846_13.2 | 1 p3 | (TAT)5 | 15 | 198  | 212  | GTCGTCGAGAGAAGCTCACC       |
| scaffold359058_11.7 | 1 p3 | (GAG)5 | 15 | 47   | 61   | GTTTAGACGTCACGCACAGC       |
| scaffold360691_10.0 | 1 p3 | (GCT)5 | 15 | 112  | 126  | CTGTGTCTCCAAGCTCCCAT       |
| scaffold361262_15.7 | 1 p3 | (TTG)6 | 18 | 1178 | 1195 | CATATGCTCCATACAGCCGA       |
| scaffold361783_17.4 | 1 p3 | (CGG)5 | 15 | 28   | 42   | GCGGCTCCTCCTATGTAAAA       |
| scaffold361832_11.7 | 1 p3 | (AAT)5 | 15 | 819  | 833  | GGTCCGATTGAGGAGATGAA       |
| scaffold362263_13.4 | 1 p3 | (TGG)6 | 18 | 473  | 490  | GGGGTTTTCTGAAATCGTGA       |
| scaffold363199_13.9 | 1 p3 | (GGC)5 | 15 | 615  | 629  | ACATCTTGGCCGTGTAAC         |
| scaffold363512_11.8 | 1 p3 | (AAT)5 | 15 | 230  | 244  | AAATTGTTCTTCGTGGACCG       |
| scaffold363652_16.9 | 1 p3 | (CAT)5 | 15 | 705  | 719  | CCCGCTTCGATATCATTTGT       |
| scaffold363706_10.8 | 1 p3 | (TAT)6 | 18 | 734  | 751  | GTGCGGGCTAAAAATGTTG        |
| scaffold363984_15.5 | 1 p3 | (CCG)5 | 15 | 207  | 221  | CGCTGCCTCTGTCAACAAT        |
| scaffold364254_16.6 | 1 p3 | (ACG)5 | 15 | 736  | 750  | CTGTATCGAACGAGCATCCA       |
| scaffold364668_17.8 | 1 p3 | (ATT)5 | 15 | 151  | 165  | CCAAATATTACAATAGCTCACAACAA |
| scaffold364863_15.6 | 1 p3 | (CAT)5 | 15 | 212  | 226  | GTGAGAAAGTTTGCTTCGGG       |
| scaffold365149_12.6 | 1 p3 | (ATC)5 | 15 | 88   | 102  | TTTTAATACCCCATTTTACCAACA   |
| scaffold365741_11.3 | 1 p3 | (CAC)5 | 15 | 117  | 131  | CCGAAGTGCTAGACCCAAAG       |
| scaffold365823_11.3 | 1 p3 | (TTC)5 | 15 | 236  | 250  | GGAGTCACTCAGCTCTTGC        |
| scaffold366054_12.0 | 1 p3 | (GAA)5 | 15 | 189  | 203  | TCAGCATGCAATACCAAACAA      |
| scaffold366156_11.6 | 1 p3 | (TCA)6 | 18 | 85   | 102  | AGCTCCCTCCTCATCATCA        |
| scaffold367038_10.8 | 1 p3 | (TAT)5 | 15 | 209  | 223  | TCCATACTTGGCATCGGTTT       |
| scaffold367064_15.4 | 1 p3 | (TGT)6 | 18 | 44   | 61   | TGTAGCCGACCCCAATTTAT       |
| scaffold367414_15.8 | 1 p3 | (TTA)5 | 15 | 33   | 47   | TTTTCTTAAGTTGTGATTTGTCCA   |
| scaffold367531_14.4 | 1 p3 | (TTA)7 | 21 | 1214 | 1234 | TTTGTTCATATGCGAACAGCA      |
| scaffold367865_12.7 | 1 p3 | (AGA)5 | 15 | 199  | 213  | TTGAGCTGCACTTGTTTTGTC      |
| scaffold368139_15.6 | 1 p3 | (ATG)6 | 18 | 928  | 945  | ACGTACCCAGCACTACTCG        |
| scaffold368384_13.4 | 1 p3 | (ATT)6 | 18 | 718  | 735  | GATGGGACCCACACAATTTTC      |
| scaffold368453_15.3 | 1 p3 | (ATT)5 | 15 | 1541 | 1555 | TCTCCTTTTCTCCACAAATTC      |
| scaffold369065_12.5 | 1 p3 | (TCC)5 | 15 | 89   | 103  | ATCAGGCACATCACCATCAA       |
| scaffold369933_14.5 | 1 p3 | (AAT)5 | 15 | 188  | 202  | TTTATTCGGTGACCCTCGAC       |
| scaffold370153_21.8 | 1 p3 | (TAT)5 | 15 | 797  | 811  | TGAAAGTAATGCCCATGGAA       |
| scaffold370868_13.2 | 1 p3 | (GTG)5 | 15 | 721  | 735  | GCGATGGGAAGTGCATATTT       |
| scaffold371046_14.3 | 1 p3 | (CTT)5 | 15 | 311  | 325  | GGTTAATACCGCTGATGGCA       |
| scaffold371152_16.2 | 1 p3 | (ATT)5 | 15 | 111  | 125  | CACGTGCATTAATTATTGTTTTCA   |
| scaffold371327_14.7 | 1 p3 | (AGA)5 | 15 | 72   | 86   | TAGCAGGCCAAAGAGGAAGA       |
| scaffold371613_15.8 | 1 p3 | (TTA)5 | 15 | 604  | 618  | TCTCCCAAGTTCAATCCATGT      |
| scaffold372311_16.1 | 1 p3 | (TTG)5 | 15 | 1738 | 1752 | TTTCTCTCTGAGCCTTCCA        |
| scaffold372498_14.5 | 1 p3 | (TTA)5 | 15 | 884  | 898  | ATGCCTTATATGCCGGACAC       |
| scaffold373173_10.1 | 1 p3 | (TCT)5 | 15 | 184  | 198  | CATTCTCTAAATGGTTTCCATTCC   |
| scaffold374074_16.0 | 1 p3 | (GAT)7 | 21 | 1138 | 1158 | GATCTCGATCGTGACCCAAT       |
| scaffold374595_10.7 | 1 p3 | (GGA)5 | 15 | 305  | 319  | GGGAGTTTCGTTTGAGCAAG       |

|                     |      |        |    |      |      |                           |
|---------------------|------|--------|----|------|------|---------------------------|
| scaffold374606_11.5 | 1 p3 | (AAT)5 | 15 | 252  | 266  | ATAAATTGGGGTTCGGCTACA     |
| scaffold375106_16.7 | 1 p3 | (AAG)5 | 15 | 313  | 327  | TAGTGTGCGTGATCGAGGAG      |
| scaffold375993_16.9 | 1 p3 | (TCT)5 | 15 | 178  | 192  | CACTAATGAATCTCCTAGCGGG    |
| scaffold376324_14.5 | 1 p3 | (CGC)5 | 15 | 341  | 355  | GTAGCTCCCTCCCAACAGA       |
| scaffold376579_14.3 | 1 p3 | (TTA)8 | 24 | 2311 | 2334 | TTTTCAATGTCCACACCCCT      |
| scaffold377319_14.2 | 1 p3 | (CAT)5 | 15 | 192  | 206  | ATGTCCTCAATCGATCCAG       |
| scaffold378423_17.0 | 1 p3 | (CCG)6 | 18 | 4114 | 4131 | CTCACGGTTGGAAGAAGAGC      |
| scaffold379011_13.7 | 1 p3 | (AAC)5 | 15 | 2761 | 2775 | TCCAACCGCTTTTGCTTAAA      |
| scaffold379895_16.6 | 1 p3 | (GAT)5 | 15 | 950  | 964  | CCGGATTACTCCGATGATGA      |
| scaffold380032_15.6 | 1 p3 | (GTT)5 | 15 | 457  | 471  | ATTTCCCTGATTGGCTTCT       |
| scaffold380162_15.6 | 1 p3 | (TCT)5 | 15 | 1942 | 1956 | CGAAGTTGTGCAAACCAATG      |
| scaffold380508_18.3 | 1 p3 | (AGA)5 | 15 | 79   | 93   | TTGAAAGAGCATCGTGCAAC      |
| scaffold381524_10.6 | 1 p3 | (CAA)5 | 15 | 46   | 60   | GTGGCTTCTATGGGCAATGT      |
| scaffold381536_14.3 | 1 p3 | (AAG)5 | 15 | 441  | 455  | GGGGTCAGTCGTGACAGATT      |
| scaffold381572_14.3 | 1 p3 | (TTG)6 | 18 | 46   | 63   | TGTAGCCGACCCCAATTTAT      |
| scaffold382019_17.7 | 1 p3 | (TGG)6 | 18 | 732  | 749  | ATGGCCTGCTCATACAGCTC      |
| scaffold382035_12.2 | 1 p3 | (ATT)5 | 15 | 492  | 506  | CGGATGAATTTTTGTTTCGCT     |
| scaffold382318_11.5 | 1 p3 | (AGA)5 | 15 | 51   | 65   | GAGCACGTTATTGGCTGGAG      |
| scaffold382656_11.6 | 1 p3 | (AAC)5 | 15 | 243  | 257  | CCTTGGAGTTGTCCAGCATT      |
| scaffold382837_15.4 | 1 p3 | (ACA)5 | 15 | 684  | 698  | GCTCAACACCTGGGAGGTTA      |
| scaffold382894_12.7 | 1 p3 | (GAA)5 | 15 | 99   | 113  | AGGGGGAGAGTTCTCTTGGGA     |
| scaffold382918_11.6 | 1 p3 | (AAG)5 | 15 | 137  | 151  | GAGTCTTCCGACAAACCGAG      |
| scaffold384020_13.8 | 1 p3 | (TGT)5 | 15 | 30   | 44   | ATTGGGATTAAGGCTTTGGT      |
| scaffold384289_16.3 | 1 p3 | (TTA)5 | 15 | 727  | 741  | CCCACTCGAAATTAACCACG      |
| scaffold384495_17.6 | 1 p3 | (TGA)8 | 24 | 39   | 62   | CCCAAGACCCCAATTTGATT      |
| scaffold385073_16.8 | 1 p3 | (GAT)5 | 15 | 2131 | 2145 | GGTCCTATATTGTGGTTTCCG     |
| scaffold385714_14.5 | 1 p3 | (CTT)7 | 21 | 375  | 395  | AAACCTTAACGCCCTCACCT      |
| scaffold386196_14.8 | 1 p3 | (GGA)7 | 21 | 1195 | 1215 | ACTCCGACATGGAGAACACC      |
| scaffold386951_16.2 | 1 p3 | (CCG)7 | 21 | 945  | 965  | CCCCCTTCTCCTTTCTTT        |
| scaffold387017_13.2 | 1 p3 | (TAT)5 | 15 | 606  | 620  | CCATTTTCCAAGAAAGGTTGTT    |
| scaffold388081_14.0 | 1 p3 | (TTC)5 | 15 | 616  | 630  | TACACACCCCAATATCCCG       |
| scaffold388171_18.7 | 1 p3 | (AAT)5 | 15 | 305  | 319  | CGATGATCACGTCAAAAACCT     |
| scaffold388181_15.2 | 1 p3 | (AAC)5 | 15 | 323  | 337  | TCGGTCCGATCTTCACTTC       |
| scaffold388480_14.9 | 1 p3 | (ATG)5 | 15 | 42   | 56   | CCTGAAACGAGTGATGCTCC      |
| scaffold388544_11.2 | 1 p3 | (GGC)5 | 15 | 154  | 168  | GAGGTGAAACTGCCCTGAAA      |
| scaffold389074_18.6 | 1 p3 | (GTG)5 | 15 | 460  | 474  | GAAGTTGGCGTGGTGGTAGT      |
| scaffold389353_15.6 | 1 p3 | (TTG)5 | 15 | 2863 | 2877 | GTTTGCTGTTGGATGGGTTT      |
| scaffold390641_15.4 | 1 p3 | (ATG)5 | 15 | 84   | 98   | TCCTGAAATGAGTGATGCTCC     |
| scaffold390837_15.2 | 1 p3 | (TGA)5 | 15 | 4209 | 4223 | GAAGAGGAATGTGTTGGCGT      |
| scaffold391802_19.9 | 1 p3 | (CGC)5 | 15 | 73   | 87   | ATGGTAGTATGGTGTGGGGG      |
| scaffold392126_11.7 | 1 p3 | (AAT)6 | 18 | 183  | 200  | CTCCATCAGGTTTGTCTCTCC     |
| scaffold393743_17.7 | 1 p3 | (TCA)5 | 15 | 1073 | 1087 | TGGACCTTCTGATTTGAGC       |
| scaffold394131_18.0 | 1 p3 | (CCT)5 | 15 | 2334 | 2348 | GGGCTTCATCTTACCACCAA      |
| scaffold394748_18.5 | 1 p3 | (ACA)7 | 21 | 260  | 280  | AGACAACGGGACGGAAGATT      |
| scaffold394799_13.2 | 1 p3 | (TGA)7 | 21 | 973  | 993  | GATCTGCAGCCATGTTGAAA      |
| scaffold395217_16.5 | 1 p3 | (CAC)7 | 21 | 104  | 124  | CCGAAGTGCTAGACCCAAAG      |
| scaffold395267_11.0 | 1 p3 | (TGA)5 | 15 | 447  | 461  | AATGGTGGTGATGTCTGTGC      |
| scaffold395887_15.9 | 1 p3 | (ATA)5 | 15 | 2237 | 2251 | TTTGCTTTGACTTTGCGGTC      |
| scaffold396402_16.7 | 1 p3 | (TCT)6 | 18 | 2002 | 2019 | ATCTCCTGCAACACTCCCAC      |
| scaffold397498_16.9 | 1 p3 | (GAT)5 | 15 | 1796 | 1810 | GATACGCGTCGTTGTCATTG      |
| scaffold397875_17.2 | 1 p3 | (CGG)5 | 15 | 366  | 380  | TCTCCGCACACTGAATAACG      |
| scaffold398183_12.0 | 1 p3 | (GGC)5 | 15 | 154  | 168  | TGTCACCCAACTTATAAAAGAAGAA |
| scaffold398509_10.0 | 1 p3 | (TTG)5 | 15 | 391  | 405  | AATTTTCTTTGCCGACACG       |
| scaffold399013_16.2 | 1 p3 | (ATG)6 | 18 | 353  | 370  | TGTGATGTGATTGGGAGAAATC    |
| scaffold399959_10.6 | 1 p3 | (CCA)5 | 15 | 473  | 487  | GCCACATGCTTTGTGTGAGT      |
| scaffold400179_11.9 | 1 p3 | (TTA)8 | 24 | 699  | 722  | CCCATAATTTTATTGGGGGA      |
| scaffold400195_16.3 | 1 p3 | (CAA)5 | 15 | 302  | 316  | AGTTTGTGCTCATAGCGGG       |
| scaffold400346_14.2 | 1 p3 | (TTA)8 | 24 | 3220 | 3243 | CAATACAAGGGTCTCGCGT       |

|                     |      |        |    |      |      |                             |
|---------------------|------|--------|----|------|------|-----------------------------|
| scaffold400467_12.1 | 1 p3 | (TGT)6 | 18 | 51   | 68   | TAGCCGACCCCAATTTAATG        |
| scaffold400994_13.7 | 1 p3 | (ATA)5 | 15 | 231  | 245  | CAAGATGTTTGGCGATTGAA        |
| scaffold401163_12.8 | 1 p3 | (ATC)5 | 15 | 2352 | 2366 | GCTGCAGATGCAAAACTCAA        |
| scaffold401196_15.9 | 1 p3 | (CGC)5 | 15 | 1640 | 1654 | ACCACAAATTCCTCAACCCA        |
| scaffold401353_14.8 | 1 p3 | (CGC)5 | 15 | 701  | 715  | TAAAATTGCCCTATTGCGCT        |
| scaffold401617_20.9 | 1 p3 | (TCC)5 | 15 | 217  | 231  | TATCATCCTCGGAGGCAATC        |
| scaffold402051_14.8 | 1 p3 | (TCA)7 | 21 | 63   | 83   | CATGAAACATTTCAAATATCATCC    |
| scaffold402182_11.0 | 1 p3 | (TAT)6 | 18 | 220  | 237  | GTGGTCCCCTAACTCGAAAA        |
| scaffold402417_14.2 | 1 p3 | (TGT)6 | 18 | 143  | 160  | AACGTAAAGAGGGGTAGGGG        |
| scaffold402720_10.1 | 1 p3 | (CAA)7 | 21 | 99   | 119  | TGAATCAGAAAATCCCCTGC        |
| scaffold402745_14.5 | 1 p3 | (ATA)6 | 18 | 4819 | 4836 | TTCCCATCACTTCGAGGAAC        |
| scaffold402881_16.5 | 1 p3 | (AGA)5 | 15 | 118  | 132  | TCACACCTCACTAATTTCTTGTTT    |
| scaffold402964_10.9 | 1 p3 | (CAG)5 | 15 | 357  | 371  | ATTTACAGCTCGGTTTCGGA        |
| scaffold403092_10.8 | 1 p3 | (GCT)5 | 15 | 197  | 211  | TCTGAAAATTGGTGCTGCTG        |
| scaffold403381_16.3 | 1 p3 | (AGA)5 | 15 | 45   | 59   | CAGATGTAGGAGGCGAGGAG        |
| scaffold403562_11.1 | 1 p3 | (GAA)5 | 15 | 533  | 547  | CGTGGTTCAACTGTTGCTTG        |
| scaffold403578_16.2 | 1 p3 | (ACC)5 | 15 | 5471 | 5485 | CAATCTCCTCAGACATCGCA        |
| scaffold404047_15.0 | 1 p3 | (TTG)5 | 15 | 2237 | 2251 | CCCTCCTTTCACATGTTCTG        |
| scaffold404086_14.8 | 1 p3 | (TGA)5 | 15 | 607  | 621  | TCAACAATTTACGGGCTTCC        |
| scaffold405201_12.9 | 1 p3 | (ATT)5 | 15 | 206  | 220  | CTGATGAAGAAGACGAGGGC        |
| scaffold405553_15.7 | 1 p3 | (TTC)5 | 15 | 323  | 337  | ACCCCAAACACATCAGAC          |
| scaffold405946_11.1 | 1 p3 | (GCA)5 | 15 | 186  | 200  | AGTAATCCTGACCACCGTGC        |
| scaffold406857_15.1 | 1 p3 | (AAC)5 | 15 | 1807 | 1821 | TTTAACGGATATGCTTGGGA        |
| scaffold407079_15.6 | 1 p3 | (TGT)7 | 21 | 695  | 715  | TGTAGCCGACCCCAATTTAT        |
| scaffold407082_14.8 | 1 p3 | (TAT)5 | 15 | 162  | 176  | TGGGACAAGGTGACATAAAATG      |
| scaffold408521_10.5 | 1 p3 | (ATA)7 | 21 | 231  | 251  | TGGTGTGAGCAGCCTATCT         |
| scaffold408554_15.8 | 1 p3 | (CTC)6 | 18 | 952  | 969  | CTCTTTCGAGCCTCCTCTA         |
| scaffold408727_12.2 | 1 p3 | (CAC)6 | 18 | 79   | 96   | AGCCATGAGCAATAACAGCC        |
| scaffold408752_17.4 | 1 p3 | (TTA)5 | 15 | 79   | 93   | CCGAAATCTTCAAGCCACAT        |
| scaffold408779_15.3 | 1 p3 | (TGT)6 | 18 | 42   | 59   | TGTAGCCGACCCCAATTTAT        |
| scaffold408957_16.6 | 1 p3 | (ATA)5 | 15 | 1121 | 1135 | TCCACCATCTATGTGCCGTA        |
| scaffold409454_14.7 | 1 p3 | (TGA)6 | 18 | 41   | 58   | CCAAGACCCCAATTTGATT         |
| scaffold409460_11.6 | 1 p3 | (ATT)5 | 15 | 119  | 133  | GGGCATTACATTTACGTTGGA       |
| scaffold409635_15.1 | 1 p3 | (ATG)5 | 15 | 667  | 681  | CAGCCTCAGGACTCCTCATC        |
| scaffold409658_13.8 | 1 p3 | (TTA)9 | 27 | 192  | 218  | ATCAGAGCCATGGAAAAGGA        |
| scaffold409673_13.0 | 1 p3 | (ATC)5 | 15 | 641  | 655  | TTATTTGGCGGGTTAATGGA        |
| scaffold409800_10.6 | 1 p3 | (CCG)6 | 18 | 276  | 293  | TCCCGCCCTCTACCTTTATT        |
| scaffold409930_16.4 | 1 p3 | (TCA)5 | 15 | 881  | 895  | CCTTCAAAAACCATGCCACT        |
| scaffold409975_13.7 | 1 p3 | (AAT)5 | 15 | 581  | 595  | GACCCAAATTTTCCCAACT         |
| scaffold409986_11.2 | 1 p3 | (ACA)7 | 21 | 957  | 977  | ACAGCTTCGGCAGATCACTT        |
| scaffold410299_14.5 | 1 p3 | (GCT)5 | 15 | 910  | 924  | GCTTTGAGGGTCAAACCAAG        |
| scaffold410669_15.8 | 1 p3 | (CCG)5 | 15 | 634  | 648  | ACCCCTTCTCCGTTTCTAA         |
| scaffold410673_15.2 | 1 p3 | (ACA)5 | 15 | 344  | 358  | GTTTCTGCCACGTGCATTC         |
| scaffold411399_15.1 | 1 p3 | (TCA)5 | 15 | 305  | 319  | CGCTTTGCTAGATTTTGGCC        |
| scaffold411453_15.9 | 1 p3 | (GCT)5 | 15 | 4650 | 4664 | GGATGCATTCCAGAGTTGCT        |
| scaffold411723_15.9 | 1 p3 | (GTG)5 | 15 | 52   | 66   | ACCGTAACCGCCAAACAC          |
| scaffold411825_16.0 | 1 p3 | (TCA)5 | 15 | 813  | 827  | AAGAACTGCTCCCTCAACAAA       |
| scaffold411854_13.0 | 1 p3 | (GGT)5 | 15 | 1615 | 1629 | TTTGGCAGAATTGGATTTGG        |
| scaffold412060_16.0 | 1 p3 | (CTT)7 | 21 | 193  | 213  | TCACCGGAAACAAATACATCA       |
| scaffold412118_11.8 | 1 p3 | (GAT)7 | 21 | 45   | 65   | TTCTTCTGTACAATTAATGTCCAAGTC |
| scaffold412129_14.2 | 1 p3 | (ATA)6 | 18 | 378  | 395  | GTCCGTTGGGTGTTTGACTT        |
| scaffold412312_16.7 | 1 p3 | (ATA)5 | 15 | 399  | 413  | ATGGGTAGCCAGTTTCACCA        |
| scaffold412628_15.1 | 1 p3 | (ACA)5 | 15 | 967  | 981  | CCCAGTTCGCCACTAACAAAT       |
| scaffold412640_13.1 | 1 p3 | (CGG)6 | 18 | 755  | 772  | ATGCTGTGTTGAGCGACTG         |
| scaffold412823_14.5 | 1 p3 | (CGG)5 | 15 | 39   | 53   | CCACCATCGTCGTCTCATC         |
| scaffold412941_12.4 | 1 p3 | (TTA)7 | 21 | 629  | 649  | TGTGATGAGATCGTGAACCTG       |
| scaffold413335_11.6 | 1 p3 | (TTA)5 | 15 | 549  | 563  | TCCATTTAATCCCCCTTCTTC       |
| scaffold413370_12.1 | 1 p3 | (TTA)7 | 21 | 936  | 956  | CTTGGCATTCTTTCTCGG          |

|                     |      |        |    |      |      |                           |
|---------------------|------|--------|----|------|------|---------------------------|
| scaffold413822_15.4 | 1 p3 | (TGT)5 | 15 | 1717 | 1731 | AGTTATGTAGCCGACCCCAA      |
| scaffold414264_15.3 | 1 p3 | (GGT)5 | 15 | 903  | 917  | AAGTGATATTTTCGGCGGTG      |
| scaffold414770_16.7 | 1 p3 | (TCA)7 | 21 | 2582 | 2602 | TTTTCAAGATAACCAGCGCC      |
| scaffold414925_15.9 | 1 p3 | (AAG)5 | 15 | 399  | 413  | CAAGGCAGAGAAAAAGCCAG      |
| scaffold414928_17.3 | 1 p3 | (GGC)5 | 15 | 1237 | 1251 | TCCGCTGCTAATTTGCTTTT      |
| scaffold414970_14.8 | 1 p3 | (GAT)5 | 15 | 1017 | 1031 | TTCAGGTTGAAGTCTTGGGC      |
| scaffold415281_11.3 | 1 p3 | (CGG)5 | 15 | 192  | 206  | GGTTTTTGCTTGCACCTTCC      |
| scaffold415387_13.3 | 1 p3 | (AAG)5 | 15 | 1891 | 1905 | TTGTATGGCACGAGTTCTTGA     |
| scaffold415496_16.6 | 1 p3 | (TCC)7 | 21 | 55   | 75   | CTCGTCCTCCGTGGATATGT      |
| scaffold415606_15.2 | 1 p3 | (TAA)5 | 15 | 937  | 951  | GCGCAGTTGCCAAACTTATT      |
| scaffold415671_17.2 | 1 p3 | (ACA)5 | 15 | 466  | 480  | GCAGGTTGCAATAAAGCACA      |
| scaffold415740_15.9 | 1 p3 | (GGC)6 | 18 | 4949 | 4966 | GAATCCGGAGAGTGAGACGA      |
| scaffold415975_13.9 | 1 p3 | (AGA)7 | 21 | 224  | 244  | CGGAAGAAGCACAGACAACA      |
| scaffold416035_15.9 | 1 p3 | (TGA)7 | 21 | 3954 | 3974 | GCCGACTCTTCTCCTTCC        |
| scaffold416239_14.0 | 1 p3 | (AAT)5 | 15 | 609  | 623  | TAAACGTTCTGCACGTCAGC      |
| scaffold416585_15.5 | 1 p3 | (TGT)7 | 21 | 40   | 60   | TGTAGCCGACCCCAATTTAT      |
| scaffold417083_13.9 | 1 p3 | (TGG)5 | 15 | 64   | 78   | TGATATTTTCAATGATGGATCG    |
| scaffold417533_16.2 | 1 p3 | (TGA)5 | 15 | 4263 | 4277 | TCAAATGCAAATCTACCTGGG     |
| scaffold418366_16.5 | 1 p3 | (ACA)5 | 15 | 855  | 869  | TTCGACGCGGAAGTAAATCT      |
| scaffold418822_16.3 | 1 p3 | (TTA)5 | 15 | 2291 | 2305 | TTGCCCATGCATACACATTT      |
| scaffold418937_14.6 | 1 p3 | (ATT)5 | 15 | 1097 | 1111 | TTTTCGGTTACCATGTCTGTT     |
| scaffold419570_13.8 | 1 p3 | (AGA)6 | 18 | 196  | 213  | GAGCGGAGGCTTAAGGATTT      |
| scaffold419756_15.3 | 1 p3 | (GGC)5 | 15 | 638  | 652  | TCGAAATTCAAGCACACGAG      |
| scaffold419868_17.0 | 1 p3 | (AAT)5 | 15 | 1053 | 1067 | GAGAAAGAATCAACTGCGGC      |
| scaffold419934_14.8 | 1 p3 | (CGG)5 | 15 | 832  | 846  | ACAAAAATCCCTCAGCAACG      |
| scaffold419945_15.4 | 1 p3 | (AGA)5 | 15 | 837  | 851  | TTGGTTACTCTGGGAATGGC      |
| scaffold419978_14.4 | 1 p3 | (AAG)6 | 18 | 1206 | 1223 | TTCTTGGATTGGAAGGCATC      |
| scaffold420332_19.6 | 1 p3 | (AAG)5 | 15 | 2411 | 2425 | CGAGAAGATCTTGAGGTCTGC     |
| scaffold420462_13.8 | 1 p3 | (TGT)5 | 15 | 49   | 63   | TTGGTTCATGTAGCCGACCT      |
| scaffold420574_12.9 | 1 p3 | (ATC)7 | 21 | 737  | 757  | ACGGAGAAATTCGACTCAGG      |
| scaffold421484_16.0 | 1 p3 | (GCG)5 | 15 | 765  | 779  | CCACCATCACCGTTATTTCC      |
| scaffold421527_13.3 | 1 p3 | (TGT)5 | 15 | 121  | 135  | CGGAGAAATGGTTTCTGCAT      |
| scaffold421531_13.9 | 1 p3 | (ATG)6 | 18 | 601  | 618  | ATGAGGATGATGACGAAGCC      |
| scaffold421606_15.0 | 1 p3 | (GTC)5 | 15 | 1496 | 1510 | TTTTTGACCCAAAATGGACA      |
| scaffold421806_11.9 | 1 p3 | (CGG)6 | 18 | 215  | 232  | AATCATGTACACCCGGTTCG      |
| scaffold422137_16.2 | 1 p3 | (GAT)7 | 21 | 495  | 515  | GAAAGTGGGGGTTGATTGAA      |
| scaffold422920_15.4 | 1 p3 | (CGG)5 | 15 | 248  | 262  | ATAACCTGGAATCGGGGTC       |
| scaffold423260_13.3 | 1 p3 | (GGC)7 | 21 | 988  | 1008 | TGAAAATCCAACAAGCCACA      |
| scaffold423275_16.9 | 1 p3 | (ACA)6 | 18 | 1683 | 1700 | TTGCACAAGCTCTTGCACTC      |
| scaffold423536_15.5 | 1 p3 | (ATG)6 | 18 | 404  | 421  | TTTCTTGATTCCGTCGTTCC      |
| scaffold423772_10.8 | 1 p3 | (ATC)7 | 21 | 74   | 94   | GATTTTACACCTGCAAGGGC      |
| scaffold423946_15.9 | 1 p3 | (TGA)7 | 21 | 1113 | 1133 | TATGACACAATGTCCCGTGG      |
| scaffold424283_16.9 | 1 p3 | (CTC)5 | 15 | 689  | 703  | TATTGGCTCCAACCAGGAAC      |
| scaffold425527_15.6 | 1 p3 | (AAT)6 | 18 | 241  | 258  | CACGCTTGGATGTGATACGA      |
| scaffold425572_12.0 | 1 p3 | (TAT)6 | 18 | 76   | 93   | CCTTTCTCCAATTGCTTTTTCG    |
| scaffold425691_12.9 | 1 p3 | (ACT)5 | 15 | 1078 | 1092 | ATAGATCCGGAATGATCGGA      |
| scaffold425760_13.2 | 1 p3 | (ATT)6 | 18 | 656  | 673  | ACATACCGACGTGACCGTTT      |
| scaffold425780_16.8 | 1 p3 | (GGC)5 | 15 | 381  | 395  | GTTTCATCAATCCCACCACC      |
| scaffold425787_15.6 | 1 p3 | (TGG)5 | 15 | 5747 | 5761 | TGATCTACTCCGTCCCCAAG      |
| scaffold425896_16.2 | 1 p3 | (CAT)6 | 18 | 2496 | 2513 | TGCAAGAGAAAACACATCCG      |
| scaffold425909_19.8 | 1 p3 | (GGC)5 | 15 | 645  | 659  | ATGGTGGAAACCAAGGCAT       |
| scaffold426298_12.3 | 1 p3 | (AAT)5 | 15 | 204  | 218  | GCTGTAAATGAAACTGCTGTATGC  |
| scaffold426331_15.3 | 1 p3 | (AAT)5 | 15 | 61   | 75   | CAGAGCGCACTCGAAGAGTA      |
| scaffold426861_12.7 | 1 p3 | (TAT)6 | 18 | 114  | 131  | TTGTCATATGAATCATGAAATTTTG |
| scaffold426888_15.2 | 1 p3 | (CTT)5 | 15 | 871  | 885  | GTTTCGCTGAGGCAACAACTT     |
| scaffold427405_14.8 | 1 p3 | (ATA)5 | 15 | 527  | 541  | TGACTGCGCGACTTTGATAC      |
| scaffold429243_15.3 | 1 p3 | (AAG)5 | 15 | 1172 | 1186 | ACTCTAACCCTACTCCGGC       |
| scaffold430246_15.3 | 1 p3 | (AAG)6 | 18 | 123  | 140  | ATGCAGCTCATGTCTGATGC      |

|                     |      |        |    |      |      |                           |
|---------------------|------|--------|----|------|------|---------------------------|
| scaffold430283_16.2 | 1 p3 | (ACA)5 | 15 | 400  | 414  | AGCAAAAGGTCGTCCTGCTA      |
| scaffold430401_12.2 | 1 p3 | (TAA)5 | 15 | 403  | 417  | TTTAGGCCAAGTTGTACCCA      |
| scaffold430477_13.3 | 1 p3 | (CAT)7 | 21 | 1046 | 1066 | GATTCAGGGGAAATTCACGA      |
| scaffold430483_17.6 | 1 p3 | (TTG)5 | 15 | 181  | 195  | CTTTATGATGGAGGCGGATT      |
| scaffold430561_14.3 | 1 p3 | (GGC)6 | 18 | 294  | 311  | GATCCCAGATCCGAATCCTC      |
| scaffold430942_13.2 | 1 p3 | (ATT)6 | 18 | 63   | 80   | TTCCAAAGTTGGACTTATGTAAAAA |
| scaffold431025_15.2 | 1 p3 | (GAC)5 | 15 | 1013 | 1027 | TGAGCAACTGCCAAAACGTA      |
| scaffold431685_16.7 | 1 p3 | (CAC)5 | 15 | 533  | 547  | AGTTATCTTCCTCCGGCGTC      |
| scaffold431814_16.0 | 1 p3 | (TCA)5 | 15 | 77   | 91   | CATTGCGTCATACGATGTATTA    |
| scaffold432461_12.2 | 1 p3 | (TAT)6 | 18 | 120  | 137  | CTAGCCCAGCATATTCCCAC      |
| scaffold432493_16.9 | 1 p3 | (ATT)5 | 15 | 177  | 191  | ATCCCAAGCCATTACCATCA      |
| scaffold432842_17.7 | 1 p3 | (ATC)6 | 18 | 1401 | 1418 | CTTTGAGCACCGAGTGGTTT      |
| scaffold433340_16.8 | 1 p3 | (GTC)5 | 15 | 845  | 859  | CCTTCGACTTTTGACTGGGA      |
| scaffold433423_14.9 | 1 p3 | (CAT)7 | 21 | 734  | 754  | AGCGAATCGAGATAGCCAAA      |
| scaffold433438_14.0 | 1 p3 | (TTA)8 | 24 | 519  | 542  | AGCCACTGACAGCCACAGTA      |
| scaffold433805_17.2 | 1 p3 | (CCG)5 | 15 | 394  | 408  | TCACACTCTCGCTCCCTCTT      |
| scaffold434033_13.8 | 1 p3 | (GGC)6 | 18 | 309  | 326  | GCAAAATTAATAATGCCCCA      |
| scaffold434149_14.0 | 1 p3 | (CTT)7 | 21 | 50   | 70   | CCCTAAGTTTGCATCTCCCA      |
| scaffold434661_17.7 | 1 p3 | (ATA)5 | 15 | 1088 | 1102 | AGACGTAAATGGGCGTGAAT      |
| scaffold435475_16.8 | 1 p3 | (TTC)5 | 15 | 37   | 51   | CCTACTTCTCGACTTTAATGG     |
| scaffold435553_16.2 | 1 p3 | (ATG)5 | 15 | 751  | 765  | GATATGCAAGCAGCCAGTGA      |
| scaffold435580_20.1 | 1 p3 | (GAG)5 | 15 | 206  | 220  | TGGTACCGATCTGGTGCATA      |
| scaffold435621_13.9 | 1 p3 | (AAC)5 | 15 | 161  | 175  | CTAGAGGGCGGCACATTTAC      |
| scaffold436624_16.2 | 1 p3 | (ATA)5 | 15 | 134  | 148  | TCTCCGCTTGCTTGTCTT        |
| scaffold437143_10.0 | 1 p3 | (ATT)5 | 15 | 403  | 417  | GCTCTGGGTAAACTCACGGA      |
| scaffold437378_17.8 | 1 p3 | (ATA)5 | 15 | 441  | 455  | TTCCATGCAATAAGCATCTATGA   |
| scaffold437400_17.2 | 1 p3 | (AAT)6 | 18 | 513  | 530  | TCACCAAAAATCGAACACACA     |
| scaffold437468_16.3 | 1 p3 | (CAT)5 | 15 | 2717 | 2731 | GGCTACAAAGGGACATCCAA      |
| scaffold438063_15.3 | 1 p3 | (ATC)5 | 15 | 75   | 89   | CCACATTTTCCACCTTAGCC      |
| scaffold438124_11.9 | 1 p3 | (CCG)8 | 24 | 376  | 399  | CTCTCCTGCCTCCGACTATG      |
| scaffold438443_14.0 | 1 p3 | (TCA)5 | 15 | 191  | 205  | AGGCGGGTACACCACACTAC      |
| scaffold438464_13.2 | 1 p3 | (TGA)5 | 15 | 485  | 499  | AAGATTACGACGGCGATACG      |
| scaffold438570_15.3 | 1 p3 | (ATC)5 | 15 | 775  | 789  | CTCCCATCATCCTTTTTCCA      |
| scaffold438846_16.3 | 1 p3 | (GGA)6 | 18 | 269  | 286  | TATGCGACCACGATCAAGAG      |
| scaffold438946_13.2 | 1 p3 | (ATA)5 | 15 | 278  | 292  | CTCTAAGGATGAATGCACG       |
| scaffold439137_16.0 | 1 p3 | (ATC)6 | 18 | 50   | 67   | CATGCGCTCAGCATAAAGAA      |
| scaffold439238_17.5 | 1 p3 | (TTC)5 | 15 | 30   | 44   | GGATCAGCAGTGGCTTTCTC      |
| scaffold439445_17.6 | 1 p3 | (TGT)5 | 15 | 2634 | 2648 | TTGGGATTAAGGCTTTGGTG      |
| scaffold439623_11.9 | 1 p3 | (ATT)6 | 18 | 444  | 461  | AAACTGCCAAGTGCCAACAT      |
| scaffold439781_11.3 | 1 p3 | (ATG)5 | 15 | 485  | 499  | AACCGTCTCAGTTGTTGCT       |
| scaffold440287_13.4 | 1 p3 | (ATC)5 | 15 | 975  | 989  | CAAGACCTTTTTGTTGCTT       |
| scaffold440641_17.0 | 1 p3 | (AAG)5 | 15 | 2298 | 2312 | AGGTTTCGAGCTACCGAAACA     |
| scaffold440740_11.2 | 1 p3 | (CAA)8 | 24 | 382  | 405  | TTTGCTGGATACCGCAAGTA      |
| scaffold440859_14.5 | 1 p3 | (GGT)5 | 15 | 515  | 529  | GAGGGAGAGAGAGGGGAAGA      |
| scaffold440912_11.9 | 1 p3 | (AAT)5 | 15 | 1127 | 1141 | GCACATATTCGTTCCCGACT      |
| scaffold440998_15.3 | 1 p3 | (TAT)6 | 18 | 4517 | 4534 | TTACGCGGGAACCTACAGAC      |
| scaffold441003_12.9 | 1 p3 | (GCG)6 | 18 | 1062 | 1079 | ATGGAGGAGGAGGAAAAGGA      |
| scaffold441074_16.4 | 1 p3 | (TGT)5 | 15 | 2694 | 2708 | TCGTTCAATTCACACACGTT      |
| scaffold441075_17.7 | 1 p3 | (GCG)5 | 15 | 412  | 426  | TGAGGGTTAGAGATCGGTGG      |
| scaffold441392_13.6 | 1 p3 | (TTG)7 | 21 | 157  | 177  | GGTGGCTGAAGATAGGAATGA     |
| scaffold442095_16.6 | 1 p3 | (AGG)5 | 15 | 1363 | 1377 | AGCAGAGTTTGTTCGTCGGT      |
| scaffold442546_20.4 | 1 p3 | (ATC)5 | 15 | 703  | 717  | TGCGGAAGTAGCTTTGATGA      |
| scaffold442620_12.2 | 1 p3 | (TAT)6 | 18 | 955  | 972  | GAGCCATTGATGGCATTTT       |
| scaffold443169_17.6 | 1 p3 | (ACA)5 | 15 | 1165 | 1179 | CAGAAAGCGCTTCGAGAACT      |
| scaffold443522_17.6 | 1 p3 | (GCA)5 | 15 | 794  | 808  | TCGGTTTTCGGAGGTATTGAG     |
| scaffold443807_13.2 | 1 p3 | (TAA)7 | 21 | 72   | 92   | TGTTTGGATTTTCATGAATTATTTT |
| scaffold444527_20.3 | 1 p3 | (ATT)7 | 21 | 428  | 448  | TCAAGCTTGGGTGTTGATGA      |
| scaffold444570_15.8 | 1 p3 | (GCA)6 | 18 | 1519 | 1536 | CTGACCACCATCTTCTCCGT      |

|                     |      |        |    |      |      |                            |
|---------------------|------|--------|----|------|------|----------------------------|
| scaffold444771_14.9 | 1 p3 | (TCC)5 | 15 | 84   | 98   | CGCTCCTCCAAGAACAACCTC      |
| scaffold444925_17.2 | 1 p3 | (GGC)5 | 15 | 388  | 402  | GCTGTTTATCACGACGAGCA       |
| scaffold445355_18.5 | 1 p3 | (ACG)5 | 15 | 467  | 481  | ACTAGCGAAAAACGGACGAA       |
| scaffold445537_12.0 | 1 p3 | (TTG)5 | 15 | 510  | 524  | AAGGTCAATATGCGGTGGAG       |
| scaffold445576_21.9 | 1 p3 | (TCC)5 | 15 | 126  | 140  | CTCCTTCCAAATCCAATCCA       |
| scaffold445580_11.2 | 1 p3 | (CTA)5 | 15 | 67   | 81   | CCAACCAAATTGGACTTGTG       |
| scaffold445586_14.3 | 1 p3 | (CCA)5 | 15 | 2638 | 2652 | CCTTTCAGGCTTGAATCTCG       |
| scaffold445852_17.8 | 1 p3 | (TGA)6 | 18 | 45   | 62   | CCAAGACCCCAATTTGATT        |
| scaffold445868_17.4 | 1 p3 | (CAT)5 | 15 | 2146 | 2160 | CGCCTCTTGATTAACCTCCA       |
| scaffold446294_11.8 | 1 p3 | (TCT)6 | 18 | 324  | 341  | GTTTGGTCCCTTTCGAATCC       |
| scaffold446309_10.7 | 1 p3 | (AAC)5 | 15 | 81   | 95   | GGGTTAGTTATGGAACGATGC      |
| scaffold446925_17.1 | 1 p3 | (ATT)5 | 15 | 384  | 398  | CATGTCACAACATGGAATCTCA     |
| scaffold446948_14.9 | 1 p3 | (ATC)6 | 18 | 1968 | 1985 | CAGGATGGTTTGAATGAGG        |
| scaffold447024_11.0 | 1 p3 | (CGG)5 | 15 | 230  | 244  | TAATTTATCGATGGCGGACG       |
| scaffold447151_19.0 | 1 p3 | (TAT)5 | 15 | 67   | 81   | TTGATTGCTTTAAATCCGGC       |
| scaffold447256_11.4 | 1 p3 | (AAT)5 | 15 | 117  | 131  | TTTAAAGTTGCCATTTTCAGCC     |
| scaffold447391_19.2 | 1 p3 | (TTA)5 | 15 | 214  | 228  | GCCAAAATCTGTATACCCCG       |
| scaffold447611_12.1 | 1 p3 | (ACA)5 | 15 | 379  | 393  | AACCTTTTTGAGCTCCGCTT       |
| scaffold447880_17.1 | 1 p3 | (CTT)6 | 18 | 4038 | 4055 | CATGCATGACTTGGTGCTCT       |
| scaffold448140_14.2 | 1 p3 | (TTG)8 | 24 | 970  | 993  | TTTGGTTCATGTAGCCCACC       |
| scaffold448185_10.9 | 1 p3 | (GCG)5 | 15 | 76   | 90   | CGCTGAACGAGCTAGAACTTG      |
| scaffold448317_20.5 | 1 p3 | (AGA)5 | 15 | 40   | 54   | AAGGAGAGGAAGATACGATTTGAA   |
| scaffold449108_14.7 | 1 p3 | (AAT)5 | 15 | 1335 | 1349 | CCTCTCCATTCTGAATCCCA       |
| scaffold449245_14.0 | 1 p3 | (GGC)5 | 15 | 500  | 514  | TTCTTTGTCGTGGTTTCGTG       |
| scaffold449422_15.7 | 1 p3 | (ATC)6 | 18 | 3391 | 3408 | ACAGGAATTGAAATGACGGG       |
| scaffold449695_17.7 | 1 p3 | (TAT)6 | 18 | 46   | 63   | TGCACAAAAATGTTTTAAAATTGC   |
| scaffold449707_15.4 | 1 p3 | (GGA)5 | 15 | 420  | 434  | TAAGGATGGGTTTCCGAATG       |
| scaffold449988_15.5 | 1 p3 | (AAT)5 | 15 | 6175 | 6189 | TGGATTTGGAATCGGTTTTTC      |
| scaffold450110_10.7 | 1 p3 | (CAA)5 | 15 | 39   | 53   | CAGCCATGAATGAGAGTGGG       |
| scaffold450155_17.2 | 1 p3 | (TGT)8 | 24 | 39   | 62   | TGTAGCCGACCCCAATTTAT       |
| scaffold450191_10.7 | 1 p3 | (ATA)5 | 15 | 412  | 426  | TCATTTATTTCTTTTTATATGTGCAA |
| scaffold450206_16.1 | 1 p3 | (TAA)6 | 18 | 177  | 194  | TTCAAGTGTGCTTCCACCAA       |
| scaffold450450_15.4 | 1 p3 | (TTG)6 | 18 | 2128 | 2145 | TAGCATTTCGTGTTTCCAGCA      |
| scaffold450521_11.7 | 1 p3 | (TGA)6 | 18 | 40   | 57   | CCAAGACCCCAATTTGATT        |
| scaffold451740_13.0 | 1 p3 | (TAT)6 | 18 | 311  | 328  | CCGATCCATTTTAGGAACGA       |
| scaffold451795_15.3 | 1 p3 | (TCA)5 | 15 | 319  | 333  | GGCCAGTGTTGAGGTCAAAT       |
| scaffold452041_16.6 | 1 p3 | (GTG)5 | 15 | 191  | 205  | AGGTTTGCCAATCGTTCTTG       |
| scaffold452151_17.2 | 1 p3 | (GAT)6 | 18 | 708  | 725  | TTGATAAGCCAGCCACTTGA       |
| scaffold452177_17.0 | 1 p3 | (TTC)5 | 15 | 842  | 856  | TGGGTAATGGCTTCAACTCC       |
| scaffold452335_17.3 | 1 p3 | (ATC)7 | 21 | 1164 | 1184 | GTGCCACTTTTAGCACCAT        |
| scaffold452593_13.2 | 1 p3 | (ATT)5 | 15 | 212  | 226  | ACTGCATGGGCTATTTCCAC       |
| scaffold452598_16.3 | 1 p3 | (GAG)5 | 15 | 255  | 269  | AGTAGAGGTGCCTGTGGTGG       |
| scaffold453322_15.2 | 1 p3 | (TAT)5 | 15 | 660  | 674  | AAAGCAGTTAATAACGAAAAACCA   |
| scaffold453374_16.0 | 1 p3 | (TTC)5 | 15 | 276  | 290  | ATTGTTGTTGCTGCTGTTGC       |
| scaffold453474_20.2 | 1 p3 | (ATA)6 | 18 | 48   | 65   | ATGTTCCACCTCCAAGGTT        |
| scaffold453495_10.4 | 1 p3 | (ATT)5 | 15 | 393  | 407  | GACGGGTGTGGGCTAAAAT        |
| scaffold453707_10.2 | 1 p3 | (ATA)7 | 21 | 376  | 396  | CGTGTGCATGTGAAATTTTAT      |
| scaffold453730_16.3 | 1 p3 | (GGT)5 | 15 | 173  | 187  | TCCAATCGCTCAAACATTG        |
| scaffold453796_11.8 | 1 p3 | (TTA)5 | 15 | 678  | 692  | CCTAGACTCCGACGAAAAGC       |
| scaffold453864_19.4 | 1 p3 | (CTC)5 | 15 | 26   | 40   | CACTCTCCTCAATGGCGTC        |
| scaffold454028_14.0 | 1 p3 | (TCA)8 | 24 | 2864 | 2887 | TTGAGACTCAGATGAAATGTAGCC   |
| scaffold454119_13.3 | 1 p3 | (TAC)5 | 15 | 225  | 239  | TTTATGCATTGCCGTGAAAA       |
| scaffold454125_15.7 | 1 p3 | (ATG)5 | 15 | 36   | 50   | ATCAGGATCGAGTAAGCGGA       |
| scaffold454537_12.4 | 1 p3 | (AAT)5 | 15 | 790  | 804  | ACTTGTGAGACAAAGAGAACAAAA   |
| scaffold454628_19.4 | 1 p3 | (AAC)5 | 15 | 565  | 579  | TCCCTCATCACTACCCAACC       |
| scaffold454729_15.0 | 1 p3 | (ATC)5 | 15 | 86   | 100  | TTCACATTTACAACCTACATCGG    |
| scaffold455048_14.7 | 1 p3 | (ATA)6 | 18 | 1881 | 1898 | TTTTCGATTTGATTTGGGTTT      |
| scaffold455436_17.1 | 1 p3 | (CTT)6 | 18 | 412  | 429  | TTATATGCCACTTCCCCG         |

|                     |      |        |    |       |       |                           |
|---------------------|------|--------|----|-------|-------|---------------------------|
| scaffold455903_15.8 | 1 p3 | (TGT)5 | 15 | 2580  | 2594  | CCATCTTTTGAATGGTCGTT      |
| scaffold456021_14.3 | 1 p3 | (ATT)7 | 21 | 3164  | 3184  | CAACGGCCTTTCTTTAGCAG      |
| scaffold456170_13.7 | 1 p3 | (CAT)5 | 15 | 1702  | 1716  | ACATTTCTCTTGGGTGCCAG      |
| scaffold456201_10.2 | 1 p3 | (TAT)5 | 15 | 189   | 203   | GCTAGACCATTGTAGGGCGA      |
| scaffold456544_11.2 | 1 p3 | (TAA)8 | 24 | 249   | 272   | GCATTGGAAAATATTACTGGGG    |
| scaffold456844_18.8 | 1 p3 | (ACA)6 | 18 | 576   | 593   | TACTTGGGACGGGATGGTTA      |
| scaffold457138_16.0 | 1 p3 | (GAG)5 | 15 | 3359  | 3373  | GGCGAAGAATGCACACTACA      |
| scaffold457617_14.9 | 1 p3 | (TTC)5 | 15 | 3736  | 3750  | TGTCGTCGTGGACAAGAAAA      |
| scaffold457630_12.9 | 1 p3 | (TTA)5 | 15 | 433   | 447   | TCTTCTATACATAGTGCTTCCGGT  |
| scaffold457709_13.4 | 1 p3 | (ATA)5 | 15 | 323   | 337   | GTTCCGTTCCGGTTTCAAAT      |
| scaffold457714_15.0 | 1 p3 | (CAT)5 | 15 | 608   | 622   | CTTCCACAGGCATTGGGTAT      |
| scaffold457742_11.2 | 1 p3 | (CCG)5 | 15 | 62    | 76    | CAAATCACCAATCAACAAAACC    |
| scaffold458651_17.4 | 1 p3 | (TGA)5 | 15 | 44    | 58    | CCCAAGACCCCAATTTGATT      |
| scaffold458875_17.0 | 1 p3 | (GAA)5 | 15 | 1646  | 1660  | ATGGTGAAAGGCTCCCTGTA      |
| scaffold459137_13.7 | 1 p3 | (TTG)5 | 15 | 362   | 376   | GGTTGAGTTGAGGGGAATCA      |
| scaffold459290_15.5 | 1 p3 | (ATA)5 | 15 | 384   | 398   | AACCCTCAGCAATATGCCAA      |
| scaffold459314_12.4 | 1 p3 | (TAA)5 | 15 | 639   | 653   | CGACAGAGTTGCAAAGAAGTTG    |
| scaffold459341_14.6 | 1 p3 | (TTC)5 | 15 | 118   | 132   | AATCCCACTCTTTTTGCTGC      |
| scaffold459397_14.2 | 1 p3 | (TTA)5 | 15 | 201   | 215   | TCACGAGTTGGCTCTTTGTG      |
| scaffold459510_18.7 | 1 p3 | (GGC)6 | 18 | 234   | 251   | CACCCTTCGATACTCCGAAA      |
| scaffold459758_16.7 | 1 p3 | (GAA)5 | 15 | 4141  | 4155  | AGAAGGCAGAGACCGTGAAA      |
| scaffold459783_10.6 | 1 p3 | (AAT)6 | 18 | 46    | 63    | CCGACTAGGACTAAGGGTCCA     |
| scaffold459935_16.0 | 1 p3 | (CAA)5 | 15 | 1435  | 1449  | AAAGGCCATGCTGACAAAAC      |
| scaffold459940_10.6 | 1 p3 | (AAT)5 | 15 | 256   | 270   | CAGCAACCACCAAATACTCTTG    |
| scaffold459978_16.4 | 1 p3 | (TAT)5 | 15 | 602   | 616   | AAGATCAGGGAAAAGGGAGC      |
| scaffold460000_16.6 | 1 p3 | (GCA)5 | 15 | 80    | 94    | CAGCTTGGTTTTGGAGGTGT      |
| scaffold460486_16.8 | 1 p3 | (ATA)5 | 15 | 445   | 459   | ACGACCTGTCAAGACCCAAT      |
| scaffold460616_14.5 | 1 p3 | (TTG)6 | 18 | 66    | 83    | TCCAAAATTAGTACAAGCATCAAAA |
| scaffold460921_12.9 | 1 p3 | (CAT)5 | 15 | 127   | 141   | TCGCCTTCTTTTGCAGCTAT      |
| scaffold461024_15.0 | 1 p3 | (TAA)5 | 15 | 4187  | 4201  | TGTAAGCAGCACGCCAACTA      |
| scaffold461087_18.5 | 1 p3 | (GTG)5 | 15 | 283   | 297   | ATGATCTCGACCTCCCTCCT      |
| scaffold461143_17.0 | 1 p3 | (TTC)5 | 15 | 3749  | 3763  | CTGCACACCTGTATGTTCCGG     |
| scaffold461587_14.2 | 1 p3 | (ATT)5 | 15 | 667   | 681   | TGCTTGAATGAGTTGGAATG      |
| scaffold461764_10.2 | 1 p3 | (ATA)5 | 15 | 397   | 411   | GTCAGCGAGGCCAACTCTAC      |
| scaffold461785_15.2 | 1 p3 | (GAT)6 | 18 | 256   | 273   | TTTCAAGGAAACATCCCAAAA     |
| scaffold461811_17.4 | 1 p3 | (CAC)5 | 15 | 681   | 695   | TGTGACGTCTAGCTCGATCC      |
| scaffold461839_12.5 | 1 p3 | (TAA)5 | 15 | 427   | 441   | TTTCCACAAAGCGTCGTACA      |
| scaffold462337_17.9 | 1 p3 | (TTG)5 | 15 | 280   | 294   | GGGTTGGGTTTTCTCCATTT      |
| scaffold462507_15.9 | 1 p3 | (TCC)6 | 18 | 4338  | 4355  | CAGATGGTGAATGGAGGGAG      |
| scaffold462817_14.9 | 1 p3 | (GGC)6 | 18 | 10495 | 10512 | GAGAGTAGGATTGGGGGAGG      |
| scaffold462866_18.5 | 1 p3 | (TTG)5 | 15 | 520   | 534   | CACCGGTTTCAAGGGTAGAA      |
| scaffold463049_17.2 | 1 p3 | (ACA)6 | 18 | 181   | 198   | TGCTTGCGGTATTGTTTTGA      |
| scaffold463389_17.3 | 1 p3 | (CAC)5 | 15 | 579   | 593   | AAACCTCACCAACACGGAG       |
| scaffold463414_11.9 | 1 p3 | (GTT)5 | 15 | 69    | 83    | TGTTGTTGAAAAAGGCGACA      |
| scaffold463990_16.5 | 1 p3 | (CGG)5 | 15 | 4440  | 4454  | TAGGGCTTTTGTGTGGTTCC      |
| scaffold464123_10.2 | 1 p3 | (AAT)6 | 18 | 378   | 395   | GTCTCAATGGGGACATCTGG      |
| scaffold464261_10.3 | 1 p3 | (CGC)5 | 15 | 247   | 261   | TTGAGCAAGAAGGGTGTTGA      |
| scaffold464272_10.0 | 1 p3 | (ATT)6 | 18 | 169   | 186   | CCCAAATTTTCTTAAGCCCTG     |
| scaffold464462_12.5 | 1 p3 | (TGT)5 | 15 | 50    | 64    | TGTAGCCGACCCCAATTTTA      |
| scaffold464577_16.5 | 1 p3 | (ATC)5 | 15 | 648   | 662   | ATCCATCCATGCATTTTGGT      |
| scaffold464717_15.2 | 1 p3 | (CCG)5 | 15 | 2017  | 2031  | ACCCATGGATCCAACCTCAA      |
| scaffold465065_14.5 | 1 p3 | (TGT)6 | 18 | 48    | 65    | TGGTTCATGTAGCCTACCCC      |
| scaffold465180_10.4 | 1 p3 | (ATC)5 | 15 | 85    | 99    | GAATGTCAAGATGAGAGATGGAAA  |
| scaffold465220_20.0 | 1 p3 | (ATT)6 | 18 | 911   | 928   | CCGAACAACACTCAACTCCA      |
| scaffold465291_13.0 | 1 p3 | (CAA)6 | 18 | 68    | 85    | GGGGTTGAGGCCACTATATC      |
| scaffold465589_15.4 | 1 p3 | (TTC)5 | 15 | 369   | 383   | TTACTCCTCGAAAACAGCCG      |
| scaffold465615_15.0 | 1 p3 | (AAT)6 | 18 | 601   | 618   | CGAAGCAATACACTTTTTGAAGAA  |
| scaffold466368_14.7 | 1 p3 | (TCT)5 | 15 | 459   | 473   | AGTTGGGATATTCGGGAAGG      |



|                     |      |        |    |      |                             |
|---------------------|------|--------|----|------|-----------------------------|
| scaffold466499_15.1 | 1 p3 | (AAT)5 | 15 | 185  | 199 GCTCTTTCAATAAACAGAATCCA |
| scaffold467167_13.9 | 1 p3 | (CGC)5 | 15 | 1360 | 1374 GCAGCGCATAACAAGTGTCT   |
| scaffold467173_14.2 | 1 p3 | (ATC)6 | 18 | 2783 | 2800 CTGGCAATTCAGCCAAAAGT   |
| scaffold467192_15.4 | 1 p3 | (GAA)5 | 15 | 1011 | 1025 TTCAAATTCACAAACACGG    |
| scaffold467223_15.4 | 1 p3 | (AAG)5 | 15 | 1027 | 1041 ATACCGCAGATCCCTTTCTCT  |
| scaffold467260_14.3 | 1 p3 | (AAT)5 | 15 | 81   | 95 TTGAATTCGGACATGAGCAA     |
| scaffold467863_21.5 | 1 p3 | (TTA)5 | 15 | 278  | 292 ACGTAGGCCGGCTTTACTGTG   |
| scaffold468075_13.0 | 1 p3 | (TAT)6 | 18 | 281  | 298 CAGAAAGGTGTTGGTGGGAT    |
| scaffold468474_13.1 | 1 p3 | (TGA)5 | 15 | 50   | 64 CCAAGACCCCAATTTGATT      |
| scaffold468552_12.9 | 1 p3 | (CAT)5 | 15 | 228  | 242 ATTTTATCCGGACGGGTTTC    |
| scaffold468607_18.8 | 1 p3 | (TTC)5 | 15 | 215  | 229 TCTGTTCCCATAGGCACTC     |
| scaffold468781_15.5 | 1 p3 | (ATT)5 | 15 | 587  | 601 TTGTTACTAAGGGTTGCGGG    |
| scaffold469198_15.7 | 1 p3 | (AAT)5 | 15 | 132  | 146 TCATTTTGGGACGGAGGTAG    |
| scaffold469397_19.4 | 1 p3 | (GCG)5 | 15 | 805  | 819 AGAAAAACGAACCGCATTTG    |
| scaffold469846_13.2 | 1 p3 | (ATA)7 | 21 | 357  | 377 TGATATCCCACCCGATCACT    |
| scaffold469870_14.2 | 1 p3 | (ACA)6 | 18 | 89   | 106 GCACAAATTGAAAGCACACAA   |
| scaffold469987_11.9 | 1 p3 | (CTC)5 | 15 | 575  | 589 TTGGTATGATGGAATGGGGT    |
| scaffold469988_15.2 | 1 p3 | (TGA)6 | 18 | 40   | 57 CCAAGACCCCAATTTGATT      |
| scaffold470735_12.3 | 1 p3 | (GTA)6 | 18 | 286  | 303 CAGCTGCTGTATCATCGTT     |
| scaffold470842_12.6 | 1 p3 | (ATA)5 | 15 | 259  | 273 AGTTCCCATTGCTGTTTTG     |
| scaffold470965_17.6 | 1 p3 | (CGG)5 | 15 | 492  | 506 TGAGCTACATCTGTGCTGG     |
| scaffold471329_15.9 | 1 p3 | (GCT)5 | 15 | 315  | 329 GCCGGTTAATATGCATTTGG    |
| scaffold471508_17.5 | 1 p3 | (CGC)5 | 15 | 280  | 294 CGGAGAGCTCGGTAAATGAG    |
| scaffold471609_16.2 | 1 p3 | (TAT)5 | 15 | 126  | 140 AAGGAGCAGCTGTCTTTTGTG   |
| scaffold471673_15.2 | 1 p3 | (ACA)5 | 15 | 934  | 948 TCTGCGGAAAGGTGTAATC     |
| scaffold471755_18.1 | 1 p3 | (AGG)5 | 15 | 1843 | 1857 GATTGGTTCAGCTATTCCGC   |
| scaffold472169_18.6 | 1 p3 | (CAT)5 | 15 | 3196 | 3210 GCTGGATTCTTGAGGTGAGC   |
| scaffold472376_16.4 | 1 p3 | (CTC)5 | 15 | 205  | 219 GAAGTAAGCCCGACCTCCTC    |
| scaffold472958_16.5 | 1 p3 | (TGC)5 | 15 | 131  | 145 TCGCAACTATCTGCACCATT    |
| scaffold472961_13.0 | 1 p3 | (TAT)5 | 15 | 87   | 101 ATGTTGAGCCCAACCCAAC     |
| scaffold473050_13.1 | 1 p3 | (TTA)6 | 18 | 761  | 778 AATCATTGATTTGGCAAGC     |
| scaffold473101_14.8 | 1 p3 | (AGA)5 | 15 | 159  | 173 GGGAGTTTCGTACACAGT      |
| scaffold473158_16.7 | 1 p3 | (TGA)5 | 15 | 105  | 119 GCAACGGAAACAACCTCTTT    |
| scaffold473194_15.7 | 1 p3 | (AGT)5 | 15 | 1696 | 1710 AGCAGGTGAGGGTGAAAATG   |
| scaffold473246_15.2 | 1 p3 | (TAA)5 | 15 | 655  | 669 AAACAAGGCAATTGTGGGTT    |
| scaffold473296_18.5 | 1 p3 | (ACA)5 | 15 | 119  | 133 GCAGATAATCACGATTTAGTTGG |
| scaffold473333_11.8 | 1 p3 | (CTT)5 | 15 | 368  | 382 CTAGCTCTGAGATCCCGGC     |
| scaffold473869_14.7 | 1 p3 | (TAT)6 | 18 | 80   | 97 CCATTGAGACTCGAACCCAT     |
| scaffold474017_14.3 | 1 p3 | (TAT)5 | 15 | 5132 | 5146 ACGTCGGCATTGCTAAAATC   |
| scaffold474186_12.4 | 1 p3 | (AAG)5 | 15 | 132  | 146 GAAGCCAGGGAAAGAATGAA    |
| scaffold474266_13.0 | 1 p3 | (AGG)5 | 15 | 520  | 534 AAGAAGTCCCTGGCTTGGAT    |
| scaffold474294_12.7 | 1 p3 | (ATT)7 | 21 | 378  | 398 TTGATGGCGTCCGTATGTTA    |
| scaffold474449_16.2 | 1 p3 | (AAT)6 | 18 | 328  | 345 ATTTTCGTGCCCCCTCTTAT    |
| scaffold474608_14.5 | 1 p3 | (TGA)5 | 15 | 67   | 81 GTTGCGTACATCTGACCCC      |
| scaffold475012_15.1 | 1 p3 | (TTA)5 | 15 | 1041 | 1055 GCGGGACCTAGAATGTTGAA   |
| scaffold475614_16.4 | 1 p3 | (TCT)5 | 15 | 172  | 186 CTGCCCTTAGCCGTTAGATG    |
| scaffold475675_16.5 | 1 p3 | (TCA)6 | 18 | 2766 | 2783 CTTTCTCACTGACCTGCACA   |
| scaffold475690_15.6 | 1 p3 | (CAG)6 | 18 | 287  | 304 TAATTTACGGCTCGGTTTCG    |
| scaffold475886_17.7 | 1 p3 | (TCA)6 | 18 | 2055 | 2072 AAATGGCCGAAGAGATTCTT   |
| scaffold476073_19.7 | 1 p3 | (GAA)6 | 18 | 257  | 274 GGTTCAAATTGGCCAAACA     |
| scaffold476219_16.6 | 1 p3 | (AAG)5 | 15 | 536  | 550 ACGTGCCCTGTTCTCTCACT    |
| scaffold476431_10.7 | 1 p3 | (AAT)7 | 21 | 511  | 531 CCAAGTCTCATCTCGTGGT     |
| scaffold476465_10.4 | 1 p3 | (ACA)8 | 24 | 1122 | 1145 TTCCTTGTGAAGCACAACTCT  |
| scaffold476622_11.1 | 1 p3 | (TTA)5 | 15 | 64   | 78 CCCATACATTTGTGGGGATAG    |
| scaffold476894_13.4 | 1 p3 | (ACA)5 | 15 | 855  | 869 ATCGTGACCAACCCAACAT     |
| scaffold477057_14.6 | 1 p3 | (AGC)5 | 15 | 712  | 726 ACGATGTTTTGTTGCGATGA    |
| scaffold477122_15.2 | 1 p3 | (CGC)5 | 15 | 35   | 49 GTCTACCCCGCCAGATCC       |
| scaffold477874_14.6 | 1 p3 | (CCG)6 | 18 | 350  | 367 AACTCACCCACCTTCTCCCT    |

|                     |      |        |    |      |                              |
|---------------------|------|--------|----|------|------------------------------|
| scaffold478116_16.6 | 1 p3 | (CAG)5 | 15 | 233  | 247 AAAATGAACGAGCATCCAGC     |
| scaffold478184_12.0 | 1 p3 | (CTC)5 | 15 | 413  | 427 TTAGGTTTTGCCCAGGATTG     |
| scaffold478253_12.5 | 1 p3 | (AAT)5 | 15 | 339  | 353 CCAAAATCTCGGCTTCAATC     |
| scaffold478539_12.7 | 1 p3 | (AAG)5 | 15 | 257  | 271 AGTGTGCGCGATAGAGGAGT     |
| scaffold478567_12.3 | 1 p3 | (TCT)5 | 15 | 298  | 312 GGGTTATATCCCCGTCTACCC    |
| scaffold478817_15.4 | 1 p3 | (CAT)7 | 21 | 5804 | 5824 TGACTIONTATGCGTGCATGTGG |
| scaffold479031_10.4 | 1 p3 | (TAT)5 | 15 | 199  | 213 CCCAGCGGAGAGCTATACTG     |
| scaffold479032_15.8 | 1 p3 | (TTA)6 | 18 | 43   | 60 TCACTCCGGATCAAATAGGC      |
| scaffold479178_15.4 | 1 p3 | (AAC)5 | 15 | 741  | 755 TCCATGACATTGCCTACGTT     |
| scaffold479188_14.0 | 1 p3 | (GAA)5 | 15 | 199  | 213 GATAAGCGGCTGAAGGTGAA     |
| scaffold479586_10.4 | 1 p3 | (TCT)5 | 15 | 119  | 133 TGCAGCAACTTCTCTCCTT      |
| scaffold479607_17.4 | 1 p3 | (TAA)5 | 15 | 1877 | 1891 ATCCTGTGGTGGCATGTTTT    |
| scaffold479648_14.3 | 1 p3 | (AAT)6 | 18 | 835  | 852 TGAGCGCACTCGAAAAGTAA     |
| scaffold479791_15.8 | 1 p3 | (TAT)6 | 18 | 309  | 326 CAACTTTAGTCGTCGTCATCATC  |
| scaffold479935_11.7 | 1 p3 | (GAG)5 | 15 | 365  | 379 TTTTCGCAGTATGCCTCAGTG    |
| scaffold480413_18.6 | 1 p3 | (CGG)5 | 15 | 447  | 461 TTCGATAACAAAAGGCCAGG     |
| scaffold481031_13.4 | 1 p3 | (ATC)8 | 24 | 712  | 735 CCATTCCGTTGAACATCAAAA    |
| scaffold481610_14.2 | 1 p3 | (GGT)8 | 24 | 1645 | 1668 CAGCAGGAGTGGTGCAGATA    |
| scaffold481762_11.2 | 1 p3 | (ATT)6 | 18 | 201  | 218 TCTAACATGCCATGGAGCAG     |
| scaffold481907_13.0 | 1 p3 | (CAT)5 | 15 | 92   | 106 GGGTAACTGAGCCGAGTCAT     |
| scaffold482065_10.5 | 1 p3 | (ATA)5 | 15 | 341  | 355 CACTCCATCGGATCCAAGAT     |
| scaffold482080_15.4 | 1 p3 | (TTC)5 | 15 | 295  | 309 TGATGTTTAGGCTGCAGGAA     |
| scaffold482589_18.7 | 1 p3 | (AGC)5 | 15 | 134  | 148 CAAGAAGCTTGCCAACATCA     |
| scaffold483159_16.5 | 1 p3 | (GAA)7 | 21 | 444  | 464 TCAATTGATTTTCGTAATCCTGG  |
| scaffold483495_15.4 | 1 p3 | (CCG)5 | 15 | 458  | 472 TAGGACGATAATTCCCACGC     |
| scaffold483745_15.2 | 1 p3 | (CAG)5 | 15 | 1699 | 1713 GCATTAGTCTGGTGGCATT     |
| scaffold484141_11.7 | 1 p3 | (AAT)6 | 18 | 130  | 147 ATGCAGTTGGAAAGCACCTT     |
| scaffold484554_14.7 | 1 p3 | (AAT)5 | 15 | 1298 | 1312 GTGGGGCCTTACACCAACTA    |
| scaffold484643_13.4 | 1 p3 | (CGG)5 | 15 | 57   | 71 CTCAATTTTTCCGGCGAAT       |
| scaffold484733_17.0 | 1 p3 | (CAA)6 | 18 | 247  | 264 GGACTIONTGTATGGGCTAGGAA  |
| scaffold484775_18.3 | 1 p3 | (GAG)5 | 15 | 685  | 699 TGC GGATTAGGGTAGCTTTG    |
| scaffold484921_16.2 | 1 p3 | (GGC)6 | 18 | 59   | 76 AAGAAACCAGCGACACATTG      |
| scaffold484989_15.5 | 1 p3 | (TAT)5 | 15 | 108  | 122 CACAAATGGGGTTGACTTCC     |
| scaffold485281_14.5 | 1 p3 | (CCA)5 | 15 | 166  | 180 ACCAAACGATGCAGATTTCC     |
| scaffold485673_16.0 | 1 p3 | (TCT)5 | 15 | 1877 | 1891 CAAATTTGATTGGCTCTGTGA   |
| scaffold485799_19.6 | 1 p3 | (GAA)5 | 15 | 2402 | 2416 GCCCTTACAAGACCATCCAC    |
| scaffold485867_16.9 | 1 p3 | (ATA)5 | 15 | 309  | 323 ATGCCGGATCGAATAATCAG     |
| scaffold485980_17.0 | 1 p3 | (CTC)5 | 15 | 297  | 311 CCAATATCTTCTCCCTCC       |
| scaffold486634_12.0 | 1 p3 | (TAA)5 | 15 | 741  | 755 TGTATGCCCTGCAAAAACAAA    |
| scaffold486696_16.7 | 1 p3 | (AAG)6 | 18 | 3251 | 3268 TAGGCACAAATCTATCCGGG    |
| scaffold486850_16.3 | 1 p3 | (TGT)6 | 18 | 33   | 50 CCAATTTATTGGGATTAAGGCA    |
| scaffold486856_11.8 | 1 p3 | (AAT)6 | 18 | 390  | 407 CCTCATTTTTGAACCCGAATG    |
| scaffold487310_13.7 | 1 p3 | (AAG)6 | 18 | 2433 | 2450 TCCCAATTCAGACATGCAAAA   |
| scaffold487539_15.6 | 1 p3 | (ATA)5 | 15 | 1116 | 1130 GAAGCTGAGCAACGAGAAGG    |
| scaffold487685_16.2 | 1 p3 | (AAT)5 | 15 | 1529 | 1543 CGTTTCCAACACCGACCTAT    |
| scaffold487987_12.6 | 1 p3 | (GAT)5 | 15 | 113  | 127 CATTGGAGATGCCCTTAGGA     |
| scaffold488314_16.5 | 1 p3 | (ATT)6 | 18 | 3792 | 3809 ATTCCGAAACCTGCTGTTTG    |
| scaffold488353_10.9 | 1 p3 | (GCG)5 | 15 | 307  | 321 TGCAAGATTGAGCGAGATTG     |
| scaffold488371_10.4 | 1 p3 | (ACA)6 | 18 | 206  | 223 GCTAGGTTTGTCTTCTGGCG     |
| scaffold488624_16.8 | 1 p3 | (TAA)5 | 15 | 261  | 275 TCCTGAATGTCCCCACTGAT     |
| scaffold488980_14.3 | 1 p3 | (TTG)6 | 18 | 912  | 929 TCATCCAAACCTCAACCAGA     |
| scaffold489047_15.2 | 1 p3 | (ATA)5 | 15 | 344  | 358 TTCATGCCTGTATTTCAATCG    |
| scaffold489629_15.2 | 1 p3 | (TAA)5 | 15 | 3362 | 3376 AAGTGGCCTTATCTTGCCT     |
| scaffold490478_16.7 | 1 p3 | (TTC)6 | 18 | 4033 | 4050 TAGGCCTCTTCTCAGCAGC     |
| scaffold490516_12.6 | 1 p3 | (TAT)5 | 15 | 639  | 653 GAATATATCTTGCCGTTGCCA    |
| scaffold490615_16.0 | 1 p3 | (CTT)5 | 15 | 385  | 399 ATTTACGTTTACGCTTCC       |
| scaffold490670_18.5 | 1 p3 | (TAT)6 | 18 | 364  | 381 CGGACCAGCCTAGAATTTGA     |
| scaffold491260_17.7 | 1 p3 | (CAG)5 | 15 | 366  | 380 AGAATGGCGAAGAAGTGAA      |

|                     |      |        |    |      |                                |
|---------------------|------|--------|----|------|--------------------------------|
| scaffold491581_13.0 | 1 p3 | (TAT)6 | 18 | 35   | 52 CGAACCATAGTTGTTGGACG        |
| scaffold492617_18.6 | 1 p3 | (ATT)5 | 15 | 215  | 229 TGTCATGCATAATCGAACTGG      |
| scaffold492647_14.8 | 1 p3 | (TGG)6 | 18 | 272  | 289 CCCATGGACCAAAACTATGC       |
| scaffold492671_13.4 | 1 p3 | (AAT)5 | 15 | 190  | 204 GTGCCACCAAAAATCACACA       |
| scaffold493036_11.5 | 1 p3 | (CGG)5 | 15 | 314  | 328 CAACGAATCCGCCATAACT        |
| scaffold493080_14.2 | 1 p3 | (TAA)5 | 15 | 444  | 458 CATGACAACCCTCTAGTTCGC      |
| scaffold493265_12.9 | 1 p3 | (TCT)5 | 15 | 68   | 82 TGTGGAACATCATCTAATCCA       |
| scaffold493275_14.6 | 1 p3 | (GCA)5 | 15 | 1000 | 1014 GCACAAATTGTTCCCATTCA      |
| scaffold493357_14.3 | 1 p3 | (TTA)5 | 15 | 632  | 646 TCGTACAAAGGAACTTGGGC       |
| scaffold493381_14.2 | 1 p3 | (CTT)5 | 15 | 227  | 241 ATCCCCCTACCCCAAACATA       |
| scaffold493505_16.1 | 1 p3 | (GCC)6 | 18 | 1046 | 1063 GGGTTTTACCGCCGTTATTT      |
| scaffold493735_12.8 | 1 p3 | (CTT)5 | 15 | 165  | 179 TGATTTTCGCACGAGTGTGT       |
| scaffold493770_17.3 | 1 p3 | (GAT)5 | 15 | 861  | 875 CCATTTCCGGTGGAGAGTA        |
| scaffold493776_10.1 | 1 p3 | (GGT)7 | 21 | 368  | 388 TCTGGTGGGAGATCAAAGC        |
| scaffold493825_15.9 | 1 p3 | (TAA)5 | 15 | 387  | 401 AGCAAGGCTTGGATCAATGT       |
| scaffold494013_16.9 | 1 p3 | (CCG)5 | 15 | 1152 | 1166 AGGCTTTGCATAGCTGTCGT      |
| scaffold494083_13.5 | 1 p3 | (AAC)6 | 18 | 305  | 322 TTCGATTCAAGGTCTCACGA       |
| scaffold494386_15.3 | 1 p3 | (AGA)5 | 15 | 1021 | 1035 GAAAATGGGTGTGACTTGGC      |
| scaffold494669_12.8 | 1 p3 | (CAA)6 | 18 | 398  | 415 GCGGTGGATTTAGGATTTCA       |
| scaffold494685_16.3 | 1 p3 | (TGA)5 | 15 | 74   | 88 TTACAAGGGAAAGGTTGCGT        |
| scaffold494750_14.9 | 1 p3 | (TTA)5 | 15 | 61   | 75 CAAATACAAATTCAAGGATTATACAC  |
| scaffold495384_15.4 | 1 p3 | (ATA)6 | 18 | 2154 | 2171 TTAAGTTGAAGGCCGCAATC      |
| scaffold495568_10.9 | 1 p3 | (ATT)6 | 18 | 67   | 84 AATTAACCCAAACCAAACCTCTT     |
| scaffold495571_16.5 | 1 p3 | (TTG)5 | 15 | 51   | 65 TTGGGATTAAGGCTTTGGTG        |
| scaffold495606_15.2 | 1 p3 | (AAG)5 | 15 | 4174 | 4188 GTTGCAAACGACTGGGAAT       |
| scaffold495626_17.3 | 1 p3 | (ATT)6 | 18 | 204  | 221 ACCACAGCGACCGATAATTC       |
| scaffold495979_15.9 | 1 p3 | (ATC)6 | 18 | 4760 | 4777 TCCTCTTTCTTGGGTGATGG      |
| scaffold496061_17.6 | 1 p3 | (ATT)5 | 15 | 323  | 337 TTAGTCCGTTAATCCGCCA        |
| scaffold496109_15.7 | 1 p3 | (TCT)5 | 15 | 1413 | 1427 GGCACACAATCATGGTGAAG      |
| scaffold496403_15.0 | 1 p3 | (AAT)5 | 15 | 3562 | 3576 GGGAGAGAGAGGGGAGTGTC      |
| scaffold496428_12.7 | 1 p3 | (ATT)5 | 15 | 531  | 545 ATCGCAATCTCTCGGACACT       |
| scaffold496437_16.8 | 1 p3 | (TAT)5 | 15 | 235  | 249 ATTGGGCCTGAGTTTTGATG       |
| scaffold496453_15.0 | 1 p3 | (AAT)5 | 15 | 188  | 202 CGCGGTTATTTATGTCCGTT       |
| scaffold496818_11.8 | 1 p3 | (TTC)5 | 15 | 968  | 982 GTCTAGCATCCTTTGGCAGC       |
| scaffold496985_12.7 | 1 p3 | (TGT)7 | 21 | 41   | 61 TGTAGCCGACCCCAATTTAT        |
| scaffold497224_12.8 | 1 p3 | (ACC)5 | 15 | 130  | 144 GGGTTTGTCTAGTTCATCCCA      |
| scaffold497349_15.8 | 1 p3 | (GCA)5 | 15 | 99   | 113 GGCTGAGATGGACTACGAGG       |
| scaffold497442_15.1 | 1 p3 | (ATA)5 | 15 | 1809 | 1823 GGTGTTGAATGAAGGGAGGA      |
| scaffold497624_17.0 | 1 p3 | (ATA)5 | 15 | 265  | 279 TGATGGGTGAGTTTTATATGATGC   |
| scaffold497651_14.4 | 1 p3 | (ATC)5 | 15 | 1459 | 1473 AGCTGCAGATCACAGAGCAA      |
| scaffold497753_14.0 | 1 p3 | (ATT)5 | 15 | 360  | 374 TTGTAATCCTTCCCACCTCG       |
| scaffold497814_14.2 | 1 p3 | (TTG)5 | 15 | 345  | 359 ATGTAGCCGACCCCAATGTA       |
| scaffold497819_13.8 | 1 p3 | (CAA)6 | 18 | 195  | 212 CCCCCATTACTCACATCAGAA      |
| scaffold497842_15.7 | 1 p3 | (TAT)7 | 21 | 619  | 639 TGAAACCTTCTGCCCTCAAT       |
| scaffold498002_14.2 | 1 p3 | (AAT)5 | 15 | 173  | 187 AGCATGAGTACATACATTTCTAGCAT |
| scaffold498003_15.9 | 1 p3 | (AAT)5 | 15 | 5763 | 5777 TTGGTGTAATTTTGAAGGGA      |
| scaffold498440_11.0 | 1 p3 | (TCA)6 | 18 | 89   | 106 AAATCCCCAAAAGAACATGG       |
| scaffold498448_13.1 | 1 p3 | (GAG)5 | 15 | 138  | 152 AGCCTTTTGTGAATGATGGC       |
| scaffold498544_15.2 | 1 p3 | (TCT)7 | 21 | 2575 | 2595 ACTGCTTTCTCACAAACGCCT     |
| scaffold498821_12.0 | 1 p3 | (GAA)5 | 15 | 183  | 197 GGATTCGATGTCTGCCAACT       |
| scaffold498874_20.2 | 1 p3 | (TAA)5 | 15 | 527  | 541 GGTTTCATCGGGTCTGAGTA       |
| scaffold498926_10.4 | 1 p3 | (ATT)6 | 18 | 398  | 415 ACTCAATATGCCCAAGGTGG       |
| scaffold499225_11.7 | 1 p3 | (GAG)5 | 15 | 67   | 81 GGGTCGTCGATTTGGACTC         |
| scaffold499541_14.6 | 1 p3 | (GAA)5 | 15 | 1046 | 1060 ATCCAAGGGCTCGATTCTCT      |
| scaffold499777_14.4 | 1 p3 | (GGC)5 | 15 | 942  | 956 GCAGAAAGCGTTTTAGGTCTG      |
| scaffold500183_17.2 | 1 p3 | (TTC)5 | 15 | 213  | 227 TTGTCCAAGTGGGAGATTGTT      |
| scaffold500383_17.1 | 1 p3 | (TTC)5 | 15 | 478  | 492 TGGATGAAGGGGTTGTTGAT       |
| scaffold500570_12.5 | 1 p3 | (TTA)5 | 15 | 115  | 129 TTTCAAATACCTTGACCAACGA     |

|                     |      |         |    |      |      |                           |
|---------------------|------|---------|----|------|------|---------------------------|
| scaffold500689_17.7 | 1 p3 | (GCA)5  | 15 | 481  | 495  | CAAGGCATATAAGCTGGGGA      |
| scaffold501061_13.8 | 1 p3 | (ATA)5  | 15 | 1172 | 1186 | GCTTGTAGACGCTTTACGCC      |
| scaffold501094_15.5 | 1 p3 | (ATT)5  | 15 | 166  | 180  | TGTGTTGTATGCGTTCATGACT    |
| scaffold501158_15.2 | 1 p3 | (TAA)6  | 18 | 310  | 327  | CACCGCCTTAATTTCTCCAG      |
| scaffold501233_12.6 | 1 p3 | (TTG)5  | 15 | 190  | 204  | CTTTATGATGGAGGCGGATT      |
| scaffold501294_15.7 | 1 p3 | (CTT)7  | 21 | 365  | 385  | CTCGACACAGTTCATCGGAA      |
| scaffold501366_17.2 | 1 p3 | (ATC)6  | 18 | 2102 | 2119 | TGCCTCATGTAATGGTGGAG      |
| scaffold501811_15.2 | 1 p3 | (CAT)5  | 15 | 4343 | 4357 | TGCCTGTAACAAGGGTGGAT      |
| scaffold502014_15.3 | 1 p3 | (ACA)5  | 15 | 1163 | 1177 | GTCGGGGTAATCCGACCTAT      |
| scaffold502577_15.2 | 1 p3 | (ATT)6  | 18 | 3775 | 3792 | TTGACCGTACTGGTGATGTACC    |
| scaffold502663_14.4 | 1 p3 | (TCT)6  | 18 | 833  | 850  | TGAAAACCTCCGGTTCATTTC     |
| scaffold502895_14.0 | 1 p3 | (CTT)7  | 21 | 242  | 262  | TCATCGAATCAAATCCATCAA     |
| scaffold503301_14.3 | 1 p3 | (TCT)5  | 15 | 928  | 942  | CCATTTTCCCATCAACATCC      |
| scaffold503573_15.9 | 1 p3 | (ATT)5  | 15 | 183  | 197  | TTACTATGCGGACTGGGACC      |
| scaffold503629_13.4 | 1 p3 | (ATT)6  | 18 | 151  | 168  | AAGGGAGCTACAACCTTTCATC    |
| scaffold503774_16.0 | 1 p3 | (GGC)5  | 15 | 530  | 544  | GGAGACAGCGGCTAGTAACG      |
| scaffold503777_15.9 | 1 p3 | (TGT)5  | 15 | 212  | 226  | GCTACGAGGCAGATAAACGG      |
| scaffold503861_18.7 | 1 p3 | (GCA)5  | 15 | 718  | 732  | TAGTACCGTGGGGCAGATTC      |
| scaffold503994_13.8 | 1 p3 | (AAT)5  | 15 | 386  | 400  | GTTTGTGCGATCATTACGCC      |
| scaffold504271_12.9 | 1 p3 | (AAT)5  | 15 | 729  | 743  | TTCATGTTTCGCGATTCAAC      |
| scaffold504489_19.5 | 1 p3 | (ACA)6  | 18 | 1120 | 1137 | CATAGGGTTGCTGATGCAGA      |
| scaffold504850_14.8 | 1 p3 | (TCA)5  | 15 | 51   | 65   | GAATGGCATGTGGATCTGTG      |
| scaffold504868_15.4 | 1 p3 | (ATA)5  | 15 | 343  | 357  | ATTTGTTCAAATCCGCGAC       |
| scaffold505305_11.0 | 1 p3 | (AGC)5  | 15 | 67   | 81   | TTACAGCTTGTTTCGGAGG       |
| scaffold505480_14.0 | 1 p3 | (ATT)8  | 24 | 1007 | 1030 | GCATAGGATATTTATTACACCACGG |
| scaffold505906_15.3 | 1 p3 | (TCC)6  | 18 | 4062 | 4079 | GCCCTCAAATCTGACCAAAA      |
| scaffold506257_10.5 | 1 p3 | (ATC)6  | 18 | 543  | 560  | TCATCACCACCACCATCATC      |
| scaffold506391_15.2 | 1 p3 | (CGG)5  | 15 | 926  | 940  | CAATTTGATTGTGCGATGGT      |
| scaffold506560_13.2 | 1 p3 | (GAA)5  | 15 | 205  | 219  | CAATTCCTTGGATCCTGAA       |
| scaffold507037_18.8 | 1 p3 | (ACA)5  | 15 | 212  | 226  | AATTGGCCCTCATTTCCATT      |
| scaffold507173_19.7 | 1 p3 | (CAG)5  | 15 | 86   | 100  | TGCTCATCAAAAAGTTCCCA      |
| scaffold507338_15.2 | 1 p3 | (TGA)6  | 18 | 991  | 1008 | ACCCCTGTTTCTGGATCTT       |
| scaffold507379_10.2 | 1 p3 | (TAT)5  | 15 | 316  | 330  | TGTACGGTGTAAATGCTTGTGC    |
| scaffold507492_16.2 | 1 p3 | (ATA)5  | 15 | 475  | 489  | CTTGTAATCCGCATCCTCGT      |
| scaffold507582_14.4 | 1 p3 | (ACA)7  | 21 | 438  | 458  | CACGAGATGGGGACTCTTGT      |
| scaffold507627_19.9 | 1 p3 | (CGG)5  | 15 | 507  | 521  | ACAAGTATCCACCACTCGCC      |
| scaffold507780_10.6 | 1 p3 | (GAA)5  | 15 | 29   | 43   | CCTCCTCTATTGCTGATTTAAGGA  |
| scaffold507899_15.2 | 1 p3 | (GTT)6  | 18 | 545  | 562  | GGCGTTTCTTTGTTGAGAGC      |
| scaffold507988_16.9 | 1 p3 | (TCA)10 | 30 | 1005 | 1034 | AATTGTGCTCCATTTCCAG       |
| scaffold508421_16.6 | 1 p3 | (CTT)5  | 15 | 405  | 419  | TCATCGAATCAAATCCATCG      |
| scaffold509085_13.8 | 1 p3 | (AAG)5  | 15 | 245  | 259  | CTGGTCCACTTCCAGCTTTC      |
| scaffold509152_14.4 | 1 p3 | (GAG)5  | 15 | 254  | 268  | ATTCTACGGTGATTTCGTCGC     |
| scaffold509447_16.2 | 1 p3 | (ATC)6  | 18 | 1028 | 1045 | AGGCTTGCTCAACCAAATCA      |
| scaffold509521_12.8 | 1 p3 | (GAG)6  | 18 | 437  | 454  | CTTTTCAGGCCCATTTCTCA      |
| scaffold509722_15.8 | 1 p3 | (TGA)5  | 15 | 49   | 63   | CCCAAGACCCCAATTTGATT      |
| scaffold510321_12.3 | 1 p3 | (AAT)5  | 15 | 470  | 484  | TTCTCAGTGCTATTTTGTTCGG    |
| scaffold510335_14.0 | 1 p3 | (CGC)5  | 15 | 300  | 314  | AGGAGAAGAAAGCCGAGGAG      |
| scaffold510527_17.2 | 1 p3 | (GAA)6  | 18 | 352  | 369  | AGGAGTTTTCTCTTTCCGC       |
| scaffold510692_14.8 | 1 p3 | (ATT)5  | 15 | 769  | 783  | CATGCAAGACAACAAGGCAC      |
| scaffold510895_15.5 | 1 p3 | (TAT)5  | 15 | 396  | 410  | TCCATCTGTCATCTCATCCA      |
| scaffold511001_16.3 | 1 p3 | (AGG)5  | 15 | 476  | 490  | GCAGCCACGATTCTCAAGAT      |
| scaffold511248_13.7 | 1 p3 | (ACC)5  | 15 | 636  | 650  | CGTTCTAAGGCGTGCGTATT      |
| scaffold511303_13.7 | 1 p3 | (TGG)5  | 15 | 58   | 72   | AGCTTTGGTTCATGTAGCCG      |
| scaffold511557_11.3 | 1 p3 | (GCG)6  | 18 | 489  | 506  | GGCCAGCTATACAAATTCGC      |
| scaffold511714_10.4 | 1 p3 | (ATT)6  | 18 | 343  | 360  | ACCCTAATCAACATCTGCCG      |
| scaffold511725_15.6 | 1 p3 | (GCT)5  | 15 | 52   | 66   | CGTCATCGTGACGTCTGC        |
| scaffold511745_19.3 | 1 p3 | (CCA)5  | 15 | 417  | 431  | CTCGTGTACCAGGTCAAAA       |
| scaffold511889_17.5 | 1 p3 | (TTG)5  | 15 | 52   | 66   | CGACCCACATAGTGGGAAAA      |

|                     |      |        |    |      |                              |
|---------------------|------|--------|----|------|------------------------------|
| scaffold512814_11.4 | 1 p3 | (TGC)5 | 15 | 36   | 50 TCTCTTCCATCCAATAATTCCTGT  |
| scaffold512912_15.2 | 1 p3 | (ACA)5 | 15 | 445  | 459 TGTGACTGCATAAAGGCCAA     |
| scaffold513228_11.6 | 1 p3 | (TAA)5 | 15 | 408  | 422 CCACCAAGAATTTGTGCCTT     |
| scaffold513615_11.9 | 1 p3 | (CCT)7 | 21 | 1189 | 1209 TGTTTCCCTTTCCCTTCTT     |
| scaffold514041_16.6 | 1 p3 | (TCC)6 | 18 | 104  | 121 TTTCAAAGATGAGCTACTAGCAA  |
| scaffold514110_15.7 | 1 p3 | (CGG)5 | 15 | 357  | 371 CCTTTAACCAAAAGTGCCCA     |
| scaffold514195_16.0 | 1 p3 | (CTG)5 | 15 | 1399 | 1413 GATTCTTGCTAACATCTCTGCG  |
| scaffold514417_16.3 | 1 p3 | (ATT)7 | 21 | 3253 | 3273 GCCACAATAACTTGTGAAACCA  |
| scaffold514430_10.6 | 1 p3 | (TAT)5 | 15 | 172  | 186 ACCACGTTGGGATCTTGTA      |
| scaffold514431_10.0 | 1 p3 | (ATC)6 | 18 | 631  | 648 CCTTTTTCTGTTTCTTGCGG     |
| scaffold514552_17.0 | 1 p3 | (ATA)5 | 15 | 605  | 619 TGGGAAAAGAAAATGGGAAA     |
| scaffold514739_14.0 | 1 p3 | (TAA)5 | 15 | 376  | 390 TGTTGTATGGTGAAGCGTCC     |
| scaffold514975_10.5 | 1 p3 | (GAA)5 | 15 | 326  | 340 GCTGAAAGAACTGAGGACGG     |
| scaffold515030_19.9 | 1 p3 | (ATA)5 | 15 | 1129 | 1143 TGTTCACACACCCACCTTA     |
| scaffold515492_15.6 | 1 p3 | (ATC)6 | 18 | 980  | 997 CATTTCAACACAAGGCAAGC     |
| scaffold515548_12.4 | 1 p3 | (AAT)6 | 18 | 477  | 494 CGTGGATATAACTCGGCCAT     |
| scaffold515701_17.3 | 1 p3 | (TCT)5 | 15 | 1658 | 1672 CCCCATATGAATCCTTTCCA    |
| scaffold515886_12.2 | 1 p3 | (TGT)6 | 18 | 43   | 60 ATGTAGCCGACCCCAATTTA      |
| scaffold516263_16.3 | 1 p3 | (ATC)6 | 18 | 2304 | 2321 TGTACAATGACCGTGCCTGT    |
| scaffold516296_12.5 | 1 p3 | (CCG)5 | 15 | 225  | 239 TGTTGAGGAGTAGGGTTGGG     |
| scaffold516472_14.4 | 1 p3 | (GTG)5 | 15 | 365  | 379 GGGGTCCTTGTCGTATAGCA     |
| scaffold516483_19.1 | 1 p3 | (TGC)6 | 18 | 509  | 526 TGCCTTCTGAATGATGGACA     |
| scaffold516719_12.0 | 1 p3 | (TTC)5 | 15 | 239  | 253 GTCGCTGTTGATGTTCCAGA     |
| scaffold517207_15.2 | 1 p3 | (TCT)5 | 15 | 99   | 113 TTGATGTAGATATGGAGCGATTTT |
| scaffold517279_16.7 | 1 p3 | (ATG)5 | 15 | 1638 | 1652 ATCAAGGGCCAGTCTGCTTA    |
| scaffold517431_17.0 | 1 p3 | (CCG)8 | 24 | 595  | 618 ACAGTGGAGACGGAATCGAC     |
| scaffold517761_16.2 | 1 p3 | (AGA)5 | 15 | 1178 | 1192 TTGGGAAGTTTCGTACACA     |
| scaffold518022_16.2 | 1 p3 | (AGC)5 | 15 | 2047 | 2061 GGTAGCCGAGCAGCTTCTAA    |
| scaffold518273_16.0 | 1 p3 | (CGG)6 | 18 | 6007 | 6024 TTCGGAGGGCAACTCATAAC    |
| scaffold518294_15.6 | 1 p3 | (TCA)6 | 18 | 65   | 82 CGATGAAGCTCGGAGAAGTT      |
| scaffold518433_15.8 | 1 p3 | (CAT)5 | 15 | 1547 | 1561 TCCTGCAGTTTTTGTGGTTG    |
| scaffold518493_10.8 | 1 p3 | (TGG)5 | 15 | 258  | 272 TTTGGAGGGGTTTAGGTTCA     |
| scaffold518587_14.4 | 1 p3 | (TTA)5 | 15 | 277  | 291 TCGGGCTTTGATTTCAAGAT     |
| scaffold518679_17.0 | 1 p3 | (CAG)5 | 15 | 2219 | 2233 TGCAATTTCAGGCACATCAT    |
| scaffold518703_14.5 | 1 p3 | (GGT)5 | 15 | 1275 | 1289 TCTGGTTCGATTGACATGA     |
| scaffold518821_15.6 | 1 p3 | (AAT)5 | 15 | 71   | 85 TTCAGAATCATTTACTTCCAAGTTT |
| scaffold519098_11.5 | 1 p3 | (GAA)6 | 18 | 181  | 198 CTCCTGCTTCACCTCGATTC     |
| scaffold519185_12.1 | 1 p3 | (CGG)5 | 15 | 282  | 296 AGAGAGAACAGATGCGAGGG     |
| scaffold519345_17.2 | 1 p3 | (CTT)5 | 15 | 1253 | 1267 GTTGCCACAATTTCTGCTC     |
| scaffold519913_14.4 | 1 p3 | (GGC)6 | 18 | 64   | 81 GGTGTAGATCTGGCGGGTAG      |
| scaffold520527_13.6 | 1 p3 | (TTA)8 | 24 | 258  | 281 TCCGAGGTCAGCAATTCCTC     |
| scaffold520626_11.1 | 1 p3 | (AAT)5 | 15 | 269  | 283 CAAAAAGGAACGCAAAAACAA    |
| scaffold520840_20.2 | 1 p3 | (CGC)7 | 21 | 140  | 160 TATCAAACCTGGATTGGCCC     |
| scaffold521749_15.5 | 1 p3 | (TTC)5 | 15 | 342  | 356 GGCGATTGTCAACTTGTTTT     |
| scaffold521811_12.6 | 1 p3 | (AAG)5 | 15 | 1468 | 1482 ACATGCAAGGAGTGAAAGGC    |
| scaffold522153_15.5 | 1 p3 | (ATT)5 | 15 | 222  | 236 GGGGCGTGACATTAACACTA     |
| scaffold522367_10.4 | 1 p3 | (TTC)6 | 18 | 90   | 107 GCCGGAAGAAAAGACACAAG     |
| scaffold522523_13.0 | 1 p3 | (CAG)5 | 15 | 314  | 328 ATCCGCAGTCAAACGTACC      |
| scaffold523135_16.2 | 1 p3 | (CCG)6 | 18 | 391  | 408 CCAACCTTTTACTCCTCCC      |
| scaffold523314_10.1 | 1 p3 | (TGA)6 | 18 | 76   | 93 CCAAGACCCCAATTTGATT       |
| scaffold523389_17.4 | 1 p3 | (TTA)5 | 15 | 1009 | 1023 CGCAAGATGTTTCAGGGATT    |
| scaffold523450_15.7 | 1 p3 | (CAC)5 | 15 | 709  | 723 AATGTTTCTACGCATTGGGG     |
| scaffold523632_14.9 | 1 p3 | (AAT)5 | 15 | 66   | 80 GCAAAATCTCAATTGTAGTGCC    |
| scaffold523640_13.7 | 1 p3 | (CAT)5 | 15 | 328  | 342 ACATGTGGTGGCAGGTTACA     |
| scaffold523697_10.7 | 1 p3 | (CAT)5 | 15 | 297  | 311 TAGCCTGCTCAGCCTCTCTC     |
| scaffold523770_16.4 | 1 p3 | (GGC)5 | 15 | 216  | 230 AACTGGGCTTCTCCGACCT      |
| scaffold523794_16.8 | 1 p3 | (GGT)5 | 15 | 648  | 662 TGAATCGGGACAGCATGTTA     |
| scaffold523975_15.4 | 1 p3 | (GCG)6 | 18 | 2329 | 2346 TGTAGCCCGTGACTGTACCA    |

|                     |      |        |    |      |      |                           |
|---------------------|------|--------|----|------|------|---------------------------|
| scaffold524247_16.2 | 1 p3 | (TAT)5 | 15 | 44   | 58   | ACCCTCACTAGTTTCGGTTAGA    |
| scaffold524451_15.2 | 1 p3 | (AAT)6 | 18 | 872  | 889  | ACAACCAAGCAGGTCCAAAA      |
| scaffold524470_19.2 | 1 p3 | (TCA)5 | 15 | 112  | 126  | CGATACCATAACGGGTGAG       |
| scaffold524568_13.8 | 1 p3 | (TTC)5 | 15 | 168  | 182  | CATGGTTTTGGGAGGAGAGA      |
| scaffold524730_19.3 | 1 p3 | (CCT)6 | 18 | 432  | 449  | TGCAATGCATCTGCCTCTC       |
| scaffold525239_10.0 | 1 p3 | (TAT)5 | 15 | 134  | 148  | AGAAAATGCTGGAATGAGGA      |
| scaffold525242_17.0 | 1 p3 | (TGG)5 | 15 | 1278 | 1292 | ACGGCTAAAATCAGGAGCTG      |
| scaffold525365_16.2 | 1 p3 | (TCA)8 | 24 | 855  | 878  | TAAATCCTTCGAGGTCACCG      |
| scaffold525366_10.2 | 1 p3 | (GGA)5 | 15 | 77   | 91   | GAATCAGTGCTTGCCGATCT      |
| scaffold525873_11.7 | 1 p3 | (AAG)5 | 15 | 273  | 287  | GTGGAAGCATCAAAGCAGGT      |
| scaffold526130_10.2 | 1 p3 | (GCT)5 | 15 | 52   | 66   | GCGTTATCGTGACGTCGG        |
| scaffold526931_18.7 | 1 p3 | (TTA)5 | 15 | 2679 | 2693 | CTTTTTGTTTTGGAGTGGGG      |
| scaffold527008_17.0 | 1 p3 | (TAT)7 | 21 | 2541 | 2561 | AATGCGATAGCCTTGCCTTA      |
| scaffold527011_11.4 | 1 p3 | (CAA)5 | 15 | 135  | 149  | CCCGGATCCACTACAAGTTC      |
| scaffold527183_15.2 | 1 p3 | (CCG)7 | 21 | 1230 | 1250 | TGCATCTGAATACACGAGGTTC    |
| scaffold527231_16.2 | 1 p3 | (GAT)7 | 21 | 995  | 1015 | AATGCCAACACAACCAAACA      |
| scaffold527324_16.7 | 1 p3 | (AAT)6 | 18 | 1894 | 1911 | ATGTTTCATCAATTGCAGCCA     |
| scaffold527554_12.8 | 1 p3 | (ATT)5 | 15 | 347  | 361  | TTCGACCCCAACTCAATAGC      |
| scaffold527633_14.2 | 1 p3 | (TGT)5 | 15 | 519  | 533  | TAGCCGACCCCAACTTATTG      |
| scaffold527876_17.8 | 1 p3 | (CAT)5 | 15 | 467  | 481  | TGAAACCCCATGATTTCCAT      |
| scaffold527938_15.0 | 1 p3 | (CTC)5 | 15 | 1180 | 1194 | TGCACATTTTCCATTGAAGG      |
| scaffold527943_13.9 | 1 p3 | (TTA)6 | 18 | 136  | 153  | TGAAAATTTCCAAGGCAGAGA     |
| scaffold527991_15.3 | 1 p3 | (TCT)5 | 15 | 474  | 488  | AATTGGCATTTTGTAGGCTCA     |
| scaffold528041_17.2 | 1 p3 | (TTG)5 | 15 | 57   | 71   | AGCTTTGGTTCATACAGCCG      |
| scaffold528206_10.6 | 1 p3 | (TAA)5 | 15 | 1509 | 1523 | CACCCGGAACCTCGAAAAAT      |
| scaffold528233_14.3 | 1 p3 | (ATC)5 | 15 | 2989 | 3003 | ACAAAAGCAAACCGCTAACC      |
| scaffold528814_16.4 | 1 p3 | (TCA)5 | 15 | 610  | 624  | ACCGGACACAATACTGCACA      |
| scaffold528816_13.6 | 1 p3 | (TGT)5 | 15 | 45   | 59   | ATGTAGCCGACCCCAATTTA      |
| scaffold528832_12.2 | 1 p3 | (TGA)5 | 15 | 51   | 65   | GACCCCAATTTGATTGAAA       |
| scaffold528844_16.8 | 1 p3 | (CAC)5 | 15 | 309  | 323  | GCGAACTGACAACGAGATCA      |
| scaffold528912_19.8 | 1 p3 | (CCA)6 | 18 | 271  | 288  | GTTGGTTCAGGGTTAGCAGC      |
| scaffold528994_12.6 | 1 p3 | (TTG)6 | 18 | 49   | 66   | TTGTATTGTCTTGATTGCAGGAA   |
| scaffold529027_17.9 | 1 p3 | (GAT)6 | 18 | 51   | 68   | GGTACGTTACTGTAAAACCCTGA   |
| scaffold529220_18.2 | 1 p3 | (AAT)5 | 15 | 51   | 65   | CAGAGCGCACTCGAAGAGTA      |
| scaffold529222_15.4 | 1 p3 | (TGA)5 | 15 | 4189 | 4203 | CAGAGGCACAGATTAGCAGC      |
| scaffold529239_18.9 | 1 p3 | (TCC)5 | 15 | 686  | 700  | TACTGCTGATTCAAGTGGCG      |
| scaffold529245_11.8 | 1 p3 | (ATT)5 | 15 | 53   | 67   | GCTAACCATTTACTTGCACATTTT  |
| scaffold529357_15.6 | 1 p3 | (ACA)5 | 15 | 297  | 311  | AAAGCATTACGTAACGGGT       |
| scaffold529509_13.2 | 1 p3 | (TCA)5 | 15 | 2543 | 2557 | AACACTATCCCACAAATCACCA    |
| scaffold529541_11.9 | 1 p3 | (TTA)6 | 18 | 98   | 115  | TCGATGTATTGTTGGATAATATGCT |
| scaffold529672_17.2 | 1 p3 | (AAT)6 | 18 | 399  | 416  | ATTCGGATTGCATCCAAGAA      |
| scaffold529862_16.2 | 1 p3 | (GGC)5 | 15 | 1815 | 1829 | TCCGTCATTTTCCACTCTC       |
| scaffold529953_15.0 | 1 p3 | (TTG)5 | 15 | 59   | 73   | TGCATTCAACATCATTACAAAGTC  |
| scaffold530361_13.9 | 1 p3 | (AAT)6 | 18 | 47   | 64   | GGACTTTGGTGTGAGAAAATTG    |
| scaffold530424_12.9 | 1 p3 | (AAG)5 | 15 | 96   | 110  | TGAATTTACCAATCGGGAG       |
| scaffold530500_13.9 | 1 p3 | (TGT)7 | 21 | 214  | 234  | TGAGATTCCCGCATCCTATC      |
| scaffold530557_16.7 | 1 p3 | (CAT)6 | 18 | 1936 | 1953 | CGCCGACTGAATTATCATC       |
| scaffold530719_16.6 | 1 p3 | (GAT)6 | 18 | 749  | 766  | TGAAGATTCTGTCGATGTGT      |
| scaffold530838_15.4 | 1 p3 | (GAA)5 | 15 | 531  | 545  | AGGTTTTCGCGGAGATTAT       |
| scaffold530931_15.4 | 1 p3 | (TGA)7 | 21 | 43   | 63   | CCTCAAGACCCCAATTTGAT      |
| scaffold531584_17.2 | 1 p3 | (AAT)5 | 15 | 1172 | 1186 | TCCCAAATGATTTCAAATGG      |
| scaffold531681_16.9 | 1 p3 | (AAT)5 | 15 | 823  | 837  | GCAGAAGAGAAGGTGGGAGA      |
| scaffold531990_12.9 | 1 p3 | (TAT)5 | 15 | 107  | 121  | CGAGAGAGAGAATGAGTGGTGA    |
| scaffold532019_14.9 | 1 p3 | (TCA)5 | 15 | 104  | 118  | CCCAGGCTCAAATTCCTACA      |
| scaffold532201_10.0 | 1 p3 | (TTC)5 | 15 | 399  | 413  | TTGTTGATGGTTGAGAGGTGTC    |
| scaffold532317_15.8 | 1 p3 | (TTG)5 | 15 | 891  | 905  | AGAATCACAATGCTCCTGGC      |
| scaffold532581_13.6 | 1 p3 | (ATT)6 | 18 | 413  | 430  | AAAATGATGATTCCGGGTCC      |
| scaffold532616_17.2 | 1 p3 | (AAT)5 | 15 | 622  | 636  | TCAATATGAATTGATCGCCG      |

|                     |      |        |    |      |      |                         |
|---------------------|------|--------|----|------|------|-------------------------|
| scaffold532628_14.6 | 1 p3 | (TAA)8 | 24 | 399  | 422  | ATTGCTCGATCCACCTCTTG    |
| scaffold532879_16.7 | 1 p3 | (TAT)6 | 18 | 412  | 429  | TCAAATTGTGTCGAGGCTAATG  |
| scaffold532982_16.4 | 1 p3 | (GTG)6 | 18 | 3291 | 3308 | GTCTAAAATTCGGCAGCGAC    |
| scaffold533052_16.3 | 1 p3 | (CCG)5 | 15 | 1171 | 1185 | GGACTCCCATCGTCTCCATA    |
| scaffold533134_10.0 | 1 p3 | (AAT)5 | 15 | 282  | 296  | GAGCTGAGCAATGAGAAGGG    |
| scaffold533461_15.7 | 1 p3 | (TTA)7 | 21 | 43   | 63   | TGAAGTTTCGAAGACTGGAAGA  |
| scaffold533689_11.2 | 1 p3 | (AAT)7 | 21 | 424  | 444  | TCACCGTTGTCATAGCCAAA    |
| scaffold533873_16.8 | 1 p3 | (CGC)5 | 15 | 516  | 530  | AATATTGGCTTCCCCAAACC    |
| scaffold533989_15.9 | 1 p3 | (TGT)5 | 15 | 46   | 60   | ATGTAGCCGACCCCAATTTA    |
| scaffold534026_12.7 | 1 p3 | (AAT)5 | 15 | 335  | 349  | TGAAAACGATTTAAACGTGGG   |
| scaffold534232_15.7 | 1 p3 | (TGT)5 | 15 | 4596 | 4610 | CAAATCATGGAAACAGCACG    |
| scaffold534588_20.8 | 1 p3 | (TCT)6 | 18 | 890  | 907  | AGGTCGGCCCTGTAGAATTT    |
| scaffold534628_17.9 | 1 p3 | (TTG)5 | 15 | 914  | 928  | TGCATACCAAGTTATTGGCG    |
| scaffold535278_12.9 | 1 p3 | (TCT)7 | 21 | 1028 | 1048 | CAAAACGCCTCCAATTTTGT    |
| scaffold535391_16.5 | 1 p3 | (ATG)5 | 15 | 842  | 856  | CATCGACTTCCACGACAAGA    |
| scaffold535480_10.7 | 1 p3 | (ATC)6 | 18 | 66   | 83   | CTGCCATCTGGTACAACCTGC   |
| scaffold535533_17.0 | 1 p3 | (TTG)5 | 15 | 1159 | 1173 | CACCGGTTAGGTGGGTAGAA    |
| scaffold535844_16.3 | 1 p3 | (AAT)5 | 15 | 341  | 355  | TGTGTTGCTGAAGGAGTTCG    |
| scaffold535895_15.2 | 1 p3 | (TGT)5 | 15 | 47   | 61   | TGTAGCCGACCCCAATTTAT    |
| scaffold535965_17.4 | 1 p3 | (TCA)6 | 18 | 107  | 124  | TGATCACAACTTAGCGGACA    |
| scaffold535992_16.0 | 1 p3 | (AAT)6 | 18 | 639  | 656  | TGCTTATTTGGATTGGCCTC    |
| scaffold537445_15.0 | 1 p3 | (TAT)5 | 15 | 1046 | 1060 | ATTGATCGAGACCGAACCAC    |
| scaffold537507_20.4 | 1 p3 | (GAT)5 | 15 | 78   | 92   | AGTTCTAGTAGCCCGGAGCC    |
| scaffold537543_17.9 | 1 p3 | (TCA)5 | 15 | 247  | 261  | CATTGCAAGACAGAACCGAA    |
| scaffold537561_17.7 | 1 p3 | (TTG)5 | 15 | 208  | 222  | GCAGACCTAACATAGTGGGAAAA |
| scaffold537678_13.6 | 1 p3 | (CCA)5 | 15 | 70   | 84   | ATCCTCCTCCACCCGTCTAC    |
| scaffold537876_11.1 | 1 p3 | (ATT)5 | 15 | 435  | 449  | CGAACCCATTAAGCCTCAA     |
| scaffold538028_15.8 | 1 p3 | (CAT)7 | 21 | 1287 | 1307 | AGGCTGGCTCTTTCAATCAG    |
| scaffold538060_10.5 | 1 p3 | (ATT)5 | 15 | 234  | 248  | CTGCAGAAATGAGAGGAGGG    |
| scaffold538209_12.2 | 1 p3 | (CAT)6 | 18 | 63   | 80   | TTGGCCTAGACTTCACATTTTTT |
| scaffold538494_15.2 | 1 p3 | (ATT)7 | 21 | 919  | 939  | AATGCTTGCAAGGGTGTAA     |
| scaffold538554_11.7 | 1 p3 | (ATC)5 | 15 | 54   | 68   | GTACCGATATCATCCCCACC    |
| scaffold538858_13.8 | 1 p3 | (TAA)5 | 15 | 529  | 543  | AGGTCAGATCGAAGGTCTCG    |
| scaffold538885_15.3 | 1 p3 | (TCA)5 | 15 | 202  | 216  | ACTGCATCTGGATCCTCCAC    |
| scaffold538967_14.8 | 1 p3 | (ATA)5 | 15 | 3343 | 3357 | GGAGCTTGGGATTATAGGGC    |
| scaffold539049_16.1 | 1 p3 | (TAT)6 | 18 | 3048 | 3065 | AGGGAAGTGTGGGGAAGAAG    |
| scaffold539270_15.5 | 1 p3 | (ACC)5 | 15 | 760  | 774  | ATCCCAATTTGGCAACTCAT    |
| scaffold539640_18.5 | 1 p3 | (GAG)5 | 15 | 409  | 423  | GTGATCTTGAAGGAGCTGGC    |
| scaffold539738_13.2 | 1 p3 | (TGA)7 | 21 | 545  | 565  | CAGAGCGAGGGTACTCAAG     |
| scaffold539829_15.2 | 1 p3 | (TTA)5 | 15 | 583  | 597  | TTCAGTCATTGCGTGCCTT     |
| scaffold539843_13.5 | 1 p3 | (ACA)5 | 15 | 82   | 96   | CAGAAATGACAAAATTCATGGC  |
| scaffold540156_14.8 | 1 p3 | (GCC)5 | 15 | 85   | 99   | AGTCTCCCTCGCCAGAAAAT    |
| scaffold540632_15.6 | 1 p3 | (AAG)5 | 15 | 1110 | 1124 | CAAACATTATGCACCAAGCG    |
| scaffold540721_13.7 | 1 p3 | (AAT)6 | 18 | 287  | 304  | GAAAGGGGTGACCAAGTTGA    |
| scaffold540883_10.2 | 1 p3 | (GCC)5 | 15 | 439  | 453  | TGAGAGAACCTCCCCCTTTT    |
| scaffold541049_16.2 | 1 p3 | (GTC)5 | 15 | 1405 | 1419 | CTCATGCCGGAGTTAGGAAG    |
| scaffold541502_13.4 | 1 p3 | (GAA)5 | 15 | 199  | 213  | TAGGAAGCCAACAATGGAGG    |
| scaffold541693_11.2 | 1 p3 | (TGT)5 | 15 | 46   | 60   | TGTAGCCGACCCCAATTTAT    |
| scaffold541823_13.6 | 1 p3 | (TAA)5 | 15 | 518  | 532  | GCCTTCTCGAATTTGTCTGC    |
| scaffold541975_17.2 | 1 p3 | (TGT)6 | 18 | 43   | 60   | TGTAGCCGACCCCAATTTAT    |
| scaffold542130_16.7 | 1 p3 | (ACA)6 | 18 | 1089 | 1106 | CCGCAATTTGATTGGGAATA    |
| scaffold542271_13.9 | 1 p3 | (TAA)5 | 15 | 244  | 258  | TCACGGGTTTGGGAATTTAA    |
| scaffold542322_15.7 | 1 p3 | (AAC)5 | 15 | 4564 | 4578 | GGTAGCCCCTAACCACACAA    |
| scaffold542396_14.4 | 1 p3 | (ATT)5 | 15 | 992  | 1006 | CCCAGCTCACGTTTACCCTA    |
| scaffold542423_12.0 | 1 p3 | (TCC)5 | 15 | 204  | 218  | TTTTATCTTCGGTGCGGAAC    |
| scaffold542447_13.7 | 1 p3 | (TCA)6 | 18 | 217  | 234  | TTCATCTGTAACGGGTGGGT    |
| scaffold542685_12.8 | 1 p3 | (TAT)5 | 15 | 152  | 166  | ATCAGGTTGCCCTCCTTTTT    |
| scaffold542744_13.2 | 1 p3 | (CGC)5 | 15 | 50   | 64   | GGTGGTATGGTGTGGAGGAC    |

|                     |      |        |    |      |                                |
|---------------------|------|--------|----|------|--------------------------------|
| scaffold542992_17.0 | 1 p3 | (CTC)6 | 18 | 208  | 225 TCTTCGTGTTTGTCCATTCCG      |
| scaffold543113_15.9 | 1 p3 | (AAC)6 | 18 | 955  | 972 CGCCATTTTCGTGTTTAATGA      |
| scaffold543610_11.8 | 1 p3 | (TTA)5 | 15 | 509  | 523 AATCTGAGGCATGTTACCCGC      |
| scaffold544059_10.9 | 1 p3 | (ATA)5 | 15 | 100  | 114 CACAATTTGAGGTGTATGGCA      |
| scaffold544152_11.3 | 1 p3 | (ATT)6 | 18 | 453  | 470 TATTAGGGCATGCAAAAAGCA      |
| scaffold544633_14.3 | 1 p3 | (ATA)5 | 15 | 575  | 589 ATCATCCCCAAAGCAAAAAT       |
| scaffold544880_17.2 | 1 p3 | (TGA)7 | 21 | 89   | 109 GTTCGTAAGAATGGGCTGG        |
| scaffold544988_15.0 | 1 p3 | (ATT)5 | 15 | 448  | 462 TTTTTGCAACGTGGTCTTCA       |
| scaffold545383_15.8 | 1 p3 | (TCT)5 | 15 | 1024 | 1038 CAACTGTCCTTGAAGAGGG       |
| scaffold545439_13.9 | 1 p3 | (CGC)5 | 15 | 531  | 545 GTGTGGAAAAGGGAGTGCAT       |
| scaffold545557_12.2 | 1 p3 | (GGT)5 | 15 | 656  | 670 CCACCTGCGAACCATAAAAT       |
| scaffold545657_15.7 | 1 p3 | (ACA)7 | 21 | 338  | 358 TTGGATTGCAACCTCCTTTT       |
| scaffold545774_15.9 | 1 p3 | (AAT)5 | 15 | 923  | 937 CAAAATGTACCCCGAAATGG       |
| scaffold545872_15.6 | 1 p3 | (ATA)6 | 18 | 957  | 974 GGCCTACAACTGCCCATAA        |
| scaffold545934_13.6 | 1 p3 | (AAT)6 | 18 | 391  | 408 AAATCCAGAACGCAGGTTTG       |
| scaffold546127_18.7 | 1 p3 | (GGC)6 | 18 | 592  | 609 CATATCGATTTTGCCTGGCT       |
| scaffold546421_10.4 | 1 p3 | (ATC)7 | 21 | 333  | 353 TTTGTGCTCACACTTCTCTCG      |
| scaffold546929_13.0 | 1 p3 | (AAC)5 | 15 | 336  | 350 AAGCCACCTTATTGCTTGA        |
| scaffold547013_16.8 | 1 p3 | (AAC)5 | 15 | 922  | 936 CCCCACATAGTCAAGAAT         |
| scaffold547073_15.4 | 1 p3 | (TAC)5 | 15 | 2902 | 2916 TGTCGGGTGTCGTTTTAATG      |
| scaffold547631_15.0 | 1 p3 | (TTA)5 | 15 | 615  | 629 GAAGGCATGGGTTTTCTTGA       |
| scaffold547644_17.9 | 1 p3 | (GAG)5 | 15 | 145  | 159 AGAATGGAGCGGAGGTTCTT       |
| scaffold547685_13.2 | 1 p3 | (CGG)5 | 15 | 46   | 60 GGGAGGGAAGAGAGGAGAAA        |
| scaffold547858_11.4 | 1 p3 | (AAT)6 | 18 | 98   | 115 TTGACCAAGATACACCTTGCAT     |
| scaffold548207_16.3 | 1 p3 | (ATA)5 | 15 | 2746 | 2760 TGAATGATGAGGTGGGTA        |
| scaffold548235_16.5 | 1 p3 | (CTG)5 | 15 | 783  | 797 ATTTGCTCTAACCAATGGCG       |
| scaffold548319_10.4 | 1 p3 | (GCC)5 | 15 | 55   | 69 ATCCCCCTTCTAGGGTTT          |
| scaffold548443_10.7 | 1 p3 | (ATC)6 | 18 | 457  | 474 TACTGCTCTGGGGCATCT         |
| scaffold548567_19.4 | 1 p3 | (AGA)5 | 15 | 957  | 971 CTGTTGGGAGGTTTCGTCAT       |
| scaffold548636_16.0 | 1 p3 | (CCA)5 | 15 | 283  | 297 TTTTTGCCCTATTTTCCCC        |
| scaffold548772_18.0 | 1 p3 | (ATC)5 | 15 | 97   | 111 TGGCCCAACCTCAATATTCT       |
| scaffold548861_15.8 | 1 p3 | (ATG)6 | 18 | 1271 | 1288 GCGTGATACCAATGGATGTG      |
| scaffold549199_17.2 | 1 p3 | (TTA)5 | 15 | 258  | 272 TTCTCAATCAAATCGGGGTC       |
| scaffold549288_18.9 | 1 p3 | (TTC)5 | 15 | 67   | 81 CGGTTTTCCCTACTCTCCCT        |
| scaffold549328_15.6 | 1 p3 | (ATT)5 | 15 | 5240 | 5254 TTTAGCTTCTGGTGGGCTGT      |
| scaffold549506_16.4 | 1 p3 | (TTA)7 | 21 | 245  | 265 TTTGCCGATCATCCACTACA       |
| scaffold549669_19.6 | 1 p3 | (CGC)5 | 15 | 41   | 55 TTCTGTCAATTTATGTGTTAACTTCTG |
| scaffold549719_17.8 | 1 p3 | (CGG)5 | 15 | 103  | 117 AATTTTTCCAACATCCGC         |
| scaffold549806_14.6 | 1 p3 | (ATC)5 | 15 | 310  | 324 TAGCCGAATTCTCCTCGAAA       |
| scaffold549808_12.9 | 1 p3 | (TCT)5 | 15 | 916  | 930 GGGGGTTTTGGATGAACTTT       |
| scaffold549921_18.7 | 1 p3 | (TCC)5 | 15 | 2436 | 2450 CATCCACCTTCACACCATCA      |
| scaffold549955_17.3 | 1 p3 | (CGG)6 | 18 | 57   | 74 AATAATTTACGGCAATGGTG        |
| scaffold550847_16.2 | 1 p3 | (CGG)6 | 18 | 152  | 169 GAAAACTGAGCCAACCCAAA       |
| scaffold551119_15.4 | 1 p3 | (TTA)5 | 15 | 217  | 231 TTCCGGTAATTAACAAAACG       |
| scaffold551203_15.0 | 1 p3 | (AAT)5 | 15 | 1673 | 1687 CCACGAATATGACGACAACG      |
| scaffold551651_15.6 | 1 p3 | (AAT)5 | 15 | 1989 | 2003 CGATCCAAGGAGAAAATCCA      |
| scaffold552101_15.6 | 1 p3 | (CAC)5 | 15 | 1399 | 1413 TGCTTCTTTAACAGCCCAT       |
| scaffold552626_16.9 | 1 p3 | (AAT)6 | 18 | 925  | 942 TATTCCTTCTCGTGGGTGC        |
| scaffold552656_18.6 | 1 p3 | (ATT)5 | 15 | 2265 | 2279 TCCCACGAGGAATTTGAGTC      |
| scaffold552657_12.2 | 1 p3 | (CGG)5 | 15 | 505  | 519 GATGAGACCACCGAGAGGAA       |
| scaffold552834_11.2 | 1 p3 | (TCC)5 | 15 | 339  | 353 ACAACTCGTCTTCCGTGGAT       |
| scaffold553078_10.0 | 1 p3 | (GCC)7 | 21 | 100  | 120 CAGAGCCAGCCTATCTCCAG       |
| scaffold553245_13.3 | 1 p3 | (TTC)5 | 15 | 242  | 256 GCATGGGGTTATTCAAGAGG       |
| scaffold553457_13.7 | 1 p3 | (GAA)5 | 15 | 284  | 298 TTAGCATCCAAAAGGGTTGG       |
| scaffold553531_13.8 | 1 p3 | (ATA)5 | 15 | 330  | 344 AGTTTGGGTATCCGCTCCTC       |
| scaffold553555_15.9 | 1 p3 | (TTG)5 | 15 | 1746 | 1760 AAAGCCGAATTCGTTACAACA     |
| scaffold554172_18.7 | 1 p3 | (TTA)5 | 15 | 176  | 190 TTCCGGTAATTAACAAAACG       |
| scaffold554280_16.0 | 1 p3 | (ATC)5 | 15 | 1057 | 1071 GACCGTCACAGTTAGTCCA       |



|                     |      |        |    |      |                                 |
|---------------------|------|--------|----|------|---------------------------------|
| scaffold554654_14.2 | 1 p3 | (AAT)6 | 18 | 756  | 773 AACGCATACCACATAAGCCA        |
| scaffold554843_15.5 | 1 p3 | (AAC)7 | 21 | 521  | 541 AAATCCAGCAGCAAATCGAC        |
| scaffold554858_19.7 | 1 p3 | (ATC)5 | 15 | 241  | 255 CCGAGAGATGTCTCCCAGAA        |
| scaffold554905_12.5 | 1 p3 | (CAT)6 | 18 | 108  | 125 TTTCGGGAATTCAAAGCATC        |
| scaffold555104_14.5 | 1 p3 | (CTT)5 | 15 | 807  | 821 ACCTTGCTCGTGTACCCATC        |
| scaffold555414_14.8 | 1 p3 | (ATA)5 | 15 | 121  | 135 TGGGAGCAAATTTCAAGAGTC       |
| scaffold555451_11.2 | 1 p3 | (TTC)6 | 18 | 76   | 93 AAAATTGGTGCGGATGTCTC         |
| scaffold555629_18.4 | 1 p3 | (TAT)5 | 15 | 620  | 634 CAAACCGACAGGGAAACACT        |
| scaffold555829_14.9 | 1 p3 | (TCA)6 | 18 | 109  | 126 ATTCGGTTGCTTTTGTCCACC       |
| scaffold555887_11.7 | 1 p3 | (TTC)5 | 15 | 237  | 251 CCACTGTTGTTGCTGCTGTT        |
| scaffold555897_12.8 | 1 p3 | (CTC)6 | 18 | 685  | 702 AAACAGTTTCCCTGCAATCG        |
| scaffold555931_16.2 | 1 p3 | (ATG)5 | 15 | 3819 | 3833 GACGACTCAGCTTGACCACA       |
| scaffold555958_12.4 | 1 p3 | (CAT)5 | 15 | 425  | 439 ATGCTTTTGCAGGATTCAGG        |
| scaffold556179_12.8 | 1 p3 | (TTA)5 | 15 | 434  | 448 TGCAGCAATGGAGGTAAGAA        |
| scaffold556392_15.0 | 1 p3 | (TCA)6 | 18 | 1951 | 1968 TGTGAACTTCTCCAACAACA       |
| scaffold556563_18.3 | 1 p3 | (TCA)5 | 15 | 1726 | 1740 CCACCAGTACCAAAACCACC       |
| scaffold556620_11.7 | 1 p3 | (CTT)5 | 15 | 135  | 149 GAATTTGGCCAAGTCGATTC        |
| scaffold557096_16.9 | 1 p3 | (GTG)6 | 18 | 5557 | 5574 AGCTTGCAAGTAGGAGGCAA       |
| scaffold557514_13.4 | 1 p3 | (ATT)5 | 15 | 450  | 464 TGTTGAGGCATGGCTATGAA        |
| scaffold557542_14.5 | 1 p3 | (ACA)6 | 18 | 3229 | 3246 ACAGTTCAGCTCCACAACCC       |
| scaffold558103_14.0 | 1 p3 | (ACA)5 | 15 | 797  | 811 CATGTGCATCAAACGGAAAC        |
| scaffold558176_17.3 | 1 p3 | (TGA)5 | 15 | 1063 | 1077 TGCTTACCTCCGGAATTTTG       |
| scaffold558197_12.7 | 1 p3 | (CTT)7 | 21 | 109  | 129 TCAACGCTCACCTTCACATC        |
| scaffold558378_14.9 | 1 p3 | (CAA)5 | 15 | 2605 | 2619 ACTTCCCAGACCTTGTTCCA       |
| scaffold558565_14.1 | 1 p3 | (TAT)5 | 15 | 3395 | 3409 TCTTCTTGACCAATAATAAAGAAAAC |
| scaffold558863_13.6 | 1 p3 | (TAT)5 | 15 | 126  | 140 CCAAACCAACCTCGCTCTTA        |
| scaffold558921_11.9 | 1 p3 | (GGC)6 | 18 | 90   | 107 AAGAGATAGGGGAAGGAGCG        |
| scaffold558930_11.3 | 1 p3 | (GGC)5 | 15 | 273  | 287 CAAACATGGGAGGGTTTTGT        |
| scaffold558979_10.9 | 1 p3 | (GAA)5 | 15 | 86   | 100 CCAGACATCGAAGAAGCTGTT       |
| scaffold559187_16.7 | 1 p3 | (TGA)6 | 18 | 152  | 169 AGGAGCCACCTGATGAACAC        |
| scaffold560033_16.7 | 1 p3 | (CAC)5 | 15 | 1682 | 1696 GCTTGTCTCCACTTGAAGC        |
| scaffold560655_12.2 | 1 p3 | (AGA)5 | 15 | 411  | 425 GGGAGGTTTCGTCCACACAGT       |
| scaffold560980_10.5 | 1 p3 | (TGT)7 | 21 | 43   | 63 TGTAGCCGACCCCAATTTAT         |
| scaffold561081_11.7 | 1 p3 | (ATA)5 | 15 | 292  | 306 ACCAGTTGGGTTTCGAGAAGA       |
| scaffold561251_12.0 | 1 p3 | (TTA)5 | 15 | 90   | 104 CCTAAGCAATTGATAGTGCCAA      |
| scaffold561708_13.4 | 1 p3 | (AGA)5 | 15 | 307  | 321 GTTTTCCACCAAGGTTGCAT        |
| scaffold561791_17.0 | 1 p3 | (GGT)5 | 15 | 1657 | 1671 TTTTGGGTTTGGAGACGAAC       |
| scaffold561809_11.4 | 1 p3 | (TTA)7 | 21 | 244  | 264 TTCGGTTTATACAATAACCAATTTACT |
| scaffold561884_14.9 | 1 p3 | (TGT)5 | 15 | 216  | 230 TGACATTCCTTCCATTGGC         |
| scaffold561954_15.1 | 1 p3 | (TCA)5 | 15 | 112  | 126 AGTCACGGGTTTCAATTTCA        |
| scaffold562123_14.2 | 1 p3 | (GGC)5 | 15 | 159  | 173 GCGAGTTTCTTGAGGTCGTC        |
| scaffold562240_14.4 | 1 p3 | (TCT)5 | 15 | 532  | 546 GTTGTGCGTGGTTCATGTTGA       |
| scaffold562470_18.2 | 1 p3 | (TAT)5 | 15 | 294  | 308 TCGTGCAAGTTTTCAAGATCA       |
| scaffold562739_17.3 | 1 p3 | (TGA)6 | 18 | 994  | 1011 AGGTTGCGTACATCTGACCC       |
| scaffold562848_15.6 | 1 p3 | (TGT)5 | 15 | 3391 | 3405 AGGTGCTAGCAGCATGGAAT       |
| scaffold563062_12.3 | 1 p3 | (TTA)5 | 15 | 354  | 368 TCACGATCCTTCTGTCCCTT        |
| scaffold563311_16.3 | 1 p3 | (TCA)5 | 15 | 399  | 413 CTTGCAATTGTCGTGCAAGT        |
| scaffold563459_13.6 | 1 p3 | (ACA)6 | 18 | 667  | 684 ACCGTTGTGGTTCCGATTAC        |
| scaffold563860_15.5 | 1 p3 | (ATC)6 | 18 | 514  | 531 TCAATTCAAAATCAAACCATGC      |
| scaffold564042_14.7 | 1 p3 | (ATA)5 | 15 | 590  | 604 TGTTACGGCAGAAGCATAG         |
| scaffold564084_12.0 | 1 p3 | (TTG)5 | 15 | 158  | 172 TTGATACTACACGGTGGCGA        |
| scaffold564090_12.9 | 1 p3 | (TAT)5 | 15 | 372  | 386 TGGTTAATGCATTTTGCCTG        |
| scaffold564132_15.1 | 1 p3 | (TTG)5 | 15 | 2203 | 2217 ACTTGGCACGATCCAATTTT       |
| scaffold564273_10.7 | 1 p3 | (CTT)5 | 15 | 926  | 940 ATCCCATGGCTGTTGTTCTT        |
| scaffold564423_16.5 | 1 p3 | (TTA)5 | 15 | 487  | 501 TCTCCTGTACTTCGTTTAGACATCA   |
| scaffold564426_11.5 | 1 p3 | (TTG)5 | 15 | 439  | 453 ATTGATCGTACACGATGGCA        |
| scaffold564466_15.7 | 1 p3 | (ATT)5 | 15 | 236  | 250 ATGTTTCATGTTGGGTGCTGA       |
| scaffold564720_14.6 | 1 p3 | (TTA)7 | 21 | 937  | 957 GGGATCCAAACCTCGACATA        |

|                     |      |        |    |      |      |                         |
|---------------------|------|--------|----|------|------|-------------------------|
| scaffold564738_18.3 | 1 p3 | (CCG)5 | 15 | 841  | 855  | CCAAGGTGCAACTTACAGCA    |
| scaffold564825_13.8 | 1 p3 | (AGA)5 | 15 | 54   | 68   | AGCTTATGTTGCATGGAGGG    |
| scaffold564826_14.6 | 1 p3 | (ATA)6 | 18 | 155  | 172  | TTGGAAAATGGAAAAGGCTG    |
| scaffold565954_16.7 | 1 p3 | (CTT)5 | 15 | 1230 | 1244 | CCATGCATTTTCAGGTTTTCC   |
| scaffold566056_16.3 | 1 p3 | (AGA)5 | 15 | 2474 | 2488 | CTCCAAAAGCTTGCACACAA    |
| scaffold566411_14.2 | 1 p3 | (ATG)5 | 15 | 608  | 622  | GGGCTGTTTTTGAATCGAGA    |
| scaffold566510_10.2 | 1 p3 | (CAT)5 | 15 | 345  | 359  | TGACATTGTGACCTTCAGGC    |
| scaffold566582_13.8 | 1 p3 | (ATC)5 | 15 | 116  | 130  | AAGGCTACAACCACATACCGA   |
| scaffold566718_14.6 | 1 p3 | (TAT)6 | 18 | 3291 | 3308 | AGATTGCACATATAGCCCCG    |
| scaffold566731_16.7 | 1 p3 | (GAT)6 | 18 | 385  | 402  | AAAATCTTTTGGGGCGTTCT    |
| scaffold567634_14.9 | 1 p3 | (TAA)5 | 15 | 750  | 764  | GGAATTCAATCCAAGGACCA    |
| scaffold568056_17.0 | 1 p3 | (CAT)7 | 21 | 2364 | 2384 | TCAAACCTGGAACCGAAACC    |
| scaffold568120_18.1 | 1 p3 | (TAA)5 | 15 | 1266 | 1280 | CTTCCCTAACCGTCCCTTGT    |
| scaffold568134_10.6 | 1 p3 | (TGT)5 | 15 | 334  | 348  | TTCTGATTTGCAGCAGGTTG    |
| scaffold568234_16.8 | 1 p3 | (TGA)7 | 21 | 479  | 499  | ACAAAACACAACAACCCCGT    |
| scaffold568426_14.2 | 1 p3 | (ATA)6 | 18 | 645  | 662  | ATGCGGATGTTGTGGGTAAT    |
| scaffold568459_15.0 | 1 p3 | (TTG)7 | 21 | 716  | 736  | TGTCAAGCTCTTGCATAGCAGT  |
| scaffold568554_14.3 | 1 p3 | (ATT)6 | 18 | 1673 | 1690 | AATAAAAGGCGGATTGACCC    |
| scaffold568577_14.4 | 1 p3 | (TTG)5 | 15 | 1294 | 1308 | TGGAGCTCTTGATACCTGG     |
| scaffold568934_18.4 | 1 p3 | (GCA)5 | 15 | 1034 | 1048 | AAGCGTTGAAGCAGCAAAGT    |
| scaffold568981_15.2 | 1 p3 | (AAT)5 | 15 | 398  | 412  | CCAACCTCAGAATCATCTTTCA  |
| scaffold569142_18.1 | 1 p3 | (CAT)6 | 18 | 369  | 386  | TTGATCTCAGTCAGCCATGC    |
| scaffold569219_14.5 | 1 p3 | (ACA)5 | 15 | 53   | 67   | TCAAACATTTAGTTGGCACAAT  |
| scaffold569381_11.0 | 1 p3 | (TGC)6 | 18 | 403  | 420  | TCTCCATCCTCAACCGATTCC   |
| scaffold569388_10.6 | 1 p3 | (ATT)5 | 15 | 108  | 122  | ATATAGGCCCAAATCTGGCA    |
| scaffold569451_12.3 | 1 p3 | (TTG)5 | 15 | 73   | 87   | CTATCGGTACTCGGATGGGA    |
| scaffold569925_18.0 | 1 p3 | (AAT)5 | 15 | 3147 | 3161 | AGCATATGCCTTGCTTGCTT    |
| scaffold570026_13.0 | 1 p3 | (AAT)5 | 15 | 492  | 506  | TGAAAAATCCGAATCCGAAC    |
| scaffold570065_16.7 | 1 p3 | (CAC)5 | 15 | 123  | 137  | CAATGGACAACCAAGCCTTT    |
| scaffold570249_16.0 | 1 p3 | (TCA)8 | 24 | 2131 | 2154 | TGCCCAGTATTGGTCATTCA    |
| scaffold570796_16.7 | 1 p3 | (GGC)5 | 15 | 436  | 450  | GCGTCTTTATAGTCGCCGAG    |
| scaffold570844_19.2 | 1 p3 | (TTC)5 | 15 | 686  | 700  | TCTCGCAGAGGAGGTCAAAT    |
| scaffold571167_15.0 | 1 p3 | (GAT)5 | 15 | 560  | 574  | AAGAAAGACGAAGCATGGGA    |
| scaffold571251_15.3 | 1 p3 | (ATT)5 | 15 | 1235 | 1249 | ATCAAAACTGGTAATGCGGG    |
| scaffold571590_16.7 | 1 p3 | (CGG)5 | 15 | 2042 | 2056 | TAGACACATGCCAACTCCCA    |
| scaffold571630_17.4 | 1 p3 | (ACG)5 | 15 | 764  | 778  | ACGACGACGGAAGATTGAG     |
| scaffold571631_13.6 | 1 p3 | (TTA)5 | 15 | 1227 | 1241 | GGGACAACGGGTTCTGATAG    |
| scaffold572154_13.9 | 1 p3 | (CCA)5 | 15 | 216  | 230  | CCAGCAGACACGAAACAGAA    |
| scaffold572157_14.4 | 1 p3 | (TCA)5 | 15 | 198  | 212  | GGTCTCAACTTCGCGATCAT    |
| scaffold572424_10.8 | 1 p3 | (TGA)6 | 18 | 96   | 113  | TGGTTTGGGAATAATTGGGT    |
| scaffold572654_18.0 | 1 p3 | (CAC)5 | 15 | 953  | 967  | CGTTAAGGACACAAACCCGT    |
| scaffold572788_11.9 | 1 p3 | (CAT)6 | 18 | 114  | 131  | GGGTGGTTTATGGCCTTTTT    |
| scaffold573085_10.2 | 1 p3 | (TAT)5 | 15 | 68   | 82   | CATTTGGGGGTATTACAATTTTT |
| scaffold573220_15.4 | 1 p3 | (TCT)5 | 15 | 359  | 373  | GCGTTTCTTAAACTGCCTGC    |
| scaffold573256_12.0 | 1 p3 | (AAT)7 | 21 | 82   | 102  | GACAGCTGCACGACATGATT    |
| scaffold573328_17.0 | 1 p3 | (TTG)5 | 15 | 331  | 345  | GAAGGGGGAGACCGAAATTA    |
| scaffold573394_17.0 | 1 p3 | (AAG)6 | 18 | 122  | 139  | ATGTTGGAGTCGGGAAGATG    |
| scaffold573538_12.6 | 1 p3 | (CTT)6 | 18 | 736  | 753  | CTCCACGACCTTTTGTGTG     |
| scaffold573938_10.6 | 1 p3 | (GGT)5 | 15 | 322  | 336  | ATTTGTACACCGGTGGTGGT    |
| scaffold574103_11.2 | 1 p3 | (ATA)6 | 18 | 186  | 203  | CGTTTGAAGCCGAGTTGAAT    |
| scaffold574201_10.7 | 1 p3 | (ATA)5 | 15 | 572  | 586  | AAAATATGGTGTGCATAACGAGA |
| scaffold574226_11.0 | 1 p3 | (CGG)5 | 15 | 248  | 262  | TGCGCCACAAAATTTTCAGTA   |
| scaffold574250_10.0 | 1 p3 | (ATT)5 | 15 | 891  | 905  | GTTTGGATTGACAAGTCGGG    |
| scaffold574770_15.3 | 1 p3 | (ATC)5 | 15 | 1993 | 2007 | TTGTTCTTGGGATTGGTGGT    |
| scaffold574853_10.3 | 1 p3 | (GAG)6 | 18 | 989  | 1006 | GTGCAGATGTGTCTGTGCT     |
| scaffold574922_14.4 | 1 p3 | (AAT)5 | 15 | 1892 | 1906 | AAGAGGCCACCGAACTCTT     |
| scaffold574931_14.4 | 1 p3 | (ATA)6 | 18 | 221  | 238  | AAAGAGGTTGTTTCCGTTGC    |
| scaffold575088_15.8 | 1 p3 | (AGG)6 | 18 | 3022 | 3039 | TCGTAATGATGCCACAGGAA    |

|                     |      |        |    |      |      |                        |
|---------------------|------|--------|----|------|------|------------------------|
| scaffold575473_14.3 | 1 p3 | (TTC)5 | 15 | 548  | 562  | CGTTGACTGCTGGAGAATGA   |
| scaffold575600_15.8 | 1 p3 | (ATC)5 | 15 | 1555 | 1569 | CTGACCCAAGGTCCCAAGTA   |
| scaffold575839_17.7 | 1 p3 | (ACC)5 | 15 | 749  | 763  | ACCTGCACCACCACCAAGT    |
| scaffold575991_11.8 | 1 p3 | (ACA)5 | 15 | 426  | 440  | TCTTGCAAAATGATTGGGTG   |
| scaffold576448_14.8 | 1 p3 | (TAC)5 | 15 | 3270 | 3284 | TTGACGGCTCATGCTTACTG   |
| scaffold576766_15.9 | 1 p3 | (TTA)5 | 15 | 1175 | 1189 | AAAAAGGTCCCCTTTCCAAG   |
| scaffold576805_10.6 | 1 p3 | (TTA)6 | 18 | 219  | 236  | GAAACCTGACACCGTAGGGA   |
| scaffold577334_18.0 | 1 p3 | (CCA)7 | 21 | 158  | 178  | CCCATCTCTTGTTCCTTCATCA |
| scaffold577475_11.3 | 1 p3 | (CTC)5 | 15 | 413  | 427  | CCGGATCACATTCGAGTCT    |
| scaffold577618_16.2 | 1 p3 | (CAT)5 | 15 | 902  | 916  | AGGCTTGCGGGTCTTACTTA   |
| scaffold577659_13.2 | 1 p3 | (CAT)6 | 18 | 1029 | 1046 | ATACTTCCGTATTGCCGCAC   |
| scaffold579121_17.0 | 1 p3 | (TGA)5 | 15 | 2049 | 2063 | CTTGCAATGTGGCATTCAAT   |
| scaffold579269_12.5 | 1 p3 | (TCT)5 | 15 | 136  | 150  | TTTGCTGAATTTTCTTCGCA   |
| scaffold580205_15.1 | 1 p3 | (TTC)5 | 15 | 2456 | 2470 | CAAGCACAAAATAGCGAATCA  |
| scaffold580233_17.0 | 1 p3 | (CTT)5 | 15 | 85   | 99   | TAGTGGGGGTCAGAACATGC   |
| scaffold580663_15.0 | 1 p3 | (CAT)6 | 18 | 132  | 149  | CCACAACCTGGTCGGTATGGT  |
| scaffold580920_10.3 | 1 p3 | (ATG)6 | 18 | 51   | 68   | GCAGCAGCAACATACAAACC   |
| scaffold581086_18.3 | 1 p3 | (CCG)5 | 15 | 2245 | 2259 | TCTCCGCCATCAAATTCTTC   |
| scaffold581284_17.3 | 1 p3 | (CAA)5 | 15 | 1664 | 1678 | TTTGTGTGGAGTTTCAGGTG   |
| scaffold581372_20.4 | 1 p3 | (TTA)5 | 15 | 290  | 304  | ATTGCCTCCACAAGAATTGG   |
| scaffold582178_16.4 | 1 p3 | (CCA)5 | 15 | 484  | 498  | GCAAGACTGTGCTCCTCCTC   |
| scaffold582190_12.7 | 1 p3 | (TGA)5 | 15 | 45   | 59   | CCAAGACCCCAATTTGATT    |
| scaffold582229_18.5 | 1 p3 | (AGA)5 | 15 | 453  | 467  | TGTTGTGCGTGCTTTTCTTC   |
| scaffold582394_10.0 | 1 p3 | (TGT)5 | 15 | 45   | 59   | TGTAGCCGACCCCAATTTAT   |
| scaffold582449_17.4 | 1 p3 | (ATT)7 | 21 | 218  | 238  | TCGAACTCCACTGTTCCATTT  |
| scaffold582782_16.1 | 1 p3 | (ACA)5 | 15 | 2113 | 2127 | CATGTCACACTTCGCTCACC   |
| scaffold582785_12.1 | 1 p3 | (AAT)6 | 18 | 1185 | 1202 | AATTATGGCGTTGGGTGAAC   |
| scaffold582866_15.1 | 1 p3 | (TGT)5 | 15 | 51   | 65   | TTCATGTAGCCAACCCCAAT   |
| scaffold582893_13.8 | 1 p3 | (ATC)6 | 18 | 183  | 200  | GCTACCTCTCCCTCTCTCCC   |
| scaffold582985_13.9 | 1 p3 | (ACA)5 | 15 | 1401 | 1415 | CCATAGTTTAAGCAAGGGCA   |
| scaffold583212_14.4 | 1 p3 | (TGA)5 | 15 | 102  | 116  | AGGTTGCGTACATCTGACCC   |
| scaffold583580_15.2 | 1 p3 | (GAA)5 | 15 | 1288 | 1302 | GATGGGGTTGCAGAAGGTAA   |
| scaffold583927_13.2 | 1 p3 | (TAT)6 | 18 | 1197 | 1214 | CCCCACAATGTCTCGTCTTT   |
| scaffold584134_15.9 | 1 p3 | (GTG)5 | 15 | 255  | 269  | AAGTGGACCATTATCGGACG   |
| scaffold584289_13.0 | 1 p3 | (CGC)6 | 18 | 356  | 373  | CGCCTTCTTTGCACCTACTC   |
| scaffold584291_12.8 | 1 p3 | (TGC)6 | 18 | 913  | 930  | GGATTTGGCCCTGTGTGTAT   |
| scaffold584633_12.1 | 1 p3 | (GGC)6 | 18 | 112  | 129  | GTTGGCAACTGGATGTAGGG   |
| scaffold584733_14.7 | 1 p3 | (ACC)6 | 18 | 1126 | 1143 | GTTTCCAACGAAGTTCCCAA   |
| scaffold584739_12.2 | 1 p3 | (TGA)5 | 15 | 103  | 117  | CCAAGACCCCAATTTGACTG   |
| scaffold584751_11.0 | 1 p3 | (ATA)7 | 21 | 608  | 628  | TAGATGGCTGGGAAAATTGCG  |
| scaffold584786_10.7 | 1 p3 | (CTT)6 | 18 | 284  | 301  | ATTGTCAAACCAGCGAGAGC   |
| scaffold584787_13.2 | 1 p3 | (CTT)6 | 18 | 274  | 291  | ATTGTCAAACCAGCGAGAGC   |
| scaffold584892_13.5 | 1 p3 | (GAA)5 | 15 | 165  | 179  | CGACCGAATAATCCTGTGGA   |
| scaffold585028_15.8 | 1 p3 | (ATT)5 | 15 | 317  | 331  | CAGTGCTGTCCAAACCTCAA   |
| scaffold585298_15.8 | 1 p3 | (TCT)5 | 15 | 1144 | 1158 | AGAAGGAAATGGGAATGGCT   |
| scaffold585565_15.3 | 1 p3 | (TAT)6 | 18 | 164  | 181  | AAAATGGTGGCTTTTCTTCCC  |
| scaffold585983_17.6 | 1 p3 | (TGA)7 | 21 | 2812 | 2832 | CTATGCCGTGATTCTGACA    |
| scaffold586096_14.2 | 1 p3 | (GGA)5 | 15 | 101  | 115  | CATGTACCCACAGAGGGTC    |
| scaffold586300_14.5 | 1 p3 | (CTT)5 | 15 | 1307 | 1321 | TTTCCTCCAACATTGCTTCC   |
| scaffold586545_16.5 | 1 p3 | (TAA)5 | 15 | 955  | 969  | CCAAGTCACCCAAGAATTGC   |
| scaffold586802_16.0 | 1 p3 | (ATT)5 | 15 | 233  | 247  | TTTGTGTGGGTTACCCGAT    |
| scaffold586870_15.7 | 1 p3 | (TGT)6 | 18 | 44   | 61   | ATGTAGCCGACCCCAATTTA   |
| scaffold586888_13.9 | 1 p3 | (GAA)5 | 15 | 321  | 335  | CTTTTCACGTGCGGATTGTT   |
| scaffold587106_12.3 | 1 p3 | (CGG)5 | 15 | 2609 | 2623 | CGGAGAAGGAAATAGGACCC   |
| scaffold587823_16.2 | 1 p3 | (ATC)7 | 21 | 2237 | 2257 | ATCATGTCAAGGGCTCAAGG   |
| scaffold587828_10.5 | 1 p3 | (AAG)5 | 15 | 318  | 332  | GGATTTGTGTGACTGCATGG   |
| scaffold587892_10.0 | 1 p3 | (AAG)5 | 15 | 609  | 623  | ATGAGCGAAACAAAATTGGG   |
| scaffold587969_10.5 | 1 p3 | (TAA)7 | 21 | 129  | 149  | GTTTACCTGGCTGACGTGGT   |

|                      |      |        |    |      |                               |
|----------------------|------|--------|----|------|-------------------------------|
| scaffold588057_16.9" | 1 p3 | (AAT)5 | 15 | 711  | 725 TATCCGTTCCGGCTGTACCTT     |
| scaffold588111_12.2" | 1 p3 | (AAG)5 | 15 | 211  | 225 GTCATGGGAACAACCGTCT       |
| scaffold588157_16.2" | 1 p3 | (TAT)6 | 18 | 2732 | 2749 ATTGCAAGCAAATCATCCC      |
| scaffold588355_12.0" | 1 p3 | (ATT)6 | 18 | 320  | 337 ACCCCATCTCAACCAAATGA      |
| scaffold588723_16.1" | 1 p3 | (TTA)5 | 15 | 815  | 829 CCAATCATACATGCAAAGTGC     |
| scaffold588991_15.5" | 1 p3 | (AAT)6 | 18 | 1756 | 1773 ACCATGACCGACATGCAGTA     |
| scaffold589399_16.1" | 1 p3 | (GGA)6 | 18 | 1119 | 1136 GCTGCTCCTCATTGTTCATCA    |
| scaffold589484_13.9" | 1 p3 | (AAC)6 | 18 | 1815 | 1832 CCGTAAATGCCTGTCAACCT     |
| scaffold589549_13.8" | 1 p3 | (CGG)6 | 18 | 80   | 97 AATCATGTACACCCGCTTCG       |
| scaffold589822_12.6" | 1 p3 | (CGG)5 | 15 | 49   | 63 CAGCACCACCAGCGAGAA         |
| scaffold589885_10.6" | 1 p3 | (GTT)5 | 15 | 226  | 240 TTGCGGATAATACAATGGAGC     |
| scaffold590321_16.4" | 1 p3 | (GCT)5 | 15 | 338  | 352 TGGCAAATATGGATGTGGAA      |
| scaffold590370_13.7" | 1 p3 | (TCT)5 | 15 | 103  | 117 GGAAAACTTTATCATTTCCCTTGA  |
| scaffold590530_16.3" | 1 p3 | (ATT)5 | 15 | 170  | 184 TGGCCTTTTAATAGGATGCG      |
| scaffold590710_16.0" | 1 p3 | (ATG)5 | 15 | 4215 | 4229 TTGGGAATTTCTTTCCATGC     |
| scaffold590887_17.4" | 1 p3 | (CAA)6 | 18 | 273  | 290 TTTGACCAAACGGAACAACA      |
| scaffold590909_13.8" | 1 p3 | (AAT)7 | 21 | 84   | 104 GTCCAAAAGCTTATCGGCTG      |
| scaffold590966_10.6" | 1 p3 | (ATT)8 | 24 | 501  | 524 TGAAATCCCTCAAATCTTACCAA   |
| scaffold591125_12.7" | 1 p3 | (CGC)5 | 15 | 244  | 258 GAATCTTAGGACGCGACGAG      |
| scaffold591654_10.1" | 1 p3 | (ATC)5 | 15 | 247  | 261 ACGAGTGAGGCTGGAAAGAA      |
| scaffold591698_14.2" | 1 p3 | (TGG)6 | 18 | 1363 | 1380 CCCATCATAGGGAAAGGGAT     |
| scaffold592654_16.7" | 1 p3 | (GTT)7 | 21 | 4824 | 4844 CCGACCCCACTTAGTGAAAA     |
| scaffold592719_17.1" | 1 p3 | (AAT)5 | 15 | 1622 | 1636 ATGATGAGCCGTCAATCTCC     |
| scaffold593051_12.8" | 1 p3 | (TTG)5 | 15 | 2869 | 2883 TGGTTTATGTAGCCAACACAATTT |
| scaffold593064_18.3" | 1 p3 | (TTC)5 | 15 | 977  | 991 GGTTCCCCATTCTCCTCTTC      |
| scaffold593654_20.0" | 1 p3 | (TTG)5 | 15 | 232  | 246 AATTAGCGCACCCACAAATC      |
| scaffold593761_13.3" | 1 p3 | (GGT)5 | 15 | 1250 | 1264 GATCCTTTGCTGGAGGTTCA     |
| scaffold594136_13.6" | 1 p3 | (ATT)5 | 15 | 974  | 988 TCGTCTTGATTTTGTCTGCAT     |
| scaffold594378_18.1" | 1 p3 | (CCG)6 | 18 | 168  | 185 CCCGACTTCGTCTCTACGAC      |
| scaffold594466_13.5" | 1 p3 | (GGA)5 | 15 | 620  | 634 TCACAGACTCACAGTGTGGC      |
| scaffold594517_17.2" | 1 p3 | (TAT)5 | 15 | 2359 | 2373 TTGGATGATGGAAGAAAATCG    |
| scaffold594557_15.3" | 1 p3 | (ATT)5 | 15 | 1014 | 1028 AAAGGGAAAAGCCCCTATTTT    |
| scaffold594591_12.6" | 1 p3 | (ATG)5 | 15 | 257  | 271 TCATTTCTAAACCGGAACGG      |
| scaffold594592_10.0" | 1 p3 | (ATG)5 | 15 | 256  | 270 TCATTTCTAAACCGGAACGG      |
| scaffold595066_12.5" | 1 p3 | (AAT)5 | 15 | 76   | 90 TCCCTTTAAAAACACAAACCTTTT   |
| scaffold595279_17.3" | 1 p3 | (CGG)5 | 15 | 1470 | 1484 CGTCAGATGAGGGTCAGGAT     |
| scaffold595313_13.0" | 1 p3 | (ATA)6 | 18 | 1079 | 1096 ACAGTTTGAGATCCATCGCC     |
| scaffold595453_17.1" | 1 p3 | (TCA)5 | 15 | 2053 | 2067 GCTTCAACCATAGCACCCAT     |
| scaffold595480_16.9" | 1 p3 | (TTG)5 | 15 | 48   | 62 TGTAGCCGACCCCAATTTAT       |
| scaffold595499_16.6" | 1 p3 | (TGT)5 | 15 | 172  | 186 TGTAGCCGACCCCAATTTAT      |
| scaffold595523_18.7" | 1 p3 | (TAG)5 | 15 | 2434 | 2448 AATGGTACCCCAACTTCACG     |
| scaffold595590_10.5" | 1 p3 | (CAT)5 | 15 | 247  | 261 CGAGATTTATGAGAGCCCCA      |
| scaffold595658_17.4" | 1 p3 | (TCT)6 | 18 | 684  | 701 AGGTTGGTGGATTTTGGGA       |
| scaffold595808_14.0" | 1 p3 | (ATA)5 | 15 | 2715 | 2729 TCTCGTGTAACGAACAAGCAA    |
| scaffold596212_22.3" | 1 p3 | (AGG)6 | 18 | 163  | 180 CGTTGCAGAAGTTTGCTTGA      |
| scaffold596462_11.7" | 1 p3 | (TTC)5 | 15 | 163  | 177 TCTTGCCTTTGTCTGGAGC       |
| scaffold596958_17.9" | 1 p3 | (AAC)5 | 15 | 474  | 488 AACACCACAAGCGACAAGACT     |
| scaffold597084_16.0" | 1 p3 | (CCT)7 | 21 | 578  | 598 TAGCAGTTGGTGTGAAGCG       |
| scaffold597091_17.5" | 1 p3 | (AGA)5 | 15 | 912  | 926 TGGAGCTCTGAAGCTCAACA      |
| scaffold597322_15.3" | 1 p3 | (AGA)5 | 15 | 1240 | 1254 GGATACCCATGAACTGGTCG     |
| scaffold597404_10.5" | 1 p3 | (CTG)5 | 15 | 86   | 100 GTCCCTTTTTCTGAGGACC       |
| scaffold597727_14.5" | 1 p3 | (CAA)5 | 15 | 231  | 245 GGATGATGATGTTTCAGATGGG    |
| scaffold597864_15.6" | 1 p3 | (CCA)5 | 15 | 538  | 552 CATCCTTGCCAAATTTCCATT     |
| scaffold597990_16.2" | 1 p3 | (ATA)5 | 15 | 24   | 38 ACCCCTTGCGGGGTAATA         |
| scaffold598690_14.1" | 1 p3 | (TTG)5 | 15 | 1749 | 1763 CACGAACACCCCTGCATATC     |
| scaffold598725_15.6" | 1 p3 | (GCC)6 | 18 | 206  | 223 GCTTATCTGGACAACCCAG       |
| scaffold598813_17.4" | 1 p3 | (CGA)5 | 15 | 906  | 920 GGCAACCTCAATGTCCAAAA      |
| scaffold598951_16.2" | 1 p3 | (AAC)5 | 15 | 386  | 400 TATGGAGAAAATCCCTCCCC      |

|                    |      |        |    |      |                             |
|--------------------|------|--------|----|------|-----------------------------|
| scaffold598988_17. | 1 p3 | (GCT)5 | 15 | 2196 | 2210 AATCCGAGGTGTGTTGCATT   |
| scaffold599052_15. | 1 p3 | (AAT)5 | 15 | 592  | 606 TGCAATTATTGGGTTCCAAAG   |
| scaffold599197_14. | 1 p3 | (GCA)5 | 15 | 1006 | 1020 GGGAGAATAAACAGACGGCA   |
| scaffold599292_13. | 1 p3 | (ATT)6 | 18 | 1581 | 1598 TGCATTTTCACGTGCATTTT   |
| scaffold599293_14. | 1 p3 | (AAT)5 | 15 | 134  | 148 TTCGAAGCTGGAGATGTGACT   |
| scaffold599323_15. | 1 p3 | (TTA)6 | 18 | 383  | 400 GGCAACGTGATTCAAGTTCAA   |
| scaffold599519_13. | 1 p3 | (CGG)7 | 21 | 199  | 219 GCCGAGGGTCAAATAGATGA    |
| scaffold599762_18. | 1 p3 | (AAT)5 | 15 | 65   | 79 TTCCACGTTTTCTTAAAATATGG  |
| scaffold599913_17. | 1 p3 | (TTA)5 | 15 | 862  | 876 GGCCGTTTGAATAGGATTT     |
| scaffold599957_17. | 1 p3 | (TCA)6 | 18 | 188  | 205 TAATCCATGGAAGGCTCCTG    |
| scaffold600030_11. | 1 p3 | (TGA)6 | 18 | 107  | 124 TTGGTACTCACAAAACCCCC    |
| scaffold600150_16. | 1 p3 | (ATC)5 | 15 | 490  | 504 ATATGCGACGTGAATCCCAT    |
| scaffold600283_16. | 1 p3 | (TCA)5 | 15 | 741  | 755 TCGCAATTTTCACTGATGGA    |
| scaffold600495_15. | 1 p3 | (GAA)5 | 15 | 615  | 629 GGTTTCTTGCAGGAGAATGC    |
| scaffold600778_13. | 1 p3 | (AAT)5 | 15 | 371  | 385 TGAATGTCTTCCATTAAGTGC   |
| scaffold601102_15. | 1 p3 | (ATA)6 | 18 | 3597 | 3614 GGACGGTTCACCAAAAATGA   |
| scaffold601406_15. | 1 p3 | (TTC)5 | 15 | 515  | 529 TAATGGGGAAGTCCTAGGGG    |
| scaffold601870_13. | 1 p3 | (AAT)7 | 21 | 502  | 522 ATACTGGCGGACAATATGGG    |
| scaffold602035_10. | 1 p3 | (GGT)5 | 15 | 317  | 331 GCTACGAGGGCGAGATGTAG    |
| scaffold602147_17. | 1 p3 | (GAA)5 | 15 | 1429 | 1443 GCCCTGCCCTAAGACTATCC   |
| scaffold602169_10. | 1 p3 | (TAT)6 | 18 | 60   | 77 TTGCAAGAAAATTGTCCCGT     |
| scaffold602364_16. | 1 p3 | (CGC)5 | 15 | 593  | 607 ACCACCACCACCGTACAAAT    |
| scaffold602868_13. | 1 p3 | (TTG)6 | 18 | 382  | 399 ATCCATACAGCCGACCTCAC    |
| scaffold602978_16. | 1 p3 | (CCA)5 | 15 | 545  | 559 TAATTTCCCCAATTTTCCC     |
| scaffold603033_16. | 1 p3 | (ATC)5 | 15 | 1788 | 1802 CTCACTCGAACTCGTCTCCC   |
| scaffold603152_15. | 1 p3 | (CGC)5 | 15 | 756  | 770 GCCTAAGAAGCCCAAATTCC    |
| scaffold603326_15. | 1 p3 | (ATA)5 | 15 | 72   | 86 TGAAGTCCGGATCAACTTACG    |
| scaffold603510_15. | 1 p3 | (TCT)5 | 15 | 458  | 472 CAGCCATGCTTCTTATGCAA    |
| scaffold603581_11. | 1 p3 | (ATC)5 | 15 | 106  | 120 CAGCGAAGTGACAACCTTGA    |
| scaffold603611_11. | 1 p3 | (ATT)5 | 15 | 371  | 385 TGCAAAATCAAGTATACGTTTGG |
| scaffold603777_11. | 1 p3 | (CCG)5 | 15 | 318  | 332 AAACACTGTGGCTCCAGCTT    |
| scaffold603892_13. | 1 p3 | (AAT)5 | 15 | 972  | 986 ACGTGGAAGAGGGACATTTG    |
| scaffold603894_17. | 1 p3 | (TTG)5 | 15 | 1913 | 1927 ACTGGCGACCTAGCAAAATG   |
| scaffold604078_15. | 1 p3 | (TTA)5 | 15 | 301  | 315 ACATTAACCACAATGGAGGC    |
| scaffold604197_13. | 1 p3 | (TTC)5 | 15 | 1486 | 1500 GCCCTGCATTTAGTTGAGGA   |
| scaffold604210_13. | 1 p3 | (AAT)5 | 15 | 888  | 902 GGATGCCATTTCTTCTCCAA    |
| scaffold604338_11. | 1 p3 | (TAT)5 | 15 | 576  | 590 CCGATTTTCTCGGATTCCAT    |
| scaffold604354_11. | 1 p3 | (ATC)5 | 15 | 204  | 218 TGCTTTCAAACCAGCACAC     |
| scaffold604513_16. | 1 p3 | (CAT)5 | 15 | 761  | 775 GTTTCTTGACAAAAGCAGCC    |
| scaffold604644_10. | 1 p3 | (CCG)5 | 15 | 57   | 71 ATCGGATGAAAGTTGCGATT     |
| scaffold604717_16. | 1 p3 | (TGA)5 | 15 | 123  | 137 GCTTTTGAGCCCTCTGTTTG    |
| scaffold604976_14. | 1 p3 | (CAA)6 | 18 | 536  | 553 GGCAGCGAAAAATCAGCTAC    |
| scaffold605010_15. | 1 p3 | (AAT)7 | 21 | 1877 | 1897 AAGGCAATGAGGCAAGAAAA   |
| scaffold605122_16. | 1 p3 | (TTC)6 | 18 | 960  | 977 TCAATACATGGCATTGGTGG    |
| scaffold605778_16. | 1 p3 | (AAG)5 | 15 | 1443 | 1457 TCTGCAATCAATCAGCAAGC   |
| scaffold605900_19. | 1 p3 | (CAT)5 | 15 | 134  | 148 CTTGTGGTTGTTGGTGTTC     |
| scaffold605995_18. | 1 p3 | (TAA)6 | 18 | 481  | 498 TAGCACCCGTAGTTGCTGTG    |
| scaffold606069_15. | 1 p3 | (GAA)6 | 18 | 2233 | 2250 GCCACACCTGGAGTTTCATT   |
| scaffold606126_14. | 1 p3 | (TGT)6 | 18 | 32   | 49 CCAATTTATTGGGATTAAGGC    |
| scaffold607064_12. | 1 p3 | (AAT)5 | 15 | 651  | 665 TCGCCCATTTTGAATTAACAC   |
| scaffold607093_12. | 1 p3 | (GAA)5 | 15 | 74   | 88 CGGAAGGCATGAAGAAGAAG     |
| scaffold607264_13. | 1 p3 | (TAA)9 | 27 | 822  | 848 CACGCCACGTCAACTTCTAA    |
| scaffold607314_11. | 1 p3 | (CGG)6 | 18 | 174  | 191 CCAATCATCGGCCTTTTCTA    |
| scaffold607448_17. | 1 p3 | (AGC)6 | 18 | 290  | 307 TTTTGGGGACACATCACAGA    |
| scaffold607488_15. | 1 p3 | (AAT)5 | 15 | 926  | 940 GAGGTGAGGTTCCATCTCCA    |
| scaffold607727_15. | 1 p3 | (GAT)7 | 21 | 657  | 677 GTCAATTGCGGGGATACAAT    |
| scaffold607758_18. | 1 p3 | (CCA)5 | 15 | 176  | 190 AGTTTATGACCATCAGCCGC    |
| scaffold608052_16. | 1 p3 | (CAA)6 | 18 | 3576 | 3593 CTTGGCCATGAACCTCATT    |

|                     |      |        |    |       |       |                           |
|---------------------|------|--------|----|-------|-------|---------------------------|
| scaffold608081_20.9 | 1 p3 | (ATT)6 | 18 | 1880  | 1897  | AAAAATGTTTCTGTAGTGGTTGTTG |
| scaffold608155_16.5 | 1 p3 | (CGC)6 | 18 | 600   | 617   | GTAACCCATGATGCCGACC       |
| scaffold608360_15.9 | 1 p3 | (AAG)5 | 15 | 49    | 63    | AACATGGACTGGAAGTTGCC      |
| scaffold608879_13.0 | 1 p3 | (GTT)5 | 15 | 541   | 555   | CGCATTAAACGGATACGACA      |
| scaffold608974_13.6 | 1 p3 | (AAT)6 | 18 | 328   | 345   | TTTATTCCGTGACCCTCGAC      |
| scaffold609203_15.0 | 1 p3 | (CCG)5 | 15 | 176   | 190   | GATTGGATTTAATCCCCCG       |
| scaffold609402_10.0 | 1 p3 | (TGG)5 | 15 | 940   | 954   | TGATGATGATAACGAAGGCG      |
| scaffold609553_15.0 | 1 p3 | (TTA)6 | 18 | 1641  | 1658  | TGTTGCACCAATGTCTGGAT      |
| scaffold609634_20.3 | 1 p3 | (GCA)6 | 18 | 381   | 398   | TTGGTCCCAAATCCCTACAA      |
| scaffold609768_15.2 | 1 p3 | (AAT)6 | 18 | 709   | 726   | CCAAGTTACGTGGCGTAGAA      |
| scaffold609931_12.7 | 1 p3 | (TAA)5 | 15 | 1263  | 1277  | TTTGAACCTCGATTTGTCCCC     |
| scaffold610032_14.4 | 1 p3 | (CCT)5 | 15 | 2418  | 2432  | TCCCACTCCCATTCAACTTC      |
| scaffold610073_13.9 | 1 p3 | (AAT)5 | 15 | 612   | 626   | TATCGCTTTAGGCCAGCTA       |
| scaffold610287_18.5 | 1 p3 | (AAG)5 | 15 | 480   | 494   | ATTCCACAGACCAAAACCCA      |
| scaffold610373_17.4 | 1 p3 | (CAA)5 | 15 | 10010 | 10024 | GGTCATTGCCTCGGATTA        |
| scaffold610467_11.6 | 1 p3 | (ACA)7 | 21 | 465   | 485   | GCTTTTCCAGTGAAAATCCG      |
| scaffold610492_16.3 | 1 p3 | (CGC)5 | 15 | 895   | 909   | TGGGACTTGGAACTAGGGTG      |
| scaffold610547_11.2 | 1 p3 | (CAT)5 | 15 | 63    | 77    | TGATTCATCCTCCGTTGTGT      |
| scaffold610913_15.2 | 1 p3 | (GAT)5 | 15 | 64    | 78    | TGATGATAATGAGGTTGCTGG     |
| scaffold610961_16.0 | 1 p3 | (TAT)5 | 15 | 3973  | 3987  | TTTTGAAAAAGTGTGCCCC       |
| scaffold611117_15.1 | 1 p3 | (GAG)5 | 15 | 305   | 319   | TGAAGCAGTGGAGACAGGTG      |
| scaffold611323_14.0 | 1 p3 | (TAT)6 | 18 | 235   | 252   | TTAGAGGTGTCAAACGGGC       |
| scaffold611553_10.8 | 1 p3 | (TTA)6 | 18 | 432   | 449   | GCAAGGGGACAACCTTTGTA      |
| scaffold611568_17.5 | 1 p3 | (CGG)5 | 15 | 39    | 53    | GGAAGTGGAGCAGGTGTGAAT     |
| scaffold611615_13.0 | 1 p3 | (CCA)5 | 15 | 252   | 266   | CAATCAACAAAACAAGCCCC      |
| scaffold611796_15.2 | 1 p3 | (ATT)6 | 18 | 1937  | 1954  | AATCACCTCGAATCAGTTTG      |
| scaffold611986_16.8 | 1 p3 | (TTG)5 | 15 | 585   | 599   | AGCCGACTTCAATTTATTGGG     |
| scaffold612222_12.7 | 1 p3 | (ATC)8 | 24 | 101   | 124   | GTTTGGGTGAGAACGAGGAG      |
| scaffold612273_14.9 | 1 p3 | (GGT)5 | 15 | 320   | 334   | GCAAACATCTCAATGGGGAC      |
| scaffold612278_17.0 | 1 p3 | (ATT)6 | 18 | 850   | 867   | AAAACGGAATCTACTTAGGGGA    |
| scaffold612505_17.0 | 1 p3 | (ATG)5 | 15 | 209   | 223   | GATGTGGCTTCTGATGACGA      |
| scaffold612637_13.0 | 1 p3 | (AAG)5 | 15 | 1198  | 1212  | ACTAGAAGCATTGGCGCTC       |
| scaffold612799_13.0 | 1 p3 | (CGG)5 | 15 | 165   | 179   | ATGTACACCCACTTCGGCTC      |
| scaffold612954_10.3 | 1 p3 | (TCA)6 | 18 | 77    | 94    | CGTTGGATTGGATTCCCTCAT     |
| scaffold613146_15.9 | 1 p3 | (ACA)5 | 15 | 179   | 193   | TTGAAGATGATACGTTGAACCC    |
| scaffold613201_13.4 | 1 p3 | (ATT)5 | 15 | 2640  | 2654  | TGTAGTTAAGGCGGTGGTGA      |
| scaffold613263_15.9 | 1 p3 | (ATA)5 | 15 | 803   | 817   | CCAAAAGGAACAAGAGTTGAGG    |
| scaffold613467_14.4 | 1 p3 | (GAA)5 | 15 | 167   | 181   | TGAAGAAGAAGGGGAGGACA      |
| scaffold614029_13.7 | 1 p3 | (AAT)6 | 18 | 168   | 185   | GGGGTCGACTACATGAACCA      |
| scaffold614204_15.0 | 1 p3 | (CGG)6 | 18 | 274   | 291   | ATCCTCAACTCCATCGCTTG      |
| scaffold614207_12.6 | 1 p3 | (CGG)6 | 18 | 291   | 308   | CAAATTCGCTGACCAAATCC      |
| scaffold614208_11.6 | 1 p3 | (CGG)5 | 15 | 297   | 311   | CAAATTCGCTGACCAAATCC      |
| scaffold614232_10.5 | 1 p3 | (AGG)5 | 15 | 210   | 224   | ATTAACCTCGGGGTGCAGTTG     |
| scaffold614368_20.5 | 1 p3 | (CCG)5 | 15 | 52    | 66    | AGCAAACCCTAATCGGCAGT      |
| scaffold614683_14.2 | 1 p3 | (ATT)7 | 21 | 654   | 674   | TAGAAGCAGCAGCAGTTTGC      |
| scaffold614691_16.0 | 1 p3 | (TGT)5 | 15 | 48    | 62    | ATGTAGCCGACCCCAATTTA      |
| scaffold614748_13.3 | 1 p3 | (ATC)5 | 15 | 213   | 227   | TGCTCAAGAAAATGAGAGCAA     |
| scaffold614838_14.3 | 1 p3 | (TAA)5 | 15 | 465   | 479   | TTCCATGCACTCTTTTGTGC      |
| scaffold614906_11.0 | 1 p3 | (ATA)5 | 15 | 456   | 470   | GCGTAATCCCCTATTTGCCT      |
| scaffold615182_18.8 | 1 p3 | (TCA)5 | 15 | 1379  | 1393  | TCACCCTCAAACATTCCACA      |
| scaffold615246_10.5 | 1 p3 | (GGC)6 | 18 | 250   | 267   | TCTGTTTTGTGCGAGTCTGG      |
| scaffold615292_11.5 | 1 p3 | (ATC)5 | 15 | 135   | 149   | TCATGTTCAAATCTGTGAAGGC    |
| scaffold615412_13.4 | 1 p3 | (AAT)5 | 15 | 68    | 82    | TCCATGAAACATAAATCTTGCC    |
| scaffold615492_16.9 | 1 p3 | (GGT)5 | 15 | 1105  | 1119  | TAGGTCACACTTGCAGTGCC      |
| scaffold615500_17.1 | 1 p3 | (TAT)5 | 15 | 1141  | 1155  | TGTGAAAATCTCGGTTAATCCAT   |
| scaffold615740_11.7 | 1 p3 | (TTG)5 | 15 | 691   | 705   | GGGTCAGATGTACGCAACCT      |
| scaffold615785_20.0 | 1 p3 | (GTT)5 | 15 | 27    | 41    | TGGGTTCAATGCATTTACTTCTT   |
| scaffold615818_19.0 | 1 p3 | (TTG)5 | 15 | 962   | 976   | ATATAGCCGACCGCACAAAG      |

|                     |      |        |    |      |      |                           |
|---------------------|------|--------|----|------|------|---------------------------|
| scaffold615877_15.0 | 1 p3 | (ATT)6 | 18 | 65   | 82   | TGAAATTGAAAACCTTAAAAATGAA |
| scaffold615988_15.1 | 1 p3 | (ATC)6 | 18 | 2954 | 2971 | TTCCTTTTCAAGGTGCTTCA      |
| scaffold616009_11.8 | 1 p3 | (CCT)5 | 15 | 440  | 454  | GAGGACCTTCAAGGGTGTCA      |
| scaffold616057_17.1 | 1 p3 | (GAA)5 | 15 | 965  | 979  | AGATTGCTGTGATGTGGGTG      |
| scaffold616160_13.7 | 1 p3 | (CGG)5 | 15 | 957  | 971  | TATTCGACGAGGATTCCGAC      |
| scaffold616351_13.1 | 1 p3 | (TTG)5 | 15 | 77   | 91   | ATCCAGAGGAGCTTGCTGGT      |
| scaffold616426_12.3 | 1 p3 | (CTC)7 | 21 | 489  | 509  | AATGATCATCCAACGGTTTCA     |
| scaffold616617_13.2 | 1 p3 | (ATC)5 | 15 | 837  | 851  | GACCGGGACTGTAATCCTCA      |
| scaffold616704_15.7 | 1 p3 | (TCA)8 | 24 | 1255 | 1278 | TGTGGATGGTCTGAATGGAA      |
| scaffold616715_11.3 | 1 p3 | (TTA)5 | 15 | 359  | 373  | GCATCAAACATTTTCAGCCA      |
| scaffold617145_10.9 | 1 p3 | (GAA)5 | 15 | 216  | 230  | AGGGTAGGAAGCCCAAAGTG      |
| scaffold617365_13.6 | 1 p3 | (AGA)5 | 15 | 172  | 186  | CCATCAGTTCCTTCTAGGGC      |
| scaffold617701_14.8 | 1 p3 | (TTG)6 | 18 | 240  | 257  | TGTAGCCGACCCCAATTTAT      |
| scaffold617751_10.1 | 1 p3 | (ATA)5 | 15 | 160  | 174  | CTCGCACCAAATGGGTTAGT      |
| scaffold617757_19.1 | 1 p3 | (AGG)5 | 15 | 201  | 215  | CGTTGCTGGTGTGAAGAGA       |
| scaffold617941_15.1 | 1 p3 | (TCA)5 | 15 | 295  | 309  | TCTTCAACATTCCTGGGCTC      |
| scaffold618157_15.3 | 1 p3 | (ATT)5 | 15 | 611  | 625  | CATCGGGTGAATGATTAAG       |
| scaffold618488_16.6 | 1 p3 | (TGA)5 | 15 | 47   | 61   | CCCAAGACCCCAATTTGATT      |
| scaffold618503_16.0 | 1 p3 | (AAT)5 | 15 | 862  | 876  | TAACGGGAGAAATGGTCCAA      |
| scaffold618510_18.1 | 1 p3 | (CGC)5 | 15 | 290  | 304  | TGATGGTATGGTGTGGAGGA      |
| scaffold618779_11.9 | 1 p3 | (GGC)5 | 15 | 239  | 253  | GGTGTGGAGGAGCAATTCAT      |
| scaffold618970_15.6 | 1 p3 | (TTC)7 | 21 | 355  | 375  | ATCCTCCACAGAAATGCCAC      |
| scaffold619060_12.7 | 1 p3 | (TCA)6 | 18 | 139  | 156  | ACATGGGTTTAGGGTTTCCC      |
| scaffold619065_12.1 | 1 p3 | (AAT)7 | 21 | 64   | 84   | GTTTCATACCCCCACCACAC      |
| scaffold619194_14.2 | 1 p3 | (TTC)5 | 15 | 489  | 503  | GAACACATTGCTGAGAGCACA     |
| scaffold619509_17.3 | 1 p3 | (TTG)5 | 15 | 1842 | 1856 | GTTTCTGATGTTGTTGCCGA      |
| scaffold619566_12.8 | 1 p3 | (AAT)6 | 18 | 272  | 289  | CATCTCATGCTCTCGCCTCT      |
| scaffold619655_15.7 | 1 p3 | (TGT)5 | 15 | 46   | 60   | TGTAGCCGACCCCAATTTAT      |
| scaffold619664_15.7 | 1 p3 | (TGA)5 | 15 | 93   | 107  | TGTTTTTGAGAAGAAACAAGAAGC  |
| scaffold619698_14.1 | 1 p3 | (ATT)5 | 15 | 405  | 419  | TCCCAAGAACAACCCATTA       |
| scaffold619810_13.8 | 1 p3 | (ATT)5 | 15 | 626  | 640  | GGCTATGGAACTTGATGATGG     |
| scaffold619919_10.0 | 1 p3 | (TTG)5 | 15 | 259  | 273  | AATGTTGATGCTGTTGGAGC      |
| scaffold620058_11.9 | 1 p3 | (GAG)5 | 15 | 553  | 567  | GATGTTGGAGCTGAAGAGCC      |
| scaffold620484_11.0 | 1 p3 | (ATT)9 | 27 | 222  | 248  | CCTCCATCAGTTCTGTCTAGGG    |
| scaffold620678_14.3 | 1 p3 | (TGA)5 | 15 | 233  | 247  | GTCCGGTATTGTCTGCTGT       |
| scaffold621022_11.1 | 1 p3 | (TAA)5 | 15 | 250  | 264  | AAATGAAATCGTGCGAAAATG     |
| scaffold621396_17.3 | 1 p3 | (TTA)5 | 15 | 1066 | 1080 | GGTATTTTTGCATGCGGTTT      |
| scaffold621669_17.4 | 1 p3 | (TTA)6 | 18 | 40   | 57   | TCATTTTCATTTTCTTTTGTTTTG  |
| scaffold621918_12.3 | 1 p3 | (GCC)6 | 18 | 349  | 366  | GGCACACTATTTTGGAGGGA      |
| scaffold621921_10.0 | 1 p3 | (CGG)5 | 15 | 87   | 101  | TTTTTCGAATATTCCGGTGG      |
| scaffold622045_14.6 | 1 p3 | (TAT)5 | 15 | 334  | 348  | AATAACATTAACCCCTAAACCTAAA |
| scaffold622147_15.4 | 1 p3 | (TGA)5 | 15 | 1770 | 1784 | TTTGATTGGGAATAATTGGG      |
| scaffold622452_15.9 | 1 p3 | (TCC)6 | 18 | 555  | 572  | ATCCTCCATTTCCCATTTCC      |
| scaffold622493_18.4 | 1 p3 | (ATC)5 | 15 | 1284 | 1298 | TAACGGGCTGGCTAGGTGT       |
| scaffold623095_14.2 | 1 p3 | (TGC)5 | 15 | 287  | 301  | ATATGCGCAAGCTCACCTTT      |
| scaffold623307_13.0 | 1 p3 | (CAG)5 | 15 | 868  | 882  | GAAATCAGCCCGACTTGAAA      |
| scaffold623833_13.7 | 1 p3 | (TGC)6 | 18 | 1435 | 1452 | ACCTCATTCTCCAATTCC        |
| scaffold624068_16.4 | 1 p3 | (TAA)5 | 15 | 115  | 129  | TCTTGATGCTCACTGTTGCC      |
| scaffold624072_10.8 | 1 p3 | (TTA)8 | 24 | 859  | 882  | ATTTTTCGTCGGAGGGACTT      |
| scaffold624105_15.2 | 1 p3 | (AAT)5 | 15 | 485  | 499  | TAAAGAGATGCTTGGTCGCC      |
| scaffold624217_12.6 | 1 p3 | (ATA)5 | 15 | 1302 | 1316 | ATAGTGGGGCCTCGTCTTTC      |
| scaffold624389_10.4 | 1 p3 | (ATA)5 | 15 | 354  | 368  | AAATTATCAAATTTCCGGACGA    |
| scaffold624545_15.6 | 1 p3 | (TTC)5 | 15 | 2587 | 2601 | AATCAAATCCAATCCACCA       |
| scaffold624547_17.0 | 1 p3 | (AGG)5 | 15 | 683  | 697  | GGATCTCGGGGAGCTAGAAC      |
| scaffold624557_11.6 | 1 p3 | (TGG)5 | 15 | 301  | 315  | CGGGCCAATAAAATCTCAA       |
| scaffold624793_20.1 | 1 p3 | (TTA)6 | 18 | 1593 | 1610 | CGATCAAGGAACACATGCAC      |
| scaffold625006_13.9 | 1 p3 | (CGG)5 | 15 | 1432 | 1446 | CAATGAACAGTTCGTGGTG       |
| scaffold625317_16.9 | 1 p3 | (ATC)6 | 18 | 1627 | 1644 | ACGAAAGCTGTCGGAAAGAA      |

|                     |      |        |    |      |      |                          |
|---------------------|------|--------|----|------|------|--------------------------|
| scaffold625411_10.1 | 1 p3 | (CGG)5 | 15 | 141  | 155  | GATTATTCTTGCCGTTGGGA     |
| scaffold625752_15.0 | 1 p3 | (GGC)6 | 18 | 3602 | 3619 | ATGATGGACTTGCTTTTGGG     |
| scaffold625786_23.1 | 1 p3 | (TTG)5 | 15 | 68   | 82   | TTTTGAATTGCTTTAATTTGTTGC |
| scaffold625942_15.3 | 1 p3 | (ATC)5 | 15 | 397  | 411  | TTGAACGCCGTTAAGTTTGA     |
| scaffold625965_15.6 | 1 p3 | (CCG)5 | 15 | 3722 | 3736 | CAAAGGGGCTGAGTTGAGAG     |
| scaffold626100_15.7 | 1 p3 | (ATT)5 | 15 | 6849 | 6863 | TCAAATTTTGGCACTGTTGC     |
| scaffold626167_12.0 | 1 p3 | (ATA)5 | 15 | 579  | 593  | TAATTTGGTTCGGTTTTCCGG    |
| scaffold626207_14.4 | 1 p3 | (TAT)6 | 18 | 1624 | 1641 | ATCCGTGCAGTAAATGAAAA     |
| scaffold626724_12.8 | 1 p3 | (CTC)5 | 15 | 283  | 297  | ACGTTTCGATCCAAAACCAAG    |
| scaffold627157_14.0 | 1 p3 | (ACC)5 | 15 | 538  | 552  | CTCTCATCTTCACCGCCACT     |
| scaffold627181_15.9 | 1 p3 | (CAT)6 | 18 | 2818 | 2835 | CTCTGGTGCAACTCCATCAA     |
| scaffold627204_14.1 | 1 p3 | (ACA)5 | 15 | 608  | 622  | ACTCAGCGAAGTGCCAATCT     |
| scaffold627229_10.7 | 1 p3 | (GAG)5 | 15 | 306  | 320  | ATGAAGAAGGAGGAGGGGAA     |
| scaffold627828_15.5 | 1 p3 | (TGG)5 | 15 | 1968 | 1982 | CACTTTTGGCGTTTGATTCC     |
| scaffold627880_16.0 | 1 p3 | (TAT)5 | 15 | 949  | 963  | TTAATGGGATGATAAGCGGC     |
| scaffold627993_19.0 | 1 p3 | (TAT)6 | 18 | 260  | 277  | GCTAAGTTGATTATGGTGGGC    |
| scaffold628120_11.7 | 1 p3 | (AAT)6 | 18 | 48   | 65   | CAGTTGCCCTTGGGATTAGA     |
| scaffold628394_19.0 | 1 p3 | (CCG)5 | 15 | 965  | 979  | CCCATCCGGAAATCTCTACA     |
| scaffold628504_15.8 | 1 p3 | (TCA)5 | 15 | 689  | 703  | GCATCTTCCCACAAGCAAAT     |
| scaffold628603_15.0 | 1 p3 | (TCT)6 | 18 | 84   | 101  | TTTGCTGAATTTTCTTGGA      |
| scaffold628604_17.3 | 1 p3 | (CGC)5 | 15 | 1477 | 1491 | GCAGCCACAAATGACAGAGA     |
| scaffold628769_11.5 | 1 p3 | (TAT)5 | 15 | 330  | 344  | AACATGAAAAATCCTCAATCCC   |
| scaffold628848_13.9 | 1 p3 | (ACA)5 | 15 | 91   | 105  | GGCCAAACGTTTAGTCTACTTGA  |
| scaffold628856_11.2 | 1 p3 | (ATG)5 | 15 | 29   | 43   | TGTTTCCATCTACACCTTGAGAA  |
| scaffold628888_15.3 | 1 p3 | (TTC)5 | 15 | 336  | 350  | TGAGGTAATGGAACCCGGTA     |
| scaffold628956_16.1 | 1 p3 | (AAT)5 | 15 | 254  | 268  | TTTCTACATTGATGCCGACG     |
| scaffold629305_14.9 | 1 p3 | (TCA)7 | 21 | 77   | 97   | ATTGAGATCCATGGGGAATG     |
| scaffold629403_17.1 | 1 p3 | (AAT)5 | 15 | 139  | 153  | TTGATTTTGCTTTTGCATCG     |
| scaffold629425_15.7 | 1 p3 | (TAT)5 | 15 | 510  | 524  | TTGCAATAAACATTGGGGGT     |
| scaffold629495_17.1 | 1 p3 | (TCT)5 | 15 | 137  | 151  | CGTTTTCTTATCTCTGCGCC     |
| scaffold629570_20.1 | 1 p3 | (CGG)5 | 15 | 1412 | 1426 | GGAAAACGCATAATTCACCC     |
| scaffold629585_15.6 | 1 p3 | (AGA)6 | 18 | 116  | 133  | AAGGATGAGGAAGGCAAGGT     |
| scaffold629724_15.7 | 1 p3 | (ATC)5 | 15 | 1579 | 1593 | GCATTGCATCCTATCCCATT     |
| scaffold629878_16.6 | 1 p3 | (GGA)5 | 15 | 316  | 330  | AGTTGGACTCGGCTTTTGAA     |
| scaffold629924_16.4 | 1 p3 | (TGA)6 | 18 | 3900 | 3917 | AGGTTGCGTACATCTGACCC     |
| scaffold630380_14.7 | 1 p3 | (GCC)6 | 18 | 309  | 326  | TCGGTTGCGTTGTTATTTGA     |
| scaffold630710_10.7 | 1 p3 | (AAG)5 | 15 | 379  | 393  | GCCATTCTTAAAAGCCTCATT    |
| scaffold631006_16.3 | 1 p3 | (AAT)5 | 15 | 195  | 209  | TGTCTCCCTCACACCCTCTT     |
| scaffold631007_14.6 | 1 p3 | (CAA)6 | 18 | 137  | 154  | AACAGGTTCAAACCAGTGGC     |
| scaffold631260_16.5 | 1 p3 | (CAA)6 | 18 | 1159 | 1176 | ATCTTGAACCCCAACATCAA     |
| scaffold631334_10.1 | 1 p3 | (AAT)5 | 15 | 316  | 330  | TGGAAAATCGTTGTTGACCA     |
| scaffold631549_11.6 | 1 p3 | (AAG)5 | 15 | 59   | 73   | TGAGAAGGTTTTCTGGGGAA     |
| scaffold631652_10.5 | 1 p3 | (GCG)6 | 18 | 449  | 466  | ATTACGGTGCCAATTTGAGC     |
| scaffold631718_16.5 | 1 p3 | (TTA)5 | 15 | 305  | 319  | GGTTCGGTCGGTTTAGGACT     |
| scaffold631851_14.3 | 1 p3 | (AGA)5 | 15 | 80   | 94   | CCAAGATGACTAACCCTC       |
| scaffold631867_15.8 | 1 p3 | (TTG)5 | 15 | 2635 | 2649 | CCTTAAAATCAGTCCCGCAA     |
| scaffold632060_14.7 | 1 p3 | (TCT)5 | 15 | 1077 | 1091 | CGGCCAATATTTAGGCATT      |
| scaffold632138_15.1 | 1 p3 | (TGT)8 | 24 | 40   | 63   | TGTAGCCGACCCCAATTTAT     |
| scaffold632186_10.5 | 1 p3 | (GCG)5 | 15 | 457  | 471  | AATCTTCATTCAGCGACGG      |
| scaffold632199_10.4 | 1 p3 | (TTC)6 | 18 | 106  | 123  | CCAAGAGACTGAAAGCTCCA     |
| scaffold632312_10.8 | 1 p3 | (ATT)6 | 18 | 141  | 158  | GGTTTTAAATTCGTTGAAACCCT  |
| scaffold632435_10.9 | 1 p3 | (AAC)6 | 18 | 279  | 296  | ATCAACCTACACCGTCCACC     |
| scaffold632455_17.2 | 1 p3 | (GAA)5 | 15 | 544  | 558  | AGAAATCCAAAAGGCAACGA     |
| scaffold632556_12.5 | 1 p3 | (GAA)5 | 15 | 541  | 555  | CCGCATCCTTTGATATGCTA     |
| scaffold632565_12.6 | 1 p3 | (ACA)6 | 18 | 106  | 123  | TAATCCTTGAACCTCGGTGGC    |
| scaffold632584_15.4 | 1 p3 | (AAT)6 | 18 | 331  | 348  | AACAAGTCGGCAAAAATTGG     |
| scaffold632602_14.6 | 1 p3 | (GAA)6 | 18 | 392  | 409  | GAGTAATCGTCTCCGCTTGC     |
| scaffold632911_14.5 | 1 p3 | (AAG)6 | 18 | 187  | 204  | CTTGCCAGGTTGCAATTATG     |



|                     |      |        |    |      |      |                            |
|---------------------|------|--------|----|------|------|----------------------------|
| scaffold632969_15.9 | 1 p3 | (AAT)5 | 15 | 1352 | 1366 | GCATTTGAAACAATGCCAAA       |
| scaffold633117_20.8 | 1 p3 | (CGC)5 | 15 | 651  | 665  | GCGAAAGCCCAGAACTTGTA       |
| scaffold633225_16.9 | 1 p3 | (CAT)6 | 18 | 1990 | 2007 | TCTGTGGTTGTTGGCATAGC       |
| scaffold633236_18.2 | 1 p3 | (CCG)5 | 15 | 431  | 445  | TTCAGCCACTGACCTAACCC       |
| scaffold633334_13.6 | 1 p3 | (ATT)8 | 24 | 45   | 68   | CCATTGCACTCCGAATAGGT       |
| scaffold633415_13.0 | 1 p3 | (CTT)5 | 15 | 408  | 422  | GCCAATTCTGTGGACCTCAT       |
| scaffold633538_19.8 | 1 p3 | (CCG)5 | 15 | 41   | 55   | CACCAAAGGCAGGAAAGAAG       |
| scaffold633765_14.1 | 1 p3 | (TAT)7 | 21 | 1297 | 1317 | TTAACATGGAACCCGTAGCC       |
| scaffold634138_12.1 | 1 p3 | (GCC)5 | 15 | 52   | 66   | AGATGATGAATCCGCAGCAT       |
| scaffold634290_14.9 | 1 p3 | (TAA)5 | 15 | 383  | 397  | CGTGAGAAGATTGGGAGGAA       |
| scaffold634484_16.7 | 1 p3 | (GAA)6 | 18 | 1946 | 1963 | TCTGGCCTTCTTCGTGTTCT       |
| scaffold634564_11.9 | 1 p3 | (TTA)5 | 15 | 579  | 593  | GAATTCCCAACCAAAGCAAA       |
| scaffold634749_10.9 | 1 p3 | (GAC)5 | 15 | 207  | 221  | CGAATTTCAGAAGCGCTGTA       |
| scaffold634787_18.4 | 1 p3 | (ACC)5 | 15 | 479  | 493  | ACCCAGCCTCGATTATGTTG       |
| scaffold634798_15.9 | 1 p3 | (TAT)5 | 15 | 262  | 276  | AGGAATCCCAATCAGAGAAAA      |
| scaffold635102_14.9 | 1 p3 | (GCA)5 | 15 | 386  | 400  | CTTCAGCTTGGTTTTGGAGG       |
| scaffold635208_15.9 | 1 p3 | (GAG)5 | 15 | 1619 | 1633 | GTCGGATTTCTTCATCGGAA       |
| scaffold635225_13.6 | 1 p3 | (TGA)5 | 15 | 221  | 235  | GCAATGTATATTGGGTCGCA       |
| scaffold635282_17.0 | 1 p3 | (CGG)5 | 15 | 32   | 46   | ATCTACAACAGGCGGCGG         |
| scaffold635292_16.1 | 1 p3 | (CCA)8 | 24 | 878  | 901  | TCTTCTCTAGCCTGGTGGGA       |
| scaffold635533_18.7 | 1 p3 | (CTC)6 | 18 | 189  | 206  | AAAACCGCAAATTGAACGAG       |
| scaffold635783_13.2 | 1 p3 | (TCA)5 | 15 | 171  | 185  | TCAAACCCATCATGAAATCCT      |
| scaffold635850_15.4 | 1 p3 | (ACA)6 | 18 | 361  | 378  | CGACTAATGCTCAAACGCTG       |
| scaffold635902_14.2 | 1 p3 | (GCC)5 | 15 | 191  | 205  | GGGGTATTCCCGATTTCACT       |
| scaffold635926_14.9 | 1 p3 | (ATT)6 | 18 | 1973 | 1990 | GTCACGCCTGTTTCTGTTGA       |
| scaffold636079_11.4 | 1 p3 | (ATT)5 | 15 | 77   | 91   | GTCTCAATGGGGACATCTGG       |
| scaffold636104_16.9 | 1 p3 | (GAA)5 | 15 | 503  | 517  | TGAAAGTCATGCGAGGAGTG       |
| scaffold636166_16.0 | 1 p3 | (TAA)5 | 15 | 540  | 554  | GAAATTTCTCCCTCGAGATG       |
| scaffold636416_10.9 | 1 p3 | (AAT)7 | 21 | 29   | 49   | GGGTCCAACCTACGGATAATGC     |
| scaffold636556_15.9 | 1 p3 | (TTG)5 | 15 | 425  | 439  | TTTCAAGCAACCTCGCTTTC       |
| scaffold636586_17.9 | 1 p3 | (GAA)5 | 15 | 825  | 839  | CGTGCCTGGAATTTCAATTT       |
| scaffold636945_15.9 | 1 p3 | (CTC)8 | 24 | 580  | 603  | AACTGAAACGACACCTTGGG       |
| scaffold637444_15.1 | 1 p3 | (CAA)6 | 18 | 2480 | 2497 | AAACGGACAACCACTTTTCG       |
| scaffold637467_10.7 | 1 p3 | (ATA)6 | 18 | 514  | 531  | TCGCCACTGAAAGAAAGAGG       |
| scaffold637816_16.8 | 1 p3 | (CTC)6 | 18 | 879  | 896  | AAGGGTCCCATCCCACTTAC       |
| scaffold637823_11.7 | 1 p3 | (AAT)6 | 18 | 51   | 68   | CATTCAAATAAAATGATGATGATAA  |
| scaffold637945_10.0 | 1 p3 | (ATT)5 | 15 | 400  | 414  | ACTCGACCAAAAAGGTGTCTG      |
| scaffold637965_14.8 | 1 p3 | (TGA)5 | 15 | 1144 | 1158 | AAGTGATGCAGGGAATCTGG       |
| scaffold637984_13.9 | 1 p3 | (AGA)6 | 18 | 1718 | 1735 | GCCAGGAGAAAGCAGTGTTT       |
| scaffold638045_16.4 | 1 p3 | (ATT)5 | 15 | 276  | 290  | TTGACTCGCGTAAAAGAATATAAAAA |
| scaffold638060_10.2 | 1 p3 | (TTA)7 | 21 | 245  | 265  | CGAAATTAATTAAGGAAAAGATTCCA |
| scaffold638078_20.9 | 1 p3 | (GAT)5 | 15 | 416  | 430  | CACCCTTTTTGTGGAAGCAT       |
| scaffold638085_16.2 | 1 p3 | (ATA)5 | 15 | 3528 | 3542 | CGTGAGAATCTTCGACCTCC       |
| scaffold638190_15.4 | 1 p3 | (AAC)5 | 15 | 896  | 910  | ACGACATGAAGCTTCTGCAA       |
| scaffold638229_16.7 | 1 p3 | (ACA)6 | 18 | 1511 | 1528 | TCACAATAAACCTCCAGTTCCC     |
| scaffold638302_14.0 | 1 p3 | (ATT)5 | 15 | 545  | 559  | ATTTTGCTCACCCCTGCTCAT      |
| scaffold638303_12.7 | 1 p3 | (AAT)5 | 15 | 646  | 660  | ATGGGGACATCAAGTTGGAA       |
| scaffold638358_14.9 | 1 p3 | (GCC)5 | 15 | 386  | 400  | GTCTAATGTTTCCGCCTCCA       |
| scaffold638386_16.1 | 1 p3 | (CGG)5 | 15 | 319  | 333  | ATTTTTATGGATTGTGCCGC       |
| scaffold638527_12.9 | 1 p3 | (ATA)5 | 15 | 142  | 156  | TTTTTGTTTTGACGGGTCC        |
| scaffold638702_15.8 | 1 p3 | (ATC)5 | 15 | 561  | 575  | CGCAGTTGATCTTCTGTCCA       |
| scaffold638872_17.9 | 1 p3 | (TGT)5 | 15 | 44   | 58   | TGTAGCCGACCCCAATTTAT       |
| scaffold638901_15.1 | 1 p3 | (AAT)5 | 15 | 1716 | 1730 | TCCAAAATAATTCGGCCAAC       |
| scaffold639087_15.9 | 1 p3 | (AGA)5 | 15 | 911  | 925  | AGCATTAAACGATGCCTTGCT      |
| scaffold639313_12.9 | 1 p3 | (ATA)5 | 15 | 924  | 938  | CGCATCTTCCGAGCTATCAT       |
| scaffold639585_10.9 | 1 p3 | (CAA)5 | 15 | 92   | 106  | TGGGCTAGTAATCTGGGTCTCT     |
| scaffold639603_18.0 | 1 p3 | (GAA)5 | 15 | 828  | 842  | CCTAAAAGGTTTTGGGGATCA      |
| scaffold640294_11.6 | 1 p3 | (TTG)5 | 15 | 292  | 306  | AATGTTGATGCTGTTTGGAGC      |

|                     |      |        |    |      |      |                            |
|---------------------|------|--------|----|------|------|----------------------------|
| scaffold640334_12.4 | 1 p3 | (TAT)9 | 27 | 175  | 201  | GCCACTTGTAACCTCCCAA        |
| scaffold640409_18.5 | 1 p3 | (ACA)6 | 18 | 358  | 375  | AATCTCGATGCCATCTCCTG       |
| scaffold640570_15.4 | 1 p3 | (ATT)8 | 24 | 99   | 122  | TGCTAAAAACAAATGCCAAGG      |
| scaffold640572_18.2 | 1 p3 | (ATT)5 | 15 | 311  | 325  | AAACGTGAAGTCAATTTCAATGAT   |
| scaffold640708_16.6 | 1 p3 | (TGA)6 | 18 | 704  | 721  | GCATCATGCATGGTCTTACC       |
| scaffold640727_21.1 | 1 p3 | (CTT)5 | 15 | 23   | 37   | AAAAATTGGTGCGGGTGC         |
| scaffold640769_14.0 | 1 p3 | (ATA)5 | 15 | 155  | 169  | GGAAAATTGGGTCATATAGCTCC    |
| scaffold640833_12.1 | 1 p3 | (TTA)6 | 18 | 565  | 582  | TTGTTGCAGTAGCCATGCTC       |
| scaffold640845_13.0 | 1 p3 | (TCT)6 | 18 | 182  | 199  | CCCCCTACACCACTCTTTCA       |
| scaffold640903_10.1 | 1 p3 | (GGC)5 | 15 | 56   | 70   | TGTCAACGTAAGAGGGGC         |
| scaffold641098_18.8 | 1 p3 | (GAA)6 | 18 | 208  | 225  | CCATTCATCGTCGAAGACCT       |
| scaffold641454_16.0 | 1 p3 | (TTG)5 | 15 | 917  | 931  | TGTTATTTGCACAATCATTTCTT    |
| scaffold641545_11.8 | 1 p3 | (GAG)7 | 21 | 998  | 1018 | ATGCTTTGCTTCTTATGCGG       |
| scaffold641557_11.6 | 1 p3 | (TTC)7 | 21 | 54   | 74   | GATCAGCAGTGGCGTTGTC        |
| scaffold641720_19.8 | 1 p3 | (GCG)7 | 21 | 191  | 211  | CATTCTTTCTCCGTCTTCCG       |
| scaffold641800_12.4 | 1 p3 | (TTC)5 | 15 | 147  | 161  | TGCTTTTCAGTTGGCATTITTT     |
| scaffold641821_15.4 | 1 p3 | (AAT)5 | 15 | 271  | 285  | AATTTCTCCCACTTGCCTTG       |
| scaffold641897_15.8 | 1 p3 | (AAT)6 | 18 | 415  | 432  | TTGGCAGCTAGTGCTCATTTT      |
| scaffold642166_16.0 | 1 p3 | (TGA)6 | 18 | 43   | 60   | CCAAGACCCCAATTTGATT        |
| scaffold642361_15.9 | 1 p3 | (GCC)5 | 15 | 492  | 506  | CACCAATCAATAATGCACGC       |
| scaffold642479_10.5 | 1 p3 | (ATT)5 | 15 | 91   | 105  | GGATAGAATGAGGGTTTTCCC      |
| scaffold642489_15.4 | 1 p3 | (ATC)7 | 21 | 1776 | 1796 | CGTGCGTGTGAATTCATGT        |
| scaffold642561_21.8 | 1 p3 | (ACA)5 | 15 | 142  | 156  | CGTGCCAATAATGACACAAAA      |
| scaffold642568_10.4 | 1 p3 | (AAC)5 | 15 | 685  | 699  | CGTTGTGCTCTTGAACTGG        |
| scaffold642595_14.7 | 1 p3 | (TGG)6 | 18 | 1568 | 1585 | GTTTCCTCACTACACCCCGA       |
| scaffold642917_18.9 | 1 p3 | (TTC)5 | 15 | 33   | 47   | GGATCAGCAGTGGCTTTTTTC      |
| scaffold642956_11.6 | 1 p3 | (AAG)5 | 15 | 217  | 231  | CCGGAATCTGAGAGAGATCG       |
| scaffold643117_15.8 | 1 p3 | (CCG)5 | 15 | 942  | 956  | CATCAAAAGCAGAGCAGCAC       |
| scaffold643125_14.0 | 1 p3 | (AAT)6 | 18 | 179  | 196  | CGCATACGATCTTGATTATGG      |
| scaffold643174_16.8 | 1 p3 | (TTG)5 | 15 | 376  | 390  | TTGGGATTAAGGCTTTGGTG       |
| scaffold643178_10.5 | 1 p3 | (ATA)5 | 15 | 431  | 445  | TGGTGAAAAATCAAATACTTGGAA   |
| scaffold643179_12.7 | 1 p3 | (ATA)5 | 15 | 462  | 476  | TGGTGAAAAATCAAATACTTGGAA   |
| scaffold643326_14.1 | 1 p3 | (GTA)5 | 15 | 490  | 504  | TGGAATAGCTTGATAAATGATTTGAA |
| scaffold643440_14.2 | 1 p3 | (CCA)5 | 15 | 616  | 630  | AATCATCACAAAGCCCAAAG       |
| scaffold643544_12.2 | 1 p3 | (TTG)7 | 21 | 63   | 83   | TAGCCGACCCCAACTTATTG       |
| scaffold643773_11.9 | 1 p3 | (AAG)5 | 15 | 67   | 81   | GGGGGAGAAAAATAAAGAAAAA     |
| scaffold643804_16.9 | 1 p3 | (CTT)5 | 15 | 968  | 982  | TCGAGAACCAATAATGATGAGC     |
| scaffold644040_17.6 | 1 p3 | (TTA)6 | 18 | 1197 | 1214 | TTTGGTTTTGCTCCTCTGCT       |
| scaffold644060_12.8 | 1 p3 | (ATA)6 | 18 | 1295 | 1312 | TCTTCCTTGTTTCTTTCTTTGGA    |
| scaffold644115_10.3 | 1 p3 | (AAG)5 | 15 | 198  | 212  | CGAACAGAGGCAGCATAAAA       |
| scaffold644287_15.9 | 1 p3 | (ACC)6 | 18 | 37   | 54   | CCTCTCCTCCTTCTTCCAC        |
| scaffold644626_15.3 | 1 p3 | (TGT)5 | 15 | 210  | 224  | AACCTTGGTTCATGTAGCCG       |
| scaffold644647_10.5 | 1 p3 | (AGG)5 | 15 | 112  | 126  | ATTGACAGCAGGGAGGTGAT       |
| scaffold644724_12.1 | 1 p3 | (TGT)5 | 15 | 64   | 78   | TTGGTTCATGTAGCCGACCT       |
| scaffold645046_15.2 | 1 p3 | (GGA)5 | 15 | 962  | 976  | TGGTAAAATTCCACTTCGGC       |
| scaffold645069_15.6 | 1 p3 | (AAT)7 | 21 | 43   | 63   | TGTTTCGTATTAATTACCGGGAG    |
| scaffold645106_16.2 | 1 p3 | (TGT)5 | 15 | 721  | 735  | AATGGCAAAGGTAATGAGCA       |
| scaffold645203_14.4 | 1 p3 | (ATA)6 | 18 | 803  | 820  | AACCATTTAGAATTTTTCGGGA     |
| scaffold645264_12.5 | 1 p3 | (AAT)5 | 15 | 724  | 738  | GGTCAGTGAAGCCCACCTTA       |
| scaffold645280_18.5 | 1 p3 | (TAT)5 | 15 | 463  | 477  | AAGTCCAGCACTCCCAATTT       |
| scaffold645295_11.7 | 1 p3 | (CAT)5 | 15 | 150  | 164  | GCGAGACAACGAAATTCTCA       |
| scaffold645321_10.2 | 1 p3 | (TGA)8 | 24 | 43   | 66   | CCAAGACCCCAATTTGATT        |
| scaffold645365_16.1 | 1 p3 | (AAT)5 | 15 | 367  | 381  | GGTTGATCGTGTGAATTATGG      |
| scaffold645433_16.9 | 1 p3 | (TTG)5 | 15 | 612  | 626  | GTAGCAGCTCGGTGAGGTTC       |
| scaffold645464_14.8 | 1 p3 | (CTT)5 | 15 | 165  | 179  | GACGATGGTTGCCTTTGT         |
| scaffold645504_16.6 | 1 p3 | (GAG)5 | 15 | 307  | 321  | TGTTGGTGGTGGTGTCTTGT       |
| scaffold645844_12.2 | 1 p3 | (TTA)5 | 15 | 349  | 363  | GAGAGCAGTCTTTTCCCG         |
| scaffold645973_14.9 | 1 p3 | (CAT)7 | 21 | 855  | 875  | CGTTCCTTGCAACAACAAGA       |

|                     |      |        |    |      |      |                          |
|---------------------|------|--------|----|------|------|--------------------------|
| scaffold646043_16.6 | 1 p3 | (AAT)6 | 18 | 381  | 398  | TCTTGCCTCGATTCTTGAT      |
| scaffold646215_18.0 | 1 p3 | (TGC)5 | 15 | 329  | 343  | TGACCAGATAACATCGGCAA     |
| scaffold646236_15.2 | 1 p3 | (AAT)5 | 15 | 2478 | 2492 | TGTGGGGACGATTATCCAT      |
| scaffold646256_14.9 | 1 p3 | (ACA)7 | 21 | 2474 | 2494 | CAGGAAAACCCAGAAGTGAGA    |
| scaffold646375_16.3 | 1 p3 | (CAT)6 | 18 | 1184 | 1201 | GAAGCAAAAACAAACCCACC     |
| scaffold646382_15.2 | 1 p3 | (TTA)5 | 15 | 477  | 491  | AAAACCTCATAAACTGTCATGTCT |
| scaffold646448_14.8 | 1 p3 | (TTC)6 | 18 | 196  | 213  | TCTTGCTGCTTTTTCCACCT     |
| scaffold646570_18.0 | 1 p3 | (TGA)6 | 18 | 884  | 901  | AATTGGGGTGCAAAACAAAG     |
| scaffold646599_14.0 | 1 p3 | (ATA)5 | 15 | 2372 | 2386 | GAACCCAAGAAGCAACATGTAA   |
| scaffold646648_11.4 | 1 p3 | (AAT)5 | 15 | 625  | 639  | TAGGGTTCATGTCCGGTTGT     |
| scaffold646769_17.7 | 1 p3 | (ATA)9 | 27 | 185  | 211  | CGTTCCAAACTTCGAAGAAAA    |
| scaffold646867_13.8 | 1 p3 | (TTA)6 | 18 | 2075 | 2092 | TTGACAACATTGCCACATACC    |
| scaffold646919_16.0 | 1 p3 | (CAC)6 | 18 | 626  | 643  | CAGCTGAGGGAGGAGTTTTG     |
| scaffold647024_14.7 | 1 p3 | (TCT)7 | 21 | 365  | 385  | TCCAGCTATCCCGTTTTGTC     |
| scaffold647069_15.2 | 1 p3 | (GGT)6 | 18 | 730  | 747  | GCAGTGCGTTGAACTAACA      |
| scaffold647092_16.9 | 1 p3 | (TAA)5 | 15 | 2370 | 2384 | CCACCTCACGCAAAAAGAGT     |
| scaffold647177_19.2 | 1 p3 | (TTC)5 | 15 | 784  | 798  | AAATAAGGCATGGGTTGTGC     |
| scaffold647326_10.3 | 1 p3 | (TTG)5 | 15 | 472  | 486  | GAGCACGTGGAGAAGAGACC     |
| scaffold647372_12.2 | 1 p3 | (ATA)5 | 15 | 545  | 559  | CGAAGTCTCACGGTTGATTG     |
| scaffold647492_10.0 | 1 p3 | (GGC)5 | 15 | 116  | 130  | ATTCCGGTGACGGTTGAATA     |
| scaffold647532_17.0 | 1 p3 | (GCT)5 | 15 | 978  | 992  | AGGGGAAAGCAAAGAACAT      |
| scaffold647558_15.9 | 1 p3 | (ACC)5 | 15 | 643  | 657  | ACTTCTCCTTCCACCGCTCT     |
| scaffold647656_16.4 | 1 p3 | (TAA)6 | 18 | 849  | 866  | GAAGTACTTCGGGGTGAAG      |
| scaffold647758_14.0 | 1 p3 | (ATA)5 | 15 | 167  | 181  | CAGTAAAATGCTGCCAGGT      |
| scaffold647817_15.0 | 1 p3 | (CTT)5 | 15 | 1608 | 1622 | ACTCAGATCACTCAACCCGC     |
| scaffold648009_14.8 | 1 p3 | (GAG)5 | 15 | 104  | 118  | GAACGTGGGAGGTGAAGAGA     |
| scaffold648136_20.5 | 1 p3 | (GAA)5 | 15 | 579  | 593  | CACGTGAGCTAGAACCTCC      |
| scaffold648138_13.7 | 1 p3 | (TAA)7 | 21 | 1323 | 1343 | CAATGAGGACATCCGAGGAG     |
| scaffold648152_16.2 | 1 p3 | (GGA)5 | 15 | 3721 | 3735 | TCCTCTGTTGTGTTGGATGC     |
| scaffold648392_16.5 | 1 p3 | (GGT)5 | 15 | 3512 | 3526 | ACAGACCCTCACACCATTCC     |
| scaffold648520_17.9 | 1 p3 | (AAT)5 | 15 | 63   | 77   | TGTGTGCGATTTAATCCTAACC   |
| scaffold648567_11.2 | 1 p3 | (TTC)5 | 15 | 104  | 118  | TCCATAAGCCATAGCTAAAAGAGG |
| scaffold648595_16.7 | 1 p3 | (TGT)6 | 18 | 2274 | 2291 | GCTGACACAACCACAACACC     |
| scaffold648864_12.8 | 1 p3 | (TAT)5 | 15 | 1109 | 1123 | TCATTTTATCATGAATCCCAACA  |
| scaffold649189_16.3 | 1 p3 | (TTG)8 | 24 | 1891 | 1914 | AACCTTCTCTCTGGTGCCAA     |
| scaffold649219_14.0 | 1 p3 | (TTG)5 | 15 | 50   | 64   | TGTAGCCGACCCCAATTTAT     |
| scaffold649257_13.0 | 1 p3 | (GCT)5 | 15 | 314  | 328  | AAAGCATACGGGTGAAGTGG     |
| scaffold649376_18.2 | 1 p3 | (GCC)6 | 18 | 3377 | 3394 | TTCACCACCAGATCCTCCTC     |
| scaffold649470_11.5 | 1 p3 | (TTA)7 | 21 | 115  | 135  | CTTCGCCGCATATGAACTT      |
| scaffold649912_17.2 | 1 p3 | (TTA)8 | 24 | 1309 | 1332 | TGAACTCGCTCCTTCCATCT     |
| scaffold649917_17.5 | 1 p3 | (GGT)5 | 15 | 356  | 370  | CAGAAATTATCCCACACCCG     |
| scaffold650244_10.3 | 1 p3 | (AAT)5 | 15 | 46   | 60   | GAACCTTTCACCGTCTCTCT     |
| scaffold650477_16.0 | 1 p3 | (TAT)6 | 18 | 3505 | 3522 | CAAGCAAAATGTGTTGATTGTT   |
| scaffold650582_13.5 | 1 p3 | (ATA)7 | 21 | 670  | 690  | CCATTTCCCGAAACGATAGA     |
| scaffold650652_13.7 | 1 p3 | (GCT)5 | 15 | 514  | 528  | AAATGCTGCTGTGTGCTGAG     |
| scaffold650732_16.4 | 1 p3 | (ATC)5 | 15 | 160  | 174  | TCAGAGGTGCACTCGAAGTT     |
| scaffold651127_19.4 | 1 p3 | (CGG)5 | 15 | 1634 | 1648 | GACCAGTTCACAAAAGTCCCA    |
| scaffold651206_16.4 | 1 p3 | (ACA)5 | 15 | 334  | 348  | CCACCGGACACATTCAATTA     |
| scaffold651265_13.0 | 1 p3 | (AAT)5 | 15 | 499  | 513  | ATATTTGGTTGTTTCAGCGG     |
| scaffold651362_12.5 | 1 p3 | (TAT)5 | 15 | 259  | 273  | AACTCGGCAAGATGAACTGC     |
| scaffold651688_13.8 | 1 p3 | (CAT)6 | 18 | 157  | 174  | AACATATTGACTCCCGTGCC     |
| scaffold651713_10.0 | 1 p3 | (GAA)6 | 18 | 344  | 361  | TTCAGGGATTTCGATTTGGAG    |
| scaffold652005_16.5 | 1 p3 | (GAA)5 | 15 | 527  | 541  | TCAGAAAGGATCCTCCTCCA     |
| scaffold652119_14.9 | 1 p3 | (TCT)5 | 15 | 203  | 217  | GGGTTCTTGGGTGTCAGAGA     |
| scaffold652207_15.9 | 1 p3 | (ATT)6 | 18 | 82   | 99   | CGTGTAGGATGGGAAATTGAA    |
| scaffold652222_15.6 | 1 p3 | (TTG)6 | 18 | 286  | 303  | CGATCTCACTTCGTGGGAAA     |
| scaffold652326_11.6 | 1 p3 | (CGG)6 | 18 | 72   | 89   | ACATGAAGAGGACGAAGCGT     |
| scaffold652402_16.9 | 1 p3 | (AAT)5 | 15 | 230  | 244  | GTTAACCGCATGTCACTTCG     |

|                     |      |         |    |      |                               |
|---------------------|------|---------|----|------|-------------------------------|
| scaffold652415_16.6 | 1 p3 | (AAT)5  | 15 | 505  | 519 CCTATTTCCCAACCCAAACA      |
| scaffold652416_13.2 | 1 p3 | (ACA)5  | 15 | 1030 | 1044 GCATGGATCTTTGGGAGAAA     |
| scaffold652452_15.8 | 1 p3 | (ATC)5  | 15 | 943  | 957 ATCTCCACCACCACCATCAT      |
| scaffold652622_16.6 | 1 p3 | (CTC)6  | 18 | 160  | 177 TTCCGTTGGCTTATTTTTGC      |
| scaffold652819_13.9 | 1 p3 | (GGC)5  | 15 | 136  | 150 AGAGTTATTCAGGCCAGCCC      |
| scaffold652827_19.2 | 1 p3 | (GCC)5  | 15 | 780  | 794 GTTGCTCAAATTCTTCCCA       |
| scaffold653011_17.2 | 1 p3 | (ATT)5  | 15 | 746  | 760 TTCTGATGCTCTACCAAACG      |
| scaffold653279_16.0 | 1 p3 | (TTG)5  | 15 | 238  | 252 CACTGATCGTACACGATGGC      |
| scaffold653323_12.3 | 1 p3 | (TGG)5  | 15 | 351  | 365 GATAGGCGTTTGAAGGTGAC      |
| scaffold653377_14.8 | 1 p3 | (TAT)5  | 15 | 772  | 786 ACGATGCTCGAGGTTTCAAG      |
| scaffold653469_18.1 | 1 p3 | (TGG)5  | 15 | 1048 | 1062 TTCCATGTTCTGGAGAAGCC     |
| scaffold653573_16.6 | 1 p3 | (TAA)5  | 15 | 821  | 835 CATTCCACCGGAAGGTCTTA      |
| scaffold653577_11.3 | 1 p3 | (CCG)6  | 18 | 165  | 182 GAAAACCCCCACTCAACTCA      |
| scaffold653804_10.3 | 1 p3 | (CAA)5  | 15 | 117  | 131 TGCAAAAACATCTTTCACAATCA   |
| scaffold653817_15.2 | 1 p3 | (CAA)5  | 15 | 1106 | 1120 TTTGAATTTGGAAAAGTATGGAA  |
| scaffold653978_10.4 | 1 p3 | (CTT)5  | 15 | 159  | 173 TCCGGTGTCTTCTTTCTTT       |
| scaffold654081_12.9 | 1 p3 | (AAT)5  | 15 | 287  | 301 AAAGTAGCGTTTGGCGATTA      |
| scaffold654155_14.4 | 1 p3 | (TTA)6  | 18 | 1084 | 1101 AACGTCAACGCTCGTACCTT     |
| scaffold654157_15.2 | 1 p3 | (GAC)5  | 15 | 1152 | 1166 TGATGAACTGCTGCCAGAAC     |
| scaffold654174_11.0 | 1 p3 | (AAT)5  | 15 | 64   | 78 TGCATAATCAACGGTCAATCA      |
| scaffold654317_14.0 | 1 p3 | (ATC)5  | 15 | 511  | 525 CACCTCTCATTACATGCCA       |
| scaffold654748_15.1 | 1 p3 | (ATA)5  | 15 | 759  | 773 CAAAAAAGGTGAAGGAAACAA     |
| scaffold654864_14.9 | 1 p3 | (ATT)5  | 15 | 921  | 935 GTGAGCCACGCACTCTGTAG      |
| scaffold654872_16.1 | 1 p3 | (GCC)5  | 15 | 436  | 450 TTCTTCTCCTCTGCCTCCCT      |
| scaffold655196_15.0 | 1 p3 | (TTA)5  | 15 | 496  | 510 GGTGTTTTCGTTGGAGCTGT      |
| scaffold655208_12.2 | 1 p3 | (GCC)5  | 15 | 894  | 908 CCAACTTCCAACATCGAAT       |
| scaffold655253_15.3 | 1 p3 | (CCT)5  | 15 | 1467 | 1481 AAATTCCCCACCATTTCTCT     |
| scaffold655440_15.9 | 1 p3 | (ATC)7  | 21 | 162  | 182 CGCCTTGAGTTTGGGTAAAA      |
| scaffold655761_14.4 | 1 p3 | (GAT)5  | 15 | 1541 | 1555 TTTGATTGTGCGATGTTTGG     |
| scaffold655803_16.2 | 1 p3 | (TTG)5  | 15 | 3841 | 3855 AGTTCCCAATTTTTGGCTCC     |
| scaffold655841_12.8 | 1 p3 | (TAT)8  | 24 | 644  | 667 TGTTCTGTTAAAACTTCACATCTCA |
| scaffold655903_10.2 | 1 p3 | (CCG)5  | 15 | 314  | 328 TCGATCCGGGACTTGAAATA      |
| scaffold656025_18.3 | 1 p3 | (ATA)5  | 15 | 59   | 73 CTTCAAATGAATCTTCAACAGGA    |
| scaffold656244_11.1 | 1 p3 | (TAA)6  | 18 | 204  | 221 TGAAGCCCAACAGATTGATTT     |
| scaffold656330_12.1 | 1 p3 | (ATT)5  | 15 | 36   | 50 GAATTCTGAATGCATGGTTCTT     |
| scaffold656543_10.7 | 1 p3 | (CGG)5  | 15 | 269  | 283 ATGGCGAGGGAGAGAGGTAG      |
| scaffold656926_16.6 | 1 p3 | (GAG)5  | 15 | 670  | 684 CCATCTCTTCCAGAGCGTC       |
| scaffold657050_15.7 | 1 p3 | (TTG)6  | 18 | 336  | 353 CGACCTCACATAGTGGGACA      |
| scaffold657177_19.9 | 1 p3 | (ACA)6  | 18 | 1293 | 1310 GTGCACATGTCAAGTTTGGG     |
| scaffold657676_14.9 | 1 p3 | (ATA)5  | 15 | 894  | 908 TTGACCCCAATCTCGACTTC      |
| scaffold657791_15.7 | 1 p3 | (CTT)5  | 15 | 448  | 462 CCGCTGATCTTCTGTCTCTT      |
| scaffold657905_12.1 | 1 p3 | (CAC)5  | 15 | 322  | 336 GATTGCCTTGTTTACCCGTG      |
| scaffold658273_18.4 | 1 p3 | (ATC)5  | 15 | 164  | 178 ATGGAATCTGGGGTTCAACA      |
| scaffold658434_10.1 | 1 p3 | (TCA)5  | 15 | 638  | 652 CCCTGCCAATAGAAGATCCA      |
| scaffold658636_12.1 | 1 p3 | (TCA)5  | 15 | 384  | 398 TGGGCGAAAATTCAACTAGG      |
| scaffold658782_16.6 | 1 p3 | (TGA)6  | 18 | 45   | 62 CCAAGACCCCAATTTGATT        |
| scaffold658976_13.1 | 1 p3 | (ATA)5  | 15 | 462  | 476 TGAGCGAGGTGAAGAGTCAA      |
| scaffold658992_11.8 | 1 p3 | (TGT)5  | 15 | 36   | 50 CCAATTTATTGGGATTAAGGCT     |
| scaffold659030_15.2 | 1 p3 | (TTA)5  | 15 | 901  | 915 CACGCGGATCTGTGTCTATTT     |
| scaffold659075_11.5 | 1 p3 | (TTA)7  | 21 | 1139 | 1159 TGCAATTTGGTTCCATTCAA     |
| scaffold659115_12.2 | 1 p3 | (ATT)5  | 15 | 104  | 118 TTGCCTTAATGCTGTGCTG       |
| scaffold659221_13.0 | 1 p3 | (CGC)5  | 15 | 322  | 336 TGGTCGTAAGTTGGAAAGGG      |
| scaffold659240_16.6 | 1 p3 | (TCA)10 | 30 | 2769 | 2798 TCCCAAAATGAAACTTGTAATCA  |
| scaffold659269_13.6 | 1 p3 | (ATT)5  | 15 | 123  | 137 AAAGGGCCTTAACACCAACA      |
| scaffold659415_16.4 | 1 p3 | (GTG)5  | 15 | 638  | 652 TGATTCATCGCATTTACGGA      |
| scaffold659462_12.7 | 1 p3 | (ACC)5  | 15 | 2243 | 2257 CGAGGCATAACCTCACCAGT     |
| scaffold659934_10.0 | 1 p3 | (ACA)6  | 18 | 540  | 557 AAGCTAAGAGCTCCTTGGGG      |
| scaffold659958_16.8 | 1 p3 | (TCC)5  | 15 | 545  | 559 GGTCCCACTCGAGTCTCATT      |

|                     |      |        |    |      |      |                           |
|---------------------|------|--------|----|------|------|---------------------------|
| scaffold659977_18.2 | 1 p3 | (TCC)5 | 15 | 388  | 402  | TTTGACATCTCTGCTGGTGG      |
| scaffold660176_16.2 | 1 p3 | (TGT)6 | 18 | 47   | 64   | TTGGTTCATGTAGCCGACCT      |
| scaffold660204_16.2 | 1 p3 | (AGC)5 | 15 | 212  | 226  | ATTCAGCTCTTGTTCGCCA       |
| scaffold660324_15.8 | 1 p3 | (TCT)5 | 15 | 1433 | 1447 | AATCTCACGCAAGGTGCTTT      |
| scaffold660419_13.5 | 1 p3 | (TTC)7 | 21 | 498  | 518  | ACATTTCTTTGGCTTCCCCT      |
| scaffold660463_16.8 | 1 p3 | (TCA)6 | 18 | 5085 | 5102 | ATTTTCCTCAACTTCGGCCT      |
| scaffold660578_16.8 | 1 p3 | (ATT)5 | 15 | 1291 | 1305 | ATAATGCCGGTGCAGGTCT       |
| scaffold660598_15.6 | 1 p3 | (AAG)5 | 15 | 979  | 993  | ATGCATGCAAACCAGGATCT      |
| scaffold660696_15.4 | 1 p3 | (ACA)6 | 18 | 404  | 421  | CTACCGGAGGAAACCATGAA      |
| scaffold660748_11.6 | 1 p3 | (TTA)5 | 15 | 617  | 631  | CTTCCACCCTTGTTTTCCAA      |
| scaffold660899_10.7 | 1 p3 | (CGC)5 | 15 | 289  | 303  | ATGGTGGTAAGGTGTGGAGG      |
| scaffold660949_17.2 | 1 p3 | (CTT)5 | 15 | 206  | 220  | AGATCCCTCCCTCGCTACAT      |
| scaffold661306_16.8 | 1 p3 | (ACA)6 | 18 | 4868 | 4885 | GGGTGGTGAAGAATGAATGC      |
| scaffold661352_13.8 | 1 p3 | (TCC)5 | 15 | 438  | 452  | CAGTCACGGGATATGCAGAA      |
| scaffold661391_16.6 | 1 p3 | (GGT)5 | 15 | 493  | 507  | TTGGGGATTTCTGAATTTGG      |
| scaffold661410_12.8 | 1 p3 | (GAA)5 | 15 | 1037 | 1051 | TTCTCTTGCAATGCTTCACG      |
| scaffold661463_17.0 | 1 p3 | (TAG)5 | 15 | 90   | 104  | GAGGAGAGCAGCCACAAGAA      |
| scaffold661529_13.2 | 1 p3 | (TAT)5 | 15 | 985  | 999  | GGTGCGGGATAAAAATGTTG      |
| scaffold661560_14.7 | 1 p3 | (GAT)5 | 15 | 404  | 418  | ATATCAGCTCGACAATCCC       |
| scaffold661569_13.0 | 1 p3 | (TGT)6 | 18 | 44   | 61   | TGTAGCCGACCCCAATTTAT      |
| scaffold661701_15.3 | 1 p3 | (ATC)5 | 15 | 558  | 572  | TCCATTAACTCATCGTTAAAATTCA |
| scaffold661753_12.0 | 1 p3 | (GAT)5 | 15 | 106  | 120  | GGATGGGGATAGTGATAGGC      |
| scaffold661841_14.6 | 1 p3 | (TTA)6 | 18 | 1447 | 1464 | CATATTCAGAGTCGTTTGAGCTT   |
| scaffold662014_15.5 | 1 p3 | (TAA)7 | 21 | 371  | 391  | CTAATAGGGGGATTTTGCCC      |
| scaffold662112_14.4 | 1 p3 | (TTC)5 | 15 | 1287 | 1301 | TGAACTTTTTGTTCTGCGA       |
| scaffold662215_12.6 | 1 p3 | (TAT)6 | 18 | 201  | 218  | CGAACAAAGAAACGGGGATAA     |
| scaffold662342_11.2 | 1 p3 | (TAA)7 | 21 | 493  | 513  | TGAAGGCTTTTCTCCTGCAA      |
| scaffold662671_10.2 | 1 p3 | (ATA)6 | 18 | 57   | 74   | GGGGACATCTGAGTGTGTGA      |
| scaffold663048_14.7 | 1 p3 | (ATC)6 | 18 | 1315 | 1332 | CCAAGTGTTAGTGGCCAACC      |
| scaffold663140_11.6 | 1 p3 | (AGA)5 | 15 | 547  | 561  | ACAAGCAAATTTCTCCCCT       |
| scaffold663155_10.2 | 1 p3 | (TGT)6 | 18 | 42   | 59   | TGTAGCCGACCCCAATTTAT      |
| scaffold663292_13.7 | 1 p3 | (TTA)5 | 15 | 766  | 780  | CCAATGTGATTGGCTAGTTGC     |
| scaffold663347_15.7 | 1 p3 | (AAT)5 | 15 | 977  | 991  | ATGACCGAGGAGCAAATTGT      |
| scaffold663475_15.4 | 1 p3 | (GGT)5 | 15 | 2414 | 2428 | CGTTGACCCTGTTAGCATT       |
| scaffold663798_11.0 | 1 p3 | (GAG)6 | 18 | 321  | 338  | GACACAGAGGCTGACGATGA      |
| scaffold663925_13.2 | 1 p3 | (AAT)5 | 15 | 334  | 348  | CCGAGTAGCTGGGTCTGAAG      |
| scaffold663931_19.5 | 1 p3 | (CAT)5 | 15 | 697  | 711  | TGTCAGTCAGGGATTCTTTTGA    |
| scaffold663942_18.8 | 1 p3 | (ATA)5 | 15 | 1443 | 1457 | TGAGCATATTTTGTGTTGCTTG    |
| scaffold664273_16.6 | 1 p3 | (ATA)5 | 15 | 1368 | 1382 | TTTAGTGGGAATCACGGGAG      |
| scaffold664419_11.2 | 1 p3 | (TTC)5 | 15 | 866  | 880  | ATAATCGTCTCCGTCTGCTGT     |
| scaffold664531_13.4 | 1 p3 | (GAT)8 | 24 | 982  | 1005 | AGCAGAGGATTGTTGACGCT      |
| scaffold664554_15.3 | 1 p3 | (AAT)5 | 15 | 927  | 941  | CACCCAACCCGAGTATCCTA      |
| scaffold664565_16.6 | 1 p3 | (TGT)6 | 18 | 31   | 48   | CCCAGTTTATTGGGATTAATGTTT  |
| scaffold664957_15.3 | 1 p3 | (ATC)6 | 18 | 1133 | 1150 | GTCCTTGCAATTAGGCAGAGC     |
| scaffold665059_16.4 | 1 p3 | (TTA)5 | 15 | 2522 | 2536 | CCCAAAAGGGAGGAGTGAAT      |
| scaffold665352_15.4 | 1 p3 | (AAT)5 | 15 | 2468 | 2482 | GGGACAATGCTGATCTCCTC      |
| scaffold665414_12.8 | 1 p3 | (AAT)6 | 18 | 881  | 898  | TTTTGACAATTCTCAGCCCC      |
| scaffold665430_15.7 | 1 p3 | (AAG)5 | 15 | 2517 | 2531 | TAATCCCACTGAATTTGGGC      |
| scaffold665432_12.8 | 1 p3 | (ATG)5 | 15 | 66   | 80   | CGAGCTCGATCATGCAACTA      |
| scaffold665472_12.7 | 1 p3 | (AAT)5 | 15 | 623  | 637  | TGGTGAAAAGTAAGCATGCAA     |
| scaffold665564_16.3 | 1 p3 | (CCG)5 | 15 | 496  | 510  | TACTCCCACCGGAAATCAAG      |
| scaffold665580_17.7 | 1 p3 | (CTT)5 | 15 | 1899 | 1913 | TCGAATGCAACACTGGAGAA      |
| scaffold665604_11.8 | 1 p3 | (ATT)7 | 21 | 382  | 402  | TGACGAGCTTCCCTCTTGTT      |
| scaffold665608_12.2 | 1 p3 | (GGC)7 | 21 | 1940 | 1960 | GATCGGACAACCCATCAAAC      |
| scaffold665663_14.0 | 1 p3 | (TAT)6 | 18 | 1190 | 1207 | TTTTGCTCACCCCTAACCAC      |
| scaffold665688_17.6 | 1 p3 | (CCT)6 | 18 | 499  | 516  | CTTCTCCTCCATTTCCACCA      |
| scaffold666123_19.2 | 1 p3 | (TGT)5 | 15 | 681  | 695  | TCAAACGAAAACATGCATCC      |
| scaffold666243_15.4 | 1 p3 | (ATT)5 | 15 | 1900 | 1914 | CCAAGTTGAAAGGGATCTG       |

|                     |      |        |    |      |      |                          |
|---------------------|------|--------|----|------|------|--------------------------|
| scaffold666446_11.4 | 1 p3 | (CCA)6 | 18 | 372  | 389  | CCCAAACCTCATGCAAAACCT    |
| scaffold666461_16.1 | 1 p3 | (AAT)6 | 18 | 1602 | 1619 | TTACCTAGCAAGGGTTTGGG     |
| scaffold666496_12.9 | 1 p3 | (AGA)5 | 15 | 1258 | 1272 | AGAGAGACGGGGAAGAGGAG     |
| scaffold666519_17.2 | 1 p3 | (ATT)5 | 15 | 730  | 744  | GCCATAAGCCCATCAAATA      |
| scaffold666525_18.4 | 1 p3 | (CCT)5 | 15 | 217  | 231  | AATGGAAAATAAGCAGGGGC     |
| scaffold666536_14.6 | 1 p3 | (ATC)5 | 15 | 2922 | 2936 | AGCACACTTCTCCTGCAACC     |
| scaffold666537_17.4 | 1 p3 | (TAT)5 | 15 | 297  | 311  | GGGAATCTTGTTTTAAGTATCCGA |
| scaffold666555_16.7 | 1 p3 | (CGC)5 | 15 | 218  | 232  | AAGATCGAGAAAACGGAGGC     |
| scaffold666612_13.9 | 1 p3 | (TAT)5 | 15 | 3045 | 3059 | CAGCCGCTACTCTTCGAGTG     |
| scaffold666635_13.6 | 1 p3 | (CTT)5 | 15 | 169  | 183  | TGAGTGCATGCTCCAAAGAC     |
| scaffold666641_15.0 | 1 p3 | (TGA)5 | 15 | 1000 | 1014 | CATTGAAGAAGAAGGCGGAG     |
| scaffold666643_16.9 | 1 p3 | (CCA)6 | 18 | 526  | 543  | GAGAATCCCGCAGATCAAA      |
| scaffold666724_15.4 | 1 p3 | (CCA)5 | 15 | 1401 | 1415 | GCAGCCAAGTTTGGTTTGT      |
| scaffold666901_10.9 | 1 p3 | (TAT)7 | 21 | 84   | 104  | CCACCCCTTCTTTTTTCATT     |
| scaffold666919_10.6 | 1 p3 | (GAG)6 | 18 | 530  | 547  | GAGATCCCCGTAAACAGCAA     |
| scaffold667001_16.2 | 1 p3 | (CGG)7 | 21 | 954  | 974  | TGCATCTTGCCCAACTATT      |
| scaffold667145_11.8 | 1 p3 | (TAA)5 | 15 | 333  | 347  | AGGGCATGCATAGGTGTAGG     |
| scaffold667272_16.9 | 1 p3 | (AAT)5 | 15 | 4512 | 4526 | TGAGCTCTGTTGGTCTTTGG     |
| scaffold667488_14.8 | 1 p3 | (TTA)5 | 15 | 1212 | 1226 | TGATTGAAAGCACCGTCTTG     |
| scaffold667520_12.2 | 1 p3 | (TCA)5 | 15 | 173  | 187  | TGGAAGAGTGCCCAAATACA     |
| scaffold667604_16.9 | 1 p3 | (CAG)5 | 15 | 1900 | 1914 | CTTCGGCTCTCCAACCTCAG     |
| scaffold667637_15.1 | 1 p3 | (GAA)5 | 15 | 1265 | 1279 | CAGCTCCAATGCAGTAGCAA     |
| scaffold667908_15.9 | 1 p3 | (ACA)6 | 18 | 1381 | 1398 | TTTCAAATTTTCTCCTCCG      |
| scaffold667921_14.4 | 1 p3 | (CCT)6 | 18 | 216  | 233  | AGATGGATGTTGAGTTGGG      |
| scaffold667974_14.6 | 1 p3 | (ATT)5 | 15 | 557  | 571  | CCATAGGCGAATTCTAAAGTGA   |
| scaffold668086_10.9 | 1 p3 | (TTA)7 | 21 | 145  | 165  | AAATTTTATGGGACGGAGGG     |
| scaffold668175_16.0 | 1 p3 | (CTT)5 | 15 | 1079 | 1093 | TCAGTTTGCACACTTTCCCA     |
| scaffold668473_15.6 | 1 p3 | (GAC)5 | 15 | 2158 | 2172 | TCTTAACGGATTCTCCAAGATG   |
| scaffold668550_11.9 | 1 p3 | (TTC)5 | 15 | 324  | 338  | TCCATCGTACCGAGGCTAAC     |
| scaffold668599_13.0 | 1 p3 | (GAA)7 | 21 | 279  | 299  | AAGAGGTGTATGCCGGATTG     |
| scaffold668617_18.4 | 1 p3 | (AGG)5 | 15 | 2817 | 2831 | GCGTGGGAATTGTTTCAAGT     |
| scaffold668669_15.2 | 1 p3 | (TTC)5 | 15 | 290  | 304  | CATCATCCGTAAGCTCCCAC     |
| scaffold668784_10.6 | 1 p3 | (GGC)5 | 15 | 51   | 65   | GGGGTCCCTGTCTTATAGCG     |
| scaffold668791_15.0 | 1 p3 | (CTC)5 | 15 | 2446 | 2460 | CTTTCTAGTCCCCATTGCCA     |
| scaffold668822_13.9 | 1 p3 | (AAT)8 | 24 | 1288 | 1311 | CGTATAGTCCCAGCAGAGG      |
| scaffold668860_15.7 | 1 p3 | (AAT)5 | 15 | 1980 | 1994 | TGCCTTGCGAATTGTGATTA     |
| scaffold668868_15.0 | 1 p3 | (TCT)5 | 15 | 648  | 662  | TCGGCGTTCCTGTATTTTTTC    |
| scaffold668869_15.4 | 1 p3 | (GCC)5 | 15 | 1191 | 1205 | AGCCCATAAAGCAACACGAAT    |
| scaffold668932_17.6 | 1 p3 | (ATC)5 | 15 | 363  | 377  | TGGGTGCGAACAACATTATTT    |
| scaffold669042_10.7 | 1 p3 | (CGG)6 | 18 | 165  | 182  | GCAGGCGATAAGCAGAAGTT     |
| scaffold669360_13.6 | 1 p3 | (TGA)7 | 21 | 42   | 62   | CCCAAGACCCCAATTTGATT     |
| scaffold669370_15.9 | 1 p3 | (CCG)5 | 15 | 1540 | 1554 | AGATCCAATCCAAATGCTGC     |
| scaffold669488_11.9 | 1 p3 | (GAG)6 | 18 | 360  | 377  | CCTTATCTGGGCCTTCACAA     |
| scaffold669500_11.0 | 1 p3 | (ATT)7 | 21 | 82   | 102  | CGTGTAGGATGGGAAATTGAA    |
| scaffold669562_11.2 | 1 p3 | (ACA)6 | 18 | 460  | 477  | ATAGTTGTTCAAAGCCGGG      |
| scaffold669594_18.9 | 1 p3 | (TGT)5 | 15 | 330  | 344  | TTTGGGAGTGAATGGGAGAG     |
| scaffold669672_14.8 | 1 p3 | (CTT)5 | 15 | 481  | 495  | TGAATGTAATGGTCGTGCGT     |
| scaffold670000_14.1 | 1 p3 | (TGA)6 | 18 | 1444 | 1461 | GCTATGCCTGTGCCTGATTT     |
| scaffold670038_17.9 | 1 p3 | (CCA)5 | 15 | 1220 | 1234 | CATCGCCCCTCTACTTCTTG     |
| scaffold670094_17.9 | 1 p3 | (TCA)5 | 15 | 3252 | 3266 | CCAATCACAGTCGAAGACGA     |
| scaffold670241_14.2 | 1 p3 | (CGC)5 | 15 | 1172 | 1186 | GCGGCTACAACCAAATTCAT     |
| scaffold670441_17.9 | 1 p3 | (ACC)6 | 18 | 329  | 346  | CATGCCTCGAGTATGTGGTG     |
| scaffold670833_13.1 | 1 p3 | (TGA)5 | 15 | 48   | 62   | CCCAAGACCCCAATTTGATT     |
| scaffold671043_15.7 | 1 p3 | (ATC)5 | 15 | 182  | 196  | CAATCAAATTTGGGGTCTTGG    |
| scaffold671287_13.9 | 1 p3 | (TTA)5 | 15 | 197  | 211  | AGCAGGCTCAGACCAAGAAG     |
| scaffold671359_13.4 | 1 p3 | (ATT)5 | 15 | 80   | 94   | TACTTCAACCCACGTGACCA     |
| scaffold671402_16.9 | 1 p3 | (CAT)7 | 21 | 2467 | 2487 | TGCAGGTTCTGAAACAGGAA     |
| scaffold671471_17.8 | 1 p3 | (GTG)6 | 18 | 1531 | 1548 | GGCCATTGAGTTATGGAGA      |

|                     |      |        |    |      |      |                            |
|---------------------|------|--------|----|------|------|----------------------------|
| scaffold671593_15.5 | 1 p3 | (AAT)8 | 24 | 37   | 60   | AATTGTTGCATCTATTTTCTAAATCA |
| scaffold671644_17.7 | 1 p3 | (ACA)6 | 18 | 373  | 390  | CAAGACCGTGACAGGCACTA       |
| scaffold671731_15.2 | 1 p3 | (AAT)5 | 15 | 1352 | 1366 | ATTGTCCCTCCACACCACTT       |
| scaffold671739_10.3 | 1 p3 | (TGC)5 | 15 | 500  | 514  | AATCGCATTTTCTCGACGAC       |
| scaffold671883_18.3 | 1 p3 | (GGC)5 | 15 | 302  | 316  | AGCCAAGAGCCCATAGTTCA       |
| scaffold671894_16.0 | 1 p3 | (GAA)5 | 15 | 637  | 651  | TTCCGATCAGAGCTTCTCGT       |
| scaffold672194_14.5 | 1 p3 | (ATT)6 | 18 | 759  | 776  | AAAATTTGTCCTTTCTACACGCA    |
| scaffold672264_20.1 | 1 p3 | (TAT)5 | 15 | 856  | 870  | AAAACCTGCCTCAACCCAG        |
| scaffold672445_15.5 | 1 p3 | (TGA)5 | 15 | 48   | 62   | CCAAGACCCCAATTTGATT        |
| scaffold672486_14.6 | 1 p3 | (ACA)5 | 15 | 8646 | 8660 | TGCAGCAACAGTTGGAGTTC       |
| scaffold672602_17.3 | 1 p3 | (TCA)7 | 21 | 1837 | 1857 | AACGCAACCTAATGTTTTGG       |
| scaffold672961_16.1 | 1 p3 | (TTC)5 | 15 | 986  | 1000 | GGCAGAATTTGAATGGGAAA       |
| scaffold673001_12.0 | 1 p3 | (TGA)5 | 15 | 77   | 91   | TGATCCCACTCTCCTTCTCG       |
| scaffold673009_13.7 | 1 p3 | (ACA)6 | 18 | 2182 | 2199 | CATCACTTCTCCAAAACCG        |
| scaffold673018_15.2 | 1 p3 | (TCC)5 | 15 | 3955 | 3969 | TACTGCCTCCAGATCCACCT       |
| scaffold673047_13.7 | 1 p3 | (GGT)5 | 15 | 932  | 946  | GGATCATTGTTATCGCGGTT       |
| scaffold673250_12.5 | 1 p3 | (TGC)5 | 15 | 602  | 616  | TGAACTGTCTTTGGCACGAG       |
| scaffold673283_16.5 | 1 p3 | (ATT)6 | 18 | 1450 | 1467 | TCAAAAACCAATTGATAGCACA     |
| scaffold673352_19.3 | 1 p3 | (CGG)5 | 15 | 700  | 714  | TGAATTCTTTCTCCATGCC        |
| scaffold673481_15.4 | 1 p3 | (GGT)5 | 15 | 425  | 439  | TCAGCAAAAATGATCCACA        |
| scaffold673588_10.1 | 1 p3 | (GGC)5 | 15 | 307  | 321  | GTCGAATTTTGCTGTGTGGA       |
| scaffold673610_10.8 | 1 p3 | (AAG)6 | 18 | 66   | 83   | GCAGGCCAAGAGGAAGAGT        |
| scaffold673614_16.6 | 1 p3 | (GGA)6 | 18 | 224  | 241  | GCTTTGGACTCGGAGTTTGA       |
| scaffold673783_15.4 | 1 p3 | (ATT)6 | 18 | 213  | 230  | GACATTATCCATTTTATTGGGCA    |
| scaffold673791_14.8 | 1 p3 | (GAA)5 | 15 | 1198 | 1212 | GAACTCGAGCATTGCAACAA       |
| scaffold673827_11.8 | 1 p3 | (ATT)8 | 24 | 1718 | 1741 | CAAGAAAGCGAAATGCTTCA       |
| scaffold673877_17.2 | 1 p3 | (GAT)5 | 15 | 180  | 194  | GGAAGCACTCGCAAGAAAAC       |
| scaffold673910_17.1 | 1 p3 | (TCA)6 | 18 | 178  | 195  | TCACCCCATACCCACATAC        |
| scaffold673937_12.7 | 1 p3 | (TTG)5 | 15 | 174  | 188  | ATGTAGCCGACCCCAATTTA       |
| scaffold673943_10.4 | 1 p3 | (ATT)5 | 15 | 51   | 65   | GGAGTGGGTGTCGGTTTTTA       |
| scaffold673950_16.1 | 1 p3 | (GCA)5 | 15 | 228  | 242  | AAAATACGAGTGGCGATGG        |
| scaffold674092_14.0 | 1 p3 | (ATT)7 | 21 | 175  | 195  | TTTGGGTTTTAAATTCGTTGAA     |
| scaffold674235_15.8 | 1 p3 | (AAT)5 | 15 | 208  | 222  | AGAACCAGACCTGCTTGCAT       |
| scaffold674289_16.0 | 1 p3 | (TTG)5 | 15 | 917  | 931  | CGACCCACATAGTGGGAAAG       |
| scaffold674441_16.3 | 1 p3 | (TTA)6 | 18 | 52   | 69   | TTCGACGGTTTCAAAGAAAAA      |
| scaffold674521_10.8 | 1 p3 | (TGA)6 | 18 | 408  | 425  | TTTTGATTGGGAATAATTGGG      |
| scaffold674534_17.1 | 1 p3 | (GCT)7 | 21 | 908  | 928  | TGTTTCGTCCAGAGACAGCAC      |
| scaffold674546_14.5 | 1 p3 | (GAA)5 | 15 | 587  | 601  | ATGTCTATCGTTTGGGCTGG       |
| scaffold674630_16.2 | 1 p3 | (TTC)7 | 21 | 1590 | 1610 | AAATTTGAGACCGTGGATCG       |
| scaffold674732_14.6 | 1 p3 | (TGG)5 | 15 | 578  | 592  | GGCTGACTCATGGAGAGGAG       |
| scaffold674834_14.7 | 1 p3 | (CAG)5 | 15 | 645  | 659  | ACTGCCTCATCCAACTTGC        |
| scaffold674841_11.9 | 1 p3 | (TAA)6 | 18 | 282  | 299  | CCCCTATCCCCACTGTTAG        |
| scaffold674852_16.4 | 1 p3 | (ACA)6 | 18 | 546  | 563  | TGACATTGTTTCGGTTGCAT       |
| scaffold674914_14.8 | 1 p3 | (TCA)5 | 15 | 448  | 462  | TCATGGTGGGGTGAGTTTTT       |
| scaffold674941_13.2 | 1 p3 | (TGT)5 | 15 | 476  | 490  | GATTCTGGTTCGGTGATGCT       |
| scaffold674951_18.9 | 1 p3 | (AGC)5 | 15 | 228  | 242  | GCTCGTACATCGAGTGATGC       |
| scaffold675005_14.0 | 1 p3 | (TAA)6 | 18 | 368  | 385  | GTGGAGCTGTGGTGGGTTAG       |
| scaffold675080_15.3 | 1 p3 | (CAA)5 | 15 | 2057 | 2071 | ATCCTATGTGCACCACGACA       |
| scaffold675286_15.3 | 1 p3 | (TTA)5 | 15 | 3192 | 3206 | AATGAGAAAATGAGGCGCAC       |
| scaffold675311_17.1 | 1 p3 | (ACA)5 | 15 | 884  | 898  | TTATGGCCAAAGACCAACCT       |
| scaffold675378_15.0 | 1 p3 | (CGG)5 | 15 | 655  | 669  | CGGATTGTTTTTGGAAAGGA       |
| scaffold675537_19.7 | 1 p3 | (GAA)5 | 15 | 429  | 443  | CAATGGAGGAGTGCAAGGTT       |
| scaffold675836_14.5 | 1 p3 | (CGC)5 | 15 | 180  | 194  | ACCTAAATCCTACCCACC         |
| scaffold675890_15.3 | 1 p3 | (ACT)5 | 15 | 1064 | 1078 | AAGGCCCTCTCAAACCAAT        |
| scaffold675935_14.6 | 1 p3 | (GGT)7 | 21 | 2756 | 2776 | GAAGATGTATCAGGGCGAGG       |
| scaffold676349_14.8 | 1 p3 | (CCG)5 | 15 | 39   | 53   | GCATGAGGAAAAGGGATGAA       |
| scaffold676398_17.5 | 1 p3 | (TTG)6 | 18 | 482  | 499  | ACCGCAGAATTTAGGAGGCT       |
| scaffold676541_13.6 | 1 p3 | (ATC)6 | 18 | 354  | 371  | TCTTATTAGGGGCTTGTGCG       |

|                     |      |        |    |      |                             |
|---------------------|------|--------|----|------|-----------------------------|
| scaffold676817_14.8 | 1 p3 | (GTG)6 | 18 | 3813 | 3830 TTCAGTGTGAGGGGTGAACA   |
| scaffold676849_15.6 | 1 p3 | (TTA)5 | 15 | 618  | 632 TTTTGTGTGGCGTCTCTTG     |
| scaffold676914_19.3 | 1 p3 | (TTC)5 | 15 | 573  | 587 GGAGATAGAGAGGGGGCCAAC   |
| scaffold677018_15.3 | 1 p3 | (AGA)5 | 15 | 1601 | 1615 GATTGGGGAGAGGATTGGAT   |
| scaffold677109_10.2 | 1 p3 | (CCT)5 | 15 | 791  | 805 TGTCGGAGCAGAATTGTACG    |
| scaffold677321_11.0 | 1 p3 | (TCT)5 | 15 | 348  | 362 AACGTATTCCTTCCCCCACT    |
| scaffold677341_16.0 | 1 p3 | (TCT)6 | 18 | 6041 | 6058 TTCCCCACCATTTCATCATT   |
| scaffold677483_13.0 | 1 p3 | (CGG)5 | 15 | 351  | 365 CCATCTCAAGGGTCTACCGA    |
| scaffold677549_16.0 | 1 p3 | (ATC)5 | 15 | 186  | 200 TTGCTCCCCTCTATCAAAGTTC  |
| scaffold677567_13.8 | 1 p3 | (CGG)5 | 15 | 834  | 848 GCCCTCGACTCCTTAGCTTT    |
| scaffold677723_16.6 | 1 p3 | (TGA)5 | 15 | 101  | 115 CCCCAAGACCCCAATTTTAT    |
| scaffold677848_11.2 | 1 p3 | (CCG)5 | 15 | 145  | 159 TACTCCATTACAGACCCCGC    |
| scaffold677863_15.6 | 1 p3 | (TAT)5 | 15 | 1606 | 1620 GGCACCCTCTCATGGATACT   |
| scaffold678042_14.3 | 1 p3 | (GCG)5 | 15 | 1342 | 1356 GTGTTTGTGATGGGCAACTG   |
| scaffold678382_18.0 | 1 p3 | (CTT)5 | 15 | 899  | 913 AAGTCGTCGTCATCATCCTCT   |
| scaffold678446_16.2 | 1 p3 | (AAT)6 | 18 | 46   | 63 GAGCATGCCTAGATGTTGCTT    |
| scaffold678599_13.2 | 1 p3 | (AAT)6 | 18 | 100  | 117 AGTCTCAATGGGGACACCAG    |
| scaffold678729_17.2 | 1 p3 | (TCA)6 | 18 | 2000 | 2017 ATCCTCCTCAGATCCTTGGC   |
| scaffold678762_16.9 | 1 p3 | (CAA)6 | 18 | 1035 | 1052 TGTAGGCCAAATGTGTTGGA   |
| scaffold678946_15.9 | 1 p3 | (TAT)6 | 18 | 408  | 425 CTCCAAATGCTCCTCTACCG    |
| scaffold678957_17.0 | 1 p3 | (GCG)5 | 15 | 1240 | 1254 GGCTCGCAAAAATAACCCAA   |
| scaffold679033_14.9 | 1 p3 | (GCT)5 | 15 | 234  | 248 GTAGTCGGAAAGTGGGGTGA    |
| scaffold679249_16.0 | 1 p3 | (TTA)5 | 15 | 773  | 787 GTGCAAAAGCAGGCAGAAGT    |
| scaffold679316_12.3 | 1 p3 | (ACA)6 | 18 | 1352 | 1369 CACTTACGAAATGTCAAGACGC |
| scaffold679404_15.2 | 1 p3 | (ATA)5 | 15 | 1070 | 1084 TTAGGACTACCGGTCCGATT   |
| scaffold679449_16.0 | 1 p3 | (ACA)8 | 24 | 3071 | 3094 CCGAATGATGAGAAGTGGGT   |
| scaffold679512_16.9 | 1 p3 | (ATC)5 | 15 | 794  | 808 TGAGGGAACCTTTGTGAACCC   |
| scaffold679688_11.2 | 1 p3 | (GAT)7 | 21 | 598  | 618 AGCTTAGGGCAACACGAGAA    |
| scaffold679718_15.8 | 1 p3 | (TCG)5 | 15 | 494  | 508 CAATTCTTTTGTGCGTGAGC    |
| scaffold679793_15.2 | 1 p3 | (TTG)5 | 15 | 397  | 411 CATTGATCGTACACGATGGC    |
| scaffold679977_11.8 | 1 p3 | (TAT)5 | 15 | 236  | 250 TGGACCCAATATGTCATAACCA  |
| scaffold680021_12.2 | 1 p3 | (TTG)5 | 15 | 235  | 249 GAAGGGGGAGACCGAAATTA    |
| scaffold680090_18.0 | 1 p3 | (CTA)5 | 15 | 443  | 457 TTGCGTCTGATTGTTGAGC     |
| scaffold680154_15.9 | 1 p3 | (TAT)5 | 15 | 684  | 698 CATCATTTGATTGTGGTCCG    |
| scaffold680165_14.7 | 1 p3 | (ATT)5 | 15 | 452  | 466 TCGAAATTGACACGATCCAA    |
| scaffold680230_12.7 | 1 p3 | (GGA)6 | 18 | 317  | 334 TGGTTAAACTCCACCTTGGC    |
| scaffold680274_10.3 | 1 p3 | (GAC)5 | 15 | 792  | 806 TTGTATCGAACGAGCATCCA    |
| scaffold680332_21.2 | 1 p3 | (TAT)5 | 15 | 172  | 186 CAGAGAGGCGGTGGTAAAAA    |
| scaffold680398_13.2 | 1 p3 | (CAC)5 | 15 | 235  | 249 GACCCGACTCCATTTTGATG    |
| scaffold680628_13.0 | 1 p3 | (TGT)7 | 21 | 52   | 72 ATGTAGCCGACCCCAATTTA     |
| scaffold680670_16.2 | 1 p3 | (TTC)6 | 18 | 476  | 493 GCATACCTGGGAGTGCATTT    |
| scaffold680764_16.8 | 1 p3 | (TGA)5 | 15 | 3137 | 3151 TTTCCCTCTCAAAAACATCACA |
| scaffold680952_14.2 | 1 p3 | (AAG)6 | 18 | 1326 | 1343 AGTCGTCTCCTATCCCATCG   |
| scaffold681155_13.2 | 1 p3 | (TTA)5 | 15 | 257  | 271 CCGGTCAAACCAAATTACG     |
| scaffold681172_16.9 | 1 p3 | (TAA)5 | 15 | 4535 | 4549 CATGAATGTGTGGTTTCATCA  |
| scaffold681190_15.3 | 1 p3 | (TCT)6 | 18 | 504  | 521 TCGTAGCTCCCTTTGCATTT    |
| scaffold681235_14.2 | 1 p3 | (AAT)7 | 21 | 436  | 456 AGGCGTTTCATTGTTCTGCT    |
| scaffold681338_13.6 | 1 p3 | (AAT)6 | 18 | 558  | 575 ATTCGGCATCAACCAACTTC    |
| scaffold681410_17.9 | 1 p3 | (GGC)6 | 18 | 610  | 627 TGCATGAACGCTTCTCACTC    |
| scaffold681456_17.2 | 1 p3 | (GGC)5 | 15 | 237  | 251 AGGGGTAAAGTGCAAATCCC    |
| scaffold681497_16.3 | 1 p3 | (TTA)5 | 15 | 1896 | 1910 GCAACCATGATCTCATCGAA   |
| scaffold681582_17.6 | 1 p3 | (CAT)6 | 18 | 411  | 428 GTACCCTTGCCAGAATCAA     |
| scaffold681649_14.3 | 1 p3 | (AAT)5 | 15 | 1583 | 1597 TTCAGTTGGATGGTTGGACA   |
| scaffold681659_16.9 | 1 p3 | (TGT)5 | 15 | 1125 | 1139 TTGTTTTGACGGGTGAAAGT   |
| scaffold681748_13.2 | 1 p3 | (TTG)7 | 21 | 42   | 62 ATGTAGCCGACCCCAATTTA     |
| scaffold681783_14.6 | 1 p3 | (CCT)5 | 15 | 143  | 157 GTCGCCTCACCTTCATCTTC    |
| scaffold681896_16.2 | 1 p3 | (AAT)5 | 15 | 396  | 410 CCATTACCGATGCCTTACTTG   |
| scaffold682032_13.2 | 1 p3 | (GAG)5 | 15 | 60   | 74 GACAGCGGTTGGTTCAGC       |



|                     |      |        |    |      |      |                           |
|---------------------|------|--------|----|------|------|---------------------------|
| scaffold682128_14.5 | 1 p3 | (AAT)6 | 18 | 228  | 245  | CTCGTAGGTTTGGGTTTCCA      |
| scaffold682169_17.2 | 1 p3 | (TCA)6 | 18 | 621  | 638  | GGTGAGCGATCAAAATCCAT      |
| scaffold682196_17.8 | 1 p3 | (ACA)7 | 21 | 875  | 895  | CCGCCTGAAGTTCTTTTCTG      |
| scaffold682371_17.8 | 1 p3 | (GGC)7 | 21 | 680  | 700  | AGAGGGGTGTTGAAGGTGTG      |
| scaffold682474_15.8 | 1 p3 | (TCA)5 | 15 | 4330 | 4344 | TCCGGCGATTACTACAAACC      |
| scaffold682577_17.5 | 1 p3 | (TCA)6 | 18 | 600  | 617  | TGGCTTCAGAAGAAACACCA      |
| scaffold682681_16.9 | 1 p3 | (TCA)5 | 15 | 2034 | 2048 | GGATCAAATGTTTTGGGTGG      |
| scaffold682707_14.7 | 1 p3 | (TGT)6 | 18 | 46   | 63   | TGTAGCCGACCCCAATTTAT      |
| scaffold682813_14.2 | 1 p3 | (CGG)5 | 15 | 866  | 880  | TAGGGAGTGGAGCAGCAACT      |
| scaffold682847_13.9 | 1 p3 | (ACC)5 | 15 | 163  | 177  | CTGCAGATGAGGGTCTTAGC      |
| scaffold683020_17.3 | 1 p3 | (CAC)6 | 18 | 1054 | 1071 | GGTGTGCTGGAGATACCGAT      |
| scaffold683164_12.1 | 1 p3 | (ATA)5 | 15 | 218  | 232  | ACTGCTCGCTATTTGGATGC      |
| scaffold683206_19.2 | 1 p3 | (TGG)6 | 18 | 1262 | 1279 | GGAAATGGTGGTAACAACGG      |
| scaffold683244_17.3 | 1 p3 | (TCA)5 | 15 | 1020 | 1034 | GTGCAGTTTCTCCTGCATCA      |
| scaffold683403_16.8 | 1 p3 | (TGT)7 | 21 | 41   | 61   | TGTAGCCGACCCCAATTTAT      |
| scaffold683406_15.2 | 1 p3 | (GTA)5 | 15 | 673  | 687  | GCAGACGATGCATTTTAGCA      |
| scaffold683457_14.7 | 1 p3 | (ATT)5 | 15 | 1962 | 1976 | TTCTGTTGCTTGGTCATGGA      |
| scaffold683590_15.4 | 1 p3 | (ATT)5 | 15 | 513  | 527  | TTGGCTCAAGTCTTTGCTGA      |
| scaffold683664_15.5 | 1 p3 | (AAT)6 | 18 | 575  | 592  | TCTCCGTTGCTCCTACATCAT     |
| scaffold684049_16.5 | 1 p3 | (TGG)5 | 15 | 797  | 811  | GGCATAGCCACGATTTCAAC      |
| scaffold684240_14.0 | 1 p3 | (GGC)5 | 15 | 159  | 173  | GCGAGTTTCTTGAGGTCGTC      |
| scaffold684335_17.1 | 1 p3 | (TTG)5 | 15 | 1635 | 1649 | CTGAAAGTTGCATCAACGA       |
| scaffold684340_13.5 | 1 p3 | (TGT)6 | 18 | 43   | 60   | ATGTAGCCGACCCCAATTTA      |
| scaffold684364_18.1 | 1 p3 | (TAT)5 | 15 | 479  | 493  | CATTTTGTACCCGAGCGAG       |
| scaffold684382_16.3 | 1 p3 | (ATA)6 | 18 | 288  | 305  | AGATGGGATGAATCTGGCTG      |
| scaffold684431_10.5 | 1 p3 | (TAA)5 | 15 | 516  | 530  | TCAAATACATAATTAGCACGGAGTG |
| scaffold684487_15.4 | 1 p3 | (CAA)5 | 15 | 1510 | 1524 | TCTGGATGCCTTGAAAAACC      |
| scaffold684587_14.3 | 1 p3 | (CTT)5 | 15 | 532  | 546  | AGAGGAAGGAGGTGACCGTT      |
| scaffold684640_14.2 | 1 p3 | (TTG)5 | 15 | 783  | 797  | TGGAGCATCCAACATGAGAG      |
| scaffold684647_15.8 | 1 p3 | (ATC)5 | 15 | 2390 | 2404 | GATGCTTGGGGATGTCTGTT      |
| scaffold684707_17.7 | 1 p3 | (TCA)5 | 15 | 1073 | 1087 | TGGGATTGTCATCCTCATCA      |
| scaffold684774_14.4 | 1 p3 | (TGA)7 | 21 | 50   | 70   | CCCAAGACCCCAATTTGATT      |
| scaffold684937_10.1 | 1 p3 | (TAA)5 | 15 | 294  | 308  | AAATGAAATCGTGCGAAAATG     |
| scaffold684955_13.6 | 1 p3 | (GGA)5 | 15 | 479  | 493  | CGGTATCGGAGACGGTAGAA      |
| scaffold684962_15.7 | 1 p3 | (TGT)6 | 18 | 41   | 58   | TGTAGCCGACCCCAATTTAT      |
| scaffold685045_18.2 | 1 p3 | (ATT)7 | 21 | 300  | 320  | AGCGTAGAATCGCGAGAGAG      |
| scaffold685072_15.5 | 1 p3 | (ATA)5 | 15 | 642  | 656  | AATCCCAAATTCATCCCTCC      |
| scaffold685090_13.4 | 1 p3 | (ATC)7 | 21 | 1256 | 1276 | TGGCCAAAATTGCCTCTATC      |
| scaffold685221_14.8 | 1 p3 | (ATC)5 | 15 | 1183 | 1197 | CAAAGCACCTGACAAGACCA      |
| scaffold685365_16.1 | 1 p3 | (GGC)5 | 15 | 638  | 652  | GAGTTCTCCGGTGATCTTGG      |
| scaffold685382_19.7 | 1 p3 | (AGA)7 | 21 | 238  | 258  | CCAAAGCTTGAAGAAATGTTTG    |
| scaffold685440_11.6 | 1 p3 | (GAT)8 | 24 | 54   | 77   | GCAGACGAATTTAGTCGGGA      |
| scaffold685448_15.4 | 1 p3 | (TAT)5 | 15 | 1236 | 1250 | AAGTGATGAAGGCTGCCACT      |
| scaffold685554_16.9 | 1 p3 | (TAA)6 | 18 | 604  | 621  | ATCTCAAAGACGCGAGGAA       |
| scaffold685648_17.6 | 1 p3 | (TGA)5 | 15 | 1490 | 1504 | TCATTAGATTGGGAATAATTGGG   |
| scaffold685675_17.9 | 1 p3 | (GCT)5 | 15 | 547  | 561  | ATGACGAAGGCTGAGATGCT      |
| scaffold685691_14.9 | 1 p3 | (CCG)5 | 15 | 476  | 490  | AATATCCACCACCTCCTCCC      |
| scaffold685756_15.6 | 1 p3 | (GAA)6 | 18 | 2572 | 2589 | ACTGGCAGCAACTCATTTC       |
| scaffold685903_19.2 | 1 p3 | (GTT)5 | 15 | 89   | 103  | TCCTTTTGCGTTTTATGTGC      |
| scaffold685934_15.9 | 1 p3 | (CAC)5 | 15 | 1036 | 1050 | GGAATCGGGTGAGTCTCAAG      |
| scaffold686097_13.4 | 1 p3 | (TAA)6 | 18 | 227  | 244  | ATAGGTCACGGGTCGAGTTG      |
| scaffold686162_16.6 | 1 p3 | (TTA)6 | 18 | 722  | 739  | CAACTTTGGGATAAAATCTCCG    |
| scaffold686166_13.9 | 1 p3 | (ATT)5 | 15 | 183  | 197  | TTTATCCCAAATGAGGCG        |
| scaffold686201_17.4 | 1 p3 | (CGT)5 | 15 | 347  | 361  | AAAACCGTTCCACCTT          |
| scaffold686229_12.2 | 1 p3 | (TCT)5 | 15 | 540  | 554  | AGGCTTTCCAACACCAAGAA      |
| scaffold686232_14.4 | 1 p3 | (TTC)5 | 15 | 1141 | 1155 | TCGGAGAACGGAAAATTGAG      |
| scaffold686296_14.2 | 1 p3 | (ATT)5 | 15 | 744  | 758  | GTCCATGTCCTCGTCTCAT       |
| scaffold686345_16.3 | 1 p3 | (ATC)5 | 15 | 1298 | 1312 | CTTGAAATGCCTGTTGGAT       |

|                     |      |        |    |      |      |                              |
|---------------------|------|--------|----|------|------|------------------------------|
| scaffold686347_15.7 | 1 p3 | (GCG)6 | 18 | 1799 | 1816 | CCTCCCCATTTTCGATTTTT         |
| scaffold686489_12.3 | 1 p3 | (ATC)5 | 15 | 112  | 126  | AGCAGGCTGAGAGAATGAGC         |
| scaffold686608_14.7 | 1 p3 | (CTC)6 | 18 | 1798 | 1815 | TGCACAGAAGATCCTGCAAC         |
| scaffold686657_12.2 | 1 p3 | (ATT)6 | 18 | 1121 | 1138 | TTTAAATCCAACCTCACACATATACAG, |
| scaffold686860_15.2 | 1 p3 | (CGC)5 | 15 | 2905 | 2919 | ACGGTCTCGAACTCGCTTTA         |
| scaffold686864_17.0 | 1 p3 | (AAT)6 | 18 | 237  | 254  | CGAATAGTAGCTTCTGCGGG         |
| scaffold686878_15.8 | 1 p3 | (GCT)5 | 15 | 1598 | 1612 | ATCCATGGGAATTGGACAAA         |
| scaffold686924_22.4 | 1 p3 | (AAC)5 | 15 | 777  | 791  | GTAATCAGGGCCATTCCCTT         |
| scaffold686941_19.7 | 1 p3 | (CCG)5 | 15 | 291  | 305  | TCATGCACCATCAAATCCTC         |
| scaffold687037_15.9 | 1 p3 | (TTA)5 | 15 | 2179 | 2193 | TTGTATCCCCCAGTTTCGTC         |
| scaffold687043_16.0 | 1 p3 | (CGC)5 | 15 | 571  | 585  | ATTTCAACTACGACGGCCAC         |
| scaffold687104_12.7 | 1 p3 | (AAT)7 | 21 | 43   | 63   | CACTCGAAGAGTAGCGGCTG         |
| scaffold687132_14.9 | 1 p3 | (ATC)5 | 15 | 246  | 260  | TGTTTTTACCTGCGTATCTGTCA      |
| scaffold687164_16.0 | 1 p3 | (ATT)5 | 15 | 1524 | 1538 | AGTTGACGGTTGGAAGATGG         |
| scaffold687182_15.7 | 1 p3 | (TTC)5 | 15 | 276  | 290  | GTTTACCTGACTGGCGTGGT         |
| scaffold687293_13.2 | 1 p3 | (ACA)5 | 15 | 576  | 590  | CCCTGGAACAACACCAGTTT         |
| scaffold687325_15.6 | 1 p3 | (CAC)6 | 18 | 361  | 378  | GTGCTTCGGTCTGGATGACT         |
| scaffold687505_18.7 | 1 p3 | (TCC)5 | 15 | 395  | 409  | ACAGAAAGGTCGGCATCATC         |
| scaffold687607_14.4 | 1 p3 | (TAA)7 | 21 | 58   | 78   | ATCTCCACTTGTGTCTCCAA         |
| scaffold687632_15.7 | 1 p3 | (ATT)6 | 18 | 295  | 312  | ATTCCTCGGGTTCTTGGAGT         |
| scaffold687709_13.0 | 1 p3 | (CGC)5 | 15 | 335  | 349  | TGATTTAGTAAAGTTGGAGGTGGA     |
| scaffold687953_14.9 | 1 p3 | (AAT)5 | 15 | 498  | 512  | GACCCTTTGTGGGATTTGAA         |
| scaffold688085_14.6 | 1 p3 | (ATC)5 | 15 | 250  | 264  | TTATGGTGCGTCGAGTCTTG         |
| scaffold688211_15.1 | 1 p3 | (TTA)6 | 18 | 167  | 184  | TCAAATGTTTCGTCTTGCAGC        |
| scaffold688282_13.4 | 1 p3 | (ACA)6 | 18 | 1204 | 1221 | AATTGAATTCAGAGCACCCG         |
| scaffold688443_18.1 | 1 p3 | (TGA)5 | 15 | 72   | 86   | CCGACTACGACTATCCTCGC         |
| scaffold688514_15.4 | 1 p3 | (ATG)5 | 15 | 66   | 80   | AATCGTCGAATTCGGTTTCA         |
| scaffold688556_10.3 | 1 p3 | (AAC)7 | 21 | 689  | 709  | AACATACCATCGTGGCCAAT         |
| scaffold688632_16.7 | 1 p3 | (TTG)5 | 15 | 49   | 63   | TGTAGCCGACCCCAATTTAT         |
| scaffold688801_15.0 | 1 p3 | (TGG)6 | 18 | 661  | 678  | GATTTCAATTCAGCGCTTCC         |
| scaffold688909_16.6 | 1 p3 | (TTG)9 | 27 | 39   | 65   | ATGTAGCCGACCCCAATTTA         |
| scaffold688975_12.3 | 1 p3 | (AAT)7 | 21 | 246  | 266  | TCAGAATATGCAAGGGGGAG         |
| scaffold689012_16.9 | 1 p3 | (TTA)5 | 15 | 790  | 804  | ACGGATTTCGAGTTTCAACGA        |
| scaffold689169_12.4 | 1 p3 | (AAT)6 | 18 | 2042 | 2059 | AGAGGGAGCATGTGACCTTG         |
| scaffold689187_15.2 | 1 p3 | (CAT)6 | 18 | 554  | 571  | TAGTCATCGAGCAAGCCAAA         |
| scaffold689294_13.1 | 1 p3 | (CGC)5 | 15 | 140  | 154  | TGACCAATCACCAATCAACAA        |
| scaffold689352_12.0 | 1 p3 | (GCG)6 | 18 | 156  | 173  | AGTGCAAATGTTGACGGGTT         |
| scaffold689414_11.2 | 1 p3 | (CAA)5 | 15 | 509  | 523  | ACGTCCTTGCCAAAGTTCAC         |
| scaffold689422_14.6 | 1 p3 | (TGA)6 | 18 | 53   | 70   | CCCAAGACCCCAATTTGATT         |
| scaffold689592_13.7 | 1 p3 | (ACA)5 | 15 | 52   | 66   | CACGCCAACTTACAACTATCG        |
| scaffold689790_18.0 | 1 p3 | (ATG)6 | 18 | 2076 | 2093 | GTCTCAGGTTCGAATCCCAC         |
| scaffold689962_16.5 | 1 p3 | (TTC)5 | 15 | 1905 | 1919 | CCTTGAGCTCGTCAAAGTCC         |
| scaffold690167_20.2 | 1 p3 | (GGA)5 | 15 | 378  | 392  | ATTGTTGAGAGCCGAAATGG         |
| scaffold690274_14.2 | 1 p3 | (TGT)6 | 18 | 46   | 63   | TTGGTTCATGTAGCCGACC          |
| scaffold690336_17.1 | 1 p3 | (GAT)5 | 15 | 2331 | 2345 | GAACAAGGTGAAGGCTCCTG         |
| scaffold690376_15.2 | 1 p3 | (ACA)5 | 15 | 889  | 903  | GTTGCGAAATATGCCTCCAT         |
| scaffold690492_16.0 | 1 p3 | (CTT)5 | 15 | 621  | 635  | TCTGTTTTATTTCCCGTGC          |
| scaffold690559_17.6 | 1 p3 | (AAG)5 | 15 | 714  | 728  | GCTGAACAATGCCTCGAAAC         |
| scaffold690654_13.9 | 1 p3 | (ATT)5 | 15 | 481  | 495  | TGCATTTTCATCGCTTTATGC        |
| scaffold690801_10.2 | 1 p3 | (TCA)5 | 15 | 294  | 308  | GCCGTCTGATTGGAGGATTA         |
| scaffold690813_11.3 | 1 p3 | (ATT)6 | 18 | 405  | 422  | TGAAAATGAGTTGGGGGTGT         |
| scaffold690951_15.2 | 1 p3 | (ATA)5 | 15 | 564  | 578  | TGAGCATGATGTGTCTTGAATTA      |
| scaffold690959_10.6 | 1 p3 | (TCA)5 | 15 | 294  | 308  | GCCGTCTGATTGGAGGATTA         |
| scaffold690980_12.1 | 1 p3 | (AAT)6 | 18 | 1180 | 1197 | AAATATTTTAGAAAGAACAGATTTTC   |
| scaffold691071_14.2 | 1 p3 | (CGG)5 | 15 | 112  | 126  | AAGAGGGGGAGGAAAATTGA         |
| scaffold691138_14.1 | 1 p3 | (TGT)6 | 18 | 69   | 86   | CCGACCTTCCAAATTGTTGT         |
| scaffold691161_13.8 | 1 p3 | (ATA)5 | 15 | 258  | 272  | ATGGGTAGCCAGTTTCACCA         |
| scaffold691204_17.1 | 1 p3 | (AAG)5 | 15 | 49   | 63   | CAGTTCCATGTCACAAACGC         |

|                     |      |        |    |      |      |                            |
|---------------------|------|--------|----|------|------|----------------------------|
| scaffold691215_13.8 | 1 p3 | (ATC)7 | 21 | 208  | 228  | ACCAATCAAACCCAACGAAA       |
| scaffold691235_15.6 | 1 p3 | (ATT)5 | 15 | 222  | 236  | TCATTTCCGACAACCTCGATG      |
| scaffold691417_11.3 | 1 p3 | (CCG)5 | 15 | 174  | 188  | CATTCCTGCAATCCTCATC        |
| scaffold691471_15.2 | 1 p3 | (AAT)5 | 15 | 227  | 241  | CCATTGTAAACCCCTGCACT       |
| scaffold691557_13.3 | 1 p3 | (ACA)5 | 15 | 427  | 441  | CCAGAACCATGGACACACAG       |
| scaffold691616_15.6 | 1 p3 | (TCT)5 | 15 | 1023 | 1037 | ACTTATTGGCACGAAGTCCG       |
| scaffold691653_14.9 | 1 p3 | (TCA)5 | 15 | 456  | 470  | CTGCTAGACCCAGTGGTGGT       |
| scaffold691756_14.6 | 1 p3 | (CCT)5 | 15 | 768  | 782  | ATGTTTCTTCCGAGTGTGGG       |
| scaffold691829_16.5 | 1 p3 | (ACG)5 | 15 | 350  | 364  | GATGAGCAGCTCGACAATGA       |
| scaffold691890_15.8 | 1 p3 | (TCC)5 | 15 | 55   | 69   | GGCCACCAAGAATCTCAGAA       |
| scaffold691961_14.0 | 1 p3 | (TTA)5 | 15 | 556  | 570  | GGGTTGTTAAGATTTAATGATTATCC |
| scaffold692060_13.7 | 1 p3 | (ACA)6 | 18 | 1038 | 1055 | CCTGGCCTTCAATTCATGTT       |
| scaffold692111_17.5 | 1 p3 | (ATA)5 | 15 | 195  | 209  | TCAAAGAAAGTGAGTAGAATCCAAA  |
| scaffold692174_13.6 | 1 p3 | (TTG)7 | 21 | 422  | 442  | TTTGGTTCATGTAGCCGACTC      |
| scaffold692177_17.0 | 1 p3 | (ATC)5 | 15 | 54   | 68   | TGTGTTTCATGTTTGTGTGATAA    |
| scaffold692229_15.2 | 1 p3 | (TAT)7 | 21 | 67   | 87   | TGAAGTTTTCGAAGACTGGAAGA    |
| scaffold692292_18.4 | 1 p3 | (ATG)6 | 18 | 457  | 474  | CCTCGATCCTGACCCAATTA       |
| scaffold692325_14.2 | 1 p3 | (TTA)8 | 24 | 734  | 757  | TGAATATTGGGGTGGGAAAA       |
| scaffold692402_18.2 | 1 p3 | (ACA)5 | 15 | 166  | 180  | AATCACGGGACCAAAATGAA       |
| scaffold692833_16.3 | 1 p3 | (GCC)6 | 18 | 2385 | 2402 | ACTTTTGTGACGGTTTTGCC       |
| scaffold692860_13.6 | 1 p3 | (ATT)7 | 21 | 75   | 95   | TGCACATGTTAGCCAGAACTTT     |
| scaffold693109_11.7 | 1 p3 | (GTC)5 | 15 | 212  | 226  | TCGATTGTATTTGTGCTGCAA      |
| scaffold693228_17.2 | 1 p3 | (GCC)5 | 15 | 590  | 604  | TCATTCTCTTCACCGGAAGC       |
| scaffold693259_18.6 | 1 p3 | (TGG)7 | 21 | 210  | 230  | AAGGTAACGGAAGGGTCTGG       |
| scaffold693500_15.5 | 1 p3 | (TGT)7 | 21 | 38   | 58   | TGTAGCCGACCCCAATTTAT       |
| scaffold693522_13.0 | 1 p3 | (ATT)5 | 15 | 530  | 544  | TATTGTCCTCCATTTCCCCA       |
| scaffold693562_15.9 | 1 p3 | (ATC)5 | 15 | 409  | 423  | ATTCCTGTTCTCTTCCCCG        |
| scaffold693671_13.0 | 1 p3 | (TGA)6 | 18 | 44   | 61   | CCAAGACCCCAATTTGATT        |
| scaffold693981_15.4 | 1 p3 | (GAA)5 | 15 | 559  | 573  | TCATGGATTCATGGTGCAGT       |
| scaffold693999_12.9 | 1 p3 | (TTC)5 | 15 | 1517 | 1531 | CCCGTTCAGACCACCTTTTA       |
| scaffold694081_14.6 | 1 p3 | (CAC)5 | 15 | 148  | 162  | TCAACCTGAGTCTCCATCCC       |
| scaffold694082_12.8 | 1 p3 | (TGA)8 | 24 | 44   | 67   | CCAAGACCCCAATTTGATT        |
| scaffold694368_11.9 | 1 p3 | (TAT)7 | 21 | 718  | 738  | TGGGATGAGGAAAAACATGA       |
| scaffold694444_14.3 | 1 p3 | (CCG)5 | 15 | 617  | 631  | TCGACGCATCAGAAGACAAC       |
| scaffold694475_18.0 | 1 p3 | (TGT)6 | 18 | 957  | 974  | GAGCTTTTGGAGAGTGCTGC       |
| scaffold694520_12.4 | 1 p3 | (TTG)5 | 15 | 1311 | 1325 | GAAGGGGATCACCAAACCTGA      |
| scaffold694583_17.2 | 1 p3 | (TGA)5 | 15 | 1345 | 1359 | TTCTATGAAGCCCTCAGCGT       |
| scaffold694651_17.2 | 1 p3 | (TCC)5 | 15 | 800  | 814  | TGCAGAAGGTCTCCTCCAGT       |
| scaffold694740_10.0 | 1 p3 | (CTT)5 | 15 | 408  | 422  | ATGGTTGCCTTTGTTTGGAG       |
| scaffold694869_13.0 | 1 p3 | (AAT)5 | 15 | 932  | 946  | CAACATTGCAAATGGGACA        |
| scaffold695150_17.6 | 1 p3 | (TGT)7 | 21 | 33   | 53   | CCAATTTATTGGGATTAAGGC      |
| scaffold695217_12.8 | 1 p3 | (TTA)6 | 18 | 997  | 1014 | TGTTTACACGTGTGGGATATGG     |
| scaffold695307_13.5 | 1 p3 | (TCC)5 | 15 | 266  | 280  | TATCTGCAGCGCATCATCTT       |
| scaffold695378_15.3 | 1 p3 | (GAG)6 | 18 | 262  | 279  | GAGTCAAAGCCATCCACGAT       |
| scaffold695394_16.4 | 1 p3 | (TTG)6 | 18 | 298  | 315  | ATGGATGCACCGTTAGAAG        |
| scaffold695593_14.2 | 1 p3 | (TCC)6 | 18 | 3738 | 3755 | GGCAATTGACCACCGTAAAC       |
| scaffold695753_17.9 | 1 p3 | (AAT)5 | 15 | 335  | 349  | TCGGGATTCAGTGATTAAGC       |
| scaffold696024_13.8 | 1 p3 | (ATG)5 | 15 | 1011 | 1025 | CGTTTAGTGGTGCAGGAAT        |
| scaffold696088_17.4 | 1 p3 | (TCA)6 | 18 | 259  | 276  | ACCAGTAGTTTCCGGTGGTG       |
| scaffold696156_16.6 | 1 p3 | (AAT)5 | 15 | 454  | 468  | TGAGGCGTAAGCAAATTTCA       |
| scaffold696236_13.9 | 1 p3 | (TTA)5 | 15 | 159  | 173  | TGTTGCACTATTTGCTTGGG       |
| scaffold696391_12.0 | 1 p3 | (TAT)6 | 18 | 475  | 492  | GACTATGGCCAAAACCGTA        |
| scaffold696396_16.6 | 1 p3 | (AAT)7 | 21 | 378  | 398  | GAGGACATCGGTCTGAGAGG       |
| scaffold696426_17.0 | 1 p3 | (TTG)5 | 15 | 151  | 165  | TGATCCATATAGCCGACCCT       |
| scaffold696529_13.9 | 1 p3 | (TTG)5 | 15 | 569  | 583  | GGTTCATGTAGCCGACCCTA       |
| scaffold696548_15.2 | 1 p3 | (CAC)5 | 15 | 500  | 514  | CCCAACCAAAAATACCCTTT       |
| scaffold696565_13.3 | 1 p3 | (ACA)8 | 24 | 1435 | 1458 | CAAATCAAATAATTGCAAAGTGA    |
| scaffold696653_15.7 | 1 p3 | (TAT)6 | 18 | 226  | 243  | TGCGAGCTAGCGTCATAAAA       |

|                     |      |        |    |       |                               |
|---------------------|------|--------|----|-------|-------------------------------|
| scaffold696666_13.3 | 1 p3 | (ATT)6 | 18 | 555   | 572 TGCTTGATTAGCATTTTATGGG    |
| scaffold696702_16.0 | 1 p3 | (TTG)5 | 15 | 532   | 546 TGAGGAAGCCGTTGAAGATT      |
| scaffold696774_14.5 | 1 p3 | (TGA)5 | 15 | 1010  | 1024 CCGAAAAATTGGGAAATCCT     |
| scaffold696783_11.9 | 1 p3 | (TCC)5 | 15 | 490   | 504 CTTTGCCTTTTCTGCCTCTG      |
| scaffold696877_16.7 | 1 p3 | (TTG)6 | 18 | 2190  | 2207 ATACGATCCATTTTGCCGAC     |
| scaffold696944_15.2 | 1 p3 | (GAG)5 | 15 | 517   | 531 GGAGGACGAGGAGCATCATA      |
| scaffold696952_15.7 | 1 p3 | (TGC)5 | 15 | 1946  | 1960 CTTGCTGTGTCGATCCCTTT     |
| scaffold697048_18.6 | 1 p3 | (AAC)5 | 15 | 271   | 285 GGCCGTGTACTACCGTGTTT      |
| scaffold697212_16.2 | 1 p3 | (CAA)5 | 15 | 11072 | 11086 ATGGTCTCGACAACACAGT     |
| scaffold697382_11.8 | 1 p3 | (CGG)5 | 15 | 387   | 401 AGCAAATAAATCGGCAGAGG      |
| scaffold697556_12.3 | 1 p3 | (GGA)5 | 15 | 538   | 552 GTCGAAGAACCTCGACAACC      |
| scaffold697655_12.7 | 1 p3 | (TGA)6 | 18 | 96    | 113 TGCTATTTTCATCTACCCACCA    |
| scaffold697775_11.6 | 1 p3 | (TAT)6 | 18 | 263   | 280 AAACGCCTAGCTCTCCACAA      |
| scaffold697867_14.5 | 1 p3 | (AAT)5 | 15 | 676   | 690 GAGAATTGGGTAACCAGCCA      |
| scaffold697883_17.1 | 1 p3 | (TCA)5 | 15 | 5875  | 5889 GGGGGAGAGGTTAGATTGGA     |
| scaffold697891_15.1 | 1 p3 | (TAT)6 | 18 | 272   | 289 AGTGATTGATGGGCTAGGCA      |
| scaffold698024_16.4 | 1 p3 | (ATA)7 | 21 | 719   | 739 TATTTTATCTCCTCCGCCCG      |
| scaffold698055_15.7 | 1 p3 | (AAT)5 | 15 | 1197  | 1211 TGAAGGAAAGGGATGGGTAG     |
| scaffold698313_17.0 | 1 p3 | (GCG)5 | 15 | 522   | 536 TGCAAGTTTGAGCGAGATTG      |
| scaffold698454_17.4 | 1 p3 | (ATT)6 | 18 | 247   | 264 ATCTCGTGGGGGAAGACTTT      |
| scaffold698486_12.4 | 1 p3 | (AAT)5 | 15 | 970   | 984 GCATTTCCACGTTCAAGAGGT     |
| scaffold698492_16.9 | 1 p3 | (TTC)5 | 15 | 62    | 76 TTCAACACTATTCAACACGACTGA   |
| scaffold698641_14.3 | 1 p3 | (CAT)6 | 18 | 2477  | 2494 GCTGCATTGGGGAAAGTCTA     |
| scaffold698716_16.6 | 1 p3 | (CCG)5 | 15 | 2435  | 2449 TCTCACTCAGCTCGAAAGCA     |
| scaffold698771_18.3 | 1 p3 | (CAT)5 | 15 | 779   | 793 CGGCAGTTAAGGCTCAAAG       |
| scaffold698813_14.9 | 1 p3 | (AAT)5 | 15 | 628   | 642 TGAAGGCCTTAATCACCAAA      |
| scaffold698854_13.1 | 1 p3 | (GTT)5 | 15 | 1067  | 1081 ATCCATATACCGACCCCACA     |
| scaffold698894_14.0 | 1 p3 | (TTC)5 | 15 | 854   | 868 TGTGCAATCCCCTAAGGTTT      |
| scaffold698993_18.6 | 1 p3 | (CAT)6 | 18 | 230   | 247 AGCTTTTTCTCTCCTTCCG       |
| scaffold699014_16.2 | 1 p3 | (CAA)5 | 15 | 2271  | 2285 CTTCCATTTGAGGATTGACA     |
| scaffold699040_16.6 | 1 p3 | (TTA)5 | 15 | 73    | 87 CTGGGTAAACCCACGGACT        |
| scaffold699182_14.1 | 1 p3 | (TTG)5 | 15 | 324   | 338 GACAGAGGCCTTGCAAGATT      |
| scaffold699332_18.0 | 1 p3 | (TGA)5 | 15 | 2101  | 2115 ATTATCTCGCAGCATTGCCT     |
| scaffold699400_14.0 | 1 p3 | (TTA)6 | 18 | 56    | 73 TCAGGTGTGATCAATGACAATTT    |
| scaffold699585_14.4 | 1 p3 | (TTG)7 | 21 | 4487  | 4507 TTTCTGCAACATCTGAACGC     |
| scaffold699642_16.1 | 1 p3 | (TAT)5 | 15 | 563   | 577 TGTACACAGTGAGGTCATACTTAGG |
| scaffold699764_12.8 | 1 p3 | (GAA)5 | 15 | 315   | 329 TGGTGACATCCACTACCTGC      |
| scaffold700045_19.2 | 1 p3 | (CCG)5 | 15 | 533   | 547 GATAATTCCCAGCCCCACTT      |
| scaffold700160_14.9 | 1 p3 | (TAA)5 | 15 | 832   | 846 GGCAATGCTATTGGGACAAG      |
| scaffold700222_16.5 | 1 p3 | (AAT)5 | 15 | 1147  | 1161 TTAAGATGAGATTTGTCCTTCAA  |
| scaffold700235_14.8 | 1 p3 | (CCA)5 | 15 | 776   | 790 CAAATTCCTCAACCACCACC      |
| scaffold700439_16.5 | 1 p3 | (GCA)6 | 18 | 522   | 539 ACAAGCATCATCTCCCAAC       |
| scaffold700478_14.6 | 1 p3 | (CTT)5 | 15 | 1816  | 1830 GTCTCCAGAAGACGATTTCGC    |
| scaffold700495_15.8 | 1 p3 | (TGG)6 | 18 | 109   | 126 GCCATATCACGGTGGAAAAG      |
| scaffold700655_17.3 | 1 p3 | (TGT)5 | 15 | 45    | 59 ATGTAGCCGACCCCAATTTA       |
| scaffold700700_15.3 | 1 p3 | (CTC)5 | 15 | 1350  | 1364 AGCTATAGGTGGGGATGGGT     |
| scaffold700764_20.0 | 1 p3 | (TAA)5 | 15 | 99    | 113 TTTACCCGATCTTGCTTTGC      |
| scaffold700869_18.6 | 1 p3 | (GGC)6 | 18 | 390   | 407 CACCGGAACCAAAACCTAGA      |
| scaffold701073_13.1 | 1 p3 | (TTA)5 | 15 | 67    | 81 TGTTCTCCAAATTCTTCCTC       |
| scaffold701194_19.7 | 1 p3 | (ATC)5 | 15 | 166   | 180 AGGAATGGACGCAAGATCAC      |
| scaffold701268_10.0 | 1 p3 | (ATG)5 | 15 | 439   | 453 GTACATCTCCAAGACCCCA       |
| scaffold701317_13.7 | 1 p3 | (TGT)5 | 15 | 49    | 63 GGTTTCATGTAGCCGACCCTA      |
| scaffold701334_16.1 | 1 p3 | (AGA)6 | 18 | 2139  | 2156 GAAAATGCTCAGGGGAGTCA     |
| scaffold701366_17.3 | 1 p3 | (TTG)5 | 15 | 744   | 758 CAATTGCTAGGGCGGACTAC      |
| scaffold701562_15.7 | 1 p3 | (CAA)5 | 15 | 999   | 1013 CCGTTTTGTTACCATTTTGC     |
| scaffold701619_16.2 | 1 p3 | (CTT)5 | 15 | 2076  | 2090 AGGATACATGACACCCGTCC     |
| scaffold701774_18.8 | 1 p3 | (TTC)5 | 15 | 378   | 392 ATCAAACCAACCCCAACAAA      |
| scaffold701831_16.7 | 1 p3 | (TGA)5 | 15 | 3026  | 3040 TCCCAAGTCTGAGCTTTTCTG    |

|                     |      |        |    |      |      |                         |
|---------------------|------|--------|----|------|------|-------------------------|
| scaffold702004_18.4 | 1 p3 | (TAT)5 | 15 | 29   | 43   | CATCAAACCCAAACCAACCT    |
| scaffold702086_17.4 | 1 p3 | (TCA)5 | 15 | 183  | 197  | GCGAAAATTTAACTAGGCCG    |
| scaffold702123_17.8 | 1 p3 | (TGT)6 | 18 | 67   | 84   | TTGGTTCATGTAGCCGACCT    |
| scaffold702169_15.0 | 1 p3 | (ACA)5 | 15 | 161  | 175  | AATTGAGAGGTGGGACGATG    |
| scaffold702205_15.9 | 1 p3 | (GCA)5 | 15 | 1686 | 1700 | CTTCAACTTGGCGCACTGTA    |
| scaffold702294_15.6 | 1 p3 | (CCA)6 | 18 | 1269 | 1286 | CAATTTCTTTTCCCCTCC      |
| scaffold702386_16.4 | 1 p3 | (ATT)5 | 15 | 274  | 288  | TTGGTGCAGAAATGATTTGA    |
| scaffold702446_16.7 | 1 p3 | (TCT)5 | 15 | 52   | 66   | TCGTCACTTTCTCTTCTCA     |
| scaffold702478_15.1 | 1 p3 | (TTA)5 | 15 | 340  | 354  | CACGATAAAACAATTTTGAATGA |
| scaffold702510_17.2 | 1 p3 | (TTG)5 | 15 | 1106 | 1120 | CAAGATAGGGGGACAGCGTA    |
| scaffold702525_10.9 | 1 p3 | (TTC)6 | 18 | 1148 | 1165 | ACAAGCCTCCAATTCACACC    |
| scaffold702639_20.5 | 1 p3 | (TTC)5 | 15 | 972  | 986  | AGATATGGAAGATGCGGTGG    |
| scaffold702734_12.8 | 1 p3 | (TGT)7 | 21 | 45   | 65   | ATGTAGCCGACCCCAATTTA    |
| scaffold702758_14.1 | 1 p3 | (GCG)6 | 18 | 250  | 267  | TGAACCCAAATCTCTCCTCG    |
| scaffold702789_13.3 | 1 p3 | (ATT)7 | 21 | 185  | 205  | CAATCCGCCAATCCTCTTTA    |
| scaffold702801_10.6 | 1 p3 | (TAT)5 | 15 | 773  | 787  | TGCCTGAGGTCTTACCTTG     |
| scaffold702810_14.4 | 1 p3 | (AAT)5 | 15 | 780  | 794  | CGTAATTTTCAACCCCAACC    |
| scaffold702818_15.1 | 1 p3 | (GCA)5 | 15 | 2352 | 2366 | ACAATCGATGAAGAAAGCGG    |
| scaffold702917_16.7 | 1 p3 | (CCG)5 | 15 | 1543 | 1557 | AGAAAACCTTCCCATTGCT     |
| scaffold703016_16.4 | 1 p3 | (AGC)5 | 15 | 2043 | 2057 | ACCATGCGATGAACACGTTA    |
| scaffold703049_17.6 | 1 p3 | (ACC)5 | 15 | 985  | 999  | CTCTTCGCCTTCAACCTCAC    |
| scaffold703059_16.2 | 1 p3 | (TTC)7 | 21 | 141  | 161  | AAAATTGGTGTGGATGTCTCT   |
| scaffold703078_14.0 | 1 p3 | (TGT)5 | 15 | 51   | 65   | TGTAGCCGACCCCAATTTAT    |
| scaffold703150_17.1 | 1 p3 | (AAG)5 | 15 | 83   | 97   | GTCATGCACCTCTTGAAGCA    |
| scaffold703248_16.1 | 1 p3 | (CTT)5 | 15 | 2318 | 2332 | GGCGTTCAATCCTATGGAGA    |
| scaffold703250_17.6 | 1 p3 | (TAT)5 | 15 | 928  | 942  | CCAATCAAATTGGGGTCAATA   |
| scaffold703287_18.0 | 1 p3 | (GCC)5 | 15 | 2277 | 2291 | ATGAATATCCTTCGTGCGCCA   |
| scaffold703354_13.2 | 1 p3 | (TTA)5 | 15 | 518  | 532  | ACTTGGGTTGTGCCAAAGTC    |
| scaffold703385_15.9 | 1 p3 | (CCG)5 | 15 | 118  | 132  | CCAGGTCGCTCAAATCTCTC    |
| scaffold703429_14.1 | 1 p3 | (AGC)6 | 18 | 2868 | 2885 | ACTTCCTCCAGCAAGAGCAG    |
| scaffold703438_16.8 | 1 p3 | (ACA)6 | 18 | 2613 | 2630 | CGAAAATAAGCCAACCGAAA    |
| scaffold703693_17.1 | 1 p3 | (GGA)5 | 15 | 1522 | 1536 | CTGTTGCAGGGAAGGCTAAG    |
| scaffold703871_14.2 | 1 p3 | (AAT)5 | 15 | 56   | 70   | GTCTCAATGGGGACATCTGG    |
| scaffold703900_18.0 | 1 p3 | (AAT)6 | 18 | 474  | 491  | CCCATCCTTGTGATATGCAAC   |
| scaffold703916_16.1 | 1 p3 | (GCT)5 | 15 | 265  | 279  | TGTCACCACTCCCAAACCTCA   |
| scaffold704036_11.2 | 1 p3 | (GAT)5 | 15 | 1150 | 1164 | TGCCCTTCCCGATTATAGTG    |
| scaffold704150_13.0 | 1 p3 | (TTA)5 | 15 | 588  | 602  | AAGGGAATTAAGCCTGCCTC    |
| scaffold704249_13.9 | 1 p3 | (AAT)6 | 18 | 152  | 169  | GCGATGGATTTTTCTTTCA     |
| scaffold704297_14.6 | 1 p3 | (ATA)5 | 15 | 111  | 125  | AGGAGCTAGCACACCATCCC    |
| scaffold704328_18.8 | 1 p3 | (TGA)6 | 18 | 3360 | 3377 | AGGTGAAGCCCAGTCTGCTA    |
| scaffold704366_13.7 | 1 p3 | (AAT)7 | 21 | 568  | 588  | CCACCATTCTTTGACAGCA     |
| scaffold704375_13.7 | 1 p3 | (GGC)7 | 21 | 45   | 65   | GTGAAGATTAGCTCCGCCTG    |
| scaffold704448_15.0 | 1 p3 | (ATA)5 | 15 | 296  | 310  | ATTCCACTTCATTGCACACG    |
| scaffold704592_15.9 | 1 p3 | (AAG)5 | 15 | 176  | 190  | CTCTTCGAGCGAGTTCAAGC    |
| scaffold704597_12.9 | 1 p3 | (AAT)7 | 21 | 169  | 189  | TGGATGAGTATTGCCTGACG    |
| scaffold704865_13.0 | 1 p3 | (TAA)7 | 21 | 742  | 762  | ATGCTTTGTGTTTTCTGCCC    |
| scaffold704896_14.2 | 1 p3 | (TTG)5 | 15 | 66   | 80   | TGATTTATGTAGCCGACCCC    |
| scaffold704983_14.6 | 1 p3 | (CCA)7 | 21 | 879  | 899  | GCAACTGAAAACCGTTTGGT    |
| scaffold705000_16.1 | 1 p3 | (TCC)5 | 15 | 1339 | 1353 | CTGCACTGTATCGGGAACCT    |
| scaffold705082_13.6 | 1 p3 | (TCA)7 | 21 | 221  | 241  | ACAGTAAAGCCCGTTGATG     |
| scaffold705129_17.0 | 1 p3 | (AAT)5 | 15 | 499  | 513  | TGAGCACCAAATTTATTATCGAA |
| scaffold705181_16.4 | 1 p3 | (GGC)5 | 15 | 1090 | 1104 | GAGCAGAAAGGAGGGGAAAC    |
| scaffold705233_15.4 | 1 p3 | (AAT)6 | 18 | 1010 | 1027 | GCTCGGTATGCCATTTGATT    |
| scaffold705522_16.3 | 1 p3 | (GAT)5 | 15 | 147  | 161  | GACATGGTTGTGGTTTGTGC    |
| scaffold705537_18.2 | 1 p3 | (ATC)5 | 15 | 754  | 768  | AATTGCTTGTGTAGGGGTGG    |
| scaffold705642_14.4 | 1 p3 | (AAT)5 | 15 | 724  | 738  | GGCTTGATCTTTGAGATGGG    |
| scaffold705765_10.0 | 1 p3 | (TCA)5 | 15 | 959  | 973  | GGGCGGATTAGAAGAAGAGG    |
| scaffold705778_10.5 | 1 p3 | (AGT)5 | 15 | 86   | 100  | GGAACCAACACAAACACACG    |

|                     |      |        |    |      |                               |
|---------------------|------|--------|----|------|-------------------------------|
| scaffold705836_14.6 | 1 p3 | (CCA)6 | 18 | 299  | 316 TCTTGGCGCCTCACTTTAAT      |
| scaffold705910_10.3 | 1 p3 | (TAT)9 | 27 | 354  | 380 TCCTACCCAACCAACTAGCG      |
| scaffold705936_14.5 | 1 p3 | (ATC)5 | 15 | 303  | 317 CCACAGCTTCCCAAACAAT       |
| scaffold706010_11.2 | 1 p3 | (CAT)5 | 15 | 404  | 418 TGCAGAACCCATGTACATCAA     |
| scaffold706049_15.2 | 1 p3 | (TTG)7 | 21 | 861  | 881 TCCATTTTCGCACAAAAGACA     |
| scaffold706197_10.5 | 1 p3 | (TAT)6 | 18 | 300  | 317 CATAAGTCGGCATCCAATG       |
| scaffold706293_16.8 | 1 p3 | (CAA)5 | 15 | 255  | 269 GACGCCATTTACGTCTTCGT      |
| scaffold706297_17.0 | 1 p3 | (TAT)5 | 15 | 801  | 815 CAATTTCCGGTGGTAAGAGC      |
| scaffold706370_13.8 | 1 p3 | (GAG)5 | 15 | 837  | 851 TTTGTTCAATTCTCCCGAGTTG    |
| scaffold706479_12.8 | 1 p3 | (TTC)5 | 15 | 837  | 851 TTGTCCCGTCAAGAAAAGG       |
| scaffold706480_15.4 | 1 p3 | (TTA)5 | 15 | 242  | 256 TGGATTTTCGTCACCATCTCTC    |
| scaffold706508_18.7 | 1 p3 | (ATC)6 | 18 | 572  | 589 AAACGCACTACACGAATCCC      |
| scaffold706516_16.4 | 1 p3 | (GCG)6 | 18 | 175  | 192 CGTGATTTCTTTTTGGGCTC      |
| scaffold706552_16.0 | 1 p3 | (CAG)5 | 15 | 1833 | 1847 GGTCTTTCTGCATCTCCAGC     |
| scaffold706588_18.3 | 1 p3 | (CGG)7 | 21 | 2057 | 2077 TAGAATCGGATTTATCGCCG     |
| scaffold706611_11.0 | 1 p3 | (GCT)5 | 15 | 626  | 640 ACTTCCAGCATACTCCCT        |
| scaffold706617_13.2 | 1 p3 | (TGA)7 | 21 | 43   | 63 CCAAGACCCCAATTTGATT        |
| scaffold706646_17.0 | 1 p3 | (TGA)6 | 18 | 43   | 60 CCAAGACCCCAATTTGATT        |
| scaffold706649_14.0 | 1 p3 | (CGC)5 | 15 | 1729 | 1743 CCCCCACCCTACAAGTATGA     |
| scaffold706718_13.0 | 1 p3 | (TTC)5 | 15 | 283  | 297 AAAACCGAGAGCAGAGTCCA      |
| scaffold706748_17.5 | 1 p3 | (GGC)5 | 15 | 60   | 74 CTTGTTGCTCAGCACAGTGG       |
| scaffold706817_15.6 | 1 p3 | (AAT)7 | 21 | 1258 | 1278 GGGACCCACATAACCATGTC     |
| scaffold706915_14.0 | 1 p3 | (CAA)5 | 15 | 1397 | 1411 CAAGCCAACTTTGAGGAAACA    |
| scaffold707025_17.0 | 1 p3 | (TTC)5 | 15 | 497  | 511 CTTGCTAGGGCAGTACGAC       |
| scaffold707062_16.3 | 1 p3 | (ATG)7 | 21 | 1094 | 1114 CTGGCATTGGAGGAGGACTA     |
| scaffold707085_16.5 | 1 p3 | (TTG)5 | 15 | 498  | 512 GTCACCAAATACAAAGCCGC      |
| scaffold707088_14.3 | 1 p3 | (GGC)5 | 15 | 307  | 321 ATCTTCAGCAAACCATCCG       |
| scaffold707089_12.6 | 1 p3 | (GCG)5 | 15 | 483  | 497 TAAGAATTGAATCGCAGGGC      |
| scaffold707094_13.2 | 1 p3 | (TGG)5 | 15 | 88   | 102 CTAGGTGTATGGCGGAGGAG      |
| scaffold707103_12.5 | 1 p3 | (GAG)5 | 15 | 1324 | 1338 CTTCTTCCCCTCCCAAACCT     |
| scaffold707149_15.7 | 1 p3 | (TCC)5 | 15 | 498  | 512 ACCTCTAGCCCGGTGAACCT      |
| scaffold707279_15.8 | 1 p3 | (TGA)6 | 18 | 46   | 63 CCAAGACCCCAATTTGATT        |
| scaffold707348_15.7 | 1 p3 | (TTA)7 | 21 | 499  | 519 TGATTTCAAACATACGTTGTCA    |
| scaffold707358_16.3 | 1 p3 | (TGA)5 | 15 | 49   | 63 CCAAGACCCCAATTTGATT        |
| scaffold707558_14.5 | 1 p3 | (ACA)5 | 15 | 462  | 476 AGCTCTCGACATCAAATCGG      |
| scaffold707664_16.7 | 1 p3 | (ATG)5 | 15 | 254  | 268 TCCGGAGAAAGCTGATGTTC      |
| scaffold707697_17.2 | 1 p3 | (GAG)6 | 18 | 1246 | 1263 CCGGTTATGAGGTCGGAGTA     |
| scaffold707808_14.8 | 1 p3 | (ATC)5 | 15 | 82   | 96 AAGCCGGATAAGCGATTTCT       |
| scaffold707965_14.4 | 1 p3 | (TAC)5 | 15 | 112  | 126 ACCCAACTTCCAAGTTCAA       |
| scaffold707969_11.4 | 1 p3 | (TGG)5 | 15 | 530  | 544 GGGTACTCGTAGTCAACGCC      |
| scaffold707991_11.4 | 1 p3 | (ATT)5 | 15 | 361  | 375 GGGATGCATCAAAGTTGTCA      |
| scaffold708142_12.0 | 1 p3 | (TTA)7 | 21 | 693  | 713 TCCTTAGTCAAGGGGAAATGAA    |
| scaffold708309_15.9 | 1 p3 | (TCA)5 | 15 | 269  | 283 ATGTGGCCATTCTGGAAAAC      |
| scaffold708336_14.5 | 1 p3 | (AAT)5 | 15 | 586  | 600 ACTTTGAACCCATCTCACCG      |
| scaffold708437_15.2 | 1 p3 | (CCA)5 | 15 | 499  | 513 CTGGTTCGCAACACAGAAAA      |
| scaffold708519_14.8 | 1 p3 | (ACA)5 | 15 | 620  | 634 GGATCCTAAAATTTGAAGGGG     |
| scaffold708563_12.7 | 1 p3 | (AAT)6 | 18 | 664  | 681 CCCTAGCAAAGAGAGAGGGA      |
| scaffold708577_13.3 | 1 p3 | (TCA)6 | 18 | 146  | 163 CCACCCTTACTCCCAATTT       |
| scaffold708702_16.0 | 1 p3 | (AAC)8 | 24 | 3720 | 3743 GCTATTGAGCAATATCAGAAACCA |
| scaffold708760_12.8 | 1 p3 | (ATT)5 | 15 | 1563 | 1577 GCAACGAACCCCAAGTCTAA     |
| scaffold708868_13.0 | 1 p3 | (TTC)6 | 18 | 947  | 964 AAGATTGCTCTCGCCTCAAC      |
| scaffold708936_12.2 | 1 p3 | (TGT)6 | 18 | 42   | 59 TGTAGCCGACCCCAATTTAT       |
| scaffold709004_15.5 | 1 p3 | (TTA)5 | 15 | 88   | 102 TGATTCTAAAATGAATCCAATCCA  |
| scaffold709020_10.0 | 1 p3 | (GCC)5 | 15 | 215  | 229 GCCGACATGACCTTAGCAGT      |
| scaffold709026_18.3 | 1 p3 | (CAG)5 | 15 | 316  | 330 TGCACATTTCAACAGCAACA      |
| scaffold709092_15.3 | 1 p3 | (AGC)5 | 15 | 593  | 607 ACAAATGGGCATGAACACA       |
| scaffold709109_16.6 | 1 p3 | (ATT)8 | 24 | 698  | 721 TCGTTAATTGGTTCCATTTTGA    |
| scaffold709187_15.3 | 1 p3 | (AAT)5 | 15 | 700  | 714 CCATGTCTTGAGAGTGGGGT      |

|                     |      |        |    |      |      |                          |
|---------------------|------|--------|----|------|------|--------------------------|
| scaffold709254_12.9 | 1 p3 | (GCG)6 | 18 | 201  | 218  | CGGTGGAGACTTAGGTGGG      |
| scaffold709313_14.7 | 1 p3 | (AAT)5 | 15 | 262  | 276  | TGCAGCTTGCTGCTGTTACT     |
| scaffold709427_18.8 | 1 p3 | (CAA)5 | 15 | 913  | 927  | TCATGCTTCTTGTGGGAAA      |
| scaffold709440_10.8 | 1 p3 | (AGA)5 | 15 | 369  | 383  | GAAATCCGAAACGCCATTAT     |
| scaffold709455_16.4 | 1 p3 | (TAA)6 | 18 | 315  | 332  | TTTGTCAAAGAACACGTTCCACAT |
| scaffold709458_15.3 | 1 p3 | (GTG)5 | 15 | 3069 | 3083 | GTGGGATTTTACGGAGTGGA     |
| scaffold709505_15.6 | 1 p3 | (AAC)6 | 18 | 555  | 572  | CCTTATACGTTCCACCCCAAGTT  |
| scaffold709523_16.3 | 1 p3 | (AAT)5 | 15 | 563  | 577  | CAACCGAAATTTTTGGAAGG     |
| scaffold709585_17.3 | 1 p3 | (TCA)6 | 18 | 796  | 813  | TGATCATATTCGGAGCCACA     |
| scaffold709637_16.7 | 1 p3 | (TGA)5 | 15 | 655  | 669  | GCCCAGGGATTCAAAGTACA     |
| scaffold709750_15.1 | 1 p3 | (CGA)5 | 15 | 5053 | 5067 | ACTCTGCCGCCAAAAGTCTA     |
| scaffold709784_17.1 | 1 p3 | (TAT)6 | 18 | 195  | 212  | TTGAGCCACTTATCATCTTTCAA  |
| scaffold709819_17.0 | 1 p3 | (TGC)5 | 15 | 1231 | 1245 | CGGAGGTAGTTGGCATTGT      |
| scaffold709851_15.1 | 1 p3 | (GGC)5 | 15 | 544  | 558  | TATCGCCCGAGAAATGAATC     |
| scaffold709927_15.3 | 1 p3 | (CAC)5 | 15 | 236  | 250  | GACGTCTTGCAAGTGACGAA     |
| scaffold709987_16.9 | 1 p3 | (GCG)6 | 18 | 442  | 459  | TCGTCACCCTACAAGCATCC     |
| scaffold710160_15.2 | 1 p3 | (TAA)6 | 18 | 105  | 122  | TTGGGGTCGGCTACATTAAC     |
| scaffold710179_14.6 | 1 p3 | (TGA)5 | 15 | 48   | 62   | CCCAAGACCCCAATTTGATT     |
| scaffold710207_16.5 | 1 p3 | (TCA)6 | 18 | 3889 | 3906 | AATCTCAAACCCGACAATGC     |
| scaffold710264_17.6 | 1 p3 | (CAA)5 | 15 | 769  | 783  | TTCCCCTGCATGTTTAGAGG     |
| scaffold710276_15.6 | 1 p3 | (ATA)5 | 15 | 3141 | 3155 | ATAGTGCAGCAAGATTGGGG     |
| scaffold710399_16.0 | 1 p3 | (GCT)6 | 18 | 677  | 694  | TTCATACCTGTCCCGACCAT     |
| scaffold710425_14.7 | 1 p3 | (GCC)5 | 15 | 394  | 408  | TCCACATGCAGAATCGGATA     |
| scaffold710454_14.8 | 1 p3 | (TCA)7 | 21 | 276  | 296  | CAAAGGAAGCAAACAAGGA      |
| scaffold710461_14.3 | 1 p3 | (CGC)8 | 24 | 1618 | 1641 | TCCACTACTCCAATGTCTGCC    |
| scaffold710490_15.6 | 1 p3 | (AAT)5 | 15 | 1401 | 1415 | ATTGTCTACCAATCGGGGTG     |
| scaffold710546_16.4 | 1 p3 | (TAT)5 | 15 | 458  | 472  | GTCAAGTTTGAGACGTTGCG     |
| scaffold710625_11.5 | 1 p3 | (TAT)5 | 15 | 681  | 695  | TAGCAACGCAATAACATCGG     |
| scaffold710663_15.8 | 1 p3 | (TTG)5 | 15 | 44   | 58   | GGTTGACTCACACGTGGAAA     |
| scaffold710792_14.9 | 1 p3 | (ATT)5 | 15 | 406  | 420  | TTCCAGTAAATCAACGAAACGA   |
| scaffold710801_15.9 | 1 p3 | (TCA)5 | 15 | 3100 | 3114 | CGTTGAAATCTGTTCTCTCC     |
| scaffold710804_14.7 | 1 p3 | (TTG)5 | 15 | 76   | 90   | ATGTAGCCGACCCCAATTTA     |
| scaffold710909_14.8 | 1 p3 | (TCA)5 | 15 | 4995 | 5009 | TATCAACCACCCATCAGCAA     |
| scaffold710936_15.7 | 1 p3 | (TGT)6 | 18 | 45   | 62   | TGTAGCCGACCCCAATTTAT     |
| scaffold710962_14.2 | 1 p3 | (AAT)5 | 15 | 612  | 626  | TGACAACCGCACGTAATTTG     |
| scaffold710998_16.5 | 1 p3 | (TCA)7 | 21 | 2084 | 2104 | AGTGCAAATCCCAGTGCTTC     |
| scaffold711086_12.0 | 1 p3 | (TTA)5 | 15 | 738  | 752  | GGGTTTGCGTTTGATTTGTT     |
| scaffold711156_12.0 | 1 p3 | (AAC)5 | 15 | 461  | 475  | CTTTGGAATTGGAAGGACGA     |
| scaffold711215_10.6 | 1 p3 | (TAT)7 | 21 | 576  | 596  | GGGAGAAGAGGGGTATAGCGG    |
| scaffold711225_13.4 | 1 p3 | (AAT)5 | 15 | 979  | 993  | AAATCCAAAATGGCCTACCA     |
| scaffold711260_17.5 | 1 p3 | (AAT)5 | 15 | 139  | 153  | TGTATCTTCTCACGAGCATTGG   |
| scaffold711304_14.7 | 1 p3 | (AAT)6 | 18 | 720  | 737  | AGAAGTACGAGGCAATGAT      |
| scaffold711472_12.9 | 1 p3 | (TAT)6 | 18 | 311  | 328  | GTGCATTGACCGTGTTTGAC     |
| scaffold711492_14.1 | 1 p3 | (AAT)5 | 15 | 744  | 758  | ATTGTTTTAATGCATCGGCG     |
| scaffold711502_17.1 | 1 p3 | (TGT)5 | 15 | 44   | 58   | ATGTAGCCGACCCCAATTTA     |
| scaffold711628_11.5 | 1 p3 | (ACA)5 | 15 | 1092 | 1106 | TTCAACTTGCTCGGAACCTT     |
| scaffold711687_17.9 | 1 p3 | (AAC)5 | 15 | 329  | 343  | CGTTCCAGACTTTCCAAAA      |
| scaffold711743_15.9 | 1 p3 | (CAC)6 | 18 | 4840 | 4857 | TTACACCCGCACCATCTGTA     |
| scaffold711807_17.3 | 1 p3 | (CGG)5 | 15 | 85   | 99   | AATCATGAAAACCGAAACCA     |
| scaffold711853_12.7 | 1 p3 | (AAC)5 | 15 | 500  | 514  | ACTACCACGCCAATTATGCC     |
| scaffold711910_19.4 | 1 p3 | (ATC)5 | 15 | 164  | 178  | AAAAGAAAGAACCGAACCCG     |
| scaffold712078_20.3 | 1 p3 | (GGT)5 | 15 | 707  | 721  | TCCGAGAAGATTTGTCGAT      |
| scaffold712140_15.0 | 1 p3 | (CCG)5 | 15 | 614  | 628  | ATAACACTCGAACAAGCGGC     |
| scaffold712171_14.5 | 1 p3 | (TTA)6 | 18 | 327  | 344  | TCGTTTCATGCTCCTCAGTTG    |
| scaffold712207_14.2 | 1 p3 | (ATT)6 | 18 | 622  | 639  | CACTCTGTGTACCACCAATCTCA  |
| scaffold712261_13.8 | 1 p3 | (TTA)5 | 15 | 56   | 70   | CCAGCAGTTGGCTCTATTTTT    |
| scaffold712262_14.9 | 1 p3 | (ATA)5 | 15 | 145  | 159  | CCGGAATTGAACACCCTTAAT    |
| scaffold712318_17.7 | 1 p3 | (CCG)6 | 18 | 155  | 172  | CATTCGGGAAAAAGGATCAA     |

|                     |      |        |    |      |      |                         |
|---------------------|------|--------|----|------|------|-------------------------|
| scaffold712345_15.2 | 1 p3 | (ATA)6 | 18 | 1200 | 1217 | ACGCGTTAGAAACGTACGAA    |
| scaffold712403_11.5 | 1 p3 | (GAC)5 | 15 | 614  | 628  | ATCCGAATGGATCAAAGCTG    |
| scaffold712420_17.0 | 1 p3 | (ATT)5 | 15 | 582  | 596  | AACATGACACAATTCGTTCTGC  |
| scaffold712430_12.6 | 1 p3 | (AAT)5 | 15 | 1001 | 1015 | CAATAAATTGGGGTCGGCTA    |
| scaffold712535_15.7 | 1 p3 | (TGA)5 | 15 | 47   | 61   | CCCAAGACCCCAATTTGATT    |
| scaffold712565_14.4 | 1 p3 | (ATT)5 | 15 | 223  | 237  | GTCCGGCAGAATACAAGGTG    |
| scaffold712567_14.4 | 1 p3 | (TCA)8 | 24 | 3543 | 3566 | TCTTTTCAGACGCAGCAGA     |
| scaffold712598_11.4 | 1 p3 | (ATC)8 | 24 | 325  | 348  | GGGTGAGGATTACTTGGGCT    |
| scaffold712613_13.6 | 1 p3 | (ATA)8 | 24 | 3493 | 3516 | GCAAGAGGCATGTTTTATTTGA  |
| scaffold712707_17.1 | 1 p3 | (ATG)5 | 15 | 1899 | 1913 | GTTTTGAATTTTTCGACCGT    |
| scaffold712790_14.8 | 1 p3 | (CAA)7 | 21 | 3627 | 3647 | ACTTTCTGCGGCAGTTCTGT    |
| scaffold712820_16.3 | 1 p3 | (TGT)6 | 18 | 41   | 58   | ATGTAGCCGACCCCAATTTA    |
| scaffold712835_15.0 | 1 p3 | (AAT)5 | 15 | 883  | 897  | GTCGAAAACCTCAATGGGGAA   |
| scaffold712855_13.9 | 1 p3 | (TTG)8 | 24 | 1684 | 1707 | TGGTGCTCCAAAAATTGTCA    |
| scaffold712944_19.2 | 1 p3 | (CAG)6 | 18 | 562  | 579  | CCGGAGCCATAATTAGCAAC    |
| scaffold712970_12.3 | 1 p3 | (TTA)5 | 15 | 669  | 683  | TGAGATCAAGAATTATGGCAAGA |
| scaffold713137_15.9 | 1 p3 | (TTC)5 | 15 | 8313 | 8327 | TCGAAAGCTTCACAACATGC    |
| scaffold713205_15.8 | 1 p3 | (ATC)5 | 15 | 860  | 874  | GCAAGTCTCGTAGCTTTGGC    |
| scaffold713483_14.4 | 1 p3 | (TCA)6 | 18 | 292  | 309  | AAAGCATATGGAAGAGCGGA    |
| scaffold713552_17.9 | 1 p3 | (CTT)5 | 15 | 571  | 585  | CTGAGGCAGCAACTTCAGTG    |
| scaffold713598_15.4 | 1 p3 | (CGC)6 | 18 | 6331 | 6348 | GTGTGGAAAAGGGAGTGCAT    |
| scaffold713660_14.0 | 1 p3 | (AAC)9 | 27 | 628  | 654  | GAGTTGAAAGGCATGCAAGA    |
| scaffold713746_15.8 | 1 p3 | (TGT)7 | 21 | 41   | 61   | ATGTAGCCGACCCCAATTTA    |
| scaffold713777_15.6 | 1 p3 | (ACA)6 | 18 | 2533 | 2550 | TCCAAGCAAGCACATTTTTG    |
| scaffold713807_15.8 | 1 p3 | (CCT)5 | 15 | 875  | 889  | CACCAACGAAGCCACCTATT    |
| scaffold713897_16.4 | 1 p3 | (CCG)7 | 21 | 399  | 419  | GGTTCACGGTTTTGGGAATA    |
| scaffold713947_14.9 | 1 p3 | (ACA)6 | 18 | 1050 | 1067 | TTAGTGGGAGTCAAACGGG     |
| scaffold713988_16.4 | 1 p3 | (CCA)5 | 15 | 386  | 400  | GGCTTAAAGACAACGGTGGA    |
| scaffold714152_13.2 | 1 p3 | (TCA)5 | 15 | 476  | 490  | CAGTCTCAGGTGCGTCAAAA    |
| scaffold714165_14.7 | 1 p3 | (TCT)5 | 15 | 686  | 700  | GAAACATATGCACCTGCCCT    |
| scaffold714183_16.0 | 1 p3 | (AGA)5 | 15 | 803  | 817  | CGAATGACCAGCCAAGAATC    |
| scaffold714211_15.4 | 1 p3 | (TCA)6 | 18 | 1449 | 1466 | TGTAGAACTCGGGTCAAGGG    |
| scaffold714270_17.0 | 1 p3 | (CAT)5 | 15 | 1735 | 1749 | GGTGAGGTCTGGTCAGGTGT    |
| scaffold714287_15.3 | 1 p3 | (CAG)5 | 15 | 576  | 590  | ACAGATGAGATGAGGCTGGC    |
| scaffold714370_17.3 | 1 p3 | (GAA)5 | 15 | 3749 | 3763 | TTGTACCAGATCCCCAGTC     |
| scaffold714403_15.9 | 1 p3 | (ATT)6 | 18 | 2882 | 2899 | CACGTGTACGTGCGTTCATA    |
| scaffold714448_15.3 | 1 p3 | (GAG)5 | 15 | 344  | 358  | TTAAACCTCCACCAGTTGGC    |
| scaffold714449_13.0 | 1 p3 | (CAA)5 | 15 | 180  | 194  | GGAGCTTTCAACACAACCTCCA  |
| scaffold714464_13.2 | 1 p3 | (TGT)6 | 18 | 44   | 61   | TGTAGCCGACCCCAATTTAT    |
| scaffold714475_14.1 | 1 p3 | (AAC)5 | 15 | 637  | 651  | AACGAATGTCACATCAACCG    |
| scaffold714529_15.6 | 1 p3 | (TGC)5 | 15 | 4445 | 4459 | TGCACCTTGGCTTTCTTTCT    |
| scaffold714592_13.3 | 1 p3 | (ACC)7 | 21 | 720  | 740  | CTTCCGAGCAAGGAGCTAGA    |
| scaffold714629_18.4 | 1 p3 | (CCG)6 | 18 | 592  | 609  | GATCCTCTGGGCCAAATGTA    |
| scaffold714730_16.3 | 1 p3 | (ATT)5 | 15 | 345  | 359  | GATCCGAAATGAAAACCCAA    |
| scaffold714732_10.8 | 1 p3 | (GTC)5 | 15 | 505  | 519  | ATCCACCAAATCATCCACC     |
| scaffold714949_18.5 | 1 p3 | (GAT)5 | 15 | 1030 | 1044 | GGTCCTGGGTTTGGGACTAT    |
| scaffold715074_16.5 | 1 p3 | (TTA)5 | 15 | 1349 | 1363 | GTTCCGATGTGCAGATGAGGA   |
| scaffold715220_15.3 | 1 p3 | (CCA)5 | 15 | 1074 | 1088 | TTTCTGAGTTGGGATACCCG    |
| scaffold715229_12.9 | 1 p3 | (TAA)5 | 15 | 179  | 193  | CGCCGCCTAAATAGTCAAAA    |
| scaffold715252_10.8 | 1 p3 | (TGA)8 | 24 | 565  | 588  | ATGCAGCAATTGGACATTGA    |
| scaffold715260_10.7 | 1 p3 | (GAT)5 | 15 | 433  | 447  | CTCAACTTTCTTTTCGAGCTGC  |
| scaffold715391_14.6 | 1 p3 | (TTG)6 | 18 | 1331 | 1348 | ATGATTCATGTAGCCGACCC    |
| scaffold715410_16.7 | 1 p3 | (ATT)6 | 18 | 205  | 222  | TCGAGTCCGCACATTAGTCA    |
| scaffold715435_16.7 | 1 p3 | (CGC)7 | 21 | 343  | 363  | GAAACCACTCAGGCCAGTTC    |
| scaffold715467_14.9 | 1 p3 | (TGA)6 | 18 | 1118 | 1135 | TTGTAAAACACCCCAATTTGA   |
| scaffold715492_16.2 | 1 p3 | (TTG)5 | 15 | 1060 | 1074 | CTCCTTCTTTATCCGGGCTT    |
| scaffold715518_13.1 | 1 p3 | (ATA)5 | 15 | 130  | 144  | CACCTTAGGTACCGCTCGTC    |
| scaffold715519_16.1 | 1 p3 | (TCA)5 | 15 | 1312 | 1326 | TCCGAAATTTGTTCCACCAT    |



|                     |      |        |    |      |                                  |
|---------------------|------|--------|----|------|----------------------------------|
| scaffold715564_15.0 | 1 p3 | (AAT)5 | 15 | 2247 | 2261 TCCAGGAGCCAAGAAAGATG        |
| scaffold715732_13.9 | 1 p3 | (CTC)5 | 15 | 345  | 359 ATGAAATGAAGCTTCCACCG         |
| scaffold715995_12.4 | 1 p3 | (AAT)7 | 21 | 187  | 207 TGGGGAGAGAGAGTGGAGTG         |
| scaffold716061_15.4 | 1 p3 | (GAA)5 | 15 | 1448 | 1462 TGTCCTCATGGATTCTTGA         |
| scaffold716147_17.5 | 1 p3 | (TCA)5 | 15 | 1961 | 1975 ATACCAGGGTTCGAATCCACA       |
| scaffold716170_15.8 | 1 p3 | (TCA)5 | 15 | 828  | 842 CTGTCACGTGTTGCAGTCCT         |
| scaffold716216_14.2 | 1 p3 | (ATG)6 | 18 | 139  | 156 CTCTTGAGAGGCCAACAAG          |
| scaffold716233_15.6 | 1 p3 | (CGC)5 | 15 | 715  | 729 AACCTTAGGCTTCTTGGC           |
| scaffold716235_16.3 | 1 p3 | (AAG)5 | 15 | 545  | 559 TCATGGAGAGAGGAGAGGGA         |
| scaffold716300_19.0 | 1 p3 | (TAT)5 | 15 | 202  | 216 GGCTTAATACGTGTGTTGCG         |
| scaffold716311_13.0 | 1 p3 | (TTG)5 | 15 | 482  | 496 GGTTCATTTAACCGACCCAA         |
| scaffold716318_14.6 | 1 p3 | (TCA)5 | 15 | 355  | 369 GTGGGCAATCTTGTGTGTG          |
| scaffold716321_15.4 | 1 p3 | (TTA)5 | 15 | 422  | 436 GGTAGCACTGCATCTGTCCA         |
| scaffold716407_13.3 | 1 p3 | (AAT)7 | 21 | 567  | 587 AACGGTGAAAAACATAATGCAG       |
| scaffold716604_16.4 | 1 p3 | (TGA)6 | 18 | 45   | 62 CCAAGACCCCAATTTGATT           |
| scaffold716692_15.5 | 1 p3 | (TCC)6 | 18 | 97   | 114 CGTTTCTTCATCATCATCCG         |
| scaffold716725_15.4 | 1 p3 | (TGA)5 | 15 | 3427 | 3441 ACACAAAATGCATGAGACG         |
| scaffold716750_11.2 | 1 p3 | (GAG)6 | 18 | 762  | 779 CACTGCTCTCACCACGATGT         |
| scaffold716769_16.5 | 1 p3 | (CGC)7 | 21 | 80   | 100 CTTCTTTTCAAGCACTGGGC         |
| scaffold716806_14.6 | 1 p3 | (TTA)5 | 15 | 70   | 84 TAGATTTGAACGACACCCCC          |
| scaffold716825_16.0 | 1 p3 | (ATG)5 | 15 | 352  | 366 TTGGCTGGTTGATCTTAGCA         |
| scaffold716826_16.6 | 1 p3 | (TTC)5 | 15 | 875  | 889 TGAGGCTGGGTTAGAATTGG         |
| scaffold716987_16.0 | 1 p3 | (CGG)5 | 15 | 181  | 195 CTGGAAGGAGAGACGGCTTA         |
| scaffold717225_16.9 | 1 p3 | (CTT)5 | 15 | 3849 | 3863 AAACGCCCTCCTTCTCTAGC        |
| scaffold717331_20.6 | 1 p3 | (AAT)6 | 18 | 84   | 101 TTCGGTCCGATTAATCAAGAAT       |
| scaffold717375_15.0 | 1 p3 | (CTC)5 | 15 | 2128 | 2142 CAGGAGTTCAAGTCGCACCT        |
| scaffold717383_17.2 | 1 p3 | (AGA)6 | 18 | 1009 | 1026 CTCGCATCTTCTACGCCAAT        |
| scaffold717481_17.0 | 1 p3 | (GAG)6 | 18 | 3713 | 3730 TTTTCCGAGCTTGTGTTGTG        |
| scaffold717493_23.2 | 1 p3 | (AAC)5 | 15 | 257  | 271 TGCAAAATGGATTCAGGTCA         |
| scaffold717538_15.2 | 1 p3 | (TGT)6 | 18 | 42   | 59 ATGTAGCCGACCCCAATTTA          |
| scaffold717557_15.8 | 1 p3 | (AAG)7 | 21 | 696  | 716 CAAATGCGATTCAAGTGACC         |
| scaffold717576_10.2 | 1 p3 | (ACA)6 | 18 | 467  | 484 TTTCCGACCATTGATATCTTTTT      |
| scaffold717646_17.4 | 1 p3 | (ATG)5 | 15 | 211  | 225 GCCAAGGGAGTTGTTACGAA         |
| scaffold717720_14.7 | 1 p3 | (TGA)7 | 21 | 2527 | 2547 TGAACGTATGGCCTTGGATT        |
| scaffold717743_16.5 | 1 p3 | (AGG)6 | 18 | 2272 | 2289 AGAGGAGGAGGCTAAGCGAC        |
| scaffold717769_15.6 | 1 p3 | (TGA)7 | 21 | 868  | 888 CCACTGAAATATTGAAGGCCA        |
| scaffold717782_14.6 | 1 p3 | (GAG)6 | 18 | 185  | 202 TGTGGATGAAGATGAAGATTTTG      |
| scaffold717812_13.0 | 1 p3 | (GAG)7 | 21 | 102  | 122 TGATGGTGTGACTGAAAGCC         |
| scaffold717882_16.2 | 1 p3 | (AAT)5 | 15 | 1455 | 1469 GTTGGCCCTCCAAACCTAAT        |
| scaffold717894_16.2 | 1 p3 | (ATC)6 | 18 | 453  | 470 CACAACAAAAACAATAAAAGGCA      |
| scaffold717970_16.7 | 1 p3 | (AAG)5 | 15 | 309  | 323 ACTCAACACGGCCTGGATAC         |
| scaffold717991_13.4 | 1 p3 | (CTC)5 | 15 | 848  | 862 TCTCCTTCCAACACCCAAAC         |
| scaffold718036_14.2 | 1 p3 | (CCG)5 | 15 | 1267 | 1281 CGTCGTCTTTTCTTCAACC         |
| scaffold718041_15.4 | 1 p3 | (CCA)5 | 15 | 180  | 194 GATCACTGCAACAAGGGGAT         |
| scaffold718061_14.8 | 1 p3 | (TAA)5 | 15 | 1344 | 1358 CCCATCTGACGGACAAAAGT        |
| scaffold718078_14.6 | 1 p3 | (AAT)5 | 15 | 487  | 501 CATCGACAAAATCATAGTCCGA       |
| scaffold718125_12.2 | 1 p3 | (GGC)5 | 15 | 560  | 574 TCAGTTACAGTGGGCAGCAG         |
| scaffold718133_14.8 | 1 p3 | (ATC)7 | 21 | 115  | 135 ACCACCATCGACTGATAGCC         |
| scaffold718203_14.6 | 1 p3 | (CTC)5 | 15 | 1826 | 1840 GCTCCTCCTCTTACGCCTCT        |
| scaffold718233_14.2 | 1 p3 | (TCC)5 | 15 | 5104 | 5118 TCAACACACCAAAACACCAAA       |
| scaffold718331_15.6 | 1 p3 | (TAT)5 | 15 | 272  | 286 CTTTATTAATAATTTCTTTCACCAAATG |
| scaffold718347_15.6 | 1 p3 | (TTG)5 | 15 | 48   | 62 TGTAGCCGACCCCAATTTAT          |
| scaffold718539_13.2 | 1 p3 | (AAC)5 | 15 | 78   | 92 TATTGGGCCGTACCTCTCCT          |
| scaffold718616_18.3 | 1 p3 | (ATT)5 | 15 | 468  | 482 ACCATGCCAGACTTTGGTTC         |
| scaffold718668_14.8 | 1 p3 | (TAA)6 | 18 | 566  | 583 TGCAAAATACCTAAAGGTTGGG       |
| scaffold718672_13.7 | 1 p3 | (CCG)5 | 15 | 97   | 111 CCCTACCTCCTCAGGGTTAC         |
| scaffold718676_16.0 | 1 p3 | (ATT)5 | 15 | 326  | 340 TTTTGCATATCTCCATTCCGGT       |
| scaffold718686_13.0 | 1 p3 | (CGG)8 | 24 | 833  | 856 TGCTTTTCAGGGAGTTGGTC         |

|                     |      |        |    |      |      |                            |
|---------------------|------|--------|----|------|------|----------------------------|
| scaffold718739_15.3 | 1 p3 | (ACA)5 | 15 | 348  | 362  | ACCCGCAAAAACACAAAAG        |
| scaffold718826_16.2 | 1 p3 | (AAG)5 | 15 | 943  | 957  | TTTCAATCACTTTTTCTCGACG     |
| scaffold718869_16.2 | 1 p3 | (ATA)7 | 21 | 2739 | 2759 | GCTCGAATATGCAACGACAA       |
| scaffold718926_14.9 | 1 p3 | (ACA)5 | 15 | 482  | 496  | GAAGGGAAGCATTCCAAACA       |
| scaffold718950_15.0 | 1 p3 | (TTG)5 | 15 | 48   | 62   | TGTAGCCGACCCCAATTTAT       |
| scaffold719004_15.4 | 1 p3 | (GAA)5 | 15 | 1125 | 1139 | TTATGGGGGACCCCTATCTCC      |
| scaffold719096_14.2 | 1 p3 | (GAT)5 | 15 | 1494 | 1508 | AACCGTTGATATTTGGCCTG       |
| scaffold719124_15.0 | 1 p3 | (GGT)5 | 15 | 466  | 480  | AGTATGGGCATATGGCAAGG       |
| scaffold719153_14.8 | 1 p3 | (AAT)5 | 15 | 588  | 602  | ATTGGGACATTTGGGTGTGT       |
| scaffold719159_10.3 | 1 p3 | (ATA)5 | 15 | 215  | 229  | TCAAATAGCCGATTGCATCA       |
| scaffold719225_15.2 | 1 p3 | (AAT)5 | 15 | 675  | 689  | GTGAAGTTGTCAATTCCCCG       |
| scaffold719275_11.6 | 1 p3 | (CCA)5 | 15 | 614  | 628  | CGCTTCGTACGCTTTTAACC       |
| scaffold719285_14.7 | 1 p3 | (CTT)5 | 15 | 1233 | 1247 | CGATGGATAAGGCCACTTGT       |
| scaffold719494_17.3 | 1 p3 | (TGG)6 | 18 | 1048 | 1065 | GAGAGGTTGAAGGCGAACAC       |
| scaffold719496_14.7 | 1 p3 | (CCA)5 | 15 | 146  | 160  | CACCAGCATTTCATCTCCT        |
| scaffold719547_15.9 | 1 p3 | (AAT)5 | 15 | 922  | 936  | CATGCGATCTAGAGTGTGGTG      |
| scaffold719556_17.3 | 1 p3 | (CGT)6 | 18 | 2085 | 2102 | CGGAAGACCAGAGGTGAGAG       |
| scaffold719562_13.4 | 1 p3 | (ATA)6 | 18 | 241  | 258  | CGAGAATTTCTCGGATTCA        |
| scaffold719770_16.0 | 1 p3 | (TGA)6 | 18 | 189  | 206  | TTAGCGTACATCTGACCCCC       |
| scaffold719776_18.0 | 1 p3 | (AGC)6 | 18 | 515  | 532  | GACAGCATTGCTTTGCCTTT       |
| scaffold719812_15.4 | 1 p3 | (GAA)5 | 15 | 1803 | 1817 | TCAACTCATGCAAATGCAGC       |
| scaffold719843_15.9 | 1 p3 | (CAT)6 | 18 | 1272 | 1289 | GGTTAAGCATCGGATGAGGA       |
| scaffold719917_16.0 | 1 p3 | (TTG)6 | 18 | 128  | 145  | ACCTCACATGGTGGGAAAAA       |
| scaffold719937_16.6 | 1 p3 | (TGA)8 | 24 | 2560 | 2583 | AGGTTGCGTACATCTGACCC       |
| scaffold720034_15.7 | 1 p3 | (ATA)5 | 15 | 2107 | 2121 | CACGGCAGAGCAATTCAATA       |
| scaffold720364_13.3 | 1 p3 | (TAT)6 | 18 | 540  | 557  | AATAATTAGGCGTGCAACGG       |
| scaffold720382_17.6 | 1 p3 | (AAT)6 | 18 | 1046 | 1063 | GAATCATCTCACACCACCCA       |
| scaffold720424_16.8 | 1 p3 | (CGG)8 | 24 | 226  | 249  | GAAGTGGAGGTGACGGATGT       |
| scaffold720451_18.3 | 1 p3 | (AAT)7 | 21 | 627  | 647  | TTGAATCCTCAGCGTGCATA       |
| scaffold720464_19.0 | 1 p3 | (CCG)5 | 15 | 2396 | 2410 | GCCTCACAGCTGAAATCCTC       |
| scaffold720547_14.6 | 1 p3 | (CAA)5 | 15 | 87   | 101  | CACAACTTGATCAAAATTGCAGA    |
| scaffold720557_13.6 | 1 p3 | (TGT)6 | 18 | 46   | 63   | ATGTAGCCGACCCCAATTTA       |
| scaffold720717_12.2 | 1 p3 | (TCT)5 | 15 | 1579 | 1593 | CTCGGTTTCTTGAGTCAGGG       |
| scaffold720718_15.0 | 1 p3 | (GAC)7 | 21 | 1509 | 1529 | TCAAAACCTGAAGCTGTCCC       |
| scaffold720780_15.2 | 1 p3 | (CCT)5 | 15 | 1688 | 1702 | ATCCAAAGGGCTTGCTTCTT       |
| scaffold720801_15.4 | 1 p3 | (AAT)6 | 18 | 909  | 926  | TAGATGCCTGTTGGGGTCTT       |
| scaffold720837_16.8 | 1 p3 | (CCT)7 | 21 | 984  | 1004 | ATCCTGAGTTGCACACCCTT       |
| scaffold720863_19.3 | 1 p3 | (AAT)7 | 21 | 1286 | 1306 | CGCGTCGCCTAAATAAAAAT       |
| scaffold720866_15.6 | 1 p3 | (GTT)6 | 18 | 62   | 79   | TGTAGCCGACCCCAATTTAT       |
| scaffold720923_19.3 | 1 p3 | (TCA)8 | 24 | 1132 | 1155 | CCTCTGGAATGGGAGTTTCA       |
| scaffold720936_16.7 | 1 p3 | (GCA)6 | 18 | 852  | 869  | TTAAACCGACCTCGCTGTTT       |
| scaffold720949_15.4 | 1 p3 | (ACT)6 | 18 | 390  | 407  | ACATACGCGTGCTTCACAAG       |
| scaffold721101_18.0 | 1 p3 | (TGT)6 | 18 | 40   | 57   | TGTAGCCGACCCCAATTTAT       |
| scaffold721102_15.3 | 1 p3 | (ATC)5 | 15 | 384  | 398  | TGGAATCCTGTCCTCTGGTT       |
| scaffold721128_14.7 | 1 p3 | (TTA)8 | 24 | 496  | 519  | GTTCCGGCCCTTCAATAATC       |
| scaffold721162_17.2 | 1 p3 | (CTT)5 | 15 | 2197 | 2211 | TGATGTTGGTATTTTGGCTACC     |
| scaffold721195_15.8 | 1 p3 | (ATA)5 | 15 | 74   | 88   | TGCAGCTCTTAACTCTATCGGA     |
| scaffold721206_14.9 | 1 p3 | (TTA)5 | 15 | 62   | 76   | GCAATATCAATGTAAGATCATATTCA |
| scaffold721214_15.3 | 1 p3 | (AAT)5 | 15 | 496  | 510  | TGTTCCCGTGGTATGTTTTT       |
| scaffold721273_14.2 | 1 p3 | (TGA)5 | 15 | 166  | 180  | TAAGGAGGCGAGAGAATGGA       |
| scaffold721319_15.3 | 1 p3 | (TAT)5 | 15 | 2014 | 2028 | CTAAGCGAGATACCAAGCCG       |
| scaffold721329_13.3 | 1 p3 | (TAA)5 | 15 | 384  | 398  | GGTTGGTTGTACAAAGAAACGAG    |
| scaffold721398_17.2 | 1 p3 | (TTG)5 | 15 | 2008 | 2022 | GAATTTGCTTTGTCATTGGGA      |
| scaffold721554_15.2 | 1 p3 | (TAT)5 | 15 | 501  | 515  | TCCATGCATTTCCAACACAC       |
| scaffold721567_18.0 | 1 p3 | (TCT)5 | 15 | 397  | 411  | GAGAACCCTAAACCGAAGGG       |
| scaffold721579_15.3 | 1 p3 | (ATA)5 | 15 | 359  | 373  | ACTCCAATGCTTCCCTTCTT       |
| scaffold721591_17.2 | 1 p3 | (TGA)6 | 18 | 5732 | 5749 | GCACCCCTACAGCATTGTTT       |
| scaffold721605_16.6 | 1 p3 | (CGG)6 | 18 | 591  | 608  | CCACTCCCTCCACTTTCTCA       |

|                     |      |        |    |      |      |             |                     |
|---------------------|------|--------|----|------|------|-------------|---------------------|
| scaffold721630_15.2 | 1 p3 | (ATG)7 | 21 | 1318 | 1338 | GCATTGCTTGA | CTGAGTTGC           |
| scaffold721722_13.4 | 1 p3 | (TTA)5 | 15 | 727  | 741  | TTTGTTACGG  | GAATAACCCAA         |
| scaffold721812_17.5 | 1 p3 | (TGA)6 | 18 | 43   | 60   | CCCAAGACCC  | CAATTTGATT          |
| scaffold721862_14.6 | 1 p3 | (ATT)5 | 15 | 511  | 525  | TGTCTCGACG  | GACTGACACT          |
| scaffold721868_14.9 | 1 p3 | (TTG)5 | 15 | 776  | 790  | GGAGACCTA   | AGGATGCACCA         |
| scaffold721905_18.5 | 1 p3 | (CGG)5 | 15 | 325  | 339  | GTTCTGAGG   | TTGGTTGGTCG         |
| scaffold721917_17.2 | 1 p3 | (AAT)5 | 15 | 519  | 533  | TGGGTAGCT   | TACAAGTCCAGC        |
| scaffold721922_10.3 | 1 p3 | (ATT)7 | 21 | 1066 | 1086 | TCATCATCT   | GGCTTTGTGGA         |
| scaffold721955_14.9 | 1 p3 | (CAT)5 | 15 | 6061 | 6075 | CCGCTACA    | AATCTTTGGTGCT       |
| scaffold722006_16.2 | 1 p3 | (GAA)5 | 15 | 1844 | 1858 | TCAGAAG     | AGAGTTTGCCATTGA     |
| scaffold722013_18.4 | 1 p3 | (TGC)5 | 15 | 96   | 110  | ATTCAA      | AGCATATGCCCTCC      |
| scaffold722029_15.2 | 1 p3 | (TAA)5 | 15 | 143  | 157  | CGTGT       | TTGAGTTTCTTGT       |
| scaffold722068_16.9 | 1 p3 | (CGG)5 | 15 | 1972 | 1986 | CCGTTT      | CTCCAGTTGACGTT      |
| scaffold722076_10.0 | 1 p3 | (ACA)6 | 18 | 759  | 776  | AACCTA      | TCCATCCCAACTTTT     |
| scaffold722091_17.2 | 1 p3 | (TAA)5 | 15 | 701  | 715  | TAGA        | AGGAGATGGGTCCTGC    |
| scaffold722101_14.8 | 1 p3 | (AAT)5 | 15 | 200  | 214  | CAAAC       | AGCGATTTTGAGTCG     |
| scaffold722123_12.5 | 1 p3 | (TGA)6 | 18 | 978  | 995  | AGCT        | CATCGCAGGTTGGATA    |
| scaffold722127_14.7 | 1 p3 | (GGT)5 | 15 | 2934 | 2948 | GTTAG       | ATTGGACCCCATCCC     |
| scaffold722201_18.2 | 1 p3 | (CGC)6 | 18 | 655  | 672  | TCAG        | CTAACC              |
| scaffold722234_16.5 | 1 p3 | (AAT)7 | 21 | 125  | 145  | TCAC        | ATCACTAGTCCGTGGG    |
| scaffold722308_15.2 | 1 p3 | (AAG)5 | 15 | 618  | 632  | ATAA        | ACGCAACTCAAACCCG    |
| scaffold722351_16.6 | 1 p3 | (CTA)7 | 21 | 399  | 419  | CTACT       | TCTGCACTGCCTCCC     |
| scaffold722352_13.7 | 1 p3 | (AAC)5 | 15 | 600  | 614  | GCAT        | TTCCGTGCAACA        |
| scaffold722465_14.9 | 1 p3 | (TGT)6 | 18 | 42   | 59   | TGT         | AGCCGACCCCAATTTAT   |
| scaffold722522_17.2 | 1 p3 | (ATC)5 | 15 | 274  | 288  | CAA         | ACCCACCAACAACAAA    |
| scaffold722539_15.6 | 1 p3 | (AAT)5 | 15 | 158  | 172  | GCG         | TGTTTTCCAGAATCCAT   |
| scaffold722747_14.8 | 1 p3 | (GAC)6 | 18 | 570  | 587  | CTG         | ATTCCATTTCCCTTCA    |
| scaffold722770_11.8 | 1 p3 | (CTT)7 | 21 | 886  | 906  | ACAT        | GAGAGCCTTGCATCCT    |
| scaffold722809_15.5 | 1 p3 | (ATA)6 | 18 | 1032 | 1049 | ACAA        | ACGATTTCCCGTCTTG    |
| scaffold722865_16.6 | 1 p3 | (ACA)6 | 18 | 3430 | 3447 | CACG        | ACGGAAACATGTAGTGA   |
| scaffold722866_16.6 | 1 p3 | (CGC)5 | 15 | 1689 | 1703 | AAG         | AGAACTTGACGAGCGG    |
| scaffold722871_15.8 | 1 p3 | (TGC)5 | 15 | 585  | 599  | CTG         | ATTGATCTTGGTGC      |
| scaffold722878_13.4 | 1 p3 | (ATT)8 | 24 | 63   | 86   | GGG         | AGTGGGTTATCGGTTTT   |
| scaffold722908_10.5 | 1 p3 | (GGC)5 | 15 | 297  | 311  | ATTT        | GTAGGGTGGTGGTGGGA   |
| scaffold722934_15.7 | 1 p3 | (AAT)5 | 15 | 1062 | 1076 | AGG         | GAAGTGAAATAAGCCC    |
| scaffold722953_13.2 | 1 p3 | (CGA)5 | 15 | 2574 | 2588 | TGC         | GAACAATCTCTCCTCCT   |
| scaffold722989_17.4 | 1 p3 | (TTG)7 | 21 | 71   | 91   | TTG         | TTCATGTAGCCAACCTC   |
| scaffold723043_15.3 | 1 p3 | (ATT)5 | 15 | 955  | 969  | AGCA        | AACAGCTCCCATCATC    |
| scaffold723081_15.2 | 1 p3 | (ATA)5 | 15 | 985  | 999  | GGG         | AAATGGCTTGATAAAA    |
| scaffold723112_17.7 | 1 p3 | (TCT)6 | 18 | 410  | 427  | GGG         | TACAGGTGGATGGTAAGAA |
| scaffold723121_15.4 | 1 p3 | (TAA)5 | 15 | 363  | 377  | TCT         | CCTGTGTGGTGTGTGGT   |
| scaffold723125_17.5 | 1 p3 | (AAT)5 | 15 | 612  | 626  | GCCC        | ACACAAATTATCGAGG    |
| scaffold723170_16.3 | 1 p3 | (GGC)6 | 18 | 44   | 61   | GA          | ATTGGAGGCGGAGGAG    |
| scaffold723197_16.3 | 1 p3 | (GTT)5 | 15 | 153  | 167  | CA          | TTTTCGCCTCAATCTGT   |
| scaffold723238_19.7 | 1 p3 | (GCG)5 | 15 | 2014 | 2028 | AGG         | TCCCGGATTTGTTATC    |
| scaffold723244_16.8 | 1 p3 | (ATA)5 | 15 | 321  | 335  | GCC         | GAGGGTGATGTATCAAT   |
| scaffold723287_13.5 | 1 p3 | (CCA)5 | 15 | 387  | 401  | ACG         | CCTCATCGTCAAACTC    |
| scaffold723382_16.2 | 1 p3 | (TAT)5 | 15 | 5234 | 5248 | GCC         | AGTTTTTCTGGGTACAG   |
| scaffold723441_15.4 | 1 p3 | (AAG)7 | 21 | 635  | 655  | TCG         | CGAGTAAAACAAAACA    |
| scaffold723709_16.9 | 1 p3 | (GGC)5 | 15 | 865  | 879  | CCCA        | AACTGATTTGCAACT     |
| scaffold723713_13.6 | 1 p3 | (ATT)7 | 21 | 1186 | 1206 | TGGA        | ATCTTCCCTTCCCTCT    |
| scaffold723742_12.4 | 1 p3 | (TGA)7 | 21 | 1548 | 1568 | AAGA        | AGAGGGTTCGCTGTCA    |
| scaffold723899_15.5 | 1 p3 | (ATC)5 | 15 | 981  | 995  | TCG         | GCAAAACCCTTTTATCA   |
| scaffold723925_16.7 | 1 p3 | (AAT)6 | 18 | 1568 | 1585 | CGA         | AGGACCACAAAAGGTA    |
| scaffold723994_16.3 | 1 p3 | (GGA)5 | 15 | 647  | 661  | ATTT        | TCTTGTGGGTGGAAGC    |
| scaffold724039_17.7 | 1 p3 | (AAG)5 | 15 | 855  | 869  | TGCC        | AAGCTTATATTATTGGTGC |
| scaffold724101_11.8 | 1 p3 | (TAT)6 | 18 | 216  | 233  | GCTA        | ACGACGTAAGGCAAATG   |
| scaffold724217_14.9 | 1 p3 | (CTT)5 | 15 | 2990 | 3004 | AAC         | ACCGAGTGCAACTTCT    |

|                     |      |        |    |      |      |                          |
|---------------------|------|--------|----|------|------|--------------------------|
| scaffold724260_12.9 | 1 p3 | (TGA)7 | 21 | 937  | 957  | TTCTCCACAGTTGGCTCCT      |
| scaffold724274_16.1 | 1 p3 | (TGA)5 | 15 | 1583 | 1597 | TTCGCTCTGTGTTTTCTCA      |
| scaffold724278_16.5 | 1 p3 | (CTC)5 | 15 | 1518 | 1532 | CAATGAACTCCAAGGGGAGA     |
| scaffold724281_13.8 | 1 p3 | (CGG)5 | 15 | 179  | 193  | AGGATTTGAACCGGTGACAG     |
| scaffold724467_16.7 | 1 p3 | (TGT)6 | 18 | 50   | 67   | TGTAGCCGACCCCAATTTAT     |
| scaffold724478_13.3 | 1 p3 | (TTA)6 | 18 | 1330 | 1347 | CCCAGACTGAGTTATTATTGATCC |
| scaffold724483_14.2 | 1 p3 | (AAG)5 | 15 | 361  | 375  | ACTCTTTCAGCCCTTGGAT      |
| scaffold724487_14.2 | 1 p3 | (GGC)5 | 15 | 237  | 251  | ATAGTAGCGGCTGCAGGTTT     |
| scaffold724494_15.4 | 1 p3 | (ATA)7 | 21 | 684  | 704  | TGATGTTCTTTGGGTGCTGA     |
| scaffold724520_15.4 | 1 p3 | (CCG)5 | 15 | 574  | 588  | AACAATAATATCGTCCGCCG     |
| scaffold724534_16.4 | 1 p3 | (TGA)5 | 15 | 1252 | 1266 | AGCCACTGCTTTTTGTTGCTT    |
| scaffold724536_17.1 | 1 p3 | (ACA)5 | 15 | 960  | 974  | TGAATGTCCAACCTTCCACC     |
| scaffold724570_16.4 | 1 p3 | (TCT)5 | 15 | 1407 | 1421 | TTGCTTCAGCACCTTGAAGA     |
| scaffold724663_24.0 | 1 p3 | (ACA)7 | 21 | 924  | 944  | GGTATTTTCATCCCGCTCAA     |
| scaffold724670_15.3 | 1 p3 | (CAG)5 | 15 | 61   | 75   | ATGGCCCTAAACACAGCAAG     |
| scaffold724747_14.6 | 1 p3 | (TTA)7 | 21 | 1156 | 1176 | GCCACAAATTCTGAAACCGA     |
| scaffold724764_18.8 | 1 p3 | (CTC)5 | 15 | 433  | 447  | AGTCTCTGCTGCTCAGCCTC     |
| scaffold724777_15.5 | 1 p3 | (CCG)6 | 18 | 604  | 621  | AATATGGCATGAGACGAGGC     |
| scaffold724786_14.0 | 1 p3 | (ATT)5 | 15 | 326  | 340  | GGATCGTGTGTGGGATCAAT     |
| scaffold724850_16.9 | 1 p3 | (CAA)5 | 15 | 139  | 153  | CTCAACCAGCATCGCTATCA     |
| scaffold724896_14.1 | 1 p3 | (CTG)5 | 15 | 1021 | 1035 | TCTGAATCCCTTTTCATCCG     |
| scaffold724953_11.5 | 1 p3 | (AAT)6 | 18 | 773  | 790  | CAGCCTTCCAGTTGGGATAA     |
| scaffold724987_17.7 | 1 p3 | (GGC)7 | 21 | 466  | 486  | GATCCACCTCTCCATCTCCA     |
| scaffold725053_14.2 | 1 p3 | (TGA)5 | 15 | 48   | 62   | CCAAGACCCCAATTTGATT      |
| scaffold725062_14.0 | 1 p3 | (GAA)5 | 15 | 909  | 923  | CCAGGTGTTGTTTTTCAGCA     |
| scaffold725080_13.6 | 1 p3 | (TTA)5 | 15 | 1827 | 1841 | ATGTATATTTTCTTTCTTTGTTTT |
| scaffold725108_19.2 | 1 p3 | (CTG)6 | 18 | 127  | 144  | GATCTGTTGAAGGTAGCGGG     |
| scaffold725127_17.6 | 1 p3 | (CGC)5 | 15 | 640  | 654  | GATGCAGGGATACTGATTCCA    |
| scaffold725135_17.0 | 1 p3 | (TTG)7 | 21 | 1313 | 1333 | TGGCAAACAAAGGATGTCAG     |
| scaffold725138_14.1 | 1 p3 | (AAT)5 | 15 | 800  | 814  | TCACATGCTTTGCTGAAAGG     |
| scaffold725219_14.4 | 1 p3 | (TGT)5 | 15 | 805  | 819  | TGCTCACCCACATTCACATT     |
| scaffold725227_15.7 | 1 p3 | (CCA)5 | 15 | 2413 | 2427 | CCCATATCTACCCCTCAT       |
| scaffold725252_15.8 | 1 p3 | (ACA)5 | 15 | 1181 | 1195 | ATGTGGTCACCTGGGGAATA     |
| scaffold725280_16.0 | 1 p3 | (AGT)5 | 15 | 1128 | 1142 | CCTCGGATGAGTCGCATATT     |
| scaffold725300_14.6 | 1 p3 | (CCG)5 | 15 | 810  | 824  | TCTTGCCGCCTTGTTAATTT     |
| scaffold725307_17.7 | 1 p3 | (AAT)5 | 15 | 221  | 235  | TCCAAGTTACTGGCCAAACC     |
| scaffold725363_15.8 | 1 p3 | (ATA)5 | 15 | 324  | 338  | CTCCACGTTTAAACAACCGA     |
| scaffold725377_16.1 | 1 p3 | (ATC)6 | 18 | 208  | 225  | TGAACAAGGTTTCGATCTATGC   |
| scaffold725384_17.6 | 1 p3 | (GGT)6 | 18 | 865  | 882  | GAGGATTGGGGGTTTTTCATT    |
| scaffold725394_15.9 | 1 p3 | (AAT)5 | 15 | 879  | 893  | GGCATTATCAGAAATTTGGCG    |
| scaffold725446_15.9 | 1 p3 | (ATG)5 | 15 | 702  | 716  | GCTGCATTGCTTCAAATGTCT    |
| scaffold725543_15.9 | 1 p3 | (TGA)5 | 15 | 45   | 59   | CCAAGACCCCAATTTGATT      |
| scaffold725593_15.4 | 1 p3 | (AAT)5 | 15 | 2588 | 2602 | TTCCTTGGAACTCTCAATCCA    |
| scaffold725603_19.8 | 1 p3 | (TTC)6 | 18 | 440  | 457  | CGTTGGTGGAAATATCGTTGA    |
| scaffold725607_14.4 | 1 p3 | (CTT)5 | 15 | 1076 | 1090 | CACCTCATCTTGCTTCGTCA     |
| scaffold725924_17.9 | 1 p3 | (ATC)7 | 21 | 404  | 424  | GCAACGAAAAATACAAGCCAA    |
| scaffold725951_18.4 | 1 p3 | (GGC)5 | 15 | 2039 | 2053 | CACAACCCACTCATCCTCG      |
| scaffold725954_16.3 | 1 p3 | (CAG)5 | 15 | 3479 | 3493 | GATGCTTTGTGCAGTTGAGC     |
| scaffold725965_16.4 | 1 p3 | (TGA)6 | 18 | 39   | 56   | CCAAGACCCCAATTTGATT      |
| scaffold726097_16.0 | 1 p3 | (TCT)5 | 15 | 177  | 191  | ATCTCGGGGTGCATTGTAAC     |
| scaffold726100_17.2 | 1 p3 | (CCT)6 | 18 | 4726 | 4743 | CGCCTCTTGAATAACCTCCA     |
| scaffold726146_10.5 | 1 p3 | (AGG)7 | 21 | 328  | 348  | AGTGGTGAAGTCCCACCTTG     |
| scaffold726172_14.7 | 1 p3 | (GGA)5 | 15 | 1727 | 1741 | ACTCTGAAAACCGATGACG      |
| scaffold726195_15.0 | 1 p3 | (TGT)7 | 21 | 45   | 65   | TAGCCGACCCCAACTTATTG     |
| scaffold726234_16.3 | 1 p3 | (TAA)6 | 18 | 1877 | 1894 | TTTTAAAACGCCTGAAAAAGTAA  |
| scaffold726362_16.4 | 1 p3 | (ATT)5 | 15 | 599  | 613  | GCACTCGAAGAGTAGCGGTT     |
| scaffold726404_14.0 | 1 p3 | (ATT)5 | 15 | 1032 | 1046 | GGCAAATTTGAATCGGTGAT     |
| scaffold726438_15.4 | 1 p3 | (TAT)5 | 15 | 770  | 784  | ACCGTCATGGCCCTACATTA     |

|                     |      |        |    |      |      |                           |
|---------------------|------|--------|----|------|------|---------------------------|
| scaffold726541_13.2 | 1 p3 | (TGT)7 | 21 | 113  | 133  | GATTCATGTAGCTGACCCCAA     |
| scaffold726553_15.5 | 1 p3 | (ATT)5 | 15 | 885  | 899  | CGAAGGATCAACTTCATAGTCG    |
| scaffold726670_14.0 | 1 p3 | (CTA)5 | 15 | 456  | 470  | CCCCACAACGTTATTCATCC      |
| scaffold726704_14.4 | 1 p3 | (TTA)6 | 18 | 393  | 410  | TGGCAGCAACTACGACCATA      |
| scaffold726717_18.4 | 1 p3 | (TTA)5 | 15 | 289  | 303  | TTGCTGCTGGTATCAAAACG      |
| scaffold726718_15.5 | 1 p3 | (CAT)5 | 15 | 1413 | 1427 | GGTCATCAATTCAGGAAGCC      |
| scaffold726723_17.0 | 1 p3 | (TCA)5 | 15 | 528  | 542  | CGAACCGATAAAGCCAAAAC      |
| scaffold726769_14.6 | 1 p3 | (CAT)5 | 15 | 1071 | 1085 | GAACCATGATCTGCCTGGAT      |
| scaffold726858_17.6 | 1 p3 | (TAT)5 | 15 | 267  | 281  | GTTGAAGCCAAGCGTGCTAT      |
| scaffold726926_13.3 | 1 p3 | (ATA)5 | 15 | 464  | 478  | TGACAAATAAAAACCTACAAAATGG |
| scaffold726957_16.0 | 1 p3 | (GAG)5 | 15 | 770  | 784  | AAGAGGAGGACGAGCATGAA      |
| scaffold727127_14.3 | 1 p3 | (AAT)7 | 21 | 444  | 464  | CATAGGGCAAGTACGGGAAA      |
| scaffold727132_14.0 | 1 p3 | (TTA)5 | 15 | 662  | 676  | CACCGGTTTTGGATTTGACT      |
| scaffold727149_15.2 | 1 p3 | (ACA)8 | 24 | 896  | 919  | CAAATTTAAGTGAGCTTTGCTTGA  |
| scaffold727177_14.9 | 1 p3 | (TTA)7 | 21 | 1035 | 1055 | ATGGCATCCATCTCTTCGTC      |
| scaffold727182_16.0 | 1 p3 | (AAC)5 | 15 | 2194 | 2208 | CTGCACACTTTGGTCCATTG      |
| scaffold727192_13.4 | 1 p3 | (TGA)5 | 15 | 127  | 141  | CCGGAACTCAATAACCAAAGA     |
| scaffold727270_15.2 | 1 p3 | (TTA)5 | 15 | 2526 | 2540 | ATGAGAGGGAGAGGGAGAGC      |
| scaffold727297_13.8 | 1 p3 | (CAA)6 | 18 | 464  | 481  | CATTCATTTCCAGGCCACTT      |
| scaffold727315_14.8 | 1 p3 | (AAT)7 | 21 | 672  | 692  | TGGAATCAAGAACCCCAAAG      |
| scaffold727348_15.7 | 1 p3 | (TTG)5 | 15 | 129  | 143  | CACATAGTGGGAAACGGCTT      |
| scaffold727374_17.5 | 1 p3 | (GCG)6 | 18 | 812  | 829  | AACAGCAAGGAGAGGCAAAA      |
| scaffold727429_15.6 | 1 p3 | (CGC)5 | 15 | 4889 | 4903 | GGTTTTGGATGAAGCGGTAA      |
| scaffold727464_14.6 | 1 p3 | (ATT)5 | 15 | 298  | 312  | AGTTCAGCGAGAACAAGGGA      |
| scaffold727532_15.0 | 1 p3 | (CAT)5 | 15 | 573  | 587  | CATCAACATTCCTGGGCTCT      |
| scaffold727585_16.2 | 1 p3 | (CCG)5 | 15 | 1507 | 1521 | TAAACTCCGGCATGGAGAAC      |
| scaffold727637_16.2 | 1 p3 | (TGT)8 | 24 | 67   | 90   | TTTGGTTCATGTAGTCGACCC     |
| scaffold727698_16.7 | 1 p3 | (ATA)5 | 15 | 1959 | 1973 | AACGAGCCAAGTGAAAGCAT      |
| scaffold727816_15.2 | 1 p3 | (GCT)8 | 24 | 596  | 619  | ACATCCTCAACCATGGCAGT      |
| scaffold727891_15.0 | 1 p3 | (ACA)5 | 15 | 1509 | 1523 | ATGTCCTGTTGATTCCGAGG      |
| scaffold727900_15.2 | 1 p3 | (TCA)6 | 18 | 2059 | 2076 | CGTACGTTGTACGGGTTTCT      |
| scaffold727962_18.0 | 1 p3 | (CGG)5 | 15 | 2596 | 2610 | AGAGTGGTAAAACCTCCGCCA     |
| scaffold728058_17.0 | 1 p3 | (GGC)5 | 15 | 329  | 343  | TCATCGGTCTAGGTGTTCC       |
| scaffold728166_17.4 | 1 p3 | (AGG)5 | 15 | 1370 | 1384 | GATTCCGACTCCAATCCTGA      |
| scaffold728202_15.8 | 1 p3 | (ACA)5 | 15 | 127  | 141  | TATTTCCGACAATTCGGTCC      |
| scaffold728260_14.5 | 1 p3 | (TTG)5 | 15 | 34   | 48   | CATTTCAAGTTTACTGGGATTAAGG |
| scaffold728267_17.4 | 1 p3 | (AAG)5 | 15 | 2417 | 2431 | AGTTGGAACCTCGAGCATTG      |
| scaffold728315_14.9 | 1 p3 | (ATA)7 | 21 | 845  | 865  | ATGTGGCGACATGAATTTCC      |
| scaffold728354_15.4 | 1 p3 | (AAC)5 | 15 | 1053 | 1067 | CCTGGCCTTAAGTAGCCACA      |
| scaffold728364_17.7 | 1 p3 | (ACC)5 | 15 | 254  | 268  | CAAACGACGAGCATCAAGAA      |
| scaffold728386_10.9 | 1 p3 | (TAA)5 | 15 | 383  | 397  | TCATACACGTGGACACCTCA      |
| scaffold728538_18.9 | 1 p3 | (GCT)5 | 15 | 2579 | 2593 | GAAGCAGAGGAGTTCCAACG      |
| scaffold728563_15.2 | 1 p3 | (CTC)6 | 18 | 1587 | 1604 | TTTAATTACCAACCTGCCGC      |
| scaffold728618_13.5 | 1 p3 | (CTT)5 | 15 | 700  | 714  | AGGCGATCAACTTCCACAAC      |
| scaffold728710_16.7 | 1 p3 | (TAT)5 | 15 | 739  | 753  | GATGAGGAATGTGATTGCGA      |
| scaffold728755_17.5 | 1 p3 | (GGA)5 | 15 | 743  | 757  | AATCATGGCATTGGCCTTAG      |
| scaffold728756_16.8 | 1 p3 | (GAG)6 | 18 | 2306 | 2323 | TGTCTGAATTTGGTGGAGGA      |
| scaffold728840_15.8 | 1 p3 | (TTG)5 | 15 | 1092 | 1106 | TGCCTCTCCTTCTTGTGCT       |
| scaffold728924_14.7 | 1 p3 | (TAT)6 | 18 | 2623 | 2640 | CATCAAACCCAAACCAACCT      |
| scaffold729016_16.2 | 1 p3 | (GCT)5 | 15 | 134  | 148  | ATCTCGTTCGTCTCGCAGTT      |
| scaffold729033_10.5 | 1 p3 | (ATT)5 | 15 | 158  | 172  | TGCAAATTGAATCAACCAAAA     |
| scaffold729107_15.0 | 1 p3 | (CAT)7 | 21 | 2248 | 2268 | TCTGCCAGTAACTTTTCGCT      |
| scaffold729119_14.5 | 1 p3 | (TTC)5 | 15 | 723  | 737  | TTTCTTTTCTTTTGCTACCCA     |
| scaffold729153_13.7 | 1 p3 | (ATC)5 | 15 | 214  | 228  | TATGGTTTGGTCCGATGGAT      |
| scaffold729155_20.2 | 1 p3 | (TCA)6 | 18 | 1159 | 1176 | TGGGTGATTGAGTTTCTCC       |
| scaffold729160_15.8 | 1 p3 | (TTA)5 | 15 | 2427 | 2441 | TGGCCTAATCGTTCCTCAAC      |
| scaffold729202_15.0 | 1 p3 | (TGG)7 | 21 | 1915 | 1935 | TCTAAAGCCTCCCACGAAGA      |
| scaffold729346_18.5 | 1 p3 | (AGA)5 | 15 | 1023 | 1037 | TGAAACCCTAGCGAACCAAC      |

|                     |      |        |    |      |      |                         |
|---------------------|------|--------|----|------|------|-------------------------|
| scaffold729349_15.9 | 1 p3 | (TGA)5 | 15 | 1180 | 1194 | TTCGTTGTTCCACACTTCCA    |
| scaffold729374_13.9 | 1 p3 | (CCT)5 | 15 | 176  | 190  | CATCAACCTCCTTCTCCGAC    |
| scaffold729407_15.4 | 1 p3 | (GCC)5 | 15 | 1530 | 1544 | TCTTGGTGGTTCTGGTAGGG    |
| scaffold729450_15.9 | 1 p3 | (ATA)6 | 18 | 7598 | 7615 | TCAGCAACTACGTGCATCCT    |
| scaffold729477_18.0 | 1 p3 | (TTA)6 | 18 | 277  | 294  | CGGGCTCTTAAATTCATTCCG   |
| scaffold729534_15.3 | 1 p3 | (GCG)5 | 15 | 493  | 507  | TAGGACTAGGGAAAACGGCA    |
| scaffold729599_16.3 | 1 p3 | (ATT)6 | 18 | 52   | 69   | CAACAACCTCGTCACCCCTTT   |
| scaffold729611_16.0 | 1 p3 | (AAG)5 | 15 | 143  | 157  | TGGAGCAACTTCTTCGATCA    |
| scaffold729643_14.7 | 1 p3 | (TTG)5 | 15 | 128  | 142  | GCCAACCTCACATAGTGAGAAA  |
| scaffold729668_16.5 | 1 p3 | (ATC)5 | 15 | 6189 | 6203 | CAATCAAATTGGGGTCTTGG    |
| scaffold729670_16.4 | 1 p3 | (TGT)5 | 15 | 38   | 52   | TGTAGCCGACCCCAATTTAT    |
| scaffold729673_14.6 | 1 p3 | (TGT)5 | 15 | 82   | 96   | ATGTAGCCGACCCCAATTTA    |
| scaffold729776_15.4 | 1 p3 | (ATC)6 | 18 | 1071 | 1088 | TGCAAGAGATTGGGTTGAAA    |
| scaffold729843_17.8 | 1 p3 | (ATA)8 | 24 | 46   | 69   | GAAGCAGAAATCGGGATTGA    |
| scaffold729874_19.0 | 1 p3 | (CAC)6 | 18 | 181  | 198  | AACCCAAATCGCAAACAGAC    |
| scaffold729926_15.6 | 1 p3 | (TGA)7 | 21 | 123  | 143  | TTTTTGATTGGGAATAATTGGG  |
| scaffold729957_14.1 | 1 p3 | (TAA)7 | 21 | 1571 | 1591 | ATCCACCCACACATCATTCC    |
| scaffold730055_15.3 | 1 p3 | (AAC)6 | 18 | 1402 | 1419 | CGAAAAGATGTATGGCGAAAA   |
| scaffold730086_18.0 | 1 p3 | (GGT)5 | 15 | 741  | 755  | GGATTCTGACTTTCAGGGA     |
| scaffold730115_14.2 | 1 p3 | (TGT)5 | 15 | 46   | 60   | TGTAGCCGACCCCAATTTAT    |
| scaffold730173_14.1 | 1 p3 | (CCG)6 | 18 | 667  | 684  | CCAAAGCAAAAACATCCCAC    |
| scaffold730238_16.0 | 1 p3 | (AAC)5 | 15 | 120  | 134  | AATCGACAATTTTCGGTTTCG   |
| scaffold730322_12.5 | 1 p3 | (ATA)5 | 15 | 286  | 300  | GCCATGAAAACAAGGAGGA     |
| scaffold730399_18.8 | 1 p3 | (CGG)5 | 15 | 637  | 651  | CACTGACCTTGGACTTCGCT    |
| scaffold730429_15.6 | 1 p3 | (GCT)5 | 15 | 3063 | 3077 | GTGAAAATCCTCCCTCGTGA    |
| scaffold730463_16.8 | 1 p3 | (CTC)6 | 18 | 2158 | 2175 | GCTGCCTCTGGACAACCTCTC   |
| scaffold730475_13.8 | 1 p3 | (TGG)7 | 21 | 2101 | 2121 | GAGCCGATGAGGCTGTTTAG    |
| scaffold730581_12.1 | 1 p3 | (GCT)5 | 15 | 600  | 614  | TCAGAAAGAGGAGACGGAGG    |
| scaffold730589_15.1 | 1 p3 | (TCT)6 | 18 | 201  | 218  | TTCGATCACAAGAAACGACG    |
| scaffold730624_15.8 | 1 p3 | (CCT)5 | 15 | 1793 | 1807 | GGGAAGGGGGTACATGCTAT    |
| scaffold730640_15.3 | 1 p3 | (CAG)5 | 15 | 434  | 448  | TCAGCAGCAGCAAATACAGC    |
| scaffold730730_14.8 | 1 p3 | (ATA)5 | 15 | 2699 | 2713 | AGACAACGAGGGATGACGAC    |
| scaffold730758_17.2 | 1 p3 | (AAT)5 | 15 | 2883 | 2897 | TAACCTTGAGCCGACATCCCT   |
| scaffold730759_15.6 | 1 p3 | (CCA)6 | 18 | 250  | 267  | TGGCAGCCCTAATTTACCAG    |
| scaffold730779_15.6 | 1 p3 | (AAT)8 | 24 | 967  | 990  | CGGGATGTAGTAGGAAAGCG    |
| scaffold730784_18.0 | 1 p3 | (TGT)6 | 18 | 41   | 58   | TGTAGCCGACCCCAATTTAT    |
| scaffold730874_15.5 | 1 p3 | (CCG)5 | 15 | 185  | 199  | ACCTCATGAGCACAATTCCC    |
| scaffold730879_14.3 | 1 p3 | (TTG)6 | 18 | 154  | 171  | GTTCCGAAAATTTTTGGCCT    |
| scaffold730880_17.0 | 1 p3 | (TCA)7 | 21 | 485  | 505  | GGGCTTAAAACCTTGCCACAA   |
| scaffold730902_11.7 | 1 p3 | (ATT)8 | 24 | 1576 | 1599 | TCCCTTTTCAGAAGTCGCAT    |
| scaffold730908_16.3 | 1 p3 | (AAT)5 | 15 | 483  | 497  | TGAATGAATGGTTCGACTCAA   |
| scaffold731027_17.4 | 1 p3 | (TTA)5 | 15 | 1687 | 1701 | AACTGGACCATATTCGTGCGC   |
| scaffold731062_20.7 | 1 p3 | (TTG)5 | 15 | 507  | 521  | GCATCGGCCTATTTACCAAA    |
| scaffold731067_15.6 | 1 p3 | (TTA)5 | 15 | 907  | 921  | ATTCTGGCAAATCATCGGAC    |
| scaffold731099_13.7 | 1 p3 | (CCT)5 | 15 | 531  | 545  | CACCACCCTCTCATGTCCTT    |
| scaffold731128_14.0 | 1 p3 | (ATA)6 | 18 | 858  | 875  | AGGAAATCACGACGGTGTTCC   |
| scaffold731151_14.3 | 1 p3 | (ATC)5 | 15 | 1542 | 1556 | CCCACACGTTTTTCCTCATT    |
| scaffold731165_14.0 | 1 p3 | (TCA)5 | 15 | 489  | 503  | GCAACTTTCAAGGAAGCCAA    |
| scaffold731171_15.6 | 1 p3 | (GAG)5 | 15 | 636  | 650  | ACAGGAATATCCCGTTGCAG    |
| scaffold731239_14.3 | 1 p3 | (AAT)5 | 15 | 48   | 62   | GGTCCCACGTCATCAAAAA     |
| scaffold731259_17.2 | 1 p3 | (ATC)5 | 15 | 3394 | 3408 | TTGGCATCATTATGGAAGCA    |
| scaffold731335_13.7 | 1 p3 | (TTA)5 | 15 | 1025 | 1039 | GGTGTGATGCATGGAGTTG     |
| scaffold731396_14.3 | 1 p3 | (CAC)5 | 15 | 1158 | 1172 | ATGGAGCTATTGGATGCTGG    |
| scaffold731510_17.6 | 1 p3 | (TTG)5 | 15 | 2152 | 2166 | TTTTGGATTTCGATATGGATTGA |
| scaffold731602_14.8 | 1 p3 | (ATT)6 | 18 | 111  | 128  | CCTCCAAACAATAACCCCT     |
| scaffold731623_16.6 | 1 p3 | (ATT)5 | 15 | 1430 | 1444 | CCATGAGATGGGGACAGTCT    |
| scaffold731857_15.5 | 1 p3 | (GAA)5 | 15 | 680  | 694  | CAAGCAAACGCAAAAATCAA    |
| scaffold731873_16.5 | 1 p3 | (AAT)5 | 15 | 366  | 380  | ATCCCACCAACACCTTCTTG    |

|                     |      |        |    |      |                                |
|---------------------|------|--------|----|------|--------------------------------|
| scaffold731918_16.1 | 1 p3 | (TGT)5 | 15 | 867  | 881 GATTGGATTTTTGGTGGTGG       |
| scaffold731958_14.7 | 1 p3 | (TCC)5 | 15 | 557  | 571 AACTCCCACCTTCCATCACA       |
| scaffold731967_14.0 | 1 p3 | (TCT)7 | 21 | 304  | 324 TTCTCTCCCAACAATGACATCT     |
| scaffold731979_16.0 | 1 p3 | (TGT)7 | 21 | 32   | 52 CCAATTTATTGGGATTAAGGCT      |
| scaffold731981_13.4 | 1 p3 | (TAT)6 | 18 | 1393 | 1410 CCTCCATGTAAAGAAAAAGAGTTCA |
| scaffold731989_15.0 | 1 p3 | (ATA)5 | 15 | 134  | 148 TGCCGAATAAAGCTAAATCCT      |
| scaffold732030_16.4 | 1 p3 | (GGC)5 | 15 | 71   | 85 ACCAGCTTTGCTCTGCAACT        |
| scaffold732053_14.3 | 1 p3 | (GAG)5 | 15 | 717  | 731 CGTCGAATTTGCTGATCTT        |
| scaffold732085_17.7 | 1 p3 | (ATG)5 | 15 | 546  | 560 AGTCAAGTGCCGCTCATTTT       |
| scaffold732102_15.7 | 1 p3 | (TAT)5 | 15 | 164  | 178 TGACAATTCGAGCTTGATCCT      |
| scaffold732116_16.3 | 1 p3 | (ATG)5 | 15 | 942  | 956 TAGGCGATGTACCTTGGGTC       |
| scaffold732126_16.8 | 1 p3 | (GGA)5 | 15 | 930  | 944 TTGGAATGCGACAGAGACAG       |
| scaffold732220_16.3 | 1 p3 | (CTG)5 | 15 | 308  | 322 GACACCATTGACTGTGCTGG       |
| scaffold732278_16.5 | 1 p3 | (TGT)5 | 15 | 46   | 60 TGTAGCCGACCCCAATTTAT        |
| scaffold732307_17.0 | 1 p3 | (TAT)5 | 15 | 53   | 67 AGCAACAGGCACACTGGAAT        |
| scaffold732308_10.6 | 1 p3 | (TTA)5 | 15 | 811  | 825 ACCCAGAGCAAACCTCGAAGA      |
| scaffold732318_13.8 | 1 p3 | (GCC)6 | 18 | 564  | 581 CAGTTGCATGCAGAGCATTT       |
| scaffold732387_15.2 | 1 p3 | (ATG)5 | 15 | 991  | 1005 CTCGAACGATGCAAACCTTCA     |
| scaffold732457_20.0 | 1 p3 | (GGC)5 | 15 | 1082 | 1096 TGGAGGAGGAGGAATGTTTG      |
| scaffold732523_16.8 | 1 p3 | (AAT)5 | 15 | 348  | 362 GCCGAAAACACAAATCAAT        |
| scaffold732543_14.7 | 1 p3 | (CTT)5 | 15 | 1006 | 1020 CTACCCTCGCTCTTCCTTCC      |
| scaffold732548_16.8 | 1 p3 | (GCC)5 | 15 | 151  | 165 AAAAATCTCCAGTCCGGCTT       |
| scaffold732641_14.0 | 1 p3 | (AGT)5 | 15 | 1277 | 1291 CAGCAAGCAATTC AAGGACA     |
| scaffold732657_16.5 | 1 p3 | (TGA)5 | 15 | 44   | 58 CCAAGACCCCAATTTGATT         |
| scaffold732659_12.6 | 1 p3 | (CCG)6 | 18 | 571  | 588 TCTAAAATAGCCACGCCTCG       |
| scaffold732672_15.2 | 1 p3 | (GCT)5 | 15 | 902  | 916 GCAGGAGAAGAGGTGGTCTG       |
| scaffold732679_14.9 | 1 p3 | (ATG)5 | 15 | 641  | 655 GGA CTCTCCGGATGTTTGA       |
| scaffold732703_17.2 | 1 p3 | (ATT)5 | 15 | 115  | 129 AAGTGTGTGCAAATGAGAAGAAA    |
| scaffold732719_15.9 | 1 p3 | (CAG)5 | 15 | 1194 | 1208 TGATTTGTGGCACCTGTTA       |
| scaffold732722_16.7 | 1 p3 | (CTT)5 | 15 | 779  | 793 GACTGAGATGTCCAGGTTCA       |
| scaffold732727_15.4 | 1 p3 | (TGT)8 | 24 | 39   | 62 TGTAGCCGACCCCAATTTAT        |
| scaffold732740_14.0 | 1 p3 | (ATC)5 | 15 | 1339 | 1353 CCCGACCCAACCTCAGTAGAA     |
| scaffold732789_16.4 | 1 p3 | (TGT)5 | 15 | 47   | 61 TGTAGCCGACCCCAATTTAT        |
| scaffold732863_14.7 | 1 p3 | (ATT)6 | 18 | 4450 | 4467 GGAAACCCTAGTTTCGTGTTCTT   |
| scaffold732871_15.7 | 1 p3 | (CAC)5 | 15 | 688  | 702 TTCATGACGTGGAAGCAAAA       |
| scaffold732934_15.1 | 1 p3 | (GGA)5 | 15 | 177  | 191 CCATCTAGTTCCTCACCGGA       |
| scaffold732952_16.5 | 1 p3 | (ATC)5 | 15 | 1254 | 1268 TAAAACCCCTTCAAATCCC       |
| scaffold732960_16.9 | 1 p3 | (AGA)5 | 15 | 1016 | 1030 TCATCTCAAGACCACCTCC       |
| scaffold732970_17.4 | 1 p3 | (TTC)8 | 24 | 575  | 598 TGAAATGGGAAGGACTTCAT       |
| scaffold733036_12.1 | 1 p3 | (CGC)6 | 18 | 3869 | 3886 AAATCTCCCCACCTCCATA       |
| scaffold733040_14.6 | 1 p3 | (GAA)5 | 15 | 1973 | 1987 AAAAGTGTGATGGCGAAACC      |
| scaffold733053_14.8 | 1 p3 | (AAG)6 | 18 | 659  | 676 CAAAGTGGTGGAGTGAGCAA       |
| scaffold733085_16.7 | 1 p3 | (AAT)6 | 18 | 109  | 126 TGCATATACACACATGTTGACCA    |
| scaffold733132_16.9 | 1 p3 | (ATT)5 | 15 | 580  | 594 GGCTGGGTAATAGCCTTTCC       |
| scaffold733147_16.2 | 1 p3 | (CTC)5 | 15 | 269  | 283 AGCTTAGCACAGCAGCATCA       |
| scaffold733162_16.2 | 1 p3 | (CCG)6 | 18 | 571  | 588 CCTCCTCGTCGTCTTCATCT       |
| scaffold733222_14.0 | 1 p3 | (ATA)5 | 15 | 299  | 313 AGATGGGCCGGCTAAATATC       |
| scaffold733241_13.9 | 1 p3 | (AAT)5 | 15 | 1139 | 1153 TCTTTGTGTAGCACCCCTC       |
| scaffold733292_16.4 | 1 p3 | (CTT)5 | 15 | 1085 | 1099 AAGGAGGGTCAGTGAGCAAA      |
| scaffold733318_13.7 | 1 p3 | (GGT)6 | 18 | 383  | 400 AGGCATTGGATTGAGTGGTC       |
| scaffold733322_17.7 | 1 p3 | (TCA)6 | 18 | 3073 | 3090 CACGTCCTCAGGCCACTATT      |
| scaffold733324_15.9 | 1 p3 | (TTC)5 | 15 | 2030 | 2044 GAGGACTGGGCTGATCTTCA      |
| scaffold733336_16.5 | 1 p3 | (ATC)6 | 18 | 2479 | 2496 TTCTTCAAACCTCCACCGTT      |
| scaffold733420_14.3 | 1 p3 | (AAT)5 | 15 | 871  | 885 TGATGGAACCTGTGTGCATGT      |
| scaffold733443_16.2 | 1 p3 | (GTG)6 | 18 | 3044 | 3061 GCTCTCAGTGCATCCAGAT       |
| scaffold733452_17.1 | 1 p3 | (ATC)5 | 15 | 596  | 610 TTCACACGCGAGAAGAGAGA       |
| scaffold733476_16.5 | 1 p3 | (TCT)5 | 15 | 837  | 851 AAGATAAAGGACGGCCGAGT       |
| scaffold733535_16.2 | 1 p3 | (ATG)5 | 15 | 598  | 612 GCTTCCAGCAGAAATCATCC       |

|                     |      |        |    |      |                              |
|---------------------|------|--------|----|------|------------------------------|
| scaffold733551_15.8 | 1 p3 | (CTT)5 | 15 | 2098 | 2112 AATGCAGTCCGGGTTTCATAG   |
| scaffold733688_16.2 | 1 p3 | (TGT)5 | 15 | 46   | 60 ATGTAGCCGACCCCAATTTA      |
| scaffold733737_15.0 | 1 p3 | (TGA)6 | 18 | 43   | 60 CCAAGACCCCAATTTGATT       |
| scaffold733753_13.7 | 1 p3 | (TGT)6 | 18 | 45   | 62 TGTAGCCGACCCCAATTTAT      |
| scaffold733764_16.7 | 1 p3 | (TTG)5 | 15 | 2331 | 2345 ACAGCTCGAGCATTTCATTCC   |
| scaffold733825_16.7 | 1 p3 | (CGG)5 | 15 | 507  | 521 TTTCTGTTGGGACTGGTTACG    |
| scaffold733846_16.7 | 1 p3 | (ACA)5 | 15 | 709  | 723 CATTCAATTCGAAATTATGCATGT |
| scaffold733892_13.9 | 1 p3 | (ATT)7 | 21 | 817  | 837 TTGTGTGAACGAGGATTTGC     |
| scaffold733993_16.7 | 1 p3 | (CAG)5 | 15 | 316  | 330 TGCAACCTGCAAGTCACATT     |
| scaffold734003_18.1 | 1 p3 | (CGG)5 | 15 | 3663 | 3677 TAATGGGCCTTCACATCCTC    |
| scaffold734029_18.9 | 1 p3 | (GAG)5 | 15 | 697  | 711 GTTTTTGGACTAGCCCATCG     |
| scaffold734045_12.3 | 1 p3 | (ATA)7 | 21 | 415  | 435 TTCAAATCCGGGTCTCTCAC     |
| scaffold734102_14.0 | 1 p3 | (ACA)5 | 15 | 2347 | 2361 TTGTCGTGATGGGTGAATGT    |
| scaffold734109_14.2 | 1 p3 | (AAT)5 | 15 | 107  | 121 CGCATGACACTGATCTATCG     |
| scaffold734128_16.0 | 1 p3 | (TGA)6 | 18 | 44   | 61 CCAAGACCCCAATTTGATT       |
| scaffold734287_13.3 | 1 p3 | (GAT)5 | 15 | 1606 | 1620 CCCCACACTCACATCAACACA   |
| scaffold734312_17.7 | 1 p3 | (ATA)5 | 15 | 5900 | 5914 TTCTTGTTTTCCCTCACTGGA   |
| scaffold734377_19.2 | 1 p3 | (AAC)5 | 15 | 1179 | 1193 TCCAGATTCAAGACCAAGCA    |
| scaffold734421_15.0 | 1 p3 | (GTC)5 | 15 | 1264 | 1278 ATTACCGATGGCCGATGTAG    |
| scaffold734449_15.0 | 1 p3 | (ATT)5 | 15 | 550  | 564 ACACCCAGCATGAGGAATA      |
| scaffold734496_16.6 | 1 p3 | (ATA)6 | 18 | 1213 | 1230 TTGTATCGTGTTCCGCCACAT   |
| scaffold734506_15.6 | 1 p3 | (ATC)7 | 21 | 3897 | 3917 TGAACGATTGTGTGGAAAG     |
| scaffold734522_12.0 | 1 p3 | (TCA)5 | 15 | 631  | 645 GCCAGGATGCAGAACAATTT     |
| scaffold734523_16.3 | 1 p3 | (GGC)7 | 21 | 3258 | 3278 TTTTGGGTGGAGAAATGGAG    |
| scaffold734552_15.1 | 1 p3 | (TGT)5 | 15 | 51   | 65 ATGTAGCCGACCCCAATTTA      |
| scaffold734557_16.9 | 1 p3 | (ACA)5 | 15 | 583  | 597 CCCATGCCGAATGTTATTCT     |
| scaffold734579_17.4 | 1 p3 | (ATA)5 | 15 | 704  | 718 CATTATACCACGGAGGAAGGA    |
| scaffold734599_14.8 | 1 p3 | (CTC)5 | 15 | 354  | 368 CCCCACACTCATCCTCTT       |
| scaffold734607_16.3 | 1 p3 | (CAT)5 | 15 | 453  | 467 GTTGGGTGGATTTGAGCAT      |
| scaffold734615_19.0 | 1 p3 | (TTC)5 | 15 | 634  | 648 TGAAACATCCATTCTCCAAAGA   |
| scaffold734647_15.2 | 1 p3 | (AAC)6 | 18 | 3486 | 3503 TAGATAACAGGCAATGCCGC    |
| scaffold734701_15.8 | 1 p3 | (ACC)5 | 15 | 838  | 852 ACTCTTCAGCTCCCCTCCA      |
| scaffold734715_12.1 | 1 p3 | (TTA)6 | 18 | 696  | 713 GTTCCTAGCTGTCCGGCACTC    |
| scaffold734770_15.4 | 1 p3 | (ATA)5 | 15 | 320  | 334 AAAAGAGGGGGAAAAATTTCG    |
| scaffold734792_15.0 | 1 p3 | (TAC)5 | 15 | 1395 | 1409 CATATAAAGAGGGCAGCCGA    |
| scaffold734798_12.3 | 1 p3 | (AGA)6 | 18 | 1890 | 1907 CCTGATGAGGCTAAGGATGG    |
| scaffold734809_16.0 | 1 p3 | (ATA)5 | 15 | 906  | 920 CCGAAAATGTCCTTCATTGC     |
| scaffold734812_14.5 | 1 p3 | (ATT)5 | 15 | 831  | 845 TTGAGGACCCGACTGACTTC     |
| scaffold734994_18.3 | 1 p3 | (ATC)6 | 18 | 645  | 662 CAGCATGAGGCAGATTGATG     |
| scaffold735098_16.0 | 1 p3 | (GCG)7 | 21 | 363  | 383 CATGACTCCGCATTAGCAGA     |
| scaffold735107_15.9 | 1 p3 | (CAT)6 | 18 | 757  | 774 CCCCTTGGGATATGTGTTTG     |
| scaffold735203_16.0 | 1 p3 | (GGA)6 | 18 | 378  | 395 GAGATTTCCGAGCTTGTTGG     |
| scaffold735237_16.5 | 1 p3 | (TAA)5 | 15 | 3316 | 3330 TTGTCACTAAGCCAACACCAA   |
| scaffold735266_18.8 | 1 p3 | (ATT)5 | 15 | 1220 | 1234 GGAAATGATTGTTCTCCTAGGTC |
| scaffold735352_14.4 | 1 p3 | (ATT)7 | 21 | 410  | 430 TGTTTGCTTTTCTTCATGCG     |
| scaffold735359_17.6 | 1 p3 | (CAT)7 | 21 | 3352 | 3372 GGCCTAAAGCTGATGGACCT    |
| scaffold735371_14.0 | 1 p3 | (GCG)8 | 24 | 2065 | 2088 CTTTGCTTCGTGCTTGAATG    |
| scaffold735376_16.6 | 1 p3 | (CTG)5 | 15 | 1471 | 1485 AGGGGACTCGTCAGGAAACT    |
| scaffold735412_12.2 | 1 p3 | (ATT)8 | 24 | 202  | 225 TCTTTTTCCATTGCTCACGA     |
| scaffold735525_14.6 | 1 p3 | (ACA)5 | 15 | 3192 | 3206 ACTGCATCGGTGTCTCACAT    |
| scaffold735556_14.8 | 1 p3 | (CGC)5 | 15 | 316  | 330 GAAGGCAGCTTGATCGTAGG     |
| scaffold735591_19.3 | 1 p3 | (AAT)5 | 15 | 827  | 841 GGAGGAAGCATCTACGCAAC     |
| scaffold735606_16.8 | 1 p3 | (TTC)5 | 15 | 670  | 684 ACGCTGTTTTTCCACTCCAG     |
| scaffold735788_16.2 | 1 p3 | (CTA)5 | 15 | 167  | 181 CAATAACGGCAACACAAACG     |
| scaffold735797_16.4 | 1 p3 | (CCG)5 | 15 | 1078 | 1092 TGCACGATCCATATCTGCTG    |
| scaffold735864_16.3 | 1 p3 | (TCA)6 | 18 | 3425 | 3442 TGATGGAATCTCTGGGAAGG    |
| scaffold735875_15.3 | 1 p3 | (AAG)5 | 15 | 1457 | 1471 AACAAAATCCCTCCCCATTC    |
| scaffold735876_17.6 | 1 p3 | (ATA)5 | 15 | 1382 | 1396 TGCCTTAACACAAAGGGGAA    |



|                     |      |        |    |      |      |                        |
|---------------------|------|--------|----|------|------|------------------------|
| scaffold735908_17.1 | 1 p3 | (TTG)5 | 15 | 49   | 63   | AGCTTTGGTTCATGTAGCCG   |
| scaffold735952_16.4 | 1 p3 | (TCC)5 | 15 | 2417 | 2431 | CCGATGAGTCGTTTCCACTT   |
| scaffold735980_13.5 | 1 p3 | (CTT)7 | 21 | 427  | 447  | TGAAACTGGACCTGGTATCAA  |
| scaffold735983_16.1 | 1 p3 | (TTA)7 | 21 | 1049 | 1069 | TGTAAAGAAACGGACGGAGG   |
| scaffold735996_14.3 | 1 p3 | (TTC)5 | 15 | 623  | 637  | TGGCACCCCTTACATCTCCTT  |
| scaffold736066_16.1 | 1 p3 | (ATA)6 | 18 | 5779 | 5796 | TTCGGAGGACAATGCTCTCT   |
| scaffold736077_14.1 | 1 p3 | (CAA)6 | 18 | 5519 | 5536 | GGGACAAGCTATCACACAGGA  |
| scaffold736097_18.3 | 1 p3 | (TGA)5 | 15 | 359  | 373  | GTTGCGTACATATGACCCCC   |
| scaffold736191_14.9 | 1 p3 | (CCT)6 | 18 | 1121 | 1138 | GTTCCACCCCCTGAGGTATT   |
| scaffold736194_17.9 | 1 p3 | (TCA)5 | 15 | 652  | 666  | CTCAAGGAGCTCAACTCCAA   |
| scaffold736219_14.8 | 1 p3 | (ATG)5 | 15 | 1855 | 1869 | GGCTTATGTCCAAGTGTCTCC  |
| scaffold736222_13.7 | 1 p3 | (AAG)8 | 24 | 86   | 109  | GCACTCGAAGAGTAGCGGTT   |
| scaffold736230_17.0 | 1 p3 | (TGG)5 | 15 | 1181 | 1195 | TCTGGAAAAGAGAAGGCCAA   |
| scaffold736335_15.0 | 1 p3 | (GGT)5 | 15 | 102  | 116  | TGTGGGAAAAACATCGATCA   |
| scaffold736366_17.8 | 1 p3 | (GAC)5 | 15 | 1467 | 1481 | TCGGCAACTTTTGAAGATT    |
| scaffold736370_15.1 | 1 p3 | (TTA)5 | 15 | 777  | 791  | TTTCTCGCCTAATGCCATGT   |
| scaffold736407_15.1 | 1 p3 | (ATT)7 | 21 | 1446 | 1466 | CGCGAACTAATCCGTCCTTA   |
| scaffold736421_14.4 | 1 p3 | (AAT)5 | 15 | 3134 | 3148 | CCCTCAATTTTGTACCCGAA   |
| scaffold736446_17.1 | 1 p3 | (TGA)6 | 18 | 45   | 62   | CCCAAGACCCCAATTTGATT   |
| scaffold736448_14.3 | 1 p3 | (TAA)6 | 18 | 403  | 420  | GCCAAAAGTAAAGGAAGGGG   |
| scaffold736470_18.0 | 1 p3 | (AAC)6 | 18 | 2057 | 2074 | TCAAAGTCATCCCCTGGAG    |
| scaffold736473_13.7 | 1 p3 | (GGT)6 | 18 | 1201 | 1218 | CTGATCACCCAGTTTTGCCT   |
| scaffold736519_16.6 | 1 p3 | (CCG)6 | 18 | 927  | 944  | CTCCAATCTCTCTCCACCA    |
| scaffold736531_16.2 | 1 p3 | (CAG)5 | 15 | 2314 | 2328 | AGCATTGGCTTCAGCTGTTT   |
| scaffold736549_14.5 | 1 p3 | (TGA)5 | 15 | 41   | 55   | CCCAAGACCCCAATTTGATT   |
| scaffold736560_11.6 | 1 p3 | (GCT)5 | 15 | 1150 | 1164 | ATCCTCAGATTTACCGTGCC   |
| scaffold736582_16.2 | 1 p3 | (GGT)7 | 21 | 1219 | 1239 | TCTGGAAAAGAGAAGGCCAA   |
| scaffold736622_11.6 | 1 p3 | (ATG)6 | 18 | 1139 | 1156 | TTGCTTGACTGAGTTGCTGC   |
| scaffold736630_16.5 | 1 p3 | (CAC)5 | 15 | 1230 | 1244 | TACATCACCCCTCCCATCTGC  |
| scaffold736676_13.8 | 1 p3 | (CCG)5 | 15 | 720  | 734  | TACTTCATCGTGCTCAACGG   |
| scaffold736742_15.6 | 1 p3 | (TCT)5 | 15 | 320  | 334  | TCCTCCAGCTGTTCTTTCGT   |
| scaffold736777_14.7 | 1 p3 | (CGG)5 | 15 | 125  | 139  | TGAACAGCATGGTCTGGATG   |
| scaffold736799_15.4 | 1 p3 | (TGA)5 | 15 | 2384 | 2398 | GATAAGGGGATTGATTGGCA   |
| scaffold736809_16.2 | 1 p3 | (CAA)5 | 15 | 1213 | 1227 | GAAGCCACGAGAGAATTTGC   |
| scaffold736831_13.4 | 1 p3 | (TAA)9 | 27 | 1231 | 1257 | TGCCCTCACAAACAAATTCA   |
| scaffold736875_16.4 | 1 p3 | (GTA)6 | 18 | 2097 | 2114 | CGAGACCTAAATTGTTGTGG   |
| scaffold736905_15.0 | 1 p3 | (ACA)5 | 15 | 699  | 713  | AAAAATCATTATCCCCGGC    |
| scaffold736926_16.6 | 1 p3 | (CAT)5 | 15 | 1909 | 1923 | TGCTGATCCACCCTTTGAAT   |
| scaffold736960_12.0 | 1 p3 | (ATA)7 | 21 | 590  | 610  | GCAGCTGAGCTAGGTGCATT   |
| scaffold736973_16.9 | 1 p3 | (TAT)6 | 18 | 629  | 646  | GCAATTTTCAAGGTTAGGCAA  |
| scaffold737052_14.3 | 1 p3 | (AGA)5 | 15 | 2620 | 2634 | ATCTCACTCGGACATGGGAC   |
| scaffold737068_14.6 | 1 p3 | (CTC)7 | 21 | 2835 | 2855 | TTGGTTCAATCTCAAAGCCC   |
| scaffold737079_14.6 | 1 p3 | (TCT)7 | 21 | 2378 | 2398 | AAGGTAGTACCAGCCTGCCA   |
| scaffold737111_15.9 | 1 p3 | (CAT)6 | 18 | 697  | 714  | CCACGCCATAACAAAGGACT   |
| scaffold737119_12.7 | 1 p3 | (TGT)5 | 15 | 45   | 59   | TGTAGCCGACCCCAATTTAT   |
| scaffold737133_14.3 | 1 p3 | (CAG)6 | 18 | 443  | 460  | TCGGCATGTTGCTCTTTATG   |
| scaffold737227_13.5 | 1 p3 | (AAT)5 | 15 | 1120 | 1134 | GCGCTGAAAGAGGATGAGAT   |
| scaffold737250_16.0 | 1 p3 | (CGG)7 | 21 | 2605 | 2625 | GTCCTCCTCGTCATCGTCAT   |
| scaffold737290_16.7 | 1 p3 | (TAT)5 | 15 | 637  | 651  | CGACAGCACATGACTTTTCA   |
| scaffold737303_17.7 | 1 p3 | (ATA)6 | 18 | 318  | 335  | TGCAAGATGTGCCCTATTT    |
| scaffold737344_15.7 | 1 p3 | (CGA)7 | 21 | 513  | 533  | GGAATATCCACCAACTCCGA   |
| scaffold737357_14.8 | 1 p3 | (TGA)5 | 15 | 2030 | 2044 | GTGCAGGCTTGCTTTTGTTA   |
| scaffold737372_16.1 | 1 p3 | (AAT)5 | 15 | 256  | 270  | AATAAGATTTGCACGCTGGG   |
| scaffold737459_13.5 | 1 p3 | (AAT)5 | 15 | 1049 | 1063 | CGTTGCTTGGCAATTCTACA   |
| scaffold737468_16.8 | 1 p3 | (GGC)5 | 15 | 320  | 334  | ACTCAGATCTGGCCTGGAGA   |
| scaffold737477_15.8 | 1 p3 | (ATA)5 | 15 | 40   | 54   | TGGTAGATCTGCTCCTTGATGA |
| scaffold737518_18.5 | 1 p3 | (TTG)5 | 15 | 97   | 111  | CTGAAAGGGAGTTGGAAGCA   |
| scaffold737596_19.3 | 1 p3 | (TGA)7 | 21 | 40   | 60   | CCCAAGACCCCAATTTGATT   |

|                     |      |        |    |      |      |                           |
|---------------------|------|--------|----|------|------|---------------------------|
| scaffold737616_18.5 | 1 p3 | (GCG)5 | 15 | 1166 | 1180 | ACGCCAATTTGGATTTTGAC      |
| scaffold737617_16.8 | 1 p3 | (TTA)5 | 15 | 51   | 65   | GGTCCTTCGTCGCATATGAA      |
| scaffold737621_16.5 | 1 p3 | (ACA)5 | 15 | 5149 | 5163 | AATGTCATATACCCGCCCAA      |
| scaffold737755_14.0 | 1 p3 | (CTG)5 | 15 | 149  | 163  | GGTGGTGAGAACCACGACTT      |
| scaffold737764_17.0 | 1 p3 | (CTT)5 | 15 | 279  | 293  | CCATCGGAAGTCTCAAGTCC      |
| scaffold737782_15.9 | 1 p3 | (TGT)5 | 15 | 50   | 64   | ATGTAGCCGACCCCAATTTA      |
| scaffold737783_16.7 | 1 p3 | (GAA)5 | 15 | 1874 | 1888 | GGGAGCCCTTGGATTTAGTT      |
| scaffold737806_14.6 | 1 p3 | (ATT)5 | 15 | 96   | 110  | TTGGGATTAAGGCTTTGGTG      |
| scaffold737841_15.8 | 1 p3 | (TTG)5 | 15 | 533  | 547  | GCACTTACAGCCAAGCAACA      |
| scaffold737846_17.3 | 1 p3 | (ATC)6 | 18 | 742  | 759  | TTGTGGGATAAAATCCCCTT      |
| scaffold737861_10.4 | 1 p3 | (TCA)8 | 24 | 679  | 702  | GAGTGTTTCGCGCAGTTGATA     |
| scaffold737876_16.4 | 1 p3 | (AGC)5 | 15 | 2261 | 2275 | CAGTGCATGCAAGCTGATTT      |
| scaffold737895_16.4 | 1 p3 | (TGA)5 | 15 | 1628 | 1642 | GGATTGAGCTCTTGTTTGC       |
| scaffold737897_17.0 | 1 p3 | (TGT)5 | 15 | 50   | 64   | TTGGTTTATGTAGCCGACCC      |
| scaffold737930_19.3 | 1 p3 | (GAA)6 | 18 | 459  | 476  | CCGATAAGCAGAGCTCCATC      |
| scaffold738028_17.0 | 1 p3 | (ATA)5 | 15 | 497  | 511  | TGGTGAAAAATCAAACACTTGG    |
| scaffold738078_16.6 | 1 p3 | (GAA)5 | 15 | 1425 | 1439 | GGGCTCCTCATGGTCTGATA      |
| scaffold738083_15.3 | 1 p3 | (ATT)5 | 15 | 1706 | 1720 | TGCCTTTCAAATAGCATTTCGT    |
| scaffold738098_16.7 | 1 p3 | (GCC)6 | 18 | 673  | 690  | CTTCTTCCTCCGACGACAAC      |
| scaffold738101_15.7 | 1 p3 | (AGT)5 | 15 | 473  | 487  | ATGCTTCTCCCCCTTGAAAT      |
| scaffold738147_15.3 | 1 p3 | (CTT)6 | 18 | 1784 | 1801 | TCAGTTATAGCCGACCCAC       |
| scaffold738222_15.6 | 1 p3 | (CAT)5 | 15 | 1923 | 1937 | AAGTCGTGCATTGACGTGAC      |
| scaffold738228_15.4 | 1 p3 | (ATG)5 | 15 | 4927 | 4941 | TCAACAGACATTGCAGCCTC      |
| scaffold738278_13.5 | 1 p3 | (TTA)5 | 15 | 1536 | 1550 | TGGAACAAACAAACAAGCACA     |
| scaffold738313_18.5 | 1 p3 | (CAG)5 | 15 | 1130 | 1144 | ATGCCGTTCTTTTGTCTGG       |
| scaffold738324_15.7 | 1 p3 | (CAC)5 | 15 | 4550 | 4564 | CCCATTTTGACGCTCTGATT      |
| scaffold738341_15.5 | 1 p3 | (TGG)5 | 15 | 615  | 629  | GATTGATTCCGGTAGGCAA       |
| scaffold738352_15.6 | 1 p3 | (TGT)5 | 15 | 4739 | 4753 | CACCTATTCGACCCTGCAAT      |
| scaffold738386_17.3 | 1 p3 | (TCA)5 | 15 | 1658 | 1672 | GCATAACCCGAACCCAATAA      |
| scaffold738394_16.7 | 1 p3 | (AGA)5 | 15 | 822  | 836  | GGGAAGATTCGTGTTTCAGG      |
| scaffold738407_14.6 | 1 p3 | (TAA)6 | 18 | 5979 | 5996 | TGACAGATGAATGGACCAACA     |
| scaffold738410_13.8 | 1 p3 | (TGA)6 | 18 | 43   | 60   | CCAAGACCCCAATTTGATT       |
| scaffold738416_15.7 | 1 p3 | (GCT)5 | 15 | 3801 | 3815 | CATTAGCTCCGTGATGCAGA      |
| scaffold738439_16.2 | 1 p3 | (GGC)6 | 18 | 1826 | 1843 | GACCCGAAAGGAAATTTTG       |
| scaffold738452_16.7 | 1 p3 | (CGC)7 | 21 | 497  | 517  | TATCCAATATAGGGCACGGC      |
| scaffold738483_18.2 | 1 p3 | (TAA)6 | 18 | 1621 | 1638 | CGTTGATTCTTCAAATCCCA      |
| scaffold738486_15.3 | 1 p3 | (CAC)5 | 15 | 4771 | 4785 | GTATGTGGTAAGGCGAGGGA      |
| scaffold738698_18.9 | 1 p3 | (AAT)5 | 15 | 594  | 608  | GCCCGTTTCTGAAAGACTGA      |
| scaffold738712_15.0 | 1 p3 | (GAT)6 | 18 | 844  | 861  | ACGAAGATACAGTCCCACCG      |
| scaffold738720_10.5 | 1 p3 | (AAG)5 | 15 | 433  | 447  | ACATTTCAACCGCAGGTAGC      |
| scaffold738721_17.8 | 1 p3 | (CGA)5 | 15 | 380  | 394  | TACCTCCGAAGGAACGAGAA      |
| scaffold738727_15.2 | 1 p3 | (TGA)6 | 18 | 44   | 61   | CCAAGACCCCAATTTGATT       |
| scaffold738754_16.0 | 1 p3 | (CAA)5 | 15 | 1860 | 1874 | CCATCACCATCACTTCCAGA      |
| scaffold738837_17.0 | 1 p3 | (AAC)5 | 15 | 429  | 443  | TGAATGCTTTATCCGAGCCT      |
| scaffold738838_17.1 | 1 p3 | (TGA)5 | 15 | 48   | 62   | CCAAGACCCCAATTTGATT       |
| scaffold738847_12.0 | 1 p3 | (TCC)5 | 15 | 1499 | 1513 | TCCCTCCTCCTCCTTCTC        |
| scaffold738933_14.4 | 1 p3 | (GAC)5 | 15 | 1337 | 1351 | CCTCCCTCTAAAACCCGAA       |
| scaffold738943_15.1 | 1 p3 | (AAC)6 | 18 | 65   | 82   | TCAGCTTCATGATACTTTGGGA    |
| scaffold739014_15.6 | 1 p3 | (AAT)5 | 15 | 1764 | 1778 | GCGTATTATTTTTCTCTCAATAGGG |
| scaffold739017_12.7 | 1 p3 | (CTC)5 | 15 | 123  | 137  | TGATCATCCTCCTCATTCTCTG    |
| scaffold739030_18.3 | 1 p3 | (TCT)6 | 18 | 963  | 980  | CTCAGCTATGAAATCCGCGT      |
| scaffold739057_15.3 | 1 p3 | (GAT)5 | 15 | 2006 | 2020 | TCAACACTGCAGATGAACAGAA    |
| scaffold739072_15.6 | 1 p3 | (CTT)5 | 15 | 1980 | 1994 | GGAAGCTTCAAGTCCAATGC      |
| scaffold739101_15.1 | 1 p3 | (TTC)5 | 15 | 1975 | 1989 | TTTCCGCCATTTTAGCATC       |
| scaffold739138_16.4 | 1 p3 | (GGA)5 | 15 | 927  | 941  | GCGGAGAGGAAGAGGAAGAA      |
| scaffold739165_16.2 | 1 p3 | (ACA)6 | 18 | 2136 | 2153 | TTAGATTGGAGATGCCGAGG      |
| scaffold739181_16.0 | 1 p3 | (ATC)5 | 15 | 2712 | 2726 | AAAGAAGCAACCATCAACCG      |
| scaffold739190_15.9 | 1 p3 | (ATA)5 | 15 | 999  | 1013 | CTGCAGAATCAACTGCTTGG      |

|                     |      |         |    |      |      |                          |
|---------------------|------|---------|----|------|------|--------------------------|
| scaffold739223_16.8 | 1 p3 | (TGT)6  | 18 | 47   | 64   | TTGGTTCATGTAGCCGACCT     |
| scaffold739249_15.8 | 1 p3 | (TTA)5  | 15 | 5158 | 5172 | TCGTCCATATCAAGGCTCAA     |
| scaffold739259_14.8 | 1 p3 | (TAT)5  | 15 | 431  | 445  | AAAATGGATGGGGTGATTGA     |
| scaffold739268_17.7 | 1 p3 | (ACA)7  | 21 | 3113 | 3133 | ACACCCGGACACAAGAATGT     |
| scaffold739299_16.2 | 1 p3 | (TGG)5  | 15 | 5372 | 5386 | GAGTATTCTTGCCGTTGGGA     |
| scaffold739307_15.2 | 1 p3 | (TGT)5  | 15 | 48   | 62   | TGTAGCCGACCCCAATTTAT     |
| scaffold739332_14.4 | 1 p3 | (CGC)5  | 15 | 1580 | 1594 | TGGTGAACCCAAACTCTTCC     |
| scaffold739367_18.8 | 1 p3 | (GCG)5  | 15 | 1772 | 1786 | GGAGGAAATTGGCATCAGAA     |
| scaffold739457_14.7 | 1 p3 | (AGG)7  | 21 | 30   | 50   | AAACAGCTTCTCTCTCCGGG     |
| scaffold739460_14.8 | 1 p3 | (CTC)5  | 15 | 878  | 892  | AAAATAATGATAACGGCGGC     |
| scaffold739464_18.0 | 1 p3 | (AAG)6  | 18 | 695  | 712  | TGGTGAAGCTTGAGGAGGTCT    |
| scaffold739514_17.6 | 1 p3 | (TGT)6  | 18 | 44   | 61   | ATGTAGCCGACCCCAATTTA     |
| scaffold739534_15.2 | 1 p3 | (TGA)7  | 21 | 45   | 65   | CCGAGACCCCAATTTGATT      |
| scaffold739542_13.5 | 1 p3 | (TGT)5  | 15 | 68   | 82   | ATGTAGCCGACCCCAATAAA     |
| scaffold739596_15.5 | 1 p3 | (TGT)6  | 18 | 42   | 59   | TGTAGCCGACCCCAATTTAT     |
| scaffold739600_16.8 | 1 p3 | (TGT)7  | 21 | 41   | 61   | TGTAGCCGACCCCAATTTAT     |
| scaffold739613_17.2 | 1 p3 | (ATC)7  | 21 | 3054 | 3074 | AAACCATCTTTCCCAAACC      |
| scaffold739631_14.2 | 1 p3 | (TTG)6  | 18 | 3284 | 3301 | CCCAGTTTTTGTGCACTGA      |
| scaffold739678_15.7 | 1 p3 | (TTA)5  | 15 | 734  | 748  | AGTGAGTTGATTCCGGTTCG     |
| scaffold739704_16.8 | 1 p3 | (ATA)5  | 15 | 146  | 160  | CCCACATCCAGCTTTCGTAT     |
| scaffold739713_15.6 | 1 p3 | (CAA)5  | 15 | 872  | 886  | CAGTTTCAAGGGGAATCGAA     |
| scaffold739714_17.0 | 1 p3 | (TGA)10 | 30 | 3779 | 3808 | GTGAGGATGATGGTGGAGGT     |
| scaffold739733_16.6 | 1 p3 | (TCC)5  | 15 | 2006 | 2020 | AATTACCTGTTGGCCTGCAT     |
| scaffold739753_15.4 | 1 p3 | (CAT)7  | 21 | 5898 | 5918 | GAAATCGGAATCCCCGTACT     |
| scaffold739861_15.5 | 1 p3 | (GGA)6  | 18 | 642  | 659  | GTTCTCCTTCGGAGTTGCAG     |
| scaffold739881_15.6 | 1 p3 | (TTG)5  | 15 | 2151 | 2165 | AGCCGACTTCACATAGTGGG     |
| scaffold739896_17.2 | 1 p3 | (GCC)5  | 15 | 1253 | 1267 | ACGTTGTTGTTGATTGGGGT     |
| scaffold739916_18.2 | 1 p3 | (GAA)5  | 15 | 960  | 974  | AAATACAAAGCCAGCCAACG     |
| scaffold739960_15.6 | 1 p3 | (TGT)5  | 15 | 47   | 61   | ATGTAGCCGACCCCAATTTA     |
| scaffold739977_14.5 | 1 p3 | (TAA)6  | 18 | 80   | 97   | ACGTGTATTGGGTGGTCCAT     |
| scaffold740019_13.8 | 1 p3 | (ATA)5  | 15 | 2284 | 2298 | GCAGAAGGCTCCACTCTTGT     |
| scaffold740035_13.9 | 1 p3 | (CAT)5  | 15 | 1620 | 1634 | AACTTTTGCCTGAAACGCAT     |
| scaffold740153_17.2 | 1 p3 | (CGG)5  | 15 | 758  | 772  | ACCATGAAGATGAAGCTGCC     |
| scaffold740170_15.7 | 1 p3 | (CAC)5  | 15 | 703  | 717  | TCGTTTTCTTCTCGGTGCT      |
| scaffold740175_15.2 | 1 p3 | (TTG)5  | 15 | 51   | 65   | TTGGGATTAAGGCTTTGGTG     |
| scaffold740177_13.6 | 1 p3 | (TTA)5  | 15 | 2268 | 2282 | ATTTCTCATACTGCCTGCC      |
| scaffold740198_15.7 | 1 p3 | (CTG)6  | 18 | 1117 | 1134 | ATGTTGATAGGGTTGGACGC     |
| scaffold740213_15.4 | 1 p3 | (CAT)6  | 18 | 2858 | 2875 | GATGCGGGGGATTTAAAGTT     |
| scaffold740254_16.7 | 1 p3 | (CAT)5  | 15 | 332  | 346  | ATCATCACCGTGGATCATCA     |
| scaffold740330_15.7 | 1 p3 | (AGC)6  | 18 | 3834 | 3851 | ACTCTTACGAGGGACGGGTT     |
| scaffold740341_15.8 | 1 p3 | (ATT)7  | 21 | 150  | 170  | AATAAAGTATGTGGGAAAGTCGAT |
| scaffold740428_15.0 | 1 p3 | (ATG)6  | 18 | 265  | 282  | GTGAAACACCATCTTTCCCG     |
| scaffold740432_16.2 | 1 p3 | (TGT)5  | 15 | 45   | 59   | TGTAGCCGACCCCAATTTAT     |
| scaffold740445_15.2 | 1 p3 | (TGA)6  | 18 | 291  | 308  | CGATTAGGGCTGTTATCGGA     |
| scaffold740478_12.6 | 1 p3 | (TAT)5  | 15 | 262  | 276  | GATTCCCTATCTTGCTCCCC     |
| scaffold740500_15.6 | 1 p3 | (GAT)5  | 15 | 3629 | 3643 | ATGCAACTTGCCAACCTACC     |
| scaffold740505_15.8 | 1 p3 | (CCG)6  | 18 | 1836 | 1853 | CAAGCCACTCAAATCAGCA      |
| scaffold740509_15.6 | 1 p3 | (CGG)5  | 15 | 3265 | 3279 | AAATGCCGTTGGTGAGGTAG     |
| scaffold740549_16.8 | 1 p3 | (TGA)5  | 15 | 3839 | 3853 | TTGCGTACATTTGATTGGGA     |
| scaffold740562_16.2 | 1 p3 | (GGC)5  | 15 | 2685 | 2699 | TTTTGCATGTTTCAAGGCAG     |
| scaffold740671_16.2 | 1 p3 | (AAG)5  | 15 | 1795 | 1809 | TTAGGCTCTCAAAGGACGA      |
| scaffold740673_14.5 | 1 p3 | (TCC)6  | 18 | 608  | 625  | CATTTCCGACCTCCACATCT     |
| scaffold740687_14.5 | 1 p3 | (GAA)5  | 15 | 3788 | 3802 | AGAGAAGTTGTGGGGTGGTG     |
| scaffold740688_16.8 | 1 p3 | (TTG)7  | 21 | 2787 | 2807 | AAATCTGTTCCAATCCGGG      |
| scaffold740704_14.6 | 1 p3 | (GAT)5  | 15 | 736  | 750  | TGTGATCAATGAAGGGGACA     |
| scaffold740712_15.7 | 1 p3 | (ACA)6  | 18 | 4039 | 4056 | CGGCTGTTACTCCTTCCAAA     |
| scaffold740714_16.2 | 1 p3 | (CAT)6  | 18 | 598  | 615  | AGGCTGAAAAGGATGCTCAA     |
| scaffold740744_14.4 | 1 p3 | (CTC)5  | 15 | 47   | 61   | GTGTAAGTCGCGGTCTCGAT     |

|                     |      |        |    |      |      |                        |
|---------------------|------|--------|----|------|------|------------------------|
| scaffold740786_14.9 | 1 p3 | (CTT)5 | 15 | 1313 | 1327 | TCCATCAACCTAACAGCAACA  |
| scaffold740790_18.0 | 1 p3 | (AGA)5 | 15 | 263  | 277  | AGGTGGCAACGAAAATGAAC   |
| scaffold740802_14.8 | 1 p3 | (GGA)5 | 15 | 842  | 856  | GACGGAGATCCCAATGAAGA   |
| scaffold740811_15.0 | 1 p3 | (TGT)7 | 21 | 41   | 61   | TGTAGCCGACCCCAATTTAT   |
| scaffold740824_14.3 | 1 p3 | (AGA)5 | 15 | 2863 | 2877 | CTCATTGACGACATCCAACG   |
| scaffold740832_18.5 | 1 p3 | (AAC)5 | 15 | 3422 | 3436 | AGCGGGATAATGGAACAGTG   |
| scaffold740833_15.9 | 1 p3 | (TTA)5 | 15 | 753  | 767  | CTGCCTGCAAAAATATCCGT   |
| scaffold740873_16.4 | 1 p3 | (GAT)5 | 15 | 571  | 585  | TGCAACTTGAGGCTGAGAAA   |
| scaffold740884_15.8 | 1 p3 | (TTG)5 | 15 | 173  | 187  | GTTTATGTAGCCGACCCCAA   |
| scaffold740885_16.0 | 1 p3 | (ACA)5 | 15 | 1600 | 1614 | GATGCTTAGTTGCCCATTCG   |
| scaffold740977_14.5 | 1 p3 | (CTT)5 | 15 | 1365 | 1379 | TCAGAGCTATTTGCTTCACCA  |
| scaffold740985_11.9 | 1 p3 | (GCT)8 | 24 | 868  | 891  | GAAGGAGGGGATGGAGAGAG   |
| scaffold741038_14.5 | 1 p3 | (TGT)7 | 21 | 3070 | 3090 | AGTGTTACGCACTCATTGCC   |
| scaffold741071_16.4 | 1 p3 | (AAT)5 | 15 | 607  | 621  | CGATAACGTGAGTCGTGACC   |
| scaffold741078_16.0 | 1 p3 | (GCG)5 | 15 | 2381 | 2395 | TACTTCGCCGTAGGTTTCGT   |
| scaffold741092_13.3 | 1 p3 | (ATT)7 | 21 | 342  | 362  | CGCCACTTGTTGGGTATTTT   |
| scaffold741094_16.5 | 1 p3 | (TTA)6 | 18 | 1897 | 1914 | CAACTGCACTTGGATCCTGA   |
| scaffold741111_16.0 | 1 p3 | (CGG)5 | 15 | 536  | 550  | TCTGGGGAATTTTCCTTGAA   |
| scaffold741114_15.6 | 1 p3 | (CAT)6 | 18 | 1421 | 1438 | TCTCCTACCCAAAACCTCCA   |
| scaffold741117_17.0 | 1 p3 | (GCA)6 | 18 | 373  | 390  | TCTGAAGCAGCTCCTGTGAA   |
| scaffold741208_19.4 | 1 p3 | (ACA)5 | 15 | 2078 | 2092 | ACAAATGCAGGGAGGTCAAC   |
| scaffold741217_15.1 | 1 p3 | (ATC)6 | 18 | 1200 | 1217 | GGGGCCCTGTCTAAAAATTG   |
| scaffold741243_17.7 | 1 p3 | (ATG)6 | 18 | 1806 | 1823 | TACATCTGACCCCAAGACC    |
| scaffold741246_15.8 | 1 p3 | (GCG)5 | 15 | 645  | 659  | GCACGTAAAACCCAGGAT     |
| scaffold741304_16.4 | 1 p3 | (GAA)5 | 15 | 201  | 215  | CTACCCACAACAGCATGACG   |
| scaffold741311_16.7 | 1 p3 | (TGT)6 | 18 | 43   | 60   | ATGTAGCCGACCCCAATTTA   |
| scaffold741320_16.9 | 1 p3 | (TGA)5 | 15 | 49   | 63   | CCCAAGACCCCAATTTGATT   |
| scaffold741329_16.6 | 1 p3 | (TGT)6 | 18 | 45   | 62   | TGTAGCCGACCCCAATTTAT   |
| scaffold741335_14.6 | 1 p3 | (ATA)5 | 15 | 322  | 336  | GAAAGGAAAGAGCCGTCCTC   |
| scaffold741347_13.5 | 1 p3 | (ATC)5 | 15 | 726  | 740  | TCACCATCATTTTCTTGCCA   |
| scaffold741381_16.7 | 1 p3 | (CAC)6 | 18 | 1046 | 1063 | CACCATTGTTGGCATCAGAC   |
| scaffold741423_15.6 | 1 p3 | (AAT)5 | 15 | 425  | 439  | ATTGGTATGCGCAACAATGA   |
| scaffold741536_16.3 | 1 p3 | (CAT)5 | 15 | 5658 | 5672 | TGTGGTCTCATAACAAACCTGA |
| scaffold741541_16.3 | 1 p3 | (ACA)5 | 15 | 2475 | 2489 | TTGGTTGAGCGAGGAATACA   |
| scaffold741588_14.8 | 1 p3 | (TTC)5 | 15 | 3267 | 3281 | TTCATCTCCCGTGTCTTTT    |
| scaffold741594_16.2 | 1 p3 | (ATT)6 | 18 | 95   | 112  | AAAAGTGGCATTTTGCCCTA   |
| scaffold741610_15.4 | 1 p3 | (ATG)6 | 18 | 2685 | 2702 | TGTGAATCCCAAATGCTTCA   |
| scaffold741613_17.0 | 1 p3 | (GTA)5 | 15 | 59   | 73   | TTTTGGCATGAGAACTCCC    |
| scaffold741639_19.3 | 1 p3 | (CAG)5 | 15 | 1022 | 1036 | AAGGCGAATTCTTGGAAC     |
| scaffold741650_16.2 | 1 p3 | (TCA)6 | 18 | 1722 | 1739 | TGTTGACGACGGAAC        |
| scaffold741675_16.0 | 1 p3 | (CAA)5 | 15 | 3083 | 3097 | GCAAGACAAACAAAGTGCCA   |
| scaffold741677_14.3 | 1 p3 | (TTA)8 | 24 | 43   | 66   | TTATAAAACCGACCCACCCC   |
| scaffold741702_17.5 | 1 p3 | (GAG)5 | 15 | 847  | 861  | TCTTCTTGATGTCTCGTCG    |
| scaffold741711_17.8 | 1 p3 | (TCT)5 | 15 | 138  | 152  | CGTTTTCTTATCTCTGCGCC   |
| scaffold741748_13.6 | 1 p3 | (TAA)6 | 18 | 542  | 559  | GCATTTTCTCAAAAAGGGA    |
| scaffold741753_14.8 | 1 p3 | (AAT)6 | 18 | 69   | 86   | GGACGGAGTTGTGAAGGAAT   |
| scaffold741763_15.0 | 1 p3 | (CAT)5 | 15 | 49   | 63   | CAATAGTCTAAGGGAGCATGG  |
| scaffold741790_16.0 | 1 p3 | (TGT)6 | 18 | 44   | 61   | TGTAGCCGACCCCAATTTAT   |
| scaffold741791_17.3 | 1 p3 | (TCT)6 | 18 | 195  | 212  | TTCTTCCACCAATTACCCCA   |
| scaffold741805_16.3 | 1 p3 | (ATC)5 | 15 | 600  | 614  | ACCGCGTTATTATTTGCAGG   |
| scaffold741806_15.6 | 1 p3 | (TGA)5 | 15 | 659  | 673  | GCACACTCGAACAAAGCAAA   |
| scaffold741820_12.4 | 1 p3 | (TCC)6 | 18 | 2578 | 2595 | TTTTTCACGCACAACACACA   |
| scaffold741824_19.0 | 1 p3 | (CTC)5 | 15 | 585  | 599  | TTCCTCTCTCTCCCTCCC     |
| scaffold741830_19.3 | 1 p3 | (CTC)5 | 15 | 737  | 751  | TGCAGTAAATCTGTGACCCG   |
| scaffold741933_16.6 | 1 p3 | (TGG)5 | 15 | 2678 | 2692 | AATTCTACCCCCGGTATTC    |
| scaffold741955_18.3 | 1 p3 | (TTA)6 | 18 | 1369 | 1386 | TCCGTAAGAGCATTTTGGCT   |
| scaffold741960_15.5 | 1 p3 | (CCG)6 | 18 | 1825 | 1842 | GAGGTGGTCGGTTGGTAAGA   |
| scaffold741977_16.0 | 1 p3 | (CAT)5 | 15 | 3275 | 3289 | AGGCTCAGTGGTCTCTTGGGA  |

|                     |      |        |    |      |      |                         |
|---------------------|------|--------|----|------|------|-------------------------|
| scaffold741985_18.1 | 1 p3 | (CCG)7 | 21 | 1270 | 1290 | GTAACGACGGTTAGCTGGC     |
| scaffold742014_12.6 | 1 p3 | (TAT)6 | 18 | 1719 | 1736 | TTTCGATGTGCAATTACAACAAA |
| scaffold742051_15.6 | 1 p3 | (TTA)5 | 15 | 1256 | 1270 | TCGATTTTATCCCTCGCAAA    |
| scaffold742055_16.2 | 1 p3 | (ATT)6 | 18 | 470  | 487  | GACATCATCCACCGAGAACC    |
| scaffold742067_17.2 | 1 p3 | (TGT)6 | 18 | 1476 | 1493 | AAGGGAGGGAATGAAGTGGT    |
| scaffold742069_16.0 | 1 p3 | (GAG)5 | 15 | 2125 | 2139 | CAAACGAAGGAGGAGGATGA    |
| scaffold742072_15.4 | 1 p3 | (AGA)5 | 15 | 1427 | 1441 | CCCAAATAACGGACCTGAA     |
| scaffold742074_17.9 | 1 p3 | (AAC)5 | 15 | 2043 | 2057 | AACCAAACAAGCCATTCCAG    |
| scaffold742081_16.1 | 1 p3 | (AAC)6 | 18 | 2233 | 2250 | GGGCATTACCTTTGCATCAC    |
| scaffold742084_15.3 | 1 p3 | (TTG)5 | 15 | 48   | 62   | TGTAGCCGACCCCAATTTAT    |
| scaffold742106_18.7 | 1 p3 | (GGT)5 | 15 | 3533 | 3547 | TGTAAGCTCACCAGCATTCCG   |
| scaffold742108_14.6 | 1 p3 | (TTC)5 | 15 | 278  | 292  | CCAGCTTCAGGTTCTCTGTTG   |
| scaffold742114_15.5 | 1 p3 | (GGA)5 | 15 | 2828 | 2842 | ATTGACTCCCACCAGGAGTG    |
| scaffold742125_17.0 | 1 p3 | (CCG)5 | 15 | 1550 | 1564 | CCACTTATTTACTTCCGCCG    |
| scaffold742167_14.5 | 1 p3 | (CTC)6 | 18 | 395  | 412  | CCCGAAGCGAATTTATTTCA    |
| scaffold742200_14.3 | 1 p3 | (GCC)5 | 15 | 3772 | 3786 | AGTTGGGAAGGTAATTGGGG    |
| scaffold742219_16.2 | 1 p3 | (TGC)5 | 15 | 2473 | 2487 | TCGAACCCGTGACATGTTTA    |
| scaffold742226_18.5 | 1 p3 | (TAA)6 | 18 | 426  | 443  | TACATCGCACAAAATCACGG    |
| scaffold742264_16.0 | 1 p3 | (ATA)5 | 15 | 2762 | 2776 | TTATTTTGGGATTCACCCATT   |
| scaffold742298_15.8 | 1 p3 | (TTA)6 | 18 | 2818 | 2835 | CGTTAAATGCCACTGTGTTGA   |
| scaffold742314_17.0 | 1 p3 | (TGA)5 | 15 | 49   | 63   | CCAAGACCCCAATTTGATT     |
| scaffold742335_17.2 | 1 p3 | (TGT)5 | 15 | 49   | 63   | TTGGGATTAAGGCTTTGGTG    |
| scaffold742347_14.3 | 1 p3 | (ATT)5 | 15 | 267  | 281  | AGCAAAAGAAGAGGTTGCCA    |
| scaffold742362_15.0 | 1 p3 | (AAT)7 | 21 | 1453 | 1473 | AAGAGGTGCATTTCAATCGG    |
| scaffold742372_13.3 | 1 p3 | (ACA)5 | 15 | 4592 | 4606 | GTTTACTTCCATTCCGCCAA    |
| scaffold742403_16.2 | 1 p3 | (AGA)6 | 18 | 3195 | 3212 | AGCCAAGATATCCGATGCAC    |
| scaffold742408_15.0 | 1 p3 | (TGT)6 | 18 | 1252 | 1269 | ATCAATGGGCATTGGATGAT    |
| scaffold742430_15.4 | 1 p3 | (AAT)5 | 15 | 2675 | 2689 | GCCGTTAAAGCGTGAAGACT    |
| scaffold742440_17.2 | 1 p3 | (TAT)6 | 18 | 1246 | 1263 | TGGATGACCGAACTCTGTTTC   |
| scaffold742450_17.0 | 1 p3 | (GCT)6 | 18 | 617  | 634  | TTTTCGTCACCTTTTGAGGC    |
| scaffold742462_16.0 | 1 p3 | (TGT)5 | 15 | 45   | 59   | TGTAGCCGACCCCAATTTAT    |
| scaffold742463_14.1 | 1 p3 | (TAA)7 | 21 | 1119 | 1139 | CTTGAATTTTTGTGTGGCAA    |
| scaffold742466_13.5 | 1 p3 | (CAA)7 | 21 | 3483 | 3503 | TCACAGATCCACAGGTTCCA    |
| scaffold742500_14.3 | 1 p3 | (TGT)8 | 24 | 2896 | 2919 | AAAAAGTCGTGACCAAACAAA   |
| scaffold742506_14.4 | 1 p3 | (CAG)5 | 15 | 277  | 291  | ACCAGCAATCTGGTGGATTC    |
| scaffold742513_14.7 | 1 p3 | (TTC)5 | 15 | 358  | 372  | TACCTTCTCCGGAATCATGC    |
| scaffold742522_14.8 | 1 p3 | (ATT)5 | 15 | 918  | 932  | TCAATGGTTGGGCTACACTTC   |
| scaffold742525_15.4 | 1 p3 | (TAA)5 | 15 | 694  | 708  | GGCCTTAATTGACCCAACCT    |
| scaffold742528_15.4 | 1 p3 | (TGA)5 | 15 | 47   | 61   | CCAAGACCCCAATTTGATT     |
| scaffold742563_16.7 | 1 p3 | (TTG)6 | 18 | 5273 | 5290 | AACGTAAAGAGGGGTAGGGG    |
| scaffold742607_15.9 | 1 p3 | (ATT)7 | 21 | 169  | 189  | AGCCAGGTAACACCAATGC     |
| scaffold742609_14.5 | 1 p3 | (TAA)5 | 15 | 2848 | 2862 | TCTCAGAGATAGTGCCAAGGTG  |
| scaffold742618_17.3 | 1 p3 | (CAT)6 | 18 | 2600 | 2617 | GAAAATGGGGTGGTTGATTG    |
| scaffold742633_16.0 | 1 p3 | (CAA)5 | 15 | 1714 | 1728 | ATTCAGGAGGCACGCATATT    |
| scaffold742659_15.0 | 1 p3 | (ATT)5 | 15 | 255  | 269  | TCCCTTTCAATTACATCGCA    |
| scaffold742694_16.6 | 1 p3 | (AAT)6 | 18 | 762  | 779  | AGGTCGGTTGAAAAGATGGA    |
| scaffold742735_14.6 | 1 p3 | (AAT)6 | 18 | 979  | 996  | ATGGGTTTTGCCATCAATTT    |
| scaffold742746_15.5 | 1 p3 | (ACA)5 | 15 | 1880 | 1894 | AAAGATCCAGTGTGGCAGG     |
| scaffold742770_14.4 | 1 p3 | (GAA)6 | 18 | 3794 | 3811 | TAGTTCTCCGCCTGCTCAAT    |
| scaffold742802_17.4 | 1 p3 | (TCC)5 | 15 | 6123 | 6137 | GAGGCTTCCACATCATCGT     |
| scaffold742812_15.2 | 1 p3 | (TGA)6 | 18 | 31   | 48   | TTTGATTGGGAATAATTGGG    |
| scaffold742846_15.8 | 1 p3 | (ATT)5 | 15 | 1856 | 1870 | GAGAAAAACAGAGGAGCAACAAA |
| scaffold742872_15.0 | 1 p3 | (TCA)5 | 15 | 2009 | 2023 | AATGCTGCATCAACCAGTCA    |
| scaffold742893_16.6 | 1 p3 | (ACA)5 | 15 | 2050 | 2064 | TCAAGGTGTCCTCGATTTGA    |
| scaffold742903_15.4 | 1 p3 | (TAA)5 | 15 | 1611 | 1625 | TTCCAACATGCTGCCTAAAA    |
| scaffold742913_16.0 | 1 p3 | (TAG)5 | 15 | 1130 | 1144 | AGAGGCCAACAAAGAGACGA    |
| scaffold742915_17.2 | 1 p3 | (CAG)5 | 15 | 3995 | 4009 | GTGCTGTTAGCTCCTCTGGG    |
| scaffold742916_16.0 | 1 p3 | (TGT)5 | 15 | 45   | 59   | TGTAGCCGACCCCAATTTAT    |

|                     |      |         |    |      |      |                           |
|---------------------|------|---------|----|------|------|---------------------------|
| scaffold742938_17.0 | 1 p3 | (TCT)5  | 15 | 492  | 506  | GGATTAAGAAAGACATTGGACGA   |
| scaffold742955_13.2 | 1 p3 | (TTC)5  | 15 | 271  | 285  | TCCCATATTTGGAGTCCAGG      |
| scaffold742965_15.7 | 1 p3 | (CAT)5  | 15 | 2169 | 2183 | AGTTGGGATTTGCCAGTTTG      |
| scaffold742969_16.7 | 1 p3 | (TGT)6  | 18 | 38   | 55   | TGTAGCCGACCCCAATTTAT      |
| scaffold742981_18.0 | 1 p3 | (GAG)6  | 18 | 4494 | 4511 | ATTTGGTGTGCGCTAAATCG      |
| scaffold743005_14.0 | 1 p3 | (TGT)5  | 15 | 51   | 65   | ATGTAGCCGACCCCAATTTA      |
| scaffold743014_17.4 | 1 p3 | (GGT)5  | 15 | 3468 | 3482 | AAGCCTTTCATGTCACCAGG      |
| scaffold743018_16.4 | 1 p3 | (GCT)5  | 15 | 5456 | 5470 | CTACCTGATGGGCTATGGGA      |
| scaffold743021_15.0 | 1 p3 | (GTT)5  | 15 | 1623 | 1637 | GATCCATATAGCCAACCCCA      |
| scaffold743022_16.2 | 1 p3 | (GCT)5  | 15 | 8663 | 8677 | CGGAAAGAGTTTTGCTCAGG      |
| scaffold743037_14.8 | 1 p3 | (TGT)6  | 18 | 45   | 62   | ATGTAGCCGACCCCAATTTA      |
| scaffold743045_15.6 | 1 p3 | (CCT)6  | 18 | 2085 | 2102 | TCGAAAAAGTGCATCATCAG      |
| scaffold743048_15.3 | 1 p3 | (TTC)7  | 21 | 2817 | 2837 | GTGCGCGTTTAATGTCTTGA      |
| scaffold743057_16.1 | 1 p3 | (CCG)5  | 15 | 2221 | 2235 | CACCGCCGTTTCAGTAAAGAT     |
| scaffold743093_15.5 | 1 p3 | (GAA)5  | 15 | 54   | 68   | GGAAGATGCTCCAACCTCTG      |
| scaffold743094_15.0 | 1 p3 | (GCG)9  | 27 | 1100 | 1126 | TCTAACCCACCATTCTCTGC      |
| scaffold743098_16.0 | 1 p3 | (TTA)5  | 15 | 243  | 257  | TCCGTTGAAATAAGATCGGG      |
| scaffold743126_16.6 | 1 p3 | (TTC)6  | 18 | 1118 | 1135 | TGCTATGTGATGTTGGCTTG      |
| scaffold743127_17.6 | 1 p3 | (ACC)7  | 21 | 2595 | 2615 | AATCCGAAATGCAAACTCG       |
| scaffold743155_15.5 | 1 p3 | (TGT)5  | 15 | 47   | 61   | TGTAGCCGACCCCAATTTAT      |
| scaffold743156_18.0 | 1 p3 | (TAT)5  | 15 | 3209 | 3223 | CACCCAGTTTGAATTTTAGCAA    |
| scaffold743165_16.2 | 1 p3 | (CAT)6  | 18 | 2948 | 2965 | GGTCCAAAACTCAGGCAAG       |
| scaffold743167_16.9 | 1 p3 | (CCA)5  | 15 | 4457 | 4471 | ACTGGGCAACATAATCCAGC      |
| scaffold743199_15.5 | 1 p3 | (TGT)8  | 24 | 39   | 62   | TGTAGCCGACCCCAATTTAT      |
| scaffold743213_14.7 | 1 p3 | (CGG)5  | 15 | 66   | 80   | AAAATTATGTAATAGTTTGCCGACG |
| scaffold743219_15.9 | 1 p3 | (TTG)6  | 18 | 3327 | 3344 | TTTGGTTCTTGTAGCCGACC      |
| scaffold743231_16.0 | 1 p3 | (CAC)5  | 15 | 244  | 258  | ATATGTTTCGCTCTCCCCT       |
| scaffold743239_16.0 | 1 p3 | (ATG)5  | 15 | 490  | 504  | CAACGTGATGTCGATGGAAG      |
| scaffold743249_16.2 | 1 p3 | (GCG)5  | 15 | 592  | 606  | GCCGGTCAGTTAATCTGCAT      |
| scaffold743250_15.8 | 1 p3 | (CCG)6  | 18 | 925  | 942  | TAATCTACCAATGGCCCGAG      |
| scaffold1350_16.1   | 1 p4 | (AAGC)  | 20 | 675  | 694  | TGAATTTGCCAAAAGCAGTG      |
| scaffold1551_14.8   | 1 p4 | (TCAA)! | 20 | 1304 | 1323 | TCACATACCTGCAACCATGAA     |
| scaffold4205_14.5   | 1 p4 | (TAGG)! | 20 | 1651 | 1670 | AATGCTCCAACCTCGACTGG      |
| scaffold4332_15.2   | 1 p4 | (ATCG)! | 20 | 825  | 844  | GAGCACGGAAATCGAGAAAC      |
| scaffold18302_15.4  | 1 p4 | (GGGT)  | 20 | 1133 | 1152 | GAGCCATCTTGTGACTGCAA      |
| scaffold18303_15.4  | 1 p4 | (CCCA)! | 20 | 314  | 333  | GGCCTTCAAAGCATAACCA       |
| scaffold18349_15.3  | 1 p4 | (CGAT)! | 20 | 104  | 123  | TCGATCGATCTCTCCTGTGA      |
| scaffold19199_11.2  | 1 p4 | (AAAT)! | 24 | 1209 | 1232 | TTGTGGTCTCACTCCTCCAA      |
| scaffold24576_14.6  | 1 p4 | (ATTT)! | 24 | 1325 | 1348 | TGTGGTGTCTTGTGGTCTTGA     |
| scaffold36007_12.4  | 1 p4 | (GGGA)  | 20 | 45   | 64   | GGTGTATTTTCGGCTGGTG       |
| scaffold37946_16.9  | 1 p4 | (TCAT)! | 20 | 728  | 747  | GCACTTTCACGGGAGTTGAT      |
| scaffold39016_15.7  | 1 p4 | (AAAT)! | 20 | 576  | 595  | GAGGAAGAGTTTCGGATGGA      |
| scaffold49950_16.0  | 1 p4 | (TAAA)! | 20 | 2805 | 2824 | CGGCAAATTAACACAGACACG     |
| scaffold57330_16.1  | 1 p4 | (TTAT)5 | 20 | 2378 | 2397 | TGGTGCATAATGGCTCTGAC      |
| scaffold58946_16.3  | 1 p4 | (ATTT)5 | 20 | 1534 | 1553 | TCCACACACGTCTTACATTT      |
| scaffold60885_12.5  | 1 p4 | (CATC)! | 24 | 1265 | 1288 | TCAGCATTATGTGCTCTGCC      |
| scaffold61097_16.7  | 1 p4 | (AAAT)! | 20 | 1154 | 1173 | CAGCAGAGATCATCCACCAA      |
| scaffold65330_12.7  | 1 p4 | (TAAT)! | 24 | 317  | 340  | AGAAGCACAACCAACCAACC      |
| scaffold66955_16.4  | 1 p4 | (TTCT)5 | 20 | 983  | 1002 | CGGTTTCATAAGGTTGTCCG      |
| scaffold107651_15.5 | 1 p4 | (CCAA)  | 20 | 1007 | 1026 | TACATTGTGCCTCCTCCCTC      |
| scaffold111948_14.5 | 1 p4 | (TTAT)5 | 20 | 764  | 783  | CCACTCATTTTTCCACACGA      |
| scaffold120623_16.3 | 1 p4 | (AAAT)! | 20 | 3985 | 4004 | GGCTCGAGTTGATGATCTTTG     |
| scaffold124168_12.4 | 1 p4 | (TATT)5 | 20 | 513  | 532  | TTTCAGATCTGCCACAGACG      |
| scaffold124671_15.1 | 1 p4 | (TACA)! | 20 | 276  | 295  | CCTATCGTTCCACATGCCTT      |
| scaffold124853_15.5 | 1 p4 | (CCAC)! | 20 | 422  | 441  | CGAGATCCACGTGTCATTTG      |
| scaffold125326_16.4 | 1 p4 | (ATTA)! | 20 | 1472 | 1491 | TTGTAGTCCTTAAATTCCCATT    |
| scaffold126775_13.0 | 1 p4 | (AATA)! | 24 | 452  | 475  | CATCTGCCATGCACCATTTA      |
| scaffold137114_17.1 | 1 p4 | (AGTC)! | 20 | 931  | 950  | TGTTCCGGAGCTTGTGTTGAG     |

|                     |      |         |    |      |                              |
|---------------------|------|---------|----|------|------------------------------|
| scaffold144284_14.8 | 1 p4 | (GAAA)  | 20 | 663  | 682 TCTCTCATTGGTGGCCCTTA     |
| scaffold144356_13.4 | 1 p4 | (AAGA)  | 20 | 414  | 433 AAAGCAAACCAACCAACG       |
| scaffold150875_13.5 | 1 p4 | (CCAT)! | 20 | 568  | 587 CCATGACACTGAATATCCCAGA   |
| scaffold166093_15.4 | 1 p4 | (AAGA)  | 24 | 54   | 77 TCCCGTGCGAGAGTAAAGT       |
| scaffold167894_10.2 | 1 p4 | (GATT)! | 20 | 248  | 267 CAGTGACTIONGCGATCGGTCTA  |
| scaffold170575_16.9 | 1 p4 | (ATTT)5 | 20 | 765  | 784 TTTCTGTTAGTCAAAATCGAGAGA |
| scaffold171052_12.6 | 1 p4 | (ATAA)  | 28 | 1459 | 1486 TGACAAAATTGAGGCGTTG     |
| scaffold180305_14.8 | 1 p4 | (ATTG)! | 20 | 636  | 655 GGATTGTGTGGCTACTGGCT     |
| scaffold180742_17.8 | 1 p4 | (TTGG)! | 20 | 1030 | 1049 TGTCATGTTCATCGTGTGCTTT  |
| scaffold181162_10.2 | 1 p4 | (TTAA)! | 20 | 245  | 264 TCTCAGATATGGGCGTCACA     |
| scaffold212608_15.7 | 1 p4 | (AAAG)  | 20 | 904  | 923 GGTGAAGCAGAAAAACCAGC     |
| scaffold224867_13.5 | 1 p4 | (AATA)! | 20 | 2194 | 2213 TGTGGTTTTGCCTCACTCTTCT  |
| scaffold228171_13.3 | 1 p4 | (TAAA)! | 20 | 201  | 220 TTATTTTTTGGTACCCGGTGG    |
| scaffold238727_15.8 | 1 p4 | (TCCC)! | 20 | 669  | 688 TTGATTTGCAACTCCCTTTT     |
| scaffold241894_11.2 | 1 p4 | (TTTA)5 | 20 | 325  | 344 TCACTGCTCTTTTCAACCCTT    |
| scaffold259208_13.3 | 1 p4 | (TATT)5 | 20 | 850  | 869 GACGTGGAATGTGGATGATG     |
| scaffold262258_12.8 | 1 p4 | (ATAA)! | 20 | 59   | 78 TTTTCCGACTTTGGCAAATACT    |
| scaffold268278_19.0 | 1 p4 | (ATTT)5 | 20 | 293  | 312 TGAATTGACGACTCCATTG      |
| scaffold280650_16.7 | 1 p4 | (AAAT)! | 20 | 91   | 110 CAAATTAATAATGCGCCACG     |
| scaffold280939_15.6 | 1 p4 | (GAGG)  | 20 | 558  | 577 TGGCTTATGAGTAGGTCCGC     |
| scaffold283553_12.0 | 1 p4 | (GATC)! | 20 | 280  | 299 TGGCGAGAAAACCTCAGATCC    |
| scaffold294280_13.3 | 1 p4 | (ATTT)5 | 20 | 417  | 436 ACACACGCAGGCAGAATATG     |
| scaffold309554_16.7 | 1 p4 | (ATTT)5 | 20 | 39   | 58 TGAAGATTGCTTCCTTATGAATTG  |
| scaffold314358_14.9 | 1 p4 | (TTGC)7 | 28 | 1703 | 1730 TGCAGAGCAAATTCATGTCC    |
| scaffold315660_13.2 | 1 p4 | (TATT)5 | 20 | 162  | 181 TGTTGGAAGAAACAAAACCTGGA  |
| scaffold322738_16.0 | 1 p4 | (TTGT)! | 24 | 4485 | 4508 GCTCCTCTTCACTGTCCGGTC   |
| scaffold357424_11.7 | 1 p4 | (ATTT)5 | 20 | 512  | 531 AGTCTTGGGAAGCGAAATGA     |
| scaffold359091_10.2 | 1 p4 | (AAAG)  | 20 | 376  | 395 TTTTCCGTGGTATCAGAGCC     |
| scaffold362989_10.2 | 1 p4 | (CTCC)! | 20 | 948  | 967 TCTTGTTTTCTCCCCAAACC     |
| scaffold379093_12.8 | 1 p4 | (TATT)5 | 20 | 252  | 271 TGGGCTTCTTCAGCTTCTTT     |
| scaffold401117_17.5 | 1 p4 | (AATA)! | 20 | 525  | 544 GGTGTGGTTTTGCAGGCTATT    |
| scaffold408858_16.9 | 1 p4 | (ATTT)5 | 20 | 2286 | 2305 TTGCAATAATCAAGTTCAAGCA  |
| scaffold421065_16.9 | 1 p4 | (TAAA)! | 24 | 5969 | 5992 CTCTCGTTTGGACTCTTGGG    |
| scaffold424451_15.4 | 1 p4 | (TAAA)! | 20 | 1408 | 1427 CCCCTATAACTCTCGGGGTG    |
| scaffold424746_14.9 | 1 p4 | (TTTA)5 | 20 | 1082 | 1101 GTCTTGGTTGCCATCTCCAT    |
| scaffold432935_14.5 | 1 p4 | (AAAT)! | 20 | 811  | 830 AATCGCAGAACATGAAACCC     |
| scaffold433361_17.2 | 1 p4 | (AAAT)! | 20 | 3083 | 3102 TCCCCTCATCTCTGCCTCTA    |
| scaffold434282_14.6 | 1 p4 | (TCTT)5 | 20 | 6551 | 6570 GAAGCAAGAGAGACGTTGGG    |
| scaffold448298_14.4 | 1 p4 | (TGTA)! | 24 | 800  | 823 TTGTGTTGGCGGCAGTAATA     |
| scaffold452632_15.4 | 1 p4 | (AATT)! | 20 | 1570 | 1589 AGGAGGGTAGGTGGTCTGGT    |
| scaffold457263_16.0 | 1 p4 | (TCAC)! | 20 | 52   | 71 GCCTTCTTTTACAGCATTTC      |
| scaffold469276_12.7 | 1 p4 | (AATA)! | 20 | 820  | 839 ATATATGGGGGAGAGGGACG     |
| scaffold471287_15.4 | 1 p4 | (ATTT)5 | 20 | 428  | 447 TCATTACACCCGAAATGGT      |
| scaffold475041_13.7 | 1 p4 | (AAAT)! | 20 | 106  | 125 TACATGGCTGGCGTAGTTTG     |
| scaffold475749_11.9 | 1 p4 | (ATTA)! | 20 | 237  | 256 GGATTGGGAGCACAAACCTA     |
| scaffold476383_11.4 | 1 p4 | (CGAT)! | 20 | 312  | 331 ATCCCAATGAAGATCGAACG     |
| scaffold476605_14.9 | 1 p4 | (ATTT)5 | 20 | 61   | 80 ACTTGGGCCCGATCTATTTT      |
| scaffold479255_12.6 | 1 p4 | (TTAA)! | 24 | 2004 | 2027 GGCATAAGAAAGGATGAATGTAA |
| scaffold492229_16.8 | 1 p4 | (CCGC)! | 24 | 745  | 768 TGGTATGGTGTGGAGAACCA     |
| scaffold495441_16.9 | 1 p4 | (CCTT)! | 20 | 427  | 446 TCGCTAACAACCAACACCA      |
| scaffold501321_16.3 | 1 p4 | (ACAT)! | 20 | 2245 | 2264 AAATAAAAACCAAAACCGGGG   |
| scaffold505269_13.3 | 1 p4 | (AAAT)! | 20 | 222  | 241 CAGGTTCAAATCCCACCAAC     |
| scaffold512811_10.8 | 1 p4 | (AATA)! | 20 | 737  | 756 GCCCGATATTTATCAAGGCA     |
| scaffold516141_15.2 | 1 p4 | (CCTC)! | 20 | 742  | 761 ACCCTAAGCAGAGGCTCACA     |
| scaffold523703_12.7 | 1 p4 | (AATA)! | 24 | 2122 | 2145 CACATGTCCCAAGTGATTTCAA  |
| scaffold523978_14.0 | 1 p4 | (TAAT)! | 20 | 319  | 338 GCAACAAATGAATTGGGCTT     |
| scaffold529630_12.6 | 1 p4 | (ATAG)! | 24 | 545  | 568 TTTGGGAGGGAAAACGACTA     |
| scaffold530555_14.9 | 1 p4 | (ATAA)! | 20 | 2003 | 2022 TTGGGAAGAACAAATGAAGGG   |

|                     |      |         |    |      |                               |
|---------------------|------|---------|----|------|-------------------------------|
| scaffold530624_13.4 | 1 p4 | (AAAG)! | 20 | 258  | 277 GGCTTGTCTGGTTCAACTT       |
| scaffold532563_13.0 | 1 p4 | (TCCA)! | 20 | 64   | 83 TTTGCCTATTTAAAGCCCC        |
| scaffold534298_14.9 | 1 p4 | (TCGA)! | 20 | 954  | 973 GGACGAAATTGATCGAAGGA      |
| scaffold535680_16.2 | 1 p4 | (CATT)! | 20 | 2589 | 2608 GCAAGGGTGGAGGAATGATA     |
| scaffold536005_15.2 | 1 p4 | (AAAT)! | 24 | 230  | 253 TGCAGAGATTTAGCCATTG       |
| scaffold536011_16.8 | 1 p4 | (CTGA)! | 20 | 100  | 119 AAGAAAAGGCGTGAATGTGG      |
| scaffold537975_15.2 | 1 p4 | (AAAT)! | 24 | 2736 | 2759 TTAGGAAAGCAGGCAACCTT     |
| scaffold539125_13.8 | 1 p4 | (TTAT)! | 24 | 654  | 677 CACTAGCACCTCATGGCTCA      |
| scaffold552987_14.6 | 1 p4 | (TATT)! | 20 | 1778 | 1797 GCCATTACCATCTCTCGTT      |
| scaffold554669_13.2 | 1 p4 | (ATTT)! | 20 | 442  | 461 ATTTGGGGAAACCATTAGG       |
| scaffold555082_15.3 | 1 p4 | (AAAT)! | 24 | 1202 | 1225 CAAATAATTGCCGGACCAAA     |
| scaffold559721_10.4 | 1 p4 | (TCAA)! | 20 | 242  | 261 CCCCCATGAAAAGTCAAAAA      |
| scaffold559844_15.6 | 1 p4 | (TAAT)! | 20 | 216  | 235 CAAGTCAAATACCCGTGTCCA     |
| scaffold567931_15.2 | 1 p4 | (CACT)! | 20 | 289  | 308 ATAGCTCACCACCGACCAAC      |
| scaffold569595_12.6 | 1 p4 | (AAAT)! | 20 | 349  | 368 CGTGTTCATGTCGACTCGTG      |
| scaffold571451_14.7 | 1 p4 | (AATA)! | 24 | 720  | 743 GTCCACCTTTCTCGCAGATG      |
| scaffold574092_10.5 | 1 p4 | (CAAG)! | 20 | 109  | 128 GACGCAGGTACGGATATTTGA     |
| scaffold580301_11.9 | 1 p4 | (GAGG)! | 20 | 318  | 337 TCTTTTGTTCGAAATCGG        |
| scaffold588183_17.3 | 1 p4 | (AGTT)! | 20 | 519  | 538 CCCTCGGATCTCATCAGAAA      |
| scaffold588818_15.6 | 1 p4 | (AGTT)! | 20 | 2823 | 2842 TGTCCAAGATGGGATTGGTT     |
| scaffold590508_13.9 | 1 p4 | (TAAA)! | 20 | 1622 | 1641 GCATTTTCGGAATTAAGCG      |
| scaffold591015_16.2 | 1 p4 | (AATT)! | 20 | 6907 | 6926 CAGATGAGGAGCACCAGTCA     |
| scaffold591306_12.2 | 1 p4 | (GAGG)! | 20 | 501  | 520 TCCATTATCTGGCCCTTTTG      |
| scaffold592220_10.6 | 1 p4 | (TACA)! | 20 | 275  | 294 AAAAAGCCAGGGCCTACCTA      |
| scaffold597113_16.0 | 1 p4 | (ATAG)! | 20 | 558  | 577 GAGTTTCCTTGGCTGCACAT      |
| scaffold597874_16.2 | 1 p4 | (TATT)! | 20 | 1148 | 1167 AGCTAGTAGGGCAAAGTTGATTAG |
| scaffold598154_14.5 | 1 p4 | (ATTT)! | 20 | 839  | 858 AAATTGATTGGAGCATTGCC      |
| scaffold600096_16.8 | 1 p4 | (TTTA)! | 20 | 1002 | 1021 TGCAATTCCACCAACTTTGA     |
| scaffold600130_20.2 | 1 p4 | (TGTA)! | 20 | 298  | 317 CCGGAATCTGAGAGAGATCG      |
| scaffold608297_15.5 | 1 p4 | (ATTT)! | 20 | 1844 | 1863 CAAGCAATGGGGAATGAAAT     |
| scaffold609679_10.9 | 1 p4 | (TTGG)! | 20 | 44   | 63 TTGTCCTAAACCCCTCTT         |
| scaffold609955_12.8 | 1 p4 | (GCCT)! | 20 | 380  | 399 ACACATTTGGCTGGAAGGAC      |
| scaffold618292_14.6 | 1 p4 | (TTAA)! | 20 | 1634 | 1653 GGGAAAAGGACAATTCCTCG     |
| scaffold621922_10.3 | 1 p4 | (TTGA)! | 20 | 43   | 62 GAAGCATTTCACATGTAGAGTATATG |
| scaffold627019_14.5 | 1 p4 | (CTTC)! | 20 | 381  | 400 GCGAGGGTTTTCTTGGTACA      |
| scaffold627354_16.6 | 1 p4 | (GGGA)! | 20 | 105  | 124 TAGCACTTGGGATGAAGCGT      |
| scaffold630379_17.8 | 1 p4 | (AATA)! | 20 | 613  | 632 GCAATTTCAATTAACAATCACGA   |
| scaffold633212_11.7 | 1 p4 | (TTTA)! | 20 | 423  | 442 CTCTCCATGGACGTAGGTGT      |
| scaffold637193_14.9 | 1 p4 | (TATT)! | 24 | 279  | 302 ACGGCAAATTAATGCGAC        |
| scaffold637968_12.5 | 1 p4 | (TATT)! | 20 | 112  | 131 TGGGTTTGGTCCATCTTCAT      |
| scaffold640410_12.2 | 1 p4 | (GGTT)! | 20 | 142  | 161 TGTTTCTGCAGGTTGCAAAG      |
| scaffold642968_11.6 | 1 p4 | (TATT)! | 20 | 493  | 512 GAAATATCCCCTGGAGCCAT      |
| scaffold644448_16.2 | 1 p4 | (ATTA)! | 20 | 1395 | 1414 TGAGTCGGACTTGCATTTGA     |
| scaffold647194_11.4 | 1 p4 | (AATA)! | 20 | 685  | 704 CAATTCCTAAACCAGCCCAA      |
| scaffold647811_14.9 | 1 p4 | (TATT)! | 20 | 1516 | 1535 TCAATGTGCCATGATTTAGCA    |
| scaffold653587_13.4 | 1 p4 | (AATA)! | 20 | 770  | 789 GTCAATCCGCACTTGGATTT      |
| scaffold655002_17.4 | 1 p4 | (ACCT)! | 20 | 79   | 98 ACCCATTCCTAAGAGATGCT       |
| scaffold655146_14.9 | 1 p4 | (GAAA)! | 20 | 698  | 717 TAATTTGTTGAGGGGAGGCA      |
| scaffold655622_16.8 | 1 p4 | (TTTA)! | 20 | 339  | 358 TCCTGTGCCAAGTTGAATAAGA    |
| scaffold656850_18.3 | 1 p4 | (AAAT)! | 20 | 163  | 182 GTGGTATACCCAAAGCGCAC      |
| scaffold657451_12.6 | 1 p4 | (TATT)! | 20 | 1012 | 1031 CAACTCATGGTTGTGGTTG      |
| scaffold658766_19.6 | 1 p4 | (ACAA)! | 20 | 1414 | 1433 AAGAGCGTCCAAATCTCCAA     |
| scaffold659505_13.3 | 1 p4 | (AATA)! | 20 | 505  | 524 TACATGGCAACCTCGTCGTA      |
| scaffold659643_17.5 | 1 p4 | (AAAT)! | 24 | 1425 | 1448 TCTGTTTATAGTCCCCCGGA     |
| scaffold661552_12.7 | 1 p4 | (TTTA)! | 20 | 202  | 221 GAAGTTTTGGGGATCCGAC       |
| scaffold661558_16.3 | 1 p4 | (AATA)! | 24 | 50   | 73 TGAAGAAATCAAATCCCACAAA     |
| scaffold662814_16.2 | 1 p4 | (TTAA)! | 20 | 1866 | 1885 CCTGATTAGCCACAAGGGAA     |
| scaffold663928_16.9 | 1 p4 | (ACAT)! | 20 | 383  | 402 TGTGCTCGTACACTCGACAA      |



|                     |      |         |    |      |      |                             |
|---------------------|------|---------|----|------|------|-----------------------------|
| scaffold666666_15.3 | 1 p4 | (TTTC)5 | 20 | 2541 | 2560 | TTTCATCATCATCAGCTCCA        |
| scaffold667242_17.2 | 1 p4 | (CAAA)  | 20 | 1398 | 1417 | GCACAAGAGGAGGCAACTTC        |
| scaffold670842_10.7 | 1 p4 | (TTCT)6 | 24 | 925  | 948  | GTGAAGGAATCTCTGGCTCG        |
| scaffold672696_17.3 | 1 p4 | (AAAT)! | 20 | 1141 | 1160 | GCAGGCCATATGCTAGTGGT        |
| scaffold675764_14.6 | 1 p4 | (ATTT)5 | 20 | 50   | 69   | GAACGAGTTCGTTGACTAATTA      |
| scaffold676142_11.7 | 1 p4 | (AAAT)! | 24 | 47   | 70   | CAGAGCGCACTCGAAGAGTA        |
| scaffold677282_12.4 | 1 p4 | (TTAT)5 | 20 | 766  | 785  | ACAATCCTGTAATTCGCGTC        |
| scaffold677401_21.2 | 1 p4 | (AAAT)! | 20 | 227  | 246  | TTTTGCACCCGAATGGTTAT        |
| scaffold677644_16.8 | 1 p4 | (ATTT)5 | 20 | 376  | 395  | TGGAATTTGTCCACCATAACA       |
| scaffold677954_12.2 | 1 p4 | (TTTA)5 | 20 | 629  | 648  | TGAGATATTTCCCGCTGTCC        |
| scaffold678923_14.9 | 1 p4 | (CATG)! | 20 | 1259 | 1278 | GCAATGCATATTTAGGAAGTGG      |
| scaffold681418_11.3 | 1 p4 | (TAAA)! | 20 | 563  | 582  | GCGAAACGAAATTTGGGAA         |
| scaffold683701_14.8 | 1 p4 | (AATA)! | 20 | 749  | 768  | AAGTGAGTTAAGTTTTGACCCAA     |
| scaffold684812_15.2 | 1 p4 | (TTTA)5 | 20 | 296  | 315  | GTCATTTCTCGTTTCGCGTT        |
| scaffold687881_10.7 | 1 p4 | (AATA)! | 20 | 759  | 778  | CCATTCATCATGATTCCTTCC       |
| scaffold688114_14.9 | 1 p4 | (TTAA)! | 20 | 854  | 873  | TGGTGTCTGTGAAAAACCA         |
| scaffold688827_14.6 | 1 p4 | (AATA)! | 20 | 597  | 616  | ATGATGGCGTCATGTTTTCA        |
| scaffold691984_12.2 | 1 p4 | (AAAT)! | 24 | 96   | 119  | GCAAATTAATGTGCCACG          |
| scaffold694377_14.2 | 1 p4 | (TTAT)5 | 20 | 261  | 280  | ACTCGAACGAACACCCAATC        |
| scaffold695096_15.3 | 1 p4 | (ATTA)! | 20 | 694  | 713  | CACCCCGTATGGAAATTCAG        |
| scaffold695443_18.7 | 1 p4 | (AAAT)! | 20 | 165  | 184  | CCAATTTTTCAATCACCGGA        |
| scaffold695906_14.8 | 1 p4 | (GGCA)  | 20 | 261  | 280  | GCCACGGATAAGTAACACCG        |
| scaffold697713_15.2 | 1 p4 | (ATCC)! | 24 | 1945 | 1968 | AAGCTGACTCGCACATTCCT        |
| scaffold698805_15.3 | 1 p4 | (AAAC)  | 20 | 333  | 352  | AACAAACGAGGGCAAGTGTC        |
| scaffold699053_12.9 | 1 p4 | (CATA)! | 20 | 1330 | 1349 | ACGCTCAAGCCATTCAAGTC        |
| scaffold700333_14.3 | 1 p4 | (ATTT)6 | 24 | 43   | 66   | TGACGTACGATCGAGTCCAG        |
| scaffold700635_12.0 | 1 p4 | (GGGT)  | 20 | 25   | 44   | TGGGAATTTAGGAATCGAGAGA      |
| scaffold701183_13.7 | 1 p4 | (AAAG)  | 20 | 278  | 297  | TGGAAAGCCCTTTTTCTTCA        |
| scaffold704554_16.4 | 1 p4 | (AAAT)! | 20 | 1745 | 1764 | TATTTGTTGGTGGGTGCGTT        |
| scaffold705454_17.5 | 1 p4 | (AAAT)! | 20 | 531  | 550  | TTGATGGGAGGCAACTCATT        |
| scaffold707915_12.2 | 1 p4 | (GCAG)  | 20 | 539  | 558  | AAGCACGTCAGCACAGACAC        |
| scaffold708416_16.2 | 1 p4 | (TCTT)5 | 20 | 708  | 727  | AACTGCCCCCTTCAATTCT         |
| scaffold708632_12.3 | 1 p4 | (TACA)! | 20 | 175  | 194  | GACTATAATGGCCAGCACCG        |
| scaffold709642_15.0 | 1 p4 | (GCCT)! | 20 | 762  | 781  | GCCTGATTAATTGTGTGGGG        |
| scaffold710333_15.4 | 1 p4 | (ATTT)5 | 20 | 672  | 691  | AAGGCTCAAGAACAATGCAAA       |
| scaffold710652_15.5 | 1 p4 | (CTAG)! | 20 | 1429 | 1448 | CAGGCGGAAGTAGAGAGGAA        |
| scaffold711218_12.3 | 1 p4 | (AATA)! | 20 | 264  | 283  | TGGTGGATTTTTATTTATGCAA      |
| scaffold714710_14.4 | 1 p4 | (CTCC)! | 20 | 1062 | 1081 | GCCCATTTCATCGATTTGTTT       |
| scaffold715985_14.9 | 1 p4 | (AAAT)! | 20 | 2199 | 2218 | AAACGGATCTCTTGCGTTTG        |
| scaffold716555_15.0 | 1 p4 | (TCAT)! | 20 | 2539 | 2558 | CGTTCTTCTCAGCTTCTGG         |
| scaffold716659_13.7 | 1 p4 | (ATGT)! | 20 | 1249 | 1268 | GGAAAGATGAAATGCTGGGA        |
| scaffold717898_15.0 | 1 p4 | (CTGC)! | 20 | 850  | 869  | GGCAGCTCCCACATACATTT        |
| scaffold717962_15.3 | 1 p4 | (AAAT)! | 24 | 460  | 483  | AATCAAGAAGCCTCTGCACG        |
| scaffold718240_13.7 | 1 p4 | (CATC)! | 20 | 2512 | 2531 | TATCTGCCTGCATATGCCCT        |
| scaffold721219_16.7 | 1 p4 | (AAAT)! | 20 | 45   | 64   | GGTCGGCTACATGAACCAAA        |
| scaffold722963_14.3 | 1 p4 | (ATTT)7 | 28 | 368  | 395  | TCCGTCCACCTCTCAATCTC        |
| scaffold723761_16.4 | 1 p4 | (TATT)5 | 20 | 315  | 334  | CCTGGAAAAATGTGGGTGAA        |
| scaffold724599_19.0 | 1 p4 | (AAAT)! | 20 | 656  | 675  | AGTTATTGGCCGAAAATCCA        |
| scaffold725295_15.2 | 1 p4 | (CCTC)! | 20 | 1893 | 1912 | ATTGGCTTTCCCGAGAACTT        |
| scaffold726004_15.0 | 1 p4 | (TTTC)5 | 20 | 869  | 888  | AGTCTTGTGGCCAGAGAAA         |
| scaffold726425_17.4 | 1 p4 | (TATT)5 | 20 | 771  | 790  | AGCTAGTAGGGCAAAGTTGATTAG    |
| scaffold727253_14.2 | 1 p4 | (TTTA)5 | 20 | 241  | 260  | TTGTTTGCCACTTGCTTCAC        |
| scaffold729308_14.3 | 1 p4 | (ATAA)! | 20 | 4621 | 4640 | AGTGGGGAGTTTAGTTCCCG        |
| scaffold729539_11.4 | 1 p4 | (TTAA)! | 20 | 279  | 298  | GCTGCAGATGGACTCACAAA        |
| scaffold730205_13.4 | 1 p4 | (TAAA)! | 20 | 374  | 393  | TTGTGTTATTTTCATATCTTTGTGCTG |
| scaffold730642_15.6 | 1 p4 | (TTAA)! | 20 | 849  | 868  | GACTTCGTGGGCTTGGACT         |
| scaffold731835_14.0 | 1 p4 | (AAAT)! | 20 | 222  | 241  | AAGTTTCTTTGGGACACCCC        |
| scaffold732041_16.8 | 1 p4 | (TATT)5 | 20 | 93   | 112  | CGTGTGCTGGGCTATTTTCT        |

|                     |      |          |    |      |      |                            |
|---------------------|------|----------|----|------|------|----------------------------|
| scaffold732762_14.6 | 1 p4 | (TTCT)6  | 24 | 2925 | 2948 | TGGGTTTGAAGTAACTGC         |
| scaffold733823_15.1 | 1 p4 | (GAGT)5  | 20 | 320  | 339  | AACTGCGAGATTCAAACGG        |
| scaffold733994_16.5 | 1 p4 | (CATT)5  | 20 | 296  | 315  | GTATGCAAAGGGAAAAGCGA       |
| scaffold734089_16.0 | 1 p4 | (GATC)5  | 20 | 3325 | 3344 | AGATTGAAGAAAAAGGGGGC       |
| scaffold734118_14.6 | 1 p4 | (AAAT)5  | 20 | 1167 | 1186 | AGACCAGACATCCACTTGCC       |
| scaffold734464_13.3 | 1 p4 | (AAAT)6  | 24 | 3231 | 3254 | GGGCTTCATGTATGCTTGGT       |
| scaffold734483_13.8 | 1 p4 | (TTCA)6  | 24 | 557  | 580  | CAAAAAGCCCATCAGTCCAT       |
| scaffold734892_16.5 | 1 p4 | (TATG)5  | 20 | 1168 | 1187 | CAATTTCCAGATGGAACGGT       |
| scaffold734928_13.6 | 1 p4 | (TCTT)5  | 20 | 272  | 291  | TGGTTTGACATGTGATGGGA       |
| scaffold735282_14.4 | 1 p4 | (AGTT)5  | 20 | 190  | 209  | GCTGCACCATCCATATTCAA       |
| scaffold736148_16.3 | 1 p4 | (ATTT)6  | 24 | 1740 | 1763 | CAAAACCCCCACCTAAGACA       |
| scaffold736332_16.7 | 1 p4 | (GATT)5  | 20 | 181  | 200  | GGGATGTGTGTACCTGAGGC       |
| scaffold736671_15.7 | 1 p4 | (GTAT)5  | 20 | 283  | 302  | TGGATTTTCTTCCCATGTCC       |
| scaffold737466_14.8 | 1 p4 | (TTAT)5  | 20 | 850  | 869  | TCCAAAATCTGGTTGCTTGA       |
| scaffold737840_14.7 | 1 p4 | (ATTT)5  | 20 | 770  | 789  | TGCTTCCATTTGTGAAGATATGA    |
| scaffold738175_13.8 | 1 p4 | (CTTT)5  | 20 | 801  | 820  | GGGGGAGATTGAAAGGGATA       |
| scaffold738509_14.8 | 1 p4 | (ATAA)5  | 20 | 137  | 156  | GCAGAAATCCGAATGACGAT       |
| scaffold739168_17.5 | 1 p4 | (TCTA)5  | 20 | 1497 | 1516 | AGTCTCCGGGGACAAATTCT       |
| scaffold739390_14.0 | 1 p4 | (TTTC)5  | 20 | 110  | 129  | CGTGCTTGAACAAAAGCAAA       |
| scaffold739734_15.3 | 1 p4 | (TGCC)5  | 20 | 5458 | 5477 | GGCAGGAAATATGGCGAGTA       |
| scaffold740449_15.2 | 1 p4 | (TTAT)5  | 20 | 941  | 960  | TCCACCATGGAACACAGAAA       |
| scaffold740496_16.0 | 1 p4 | (ATAA)5  | 20 | 255  | 274  | TCTTCCACGAGAATTGGACC       |
| scaffold740667_16.0 | 1 p4 | (GCAT)5  | 20 | 2213 | 2232 | CGAGCTGAAAAAGACCAAGG       |
| scaffold740879_14.0 | 1 p4 | (AAAT)5  | 28 | 1280 | 1307 | TTGAACGAAAATTGATGGTCC      |
| scaffold741336_13.2 | 1 p4 | (TATT)5  | 20 | 485  | 504  | GCACAAAATGAAGCAGACGA       |
| scaffold741447_15.2 | 1 p4 | (GTAT)6  | 24 | 644  | 667  | CAATTATTGGCCGCAAAAGT       |
| scaffold741558_14.5 | 1 p4 | (ATTT)5  | 20 | 1876 | 1895 | CGGATTGCCAAGCCTATTT        |
| scaffold741876_15.8 | 1 p4 | (TTTC)5  | 20 | 3089 | 3108 | ATGGTGTCAAAGTTCACGCA       |
| scaffold742457_15.7 | 1 p4 | (TTTA)5  | 20 | 1592 | 1611 | GAAGGCAACAAGAGATGGGA       |
| scaffold742712_16.0 | 1 p4 | (TATT)5  | 20 | 1039 | 1058 | AATCATGCAACCACAACAATTA     |
| scaffold742933_15.3 | 1 p4 | (GATT)5  | 20 | 1198 | 1217 | AAACAAACCTGCAAAATGCC       |
| scaffold743044_16.1 | 1 p4 | (ATAA)6  | 24 | 6543 | 6566 | GCATCGACCTTGGACAAAAT       |
| scaffold743097_16.5 | 1 p4 | (TTAT)5  | 20 | 3265 | 3284 | AATGGCTCAGTAAACAATGGG      |
| scaffold78862_14.0  | 1 p5 | (GCGG)5  | 25 | 1209 | 1233 | ACAAACCTCGATTCTGTGG        |
| scaffold129996_14.2 | 1 p5 | (ATAAA)5 | 25 | 2190 | 2214 | TTGCATCTTCATGTGCAATTC      |
| scaffold209057_14.9 | 1 p5 | (ATTTT)5 | 25 | 28   | 52   | TGCTCCCTCCAATTAAGACG       |
| scaffold281552_10.3 | 1 p5 | (CAGG)5  | 25 | 240  | 264  | GCGCCATAAAAAATGAAATG       |
| scaffold346597_11.5 | 1 p5 | (CTTTT)5 | 25 | 41   | 65   | CCGACTTTTATGGCTGCTGT       |
| scaffold404725_15.9 | 1 p5 | (AATAC)5 | 25 | 527  | 551  | TGCGAATTGAATAAGGCAAA       |
| scaffold419361_15.9 | 1 p5 | (AATAA)5 | 25 | 767  | 791  | GGCAACAACAGAATCCCAA        |
| scaffold436901_11.6 | 1 p5 | (CCAAC)5 | 25 | 228  | 252  | GCCGGGTCTAGTGAATGAAA       |
| scaffold437080_10.1 | 1 p5 | (ACACC)5 | 25 | 85   | 109  | ATTTGGTTCGGTTCGGTTTT       |
| scaffold450612_11.1 | 1 p5 | (TTAGG)5 | 25 | 74   | 98   | GAGTATTCATTGTACACAATAAGGAG |
| scaffold498369_13.7 | 1 p5 | (AATCT)5 | 30 | 470  | 499  | TTTGTTCATGACTTCGGCTTG      |
| scaffold502759_17.3 | 1 p5 | (TAAAA)5 | 25 | 49   | 73   | TCTAAAAACATGGGTAAAAATGATAA |
| scaffold549972_10.6 | 1 p5 | (GATGC)5 | 25 | 81   | 105  | TTTGAGGAGCTTTGCGTTTT       |
| scaffold567385_10.3 | 1 p5 | (ACAA)5  | 25 | 64   | 88   | AAAGAGCAATGTGGCATCAA       |
| scaffold574523_12.8 | 1 p5 | (CCTAA)5 | 25 | 186  | 210  | TCAAACCAGTTCTTCAATGG       |
| scaffold588661_14.1 | 1 p5 | (AGATA)5 | 25 | 2021 | 2045 | CAATGACAACCAAACATGCC       |
| scaffold634405_15.1 | 1 p5 | (TCGG)5  | 35 | 1527 | 1561 | TTGGCGGAAGCCATAATATC       |
| scaffold637883_16.6 | 1 p5 | (GGGT)5  | 25 | 22   | 46   | AAACGGGGTTGGGTTGTG         |
| scaffold652062_16.1 | 1 p5 | (ATAAT)5 | 25 | 407  | 431  | AACGATAACGGTAACGATAACAA    |
| scaffold679227_16.8 | 1 p5 | (AAATC)5 | 30 | 45   | 74   | GGAAGGAAAGCTAAAAAGGATT     |
| scaffold708599_14.5 | 1 p5 | (AAAA)5  | 25 | 254  | 278  | TGCAAAAGCACTCTTCTGA        |
| scaffold720454_13.9 | 1 p5 | (ACCTA)5 | 25 | 1226 | 1250 | TGGCATGCGAGTGCTATTAC       |
| scaffold732293_13.2 | 1 p5 | (TTTTG)5 | 25 | 1908 | 1932 | GCAGACCATAATGCTTTTGTGA     |
| scaffold733459_14.0 | 1 p5 | (TATCT)5 | 30 | 1080 | 1109 | GAAGAAGATGTCAAGCCGGA       |
| scaffold733662_13.5 | 1 p5 | (TGCTT)5 | 25 | 144  | 168  | CCAAGAGAGAGAAAGGGGCT       |

|                     |      |         |    |      |                                  |               |
|---------------------|------|---------|----|------|----------------------------------|---------------|
| scaffold737970_18.1 | 1 p5 | (ATCTA  | 25 | 227  | 251 TTCTCTT                      | GGAATGGGATTGG |
| scaffold740060_14.4 | 1 p5 | (CTTTT) | 25 | 123  | 147 GTTCGAACCGAACCATGAAC         |               |
| scaffold741982_15.1 | 1 p5 | (TTTAT) | 30 | 1285 | 1314 TGCAACAATTTTTGGTATATATCTTTC |               |
| scaffold741994_15.2 | 1 p5 | (ATATT  | 25 | 227  | 251 TTATTGCACAGCTTCATGCC         |               |
| scaffold97925_17.0  | 1 p6 | (TTGGA  | 30 | 420  | 449 AAAGCTTTGTCCCACATAGGAA       |               |
| scaffold156626_11.2 | 1 p6 | (CCAAC  | 30 | 252  | 281 CACTGCTGCTGAGGAGTTTG         |               |
| scaffold339935_15.1 | 1 p6 | (TCCAC  | 30 | 903  | 932 AAACATACCAACTCACCCTCC        |               |
| scaffold502162_13.7 | 1 p6 | (TAGTA  | 30 | 215  | 244 GAGAACTGCAGCAAAAGGC          |               |
| scaffold540849_12.9 | 1 p6 | (ACAAT  | 36 | 367  | 402 AATTTTCGTATCGAGTTGGCG        |               |
| scaffold554235_20.7 | 1 p6 | (ATCGC  | 30 | 204  | 233 GGATTTGGATGGGTTTTTCA         |               |
| scaffold576716_13.1 | 1 p6 | (GATTT  | 30 | 908  | 937 TTGGTCAGATCAAACCGAATC        |               |
| scaffold652042_14.8 | 1 p6 | (TTCTG  | 30 | 72   | 101 AGACAATCCATCTCCATCTGGT       |               |
| scaffold722193_18.0 | 1 p6 | (GATTC  | 30 | 1163 | 1192 TGCATCTGCTTCTGGTTTTG        |               |
| scaffold736788_12.7 | 1 p6 | (CAAA/  | 30 | 540  | 569 TCCGATCGAATGGACCTTAC         |               |
| scaffold740076_14.2 | 1 p6 | (TGTGC  | 30 | 1359 | 1388 CGCCTCGATTGAATCTTCTC        |               |

| Tm(C°) | size | REVERSE PRIMER1 (5'-3')   | Tm(C°) | size | PRODUCT<br>1 size (bp) | start (bp) | end (bp) |
|--------|------|---------------------------|--------|------|------------------------|------------|----------|
| 57.426 | 23   | TACCCCTACCCCTTTGGGAAC     | 60.046 | 20   | 207                    | 1433       | 1639     |
| 59.728 | 21   | TCTCACGATCCCCTTACCAC      | 59.927 | 20   | 178                    | 21         | 198      |
| 59.955 | 20   | AAACACGACCATTTTCAGGC      | 59.978 | 20   | 277                    | 82         | 358      |
| 59.745 | 20   | TTCTCATACTAAAAGGTCTTTCTC/ | 59.662 | 27   | 165                    | 23         | 187      |
| 60.533 | 23   | ATTTCCCGGCTTCTTGCTAT      | 60.061 | 20   | 132                    | 599        | 730      |
| 59.844 | 20   | GGCATTATGCTTCTGCCATT      | 60.067 | 20   | 148                    | 362        | 509      |
| 60.397 | 20   | CTATGCTTGCATTCACCCAA      | 59.688 | 20   | 279                    | 14936      | 15214    |
| 60.217 | 25   | CGTGCCAAAAACCGACTAAT      | 59.996 | 20   | 181                    | 19         | 199      |
| 59.989 | 20   | ATTTTGGACCACCCCTTTTC      | 60.032 | 20   | 158                    | 667        | 824      |
| 60.119 | 20   | CAAAACAATTCTTCTACCTTTTTC  | 59.519 | 25   | 238                    | 11         | 248      |
| 60.025 | 20   | GCGTCTACGGTGCAGAAAAT      | 60.278 | 20   | 221                    | 89         | 309      |
| 59.577 | 20   | TGCGTGAAAAACAGATGGTG      | 60.699 | 20   | 173                    | 20         | 192      |
| 60.073 | 20   | ACCGTGTCTCCAAAAGATGG      | 59.966 | 20   | 179                    | 162        | 340      |
| 59.842 | 20   | CAATCTCGAAAATGGATGGC      | 60.414 | 20   | 193                    | 272        | 464      |
| 58.973 | 20   | CGTGAGAAGCAACCAAATGA      | 59.84  | 20   | 240                    | 253        | 492      |
| 59.241 | 21   | TTTATCCTTACGCAATCCCAA     | 59.442 | 21   | 197                    | 414        | 610      |
| 60.626 | 20   | CCCACACCCTCATTCTCTCA      | 61.071 | 20   | 232                    | 369        | 600      |
| 60.299 | 20   | CAACACAAGAACTCACCTCCC     | 59.607 | 21   | 242                    | 383        | 624      |
| 60.232 | 20   | AATTTCCACCGGTGTTCTTG      | 59.83  | 20   | 231                    | 6          | 236      |
| 59.903 | 20   | TTGGGAGGGAGAGATTGTTG      | 60.042 | 20   | 261                    | 16         | 276      |
| 59.52  | 20   | TGGGCTAAGTGGAGTGAGTG      | 58.879 | 20   | 150                    | 13         | 162      |
| 59.756 | 20   | CCGATTGTTAAAATCCGGTT      | 60.062 | 21   | 210                    | 16         | 225      |
| 60.198 | 20   | TGTTGACTTGCTTTCTTGCC      | 59.05  | 20   | 113                    | 661        | 773      |
| 58.254 | 21   | GCTTAATCTTTCAACGCCGA      | 60.343 | 20   | 212                    | 30         | 241      |
| 60.144 | 20   | CAAATATGCTTTCTTGATCATATT  | 58.646 | 25   | 240                    | 622        | 861      |
| 60.066 | 20   | CACCATTGTGTCCAGGTCAG      | 59.997 | 20   | 160                    | 200        | 359      |
| 59.679 | 20   | AATGATCTCATGGTGGAGGG      | 59.737 | 20   | 154                    | 3          | 156      |
| 60.938 | 20   | TCCACTCACCTAAACCCGAC      | 59.966 | 20   | 229                    | 8          | 236      |
| 59.429 | 20   | CCCCTTTTTCAGACGTTTTG      | 59.581 | 20   | 273                    | 14         | 286      |
| 60.227 | 20   | CGCGAACTTTACAGGGCTAC      | 59.904 | 20   | 239                    | 85         | 323      |
| 60.13  | 20   | TGGGCTCGAATCTCTTGTTT      | 59.813 | 20   | 183                    | 121        | 303      |
| 59.772 | 21   | TCAGGGGCATATGTGTCAAA      | 59.924 | 20   | 195                    | 13         | 207      |
| 59.368 | 22   | CCAGCCAATTTTATCCCAAG      | 59.406 | 20   | 208                    | 1          | 208      |
| 59.927 | 20   | GACTCGTAATGATCCCCCAA      | 59.75  | 20   | 209                    | 252        | 460      |
| 59.694 | 20   | GCCGTTTTAACGGTTTTGG       | 60.342 | 19   | 265                    | 214        | 478      |
| 60.043 | 20   | TAAGTACAGGAGCCATCGGG      | 60.088 | 20   | 116                    | 66         | 181      |
| 59.99  | 21   | ATTGGGATTTTTGGTTTGA       | 59.111 | 20   | 115                    | 132        | 246      |
| 59.989 | 20   | CAAAACCAACAGCCGAGATT      | 60.11  | 20   | 277                    | 219        | 495      |
| 59.182 | 20   | CCGATATGCTATGCTTTTGC      | 58.421 | 20   | 163                    | 76         | 238      |
| 60.005 | 20   | CCATGTTGTAATTAATGTAGGGAA  | 57.155 | 24   | 125                    | 2152       | 2276     |
| 59.997 | 20   | GGTCACGAGAACACGCATAC      | 59.169 | 20   | 231                    | 2250       | 2480     |
| 57.03  | 27   | TAAGCATCCACTCGCATCAC      | 59.83  | 20   | 177                    | 24         | 200      |
| 60.117 | 20   | TGATGGATTGCATTTGAGGA      | 60.009 | 20   | 241                    | 198        | 438      |
| 57.667 | 22   | CGGAAACAAGCAACTACAGC      | 58.58  | 20   | 146                    | 29         | 174      |
| 59.859 | 20   | ATAATGCTTGTTCGTTTTCGC     | 60.103 | 20   | 210                    | 38         | 247      |
| 60.02  | 20   | TCCCAAATTTTGTCCAAAGC      | 59.916 | 20   | 190                    | 1023       | 1212     |
| 60.049 | 20   | ACCCACTAAACCCAAACTT       | 57.435 | 20   | 153                    | 35         | 187      |
| 57.932 | 23   | GCCATTTTCCAAGAGCTTAAA     | 58.508 | 21   | 273                    | 28         | 300      |
| 60.052 | 20   | ACACGAACGGTTTAGGATCG      | 59.993 | 20   | 161                    | 132        | 292      |
| 59.95  | 20   | CTTGACTTCAAACCCCAACG      | 60.52  | 20   | 196                    | 336        | 531      |
| 59.985 | 20   | GAGTCGCTGCAACAAATGAA      | 59.995 | 20   | 228                    | 30         | 257      |
| 60.301 | 24   | TCAGTGGTTGTAACATTGGCA     | 60.019 | 21   | 241                    | 381        | 621      |
| 58.731 | 21   | CACCCGAAAACCGAATAAGA      | 59.931 | 20   | 101                    | 782        | 882      |
| 59.389 | 20   | AATGCAGGGTTTGCAAGAGT      | 59.74  | 20   | 150                    | 16         | 165      |
| 59.938 | 20   | TGAGCGGCTACGCTAATTCT      | 60.138 | 20   | 229                    | 16         | 244      |

|        |    |                          |        |    |     |      |      |
|--------|----|--------------------------|--------|----|-----|------|------|
| 60.153 | 20 | CTCAACGGTATGCTCGGATT     | 60.096 | 20 | 231 | 406  | 636  |
| 58.76  | 22 | AACAATCTGGATCGTTTGATACC  | 59.259 | 23 | 165 | 0    | 164  |
| 59.969 | 20 | TCCAAAAATCAAAGCTTGAAGA   | 58.987 | 22 | 220 | 65   | 284  |
| 58.57  | 20 | CGTCAGCATTTACCCCAACT     | 59.993 | 20 | 271 | 951  | 1221 |
| 60.065 | 20 | CATTTTACGAACGAACCACG     | 59.083 | 20 | 268 | 143  | 410  |
| 59.67  | 20 | TGGTTGCACATGAATCATCC     | 60.339 | 20 | 172 | 1333 | 1504 |
| 59.839 | 20 | AACAACAACCCACCCATTA      | 59.948 | 20 | 198 | 3118 | 3315 |
| 61.606 | 20 | ATCCCTCGTGTTCCTCCTCC     | 60.456 | 20 | 172 | 8    | 179  |
| 59.64  | 20 | ACCGTCCATCTTAATGCAGC     | 60.103 | 20 | 239 | 874  | 1112 |
| 60.103 | 20 | CATCAGAGCCGTGATTGAGA     | 59.942 | 20 | 143 | 0    | 142  |
| 60.978 | 20 | GGTTGTATGAAACCGTTAGTTGC  | 59.826 | 23 | 273 | 426  | 698  |
| 61.018 | 20 | TCACTCCGCCAACTAACAAA     | 59.317 | 20 | 177 | 169  | 345  |
| 59.623 | 20 | GTTTGTGGTGTTCATGTGGC     | 59.862 | 20 | 241 | 1849 | 2089 |
| 58.188 | 23 | CGCTTCTTTTGTATCCAGC      | 59.845 | 20 | 101 | 0    | 100  |
| 59.288 | 23 | AGCATAAGACGATGCGAGGT     | 59.866 | 20 | 161 | 12   | 172  |
| 59.847 | 20 | GCCCCCTTCTGAATCTCCTA     | 60.537 | 20 | 272 | 2564 | 2835 |
| 59.697 | 21 | ATTCAAGCATGGAATCGCTC     | 60.185 | 20 | 202 | 12   | 213  |
| 59.081 | 23 | CCCATTCCCAAATCCCTTAT     | 59.846 | 20 | 158 | 925  | 1082 |
| 59.399 | 20 | GTCTTGCACGATTCTCCACA     | 59.837 | 20 | 158 | 654  | 811  |
| 60.162 | 20 | TTATTGCCTACCAACCAGCC     | 59.96  | 20 | 183 | 4195 | 4377 |
| 59.442 | 21 | CACATAAATGGGTTATCAATGGA/ | 59.851 | 24 | 210 | 302  | 511  |
| 59.127 | 20 | TCCAACAATCTCCCACTTGA     | 59.059 | 20 | 129 | 158  | 286  |
| 60.154 | 20 | TGCGTTTGATGTTGCTCTTC     | 59.847 | 20 | 220 | 59   | 278  |
| 60.377 | 20 | TTCGCTGGTCTGAGTTCCT      | 59.989 | 20 | 278 | 61   | 338  |
| 59.808 | 23 | TCCCTCTCTCTCTCTCGG       | 58.792 | 20 | 165 | 25   | 189  |
| 59.587 | 21 | GCTAATTGCGCAACAACTG      | 59.514 | 20 | 224 | 315  | 538  |
| 59.322 | 20 | CGGTTTTGTTTTGTTCTTACA    | 59.884 | 21 | 255 | 1160 | 1414 |
| 59.773 | 20 | CCCACTCTGGTGACACATTG     | 59.997 | 20 | 190 | 33   | 222  |
| 59.856 | 20 | GTCGGTACTGGGGCAGATAA     | 59.955 | 20 | 228 | 422  | 649  |
| 59.315 | 21 | TCTTGTCATCACCTTTCCCC     | 59.903 | 20 | 277 | 481  | 757  |
| 60.317 | 20 | CCATACCTAACCTGTACCGTCG   | 60.652 | 22 | 177 | 504  | 680  |
| 59.795 | 20 | TCTGCTATCGAAACAACCCC     | 60.074 | 20 | 267 | 189  | 455  |
| 59.907 | 20 | CTTTTTCTTGCAAGGATTGA     | 59.325 | 21 | 250 | 266  | 515  |
| 59.333 | 20 | CGACCTGAAGGAGGCTAGAG     | 59.183 | 20 | 167 | 1217 | 1383 |
| 60.812 | 20 | ACCGGCAAGAAGAAAACCTGA    | 59.853 | 20 | 267 | 1525 | 1791 |
| 60.025 | 20 | TCATTAGCCATGTGTTCCCA     | 59.924 | 20 | 125 | 981  | 1105 |
| 60.117 | 20 | CATGAGCCGCTAGATTGACA     | 59.972 | 20 | 251 | 50   | 300  |
| 59.048 | 25 | TGCGTGCCATTTATAAAACA     | 57.749 | 20 | 112 | 1    | 112  |
| 60.135 | 20 | CCGAAAGAAGCAGGATAGCA     | 60.481 | 20 | 269 | 1394 | 1662 |
| 60.008 | 20 | TACGGGATCTCTTTGGTTCG     | 60.066 | 20 | 243 | 884  | 1126 |
| 59.721 | 20 | AAACTCCTCTCCAGCCACT      | 60.252 | 20 | 226 | 2    | 227  |
| 60.19  | 20 | ATTCTCCTCAACCAAACCC      | 60.169 | 20 | 144 | 225  | 368  |
| 60.361 | 20 | ATGTGCAAAGCTGCTGAAGA     | 59.746 | 20 | 260 | 293  | 552  |
| 59.166 | 20 | TGGACGTAAATACCCTTTTACCA  | 59.667 | 23 | 125 | 236  | 360  |
| 59.9   | 20 | GGGAAACCCACAATCATCAC     | 60.034 | 20 | 220 | 31   | 250  |
| 58.711 | 23 | ATGCGCGCTGCTTTAATAAT     | 59.873 | 20 | 142 | 6    | 147  |
| 59.813 | 20 | TGGGCAGTAGAATACCTCCG     | 60.088 | 20 | 118 | 84   | 201  |
| 59.034 | 20 | TTTTGTTTGGACAAAATGA      | 58.032 | 21 | 280 | 90   | 369  |
| 59.691 | 20 | TTCGAGTGACACAAGGCAAG     | 60.025 | 20 | 242 | 18   | 259  |
| 59.767 | 22 | ATTAGGCGACAACCAACTCG     | 60.132 | 20 | 175 | 714  | 888  |
| 59.975 | 20 | AGAGACGGCAGAAGGTGAGA     | 60.135 | 20 | 212 | 1263 | 1474 |
| 58.5   | 20 | AATGGCCGAGAGGGTTTTAC     | 60.32  | 20 | 103 | 10   | 112  |
| 60.296 | 20 | TCTCAGCCAACACATTTCCA     | 60.24  | 20 | 100 | 5017 | 5116 |
| 60.119 | 20 | TGAAGTTAGGAAATAAGGAGGTG  | 58.743 | 25 | 137 | 315  | 451  |
| 59.194 | 24 | GGCCAAATCAATACGAAAA      | 59.773 | 20 | 152 | 26   | 177  |
| 60.656 | 20 | TTGGCCTTGCCATGTATATC     | 58.457 | 20 | 278 | 249  | 526  |
| 59.894 | 20 | GGGAAGCTATGATGGGGAAT     | 60.117 | 20 | 249 | 2139 | 2387 |
| 59.948 | 20 | GCTTTCATTTTTCAGCCCAA     | 60.188 | 20 | 198 | 510  | 707  |

|        |                             |        |    |     |      |      |
|--------|-----------------------------|--------|----|-----|------|------|
| 59.843 | 20 CAACAGTTTGGCATCAGAGC     | 59.445 | 20 | 163 | 70   | 232  |
| 60.021 | 20 GCTGGGACGATCACGTATTT     | 59.962 | 20 | 236 | 2098 | 2333 |
| 60.288 | 20 TTTGGTTATGGACATACGGTCA   | 60.11  | 22 | 171 | 650  | 820  |
| 60.218 | 20 ATGCATCTCGGATCACATCA     | 60.039 | 20 | 193 | 8    | 200  |
| 60.066 | 20 CTCTCTCAATGTGGCAACGA     | 59.984 | 20 | 188 | 581  | 768  |
| 59.925 | 20 TTCCACCGTTGAAAGATCAAT    | 59.42  | 21 | 151 | 48   | 198  |
| 58.212 | 23 ATTTATGCTGACCGGAGTGG     | 59.955 | 20 | 225 | 621  | 845  |
| 59.138 | 21 ATACGTGTGCGAAACAACCC     | 60.817 | 20 | 124 | 315  | 438  |
| 59.086 | 20 ATTCCTCCTCAACACCCTT      | 59.795 | 20 | 216 | 101  | 316  |
| 60.111 | 20 CCCCCTCCTACATTTTAC       | 59.259 | 20 | 218 | 902  | 1119 |
| 58.866 | 20 AAGGAGATGACACCTAAACCCA   | 59.864 | 22 | 156 | 12   | 167  |
| 59.883 | 21 TGGCTGTCATTATTTCTCATTTT  | 58.262 | 23 | 150 | 368  | 517  |
| 59.434 | 20 GGAAATAATAAACACAAACACCG  | 59.233 | 24 | 253 | 882  | 1134 |
| 59.564 | 20 TCCTTGAACCATTCCATCATT    | 59.234 | 21 | 116 | 149  | 264  |
| 59.929 | 20 GAGGGCCAAAATCTTTAGTGG    | 59.952 | 21 | 207 | 69   | 275  |
| 60.239 | 20 TCTACGTGGCATGTGGACTC     | 59.707 | 20 | 216 | 4    | 219  |
| 59.333 | 22 TTGAATTGAATTGGAGCAAAA    | 58.265 | 21 | 233 | 20   | 252  |
| 59.853 | 20 TATAACCGTCGGCTTGCTTC     | 60.23  | 20 | 254 | 17   | 270  |
| 60.074 | 20 TCATATCCACGAGAATGGCA     | 60.033 | 20 | 195 | 1264 | 1458 |
| 59.95  | 20 TGGTGGAGGTATGGTGTGAA     | 59.806 | 20 | 119 | 23   | 141  |
| 59.82  | 20 CCCAAGACCCCAATTTGATT     | 60.91  | 20 | 267 | 57   | 323  |
| 59.761 | 20 CATCGACACCACTCATCGTC     | 60.121 | 20 | 240 | 9    | 248  |
| 60.18  | 20 TGCTGCAGTCTGTTCATGGAT    | 60.436 | 20 | 243 | 242  | 484  |
| 60.067 | 20 CGTTGCATGGTGTATTGGAC     | 59.847 | 20 | 200 | 29   | 228  |
| 60.124 | 20 GATGTTGGGTCTGCAGAGGT     | 60.12  | 20 | 237 | 566  | 802  |
| 61.023 | 20 TTCATCTCCCTAATCGACCG     | 60.029 | 20 | 269 | 411  | 679  |
| 59.706 | 20 TTAGCTTCACACCAGCAACG     | 60.05  | 20 | 276 | 18   | 293  |
| 60.037 | 20 TTGCCTAAAAAGTTGCTCCC     | 59.338 | 20 | 257 | 978  | 1234 |
| 59.93  | 22 TTTACCGACGTCTCACCATCT    | 59.607 | 21 | 155 | 18   | 172  |
| 59.17  | 20 GAAGGTGTCTTCAATGGAGGTT   | 59.484 | 22 | 151 | 163  | 313  |
| 59.244 | 20 TGTGAGCCATAACTCGACCA     | 60.263 | 20 | 251 | 6    | 256  |
| 59.831 | 20 AAAAATTTATCAGATTTACGAGCA | 57.706 | 25 | 133 | 312  | 444  |
| 59.257 | 20 CTTAGCCCCCAAGTTTTCAA     | 59.198 | 20 | 280 | 303  | 582  |
| 60.162 | 20 AAAGGCGACAAAACCATCAC     | 59.978 | 20 | 195 | 572  | 766  |
| 60.129 | 20 GACAGCCTTTTTGTTTTGCC     | 59.73  | 20 | 171 | 8    | 178  |
| 59.801 | 20 CAGGATGTGGTCATCCTCACT    | 59.977 | 21 | 275 | 1875 | 2149 |
| 59.951 | 20 GTATGGGGGAGCTGAACAAA     | 59.933 | 20 | 231 | 1248 | 1478 |
| 59.867 | 20 GGACCGTTTTAACGGATTTG     | 59.315 | 20 | 271 | 166  | 436  |
| 60.492 | 20 GGATCAGTAAAATAATAGGCAGA. | 59.934 | 26 | 244 | 537  | 780  |
| 60.132 | 20 ATCCGTGCCCTATCAGGAAT     | 60.682 | 20 | 234 | 526  | 759  |
| 60.413 | 20 CCACATCCTCAGCTCAGACA     | 59.98  | 20 | 158 | 212  | 369  |
| 60.088 | 20 CGATCCTCCTCCTTCACATT     | 59.09  | 20 | 244 | 1542 | 1785 |
| 59.026 | 23 AAGGACTCAAGCCCCTCAAT     | 60.074 | 20 | 156 | 20   | 175  |
| 59.13  | 21 CAGACAGCAGAGGTGTGCAT     | 60.055 | 20 | 203 | 96   | 298  |
| 59.997 | 20 TGAAACGGAACAAGATTTGC     | 58.747 | 20 | 135 | 15   | 149  |
| 60.175 | 20 ACCCAGATTTGTTTCTACGC     | 59.056 | 20 | 214 | 796  | 1009 |
| 59.993 | 20 CGTGTCAACTGTGACGAGAAA    | 59.93  | 21 | 214 | 1837 | 2050 |
| 59.911 | 20 GAAACCCTAACCTGATGCCA     | 59.933 | 20 | 252 | 447  | 698  |
| 59.72  | 22 GCTATGCATCAACGCACAAT     | 59.724 | 20 | 253 | 409  | 661  |
| 60.301 | 20 TGCCTACTCCACCAACATGA     | 60.112 | 20 | 230 | 938  | 1167 |
| 59.988 | 20 ATGGCTAACCATCAATTGCC     | 59.791 | 20 | 268 | 501  | 768  |
| 59.676 | 20 TATTGTTGCGAAGGGCCTAA     | 60.58  | 20 | 249 | 221  | 469  |
| 60.257 | 20 CTACTCCAAGTCCGACCCAA     | 60.103 | 20 | 192 | 1185 | 1376 |
| 59.259 | 20 CACAATATCAAGAACCCCAA     | 59.671 | 21 | 266 | 20   | 285  |
| 60.051 | 20 TTGCATCATCCAGGCATTTA     | 60.035 | 20 | 157 | 2174 | 2330 |
| 60.006 | 20 ATTTACAGACCCCAACA        | 59.893 | 18 | 130 | 1002 | 1131 |
| 59.505 | 20 TAGCCCACTAATCCCAAACC     | 58.903 | 20 | 113 | 17   | 129  |
| 59.859 | 21 GAACCTTCATCTTCCACCA      | 59.903 | 20 | 156 | 2193 | 2348 |

|        |    |                          |        |    |     |      |      |
|--------|----|--------------------------|--------|----|-----|------|------|
| 60.001 | 20 | ACCCCCAATTCTTGATAGCC     | 60.152 | 20 | 101 | 270  | 370  |
| 58.969 | 21 | GAGCTCCACATCAACACCAA     | 59.682 | 20 | 169 | 12   | 180  |
| 59.981 | 20 | TGCGTTTTGATGATATATAGGTGT | 60.054 | 26 | 214 | 561  | 774  |
| 60.144 | 21 | GGCCGTATTAGCAGCGTAAA     | 60.246 | 20 | 279 | 480  | 758  |
| 59.799 | 20 | AGCCACGTGTGTTCAATTGAG    | 59.751 | 20 | 241 | 515  | 755  |
| 59.761 | 20 | ATCTGCCATAGCACCAAACC     | 59.962 | 20 | 269 | 362  | 630  |
| 60.047 | 20 | CCTCGAAGTCGAAACCTGAG     | 59.982 | 20 | 192 | 604  | 795  |
| 59.483 | 21 | TGAAAGCCTACCTTGCTTCC     | 59.452 | 20 | 246 | 3    | 248  |
| 59.152 | 20 | CTCGGTTGAGCTCGGATAAG     | 59.971 | 20 | 161 | 81   | 241  |
| 59.379 | 23 | CCTGACTTCGCTGTGGGTAT     | 60.134 | 20 | 169 | 2287 | 2455 |
| 59.865 | 23 | AACCCACTCCTATTTCTCTCA    | 59.101 | 22 | 145 | 175  | 319  |
| 59.933 | 20 | TCAATGCTCTTTTCAACCCTTT   | 60.109 | 22 | 164 | 19   | 182  |
| 59.989 | 20 | GGTGGTATGGTGTGGAGGAC     | 60.096 | 20 | 185 | 61   | 245  |
| 59.939 | 20 | GGCATCAGAGCCAAGTTAGG     | 59.836 | 20 | 192 | 8    | 199  |
| 59.726 | 20 | GGCACGATTCAAAGTCACA      | 59.697 | 20 | 274 | 122  | 395  |
| 59.975 | 20 | TGACAAAGGGTGTGTTGGAA     | 59.976 | 20 | 153 | 75   | 227  |
| 60.488 | 20 | AACGAGGGGAGTGACACTTG     | 60.151 | 20 | 274 | 11   | 284  |
| 59.657 | 20 | GTTGGCTTGTGAGCGTGTAG     | 59.515 | 20 | 155 | 52   | 206  |
| 60.047 | 19 | CCATTGAGACTCGAACCCAT     | 59.927 | 20 | 183 | 75   | 257  |
| 59.272 | 20 | GCCTCTCATGCAACAAAA       | 59.847 | 20 | 253 | 308  | 560  |
| 58.774 | 26 | CACGCAATCCACATCAAGTC     | 60.12  | 20 | 247 | 76   | 322  |
| 59.962 | 20 | GAGAATGTTGAGCGTGTGA      | 59.992 | 20 | 235 | 369  | 603  |
| 60.095 | 23 | TACGACTCTTTCAAGGGGGA     | 59.665 | 20 | 233 | 1964 | 2196 |
| 59.815 | 21 | GGGATGATGTTGAATTAGTGGG   | 60.431 | 22 | 280 | 20   | 299  |
| 59.23  | 20 | ATATGTGGGATTCTGCCTGC     | 59.923 | 20 | 253 | 1421 | 1673 |
| 59.944 | 23 | TCAAAACAAATACTAACATGCAC/ | 57.428 | 24 | 192 | 1073 | 1264 |
| 59.576 | 20 | TTGAGAGGATTTGAGTTGGCT    | 58.923 | 21 | 251 | 157  | 407  |
| 60.674 | 20 | GCGACATGACACAATCAACC     | 59.975 | 20 | 165 | 430  | 594  |
| 59.926 | 20 | TGATTTCTAGATACGGGGC      | 58.998 | 20 | 131 | 46   | 176  |
| 60.08  | 19 | GCGAGAACTTAGTCAACGGG     | 59.875 | 20 | 184 | 15   | 198  |
| 60.349 | 20 | AGAAGACACTTGGGCCTGAA     | 59.844 | 20 | 203 | 222  | 424  |
| 60.903 | 20 | CTCCTCTCTGCTGAGCCAGT     | 59.883 | 20 | 192 | 265  | 456  |
| 60.16  | 20 | GCCTAGCCTATTTGAACCCA     | 59.182 | 20 | 163 | 233  | 395  |
| 60.052 | 20 | TTTTTAAGGTGGGGAGAATGT    | 57.596 | 21 | 248 | 1093 | 1340 |
| 60.833 | 20 | CAACCCAAGTTTACATGTGACG   | 60.318 | 22 | 280 | 47   | 326  |
| 58.144 | 25 | GGGGCTGTATAATGCGAAAA     | 59.928 | 20 | 196 | 165  | 360  |
| 58.629 | 22 | ACCATCCCGTTTCAAACCTCA    | 60.353 | 20 | 178 | 7    | 184  |
| 60.262 | 20 | TGAAATCCTTGAACCATTCCAT   | 60.542 | 22 | 200 | 15   | 214  |
| 59.056 | 20 | AACAACCCTCCCCTCATTTT     | 60.169 | 20 | 121 | 92   | 212  |
| 59.89  | 20 | GGACGGTTAATGATTGTCCC     | 59.105 | 20 | 264 | 909  | 1172 |
| 60.188 | 20 | TATTCCGCCATAGAACCAGG     | 59.916 | 20 | 219 | 547  | 765  |
| 60.22  | 20 | CCGAAAGCTGCAAGTCCTAC     | 60.015 | 20 | 176 | 256  | 431  |
| 59.369 | 20 | AACCCTCCAATTCCAAGAGG     | 60.298 | 20 | 207 | 356  | 562  |
| 60.692 | 20 | TCTTCGACGGAGGAGAATGT     | 59.803 | 20 | 194 | 1128 | 1321 |
| 60.21  | 20 | TGGGCTACCAAACACAGCTT     | 60.689 | 20 | 189 | 765  | 953  |
| 60.031 | 20 | TGGTTCAACCTAGCATTCCC     | 59.933 | 20 | 178 | 68   | 245  |
| 57.16  | 27 | GAGAGGTTAAGGGGGCAGAC     | 60.074 | 20 | 258 | 561  | 818  |
| 60.018 | 21 | TCCACCTAGTCTTTTCAGCAGC   | 59.63  | 21 | 102 | 19   | 120  |
| 60.323 | 22 | GAATGAAGAATGGTTTGTCCG    | 59.42  | 21 | 254 | 690  | 943  |
| 59.624 | 21 | TTCCCTTTTCGTACGATTGC     | 60.074 | 20 | 234 | 1843 | 2076 |
| 59.756 | 20 | TCAAACACCAATCGCTCAAA     | 60.234 | 20 | 131 | 3643 | 3773 |
| 59.778 | 20 | CGGTTAAGATTGAGCAAGCG     | 60.895 | 20 | 221 | 73   | 293  |
| 59.988 | 20 | TATACGCACTCACACACGCA     | 59.926 | 20 | 211 | 2608 | 2818 |
| 58.824 | 20 | TCATTCACCATATCCACCCC     | 60.404 | 20 | 280 | 4    | 283  |
| 58.978 | 20 | ATGGTTCCGATGAGATCCTG     | 59.886 | 20 | 212 | 10   | 221  |
| 59.894 | 20 | GATAAAAATGGCACACGGCT     | 59.967 | 20 | 261 | 212  | 472  |
| 59.5   | 21 | GAAATCCCACTGCCAACTTT     | 59.031 | 20 | 279 | 80   | 358  |
| 60.624 | 20 | GGGAATGAAATGCACATTGA     | 59.33  | 20 | 272 | 438  | 709  |

|        |    |                          |        |    |     |      |      |
|--------|----|--------------------------|--------|----|-----|------|------|
| 59.685 | 20 | TGTCCCGTTCTCTCTCTGCT     | 60.135 | 20 | 276 | 3    | 278  |
| 59.337 | 20 | TGCCGGTCTTCTTCTGACTT     | 59.989 | 20 | 253 | 16   | 268  |
| 60.467 | 21 | TGAAGTTAGGAAATAAGGAGGTG  | 58.743 | 25 | 279 | 828  | 1106 |
| 60.018 | 22 | GGTTGAGCTCGGATAAGCTG     | 59.978 | 20 | 197 | 0    | 196  |
| 59.496 | 20 | GCTTTTATTGACTCAAGATCCGA  | 59.75  | 23 | 268 | 6816 | 7083 |
| 60.199 | 20 | AACCCACACATTCAACACA      | 59.701 | 20 | 165 | 167  | 331  |
| 60.23  | 20 | TCTGTTGTGCTGCTGCTTCT     | 59.929 | 20 | 183 | 389  | 571  |
| 60.517 | 19 | ACAATGGTCCAAGACCGAAG     | 59.966 | 20 | 137 | 25   | 161  |
| 59.612 | 20 | ACCACCGAGCACCATGTATT     | 60.263 | 20 | 207 | 2    | 208  |
| 60.268 | 20 | TGGTTGAATTTTGTCCCACA     | 59.792 | 20 | 186 | 1433 | 1618 |
| 59.634 | 21 | TCTCACGATATCCTGCATCG     | 59.781 | 20 | 187 | 26   | 212  |
| 61.271 | 20 | CTCAAACCATACGCTTGGC      | 59.287 | 19 | 113 | 114  | 226  |
| 57.739 | 20 | AGTGGATAAACCCCTGCGAAA    | 59.569 | 20 | 147 | 0    | 146  |
| 59.184 | 21 | TTGTCCTCATCATCGAACCA     | 60.048 | 20 | 211 | 15   | 225  |
| 59.747 | 21 | CAAATCCCACCCCTGTCTA      | 59.784 | 20 | 214 | 23   | 236  |
| 59.717 | 22 | AGGAGATCGAGAGGGAGAGG     | 59.906 | 20 | 226 | 552  | 777  |
| 59.668 | 20 | ATAATGGGGTTTCAGTCCGA     | 59.244 | 20 | 278 | 136  | 413  |
| 59.966 | 20 | TGAATTCGGATATGCGATGA     | 59.997 | 20 | 261 | 3492 | 3752 |
| 60.24  | 20 | CTTTCTCCATCCCATCTCCA     | 60.003 | 20 | 272 | 576  | 847  |
| 59.995 | 20 | GAAGCCCGAGTAAGGAAACC     | 60.074 | 20 | 113 | 1574 | 1686 |
| 59.873 | 20 | AGTGCCAGATAGGCCGTTTA     | 59.73  | 20 | 244 | 172  | 415  |
| 60.184 | 20 | AGCCGTTTTGAGACGTTGTT     | 59.78  | 20 | 262 | 45   | 306  |
| 59.784 | 20 | AAACCATTTGGGGACGATTT     | 60.411 | 20 | 168 | 28   | 195  |
| 59.839 | 20 | CCCCGGTTTCATTTATAGCA     | 59.789 | 20 | 200 | 0    | 199  |
| 60.363 | 20 | GGAGAGTACGAGAGTGAGGAGG   | 59.505 | 22 | 136 | 174  | 309  |
| 60.088 | 20 | CTACCGTCAAATCCTGGCTC     | 59.694 | 20 | 271 | 678  | 948  |
| 58.78  | 20 | CCGGGTTTAAAGCAATCAAA     | 59.937 | 20 | 143 | 24   | 166  |
| 57.573 | 20 | TCCCCGTTTTTACTCGTCTG     | 60.103 | 20 | 168 | 25   | 192  |
| 60.074 | 20 | CCTCCAGAAATTGGGAGTGA     | 60.042 | 20 | 224 | 3393 | 3616 |
| 59.759 | 21 | AATTGAAACCCTGCAGCTTG     | 60.249 | 20 | 240 | 282  | 521  |
| 60.243 | 20 | CACGTGTGTAAGTTTTGTGCG    | 60.26  | 21 | 262 | 90   | 351  |
| 59.943 | 20 | TCTCCACTCTCTCCCACGAT     | 59.792 | 20 | 230 | 2993 | 3222 |
| 59.764 | 20 | TAACCACCTCTTGGGTCCAC     | 59.82  | 20 | 170 | 1474 | 1643 |
| 57.265 | 20 | TAGGCATTATTGGATTCCCG     | 59.751 | 20 | 159 | 30   | 188  |
| 59.902 | 19 | TAATCCCGCTGAAAATGAGG     | 60.031 | 20 | 198 | 2    | 199  |
| 59.923 | 20 | CCTTTGTCTTCGAACCCGTA     | 60.103 | 20 | 221 | 96   | 316  |
| 60.245 | 23 | ACCTCTCAGGGTTCACCGTA     | 59.574 | 20 | 266 | 55   | 320  |
| 60.035 | 22 | CTTTAGGGCCCTTGATTTCC     | 59.903 | 20 | 170 | 196  | 365  |
| 60.051 | 20 | TCGACCTTAACCACCTCGAC     | 60.111 | 20 | 138 | 23   | 160  |
| 60.568 | 21 | CGTCGGTTCAACTGGAGAAT     | 60.111 | 20 | 223 | 267  | 489  |
| 59.556 | 20 | TCGAAAATGTCCGACTCTCC     | 60.195 | 20 | 224 | 26   | 249  |
| 60.039 | 20 | GGGCTTTGAGTAACTGAGGTG    | 58.851 | 21 | 274 | 315  | 588  |
| 59.162 | 22 | ACATAACTCTCCGGCCAATG     | 59.955 | 20 | 196 | 45   | 240  |
| 60.836 | 20 | TCGAAATGCAGTGTTGAAG      | 59.84  | 20 | 245 | 4    | 248  |
| 59.903 | 20 | CGGAATATCGAGAAGGTTATTATT | 59.689 | 26 | 266 | 69   | 334  |
| 59.885 | 24 | CAACGGTGATGACGTCGTAG     | 60.175 | 20 | 230 | 151  | 380  |
| 59.693 | 21 | ATCTTCCATCCATCGAGCTG     | 60.181 | 20 | 112 | 497  | 608  |
| 59.882 | 20 | AGGGTATGTCCGGTATGCAG     | 59.836 | 20 | 264 | 2953 | 3216 |
| 59.247 | 20 | CCACCACCTAATTCTCTGGC     | 59.55  | 20 | 163 | 1146 | 1308 |
| 60.249 | 20 | TCAAGACTAAAATTGGTAAAGAA( | 58.241 | 27 | 133 | 415  | 547  |
| 58.743 | 22 | CGAGTGTGTACATGGGCATT     | 59.445 | 20 | 278 | 6002 | 6279 |
| 59.615 | 20 | GCAACGGAATACCACTCGTT     | 60     | 20 | 241 | 97   | 337  |
| 58.327 | 23 | CCATTTTCAATCCTGTGCCT     | 59.933 | 20 | 100 | 7    | 106  |
| 59.934 | 20 | CAAGTTGATGCTAGTCCTCCG    | 59.883 | 21 | 225 | 3216 | 3440 |
| 59.814 | 26 | CCGGATTCTACTGTCCGAAA     | 60.066 | 20 | 279 | 429  | 707  |
| 60.488 | 20 | AGGCTTGATCTTTGCTTCCC     | 60.713 | 20 | 212 | 186  | 397  |
| 60.766 | 20 | TGGGAATGAAAAAGCCATGT     | 60.309 | 20 | 237 | 731  | 967  |
| 59.993 | 20 | GAACTCGCTTAGTTGCTCCG     | 60.154 | 20 | 276 | 453  | 728  |



|        |    |                          |        |    |     |      |      |
|--------|----|--------------------------|--------|----|-----|------|------|
| 59.801 | 20 | CATTTTTCAATCCCAGCCAT     | 59.762 | 20 | 274 | 616  | 889  |
| 60.005 | 20 | CCGGGTCAACAGATTGAACT     | 59.966 | 20 | 200 | 409  | 608  |
| 59.831 | 21 | TTACGCTTTCAAGGAATGGG     | 60.067 | 20 | 171 | 19   | 189  |
| 59.454 | 26 | CCCACTTTTGGGTTATTACCTG   | 59.641 | 22 | 275 | 80   | 354  |
| 59.907 | 20 | TTGTGTGATCGAACTACGTTAAA  | 57.469 | 23 | 107 | 277  | 383  |
| 59.813 | 20 | AGTTACAAGCCAACCCAACG     | 60.03  | 20 | 269 | 252  | 520  |
| 59.515 | 20 | CGCACTGCTGTTGGAATTT      | 59.856 | 19 | 236 | 203  | 438  |
| 59.989 | 20 | CTTTGCCCCCTTTCTCTCTT     | 59.821 | 20 | 206 | 375  | 580  |
| 59.797 | 20 | TGAATCAAAGCATGTCATTTCAA  | 60.482 | 23 | 195 | 919  | 1113 |
| 57.764 | 22 | TAGCCCAATTTTTGTACCC      | 58.807 | 20 | 237 | 239  | 475  |
| 59.325 | 20 | TCGGGTACGACAAAACAACA     | 60.004 | 20 | 280 | 658  | 937  |
| 57.193 | 27 | GGCTTCCATTACGAACCTCA     | 60.074 | 20 | 129 | 23   | 151  |
| 59.799 | 22 | ACCTCCTCCTCTTCTCTCCG     | 59.945 | 20 | 188 | 12   | 199  |
| 59.259 | 20 | CATGCAACCATCAAAACATCA    | 60.373 | 21 | 189 | 1    | 189  |
| 60.014 | 20 | TGCGACGGAATTTAAAAGG      | 60.068 | 20 | 172 | 165  | 336  |
| 60.008 | 20 | TGACGGTGTAAATATGGGTTTTTC | 59.997 | 23 | 159 | 62   | 220  |
| 57.125 | 21 | GAGTTTGTTCATCATTCCGA     | 59.925 | 21 | 273 | 1    | 273  |
| 60.307 | 20 | TTTTTATCCCATGTTTGTGCAT   | 59.234 | 22 | 255 | 232  | 486  |
| 57.208 | 27 | TGCACACAAGACTTTGCCAT     | 60.31  | 20 | 196 | 938  | 1133 |
| 58.315 | 21 | CAAACAAGAAAAGGAGTTAGTGG  | 60.529 | 24 | 225 | 56   | 280  |
| 57.85  | 22 | GGATGATCACCATTCGAACC     | 60.143 | 20 | 143 | 1    | 143  |
| 60.027 | 20 | ATCGAGTTCCTTCCGTTTT      | 59.94  | 20 | 280 | 611  | 890  |
| 57.483 | 25 | ACTGACAAAATTCGGGACG      | 59.971 | 20 | 249 | 25   | 273  |
| 59.96  | 20 | GCTAATTGGGCAGCTTCTTG     | 59.982 | 20 | 167 | 22   | 188  |
| 59.499 | 22 | GGACACCAGGGTGAGAATTG     | 60.363 | 20 | 278 | 280  | 557  |
| 59.299 | 25 | AACATGATACGGCCGAAAAC     | 59.829 | 20 | 167 | 0    | 166  |
| 59.247 | 20 | CGCCGGTATTCGTGTAAGTT     | 60.018 | 20 | 180 | 426  | 605  |
| 59.726 | 20 | GTCGACTTTTGATCGGGAAA     | 60.051 | 20 | 196 | 20   | 215  |
| 60.335 | 20 | AAAAACATGCCCACTTCAC      | 59.836 | 20 | 182 | 49   | 230  |
| 60.173 | 20 | CCATGGTTCGTCCAAATCTCT    | 59.927 | 20 | 126 | 228  | 353  |
| 59.379 | 20 | GCGTGTATCCGCCAAAATA      | 60.831 | 20 | 244 | 56   | 299  |
| 59.372 | 24 | TACCCCAACCCACTAACACC     | 59.569 | 20 | 104 | 1    | 104  |
| 60.434 | 25 | GCATGACACATGGCGTAATC     | 59.963 | 20 | 152 | 18   | 169  |
| 59.656 | 20 | AACTCTCTCCCTCCTCTGCC     | 59.952 | 20 | 223 | 14   | 236  |
| 59.534 | 20 | TGAGGAACCAATTATCCCGA     | 60.266 | 20 | 265 | 18   | 282  |
| 60.031 | 20 | GGCCAATACCGTGACATAC      | 60.081 | 20 | 239 | 130  | 368  |
| 60.071 | 25 | AAACATGATTAACAATGATGGAA( | 59.553 | 25 | 201 | 1821 | 2021 |
| 60.732 | 20 | GGAATGAAAGGCTTAATTCTTGTC | 60.344 | 24 | 272 | 410  | 681  |
| 58.175 | 22 | TCAGATAGCCCTCTCAGACCA    | 59.958 | 21 | 230 | 24   | 253  |
| 61.069 | 20 | TTCCATCTTTCAACCTCATCG    | 60.059 | 21 | 136 | 538  | 673  |
| 59.973 | 20 | GGGAATTCGAAGTGGGATTT     | 60.131 | 20 | 242 | 1365 | 1606 |
| 59.351 | 20 | CCGAAATGAAGAAATGAGTTCC   | 59.945 | 22 | 230 | 1412 | 1641 |
| 60.096 | 20 | GAGGTTTTGACGGGATTTAGG    | 59.822 | 21 | 103 | 307  | 409  |
| 60.149 | 20 | TTGATGATGGAATGAAAATGAAA  | 59.291 | 23 | 276 | 45   | 320  |
| 59.832 | 20 | CAAGCATAAGGATTTTCGGA     | 57.845 | 20 | 268 | 3388 | 3655 |
| 60.088 | 19 | CCAGAAGGTGCAGTGGTATG     | 59.161 | 20 | 213 | 3539 | 3751 |
| 59.808 | 20 | TTCGAATCGACGGTGTATGA     | 60.073 | 20 | 236 | 5779 | 6014 |
| 59.83  | 20 | TCACAAATAAGGAGGTGCC      | 59.933 | 20 | 275 | 42   | 316  |
| 59.635 | 20 | AATTGTGTGAATTCTAAATTTTCT | 57.862 | 26 | 272 | 318  | 589  |
| 59.942 | 20 | ATTTTTCCATGTGGCATCGT     | 60.199 | 20 | 275 | 1995 | 2269 |
| 59.943 | 20 | TGAGGGGCCTCACTAACAAAG    | 60.246 | 20 | 196 | 810  | 1005 |
| 59.576 | 27 | TGATGCTCCTCAGAAAGCAC     | 59.116 | 20 | 124 | 18   | 141  |
| 60.135 | 20 | TCCACAAAATCAACCCATT      | 60.029 | 20 | 246 | 147  | 392  |
| 60.073 | 20 | CTGCTGTTCTTGGTGCAAAA     | 60.027 | 20 | 194 | 32   | 225  |
| 59.871 | 23 | TTATTTGTTGCGTAGGGGCT     | 59.609 | 20 | 277 | 176  | 452  |
| 59.962 | 20 | GGAGGTATATGCCACCTGGA     | 59.773 | 20 | 198 | 395  | 592  |
| 60.225 | 19 | ACGTTTACGGTCCTTACCGA     | 59.494 | 20 | 238 | 375  | 612  |
| 60.029 | 20 | CTTGCAACTGGTCGAAATCA     | 59.84  | 20 | 225 | 1898 | 2122 |

|        |    |                          |        |    |     |      |      |
|--------|----|--------------------------|--------|----|-----|------|------|
| 60.755 | 20 | GCCTTCTTGCCTGTTTCTTG     | 59.993 | 20 | 252 | 305  | 556  |
| 60.019 | 20 | GATTACATGATGCAGTGCGG     | 60.104 | 20 | 194 | 432  | 625  |
| 60.074 | 20 | GGGGATGGTTATGCATGG       | 59.534 | 18 | 124 | 409  | 532  |
| 57.761 | 20 | AATGGCCACAAATGTTTCTT     | 59.292 | 20 | 109 | 740  | 848  |
| 59.697 | 21 | TACTGTTCTTCAGCTCGGGG     | 60.388 | 20 | 136 | 23   | 158  |
| 60.045 | 20 | TTATATCGCCGAAAATGCC      | 59.898 | 20 | 229 | 22   | 250  |
| 59.002 | 20 | AATGCACCCACAAATGGAAT     | 60.059 | 20 | 182 | 695  | 876  |
| 59.989 | 20 | TGTGGATTAATATAGTGGTTCAAC | 57.953 | 26 | 242 | 136  | 377  |
| 57.373 | 24 | TGAGGAGCGTTGATCTTGTG     | 59.984 | 20 | 133 | 20   | 152  |
| 59.923 | 20 | CCGCCCAATAGAGACAATA      | 59.916 | 20 | 254 | 1598 | 1851 |
| 60.257 | 20 | CTCGGATTCGTCACCTTGT      | 60.111 | 20 | 272 | 72   | 343  |
| 59.88  | 20 | TTTGTGGTGACCTTGAGGAA     | 59.109 | 20 | 131 | 41   | 171  |
| 59.948 | 20 | TGTTTGATTCAATCCATTTCCA   | 60.167 | 22 | 262 | 1136 | 1397 |
| 59.16  | 22 | CACGACTTGCAATCCGTTTA     | 59.729 | 20 | 238 | 0    | 237  |
| 60.929 | 20 | CTCCCAATCCGGTTCTATCA     | 59.887 | 20 | 274 | 3165 | 3438 |
| 60.264 | 20 | ACATGATTACCAACCGGCAT     | 60.081 | 20 | 226 | 2742 | 2967 |
| 59.67  | 20 | TAATGCCCGTTTTTCTTGT      | 59.451 | 20 | 280 | 47   | 326  |
| 57.425 | 21 | TGAGGAGCGTTGATCTTGTG     | 59.984 | 20 | 126 | 24   | 149  |
| 57.298 | 21 | TTTGAAACCCATGGGATATAG    | 59.909 | 22 | 259 | 843  | 1101 |
| 60.49  | 20 | GACCTTAGCTTGCGACTTGC     | 60.162 | 20 | 192 | 2    | 193  |
| 59.988 | 20 | GCATCAGTAAATCCTGGCCT     | 59.154 | 20 | 196 | 92   | 287  |
| 58.935 | 20 | TGAAATCCATCTCCCCTGAG     | 60.003 | 20 | 273 | 487  | 759  |
| 58.488 | 25 | CAGCGTAAGAAAATAATTGATGG, | 59.557 | 24 | 232 | 10   | 241  |
| 60.134 | 20 | CTCTTTCCGCACCTTCACTT     | 59.473 | 20 | 280 | 94   | 373  |
| 59.787 | 20 | GTGGTGTGGTGTGAAGTTGG     | 59.89  | 20 | 181 | 96   | 276  |
| 60.257 | 20 | CGTTTGGATCCGATTTGGTA     | 60.692 | 20 | 220 | 578  | 797  |
| 60.431 | 20 | GACCGGGTACAGAGCAAAAA     | 60.11  | 20 | 179 | 19   | 197  |
| 59.899 | 19 | CGATCATTGTGCGAATCAGT     | 59.679 | 20 | 176 | 8    | 183  |
| 58.743 | 25 | TCGATTGGTTTGTGAATTGTG    | 59.43  | 21 | 273 | 2821 | 3093 |
| 60.269 | 20 | TCCCTTTCGGTCTCCTAACA     | 59.665 | 20 | 278 | 59   | 336  |
| 59.72  | 20 | CTCGCACCACTCCTCTTCT      | 59.598 | 20 | 270 | 0    | 269  |
| 60.192 | 20 | TCGGTTTTACCGTTTTGAC      | 59.839 | 20 | 181 | 13   | 193  |
| 59.016 | 25 | CTGTTTCGGTTCGGAGAGAAG    | 59.982 | 20 | 166 | 18   | 183  |
| 59.992 | 20 | GGATGAAGTTGAATTGTTGGG    | 59.278 | 21 | 253 | 62   | 314  |
| 59.948 | 20 | TTTGGTGTGTTGCTGTTGGAG    | 59.734 | 20 | 120 | 464  | 583  |
| 60.155 | 20 | CGTGGTTCGATCGTAATTGA     | 59.542 | 20 | 260 | 0    | 259  |
| 60.08  | 20 | CCCAACCCTTGAGAACTTGA     | 60.081 | 20 | 278 | 222  | 499  |
| 60.69  | 20 | ATTCTAAACGCCGGTGATGT     | 59.457 | 20 | 104 | 44   | 147  |
| 59.992 | 20 | GCAGGTGGATGGTGAGAAAT     | 59.934 | 20 | 212 | 245  | 456  |
| 59.934 | 20 | GTGTAAGTTGGTGGGGGTG      | 60.126 | 20 | 241 | 2644 | 2884 |
| 59.903 | 20 | CCGGTGAAGTTGGATTATCG     | 60.323 | 20 | 247 | 3008 | 3254 |
| 58.255 | 20 | GCAAATTTGTGGA AAAACCG    | 60.335 | 20 | 257 | 245  | 501  |
| 59.964 | 20 | GTCAACTTTGGCAATGGGAT     | 59.797 | 20 | 223 | 61   | 283  |
| 59.572 | 24 | GCTAAACTTTAAAGGTGATGCCA  | 59.692 | 23 | 201 | 106  | 306  |
| 58.81  | 24 | ATGGGAAGGGCATT TTCAG     | 59.879 | 19 | 166 | 7    | 172  |
| 59.997 | 20 | TCCTTCAAGGCCAGATTGAG     | 60.331 | 20 | 169 | 150  | 318  |
| 59.528 | 20 | TTTCTCTCCAACCCACA ACTC   | 59.173 | 21 | 278 | 190  | 467  |
| 59.562 | 20 | TTCATCCTCTTGCCCATTA      | 60.405 | 20 | 204 | 201  | 404  |
| 57.88  | 21 | TCAAAAACCGGTGAAAAACC     | 59.817 | 20 | 276 | 1501 | 1776 |
| 59.942 | 20 | TGTTTCTCTCGTGGAGTCCT     | 58.929 | 21 | 231 | 379  | 609  |
| 60.167 | 20 | AAGATTTGATCATGGGCGTC     | 59.9   | 20 | 207 | 527  | 733  |
| 59.489 | 23 | TGGACATCCTATGCAATGTG     | 57.907 | 20 | 274 | 1205 | 1478 |
| 59.815 | 21 | CAGACAAATCTTCGTTATCCCA   | 59.087 | 22 | 153 | 1048 | 1200 |
| 59.579 | 20 | ACGCTCGAACTCGATGATCT     | 59.981 | 20 | 200 | 609  | 808  |
| 59.803 | 20 | TCAAATGGTAACCAATCACTAAGC | 59.328 | 24 | 273 | 984  | 1256 |
| 59.853 | 20 | CACCTGAATCCACTCACCT      | 59.962 | 20 | 190 | 1424 | 1613 |
| 59.708 | 20 | CAGCATACCAAGGGCATT T     | 59.96  | 20 | 251 | 1684 | 1934 |
| 59.933 | 20 | CTGAGTCATCTACAGGTCAATGG  | 58.732 | 23 | 229 | 483  | 711  |

|        |    |                           |        |    |     |      |      |
|--------|----|---------------------------|--------|----|-----|------|------|
| 58.149 | 22 | CCTTTCTGAATGTGGCTGCT      | 60.397 | 20 | 231 | 17   | 247  |
| 59.96  | 20 | GGTAGTGGGGAGTGGGATTT      | 60.052 | 20 | 157 | 451  | 607  |
| 59.756 | 20 | TCATGTACGTTGCTTATGGCA     | 60.148 | 21 | 234 | 25   | 258  |
| 59.038 | 21 | CATATGGGAAGGGCATTTC       | 59.23  | 20 | 211 | 1135 | 1345 |
| 60.69  | 20 | GTTTGGATATCGAGATCGGG      | 59.344 | 20 | 188 | 293  | 480  |
| 59.07  | 23 | CCAACCCAAACTCACACACTT     | 59.915 | 21 | 269 | 36   | 304  |
| 59.938 | 20 | TCTTTACCGCCTCCATCTTG      | 60.206 | 20 | 202 | 29   | 230  |
| 58.075 | 20 | CAGATCTGATGGCCAGATT       | 60.034 | 20 | 133 | 0    | 132  |
| 59.717 | 20 | ACTGACATTCACAGGCATTG      | 57.067 | 20 | 151 | 21   | 171  |
| 59.725 | 20 | AAAAAGTTGATGCCAAAATTAGAC  | 59.605 | 25 | 147 | 251  | 397  |
| 58.858 | 20 | TTTCTGCATTCCGAATTTCC      | 60.016 | 20 | 132 | 14   | 145  |
| 59.272 | 20 | CCGCTGATTTCCGTTTTCTA      | 60.202 | 20 | 199 | 475  | 673  |
| 59.415 | 20 | CCATCACCAGCTTTGTTGTG      | 60.152 | 20 | 160 | 34   | 193  |
| 60.103 | 20 | CATGCATGAACCTGCAATCT      | 59.679 | 20 | 267 | 834  | 1100 |
| 58.884 | 20 | CATTATCGCCACAAATCTGC      | 59.14  | 20 | 277 | 858  | 1134 |
| 58.532 | 22 | GAGGGTCAACCAGGAAGTTG      | 59.549 | 20 | 136 | 25   | 160  |
| 60.481 | 20 | GCATGCATGTGAAGTTGCTT      | 59.878 | 20 | 278 | 74   | 351  |
| 59.833 | 20 | AGGTCACGCTCGAGAAAGAG      | 59.745 | 20 | 236 | 51   | 286  |
| 60.103 | 20 | AATTTGGCCCCGTCTAAAAA      | 60.645 | 20 | 237 | 88   | 324  |
| 59.569 | 20 | TGTTGCTTGCCAAAATTTCA      | 60.229 | 20 | 185 | 99   | 283  |
| 60.221 | 20 | TCTAAGAGATGATTGCACCTGAA   | 58.986 | 23 | 243 | 374  | 616  |
| 59.556 | 20 | GGAATGTCCACTCGGTCAAA      | 60.903 | 20 | 280 | 1553 | 1832 |
| 59.436 | 20 | GGCCAAGAAATATTGCTCCA      | 60.038 | 20 | 262 | 248  | 509  |
| 59.188 | 21 | CCCCATAACTCCTTTCCTG       | 60.674 | 20 | 142 | 548  | 689  |
| 59.805 | 20 | TTGAATCAACCCTTATCGCC      | 59.901 | 20 | 192 | 479  | 670  |
| 59.95  | 20 | CTGAAAGCCATGTTTCAGCA      | 59.988 | 20 | 105 | 606  | 710  |
| 59.833 | 20 | CATCGACAAGCACAAGCAAT      | 59.871 | 20 | 256 | 1842 | 2097 |
| 59.966 | 20 | TGAATGATGAGTTTTGTGGGTC    | 59.836 | 22 | 223 | 7    | 229  |
| 59.363 | 25 | CACTTGGCAAAAAGCAGCATA     | 60.014 | 20 | 260 | 8    | 267  |
| 60.855 | 20 | GGGTATATGCCACAGGATCG      | 60.177 | 20 | 260 | 99   | 358  |
| 58.242 | 26 | CGTTGATTTGCCGTTTTAT       | 59.964 | 20 | 278 | 27   | 304  |
| 58.612 | 24 | CCAGCCCAATAACTCAACCT      | 59.052 | 20 | 159 | 12   | 170  |
| 59.886 | 20 | CTGATCAGCGTGTGTAACGA      | 59.92  | 21 | 240 | 5    | 244  |
| 60.384 | 20 | CCCTCGTATGCTGTGGTTTT      | 59.993 | 20 | 268 | 649  | 916  |
| 60.142 | 20 | GGGCCGAGATTTGTTAGAGG      | 60.949 | 20 | 180 | 751  | 930  |
| 59.871 | 19 | GCACGCTCTCCTCTCACTTT      | 59.751 | 20 | 186 | 549  | 734  |
| 59.679 | 20 | CCCCTTTTGAGAAGAAAGC       | 60.18  | 20 | 250 | 14   | 263  |
| 59.245 | 22 | ACCCAGTACCACCACCATTG      | 60.545 | 20 | 119 | 3    | 121  |
| 60.049 | 20 | GCATCAGAGCCACGGTTAG       | 59.41  | 19 | 260 | 56   | 315  |
| 57.062 | 27 | GAGGACGATGAGGGTGAAGA      | 60.199 | 20 | 232 | 28   | 259  |
| 59.677 | 22 | CATGGACCCACATGTCATA       | 60.048 | 20 | 174 | 20   | 193  |
| 60.155 | 20 | CAGATCCAACGGCCATAAGT      | 59.955 | 20 | 257 | 877  | 1133 |
| 59.481 | 20 | AAAATCAAAGGCCACAATG       | 59.801 | 20 | 176 | 35   | 210  |
| 60.255 | 20 | CTCAGCATATGGGAGGGGTA      | 59.91  | 20 | 253 | 311  | 563  |
| 59.786 | 20 | ACATGGTTGGTTGCTTGTT       | 60.277 | 20 | 163 | 285  | 447  |
| 59.592 | 20 | CCAAGCTTTGTGAATTTTTGAA    | 59.272 | 22 | 267 | 1271 | 1537 |
| 59.752 | 20 | TCAACTCTATCATATAAATTTTTGC | 57.188 | 26 | 224 | 9    | 232  |
| 59.923 | 20 | ACCTATGGTGGTATGGCGTG      | 60.657 | 20 | 193 | 716  | 908  |
| 60.116 | 20 | CGAACCCCTCACACTTCTGGT     | 60.151 | 20 | 206 | 11   | 216  |
| 60.081 | 20 | TCCCGCTGATTTCTTCTCTC      | 59.508 | 20 | 277 | 3538 | 3814 |
| 60.449 | 20 | TTGGGTATCCAAAAACCAAAA     | 59.195 | 21 | 269 | 1540 | 1808 |
| 59.789 | 20 | CAAAACATACGTTGCGCTCT      | 58.992 | 20 | 147 | 173  | 319  |
| 60.029 | 20 | GCGTGAAATTATTAAGCCGC      | 59.722 | 20 | 244 | 838  | 1081 |
| 60.532 | 20 | TGTTTGGCGTAAGAGACGTG      | 59.904 | 20 | 240 | 973  | 1212 |
| 59.803 | 20 | AGTCACACCCTCTCCCACAC      | 60.006 | 20 | 269 | 1349 | 1617 |
| 57.131 | 27 | TTGAAGTCTGCTGTGCTGCT      | 59.929 | 20 | 228 | 20   | 247  |
| 60.144 | 21 | ACTGTCACACACACCACCGT      | 59.96  | 20 | 204 | 12   | 215  |
| 59.82  | 20 | ACACCAAATCAAGAACCCCC      | 60.979 | 20 | 277 | 10   | 286  |

|        |    |                           |        |    |     |      |      |
|--------|----|---------------------------|--------|----|-----|------|------|
| 59.315 | 20 | TCACCTCCGTCTAAATTGCC      | 60.074 | 20 | 241 | 35   | 275  |
| 59.933 | 20 | CGTAAAATTCCGGTGCAAAT      | 59.832 | 20 | 137 | 821  | 957  |
| 57.771 | 26 | TAGAGGACACTTGGACCTGAAA    | 58.837 | 22 | 100 | 6    | 105  |
| 57.176 | 20 | ACATGCCCTAAAAACCGATG      | 59.823 | 20 | 223 | 610  | 832  |
| 59.092 | 26 | AGCGAGACCTTCTATCACGC      | 59.603 | 20 | 191 | 7    | 197  |
| 59.885 | 24 | TTAATGAACGGTCCGGTTTC      | 59.801 | 20 | 220 | 21   | 240  |
| 59.697 | 20 | GGTACCCCCACACAAACAAC      | 59.989 | 20 | 209 | 209  | 417  |
| 60.074 | 20 | TGACTCTTCTAGCTCCATTTGC    | 58.745 | 22 | 125 | 2837 | 2961 |
| 60.149 | 20 | CAAGGGGTCAAAGAAGGTTG      | 59.563 | 20 | 236 | 66   | 301  |
| 60.003 | 20 | TTGGATGTAGCCCCATCATT      | 60.155 | 20 | 184 | 545  | 728  |
| 59.61  | 20 | AGCCACTGAACCAAATGACC      | 59.973 | 20 | 265 | 2110 | 2374 |
| 60.005 | 20 | GATGACGATGACGATGATGG      | 59.882 | 20 | 187 | 2049 | 2235 |
| 59.34  | 20 | GCGATCGTTCACACACAATC      | 60.128 | 20 | 106 | 394  | 499  |
| 59.953 | 20 | TCCGTCATCTATTAGCACCATC    | 59.07  | 22 | 137 | 106  | 242  |
| 59.598 | 20 | CACTACTAGGGTTTGGGAGGG     | 59.866 | 21 | 215 | 97   | 311  |
| 58.909 | 20 | CAACTGAGTTCCTACCCGA       | 60.103 | 20 | 257 | 201  | 457  |
| 59.953 | 20 | TCAATTCTTCATCGCTGCTG      | 60.096 | 20 | 280 | 1645 | 1924 |
| 60.258 | 20 | TACAAGTGCAAGAAGCGGTG      | 60.05  | 20 | 209 | 909  | 1117 |
| 60.69  | 20 | TGCTGGTACCTTCGGAACTC      | 60.255 | 20 | 188 | 68   | 255  |
| 60.02  | 20 | CAAGCGAAAATGATCGGATT      | 60.038 | 20 | 200 | 2127 | 2326 |
| 59.165 | 23 | AAAAGTTCACTAAAACCTGCCTTCT | 57.086 | 24 | 198 | 95   | 292  |
| 59.907 | 20 | TTGTGTGATCGAACCCAGTT      | 60.008 | 20 | 108 | 24   | 131  |
| 59.95  | 20 | AATCGCCATAGCAAGAGAGC      | 59.579 | 20 | 127 | 1031 | 1157 |
| 58.816 | 23 | CCACCGAGCTTCTACACGTT      | 60.312 | 20 | 188 | 6    | 193  |
| 57.467 | 22 | ATGTTGGCTCCGATTGAAAC      | 59.939 | 20 | 276 | 29   | 304  |
| 60.249 | 20 | ATATGTTGCCCAAGTGGGAG      | 59.813 | 20 | 214 | 149  | 362  |
| 59.189 | 23 | TTGGCCTGTCTGCTATCATT      | 59.722 | 21 | 192 | 23   | 214  |
| 60.039 | 20 | TTGAAGCCTTGTTCCCTTGCT     | 59.993 | 20 | 209 | 167  | 375  |
| 59.844 | 20 | TAAGGTGGTGACGATAGGGC      | 59.955 | 20 | 201 | 398  | 598  |
| 60.053 | 20 | GACAGCTGTGATGAAGGCAA      | 59.992 | 20 | 184 | 2712 | 2895 |
| 59.586 | 20 | AGAGGAGAGGAGGTTGGAGC      | 59.952 | 20 | 210 | 48   | 257  |
| 60.104 | 20 | GAAGATTGTGGGGCGAGTAA      | 60.074 | 20 | 225 | 1719 | 1943 |
| 59.934 | 20 | CTCATGGATCAGGAATCTGGA     | 60.019 | 21 | 262 | 442  | 703  |
| 60.11  | 20 | TTTGGTAAATACAACATAATTGGT  | 58.757 | 26 | 245 | 278  | 522  |
| 59.783 | 20 | ATTGCATTGCATGTGTGGAC      | 60.409 | 20 | 278 | 396  | 673  |
| 60.054 | 20 | AAGGAGGTGTTATGAAGGGATT    | 58.028 | 22 | 148 | 1416 | 1563 |
| 59.679 | 20 | CGCGACCACGAAGTACATAA      | 59.752 | 20 | 244 | 69   | 312  |
| 60.331 | 20 | TGAGCAAAAGTAATAAGAGCAAC   | 58.341 | 24 | 206 | 226  | 431  |
| 60.713 | 21 | TGACTCTGCGTTTGTGGAC       | 59.88  | 20 | 195 | 263  | 457  |
| 58.792 | 22 | AATCCCAAAATCTATGGGGC      | 59.984 | 20 | 183 | 20   | 202  |
| 58.874 | 20 | GCAGCCACTATCCTTTCACC      | 59.7   | 20 | 198 | 678  | 875  |
| 59.756 | 22 | CAATTTCAAGAACCCCAAA       | 59.772 | 20 | 240 | 5    | 244  |
| 59.455 | 22 | TCATTATCCGTCGATCGCT       | 60.574 | 20 | 181 | 2    | 182  |
| 59.875 | 20 | CCAAAATCCCAGAACGAAAA      | 59.91  | 20 | 194 | 115  | 308  |
| 57.719 | 22 | ATCCAATATGTGGGGCAAAA      | 60.016 | 20 | 263 | 2    | 264  |
| 59.872 | 20 | AGAAGACGCTCACACAGGCT      | 60.205 | 20 | 185 | 33   | 217  |
| 60.003 | 20 | TCCATTTTCTCACCCATA        | 60.126 | 20 | 219 | 334  | 552  |
| 59.435 | 21 | TGGTAGGTGGGTTTAGGTGG      | 59.705 | 20 | 130 | 20   | 149  |
| 59.483 | 22 | TGGTCAATTCACAATCCGAA      | 59.9   | 20 | 265 | 71   | 335  |
| 60.008 | 20 | TTTTGAATCTTTGTCCCAA       | 58.039 | 20 | 144 | 364  | 507  |
| 60.285 | 20 | TCACCTAAACCACTTTTGAAGAA   | 57.979 | 23 | 238 | 68   | 305  |
| 59.42  | 22 | CGTGGTTCGATCGTAATTGA      | 59.542 | 20 | 100 | 1    | 100  |
| 59.577 | 20 | GGTTCGAGTCTCAATGGGAA      | 60.05  | 20 | 277 | 793  | 1069 |
| 59.978 | 20 | TCAATTGTCACACGTGATTGAG    | 59.615 | 22 | 209 | 1028 | 1236 |
| 59.888 | 20 | TCTGGACACATCCTTGTATCA     | 59.485 | 23 | 209 | 1076 | 1284 |
| 58.079 | 23 | TCATCTTTTGGGAATGGTTTG     | 59.787 | 21 | 239 | 220  | 458  |
| 58.527 | 26 | ACCTCATGGGGAAATTTTAGC     | 59.324 | 21 | 100 | 1    | 100  |
| 60.166 | 20 | CTCTGTTCCACGCACACCT       | 59.881 | 19 | 224 | 19   | 242  |

|        |    |                          |        |    |     |      |      |
|--------|----|--------------------------|--------|----|-----|------|------|
| 60.495 | 20 | GGTGGAGCATGGGAAAAATA     | 59.762 | 20 | 134 | 967  | 1100 |
| 60.203 | 20 | CTTTCCTCAACCGAGCTCAC     | 59.989 | 20 | 252 | 16   | 267  |
| 59.966 | 20 | GAGAAAGCCACAAATCTTTCC    | 57.916 | 21 | 262 | 3612 | 3873 |
| 59.948 | 20 | AAATCAAAAGGCCACAATG      | 59.801 | 20 | 153 | 281  | 433  |
| 59.973 | 20 | TAGGGATCGCTCCAGAAAAA     | 59.778 | 20 | 146 | 2094 | 2239 |
| 58.221 | 25 | AAATGCGCAATTTTAAACCC     | 58.982 | 20 | 246 | 150  | 395  |
| 59.984 | 20 | CTTCCACTCCCACCAACCTA     | 59.959 | 20 | 245 | 257  | 501  |
| 58.045 | 24 | TCTCATTTACACCGCCTCAA     | 59.272 | 20 | 274 | 699  | 972  |
| 60.303 | 22 | AGTTTTGACATGAAAATTGAATGA | 57.739 | 24 | 244 | 480  | 723  |
| 60.076 | 26 | TTCTTCATTCTAAATGATTAATT  | 58.94  | 26 | 277 | 668  | 944  |
| 59.405 | 20 | GCAGTACTTGCCGAATCCAT     | 60.103 | 20 | 277 | 43   | 319  |
| 59.894 | 20 | GCCCAATTATTTTAGTCCCA     | 60.029 | 21 | 253 | 318  | 570  |
| 59.978 | 20 | CAGATCGACCGATCCACTTT     | 60.073 | 20 | 217 | 83   | 299  |
| 60.032 | 20 | AAAGTGGAAATTTGCTTCCCA    | 59.546 | 20 | 238 | 196  | 433  |
| 59.76  | 21 | GCACATGCAACCTCAGAGAA     | 59.992 | 20 | 236 | 124  | 359  |
| 59.857 | 23 | CCTGGGACACATAAGCCTCA     | 61.055 | 20 | 257 | 495  | 751  |
| 59.82  | 20 | TGAAATGAAATCTTGCCCGT     | 60.448 | 20 | 275 | 171  | 445  |
| 60.181 | 20 | ACATGTGATGTGATCCCCAA     | 59.611 | 20 | 116 | 1138 | 1253 |
| 60.008 | 20 | TCGCATCATCAACCTTCTGA     | 60.353 | 20 | 223 | 594  | 816  |
| 60.132 | 20 | GCTAGCTCGGGAGAGAGGAT     | 60.081 | 20 | 271 | 223  | 493  |
| 60.343 | 20 | GACTAGCACGTGACCGGATT     | 60.142 | 20 | 262 | 252  | 513  |
| 60.393 | 20 | CCAACCCAGAATTCGTCCTA     | 59.926 | 20 | 211 | 980  | 1190 |
| 59.918 | 19 | TGTAGTTGATGGACGTGATTGTT  | 59.415 | 23 | 113 | 4    | 116  |
| 59.926 | 20 | CACATCGACGACGCTACCTA     | 59.888 | 20 | 186 | 228  | 413  |
| 59.834 | 20 | AAGGCCATTTTCATCTTCAGC    | 59.273 | 20 | 200 | 813  | 1012 |
| 58.909 | 24 | GGAAATAAGGAGGTGTTATGAAG  | 59.323 | 24 | 186 | 1222 | 1407 |
| 60.164 | 20 | TGGACAAAATGAGTGGAGAGAA   | 59.711 | 22 | 203 | 1055 | 1257 |
| 59.993 | 20 | AGCTCGAGGCTCAAACGTA      | 60.154 | 20 | 271 | 870  | 1140 |
| 60.237 | 20 | ATGGGTGTGGGTGTTAGTGG     | 60.545 | 20 | 127 | 271  | 397  |
| 60.497 | 20 | TTGTGCGGGTCATTGCTACA     | 60.111 | 20 | 184 | 827  | 1010 |
| 59.903 | 20 | TAATGGTGATGCCAGGGTTT     | 60.192 | 20 | 158 | 1220 | 1377 |
| 60.173 | 20 | GGGAATGAGGGATGGAATTT     | 59.959 | 20 | 161 | 2290 | 2450 |
| 60.201 | 21 | CCCGACTCGAGATTACCAA      | 60.066 | 20 | 152 | 100  | 251  |
| 60.096 | 20 | GTTGGTTGATGAGGTGGCTT     | 59.973 | 20 | 218 | 611  | 828  |
| 59.282 | 20 | GGAGACGACCTTGCTCACTC     | 59.993 | 20 | 197 | 132  | 328  |
| 60.025 | 20 | CCATCTCCAATTCGTCACCT     | 59.927 | 20 | 186 | 328  | 513  |
| 59.767 | 20 | ATGGACAGGTGGCGTTAATC     | 59.82  | 20 | 254 | 592  | 845  |
| 59.2   | 20 | CGTATACCCTCAAACATCCGA    | 59.831 | 21 | 176 | 790  | 965  |
| 60.073 | 20 | TGCATGGTTTTGAGTTTTGTGA   | 60.142 | 21 | 161 | 16   | 176  |
| 60.119 | 20 | ACGGTACCACCCCAATACAA     | 59.971 | 20 | 112 | 2273 | 2384 |
| 59.801 | 20 | CCCCATCAATCATGAAAAC      | 59.991 | 20 | 219 | 535  | 753  |
| 59.806 | 20 | CTCCTCTCCTATTCGCTCCC     | 60.306 | 20 | 261 | 150  | 410  |
| 59.641 | 22 | AATCACAGCATTCAAAGGGC     | 60.081 | 20 | 184 | 18   | 201  |
| 59.572 | 20 | TTCTCCATTTGTCTCCCTGC     | 60.195 | 20 | 193 | 2251 | 2443 |
| 60.149 | 20 | GAACCACCACACCAAATTCC     | 60.073 | 20 | 221 | 397  | 617  |
| 60.234 | 20 | CCATGCCCCAGTAATCATCT     | 59.773 | 20 | 219 | 118  | 336  |
| 59.849 | 21 | TAAATAAGTTGCCAACCGCC     | 59.964 | 20 | 116 | 5    | 120  |
| 60.049 | 20 | GCCAAGGATGAGAATGAGGA     | 60.158 | 20 | 202 | 60   | 261  |
| 59.532 | 20 | CACAAACCATCATTGCAACC     | 59.823 | 20 | 270 | 971  | 1240 |
| 59.415 | 24 | TGGAAGTGAAGTGAATGCTC     | 59.992 | 20 | 202 | 990  | 1191 |
| 60.223 | 20 | CAGAGTGATGCGTGAAGGAA     | 59.984 | 20 | 195 | 334  | 528  |
| 59.805 | 20 | GGTTACCGAACCGAACTGAA     | 59.971 | 20 | 264 | 154  | 417  |
| 59.048 | 23 | AGTGGGCTTTGGCACAAGTA     | 60.689 | 20 | 114 | 1    | 114  |
| 59.072 | 20 | TTACATCTGAAAATTTGACGCA   | 58.355 | 22 | 260 | 157  | 416  |
| 59.967 | 20 | GGGGTTATCACTGGATCACG     | 60.195 | 20 | 187 | 509  | 695  |
| 60.991 | 20 | AACCATCTTCGGAGAGAGCA     | 59.95  | 20 | 115 | 249  | 363  |
| 59.953 | 20 | TCCATGACAGGAACCAAACA     | 59.935 | 20 | 212 | 1297 | 1508 |
| 59.95  | 20 | AAGCTCATCCATTGGTTTGG     | 59.933 | 20 | 258 | 233  | 490  |

|        |    |                          |        |    |     |      |      |
|--------|----|--------------------------|--------|----|-----|------|------|
| 59.189 | 22 | TGGCAGAAAGATTTTAGATATAGA | 59.31  | 26 | 133 | 214  | 346  |
| 60.173 | 21 | TTTCGAAGATCAACGAACGA     | 59.395 | 20 | 123 | 223  | 345  |
| 60.439 | 20 | AGACCGAAACCGTTCAAAAA     | 59.587 | 20 | 258 | 633  | 890  |
| 59.792 | 20 | CCACCAAGTCAGCACCTTTT     | 60.149 | 20 | 243 | 1073 | 1315 |
| 60.159 | 20 | CGGCAAGGAGAAAGAGGATA     | 59.406 | 20 | 271 | 82   | 352  |
| 60.038 | 20 | AACATGTAACCTGTAATCTGTAAA | 57.047 | 27 | 226 | 182  | 407  |
| 60.02  | 20 | CGGAAAACGACACCAGAAAT     | 59.971 | 20 | 164 | 49   | 212  |
| 59.96  | 20 | CGGCCTAAATATCCCTTTCC     | 59.767 | 20 | 262 | 763  | 1024 |
| 59.574 | 20 | ACGGGAGCATGAAATGAAAC     | 59.939 | 20 | 204 | 554  | 757  |
| 59.985 | 22 | CCAATTTTCGATTTCTCCAC     | 59.363 | 20 | 272 | 0    | 271  |
| 59.575 | 20 | TCAGCGTGAAATGTGGGTAA     | 60.111 | 20 | 224 | 1230 | 1453 |
| 59.931 | 20 | GCGGCCACGTATTCTCTTTA     | 60.23  | 20 | 176 | 579  | 754  |
| 59.971 | 20 | CATACATTCACACGGGGGAG     | 61.176 | 20 | 136 | 2377 | 2512 |
| 59.84  | 20 | TCATCGACCCCATCTCTTTC     | 60.011 | 20 | 137 | 389  | 525  |
| 59.975 | 20 | GACTTGAGCACCAAGAATCCA    | 60.248 | 21 | 143 | 82   | 224  |
| 59.7   | 20 | GATTATGCAAGCCCAGCCTA     | 60.196 | 20 | 159 | 414  | 572  |
| 57.381 | 21 | TCAAAATAGGCATAACCGATCC   | 60.168 | 22 | 150 | 46   | 195  |
| 60.009 | 20 | ATGCAATCTAGTTGACGGGC     | 60.103 | 20 | 205 | 17   | 221  |
| 60.038 | 20 | TGAATCGATTAGGCTTATCTTGA  | 58.055 | 23 | 146 | 87   | 232  |
| 57.658 | 22 | GAAGTTGGGGGTGGAATACA     | 59.647 | 20 | 271 | 393  | 663  |
| 59.955 | 20 | CGATGACCTTGAGTTTCGTT     | 60.111 | 20 | 227 | 3393 | 3619 |
| 60.096 | 20 | GATGTGATACCCGGAGTCGT     | 59.81  | 20 | 167 | 31   | 197  |
| 58.86  | 26 | AGGACACGTTGGACCTGAAG     | 60.151 | 20 | 105 | 24   | 128  |
| 59.88  | 20 | TGGTTGTATGTCATTTAGCGG    | 58.57  | 21 | 247 | 303  | 549  |
| 59.829 | 20 | GGCTTTCACATTAAGCCCTG     | 59.708 | 20 | 113 | 6530 | 6642 |
| 60.903 | 20 | CAATGGTGGTATGGTGTGGG     | 61.898 | 20 | 105 | 18   | 122  |
| 60.02  | 22 | ACCAAATAGGGTAAGCCGTG     | 58.973 | 20 | 241 | 1178 | 1418 |
| 59.823 | 20 | ATCGGGCATTTCGACTACAG     | 60.096 | 20 | 160 | 830  | 989  |
| 59.536 | 20 | GACAGCCCAAGATTGAGAGG     | 59.803 | 20 | 274 | 9    | 282  |
| 60.068 | 21 | TCCAAGGCAAATTGAACTCC     | 60.051 | 20 | 258 | 229  | 486  |
| 60.24  | 20 | AGCGACAAAGTGTGATGACG     | 59.905 | 20 | 169 | 120  | 288  |
| 59.569 | 20 | GAATTGGTGGAAAGATTTGAGAA  | 59.472 | 23 | 244 | 15   | 258  |
| 59.487 | 22 | CTATTTTGTGGCGCTGGAAT     | 60.096 | 20 | 256 | 22   | 277  |
| 59.982 | 20 | CCCACCAACCCAGATCATAG     | 60.187 | 20 | 279 | 2448 | 2726 |
| 59.971 | 20 | TGTGGTGTGAGGGCTGTAAA     | 60.152 | 20 | 220 | 2000 | 2219 |
| 59.248 | 20 | CAGCACGCGCACTACATAAT     | 59.925 | 20 | 273 | 145  | 417  |
| 59.79  | 20 | CCACACCTCTTGGACCAAAT     | 59.82  | 20 | 279 | 790  | 1068 |
| 59.835 | 22 | TCTCCCTTCTCTCTCGTG       | 59.525 | 20 | 169 | 442  | 610  |
| 59.317 | 20 | AACTCAGTTGGGTTGTTGCC     | 60.012 | 20 | 265 | 1110 | 1374 |
| 60.123 | 20 | CCCACCAGTAGTCTGCCACT     | 60.174 | 20 | 230 | 3447 | 3676 |
| 60.545 | 20 | TGCCATGATCATTGATTGGT     | 59.738 | 20 | 270 | 873  | 1142 |
| 59.992 | 20 | CCCAACCAACAAGAACCCTA     | 59.824 | 20 | 117 | 455  | 571  |
| 59.775 | 20 | CCCAGTTGCTCACAATGACA     | 60.722 | 20 | 200 | 374  | 573  |
| 58.792 | 22 | AATCCCAAAATCTATGGGGC     | 59.984 | 20 | 199 | 20   | 218  |
| 59.993 | 20 | TGGTAGGGTGGTAAACCAGG     | 59.705 | 20 | 102 | 210  | 311  |
| 59.942 | 20 | CAATTCTCTCAACCAACCCC     | 59.381 | 20 | 191 | 30   | 220  |
| 59.226 | 20 | CATCATGTAGTAGCGGGCTG     | 59.322 | 20 | 146 | 42   | 187  |
| 60.469 | 20 | TCGTCGTCGTCAAACAAGAC     | 59.88  | 20 | 184 | 30   | 213  |
| 60.016 | 20 | TGGGTTTGGTGTGAATCCT      | 60.21  | 20 | 275 | 104  | 378  |
| 59.187 | 24 | TGGACCGTTGAAATACAGAAAA   | 59.492 | 22 | 152 | 24   | 175  |
| 59.31  | 20 | CGAAGTCGAAGCCTAACTCG     | 60.147 | 20 | 271 | 28   | 298  |
| 59.823 | 20 | ATTGCCACAACCTCCACCTTC    | 59.973 | 20 | 145 | 1832 | 1976 |
| 59.716 | 20 | AGCCCACCTGATATGCTTCA     | 60.624 | 20 | 182 | 24   | 205  |
| 59.556 | 20 | ATTCGAACCAAAATGCGATG     | 60.837 | 20 | 206 | 493  | 698  |
| 59.964 | 20 | TGACAAAATATGGAACCACAAGA  | 59.37  | 23 | 156 | 23   | 178  |
| 60.134 | 20 | AGAGCAGCAACAGTGCAGAA     | 59.929 | 20 | 164 | 204  | 367  |
| 60.014 | 20 | GCGCGCAATCACTCTCTT       | 60.257 | 18 | 117 | 865  | 981  |
| 59.71  | 21 | ATGCGGTTCAAAGGTAGGAA     | 59.569 | 20 | 214 | 36   | 249  |

|        |    |                         |        |    |     |      |      |
|--------|----|-------------------------|--------|----|-----|------|------|
| 59.627 | 20 | CATCCTCCTTTTCCCAATCA    | 59.864 | 20 | 275 | 24   | 298  |
| 60.123 | 21 | GGTTGACACACTCGAACCAA    | 59.571 | 20 | 225 | 5    | 229  |
| 59.445 | 20 | GGTCCGAATGCTGGTATGTT    | 59.82  | 20 | 159 | 3143 | 3301 |
| 60.122 | 23 | GGGGATTTGATTGATGATCG    | 60.096 | 20 | 280 | 97   | 376  |
| 58.074 | 21 | TTAGACTGCGGATCACCACA    | 60.263 | 20 | 242 | 256  | 497  |
| 60.022 | 20 | TTTGTCCCCACAAATGTCCT    | 60.21  | 20 | 244 | 2376 | 2619 |
| 59.904 | 20 | GAAGCAGAGCATTGATGGGT    | 60.226 | 20 | 267 | 169  | 435  |
| 60.169 | 20 | GACGCCACATCATTCTCTCA    | 59.794 | 20 | 280 | 4100 | 4379 |
| 59.933 | 20 | TGACATGTCCTTTCACTCCAA   | 59.124 | 21 | 226 | 3126 | 3351 |
| 59.319 | 23 | ATTTAGGCCACACAGGATCG    | 59.955 | 20 | 100 | 59   | 158  |
| 59.997 | 20 | TCATTAAACCCGAATCCGTC    | 59.762 | 20 | 186 | 504  | 689  |
| 59.995 | 20 | GGCACAGCTCCACTTTCTTC    | 59.997 | 20 | 198 | 117  | 314  |
| 59.67  | 21 | CAGCCTTATCTCTGGCCGT     | 60.368 | 19 | 278 | 321  | 598  |
| 60.475 | 20 | CAGAAAGTGCTTGTTCCAGCG   | 59.781 | 20 | 163 | 1163 | 1325 |
| 59.745 | 20 | CTCTGCGACGTAATCCCAT     | 60.096 | 20 | 266 | 90   | 355  |
| 59.986 | 20 | GACCAACTCTACTGGTGAAGGC  | 60.175 | 22 | 197 | 439  | 635  |
| 59.997 | 20 | ACGCGATTATGGAAAAATGC    | 59.935 | 20 | 236 | 269  | 504  |
| 57.083 | 20 | CGTGTGTTTTGCTTGTTTCA    | 59.801 | 21 | 130 | 20   | 149  |
| 60.089 | 20 | GGGTTCAATGTACGCAACCT    | 59.859 | 20 | 272 | 236  | 507  |
| 57.552 | 24 | AGGAAGGATTAGGCGAAGGA    | 60.166 | 20 | 224 | 13   | 236  |
| 59.912 | 20 | TGGCATTTCAGCTTTTGTAGC   | 60.391 | 21 | 145 | 96   | 240  |
| 60.038 | 20 | TTGGTTCACACAACCACTCC    | 59.415 | 20 | 177 | 72   | 248  |
| 59.284 | 20 | CGCTTTCGCTCTTTATTTG     | 59.979 | 20 | 148 | 3    | 150  |
| 59.955 | 20 | GGCTCACTCTCTGGCTCATC    | 60.104 | 20 | 242 | 1451 | 1692 |
| 60.051 | 20 | CTTGGAGCTGTTTTCTTGGC    | 59.993 | 20 | 158 | 2641 | 2798 |
| 59.845 | 20 | TGAAATACAAAAGGGTGCG     | 58.674 | 20 | 253 | 687  | 939  |
| 60.587 | 20 | CGGAGCAACCACCGTATAAT    | 59.845 | 20 | 279 | 67   | 345  |
| 60.209 | 20 | GGGATTTGCTGCTGTTGTTT    | 60.646 | 20 | 233 | 3    | 235  |
| 60.257 | 20 | CACATGTCATGAATCGGTGT    | 57.712 | 20 | 227 | 44   | 270  |
| 59.321 | 23 | TGCGTCACACGTAATTCAGA    | 58.863 | 20 | 278 | 776  | 1053 |
| 59.604 | 20 | GGGCCGAGATTTGTTAGAGG    | 60.949 | 20 | 279 | 926  | 1204 |
| 60.074 | 20 | CGGTACGGTAAGTGCGGTAT    | 59.904 | 20 | 134 | 595  | 728  |
| 58.241 | 20 | TCACACCATATTTTTCCCCC    | 59.481 | 20 | 219 | 755  | 973  |
| 60.08  | 20 | TGCGTGTCTAAATGTGCCTC    | 59.871 | 20 | 142 | 379  | 520  |
| 59.569 | 20 | AGCGTTGGATTTTTCAATGG    | 59.938 | 20 | 159 | 21   | 179  |
| 59.948 | 21 | TGATCTTTTCGCCATTAGAGAG  | 58.605 | 22 | 107 | 209  | 315  |
| 59.829 | 20 | TCCAGTCTAAAAGTCCATGC    | 59.184 | 21 | 204 | 172  | 375  |
| 60.365 | 20 | TCTCTCCCGACACACACGTA    | 60.309 | 20 | 116 | 100  | 215  |
| 60.11  | 20 | TCAAGTCGCTACTCACCATCA   | 59.455 | 21 | 115 | 887  | 1001 |
| 59.945 | 20 | ACAATGGAACGAGATCCAGG    | 59.927 | 20 | 198 | 323  | 520  |
| 60.073 | 20 | TTTTTCTTGCTTTTGCTGTGAA  | 60.034 | 22 | 230 | 27   | 256  |
| 59.069 | 21 | AAACAGGGGTAGCTGGGAAT    | 59.827 | 20 | 187 | 15   | 201  |
| 57.862 | 23 | CAAGCTCAGTCTCAATGGGG    | 60.791 | 20 | 132 | 233  | 364  |
| 60.184 | 20 | CTCTAGGGTTCAATTGGGCA    | 60.066 | 20 | 101 | 3000 | 3100 |
| 59.934 | 20 | TTGCGATAGTTAACAGGCAGAA  | 59.911 | 22 | 162 | 359  | 520  |
| 59.978 | 20 | ACGCTGCCTCAAAAGCTAAA    | 60.152 | 20 | 232 | 689  | 920  |
| 57.978 | 23 | TTTTGGTGTCTAATCCATTTGTG | 58.909 | 23 | 135 | 46   | 180  |
| 58.886 | 20 | CCCAAGGTACATTGCGTCAT    | 60.776 | 20 | 233 | 575  | 807  |
| 58.374 | 21 | TGAGAAACCGTAACCCAAGC    | 60.11  | 20 | 239 | 10   | 248  |
| 59.892 | 21 | GCTGCAGCAATAAAATCCC     | 59.688 | 20 | 229 | 2705 | 2933 |
| 60.067 | 20 | TCGCTCTGAACCAAAAACCT    | 59.853 | 20 | 189 | 279  | 467  |
| 59.895 | 20 | TGCACTCATCAGAGTTATCGG   | 58.888 | 21 | 161 | 3162 | 3322 |
| 59.992 | 20 | ATTCAAACACGAGTCGCAA     | 59.322 | 20 | 244 | 313  | 556  |
| 59.903 | 20 | CAGGAGGGTTCACACAACCT    | 60.002 | 20 | 126 | 229  | 354  |
| 60.55  | 20 | TTGGGGCTTGTAATAGCTGG    | 60.089 | 20 | 270 | 7154 | 7423 |
| 60.246 | 20 | CATCTTCAACCCGTCACCTT    | 59.966 | 20 | 175 | 318  | 492  |
| 59.699 | 20 | ATTGATATGGCACAGCAGCA    | 60.251 | 20 | 279 | 224  | 502  |
| 59.955 | 20 | ATGCCAACACAAAACACCA     | 59.864 | 20 | 213 | 189  | 401  |

|        |    |                           |        |    |     |      |      |
|--------|----|---------------------------|--------|----|-----|------|------|
| 59.562 | 21 | TTGATTACGAATCCTCGCCT      | 59.668 | 20 | 270 | 83   | 352  |
| 59.943 | 20 | TTAGTGTGGCCGGTTTAATTG     | 59.876 | 21 | 172 | 91   | 262  |
| 60.096 | 20 | CCGATATAAGCGCCATCCTA      | 60.04  | 20 | 190 | 292  | 481  |
| 59.717 | 20 | CCACGTACATCTTGTGTCCA      | 57.946 | 20 | 193 | 1050 | 1242 |
| 60.112 | 20 | GCCAGCTTCTCTCAATCAG       | 60.096 | 20 | 242 | 2204 | 2445 |
| 59.997 | 20 | TGCAATTTGTTTCTCTCCCA      | 59.247 | 20 | 195 | 1739 | 1933 |
| 60.032 | 20 | TGTGGATATGTAGATAATTTTTGG, | 57.748 | 26 | 240 | 60   | 299  |
| 58.973 | 20 | TGGTAAAGGGACGGCATTAG      | 59.953 | 20 | 129 | 770  | 898  |
| 59.665 | 24 | TCCTTCTTCACTTTTGCTCACA    | 60.03  | 22 | 148 | 10   | 157  |
| 60.136 | 20 | ATCCTTCAACTGCAACAGCC      | 60.263 | 20 | 195 | 1498 | 1692 |
| 60.051 | 20 | GGCCCGAGCTAAAAACATTG      | 61.816 | 20 | 267 | 38   | 304  |
| 58.93  | 20 | CCTCCCAACTTGTGTGTGTG      | 60.039 | 20 | 196 | 0    | 195  |
| 60.328 | 20 | CCATGTCTCTGGACTGGGAT      | 59.92  | 20 | 247 | 3446 | 3692 |
| 59.677 | 21 | TCTTTTATGTGCACAATGCG      | 58.354 | 20 | 170 | 359  | 528  |
| 57.223 | 20 | CCCCAGAATGCAGTCAACTA      | 58.722 | 20 | 128 | 77   | 204  |
| 58.743 | 25 | TCCTCCTTCCACTTCCAC        | 59.228 | 20 | 189 | 62   | 250  |
| 60.31  | 20 | CCAGTAGATGCCCTCCTAA       | 59.146 | 20 | 278 | 450  | 727  |
| 60.021 | 20 | TCTCGCAGATCAACGTCAAC      | 59.992 | 20 | 276 | 6    | 281  |
| 59.797 | 20 | TTAACTTCCTCCAGCTCCGA      | 59.948 | 20 | 128 | 103  | 230  |
| 60.762 | 20 | TTCGCATAATTTTTGTGAGAGG    | 59.253 | 22 | 242 | 56   | 297  |
| 59.923 | 20 | TCGTTGCTCTCCATATCCC       | 60.036 | 20 | 131 | 324  | 454  |
| 59.939 | 20 | GATTTGGAAGTCCGGTGAGA      | 60.05  | 20 | 204 | 1443 | 1646 |
| 60.103 | 20 | TGTGACTGCTCTGTTGAGG       | 60.022 | 20 | 106 | 15   | 120  |
| 60.008 | 20 | CGATTTTGGGTTTGTGCT        | 59.975 | 20 | 265 | 539  | 803  |
| 60.218 | 20 | CCCTCTTTTTGGCCTCTCT       | 59.95  | 20 | 122 | 1525 | 1646 |
| 60.04  | 21 | CTGTATGGGCCTTCGTCCTA      | 60.088 | 20 | 269 | 2810 | 3078 |
| 60.096 | 20 | CATGCGCCTAGATAACGACA      | 59.856 | 20 | 228 | 700  | 927  |
| 60.039 | 20 | CGCAGATATGCGTTTCTCAT      | 58.897 | 20 | 166 | 20   | 185  |
| 59.505 | 20 | ATATACCGGTGCAAACGAGC      | 59.988 | 20 | 210 | 1162 | 1371 |
| 60.143 | 20 | TGGTTGTGGTCAATGGAGAA      | 59.935 | 20 | 196 | 432  | 627  |
| 59.679 | 20 | TCAGCAGAGCAGCCATATCA      | 60.675 | 20 | 108 | 155  | 262  |
| 59.312 | 20 | CCTCAAATTGTTGAAAAACCG     | 59.478 | 21 | 224 | 413  | 636  |
| 59.83  | 20 | CCGTCCATCTCAAAAATGAA      | 58.546 | 20 | 214 | 898  | 1111 |
| 59.775 | 25 | CAGCACCAGATTTGCACCTA      | 59.864 | 20 | 227 | 278  | 504  |
| 58.652 | 22 | TGAATTTAGTCATGGATTCTCTT   | 59.136 | 24 | 166 | 24   | 189  |
| 59.939 | 20 | GCATACACACTCCGCATTTG      | 60.142 | 20 | 239 | 5    | 243  |
| 59.878 | 20 | GGCATTCAAATTTCAAATCA      | 59.765 | 21 | 235 | 307  | 541  |
| 61.278 | 20 | GTGGACGCTCCAGATTGTTT      | 60.119 | 20 | 169 | 1    | 169  |
| 59.694 | 20 | CGAATATTCAGACGAAGCCC      | 59.668 | 20 | 274 | 92   | 365  |
| 59.789 | 20 | AACGGGATTTACTGTTTTGACA    | 58.539 | 22 | 262 | 177  | 438  |
| 59.966 | 20 | AGCCCGTACCCGGTCTATAA      | 60.702 | 20 | 205 | 76   | 280  |
| 59.563 | 20 | ATTTGGTGCATTGATTCGC       | 60.847 | 20 | 173 | 658  | 830  |
| 60.008 | 20 | ATCCCGACAAAATTTTCAACA     | 60.17  | 20 | 106 | 61   | 166  |
| 60.022 | 20 | GACAAATCCAAGTGGGAGGA      | 59.903 | 20 | 142 | 1888 | 2029 |
| 59.934 | 20 | CCATTTTCATTTGCGGCTAA      | 59.901 | 20 | 238 | 353  | 590  |
| 59.375 | 20 | GGGAAGAGGGGGTATGAGAG      | 59.89  | 20 | 244 | 143  | 386  |
| 59.957 | 20 | CAGTCGGGGGTAACACTCTT      | 59.062 | 20 | 108 | 2155 | 2262 |
| 60.118 | 20 | CCCTAGCTTTGCCCTTTTT       | 60.332 | 20 | 270 | 595  | 864  |
| 59.939 | 20 | TAAACCCTAAAAACGCGTGC      | 60.13  | 20 | 243 | 19   | 261  |
| 59.697 | 20 | ACAAGCCCTAGCTTTTTCCC      | 59.848 | 20 | 102 | 103  | 204  |
| 59.562 | 20 | TTTCTGTTTTTGACAGCCGA      | 59.439 | 20 | 182 | 5    | 186  |
| 59.647 | 20 | AGCACTCTGCGAGTCTCCTT      | 59.355 | 20 | 278 | 69   | 346  |
| 59.691 | 20 | TTCGAGTGACACAAGGCAAG      | 60.025 | 20 | 262 | 9    | 270  |
| 60.003 | 20 | AATCGCTGTATCTCCATCGC      | 60.207 | 20 | 180 | 1485 | 1664 |
| 59.551 | 20 | AAGGTGTGCAATCTCCGTA       | 60.657 | 20 | 115 | 349  | 463  |
| 59.69  | 21 | CTTTTTGCCTTTTGCTGGAC      | 59.861 | 20 | 268 | 344  | 611  |
| 60.066 | 20 | GTGCTGATGGTTTTGCATTG      | 60.119 | 20 | 156 | 72   | 227  |
| 60.049 | 20 | CCCGACAGTGAATCGTACCT      | 59.989 | 20 | 137 | 30   | 166  |



|        |    |                          |        |    |     |      |      |
|--------|----|--------------------------|--------|----|-----|------|------|
| 59.933 | 20 | GCCGAAAACAAAGTCCAGTT     | 59.218 | 20 | 274 | 28   | 301  |
| 60.125 | 20 | CCTTATTTCTATTCCCGCC      | 59.767 | 20 | 136 | 598  | 733  |
| 59.184 | 21 | TTCATATACACGTGCGTCTTTT   | 57.425 | 22 | 158 | 586  | 743  |
| 59.79  | 20 | GGCTGTGCTTTCTGGTTCAT     | 60.263 | 20 | 266 | 53   | 318  |
| 60     | 20 | GTTAGGCCTTGAATCGTGA      | 60.074 | 20 | 280 | 1428 | 1707 |
| 59.713 | 20 | GCTTGTTACCGGTGGAGAAA     | 60.11  | 20 | 189 | 34   | 222  |
| 60.022 | 20 | CCCCAACACACTCAACA        | 58.839 | 18 | 108 | 988  | 1095 |
| 58.672 | 20 | GGACGAGATTTAACCCCA       | 59.79  | 20 | 199 | 31   | 229  |
| 60.112 | 20 | CGCAGGAGGACAAAAGAAAG     | 59.986 | 20 | 231 | 2496 | 2726 |
| 59.758 | 22 | TCAAAGGAGGATTGTGTTAAGGA  | 59.987 | 23 | 132 | 60   | 191  |
| 59.874 | 20 | GACAGCCTTTTTGTTTTGCC     | 59.73  | 20 | 194 | 22   | 215  |
| 60.665 | 20 | TGTTTGAGATTCAGTGGGGA     | 59.059 | 20 | 248 | 2666 | 2913 |
| 60.209 | 26 | AATACGGCTGCGTAAACCAC     | 60.025 | 20 | 273 | 12   | 284  |
| 59.983 | 20 | CCCACGTAGCAATTGACAAA     | 59.585 | 20 | 259 | 688  | 946  |
| 60.074 | 20 | GGGTTGACATGGCTTCGTAT     | 59.82  | 20 | 155 | 151  | 305  |
| 59.032 | 26 | ATGCTTTCCCTCTCCATCAA     | 59.629 | 20 | 112 | 80   | 191  |
| 60.015 | 20 | ATATTCGAGTCATCCGCAGC     | 60.207 | 20 | 263 | 2703 | 2965 |
| 60.144 | 20 | GTAACACCAACCACACAGCG     | 60.072 | 20 | 192 | 169  | 360  |
| 59.844 | 20 | GAAACACGAACGGATTCTTGA    | 60.103 | 21 | 209 | 91   | 299  |
| 60.006 | 20 | ATCATAGTTGACGCCCTTCG     | 60.096 | 20 | 171 | 94   | 264  |
| 59.027 | 20 | TCAAAACTCACCGGAATCCT     | 59.526 | 20 | 259 | 1455 | 1713 |
| 59.933 | 20 | GATGCGATCACTGCCCTATT     | 60.066 | 20 | 207 | 667  | 873  |
| 57.575 | 24 | CATGTGTTGCTTAGGTGGCA     | 60.72  | 20 | 246 | 1745 | 1990 |
| 59.992 | 20 | GTCAACTTGGGCAGTGAAT      | 59.973 | 20 | 132 | 3056 | 3187 |
| 59.831 | 20 | AGCGAATTTCTCTTGACGTG     | 58.104 | 20 | 242 | 1145 | 1386 |
| 59.982 | 20 | CCAGAAGGATTCTTCGGCTA     | 59.406 | 20 | 269 | 136  | 404  |
| 60.011 | 20 | CCGGTCCTGAGTTTGTGTTT     | 60.005 | 20 | 272 | 597  | 868  |
| 60.142 | 20 | CGCGTAGAGTTACCAAACCC     | 59.632 | 20 | 127 | 98   | 224  |
| 60.046 | 20 | GATTTTGCCTTGCATGTTGA     | 59.67  | 20 | 230 | 1919 | 2148 |
| 60.125 | 20 | ACACGAGTGTGGAAAGGGAG     | 60.151 | 20 | 221 | 70   | 290  |
| 59.673 | 20 | ATGGGTATGGATCTATGGCG     | 59.628 | 20 | 274 | 275  | 548  |
| 58.388 | 25 | CGGGATTTGGTCTTTTCCTT     | 60.291 | 20 | 229 | 765  | 993  |
| 60.453 | 20 | CTTCTCCACGTCATTTGGCT     | 60.255 | 20 | 251 | 136  | 386  |
| 60.058 | 20 | ATGCCTCCACATCCTCAAAC     | 59.934 | 20 | 256 | 312  | 567  |
| 58.627 | 20 | TTTTGAAGTGTTCGGGGAA      | 60.452 | 20 | 274 | 1281 | 1554 |
| 58.852 | 22 | GAGGCCTTGAGGCAGACTTA     | 59.574 | 20 | 279 | 845  | 1123 |
| 59.955 | 20 | GGCTGGTATCACCATAACGC     | 60.361 | 20 | 119 | 90   | 208  |
| 60.109 | 25 | AGGCTGTGAAAGCTCCATCT     | 59.043 | 20 | 147 | 41   | 187  |
| 59.844 | 20 | TGTTATATGGCTGGGGCTAAA    | 59.464 | 21 | 160 | 177  | 336  |
| 59.945 | 20 | TGCAACACCAAGTAACCATCA    | 60.019 | 21 | 148 | 210  | 357  |
| 59.673 | 20 | TAGGCACAAGTTCGAAACCC     | 60.11  | 20 | 268 | 23   | 290  |
| 60.262 | 20 | ATTTCAATTCATGGGTTTCG     | 57.399 | 20 | 159 | 34   | 192  |
| 59.925 | 20 | CACGAGTGAGAAAGGGAGAGA    | 59.583 | 21 | 181 | 84   | 264  |
| 59.971 | 20 | GGTTCGGTTTTTCGGTTTTTC    | 60.683 | 20 | 203 | 179  | 381  |
| 59.505 | 20 | ATGCAGCAGAGCCAATTTTT     | 59.851 | 20 | 206 | 4    | 209  |
| 57.4   | 22 | AATTTCCCTGCTTTCCAGTTT    | 59.123 | 21 | 276 | 449  | 724  |
| 60.203 | 20 | TGCAGGTTGAATCAGATCA      | 60.201 | 20 | 115 | 74   | 188  |
| 59.834 | 20 | TTTGGGTTTCTGGGTGTGTT     | 60.246 | 20 | 267 | 796  | 1062 |
| 60.483 | 20 | TGCTGAATCTTAACCGTCCC     | 60.074 | 20 | 133 | 761  | 893  |
| 59.467 | 20 | CGTTTTGCTTTAGGTTACAAGGA  | 59.722 | 23 | 261 | 222  | 482  |
| 60.301 | 20 | TCAACCACCAACATTGTTTCTC   | 59.875 | 22 | 151 | 233  | 383  |
| 59.982 | 20 | TTTTCCCTCTTCTGGGATCA     | 59.6   | 20 | 253 | 407  | 659  |
| 59.663 | 21 | GTTGAGGAAGAAGAGCGGTG     | 59.989 | 20 | 176 | 142  | 317  |
| 60.894 | 20 | CATCATCCTCCTCTTCTCGG     | 59.755 | 20 | 221 | 321  | 541  |
| 59.764 | 20 | TATTCCTCAGACCACTCGC      | 60.218 | 20 | 280 | 819  | 1098 |
| 60.082 | 23 | AGCTGGTTACCTTCGAGCAA     | 60.015 | 20 | 196 | 26   | 221  |
| 59.492 | 22 | TCTTGTTTCAGGTTATCGTCTAAA | 57.253 | 24 | 218 | 43   | 260  |
| 60.088 | 20 | AATTTTTTCGCTAAAGGGGGA    | 59.909 | 20 | 203 | 578  | 780  |

|        |    |                           |        |    |     |      |      |
|--------|----|---------------------------|--------|----|-----|------|------|
| 59.518 | 20 | CCAGGAAGGCTCTTACAAG       | 59.982 | 20 | 171 | 3573 | 3743 |
| 59.933 | 20 | TCTTGGGTTGTCTTGATCCC      | 59.903 | 20 | 188 | 592  | 779  |
| 59.561 | 22 | CAGCTTGCATGTAAGGTCCA      | 59.864 | 20 | 195 | 470  | 664  |
| 59.711 | 20 | GAAAACCCAAAACACATGCC      | 60.214 | 20 | 244 | 3    | 246  |
| 60.073 | 20 | GATGATGATGGCTTATGGGG      | 60.118 | 20 | 143 | 88   | 230  |
| 59.175 | 22 | TCAAGTCAACATAAACATAAAAA(  | 58.978 | 26 | 136 | 93   | 228  |
| 57.552 | 24 | GTTTTGGCTCCGTATGCTTG      | 60.637 | 20 | 144 | 18   | 161  |
| 60.067 | 20 | TCGTGATTCGCAACTCTGAT      | 59.399 | 20 | 275 | 71   | 345  |
| 59.956 | 20 | GTAATGTCAAATGCGCAACG      | 60.14  | 20 | 168 | 240  | 407  |
| 60.214 | 20 | ATGGGTTAGCGTGTGATCGT      | 60.406 | 20 | 135 | 327  | 461  |
| 58.593 | 21 | TTCAAAAATCAAAAGGTCGAA     | 57.419 | 21 | 272 | 3    | 274  |
| 60.068 | 21 | GGGCCGAGATTTGTTAGAGG      | 60.949 | 20 | 169 | 1565 | 1733 |
| 59.836 | 20 | CATATATTTTCATTGGCCCCG     | 59.998 | 20 | 146 | 1452 | 1597 |
| 59.964 | 20 | GCACTACATAAAAATGAACATTCTC | 58.234 | 25 | 269 | 1530 | 1798 |
| 59.91  | 20 | CCACAAACCCTTCATCACCT      | 59.82  | 20 | 126 | 31   | 156  |
| 59.222 | 20 | ATGTGGAGACGAGATGGGAC      | 59.928 | 20 | 174 | 1160 | 1333 |
| 60.153 | 20 | TTTATCTTGCCCATGGAACG      | 60.827 | 20 | 239 | 5619 | 5857 |
| 60.298 | 21 | TCCAGCTCTTCCAACCAAC       | 60.232 | 20 | 168 | 306  | 473  |
| 60.234 | 20 | GGGTTTTAAATTGGGGATTTTG    | 60.588 | 22 | 204 | 142  | 345  |
| 60.043 | 20 | TTAGCCGATGAGAGGAGGAA      | 59.91  | 20 | 272 | 4676 | 4947 |
| 60.857 | 20 | TCTTTTTCTTCGTCACGGGT      | 59.711 | 20 | 215 | 663  | 877  |
| 57.584 | 20 | TACGAAGGAGGCTTGAAAA       | 59.817 | 20 | 248 | 1020 | 1267 |
| 58.773 | 20 | AAACAATCAACCAAGGATGACA    | 59.336 | 22 | 216 | 1765 | 1980 |
| 59.894 | 20 | GATTCTCGCAGATCAACGGT      | 60.226 | 20 | 239 | 549  | 787  |
| 60.19  | 22 | TGAATTCATCACCTCTACCGT     | 57.126 | 21 | 151 | 340  | 490  |
| 59.904 | 20 | AGAGTGAAGCAAGGGAACCA      | 59.844 | 20 | 276 | 545  | 820  |
| 59.579 | 20 | TGTGGCTATTTTAGCTCTTTGGA   | 60.257 | 23 | 156 | 8    | 163  |
| 59.847 | 20 | CAATATTACAATGGGCAAGAGTC   | 57.725 | 23 | 253 | 1535 | 1787 |
| 60.194 | 26 | CATGGCTGTCAGATCTCGTG      | 60.426 | 20 | 145 | 0    | 144  |
| 59.022 | 20 | CACCTTGCTATGCAATACGG      | 59.206 | 20 | 280 | 96   | 375  |
| 60.27  | 20 | CGAGAAGGAGAAACGTGGTC      | 59.844 | 20 | 250 | 194  | 443  |
| 60.264 | 20 | TGCTTGTTGGCACCAGTAGA      | 60.449 | 20 | 139 | 262  | 400  |
| 60.343 | 20 | CTGTGACGGTGCGTGTCTAT      | 59.776 | 20 | 157 | 138  | 294  |
| 60.126 | 20 | AATTCTTTGAGGCGCAGAAA      | 59.96  | 20 | 264 | 2030 | 2293 |
| 60.17  | 20 | CCATGCACTTCTTTCTTTGC      | 58.502 | 20 | 265 | 230  | 494  |
| 60.119 | 20 | TTCTGTATCTGCCAGAAG        | 59.322 | 21 | 179 | 719  | 897  |
| 60.051 | 20 | GATCAGGAACCATTTGTGGG      | 60.173 | 20 | 183 | 1383 | 1565 |
| 58.161 | 20 | GGCACCGACATCAAGTTGTA      | 59.572 | 20 | 258 | 93   | 350  |
| 60.065 | 20 | GGGTGGGTTTGAAAAGAGT       | 60.204 | 20 | 253 | 603  | 855  |
| 59.51  | 20 | GCGTGTCTTGGTGTCTTG        | 59.339 | 20 | 218 | 89   | 306  |
| 59.359 | 20 | ACAAATTCGAGATCGAACGG      | 60.074 | 20 | 269 | 563  | 831  |
| 58.799 | 20 | AGCATCTGGAATGCAGGAAG      | 60.362 | 20 | 144 | 778  | 921  |
| 59.935 | 20 | AAGGGCTTGGAACATGACAC      | 59.973 | 20 | 202 | 23   | 224  |
| 59.667 | 23 | TGAAATAGGAGAATAGGGGCG     | 60.406 | 21 | 199 | 57   | 255  |
| 60.066 | 20 | GAGAAAAGGGAAGCCTCAAGA     | 59.948 | 21 | 232 | 184  | 415  |
| 59.992 | 20 | ATCCTCATCTTACCATCGC       | 60.042 | 20 | 131 | 592  | 722  |
| 60.268 | 20 | GCAAATCCGAGTAGCTTGGT      | 59.34  | 20 | 241 | 226  | 466  |
| 60.118 | 20 | CGAAACAATAAGATGCTGTGTGA   | 60.18  | 23 | 159 | 111  | 269  |
| 59.458 | 21 | ATGGAATTGGGTGTTGGATG      | 60.439 | 20 | 152 | 24   | 175  |
| 60.009 | 20 | TTCACACAACCACTCCACAAA     | 60.033 | 21 | 121 | 274  | 394  |
| 60.102 | 22 | CACCCGTATGGGACAAAATC      | 60.051 | 20 | 177 | 231  | 407  |
| 59.813 | 20 | GGAGGATTTTCTTTCCCAA       | 60.237 | 20 | 193 | 19   | 211  |
| 60.34  | 20 | CGTGGACAGTTTCCCAAAGT      | 60.005 | 20 | 238 | 15   | 252  |
| 59.547 | 20 | ATTACTCACACGCACACCCA      | 60.032 | 20 | 172 | 170  | 341  |
| 57.436 | 21 | AAAGCCCCGATTTTCGTATCT     | 59.93  | 20 | 184 | 0    | 183  |
| 60     | 20 | TCTTGTGAGCCTGTGTTTGC      | 60.032 | 20 | 145 | 65   | 209  |
| 59.853 | 20 | GCGGATAATCTGGAGATGGA      | 59.998 | 20 | 175 | 2658 | 2832 |
| 60.159 | 20 | AACTTCTTGTCATCGCCACC      | 60.119 | 20 | 259 | 396  | 654  |

|        |    |                           |        |    |     |      |      |
|--------|----|---------------------------|--------|----|-----|------|------|
| 60.061 | 20 | CACCAAATTTGAGGGTTATTATTT( | 59.905 | 25 | 229 | 147  | 375  |
| 59.967 | 20 | GGGTATTTCTGGAAATCATTGAA   | 59.22  | 23 | 197 | 68   | 264  |
| 59.259 | 21 | GTGGTAATTTTCGCACCCAC      | 60.235 | 20 | 276 | 150  | 425  |
| 60.112 | 20 | CGAAAAAGAAGAGGTGAGCG      | 60.125 | 20 | 277 | 1088 | 1364 |
| 60.535 | 20 | AAAGGGCATAATCTATGATCGG    | 59.339 | 22 | 175 | 44   | 218  |
| 60.768 | 20 | TGTGTTTTTCAGTGTGTGGGA     | 60.033 | 21 | 132 | 74   | 205  |
| 60.202 | 20 | AATTGCACGGTAGTTGCAC       | 58.703 | 20 | 269 | 1589 | 1857 |
| 59.964 | 19 | CAGATGTGGACGGTCACTA       | 59.545 | 20 | 280 | 19   | 298  |
| 60.285 | 20 | TGGCATTTTCGATCTCTGTG      | 59.799 | 20 | 179 | 73   | 251  |
| 59.741 | 21 | AGGTTCAACCCAGGCTTTT       | 60.11  | 20 | 222 | 158  | 379  |
| 58.926 | 20 | GCAGGAAGTGATGAAGAGAACA    | 59.478 | 22 | 268 | 107  | 374  |
| 57.626 | 21 | TGGTGGTTTTTCAGATGCTCA     | 60.24  | 20 | 211 | 52   | 262  |
| 59.215 | 20 | TCTAATTGGGATCTCCACGC      | 60.036 | 20 | 254 | 157  | 410  |
| 59.82  | 20 | CGAAGCATTTTGATTTGCGT      | 61.131 | 20 | 242 | 127  | 368  |
| 60.228 | 25 | GCCATTGTGAGGAAGGTTGT      | 59.973 | 20 | 177 | 3    | 179  |
| 60.904 | 20 | GGGCAGCAGCTTTACTTCAG      | 60.154 | 20 | 266 | 3368 | 3633 |
| 59.96  | 20 | ATCAGAGCATCAGAGCGGTT      | 59.981 | 20 | 172 | 492  | 663  |
| 60.331 | 20 | AGGCAGACAGATAAGGGCTG      | 59.454 | 20 | 245 | 429  | 673  |
| 59.751 | 20 | AAAAGATGCATGTGTTCCCC      | 59.797 | 20 | 206 | 314  | 519  |
| 59.83  | 20 | ATAAAACGACGTGCGAATCC      | 59.967 | 20 | 180 | 226  | 405  |
| 60.058 | 20 | CTATTACCCCTTCCCGTTT       | 59.197 | 20 | 275 | 429  | 703  |
| 57.427 | 22 | CGATTTAAGGGTTATTACCTGAT   | 58.81  | 24 | 207 | 682  | 888  |
| 60.067 | 20 | TAAATTGCACCCATCAACCA      | 59.786 | 20 | 176 | 931  | 1106 |
| 59.83  | 20 | CCAAGTACACTCCTCCTCTG      | 58.804 | 21 | 252 | 3981 | 4232 |
| 60.088 | 20 | TGATTTGAGTGTAACACGTCCT    | 58.688 | 23 | 160 | 96   | 255  |
| 59.691 | 20 | TCGATCCTGTGGCCTAAATC      | 60.036 | 20 | 184 | 7    | 190  |
| 60.179 | 20 | AAAAATGGCACATGGGTTGT      | 60.096 | 20 | 262 | 1647 | 1908 |
| 59.697 | 21 | CCAATTTGACCGTTGATCT       | 59.933 | 20 | 272 | 2272 | 2543 |
| 60.18  | 20 | AGCCGACTCCATTTATTGCT      | 58.814 | 20 | 279 | 1041 | 1319 |
| 59.508 | 21 | AAACACCTGTGGCTCAAACC      | 60.012 | 20 | 240 | 53   | 292  |
| 59.325 | 20 | GGCTCAAACATGTCAGCCTT      | 60.263 | 20 | 264 | 32   | 295  |
| 58.686 | 23 | AGGGAGTGCTCTCACCTGAA      | 59.986 | 20 | 213 | 170  | 382  |
| 59.859 | 20 | TTGCACACCCTCTCTCACAC      | 59.872 | 20 | 184 | 442  | 625  |
| 59.966 | 20 | TTTGCTTGATCCAATGGTGT      | 58.976 | 20 | 264 | 380  | 643  |
| 59.624 | 21 | GCTGGATAGTTGGGAAACGA      | 60.074 | 20 | 216 | 20   | 235  |
| 60.11  | 20 | GAGAGGAAGGTGTGGAGCAA      | 60.386 | 20 | 268 | 324  | 591  |
| 59.967 | 20 | TGAAAATATCATCGGCCACA      | 59.891 | 20 | 279 | 300  | 578  |
| 59.647 | 20 | AGCACTCTGCGAGTCTCCTT      | 59.355 | 20 | 280 | 70   | 349  |
| 59.555 | 20 | GGAATAAAGCCGTTTGAATTTG    | 59.851 | 22 | 226 | 2    | 227  |
| 59.703 | 21 | TGCGTTTTGACAATATATAGGTGT  | 60.083 | 26 | 179 | 62   | 240  |
| 59.712 | 20 | GGCCTGAATTCACATCCATT      | 59.756 | 20 | 271 | 1348 | 1618 |
| 60.481 | 20 | CAAAATTACAAATGGCCAAGA     | 57.705 | 21 | 132 | 51   | 182  |
| 59.955 | 20 | CCACTACATTCAGGGCCATT      | 59.813 | 20 | 235 | 749  | 983  |
| 59.952 | 20 | TGCTCACCACACTCTTTTCG      | 60.025 | 20 | 105 | 325  | 429  |
| 60.692 | 20 | GAACGAATCAAGTTCCGCAT      | 60.081 | 20 | 248 | 98   | 345  |
| 59.301 | 20 | TCTGGCCACTTGTTTCTCCT      | 59.844 | 20 | 275 | 573  | 847  |
| 59.867 | 20 | CAACTCGCATACCCAAAAGA      | 58.771 | 20 | 236 | 22   | 257  |
| 59.861 | 21 | CAAATTTGCGCGTTCTTTTT      | 59.231 | 20 | 248 | 2008 | 2255 |
| 59.993 | 22 | TCCGTCTTATTGGTCCGTTT      | 59.429 | 20 | 280 | 402  | 681  |
| 59.522 | 20 | CTGCAGGTTTCATGTTGCTTC     | 59.445 | 20 | 258 | 553  | 810  |
| 59.665 | 20 | GCTGAGCATTTTTAGCACCC      | 59.851 | 20 | 280 | 6    | 285  |
| 59.927 | 20 | CGCTGTATAATGGGGATCTCA     | 59.93  | 21 | 159 | 2342 | 2500 |
| 59.878 | 20 | GGACGATGGTTGTGATGATG      | 59.769 | 20 | 276 | 40   | 315  |
| 59.864 | 20 | TTCGGACCATTCAAACCTCGT     | 60.495 | 20 | 261 | 4089 | 4349 |
| 59.803 | 20 | ATGGGTTTCGAGTCTCAATGG     | 59.927 | 20 | 227 | 289  | 515  |
| 60.557 | 20 | GTCCTCAACCTCTCAATCGC      | 59.81  | 20 | 168 | 75   | 242  |
| 60.111 | 20 | CATTAAATCCTGTCCACATACAAA  | 59.241 | 25 | 170 | 579  | 748  |
| 59.959 | 20 | TGATGGTTGCAAGAGAATGG      | 59.648 | 20 | 218 | 1780 | 1997 |

|        |    |                           |        |    |     |      |      |
|--------|----|---------------------------|--------|----|-----|------|------|
| 60.147 | 20 | TGCAATGCATGGAGGAAATA      | 60.035 | 20 | 119 | 38   | 156  |
| 59.933 | 20 | GGCAAATGGCATAACAAACC      | 60.196 | 20 | 220 | 309  | 528  |
| 60.564 | 20 | TCGGTACCATCATCTGTTTCTTT   | 59.885 | 23 | 258 | 138  | 395  |
| 59.729 | 20 | TTTTCTTTTCTTTTATGCTCG     | 57.789 | 22 | 160 | 22   | 181  |
| 59.973 | 20 | AGATTCTGGGGATTCTGCCT      | 60.037 | 20 | 213 | 1031 | 1243 |
| 60.001 | 22 | TCATAGTTGACGCCCTTCGT      | 60.657 | 20 | 169 | 10   | 178  |
| 59.555 | 20 | AAGGATGTGGGTTGAAGGTG      | 59.82  | 20 | 131 | 43   | 173  |
| 59.339 | 20 | CAAGCAAATTGTGGCTCTGA      | 59.988 | 20 | 252 | 213  | 464  |
| 59.931 | 20 | TCGTTGTGAATTACCCAAGAAA    | 59.492 | 22 | 124 | 165  | 288  |
| 60.142 | 20 | CGCGTAGAGTTACCAAACCC      | 59.632 | 20 | 134 | 99   | 232  |
| 59.836 | 20 | ATGGGAGCTCATGAACGAAC      | 60.081 | 20 | 277 | 869  | 1145 |
| 59.258 | 20 | ATCGTGTTCTCAAGGTTGC       | 60.119 | 20 | 165 | 2532 | 2696 |
| 60.199 | 20 | CCTCTCACTTCTCTCCCCCT      | 59.801 | 20 | 216 | 19   | 234  |
| 60.133 | 21 | TCAATGTCCCAACAAATCCA      | 59.75  | 20 | 270 | 33   | 302  |
| 59.993 | 20 | TGAGTGCTCAGGCACAGAAG      | 60.333 | 20 | 188 | 83   | 270  |
| 60.447 | 20 | TTAGGTCGATCCAACGGTCT      | 59.55  | 20 | 240 | 398  | 637  |
| 57.172 | 27 | CAATTTCTGCTCTAATAAATCCAC, | 58.809 | 25 | 113 | 14   | 126  |
| 59.174 | 20 | ACTTTGTTGGTGGAGCGAAC      | 60.156 | 20 | 264 | 3452 | 3715 |
| 59.072 | 21 | CTTTATCCTTTGCGCGAGAC      | 59.982 | 20 | 190 | 2    | 191  |
| 59.61  | 20 | ACCGACCGGAATTTTTATCC      | 60.02  | 20 | 249 | 882  | 1130 |
| 60.002 | 21 | GATTCGATCCGAAAGGTCAA      | 60.014 | 20 | 243 | 1024 | 1266 |
| 60.02  | 25 | GAAGCAGCCAATGGGAATAG      | 59.668 | 20 | 100 | 28   | 127  |
| 58.743 | 25 | GTCCTCCGTTGGATTGTACG      | 60.375 | 20 | 199 | 3    | 201  |
| 59.93  | 20 | TGCTCCCATTTAAACAACCC      | 59.801 | 20 | 259 | 722  | 980  |
| 58.255 | 24 | TGGAAGAATCATAATCAAGAAGA,  | 59.663 | 26 | 104 | 183  | 286  |
| 60.458 | 20 | TTTTATTGGGCACCAAGGAC      | 59.801 | 20 | 264 | 2225 | 2488 |
| 59.964 | 20 | AACCGTCCGCTTACTTCTGA      | 59.875 | 20 | 251 | 213  | 463  |
| 59.962 | 20 | TTCTCAACCTCGGCTCTGAT      | 59.95  | 20 | 199 | 45   | 243  |
| 60.596 | 20 | TATCATGCCAATCCACCACA      | 60.757 | 20 | 183 | 334  | 516  |
| 59.971 | 20 | TTCCCATGTTGTAATTAATGTAGC  | 58.388 | 25 | 145 | 63   | 207  |
| 59.72  | 20 | CTCGCACCACTCCTCTTTCT      | 59.598 | 20 | 278 | 5    | 282  |
| 57.108 | 26 | TGGCCAAGTGTCAACAATTTA     | 59.073 | 21 | 274 | 109  | 382  |
| 60.318 | 20 | CCCTAAGGAACCGGTCTAGC      | 60.089 | 20 | 186 | 155  | 340  |
| 59.956 | 21 | TGAGTTGGTTGTTAGTCCGGT     | 59.506 | 21 | 166 | 35   | 200  |
| 59.772 | 20 | GCCTTCTCGAATTTGTCTGC      | 59.962 | 20 | 215 | 180  | 394  |
| 60.777 | 20 | CTCGTCTCCCTTCGCTTCTA      | 59.711 | 20 | 275 | 18   | 292  |
| 59.92  | 20 | GAGCTGGAGTTGAGAAACGG      | 59.989 | 20 | 200 | 74   | 273  |
| 59.91  | 20 | TTGCCCGGAATTCTTAACAG      | 60.067 | 20 | 160 | 268  | 427  |
| 59.989 | 20 | GTGTTAATCGCTTCCGCATT      | 60.103 | 20 | 189 | 591  | 779  |
| 59.875 | 20 | AACTCGCACCCACAGTAAC       | 60.035 | 20 | 151 | 2350 | 2500 |
| 60.119 | 20 | GCCTCAGAGGTCGAAATCAC      | 59.81  | 20 | 271 | 363  | 633  |
| 60.074 | 20 | ACGTCATGTTTTCAATCGCA      | 60.119 | 20 | 254 | 18   | 271  |
| 58.901 | 20 | ATCTTGATCGACTTGCC         | 60.081 | 20 | 179 | 16   | 194  |
| 59.807 | 20 | ATGACTCAACGGCTGGTTTC      | 60.119 | 20 | 112 | 66   | 177  |
| 59.912 | 24 | CGGACATGGTACATTTTCTGC     | 60.38  | 21 | 170 | 584  | 753  |
| 59.378 | 22 | AAAGTTGATGGAAAAGGGGG      | 60.159 | 20 | 139 | 2043 | 2181 |
| 59.813 | 20 | TTTTTCTGCATTGTGGAAGAGA    | 59.996 | 22 | 249 | 481  | 729  |
| 60.038 | 20 | GGAAAAGCCGATCAAATCA       | 60.016 | 20 | 268 | 105  | 372  |
| 60.24  | 20 | GAGAGGGTTGTCAAAGAGCG      | 59.989 | 20 | 133 | 263  | 395  |
| 60.073 | 20 | CGTTACCTTCATCCCCTTCA      | 59.926 | 20 | 183 | 15   | 197  |
| 60.053 | 20 | TCTGTGTCAGCATGTGTGTGA     | 59.922 | 21 | 280 | 1848 | 2127 |
| 59.873 | 20 | GAGAGAGAAAGGCTACGGGG      | 60.34  | 20 | 156 | 80   | 235  |
| 58.725 | 20 | GCAACGGAATACCACTCGTT      | 60     | 20 | 100 | 8    | 107  |
| 59.285 | 20 | TCAGGGATAAGTGAGCTCGG      | 60.353 | 20 | 226 | 433  | 658  |
| 60.278 | 20 | CCGGGTTTGATACCTGAATG      | 60.184 | 20 | 248 | 1216 | 1463 |
| 59.297 | 20 | AGACTTCAATGCCCTCCTC       | 60.596 | 20 | 170 | 169  | 338  |
| 59.955 | 20 | CTGTGCATGAAACATGGAGG      | 60.112 | 20 | 167 | 274  | 440  |
| 60.088 | 20 | CTGAATGTCACGACCGACAC      | 60.162 | 20 | 238 | 606  | 843  |

|        |    |                           |        |    |     |      |      |
|--------|----|---------------------------|--------|----|-----|------|------|
| 59.937 | 20 | CGAGGACATTTACTCATGGGA     | 59.94  | 21 | 251 | 447  | 697  |
| 60.603 | 20 | CTCGTCGTGAACCTCCCTGAT     | 60.261 | 20 | 276 | 400  | 675  |
| 59.468 | 23 | CACCTCCTCCCTCACCAATA      | 59.92  | 20 | 248 | 114  | 361  |
| 60.046 | 20 | TCAGAAACAACCTTGCCCTCA     | 59.415 | 20 | 230 | 28   | 257  |
| 59.721 | 20 | AATCGAGGAAGAGGGCAAAT      | 60.039 | 20 | 211 | 3087 | 3297 |
| 60.206 | 20 | TTCTCTTTTGGTTGGTGAAGAAA   | 60.129 | 23 | 228 | 1723 | 1950 |
| 59.499 | 20 | GTGGGTTGGGGAAAAAGAAT      | 60.032 | 20 | 219 | 227  | 445  |
| 59.682 | 20 | GACAGGGGTTGGGGTAAAGT      | 60.088 | 20 | 233 | 62   | 294  |
| 57.122 | 26 | AAAGCTTGCAGTGCATTTT       | 60.025 | 20 | 148 | 27   | 174  |
| 59.332 | 23 | TATCCCTTGCAGTCCCTTTG      | 60.066 | 20 | 254 | 0    | 253  |
| 59.693 | 20 | AATGCATGCACCTGATTACAA     | 59.055 | 21 | 177 | 220  | 396  |
| 60.111 | 20 | TGTACCATCCGGGATTTGTT      | 60.051 | 20 | 190 | 222  | 411  |
| 60.066 | 20 | TTCGAAATTATGAGGCTCCAA     | 59.668 | 21 | 188 | 37   | 224  |
| 60.197 | 20 | CTTCGGGTTAGCAGATCAGG      | 59.83  | 20 | 267 | 106  | 372  |
| 58.916 | 27 | CCAAATAATTTTGTTCACCAA     | 59.974 | 23 | 124 | 97   | 220  |
| 59.701 | 20 | TTTAACGGGCGGTTTTGTAG      | 59.993 | 20 | 190 | 105  | 294  |
| 59.644 | 20 | CTTCCTTCCACCCAACAAAA      | 59.942 | 20 | 271 | 1205 | 1475 |
| 59.79  | 20 | TACTGCATTGCGACCCTACA      | 60.28  | 20 | 237 | 333  | 569  |
| 60.246 | 18 | CCCCTTTTGTAAAGTCCCAT      | 60.046 | 20 | 174 | 1    | 174  |
| 60.243 | 20 | AAACATCGATCAGTCCCACC      | 59.786 | 20 | 115 | 196  | 310  |
| 60.656 | 20 | AATGGCTGGATTTAGTCCCT      | 57.611 | 20 | 277 | 22   | 298  |
| 59.925 | 20 | TTTGGCTACAAATTGCTAGGG     | 59.262 | 21 | 242 | 48   | 289  |
| 59.957 | 25 | TTTTGGGAAATTCTTGCACC      | 59.916 | 20 | 101 | 0    | 100  |
| 60.131 | 20 | ATTCCAAGATGGCAACTGCT      | 59.7   | 20 | 194 | 7    | 200  |
| 60.425 | 20 | TATTCACAGCATTCAAGGGG      | 58.572 | 20 | 198 | 500  | 697  |
| 60.555 | 20 | TGTCCATTTCCCAAAATTGT      | 60.029 | 20 | 280 | 3    | 282  |
| 59.749 | 26 | ATACTGGTGTTCCTGCTCA       | 59.318 | 20 | 178 | 26   | 203  |
| 60.226 | 20 | ACCAACCAAGAAGTCGAACG      | 60.149 | 20 | 279 | 1840 | 2118 |
| 59.989 | 20 | CATCCATCTCTCCCTCACTCA     | 60.207 | 21 | 117 | 170  | 286  |
| 60.307 | 20 | AAAATCGGACTGGACCATTG      | 59.79  | 20 | 268 | 247  | 514  |
| 60.022 | 20 | GGGGAATTTTGAAGGTGGAAT     | 59.996 | 20 | 275 | 492  | 766  |
| 59.808 | 21 | TGACTAGTGTGCATCGTGGC      | 60.907 | 20 | 208 | 89   | 296  |
| 59.924 | 20 | TGTCTTGAGTTTGTATCTAAGAAGI | 59.365 | 27 | 139 | 221  | 359  |
| 59.877 | 20 | CATCAACTCACCTCACATTTT     | 59.454 | 22 | 183 | 390  | 572  |
| 59.927 | 20 | AAATATTTCTAGCACATGAAATTG  | 57.859 | 25 | 246 | 45   | 290  |
| 60.088 | 20 | TGAGAGCTTGAAGAAGAGCAAA    | 59.517 | 22 | 132 | 392  | 523  |
| 59.756 | 20 | ATTAGGAACGGGGGTGAATC      | 60.017 | 20 | 210 | 662  | 871  |
| 59.973 | 20 | TCCCGATCTTGGTTGTCTTC      | 60.05  | 20 | 216 | 17   | 232  |
| 59.724 | 20 | GTCAACTTGGGCAGTGAAT       | 59.973 | 20 | 274 | 763  | 1036 |
| 59.901 | 20 | CCATTAACGCCCTGATTTA       | 59.789 | 20 | 170 | 249  | 418  |
| 59.542 | 20 | AGTCGGCATTCAAGTAGTCG      | 57.98  | 20 | 144 | 268  | 411  |
| 60.169 | 20 | TGAAGTTGTAGCATGGGCTT      | 58.379 | 20 | 230 | 83   | 312  |
| 59.943 | 20 | AATTGGAGCAAAATTGGCAG      | 60.074 | 20 | 253 | 335  | 587  |
| 60.096 | 20 | AAGCAGAATGCAAGCAAGGT      | 60.022 | 20 | 168 | 526  | 693  |
| 59.79  | 20 | CAGCCTGATAAATGGGACAAA     | 59.946 | 21 | 210 | 178  | 387  |
| 59.301 | 20 | ATTTAAGCGCACGCCAATAC      | 60.123 | 20 | 216 | 207  | 422  |
| 58.035 | 22 | CTGTCCTTCTCCACTCCTCT      | 59.856 | 21 | 201 | 164  | 364  |
| 59.948 | 20 | TCAAAACAACACCCAACCAA      | 59.834 | 20 | 261 | 84   | 344  |
| 59.381 | 20 | CAACAGCCTTGTCTCTGCAC      | 59.622 | 20 | 240 | 338  | 577  |
| 58.379 | 20 | TCATTGTACCGCAGCAAGAG      | 60.011 | 20 | 272 | 3744 | 4015 |
| 60.088 | 20 | TGAAATTTCCCAACATTCGC      | 60.817 | 20 | 171 | 392  | 562  |
| 59.92  | 20 | TGCAACTCGAGATGAGATGG      | 59.942 | 20 | 200 | 78   | 277  |
| 60.03  | 20 | AATCACAATCTTGGGCTTGG      | 59.933 | 20 | 270 | 339  | 608  |
| 60.027 | 20 | ATACCTTCGGTGCTCATCGT      | 59.579 | 20 | 280 | 512  | 791  |
| 59.43  | 20 | TCCTCACCTTTTCTTTTCT       | 60.045 | 20 | 101 | 50   | 150  |
| 59.623 | 20 | TTGAAAAAGTCGGCTGAAAAA     | 59.855 | 21 | 234 | 953  | 1186 |
| 59.61  | 20 | TGGATTTCTCACGAAAAGGG      | 60.044 | 20 | 252 | 646  | 897  |
| 58.646 | 22 | CTTGACAAGGCAGTACCCGT      | 60.171 | 20 | 171 | 2    | 172  |

|        |    |                          |        |    |     |      |      |
|--------|----|--------------------------|--------|----|-----|------|------|
| 59.325 | 20 | CAAAAGTCAAGGCTCGGAAG     | 59.986 | 20 | 163 | 3636 | 3798 |
| 59.713 | 19 | TTGTCATAGCCAACCCAAAA     | 59.013 | 20 | 223 | 364  | 586  |
| 59.957 | 20 | TCGTGCGACATAGTATGGGA     | 60.096 | 20 | 205 | 3    | 207  |
| 59.433 | 21 | TCCTCCATTTCCAATCTGCT     | 59.629 | 20 | 258 | 87   | 344  |
| 59.585 | 20 | TGGAAAGATTGAGATGGGATT    | 58.44  | 21 | 260 | 842  | 1101 |
| 58.882 | 22 | TAGTGAACGTTGGGGACACA     | 60.001 | 20 | 182 | 104  | 285  |
| 59.267 | 20 | GGCCCGAGTTGTTGAGATAG     | 59.694 | 20 | 140 | 521  | 660  |
| 60.039 | 20 | TTAAGCATTCTCTTGTAAATCCCA | 59.212 | 24 | 272 | 53   | 324  |
| 59.573 | 21 | TCCAGAGACCTACATGGGCT     | 59.679 | 20 | 216 | 1291 | 1506 |
| 59.749 | 26 | CCAGATATACCCCCACATGC     | 60.036 | 20 | 254 | 3    | 256  |
| 59.799 | 20 | CTCAGGGCAAATAGGGACAG     | 59.688 | 20 | 279 | 4152 | 4430 |
| 60.208 | 20 | AACAGGCGCCTTACCAGTTA     | 59.769 | 20 | 187 | 111  | 297  |
| 59.992 | 20 | AATGAAATCCTTTGGGGTCC     | 59.996 | 20 | 186 | 2451 | 2636 |
| 60.873 | 20 | CAATGGGGCTTGGTTTTCTA     | 59.931 | 20 | 271 | 1303 | 1573 |
| 59.934 | 20 | TCGGTTCAGTTAGAGGCTGG     | 60.388 | 20 | 156 | 1628 | 1783 |
| 60.009 | 20 | GTGGACGTCCAGATTGTTT      | 59.827 | 20 | 250 | 1109 | 1358 |
| 60.031 | 20 | CGAGTAGATCACAACGGCAA     | 59.864 | 20 | 159 | 377  | 535  |
| 60.112 | 20 | AAGATCTTGGTTGTTGGGTTG    | 58.945 | 21 | 149 | 585  | 733  |
| 58.693 | 25 | TCTCTTCGAAACTCGAATCGT    | 59.066 | 21 | 160 | 1    | 160  |
| 59.971 | 20 | AGATCAAAGGGCCGAGATTT     | 60.039 | 20 | 209 | 52   | 260  |
| 60.016 | 20 | TATATCAATGGCAGCCCA       | 59.914 | 20 | 278 | 1790 | 2067 |
| 60.22  | 20 | GTCCGATACGAGCTAAAGCG     | 60.003 | 20 | 190 | 14   | 203  |
| 60.005 | 20 | TCGAAAGAGTTGACGAATGTT    | 57.468 | 21 | 249 | 87   | 335  |
| 59.325 | 20 | CCAAAATGCCCTTGTATGCT     | 59.96  | 20 | 207 | 393  | 599  |
| 59.867 | 20 | ACAAAACCCTAGACGGCAAC     | 59.101 | 20 | 238 | 145  | 382  |
| 59.971 | 20 | ATAGGGATGGAAGGGTACGG     | 60.032 | 20 | 129 | 230  | 358  |
| 60.074 | 20 | CGACGGGTGAAAATCCTAAA     | 59.931 | 20 | 257 | 95   | 351  |
| 59.871 | 20 | CGTGTCCATGCCCTAATTCT     | 59.955 | 20 | 236 | 319  | 554  |
| 59.853 | 20 | ATCGGGATTGGTGGAAACATA    | 60.014 | 20 | 176 | 796  | 971  |
| 60.05  | 20 | GTTCTCGCAAACAATGCTCA     | 59.995 | 20 | 275 | 149  | 423  |
| 59.702 | 20 | CCCCGAAAATTAATCATTGC     | 59.259 | 20 | 230 | 2165 | 2394 |
| 60.17  | 20 | TCAACATTGGGCATTTTCAA     | 59.907 | 20 | 247 | 983  | 1229 |
| 59.842 | 20 | AATTCAAGCTTCAAACGGGA     | 59.685 | 20 | 236 | 418  | 653  |
| 60.008 | 20 | AGTGAACCGAAGGTCCATTG     | 59.966 | 20 | 241 | 176  | 416  |
| 59.647 | 20 | CGGGTTCGAATTTACCAGAA     | 59.931 | 20 | 257 | 1823 | 2079 |
| 59.758 | 20 | TCGAGGTGTCGAACTTGTTG     | 59.873 | 20 | 262 | 1035 | 1296 |
| 60.065 | 20 | AAAACATACTCAGCCACCGC     | 60.14  | 20 | 261 | 1266 | 1526 |
| 59.853 | 20 | ATGTAGGGTTCCTGTGGCTG     | 59.989 | 20 | 253 | 340  | 592  |
| 60.242 | 22 | AAAAGACCCTAAGCACTCACAA   | 58.061 | 22 | 227 | 4329 | 4555 |
| 60.517 | 21 | TTCTTGTTGGTGTGTGGCAT     | 60.008 | 20 | 266 | 82   | 347  |
| 60.226 | 20 | GCTTGTGGGCATGAATCTCT     | 60.226 | 20 | 266 | 625  | 890  |
| 59.986 | 20 | ATTAACGGGTAACCTCGGGC     | 60.204 | 20 | 250 | 1903 | 2152 |
| 59.816 | 20 | GACACGTGGTAGCACGAGAAT    | 60.194 | 21 | 188 | 235  | 422  |
| 59.725 | 21 | CCTTCCTTCGTTTTTCTCCC     | 60.046 | 20 | 160 | 335  | 494  |
| 58.948 | 20 | CCGAAGCAGCTATCACTCC      | 59.978 | 20 | 111 | 1404 | 1514 |
| 59.212 | 20 | GCTTTAAATGTGTTACAAAATCGA | 58.332 | 25 | 277 | 247  | 523  |
| 60.352 | 20 | GTAGTGGCTACGGTTTCCCA     | 59.993 | 20 | 134 | 3837 | 3970 |
| 60.197 | 20 | CCCATTTTTCTAGGCACCTTT    | 59.489 | 21 | 259 | 201  | 459  |
| 59.878 | 20 | TTACGGTTCCTACTTTTTCGG    | 59.968 | 20 | 200 | 41   | 240  |
| 60.035 | 21 | CGGAAGATCCGAGATCAGAA     | 60.295 | 20 | 189 | 35   | 223  |
| 59.668 | 20 | TGTGGCATCAAATCTAGCCAT    | 60.484 | 21 | 236 | 333  | 568  |
| 59.968 | 20 | CACGTACACATTGGACTTTG     | 60.057 | 21 | 276 | 337  | 612  |
| 57.569 | 22 | TTACGCATTTCCACACATT      | 59.972 | 20 | 101 | 38   | 138  |
| 59.66  | 20 | CACACAATACGCACACACCA     | 60.071 | 20 | 176 | 239  | 414  |
| 60.009 | 20 | GTCGGACCAGCTCTCTATCG     | 59.973 | 20 | 266 | 249  | 514  |
| 59.499 | 23 | AATCTGACGGCCGATATTTG     | 59.923 | 20 | 182 | 284  | 465  |
| 59.218 | 21 | GCCATCTGAAACCCCATCTA     | 59.894 | 20 | 150 | 28   | 177  |
| 60.405 | 20 | CAACCGATATCCCCTCTCT      | 60.285 | 20 | 157 | 6    | 162  |

|        |    |                          |        |    |     |      |      |
|--------|----|--------------------------|--------|----|-----|------|------|
| 60.292 | 21 | GGTGGGAATTGTGGAAGAAA     | 59.767 | 20 | 222 | 75   | 296  |
| 59.957 | 20 | AAAAGCATTCCCCATGATT      | 60.511 | 20 | 232 | 1544 | 1775 |
| 60.103 | 20 | TGCTAAGAGAAAAGCCCCTCA    | 60.088 | 20 | 213 | 534  | 746  |
| 60.118 | 20 | GGGAGACAGCAAAAGCTCAC     | 59.997 | 20 | 189 | 409  | 597  |
| 59.95  | 20 | CCCCTCGTATGCAATGAATC     | 60.296 | 20 | 279 | 105  | 383  |
| 59.311 | 20 | GATGATAGAACTCTGGCGGG     | 59.653 | 20 | 180 | 232  | 411  |
| 60.578 | 20 | TACCTTTTTGCCCTCGAATG     | 60.067 | 20 | 171 | 1    | 171  |
| 59.724 | 20 | GCACAACCACTCCACAAAGA     | 59.726 | 20 | 264 | 83   | 346  |
| 58.994 | 20 | CCGATTGGGCCTATCCTATC     | 60.623 | 20 | 194 | 101  | 294  |
| 59.688 | 20 | CCAAATGTGAGACCCTTAACC    | 58.423 | 21 | 132 | 40   | 171  |
| 60.014 | 20 | AGAGACTGACGCACGTTGTG     | 60.096 | 20 | 117 | 205  | 321  |
| 59.845 | 20 | TCAATCTAAAACCCGTGCAA     | 59.157 | 20 | 139 | 237  | 375  |
| 59.601 | 21 | GTTCAAGATTGTGCGAGCTG     | 59.596 | 20 | 211 | 18   | 228  |
| 59.5   | 21 | ACCTGCACCAAAATGGAGAG     | 60.111 | 20 | 151 | 277  | 427  |
| 59.383 | 21 | CGTGGTTCGATCGTAATTGA     | 59.542 | 20 | 105 | 102  | 206  |
| 59.241 | 20 | AGGGTAGACATGGGTTTCCC     | 60.052 | 20 | 222 | 239  | 460  |
| 59.968 | 20 | GAGGCGGTAGGAAACCCTAA     | 60.443 | 20 | 130 | 95   | 224  |
| 59.943 | 20 | CAGTTGGTCAGAGATGGCAA     | 59.831 | 20 | 231 | 297  | 527  |
| 59.971 | 20 | GGCGTTGGACCAGTGTAGAT     | 59.997 | 20 | 274 | 70   | 343  |
| 60.469 | 20 | GATGACACGCATCAAAATGG     | 59.931 | 20 | 154 | 1298 | 1451 |
| 58.81  | 24 | CTCTTCATATGGGAAGGGCA     | 60.029 | 20 | 197 | 10   | 206  |
| 59.783 | 20 | GCATTTTCATCCTCTTCCCAA    | 60.014 | 20 | 106 | 544  | 649  |
| 60.22  | 20 | CACTGCGAACCAACATCACT     | 59.751 | 20 | 151 | 132  | 282  |
| 60.227 | 20 | TTCTCAGCTCGGGTTCCTAA     | 59.948 | 20 | 243 | 147  | 389  |
| 59.518 | 20 | ATTTGGCACATGAGATGTGC     | 59.527 | 20 | 246 | 615  | 860  |
| 59.911 | 20 | CGGTCACATAAGCGTCTCT      | 60.277 | 20 | 252 | 619  | 870  |
| 60.082 | 23 | TGATGATGACAATGATATCGTGAA | 60.217 | 24 | 175 | 71   | 245  |
| 59.836 | 20 | TTAGGCCATGTTTGTCTGCTT    | 59.761 | 21 | 216 | 200  | 415  |
| 60.009 | 20 | GGCCTTCATTCAAAAGCTCA     | 60.331 | 20 | 260 | 2897 | 3156 |
| 60.298 | 20 | CAGCCGAAGTAACAAAGACG     | 58.579 | 20 | 213 | 2104 | 2316 |
| 59.526 | 20 | ATTATCATACCTCGCCACGC     | 59.951 | 20 | 169 | 944  | 1112 |
| 59.894 | 20 | CGTCCACTTCATTGAATTTCTT   | 59.531 | 23 | 280 | 3919 | 4198 |
| 59.978 | 20 | TTGCATTACATGCTCCCATT     | 58.994 | 20 | 247 | 225  | 471  |
| 59.9   | 20 | GCACACCAAAGTGAAACCGT     | 60.996 | 20 | 234 | 103  | 336  |
| 57.864 | 20 | CAACAAAGCATTGCAAAGTGA    | 59.903 | 21 | 224 | 0    | 223  |
| 58.048 | 21 | TCAAATACTAGCATATCGATGAAC | 59.623 | 27 | 174 | 88   | 261  |
| 59.83  | 20 | ATGGACGTCGTGACTGCATA     | 60.144 | 20 | 168 | 25   | 192  |
| 60.971 | 20 | CTTCACCTCCCAGATTTCCA     | 60.042 | 20 | 143 | 87   | 229  |
| 60.103 | 20 | TGTGAGAACCATCTCGGTGA     | 60.246 | 20 | 134 | 6    | 139  |
| 60.262 | 20 | CCCAGATAGCAATAAGGGCA     | 60.053 | 20 | 156 | 735  | 890  |
| 59.923 | 20 | CATTGTCAGAAAGTGCCGAG     | 59.44  | 20 | 256 | 42   | 297  |
| 59.752 | 20 | GGAAGCCAGGAAAAGAAACA     | 59.288 | 20 | 276 | 2118 | 2393 |
| 59.829 | 22 | CGACAAAGACTTAACTACTTGTA  | 60.049 | 27 | 278 | 853  | 1130 |
| 59.337 | 20 | TCTTTTGAGACCCACCAACC     | 59.943 | 20 | 264 | 659  | 922  |
| 60.739 | 19 | TTGTTTGATATTCAACCACTTGT  | 57.681 | 24 | 102 | 268  | 369  |
| 59.982 | 21 | TGTCGGCGGTTAAAAAGTTC     | 60.11  | 20 | 197 | 4467 | 4663 |
| 59.984 | 20 | GCGTGGAAAGGCTGAATAAG     | 59.845 | 20 | 244 | 664  | 907  |
| 59.94  | 27 | AGGGACACCTAACCCCAACT     | 59.717 | 20 | 115 | 1    | 115  |
| 60.173 | 20 | AAAAACCTTTGTAGGCGCAA     | 59.758 | 20 | 265 | 365  | 629  |
| 59.172 | 21 | CCAGCCCAATAACTTGACCT     | 59.052 | 20 | 235 | 70   | 304  |
| 60.461 | 20 | TATACACGGCATAACATGGGG    | 59.136 | 20 | 254 | 571  | 824  |
| 60.474 | 20 | ATGGGTCCAAACAACCTTTT     | 58.266 | 20 | 168 | 257  | 424  |
| 60.162 | 20 | CGTGTTAATTCCTTCCCAA      | 59.795 | 20 | 191 | 1499 | 1689 |
| 60.081 | 20 | CAAATTTGATAGCGGTCTAATGAA | 59.557 | 24 | 170 | 1463 | 1632 |
| 58.161 | 22 | CTCAGGGACTAGTTGAGCGG     | 60.005 | 20 | 188 | 65   | 252  |
| 59.682 | 20 | CACTAATCATCACCGTGCCA     | 60.539 | 20 | 279 | 75   | 353  |
| 60.007 | 20 | ATTTTCCCTCCAGTTGACCC     | 60.169 | 20 | 247 | 4485 | 4731 |
| 60.154 | 22 | AGCGCAAGCACCTAGAAATG     | 60.543 | 20 | 209 | 722  | 930  |

|        |    |                            |        |    |     |      |      |
|--------|----|----------------------------|--------|----|-----|------|------|
| 59.146 | 20 | TGCACAGAAAATGAAAAGCG       | 59.992 | 20 | 233 | 277  | 509  |
| 60.17  | 20 | GCCATGTGAGAGGGAGAGAG       | 59.945 | 20 | 234 | 110  | 343  |
| 59.551 | 20 | TCCAATGGATGTAATGAGTTATTA   | 57.297 | 26 | 167 | 374  | 540  |
| 59.844 | 20 | AGCCGTCGTATTCTAAACGC       | 59.388 | 20 | 153 | 74   | 226  |
| 60.051 | 20 | TGTTTGTCTCTTACTCTCGGT      | 60.068 | 23 | 195 | 66   | 260  |
| 60.765 | 20 | AGTTGGGTGAAGATCATGGC       | 59.934 | 20 | 233 | 84   | 316  |
| 60.026 | 20 | GGAGCAATAAAGGGCAATCA       | 60.038 | 20 | 156 | 2938 | 3093 |
| 59.93  | 20 | GCTATGGTATGCTGTCTGCG       | 59.474 | 20 | 259 | 101  | 359  |
| 58.201 | 20 | TGCAGGACAATATCCATCACA      | 59.94  | 21 | 174 | 12   | 185  |
| 57.769 | 27 | ATCTCGTTTCAAGCCCAAAA       | 59.685 | 20 | 150 | 35   | 184  |
| 59.95  | 20 | TGATGACGATCTTTTGAAACCA     | 60.481 | 22 | 234 | 17   | 250  |
| 60.195 | 20 | CCTAAGCCTACTCCCCACCT       | 59.593 | 20 | 162 | 109  | 270  |
| 59.722 | 20 | ATGCGCGTTTTTAGGGTTTA       | 59.624 | 20 | 198 | 2366 | 2563 |
| 59.711 | 20 | CAGAGTCCTGGGAGCTCATT       | 59.405 | 20 | 230 | 1072 | 1301 |
| 59.992 | 20 | TGTGCACAAGCTTGAAAAAT       | 60.663 | 21 | 209 | 1575 | 1783 |
| 59.454 | 20 | ACTTGTGCTCGCCTTTCATT       | 59.882 | 20 | 272 | 2202 | 2473 |
| 59.988 | 20 | TGAAGACCATGAGCACAGGA       | 60.402 | 20 | 249 | 265  | 513  |
| 60.59  | 20 | GGGACGGATCACTCTTTTGA       | 60.05  | 20 | 270 | 74   | 343  |
| 60.184 | 20 | ATGGAGGTATGGTGTATGGG       | 57.047 | 20 | 247 | 2478 | 2724 |
| 59.402 | 20 | AGTCCCCACGAGGAAGAACT       | 60.111 | 20 | 275 | 690  | 964  |
| 60.475 | 21 | TTGACGATATATAGTGTTTTGACA   | 58.972 | 27 | 187 | 286  | 472  |
| 59.773 | 20 | CATGGGTGGTATGGTGTGG        | 60.517 | 19 | 144 | 17   | 160  |
| 59.955 | 20 | AGCTGTTAGGGTGTATAGTGAGT    | 57.436 | 27 | 165 | 338  | 502  |
| 60     | 20 | GCCTTTGCCCTTTTTCTCTC       | 60.32  | 20 | 129 | 298  | 426  |
| 59.91  | 20 | TTCAAAAACGAATTTGGCGT       | 60.468 | 20 | 178 | 231  | 408  |
| 59.837 | 20 | CTTGCCATGCATGTAAGGTG       | 60.134 | 20 | 164 | 1059 | 1222 |
| 60.074 | 20 | TCCTCTCGTGTTTCATCCTCA      | 59.34  | 20 | 156 | 59   | 214  |
| 59.712 | 20 | CGTCGATCTCAGTATCTTCGC      | 59.992 | 21 | 239 | 80   | 318  |
| 60.536 | 20 | GGTAAATGGTTACCGTTTTGG      | 60.33  | 21 | 214 | 49   | 262  |
| 60.227 | 20 | TCACGTTGCAAAAATAGCGT       | 59.373 | 20 | 272 | 46   | 317  |
| 59.859 | 20 | TGGAATCTTGTTGGGGAAAG       | 59.903 | 20 | 251 | 599  | 849  |
| 60.309 | 20 | CATATACGCGAACCCGAGAT       | 59.945 | 20 | 258 | 215  | 472  |
| 60.053 | 20 | AGCCACCTCCTAGCCATCTC       | 60.756 | 20 | 108 | 344  | 451  |
| 60.038 | 20 | CCCATGTTTGTAAATTATTGTAGGG, | 60.228 | 25 | 168 | 1909 | 2076 |
| 59.803 | 20 | TGCCCATGATTCTGTAGTTTTG     | 59.996 | 22 | 255 | 180  | 434  |
| 59.679 | 20 | TTTTGTGATTTCCCATGTTTG      | 58.374 | 21 | 136 | 94   | 229  |
| 59.645 | 20 | AAGTGGTGTGTTTCGAGGCTT      | 59.769 | 20 | 264 | 203  | 466  |
| 59.919 | 20 | TTTGAAGGCCGGAATATGAG       | 60.031 | 20 | 225 | 0    | 224  |
| 59.76  | 21 | GGGTGTGGTTATTCCAATCC       | 58.959 | 20 | 253 | 3    | 255  |
| 58.686 | 25 | CACTCAGTGGACACATTGCC       | 60.162 | 20 | 251 | 145  | 395  |
| 60.555 | 20 | ACTGACATTCACAGGCATTG       | 57.067 | 20 | 223 | 72   | 294  |
| 60.096 | 20 | GGGACTTTCTCTCTCCTGGG       | 60.186 | 20 | 205 | 187  | 391  |
| 59.622 | 20 | CATGCATGATCAATGTTGTAAGA    | 58.571 | 23 | 158 | 7    | 164  |
| 60.864 | 20 | TCATGATAATGCATGTCTCTGAAA   | 59.614 | 24 | 100 | 430  | 529  |
| 59.161 | 22 | AACAGTGGTTTTCGCGTATT       | 59.499 | 20 | 126 | 29   | 154  |
| 60.057 | 20 | GACTAGTTTTCTGCGACGGC       | 60.022 | 20 | 200 | 866  | 1065 |
| 60.008 | 19 | TTCTGCTCTCCCCTCCAAC        | 60.333 | 19 | 260 | 108  | 367  |
| 59.903 | 20 | TCAACGCATCTACAGGTTGC       | 59.871 | 20 | 119 | 290  | 408  |
| 60.298 | 22 | TCCAATTGTTGTCTTCCATCTG     | 59.971 | 22 | 157 | 284  | 440  |
| 58.57  | 21 | GGTTTTGATGGTTGTGATTTGTT    | 60.014 | 23 | 185 | 98   | 282  |
| 60.163 | 19 | TGTGGTTGATGAGTTGGCAT       | 59.967 | 20 | 279 | 4092 | 4370 |
| 60.16  | 20 | GCCTGAACAGTCGAGGTGAT       | 60.269 | 20 | 149 | 24   | 172  |
| 59.931 | 20 | AGACGCTTGACGTTTGTCTG       | 60.896 | 20 | 216 | 33   | 248  |
| 60.269 | 25 | TGGTCGTGAGATAGAGTGCG       | 60.008 | 20 | 206 | 1    | 206  |
| 59.844 | 20 | TGGCATCTTCTCTCAAATTCAA     | 59.823 | 22 | 222 | 329  | 550  |
| 59.733 | 20 | TGTTTCGATGTGCATGGAGT       | 60.12  | 20 | 122 | 259  | 380  |
| 60.008 | 20 | ACCTGTGAAAGCGATCGTG        | 59.846 | 19 | 126 | 2521 | 2646 |
| 60.143 | 20 | AAAATCAAAGGCCCAATG         | 59.801 | 20 | 106 | 1700 | 1805 |



|        |    |                          |        |    |     |      |      |
|--------|----|--------------------------|--------|----|-----|------|------|
| 59.837 | 20 | TAAAAAGATGAGCCCACCCA     | 60.439 | 20 | 186 | 160  | 345  |
| 59.685 | 20 | TGAGGAAGAAGTGGGATGATG    | 60.058 | 21 | 157 | 42   | 198  |
| 60.065 | 20 | GAGCTCTGGTCCCACAGAC      | 59.841 | 20 | 235 | 835  | 1069 |
| 59.988 | 20 | CGAAAATGCCCTTTTATGCT     | 59.212 | 20 | 246 | 1179 | 1424 |
| 59.903 | 20 | CATCAAGAGTCGGCTGTCAA     | 59.984 | 20 | 182 | 54   | 235  |
| 60.053 | 20 | AGAGGAAGAAGGGGGTGAAA     | 60.045 | 20 | 217 | 467  | 683  |
| 58.809 | 23 | TCATCCCGTTTCAAACCTCAA    | 59.097 | 20 | 154 | 43   | 196  |
| 59.546 | 20 | TGATGTGCAGCTCAAACCTCC    | 59.992 | 20 | 267 | 831  | 1097 |
| 58.994 | 20 | CCACCAAGTATCGGTCCAGT     | 59.844 | 20 | 266 | 107  | 372  |
| 60.103 | 21 | TGATGAAAAACAATTGACCAAAA  | 59.372 | 23 | 223 | 1    | 223  |
| 58.869 | 20 | CCTCAAAATCTTTGAAGGCTC    | 58.059 | 21 | 176 | 95   | 270  |
| 60.232 | 20 | CAACTGAGTCCCCTATCCGA     | 60.065 | 20 | 260 | 100  | 359  |
| 59.569 | 20 | TGTTGCGATTTTCATTTTCC     | 58.601 | 20 | 202 | 34   | 235  |
| 59.864 | 20 | CCCTCATAACTCCTGACTGCTC   | 60.268 | 22 | 191 | 592  | 782  |
| 59.815 | 21 | TTCAACCATCAACTCCACCA     | 59.935 | 20 | 258 | 236  | 493  |
| 59.859 | 20 | ACCATCGATGCATTCACAAA     | 59.931 | 20 | 277 | 1570 | 1846 |
| 60.089 | 20 | AAAATCATGTTCCGTCCCAA     | 60.17  | 20 | 244 | 45   | 288  |
| 60.375 | 20 | TCAGTTTCGAGTTATGAAGTTAGG | 59.749 | 26 | 100 | 163  | 262  |
| 59.813 | 20 | TTAATCTTGACCGCCGATTT     | 59.547 | 20 | 280 | 39   | 318  |
| 58.94  | 21 | TTAAATGGCCTCGGTATTCCG    | 59.922 | 20 | 240 | 26   | 265  |
| 60.406 | 20 | AAGCTCGGAGTTGCCAGATA     | 59.978 | 20 | 191 | 30   | 220  |
| 59.82  | 20 | GGTGAGGGGGAAAAATAGGA     | 60.124 | 20 | 104 | 73   | 176  |
| 59.823 | 20 | CATATGCATCCGCAATTCTG     | 60.058 | 20 | 280 | 4547 | 4826 |
| 59.937 | 20 | TGTTGTGTTTCGTGTCCGATT    | 60.008 | 20 | 241 | 189  | 429  |
| 59.592 | 20 | GTTATCGTTGTTGGGGATGG     | 60.051 | 20 | 197 | 3585 | 3781 |
| 59.903 | 20 | CGTCACGGTTATCCTTCGTT     | 59.993 | 20 | 259 | 77   | 335  |
| 59.862 | 20 | TTTAGCAGAGTTGGTGAAATCAT  | 57.952 | 23 | 220 | 572  | 791  |
| 59.849 | 21 | CACCCTAACACGCACAAATG     | 60.027 | 20 | 134 | 314  | 447  |
| 60.029 | 20 | GAGATTGGGGACTTGGTGAA     | 59.903 | 20 | 120 | 548  | 667  |
| 59.682 | 20 | AACACCCCTCCTCAATTTCC     | 60.169 | 20 | 105 | 20   | 124  |
| 60.063 | 23 | ATGCACCAAAAATTGACACG     | 59.444 | 20 | 197 | 724  | 920  |
| 60.074 | 20 | GGTGATTGTATCGCCACCTC     | 60.348 | 20 | 255 | 2320 | 2574 |
| 59.993 | 20 | GACCGCTAAAAACCGTGAAA     | 60.11  | 20 | 261 | 459  | 719  |
| 59.928 | 20 | TGATTGGGCTTTGTCTTTTTG    | 60.096 | 21 | 180 | 48   | 227  |
| 59.671 | 20 | GCCGTACATGAAAGACAAAACA   | 60.039 | 22 | 217 | 142  | 358  |
| 59.873 | 21 | GGGAGATTTGAAATGTGGGA     | 59.727 | 20 | 270 | 124  | 393  |
| 59.853 | 26 | AGAACACGAGGAACTTGGGA     | 59.697 | 20 | 154 | 6    | 159  |
| 60.169 | 20 | CTCAACTCAGAGCTCCATGCT    | 59.76  | 21 | 167 | 610  | 776  |
| 59.78  | 20 | GCGAATGAAACCCAAGAAAT     | 59.022 | 20 | 178 | 214  | 391  |
| 59.968 | 20 | TTAGGCCAAGGCAATCAATC     | 60.038 | 20 | 172 | 103  | 274  |
| 61.042 | 20 | CCCCTCCCCACATTCTTTAT     | 60.011 | 20 | 105 | 9    | 113  |
| 59.45  | 21 | GGGTGTTTTGACAATATCACGA   | 59.73  | 22 | 230 | 1943 | 2172 |
| 59.87  | 20 | AAAGATCTCTGCAAGTCCGC     | 59.579 | 20 | 216 | 285  | 500  |
| 59.74  | 20 | GCTCTCAACCATACCTGGTCA    | 60.126 | 21 | 263 | 275  | 537  |
| 60.088 | 20 | AATTTTCGTTTCATGCCCAAG    | 59.938 | 20 | 218 | 218  | 435  |
| 59.826 | 20 | TTGAGCTGTTATGCGTTTTGA    | 59.5   | 21 | 148 | 83   | 230  |
| 59.664 | 20 | CGTGCTCAAACCTACATCCGA    | 59.864 | 20 | 268 | 215  | 482  |
| 58.25  | 22 | TGGTGGGTTGAATGCTATGA     | 59.924 | 20 | 203 | 442  | 644  |
| 59.989 | 20 | ATCCAAACGAACTTCCAACG     | 59.971 | 20 | 207 | 41   | 247  |
| 60.069 | 24 | TAACCCAAACCCACCCAATA     | 59.91  | 20 | 106 | 17   | 122  |
| 59.074 | 24 | ATATGCCCGGTAAAAGAGCA     | 59.569 | 20 | 245 | 14   | 258  |
| 60.151 | 20 | ACCGACCCATCTCTTGTGAC     | 59.969 | 20 | 210 | 461  | 670  |
| 57.462 | 27 | CCTGCCCACTTTGAAGAAGA     | 60.366 | 20 | 247 | 1    | 247  |
| 60.011 | 20 | ATCAACATGCAAGCATCCAA     | 60.08  | 20 | 200 | 46   | 245  |
| 60.14  | 20 | TTGCTCTCATTGTAATCTCTCCC  | 59.739 | 23 | 120 | 0    | 119  |
| 57.479 | 20 | CAGCTCCAATCCATCTCCAT     | 60.034 | 20 | 227 | 309  | 535  |
| 59.96  | 20 | TCTAGCACGGTTGCAATCAA     | 60.401 | 20 | 245 | 90   | 334  |
| 59.96  | 20 | GCTAATTCGGCAGCTTCTTG     | 60.117 | 20 | 144 | 441  | 584  |

|        |    |                           |        |    |     |      |      |
|--------|----|---------------------------|--------|----|-----|------|------|
| 60.263 | 20 | GTTCTGACTGATGGGTGCTTT     | 60.119 | 20 | 212 | 1227 | 1438 |
| 60.14  | 20 | TTCAAAAATGAGTGGACCAGA     | 58.187 | 21 | 128 | 1214 | 1341 |
| 59.95  | 21 | CATGGCCTTCTTCTTCCAAC      | 59.67  | 20 | 191 | 999  | 1189 |
| 59.882 | 20 | CCTAAATGTGGGAAGTGGGA      | 59.784 | 20 | 172 | 1488 | 1659 |
| 60.074 | 20 | TGTGGAAGCAAATGGTTAGC      | 58.773 | 20 | 157 | 505  | 661  |
| 57.538 | 22 | TGGGACCACAGGATAGGAGT      | 59.38  | 20 | 244 | 6    | 249  |
| 59.29  | 22 | CACCTTTTCTCCCTCTTCCC      | 60.045 | 20 | 218 | 78   | 295  |
| 59.989 | 20 | GATGATCCGTTTCGCACTTCT     | 60.226 | 20 | 223 | 136  | 358  |
| 59.567 | 20 | ACGAAATTGATGTGTTGGCA      | 59.972 | 20 | 226 | 228  | 453  |
| 60.323 | 22 | GTTCTGAACCCTGGTCTTCAC     | 59.555 | 20 | 247 | 968  | 1214 |
| 60.046 | 20 | ATGACCTTGCCACCATCTTC      | 59.934 | 20 | 227 | 442  | 668  |
| 60.349 | 20 | CCTCGATTCACTCATCGCTT      | 60.362 | 20 | 233 | 225  | 457  |
| 59.097 | 22 | ATCAATCTTACGGACTGGCG      | 60.096 | 20 | 222 | 295  | 516  |
| 59.973 | 20 | AAGATCGTGCAAATTTGAAAAG    | 59.672 | 23 | 249 | 28   | 276  |
| 61.448 | 23 | GGATAGGCGGTTGAGATTTG      | 59.528 | 20 | 115 | 12   | 126  |
| 59.674 | 20 | TCAGTTTGGTTTATGAGTAGGACA  | 59.15  | 25 | 136 | 1073 | 1208 |
| 59.946 | 20 | CGTGGCAGGCTAATATCCAT      | 59.945 | 20 | 152 | 97   | 248  |
| 59.95  | 20 | TGACATCGGACCATTTTCTG      | 59.496 | 20 | 203 | 31   | 233  |
| 59.989 | 20 | GCGCTTTTTGCCTGATATTT      | 59.349 | 20 | 210 | 561  | 770  |
| 60.035 | 20 | GAATGTGTACTGTGCAGGGC      | 59.169 | 20 | 254 | 3928 | 4181 |
| 59.336 | 20 | TAACTCCGTATTCTTGCGGG      | 60.089 | 20 | 224 | 140  | 363  |
| 57.128 | 26 | AGGAGGAGCAAGAGAGGACC      | 59.952 | 20 | 257 | 37   | 293  |
| 58.783 | 23 | TATGGGTCAGAAAAGCCCAC      | 59.933 | 20 | 241 | 189  | 429  |
| 60.28  | 20 | GCGTTGCGTATGGAAGAATC      | 60.615 | 20 | 279 | 682  | 960  |
| 59.651 | 20 | ATTTGGGGTGAGCTTCACAA      | 60.495 | 20 | 240 | 239  | 478  |
| 60.017 | 20 | GATGTTGATTGCTGCGAAGA      | 59.955 | 20 | 251 | 2236 | 2486 |
| 59.48  | 20 | CGTAAATCTCTGTGTTGAATCTG   | 58.016 | 24 | 180 | 249  | 428  |
| 60.11  | 20 | CTTGTCACCTTCTCCCTCGC      | 59.989 | 20 | 193 | 1    | 193  |
| 60.074 | 20 | TTTCAGAGGGGATGAAATGC      | 60.014 | 20 | 229 | 51   | 279  |
| 59.972 | 20 | ATGGACCACCCACCAAAATA      | 59.91  | 20 | 247 | 77   | 323  |
| 60.399 | 20 | CAACCCACCATGATTTACACA     | 60.216 | 20 | 229 | 752  | 980  |
| 58.406 | 27 | GGCCGAAACAAGAACATCAT      | 59.939 | 20 | 239 | 314  | 552  |
| 59.973 | 20 | CCCGATTCCCTCTCTTTTTTC     | 60.011 | 20 | 131 | 515  | 645  |
| 58.876 | 24 | TTTGCTGCTGATGTTTGTCC      | 59.847 | 20 | 212 | 43   | 254  |
| 58.46  | 21 | TTGACTAAAACATGGAATAATG/   | 60.054 | 27 | 160 | 19   | 178  |
| 59.939 | 20 | GCAGTTTTGCTCCCCTCTC       | 59.997 | 20 | 230 | 1238 | 1467 |
| 60.073 | 20 | TTGTTCCAGAAAGGAGGTTGA     | 59.697 | 21 | 117 | 713  | 829  |
| 60.016 | 20 | GGTCGATACATCAGGCAACA      | 59.527 | 20 | 196 | 1006 | 1201 |
| 60.029 | 20 | TGCATGATGAGGTCTTCGAG      | 59.942 | 20 | 233 | 6018 | 6250 |
| 58.2   | 23 | TTCTGACTTAATCAATAAAGATAAC | 57     | 27 | 264 | 94   | 357  |
| 59.931 | 20 | CTCCAATCTCCAATCCATGC      | 60.426 | 20 | 243 | 500  | 742  |
| 60.206 | 20 | CAATACAACCTGCCGAGCTGA     | 60.011 | 20 | 119 | 88   | 206  |
| 60.495 | 20 | CCGAAGGGATAGGATTGTTG      | 59.382 | 20 | 163 | 26   | 188  |
| 60.073 | 20 | GAACCTTGCTGTTTTGGATGGA    | 60.103 | 21 | 154 | 103  | 256  |
| 61.008 | 20 | CACGAAATTGATGGAAGAGGA     | 60.059 | 21 | 198 | 344  | 541  |
| 57.914 | 21 | TGAATAAGAGTTCAATGAATTTCA  | 59.912 | 26 | 223 | 48   | 270  |
| 59.924 | 20 | AAGGAGGTGTTATGAAGGGATT    | 58.028 | 22 | 121 | 222  | 342  |
| 58.644 | 21 | ACACGCTTGTCAAACATTTCT     | 57.402 | 21 | 242 | 656  | 897  |
| 60.029 | 20 | TGTGCAGAGGGACTTTAATGC     | 60.264 | 21 | 112 | 385  | 496  |
| 60.008 | 20 | TAAGTTGATGTGTGCAGGGG      | 59.566 | 20 | 254 | 764  | 1017 |
| 59.464 | 20 | ACAAACTAATCAAGTTCCGCA     | 57.439 | 21 | 117 | 222  | 338  |
| 58.785 | 20 | TCAATTATTATCTCGATCCAACCA  | 59.713 | 24 | 275 | 551  | 825  |
| 59.934 | 21 | GACATGATTACTCGTCCCCC      | 59.218 | 20 | 279 | 1338 | 1616 |
| 59.927 | 20 | TTGAACAATGGTACCTCCTCC     | 58.898 | 21 | 144 | 497  | 640  |
| 60.035 | 20 | GAAACTCCAATTTGGCTGA       | 60.051 | 20 | 263 | 701  | 963  |
| 59.874 | 21 | TAGTTCACCAACTCCGGGAC      | 59.966 | 20 | 183 | 5647 | 5829 |
| 59.924 | 20 | TTCTCTTCTATTCTTTCTTTTTT   | 58.425 | 27 | 234 | 79   | 312  |
| 59.588 | 22 | CGGACCGGGTGGTCTAAATA      | 61.972 | 20 | 100 | 2078 | 2177 |

|        |    |                          |        |    |     |      |      |
|--------|----|--------------------------|--------|----|-----|------|------|
| 60.178 | 20 | CATTTGGATCCTCAAGTGGG     | 60.309 | 20 | 127 | 2618 | 2744 |
| 60.074 | 20 | GGCCTGGTAATCCATTCTT      | 60.152 | 20 | 259 | 219  | 477  |
| 58.348 | 21 | CTGTTGCCGTCAGTTTCATGT    | 59.751 | 20 | 161 | 0    | 160  |
| 57.987 | 21 | TTGGGATATCCGTTTCTTGG     | 59.756 | 20 | 256 | 320  | 575  |
| 60.011 | 20 | AACTTCTTTCCAACCGGAAT     | 58.991 | 21 | 200 | 63   | 262  |
| 57.844 | 20 | TTGGATCATGATTTGAGTTTGA   | 59.442 | 23 | 280 | 491  | 770  |
| 57.192 | 20 | AATGACCGATCTCTATCCCA     | 59.925 | 22 | 100 | 344  | 443  |
| 60.014 | 20 | ATGAGAGCCGCACTTTGTCT     | 60.02  | 20 | 195 | 318  | 512  |
| 59.955 | 20 | CAAAGCTCGGTTTAATCTGC     | 59.023 | 21 | 248 | 149  | 396  |
| 60.198 | 20 | ATTGGGGATGGAAAATTGGT     | 60.245 | 20 | 143 | 46   | 188  |
| 59.916 | 20 | AGGCTGCTCTACCACAAGGA     | 60.012 | 20 | 260 | 104  | 363  |
| 59.522 | 20 | GCATGATCAGGGTAAAATCCA    | 59.776 | 21 | 190 | 558  | 747  |
| 60.149 | 20 | TCAGGGTTTTAGCCACAAGG     | 60.103 | 20 | 201 | 304  | 504  |
| 58.288 | 23 | GGAATGAGAACTTTGGAGCC     | 60.067 | 21 | 268 | 0    | 267  |
| 58.743 | 25 | GGGACAACGACTACGGAGAA     | 60.111 | 20 | 266 | 1    | 266  |
| 59.311 | 20 | CATTTCCCTTCTTTCTCCC      | 59.875 | 20 | 228 | 2112 | 2339 |
| 59.982 | 20 | ATCGAACCCACGAGAGCTAA     | 59.836 | 20 | 267 | 2096 | 2362 |
| 59.166 | 20 | AAAATGCTGACATTGGAGGC     | 60.081 | 20 | 208 | 2464 | 2671 |
| 60.376 | 20 | TGAAGCAAAGAACCAGAATCA    | 59.861 | 22 | 190 | 230  | 419  |
| 60.096 | 20 | TGTTATCATTCCACCCACGA     | 59.774 | 20 | 184 | 166  | 349  |
| 59.953 | 20 | CTTGTAGGCAACGGGAAGAG     | 59.869 | 20 | 190 | 45   | 234  |
| 60.042 | 20 | TTGCCTCAACTACCCAAACC     | 59.971 | 20 | 109 | 10   | 118  |
| 60.149 | 20 | CCGAACCACGTACATCCTCT     | 59.989 | 20 | 215 | 475  | 689  |
| 59.401 | 20 | ACAGGGTCGGCTCATTTTTA     | 59.569 | 20 | 254 | 5    | 258  |
| 60.251 | 20 | AGGGGAGGAGGAAGAGGATA     | 59.091 | 20 | 244 | 390  | 633  |
| 59.623 | 20 | TCCCATTTTCGTTTTCTTTA     | 59.655 | 20 | 279 | 5594 | 5872 |
| 60.019 | 20 | GCGGGTCTAACCCAGATGTA     | 59.955 | 20 | 264 | 579  | 842  |
| 59.701 | 20 | GTCTTCTCTCCAATGGCAGC     | 59.957 | 20 | 247 | 429  | 675  |
| 59.522 | 20 | TCAGTTTTCGAGTTATGAAGTTAG | 59.749 | 26 | 102 | 384  | 485  |
| 59.44  | 20 | ATACGAGCCCGAAGGCTTAT     | 60.082 | 20 | 172 | 657  | 828  |
| 59.619 | 21 | TCCTAAGAGATTTGATTGAAAAGC | 59.651 | 25 | 168 | 39   | 206  |
| 59.971 | 20 | AATGCGCTCCCACTTTAAT      | 60.821 | 20 | 163 | 177  | 339  |
| 57.142 | 21 | CCGAGCCCTCTCTCTTCTCT     | 60.23  | 20 | 259 | 455  | 713  |
| 57.459 | 27 | GAATGCTTAATGGGAAGCCA     | 60.038 | 20 | 121 | 2    | 122  |
| 57.235 | 25 | ATGAACCTATTTGTTGCCG      | 59.96  | 20 | 242 | 1    | 242  |
| 59.967 | 20 | CGGGGTGTAACCTGCTTGAT     | 59.993 | 20 | 272 | 1020 | 1291 |
| 61.066 | 20 | TTTTGAGGTGAGAATTGCC      | 60.051 | 20 | 246 | 107  | 352  |
| 59.993 | 20 | GTTATGCGTTTTGACGGGAT     | 59.829 | 20 | 278 | 997  | 1274 |
| 59.67  | 20 | ACACTGAAACCGAACCGAGA     | 60.69  | 20 | 254 | 35   | 288  |
| 60.059 | 20 | GCGTGACTATCCACCGTTTT     | 60     | 20 | 113 | 43   | 155  |
| 59.823 | 20 | CACATGTACGCGCTTTGAT      | 59.895 | 20 | 172 | 6    | 177  |
| 59.853 | 22 | CCCAATTAATTTGCGCCATTG    | 60.144 | 20 | 104 | 456  | 559  |
| 59.797 | 20 | CACCCTCAATCACTCACACG     | 60.154 | 20 | 171 | 361  | 531  |
| 60.27  | 24 | GCCTAGTTGGCACAAACTCC     | 59.74  | 20 | 152 | 598  | 749  |
| 59.705 | 20 | GGATGGTGTTTGTGGCTTGT     | 60.823 | 20 | 148 | 171  | 318  |
| 59.565 | 20 | CAGCTGCCTGCTGTAACCTGA    | 60.347 | 20 | 218 | 12   | 229  |
| 58.775 | 20 | GACCCAGCAATGGGTATATGA    | 59.659 | 21 | 279 | 767  | 1045 |
| 59.905 | 20 | TGTTCCCTGGCAGCTACTCT     | 60.012 | 20 | 243 | 397  | 639  |
| 57.794 | 22 | GCCAGATGCATTTCAATGTG     | 60.08  | 20 | 243 | 104  | 346  |
| 60.119 | 20 | CAAAGGCCCAATGGTTAT       | 59.685 | 20 | 145 | 332  | 476  |
| 59.533 | 20 | GGCAAGTGGGTTACCGATTA     | 59.823 | 20 | 172 | 13   | 184  |
| 59.96  | 20 | GGGATTTGTGGCAAGAAAAA     | 59.916 | 20 | 149 | 343  | 491  |
| 57.631 | 27 | TCCATTTATGGAATCCTTCCC    | 59.971 | 21 | 243 | 9    | 251  |
| 59.989 | 20 | AGGAGTTTCATGCCCTTTT      | 59.94  | 20 | 211 | 435  | 645  |
| 60.088 | 20 | TACCTTTTTGCCCTCGAATG     | 60.067 | 20 | 202 | 688  | 889  |
| 58.407 | 20 | CAATTTCTTGCTGGGTCCTT     | 59.17  | 20 | 280 | 184  | 463  |
| 60.639 | 20 | AACAAGAGAGACAAGGCCGA     | 59.989 | 20 | 136 | 0    | 135  |
| 60.082 | 20 | CGGAAATTATTTTTAACACCCG   | 59.633 | 22 | 255 | 588  | 842  |

|        |    |                           |        |    |     |      |      |
|--------|----|---------------------------|--------|----|-----|------|------|
| 57.369 | 24 | CGTGCAATTA AATTCAAATCTTGT | 59.476 | 24 | 250 | 217  | 466  |
| 59.763 | 20 | TGCGTTTTGATGATATATAGGTGT  | 60.054 | 26 | 121 | 520  | 640  |
| 59.75  | 20 | GAATAACAACAATGAAGTGAA     | 58.585 | 25 | 165 | 148  | 312  |
| 60.103 | 20 | GAAAGCCAGCATTGAAACCT      | 59.316 | 20 | 259 | 79   | 337  |
| 59.667 | 22 | TAAC TTATTAATCGGGTTAAACAA | 58.599 | 27 | 100 | 958  | 1057 |
| 59.966 | 20 | CATCCATGCAATGGAGATGA      | 60.444 | 20 | 216 | 240  | 455  |
| 59.566 | 20 | TGAAATTTGGCCTTGGAAC       | 59.916 | 20 | 269 | 172  | 440  |
| 59.851 | 20 | ATCATTTATTTCCGGCAACGC     | 59.935 | 20 | 135 | 169  | 303  |
| 58.308 | 20 | CGGAACCGGACCATATTAGA      | 59.778 | 20 | 251 | 86   | 336  |
| 59.964 | 20 | GAAGAACAATTACAATGTTTATCC  | 57.771 | 26 | 204 | 75   | 278  |
| 58.821 | 20 | GTACGTTGGAACACGTGGC       | 60.024 | 19 | 223 | 845  | 1067 |
| 59.996 | 20 | TTTTTGCAGGATTTTGGAC       | 60.053 | 20 | 203 | 102  | 304  |
| 60.212 | 20 | CGTAAGATTTTTAAAAGAATTGAT  | 60.128 | 27 | 115 | 135  | 249  |
| 59.989 | 20 | TTAAACCGAATGGCGGTTAC      | 59.832 | 20 | 215 | 13   | 227  |
| 59.997 | 20 | TTAGCACTTCTGCCTGGGTT      | 59.875 | 20 | 226 | 613  | 838  |
| 60.118 | 20 | ATGGTGGCTGCATGTCATTA      | 59.955 | 20 | 190 | 6250 | 6439 |
| 59.971 | 20 | ATTA AATGCGCCTCCCTCTT     | 60.061 | 20 | 179 | 162  | 340  |
| 59.812 | 20 | GAATTGAGTTTTTCAACTCTATGG, | 59.17  | 26 | 252 | 1546 | 1797 |
| 59.976 | 20 | CCCAAAAAGGGATAACATGC      | 59.273 | 20 | 240 | 1003 | 1242 |
| 58.861 | 22 | CCCGCATCACTTGA ACTCTT     | 60.255 | 20 | 238 | 9    | 246  |
| 60.008 | 20 | GTCCACGGAGAGAATGAGA       | 60.199 | 20 | 279 | 160  | 438  |
| 59.685 | 20 | CAATTTGACGTGATTTAACGTGT   | 58.978 | 23 | 240 | 369  | 608  |
| 58.2   | 21 | TTCTGCGACCCTTCACTCTT      | 59.989 | 20 | 280 | 148  | 427  |
| 58.995 | 20 | GGAGGAATTGGGATTTTTGG      | 60.482 | 20 | 101 | 192  | 292  |
| 59.607 | 21 | GGTTGTGGCTCAGAGGGATA      | 60.073 | 20 | 232 | 45   | 276  |
| 59.276 | 23 | TTTTCACCTTCAAATGTCGC      | 58.747 | 20 | 219 | 453  | 671  |
| 60.112 | 20 | CCTCCATGTTCCCTCATCGTC     | 60.475 | 20 | 161 | 548  | 708  |
| 60.096 | 20 | CCGCCATGTTTCGATGATTA      | 61.747 | 20 | 271 | 2174 | 2444 |
| 59.95  | 20 | TCCCCATTTTTGATCACCTC      | 59.727 | 20 | 207 | 73   | 279  |
| 60.223 | 20 | AGGCCGAGTGAAAACCATTA      | 59.569 | 20 | 138 | 203  | 340  |
| 57.536 | 20 | GGGGTTGTA CTCTGGGATA      | 59.67  | 20 | 262 | 88   | 349  |
| 59.691 | 20 | TTTTCCGGAGTTCACCTCAC      | 60.088 | 20 | 273 | 156  | 428  |
| 59.694 | 20 | CGATGTCAAGATGCACAAGG      | 60.263 | 20 | 277 | 2284 | 2560 |
| 59.987 | 18 | TACCACACGTGTTGGCTAGG      | 59.634 | 20 | 280 | 1312 | 1591 |
| 60.219 | 21 | AAACCAATATTTTGC GGTCG     | 59.832 | 20 | 270 | 32   | 301  |
| 59.899 | 21 | ATCTTGCTGCTCCAAGGTGT      | 59.874 | 20 | 130 | 161  | 290  |
| 59.744 | 20 | TGGGTAGGGGTGTTCAAAA       | 60.198 | 20 | 232 | 210  | 441  |
| 60.103 | 21 | AATCATGCTGCATATATAAATGTC  | 57.471 | 26 | 103 | 107  | 209  |
| 60.118 | 21 | ATAGATTGTCCCTCGAACGC      | 59.154 | 20 | 218 | 37   | 254  |
| 60.285 | 20 | TCGGAGCGATAAGGAATCTG      | 60.309 | 20 | 276 | 7    | 282  |
| 59.392 | 23 | GGCGTCGCTGTAATAGTCCT      | 59.364 | 20 | 180 | 329  | 508  |
| 60.197 | 20 | AAAGAAACAATCCAACCCC       | 60.032 | 20 | 216 | 341  | 556  |
| 59.916 | 20 | GACTCCCTTCTCAACTCCC       | 60.05  | 20 | 236 | 92   | 327  |
| 59.875 | 20 | CACTCACTTCTCCGTCACC       | 60.713 | 20 | 166 | 584  | 749  |
| 58.297 | 20 | AGGGCATCACTAGAAAGCCA      | 59.836 | 20 | 224 | 32   | 255  |
| 59.872 | 20 | AATCATTTTTCCGCACCCATA     | 60.153 | 20 | 171 | 92   | 262  |
| 58.397 | 23 | CAAATTGATTATGAAGAAATTGGA  | 58.222 | 25 | 269 | 578  | 846  |
| 59.931 | 20 | GCGGTTCCATACAGTGACCT      | 59.997 | 20 | 219 | 460  | 678  |
| 59.801 | 20 | AGGGTTTTTCTGGGGAGAGA      | 60.045 | 20 | 262 | 3    | 264  |
| 60.127 | 23 | CACACACACTCTATAAAATGCACT  | 60.501 | 26 | 114 | 420  | 533  |
| 59.728 | 20 | ATTTGTGGGTGGTTCGTGAT      | 60.096 | 20 | 252 | 840  | 1091 |
| 59.955 | 20 | GAACGAGGAGAAGGACATGC      | 59.81  | 20 | 172 | 42   | 213  |
| 60.159 | 20 | GTCCACTTTGTTTCTGCTGCT     | 59.534 | 21 | 100 | 311  | 410  |
| 60.07  | 20 | ACCTCTCATACCGTTCCAG       | 60.112 | 20 | 182 | 7    | 188  |
| 60.444 | 20 | TGCATATCTTGGTGAGTGATGG    | 59.897 | 23 | 148 | 333  | 480  |
| 60.088 | 20 | TCACTGGCTTGAGTTTGACG      | 60.025 | 20 | 186 | 263  | 448  |
| 59.006 | 21 | TCATCGAATCACATGCTTGC      | 60.79  | 20 | 199 | 1469 | 1667 |
| 59.864 | 20 | GACGGTCAGCCACTCAATCT      | 60.269 | 20 | 196 | 103  | 298  |

|        |    |                          |        |    |     |      |      |
|--------|----|--------------------------|--------|----|-----|------|------|
| 60.034 | 20 | TTGGGAGAATTTTCAACTCTTG   | 58.352 | 22 | 191 | 77   | 267  |
| 59.089 | 24 | CACAAAGGCAGCACTTGTTT     | 59.49  | 20 | 246 | 7    | 252  |
| 59.894 | 20 | AAATCAAATGGGAATGTCCG     | 59.622 | 20 | 134 | 18   | 151  |
| 59.992 | 20 | TTCTTTCCCTCCAAAACAA      | 59.518 | 20 | 218 | 846  | 1063 |
| 60.111 | 20 | TTTCTCTCTTGGTTGGTGAAGA   | 58.955 | 22 | 105 | 158  | 262  |
| 57.424 | 20 | CCACGGTTCCTTGGAATTG      | 60.22  | 20 | 206 | 491  | 696  |
| 60.025 | 20 | ACACGAGTGTGGAAAGGGAG     | 60.151 | 20 | 161 | 59   | 219  |
| 59.556 | 20 | AAGGCCAAACGAGAGCTACA     | 60.015 | 20 | 160 | 187  | 346  |
| 59.924 | 20 | TTCCGGTCCAAACCAAATTA     | 60.16  | 20 | 221 | 142  | 362  |
| 60.009 | 20 | TCTCGTCCTCCTTCGACACT     | 59.986 | 20 | 225 | 1    | 225  |
| 59.741 | 20 | CGATACCATCATCCCAATCC     | 59.975 | 20 | 203 | 545  | 747  |
| 60.266 | 20 | AATTTACACCTGTCCCTGCG     | 59.993 | 20 | 130 | 247  | 376  |
| 60.309 | 20 | TTGAGTCGAGGAAGATCGGT     | 59.803 | 20 | 112 | 705  | 816  |
| 60.252 | 20 | ATTGGCAAATATGCGAGGAC     | 59.929 | 20 | 132 | 29   | 160  |
| 58.554 | 22 | ATCGGTTATCACCGGATCG      | 60.697 | 19 | 160 | 310  | 469  |
| 59.799 | 21 | CTCGAGTGAGACCGAAGTGA     | 59.125 | 20 | 239 | 76   | 314  |
| 58.994 | 20 | ATTCAAAGGGCATTTCGTC      | 59.022 | 20 | 158 | 340  | 497  |
| 59.96  | 24 | TTTTTATACAAGGGGCGGAA     | 59.429 | 20 | 150 | 71   | 220  |
| 60.049 | 20 | CTCTGCTGTGAGCATTTCGAT    | 59.143 | 20 | 143 | 64   | 206  |
| 59.635 | 20 | ATGTAAGGCCATAATCGCA      | 60.31  | 20 | 131 | 699  | 829  |
| 59.802 | 24 | TGATAACCTTGAGGAAACTTGC   | 58.378 | 22 | 278 | 9    | 286  |
| 61.391 | 20 | GGGTGGGTTTGAAAAGAGT      | 60.204 | 20 | 272 | 78   | 349  |
| 59.989 | 20 | AAATGCCAAATAAAGCTAAATCC  | 57.912 | 23 | 252 | 2781 | 3032 |
| 60.096 | 20 | CTATGCATGGGTTCCGTTCT     | 59.955 | 20 | 165 | 25   | 189  |
| 59.984 | 20 | GGCAAATCCCACAAAAGAA      | 59.916 | 20 | 262 | 80   | 341  |
| 59.656 | 20 | TTTCGCCCTTCTAGAGTCA      | 59.948 | 20 | 217 | 1    | 217  |
| 57.555 | 23 | TCAAGGAGGGTGTATGAGGC     | 60.073 | 20 | 267 | 5    | 271  |
| 60.147 | 20 | CCATGTTTGTATTATTGTAGGGA, | 58.388 | 25 | 108 | 87   | 194  |
| 59.933 | 20 | CCTAGAACTGGCCTCACGAC     | 59.867 | 20 | 156 | 74   | 229  |
| 60.081 | 20 | GAGAGAGAGGCAGACATCGG     | 60.096 | 20 | 202 | 82   | 283  |
| 60.074 | 20 | GGCCCTATGCATGTGAAGTT     | 59.962 | 20 | 268 | 432  | 699  |
| 58.674 | 20 | TCACTCTCGAGCCTAACCGT     | 60.012 | 20 | 211 | 441  | 651  |
| 58.199 | 26 | ATGTTGAAACCCTTCCCAT      | 60.422 | 20 | 280 | 2976 | 3255 |
| 59.019 | 20 | GGATTCCTCCTTCCTTG        | 60.008 | 20 | 202 | 116  | 317  |
| 59.987 | 20 | TGAGAACCCGGTTTGATTTT     | 59.91  | 20 | 263 | 6511 | 6773 |
| 58.093 | 27 | AATCGAACCTGGGTCTCTCA     | 59.655 | 20 | 172 | 10   | 181  |
| 60.081 | 20 | GAATCACACCAACGCCTTTT     | 59.978 | 20 | 158 | 4067 | 4224 |
| 58.124 | 25 | GGTTTTGACATAACTTAGGTGTTT | 59.358 | 26 | 119 | 0    | 118  |
| 59.834 | 20 | TCTTTTCGTCGTTTCATTGCAG   | 59.988 | 20 | 165 | 233  | 397  |
| 60.029 | 20 | TGCACCACGTCATCTTCTTC     | 59.837 | 20 | 230 | 1114 | 1343 |
| 59.933 | 20 | CCTTCCTTCCTTCCAACCC      | 59.912 | 20 | 256 | 10   | 265  |
| 60.162 | 20 | AAATTGGCATTGTGAAGCC      | 59.945 | 20 | 182 | 748  | 929  |
| 59.777 | 19 | TGGGTGGAACCCTAGATGAC     | 59.779 | 20 | 164 | 64   | 227  |
| 60.103 | 20 | TTCTCACCACTGTCAACCA      | 59.294 | 21 | 252 | 1000 | 1251 |
| 59.902 | 20 | GGGTATGATTCGAACTGCGT     | 59.962 | 20 | 246 | 0    | 245  |
| 60.538 | 20 | ATGAAAAATGAGGGCTGCAA     | 60.585 | 20 | 273 | 972  | 1244 |
| 59.04  | 20 | AACTGAGTCCCCTACCCGAT     | 59.817 | 20 | 275 | 134  | 408  |
| 59.724 | 22 | TGGCTACAATAACAACGCCAA    | 60.133 | 20 | 190 | 96   | 285  |
| 61.606 | 20 | AAAATCGTCCCAAATCCCTC     | 60.131 | 20 | 174 | 0    | 173  |
| 58.844 | 21 | CTGAGCAATCTGTTTCGTCCA    | 59.984 | 20 | 224 | 85   | 308  |
| 59.541 | 20 | TGGGTTTTGCTGTCTTTTCC     | 60.088 | 20 | 178 | 6    | 183  |
| 60.218 | 20 | GGGGTTAAGATTTGGGGAAC     | 59.51  | 20 | 255 | 70   | 324  |
| 59.845 | 20 | ATAGGCTTGGGAAAGCAGGT     | 60.096 | 20 | 276 | 408  | 683  |
| 59.811 | 20 | CGATAAATGGTTGACGGCTT     | 59.96  | 20 | 162 | 300  | 461  |
| 60.081 | 20 | CCGACCTAGCATAGTGGGAA     | 60.088 | 20 | 263 | 1403 | 1665 |
| 60.12  | 20 | CCTCTGCAGCTTCCAAAGAC     | 60.134 | 20 | 136 | 1061 | 1196 |
| 60.969 | 20 | CGCATCATGTTGTTGGAAGT     | 59.572 | 20 | 238 | 983  | 1220 |
| 59.967 | 20 | TCGGAGTGTTACCGTCTTCC     | 60.111 | 20 | 262 | 668  | 929  |

|        |    |                          |        |    |     |      |      |
|--------|----|--------------------------|--------|----|-----|------|------|
| 60.431 | 18 | GTCACCTGCGGGTATTGGAC     | 60.384 | 20 | 149 | 43   | 191  |
| 59.284 | 20 | GCATAGTTCATTCAAAAATGTCTG | 58.689 | 23 | 211 | 689  | 899  |
| 57.497 | 27 | TTTAAACTGACGGCCGAGAT     | 59.708 | 20 | 161 | 68   | 228  |
| 60.61  | 20 | TCCTCTCCAGCCAAAAGAA      | 59.926 | 20 | 203 | 278  | 480  |
| 60.12  | 20 | CCCAAAAATTGAACATATCGAA   | 58.848 | 22 | 194 | 546  | 739  |
| 60.039 | 20 | TCGAGATGGGGTGCTTTTAC     | 60.074 | 20 | 234 | 97   | 330  |
| 59.871 | 20 | GCCTTCTAGCATCTCTTGCTCA   | 61.155 | 22 | 234 | 176  | 409  |
| 59.923 | 20 | GATGATGATTGCCCATTTT      | 59.587 | 20 | 132 | 300  | 431  |
| 59.228 | 21 | GCAAACGATCAATCCCTGTT     | 59.939 | 20 | 270 | 741  | 1010 |
| 59.647 | 20 | GGTTAAAGATCAAACCAAACACG  | 59.801 | 23 | 276 | 99   | 374  |
| 60.096 | 20 | CACATGGATAGAAGGGGTGG     | 60.187 | 20 | 192 | 898  | 1089 |
| 60.051 | 20 | TTTTGGATCCGAACATCCAT     | 60.133 | 20 | 278 | 1571 | 1848 |
| 59.951 | 20 | ATGTAATTCATTACGCGCA      | 60.103 | 20 | 112 | 42   | 153  |
| 59.813 | 20 | ACGTTGATAAGCCATCCAG      | 59.955 | 20 | 229 | 12   | 240  |
| 59.946 | 20 | AACCTCATTGCTCTCCGCTA     | 59.978 | 20 | 144 | 323  | 466  |
| 60.853 | 20 | CGCCTTTATGTGACGTGGTA     | 59.609 | 20 | 258 | 2450 | 2707 |
| 60.019 | 20 | TAAGACTGGTGGGAGTTGGG     | 59.959 | 20 | 187 | 275  | 461  |
| 59.731 | 26 | ACGGCGGAAACATTAGACAG     | 60.132 | 20 | 208 | 86   | 293  |
| 60.103 | 20 | TAACCCCAAAGCTATGCAC      | 59.96  | 20 | 274 | 496  | 769  |
| 60.249 | 20 | TCCCAAAGCAATAATGCAA      | 59.146 | 20 | 268 | 285  | 552  |
| 59.769 | 20 | GTTGGACTTTTGGCCTTTGT     | 59.077 | 20 | 176 | 332  | 507  |
| 59.988 | 20 | TCTCACGTCTCACACCCTTG     | 59.864 | 20 | 255 | 15   | 269  |
| 60.386 | 20 | TCGTGTTCTATATTCCCGTATCG  | 60.226 | 23 | 102 | 957  | 1058 |
| 60.006 | 20 | TTGACCACAGCAGTACGACC     | 59.751 | 20 | 217 | 324  | 540  |
| 59.156 | 23 | ACCACGCCAGTCAGGTAAAC     | 60.035 | 20 | 220 | 318  | 537  |
| 59.405 | 20 | AGACACATGCACTCGCTACG     | 60.08  | 20 | 154 | 211  | 364  |
| 59.996 | 20 | GGCGAGCCATATGTCATTTT     | 59.929 | 20 | 114 | 3603 | 3716 |
| 59.805 | 20 | TGTGGATCTTGGTTTGGTGT     | 58.827 | 20 | 254 | 205  | 458  |
| 58.903 | 20 | GTGTTGGTGGACGAGGAACT     | 60.009 | 20 | 186 | 45   | 230  |
| 59.967 | 20 | CCCAACTGTTTCAGCCATTT     | 59.971 | 20 | 121 | 545  | 665  |
| 59.596 | 20 | ATCGTATTTTCATCGACGCC     | 59.929 | 20 | 151 | 475  | 625  |
| 60.733 | 20 | TGGAGAGGGTTGTTGGTGAT     | 60.363 | 20 | 101 | 107  | 207  |
| 60.041 | 20 | GGTATTTATGATATTTCCAACAC  | 57.935 | 26 | 228 | 11   | 238  |
| 60.532 | 20 | CCACTAGGGGTGGCAATCTA     | 59.948 | 20 | 229 | 1235 | 1463 |
| 58.743 | 20 | GGGCGAGTTAAGCTCGAATA     | 59.456 | 20 | 239 | 27   | 265  |
| 60.015 | 20 | GAACTCAAAGTGGTTGGGA      | 59.943 | 20 | 244 | 333  | 576  |
| 59.293 | 20 | GCTGGATTGGCATCATTTTT     | 59.907 | 20 | 246 | 107  | 352  |
| 60.626 | 20 | GCTTGATTTTCTTCTCTCCC     | 60.017 | 20 | 156 | 33   | 188  |
| 57.53  | 21 | CGGTCCAGTCTAAACCCAAA     | 59.964 | 20 | 260 | 32   | 291  |
| 59.926 | 21 | ATGGCGAAGAAAGCTACCAA     | 59.845 | 20 | 267 | 41   | 307  |
| 60.488 | 20 | TGTTTTCTAAAAATAGGACACACC | 59.056 | 25 | 224 | 155  | 378  |
| 57.837 | 20 | GCCTATCAGGTCGTTGTGGT     | 59.997 | 20 | 148 | 34   | 181  |
| 59.978 | 20 | CCCTTTTCGATCCTTTGTGA     | 60.044 | 20 | 157 | 73   | 229  |
| 58.941 | 21 | AAGTTGGTTTCCACAGACG      | 60.005 | 20 | 162 | 114  | 275  |
| 60.519 | 20 | TCCAATTGCAGCATTTAACAA    | 59.359 | 21 | 216 | 446  | 661  |
| 59.316 | 20 | TTGGACAAAAGTACCAGGGC     | 59.971 | 20 | 272 | 1493 | 1764 |
| 59.261 | 22 | ATTTTCGGTGAATGCAAGACC    | 59.939 | 20 | 280 | 1467 | 1746 |
| 58.558 | 27 | GCACCACACCGAACTCAATA     | 59.572 | 20 | 206 | 39   | 244  |
| 59.288 | 20 | TCATATGTCACGTTAAGACATGGA | 59.406 | 24 | 223 | 382  | 604  |
| 59.944 | 20 | GACGACAACGTTGGTGTGTTG    | 60.049 | 20 | 162 | 980  | 1141 |
| 59.734 | 20 | TCCATGTGTATGCTGCTGGT     | 60.144 | 20 | 213 | 299  | 511  |
| 60.088 | 20 | GGTGTGAAGAACTCCCTTGG     | 59.549 | 20 | 158 | 28   | 185  |
| 59.769 | 20 | ACGCAAATCCTAACAGTGGG     | 59.993 | 20 | 254 | 1082 | 1335 |
| 59.872 | 20 | GATGATGGGGAGGGTAGGTT     | 60.015 | 20 | 182 | 20   | 201  |
| 59.803 | 20 | CCGAGGTGGAGTAGTATCCG     | 59.569 | 20 | 176 | 339  | 514  |
| 57.301 | 23 | GGAATACGATTCCGAGCATC     | 59.491 | 20 | 270 | 1    | 270  |
| 59.861 | 24 | TCCGGAATTAGGTGAAAGCA     | 60.576 | 20 | 160 | 213  | 372  |
| 60.441 | 23 | CACGTTTCTTTAACCGCCTC     | 59.747 | 20 | 220 | 21   | 240  |

|        |    |                          |        |    |     |      |      |
|--------|----|--------------------------|--------|----|-----|------|------|
| 60.605 | 20 | CTCTGTCACCCCAGAAAACC     | 59.549 | 20 | 127 | 1551 | 1677 |
| 60.042 | 20 | GCCCTCATGACTCTCAGCAT     | 60.381 | 20 | 280 | 824  | 1103 |
| 59.691 | 20 | AACACCTTAAATGTCGCCG      | 59.996 | 20 | 221 | 78   | 298  |
| 58.93  | 20 | CATGTGTCTTATGTTTCGCAGG   | 59.209 | 21 | 236 | 2510 | 2745 |
| 58.079 | 23 | GCTACCTTTTTGACCTACGG     | 60.008 | 21 | 254 | 26   | 279  |
| 59.578 | 21 | TGTTGTTCCGGTTGATTTGA     | 59.941 | 20 | 101 | 51   | 151  |
| 60.713 | 20 | GAGTTTGGGAGTTGAGCTGG     | 59.844 | 20 | 228 | 570  | 797  |
| 59.826 | 20 | AATTGCGGAGTTGCTGTTTC     | 60.257 | 20 | 278 | 5190 | 5467 |
| 60.001 | 20 | TCCTGAAAGCAAGCAAAGGT     | 59.993 | 20 | 170 | 1102 | 1271 |
| 61.031 | 20 | CAAAGGCCACAATGGTTAT      | 59.685 | 20 | 110 | 17   | 126  |
| 58.51  | 27 | TTCCCCAGTGTACACAGAC      | 59.55  | 20 | 122 | 3    | 124  |
| 57.083 | 25 | AGTGACCACCCAACCACAAT     | 60.135 | 20 | 216 | 66   | 281  |
| 60.626 | 20 | CCCACAAAATAGGGGGAAAA     | 60.873 | 20 | 175 | 233  | 407  |
| 60.184 | 20 | TCACTCTCATCTCTCTCACCTCA  | 59.19  | 23 | 258 | 142  | 399  |
| 59.916 | 20 | TCTTATGCCAACAAGACGAAAA   | 59.758 | 22 | 178 | 25   | 202  |
| 58.264 | 25 | TATATGCTCGCGTTTCATGC     | 59.832 | 20 | 146 | 272  | 417  |
| 59.062 | 20 | AGCAATGTTGTTGGGTGGTT     | 60.277 | 20 | 135 | 1118 | 1252 |
| 58.273 | 23 | AGATCTGCTCACCAATCGCT     | 59.981 | 20 | 272 | 15   | 286  |
| 59.864 | 20 | AAATCGTGTTCGTGCATCA      | 60.119 | 20 | 209 | 213  | 421  |
| 60.366 | 20 | CTTGCCTAACTCCTCCTCCC     | 60.204 | 20 | 208 | 81   | 288  |
| 59.943 | 20 | GATTTCTTTGGGCAGAACCA     | 60.051 | 20 | 107 | 757  | 863  |
| 57.552 | 24 | CGAGAAAGGTTTCTTCGCAC     | 59.993 | 20 | 220 | 6    | 225  |
| 59.894 | 20 | GGTCTTTTGTGTTAACATCATGC  | 58.553 | 23 | 223 | 292  | 514  |
| 59.072 | 20 | ATCAGCTGTCCCTTTTCCCT     | 60.074 | 20 | 260 | 155  | 414  |
| 59.956 | 21 | GACGGAGGTGATTCTTTGGA     | 60.05  | 20 | 190 | 256  | 445  |
| 57.734 | 23 | AAAATGAAATTGATCATTTGAGGA | 58.904 | 24 | 254 | 56   | 309  |
| 59.962 | 20 | GAGGCAACTTGGGAATTGAA     | 60.051 | 20 | 273 | 2324 | 2596 |
| 60.615 | 20 | GACTCTGCATTTGAGTCGCC     | 60.956 | 20 | 265 | 387  | 651  |
| 60.061 | 23 | CCTTCCTTTTGCTTGTTGGA     | 60.22  | 20 | 133 | 142  | 274  |
| 57.606 | 22 | TCACCATAGGATTCTCTCAATCTG | 59.615 | 24 | 275 | 12   | 286  |
| 57.588 | 23 | GGGTTCCCACGTCATAAAAA     | 59.662 | 20 | 104 | 1412 | 1515 |
| 59.518 | 20 | TCTGCATTCTTGATATCGG      | 59.792 | 20 | 163 | 1285 | 1447 |
| 58.842 | 22 | TCAGCCTTATCTCTTGCCGT     | 59.978 | 20 | 196 | 16   | 211  |
| 59.996 | 20 | AATGGCTGTGGAGAATCCAG     | 60.073 | 20 | 189 | 201  | 389  |
| 60.017 | 20 | CGGTTCCAAATTGCTCCTAC     | 59.569 | 20 | 244 | 357  | 600  |
| 58.885 | 22 | AAGCCTCCAGATTTAAGCCC     | 59.688 | 20 | 267 | 76   | 342  |
| 60.334 | 21 | ACGCCAGCCTCACTCAA        | 60.557 | 18 | 131 | 3    | 133  |
| 59.803 | 20 | TGTTCTTGTGTGTGTGCGTG     | 60.412 | 20 | 272 | 627  | 898  |
| 59.664 | 20 | ACGGAAAAAGGACTCCGACT     | 60.11  | 20 | 277 | 246  | 522  |
| 60.006 | 20 | CGTTCCTATGGCCAGATA       | 60.435 | 18 | 174 | 36   | 209  |
| 60.039 | 21 | AAACCCGGAATGGGTAAAAA     | 60.393 | 20 | 279 | 8    | 286  |
| 59.485 | 21 | TCGACCTCGTGCTAATGATG     | 59.823 | 20 | 217 | 192  | 408  |
| 58.909 | 20 | ACGGATCGGAAATCCATAAA     | 59.23  | 20 | 193 | 994  | 1186 |
| 60.292 | 20 | GAGATCGGAGTGAATCTGGC     | 59.952 | 20 | 151 | 60   | 210  |
| 60.177 | 20 | ACATACGTTCCCTCGGACAGC    | 60.142 | 20 | 158 | 328  | 485  |
| 60.134 | 20 | GCACAATTAATGCGCGATA      | 59.705 | 20 | 171 | 131  | 301  |
| 60.088 | 20 | GCAGCAGCTGAATCACAACT     | 59.195 | 20 | 145 | 1595 | 1739 |
| 59.691 | 20 | ATCAGAGCCGAGGTTGAGAA     | 59.95  | 20 | 144 | 7    | 150  |
| 60.255 | 20 | CTACAAAATGCGCGAGATCA     | 59.976 | 20 | 210 | 3425 | 3634 |
| 59.293 | 20 | GGGGAACCTTAATTTTGTGCC    | 59.708 | 21 | 246 | 448  | 693  |
| 60.539 | 20 | CCGTTGAGCCGAATGTTTTA     | 60.989 | 20 | 280 | 44   | 323  |
| 60.214 | 23 | CCTGTGTGTGCTCCAATCTG     | 60.309 | 20 | 214 | 790  | 1003 |
| 60.408 | 21 | ACGAAATTGCCCTTGATGC      | 59.967 | 20 | 203 | 84   | 286  |
| 60.088 | 20 | ATCACATCATCCTCCCCTTG     | 59.737 | 20 | 266 | 1    | 266  |
| 59.883 | 20 | TTTCGTGTGTGTTTCTCTCG     | 59.873 | 20 | 229 | 108  | 336  |
| 61.021 | 20 | AGAATTCTGCCTCCTGCAAA     | 59.955 | 20 | 196 | 1857 | 2052 |
| 60.593 | 20 | ATCGATGTGTTGGCATTCAA     | 59.931 | 20 | 193 | 246  | 438  |
| 60.155 | 20 | ACGTTCCGGTCTGTATTTCCG    | 59.993 | 20 | 259 | 2347 | 2605 |

|        |    |                           |        |    |     |      |      |
|--------|----|---------------------------|--------|----|-----|------|------|
| 60.096 | 20 | TCTCAACCATCACGAAATGC      | 59.654 | 20 | 269 | 1280 | 1548 |
| 59.107 | 21 | TGAAATTTGGAAATAAGGAGGTG   | 59.382 | 23 | 102 | 686  | 787  |
| 60.04  | 20 | TCTTTTCAGCACAAATGCGAG     | 60.134 | 20 | 246 | 3328 | 3573 |
| 59.64  | 26 | CTGAAGGCCGATATTTGCTC      | 59.807 | 20 | 264 | 907  | 1170 |
| 59.923 | 20 | CATGTGGACCATCGATCTTG      | 59.918 | 20 | 173 | 13   | 185  |
| 60.096 | 20 | GTCAGACCAGCTCCCCTTC       | 59.783 | 19 | 192 | 1002 | 1193 |
| 59.995 | 20 | TTGACCAAGGTGAGAATTTGAA    | 59.587 | 22 | 216 | 27   | 242  |
| 61.066 | 20 | TGGATTTTCATCATCAAGTCTCC   | 58.984 | 22 | 208 | 51   | 258  |
| 60.229 | 20 | ACGGCAGCTTCTCTCATGTT      | 60.02  | 20 | 213 | 816  | 1028 |
| 59.998 | 20 | ATTGATTGTTAGCGGATGGC      | 59.929 | 20 | 224 | 830  | 1053 |
| 59.212 | 20 | TTGTGAATGTGGTTTATTTGCG    | 59.742 | 22 | 136 | 12   | 147  |
| 59.801 | 20 | TCTCAAACCGTGAGATGAGATT    | 58.792 | 22 | 183 | 962  | 1144 |
| 59.931 | 23 | TTCCGTTTGAACTTTTCATTTTT   | 59.098 | 23 | 277 | 194  | 470  |
| 59.395 | 20 | CGGATTTAAAGGTTATTACCTGAT  | 58.157 | 25 | 223 | 889  | 1111 |
| 60.151 | 20 | GCCTTTGCCCTTTCTCTAT       | 59.688 | 20 | 263 | 85   | 347  |
| 60.723 | 20 | TTTCCGAATATGAAAACCGC      | 59.907 | 20 | 257 | 104  | 360  |
| 60.102 | 23 | TGGATATGGTTTTTGCAGGG      | 60.692 | 20 | 168 | 89   | 256  |
| 59.273 | 20 | TCGTCCAACCAAATTGTTGAT     | 60.22  | 21 | 268 | 607  | 874  |
| 60.656 | 18 | TGACAATGTTATCGATGGCG      | 60.488 | 20 | 169 | 5    | 173  |
| 59.973 | 20 | CGTACGCATGTTCAATTTGG      | 59.992 | 20 | 168 | 2171 | 2338 |
| 59.789 | 20 | TGTCGAGACAATCGTGGAGA      | 60.402 | 20 | 244 | 467  | 710  |
| 58.991 | 21 | GGTTTTAAATAGCGCGTTG       | 59.624 | 20 | 156 | 326  | 481  |
| 59.823 | 20 | AATTAAGATTTTCGGGAAATTAGTC | 57.21  | 25 | 243 | 167  | 409  |
| 57.308 | 27 | ATCAAAAATCCAATTGGCCC      | 60.865 | 20 | 179 | 11   | 189  |
| 59.61  | 18 | TGCAACTCCAATAAAGAATTTGG   | 60.342 | 23 | 254 | 26   | 279  |
| 60.227 | 20 | CGAACAAGGGAAAACAATGG      | 60.336 | 20 | 264 | 276  | 539  |
| 59.705 | 20 | CAATCAACATGCAAGCATCA      | 59.232 | 20 | 194 | 4    | 197  |
| 60.012 | 20 | AAACAGCCGTTATCAGCCAC      | 60.14  | 20 | 254 | 80   | 333  |
| 60.029 | 20 | CCTTGGCTATAAAAAGGGGC      | 59.93  | 20 | 161 | 532  | 692  |
| 60.188 | 20 | GCGGGTAAATATCAGTTTTTGA    | 58.2   | 22 | 237 | 191  | 427  |
| 59.901 | 20 | TTTGTGATGCTCCATGCTTC      | 59.805 | 20 | 168 | 378  | 545  |
| 59.846 | 20 | TCAAGGGTTAGGGCTTGCTA      | 59.839 | 20 | 186 | 195  | 380  |
| 59.653 | 20 | AATTGAATGGCAAGGATTGG      | 59.762 | 20 | 184 | 2116 | 2299 |
| 59.717 | 20 | CGCCATTTTAGTGGTGGAAAC     | 60.365 | 20 | 222 | 104  | 325  |
| 59.989 | 21 | GTCCTCCGAACACTCATGGTGT    | 59.969 | 20 | 256 | 54   | 309  |
| 60.134 | 20 | AACCTCAGTGTGCAGCAGA       | 59.622 | 20 | 275 | 179  | 453  |
| 59.903 | 20 | TGCGATTCTGGAAGTGAATG      | 59.799 | 20 | 175 | 583  | 757  |
| 59.91  | 20 | GTACGGTTGCTCATCAGCCT      | 60.285 | 20 | 264 | 1891 | 2154 |
| 59.957 | 20 | TTTCCCACCGAAAGCTACAG      | 60.241 | 20 | 255 | 2060 | 2314 |
| 60.786 | 20 | CTCTGAGCTTGGGAAACCAG      | 59.982 | 20 | 100 | 373  | 472  |
| 60.659 | 20 | CCCAAGACCCCAATTTGATT      | 60.91  | 20 | 260 | 381  | 640  |
| 60.22  | 20 | GGAGTGTAATCAAATGAGAGCAA   | 59.672 | 24 | 178 | 67   | 244  |
| 60.361 | 20 | GTGCTTTGTGTTGGTGGATG      | 60.008 | 20 | 243 | 487  | 729  |
| 59.953 | 20 | TGTTTCATGTGTCCATGTTTCA    | 59.864 | 22 | 235 | 2567 | 2801 |
| 59.803 | 20 | ATGAAACTGCGTTCCCACTC      | 60.119 | 20 | 246 | 530  | 775  |
| 60.32  | 20 | GGTTCTCACAGGAGGGTTCA      | 60.088 | 20 | 177 | 53   | 229  |
| 59.157 | 20 | TGCATAGGTTGTTTCATCATCTT   | 58.642 | 23 | 265 | 243  | 507  |
| 59.894 | 20 | ATGTTTTTTCGGATCCCTTCC     | 60.131 | 20 | 228 | 10   | 237  |
| 60.035 | 20 | AGTGGGGAGCCTTACCTTGT      | 59.994 | 20 | 265 | 180  | 444  |
| 59.928 | 20 | GCGAAGAAACATTCAGGGAA      | 60.192 | 20 | 171 | 9    | 179  |
| 60.088 | 20 | AGGCCTAAAATGCAAGCTCA      | 59.982 | 20 | 252 | 2030 | 2281 |
| 59.982 | 20 | CCCCAACAAAAACACCAAAC      | 60.103 | 20 | 262 | 2634 | 2895 |
| 59.52  | 20 | ACCTTCACCAATCACTGCCT      | 59.579 | 20 | 222 | 632  | 853  |
| 58.923 | 20 | ACCTGGACTCATGTGGCTTC      | 60.12  | 20 | 264 | 1366 | 1629 |
| 60.277 | 20 | TTTGTCTCCACATTCATGG       | 59.343 | 20 | 180 | 632  | 811  |
| 58.544 | 21 | AAAGCCTACCTTGCTTCCGT      | 60.262 | 20 | 233 | 35   | 267  |
| 59.778 | 20 | TGCCATTAATGACGGTGAAA      | 59.93  | 20 | 176 | 15   | 190  |
| 59.047 | 23 | CCGAAAATGTGGATGAAA        | 59.31  | 19 | 280 | 10   | 289  |



|        |    |                           |        |    |     |      |      |
|--------|----|---------------------------|--------|----|-----|------|------|
| 60.168 | 20 | TCACCAAATCTATAGTTATCACA   | 59.412 | 27 | 170 | 342  | 511  |
| 59.917 | 20 | AGCAGCAAGAACAAGGTGGT      | 59.914 | 20 | 252 | 770  | 1021 |
| 59.731 | 23 | AGAACATCAGCGGGCATATC      | 60.066 | 20 | 173 | 236  | 408  |
| 59.919 | 20 | ATTTCTCACTGACTTGGGCG      | 60.255 | 20 | 126 | 172  | 297  |
| 61.003 | 20 | TGTGTGTGTCCAGTAGGGCA      | 61.223 | 20 | 280 | 784  | 1063 |
| 59.811 | 20 | TTAAACCCTAAAAACGCGCA      | 60.593 | 20 | 279 | 323  | 601  |
| 59.36  | 24 | GCAGTGGATTTTTGGTGATG      | 58.976 | 20 | 212 | 1637 | 1848 |
| 59.784 | 20 | CGTGTGGATTGTAGCAGGTG      | 60.175 | 20 | 170 | 24   | 193  |
| 60.195 | 20 | AAACCCAGTAATCTCAGCCG      | 59.195 | 20 | 119 | 7    | 125  |
| 60.016 | 20 | TATTGACGCGTTTTGGCATA      | 60.096 | 20 | 223 | 134  | 356  |
| 58.943 | 20 | TGACGTGGCATTTCAGAGA       | 60.39  | 20 | 263 | 18   | 280  |
| 59.872 | 20 | TTCGTTTGGCATGTTTGTGT      | 60.011 | 20 | 267 | 296  | 562  |
| 60.315 | 23 | CATTGTACTACATGGATGAATGAT  | 60.03  | 26 | 223 | 388  | 610  |
| 58.995 | 25 | TTGACGTTTCACCTAACCCA      | 59.021 | 20 | 208 | 258  | 465  |
| 59.779 | 20 | GCAAGACCTCCACACACAAA      | 59.726 | 20 | 274 | 234  | 507  |
| 60.448 | 20 | CAAAAGGCCCTCAATGGTTA      | 59.931 | 20 | 135 | 3020 | 3154 |
| 60.017 | 20 | TTGCCCAACTCATGTAGCAG      | 59.864 | 20 | 276 | 466  | 741  |
| 60.186 | 20 | TATTTGAGAAATGGCACCC       | 59.901 | 20 | 273 | 143  | 415  |
| 60.038 | 20 | TGCGTTTTGACAATATATAGGTGT  | 60.083 | 26 | 194 | 2885 | 3078 |
| 59.91  | 20 | CACCCTCTCCGAACAACATT      | 59.966 | 20 | 224 | 775  | 998  |
| 59.866 | 20 | TCGGAGTAGATCTCAACACGC     | 60.412 | 21 | 239 | 43   | 281  |
| 59.844 | 20 | TAAACGCCGGTGAGTAATC       | 59.96  | 20 | 138 | 314  | 451  |
| 59.969 | 20 | ATACCGCCTAACCTATCCC       | 59.182 | 20 | 257 | 0    | 256  |
| 59.655 | 20 | ATCGAAACACATCCCCAAA       | 60.17  | 20 | 222 | 352  | 573  |
| 60.096 | 20 | TCAACCTCGCAGATTGATTC      | 58.799 | 20 | 175 | 1148 | 1322 |
| 58.792 | 20 | AAAACCAATGGTGGAGCAAG      | 59.971 | 20 | 236 | 896  | 1131 |
| 60.168 | 20 | AATGCTCGAGGGCTAAAACA      | 59.845 | 20 | 208 | 138  | 345  |
| 59.071 | 21 | TTGATCGATTGTTTTCTTGGC     | 60.067 | 21 | 147 | 668  | 814  |
| 60.209 | 26 | GCAATAAGTGAGTGACTTCCCC    | 60.004 | 22 | 222 | 14   | 235  |
| 59.911 | 20 | TGAAGTGTTATGCGTTTTGACA    | 59.274 | 22 | 169 | 94   | 262  |
| 59.476 | 20 | TGAGTTATGAAGTGTTATGAAGGC  | 59.11  | 25 | 165 | 176  | 340  |
| 60.173 | 20 | AGTCGCTGCAATTTCCAGTT      | 59.882 | 20 | 112 | 29   | 140  |
| 60.036 | 20 | CACTCTCCTGCTCCAGCTCT      | 59.883 | 20 | 183 | 27   | 209  |
| 60.269 | 20 | CGTTAGTCCAGCCATCTCT       | 59.308 | 20 | 186 | 173  | 358  |
| 59.374 | 24 | ACCAATGGTGGTATGGTGTG      | 58.984 | 20 | 102 | 17   | 118  |
| 60.262 | 20 | ATTTCAATTCATGGGTTTCG      | 57.399 | 20 | 180 | 42   | 221  |
| 60.025 | 20 | TGCGCTAACAAGGTCCCTAT      | 59.73  | 20 | 144 | 221  | 364  |
| 59.835 | 20 | TTGAAGATCAACGGTCCACA      | 60.088 | 20 | 183 | 41   | 223  |
| 60.299 | 20 | TTGGGTTGAAATGTTTACATGG    | 59.603 | 22 | 195 | 152  | 346  |
| 59.901 | 20 | AAACGCCACTTCAAACCATC      | 59.978 | 20 | 120 | 307  | 426  |
| 60.104 | 20 | CACCAAATTTGAGGGTTATTATTT( | 59.905 | 25 | 260 | 187  | 446  |
| 60.202 | 20 | CGGATTTAAGGGTTATTACGTG    | 57.682 | 22 | 212 | 36   | 247  |
| 58.956 | 21 | TGAAATTAGATTCGAAATTGCAT   | 57.856 | 23 | 184 | 151  | 334  |
| 59.871 | 20 | CAGTTGCACCCAACACAAAC      | 60.049 | 20 | 274 | 535  | 808  |
| 59.827 | 20 | AGCCACTCCCTCCAAAAGAT      | 60.074 | 20 | 141 | 116  | 256  |
| 59.72  | 21 | CCGGTTTCGTGAGCTTTCTA      | 60.378 | 20 | 240 | 30   | 269  |
| 59.534 | 21 | CATCCAATTTTGAGGGTTGG      | 60.162 | 20 | 233 | 680  | 912  |
| 59.971 | 20 | ACGGGAGAGGCATACAAATG      | 59.955 | 20 | 170 | 2183 | 2352 |
| 59.95  | 20 | CGATCACACTCCAATGCAC       | 60.12  | 20 | 237 | 773  | 1009 |
| 60.11  | 20 | TCGAGGAGCGTGGTTTTAAG      | 60.378 | 20 | 181 | 37   | 217  |
| 60.423 | 20 | TGGAACCATGGGTAACAA        | 58.719 | 20 | 246 | 123  | 368  |
| 59.532 | 21 | CCACACGACATACGATACCG      | 59.92  | 21 | 128 | 244  | 371  |
| 59.921 | 23 | TAATGCAAACGGGATGTCAA      | 59.93  | 20 | 249 | 2095 | 2343 |
| 59.972 | 24 | TGTTACTTTTCATCGCACTCAA    | 58.489 | 22 | 243 | 1255 | 1497 |
| 59.883 | 20 | TGCGTGATTTACACCCGATA      | 59.953 | 20 | 122 | 173  | 294  |
| 59.989 | 20 | GGTTTTCTCCGGTGATCGTA      | 59.933 | 20 | 217 | 36   | 252  |
| 59.96  | 22 | AGCAATTCTGATGGAATGGG      | 59.894 | 20 | 235 | 48   | 282  |
| 60.036 | 20 | ACTTGTCCACCCACATGACA      | 59.846 | 20 | 232 | 1132 | 1363 |

|        |    |                            |        |    |     |      |      |
|--------|----|----------------------------|--------|----|-----|------|------|
| 60.081 | 22 | CAATCCCCTCAAACAAAATCA      | 59.787 | 21 | 279 | 1097 | 1375 |
| 59.898 | 20 | TTTGCAGTTGCACCAGTTTC       | 59.888 | 20 | 239 | 53   | 291  |
| 60.051 | 20 | TCACTCGCGCTAGATTCTCA       | 59.847 | 20 | 125 | 276  | 400  |
| 58.189 | 27 | TTGATTCTGGAATATCCCGC       | 59.862 | 20 | 242 | 2    | 243  |
| 59.81  | 20 | TCGTTGTAAACCCGTAAGGC       | 59.996 | 20 | 220 | 81   | 300  |
| 60.008 | 20 | CATCACACAAAACCAGTGGG       | 59.848 | 20 | 197 | 289  | 485  |
| 60.036 | 20 | CCGGTATGCTGACGATAACA       | 59.566 | 20 | 241 | 1013 | 1253 |
| 59.465 | 20 | ACAAATAGATCGGGGGAAGG       | 60.145 | 20 | 272 | 89   | 360  |
| 60.293 | 20 | CACAACATGACAGCAACCCT       | 59.597 | 20 | 240 | 7    | 246  |
| 60.34  | 20 | CATGCCTTAAATCCACGGT        | 59.823 | 20 | 228 | 9    | 236  |
| 60.278 | 20 | GAGATGGTTGCACCATAACG       | 59.002 | 20 | 212 | 31   | 242  |
| 59.685 | 20 | GACGAGATCATGGCTCGATT       | 60.189 | 20 | 164 | 99   | 262  |
| 57.898 | 26 | AAATATTCTAGCACATGAAATTG    | 57.859 | 25 | 114 | 1    | 114  |
| 59.226 | 20 | GGTTTTGACCATATTTACTGTTTTG  | 59.631 | 26 | 267 | 199  | 465  |
| 59.91  | 20 | TCAACAACCAGTCCACTCCA       | 60.129 | 20 | 208 | 100  | 307  |
| 59.927 | 20 | GCAACGGAATACCACTCGTT       | 60     | 20 | 163 | 87   | 249  |
| 59.621 | 22 | TGAAAAGCTTTGAGTGTGCC       | 59.05  | 20 | 158 | 657  | 814  |
| 60.445 | 21 | AGGGTTTAAAATCGCGCA         | 59.257 | 18 | 280 | 693  | 972  |
| 59.801 | 20 | CAGCATATTCTTTGGACGGAA      | 60.081 | 21 | 247 | 124  | 370  |
| 59.668 | 20 | ATCGCTCCACATGACACGTA       | 60.144 | 20 | 244 | 131  | 374  |
| 59.694 | 20 | GTTGGTCCATTTGCCATTGT       | 60.624 | 20 | 216 | 48   | 263  |
| 59.549 | 20 | TGAAATTGTCATCTCCCCCT       | 59.336 | 20 | 211 | 69   | 279  |
| 59.937 | 20 | TTCTTTTACTTTGCATGCTACTTTTC | 59.476 | 26 | 280 | 275  | 554  |
| 59.727 | 20 | CTGGAAAGATGGTGGCAAAA       | 61.001 | 20 | 278 | 248  | 525  |
| 60.547 | 20 | ACGGAGCAAATTCATCCAC        | 59.939 | 20 | 278 | 244  | 521  |
| 60.034 | 20 | GAGACCCGGGTTTACCTCTC       | 59.935 | 20 | 132 | 88   | 219  |
| 58.842 | 22 | ACCATCGTTACCGATTTCCA       | 60.192 | 20 | 193 | 32   | 224  |
| 59.773 | 20 | AAATTTAACATGGTCCGCCA       | 60.188 | 20 | 227 | 82   | 308  |
| 60.004 | 21 | AAAAACCCTGATGTGGATGC       | 59.797 | 20 | 273 | 28   | 300  |
| 58.976 | 20 | TTGGACCAAAATAGCCTCCA       | 60.439 | 20 | 166 | 10   | 175  |
| 59.259 | 20 | CATTGATCATCACCCCTGTGC      | 59.925 | 20 | 209 | 3    | 211  |
| 59.96  | 20 | CCAAGTCTTGCAATTTGGTTG      | 59.17  | 20 | 217 | 1568 | 1784 |
| 60.282 | 20 | TCCCAACTCAAGGACACTC        | 60.088 | 20 | 258 | 356  | 613  |
| 59.847 | 20 | GAATCATGCTACTACACGTCGC     | 59.803 | 22 | 260 | 495  | 754  |
| 58.028 | 22 | CCCATTAATAGCGATATATGTAAG   | 58.562 | 27 | 140 | 151  | 290  |
| 60.074 | 20 | CACCTAACCATTAAACCCCA       | 59.541 | 20 | 243 | 49   | 291  |
| 59.787 | 20 | TTACCGCTGGGATCATTTTC       | 59.901 | 20 | 181 | 98   | 278  |
| 59.783 | 20 | GGATGGGTTATCACTTGAATAGG    | 58.769 | 23 | 102 | 153  | 254  |
| 59.989 | 22 | TGAAGTTAGGAAATAAGGAGGTG    | 58.743 | 25 | 254 | 213  | 466  |
| 60.027 | 20 | CCCTCCAAGGAATCTGATGA       | 60.003 | 20 | 239 | 14   | 252  |
| 60.333 | 20 | CAAGAAGTCCTGCGTCAACA       | 60.025 | 20 | 173 | 1    | 173  |
| 59.635 | 24 | GGGATAATTAATGCGATTGTGA     | 58.83  | 22 | 274 | 540  | 813  |
| 57.221 | 24 | TCTGTTTTGAGCTGGCAATG       | 59.988 | 20 | 190 | 47   | 236  |
| 60.416 | 20 | GCTCCTTGTGCATCACTCAA       | 59.992 | 20 | 268 | 226  | 493  |
| 59.61  | 20 | GAAGTCTCAAGTCAATGTATGATC   | 57.445 | 25 | 115 | 570  | 684  |
| 59.706 | 20 | GAACGGAGAAAATATCACGAAAA    | 59.512 | 23 | 237 | 576  | 812  |
| 60.088 | 20 | TTTCTCAACCGAGCTCACCT       | 59.989 | 20 | 121 | 833  | 953  |
| 59.486 | 20 | TTCCAGATGCCTCTCAGCTT       | 60.096 | 20 | 279 | 1775 | 2053 |
| 59.996 | 20 | CACCCCGGATAGTAATCCCT       | 60.032 | 20 | 271 | 480  | 750  |
| 58.276 | 27 | TTTCTCAAGGGTATGGGTGG       | 59.784 | 20 | 246 | 29   | 274  |
| 60.02  | 20 | GCCTTGAGGGGGAGAATTAG       | 60.032 | 20 | 167 | 77   | 243  |
| 58.82  | 27 | TGAAATAGGAAATGCAGGGG       | 59.894 | 20 | 272 | 2    | 273  |
| 60.111 | 20 | TTTACCACCTCCATTCTC         | 59.903 | 20 | 273 | 65   | 337  |
| 60.029 | 20 | CACTGTTGTCATCGGTCCAC       | 60.005 | 20 | 245 | 103  | 347  |
| 60.232 | 20 | TGTGGAAGGGTGTGTGATGT       | 59.846 | 20 | 274 | 1388 | 1661 |
| 59.547 | 20 | TGATCTTCACCTTAAATCTGCAT    | 57.9   | 23 | 259 | 70   | 328  |
| 59.123 | 23 | AGTTTGGGGGAGGAGAAAAA       | 59.912 | 20 | 279 | 65   | 343  |
| 60.02  | 20 | AAGGAGGTGTTATGAAGGGATT     | 58.028 | 22 | 268 | 40   | 307  |

|        |    |                          |        |    |     |      |      |
|--------|----|--------------------------|--------|----|-----|------|------|
| 59.81  | 20 | AAGGTTGGAGAGGGGACAAC     | 60.349 | 20 | 224 | 10   | 233  |
| 59.967 | 20 | GCTCGACGGAGGTTTGATAG     | 59.836 | 20 | 165 | 389  | 553  |
| 58.651 | 20 | ACCTCAACAAACCACCCAAA     | 60.246 | 20 | 204 | 26   | 229  |
| 59.833 | 20 | AAAATCACTAACCCACCCCA     | 59.146 | 20 | 191 | 34   | 224  |
| 60.199 | 20 | ATGGCCATCTCTTCCCTTT      | 59.903 | 20 | 196 | 402  | 597  |
| 58.745 | 20 | CCCATTTTCTTCTGCTCCAA     | 60.184 | 20 | 183 | 1144 | 1326 |
| 59.923 | 20 | TTGTCCCACATAGGAAAAATAA   | 57.644 | 23 | 243 | 447  | 689  |
| 60.257 | 20 | TTGTGAGTGAAAGTGGTGGG     | 59.565 | 20 | 118 | 716  | 833  |
| 59.476 | 20 | GCCTCGGTGGAATTTATTGA     | 59.901 | 20 | 264 | 2392 | 2655 |
| 59.859 | 20 | CATGAGAAATGGGGTTGCTT     | 59.933 | 20 | 180 | 32   | 211  |
| 59.751 | 20 | TGCACAATACAAGCACCCAT     | 59.995 | 20 | 123 | 880  | 1002 |
| 59.726 | 20 | CTCGTGTTTTATCCTCCCC      | 60.683 | 20 | 107 | 4    | 110  |
| 59.919 | 20 | ATGGTGGTTTGGTGGAAGAA     | 60.21  | 20 | 189 | 600  | 788  |
| 59.971 | 20 | ATTATGGCGCCGCTATTGTA     | 60.452 | 20 | 152 | 253  | 404  |
| 59.844 | 20 | AATTGTCTGGAGCCAAGGTG     | 60.111 | 20 | 235 | 243  | 477  |
| 60.065 | 20 | TCCACGGTGATGCTAGAGTG     | 59.855 | 20 | 212 | 452  | 663  |
| 57.201 | 27 | TGGGCTGAGTATGTGTTTGTG    | 59.624 | 21 | 145 | 3    | 147  |
| 60.049 | 20 | TTCTGAAACATGATGGCGTC     | 59.654 | 20 | 239 | 1371 | 1609 |
| 59.485 | 20 | CCAAGTCAATTGTCGATGGTAA   | 59.861 | 22 | 269 | 815  | 1083 |
| 59.928 | 20 | AGCTTCCATGGAGTTGATG      | 60.073 | 20 | 165 | 237  | 401  |
| 59.181 | 21 | GGAAGCACTTTTTGAACGGT     | 59.218 | 20 | 254 | 395  | 648  |
| 60.582 | 20 | TCAGCCGACTTTTTAATGGC     | 60.209 | 20 | 192 | 37   | 228  |
| 57.73  | 23 | TTTTAAATGGACGGTGATGA     | 58.005 | 21 | 117 | 14   | 130  |
| 59.962 | 20 | GGTGTGTTGCTTCGCTTT       | 60.292 | 20 | 231 | 566  | 796  |
| 59.831 | 20 | TCAGCAGAGCAAAGGGTCT      | 60.134 | 20 | 265 | 1757 | 2021 |
| 58.909 | 21 | GCCTAAGGAATAAACACCTAGCA  | 58.895 | 23 | 235 | 24   | 258  |
| 60.051 | 20 | GGGATGAGTTATCACTTGAATAGC | 59.765 | 25 | 215 | 291  | 505  |
| 59.904 | 20 | CCTATGGTGGTATGGTGTGG     | 58.569 | 20 | 248 | 214  | 461  |
| 59.951 | 20 | TACGTGATAGGATACGGCCC     | 59.807 | 20 | 276 | 44   | 319  |
| 59.973 | 20 | TTCCGTTGGCAAGCTAACTC     | 60.386 | 20 | 268 | 751  | 1018 |
| 60.195 | 20 | CATGAAAATCATGTTCCGCA     | 60.466 | 20 | 159 | 312  | 470  |
| 59.975 | 20 | CTCCAAAATGGTGCAATCCT     | 60.111 | 20 | 204 | 423  | 626  |
| 57.414 | 24 | ACACGAATCAAATCAATGGC     | 58.424 | 20 | 277 | 27   | 303  |
| 59.894 | 20 | CAAACAAGACCAAGTGGGGT     | 59.861 | 20 | 131 | 283  | 413  |
| 59.923 | 20 | GACTTGTGTGGGGAATGGAT     | 59.636 | 20 | 272 | 364  | 635  |
| 60.172 | 20 | ACCGACGTGGCCTAACATAG     | 60.015 | 20 | 261 | 240  | 500  |
| 59.656 | 20 | CAAATGTTGCACAATCATTGAC   | 58.945 | 22 | 211 | 77   | 287  |
| 60.238 | 20 | GTTTGGATATCGAGATCGGG     | 59.344 | 20 | 117 | 96   | 212  |
| 59.072 | 21 | ATCATAGTTGACGCCCTTCG     | 60.096 | 20 | 103 | 19   | 121  |
| 59.993 | 20 | TATTCCAAAACCATCGCACA     | 59.93  | 20 | 277 | 79   | 355  |
| 59.505 | 20 | TGCTTTGGCTTGGTCTTTTT     | 59.861 | 20 | 224 | 1103 | 1326 |
| 58.516 | 21 | TCGGAGTTCATCATGACACAA    | 60.104 | 21 | 186 | 346  | 531  |
| 60.053 | 20 | TGTGGTTCGATATTTTGTGG     | 59.736 | 22 | 118 | 222  | 339  |
| 60.111 | 20 | AGCCTGCAATTGATACCGAG     | 60.235 | 20 | 239 | 679  | 917  |
| 60.397 | 20 | TCCTAACTTCATAACTCGAAGACT | 59.858 | 26 | 279 | 0    | 278  |
| 59.991 | 20 | ATTAACCGTGAAAATGGCGA     | 60.323 | 20 | 154 | 331  | 484  |
| 59.75  | 20 | GCAAACCATACACGAACACG     | 60.035 | 20 | 204 | 108  | 311  |
| 59.53  | 26 | CAGGATGGACTCGAACGAAC     | 60.656 | 20 | 144 | 9    | 152  |
| 59.573 | 21 | TTTGTACAGTATTTTCATCATTG  | 59.055 | 24 | 192 | 4755 | 4946 |
| 59.923 | 20 | CGTCTGCGCTGTAGATTC       | 60.157 | 20 | 134 | 259  | 392  |
| 59.901 | 20 | GCCGGAGATTATCCATCATT     | 58.812 | 20 | 270 | 85   | 354  |
| 60.356 | 20 | AAGGCCGAGATTTGTTAGAGG    | 59.733 | 21 | 174 | 1789 | 1962 |
| 60.701 | 20 | ATGGCTTGGAAAAGATGGTG     | 59.933 | 20 | 266 | 930  | 1195 |
| 60.339 | 27 | AAAATCCTGTCAATGAAAAAGCA  | 59.997 | 23 | 273 | 89   | 361  |
| 59.303 | 21 | TGATGGGCCATAATCAAAGG     | 60.66  | 20 | 149 | 368  | 516  |
| 60.088 | 20 | TTGCAATGGACCTAAGCATTC    | 60.089 | 21 | 119 | 947  | 1065 |
| 60.074 | 20 | AGGTTGATCATTTCCATCGC     | 59.9   | 20 | 164 | 1034 | 1197 |
| 59.679 | 20 | GAGAATCCATGGCGGAAGTA     | 60.036 | 20 | 124 | 636  | 759  |

|        |    |                          |        |    |     |      |      |
|--------|----|--------------------------|--------|----|-----|------|------|
| 60.309 | 20 | CCACCCATTTCATCCCTCAT     | 61.882 | 20 | 100 | 147  | 246  |
| 57.643 | 26 | GCTACTCCCGTCGAAGATTG     | 59.836 | 20 | 234 | 13   | 246  |
| 59.83  | 20 | GCCCAACAAATGAACCGATA     | 60.701 | 20 | 278 | 2118 | 2395 |
| 59.927 | 20 | TCTTCCCAAAATTGGTTTCC     | 61.023 | 20 | 187 | 199  | 385  |
| 59.939 | 20 | TTCTCTCATTTCCCAAACG      | 60.044 | 20 | 228 | 484  | 711  |
| 58.756 | 24 | CATGGAATGGCTGTCAGATG     | 60.072 | 20 | 106 | 20   | 125  |
| 60.278 | 20 | TCATGAGGACGAATATGCC      | 60.833 | 20 | 195 | 2    | 196  |
| 60.917 | 20 | CAACGTTTGTTCGTGTTTGTG    | 60.096 | 21 | 212 | 18   | 229  |
| 60.153 | 20 | GGCTACGAGAAATGGATGGA     | 60.036 | 20 | 144 | 705  | 848  |
| 59.522 | 20 | CACACACACGTGGCATGATA     | 60.029 | 20 | 147 | 69   | 215  |
| 60.096 | 20 | CCTCCCGTCTAATCTCCACA     | 60.065 | 20 | 239 | 20   | 258  |
| 60.562 | 20 | CGGAAATGACCCATAATGA      | 60.523 | 20 | 256 | 253  | 508  |
| 60.353 | 20 | GCAGCTACGTTTGTGTGCAT     | 59.942 | 20 | 129 | 1229 | 1357 |
| 58.672 | 20 | AGATCCATGTTTCATCTCCCC    | 58.741 | 20 | 130 | 87   | 216  |
| 57.587 | 27 | GATGATCAGATGAAGCCAA      | 59.61  | 20 | 172 | 77   | 248  |
| 60.134 | 20 | ATTTAGCAAGCCCGATGATG     | 60.06  | 20 | 145 | 727  | 871  |
| 60.423 | 20 | CCTCCAATGATTGCCAGAAT     | 59.894 | 20 | 166 | 364  | 529  |
| 60.202 | 20 | TTCAATCTCAACCATCAATTTT   | 57.674 | 23 | 204 | 478  | 681  |
| 60.216 | 20 | CATATGGTGAATGCCCTTT      | 59.645 | 20 | 163 | 254  | 416  |
| 60.103 | 20 | CTGGTTTGCCTGGTTCTTTT     | 60.147 | 20 | 224 | 660  | 883  |
| 59.648 | 20 | CTGTTGGCCGTTGTTTTACA     | 59.627 | 20 | 201 | 1138 | 1338 |
| 58.857 | 21 | CTCTTCATTGACACGCGAAA     | 59.988 | 20 | 275 | 155  | 429  |
| 61.027 | 20 | CCCTATTTAGCTTTCTTTGCGA   | 59.885 | 22 | 259 | 29   | 287  |
| 60.21  | 20 | TATGGAATTCCGACGAGCAT     | 60.435 | 20 | 276 | 478  | 753  |
| 60.029 | 20 | TGTGCAACTTGTCTGGTCTCA    | 60.494 | 21 | 275 | 566  | 840  |
| 60.031 | 20 | CAGTTCTGGCCGTGCATT       | 60.84  | 18 | 209 | 656  | 864  |
| 59.402 | 22 | TGGAATCCGAGAAAATCAGG     | 60.006 | 20 | 190 | 895  | 1084 |
| 59.761 | 21 | CCTCCGTATTTTGGGTAGCA     | 59.953 | 20 | 200 | 1004 | 1203 |
| 60.035 | 20 | ATGTGCGCGTGTACTTATCG     | 59.782 | 20 | 188 | 669  | 856  |
| 59.95  | 20 | TATTGGGGGAAGAAGCACTG     | 60.066 | 20 | 231 | 2020 | 2250 |
| 59.664 | 20 | TTGAATCCATTGGTGAAGCA     | 60.049 | 20 | 202 | 220  | 421  |
| 59.688 | 20 | GAGAGAAACATTAATTCCTCACC  | 59.9   | 25 | 179 | 49   | 227  |
| 59.888 | 21 | TGGTGGAAGACCAGACAGA      | 59.23  | 20 | 272 | 0    | 271  |
| 59.756 | 20 | AAATCAAATAGGGCAGGGG      | 60.143 | 20 | 215 | 31   | 245  |
| 58.914 | 20 | CTTTTGTGTGGCTTGTGAA      | 60.027 | 20 | 254 | 204  | 457  |
| 60.66  | 20 | TGCAGGTTAGGTACCTTCGG     | 60.125 | 20 | 244 | 2796 | 3039 |
| 60.06  | 20 | TACAGCCGCTCTTGGAACTC     | 60.538 | 20 | 124 | 75   | 198  |
| 59.364 | 20 | ACGATTGAAACCCTCCCTCT     | 59.935 | 20 | 241 | 261  | 501  |
| 60.096 | 20 | ATCCGCTTTCCCAAGTTTCT     | 60.074 | 20 | 264 | 3289 | 3552 |
| 60.565 | 20 | ACCATATTTAAGGGTTATCACCTG | 57.552 | 24 | 278 | 254  | 531  |
| 60.081 | 20 | GTTTTGCAGGTGGTGGATCT     | 59.973 | 20 | 171 | 1179 | 1349 |
| 59.071 | 21 | GCGGATGTAATTTGGGTGAA     | 60.701 | 20 | 231 | 249  | 479  |
| 60.055 | 20 | AAACCGAGAAAGAAACATTTCAA  | 59.194 | 23 | 201 | 1102 | 1302 |
| 59.82  | 20 | TTGTTAGTGCGTGTTTTGGG     | 59.627 | 20 | 179 | 29   | 207  |
| 59.928 | 20 | CGAACTTAGAAGGGCCACTG     | 59.869 | 20 | 235 | 20   | 254  |
| 59.596 | 20 | TCTCTTTTGGTTGGTGAAGGA    | 59.697 | 21 | 166 | 290  | 455  |
| 59.126 | 20 | CCTTGTGTGATCAAGGGTCC     | 60.363 | 20 | 176 | 1771 | 1946 |
| 60.118 | 21 | GCTAATGGTGCCACAGTTGA     | 59.722 | 20 | 264 | 37   | 300  |
| 59.702 | 20 | ATCAAAGGCCACAAATGGTT     | 59.292 | 20 | 232 | 97   | 328  |
| 60.406 | 21 | AACTTCTTGCTGGTTGAGGC     | 59.478 | 20 | 263 | 48   | 310  |
| 60.255 | 20 | GGTTATCACCGGATCACGA      | 59.311 | 19 | 123 | 687  | 809  |
| 59.032 | 20 | TCCCTTCCCATCTCAATAA      | 59.315 | 20 | 274 | 1194 | 1467 |
| 59.934 | 20 | TTATATCCCAAAAAGCCCC      | 59.982 | 20 | 263 | 400  | 662  |
| 60.033 | 20 | AGCTCACTAGGATGGCAAGC     | 59.603 | 20 | 201 | 218  | 418  |
| 59.577 | 24 | AAAAATCATGCCACCGTACC     | 59.691 | 20 | 212 | 10   | 221  |
| 58.831 | 25 | TTTTAACGAATAAACATGTTCCAA | 57.778 | 24 | 107 | 103  | 209  |
| 59.021 | 26 | TGTTTTACGAATAAACATGTTAC, | 59.448 | 26 | 276 | 131  | 406  |
| 60.576 | 20 | ATCCATCATCTTCCGTGAGC     | 60.042 | 20 | 199 | 706  | 904  |

|        |    |                           |        |    |     |      |      |
|--------|----|---------------------------|--------|----|-----|------|------|
| 59.894 | 21 | GGTTTTCAACCCATGTTTTTG     | 59.211 | 21 | 273 | 1565 | 1837 |
| 60.263 | 20 | CAAATTTTCCGCTTTGTCGT      | 60.11  | 20 | 199 | 1032 | 1230 |
| 59.964 | 20 | GGTTATTAGTTATTACGGATTTAA1 | 57.055 | 27 | 164 | 278  | 441  |
| 60.192 | 20 | CGGACTTCTTTCTGCAAAC       | 59.853 | 20 | 278 | 91   | 368  |
| 60.204 | 20 | CTTCGAACATGCACACTCGT      | 59.905 | 20 | 139 | 449  | 587  |
| 60.096 | 20 | TTGACCGAGTGAAGTAAACCC     | 59.087 | 21 | 241 | 3285 | 3525 |
| 59.691 | 20 | TTGACATGAGCGCATAAACCC     | 59.694 | 20 | 161 | 941  | 1101 |
| 60.324 | 19 | GCCCTCAACTCTCCCTCTCT      | 59.952 | 20 | 104 | 9    | 112  |
| 58.522 | 23 | CCGGATCAGCTCTCTTTCTC      | 59.116 | 20 | 180 | 1608 | 1787 |
| 60.384 | 20 | TGTCGTCTATCACCTTCCGTC     | 60.126 | 21 | 191 | 63   | 253  |
| 59.927 | 20 | TTGATTCTTTTGTCCCTATTT     | 58.142 | 23 | 269 | 226  | 494  |
| 58.272 | 27 | GGGAGCTTCAGTCTTTCATCTC    | 59.466 | 22 | 118 | 14   | 131  |
| 60.051 | 20 | TAGAGTTCCAAGAGGGGGCT      | 60.204 | 20 | 202 | 5    | 206  |
| 60.147 | 20 | TCTCTCAACCTCACTCGCAA      | 59.701 | 20 | 264 | 418  | 681  |
| 59.104 | 22 | TCTACGACCGAAATTCCTCC      | 59.184 | 21 | 104 | 23   | 126  |
| 58.811 | 21 | CGAACAAAGGGAAAAACAATG     | 58.121 | 20 | 126 | 90   | 215  |
| 59.848 | 20 | CAAGGGGAGAGAGGTCAATG      | 59.649 | 20 | 266 | 425  | 690  |
| 57.955 | 21 | TCAACTTTTGACGGTCCGA       | 60.224 | 19 | 280 | 140  | 419  |
| 59.89  | 20 | AGGATCGGCATATCGAGAAA      | 59.628 | 20 | 276 | 146  | 421  |
| 59.13  | 25 | TTCTGACTTTGTTTTGTGCAG     | 58.135 | 22 | 184 | 39   | 222  |
| 59.991 | 23 | TGACTTTGATCAAGTGATAACATC  | 60.287 | 26 | 174 | 386  | 559  |
| 60.192 | 20 | TCGGATAATCTGAAAGCGAA      | 58.455 | 20 | 263 | 1083 | 1345 |
| 59.955 | 20 | ATCCTCCCCTTCCTTGCTTA      | 60.032 | 20 | 150 | 478  | 627  |
| 59.549 | 20 | CATGTCAAAAATGCCCTTC       | 60.309 | 20 | 268 | 483  | 750  |
| 59.499 | 21 | CCCTCCTCACCTCCTCTCTT      | 59.801 | 20 | 263 | 933  | 1195 |
| 57.551 | 24 | ACCTGCACCAAAATGGAGAG      | 60.111 | 20 | 257 | 60   | 316  |
| 59.792 | 20 | CCGAATCCATTCCCTACTCA      | 59.887 | 20 | 263 | 2825 | 3087 |
| 59.484 | 19 | CGGAGTGTTTGGGTAGTCGT      | 60.028 | 20 | 241 | 150  | 390  |
| 60.214 | 20 | CCACTCCACAAAAGATCTCACA    | 58.71  | 21 | 104 | 212  | 315  |
| 58.826 | 22 | ATGTCCGTCGTTGGTTCTTC      | 59.973 | 20 | 173 | 24   | 196  |
| 58.45  | 20 | TGCAATGCTTCAATTCATCC      | 59.628 | 20 | 230 | 0    | 229  |
| 61.027 | 20 | TCGATCACGATAATCACCCA      | 59.883 | 20 | 199 | 16   | 214  |
| 60.096 | 20 | AGGAGGGGAGTTGTTGGGTA      | 60.736 | 20 | 278 | 620  | 897  |
| 60.142 | 20 | AAGGTGTTGTTGGGTTTTGC      | 59.875 | 20 | 256 | 242  | 497  |
| 60.103 | 20 | AAATCCCTTTTCTCTCCCA       | 59.875 | 20 | 147 | 245  | 391  |
| 59.777 | 20 | TTGAATGGTTATCACCTGATCG    | 59.823 | 22 | 129 | 106  | 234  |
| 60.659 | 21 | GCGGAAATTA CTACAGCCATC    | 59.996 | 22 | 178 | 295  | 472  |
| 59.989 | 20 | GAATCCATGCAAACAGCAA       | 59.67  | 20 | 161 | 2331 | 2491 |
| 59.411 | 20 | ATGCGCGTTTTTAGGGTTTA      | 59.624 | 20 | 151 | 394  | 544  |
| 59.855 | 20 | CATGTTTGGTGACTTGGTTCG     | 60.001 | 20 | 244 | 16   | 259  |
| 59.904 | 20 | CATCCAGGAACCACTTTCGT      | 59.966 | 20 | 265 | 225  | 489  |
| 59.975 | 20 | AGCCCCCATTTTTCATTTTC      | 60.13  | 20 | 146 | 253  | 398  |
| 59.751 | 20 | TCTGCAGTCTCCGTTTTTCA      | 59.566 | 20 | 137 | 407  | 543  |
| 61.532 | 20 | CATGCCAAA ACTCCACTCCT     | 60.111 | 20 | 262 | 298  | 559  |
| 59.88  | 20 | GGACCGACCGTTAGGTAAT       | 60.074 | 20 | 277 | 219  | 495  |
| 59.945 | 20 | CCCACATTGGTTGGAGATTA      | 58.27  | 20 | 218 | 148  | 365  |
| 59.94  | 20 | GAGGTTTTGACGAGATTTAGGTG   | 59.187 | 23 | 142 | 391  | 532  |
| 60.323 | 20 | ATGGTGGTATGGTGTGGAGG      | 60.51  | 20 | 139 | 218  | 356  |
| 59.967 | 20 | GAGCGAGTGGTTGTGAGGTT      | 60.307 | 20 | 280 | 27   | 306  |
| 60.263 | 20 | CGAAAATGAGCTTCCACACC      | 60.636 | 20 | 162 | 241  | 402  |
| 57.496 | 21 | TTTGATTCTTGAGTACACCATCG   | 59.144 | 23 | 171 | 57   | 227  |
| 59.148 | 21 | CCATTGACTTGGCATCAAAA      | 59.518 | 20 | 279 | 109  | 387  |
| 59.992 | 20 | CCATTTTCATCTTCGGCATT      | 59.901 | 20 | 231 | 74   | 304  |
| 59.941 | 20 | TGATTTTTTCATGTTTTGGAGCA   | 60.468 | 22 | 215 | 302  | 516  |
| 60.578 | 20 | CGTTCCTCTCTCTCGGTG        | 60.127 | 20 | 167 | 60   | 226  |
| 59.962 | 23 | GGCTTGAAGAATGATGAAGATG    | 58.789 | 22 | 113 | 132  | 244  |
| 59.781 | 20 | CATCATTGTTTCGCAAGCAG      | 60.401 | 20 | 209 | 1007 | 1215 |
| 60.096 | 20 | TCAACCATCTTGTTCTGTGGA     | 59.124 | 21 | 198 | 698  | 895  |

|        |    |                           |        |    |     |      |      |
|--------|----|---------------------------|--------|----|-----|------|------|
| 57.104 | 23 | TGGTACTTAAATGAGAGAGATGC   | 59.913 | 25 | 243 | 303  | 545  |
| 59.797 | 20 | TGTATCGTCCGCGATGTAGA      | 60.243 | 20 | 152 | 209  | 360  |
| 59.474 | 20 | CGGCCGTTTTGTAACCTT        | 60.883 | 18 | 256 | 2169 | 2424 |
| 59.884 | 23 | TGCACCCTTTGACATCAGTT      | 59.139 | 20 | 180 | 50   | 229  |
| 59.685 | 20 | TTTTTGTGGTTCCAGGTTG       | 59.862 | 21 | 105 | 21   | 125  |
| 58.456 | 21 | TCGTGTTCCGATCCTAGCTT      | 59.836 | 20 | 217 | 17   | 233  |
| 60.255 | 20 | TAAACAGAACGACGACGCGA      | 59.752 | 20 | 154 | 41   | 194  |
| 59.917 | 20 | TGGTGTGACTTTTGTAGCAATCA   | 59.618 | 24 | 259 | 106  | 364  |
| 60.34  | 20 | CAAAGAGCTGTGGGAGAGC       | 60.134 | 20 | 215 | 87   | 301  |
| 59.874 | 24 | GATGATGCATGTATACTATCAAAA  | 57.305 | 26 | 245 | 1336 | 1580 |
| 60.305 | 20 | GGGAGGGTGGTTTGGTTAGT      | 60.088 | 20 | 266 | 17   | 282  |
| 57.333 | 24 | TCACACTCACGCACTCACAA      | 60.07  | 20 | 121 | 3    | 123  |
| 59.805 | 20 | TTCGTAGCATGATTTAAATGGTTT  | 59.021 | 24 | 242 | 575  | 816  |
| 59.827 | 20 | TCCAAGTGCACAAGTGTTT       | 59.187 | 20 | 276 | 295  | 570  |
| 59.823 | 20 | ATGATTGGGACACGTGTTTG      | 59.267 | 20 | 196 | 1618 | 1813 |
| 59.726 | 20 | GTGCAGTAGGGGTTGTCGTT      | 60.035 | 20 | 243 | 92   | 334  |
| 59.988 | 22 | GGAAATAAGGAGGTGTTATGAAG   | 59.323 | 24 | 137 | 809  | 945  |
| 60.333 | 20 | TTACAAACACCGATTCCGCAC     | 59.59  | 20 | 146 | 62   | 207  |
| 60.148 | 20 | ACGAAGGGTATTTTGGGAAA      | 58.417 | 20 | 179 | 208  | 386  |
| 58.974 | 20 | GTAACCGTCACCCCAAAAC       | 59.195 | 20 | 125 | 53   | 177  |
| 59.624 | 22 | CCGTCGACAAGCTCAGAGTA      | 59.187 | 20 | 190 | 4    | 193  |
| 59.992 | 20 | TGTATCACACAACGGTTCATCA    | 59.888 | 22 | 241 | 246  | 486  |
| 59.94  | 21 | CACCAACCCAACCCATTAAC      | 59.948 | 20 | 105 | 54   | 158  |
| 59.916 | 20 | GGGTGGTTATGGTTTGTAGGTG    | 60.385 | 22 | 171 | 1337 | 1507 |
| 60.187 | 20 | CTCCGCCTTGACTCCTTCTA      | 59.569 | 20 | 109 | 308  | 416  |
| 59.823 | 20 | TCGACCAAAATTTAAAAGTCCT    | 57.036 | 22 | 273 | 834  | 1106 |
| 58.874 | 22 | TGTGGATATGTAGATGATTTTTGG, | 59.637 | 25 | 184 | 11   | 194  |
| 60.139 | 21 | GGAGGTCAGGATCTGGTCAA      | 60.048 | 20 | 162 | 797  | 958  |
| 60.265 | 20 | CCATCACACTAACCTCCCTCA     | 59.974 | 21 | 259 | 150  | 408  |
| 58.436 | 26 | AAATATCGGCCGTGAGATTG      | 59.923 | 20 | 189 | 1    | 189  |
| 59.03  | 22 | CAAACCTTGGCACTTGCATA      | 59.729 | 20 | 100 | 94   | 193  |
| 60.36  | 21 | TGCATAGGCTGTCTCTTGA       | 59.547 | 20 | 227 | 108  | 334  |
| 60.362 | 20 | TGGTGCATGAGACGAGAATTA     | 59.287 | 21 | 163 | 177  | 339  |
| 59.425 | 21 | TTGGAATTGGAACCAGCTTT      | 59.546 | 20 | 272 | 88   | 359  |
| 59.96  | 20 | GAGAAGGTAGGGGGCTAAGG      | 59.191 | 20 | 180 | 29   | 208  |
| 60.554 | 20 | TACCATGTGCTTGGAGTTGG      | 59.566 | 20 | 277 | 1015 | 1291 |
| 59.024 | 20 | CCATGAATCTTTACATTTTTCA    | 58.976 | 23 | 207 | 219  | 425  |
| 60.382 | 20 | TGGTATTGGTCCACCTGTGA      | 59.806 | 20 | 207 | 360  | 566  |
| 59.95  | 20 | AAAGTCAGCCGAGAAATTCAA     | 58.962 | 21 | 143 | 752  | 894  |
| 59.894 | 20 | TTGACAATATTTAGTGTTTTGACA  | 58.99  | 27 | 187 | 63   | 249  |
| 60.131 | 20 | TTGTCAAATCTCATTCAATTC     | 59.114 | 23 | 126 | 50   | 175  |
| 60.257 | 20 | CACACGAGCCTTCTTCTTCC      | 59.989 | 20 | 274 | 70   | 343  |
| 59.875 | 20 | CCTTGAGGACTTCTTGGGGT      | 60.48  | 20 | 118 | 67   | 184  |
| 58.695 | 20 | AGTCCTGGCACTTTGCTTGA      | 60.975 | 20 | 274 | 540  | 813  |
| 59.797 | 20 | GTCCTCCGAACTCATGGTGT      | 59.969 | 20 | 179 | 73   | 251  |
| 60.073 | 20 | CGCATCAACACACCAATGAT      | 60.399 | 20 | 216 | 52   | 267  |
| 60.195 | 20 | TGGGACTCAAGCTGTTGTTG      | 59.873 | 20 | 240 | 1078 | 1317 |
| 60.21  | 20 | GTTTGACAGCCCGACAAGAT      | 60.119 | 20 | 247 | 200  | 446  |
| 60.14  | 20 | GTCGTGCTTAAACGTGGGTT      | 60.037 | 20 | 233 | 534  | 766  |
| 60.924 | 20 | GAAAGCCTACCTCGCTTCCT      | 59.983 | 20 | 178 | 642  | 819  |
| 59.801 | 20 | AACCGGTTAAAAACCGAAC       | 60.089 | 20 | 121 | 391  | 511  |
| 57.845 | 21 | GGAGATCTTGCAGGATAGGCT     | 59.825 | 21 | 255 | 6    | 260  |
| 59.971 | 20 | TTCACCGGATGAAAAAGGAG      | 60.044 | 20 | 268 | 67   | 334  |
| 60.157 | 20 | GACGACCGATATTTGCTCCT      | 59.154 | 20 | 155 | 922  | 1076 |
| 60.088 | 20 | TTCATGAAATCAAGCAAACCA     | 59.147 | 21 | 101 | 13   | 113  |
| 59.934 | 20 | GCAAGAGTGAGTGAGGAGGG      | 59.986 | 20 | 123 | 339  | 461  |
| 60.012 | 20 | TCAAGACAACCGAGCAAGTG      | 60.025 | 20 | 187 | 163  | 349  |
| 59.875 | 20 | CCAACCCATTCTCACCAAC       | 60.21  | 20 | 212 | 184  | 395  |

|        |    |                          |        |    |     |      |      |
|--------|----|--------------------------|--------|----|-----|------|------|
| 59.929 | 20 | ATGGGAATCGGGTAAAAACC     | 59.888 | 20 | 255 | 225  | 479  |
| 60.081 | 20 | GGTTCGTTGTTAGCTTTCCG     | 59.747 | 20 | 268 | 284  | 551  |
| 57.001 | 22 | TGTTACGCCCGTGATAATGA     | 59.953 | 20 | 205 | 1143 | 1347 |
| 60.288 | 19 | TGGATCCCAATGAAAATGAAA    | 60.117 | 21 | 276 | 390  | 665  |
| 59.986 | 20 | TGAAGAATGAAGGGAATGGG     | 59.864 | 20 | 174 | 760  | 933  |
| 60.029 | 20 | AGAGCGAGAGATGGACGATT     | 58.995 | 20 | 211 | 75   | 285  |
| 59.457 | 20 | CAGAACTTGTCGTGGTGGTG     | 60.194 | 20 | 250 | 109  | 358  |
| 60.196 | 22 | CTCCGGCCATAGTTTCTCAC     | 59.694 | 20 | 126 | 95   | 220  |
| 58.466 | 23 | CTGTTCTTGCGCAAAATTATC    | 57.614 | 21 | 168 | 706  | 873  |
| 60.168 | 20 | AAAGAGGTGTTATGAAGGGACAA  | 59.056 | 23 | 220 | 18   | 237  |
| 60.269 | 20 | AAGCACACAATAACCAAAGTATT  | 59.08  | 25 | 153 | 64   | 216  |
| 60.073 | 20 | TCCCACTTGCTTGTTGACAT     | 59.139 | 20 | 186 | 39   | 224  |
| 59.989 | 20 | CCAGCTTCGAACGTTGTATGT    | 60.183 | 21 | 213 | 1919 | 2131 |
| 59.276 | 20 | TCAAGGAGTTGTACCTGATAGCC  | 59.666 | 23 | 253 | 1478 | 1730 |
| 59.502 | 23 | TTAGCAGCAGATGCAAAGGA     | 59.712 | 20 | 125 | 538  | 662  |
| 59.966 | 20 | TGAAATCAGGCCATCTCCTC     | 60.158 | 20 | 221 | 7    | 227  |
| 59.971 | 20 | CTGTGCTGCTGGAAAATTGA     | 59.988 | 20 | 235 | 340  | 574  |
| 59.68  | 23 | CACCAGCACCATCGTACATC     | 59.992 | 20 | 211 | 23   | 233  |
| 59.547 | 20 | GAGGGGGAAAAGAGAGGATG     | 60.008 | 20 | 185 | 183  | 367  |
| 59.553 | 22 | TCAGCTGACATTGGGTTGAG     | 59.831 | 20 | 268 | 1372 | 1639 |
| 60.371 | 19 | TCGTAACTGAAAATCATCGGC    | 60.089 | 21 | 246 | 355  | 600  |
| 60.008 | 20 | TTGGGAAAGCACTATGGACC     | 59.933 | 20 | 241 | 53   | 293  |
| 60.053 | 20 | TCACTCATTCAAGAACATAGCCA  | 59.761 | 23 | 177 | 375  | 551  |
| 59.933 | 20 | TGACATGCTCTTAAGGATGGG    | 60.081 | 21 | 100 | 217  | 316  |
| 59.94  | 20 | CTCATAGTCAAACACGATTGCTT  | 58.464 | 23 | 177 | 77   | 253  |
| 59.5   | 20 | GGACATGAAGTAACTGCACATGA  | 60.052 | 23 | 272 | 200  | 471  |
| 59.583 | 21 | GAAGTGGGTGTGTGCTGAAA     | 59.726 | 20 | 173 | 274  | 446  |
| 59.742 | 22 | TTCCAGGAAATCGGGAGAT      | 59.425 | 19 | 259 | 401  | 659  |
| 59.801 | 20 | TAGTACGAACACGCGCAGAG     | 60.217 | 20 | 280 | 512  | 791  |
| 60.595 | 24 | CATTGCACGTAACCAAAAA      | 57.851 | 22 | 269 | 17   | 285  |
| 59.827 | 20 | GGGGTGAATGATCAAGATGG     | 60.135 | 20 | 177 | 11   | 187  |
| 60.044 | 20 | AGAAGGCGGATAAAGTTGGT     | 59.962 | 20 | 272 | 3617 | 3888 |
| 59.999 | 21 | CTTCATCACCTTCCCATTCC     | 59.336 | 20 | 249 | 171  | 419  |
| 60.059 | 21 | GAGGGAGTTGTTTAATTGTCGG   | 59.871 | 22 | 276 | 97   | 372  |
| 59.415 | 20 | ATTTCCAAATCGGTACATGC     | 57.424 | 20 | 273 | 881  | 1153 |
| 60.08  | 20 | AAACCCATTTATAACGGCGA     | 59.323 | 20 | 211 | 258  | 468  |
| 60.134 | 20 | GACTTACGTTCCGCCAACTC     | 59.74  | 20 | 215 | 1963 | 2177 |
| 59.526 | 20 | CTCGTCAACAGCTCGGTACA     | 60.049 | 20 | 259 | 135  | 393  |
| 60.119 | 20 | TCCATCTTCGTCCACCTCTT     | 59.655 | 20 | 107 | 15   | 121  |
| 59.694 | 20 | CTAGGGTTAGCATGCTTGGG     | 59.724 | 20 | 220 | 2    | 221  |
| 60.008 | 20 | GTCCTCGCGAAACAGAGATT     | 59.434 | 20 | 135 | 317  | 451  |
| 59.325 | 20 | GCTGGGTAAAACCTGAATAATACC | 58.575 | 24 | 109 | 129  | 237  |
| 59.458 | 20 | TTTGCCTCTCCATCTCCATC     | 60.158 | 20 | 277 | 5    | 281  |
| 60.048 | 20 | GCAAACTTAGGAACGAAGCA     | 59.527 | 21 | 218 | 24   | 241  |
| 59.923 | 20 | TTGAAATCCTTGAACCGTGTC    | 59.963 | 21 | 153 | 150  | 302  |
| 60.466 | 20 | ACCATCTCGGGTTGTAGTGC     | 59.997 | 20 | 163 | 630  | 792  |
| 60.066 | 20 | GCTTTATGTTGTTGATCCGTCA   | 60.003 | 22 | 152 | 30   | 181  |
| 60.088 | 20 | CAGCAGATGCTTTCATCCAA     | 59.948 | 20 | 132 | 922  | 1053 |
| 59.978 | 20 | CCGTCGTCGTTATGAAGAAAA    | 60.117 | 21 | 149 | 106  | 254  |
| 57.815 | 24 | GTGAAATTATTCGTTGATAAACTC | 57.681 | 27 | 233 | 305  | 537  |
| 60.012 | 20 | TGGTGGGTTGAATGCTATGA     | 59.924 | 20 | 240 | 1448 | 1687 |
| 57.051 | 25 | ACATGGACGTCCCAGATTGT     | 60.246 | 20 | 131 | 2    | 132  |
| 60.636 | 20 | GGTAGGGTGGGGATGAGATT     | 60.015 | 20 | 259 | 123  | 381  |
| 59.986 | 20 | ATGGAAGAAAAACCCAACCC     | 60.032 | 20 | 245 | 210  | 454  |
| 57.433 | 26 | CCCTGCACCTCTTTCAAATC     | 59.67  | 20 | 194 | 16   | 209  |
| 59.564 | 20 | CGTTTTCCCTATTTGTGCAT     | 59     | 21 | 251 | 81   | 331  |
| 60.214 | 20 | TAAACAATAAGGTGCCCCG      | 59.958 | 20 | 241 | 871  | 1111 |
| 60.075 | 21 | AGGTGGAATAGGCAGTGACG     | 60.134 | 20 | 274 | 99   | 372  |

|        |    |                          |        |    |     |      |      |
|--------|----|--------------------------|--------|----|-----|------|------|
| 60.365 | 20 | GCGAGCGAGTAGGTTGTGAG     | 61.136 | 20 | 110 | 2    | 111  |
| 60.162 | 20 | TATCATTCTATGGTGGGGCG     | 60.681 | 20 | 202 | 830  | 1031 |
| 60.166 | 20 | ATGGTTCGCCATAAAAATGC     | 59.801 | 20 | 162 | 37   | 198  |
| 60     | 20 | CTTCACCCCCTACTCCATCA     | 59.92  | 20 | 266 | 393  | 658  |
| 59.895 | 20 | TCGCTATGCACACTTTCTGG     | 60.011 | 20 | 127 | 646  | 772  |
| 60.224 | 20 | GGATGAAGGTGTTTCGTTCA     | 60.95  | 21 | 115 | 355  | 469  |
| 59.968 | 20 | CGCGCCTCTACTTTTAATTACC   | 60.473 | 23 | 190 | 797  | 986  |
| 60.903 | 20 | CTCGACATTGTTTGAGTGCAA    | 59.896 | 21 | 175 | 211  | 385  |
| 58.411 | 20 | TATGCCATTTTCATCTGGGG     | 60.66  | 20 | 246 | 1885 | 2130 |
| 58.931 | 21 | GCCATTTAAAAAGTCGGCTG     | 59.72  | 20 | 226 | 1109 | 1334 |
| 59.75  | 20 | TTAGGAATGGGATGGTGGTG     | 60.572 | 20 | 267 | 82   | 348  |
| 59.916 | 20 | TAAACGGGCCAATTTAAACG     | 59.835 | 20 | 240 | 118  | 357  |
| 58.155 | 20 | GCTTGCACCCCAAATTA        | 59.943 | 20 | 167 | 0    | 166  |
| 60.117 | 20 | TACAACACTGACCATCCCC      | 60.634 | 20 | 127 | 3919 | 4045 |
| 59.939 | 20 | CTTCGCCACTGTTACCCTTC     | 59.734 | 20 | 250 | 791  | 1040 |
| 60.234 | 20 | ACGTGTCCGAGTGTGTTGAA     | 60.203 | 20 | 119 | 79   | 197  |
| 60.249 | 20 | ATGCAAGCTTTGTTGGGAG      | 60.249 | 20 | 244 | 698  | 941  |
| 60.103 | 20 | GTGTGTTGTTCTGCACTGGG     | 60.203 | 20 | 257 | 27   | 283  |
| 59.049 | 20 | CTGGGTATACCTTGCCTCCA     | 59.948 | 20 | 180 | 111  | 290  |
| 60.205 | 20 | TCTATCGGATTAATGGAATAAGC  | 60.184 | 25 | 102 | 9    | 110  |
| 60.214 | 20 | TCGGTGTATGCTGTAAACGAA    | 59.24  | 21 | 134 | 112  | 245  |
| 59.859 | 20 | CAGTCACGACTTGCCAAAA      | 59.881 | 20 | 221 | 852  | 1072 |
| 59.975 | 20 | TCGTATGAATTTTTGTATGGACG  | 58.927 | 23 | 194 | 605  | 798  |
| 59.894 | 20 | GGTTTACCCATAGCGCACTC     | 59.597 | 20 | 156 | 809  | 964  |
| 59.086 | 20 | CCAACACTATTCGTTTTGGG     | 60.22  | 20 | 271 | 434  | 704  |
| 59.17  | 20 | TGAATCCTCACAATATAACCTATT | 59.283 | 27 | 232 | 86   | 317  |
| 59.982 | 20 | AGCCAAATTTGCAACCTCAG     | 60.249 | 20 | 279 | 1215 | 1493 |
| 59.43  | 20 | TCAATTATGTCATGAATGTTCAA  | 57.148 | 24 | 224 | 76   | 299  |
| 60.245 | 20 | TTGTTCGTGGTTCCGGTATTCA   | 59.964 | 20 | 272 | 53   | 324  |
| 59.861 | 20 | ACTGACATCCACAGGCATTG     | 59.551 | 20 | 122 | 76   | 197  |
| 60.221 | 20 | TTTAAACGACCGAGTTTTGGC    | 60.11  | 20 | 265 | 521  | 785  |
| 58.22  | 27 | TGCAAATCCAAAGGTCAACA     | 60.088 | 20 | 135 | 0    | 134  |
| 60.134 | 20 | GTCGAGGGTTTGGAGCTGTA     | 60.255 | 20 | 245 | 8    | 252  |
| 60.002 | 20 | TTGGTGAGTAGGATGAGGGC     | 60.073 | 20 | 270 | 1336 | 1605 |
| 59.547 | 20 | TCATGAATGAAGCAGAAGAGGA   | 59.955 | 22 | 267 | 260  | 526  |
| 59.96  | 20 | ACCCAGGCTGAGTGAGTTA      | 59.721 | 20 | 252 | 320  | 571  |
| 60.21  | 20 | TTCAAACCACCTTCGAACC      | 59.948 | 20 | 214 | 483  | 696  |
| 60.073 | 20 | TTATCATAGGATCACCTCCC     | 57.807 | 21 | 154 | 59   | 212  |
| 60.472 | 20 | TGTATGCAGTCCATTTCCGA     | 60.073 | 20 | 274 | 637  | 910  |
| 58.82  | 21 | TCAAATTACAATCGTCGCC      | 60.837 | 20 | 274 | 147  | 420  |
| 59.823 | 20 | ACGTCGGCTCGAGAGTAAA      | 60.015 | 20 | 169 | 79   | 247  |
| 59.969 | 20 | GTGTGCACCTCGATGCATTT     | 61.078 | 20 | 275 | 818  | 1092 |
| 60.074 | 20 | CCCAAATTGCGAATGCTAT      | 59.928 | 20 | 222 | 608  | 829  |
| 59.934 | 20 | TCATTATCCTAACTCGGATGTGG  | 60.21  | 23 | 200 | 398  | 597  |
| 58.568 | 20 | CAACCTCTGCAAACCCAAAT     | 59.971 | 20 | 275 | 373  | 647  |
| 60.061 | 20 | ATCTGGTATCAGAGCCACGG     | 60.096 | 20 | 275 | 71   | 345  |
| 59.957 | 20 | GGCTTCATGGTGGTTTAGA      | 59.933 | 20 | 105 | 14   | 118  |
| 60.038 | 20 | CAACCATCCCAAACCTTCA      | 59.389 | 20 | 157 | 333  | 489  |
| 59.923 | 20 | TTGTATGCTGAGGCTTGTGC     | 60.019 | 20 | 228 | 30   | 257  |
| 59.929 | 20 | AGCCACTAAGCCACCTTCAA     | 59.875 | 20 | 275 | 592  | 866  |
| 57.635 | 20 | CCAAATTTAAGGGTTATCACCTG  | 58.849 | 23 | 151 | 98   | 248  |
| 59.375 | 20 | ACATAGAGAAGGGTTACTTG/    | 57.537 | 25 | 154 | 70   | 223  |
| 59.476 | 20 | TCAAAGCCAAAAGTATGGC      | 60.074 | 20 | 214 | 81   | 294  |
| 59.923 | 20 | GCGGAATACGAAGAGTCACC     | 59.7   | 20 | 244 | 14   | 257  |
| 60.192 | 20 | CGAAGTAATGCTCACACGGA     | 59.864 | 20 | 263 | 55   | 317  |
| 59.645 | 20 | CAAACACCGATTACATTGG      | 59.816 | 20 | 167 | 269  | 435  |
| 60.471 | 20 | TTGCTGGTGGAACTCCTTT      | 59.711 | 20 | 279 | 1698 | 1976 |
| 59.982 | 22 | TTGGCATCCATCGTAACAGA     | 60.073 | 20 | 169 | 11   | 179  |



|        |    |                            |        |    |     |      |      |
|--------|----|----------------------------|--------|----|-----|------|------|
| 59.977 | 23 | GGGCATACGCTTCGATACAT       | 59.951 | 20 | 209 | 23   | 231  |
| 60.7   | 20 | CTTGTTCCCTATTGCCAACGA      | 58.771 | 20 | 177 | 87   | 263  |
| 59.745 | 20 | TTCACCTACCCTTTTCGATCC      | 60.05  | 20 | 267 | 1409 | 1675 |
| 60.204 | 20 | CTGAGATTTGTAAGTGGCCCA      | 60.011 | 20 | 208 | 18   | 225  |
| 60.195 | 20 | GGAGTTGGGCTAAGTGGGAT       | 60.328 | 20 | 220 | 158  | 377  |
| 60.255 | 20 | CGCTTTGTTTTCTGTGTTGA       | 59.888 | 20 | 255 | 394  | 648  |
| 59.88  | 20 | CGTTCATTTTCTGTCCGTT        | 59.971 | 20 | 155 | 441  | 595  |
| 60.096 | 22 | ATGCGCGATTTTAAACCCTA       | 59.586 | 20 | 175 | 5005 | 5179 |
| 59.937 | 20 | GTCGAGGTGGTCTCAACGAT       | 60.12  | 20 | 269 | 47   | 315  |
| 58.984 | 20 | CAACACAAGGACATCCATCG       | 59.96  | 20 | 141 | 888  | 1028 |
| 60.399 | 20 | AAAGGGCGATGACACAAAAC       | 59.978 | 20 | 124 | 144  | 267  |
| 59.973 | 20 | ATCACGAGATGGGGACTCAG       | 60.072 | 20 | 278 | 1190 | 1467 |
| 57.536 | 27 | CTGTGTTAAATTTTGGAAAGAGAAA  | 57.213 | 25 | 280 | 96   | 375  |
| 59.996 | 20 | GGATACCATGGGCAACCTAA       | 59.645 | 20 | 280 | 904  | 1183 |
| 59.673 | 20 | CGCTCCGTAATTCTCACTCC       | 59.836 | 20 | 219 | 58   | 276  |
| 58.703 | 20 | GAACGAGCATCCATGTCAAA       | 59.654 | 20 | 267 | 184  | 450  |
| 58.008 | 26 | AATTGAGAAGGGGGAGAGGA       | 60.008 | 20 | 132 | 59   | 190  |
| 59.96  | 20 | AATCCTTTCCTCTTTCCCA        | 59.875 | 20 | 219 | 150  | 368  |
| 60.073 | 20 | CACCTCTCCGATTAACCCA        | 59.926 | 20 | 154 | 340  | 493  |
| 60.012 | 20 | TTTCTTTGAGTGGGATGCAA       | 59.247 | 20 | 266 | 114  | 379  |
| 59.925 | 20 | TTGCTTCTCAAACCTTGATTAGGTA( | 58.301 | 25 | 204 | 5    | 208  |
| 60.081 | 20 | AAACGAAAAATTGGGGTTCA       | 59.292 | 20 | 230 | 26   | 255  |
| 59.425 | 20 | AAAACCGTAGTGGGTAAAATTC/    | 60.041 | 24 | 182 | 96   | 277  |
| 59.676 | 20 | TTGGGTGATGTGCTTGAAGA       | 60.24  | 20 | 127 | 162  | 288  |
| 60.12  | 20 | TTGAATTCTATGGCTTCCGC       | 60.175 | 20 | 208 | 352  | 559  |
| 60.031 | 20 | TCTTCGTGTTCTTCGTCTGTG      | 60.025 | 20 | 232 | 3483 | 3714 |
| 59.948 | 20 | TGGAGGAATGAAGGTGAAGG       | 60.042 | 20 | 105 | 108  | 212  |
| 59.989 | 20 | GAAGAAATCCAATAGAGTTGAT(    | 57.932 | 25 | 254 | 18   | 271  |
| 59.763 | 20 | TGCCTAATTTATAGATAATGGACC   | 59.68  | 25 | 274 | 1070 | 1343 |
| 60.144 | 21 | AAAATATGATCTTACTCCCCTGA    | 60.035 | 26 | 205 | 611  | 815  |
| 60.096 | 20 | GGGGTAACTTGTATCCCT         | 60.052 | 20 | 138 | 12   | 149  |
| 59.801 | 20 | CTGAAATCCTGGGCGTAGAT       | 59.15  | 20 | 275 | 91   | 365  |
| 59.831 | 20 | TTTGTCCAAACAAATGAAAACA     | 58.097 | 22 | 257 | 253  | 509  |
| 60.243 | 20 | CTGTAATCCCGATTGCTGCT       | 60.235 | 20 | 118 | 805  | 922  |
| 59.813 | 20 | ATTGTGACATGGCCGAAATC       | 60.733 | 20 | 183 | 149  | 331  |
| 59.823 | 20 | AAAGAAGACCGAGAGACACACA     | 58.991 | 22 | 159 | 0    | 158  |
| 60.228 | 20 | GAGAAAAGACAATTCGGCCA       | 60.192 | 20 | 180 | 67   | 246  |
| 59.581 | 20 | GCACACGAGCTCTCACTCAC       | 59.771 | 20 | 247 | 400  | 646  |
| 59.96  | 20 | TAGCCGATAAAAATGGCACC       | 59.928 | 20 | 224 | 107  | 330  |
| 59.759 | 20 | GACTCTCGCACCATCCATTT       | 60.081 | 20 | 220 | 270  | 489  |
| 59.889 | 20 | AATTTGTACACACGTCCACCA      | 58.813 | 21 | 250 | 81   | 330  |
| 59.304 | 20 | GCGTTGATCCAACGGTCTAT       | 59.962 | 20 | 208 | 149  | 356  |
| 60.578 | 20 | CATGATCCAACCTTATTCCTCC     | 59.666 | 22 | 241 | 30   | 270  |
| 60.08  | 20 | AGTCATGCGATCTGAACGTG       | 59.862 | 20 | 223 | 48   | 270  |
| 60.376 | 23 | GCATGCTCTGTTTTCTGCAA       | 60.142 | 20 | 278 | 3    | 280  |
| 60.873 | 20 | TGCGAAAATTTCTGGAATCA       | 59.232 | 20 | 123 | 318  | 440  |
| 60.007 | 20 | CAATTTTGTCTGCTGCATGG       | 60.257 | 20 | 138 | 467  | 604  |
| 59.94  | 20 | TTTGCAATATTCAACTACGAGCA    | 59.802 | 23 | 188 | 56   | 243  |
| 59.406 | 20 | TGCAGATCCTCGGTACCTTT       | 59.694 | 20 | 232 | 384  | 615  |
| 59.337 | 20 | TTACGAAAATACACGTTCCGGG     | 59.876 | 21 | 214 | 20   | 233  |
| 61.235 | 20 | TCCCAGTGTACACAGACT         | 59.113 | 20 | 258 | 259  | 516  |
| 59.659 | 21 | TCTGCACGCTGCAATAACTC       | 60.165 | 20 | 262 | 1149 | 1410 |
| 59.685 | 20 | TTTAGGATCGGAATATCGAGAAA    | 59.122 | 23 | 280 | 5    | 284  |
| 60.035 | 20 | ACTTTGGCAAATCACACAGAT      | 57.186 | 21 | 276 | 164  | 439  |
| 60.206 | 20 | ATGTTTTGTGAAAGTCCCGC       | 59.978 | 20 | 117 | 523  | 639  |
| 60.299 | 20 | GGTAAAGAAACGGTGGAAAGG      | 59.858 | 21 | 158 | 122  | 279  |
| 59.933 | 20 | GATAATTAGTGGAGGCGGCA       | 60.06  | 20 | 128 | 1530 | 1657 |
| 60.004 | 21 | TGAAGAGAAGAGGTCGGGAA       | 59.92  | 20 | 213 | 30   | 242  |

|        |    |                          |        |    |     |      |      |
|--------|----|--------------------------|--------|----|-----|------|------|
| 59.756 | 20 | CGTTATGGATGTGCCATTTG     | 59.809 | 20 | 236 | 762  | 997  |
| 60.255 | 20 | TACCGACGAATGGTTGTTCA     | 59.964 | 20 | 274 | 507  | 780  |
| 60.298 | 20 | AGCTTCAGGCCTTCAGTTTG     | 59.615 | 20 | 223 | 1363 | 1585 |
| 60.903 | 20 | TGTTCAATCTGCCACCAAAA     | 60.088 | 20 | 255 | 1079 | 1333 |
| 60.323 | 20 | GTGTGGGGGATTGTTGAAAT     | 59.508 | 20 | 280 | 87   | 366  |
| 59.839 | 20 | CACAATCCCAACAAAAAGAAAA   | 59.007 | 22 | 238 | 2    | 239  |
| 59.566 | 20 | TGCAAGTAAAACCATGCTCG     | 59.872 | 20 | 251 | 153  | 403  |
| 59.933 | 20 | AGTTGCTTAGCGACCCCATATA   | 59.73  | 20 | 257 | 4027 | 4283 |
| 59.239 | 20 | GGTTCGGGTATTCACGTTGT     | 59.717 | 20 | 259 | 685  | 943  |
| 59.68  | 23 | GGAGTTGCAGTTTTGGATGAA    | 60.103 | 21 | 193 | 207  | 399  |
| 59.143 | 20 | TGTTCTGTCTTTGCACGAG      | 60.025 | 20 | 268 | 23   | 290  |
| 60.405 | 20 | AGACACCTAAGCCATTCCC      | 60.328 | 20 | 153 | 27   | 179  |
| 59.089 | 24 | CAAATTTTCGGTTTGTTGGCT    | 59.975 | 20 | 133 | 32   | 164  |
| 59.943 | 20 | CAAAAACCGAAAAACCGAAA     | 59.951 | 20 | 266 | 425  | 690  |
| 59.803 | 20 | TACCCAACCCACTAACCCTAA    | 60.081 | 20 | 140 | 63   | 202  |
| 60.439 | 20 | CCTAACCCCACTAATGACCC     | 58.24  | 20 | 112 | 688  | 799  |
| 60.015 | 20 | TTCGTGATTATTGCTGCTGG     | 59.833 | 20 | 140 | 514  | 653  |
| 60.11  | 20 | CACATGTTGAGGTACACGGC     | 60.032 | 20 | 216 | 138  | 353  |
| 60.103 | 20 | TATTACAGGGGCCAGTCGTT     | 59.452 | 20 | 231 | 2912 | 3142 |
| 59.916 | 20 | ACCACCATCTTCTACGACCG     | 59.989 | 20 | 217 | 307  | 523  |
| 59.729 | 20 | GAAGCCTCAAATCACAACCC     | 59.532 | 20 | 218 | 352  | 569  |
| 59.962 | 20 | CAGTTGAAAAATTGCCAAAACA   | 60.014 | 22 | 187 | 610  | 796  |
| 59.476 | 20 | AGCCATTTAAAAGTCGGCTG     | 59.361 | 20 | 154 | 30   | 183  |
| 60.015 | 20 | CTGCTCTCTTGATTCATGGCT    | 59.588 | 21 | 252 | 1121 | 1372 |
| 59.928 | 20 | ACCTTGAGGCATTTGAGGAG     | 59.284 | 20 | 257 | 216  | 472  |
| 60.06  | 20 | TCGATTTGGAAAACAGAGCA     | 59.395 | 20 | 242 | 360  | 601  |
| 59.95  | 20 | TGATGCCTCAAATCACAAGC     | 59.805 | 20 | 198 | 1073 | 1270 |
| 60.504 | 19 | CCACTCTAGACCCTAGCCCC     | 60.088 | 20 | 194 | 162  | 355  |
| 60.028 | 23 | GCATTATAACCACCGCAACA     | 59.448 | 20 | 250 | 74   | 323  |
| 59.717 | 20 | GAGTAGGAGTCCGGAGCAAAA    | 59.43  | 20 | 240 | 240  | 479  |
| 60.19  | 20 | TGACCGGACGAAAATACTCC     | 59.933 | 20 | 182 | 202  | 383  |
| 59.585 | 20 | TTGGCCTGTTACGACTCAAG     | 58.923 | 20 | 147 | 159  | 305  |
| 59.928 | 20 | TACAGTCGACCTCAGCTCCC     | 60.408 | 20 | 208 | 21   | 228  |
| 59.773 | 20 | TAAAACCGACATCCCCACTC     | 59.79  | 20 | 110 | 2    | 111  |
| 59.847 | 20 | CATTTGGAAAATCAATGGATGA   | 59.638 | 22 | 206 | 751  | 956  |
| 59.827 | 20 | TTCAATACTTTGAGGATAGATTGA | 59.474 | 27 | 267 | 20   | 286  |
| 60     | 20 | GTGTGTCACTCCCCGATCTT     | 59.969 | 20 | 203 | 18   | 220  |
| 57.31  | 27 | TTTATCAAAAAGCCGAAACCG    | 60.068 | 20 | 169 | 10   | 178  |
| 60.291 | 20 | TGTTGTCCGGTTCTCTCTCC     | 60.238 | 20 | 256 | 274  | 529  |
| 59.993 | 20 | ATACCGCTTCCAAAATGTGC     | 59.967 | 20 | 143 | 2858 | 3000 |
| 60.357 | 20 | AGCGGTTATTACCGGATCG      | 59.93  | 19 | 230 | 46   | 275  |
| 59.927 | 20 | TCACGCACTCACGATCTCTC     | 60.146 | 20 | 151 | 999  | 1149 |
| 59.943 | 20 | TTTTACGGGTTGGGCCAT       | 61.09  | 18 | 280 | 708  | 987  |
| 60.111 | 20 | TGAGGGAGGGAAAAGAGAATTAAC | 60.076 | 23 | 129 | 176  | 304  |
| 59.303 | 21 | TTGACGCAGCTTGAAGATTG     | 60.134 | 20 | 232 | 4    | 235  |
| 60.074 | 20 | GGAGAAACTGACCGGATTGA     | 60.05  | 20 | 148 | 1091 | 1238 |
| 60.001 | 22 | AGGCAATTAAGATTGCGCCT     | 60.061 | 20 | 185 | 6    | 190  |
| 58.462 | 21 | CCGATCCCATCCCTTAATTT     | 59.978 | 20 | 256 | 249  | 504  |
| 58.78  | 20 | ACGCTCCACCAAAAAGGAGTA    | 59.734 | 20 | 227 | 26   | 252  |
| 59.809 | 20 | GGAAATGTGATTTGATGGGC     | 60.141 | 20 | 162 | 31   | 192  |
| 59.083 | 20 | CATTCCTTTTTATGTGTTTGTTC  | 59.38  | 25 | 242 | 1125 | 1366 |
| 59.315 | 20 | TGTGGGTTAGCATTGATCG      | 59.542 | 20 | 242 | 622  | 863  |
| 59.943 | 20 | TGCTCTGAGAGGCCTGATTT     | 60.096 | 20 | 254 | 494  | 747  |
| 59.81  | 21 | GTTAAAAACCGGACTGCACC     | 59.476 | 20 | 138 | 52   | 189  |
| 58.38  | 20 | CCACAATTTTAGGCAGTTTCG    | 59.634 | 21 | 163 | 483  | 645  |
| 59.688 | 20 | CCCATTTTCTCCATCCCTTT     | 60.124 | 20 | 141 | 224  | 364  |
| 60.54  | 19 | CAAAATCTTACACCTGGAGCC    | 58.707 | 21 | 277 | 232  | 508  |
| 60.11  | 20 | ATTTTTCGCCGAAGAGGATT     | 60.041 | 20 | 270 | 553  | 822  |

|        |    |                          |        |    |     |      |      |
|--------|----|--------------------------|--------|----|-----|------|------|
| 59.429 | 20 | TCCGAGTTGAAGTAGTGGCTT    | 58.994 | 21 | 216 | 251  | 466  |
| 59.366 | 24 | GCGTTTTGATGATATATAGATGTT | 59.327 | 27 | 189 | 306  | 494  |
| 60.066 | 20 | ACCGTCCATCTTAATGCAGC     | 60.103 | 20 | 258 | 2789 | 3046 |
| 60.323 | 20 | AGGAAAATGTGTGCGAGAGGG    | 59.137 | 20 | 280 | 129  | 408  |
| 59.797 | 20 | TTTCCTCCCAACATTCGTGT     | 60.353 | 20 | 224 | 88   | 311  |
| 60.096 | 20 | TGAGGAGCGTTGATCTTGTG     | 59.984 | 20 | 200 | 271  | 470  |
| 60.507 | 20 | CAGACGGTATTGCCCTTCAG     | 60.647 | 20 | 244 | 1175 | 1418 |
| 59.509 | 23 | CCCGGTGTAAAGAAATCGAA     | 59.931 | 20 | 205 | 26   | 230  |
| 59.697 | 20 | TCTGCAAAAATGAACAAACTATAC | 59.639 | 25 | 178 | 12   | 189  |
| 60.038 | 20 | CACGAGTGAAGAAAGGGAGAG    | 59.072 | 21 | 143 | 41   | 183  |
| 59.312 | 20 | GCCGCGAAACAGACATAAAT     | 60.103 | 20 | 151 | 175  | 325  |
| 60.173 | 20 | CGGTAACACAAAATTGCAGAA    | 58.736 | 21 | 240 | 2179 | 2418 |
| 60.142 | 20 | AACATGCTTCACCATATCCAAG   | 58.976 | 22 | 280 | 928  | 1207 |
| 60.061 | 21 | ATATGGAAGGCAGTGGTTCCG    | 59.955 | 20 | 270 | 405  | 674  |
| 59.46  | 24 | ATATGTTACCAAGCCGCTC      | 60.103 | 20 | 226 | 6    | 231  |
| 60.059 | 20 | GCAAGCAAAAATGCTACGAGA    | 59.21  | 20 | 244 | 99   | 342  |
| 60.151 | 20 | CGCGAAGACAATGTTGAAAA     | 59.849 | 20 | 265 | 25   | 289  |
| 60.217 | 20 | TGTTTTGTAAAGGGGTGCGAGA   | 59.595 | 21 | 246 | 845  | 1090 |
| 59.934 | 20 | TGCAAGAAAGTGGACTGCAA     | 60.574 | 20 | 199 | 517  | 715  |
| 58.847 | 20 | CTCTCAATGGACCAGCACCT     | 60.261 | 20 | 264 | 1466 | 1729 |
| 59.262 | 23 | GACACAATTAACCAAAAACATTGC | 59.705 | 24 | 242 | 332  | 573  |
| 60.155 | 20 | TTTGTCTGCGTGGACAAGTT     | 59.339 | 20 | 240 | 217  | 456  |
| 60.044 | 20 | TAATGCATTGCGCAACTGAG     | 59.833 | 20 | 213 | 125  | 337  |
| 59.861 | 20 | TCGTGTCGCTTTCATCATA      | 60.366 | 20 | 126 | 2473 | 2598 |
| 59.953 | 20 | ATTTTTGTTGGCCGAAAATG     | 59.81  | 20 | 170 | 261  | 430  |
| 58.687 | 21 | AGGTGCCCTACTTCTTTGG      | 60.488 | 20 | 245 | 1    | 245  |
| 59.528 | 20 | TGCTCTGTATGCTGCGTTT      | 59.638 | 20 | 275 | 659  | 933  |
| 60.111 | 20 | CGACGGATATTTGTTCTTGTG    | 58.161 | 21 | 196 | 157  | 352  |
| 60.352 | 20 | TTCCCATCTAATCTCGTCCG     | 60.029 | 20 | 183 | 746  | 928  |
| 59.597 | 20 | TTGGGAGACAAACACACTCTC    | 59.232 | 22 | 233 | 92   | 324  |
| 59.588 | 20 | CCACCCACACCTAAGGAAGA     | 59.959 | 20 | 118 | 3    | 120  |
| 59.175 | 20 | CCCTAATACCCACTAACCCCC    | 60.643 | 21 | 110 | 1    | 110  |
| 59.941 | 20 | TCATTGTGATGTGTGGGAAAA    | 59.808 | 21 | 219 | 874  | 1092 |
| 59.82  | 20 | CGACTTGTCGTTGTTCCGGTA    | 59.758 | 20 | 265 | 221  | 485  |
| 60.34  | 20 | GAGGGACAGCCTAGAACTTTGA   | 59.886 | 22 | 134 | 294  | 427  |
| 59.986 | 22 | GAAGTGCATCTCGATGACGA     | 59.95  | 20 | 165 | 38   | 202  |
| 59.82  | 20 | CCACCTGAAAAAGGGTTGAA     | 59.942 | 20 | 265 | 218  | 482  |
| 59.612 | 21 | CCCACACATTTGAGGGAAGA     | 60.892 | 20 | 234 | 253  | 486  |
| 59.622 | 23 | GGCAACTTGGGAGTTGAAAA     | 60.088 | 20 | 275 | 353  | 627  |
| 59.434 | 20 | AATGACACGCAAAAAGGGAC     | 59.978 | 20 | 101 | 173  | 273  |
| 59.75  | 20 | AATCTGACGGCCGATATTTG     | 59.923 | 20 | 171 | 962  | 1132 |
| 59.966 | 20 | TTGTCACACATTTACACACACG   | 58.016 | 22 | 220 | 137  | 356  |
| 59.667 | 23 | TGGACTTAAGTGGTAGCCCG     | 60.125 | 20 | 180 | 186  | 365  |
| 59.49  | 20 | TGGATGTGTAGATGATTTTTGGA  | 59.329 | 23 | 169 | 43   | 211  |
| 59.627 | 20 | AAGCGATCCTTACAGGCAGA     | 59.978 | 20 | 230 | 61   | 290  |
| 59.883 | 20 | ACACACACGATGGATCGAAA     | 59.967 | 20 | 234 | 97   | 330  |
| 59.269 | 20 | AGCATCTCTTGCTCTCTCATTG   | 58.842 | 22 | 161 | 1    | 161  |
| 59.973 | 20 | CCATTTTTACATGCCGCAAT     | 60.7   | 20 | 203 | 805  | 1007 |
| 59.563 | 20 | CCTCACCAACTCAACCCACT     | 60.002 | 20 | 212 | 26   | 237  |
| 59.101 | 20 | TTCTCCTTGCAACAAATCC      | 60.051 | 20 | 204 | 169  | 372  |
| 60.032 | 20 | GGTGCTGTGTGATGTTGGAG     | 60.162 | 20 | 190 | 57   | 246  |
| 59.96  | 20 | TTTCACCGTCCAAAACACAA     | 59.981 | 20 | 213 | 380  | 592  |
| 59.873 | 21 | GCATGCAGAAGATGTGGAGA     | 59.95  | 20 | 215 | 1570 | 1784 |
| 59.967 | 20 | ATGCAAGCTAACCCTAGAA      | 57.835 | 20 | 266 | 52   | 317  |
| 60.157 | 20 | CGTGTCAAAATTTGCTTGTCA    | 59.761 | 21 | 244 | 91   | 334  |
| 60.02  | 22 | GGATGGGAGTACATTGGTGG     | 60.05  | 20 | 247 | 67   | 313  |
| 59.433 | 22 | TTTGGGGGTGAGGTGTAAG      | 59.824 | 20 | 215 | 522  | 736  |
| 59.595 | 21 | GCGTTTTGATGATATATAGGTGTT | 58.907 | 26 | 156 | 384  | 539  |

|        |    |                           |        |    |     |      |      |
|--------|----|---------------------------|--------|----|-----|------|------|
| 59.946 | 21 | AGGAGCCTCACTGACCTTCA      | 59.986 | 20 | 136 | 342  | 477  |
| 60.23  | 20 | CACTTAGCTCATTGATTTTCATCAC | 59.24  | 25 | 153 | 602  | 754  |
| 59.888 | 20 | AGAAGTAGGGCACTCCATCG      | 59.308 | 20 | 278 | 78   | 355  |
| 59.926 | 20 | CGAACCACCACACCAAATTC      | 61.196 | 20 | 154 | 487  | 640  |
| 60.059 | 26 | CTCAACAGTCAACAAGCACACA    | 59.986 | 22 | 212 | 313  | 524  |
| 60.469 | 20 | TTTAAGGGTTATCACCTGATTTTC  | 57.757 | 24 | 278 | 55   | 332  |
| 60.133 | 20 | GAGGAAACCAGCTGTCCAAG      | 59.844 | 20 | 250 | 2029 | 2278 |
| 59.997 | 20 | CATGCCTCAAACAACCTCAA      | 59.691 | 20 | 122 | 578  | 699  |
| 59.734 | 20 | CCATTCACACACACACTCAGA     | 58.078 | 21 | 258 | 183  | 440  |
| 59.882 | 20 | AATGGGGACACACACTCACA      | 59.846 | 20 | 126 | 355  | 480  |
| 59.931 | 20 | GCCTCATCGTCGGATTTTAG      | 59.668 | 20 | 273 | 87   | 359  |
| 59.837 | 20 | GTGGCTGCTGTGTGAGGTAA      | 59.905 | 20 | 222 | 171  | 392  |
| 59.224 | 23 | ATTTTCATTTTCATGGGTTTCG    | 57.399 | 20 | 108 | 11   | 118  |
| 60.034 | 20 | GACACAATGCACACCTCACC      | 60.013 | 20 | 272 | 1060 | 1331 |
| 59.614 | 20 | TCGGTCGTGAGATTGAGAAA      | 59.369 | 20 | 222 | 2067 | 2288 |
| 59.67  | 20 | CATCCAAATCAGGATCAGGTC     | 59.351 | 21 | 221 | 2405 | 2625 |
| 59.322 | 20 | TGCATGTATTTGGGCTAAAGTG    | 60.02  | 22 | 150 | 18   | 167  |
| 60.241 | 20 | TTTACCCGTTGCATGTGTGT      | 59.888 | 20 | 248 | 1416 | 1663 |
| 60.013 | 23 | GAAGGAGACGATCGAACAGC      | 59.957 | 20 | 280 | 157  | 436  |
| 59.709 | 27 | CAAATCCCATCAACCCAAAC      | 60.029 | 20 | 109 | 18   | 126  |
| 60.024 | 20 | GGAGAAGAGATCGGAGACGA      | 59.486 | 20 | 190 | 36   | 225  |
| 59.982 | 20 | CATTGCTGCTATGCCTGAAA      | 59.976 | 20 | 247 | 846  | 1092 |
| 59.916 | 20 | GTGGCCTGAGATAGCCGTTA      | 60.235 | 20 | 202 | 9    | 210  |
| 60.019 | 20 | CCCGTCTCTATCCCTCCTCT      | 59.653 | 20 | 246 | 2240 | 2485 |
| 60.049 | 20 | GAGTGAGGAGCAGAGGGATG      | 59.945 | 20 | 205 | 476  | 680  |
| 59.523 | 21 | TGCATTCAAAGCCACATCT       | 59.276 | 20 | 228 | 418  | 645  |
| 60.142 | 20 | GACCGCGAAGTTTACATGGT      | 60     | 20 | 238 | 53   | 290  |
| 59.973 | 20 | TGTTTAGCAGTCCACCTCCC      | 60.111 | 20 | 253 | 3498 | 3750 |
| 60.386 | 20 | TCCAATTAACGTTCCATTACACA   | 60.223 | 22 | 226 | 2381 | 2606 |
| 60.088 | 20 | TTTCTACTCCCTTCCCCTGC      | 60.569 | 20 | 259 | 988  | 1246 |
| 60.096 | 20 | GGTGGCTTCTCTCTTCGTTTT     | 59.878 | 21 | 221 | 10   | 230  |
| 59.93  | 22 | TCTTCGACCCAACACCATATT     | 59.302 | 21 | 100 | 31   | 130  |
| 57.239 | 26 | AAGGCGTTTTGTAAATTGGC      | 59.124 | 20 | 273 | 5    | 277  |
| 59.708 | 20 | TCATCTTGTCAATTTTCGCCA     | 60.197 | 20 | 188 | 204  | 391  |
| 59.761 | 21 | AGCGGTTATTACCGGATCG       | 59.93  | 19 | 225 | 72   | 296  |
| 60.34  | 20 | ACGGCTGGCATTGTTAGAG       | 60.27  | 20 | 168 | 71   | 238  |
| 59.957 | 20 | TGTTGTTGTTGTTGCTGCTG      | 59.504 | 20 | 222 | 99   | 320  |
| 60.081 | 20 | TATGGGTTATCACCGGATCG      | 60.544 | 20 | 267 | 651  | 917  |
| 59.547 | 20 | ATTAGGGTTCCTCCTTCCCC      | 60.497 | 20 | 112 | 3    | 114  |
| 58.302 | 27 | CAGGATCTTTTGTTATCTTTGACG  | 59.224 | 24 | 174 | 4    | 177  |
| 59.962 | 20 | AGCTTCAGTCACGCACACAC      | 60.104 | 20 | 250 | 96   | 345  |
| 60.016 | 20 | TATGGGTTATCACCGGATCG      | 60.544 | 20 | 129 | 297  | 425  |
| 59.737 | 20 | TTTCTTCCCATCATCACCGT      | 60.317 | 20 | 280 | 778  | 1057 |
| 60.166 | 20 | AACACACACGCACTCACACA      | 59.818 | 20 | 147 | 262  | 408  |
| 60.015 | 20 | TTGTCCAGTGTGTGTTTTTGG     | 59.495 | 21 | 224 | 59   | 282  |
| 60.128 | 20 | GCCACATACTTTGGAGACGC      | 60.667 | 20 | 268 | 1242 | 1509 |
| 59.98  | 20 | GATGGTTTTCCGAAAGTGAA      | 59.91  | 20 | 257 | 1689 | 1945 |
| 59.581 | 20 | GGGCTCAGTAAACTGCTCTCA     | 59.63  | 21 | 243 | 95   | 337  |
| 60.886 | 20 | CCCAAACATTTGAGGGTTGT      | 59.688 | 20 | 205 | 558  | 762  |
| 59.911 | 20 | TTTTATGTAAATTGTCGTGCGT    | 57.373 | 22 | 130 | 190  | 319  |
| 59.755 | 20 | GCTTGGTGAAGGAAGTGAGG      | 59.844 | 20 | 122 | 24   | 145  |
| 59.632 | 23 | TCCTTTATTTTGTATGTAGCAACCA | 59.904 | 24 | 272 | 698  | 969  |
| 59.587 | 20 | TGACCCTTTGATGTTATACACGA   | 59.393 | 23 | 209 | 534  | 742  |
| 59.993 | 20 | CGAGAAATGAGAGCGTAGGG      | 59.971 | 20 | 260 | 86   | 345  |
| 59.853 | 20 | TGGTGACTTGAAGAAATTTGGA    | 59.587 | 22 | 159 | 50   | 208  |
| 58.88  | 21 | GTGGGTTTAAAGTGGGGTGTG     | 60.126 | 20 | 104 | 77   | 180  |
| 60.317 | 20 | CGACCCAGATTCAAACCCTA      | 59.926 | 20 | 275 | 73   | 347  |
| 60.434 | 20 | AATGATTCCTTGGCACTTGG      | 59.933 | 20 | 160 | 490  | 649  |

|        |    |                          |        |    |     |      |      |
|--------|----|--------------------------|--------|----|-----|------|------|
| 59.962 | 20 | GGATGCTGATGGAGGGAATA     | 59.854 | 20 | 246 | 446  | 691  |
| 60.008 | 20 | GGACCAACTTGGAAGTACCG     | 59.449 | 20 | 103 | 23   | 125  |
| 59.74  | 20 | ATAATGGTGGCAGCTGTGCT     | 60.688 | 20 | 201 | 484  | 684  |
| 57.155 | 20 | TCCTTTTGGCGTAGTGAGGT     | 59.734 | 20 | 166 | 11   | 176  |
| 59.867 | 21 | ATTGAATCTACGTCCACGGG     | 59.813 | 20 | 255 | 70   | 324  |
| 58.5   | 20 | CGCTCGGGCTCATATCTATC     | 59.791 | 20 | 231 | 37   | 267  |
| 60.183 | 20 | CGCTCCACAAAGATCTCACA     | 59.984 | 20 | 114 | 181  | 294  |
| 59.67  | 20 | TGCATGCAAACTGAGCTTC      | 60.142 | 20 | 174 | 375  | 548  |
| 59.758 | 22 | AAGTGTTCACAGACGG         | 60.005 | 20 | 177 | 40   | 216  |
| 59.847 | 20 | CTCTGCATGTACGCTACCTACC   | 58.954 | 22 | 219 | 42   | 260  |
| 60.285 | 20 | TCGTGTAAGTTAGCCGGGAC     | 60.132 | 20 | 267 | 0    | 266  |
| 59.997 | 20 | AATTTCTGTCCCGTTTTCCC     | 60.166 | 20 | 280 | 48   | 327  |
| 60.029 | 20 | AAGGAATGGTTTGATGGGTG     | 59.647 | 20 | 216 | 145  | 360  |
| 60.088 | 20 | TAAGTTGCTCGTTGGCATTG     | 59.872 | 20 | 189 | 3313 | 3501 |
| 59.95  | 20 | AAATTGACAGCGATGGAAGC     | 60.221 | 20 | 171 | 109  | 279  |
| 58.161 | 20 | AGGGGTTATCACCTGAATGC     | 58.864 | 20 | 156 | 484  | 639  |
| 59.73  | 20 | CTGGAAAACTTCCCACCAA      | 59.942 | 20 | 177 | 5835 | 6011 |
| 59.73  | 20 | CGAGCGAGTGGTTGTGTAAG     | 59.51  | 20 | 100 | 12   | 111  |
| 59.823 | 20 | GCTCATGGTTCAGGGTTCAT     | 59.934 | 20 | 242 | 223  | 464  |
| 60.033 | 20 | ATCCGCCTACATTGGATGAC     | 59.78  | 20 | 188 | 1448 | 1635 |
| 60.118 | 20 | GCCGGAATCGAGAATATGAG     | 59.628 | 20 | 202 | 390  | 591  |
| 60.066 | 20 | GCGAGGTAGGCTTTCGAACT     | 60.894 | 20 | 249 | 71   | 319  |
| 59.809 | 20 | CCTCTGCCTCGTCTGGTTAG     | 60.005 | 20 | 230 | 29   | 258  |
| 58.809 | 25 | CTCCTAAGTTGCCCATTTGA     | 60.066 | 20 | 112 | 24   | 135  |
| 59.822 | 20 | TGCAATCACCTTCTCTTTGC     | 59.002 | 20 | 200 | 157  | 356  |
| 60.456 | 20 | TGGTGTAATAATTTGGTTTCATCG | 60.006 | 24 | 254 | 245  | 498  |
| 59.296 | 25 | GTCTTCCGCGTGCGTATAAT     | 60.124 | 20 | 222 | 23   | 244  |
| 59.997 | 20 | GTTTACAACCTACAACGCGG     | 59.245 | 20 | 145 | 170  | 314  |
| 59.933 | 20 | CCATATTTAAGGGTTATCACATGA | 59.713 | 27 | 124 | 960  | 1083 |
| 59.988 | 20 | TTCTCCCTCGTTTTTCGAT      | 60.929 | 20 | 256 | 3303 | 3558 |
| 60.006 | 20 | TTTGTCTTCCCGTTTGTTC      | 59.948 | 20 | 278 | 146  | 423  |
| 59.751 | 20 | ATAACCCGGTCAACAAGCTG     | 59.993 | 20 | 249 | 25   | 273  |
| 59.844 | 20 | ACCAAAGACGGGCTAAAATG     | 59.087 | 20 | 214 | 399  | 612  |
| 59.988 | 20 | TGTTGCAGTTGTGGGTGATT     | 60.008 | 20 | 168 | 366  | 533  |
| 57.299 | 25 | CATCAACTCCATCCCCATTC     | 60.135 | 20 | 276 | 14   | 289  |
| 59.52  | 20 | CGTAGGACAACGACGGTTTT     | 60.03  | 20 | 109 | 21   | 129  |
| 60.025 | 20 | TGCGTAAGTTTTGGTGCAAG     | 59.911 | 20 | 260 | 168  | 427  |
| 60.011 | 20 | CTTGATTGGTTGACGTCCCT     | 59.966 | 20 | 232 | 242  | 473  |
| 60.706 | 19 | GAGCTGCGTTTTTGATCTGT     | 60.406 | 20 | 265 | 198  | 462  |
| 60.009 | 20 | TGCTGTGGGAGTAAACACA      | 60.152 | 20 | 276 | 2    | 277  |
| 60.612 | 20 | TGCCTACCACCAATGTAAA      | 59.964 | 20 | 217 | 537  | 753  |
| 57.229 | 25 | CAGGCCCAATACCTTGACAT     | 59.813 | 20 | 134 | 21   | 154  |
| 59.734 | 20 | CCTCCGAACCTCATGGTGTTA    | 58.569 | 20 | 245 | 206  | 450  |
| 60.7   | 20 | GATCATCCCGTGGTTTGTTT     | 59.653 | 20 | 268 | 29   | 296  |
| 59.982 | 20 | GTCAACTTGGGCAGTGAAT      | 59.973 | 20 | 249 | 102  | 350  |
| 59.454 | 22 | TGCAAGCATCAAACAACACA     | 59.877 | 20 | 179 | 3    | 181  |
| 59.317 | 20 | CGGGAAGCCTTTATCTATGC     | 58.809 | 20 | 222 | 613  | 834  |
| 58.899 | 22 | TGACTAAGGTCCCATCACGA     | 59.086 | 20 | 234 | 51   | 284  |
| 57.557 | 25 | TCTTATCACATCAACCGCCA     | 60.073 | 20 | 127 | 20   | 146  |
| 59.881 | 20 | AAATCTACCTCTGCCACCCC     | 60.328 | 20 | 254 | 181  | 434  |
| 60.04  | 20 | GTCACGAGGTTGAATTGTGC     | 59.143 | 20 | 177 | 1551 | 1727 |
| 59.882 | 20 | CTTTTGGATGACGGAAGGAA     | 60.044 | 20 | 150 | 121  | 270  |
| 59.429 | 20 | TTGGATGTTTCTGGAGCGAT     | 60.603 | 20 | 280 | 153  | 432  |
| 59.658 | 24 | CATCGTGAATGTTGGGAGTG     | 59.96  | 20 | 172 | 3    | 174  |
| 59.799 | 20 | TGCTGCTTCTCTTGCTGAAA     | 60.011 | 20 | 158 | 416  | 573  |
| 60.125 | 20 | TACATGGGACGATTCCGATT     | 60.155 | 20 | 154 | 2864 | 3017 |
| 59.853 | 20 | CCAGCTCAGTGGTGGAAAAT     | 60.111 | 20 | 204 | 100  | 303  |
| 59.304 | 20 | GTGGAGAGGAGGGATGATGA     | 60.008 | 20 | 116 | 171  | 286  |

|        |    |                           |        |    |     |      |      |
|--------|----|---------------------------|--------|----|-----|------|------|
| 59.537 | 19 | ACCTGGATCACGGGTTTAAT      | 58.24  | 20 | 280 | 2129 | 2408 |
| 59.779 | 20 | GGTGAAAAATGATTCAGAGGA     | 60.299 | 22 | 131 | 68   | 198  |
| 60.027 | 20 | CATGATGCGAGGATCCTTTT      | 60.036 | 20 | 182 | 164  | 345  |
| 60.173 | 20 | TGCGTTTTGACAATATATAGGTGT  | 60.083 | 26 | 251 | 50   | 300  |
| 58.93  | 20 | CACCACTCTTCGATGGAACC      | 60.51  | 20 | 247 | 83   | 329  |
| 59.564 | 20 | AGCGGTTATTACCGGATCGT      | 60.711 | 20 | 231 | 146  | 376  |
| 59.465 | 25 | ATTTCTTACCCGTCCGTCG       | 59.94  | 19 | 214 | 21   | 234  |
| 59.505 | 23 | TTGCAATATTCAACTACGAGCA    | 58.52  | 22 | 104 | 27   | 130  |
| 59.784 | 20 | GTGGCGTTATTGGGTTTCATT     | 59.691 | 20 | 268 | 4    | 271  |
| 61.21  | 20 | TCAGCCTAGTCGCGATTTTT      | 59.982 | 20 | 276 | 195  | 470  |
| 60.074 | 20 | GGGATGGGAGAAGATGTTGA      | 59.862 | 20 | 166 | 507  | 672  |
| 59.569 | 20 | AGCCACTCCCTCCAAAAGAT      | 60.074 | 20 | 203 | 12   | 214  |
| 60.011 | 19 | TATGCACGAAGCCAATTCAC      | 59.694 | 20 | 257 | 1987 | 2243 |
| 60.181 | 20 | TCGTCCCATCTTTTACCCTC      | 58.981 | 20 | 256 | 337  | 592  |
| 58.608 | 20 | TTTGAACTCTCGGCCTCTTG      | 60.508 | 20 | 249 | 79   | 327  |
| 60.184 | 20 | CGGGCGTTTTTGTAGGTAAA      | 59.993 | 20 | 247 | 2252 | 2498 |
| 58.121 | 21 | AATAAAATGTACGGGCGCTG      | 59.985 | 20 | 158 | 23   | 180  |
| 60.014 | 20 | CGAGTGTGAGGCTGTGAGAG      | 59.757 | 20 | 127 | 64   | 190  |
| 60.065 | 20 | AGTCACCACCGAACCAGAAC      | 60.009 | 20 | 249 | 21   | 269  |
| 59.934 | 20 | TCTTACGGAATTCCACTGGG      | 59.926 | 20 | 129 | 177  | 305  |
| 59.572 | 22 | AATCCTCAAAACCTTGCGTT      | 58.695 | 20 | 249 | 70   | 318  |
| 60.045 | 22 | ATAAGGGCCTGGTCATTCT       | 59.789 | 20 | 266 | 1982 | 2247 |
| 60.435 | 20 | ACAAATTTGCCCTCGTATGC      | 59.967 | 20 | 125 | 126  | 250  |
| 59.053 | 25 | CACTTGAGGAAGGATGATGAAG    | 58.789 | 22 | 100 | 425  | 524  |
| 59.984 | 20 | CTTTTTCGACTTTGATCCGC      | 59.823 | 20 | 242 | 9    | 250  |
| 58.079 | 23 | TAGGTGAGGTCGGGTCACTC      | 60.112 | 20 | 195 | 31   | 225  |
| 60.261 | 20 | TCGTCCGAAAATCCTTTCAC      | 60.051 | 20 | 246 | 272  | 517  |
| 60.088 | 21 | ATCGGTTATTACCGGATCGC      | 61.031 | 20 | 259 | 291  | 549  |
| 59.358 | 26 | AAATGTTTGAAATATCGGGGC     | 60.035 | 21 | 100 | 10   | 109  |
| 59.997 | 20 | TGGCACAATAGGAAAGCAAG      | 58.917 | 20 | 105 | 480  | 584  |
| 59.67  | 20 | ACAACTTATGGACCGCTGG       | 59.993 | 20 | 103 | 587  | 689  |
| 60.141 | 21 | ACGTCACCCCACTTGGTAAA      | 60.269 | 20 | 199 | 1708 | 1906 |
| 59.083 | 20 | AGTTGAGGTTACGCCAAACA      | 58.283 | 20 | 238 | 64   | 301  |
| 58.861 | 22 | TATAACCGATCCCACCCCTT      | 60.391 | 20 | 126 | 94   | 219  |
| 60.11  | 20 | AGTAATTGTCCAGGGGGAGG      | 60.183 | 20 | 139 | 386  | 524  |
| 57.85  | 20 | ATATGAAGTGGGGATGGACG      | 59.629 | 20 | 258 | 1135 | 1392 |
| 59.556 | 20 | CATCCACTTAAAGCAAGGCA      | 58.917 | 20 | 280 | 733  | 1012 |
| 60.128 | 19 | CGACATTGCCCTATGAGAAAA     | 60.081 | 21 | 115 | 35   | 149  |
| 60.155 | 21 | AAATTAATAATTATGGCAACTTTCC | 57.89  | 25 | 258 | 3636 | 3893 |
| 60     | 20 | CCATGGATGTCAGTCATTGC      | 59.925 | 20 | 264 | 1513 | 1776 |
| 59.907 | 22 | CCGTCGATTTCTAGTGTGG       | 59.618 | 21 | 190 | 393  | 582  |
| 59.438 | 21 | AGTTTTTCCGACTCAAGGCA      | 59.853 | 20 | 251 | 186  | 436  |
| 59.762 | 20 | TCTTGCACATCTTGGTGAGTG     | 59.889 | 21 | 229 | 18   | 246  |
| 57.767 | 25 | ACCTGTAGAATCTCTTACTCTATC  | 57.215 | 27 | 223 | 593  | 815  |
| 60.987 | 20 | GATGGAGACACCTAAGCCCA      | 60.073 | 20 | 172 | 5    | 176  |
| 60.08  | 20 | ATACGAGTAGCGATCGGCAT      | 59.719 | 20 | 263 | 24   | 286  |
| 60.052 | 20 | GGCATCACAAAAGCAGACA       | 59.847 | 20 | 271 | 64   | 334  |
| 60.081 | 20 | TGAACCTTGAATCGAGTTTACAT   | 57.814 | 23 | 187 | 8    | 194  |
| 60.103 | 20 | TTGTAGGCAACGAGCCTTCT      | 60.015 | 20 | 232 | 3460 | 3691 |
| 60.423 | 20 | TTATGCATGCACTCCACCAC      | 60.549 | 20 | 170 | 320  | 489  |
| 60.155 | 20 | CCACTGTTGGAATCACATGC      | 59.967 | 20 | 263 | 371  | 633  |
| 58.933 | 20 | TCATCAGGTCGTGGATTGA       | 60.048 | 20 | 122 | 445  | 566  |
| 57.617 | 23 | GCCTCGTTGCTTATTTGTT       | 59.229 | 20 | 279 | 378  | 656  |
| 59.988 | 20 | GGTGGTTTGAGGGTGAATGT      | 59.679 | 20 | 172 | 44   | 215  |
| 59.903 | 20 | TTGTCTCACTCACCGTGCTC      | 60.03  | 20 | 277 | 4176 | 4452 |
| 59.799 | 20 | TCCCGTTTTACCCTTGAATG      | 59.795 | 20 | 196 | 89   | 284  |
| 60.791 | 21 | CCTCACTCTTTTACGCCTTCC     | 60.248 | 21 | 102 | 16   | 117  |
| 59.708 | 20 | CCTGTTCTCCGCTGTATTCC      | 59.694 | 20 | 149 | 2772 | 2920 |

|        |    |                          |        |    |     |      |      |
|--------|----|--------------------------|--------|----|-----|------|------|
| 59.978 | 20 | CATGCAAACATGGAACATTG     | 58.389 | 20 | 268 | 297  | 564  |
| 60.015 | 20 | TTGATCAAGACCTTTTGGGG     | 59.903 | 20 | 226 | 82   | 307  |
| 60.379 | 23 | GCTGCTCCTTTGACTCCAAC     | 59.997 | 20 | 146 | 73   | 218  |
| 60.143 | 20 | GATGTTCCACAAAACCACC      | 60.073 | 20 | 175 | 538  | 712  |
| 60.153 | 20 | GACCGCGAACTTAGAGGAGTT    | 59.899 | 21 | 266 | 110  | 375  |
| 59.939 | 20 | ACCCTCCTCAGCCAAAAAT      | 59.94  | 20 | 252 | 588  | 839  |
| 60.439 | 20 | GATGATTGCACCATAACGCA     | 60.498 | 20 | 148 | 479  | 626  |
| 60.006 | 20 | TGTTGTCATAACAAAATGACACC  | 59.837 | 24 | 100 | 352  | 451  |
| 59.645 | 20 | TCGCCATATTCGATCACAAA     | 60.035 | 20 | 235 | 180  | 414  |
| 59.238 | 22 | GTTGTGCGCATGATTGAAAG     | 60.265 | 20 | 130 | 1    | 130  |
| 60.284 | 20 | GGTGTGGCCGAAAGTTTTA      | 59.975 | 20 | 103 | 71   | 173  |
| 58.178 | 25 | TCGCATGTTGATTTTCCAAC     | 59.523 | 20 | 278 | 853  | 1130 |
| 59.848 | 20 | TCGGCATGACGTAGTTTGAA     | 60.257 | 20 | 222 | 1767 | 1988 |
| 60.066 | 20 | GGCCAAATATTTCCCTACCG     | 60.508 | 20 | 212 | 92   | 303  |
| 59.978 | 20 | ACCATATTTAAGGGTTATCACCTG | 57.552 | 24 | 274 | 304  | 577  |
| 59.954 | 20 | CCCGTGACACAACAGATCAC     | 60.005 | 20 | 258 | 578  | 835  |
| 58.4   | 21 | AAGTCCCCATTAAAGATGTAAGTT | 58.935 | 26 | 280 | 229  | 508  |
| 60.807 | 20 | TCATAAGTTAACATAAACCAAAC  | 59.079 | 27 | 109 | 79   | 187  |
| 59.969 | 20 | GGATTGCTGAAAACCTGGCTC    | 59.82  | 20 | 276 | 32   | 307  |
| 58.932 | 20 | AATACGACGGCGAAGAAAGA     | 59.845 | 20 | 239 | 25   | 263  |
| 59.682 | 25 | TCGGTTCCAAATCTCGTAG      | 60.066 | 20 | 228 | 38   | 265  |
| 59.95  | 20 | AAGGCCACACTCCAAGAAAA     | 59.711 | 20 | 176 | 673  | 848  |
| 59.639 | 20 | CATCCAGTTGTCTTGGGAG      | 60.501 | 20 | 181 | 18   | 198  |
| 59.677 | 20 | ATGTCACACCCTCCCAATA      | 60.05  | 20 | 171 | 233  | 403  |
| 60.483 | 20 | ATCATGTAGTCGCGTGCTGA     | 60.445 | 20 | 161 | 829  | 989  |
| 59.195 | 20 | TTTTCGAGTTTCTTGTCTCCA    | 58.994 | 22 | 246 | 321  | 566  |
| 59.925 | 20 | CGAGAGCTGAGAGACAAAGAGA   | 59.112 | 22 | 277 | 535  | 811  |
| 60.053 | 20 | ACCCTCCTCAGCCAAAAAT      | 59.94  | 20 | 244 | 1284 | 1527 |
| 59.956 | 21 | CACTTTTAACTCCAACCAGGA    | 58.288 | 22 | 220 | 105  | 324  |
| 59.799 | 20 | CTTTCGTTGGCGATTTTCAT     | 60.074 | 20 | 236 | 40   | 275  |
| 60.255 | 20 | GGGGAAGGAAAGAGAACGAG     | 60.183 | 20 | 221 | 37   | 257  |
| 60.089 | 20 | AACGGTTATCACTGGATCGC     | 59.962 | 20 | 204 | 424  | 627  |
| 59.734 | 20 | TCTCCCTTTCCTCACTCCTG     | 59.375 | 20 | 258 | 2    | 259  |
| 60.733 | 20 | ATTTGCTTAAAATGAATCAATGG  | 57.325 | 23 | 191 | 275  | 465  |
| 60.908 | 21 | TTTGTTCATTAAACAAGACCATC/ | 60.047 | 26 | 217 | 1070 | 1286 |
| 60.066 | 20 | TCCGTCATCGACCACTATCA     | 60.072 | 20 | 278 | 477  | 754  |
| 60.045 | 20 | CGGCCGGTTTTTAATGTTTA     | 59.835 | 20 | 210 | 2187 | 2396 |
| 60.101 | 24 | TGAGTGGAACGATCCATATAAATT | 60.427 | 25 | 258 | 680  | 937  |
| 59.55  | 20 | CCCACACTCACACGATTTCA     | 60.57  | 20 | 174 | 1163 | 1336 |
| 59.966 | 20 | GCAGACATGTTTCGCTACCA     | 59.871 | 20 | 183 | 202  | 384  |
| 59.267 | 22 | AATGCGCCTCCCCTTTAAT      | 60.821 | 20 | 120 | 4    | 123  |
| 60.263 | 20 | TGCATTGTCAGTAGTCCGA      | 60.413 | 20 | 178 | 480  | 657  |
| 59.033 | 21 | CTACAAGATCAACCGCCTGC     | 60.796 | 20 | 201 | 104  | 304  |
| 59.346 | 20 | CCCGTACCTCAATTAAGGG      | 59.719 | 21 | 263 | 716  | 978  |
| 59.801 | 20 | CCGAATTCCTCTACCGTCAA     | 60.066 | 20 | 192 | 393  | 584  |
| 59.934 | 20 | TGCACACTGTCACACTCCAA     | 59.905 | 20 | 201 | 2043 | 2243 |
| 59.75  | 20 | CCAGGCTAGCCAGAACAATC     | 59.836 | 20 | 177 | 202  | 378  |
| 60.032 | 20 | CACCCTCATCTCTTGCATT      | 60.126 | 21 | 115 | 228  | 342  |
| 60.797 | 18 | ATAAGAGGTATTTTGACAGTATCG | 57.206 | 25 | 122 | 91   | 212  |
| 59.836 | 20 | ATCGATGTGTTGGCATTCAA     | 59.931 | 20 | 250 | 225  | 474  |
| 59.816 | 20 | CCACCCGTGTATGTCATGTG     | 60.722 | 20 | 226 | 397  | 622  |
| 59.778 | 20 | CGAAATTGACGGAAGAGGAA     | 60.184 | 20 | 242 | 103  | 344  |
| 60.328 | 20 | GCCGGATTTAGAGCAATCAA     | 60.175 | 20 | 212 | 184  | 395  |
| 59.339 | 20 | GAACTTCGCCATCGTCTCTC     | 59.957 | 20 | 188 | 13   | 200  |
| 59.308 | 20 | TGGATGAAAATCATTGTTTCGC   | 60.832 | 21 | 275 | 583  | 857  |
| 60.111 | 20 | TGGACTTCTCCAATCCATGC     | 61.016 | 20 | 239 | 234  | 472  |
| 60.452 | 20 | TGCAATTCCTTCTGAACCCT     | 59.67  | 20 | 232 | 108  | 339  |
| 59.882 | 20 | CTCGTTCTTCTTTCATCTAAACA  | 57.05  | 24 | 123 | 281  | 403  |

|        |    |                            |        |    |     |      |      |
|--------|----|----------------------------|--------|----|-----|------|------|
| 61.225 | 20 | CAGGCTAAAGATCGTCCGAG       | 59.971 | 20 | 249 | 213  | 461  |
| 60.39  | 20 | TCATGGCTGGGTCTACATGA       | 60.072 | 20 | 177 | 3247 | 3423 |
| 57.497 | 26 | CAACACTCAATTATAGGAAAATC/   | 59.318 | 27 | 250 | 210  | 459  |
| 58.133 | 20 | GGGTAGTTGAAATGCAAGCC       | 59.574 | 20 | 168 | 416  | 583  |
| 59.523 | 20 | GGGGAAGAGAATCAAGAGGG       | 60.008 | 20 | 103 | 369  | 471  |
| 60.508 | 20 | AACACTGATTCGCACAAGGA       | 59.293 | 20 | 229 | 61   | 289  |
| 60.038 | 20 | CATATTCATGGTCCCAAC         | 59.871 | 20 | 109 | 4452 | 4560 |
| 59.12  | 20 | TCTTCACCTCAGTCTGCACG       | 60.178 | 20 | 215 | 1120 | 1334 |
| 60.038 | 20 | TGCATCACATTTGTTTCATATCG    | 59.448 | 22 | 195 | 88   | 282  |
| 60.309 | 20 | ATCTCCATCTCCTTCCTCCG       | 60.553 | 20 | 276 | 947  | 1222 |
| 60.142 | 20 | TGCCCTTGATGCTCCCTAT        | 59.551 | 20 | 280 | 3139 | 3418 |
| 58.616 | 21 | TGGGTTTTTACGAAAGGCAG       | 60.103 | 20 | 207 | 25   | 231  |
| 59.938 | 20 | CGTTCATTTCTGACCTTTAGAAGT   | 60.307 | 26 | 131 | 103  | 233  |
| 59.505 | 20 | TGCTCGTTTCATATGTTGCC       | 59.694 | 20 | 139 | 147  | 285  |
| 60.331 | 20 | GGAAGGCGTTGACATTTGAT       | 59.939 | 20 | 259 | 93   | 351  |
| 61.799 | 20 | AATGTTGTCCCGGACTCCTC       | 61.291 | 20 | 100 | 59   | 158  |
| 61.248 | 20 | TGGTAGTGAAATAAACATAAACTC   | 59.645 | 26 | 237 | 0    | 236  |
| 58.165 | 23 | GGTTTTACGAACCACAATCCA      | 59.716 | 21 | 130 | 151  | 280  |
| 59.989 | 20 | TACATTTCCCAACCACTCC        | 59.647 | 20 | 173 | 12   | 184  |
| 60.423 | 20 | CGTAAAAATGGTATTATTGGATC    | 59.202 | 26 | 143 | 98   | 240  |
| 59.955 | 20 | AATGGAGGCGATTTTGTGTC       | 59.939 | 20 | 246 | 1247 | 1492 |
| 60.549 | 20 | TGCTTTGATTAATCCCTCCG       | 60.031 | 20 | 277 | 166  | 442  |
| 60.048 | 20 | ATGGCATATGAGGCTTGGTC       | 59.923 | 20 | 175 | 181  | 355  |
| 61.11  | 20 | GCCTATGCAGTCACAAATGC       | 59.306 | 20 | 266 | 734  | 999  |
| 60.648 | 20 | ATCGCAATTCGATTAGGCAC       | 60.067 | 20 | 274 | 103  | 376  |
| 59.985 | 22 | TGTTGCGTAATAGGCGAGAA       | 59.467 | 20 | 209 | 330  | 538  |
| 59.998 | 20 | ACGATTACAACGCAACATCG       | 59.614 | 20 | 137 | 346  | 482  |
| 59.317 | 23 | CCATTCAATTTAACTTCGGCA      | 59.95  | 21 | 217 | 97   | 313  |
| 60.028 | 20 | GTTGGCAACCAGATATGCCT       | 59.962 | 20 | 127 | 304  | 430  |
| 60.14  | 20 | TCCAATGGATGGAAATGGTT       | 59.991 | 20 | 279 | 288  | 566  |
| 59.439 | 20 | GGCTAAAAGTTGTTGTCTGGCT     | 59.825 | 22 | 184 | 9    | 192  |
| 59.894 | 20 | ATGTTGCAGCATAGGCATGA       | 60.251 | 20 | 279 | 608  | 886  |
| 60.037 | 20 | CAATGCCGCTGAACATATTG       | 60.096 | 20 | 171 | 684  | 854  |
| 60.376 | 23 | TTCTGTCCCGTCTTCTTCGT       | 59.844 | 20 | 170 | 13   | 182  |
| 60.723 | 20 | GGACCCTAATACCACTAACCCC     | 59.847 | 22 | 102 | 513  | 614  |
| 59.955 | 20 | CCTTCAACAAATGGTTCATGC      | 60.359 | 21 | 187 | 1721 | 1907 |
| 60.042 | 20 | TTCCAGGATCGAATTGAGAA       | 59.631 | 21 | 262 | 235  | 496  |
| 60.03  | 20 | TTCAAACCTGGTTCTCGTCC       | 60.088 | 20 | 243 | 70   | 312  |
| 60.807 | 21 | CAACATCACCAAACACTCCG       | 60.001 | 20 | 225 | 8    | 232  |
| 60.894 | 20 | TTCATCATTTTCAATTTATAAGCTTC | 59.91  | 26 | 189 | 107  | 295  |
| 59.943 | 20 | TGGTTGGTGGAAAGAAATCAA      | 58.947 | 20 | 215 | 59   | 273  |
| 59.182 | 20 | CAATGTTTCCATGTTCCGTG       | 59.816 | 20 | 262 | 1324 | 1585 |
| 59.979 | 20 | ACAGAAATTGCCTTGGTTGC       | 60.118 | 20 | 134 | 249  | 382  |
| 59.049 | 20 | GTCCGATTTGCCGTTCTATC       | 59.533 | 20 | 215 | 1028 | 1242 |
| 59.993 | 20 | TCCAGCATTTGTATGTCCCA       | 59.924 | 20 | 213 | 1442 | 1654 |
| 60.294 | 20 | CATGAACCTGAAACAGCGTG       | 60.301 | 20 | 229 | 2155 | 2383 |
| 59.983 | 20 | ACAAGAGCTGAAATGCCCTT       | 58.936 | 20 | 215 | 30   | 244  |
| 60.005 | 20 | TTGAATCATTTGCGTTGCAT       | 60.081 | 20 | 268 | 4312 | 4579 |
| 59.743 | 22 | GCCAAAAAGTCAAGGCGTTA       | 60.244 | 20 | 262 | 3    | 264  |
| 61.061 | 20 | GATGTCGAGATCCAACCCAT       | 59.744 | 20 | 230 | 364  | 593  |
| 59.762 | 20 | TTAGGTGTTTTGACATGTTCACTC   | 58.225 | 24 | 165 | 236  | 400  |
| 59.534 | 20 | CCCCTTCCTCCAACCAGTA        | 59.959 | 20 | 244 | 536  | 779  |
| 57.509 | 23 | TGTTGTAATGAGGCTTTTGAA      | 59.625 | 22 | 237 | 15   | 251  |
| 59.271 | 22 | AAATATCAGGCCAAAAACGC       | 59.081 | 20 | 191 | 242  | 432  |
| 59.95  | 20 | TTCCCATCACCATCACTTT        | 60.173 | 20 | 166 | 111  | 276  |
| 60.074 | 20 | CCGCCTGATTTGTTTCTCAT       | 60.074 | 20 | 127 | 159  | 285  |
| 59.665 | 20 | TCCGATGACTAAATGGAAGACA     | 59.569 | 22 | 141 | 5522 | 5662 |
| 59.864 | 20 | TTTCGTTTGCCTAAAATGCC       | 60.075 | 20 | 233 | 218  | 450  |



|        |    |                           |        |    |     |      |      |
|--------|----|---------------------------|--------|----|-----|------|------|
| 59.706 | 20 | TACACAATGCCAAACATGGG      | 60.234 | 20 | 265 | 5399 | 5663 |
| 59.989 | 20 | CAGTGGTCCTGGGAACCTAA      | 59.959 | 20 | 152 | 6    | 157  |
| 59.578 | 21 | GTAATGGCGGTGAAGATGGT      | 59.82  | 20 | 276 | 100  | 375  |
| 59.926 | 20 | CCTTGGCGGTTTCATATCAGT     | 59.955 | 20 | 171 | 65   | 235  |
| 60.123 | 21 | GAGAAGTTGTCGGTTTGGGA      | 60.088 | 20 | 213 | 639  | 851  |
| 60.147 | 20 | GGACCTTGCCAGAAACCAA       | 59.943 | 20 | 148 | 87   | 234  |
| 59.747 | 20 | CATACTCTACCAATCCCCG       | 60.331 | 20 | 141 | 4    | 144  |
| 59.978 | 20 | TCCCAGCATTCTTGAACACA      | 60.24  | 20 | 138 | 71   | 208  |
| 60.162 | 20 | TCATGTTGCTACACGTTGCT      | 57.926 | 20 | 149 | 175  | 323  |
| 59.274 | 21 | TCGGGTAGTCAAGTTTGCTTT     | 58.893 | 21 | 255 | 20   | 274  |
| 59.864 | 20 | TGTACAAAAGCTTGTGGTGAAGA   | 59.836 | 23 | 240 | 36   | 275  |
| 59.853 | 20 | GCAACGGAATACCACTCGTT      | 60     | 20 | 167 | 1466 | 1632 |
| 59.481 | 20 | GCACACTCGAAGAGTAGCGA      | 59.344 | 20 | 216 | 776  | 991  |
| 59.267 | 22 | AAAATACCAAAGTCGATTATCCA/  | 59.264 | 25 | 162 | 39   | 200  |
| 58.161 | 21 | TATGGGTTATCACCGGATCG      | 60.544 | 20 | 119 | 104  | 222  |
| 60.152 | 20 | AAAAAGCATTTCACACGTTCTG    | 59.312 | 22 | 179 | 294  | 472  |
| 59.727 | 21 | CGCCACAATTACCAAAATGA      | 59.42  | 20 | 280 | 844  | 1123 |
| 59.844 | 20 | CACACGTTATATTTATAGTTTTGTG | 59.19  | 27 | 124 | 223  | 346  |
| 59.955 | 20 | GCGAATTCAGCTAGAACAACAA    | 59.541 | 22 | 180 | 1836 | 2015 |
| 60.211 | 21 | AGCTTATCACTATCACCCCTCTCC  | 59.22  | 24 | 100 | 28   | 127  |
| 60.192 | 20 | ACGGTTCACATACTCCTGCC      | 59.997 | 20 | 235 | 150  | 384  |
| 59.208 | 22 | TGCAACCAACAAAAACAACA      | 58.626 | 20 | 190 | 25   | 214  |
| 59.969 | 20 | TCCTTGGAACCTAGAAATGGTT    | 59.001 | 22 | 256 | 9    | 264  |
| 59.938 | 20 | GGGAGAATGCCTTGTTTCAA      | 60.051 | 20 | 145 | 309  | 453  |
| 60.183 | 20 | ATCCTTTTCGCCATCTTGAA      | 59.645 | 20 | 190 | 127  | 316  |
| 58.423 | 21 | ATGGAATTGGGTGTTGGATG      | 60.439 | 20 | 115 | 132  | 246  |
| 57.315 | 21 | AAGGAGCTCAACCTACGTGAA     | 58.994 | 21 | 271 | 201  | 471  |
| 59.824 | 20 | AGGTTGCAAGGACAAGCCTA      | 59.875 | 20 | 274 | 700  | 973  |
| 60.175 | 21 | TTGATTTCCACCCTTCTTC       | 58.956 | 20 | 213 | 53   | 265  |
| 58.695 | 20 | TGCCTCTAATGCACACAAGAA     | 59.478 | 21 | 279 | 67   | 345  |
| 60.344 | 20 | GAGCCAGGATTTACGGTAG       | 59.694 | 20 | 267 | 1022 | 1288 |
| 61.196 | 20 | CAAGGGTGATTGTAGCCAGC      | 60.657 | 20 | 158 | 890  | 1047 |
| 59.206 | 24 | CTCGCTAACGGCACTAAACC      | 59.904 | 20 | 106 | 148  | 253  |
| 59.967 | 20 | GGTATTGTCGGAACCTTCGCT     | 59.198 | 20 | 163 | 101  | 263  |
| 60.326 | 20 | TGCAGAAAGCAGGCAGTAGA      | 59.888 | 20 | 190 | 4388 | 4577 |
| 60.255 | 20 | AGACGATTGAGAGAAAGCGG      | 59.574 | 20 | 106 | 503  | 608  |
| 59.938 | 20 | AAATTTATTGTAATCTTCCCTCCA/ | 59.594 | 26 | 233 | 559  | 791  |
| 60.189 | 23 | CACCAACCCAACCCACTAAC      | 60.126 | 20 | 120 | 11   | 130  |
| 58.984 | 20 | ATCAATGGTCCACATCGGTT      | 60.057 | 20 | 217 | 25   | 241  |
| 59.708 | 20 | TTCTCTTGTGCGCCATTTTT      | 59.685 | 20 | 280 | 319  | 598  |
| 59.964 | 20 | GAACAATTACAATGTTTATGAAAT  | 59.51  | 27 | 105 | 25   | 129  |
| 60.286 | 20 | TGGTTGTGTGAACCAACTCTG     | 59.626 | 21 | 141 | 272  | 412  |
| 60.044 | 20 | GGCCATTAAGCTTCACCAA       | 60.074 | 20 | 220 | 49   | 268  |
| 59.917 | 20 | GTTTGAGGTCGGAGATTGGA      | 60.05  | 20 | 137 | 248  | 384  |
| 60.144 | 20 | CAAGCTCATTTTGTGTCCCA      | 59.691 | 20 | 243 | 1056 | 1298 |
| 59.923 | 20 | ATCGATGTGTTGGCATTCAA      | 59.931 | 20 | 145 | 79   | 223  |
| 59.945 | 20 | AATGAAAGCGATCGTATGCC      | 60.067 | 20 | 190 | 887  | 1076 |
| 57.436 | 27 | AAGGAGCAGGTGTGTTGTC       | 60.159 | 20 | 240 | 18   | 257  |
| 59.784 | 20 | TATTCACACAGCCCTTTCCC      | 59.933 | 20 | 211 | 107  | 317  |
| 60.081 | 20 | AATTTGGAGAGGGAGGGAGA      | 60.008 | 20 | 102 | 27   | 128  |
| 60.195 | 20 | AAGGGATTACCTGCCTTCT       | 60.074 | 20 | 161 | 1158 | 1318 |
| 59.42  | 20 | TTGATCCTGCAATCTCTCGTT     | 59.828 | 21 | 187 | 9    | 195  |
| 60.185 | 25 | GACTCTTCACAACCTTCTACACAAT | 57.679 | 26 | 275 | 822  | 1096 |
| 59.933 | 20 | GACACCCAATCCCATGAAAC      | 60.034 | 20 | 203 | 5    | 207  |
| 59.651 | 20 | ATTTGCGTCGCCTAATGAAC      | 60.103 | 20 | 132 | 182  | 313  |
| 59.921 | 21 | TGCTGAGAGTGTGTTGGCAT      | 60.473 | 20 | 108 | 1218 | 1325 |
| 59.964 | 20 | CCCTCAATCGATCCATGTCT      | 59.886 | 20 | 177 | 498  | 674  |
| 60.312 | 20 | GATCCCGTGTGTGAACTGTG      | 60.005 | 20 | 141 | 56   | 196  |

|        |    |                          |        |    |     |      |      |
|--------|----|--------------------------|--------|----|-----|------|------|
| 57.251 | 27 | TTTGGTTCAATGGGTTATTCG    | 59.685 | 21 | 190 | 87   | 276  |
| 59.097 | 21 | GCATGATCAGGGTAAATCCA     | 59.776 | 21 | 191 | 46   | 236  |
| 60.188 | 20 | ACAGCCACCATAATCGAAGG     | 59.955 | 20 | 262 | 285  | 546  |
| 60.218 | 20 | GAACGGGCAGCAGTCTAAAG     | 60.015 | 20 | 157 | 58   | 214  |
| 59.6   | 21 | CCTTCAGCATTGAGATCGG      | 60.734 | 20 | 102 | 6    | 107  |
| 60.235 | 20 | TGCTCACCTTCGATCTCTGA     | 59.656 | 20 | 214 | 47   | 260  |
| 59.888 | 20 | GGTGGGAGGGAATTTGAGAT     | 60.133 | 20 | 235 | 1961 | 2195 |
| 59.971 | 20 | TGTGTTTTATCCCTCGCACA     | 60.111 | 20 | 210 | 37   | 246  |
| 59.948 | 20 | AGAACATGGTTTCCGAGCTG     | 60.255 | 20 | 101 | 163  | 263  |
| 59.988 | 20 | TCTCCCCCTCTTCCCTCTTA     | 60.139 | 20 | 260 | 4096 | 4355 |
| 59.865 | 23 | CACCTCACCTTCTCTCCACTCT   | 59.91  | 22 | 149 | 92   | 240  |
| 59.951 | 20 | AGGCTAAACAAGGCCCAAAC     | 60.483 | 20 | 276 | 91   | 366  |
| 60.218 | 20 | CAGAAATTGCCTCTGTTGTTC    | 57.468 | 21 | 170 | 111  | 280  |
| 60.008 | 20 | TAATTTTCGGCCAACACCTTC    | 59.938 | 20 | 180 | 1380 | 1559 |
| 59.027 | 21 | TGCCTCAAGGCTAAACAAGG     | 60.378 | 20 | 259 | 87   | 345  |
| 60.088 | 20 | CCTCTCGTGTTCCTTCGTCC     | 59.844 | 20 | 122 | 38   | 159  |
| 60.144 | 20 | TACACCGAAGGATATCCCCA     | 60.148 | 20 | 266 | 285  | 550  |
| 59.697 | 20 | AACAAGTGTTTTGTGAGTG      | 59.969 | 22 | 146 | 385  | 530  |
| 60.068 | 20 | CCCTCACCCCTTATGGTTTT     | 60.046 | 20 | 255 | 112  | 366  |
| 60.263 | 23 | AACTCTGCCGAGAATGTGT      | 59.727 | 20 | 232 | 1259 | 1490 |
| 59.472 | 25 | TTCTGGATTATCCTGCGGTC     | 60.036 | 20 | 219 | 200  | 418  |
| 57.335 | 20 | GGTAAATTTTGTCCCTAGTTAGC, | 59.109 | 25 | 103 | 141  | 243  |
| 60.074 | 20 | TTTCTTGCGTGGTGTGTA       | 60.149 | 20 | 190 | 442  | 631  |
| 59.988 | 20 | GAAGACACGGTTGGACAAAA     | 60.001 | 21 | 264 | 233  | 496  |
| 59.78  | 20 | TGTAGTGGTTCGTGGACTGC     | 59.751 | 20 | 219 | 32   | 250  |
| 59.928 | 20 | AGCTTCCATGGAGGTTGATG     | 60.073 | 20 | 184 | 5    | 188  |
| 60.155 | 20 | ATGGGCTCAAATATCGGACA     | 60.296 | 20 | 258 | 18   | 275  |
| 60.119 | 20 | TATGAAGGCTAGGGGTGTGC     | 60.096 | 20 | 231 | 276  | 506  |
| 60.038 | 20 | TCGTGGAGAACTATCCAAGG     | 59.181 | 21 | 244 | 762  | 1005 |
| 58.987 | 22 | CCCCTACGTTGAAATTGTGC     | 60.357 | 20 | 232 | 368  | 599  |
| 59.938 | 20 | TCGTTGATTTGAAACTCTAAAGC  | 59.028 | 24 | 159 | 341  | 499  |
| 59.864 | 20 | TATGTCGCATTTGACATCGG     | 60.488 | 20 | 232 | 78   | 309  |
| 59.446 | 20 | TACCTCATCACCATCCCCAT     | 60.011 | 20 | 150 | 40   | 189  |
| 60.073 | 20 | TCCCGTTGTTGCTTTCTCTC     | 60.375 | 20 | 271 | 137  | 407  |
| 60.044 | 20 | TAGGAAAATCATGCACGTCCG    | 59.688 | 20 | 148 | 1360 | 1507 |
| 60.656 | 20 | AGGGGTTATCACCTGAATGC     | 58.864 | 20 | 248 | 268  | 515  |
| 58.371 | 20 | GTGGGCATAAGAGACGGAGA     | 60.218 | 20 | 153 | 2138 | 2290 |
| 59.945 | 20 | GCGGAGATAGAGACAAGGCA     | 60.504 | 20 | 178 | 203  | 380  |
| 60.068 | 20 | GAGCTGCTGTTGGAGGAAAC     | 59.997 | 20 | 279 | 69   | 347  |
| 58.697 | 20 | GAGTTCTTATCGCCTCCGGT     | 60.599 | 20 | 255 | 9    | 263  |
| 59.91  | 20 | TGGATTTGGGATTCTTCTGC     | 60.014 | 20 | 271 | 1807 | 2077 |
| 59.569 | 20 | CATTTCCCCCAACTTCACAT     | 59.647 | 20 | 207 | 21   | 227  |
| 59.839 | 20 | ACTTTCTCGCCTGGATTTTG     | 59.312 | 20 | 136 | 143  | 278  |
| 59.993 | 20 | TAGAACATTAGCGGGATGGG     | 59.916 | 20 | 137 | 187  | 323  |
| 60.212 | 20 | GGATGAATTGATGGTTTTTGG    | 59.125 | 21 | 169 | 145  | 313  |
| 59.671 | 21 | TGGAATTTGAAAGTTTGAACA    | 59.469 | 22 | 272 | 713  | 984  |
| 58.576 | 23 | GGAGATTGAGCATCAGGAGC     | 59.917 | 20 | 226 | 32   | 257  |
| 60.059 | 20 | GAGAGGGAAAAGTTGGGAGG     | 60.045 | 20 | 237 | 272  | 508  |
| 59.747 | 20 | ATGATTATTTGCCTCGTCCG     | 59.923 | 20 | 259 | 1669 | 1927 |
| 59.945 | 20 | GTGGAAGAGAAGATGCTCGG     | 59.95  | 20 | 164 | 47   | 210  |
| 60.067 | 20 | CAGAGCGCTAGAGGTTTTCC     | 59.218 | 20 | 233 | 447  | 679  |
| 60.015 | 20 | GTAAAACCCGACACCTGCAA     | 60.924 | 20 | 240 | 92   | 331  |
| 59.961 | 27 | GGGAAAGATTATTGGAACCTTG   | 58.864 | 22 | 215 | 1    | 215  |
| 59.996 | 20 | ATCGAAAATGCCAAAAATCG     | 59.907 | 20 | 241 | 3140 | 3380 |
| 60.027 | 20 | TCTTGCAATGAAGAACGTCCG    | 59.988 | 20 | 150 | 63   | 212  |
| 58.866 | 20 | GCAAGGCCAATGGAAATATG     | 60.289 | 20 | 160 | 1711 | 1870 |
| 59.95  | 20 | TCATCTTCAACCCCAACTC      | 59.903 | 20 | 248 | 1539 | 1786 |
| 60.214 | 20 | TGCTGGTGTGAAATGGAAAA     | 60.088 | 20 | 211 | 287  | 497  |

|        |                              |        |    |     |      |      |
|--------|------------------------------|--------|----|-----|------|------|
| 60.206 | 20 AAACGCTCGTAGTGTCCCAG      | 60.312 | 20 | 124 | 208  | 331  |
| 58.017 | 20 TCGTGGTTCAGATTGAGTT       | 59.293 | 20 | 280 | 1131 | 1410 |
| 59.844 | 20 TCCTCATGTACGTTGTTTATGGA   | 59.393 | 23 | 221 | 7    | 227  |
| 60.187 | 20 TGATTGAGGGTGATTGGTTAGA    | 59.429 | 22 | 100 | 29   | 128  |
| 60.212 | 20 CCGCCAGCTTTTATTCAAAC      | 59.72  | 20 | 271 | 1    | 271  |
| 60.655 | 23 GATGCACTGCACAATCAACC      | 60.128 | 20 | 219 | 216  | 434  |
| 60.134 | 20 AACTCCCCACGAACCTC         | 59.896 | 18 | 101 | 41   | 141  |
| 60.111 | 20 TTTTGATGATATATAGGTGTTTTGA | 58.782 | 27 | 136 | 2035 | 2170 |
| 59.983 | 20 CGACTTGTCGTGGTTCGATA      | 59.716 | 20 | 242 | 233  | 474  |
| 59.844 | 20 TCCTCTCTCTTCACCACCG       | 60.377 | 20 | 201 | 1    | 201  |
| 59.922 | 20 ATAGTGGTGGGAGGAGGCTT      | 59.957 | 20 | 229 | 34   | 262  |
| 60.138 | 21 GATGAGGGATGCCATAAGGA      | 59.854 | 20 | 240 | 667  | 906  |
| 60.833 | 20 GGGATGGCTTGTTCACTCTC      | 59.661 | 20 | 215 | 18   | 232  |
| 59.997 | 20 TTTTCAGCCGTTTGGTTTTGT     | 60.514 | 20 | 274 | 312  | 585  |
| 58.922 | 24 CGTTTCCGACTACCCTTGAA      | 60.103 | 20 | 259 | 4    | 262  |
| 60.081 | 20 AGCACTGCAGTCTCTGGCTT      | 60.352 | 20 | 174 | 393  | 566  |
| 59.993 | 20 TTATCCCAGCTCCGCTAAAA      | 59.81  | 20 | 161 | 1887 | 2047 |
| 59.992 | 20 TTTGCGTGAACAATGGTGTA      | 58.601 | 20 | 272 | 178  | 449  |
| 60.025 | 20 AATGCATGTCTCCGAGAAAAA     | 59.699 | 21 | 225 | 1122 | 1346 |
| 59.891 | 25 TCTGTTGGCAAACACAGGTC      | 59.726 | 20 | 108 | 63   | 170  |
| 59.565 | 21 CACCCACACACTCACACACA      | 60.088 | 20 | 126 | 17   | 142  |
| 59.993 | 20 CGGTACGAGCACAAACACAC      | 60.222 | 20 | 183 | 419  | 601  |
| 60     | 20 CGTGTATCCTCACCCGTT        | 59.853 | 20 | 166 | 70   | 235  |
| 60.096 | 20 TGGCAGAAGTGGGAGTCTTT      | 59.844 | 20 | 137 | 74   | 210  |
| 60.142 | 20 TGTGAAAATTTGGTTGCAGAA     | 59.192 | 21 | 194 | 191  | 384  |
| 59.801 | 20 AAAATCAAAGGCCCAACAATG     | 59.801 | 20 | 216 | 106  | 321  |
| 60.192 | 20 GGGATGGGAGAATTGGAAAT      | 59.959 | 20 | 201 | 375  | 575  |
| 59.973 | 21 CCAACTATCCATGAGAAATGAGG   | 59.843 | 23 | 100 | 3    | 102  |
| 59.91  | 20 GGAATCATCACCATGCAACA      | 60.339 | 20 | 224 | 53   | 276  |
| 59.982 | 20 AAACCTTCGGCTTGAAAACA      | 59.724 | 20 | 277 | 60   | 336  |
| 60.35  | 23 CCAATCTCAACAACACACGC      | 60.16  | 20 | 170 | 55   | 224  |
| 60.029 | 20 GGACGCCACAAATTGTTTCT      | 59.978 | 20 | 192 | 103  | 294  |
| 59.009 | 20 CCATTCAAATAAAAATCAAGGGA   | 59.243 | 23 | 279 | 309  | 587  |
| 60.499 | 20 ATAACCCACCTCCCCAAAAG      | 60.046 | 20 | 125 | 43   | 167  |
| 59.623 | 21 AGTCGCTGCAATTTCCAGTT      | 59.882 | 20 | 215 | 3    | 217  |
| 57.862 | 23 GCAGGCAGCTGATATGTTCA      | 59.979 | 20 | 200 | 13   | 212  |
| 59.43  | 20 CCCTAGCCTTTGCCTCTTTC      | 60.332 | 20 | 234 | 35   | 268  |
| 60.054 | 20 TGATATAGTTTTTTCGTGGCATCA  | 59.507 | 23 | 215 | 53   | 267  |
| 59.819 | 22 ATGATCGACCAACCCTGTTC      | 59.786 | 20 | 155 | 25   | 179  |
| 59.788 | 24 CCATTGAGACTCGAACCCAT      | 59.927 | 20 | 143 | 839  | 981  |
| 60.617 | 20 GCGACGTTACCCACTTTTAC      | 60.559 | 20 | 129 | 82   | 210  |
| 59.805 | 20 TGGCAACAAGATACCCACAA      | 59.964 | 20 | 124 | 571  | 694  |
| 59.989 | 20 TTTCAATGGGAATCGGAAAC      | 59.739 | 20 | 203 | 1191 | 1393 |
| 60.014 | 20 CAGTTGAACCAAACACCCCT      | 59.861 | 20 | 280 | 278  | 557  |
| 59.853 | 20 TGCGGGGATATATGTGGTTT      | 60.038 | 20 | 275 | 403  | 677  |
| 61.072 | 20 CAACGCCATGCATTTATCCT      | 60.857 | 20 | 153 | 16   | 168  |
| 59.942 | 20 TCTGTTGCTCCAAATCATTCA     | 59.262 | 21 | 221 | 1496 | 1716 |
| 60.096 | 20 CTAACCTTGGGCTCTGATGC      | 59.836 | 20 | 136 | 76   | 211  |
| 58.944 | 24 TGTCGCGTTGCAGATCTAGT      | 59.621 | 20 | 209 | 43   | 251  |
| 60.134 | 20 GGGATGGGAAGAGCATTAAAG     | 59.917 | 21 | 274 | 1052 | 1325 |
| 59.797 | 20 GCTTGGGCGAAACATGTAGT      | 60.14  | 20 | 280 | 132  | 411  |
| 59.097 | 20 GCTCGCATAACACCCCTTTA      | 60.096 | 20 | 225 | 684  | 908  |
| 60.012 | 20 CTGGTTTGGAGAAAGCGAAG      | 59.986 | 20 | 269 | 340  | 608  |
| 59.434 | 20 CGGTATCACCCCTCCTTTTCA     | 59.926 | 20 | 127 | 88   | 214  |
| 59.569 | 20 CTCTATTTGGAGTTGGGGCA      | 60.066 | 20 | 229 | 3663 | 3891 |
| 60.067 | 20 TCTCTTTCTCACACCCTTTTCA    | 58.955 | 22 | 212 | 355  | 566  |
| 59.691 | 20 CCGACATGGGGAAATTGTAG      | 60.184 | 20 | 246 | 339  | 584  |
| 60.088 | 20 GGTTTCGTTTTCGTTCGTGATT    | 59.978 | 20 | 114 | 483  | 596  |

|        |    |                          |        |    |     |      |      |
|--------|----|--------------------------|--------|----|-----|------|------|
| 60.277 | 20 | CAGCAATTTTCGATTTCAACG    | 59.301 | 20 | 180 | 77   | 256  |
| 60.444 | 20 | TAAAGGAGCCCAGAAAAGCA     | 59.953 | 20 | 186 | 2075 | 2260 |
| 59.664 | 20 | CTGGTCCCCCTTTCTCTCTC     | 60.186 | 20 | 217 | 59   | 275  |
| 59.859 | 20 | CATGAATCCAACGTACGCAT     | 59.425 | 20 | 228 | 1428 | 1655 |
| 60.545 | 20 | CCTTATGCGGTTCTTGAAA      | 60.067 | 20 | 258 | 0    | 257  |
| 59.721 | 20 | TCGGAGTGTCTCTGTGCATC     | 59.988 | 20 | 256 | 795  | 1050 |
| 60.067 | 20 | TGAAGTTAGGAAATAAGGAGGTG  | 58.743 | 25 | 105 | 659  | 763  |
| 60.212 | 20 | ATATTAGCCCCGCTCTGATGC    | 59.305 | 20 | 265 | 2938 | 3202 |
| 60.929 | 20 | CAAGCAAAGGCCAATATCGT     | 60.096 | 20 | 114 | 63   | 176  |
| 58.956 | 21 | TCAATGCATGATACGCCCTA     | 60.058 | 20 | 237 | 2147 | 2383 |
| 59.934 | 20 | TCAAATGCTCGACTTATGCG     | 59.976 | 20 | 279 | 414  | 692  |
| 59.961 | 21 | ACAAACCAAAGTTGCGATCC     | 59.978 | 20 | 193 | 694  | 886  |
| 59.536 | 20 | GATCGCTCATGCATCAAGAA     | 59.914 | 20 | 123 | 368  | 490  |
| 60.315 | 20 | ACCATATTTAAGGGTTATCACCTG | 57.552 | 24 | 236 | 262  | 497  |
| 60.169 | 20 | TGAAACATGAGGCCTTGCTA     | 59.42  | 20 | 158 | 562  | 719  |
| 59.945 | 20 | TAGTGGTATGGAGTGGGGGA     | 60.187 | 20 | 140 | 45   | 184  |
| 59.996 | 20 | CGTGGATGCCCTAGATTGTT     | 59.955 | 20 | 250 | 379  | 628  |
| 59.702 | 23 | GGACCGTTAGACCGAATTT      | 60.187 | 20 | 123 | 268  | 390  |
| 58.982 | 20 | CTGTCCTAACCCGCTGTCAT     | 60.134 | 20 | 277 | 4    | 280  |
| 59.945 | 20 | CGACACGGATTGAATCACAC     | 59.967 | 20 | 140 | 366  | 505  |
| 60.068 | 21 | CAAGGCATGCAATCAAATGT     | 59.548 | 20 | 255 | 504  | 758  |
| 59.605 | 20 | TGAAAAGGCCCGCATAAATA     | 60.405 | 20 | 189 | 224  | 412  |
| 59.661 | 20 | CCACAAATCATGATGAGCAA     | 59.533 | 21 | 191 | 2674 | 2864 |
| 59.878 | 20 | TTCATCCCTAGCCATCGAAC     | 60.036 | 20 | 196 | 10   | 205  |
| 59.682 | 20 | CCGTACGGTCCCAACATATC     | 60.074 | 20 | 253 | 1393 | 1645 |
| 60.365 | 20 | CGAAAATCAATGGATGGGAT     | 59.581 | 20 | 227 | 1370 | 1596 |
| 60.142 | 20 | CACGAGAGAGGAAAGGGAGA     | 59.525 | 20 | 103 | 28   | 130  |
| 59.558 | 20 | GCAGTTGGGAGAGGAAAACA     | 60.232 | 20 | 178 | 189  | 366  |
| 60.142 | 20 | GAAAAGCTTGGCCATTCAAC     | 59.691 | 20 | 114 | 189  | 302  |
| 59.089 | 24 | AGGGGCAAATGTTGATGAAA     | 60.309 | 20 | 221 | 26   | 246  |
| 59.807 | 20 | CTTCCCCCTTTTCTCTCGTC     | 60.183 | 20 | 258 | 779  | 1036 |
| 59.822 | 19 | AGTTGAAGGTGACGCTCAAAA    | 59.906 | 21 | 279 | 27   | 305  |
| 59.935 | 20 | CGTAAAATTCCGGTGCAAAT     | 59.832 | 20 | 161 | 67   | 227  |
| 59.844 | 20 | ACTGTGGAAAGGGAGCTGAA     | 59.844 | 20 | 115 | 657  | 771  |
| 60.066 | 20 | AAAGCAAGTTCGATATATTA AAC | 59.345 | 26 | 205 | 31   | 235  |
| 59.021 | 24 | GCGATTCTCATTCCAATTCAA    | 60.031 | 21 | 117 | 697  | 813  |
| 60.195 | 20 | CCCTAAGATAATGCCACCCA     | 59.778 | 20 | 150 | 88   | 237  |
| 60.088 | 20 | AGGTCTTGACAGGTTGTGGG     | 60.002 | 20 | 206 | 903  | 1108 |
| 59.14  | 20 | AGGATACAAGGCAAAAGGCA     | 59.708 | 20 | 213 | 180  | 392  |
| 58.926 | 24 | GCGTTCACACCCTCATTTTT     | 59.978 | 20 | 191 | 27   | 217  |
| 60.399 | 20 | CCAAGAACA CTCTCCACTCTCC  | 60.288 | 22 | 187 | 1    | 187  |
| 59.823 | 20 | ACAAACTAATCAAGTTCCGCA    | 57.439 | 21 | 219 | 344  | 562  |
| 59.838 | 21 | GTTATATCTATAGGGAGGGTTATC | 57.293 | 26 | 227 | 1193 | 1419 |
| 60.008 | 21 | TTCGATGATAACTATGGGTTTGT  | 57.589 | 23 | 276 | 375  | 650  |
| 60.111 | 20 | TGGAAAGAAGGGAAAGTCAA     | 57.367 | 20 | 257 | 1356 | 1612 |
| 59.813 | 20 | CCTTCCTAGGACATTTGCCA     | 60.066 | 20 | 228 | 26   | 253  |
| 59.415 | 20 | GCTATGACCCAAGAACCGAA     | 60.074 | 20 | 209 | 5    | 213  |
| 58.467 | 25 | TTCAAACCGAGCTTGAGATG     | 58.999 | 20 | 255 | 42   | 296  |
| 60.027 | 20 | CACTTACACACGCACACACG     | 59.848 | 20 | 263 | 212  | 474  |
| 59.123 | 20 | AGCCCAACGGCTGATTATAC     | 59.07  | 20 | 137 | 50   | 186  |
| 60.307 | 20 | TCAGGATCTCACCTTCACCC     | 60.048 | 20 | 275 | 19   | 293  |
| 59.542 | 20 | CCTCCTCCTCACACTGCTTC     | 59.986 | 20 | 201 | 696  | 896  |
| 59.872 | 20 | CTCTGACCTTGAGGGCTTTG     | 59.982 | 20 | 276 | 142  | 417  |
| 59.978 | 20 | ATTTGCGATTTATGATGGCG     | 60.802 | 20 | 164 | 1133 | 1296 |
| 59.864 | 20 | CGTGAGGAAAAACCGTGATT     | 59.971 | 20 | 255 | 370  | 624  |
| 58.78  | 20 | GCTCAGCCCAACTTCCTAAA     | 59.452 | 20 | 242 | 30   | 271  |
| 59.809 | 20 | GCACGCGAGACA ACTATCTG    | 59.621 | 20 | 123 | 239  | 361  |
| 59.224 | 23 | CTGTCCCGTCTTCTTCGTT      | 59.844 | 20 | 173 | 19   | 191  |

|        |    |                          |        |    |     |      |      |
|--------|----|--------------------------|--------|----|-----|------|------|
| 59.978 | 20 | GGCCGATTGGAGTATAACGA     | 59.923 | 20 | 279 | 789  | 1067 |
| 58.83  | 21 | AAGCTTTCTGAATTTGTTTGCAG  | 59.946 | 23 | 235 | 66   | 300  |
| 59.933 | 20 | TTTGCATGTGTTGCAAATGA     | 59.691 | 20 | 252 | 35   | 286  |
| 59.899 | 21 | TGGCTCCAACATCACAAAAA     | 60.088 | 20 | 194 | 261  | 454  |
| 59.707 | 21 | AAGGAGGTGTTATGAAGGGATT   | 58.028 | 22 | 143 | 70   | 212  |
| 59.88  | 20 | CTCCGATTTCTTGGTGTGGT     | 59.966 | 20 | 225 | 74   | 298  |
| 59.766 | 20 | TCCAGTCTCAACAAACGTGG     | 59.72  | 20 | 251 | 1919 | 2169 |
| 60.102 | 23 | TACAGCTCCTACCCGCAACT     | 59.898 | 20 | 229 | 296  | 524  |
| 59.794 | 20 | CGAAAAATTTAAAATCAAACGATC | 60.521 | 25 | 219 | 4    | 222  |
| 59.915 | 20 | GGAATGAAGAAGTTTCGCA      | 60.192 | 20 | 253 | 332  | 584  |
| 60.034 | 20 | TTGGTGAGGTGGCATCATAA     | 59.924 | 20 | 185 | 232  | 416  |
| 59.762 | 20 | TGCAGATTGACGAAGGAAGA     | 59.522 | 20 | 139 | 970  | 1108 |
| 59.009 | 26 | TGGGAGGAGGCTTAGGATCT     | 60.169 | 20 | 113 | 2    | 114  |
| 59.901 | 20 | CCAGCAACTACAGGACAGCA     | 60.049 | 20 | 157 | 836  | 992  |
| 60.067 | 20 | CACTTATAGATGGGTTAGCGTGTG | 59.972 | 24 | 164 | 238  | 401  |
| 60.016 | 20 | TTTCTGAGCCTAACCTTGGGT    | 60.116 | 21 | 252 | 150  | 401  |
| 57.717 | 22 | AATTTTCGACTTTGCCGTGT     | 59.615 | 20 | 238 | 17   | 254  |
| 58.236 | 23 | TCCTGACCCTTTTTGAGATTG    | 59.157 | 21 | 221 | 23   | 243  |
| 59.712 | 23 | GGGTACATGTTACGTGCCCT     | 59.74  | 20 | 280 | 37   | 316  |
| 59.52  | 20 | ACAGGTATCCGAAGGGATGA     | 59.361 | 20 | 108 | 7    | 114  |
| 60.018 | 20 | CAATTAACGGTAGCCATCACAA   | 59.89  | 22 | 271 | 436  | 706  |
| 59.439 | 20 | GGTTCATCGGAAGAGTTCCA     | 60.05  | 20 | 237 | 193  | 429  |
| 60.075 | 20 | GCCGATCATGTCCTCAAAGA     | 61.159 | 20 | 255 | 101  | 355  |
| 58.984 | 20 | ACCACGCCAGTCAGGTAAAC     | 60.035 | 20 | 144 | 67   | 210  |
| 59.245 | 20 | CCAATGACACGACACAAACA     | 58.974 | 20 | 186 | 569  | 754  |
| 59.694 | 20 | AAAATAAGTGGGGTGCTGGA     | 59.429 | 20 | 130 | 713  | 842  |
| 59.999 | 20 | GAAATGGTGTAAGGGGGTT      | 59.101 | 21 | 230 | 145  | 374  |
| 61.128 | 20 | TGGACACCCCAGATTGTTTT     | 60.21  | 20 | 177 | 261  | 437  |
| 60.124 | 21 | TGCTTACTGTTGTATGGGGTG    | 58.566 | 21 | 238 | 166  | 403  |
| 59.823 | 20 | TCTAACGGCCAGATTTGTT      | 59.569 | 20 | 275 | 664  | 938  |
| 60.352 | 20 | GAGTTCGTCAAACCTCCCAA     | 60.088 | 20 | 265 | 838  | 1102 |
| 60.096 | 20 | TACGAGACCGAAAGGAAAAA     | 57.49  | 20 | 208 | 2    | 209  |
| 60.014 | 20 | GCGCAGCAGCATGTTAAATA     | 60.009 | 20 | 147 | 3078 | 3224 |
| 60.053 | 20 | ATCCACTGCATGAACAACCA     | 59.967 | 20 | 175 | 75   | 249  |
| 60.045 | 20 | GTGGCCTTTGTGGGCTACTA     | 60.132 | 20 | 194 | 2564 | 2757 |
| 59.464 | 20 | AGATTCAGACGCATTTTGGC     | 60.221 | 20 | 251 | 2112 | 2362 |
| 60.214 | 20 | TGAATTGGTGACACACACGA     | 59.541 | 20 | 209 | 1113 | 1321 |
| 59.864 | 20 | TCCATCTGCTGTCTAACCCA     | 59.241 | 20 | 225 | 23   | 247  |
| 59.716 | 20 | TTGAGGACATTTATTCGTGCG    | 59.946 | 21 | 153 | 413  | 565  |
| 59.935 | 20 | TCACTCATACCCTCCCTCCA     | 60.465 | 20 | 273 | 304  | 576  |
| 59.933 | 20 | TGCAACGCCAACTACAAAAG     | 59.911 | 20 | 145 | 9052 | 9196 |
| 60.372 | 21 | TGCCTAACGTTAAATGGGCT     | 59.609 | 20 | 249 | 0    | 248  |
| 60.152 | 20 | ATTTGGCTTCCAAAGCTTCC     | 60.562 | 20 | 209 | 335  | 543  |
| 59.697 | 21 | CCACTAACCCTAACCCATCA     | 60.605 | 20 | 119 | 12   | 130  |
| 59.96  | 20 | TGCTGTGAATTGTCCAGCTC     | 59.992 | 20 | 246 | 917  | 1162 |
| 60.14  | 20 | AACATGGTTGGGCTAAGTGG     | 59.853 | 20 | 175 | 5    | 179  |
| 59.569 | 20 | TCATTTAGAATTGGTGGAAGATT  | 58.153 | 24 | 273 | 7    | 279  |
| 59.952 | 20 | TTCTTCAATCCATGCAACA      | 60.049 | 20 | 207 | 511  | 717  |
| 60.12  | 20 | TGCCAGCGTATTGTGAAGAG     | 60.011 | 20 | 187 | 150  | 336  |
| 59.705 | 20 | ACAACAAAAGGCAAAGGCTG     | 60.284 | 20 | 252 | 781  | 1032 |
| 59.923 | 20 | GGCTTGCCCTTAACCCTATC     | 59.93  | 20 | 222 | 408  | 629  |
| 59.75  | 20 | CCCCAAGAACAACACTCAAGAACA | 60.133 | 21 | 233 | 358  | 590  |
| 60.149 | 20 | CCACCTTGTAGCTTTTCCCA     | 60.103 | 20 | 221 | 1128 | 1348 |
| 59.637 | 20 | CACTTTTCCAGTCTGCTCCC     | 59.844 | 20 | 130 | 415  | 544  |
| 60.055 | 25 | AATCGGACCGGATCGTTAAT     | 60.531 | 20 | 210 | 134  | 343  |
| 60.081 | 20 | TTAAACAAAGCGTGACAGACG    | 60.052 | 20 | 169 | 2611 | 2779 |
| 60.089 | 20 | TATCAAACGAAGATGTGGCG     | 59.688 | 20 | 200 | 112  | 311  |
| 59.799 | 20 | AGATTTGATTTCCCGAAC       | 60.265 | 20 | 189 | 213  | 401  |

|        |    |                          |        |    |     |      |      |
|--------|----|--------------------------|--------|----|-----|------|------|
| 59.923 | 20 | CCCAGTAACCAACGCATACC     | 60.249 | 20 | 162 | 399  | 560  |
| 60.073 | 20 | GGGGTACCCAATATTCTCCG     | 60.391 | 20 | 264 | 43   | 306  |
| 59.931 | 20 | CCATATCAGAGAAGGGCAGC     | 59.797 | 20 | 242 | 42   | 283  |
| 59.96  | 20 | GGAGTGCTCATGATCCGTAGA    | 60.233 | 21 | 207 | 154  | 360  |
| 60.044 | 20 | ACGAACAGAATCCTCATCCG     | 60.073 | 20 | 268 | 87   | 354  |
| 59.026 | 20 | TTTGACCGAACCGTTGTGTA     | 60.004 | 20 | 189 | 2312 | 2500 |
| 59.887 | 21 | TGATGCAAATCACCTTCGTAA    | 59.172 | 21 | 271 | 105  | 375  |
| 60.125 | 20 | GTGGACGGCCATAAGAAGTC     | 59.556 | 20 | 262 | 191  | 452  |
| 59.803 | 20 | TCGGGGTATCAGAAATCGAG     | 60.029 | 20 | 167 | 79   | 245  |
| 60.745 | 20 | GAAAAAGTGCTGGGTTGAGG     | 59.711 | 20 | 225 | 48   | 272  |
| 59.867 | 20 | TGTAGGCGCCATCTTTTTCT     | 59.845 | 20 | 162 | 625  | 786  |
| 59.916 | 20 | AATTTTTCGATCATGTGGGC     | 59.768 | 20 | 156 | 13   | 168  |
| 60.045 | 20 | TCGTGTGTGTGAATAAAATGAA   | 58.136 | 23 | 261 | 101  | 361  |
| 60.448 | 20 | TATATATGGGTTATCACCTGATCG | 57.071 | 24 | 149 | 463  | 611  |
| 59.997 | 20 | CATTCTGTGTTCTCTGTTTTCGAT | 59.696 | 24 | 260 | 916  | 1175 |
| 59.598 | 20 | CATGGCGTTGTATTTGTGCT     | 59.614 | 20 | 199 | 1999 | 2197 |
| 59.216 | 21 | TGGAAGGCTGTTCCGATAAC     | 60.074 | 20 | 188 | 1323 | 1510 |
| 60.776 | 20 | CACCCTCTTCTGGTCAGC       | 59.986 | 20 | 230 | 537  | 766  |
| 60.01  | 22 | ACCTGCACCAAAATGGAGAG     | 60.111 | 20 | 135 | 51   | 185  |
| 58.718 | 26 | CTCCCAGCTCACGTTCTACC     | 59.867 | 20 | 270 | 4    | 273  |
| 60.011 | 20 | TTTCTTCCATTCCATGGTCC     | 59.727 | 20 | 220 | 74   | 293  |
| 59.586 | 20 | TGCCGTATATGGTGCTCATT     | 59.019 | 20 | 280 | 202  | 481  |
| 60.251 | 20 | ACATGGAAGTGCACCAGATG     | 59.551 | 20 | 231 | 100  | 330  |
| 59.343 | 21 | CCGGTCAATATTTCCCTCA      | 59.894 | 20 | 271 | 252  | 522  |
| 60.218 | 20 | CATCAGAGCCACGGTTAGGT     | 60.134 | 20 | 240 | 87   | 326  |
| 60.169 | 20 | TGTGTGTGAGTGTGTGGGTG     | 60.088 | 20 | 196 | 57   | 252  |
| 60.01  | 20 | TCACGTCAGGTTACCCATGT     | 60.005 | 20 | 205 | 238  | 442  |
| 61.021 | 20 | GAGAAGGGGAGAGGGACTGT     | 59.661 | 20 | 190 | 53   | 242  |
| 60.116 | 21 | TCAACAGAGAATGCAAGCAAA    | 59.6   | 21 | 162 | 82   | 243  |
| 59.072 | 20 | CGGATTAGCCACGGTCATAG     | 60.481 | 20 | 257 | 174  | 430  |
| 60.324 | 20 | CTCCACTCCAAACCACCATT     | 59.82  | 20 | 225 | 356  | 580  |
| 59.791 | 20 | TGTCCGTATTCATTCCGTGA     | 59.924 | 20 | 262 | 511  | 772  |
| 61.204 | 20 | CGGGTAACGGGTAGGGTATT     | 59.96  | 20 | 280 | 84   | 363  |
| 60.357 | 20 | CCTTAACATGTTCGGGTTCTG    | 59.853 | 20 | 199 | 7    | 205  |
| 59.916 | 20 | TCCATTCCGAAAATCAAAGG     | 59.872 | 20 | 153 | 184  | 336  |
| 59.15  | 20 | GACTTCCGCCTTGTTCTTTG     | 59.853 | 20 | 219 | 225  | 443  |
| 59.342 | 20 | GATTAACCTCGCATCCCTCA     | 60.036 | 20 | 160 | 439  | 598  |
| 59.225 | 22 | CCAACCAATACGGGACACTT     | 59.711 | 20 | 262 | 717  | 978  |
| 59.528 | 20 | AAAATCAAAGGCCACAAATG     | 59.801 | 20 | 226 | 975  | 1200 |
| 60.035 | 20 | GACATCTCCCTCTCCGACC      | 59.583 | 19 | 194 | 328  | 521  |
| 60.301 | 20 | CTGTCTCTCGCTCTCGCTCT     | 60.182 | 20 | 274 | 428  | 701  |
| 59.942 | 20 | GACTGTGAGGAAACGTGCAA     | 59.88  | 20 | 223 | 500  | 722  |
| 59.111 | 23 | GGGGAGAATGTAATATCCCGA    | 59.992 | 21 | 222 | 24   | 245  |
| 60.182 | 20 | CCCTAACTCGACCCAGATCA     | 60.065 | 20 | 221 | 41   | 261  |
| 60.578 | 20 | GATGCAGAATGTTCGGTGAGA    | 59.794 | 20 | 237 | 1109 | 1345 |
| 57.268 | 23 | TGGAGGTGAAGAGAGGGAGA     | 59.913 | 20 | 253 | 167  | 419  |
| 60.103 | 20 | ACTATCAGCCGCCAAATGAT     | 59.556 | 20 | 140 | 210  | 349  |
| 59.648 | 20 | TCAAGGATTCAAGCCACAT      | 60.461 | 20 | 100 | 19   | 118  |
| 59.757 | 20 | GCCCAAAAAGAACACTCACC     | 59.574 | 20 | 277 | 50   | 326  |
| 60.179 | 20 | CATGATAATGCACGTCTCCG     | 60.096 | 20 | 104 | 91   | 194  |
| 60.008 | 20 | TGAAAAGTGATCCCCTTGATTT   | 59.814 | 22 | 177 | 6    | 182  |
| 60.036 | 20 | GGAAATAAGGAGGCGTTATGA    | 58.213 | 21 | 127 | 184  | 310  |
| 59.813 | 20 | GTTGGACTCAAGTCATGCGA     | 59.837 | 20 | 156 | 298  | 453  |
| 57.33  | 26 | CATCCCCTTCATTCAACACC     | 60.173 | 20 | 105 | 9    | 113  |
| 59.75  | 20 | ATGTCTCAGCCGATCGATTT     | 59.658 | 20 | 162 | 1965 | 2126 |
| 60.088 | 20 | CGTTGCATGGTGATTGGAC      | 59.847 | 20 | 253 | 2217 | 2469 |
| 59.787 | 20 | TTGCCTTTAATCGATCCTGG     | 60.031 | 20 | 176 | 4    | 179  |
| 59.948 | 20 | TTCCACCTTTCACCCTGTTC     | 59.943 | 20 | 200 | 513  | 712  |

|        |    |                          |        |    |     |      |      |
|--------|----|--------------------------|--------|----|-----|------|------|
| 60.103 | 21 | GAAGGAATTGCAAGGGACAA     | 60.051 | 20 | 181 | 285  | 465  |
| 59.878 | 24 | TGGTTTTGGATGATGGATGA     | 59.707 | 20 | 159 | 22   | 180  |
| 60.699 | 20 | CACCTAAAGCCCATGCATTT     | 59.96  | 20 | 279 | 47   | 325  |
| 59.822 | 19 | CCCCTTGA ACTCCAGCAATA    | 60.066 | 20 | 203 | 201  | 403  |
| 60.251 | 20 | CAGTGGCTACCGAGCATTTT     | 60.27  | 20 | 120 | 2922 | 3041 |
| 60.035 | 20 | TCCCAAATGAAAGAATGGA      | 60.244 | 20 | 190 | 243  | 432  |
| 59.872 | 20 | GAAAACGCCAAAATCGTGT      | 59.982 | 20 | 114 | 20   | 133  |
| 59.903 | 20 | CGAATTCTCTCTCTGCAAACC    | 59.066 | 21 | 103 | 289  | 391  |
| 60.074 | 20 | GGCATGAGCGTGTAAAGATGA    | 59.83  | 20 | 193 | 162  | 354  |
| 60.042 | 20 | TGTCCGAAAAGGCCAAAATC     | 60.053 | 20 | 169 | 29   | 197  |
| 60.074 | 20 | AGTAGTCGTTCGAGGTGGTCG    | 60.321 | 20 | 228 | 298  | 525  |
| 59.052 | 20 | CCCCGAACAGAGTCAAATGT     | 59.966 | 20 | 275 | 599  | 873  |
| 59.668 | 20 | CTGGAGGAAAAGAGCTTGAATC   | 58.134 | 21 | 168 | 1563 | 1730 |
| 59.943 | 20 | GGGCACTCTTGTGTTTAGCC     | 59.74  | 20 | 260 | 1211 | 1470 |
| 59.953 | 20 | GTTAGCCACCAATGAGGCAT     | 59.962 | 20 | 274 | 440  | 713  |
| 59.051 | 25 | GTCTAGTGATGACGGGGAGG     | 59.53  | 20 | 198 | 1    | 198  |
| 60.22  | 20 | TTGTTTTCCAAGCCCATAA      | 60.294 | 20 | 134 | 320  | 453  |
| 60.022 | 20 | TGGGAACTTGA ACTTGGAAAGA  | 59.697 | 21 | 247 | 351  | 597  |
| 60.291 | 20 | ACGTCTTTGTGTCGAAACCC     | 60.012 | 20 | 173 | 178  | 350  |
| 60.02  | 20 | TCGATAAAACTTTACCAACACCA  | 59.817 | 24 | 250 | 15   | 264  |
| 59.82  | 20 | TAAGTTCTCCACAGCGAGCA     | 59.74  | 20 | 177 | 143  | 319  |
| 59.318 | 27 | GGACGTCTTTCTTGAGCAGC     | 60.142 | 20 | 203 | 4    | 206  |
| 58.286 | 21 | GAAAACAAAATGGGGAGCAA     | 59.916 | 20 | 241 | 19   | 259  |
| 57.416 | 20 | AATGCAGCGGAAGAACAAT      | 59.713 | 20 | 201 | 4    | 204  |
| 59.966 | 20 | GGTAGCGAGAGAGGGGAAAG     | 60.34  | 20 | 255 | 555  | 809  |
| 59.836 | 20 | CTTTGTGAAGTAGTCGCCCC     | 59.734 | 20 | 177 | 10   | 186  |
| 59.836 | 20 | GGCAACGGAATACCATTTGT     | 59.691 | 20 | 147 | 42   | 188  |
| 59.215 | 20 | TTGACAATATTTAGTGTTTTGACA | 58.99  | 27 | 269 | 189  | 457  |
| 60.034 | 20 | ATTTGGCCGGTTCTCTTTTT     | 59.945 | 20 | 198 | 4527 | 4724 |
| 60.173 | 20 | GAGGACGTTGTGGTGGTCTT     | 60.009 | 20 | 188 | 199  | 386  |
| 60.542 | 20 | CTGCACTAACGCCATTCCTT     | 60.27  | 20 | 271 | 223  | 493  |
| 57.318 | 22 | AAGGAGGTGTTATGAAGGGATT   | 58.028 | 22 | 129 | 95   | 223  |
| 60.048 | 20 | GGGAGGGATAAATGGGAAGA     | 60.089 | 20 | 244 | 1358 | 1601 |
| 57.885 | 21 | ATATGTGGCTTGAGATCGTGT    | 57.152 | 21 | 248 | 136  | 383  |
| 59.933 | 20 | TCGACCGAAGAGCTATCCAT     | 59.797 | 20 | 228 | 159  | 386  |
| 59.911 | 20 | TTTTATGTAAATTGTCGTGCGT   | 57.373 | 22 | 253 | 182  | 434  |
| 60.401 | 20 | ATCTGGGTTACACTGAGCGG     | 60.134 | 20 | 216 | 1    | 216  |
| 59.616 | 20 | AGACTGCGGTGCAAGACTTT     | 60.058 | 20 | 263 | 1453 | 1715 |
| 60.24  | 20 | TTCAACCAGGCAAAGACCAC     | 61.075 | 20 | 189 | 136  | 324  |
| 59.923 | 20 | ACCGGAATAGCATCAGTTGG     | 59.955 | 20 | 221 | 7    | 227  |
| 60.665 | 20 | TGGCTGTCAGATGATGTAAGTTC  | 59.256 | 23 | 175 | 354  | 528  |
| 59.744 | 20 | GCATTCGGTTGATTATGCAG     | 59.14  | 20 | 243 | 953  | 1195 |
| 59.988 | 20 | GATTGGCTCCATCCTCTTCA     | 60.158 | 20 | 254 | 385  | 638  |
| 60.045 | 20 | GAACTCCCCTCTCTCGGT       | 59.807 | 20 | 120 | 89   | 208  |
| 60.149 | 20 | CTTTCTTCTTCATTTGCGCG     | 59.953 | 20 | 128 | 3    | 130  |
| 60.036 | 20 | TAGGTGTAGGTAGCCAGGGG     | 59.073 | 20 | 171 | 466  | 636  |
| 60.013 | 20 | GCACTATCTCTCCCTCACCG     | 59.827 | 20 | 123 | 319  | 441  |
| 60.048 | 20 | TATGCAGTGGATTTGGTGGGA    | 59.924 | 20 | 195 | 179  | 373  |
| 60.463 | 20 | GAAGCCTCAAATCACAAGCC     | 59.82  | 20 | 142 | 106  | 247  |
| 59.232 | 22 | TACCGTTGGTTAATCCTGCC     | 59.823 | 20 | 117 | 0    | 116  |
| 59.992 | 20 | GTCAACTTTGGCAACGGAAT     | 59.978 | 20 | 176 | 42   | 217  |
| 59.989 | 20 | CAAGAGCTGAAGATGTGATTGC   | 60.022 | 22 | 198 | 259  | 456  |
| 60.619 | 20 | TTCGAATGGATTTGTTGGGT     | 60.17  | 20 | 156 | 394  | 549  |
| 60.03  | 20 | GTTGTCTGAAACCCTTCCCA     | 59.943 | 20 | 122 | 238  | 359  |
| 59.312 | 20 | CGACCCTGTAAGGTTCTTTGA    | 59.225 | 21 | 272 | 130  | 401  |
| 59.929 | 20 | GCGAAGAAGAGGGGAAGAAT     | 59.789 | 20 | 232 | 61   | 292  |
| 59.982 | 20 | TTCTACAGCGAATGATGCC      | 61.141 | 20 | 229 | 844  | 1072 |
| 58.982 | 20 | AATCATTCCATTCCCCGATT     | 60.345 | 20 | 246 | 37   | 282  |

|        |    |                           |        |    |     |      |      |
|--------|----|---------------------------|--------|----|-----|------|------|
| 59.145 | 22 | AAGGAGGTGTTATGAAGGGATT    | 58.028 | 22 | 238 | 34   | 271  |
| 57.077 | 21 | TGGCAAACACAGGTCACAAT      | 60.008 | 20 | 163 | 5    | 167  |
| 59.4   | 20 | GGTCGTCGGATTTCATTTTG      | 60.309 | 20 | 261 | 2756 | 3016 |
| 60.322 | 19 | GGATACGGTGTCCGAAACTC      | 59.41  | 20 | 269 | 1391 | 1659 |
| 59.972 | 20 | TTGAAATTTCCGGCTTCAACC     | 60.053 | 20 | 221 | 4    | 224  |
| 59.203 | 20 | CGACAACAATGCAAGGAAGA      | 59.84  | 20 | 183 | 14   | 196  |
| 60.074 | 20 | TGTAAATACGGTCTGTGCATGTT   | 59.46  | 23 | 149 | 323  | 471  |
| 59.276 | 21 | TGCTTTGATTTGATGGTTATGG    | 59.832 | 22 | 173 | 4291 | 4463 |
| 60.073 | 20 | GATGATGGGGAAGAGACCAA      | 59.862 | 20 | 142 | 254  | 395  |
| 59.801 | 20 | TCTCAAATAACCAAATCAGCA     | 58.796 | 23 | 220 | 109  | 328  |
| 59.846 | 20 | ATAACCCGTGTGTGGGTTTA      | 57.729 | 20 | 230 | 102  | 331  |
| 60.257 | 20 | TGTCGAGAGGCAAGTGTGTTG     | 60.025 | 20 | 177 | 32   | 208  |
| 59.267 | 20 | TCGCAGTCCATCACTCCATA      | 60.225 | 20 | 139 | 268  | 406  |
| 57.589 | 23 | TGGAAGTTGTGTTGTACCCA      | 58.934 | 21 | 199 | 18   | 216  |
| 60.608 | 20 | CGCAAGTACAACAACATGCC      | 60.18  | 20 | 270 | 235  | 504  |
| 60.111 | 20 | AACTTGTATCACTGGAAGAATTCA  | 58.329 | 25 | 275 | 102  | 376  |
| 60.001 | 20 | CAATTTTCATTGCCCTCAC       | 60.309 | 20 | 176 | 46   | 221  |
| 59.83  | 20 | GACGAGAATGCCCTGTATG       | 60.483 | 20 | 200 | 331  | 530  |
| 60.151 | 20 | TGAGTGGAAGAGAGGGAGGA      | 59.913 | 20 | 128 | 80   | 207  |
| 59.931 | 20 | AGAGCCACGTTAGGCTCAAG      | 59.639 | 20 | 279 | 79   | 357  |
| 60.074 | 20 | TCAACAGAGAATGCAAGCAAA     | 59.6   | 21 | 186 | 11   | 196  |
| 59.915 | 20 | GGTTCAGACCCGGGATAGG       | 60.842 | 20 | 273 | 0    | 272  |
| 59.858 | 20 | AGGAAGCGAGGTAGGCTTTC      | 59.983 | 20 | 190 | 199  | 388  |
| 59.836 | 20 | TCTTAGTGATTTTTCTTCGTCCA   | 58.064 | 23 | 247 | 666  | 912  |
| 59.708 | 22 | GACAACAGTCACGTGGCATC      | 60.171 | 20 | 278 | 590  | 867  |
| 59.934 | 20 | CGTGTGTCAGCGTGTCTCTC      | 60.685 | 20 | 177 | 1617 | 1793 |
| 59.984 | 20 | TGGTTCATGCCATTGTGAAT      | 59.781 | 20 | 124 | 39   | 162  |
| 59.591 | 20 | GAAATTTACGAAACAACGAATC    | 59.877 | 23 | 258 | 299  | 556  |
| 59.09  | 20 | TCTTCCAAGATGGGAATGGA      | 60.395 | 20 | 187 | 112  | 298  |
| 59.827 | 20 | CCGTCTGGTCATCCCTTTTA      | 59.926 | 20 | 260 | 558  | 817  |
| 59.867 | 20 | TCTCTCTGGTTGGTGAAGAAA     | 58.955 | 22 | 169 | 53   | 221  |
| 60.47  | 24 | ACCTTGAATGCAACCGAAG       | 60.11  | 20 | 264 | 1627 | 1890 |
| 58.381 | 25 | GCTCGAGCTCAGACATCAAGA     | 60.839 | 21 | 276 | 454  | 729  |
| 60.633 | 20 | TCCAAGCTTTAATTGCGGAC      | 60.209 | 20 | 133 | 441  | 573  |
| 59.992 | 20 | TATCCCGTGGGTCAAATACG      | 60.576 | 20 | 234 | 962  | 1195 |
| 59.96  | 20 | TGGATGCGAAACATGAAAAA      | 60.051 | 20 | 271 | 513  | 783  |
| 59.795 | 21 | TTTACCACCGCCTTAATTC       | 59.938 | 20 | 249 | 28   | 276  |
| 59.971 | 20 | CTGCTCTCCCAAGCAGAATC      | 60.096 | 20 | 244 | 3682 | 3925 |
| 59.742 | 20 | CCTTTCAAGCATTTAAGTGGA     | 59.211 | 21 | 275 | 1747 | 2021 |
| 59.836 | 20 | GTACACGCACCAATCGTCAC      | 60.04  | 20 | 276 | 886  | 1161 |
| 59.472 | 22 | TCAGTTTCTGAGTTTTGAGTTTTG  | 59.835 | 24 | 108 | 747  | 854  |
| 60.057 | 21 | TCTAAGCTTGTTAACCCCG       | 59.221 | 20 | 232 | 9    | 240  |
| 60.265 | 20 | TTTTCGACCAATAGGAACGG      | 59.931 | 20 | 132 | 1333 | 1464 |
| 59.978 | 20 | GAGATGTGGTGGTGGTGATG      | 59.801 | 20 | 136 | 388  | 523  |
| 59.751 | 20 | AAAGTCCAAATGTTGGCGAG      | 60.11  | 20 | 121 | 1552 | 1672 |
| 59.827 | 20 | TAAATCACAAAACCCACGCA      | 59.969 | 20 | 135 | 343  | 477  |
| 59.67  | 20 | CCCAGCAACTGTTGGCTACT      | 60.312 | 20 | 239 | 305  | 543  |
| 60.11  | 20 | TTTTTAGTAGGGTTTTCAAGTTCAC | 59.564 | 26 | 265 | 356  | 620  |
| 59.966 | 20 | CATGCTTGAATGAAAACCACA     | 59.576 | 21 | 122 | 272  | 393  |
| 59.841 | 20 | TGTAGGGGCAATGATGTAAAAA    | 59.363 | 22 | 232 | 25   | 256  |
| 60.088 | 20 | CAGCCCAATAACTCAACCTACC    | 59.892 | 22 | 101 | 44   | 144  |
| 60.501 | 20 | GGAGCCTCCGAACCTTTGAA      | 60.324 | 19 | 188 | 56   | 243  |
| 60.002 | 20 | TCCACTGTCTTGTGCCTCAG      | 60.022 | 20 | 127 | 891  | 1017 |
| 59.764 | 19 | GCCAAGAGGTGAGTTTCTGG      | 59.844 | 20 | 168 | 9    | 176  |
| 59.54  | 20 | ACAGTTGAAAAAGGAGGGCA      | 59.711 | 20 | 280 | 765  | 1044 |
| 60.05  | 20 | CTTTGAATTGCAGCTCGACA      | 60.134 | 20 | 267 | 1127 | 1393 |
| 58.06  | 20 | TTTCTTGTGTGTGCATGTG       | 59.203 | 21 | 170 | 181  | 350  |
| 58.826 | 22 | TACGAATCTCAAGGGGCAAC      | 60.074 | 20 | 212 | 99   | 310  |



|        |    |                           |        |    |     |      |      |
|--------|----|---------------------------|--------|----|-----|------|------|
| 59.855 | 26 | ACGTAGTTTGTGGGGGAAAT      | 58.293 | 20 | 280 | 916  | 1195 |
| 60.49  | 20 | TATGCAGATTGGTGTGTGGC      | 60.549 | 20 | 262 | 141  | 402  |
| 59.667 | 24 | CGTGCTGAGCTTATTCACCA      | 60.011 | 20 | 191 | 2    | 192  |
| 59.26  | 20 | TGCGCAACCAATGTAATAGC      | 59.731 | 20 | 234 | 785  | 1018 |
| 59.521 | 20 | GATCGTGTCCGTTTGTGTA       | 59.42  | 20 | 251 | 104  | 354  |
| 60.067 | 20 | GGAACCTGTTTTCCCAGTCA      | 59.943 | 20 | 215 | 215  | 429  |
| 59.624 | 20 | TCGAAGGTGACTATCCCGAC      | 60.073 | 20 | 241 | 108  | 348  |
| 59.872 | 20 | GCAGCATCCTTCACCATTTT      | 60.081 | 20 | 162 | 72   | 233  |
| 57.874 | 25 | GCAGTAGGGTTGGAGATGCT      | 59.313 | 20 | 263 | 7    | 269  |
| 59.928 | 20 | GTGGACGTCCAGATTGTTT       | 59.827 | 20 | 182 | 665  | 846  |
| 60.178 | 20 | GCATAGAGGGCAAGAAGACG      | 59.978 | 20 | 192 | 427  | 618  |
| 59.248 | 20 | CGTTTTGATGATATATAGGTGTTTT | 59.637 | 27 | 237 | 378  | 614  |
| 60.264 | 20 | CCCTTAATCTTTGTGGTTGTGA    | 58.994 | 22 | 273 | 1896 | 2168 |
| 59.985 | 21 | TTTGAGTTTGCATCTAAGAAGGTG  | 59.828 | 24 | 117 | 835  | 951  |
| 59.609 | 20 | TTTGGTTTTATCGAAGAGGCA     | 59.707 | 21 | 260 | 845  | 1104 |
| 60.111 | 20 | GACTCTCCAATAAGGGGGC       | 60.074 | 20 | 276 | 243  | 518  |
| 60.557 | 20 | CAGGAGCACTACAGTTCACGA     | 59.097 | 21 | 264 | 2128 | 2391 |
| 60.068 | 20 | CGGCCAAGATTTGTTAGAGG      | 59.702 | 20 | 195 | 380  | 574  |
| 60.024 | 21 | CATTCGTTGAACCCTCAGT       | 59.966 | 20 | 109 | 189  | 297  |
| 59.82  | 20 | GGATTGATGAATTTCCATTCG     | 59.221 | 21 | 194 | 1757 | 1950 |
| 60.376 | 20 | CCATCATTCCAATTCAAGGAA     | 59.748 | 21 | 264 | 1869 | 2132 |
| 59.443 | 21 | TTGACCAAGATACACCTTGCAT    | 59.499 | 22 | 185 | 17   | 201  |
| 60.289 | 20 | GCTCTTTTATTTACCTTTTATGCTC | 60.067 | 26 | 212 | 338  | 549  |
| 59.93  | 19 | GAGGGTTGTTGTTGTGGGAC      | 60.261 | 20 | 200 | 0    | 199  |
| 58.753 | 20 | CCGAGATCTTTTCATGAGTGC     | 59.828 | 21 | 249 | 834  | 1082 |
| 60.307 | 20 | TATGTTTCGGCCCGGTATTA      | 60.165 | 20 | 154 | 45   | 198  |
| 59.964 | 20 | GTTCAATTTGGACGTTTGGG      | 60.206 | 20 | 267 | 530  | 796  |
| 58.388 | 25 | TGAATCTCATGTTATTGAGTGATG  | 57.699 | 25 | 206 | 671  | 876  |
| 59.937 | 20 | TTTTCAACGTTTGCCATCC       | 60.846 | 20 | 183 | 189  | 371  |
| 60.088 | 20 | GCCGGAATCCATTACTTCT       | 60.286 | 20 | 220 | 17   | 236  |
| 60.21  | 20 | CTTGTGAACTCCGATGGACA      | 59.676 | 20 | 156 | 448  | 603  |
| 59.935 | 20 | TCTCGAGCAACAGAGCTCAA      | 60.008 | 20 | 219 | 155  | 373  |
| 60.152 | 20 | GAAATCCCGCTCAATCTCAA      | 60.155 | 20 | 218 | 396  | 613  |
| 58.792 | 20 | TCGGCAGAAAAGAAGAAGGA      | 60.066 | 20 | 114 | 428  | 541  |
| 59.621 | 20 | GATGGCCCAGATTTGTTTTG      | 60.309 | 20 | 102 | 106  | 207  |
| 59.238 | 23 | GCGAACATGATGAATGAACT      | 59.954 | 21 | 280 | 23   | 302  |
| 57.557 | 25 | GAGAGAAGTAGCAAGCGCGA      | 60.955 | 20 | 181 | 10   | 190  |
| 59.939 | 20 | AAATGCTCATGCATGCTGTC      | 59.836 | 20 | 182 | 44   | 225  |
| 58.707 | 23 | ACACACAAGCCTCGCTCTTT      | 60.058 | 20 | 223 | 658  | 880  |
| 60.435 | 20 | TCAATGACGAAACATATCCCA     | 58.832 | 21 | 192 | 1779 | 1970 |
| 59.673 | 20 | CTATCGAGCGTGTGGCAATA      | 59.856 | 20 | 146 | 24   | 169  |
| 58.004 | 25 | CTTGTGGCTTGCAAACATCT      | 58.926 | 20 | 162 | 73   | 234  |
| 59.981 | 20 | GCAGTGGGTTTTGAATGGTT      | 59.836 | 20 | 225 | 210  | 434  |
| 59.993 | 20 | GCATTTGAAAGGTTTTATATGATC, | 60.438 | 27 | 160 | 491  | 650  |
| 59.64  | 20 | CTTACGGAATTCCACTGGGT      | 58.909 | 20 | 247 | 14   | 260  |
| 59.976 | 20 | CGTAACCTTGGTGTAGCCGT      | 60.052 | 20 | 252 | 563  | 814  |
| 59.993 | 20 | ATGTATGGCAGGTGACCCAT      | 60.081 | 20 | 274 | 123  | 396  |
| 59.146 | 20 | AGTTGTCAATGGAGGTTGGG      | 59.82  | 20 | 252 | 267  | 518  |
| 59.787 | 20 | AGAGCGAAGAAAGCAGATGG      | 59.717 | 20 | 143 | 1357 | 1499 |
| 59.849 | 20 | ATGAATGTGGAGCAACGTGA      | 60.12  | 20 | 268 | 2148 | 2415 |
| 60.132 | 20 | TTTGAACGCGTGACTTCTTG      | 60.027 | 20 | 259 | 4833 | 5091 |
| 59.267 | 22 | GCATTAAATGAGCCTCCAC       | 59.533 | 20 | 125 | 5    | 129  |
| 60.042 | 20 | AAATGCTGGTAGAGGCAACG      | 60.27  | 20 | 257 | 322  | 578  |
| 60.142 | 20 | TGATACAGGTGTTCCAAACAATG   | 59.777 | 23 | 247 | 6310 | 6556 |
| 59.964 | 20 | AGGGAGAGGCTTTGGATGAC      | 60.596 | 20 | 232 | 39   | 270  |
| 60.214 | 21 | TGCATGTGTGGGGCTATTTA      | 59.953 | 20 | 218 | 1005 | 1222 |
| 60.255 | 20 | AAATTCCGTTTTTGCCCTCC      | 60.292 | 20 | 183 | 193  | 375  |
| 60.564 | 20 | AGAAAGAAGTCGGCAACCCT      | 60.247 | 20 | 163 | 1170 | 1332 |

|        |    |                           |        |    |     |      |      |
|--------|----|---------------------------|--------|----|-----|------|------|
| 59.173 | 21 | TCGGGCAACTGGAGCTAATA      | 60.732 | 20 | 212 | 2    | 213  |
| 59.962 | 20 | TGCCACCCTAGATCCGTTAC      | 59.955 | 20 | 175 | 517  | 691  |
| 59.052 | 20 | TGAAACAAAAATATAGCTAATGCC  | 59.293 | 25 | 273 | 385  | 657  |
| 57.436 | 27 | TGACGAGTCCATTGTGCATT      | 60.12  | 20 | 159 | 14   | 172  |
| 59.236 | 22 | GGGAGAGGATCAAGAGAGGAA     | 59.763 | 21 | 201 | 37   | 237  |
| 59.844 | 20 | GATGTATCGCCCAAAGGAGA      | 60.036 | 20 | 225 | 2484 | 2708 |
| 60.111 | 20 | CTGCCTTCCAACCATACACA      | 59.566 | 20 | 267 | 453  | 719  |
| 59.688 | 20 | AATGGGACTGGCGATTGTAG      | 59.955 | 20 | 267 | 95   | 361  |
| 60.012 | 20 | GGTCACCGTTCCTGAAATA       | 59.79  | 20 | 257 | 1395 | 1651 |
| 60.162 | 20 | TGTGAATGGAGGACAAACCA      | 59.935 | 20 | 156 | 201  | 356  |
| 60.081 | 20 | TGGCAACAAATATGACTGCAT     | 59.055 | 21 | 116 | 341  | 456  |
| 59.905 | 20 | TCTCCGAGGAGACAACCTTCA     | 59.974 | 21 | 170 | 4000 | 4169 |
| 59.33  | 25 | TCTTTGAATTCAGCACGCTA      | 57.257 | 20 | 140 | 35   | 174  |
| 60     | 25 | TTTTGATGATATATAGGTGTTTTGA | 58.782 | 27 | 150 | 616  | 765  |
| 57.548 | 22 | GATGGTGGGTCTGAACGAAT      | 59.786 | 20 | 212 | 554  | 765  |
| 59.911 | 20 | CTCCGAGATCAGAGCTCACC      | 60.096 | 20 | 227 | 1756 | 1982 |
| 59.516 | 20 | CCCATTCTAACTACCCAAATCC    | 59.962 | 23 | 212 | 231  | 442  |
| 57.926 | 20 | GGTTTGATGACGTGGCTTCT      | 60.119 | 20 | 194 | 1107 | 1300 |
| 60.073 | 20 | AATGCCTCTGCAAAAAGCTG      | 60.523 | 20 | 189 | 2874 | 3062 |
| 59.469 | 23 | CCCACCCCACTACTCAAGAA      | 59.959 | 20 | 116 | 8    | 123  |
| 57.236 | 26 | GCTTTCCATTTTGCTTTTT       | 58.361 | 20 | 280 | 646  | 925  |
| 59.247 | 20 | TTGTGATTTGGTGTGTGTATGG    | 59.22  | 22 | 249 | 247  | 495  |
| 59.817 | 20 | AACGGCTTGGATTCTTTCCT      | 60.074 | 20 | 147 | 397  | 543  |
| 59.823 | 20 | ATATCCCTTGCACGACGAAC      | 59.962 | 20 | 274 | 523  | 796  |
| 60.096 | 20 | TAGCCATTATCTCCCACCA       | 60.288 | 20 | 162 | 1575 | 1736 |
| 59.938 | 20 | TGCCTCTGCTATTACATGCC      | 58.897 | 20 | 211 | 967  | 1177 |
| 59.271 | 24 | TGGAGAAACGAACGGAAACC      | 60.088 | 20 | 252 | 205  | 456  |
| 60.173 | 20 | TTGTGGCAGGTTATTCATGC      | 59.548 | 20 | 201 | 432  | 632  |
| 59.964 | 20 | CACCATGACGGCAGATGTAT      | 59.399 | 20 | 251 | 636  | 886  |
| 60.119 | 20 | CGGCTTACCAGTTTCTTTT       | 59.355 | 20 | 138 | 246  | 383  |
| 60.203 | 20 | ATTGTATGGCGAGAGGTTGC      | 60.103 | 20 | 278 | 27   | 304  |
| 60.483 | 20 | CACACGTTCTTCCCAGATT       | 59.966 | 20 | 143 | 45   | 187  |
| 59.646 | 20 | TTTTGAGGAGTTTGCGCTCT      | 60.132 | 20 | 239 | 756  | 994  |
| 60.011 | 19 | GATGATTGCACCATAATGCG      | 59.921 | 20 | 126 | 2678 | 2803 |
| 60.073 | 20 | CCTGCTTTTGGATGTTGGAT      | 59.933 | 20 | 172 | 1036 | 1207 |
| 59.703 | 19 | GTGCATCCATCTGAGCATTG      | 60.233 | 20 | 246 | 186  | 431  |
| 59.884 | 19 | GTCGTTCTGAGCTGCCTTTC      | 60.142 | 20 | 237 | 2257 | 2493 |
| 59.96  | 20 | GGGTCCCACCACCTAACATA      | 59.526 | 20 | 232 | 567  | 798  |
| 59.911 | 20 | TCCCTTAGACCTTACATAATGAAT  | 60.001 | 26 | 221 | 45   | 265  |
| 59.957 | 20 | AGATGCTGGAATCTTCGTGG      | 60.218 | 20 | 138 | 151  | 288  |
| 59.82  | 20 | TCCAAAACCTGGGAACCATTC     | 59.767 | 20 | 140 | 325  | 464  |
| 59.746 | 20 | TCCATTAAGAATTTCCCATGC     | 58.888 | 21 | 178 | 1623 | 1800 |
| 60.062 | 23 | CAGTGCGGACGGTTAAGATT      | 60.132 | 20 | 208 | 19   | 226  |
| 60.136 | 20 | GAAGCTGGTGCAATTGTTTG      | 59.322 | 20 | 247 | 96   | 342  |
| 59.518 | 20 | TTCTTGGTGGCGGTAGGTAG      | 60.125 | 20 | 198 | 1    | 198  |
| 60.119 | 20 | TGACGATGAGACGTGTAGGG      | 59.701 | 20 | 279 | 303  | 581  |
| 59.293 | 20 | CTTCTTCACTACTGGAACCTTCAT  | 57.353 | 25 | 222 | 54   | 275  |
| 60.035 | 20 | GATAAGAACTCTGGCTCCAAGG    | 59.371 | 22 | 255 | 354  | 608  |
| 60.096 | 20 | TCATGCACGTGTTTCACAAA      | 59.721 | 20 | 276 | 184  | 459  |
| 60.032 | 20 | AAAAATCTCAGGGACGGGAC      | 60.306 | 20 | 173 | 3450 | 3622 |
| 60.021 | 20 | GTTTGCTTCCACGGCTAAAC      | 59.752 | 20 | 268 | 1205 | 1472 |
| 60.02  | 20 | GTGTCGATTGTGTTTCATGCC     | 59.975 | 20 | 188 | 96   | 283  |
| 59.883 | 20 | ATACTTGGCCAGTTCGTG        | 59.993 | 20 | 261 | 2980 | 3240 |
| 59.969 | 20 | TCGAGTGTTTCGTTAGTTAGTGAGG | 59.876 | 24 | 106 | 141  | 246  |
| 59.717 | 20 | GGTGGTTGCTGGGTTAGAGA      | 60.111 | 20 | 200 | 7    | 206  |
| 59.225 | 20 | ATTTCGAAGATCAACGGACG      | 60.074 | 20 | 206 | 195  | 400  |
| 59.394 | 20 | GTTGTTTGGTTCACGGGTTT      | 59.734 | 20 | 249 | 109  | 357  |
| 60.053 | 21 | CGTTCTTAATTAGCGCCGAA      | 60.347 | 20 | 114 | 1020 | 1133 |

|        |    |                          |        |    |     |      |      |
|--------|----|--------------------------|--------|----|-----|------|------|
| 59.988 | 20 | GAGCGTCGATCTGGTAAAAT     | 60.226 | 20 | 253 | 385  | 637  |
| 59.573 | 21 | GCGATCGAGAGAGAGAGGTG     | 60.246 | 20 | 176 | 1068 | 1243 |
| 60.362 | 20 | CAAACAACGATCGACAATGG     | 59.964 | 20 | 207 | 35   | 241  |
| 60.642 | 20 | TGACGTTAAGAGAGTTTTCACTGG | 59.855 | 24 | 179 | 1004 | 1182 |
| 59.948 | 20 | TTTGGCAAGGGTTTAAAAAG     | 60.081 | 20 | 243 | 167  | 409  |
| 60.014 | 20 | ATTGGAACGTTTAAAACCGA     | 60.344 | 20 | 251 | 221  | 471  |
| 59.15  | 20 | GGGGATTTGTCAACTGGAAA     | 59.767 | 20 | 236 | 58   | 293  |
| 59.763 | 20 | CCTCACACATTCAGCCCTCT     | 60.261 | 20 | 276 | 144  | 419  |
| 60.042 | 20 | ACCAACGTCCCTCATCTACG     | 59.989 | 20 | 247 | 191  | 437  |
| 59.485 | 21 | GCAAACGGTATAGGATCGGA     | 59.923 | 20 | 192 | 247  | 438  |
| 60.11  | 20 | TGGCTCTCACACTCACTCTCA    | 59.747 | 21 | 187 | 106  | 292  |
| 59.632 | 20 | TTCGGCTTAATGGTCGAATC     | 60.038 | 20 | 208 | 61   | 268  |
| 60.05  | 20 | TGATCCATTTGCAGAAGTCG     | 59.799 | 20 | 264 | 415  | 678  |
| 60.133 | 20 | AACACGTGGAGATGACACCA     | 60.005 | 20 | 181 | 551  | 731  |
| 60.173 | 20 | GCTCCATTTGTAAATCACCCA    | 59.815 | 21 | 222 | 158  | 379  |
| 60.034 | 20 | TCACACAGATTAAACACTGAAAC/ | 60.128 | 26 | 253 | 567  | 819  |
| 60.051 | 20 | TGGAAATTTTCGACACGCTTT    | 60.617 | 20 | 252 | 566  | 817  |
| 60.218 | 20 | CGCGAAGTACCTGCGTTAT      | 58.956 | 19 | 274 | 35   | 308  |
| 58.353 | 22 | AACTGCTGGACCTCCACAAC     | 60.159 | 20 | 194 | 308  | 501  |
| 60.034 | 20 | GGGGGAAAAAGAAAGGTTGA     | 60.271 | 20 | 196 | 15   | 210  |
| 60.073 | 20 | TGAATCAATCACGTTTCGCA     | 61.204 | 20 | 218 | 14   | 231  |
| 59.202 | 20 | TTTGGAGATGGTGATGGTGA     | 59.893 | 20 | 276 | 65   | 340  |
| 59.274 | 25 | TAGTCTTTCTCCCGTGC GTT    | 59.875 | 20 | 274 | 19   | 292  |
| 60.11  | 20 | CAGCAAGAAAAATACACCAGCA   | 60.298 | 22 | 134 | 95   | 228  |
| 60.43  | 20 | CCTTGGCCTTCTGACATCAT     | 60.073 | 20 | 190 | 135  | 324  |
| 60.683 | 20 | TGACACTCACGCACACACAC     | 60.437 | 20 | 265 | 599  | 863  |
| 59.493 | 20 | TGTAGCGTGGTGAGACAAGG     | 59.897 | 20 | 276 | 84   | 359  |
| 60.241 | 20 | AGCCCGAGCCTAAGCATATT     | 60.211 | 20 | 265 | 285  | 549  |
| 60.472 | 20 | CCCCCTTAACCTACTTATGAAA   | 59.692 | 24 | 213 | 368  | 580  |
| 59.716 | 22 | AAATCCCGTTCTGGGAAACT     | 59.805 | 20 | 275 | 1633 | 1907 |
| 59.401 | 20 | GGGATTTGGGACGATTTTCT     | 60.131 | 20 | 147 | 199  | 345  |
| 59.803 | 20 | TTAGAAACGGAGGTTGGGTG     | 59.964 | 20 | 139 | 15   | 153  |
| 59.607 | 21 | TGAGCCTATCTTGGAGCACA     | 59.547 | 20 | 190 | 410  | 599  |
| 59.587 | 22 | TCCCTCTCATCTCTCTCGATTC   | 59.919 | 22 | 118 | 87   | 204  |
| 58.003 | 23 | TATTGTTTCGCGCATCATTGT    | 60.103 | 20 | 126 | 51   | 176  |
| 59.96  | 20 | GTTTCATCCCTCGCACATTT     | 59.939 | 20 | 260 | 200  | 459  |
| 59.664 | 20 | ACGTTAAGGAGGGGATCCAT     | 59.651 | 20 | 258 | 19   | 276  |
| 59.871 | 20 | CGTCCACGGAGAGGTTAGAG     | 59.861 | 20 | 169 | 264  | 432  |
| 59.84  | 20 | TACGAGCGCATAGCCTTTTT     | 60.006 | 20 | 120 | 1375 | 1494 |
| 60.066 | 20 | ACCTTAGTTGCGAAGACGGA     | 59.875 | 20 | 164 | 47   | 210  |
| 59.682 | 20 | GGTTTCTTACTCGGGCTCCT     | 59.713 | 20 | 215 | 213  | 427  |
| 59.948 | 20 | GAAAAATCAAAGGCCACAA      | 59.916 | 20 | 246 | 93   | 338  |
| 60.11  | 20 | GAGTTTATCAGCGGTCTCGC     | 59.985 | 20 | 157 | 3475 | 3631 |
| 60.088 | 20 | GGCTTTCTTAACTTGTGGAAACC  | 60.376 | 23 | 205 | 3    | 207  |
| 60.02  | 20 | GTGATCAACATCCGTGATCG     | 59.925 | 20 | 148 | 638  | 785  |
| 61.266 | 20 | ATTCGGGAGATGTTCCAGTG     | 59.927 | 20 | 170 | 190  | 359  |
| 59.871 | 22 | ACATTGGGGACAATGTTGGT     | 59.95  | 20 | 139 | 71   | 209  |
| 60.08  | 20 | ATCCATAATGTCCCGTTGA      | 60.014 | 20 | 277 | 269  | 545  |
| 59.966 | 20 | TTTTCTGGAACGTGAAAATC     | 59.054 | 21 | 279 | 162  | 440  |
| 59.359 | 20 | TGTACCTAAAAAGTTGTTCCCAC  | 57.314 | 23 | 280 | 442  | 721  |
| 59.998 | 20 | CCACTCCCACCCATACAAAC     | 60.088 | 20 | 145 | 3416 | 3560 |
| 59.989 | 20 | CGTCACAGCCTTTCAACAA      | 60.025 | 20 | 123 | 644  | 766  |
| 59.845 | 20 | TCCGGTAGGTAGCCATTGTC     | 59.955 | 20 | 265 | 428  | 692  |
| 60.07  | 20 | TGAGCCCGTAAATCACACAA     | 60.111 | 20 | 183 | 293  | 475  |
| 59.962 | 20 | TTCTTCCACGTCTCTAGGTG     | 59.338 | 21 | 160 | 226  | 385  |
| 60.832 | 20 | TCTCTCACGCACTCTCACAAA    | 59.76  | 21 | 166 | 66   | 231  |
| 61.136 | 20 | TTCGTCGTTTATTGCAGTTT     | 59.322 | 20 | 123 | 7    | 129  |
| 60.292 | 20 | AAGGAGGTGTTATGAAGGGATT   | 58.028 | 22 | 180 | 267  | 446  |

|        |    |                           |        |    |     |      |      |
|--------|----|---------------------------|--------|----|-----|------|------|
| 60.272 | 20 | CTCGAAAATTGAATGACAAGGA    | 59.202 | 22 | 181 | 255  | 435  |
| 60.159 | 20 | TTTGTACATGCATTCCAGC       | 60.675 | 20 | 211 | 96   | 306  |
| 59.931 | 20 | TTTCTCATTGGCAGTCACCA      | 60.24  | 20 | 171 | 45   | 215  |
| 60.06  | 21 | TTGATTCCTCCTCACTTGCC      | 60.195 | 20 | 162 | 14   | 175  |
| 59.758 | 20 | CATGAGCAATTGAGCAGCAT      | 59.979 | 20 | 266 | 67   | 332  |
| 59.931 | 20 | TTTTCTTCCCACACACACA       | 59.976 | 20 | 183 | 287  | 469  |
| 60.081 | 20 | TGGAGCTTTGATCCTTGCTT      | 59.955 | 20 | 151 | 26   | 176  |
| 59.706 | 20 | GGGGGCATTTTGCCTATTA       | 59.795 | 20 | 260 | 238  | 497  |
| 59.934 | 20 | TGCCATCTCCTCATCACTTG      | 59.787 | 20 | 189 | 420  | 608  |
| 59.971 | 20 | AATTCAAGAATGCTGCCAC       | 60.081 | 20 | 267 | 247  | 513  |
| 59.078 | 22 | TCACTGGAATGCTATGGTGC      | 59.679 | 20 | 208 | 2    | 209  |
| 59.648 | 20 | CGGATTTAAGGGTTATTACCTGAT  | 58.81  | 24 | 116 | 136  | 251  |
| 59.499 | 21 | TTTGCGCATAAATATTGGTTTC    | 59.039 | 22 | 264 | 0    | 263  |
| 59.571 | 23 | CGAACATAGTGCACCCACAC      | 60.032 | 20 | 235 | 29   | 263  |
| 60.074 | 20 | TTAGTTATATGTATGGGGATGGTT, | 57.868 | 27 | 122 | 107  | 228  |
| 59.72  | 20 | TCTTTTTCTGAACGATGAGC      | 59.443 | 21 | 267 | 1480 | 1746 |
| 59.807 | 20 | TTCTTTCCTTTGAGCATACGATT   | 59.302 | 23 | 187 | 11   | 197  |
| 59.903 | 20 | ACACAAACGAACCGGAAGAG      | 60.149 | 20 | 216 | 379  | 594  |
| 59.95  | 20 | CAGGCAAATAGCTACCGAGG      | 59.861 | 20 | 227 | 106  | 332  |
| 60.111 | 20 | ATCAATCTTGGGCTCCTCT       | 60.037 | 20 | 211 | 2968 | 3178 |
| 60.066 | 20 | GACTCGGAGGTGAAGGTGAG      | 59.835 | 20 | 192 | 77   | 268  |
| 60.306 | 20 | GGATCTTAATTGGTTCGATTTTG   | 58.914 | 23 | 169 | 650  | 818  |
| 59.653 | 25 | TATTTATGGTGGCTGCGGTT      | 60.343 | 20 | 265 | 509  | 773  |
| 60.404 | 20 | GCACATTGATATCGTGTCCAA     | 59.415 | 21 | 253 | 193  | 445  |
| 59.904 | 20 | CCTATGGTTGTATGGTTTGGAG    | 58.377 | 22 | 171 | 38   | 208  |
| 57.272 | 25 | CCATCCATTTGCAACCATAA      | 59.232 | 20 | 225 | 34   | 258  |
| 59.96  | 20 | AACTGGACCGAAAAATGCAC      | 59.978 | 20 | 118 | 554  | 671  |
| 59.934 | 20 | TTGTTCAAAATTCGTCCAAAA     | 58.175 | 21 | 277 | 140  | 416  |
| 59.055 | 21 | CGGGGCGTGACATTAGTTAT      | 59.845 | 20 | 147 | 39   | 185  |
| 60.056 | 20 | AAGAGGTTATCCCTCGTCCA      | 58.594 | 20 | 278 | 425  | 702  |
| 60.119 | 20 | ATTGTCAGCCCACTTTGACC      | 59.973 | 20 | 259 | 429  | 687  |
| 59.274 | 22 | CCGCCTGCATTGTTTCTAAT      | 60.096 | 20 | 138 | 5    | 142  |
| 60.088 | 20 | CATTCGAACATCATCATCCG      | 59.883 | 20 | 275 | 338  | 612  |
| 59.449 | 20 | TTCTTGGACCAAAATAGCC       | 59.019 | 20 | 183 | 42   | 224  |
| 60.05  | 20 | ATTGATCGCATTTCAGGGAAA     | 60.414 | 20 | 260 | 380  | 639  |
| 60.232 | 20 | AAACAATTTTCTGGCCATGC      | 59.945 | 20 | 249 | 146  | 394  |
| 59.903 | 20 | ACCATCCCACCAGCATTTAG      | 59.813 | 20 | 127 | 154  | 280  |
| 60.164 | 20 | GGCCATCAGGGATTCAAGTA      | 59.894 | 20 | 120 | 166  | 285  |
| 60.133 | 20 | CGCTGATGTGATCTCAATGG      | 60.225 | 20 | 252 | 88   | 339  |
| 59.049 | 20 | ACTGGTGAAGATGCCTGGAG      | 60.261 | 20 | 264 | 602  | 865  |
| 58.881 | 23 | GGTCAATCGGCAAAAATAA       | 59.773 | 20 | 218 | 492  | 709  |
| 60.067 | 20 | TAAATTGCTCCGTCTCCAGC      | 60.352 | 20 | 161 | 83   | 243  |
| 59.966 | 20 | ATGGTGTCTTCCATCAGGC       | 59.934 | 20 | 216 | 1    | 216  |
| 60.342 | 21 | GGGTTGCCAGGTTGAATAAA      | 59.801 | 20 | 210 | 262  | 471  |
| 59.813 | 20 | TGTAAGCAGGTATCATCATAAGC/  | 58.854 | 24 | 126 | 94   | 219  |
| 60.689 | 20 | TTTCTCCCAACGTAGCCAAC      | 60.11  | 20 | 253 | 10   | 262  |
| 59.803 | 20 | TTACACTCCCCTCCCGTTC       | 59.966 | 20 | 275 | 279  | 553  |
| 59.903 | 20 | GTGTAAAGCATGGGAAGGA       | 59.933 | 20 | 250 | 298  | 547  |
| 59.541 | 20 | GAAACATTTCCACTGAATCAACTC  | 59.913 | 24 | 138 | 149  | 286  |
| 60.51  | 20 | ATGTTGGTCCAAGTCCAAGC      | 59.973 | 20 | 184 | 280  | 463  |
| 60.523 | 20 | CCATTTTGTGCCCTTGATTT      | 59.801 | 20 | 190 | 91   | 280  |
| 60.359 | 21 | GAGATGCGAGCTGATGTTGA      | 60.104 | 20 | 212 | 55   | 266  |
| 60.134 | 20 | TTCCGAACTTCATCCTTTGC      | 60.192 | 20 | 249 | 581  | 829  |
| 59.13  | 23 | TGACTCACTATGGGCACAGC      | 59.862 | 20 | 108 | 375  | 482  |
| 59.682 | 20 | TGTATGGTGCTTGGTGGTTG      | 60.427 | 20 | 188 | 35   | 222  |
| 60.111 | 20 | CGGTTTGTTCGTGTTTGA        | 59.603 | 20 | 216 | 451  | 666  |
| 59.194 | 23 | TGCCTACGCATCAAGACAAC      | 59.871 | 20 | 204 | 1    | 204  |
| 59.834 | 20 | CGAGGAGAGGAGAGACATCG      | 60.088 | 20 | 241 | 42   | 282  |

|        |                              |        |    |     |      |      |
|--------|------------------------------|--------|----|-----|------|------|
| 59.154 | 20 AACCGGAAAAGTGGAAGAAAA     | 59.967 | 21 | 192 | 348  | 539  |
| 59.973 | 20 AGGTGGGCTTAGTTGAGGTG      | 59.208 | 20 | 213 | 19   | 231  |
| 59.745 | 20 TCAATCAAACCAACGAAACAA     | 59.048 | 21 | 212 | 645  | 856  |
| 60.198 | 20 TCAATGTAAATGCCAATCTCTTTT  | 59.525 | 24 | 197 | 298  | 494  |
| 59.937 | 20 TTCTCAGCATATGGGAAGGG      | 60.029 | 20 | 239 | 759  | 997  |
| 59.499 | 20 TTCTGAGGATGGAAATCAACA     | 58.131 | 21 | 277 | 2117 | 2393 |
| 59.955 | 20 TGGCAGTAGATTCATTCTATCTTTT | 58.871 | 26 | 250 | 7    | 256  |
| 59.971 | 20 AGTCACCACCACCTTTCCTGG     | 60.002 | 20 | 274 | 56   | 329  |
| 60.096 | 20 AATCTCTGCCACCTTTCCT       | 60.074 | 20 | 164 | 650  | 813  |
| 57.101 | 25 CACAACCTCCACCTGACATAATCA  | 59.906 | 23 | 172 | 547  | 718  |
| 60.578 | 20 GATTATGGCATACTGTGGG       | 58.723 | 20 | 151 | 389  | 539  |
| 58.71  | 25 CCATTATGTCGATATCCATCCA    | 59.507 | 22 | 233 | 105  | 337  |
| 59.756 | 20 CCTATGGTTGTATGGTGTGGAG    | 59.238 | 22 | 113 | 98   | 210  |
| 59.904 | 20 ATTCTGAACCAACTGGCACC      | 59.973 | 20 | 274 | 1695 | 1968 |
| 60.032 | 22 GAAAAGCAAGGAAAAAGCCA      | 59.451 | 20 | 260 | 2819 | 3078 |
| 60.177 | 21 AAGACAACAGGCCAACTTGC      | 60.299 | 20 | 252 | 5328 | 5579 |
| 60.263 | 20 ATTTGTGTGGCCATTTGGTT      | 60.096 | 20 | 183 | 96   | 278  |
| 60.037 | 20 AAGCAAATTCGAAGATGACGA     | 59.699 | 21 | 274 | 4639 | 4912 |
| 60.249 | 20 CAACCCTACCTCCTTCTCCC      | 59.928 | 20 | 117 | 953  | 1069 |
| 60.844 | 20 ACGTGGCCTTTGATGGTAAA      | 60.365 | 20 | 279 | 69   | 347  |
| 58.925 | 20 AACACTATCACAAGGTTCCGAGA   | 60.047 | 23 | 236 | 70   | 305  |
| 59.834 | 20 TTTACTTTTTGAGGTGGCGCT     | 59.883 | 20 | 140 | 4182 | 4321 |
| 60.125 | 20 CCTTCTTGGGATGTAGGGGT      | 60.183 | 20 | 171 | 446  | 616  |
| 59.494 | 22 ATGTTGTGAAGCACATGGGA      | 59.967 | 20 | 220 | 1008 | 1227 |
| 58.891 | 20 CAAATCCCTCTTTTCTTATTCTCAA | 59.236 | 25 | 250 | 174  | 423  |
| 59.975 | 20 CCACGGACTACTCTGGGAAA      | 59.926 | 20 | 277 | 599  | 875  |
| 59.989 | 20 TGCATTTATCAGCTTTATCAGCA   | 59.895 | 23 | 223 | 549  | 771  |
| 60.538 | 20 GCCAAATTAAGACCATATTTTCA   | 59.68  | 25 | 215 | 2643 | 2857 |
| 59.41  | 20 TGCATCCATGATATGGCG        | 59.988 | 18 | 216 | 384  | 599  |
| 60.073 | 20 TGTA AACCGACCTCCCACTC     | 59.966 | 20 | 167 | 1832 | 1998 |
| 59.691 | 19 ATAGGCTCCCCGATCATAA       | 60.623 | 20 | 231 | 1306 | 1536 |
| 59.45  | 20 GGGAGAAAAGGGGAAATAAGTG    | 60.173 | 22 | 220 | 50   | 269  |
| 60.02  | 20 GATGAACTCTCTGGGTGGG       | 59.505 | 20 | 113 | 262  | 374  |
| 59.853 | 20 CTCTCATTCCGGTGTGGATT      | 59.927 | 20 | 246 | 107  | 352  |
| 59.397 | 27 TTCTCATTTCCCAAATGTCTG     | 58.546 | 20 | 277 | 488  | 764  |
| 60.17  | 26 AAGGGTGTCTTCTCTGCATCA     | 59.726 | 21 | 251 | 31   | 281  |
| 60.502 | 20 ACGAGAGAGCGAGTTGGGTA      | 60.012 | 20 | 179 | 321  | 499  |
| 57.922 | 21 TCTTCGCATGCTTATTTGGA      | 59.401 | 20 | 196 | 41   | 236  |
| 59.867 | 20 ATAAAAATGGCAGACGGCAG      | 60.096 | 20 | 254 | 528  | 781  |
| 60.004 | 21 ACCGGGATAAAATAGGGCAA      | 60.508 | 20 | 235 | 1630 | 1864 |
| 60.359 | 21 ATTATCATATTTAAGGGTTATCAC  | 57.31  | 27 | 135 | 330  | 464  |
| 57.94  | 23 TTTCACTCTTCACGTTTGCAC     | 58.963 | 21 | 182 | 10   | 191  |
| 60.059 | 20 AAAACCCTAAACAACCAGTGAA    | 57.717 | 22 | 252 | 49   | 300  |
| 59.856 | 20 TCAAAAATTGCGTCATTGCAT     | 60.081 | 20 | 200 | 247  | 446  |
| 60.193 | 25 AACAAATACAATCCCGTGCAA     | 58.895 | 20 | 246 | 3    | 248  |
| 58.114 | 23 TTGCAAAAGTCACACTCTGTCA    | 59.534 | 22 | 248 | 52   | 299  |
| 59.73  | 20 TCTCTACAACAACCCTCGG       | 60.103 | 20 | 233 | 192  | 424  |
| 59.821 | 20 TAGTTTTGCATGCATTTGGG      | 59.562 | 20 | 148 | 8    | 155  |
| 60.935 | 20 TAAAGGATCACGTTGGGAGC      | 60.074 | 20 | 265 | 168  | 432  |
| 58.82  | 20 CCGTTTATTTTTCACACGTTCA    | 59.904 | 22 | 177 | 1118 | 1294 |
| 57.051 | 25 GCAACGGATCTGATTTGGTT      | 59.939 | 20 | 241 | 31   | 271  |
| 60.169 | 20 GAATCGCAGAACCGATGATT      | 60.043 | 20 | 270 | 1247 | 1516 |
| 60.348 | 20 TCCTTATTGTTGGGTGTGGG      | 60.605 | 20 | 150 | 987  | 1136 |
| 59.709 | 21 GATCTAAGGGCCGAGATTTG      | 58.74  | 20 | 101 | 171  | 271  |
| 59.938 | 20 ATTCGAATTCCTAAGCGCAA      | 59.816 | 20 | 109 | 251  | 359  |
| 60.088 | 20 GTGGTACTTGACGCACATT       | 59.646 | 20 | 261 | 62   | 322  |
| 60.374 | 20 TAGTCATGCGGGCTACATCA      | 60.243 | 20 | 220 | 312  | 531  |
| 60.21  | 20 TGAGGTGAAGTGTGGAGTGTG     | 59.766 | 21 | 180 | 28   | 207  |

|        |    |                           |        |    |     |      |      |
|--------|----|---------------------------|--------|----|-----|------|------|
| 60.237 | 20 | GAGCCACAGCTACAGGCAAG      | 61.136 | 20 | 267 | 29   | 295  |
| 59.691 | 20 | TCTCGGTGAGCGAGTAGGTT      | 60.012 | 20 | 117 | 5    | 121  |
| 60.223 | 20 | TCCATTTATCGGAGTTACGGTT    | 59.737 | 22 | 207 | 249  | 455  |
| 59.009 | 23 | CCTCACGCACTCCACTAACA      | 59.897 | 20 | 233 | 8    | 240  |
| 59.824 | 21 | AATTGATGGAACGGGGATTT      | 60.378 | 20 | 263 | 83   | 345  |
| 59.875 | 20 | TTGTCACATTTTTGGTGTTC      | 58.964 | 22 | 249 | 1609 | 1857 |
| 59.923 | 20 | GGGATTCTTGATGAATGGGA      | 59.685 | 20 | 133 | 40   | 172  |
| 59.966 | 20 | CAACGCACGGGTAAAAGACT      | 60.168 | 20 | 144 | 1422 | 1565 |
| 59.806 | 27 | AGGCCTATAAATGCGTTTGG      | 59.101 | 20 | 228 | 34   | 261  |
| 59.91  | 20 | ACAGACATCGGGAGAAGGTG      | 60.112 | 20 | 198 | 2602 | 2799 |
| 60.111 | 20 | CATGCAAGCAGCACTTCAAT      | 60.019 | 20 | 278 | 109  | 386  |
| 58.616 | 23 | AGGTAGCTGGGAGGAGGAGA      | 60.349 | 20 | 186 | 16   | 201  |
| 60.21  | 20 | ATTGGCCGTGAATTTTTCTG      | 59.938 | 20 | 261 | 137  | 397  |
| 59.364 | 20 | TCATGAAATTGTTGGGGGTT      | 60.029 | 20 | 192 | 195  | 386  |
| 59.873 | 20 | TCTTCACCTATTATTTCAACAAGA/ | 57.674 | 26 | 156 | 38   | 193  |
| 60.473 | 20 | TCTTCGAGTACGCTCTGGGT      | 60.012 | 20 | 178 | 48   | 225  |
| 59.83  | 20 | GTGCGTGACGGTTGGTATAA      | 59.469 | 20 | 280 | 64   | 343  |
| 59.959 | 23 | GTTTTTCTCCCCAGTGACCA      | 59.943 | 20 | 234 | 15   | 248  |
| 59.79  | 20 | ATAAAAATGGCACCTGGCTG      | 59.96  | 20 | 238 | 19   | 256  |
| 61.021 | 20 | ATTTAGGGCAAGAGCCCATT      | 59.93  | 20 | 186 | 343  | 528  |
| 59.308 | 20 | CCGATGTTTTCGAGGATGAG      | 60.594 | 20 | 266 | 204  | 469  |
| 59.78  | 20 | TCGGCTACTTTGAAGGGAAA      | 59.817 | 20 | 237 | 228  | 464  |
| 60.319 | 20 | TCTCGTGTTTGACCGTAATCAT    | 59.499 | 22 | 144 | 1015 | 1158 |
| 59.823 | 20 | CAGAAATGCCACAGCAGAAA      | 59.988 | 20 | 186 | 861  | 1046 |
| 59.458 | 22 | GAGTTGGAGTTCGGGATCG       | 60.606 | 19 | 278 | 2987 | 3264 |
| 59.019 | 20 | GCTTTCACGGGAGAAAGTTG      | 59.853 | 20 | 252 | 2642 | 2893 |
| 60.758 | 20 | TGTGTGGATCAATAACTGTCAGAA  | 59.54  | 24 | 209 | 37   | 245  |
| 59.89  | 20 | TTAAGGTTGGCTTGGGTTTG      | 59.968 | 20 | 185 | 2254 | 2438 |
| 59.249 | 25 | TGTAGTGGCTTCAGCTCGTG      | 60.199 | 20 | 194 | 41   | 234  |
| 60.021 | 22 | TTAAGAGATAGTACCGGATCGC    | 58.853 | 23 | 215 | 42   | 256  |
| 59.232 | 20 | GAGGTCGGGTTTCGTGTAGAG     | 59.721 | 20 | 128 | 16   | 143  |
| 59.966 | 20 | CCACTCTTTTGGGGCAATAC      | 59.429 | 20 | 232 | 31   | 262  |
| 60.11  | 22 | CCACGCATGTTTCTGTATC       | 60.12  | 20 | 128 | 920  | 1047 |
| 59.476 | 20 | GGAAACCACTCACCGTGTCT      | 60.009 | 20 | 228 | 383  | 610  |
| 60.103 | 20 | CGATAAAATGGCACACATCG      | 59.953 | 20 | 248 | 1046 | 1293 |
| 60.011 | 20 | AGCTTTTCACGCATTTCCAC      | 60.257 | 20 | 101 | 25   | 125  |
| 60.331 | 20 | TGCACTGCATAACAAGCGTA      | 59.086 | 20 | 216 | 50   | 265  |
| 59.633 | 20 | CGTATGAGCTCTGAGAGTGAGTG   | 59.315 | 23 | 233 | 1002 | 1234 |
| 59.989 | 20 | CGTGTGTGAGTCCCCATGTA      | 60.44  | 20 | 166 | 231  | 396  |
| 60.074 | 20 | TCCAACATCCAACCTCCATT      | 60.173 | 20 | 220 | 624  | 843  |
| 59.533 | 20 | TGGTGGGGCTTAATTAGGTG      | 59.817 | 20 | 277 | 1318 | 1594 |
| 60     | 20 | CACATTGGTAGAAGGCCGAT      | 59.955 | 20 | 202 | 434  | 635  |
| 59.007 | 23 | GCAGGATAAGGGGTGTTGTT      | 58.912 | 20 | 116 | 2    | 117  |
| 59.971 | 20 | CTGAACCGAACCGAAATTGT      | 59.971 | 20 | 205 | 724  | 928  |
| 59.795 | 20 | TCTTTGAGGTAGGGCTGGAA      | 59.807 | 20 | 248 | 466  | 713  |
| 60     | 20 | GGAGCTCCCTAAAGCATTCC      | 60.173 | 20 | 241 | 448  | 688  |
| 60.46  | 20 | GCCATGACCAACTTTCTTTTC     | 58.684 | 21 | 106 | 26   | 131  |
| 59.986 | 20 | TCTTTGGGAAGGAGGTTGTG      | 60.081 | 20 | 137 | 928  | 1064 |
| 59.331 | 20 | TGCTTCTTGAAAACCTTCTTCATT  | 59.84  | 25 | 213 | 866  | 1078 |
| 59.637 | 22 | GGTGACATGGCTGGATTTCT      | 59.934 | 20 | 146 | 294  | 439  |
| 60.05  | 23 | AATTGCTTCAATGTCACCCC      | 59.797 | 20 | 272 | 117  | 388  |
| 60.009 | 20 | TGGAATGTACTGCTGATGTGG     | 59.581 | 21 | 201 | 0    | 200  |
| 59.973 | 20 | TGGAAAAGAATTCGTCTCG       | 60.184 | 20 | 223 | 77   | 299  |
| 60.309 | 20 | TGCATACACGAGTGGAAAGAG     | 58.937 | 21 | 215 | 449  | 663  |
| 59.996 | 20 | ATGACGAGAAAATGGTTCGG      | 59.933 | 20 | 136 | 425  | 560  |
| 57.866 | 21 | CCTTGTAGCCCTTTGAGC        | 59.822 | 19 | 280 | 111  | 390  |
| 60.049 | 20 | CTTGTTTAGGGAGAGCACGC      | 60.015 | 20 | 250 | 1868 | 2117 |
| 57.436 | 27 | GCAAGTCGCTCTTCTCGTCT      | 59.898 | 20 | 196 | 18   | 213  |

|        |    |                            |        |    |     |      |      |
|--------|----|----------------------------|--------|----|-----|------|------|
| 60.152 | 20 | CTTTCTCTCTCCCGCGTATG       | 59.971 | 20 | 278 | 203  | 480  |
| 59.734 | 20 | CCGAATTTCTTTGCACAGGT       | 60.11  | 20 | 275 | 11   | 285  |
| 59.816 | 20 | TGAAATGAAGAAAAAGAAATTGG    | 57.512 | 23 | 150 | 96   | 245  |
| 60.145 | 20 | TGGAGAAGGGACAAATGGAG       | 60.042 | 20 | 182 | 191  | 372  |
| 60.326 | 20 | ACCAATATCCAACGGCAAGA       | 60.331 | 20 | 183 | 1278 | 1460 |
| 60.096 | 20 | TTTCAAAATCCCCACAAGC        | 59.916 | 20 | 219 | 2716 | 2934 |
| 60.736 | 20 | TGAAGGTTGGAGGAATGGAG       | 60.042 | 20 | 276 | 146  | 421  |
| 58.275 | 22 | CAGCTTGAAGGGGAGTCTTG       | 59.982 | 20 | 250 | 0    | 249  |
| 60.282 | 22 | ATGTAGTGTGTCACGGGCAA       | 60.032 | 20 | 258 | 590  | 847  |
| 59.901 | 20 | TATGGGTTATCACCGGATCG       | 60.544 | 20 | 259 | 641  | 899  |
| 59.939 | 20 | TGAAGTTAGGAAATAAGGAGGTG    | 58.743 | 25 | 169 | 352  | 520  |
| 59.955 | 20 | AATTGTATTCTCCCGAGCCC       | 60.286 | 20 | 177 | 636  | 812  |
| 59.924 | 20 | TTGTAGCCGTTATAGTGTGGGA     | 59.536 | 22 | 265 | 12   | 276  |
| 59.88  | 20 | CCTGTTTCAGCTATCTTTTGCG     | 60.025 | 21 | 278 | 55   | 332  |
| 60.382 | 20 | ATGGGTTAGCGTGTTCATCGC      | 59.988 | 20 | 120 | 177  | 296  |
| 58.892 | 20 | ACACTACCCTCCTCGTCCCT       | 59.991 | 20 | 211 | 72   | 282  |
| 58.097 | 22 | CAGGTAATGCTAGCCGAAA        | 60.223 | 20 | 197 | 380  | 576  |
| 59.792 | 20 | AATCTTGCGAACCAACACC        | 59.978 | 20 | 118 | 20   | 137  |
| 59.899 | 21 | TGCGAACAAACAAGAAACAGG      | 59.881 | 20 | 207 | 2457 | 2663 |
| 60.074 | 20 | GAAATAAGGAGGTGTTATGATA     | 57.235 | 25 | 225 | 94   | 318  |
| 59.951 | 20 | TGGGTTATTTGGCCCATTA        | 60.012 | 20 | 262 | 17   | 278  |
| 59.934 | 20 | CTGCAAATTTGGCTGAGTTG       | 59.464 | 20 | 101 | 709  | 809  |
| 60.34  | 20 | ACGTGTTGGATGGAATGCTA       | 59.002 | 20 | 153 | 79   | 231  |
| 60.011 | 20 | AGCTCTCGTCAGCAGTTGGT       | 60.205 | 20 | 218 | 770  | 987  |
| 58.293 | 22 | AGATGAATGAAGTACGGCGA       | 58.326 | 20 | 162 | 0    | 161  |
| 60.307 | 20 | GGTTATCCTGTGGAGCGTGT       | 59.997 | 20 | 226 | 429  | 654  |
| 59.763 | 20 | TTGTTTTCTATTCTTTATAATTGCC/ | 57.667 | 26 | 275 | 6    | 280  |
| 60.713 | 20 | TTGCAGTTGCAGTTGGTGAT       | 60.31  | 20 | 185 | 821  | 1005 |
| 60.175 | 20 | AAGGGCACCGCTAATGTAGA       | 59.73  | 20 | 145 | 80   | 224  |
| 59.787 | 20 | GCTTTGTCCGTTTCTCCATC       | 59.676 | 20 | 186 | 52   | 237  |
| 58.116 | 24 | CCAAGTTACTCCAGCGAGA        | 60.388 | 20 | 116 | 1    | 116  |
| 59.967 | 20 | GCAAGAAATGGCTCCCTACA       | 60.214 | 20 | 260 | 794  | 1053 |
| 59.626 | 22 | TGAAGGCCCAACCTTAAGAA       | 59.679 | 20 | 224 | 4    | 227  |
| 59.638 | 20 | TGAAGTCACAGCGAGGTTTG       | 60.025 | 20 | 110 | 2    | 111  |
| 59.586 | 25 | TGACGGTCAAGATTTGCTCA       | 60.39  | 20 | 130 | 1    | 130  |
| 59.836 | 20 | TCCATCCTTCTTTGCTGCTT       | 59.955 | 20 | 179 | 631  | 809  |
| 59.697 | 20 | TTAACCTCCCGTGGACGTAG       | 59.986 | 20 | 181 | 372  | 552  |
| 60.467 | 20 | TTTTTGGCAATTTGTGACGA       | 60.088 | 20 | 202 | 39   | 240  |
| 59.157 | 20 | TCCAATGGATGTGAATGGTT       | 58.617 | 20 | 274 | 67   | 340  |
| 58.527 | 21 | CCTGCTTTTGTGCATAGTTT       | 57.906 | 20 | 175 | 253  | 427  |
| 59.672 | 25 | AAATGATAGGGCACACAGCC       | 59.962 | 20 | 182 | 83   | 264  |
| 60.111 | 20 | AAGTCGCGCAAACCTTGAGAT      | 60.022 | 20 | 178 | 3813 | 3990 |
| 60.173 | 20 | AAACCTGGCTGGACTGATGT       | 59.579 | 20 | 213 | 1763 | 1975 |
| 60.169 | 20 | AAGTGAAACTGCTGTATGCTGAG    | 58.737 | 23 | 248 | 472  | 719  |
| 60.011 | 20 | ATTTGGGGATGAATCTGACG       | 59.75  | 20 | 212 | 11   | 222  |
| 59.152 | 20 | CTCGTTGAGCTCGGATAAG        | 59.971 | 20 | 183 | 71   | 253  |
| 59.982 | 20 | TAGCCTGGTCGTTTTGGAAG       | 60.241 | 20 | 266 | 1002 | 1267 |
| 58.268 | 24 | TCAACGGTTTTGATTTGTTCC      | 59.831 | 21 | 182 | 73   | 254  |
| 60.126 | 20 | GTGCATGGTAGGGCAAACCTT      | 60     | 20 | 270 | 1540 | 1809 |
| 60.059 | 19 | TGCGTTTTGACAATATATAGGTGT   | 60.083 | 26 | 103 | 292  | 394  |
| 59.763 | 20 | ATGGCTGGGCTCTGAAATTA       | 59.668 | 20 | 241 | 351  | 591  |
| 59.931 | 20 | GCGAATTCAAACCCCTTGTA       | 59.938 | 20 | 227 | 8    | 234  |
| 60.177 | 20 | TAACACCACCACCCACACAC       | 60.178 | 20 | 115 | 1762 | 1876 |
| 59.948 | 26 | TTACAAATGGCCAAGAGAGTTT     | 57.94  | 22 | 102 | 8    | 109  |
| 60.066 | 20 | TTTTTGACAGCGAAAGTCCC       | 60.227 | 20 | 242 | 4197 | 4438 |
| 59.959 | 20 | TTTCCCTTTGCTCTCTATTTT      | 58.887 | 22 | 272 | 138  | 409  |
| 60.035 | 21 | CCGAAGATCCGAGATCAGAA       | 60.295 | 20 | 209 | 35   | 243  |
| 60.119 | 20 | CCAACCTGAAGAACACGAGTTTG    | 59.813 | 22 | 269 | 1208 | 1476 |

|        |    |                          |        |    |     |      |      |
|--------|----|--------------------------|--------|----|-----|------|------|
| 59.542 | 20 | GGCAATCCATTCCGTACAAG     | 60.331 | 20 | 249 | 21   | 269  |
| 59.157 | 20 | GATCGACGCCTCAGATTTGT     | 60.226 | 20 | 169 | 948  | 1116 |
| 59.95  | 20 | CCTCTAGCATCTCTTGCTCTCA   | 58.983 | 22 | 270 | 255  | 524  |
| 59.01  | 21 | AGCAAGATTGATCCTCCTCG     | 59.386 | 20 | 277 | 21   | 297  |
| 59.759 | 20 | ACAGGGTACTCAGTGGACGC     | 60.182 | 20 | 209 | 17   | 225  |
| 59.411 | 22 | ATTTCCACGAAGCATCATCA     | 59.079 | 20 | 269 | 239  | 507  |
| 60.236 | 20 | TTTCCAACATCCAAACGGC      | 59.938 | 20 | 250 | 634  | 883  |
| 57.771 | 26 | CACACTATTAGGGTTTGGGAGG   | 59.757 | 22 | 116 | 4    | 119  |
| 60.294 | 20 | CCCCGAAAAACCCTCTATCT     | 59.415 | 20 | 254 | 2290 | 2543 |
| 59.6   | 21 | CGAGCTCGGACCTTCAGTAT     | 59.454 | 20 | 112 | 21   | 132  |
| 59.811 | 21 | AGGGCAAAAATAACCAACCC     | 60.055 | 20 | 272 | 83   | 354  |
| 60.083 | 26 | GACCAAAAAGAGACGACCGA     | 60.232 | 20 | 121 | 1    | 121  |
| 60.006 | 20 | ATCACATGGTGATGCCTTCT     | 57.939 | 20 | 215 | 28   | 242  |
| 59.928 | 20 | TGGTGGCTTCATTTCTGT       | 60.495 | 20 | 210 | 549  | 758  |
| 59.478 | 21 | TCTCGTGACAAAAGCCGTG      | 59.904 | 20 | 109 | 0    | 108  |
| 60.104 | 21 | TAAAACCATGCACGTAGGCA     | 60.133 | 20 | 268 | 0    | 267  |
| 57.425 | 21 | GGGGTCTTGGCGTACTAACA     | 59.993 | 20 | 106 | 17   | 122  |
| 59.621 | 20 | AAGGGATGTTTGCACCTGAA     | 60.495 | 20 | 161 | 50   | 210  |
| 60.199 | 20 | TGAAGTTAGGAAATAAGGAGGTG  | 58.743 | 25 | 156 | 953  | 1108 |
| 59.476 | 20 | GAGTTTTTCATCTTACCTTGAGGG | 58.333 | 23 | 210 | 46   | 255  |
| 58.388 | 25 | TTGTGGGGTTGTGGTGAATA     | 59.667 | 20 | 187 | 35   | 221  |
| 59.034 | 20 | TGGCCGGAGTTTTAGGTATG     | 59.953 | 20 | 266 | 43   | 308  |
| 60.118 | 21 | GTTTTTAAAGAGCTGGGGGC     | 60.075 | 20 | 186 | 981  | 1166 |
| 59.617 | 23 | GCAAAACAGCCAGAGGATTC     | 59.82  | 20 | 203 | 0    | 202  |
| 60.012 | 20 | TAATTGAATTCCTGGGTCCG     | 59.756 | 20 | 265 | 899  | 1163 |
| 59.395 | 21 | TGGCTATTTTGGTTTCTACAACA  | 58.731 | 23 | 236 | 64   | 299  |
| 58.976 | 21 | TATCAGGCTTGATGATGGCA     | 60.182 | 20 | 266 | 228  | 493  |
| 60.377 | 22 | CGCAGCAGGTCAAGATTACA     | 60.011 | 20 | 267 | 535  | 801  |
| 58.4   | 21 | TTGAAGCATCGTTTGTGTTTTT   | 60.152 | 22 | 272 | 6    | 277  |
| 59.608 | 22 | TGGTTTATATTTTCGTTGATTTGC | 58.141 | 23 | 258 | 31   | 288  |
| 59.229 | 24 | GGTGTTTCATGGTTTCGATTC    | 60.181 | 20 | 274 | 31   | 304  |
| 59.763 | 20 | TCGAGTCCAATGTTGAAAGAAA   | 59.724 | 22 | 279 | 439  | 717  |
| 59.962 | 20 | TCGATGAAGGTGACGAAGTG     | 59.831 | 20 | 232 | 22   | 253  |
| 59.667 | 23 | TCCTTTTTGTCATTCACCTTTG   | 59.108 | 22 | 232 | 488  | 719  |
| 59.532 | 20 | TCTTGGACTGCGTTAGGGAC     | 60.255 | 20 | 199 | 188  | 386  |
| 59.368 | 20 | AATGGACCGGTGAAAACAAG     | 59.83  | 20 | 264 | 565  | 828  |
| 59.822 | 19 | ATTTGGAGGAGGATGGGTTT     | 59.629 | 20 | 187 | 2432 | 2618 |
| 60.033 | 20 | CTTCCTTGGGCACAACATTT     | 59.971 | 20 | 232 | 716  | 947  |
| 60.192 | 20 | ACGTGAAAAACGGGAATGAA     | 60.344 | 20 | 189 | 113  | 301  |
| 60.299 | 20 | TCACACAATTTCACTCTTCACTCT | 58.044 | 24 | 169 | 97   | 265  |
| 59.786 | 20 | TGGACTTCGTCACAACCAAA     | 60.128 | 20 | 124 | 269  | 392  |
| 60.073 | 20 | CCATGAGCCCCAGTAAAGAA     | 60.066 | 20 | 257 | 3075 | 3331 |
| 61.296 | 20 | CCCCCTCGTGTTCCTTGTA      | 59.964 | 20 | 197 | 23   | 219  |
| 60.032 | 20 | AAAAACCGCCACATCAGAAG     | 60.11  | 20 | 268 | 1879 | 2146 |
| 58.624 | 27 | ATTTGACCATGGTTTTGGGA     | 60.029 | 20 | 223 | 18   | 240  |
| 59.821 | 21 | TCAAACACGAGTAGAAAGGATTT  | 57.147 | 23 | 161 | 66   | 226  |
| 59.956 | 21 | TCTCCTTCACCCATTTGGAG     | 60.042 | 20 | 126 | 815  | 940  |
| 57.426 | 20 | AAATTTGGGCCCTTAGATCG     | 60.272 | 20 | 191 | 56   | 246  |
| 59.951 | 20 | TGAAGTTAGGAAATAAGGAGGTG  | 58.743 | 25 | 188 | 136  | 323  |
| 60.096 | 20 | TCTGATTCTGGGATTTTGGC     | 60.014 | 20 | 266 | 573  | 838  |
| 58.677 | 20 | GAACCTCATGCCCTGGAAA      | 60.195 | 20 | 160 | 113  | 272  |
| 60.08  | 20 | CATTATTTAAAGCACGCGCA     | 59.872 | 20 | 216 | 452  | 667  |
| 58.028 | 22 | CAAAAATGGATGCAAAATACGG   | 60.192 | 21 | 106 | 14   | 119  |
| 59.813 | 20 | GCTGGAACGTGCCATTTACT     | 60.14  | 20 | 140 | 19   | 158  |
| 60.088 | 20 | TGCTCTTCACCTTTGTGTGC     | 60.032 | 20 | 132 | 529  | 660  |
| 59.485 | 21 | TTAATCGTCCATTTCTGTCGG    | 60.827 | 20 | 270 | 241  | 510  |
| 60.831 | 21 | AGGGCCTCTTTTTGTCTGAA     | 58.909 | 20 | 206 | 10   | 215  |
| 59.976 | 20 | GTAGCTGCACATTGTCCGTC     | 59.323 | 20 | 270 | 75   | 344  |



|        |    |                          |        |    |     |      |      |
|--------|----|--------------------------|--------|----|-----|------|------|
| 60.111 | 20 | GATCACCATCACCATCCTCA     | 59.269 | 20 | 153 | 1389 | 1541 |
| 60.537 | 21 | CCCTTCAATGGTGTTCCTG      | 60.345 | 20 | 209 | 357  | 565  |
| 59.555 | 20 | TAGGGGTCAGTGTGGGTTGT     | 60.275 | 20 | 173 | 299  | 471  |
| 60.096 | 20 | CAATGTACCCCGATGTGAGA     | 59.369 | 20 | 278 | 764  | 1041 |
| 59.239 | 20 | TGAACACGTTGCCAAAACAT     | 60.011 | 20 | 120 | 76   | 195  |
| 60.039 | 20 | TTAAAACTCGACCCGATGC      | 60.074 | 20 | 146 | 143  | 288  |
| 58.815 | 22 | TCAAATCAGGAAAACCCCTT     | 58.477 | 20 | 201 | 55   | 255  |
| 58.687 | 21 | TGTTTTTGGAGGGAAAATGG     | 59.772 | 20 | 122 | 38   | 159  |
| 60.495 | 20 | GGAAGGGCTCAACAACACAA     | 61.075 | 20 | 224 | 0    | 223  |
| 59.799 | 20 | CATGTTTTGTTGGCTGTGG      | 60.004 | 20 | 277 | 194  | 470  |
| 59.72  | 20 | TCGGTTAGAAAATGGACCGT     | 59.429 | 20 | 280 | 11   | 290  |
| 59.24  | 21 | GGGGTGGGAATGATGTGATA     | 60.404 | 20 | 214 | 69   | 282  |
| 60.088 | 20 | TTTGATTTGTGTTGGCAAGG     | 59.561 | 20 | 107 | 360  | 466  |
| 60.203 | 23 | ACCACGAGATGGAGACCAAC     | 59.969 | 20 | 219 | 410  | 628  |
| 60.11  | 20 | GCTGAATCTTAACCGTTCGC     | 59.851 | 20 | 221 | 80   | 300  |
| 59.587 | 22 | TTGATACAGATGGTACGCCG     | 59.566 | 20 | 275 | 47   | 321  |
| 59.964 | 20 | TCAACAGAGAATGCAAGCAAA    | 59.6   | 21 | 217 | 89   | 305  |
| 60.046 | 20 | ACGGATATGCCCTTGTATGC     | 59.813 | 20 | 227 | 43   | 269  |
| 60.206 | 20 | AGATGGCGGTAAACATGGAG     | 59.955 | 20 | 232 | 116  | 347  |
| 57.615 | 23 | CCCTAATTGAGTAGAAAACCACA  | 57.399 | 23 | 263 | 1341 | 1603 |
| 59.072 | 22 | TGCTGACTTGATTTTCGAGC     | 59.152 | 20 | 187 | 0    | 186  |
| 58.703 | 20 | TGATACGACCTTGGGGGTTA     | 60.184 | 20 | 224 | 2    | 225  |
| 60.144 | 20 | CACCCAAAAAGGTTATTATTTGA  | 57.25  | 23 | 279 | 308  | 586  |
| 60.235 | 20 | GACCGAGTTGGTGGAGTAGG     | 59.574 | 20 | 233 | 2591 | 2823 |
| 57.804 | 20 | GGTCTTTCTTTTCCACGCA      | 60.227 | 20 | 185 | 485  | 669  |
| 60.127 | 20 | TTGGTTATCGCTTGAACGAG     | 58.917 | 20 | 247 | 6    | 252  |
| 59.154 | 22 | GCGTTTTGACAGGATTTGCT     | 60.257 | 20 | 103 | 4    | 106  |
| 59.2   | 20 | TCTCAAAAGTCTCATTTTCACAGG | 59.799 | 24 | 257 | 2269 | 2525 |
| 60.309 | 20 | ACACCTTGTCTCCCAAATGC     | 59.973 | 20 | 218 | 2314 | 2531 |
| 59.962 | 20 | CTCGATCTCCATCACCACCT     | 60.072 | 20 | 235 | 1654 | 1888 |
| 59.969 | 20 | CCCTCGGATGCTATGCTAAA     | 60.188 | 20 | 182 | 2434 | 2615 |
| 58.787 | 25 | CTTACAAAATCCGCCGTGTT     | 59.996 | 20 | 257 | 14   | 270  |
| 60.082 | 20 | GACCGAAGCCACCATATCAC     | 60.348 | 20 | 145 | 316  | 460  |
| 58.121 | 22 | TCTCTCCAACCTCATTTTCGCA   | 59.522 | 20 | 188 | 165  | 352  |
| 60.088 | 20 | CCCCTTAAGTGTGAACGCAT     | 59.993 | 20 | 253 | 499  | 751  |
| 59.341 | 21 | GCTGGAATACAACCTACCCCAA   | 58.962 | 21 | 272 | 1439 | 1710 |
| 60.263 | 20 | CAAATTTGAGAGGCTTTTCGAC   | 58.962 | 21 | 191 | 2077 | 2267 |
| 58.188 | 20 | TTAAGTTTGGGGGTGCAGAG     | 60.103 | 20 | 104 | 212  | 315  |
| 59.438 | 21 | TCAAACCTTACCGTCTTTGTCCA  | 59.649 | 22 | 239 | 13   | 251  |
| 59.882 | 20 | CGAGTAGAGAAGGGGTGGGT     | 60.502 | 20 | 181 | 3    | 183  |
| 61.031 | 20 | TGGCGGACACTCATGTTTTA     | 60.111 | 20 | 116 | 18   | 133  |
| 59.823 | 20 | TTTGTCAACCCTCTCCCAGTT    | 59.549 | 20 | 264 | 711  | 974  |
| 60.111 | 20 | TTTTCTGACAAGGGTGGGAC     | 59.943 | 20 | 274 | 1156 | 1429 |
| 59.853 | 20 | CTCGTGCTTGTCTTCCACAA     | 60.025 | 20 | 216 | 1135 | 1350 |
| 58.447 | 26 | AATTCGAACCTGGGACCTCT     | 59.935 | 20 | 137 | 622  | 758  |
| 59.992 | 20 | TCCACAGACAGATGGAGCAG     | 59.98  | 20 | 248 | 335  | 582  |
| 60.154 | 20 | GCAATGGAGTGGAGGAGAAG     | 59.803 | 20 | 140 | 156  | 295  |
| 59.676 | 20 | CACACAGAAGTTGTGGGAGG     | 59.148 | 20 | 161 | 13   | 173  |
| 60.199 | 20 | TCCTTTGAGGATGGATTGATG    | 59.879 | 21 | 204 | 91   | 294  |
| 60.192 | 20 | AATTGGTTTGCTTGGTTTGC     | 59.982 | 20 | 271 | 101  | 371  |
| 59.805 | 20 | TTTTCCGAGCAAATGAAAA      | 58.394 | 20 | 239 | 1103 | 1341 |
| 59.184 | 21 | ACCACCTAGCAATGGTTTCC     | 58.912 | 20 | 264 | 5    | 268  |
| 59.493 | 20 | AATCCGTATTTTTGTCCCCC     | 59.888 | 20 | 176 | 690  | 865  |
| 60.142 | 20 | TCGAAGTTTGGTGTGGTGA      | 60.128 | 20 | 199 | 78   | 276  |
| 59.813 | 20 | GCAATGTGCTTCCATCTTGA     | 59.805 | 20 | 187 | 954  | 1140 |
| 60.038 | 21 | ACCTTGACGAGGTGGTTGAC     | 60.009 | 20 | 258 | 24   | 281  |
| 60.192 | 20 | TCTCTTTGGTTGGTGAAGAAA    | 58.955 | 22 | 195 | 153  | 347  |
| 60.003 | 20 | CCATAAGAAAGTGAGCCCCA     | 60.066 | 20 | 260 | 554  | 813  |

|        |    |                           |        |    |     |      |      |
|--------|----|---------------------------|--------|----|-----|------|------|
| 60.614 | 20 | CGTTAGGTCCGTCTCGATTT      | 59.195 | 20 | 126 | 44   | 169  |
| 58.278 | 20 | ACCATGAAGCACATCACAGG      | 59.551 | 20 | 236 | 1825 | 2060 |
| 59.979 | 20 | TGACAAGCAGGTAGACCACG      | 59.897 | 20 | 214 | 18   | 231  |
| 59.049 | 20 | TTCCGTCTACCCCTTTTCT       | 59.934 | 20 | 176 | 839  | 1014 |
| 57.628 | 22 | TCACCTCCTCTATCGGAACG      | 60.21  | 20 | 219 | 0    | 218  |
| 60.177 | 20 | AAAAATAGAGTTATCACAGGATC/  | 58.199 | 26 | 134 | 217  | 350  |
| 60.224 | 20 | CACCCCGGGCTAGATATTTT      | 60.164 | 20 | 261 | 4162 | 4422 |
| 60.298 | 20 | ACCCCTTAGGGCAAGGTAGA      | 59.955 | 20 | 268 | 28   | 295  |
| 59.997 | 20 | TATGGGTTATCACCGGATCG      | 60.544 | 20 | 246 | 768  | 1013 |
| 60.362 | 20 | CTAATGCCCTCCAAAACCAA      | 59.931 | 20 | 243 | 361  | 603  |
| 59.972 | 20 | CGCTGTAGATCTAACGGCTGA     | 60.549 | 21 | 259 | 321  | 579  |
| 59.866 | 20 | CCTTCCATGGCTTTGAAAAA      | 60.046 | 20 | 222 | 585  | 806  |
| 60.448 | 20 | GAGGCAAATTATTCGGATTTTC    | 58.99  | 22 | 230 | 1196 | 1425 |
| 59.972 | 20 | CCCCATCAACCTCCATACTG      | 60.187 | 20 | 241 | 1211 | 1451 |
| 60.422 | 24 | CCTAGCCAGGAACATACCCA      | 59.948 | 20 | 146 | 41   | 186  |
| 57.858 | 27 | GATGATGATGATGCAGGTGG      | 59.882 | 20 | 271 | 3    | 273  |
| 60.063 | 20 | CAGCTGCTTTGTTTCCATCA      | 59.988 | 20 | 240 | 149  | 388  |
| 60.255 | 20 | TCAGGTCCACGTATTTTCCC      | 59.79  | 20 | 117 | 441  | 557  |
| 57.73  | 23 | GCTTCTTTGCCGATGAAGAG      | 60.096 | 20 | 269 | 18   | 286  |
| 60.096 | 20 | GGGTTATTACCTGATTACCTCCC   | 59.052 | 23 | 154 | 338  | 491  |
| 58.78  | 20 | CTTCTAACGAAGCCCAAACG      | 59.876 | 20 | 267 | 82   | 348  |
| 59.73  | 20 | GCTTCCACTGCCTACTTTGC      | 60.022 | 20 | 245 | 176  | 420  |
| 59.967 | 20 | AATTTGGCAGCTTCTTGTGC      | 60.395 | 20 | 112 | 77   | 188  |
| 60.665 | 20 | CCAGATGCAGCATGAGAGAA      | 60.096 | 20 | 209 | 693  | 901  |
| 58.982 | 20 | TCCACCGTGGTTAGTTGACA      | 60.001 | 20 | 238 | 109  | 346  |
| 59.42  | 20 | CTCAGCTCAGGGTGGAGAAA      | 60.523 | 20 | 230 | 167  | 396  |
| 58.486 | 22 | CATCTGAGGAAGGCACATGA      | 59.787 | 20 | 153 | 59   | 211  |
| 59.264 | 20 | ATAGTTGGTGTGAGACGGGC      | 59.997 | 20 | 200 | 159  | 358  |
| 59.155 | 20 | CACAATATTTGAGGGTTATCATTT( | 58.787 | 25 | 195 | 466  | 660  |
| 59.886 | 20 | TGTGCGTAGAACAGAGAGCG      | 60.347 | 20 | 268 | 9    | 276  |
| 59.92  | 20 | TAGAGGACATCGCGGAGAGT      | 59.973 | 20 | 172 | 44   | 215  |
| 59.84  | 20 | GGTAGGATTTCAACGGCGTA      | 59.96  | 20 | 219 | 1168 | 1386 |
| 59.853 | 20 | TGAAAAGAAAAGAGGCACTCG     | 59.618 | 21 | 212 | 63   | 274  |
| 60.277 | 20 | GGTGAAGACGGCTTGTTGAT      | 60.119 | 20 | 161 | 742  | 902  |
| 59.81  | 20 | ATTTCGAAGATCAACGGACG      | 60.074 | 20 | 137 | 97   | 233  |
| 60.235 | 20 | TTCAAAGGCCGAGATTTGTT      | 59.685 | 20 | 262 | 23   | 284  |
| 59.415 | 20 | CAACAACCTAATCATCCAACCA    | 59.724 | 22 | 224 | 230  | 453  |
| 58.97  | 23 | CCACCAACTTGTCCACTCCT      | 60.002 | 20 | 248 | 1982 | 2229 |
| 59.946 | 21 | GGCTTACATTTCCCATCAC       | 60.326 | 20 | 228 | 52   | 279  |
| 59.109 | 26 | TTTTTGCGAGGGAGAATGTC      | 60.192 | 20 | 125 | 0    | 124  |
| 58.896 | 24 | CGGACGATATCGGTTATTGG      | 60.167 | 20 | 123 | 0    | 122  |
| 59.946 | 20 | ACTCCTGGTGAATGGCAAAG      | 60.111 | 20 | 199 | 22   | 220  |
| 59.545 | 20 | TTCGGATCTTCACATGGTCA      | 60.048 | 20 | 236 | 488  | 723  |
| 59.997 | 20 | TATGGTGGTATGGTGTGGGG      | 61.296 | 20 | 221 | 179  | 399  |
| 59.803 | 20 | CTGGTGTCAACCGGATGTC       | 60.005 | 20 | 194 | 40   | 233  |
| 59.875 | 20 | TGCAAGAGCAGCAGGATATG      | 60.119 | 20 | 216 | 275  | 490  |
| 60.029 | 20 | CCGCCTACTCTCCCTTTTT       | 59.842 | 20 | 240 | 37   | 276  |
| 59.107 | 24 | GCGAGCATCATACAGAGAA       | 59.979 | 20 | 254 | 2436 | 2689 |
| 60.05  | 20 | TTCTCAGTGCATCCATTTTCG     | 59.799 | 20 | 205 | 750  | 954  |
| 58.279 | 21 | GGAGTTTGCTGTTGAGACCC      | 59.703 | 20 | 229 | 332  | 560  |
| 60.173 | 20 | AGTCGCTGCAATTTCCAGTT      | 59.882 | 20 | 112 | 3    | 114  |
| 59.222 | 20 | AGCCTAAACACACACACCTCA     | 58.285 | 21 | 103 | 105  | 207  |
| 59.85  | 22 | GCAAGGGGCAAGTGTTATTT      | 59.091 | 20 | 223 | 513  | 735  |
| 60.34  | 20 | ATCACATGCCATTCAGTCCA      | 59.925 | 20 | 234 | 1794 | 2027 |
| 60.431 | 20 | AGCCGTTGTGGGATATCTTG      | 59.955 | 20 | 125 | 1117 | 1241 |
| 60.559 | 20 | GGCTAATATAATTTATCTCCATGC, | 58.976 | 26 | 215 | 235  | 449  |
| 59.967 | 20 | TGGCACTACTGTGAATTGGG      | 59.566 | 20 | 257 | 5728 | 5984 |
| 60.016 | 20 | TTGAGAAGTCAGAAGCGGGT      | 59.989 | 20 | 109 | 778  | 886  |

|        |    |                           |        |    |     |       |       |
|--------|----|---------------------------|--------|----|-----|-------|-------|
| 60.111 | 20 | GAAAGCCTACTTGGCGATCTT     | 59.87  | 21 | 142 | 413   | 554   |
| 60.154 | 21 | GTTCGAAAGCCTACCTCGCT      | 60.894 | 20 | 186 | 5     | 190   |
| 58.992 | 20 | ATGGGAAGAGGGGGTATGAG      | 60.147 | 20 | 110 | 2109  | 2218  |
| 59.912 | 20 | GCAATTAACCCCTCGAT         | 60.15  | 20 | 248 | 285   | 532   |
| 60.156 | 20 | TCTCTATCTTTTTGGTTGGTGA    | 59.304 | 24 | 232 | 4     | 235   |
| 59.404 | 23 | CTCAGCATACGGACGCATTA      | 59.856 | 20 | 192 | 12    | 203   |
| 59.679 | 19 | ACTGTTGGACGGTTATCGCT      | 59.621 | 20 | 151 | 87    | 237   |
| 59.938 | 20 | ATGCGCGATTTTAAACCCTA      | 59.586 | 20 | 214 | 31    | 244   |
| 59.566 | 20 | CCGAAAATCTCCGTCAAGAA      | 60.184 | 20 | 192 | 258   | 449   |
| 60.215 | 22 | GGTTTGGGTTAATTTGGGC       | 60.4   | 20 | 229 | 8     | 236   |
| 60.137 | 21 | TCACTTCGAACCTTCTGCAA      | 59.566 | 20 | 185 | 7     | 191   |
| 59.746 | 20 | AATTCATTCAAGCAGCAGCA      | 59.572 | 20 | 269 | 98    | 366   |
| 59.823 | 20 | CCAAAATTTATGGTTATCACAGGA  | 59.191 | 24 | 172 | 79    | 250   |
| 57.388 | 23 | CCCATGTGGGGAGATATGAT      | 59.44  | 20 | 191 | 801   | 991   |
| 59.839 | 20 | TTTTGTGGAAGATGCAGGTG      | 59.691 | 20 | 173 | 2903  | 3075  |
| 57.222 | 23 | TCGCATGCCACTAAAAATGA      | 60.215 | 20 | 213 | 20    | 232   |
| 59.971 | 20 | CTCAACGGTGAAGTCGGATT      | 60.111 | 20 | 194 | 204   | 397   |
| 59.934 | 20 | AATAGAAAAACCACGCAGGG      | 59.087 | 20 | 179 | 159   | 337   |
| 60     | 20 | GGCGTCTGGTTTTTGT          | 60.015 | 20 | 259 | 15    | 273   |
| 59.716 | 21 | AAAATTTACATATTTGATCGGAA   | 58.838 | 24 | 192 | 34    | 225   |
| 60.69  | 20 | ACAATCTGGGGCGTACACAT      | 60.263 | 20 | 229 | 82    | 310   |
| 60.142 | 20 | CGGGGGTAAGAAAGTCAACA      | 59.964 | 20 | 264 | 938   | 1201  |
| 60.537 | 20 | GGCTGCCAGAATAAAAAGGA      | 59.297 | 20 | 278 | 497   | 774   |
| 60.103 | 20 | TGGTGATGCCAGAACAGAAG      | 59.831 | 20 | 231 | 279   | 509   |
| 60.081 | 20 | ATTTAGGGGCTTTTGAGCGT      | 60.095 | 20 | 268 | 772   | 1039  |
| 59.586 | 20 | CAACGGTTTTGGTTTGTCC       | 60.241 | 20 | 152 | 76    | 227   |
| 60.126 | 20 | GTTTGGCTGGTGCAGAGATT      | 60.263 | 20 | 220 | 370   | 589   |
| 60.119 | 20 | GA CTCACGGTTTTTCGGAAG     | 59.711 | 20 | 262 | 475   | 736   |
| 59.701 | 20 | TGTTCCGGAAGATTGAACGTG     | 59.691 | 20 | 212 | 94    | 305   |
| 60.275 | 21 | TCGGACCAAATTACCCTTCA      | 60.301 | 20 | 254 | 396   | 649   |
| 60.025 | 20 | TGAACAATTGAACCCGGAA       | 59.941 | 20 | 237 | 7     | 243   |
| 58.903 | 20 | CGCGACAGAGTGGTATCAGA      | 60.008 | 20 | 253 | 369   | 621   |
| 59.113 | 23 | GGTGAATCTGTAAAAGGTCATCG   | 59.885 | 23 | 235 | 337   | 571   |
| 60.247 | 20 | TTGTTTTGGTTGGCAATTCA      | 59.946 | 20 | 264 | 67    | 330   |
| 60.171 | 20 | TTGTGGAGAACGAACCTCGAA     | 59.415 | 20 | 207 | 262   | 468   |
| 59.637 | 25 | ACATGTGCTGTGAGAGTGGG      | 59.738 | 20 | 263 | 500   | 762   |
| 60.061 | 20 | AAAAACCGTCCACATTCAAA      | 59.348 | 21 | 166 | 1271  | 1436  |
| 60.142 | 20 | TCAAACAGAACACACCTTCCC     | 59.997 | 21 | 105 | 177   | 281   |
| 59.22  | 25 | CAACCGCATAGGCACAGTAG      | 59.366 | 20 | 121 | 15    | 135   |
| 60.053 | 20 | GCAAATTTCTTCGAGACCCA      | 60.192 | 20 | 111 | 174   | 284   |
| 60     | 20 | CAGTTTGACATCAGAGCCGA      | 59.984 | 20 | 150 | 41    | 190   |
| 60.055 | 23 | TCAATTTGAATGGTTATCACCTG   | 58.865 | 23 | 116 | 230   | 345   |
| 59.429 | 22 | TTAACGACTTGAACCCATTTTT    | 57.74  | 22 | 279 | 305   | 583   |
| 58.444 | 20 | CTAGCTCCTTCCCCTTACC       | 60.204 | 20 | 111 | 21    | 131   |
| 59.966 | 20 | CCAACATGAAAGGCCATGAT      | 60.723 | 20 | 202 | 408   | 609   |
| 59.939 | 20 | TGTGATTTCTACCATTTATTCTTTG | 59.708 | 26 | 243 | 5     | 247   |
| 60.066 | 20 | AACATGTTCTTGACGCACCA      | 60.16  | 20 | 153 | 50    | 202   |
| 59.172 | 21 | TTGTTTGCATCCCACACAAC      | 60.413 | 20 | 158 | 264   | 421   |
| 59.816 | 20 | GAGAATGTGAGACATCATCATCA   | 59.059 | 24 | 152 | 228   | 379   |
| 59.601 | 23 | TTTCACAGAACAACGATCA       | 57.72  | 21 | 260 | 10    | 269   |
| 60.298 | 20 | TGATGATGAAATGACATGGAAA    | 58.82  | 22 | 131 | 81    | 211   |
| 59.606 | 21 | AATAGGAGAACCAAACCGCA      | 59.569 | 20 | 220 | 1781  | 2000  |
| 60.408 | 20 | ACCACTCCCCACTGCAATAA      | 60.375 | 20 | 164 | 297   | 460   |
| 60.111 | 20 | CAACATAAATGGGGCGTAGG      | 60.202 | 20 | 103 | 1099  | 1201  |
| 60.695 | 20 | GTGTTCTCGTGAGAGTGCCT      | 59.051 | 20 | 204 | 6     | 209   |
| 59.083 | 20 | TTCCAAACCTTTGTTCCGAG      | 60.081 | 20 | 230 | 821   | 1050  |
| 58.935 | 25 | GGGCCATTGGTTCTGTATGT      | 59.676 | 20 | 115 | 4     | 118   |
| 59.964 | 20 | TGATTAATATCAGGGGGCGA      | 60.247 | 20 | 207 | 10614 | 10820 |

|        |    |                          |        |    |     |      |      |
|--------|----|--------------------------|--------|----|-----|------|------|
| 59.971 | 20 | CAACGACTCCGATCACTTCA     | 59.831 | 20 | 276 | 883  | 1158 |
| 61.84  | 20 | GAGACGATCGAACAGCATGA     | 59.95  | 20 | 278 | 0    | 277  |
| 59.862 | 20 | AGGCCTTGATGTCCCTTCTT     | 60.074 | 20 | 205 | 110  | 314  |
| 59.873 | 20 | AGAGGAGTGACCTTTCCGGT     | 60.111 | 20 | 248 | 249  | 496  |
| 58.955 | 20 | GATAGGGGCACACCAAGAGA     | 60.073 | 20 | 257 | 17   | 273  |
| 59.971 | 20 | TGATACACGAGCGTGAAAG      | 59.864 | 20 | 126 | 217  | 342  |
| 59.779 | 20 | ACGACAGTGGACAAGGGAAT     | 59.43  | 20 | 231 | 88   | 318  |
| 59.162 | 22 | TGGGCTGAAGTATGTGTGGA     | 60.112 | 20 | 273 | 526  | 798  |
| 59.315 | 20 | TCTGTTTGCCTTTTCAATCC     | 60.192 | 20 | 271 | 418  | 688  |
| 59.82  | 20 | GCAGACTTTAAGGCAGCCAA     | 60.523 | 20 | 268 | 5296 | 5563 |
| 59.168 | 21 | CGTGGTTCGATCGTAATTGA     | 59.542 | 20 | 208 | 373  | 580  |
| 59.996 | 20 | TGCTTCCTTTTGCTGCTACA     | 59.752 | 20 | 275 | 215  | 489  |
| 60.05  | 20 | GGTTTTCTCGCAATCCACTT     | 59.174 | 20 | 244 | 2270 | 2513 |
| 59.962 | 20 | TGCAGGTACCTTCGGAACTT     | 59.734 | 20 | 272 | 49   | 320  |
| 59.624 | 20 | TAGGGGAAAAGGGGAAAGTG     | 60.284 | 20 | 152 | 242  | 393  |
| 57.694 | 20 | ACGCAGTCTAGAGATATATGTTGA | 57.442 | 26 | 122 | 420  | 541  |
| 57.088 | 20 | GGTGCCACCAAATTTATGA      | 60.564 | 20 | 203 | 659  | 861  |
| 60.859 | 20 | CTGAGCTCACTCGCCTTTCT     | 59.891 | 20 | 199 | 1499 | 1697 |
| 59.872 | 22 | TTGTCAATTGGGCATCGATTA    | 59.891 | 20 | 241 | 47   | 287  |
| 59.17  | 24 | TTGTGGGAAGCATTTTCTCC     | 60.051 | 20 | 267 | 87   | 353  |
| 59.903 | 20 | ATTTAGCCGTTTCTCGGTTT     | 59.966 | 20 | 180 | 2865 | 3044 |
| 58.78  | 20 | TCCTTCAACCAGTTGTTCCC     | 59.943 | 20 | 179 | 69   | 247  |
| 59.984 | 20 | AACTGGCTAACCCATCACCA     | 60.375 | 20 | 246 | 81   | 326  |
| 59.974 | 20 | TTCACAATTAACAAGAACAATTC  | 59.077 | 26 | 145 | 591  | 735  |
| 59.883 | 20 | CAAGAGCAACAACACCATTCA    | 59.749 | 21 | 122 | 724  | 845  |
| 60.049 | 20 | TGCTAACTCAAATTTTCGGTGC   | 60.258 | 21 | 207 | 541  | 747  |
| 60.292 | 21 | GACACGAGATTTACATGGTTCCG  | 59.499 | 22 | 109 | 1    | 109  |
| 59.154 | 20 | GATTCCTCGTGGGATTGAAA     | 59.871 | 20 | 270 | 48   | 317  |
| 58.961 | 23 | GATTGTAACGTTATTTGGCCG    | 59.376 | 21 | 153 | 1259 | 1411 |
| 60.154 | 21 | TGAGGGGAGAACTGCGGTATT    | 59.694 | 20 | 194 | 16   | 209  |
| 60.232 | 20 | AACTGAGTCCCCTACCCGAT     | 59.817 | 20 | 205 | 321  | 525  |
| 59.929 | 20 | TTTGAGGCGAATCGAAATCT     | 59.784 | 20 | 225 | 1023 | 1247 |
| 58.842 | 22 | TAAAAGGTTCCCCACAGACG     | 59.964 | 20 | 129 | 74   | 202  |
| 59.942 | 20 | TTGTTAGTTTCCATTCCGCC     | 59.938 | 20 | 100 | 212  | 311  |
| 59.962 | 20 | ATGCACATGCTACTTCCACG     | 59.746 | 20 | 238 | 572  | 809  |
| 60.915 | 20 | CGGAAATTTTACCCGGATGT     | 60.902 | 20 | 221 | 42   | 262  |
| 59.737 | 24 | ATATCTCCCTTTTTCGGCCAT    | 59.761 | 20 | 187 | 13   | 199  |
| 59.955 | 20 | TCAAGTCAAACCTGCCAAACT    | 57.528 | 21 | 252 | 960  | 1211 |
| 59.823 | 20 | GATCGCATCAGAGAGTCGGT     | 60.381 | 20 | 229 | 1112 | 1340 |
| 58.409 | 20 | TCTTCCCAACTACTTTCCAG     | 58.305 | 21 | 280 | 264  | 543  |
| 59.607 | 21 | ACCCATTGGTGCTCAAACCTC    | 59.973 | 20 | 242 | 450  | 691  |
| 59.133 | 20 | TTGCTTCAGAGGTGAAATCACTA  | 59.031 | 23 | 280 | 130  | 409  |
| 60.011 | 20 | CCGCCATTCTCCGTTAACTA     | 60.089 | 20 | 269 | 1105 | 1373 |
| 60.08  | 20 | CCCGGATTTACGAGACAAAA     | 59.931 | 20 | 265 | 73   | 337  |
| 59.843 | 25 | TCATCAGCCGTCAATCATT      | 59.079 | 20 | 148 | 6    | 153  |
| 59.786 | 20 | CCATCTCCACCTCCATACTCA    | 59.935 | 21 | 110 | 1902 | 2011 |
| 60.134 | 20 | ACGCCCAAGTTGTTTCTTA      | 59.609 | 20 | 265 | 147  | 411  |
| 59.917 | 20 | CATTTTGGACGGTCCTGTT      | 60.353 | 20 | 271 | 181  | 451  |
| 60.701 | 20 | GCATATACGAAGGGTATTTTGA   | 59.289 | 23 | 204 | 477  | 680  |
| 59.959 | 20 | CTGAGTCCCCTAACCGACAA     | 60.103 | 20 | 172 | 178  | 349  |
| 59.989 | 20 | AATTAATGTGGCATGGGGAA     | 60.016 | 20 | 246 | 54   | 299  |
| 60.103 | 20 | TCACCCACGTAGAAGCTTGA     | 59.44  | 20 | 277 | 387  | 663  |
| 60.103 | 20 | GAATCCGACAACGAAAGATGA    | 60.066 | 21 | 210 | 511  | 720  |
| 59.945 | 20 | AGCAGTAGTGCCCCTGAAGA     | 60.012 | 20 | 275 | 995  | 1269 |
| 59.935 | 20 | AACACTCTGTGTTGTTGGGAAA   | 59.538 | 22 | 270 | 72   | 341  |
| 59.864 | 21 | CGGGGCTTACCTAGTCTAA      | 59.331 | 20 | 251 | 113  | 363  |
| 57.69  | 24 | TTTTGATTCCCATTAAAAAGTT   | 58.076 | 23 | 223 | 257  | 479  |
| 60.096 | 20 | CAAGAATCGCCTGCAAAGAT     | 60.352 | 20 | 251 | 1152 | 1402 |

|        |    |                          |        |    |     |      |      |
|--------|----|--------------------------|--------|----|-----|------|------|
| 60.036 | 20 | AAGATTTGATCATGGGCGTT     | 59.391 | 20 | 158 | 35   | 192  |
| 57.546 | 20 | AGCCGTGCCTTCAACATAAC     | 60.14  | 20 | 216 | 694  | 909  |
| 59.901 | 20 | GCTCCCTTAAACACGAATGTG    | 59.623 | 21 | 239 | 106  | 344  |
| 59.934 | 20 | GCCCCTTAAACTCTCCTTGA     | 59.712 | 21 | 264 | 382  | 645  |
| 60.055 | 20 | TCGAACTCATGCATTCATTTTT   | 59.592 | 22 | 277 | 2039 | 2315 |
| 60.067 | 20 | CACCCGAAAACCGAATAAGA     | 59.931 | 20 | 125 | 160  | 284  |
| 59.966 | 20 | TGCAAGCTCAGCCTAATGAA     | 59.712 | 20 | 163 | 26   | 188  |
| 60.112 | 20 | CACCCGTGAAGCACAAAATA     | 59.585 | 20 | 252 | 140  | 391  |
| 60.023 | 20 | ACCGAATTCCTTCCAAGGTT     | 59.805 | 20 | 226 | 2045 | 2270 |
| 59.75  | 20 | CATGGAACAACATGAGCCAC     | 59.967 | 20 | 256 | 377  | 632  |
| 60.004 | 20 | GTGATGTGCAACGCTATTGG     | 60.142 | 20 | 158 | 1163 | 1320 |
| 60.083 | 26 | CCGAAAATCGGAGGATGATA     | 59.856 | 20 | 153 | 5    | 157  |
| 59.547 | 20 | ACTTTCCCCGTGGACGTAG      | 59.974 | 19 | 259 | 219  | 477  |
| 59.928 | 20 | ATCGGTTATTACCGGATCGC     | 61.031 | 20 | 109 | 276  | 384  |
| 60.237 | 20 | CTGGAAGTCAATGCTTCAA      | 59.988 | 20 | 235 | 414  | 648  |
| 59.903 | 20 | GCTTTCAATCCTCCAGCATC     | 59.78  | 20 | 213 | 16   | 228  |
| 60.119 | 20 | CATTACACCACCCTTCCAC      | 60.088 | 20 | 201 | 332  | 532  |
| 59.162 | 20 | GAGGTTTCCAACCTTGCTTCG    | 59.853 | 20 | 213 | 169  | 381  |
| 59.989 | 20 | TTGTGAGAACCAACTCGGTG     | 59.72  | 20 | 274 | 232  | 505  |
| 59.091 | 22 | GGTTGTTGCCGCTTCTACTT     | 59.383 | 20 | 264 | 0    | 263  |
| 60.031 | 20 | GAGATGGTTCGAGAACGAGG     | 59.803 | 20 | 150 | 438  | 587  |
| 60.397 | 20 | ATTC AATTGCTGGTGGAAGG    | 59.933 | 20 | 265 | 28   | 292  |
| 59.708 | 20 | TTGGAGATAGAATGAGATAGAATC | 58.905 | 27 | 168 | 218  | 385  |
| 59.73  | 20 | CAACCCTACCTCCTTCTCCC     | 59.928 | 20 | 211 | 163  | 373  |
| 60.214 | 20 | CAAGAGCTCTCATTCTCTCCCT   | 59.23  | 22 | 251 | 618  | 868  |
| 60.162 | 20 | GCATCAA AATTCAA AAGCGA   | 58.89  | 20 | 269 | 382  | 650  |
| 59.004 | 20 | ATCCGGCCATGTTGCTATTA     | 60.31  | 20 | 243 | 1550 | 1792 |
| 59.984 | 20 | AAACCTAGCATTGGGGAAGG     | 60.312 | 20 | 211 | 88   | 298  |
| 59.573 | 25 | AATTGATGGAACGGGGATTT     | 60.378 | 20 | 157 | 8    | 164  |
| 59.387 | 20 | GGACAAA AACTTCATGGGAGC   | 59.532 | 20 | 277 | 316  | 592  |
| 59.28  | 23 | TTCATGATTCAA AAGCATCAAAA | 59.595 | 23 | 136 | 66   | 201  |
| 57.665 | 23 | TTTTACATGCCATACACCAA     | 59.841 | 21 | 183 | 25   | 207  |
| 60.074 | 20 | TCTCACCTTCGGTCAGAACC     | 60.238 | 20 | 263 | 289  | 551  |
| 59.849 | 20 | GGAAGAGAGAGAAGGGGTGG     | 60.186 | 20 | 270 | 195  | 464  |
| 59.72  | 20 | AATGGAAGGGACGAGTTTGA     | 59.526 | 20 | 135 | 292  | 426  |
| 59.938 | 20 | TTAAA AACC GAACTGGACCG   | 59.968 | 20 | 193 | 2813 | 3005 |
| 59.935 | 23 | CCACTCTCCCTCTCAGTACTTTTC | 59.823 | 24 | 280 | 93   | 372  |
| 59.82  | 20 | GGAGATCGAAGGAGCTGATG     | 59.91  | 20 | 221 | 313  | 533  |
| 59.265 | 20 | TGATTACATCGATCCAACGG     | 59.35  | 20 | 270 | 54   | 323  |
| 61.146 | 20 | GGTGGGTCGATTCAATATG      | 60.014 | 20 | 243 | 9    | 251  |
| 60.058 | 20 | TGGAGCTCTTGTTCCCTCACA    | 59.545 | 20 | 133 | 75   | 207  |
| 60.016 | 20 | GAATACCCCTACTTTGCC       | 59.666 | 20 | 233 | 5    | 237  |
| 59.144 | 26 | AACA AACTTTGAACCTGCGCT   | 59.92  | 20 | 226 | 9    | 234  |
| 60.658 | 23 | TCTGCCTCGTCTGGCTAGTT     | 60.156 | 20 | 241 | 1    | 241  |
| 59.953 | 20 | CGAAAGCTGGAGCTGAGAAC     | 60.277 | 20 | 123 | 10   | 132  |
| 59.01  | 20 | AAAACATGCCTTTCGACCAC     | 59.978 | 20 | 246 | 96   | 341  |
| 59.76  | 21 | ACGGTGTACCTTCCCCTCTT     | 59.856 | 20 | 227 | 49   | 275  |
| 59.624 | 20 | ATGCATGGCCATAACTCACA     | 59.955 | 20 | 270 | 166  | 435  |
| 60.045 | 21 | GAGGCAATTAATCAGGGCAA     | 60.038 | 20 | 186 | 1861 | 2046 |
| 59.861 | 21 | ATATTACCTGCACAAGGCCG     | 59.982 | 20 | 253 | 86   | 338  |
| 59.666 | 22 | TGCAACCAAGTTCCAAATCA     | 60.088 | 20 | 258 | 189  | 446  |
| 59.778 | 22 | TCCCAACTGAGATCGGAATC     | 60.011 | 20 | 277 | 5    | 281  |
| 60.162 | 20 | GTTTCGCATACAAACACGCAC    | 60.188 | 20 | 231 | 106  | 336  |
| 60.242 | 21 | GGCCACGTACATGACTACC      | 60.263 | 20 | 231 | 2263 | 2493 |
| 59.726 | 21 | AAGATGGGCGAATAAGACCC     | 60.286 | 20 | 122 | 77   | 198  |
| 59.917 | 20 | TGTTGGGGTTGTTGTAGGGT     | 60.126 | 20 | 202 | 1792 | 1993 |
| 60.102 | 23 | ACAAA AATTGTGCCCAAGGAG   | 59.971 | 20 | 194 | 13   | 206  |
| 59.955 | 20 | CTGATTTCGCACAAATGATCG    | 60.22  | 20 | 231 | 36   | 266  |

|        |    |                          |        |    |     |      |      |
|--------|----|--------------------------|--------|----|-----|------|------|
| 59.694 | 20 | TGCAATGCATGGAGGAATTA     | 60.035 | 20 | 179 | 84   | 262  |
| 59.997 | 20 | TTGTTGTTGTTGGGCATTGT     | 59.864 | 20 | 222 | 1884 | 2105 |
| 60.251 | 20 | AAGTTATCTGTGGCCGATGC     | 60.103 | 20 | 259 | 2368 | 2626 |
| 59.542 | 20 | CTGAACCACATGTTCCCCTT     | 59.82  | 20 | 134 | 2    | 135  |
| 60.133 | 20 | AACGGACGAACAACGAAAAC     | 60.015 | 20 | 235 | 320  | 554  |
| 59.89  | 21 | AAACGACATCCTGACGCAAC     | 61.107 | 20 | 274 | 225  | 498  |
| 59.957 | 20 | TATCATTGCTCGTTTTGGGG     | 60.827 | 20 | 254 | 190  | 443  |
| 57.589 | 21 | GAACAAGGTTCCATTTACACA    | 59.875 | 22 | 173 | 39   | 211  |
| 60.24  | 20 | CCCCACTTGGCTTGAGATAA     | 60.066 | 20 | 267 | 54   | 320  |
| 58.694 | 22 | GGATTGCATCATCAAGTCTCC    | 59.503 | 21 | 203 | 0    | 202  |
| 59.141 | 22 | AGTTGTGCAATCCGCAAGAG     | 60.397 | 20 | 198 | 552  | 749  |
| 57.197 | 25 | TATCCTTGCACCTTTGCCCT     | 59.836 | 20 | 252 | 13   | 264  |
| 59.72  | 20 | TGTTTTGAATCCGAGTTTCCC    | 59.91  | 20 | 235 | 47   | 281  |
| 57.636 | 25 | GAAGTTGAGCCATATTCATTTGC  | 59.989 | 23 | 181 | 440  | 620  |
| 59.96  | 20 | TCTTGGGAGGGAAAATGACA     | 60.43  | 20 | 185 | 448  | 632  |
| 59.941 | 20 | GGGTCAAGTCATGTTCCCAC     | 60.223 | 20 | 237 | 615  | 851  |
| 59.809 | 21 | GAGAGAGAGGCAGACATCGG     | 60.096 | 20 | 116 | 55   | 170  |
| 60.155 | 20 | TGAGGATGCAAGCCTCAATA     | 59.375 | 20 | 232 | 3038 | 3269 |
| 59.435 | 20 | GGACCGCTGGATAATCCTCT     | 60.431 | 20 | 210 | 98   | 307  |
| 59.075 | 20 | AAGCTGGTGGATTGAATGCT     | 59.7   | 20 | 172 | 175  | 346  |
| 59.233 | 20 | CATACAATTCCCCACCCTTG     | 60.044 | 20 | 213 | 90   | 302  |
| 60.162 | 20 | GGGTAGGGTCCCTGTATGT      | 59.935 | 20 | 192 | 434  | 625  |
| 60.011 | 20 | GAGCACGAGGGTGAAAGTGT     | 60.307 | 20 | 252 | 59   | 310  |
| 59.938 | 19 | CCCAGCTGAATGCGAGTTA      | 59.956 | 19 | 280 | 265  | 544  |
| 61.191 | 20 | TCTCGTGGTGCAGTGGTAGA     | 60.463 | 20 | 255 | 28   | 282  |
| 58.379 | 20 | TTTGCATGAGCTAACATGCC     | 59.839 | 20 | 206 | 650  | 855  |
| 60.134 | 20 | CATTCCCATCATTTGCGCTA     | 60.797 | 20 | 109 | 1929 | 2037 |
| 59.807 | 20 | AACGAATGTAACAATACGTACAC/ | 57.736 | 25 | 233 | 382  | 614  |
| 60.132 | 20 | AGCACTCGTGGATTCTGGAC     | 60.269 | 20 | 152 | 962  | 1113 |
| 60.375 | 20 | TTACAAAATGCCCTTTCGC      | 60.075 | 20 | 249 | 427  | 675  |
| 59.64  | 20 | GGTACAGCCGAGTAGCGAAG     | 60.037 | 20 | 269 | 215  | 483  |
| 60.667 | 20 | AAGAACAACGAGGATGGC       | 60.119 | 20 | 260 | 254  | 513  |
| 60.529 | 20 | TTATCCTCACCCGTTTTTCG     | 59.931 | 20 | 148 | 293  | 440  |
| 59.574 | 20 | AACCCTTTGTCCCGATCTTT     | 59.805 | 20 | 245 | 3835 | 4079 |
| 58.52  | 25 | CGATTTGGAATCGATAAGCA     | 58.721 | 20 | 269 | 560  | 828  |
| 60.177 | 22 | ACCTCTCCACGGCCTCTAT      | 60.096 | 20 | 130 | 85   | 214  |
| 59.725 | 20 | TCTTATTGCCCCGTTTATTTT    | 57.725 | 21 | 276 | 251  | 526  |
| 58.741 | 20 | ATCTACCAAGATGCCCAAG      | 60.073 | 20 | 100 | 7    | 106  |
| 60.081 | 20 | TGTAATGGAGGGGGAATCTG     | 59.744 | 20 | 212 | 186  | 397  |
| 59.839 | 20 | ACAACTTATGGACCGCTGG      | 59.993 | 20 | 159 | 502  | 660  |
| 60.149 | 20 | GTGCACGAAATTGGAGGAAG     | 60.636 | 20 | 179 | 2074 | 2252 |
| 59.853 | 20 | CCTATGGTGGTATGGTGTGG     | 58.569 | 20 | 238 | 231  | 468  |
| 60.117 | 20 | GCGAAGGAACTGTGGAGAAC     | 59.851 | 20 | 156 | 328  | 483  |
| 60.082 | 20 | AAAAATCGACAAATTATCAGTACC | 58.166 | 25 | 275 | 433  | 707  |
| 59.957 | 20 | CACCTTTGCAAAAGGGAGAA     | 60.22  | 20 | 254 | 10   | 263  |
| 59.963 | 21 | AACACAGCTGAGTAACCGGG     | 60.171 | 20 | 102 | 1291 | 1392 |
| 59.882 | 20 | TAACCAGGCCCTTTCTCCTT     | 60.068 | 20 | 265 | 1437 | 1701 |
| 60.134 | 20 | GCGTGTTAAATTTGGATTCCC    | 60.541 | 21 | 280 | 2247 | 2526 |
| 59.964 | 20 | TGGCGAATATTTGTTTTTGA     | 58.213 | 21 | 145 | 281  | 425  |
| 58.278 | 20 | CTACAAATGTTTTGGCCCCT     | 58.949 | 20 | 183 | 1275 | 1457 |
| 59.685 | 20 | AATTCAATCCCCAAAACCC      | 59.867 | 20 | 269 | 363  | 631  |
| 59.774 | 22 | AAGCCACTTTTGTCAAGGTGA    | 59.766 | 21 | 234 | 1097 | 1330 |
| 59.651 | 20 | GGCTCTTCGGCAGTGAATAG     | 59.978 | 20 | 253 | 252  | 504  |
| 59.917 | 26 | GAAAACGTCGAGTTTCAGGC     | 59.859 | 20 | 193 | 28   | 220  |
| 59.813 | 20 | ATTGCCTTGTGTTTGGGAC      | 59.836 | 20 | 201 | 46   | 246  |
| 59.67  | 20 | GGTCTATGGTCGATTGGGTG     | 60.195 | 20 | 203 | 4617 | 4819 |
| 60.042 | 20 | AAACAGAAAAATCCCCTTCATC   | 59.725 | 23 | 264 | 4454 | 4717 |
| 60.149 | 20 | TCCGTTGTA AAAAGACCGTTG   | 60.018 | 21 | 201 | 38   | 238  |

|        |    |                          |        |    |     |      |      |
|--------|----|--------------------------|--------|----|-----|------|------|
| 59.722 | 20 | GTAGAAAACACGAGGGGGT      | 60.225 | 20 | 256 | 2162 | 2417 |
| 61.009 | 20 | TCACGCTAAAGAGGTGTTTTGA   | 59.92  | 22 | 252 | 212  | 463  |
| 58.876 | 24 | TCGTGCTCATTGTGTTGGT      | 60.16  | 20 | 183 | 7    | 189  |
| 58.745 | 20 | GCCAGCCAGGAAAACACTAA     | 60.249 | 20 | 127 | 346  | 472  |
| 60.586 | 20 | AAATTCACGTGTTAGAGTTGATTC | 59.424 | 26 | 231 | 911  | 1141 |
| 59.962 | 20 | CCGTGCTTACATCAAGCAGA     | 60.011 | 20 | 227 | 15   | 241  |
| 60.228 | 20 | ATCCCCTTCATTCAGCACAC     | 59.934 | 20 | 122 | 10   | 131  |
| 59.91  | 20 | TCAAGAGTTGCATGTGAGCC     | 59.992 | 20 | 251 | 1470 | 1720 |
| 60.074 | 20 | ACTGACATTCACAGGCATTG     | 57.067 | 20 | 204 | 57   | 260  |
| 60.011 | 20 | TTAAACCCTAAAAACGCGCA     | 60.593 | 20 | 239 | 106  | 344  |
| 60.124 | 20 | GGGATGGAGGAGGAAAGAAG     | 60.008 | 20 | 251 | 339  | 589  |
| 59.948 | 20 | CCGAAAAGCTGAAAGAAACC     | 58.949 | 20 | 115 | 819  | 933  |
| 60.326 | 20 | CCTGTTGTGCCCATCAATTA     | 59.395 | 20 | 183 | 9128 | 9310 |
| 60.058 | 19 | TAGGATGATTGGCAACACGA     | 60.073 | 20 | 196 | 0    | 195  |
| 60.156 | 20 | TCCAATCAAGGCAAAGATCA     | 59.2   | 20 | 205 | 5464 | 5668 |
| 59.74  | 20 | GGTGATGTGTGACGTTGGAG     | 60.005 | 20 | 214 | 105  | 318  |
| 60.112 | 20 | AGATCAAGGTGGCTGCAAAT     | 59.7   | 20 | 251 | 700  | 950  |
| 59.839 | 20 | TGTGGTTGATGAGTTGGCAT     | 59.967 | 20 | 112 | 1229 | 1340 |
| 58.804 | 22 | TTCCAAGTCTTCCCCTTCT      | 60.045 | 20 | 176 | 3    | 178  |
| 59.717 | 20 | TTTGTTTTCCATCGTATTCCA    | 58.005 | 21 | 143 | 4091 | 4233 |
| 60.104 | 20 | TTTGAGTCGTTACCACGAG      | 59.873 | 20 | 230 | 98   | 327  |
| 59.691 | 20 | TTCAAATTGAAACCGGACC      | 59.778 | 20 | 234 | 24   | 257  |
| 57.59  | 21 | CTAGGCATGGAATCCGAGAA     | 60.17  | 20 | 269 | 59   | 327  |
| 59.432 | 24 | TGTTTGATATGGCAGGGGTT     | 60.192 | 20 | 216 | 634  | 849  |
| 60.022 | 20 | TGCAAGTGCATATCAATGAACA   | 60.14  | 22 | 135 | 1314 | 1448 |
| 60.468 | 20 | TGCTGAGACATAGCGGACTG     | 60.16  | 20 | 169 | 228  | 396  |
| 60.133 | 20 | GGTGGGTTGACGACAATAG      | 60.375 | 20 | 131 | 541  | 671  |
| 60.005 | 20 | TCAACTTCTTCAACAGGCCA     | 59.415 | 20 | 244 | 2186 | 2429 |
| 59.853 | 20 | CAACCTAGAATGAGCATTGGC    | 59.722 | 21 | 207 | 703  | 909  |
| 57.234 | 21 | CACGGGTCTTTCTTCTTCCA     | 60.224 | 20 | 201 | 9    | 209  |
| 60.228 | 20 | AAGCCAGTGCTGGTTGACTT     | 59.914 | 20 | 239 | 1156 | 1394 |
| 59.714 | 20 | AATGTGGATGCCCCCTATTT     | 60.399 | 20 | 252 | 233  | 484  |
| 59.934 | 20 | CAGACGCCGACATTTATCCT     | 60.096 | 20 | 144 | 176  | 319  |
| 60.167 | 20 | GCGTGATCTTGGTGTCTTG      | 59.293 | 20 | 168 | 1948 | 2115 |
| 58.972 | 21 | AAAATTCGATGATTGGCTCG     | 60.038 | 20 | 212 | 333  | 544  |
| 60.014 | 20 | CCTTCAAGCTGTGCAACTCC     | 59.989 | 20 | 278 | 444  | 721  |
| 59.801 | 20 | CCAAATTAAGCGAACCGAAA     | 60.068 | 20 | 222 | 334  | 555  |
| 60.056 | 19 | TGTTGGAGTCTTGAACAAGGG    | 60.133 | 21 | 261 | 309  | 569  |
| 59.832 | 22 | CATTGACTGTCACAATCCCG     | 59.96  | 20 | 251 | 1013 | 1263 |
| 60.161 | 20 | TTAGGGTTTAAAATCGCGCA     | 60.564 | 20 | 280 | 7557 | 7836 |
| 59.56  | 20 | TATGGGTTAGCGTGTGATCG     | 59.566 | 20 | 244 | 119  | 362  |
| 60.026 | 24 | GAGATTGGTGGTTGTGGGAT     | 59.636 | 20 | 195 | 0    | 194  |
| 59.769 | 20 | TGGAATAGGAAAGGTGCAGG     | 60.066 | 20 | 216 | 650  | 865  |
| 60.073 | 20 | TCTTAATCCTTTGGCATTCAA    | 57.388 | 21 | 212 | 1124 | 1335 |
| 59.838 | 20 | GGAGGGTGCACATCTCTTTC     | 59.661 | 20 | 268 | 2    | 269  |
| 60.032 | 20 | CGCGGATGGTTAAGATTGAG     | 60.597 | 20 | 191 | 1435 | 1625 |
| 59.978 | 20 | CAAATCAGGCACCAGCTAA      | 58.917 | 20 | 232 | 909  | 1140 |
| 59.833 | 20 | TTGTCCCAAACAACGAAAT      | 60.206 | 20 | 185 | 54   | 238  |
| 59.28  | 23 | CAGCATACCAAGGGCATTTC     | 59.96  | 20 | 215 | 24   | 238  |
| 58.96  | 22 | GCCTCAAATCCTATTCTATTTG   | 59.549 | 24 | 246 | 77   | 322  |
| 60.195 | 20 | CAACCCTTCCAGTTCTGGTC     | 59.549 | 20 | 258 | 1280 | 1537 |
| 59.937 | 20 | CTACCACCGATCCCTCTGAA     | 60.065 | 20 | 228 | 1073 | 1300 |
| 59.405 | 20 | AGCAAAACGGTCATCTGCTT     | 59.882 | 20 | 273 | 21   | 293  |
| 59.933 | 20 | CACCCCTGAGCTCACTTTTC     | 59.844 | 20 | 218 | 644  | 861  |
| 59.805 | 20 | TGTCCACTGATGTGGCATT      | 59.967 | 20 | 189 | 297  | 485  |
| 59.52  | 20 | CAGCCCACAAATCCTTGACT     | 60.111 | 20 | 214 | 710  | 923  |
| 60.272 | 20 | ACTTGTGAAATTCACCGGC      | 59.978 | 20 | 278 | 528  | 805  |
| 59.933 | 20 | TTGAGGCTCCCAACTTTCAC     | 60.232 | 20 | 260 | 987  | 1246 |

|        |    |                           |        |    |     |      |      |
|--------|----|---------------------------|--------|----|-----|------|------|
| 59.473 | 20 | AAAAATGTCCCCGAAGATACA     | 58.43  | 21 | 245 | 485  | 729  |
| 60.012 | 20 | CACTAAAGTGTGCTGTCATCG     | 57.006 | 21 | 184 | 19   | 202  |
| 59.835 | 20 | ACTCCCCCTCGAAGTTTTGT      | 59.972 | 20 | 261 | 219  | 479  |
| 59.694 | 20 | TCATCAATTCTTTCTGCGCTT     | 59.974 | 21 | 279 | 1240 | 1518 |
| 59.858 | 20 | CATGCCGAAAGAGTTTACGA      | 58.917 | 20 | 248 | 44   | 291  |
| 60.029 | 20 | GTTATGCGTTTTGACGGGAT      | 59.829 | 20 | 200 | 514  | 713  |
| 60.04  | 20 | TCTCATCATCTCCCCTCACC      | 60.008 | 20 | 227 | 324  | 550  |
| 60.192 | 20 | AGTAGAGAAGGGGAAGGGGG      | 60.797 | 20 | 168 | 469  | 636  |
| 60.529 | 20 | AATATCCATGCCATTCCCAA      | 59.979 | 20 | 272 | 166  | 437  |
| 60.245 | 21 | TGGTGTTGCAATGCTACTGA      | 58.863 | 20 | 276 | 676  | 951  |
| 58.81  | 24 | TTGGATTGAGAAAGCGATCC      | 60.155 | 20 | 278 | 15   | 292  |
| 60.029 | 20 | GGGTTATCAGCAGCTTTTGC      | 59.851 | 20 | 259 | 1081 | 1339 |
| 60.221 | 20 | TCGCACTTGGACTTTCCTTT      | 59.853 | 20 | 272 | 11   | 282  |
| 57.757 | 20 | TTCAAATGTTTTTGTAAATTTCCCA | 59.653 | 24 | 100 | 30   | 129  |
| 59.993 | 20 | GGCCGCTGATCATTTAGTTG      | 60.606 | 20 | 276 | 1217 | 1492 |
| 60.457 | 23 | GAATGTAGGTATAAGACTGTGAA   | 57.394 | 26 | 280 | 5    | 284  |
| 60.118 | 20 | GGTTTGCCCTGTATCTCAA       | 59.933 | 20 | 230 | 219  | 448  |
| 57.978 | 23 | GCGACATACATTGATCTGCG      | 60.251 | 20 | 249 | 32   | 280  |
| 59.95  | 20 | TTCTCTCGTGTTTCATCCC       | 60.05  | 20 | 198 | 3    | 200  |
| 59.955 | 20 | TTAGCCCATCAAAGTCCAGG      | 60.066 | 20 | 185 | 196  | 380  |
| 60.038 | 20 | GTTGCGTTCACATAAGCCT       | 60.14  | 20 | 170 | 2736 | 2905 |
| 58.941 | 19 | ACCTACCATAACCGTCGCAT      | 59.34  | 20 | 223 | 21   | 243  |
| 59.931 | 20 | AACCTTATAGGATGTCCGGC      | 58.019 | 20 | 265 | 776  | 1040 |
| 60.058 | 20 | CCGAGTGCCTATTTTGCCTA      | 60.223 | 20 | 224 | 6804 | 7027 |
| 59.663 | 21 | CGCGTCTATCGATACTGATCC     | 59.705 | 21 | 256 | 3227 | 3482 |
| 59.505 | 20 | AAAAGGTCTGCCCTTGCTTA      | 58.973 | 20 | 268 | 228  | 495  |
| 60.024 | 20 | GGCTCCGAGTTTTTCCTGT       | 60.61  | 20 | 225 | 900  | 1124 |
| 59.971 | 20 | ACAGTCCACACATGAAGCCA      | 60.162 | 20 | 176 | 1078 | 1253 |
| 59.682 | 20 | GGGGTTATCATGGGATCAAG      | 59.055 | 20 | 211 | 6    | 216  |
| 59.507 | 23 | CGGTTAAAAACCGAATCGAA      | 59.937 | 20 | 226 | 380  | 605  |
| 60.564 | 20 | CGAAGTTAGAAAATAAGGAGGTG   | 58.471 | 25 | 152 | 115  | 266  |
| 59.931 | 20 | GAGGCCGTCGGAATTTATTT      | 60.28  | 20 | 250 | 1336 | 1585 |
| 57.795 | 21 | TCGCGTCTGACTCCTCACTA      | 59.726 | 20 | 164 | 34   | 197  |
| 58.78  | 20 | GTCCACGGTGGTGCTAGAGT      | 60.182 | 20 | 104 | 32   | 135  |
| 60.255 | 20 | TTTGTGTCGTCGGTGTGATT      | 60.008 | 20 | 217 | 937  | 1153 |
| 60.005 | 20 | AAAAGGGGAGAAAAGAACGG      | 59.566 | 20 | 241 | 32   | 272  |
| 59.988 | 20 | TTACCGAGCTTGATGGGAAC      | 60.074 | 20 | 178 | 488  | 665  |
| 59.66  | 20 | TTTCTCTCGTGCCATTCTCA      | 59.522 | 20 | 265 | 312  | 576  |
| 57.591 | 23 | TGGTAAACTCGAAGGATGGA      | 59.555 | 21 | 191 | 33   | 223  |
| 60.05  | 20 | TGTTGCACTTTTGAACAATGG     | 59.618 | 21 | 176 | 69   | 244  |
| 59.945 | 22 | TTACATGTGTGGGGATGGAA      | 59.623 | 20 | 139 | 224  | 362  |
| 60.096 | 20 | CGTGTTTATCCTCACCCGTT      | 59.853 | 20 | 200 | 235  | 434  |
| 59.42  | 20 | AAACATAAAAGCCACCTGCC      | 59.091 | 20 | 204 | 16   | 219  |
| 60.624 | 20 | TAGCATCGTGAGTAGCGTCG      | 60.18  | 20 | 167 | 0    | 166  |
| 59.273 | 20 | TGTGGCATCACATGGTCTCT      | 60.121 | 20 | 237 | 35   | 271  |
| 59.29  | 22 | GCCGATCGAGTTTTGGATAA      | 60.038 | 20 | 152 | 215  | 366  |
| 60.005 | 20 | GGTGTGTGAGGGAAGGAGAG      | 59.682 | 20 | 242 | 853  | 1094 |
| 59.962 | 20 | GAACACTATTCCCATCCCCC      | 60.388 | 20 | 146 | 28   | 173  |
| 59.945 | 20 | ATAGACCCAGACACGGGCTT      | 60.903 | 20 | 197 | 27   | 223  |
| 58.877 | 20 | TGCTCAATGAACTCCTTTGG      | 58.847 | 20 | 138 | 11   | 148  |
| 60.37  | 20 | ATCTTACTGGCATTGTCCGGC     | 60.103 | 20 | 217 | 1213 | 1429 |
| 57.576 | 24 | GGTGGGCTCCATTTTTAGT       | 60.187 | 20 | 200 | 11   | 210  |
| 60.135 | 20 | AAAGAAAAGGACGGGAGGAA      | 60.046 | 20 | 114 | 80   | 193  |
| 59.962 | 20 | AACGGCCGAGATTTGTTATG      | 59.96  | 20 | 229 | 883  | 1111 |
| 59.668 | 20 | TGTGCGTGTAAGCTGGTTC       | 59.911 | 20 | 237 | 741  | 977  |
| 59.926 | 20 | TACTTTTGGGCAATCCTTGG      | 59.931 | 20 | 167 | 3147 | 3313 |
| 59.565 | 20 | TTGCCAAACACACATTTTCAA     | 59.999 | 21 | 268 | 1298 | 1565 |
| 59.801 | 20 | GAAAGGTGCTTTGCCACTTC      | 59.859 | 20 | 204 | 12   | 215  |



|        |    |                           |        |    |     |      |      |
|--------|----|---------------------------|--------|----|-----|------|------|
| 60.194 | 20 | AGTAGGATTCCGGTTCGCTT      | 60.096 | 20 | 247 | 221  | 467  |
| 59.302 | 21 | TGCCTATTTTGAATTTTGGTG     | 57.705 | 21 | 145 | 368  | 512  |
| 60.243 | 20 | TATGGGTTATCACCGGATCG      | 60.544 | 20 | 217 | 1096 | 1312 |
| 60.048 | 20 | TCGATCATAAGAGCATCCCC      | 59.998 | 20 | 138 | 490  | 627  |
| 60.145 | 20 | CGTCCCACAAAATATGTCTT      | 57.393 | 20 | 212 | 45   | 256  |
| 60.617 | 20 | CAGTTGGGTCAGTGACATGG      | 59.997 | 20 | 223 | 111  | 333  |
| 60.336 | 20 | CGCTTAAAAACCGGACCATA      | 59.958 | 20 | 147 | 894  | 1040 |
| 57.538 | 25 | GCCGAGATTTGTGAGAGGTT      | 59.288 | 20 | 103 | 23   | 125  |
| 59.782 | 19 | GGGGTGACCTTATCACTCCA      | 59.779 | 20 | 189 | 0    | 188  |
| 60.189 | 20 | CAAAAAGGAGCTCAACGGAG      | 59.986 | 20 | 143 | 105  | 247  |
| 59.735 | 20 | CAAAATTCCCACCCAATCAG      | 60.162 | 20 | 271 | 107  | 377  |
| 59.853 | 20 | AAAATGCACCATTTCTTGCC      | 59.945 | 20 | 276 | 1243 | 1518 |
| 59.925 | 20 | GCTTCATTATTTTTGCCCA       | 59.907 | 20 | 141 | 24   | 164  |
| 59.901 | 20 | ACGCTATGAGAGCGAGGGT       | 59.989 | 19 | 274 | 38   | 311  |
| 60.196 | 27 | TTCCGGCTACTTCGAACTTT      | 58.973 | 20 | 262 | 565  | 826  |
| 59.903 | 20 | AACATGGGCAAGAAACAACC      | 59.836 | 20 | 257 | 869  | 1125 |
| 59.2   | 20 | CCGGATCCTATTCACCTCAA      | 59.887 | 20 | 276 | 1044 | 1319 |
| 59.789 | 20 | TTCATTGGAAAGTTAGGGCG      | 60.067 | 20 | 133 | 365  | 497  |
| 59.697 | 20 | GAACAACCAAGGCAATTTTCAG    | 59.601 | 21 | 235 | 25   | 259  |
| 59.923 | 20 | CTGAATCGCGAAACATGAAA      | 59.809 | 20 | 178 | 498  | 675  |
| 59.089 | 24 | ACCATGATGAATGTGAGGCA      | 59.925 | 20 | 267 | 31   | 297  |
| 59.955 | 20 | ATTGGAACAATACTATAACAACCAC | 57.118 | 26 | 135 | 87   | 221  |
| 58.968 | 20 | TTCTTGATGTGTTGGCAAGC      | 59.847 | 20 | 138 | 170  | 307  |
| 59.209 | 20 | GGTCCATGGCCTGTTATGTC      | 60.203 | 20 | 258 | 248  | 505  |
| 59.779 | 20 | TAGTGGGCTAAGTGGGGTG       | 59.986 | 20 | 172 | 205  | 376  |
| 58.585 | 22 | TTGCATCAAGTTTTAGAGCAGC    | 59.674 | 22 | 227 | 35   | 261  |
| 59.938 | 20 | ACTGAATCAGCGCTCCAGAT      | 59.981 | 20 | 243 | 115  | 357  |
| 59.935 | 20 | CTTCCCTGCACAAAAGTCGT      | 60.291 | 20 | 278 | 57   | 334  |
| 60.03  | 20 | AAGGTCAGGAAAACCCAAGG      | 60.332 | 20 | 255 | 2782 | 3036 |
| 59.943 | 20 | TACAGGTTACCCCTTCTGGG      | 59.959 | 20 | 158 | 178  | 335  |
| 59.997 | 21 | ATTTTCCCGGTGAAAGAAGG      | 60.291 | 20 | 123 | 252  | 374  |
| 59.657 | 20 | TTTCTTTTCTTTTCTTTCCATTTCA | 59.678 | 25 | 276 | 101  | 376  |
| 59.127 | 20 | GCCATCCTCTCCAAGCTACA      | 60.362 | 20 | 233 | 2214 | 2446 |
| 58.188 | 24 | CGGCTATTTGAGACGACATTT     | 59.238 | 21 | 279 | 2    | 280  |
| 59.094 | 20 | CGACCCAGATTCAAACCCTA      | 59.926 | 20 | 204 | 184  | 387  |
| 59.402 | 23 | TGGTGGTGGGAGAAGAGAAG      | 60.229 | 20 | 207 | 84   | 290  |
| 60.241 | 20 | GCCACACACGAAATGAATTG      | 59.972 | 20 | 127 | 351  | 477  |
| 60.292 | 20 | CGAACGGTATAGGATCGGAA      | 59.916 | 20 | 227 | 79   | 305  |
| 59.843 | 20 | GCCTTCCATTCCAAAAATCA      | 59.878 | 20 | 151 | 113  | 263  |
| 59.178 | 20 | GTTGGGGGATGAAGAAGGAT      | 60.133 | 20 | 265 | 449  | 713  |
| 60.255 | 20 | TGAGGCAAACCTGAAAAACCA     | 59.293 | 20 | 246 | 323  | 568  |
| 59.92  | 20 | TCGATCCCACAGAGATTGGT      | 60.475 | 20 | 255 | 324  | 578  |
| 59.997 | 20 | CTGTGCATTTGCAGACCACT      | 59.905 | 20 | 206 | 397  | 602  |
| 59.585 | 20 | ACAAGTTTGGGATTGCTCCA      | 60.495 | 20 | 272 | 206  | 477  |
| 60.03  | 20 | CACCCCTTATCTTCCACAGC      | 59.55  | 20 | 231 | 173  | 403  |
| 59.896 | 21 | GTACCTGCACGTTGCGTAGA      | 59.935 | 20 | 253 | 4225 | 4477 |
| 60.035 | 20 | AGGGGCAAGTTGGCTATTTT      | 59.966 | 20 | 183 | 2577 | 2759 |
| 60.111 | 20 | ATCGTCGAACATCCTTTTGG      | 59.933 | 20 | 255 | 2315 | 2569 |
| 59.909 | 19 | TGATTGCATTATCAAGAACCAAA   | 59.485 | 23 | 135 | 107  | 241  |
| 60.564 | 20 | GACACGTGGCAGCACTAGAA      | 60.056 | 20 | 219 | 445  | 663  |
| 59.917 | 20 | AAAACCTCCTAAGCCCCCAA      | 59.939 | 20 | 206 | 665  | 870  |
| 60.32  | 20 | CCCAATTGTCGTGTGTGTTT      | 59.855 | 20 | 213 | 2    | 214  |
| 59.682 | 20 | CCACCTATCTGCATCCACCT      | 59.95  | 20 | 108 | 1497 | 1604 |
| 59.973 | 20 | GGCGGTGAAACGATAAACAT      | 59.829 | 20 | 230 | 227  | 456  |
| 59.729 | 25 | TTGACCCCAATGGATCGTAG      | 60.713 | 20 | 278 | 166  | 443  |
| 57.236 | 20 | TTGGTGTGGTGTGTTGCT        | 60.049 | 20 | 225 | 45   | 269  |
| 59.708 | 20 | ATTCGTTTTTCTTCCCAGG       | 60.291 | 20 | 140 | 51   | 190  |
| 59.654 | 21 | AGGTTGAGTCGGACGAGTTG      | 60.298 | 20 | 256 | 590  | 845  |

|        |    |                          |        |    |     |      |      |
|--------|----|--------------------------|--------|----|-----|------|------|
| 59.972 | 20 | AGCATCAATGGAGTATTGAAAAA  | 57.835 | 23 | 252 | 345  | 596  |
| 59.823 | 20 | AATGTCGTGACACCTAGCCC     | 59.997 | 20 | 173 | 84   | 256  |
| 59.601 | 21 | TCGGGAGTCTGTATTGAGCC     | 60.218 | 20 | 190 | 27   | 216  |
| 59.997 | 20 | TGGTAAATCACTAGACCCAAGGA  | 59.879 | 23 | 277 | 10   | 286  |
| 59.213 | 22 | TTGCGGATTCTAAGATTGGG     | 60.031 | 20 | 151 | 60   | 210  |
| 60.278 | 20 | ATTGAGAGAATGCGAATGGC     | 60.185 | 20 | 268 | 19   | 286  |
| 59.518 | 20 | ATGCCATTCAAACCTCAGC      | 60.081 | 20 | 113 | 86   | 198  |
| 60.535 | 20 | TGATGGATGGATGGTCTTGA     | 59.85  | 20 | 104 | 92   | 195  |
| 60.134 | 20 | TATGTATCGTCCGCGCTGTA     | 60.259 | 20 | 255 | 633  | 887  |
| 60.042 | 20 | TAGTGCCGTATTGTTTCCCC     | 59.823 | 20 | 257 | 77   | 333  |
| 59.978 | 20 | TTGGACAAGCATCGGTTACA     | 60.111 | 20 | 215 | 575  | 789  |
| 59.971 | 20 | TGAAGTAGGAAATAAGGAGGTGT  | 57.525 | 24 | 263 | 215  | 477  |
| 60.088 | 20 | AGCGTAAACACGTCCCCATA     | 60.386 | 20 | 231 | 155  | 385  |
| 58.512 | 26 | GCTTGCAGCCTTCTGTGTTA     | 59.224 | 20 | 227 | 1    | 227  |
| 59.243 | 21 | ATAACCCACCAACCTAGCC      | 60.074 | 20 | 102 | 29   | 130  |
| 59.94  | 19 | GGAGTATCACTTGAATGCACCA   | 60     | 22 | 280 | 15   | 294  |
| 59.064 | 20 | AGGGGAGAGATGGAGGTGAT     | 59.889 | 20 | 236 | 111  | 346  |
| 60.422 | 20 | AGCTGATCCTGCGACATTG      | 59.959 | 19 | 256 | 366  | 621  |
| 60.207 | 19 | CACTCCCCCGTAAAACAAGA     | 59.964 | 20 | 272 | 370  | 641  |
| 59.955 | 20 | CCTCCGTGGACGTAGATCAT     | 59.95  | 20 | 191 | 21   | 211  |
| 60.323 | 20 | CGTTTATTCCCATCCTAAA      | 59.756 | 20 | 210 | 227  | 436  |
| 60.166 | 20 | GCCGTGTTAGCCAACGTAAT     | 60.025 | 20 | 246 | 57   | 302  |
| 60.183 | 20 | CGTAGTGGAAAGTGACAGCGA    | 60.049 | 20 | 171 | 284  | 454  |
| 59.801 | 20 | ACCTTTTGCATTGTCAGCAA     | 59.322 | 20 | 225 | 393  | 617  |
| 59.109 | 20 | CTAAGCACCACAAGCAAGCA     | 60.195 | 20 | 209 | 179  | 387  |
| 59.55  | 22 | GAGCTTCCGCATCGTTCTTA     | 60.49  | 20 | 239 | 3    | 241  |
| 59.648 | 20 | TGCATACGGAATTTTACGCAA    | 60.215 | 20 | 239 | 512  | 750  |
| 59.797 | 20 | ATTCGAAAATGCTCGTGAAA     | 58.361 | 20 | 237 | 1908 | 2144 |
| 60.038 | 20 | TGATCATTATTGGAACGCGA     | 60.035 | 20 | 209 | 82   | 290  |
| 58.923 | 21 | ATCTCCAAAACCCGACAACA     | 60.353 | 20 | 271 | 110  | 380  |
| 59.756 | 20 | TGTTATGCATTTTGACGGGA     | 59.93  | 20 | 180 | 89   | 268  |
| 59.862 | 20 | CACTTAAGGGGTTATCATTGG    | 59.604 | 22 | 209 | 99   | 307  |
| 59.95  | 20 | CATGAACGGTTTAGGATCGG     | 60.323 | 20 | 255 | 159  | 413  |
| 59.929 | 20 | TGCTGTTAATGAAGGCATCG     | 59.833 | 20 | 129 | 297  | 425  |
| 59.955 | 20 | TGGAGAGGACCTTGGAACAC     | 60.088 | 20 | 229 | 2570 | 2798 |
| 60.195 | 20 | CGTCCATTTCTGCAAATCCT     | 60.074 | 20 | 171 | 393  | 563  |
| 59.853 | 20 | AAAATTGAAGCGCCAGAAAG     | 59.474 | 20 | 269 | 101  | 369  |
| 59.904 | 22 | TGTCCGTTAAGCAGTAAAGACG   | 59.464 | 22 | 196 | 435  | 630  |
| 59.867 | 20 | CCTACTCCACCCCTTCATCA     | 59.92  | 20 | 140 | 2762 | 2901 |
| 59.875 | 20 | CGCGTGTGAAACTCTAGCAA     | 60.195 | 20 | 137 | 194  | 330  |
| 59.182 | 20 | TGAATGAATCACAAAAGGGGA    | 60.294 | 21 | 228 | 24   | 251  |
| 60.195 | 20 | GTTTTGCCATTTTACCCCT      | 60.055 | 20 | 198 | 23   | 220  |
| 59.996 | 20 | AGCTCTTCTCCACAGACGG      | 59.598 | 20 | 255 | 2154 | 2408 |
| 59.92  | 20 | TGAATCCTCCCGTTTTCTTG     | 60.044 | 20 | 227 | 176  | 402  |
| 59.691 | 20 | TCCTTGTGGTTCTACAAAATAGCA | 60.056 | 24 | 131 | 168  | 298  |
| 59.786 | 20 | CACACCCACACGCACTTTAC     | 60.072 | 20 | 187 | 386  | 572  |
| 59.878 | 20 | AGGATATTGGCGATGTACGC     | 59.951 | 20 | 263 | 445  | 707  |
| 59.116 | 20 | CCGATCTTAATCTTCGCTGC     | 59.945 | 20 | 201 | 165  | 365  |
| 59.996 | 20 | GGAATTGATGGATTTGGGA      | 59.558 | 20 | 187 | 674  | 860  |
| 59.971 | 21 | TCTCAGATCCAAACGCCTAGA    | 59.963 | 21 | 169 | 199  | 367  |
| 60.011 | 20 | TCGGGGCATAACATGTGTTA     | 59.809 | 20 | 222 | 3066 | 3287 |
| 59.851 | 20 | GAGTTGGGGGATGAACTGTG     | 60.363 | 20 | 215 | 70   | 284  |
| 60.016 | 20 | GCTCCTAAAATATTGTTTCTATT  | 59.441 | 27 | 146 | 406  | 551  |
| 59.205 | 24 | CAGCATTGCTTGCACTTCTAA    | 59.264 | 21 | 193 | 1104 | 1296 |
| 58.212 | 23 | TGTTTTGTAATTTCCCATGTTT   | 58.816 | 23 | 102 | 23   | 124  |
| 59.373 | 21 | CGAGTATTGGTTCAATAGAATTGA | 60.143 | 26 | 275 | 310  | 584  |
| 59.978 | 20 | TGTGTACCGCAGTTCAGAGG     | 59.897 | 20 | 244 | 94   | 337  |
| 60.12  | 20 | TTTGATCTACCTCGGCCATC     | 60.036 | 20 | 125 | 2321 | 2445 |

|        |    |                            |        |    |     |      |      |
|--------|----|----------------------------|--------|----|-----|------|------|
| 59.542 | 20 | ACCACCTCGGCGTAAATATG       | 59.845 | 20 | 205 | 158  | 362  |
| 59.62  | 21 | TGAAAAGTCACACGAAAACGA      | 59.352 | 21 | 181 | 239  | 419  |
| 60.131 | 20 | TGGTTGTTGTGAGGGTTTCA       | 59.976 | 20 | 245 | 21   | 265  |
| 59.989 | 20 | AGAAACACCATTGCAGTCCC       | 59.973 | 20 | 142 | 2263 | 2404 |
| 60.103 | 20 | GGGGTTATCATGGGATCAAG       | 59.055 | 20 | 262 | 275  | 536  |
| 60.048 | 20 | GAACCAGAACTACCCACCC        | 60.607 | 20 | 245 | 1282 | 1526 |
| 60.215 | 20 | ACCGGAACCGGAATTAGAAC       | 60.187 | 20 | 221 | 322  | 542  |
| 58.382 | 21 | TGTGTTTTGACAATATTTAGTGTTT  | 58.633 | 27 | 101 | 151  | 251  |
| 57.68  | 21 | GATCAGCCATCAACCCCTTA       | 59.894 | 20 | 179 | 0    | 178  |
| 59.402 | 20 | CAATCCGCACACCATATTCA       | 60.343 | 20 | 258 | 555  | 812  |
| 60.074 | 20 | GCAAATATTGGCCGTCAGAT       | 59.929 | 20 | 226 | 399  | 624  |
| 59.948 | 20 | ATGGTGGTATGGTGTGGAGG       | 60.51  | 20 | 170 | 93   | 262  |
| 59.293 | 20 | TGATGGAACGGGGATTGTAT       | 60.014 | 20 | 188 | 619  | 806  |
| 60.501 | 20 | TGCTTGGGTCTACCCTTTTG       | 60.103 | 20 | 202 | 3383 | 3584 |
| 59.903 | 20 | GTCTGGAGTCCATGAGGCTG       | 60.829 | 20 | 121 | 77   | 197  |
| 59.928 | 20 | TGACGGGATTTAGGTGTTTTG      | 59.847 | 21 | 104 | 367  | 470  |
| 59.962 | 20 | AGAACGAGAGAAATCGACGG       | 59.43  | 20 | 184 | 93   | 276  |
| 59.995 | 20 | CAGCCCCTTTTTCATTTTCA       | 60.046 | 20 | 213 | 228  | 440  |
| 59.439 | 20 | GTGGACGTCCCAGATTGTTT       | 59.827 | 20 | 164 | 3    | 166  |
| 60.894 | 20 | ACAAATAAGCCACAGCCAC        | 60     | 20 | 174 | 74   | 247  |
| 59.873 | 20 | CCCTAAGTTCCCCACTGAT        | 60.183 | 20 | 192 | 1053 | 1244 |
| 60.03  | 20 | TCGACCTACGAGAGTGAGGG       | 60.399 | 20 | 279 | 363  | 641  |
| 59.972 | 20 | CAACTTTTCCGGTCCGTTTA       | 59.968 | 20 | 276 | 714  | 989  |
| 59.969 | 20 | GGGATGAAATGAAGTGGGTG       | 60.173 | 20 | 267 | 397  | 663  |
| 59.547 | 20 | TCTTCGATGAACTCTGAAATGC     | 59.457 | 22 | 191 | 279  | 469  |
| 60.425 | 21 | CGAACCCCTTTCATTCTCCAA      | 60.044 | 20 | 278 | 293  | 570  |
| 58.974 | 20 | TTTTCTTCAAAAATGCACAATAATTI | 58.319 | 25 | 237 | 97   | 333  |
| 59.536 | 23 | CCATCGTCGCTATCACATTG       | 60.096 | 20 | 165 | 79   | 243  |
| 60.872 | 21 | TGCAACAAATGGATGGTTGT       | 59.823 | 20 | 118 | 18   | 135  |
| 59.245 | 22 | GGCATCAAAGTTGTGATCAT       | 59.954 | 21 | 111 | 3    | 113  |
| 59.945 | 20 | TCCACATTGGTTGGAGATT        | 60.173 | 20 | 247 | 26   | 272  |
| 60.212 | 20 | AATTAACGAAGTCCCACC         | 60.053 | 20 | 127 | 3669 | 3795 |
| 59.791 | 20 | TTCGGTCACATTCAATAAGGC      | 59.952 | 21 | 244 | 1047 | 1290 |
| 59.779 | 20 | TGCAAACCCATGATTGACAC       | 60.376 | 20 | 151 | 695  | 845  |
| 59.542 | 20 | CAGGCTTGACAGCAACTAACA      | 60.195 | 20 | 236 | 689  | 924  |
| 59.84  | 20 | GGATAATTTGGACAGCCAC        | 59.249 | 20 | 176 | 826  | 1001 |
| 57.062 | 26 | AAGAGGGGTGAGGGAGATGT       | 59.929 | 20 | 197 | 0    | 196  |
| 60.461 | 20 | CAACGAAATCCTGCCAATCT       | 60.074 | 20 | 179 | 65   | 243  |
| 59.985 | 20 | AACCGATCATTTATCAGCC        | 59.9   | 20 | 271 | 2715 | 2985 |
| 60.176 | 24 | GAGGCCTCGATCTTCTGTCA       | 60.497 | 20 | 104 | 11   | 114  |
| 58.943 | 20 | TACGGTTCGGTTTACGGTTT       | 59.379 | 20 | 257 | 150  | 406  |
| 58.94  | 26 | TGGGCTAATCACTCTCAGCA       | 59.547 | 20 | 178 | 11   | 188  |
| 60.222 | 20 | CAATTTGAGAATGGGATGGG       | 60.126 | 20 | 236 | 776  | 1011 |
| 60.636 | 20 | GTTGACAAAACGCACGTGAA       | 60.742 | 20 | 228 | 583  | 810  |
| 60.953 | 20 | AACATTGCGGACTTGGTACA       | 59.05  | 20 | 265 | 774  | 1038 |
| 60.053 | 20 | TGAGATGATATTATGAACTGCATC   | 59.394 | 25 | 264 | 208  | 471  |
| 60.397 | 20 | CGTGATGCAACGCATTCTTA       | 60.807 | 20 | 248 | 227  | 474  |
| 59.964 | 20 | TCCGAGAATCTGTTAGAGGAGAA    | 59.491 | 23 | 255 | 103  | 357  |
| 59.603 | 20 | CCTTTTGCAAGCACTGATGA       | 59.988 | 20 | 196 | 533  | 728  |
| 59.36  | 20 | TGAAAAGGGGTGAGAGGATG       | 60.042 | 20 | 252 | 124  | 375  |
| 60.003 | 20 | TTTTTATGCACAAGCCTCCC       | 60.074 | 20 | 275 | 51   | 325  |
| 59.843 | 20 | AACCACAGCCCTACATCTCG       | 60.134 | 20 | 263 | 344  | 606  |
| 60.249 | 20 | TCATTTGTTCCACTTCATTTGG     | 59.839 | 22 | 250 | 4339 | 4588 |
| 59.794 | 20 | GCGTGGCCTAAGTTGTCCTA       | 60.27  | 20 | 257 | 645  | 901  |
| 60.124 | 20 | TAGTGAAGCAGCTGACGTGG       | 60.199 | 20 | 144 | 65   | 208  |
| 59.982 | 20 | GGTTGATGGATCTGCGTTTT       | 59.939 | 20 | 224 | 68   | 291  |
| 59.927 | 20 | TCAAAAATATCCTCGCTGCAT      | 59.696 | 21 | 128 | 4    | 131  |
| 59.773 | 20 | AGAGTTGGGGATCTGCAAAA       | 59.67  | 20 | 211 | 103  | 313  |

|        |    |                          |        |    |     |      |      |
|--------|----|--------------------------|--------|----|-----|------|------|
| 59.917 | 20 | ACCGTCTCGACGAAAGCTAA     | 60.015 | 20 | 224 | 343  | 566  |
| 60.257 | 20 | TGAGGCATGCAAAGATGAAG     | 59.948 | 20 | 234 | 199  | 432  |
| 60.088 | 20 | TTGCGTATGATAGGGTTAGCA    | 58.342 | 21 | 240 | 26   | 265  |
| 60.081 | 20 | CATGCTACATTCCGTGATGG     | 59.948 | 20 | 201 | 592  | 792  |
| 60.081 | 20 | TTTCTTATTTCCCGGCTCCT     | 60.034 | 20 | 137 | 553  | 689  |
| 59.776 | 20 | AAAGAGGAAGAGGGAGGCAG     | 59.95  | 20 | 238 | 644  | 881  |
| 59.767 | 20 | AATCCTTGCTCTGGCTGCTA     | 60.118 | 20 | 259 | 3    | 261  |
| 59.902 | 20 | GGGATGTTTGTACCTGAATGC    | 59.307 | 21 | 121 | 3    | 123  |
| 59.96  | 20 | ATAAAAATGGCACCTGGCTG     | 59.96  | 20 | 220 | 158  | 377  |
| 59.577 | 20 | CAAGAGGCAATCACGTTGAA     | 59.84  | 20 | 232 | 281  | 512  |
| 60.472 | 20 | GTTCTTGCGTGGCATTATT      | 59.967 | 20 | 185 | 1027 | 1211 |
| 59.318 | 27 | TCAAGAGCAAGCAAAGATCTAAA  | 59.7   | 24 | 164 | 6    | 169  |
| 59.938 | 20 | TACTGACTTGTTGTGCGGGA     | 60.301 | 20 | 271 | 381  | 651  |
| 60.165 | 23 | ACGGTCTGGTTTCAGTTTCG     | 60.149 | 20 | 146 | 769  | 914  |
| 59.028 | 20 | GGAACCGGCTAAGATGATGA     | 60.036 | 20 | 227 | 244  | 470  |
| 57.369 | 25 | CCCGCATGTCATAACCACTA     | 59.42  | 20 | 274 | 268  | 541  |
| 60.096 | 20 | CCAATGGCGATATTTCTGT      | 59.784 | 20 | 213 | 168  | 380  |
| 60.049 | 20 | TGGTGTCTATGTATGGGTGGA    | 58.709 | 21 | 210 | 651  | 860  |
| 60.668 | 20 | TGGACATAAATTGTAGTGCCAAA  | 59.415 | 23 | 176 | 667  | 842  |
| 60     | 20 | ATAAATGCCTACGTCCACGG     | 59.845 | 20 | 231 | 151  | 381  |
| 59.935 | 20 | CACCCTCCTTCTCAAACAA      | 60.081 | 20 | 277 | 404  | 680  |
| 59.576 | 21 | AACAAAGGGGTTGGAGAAT      | 59.668 | 20 | 232 | 3177 | 3408 |
| 60.183 | 22 | CGCGTGCTCCTAACTCTTTC     | 60.154 | 20 | 118 | 29   | 146  |
| 60.386 | 20 | AAATGGTTGTTTGTCCCAA      | 60.066 | 20 | 203 | 146  | 348  |
| 59.923 | 20 | TAGTCAGAACTTGCATGCCG     | 60.011 | 20 | 171 | 46   | 216  |
| 59.989 | 20 | TCTCTCTCTTTTGGTAGGTCAATC | 60.165 | 25 | 262 | 144  | 405  |
| 57.139 | 20 | TAGAATGTTCCGAAATGGGC     | 59.901 | 20 | 176 | 23   | 198  |
| 60.051 | 20 | TGTGAAGTGTTGCTGATGTGA    | 58.855 | 21 | 220 | 1168 | 1387 |
| 59.95  | 20 | GCGGATCCCCCTTAATTTT      | 60.102 | 19 | 280 | 302  | 581  |
| 59.666 | 20 | TGAAAATTAGAAACAGCACATTTG | 60.051 | 25 | 272 | 767  | 1038 |
| 60.088 | 20 | TTTATCAGGGAAGGACGTGG     | 59.926 | 20 | 165 | 3064 | 3228 |
| 59.78  | 20 | TCCGGACGGAAGATTACAC      | 59.933 | 20 | 251 | 9    | 259  |
| 60.045 | 20 | CTGTTATGTCGTGTCCGGTG     | 60.025 | 20 | 244 | 1066 | 1309 |
| 59.989 | 20 | CGATTTGGCAAGGAAGAAAG     | 59.817 | 20 | 183 | 430  | 612  |
| 60.088 | 20 | TGGCGCCTTCTATTCTCCTA     | 59.938 | 20 | 151 | 342  | 492  |
| 59.23  | 20 | CCCGTACAATATCAACCACAA    | 58.28  | 21 | 180 | 61   | 240  |
| 61.072 | 20 | GAAGTGTTATGCGTTTTGACAAT  | 58.249 | 23 | 235 | 1789 | 2023 |
| 60.103 | 20 | ATCTCACGATATCCCGCATC     | 59.884 | 20 | 235 | 101  | 335  |
| 60.12  | 20 | GAGGAATCTTCCCAATTCACA    | 58.97  | 21 | 277 | 14   | 290  |
| 59.766 | 20 | TGAGACGAAACTCATGCGAC     | 59.992 | 20 | 246 | 48   | 293  |
| 60.029 | 21 | TCCACATATGCAAGATTTTCCAGC | 60.103 | 22 | 125 | 50   | 174  |
| 60.11  | 20 | ATGAGCACCAAATCTTTGCC     | 60.081 | 20 | 153 | 203  | 355  |
| 59.829 | 20 | ACGGATATGCCCTTGTATGC     | 59.813 | 20 | 249 | 23   | 271  |
| 60.812 | 20 | AATCCACACCCGAAATATGC     | 59.651 | 20 | 157 | 375  | 531  |
| 60.008 | 19 | CAAATGGTTTGGGGTTTTTG     | 60.06  | 20 | 271 | 116  | 386  |
| 59.245 | 20 | TCGGCATAGATGACTTAAAAGC   | 58.544 | 22 | 205 | 1454 | 1658 |
| 60.134 | 20 | CAACCGAAGCAATAAGAGGG     | 59.702 | 20 | 266 | 6    | 271  |
| 58.421 | 21 | GCAACCAACATCAACGTGAC     | 60.016 | 20 | 251 | 553  | 803  |
| 59.576 | 27 | AGAAAACCTACCCTGCCTCC     | 60.628 | 20 | 272 | 112  | 383  |
| 60.375 | 20 | TTTAAGGGTTATCACCTGATTTTC | 57.757 | 24 | 211 | 830  | 1040 |
| 59.972 | 20 | GTTGCGTGAAGATTGGAGGA     | 60.05  | 20 | 225 | 31   | 255  |
| 59.964 | 20 | AACCAAGATCAGGCTGCAAT     | 59.7   | 20 | 171 | 669  | 839  |
| 60.43  | 20 | CTTAGGGGACACCCAAGTGA     | 59.959 | 20 | 276 | 382  | 657  |
| 60.46  | 20 | GACTCGCAAAGACTTGAGGG     | 59.989 | 20 | 153 | 34   | 186  |
| 59.762 | 20 | GTGACGTGCTGGTTGTCCTA     | 59.751 | 20 | 225 | 1027 | 1251 |
| 57.559 | 23 | TGACAATTGCAAATATGGCG     | 60.474 | 20 | 217 | 3    | 219  |
| 59.96  | 20 | GCTGCATCGATGTATTGTGG     | 60.104 | 20 | 130 | 1998 | 2127 |
| 59.813 | 20 | GAATCTTGTCCGGATCAAA      | 60.155 | 20 | 259 | 692  | 950  |

|        |    |                         |        |    |     |      |      |
|--------|----|-------------------------|--------|----|-----|------|------|
| 60.159 | 20 | TCATTCTCGGGCAAAAATTC    | 60.016 | 20 | 271 | 52   | 322  |
| 59.749 | 26 | GTCGCTACAAGCAGTCACCA    | 60.056 | 20 | 264 | 3    | 266  |
| 60.117 | 20 | GCGACTTTTCAGTTTCCAGC    | 60     | 20 | 208 | 749  | 956  |
| 59.837 | 20 | CATTTGCAGATGCTGATGCT    | 59.979 | 20 | 268 | 1014 | 1281 |
| 58.863 | 20 | GCGTGTGTCTGAGGATGTTT    | 58.727 | 20 | 181 | 17   | 197  |
| 59.948 | 20 | GCAAAATACCCTGAGTGGGA    | 59.933 | 20 | 153 | 307  | 459  |
| 59.429 | 20 | TGGAGGTGCGAACTCAATTATGA | 59.569 | 22 | 157 | 209  | 365  |
| 60.246 | 20 | ATTCATCAAACCCAGTTCGC    | 59.939 | 20 | 229 | 20   | 248  |
| 59.975 | 20 | ATAGCCAAGGCAGCTCTCAA    | 60.118 | 20 | 231 | 1867 | 2097 |
| 59.82  | 20 | ATGTGAACGAAGTACCCCGA    | 60.375 | 20 | 187 | 263  | 449  |
| 60.582 | 20 | GAAAAACGCTAGGCGGATCT    | 60.711 | 20 | 214 | 23   | 236  |
| 58.931 | 20 | TCACACTAGTGGCATCGCTC    | 60.016 | 20 | 203 | 212  | 414  |
| 59.269 | 21 | AAAGCGGATTTTAAACCCT     | 60.095 | 20 | 235 | 2183 | 2417 |
| 57.192 | 22 | TGGGACATTTTAAATTTGCCT   | 59.728 | 22 | 232 | 1480 | 1711 |
| 61.489 | 19 | TTTTTCGTGGATATAATTGGGC  | 60.044 | 22 | 175 | 64   | 238  |
| 59.528 | 20 | CACCTCGAGCTTCGCTTCTA    | 60.807 | 20 | 263 | 4779 | 5041 |
| 60.088 | 20 | GAAGGGAAAGAACCTTTGGG    | 59.912 | 20 | 252 | 1288 | 1539 |
| 59.996 | 19 | TGTTGAATCACATGTCCCGT    | 59.812 | 20 | 200 | 271  | 470  |
| 60.059 | 20 | GCATGCATCTGTCCGATCTA    | 59.788 | 20 | 173 | 334  | 506  |
| 59.569 | 20 | GAAATAAGGAGTTGTTATGAAG  | 60.434 | 25 | 134 | 2768 | 2901 |
| 59.031 | 20 | CATGTTCTAGGCGTTTCGGT    | 60.132 | 20 | 268 | 81   | 348  |
| 59.847 | 20 | TTTTACTTTTGCCGAATTGTC   | 59.111 | 21 | 118 | 290  | 407  |
| 59.915 | 27 | TAAATTTTCGAACGCCTGC     | 60.205 | 20 | 129 | 212  | 340  |
| 60.118 | 20 | GAAAGTTCGGATTTTTGGCA    | 60.053 | 20 | 244 | 98   | 341  |
| 57.756 | 24 | AGCTCCAATAGTTGCTTCGG    | 59.476 | 20 | 192 | 0    | 191  |
| 60.132 | 20 | ACTGCGCACACTTTGTTTTG    | 59.951 | 20 | 191 | 2168 | 2358 |
| 60.035 | 20 | AGCCGATTTCTTTCACCTCC    | 60.578 | 20 | 226 | 35   | 260  |
| 59.03  | 20 | AAAATCAAAGGCCCAACAATG   | 59.801 | 20 | 142 | 2168 | 2309 |
| 59.948 | 20 | TGGCGTCTGGTAAATCAACA    | 60.111 | 20 | 247 | 1343 | 1589 |
| 59.688 | 20 | GATTATGAATCGGGCGAGAA    | 60.001 | 20 | 242 | 1702 | 1943 |
| 59.844 | 20 | TGCATTGCCATGTTACTTTCA   | 60.126 | 21 | 167 | 146  | 312  |
| 60.103 | 20 | ATCTCATACGTTGCCAACCC    | 59.82  | 20 | 238 | 456  | 693  |
| 59.799 | 20 | CAGCAACCAAGAAGGGATGT    | 60.111 | 20 | 277 | 2010 | 2286 |
| 60.388 | 20 | AAAAGGGAGAAAGAGGCCAA    | 60.18  | 20 | 227 | 4090 | 4316 |
| 60.22  | 20 | GGCCGGTTAAAGGAGAAAAG    | 60.068 | 20 | 195 | 21   | 215  |
| 59.9   | 25 | GCGGAAATTAACCACAACCA    | 60.732 | 20 | 147 | 8    | 154  |
| 60.042 | 20 | CGCGTTACGAATCCAAGTTT    | 60.131 | 20 | 160 | 639  | 798  |
| 59.74  | 20 | CCTTCTCGAGCACTGATTCC    | 59.95  | 20 | 221 | 81   | 301  |
| 60.003 | 20 | GCGGAATCACATTAGCATT     | 59.929 | 20 | 230 | 268  | 497  |
| 59.982 | 20 | TCTCTCTTTTGGTTGGTGAAGA  | 58.955 | 22 | 183 | 210  | 392  |
| 60.034 | 20 | GGACGCATCAGGTATAAAAGGA  | 60.332 | 22 | 240 | 6    | 245  |
| 59.968 | 20 | CGCATCTGATTTTTGCAATC    | 59.261 | 20 | 258 | 1598 | 1855 |
| 59.896 | 21 | GAAGAAACCCCTTTTTCTTCTCT | 59.682 | 24 | 247 | 593  | 839  |
| 59.615 | 20 | ATCATCACCACAACCTCACCG   | 59.393 | 20 | 104 | 333  | 436  |
| 59.813 | 20 | TCGGATGGTTTATGGATGGT    | 60.014 | 20 | 274 | 295  | 568  |
| 60.005 | 20 | TGTTCATACGCATTGGAAAAA   | 59.063 | 21 | 156 | 188  | 343  |
| 59.752 | 20 | GAACTCCCCTCTCTCTCGGT    | 59.807 | 20 | 203 | 76   | 278  |
| 59.449 | 20 | ACGCCCCGTATTTTGAATTT    | 60.547 | 20 | 278 | 1431 | 1708 |
| 59.31  | 22 | GTTTGCCTTGCATTTGATT     | 59.945 | 20 | 161 | 1952 | 2112 |
| 59.476 | 20 | CTCCACCAAGCTTACACAACA   | 58.837 | 21 | 177 | 608  | 784  |
| 59.978 | 20 | GCGTTGTGCTTTCTTTGGAT    | 60.118 | 20 | 222 | 267  | 488  |
| 58.987 | 22 | ATAGCCATTGGCCTAGCCTT    | 60.082 | 20 | 278 | 1638 | 1915 |
| 60.177 | 20 | TTGCTTTTCCGAATCTGTGA    | 59.395 | 20 | 210 | 581  | 790  |
| 59.238 | 21 | GCGTAGTCTTGTCTTTCGCC    | 60.022 | 20 | 191 | 249  | 439  |
| 60.683 | 20 | CCCCTAAACCGTAAATCAAGC   | 59.851 | 21 | 207 | 2    | 208  |
| 60.088 | 20 | TGAAGTTGATCAAGCAAGGG    | 58.847 | 20 | 201 | 1187 | 1387 |
| 59.853 | 20 | AACATTAATGGCGTCAAGG     | 59.96  | 20 | 264 | 4526 | 4789 |
| 58.941 | 21 | CGATCGTAATTGATCTACGTCCA | 61.213 | 23 | 266 | 91   | 356  |

|        |    |                          |        |    |     |      |      |
|--------|----|--------------------------|--------|----|-----|------|------|
| 59.847 | 21 | GTTGGTGCCAAAATTGCTCT     | 60.118 | 20 | 226 | 2    | 227  |
| 59.647 | 20 | ATTACGAGCCACGGCTACAG     | 60.292 | 20 | 228 | 72   | 299  |
| 59.984 | 20 | ATTCACATTTTCCCAGTCGC     | 59.939 | 20 | 235 | 1081 | 1315 |
| 59.933 | 20 | GAAAAGCCGAATGCAGAAAG     | 59.96  | 20 | 170 | 1118 | 1287 |
| 60.291 | 20 | CGGTTATCACCGAATCGC       | 60.033 | 18 | 280 | 97   | 376  |
| 60.03  | 20 | GGCAGTACGTGTGCGATAGA     | 59.895 | 20 | 105 | 80   | 184  |
| 59.305 | 20 | TTCCACAAGTGAAGCAACG      | 59.881 | 20 | 260 | 3659 | 3918 |
| 60     | 20 | AAGGCTATCGTTGCTTTCCC     | 60.582 | 20 | 149 | 378  | 526  |
| 60.147 | 20 | TACAAGGCCCGACTTGAGTT     | 59.734 | 20 | 246 | 10   | 255  |
| 60.005 | 20 | CTTTTGCACCTTTTTGCCTC     | 59.861 | 20 | 230 | 474  | 703  |
| 59.789 | 20 | ACCCTCACCTCCCCTCAC       | 59.888 | 18 | 248 | 13   | 260  |
| 59.875 | 20 | GGAACTCCCATAACTGCAA      | 59.933 | 20 | 181 | 388  | 568  |
| 60.492 | 20 | TTACGTAAAAATGGGTTATTATTT | 57.411 | 26 | 164 | 491  | 654  |
| 60.791 | 20 | AACGTGACATGTTGCTGAGG     | 59.751 | 20 | 200 | 838  | 1037 |
| 58.759 | 21 | TCCGATGTGGGATCATAACA     | 59.732 | 20 | 119 | 358  | 476  |
| 59.669 | 27 | ATTTCGAAGATCAACGGACG     | 60.074 | 20 | 140 | 9    | 148  |
| 60.163 | 20 | AAGGAGGTGTTATGAAGGGATT   | 58.028 | 22 | 249 | 120  | 368  |
| 60.134 | 20 | CCCCATGTAAATAGCCGTTG     | 60.202 | 20 | 254 | 24   | 277  |
| 59.903 | 22 | TGATTTGTTGGGGCTTTAGG     | 59.931 | 20 | 251 | 471  | 721  |
| 59.948 | 20 | AAAACAAGAATTCGGCATCG     | 60.074 | 20 | 182 | 283  | 464  |
| 60.009 | 20 | CCACCATCTTGTAGGTGCGT     | 60.134 | 20 | 123 | 1808 | 1930 |
| 59.335 | 22 | TGAGTTTGCATCTAAGGAGGTG   | 59.378 | 22 | 269 | 503  | 771  |
| 60.156 | 20 | TGAGGATACTCGATTTACGG     | 60.081 | 21 | 135 | 362  | 496  |
| 59.83  | 20 | GAGAAGGGTTATCACTTGAATAG  | 57.473 | 24 | 267 | 87   | 353  |
| 59.898 | 20 | ATTTCAAGGTTGGGCATCTG     | 59.933 | 20 | 243 | 2703 | 2945 |
| 60.817 | 20 | CGTTTAAGCCAATATCATTGTTCA | 60.247 | 24 | 279 | 477  | 755  |
| 59.767 | 20 | TTTCAACCTCGCTATCGCTT     | 59.982 | 20 | 182 | 269  | 450  |
| 60.005 | 20 | CATGCGCATTTATGAGTCCA     | 60.632 | 20 | 212 | 120  | 331  |
| 59.405 | 20 | GAGGAAAACAGAGGCTGTTCA    | 59.463 | 21 | 138 | 84   | 221  |
| 59.96  | 20 | TCGAAGTTTGGTGTGGTGA      | 60.128 | 20 | 197 | 49   | 245  |
| 60.255 | 20 | CCACGTTAGGCTCAGGAGTG     | 60.843 | 20 | 103 | 4    | 106  |
| 57.853 | 21 | TCGTATCGCTTCCATGTTGA     | 60.22  | 20 | 227 | 5    | 231  |
| 60.278 | 20 | TTCAACATTTCTTGCCAAA      | 59.133 | 20 | 201 | 339  | 539  |
| 59.837 | 20 | TTCTTTTGGGGCAGTGAATC     | 60.051 | 20 | 195 | 577  | 771  |
| 59.685 | 20 | TTGTTTAACTCCCCTAATGCAAA  | 59.937 | 24 | 208 | 25   | 232  |
| 60.257 | 20 | TGTTTCCATTTCCATGGTACG    | 60.602 | 21 | 261 | 2248 | 2508 |
| 60.025 | 20 | GATGATAGAAGGGGGCATGA     | 59.854 | 20 | 279 | 1905 | 2183 |
| 60.049 | 20 | AATCCAGCAATTTGCCTTGTA    | 59.6   | 21 | 277 | 2502 | 2778 |
| 60.246 | 20 | CAAAGTCCGGCGTAGAATGT     | 60.132 | 20 | 220 | 344  | 563  |
| 60.02  | 20 | TTGAGTCCCAAAACATGCAA     | 60.088 | 20 | 278 | 773  | 1050 |
| 59.017 | 22 | CATGGCATGCACATTTTAGC     | 60.103 | 20 | 224 | 1266 | 1489 |
| 58.547 | 20 | GAACTCGGATCTTTCACCCA     | 60.05  | 20 | 198 | 754  | 951  |
| 58.277 | 20 | TGGTGGGAGCCTATAGCAAC     | 60.096 | 20 | 254 | 18   | 271  |
| 59.813 | 20 | GCATTGGGACACCTAAGCAT     | 59.962 | 20 | 225 | 529  | 753  |
| 60.006 | 20 | CAATATTACAATGGCCAAGAGTC  | 57.725 | 23 | 185 | 62   | 246  |
| 59.401 | 20 | TGAGAACTCCCTTGGGTGA      | 60.624 | 20 | 128 | 314  | 441  |
| 59.566 | 20 | TGGTAGGTTTGTGTTAGGCC     | 60.223 | 21 | 202 | 4    | 205  |
| 58.497 | 21 | CCATGTTAAAACGGGCACAT     | 60.617 | 20 | 106 | 37   | 142  |
| 59.871 | 20 | TGAAACGGACAAACGATGAA     | 60.088 | 20 | 146 | 159  | 304  |
| 59.866 | 20 | AAAAGGGAAAAACCCTCAGC     | 59.571 | 20 | 150 | 410  | 559  |
| 59.982 | 20 | AAAATACCCTTCCCCGAATG     | 60.013 | 20 | 177 | 83   | 259  |
| 59.817 | 20 | AAGGGTGATGTCGCACTTCT     | 59.727 | 20 | 279 | 43   | 321  |
| 59.971 | 20 | GGATGATGCCTTCAAGGGTA     | 59.894 | 20 | 236 | 460  | 695  |
| 60.578 | 20 | ACACCCAACCTCAGTCAAGGC    | 60.159 | 20 | 237 | 587  | 823  |
| 59.956 | 24 | CATGCTAGAGGTGACGTTTTG    | 58.445 | 21 | 231 | 1631 | 1861 |
| 59.55  | 20 | TTTTGTCTTTTGGGATTCCG     | 59.91  | 20 | 207 | 2087 | 2293 |
| 59.81  | 20 | ATCCAACCCATTTGTGAAAA     | 60.029 | 20 | 279 | 332  | 610  |
| 60.002 | 20 | CTAACATCGGAACTTGCCGT     | 60.132 | 20 | 259 | 592  | 850  |

|        |    |                           |        |    |     |      |      |
|--------|----|---------------------------|--------|----|-----|------|------|
| 60.103 | 21 | TGGTGTACAGAGTGCATGTGA     | 58.719 | 21 | 279 | 174  | 452  |
| 59.246 | 27 | GCGAATATAACCCGCTCTGA      | 60.196 | 20 | 219 | 44   | 262  |
| 60.134 | 20 | CCTTGGGCGTTGATCTTAAA      | 60.067 | 20 | 119 | 99   | 217  |
| 60.457 | 23 | CAGGAGAGATAGGGGGAAGG      | 60.023 | 20 | 263 | 18   | 280  |
| 59.962 | 22 | CATCATCACCTGATTGACGC      | 60.08  | 20 | 261 | 42   | 302  |
| 60.024 | 21 | GCGCAGATCTAATGGTCCAG      | 60.765 | 20 | 179 | 204  | 382  |
| 58.81  | 24 | AGGTGGCAACATAATCAGCC      | 59.962 | 20 | 149 | 9    | 157  |
| 59.962 | 20 | TTTCGCACGCATTAAATCAG      | 59.842 | 20 | 167 | 335  | 501  |
| 60     | 20 | TGTGTGATGTTGGAGTTGGG      | 60.416 | 20 | 229 | 52   | 280  |
| 59.813 | 20 | TTCCACGTTTCGTGTTTCGATA    | 60.111 | 20 | 232 | 239  | 470  |
| 60.081 | 20 | TTATATTTTCAGGGGGAGGGG     | 59.971 | 20 | 180 | 250  | 429  |
| 59.874 | 20 | TTCTTCACTCCCCCTCTCT       | 60.186 | 20 | 221 | 1849 | 2069 |
| 59.619 | 27 | TTCTTATTTCTCACTTTAAGACCAT | 58.093 | 27 | 216 | 451  | 666  |
| 60.119 | 20 | AAAAACCCTTCTGAAACCCG      | 60.324 | 20 | 171 | 414  | 584  |
| 59.83  | 20 | AGGCGATTTTGGGTGTTATG      | 59.823 | 20 | 251 | 71   | 321  |
| 59.486 | 20 | ATGGGATTCACCTGCCTTCT      | 60.853 | 20 | 138 | 8    | 145  |
| 60.088 | 20 | TAATTGTTTCGGGCTAACGG      | 59.958 | 20 | 208 | 200  | 407  |
| 60.517 | 20 | ACCACCAACATCACCAAAT       | 59.95  | 20 | 219 | 57   | 275  |
| 59.559 | 20 | GGGCGTTTTATTTCCCATCT      | 60.15  | 20 | 243 | 157  | 399  |
| 60.081 | 20 | TCATTATACGGGCCCAAGAC      | 59.784 | 20 | 231 | 44   | 274  |
| 59.756 | 20 | TCGCCTAACTTATGCAATGAAA    | 59.753 | 22 | 157 | 230  | 386  |
| 58.03  | 20 | TACATCGTCCACCCCATTTT      | 60.051 | 20 | 273 | 147  | 419  |
| 59.55  | 20 | TCGTGTGGTTTTGAAGCAAG      | 59.881 | 20 | 238 | 264  | 501  |
| 58.402 | 23 | ACCACCGGCTAAACCAGTC       | 59.981 | 19 | 208 | 17   | 224  |
| 59.864 | 20 | GATATGATTTTGC GCGGAGT     | 60.067 | 20 | 230 | 28   | 257  |
| 59.783 | 20 | CAATTTTCGGCAGCATTACA      | 59.702 | 20 | 237 | 351  | 587  |
| 60.152 | 20 | TTTTTCCAAAACACCCCTA       | 59.288 | 20 | 202 | 1262 | 1463 |
| 60.212 | 20 | TAGAGTTCCAAGAGGGGGCT      | 60.204 | 20 | 209 | 4    | 212  |
| 60.286 | 20 | GGCAACAAGAAGAAAATCGC      | 59.829 | 20 | 253 | 390  | 642  |
| 59.837 | 20 | CACTACTCATCATCCTCTTTTCTC  | 57.758 | 25 | 144 | 904  | 1047 |
| 60.448 | 20 | CTGCAGACGTTTCAAGGTGA      | 60.025 | 20 | 211 | 736  | 946  |
| 59.126 | 23 | TCATTTATGAAGCAAGGGGG      | 59.894 | 20 | 105 | 33   | 137  |
| 60.386 | 20 | AAGCTTGGGCTTTCTTCTCC      | 59.962 | 20 | 235 | 3881 | 4115 |
| 59.871 | 20 | CAGCGAGATCTTCGTCCATT      | 60.362 | 20 | 131 | 126  | 256  |
| 59.963 | 21 | TGGCGTCTGTTCCCTTAATC      | 60.074 | 20 | 198 | 23   | 220  |
| 59.923 | 20 | CATGCCAACCCGTCTTATTT      | 59.823 | 20 | 238 | 2420 | 2657 |
| 59.079 | 20 | GGTGGAGCAAAATCTGAAA       | 60.051 | 20 | 217 | 40   | 256  |
| 59.845 | 20 | CAAGCAAATTGTGGCTCTGA      | 59.988 | 20 | 227 | 500  | 726  |
| 59.682 | 20 | GATCGGTGAAGATTGGAGGA      | 60.011 | 20 | 210 | 11   | 220  |
| 60.195 | 20 | GCGAAAGACATACGGGGTTA      | 59.96  | 20 | 250 | 44   | 293  |
| 60.448 | 20 | CAGAGCGCACTCGAAGAGTA      | 59.49  | 20 | 276 | 63   | 338  |
| 60.603 | 20 | ATCACGTGCACCGTCATCTA      | 60.144 | 20 | 185 | 320  | 504  |
| 59.807 | 20 | CCACGAGATCAAGAATGGAA      | 58.643 | 20 | 250 | 1    | 250  |
| 60.195 | 20 | CCCGTTTTCGGAGTTTGTCTA     | 60.103 | 20 | 233 | 1097 | 1329 |
| 59.174 | 20 | TTCAGCCCACATATGTTCCA      | 59.924 | 20 | 104 | 36   | 139  |
| 61.031 | 20 | ACCCAACCCACGCAATAAT       | 60.066 | 19 | 272 | 20   | 291  |
| 58.038 | 20 | ACAATTCCACGGAACCTG        | 59.966 | 20 | 248 | 773  | 1020 |
| 59.411 | 23 | TCCATGGATCTGGATCATCA      | 59.806 | 20 | 249 | 117  | 365  |
| 57.929 | 20 | TTGGGTTGCTGAAAATAGGC      | 60.074 | 20 | 237 | 27   | 263  |
| 59.696 | 20 | AGGCCCGAGCTAAAAACATT      | 60.095 | 20 | 146 | 62   | 207  |
| 59.848 | 23 | TGCCTAGGTGGCTACTATGTGA    | 59.791 | 22 | 169 | 30   | 198  |
| 60.173 | 20 | TTGTGATTCTGAAAAATAGATCGT  | 58.337 | 25 | 204 | 321  | 524  |
| 60.134 | 20 | ATCGAAAGACGAACACGCTT      | 59.882 | 20 | 220 | 585  | 804  |
| 59.823 | 20 | GAAGATACTTCATGCTTGTA AAC  | 58.527 | 25 | 185 | 358  | 542  |
| 60.237 | 20 | TGTGGGACAAGCAAATGAAA      | 60.088 | 20 | 280 | 466  | 745  |
| 59.9   | 20 | AACATGCACTTTCATTTCGTGTT   | 59.545 | 22 | 219 | 59   | 277  |
| 60.336 | 20 | AAAGGTAGCGGGGTCTTTGT      | 59.998 | 20 | 117 | 334  | 450  |
| 60.162 | 20 | GCAAGGTTTCATGGAGTGGTT     | 59.973 | 20 | 233 | 202  | 434  |

|        |    |                           |        |    |     |      |      |
|--------|----|---------------------------|--------|----|-----|------|------|
| 59.64  | 23 | CCTAACCCCACTAATGACCC      | 58.24  | 20 | 143 | 3    | 145  |
| 57.833 | 20 | GGTTGACGTTGGATCTGCTT      | 60.119 | 20 | 214 | 146  | 359  |
| 59.933 | 20 | ATTTGGTCTCTTCCCCTCGT      | 59.935 | 20 | 269 | 680  | 948  |
| 59.797 | 20 | CATGTTCCGAATCTTCGTCC      | 60.461 | 20 | 171 | 4    | 174  |
| 59.938 | 20 | TGTGGCCCGTTTCTTATTTT      | 59.938 | 20 | 177 | 28   | 204  |
| 60.015 | 20 | CGCATATAGCTCGACTGCAA      | 60.14  | 20 | 136 | 269  | 404  |
| 60.117 | 20 | AAACCCTTGAAACAAATAAAATC/  | 58.132 | 24 | 259 | 45   | 303  |
| 59.539 | 22 | TGAGTTGGTGGAGGGTTTTTC     | 59.943 | 20 | 218 | 102  | 319  |
| 59.671 | 21 | TCGAATTGAAGTTAAAGCTTAGTT  | 58.353 | 25 | 132 | 275  | 406  |
| 59.161 | 20 | GAAACGAGTTCCGAAATGGA      | 60.051 | 20 | 220 | 47   | 266  |
| 60.081 | 20 | TGAAGCCTTTAAATGGGCAC      | 60.074 | 20 | 204 | 377  | 580  |
| 60.591 | 20 | CACCCATTCAATCCCTCATT      | 59.605 | 20 | 136 | 198  | 333  |
| 59.803 | 20 | GGACACAACAGAGGGGAGAA      | 60.088 | 20 | 237 | 352  | 588  |
| 59.962 | 20 | GGCGAATGCTATGCATTTTT      | 60.068 | 20 | 260 | 683  | 942  |
| 59.934 | 20 | TTCTTGGTGGCGGTAGGTAG      | 60.125 | 20 | 178 | 223  | 400  |
| 60.284 | 20 | GGTGTGGCCGAAAGTTTTA       | 59.975 | 20 | 107 | 0    | 106  |
| 59.91  | 20 | TGCTCTCTCATTGTAATCTCTCTCA | 59.688 | 25 | 153 | 836  | 988  |
| 60.017 | 20 | ATTGTTGTGGTGCGTTTTCA      | 60.011 | 20 | 236 | 415  | 650  |
| 59.927 | 20 | TCCGATTGACACCTACACCA      | 59.96  | 20 | 167 | 1163 | 1329 |
| 59.967 | 20 | GAGGGGGTGACCACAATCTA      | 59.779 | 20 | 229 | 211  | 439  |
| 60.045 | 20 | TTCACGCAACACAAACCCTA      | 60.149 | 20 | 240 | 131  | 370  |
| 58.359 | 20 | TTGGGGGAGGGTTTAGGTAG      | 60.172 | 20 | 121 | 12   | 132  |
| 60.065 | 20 | AAAGAGAGCTGCAAATGGGA      | 59.955 | 20 | 152 | 44   | 195  |
| 59.894 | 20 | ATTGGGGAGGATAAAGGACG      | 60.145 | 20 | 140 | 37   | 176  |
| 60.032 | 20 | CCTGGAAACAAAGAAGCACC      | 59.711 | 20 | 275 | 706  | 980  |
| 59.982 | 20 | CAGAGCCCTATTCATGCGAT      | 60.199 | 20 | 158 | 12   | 169  |
| 60.163 | 20 | CTCCAGCAATTCAGCTTCC       | 59.955 | 20 | 174 | 73   | 246  |
| 59.668 | 20 | CACTTAAGGGGGTTATTAGTGGA/  | 59.692 | 24 | 150 | 1203 | 1352 |
| 59.816 | 20 | GCTGCTGTATTAACCGAACG      | 59.793 | 21 | 258 | 510  | 767  |
| 60.13  | 21 | TAAGGGTTATCACCGGATCG      | 59.778 | 20 | 231 | 8    | 238  |
| 59.78  | 23 | TGCTTTAATCCATACAAAGACCC   | 59.407 | 23 | 128 | 14   | 141  |
| 60.454 | 25 | ACGCCTGCTTGAGAGATTTT      | 59.08  | 20 | 220 | 8    | 227  |
| 59.947 | 20 | TGAGGGCAGTCAAAAATTCG      | 61.137 | 20 | 131 | 86   | 216  |
| 60.062 | 22 | TGGTTGAAACCAGATCGAAA      | 59.097 | 20 | 275 | 1348 | 1622 |
| 57.122 | 24 | GTCCACGGGAGAGAATGAGA      | 60.199 | 20 | 178 | 5    | 182  |
| 59.267 | 21 | CCCCAAACAACGAAATGAAT      | 59.662 | 20 | 193 | 221  | 413  |
| 59.738 | 21 | CGAGGAAGAAAATGGAAGCA      | 60.323 | 20 | 178 | 194  | 371  |
| 59.154 | 23 | TTGTGGCATTCTTGACCAA       | 60.088 | 20 | 177 | 231  | 407  |
| 59.992 | 20 | ACGGTCCCATCAGCAATAC       | 59.82  | 20 | 262 | 732  | 993  |
| 60.05  | 20 | TTCCCCTCCACCCTCTATTT      | 59.761 | 20 | 269 | 334  | 602  |
| 59.83  | 20 | TTGTAATCGGACCGGTTTTTC     | 59.801 | 20 | 217 | 380  | 596  |
| 57.782 | 25 | CACCTTCTGGACTCAGACGA      | 58.964 | 20 | 267 | 250  | 516  |
| 57.515 | 20 | GAGCGCATTCTGAAGAGTAGC     | 60.265 | 20 | 256 | 69   | 324  |
| 58.404 | 20 | ATATCGGCCGTCAGATTGAG      | 60.059 | 20 | 216 | 325  | 540  |
| 59.726 | 20 | ATAGGGTCATGCGTGTGTA       | 59.992 | 20 | 169 | 98   | 266  |
| 60.301 | 20 | TGCGTTTTGACGATATATAGTGTI  | 59.092 | 25 | 169 | 1279 | 1447 |
| 59.013 | 20 | CCCAACTTTTCTCCCCAAAT      | 60.159 | 20 | 256 | 1027 | 1282 |
| 59.05  | 20 | CAAACCAAAGCATGCGTAAA      | 59.742 | 20 | 183 | 69   | 251  |
| 59.563 | 23 | AAGTAGTCCTTTCTCGGGC       | 59.713 | 20 | 241 | 125  | 365  |
| 60.184 | 20 | TAGCCGAGAAGAACCCTGGA      | 59.948 | 20 | 183 | 79   | 261  |
| 60.003 | 20 | TCCTGCCACATGTAATGGAA      | 59.924 | 20 | 147 | 6040 | 6186 |
| 60.03  | 21 | AGATTTCACTTTGCAACCGC      | 60.257 | 20 | 243 | 2850 | 3092 |
| 60.051 | 20 | AACAAACAAGCCCCCTCTTC      | 60.476 | 20 | 177 | 554  | 730  |
| 60.074 | 20 | GCCTACCTGGGCCATTTTTA      | 61.155 | 20 | 230 | 12   | 241  |
| 59.445 | 20 | TTTGCATCTTAGCGAGTTGG      | 59.062 | 20 | 253 | 936  | 1188 |
| 59.279 | 20 | CGTATTGAATGAGGGAGGGA      | 59.887 | 20 | 214 | 406  | 619  |
| 58.268 | 20 | TGGAATTTGGTTTTTGTAACTTGA  | 59.797 | 24 | 250 | 267  | 516  |
| 57.687 | 25 | TTAGTAGCTTCGGGGTGCAT      | 59.73  | 20 | 235 | 200  | 434  |



|        |    |                           |        |    |     |      |      |
|--------|----|---------------------------|--------|----|-----|------|------|
| 59.457 | 20 | AATCTCCATCCAAGCACCAC      | 59.934 | 20 | 198 | 470  | 667  |
| 60.448 | 20 | CGAGGAATACGAAGAGTCGC      | 59.978 | 20 | 200 | 42   | 241  |
| 59.365 | 22 | CATCGAGCCCACCTTAGTGCT     | 60.419 | 20 | 248 | 991  | 1238 |
| 60.278 | 20 | ATTGAGAGAATGCGAATGGC      | 60.185 | 20 | 274 | 19   | 292  |
| 59.473 | 21 | GGGACGAAAATAACCCTCGT      | 60.187 | 20 | 215 | 706  | 920  |
| 57.647 | 21 | GAAATAAGGAGGTGTTATGATA    | 57.235 | 25 | 129 | 1309 | 1437 |
| 60.119 | 20 | GGTTTTCTTGCCAAAATGG       | 59.429 | 20 | 205 | 433  | 637  |
| 60.812 | 20 | CGATCCATATGGCAAGAGAAA     | 60.045 | 21 | 226 | 12   | 237  |
| 60.478 | 26 | GCGGAAGAATTTGCTCTCAG      | 60.096 | 20 | 232 | 20   | 251  |
| 57.608 | 20 | ATTTTCATTAATAATTGATCAACGG | 57.193 | 23 | 122 | 22   | 143  |
| 60.048 | 20 | ATCGGCGCTAGACGACATAC      | 60.265 | 20 | 145 | 1335 | 1479 |
| 57.024 | 26 | GGTGTGTTGGCATTGCTAGA      | 59.722 | 20 | 193 | 1015 | 1207 |
| 60.773 | 20 | AAGGAGGTGTTATGAAGGGATT    | 58.028 | 22 | 198 | 236  | 433  |
| 59.83  | 20 | TTTTCTCTCCCCTCTTGGT       | 60.045 | 20 | 274 | 319  | 592  |
| 59.934 | 20 | CGCTGGTCTTGGAGATCAAT      | 60.218 | 20 | 251 | 1140 | 1390 |
| 59.101 | 21 | TCAATTACATTCCCGTGGGT      | 60.051 | 20 | 235 | 1252 | 1486 |
| 59.006 | 20 | TCAACAGCAATGAATTTGTGG     | 59.576 | 21 | 244 | 133  | 376  |
| 60.04  | 20 | TCAGCTGCGATGTCAATTC       | 59.955 | 20 | 110 | 94   | 203  |
| 60.493 | 20 | CGGTGACGGTTGAGAATGAC      | 61.527 | 20 | 152 | 51   | 202  |
| 60.61  | 20 | AATTGTGTGGCGATTGATT       | 60.199 | 20 | 278 | 3737 | 4014 |
| 59.95  | 20 | AGCGTATTTCTTGATTGCCG      | 60.23  | 20 | 250 | 575  | 824  |
| 60.058 | 20 | TCCCTATTCCCACTCCTTCC      | 60.264 | 20 | 191 | 657  | 847  |
| 59.887 | 20 | GCGTCTCTCGACGTTACACA      | 60.056 | 20 | 225 | 64   | 288  |
| 58.866 | 20 | TGGAGGAAGATATTGTGACGTG    | 59.993 | 22 | 269 | 2123 | 2391 |
| 60.096 | 20 | TCAGTGTTATCGAGCCTCTCAA    | 60.015 | 22 | 278 | 17   | 294  |
| 60.366 | 20 | TCGGGATATTAATCCATCAGG     | 60.002 | 22 | 128 | 220  | 347  |
| 59.823 | 20 | CGCTTTCACCACGAACACTA      | 59.904 | 20 | 246 | 64   | 309  |
| 59.481 | 20 | AACACACACGGATGTGGAGA      | 60.005 | 20 | 231 | 5852 | 6082 |
| 60.032 | 20 | AAAAGAGAAGCCCTCCAAGC      | 59.962 | 20 | 230 | 551  | 780  |
| 59.83  | 20 | CGAAAAGCAAATTCATCA        | 58.744 | 20 | 273 | 9    | 281  |
| 58.658 | 23 | CGAGTGGTTTGGGAAGAAGA      | 60.224 | 20 | 262 | 0    | 261  |
| 60.042 | 20 | AGGGCCAGAAAACCAAGAT       | 59.94  | 20 | 268 | 349  | 616  |
| 59.577 | 20 | TGCTGGGATACACAGGTTT       | 60.375 | 20 | 172 | 96   | 267  |
| 57.73  | 23 | ATGCCCTCATGACTCTCAGC      | 60.381 | 20 | 232 | 16   | 247  |
| 58.988 | 26 | TTTCATGATCAAATCTTATGAACC  | 59.741 | 25 | 156 | 30   | 185  |
| 60.047 | 24 | TTGAAACGAAATAGGGGTGG      | 59.795 | 20 | 267 | 532  | 798  |
| 59.933 | 20 | TGTTGGTGGATTGTGCATTT      | 59.823 | 20 | 176 | 123  | 298  |
| 59.797 | 20 | TTTAAGGGTTATCACCTGATTTTC  | 57.757 | 24 | 212 | 569  | 780  |
| 60.134 | 20 | CACCTCCCAAACACAAAGGT      | 59.861 | 20 | 142 | 3943 | 4084 |
| 59.622 | 20 | AGGTCTTGACAGGTTGTGGG      | 60.002 | 20 | 262 | 27   | 288  |
| 59.691 | 20 | AGATGAGATCAATGCCCCAG      | 60.034 | 20 | 138 | 3188 | 3325 |
| 59.975 | 20 | CCAGTTCAAAAGCATCACCA      | 59.691 | 20 | 234 | 1253 | 1486 |
| 59.962 | 20 | ACATCCAGCCCACAAAGAAC      | 59.973 | 20 | 161 | 3047 | 3207 |
| 59.94  | 20 | TTGCCATGTTCTGCTTCTCTT     | 60.008 | 21 | 240 | 1053 | 1292 |
| 59.907 | 20 | AAAGAAAAGAGACAATCCGGC     | 59.717 | 21 | 252 | 504  | 755  |
| 59.871 | 20 | GAACGAATGCATGGGTGTAA      | 59.4   | 20 | 261 | 886  | 1146 |
| 59.879 | 20 | CAGAACCCTCAAATCCCTCA      | 60.042 | 20 | 215 | 8166 | 8380 |
| 57.268 | 20 | AGAAATGGGGTCGACATGAA      | 60.317 | 20 | 232 | 43   | 274  |
| 59.716 | 21 | CAACGAAGGATTTGGTGTTG      | 59.021 | 20 | 274 | 3247 | 3520 |
| 59.989 | 20 | GATTGGACTTGTCTCTCGGC      | 59.676 | 20 | 228 | 30   | 257  |
| 60.032 | 20 | TCTTCCAAGAATGGAGCAGC      | 60.483 | 20 | 183 | 962  | 1144 |
| 61.706 | 20 | TCATTTGCCCCCGTATTTTA      | 60.144 | 20 | 177 | 0    | 176  |
| 57.785 | 25 | CCACGAATCATGATCGAAAA      | 59.474 | 20 | 229 | 2331 | 2559 |
| 59.982 | 22 | AAGATATATAATTCATTGAGCTTT  | 57.982 | 27 | 105 | 175  | 279  |
| 57.749 | 22 | TGATTTGAGAAGCAGTAGGTG     | 59.517 | 22 | 114 | 237  | 350  |
| 60.103 | 20 | ACCAGAACCGAAGTGATTGG      | 59.966 | 20 | 238 | 627  | 864  |
| 60.11  | 20 | TGGAAGGATTGAAGGAGGTG      | 60.042 | 20 | 224 | 1929 | 2152 |
| 59.282 | 20 | CACCTTAAGATCTGCTCCGC      | 59.978 | 20 | 240 | 125  | 364  |

|        |    |                           |        |    |     |      |      |
|--------|----|---------------------------|--------|----|-----|------|------|
| 60.461 | 20 | GGCAGTCACTGGAAGGAAGA      | 60.386 | 20 | 275 | 1161 | 1435 |
| 60.008 | 20 | CACCCGAAAATGAGTTATTATTTG  | 60.438 | 25 | 166 | 242  | 407  |
| 59.598 | 20 | GGCATTGCAGAGTTGAGAAA      | 59.002 | 20 | 144 | 4778 | 4921 |
| 59.967 | 20 | TGCGTTTTGACGATATATAGTGTTT | 59.092 | 25 | 253 | 266  | 518  |
| 59.967 | 21 | AAAATAGCTTATTGAATTTGATTTT | 59.723 | 27 | 195 | 108  | 302  |
| 60.183 | 25 | GCCAGATGTGAATGGGTCAC      | 61.369 | 20 | 184 | 130  | 313  |
| 59.942 | 20 | TCCCATTTCCATTTCCAAAC      | 59.599 | 20 | 156 | 494  | 649  |
| 59.933 | 20 | CACCACGGAAGAGAGGTAGG      | 59.715 | 20 | 168 | 65   | 232  |
| 58.148 | 20 | TCCGATTAATGGGCTCTGAC      | 60.036 | 20 | 117 | 1744 | 1860 |
| 60.089 | 21 | TTTTTGCTGATATTTGTATAACGA  | 59.061 | 25 | 273 | 891  | 1163 |
| 59.605 | 21 | AAAGTTGAAGGTTGGGGAGG      | 60.332 | 20 | 257 | 13   | 269  |
| 57.486 | 27 | TTCTGTGCGAGCTTAGCCTCA     | 58.9   | 20 | 173 | 9    | 181  |
| 60.11  | 20 | TCTCTCCCTCTCTCTTTCGG      | 60.215 | 21 | 150 | 122  | 271  |
| 59.31  | 26 | GGACGCATAACCCGTAACAAA     | 59.832 | 20 | 109 | 2    | 110  |
| 59.874 | 20 | TGGAAGATCCGAGAACCACT      | 59.655 | 20 | 265 | 1121 | 1385 |
| 59.919 | 20 | TTGTTGAACCGTGTGCAAAAT     | 60.011 | 20 | 225 | 23   | 247  |
| 59.937 | 20 | GCTGACATGGCTTCGTATCA      | 59.83  | 20 | 269 | 1702 | 1970 |
| 59.711 | 20 | CAAAACAACCTGCACCACACC     | 60.049 | 20 | 219 | 837  | 1055 |
| 60.05  | 20 | GTCAACTTGGGCAGTGGAAAT     | 59.973 | 20 | 176 | 51   | 226  |
| 59.592 | 20 | TGTGTGCTTTATTGGAGCGA      | 60.401 | 20 | 277 | 10   | 286  |
| 60.067 | 20 | GGATTTGCACACCCCTAAGA      | 59.933 | 20 | 277 | 217  | 493  |
| 59.717 | 24 | GAACCGCCGAAAAGAAT         | 60.014 | 18 | 268 | 5    | 272  |
| 59.967 | 20 | CGGGAGGAATATCGCACTTA      | 60.053 | 20 | 202 | 954  | 1155 |
| 59.968 | 20 | AGCCTAAGTAATGGCGCAGA      | 60.003 | 20 | 145 | 228  | 372  |
| 59.131 | 24 | GAAGCCGGGTGTCAAATAAA      | 59.938 | 20 | 263 | 521  | 783  |
| 60.008 | 20 | CAATGCCTAGTTTACCCCA       | 59.817 | 20 | 252 | 644  | 895  |
| 60.365 | 20 | TCCGGCCAAATTAAGAAA        | 59.538 | 20 | 105 | 778  | 882  |
| 60.111 | 20 | ACCAACCTCCATTGAAGAGC      | 59.141 | 20 | 199 | 91   | 289  |
| 58.652 | 22 | TATGCTCGCTGGATTACGTG      | 59.856 | 20 | 251 | 506  | 756  |
| 59.247 | 20 | TTCCGTCTTTAGGCATGAGC      | 60.352 | 20 | 266 | 6    | 271  |
| 60.133 | 20 | GACCCACGACCGTGTACTTT      | 59.891 | 20 | 263 | 66   | 328  |
| 59.434 | 20 | TGTTGCCGTAAACAATGGTC      | 59.444 | 20 | 194 | 203  | 396  |
| 60.066 | 20 | CAGATGTGGACGGTCACTA       | 59.545 | 20 | 220 | 29   | 248  |
| 59.21  | 20 | TATCCATTTGCCCTTTTTGC      | 59.907 | 20 | 249 | 226  | 474  |
| 58.145 | 20 | TGGTTCGATCGTAATTGATCT     | 57.168 | 21 | 129 | 20   | 148  |
| 60.073 | 20 | TCTTGGTGGGATTTGGAGAG      | 60.042 | 20 | 179 | 162  | 340  |
| 59.711 | 20 | TCACTTCTTGGAGTTTGGCA      | 59.415 | 20 | 133 | 73   | 205  |
| 59.92  | 20 | CAACCTCAGCTTCTTCCAG       | 59.982 | 20 | 192 | 147  | 338  |
| 60.012 | 20 | TGCAACCATTTTGTGGAAA       | 59.946 | 20 | 247 | 37   | 283  |
| 60.172 | 20 | ACGGATCGGAAATCCATAAA      | 59.23  | 20 | 212 | 270  | 481  |
| 57.239 | 26 | CTTCGATGGAGTTCCTCTCT      | 60.586 | 20 | 187 | 7    | 193  |
| 59.903 | 20 | ATGGGGTGAGACAAAGCAAG      | 60.111 | 20 | 272 | 121  | 392  |
| 59.926 | 20 | AAAAGAGCTTGGGCCTCTTC      | 59.962 | 20 | 248 | 772  | 1019 |
| 60.096 | 21 | CCGACACAAGCTGAAGTGAG      | 59.616 | 20 | 152 | 42   | 193  |
| 59.991 | 20 | ACCCACTTTTCAAATCAGCG      | 60.11  | 20 | 125 | 2854 | 2978 |
| 60.081 | 21 | GTTTTGGCATGCTAGTGGGT      | 60     | 20 | 146 | 70   | 215  |
| 59.894 | 20 | CCCAATCTTTTCCACCCTTT      | 60.159 | 20 | 145 | 86   | 230  |
| 59.774 | 23 | AAATTCCCGAAGAGCCATCT      | 60.039 | 20 | 258 | 49   | 306  |
| 60.265 | 20 | TTCTCTGTTCTGGCAGTGGA      | 59.545 | 20 | 204 | 109  | 312  |
| 59.779 | 20 | GGCATGCCAAAAATATCAC       | 60.161 | 20 | 275 | 967  | 1241 |
| 60.118 | 20 | CTGTGAAATTGCACGGCTTA      | 59.872 | 20 | 116 | 102  | 217  |
| 60.014 | 20 | AGTTCAAGTTTGGGGGTGTG      | 59.861 | 20 | 189 | 343  | 531  |
| 59.831 | 21 | TCAAGATTTAGGGGTTATCATTTG  | 58.508 | 24 | 113 | 170  | 282  |
| 60.05  | 20 | CTTTCCTTGGGGACTGTGAA      | 60.081 | 20 | 195 | 5224 | 5418 |
| 59.978 | 20 | TTTTGGCGGGAAAAATAGC       | 60.026 | 19 | 159 | 322  | 480  |
| 60.331 | 20 | CTGAATTTGGAAGGAACGGA      | 60.044 | 20 | 248 | 523  | 770  |
| 59.756 | 20 | CCTATGGTGGTATGGTGTGG      | 58.569 | 20 | 207 | 93   | 299  |
| 59.173 | 22 | GTGGACGCTCCAAATTGTTT      | 59.978 | 20 | 143 | 63   | 205  |

|        |    |                          |        |    |     |      |      |
|--------|----|--------------------------|--------|----|-----|------|------|
| 60.288 | 19 | GGCAACAGCTCTTACCGTTG     | 60.827 | 20 | 279 | 131  | 409  |
| 59.724 | 20 | CACATCCTCACACACTCACACA   | 60.697 | 22 | 241 | 2630 | 2870 |
| 60.954 | 20 | CCAACACAAATGAACCTGGA     | 59.389 | 20 | 215 | 19   | 233  |
| 60.011 | 20 | ATTGAAACCGTGAAAACCGA     | 60.344 | 20 | 232 | 865  | 1096 |
| 60.439 | 20 | CACGAACGGTATAACATCGG     | 58.917 | 20 | 272 | 706  | 977  |
| 60.119 | 20 | CCCTCGTATGCAATGAATCTG    | 60.475 | 21 | 266 | 357  | 622  |
| 60.255 | 20 | GTGAGGGGGTGACAGAAATG     | 60.363 | 20 | 268 | 39   | 306  |
| 58.851 | 20 | CTGATTGCTAGCTTCCAC       | 59.978 | 20 | 119 | 20   | 138  |
| 60.721 | 20 | GGAACCAAGTCTTCAGATGC     | 57.288 | 20 | 260 | 44   | 303  |
| 58.884 | 22 | ACCGACAAAAGGTAGGCTCA     | 59.734 | 20 | 229 | 267  | 495  |
| 59.682 | 20 | GCATCGTGTGAAGCATTGAT     | 59.685 | 20 | 138 | 219  | 356  |
| 59.273 | 20 | TTGAAGGGAACGAGACCAAG     | 60.224 | 20 | 252 | 51   | 302  |
| 60.517 | 20 | GGATTCCATCAACACCAACC     | 60.034 | 20 | 160 | 60   | 219  |
| 58.057 | 21 | CTCATTGGAATTTTCCGGGT     | 61.042 | 20 | 269 | 914  | 1182 |
| 60.017 | 25 | GAGCATTGATGGAGGATCG      | 60.57  | 20 | 239 | 30   | 268  |
| 59.84  | 20 | CTGCCATTTTACCCTTTTT      | 58.113 | 20 | 111 | 866  | 976  |
| 59.931 | 20 | CATTTCTTCAAGCACACCA      | 59.691 | 20 | 247 | 102  | 348  |
| 60.885 | 18 | CCATTTCAAGTATTTGCCGGT    | 59.823 | 20 | 278 | 357  | 634  |
| 60.327 | 20 | ATTTTCTGGCGACGGTACAC     | 60     | 20 | 158 | 1833 | 1990 |
| 59.706 | 20 | ATGTTATCGTGTGGATGGGC     | 60.613 | 20 | 234 | 358  | 591  |
| 59.013 | 20 | TCCAATGATTGTTTGGTCA      | 59.75  | 20 | 213 | 750  | 962  |
| 60.14  | 20 | CACTCACAGCCAACAGGGTA     | 59.745 | 20 | 148 | 1268 | 1415 |
| 59.801 | 20 | TTCCAATTGCGAAAAGATTTG    | 60.061 | 21 | 180 | 62   | 241  |
| 59.779 | 20 | ACTCCAATGGATCGCTATG      | 59.917 | 20 | 245 | 2    | 246  |
| 60.134 | 20 | TGAAAGCAGCATAAGCATGG     | 59.976 | 20 | 143 | 1304 | 1446 |
| 59.993 | 20 | ATCTGGAAAACACGCCACAC     | 60.966 | 20 | 209 | 168  | 376  |
| 59.96  | 20 | ATCCAAACGGCGAAGTGATA     | 60.469 | 20 | 187 | 60   | 246  |
| 59.976 | 20 | TCCGGCAATCTCCTTAATTG     | 60.031 | 20 | 160 | 290  | 449  |
| 59.23  | 20 | CGACACGAATCCAAACTGA      | 59.691 | 20 | 276 | 1444 | 1719 |
| 60.058 | 20 | TTGCAAACATTTTGAAGGACA    | 59.192 | 21 | 190 | 275  | 464  |
| 59.752 | 20 | ACTGGACGGAAATCGGAAG      | 60.058 | 19 | 256 | 275  | 530  |
| 59.95  | 20 | ACCACTGCATTCATTTCCC      | 59.973 | 20 | 264 | 949  | 1212 |
| 58.676 | 24 | TTGCTCGCGAGATTTCTTTT     | 60.096 | 20 | 269 | 649  | 917  |
| 60.11  | 20 | CATGCCAAGTGGTGTGATCT     | 59.551 | 20 | 216 | 390  | 605  |
| 57.197 | 24 | GGATGAGGTTGTATTGAAACTGC  | 59.891 | 23 | 142 | 59   | 200  |
| 59.917 | 20 | CCCTAGCCTTTGCCTCTTTC     | 60.332 | 20 | 164 | 190  | 353  |
| 58.9   | 20 | AGCGTTATTTTGAAGGTCG      | 60.264 | 20 | 117 | 6    | 122  |
| 58.37  | 22 | GGTGAGGAGGAACACGAAAA     | 60.088 | 20 | 253 | 14   | 266  |
| 57.719 | 22 | GGGTGGCCCTCAATTTTATT     | 60.02  | 20 | 270 | 32   | 301  |
| 60.021 | 20 | AACGGGGAAACATACGTCAC     | 59.717 | 20 | 209 | 896  | 1104 |
| 60.029 | 20 | GAGCCTGACTTGCTTTCACC     | 59.997 | 20 | 256 | 299  | 554  |
| 60.36  | 20 | TTTCTCTTTGGTTGGTGAAGA    | 58.955 | 22 | 211 | 22   | 232  |
| 60.05  | 20 | GCACCTATATACGCACGCAC     | 59.238 | 20 | 258 | 11   | 268  |
| 59.536 | 23 | TTGACCGATCTCATTTGAAAAA   | 59.564 | 22 | 253 | 61   | 313  |
| 59.923 | 20 | CCAAAATCACAATCTATCAATCCA | 60.076 | 24 | 222 | 6193 | 6414 |
| 59.883 | 20 | CGTATACTTGCGGGGTTGTT     | 59.883 | 20 | 223 | 657  | 879  |
| 60.603 | 20 | TGAAATAGTAACCGCCGACC     | 59.96  | 20 | 244 | 174  | 417  |
| 57.238 | 25 | CAAAGGCTCGGAATATGCAC     | 60.606 | 20 | 149 | 0    | 148  |
| 58.978 | 21 | GATCAATGTTTACGCTCTCGAA   | 60.118 | 22 | 226 | 94   | 319  |
| 59.348 | 21 | AACCCACTACCCATTCCCTC     | 60.052 | 20 | 142 | 0    | 141  |
| 59.877 | 20 | TATTTGCCACCCAGAACACA     | 59.964 | 20 | 243 | 548  | 790  |
| 60.125 | 20 | TTGAGCGAAAAGCCAAAGAT     | 59.96  | 20 | 152 | 3441 | 3592 |
| 57.439 | 21 | TCAACTTTCGGAAGCGTACA     | 59.464 | 20 | 113 | 8    | 120  |
| 59.873 | 20 | TGTCCCGTTTTCTTGTTTC      | 59.948 | 20 | 242 | 117  | 358  |
| 59.787 | 20 | CGAACATCGTTGCTGCTCTA     | 60.157 | 20 | 216 | 450  | 665  |
| 59.653 | 22 | GAGGACGCCCAATGATAAAA     | 59.901 | 20 | 219 | 925  | 1143 |
| 57.054 | 25 | CCAAACATGCTTCTCATGCT     | 58.877 | 20 | 210 | 21   | 230  |
| 58.412 | 23 | ACTGGAAGAATTGGAGGGCT     | 60.074 | 20 | 207 | 105  | 311  |

|        |    |                          |        |    |     |      |      |
|--------|----|--------------------------|--------|----|-----|------|------|
| 58.963 | 22 | CTTAAGCATGCACGACTCCC     | 60.796 | 20 | 262 | 745  | 1006 |
| 60.066 | 20 | CTTCTTCCCCGTTTTGTTCA     | 60.081 | 20 | 259 | 1002 | 1260 |
| 59.871 | 20 | ATTCTCCTTTTCAGCACCC      | 60.443 | 20 | 275 | 10   | 284  |
| 59.9   | 20 | TCCGTCTGCTTGGAGAACTT     | 59.989 | 20 | 232 | 866  | 1097 |
| 59.999 | 20 | CCACTCTCTCCTCTTTCTCTC    | 57.98  | 23 | 151 | 641  | 791  |
| 60.268 | 20 | GCCTCTTGAAACTCTGCCAC     | 59.997 | 20 | 274 | 269  | 542  |
| 60.074 | 20 | TTCGCACGCTATAAAACAAGAA   | 59.916 | 22 | 130 | 668  | 797  |
| 60.388 | 20 | CCTCCAGACGTGAAGAAACC     | 59.697 | 20 | 266 | 1520 | 1785 |
| 59.957 | 20 | TGCCTCATTTGTGTTAATTTGG   | 59.868 | 22 | 231 | 41   | 271  |
| 59.931 | 20 | CCTTTCCAGGAAGATTGTGG     | 59.521 | 20 | 189 | 73   | 261  |
| 60.386 | 20 | TTAACCTGTAGGGCACCCA      | 60.357 | 20 | 200 | 1611 | 1810 |
| 60.895 | 20 | TTGCGCCTAAGGAGGAGTTA     | 59.975 | 20 | 247 | 1938 | 2184 |
| 59.52  | 20 | GGATAGGCTAGATGACGTAGATG  | 57.085 | 23 | 216 | 112  | 327  |
| 60.036 | 20 | TGCATTGGAAAAAGTTGTGG     | 59.561 | 20 | 240 | 309  | 548  |
| 59.934 | 20 | TGGAGTTTTTGCTTTCTGGG     | 60.22  | 20 | 274 | 1719 | 1992 |
| 59.88  | 20 | GGGAGTCTTTCATGCCACAT     | 59.934 | 20 | 157 | 230  | 386  |
| 59.88  | 20 | TGGAGTTGGTGGTGTCTTCA     | 60.129 | 20 | 145 | 1030 | 1174 |
| 59.319 | 22 | TTGGAACGCCACTAGTTTCC     | 60.11  | 20 | 276 | 116  | 391  |
| 59.791 | 20 | GGTGTGTTAAATGCGTGAGG     | 59.05  | 20 | 272 | 3166 | 3437 |
| 57.063 | 27 | CACCGTGCATTACAAGATGA     | 58.129 | 20 | 182 | 8    | 189  |
| 59.835 | 20 | CAACCCTACCTCCTTCTCCC     | 59.928 | 20 | 199 | 18   | 216  |
| 58.749 | 20 | GAAATCTGAAGTTGTTCCCGA    | 59.16  | 21 | 268 | 57   | 324  |
| 60.156 | 20 | GAGGCGGATACACTACACA      | 59.895 | 20 | 194 | 100  | 293  |
| 59.873 | 20 | TCTGAAAATCAAAGGCCAC      | 60.051 | 20 | 190 | 2038 | 2227 |
| 59.239 | 20 | AGTGGGACCAAATGCAAGT      | 59.454 | 20 | 231 | 368  | 598  |
| 61.136 | 20 | AAGCTGTTGACTTCAGCGGT     | 60.058 | 20 | 269 | 10   | 278  |
| 60.214 | 20 | AAAGGGAAAAGACAGCAGCC     | 60.743 | 20 | 272 | 94   | 365  |
| 59.871 | 20 | CCACATATTCATTTCCCCCA     | 60.384 | 20 | 110 | 2405 | 2514 |
| 59.829 | 22 | TGGCATTTCAGCTCTTGATGC    | 60.537 | 21 | 203 | 26   | 228  |
| 59.966 | 20 | GGCTGCAGAAAGTGTGATGA     | 59.992 | 20 | 201 | 4485 | 4685 |
| 60.066 | 20 | TGTTCAGCTATGTTGCCGA      | 60.401 | 20 | 144 | 88   | 231  |
| 59.773 | 20 | GTTGGGGGTTGGGTTATCTC     | 60.422 | 20 | 235 | 0    | 234  |
| 59.547 | 22 | CCCAAACCTGGGGAAGAAAT     | 60.159 | 20 | 180 | 741  | 920  |
| 58.775 | 21 | CGATCGTGAGAGGGAGAGAG     | 60.088 | 20 | 261 | 108  | 368  |
| 59.67  | 20 | GGTGGGTGCCTAGGTTTTCT     | 60.361 | 20 | 185 | 83   | 267  |
| 60.051 | 20 | ATACGAACACTGCACCACCA     | 60.032 | 20 | 119 | 529  | 647  |
| 60.114 | 24 | CAAAATTAGTGTGACACCGAA    | 60.166 | 22 | 148 | 1493 | 1640 |
| 59.803 | 20 | GCAATATCCTCTTCAACGCC     | 59.674 | 20 | 267 | 149  | 415  |
| 60.035 | 20 | CCATTCCATGTCACAAACGA     | 60.367 | 20 | 149 | 789  | 937  |
| 60.155 | 20 | CAATCTTAATTCCGTCCCCA     | 59.756 | 20 | 127 | 492  | 618  |
| 59.923 | 20 | CTCGGGTCATTGGATTGAGT     | 59.927 | 20 | 232 | 43   | 274  |
| 59.859 | 20 | AAGGGAAGGGGAAGTGAAGA     | 60.045 | 20 | 217 | 98   | 314  |
| 60.005 | 20 | GAAAGGAAGAATGCGAGTGG     | 59.813 | 20 | 109 | 383  | 491  |
| 58.955 | 22 | TAAGTTGGAGTGGAGTCGCC     | 60.255 | 20 | 224 | 21   | 244  |
| 59.006 | 20 | GGTTCAAAAATCCGGGAAAT     | 59.999 | 20 | 217 | 467  | 683  |
| 59.774 | 20 | AAAATGCAGCAAAGGGTCAC     | 60.118 | 20 | 278 | 231  | 508  |
| 59.34  | 23 | CTTTGTGACAGGGTTCCGTT     | 60.005 | 20 | 146 | 43   | 188  |
| 59.946 | 20 | CCTCCTTCTCCAAAACCTC      | 60.045 | 20 | 105 | 5    | 109  |
| 59.985 | 20 | TCCCTAGTTAGCTCCTAGATATTG | 59.225 | 26 | 204 | 192  | 395  |
| 59.966 | 20 | ACAAAGTGGGAGGGCTTTCT     | 60.11  | 20 | 173 | 2759 | 2931 |
| 59.533 | 20 | CAAGGATGAGATGAGGGCAT     | 60.034 | 20 | 161 | 70   | 230  |
| 60.323 | 20 | ACCTATGGTGGTATGGTGTAGAG  | 57.076 | 23 | 256 | 22   | 277  |
| 59.433 | 24 | CACATTTCCCTCTCCCTTCA     | 60.042 | 20 | 219 | 42   | 260  |
| 60.46  | 20 | GGGAAAATAGCTACTCCCATTT   | 57.766 | 22 | 267 | 588  | 854  |
| 59.668 | 21 | TCTTGAAAACCTCAAGCCCA     | 60.745 | 20 | 135 | 1    | 135  |
| 60.153 | 20 | GGATTTACCTTTGGATGGA      | 59.727 | 20 | 147 | 33   | 179  |
| 59.881 | 20 | TTATTTGCACGCGCAGTAAT     | 59.379 | 20 | 264 | 25   | 288  |
| 58.816 | 23 | CGGCTTCTCTATCAGCCAG      | 60.11  | 20 | 240 | 8    | 247  |

|        |    |                           |        |    |     |      |      |
|--------|----|---------------------------|--------|----|-----|------|------|
| 58.068 | 23 | CCTCACCACTCAAGCTTTC       | 59.844 | 20 | 199 | 119  | 317  |
| 60.323 | 20 | GAGTCCAATTGAACCTCCGA      | 60.05  | 20 | 224 | 1094 | 1317 |
| 58.992 | 21 | CACCAACTGCTTTATTGCCA      | 59.729 | 20 | 235 | 469  | 703  |
| 59.577 | 24 | TGATGAACTCGTCAATTGGAA     | 59.112 | 21 | 241 | 430  | 670  |
| 59.369 | 20 | TGTTGGGTTGGTTTGACAGA      | 59.976 | 20 | 239 | 22   | 260  |
| 60.096 | 20 | CACGTGTGGACATCCATATCA     | 60.256 | 21 | 271 | 87   | 357  |
| 57.092 | 21 | ATGCCGTGTAATCCATCAA       | 58.846 | 20 | 280 | 445  | 724  |
| 59.916 | 20 | TCGGACCAATTACCCTTCA       | 60.301 | 20 | 277 | 22   | 298  |
| 59.901 | 20 | GCCAAGAACAGACCGAATGT      | 60.119 | 20 | 113 | 84   | 196  |
| 60.032 | 20 | TTTGCAAACCCTACTTCACTCA    | 59.785 | 22 | 249 | 52   | 300  |
| 60.203 | 20 | TCTCGAGATATTACTGGCGTGA    | 59.867 | 22 | 187 | 2    | 188  |
| 59.939 | 20 | GCCCTATCACAACCTCCGAAA     | 60.074 | 20 | 276 | 360  | 635  |
| 59.743 | 21 | CGATATAAGCAGTCGCCACA      | 59.856 | 20 | 269 | 0    | 268  |
| 60.17  | 20 | TCGAAATCAGCATATCAAAACAA   | 59.616 | 23 | 268 | 42   | 309  |
| 59.215 | 23 | ATTGTGCCCTATTCAACCA       | 60.192 | 20 | 209 | 1    | 209  |
| 57.643 | 26 | TTTGTGTGCATGGAATTTTTG     | 59.453 | 21 | 244 | 3    | 246  |
| 58.961 | 23 | CACAAATTTGGGTTGCCAG       | 59.949 | 19 | 161 | 135  | 295  |
| 60.203 | 20 | GAATAAATGCAATCACGCCC      | 60.297 | 20 | 262 | 398  | 659  |
| 59.411 | 20 | CAAAATTTGGACGGGAGAAA      | 59.91  | 20 | 267 | 14   | 280  |
| 59.494 | 22 | AGGCTTGAGTTTCCTCACGA      | 59.989 | 20 | 125 | 5    | 129  |
| 59.702 | 22 | GCAAGATAAGGGAGTTGGCA      | 60.214 | 20 | 145 | 597  | 741  |
| 60.375 | 20 | TTACATCAACCCGTCAACCC      | 60.615 | 20 | 277 | 796  | 1072 |
| 59.593 | 20 | CCAGCGCAGACAGAATACAA      | 60.011 | 20 | 279 | 41   | 319  |
| 59.715 | 20 | TTATGATCGTCGTCGTCCAA      | 60.073 | 20 | 269 | 90   | 358  |
| 59.002 | 23 | TTCGTGTATTAAGGTCACGGC     | 60.011 | 21 | 187 | 654  | 840  |
| 60.319 | 20 | AGCCAGAGACTCGGATTCAA      | 59.95  | 20 | 190 | 905  | 1094 |
| 60.14  | 20 | TATGCCACAGTCCCAATACG      | 59.42  | 20 | 253 | 1099 | 1351 |
| 59.962 | 20 | CCAACCTCCATTAACAACCC      | 59.146 | 20 | 218 | 17   | 234  |
| 60.042 | 20 | GACCGATCGTGAGGCTTTTA      | 60.214 | 20 | 255 | 397  | 651  |
| 60.06  | 20 | GGAGCTGCTCTTTGAGATCG      | 60.24  | 20 | 274 | 1006 | 1279 |
| 59.609 | 20 | CCCGTATATTCACGACTCGTTT    | 60.257 | 22 | 241 | 304  | 544  |
| 59.888 | 20 | GCAAATTATTCACACCCGCT      | 59.967 | 20 | 144 | 5421 | 5564 |
| 59.182 | 20 | TCGACACATTCAGGCAAATC      | 59.654 | 20 | 166 | 3    | 168  |
| 60.206 | 20 | GCCGTCAGTAGCTTAATCGG      | 59.867 | 20 | 248 | 1948 | 2195 |
| 59.677 | 20 | ATTTTGTGAGGGGTCGATG       | 59.79  | 20 | 274 | 2458 | 2731 |
| 60.02  | 22 | TTTGCTTAAAATGGATCAATGG    | 58.98  | 22 | 264 | 85   | 348  |
| 60.142 | 20 | AACATCAAAACTGCCGAAGC      | 60.257 | 20 | 246 | 219  | 464  |
| 59.495 | 21 | ATTTTCAGTTTGAATCGGCA      | 60.448 | 20 | 278 | 402  | 679  |
| 60.32  | 22 | CCAAGCCACACATCTCTCAA      | 59.831 | 20 | 262 | 245  | 506  |
| 59.938 | 20 | TTCCGCACCAAGATTTAACC      | 59.938 | 20 | 276 | 40   | 315  |
| 60.042 | 20 | TGCGTTTTGACGATATATAGTGTTT | 59.092 | 25 | 151 | 608  | 758  |
| 59.654 | 23 | CACCCCACCTTAACCTTTGA      | 59.824 | 20 | 219 | 12   | 230  |
| 58.974 | 23 | TTGCAGTAGCTTGTGAACGG      | 60.05  | 20 | 222 | 34   | 255  |
| 60.261 | 20 | AAGCTTGTCCGTCGATTTTG      | 60.249 | 20 | 201 | 115  | 315  |
| 58.311 | 23 | AGAGGCAGCATACCCATCAC      | 60.104 | 20 | 143 | 1983 | 2125 |
| 60.11  | 20 | CCATCTTTCTCAAATTCGCC      | 59.645 | 20 | 136 | 96   | 231  |
| 59.996 | 27 | TTCTACCCATGCAAATCAAGTG    | 59.996 | 22 | 121 | 65   | 185  |
| 60.226 | 20 | GATGGCTCATTTGTTCCGTT      | 59.939 | 20 | 225 | 85   | 309  |
| 58.697 | 20 | TGGATATTGTTGCCGTTTGA      | 59.93  | 20 | 265 | 0    | 264  |
| 59.993 | 20 | TCGCCTTCACTCTCACACAC      | 60.03  | 20 | 125 | 828  | 952  |
| 60.68  | 20 | ATGCCAACTTTTCCTCATGC      | 60.081 | 20 | 279 | 1771 | 2049 |
| 59.767 | 20 | CAGCATACAGCAGTTTCGTTT     | 58.121 | 21 | 136 | 1059 | 1194 |
| 58.741 | 20 | AATTTACCAAGATGTCCAAGA     | 58.554 | 22 | 102 | 20   | 121  |
| 60.11  | 20 | AGTTTTGGTGAAGACCGCAC      | 60.156 | 20 | 192 | 52   | 243  |
| 60.044 | 20 | GAATTGCGTAGCCTCCAAGA      | 60.352 | 20 | 137 | 185  | 321  |
| 60.081 | 20 | CGTTGCCGGTTAAAGCTAGT      | 59.424 | 20 | 267 | 4    | 270  |
| 59.859 | 20 | GTGAGCACCCAGATTGTTT       | 59.973 | 20 | 240 | 1492 | 1731 |
| 59.92  | 22 | AAATTTTATGGGACGGAGGG      | 60.013 | 20 | 251 | 368  | 618  |

|        |    |                           |        |    |     |      |      |
|--------|----|---------------------------|--------|----|-----|------|------|
| 59.866 | 21 | GAATCCAGAAGGGCAGTTGA      | 60.195 | 20 | 182 | 3235 | 3416 |
| 60.015 | 20 | ACGCGCGTTTTTAGGGTTTA      | 61.796 | 20 | 124 | 300  | 423  |
| 58.847 | 20 | CCTCGACTTGACAACCTTTGCT    | 59.529 | 21 | 280 | 105  | 384  |
| 57.397 | 22 | AGGTTTTTCAAACGATTGCC      | 59.067 | 20 | 196 | 702  | 897  |
| 60.02  | 20 | AGTGGTAGCACGACATTCCC      | 59.997 | 20 | 219 | 2194 | 2412 |
| 59.595 | 21 | ACAGCAATCATCCAACCACA      | 59.967 | 20 | 211 | 523  | 733  |
| 59.12  | 20 | TTAAGGGTTATCACCTGATTTTC   | 57.757 | 24 | 144 | 72   | 215  |
| 59.886 | 21 | CCAATCTTGTTCCGGTTCCT      | 59.028 | 20 | 200 | 11   | 210  |
| 59.756 | 20 | TGAAAGCGATTGTAAGCGTG      | 60.014 | 20 | 220 | 102  | 321  |
| 60.177 | 20 | TGCGTTTTGACGATATATAGTGT   | 59.092 | 25 | 274 | 1010 | 1283 |
| 60.015 | 20 | TTCCCTATCTCTCCCAGCAA      | 59.767 | 20 | 100 | 3204 | 3303 |
| 60.412 | 21 | AAACTCCAAAGTCCAAACTCCA    | 60.012 | 22 | 128 | 0    | 127  |
| 60.202 | 20 | TTCCCTCTCCATCTCTAGCA      | 59.017 | 21 | 263 | 1095 | 1357 |
| 59.66  | 23 | AGAATCTGCTTTGCCAGAA       | 59.955 | 20 | 257 | 449  | 705  |
| 60.578 | 20 | ACCATCACCATCGTCACCTT      | 60.246 | 20 | 160 | 48   | 207  |
| 60.033 | 21 | CCCTGCACCCTTTTAAATCA      | 59.931 | 20 | 206 | 78   | 283  |
| 60.21  | 20 | AGGTGGTGGAGTGGTGTGAC      | 60.915 | 20 | 227 | 111  | 337  |
| 60.243 | 20 | GTCTGCAAGAGAGAGGCCAG      | 60.284 | 20 | 233 | 539  | 771  |
| 59.916 | 20 | TTTTGATGATATATAGGTGTTTTGA | 58.782 | 27 | 238 | 396  | 633  |
| 60.053 | 20 | AACGGACGAACGATGAAAAC      | 59.978 | 20 | 175 | 3243 | 3417 |
| 59.706 | 20 | GACATGTCGCTCATGTCACC      | 60.13  | 20 | 145 | 4254 | 4398 |
| 59.964 | 20 | CCTTTCTCACCTAATTACAACCC   | 58.153 | 23 | 203 | 3329 | 3531 |
| 59.982 | 20 | TGCACGATTTGACTTGCCTA      | 60.401 | 20 | 203 | 685  | 887  |
| 60.104 | 20 | TCTACGACCACAATTTGTCCC     | 59.845 | 21 | 165 | 521  | 685  |
| 60.074 | 20 | TCAGCCACCACCCTAGTAGC      | 60.277 | 20 | 265 | 343  | 607  |
| 59.816 | 20 | CAAATATTAGGCCAAAAACGC     | 58.687 | 21 | 202 | 2456 | 2657 |
| 58.643 | 20 | TGAATTTCCATCGTTGATTTGA    | 60.302 | 22 | 141 | 133  | 273  |
| 59.996 | 20 | GGAGGTGGAGGAGAGAGAGG      | 60.336 | 20 | 111 | 469  | 579  |
| 60.263 | 20 | TCATCATAATATTGATTTTGCAC   | 59.703 | 27 | 116 | 896  | 1011 |
| 60.157 | 20 | CAAATAATAGCAATGGCCGA      | 60.102 | 21 | 134 | 3808 | 3941 |
| 60.12  | 20 | CCAGGTTTTGGAACCTGGAA      | 59.942 | 20 | 261 | 1439 | 1699 |
| 60.088 | 20 | GGCTCAAAGACAAGTCCCA       | 60.232 | 20 | 238 | 136  | 373  |
| 59.967 | 20 | GTGGGGATGGGAGGTTTATT      | 59.881 | 20 | 200 | 1076 | 1275 |
| 60.027 | 20 | TAGAGGGGCCTAGTGGGTTT      | 59.955 | 20 | 254 | 17   | 270  |
| 60.006 | 20 | GTTATTTGCGGGTCTGGGAT      | 60.017 | 20 | 262 | 2433 | 2694 |
| 58.861 | 22 | ATTTTGTGAATTTGGCCGTT      | 59.32  | 20 | 140 | 356  | 495  |
| 60.243 | 20 | GGCCATAGATCTTGTGGAA       | 59.894 | 20 | 220 | 539  | 758  |
| 60.401 | 20 | CCTTGAATCCAGGTTGAGGA      | 60.042 | 20 | 185 | 30   | 214  |
| 59.101 | 20 | CCCAATTTACCATCCTTCA       | 60.692 | 20 | 178 | 168  | 345  |
| 60.074 | 20 | GAGTTGAGGGTGGTTGAAA       | 59.943 | 20 | 178 | 70   | 247  |
| 60.137 | 20 | CCAACGGGTAGATACCCAAG      | 59.308 | 20 | 280 | 685  | 964  |
| 59.803 | 20 | GGATTAGGTGTTGGCTGGAA      | 59.933 | 20 | 206 | 501  | 706  |
| 59.955 | 20 | CCAATTCATCAAATCCAGG       | 60.126 | 20 | 184 | 86   | 269  |
| 60.545 | 20 | GGTTCGAAAAGGTTAGGCT       | 59.593 | 20 | 262 | 42   | 303  |
| 60.173 | 20 | CGACTTGTCGTGGTTCGATA      | 59.716 | 20 | 239 | 87   | 325  |
| 59.933 | 20 | CGAGAAAAACAAAATTATACGAG   | 59.565 | 26 | 229 | 610  | 838  |
| 58.019 | 20 | CTTTTCGTTTTTGCCTCGAG      | 60.904 | 20 | 169 | 80   | 248  |
| 60.013 | 20 | GCATGTGAGGATGTTTGTGG      | 59.967 | 20 | 139 | 1804 | 1942 |
| 58.874 | 20 | CAAGAGACGCATTAAGACGC      | 58.677 | 20 | 217 | 1327 | 1543 |
| 59.856 | 20 | TCACACCAAGAAGGGGACAT      | 60.363 | 20 | 204 | 108  | 311  |
| 60.027 | 20 | ATTCCTCCATCATCAAACCA      | 59.991 | 20 | 188 | 83   | 270  |
| 60.291 | 20 | TGCGTGAATCGAAAGTGAG       | 59.988 | 20 | 185 | 466  | 650  |
| 59.504 | 25 | GCTCGAGTTTTAGTGTGGGG      | 59.734 | 20 | 272 | 150  | 421  |
| 58.856 | 21 | TTGCTCACCCCTACCTATCG      | 60.088 | 20 | 199 | 26   | 224  |
| 59.859 | 20 | CACAAGAAAATTATTGTCGCTCA   | 59.307 | 23 | 270 | 584  | 853  |
| 60.008 | 21 | GATCCTGGTATCCATCTCGC      | 59.469 | 20 | 190 | 630  | 819  |
| 60.003 | 20 | AAGACCCCATTTCCCTAAA       | 59.639 | 20 | 265 | 1382 | 1646 |
| 59.597 | 20 | GGTCTCACGGTGGTTTTTA       | 59.83  | 20 | 242 | 1560 | 1801 |

|        |    |                        |        |    |     |      |      |
|--------|----|------------------------|--------|----|-----|------|------|
| 59.931 | 20 | CACCGCGTCTTTTCACTACA   | 59.904 | 20 | 217 | 2311 | 2527 |
| 59.601 | 21 | AATCATGGTGCACGAAATTG   | 59.4   | 20 | 183 | 411  | 593  |
| 59.962 | 20 | GGTTGTGGTGGAGCAAAGTT   | 60.012 | 20 | 160 | 4427 | 4586 |
| 59.969 | 20 | CTCTTGACTTCTGATCCGGC   | 59.95  | 20 | 161 | 88   | 248  |
| 60.074 | 20 | CGAGATTCTCTCTCGCTCTCA  | 59.981 | 21 | 238 | 253  | 490  |
| 58.77  | 23 | GGCAAGCTTGGGTATGTGTT   | 60     | 20 | 256 | 2    | 257  |
| 59.711 | 20 | TATGTGTTGCAGGGGATTGA   | 59.924 | 20 | 159 | 585  | 743  |
| 58.823 | 20 | GTTGGTGCTTGATGGTTGTG   | 60.008 | 20 | 133 | 2022 | 2154 |
| 60.298 | 21 | CCAAACGACATTATGACGCA   | 60.523 | 20 | 268 | 173  | 440  |
| 59.938 | 20 | TTCAATATCCGCCAGAGTCC   | 60.036 | 20 | 196 | 2273 | 2468 |
| 58.072 | 21 | TGTGTCGCGAATTTTGAACA   | 61.233 | 20 | 212 | 8    | 219  |
| 59.839 | 20 | GCTCTTCTCAACCCTTTTATGC | 59.398 | 22 | 244 | 95   | 338  |
| 59.111 | 21 | TTGTGCCGCTTGTAATATGC   | 59.731 | 20 | 236 | 43   | 278  |
| 59.859 | 20 | GTCACCTGCTCATGTTGCAT   | 59.714 | 20 | 214 | 257  | 470  |
| 58.462 | 20 | TTGGTAGGAATGGTTCGAGG   | 59.926 | 20 | 264 | 0    | 263  |
| 59.922 | 21 | AATTCTTGGGGTTGATGACG   | 59.79  | 20 | 222 | 556  | 777  |
| 60.067 | 21 | GAAACACATCGTTTCCTGGG   | 60.353 | 20 | 251 | 76   | 326  |
| 59.881 | 20 | TTCCATCGGACCAAGTCTC    | 60.05  | 20 | 238 | 954  | 1191 |
| 60.194 | 20 | GTTCAAATACACGTCCCT     | 60     | 20 | 212 | 19   | 230  |
| 59.827 | 20 | CAAAAGCACAAATTGGGAAA   | 58.649 | 20 | 242 | 45   | 286  |
| 60.064 | 21 | TTAACCTGCAACGGTCAAAA   | 59.202 | 20 | 217 | 1470 | 1686 |
| 60.038 | 20 | CTCTAGAGTGTTTGCGGTGC   | 58.677 | 20 | 230 | 69   | 298  |
| 59.647 | 23 | ACGTGGAGTTCCAAATGCTC   | 60.119 | 20 | 270 | 3    | 272  |
| 59.459 | 22 | AGTATGCCGTTTTTCTCCA    | 59.569 | 20 | 280 | 1319 | 1598 |
| 60.556 | 20 | ACCTCCTCTCCGTGCTAGT    | 60.414 | 20 | 252 | 2    | 253  |
| 59.243 | 20 | TCTCTCCCTTTTCTCACGGA   | 59.92  | 20 | 136 | 832  | 967  |
| 59.997 | 20 | TGGTTACTGGAACGCGA      | 59.182 | 20 | 110 | 784  | 893  |
| 59.928 | 20 | TCTTCAAAGGAACCGACTGG   | 60.224 | 20 | 280 | 75   | 354  |
| 59.343 | 20 | CCCGGGTTTTCTTTTGT      | 60.19  | 20 | 199 | 1399 | 1597 |
| 60.051 | 20 | CCCCAAATGGAGACGATAAA   | 59.756 | 20 | 180 | 4639 | 4818 |
| 59.953 | 18 | AGGTGACAATTGTGATAGCCA  | 58.09  | 21 | 280 | 123  | 402  |
| 59.859 | 20 | ATTTGTACGGCGTTTCTCA    | 60.502 | 20 | 154 | 661  | 814  |
| 60.734 | 20 | GGTCAACTTTCTGCACACCA   | 59.726 | 20 | 212 | 606  | 817  |
| 59.615 | 20 | GTGGTGGTATTTGGTCCGAT   | 59.532 | 20 | 260 | 31   | 290  |
| 59.883 | 20 | AACGCTCCAGATTTTCATGCT  | 59.843 | 20 | 270 | 435  | 704  |
| 60.031 | 20 | CAAGCAGACTAAGCATGGCA   | 60.157 | 20 | 239 | 79   | 317  |
| 60.177 | 20 | TAATGGCGAAAACAGGAAGG   | 60.067 | 20 | 197 | 149  | 345  |
| 57.557 | 25 | CTTTAGAGCGCCTGCAAGAC   | 60.292 | 20 | 267 | 19   | 285  |
| 59.859 | 20 | ATTTTCCCAAATGCAAGCTG   | 60.074 | 20 | 250 | 252  | 501  |
| 57.379 | 21 | CGCTTATATCGTGTGCGGTT   | 59.982 | 20 | 100 | 36   | 135  |
| 59.948 | 20 | CCACAGCTATGCCTAAGTGC   | 58.555 | 20 | 188 | 3269 | 3456 |
| 60.411 | 20 | GGCATTCAAATCAACCATTG   | 58.82  | 20 | 233 | 81   | 313  |
| 60.096 | 20 | GGTCGGCTACATGAACCAAA   | 60.894 | 20 | 116 | 32   | 147  |
| 60.112 | 20 | GTAGGAGGAGTGATCGGGT    | 60.336 | 20 | 278 | 737  | 1014 |
| 57.111 | 27 | ACTTCAACAGCCGCAAAAAT   | 59.752 | 20 | 175 | 278  | 452  |
| 60.132 | 20 | GAGCAGTTATCACCGGATCA   | 58.672 | 20 | 237 | 29   | 265  |
| 59.707 | 20 | AAAACGGGGCTAAGGATTGT   | 59.835 | 20 | 246 | 277  | 522  |
| 58.743 | 25 | GAACTACAAAGTATGGGGCA   | 59.985 | 21 | 127 | 3    | 129  |
| 59.215 | 21 | AGGGATTCGAGTTGCTTTGA   | 59.813 | 20 | 263 | 5193 | 5455 |
| 59.033 | 21 | CCCCATGAAGCAGAGATGAT   | 60.034 | 20 | 117 | 757  | 873  |
| 59.871 | 20 | ATGCACGTGAATGCTTTATTT  | 57.351 | 21 | 190 | 34   | 223  |
| 59.187 | 21 | ACATTCTGGAATGGTTCCCA   | 60.173 | 20 | 185 | 1247 | 1431 |
| 59.905 | 20 | TGGTGATGTGTACTTTGGCA   | 60.019 | 21 | 188 | 1936 | 2123 |
| 60.324 | 20 | AGGACTCACTGAAGGAGGCA   | 59.986 | 20 | 279 | 662  | 940  |
| 59.903 | 21 | TCTTGCGTTTGATTGTTGA    | 60.379 | 20 | 225 | 369  | 593  |
| 58.732 | 21 | GGAGCAAGAACTTGAGGCAT   | 59.434 | 20 | 240 | 170  | 409  |
| 60.634 | 20 | CCGATTTTGTTCCTTTCAA    | 57.728 | 20 | 230 | 642  | 871  |
| 60.345 | 20 | TGCTTGAGGGGAGTGTTGA    | 59.23  | 20 | 278 | 352  | 629  |

|        |    |                          |        |    |     |      |      |
|--------|----|--------------------------|--------|----|-----|------|------|
| 60.201 | 20 | GTGACATTTTTAGGCGGGAA     | 59.938 | 20 | 195 | 1183 | 1377 |
| 60.332 | 20 | AATCTTGAAGTTGTTTCGCGG    | 60.249 | 20 | 221 | 17   | 237  |
| 60.191 | 26 | AAGCCTAACAAGTGGATATTAAG/ | 58.116 | 26 | 166 | 1299 | 1464 |
| 57.905 | 27 | GTCGGGCAATGATTCTGTTT     | 59.939 | 20 | 260 | 9    | 268  |
| 60.089 | 20 | CAGGTAAAACCTAAAATAGCGCC  | 60.36  | 23 | 258 | 4905 | 5162 |
| 60.324 | 20 | TGGTTACTGGAACGCGA        | 59.182 | 20 | 188 | 1106 | 1293 |
| 59.502 | 24 | AGGCATACTTGGTTGATCCG     | 59.955 | 20 | 258 | 10   | 267  |
| 59.989 | 20 | CACTAGGGCTTTGCTGCTGT     | 60.592 | 20 | 161 | 2868 | 3028 |
| 59.366 | 20 | AGCACTCCCTTTTACCACCA     | 59.592 | 20 | 246 | 68   | 313  |
| 60.395 | 20 | TCTTCGATTGGAGTTCAGGC     | 60.34  | 20 | 241 | 552  | 792  |
| 59.803 | 20 | AAAGTTAAGTAGGACTGGATCCA/ | 59.856 | 26 | 100 | 26   | 125  |
| 58.521 | 26 | CAGATCTGATGGCCCAGATT     | 60.034 | 20 | 105 | 18   | 122  |
| 59.679 | 20 | CCTTCTCTGGCTGTTGTTCA     | 59.007 | 20 | 236 | 1349 | 1584 |
| 59.919 | 20 | TGAACATAATCAAGTTCGCGT    | 59.761 | 21 | 170 | 53   | 222  |
| 61.129 | 20 | AATTTACCCCTGATTCCAATG    | 58.751 | 21 | 279 | 43   | 321  |
| 59.175 | 20 | TCTTCGCTGTCTCTCAGCAA     | 60.008 | 20 | 228 | 1226 | 1453 |
| 59.993 | 20 | AAAGGGAACCTTCTGTTTTAGC   | 58.034 | 22 | 174 | 93   | 266  |
| 59.957 | 20 | TGGCTTCAGTTGCAGAGAGA     | 59.855 | 20 | 162 | 84   | 245  |
| 59.916 | 20 | ATCGGTTATTACCGGATCGC     | 61.031 | 20 | 206 | 24   | 229  |
| 59.931 | 20 | CTGGGCCACACCTAATAAAA     | 59.817 | 20 | 145 | 159  | 303  |
| 60.84  | 20 | CCTCTCTGCAACACCATTCA     | 59.831 | 20 | 197 | 505  | 701  |
| 58.695 | 20 | ACCATCGAACCCCAAAATA      | 60.051 | 20 | 217 | 13   | 229  |
| 60.048 | 21 | GGGGTGGGGTATGTTAGTT      | 59.805 | 20 | 219 | 9    | 227  |
| 60.052 | 20 | ATTTCTCCTCCATCATCCCC     | 60.096 | 20 | 127 | 261  | 387  |
| 60.257 | 20 | CGAATCAGAAAGAACGTAGCG    | 60.025 | 21 | 180 | 31   | 210  |
| 59.837 | 20 | GCAAATCAAACCCTTGTCAAA    | 59.967 | 21 | 213 | 717  | 929  |
| 59.707 | 20 | ACTTCTCTGGCATCGCTTA      | 59.978 | 20 | 152 | 1045 | 1196 |
| 59.924 | 21 | GCAGTTGGAGAGGGTGAGAG     | 59.986 | 20 | 206 | 119  | 324  |
| 59.723 | 20 | TGCACCTTGTGCAGATTTGT     | 60.31  | 20 | 175 | 598  | 772  |
| 59.878 | 20 | CACGGTTTGGGCTTAATTTTT    | 60.219 | 21 | 279 | 467  | 745  |
| 60.051 | 20 | AAATCAAAAGCCCACAATGG     | 59.801 | 20 | 128 | 64   | 191  |
| 59.968 | 20 | CATGCACAGATTCCGTCCT      | 59.707 | 20 | 215 | 303  | 517  |
| 59.607 | 21 | CATGGTGCATGAAATTGGAG     | 59.924 | 20 | 130 | 134  | 263  |
| 60.183 | 20 | AATCATCCTTTTCGCAACTGG    | 60.074 | 20 | 220 | 471  | 690  |
| 59.897 | 20 | ATGTGCGTGTGAGTGTTTCGT    | 60.236 | 20 | 199 | 105  | 303  |
| 57.252 | 22 | TCACATGAGATGATTAATTGGACA | 59.343 | 24 | 181 | 64   | 244  |
| 60.452 | 20 | TGGAATAACCCAAGCCAAAG     | 59.931 | 20 | 179 | 2622 | 2800 |
| 59.986 | 20 | TGATTCGGAGGAATACGAGG     | 60.029 | 20 | 199 | 421  | 619  |
| 59.05  | 20 | AACAGCAAATCCGAGACACA     | 59.293 | 20 | 150 | 552  | 701  |
| 59.078 | 22 | CCATTTTCAGGTCCTCACCA     | 60.892 | 20 | 125 | 31   | 155  |
| 59.679 | 20 | GGAGATCAGCTACGGTCTGC     | 59.981 | 20 | 238 | 43   | 280  |
| 60.221 | 20 | TGAAACTGCTGTATGCTGAGTTAT | 59.424 | 25 | 170 | 312  | 481  |
| 59.231 | 23 | TTGGCAAGAAAACAACAGCA     | 60.415 | 20 | 227 | 37   | 263  |
| 60.067 | 21 | TTCACAAAGAAATCAGCACGA    | 59.454 | 21 | 186 | 70   | 255  |
| 60.249 | 20 | TCAACGGTTTAAAATTGTTCTT   | 57.74  | 22 | 171 | 129  | 299  |
| 58.359 | 20 | TCCATCCACAGCAATGAAAA     | 60.049 | 20 | 149 | 342  | 490  |
| 59.887 | 20 | TTTCACTTCGATCCCACCTC     | 60.05  | 20 | 128 | 65   | 192  |
| 59.53  | 20 | ACGACAACAGCAACACAAGC     | 59.953 | 20 | 240 | 216  | 455  |
| 60.104 | 21 | GGAGACAGAGCCTGTTGGAG     | 59.986 | 20 | 196 | 15   | 210  |
| 60.315 | 20 | CATTGGGTGGAAGTGTAAGAA    | 58.994 | 22 | 172 | 540  | 711  |
| 57.989 | 27 | GCAGCCTTATGTGGAGGATG     | 60.624 | 20 | 225 | 29   | 253  |
| 59.539 | 22 | GGTCAGTTTGTCCGAATCTTG    | 59.583 | 21 | 105 | 256  | 360  |
| 59.162 | 20 | CGCTGAAATTAGTTGAGGCA     | 59.062 | 20 | 272 | 133  | 404  |
| 60.24  | 20 | TCATGTACCCCAACATGTCA     | 60.665 | 20 | 275 | 283  | 557  |
| 59.542 | 20 | TTGGGTGTAAGACATAGAAGGAA  | 57.815 | 23 | 153 | 898  | 1050 |
| 59.202 | 21 | GCGAAAAACTCGAAAAACCA     | 60.223 | 20 | 256 | 1554 | 1809 |
| 58.81  | 24 | TGGATGATGTGATGTTTTTAGAGG | 60.237 | 24 | 176 | 11   | 186  |
| 59.685 | 20 | AAACTCAAATCCGAGATCTAATGC | 59.874 | 24 | 280 | 32   | 311  |



|        |    |                          |        |    |     |      |      |
|--------|----|--------------------------|--------|----|-----|------|------|
| 60.074 | 20 | CTCAACGGTATGCTCGGATT     | 60.096 | 20 | 235 | 490  | 724  |
| 60.136 | 20 | GAAAACCTGGAGTCAGCTCG     | 59.989 | 20 | 265 | 427  | 691  |
| 59.803 | 20 | GAGAGGAGAACTGCGTGAGG     | 60.135 | 20 | 161 | 74   | 234  |
| 60.31  | 20 | CGCTTCTTCGCTATGGCTAC     | 60.138 | 20 | 218 | 393  | 610  |
| 58.9   | 20 | GGAAGAAGAAGCTCGCAAGA     | 59.836 | 20 | 200 | 3301 | 3500 |
| 60.05  | 20 | AAGCCGATCGAGTTTTTCT      | 60.208 | 20 | 181 | 120  | 300  |
| 59.726 | 23 | AGAAGACGGAGAGCCACAAA     | 59.989 | 20 | 165 | 1310 | 1474 |
| 60.164 | 23 | CAATAGCGTGTGTTTTGCGT     | 59.799 | 20 | 273 | 587  | 859  |
| 59.976 | 20 | CCCGTTTTGACTCTTTGAC      | 59.569 | 20 | 151 | 450  | 600  |
| 59.891 | 20 | ACCCTCGAATGATATGCTGC     | 60.066 | 20 | 169 | 26   | 194  |
| 59.732 | 22 | AACCGGTTAAAAATCGGACC     | 60.055 | 20 | 248 | 208  | 455  |
| 59.803 | 20 | GCATGGCATGAAATTGTTGA     | 60.476 | 20 | 273 | 118  | 390  |
| 60.129 | 20 | TTTTCCGGTGATGGATGAGT     | 60.317 | 20 | 174 | 449  | 622  |
| 59.729 | 20 | TTGTCTAGCAATCTTCGAGTTTT  | 57.422 | 23 | 280 | 135  | 414  |
| 59.272 | 20 | TCGACAATGTTAAAAATCAAATAA | 60.026 | 27 | 171 | 65   | 235  |
| 60.162 | 20 | TCAAGGAGTCACAACGTGAAA    | 59.324 | 21 | 179 | 132  | 310  |
| 60.439 | 20 | CTGATGAACAAGCCGAACAA     | 59.84  | 20 | 278 | 532  | 809  |
| 60.246 | 23 | ACGATCGTAAGGCGAAATTG     | 60.096 | 20 | 104 | 4    | 107  |
| 59.955 | 20 | TACCCAACCCACTAACCCAA     | 60.081 | 20 | 171 | 136  | 306  |
| 57.599 | 24 | ACTTTCAGCATGGAAGAGGG     | 59.284 | 20 | 120 | 0    | 119  |
| 59.544 | 23 | CAAATGCAATGACTGTTGGG     | 59.964 | 20 | 208 | 30   | 237  |
| 59.545 | 20 | AGCGGTTATTACCGGATCG      | 59.93  | 19 | 249 | 2231 | 2479 |
| 59.926 | 20 | GGATACCCGAGCAGTTGAAA     | 60.074 | 20 | 248 | 2251 | 2498 |
| 59.847 | 20 | CCAAGATCAATGGTTCCTAAGTG  | 59.879 | 23 | 128 | 1272 | 1399 |
| 58.941 | 21 | ACAATGCGAGTGCATTTTTG     | 59.735 | 20 | 186 | 111  | 296  |
| 59.571 | 22 | TGTTGATGTCCGCAAACAT      | 59.972 | 20 | 174 | 79   | 252  |
| 59.178 | 20 | GACGAGATCATGGCTCGATT     | 60.189 | 20 | 265 | 14   | 278  |
| 61.434 | 20 | CAGCTGAAAGGAGCCATCTC     | 60.096 | 20 | 275 | 44   | 318  |
| 59.883 | 20 | TATATTTGCTCTGGCAGGGG     | 60.053 | 20 | 217 | 681  | 897  |
| 59.662 | 20 | GGATGACATAACGTTCCGCT     | 59.962 | 20 | 186 | 28   | 213  |
| 60.11  | 20 | CTGGAAGGAGTGGCTAGCTG     | 60.149 | 20 | 159 | 1248 | 1406 |
| 60.636 | 20 | TCATAGGTAAGCCGCAACC      | 60.096 | 20 | 211 | 23   | 233  |
| 59.792 | 20 | CAATGCTTCCATTTGCACAC     | 60.119 | 20 | 264 | 91   | 354  |
| 60.288 | 20 | GGCTCAACAACAATTTCCA      | 59.547 | 20 | 262 | 16   | 277  |
| 59.868 | 20 | GCTTCATGAATGGCATGACT     | 58.674 | 20 | 247 | 44   | 290  |
| 59.989 | 20 | TGCAGTTCATCTTTGCCTCA     | 60.539 | 20 | 122 | 1134 | 1255 |
| 59.955 | 20 | AAGAAACAAACAGGGTACGAGG   | 59.56  | 22 | 262 | 264  | 525  |
| 59.972 | 20 | TTGGTAGGGGTCAGCACAAT     | 60.375 | 20 | 225 | 115  | 339  |
| 60.096 | 20 | TTCGTTATTTGATTGGGGGA     | 60.124 | 20 | 235 | 1199 | 1433 |
| 59.992 | 20 | AGGTATCGTTCGCGCTGTAG     | 60.428 | 20 | 170 | 105  | 274  |
| 59.752 | 20 | AAGCAAGAAGGTTGCAACTGA    | 60.045 | 21 | 150 | 353  | 502  |
| 59.496 | 20 | TCATGTCAACTGTGCAAGGG     | 59.676 | 20 | 120 | 7    | 126  |
| 59.933 | 20 | ACCTGTCTCAATCCGCTCAC     | 60.269 | 20 | 188 | 1434 | 1621 |
| 58.947 | 20 | GTCCGGAACAAGGGAAAGTT     | 60.34  | 20 | 236 | 2    | 237  |
| 59.96  | 20 | TAGCCTAAGTCGGGACAGGA     | 59.83  | 20 | 256 | 600  | 855  |
| 59.946 | 20 | GCATGATGCAGCCCTAGATT     | 60.207 | 20 | 224 | 1919 | 2142 |
| 58.864 | 20 | GGAGGGTGAGATCAATCGTG     | 60.475 | 20 | 184 | 61   | 244  |
| 59.933 | 20 | CCTCCCCGATATTTTCAACA     | 59.756 | 20 | 222 | 8    | 229  |
| 59.997 | 20 | TCGACTTGTGCAATCAGTCC     | 59.837 | 20 | 246 | 753  | 998  |
| 59.984 | 20 | ACAAAAATGCCCTCGTATGC     | 59.967 | 20 | 241 | 22   | 262  |
| 57.857 | 24 | TTTTTACCCTTTCCGCTTCA     | 59.693 | 20 | 210 | 48   | 257  |
| 59.526 | 20 | ACGACACTCGAATGGAGGAA     | 60.656 | 20 | 244 | 241  | 484  |
| 59.763 | 20 | GTGTGTGTGCGTGAGTGAAA     | 59.321 | 20 | 184 | 426  | 609  |
| 60.049 | 20 | CTAGCCGTTGGTGGGAGTAA     | 60.125 | 20 | 148 | 463  | 610  |
| 59.442 | 23 | CCACAACATGTGGGGAAAAA     | 59.71  | 21 | 208 | 405  | 612  |
| 60.323 | 20 | CACTCGAAAAAGGCATCCAT     | 60.074 | 20 | 193 | 2588 | 2780 |
| 58.826 | 23 | TCGTTTTAGTTGGCCATAATCT   | 57.848 | 22 | 202 | 286  | 487  |
| 59.91  | 20 | TTTTTCAGCACCCTTCACA      | 57.867 | 20 | 181 | 114  | 294  |

|        |    |                         |        |    |     |      |      |
|--------|----|-------------------------|--------|----|-----|------|------|
| 59.592 | 20 | GCAGACCAGCTTTTACTGGG    | 59.875 | 20 | 192 | 454  | 645  |
| 60.249 | 20 | GGGATGACAGAATGAATGTGAA  | 59.797 | 22 | 203 | 507  | 709  |
| 59.881 | 20 | AAAGAGAGCCACGTGTGTGA    | 59.467 | 20 | 202 | 134  | 335  |
| 60.089 | 22 | ATCGTTTTCAAATCAGGCG     | 60.074 | 20 | 238 | 207  | 444  |
| 58.694 | 22 | ACAGCGCGGAAGTTACAGAT    | 59.904 | 20 | 240 | 26   | 265  |
| 59.369 | 21 | AAATGCCCTGCTGTAGGAAT    | 58.672 | 20 | 209 | 372  | 580  |
| 59.964 | 20 | GACATCGTCGTCCTGCTAT     | 60.104 | 20 | 235 | 1109 | 1343 |
| 59.978 | 20 | ATGCTTAATGTGCATGTGCG    | 60.697 | 20 | 280 | 1932 | 2211 |
| 59.988 | 20 | CGCTCACAATGATGGATACG    | 60.096 | 20 | 121 | 5036 | 5156 |
| 59.245 | 20 | GGGTCAGGGGGTTAATAAGG    | 59.527 | 20 | 129 | 468  | 596  |
| 59.845 | 20 | TGAACAAATTACACAAAACAAAC | 60.54  | 25 | 129 | 521  | 649  |
| 59.335 | 21 | GCAAACAACCAGCACAATCA    | 60.709 | 20 | 174 | 1587 | 1760 |
| 61.184 | 20 | TCGTGGAGTGAGTGGAAGTG    | 59.864 | 20 | 273 | 112  | 384  |
| 60.194 | 20 | ATACACGTTGCCCTCAATC     | 59.82  | 20 | 196 | 847  | 1042 |
| 59.78  | 20 | ACGCCTGAATATCGGTCATC    | 59.923 | 20 | 243 | 221  | 463  |
| 59.923 | 20 | TCCATTCCGAAAATCAAAGG    | 59.872 | 20 | 116 | 24   | 139  |
| 60.378 | 20 | GCCGACCCATTTAAATAACG    | 59.323 | 20 | 122 | 28   | 149  |
| 60.096 | 20 | GTGGTGACAGTTCGATGTGG    | 60.005 | 20 | 163 | 2967 | 3129 |
| 59.78  | 20 | GGGAAGATAAGACAGCCACG    | 59.694 | 20 | 217 | 20   | 236  |
| 59.735 | 20 | TGAGCCAACTGAAAACACACA   | 60.331 | 21 | 119 | 2849 | 2967 |
| 60.238 | 20 | CCATGGCCTAGCTTTGGATA    | 60.053 | 20 | 167 | 199  | 365  |
| 59.706 | 20 | GCATCTTGCTCATGTGATG     | 60.233 | 20 | 162 | 302  | 463  |
| 59.91  | 20 | TCCCTGTCCTTTTTCCCTTT    | 59.912 | 20 | 144 | 584  | 727  |
| 58.294 | 22 | TGCAAGCATCTTTTGTCTCG    | 60.134 | 20 | 215 | 11   | 225  |
| 57.487 | 25 | GTTTGTTCACCGGAATCACC    | 60.218 | 20 | 249 | 19   | 267  |
| 59.767 | 25 | ACGTGAGGTGAGGGATGAAG    | 60.112 | 20 | 271 | 46   | 316  |
| 57.085 | 26 | TGGTTGTGGTTTGGTTTCTTC   | 59.861 | 21 | 222 | 1    | 222  |
| 60.073 | 20 | ATCATCTCGGGGTGCAATAG    | 59.917 | 20 | 214 | 18   | 231  |
| 59.96  | 20 | CGGGGTATTACATAAATGATGC  | 58.285 | 22 | 206 | 27   | 232  |
| 59.727 | 20 | TGAAGGTGTTTGTGGGTTGA    | 59.976 | 20 | 136 | 5    | 140  |
| 59.862 | 20 | GAGTCTGCCACGTGTACCAA    | 59.751 | 20 | 204 | 368  | 571  |
| 58.999 | 20 | TTTTTGATGAGCTGGAGCCT    | 59.955 | 20 | 258 | 3989 | 4246 |
| 60.266 | 20 | GGGCCGAGATTTGTAGAGGT    | 60.464 | 20 | 240 | 96   | 335  |
| 60.011 | 20 | GGTCCGATTTTCCCCTTTC     | 59.881 | 20 | 150 | 994  | 1143 |
| 59.926 | 20 | GTGGGGGCTTAACAAAGTCA    | 59.971 | 20 | 187 | 397  | 583  |
| 60.24  | 20 | CCAAAATCTAATGCGCGTCT    | 60.23  | 20 | 245 | 970  | 1214 |
| 59.072 | 22 | AATGTGGGGTGCGATTTTTA    | 60.188 | 20 | 256 | 1949 | 2204 |
| 60.331 | 20 | TCGAGGCGTTTTCTTGATTT    | 59.823 | 20 | 203 | 778  | 980  |
| 59.829 | 20 | GCCAGCTTGTTTTGGGATAA    | 60.074 | 20 | 202 | 252  | 453  |
| 60.481 | 20 | TGGTGTCTGAACAGCAGAGG    | 60.022 | 20 | 272 | 164  | 435  |
| 58.774 | 20 | ATGACTTCGCCATTTTCCAC    | 59.939 | 20 | 280 | 216  | 495  |
| 60.051 | 20 | TGTCCAAAATCGTGTCTCA     | 60.088 | 20 | 264 | 15   | 278  |
| 60.281 | 23 | GGATAGGTTGAAACTGCCCA    | 59.933 | 20 | 278 | 49   | 326  |
| 59.691 | 20 | TGCGCATCTAGCTTGAGAGA    | 59.995 | 20 | 280 | 523  | 802  |
| 59.37  | 21 | CCCCGATTCTTTTAGCCTTC    | 60.034 | 20 | 147 | 121  | 267  |
| 60.11  | 20 | GTGACCGTTGGTGATGAGAA    | 59.525 | 20 | 189 | 1758 | 1946 |
| 58.451 | 21 | CGACCTGGTGGGTTGTTCTA    | 60.943 | 20 | 268 | 1    | 268  |
| 59.971 | 22 | GTGTGATTGGAGGGTTTGCT    | 59.973 | 20 | 122 | 14   | 135  |
| 59.059 | 20 | CATCAATGGCCTGATTTGTTT   | 59.815 | 21 | 166 | 97   | 262  |
| 61.019 | 20 | CCTAAAACACGACAGGGGAA    | 59.964 | 20 | 261 | 60   | 320  |
| 59.716 | 20 | ATGACACGCATAAAGGGACC    | 59.82  | 20 | 240 | 249  | 488  |
| 59.517 | 22 | AGCGGAAGAACAAAACGAA     | 59.861 | 20 | 223 | 6    | 228  |
| 60.601 | 20 | AACTGTGGCAAGATCCATCC    | 59.934 | 20 | 122 | 33   | 154  |
| 59.967 | 21 | TTACAGATAACCGTTCCCGC    | 59.96  | 20 | 225 | 44   | 268  |
| 59.801 | 20 | CATAAAATGGACACGCACCT    | 58.502 | 20 | 132 | 79   | 210  |
| 60.437 | 20 | CACACACGCGCATATACAAA    | 59.211 | 20 | 107 | 1637 | 1743 |
| 60.187 | 20 | AAGTTAAGCGTGTTCGCGCT    | 60.082 | 20 | 173 | 1313 | 1485 |
| 59.203 | 20 | TCGGATTTTTATAGGCTTCTCA  | 59.285 | 23 | 278 | 1344 | 1621 |

|        |    |                         |        |    |     |      |      |
|--------|----|-------------------------|--------|----|-----|------|------|
| 59.847 | 21 | TCAATCATGAGCGTCCGTAA    | 60.22  | 20 | 138 | 14   | 151  |
| 59.766 | 24 | CGAAAATAGCCAAGTCGGAA    | 60.202 | 20 | 268 | 1    | 268  |
| 59.801 | 20 | GCTTTCAGGGTTTAAAATCGC   | 60.089 | 21 | 277 | 222  | 498  |
| 59.851 | 20 | TCATGATAGGATGGGGCTTC    | 59.854 | 20 | 224 | 2507 | 2730 |
| 60.037 | 20 | TGGAAGGAGAAACGATGACC    | 60.05  | 20 | 194 | 55   | 248  |
| 58.444 | 21 | CCACTTTTTATTCCGACTC     | 59.526 | 20 | 148 | 44   | 191  |
| 59.989 | 20 | GCTCCCTCCATTTTTGTGTG    | 60.495 | 20 | 180 | 417  | 596  |
| 58.631 | 24 | AACACAGCAGGTTTCGATCC    | 60.119 | 20 | 244 | 12   | 255  |
| 59.978 | 20 | ACTTCCCTTCATCAGCCCTT    | 60.074 | 20 | 188 | 1267 | 1454 |
| 59.813 | 20 | GGCCGGTTAAAGGAGAAAAG    | 60.068 | 20 | 280 | 233  | 512  |
| 59.569 | 20 | TCAAAACAGAGAAGCCCACC    | 60.232 | 20 | 202 | 414  | 615  |
| 59.959 | 20 | TCGATGTGGTGGAGAACGTA    | 60.112 | 20 | 123 | 82   | 204  |
| 60.048 | 20 | AGGGTTTGAATGAGGTGTCG    | 59.966 | 20 | 146 | 334  | 479  |
| 59.571 | 20 | AATTTGTCGTTTGACCAGCC    | 59.978 | 20 | 269 | 1004 | 1272 |
| 59.917 | 20 | CTCCTTCGACACTTTTTCGG    | 59.846 | 20 | 259 | 808  | 1066 |
| 59.986 | 20 | TGTTGAAATCCTCGTTTGA     | 59.097 | 20 | 203 | 9    | 211  |
| 60.173 | 20 | CAAGCTTACCCGAGCTGAAC    | 60.015 | 20 | 249 | 10   | 258  |
| 59.428 | 21 | GACCGATCATTGCTATCCTCA   | 60.051 | 21 | 185 | 542  | 726  |
| 60.074 | 20 | TTTTCTCGAGTTTCACGCCT    | 59.993 | 20 | 259 | 4678 | 4936 |
| 59.844 | 20 | TTTTGGTTCAGGGGTGGATA    | 60.162 | 20 | 119 | 170  | 288  |
| 59.963 | 21 | CTTGTCGTATCCCTCCTCCA    | 60.065 | 20 | 165 | 1271 | 1435 |
| 58.308 | 20 | GAAAACAAGTGTTGCGGGAT    | 59.978 | 20 | 280 | 84   | 363  |
| 60.142 | 20 | TAACTGCCTCTTTGCACCTG    | 59.072 | 20 | 227 | 7    | 233  |
| 60.134 | 20 | AATACCAGGCAAAGAAGCG     | 59.361 | 20 | 240 | 961  | 1200 |
| 61.031 | 20 | AAACGGACGAACAATGAAGG    | 59.971 | 20 | 152 | 23   | 174  |
| 59.55  | 20 | AGAACATTCTCATCCCGGTG    | 59.927 | 20 | 269 | 67   | 335  |
| 59.315 | 20 | ACGCAAAAGCCCCTTCTTAT    | 60.095 | 20 | 233 | 127  | 359  |
| 59.284 | 20 | ATGGAGGATCACACCACGA     | 59.901 | 19 | 240 | 558  | 797  |
| 60.21  | 20 | TCTCGCTTCTCTTTACCGC     | 59.859 | 20 | 140 | 977  | 1116 |
| 59.981 | 20 | CTCTCGTACGCTGCCTCTCT    | 59.914 | 20 | 183 | 331  | 513  |
| 60.159 | 20 | CAAAACCACAGCCGACAATA    | 59.585 | 20 | 264 | 1488 | 1751 |
| 59.74  | 22 | CAACATGTGAGATTCCACGC    | 60.12  | 20 | 262 | 304  | 565  |
| 60.124 | 20 | AAAAATGACGAATGGGAGGG    | 61.042 | 20 | 267 | 92   | 358  |
| 60.801 | 20 | AAACTTGAGCAATGTTGGGC    | 60.118 | 20 | 267 | 429  | 695  |
| 58.876 | 20 | TTCGTATCTTGCCCATGGAT    | 60.296 | 20 | 249 | 241  | 489  |
| 59.845 | 20 | GGACAGTTTGTCCGAATCTTG   | 59.583 | 21 | 279 | 130  | 408  |
| 60.13  | 20 | AAGGAGGTGTTATGAAGGGATT  | 58.028 | 22 | 262 | 1156 | 1417 |
| 59.875 | 20 | CCAAACGGCCGATAAGAATA    | 59.922 | 20 | 196 | 4    | 199  |
| 60.558 | 20 | TGGGTGAAAACCCATAGACG    | 60.745 | 20 | 280 | 504  | 783  |
| 59.82  | 20 | AAATTTTGTTCACCAAATAA    | 58.744 | 23 | 252 | 135  | 386  |
| 60.074 | 20 | TTCCCACAGTTTGATCACCA    | 59.935 | 20 | 263 | 876  | 1138 |
| 59.056 | 22 | GTTGGCAGAATTTGTCCGAT    | 59.939 | 20 | 144 | 0    | 143  |
| 59.952 | 25 | GATCACAGGCCATCTTTTCC    | 59.488 | 20 | 279 | 4    | 282  |
| 58.355 | 22 | CCGCATTTATGTGTGCAAAA    | 60.508 | 20 | 278 | 40   | 317  |
| 60.214 | 20 | CAGCGAAGATGTGAGGATCA    | 59.942 | 20 | 127 | 513  | 639  |
| 59.968 | 21 | CGACGTGCTTTTGTAATTG     | 59.226 | 20 | 139 | 1307 | 1445 |
| 59.182 | 20 | AGCAAAGTTGCTACCGAGGA    | 60.015 | 20 | 196 | 1200 | 1395 |
| 59.264 | 20 | TCAGTTGATGCCTGATGAAGA   | 59.384 | 21 | 184 | 1471 | 1654 |
| 59.823 | 20 | CTTCCAGAAACCTGAGCAGC    | 60.134 | 20 | 272 | 1883 | 2154 |
| 60.017 | 23 | TGCCGTCTCACACATTAGAAA   | 59.332 | 21 | 164 | 2303 | 2466 |
| 60.045 | 24 | CCCACCAATTTTGAGACGTT    | 59.83  | 20 | 265 | 67   | 331  |
| 60.353 | 20 | TTTAACGAATGCTCCAGCG     | 59.961 | 19 | 280 | 111  | 390  |
| 61.096 | 20 | CGCACTTGCTCCTTTTTAG     | 60.011 | 20 | 275 | 1009 | 1283 |
| 60.243 | 20 | AGTGTTTGACATGATTACTCGTC | 57.373 | 24 | 101 | 2147 | 2247 |
| 57.681 | 24 | TCGATTTGGATTGAAATTTG    | 59.893 | 21 | 170 | 58   | 227  |
| 59.942 | 20 | GGTTTGCAGCATAAAAATGA    | 60.089 | 21 | 272 | 512  | 783  |
| 60.081 | 22 | AAGAGAAACCTTGCCCCCTA    | 60.068 | 20 | 121 | 11   | 131  |
| 59.787 | 21 | AGCGCACTCAAACAATAGCC    | 60.416 | 20 | 279 | 686  | 964  |

|        |                            |        |    |     |      |      |
|--------|----------------------------|--------|----|-----|------|------|
| 60.483 | 20 CAATGCCTAGTTTACCCCA     | 59.817 | 20 | 242 | 0    | 241  |
| 59.647 | 20 GACCGAAAATGGAGGTTCAA    | 59.91  | 20 | 174 | 247  | 420  |
| 59.597 | 20 CACACACTCACGCACACATT    | 59.183 | 20 | 160 | 408  | 567  |
| 60.457 | 23 ATTGTTGCCGAAAATATCG     | 59.795 | 20 | 256 | 19   | 274  |
| 60.154 | 20 CCCTCGTATGCAGTCAAACC    | 60.517 | 20 | 274 | 693  | 966  |
| 59.929 | 20 CTAGGCATGGAATCCGAGAA    | 60.17  | 20 | 254 | 12   | 265  |
| 59.482 | 20 CAACCTTGCCACATAACCT     | 59.853 | 20 | 233 | 3    | 235  |
| 60.003 | 20 CCCACAATTAGTCCCCTTT     | 60.046 | 20 | 163 | 259  | 421  |
| 58.287 | 20 CGGTTATTACCGGATCGCT     | 59.93  | 19 | 266 | 1528 | 1793 |
| 59.93  | 21 GTGGCGACATCCGAATAACT    | 59.962 | 20 | 216 | 178  | 393  |
| 60     | 20 CATAGCCGATAAAAATGGCG    | 60.424 | 20 | 199 | 80   | 278  |
| 59.457 | 20 CGAAATCCCCTTTTTCAACA    | 59.91  | 20 | 224 | 1029 | 1252 |
| 59.758 | 20 CGGCTCAAGATACCGATGAT    | 60.059 | 20 | 234 | 572  | 805  |
| 60.02  | 20 AGAATATTCATGGGGTCCGA    | 59.2   | 20 | 269 | 1128 | 1396 |
| 59.83  | 20 AACCCGGATCGGAAAATAC     | 60.02  | 20 | 274 | 835  | 1108 |
| 59.803 | 20 TGAGTTGCACGTGTGTGAGA    | 60.07  | 20 | 200 | 323  | 522  |
| 59.894 | 20 TGGGCACATTGCTCATTAAA    | 60.073 | 20 | 266 | 2805 | 3070 |
| 60.288 | 20 AATGTTTGTCTGGCCTAAAT    | 58.443 | 20 | 266 | 547  | 812  |
| 60.439 | 20 TGATGTGTGATGCCTCCCTA    | 60.072 | 20 | 260 | 710  | 969  |
| 60.154 | 20 GTGAAGGGCCAATTTCTTGA    | 60.051 | 20 | 245 | 1468 | 1712 |
| 58.583 | 26 ATAAGTTGGGTCACGGGTTG    | 59.711 | 20 | 264 | 210  | 473  |
| 59.966 | 20 CTACGTAGCCCCAAATCAA     | 59.953 | 20 | 201 | 221  | 421  |
| 57.869 | 22 AGGGCAGTCAAGACCATCAT    | 59.535 | 20 | 250 | 0    | 249  |
| 59.679 | 20 ATCACCAGTGGCAAACACAA    | 60.008 | 20 | 174 | 69   | 242  |
| 59.885 | 20 CGAATATCCCCAATTCAA      | 59.593 | 20 | 276 | 2278 | 2553 |
| 60.074 | 20 GCCTGCCTATTAACTCCCC     | 59.93  | 20 | 178 | 33   | 210  |
| 60.37  | 20 TTTTGTATGATAGGATAAAACCT | 58.996 | 26 | 259 | 466  | 724  |
| 60.002 | 20 CACCATGCTCAGGAATGCTA    | 59.823 | 20 | 234 | 2201 | 2434 |
| 60.149 | 20 AACCTAACCCGACTCGTTT     | 59.864 | 20 | 257 | 41   | 297  |
| 60.732 | 20 GCAGCTGTCCATTGTGAGAA    | 59.992 | 20 | 261 | 218  | 478  |
| 57.528 | 21 TCAATGATGAAACGGGGATT    | 60.133 | 20 | 134 | 80   | 213  |
| 60.088 | 20 AACTCACCCACACACACAG     | 60.541 | 20 | 274 | 4    | 277  |
| 59.01  | 20 ATGGAGAAAAGGTACGCACG    | 60.132 | 20 | 158 | 8    | 165  |
| 59.264 | 20 TGAATCGAGTGTCTTCTGCG    | 59.988 | 20 | 205 | 1332 | 1536 |
| 58.925 | 20 CATGAAAGGAAACAAAATCGAA  | 59.098 | 22 | 119 | 762  | 880  |
| 59.638 | 20 TTTGTTATGCGTTTTGACGA    | 57.846 | 20 | 277 | 95   | 371  |
| 60     | 20 CCTTCTTCCACCGTTCTTCA    | 60.224 | 20 | 114 | 4327 | 4440 |
| 59.123 | 20 ACAAGCCCGTAGGGAAAAT     | 59.835 | 20 | 273 | 44   | 316  |
| 60.045 | 20 GTTGGTGGGATTTGAACCTG    | 60.21  | 20 | 237 | 873  | 1109 |
| 60.842 | 20 GGGCTGCACACGAATGATTA    | 61.98  | 20 | 150 | 673  | 822  |
| 59.986 | 20 GGGAGGATAAACCGAGGAAG    | 59.897 | 20 | 161 | 2263 | 2423 |
| 59.831 | 20 TTCTCATCCACAGACCCCTC    | 60.048 | 20 | 120 | 1927 | 2046 |
| 59.316 | 20 TCGATTCAAGCAACCAACAC    | 59.697 | 20 | 190 | 27   | 216  |
| 60.594 | 20 TTTTGGTTGAATAGGGGTGA    | 59.302 | 21 | 280 | 98   | 377  |
| 60.361 | 20 TGCAGGGCTGAGTATAGGGT    | 59.717 | 20 | 271 | 83   | 353  |
| 60.034 | 20 CAGCAAGGAACTGATGGACA    | 59.831 | 20 | 176 | 1327 | 1502 |
| 59.67  | 20 CCCTAGGATGTGGGGTAAA     | 60.919 | 20 | 252 | 1737 | 1988 |
| 59.996 | 20 GTGGGTTTACCCAGAGCGTA    | 59.993 | 20 | 116 | 524  | 639  |
| 57.118 | 26 TTTTCAATCATACTTCCGGTTTT | 58.955 | 23 | 220 | 57   | 276  |
| 59.726 | 20 TTTTGACCAATCCTTTTGGG    | 59.772 | 20 | 273 | 259  | 531  |
| 60.074 | 20 CGGCCAAATCAAAGAAAAA     | 60.047 | 20 | 100 | 486  | 585  |
| 59.962 | 20 CCTCCATTCAAGCAGAAAGC    | 59.955 | 20 | 189 | 926  | 1114 |
| 59.953 | 20 TTGCAATAGCATGCCAACAT    | 60.103 | 20 | 224 | 191  | 414  |
| 60.149 | 20 TTCGGCATTATAGGAGGACG    | 60.053 | 20 | 278 | 35   | 312  |
| 59.79  | 20 GCCGTAGATCTAACGACCGA    | 60.235 | 20 | 127 | 1314 | 1440 |
| 59.406 | 20 TTCTTGATGTGTTGGCAAGC    | 59.847 | 20 | 134 | 206  | 339  |
| 60.792 | 20 GACCCAAAAGACTAGGTGCG    | 59.734 | 20 | 197 | 278  | 474  |
| 59.979 | 20 CAATATGAGAATGGCCGAAA    | 58.576 | 20 | 159 | 428  | 586  |

|        |    |                          |        |    |     |      |      |
|--------|----|--------------------------|--------|----|-----|------|------|
| 59.901 | 20 | GTGGACGTCCCAGATTGTTT     | 59.827 | 20 | 144 | 777  | 920  |
| 59.637 | 20 | CACGTGGCATTAACTGGTG      | 60.027 | 20 | 258 | 1217 | 1474 |
| 60.175 | 20 | AAGGGGAAGTTATTATTTGATCAC | 59.882 | 25 | 194 | 278  | 471  |
| 60.051 | 20 | AACAGTGAGGGAACACCAGG     | 60.002 | 20 | 233 | 186  | 418  |
| 59.95  | 20 | CGTTGATGAAGCACCGTATG     | 60.134 | 20 | 160 | 671  | 830  |
| 60.074 | 20 | TTCCTACGCACTCACATTAAGA   | 57.601 | 22 | 184 | 229  | 412  |
| 61.091 | 20 | TTGGAAGGGGCTTGAGTATG     | 60.066 | 20 | 102 | 1325 | 1426 |
| 60.07  | 20 | CGATGACATTAACAATAACAACA/ | 60.095 | 26 | 169 | 381  | 549  |
| 59.129 | 20 | CACCCTTCGATACTCCGAAA     | 60.066 | 20 | 259 | 54   | 312  |
| 59.967 | 20 | CAGATCAATGGCCAGATTT      | 59.894 | 20 | 230 | 504  | 733  |
| 59.907 | 20 | TGTGTGGCTTTTCTGCAAAC     | 59.888 | 20 | 277 | 565  | 841  |
| 60.356 | 20 | GCGGACACAGGATTTCAACT     | 60.119 | 20 | 280 | 80   | 359  |
| 60.201 | 20 | ACGGTGATAGTTTGC GTTGA    | 59.199 | 20 | 279 | 6155 | 6433 |
| 60.053 | 20 | TCTGTGGTTCCATTCCATCA     | 59.893 | 20 | 214 | 506  | 719  |
| 60.852 | 20 | ATCACAGGAGATTGGCATT      | 57.043 | 20 | 223 | 496  | 718  |
| 59.938 | 20 | GCCTGAACCACCAACCTTGT     | 62.297 | 20 | 191 | 207  | 397  |
| 58.145 | 20 | AGCAACTCCTCAAACGCAGT     | 60.058 | 20 | 176 | 67   | 242  |
| 60.088 | 20 | GCCGCAGTTGAGATCTAAGG     | 59.978 | 20 | 219 | 1040 | 1258 |
| 59.883 | 20 | AAGTGGAGTTCCATGTTGG      | 59.82  | 20 | 160 | 59   | 218  |
| 60     | 20 | TTGCCTTTAGCTTTAGCCCT     | 58.299 | 20 | 224 | 2706 | 2929 |
| 59.916 | 20 | GATTGCGAGAGACCAAAGGA     | 60.34  | 20 | 205 | 258  | 462  |
| 59.903 | 20 | CATGCAGTTTTTGCATGGTT     | 59.59  | 20 | 272 | 1428 | 1699 |
| 58.556 | 22 | ATTTCGAAGATCAACGGACG     | 60.074 | 20 | 124 | 34   | 157  |
| 59.267 | 22 | AGAGAGACGACGGATCGAAA     | 59.95  | 20 | 237 | 16   | 252  |
| 59.774 | 20 | GCAACGGAATACCACTCGTT     | 60     | 20 | 176 | 84   | 259  |
| 59.93  | 19 | AAACAAAAGGCAACTGATTCCG   | 59.257 | 21 | 273 | 19   | 291  |
| 59.429 | 20 | AATTTACATCCTCCCTCCC      | 60.133 | 20 | 268 | 42   | 309  |
| 60.088 | 20 | TTGGAGGGAGAAAATTGTGC     | 60.051 | 20 | 275 | 1075 | 1349 |
| 60.12  | 20 | ATTCTCAACAAGGGGCTGAA     | 59.67  | 20 | 219 | 230  | 448  |
| 57.069 | 26 | AATTGCCACGTTGAGGAATC     | 59.939 | 20 | 270 | 2    | 271  |
| 60.008 | 20 | GCGTTGGGATCGTGTTAAGT     | 60     | 20 | 196 | 3369 | 3564 |
| 60.892 | 20 | TGAGCTTCCAACGTAAGTTTCAT  | 60.176 | 23 | 147 | 3181 | 3327 |
| 57.542 | 20 | GCATGATACCAATGCTGCAC     | 60.112 | 20 | 241 | 48   | 288  |
| 59.948 | 20 | GGATTGGAACCCAAAACGA      | 59.91  | 20 | 227 | 400  | 626  |
| 59.95  | 20 | GTTGACGGCTGGAACCTTAG     | 59.734 | 20 | 162 | 1396 | 1557 |
| 58.381 | 25 | ACATTCCC GTTGTGTGTTCA    | 59.855 | 20 | 246 | 57   | 302  |
| 60.088 | 20 | TGCAAGTGGGAGGGAAGTAG     | 60.246 | 20 | 218 | 583  | 800  |
| 59.781 | 20 | TAATTTGGCAAACCTG GGC     | 60.074 | 20 | 128 | 785  | 912  |
| 58.829 | 23 | CGGACCAACCCGTTTATATG     | 60.067 | 20 | 163 | 67   | 229  |
| 60.088 | 20 | TCCACGTCTTGTTTTCCATCT    | 59.583 | 21 | 280 | 4276 | 4555 |
| 60.192 | 20 | AACATTGTTTGGGAAAAACCTT   | 58.822 | 22 | 162 | 828  | 989  |
| 59.801 | 20 | TCGAAGGTCAATGGTTCACA     | 60.088 | 20 | 211 | 122  | 332  |
| 59.964 | 20 | GCGCGGAGTTTAAGAAATGT     | 59.365 | 20 | 239 | 290  | 528  |
| 59.995 | 20 | GCCATCAGATCTGCACTGAA     | 59.95  | 20 | 203 | 1237 | 1439 |
| 60.096 | 20 | CTCGTTTCTTGCTAGCTCGG     | 60.284 | 20 | 235 | 660  | 894  |
| 60.081 | 21 | GGCAATATTACCATGACGGG     | 60.038 | 20 | 276 | 2013 | 2288 |
| 60.447 | 21 | GCCGGCAACTCACTTAACTC     | 59.882 | 20 | 114 | 38   | 151  |
| 60.12  | 20 | GTGTGTGTATGCGCATGTGT     | 59.038 | 20 | 238 | 92   | 329  |
| 59.935 | 20 | TGAGTCTGATGGACTGCCAC     | 59.827 | 20 | 274 | 101  | 374  |
| 60.096 | 20 | GATCTAACTAGGCCCGTCCC     | 59.925 | 20 | 162 | 242  | 403  |
| 59.973 | 20 | GAAAAACCCTAATCCGCCTC     | 59.909 | 20 | 141 | 80   | 220  |
| 59.56  | 24 | AACCCGTGTTCTTCAGTTGG     | 60.005 | 20 | 242 | 213  | 454  |
| 59.663 | 21 | TCCATGAAAGATTGGGGTGT     | 60.173 | 20 | 240 | 1734 | 1973 |
| 59.942 | 20 | GATCGCCGAAGGTTTTTGTA     | 60.074 | 20 | 271 | 815  | 1085 |
| 60.238 | 20 | CACCCCGAGATAACTTTCCA     | 59.926 | 20 | 224 | 16   | 239  |
| 59.783 | 20 | TGTTACCAAGTTCGCAAGA      | 60.427 | 20 | 162 | 115  | 276  |
| 59.697 | 20 | GATGCTCCACTTCTACTCCA     | 59.298 | 21 | 233 | 104  | 336  |
| 60.001 | 20 | CTACCATCTCGGGATGCAGT     | 60.096 | 20 | 253 | 1328 | 1580 |

|        |    |                           |        |    |     |      |      |
|--------|----|---------------------------|--------|----|-----|------|------|
| 60.074 | 20 | TGTGTAATTGTGTTGTGTCATGTTT | 59.278 | 25 | 210 | 309  | 518  |
| 60.014 | 20 | AGGTTCCGACAAACAACAGC      | 60.156 | 20 | 212 | 1223 | 1434 |
| 58.575 | 24 | GCTATGAGCATGTCATCAACA     | 57.291 | 21 | 125 | 0    | 124  |
| 57.312 | 24 | CAAAAACCATCTGCCCTTA       | 59.931 | 20 | 182 | 1    | 182  |
| 59.661 | 20 | CATGGGATCTCAACGATTCA      | 59.451 | 20 | 259 | 661  | 919  |
| 59.526 | 20 | CAGCATAACACACACACGCT      | 60.026 | 21 | 260 | 59   | 318  |
| 60.199 | 20 | TGCATAACACGGGTGGAGTA      | 59.988 | 20 | 252 | 1364 | 1615 |
| 59.907 | 20 | GAGGTCACCCTTGTCCGTA       | 59.966 | 20 | 257 | 222  | 478  |
| 60.44  | 20 | AACCCGCGAGTTGCTACTAA      | 59.904 | 20 | 137 | 283  | 419  |
| 60.038 | 20 | GTGTAGATCTGGCGGGTAGG      | 59.574 | 20 | 279 | 373  | 651  |
| 58.823 | 21 | TTGACTTAACAAACCCCAAGG     | 58.98  | 21 | 247 | 98   | 344  |
| 60.119 | 20 | AATTGAGTTCGGGATTGTGC      | 59.939 | 20 | 271 | 18   | 288  |
| 59.864 | 20 | TTACAATGACGTCAGCACGC      | 60.876 | 20 | 208 | 3    | 210  |
| 59.901 | 20 | TTCTACGAATGTTGACGAAAA     | 59.625 | 22 | 113 | 536  | 648  |
| 60.118 | 20 | GATACGTGATGCGTTGATCG      | 60.104 | 20 | 183 | 140  | 322  |
| 60.218 | 20 | TTAAATCTCCCCACAAACGG      | 59.795 | 20 | 241 | 11   | 251  |
| 60.032 | 22 | GTACAGAGCGAAAACGAGGC      | 60.022 | 20 | 243 | 193  | 435  |
| 60.495 | 24 | AAGCATGAGTTGTGTGCTGG      | 59.905 | 20 | 244 | 0    | 243  |
| 59.72  | 20 | CTCCCGAATTGGGTTTTCTT      | 60.291 | 20 | 213 | 11   | 223  |
| 59.864 | 20 | GTGGATCATGAGCGACCTTC      | 60.633 | 20 | 232 | 629  | 860  |
| 60.11  | 20 | AGTGTTATTACCGGATCGC       | 58.93  | 20 | 210 | 2692 | 2901 |
| 59.264 | 20 | GATGGTGAATACGATTGGCA      | 59.355 | 20 | 268 | 118  | 385  |
| 59.043 | 20 | TAGGCCGAATGAAATGAAG       | 60.031 | 20 | 202 | 203  | 404  |
| 58.949 | 22 | CTTCCAGCAGAGAATCGAG       | 60.088 | 20 | 149 | 5    | 153  |
| 60.299 | 20 | CCGGGGTAATCTCAAAACCT      | 60.18  | 20 | 247 | 540  | 786  |
| 60.103 | 20 | ATCGGCCATTCTATTTCTT       | 59.761 | 20 | 148 | 409  | 556  |
| 59.173 | 22 | AGCCATTCTGTGATTTATGG      | 59.784 | 20 | 260 | 16   | 275  |
| 60.133 | 20 | GCGTCCATTATCAAGATCC       | 60.435 | 20 | 233 | 23   | 255  |
| 60.34  | 20 | TTGATGCAGCCCAATGTATG      | 60.488 | 20 | 237 | 205  | 441  |
| 60.157 | 20 | GAGCGGGATTATCAGACGTG      | 60.624 | 20 | 210 | 3    | 212  |
| 59.971 | 20 | GGGAGAAACAACCACCATTG      | 60.21  | 20 | 252 | 600  | 851  |
| 59.997 | 20 | CATGAGCCTCCAAACCTTAA      | 60.066 | 20 | 151 | 1056 | 1206 |
| 59.797 | 20 | AGCACGAGAAAAAGACCAGC      | 59.621 | 20 | 176 | 1618 | 1793 |
| 60.058 | 20 | AGCAAGAACTCACGCCTTTC      | 59.621 | 20 | 265 | 108  | 372  |
| 59.614 | 20 | TTTTGCTGTGGTCCCTTAC       | 59.971 | 20 | 151 | 444  | 594  |
| 59.745 | 20 | TTTGGGTAGGCCTGAGTCTG      | 60.246 | 20 | 276 | 3281 | 3556 |
| 59.693 | 20 | AGCTTCAAACATTGATGGCA      | 59.276 | 20 | 247 | 243  | 489  |
| 60.457 | 20 | GCTTCGCAACGAAGGAATAC      | 59.851 | 20 | 270 | 17   | 286  |
| 59.566 | 20 | CTCCAACCTGCCACAAAAT       | 59.971 | 20 | 135 | 2515 | 2649 |
| 59.905 | 20 | GGGATGTGTGGGATTGATTC      | 59.995 | 20 | 245 | 930  | 1174 |
| 59.836 | 20 | TCACGCAATCACACAGATCA      | 59.823 | 20 | 271 | 1049 | 1319 |
| 59.257 | 20 | GGTGAACGTAGGGGTGAAAA      | 59.83  | 20 | 198 | 109  | 306  |
| 59.111 | 21 | TCGCGTAGAAATCCTTATGC      | 58.017 | 20 | 191 | 16   | 206  |
| 59.988 | 20 | TGAAAGAAAACAAGAAAGAATCA   | 60.499 | 26 | 240 | 4238 | 4477 |
| 59.48  | 19 | AGCGAGGGAATTAGGAGGAG      | 59.805 | 20 | 257 | 2    | 258  |
| 60.138 | 20 | TCCAAAGAAATTGAGGTGCC      | 60.051 | 20 | 255 | 250  | 504  |
| 59.996 | 20 | AACGAAGCAGCCGTAGAAAA      | 60.018 | 20 | 264 | 974  | 1237 |
| 59.946 | 20 | TTATCTGTCCTCTGGCCTTGA     | 59.822 | 21 | 237 | 6    | 242  |
| 58.165 | 25 | TGCGTTTTGATGATATATAGGTGT  | 60.054 | 26 | 244 | 1913 | 2156 |
| 59.685 | 20 | ATCCAATGGCCATGATTTGT      | 60.021 | 20 | 145 | 3    | 147  |
| 60.349 | 20 | TGCACAAAATCCCACAAAGA      | 60.088 | 20 | 243 | 11   | 253  |
| 60.667 | 20 | TTGCCTATTTTGGAGGATCG      | 60.031 | 20 | 224 | 47   | 270  |
| 60.074 | 20 | GGTTGTGAGAACCAACTCTGTG    | 59.664 | 22 | 187 | 118  | 304  |
| 59.651 | 20 | TTACTGCTTATCGCCACTG       | 60.011 | 20 | 236 | 41   | 276  |
| 58.619 | 21 | CAACCACGTACAACCTGCAC      | 60.072 | 20 | 236 | 739  | 974  |
| 59.742 | 20 | AGAGGAGGAACCCATGGAGA      | 60.991 | 20 | 215 | 355  | 569  |
| 59.748 | 22 | GGTTGAATGGATATGGCTCAA     | 59.776 | 21 | 269 | 140  | 408  |
| 59.364 | 21 | GGGGCGTGACAAGGATACTA      | 59.955 | 20 | 267 | 62   | 328  |

|        |    |                          |        |    |     |      |      |
|--------|----|--------------------------|--------|----|-----|------|------|
| 59.939 | 20 | TAGGGAGCTGTCAATTTCCGG    | 60.206 | 20 | 210 | 1109 | 1318 |
| 59.16  | 21 | CAGATGGGAGGAGAGAACGA     | 60.34  | 20 | 236 | 1    | 236  |
| 59.95  | 20 | AGGCAATATCAATCTCGGTGA    | 59.542 | 21 | 158 | 120  | 277  |
| 60.042 | 20 | GGGGAAGCACAGTCTAGGGT     | 60.511 | 20 | 277 | 77   | 353  |
| 60     | 20 | GGTGTGTGTGATGTCGGAG      | 60.005 | 20 | 203 | 75   | 277  |
| 59.967 | 22 | GTTTAGTGATGGAACGGGGA     | 59.79  | 20 | 144 | 47   | 190  |
| 59.903 | 20 | CACGTGGCGCTAATTGAGTA     | 59.895 | 20 | 198 | 112  | 309  |
| 59.673 | 20 | CTCGTCTGTTC AAGGCTC      | 59.561 | 19 | 233 | 1618 | 1850 |
| 60.119 | 20 | CCTCCCAAATTGTCGAGTGT     | 59.966 | 20 | 232 | 31   | 262  |
| 60.162 | 20 | AGCAAAAATGCCACGTATCC     | 59.967 | 20 | 213 | 6    | 218  |
| 60.067 | 20 | ATCTCCAATCACGTTCCACC     | 59.786 | 20 | 170 | 871  | 1040 |
| 60.434 | 25 | CAACTTGCAGGTGCTAACCA     | 59.904 | 20 | 128 | 19   | 146  |
| 59.996 | 22 | ACCCTCCTCAGCCAAAAAT      | 59.94  | 20 | 256 | 76   | 331  |
| 60.049 | 20 | AGTGTCTCCAGTCTCCACCG     | 60.306 | 20 | 225 | 2950 | 3174 |
| 60.885 | 24 | GGGCTGAAAAGCCAATTTAA     | 59.189 | 20 | 280 | 9    | 288  |
| 58.439 | 22 | GGCATTGGACATCAACATGA     | 60.339 | 20 | 187 | 72   | 258  |
| 60.246 | 20 | TCGGCTCCTCAGACACTTTT     | 59.989 | 20 | 223 | 105  | 327  |
| 59.95  | 20 | TCGCCTTAACCACTTTGAGG     | 60.241 | 20 | 275 | 363  | 637  |
| 57.171 | 23 | GTAGAGGCGGAGTGCTTTTT     | 58.604 | 20 | 233 | 0    | 232  |
| 60.547 | 20 | ATGCTGCTCTAAGGCGTGTT     | 60.044 | 20 | 250 | 2776 | 3025 |
| 59.696 | 20 | CAAACCGGACTGGACCATTA     | 60.745 | 20 | 271 | 9    | 279  |
| 59.696 | 20 | CAAACCGGACTGGACCATTA     | 60.745 | 20 | 267 | 9    | 275  |
| 59.967 | 20 | AATCTTTGAGGACCCCTTT      | 58.896 | 20 | 120 | 18   | 137  |
| 60.227 | 20 | CCTATGGTGGTATGGTGTGG     | 58.569 | 20 | 259 | 53   | 311  |
| 60.052 | 20 | CTCTGCATGTTTGTGGGTG      | 60.152 | 20 | 216 | 1864 | 2079 |
| 59.381 | 20 | TGGCGTATGCTGAGAGAATG     | 59.972 | 20 | 136 | 222  | 357  |
| 58.888 | 23 | AAAATCAAAGGCCACAATG      | 59.801 | 20 | 221 | 212  | 432  |
| 60.244 | 20 | GGGAGTTATCATTGGATCAAGC   | 59.805 | 22 | 179 | 537  | 715  |
| 59.945 | 20 | GGTCGACATTAATCTTGGCA     | 59.952 | 21 | 264 | 581  | 844  |
| 59.926 | 21 | CCAAAGAACTGATATCCTCACCTT | 59.901 | 24 | 145 | 525  | 669  |
| 60.229 | 20 | TTATCAAGGGCCCTACCTCC     | 60.278 | 20 | 204 | 605  | 808  |
| 59.772 | 20 | CGCCTACCCTCCTCTCTTCT     | 59.972 | 20 | 107 | 89   | 195  |
| 59.326 | 23 | CTTTTTAATCCACCTGGCGA     | 60.067 | 20 | 203 | 15   | 217  |
| 59.971 | 21 | TCATGTGCCTGGATTGGATA     | 59.883 | 20 | 237 | 34   | 270  |
| 59.463 | 22 | GCTGAACGAGTAATTCTTGGTG   | 58.906 | 22 | 278 | 561  | 838  |
| 58.955 | 22 | AAGATGCACGTAGGGAGGTG     | 60.134 | 20 | 207 | 6    | 212  |
| 59.434 | 21 | AGAAAACCCGGCTCGTATCT     | 60.096 | 20 | 238 | 184  | 421  |
| 59.823 | 20 | TCAAAACTGCATTTCTGGGTT    | 59.601 | 21 | 214 | 675  | 888  |
| 59.809 | 20 | CATGATTGCCATCCTCCTCT     | 60.034 | 20 | 141 | 659  | 799  |
| 58.161 | 20 | AGAGCAAACCCATCAGTGG      | 60.111 | 20 | 100 | 1726 | 1825 |
| 59.842 | 25 | CAAATTC AATGCCTCAGCA     | 59.809 | 20 | 243 | 0    | 242  |
| 59.955 | 20 | TGAGTGACAAGACCCTGCTG     | 60.022 | 20 | 202 | 635  | 836  |
| 60.287 | 19 | CCCGATCCAAGTTCAACTA      | 59.926 | 20 | 279 | 38   | 316  |
| 59.592 | 22 | CGTGGTTCGATCGTAATTGA     | 59.542 | 20 | 128 | 18   | 145  |
| 59.579 | 20 | TGCTAACAATGATGGGCAAA     | 60.073 | 20 | 111 | 2757 | 2867 |
| 60.214 | 20 | GTGGGCTGTGGCTTTTGTAT     | 60     | 20 | 188 | 353  | 540  |
| 59.943 | 20 | CCGAGACAGCACTCACGATA     | 60.008 | 20 | 239 | 4147 | 4385 |
| 59.707 | 25 | AGCATTTGATCTGATGCACG     | 59.83  | 20 | 151 | 3    | 153  |
| 58.381 | 21 | ATGGCCCCAAGAAAATAAT      | 59.512 | 20 | 268 | 123  | 390  |
| 59.08  | 21 | ATGCCTTCTCTTTCCTGCAA     | 59.955 | 20 | 246 | 4215 | 4460 |
| 60.011 | 20 | ATTGACGCCTACATTGCCTC     | 60.103 | 20 | 232 | 107  | 338  |
| 60.149 | 20 | CCTCTCATGTTTTCCCAAAA     | 59.903 | 20 | 201 | 267  | 467  |
| 59.997 | 20 | ATCCTCATCTTTC CCAACC     | 60.133 | 20 | 170 | 1400 | 1569 |
| 59.028 | 20 | TTGTCTCACCCCTCTCCATC     | 60.048 | 20 | 119 | 1    | 119  |
| 57.458 | 27 | ATGCACTACCGGATAGGCTC     | 59.178 | 20 | 197 | 49   | 245  |
| 60.306 | 20 | ACACCCACCACCTCATCT       | 60.291 | 20 | 197 | 118  | 314  |
| 60     | 22 | GCCAAATTAAGGGCATGAAA     | 59.907 | 20 | 139 | 258  | 396  |
| 59.978 | 20 | TCTCCTCCCCTTTTAATTCCT    | 58.212 | 21 | 218 | 51   | 268  |

|        |    |                          |        |    |     |      |      |
|--------|----|--------------------------|--------|----|-----|------|------|
| 59.583 | 21 | CACTTGGACCTGAAAAGGGA     | 60.081 | 20 | 141 | 0    | 140  |
| 59.799 | 20 | TGCTATCCCATTGCCCTAAG     | 60.053 | 20 | 198 | 263  | 460  |
| 59.823 | 20 | CGTTAGGCTCGAGAGTGAAGA    | 59.766 | 21 | 161 | 3    | 163  |
| 60.051 | 20 | TTGAATTTTTGGGGTTGGAA     | 60.138 | 20 | 251 | 125  | 375  |
| 60.363 | 20 | CCCACCAGTGCCATACTTCT     | 59.989 | 20 | 116 | 657  | 772  |
| 59.933 | 20 | TCTTCAATCCTTCTTCCCCA     | 59.6   | 20 | 159 | 32   | 190  |
| 59.923 | 20 | TTCGAAAATGGAGGGATGAG     | 60.006 | 20 | 211 | 99   | 309  |
| 59.96  | 20 | TGGGTGGATCTTGAAAGAGG     | 60.042 | 20 | 227 | 753  | 979  |
| 59.927 | 20 | GCCCTCCCAAAGTAACTCC      | 59.94  | 20 | 211 | 40   | 250  |
| 59.861 | 20 | CAGTCCACTTTTGAATGGCA     | 59.691 | 20 | 207 | 25   | 231  |
| 59.934 | 20 | CAGGCACATGCAAAAAGAAA     | 59.849 | 20 | 177 | 102  | 278  |
| 59.121 | 25 | TCTTCATCCCATTGACCCAT     | 60.135 | 20 | 264 | 112  | 375  |
| 60.274 | 22 | TTCCGATTGCAAGAAAAACA     | 59.277 | 20 | 269 | 288  | 556  |
| 59.972 | 20 | TTCATCATCTTCCCTTTCTGC    | 59.259 | 21 | 176 | 64   | 239  |
| 59.959 | 25 | AATCCATACTGCCAAAACGG     | 59.823 | 20 | 251 | 228  | 478  |
| 59.914 | 22 | GTCTCTTCTGGGAGGGTTC      | 60.05  | 20 | 153 | 2    | 154  |
| 57.01  | 23 | GGTCATTTTAGCTTGATCAACAG  | 57.952 | 23 | 174 | 524  | 697  |
| 60.082 | 23 | TGTTTCTCGATAGCCCGTTT     | 59.708 | 20 | 243 | 1913 | 2155 |
| 59.545 | 20 | TTTGAGAAAGCAGTGGCAGA     | 59.716 | 20 | 252 | 9710 | 9961 |
| 60.314 | 20 | GGCAATCAGTAGCCCAAAAA     | 60.074 | 20 | 273 | 2516 | 2788 |
| 59.091 | 20 | GGTCGGCTACATGAACCAA      | 60.894 | 20 | 159 | 0    | 158  |
| 60.258 | 20 | AAGCGAAGGTGTTGATGAGC     | 60.406 | 20 | 233 | 84   | 316  |
| 59.957 | 20 | GCGTGGTCTTGCCAATTTAT     | 59.967 | 20 | 272 | 2773 | 3044 |
| 59.744 | 23 | CTCAAGCTCGTCACCCTTTT     | 59.473 | 20 | 147 | 7    | 153  |
| 59.993 | 20 | AAGGAGGTGTTATGAAGGGATT   | 58.028 | 22 | 268 | 973  | 1240 |
| 59.96  | 22 | TTGATTCTGGAATATCCCGC     | 59.862 | 20 | 151 | 92   | 242  |
| 59.75  | 20 | GACCTAAGCCACTCGCTACG     | 60.037 | 20 | 240 | 294  | 533  |
| 60.147 | 20 | GAGCCCCACTATCTTCACCA     | 60.073 | 20 | 221 | 48   | 268  |
| 59.349 | 20 | TTCTTTCTCATTCTCTCGGCTC   | 60.096 | 22 | 146 | 1149 | 1294 |
| 59.941 | 20 | TCCTCATTGTTTGTGTGAAA     | 59.01  | 21 | 206 | 56   | 261  |
| 60.012 | 20 | ATGCCTCAAACAACCTCACC     | 59.973 | 20 | 161 | 986  | 1146 |
| 60.083 | 26 | TGGATGAGCTCCAATGTGTC     | 59.637 | 20 | 147 | 1    | 147  |
| 59.995 | 20 | GACGCTCCACATGATGACAC     | 60.13  | 20 | 265 | 118  | 382  |
| 60.036 | 20 | AAAACGCGAAATGAGGAAGA     | 58.962 | 21 | 154 | 253  | 406  |
| 60.11  | 21 | TTGCTACAAAACAGTGGCA      | 60.293 | 20 | 205 | 1060 | 1264 |
| 59.966 | 20 | CGATGTTTATTTGAGGCGCT     | 60.23  | 20 | 108 | 190  | 297  |
| 60.584 | 20 | TTTGTGAACGTCGTCATTGT     | 57.571 | 20 | 200 | 243  | 442  |
| 60.019 | 20 | TCCACGTGGCACTTCATCTA     | 60.263 | 20 | 219 | 2319 | 2537 |
| 59.92  | 20 | CCAGCAGACAAAAAGCATCA     | 59.988 | 20 | 131 | 467  | 597  |
| 59.75  | 20 | TTCCATTGGGTTTTGGGTTA     | 60.024 | 20 | 142 | 4045 | 4186 |
| 59.206 | 20 | TGCCCTTCTGACTCTGTCT      | 59.986 | 20 | 230 | 193  | 422  |
| 60.703 | 22 | ACTGCCCAACAATGGCTTAC     | 60     | 20 | 189 | 6    | 194  |
| 60.201 | 20 | CCATGATTTCTTTAATTCGATG   | 59.7   | 23 | 115 | 217  | 331  |
| 59.93  | 22 | TGTTTTGCCCGTACGTTGTA     | 60.029 | 20 | 245 | 194  | 438  |
| 60.713 | 20 | TGAGCTGGCAGAGACCTTTT     | 60.134 | 20 | 134 | 209  | 342  |
| 60.03  | 20 | TTAGGCCCTCCCTACATCT      | 59.919 | 20 | 147 | 335  | 481  |
| 59.9   | 20 | CTCACCAGGCCAGGGTAGTA     | 60.126 | 20 | 212 | 1216 | 1427 |
| 59.971 | 20 | TCCCAACAAAACGAAAAAGT     | 57.25  | 20 | 201 | 1235 | 1435 |
| 60.011 | 20 | CGCTCTCTCATTGTAATCTCTCTC | 58.83  | 24 | 136 | 345  | 480  |
| 60.096 | 20 | TTAATGCACTTCGACGATGG     | 59.688 | 20 | 248 | 736  | 983  |
| 59.907 | 20 | GCCAGCTTATTTGGTGA        | 60.074 | 20 | 238 | 1678 | 1915 |
| 60.081 | 20 | GTCAAGCCTGGGACTGAGAG     | 59.986 | 20 | 261 | 1176 | 1436 |
| 59.83  | 20 | GACTGGAGGAGAGCGAGCTT     | 61.212 | 20 | 213 | 118  | 330  |
| 59.052 | 20 | TTCAAACATGGCAACAATGG     | 60.357 | 20 | 139 | 409  | 547  |
| 60.131 | 20 | AAATCCTTTGCACAACCCAC     | 59.836 | 20 | 111 | 48   | 158  |
| 60.058 | 20 | TTCTTGGCAATCATGTCCCT     | 60.461 | 20 | 183 | 66   | 248  |
| 57.333 | 24 | TCACACTCACGCACTCACAA     | 60.07  | 20 | 121 | 15   | 135  |
| 60.22  | 20 | TTTGTACCAAAAAGTATATAAATG | 57.58  | 27 | 260 | 597  | 856  |



|        |    |                          |        |    |     |      |      |
|--------|----|--------------------------|--------|----|-----|------|------|
| 59.455 | 23 | TCGTTCAAGTCGGTCACATT     | 59.139 | 20 | 195 | 46   | 240  |
| 60.118 | 20 | CAGATCTGATGGCCCAGATT     | 60.034 | 20 | 143 | 276  | 418  |
| 59.697 | 20 | GCCCGGCATACAAATAGAGA     | 60.06  | 20 | 270 | 22   | 291  |
| 60.199 | 20 | AGTCACCGACAACCTCCAACC    | 60.009 | 20 | 250 | 20   | 269  |
| 60.523 | 20 | TAACCACCCAATCTTCGCTC     | 60.074 | 20 | 181 | 96   | 276  |
| 59.966 | 22 | TCGTGAGAGATAGATATGGAGAG  | 57.233 | 24 | 261 | 88   | 348  |
| 59.41  | 21 | GGGTCTGACATTGTAATAAAGGG  | 58.812 | 23 | 272 | 31   | 302  |
| 60.817 | 20 | CACGTTCCGGTTTGATAAGG     | 60.357 | 20 | 250 | 446  | 695  |
| 57.154 | 22 | GGGTGTATGTGAACCAACCA     | 59.112 | 20 | 203 | 628  | 830  |
| 60.011 | 20 | AATTTGGCTTGTTACAGCGG     | 60.131 | 20 | 253 | 563  | 815  |
| 58.4   | 21 | CCTCCATTATCCACTCTCGC     | 59.653 | 20 | 258 | 739  | 996  |
| 59.556 | 24 | AAGAGCAGAAAGGGGGAAAA     | 60.18  | 20 | 248 | 32   | 279  |
| 58.013 | 23 | TTTTCCGGTTAACAAATCGC     | 59.943 | 20 | 279 | 792  | 1070 |
| 60.088 | 20 | TGTCGAAATGGGAGTCACAA     | 60.088 | 20 | 105 | 1226 | 1330 |
| 59.847 | 20 | TCAGAACATGGGCAAATTCA     | 60.049 | 20 | 169 | 491  | 659  |
| 60.375 | 20 | GGGACATCTTGGTGGGAATA     | 59.605 | 20 | 279 | 35   | 313  |
| 59.697 | 20 | GGGAACATTCGAGCCATAAC     | 59.391 | 20 | 163 | 41   | 203  |
| 59.768 | 24 | GAGAGAGGCAGACATCAGGC     | 60.104 | 20 | 280 | 21   | 300  |
| 60.011 | 20 | CAGATGATGTCCCAGCAAAA     | 59.648 | 20 | 259 | 36   | 294  |
| 59.583 | 22 | ATCGTCCCCTCTCTTGCAG      | 60.356 | 19 | 204 | 375  | 578  |
| 60.683 | 20 | TTGTGTGATCGAACACGTT      | 60.008 | 20 | 123 | 48   | 170  |
| 60.116 | 21 | CTCGTCATCAACTTTTCCCC     | 59.526 | 20 | 209 | 411  | 619  |
| 60.472 | 20 | GGATAGGAATCTCAAGAGTATGC, | 60.007 | 25 | 185 | 1013 | 1197 |
| 60.844 | 20 | TCTCTCTTTCTTGTTGGTGAA    | 58.955 | 22 | 190 | 142  | 331  |
| 59.89  | 21 | ATTCGGACATCGAGATTTGG     | 59.894 | 20 | 238 | 69   | 306  |
| 59.778 | 20 | CGAATACTCCAAATGACACCAA   | 59.861 | 22 | 238 | 53   | 290  |
| 59.322 | 21 | TTGAATATGCAATCACCAAAGAA  | 59.485 | 23 | 219 | 26   | 244  |
| 57.122 | 26 | GGTGCACCACCCCTATCTT      | 59.794 | 19 | 251 | 590  | 840  |
| 60.298 | 20 | AAGAAAACAGAGGTAGTGAATTG  | 59.658 | 26 | 231 | 287  | 517  |
| 59.273 | 20 | TTAACAAACGTTTCGGAATTTTT  | 57.813 | 22 | 280 | 122  | 401  |
| 60.117 | 20 | TTCACCATGATTTTCGATACACA  | 58.895 | 22 | 230 | 656  | 885  |
| 59.791 | 21 | TTTCTCCTCGTATGCGTATTCA   | 59.742 | 22 | 277 | 644  | 920  |
| 59.145 | 21 | AGAGGGAAAACAGGGGTAGC     | 59.576 | 20 | 124 | 7    | 130  |
| 60.031 | 20 | ATAAGCAACGAAGGGAGTGC     | 59.34  | 20 | 212 | 279  | 490  |
| 59.939 | 20 | AATCTTCGCCCTTTTGTCT      | 60.074 | 20 | 274 | 1615 | 1888 |
| 59.955 | 20 | ATTTTATCCGACTGGCGTTG     | 59.96  | 20 | 272 | 457  | 728  |
| 59.933 | 20 | AACAAAATCACCCCTCACA      | 60.21  | 20 | 108 | 4    | 111  |
| 57.727 | 24 | TTTCACTTTTTGCACTCCCC     | 60.088 | 20 | 151 | 0    | 150  |
| 59.263 | 20 | TATCACCATAACGCACCCCT     | 60.214 | 20 | 247 | 127  | 373  |
| 60.255 | 20 | CCAGGTGGAGTTACACCCAT     | 59.697 | 20 | 208 | 732  | 939  |
| 59.357 | 20 | ATGGCCATGTTTTTGGATGT     | 60.059 | 20 | 202 | 651  | 852  |
| 59.566 | 24 | GAATCACTTTGCAAGCACCA     | 59.847 | 20 | 183 | 221  | 403  |
| 60.081 | 20 | GTGGAATCAGTGAGGAGGGA     | 60.048 | 20 | 182 | 66   | 247  |
| 59.903 | 20 | ATTGAATCGCAAGCACATGA     | 60.228 | 20 | 124 | 194  | 317  |
| 59.84  | 21 | GATTTTGTAGCCTTTTGTCTGC   | 59.967 | 20 | 212 | 5    | 216  |
| 60.214 | 20 | GGGACTGTGAAACAGGGAAA     | 59.943 | 20 | 251 | 271  | 521  |
| 59.84  | 20 | TGCAAAGAAAGAATCTGGGG     | 60.184 | 20 | 259 | 805  | 1063 |
| 59.839 | 20 | TGAGATTTTCTGCCAAACC      | 60.051 | 20 | 187 | 1596 | 1782 |
| 60.578 | 20 | CTCTTCAGCTGCTCTCCGTT     | 59.891 | 20 | 244 | 304  | 547  |
| 59.396 | 21 | CATGTGTGAATATCCGCTCG     | 60.096 | 20 | 190 | 39   | 228  |
| 59.989 | 20 | ACGGCATTGAAGAAATGAGG     | 60.074 | 20 | 268 | 56   | 323  |
| 59.897 | 21 | TCGAATCCGAATCTTTCACC     | 60.014 | 20 | 276 | 836  | 1111 |
| 59.792 | 20 | GCTTTTACCAAGGTGAGGCA     | 60.249 | 20 | 249 | 686  | 934  |
| 61.165 | 20 | GCCTTTGGTGGACTTTTCAA     | 60.088 | 20 | 240 | 1    | 240  |
| 60.119 | 20 | TCCCGTTTCACTCTTCTGCT     | 59.989 | 20 | 264 | 917  | 1180 |
| 60.135 | 20 | ATGCCAACTCACCCATAAGC     | 59.962 | 20 | 276 | 3    | 278  |
| 59.773 | 20 | GAACCGTTTAAACAACCCGA     | 59.839 | 20 | 271 | 107  | 377  |
| 60.41  | 20 | ACATCTCTTGTCTCCCCCA      | 59.505 | 20 | 256 | 199  | 454  |

|        |    |                           |        |    |     |      |      |
|--------|----|---------------------------|--------|----|-----|------|------|
| 60.012 | 20 | CAAGTTTCATCTTCCTCGCC      | 59.813 | 20 | 199 | 229  | 427  |
| 60.263 | 20 | TTACCGTGTGTGTCATGTG       | 60.071 | 20 | 104 | 1210 | 1313 |
| 58.388 | 25 | TCAAGTAAATCAGCCGTCCC      | 60.074 | 20 | 270 | 0    | 269  |
| 59.973 | 20 | GTCGGGAGAGAGGGGTAAAT      | 59.397 | 20 | 279 | 20   | 298  |
| 60.484 | 20 | GGGGTGGAAAGGGTTTAGAA      | 60.159 | 20 | 245 | 485  | 729  |
| 60.475 | 20 | TGGCAATGTGGTGGTAAAGA      | 59.964 | 20 | 187 | 164  | 350  |
| 60.011 | 20 | CCATCGTTGTCGAAATCCTT      | 59.933 | 20 | 207 | 274  | 480  |
| 59.001 | 20 | ATGAATGGATTCCGGTCAAA      | 60.133 | 20 | 276 | 6    | 281  |
| 59.928 | 20 | TGGAGCATAACGCAACATCAT     | 60.104 | 20 | 248 | 28   | 275  |
| 60.096 | 20 | TGGGGCCTACGAGAAATATG      | 59.916 | 20 | 170 | 311  | 480  |
| 59.971 | 20 | GGATTTCCGTTGTTATTGCC      | 59.277 | 20 | 276 | 83   | 358  |
| 59.971 | 20 | TGGTTAGCACCAAATAGCCA      | 59.182 | 20 | 194 | 50   | 243  |
| 60.607 | 20 | GAAAGTTGGCTCAAGCTCGT      | 59.621 | 20 | 274 | 12   | 285  |
| 59.797 | 20 | GAGAGCTATAACCGACGGCAG     | 60     | 20 | 256 | 386  | 641  |
| 59.984 | 20 | AACACACAGAAGGGAGTGGG      | 60.002 | 20 | 240 | 635  | 874  |
| 59.935 | 20 | CGTCGGTCAGAACCTTGATT      | 60.111 | 20 | 166 | 26   | 191  |
| 60.074 | 20 | ATTTCCCTGGCCTTCTTCGT      | 60.074 | 20 | 189 | 1432 | 1620 |
| 59.939 | 20 | GTCTTGGGGGAGTAACCCAT      | 60.052 | 20 | 217 | 2444 | 2660 |
| 60.111 | 20 | GAAGTGCAGTTTCCCCTTCA      | 60.232 | 20 | 204 | 816  | 1019 |
| 58.188 | 22 | AAATGGAGCAAACATTACCGA     | 59.465 | 21 | 244 | 551  | 794  |
| 59.615 | 20 | CCATGTCAAGGGTTCGAAGT      | 59.966 | 20 | 235 | 118  | 352  |
| 59.564 | 20 | TCCTTTGCACCTATTCGTCC      | 60.074 | 20 | 102 | 1846 | 1947 |
| 58.427 | 27 | TTGTTGGTGGGTTTGAGTGA      | 59.976 | 20 | 218 | 6    | 223  |
| 59.942 | 20 | GGTTCGAGTCTCAATGGGAA      | 60.05  | 20 | 224 | 399  | 622  |
| 59.933 | 20 | CTTAAACCCTTGAGCCATGC      | 59.708 | 20 | 202 | 137  | 338  |
| 60.096 | 20 | GAAGAAATCCCCAAGACC        | 59.744 | 20 | 278 | 1814 | 2091 |
| 59.744 | 21 | ATGTGTTGGTTTTGGCTGC       | 60.934 | 20 | 220 | 94   | 313  |
| 59.231 | 22 | TGTGGTTGAAATCTAGCCCTTT    | 60.001 | 22 | 149 | 10   | 158  |
| 59.981 | 20 | GCACTGCTTTTTGGTGATGA      | 59.847 | 20 | 200 | 270  | 469  |
| 60.008 | 20 | TGACACAGATTTGGTGCTTG      | 58.246 | 20 | 238 | 385  | 622  |
| 60.191 | 20 | AGAGGTTAGGGTGTGGGCT       | 59.994 | 20 | 255 | 690  | 944  |
| 59.933 | 20 | ATGCCACCTCCAATTTTCAC      | 59.797 | 20 | 121 | 134  | 254  |
| 59.847 | 20 | GTCATCATCGTCTTCCCCAC      | 60.335 | 20 | 123 | 28   | 150  |
| 57.781 | 24 | TGTGTTTTGACAATATTTAGTGTTT | 58.633 | 27 | 101 | 756  | 856  |
| 60.523 | 20 | GTTAGGGATAACCGCTAGGCA     | 59.205 | 20 | 273 | 72   | 344  |
| 57.034 | 27 | GAAATTTCTTGCCCGAATCA      | 60.016 | 20 | 202 | 52   | 253  |
| 60.332 | 20 | AAAAGAAGCAGCAGTCGGAA      | 60.132 | 20 | 116 | 5    | 120  |
| 59.402 | 21 | CTCAAAGAGCACCTCCTGC       | 60.134 | 20 | 200 | 9    | 208  |
| 60.103 | 20 | CCTCCCGAATTTCTGTGTGT      | 59.966 | 20 | 211 | 819  | 1029 |
| 57.729 | 24 | TAGTCAATGGAGGGTGGGAG      | 59.92  | 20 | 241 | 544  | 784  |
| 60.112 | 20 | GTTGGATGTTAAGGATGCCG      | 60.331 | 20 | 275 | 137  | 411  |
| 59.95  | 20 | CGTGAACACACCGGTTCAAT      | 61.814 | 20 | 270 | 336  | 605  |
| 58.405 | 20 | GGGTTGTGGTGAAGGAGAGA      | 60.088 | 20 | 195 | 22   | 216  |
| 59.761 | 20 | TGCTTAAAATGGGTTTTCCG      | 59.937 | 20 | 220 | 169  | 388  |
| 58.897 | 20 | TCAATGACCACACAACCACA      | 59.376 | 20 | 260 | 135  | 394  |
| 60.156 | 20 | CACTAAATAAATATTTTGGCATAT  | 57.149 | 27 | 247 | 19   | 265  |
| 60.331 | 20 | TCAGATGAAAAGCCTACAGGAA    | 58.973 | 22 | 126 | 224  | 349  |
| 59.722 | 20 | AGCCGAGGACATTCTTCTGA      | 59.95  | 20 | 248 | 370  | 617  |
| 59.827 | 20 | CAAGTGCAGCAACTTTTGGGA     | 60.027 | 20 | 241 | 65   | 305  |
| 59.882 | 20 | TCCTCCCAACATATTGTGCAT     | 60.207 | 21 | 225 | 57   | 281  |
| 58.028 | 20 | AATCTCGCATCCCAATTCTG      | 60.036 | 20 | 121 | 72   | 192  |
| 60.54  | 20 | GCGACTGGCACCTTATCTTC      | 59.843 | 20 | 179 | 2076 | 2254 |
| 59.955 | 20 | TGGAACCCATCAACACAAAA      | 59.792 | 20 | 263 | 379  | 641  |
| 59.75  | 20 | CGGGTTTCGCTATTCATCAT      | 59.923 | 20 | 153 | 12   | 164  |
| 57.416 | 21 | AGTTTTTAATCGTGGCCGCT      | 60.976 | 20 | 156 | 135  | 290  |
| 60.46  | 20 | ACCTTTTACGGGGAAGGAAA      | 59.808 | 20 | 191 | 81   | 271  |
| 59.799 | 22 | GGAGTGTGGAGGAGGAGTG       | 59.682 | 20 | 276 | 6    | 281  |
| 58.649 | 22 | CGTGGTTCGATCGTAAATGA      | 59.542 | 20 | 217 | 114  | 330  |

|        |    |                           |        |    |     |      |      |
|--------|----|---------------------------|--------|----|-----|------|------|
| 57.6   | 26 | AGTCAAGGAGGGCAGAGTGA      | 59.986 | 20 | 274 | 4    | 277  |
| 60.006 | 20 | TGCATTTATCCGATTTATCAAAA   | 58.561 | 23 | 207 | 814  | 1020 |
| 59.836 | 20 | GTCGTGGATATGGGCTGACT      | 59.957 | 20 | 196 | 1105 | 1300 |
| 60.134 | 20 | TCATGTTAATTGGTGGTATCATTTG | 59.898 | 25 | 188 | 3400 | 3587 |
| 59.955 | 20 | TGAAACTGAAGATTTGGGGC      | 60.051 | 20 | 176 | 1234 | 1409 |
| 59.162 | 22 | ACAGGGCTTGGGACAAACTA      | 59.592 | 20 | 245 | 1892 | 2136 |
| 60.073 | 20 | CCAGTTTTACCACCGCCTTA      | 59.99  | 20 | 172 | 803  | 974  |
| 59.937 | 21 | GGGTATGTGGACAGAGTGGG      | 60.238 | 20 | 125 | 81   | 205  |
| 58.572 | 20 | ATTTGTGCGAGTCTCGTGTG      | 59.905 | 20 | 248 | 698  | 945  |
| 59.824 | 20 | TATTATCACGGTTTTCCGGG      | 59.655 | 20 | 150 | 510  | 659  |
| 58.858 | 22 | TCATGTGTCTTCCACCATGAA     | 59.951 | 21 | 188 | 5026 | 5213 |
| 57.063 | 22 | TCTTTCTTTCCCTTGCTCCA      | 59.926 | 20 | 221 | 123  | 343  |
| 59.976 | 20 | CCAATGCATTACGAGTTGGT      | 58.502 | 20 | 224 | 418  | 641  |
| 59.992 | 21 | TCCTAGCCCTCAATCTCGAA      | 59.91  | 20 | 252 | 608  | 859  |
| 60.11  | 20 | GCACTCTCCAGCTCGATTTT      | 60.104 | 20 | 181 | 977  | 1157 |
| 59.325 | 20 | GTACTIONGCAACGGAGATGCG    | 58.555 | 20 | 215 | 41   | 255  |
| 59.976 | 20 | CACCCGACGTATTCGAGTTT      | 59.993 | 20 | 249 | 176  | 424  |
| 60.081 | 20 | TCACTTCTTGCCGATGAAGA      | 59.522 | 20 | 274 | 477  | 750  |
| 59.801 | 20 | TTCATCATCAGCTGCTGTCC      | 59.95  | 20 | 216 | 1039 | 1254 |
| 60     | 20 | TGCCACAGTTTCATCTTCCA      | 60.24  | 20 | 190 | 4610 | 4799 |
| 60.456 | 20 | CGGAGTTGAGGACTTAACGG      | 59.728 | 20 | 249 | 109  | 357  |
| 59.434 | 20 | AGGTTTGGAGCCATTTTGTG      | 59.971 | 20 | 142 | 324  | 465  |
| 59.933 | 20 | CAACACAATACTAATGCAATCCG   | 59.437 | 23 | 223 | 14   | 236  |
| 59.169 | 20 | TTGGGGGAGAATTGTTTGAG      | 59.903 | 20 | 248 | 84   | 331  |
| 60.044 | 20 | CTTGACGACTTCGAACCTGA      | 59.007 | 20 | 249 | 113  | 361  |
| 59.072 | 21 | ATCATAATTGACGCCCTTCG      | 59.923 | 20 | 105 | 11   | 115  |
| 60.192 | 20 | ATGGACCCTTGTTGGTTTGA      | 60.21  | 20 | 146 | 299  | 444  |
| 60.11  | 21 | GATGGAAAATGGTGAATTGGG     | 59.991 | 20 | 187 | 84   | 270  |
| 59.01  | 21 | CCGCACACCCTATCTTTTA       | 59.953 | 20 | 229 | 356  | 584  |
| 59.135 | 20 | ATTGCTTTGACACCACCACA      | 60.008 | 20 | 279 | 47   | 325  |
| 59.933 | 20 | GACGAAAATTGCCCGTAAAA      | 59.943 | 20 | 247 | 103  | 349  |
| 59.693 | 21 | ATTTCAAATCCTTCCCACCC      | 59.996 | 20 | 217 | 25   | 241  |
| 59.929 | 20 | GAACATCGACTCACTGTATTGTTT  | 57.373 | 24 | 166 | 233  | 398  |
| 59.988 | 20 | AGCTTCTGCTTCACACAGCA      | 59.929 | 20 | 232 | 107  | 338  |
| 57.321 | 26 | TCCCTCAAACAGATTCCCA       | 60.43  | 20 | 207 | 663  | 869  |
| 60.119 | 20 | TGTCCGAAATTCTCTCACCC      | 60.05  | 20 | 210 | 38   | 247  |
| 60.131 | 20 | ACTGCAACCCATCCTTTGAG      | 60.111 | 20 | 213 | 24   | 236  |
| 59.328 | 26 | AAATCCTTGACCTCCTCCT       | 60.074 | 20 | 132 | 2    | 133  |
| 59.848 | 20 | AAGTTGGAACGAGCGAAAAA      | 59.861 | 20 | 239 | 87   | 325  |
| 59.82  | 20 | CTCCATGCCTCTGCTTTTT       | 59.574 | 20 | 186 | 594  | 779  |
| 58.158 | 20 | GGCCCAGTAGCATGAATATGA     | 59.937 | 21 | 267 | 108  | 374  |
| 59.216 | 21 | CGTAGTTGCTACATGTTAAAGAAA  | 57.052 | 25 | 280 | 21   | 300  |
| 59.881 | 20 | AAAATCAAAGGCCACAATG       | 59.801 | 20 | 277 | 2    | 278  |
| 60.095 | 20 | CCCCCAGCAAAAATAAAAAGG     | 60.637 | 20 | 162 | 4425 | 4586 |
| 59.789 | 20 | CCCCAAGAGAGGATTTCAACA     | 60.042 | 20 | 262 | 15   | 276  |
| 59.64  | 20 | TCGTTTCTTCACTCCAACCC      | 60.088 | 20 | 162 | 241  | 402  |
| 60.363 | 20 | ATGAAAATGGGCGAGAGTTT      | 58.647 | 20 | 225 | 231  | 455  |
| 59.85  | 20 | AATACTCACGGGAAGCATCG      | 60.096 | 20 | 147 | 13   | 159  |
| 58.864 | 25 | CCAATGACACGTTATGCTCAA     | 59.6   | 21 | 198 | 92   | 289  |
| 60.199 | 20 | GTTGTTTTTGTGCGGATTT       | 59.982 | 20 | 280 | 1    | 280  |
| 60.126 | 20 | CAGCAATTTGATTTTCAAGTGA    | 59.883 | 22 | 193 | 262  | 454  |
| 59.52  | 20 | CGGGATTTAGGTGTTTTGACC     | 60.579 | 21 | 280 | 1935 | 2214 |
| 59.848 | 20 | ATCGATAATTCGCACCCAAG      | 59.923 | 20 | 234 | 960  | 1193 |
| 60.149 | 20 | TCTGGGCTCCCAAATTTTA       | 59.52  | 20 | 277 | 824  | 1100 |
| 59.91  | 20 | GGGAGATGAGGGGAAAAGAG      | 60.008 | 20 | 171 | 279  | 449  |
| 60.088 | 20 | TGGCTTAAGGCAATTTGTTAAT    | 57.918 | 22 | 241 | 222  | 462  |
| 58.573 | 21 | CTTTGAATTGCAGCTCGACA      | 60.134 | 20 | 271 | 652  | 922  |
| 60.206 | 20 | TCGTCCGAAAATCCTTTCAC      | 60.051 | 20 | 272 | 77   | 348  |

|        |    |                          |        |    |     |      |      |
|--------|----|--------------------------|--------|----|-----|------|------|
| 59.931 | 20 | CCAAATGATTTCCCTTTGATG    | 59.26  | 21 | 229 | 60   | 288  |
| 59.805 | 20 | CACTTTCTGCACCCCAAAT      | 59.971 | 20 | 261 | 888  | 1148 |
| 58.2   | 22 | ATACCGCTGACGACAACCAT     | 60.406 | 20 | 134 | 4    | 137  |
| 59.813 | 20 | ATGTAGGGAAAGATGGCACG     | 59.955 | 20 | 275 | 412  | 686  |
| 59.772 | 20 | TCTGGTTTGCAAACTTTCTGT    | 58.927 | 22 | 167 | 896  | 1062 |
| 59.343 | 20 | ATTGCTCTCCAACCCACAAC     | 59.973 | 20 | 257 | 130  | 386  |
| 60.13  | 20 | ATTTGCAAAATCAACGGACG     | 59.938 | 20 | 162 | 221  | 382  |
| 59.6   | 20 | GCTGGTGTGGGAGAGAGAT      | 59.258 | 20 | 212 | 507  | 718  |
| 59.109 | 25 | ATTACGTGATCCAACGGTC      | 59.82  | 20 | 135 | 2    | 136  |
| 61.031 | 20 | CCCAGTCGTATCACTTTGGC     | 60.517 | 20 | 201 | 22   | 222  |
| 60.184 | 20 | CACAGGAACAAGAGCGAATG     | 59.44  | 20 | 273 | 132  | 404  |
| 58.895 | 21 | ACATTGAAAACCGCCGTTT      | 59.978 | 20 | 145 | 114  | 258  |
| 60.352 | 20 | ACGGATTTGTCGATCGGTTA     | 60.331 | 20 | 224 | 1336 | 1559 |
| 59.182 | 20 | GTTCTGCCACCCTACTTGA      | 59.966 | 20 | 196 | 53   | 248  |
| 60.149 | 20 | CTTCGGCAACGAAATACCAT     | 59.96  | 20 | 147 | 92   | 238  |
| 59.746 | 20 | TGTAGGGAGTGGGATGTGTG     | 59.388 | 20 | 206 | 186  | 391  |
| 59.079 | 20 | GGGAAATTTTCAAGTTGCAACA   | 59.967 | 21 | 249 | 3    | 251  |
| 58.984 | 20 | ATGTGCAGGAATCTCAAGGG     | 60.073 | 20 | 224 | 17   | 240  |
| 60.22  | 20 | ACGTAGTGGGAAAAGGGCT      | 59.998 | 20 | 273 | 127  | 399  |
| 60     | 20 | CTTATTGCCTCCATCGTCGT     | 60.096 | 20 | 223 | 83   | 305  |
| 59.847 | 20 | TGGGAATCTTTGCATCTTCC     | 60.014 | 20 | 127 | 333  | 459  |
| 60.066 | 20 | AATTGGGGTGCAGTTCAAAG     | 59.971 | 20 | 180 | 110  | 289  |
| 59.813 | 20 | CACTTAGGGGGTTATTAGTGGA   | 58.515 | 23 | 279 | 7706 | 7984 |
| 60.096 | 20 | CATCCACGTGTGCTAACTCG     | 60.324 | 20 | 184 | 2394 | 2577 |
| 59.952 | 21 | AAACAATATGGCCTCCCAA      | 59.273 | 20 | 196 | 584  | 779  |
| 58.83  | 21 | ATGACAACCCACCAGAAAGC     | 59.973 | 20 | 172 | 950  | 1121 |
| 59.945 | 20 | AGACCGAGCGCAATGAATTA     | 60.742 | 20 | 225 | 265  | 489  |
| 59.916 | 20 | GTTGTGTAGCCAAACATGCG     | 60.18  | 20 | 151 | 0    | 150  |
| 60.207 | 20 | ATTAATGCCGGTCAAAGCA      | 60.456 | 20 | 267 | 150  | 416  |
| 60.448 | 20 | TAAGATCGAACGATCCAGCC     | 60.177 | 20 | 208 | 97   | 304  |
| 59.882 | 20 | GAAACTGACCACCACGGAAT     | 59.827 | 20 | 193 | 462  | 654  |
| 59.281 | 20 | ACAAAACCACGGCTGTCAAT     | 60.419 | 20 | 183 | 16   | 198  |
| 59.833 | 20 | AAAAACACGAACTTGATTGTGA/  | 59.952 | 24 | 270 | 102  | 371  |
| 59.055 | 20 | CGAATGAGCCACAGAATTT      | 60.074 | 20 | 240 | 27   | 266  |
| 59.925 | 20 | TGTTTTGTTGCTTGCTTGT      | 59.366 | 20 | 204 | 1152 | 1355 |
| 59.074 | 21 | GGGTCTTCTTTTGGGACTC      | 59.912 | 20 | 180 | 462  | 641  |
| 59.332 | 26 | CCGGGACCGAAACATAGAT      | 59.759 | 19 | 232 | 2015 | 2246 |
| 59.967 | 20 | CCAATTTGAATGGTTATTACCTGA | 59.191 | 24 | 141 | 581  | 721  |
| 60.06  | 20 | TGGATGACGAGGTGAGATT      | 60.622 | 20 | 253 | 91   | 343  |
| 59.691 | 20 | TCGGAATAGGTGGTTTTTCG     | 59.931 | 20 | 267 | 18   | 284  |
| 59.898 | 25 | AGGAGCAATACTGCTTGTTGA    | 59.89  | 21 | 146 | 10   | 155  |
| 60.081 | 20 | CAACTGGGCTAAGGATTTTG     | 58.751 | 21 | 152 | 59   | 210  |
| 59.887 | 20 | GCGGTATACTGCCTTTCCAA     | 60.096 | 20 | 197 | 19   | 215  |
| 57.806 | 25 | CAATGGTAAAACAACGCTCG     | 59.226 | 20 | 265 | 1    | 265  |
| 60.088 | 20 | AACATGGCCGGAGAATACAG     | 59.955 | 20 | 258 | 144  | 401  |
| 59.955 | 20 | TCGAGACTTCGGTTGGTTTC     | 60.232 | 20 | 165 | 3    | 167  |
| 60.001 | 20 | TTTGTCTCCTGGGAGAATGG     | 60.042 | 20 | 253 | 396  | 648  |
| 60.118 | 20 | GAGATGTGTGTGTGCGTGTG     | 59.772 | 20 | 264 | 983  | 1246 |
| 59.847 | 21 | ATCATTCCCAGCCACACATT     | 60.203 | 20 | 152 | 9    | 160  |
| 59.989 | 20 | AACCGTCAGATTTCAAACCG     | 59.971 | 20 | 230 | 384  | 613  |
| 60.111 | 20 | ATTCACTCACCACCGTCCAT     | 60.246 | 20 | 253 | 22   | 274  |
| 59.966 | 20 | GGGAGAGAGAGCAGCAGAGA     | 59.969 | 20 | 247 | 235  | 481  |
| 60.668 | 20 | CGGATGAACACCCTACTTG      | 60.366 | 20 | 256 | 1263 | 1518 |
| 60.274 | 20 | TCAGCCTACTTTGCGCCTTA     | 59.975 | 20 | 132 | 130  | 261  |
| 60.493 | 20 | GAACGATGCTGCCATGATTT     | 61.014 | 20 | 215 | 456  | 670  |
| 59.797 | 20 | AGGCACCAAAGAGATAGGCA     | 59.836 | 20 | 260 | 6    | 265  |
| 59.993 | 20 | TTAACCGCCAAACTCAAACC     | 59.975 | 20 | 109 | 507  | 615  |
| 59.502 | 20 | TTAGATCATACACGTGGCCG     | 59.566 | 20 | 152 | 416  | 567  |

|        |    |                          |        |    |     |      |      |
|--------|----|--------------------------|--------|----|-----|------|------|
| 59.73  | 21 | CAAGTTGAAGTTATGCCCCC     | 59.429 | 20 | 275 | 0    | 274  |
| 62.397 | 18 | TCATGGAAACATGACGTGCT     | 60.12  | 20 | 228 | 39   | 266  |
| 60.011 | 20 | CTGGGTAAAAATTGTGCGCT     | 60.131 | 20 | 243 | 1087 | 1329 |
| 59.901 | 22 | TATTTTGGGCCTGAATGGAC     | 59.762 | 20 | 141 | 18   | 158  |
| 59.391 | 21 | GTCCACGGTGGTGTAGAGT      | 60.182 | 20 | 105 | 62   | 166  |
| 59.799 | 20 | CAGTTTTCGTTGCACCCTTT     | 60.147 | 20 | 263 | 1664 | 1926 |
| 59.424 | 23 | TTTGTGGTGGTGAAGATGGA     | 59.935 | 20 | 263 | 0    | 262  |
| 60.125 | 20 | GTGGGGGACTTATCTGTTAGAA   | 57.236 | 22 | 278 | 53   | 330  |
| 59.597 | 20 | TGACCGAATTCAGACATCCA     | 60.048 | 20 | 174 | 1005 | 1178 |
| 59.93  | 20 | GGTGGTATGGTGTAGAGGACC    | 58.242 | 21 | 264 | 42   | 305  |
| 60.683 | 20 | CCATTGGTATTGACAGCGTG     | 59.988 | 20 | 115 | 487  | 601  |
| 59.875 | 20 | GCACTCTCACGAGCTCACAC     | 59.771 | 20 | 140 | 882  | 1021 |
| 59.272 | 20 | TCATGCCTAAATGTTTTGATGC   | 59.971 | 22 | 180 | 282  | 461  |
| 59.75  | 20 | AGAGCTTGCCGAGAGAAAGA     | 59.454 | 20 | 159 | 180  | 338  |
| 60.361 | 20 | TGTGCTTCTCCAAGGCTTTT     | 59.993 | 20 | 245 | 132  | 376  |
| 60.86  | 20 | TGTGGCTTATGGAGGTTCAA     | 59.123 | 20 | 132 | 172  | 303  |
| 60.725 | 20 | TTCAATTCTCTGCGTTGTGC     | 59.995 | 20 | 205 | 375  | 579  |
| 60.22  | 20 | AAATTACGGCCACAACAAGC     | 60.003 | 20 | 175 | 2203 | 2377 |
| 60.035 | 20 | ATCTCACTTCACCTCCCCCT     | 59.929 | 20 | 202 | 78   | 279  |
| 59.262 | 20 | TGTCTGTGAGAATGGCCAAG     | 59.831 | 20 | 201 | 107  | 307  |
| 59.973 | 20 | CAAGTCCAAGTCCGAAGACC     | 59.697 | 20 | 223 | 19   | 241  |
| 59.939 | 20 | GCTAAAAATGTGGTTGGCGT     | 60.003 | 20 | 279 | 1310 | 1588 |
| 59.897 | 20 | ACGCCACAAAATTTCTCACC     | 59.978 | 20 | 211 | 429  | 639  |
| 59.801 | 20 | GACCGAAAACCGTTCAAAAA     | 59.953 | 20 | 224 | 221  | 444  |
| 60.237 | 20 | TCGCCCTTTGGATTTATTTG     | 59.901 | 20 | 278 | 48   | 325  |
| 59.329 | 20 | GGAATAAAGGGTGGTTGGGT     | 59.919 | 20 | 203 | 53   | 255  |
| 59.9   | 20 | GTCAGAATGGATTGAGTGCG     | 59.245 | 20 | 156 | 71   | 226  |
| 59.973 | 20 | TCCCTAACAAATCACACCGA     | 58.973 | 20 | 111 | 142  | 252  |
| 58.644 | 23 | TGTCCAAACAAATAAAAACATTC  | 60.139 | 24 | 187 | 15   | 201  |
| 60.156 | 20 | GCATGAGAAAATCCTCCCAA     | 60.014 | 20 | 110 | 18   | 127  |
| 59.97  | 25 | TGGGTGGTGGAAAAGAAGTT     | 59.425 | 20 | 199 | 38   | 236  |
| 57.416 | 26 | CACACACAATGTTGGGAGGA     | 60.416 | 20 | 130 | 28   | 157  |
| 59.498 | 23 | ATATTGTTTTCGGATCGTGC     | 59.791 | 20 | 221 | 4327 | 4547 |
| 59.231 | 22 | TGTGGTTGAAATCTAGCCCTTT   | 60.001 | 22 | 153 | 10   | 162  |
| 59.485 | 21 | CGCATCACTCTTTTTAGCCA     | 59.062 | 20 | 263 | 466  | 728  |
| 60.183 | 20 | GTTATGCGTTTTGACGGGAT     | 59.829 | 20 | 210 | 250  | 459  |
| 59.008 | 25 | GATTTCGGAAGGTCGACAAC     | 59.141 | 20 | 142 | 8    | 149  |
| 59.583 | 21 | CAAATGTCGCGGATTTTGAT     | 60.837 | 20 | 251 | 150  | 400  |
| 59.948 | 20 | CTTTTATCCCCAAAATGCC      | 60.489 | 20 | 208 | 412  | 619  |
| 59.447 | 21 | GCCATGATAAATCCACCACA     | 59.205 | 20 | 268 | 40   | 307  |
| 60.053 | 20 | AAAGCAATAATTTGTGCCATGA   | 59.783 | 24 | 201 | 74   | 274  |
| 60.27  | 20 | CGCGGACACATCATGTAAAC     | 59.995 | 20 | 185 | 102  | 286  |
| 59.943 | 20 | TCACACATAATTGAGTTATCATTG | 59.685 | 26 | 228 | 90   | 317  |
| 60.112 | 20 | AGGTGAGGGAGACAATGTGG     | 59.962 | 20 | 239 | 457  | 695  |
| 59.811 | 20 | ACCGTGTTCGGATACACATGA    | 59.837 | 20 | 213 | 31   | 243  |
| 59.997 | 20 | AGAGAGCATTCCCACAAACA     | 58.287 | 20 | 107 | 643  | 749  |
| 60.016 | 20 | GCAAGGACGAATTC AAGAG     | 59.813 | 20 | 269 | 1423 | 1691 |
| 59.915 | 20 | TCCCCTATCGGTATTTTCCC     | 59.978 | 20 | 207 | 90   | 296  |
| 59.933 | 20 | TGGGCTAGCAGACCATCTCT     | 59.973 | 20 | 259 | 68   | 326  |
| 60.24  | 20 | TTGCCACCCCTAGAGAGAGA     | 59.943 | 20 | 247 | 76   | 322  |
| 59.628 | 20 | ACTTCACCCGTACGTTGCAC     | 61.016 | 20 | 169 | 526  | 694  |
| 58.849 | 23 | ACGATTTTGCCCTTGTATGC     | 59.967 | 20 | 213 | 7    | 219  |
| 60.822 | 20 | ATTAGGGGAGAGAGGGCTCA     | 60.169 | 20 | 240 | 218  | 457  |
| 59.543 | 20 | ACCCGAAGCTAGGAAGAAGC     | 59.983 | 20 | 142 | 87   | 228  |
| 60.025 | 20 | GTGCACATTTCCCTTTACC      | 60.362 | 20 | 247 | 225  | 471  |
| 59.5   | 21 | AACGTGCCCTATTCACATTTT    | 59.778 | 22 | 141 | 12   | 152  |
| 59.569 | 20 | GACCAACGTGGCCTAACCTA     | 59.993 | 20 | 254 | 439  | 692  |
| 59.572 | 20 | CATTGCAGATTTTGATGAGCA    | 59.824 | 21 | 253 | 2067 | 2319 |

|        |                            |        |    |     |      |      |
|--------|----------------------------|--------|----|-----|------|------|
| 59.823 | 20 TAAAAAGGAAACAGCCGTCG    | 60.236 | 20 | 126 | 145  | 270  |
| 59.546 | 20 AACCTTTGATCACACACGCA    | 60.16  | 20 | 171 | 13   | 183  |
| 59.989 | 20 TCCAACATCTTTTCGGACC     | 60.05  | 20 | 277 | 586  | 862  |
| 60.932 | 20 CCCTAATTTATGAAAGAGTGGA  | 58.576 | 23 | 195 | 313  | 507  |
| 60.088 | 20 TTGTGTGGGTCGATTCTTGA    | 60.088 | 20 | 257 | 1169 | 1425 |
| 60.11  | 20 CAACACCAACCACGAACAAC    | 59.897 | 20 | 263 | 58   | 320  |
| 59.104 | 22 TCCATCCTCCATAATCCTGC    | 59.854 | 20 | 221 | 95   | 315  |
| 60.375 | 20 TGCCTGCATGATCAAATAGC    | 59.799 | 20 | 247 | 2644 | 2890 |
| 57.516 | 24 ATTGACCACCATCATTGCG     | 60.346 | 19 | 158 | 98   | 255  |
| 59.352 | 23 GGACGCACCAGACTGTTTCT    | 60.307 | 20 | 199 | 867  | 1065 |
| 60.285 | 20 GTGTGTTTAGCAGGGACCGT    | 60.035 | 20 | 198 | 1696 | 1893 |
| 59.972 | 20 GTGTGGATGTGCGTGTTTTT    | 60.016 | 20 | 223 | 620  | 842  |
| 61.041 | 19 GCTAGACCATTGTAAGGGGG    | 58.528 | 20 | 194 | 70   | 263  |
| 60.288 | 20 TCCACGGATGTAAATTGTTCC   | 59.677 | 21 | 124 | 1727 | 1850 |
| 57.605 | 22 GCCATGCGCAGTATAATTGA    | 59.691 | 20 | 138 | 91   | 228  |
| 60.032 | 20 ACATTTTTCCACACTCAGCG    | 58.775 | 20 | 280 | 261  | 540  |
| 60.089 | 20 ATGGGAAGGGGAGTTAGCAT    | 59.789 | 20 | 108 | 43   | 150  |
| 60.015 | 21 TGACTCATACCATGGAGCACA   | 60.128 | 21 | 237 | 399  | 635  |
| 59.945 | 20 ACCATAGAACCACACGGCTC    | 59.997 | 20 | 267 | 146  | 412  |
| 59.982 | 20 ACCATAGAACCACACGGCTC    | 59.997 | 20 | 183 | 232  | 414  |
| 59.72  | 20 TCGTCCGAAAGAAACCTTTG    | 60.22  | 20 | 264 | 28   | 291  |
| 59.962 | 20 TCACAACCAAGTTTTGGACA    | 59.976 | 20 | 215 | 909  | 1123 |
| 58.869 | 20 ACAAGAGGATGAAGGCCAGA    | 59.803 | 20 | 258 | 78   | 335  |
| 59.347 | 20 CCTTCGGATTGCATTACCAC    | 60.331 | 20 | 222 | 51   | 272  |
| 58.566 | 20 TTACAGATAACCGTTCCTCCG   | 59.96  | 20 | 158 | 0    | 157  |
| 60.103 | 20 CGGGAGTATTTGGTCACACC    | 60.232 | 20 | 190 | 549  | 738  |
| 59.598 | 20 GGCAGGCACAGAAGAGAAGA    | 60.678 | 20 | 270 | 2186 | 2455 |
| 59.098 | 23 TCATTGACCAAGTCTTGACGA   | 59.278 | 21 | 252 | 228  | 479  |
| 60.111 | 20 TGCAACCTACTCAAAGACTTCGT | 60.341 | 23 | 266 | 571  | 836  |
| 60.132 | 20 TGATGCCCAAATCTGAAAT     | 60.274 | 20 | 245 | 33   | 277  |
| 60.209 | 20 GCTTACTGATGCAGAAGCCC    | 59.985 | 20 | 249 | 105  | 353  |
| 59.844 | 20 ACCCCTCATGCTCTTCAC      | 60.12  | 20 | 275 | 630  | 904  |
| 59.592 | 20 TTCGTTGACCCCATATGTCA    | 59.774 | 20 | 208 | 444  | 651  |
| 59.82  | 20 CAGCACCAGAATTGCTCCTA    | 59.024 | 20 | 144 | 184  | 327  |
| 59.488 | 20 GATTGCCGACTGAACCTCAT    | 60.081 | 20 | 273 | 152  | 424  |
| 57.837 | 27 TCCACACCATCTCAATCCAA    | 59.893 | 20 | 234 | 543  | 776  |
| 58.64  | 21 CCCAACACTCCATTCTTCGT    | 59.966 | 20 | 117 | 9    | 125  |
| 59.703 | 21 AACCAGAACGGCTTGAAAAA    | 59.724 | 20 | 280 | 1057 | 1336 |
| 59.933 | 20 CGATCGGTCAATCGAATTTT    | 59.901 | 20 | 177 | 434  | 610  |
| 58.801 | 20 AACCTAGTTTCTGCTGCGA     | 60.015 | 20 | 175 | 20   | 194  |
| 60.177 | 20 TGTCGTAGATCACACGGTGG    | 60.593 | 20 | 269 | 2654 | 2922 |
| 62.397 | 18 TCATGGAAACATGACGTGCT    | 60.12  | 20 | 230 | 39   | 268  |
| 60.081 | 21 AACTCGATAACGGATGCTCG    | 60.235 | 20 | 223 | 12   | 234  |
| 59.903 | 20 CCTTCAGAGGCATGGTTTGT    | 60.111 | 20 | 176 | 44   | 219  |
| 60.418 | 20 ACGGGAGGGAGAGAGGGTAT    | 61.214 | 20 | 255 | 212  | 466  |
| 59.465 | 20 CCATTCTTTTAGGGCCAACA    | 59.931 | 20 | 276 | 388  | 663  |
| 59.993 | 20 CGATCCCTCTCTCACGTC      | 59.945 | 20 | 170 | 101  | 270  |
| 60.362 | 20 AATGGATCGGAAGCAATGAG    | 60.036 | 20 | 179 | 789  | 967  |
| 60.104 | 20 AAATCCTTTCCCAATAAACG    | 59.216 | 21 | 280 | 3265 | 3544 |
| 59.916 | 20 GACACCGTTACGCAGACTCA    | 59.905 | 20 | 128 | 1480 | 1607 |
| 59.874 | 20 TCCCCTAATTCACGTGTTGA    | 58.973 | 20 | 263 | 612  | 874  |
| 59.976 | 20 GCCGATTCCTCTTTCTCTC     | 60.293 | 20 | 128 | 4302 | 4429 |
| 61.006 | 20 TCGTCGATGATCGTATAGCAA   | 59.295 | 21 | 279 | 33   | 311  |
| 59.903 | 20 AACACGCGTTTTTAGGGTTT    | 58.676 | 20 | 217 | 72   | 288  |
| 59.109 | 20 GAGTGGGAGATTGTTGGGAA    | 59.903 | 20 | 241 | 70   | 310  |
| 59.232 | 20 TGGGTTCTCTCTCCCTTTT     | 60.045 | 20 | 210 | 136  | 345  |
| 59.752 | 27 ACGTGTGAGACTTCGTGTCG    | 59.94  | 20 | 276 | 1098 | 1373 |
| 60.161 | 20 AACTGCTGGACCTCCACAAC    | 60.159 | 20 | 143 | 101  | 243  |

|        |    |                           |        |    |     |      |      |
|--------|----|---------------------------|--------|----|-----|------|------|
| 59.973 | 20 | CCCCACCCAAGTATTTTTGA      | 59.657 | 20 | 101 | 140  | 240  |
| 60.068 | 20 | CATGACTCTCAGCATATGGGC     | 60.64  | 21 | 262 | 32   | 293  |
| 58.947 | 20 | CCACCTTACTCACGCCTCTC      | 59.867 | 20 | 251 | 40   | 290  |
| 59.993 | 20 | ATGGTGGATTTTCCTTTCCC      | 59.996 | 20 | 172 | 45   | 216  |
| 59.767 | 20 | CACACAAGCAACTTCCCTCA      | 59.873 | 20 | 239 | 640  | 878  |
| 59.73  | 20 | TATTTTGGGCTTTTGCTTGC      | 60.205 | 20 | 219 | 2416 | 2634 |
| 59.988 | 20 | CAACGAGCCTTCCTTTTGTC      | 59.853 | 20 | 257 | 356  | 612  |
| 60.496 | 21 | TGAAGAAGGAAGCTAAAATGCAG   | 60.03  | 23 | 155 | 17   | 171  |
| 59.41  | 20 | GCATTTGTTAGAGGTTTTGACCA   | 60.389 | 23 | 280 | 2196 | 2475 |
| 59.288 | 20 | GGAGATCGACCAATTTGGAA      | 59.871 | 20 | 232 | 80   | 311  |
| 59.813 | 20 | CGTGGTTCGATCGTAAGTGA      | 59.716 | 20 | 210 | 307  | 516  |
| 60.048 | 20 | CATCTCTCCTTCTCTTTCTCGG    | 59.593 | 22 | 252 | 16   | 267  |
| 59.975 | 20 | AAAAATGAAAACGTTACTTCTGCC  | 59.949 | 24 | 178 | 129  | 306  |
| 59.55  | 20 | GTGGACTCTTGGGGTTGAGA      | 60.088 | 20 | 227 | 20   | 246  |
| 59.797 | 20 | CCCTTTTCTCCTTCTCGCTT      | 59.955 | 20 | 221 | 255  | 475  |
| 58.446 | 20 | GTCTCGATGGTGTGATCGG       | 60.063 | 19 | 158 | 15   | 172  |
| 60.269 | 26 | CATATATGGGGAGCGTACCG      | 60.188 | 20 | 273 | 5    | 277  |
| 60     | 22 | GCCGAAAATACCCCAACTA       | 61.029 | 20 | 172 | 94   | 265  |
| 59.954 | 21 | GCTTGCCCAGACTTTCAATTT     | 60.607 | 21 | 280 | 54   | 333  |
| 60.031 | 20 | GGTGGTGGGCGAGTAATAAA      | 59.823 | 20 | 123 | 289  | 411  |
| 59.579 | 20 | AAGTCCACACAGGTGACTCG      | 58.725 | 20 | 148 | 214  | 361  |
| 59.989 | 20 | ATTGGCGAGGGGAGAGTG        | 61.188 | 18 | 228 | 1405 | 1632 |
| 60.043 | 20 | TCAGCTCCAGCTCCTTGATT      | 60.096 | 20 | 219 | 1082 | 1300 |
| 57.439 | 21 | TCAACTTTCGGAAGCGTACA      | 59.464 | 20 | 117 | 37   | 153  |
| 59.32  | 20 | CACGCATTCCAGAAAATCT       | 60.074 | 20 | 118 | 10   | 127  |
| 59.966 | 20 | CCCTACGGGATTCTCCCTAC      | 59.783 | 20 | 226 | 356  | 581  |
| 60.125 | 20 | AACCGAAATCACCGCTACAC      | 60     | 20 | 160 | 144  | 303  |
| 59.933 | 20 | AGAGCAAACCTCCGATGGCTA     | 59.978 | 20 | 256 | 1308 | 1563 |
| 59.758 | 20 | AAGACACCTAGTTGCCCCCT      | 59.994 | 20 | 183 | 68   | 250  |
| 60.035 | 20 | GCCACTGATCCCAGAGTAA       | 60.073 | 20 | 267 | 1065 | 1331 |
| 59.724 | 24 | TGCAGGGTTCGATTCACATA      | 60.073 | 20 | 238 | 269  | 506  |
| 60.688 | 20 | CTTGGCGGATCATATCACAC      | 58.953 | 20 | 228 | 4    | 231  |
| 59.31  | 20 | TTCACGAACACCCCACCTA       | 60.001 | 20 | 140 | 205  | 344  |
| 60.08  | 20 | AAAAAGTGCGCCAAAACC        | 60.103 | 19 | 269 | 130  | 398  |
| 60.147 | 20 | GTGCCAGTGAGGACAAAACA      | 59.726 | 20 | 234 | 25   | 258  |
| 59.839 | 20 | CGGTTATTAGTTATCACCCGAAA   | 59.322 | 23 | 191 | 785  | 975  |
| 59.518 | 20 | GCGTTTTAACTCGTCGTGGT      | 60.176 | 20 | 233 | 1096 | 1328 |
| 59.917 | 20 | GAGCTGAAGCACTTTGACCC      | 59.997 | 20 | 148 | 1628 | 1775 |
| 60.042 | 20 | AAAATATGCAGTGGCTTGGG      | 59.96  | 20 | 173 | 1812 | 1984 |
| 59.586 | 20 | GAACCTGAAATGCAAGGAGC      | 59.82  | 20 | 129 | 1258 | 1386 |
| 59.473 | 20 | GAAGTAGGCGAGAACGATGC      | 59.985 | 20 | 178 | 390  | 567  |
| 59.896 | 21 | GCTTAGGAGGGTTTCCTTGG      | 60.068 | 20 | 239 | 227  | 465  |
| 60.155 | 27 | CGTAAAAGGAAATGCATGAAAA    | 59.151 | 22 | 187 | 264  | 450  |
| 59.813 | 20 | CCTTGTTCTCCTGCCTTGAC      | 59.844 | 20 | 218 | 99   | 316  |
| 60.56  | 20 | ATCGGTAATTCACACGCACA      | 59.995 | 20 | 181 | 66   | 246  |
| 60.175 | 20 | GTTGGCCCTTGATTGTTGTT      | 59.836 | 20 | 183 | 142  | 324  |
| 59.415 | 20 | AACTAAAGGGGAAGCTCTGC      | 57.695 | 20 | 219 | 567  | 785  |
| 60.146 | 20 | CTGGGTACGGCTAGAAGGAA      | 59.331 | 20 | 152 | 238  | 389  |
| 58.999 | 20 | AGGGTCGTTTCATGGATTACA     | 57.864 | 20 | 174 | 347  | 520  |
| 59.973 | 22 | GAAGTGGGAGGATTTGGACA      | 59.903 | 20 | 112 | 482  | 593  |
| 59.933 | 20 | AGAAGTGTAGAGCGGTCGGA      | 60.012 | 20 | 135 | 1792 | 1926 |
| 60.157 | 27 | GCCTGCAATTAATTGGGGTA      | 59.96  | 20 | 156 | 68   | 223  |
| 60.148 | 21 | CGTCGAAACGGATATTTTGG      | 60.315 | 20 | 232 | 48   | 279  |
| 60.397 | 20 | GATGCCTTTTTGCTTTGCTC      | 59.967 | 20 | 187 | 1919 | 2105 |
| 59.67  | 20 | TGTAACCTTGATTGCTAAGAAATTG | 58.849 | 25 | 251 | 90   | 340  |
| 59.694 | 20 | GCATATCCAGCACGCTAACA      | 59.862 | 20 | 263 | 146  | 408  |
| 60.142 | 20 | TGTAGTGAACCTCGACGCTGG     | 60.049 | 20 | 206 | 209  | 414  |
| 60.188 | 20 | TTTGCATGGGTCAAAGTGAG      | 59.691 | 20 | 264 | 8    | 271  |

|        |    |                          |        |    |     |      |      |
|--------|----|--------------------------|--------|----|-----|------|------|
| 60.042 | 20 | GTCCACATTTTGCAGCCTTT     | 60.118 | 20 | 117 | 65   | 181  |
| 58.819 | 20 | TGGTATCAGAGCGGGATTTT     | 60.036 | 20 | 142 | 629  | 770  |
| 60.029 | 20 | AAATGGACAGTTACGGGCTG     | 59.993 | 20 | 217 | 127  | 343  |
| 59.175 | 22 | TTGGGATATGAAAATGACACCT   | 58.303 | 22 | 117 | 295  | 411  |
| 59.973 | 24 | CTCAGCATAACGGGAAGGGTA    | 60.088 | 20 | 248 | 8    | 255  |
| 59.864 | 20 | ATCTGGCCCATCTGAAACAC     | 59.934 | 20 | 152 | 394  | 545  |
| 59.872 | 20 | CCCCTACCAATGTCTCACT      | 59.962 | 20 | 230 | 69   | 298  |
| 58.895 | 20 | AAGAATTGATCATGCGCGTT     | 60.615 | 20 | 221 | 1572 | 1792 |
| 59.174 | 20 | TATGGGAACTGCAACATGGA     | 59.924 | 20 | 143 | 600  | 742  |
| 60.118 | 20 | ATTCCACAACAAAATGCAA      | 58.869 | 20 | 271 | 376  | 646  |
| 59.846 | 20 | CAAGCTGTCAACCCAAAACA     | 59.734 | 20 | 269 | 42   | 310  |
| 59.409 | 20 | GGAAGAACTCAGCTGAACCA     | 59.463 | 21 | 187 | 179  | 365  |
| 60.135 | 20 | TGGAAACAAGGGAAAAGTCAA    | 58.173 | 20 | 218 | 0    | 217  |
| 60.232 | 20 | TTAAGAGGGAGGGAAAAGGC     | 59.661 | 20 | 176 | 851  | 1026 |
| 57.86  | 20 | TCGACGTGTAATCACCCCTCA    | 60.112 | 20 | 263 | 9    | 271  |
| 60.157 | 20 | TTCGGGTCCAGAAAAGTTGTC    | 60.088 | 20 | 279 | 273  | 551  |
| 60.067 | 20 | GCCATAACCGTGTA AAAATGC   | 59.38  | 21 | 272 | 16   | 287  |
| 59.694 | 20 | TGTGAATGCACCTGAATACG     | 58.129 | 20 | 244 | 128  | 371  |
| 60.159 | 24 | CCTAGGCCTCTTCTTCCACA     | 59.425 | 20 | 166 | 6    | 171  |
| 59.621 | 24 | TGATTCACGCTAAAGCACAA     | 58.075 | 20 | 226 | 8    | 233  |
| 59.942 | 20 | TCGTCGACTACTCATGCAA      | 57.997 | 20 | 189 | 2401 | 2589 |
| 59.371 | 20 | CAAATCCCACCATTTAGCACT    | 58.962 | 21 | 280 | 38   | 317  |
| 60.68  | 20 | AAAGACCCGCAACGTACAAC     | 60.037 | 20 | 252 | 12   | 263  |
| 60.003 | 20 | TCAACAGAAACGCACACACA     | 59.912 | 20 | 154 | 115  | 268  |
| 59.017 | 21 | ACGGTGGTGCAAGAGTGATT     | 60.577 | 20 | 146 | 1    | 146  |
| 60.905 | 20 | GGGATCCCTCGTATCTTTCC     | 59.728 | 20 | 150 | 4533 | 4682 |
| 59.839 | 20 | GAGGGTGAGTTGGCATCATT     | 59.934 | 20 | 212 | 118  | 329  |
| 59.434 | 21 | TCGACTTTCAGTATTGCGATTG   | 60.264 | 22 | 264 | 357  | 620  |
| 60.11  | 20 | ATTCGAACACCACCGACTTC     | 59.973 | 20 | 276 | 118  | 393  |
| 59.866 | 21 | TGGCACATATTTCAACGAGTG    | 59.6   | 21 | 266 | 8    | 273  |
| 59.261 | 20 | TTGCATGCATTGCTTAAGTCT    | 58.597 | 21 | 250 | 209  | 458  |
| 59.82  | 20 | CATGGGGAGAGGAGTTAGCA     | 60.21  | 20 | 161 | 253  | 413  |
| 59.127 | 20 | CCAATATGGCGAACCCTCT      | 59.955 | 20 | 251 | 190  | 440  |
| 60.573 | 20 | TTGATGGGGTGAAAATTCTTG    | 59.787 | 21 | 280 | 79   | 358  |
| 59.854 | 20 | CTTTGTTTGGGAGTCGAAGC     | 59.853 | 20 | 243 | 1167 | 1409 |
| 59.596 | 20 | AAGCATTGATGTCTGAATTTGAA  | 58.755 | 23 | 240 | 273  | 512  |
| 60.056 | 20 | CAACAGTTTGGCATCAGAGC     | 59.445 | 20 | 270 | 117  | 386  |
| 60.216 | 21 | TGTTGCCAGAAAAATTGTCTG    | 59.706 | 20 | 250 | 20   | 269  |
| 59.734 | 20 | CGTGTATGCTGCATGTTTGA     | 59.307 | 20 | 238 | 347  | 584  |
| 59.845 | 20 | CCTATGATGGTATGGTGTGGAG   | 59.195 | 22 | 253 | 73   | 325  |
| 59.998 | 21 | GGGTTTCTCTGTCACCCCTT     | 60.349 | 20 | 229 | 53   | 281  |
| 59.988 | 20 | GAATGAGCAGACGCGTTTTT     | 60.395 | 20 | 277 | 24   | 300  |
| 60.068 | 20 | AGCTGCCTGCTTCATGTCTT     | 60.164 | 20 | 230 | 115  | 344  |
| 60.112 | 20 | CGATAAATCATGCTGATATCGTAC | 60.247 | 25 | 174 | 134  | 307  |
| 60.21  | 20 | ATCGGCTACTTACCGCAGAA     | 59.867 | 20 | 120 | 26   | 145  |
| 59.791 | 23 | CTTCAAATCCCTCCCAAGT      | 60.298 | 20 | 154 | 347  | 500  |
| 60.008 | 20 | GCAAGAGTAACCGGAAACCA     | 60.11  | 20 | 190 | 3211 | 3400 |
| 60.188 | 20 | CGTTTTGACAATATTTAGTGTTTG | 58.7   | 26 | 134 | 996  | 1129 |
| 60.291 | 20 | CTCATATGACCACAACCCGA     | 59.369 | 20 | 257 | 24   | 280  |
| 60.201 | 20 | GACCAAACCCCAAAGTGAAA     | 59.807 | 20 | 270 | 113  | 382  |
| 59.722 | 21 | TGTGTGGCTTCTTACACCCA     | 60.152 | 20 | 271 | 2103 | 2373 |
| 60.044 | 20 | GAGTTTTGACGTCCGAGTCC     | 59.703 | 20 | 181 | 1207 | 1387 |
| 59.439 | 20 | TTTTTACCATTTTGCCTCG      | 59.937 | 20 | 208 | 1044 | 1251 |
| 59.989 | 20 | CCCATCTCCACGACGTTATC     | 60.34  | 20 | 271 | 1506 | 1776 |
| 59.968 | 20 | ACTTACACACGCACGCACTC     | 59.977 | 20 | 118 | 27   | 144  |
| 58.413 | 20 | CGATCCATATTGGGTCAAAC     | 57.735 | 20 | 211 | 9    | 219  |
| 60.003 | 20 | TACCAAAGAGCAGGGAGGAA     | 59.807 | 20 | 160 | 1877 | 2036 |
| 60.004 | 20 | GGATCAGTATGGCAGTTGGG     | 60.34  | 20 | 128 | 65   | 192  |



|        |    |                           |        |    |     |      |      |
|--------|----|---------------------------|--------|----|-----|------|------|
| 59.092 | 25 | CTGATCTGGGTTGGGAATTG      | 60.309 | 20 | 115 | 3    | 117  |
| 59.711 | 20 | ATATGTGCTGGAGCCTTGCT      | 59.866 | 20 | 260 | 2116 | 2375 |
| 59.999 | 20 | GACCCACTGACCTCCGTAAA      | 59.966 | 20 | 229 | 376  | 604  |
| 59.993 | 22 | ACGCAAGTGTACGTGGTCAA      | 60.222 | 20 | 222 | 251  | 472  |
| 59.933 | 20 | TCCCAGCCTGTTTCAATAATTC    | 60.312 | 22 | 241 | 2912 | 3152 |
| 60.045 | 20 | TTTTTCGAGGTCCATTTTCG      | 60.046 | 20 | 249 | 6    | 254  |
| 62.397 | 18 | AAGTATTGGTCGATCGGTTTTT    | 58.931 | 22 | 136 | 39   | 174  |
| 59.992 | 20 | TTCACAGAGGGTGGTTTTCC      | 59.943 | 20 | 224 | 394  | 617  |
| 59.636 | 21 | TCGCGGATTTTTGGATAAAC      | 59.907 | 20 | 226 | 0    | 225  |
| 58.655 | 20 | GCAGCAAATCGATCCATAACC     | 60.444 | 20 | 209 | 970  | 1178 |
| 59.907 | 20 | CGGATTTATTGGTTATTACCTGA   | 57.222 | 23 | 182 | 469  | 650  |
| 59.355 | 20 | TGGGGAAGTGTTTATCAGGC      | 59.933 | 20 | 192 | 156  | 347  |
| 57.842 | 20 | GGTAGTTGATGAAAGCCGGA      | 60.074 | 20 | 179 | 31   | 209  |
| 59.95  | 20 | CACACTTTACACACACTGAAAATC  | 59.163 | 25 | 182 | 359  | 540  |
| 60.142 | 20 | CAGAGCCCACGGTTAGTCTC      | 59.867 | 20 | 245 | 139  | 383  |
| 59.989 | 20 | GGGTTGTGTGCCCTATCATT      | 59.676 | 20 | 254 | 8    | 261  |
| 59.918 | 21 | GTTTCTTTGTGGGTTTGGGA      | 59.807 | 20 | 191 | 4815 | 5005 |
| 58.976 | 23 | TCGCTCAACCAAGTAAGTCG      | 59.072 | 20 | 201 | 362  | 562  |
| 58.955 | 22 | TTGGGAGGAGAGATTGTTGG      | 60.042 | 20 | 277 | 17   | 293  |
| 59.586 | 22 | GGTCCCACGTTACCAAAAA       | 59.702 | 20 | 254 | 2114 | 2367 |
| 59.985 | 20 | GCTAACACCACGCCACTACA      | 59.788 | 20 | 215 | 1241 | 1455 |
| 60.149 | 20 | AGCAGTTATTGTGATGTGGGTG    | 59.92  | 22 | 251 | 20   | 270  |
| 60.615 | 20 | GTCGTTGCCTCATCTTGTT       | 60.119 | 20 | 260 | 270  | 529  |
| 60.162 | 20 | TGGGAGGGAGATAATAGGGC      | 60.245 | 20 | 274 | 160  | 433  |
| 59.938 | 20 | TTTGTGCTTAATTTGTTTCTAATC  | 59.969 | 26 | 177 | 148  | 324  |
| 60.096 | 20 | GAGAGGATTTGGGACGACA       | 60.05  | 20 | 197 | 941  | 1137 |
| 60.008 | 20 | ATCCCAATTTACCAAACCC       | 59.756 | 20 | 199 | 3    | 201  |
| 59.769 | 22 | CGATCTGGTATCAGCGGTTT      | 60.096 | 20 | 200 | 343  | 542  |
| 59.066 | 21 | ATTTTTGGATGAGGCAGTGG      | 59.933 | 20 | 279 | 1229 | 1507 |
| 59.833 | 20 | TTTTCTGACCAACACCACCA      | 59.976 | 20 | 279 | 1212 | 1490 |
| 58.32  | 21 | AAGGAGGAAGTGAGGGGAGA      | 60.186 | 20 | 232 | 15   | 246  |
| 59.504 | 20 | TTGACAATATTTAGTGTTTTGACAT | 58.99  | 27 | 145 | 344  | 488  |
| 60.008 | 20 | CTTTTCTCTTGGCCTCCTCT      | 59.95  | 20 | 191 | 338  | 528  |
| 60.103 | 20 | CGGGAGTATTTGGTCACACC      | 60.232 | 20 | 189 | 137  | 325  |
| 58.966 | 20 | ATGCAACTCCCAAACGAACT      | 59.598 | 20 | 267 | 2413 | 2679 |
| 59.527 | 20 | AGATTTACGTGGTTCGGTCG      | 59.993 | 20 | 153 | 1137 | 1289 |
| 59.148 | 21 | CCACATTTAAGGGTTATCACCTG   | 59.654 | 23 | 102 | 231  | 332  |
| 60.051 | 20 | GTTTGGGGTGTGGAGTTG        | 60.246 | 20 | 151 | 217  | 367  |
| 59.645 | 23 | GGTGGGCTTGGTGTACTAACAT    | 60.172 | 22 | 112 | 917  | 1028 |
| 59.971 | 23 | TAATAGGCCACACCACCTC       | 59.813 | 20 | 244 | 61   | 304  |
| 57.235 | 25 | TGGGAAGACAATTGGTGTGA      | 59.935 | 20 | 159 | 5    | 163  |
| 60.032 | 20 | TGTGAGGCCCATCATACTTG      | 59.522 | 20 | 257 | 1265 | 1521 |
| 60.074 | 20 | CCGATTCTGCCTCACTCATT      | 60.218 | 20 | 190 | 205  | 394  |
| 59.137 | 21 | TACGAGGAGAGACCGCAAGT      | 60.012 | 20 | 272 | 77   | 348  |
| 59.929 | 20 | TGTTTTGACAATATCACGACCC    | 59.73  | 22 | 175 | 241  | 415  |
| 59.788 | 20 | GCAGATGCCACAAAAGGATT      | 60.081 | 20 | 187 | 843  | 1029 |
| 59.587 | 20 | GGCCGTGAGTCCATTGTAGT      | 59.997 | 20 | 277 | 19   | 295  |
| 59.893 | 20 | CGTGATCATGCAACTACCA       | 60.539 | 20 | 279 | 989  | 1267 |
| 59.127 | 20 | TACTACATCAACCGCCAGCA      | 60.28  | 20 | 278 | 370  | 647  |
| 60.026 | 24 | CCGTGAATTTACCCATAGCG      | 60.335 | 20 | 117 | 7    | 123  |
| 60.081 | 20 | GGAGGGATCGGATAGAAAGG      | 59.859 | 20 | 254 | 1355 | 1608 |
| 60.755 | 20 | CCAATACTGGTCGGGCATAC      | 60.214 | 20 | 114 | 1    | 114  |
| 59.415 | 20 | AACAACGTTATCTGCCACAAGA    | 59.813 | 22 | 194 | 528  | 721  |
| 60.095 | 20 | GGATCATTAGGGTTGCCAGA      | 59.894 | 20 | 124 | 303  | 426  |
| 60.969 | 20 | TTTCTTGGCCTACACCGAAC      | 60.11  | 20 | 277 | 55   | 331  |
| 60.366 | 20 | GTAGCATTTGCCGCATTTCT      | 60.238 | 20 | 242 | 963  | 1204 |
| 59.916 | 20 | GAAAAGAGCTGCAAAGGGTG      | 59.993 | 20 | 201 | 552  | 752  |
| 58.967 | 24 | CGATCCATCCCGTTAGTACG      | 60.344 | 20 | 270 | 466  | 735  |

|        |    |                           |        |    |     |      |      |
|--------|----|---------------------------|--------|----|-----|------|------|
| 59.916 | 20 | AAACCCATTTCCACCTGTCA      | 60.21  | 20 | 184 | 281  | 464  |
| 60.009 | 20 | CCATGAAAGCTTGGTTTGCT      | 60.249 | 20 | 115 | 845  | 959  |
| 59.962 | 20 | TGATTCCGGAAAGAAGATGG      | 60.006 | 20 | 145 | 980  | 1124 |
| 59.969 | 20 | GGCGCACTGAATTGTTGTTA      | 59.735 | 20 | 216 | 3    | 218  |
| 60.425 | 23 | AGGGTCACGAATCCTTCCTT      | 59.935 | 20 | 265 | 74   | 338  |
| 60.554 | 19 | AAAATGCCCTTGTATGCTGC      | 60.103 | 20 | 146 | 21   | 166  |
| 59.916 | 20 | TAGGATTTGAACCTGCGACC      | 60.074 | 20 | 227 | 76   | 302  |
| 60.47  | 20 | TCTGCTGCAAATTTGGAAGTTA    | 59.89  | 22 | 179 | 851  | 1029 |
| 59.292 | 20 | CCGTCGATTTTCAGGTTTTG      | 60.472 | 20 | 186 | 105  | 290  |
| 59.844 | 20 | CGGAGAGGACTTACCGGATT      | 60.455 | 20 | 242 | 29   | 270  |
| 59.756 | 20 | TTCATTCAAGCTACCCACTCTTT   | 59.317 | 23 | 163 | 105  | 267  |
| 59.924 | 20 | TGGCCATGTTGGTAGATTCA      | 59.924 | 20 | 150 | 27   | 176  |
| 59.924 | 20 | TGCTTCACCACTCAATCTGC      | 59.992 | 20 | 189 | 1080 | 1268 |
| 60.287 | 20 | CGAAACGTAAATCAGCAGTGA     | 58.978 | 21 | 228 | 829  | 1056 |
| 60.096 | 20 | TGTCCACTTGTGTCACGGAT      | 60.005 | 20 | 221 | 67   | 287  |
| 59.688 | 20 | CCCACTGCAGAAATGGAGAT      | 60.073 | 20 | 125 | 695  | 819  |
| 60.362 | 20 | TCATCATTTTCGATCCTGTGG     | 59.451 | 20 | 148 | 1    | 148  |
| 60.117 | 20 | TGGGTTTTTCTCATCTTCGG      | 60.044 | 20 | 197 | 612  | 808  |
| 59.72  | 22 | TGGCAATTTGTCTTTCAATCC     | 59.93  | 21 | 198 | 21   | 218  |
| 59.88  | 20 | AGCATCTCCAATGCCAGGTA      | 60.624 | 20 | 201 | 14   | 214  |
| 59.658 | 20 | CGAGTGGATCCTCTTCAAGC      | 59.95  | 20 | 224 | 1270 | 1493 |
| 60.074 | 20 | CAGCACTTTTCATGTTGTTGC     | 59.381 | 21 | 187 | 854  | 1040 |
| 59.864 | 20 | GATATGATTTTGC GCGGAGT     | 60.067 | 20 | 230 | 215  | 444  |
| 60.025 | 20 | AACGATTGGAGCATTATGGG      | 59.784 | 20 | 193 | 142  | 334  |
| 59.903 | 20 | TTTTGTTCGATGATATGGTTGTG   | 58.413 | 22 | 192 | 38   | 229  |
| 60.173 | 20 | TGTAACAAATAAATTAACGTA CTG | 57.577 | 27 | 200 | 1055 | 1254 |
| 60.074 | 20 | GCGTGTTCTAGGTGTTCTTGG     | 59.788 | 21 | 225 | 126  | 350  |
| 60.378 | 20 | CTCATTGTAATCTCTCCCAAAGTT  | 57.927 | 24 | 158 | 399  | 556  |
| 60.416 | 20 | CATGCATGATGTGATGTCAGTC    | 59.999 | 22 | 166 | 41   | 206  |
| 59.912 | 23 | CCATTTACTAAGAACGACATGCA/  | 60.404 | 24 | 277 | 1645 | 1921 |
| 60.203 | 20 | TTTTCGGATCGAAATTAGGTT     | 57.759 | 21 | 205 | 466  | 670  |
| 58.754 | 23 | TTTTCTTTTGCACGACTGC       | 59.087 | 20 | 156 | 13   | 168  |
| 61.016 | 19 | TCGTCTTCCCAATCATCTC       | 60.011 | 20 | 273 | 4    | 276  |
| 60.504 | 20 | GAGCACAACCATGGTGAGAA      | 59.682 | 20 | 266 | 115  | 380  |
| 59.281 | 20 | TTTTTGAAATCCAACGACCC      | 59.778 | 20 | 145 | 115  | 259  |
| 57.357 | 20 | CCATTGGCTCGTTTATTTTAGA    | 58.331 | 22 | 280 | 171  | 450  |
| 60.074 | 20 | TACAGATCGGGTCTTGAGGG      | 60.065 | 20 | 268 | 443  | 710  |
| 60.149 | 20 | AGTATGCTTCTCCGAGTCCG      | 59.454 | 20 | 219 | 507  | 725  |
| 60.064 | 19 | GCATACAAAGGTAAGGAGGCA     | 59.238 | 21 | 141 | 636  | 776  |
| 60.126 | 20 | GGGAGAAAGACACGTGGAAC      | 59.555 | 20 | 271 | 133  | 403  |
| 60.255 | 20 | GCAACATAGTTTATGCATCCCA    | 59.859 | 22 | 232 | 62   | 293  |
| 59.901 | 20 | ATTGTGAACCGGTGGTTCTT      | 59.308 | 20 | 252 | 120  | 371  |
| 59.75  | 20 | GCATGATCAGGGTAAAATCCA     | 59.776 | 21 | 200 | 266  | 465  |
| 59.918 | 21 | CCTTACACCTCACACCCAC       | 60.275 | 20 | 168 | 456  | 623  |
| 59.85  | 20 | TTTTCTTCATTCCCATTATGTC    | 59.22  | 23 | 257 | 398  | 654  |
| 58.12  | 20 | AACGGCCAAATCTAACGAAA      | 59.586 | 20 | 265 | 285  | 549  |
| 58.917 | 20 | ATTTCAAAAAGTGGGGTCCA      | 59.264 | 20 | 265 | 0    | 264  |
| 59.787 | 20 | GAAAGAAGAAGAGAGATAGATAC   | 58.05  | 27 | 130 | 607  | 736  |
| 60.073 | 20 | CCATCGTCCTTATGGGCTAA      | 59.916 | 20 | 249 | 222  | 470  |
| 59.703 | 21 | CCCTCCATCTCTCTTCTCCC      | 60.149 | 20 | 246 | 9    | 254  |
| 60.553 | 20 | TCCCTGCTGCTCTCTCTC        | 59.969 | 20 | 150 | 3    | 152  |
| 59.976 | 20 | CCAAGCCCATAAGCATCCTA      | 60.053 | 20 | 195 | 28   | 222  |
| 59.803 | 20 | TTCTCCTTGTTCCGTGGAC       | 60.088 | 20 | 280 | 65   | 344  |
| 59.839 | 20 | TGATTTGATTCTTCGCGTTG      | 59.809 | 20 | 108 | 2489 | 2596 |
| 57.318 | 27 | TTGGTCCTCGATTGTTATGAA     | 58.079 | 21 | 280 | 316  | 595  |
| 57.593 | 21 | GGATGGACCTTCCCAA ACTT     | 60.169 | 20 | 242 | 50   | 291  |
| 59.874 | 20 | CGCTTCAACTTTTCCACCAT      | 60.11  | 20 | 161 | 611  | 771  |
| 60.318 | 21 | TCCAGTACGCAGACTTTTCT      | 58.994 | 21 | 280 | 34   | 313  |

|        |    |                           |        |    |     |      |      |
|--------|----|---------------------------|--------|----|-----|------|------|
| 59.968 | 20 | TTAGGAATTTGTTCCCGTGC      | 59.938 | 20 | 267 | 64   | 330  |
| 58.62  | 21 | CGGCTTCTCCCTATCAAATG      | 59.662 | 20 | 105 | 500  | 604  |
| 59.889 | 20 | AAAAACCCCGACTCAAACCT      | 57.697 | 20 | 224 | 309  | 532  |
| 60.765 | 20 | GTGGACACCTTGTCAAAGCA      | 59.726 | 20 | 116 | 29   | 144  |
| 59.94  | 20 | TTGACAATATTTAGTGTTTTGACAT | 58.99  | 27 | 258 | 602  | 859  |
| 58.388 | 20 | TAAATTTGAACTTTGCCCCG      | 59.937 | 20 | 134 | 796  | 929  |
| 59.086 | 20 | GTTGCCCAAGTTTCGAGTT       | 60.156 | 20 | 216 | 314  | 529  |
| 59.873 | 20 | TGCAAAATGGGGATTTGATT      | 60.132 | 20 | 227 | 1055 | 1281 |
| 57.771 | 26 | CACTTGACACAGAAAAGGGA      | 60.081 | 20 | 109 | 14   | 122  |
| 60.11  | 20 | AGACGTTGCATGTGCTTCTG      | 60.056 | 20 | 250 | 1697 | 1946 |
| 59.775 | 20 | TGCTGAGTTTTGAGTCACGA      | 58.112 | 20 | 178 | 131  | 308  |
| 60.195 | 20 | GGATCCGAACCAGAAAACCT      | 60.306 | 20 | 267 | 1851 | 2117 |
| 60.264 | 21 | GAACCAAGGGATTGAGTGGA      | 59.903 | 20 | 275 | 1256 | 1530 |
| 60.207 | 21 | GTTTGTGAAGCAACTCGCA       | 60.035 | 20 | 230 | 99   | 328  |
| 60.39  | 21 | GCTGATTCTGAAGGCATGGT      | 60.226 | 20 | 280 | 100  | 379  |
| 59.993 | 20 | AACCAGAACCGTGAAATTCG      | 59.971 | 20 | 217 | 416  | 632  |
| 59.83  | 20 | CCAACCATAATTGTTTCGGG      | 60.046 | 20 | 246 | 298  | 543  |
| 60.103 | 20 | CGTCATAAACAGCCGAAAT       | 59.96  | 20 | 224 | 1049 | 1272 |
| 59.833 | 20 | CCCATAACCATGACAAACAATG    | 59.975 | 22 | 231 | 429  | 659  |
| 57.73  | 23 | TGCTACAATGACGATGCCAC      | 60.697 | 20 | 130 | 20   | 149  |
| 59.123 | 20 | GGTTGGGATGGAATGAAAAA      | 59.599 | 20 | 246 | 301  | 546  |
| 59.324 | 21 | AAAATCACTAGCATGCACGG      | 58.799 | 20 | 193 | 14   | 206  |
| 60.032 | 20 | TTCATAGTCGGCTCAATCCC      | 60.036 | 20 | 232 | 309  | 540  |
| 59.962 | 20 | CCTTGCTAGATGGCCAAAAA      | 60.202 | 20 | 280 | 318  | 597  |
| 60.038 | 20 | TTCCACCTCATATCATTCCCA     | 60.14  | 21 | 210 | 145  | 354  |
| 60.096 | 20 | ATCCTTGCCTCCTGTCCCT       | 59.929 | 20 | 179 | 706  | 884  |
| 59.931 | 20 | CCATTGCATGCGTCAGTATC      | 60.104 | 20 | 225 | 3525 | 3749 |
| 59.318 | 20 | TGCAGAGATGGTGATGGTGT      | 60.121 | 20 | 248 | 7    | 254  |
| 57.878 | 20 | CGTCGCCTCTTATTGGACAT      | 60.096 | 20 | 252 | 13   | 264  |
| 60.027 | 20 | ATGAGCTTTGTATGCCCCAC      | 59.962 | 20 | 270 | 89   | 358  |
| 57.543 | 18 | ACAAACGCCATCAACATCAA      | 59.972 | 20 | 118 | 0    | 117  |
| 59.89  | 20 | AATGATTGAAGCTTCCCCCT      | 59.903 | 20 | 146 | 319  | 464  |
| 60.134 | 20 | GCTTGTGGATGCCTTTGAT       | 60.081 | 20 | 153 | 10   | 162  |
| 59.844 | 20 | CGAGTTGCTTCTATCGTCACC     | 59.89  | 21 | 223 | 676  | 898  |
| 59.381 | 20 | TTGGCATGTAATGCGAGTTT      | 59.186 | 20 | 277 | 976  | 1252 |
| 60.096 | 20 | CAAGACGGACAAGTTGGGTT      | 60.005 | 20 | 263 | 240  | 502  |
| 59.286 | 22 | TTGGAAGCAATTGCATGATT      | 59.115 | 20 | 196 | 31   | 226  |
| 58.994 | 20 | CACGTCAGCTTCATCTCCAA      | 59.984 | 20 | 238 | 325  | 562  |
| 59.805 | 20 | CAATGCGCTGTGTTCTTCAT      | 59.871 | 20 | 146 | 415  | 560  |
| 58.123 | 23 | AGCACCGACTGAAAATGAGG      | 60.255 | 20 | 178 | 1    | 178  |
| 59.713 | 20 | TGTGCTGCTTCAATTCGTTT      | 59.469 | 20 | 279 | 49   | 327  |
| 60.249 | 20 | AACCCATCCTCTCATCGAAA      | 59.483 | 20 | 131 | 108  | 238  |
| 59.075 | 20 | CCATTTTGCCCTGATATGCT      | 59.923 | 20 | 193 | 104  | 296  |
| 59.795 | 20 | AGCGATTTTCATGGAGATTGG     | 60.036 | 20 | 253 | 662  | 914  |
| 59.762 | 20 | GCACACAAATAATGGTTTCTTCC   | 59.771 | 23 | 215 | 145  | 359  |
| 58.867 | 20 | TCCTCTCGCTGTATTTGCAC      | 59.028 | 20 | 258 | 711  | 968  |
| 59.51  | 20 | TTTTTAAATGGATCGGCCTC      | 59.011 | 20 | 270 | 2    | 271  |
| 59.935 | 20 | AAACGGGTGAGCAAGACAAC      | 60.156 | 20 | 256 | 1558 | 1813 |
| 58.941 | 19 | TCCAGTTTGGGTGTTTAGC       | 59.971 | 20 | 244 | 49   | 292  |
| 59.973 | 20 | CATGTTTTTGGATTTTGGGG      | 60.024 | 20 | 127 | 948  | 1074 |
| 60.5   | 20 | TCTCGAACCACCTTCAAGCC      | 60.375 | 20 | 275 | 130  | 404  |
| 60.712 | 20 | GGCTTGGTTGTTGTAGATTCTG    | 58.767 | 22 | 280 | 989  | 1268 |
| 59.791 | 21 | TGGGAAGATCTCTCCATTCTG     | 59.224 | 21 | 228 | 240  | 467  |
| 60.112 | 20 | AGGGGTTATCACCTGAATGC      | 58.864 | 20 | 117 | 159  | 275  |
| 59.886 | 23 | CGAATTAATCCGTCCAATGAA     | 59.781 | 21 | 247 | 764  | 1010 |
| 58.509 | 20 | GAATCACTTTGCAAGCACCA      | 59.847 | 20 | 242 | 157  | 398  |
| 60.195 | 20 | TGCAACCGAAAATTAGGGAA      | 60.427 | 20 | 179 | 140  | 318  |
| 59.348 | 24 | TCAAATTTTCTCATGATATTTGT   | 59.012 | 25 | 230 | 516  | 745  |

|        |    |                          |        |    |     |      |      |
|--------|----|--------------------------|--------|----|-----|------|------|
| 60.006 | 20 | TTTGTTATGCGTTTTGACGA     | 57.846 | 20 | 252 | 290  | 541  |
| 59.385 | 22 | CACGTGCAACCAGATTCAAA     | 60.699 | 20 | 142 | 82   | 223  |
| 58.994 | 21 | GCTTCCTCTGAATGCCAAAG     | 59.955 | 20 | 142 | 115  | 256  |
| 60.096 | 20 | TCACGTAAAGGGCGGTATC      | 59.96  | 20 | 131 | 21   | 151  |
| 59.722 | 20 | GAAGCGAATCGTCGAGAAAC     | 59.962 | 20 | 198 | 311  | 508  |
| 60.082 | 23 | TAGCCATGATCTCCCGATTC     | 59.998 | 20 | 228 | 299  | 526  |
| 59.642 | 20 | GAGGGCTATGCTGATTTGTTC    | 58.803 | 21 | 259 | 47   | 305  |
| 59.275 | 22 | CCTCCTGTGTTGCCAAGTT      | 60.149 | 20 | 160 | 120  | 279  |
| 60.423 | 20 | TCAAGGGACCAGAGGAATTG     | 60.042 | 20 | 261 | 67   | 327  |
| 59.901 | 20 | TCGGGGTATCAGAAATCGAG     | 60.029 | 20 | 260 | 54   | 313  |
| 60.081 | 20 | CCATATAACGATGCCATCCC     | 60.001 | 20 | 264 | 26   | 289  |
| 60.032 | 20 | ATGGTGCAGAGGATAGACGG     | 60.096 | 20 | 253 | 1264 | 1516 |
| 57.152 | 22 | ATAACCCCCACCAAACCTCC     | 59.919 | 20 | 250 | 15   | 264  |
| 60.255 | 20 | CCATCCCCCTCTCTTTCTCT     | 59.63  | 20 | 255 | 144  | 398  |
| 59.225 | 22 | TTGCTTCCAGTTTTGTCT       | 59.853 | 20 | 265 | 8    | 272  |
| 60.083 | 26 | CAACAACAACGTCGTCCATC     | 60.008 | 20 | 198 | 4    | 201  |
| 60.818 | 18 | CCGACAATTCATCTTTTTCTCA   | 59.202 | 22 | 278 | 11   | 288  |
| 60.156 | 20 | GGCCGGATTGCTGATATAGA     | 60.023 | 20 | 140 | 935  | 1074 |
| 59.962 | 20 | AAGAGCAATCTCTCTCCCCC     | 59.778 | 20 | 166 | 579  | 744  |
| 58.707 | 21 | CTGCCACCATTGATGCTAGA     | 59.823 | 20 | 166 | 61   | 226  |
| 58.21  | 27 | TCGCTTCAGTCAGTTATCCG     | 59.024 | 20 | 158 | 11   | 168  |
| 58.294 | 22 | TACATTCATTGGGGTGTGGA     | 59.623 | 20 | 102 | 15   | 116  |
| 58.686 | 21 | TGGCAGATTTAATATTTACGTTCA | 59.061 | 25 | 212 | 167  | 378  |
| 59.719 | 20 | TGGAAGGGAAAAGAACCTCA     | 59.641 | 20 | 189 | 434  | 622  |
| 60.361 | 20 | GACCTGACACAACCCTCCAT     | 59.817 | 20 | 266 | 52   | 317  |
| 59.315 | 20 | GTGGACGCTCCAGATTGTTT     | 60.119 | 20 | 268 | 496  | 763  |
| 59.134 | 22 | GGATCATGCTGGAAGCAGTT     | 60.226 | 20 | 125 | 7    | 131  |
| 59.182 | 20 | TGATACAAGTGTGAAGCCAAA    | 58.346 | 22 | 203 | 444  | 646  |
| 59.871 | 20 | GGCATGTTGACACCCTACT      | 59.851 | 20 | 223 | 312  | 534  |
| 59.746 | 20 | CGGTGATAACTAGGAACAAATCC  | 58.941 | 23 | 190 | 576  | 765  |
| 57.821 | 25 | CCCGGTATGCTGACGATAAT     | 59.807 | 20 | 202 | 0    | 201  |
| 59.579 | 20 | ATGGTTGCTTGATGGAGAGG     | 60.073 | 20 | 148 | 6837 | 6984 |
| 59.844 | 20 | AGCAACTTGGTCTGCGATCT     | 60.02  | 20 | 146 | 1    | 146  |
| 59.123 | 20 | TGGGTCCAAGAAAACCAAAG     | 59.942 | 20 | 118 | 275  | 392  |
| 59.89  | 20 | ACACGGAGGTGATGCCTATC     | 59.957 | 20 | 218 | 543  | 760  |
| 60.025 | 21 | TGCGTTTTGACGATATATAGTGT  | 59.092 | 25 | 100 | 509  | 608  |
| 60.606 | 20 | AAATGGTTGTTTGTCCCAA      | 60.066 | 20 | 221 | 17   | 237  |
| 59.141 | 20 | GAGGGAATCGGAGTTCATCA     | 60.011 | 20 | 272 | 320  | 591  |
| 60.103 | 20 | CGTCTTCTCCTTGGACTTG      | 59.837 | 20 | 267 | 4574 | 4840 |
| 60.032 | 20 | TCCGTTGAGATTTTGCATCA     | 60.197 | 20 | 257 | 38   | 294  |
| 59.988 | 20 | TCATGGATGGGGACTTGATT     | 60.135 | 20 | 137 | 664  | 800  |
| 59.773 | 20 | TTGTTGGGAAAGAAGAATGGA    | 59.532 | 21 | 271 | 31   | 301  |
| 59.962 | 20 | GCGAAATGAATGTACCGGAT     | 59.791 | 20 | 263 | 672  | 934  |
| 59.934 | 24 | CCTGGTGGATTGTTCTGTCC     | 60.363 | 20 | 259 | 40   | 298  |
| 59.933 | 20 | CCTTGACAACGACGACCAAT     | 60.954 | 20 | 270 | 570  | 839  |
| 60.162 | 20 | TCACTCACACGCACTCACAA     | 60.07  | 20 | 103 | 22   | 124  |
| 60.058 | 19 | TGAAGCAAGAAAAGGGGCT      | 59.94  | 19 | 168 | 591  | 758  |
| 58.109 | 22 | AACATGAGACGCAACACCA      | 60.16  | 20 | 256 | 67   | 322  |
| 60.081 | 20 | CGCGTTACGAATCCAAGTTT     | 60.131 | 20 | 248 | 206  | 453  |
| 60.667 | 24 | AACCGAAAAATTAATCATCACC   | 57.085 | 22 | 203 | 157  | 359  |
| 59.626 | 21 | TACAAAGCTGCTCGGTCCTT     | 60.015 | 20 | 233 | 30   | 262  |
| 60.211 | 21 | GAGATTGGTGGTTGCAGGAT     | 59.934 | 20 | 263 | 254  | 516  |
| 59.955 | 20 | CGTGTATGTGTGTGAGTGTATATG | 59.332 | 26 | 182 | 151  | 332  |
| 59.682 | 20 | GAAAAAGTAGCGATGTCGGC     | 59.851 | 20 | 236 | 4300 | 4535 |
| 59.744 | 20 | GCTTGCGATTAGGAATGGAG     | 59.807 | 20 | 234 | 314  | 547  |
| 59.271 | 22 | CTCAAGAAAGTTGTGGGGTTG    | 59.619 | 21 | 279 | 11   | 289  |
| 60.029 | 20 | GCAACATCTAATGGTTGTGGG    | 60.242 | 21 | 215 | 125  | 339  |
| 57.929 | 23 | CCTTAGGATTCTCACAGCCG     | 59.83  | 20 | 263 | 4    | 266  |

|        |                             |        |    |     |      |      |
|--------|-----------------------------|--------|----|-----|------|------|
| 59.926 | 20 TTGAGACATGGGTATTTGATGA   | 57.944 | 22 | 224 | 204  | 427  |
| 59.297 | 20 GCAAGACCAAATCACTCTTTCC   | 60.117 | 22 | 198 | 613  | 810  |
| 59.666 | 22 CATGTTTCGGAGCATGATTTT    | 59.952 | 21 | 268 | 130  | 397  |
| 59.566 | 27 ACTCACGTGAAGTATGCCCC     | 59.997 | 20 | 148 | 106  | 253  |
| 59.989 | 20 CGCAAGCATGTTAATTTTATTCA  | 59.213 | 23 | 175 | 238  | 412  |
| 59.78  | 20 GAATGCATTTCCGGTGACTT     | 59.939 | 20 | 280 | 1214 | 1493 |
| 60.384 | 21 AGTGAGAGAGAGGGGCTGCTG    | 59.883 | 20 | 275 | 54   | 328  |
| 59.988 | 20 TCTTCATCGTTGTAACCCTCG    | 60.118 | 21 | 236 | 92   | 327  |
| 60.197 | 20 CCATTTCTGCCACAAAACCT     | 59.971 | 20 | 189 | 481  | 669  |
| 60.039 | 20 CCCTCCACCGCCTAACTATT     | 60.332 | 20 | 106 | 52   | 157  |
| 59.862 | 20 CAACACTTCACAGCTTCTCCC    | 59.899 | 21 | 221 | 425  | 645  |
| 60.088 | 20 ATGGATGGGGGTTAAGGAAG     | 60.011 | 20 | 220 | 69   | 288  |
| 60.053 | 20 AACAAAGGGGCAATATGCTG     | 59.96  | 20 | 152 | 112  | 263  |
| 59.7   | 20 AAGGAGGTGTTATGAAGGGATT   | 58.028 | 22 | 280 | 318  | 597  |
| 58.787 | 21 ATGTCGCAGGTTCAACGTC      | 59.698 | 19 | 263 | 12   | 274  |
| 60.535 | 20 AAAAGAGACAAAAGGCAGCAA    | 59.144 | 21 | 257 | 31   | 287  |
| 60.081 | 21 TTGGGATTGGTCGTTTCAAT     | 60.17  | 20 | 217 | 701  | 917  |
| 60.235 | 20 TGGCTTCTGTACGATCCCAT     | 60.483 | 20 | 218 | 119  | 336  |
| 59.41  | 20 TCATGAGGTGGCACAATGAT     | 59.925 | 20 | 215 | 766  | 980  |
| 59.855 | 20 CAATTCCTTCCAACCCGAA      | 60.863 | 20 | 171 | 111  | 281  |
| 59.834 | 20 CGTGTGTGTAACGTGTGTGTG    | 59.591 | 21 | 148 | 1185 | 1332 |
| 60.159 | 20 AAGAAAATAACCACGTGCC      | 58.952 | 20 | 190 | 96   | 285  |
| 60.157 | 20 TTCTTCCTCATTGGTAGGCG     | 60.206 | 20 | 105 | 57   | 161  |
| 60.025 | 20 ATCGGAGTTGATTTGATGCC     | 59.9   | 20 | 230 | 324  | 553  |
| 60.032 | 20 TGCTTTTTATAACTCGCCCG     | 60.218 | 20 | 208 | 1323 | 1530 |
| 60.011 | 20 AGGTTGGCTCGACTTTGTTG     | 60.291 | 20 | 186 | 49   | 234  |
| 59.572 | 20 TTTCCATGGCTATGCTTCTCT    | 58.941 | 21 | 184 | 111  | 294  |
| 57.528 | 21 TCATGGGTTCTTTCTCACA      | 59.059 | 20 | 279 | 534  | 812  |
| 59.951 | 20 TAGCAGCTGATATCCCGGT      | 59.691 | 20 | 165 | 72   | 236  |
| 59.708 | 20 TGGATGTTGGTTTTGAGCTG     | 59.691 | 20 | 245 | 669  | 913  |
| 60.008 | 22 TGCCTAAAGAACGTTACACGG    | 60.172 | 21 | 266 | 2    | 267  |
| 59.939 | 20 GGAGAGACTCGAGATGCAATG    | 59.965 | 21 | 142 | 84   | 225  |
| 59.943 | 20 AACGAGGTAGCAAGTTGGACA    | 59.788 | 21 | 101 | 481  | 581  |
| 59.199 | 20 ATCTGCCAATGAATTCACGA     | 59.079 | 20 | 253 | 66   | 318  |
| 60.046 | 20 GGCCGGATCTCACTAAATCA     | 60.036 | 20 | 236 | 2052 | 2287 |
| 58.574 | 20 TTGATTTGTTAATCTAATGGATG/ | 57.304 | 26 | 273 | 779  | 1051 |
| 59.983 | 21 GCGTTTTGATGATATATAGGTGTT | 58.907 | 26 | 183 | 126  | 308  |
| 59.96  | 20 ATCGAAGTGACGATGGAAGC     | 60.226 | 20 | 262 | 3376 | 3637 |
| 60.144 | 20 GCTTGCTGAGTTGGCATGTA     | 60.019 | 20 | 207 | 248  | 454  |
| 59.799 | 20 AAGGTGACAACCGATCAAAA     | 58.048 | 20 | 266 | 248  | 513  |
| 59.989 | 20 CCCGAACAGAGTCTCCTTGT     | 59.3   | 20 | 254 | 488  | 741  |
| 59.978 | 20 ACTGTTATGAGGCGGGATTG     | 59.955 | 20 | 275 | 2    | 276  |
| 60.288 | 21 TTCAGTCTTGAAAAGGAGCCA    | 59.978 | 21 | 278 | 54   | 331  |
| 59.314 | 20 TGTTCTTCACGGTTCAATGC     | 59.697 | 20 | 261 | 33   | 293  |
| 57.925 | 24 GGAGAGAGAGGGAGGGAGAG     | 59.489 | 20 | 229 | 251  | 479  |
| 60.081 | 21 TAACCCCAAGTCTGGGACTG     | 59.959 | 20 | 172 | 36   | 207  |
| 59.621 | 20 AGGATCGAGAGAGACGTGAGA    | 59.142 | 21 | 265 | 82   | 346  |
| 59.898 | 20 AGAAGAAGCAGAGACCGACG     | 59.745 | 20 | 192 | 86   | 277  |
| 60.27  | 20 AATCACTTCCCACACGTTCC     | 59.827 | 20 | 153 | 12   | 164  |
| 59.901 | 20 GGCCTCATGAACTCTTGAATG    | 59.685 | 21 | 208 | 881  | 1088 |
| 59.997 | 24 CCGTACCGGAAATTAACGAA     | 59.826 | 20 | 241 | 672  | 912  |
| 59.569 | 20 CACTTCCACACGAACACACA     | 59.15  | 20 | 236 | 527  | 762  |
| 59.986 | 20 CCAACTGAGTCCACTACCCG     | 60.557 | 20 | 167 | 41   | 207  |
| 60.074 | 20 GGTTATCACCGGATCGCT       | 58.462 | 18 | 191 | 1935 | 2125 |
| 58.035 | 25 CCCAAACATCCAACCAATTC     | 60.029 | 20 | 263 | 217  | 479  |
| 59.784 | 20 ACTCTATCTCTCACACAATCTTI  | 57.487 | 27 | 246 | 188  | 433  |
| 60.016 | 20 AAATAAGGAGGTGTTATGAAGGG  | 59.323 | 24 | 184 | 352  | 535  |
| 60.309 | 20 AGCTCATGGATGTTTGACCC     | 59.934 | 20 | 242 | 306  | 547  |

|        |    |                           |        |    |     |      |      |
|--------|----|---------------------------|--------|----|-----|------|------|
| 59.939 | 20 | TCCAGCCTTCCAATCTCAAC      | 60.195 | 20 | 280 | 24   | 303  |
| 60.103 | 20 | TTCTAAGTCGTGTTGCGTG       | 59.904 | 20 | 245 | 796  | 1040 |
| 59.897 | 20 | GTAGGAGCCCACAGTCCTTG      | 59.721 | 20 | 157 | 351  | 507  |
| 59.91  | 20 | CGCCGTTTTAAGACCCATTA      | 59.958 | 20 | 254 | 767  | 1020 |
| 59.569 | 20 | GATATGCGAGATGGATGCCT      | 60.028 | 20 | 155 | 3547 | 3701 |
| 60.949 | 20 | TTCTCAGCATATGGGAAGGG      | 60.029 | 20 | 235 | 8    | 242  |
| 60.049 | 20 | TTTTTGTTATGATAGGATCAAACC  | 58.947 | 26 | 178 | 1786 | 1963 |
| 60.053 | 20 | CGTGTGGGAAAGATATGCCT      | 59.955 | 20 | 183 | 995  | 1177 |
| 59.762 | 20 | TCATCGATTACGTTGAGATGAA    | 58.241 | 22 | 280 | 756  | 1035 |
| 60.212 | 20 | TCACCCACTCTCGTCACTTG      | 59.864 | 20 | 105 | 2    | 106  |
| 60.278 | 20 | CATTCCTGTGCGCTTCAAAT      | 60.074 | 20 | 278 | 37   | 314  |
| 59.971 | 20 | GATCAACCTCCTCCACCTGA      | 60.048 | 20 | 277 | 507  | 783  |
| 60.008 | 20 | CCTTATTTTTAACCCATAAAAACGC | 58.713 | 24 | 258 | 210  | 467  |
| 59.56  | 20 | TGCAACGCTTGTTC AAGAC      | 60.035 | 20 | 275 | 1067 | 1341 |
| 60.012 | 20 | TTACGAGCTTGCAGATTGA       | 59.712 | 20 | 276 | 118  | 393  |
| 59.917 | 20 | TATCAGTGACCACCCAACCA      | 59.806 | 20 | 260 | 22   | 281  |
| 57.616 | 21 | ACTGAAAGAGAAGCAGCCGA      | 60.277 | 20 | 253 | 66   | 318  |
| 60.096 | 22 | GGTCTTGCAGGCTATTACGC      | 59.873 | 20 | 263 | 61   | 323  |
| 60.423 | 20 | ATGGGATATTCGGGGAAAAG      | 59.978 | 20 | 206 | 421  | 626  |
| 60.531 | 20 | TCTTTCATGCAATCGCTTTG      | 59.953 | 20 | 229 | 504  | 732  |
| 59.833 | 20 | CATCCATATTTGGGAGGTGG      | 60.006 | 20 | 217 | 138  | 354  |
| 60.065 | 20 | TCCTCAATCTGGTGCTTGTG      | 59.831 | 20 | 137 | 1860 | 1996 |
| 59.962 | 20 | TGGTTTCCGTTTATATGACGA     | 58.031 | 21 | 126 | 81   | 206  |
| 60.14  | 20 | TTTCGTGGAAGGATAACCGAC     | 59.933 | 20 | 266 | 25   | 290  |
| 60.263 | 20 | AATAGGGGCATCACGATGAG      | 59.917 | 20 | 218 | 2455 | 2672 |
| 60.029 | 20 | AGCAGGATAAAGGGAGTTAGCA    | 58.111 | 21 | 200 | 405  | 604  |
| 59.024 | 20 | AGCTGTAGGCAGCGAACAAAT     | 60.044 | 20 | 103 | 14   | 116  |
| 59.955 | 20 | CTTGTGGGAGGAAGAAACCA      | 60.081 | 20 | 149 | 343  | 491  |
| 58.02  | 20 | CAAAACACCTAAATCCCCTCA     | 59.847 | 21 | 255 | 113  | 367  |
| 57.235 | 25 | ATCGAGAGGAAAGTGGAGCA      | 59.95  | 20 | 263 | 11   | 273  |
| 60.218 | 20 | CGTATTTAATTCCAACTTTGGGG   | 60.752 | 23 | 247 | 45   | 291  |
| 60.074 | 20 | TGCGACGATGATGATACGAT      | 60.065 | 20 | 139 | 251  | 389  |
| 60.096 | 21 | TTTGGACTGTATCGGTCTACCA    | 59.494 | 22 | 244 | 23   | 266  |
| 60.192 | 20 | TCATGAACTAATCAAGTTCCACA   | 57.291 | 23 | 256 | 93   | 348  |
| 59.853 | 20 | ATCTTGGTGGGACTACGTGC      | 59.997 | 20 | 275 | 155  | 429  |
| 59.701 | 20 | TCTCCCTAACGTGCTAACTTCA    | 59.041 | 22 | 244 | 284  | 527  |
| 59.452 | 20 | CTTGGACCAGAGAGCCATTC      | 59.803 | 20 | 279 | 1259 | 1537 |
| 60.032 | 20 | GGAGCCCATTTGTTTTCTGA      | 60.051 | 20 | 177 | 60   | 236  |
| 59.933 | 20 | AAGCTGTGCATGAAGCAGTG      | 60.207 | 20 | 207 | 671  | 877  |
| 59.223 | 20 | TTGGAATTTCTGGGAGTGGT      | 59.381 | 20 | 271 | 2038 | 2308 |
| 60.066 | 20 | ATTTTGTATGGGCTCCAGTTG     | 59.933 | 20 | 169 | 1968 | 2136 |
| 59.694 | 20 | CCGAATGTAGTGGATACGGC      | 60.352 | 20 | 106 | 331  | 436  |
| 59.939 | 20 | CATGAACAAATGATGGCTGG      | 59.924 | 20 | 234 | 282  | 515  |
| 59.969 | 21 | ATAGGGCACACAACCCTTCA      | 60.375 | 20 | 278 | 135  | 412  |
| 60.183 | 20 | GACGGCACCACTTCTTTAG       | 60.015 | 20 | 257 | 41   | 297  |
| 59.205 | 20 | TCAATGTGGCGCAATTA AAA     | 60.074 | 20 | 278 | 289  | 566  |
| 59.962 | 20 | CCTCTTCAAACAGAGAGCCG      | 60.126 | 20 | 161 | 849  | 1009 |
| 60.256 | 21 | ATTTTATGGTCTTCCAACATTTTT  | 57.249 | 24 | 271 | 108  | 378  |
| 57.983 | 20 | AGATTCATGGTGCTGCAGTT      | 58.316 | 20 | 189 | 349  | 537  |
| 59.694 | 20 | GCCTTGCCTTGTCCATATTC      | 59.533 | 20 | 274 | 134  | 407  |
| 60.734 | 20 | GTAAAGGGTGAGTGGTGGGA      | 59.82  | 20 | 273 | 259  | 531  |
| 60.073 | 20 | GAGCGCGAAAATAAGACGAC      | 59.988 | 20 | 258 | 3632 | 3889 |
| 59.184 | 21 | TGATGGTCCGGTTAATACTCG     | 59.831 | 21 | 190 | 101  | 290  |
| 60.149 | 20 | GGACTTGAGCTTGTTCGGAG      | 59.989 | 20 | 163 | 245  | 407  |
| 60.045 | 20 | AGCATTTGGAGATGGTTTCG      | 60.074 | 20 | 257 | 322  | 578  |
| 59.861 | 20 | TTCCAAACAGTGCACGAGAG      | 60.025 | 20 | 193 | 5557 | 5749 |
| 60.012 | 20 | GGGACGACAAAAGTTCCAA       | 59.948 | 20 | 280 | 750  | 1029 |
| 60.008 | 20 | TCGTCCATTGTAAACAGTTCCA    | 60.399 | 22 | 175 | 132  | 306  |

|        |    |                         |        |    |     |      |      |
|--------|----|-------------------------|--------|----|-----|------|------|
| 60.18  | 20 | CTCAGCCGTACAGAAAAGGG    | 59.869 | 20 | 275 | 63   | 337  |
| 60.104 | 20 | AAACTGGTGAGACTGTGGGG    | 60.002 | 20 | 185 | 1618 | 1802 |
| 60.156 | 20 | GATGGATAAATGATTGCGGC    | 60.262 | 20 | 246 | 86   | 331  |
| 58.95  | 20 | CTCTCAAACCTCACGGCCTTC   | 59.989 | 20 | 130 | 30   | 159  |
| 59.555 | 21 | TTTCTCTTAGACCGAGCCCA    | 59.948 | 20 | 263 | 3    | 265  |
| 60.773 | 19 | ATGAGTTTGTATGGAGCGAGG   | 60.218 | 20 | 270 | 308  | 577  |
| 60.074 | 20 | TGTTTCATGTGGCATCAAGG    | 60.517 | 20 | 218 | 0    | 217  |
| 60.41  | 23 | AGGCGATTTCAGTCGAACAAT   | 59.7   | 20 | 100 | 36   | 135  |
| 60.132 | 20 | TGGCAGCTCATAATCAGTGG    | 59.823 | 20 | 172 | 304  | 475  |
| 60.073 | 20 | GCAGCAGTGCAACTGAAAAG    | 59.788 | 20 | 277 | 5001 | 5277 |
| 57.444 | 22 | AAATTCATGGGGATGGACAA    | 59.991 | 20 | 157 | 2    | 158  |
| 58.777 | 23 | TGCATTGAATGGACTTAGCC    | 58.723 | 20 | 244 | 24   | 267  |
| 59.907 | 20 | ATGCACCCTCACCTTTATG     | 59.813 | 20 | 221 | 28   | 248  |
| 60.11  | 20 | GGCTTGGAGGGTTCTTCTTT    | 59.691 | 20 | 249 | 219  | 467  |
| 59.933 | 20 | TGACCCACTCCAACCTCTTCC   | 60.088 | 20 | 227 | 673  | 899  |
| 59.837 | 22 | TTTGCACCTGAGGAGGTGTT    | 60.69  | 20 | 126 | 51   | 176  |
| 60.111 | 20 | AATTGCCCTTTCATGCATTT    | 59.415 | 20 | 205 | 1251 | 1455 |
| 59.716 | 20 | GAAACAGAGGGAGGGAAAGG    | 60.045 | 20 | 248 | 47   | 294  |
| 57.52  | 20 | CCTCATTCAACAACCTCATCCAC | 59.454 | 22 | 280 | 1083 | 1362 |
| 58.161 | 22 | AAGGTGCGCAGAAAAGGTTTC   | 60.61  | 20 | 274 | 289  | 562  |
| 59.055 | 21 | AAGAAAAAGTTCGCTGCCAAA   | 59.996 | 20 | 274 | 57   | 330  |
| 59.942 | 20 | TCCTGACAACGCAAGATCAG    | 59.984 | 20 | 240 | 194  | 433  |
| 59.316 | 20 | GAGCAATTGTTGGACCGAGT    | 60.119 | 20 | 155 | 532  | 686  |
| 59.259 | 21 | AAAAACATTGCACCCAGAC     | 59.836 | 20 | 146 | 24   | 169  |
| 60.012 | 20 | ACCGACCAAAAATCAAACCA    | 60.206 | 20 | 232 | 414  | 645  |
| 60.227 | 20 | TGGATCGACAATTAGCTGGA    | 59.226 | 20 | 185 | 309  | 493  |
| 58.78  | 20 | CTACCCCGTTGGAAAAGAT     | 60.18  | 20 | 222 | 17   | 238  |
| 59.988 | 20 | TGGCTGGTTCTCAAAAAGTCC   | 60.232 | 20 | 225 | 21   | 245  |
| 59.967 | 20 | TAATCTTGGCCGCTGATTTT    | 59.682 | 20 | 227 | 1581 | 1807 |
| 59.985 | 20 | GCTGCACACCCTGTTTTGTA    | 59.764 | 20 | 226 | 3450 | 3675 |
| 59.566 | 20 | TCCTGATTTCACTTGGGAGG    | 60.042 | 20 | 218 | 120  | 337  |
| 59.839 | 20 | TCCTTCAATGGAGGTTTCAAG   | 60.042 | 20 | 173 | 370  | 542  |
| 59.381 | 20 | ACCGATTTTCCCCATTTTA     | 60.361 | 20 | 277 | 292  | 568  |
| 60.246 | 20 | GTGTGATTTGGTGAAAGCCC    | 60.362 | 20 | 112 | 104  | 215  |
| 60.081 | 20 | GAGGCTTGATGATGCACAGA    | 59.95  | 20 | 160 | 5217 | 5376 |
| 60.081 | 20 | TGAAGTGGCAACAATTCGAG    | 59.84  | 20 | 276 | 920  | 1195 |
| 59.973 | 20 | CCGACATAATACACCGCCTT    | 59.845 | 20 | 136 | 30   | 165  |
| 59.939 | 20 | CCCTTATGGTGGCTTGTGTTG   | 60.357 | 20 | 177 | 432  | 608  |
| 60.255 | 20 | ACTTCCCGGACAGCATTAGA    | 59.694 | 20 | 226 | 376  | 601  |
| 59.549 | 20 | GCGGCAGAATGAAGAAGAAA    | 60.469 | 20 | 127 | 273  | 399  |
| 60.073 | 20 | TCCATGCAAGTCCATTCTGT    | 59.09  | 20 | 258 | 89   | 346  |
| 59.933 | 20 | ATCGGTTATCACCGGATCG     | 60.697 | 19 | 209 | 1369 | 1577 |
| 60.277 | 20 | CCGTGTCCGTGTACATTTG     | 58.394 | 19 | 269 | 139  | 407  |
| 59.435 | 20 | TCAACCATTTTTGTGCTCCTT   | 59.601 | 21 | 152 | 259  | 410  |
| 59.625 | 22 | GCGCGCTGTATATCTAACGA    | 59.104 | 20 | 153 | 62   | 214  |
| 59.992 | 20 | TTTTAGAGCATCCCCAGTGTG   | 60.118 | 21 | 278 | 214  | 491  |
| 60.366 | 20 | TGGCTCTGGTACCATGTTGA    | 60.112 | 20 | 218 | 6    | 223  |
| 59.229 | 20 | CCTTCACGAGTGGTGACAAA    | 59.72  | 20 | 106 | 677  | 782  |
| 60.17  | 20 | TTTTGGTGTGTTTGCCTGTGT   | 60.05  | 20 | 241 | 25   | 265  |
| 59.555 | 21 | AAGAGAAAACAAGAGGGGGC    | 59.691 | 20 | 102 | 3    | 104  |
| 60.042 | 20 | GTTTACTTTTGGGACGGCTG    | 59.609 | 20 | 182 | 426  | 607  |
| 58.439 | 25 | TCTGGGATAAGGAGCATCAGA   | 59.782 | 21 | 252 | 919  | 1170 |
| 60.03  | 22 | GGGTTTGAATGTTAGCTGG     | 59.429 | 20 | 267 | 304  | 570  |
| 59.752 | 20 | GCTACAGCAGCCATTGATGA    | 59.979 | 20 | 128 | 644  | 771  |
| 59.955 | 20 | TTGCAGATCTTCATCCAACAA   | 59.262 | 21 | 244 | 32   | 275  |
| 59.499 | 20 | CCTCAATTCGATCCTGGAAA    | 60.006 | 20 | 179 | 48   | 226  |
| 59.664 | 20 | GAATTGCGGTCGTCTTCTTC    | 59.82  | 20 | 254 | 825  | 1078 |
| 60.152 | 20 | CAATTTGTTTCGAATTTTGCTG  | 59.64  | 22 | 172 | 257  | 428  |

|        |    |                         |        |    |     |      |      |
|--------|----|-------------------------|--------|----|-----|------|------|
| 60.156 | 20 | CCCTGCTTCTGAAACCCTAGT   | 59.759 | 21 | 227 | 598  | 824  |
| 58.796 | 20 | TCTTGGGAACCCTTGAGATG    | 60.042 | 20 | 257 | 965  | 1221 |
| 59.724 | 23 | GGGAGTTTGCACCAGATCAC    | 60.52  | 20 | 276 | 19   | 294  |
| 60.095 | 20 | TGAATCTGCATAGCCTCTACGA  | 60.003 | 22 | 188 | 161  | 348  |
| 60.051 | 20 | AGGAAGGGTCTCGTGTGTATG   | 59.076 | 21 | 274 | 486  | 759  |
| 58.107 | 21 | GGATCTCAAGCCATTTTCATGT  | 58.998 | 21 | 222 | 469  | 690  |
| 60.363 | 20 | TTGATCGACAGCATCCTAGC    | 58.979 | 20 | 228 | 330  | 557  |
| 59.113 | 20 | ATTTCTTGAGTCGGGGGAAT    | 59.766 | 20 | 278 | 580  | 857  |
| 60.455 | 23 | GGGAGATCTAGCAGGATACGC   | 60.209 | 21 | 239 | 247  | 485  |
| 59.91  | 20 | GCGCCTAGAATTCGTCAAAG    | 59.982 | 20 | 260 | 228  | 487  |
| 60.029 | 21 | TGTGCAGATCTAATGGCACAG   | 59.879 | 21 | 174 | 154  | 327  |
| 59.203 | 20 | ACGCACGCACTCAGTTACAC    | 59.977 | 20 | 266 | 1203 | 1468 |
| 58.289 | 22 | GACGCCAATGGAACCTTTTA    | 59.938 | 20 | 106 | 45   | 150  |
| 59.803 | 20 | AAAATGGGTTTCCTTACCCG    | 60.048 | 20 | 220 | 138  | 357  |
| 60.29  | 21 | AAATTGAGCTCCATAGCCGA    | 59.807 | 20 | 121 | 32   | 152  |
| 58.82  | 27 | ACAAAAATGCCCTTGAATGC    | 59.945 | 20 | 265 | 0    | 264  |
| 60.081 | 20 | CAGACCAGACTAGGGGCAAAA   | 60.246 | 20 | 178 | 242  | 419  |
| 60.298 | 20 | TTGATTTTTAATGGGGCAGG    | 59.767 | 20 | 280 | 66   | 345  |
| 59.894 | 20 | CCGAATGCACTCACACAAAC    | 60.16  | 20 | 143 | 516  | 658  |
| 60.69  | 20 | GCACCGGAGAAGAACTACCA    | 60.255 | 20 | 257 | 508  | 764  |
| 60.074 | 20 | TTTCTCAACCGAGCTCACC     | 58.945 | 19 | 106 | 305  | 410  |
| 60.088 | 20 | ATCCGCCCTTATCTCTGTT     | 59.925 | 20 | 214 | 264  | 477  |
| 59.624 | 20 | TTTCCCTCGATTCTCGTGTC    | 60.195 | 20 | 270 | 903  | 1172 |
| 60.042 | 20 | GTGCTGCTTTTCTTCGGAGT    | 59.621 | 20 | 256 | 84   | 339  |
| 59.933 | 20 | TCTAACTTGACCTCACCGCC    | 60.255 | 20 | 260 | 507  | 766  |
| 59.784 | 20 | GATATTAACGAGCGGTGGC     | 59.574 | 20 | 277 | 704  | 980  |
| 60.353 | 20 | AAAATGCCCTTGTATGCTGC    | 60.103 | 20 | 224 | 457  | 680  |
| 59.989 | 20 | CAAATCCAATGAAAGGGGA     | 59.733 | 20 | 205 | 143  | 347  |
| 59.805 | 20 | ATTTACGTGATCTGCGTCC     | 60.103 | 20 | 168 | 64   | 231  |
| 59.923 | 20 | GCACCGTGTGCAGTTATTTG    | 60.18  | 20 | 156 | 284  | 439  |
| 59.95  | 20 | ACCAGCTGCACCTGTAACAA    | 59.365 | 20 | 170 | 3368 | 3537 |
| 59.914 | 20 | TTCAAAGAGATGGGTCAGGG    | 60.042 | 20 | 168 | 1356 | 1523 |
| 59.779 | 20 | GGGGTTCGTGCTTGTATTTG    | 60.365 | 20 | 241 | 404  | 644  |
| 59.829 | 20 | AAATCGGTTAAAACCGGACC    | 60.055 | 20 | 179 | 71   | 249  |
| 60.147 | 20 | GGCGCATCTGATCTTAAAAA    | 57.99  | 20 | 142 | 17   | 158  |
| 60.05  | 20 | ACGGCTGTGGTTTCAAATTC    | 59.978 | 20 | 254 | 376  | 629  |
| 60.035 | 20 | ACCATCGTAGGGTGTATGCC    | 59.7   | 20 | 218 | 34   | 251  |
| 60.074 | 20 | GGAGAAGAACATGGATCGGA    | 60.011 | 20 | 127 | 86   | 212  |
| 60.194 | 20 | ATATCAAAGGCGTGGATTGC    | 59.929 | 20 | 154 | 721  | 874  |
| 60.184 | 20 | GGTAGCCATTTGAGTCGCAT    | 60.103 | 20 | 167 | 360  | 526  |
| 60.627 | 19 | ACTTCATCCCATTGAGTCGG    | 59.927 | 20 | 103 | 2    | 104  |
| 60.627 | 19 | CATCAAGAGCCTCCTCGAAC    | 59.95  | 20 | 125 | 2    | 126  |
| 60.074 | 20 | CCGGAGCCTGTCAACTAGAG    | 60.005 | 20 | 256 | 3040 | 3295 |
| 59.997 | 20 | TTGCTCTAACAATTCTGAAACGA | 59.065 | 23 | 183 | 400  | 582  |
| 59.962 | 20 | CGCCAGGGGAATTGTATTTA    | 59.789 | 20 | 216 | 1170 | 1385 |
| 58.623 | 20 | GCAGCCATGGTATGGACTCT    | 60.104 | 20 | 279 | 548  | 826  |
| 59.63  | 21 | TTATGTGTTTTGGTCCGGTT    | 60.088 | 20 | 143 | 21   | 163  |
| 60.206 | 20 | GTGGATTTGGGGATGATGAC    | 59.995 | 20 | 257 | 362  | 618  |
| 59.59  | 20 | CGTGGAGTCGACGACAATTA    | 59.716 | 20 | 198 | 1003 | 1200 |
| 60.185 | 20 | CGCACAGATTGCTTGTGATT    | 59.871 | 20 | 242 | 597  | 838  |
| 60.072 | 20 | GCCAAATGCCTACAAATTGC    | 60.465 | 20 | 237 | 1191 | 1427 |
| 59.688 | 20 | TTGGCTTGTGCGAGCTTTTT    | 60.132 | 20 | 261 | 6193 | 6453 |
| 60.048 | 20 | CCGAATGCTATCTTGGGGTA    | 59.916 | 20 | 248 | 323  | 570  |
| 59.664 | 20 | TTTTGGCTCGTTGAGCTTTT    | 59.996 | 20 | 243 | 2350 | 2592 |
| 59.856 | 21 | TGCAAAGCATACTAAAGATGCAC | 59.463 | 23 | 185 | 385  | 569  |
| 59.966 | 20 | ATTGTCTCATGGCCCAACAT    | 60.203 | 20 | 154 | 651  | 804  |
| 60.347 | 20 | TTTGACGACCCATTCAAGGT    | 60.353 | 20 | 258 | 1480 | 1737 |
| 59.797 | 20 | CGGTCTCCTTTGTCCAACCTC   | 59.697 | 20 | 158 | 293  | 450  |



|        |    |                          |        |    |     |      |      |
|--------|----|--------------------------|--------|----|-----|------|------|
| 60.431 | 20 | GAATAGTTGCGGATGCACG      | 60.235 | 19 | 177 | 156  | 332  |
| 59.973 | 20 | CAAGCCCTAGTTCTTTCCCC     | 60.068 | 20 | 239 | 73   | 311  |
| 60.431 | 20 | CGGTGGAAGGAGTGAGAGAG     | 59.978 | 20 | 103 | 4    | 106  |
| 59.931 | 20 | AATCCGACACGAACATGACA     | 59.967 | 20 | 256 | 1659 | 1914 |
| 59.184 | 21 | CACTACCAAGGGGTCTGCAT     | 59.989 | 20 | 131 | 340  | 470  |
| 59.976 | 20 | TGGGGTTGAGCCCAATAATA     | 60.146 | 20 | 267 | 81   | 347  |
| 60.226 | 20 | CCGGATATACAAACTACAGGGC   | 59.758 | 22 | 224 | 102  | 325  |
| 59.939 | 20 | GGGATGAATTTCCACCATGA     | 60.526 | 20 | 183 | 564  | 746  |
| 57.16  | 27 | TACATGATGGAACGGGGATT     | 60.014 | 20 | 155 | 2    | 156  |
| 59.993 | 20 | GCATCTCTCTCTTGCTCTCATTG  | 60.665 | 23 | 110 | 370  | 479  |
| 60.762 | 20 | ATCGGTTATTACCGGATCGC     | 61.031 | 20 | 199 | 198  | 396  |
| 59.967 | 20 | TTCTTGGTGGCGGTAGGTAG     | 60.125 | 20 | 180 | 543  | 722  |
| 60.399 | 20 | CAGCCGTCGGATTTAACATT     | 59.96  | 20 | 167 | 2364 | 2530 |
| 60.152 | 20 | AATGCTTGCCATGAGAATCC     | 60.043 | 20 | 280 | 767  | 1046 |
| 59.784 | 21 | TTAACCGTCCACATTGCAGA     | 60.111 | 20 | 166 | 435  | 600  |
| 59.971 | 20 | CAGTTGGTTTTGCATCATCG     | 60.111 | 20 | 141 | 4573 | 4713 |
| 59.973 | 20 | ACTCGGGCAGGAAAAGAAAT     | 60.074 | 20 | 184 | 869  | 1052 |
| 60.301 | 20 | TTGAGGGATGACGGGAGTAG     | 60.065 | 20 | 263 | 39   | 301  |
| 60.637 | 20 | AGGATCAATCCCCACAAAAA     | 59.22  | 20 | 271 | 159  | 429  |
| 59.028 | 20 | GCGTGTGAGTGTTTCGTGAGT    | 59.948 | 20 | 273 | 48   | 320  |
| 60.149 | 20 | CTTTCTTCTTCATTTGCGCG     | 59.953 | 20 | 134 | 27   | 160  |
| 59.797 | 20 | TTATCGATCTCCTGCATCACC    | 60.051 | 21 | 246 | 114  | 359  |
| 59.855 | 20 | CATCACAGAGAATCAAACCAACA  | 60.023 | 23 | 120 | 325  | 444  |
| 60.045 | 20 | AATGGACCAGCCACTACAGG     | 59.989 | 20 | 279 | 1375 | 1653 |
| 59.962 | 20 | AACATCATCCAAATCCCAGC     | 59.756 | 20 | 202 | 644  | 845  |
| 59.966 | 20 | ACTGTCCCTACCTGCCCTTT     | 59.994 | 20 | 256 | 1424 | 1679 |
| 57.885 | 21 | TGAACCACTCCTCGCTCTCT     | 60.135 | 20 | 241 | 37   | 277  |
| 60.096 | 20 | CCTTTTTGGGTGCGTATCAT     | 59.823 | 20 | 238 | 3169 | 3406 |
| 59.82  | 20 | TTTAACAGCCATAAGCACAAGC   | 59.45  | 22 | 160 | 1713 | 1872 |
| 59.95  | 20 | AGAGTCAAACATGCGATCCTT    | 58.806 | 21 | 190 | 381  | 570  |
| 59.96  | 20 | GCCAATGGATGAACAGTCCT     | 59.934 | 20 | 191 | 693  | 883  |
| 60.054 | 26 | ATGCCAATGGCCCAATAAT      | 59.994 | 19 | 244 | 5    | 248  |
| 59.827 | 20 | GCAAGTGGTCACGTGAAATG     | 60.16  | 20 | 235 | 406  | 640  |
| 59.987 | 20 | CCCTAATTTGTGAAAATGGGTT   | 59.141 | 22 | 274 | 69   | 342  |
| 59.964 | 20 | GGTCTCTGGTTGCACCATT      | 59.973 | 20 | 276 | 914  | 1189 |
| 59.955 | 20 | CAAACCCGTAAAGCGAAAAA     | 60.102 | 20 | 231 | 861  | 1091 |
| 57.023 | 20 | GTTCGAATCCTCTCTTCCCC     | 60.015 | 20 | 279 | 94   | 372  |
| 59.507 | 23 | GTAGCCTTTCATTCCCTCCC     | 59.903 | 20 | 124 | 475  | 598  |
| 60.149 | 25 | TAAAGCAATTTTGCCCAAGG     | 60.068 | 20 | 171 | 269  | 439  |
| 59.973 | 20 | CTTGTCTCCATTCCATTGGC     | 60.461 | 20 | 231 | 85   | 315  |
| 60.001 | 20 | AGGCTATAAAGGAGCGAGAGTT   | 57.926 | 22 | 260 | 929  | 1188 |
| 59.685 | 25 | ACATATTTATACGCATATAGCAAA | 57.577 | 27 | 197 | 1885 | 2081 |
| 60.223 | 20 | TGACCCTATGAGGCCAAGTC     | 60.073 | 20 | 259 | 838  | 1096 |
| 59.691 | 20 | CCGTGATGCCTGTGAAGTAA     | 59.716 | 20 | 254 | 2236 | 2489 |
| 59.694 | 21 | TGCGAGTGTTAACCGTTTCT     | 58.432 | 20 | 260 | 0    | 259  |
| 59.939 | 20 | CGACAATTTTAGAGACAACGTGA  | 59.322 | 23 | 212 | 2508 | 2719 |
| 59.803 | 20 | CGAGGGAAGGAAGGTTTAGG     | 60.061 | 20 | 125 | 937  | 1061 |
| 58.912 | 21 | TGTAGCCCGGTGCTAGAGTT     | 59.898 | 20 | 145 | 21   | 165  |
| 60.111 | 20 | ACGTTGGACCTGAAAGAGGA     | 59.697 | 20 | 275 | 100  | 374  |
| 60.401 | 20 | AAGGATGCCCAAAGTGTACG     | 59.993 | 20 | 235 | 8    | 242  |
| 60.243 | 20 | CTTGTGAAATCAATGCACCG     | 60.111 | 20 | 202 | 98   | 299  |
| 59.854 | 20 | GAGTTCGTCAAACCTCCCAA     | 60.088 | 20 | 184 | 259  | 442  |
| 59.883 | 20 | TAGCCCATGAACACACCAAAA    | 59.964 | 20 | 241 | 513  | 753  |
| 60.131 | 20 | AGGCACGAACCTCTTTCTCA     | 59.989 | 20 | 145 | 8    | 152  |
| 59.118 | 22 | AGCGGTTAAAGGTGGTGCTA     | 59.769 | 20 | 249 | 103  | 351  |
| 59.893 | 20 | TTGGTTGGGTAGCTTTGGAG     | 60.103 | 20 | 278 | 404  | 681  |
| 58.013 | 21 | ACAATCGTCGGATTTTAGCG     | 60.096 | 20 | 179 | 0    | 178  |
| 60.489 | 20 | CGGATGGACCGGATGTATTA     | 60.544 | 20 | 250 | 13   | 262  |

|        |    |                          |        |    |     |      |      |
|--------|----|--------------------------|--------|----|-----|------|------|
| 58.882 | 20 | CTCGGTATGCGAGAGAGAGG     | 60.111 | 20 | 209 | 57   | 265  |
| 57.552 | 24 | TACGGCTGCGTAAACTACCC     | 60.152 | 20 | 271 | 16   | 286  |
| 60.132 | 20 | CCCTAGCCTTTGCCTCTTTC     | 60.332 | 20 | 212 | 190  | 401  |
| 59.585 | 20 | GGCTTGTCTGGAGTTTGCTC     | 59.997 | 20 | 277 | 65   | 341  |
| 60.011 | 20 | TTAATGCGCGTACCAAATCA     | 60.096 | 20 | 274 | 925  | 1198 |
| 58.514 | 21 | CACATGGAATTGCCTGAAGA     | 59.648 | 20 | 277 | 418  | 694  |
| 60.18  | 20 | CCATGAACACATTGATTGGC     | 59.781 | 20 | 252 | 151  | 402  |
| 59.904 | 20 | CACCCGAAAACCGAATAAGA     | 59.931 | 20 | 125 | 394  | 518  |
| 58.762 | 26 | ACGGCCTGAATGACAGAAAT     | 59.556 | 20 | 280 | 10   | 289  |
| 59.871 | 20 | CGGAGTGGGCTCATAAATGT     | 59.955 | 20 | 275 | 136  | 410  |
| 59.982 | 20 | CATCCCAAGCCATACGAACT     | 59.955 | 20 | 250 | 56   | 305  |
| 60.089 | 20 | CCTTTGTTCTTTGGCACAT      | 59.971 | 20 | 242 | 1250 | 1491 |
| 60.203 | 20 | ACACGGTCTCATGGCATAAA     | 59.002 | 20 | 254 | 425  | 678  |
| 60.074 | 20 | GTTTCCTCCACAACGCTCTC     | 59.851 | 20 | 201 | 1936 | 2136 |
| 59.595 | 20 | GCAATAACAAAACCTCGGGTGA   | 59.989 | 21 | 253 | 63   | 315  |
| 60.088 | 20 | TTCTACTGGCTGTCCTTCG      | 60.388 | 20 | 227 | 962  | 1188 |
| 60.206 | 20 | ATCCATGCATTCCCAACAAT     | 60.021 | 20 | 181 | 273  | 453  |
| 59.457 | 22 | CAATAAGAAACACGCAACACAAA  | 60.082 | 23 | 200 | 221  | 420  |
| 59.25  | 20 | GGGTCCAGACTTGAGACCAA     | 60.088 | 20 | 197 | 700  | 896  |
| 59.986 | 20 | TGTGCGCTTGAGTGTGTGTA     | 60.096 | 20 | 164 | 676  | 839  |
| 59.697 | 20 | TGACGTTCTTGCTGCTATGG     | 60.011 | 20 | 139 | 1633 | 1771 |
| 59.953 | 20 | CACATGTCACGAATCGGTGT     | 60.45  | 20 | 274 | 108  | 381  |
| 60.118 | 20 | TAAACAACCATGTCGGCGTA     | 59.992 | 20 | 279 | 235  | 513  |
| 59.001 | 21 | GATCGACCAATTGTGTGACG     | 59.967 | 20 | 171 | 1003 | 1173 |
| 61.052 | 20 | ACGTCCATGGGAGAATGTGT     | 60.246 | 20 | 228 | 68   | 295  |
| 59.381 | 20 | AGGGCCACATGATGATAACC     | 59.635 | 20 | 252 | 61   | 312  |
| 59.888 | 20 | TGAGCCTAAGGGGTGAAGTG     | 60.246 | 20 | 229 | 5579 | 5807 |
| 60.018 | 20 | ATTTCTCTCGTCACACGCCT     | 59.874 | 20 | 205 | 949  | 1153 |
| 60.129 | 20 | TCTTCGAATAAACCCCCACA     | 60.301 | 20 | 275 | 341  | 615  |
| 60.111 | 20 | TGGAGGAAGAAGACAAGATGC    | 59.42  | 21 | 185 | 53   | 237  |
| 60.111 | 20 | GGAGTGGCTTGCGAACTTAG     | 60.015 | 20 | 214 | 21   | 234  |
| 60.293 | 20 | GTGCGTGTGTCGTGATTT       | 59.621 | 20 | 271 | 119  | 389  |
| 59.997 | 20 | TAGATCACATTTGGCACGGA     | 60.073 | 20 | 164 | 265  | 428  |
| 59.238 | 21 | GCTTTGCGGGTGAAAAGTT      | 59.218 | 20 | 245 | 25   | 269  |
| 60.459 | 20 | TCCAAACCAACAACACCTGA     | 59.976 | 20 | 136 | 107  | 242  |
| 60.096 | 20 | TCCGTTATGGGCCGTTAATA     | 60.165 | 20 | 202 | 2707 | 2908 |
| 60.008 | 20 | AAGGGACATTTTCTGCTTGC     | 59.316 | 20 | 215 | 1785 | 1999 |
| 60.015 | 20 | ACATCTCCCTCACCTCTCC      | 60.469 | 20 | 248 | 1167 | 1414 |
| 59.972 | 20 | CTGAAACCACACCTCCACCT     | 60.002 | 20 | 272 | 722  | 993  |
| 59.966 | 20 | GATACTCCGGCCAACTGAAA     | 60.074 | 20 | 280 | 1301 | 1580 |
| 58.866 | 20 | TTGAACCTAGCCGGAGAAGA     | 59.948 | 20 | 237 | 32   | 268  |
| 60.016 | 20 | GCTTGCCACGTCAACATAAA     | 59.735 | 20 | 136 | 2535 | 2670 |
| 59.853 | 20 | TGACCGTTTCACCACAGGTA     | 60.001 | 20 | 234 | 14   | 247  |
| 59.659 | 21 | AGATGTAGCAACCTATTTCTAATT | 57.349 | 27 | 170 | 107  | 276  |
| 60.397 | 20 | CTTGACCAGATTGTCCCTC      | 59.505 | 20 | 233 | 346  | 578  |
| 59.907 | 20 | GCATAGAAAAATATGTAAAATTC/ | 58.929 | 27 | 178 | 356  | 533  |
| 57.795 | 21 | ATCCATCTACACAACCGGA      | 60.195 | 20 | 212 | 19   | 230  |
| 60.066 | 20 | GGCACGATCACTTTAACCGT     | 60     | 20 | 170 | 1229 | 1398 |
| 59.803 | 21 | TCCCAATTTAAGGGTTATTACCTG | 59.555 | 24 | 145 | 1018 | 1162 |
| 59.893 | 20 | TAATTGCATTCTCCCGAACC     | 59.901 | 20 | 271 | 268  | 538  |
| 59.836 | 20 | AACCAGCTGTCAGAAGTGGG     | 60.298 | 20 | 266 | 1043 | 1308 |
| 59.897 | 20 | CTTCTTGTCTGCAACGTGGA     | 60.025 | 20 | 140 | 668  | 807  |
| 60.184 | 20 | GGCCTGTAGACCAATACCCA     | 59.813 | 20 | 107 | 42   | 148  |
| 59.67  | 20 | TGACTGCCACAGTTTCCTCA     | 60.44  | 20 | 223 | 1545 | 1767 |
| 59.284 | 20 | TGTGACCACTTGTCTACGGG     | 59.591 | 20 | 209 | 319  | 527  |
| 60.088 | 20 | AAAGAGACTGAGCCACCGAA     | 59.989 | 20 | 251 | 346  | 596  |
| 59.989 | 20 | AAGGACCAATGAGATGGGTG     | 59.779 | 20 | 248 | 66   | 313  |
| 60.018 | 20 | TGAAGGTGACGAGAATGGTG     | 59.676 | 20 | 118 | 699  | 816  |

|        |    |                           |        |    |     |      |      |
|--------|----|---------------------------|--------|----|-----|------|------|
| 60.331 | 20 | GGTGTGTGAGGTGTGTGAGG      | 60.045 | 20 | 103 | 40   | 142  |
| 59.973 | 20 | TGCTCTCTCATTGTAATCTCTCTCA | 59.688 | 25 | 251 | 109  | 359  |
| 59.673 | 20 | CACACTGGACATCCCTTGAA      | 59.52  | 20 | 260 | 1698 | 1957 |
| 59.844 | 20 | TGCTGCTGAACTTCTTGTA       | 59.773 | 21 | 203 | 4779 | 4981 |
| 61.188 | 20 | TGCATATCTTCGTGTGTGCAT     | 60.158 | 21 | 242 | 133  | 374  |
| 59.381 | 20 | CACCACTGCTTCTGCTTTGA      | 60.175 | 20 | 160 | 303  | 462  |
| 59.931 | 20 | GCCGAGATTTGTTATGCGTT      | 60.103 | 20 | 169 | 329  | 497  |
| 60.331 | 20 | CAAGATCCAAGGGCTGTGATA     | 60.081 | 21 | 190 | 705  | 894  |
| 59.96  | 24 | CGATCCGGTCTGATCCAA        | 60.582 | 18 | 268 | 352  | 619  |
| 59.96  | 20 | GCAGCCATTCTATGCAAAT       | 60.067 | 20 | 209 | 1076 | 1284 |
| 59.924 | 20 | ACGAAAAAGGGCATGAAAAA      | 59.564 | 20 | 280 | 381  | 660  |
| 60.158 | 20 | TTCACACGAGAGTGCAGATTG     | 60.04  | 21 | 199 | 534  | 732  |
| 58.53  | 22 | GCCAGAAATAGTGGATTTTGC     | 58.709 | 21 | 240 | 2170 | 2409 |
| 60.067 | 20 | TTTAAGGGTTATCACCTGATTTTC  | 57.757 | 24 | 184 | 607  | 790  |
| 58.958 | 20 | TTTTTAAAAGGAGACATTGCTGTT  | 58.494 | 24 | 227 | 246  | 472  |
| 59.901 | 20 | TGTTGCAAGTAGTAAAGTAAAGG   | 59.475 | 25 | 182 | 528  | 709  |
| 59.847 | 20 | AGAAGGTTATCACCGGATCG      | 59.006 | 20 | 250 | 1159 | 1408 |
| 59.901 | 20 | AACCGCTGTTATCCCTCATT      | 58.53  | 20 | 152 | 674  | 825  |
| 59.934 | 20 | GATGATTGGTTTCCACCACC      | 60.034 | 20 | 171 | 360  | 530  |
| 59.7   | 20 | AACGCATTCTCCATGCTCTC      | 60.37  | 20 | 131 | 56   | 186  |
| 59.041 | 20 | TTTTGGACAAAATGCCCTT       | 59.429 | 20 | 251 | 43   | 293  |
| 60.05  | 20 | GGCTGGGATGTCATTCATTT      | 59.756 | 20 | 263 | 150  | 412  |
| 59.472 | 20 | GGTGTGGAAAAGGAACAACC      | 59.284 | 20 | 185 | 360  | 544  |
| 59.824 | 20 | TCTTCTGTCTGCCCTGGCT       | 59.986 | 20 | 265 | 347  | 611  |
| 60.051 | 20 | ACAGCTTCACCGTTTTGTTT      | 60.156 | 20 | 231 | 1408 | 1638 |
| 59.591 | 20 | ATGGCTGTTTTCCAATGAGC      | 60.081 | 20 | 167 | 528  | 694  |
| 59.938 | 20 | GAGATTCGTGGTGAACCCG       | 60.495 | 20 | 247 | 109  | 355  |
| 59.429 | 22 | CAAATCTTAACCGCCGATCT      | 59.182 | 20 | 264 | 1274 | 1537 |
| 60.159 | 20 | TTCCGTTTTCGACATCACTG      | 59.691 | 20 | 142 | 813  | 954  |
| 59.829 | 20 | CAACAGTTTGGCATCAGAGC      | 59.445 | 20 | 143 | 97   | 239  |
| 60.278 | 20 | GCCAACCACACAGTGAACAA      | 60.616 | 20 | 218 | 582  | 799  |
| 58.627 | 20 | GTACAGTGGTGGTGTGCTCG      | 60.227 | 20 | 200 | 406  | 605  |
| 60.39  | 20 | GGCTAATTGTTGGCCTTTGA      | 60.074 | 20 | 238 | 10   | 247  |
| 60.305 | 20 | GGAGAATTCCAATGCCAGAA      | 60.014 | 20 | 171 | 307  | 477  |
| 59.938 | 20 | TTCGTGGATGCTATGCTCAC      | 59.83  | 20 | 164 | 18   | 181  |
| 60.414 | 20 | GCACAATAATGCTTCCTGCT      | 59.536 | 21 | 250 | 150  | 399  |
| 60.032 | 20 | ATTACATTGTTTCTGCCGCC      | 59.967 | 20 | 246 | 346  | 591  |
| 59.938 | 20 | AGGTGATTGTGGTGGGTCC       | 60.649 | 19 | 155 | 35   | 189  |
| 59.297 | 20 | GCCAATGCCTCATCTAAAG       | 59.668 | 20 | 163 | 336  | 498  |
| 59.485 | 23 | AAAAGTTTGGCGTCATCACC      | 59.978 | 20 | 213 | 2420 | 2632 |
| 60.278 | 20 | TCGAGCTGGCTGAAGAATTT      | 60.096 | 20 | 212 | 568  | 779  |
| 60.195 | 20 | ACGTAGGATATCACTAAATTGATT  | 57.146 | 27 | 279 | 1167 | 1445 |
| 58.055 | 22 | GTGCAGCCTTATCTCTTGCC      | 59.985 | 20 | 207 | 93   | 299  |
| 59.967 | 21 | TGGGTAGCATATGTGATGG       | 59.375 | 20 | 161 | 68   | 228  |
| 60.257 | 20 | GCGTTTTGATGATATATAGGTGTT  | 58.907 | 26 | 195 | 546  | 740  |
| 59.923 | 20 | CGGGAGGGATGACTTTGTAA      | 59.926 | 20 | 233 | 971  | 1203 |
| 60.11  | 22 | CCCTTGAAGAACTCATCCCTT     | 59.562 | 21 | 225 | 2837 | 3061 |
| 59.113 | 25 | GTGGCAGAGGTTGGGTAGAA      | 60.111 | 20 | 216 | 18   | 233  |
| 60.312 | 20 | CAGGGCTATCCCTCATCAGA      | 60.173 | 20 | 271 | 215  | 485  |
| 60     | 20 | CATCGCTGCAAGATGGAATA      | 59.792 | 20 | 223 | 69   | 291  |
| 59.972 | 20 | AGTTTTGTGGTGAAGGTGC       | 60.156 | 20 | 202 | 151  | 352  |
| 59.813 | 20 | CTCATTGACAAACCATGTCCA     | 59.405 | 21 | 276 | 122  | 397  |
| 59.96  | 20 | AAACCCGTGTTCTTCAGTCG      | 60.149 | 20 | 256 | 19   | 274  |
| 59.504 | 20 | GAGTGGGCATTATGGAGCAT      | 59.923 | 20 | 131 | 744  | 874  |
| 59.93  | 20 | GACGAATCAAAGGTGCCAAT      | 59.939 | 20 | 173 | 73   | 245  |
| 59.739 | 20 | GGGAAAGCCGATCAATTTTT      | 60.26  | 20 | 111 | 197  | 307  |
| 60.183 | 20 | ATCGGTTATTATCGGATCGC      | 58.88  | 20 | 248 | 1258 | 1505 |
| 60.127 | 21 | AAGGGTTCTGCTGAGAACGA      | 59.989 | 20 | 238 | 53   | 290  |

|        |    |                         |        |    |     |      |      |
|--------|----|-------------------------|--------|----|-----|------|------|
| 60.135 | 20 | GTTAGCATGGGAAGGGAAGG    | 60.817 | 20 | 262 | 367  | 628  |
| 59.948 | 20 | TAGGAATCACACGTGGTGGG    | 61.777 | 20 | 253 | 157  | 409  |
| 60.221 | 20 | CAAACCCCGAGTCTGATGTT    | 59.966 | 20 | 202 | 1832 | 2033 |
| 59.127 | 20 | AAGCCTGTACCGAGCTTGA     | 60.015 | 20 | 243 | 1275 | 1517 |
| 59.95  | 20 | ACCAATCTCGCATAGAACCG    | 60.096 | 20 | 274 | 1297 | 1570 |
| 59.656 | 20 | CACAAATGGAGGTGATGTGG    | 59.806 | 20 | 251 | 317  | 567  |
| 58.955 | 22 | ACTCAGGATGCCACTGTTC     | 60.12  | 20 | 162 | 0    | 161  |
| 59.359 | 21 | CCATCGTGAAGAACAGACCA    | 59.676 | 20 | 224 | 276  | 499  |
| 59.964 | 20 | TTGACATGCCATTTTCTTGC    | 59.67  | 20 | 280 | 1028 | 1307 |
| 59.82  | 22 | CCCCACTTCACCACTTCACT    | 60.002 | 20 | 219 | 142  | 360  |
| 59.862 | 20 | AACAACCCTCATTGCTCTCG    | 60.255 | 20 | 278 | 121  | 398  |
| 60.157 | 20 | CCCGGTAAGAAACCCATTTT    | 60.048 | 20 | 119 | 259  | 377  |
| 59.079 | 26 | TGGGAAGAAAGGACAGGATG    | 60.042 | 20 | 188 | 4    | 191  |
| 59.09  | 20 | TCGAGATGAAAACATTGGCA    | 60.197 | 20 | 218 | 113  | 330  |
| 59.411 | 20 | CTTCACCTCCCAGATTTCCA    | 60.042 | 20 | 171 | 13   | 183  |
| 59.735 | 20 | ATCCATGGTGAGGTGACTGG    | 60.806 | 20 | 145 | 390  | 534  |
| 59.707 | 21 | TGCAGCTGCTCTAATCATGG    | 60.119 | 20 | 258 | 1254 | 1511 |
| 59.75  | 20 | GGGGAGTAAAACGACCGAAT    | 60.187 | 20 | 231 | 74   | 304  |
| 60.067 | 20 | AAGAACCGTGGTTTTTGTCTG   | 60.008 | 20 | 251 | 298  | 548  |
| 59.146 | 20 | TCCAAAATGAGACCAATCTTGA  | 59.546 | 22 | 248 | 164  | 411  |
| 60.298 | 20 | CCGCGGCCTATCTTCTTAG     | 59.946 | 19 | 261 | 1972 | 2232 |
| 60.483 | 20 | CTGTGTCCGGTTAAGTCCGT    | 60.028 | 20 | 213 | 1086 | 1298 |
| 59.866 | 20 | ATGATTTTTGCAGCGAAACC    | 60.081 | 20 | 242 | 517  | 758  |
| 57.204 | 20 | CAACAATGCCTTTGGTCTCA    | 59.691 | 20 | 152 | 328  | 479  |
| 60.49  | 20 | GCTTGGGAGTCGAGGTACAA    | 60.255 | 20 | 264 | 963  | 1226 |
| 59.986 | 20 | AGAGCGAGGTGAGAAGAGGG    | 61.061 | 20 | 260 | 113  | 372  |
| 59.826 | 20 | CATCCTGATCCACACAGTGC    | 60.121 | 20 | 223 | 727  | 949  |
| 59.923 | 20 | CCAAGTGCAGAGTAACGCAG    | 59.658 | 20 | 232 | 2267 | 2498 |
| 60.067 | 20 | GAAGTTAAAATAACGTACGTGTC | 58.397 | 25 | 250 | 1080 | 1329 |
| 59.572 | 20 | GGTTCGTGTCTGTTTTTCAGGT  | 60.012 | 20 | 189 | 165  | 353  |
| 60.051 | 20 | ATGCCATCACAAAGGAAGAGC   | 60.226 | 20 | 118 | 2103 | 2220 |
| 60.073 | 20 | CCCGAATATTCTGTGCCAGT    | 59.955 | 20 | 138 | 2664 | 2801 |
| 59.212 | 20 | TTGTCAGGAGAGGCGTTCTT    | 59.989 | 20 | 185 | 2496 | 2680 |
| 60.14  | 20 | CCGCTGATGAAATGATCTGA    | 59.756 | 20 | 166 | 352  | 517  |
| 60.199 | 20 | CTGGAGCCATTTTTGTGGAT    | 59.933 | 20 | 251 | 23   | 273  |
| 60.232 | 20 | TTACCATTCCGCGTGGACATA   | 59.953 | 20 | 104 | 421  | 524  |
| 59.973 | 20 | GATTACTCCACCCTCACCGA    | 59.927 | 20 | 277 | 381  | 657  |
| 59.989 | 20 | CCACCCTCAAACAACACTCA    | 59.565 | 20 | 211 | 16   | 226  |
| 60.009 | 20 | TTACGTCCCGATCCCAATAA    | 60.146 | 20 | 202 | 2698 | 2899 |
| 59.847 | 20 | ACCTTTTTCACAGCAGAGGGA   | 59.844 | 20 | 233 | 726  | 958  |
| 59.801 | 20 | TGAAGTATCGACGCATTCACA   | 60.272 | 21 | 238 | 545  | 782  |
| 60.006 | 21 | AAACATTTTCAAAAACGCCAA   | 59.502 | 21 | 198 | 70   | 267  |
| 59.888 | 19 | CACCACCACCGTTAAATTCC    | 60.088 | 20 | 224 | 49   | 272  |
| 59.975 | 20 | AAATAGCTCCGATAACCGGG    | 60.292 | 20 | 198 | 165  | 362  |
| 59.772 | 21 | GGGTTGATAGATCGGGTTGA    | 59.75  | 20 | 168 | 765  | 932  |
| 60.053 | 20 | GCGTGCTGAATCTTATCCGT    | 60.243 | 20 | 251 | 204  | 454  |
| 58.986 | 23 | GAGCATGATTTGGCTGGACT    | 60.226 | 20 | 261 | 78   | 338  |
| 57.484 | 20 | GCAAATGCTTCTTACCCATCA   | 60.089 | 21 | 261 | 60   | 320  |
| 60.073 | 20 | CCGGTAAAAACAATTCGCAC    | 60.356 | 20 | 135 | 117  | 251  |
| 60.395 | 22 | AGAGAGAGAGTGTGGAGAGAGA  | 59.473 | 25 | 100 | 464  | 563  |
| 59.976 | 20 | TTATACCACCGCCACCCTTA    | 60.202 | 20 | 144 | 1012 | 1155 |
| 60.657 | 20 | CACTTTACGACCATCCCCAG    | 60.366 | 20 | 270 | 81   | 350  |
| 61.448 | 23 | TTCTTGATGTGTTGGCAAGC    | 59.847 | 20 | 142 | 19   | 160  |
| 59.813 | 20 | AAATGTTTCGTGCGAATGTGA   | 60.119 | 20 | 136 | 440  | 575  |
| 59.986 | 20 | TCATTCAAAAATTGATCACCCA  | 60.167 | 22 | 147 | 14   | 160  |
| 59.927 | 20 | TAGATGGGAAATCCGACACC    | 59.75  | 20 | 250 | 2026 | 2275 |
| 59.836 | 20 | AAACGATGTATGGGATTGATGA  | 59.162 | 22 | 222 | 153  | 374  |
| 58.32  | 21 | AATCGTGCTGAAACGTGTTG    | 59.764 | 20 | 276 | 21   | 296  |

|        |    |                          |        |    |     |      |      |
|--------|----|--------------------------|--------|----|-----|------|------|
| 60.154 | 20 | AAGGCCAAATGAGTCTGAGC     | 59.434 | 20 | 278 | 176  | 453  |
| 60.159 | 20 | TCCATCTGCAAAATCCATCA     | 60.009 | 20 | 280 | 119  | 398  |
| 60.416 | 20 | ACCCTGTGTATCCCAGCAAA     | 60.375 | 20 | 221 | 6    | 226  |
| 59.41  | 20 | AAAAACACCAACACTTCTTGCAT  | 59.961 | 23 | 273 | 2325 | 2597 |
| 59.478 | 20 | AGTTCCGGGTCCATTCTAC      | 60.19  | 20 | 270 | 33   | 302  |
| 60.636 | 20 | AGCGGAGGAGGAGGAAGTAG     | 59.972 | 20 | 246 | 43   | 288  |
| 59.997 | 20 | ACTGCATCACTCTCAAGCCC     | 60.418 | 20 | 121 | 1119 | 1239 |
| 60.241 | 20 | AAAACCTCCGGTGTTCATTG     | 59.83  | 20 | 116 | 374  | 489  |
| 58.111 | 21 | AGACTATCAACAAGCCCCGA     | 59.694 | 20 | 227 | 3    | 229  |
| 60.009 | 20 | GCCACCTGATCTAGCGATGT     | 60.249 | 20 | 156 | 2262 | 2417 |
| 60.483 | 20 | CCAGGTGTTATGACCCGAAC     | 60.232 | 20 | 213 | 296  | 508  |
| 60.05  | 20 | CACCACCATCACCTCTTCT      | 59.962 | 20 | 203 | 96   | 298  |
| 59.943 | 20 | TGCCACTTAGAAAAGTAAAAACG  | 60.101 | 25 | 243 | 315  | 557  |
| 59.572 | 20 | AGGTGAATCGTCAAACGTCA     | 59.139 | 20 | 134 | 299  | 432  |
| 59.33  | 20 | CCGTACCGGAAATTAACGAA     | 59.826 | 20 | 247 | 249  | 495  |
| 60.027 | 20 | GAAATTCTGCAGTTCGGAGC     | 59.962 | 20 | 193 | 144  | 336  |
| 59.996 | 20 | TTTGATTTTGGGGTCAGCTC     | 60.051 | 20 | 260 | 216  | 475  |
| 60.652 | 24 | TAGTAGGGTGCAGGGGATTG     | 59.948 | 20 | 225 | 2391 | 2615 |
| 60.472 | 19 | TAAGCCGCTTTGCCTAGAAA     | 60.109 | 20 | 280 | 1373 | 1652 |
| 58.974 | 20 | GCTCCTCTTCCCTTTTGCT      | 59.962 | 20 | 260 | 456  | 715  |
| 59.925 | 20 | AGTCACAGGATCCAAGAGCC     | 59.258 | 20 | 219 | 232  | 450  |
| 60.133 | 20 | CATTCCCAACTCCCAAATTA     | 58.794 | 21 | 240 | 424  | 663  |
| 60.188 | 20 | GGTGCTGCAACTCAACTGAA     | 60.032 | 20 | 216 | 869  | 1084 |
| 60.008 | 20 | ATGAAGCATGCAATTCGACA     | 60.228 | 20 | 239 | 56   | 294  |
| 60.152 | 20 | TCCACCCGAGCTTTAGTTTTT    | 60.116 | 21 | 178 | 1997 | 2174 |
| 60.011 | 20 | CATCTGGTGGTCCAACGAC      | 59.945 | 19 | 178 | 2000 | 2177 |
| 60.21  | 20 | TTTTGATGTTCGAAAATACCCC   | 60.056 | 22 | 152 | 102  | 253  |
| 59.903 | 20 | ACATGCATGCTCGCAAATTA     | 60.245 | 20 | 130 | 34   | 163  |
| 60.352 | 20 | GCAGCGTCAAATCAATAACCT    | 59.242 | 21 | 280 | 266  | 545  |
| 60.008 | 20 | CGTGTGCAATGCATCTGGTA     | 61.713 | 20 | 226 | 69   | 294  |
| 59.152 | 20 | ATGGTCTGGCTTATGTGGC      | 59.962 | 20 | 273 | 288  | 560  |
| 57.613 | 25 | ACCCAACCAACCACAATAA      | 59.948 | 20 | 239 | 489  | 727  |
| 59.978 | 20 | ATGGCCGAGATTTGTTATGC     | 59.929 | 20 | 108 | 1391 | 1498 |
| 60.389 | 22 | TTGTTTGCTTGTAGATGTTGGG   | 60.032 | 22 | 183 | 799  | 981  |
| 59.551 | 20 | CATTTGCCGACTTTAGAGC      | 59.845 | 20 | 209 | 2649 | 2857 |
| 60.136 | 20 | TGGCATGGGGAAGCTACTAT     | 59.551 | 20 | 230 | 80   | 309  |
| 59.955 | 20 | TTCTCCCAAAAGCTAATCG      | 59.292 | 20 | 277 | 148  | 424  |
| 58.646 | 22 | GACGAAGAAAATCAACCGGA     | 60.051 | 20 | 159 | 4    | 162  |
| 60.532 | 19 | AACTTTGAATCTGGCAACGTG    | 60.161 | 21 | 280 | 161  | 440  |
| 59.943 | 20 | TTGTGTAATTGTGTTGTGTCGTG  | 59.468 | 23 | 237 | 101  | 337  |
| 59.933 | 20 | AGGAGCTTTCTGCGTGGATA     | 59.978 | 20 | 118 | 2    | 119  |
| 59.815 | 21 | TTGTTCTCTCGAAGCCCCTA     | 59.948 | 20 | 269 | 1823 | 2091 |
| 60.827 | 20 | TCAGTTTTTGAGTTATGAATTTGC | 57.598 | 24 | 188 | 244  | 431  |
| 60.138 | 20 | GCTGGTGTGAGTTGTACGCA     | 60.939 | 20 | 247 | 233  | 479  |
| 60.096 | 20 | CCAAATTTAAGGGTTATCACCTG  | 58.849 | 23 | 271 | 3642 | 3912 |
| 59.817 | 20 | TTTCGACCGACAAAAAGGAG     | 60.22  | 20 | 107 | 717  | 823  |
| 60.23  | 20 | CCAAAAGAAAATCTCCTGCG     | 59.817 | 20 | 200 | 702  | 901  |
| 60.111 | 20 | ATAATTGATGGTTGTGCGGC     | 60.731 | 20 | 212 | 112  | 323  |
| 60.235 | 19 | AAAAATGCAACCAGCATTAAAA   | 58.72  | 22 | 270 | 492  | 761  |
| 59.795 | 20 | TACCCATTTGAAAATCCCCA     | 59.988 | 20 | 144 | 160  | 303  |
| 58.484 | 25 | TCATGAGGAGCGTCAATCAG     | 59.942 | 20 | 141 | 9    | 149  |
| 60.234 | 20 | AGTGCTGCCTCAAAGGGTAA     | 59.875 | 20 | 172 | 92   | 263  |
| 59.986 | 20 | CGATCCTGTGTGGCCTAAAT     | 59.955 | 20 | 236 | 96   | 331  |
| 60.05  | 20 | TTCCGTTAGGGGATACGATG     | 59.778 | 20 | 246 | 989  | 1234 |
| 59.816 | 20 | GACACTTAGAGGGTGTTTTGACC  | 59.068 | 23 | 211 | 914  | 1124 |
| 59.762 | 20 | TTCCAGATCCAAAATATCCACC   | 60.02  | 22 | 269 | 249  | 517  |
| 59.578 | 19 | TGGATCATGTAAGGAACAATGTG  | 59.738 | 23 | 150 | 15   | 164  |
| 59.009 | 20 | TTCAAGGCATTTGAGATCCAC    | 60.066 | 21 | 196 | 2356 | 2551 |

|        |    |                          |        |    |     |      |      |
|--------|----|--------------------------|--------|----|-----|------|------|
| 59.801 | 20 | AAGAAGAAAAGACATTCCGGC    | 59.717 | 21 | 121 | 275  | 395  |
| 60.46  | 20 | TAGGGTCAACCATCAGTCCC     | 59.779 | 20 | 186 | 250  | 435  |
| 59.958 | 20 | GGTGGATTGTCCTTGATGCT     | 59.934 | 20 | 139 | 867  | 1005 |
| 59.596 | 20 | GAAGATCCCGGTGAAATGAA     | 59.871 | 20 | 153 | 15   | 167  |
| 59.7   | 20 | TTAAACCCTAAAAGCGCACG     | 60.251 | 20 | 257 | 228  | 484  |
| 59.978 | 20 | CCCCCTAATCCCTAAATCCC     | 60.678 | 20 | 213 | 967  | 1179 |
| 60.025 | 20 | CCATCTCCAACCTTCATGCCT    | 60.073 | 20 | 252 | 0    | 251  |
| 60.118 | 20 | ACGCAACCGTAAAGAACCTG     | 60.168 | 20 | 279 | 304  | 582  |
| 59.875 | 20 | CCCGATCACCATCACTATCC     | 60.158 | 20 | 270 | 129  | 398  |
| 59.166 | 20 | TGGTATCAGAGCCATGACGA     | 60.225 | 20 | 276 | 8    | 283  |
| 60.378 | 20 | GCACGAAGAAGGTTAAAAGGG    | 60.116 | 21 | 252 | 651  | 902  |
| 60.134 | 20 | TATCGTGCGCAATAGACGAG     | 59.999 | 20 | 178 | 1179 | 1356 |
| 59.483 | 20 | CTCGATAGGAAAGGATGCAA     | 57.916 | 20 | 119 | 836  | 954  |
| 59.04  | 20 | CAATCTTTGGGCGTGAGAGT     | 60.255 | 20 | 140 | 5    | 144  |
| 59.984 | 20 | GTGCGTTGACCAGCATTTA      | 58.274 | 19 | 125 | 275  | 399  |
| 59.639 | 19 | AAGGACGTAACGGCTCTCAA     | 59.875 | 20 | 253 | 8    | 260  |
| 61.078 | 20 | TTTTGGAGATCTATGGCTGTCA   | 59.708 | 22 | 164 | 254  | 417  |
| 60.388 | 20 | TAAGAATTCCAATGGGGCAG     | 59.894 | 20 | 280 | 127  | 406  |
| 59.585 | 20 | AAAGTGGGAGTTAGGGCACA     | 59.592 | 20 | 219 | 62   | 280  |
| 59.809 | 20 | TAGGTGTGTGCATCTTGGGA     | 60.112 | 20 | 217 | 513  | 729  |
| 60.132 | 20 | GTGTTTGCATGGTGAAGTGC     | 60.168 | 20 | 242 | 1485 | 1726 |
| 59.242 | 23 | CGGATTTAATCGTGGCTGTT     | 59.96  | 20 | 140 | 31   | 170  |
| 57.296 | 27 | CAAATCAGACTGCGAACAA      | 59.84  | 20 | 246 | 1780 | 2025 |
| 59.999 | 20 | CGGTTATTAGTTATCACCCGAAA  | 59.322 | 23 | 125 | 2896 | 3020 |
| 59.797 | 20 | AGGAGGATTCACCACGTCAC     | 59.969 | 20 | 173 | 224  | 396  |
| 60.18  | 20 | CAAACCATCCAACCACAACA     | 60.255 | 20 | 261 | 11   | 271  |
| 60.366 | 20 | TCCTTCAATCTCAGCCTTTCA    | 59.94  | 21 | 250 | 963  | 1212 |
| 60.61  | 20 | TTCCCTACAATTTTCGGCTG     | 60.067 | 20 | 195 | 145  | 339  |
| 59.827 | 20 | CATATGGGCACAGACACTGG     | 59.984 | 20 | 153 | 21   | 173  |
| 59.827 | 20 | CATATGGGCACAGACACTGG     | 59.984 | 20 | 153 | 21   | 173  |
| 60.066 | 20 | AAAGGAGCTTCTTGCACTGG     | 59.615 | 20 | 261 | 1632 | 1892 |
| 60.235 | 20 | TCCAGAAATATCGAAGGCAC     | 60.036 | 20 | 165 | 322  | 486  |
| 59.864 | 20 | AGGGTTTTGAGGGTTTGCTT     | 59.976 | 20 | 253 | 438  | 690  |
| 60.051 | 20 | AATCCCAACAAATGACCCAA     | 60.029 | 20 | 175 | 1155 | 1329 |
| 59.888 | 20 | ATGCAGACGAATAAGCGAGG     | 60.374 | 20 | 218 | 119  | 336  |
| 59.691 | 20 | CACCATCATCTTCATCCACG     | 59.918 | 20 | 258 | 85   | 342  |
| 59.928 | 20 | ACCCACATAGTGCCGAGAGA     | 60.678 | 20 | 121 | 633  | 753  |
| 59.464 | 26 | GAAAGCTAAAATTTGCAATCAAAC | 58.619 | 24 | 117 | 12   | 128  |
| 60.206 | 20 | TCCTTGCATGCACATCATT      | 60.08  | 20 | 263 | 34   | 296  |
| 59.685 | 20 | GACAAAGCAGGCACACAAC      | 58.935 | 20 | 201 | 150  | 350  |
| 59.903 | 20 | TTGAACGGAATCATGGACAA     | 59.9   | 20 | 167 | 79   | 245  |
| 59.055 | 24 | TTTGTCTACCAGTTGCCCT      | 59.592 | 20 | 234 | 798  | 1031 |
| 60.073 | 20 | GGCATGATTCTGCTGGTTTT     | 60.081 | 20 | 278 | 1281 | 1558 |
| 59.215 | 20 | GATTTGACCATGAGCGTTGA     | 59.654 | 20 | 157 | 157  | 313  |
| 59.9   | 25 | AAATGGTCCCCTCATGAACA     | 60.173 | 20 | 139 | 8    | 146  |
| 60.013 | 20 | CAACCAGCAAACAAAAGCAA     | 59.888 | 20 | 136 | 122  | 257  |
| 57.864 | 25 | ATTTTAGGAAGGATCGGGGC     | 61.454 | 20 | 231 | 171  | 401  |
| 59.157 | 20 | AAGCCTTCCATTCCGAAAT      | 59.909 | 20 | 161 | 742  | 902  |
| 60.204 | 20 | TTTTACACGGGACCGTCAAT     | 60.227 | 20 | 267 | 486  | 752  |
| 59.891 | 20 | AGATGTTGGATCTGCAGCCT     | 59.834 | 20 | 253 | 591  | 843  |
| 60.015 | 20 | AATCCTCCTGCTGTGGTGAC     | 60.12  | 20 | 230 | 4235 | 4464 |
| 59.276 | 20 | CCGCAAGTGTACGGGACTAT     | 60.015 | 20 | 218 | 286  | 503  |
| 60.119 | 20 | TCTTCTTCCACTCGCATCGT     | 60.945 | 20 | 237 | 864  | 1100 |
| 59.115 | 21 | AAGCGCACGTTTGAGTTTT      | 59.926 | 20 | 153 | 73   | 225  |
| 59.853 | 20 | CAAATTGTTTGGGCTCGATT     | 59.938 | 20 | 226 | 340  | 565  |
| 57.656 | 19 | CCAATGATGCATGGTTATGG     | 59.622 | 20 | 254 | 177  | 430  |
| 59.444 | 20 | TTCAGCCATGGCAAATACTG     | 59.688 | 20 | 276 | 364  | 639  |
| 59.83  | 20 | GCAGGTAATATCAATTTTCGAG   | 57.112 | 23 | 272 | 211  | 482  |

|        |    |                           |        |    |     |      |      |
|--------|----|---------------------------|--------|----|-----|------|------|
| 59.875 | 20 | TGCCAGCAGAGAGGAGGTAT      | 59.973 | 20 | 164 | 17   | 180  |
| 59.748 | 21 | TACGCACGATGTTGGTGAAT      | 59.995 | 20 | 174 | 117  | 290  |
| 59.967 | 20 | AATTAACATCACGGCCATCC      | 59.651 | 20 | 243 | 105  | 347  |
| 60.619 | 20 | CCGTTGGAATTTTAGAGTTACG    | 57.9   | 22 | 111 | 578  | 688  |
| 59.979 | 20 | GTGGGCTTCGACTCTCAGAC      | 59.993 | 20 | 184 | 566  | 749  |
| 59.993 | 20 | CCAAAATCAACGTCCCAGAT      | 59.79  | 20 | 279 | 786  | 1064 |
| 60.039 | 20 | GTGCTGAGGCGTTTCTTGAC      | 60.986 | 20 | 251 | 37   | 287  |
| 59.533 | 25 | TGTTTCGATTTGGCGATTAT      | 60.289 | 20 | 276 | 219  | 494  |
| 60.074 | 20 | TCCCTTAATTCCTCACCCC       | 60.124 | 20 | 172 | 292  | 463  |
| 59.989 | 20 | TGGACTCCGTGTGTATGACTG     | 59.606 | 21 | 203 | 478  | 680  |
| 57.849 | 20 | CGCACCTTTCATGTGCAATA      | 60.665 | 20 | 280 | 1121 | 1400 |
| 60.096 | 20 | ACATGATTTGCAAGATGCCA      | 60.08  | 20 | 249 | 519  | 767  |
| 58.532 | 23 | CCGGCTCTGATACCATTGTT      | 59.955 | 20 | 270 | 687  | 956  |
| 59.713 | 20 | TGGTCTTACATCTCCCAGGC      | 60.073 | 20 | 192 | 1510 | 1701 |
| 59.984 | 20 | AACACGGTAACAAAATATATTGA/  | 58.491 | 27 | 163 | 199  | 361  |
| 59.992 | 20 | TCGGTTTCACCAATGGAAAT      | 60.17  | 20 | 110 | 304  | 413  |
| 59.733 | 21 | GATCTCTTTTGTCAAGGGCG      | 59.813 | 20 | 119 | 4    | 122  |
| 58.315 | 21 | CCCAAATAGCTTTCCCACA       | 59.931 | 20 | 224 | 48   | 271  |
| 59.862 | 20 | GGATTGTGCACTCAATGAATCT    | 59.059 | 22 | 256 | 198  | 453  |
| 60.195 | 20 | TTCTCCTTTCCTCTTATGGG      | 59.536 | 21 | 270 | 139  | 408  |
| 60.133 | 20 | TCCCCGAATATTCCAACCTCA     | 60.266 | 20 | 163 | 163  | 325  |
| 59.989 | 20 | TTGGTGAAAGGAGACGAAGG      | 60.224 | 20 | 234 | 94   | 327  |
| 60.045 | 20 | TGAGTGAACATGTGTGTGCG      | 60.373 | 20 | 159 | 250  | 408  |
| 60.401 | 20 | ATCCAACCTCCTGCATTTTGC     | 60.081 | 20 | 270 | 13   | 282  |
| 57.141 | 23 | CGGTTAAAAATCGGACAGGA      | 59.931 | 20 | 260 | 1836 | 2095 |
| 60.671 | 20 | TACGGCACCATATAATCGGG      | 60.548 | 20 | 109 | 86   | 194  |
| 60.012 | 20 | AAAGTGGCCGACAAAAACC       | 59.963 | 19 | 275 | 559  | 833  |
| 59.803 | 20 | GGATCGTTGATCGGGTTAGA      | 59.894 | 20 | 133 | 40   | 172  |
| 59.816 | 20 | GATCTTTTCACTCGAGCCCA      | 60.34  | 20 | 252 | 93   | 344  |
| 59.799 | 20 | CGACTGGCAAATACAAAAGTT     | 57.007 | 21 | 203 | 426  | 628  |
| 60.096 | 20 | ATGGCTCCATTCTTCTCCT       | 60.037 | 20 | 242 | 162  | 403  |
| 59.831 | 20 | GGAATTGAAATCCCACCTGA      | 59.727 | 20 | 256 | 389  | 644  |
| 59.807 | 20 | TATTTTTCGGCCACCACTCTC     | 60.074 | 20 | 163 | 219  | 381  |
| 59.859 | 20 | TCTCTTCTCCCAATGAACCA      | 59.656 | 21 | 229 | 1614 | 1842 |
| 59.96  | 20 | ACTCGTAACATCCCCATCCA      | 60.195 | 20 | 269 | 741  | 1009 |
| 58.775 | 22 | AATTGTTGAAACCGGTCCAG      | 59.83  | 20 | 200 | 316  | 515  |
| 59.939 | 20 | AACACCACAATTGGCCTCTC      | 59.973 | 20 | 130 | 230  | 359  |
| 59.894 | 20 | AGCCTGCATTTGACTTTTGG      | 60.249 | 20 | 228 | 580  | 807  |
| 59.901 | 20 | AGGAAGGGCGAAAAAGAGAG      | 59.955 | 20 | 273 | 31   | 303  |
| 59.599 | 20 | GATGTGGAAAAGCCCAGAAA      | 60.051 | 20 | 272 | 1638 | 1909 |
| 59.986 | 20 | TCCTTTCGCTGAGCTTCTA       | 60.227 | 20 | 253 | 281  | 533  |
| 60.153 | 21 | CCACCAAGCAGTGTTTATAGTAGC  | 59.308 | 24 | 217 | 155  | 371  |
| 60.011 | 20 | TATCCCCTCATGCATTCCTT      | 59.344 | 20 | 200 | 1690 | 1889 |
| 59.387 | 20 | TGGACCATTTGTCCCTCAA       | 58.947 | 20 | 226 | 44   | 269  |
| 59.855 | 20 | TGGTCAATACCAGAAAAATCCA    | 59.315 | 22 | 220 | 234  | 453  |
| 59.541 | 26 | CCCCTTATTTGTGGTTCCAA      | 59.657 | 20 | 259 | 22   | 280  |
| 60.035 | 20 | ATTACTGCGGCTGATGCTCT      | 60.007 | 20 | 254 | 56   | 309  |
| 58.12  | 20 | AAGCCCTAAATGCACTCGAA      | 59.845 | 20 | 280 | 107  | 386  |
| 59.872 | 20 | TCCACGAATTTGACACGAAA      | 60.088 | 20 | 162 | 1462 | 1623 |
| 58.471 | 27 | TGAATTTTGTTCACCAA         | 58.841 | 20 | 126 | 8    | 133  |
| 59.978 | 22 | TTTGTTCCAAAGAATTTGTGGTAG/ | 59.157 | 25 | 169 | 698  | 866  |
| 59.682 | 20 | TGCTCCAGTTTCCTTTTGCT      | 59.993 | 20 | 116 | 52   | 167  |
| 58.765 | 20 | CGACTTTTAATGGCGGTTGT      | 59.996 | 20 | 110 | 66   | 175  |
| 60.123 | 20 | CCTAAATCATTGGGGCAGAA      | 59.894 | 20 | 220 | 3385 | 3604 |
| 59.721 | 20 | TTGGGAAGGATGAAGTTTGG      | 59.903 | 20 | 142 | 1178 | 1319 |
| 60.11  | 20 | GGTGCCGGTCCATAAAATAA      | 59.66  | 20 | 265 | 803  | 1067 |
| 60.573 | 26 | GTGCTTGCATGAGAGATGGA      | 59.95  | 20 | 201 | 32   | 232  |
| 59.54  | 21 | GTTGAAAAGAGCGCTGAACG      | 61.08  | 20 | 108 | 62   | 169  |

|        |    |                           |        |    |     |      |      |
|--------|----|---------------------------|--------|----|-----|------|------|
| 59.894 | 20 | CAGCAACATCGAGTCGAGAA      | 60.136 | 20 | 260 | 1642 | 1901 |
| 60.215 | 20 | TTCTACAACCACCCAAAGGG      | 59.824 | 20 | 251 | 109  | 359  |
| 59.878 | 20 | GGATATCCAAAATATCCGAAAA    | 57.071 | 22 | 216 | 1066 | 1281 |
| 57.043 | 20 | CGATCATATCCAATTTCTGTTTC   | 58.449 | 22 | 149 | 156  | 304  |
| 59.973 | 20 | CTTCATTACACCGGCAAGGT      | 59.993 | 20 | 277 | 922  | 1198 |
| 59.425 | 20 | GGATCTGCGAGATAAGCGAC      | 59.946 | 20 | 229 | 471  | 699  |
| 60.081 | 20 | ACCCTTGCAAATTATCGCAC      | 59.967 | 20 | 120 | 391  | 510  |
| 60.066 | 20 | TTGCAATATGTCCTTGACC       | 59.548 | 20 | 236 | 2340 | 2575 |
| 60.255 | 20 | AACATGAGCGCACCAACATA      | 60.142 | 20 | 110 | 23   | 132  |
| 59.696 | 25 | AAATTCTCCACTTCCCCACC      | 60.169 | 20 | 100 | 13   | 112  |
| 60.096 | 20 | GGCTAATGTGTGGCAGGTTT      | 60     | 20 | 208 | 1536 | 1743 |
| 58.979 | 20 | AACATCTCAAACATTCAAAGAGAC  | 59.724 | 26 | 243 | 1757 | 1999 |
| 59.96  | 20 | TACTGCCTTGCAATTGGATCA     | 60.22  | 20 | 189 | 35   | 223  |
| 60.055 | 20 | GGACTTATTACCAATCATCCCA    | 57.808 | 22 | 149 | 729  | 877  |
| 60.008 | 20 | TCTCAGCTTTCTTGATGGGAA     | 59.94  | 21 | 197 | 1403 | 1599 |
| 59.992 | 20 | CCCCCAAATTTTACAAGCCT      | 60.177 | 20 | 147 | 3190 | 3336 |
| 60.149 | 20 | TTGCCCTTGCCCATTTAATA      | 60.275 | 20 | 119 | 1439 | 1557 |
| 60.377 | 20 | TTGTCCATTCAATCCTGTGG      | 59.343 | 20 | 175 | 9    | 183  |
| 60.155 | 20 | TCAATTAACAATAGACTGACGCC   | 58.335 | 23 | 179 | 320  | 498  |
| 59.481 | 20 | GGAAAGAGTGTGTGTTTGC       | 59.339 | 20 | 228 | 400  | 627  |
| 60.532 | 20 | CCGTCGATTTTTCCCAACAC      | 60.227 | 20 | 266 | 7    | 272  |
| 59.322 | 21 | TTGTAGCCCCTTTGAGCCTA      | 59.839 | 20 | 239 | 9    | 247  |
| 60.181 | 20 | TTTTTCTTTCCACAACCCCC      | 61.05  | 20 | 275 | 68   | 342  |
| 60.352 | 20 | CCATTGATTTGGTTGATTGAA     | 58.321 | 21 | 106 | 56   | 161  |
| 58.215 | 20 | GACATTGCTAGCACCGAACA      | 59.871 | 20 | 177 | 93   | 269  |
| 59.789 | 24 | AAAATGTAACAACCTTTTGATCCCT | 59.723 | 25 | 258 | 624  | 881  |
| 59.972 | 20 | TTGTGATGTGGCAGCTTTTC      | 59.847 | 20 | 137 | 114  | 250  |
| 60.244 | 20 | ACGCCAGATTTATCACCCAG      | 59.955 | 20 | 229 | 31   | 259  |
| 60.042 | 20 | ATCGGAGTTGATTTGATGCC      | 59.9   | 20 | 277 | 134  | 410  |
| 59.872 | 20 | TGGTGGGAAGGAGAGGTATG      | 59.92  | 20 | 154 | 989  | 1142 |
| 59.757 | 20 | ATGCGTTTTGATGATATATAGGTG  | 57.255 | 24 | 100 | 706  | 805  |
| 58.341 | 21 | TGAAATTTGGAACAAACAATGA    | 58.045 | 22 | 174 | 3    | 176  |
| 59.803 | 20 | GCTATCAGCAACAAAACCCC      | 59.574 | 20 | 277 | 1011 | 1287 |
| 60.052 | 20 | CACCCTAAAATACGCCAACA      | 59.876 | 21 | 264 | 99   | 362  |
| 59.745 | 20 | TCAAATGTAAGCACTAGAGCCA    | 59.088 | 23 | 269 | 4579 | 4847 |
| 59.888 | 20 | TGACATTGCCTAGAAAGTGAA     | 59.747 | 22 | 279 | 117  | 395  |
| 60.022 | 20 | TCTTTTCGTGAAGTGTGCTGG     | 60.025 | 20 | 102 | 1144 | 1245 |
| 59.757 | 20 | GGCTTTTGTCTCATGCACT       | 60.263 | 20 | 170 | 131  | 300  |
| 59.526 | 20 | ATTCCATCCCTTGGCTCTTT      | 59.903 | 20 | 149 | 1311 | 1459 |
| 59.905 | 20 | ACAGATGAGTGGCAGTCGGT      | 60.746 | 20 | 160 | 77   | 236  |
| 59.374 | 20 | ATGTAATAGGGTTTGGGAAGG     | 57.006 | 21 | 196 | 823  | 1018 |
| 60.052 | 20 | CCCGAAGAAGCCATCAAGTA      | 60.206 | 20 | 224 | 84   | 307  |
| 59.434 | 20 | CATGACCACTCTTCTCTCCA      | 58.641 | 20 | 254 | 2352 | 2605 |
| 59.576 | 25 | ATGAACTTGATGGTGGAGCC      | 59.934 | 20 | 276 | 219  | 494  |
| 59.806 | 20 | GGATACAAGCAAGGGCACAT      | 59.962 | 20 | 104 | 1381 | 1484 |
| 60.111 | 20 | GCTGCAGCATAAACACGGTA      | 59.902 | 20 | 238 | 137  | 374  |
| 60.352 | 20 | CCCTTCACAAGTGGTGACAA      | 59.565 | 20 | 231 | 132  | 362  |
| 59.967 | 20 | CGGTGTTGGATTGGTGAGTA      | 59.415 | 20 | 119 | 1123 | 1241 |
| 59.79  | 20 | AAGACGAAGACGACGACGAT      | 59.874 | 20 | 218 | 538  | 755  |
| 59.955 | 20 | ACTCCTTCACTCCCAGCTCA      | 59.986 | 20 | 203 | 811  | 1013 |
| 60.386 | 20 | GGCAGCTCATCAAGTTCACA      | 59.992 | 20 | 167 | 10   | 176  |
| 59.679 | 20 | TGATCCATGTACCCATGCTG      | 60.353 | 20 | 245 | 6    | 250  |
| 60.57  | 20 | TCTTACCAACTGTACGCCA       | 60.301 | 20 | 280 | 596  | 875  |
| 58.075 | 22 | CAATTTGTTTCAGAACCCAAGA    | 59.108 | 22 | 246 | 4378 | 4623 |
| 59.933 | 20 | AAATGCATGCACCTGATTACA     | 59.055 | 21 | 196 | 105  | 300  |
| 59.041 | 22 | TCTTTTGCCGTAGCTTGTGA      | 59.609 | 20 | 243 | 44   | 286  |
| 58.117 | 22 | CATTTCTTTTCCACCAACG       | 60.336 | 20 | 215 | 19   | 233  |
| 59.328 | 20 | CCAAGATCATATTCGCCAT       | 59.745 | 20 | 190 | 892  | 1081 |



|        |    |                          |        |    |     |      |      |
|--------|----|--------------------------|--------|----|-----|------|------|
| 58.978 | 20 | TTTTGATTTTATTGGGATTTGTTT | 58.024 | 24 | 274 | 19   | 292  |
| 59.764 | 20 | CGAGCCAAATCTTCCTTTTG     | 59.817 | 20 | 254 | 177  | 430  |
| 59.682 | 20 | CGGTTATCACCGGATCGC       | 62.397 | 18 | 127 | 1345 | 1471 |
| 60.023 | 20 | GGACTTTGAATTTGCTTGCC     | 59.691 | 20 | 266 | 338  | 603  |
| 57.557 | 25 | ATCCAATTTGGGCCATTTTA     | 59.124 | 20 | 266 | 23   | 288  |
| 60.353 | 20 | GACTTTTCCGATGGTGTCGT     | 59.973 | 20 | 199 | 100  | 298  |
| 58.035 | 19 | CGTGGTTTCGATCGTAATTGA    | 59.542 | 20 | 270 | 166  | 435  |
| 59.988 | 20 | CTGCCTCCATTTCTTGCTTC     | 59.955 | 20 | 260 | 365  | 624  |
| 61.296 | 20 | GTCTTCCTCGTAGCAGCACC     | 60.02  | 20 | 280 | 41   | 320  |
| 59.862 | 20 | AGACCTTCTTTGGGTGCCTT     | 60.11  | 20 | 149 | 127  | 275  |
| 59.729 | 20 | AGGGGTTATCACCTGAATGC     | 58.864 | 20 | 176 | 170  | 345  |
| 61.032 | 20 | GTGGACGTCCCAGATTGTTT     | 59.827 | 20 | 173 | 9    | 181  |
| 59.953 | 20 | TGTAAGCCCATCAACCTTCA     | 59.123 | 20 | 277 | 1378 | 1654 |
| 59.154 | 21 | TGAGCCATGAACACCAACTC     | 59.682 | 20 | 207 | 338  | 544  |
| 61.031 | 20 | TTGGGTTATCTTGTGGCTCA     | 59.123 | 20 | 114 | 21   | 134  |
| 60.074 | 20 | CCACGATTCAATTATGTTCCG    | 60.195 | 21 | 180 | 1088 | 1267 |
| 60.048 | 20 | CGCATTATGTTGCCTTTGAA     | 59.702 | 20 | 152 | 786  | 937  |
| 61.031 | 20 | AAAGCCAAATGAATGGGGAT     | 60.511 | 20 | 126 | 21   | 146  |
| 60.195 | 20 | TCCCCGAGTTATCGATCTTG     | 60.029 | 20 | 189 | 906  | 1094 |
| 60.008 | 20 | CGAGAGAAAGAGATGGAGCG     | 60.232 | 20 | 236 | 61   | 296  |
| 59.851 | 20 | TGATAACCATGACCTCACGA     | 57.442 | 20 | 256 | 488  | 743  |
| 58.882 | 20 | TTCTCGTGTTCCCTCCTACC     | 60.238 | 20 | 103 | 0    | 102  |
| 60.029 | 20 | AACAGCCATTAAGTCGGC       | 59.229 | 20 | 129 | 290  | 418  |
| 59.96  | 20 | TGTACCAGGGAGTCTCGGTC     | 60.112 | 20 | 236 | 86   | 321  |
| 59.95  | 20 | TCGATATTGTTGTTGCCGTG     | 60.523 | 20 | 278 | 572  | 849  |
| 59.61  | 23 | CCAAC TTGGATATTGGTGCC    | 60.192 | 20 | 264 | 454  | 717  |
| 59.963 | 21 | ATACCGTTGAGACCACCTCG     | 59.989 | 20 | 279 | 108  | 386  |
| 59.84  | 20 | CGGCTTAGCTGTTTCGTTGTT    | 60.44  | 20 | 238 | 1323 | 1560 |
| 59.462 | 20 | CTCTTGGGCCACACTTTCTC     | 59.844 | 20 | 266 | 146  | 411  |
| 59.88  | 20 | CGAGCTCGAGTTTGAATTTG     | 58.649 | 20 | 280 | 679  | 958  |
| 59.84  | 20 | CGCCCTCTCCACCTATCTCT     | 60.746 | 20 | 169 | 17   | 185  |
| 59.735 | 20 | ATGGCAAAGAGCAAGTCAAA     | 58.502 | 20 | 252 | 91   | 342  |
| 60.071 | 20 | TTTGTGTGACCCATCTTCCA     | 59.935 | 20 | 199 | 2232 | 2430 |
| 59.789 | 20 | TTGCCATCCACTACACCAAA     | 59.964 | 20 | 269 | 551  | 819  |
| 58.807 | 20 | CCGGGGCATTACATTATTTG     | 60.033 | 20 | 183 | 181  | 363  |
| 59.22  | 20 | TGGGAGAGAGATCGATATTGTG   | 59.15  | 22 | 279 | 364  | 642  |
| 58.674 | 20 | AATAACACGGCACCTACCCA     | 60.249 | 20 | 235 | 2798 | 3032 |
| 57.043 | 20 | CAGAAACTACATCGCGCAAG     | 59.632 | 20 | 132 | 164  | 295  |
| 60.366 | 20 | GGGGTTATCATGGGATCAAA     | 59.439 | 20 | 220 | 64   | 283  |
| 60.051 | 20 | GCATGCTGATAGGCAACAAA     | 59.839 | 20 | 209 | 1339 | 1547 |
| 59.803 | 20 | AAGTTGGAGGTGATGATGGTG    | 59.835 | 21 | 112 | 66   | 177  |
| 59.238 | 23 | CGGGTTATGGCAGATTTTCA     | 59.784 | 20 | 142 | 5    | 146  |
| 59.101 | 22 | TGTTGTTTGGAAAGTTGGAGG    | 59.994 | 21 | 237 | 641  | 877  |
| 59.579 | 20 | TTCTGGTTTGGAAAGGGAACA    | 60.465 | 20 | 216 | 133  | 348  |
| 59.485 | 21 | CTGTCAAACGTGGTGAATGAA    | 59.6   | 21 | 276 | 164  | 439  |
| 59.697 | 20 | GTCCACGGTGGTTTGAGAGT     | 60.009 | 20 | 141 | 38   | 178  |
| 58.625 | 20 | TTGGACCTGCCACCAATTAT     | 60.192 | 20 | 229 | 739  | 967  |
| 60.005 | 20 | AGCAATATCGATCTCGCAAA     | 58.483 | 20 | 207 | 48   | 254  |
| 59.947 | 20 | ATGGATCAGTTAATCGGGCA     | 60.296 | 20 | 178 | 18   | 195  |
| 59.538 | 20 | AAAATCAAAGGCCCAACAATG    | 59.801 | 20 | 151 | 403  | 553  |
| 59.901 | 20 | ATCTCAACGATATGGCTCGG     | 60.059 | 20 | 222 | 37   | 258  |
| 60.492 | 20 | GCACACACCCACAAACTC       | 60.055 | 20 | 220 | 103  | 322  |
| 59.966 | 20 | TGAAGAGAGAGCTTCTGTCGG    | 59.876 | 21 | 278 | 177  | 454  |
| 60.103 | 21 | GTGTTTCGATACCGGGTTCTT    | 58.912 | 20 | 246 | 96   | 341  |
| 60.073 | 20 | CACCCACCTCATTTTCAAC      | 60.21  | 20 | 235 | 180  | 414  |
| 60.255 | 20 | TTTTGAGATGGAACCACTTGC    | 60.103 | 21 | 164 | 6    | 169  |
| 58.994 | 22 | TGCAAATACGGAAAATTTGACA   | 60.347 | 22 | 280 | 681  | 960  |
| 59.991 | 20 | TTCTTCCTCACACCTCAGCC     | 60.386 | 20 | 237 | 240  | 476  |

|        |    |                         |        |    |     |      |      |
|--------|----|-------------------------|--------|----|-----|------|------|
| 60.251 | 20 | TGAACAATTGAAACACCGGA    | 59.941 | 20 | 255 | 64   | 318  |
| 59.939 | 20 | TGATCCATTCCGACTTCCTC    | 60.011 | 20 | 227 | 140  | 366  |
| 59.859 | 20 | CCTCCATCAAACCATTGTCA    | 59.343 | 20 | 273 | 2329 | 2601 |
| 60.12  | 20 | TTGAGCTATAGTTGGAGGGTAGC | 58.986 | 23 | 176 | 6284 | 6459 |
| 59.882 | 20 | ACATCTGTGGAGCTGCTGTG    | 60.055 | 20 | 254 | 1240 | 1493 |
| 60.255 | 20 | CTTTAGGTGCATCTCTTGACGA  | 59.517 | 22 | 210 | 142  | 351  |
| 60.05  | 20 | GTGATTCATGGCCGAGGTA     | 59.466 | 19 | 227 | 71   | 297  |
| 59.975 | 21 | ATTTAAGCCCCATCCCCTAA    | 59.637 | 20 | 232 | 168  | 399  |
| 57.497 | 26 | CTCAAGACCCGATCGGTA      | 60.066 | 20 | 254 | 50   | 303  |
| 59.487 | 22 | GAGAGAAAACCGAGAAGCGA    | 59.694 | 20 | 260 | 41   | 300  |
| 59.836 | 20 | AACACCTGTAATCGGGATCG    | 59.813 | 20 | 157 | 2    | 158  |
| 59.721 | 25 | CGCCAAGTGAGTTATTGCAG    | 59.488 | 20 | 280 | 23   | 302  |
| 59.826 | 20 | CGCGTCAGATTTGTTATGTGTT  | 60.06  | 22 | 253 | 90   | 342  |
| 59.873 | 21 | TAAGGGTTATCACCGGATCG    | 59.778 | 20 | 108 | 0    | 107  |
| 60.288 | 20 | GCGTCAATTACGTTCCATGA    | 59.548 | 20 | 241 | 1831 | 2071 |
| 58.928 | 21 | AGGGGTCAAACCTCCACTCT    | 59.968 | 20 | 209 | 130  | 338  |
| 59.859 | 21 | GTGCCAAAAATTGTCATCCA    | 59.375 | 20 | 228 | 127  | 354  |
| 59.806 | 19 | AACTGGGCCATGATAGGTTG    | 59.813 | 20 | 246 | 0    | 245  |
| 59.969 | 20 | GACTCCCTTCTCAACTCCC     | 60.05  | 20 | 107 | 640  | 746  |
| 60.277 | 20 | TTGGGCTACTGGAGATTTGG    | 60.066 | 20 | 162 | 3631 | 3792 |
| 59.939 | 20 | TTTTGGGAAATGGGGTATGA    | 59.988 | 20 | 235 | 707  | 941  |
| 59.872 | 20 | TACCTAATCTCCCGCCCTTT    | 59.924 | 20 | 277 | 148  | 424  |
| 60.193 | 20 | GATCGGAGGAGATGAAACGA    | 60.158 | 20 | 112 | 148  | 259  |
| 59.934 | 20 | ACATCAGAAGCAGTGGAGGG    | 60.261 | 20 | 254 | 80   | 333  |
| 59.822 | 22 | GGAGGATCTTCTTGAGACACAGA | 59.87  | 23 | 273 | 107  | 379  |
| 60.096 | 20 | CATCCCTCGGTTCAAGGATA    | 59.887 | 20 | 274 | 2338 | 2611 |
| 59.874 | 21 | TGCATCTTGGAGGTGAGTAGG   | 60.262 | 21 | 231 | 25   | 255  |
| 60.132 | 20 | TGGTACCTCCAACAAGAGGG    | 59.959 | 20 | 279 | 87   | 365  |
| 59.901 | 20 | CTGCTGACTGAAGCGGGTAT    | 60.419 | 20 | 258 | 509  | 766  |
| 58.879 | 20 | CACCCCTTCTTTACCCAT      | 60.046 | 20 | 248 | 164  | 411  |
| 60.111 | 20 | GTTGTAGGCAAAAGGGCGTA    | 60.131 | 20 | 162 | 363  | 524  |
| 59.63  | 22 | ATTGTCATCCACGCAAAAAT    | 57.943 | 20 | 265 | 104  | 368  |
| 60.381 | 20 | AGGGCAACAATCATGAGTCC    | 59.934 | 20 | 213 | 477  | 689  |
| 58.637 | 26 | TTGTCAATGTCACCTCATTCA   | 59.951 | 21 | 182 | 501  | 682  |
| 59.943 | 20 | CATCCAAGACATGATCGCAC    | 60.08  | 20 | 262 | 25   | 286  |
| 59.948 | 20 | TTTAAACCCCAACACCTTCG    | 59.833 | 20 | 249 | 404  | 652  |
| 59.971 | 20 | CTGGAGTGTCAAGCTGGGAT    | 60.261 | 20 | 198 | 103  | 300  |
| 60.332 | 20 | CGAGGAAGTCGAGGATTGAG    | 59.943 | 20 | 220 | 25   | 244  |
| 60.281 | 20 | ATAGCGTCTTCCAGTTTCCG    | 59.336 | 20 | 276 | 204  | 479  |
| 59.722 | 20 | GATTATGTCGTGGATTTGAACA  | 58.867 | 23 | 250 | 55   | 304  |
| 60.135 | 20 | CCCTTTGAATTTTGCCTCTG    | 59.679 | 20 | 135 | 151  | 285  |
| 59.799 | 21 | GAGTCAGCGGAGCTTTTACG    | 60.154 | 20 | 189 | 1    | 189  |
| 60.874 | 20 | TGATCTGAGAATTCAGCAACAA  | 58.502 | 22 | 279 | 320  | 598  |
| 62.112 | 20 | CGAACCATGAAAAACATGGA    | 59.371 | 20 | 230 | 25   | 254  |
| 59.826 | 20 | AGGCACAATAGCCACGAATC    | 60.103 | 20 | 261 | 244  | 504  |
| 59.603 | 26 | ACGAACTTGACACGAACACG    | 59.794 | 20 | 270 | 357  | 626  |
| 59.916 | 20 | TATTCGAGGGAGGGAGTTT     | 59.897 | 20 | 203 | 389  | 591  |
| 59.817 | 20 | TTTGGGGCTACGTGTTCTTC    | 60.11  | 20 | 235 | 58   | 292  |
| 60.195 | 20 | AGAGAACTGGAACCCCCAC     | 60.349 | 20 | 181 | 122  | 302  |
| 58.843 | 20 | CGTTATCACCGGATCGC       | 62.397 | 18 | 250 | 836  | 1085 |
| 59.962 | 20 | AAATAGCGCATTTTTGCCTG    | 60.226 | 20 | 232 | 903  | 1134 |
| 60.426 | 20 | TTGCATGCTCAATAAAATGGA   | 59.159 | 21 | 251 | 1266 | 1516 |
| 59.883 | 20 | ATGGGAATCTTGGGGAAGAC    | 60.133 | 20 | 194 | 232  | 425  |
| 59.838 | 21 | GAATTTCCAGTTCCAACCA     | 59.767 | 20 | 136 | 866  | 1001 |
| 60.833 | 20 | GCAAGATCCAATGGTTGTGA    | 59.502 | 20 | 279 | 462  | 740  |
| 59.976 | 20 | TAACCCATTTTCAGCCGAATC   | 59.901 | 20 | 273 | 1923 | 2195 |
| 59.597 | 20 | CCATCCTCCTCCAATAGCAA    | 60.029 | 20 | 218 | 1782 | 1999 |
| 59.464 | 20 | GCACAGTGCACCACAATCC     | 60.013 | 20 | 277 | 695  | 971  |

|        |    |                          |        |    |     |      |      |
|--------|----|--------------------------|--------|----|-----|------|------|
| 59.993 | 20 | GACGGTGGAGATTGAGGAAA     | 60.05  | 20 | 197 | 1048 | 1244 |
| 59.238 | 21 | AGTTTTGAATGGCTTGGTGG     | 59.971 | 20 | 241 | 592  | 832  |
| 59.709 | 20 | AGGGAGGTGGTTGATCAGAA     | 59.505 | 20 | 279 | 122  | 400  |
| 60.169 | 20 | ACGGCTGTGTAGTGTGTTCCG    | 59.819 | 20 | 163 | 578  | 740  |
| 59.934 | 20 | GCAAAAGCTGAGGTGTCAAA     | 59.05  | 20 | 245 | 11   | 255  |
| 59.947 | 20 | TAAAAATGACCCTCGTTCGG     | 59.931 | 20 | 249 | 3    | 251  |
| 60     | 20 | CAAGCCCGCATTAAACATT      | 59.964 | 20 | 208 | 19   | 226  |
| 59.969 | 20 | TAGTCGGCCGATAAGTTTGG     | 60.089 | 20 | 155 | 870  | 1024 |
| 59.299 | 21 | CTTCGAGCTCCTCACATTCC     | 59.95  | 20 | 160 | 27   | 186  |
| 60.122 | 21 | CGTGGAAATTTTCATGGTTTGA   | 59.371 | 20 | 222 | 18   | 239  |
| 58.734 | 25 | TCATGTCCGTCCATTTTGAA     | 59.9   | 20 | 226 | 660  | 885  |
| 59.941 | 20 | CAAGCCTAACACCACAAGCA     | 59.904 | 20 | 207 | 1755 | 1961 |
| 59.499 | 20 | CTACCCTGCTGATGAAACCC     | 59.55  | 20 | 128 | 51   | 178  |
| 60.029 | 20 | AAATCCATCCCATCCACGTA     | 60.014 | 20 | 216 | 296  | 511  |
| 60.051 | 20 | AGCCAGCTAGTCGGTTTGGAG    | 59.639 | 20 | 164 | 161  | 324  |
| 59.668 | 23 | ATCGACCCTAATTCGAACCC     | 60.152 | 20 | 276 | 1190 | 1465 |
| 59.881 | 20 | TGCATGTGAGTTGCACTTGA     | 60.029 | 20 | 209 | 456  | 664  |
| 60.161 | 21 | TTTTGATGCAGCAACCATAAG    | 58.83  | 21 | 280 | 57   | 336  |
| 59.685 | 20 | CATTGATTGATTCACAGCCCT    | 59.947 | 21 | 224 | 152  | 375  |
| 59.914 | 20 | GAAAGTATGGCTGCTCCTCG     | 59.978 | 20 | 165 | 1915 | 2079 |
| 60.246 | 20 | TTTGGGTGTTCTGTACACGG     | 59.46  | 20 | 165 | 182  | 346  |
| 59.23  | 20 | GGGTCTCGCATAAAGTGGA      | 60.074 | 20 | 278 | 124  | 401  |
| 58.92  | 20 | TGATCTTGCTTGGTTGCTTG     | 59.988 | 20 | 260 | 2044 | 2303 |
| 60.051 | 20 | CACATGTGGAGAGCTTGTGC     | 60.473 | 20 | 276 | 490  | 765  |
| 59.973 | 20 | TTGCAAGATTTGACGATCCA     | 60.197 | 20 | 241 | 1710 | 1950 |
| 60.449 | 20 | CCAACTTTGTGTTCTTGGCA     | 59.734 | 20 | 103 | 27   | 129  |
| 58.663 | 23 | TTGTTAAAGGTTTCGACGGG     | 59.968 | 20 | 101 | 11   | 111  |
| 59.903 | 20 | GAGGCTGTGAAATTGAGGTTG    | 59.726 | 21 | 101 | 277  | 377  |
| 59.359 | 20 | CCACTTACCGGAGCTATCCA     | 60.088 | 20 | 241 | 181  | 421  |
| 59.864 | 20 | ATGCGCGATTTTAAACCCTA     | 59.586 | 20 | 270 | 1579 | 1848 |
| 59.966 | 20 | AATGCTTGCAAATTTTCGGT     | 59.592 | 20 | 136 | 407  | 542  |
| 59.313 | 20 | AAGATGGAGAGACGGTGGTG     | 60.112 | 20 | 274 | 220  | 493  |
| 59.982 | 20 | TGCCAATGGAATAGTGATCG     | 59.499 | 20 | 269 | 1664 | 1932 |
| 59.433 | 20 | CCCACACTCACATGTACAAACA   | 59.385 | 22 | 152 | 324  | 475  |
| 59.89  | 20 | TCCTTCCGGAGTACGAGCTA     | 59.971 | 20 | 111 | 36   | 146  |
| 58     | 20 | TCGAACATGTAGTGGTCAAACCTG | 60.081 | 23 | 195 | 292  | 486  |
| 57.757 | 21 | TGAACAATGAGATCCACAATCA   | 58.976 | 22 | 264 | 439  | 702  |
| 59.01  | 20 | TTTTTACCTTCTCCAGGGCA     | 59.679 | 20 | 264 | 4236 | 4499 |
| 60.049 | 20 | ATGTCACTGCCTTGCCTCTT     | 59.874 | 20 | 216 | 617  | 832  |
| 58.362 | 20 | ATTTCAGAACGACACCGAGG     | 60.111 | 20 | 176 | 742  | 917  |
| 59.697 | 20 | TGCCTTAGATCCACCGGATA     | 60.427 | 20 | 216 | 588  | 803  |
| 60.008 | 20 | ACCCGAATTACCACCCCTAC     | 59.94  | 20 | 270 | 1898 | 2167 |
| 59.862 | 21 | ACACACGAACACTCACCCAA     | 60.047 | 20 | 198 | 69   | 266  |
| 60.028 | 20 | GGAAATCCAAACGAAAGCAA     | 60.053 | 20 | 213 | 60   | 272  |
| 58.983 | 22 | TTGCCTTTTGATTTTCGGTC     | 60.053 | 20 | 280 | 697  | 976  |
| 60.044 | 20 | GCAACCAAGTTGTCAACCAGT    | 60.066 | 21 | 251 | 65   | 315  |
| 59.322 | 20 | TTGACTGAACTTCACCCATTT    | 57.16  | 21 | 199 | 175  | 373  |
| 59.853 | 20 | CCTCACGAGTTTGGACAGTG     | 59.305 | 20 | 237 | 379  | 615  |
| 59.823 | 20 | AGACCGGAGTAGATGACCTTC    | 57.321 | 21 | 218 | 250  | 467  |
| 59.505 | 20 | GATTTTGACATCAAGATAAGGCA/ | 59.525 | 24 | 220 | 408  | 627  |
| 59.836 | 20 | AAAATCCAGCAGGCAAAGAA     | 59.823 | 20 | 231 | 103  | 333  |
| 59.255 | 20 | TTGTCCTCAACTGAAAGAATGC   | 59.359 | 22 | 269 | 1679 | 1947 |
| 60.323 | 20 | CCACAGCTTTCAACATCACG     | 60.301 | 20 | 261 | 77   | 337  |
| 59.933 | 20 | ATCGGAGCTGAGAAAGCAGA     | 60.24  | 20 | 228 | 854  | 1081 |
| 60.208 | 20 | CGCCATTCTCTCTAACCTG      | 59.087 | 21 | 171 | 279  | 449  |
| 60.011 | 20 | GGCCAGATATCTCTCCATGC     | 59.616 | 20 | 253 | 2717 | 2969 |
| 59.874 | 20 | CACCAACAGCTTGTGCAATG     | 60.301 | 20 | 159 | 1883 | 2041 |
| 60.011 | 20 | CAAGGGCCGAGATTTGTTAG     | 59.702 | 20 | 202 | 1377 | 1578 |

|        |    |                          |        |    |     |      |      |
|--------|----|--------------------------|--------|----|-----|------|------|
| 59.938 | 20 | TCCATTCCGAAAATCAAAGG     | 59.872 | 20 | 178 | 176  | 353  |
| 59.948 | 20 | TGACGTTGGTGGATTGAAAA     | 59.941 | 20 | 154 | 322  | 475  |
| 60.249 | 20 | CATCGGTTTCATGTCACCTGG    | 59.96  | 20 | 185 | 5    | 189  |
| 59.623 | 21 | TCTGAGATGTACTGCGCC       | 60.016 | 20 | 160 | 17   | 176  |
| 57.44  | 23 | GATAGGATACGGCCCATTCA     | 59.745 | 20 | 254 | 17   | 270  |
| 59.972 | 20 | TCTAAATGGTGGCCGAAAAC     | 59.938 | 20 | 171 | 445  | 615  |
| 60.103 | 20 | CAACGGCTATTTACATGGGG     | 60.202 | 20 | 266 | 681  | 946  |
| 60.192 | 20 | TGCATGCTATACGGCACTGT     | 60.31  | 20 | 225 | 2771 | 2995 |
| 58.972 | 27 | CTAATAGCAGGCAAAATGCG     | 58.609 | 20 | 241 | 2    | 242  |
| 58.028 | 22 | TCAATATTTCCCAAACCTCGGA   | 59.397 | 21 | 191 | 15   | 205  |
| 60.01  | 23 | CGGATTATGTATGTTACTTTTGGG | 58.797 | 24 | 173 | 14   | 186  |
| 59.625 | 22 | CAAAATTTGGGGCAAAAA       | 57.057 | 18 | 277 | 742  | 1018 |
| 60.682 | 20 | TCTTAGAAGGGGCCAAAGGT     | 60.068 | 20 | 101 | 6149 | 6249 |
| 59.307 | 22 | CCAGAGGAAAATGGGTCAA      | 59.903 | 20 | 254 | 130  | 383  |
| 59.928 | 20 | CTCAGAGGCACCTCATCCTC     | 59.945 | 20 | 130 | 1788 | 1917 |
| 60.214 | 20 | TCAAAATCAAGTCTTCCTCCG    | 59.298 | 21 | 200 | 339  | 538  |
| 59.255 | 24 | ACCTCGCGAAAGAGACAATG     | 60.397 | 20 | 270 | 23   | 292  |
| 60.136 | 20 | GCAAGACATGGTGTGTTTGA     | 59.606 | 21 | 267 | 842  | 1108 |
| 60.246 | 20 | TGTAGGGGACTCGCTTCAAC     | 60.255 | 20 | 166 | 76   | 241  |
| 59.556 | 20 | GGGTTCCAGCGTCATAAAAA     | 59.938 | 20 | 277 | 317  | 593  |
| 60.984 | 20 | TGGGTGATCTGAGAGGAAAA     | 59.656 | 21 | 248 | 518  | 765  |
| 60.045 | 23 | GGACCTCATCTGTTGTAACCACTA | 59.726 | 25 | 273 | 390  | 662  |
| 59.779 | 20 | CGGTGGAAGCTTTGTCTGTT     | 60.291 | 20 | 223 | 1065 | 1287 |
| 59.767 | 20 | TCACGCTAAGGGGTGGTATC     | 59.955 | 20 | 187 | 371  | 557  |
| 59.993 | 20 | TCCGTGCATGAGAGAGAGAA     | 59.656 | 20 | 280 | 1500 | 1779 |
| 60.742 | 20 | AGTCTGCCATTCTTGCAACC     | 60.263 | 20 | 221 | 438  | 658  |
| 57.677 | 21 | CGAGGATGTTGTGCGAGGAAT    | 60.073 | 20 | 198 | 83   | 280  |
| 59.937 | 20 | GAGGACACTTGGACCTGGAA     | 60.088 | 20 | 226 | 784  | 1009 |
| 60.112 | 20 | GCTTCGTGTCTCTGTGGTCA     | 60.03  | 20 | 203 | 90   | 292  |
| 59.676 | 20 | AATTGAGGGAAATGTCAGCG     | 60.074 | 20 | 199 | 1707 | 1905 |
| 60.175 | 20 | CTTTTCTGTATTGGGGCTGG     | 59.564 | 20 | 238 | 465  | 702  |
| 60.042 | 20 | GGTGGAGGAGGGTATTAAGATG   | 58.847 | 22 | 119 | 568  | 686  |
| 59.881 | 20 | CCTCTGGACCGACCATTTTA     | 59.926 | 20 | 206 | 467  | 672  |
| 59.55  | 20 | CGCAGAATCATGAGACACAAA    | 59.856 | 21 | 236 | 16   | 251  |
| 59.606 | 25 | GCTGCTGTGTTTGTCTTGA      | 60.032 | 20 | 216 | 292  | 507  |
| 62.18  | 18 | TGGGTGAGAGAAAGATAGATGAG  | 59.371 | 24 | 238 | 447  | 684  |
| 60.321 | 20 | CAGCAGGCAGATCACAGGTA     | 60.008 | 20 | 226 | 658  | 883  |
| 59.717 | 20 | TTGGTCCACCAATCTTGTGA     | 59.935 | 20 | 260 | 894  | 1153 |
| 60.147 | 20 | TCATTATTAAGTGCACCCA      | 60.096 | 20 | 138 | 19   | 156  |
| 59.861 | 20 | TGAGGAGCGTTGATCTTGTG     | 59.984 | 20 | 234 | 354  | 587  |
| 60.758 | 21 | AACCCGCTGTTTGTGTTATCG    | 59.996 | 20 | 255 | 265  | 519  |
| 59.76  | 21 | CATAATGCCTTCCCCTGACT     | 59.955 | 20 | 208 | 117  | 324  |
| 59.214 | 20 | AACAATGATGGACACATGGC     | 59.223 | 20 | 143 | 539  | 681  |
| 59.722 | 20 | GAAATGATTGGAGAAGGGCA     | 60.014 | 20 | 202 | 134  | 335  |
| 60.16  | 20 | ATCCTTGCACCTCCTCTTGA     | 59.803 | 20 | 274 | 2185 | 2458 |
| 58.597 | 20 | GCATCTAGCCACTGCTGTCA     | 60.168 | 20 | 245 | 274  | 518  |
| 59.91  | 20 | GCACAACAATCTGCAATCTCA    | 59.862 | 21 | 253 | 1032 | 1284 |
| 59.879 | 21 | CGCGTCCGACTCCTTAACTA     | 60.399 | 20 | 110 | 269  | 378  |
| 59.452 | 20 | TGAAGTTTGGCAAGGAAACC     | 60.088 | 20 | 198 | 167  | 364  |
| 59.365 | 20 | TGGTAGGCCAGAGCTTGATT     | 59.836 | 20 | 173 | 95   | 267  |
| 59.056 | 20 | ATGCAATTTTTGTGGGCAAT     | 60.196 | 20 | 259 | 755  | 1013 |
| 59.816 | 20 | TCAGCATGATATTGCGGAGA     | 60.329 | 20 | 217 | 26   | 242  |
| 59.989 | 20 | CAACAAATTCCAATGAAAGGG    | 59.302 | 21 | 212 | 164  | 375  |
| 59.989 | 20 | TCACATTCAACCTCAGCGAA     | 60.39  | 20 | 255 | 1278 | 1532 |
| 60.048 | 20 | CTCTCTCCTGATGCAGCC       | 60.246 | 20 | 235 | 2656 | 2890 |
| 59.962 | 20 | TATGTCGAGGAGGACGCTCT     | 59.973 | 20 | 240 | 3047 | 3286 |
| 60.008 | 20 | TGTGGCTTGAGTGAAGTTGC     | 60.032 | 20 | 261 | 809  | 1069 |
| 60.292 | 20 | TTCCAGCAATGGAACCAAT      | 60.309 | 20 | 277 | 972  | 1248 |

|        |    |                           |        |    |     |      |      |
|--------|----|---------------------------|--------|----|-----|------|------|
| 59.875 | 24 | TGCTGTGGACACGTTCAAAT      | 60.16  | 20 | 249 | 24   | 272  |
| 59.827 | 20 | TGGGAACATTATGATGGGAAA     | 60.002 | 21 | 217 | 633  | 849  |
| 59.985 | 19 | GGACCATGTACTGGACTGGC      | 60.395 | 20 | 244 | 1694 | 1937 |
| 59.993 | 20 | CACCGGGTACTGAGGGATTA      | 59.807 | 20 | 251 | 325  | 575  |
| 60.324 | 20 | CACGTGTAATTAATTCGGTTACCA  | 60.057 | 24 | 264 | 31   | 294  |
| 59.85  | 20 | GGGAATTGGCCCAAATAAGT      | 60.02  | 20 | 262 | 51   | 312  |
| 60.184 | 20 | CATCAGTCTACAGCCAGGCA      | 60.008 | 20 | 126 | 857  | 982  |
| 60.197 | 20 | TTGTGCCGTGATGATGAGAT      | 60.08  | 20 | 263 | 261  | 523  |
| 60.242 | 20 | ACTTTTGATGCCGAAGTACAA     | 57.439 | 21 | 254 | 103  | 356  |
| 59.019 | 20 | ACACATGTCGCCTTCTGGTT      | 60.577 | 20 | 197 | 35   | 231  |
| 60.051 | 20 | CGAGGAATTTGAAGAACAATTG    | 58.88  | 22 | 266 | 1390 | 1655 |
| 59.172 | 21 | TCCATTAAGCCCTGAACCTG      | 60.066 | 20 | 272 | 163  | 434  |
| 60.199 | 20 | TTGAACTCACGATCTCACGC      | 59.992 | 20 | 165 | 25   | 189  |
| 59.648 | 20 | GCATAAATTGTGTTCCCCGA      | 60.701 | 20 | 268 | 183  | 450  |
| 60.257 | 19 | GTTGGAGGAGAGCTGTAGCG      | 60.156 | 20 | 239 | 22   | 260  |
| 61.095 | 20 | CTCGAAGGGAGGAAACAACA      | 60.224 | 20 | 212 | 21   | 232  |
| 57.38  | 23 | ATGGGAAGAGGGGGTATGAG      | 60.147 | 20 | 239 | 1277 | 1515 |
| 59.843 | 23 | GAGTGTGTCGGGAGTGAGGT      | 60.161 | 20 | 250 | 214  | 463  |
| 60.074 | 20 | ACAGGGTCAAATCGAGATGC      | 60.081 | 20 | 206 | 778  | 983  |
| 58.917 | 20 | AGGAAGAAAGAAGGGGCAA       | 60.18  | 20 | 196 | 65   | 260  |
| 59.875 | 20 | GAATGCTGCTGTTGTGCATT      | 59.878 | 20 | 268 | 2376 | 2643 |
| 59.74  | 20 | TGACGGACCTTCATTTTTCC      | 59.91  | 20 | 188 | 526  | 713  |
| 59.903 | 20 | ATGAAAGGGACACGTGGAAA      | 60.353 | 20 | 127 | 1381 | 1507 |
| 60.765 | 20 | GGAATGGTGTGGGGAATATG      | 59.871 | 20 | 124 | 832  | 955  |
| 58.174 | 20 | CGTAAAAGAAGTCGTTGCC       | 59.747 | 20 | 222 | 183  | 404  |
| 59.913 | 20 | GGTAGTGGCGAGGTGAATA       | 59.955 | 20 | 113 | 71   | 183  |
| 59.962 | 20 | GGCCCCTCTACTCCTGTGAT      | 60.477 | 20 | 272 | 114  | 385  |
| 59.851 | 20 | GAACCACCACCCTGTTTCC       | 60.261 | 20 | 212 | 410  | 621  |
| 59.825 | 21 | TGATTGATTAATTCGTTTGTAGG/  | 59.009 | 25 | 215 | 125  | 339  |
| 59.811 | 20 | TCCATGAAGGAAAAAGTCGG      | 60.044 | 20 | 176 | 145  | 320  |
| 59.88  | 20 | CTCCATTTCTTCTCCTGCG       | 59.948 | 20 | 233 | 262  | 494  |
| 59.823 | 20 | AGCTGGCTCAACTACTCCCA      | 60.012 | 20 | 246 | 2693 | 2938 |
| 60.042 | 20 | CCTAGCTCTTGCCCCTTCT       | 59.976 | 20 | 278 | 107  | 384  |
| 60.178 | 20 | ATCGGAGTTGATTTGATGCC      | 59.9   | 20 | 209 | 594  | 802  |
| 59.855 | 21 | TGTAAAGTGAACAATGGAAGCAA   | 59.677 | 23 | 215 | 4964 | 5178 |
| 59.971 | 20 | ATTTGCTTGATCCAACGGTC      | 59.939 | 20 | 163 | 959  | 1121 |
| 59.939 | 20 | CCAATTTGAATGGTTATCACCTG   | 60.457 | 23 | 157 | 1232 | 1388 |
| 60.177 | 20 | ACAGTGGCGAATGTATGCAA      | 60.142 | 20 | 164 | 241  | 404  |
| 60.278 | 20 | TTTCGTTGTTTCCAGCCTGT      | 60.668 | 20 | 239 | 2201 | 2439 |
| 59.903 | 20 | TCTGCTTAGCTTTTGGACGTT     | 59.167 | 21 | 173 | 4369 | 4541 |
| 60.008 | 22 | GTGAAGTGGGGTAGAAGGCA      | 60.111 | 20 | 264 | 50   | 313  |
| 60.045 | 20 | AACATGCACACAAGCACACA      | 59.785 | 20 | 255 | 174  | 428  |
| 59.934 | 20 | ATATCGTGGCACCATTGCTA      | 59.019 | 20 | 159 | 270  | 428  |
| 57.046 | 24 | GCAGTTGGACTTTTCGCTTC      | 60     | 20 | 259 | 526  | 784  |
| 60.331 | 20 | GCTTCAGCAAGGAAGATGCT      | 59.723 | 20 | 125 | 1434 | 1558 |
| 60.309 | 20 | GAAACCCGTGAACTAAACGC      | 59.615 | 20 | 146 | 701  | 846  |
| 59.991 | 20 | TGTGAACCTTTTTCAGCCGT      | 60.668 | 20 | 189 | 1443 | 1631 |
| 59.542 | 20 | TCCAACGTTGTAACACACACA     | 58.508 | 21 | 134 | 4    | 137  |
| 60.356 | 20 | TGAAGCACAAACCAAGCTC       | 60.032 | 20 | 247 | 284  | 530  |
| 60.558 | 20 | GGGAGGAAAGAGAGAGGTG       | 60.186 | 20 | 158 | 45   | 202  |
| 60.592 | 20 | GGCAACTTTTGATTCTTCTCG     | 58.962 | 21 | 256 | 4356 | 4611 |
| 60     | 20 | CCCAATAACTCGCAATAGTTTG    | 58.698 | 22 | 133 | 482  | 614  |
| 60.16  | 21 | CACAATATTTGAGGGTTATCATTT( | 58.787 | 25 | 212 | 255  | 466  |
| 60.422 | 20 | TTCCAATAACTCACAAAACCTTAA  | 58.364 | 26 | 185 | 270  | 454  |
| 59.802 | 25 | TCAAAATCAGCAATCGGACA      | 60.197 | 20 | 233 | 3220 | 3452 |
| 59.558 | 20 | ACGGCCGTGTA CTCTGTTTT     | 59.662 | 20 | 131 | 416  | 546  |
| 59.133 | 20 | ATCCCTCGACTTTCCCCTAA      | 59.897 | 20 | 187 | 1800 | 1986 |
| 58.049 | 24 | CATGTTCCCAATTAATAAATGTT(  | 60.219 | 26 | 272 | 89   | 360  |

|        |    |                           |        |    |     |      |      |
|--------|----|---------------------------|--------|----|-----|------|------|
| 59.505 | 20 | AAAGAAGGACCTCCCGTGAA      | 60.988 | 20 | 162 | 714  | 875  |
| 60.744 | 20 | AATGGACGAAGATGCTCTGG      | 60.218 | 20 | 226 | 46   | 271  |
| 59.478 | 20 | ATCTTCGCTCCTTCAGGGTC      | 60.735 | 20 | 277 | 450  | 726  |
| 59.924 | 20 | CAGTTTCGAGTTTTGAAGTTAGGA  | 59.033 | 24 | 167 | 150  | 316  |
| 59.641 | 21 | GAAGTGGTGGCAACTGGATT      | 59.973 | 20 | 133 | 1027 | 1159 |
| 60.104 | 20 | TAGGGCCGAAAACAACAAAC      | 59.975 | 20 | 154 | 4    | 157  |
| 59.801 | 20 | CGTCCACGTGCATAATGAAA      | 60.523 | 20 | 245 | 3    | 247  |
| 59.914 | 20 | GTGGCACCAATCAACTCCTT      | 59.973 | 20 | 128 | 497  | 624  |
| 59.85  | 20 | TTGGAGAACAGGTAGCGGTC      | 60.255 | 20 | 158 | 32   | 189  |
| 60.006 | 20 | CGGGAATGCACCAAGAAATA      | 60.827 | 20 | 113 | 89   | 201  |
| 59.266 | 25 | GCCCACCATTTATCTAAACCTG    | 59.737 | 22 | 211 | 94   | 304  |
| 59.592 | 20 | GGTTTCATTTCCACCTTCCA      | 59.767 | 20 | 217 | 338  | 554  |
| 60.204 | 20 | CGACATTAACACACGGTCG       | 60.027 | 20 | 156 | 5    | 160  |
| 59.973 | 20 | ACCCACACATGCAAGACAAA      | 60.008 | 20 | 212 | 627  | 838  |
| 60.776 | 20 | CATGAACCTCCAGGGAAGAA      | 60.042 | 20 | 277 | 389  | 665  |
| 59.894 | 20 | GCCAACACCTACACCAGGAC      | 60.431 | 20 | 182 | 2977 | 3158 |
| 58.972 | 27 | CTACGATCCGATCCAACGAT      | 59.917 | 20 | 176 | 3    | 178  |
| 60.625 | 25 | CCCAAATTCAGGCTGTTTCA      | 59.933 | 20 | 186 | 1    | 186  |
| 60.019 | 19 | CCTCCCCGTATCGATTATCA      | 59.739 | 20 | 268 | 62   | 329  |
| 59.966 | 20 | GAAGTGGTGGGAGATTGCTAGAG   | 60.024 | 20 | 214 | 1102 | 1315 |
| 59.817 | 20 | CAAAATGAAGGCAATGAGCA      | 59.809 | 20 | 139 | 99   | 237  |
| 57.228 | 24 | GCTATCCGCTGAAAAGCATC      | 59.951 | 20 | 204 | 79   | 282  |
| 61.298 | 20 | CTGTCCACGGCTCCTAAAAG      | 59.869 | 20 | 277 | 1164 | 1440 |
| 60.469 | 20 | TGGAACAACACTTCAACAACG     | 59.643 | 21 | 277 | 4151 | 4427 |
| 58.744 | 23 | TTGCTAGAGGGTTTTGTTAATATG  | 59.12  | 26 | 115 | 1167 | 1281 |
| 59.973 | 20 | TTGGTGGGAGATTGCTAGAG      | 57.894 | 20 | 278 | 18   | 295  |
| 59.712 | 20 | TGTTTAATCAGGTAGAAAAGTTGCA | 58.854 | 25 | 233 | 1115 | 1347 |
| 59.992 | 20 | ATGCGGGCGCCTTTTTAAT       | 60.557 | 18 | 275 | 139  | 413  |
| 59.903 | 20 | TCTTCTTCCCAATCCTCCT       | 60.008 | 20 | 250 | 1574 | 1823 |
| 59.992 | 20 | CATCCCATCACTACCCCATC      | 60.011 | 20 | 128 | 122  | 249  |
| 59.992 | 20 | TTTCCAAGGATCAGACGAC       | 60.05  | 20 | 224 | 2004 | 2227 |
| 60.005 | 20 | CTTGCTCGTTTTATCCCTCG      | 59.839 | 20 | 236 | 416  | 651  |
| 59.685 | 20 | GACGAGCAAGGATAGCGAGT      | 59.603 | 20 | 173 | 2    | 174  |
| 59.316 | 20 | TTGGACACATAGTTCATGCCT     | 58.09  | 21 | 153 | 49   | 201  |
| 59.79  | 20 | GCTCTCAAAGATGCGGAAAC      | 59.962 | 20 | 185 | 121  | 305  |
| 57.046 | 21 | TCCCGAACTCTTTCAGCACT      | 59.989 | 20 | 239 | 104  | 342  |
| 58.48  | 21 | CATCTTCTCATCTCAACTCCCA    | 59.284 | 22 | 277 | 2    | 278  |
| 59.631 | 21 | AATGGAAATGAGTGGCGTCT      | 59.556 | 20 | 102 | 145  | 246  |
| 60.838 | 21 | TGCCAAGTGTGTTGAACCAT      | 60.008 | 20 | 243 | 10   | 252  |
| 60.21  | 20 | TTGAAGAAGCACAGGCAATG      | 59.988 | 20 | 244 | 101  | 344  |
| 59.823 | 20 | TGCAAATTAATCAACGGGG       | 60.671 | 20 | 271 | 227  | 497  |
| 60.008 | 20 | CCGGCATCATCTGCTTTTAT      | 60.06  | 20 | 209 | 105  | 313  |
| 60.319 | 20 | CCCGAATTCGATACAACAAA      | 58.48  | 20 | 133 | 65   | 197  |
| 60.025 | 20 | TTTTTGAGGGAAAGTTGTGGA     | 59.573 | 21 | 280 | 40   | 319  |
| 59.66  | 20 | GGTGAATGACCATTTTGGG       | 60.029 | 20 | 239 | 2281 | 2519 |
| 58.995 | 20 | GATCGTGAATGATCTACGTCCA    | 59.962 | 22 | 111 | 242  | 352  |
| 60.495 | 20 | AATTCCCATGACCCACAT        | 59.854 | 19 | 277 | 88   | 364  |
| 60.096 | 20 | GGAAGAACACCCCATACGTG      | 60.232 | 20 | 276 | 132  | 407  |
| 60.617 | 20 | TGTGCTAGGGTTTAGGTGGG      | 59.986 | 20 | 167 | 42   | 208  |
| 60.419 | 20 | TTTGGCTGATTGAATTTATGGA    | 59.433 | 22 | 270 | 585  | 854  |
| 59.701 | 20 | AGAATCGATTACTCCCGCCT      | 60.06  | 20 | 213 | 91   | 303  |
| 60.044 | 20 | GCGGTCCAGATCTGCTACTCT     | 60.938 | 21 | 167 | 324  | 490  |
| 60.05  | 20 | GAAGTGAAGATCGTGGAAGG      | 59.655 | 20 | 113 | 6    | 118  |
| 59.799 | 20 | ATGCATTTTCTGCACACGAG      | 59.871 | 20 | 236 | 211  | 446  |
| 59.935 | 20 | CACCAGCAGTCTGTCTTCA       | 60.022 | 20 | 228 | 711  | 938  |
| 59.697 | 20 | AAAGCAATGGCGGATACAAG      | 60.096 | 20 | 267 | 1    | 267  |
| 60.166 | 20 | AAATTTGCCCTTGTGGATTG      | 59.801 | 20 | 252 | 2243 | 2494 |
| 60.246 | 20 | GTTTGGGCTTTTAGCCTTCA      | 59.338 | 20 | 217 | 658  | 874  |

|        |    |                            |        |    |     |      |      |
|--------|----|----------------------------|--------|----|-----|------|------|
| 59.676 | 20 | GGGATTTATTTTGGGGGTACA      | 59.774 | 21 | 106 | 358  | 463  |
| 60.042 | 20 | CCATCTTCCGTTGTGCGATTT      | 59.933 | 20 | 251 | 114  | 364  |
| 59.092 | 25 | GCAGCCGATTGAAGAACTTT       | 59.457 | 20 | 109 | 4    | 112  |
| 59.727 | 20 | TGGAAGAAAAGGTTGCTGCT       | 59.993 | 20 | 221 | 188  | 408  |
| 60.044 | 20 | GCGGTCCAGATCTGCTACTCT      | 60.938 | 21 | 173 | 338  | 510  |
| 60.08  | 20 | TCTTCTTCCCTCCCTGGGATT      | 60.008 | 20 | 170 | 112  | 281  |
| 59.676 | 20 | TGCTGTTGATGGTGTGGT         | 60.008 | 20 | 267 | 1821 | 2087 |
| 60.035 | 20 | ATTCTTCAATCAAGGCGTGG       | 60.074 | 20 | 235 | 854  | 1088 |
| 58.028 | 22 | AGGCTCTGCATGCTCTTTTT       | 59.222 | 20 | 164 | 17   | 180  |
| 58.977 | 20 | CAGTTGGGTCAGTGACATGG       | 59.997 | 20 | 203 | 3    | 205  |
| 60.054 | 20 | AAAAATGGTTATTACTGGAACGC    | 58.564 | 23 | 258 | 440  | 697  |
| 59.933 | 20 | TATGTGTGATTTTGGCTGGG       | 59.395 | 20 | 232 | 117  | 348  |
| 61.046 | 20 | TATTGATGGAATTGGGGTGG       | 60.384 | 20 | 195 | 617  | 811  |
| 59.933 | 20 | GGCCAATTCTTGTAATTTTCG      | 60.659 | 21 | 253 | 15   | 267  |
| 60.088 | 20 | GTGAGGACTGAGGGCAGAAG       | 59.986 | 20 | 115 | 1588 | 1702 |
| 59.801 | 20 | TGGGTTTGATTCCCAAATGT       | 60.029 | 20 | 176 | 309  | 484  |
| 59.6   | 20 | AATTCATGGCTGCGACTTTC       | 60.221 | 20 | 268 | 265  | 532  |
| 60.37  | 20 | ATTGAATTCGGATCTGACGC       | 60.043 | 20 | 264 | 321  | 584  |
| 58.799 | 20 | CGCTTCCGGAGTGGATAATA       | 60.053 | 20 | 158 | 86   | 243  |
| 60.64  | 24 | ATAGCGGACACTTGGACCTG       | 60.134 | 20 | 101 | 0    | 100  |
| 60.218 | 20 | TTCCGATAGGTGTTGGGAG        | 59.926 | 20 | 192 | 266  | 457  |
| 59.632 | 23 | TCGGTCAAATTCAAACTCGT       | 58.201 | 20 | 239 | 1332 | 1570 |
| 59.697 | 20 | TGTTGTTGGGTTGTTGGTGT       | 59.745 | 20 | 215 | 323  | 537  |
| 60.002 | 20 | GGTCTAGGCCCTCAAATCT        | 59.536 | 20 | 139 | 1127 | 1265 |
| 59.55  | 20 | ATCGAACTCTTGC GTTGCTT      | 60.022 | 20 | 132 | 43   | 174  |
| 59.95  | 20 | ACGTAATTTGGCGGTCTCAG       | 60.132 | 20 | 239 | 552  | 790  |
| 59.705 | 20 | TCCACAAAAGTGGGTGTGA        | 59.976 | 20 | 143 | 36   | 178  |
| 60.306 | 20 | TCCAAGAGTCTGCAGTGTGG       | 60.022 | 20 | 100 | 22   | 121  |
| 59.964 | 20 | GCTACCCCTCCCTACACCAT       | 60.212 | 20 | 208 | 595  | 802  |
| 59.648 | 20 | CTTTTCACACGAGGTCACGA       | 59.873 | 20 | 199 | 82   | 280  |
| 59.83  | 20 | TGCAATCCAGTGAAAACCTCG      | 58.912 | 21 | 190 | 48   | 237  |
| 58.328 | 20 | TCATGTTGCATATTATTTGGCAT    | 59.256 | 23 | 241 | 60   | 300  |
| 59.981 | 20 | ATTTCCACCAAACAGCAAA        | 60.344 | 20 | 191 | 533  | 723  |
| 59.973 | 20 | GGCACACATCTGTGACATCC       | 59.97  | 20 | 140 | 234  | 373  |
| 59.809 | 20 | GGAGTTCAAATTCGGTTGGA       | 59.91  | 20 | 182 | 1159 | 1340 |
| 59.508 | 20 | CACCAGATCACTCCCCTGAT       | 59.92  | 20 | 268 | 1303 | 1570 |
| 59.785 | 20 | GCAGCTGCTGTGTGGATAAA       | 60.019 | 20 | 187 | 1147 | 1333 |
| 60.133 | 20 | AGCGGTTATTACCGGATCG        | 59.93  | 19 | 163 | 479  | 641  |
| 60.111 | 22 | CATTCAACTGGGCATTTGTG       | 59.964 | 20 | 206 | 27   | 232  |
| 59.496 | 20 | CAAGGCTTGAAGCTGGTAGG       | 60.008 | 20 | 252 | 76   | 327  |
| 60.111 | 20 | AACAACGGTATCACCTGAACG      | 59.906 | 21 | 151 | 3990 | 4140 |
| 58.826 | 27 | CTTCTTTCCTTTCGCGTGTC       | 59.993 | 20 | 159 | 3    | 161  |
| 60.066 | 20 | CACGGTTAGGCTCGAGAGAG       | 60.149 | 20 | 154 | 81   | 234  |
| 59.789 | 20 | ATGGAGGAAGGAAGGAAGGA       | 60.008 | 20 | 276 | 15   | 290  |
| 57.439 | 27 | GAGCAAGGCACCTCAATCAT       | 60.226 | 20 | 182 | 11   | 192  |
| 59.685 | 20 | TACCGGCTGGGTACCAACTA       | 60.378 | 20 | 167 | 478  | 644  |
| 60.011 | 20 | AAAAGGGCGGTGGTAAAACT       | 59.871 | 20 | 125 | 45   | 169  |
| 60.593 | 23 | AATCGGTGAACAGTTCGGTC       | 59.973 | 20 | 224 | 1882 | 2105 |
| 57.155 | 22 | CACCAAATTTTCATCATTTTTAATTC | 58.035 | 25 | 205 | 149  | 353  |
| 59.881 | 20 | TTTCTGTTCCCGATCTGAGC       | 60.34  | 20 | 233 | 2095 | 2327 |
| 60.452 | 20 | GGGAGAATCGAGATTTGTTTTG     | 59.945 | 22 | 274 | 271  | 544  |
| 60.081 | 20 | AAATTTGAGGGGGTTCATCC       | 59.996 | 20 | 240 | 22   | 261  |
| 59.971 | 20 | AGTCCCTTTTTGTTGCCTGA       | 59.711 | 20 | 128 | 369  | 496  |
| 60.326 | 20 | CATGAAGCGCTGATTGTTGT       | 59.871 | 20 | 280 | 1301 | 1580 |
| 60.345 | 20 | TAGCCGATAAAAATGGCACC       | 59.928 | 20 | 259 | 91   | 349  |
| 59.903 | 20 | CGCTAACTTCCAAAATGCCT       | 59.361 | 20 | 262 | 799  | 1060 |
| 60.683 | 20 | GCCCGTGTGCATCACTACTT       | 61.128 | 20 | 132 | 550  | 681  |
| 59.349 | 20 | GCACCAAATAATTCGACTTGC      | 59.605 | 21 | 270 | 167  | 436  |

|        |    |                         |        |    |     |      |      |
|--------|----|-------------------------|--------|----|-----|------|------|
| 59.96  | 20 | TCGCAGACTGATCTTAGCGA    | 59.847 | 20 | 203 | 772  | 974  |
| 60.14  | 20 | GCATTGATGGGATTCCACTT    | 59.756 | 20 | 212 | 1085 | 1296 |
| 60.136 | 20 | TCACTCCAAAATCCACTCCC    | 59.903 | 20 | 136 | 304  | 439  |
| 60.088 | 20 | TGGGTGCAACTTTCTAGCCT    | 59.875 | 20 | 164 | 7    | 170  |
| 59.975 | 20 | GGGTTTGGAGGGGTATCCTA    | 60.011 | 20 | 197 | 158  | 354  |
| 59.769 | 20 | TCCATAGCCGGTAAAAATGG    | 59.789 | 20 | 188 | 8    | 195  |
| 59.757 | 20 | GATTTGCGTGGTCCATTGAT    | 60.733 | 20 | 270 | 1    | 270  |
| 59.916 | 20 | TCAGCCTCCATCAATTATCAAA  | 59.547 | 22 | 163 | 183  | 345  |
| 61.087 | 20 | AGGGGTGACTTCATGGAATG    | 59.779 | 20 | 221 | 1922 | 2142 |
| 59.957 | 20 | GGACCACAAGTTCGACAACA    | 59.571 | 20 | 194 | 169  | 362  |
| 60.95  | 20 | CATGCTGCCGGAAGTAATTT    | 60.096 | 20 | 262 | 150  | 411  |
| 59.221 | 23 | TGGACATATGGAGGGAAGGA    | 60.272 | 20 | 255 | 831  | 1085 |
| 60.074 | 20 | TCCCTCTTGAGTGAGCTTTGA   | 60.119 | 21 | 263 | 2536 | 2798 |
| 59.642 | 20 | GCATTTTGGGTACACCTGCT    | 60     | 20 | 250 | 1185 | 1434 |
| 60.449 | 20 | CAACAAGAACCAGGCATCAG    | 59.288 | 20 | 271 | 146  | 416  |
| 60.622 | 20 | GATGGACTCCGAGGATGATG    | 60.439 | 20 | 207 | 51   | 257  |
| 60.225 | 20 | AGGGTTTCAAGAATCCACCC    | 60.169 | 20 | 126 | 1821 | 1946 |
| 59.92  | 20 | TTTTTGACGATTTTGCCCTC    | 60.053 | 20 | 245 | 1642 | 1886 |
| 59.757 | 20 | CCGACCTCGGTAAATGCTTA    | 60.089 | 20 | 206 | 626  | 831  |
| 60.232 | 20 | GCATTGTGATGTTGTTTGCC    | 59.979 | 20 | 210 | 503  | 712  |
| 59.691 | 20 | TCCAATCGAAGATTCCGGAAC   | 60.014 | 20 | 202 | 98   | 299  |
| 59.708 | 23 | TTTGTAGAGATCTTGACGGGA   | 58.834 | 22 | 204 | 960  | 1163 |
| 60.018 | 21 | GTGTGTATGAGAGCCGCAA     | 59.871 | 20 | 189 | 1350 | 1538 |
| 58.513 | 22 | CAACTCCTTTGGAGCCATTC    | 59.67  | 20 | 260 | 3    | 262  |
| 59.989 | 20 | CTGGCACATCTGCAGTTCAT    | 59.862 | 20 | 228 | 287  | 514  |
| 59.322 | 20 | AAGCTGTGGGAGATGGAGTG    | 60.261 | 20 | 237 | 646  | 882  |
| 60.022 | 20 | GTGGATGGTCCTCAGCTGTT    | 60.12  | 20 | 183 | 288  | 470  |
| 59.967 | 20 | TGTGGAAATTATGGTTCGCC    | 60.701 | 20 | 253 | 791  | 1043 |
| 59.964 | 22 | TGCGTTTACATTCAAGCAGTG   | 59.926 | 21 | 100 | 43   | 142  |
| 59.195 | 20 | GTCTTCTGGCTTCTCTTGCC    | 59.166 | 20 | 114 | 36   | 149  |
| 58.288 | 20 | ATTTCGAAGATCAACGGACG    | 60.074 | 20 | 111 | 65   | 175  |
| 59.545 | 20 | AAATCACAACACACGCCC      | 60.966 | 20 | 242 | 24   | 265  |
| 59.076 | 21 | CCCCATTAGCTTCATCCTCA    | 60.029 | 20 | 236 | 780  | 1015 |
| 60.072 | 20 | CGGGCATGAAAAGGTTAAAA    | 59.937 | 20 | 274 | 191  | 464  |
| 60.081 | 20 | CAATACAACCTGCCGAGCTGA   | 60.011 | 20 | 134 | 52   | 185  |
| 59.744 | 24 | ATGATCGCTCTGTTCCGATT    | 59.658 | 20 | 275 | 681  | 955  |
| 60.11  | 20 | GCAACCAGGTAATCATTGGC    | 60.526 | 20 | 160 | 781  | 940  |
| 59.988 | 20 | AAACCCCAACGGACAGATTT    | 60.59  | 20 | 174 | 1832 | 2005 |
| 58.661 | 21 | TTCCACCTGATCCTGGTTTT    | 59.903 | 20 | 166 | 2084 | 2249 |
| 59.881 | 21 | TTTTCATTCATGTTTCGCCA    | 60.051 | 20 | 228 | 673  | 900  |
| 60.183 | 20 | TCAAACCCACGGACTGTGTA    | 60.001 | 20 | 157 | 1596 | 1752 |
| 60.009 | 20 | GATAAAACAGGGGAAAGGGC    | 59.777 | 20 | 223 | 96   | 318  |
| 59.976 | 20 | TACAAAGCTGCTCGGTCCTT    | 60.015 | 20 | 227 | 101  | 327  |
| 59.74  | 20 | CGTGCCTAGTCTTTGCTTCC    | 60.015 | 20 | 160 | 473  | 632  |
| 60.249 | 20 | GAAAGTATGGCTGCTCCTCG    | 59.978 | 20 | 174 | 325  | 498  |
| 60.124 | 20 | TCGACGATCACAATTTGTCC    | 59.502 | 20 | 193 | 439  | 631  |
| 59.839 | 20 | CCCAAATTTTGACCATTTC     | 59.111 | 20 | 176 | 0    | 175  |
| 59.72  | 21 | AAAAACACATATGGTGACACGG  | 59.654 | 22 | 225 | 1285 | 1509 |
| 59.83  | 20 | GTCGGTGGCTGGAGAAAGTA    | 60.255 | 20 | 155 | 2593 | 2747 |
| 57.118 | 25 | CCCATAACTCCAAACCCAAA    | 59.657 | 20 | 269 | 52   | 320  |
| 60.142 | 20 | TCACATGGAAACATGTGGCT    | 59.967 | 20 | 191 | 176  | 366  |
| 59.269 | 20 | GGGAATTTAATTTCTGGCCC    | 59.621 | 20 | 147 | 2665 | 2811 |
| 59.829 | 20 | CAAAAAGCTGGGTGAACTCC    | 59.711 | 20 | 223 | 247  | 469  |
| 57.055 | 25 | TCTTAAAAGGGAGGGGCTAA    | 57.95  | 20 | 280 | 138  | 417  |
| 58.418 | 24 | CGGTTTAGGTATTTTGATGTTTG | 58.937 | 24 | 136 | 83   | 218  |
| 59.347 | 22 | CGACGAGAAAGTCGTGTCAA    | 60.025 | 20 | 232 | 117  | 348  |
| 57.664 | 22 | TGGTTACAAGCAGTGGCGTA    | 60.316 | 20 | 162 | 4    | 165  |
| 59.644 | 27 | ACATGGATTGTGCATTTCGAC   | 59.379 | 20 | 280 | 31   | 310  |



|        |    |                         |        |    |     |      |      |
|--------|----|-------------------------|--------|----|-----|------|------|
| 60.066 | 20 | AGGGGAGTGATCTCATGTGG    | 59.92  | 20 | 247 | 161  | 407  |
| 60.111 | 20 | TGCTGCTGATTCACATAGCC    | 59.979 | 20 | 237 | 87   | 323  |
| 60.019 | 20 | ACCATGGCAGATTCATCCAG    | 60.893 | 20 | 197 | 165  | 361  |
| 58.965 | 21 | TTAAACCTTCCCCAATCC      | 59.992 | 20 | 277 | 1561 | 1837 |
| 60.009 | 20 | GTATGTGTGGCTGTGGATGC    | 59.999 | 20 | 245 | 53   | 297  |
| 60.14  | 20 | CCTATGGTGGTATGGTGTGG    | 58.569 | 20 | 190 | 5    | 194  |
| 60.049 | 20 | TCTACCACTCCGAAACCTCG    | 60.246 | 20 | 238 | 82   | 319  |
| 59.658 | 20 | GCGACATCCAGTCTGAGTGA    | 59.988 | 20 | 116 | 129  | 244  |
| 59.765 | 21 | TGGTACCTCCTCCTAATTCCTC  | 59.854 | 23 | 181 | 258  | 438  |
| 60.036 | 20 | TATGATGGGAAGGGTGGGTA    | 60.006 | 20 | 263 | 1166 | 1428 |
| 60.05  | 20 | AGCGAATGTTGTGAGAAGCA    | 59.596 | 20 | 242 | 25   | 266  |
| 60.688 | 20 | CTCGACACAAATCTGCACAA    | 58.409 | 20 | 262 | 248  | 509  |
| 59.985 | 20 | CGGTTTTCGGTTTTACAAT     | 59.839 | 20 | 235 | 78   | 312  |
| 59.995 | 20 | AGGGCTACAACCTCTCAGCCA   | 60.012 | 20 | 265 | 627  | 891  |
| 60.209 | 20 | CTGCATACGAGCATGGAAGA    | 59.972 | 20 | 273 | 588  | 860  |
| 59.799 | 20 | TTGAGTGC GTGTGTGAGTGA   | 60.07  | 20 | 231 | 157  | 387  |
| 60.39  | 21 | TTGGGAAGGGAATGTGTCAT    | 60.173 | 20 | 158 | 3705 | 3862 |
| 59.027 | 20 | CAAACGCTAAACGACACCAG    | 59.386 | 20 | 279 | 2    | 280  |
| 59.336 | 20 | AAGTTATGCTGGTGGTTGGG    | 59.853 | 20 | 263 | 344  | 606  |
| 60.147 | 20 | CGCGTTCAATATTCTCAGCA    | 59.976 | 20 | 207 | 171  | 377  |
| 58.122 | 24 | TGAGGAACTTGAGAGTGGGG    | 60.229 | 20 | 101 | 167  | 267  |
| 59.311 | 22 | ACATTTTCGGTTCATTGGGA    | 60.17  | 20 | 145 | 25   | 169  |
| 59.813 | 20 | CTCTCCATTTCCCTCCTCC     | 60.008 | 20 | 280 | 470  | 749  |
| 60.005 | 20 | TGCATGATCGATATTGTAAGGAA | 59.468 | 23 | 184 | 56   | 239  |
| 59.95  | 20 | GAGCGTTAATGCCGTTTCAT    | 60.103 | 20 | 172 | 192  | 363  |
| 60.119 | 20 | TCCATTTCTTTTTCGATTCC    | 60.246 | 21 | 195 | 998  | 1192 |
| 57.73  | 23 | CGGACCCAGGATTTTAGGTT    | 60.18  | 20 | 262 | 14   | 275  |
| 60.048 | 20 | TTGACGGCCCTAAACAAAAC    | 59.975 | 20 | 206 | 182  | 387  |
| 58.249 | 23 | TCCGCCTTGACACCTTCTAC    | 60.255 | 20 | 162 | 0    | 161  |
| 59.671 | 20 | TGTGAATCAAGTACCCCGAA    | 58.973 | 20 | 279 | 72   | 350  |
| 59.963 | 21 | TCGAACCTGCCCTCATTATC    | 60.036 | 20 | 227 | 401  | 627  |
| 59.234 | 20 | CTACACCCATCGGAATCAGC    | 60.483 | 20 | 271 | 91   | 361  |
| 60.938 | 20 | TGTGGCCTTATTCATGCTCA    | 60.22  | 20 | 251 | 372  | 622  |
| 60.294 | 20 | GGGCCACTTTGGTGACTAAC    | 59.454 | 20 | 252 | 326  | 577  |
| 58.358 | 23 | CTCTCTGCTGGCCAAAAGTC    | 60.134 | 20 | 273 | 781  | 1053 |
| 59.58  | 22 | CATTACAGCCGTGAGAAGCA    | 60.011 | 20 | 265 | 2    | 266  |
| 60.136 | 20 | GGCAACGATCATTTCTGGTAA   | 59.952 | 21 | 271 | 1250 | 1520 |
| 59.995 | 20 | ACCAAGGGTGAGAAGCATTG    | 60.111 | 20 | 227 | 288  | 514  |
| 59.694 | 20 | CGTGTTTTTCCCCCTTTTTTC   | 60.674 | 20 | 252 | 3826 | 4077 |
| 59.864 | 20 | GGAGGACCTAGACAGCCCTC    | 60.216 | 20 | 254 | 1289 | 1542 |
| 60.124 | 20 | CAGCCAAATGTTGGGTTAGC    | 60.502 | 20 | 221 | 145  | 365  |
| 59.528 | 20 | ATTGCCCATATCAGCACTCC    | 59.923 | 20 | 279 | 795  | 1073 |
| 60.187 | 20 | ACCCTCGACGTTTTCTTCT     | 60.11  | 20 | 220 | 1106 | 1325 |
| 59.92  | 20 | ATTTGTCTGCATACGGGCTC    | 60.103 | 20 | 184 | 1261 | 1444 |
| 59.978 | 24 | TTGGATGTTCCAAATACAGGC   | 59.815 | 21 | 279 | 2551 | 2829 |
| 60.281 | 20 | CTGGAAAAAGTCACCGGAAA    | 60.081 | 20 | 277 | 49   | 325  |
| 59.989 | 20 | ATCCCATTTCCCTCCTTGAC    | 60.133 | 20 | 185 | 113  | 297  |
| 60.526 | 20 | TGGATTTTCTGAATTGTGGG    | 58.395 | 20 | 254 | 846  | 1099 |
| 59.934 | 20 | TTTCATGCAACAAAACCACC    | 59.42  | 20 | 261 | 1918 | 2178 |
| 60.691 | 20 | TCAGCAACTGAACCTGGAAA    | 59.415 | 20 | 160 | 79   | 238  |
| 60.134 | 20 | ATGCATCCGTTAGATCAGGG    | 59.917 | 20 | 233 | 104  | 336  |
| 60.008 | 20 | CCAGCTGACGAGCATACTGA    | 60.16  | 20 | 247 | 205  | 451  |
| 60.138 | 21 | TCTGAATCTGATTGCGTTGC    | 59.955 | 20 | 266 | 39   | 304  |
| 60.535 | 20 | CCCGAGGACACATAAGCCT     | 60.081 | 19 | 280 | 165  | 444  |
| 59.109 | 25 | TCCATTCCGAAAATCGAAAG    | 60.009 | 20 | 280 | 609  | 888  |
| 59.375 | 20 | AAAAACACGCGTTTGTAGGG    | 60.032 | 20 | 232 | 104  | 335  |
| 59.96  | 20 | TCCGGTGAAACATTGACAAA    | 59.941 | 20 | 249 | 1319 | 1567 |
| 59.662 | 20 | TTAAAGTTCTTAAGTCCTGGCG  | 57.792 | 22 | 255 | 677  | 931  |

|        |    |                         |        |    |     |      |      |
|--------|----|-------------------------|--------|----|-----|------|------|
| 60.326 | 20 | AGATGGTTGCACCATAACGC    | 60.925 | 20 | 183 | 298  | 480  |
| 59.96  | 20 | GGCACCAATTCTCATAATACACA | 58.891 | 23 | 142 | 266  | 407  |
| 58.823 | 21 | TGGTCGCCGTGTCTGTAATA    | 60.134 | 20 | 195 | 3852 | 4046 |
| 59.52  | 20 | CGACAGGTGGGAGAGTCATT    | 60.112 | 20 | 251 | 393  | 643  |
| 60.103 | 20 | CACCGTTGTCTTTAAGCCGT    | 60.168 | 20 | 240 | 715  | 954  |
| 59.057 | 24 | ATACGGATCTCTGCCTCTCG    | 59.41  | 20 | 155 | 3    | 157  |
| 59.928 | 20 | TTGGTTGGATATTTTGGGGA    | 59.988 | 20 | 244 | 266  | 509  |
| 59.971 | 20 | GAAATCCCATCCACAACCAC    | 60.034 | 20 | 165 | 203  | 367  |
| 59.971 | 20 | AACACGAGCAAACGACAAA     | 59.366 | 20 | 251 | 95   | 345  |
| 60.25  | 21 | GGAAGAGGAGGTATGAGGGG    | 59.89  | 20 | 223 | 556  | 778  |
| 59.82  | 20 | AAGGAGGTGTTATGAAGGGATT  | 58.028 | 22 | 157 | 291  | 447  |
| 59.72  | 21 | GATGTTTTCCGGCTCAGTGT    | 60.119 | 20 | 269 | 91   | 359  |
| 59.898 | 19 | CGTGACGGTTGAGAATGAC     | 61.527 | 20 | 271 | 183  | 453  |
| 60.519 | 20 | CAGGAACCACCTCAGGGTTA    | 59.959 | 20 | 250 | 39   | 288  |
| 59.751 | 20 | GAGTTTTCATCTTACCTTGAGGG | 58.333 | 23 | 271 | 70   | 340  |
| 60.464 | 20 | TCAAAACGCATAAATAGTGCAA  | 59.687 | 23 | 280 | 44   | 323  |
| 60.042 | 20 | CATCAGATCCATACTCGGCA    | 59.629 | 20 | 241 | 18   | 258  |
| 58.58  | 22 | GCGAACGGTATAGAATCGGA    | 60.06  | 20 | 278 | 56   | 333  |
| 58.823 | 20 | TGGATGATTCACAACCAACA    | 59.808 | 21 | 189 | 943  | 1131 |
| 59.975 | 20 | TTGCTAAGTTGGGCCTATCG    | 60.223 | 20 | 272 | 1126 | 1397 |
| 59.903 | 20 | CACTTCAGCGTCACCTCAA     | 60.025 | 20 | 274 | 123  | 396  |
| 59.985 | 20 | GTTTAGCAAGCACGCCTCTC    | 60.162 | 20 | 278 | 1222 | 1499 |
| 59.062 | 20 | GGTTGTTTCATGACATTTGAGG  | 59.336 | 22 | 270 | 411  | 680  |
| 60.214 | 20 | CTTCTACGCGAAGCACGTTT    | 60.575 | 20 | 264 | 1236 | 1499 |
| 59.273 | 20 | CCGTTGCAAGAGTAATGGCT    | 60.27  | 20 | 185 | 2773 | 2957 |
| 59.943 | 20 | AGCAGGCGAGGTGTTACAAT    | 59.763 | 20 | 242 | 57   | 298  |
| 59.923 | 20 | TTGATTAGTTCGTGCAACGC    | 59.879 | 20 | 275 | 386  | 660  |
| 60.26  | 20 | CCACCATCTCTCTCCCAC      | 59.638 | 20 | 179 | 1448 | 1626 |
| 59.587 | 20 | GGTGGCTGATGAAGAGAAA     | 60.195 | 20 | 262 | 705  | 966  |
| 60.051 | 20 | ACACACAAATGGTTTGCCCT    | 60.277 | 20 | 218 | 69   | 286  |
| 60.029 | 20 | TGGGTTGGTTTGCTTACCTT    | 59.471 | 20 | 260 | 150  | 409  |
| 59.525 | 20 | TTTACGGGTCAAAAGAAACCA   | 59.478 | 21 | 250 | 678  | 927  |
| 58.842 | 22 | TGGCTTGTGAACGTGTAACC    | 59.615 | 20 | 184 | 67   | 250  |
| 59.934 | 20 | TGCATGCACATCAAATCAA     | 59.648 | 20 | 253 | 40   | 292  |
| 59.316 | 20 | GCAGTGGATATGCAATGTGG    | 59.955 | 20 | 217 | 88   | 304  |
| 59.667 | 23 | TTACCATCATTCTTGCCATT    | 59.287 | 21 | 244 | 169  | 412  |
| 59.955 | 20 | CAAATTCGCTCTCCAGTCA     | 59.84  | 20 | 238 | 1501 | 1738 |
| 60.272 | 20 | TATCGGTTATCATCGGATCG    | 58.404 | 20 | 171 | 439  | 609  |
| 58.589 | 21 | GGAATTTCTTGATACACATACAT | 59.918 | 26 | 277 | 619  | 895  |
| 59.974 | 21 | GGGATCTACATGCTGGGAAA    | 59.894 | 20 | 135 | 134  | 268  |
| 57.268 | 20 | CTTAGATGCCATCAACCCGT    | 59.955 | 20 | 184 | 22   | 205  |
| 60.073 | 20 | CATCAAGAAGCTGCAGCAAG    | 59.888 | 20 | 269 | 769  | 1037 |
| 60.24  | 20 | TCCCCTCAAATCCCCTAAC     | 60.124 | 20 | 190 | 56   | 245  |
| 59.879 | 20 | ATTTAAAGGCACGGGAACCT    | 59.835 | 20 | 275 | 1087 | 1361 |
| 59.926 | 21 | CGTTAAGATCAACGCGGATA    | 58.794 | 20 | 210 | 2491 | 2700 |
| 60.111 | 20 | CATGGAGATCGTACGTTTCGT   | 60.008 | 21 | 173 | 2001 | 2173 |
| 60.802 | 20 | ATCTCCGAAGCTCAAACGA     | 59.955 | 20 | 100 | 261  | 360  |
| 60.103 | 20 | TCCACAGTTTTGTACCCACTTTT | 59.827 | 23 | 233 | 1489 | 1721 |
| 59.823 | 20 | TACACGCATATTCGCACACA    | 59.741 | 20 | 181 | 149  | 329  |
| 59.935 | 20 | GGATCGGAAGGATAAGAGCC    | 60.003 | 20 | 135 | 442  | 576  |
| 59.988 | 20 | CCACAAAACACGTTCTCT      | 60.005 | 20 | 190 | 268  | 457  |
| 57.552 | 24 | GGAAGTTGAGATAATGGCG     | 59.528 | 20 | 272 | 11   | 282  |
| 60.545 | 20 | TGATGGCGGTAGGTAGCTCT    | 59.859 | 20 | 231 | 288  | 518  |
| 59.108 | 22 | CCGACCCTCGTGTTTAATGT    | 59.853 | 20 | 129 | 13   | 141  |
| 60.184 | 20 | TATGGGGACTCTCATCTGCC    | 60.034 | 20 | 248 | 1075 | 1322 |
| 58.864 | 20 | ACCTCCCCTGCTCCATATTT    | 59.789 | 20 | 101 | 286  | 386  |
| 60.292 | 20 | CGGACCGTGAAAGCTCTAAG    | 60.008 | 20 | 240 | 234  | 473  |
| 60.003 | 20 | TCGTTTAGGAAGCCTCTGGA    | 59.948 | 20 | 261 | 88   | 348  |

|        |    |                           |        |    |     |      |      |
|--------|----|---------------------------|--------|----|-----|------|------|
| 59.291 | 21 | TTGAATTCGTAACGGGGAG       | 59.931 | 20 | 196 | 11   | 206  |
| 57.409 | 21 | TCGGGACGAAATTTTTGTATG     | 59.818 | 21 | 274 | 2    | 275  |
| 59.337 | 20 | GGCAACGGAACAACAACCTT      | 60.015 | 20 | 280 | 3145 | 3424 |
| 59.037 | 20 | GGTTCAAATCCCACCAACAC      | 60.073 | 20 | 249 | 1192 | 1440 |
| 59.992 | 20 | CATCCCATCACTACCCCATC      | 60.011 | 20 | 129 | 144  | 272  |
| 59.962 | 20 | AACCGAATAACCGAACCAAA      | 59.315 | 20 | 235 | 25   | 259  |
| 60.612 | 20 | ATTCTTGGCCAAAACGTGTC      | 59.978 | 20 | 241 | 148  | 388  |
| 59.957 | 20 | GCTTTCCTCATCTGCACCTC      | 59.957 | 20 | 259 | 1291 | 1549 |
| 57.073 | 22 | CTTCTGCTGGTAGAGCACCC      | 60.012 | 20 | 233 | 1228 | 1460 |
| 59.445 | 23 | AGTTTATCATTTGGGCCGGT      | 60.562 | 20 | 140 | 21   | 160  |
| 60.074 | 20 | TTTCTTCACCGTTTTCTTGA      | 59.71  | 21 | 219 | 470  | 688  |
| 59.662 | 20 | ATTCCAAGGTTTTGCTGTGG      | 59.971 | 20 | 177 | 3077 | 3253 |
| 59.84  | 20 | CAACAGTTTGGTTGGCTGA       | 59.734 | 20 | 255 | 708  | 962  |
| 59.861 | 20 | AGGCATAAAAATTCTCCCGCT     | 60.061 | 20 | 251 | 21   | 271  |
| 60.38  | 21 | GCTTCAGGGGGTGTGAAGTA      | 60.111 | 20 | 254 | 90   | 343  |
| 60.155 | 20 | CTCTCGCCCCAAACTTAGAA      | 59.448 | 20 | 255 | 401  | 655  |
| 60.319 | 20 | TTACCTCCTCCACCATCGAC      | 59.927 | 20 | 272 | 273  | 544  |
| 60.05  | 20 | GCCGAATATTTTGGGCCTAT      | 60.135 | 20 | 222 | 416  | 637  |
| 59.79  | 20 | GAAAAGAAATGAACACCGGC      | 59.551 | 20 | 210 | 62   | 271  |
| 60.011 | 20 | AACTTTGCTGAGTTCGGGTG      | 60.291 | 20 | 270 | 471  | 740  |
| 59.098 | 24 | TACCCACCGACATTTTTGT       | 60.088 | 20 | 126 | 343  | 468  |
| 60.345 | 20 | TCCGTGAATATTTAACCCGC      | 59.795 | 20 | 254 | 1158 | 1411 |
| 60.132 | 20 | TGCAATCACCAAAGAAGTGA      | 57.806 | 20 | 118 | 340  | 457  |
| 60.025 | 20 | TGTCCCCTATTTGGACGAAG      | 59.926 | 20 | 210 | 184  | 393  |
| 59.449 | 20 | AGAAATAAAGGCCAGCTCC       | 59.688 | 20 | 151 | 2176 | 2326 |
| 60.213 | 21 | TGGCCCAGATTTGTTCTAC       | 59.933 | 20 | 185 | 1360 | 1544 |
| 61.129 | 20 | GGTGCCTGAATTGGCTTAAT      | 59.967 | 20 | 239 | 128  | 366  |
| 60.081 | 20 | GAGGGTTATCATGGGATCAAG     | 58.32  | 21 | 162 | 470  | 631  |
| 60.089 | 20 | CAAGCTTGTGGAGTACATGAGA    | 58.036 | 22 | 252 | 40   | 291  |
| 60.52  | 20 | TGGTCGCATGTTACGTGTTT      | 60.035 | 20 | 179 | 1342 | 1520 |
| 60.111 | 20 | AATTGCCAAGTTTGCGAGAT      | 59.713 | 20 | 259 | 622  | 880  |
| 60.073 | 20 | ATTGGCTGAAATGGAGTTGG      | 59.933 | 20 | 236 | 497  | 732  |
| 57.828 | 22 | GGGCAACCACGTTAGTTTA       | 59.861 | 20 | 234 | 449  | 682  |
| 60.029 | 20 | ATGCCCGGTTACCCTCTAAA      | 60.683 | 20 | 156 | 514  | 669  |
| 60.264 | 20 | GTCTGGGACAGACAACCGAT      | 59.969 | 20 | 174 | 85   | 258  |
| 60.033 | 20 | TCAATCCTTTGGAAACTCC       | 59.017 | 21 | 178 | 155  | 332  |
| 59.79  | 20 | TGCGTTCACACCTTCATATTTT    | 59.519 | 22 | 196 | 142  | 337  |
| 59.971 | 23 | CAACTCGCCTACTCCTTTTCG     | 60.008 | 20 | 154 | 445  | 598  |
| 58.62  | 20 | TGCAAGCCTATGGTAGGTGA      | 59.297 | 20 | 115 | 103  | 217  |
| 60.049 | 20 | CACTGATCGTACACGATGGC      | 60.144 | 20 | 182 | 403  | 584  |
| 59.813 | 20 | CACCATCATCGACAATCACC      | 59.769 | 20 | 215 | 385  | 599  |
| 60.397 | 20 | ATTTAAGCTGCACTTTTATTCAACT | 57.118 | 25 | 240 | 140  | 379  |
| 59.415 | 20 | TTCCACGTTTCATGTTTCCA      | 59.941 | 20 | 144 | 60   | 203  |
| 59.415 | 21 | CTTGCGCCGCCTAAATAATA      | 60.202 | 20 | 189 | 809  | 997  |
| 59.797 | 20 | AGGGGCAGGATGTGTAGTTG      | 59.989 | 20 | 273 | 437  | 709  |
| 59.991 | 20 | CCCTCGGATGCTATGCTAAA      | 60.188 | 20 | 231 | 351  | 581  |
| 59.703 | 20 | CTCTCGTCTCCTCCTTCCCT      | 59.945 | 20 | 170 | 28   | 197  |
| 59.46  | 22 | AAGTTGGGGATCGTGCATAC      | 59.82  | 20 | 261 | 97   | 357  |
| 59.83  | 20 | CCCCTATATCCCCATGACTCT     | 59.138 | 21 | 228 | 1301 | 1528 |
| 59.629 | 20 | GTTGGATTCGAGCAGCTCAT      | 60.37  | 20 | 256 | 143  | 398  |
| 59.962 | 20 | TCAGCCACCAAATCAAATCA      | 60.049 | 20 | 161 | 114  | 274  |
| 59.901 | 20 | TAGTGGTATGATGTGGGGGA      | 58.643 | 20 | 203 | 196  | 398  |
| 59.75  | 20 | TAGAAAGATGTGCGGCTGTG      | 60.011 | 20 | 153 | 2081 | 2233 |
| 59.966 | 20 | AAACTCTCCGCCCTTCTA        | 60.2   | 20 | 151 | 135  | 285  |
| 59.843 | 20 | AGGAATCCTGCCCCAAGTAA      | 60.817 | 20 | 146 | 324  | 469  |
| 59.784 | 21 | TGATTGGTGTGGTGAATTGG      | 60.216 | 20 | 276 | 71   | 346  |
| 60.19  | 20 | TCCGTCCCAAGAAATGTGAT      | 60.317 | 20 | 207 | 2175 | 2381 |
| 59.756 | 20 | TTGGAATTTTTCGAGTTCCG      | 60.046 | 20 | 176 | 899  | 1074 |

|        |                              |        |    |     |      |      |
|--------|------------------------------|--------|----|-----|------|------|
| 60.051 | 20 CAATGTAAGGGGGAGCAGAA      | 60.066 | 20 | 254 | 124  | 377  |
| 59.755 | 20 AACATGTTTGCTGGTGCTTG      | 59.764 | 20 | 209 | 3746 | 3954 |
| 60.408 | 20 GGCAAGCGAGTAGGTTGTGT      | 60.321 | 20 | 161 | 242  | 402  |
| 60.424 | 20 GGGGTTGTTAAAATGTCCACC     | 60.326 | 21 | 156 | 607  | 762  |
| 60.111 | 20 AAAAACCTTGGCAACAGTCG      | 60.147 | 20 | 223 | 58   | 280  |
| 59.656 | 20 ATGTTTCATCAACGGACACG      | 59.42  | 20 | 280 | 477  | 756  |
| 60.159 | 20 GGAGAAGACGGAGCTTGGTA      | 59.43  | 20 | 245 | 722  | 966  |
| 59.579 | 20 AATGAACATGCTCCTATTTTAATA( | 58.22  | 27 | 280 | 735  | 1014 |
| 59.399 | 20 CCCAGTGAGGTTGTGGAGAT      | 59.962 | 20 | 130 | 1407 | 1536 |
| 60.307 | 20 ATGTGGCGACAAATTTAGGG      | 59.823 | 20 | 195 | 318  | 512  |
| 59.801 | 20 TGCATGGAGGAAATATGCAA      | 60.035 | 20 | 214 | 38   | 251  |
| 59.734 | 20 CCCCTCTCTACACATTGACA      | 59.974 | 21 | 227 | 2892 | 3118 |
| 60.205 | 26 ATTCTGCATCAGGCCTTCAC      | 60.226 | 20 | 116 | 0    | 115  |
| 59.579 | 20 GGTGAGGTGAGGTGTGTGTG      | 60.045 | 20 | 157 | 395  | 551  |
| 59.986 | 20 ACCGTTGACCCCGAATTAT       | 62.535 | 20 | 199 | 1244 | 1442 |
| 59.527 | 21 TCCATCTTCATGTTCCGACA      | 60.048 | 20 | 188 | 17   | 204  |
| 60.132 | 20 CTTGAATTATCGGCGGTGTT      | 59.96  | 20 | 153 | 143  | 295  |
| 59.871 | 20 TTTACGCATTTCCACACAT       | 59.972 | 20 | 102 | 24   | 125  |
| 60.128 | 20 ATCGGTTATCACCGGATCG       | 60.697 | 19 | 280 | 73   | 352  |
| 59.587 | 20 CCCAAGAACAGAACCACAT       | 59.82  | 20 | 112 | 1044 | 1155 |
| 61.096 | 20 GCGATTTCAATTCCGACTTT      | 59.162 | 20 | 279 | 1255 | 1533 |
| 59.962 | 20 CGCCATGACTATCGTTTTT       | 59.96  | 20 | 242 | 181  | 422  |
| 60.265 | 20 TGCGCAAGTGTATTGTACCAG     | 59.807 | 21 | 259 | 2942 | 3200 |
| 60.21  | 20 CAACGCCATAGGGAAAGTGTT     | 59.993 | 20 | 266 | 1562 | 1827 |
| 60.165 | 21 GGCAAATTGTGGGATGAGAT      | 59.756 | 20 | 212 | 86   | 297  |
| 60.413 | 20 TTAATTGGTTCGGGCTCATC      | 59.901 | 20 | 273 | 30   | 302  |
| 60.06  | 20 GACGTCGTATCGAGACTCA       | 59.988 | 20 | 271 | 74   | 344  |
| 62.397 | 18 TCCGAAAATCAAAGGTCCAC      | 59.91  | 20 | 113 | 18   | 130  |
| 59.702 | 20 AATCGGAGTCTGTTTGGTGG      | 59.966 | 20 | 129 | 145  | 273  |
| 59.836 | 20 TGTCGCATGCCAATCACTAT      | 60.104 | 20 | 232 | 2549 | 2780 |
| 59.859 | 20 TCATTGAACTCCCATCACA       | 59.893 | 20 | 251 | 1343 | 1593 |
| 60.012 | 20 CCTATGGTGGTATGGTGTGG      | 58.569 | 20 | 132 | 454  | 585  |
| 59.934 | 20 CACGAAGCATTGCCACTAGA      | 60.011 | 20 | 208 | 595  | 802  |
| 60.158 | 20 CATATCGGGTCAAAGCAACC      | 60.331 | 20 | 124 | 716  | 839  |
| 59.336 | 20 AAATCTCCACTTGGGAAATTTAGA  | 59.424 | 24 | 130 | 265  | 394  |
| 59.906 | 23 AACATTTTGGGTCTTTGTGC      | 57.578 | 20 | 190 | 1245 | 1434 |
| 60.812 | 20 ACATTTAATGCCCCAGCAAA      | 60.323 | 20 | 202 | 420  | 621  |
| 59.139 | 20 TGAACAGGTTGCATTTTAGATGA   | 59.639 | 23 | 254 | 2017 | 2270 |
| 59.955 | 20 CAACGGTACGTTCCGATTTT      | 59.861 | 20 | 212 | 519  | 730  |
| 59.97  | 20 CGACAAGAGAAAGAGGGTGC      | 59.982 | 20 | 142 | 393  | 534  |
| 59.14  | 23 AGAGCGTGGGATTGAGAGAA      | 59.95  | 20 | 226 | 900  | 1125 |
| 60.69  | 20 TGGAGACGGCTGTTTTCTTT      | 59.853 | 20 | 205 | 312  | 516  |
| 60.163 | 20 ATTGGGTGGGATAGTGCTTG      | 59.813 | 20 | 209 | 291  | 499  |
| 59.96  | 20 TAAGGGGCATTACCACATGC      | 60.721 | 20 | 218 | 490  | 707  |
| 59.799 | 20 GAGATATTCTGTCGGATAGGTGC   | 59.13  | 23 | 229 | 466  | 694  |
| 60.683 | 20 CACCGTTAATCGCAACAAAA      | 59.603 | 20 | 273 | 180  | 452  |
| 59.129 | 20 TTTGATGGGAATGGGAGGTA      | 60.126 | 20 | 114 | 15   | 128  |
| 59.778 | 20 CCTATGGTGGTATGGTGTGG      | 58.569 | 20 | 164 | 53   | 216  |
| 59.343 | 20 ATCAAAGCACCAAGTTACCCG     | 59.993 | 20 | 279 | 182  | 460  |
| 59.894 | 20 TCTTCCTTTTCTCGTTCACATATT  | 58.4   | 24 | 221 | 198  | 418  |
| 60.309 | 20 TATGGGTTATCACCGGATCG      | 60.544 | 20 | 188 | 437  | 624  |
| 59.935 | 20 ACGCAGTTGCTCGGAAGTAT      | 59.904 | 20 | 265 | 39   | 303  |
| 59.282 | 20 TTTGATCCAATGGCCCTAAG      | 59.894 | 20 | 194 | 1    | 194  |
| 59.115 | 20 CTCAATCGTCGCCGATATTT      | 60.06  | 20 | 266 | 200  | 465  |
| 58.901 | 21 CACACCATGTGACGAAGGTT      | 59.441 | 20 | 271 | 627  | 897  |
| 60.088 | 20 TTTTGGTCACCGTGATTTGT      | 58.874 | 20 | 249 | 36   | 284  |
| 60.293 | 20 CACGATGAATTGTCGTGGTT      | 59.42  | 20 | 243 | 60   | 302  |
| 60.019 | 20 ATGCCAAATTGTGTTGGGTT      | 60.096 | 20 | 185 | 129  | 313  |

|        |    |                          |        |    |     |      |      |
|--------|----|--------------------------|--------|----|-----|------|------|
| 59.903 | 20 | GATTGAAGATGTTGGGCGTT     | 59.939 | 20 | 167 | 1007 | 1173 |
| 60.16  | 20 | ATTTCGAAGATCAACGGACG     | 60.074 | 20 | 214 | 2224 | 2437 |
| 59.727 | 20 | TGGATTTTTGAAACGTGGAA     | 58.987 | 20 | 208 | 47   | 254  |
| 60.131 | 20 | AAGCTTGCATTTTATCGGGA     | 59.682 | 20 | 220 | 248  | 467  |
| 59.973 | 20 | GCAACAAAACAAATATTGGATCA  | 58.906 | 23 | 276 | 522  | 797  |
| 60.073 | 20 | GTGCTGTTTTGGTTGGTGTG     | 60.049 | 20 | 244 | 480  | 723  |
| 59.307 | 21 | CTGCCAGGACGAACTTGTA      | 58.923 | 20 | 276 | 227  | 502  |
| 60.235 | 20 | ACGTTGTAGTTGAGGCCCTG     | 60.171 | 20 | 276 | 1068 | 1343 |
| 60.081 | 20 | TTCACGAATTCTTCTTTCCTTTC  | 58.919 | 23 | 276 | 951  | 1226 |
| 57.647 | 21 | TCAACTCAATAGGTTTTCGAGTCT | 59.732 | 25 | 198 | 8    | 205  |
| 60.199 | 25 | ATTTGGCACCATTCTTCACC     | 59.797 | 20 | 266 | 331  | 596  |
| 59.769 | 20 | GTCAGACGTCCTCCTGGTGT     | 60.161 | 20 | 108 | 39   | 146  |
| 57.201 | 23 | CCGCGCTGTAGATTCAAAGT     | 60.407 | 20 | 124 | 40   | 163  |
| 60.149 | 20 | GTGCACAGCTGAGACAGCAT     | 60.22  | 20 | 166 | 3909 | 4074 |
| 59.569 | 20 | GGTTGATGGATCTGCGTTTT     | 59.939 | 20 | 240 | 154  | 393  |
| 59.938 | 20 | AGGCTGAGATCTTCCAACG      | 59.43  | 20 | 226 | 837  | 1062 |
| 60.134 | 20 | CCAAATCCTTCGTTTCTTGG     | 59.541 | 20 | 271 | 105  | 375  |
| 59.528 | 20 | GCCACATATGCAAATATCAGC    | 59.486 | 22 | 280 | 163  | 442  |
| 60.104 | 20 | AGGCCGAGGAGTAGGAAGAA     | 60.34  | 20 | 171 | 174  | 344  |
| 59.95  | 20 | CAGGAAAAGCATCATCACCA     | 59.648 | 20 | 205 | 2039 | 2243 |
| 57.557 | 25 | GACGTGACGAAAGTGGGAAT     | 59.973 | 20 | 196 | 11   | 206  |
| 60.314 | 20 | TAAAAAGCGGCATTTCGATCT    | 59.816 | 20 | 146 | 60   | 205  |
| 60.232 | 20 | GTGGGGTGGGATTGAACTTA     | 59.647 | 20 | 272 | 23   | 294  |
| 57.395 | 25 | AAATAGATGCATGAAACATTTTGA | 59.012 | 25 | 280 | 28   | 307  |
| 60.281 | 20 | AAGGAACAACCTGGTGGATGC    | 59.973 | 20 | 201 | 1397 | 1597 |
| 59.837 | 20 | TGTTGCGCGTGCTTTAAATA     | 60.401 | 20 | 155 | 246  | 400  |
| 59.831 | 20 | AAAATTGCAAAGCGGTGTCT     | 59.752 | 20 | 246 | 2    | 247  |
| 60.142 | 20 | TCCTAGCCCTCAATCTCGAA     | 59.91  | 20 | 236 | 251  | 486  |
| 60.014 | 20 | AGATCCACCCTGCTTGGAG      | 60.261 | 20 | 217 | 280  | 496  |
| 59.704 | 20 | TTGATTGTCTTTGCGTTGGA     | 60.234 | 20 | 227 | 127  | 353  |
| 60.081 | 21 | ACGCGGACGGTACAGATTAC     | 60.022 | 20 | 189 | 171  | 359  |
| 60.155 | 20 | GTAAAACGCTAGAAGGCCCC     | 60.095 | 20 | 124 | 9    | 132  |
| 59.952 | 21 | AGGAACAATCCCAACTTCCC     | 60.169 | 20 | 248 | 273  | 520  |
| 60.074 | 20 | TGATCTGGAACAAGGCAGTG     | 59.831 | 20 | 278 | 1276 | 1553 |
| 59.604 | 23 | GGGTGTGATCTTGACCCTTG     | 60.363 | 20 | 216 | 473  | 688  |
| 60.461 | 20 | CAAGCAAATCCCCTTCTCTG     | 59.807 | 20 | 141 | 849  | 989  |
| 59.542 | 20 | CATGTTGCTTTTGCATGTGA     | 59.28  | 20 | 183 | 41   | 223  |
| 60.275 | 21 | CAGATGGGGATTTGCTTCAT     | 59.894 | 20 | 224 | 2636 | 2859 |
| 60.461 | 20 | CGACAGCGTAATTGAAGCAA     | 60.014 | 20 | 262 | 7    | 268  |
| 61.051 | 19 | TCCGAAATATCCGTTTTTATT    | 58.795 | 22 | 259 | 889  | 1147 |
| 58.456 | 24 | AAGGGAGGGTTTCATTCTCA     | 58.568 | 20 | 277 | 54   | 330  |
| 59.229 | 20 | CTGGCTCCCTATAGTGCTGG     | 59.853 | 20 | 266 | 1365 | 1630 |
| 58.613 | 21 | CACATCCAGCATCAACCAAC     | 59.967 | 20 | 254 | 105  | 358  |
| 60.245 | 21 | TTGCTGTAGGCCTTTTGCTT     | 60.018 | 20 | 117 | 157  | 273  |
| 60.238 | 20 | GGGCAGCTGTAAAACCTTCA     | 60.249 | 20 | 250 | 154  | 403  |
| 59.485 | 20 | CCTCCAGATTTGACAGGGAA     | 60.042 | 20 | 261 | 80   | 340  |
| 60.303 | 20 | GAACGATTAGTGTAGTTGGGC    | 59.898 | 22 | 177 | 348  | 524  |
| 59.938 | 20 | ATGCCTCTCCAGTTACGTG      | 60.134 | 20 | 129 | 138  | 266  |
| 59.875 | 20 | TGTTGATTTATGGCGGATTG     | 59.377 | 20 | 173 | 1025 | 1197 |
| 59.976 | 20 | TTTCTCATTGGCAGTCACCA     | 60.24  | 20 | 263 | 548  | 810  |
| 60.182 | 20 | ACGGAATCTAGGGAGCTGG      | 60.59  | 20 | 267 | 131  | 397  |
| 60.089 | 20 | GTGGGTCCCTCTCACAAA       | 60.088 | 20 | 270 | 2739 | 3008 |
| 59.795 | 20 | ATGAGTTATCACCGGATCGC     | 59.923 | 20 | 253 | 253  | 505  |
| 59.528 | 20 | TGTTGTCGCTTTAGCTCCCT     | 60.015 | 20 | 267 | 430  | 696  |
| 59.547 | 20 | GGGTTAAAAGAAACCCCAA      | 60.027 | 20 | 233 | 257  | 489  |
| 60.067 | 20 | ACAAAATGCCCTCGTATGC      | 59.967 | 20 | 246 | 425  | 670  |
| 59.893 | 20 | GGAATGGAATTCCTCTAAAGC    | 60.316 | 23 | 223 | 2847 | 3069 |
| 59.445 | 20 | GCCAGGCAGAGAAAGAGA       | 59.827 | 20 | 206 | 1142 | 1347 |

|        |    |                           |        |    |     |      |      |
|--------|----|---------------------------|--------|----|-----|------|------|
| 60.02  | 25 | GGTGGGATACAGCAAGAGA       | 60.073 | 20 | 106 | 44   | 149  |
| 59.101 | 20 | TTGAAGAGGCAATTATCGGG      | 60.031 | 20 | 267 | 1677 | 1943 |
| 60.217 | 20 | CGGCCAGTCTAATTGGTAA       | 59.953 | 20 | 254 | 4    | 257  |
| 59.933 | 20 | GCATTACGTGTGTGCGTTCT      | 59.794 | 20 | 268 | 51   | 318  |
| 58.536 | 20 | TCAATCGAGCTACAAACGTG      | 57.506 | 20 | 108 | 16   | 123  |
| 60.192 | 20 | AGGAAAGAGAAGTGAGCCCC      | 59.817 | 20 | 251 | 5474 | 5724 |
| 60.116 | 20 | TTGTTGCATGTCATTGGTCA      | 59.516 | 20 | 216 | 268  | 483  |
| 59.467 | 20 | GCGCATTCTGATATCGTCA       | 59.799 | 20 | 159 | 675  | 833  |
| 59.226 | 20 | TCGTGAATTATCCAAACTTTTCAA  | 59.885 | 24 | 155 | 414  | 568  |
| 60.032 | 20 | GCGTTGGAGATGGTCTTACAA     | 60.125 | 21 | 146 | 546  | 691  |
| 58.595 | 20 | CCAATGCGGATGCTCTTAAT      | 60.06  | 20 | 279 | 37   | 315  |
| 59.861 | 20 | ACCGCCCTCTATTTTCGTAG      | 60.463 | 20 | 181 | 35   | 215  |
| 59.268 | 23 | GGAGAGGGAGGAAAGACTGG      | 60.186 | 20 | 189 | 608  | 796  |
| 59.869 | 20 | TCATGATCCCATGAACGCTA      | 60.033 | 20 | 252 | 194  | 445  |
| 58.897 | 20 | AGGGGGTTATCACCTGATCG      | 61.095 | 20 | 111 | 448  | 558  |
| 59.586 | 20 | TTTGATTTCTCCCCTACCCC      | 60.124 | 20 | 278 | 87   | 364  |
| 60.059 | 20 | CCACCCGTTGATTTTTCACT      | 59.83  | 20 | 235 | 393  | 627  |
| 59.972 | 20 | GCGTGCTGAATCTTAACCGT      | 60.278 | 20 | 141 | 1005 | 1145 |
| 60.006 | 20 | TGGTTTCCATCGTTTGTGA       | 59.941 | 20 | 143 | 451  | 593  |
| 59.003 | 21 | GGCCGATATTTGCTCCTAGTT     | 59.606 | 21 | 272 | 145  | 416  |
| 59.972 | 20 | AACACCTGGGTGAAACCAA       | 60.246 | 20 | 164 | 312  | 475  |
| 59.542 | 20 | CACCTAAAATATTGGTTTCTATTTG | 57.121 | 26 | 139 | 281  | 419  |
| 59.562 | 21 | GTCACGTGGCATCATGAGAA      | 60.698 | 20 | 199 | 336  | 534  |
| 60.02  | 20 | TTGCCAGAGCAAAAACACAG      | 60.027 | 20 | 105 | 1622 | 1726 |
| 58.927 | 23 | ATCTCAAACAGTGGGCTTGC      | 60.263 | 20 | 278 | 2836 | 3113 |
| 60.119 | 20 | TGGCCCTTAGCCAGAATATG      | 60.053 | 20 | 165 | 916  | 1080 |
| 60.031 | 20 | TCATGTACCCCGGATCTACC      | 59.629 | 20 | 280 | 828  | 1107 |
| 59.996 | 20 | AAAAAGAAAAGAAAAGAAAGAA    | 57.177 | 26 | 190 | 505  | 694  |
| 59.953 | 20 | GCAAGTTGAGGGAGAATGGA      | 60.195 | 20 | 153 | 371  | 523  |
| 59.941 | 20 | GTCTTTGGCTATGACCCACG      | 60.517 | 20 | 259 | 163  | 421  |
| 59.569 | 20 | TGATTTTCATGTTTCGCGATT     | 60.45  | 21 | 216 | 81   | 296  |
| 60.112 | 20 | GGAATCATAAGGAAAGCCA       | 60.218 | 20 | 196 | 2438 | 2633 |
| 59.956 | 21 | CGTCATTGGAAAATAATGCG      | 59.029 | 20 | 218 | 65   | 282  |
| 59.407 | 20 | GGAAAGAACTCAATGTCGGC      | 59.676 | 20 | 262 | 132  | 393  |
| 59.311 | 22 | TTACACAGTTCATCTCCCG       | 59.676 | 20 | 259 | 11   | 269  |
| 59.864 | 20 | ATCTCCATTGCTGTTGGGAA      | 60.461 | 20 | 237 | 3106 | 3342 |
| 59.864 | 20 | GGAATCCCTTGACACGAAGA      | 60.05  | 20 | 253 | 380  | 632  |
| 59.789 | 20 | CCTATAGTGGTATGGTGTGGGG    | 60.365 | 22 | 194 | 180  | 373  |
| 59.2   | 20 | GCAACCAAGGAGACTTGAGC      | 59.997 | 20 | 144 | 171  | 314  |
| 58.826 | 22 | TGGCTAGCCTTTGAAGCAAT      | 59.982 | 20 | 149 | 24   | 172  |
| 58.667 | 21 | CGTTGCTTCCTTCTACTCC       | 58.934 | 20 | 204 | 186  | 389  |
| 57.904 | 20 | TTGATGCACTCTTTTTCCCC      | 60.051 | 20 | 212 | 162  | 373  |
| 59.282 | 22 | GAAGAGGGGGTATGAGTGGA      | 58.94  | 20 | 102 | 126  | 227  |
| 60.127 | 20 | TGCGTTTTGACAATATTTAGTGTTT | 59.109 | 25 | 188 | 281  | 468  |
| 60.032 | 20 | TGCATATTTCTCGATCCCGT      | 60.435 | 20 | 249 | 5674 | 5922 |
| 60.11  | 20 | TGAGCAAACTGGTTCCTT        | 59.711 | 20 | 269 | 966  | 1234 |
| 59.178 | 20 | AGCAAGGTGTGTGAACGATG      | 59.751 | 20 | 274 | 525  | 798  |
| 60.014 | 23 | TGAACACCCCTACTTGAGCC      | 60.111 | 20 | 185 | 0    | 184  |
| 59.534 | 20 | GCGGATTGGATGCTTTAGTC      | 59.674 | 20 | 110 | 0    | 109  |
| 60.391 | 20 | TCCGCACTAGTTCACGATA       | 59.297 | 20 | 280 | 761  | 1040 |
| 59.817 | 20 | GCCATGTTTACGATGAAATGC     | 60.345 | 21 | 205 | 487  | 691  |
| 59.96  | 20 | CAACAAGATTCGATAGAAGCCAT   | 59.643 | 23 | 143 | 770  | 912  |
| 60.074 | 20 | GATCTGCTGGCGGTCTTTAT      | 59.297 | 20 | 243 | 925  | 1167 |
| 59.469 | 20 | GGCTCCTTGGATTCATCTTG      | 59.629 | 20 | 275 | 69   | 343  |
| 58.084 | 21 | ATTCTTGCTGGCTGCTCAGT      | 60.164 | 20 | 125 | 9    | 133  |
| 60.147 | 20 | GAGACGCGAATGTTGAGACA      | 59.992 | 20 | 210 | 3496 | 3705 |
| 59.793 | 24 | CTTTGAGCTGATCTTGAAATGC    | 59.114 | 22 | 232 | 354  | 585  |
| 59.989 | 20 | CTCCCTCTCTAAAGGGACGC      | 60.34  | 20 | 173 | 326  | 498  |

|        |    |                           |        |    |     |      |      |
|--------|----|---------------------------|--------|----|-----|------|------|
| 59.873 | 20 | GCCAGTCTCTTTGGATCCTG      | 59.803 | 20 | 209 | 177  | 385  |
| 59.823 | 20 | TGGTATCCATAGCAAAGCGA      | 59.281 | 20 | 249 | 158  | 406  |
| 60.365 | 20 | GATTGACGGGATCACAGGTT      | 59.786 | 20 | 176 | 157  | 332  |
| 59.392 | 24 | TTCTTACTGCCACACAAAATCAA   | 59.677 | 23 | 247 | 457  | 703  |
| 59.832 | 20 | TGGTAAAAGTGCTCAAGACGA     | 58.566 | 21 | 277 | 93   | 369  |
| 59.136 | 20 | TATTCCGCCGTGGTCTAAAG      | 60.089 | 20 | 267 | 145  | 411  |
| 59.304 | 20 | CACTCTCCCTCACACACACG      | 60.358 | 20 | 143 | 1295 | 1437 |
| 60.124 | 21 | CAAACCTCGCTCAAAAAGACACA   | 60.453 | 22 | 222 | 1973 | 2194 |
| 60.008 | 22 | CAAATAATGCTGCGTGATGG      | 60.096 | 20 | 200 | 11   | 210  |
| 59.934 | 20 | AGCCCGATAAGTTCGCAGTA      | 59.867 | 20 | 204 | 257  | 460  |
| 60.483 | 20 | CGGAACCAGACCGAATATGA      | 60.853 | 20 | 184 | 35   | 218  |
| 60.24  | 20 | AGTCCGAAAATCCCAACAAT      | 58.36  | 20 | 270 | 271  | 540  |
| 60.138 | 20 | TTAAAAATCGCCCGTGAGAC      | 60.074 | 20 | 267 | 3256 | 3522 |
| 60.022 | 20 | ATCTTCTAATCACCGCCCCT      | 59.925 | 20 | 237 | 186  | 422  |
| 59.803 | 20 | TTGTTTGAGGGAGAAGTGGG      | 60.081 | 20 | 220 | 3205 | 3424 |
| 59.795 | 20 | TTTGGAGGATCGACGTTACC      | 59.933 | 20 | 260 | 67   | 326  |
| 59.846 | 20 | TTGGATCATTCAAGGAATTTCA    | 59.388 | 22 | 218 | 918  | 1135 |
| 59.844 | 20 | CGAATTCAAACTCTCCCGAA      | 60.184 | 20 | 266 | 14   | 279  |
| 58.44  | 24 | TCACAACAGGTTTCGCCATA      | 60.111 | 20 | 199 | 142  | 340  |
| 59.624 | 20 | ATGACTGCAAGCAACCTGTG      | 59.905 | 20 | 104 | 87   | 190  |
| 60.22  | 20 | CTCCACCCTGGTTCTAATGC      | 59.55  | 20 | 275 | 937  | 1211 |
| 59.855 | 20 | AATACCGGGAAGAATTTGGC      | 60.15  | 20 | 231 | 164  | 394  |
| 60.23  | 20 | GACACGTTGGTGAAGCATTG      | 60.16  | 20 | 145 | 251  | 395  |
| 60.179 | 20 | CCGCTATCGAAAATATAATCCC    | 58.9   | 22 | 272 | 112  | 383  |
| 57.122 | 24 | TCCACGGGAGAGAATGAGAG      | 60.34  | 20 | 188 | 25   | 212  |
| 60.315 | 20 | AAAAAGAGGGAGGGATACACC     | 58.452 | 21 | 274 | 59   | 332  |
| 59.928 | 20 | TCACCCCACTCCTCACTTTC      | 60.088 | 20 | 116 | 283  | 398  |
| 60.02  | 20 | GGAAAAGCAATCAAGATCCG      | 59.645 | 20 | 143 | 734  | 876  |
| 59.924 | 20 | CTAAAATGGAAAGGGCGTGA      | 60.067 | 20 | 145 | 440  | 584  |
| 60.126 | 20 | CTACCCGCAATGGTTCAACT      | 59.993 | 20 | 239 | 6672 | 6910 |
| 57.328 | 20 | ACGGGTTATTACCTGATCGC      | 58.93  | 20 | 101 | 826  | 926  |
| 59.82  | 20 | TTCCCAACTCCAATTGATCC      | 59.727 | 20 | 104 | 1119 | 1222 |
| 60.362 | 20 | TCAACCTTTTCACACCACCTT     | 59.482 | 21 | 196 | 88   | 283  |
| 60.016 | 20 | TACCCTTCATCTTCAACGCC      | 60.074 | 20 | 184 | 1341 | 1524 |
| 58.622 | 20 | ACAGAAGGAGCAAAGCTGGA      | 60.134 | 20 | 262 | 621  | 882  |
| 59.942 | 20 | TGTGCAGGGAAGATCAAGTG      | 59.831 | 20 | 191 | 7    | 197  |
| 58.898 | 23 | GGGTGGAGTTATGGCTGAAA      | 59.933 | 20 | 235 | 150  | 384  |
| 60.328 | 20 | CCATTTCAAGAATGCAGGGT      | 59.933 | 20 | 196 | 1510 | 1705 |
| 59.933 | 20 | CGGTTCAACCCTTTTGTAGG      | 59.466 | 20 | 279 | 1497 | 1775 |
| 59.677 | 20 | CAACACAAGAACTCACCTCCC     | 59.607 | 21 | 272 | 492  | 763  |
| 60.016 | 20 | GGCCTAGCTGGGTCTTCTTC      | 60.349 | 20 | 187 | 5760 | 5946 |
| 59.942 | 20 | TCTCGATCACTACAATCTTTGAGA. | 59.445 | 25 | 269 | 163  | 431  |
| 59.978 | 20 | TGCCGTAACCTGTCATACCA      | 59.988 | 20 | 164 | 94   | 257  |
| 59.087 | 20 | ACAAAGGCACAGAATGGACC      | 59.973 | 20 | 274 | 1449 | 1722 |
| 59.304 | 24 | GAAGGAACGCTTACACGGAG      | 59.875 | 20 | 127 | 9    | 135  |
| 60.008 | 20 | AGATGCTGGAATCTTCGTGG      | 60.218 | 20 | 191 | 20   | 210  |
| 60.081 | 20 | TCTGTCACGTCTTCGTGTCG      | 61.092 | 20 | 177 | 254  | 430  |
| 59.662 | 20 | CCTGGAACCTGTCATCACCT      | 59.962 | 20 | 264 | 1121 | 1384 |
| 60.15  | 20 | TGGCTCTTACCCTTGATTT       | 59.67  | 20 | 175 | 36   | 210  |
| 60.133 | 21 | AGAAAGCCGGCAAACCTGTAA     | 59.883 | 20 | 222 | 138  | 359  |
| 59.984 | 20 | GCAGATGGCAGATTGGTACA      | 59.679 | 20 | 217 | 84   | 300  |
| 59.989 | 20 | AACTGCCCAATCTGGATGTC      | 59.934 | 20 | 271 | 1139 | 1409 |
| 60.723 | 20 | ATTTTGCAGTCCCTCCAAC       | 58.646 | 20 | 227 | 1192 | 1418 |
| 59.722 | 20 | ACTTTTGGGGGACAAATCCT      | 59.668 | 20 | 226 | 265  | 490  |
| 59.844 | 20 | GTCCATTGTAGCGGTTGGAT      | 59.82  | 20 | 250 | 96   | 345  |
| 60.197 | 20 | GAAATGGCATTGATTGGGTC      | 60.141 | 20 | 226 | 2176 | 2401 |
| 60.096 | 20 | TAGTCGCGTGCGATAATTTG      | 59.864 | 20 | 238 | 156  | 393  |
| 59.938 | 20 | ACGTCCAACGATCATTCTCC      | 59.934 | 20 | 270 | 71   | 340  |

|        |    |                          |        |    |     |      |      |
|--------|----|--------------------------|--------|----|-----|------|------|
| 60.72  | 20 | CTAAGGTCGGCGATAGCTTG     | 59.996 | 20 | 203 | 836  | 1038 |
| 59.894 | 20 | CAAATGGGTCCATCACTCCT     | 59.779 | 20 | 184 | 308  | 491  |
| 59.997 | 20 | TGCACGTGTGTAGGGTTTGT     | 60.072 | 20 | 271 | 1006 | 1276 |
| 59.972 | 20 | GGAGGGCTGTGTGATATTGG     | 60.34  | 20 | 276 | 141  | 416  |
| 57.273 | 21 | TGTTGCGCGTGCTTTAAATA     | 60.401 | 20 | 128 | 87   | 214  |
| 60.009 | 20 | GGAACGAACCAAAAGTCCAA     | 59.948 | 20 | 271 | 509  | 779  |
| 59.853 | 20 | GCAGGAGAAATGGAGACAGC     | 59.957 | 20 | 246 | 619  | 864  |
| 59.984 | 20 | AGCAAGGTCTGGGGTGTATG     | 59.989 | 20 | 247 | 2105 | 2351 |
| 60.312 | 20 | GCATCATCTTGTTGTATTCGTTG  | 59.532 | 23 | 223 | 2    | 224  |
| 59.864 | 20 | TTTTTATGTGACACGCCCC      | 59.385 | 19 | 262 | 574  | 835  |
| 60.357 | 20 | CCCTTGCTACCATCATCGTT     | 59.955 | 20 | 172 | 205  | 376  |
| 59.955 | 20 | CTGTATTGTGGAAGGACGGG     | 60.366 | 20 | 241 | 266  | 506  |
| 60.096 | 20 | TTGCAAACAATCCCATTCAA     | 59.907 | 20 | 235 | 1806 | 2040 |
| 59.993 | 20 | GGGATGACTCCAAAAGGACA     | 59.903 | 20 | 237 | 169  | 405  |
| 59.829 | 25 | TCGAACCTTGAACCAAAAGG     | 60.081 | 20 | 175 | 8    | 182  |
| 59.957 | 20 | GCCTACGATCCAAATCCTGA     | 60.036 | 20 | 188 | 4143 | 4330 |
| 59.989 | 20 | AGCCCCACATAATCCCACTT     | 60.578 | 20 | 254 | 56   | 309  |
| 59.956 | 27 | TGTACCGCACCAAGATTTGA     | 60.111 | 20 | 169 | 1    | 169  |
| 60.021 | 20 | TTGCAAGAAAAGCCACACAC     | 59.888 | 20 | 276 | 174  | 449  |
| 60.16  | 20 | AAAAATTTAGTATGAGGTCACATC | 59.925 | 26 | 235 | 657  | 891  |
| 59.134 | 22 | AAGGGAGTTCTCCCAATCAA     | 59.926 | 21 | 164 | 36   | 199  |
| 60.634 | 20 | CATAAAGCCACCCCAACAAC     | 60.227 | 20 | 206 | 189  | 394  |
| 60.103 | 20 | AAGGGAGCCCAATTGAAAAT     | 59.777 | 20 | 250 | 196  | 445  |
| 59.994 | 20 | GAAAAGCTTGGCCATTCAAC     | 59.691 | 20 | 156 | 342  | 497  |
| 59.972 | 20 | TCCCATTTGTGTGTTCTTCG     | 59.541 | 20 | 154 | 2458 | 2611 |
| 59.769 | 20 | GGTAGGTGCTCTGACTTGCC     | 59.874 | 20 | 242 | 889  | 1130 |
| 59.953 | 20 | GGAGGAGAAGGAACAAACCC     | 59.912 | 20 | 132 | 398  | 529  |
| 60.074 | 21 | GAGCTTCAAGTCCCACTGA      | 60.386 | 20 | 232 | 57   | 288  |
| 60.096 | 20 | TGAGATTTGGACGGTTATGATTT  | 59.729 | 23 | 200 | 207  | 406  |
| 60.523 | 20 | GCGAACTCGGCTAGAACAAA     | 60.523 | 20 | 116 | 695  | 810  |
| 59.694 | 20 | CCCAATGATCAAAGACGAGG     | 60.452 | 20 | 272 | 201  | 472  |
| 60.119 | 20 | CTGCAAGGGACAGCAAAATA     | 58.917 | 20 | 149 | 529  | 677  |
| 60.103 | 20 | AGTATTTGCAGAGGCGGAGA     | 59.978 | 20 | 271 | 170  | 440  |
| 59.904 | 20 | TTTCTGGTTGCATTTTGCTG     | 59.849 | 20 | 165 | 1610 | 1774 |
| 60.045 | 20 | TCATTCTACAACATCCACATCA   | 59.499 | 24 | 267 | 266  | 532  |
| 59.96  | 20 | GGTGTGCTCGGATTTTTGAT     | 59.939 | 20 | 161 | 279  | 439  |
| 61.113 | 21 | CTATTTTCGCTGGCTTGGTG     | 60.762 | 20 | 279 | 210  | 488  |
| 59.74  | 20 | TCCCATTTTCAGTGGAACA      | 58.947 | 20 | 166 | 129  | 294  |
| 57.947 | 20 | AAGGCGGTTTTTGATACGTG     | 59.996 | 20 | 275 | 346  | 620  |
| 60.096 | 20 | TGTCTCAGAACTGTAACCCTGA   | 58.898 | 23 | 260 | 2887 | 3146 |
| 59.945 | 20 | TGAAAGGCAGATTTCCCAAC     | 60.051 | 20 | 204 | 189  | 392  |
| 59.973 | 20 | GATGAAGATGACCACGGCTT     | 60.081 | 20 | 233 | 624  | 856  |
| 60.103 | 20 | GTACGGTTGCATAAACGGCT     | 60.025 | 20 | 264 | 2458 | 2721 |
| 59.305 | 20 | GGACACGTTGGACCTGAAAG     | 60.545 | 20 | 152 | 38   | 189  |
| 59.999 | 20 | ATTTCGAAGATCAACGGACG     | 60.074 | 20 | 247 | 423  | 669  |
| 60.074 | 20 | ATAAAAGCAAAAGACGGGGG     | 60.305 | 20 | 224 | 3215 | 3438 |
| 59.762 | 20 | TGCCAGTAATTCACAACCCA     | 59.964 | 20 | 217 | 448  | 664  |
| 60.725 | 20 | CAAGGGCTATGCAATAAAAGC    | 60.114 | 22 | 276 | 83   | 358  |
| 60.544 | 20 | TGGCAATTCTATGACCCTTG     | 58.572 | 20 | 135 | 22   | 156  |
| 60.132 | 20 | CCGTTTTCCCGTGAATAG       | 60.308 | 19 | 170 | 999  | 1168 |
| 60.021 | 20 | TCTCTGTGTGTGAACCTGCC     | 59.872 | 20 | 271 | 795  | 1065 |
| 59.673 | 20 | ACCATATTTAAGGGTTATCACCTG | 57.552 | 24 | 167 | 773  | 939  |
| 58.464 | 23 | TTGTGCATCGTGTCTTGTG      | 59.298 | 20 | 127 | 0    | 126  |
| 59.913 | 20 | GGGAAGGATGAAAGGGGTTA     | 60.124 | 20 | 104 | 177  | 280  |
| 59.869 | 20 | TTGATGGTGACGTAGAACATTTG  | 59.912 | 23 | 166 | 44   | 209  |
| 59.482 | 21 | CGTGTGTGTGGTGTGGTACA     | 59.95  | 20 | 146 | 65   | 210  |
| 59.939 | 20 | AAAGTGCATGTGAACCTCCC     | 59.973 | 20 | 226 | 334  | 559  |
| 59.894 | 20 | ATCAACACGTACGGAGATGC     | 58.599 | 20 | 240 | 214  | 453  |



|        |    |                           |        |    |     |      |      |
|--------|----|---------------------------|--------|----|-----|------|------|
| 59.813 | 20 | TCATCTAGCATCTCTTGCTTTCA   | 59.261 | 23 | 184 | 390  | 573  |
| 60.074 | 20 | GTGGAAGATTTCTTGGCAGC      | 59.82  | 20 | 193 | 756  | 948  |
| 59.847 | 21 | CGACCACAAAATGGGAGAAC      | 60.353 | 20 | 152 | 1    | 152  |
| 57.432 | 24 | ACGGCGTAACTAACCTGGA       | 59.632 | 20 | 255 | 30   | 284  |
| 59.853 | 20 | ACAATCCCCAGCTAATTCCC      | 60.152 | 20 | 273 | 334  | 606  |
| 59.972 | 20 | GTCCCACCCAATCACATTTT      | 60.034 | 20 | 277 | 651  | 927  |
| 58.723 | 20 | TATGTCGTTAGACGATGGCG      | 59.712 | 20 | 244 | 275  | 518  |
| 59.569 | 22 | TAATGGGAATGGCTTGGCTA      | 60.415 | 20 | 277 | 909  | 1185 |
| 59.962 | 20 | CGACTTGTCGTGGTTCGATA      | 59.716 | 20 | 276 | 44   | 319  |
| 59.394 | 20 | TTCCTTCCCCACCTCTTCTT      | 60.045 | 20 | 232 | 854  | 1085 |
| 58.721 | 20 | TTTCTATGGACCGAAATGC       | 59.901 | 20 | 252 | 651  | 902  |
| 60.118 | 22 | CGATTTGACCTCGGATAATCA     | 59.908 | 21 | 254 | 161  | 414  |
| 60.323 | 20 | CATGTTATTCGCGTGCATGT      | 60.554 | 20 | 141 | 3658 | 3798 |
| 60.119 | 20 | CACACCTCCTCCAAAGCACT      | 60.298 | 20 | 235 | 498  | 732  |
| 59.297 | 20 | ACGGGAGGGAGAGGGAGTAT      | 61.214 | 20 | 111 | 371  | 481  |
| 59.278 | 21 | GTTCTTGGTTGCCTTACGGA      | 60.11  | 20 | 275 | 138  | 412  |
| 59.853 | 20 | GGTGAAGACGGATCGTCAAT      | 59.934 | 20 | 252 | 2605 | 2856 |
| 59.851 | 20 | GAAGTGCATATGCGAGGTGA      | 59.83  | 20 | 139 | 734  | 872  |
| 59.933 | 20 | GAGCCGTTGAATCCTTGTGT      | 60.119 | 20 | 265 | 28   | 292  |
| 59.864 | 20 | AACCCGTTTGAGGTTGAACA      | 60.388 | 20 | 274 | 4    | 277  |
| 59.916 | 20 | TCCCCTTGGTCCTAAATGTG      | 59.784 | 20 | 216 | 2372 | 2587 |
| 60.397 | 20 | GTAAGCCAAAATCCTGCGAA      | 60.209 | 20 | 264 | 40   | 303  |
| 60.352 | 20 | AAATGAAGGTTGAGATGGG       | 58.836 | 20 | 204 | 2009 | 2212 |
| 59.375 | 20 | TCATTTTACCTTTCTGTTTTTGA   | 59.107 | 24 | 250 | 416  | 665  |
| 60.036 | 20 | GGGACCATGATACATTTGGG      | 59.871 | 20 | 257 | 168  | 424  |
| 59.847 | 20 | TTGTCAACCCTGTTGAGCCT      | 60.69  | 20 | 280 | 1856 | 2135 |
| 60.689 | 20 | TCATGCAGGAAAAACCATCA      | 60.049 | 20 | 224 | 3338 | 3561 |
| 60.331 | 20 | TGCATTTTATTTACGTGGTTACTTT | 58.285 | 25 | 279 | 380  | 658  |
| 59.566 | 20 | AATTTGAAAATTTAAAGGTCCA    | 58.2   | 23 | 105 | 543  | 647  |
| 59.791 | 23 | CATCGCATTCTCGATTCAA       | 59.769 | 20 | 239 | 1492 | 1730 |
| 60.601 | 20 | CACTGGCCAAGAATCAATCA      | 59.648 | 20 | 249 | 415  | 663  |
| 60.029 | 20 | CCGTTGGATTTATCTTCTCCA     | 59.03  | 21 | 243 | 3503 | 3745 |
| 60.011 | 20 | TTTGCTCGAATTCATATTTTTATGT | 58.297 | 25 | 276 | 428  | 703  |
| 59.759 | 20 | GTAGCCCGAGTCAGATCGTC      | 59.834 | 20 | 269 | 187  | 455  |
| 59.79  | 20 | CCACCACACACAGGGTTATC      | 58.697 | 20 | 103 | 169  | 271  |
| 58.987 | 20 | GATGTGTTTGACGGTGAGA       | 59.525 | 20 | 147 | 815  | 961  |
| 59.656 | 20 | TCCATTCCATTGACCCATTT      | 59.991 | 20 | 275 | 113  | 387  |
| 60.006 | 20 | GATGAAAACGTGAGGCTGAA      | 58.85  | 20 | 259 | 137  | 395  |
| 60.16  | 20 | TGATTTGGTTTTGGGGTTA       | 60.024 | 20 | 251 | 12   | 262  |
| 59.967 | 20 | GTGGCAGTAAAATTGTGGGC      | 60.374 | 20 | 243 | 80   | 322  |
| 59.978 | 20 | CTACCACCTCCCATCACCAC      | 60.238 | 20 | 165 | 618  | 782  |
| 59.297 | 20 | CAAGAACC CGAAAGTGA        | 60.081 | 20 | 254 | 1581 | 1834 |
| 58.033 | 27 | TAGCAGTGTTATCGATGGCG      | 59.856 | 20 | 177 | 446  | 622  |
| 60.132 | 20 | ACTCTCCATTCCATCAACGC      | 60.081 | 20 | 249 | 286  | 534  |
| 59.844 | 20 | TCCGAAAAATCAAAGTCCA       | 60.418 | 20 | 236 | 458  | 693  |
| 60     | 20 | GCCTTGACGGTTGATTGGA       | 60.894 | 20 | 273 | 196  | 468  |
| 59.537 | 22 | CAACTTGGTCACCTCCTTGG      | 60.536 | 20 | 111 | 66   | 176  |
| 60.193 | 20 | CCCTGGATTTTGATTGAGGA      | 59.864 | 20 | 259 | 92   | 350  |
| 60.192 | 20 | AGTTGTGCAGCCAGGATCTC      | 60.418 | 20 | 213 | 151  | 363  |
| 59.703 | 20 | TGACGGGATTTAGGTGTTTTG     | 59.847 | 21 | 249 | 366  | 614  |
| 59.867 | 20 | TTGTTTCGGTGTTGCTTCAG      | 59.881 | 20 | 265 | 357  | 621  |
| 59.499 | 20 | TTGGGACACATTCACGAAAA      | 59.941 | 20 | 276 | 1994 | 2269 |
| 59.607 | 21 | TGAGTTGGCCAAGAGAGTGA      | 59.545 | 20 | 224 | 342  | 565  |
| 61.035 | 20 | GGAAAAATCAAACAAAACACGA    | 60.238 | 23 | 257 | 1243 | 1499 |
| 59.148 | 20 | GGCCAAACAAAAATCTTGA       | 59.916 | 20 | 241 | 382  | 622  |
| 60.067 | 20 | AATGCGATGTGAGGACATGA      | 60.08  | 20 | 239 | 1782 | 2020 |
| 58.374 | 21 | GAGGCAGAGTAGGGGGAATC      | 60.037 | 20 | 137 | 22   | 158  |
| 60.041 | 20 | CCTTCTGACAAAGGCGAAAG      | 59.986 | 20 | 198 | 2831 | 3028 |

|        |    |                          |        |    |     |      |      |
|--------|----|--------------------------|--------|----|-----|------|------|
| 60.169 | 20 | TGTGCCATTTCTTGCACTTC     | 59.847 | 20 | 180 | 2250 | 2429 |
| 59.097 | 20 | TTCTTCAACCGATCAATGAAA    | 58.201 | 21 | 278 | 844  | 1121 |
| 59.659 | 23 | CATGAGATCCTGGGTAGTGGA    | 59.935 | 21 | 274 | 1521 | 1794 |
| 60.14  | 20 | TGCCACGTGTCAAATCTTA      | 57.763 | 20 | 154 | 757  | 910  |
| 59.5   | 27 | GGGATTGGGATGAGAAGAGA     | 59.016 | 20 | 272 | 49   | 320  |
| 60.306 | 20 | AGACTCACGCCCTCTCACTC     | 59.585 | 20 | 268 | 41   | 308  |
| 59.805 | 20 | AATTTAGCGCAAACCTGGTCG    | 60.264 | 20 | 264 | 190  | 453  |
| 60.298 | 20 | GGGGATTTTCAGACAGCAATG    | 60.461 | 20 | 239 | 1408 | 1646 |
| 57.188 | 23 | CTCCGGTGTAAAAGATGCC      | 59.569 | 20 | 260 | 2314 | 2573 |
| 59.84  | 20 | CCCTCTTCTCCATCATCACC     | 59.46  | 20 | 226 | 134  | 359  |
| 60.009 | 20 | CGATCGATTTTAGGGTTTTCC    | 59.795 | 21 | 197 | 773  | 969  |
| 60.005 | 20 | CTTCTTTCCGCCTCTTTCT      | 59.955 | 20 | 257 | 33   | 289  |
| 57.89  | 24 | CATCAAGATCCAAGGGCTGT     | 60.073 | 20 | 201 | 4    | 204  |
| 59.954 | 20 | CCGAACCCGATTACAGAAAA     | 59.931 | 20 | 196 | 16   | 211  |
| 60.344 | 20 | TTTCAACAAACACACACGCA     | 59.765 | 20 | 274 | 505  | 778  |
| 60.05  | 20 | AAAACCCATGGATGCAAAAA     | 60.167 | 20 | 275 | 468  | 742  |
| 60.067 | 20 | TCACCCTTCGAGCTTAAACA     | 59.869 | 21 | 183 | 361  | 543  |
| 60.583 | 21 | CTTGTCTCCGTTCTGCTTCC     | 59.989 | 20 | 277 | 1245 | 1521 |
| 60.269 | 21 | ACTTGCCTCCCTGTACCT       | 59.756 | 20 | 208 | 966  | 1173 |
| 60.066 | 20 | TGGAAACAAATCAATTGACCA    | 58.855 | 21 | 146 | 253  | 398  |
| 58.878 | 21 | CACAGCAGTAGGGTCCAAAAA    | 60.154 | 21 | 156 | 7    | 162  |
| 59.097 | 20 | CCCACCCCAATATCAAAA       | 60.369 | 19 | 164 | 323  | 486  |
| 59.955 | 20 | GTGGAGTTTGAAGGTGCCAT     | 59.973 | 20 | 241 | 561  | 801  |
| 60.043 | 20 | GACCTGCGTAAGGTTCTTGC     | 59.882 | 20 | 194 | 2977 | 3170 |
| 58.973 | 20 | CTATCTCATCCCCTCACCGA     | 60.027 | 20 | 104 | 28   | 131  |
| 60.022 | 20 | TTATGGTGCTACTCCCACCC     | 59.813 | 20 | 240 | 132  | 371  |
| 59.971 | 20 | CCAATCAACTAAACCCCAA      | 59.657 | 20 | 222 | 1114 | 1335 |
| 60.002 | 20 | AAAAGAGGAGGAGAGGCAGC     | 60.096 | 20 | 209 | 359  | 567  |
| 59.835 | 20 | TGCAGTGGGTTTGATTGTGT     | 60.008 | 20 | 172 | 317  | 488  |
| 59.119 | 25 | TTTTCAGTTAATGAGGTAATGCAA | 57.967 | 24 | 199 | 22   | 220  |
| 59.951 | 20 | GAAATTTTGGAGGCTGGACA     | 60.051 | 20 | 185 | 21   | 205  |
| 60.91  | 20 | AAATGCCGCAGACATATCCT     | 59.556 | 20 | 246 | 14   | 259  |
| 59.942 | 20 | TTGATTTGTATATAAAGAGGCTGG | 58.367 | 25 | 276 | 2507 | 2782 |
| 60.16  | 20 | GCAGCCTCCTCCTCTCTCTT     | 60.238 | 20 | 199 | 8    | 206  |
| 60.059 | 20 | TTCTTCTAAGGTGCCCATCTG    | 59.322 | 21 | 247 | 2687 | 2933 |
| 60.21  | 20 | GCATTGGATTCTTTTATCCG     | 60.63  | 21 | 191 | 503  | 693  |
| 59.964 | 20 | TACGCAGCCGGAGTAGTTTT     | 59.904 | 20 | 184 | 604  | 787  |
| 59.828 | 19 | TTATGCCTATGTGGCTGCTT     | 58.414 | 20 | 280 | 550  | 829  |
| 59.844 | 20 | TGTTAGGTGGTGGGGTTGAT     | 60.088 | 20 | 219 | 2    | 220  |
| 59.997 | 20 | AGATCACCAAACCAACCAGG     | 59.82  | 20 | 270 | 1662 | 1931 |
| 58.325 | 20 | TTGGTTTAAAAGTCGTTGTTGA   | 57.43  | 22 | 277 | 210  | 486  |
| 60.088 | 20 | AATCTAACTAATGGCGCGGA     | 59.704 | 20 | 231 | 374  | 604  |
| 60.134 | 20 | TCCAGCAGTTTCAATCACCA     | 60.24  | 20 | 239 | 1301 | 1539 |
| 57.557 | 27 | GAAAAGGATTGGGTGCTTCA     | 60.051 | 20 | 123 | 4    | 126  |
| 60.046 | 20 | CCTGCTCAAAGGGAGACAAG     | 59.982 | 20 | 144 | 153  | 296  |
| 60.049 | 20 | TGTAATGGGTGCCAAAATCA     | 59.786 | 20 | 240 | 4666 | 4905 |
| 60.012 | 20 | GGTGCAAGCCACAGTTAAT      | 60     | 20 | 272 | 62   | 333  |
| 60.096 | 20 | AAACAGTGCTTTTGTGATTCCA   | 59.654 | 22 | 146 | 885  | 1030 |
| 60.837 | 20 | TGCAGATTTGTTGCACTTTTG    | 59.903 | 21 | 183 | 20   | 202  |
| 59.304 | 24 | TGGGATAAATCTTCAACACCG    | 59.809 | 21 | 234 | 198  | 431  |
| 59.799 | 20 | TTGTATTCGCAGTAGCCGTG     | 59.895 | 20 | 259 | 731  | 989  |
| 60.488 | 20 | TTACAGTTTTCATTTGATCACC   | 58.986 | 23 | 208 | 8    | 215  |
| 58.659 | 23 | AGTGTTTGACATGATTACTCGTC  | 57.373 | 24 | 247 | 1460 | 1706 |
| 60.081 | 20 | GAAGCTAGCAACGAAATCCG     | 59.982 | 20 | 220 | 121  | 340  |
| 59.244 | 20 | TTTATTAATCAATATAAGGTTGCA | 59.344 | 27 | 271 | 613  | 883  |
| 60.089 | 21 | TGGTTCGAATCCTCCACTACA    | 60.501 | 21 | 255 | 94   | 348  |
| 60.297 | 20 | GGAACAAAAGGAGAACATCCC    | 59.797 | 21 | 272 | 2162 | 2433 |
| 59.343 | 20 | CTCTCATGTGCGTGTGTTGCT    | 60.056 | 20 | 223 | 127  | 349  |

|        |                             |        |    |     |      |      |
|--------|-----------------------------|--------|----|-----|------|------|
| 59.848 | 20 TAGAGCCCTGCCAAACAAC      | 59.875 | 20 | 275 | 11   | 285  |
| 59.805 | 20 AGGATGGCATTCCAGTTTTG     | 59.933 | 20 | 276 | 9    | 284  |
| 59.836 | 20 TGCATTGTCAAAGTAGTAACTCA  | 59.027 | 26 | 259 | 241  | 499  |
| 59.978 | 20 ATTCGTGCCAAGTTTATGCC     | 59.967 | 20 | 230 | 128  | 357  |
| 57.507 | 23 TGAGTGATTTGAAATAAAATTTGA | 59.694 | 26 | 270 | 3473 | 3742 |
| 59.805 | 20 TGGTGTTACTGGCGGTGATA     | 59.988 | 20 | 222 | 93   | 314  |
| 59.966 | 24 CGAGTAAACCAAACACGTGAA    | 58.737 | 21 | 191 | 3146 | 3336 |
| 59.615 | 20 TGATGTTGGAGAGAGGACCC     | 60.048 | 20 | 258 | 339  | 596  |
| 59.234 | 20 AGTTAAAATCGAACCGAACCA    | 58.616 | 21 | 206 | 344  | 549  |
| 59.964 | 20 ATTTCAACCTTTGCCAACGA     | 60.481 | 20 | 278 | 880  | 1157 |
| 59.964 | 20 TCCCCTTTCTCTCGCTGTTA     | 59.948 | 20 | 205 | 302  | 506  |
| 60.119 | 20 TCCTCACCCTGTACCCCTC      | 59.962 | 20 | 243 | 434  | 676  |
| 60.128 | 20 CGAGATGGGGACAGTTGTTT     | 59.966 | 20 | 158 | 260  | 417  |
| 60.384 | 20 GGACAGCCAGCTGAAGAAAC     | 59.997 | 20 | 237 | 1310 | 1546 |
| 59.964 | 20 ATAGGCAAATTCGGAGGCTT     | 60.061 | 20 | 227 | 194  | 420  |
| 59.823 | 20 ACGAGACCGAAAGCAACAAC     | 60.299 | 20 | 192 | 385  | 576  |
| 60.046 | 20 GAGTGGAGGAAGATGGGGAT     | 60.278 | 20 | 265 | 525  | 789  |
| 59.762 | 20 TTATTTGGAAGTGCAACCCA     | 59.013 | 20 | 108 | 1909 | 2016 |
| 59.535 | 20 CACTCCAACCTTTGCAAGAACA   | 58.96  | 21 | 230 | 1013 | 1242 |
| 59.612 | 20 CTTCTGTTTACTCACGCGCA     | 60.195 | 20 | 186 | 12   | 197  |
| 59.42  | 20 GGAGGGAGACCATGTGAGTG     | 60.527 | 20 | 206 | 2414 | 2619 |
| 59.405 | 20 TTACCACAGGCTTTTGGAGG     | 60.103 | 20 | 253 | 444  | 696  |
| 60.132 | 20 GGTGAGGTGGCTGCATTTAT     | 59.962 | 20 | 168 | 140  | 307  |
| 59.721 | 20 TTTAAAGGTCCCTCACCCGT     | 60.714 | 20 | 229 | 1562 | 1790 |
| 60.075 | 20 AAATACACAATTGAACCAACAATC | 59.589 | 25 | 120 | 618  | 737  |
| 59.988 | 20 ATGTCCGCTCATACTTTGGC     | 60.103 | 20 | 176 | 196  | 371  |
| 60.25  | 20 TCCCTCTCCTCACCACACTT     | 59.682 | 20 | 266 | 536  | 801  |
| 59.789 | 23 GGGCGAGCAATCTGTAAGTC     | 59.843 | 20 | 262 | 183  | 444  |
| 60.544 | 20 TCCATTCCGAAAATCAAAGG     | 59.872 | 20 | 271 | 49   | 319  |
| 60.44  | 20 ATTCATGTGCGAAAAGGAT      | 60.478 | 20 | 232 | 487  | 718  |
| 57.953 | 24 TGTGCAGGGTTGAATCTGAA     | 60.24  | 20 | 251 | 197  | 447  |
| 60.088 | 20 AACAAAACCAGGCACACACA     | 60.049 | 20 | 272 | 595  | 866  |
| 60.218 | 20 TTCAGACGAAGCGATCACAC     | 59.992 | 20 | 165 | 2    | 166  |
| 59.975 | 20 GGGCAGGTGGCTAATCACTA     | 60.096 | 20 | 139 | 1192 | 1330 |
| 59.989 | 20 TGCATGCTCACGCAAAGTAT     | 60.432 | 20 | 273 | 1895 | 2167 |
| 59.79  | 20 TCAAAATTGGGGAAATGACC     | 59.599 | 20 | 250 | 385  | 634  |
| 60.366 | 20 CCACGTGCTCCATACTTCCT     | 60.134 | 20 | 247 | 481  | 727  |
| 60.195 | 20 AAAGCCGACAGACAACAAGG     | 60.291 | 20 | 241 | 143  | 383  |
| 59.381 | 24 TCCGAAACAAAAGGGACAAA     | 60.452 | 20 | 167 | 38   | 204  |
| 58.836 | 22 CTCCATCCTCTTGCTTCGAG     | 60.088 | 20 | 219 | 1101 | 1319 |
| 60.204 | 20 ATGTGAAGAAGCTGCTGGCT     | 60.164 | 20 | 233 | 470  | 702  |
| 60.328 | 20 CCTACCTGCAATTGGACACA     | 59.566 | 20 | 262 | 4399 | 4660 |
| 59.935 | 20 AAATAGGCCCTTTTGCCTT      | 59.97  | 20 | 150 | 1671 | 1820 |
| 59.363 | 25 AAAAATGAGTGGTTCATATTGGTT | 57.968 | 24 | 134 | 719  | 852  |
| 59.691 | 20 CTTTAGGATCCCTTGTCCCA     | 58.978 | 20 | 226 | 268  | 493  |
| 58.215 | 20 CCCTTTGAAAGTTGATGGTTTT   | 59.39  | 22 | 266 | 202  | 467  |
| 60.074 | 20 TCGAGCAACATCTTGTGGG      | 60.823 | 19 | 135 | 839  | 973  |
| 59.748 | 20 TGAGATCACGAGGTCACGAG     | 59.98  | 20 | 192 | 437  | 628  |
| 60.882 | 20 GTTTTCAATCACAGCCACCC     | 60.362 | 20 | 127 | 170  | 296  |
| 58.475 | 20 CCAATTGTCCATATTTGCC      | 60.153 | 20 | 204 | 347  | 550  |
| 60.01  | 20 TTTGAGCACATTTTCTTCTCA    | 59.996 | 22 | 262 | 10   | 271  |
| 59.744 | 20 AGAGCATATCCAATGCCAGG     | 60.059 | 20 | 241 | 678  | 918  |
| 59.933 | 20 TGGAAAACAATGCCTAACAGC    | 60.124 | 21 | 247 | 143  | 389  |
| 59.377 | 20 TCCTACATTTTGGGGATTAACA   | 58.735 | 24 | 135 | 10   | 144  |
| 60.118 | 20 CCACTGCACCACGAGATATG     | 60.136 | 20 | 189 | 6    | 194  |
| 60.035 | 20 CATCACATTCTCCAGTCCCC     | 60.326 | 20 | 252 | 774  | 1025 |
| 59.092 | 25 TGCAGTCGATATTTGCTCCT     | 58.477 | 20 | 120 | 1    | 120  |
| 59.997 | 20 CCCTTCTTTCCACAGCAGTC     | 59.844 | 20 | 279 | 25   | 303  |

|        |    |                          |        |    |     |       |       |
|--------|----|--------------------------|--------|----|-----|-------|-------|
| 58.172 | 21 | TCTCGCGGTTTTTCAGTTTCT    | 59.993 | 20 | 208 | 212   | 419   |
| 60.949 | 20 | TGGCCTTCCTCAATCTATGG     | 60.029 | 20 | 146 | 2     | 147   |
| 60.991 | 20 | TTGCAATTGAGACCGCTAGA     | 59.566 | 20 | 249 | 365   | 613   |
| 59.544 | 23 | GAATGTTCAAGGCCATGGTT     | 59.797 | 20 | 227 | 133   | 359   |
| 59.172 | 21 | TCGATCACACAGAAAACACGA    | 60.294 | 21 | 101 | 14    | 114   |
| 60.073 | 20 | CTTCACTTCAAATGCCCCAT     | 59.933 | 20 | 275 | 2123  | 2397  |
| 58.161 | 22 | CGACCAATTACACAAATCAACC   | 59.248 | 22 | 280 | 95    | 374   |
| 59.805 | 20 | TGCGTTTTGACAATATATAGGTGT | 60.083 | 26 | 170 | 306   | 475   |
| 59.967 | 20 | GGCATGTGTGGGAGAAGAAA     | 61.046 | 20 | 171 | 7     | 177   |
| 60.126 | 20 | TGCCAGGGTTATCTTGATCC     | 59.894 | 20 | 279 | 90    | 368   |
| 59.935 | 20 | GGACAAGAGGTTGGGACAAA     | 59.943 | 20 | 122 | 170   | 291   |
| 59.91  | 20 | AACTTTGGCGTTCTTGTGCT     | 59.92  | 20 | 108 | 955   | 1062  |
| 60.043 | 20 | TGTTTTGGGGGTGTTGAGTTT    | 60.246 | 20 | 182 | 2717  | 2898  |
| 59.526 | 20 | TTTGCACCTGAGGAGGTGTT     | 60.69  | 20 | 131 | 1120  | 1250  |
| 57.733 | 24 | TCCATACTCAACACAAGTCGAA   | 58.283 | 22 | 280 | 367   | 646   |
| 59.181 | 21 | GTCCAGCTGCTCTCACACAA     | 60.187 | 20 | 173 | 3890  | 4062  |
| 60.082 | 20 | TTTTGATTGCCACATTTCCA     | 59.907 | 20 | 248 | 691   | 938   |
| 58.89  | 21 | ATAATGATATTTTGGAAACGCATC | 57.16  | 23 | 225 | 615   | 839   |
| 59.92  | 20 | TTCACGAGTGGTGACAAACG     | 60.757 | 20 | 191 | 277   | 467   |
| 60.274 | 20 | AATAAGGGTTTGGGCAGTCA     | 59.429 | 20 | 214 | 197   | 410   |
| 60.103 | 20 | CCATCAAGGAAAGACGCATT     | 60.074 | 20 | 208 | 386   | 593   |
| 60.081 | 21 | TCTGCCCTAAGATGAAACGG     | 60.206 | 20 | 178 | 99    | 276   |
| 59.82  | 20 | TGAATCAATCTTGTGCGTTGA    | 60.25  | 21 | 183 | 19    | 201   |
| 57.09  | 25 | TCGCCATAATTGACTGCAAA     | 60.215 | 20 | 108 | 18    | 125   |
| 60.162 | 20 | CTGCAGTGCCTTTGGTAGTG     | 59.51  | 20 | 225 | 141   | 365   |
| 59.931 | 20 | CACGTGGCATGATAATAGCG     | 60.118 | 20 | 213 | 390   | 602   |
| 59.005 | 24 | GATGATCGGAACGTGAAGCTA    | 60.228 | 21 | 210 | 686   | 895   |
| 60.344 | 20 | TCATCTTCTCCACCAAAGGAA    | 59.656 | 21 | 278 | 1231  | 1508  |
| 59.973 | 20 | GCACGCAGCGAATAACAGTA     | 60.044 | 20 | 177 | 1108  | 1284  |
| 60.11  | 20 | TGTTGAGACCAGGCGTACAG     | 59.897 | 20 | 216 | 180   | 395   |
| 60.553 | 20 | TATCATTGTTTCGCGAGCAG     | 59.976 | 20 | 242 | 206   | 447   |
| 59.942 | 20 | TTGATTAGAAAAATGCGCGA     | 59.424 | 20 | 175 | 97    | 271   |
| 60.237 | 20 | CAGCTGCAGAGATGGAATCA     | 60.096 | 20 | 254 | 489   | 742   |
| 60.218 | 20 | CGCGTTACGAATCCAAGTTT     | 60.131 | 20 | 177 | 344   | 520   |
| 59.28  | 20 | ACTCCATGGTGCATTTCA       | 59.967 | 20 | 264 | 4     | 267   |
| 60.209 | 20 | TGGGTCCTCCTGTTTAGTGAA    | 59.633 | 22 | 276 | 14872 | 15147 |
| 59.971 | 20 | TTGGCCATGTGAAAATCAGA     | 60.049 | 20 | 205 | 175   | 379   |
| 60.822 | 20 | GCTCGGATATGTGGTAATCAAA   | 58.969 | 22 | 270 | 226   | 495   |
| 59.871 | 20 | CGAATTCAGCCAGAACAACA     | 59.84  | 20 | 171 | 20    | 190   |
| 59.666 | 21 | GGCCTAGGCACCAAATCTTA     | 59.182 | 20 | 188 | 1590  | 1777  |
| 59.96  | 20 | ACCCACACCCTGTACCCATA     | 59.966 | 20 | 172 | 13    | 184   |
| 60.002 | 20 | CACCATAACAAGCATTACGCG    | 60.28  | 20 | 253 | 284   | 536   |
| 59.978 | 20 | CTTTCAATCGTTGATGGGGT     | 59.79  | 20 | 255 | 1153  | 1407  |
| 59.788 | 23 | TGATGCAACCTTGCTCACTC     | 59.992 | 20 | 265 | 1459  | 1723  |
| 60.168 | 22 | TGGTTTTATGTTTCTTTGGGA    | 59.865 | 23 | 248 | 1531  | 1778  |
| 60.475 | 20 | AGAGATGCCGGGGAAGTAAT     | 59.925 | 20 | 227 | 144   | 370   |
| 60.073 | 20 | TCTGTGAATCAAGCTCAAGCA    | 59.731 | 21 | 252 | 135   | 386   |
| 60.318 | 20 | TTTCTCTCTTTTGGTGGAAAGAAA | 59.398 | 23 | 257 | 213   | 469   |
| 59.711 | 20 | ACTGTGAAAGAGACCTCCGC     | 59.455 | 20 | 250 | 1095  | 1344  |
| 60.073 | 20 | TATGGATCTTTGGCAGGTCCG    | 60.992 | 20 | 240 | 195   | 434   |
| 59.941 | 20 | TGGGAGTCTGTTTTCCATC      | 59.903 | 20 | 100 | 178   | 277   |
| 60.24  | 20 | CCCTCATAATGTGTGGCTCA     | 59.522 | 20 | 271 | 63    | 333   |
| 59.898 | 20 | GGAATCTAGAACAGACCAATCCC  | 60.196 | 23 | 179 | 1339  | 1517  |
| 59.297 | 22 | TGAGTCCATGACCCAATTTT     | 59.439 | 21 | 175 | 753   | 927   |
| 60.051 | 20 | AGAGATCCGTGCTTCACTTG     | 58.029 | 20 | 133 | 1469  | 1601  |
| 59.862 | 20 | AAGGCGGCTAAATCAATCAA     | 59.682 | 20 | 268 | 283   | 550   |
| 59.064 | 20 | CCTTGCACATTATCTGGAACAA   | 59.996 | 22 | 263 | 211   | 473   |
| 58.782 | 20 | TTTCCCAAGCTTCCCTACAC     | 59.17  | 20 | 275 | 465   | 739   |

|        |    |                          |        |    |     |      |      |
|--------|----|--------------------------|--------|----|-----|------|------|
| 59.953 | 20 | ACGCACCCACACTGTCAATA     | 60.032 | 20 | 135 | 60   | 194  |
| 58.054 | 22 | GTGCGTTGTGTTGACGTTG      | 59.768 | 19 | 271 | 2325 | 2595 |
| 60.081 | 20 | TTAGCATTTGACTACACTCCTCAA | 58.151 | 24 | 186 | 272  | 457  |
| 59.914 | 20 | TGCTGGAGCAGTCATTTTTG     | 59.988 | 20 | 140 | 1043 | 1182 |
| 59.269 | 20 | TCCCGAAAATAAAAAGAAAAAGA  | 59.552 | 24 | 111 | 339  | 449  |
| 59.985 | 21 | GATAACATGCCATCACACGC     | 59.963 | 20 | 269 | 873  | 1141 |
| 60.074 | 20 | GGCTACTTGGCCCCTATGA      | 60.044 | 19 | 272 | 199  | 470  |
| 58.223 | 23 | TGAACAGCCATCGAGCATAG     | 59.972 | 20 | 259 | 1211 | 1469 |
| 59.887 | 20 | TCGGGTTAGGAATTTTCATCG    | 59.894 | 20 | 272 | 1284 | 1555 |
| 59.842 | 20 | TGTGATTTTCATCCATTCGGA    | 59.859 | 20 | 227 | 262  | 488  |
| 60.64  | 20 | CACACAATTGAGCACACACG     | 59.778 | 20 | 103 | 182  | 284  |
| 59.636 | 20 | CCATCCACCACCGTCTACTT     | 59.844 | 20 | 252 | 72   | 323  |
| 58.976 | 22 | ATGCGCAGATCTAATGGTCC     | 60.066 | 20 | 198 | 9    | 206  |
| 59.302 | 21 | GGGTTTGCCTTTAGCCTCAT     | 60.451 | 20 | 239 | 131  | 369  |
| 60.43  | 20 | TGGCCCTTTTGTACACTTCA     | 59.17  | 20 | 132 | 316  | 447  |
| 60.488 | 20 | GTGCAGCACTAGGTCCATTG     | 59.318 | 20 | 277 | 127  | 403  |
| 59.587 | 22 | ACGGGAGGTTAAAAATCGCT     | 59.966 | 20 | 193 | 24   | 216  |
| 59.814 | 20 | GCCGCATTTCTTCTAACCCCT    | 60.582 | 20 | 235 | 950  | 1184 |
| 58.474 | 21 | AATATTTGCATGGCTCTGGG     | 59.923 | 20 | 274 | 1266 | 1539 |
| 59.973 | 20 | GGGGCGTATAGACGCAAATA     | 59.95  | 20 | 168 | 638  | 805  |
| 59.912 | 23 | GGCATCTTGAATCACCCAGT     | 59.934 | 20 | 172 | 1201 | 1372 |
| 60.31  | 20 | TGGGGTTATTAGTGGATCAAGC   | 60.204 | 22 | 274 | 872  | 1145 |
| 59.255 | 22 | TGCACCTCCTCTTCAACAAC     | 59.899 | 21 | 257 | 1022 | 1278 |
| 60.025 | 21 | TGTTGCGCGTGCTTTAAATA     | 60.401 | 20 | 139 | 349  | 487  |
| 60.659 | 21 | GAGCAAAGTGTGAACCTCTCGAT  | 59.942 | 23 | 121 | 7    | 127  |
| 60.088 | 20 | AGAGAGAAAGTGGCAGTGGG     | 59.45  | 20 | 275 | 13   | 287  |
| 59.962 | 20 | TCGCCGTGTTTGTATTCTTG     | 59.729 | 20 | 256 | 816  | 1071 |
| 59.989 | 20 | AAACGCGCATTTTTAGGATTT    | 59.986 | 21 | 274 | 356  | 629  |
| 60.723 | 20 | TCAGCTCGGGAAGAAAAC       | 59.55  | 20 | 164 | 609  | 772  |
| 60.12  | 20 | CGCTATGTGACCATCTGTGG     | 60.136 | 20 | 191 | 5217 | 5407 |
| 57.546 | 24 | GTGCGTTCCACGTTAGGTTT     | 60.037 | 20 | 260 | 54   | 313  |
| 60.674 | 21 | CGATTGAATTGGTGGGTTTC     | 60.17  | 20 | 170 | 78   | 247  |
| 59.827 | 20 | TTTCTTCTCCCTCCCTCCAT     | 60.008 | 20 | 239 | 1548 | 1786 |
| 59.851 | 24 | GTTAGGGCAATCAAGCAAGG     | 59.708 | 20 | 138 | 163  | 300  |
| 59.875 | 20 | GGGCAAACTGTAATTGCTCA     | 60.124 | 21 | 256 | 4053 | 4308 |
| 60.292 | 21 | CACGAGATTTACGTGGTTTCG    | 59.195 | 20 | 108 | 132  | 239  |
| 60.261 | 20 | CATGGAATTGAAACTTTTCGGA   | 59.924 | 21 | 156 | 16   | 171  |
| 60.604 | 20 | CCTAGTGGCTTCCCACTAAA     | 60.48  | 21 | 252 | 351  | 602  |
| 60.074 | 20 | CGAACCATCGTCTCGTATCA     | 59.673 | 20 | 169 | 289  | 457  |
| 59.848 | 24 | GGGGAATGGAAGAATGAGGT     | 60.133 | 20 | 244 | 1032 | 1275 |
| 59.311 | 23 | TTGGCAAATTTTCTTGCACA     | 60.229 | 20 | 158 | 1028 | 1185 |
| 59.939 | 20 | TATTGAACTGCCTTTCGCCT     | 59.845 | 20 | 193 | 113  | 305  |
| 59.542 | 20 | AAACAGACTCCCATGTTTCGC    | 60.119 | 20 | 280 | 153  | 432  |
| 59.933 | 20 | AAGGGCTTTGTTGGTTTGTG     | 60.008 | 20 | 272 | 1049 | 1320 |
| 59.872 | 20 | TTCATTCTTTGCATCCCTCC     | 60.014 | 20 | 111 | 3811 | 3921 |
| 60.05  | 20 | GTGGTTCGGAGAGTTGAGAGC    | 59.993 | 20 | 214 | 382  | 595  |
| 59.985 | 20 | ACTCGAGCTGCAAAAACCAT     | 59.882 | 20 | 268 | 168  | 435  |
| 60.486 | 20 | GCTTCCGCATTTTCTTTTTG     | 59.832 | 20 | 270 | 992  | 1261 |
| 59.853 | 20 | CAAAACCTGACACGAACACG     | 60.19  | 20 | 271 | 850  | 1120 |
| 60.498 | 20 | CTGAGGATAAAGGTGGCGAA     | 60.206 | 20 | 171 | 43   | 213  |
| 60.504 | 20 | CCGAAAACACCATCAATCT      | 59.79  | 20 | 279 | 581  | 859  |
| 59.521 | 20 | CTCTCAGGGGCAGATACAGG     | 59.82  | 20 | 136 | 252  | 387  |
| 59.934 | 20 | TGCAGTTGGTGGTAACCTCA     | 60.152 | 20 | 154 | 602  | 755  |
| 59.899 | 21 | TGTTCTCGTATGATTACGCTCC   | 59.252 | 22 | 269 | 1024 | 1292 |
| 60.005 | 20 | AGCAAGAAACCAGAGGCAAA     | 59.993 | 20 | 183 | 156  | 338  |
| 60.153 | 20 | TTGTTATTGAGAGGGCAGGC     | 60.214 | 20 | 168 | 61   | 228  |
| 60.202 | 22 | GATTGATGAGGGTTCCAAGC     | 59.488 | 20 | 253 | 94   | 346  |
| 57.278 | 21 | TTATGCTGCCGTGTGTTTGT     | 60.18  | 20 | 228 | 0    | 227  |

|        |    |                         |        |    |     |      |      |
|--------|----|-------------------------|--------|----|-----|------|------|
| 59.375 | 20 | CACACCTAGTGTGCTATCATCAA | 59.223 | 24 | 209 | 75   | 283  |
| 60.065 | 20 | ATTTCCCGGAGAGGAGAAAA    | 60.011 | 20 | 210 | 1061 | 1270 |
| 60.146 | 20 | CCAAATTGCCCTTCTGTGT     | 59.971 | 20 | 265 | 454  | 718  |
| 58.658 | 21 | CCAAGATTTGATCATGGCGT    | 60.864 | 20 | 272 | 584  | 855  |
| 59.089 | 24 | ATAACATAATGGTTGGCGGC    | 59.688 | 20 | 125 | 19   | 143  |
| 60.051 | 20 | AACCGTAAGGTAGATCCGGC    | 60.34  | 20 | 211 | 503  | 713  |
| 60.058 | 20 | GTATTCGCTCTGCCACAACA    | 59.871 | 20 | 249 | 2574 | 2822 |
| 60.05  | 20 | TACTCCTGCTCAACCTGGTG    | 58.879 | 20 | 132 | 378  | 509  |
| 59.955 | 20 | CCACACCCTCTTCCTCTGAA    | 60.229 | 20 | 167 | 416  | 582  |
| 60.066 | 20 | ACCAGCCTAGGGTTGAGGTT    | 59.994 | 20 | 250 | 1437 | 1686 |
| 59.049 | 21 | TGTAAATCTGCCGAAAACC     | 59.938 | 20 | 167 | 36   | 202  |
| 59.848 | 20 | GGTAAACATTTAGCGGAGGC    | 59.713 | 20 | 185 | 0    | 184  |
| 59.93  | 19 | AGGTTAATGAACGCAACCCA    | 60.365 | 20 | 119 | 66   | 184  |
| 60.73  | 20 | CGTCCATAAAAATGTGACCA    | 59.247 | 20 | 241 | 824  | 1064 |
| 59.43  | 20 | TGGTGTACAGTAAGAGGCAAACA | 59.724 | 23 | 239 | 664  | 902  |
| 58.671 | 20 | AAATCCTGCAATCATCACCC    | 59.756 | 20 | 234 | 259  | 492  |
| 60.036 | 20 | ACGAAATGAGGAAATCGACG    | 60.074 | 20 | 254 | 67   | 320  |
| 59.691 | 20 | ACCCGGACAATGAGCAATAA    | 60.331 | 20 | 199 | 276  | 474  |
| 59.883 | 20 | TAATCCTCGTGGAAAATCGG    | 59.894 | 20 | 205 | 411  | 615  |
| 61.071 | 20 | TGAACCAAACACCCGTGATA    | 59.816 | 20 | 244 | 87   | 330  |
| 60.032 | 20 | TGAAATAAACATTGCCACCG    | 59.42  | 20 | 274 | 995  | 1268 |
| 60.042 | 20 | CAAATCATGTGCGCTGAAAT    | 59.694 | 20 | 266 | 5404 | 5669 |
| 60.066 | 20 | AGTTTGGTTCTGGCTCATGG    | 60.111 | 20 | 197 | 138  | 334  |
| 59.973 | 20 | GTCAAAGTCGACCACCCTTGT   | 60.009 | 20 | 123 | 30   | 152  |
| 59.452 | 20 | TTACGAGGAGCAAGGTCGAT    | 59.836 | 20 | 191 | 385  | 575  |
| 59.985 | 21 | CCAATTTGAATGGTTATCACCTG | 60.457 | 23 | 272 | 1210 | 1481 |
| 60.103 | 20 | ACGAGATGTGGAAGCCATTG    | 61.067 | 20 | 158 | 270  | 427  |
| 59.979 | 20 | TCCTTCCCTGCATTTTCATTC   | 60.014 | 20 | 214 | 1958 | 2171 |
| 60.005 | 21 | TCATTTCAAAAATCAATGGATGA | 59.291 | 23 | 193 | 2372 | 2564 |
| 59.917 | 20 | GTTTTGTAGCTCTCGTCGGC    | 60.022 | 20 | 249 | 995  | 1243 |
| 60.252 | 20 | TTCTTGGTTAGCTGGTCTGGA   | 59.861 | 21 | 224 | 1899 | 2122 |
| 59.931 | 20 | TTTTGAACAATGATACCTTCTCC | 57.314 | 23 | 215 | 36   | 250  |
| 58.694 | 22 | TCATGGTGCTTGAAATTGGA    | 60.049 | 20 | 169 | 13   | 181  |
| 60.292 | 21 | AGTTATGCTTGGACCGGTTG    | 59.993 | 20 | 277 | 146  | 422  |
| 59.764 | 20 | GCTACGAACTACGGGGTGAA    | 60.132 | 20 | 259 | 82   | 340  |
| 60.698 | 20 | GATTGGGATGGGCTAGGAAG    | 60.787 | 20 | 280 | 7    | 286  |
| 60.011 | 20 | CTTACCACCATTACCCACCC    | 60.088 | 20 | 240 | 718  | 957  |
| 59.645 | 20 | TACCAATGCCACAAAACGA     | 59.969 | 20 | 254 | 79   | 332  |
| 60.533 | 20 | GCATCACAAATTCCTGCAA     | 59.67  | 20 | 276 | 185  | 460  |
| 59.867 | 21 | CAGCTCTCATTATTTCCGGC    | 59.807 | 20 | 203 | 914  | 1116 |
| 59.585 | 20 | GAGTGGAACCTCGTCTTCCTCAG | 60.427 | 22 | 217 | 776  | 992  |
| 59.111 | 20 | TCACGATCGAACCACGTAAA    | 60.111 | 20 | 165 | 1440 | 1604 |
| 57.827 | 21 | ACCTCTTTTCGGTTTGATGG    | 59.028 | 20 | 164 | 232  | 395  |
| 59.277 | 22 | CGAATGATCTGGTGATGGTG    | 59.918 | 20 | 202 | 178  | 379  |
| 59.713 | 20 | CAATGGATTAGGCCGAAAGA    | 60.031 | 20 | 177 | 1115 | 1291 |
| 59.871 | 20 | ACCTGGTCTCCAAGTGATGG    | 59.962 | 20 | 243 | 2463 | 2705 |
| 60.038 | 20 | GGGAATCAAACCATTCCCT     | 59.996 | 20 | 280 | 393  | 672  |
| 59.809 | 21 | GCCTGCCTTGAAACTATTG     | 59.708 | 20 | 274 | 117  | 390  |
| 59.813 | 20 | AAACTTGCGGGAATGAGTTG    | 60.11  | 20 | 228 | 637  | 864  |
| 59.951 | 20 | GCTGCAGATCTAACGACCAA    | 59.028 | 20 | 130 | 368  | 497  |
| 59.679 | 20 | TGGTAAGCGATTAACGGTCC    | 59.96  | 20 | 273 | 384  | 656  |
| 60.31  | 20 | TTAGACGTGAATTGCAAGCG    | 60.014 | 20 | 272 | 181  | 452  |
| 59.994 | 20 | AGGCCATCATACCACAGTC     | 59.81  | 20 | 201 | 921  | 1121 |
| 59.998 | 20 | CATTTTGTGGCCTGTGTTTG    | 60.004 | 20 | 206 | 2212 | 2417 |
| 59.934 | 20 | GAGCTACCGGTTCTTTTGA     | 60.375 | 20 | 184 | 134  | 317  |
| 60.015 | 20 | CAACGATGTGCTAGTTGTGGA   | 59.773 | 21 | 221 | 4    | 224  |
| 60.051 | 20 | AACACAAAAGGGCTCATTCC    | 59.031 | 20 | 221 | 93   | 313  |
| 59.95  | 20 | AGAAGAGAGAGGGAGGGTCCG   | 59.945 | 20 | 251 | 480  | 730  |

|        |                              |        |    |     |      |      |
|--------|------------------------------|--------|----|-----|------|------|
| 60.066 | 20 TTACGGCAATTTGCATCAGA      | 60.215 | 20 | 139 | 356  | 494  |
| 60.153 | 20 ACTTTTCACGGACTGCCAAC      | 60.156 | 20 | 132 | 1996 | 2127 |
| 59.895 | 20 GCCGGACTTGAAAATTGAAA      | 60.053 | 20 | 266 | 974  | 1239 |
| 60.34  | 20 TTGTCCTTTTGGGAACCAAG      | 59.942 | 20 | 226 | 471  | 696  |
| 57.662 | 20 TCACACACACGCACAAAGAA      | 59.912 | 20 | 107 | 74   | 180  |
| 57.628 | 22 GTTCGCCAAGAACTTACCG       | 59.747 | 20 | 258 | 691  | 948  |
| 59.84  | 20 TGAAAAATGACGCCAAAATG      | 59.538 | 20 | 154 | 134  | 287  |
| 59.939 | 20 TCGAGTGGGACCAAAAGAAC      | 60.088 | 20 | 219 | 624  | 842  |
| 59.853 | 20 TGCAAGCATCAAAAATGGAG      | 59.809 | 20 | 216 | 759  | 974  |
| 59.191 | 27 ACCAAGTCATACATCATGTTATCT  | 58.868 | 27 | 222 | 2    | 223  |
| 59.99  | 20 TTCTCACAGGATTTAGGTGTTCC   | 59.513 | 23 | 246 | 2    | 247  |
| 60.504 | 20 CTCGATGAGGAATGGGAAGA      | 60.15  | 20 | 278 | 69   | 346  |
| 60.523 | 20 TTTGTGTGATTTTGACCCCA      | 59.792 | 20 | 280 | 122  | 401  |
| 58.065 | 25 ATGGCGATATTGAAATGGGA      | 60.117 | 20 | 171 | 4    | 174  |
| 60.003 | 20 CTATCGTTTTCTCCGCCTTG      | 59.839 | 20 | 199 | 326  | 524  |
| 59.969 | 21 AAAACCGAACCAGGTCGTTA      | 59.471 | 20 | 225 | 231  | 455  |
| 59.654 | 23 ACGATTGTTTTGAATTCGCC      | 59.945 | 20 | 216 | 12   | 227  |
| 60.042 | 20 GTTGCTTCTTTAACGCTGGC      | 60.025 | 20 | 268 | 1016 | 1283 |
| 59.933 | 20 TGCATAACAACACGCAATGA      | 59.716 | 20 | 144 | 2397 | 2540 |
| 58.928 | 21 TTCGGAATTTATAATATGGGCA    | 58.4   | 22 | 276 | 99   | 374  |
| 58.836 | 24 GCTCGTGTGTTACAGGGGAT      | 59.997 | 20 | 249 | 703  | 951  |
| 59.03  | 27 AAATATGCCACCTATTGCCG      | 59.816 | 20 | 263 | 15   | 277  |
| 57.817 | 25 GGGTGGTGATATCTCCCTGA      | 59.737 | 20 | 270 | 19   | 288  |
| 59.901 | 20 ACGGCCCTTTCTCTTGAGTT      | 60.247 | 20 | 279 | 68   | 346  |
| 60.137 | 21 ACCATGGCGTGCAAGAGTAT      | 60.547 | 20 | 220 | 169  | 388  |
| 60.486 | 20 AATTAGTTGAGGCACGTGGG      | 59.993 | 20 | 233 | 207  | 439  |
| 60.235 | 20 TTTGCATCAAACATGGCTTC      | 59.67  | 20 | 253 | 1226 | 1478 |
| 59.901 | 20 TTGCGACTCAACACCAGAAC      | 59.88  | 20 | 196 | 454  | 649  |
| 57.557 | 25 TTCGATCTTCTTTCCTTTCCA     | 58.89  | 21 | 104 | 8    | 111  |
| 60.523 | 20 GTACAGGGTTCTCCAACCGA      | 59.966 | 20 | 177 | 138  | 314  |
| 59.96  | 20 GGTGGCCATTGATAGGAGAA      | 59.894 | 20 | 204 | 5491 | 5694 |
| 60.615 | 20 AAAAAGGGATTATCACGGGG      | 60.013 | 20 | 245 | 892  | 1136 |
| 59.367 | 20 GCGTTTTGGTGGATGAATTT      | 59.807 | 20 | 279 | 471  | 749  |
| 59.912 | 20 GCCATGCTCTATGGCAAAC       | 60.243 | 20 | 111 | 1149 | 1259 |
| 59.957 | 20 GGATTTTGATGTATGAGTTTGCAT  | 59.297 | 24 | 235 | 492  | 726  |
| 57.604 | 24 ATCAATCACAACCCCGTCAT      | 60.057 | 20 | 188 | 0    | 187  |
| 60.088 | 20 GGGTCGGGCTAATAGGCTAC      | 59.951 | 20 | 167 | 212  | 378  |
| 59.795 | 20 TCATATGGGTTGGTGTGTC       | 59.682 | 21 | 178 | 183  | 360  |
| 59.295 | 23 TGTGTTTTCAAAGCCTAGACA     | 57.63  | 22 | 227 | 217  | 443  |
| 59.823 | 20 AGATCGCGGGCAAGTAGTTA      | 59.867 | 20 | 106 | 9    | 114  |
| 59.478 | 20 CCTCAGCAAAATGCAGTTGA      | 59.988 | 20 | 100 | 197  | 296  |
| 60.591 | 20 CTCACTAACTCGCACCACGA      | 60.049 | 20 | 264 | 101  | 364  |
| 59.888 | 20 TTTTGGAGGAGGCAAAGAAA      | 59.795 | 20 | 208 | 512  | 719  |
| 58.461 | 23 TGTAATAACCCTTATTTTCGTGCTC | 59.834 | 25 | 265 | 69   | 333  |
| 60.252 | 20 TACAAAGTCGCCGAAAAC        | 59.747 | 20 | 143 | 482  | 624  |
| 59.964 | 19 TCAAACCTCTTCCATCACCC      | 59.903 | 20 | 272 | 2135 | 2406 |
| 59.964 | 20 TTGCCAAATGGTGTAAATGTCA    | 59.841 | 21 | 207 | 429  | 635  |
| 60.132 | 20 TTGACTCACAACACACGCA       | 59.912 | 20 | 213 | 374  | 586  |
| 57.14  | 22 TCAAGGTGTTGATGCTTGGA      | 60.24  | 20 | 201 | 5    | 205  |
| 59.64  | 20 TGTGAGAGACGTCGTGTGTG      | 59.454 | 20 | 226 | 485  | 710  |
| 60.06  | 20 GCAAGAGCTTAGAACGGGTG      | 60.015 | 20 | 159 | 3004 | 3162 |
| 60.192 | 20 GTACGGCTGAGCCTGATTG       | 59.41  | 19 | 191 | 676  | 866  |
| 60.352 | 20 TTGGACAGGCTCCTTTATTTG     | 59.211 | 21 | 279 | 409  | 687  |
| 60.306 | 20 CCAGACATTTGTGGTGGATG      | 59.806 | 20 | 187 | 185  | 371  |
| 60.032 | 20 GTTGGGGTTGAGTTGTGCTT      | 60.012 | 20 | 194 | 570  | 763  |
| 59.836 | 20 ATTAATCCGATGGCCCTCAT      | 60.499 | 20 | 208 | 618  | 825  |
| 59.955 | 20 TCTAGGAAAGGGCGAATCAA      | 59.778 | 20 | 252 | 214  | 465  |
| 59.215 | 20 TGTTTTCTTTTACCTGTATTCAAGA | 58.442 | 27 | 250 | 225  | 474  |

|        |    |                           |        |    |     |      |      |
|--------|----|---------------------------|--------|----|-----|------|------|
| 60.065 | 20 | CGCCATAGCTTCTTGGTCTC      | 59.978 | 20 | 143 | 197  | 339  |
| 60.21  | 20 | GAAAAGGGGAGGATCGGTTA      | 60.258 | 20 | 156 | 355  | 510  |
| 59.964 | 20 | CGGATCACCAGATCCGATAG      | 60.439 | 20 | 202 | 520  | 721  |
| 60.263 | 20 | TGAAAGAATATGAGTTTGAACGG/  | 60.004 | 24 | 189 | 100  | 288  |
| 59.123 | 20 | CCAACCAAATCCGGTACTG       | 60.22  | 20 | 266 | 62   | 327  |
| 60.011 | 21 | AGGCCTTGCTCTCTCTGTTG      | 59.745 | 20 | 278 | 63   | 340  |
| 59.982 | 20 | TTTCTGGACCACTTTCTGGG      | 60.081 | 20 | 169 | 4    | 172  |
| 60.132 | 20 | TTCGGGGTGAGAACTAGGAA      | 59.665 | 20 | 275 | 1291 | 1565 |
| 60.011 | 20 | TGAGTTGGTGTGTTGGCATT      | 60.008 | 20 | 164 | 394  | 557  |
| 59.647 | 20 | CGGTTGACAGCCGATTTTAT      | 59.96  | 20 | 280 | 557  | 836  |
| 59.894 | 20 | TGGAGCATTAAATTTGGAGGG     | 59.894 | 20 | 124 | 649  | 772  |
| 59.962 | 20 | TGCTCAAGTTCTTGCCATTG      | 59.988 | 20 | 215 | 554  | 768  |
| 59.997 | 20 | CCATCATCGTCCACATCTTG      | 59.918 | 20 | 270 | 659  | 928  |
| 60.244 | 20 | GGTAGCCTGCTGATGCAAAT      | 60.243 | 20 | 250 | 121  | 370  |
| 60.511 | 20 | TGTCAAATATGGGCATCCA       | 59.745 | 20 | 276 | 611  | 886  |
| 59.993 | 20 | GAAAGTTTGGGGTGGGTTTT      | 60.068 | 20 | 206 | 961  | 1166 |
| 57.824 | 20 | TTTCATATATCACGTTAAGACATG/ | 57.297 | 25 | 234 | 410  | 643  |
| 60.142 | 20 | CCAAACGTATATGCCCTGGT      | 59.708 | 20 | 159 | 159  | 317  |
| 58.187 | 20 | GCGTCGTTTCTTGAATTAGGG     | 60.962 | 21 | 206 | 1271 | 1476 |
| 60.053 | 20 | ACAATACACGCCACACAAGC      | 59.646 | 20 | 220 | 1279 | 1498 |
| 60.008 | 20 | AGCATTAAATGGTGCCCAAAT     | 59.301 | 20 | 245 | 228  | 472  |
| 59.901 | 20 | GCGTTTTGATGATATATATGTGTTT | 59.956 | 27 | 198 | 971  | 1168 |
| 59.986 | 20 | TAAGATCAAGGGCAACCTCG      | 60.206 | 20 | 244 | 2961 | 3204 |
| 60.964 | 20 | TGAGAAAAGGTTGTACATGGCA    | 60.534 | 22 | 221 | 72   | 292  |
| 59.851 | 20 | ATGTCCAAAGCTGGCAGAGT      | 59.874 | 20 | 137 | 576  | 712  |
| 59.923 | 20 | ATGCATGCACGTGAATATGG      | 60.375 | 20 | 140 | 321  | 460  |
| 60.617 | 20 | TTTTCATGTTTTGGAGCATCA     | 59.147 | 21 | 241 | 301  | 541  |
| 59.478 | 20 | TCCCACCATTACATCTTGA       | 59.893 | 20 | 255 | 482  | 736  |
| 59.916 | 20 | GCATTCAAGATTCTGCCCAT      | 60.043 | 20 | 255 | 1550 | 1804 |
| 60.05  | 20 | GGTTATCACCTGATTTCTCTCC    | 60.901 | 22 | 210 | 595  | 804  |
| 57.425 | 21 | AATCCTTATGCCCCAATTC       | 59.984 | 20 | 234 | 12   | 245  |
| 60.451 | 20 | ACCCGGGTTTCGAAGTAGAC      | 60.361 | 20 | 190 | 1396 | 1585 |
| 59.688 | 24 | TCCTTGCCAACAAGATAGTGC     | 60.264 | 21 | 248 | 2581 | 2828 |
| 60.646 | 20 | CATTCGTTTTACTGGACA        | 59.541 | 20 | 276 | 45   | 320  |
| 60.074 | 20 | TCGAAGGATGTGTTTCATTGTG    | 59.556 | 21 | 260 | 1898 | 2157 |
| 59.937 | 20 | AGTTGGGACGGAGGGAGTAT      | 59.817 | 20 | 142 | 339  | 480  |
| 59.966 | 20 | GCACCATAAAGTTCAACGAACA    | 60.039 | 22 | 211 | 318  | 528  |
| 60.11  | 20 | CAACAGGTCTACCAATCCA       | 59.52  | 20 | 272 | 836  | 1107 |
| 58.642 | 20 | TGACGAGTTAGAATGGCAAAGA    | 59.883 | 22 | 107 | 13   | 119  |
| 59.621 | 20 | TCCAAGCTGACCAGTGTCTG      | 60.022 | 20 | 173 | 3756 | 3928 |
| 61.031 | 20 | GCTGATCTTGGCCATGCTAT      | 60.207 | 20 | 172 | 38   | 209  |
| 59.598 | 20 | TGCATATATTAGGGGAAAAATAA/  | 58.877 | 27 | 277 | 896  | 1172 |
| 60.209 | 22 | TCCTTTAACAAATTGGTGTAGTCA, | 59.056 | 25 | 195 | 216  | 410  |
| 60.443 | 20 | TTGTGAATCGCCCAAATACA      | 59.93  | 20 | 222 | 802  | 1023 |
| 59.819 | 22 | TGAGAGGTCTAGGGTTCGGA      | 59.797 | 20 | 243 | 642  | 884  |
| 59.786 | 25 | CATCCGCCTGAGATTTTCAT      | 60.036 | 20 | 119 | 3    | 121  |
| 59.943 | 20 | AAATGTGGATAGCAGAGGCG      | 60.235 | 20 | 164 | 47   | 210  |
| 60.151 | 20 | GTCCACGGTGGTTTGAGAGT      | 60.009 | 20 | 151 | 41   | 191  |
| 57.162 | 22 | TGTATGACATTTGGCTCCGA      | 60.073 | 20 | 227 | 499  | 725  |
| 60.011 | 20 | AATCCAGCCATGTAGGTGC       | 59.962 | 20 | 241 | 756  | 996  |
| 60.181 | 20 | ACCCGATAATACCATAAAAAGCA   | 57.629 | 22 | 265 | 1163 | 1427 |
| 60.05  | 20 | TGCCACTAATCTGTAAAGGG      | 59.098 | 21 | 184 | 927  | 1110 |
| 59.429 | 20 | GCGGTAGGTAGCTCTTGTCG      | 60.037 | 20 | 201 | 170  | 370  |
| 59.848 | 20 | TCCGTGAACCGTTCTTCTTC      | 60.232 | 20 | 233 | 476  | 708  |
| 59.823 | 20 | GATTGTAATCGGGCAAGGA       | 59.901 | 20 | 273 | 1558 | 1830 |
| 58.253 | 20 | TCCGTTCAATCAACGAGGTT      | 60.495 | 20 | 280 | 50   | 329  |
| 60.278 | 20 | AATTCGGGTACCATCGACAG      | 59.813 | 20 | 221 | 719  | 939  |
| 59.813 | 20 | TCGAAAAACTCCTGAGTGAA      | 59.838 | 21 | 182 | 380  | 561  |



|        |    |                           |        |    |     |      |      |
|--------|----|---------------------------|--------|----|-----|------|------|
| 60.66  | 20 | TGTGGTGTGACGGTGATTC       | 60.426 | 20 | 172 | 130  | 301  |
| 60.044 | 20 | CCTGTAGCCATGTGATTGTTG     | 59.061 | 21 | 258 | 413  | 670  |
| 57.477 | 26 | GGGAACATGCTTCCTGAAAA      | 60.051 | 20 | 158 | 7    | 164  |
| 59.907 | 20 | CGTTCTTTCTGATTCGCCTC      | 59.955 | 20 | 149 | 484  | 632  |
| 58.694 | 20 | TGGGCAATACGTGGTTTAGG      | 60.742 | 20 | 277 | 97   | 373  |
| 59.817 | 20 | GAAGAGCAGGGGTGTCTTTG      | 59.844 | 20 | 268 | 207  | 474  |
| 60.304 | 20 | TGCTAAATCTGCTCTGGCAA      | 59.712 | 20 | 244 | 755  | 998  |
| 60.032 | 20 | TCATTCCCAGAAATCCTTCA      | 60.538 | 20 | 169 | 792  | 960  |
| 60.21  | 20 | GCAAAAGGTTTGAAGTCCTGA     | 59.345 | 21 | 232 | 900  | 1131 |
| 59.636 | 20 | ATCCCAAGTGGGTTTTTGTG      | 59.688 | 20 | 156 | 16   | 171  |
| 60.827 | 20 | CATTAAATCTCATACCCTCAGTTT  | 57.435 | 25 | 249 | 224  | 472  |
| 60.133 | 20 | ATCAAGAGCACGGTGGTTTC      | 60.119 | 20 | 224 | 210  | 433  |
| 60.119 | 20 | TCACTCCATCTTCACACCCA      | 60.088 | 20 | 195 | 2614 | 2808 |
| 59.875 | 20 | GCGCCGATAGACGATAAAAA      | 60.192 | 20 | 151 | 1180 | 1330 |
| 59.817 | 20 | GCGGGGAAAAATAGGAAGAA      | 60.381 | 20 | 178 | 176  | 353  |
| 59.224 | 20 | TTCTCAATTTCTTCCACCC       | 58.956 | 20 | 236 | 164  | 399  |
| 59.272 | 20 | GACTTTCCAAGCATCCAACC      | 59.532 | 20 | 280 | 59   | 338  |
| 59.933 | 22 | TACTTTTCGCATCCGACTCC      | 60.214 | 20 | 114 | 2873 | 2986 |
| 60.119 | 20 | TCTCGGTGAGCGAGTAGGTT      | 60.012 | 20 | 232 | 6    | 237  |
| 59.924 | 20 | GGTTTTGACCATATTTACTGTTTTG | 59.631 | 26 | 117 | 439  | 555  |
| 60.448 | 20 | TTAGTTAGTACCGATTTCAAGGTT  | 57.499 | 24 | 153 | 1177 | 1329 |
| 59.179 | 20 | GAGAACGTGAAAGCCAAAGC      | 60     | 20 | 187 | 9    | 195  |
| 60.081 | 20 | TTTGACCTTTAAGGCCGATG      | 60.067 | 20 | 254 | 782  | 1035 |
| 59.84  | 20 | TTGTTCTTTGGTTGCAGGAA      | 59.293 | 20 | 201 | 2802 | 3002 |
| 59.664 | 20 | TGCCAGTGTCTCAATCCTCA      | 60.402 | 20 | 235 | 34   | 268  |
| 60.042 | 20 | CCAAAACGTCCATTTTCCAA      | 60.702 | 20 | 273 | 572  | 844  |
| 57.369 | 23 | TGGATTGAATGGATGTTTGG      | 59.175 | 20 | 102 | 0    | 101  |
| 60.111 | 20 | TCACAAATACCCCTAAACCCA     | 59.188 | 21 | 148 | 356  | 503  |
| 59.962 | 20 | TGTCATGGCATTGTTGATGTTT    | 59.288 | 23 | 236 | 315  | 550  |
| 58.462 | 22 | CCCTTTGGAATGTTCAAGGA      | 59.903 | 20 | 103 | 22   | 124  |
| 60.124 | 23 | ACCAAGATTTGATCATGGGC      | 59.756 | 20 | 237 | 377  | 613  |
| 60.511 | 20 | TTGTTAGAGGTTTTGACGGGA     | 59.595 | 21 | 192 | 241  | 432  |
| 60.103 | 20 | GGGCTGCCTCCTAATCCTAA      | 60.542 | 20 | 254 | 348  | 601  |
| 59.431 | 20 | TTATATGACCCCTCCCTC        | 59.974 | 20 | 154 | 1188 | 1341 |
| 58.258 | 20 | ACTGCACCAAGGCAGAAACT      | 59.914 | 20 | 257 | 1191 | 1447 |
| 59.855 | 20 | GTTTGGAGGAGCAAGTGGAG      | 59.844 | 20 | 148 | 1053 | 1200 |
| 60.348 | 20 | CCATCATTTTATTCCCAACC      | 59.991 | 20 | 198 | 3610 | 3807 |
| 59.843 | 20 | GCCCCAAACGACTTACGAT       | 59.947 | 19 | 203 | 326  | 528  |
| 59.694 | 20 | ACACCCTCAAATGGCTCAAC      | 59.973 | 20 | 225 | 959  | 1183 |
| 59.982 | 20 | TTAACAAAAGCAAACCGCCT      | 59.758 | 20 | 248 | 704  | 951  |
| 59.813 | 27 | TTTCGAATGATTTTGCCCTC      | 60.016 | 20 | 218 | 0    | 217  |
| 58.98  | 20 | TTGTTTACACACGGTGCGAT      | 60.035 | 20 | 253 | 85   | 337  |
| 59.679 | 20 | ATTTTCCCAAATTTGTCCC       | 59.867 | 20 | 150 | 13   | 162  |
| 59.894 | 20 | CTTGAATTGCTCTCCCTCCA      | 60.331 | 20 | 229 | 183  | 411  |
| 60.011 | 20 | ATTACGTCCAAATTGCTCGG      | 59.96  | 20 | 265 | 130  | 394  |
| 60.117 | 20 | CCCTTGATGCAGTCCGAGT       | 60.134 | 20 | 276 | 201  | 476  |
| 57.792 | 21 | GCCACTCTTGCTTCCTTC        | 59.997 | 20 | 167 | 9    | 175  |
| 60.261 | 20 | TTACATCCAAGCCACCTTCC      | 59.933 | 20 | 158 | 1059 | 1216 |
| 60.088 | 20 | TCCTTTCTTCTTACGGCACC      | 59.312 | 20 | 251 | 790  | 1040 |
| 60.457 | 23 | CGCGAACTCATAAATTGAACA     | 58.83  | 21 | 214 | 12   | 225  |
| 58.96  | 20 | CGTCCGTTTTGAAGATCCAT      | 59.933 | 20 | 256 | 276  | 531  |
| 60.269 | 20 | CCAAAAGTGTTATTTTTGTTTTG   | 57.875 | 23 | 146 | 64   | 209  |
| 59.165 | 23 | TGTTAATCAGTTTATGCATCTTGG/ | 59.917 | 25 | 149 | 24   | 172  |
| 59.028 | 24 | TGTCCTCCATTAAGCAAGCC      | 60.214 | 20 | 114 | 1    | 114  |
| 60.03  | 20 | TGTGATGAGAGAGAGGGGCT      | 59.945 | 20 | 235 | 104  | 338  |
| 59.953 | 20 | CGAAGGTACGGTATGCGATT      | 59.982 | 20 | 172 | 62   | 233  |
| 60.408 | 20 | CGGCGATAAGAGAGAGAAGG      | 59.17  | 20 | 161 | 422  | 582  |
| 60.663 | 21 | TGGCAACTGCAAGTTCAAAG      | 60.027 | 20 | 269 | 514  | 782  |

|        |    |                           |        |    |     |      |      |
|--------|----|---------------------------|--------|----|-----|------|------|
| 60.109 | 20 | TTTTGGGAGAAGTATTGGGA      | 57.13  | 20 | 183 | 56   | 238  |
| 59.415 | 20 | CCAATTTGAATGGTTATCACCTG   | 60.457 | 23 | 107 | 1908 | 2014 |
| 59.978 | 20 | GTTATGCGTTTTGACGGGAT      | 59.829 | 20 | 230 | 286  | 515  |
| 60.017 | 20 | TGCATGGATGCAAGTTGAAG      | 60.812 | 20 | 229 | 138  | 366  |
| 59.964 | 20 | AATAGCTTTGGGTGCATTGG      | 59.96  | 20 | 194 | 2862 | 3055 |
| 59.123 | 20 | GGTTTGGCCGTTTTTGGAGTA     | 59.975 | 20 | 225 | 13   | 237  |
| 60.081 | 20 | TTCCGAAAATATGCTCCACA      | 59.112 | 20 | 166 | 801  | 966  |
| 59.939 | 20 | AGAGGAGCCCCATTTCATTCT     | 60.037 | 20 | 203 | 235  | 437  |
| 59.583 | 21 | AGGTTGCGTACATCTGACCC      | 59.997 | 20 | 256 | 3    | 258  |
| 59.51  | 20 | GATGGCTTCTCCTTGCAGAC      | 59.957 | 20 | 141 | 154  | 294  |
| 59.967 | 20 | AGGGTCCCACCCTTTTGTTA      | 60.581 | 20 | 124 | 220  | 343  |
| 60.065 | 20 | TATGAACCCACCAGCATTCA      | 59.924 | 20 | 131 | 1957 | 2087 |
| 59.83  | 20 | ATTCTAAGCTCGAGGGCACA      | 59.978 | 20 | 238 | 327  | 564  |
| 59.234 | 21 | GCTAGAGGGTTTTGTTAATATGTC  | 58.796 | 27 | 174 | 324  | 497  |
| 60.154 | 20 | GTTAAGGCCAACTTCCCTCC      | 59.94  | 20 | 249 | 1543 | 1791 |
| 59.934 | 20 | AGGAATGATGGGATCTGCAA      | 60.426 | 20 | 172 | 2082 | 2253 |
| 60.204 | 19 | GGCGGCGTGACTTATTCTAA      | 60.23  | 20 | 262 | 208  | 469  |
| 60.035 | 20 | GGGGGAAAATTATAGTTAGGGA    | 57.532 | 22 | 108 | 524  | 631  |
| 60.131 | 22 | CGATAGATTCGATGAACCCC      | 59.344 | 20 | 226 | 665  | 890  |
| 60.038 | 20 | GCAATTGAAGGTTTGACCGT      | 59.978 | 20 | 121 | 5    | 125  |
| 59.557 | 24 | GGCCTATTGAGCCAAGACTG      | 59.836 | 20 | 279 | 972  | 1250 |
| 60.249 | 20 | GTGCATTTTTGGGAGCAAAT      | 59.945 | 20 | 238 | 96   | 333  |
| 59.181 | 21 | CAGAAACATGTCAACGTGAGAA    | 58.825 | 22 | 278 | 1114 | 1391 |
| 60.021 | 20 | TCTCCGAGTTCTTGCTCTCC      | 59.679 | 20 | 228 | 352  | 579  |
| 59.966 | 20 | CCTGGCTTCAAACCAATGA       | 61.001 | 20 | 255 | 669  | 923  |
| 58.237 | 25 | AATTGACCTTTGACGTTGGC      | 59.978 | 20 | 242 | 3    | 244  |
| 60.052 | 20 | TTTTTATTCAGGCAAACATTCTCA  | 60.006 | 24 | 206 | 311  | 516  |
| 60.357 | 20 | CGCTGGTTTTGGAGATCAAT      | 60.074 | 20 | 228 | 2294 | 2521 |
| 59.93  | 20 | TCCGGTCCGATTACAATTC       | 59.762 | 20 | 165 | 319  | 483  |
| 60.11  | 20 | AGGCGTCTGTTGGAATTTTG      | 60.11  | 20 | 252 | 1446 | 1697 |
| 58.824 | 20 | CTTCCAGAGGGATACCGTCA      | 60.065 | 20 | 198 | 634  | 831  |
| 60.066 | 20 | TGTCCGGATTGTCACACCTA      | 59.96  | 20 | 225 | 90   | 314  |
| 57.557 | 25 | TTGTAGTTGCTGGCCATGTG      | 60.72  | 20 | 105 | 21   | 125  |
| 59.773 | 22 | TTCACTTTTACAACCTCCACATGA/ | 59.959 | 25 | 205 | 96   | 300  |
| 59.992 | 20 | TGGAAAGAACTAAATGCCCG      | 60.067 | 20 | 185 | 117  | 301  |
| 59.829 | 20 | TGTGCATGTCTCATTTGTTTT     | 59.188 | 21 | 140 | 19   | 158  |
| 59.449 | 20 | AGCCATGGTTCAATCATCAA      | 58.926 | 20 | 254 | 3115 | 3368 |
| 60.073 | 20 | TCACAAACCCATGTCCCTTT      | 60.21  | 20 | 261 | 1440 | 1700 |
| 58.028 | 22 | GAAGGAAACATTCTTTTGGGG     | 59.801 | 21 | 249 | 1914 | 2162 |
| 59.381 | 20 | GCATGGTGATTTGAGGGACT      | 59.934 | 20 | 228 | 169  | 396  |
| 57.101 | 24 | AGATTGGGTACCCGACACTG      | 59.844 | 20 | 175 | 5    | 179  |
| 59.839 | 20 | AGATTCAAGGGCCGAGATTT      | 60.039 | 20 | 173 | 840  | 1012 |
| 59.916 | 21 | TCCATAGCCGATAAAATGGC      | 59.892 | 20 | 217 | 6    | 222  |
| 60.057 | 20 | AAAATCAAAGGCCACAAATG      | 59.801 | 20 | 139 | 11   | 149  |
| 59.829 | 21 | GCGACAAATGCAAGGCTACT      | 60.416 | 20 | 177 | 20   | 196  |
| 60.001 | 20 | GATGAAGGGTGAAGGTTGA       | 59.903 | 20 | 160 | 456  | 615  |
| 60.073 | 20 | ATGTGAGTGGCACGTGATTC      | 59.557 | 20 | 211 | 1611 | 1821 |
| 60.03  | 20 | TATCATTTTTGCCAACCTCC      | 59.762 | 20 | 188 | 1324 | 1511 |
| 60.255 | 20 | GGATGGCAAGCTTTTAGCTG      | 59.982 | 20 | 188 | 525  | 712  |
| 60.081 | 20 | CGCATTATCGCTGTGAGTGT      | 59.895 | 20 | 224 | 1042 | 1265 |
| 58.337 | 20 | AGCCTTGATTGGAACATGGA      | 60.461 | 20 | 252 | 102  | 353  |
| 59.939 | 20 | TGTAACCCAAACCAAGCACA      | 60.004 | 20 | 247 | 2095 | 2341 |
| 60.21  | 20 | AGAGGAGAGGCGAAGGAAAG      | 60.088 | 20 | 189 | 5    | 193  |
| 60.162 | 20 | CCTATGGTGGTATGGTGTGGA     | 60.501 | 21 | 172 | 81   | 252  |
| 59.835 | 20 | ATCAAACCGTTACTTGCGG       | 59.996 | 20 | 260 | 814  | 1073 |
| 59.971 | 20 | TGAATGCAGGACAAGAATGC      | 59.805 | 20 | 222 | 372  | 593  |
| 59.989 | 20 | CTTTGCCCTTTACTTGCTG       | 59.876 | 20 | 161 | 468  | 628  |
| 59.933 | 20 | ATGCCACATTTTCAGAGTCC      | 59.934 | 20 | 234 | 692  | 925  |

|        |    |                          |        |    |     |      |      |
|--------|----|--------------------------|--------|----|-----|------|------|
| 60.315 | 20 | TCAACCATTTGTTTTTGCCA     | 59.946 | 20 | 246 | 907  | 1152 |
| 59.986 | 20 | TTAACCTCCCGTGGACGTAG     | 59.986 | 20 | 262 | 4    | 265  |
| 59.732 | 22 | TGGTGGAGCGTCTGTTTTAAT    | 59.623 | 21 | 280 | 31   | 310  |
| 60.025 | 20 | GACCAAGAGGCGTTGGTAGA     | 60.255 | 20 | 249 | 1943 | 2191 |
| 59.836 | 20 | TCTAGGAGCGAAGGATTTGC     | 59.551 | 20 | 235 | 390  | 624  |
| 59.64  | 20 | GACCGCAGGTTAATCCAGAA     | 60.074 | 20 | 240 | 1051 | 1290 |
| 59.806 | 20 | TGTCTCCATTCTATTGGCCC     | 59.894 | 20 | 230 | 236  | 465  |
| 60.028 | 20 | GATCTGAACCGACCGAACAT     | 59.934 | 20 | 255 | 206  | 460  |
| 59.986 | 20 | ATTAGCGAACATGGAGGTGG     | 59.955 | 20 | 123 | 505  | 627  |
| 59.64  | 20 | TCCGAGACAAGTTTCGTGAAC    | 60.284 | 21 | 270 | 63   | 332  |
| 60.122 | 20 | AAAATCAAAGGCCCAACAATG    | 59.801 | 20 | 265 | 391  | 655  |
| 60.17  | 20 | TTATTGTGTGGGGCAGAGGT     | 60.375 | 20 | 226 | 139  | 364  |
| 59.685 | 20 | TTTTCCCTGAGCACGTTAGG     | 60.241 | 20 | 178 | 404  | 581  |
| 59.239 | 20 | GATTCTGTATCCGCCATTGAA    | 59.915 | 21 | 202 | 666  | 867  |
| 61.096 | 20 | TGTGAAAGTCTTTGGATGGTTC   | 59.077 | 22 | 258 | 101  | 358  |
| 60.195 | 20 | ACAGCTTCGTTGATGATGGA     | 59.245 | 20 | 247 | 474  | 720  |
| 60.894 | 20 | CCGCCGATGTGATTTAACT      | 59.96  | 20 | 273 | 242  | 514  |
| 60.133 | 20 | TTCACACACCAAAAATTCCGA    | 59.941 | 20 | 192 | 637  | 828  |
| 58.709 | 21 | CATTTTTCTCATGGAATGGA     | 59.748 | 21 | 188 | 1123 | 1310 |
| 60.362 | 20 | GATTACAAGGCCACCTCAA      | 59.933 | 20 | 239 | 124  | 362  |
| 59.744 | 21 | CGAATACAATTGACAGAAAA     | 59.12  | 22 | 276 | 1051 | 1326 |
| 60.12  | 20 | GAGGGGTGTTCCAGACAAA      | 59.943 | 20 | 276 | 27   | 302  |
| 60.012 | 20 | GTTGTTGAGGTGGTCTCCGT     | 60.009 | 20 | 268 | 585  | 852  |
| 59.829 | 20 | TCCCGGCTGAATGTTACAA      | 60.057 | 19 | 176 | 10   | 185  |
| 58.028 | 22 | GCATTGCAGGTTTCGAATTT     | 60.081 | 20 | 142 | 15   | 156  |
| 60.885 | 20 | ACGAAAATCTCTGCCCAATG     | 60.074 | 20 | 165 | 221  | 385  |
| 59.762 | 20 | ATTGCCACCCCTCACTACAA     | 60.375 | 20 | 246 | 488  | 733  |
| 59.923 | 20 | AATGCCCTCAGATGCTATGG     | 60.059 | 20 | 249 | 384  | 632  |
| 60.129 | 20 | CTGCCGATCAATGCAGTCTA     | 59.972 | 20 | 274 | 842  | 1115 |
| 59.822 | 21 | CGTGTGAGAAAATTGACAGCC    | 59.293 | 20 | 273 | 173  | 445  |
| 58.521 | 26 | CAAAATTATGTGGCCCAAC      | 60.053 | 20 | 274 | 87   | 360  |
| 59.522 | 20 | GGTCCCACCACCTAACATA      | 59.526 | 20 | 195 | 71   | 265  |
| 59.212 | 20 | TCACTCCAGTTTTTCACCCA     | 59.109 | 20 | 206 | 902  | 1107 |
| 60.111 | 20 | GGAAGCAAAAATGGCAGAAG     | 59.823 | 20 | 246 | 567  | 812  |
| 59.717 | 20 | TGACTAAGTTGTGTGAGCAGGAA  | 59.966 | 23 | 262 | 741  | 1002 |
| 60.505 | 20 | CGTAAAAATGGTTATTATTGGATC | 58.395 | 25 | 254 | 909  | 1162 |
| 59.14  | 23 | ATGCTGATGTTAGTGCGCTG     | 60.042 | 20 | 188 | 16   | 203  |
| 60.285 | 20 | GCCCCAATTTCTCTCTTTC      | 60.017 | 20 | 197 | 34   | 230  |
| 59.743 | 20 | GATCGCATTGATCCCAACTC     | 60.435 | 20 | 167 | 605  | 771  |
| 59.978 | 20 | CCATCTACGCAAACCCAGTT     | 59.993 | 20 | 213 | 150  | 362  |
| 60.117 | 20 | AATTTCCAGATTCCCGTCG      | 59.879 | 19 | 173 | 1518 | 1690 |
| 60.569 | 20 | TGTTGCGCGTGCTTTAAATA     | 60.401 | 20 | 134 | 1557 | 1690 |
| 59.813 | 20 | CCACGACGGTTAAAGGAGAA     | 60.103 | 20 | 253 | 213  | 465  |
| 59.234 | 21 | AGGGGGTTATCACCTGATCG     | 61.095 | 20 | 189 | 534  | 722  |
| 60.111 | 20 | ATTTCTGCAATTGGGGTTCT     | 58.504 | 20 | 180 | 27   | 206  |
| 60.051 | 20 | TGTACCGTGACAAGACCTTTG    | 58.687 | 21 | 100 | 887  | 986  |
| 59.901 | 20 | CCACAACCCTTTCATCACCT     | 59.82  | 20 | 254 | 336  | 589  |
| 60.218 | 20 | CATTGATGGTTTCGGAGCTT     | 60.074 | 20 | 280 | 232  | 511  |
| 59.002 | 20 | CAATTACACTGCATGGGCTG     | 60.134 | 20 | 167 | 76   | 242  |
| 59.903 | 21 | CAGCATTGATGGTCACATCC     | 59.925 | 20 | 217 | 118  | 334  |
| 59.94  | 20 | AACATGGCCAACCCAAATAA     | 60.053 | 20 | 275 | 2488 | 2762 |
| 60.131 | 20 | TGGCAGAAGTCGTTGAACTG     | 60.025 | 20 | 248 | 113  | 360  |
| 59.077 | 20 | TCGGAGCCATAATCATCACA     | 60.033 | 20 | 225 | 696  | 920  |
| 59.595 | 21 | TGGATCTTCGTATTTGTTACTTCA | 57.899 | 24 | 129 | 213  | 341  |
| 58.977 | 20 | GTTTTCAATTTGATCACGCCC    | 60.318 | 20 | 106 | 24   | 129  |
| 59.972 | 20 | TCCAATTTCAATGGTGCAA      | 60.088 | 20 | 275 | 477  | 751  |
| 59.79  | 20 | GAGATTGGGACAGACCCTGA     | 60.048 | 20 | 196 | 1667 | 1862 |
| 58.878 | 22 | CGTCCAGTTCACTTCATTGG     | 59.135 | 20 | 113 | 1166 | 1278 |

|        |    |                          |        |    |     |      |      |
|--------|----|--------------------------|--------|----|-----|------|------|
| 60.269 | 20 | CCTGAATTCTCCCCAACTCA     | 60.042 | 20 | 270 | 501  | 770  |
| 59.585 | 20 | GAGTTCGTCAAACCTCCCAA     | 60.088 | 20 | 261 | 133  | 393  |
| 59.764 | 20 | GAGGGAAATGGTGGGGTATT     | 59.881 | 20 | 107 | 1077 | 1183 |
| 59.82  | 20 | AATCTTTGAACAGCCGATGG     | 60.074 | 20 | 208 | 577  | 784  |
| 59.722 | 20 | CGAACCTTTCATCATCGAAT     | 59.894 | 20 | 100 | 570  | 669  |
| 60.103 | 20 | AACCTCTTCGAGTTCGTCCA     | 59.844 | 20 | 278 | 390  | 667  |
| 59.829 | 20 | AGAGTGC GCGTTTTTCATCTT   | 60.022 | 20 | 108 | 442  | 549  |
| 59.518 | 20 | TCACGACATTATTTCCCTCAA    | 59.451 | 22 | 133 | 3481 | 3613 |
| 59.501 | 20 | GCGGAAGCTGTGGTTTGTAT     | 60.14  | 20 | 270 | 228  | 497  |
| 59.129 | 20 | AGATCTTAATCGTGGCCGCT     | 61.11  | 20 | 182 | 388  | 569  |
| 60.015 | 20 | TCTTCTCCGTTTCAGTCCGT     | 59.844 | 20 | 226 | 560  | 785  |
| 60.073 | 20 | TGAAGTTAGGAAATAAGGAGGTG  | 58.743 | 25 | 151 | 693  | 843  |
| 57.239 | 26 | TAAATCATGTTTCACCGCCA     | 59.93  | 20 | 134 | 2    | 135  |
| 59.685 | 25 | GACAATCTTCCAATTGGCGT     | 59.939 | 20 | 255 | 144  | 398  |
| 59.668 | 20 | TCTTCGAGACGGAACCACTT     | 59.844 | 20 | 255 | 582  | 836  |
| 60.015 | 20 | TGCAACTCCTCTGACCTCCT     | 59.986 | 20 | 125 | 2857 | 2981 |
| 59.75  | 20 | CCACCACCAGAAGCAAACCTT    | 60.149 | 20 | 143 | 247  | 389  |
| 60.46  | 20 | CTTTATTA AAAATGCGGGGCA   | 59.927 | 20 | 277 | 385  | 661  |
| 59.993 | 20 | GAACAAGGGTAAGATGAACCCA   | 60.221 | 22 | 187 | 394  | 580  |
| 59.836 | 20 | GCGGCTTCATCTTTACTTGC     | 59.988 | 20 | 239 | 167  | 405  |
| 60.032 | 20 | TCACTGCTGACCGTGTTCTT     | 59.467 | 20 | 172 | 167  | 338  |
| 60.17  | 20 | GTAAAGGGGGCACGAAAGTT     | 60.352 | 20 | 263 | 1643 | 1905 |
| 59.952 | 23 | ATCAGATGGGCGAGCTCTAA     | 59.939 | 20 | 247 | 251  | 497  |
| 59.993 | 20 | AGGCTGGATTTTCGTCCCTAT    | 59.925 | 20 | 274 | 376  | 649  |
| 58.32  | 21 | AAACGGTTGAAAAGCCCATA     | 59.451 | 20 | 247 | 18   | 264  |
| 59.25  | 20 | TTTGGATGGAGTTTTGGAGC     | 60.051 | 20 | 199 | 186  | 384  |
| 60.012 | 20 | CGTCACGGTGGTTCTTCATT     | 60.954 | 20 | 277 | 555  | 831  |
| 61.211 | 20 | ATCCACGTCTTGTGTCTCC      | 59.969 | 20 | 191 | 721  | 911  |
| 59.706 | 20 | CCACAGCTGAAAACGTAGCA     | 60.05  | 20 | 225 | 2448 | 2672 |
| 60.066 | 20 | TTGATGCACGAATTTGGAAG     | 59.664 | 20 | 228 | 198  | 425  |
| 59.067 | 20 | ACCAGACCGTTAGGGGTGTT     | 60.66  | 20 | 277 | 50   | 326  |
| 59.803 | 20 | CCACTTATGTCGAAGATTTTTGTG | 59.933 | 24 | 261 | 1589 | 1849 |
| 59.994 | 23 | TCTAAGGGATGATTGCACCA     | 59.075 | 20 | 125 | 322  | 446  |
| 59.897 | 21 | ATGGCGCTATCTGGTTGTTT     | 60.103 | 20 | 109 | 6947 | 7055 |
| 61.118 | 20 | AATTTGGGCCTCCATTATCC     | 59.984 | 20 | 213 | 416  | 628  |
| 59.647 | 20 | GTTGTCTGAAAGGCATCGGT     | 60.119 | 20 | 225 | 155  | 379  |
| 59.992 | 20 | CTTTTTGGTTGCTGTTGGGT     | 60.008 | 20 | 218 | 6944 | 7161 |
| 60.132 | 20 | CAACACACAAAGCCACCATC     | 60.008 | 20 | 214 | 183  | 396  |
| 59.825 | 20 | AGTGGTTATTACCGGATCGC     | 58.93  | 20 | 111 | 832  | 942  |
| 60.41  | 20 | CTTGAATCGTGAGAAGCGT      | 60.397 | 20 | 252 | 936  | 1187 |
| 59.831 | 20 | TACAGGGGGATTTGGATGAG     | 59.744 | 20 | 149 | 567  | 715  |
| 59.809 | 20 | TGCAGGGTATGCATGTTTGT     | 59.995 | 20 | 159 | 306  | 464  |
| 59.585 | 20 | GGTTGCATACTGTGGGGATT     | 59.676 | 20 | 253 | 780  | 1032 |
| 59.716 | 20 | CAAACAATGGGACCACAAAA     | 59.268 | 20 | 256 | 248  | 503  |
| 59.43  | 21 | GTCTGGATCAGCTCGGAAAG     | 59.95  | 20 | 279 | 251  | 529  |
| 60.111 | 20 | GTGGCTGTGGTTTTCGTTTT     | 60.015 | 20 | 279 | 181  | 459  |
| 59.901 | 20 | AAGGCAATGGACATGGAAGA     | 60.461 | 20 | 244 | 1835 | 2078 |
| 60.045 | 20 | GACAAGCACTCATGTGATGGA    | 59.698 | 21 | 193 | 3083 | 3275 |
| 60.119 | 20 | TGCATCTCTAATTGGACCCC     | 59.894 | 20 | 122 | 205  | 326  |
| 60.112 | 20 | GAAATGCAAGATTGCGACAG     | 59.425 | 20 | 131 | 1155 | 1285 |
| 59.297 | 20 | ACCACCACCACATTTTCAT      | 59.95  | 20 | 263 | 107  | 369  |
| 59.768 | 20 | CAGTCATTGGATTGCATTGTG    | 59.98  | 21 | 159 | 342  | 500  |
| 58.959 | 21 | ATGAAAATACGCGGGGAAAT     | 60.517 | 20 | 265 | 92   | 356  |
| 59.989 | 20 | CAAAGGAAGTCGGTTGGTTC     | 59.569 | 20 | 166 | 17   | 182  |
| 60.201 | 20 | CCCCACCACACCTCTACTA      | 59.837 | 20 | 217 | 3485 | 3701 |
| 60.306 | 23 | CCGAATCTTTTCGTGAATCAA    | 60.06  | 21 | 240 | 25   | 264  |
| 60.672 | 19 | TTGAGATGAGGGATTTTGGG     | 59.864 | 20 | 197 | 3273 | 3469 |
| 59.654 | 21 | CCAAGTAAAGCTCGAACCCA     | 60.241 | 20 | 265 | 1297 | 1561 |

|        |    |                          |        |    |     |      |      |
|--------|----|--------------------------|--------|----|-----|------|------|
| 60.17  | 20 | TTTCATGATCCAGATGGACG     | 59.451 | 20 | 249 | 127  | 375  |
| 60.11  | 20 | CTTGTGGAGCTACTCAGCCC     | 60.012 | 20 | 275 | 158  | 432  |
| 60.167 | 21 | TGCGAAAAATTTGGTTCTTG     | 58.792 | 20 | 247 | 198  | 444  |
| 59.066 | 20 | GTGGCACGATCATTGTTGTC     | 59.975 | 20 | 195 | 327  | 521  |
| 59.066 | 20 | GTGGCACGATCATTGTTGTC     | 59.975 | 20 | 195 | 316  | 510  |
| 60.073 | 20 | TGCTCTTGATCACCTTCAC      | 59.992 | 20 | 268 | 396  | 663  |
| 59.817 | 20 | CGTGCTCATGTCAGCAAGTC     | 60.627 | 20 | 164 | 23   | 186  |
| 58.812 | 20 | TCGAAGATCAATGGTCCACA     | 60.048 | 20 | 134 | 118  | 251  |
| 59.561 | 24 | TGCGTTTTGACAATATATAGGTGT | 60.083 | 26 | 149 | 1376 | 1524 |
| 60.088 | 20 | AGCGATAACATGGATGGAGC     | 60.066 | 20 | 275 | 2377 | 2651 |
| 59.832 | 20 | GTTGGCATAAAAATCCAACCA    | 58.335 | 20 | 244 | 512  | 755  |
| 60.152 | 20 | GCTATCAGGAACCTATGTTTGG   | 57.774 | 22 | 207 | 1217 | 1423 |
| 60.514 | 24 | TTCAAACAAGGCATAAAACTTTG  | 58.412 | 23 | 132 | 227  | 358  |
| 59.844 | 20 | AGAGGCTTCATCTTCTGCC      | 60.873 | 20 | 244 | 749  | 992  |
| 58.057 | 20 | GCAAAGAAGGGACGACTGAG     | 59.989 | 20 | 238 | 885  | 1122 |
| 58.953 | 21 | ACTCACGTGTCAGCACACAA     | 58.876 | 20 | 189 | 29   | 217  |
| 59.864 | 20 | TTACAGCCCAGATTCCCAAG     | 60.066 | 20 | 277 | 231  | 507  |
| 59.81  | 20 | TGATAGCGTTTTGCTGTATGC    | 58.998 | 21 | 202 | 418  | 619  |
| 59.82  | 20 | GAGGTTGGTGACAGTGGCTT     | 60.159 | 20 | 272 | 484  | 755  |
| 60.393 | 20 | ATCGTCTTCTTTTCGCAGA      | 60.235 | 20 | 279 | 216  | 494  |
| 58.826 | 22 | CCCCTGGTTGTTATCCTTGA     | 59.784 | 20 | 186 | 37   | 222  |
| 59.691 | 20 | GTGTGACATTGCCAGACAT      | 59.399 | 20 | 263 | 1022 | 1284 |
| 60.461 | 20 | TCGATAGGACGTGTATGACGA    | 59.163 | 21 | 216 | 1687 | 1902 |
| 59.929 | 20 | GGAGAAATTTGATTTGTTGGGA   | 60.164 | 22 | 274 | 205  | 478  |
| 60.073 | 20 | TTAACCCTTGGATCTGAAGCA    | 59.693 | 21 | 269 | 49   | 317  |
| 59.984 | 20 | TACTCTTCGATCCCGCGTAT     | 59.691 | 20 | 232 | 72   | 303  |
| 59.062 | 20 | AGATGCTTTTTGTGCGGAAT     | 59.851 | 20 | 275 | 2434 | 2708 |
| 59.624 | 20 | CGCCGCCATTATCTCTACTC     | 59.829 | 20 | 254 | 22   | 275  |
| 59.557 | 21 | CCCCACTTTTAAATTGCGAA     | 59.937 | 20 | 280 | 710  | 989  |
| 59.864 | 20 | GATTGCGTAGTCGTGTGTGG     | 60.183 | 20 | 267 | 561  | 827  |
| 60.702 | 20 | TTAAACTACACATGTAATCCATAA | 58.07  | 27 | 152 | 970  | 1121 |
| 60.913 | 20 | ACAAAATCTTGGTTTGGCG      | 59.975 | 20 | 266 | 115  | 380  |
| 60.17  | 20 | CGCGTTAACAGTGGAAAACA     | 59.769 | 20 | 240 | 96   | 335  |
| 57.503 | 26 | AATATCCTTTCGGGACACCC     | 60.017 | 20 | 148 | 13   | 160  |
| 60.066 | 20 | ACACAGAATTCGCCAAAAC      | 59.978 | 20 | 221 | 233  | 453  |
| 60.053 | 20 | TTCTACTCCCCTAGGCCAT      | 59.919 | 20 | 219 | 251  | 469  |
| 60.048 | 23 | AAGGAAAGATCCGTCGAGTTC    | 59.705 | 21 | 170 | 3    | 172  |
| 60.123 | 21 | GCTTAAGAATCGTGGCTTCG     | 59.982 | 20 | 199 | 220  | 418  |
| 59.457 | 21 | AGCAAAAATAAAGGGGCTGC     | 60.566 | 20 | 278 | 609  | 886  |
| 59.109 | 20 | GAATAAATGGACCCCGAGT      | 60.017 | 20 | 164 | 427  | 590  |
| 60.008 | 20 | ACGGCACATCAAACACCATA     | 59.847 | 20 | 217 | 4572 | 4788 |
| 60.145 | 22 | ATGGAACATCTGATCACGCA     | 60.08  | 20 | 193 | 347  | 539  |
| 60.073 | 20 | GCAACAATGGAGCAGATCAA     | 59.805 | 20 | 161 | 2273 | 2433 |
| 59.95  | 20 | GCATCAAGAATCAAGCCTCC     | 59.78  | 20 | 262 | 714  | 975  |
| 59.579 | 20 | TTGTATTTTGTCTGGCAGCG     | 59.872 | 20 | 215 | 159  | 373  |
| 60.162 | 20 | GAAAAGGGAAAAGGACCGAC     | 59.919 | 20 | 173 | 368  | 540  |
| 60.203 | 20 | ACCTCCCTCTTCTTTCCCAA     | 60.045 | 20 | 114 | 1144 | 1257 |
| 60.103 | 20 | GATCCCGACGACCTCTCATA     | 60.034 | 20 | 139 | 539  | 677  |
| 60.017 | 20 | AAACAAGGCATGGTTCATCC     | 59.797 | 20 | 238 | 840  | 1077 |
| 57.943 | 20 | TATCCCTAAAGTGCCCTCCA     | 59.523 | 20 | 190 | 20   | 209  |
| 60.066 | 20 | GAGTGCACCTCCTCAATGCT     | 60.418 | 20 | 244 | 1146 | 1389 |
| 60.074 | 20 | GGGGTGAATTTAAAGGGGAA     | 59.992 | 20 | 259 | 261  | 519  |
| 60.014 | 20 | ATTGACTAGGAGCACGCGAA     | 60.934 | 20 | 280 | 580  | 859  |
| 59.708 | 20 | ACTGTCTGGGGCTTTGTTTG     | 60.149 | 20 | 240 | 88   | 327  |
| 60.206 | 20 | CACACTCTTCTCAGTGGACG     | 58.504 | 21 | 240 | 1020 | 1259 |
| 59.84  | 20 | TTCCAGTTCCTTCACCAAG      | 60.081 | 20 | 246 | 354  | 599  |
| 60.683 | 20 | GGCATCACATGGTCTCTTGA     | 59.637 | 20 | 131 | 380  | 510  |
| 57.844 | 20 | GTGCATGAGCTGTCTCTTGG     | 59.577 | 20 | 110 | 128  | 237  |

|        |    |                          |        |    |     |      |      |
|--------|----|--------------------------|--------|----|-----|------|------|
| 59.181 | 22 | TTGACAATATTTAGTGTTTTGACA | 58.99  | 27 | 166 | 943  | 1108 |
| 59.438 | 20 | AAAACGCGCAATGGATAAAC     | 59.971 | 20 | 243 | 179  | 421  |
| 60.11  | 20 | TCCCATCTACTGCCCAAAC      | 59.933 | 20 | 266 | 452  | 717  |
| 59.993 | 20 | CGTAAATCCGGCTTGAATTG     | 60.448 | 20 | 217 | 300  | 516  |
| 59.874 | 20 | TGCAGACATGAAGAGGGTGA     | 60.402 | 20 | 263 | 152  | 414  |
| 59.874 | 20 | TACATGGCCAACGGGTATTT     | 60.074 | 20 | 260 | 177  | 436  |
| 59.939 | 20 | TTCTCATCCTTTGCCTTGGT     | 59.67  | 20 | 235 | 395  | 629  |
| 60.173 | 20 | GAAAATTGGCAGGATCCGTA     | 59.901 | 20 | 231 | 139  | 369  |
| 60.234 | 20 | TTCCACCATGATTTCAACA      | 59.75  | 20 | 220 | 1307 | 1526 |
| 60.152 | 20 | TGTTTTATGCCGTTGATACAAAA  | 59.437 | 23 | 221 | 185  | 405  |
| 60.055 | 20 | CCTAAAATTGGGTCCGATCA     | 59.756 | 20 | 242 | 293  | 534  |
| 59.475 | 21 | TTTCTGCAACAATTTCAACC     | 59.967 | 21 | 219 | 648  | 866  |
| 59.832 | 22 | GGTTTGAACCATGATTTATTTGG  | 59.491 | 23 | 236 | 401  | 636  |
| 59.989 | 20 | TTGGTTCGAGCCATTGTGTA     | 60.111 | 20 | 152 | 15   | 166  |
| 60.353 | 20 | GTCCACAGTTACCCGCAGTT     | 60.035 | 20 | 239 | 497  | 735  |
| 60.263 | 20 | ATCTCAGAACTCCCTTCGCA     | 59.95  | 20 | 219 | 1218 | 1436 |
| 59.943 | 20 | AACTCCAAATTTTGATGCATGT   | 58.493 | 22 | 259 | 366  | 624  |
| 57.065 | 22 | AACCAAAACTCTCGACCCA      | 59.569 | 20 | 229 | 848  | 1076 |
| 59.676 | 20 | CTATCCCCGAATGTGCCTAA     | 59.916 | 20 | 220 | 844  | 1063 |
| 59.943 | 20 | TGAAGTTTACACAACAAATCTAAC | 59.348 | 26 | 204 | 1628 | 1831 |
| 60.903 | 20 | CTCTCAGTCCCAGACTTGCC     | 59.986 | 20 | 216 | 23   | 238  |
| 58.601 | 20 | ATAGCTCAAGGGTTTTTCGCA    | 59.845 | 20 | 208 | 259  | 466  |
| 59.984 | 20 | GGGGACTGTCAATTCATTTTG    | 59.278 | 21 | 111 | 1388 | 1498 |
| 59.939 | 20 | TGCAATTGTTTCGTTCTTCA     | 60.234 | 20 | 176 | 90   | 265  |
| 60.349 | 20 | TGCCTACACAAATCCACCAA     | 59.964 | 20 | 133 | 921  | 1053 |
| 59.601 | 21 | AAGGCAGTTATGACCGTTGG     | 59.993 | 20 | 158 | 29   | 186  |
| 60.088 | 20 | TCACGCCTTCTCTCCAAT       | 59.95  | 20 | 257 | 617  | 873  |
| 59.746 | 20 | CGGTACCGTCACCGTTATCT     | 59.875 | 20 | 232 | 126  | 357  |
| 59.767 | 20 | AACCCTCAACCCTCTCCAAT     | 59.795 | 20 | 224 | 21   | 244  |
| 59.434 | 20 | ATTGTGGCCCTCAGATTTCA     | 60.461 | 20 | 153 | 168  | 320  |
| 59.939 | 20 | GCTCGTTTTCGGACCAATCTA    | 60.214 | 20 | 271 | 214  | 484  |
| 58.9   | 25 | TGCTTCCCTCACAACAACAA     | 60.278 | 20 | 268 | 1783 | 2050 |
| 60.457 | 23 | GCGTTTTTGGCCTGATATTT     | 59.081 | 20 | 188 | 17   | 204  |
| 60.088 | 20 | TGCATCTGTGAATGGAAAGC     | 59.805 | 20 | 278 | 76   | 353  |
| 59.989 | 20 | CTGGGAGCATGTCAGTGTTG     | 60.309 | 20 | 224 | 763  | 986  |
| 60.206 | 20 | TCGTTTGAGATCACGAGCAG     | 60.136 | 20 | 250 | 881  | 1130 |
| 58.858 | 20 | TTTTTGTAACCGCCTCGAT      | 59.586 | 20 | 193 | 584  | 776  |
| 59.869 | 20 | ACAGGCCAAAGAGAGCAAAA     | 59.993 | 20 | 142 | 511  | 652  |
| 60.142 | 20 | CAGAGAAAAGTCGTCGGGAA     | 60.366 | 20 | 221 | 117  | 337  |
| 59.926 | 20 | GAGTCCC CGTCATAAAAA      | 60.074 | 20 | 256 | 498  | 753  |
| 59.882 | 20 | GGGGAGAGTCAGGTAGGAGG     | 60.066 | 20 | 144 | 103  | 246  |
| 59.845 | 20 | TGATGAATGACGACACATGC     | 59.037 | 20 | 266 | 316  | 581  |
| 60.175 | 20 | ATGTGGTGTTC AAGCGTCTG    | 59.751 | 20 | 272 | 603  | 874  |
| 59.606 | 23 | GCACGATCTCATGATTCCAA     | 59.61  | 20 | 255 | 21   | 275  |
| 59.396 | 20 | TCATTTTTGACCGACGGTTT     | 60.344 | 20 | 188 | 23   | 210  |
| 58.789 | 22 | CAATAAACGCCACATGAAA      | 59.42  | 20 | 267 | 370  | 636  |
| 59.831 | 20 | AAATTCCAAACTCCGACCAA     | 59.406 | 20 | 232 | 174  | 405  |
| 59.938 | 20 | CGAGTGCCGTA CTGAGAGA     | 59.187 | 20 | 209 | 216  | 424  |
| 59.378 | 20 | GCGCTATTTTTA ACCCCAAA    | 59.11  | 20 | 214 | 204  | 417  |
| 60.12  | 20 | ATTTCGAATGTCGCCTTGTC     | 60.081 | 20 | 242 | 1100 | 1341 |
| 60.012 | 20 | TTGTCTCTTGCATCACTCCCT    | 59.859 | 21 | 259 | 488  | 746  |
| 59.481 | 20 | CATGTGGCTTTGCTTTGAGA     | 59.988 | 20 | 160 | 191  | 350  |
| 59.728 | 20 | CTCTTCACATTTCTCCCCA      | 60.042 | 20 | 127 | 113  | 239  |
| 60.154 | 22 | CTCGCCTCCAATACCAAGTC     | 59.694 | 20 | 272 | 178  | 449  |
| 60.827 | 20 | ATGGCATTCTTTGGCTTTG      | 60.074 | 20 | 257 | 524  | 780  |
| 59.7   | 20 | CGGTATCACGGACGATTTTT     | 59.823 | 20 | 248 | 863  | 1110 |
| 60.031 | 20 | TCTTCGTGTTCTTCGTCGTG     | 60.025 | 20 | 158 | 934  | 1091 |
| 57.943 | 21 | CAAATCATGTTGAAAGGAACCA   | 59.839 | 22 | 272 | 728  | 999  |

|        |    |                         |        |    |     |      |      |
|--------|----|-------------------------|--------|----|-----|------|------|
| 60.05  | 20 | TTGAGTGGTTCGGGGATTAG    | 59.926 | 20 | 205 | 242  | 446  |
| 59.397 | 20 | TCGATAAATAGCCACATGCC    | 58.603 | 20 | 251 | 180  | 430  |
| 59.891 | 23 | GGGACACCTCAGTGGTAGGA    | 59.962 | 20 | 264 | 59   | 322  |
| 60.119 | 20 | TGTGAGGGACACAATTCTTGA   | 59.124 | 21 | 248 | 204  | 451  |
| 59.811 | 20 | GGGGTATTGGTAATAGCTCC    | 59.68  | 21 | 174 | 140  | 313  |
| 57.557 | 25 | TTCAATCATGAGCGTTCGTC    | 59.805 | 20 | 136 | 16   | 151  |
| 58.486 | 22 | TAATTCTGGCGAATCGGAAC    | 60.038 | 20 | 128 | 287  | 414  |
| 60.046 | 20 | TCTTAATGAGGGCCCCTACC    | 60.278 | 20 | 263 | 125  | 387  |
| 59.298 | 20 | AATTCCTATGGGTTTTGGGG    | 59.882 | 20 | 225 | 74   | 298  |
| 59.339 | 20 | TGGGAGAAATCGATAATGGG    | 59.717 | 20 | 255 | 150  | 404  |
| 57.52  | 22 | AAAATCAAAGGCCCAACAATG   | 59.801 | 20 | 139 | 996  | 1134 |
| 60.025 | 20 | GCGCAATTGCATCTATTGAA    | 59.809 | 20 | 177 | 2011 | 2187 |
| 60.198 | 20 | CAGAATTGGGTGTAGCAGCA    | 59.864 | 20 | 175 | 263  | 437  |
| 60.005 | 20 | CTCAAACCCCAAGAATCGAA    | 60.044 | 20 | 252 | 455  | 706  |
| 60.214 | 20 | AATTAGCTTCTTCGTCGCGT    | 59.138 | 20 | 277 | 1389 | 1665 |
| 59.728 | 20 | GTTTCGCGAGATCCAGAAGTC   | 59.957 | 20 | 265 | 1445 | 1709 |
| 60.005 | 20 | TGTTAATCTGTTCCGGCCTC    | 60.074 | 20 | 233 | 3245 | 3477 |
| 59.673 | 20 | CTGAGGCCACTACCCGATAA    | 60.088 | 20 | 271 | 719  | 989  |
| 59.986 | 20 | CAAAAGGTTTATCCCAGTCTCTC | 58.333 | 23 | 108 | 3539 | 3646 |
| 60.036 | 25 | TGAATTTTTGGAAATGGTGTTT  | 58.831 | 22 | 227 | 25   | 251  |
| 59.988 | 20 | TAAGACACCAGGCAGTTCCC    | 60.111 | 20 | 202 | 263  | 464  |
| 60.125 | 20 | AGCTTGAAACACACACACGC    | 59.953 | 20 | 252 | 307  | 558  |
| 59.469 | 20 | ATGAAGAAAATCTGGCGCTG    | 60.352 | 20 | 244 | 615  | 858  |
| 60.036 | 20 | GAAGTCGTCTAGGAAAGCA     | 58.104 | 20 | 223 | 735  | 957  |
| 60.223 | 20 | CAAAGCTCAAGCTGATGCAA    | 60.28  | 20 | 211 | 2993 | 3203 |
| 59.18  | 20 | GGGGATTTCTGTCGCTTTTT    | 60.431 | 20 | 223 | 330  | 552  |
| 60.369 | 21 | GTGATGATTCCGGCTCGTTTT   | 60.081 | 20 | 194 | 558  | 751  |
| 59.523 | 20 | CCATCATTCAACGCATTACG    | 59.953 | 20 | 274 | 2782 | 3055 |
| 58.755 | 20 | ATAGGCCTACATCGAAGCCA    | 59.691 | 20 | 225 | 118  | 342  |
| 59.679 | 20 | TGACCCTTTGTACCGTTCCT    | 59.449 | 20 | 181 | 113  | 293  |
| 59.96  | 20 | AAGGAACGAACAAGTTTTCCA   | 58.73  | 21 | 270 | 654  | 923  |
| 60.526 | 20 | TGAATGTTGTCGTAGCCTGTC   | 58.79  | 21 | 108 | 1358 | 1465 |
| 59.202 | 23 | GACGCTAACGCCATTACGAT    | 60.124 | 20 | 255 | 531  | 785  |
| 59.708 | 20 | GTGGCATGGGGAAGCTACTA    | 60.096 | 20 | 234 | 52   | 285  |
| 60.169 | 20 | GAGCACGCAGAGAAGCAATA    | 59.326 | 20 | 238 | 378  | 615  |
| 59.688 | 20 | GACAATCCGGCCAAATTA      | 59.773 | 20 | 276 | 196  | 471  |
| 60.089 | 20 | GTGGAAGCGCCATGTTTTAT    | 59.967 | 20 | 240 | 130  | 369  |
| 58.8   | 20 | GTATCAGCAGCCACCCAAAT    | 59.962 | 20 | 262 | 4780 | 5041 |
| 57.517 | 20 | GCAAAGTGGAGATCATGGGT    | 59.934 | 20 | 229 | 631  | 859  |
| 59.861 | 21 | GTCTTTAACCGCCACCAAAA    | 59.975 | 20 | 209 | 524  | 732  |
| 60.071 | 23 | GAGAGCAGTTTCGGACATAAA   | 57.108 | 21 | 280 | 139  | 418  |
| 57.406 | 21 | GCCAAAACACTACCCCTTTCAG  | 58.694 | 20 | 176 | 414  | 589  |
| 59.657 | 20 | CTTCAGCAAACCAGCTCTCC    | 60.134 | 20 | 247 | 44   | 290  |
| 59.938 | 20 | TGCGAAGTTTGTTCTTGTC     | 60.035 | 20 | 157 | 560  | 716  |
| 60.517 | 20 | AAGGAGTTCACAGGTGGTGG    | 60.002 | 20 | 259 | 3    | 261  |
| 59.716 | 20 | TCAAATTTTGCTTTGCAATC    | 60.068 | 21 | 274 | 80   | 353  |
| 60.066 | 20 | TGGAAAACACCCTTTTCTTGA   | 59.573 | 21 | 232 | 512  | 743  |
| 60.035 | 20 | TGTCTCATTGTGCTCAAGCC    | 59.992 | 20 | 116 | 222  | 337  |
| 60.015 | 20 | AGCTCGGTCGGGTAGAAAGT    | 60.268 | 20 | 246 | 91   | 336  |
| 59.758 | 22 | GGGGTTATCATGGGATCAAG    | 59.055 | 20 | 266 | 2403 | 2668 |
| 59.939 | 20 | GAGAAAGTGAAGAATCGATTGGA | 59.717 | 23 | 123 | 370  | 492  |
| 60.235 | 20 | TTCACGCAAACAAATTCCAA    | 60.088 | 20 | 161 | 242  | 402  |
| 59.982 | 20 | TCAAGTGTCCCATCACCAA     | 59.935 | 20 | 222 | 498  | 719  |
| 59.984 | 20 | CCCAACTTTCTCCCCTCTTC    | 60.045 | 20 | 170 | 3415 | 3584 |
| 59.931 | 20 | TGAAGCACAATGAAAACGGA    | 60.234 | 20 | 237 | 130  | 366  |
| 59.993 | 20 | CCCACAACCTTTCTCTGCCT    | 59.328 | 20 | 212 | 1564 | 1775 |
| 59.738 | 23 | CTCAACAGCGTGTGGTTT      | 58.825 | 20 | 280 | 1316 | 1595 |
| 60.089 | 20 | TTTAGGCGTTCAAAGGCAT     | 59.72  | 20 | 178 | 311  | 488  |

|        |    |                         |        |    |     |      |      |
|--------|----|-------------------------|--------|----|-----|------|------|
| 59.916 | 20 | TCGAAGATCAACGATCCACA    | 60.201 | 20 | 177 | 799  | 975  |
| 59.988 | 20 | TGTTGTGTGCAAGTTCCCAT    | 60.008 | 20 | 253 | 548  | 800  |
| 59.923 | 20 | TGCACAACAAATAGGCAAAA    | 57.846 | 20 | 224 | 225  | 448  |
| 60.24  | 20 | TACATTCCAATGGCAAAGCC    | 60.837 | 20 | 165 | 800  | 964  |
| 59.999 | 20 | AACTCATTGTCAACCGCACA    | 60.16  | 20 | 217 | 566  | 782  |
| 59.878 | 20 | ATTTCCAAGATCAACGGACG    | 59.933 | 20 | 169 | 496  | 664  |
| 59.989 | 20 | AGGCTGATTGTGAACTCCAGA   | 59.859 | 21 | 250 | 2091 | 2340 |
| 58.743 | 25 | GTGGACGCTCCAGATTGTTT    | 60.119 | 20 | 124 | 2    | 125  |
| 60.23  | 20 | TCTTCCCAGCAAGAAAGGAG    | 59.545 | 20 | 268 | 95   | 362  |
| 59.992 | 20 | AATTGTTCATTTGCAACGGC    | 60.876 | 20 | 273 | 802  | 1074 |
| 59.923 | 20 | TTAAATATTCATGGGCACGC    | 58.513 | 20 | 209 | 158  | 366  |
| 59.924 | 20 | CTCAGGCCTATCGAACCAAA    | 60.206 | 20 | 276 | 102  | 377  |
| 60.142 | 20 | TGACCCGCCTCATCTTCTAC    | 60.218 | 20 | 197 | 1158 | 1354 |
| 58.743 | 25 | CAGGTTTATCAACAAGGTTTTGG | 59.795 | 23 | 140 | 24   | 163  |
| 60.312 | 20 | AAGGCAAGCTAGAACCCACC    | 60.63  | 20 | 161 | 551  | 711  |
| 60.051 | 20 | ACCTCCTCCTTTTCCTTCCA    | 60.045 | 20 | 265 | 787  | 1051 |
| 59.946 | 20 | CCAGAGCTGAAAATCGAAGG    | 59.948 | 20 | 274 | 525  | 798  |
| 60.134 | 20 | CGAATTCTAGGCGATTCTTG    | 59.801 | 20 | 218 | 1266 | 1483 |
| 60.016 | 20 | GGGAAGAACGACGACGATAA    | 60.074 | 20 | 254 | 50   | 303  |
| 60.008 | 20 | GGTTTGGTTGGAGAAAGCAA    | 60.088 | 20 | 188 | 296  | 483  |
| 59.828 | 21 | CTTGAAAAGGGTTGCAAGGA    | 60.22  | 20 | 101 | 856  | 956  |
| 59.997 | 20 | ACCCTGTGTATCCCAGCAAA    | 60.375 | 20 | 220 | 104  | 323  |
| 59.813 | 20 | CTTTCTTGACCAGATTGCC     | 59.67  | 20 | 240 | 3551 | 3790 |
| 59.28  | 20 | TCAATCATGTTGGGTGCAGT    | 59.967 | 20 | 201 | 248  | 448  |
| 59.968 | 20 | TACAAGCCTTGGACTTTGGG    | 60.103 | 20 | 173 | 1216 | 1388 |
| 60.181 | 20 | GGACGTTGATTTGTTGGGAT    | 59.653 | 20 | 200 | 170  | 369  |
| 59.989 | 20 | AACCATGTGCTTACACCACG    | 59.49  | 20 | 247 | 244  | 490  |
| 59.913 | 20 | TGGTCGGAGACTAGGGTTTG    | 60.103 | 20 | 272 | 228  | 499  |
| 60.214 | 20 | CCGAAACGATGAACGAGTTT    | 60.11  | 20 | 137 | 1001 | 1137 |
| 59.353 | 20 | CTGCATGCACATAGAGTATTGG  | 58.346 | 22 | 274 | 380  | 653  |
| 59.96  | 20 | TTCCAATATTCTTCGGAGCG    | 60.167 | 20 | 254 | 1879 | 2132 |
| 58.877 | 26 | GGTACGTGGGGTATGGTCAA    | 60.495 | 20 | 276 | 610  | 885  |
| 57.036 | 22 | TGAAGATCGATTGGCCATAA    | 59.065 | 20 | 237 | 268  | 504  |
| 60.17  | 20 | TCTTTCTGCATCCACCACAA    | 60.24  | 20 | 258 | 110  | 367  |
| 59.702 | 20 | TAGGCCCATAAATGCTTCCA    | 60.415 | 20 | 249 | 39   | 287  |
| 59.547 | 20 | AACCGATTCTCACCTCTCCC    | 60.456 | 20 | 136 | 676  | 811  |
| 59.014 | 20 | AGTCGAATCTGTACGACCC     | 60.12  | 20 | 176 | 431  | 606  |
| 60.038 | 20 | AACTGGCAATTGCTGGAATC    | 60.081 | 20 | 206 | 645  | 850  |
| 60.081 | 20 | TCCCTACGAGGAAGTCAGGA    | 59.797 | 20 | 277 | 103  | 379  |
| 60.111 | 20 | TTGGTTTTGTTGGGATTGA     | 58.841 | 20 | 280 | 117  | 396  |
| 59.914 | 20 | ATTTGTTGGAGGTTTGGTCG    | 59.83  | 20 | 223 | 57   | 279  |
| 59.157 | 21 | TTTTTATTGTTTGCTCCGGG    | 59.937 | 20 | 138 | 48   | 185  |
| 60.224 | 20 | GCCATTGGGGAAGGTAAGAT    | 60.152 | 20 | 143 | 371  | 513  |
| 59.955 | 20 | CAACTCAAATGCATGGGAAA    | 59.518 | 20 | 129 | 237  | 365  |
| 61.031 | 20 | TGTGCTGGATGTCGTTGATT    | 60.12  | 20 | 138 | 19   | 156  |
| 60     | 20 | TCATTCATTCAGACTCAGGGG   | 60.058 | 21 | 113 | 935  | 1047 |
| 59.215 | 20 | TGTTACCTTTTGGCCATTT     | 60.344 | 20 | 195 | 30   | 224  |
| 58.897 | 20 | CTTTCTGGTCAACACTCACGA   | 58.917 | 21 | 222 | 213  | 434  |
| 59.734 | 20 | TGGGATAAAATAAGGGGTTTCC  | 60.241 | 22 | 255 | 966  | 1220 |
| 60.111 | 20 | TGGGCTGCAAATGATAAAAA    | 59.146 | 20 | 204 | 88   | 291  |
| 59.494 | 22 | CCGTCTCCTCCCTCTACCTC    | 60.208 | 20 | 245 | 843  | 1087 |
| 60.019 | 20 | CAAGAGCAACACATGCCAAC    | 60.31  | 20 | 232 | 2586 | 2817 |
| 59.088 | 23 | GTGTGTCTGGTGGGGAAGAC    | 60.421 | 20 | 166 | 15   | 180  |
| 59.638 | 20 | GGGGCCAATCCAAATTTAT     | 58.563 | 19 | 192 | 618  | 809  |
| 58.285 | 21 | ACTGAATCCTTTACGGAGC     | 59.288 | 20 | 175 | 409  | 583  |
| 59.691 | 20 | GTCGATCCCCTGAGTGTGTT    | 59.969 | 20 | 279 | 7    | 285  |
| 59.96  | 20 | GGTCTCTCAAACGGCCAAA     | 60.232 | 20 | 128 | 5861 | 5988 |
| 59.73  | 20 | CGCCCCACATTGTTTCTTAT    | 59.823 | 20 | 119 | 70   | 188  |



|        |    |                          |        |    |     |      |      |
|--------|----|--------------------------|--------|----|-----|------|------|
| 59.161 | 20 | GGAGGAATGCAAGTTGTGGT     | 59.973 | 20 | 280 | 263  | 542  |
| 59.845 | 20 | TTTTGTTGGACGAAAATGTCC    | 59.831 | 21 | 248 | 1253 | 1500 |
| 58.743 | 25 | TCTTAATTGGGGTGAAAGCG     | 60.067 | 20 | 260 | 6    | 265  |
| 59.916 | 20 | TACCGACCATTAGCAGCCTC     | 60.235 | 20 | 189 | 557  | 745  |
| 59.304 | 20 | CTCGCTTTATCCTCCTTCCC     | 60.166 | 20 | 258 | 1685 | 1942 |
| 58.243 | 20 | TCGTCCAACCTTAAGTGATTTTCA | 60.037 | 24 | 209 | 239  | 447  |
| 59.064 | 20 | TGGTTTGGAAATATACCGAAGTTG | 60.115 | 23 | 115 | 4062 | 4176 |
| 59.875 | 20 | GCGTAAGGGTGTTCTGTGAGT    | 60.179 | 20 | 143 | 77   | 219  |
| 60.04  | 19 | ATGCCATGACACGAACAATG     | 60.399 | 20 | 171 | 199  | 369  |
| 57.944 | 23 | GGCCGAATTATGCTTTTTGAA    | 60.04  | 20 | 261 | 94   | 354  |
| 59.738 | 21 | TGTGTCATCTTACACTTTCCACA  | 58.201 | 23 | 136 | 20   | 155  |
| 59.229 | 25 | ACAATCTGCGAAACTGGGTC     | 60.119 | 20 | 107 | 17   | 123  |
| 60.199 | 20 | CTCGACAACCTTGCCCTATC     | 59.694 | 20 | 212 | 547  | 758  |
| 60.074 | 20 | GAGAGTGCCTCACTTTTGTGG    | 59.899 | 21 | 203 | 177  | 379  |
| 60.035 | 20 | GTCGTGGAGGCATGCTTAAT     | 60.103 | 20 | 275 | 682  | 956  |
| 59.978 | 20 | CTTCAATTTCTTGGCGTGGT     | 60.11  | 20 | 267 | 393  | 659  |
| 59.985 | 20 | TTCATCGCCTCTCCTCTTGT     | 59.95  | 20 | 275 | 35   | 309  |
| 60.096 | 20 | CATTTGCAATGGAAAAAGGG     | 60.294 | 20 | 180 | 1720 | 1899 |
| 60.289 | 20 | CGGTTATTACCGGATCGCT      | 59.93  | 19 | 196 | 61   | 256  |
| 59.141 | 20 | AAGAGGTTGGGGTGCTACT      | 59.994 | 20 | 254 | 669  | 922  |
| 59.997 | 20 | CAAAGTCAATAGCCCAACCAA    | 59.982 | 21 | 238 | 320  | 557  |
| 59.629 | 20 | CGTTTGAGCTTTGTTTTCTTGA   | 59.553 | 22 | 156 | 29   | 184  |
| 59.973 | 23 | CCCTTTTTACCCACCGATTT     | 60.048 | 20 | 115 | 16   | 130  |
| 60.089 | 21 | AAAATGCATCCTCGTGTGTG     | 59.572 | 20 | 277 | 260  | 536  |
| 59.202 | 21 | GGCAAGACTCGATCAGGAAG     | 59.95  | 20 | 158 | 179  | 336  |
| 60.039 | 20 | CCACTGTTCAAGTGGACGAA     | 59.72  | 20 | 214 | 119  | 332  |
| 60.34  | 20 | ACCAAGCATTGTGGATGCTC     | 61.078 | 20 | 109 | 600  | 708  |
| 60.331 | 20 | CCAATTTGAATGGTTATCACCTG  | 60.457 | 23 | 115 | 455  | 569  |
| 60.211 | 20 | TCTCGTTTGGAGGAATTTGG     | 60.044 | 20 | 211 | 488  | 698  |
| 60.103 | 21 | CCTCGTTTGCAGCAGTTACA     | 60.05  | 20 | 234 | 992  | 1225 |
| 60     | 20 | GCGTACC GCATATGATCT      | 59.951 | 20 | 192 | 3205 | 3396 |
| 58.349 | 23 | TGTTTTCCGATTTACCAA       | 58.987 | 20 | 177 | 33   | 209  |
| 59.26  | 23 | TCCGTAGAATTTAAAAAGAAAGTA | 58.158 | 27 | 267 | 61   | 327  |
| 59.7   | 20 | AAAATCAAAGGCCCACAAATG    | 59.801 | 20 | 168 | 369  | 536  |
| 59.655 | 20 | ATCCCAAATTC CCAACCTCT    | 59.629 | 20 | 107 | 585  | 691  |
| 59.872 | 20 | CGTGGCAGGCTAATATCCAT     | 59.945 | 20 | 168 | 85   | 252  |
| 60.203 | 20 | AAATGGCCAAGCCTCTGTTA     | 59.708 | 20 | 253 | 805  | 1057 |
| 60.008 | 20 | TCTTGTGGTAAGCAGCTCCA     | 59.591 | 20 | 194 | 1200 | 1393 |
| 59.712 | 21 | TATATCGGGGGCTGAGCATA     | 60.403 | 20 | 146 | 248  | 393  |
| 60.081 | 20 | CAAACCTCCACCATAACCGCT    | 59.993 | 20 | 233 | 552  | 784  |
| 59.229 | 25 | ACAATCTGCGAAACTGGGTC     | 60.119 | 20 | 109 | 17   | 125  |
| 59.84  | 20 | AAGGGGACTTGCACAAACAG     | 60.149 | 20 | 244 | 100  | 343  |
| 59.091 | 23 | CGATATTGTGCCGTTTTGAT     | 60.721 | 20 | 271 | 90   | 360  |
| 59.749 | 21 | CGGGTGAGAATAATTTAAAGCC   | 59.049 | 22 | 179 | 2224 | 2402 |
| 60.179 | 20 | CATCAGTTCACTGGCAAAA      | 59.691 | 20 | 275 | 1120 | 1394 |
| 57.557 | 25 | GGTTGGCCAAGTAAGGTCAA     | 59.971 | 20 | 244 | 15   | 258  |
| 59.496 | 20 | TCAATGCAGATGGGATTCAA     | 60.009 | 20 | 201 | 421  | 621  |
| 60.068 | 21 | TTCACGAAAGTTGCAAAACG     | 59.888 | 20 | 185 | 418  | 602  |
| 58.747 | 23 | TTCATAATTTTGTGCTTTTGC    | 57.131 | 22 | 272 | 1845 | 2116 |
| 60.081 | 20 | AAATCCCAGCCACACATTTT     | 59.797 | 20 | 143 | 494  | 636  |
| 60.362 | 20 | CATGATCACTTAGGCACTTAGGA  | 59.687 | 24 | 279 | 547  | 825  |
| 60.068 | 20 | CAGAGGCATGGTCTCAGTCA     | 59.98  | 20 | 239 | 610  | 848  |
| 60.481 | 20 | GGGAGGACCATAGCTCATCA     | 60.034 | 20 | 187 | 467  | 653  |
| 59.535 | 21 | GGAGATCGGAATCGAACGTA     | 60.036 | 20 | 199 | 466  | 664  |
| 60.144 | 20 | GCCCACTCTTTCTAACCGTC     | 58.792 | 20 | 126 | 511  | 636  |
| 60.096 | 20 | GCAGAAAAACCATGGGAGAG     | 59.67  | 20 | 106 | 451  | 556  |
| 59.934 | 20 | AAAGCAAGCCTGGACTACCA     | 59.875 | 20 | 130 | 331  | 460  |
| 60.582 | 20 | ATTTTCGATTTAGGGGCGAT     | 59.772 | 20 | 225 | 1417 | 1641 |

|        |    |                          |        |    |     |      |      |
|--------|----|--------------------------|--------|----|-----|------|------|
| 59.632 | 20 | GGTTTTCAGATACACGTGCC     | 58.076 | 20 | 191 | 5    | 195  |
| 58.743 | 25 | ATGAGGAGGAGGAGTTGGGT     | 59.929 | 20 | 224 | 3    | 226  |
| 59.842 | 20 | CAAAGGCCTAGAAGTGTTTTGA   | 58.562 | 22 | 154 | 688  | 841  |
| 59.101 | 20 | AGGAAATGCAGTGTTTTTCAA    | 57.411 | 21 | 259 | 216  | 474  |
| 60.103 | 20 | GACAGTTTTCATTTGATCAAGCC  | 60     | 23 | 196 | 27   | 222  |
| 59.96  | 20 | TTGAAACGGACCAACAATGA     | 59.941 | 20 | 266 | 1    | 266  |
| 60.692 | 20 | GACCAGATGGGTGCTTGAGT     | 60.12  | 20 | 239 | 869  | 1107 |
| 59.927 | 20 | TTCAATTGTATTAGCCGATTTTT  | 57.072 | 23 | 217 | 242  | 458  |
| 59.367 | 20 | GAGAACCAAGGGTCAAGAAAAA   | 59.61  | 22 | 202 | 336  | 537  |
| 59.369 | 20 | CAAAAATCCAACACCTCTCAGAT  | 59.513 | 23 | 228 | 1310 | 1537 |
| 60.04  | 22 | TCACAATCGTCCATTTTTTCG    | 59.518 | 20 | 273 | 244  | 516  |
| 59.978 | 20 | TTGTGTGATCGAACCACGTT     | 60.008 | 20 | 179 | 118  | 296  |
| 60.118 | 20 | CCGGAGCTTCAATATCCAAA     | 60.031 | 20 | 234 | 591  | 824  |
| 59.876 | 20 | TGACTCAAGTCTTCAACCAACA   | 58.397 | 22 | 273 | 269  | 541  |
| 60.229 | 20 | CGGAGGGTTGGTGTAGAGA      | 60.103 | 20 | 180 | 1    | 180  |
| 59.939 | 20 | CGGTGGAATATGTATGGTTGTG   | 59.996 | 22 | 221 | 6    | 226  |
| 60.457 | 23 | GTGAGCTCTTCCGTGTCCTC     | 59.993 | 20 | 202 | 19   | 220  |
| 60.096 | 20 | ACTTGCACCACCACTTCCTC     | 60.159 | 20 | 154 | 485  | 638  |
| 60.03  | 22 | TGCCACGTAAGATCTCCAAA     | 59.272 | 20 | 280 | 609  | 888  |
| 60.785 | 24 | GAAAGAAATGCACACGCTACC    | 59.766 | 21 | 220 | 1136 | 1355 |
| 59.813 | 23 | GTTGGCTGTCCCCTCATTT      | 59.973 | 20 | 213 | 1128 | 1340 |
| 59.736 | 20 | TTAAGGGTTATCACCTGATTTTC  | 57.757 | 24 | 164 | 621  | 784  |
| 60.119 | 20 | TTAAACTTTCCATCGTCGCC     | 60.074 | 20 | 246 | 1461 | 1706 |
| 59.833 | 20 | ACGTTCTTCTCCATCCCCTT     | 59.935 | 20 | 179 | 218  | 396  |
| 59.685 | 20 | GTAAGGCGACAGCGATAACA     | 59.895 | 20 | 241 | 462  | 702  |
| 59.67  | 22 | TGAAATTAGGAAATAAGGAGGTG  | 58.625 | 25 | 246 | 345  | 590  |
| 59.962 | 20 | TGCCACGTAATCACAGCCTA     | 60.28  | 20 | 154 | 419  | 572  |
| 60.11  | 20 | TCTGAGATTTTCATTTGTGCGG   | 59.202 | 22 | 198 | 713  | 910  |
| 59.901 | 20 | TCAAATGCTCAAGGATCAATTC   | 59.162 | 22 | 250 | 1428 | 1677 |
| 60.576 | 23 | GGCTGTGTGATCATGTTTGG     | 59.967 | 20 | 216 | 987  | 1202 |
| 59.124 | 21 | AACGAAATCGAGACACCGAC     | 60.119 | 20 | 235 | 90   | 324  |
| 60.693 | 20 | GATTCTGCTCTCGTGAAGGC     | 60.104 | 20 | 227 | 3555 | 3781 |
| 60.617 | 20 | TGATCAATGTGGGATCATGTTT   | 60.059 | 22 | 224 | 955  | 1178 |
| 58.388 | 23 | TCATGCTTGAATCAAACAACA    | 59.206 | 22 | 193 | 1    | 193  |
| 59.691 | 20 | AGGTTGTCCTGATGGTGGAG     | 59.962 | 20 | 114 | 2186 | 2299 |
| 60.088 | 20 | TCACACACTCAAACACACGC     | 59.321 | 20 | 237 | 361  | 597  |
| 58.729 | 21 | TTTTGCCATTTTCGAAATCC     | 59.886 | 20 | 253 | 1274 | 1526 |
| 59.854 | 24 | GGAAATAAGGAGGTATTATGAAG  | 59.555 | 25 | 156 | 837  | 992  |
| 59.998 | 20 | ATTGCTTCCAATCGAACACG     | 61.032 | 20 | 102 | 3550 | 3651 |
| 59.75  | 20 | CACGAGCCGCCTAAAATAAA     | 60.218 | 20 | 270 | 203  | 472  |
| 59.935 | 20 | GTGATGCAGTGTGCTGCTT      | 60.064 | 20 | 239 | 2253 | 2491 |
| 60.104 | 20 | TGCGAATGATAATCAACATGAA   | 59.032 | 22 | 269 | 206  | 474  |
| 59.573 | 21 | GCAATTTCTGTTTCAGTATTTCAA | 57.598 | 24 | 280 | 1003 | 1282 |
| 60.051 | 20 | AAATATTTACGCCGCTGTC      | 60.103 | 20 | 246 | 843  | 1088 |
| 60.073 | 20 | CACGTACACCGACAAACACC     | 59.922 | 20 | 207 | 783  | 989  |
| 59.708 | 20 | TGATCAGCAGCTATGGAACCT    | 59.851 | 21 | 258 | 83   | 340  |
| 59.945 | 21 | TGATGGAAGCAATGCAACTT     | 59.276 | 20 | 171 | 173  | 343  |
| 59.937 | 20 | TTGGCAAACCCCTATTCAGG     | 59.931 | 20 | 222 | 2852 | 3073 |
| 60.132 | 20 | TTTCGCAAGGTAGAAACCGT     | 59.747 | 20 | 132 | 1257 | 1388 |
| 59.993 | 20 | ACTGAACTCAGCAGCCTCGT     | 60.205 | 20 | 193 | 2510 | 2702 |
| 60.044 | 20 | GGCCAAAACATTGCTCCTAT     | 59.046 | 20 | 175 | 2715 | 2889 |
| 58.108 | 22 | TGGACAAATATGGTGTGATGGC   | 59.205 | 20 | 246 | 186  | 431  |
| 59.622 | 20 | TTGGCTCGTACCAAGAAAGG     | 60.241 | 20 | 265 | 2305 | 2569 |
| 59.699 | 21 | ATATCACATGCATGACCGGA     | 59.763 | 20 | 188 | 332  | 519  |
| 60.225 | 21 | GCCCTAAGGTTGACTCATGG     | 59.55  | 20 | 211 | 25   | 235  |
| 59.882 | 20 | GTTCCGGGATATCATCATGC     | 60.126 | 20 | 271 | 251  | 521  |
| 60.246 | 20 | CGTTTGGCGGATAGTTTTGT     | 59.996 | 20 | 261 | 195  | 455  |
| 59.67  | 20 | CGAAGGTGGGTTCTTGATGAT    | 59.966 | 20 | 217 | 11   | 227  |

|        |    |                         |        |    |     |      |      |
|--------|----|-------------------------|--------|----|-----|------|------|
| 57.797 | 24 | GGGATCCATTGAGGATGTGT    | 59.593 | 20 | 266 | 2685 | 2950 |
| 59.91  | 20 | GGGAGGGAATCTATTGTGATTG  | 59.666 | 22 | 198 | 577  | 774  |
| 59.05  | 20 | TTGGATGAGATGATGGCAAA    | 60.009 | 20 | 236 | 1    | 236  |
| 59.99  | 20 | GTGCTGCCCAAGAACTTAGC    | 60.022 | 20 | 242 | 639  | 880  |
| 60.053 | 20 | GGCTGCATTTTTATCCCAA     | 59.907 | 20 | 256 | 510  | 765  |
| 59.787 | 20 | AAGCGTAGCATTGAGGGAGA    | 59.978 | 20 | 214 | 474  | 687  |
| 58.82  | 27 | CCCCGACTTCTCCTTTGATT    | 60.434 | 20 | 253 | 1984 | 2236 |
| 59.84  | 20 | AGAGGCGATTGCTTAGGTGA    | 59.978 | 20 | 269 | 66   | 334  |
| 59.007 | 23 | GTTTTCGTTGTCCCCACAAT    | 59.694 | 20 | 161 | 199  | 359  |
| 60.038 | 20 | CCAAGCCTACCGAGTCAATG    | 60.647 | 20 | 209 | 952  | 1160 |
| 59.907 | 20 | TATACAAGCTGTGGCGGTTG    | 59.752 | 20 | 273 | 50   | 322  |
| 60.132 | 20 | CGTCCAGTGCCTGTGAATTT    | 61.096 | 20 | 258 | 2258 | 2515 |
| 59.797 | 21 | GGGTCGACAAGCTTGAGAAA    | 60.375 | 20 | 184 | 10   | 193  |
| 60.11  | 20 | GCAGAGAGGGAGGGAGAGTT    | 59.952 | 20 | 237 | 123  | 359  |
| 59.866 | 20 | TGGCACCCCTTTGTAATCAT    | 60.192 | 20 | 270 | 1035 | 1304 |
| 59.939 | 22 | TCAAGATTATGGTGGGGGTG    | 60.572 | 20 | 274 | 878  | 1151 |
| 60.232 | 20 | CACGAATTCCTCCGACTTTTA   | 59.931 | 20 | 171 | 990  | 1160 |
| 59.945 | 20 | TCACCCGAATCTTTCGTTTT    | 60.051 | 20 | 207 | 496  | 702  |
| 60.152 | 21 | CGATCGATCATCGGAAAAAT    | 59.862 | 20 | 114 | 16   | 129  |
| 59.871 | 20 | ATGAGGCCCATCAACACAAT    | 60.203 | 20 | 241 | 116  | 356  |
| 58.736 | 24 | TGGCTGATCAAGCTCCTTCT    | 60.096 | 20 | 131 | 14   | 144  |
| 59.953 | 20 | TCCCAAAGTTTCACACGTCA    | 60.128 | 20 | 216 | 501  | 716  |
| 60.042 | 20 | TGGGATTGATCCTACCCAAA    | 60.126 | 20 | 262 | 2459 | 2720 |
| 60.03  | 20 | TTTTCATGAATTGCCTTCCC    | 59.878 | 20 | 263 | 2855 | 3117 |
| 59.96  | 20 | TTTAATTAGGTCCACGCGCT    | 59.742 | 20 | 103 | 123  | 225  |
| 59.988 | 20 | TTGATAGTCCGGTTTTTCGG    | 59.931 | 20 | 238 | 179  | 416  |
| 57.278 | 20 | TTGGTAGGTGTCCGTGATGA    | 59.96  | 20 | 249 | 836  | 1084 |
| 60.035 | 20 | AGTTAGCATGGGGAAGGGTT    | 59.827 | 20 | 199 | 16   | 214  |
| 60.209 | 20 | TCATCCCAAGTCCAGAGCAT    | 60.622 | 20 | 259 | 2726 | 2984 |
| 60.353 | 20 | TTTTTCAGCTCACTTTGTGATG  | 58.081 | 22 | 229 | 647  | 875  |
| 59.903 | 20 | CCAGCAATAGCCCTCTGTGT    | 60.277 | 20 | 267 | 4389 | 4655 |
| 59.992 | 20 | TGCAAATGGTGATTGCTCAT    | 60.08  | 20 | 265 | 365  | 629  |
| 59.924 | 20 | GACCGTGTGCAATGAAACAG    | 60.16  | 20 | 211 | 166  | 376  |
| 60.144 | 20 | GTGGCATGCAAACGACATTA    | 60.532 | 20 | 107 | 2    | 108  |
| 59.938 | 20 | CTGCAGATCTAAGGCCGAG     | 58.709 | 19 | 146 | 974  | 1119 |
| 59.773 | 20 | GCTCGAACTCGATCACAACA    | 59.992 | 20 | 236 | 66   | 301  |
| 60.307 | 20 | TCGCCAAAACATGATGAGAG    | 59.799 | 20 | 280 | 33   | 312  |
| 59.988 | 20 | ATCGGAGTTGATTTGATGCC    | 59.9   | 20 | 261 | 1600 | 1860 |
| 59.005 | 20 | TGGCGATTAATTTCCCTTCA    | 60.395 | 20 | 154 | 406  | 559  |
| 59.739 | 20 | TGTCCAACCTCAAAGAGGAAAA  | 57.441 | 21 | 260 | 130  | 389  |
| 59.065 | 20 | ACAAAAAGCACAAACCCACC    | 59.875 | 20 | 259 | 1619 | 1877 |
| 60.059 | 20 | CCAAGTTGATGCACGAGAGA    | 59.984 | 20 | 222 | 911  | 1132 |
| 59.722 | 20 | GCTACCTTGCGGAGTTCAAG    | 60.015 | 20 | 188 | 59   | 246  |
| 60.36  | 20 | CTCTCTCCTCCCACAACCTG    | 59.828 | 20 | 144 | 160  | 303  |
| 60.004 | 20 | TGTGCATCAAAATAAACCCAA   | 58.922 | 21 | 144 | 1559 | 1702 |
| 59.756 | 20 | AAAGCAGGTTCCCCCTATTG    | 60.312 | 20 | 207 | 270  | 476  |
| 59.024 | 20 | TTGGGATTTACGAAAGATTG    | 59.924 | 21 | 231 | 14   | 244  |
| 57.999 | 20 | TTGCCGTTTTGTTTCATGTTT   | 59.062 | 20 | 235 | 1925 | 2159 |
| 60.035 | 20 | GGCTAATTGTTGCGCTTTGA    | 60.074 | 20 | 146 | 268  | 413  |
| 59.854 | 20 | CCGGATACGGATTATATCCAA   | 58.659 | 21 | 249 | 383  | 631  |
| 59.918 | 21 | CCTTAGATTCCACTTGGGCA    | 60.066 | 20 | 125 | 371  | 495  |
| 59.769 | 20 | ACCTCCAACCCTTATCCAC     | 60.052 | 20 | 146 | 8    | 153  |
| 60.111 | 20 | GTCGATTGCGCACCTTTAAC    | 59.574 | 20 | 202 | 226  | 427  |
| 60.195 | 20 | AGTTGCAATTGCCCGAAATA    | 60.456 | 20 | 175 | 250  | 424  |
| 59.606 | 21 | AAGCCTACATTCACATTCCCA   | 59.443 | 21 | 241 | 418  | 658  |
| 59.82  | 20 | TCCAGCGACTCATGTTGTTT    | 59.837 | 20 | 274 | 727  | 1000 |
| 59.079 | 21 | AATCAATGAAGGGAGGGAGG    | 60.264 | 20 | 250 | 251  | 500  |
| 60.081 | 20 | CCCAAGAATGGGTTATTATTTGA | 59.14  | 23 | 149 | 778  | 926  |

|        |    |                         |        |    |     |      |      |
|--------|----|-------------------------|--------|----|-----|------|------|
| 59.972 | 20 | CGAAATGCATGATTGAGGTG    | 60.073 | 20 | 249 | 722  | 970  |
| 60.074 | 20 | TAGAGGTGGACGAGGAGGTG    | 60.252 | 20 | 224 | 274  | 497  |
| 59.369 | 20 | TGACATGGATTGTGCTTTTCG   | 60.665 | 20 | 233 | 2    | 234  |
| 60.051 | 20 | TTGAGTTTGGGGATATTCGG    | 59.756 | 20 | 198 | 922  | 1119 |
| 59.917 | 20 | TTTCTGGAAGGACCAAC       | 59.943 | 20 | 236 | 502  | 737  |
| 60.263 | 20 | GGTTTCGACTGGTAACGGAA    | 59.971 | 20 | 277 | 390  | 666  |
| 57.297 | 26 | AAGCGAAAGAAAATGGTTTGAA  | 60.108 | 22 | 280 | 5    | 284  |
| 60.073 | 20 | CATGAAGTGAAAGGGACGGT    | 59.966 | 20 | 205 | 182  | 386  |
| 59.831 | 20 | TTGAAGTAGGGCATTGAGGC    | 60.214 | 20 | 261 | 435  | 695  |
| 59.752 | 20 | GATAGTGGAGTTGTGAGCATCTG | 58.878 | 23 | 280 | 56   | 335  |
| 59.903 | 20 | TGACGACCGATAATTGCTCC    | 61.003 | 20 | 174 | 44   | 217  |
| 59.817 | 20 | TACTGCAGTGGAGTTGCCTG    | 60.049 | 20 | 250 | 1413 | 1662 |
| 59.052 | 20 | CCAAAACTGATAAATGATGCTG  | 58.687 | 23 | 253 | 423  | 675  |
| 59.971 | 20 | TTTTTGGCCTTTGATCTTCG    | 60.181 | 20 | 262 | 95   | 356  |
| 59.864 | 20 | TTCGTGAATAGTGCTGCCTC    | 59.028 | 20 | 235 | 512  | 746  |
| 59.978 | 20 | TACCCATTCTTCGCCACTTC    | 60.074 | 20 | 209 | 1569 | 1777 |
| 60.264 | 20 | CGGGAGAAAATGAAAACCCT    | 60.291 | 20 | 140 | 1025 | 1164 |
| 60.645 | 20 | CGGTCTCGGTTTGGAACTA     | 60.066 | 20 | 253 | 150  | 402  |
| 59.359 | 20 | GGGATAGTACCGAACACGA     | 59.813 | 20 | 186 | 877  | 1062 |
| 58.727 | 21 | CGAACCTGGGTCTCTCACAT    | 60.112 | 20 | 164 | 118  | 281  |
| 59.882 | 20 | GAGGGAGGGAAGATATTCGG    | 59.859 | 20 | 266 | 1447 | 1712 |
| 59.835 | 20 | ATCCACCAAAAACCTGTCCA    | 60.21  | 20 | 173 | 1066 | 1238 |
| 59.923 | 20 | AGAGTGAGAGTTGGCCTCCA    | 59.986 | 20 | 280 | 230  | 509  |
| 59.992 | 20 | CGCTGCAACAAATACACACC    | 60.18  | 20 | 256 | 978  | 1233 |
| 60.11  | 20 | TCCAACCTTGTTCCTCCGAC    | 59.948 | 20 | 227 | 573  | 799  |
| 59.903 | 20 | ATCACCGATTTGCAAACACA    | 59.972 | 20 | 222 | 162  | 383  |
| 60.227 | 20 | ATAGGATTTCACTGCCTGCG    | 60.235 | 20 | 247 | 140  | 386  |
| 59.903 | 20 | TTGTCAAAAACGCCAGCAC     | 59.888 | 20 | 265 | 2699 | 2963 |
| 60.074 | 20 | CACCTGATTTTCTCCCTCCC    | 60.822 | 20 | 224 | 1547 | 1770 |
| 59.66  | 25 | TGCACGCAGCATATTATGAA    | 58.88  | 20 | 216 | 578  | 793  |
| 57.587 | 21 | TAGGCCTAAATGGTTCGCATC   | 60.06  | 20 | 278 | 519  | 796  |
| 59.962 | 20 | CAAATCCAAACCACCATTCC    | 60.029 | 20 | 224 | 156  | 379  |
| 59.839 | 20 | GATTCTGCTCGATTCCCAAG    | 59.773 | 20 | 154 | 1348 | 1501 |
| 59.579 | 20 | TTTGGAAAAACAGAGCACCC    | 60.088 | 20 | 134 | 342  | 475  |
| 59.992 | 21 | GGCTTAATGGCCAAAAACAA    | 59.943 | 20 | 272 | 3788 | 4059 |
| 59.583 | 24 | TGACATTTGTCTAACGATGGTG  | 58.554 | 22 | 269 | 70   | 338  |
| 59.851 | 24 | TGTGATGCTCAGCAGTGTTT    | 57.976 | 20 | 208 | 48   | 255  |
| 59.826 | 20 | GAAGCATTGGTAAGCCCAA     | 60.074 | 20 | 197 | 21   | 217  |
| 60.194 | 26 | AAAACGCGCTATTTTAAACCC   | 59.549 | 21 | 255 | 1    | 255  |
| 60     | 20 | TCACTGCATTAACCTACTCCC   | 58.264 | 22 | 263 | 3910 | 4172 |
| 59.174 | 20 | GGTCTGGCAGTCGTGTTTCT    | 60.307 | 20 | 271 | 2751 | 3021 |
| 60.21  | 20 | CAGACAATCCCGGAGGACTA    | 60.065 | 20 | 221 | 2622 | 2842 |
| 59.966 | 20 | TGACACGGTGATTTACGTGG    | 60.427 | 20 | 242 | 248  | 489  |
| 59.833 | 20 | CCTAATGAATCCTCCCCCAT    | 59.974 | 20 | 278 | 1154 | 1431 |
| 59.82  | 20 | ATCTAATGCCCAACACAGC     | 59.962 | 20 | 239 | 1130 | 1368 |
| 59.918 | 20 | CTGTGCGCTAAAGTTTTCC     | 59.883 | 20 | 145 | 77   | 221  |
| 59.661 | 20 | TCCACTCCAACCCTTCTTTG    | 60.081 | 20 | 261 | 5285 | 5545 |
| 59.957 | 20 | TTGTCTTCATCAAACGCCAG    | 59.84  | 20 | 183 | 787  | 969  |
| 59.933 | 20 | AGGGAGGTGGCTCCTGTTAT    | 59.957 | 20 | 183 | 383  | 565  |
| 59.586 | 20 | TGATTGCGAAACAGGAAAAA    | 59.277 | 20 | 168 | 85   | 252  |
| 57.796 | 21 | GCCTGCTACACAGGGTTTTTC   | 59.74  | 20 | 198 | 27   | 224  |
| 60.24  | 20 | GAATGATGTGATTTCGGCCTT   | 59.9   | 20 | 229 | 546  | 774  |
| 59.956 | 21 | TGAGAAGAACACATAAATTCGCA | 59.772 | 23 | 280 | 1610 | 1889 |
| 59.702 | 20 | GGTGGAGACAGGAGGGTGTA    | 59.962 | 20 | 231 | 39   | 269  |
| 58.912 | 20 | TCCAGCTGTTAAAACCCACC    | 59.971 | 20 | 235 | 1001 | 1235 |
| 60.132 | 20 | TCGGAGTCTTCAGACAAATCAA  | 59.853 | 22 | 274 | 1919 | 2192 |
| 59.521 | 20 | TGTGCTTCAGTCCTTGCATC    | 59.992 | 20 | 277 | 4899 | 5175 |
| 60.014 | 20 | ATGGAATACCGGTGCAAAAA    | 60.188 | 20 | 201 | 1558 | 1758 |

|        |    |                           |        |    |     |      |      |
|--------|----|---------------------------|--------|----|-----|------|------|
| 59.864 | 20 | ATTCTCTCTCCCCCTCCAAA      | 60.008 | 20 | 226 | 51   | 276  |
| 59.926 | 20 | ATGCTTTCGTTCCATTGGTC      | 59.939 | 20 | 263 | 213  | 475  |
| 60.14  | 20 | AATCCTGGTTCCTCGGAGTT      | 59.935 | 20 | 130 | 674  | 803  |
| 58.954 | 21 | TATTTGCAGAATTTGCCACG      | 59.702 | 20 | 185 | 246  | 430  |
| 60.008 | 20 | ACACCTGGGTGAGACCAAAC      | 59.859 | 20 | 181 | 742  | 922  |
| 59.723 | 21 | TCCGATGGGGTATTCCACTA      | 60.148 | 20 | 182 | 180  | 361  |
| 59.989 | 20 | GGCTAGGCTTGTAGCAAAAAGG    | 60.389 | 21 | 234 | 71   | 304  |
| 59.916 | 20 | CGCATTTTTGGCCTGATATT      | 59.928 | 20 | 221 | 776  | 996  |
| 60.431 | 20 | TTTGAAAACGTTTCGCTTCA      | 59.462 | 20 | 269 | 646  | 914  |
| 59.293 | 20 | TCCTTAATTCATTAATAACATACCC | 57.288 | 26 | 123 | 481  | 603  |
| 60.673 | 20 | TGCAAACACAATGTCTGAAATG    | 59.632 | 22 | 269 | 698  | 966  |
| 60.147 | 20 | CCCTCTCTCCCCTCACTCAT      | 60.605 | 20 | 240 | 58   | 297  |
| 59.439 | 21 | GTGTGATTGGCAGTGACAGG      | 60.162 | 20 | 143 | 1036 | 1178 |
| 58.503 | 27 | GCACGGCAGTGGAAGAATA       | 59.814 | 19 | 277 | 1015 | 1291 |
| 58.957 | 20 | CTCAGTACAATGGAGTGATGGC    | 59.621 | 22 | 168 | 606  | 773  |
| 60.275 | 20 | AGTCAGCCGAGGAAATTCAA      | 59.813 | 20 | 277 | 170  | 446  |
| 59.338 | 20 | GCTGAGAAGATGGCCTTTTG      | 59.955 | 20 | 213 | 248  | 460  |
| 61.981 | 20 | CGGCTGTCAACAGAAGTTCA      | 60.025 | 20 | 202 | 72   | 273  |
| 60.089 | 20 | GGCATGTGGGGGTATAGTTG      | 60.074 | 20 | 256 | 1533 | 1788 |
| 59.934 | 20 | GACACCCCAAGTCCAAAGAA      | 59.943 | 20 | 269 | 143  | 411  |
| 60.081 | 20 | TATTTTCGTTTATTGGGCG       | 59.799 | 20 | 171 | 76   | 246  |
| 59.939 | 20 | TGGGACACTGTTTTCTTTGG      | 58.594 | 20 | 195 | 284  | 478  |
| 59.757 | 20 | TCCCCTGCTTCTAAAACCCT      | 60.068 | 20 | 140 | 10   | 149  |
| 58.952 | 20 | TGCCCAGATGTCAAGAATTG      | 59.648 | 20 | 271 | 223  | 493  |
| 59.362 | 23 | GGATTACGTGCAAGGGAGA       | 60.074 | 20 | 100 | 442  | 541  |
| 59.972 | 20 | TGGCTTGGTCTTGATCTGTG      | 59.831 | 20 | 103 | 938  | 1040 |
| 57.299 | 27 | TGGGAATAATGTATGAATGATCG   | 58.707 | 23 | 271 | 943  | 1213 |
| 59.74  | 20 | CACGGTTGCCCTTTGTTACT      | 60.03  | 20 | 238 | 660  | 897  |
| 60.401 | 20 | TGTTTGTGATCCCAATTGAA      | 57.35  | 20 | 234 | 608  | 841  |
| 59.989 | 20 | TTGGTTCGAGCCATTGTGTA      | 60.111 | 20 | 155 | 44   | 198  |
| 60.081 | 20 | TCCAGTGTTGCTTTGCCATA      | 60.257 | 20 | 254 | 1190 | 1443 |
| 59.941 | 20 | AAGTCGAAATTTGGCAACAA      | 58.267 | 20 | 103 | 203  | 305  |
| 59.953 | 20 | ATGAGCACATGCCAAAATGT      | 59.005 | 20 | 204 | 1838 | 2041 |
| 60.088 | 20 | TGTGCTCCATGGCTGATAAA      | 60.22  | 20 | 226 | 189  | 414  |
| 59.258 | 20 | GCTAATGGGAAAAGCATTGG      | 59.547 | 20 | 109 | 1461 | 1569 |
| 59.874 | 20 | CATGATAATGCTGATAAAAATTGC  | 57.831 | 24 | 203 | 447  | 649  |
| 59.971 | 20 | CTCCTTCTTTGGCTCAATGG      | 59.807 | 20 | 221 | 837  | 1057 |
| 59.097 | 20 | ACTTGGAATCTGGACTCGGA      | 59.655 | 20 | 227 | 15   | 241  |
| 60.073 | 20 | CAACCGGCAGCATTTTTACT      | 60.131 | 20 | 216 | 3487 | 3702 |
| 59.67  | 23 | CGGGTGGGAATGTATTAGTT      | 59.952 | 21 | 250 | 70   | 319  |
| 58.703 | 23 | ATAAAAAGGACTGGCCTGGG      | 60.312 | 20 | 214 | 60   | 273  |
| 59.923 | 20 | TTTGGTTGAAGGTGCATGTC      | 59.547 | 20 | 121 | 399  | 519  |
| 60.327 | 20 | CTGCCCATTTGACTCCATCT      | 60.073 | 20 | 216 | 133  | 348  |
| 59.984 | 20 | TGAGGCCACTGACTTGAATG      | 59.831 | 20 | 251 | 39   | 289  |
| 59.835 | 20 | CAAATAATGTGGCAATCCCC      | 60.016 | 20 | 146 | 40   | 185  |
| 60.054 | 26 | TTCATCTTGTAGCGTTTGAATGA   | 59.772 | 23 | 105 | 1    | 105  |
| 60.024 | 20 | TGCATCATCTGCCATTTTGT      | 60.08  | 20 | 191 | 1438 | 1628 |
| 60.008 | 20 | CACAAAGCTGCTCTCTTCTCC     | 59.367 | 21 | 280 | 27   | 306  |
| 60.544 | 20 | CTACGCATGGTTTTCCAGT       | 59.993 | 20 | 169 | 176  | 344  |
| 59.448 | 21 | GGAATATGATCGGTGCGAAA      | 60.807 | 20 | 239 | 2    | 240  |
| 59.997 | 20 | AAATCACAGGAGGACGATGC      | 60.081 | 20 | 182 | 850  | 1031 |
| 59.831 | 20 | TTATCAACCCAAAACCCCAA      | 60.024 | 20 | 105 | 176  | 280  |
| 59.653 | 20 | GCTAAAAGGGATTCTTGGGC      | 60.041 | 20 | 123 | 1186 | 1308 |
| 61.429 | 20 | AATTTTGGAGATGGACCGTG      | 59.79  | 20 | 261 | 918  | 1178 |
| 59.9   | 20 | ATCGCCTCCACCTCAAATTA      | 59.528 | 20 | 211 | 299  | 509  |
| 59.801 | 20 | GCTGACTAACCCATTCTTGTTTG   | 60.048 | 23 | 240 | 917  | 1156 |
| 60.074 | 20 | ATCTGAACAAATGGGCTTGG      | 59.933 | 20 | 205 | 2894 | 3098 |
| 59.96  | 20 | ATACGACAGCGTGTGGACA       | 60.183 | 20 | 255 | 1285 | 1539 |

|        |    |                          |        |    |     |      |      |
|--------|----|--------------------------|--------|----|-----|------|------|
| 59.861 | 21 | CTACCCAAACGTCCCAAAAC     | 59.331 | 20 | 175 | 531  | 705  |
| 59.91  | 20 | TTTTTGAATGGTGGGGTAA      | 60.024 | 20 | 207 | 229  | 435  |
| 59.696 | 21 | TCTTTCTTGGAACATCTCGTCA   | 59.853 | 22 | 255 | 595  | 849  |
| 58.922 | 20 | CCTGGTTCATTTCAAGGAGA     | 60.042 | 20 | 155 | 211  | 365  |
| 60.142 | 20 | AACACACAAACGAATGGCAA     | 60.011 | 20 | 275 | 404  | 678  |
| 60.241 | 20 | AGGAAACCTTAAAGGGCCAA     | 59.939 | 20 | 256 | 1135 | 1390 |
| 60.129 | 20 | GTGGTGGTGTGCGTTCATTA     | 60.436 | 20 | 176 | 185  | 360  |
| 60.081 | 20 | TGAACATGCATCCAAAGGAA     | 60.049 | 20 | 214 | 214  | 427  |
| 58.605 | 23 | ACCTGGAAACGCATATGGAG     | 59.955 | 20 | 260 | 2    | 261  |
| 60.056 | 20 | CCTTTTCTGCATTTGGTGCT     | 60.249 | 20 | 251 | 584  | 834  |
| 59.875 | 20 | GGGCTATCGACCTCTTTTCC     | 60.039 | 20 | 239 | 496  | 734  |
| 59.903 | 20 | AACAGAGGCATTCCATGAGG     | 60.073 | 20 | 129 | 355  | 483  |
| 59.845 | 20 | GCTTGAAGCGAAAAAGGAGA     | 59.708 | 20 | 218 | 228  | 445  |
| 60.79  | 20 | CTCACCTGCACACACATTCA     | 59.265 | 20 | 280 | 1181 | 1460 |
| 59.989 | 21 | AGATGGGGCTGTTGTGAAAG     | 60.111 | 20 | 244 | 2085 | 2328 |
| 59.789 | 20 | TCAGTCAACCAACCAACTGC     | 59.726 | 20 | 212 | 21   | 232  |
| 58.601 | 23 | ATTGCACCTCGTAAACACCC     | 59.859 | 20 | 111 | 22   | 132  |
| 60.042 | 20 | AACTGGGAAAAGGAAACGGT     | 59.842 | 20 | 171 | 1532 | 1702 |
| 59.847 | 20 | TTTACACCACAAAGTTGCCG     | 59.627 | 20 | 184 | 790  | 973  |
| 59.722 | 21 | AAGGTCCTTCTCATTGGGCT     | 60.074 | 20 | 142 | 25   | 166  |
| 58.32  | 21 | CCCATATTGGCAAGCATTTC     | 60.289 | 20 | 100 | 21   | 120  |
| 59.127 | 20 | AACTCAACAACCCGTGAAGC     | 60.156 | 20 | 225 | 94   | 318  |
| 60.134 | 20 | CGCGTGACAAATTCTTGAAA     | 59.849 | 20 | 154 | 275  | 428  |
| 60.175 | 20 | AAGCCAGGCAGCATAAGAAA     | 59.982 | 20 | 212 | 47   | 258  |
| 60.833 | 20 | TGCTTGACAAGTGACATTGAAA   | 59.366 | 22 | 146 | 446  | 591  |
| 59.948 | 20 | ACTTGCAAATTACCAAGGGA     | 57.217 | 20 | 126 | 162  | 287  |
| 60.008 | 20 | ACTGAAGCTCGAACCCCTCT     | 60.393 | 20 | 238 | 248  | 485  |
| 59.933 | 20 | GTGGCAGGAAGCATTCACTT     | 60.263 | 20 | 260 | 1169 | 1428 |
| 59.875 | 20 | ATGGGGAGGGGATATGGTAA     | 60.224 | 20 | 130 | 239  | 368  |
| 60.046 | 21 | TGGTCCCTAATTCAACTTTTGC   | 60.344 | 22 | 208 | 68   | 275  |
| 59.742 | 19 | GCTGGTTGCATACTTGACACA    | 60.876 | 20 | 205 | 8    | 212  |
| 58.315 | 21 | TGATTCCTCCTACGGACCTG     | 60.065 | 20 | 159 | 2913 | 3071 |
| 59.882 | 20 | TGTGCACTCGATGATGTTTG     | 59.248 | 20 | 235 | 2657 | 2891 |
| 60.06  | 20 | CCAAACAACCTCCCTACCGAA    | 59.964 | 20 | 233 | 481  | 713  |
| 60.064 | 20 | TGTCACAAGCTCTTCATCGG     | 59.984 | 20 | 269 | 334  | 602  |
| 60.041 | 20 | CTGATGCATGTGGTAGGAGC     | 59.271 | 20 | 220 | 4028 | 4247 |
| 60.238 | 20 | CCATACAAAAGCGCCAAACT     | 60.131 | 20 | 188 | 1967 | 2154 |
| 60.244 | 20 | CAATTGTAGCTCCTCCTAATTTCC | 59.564 | 24 | 181 | 416  | 596  |
| 59.823 | 20 | CCCAACATCATCCCTCACTC     | 60.326 | 20 | 174 | 150  | 323  |
| 60.448 | 20 | GGTGGGCTTTTCTGACTCAA     | 60.232 | 20 | 271 | 19   | 289  |
| 59.587 | 20 | AATTTTGGCAACCGATCTTG     | 59.938 | 20 | 212 | 2767 | 2978 |
| 60.044 | 19 | CTACCCTTACCTGTCTGCCG     | 59.751 | 20 | 246 | 186  | 431  |
| 59.96  | 20 | TCAAAAACCACAAACCACGA     | 59.981 | 20 | 222 | 445  | 666  |
| 60.277 | 20 | GGCGGTATGCACTCAAAGTT     | 60.14  | 20 | 218 | 782  | 999  |
| 60.13  | 22 | TTGGGTTTTGATGATTGCTTT    | 59.442 | 21 | 265 | 1016 | 1280 |
| 59.962 | 20 | CCACCAAACCAGAAGCAGTT     | 60.149 | 20 | 161 | 3169 | 3329 |
| 60.151 | 20 | TGTGGCCTTTTGTCACTTCA     | 60.278 | 20 | 280 | 131  | 410  |
| 60.449 | 20 | ATGCATTTGGGAGGACAAAG     | 59.933 | 20 | 219 | 368  | 586  |
| 59.377 | 20 | AGTGGAGTAGGCGGAAGGTT     | 60.132 | 20 | 277 | 832  | 1108 |
| 59.971 | 20 | TTTAAATGGCCTGTTCCCA      | 60.294 | 20 | 204 | 10   | 213  |
| 59.917 | 20 | GGACGTCCAAAAACGGAAAT     | 61.08  | 20 | 231 | 455  | 685  |
| 60.003 | 20 | GGACTACCGTGATGGAAGA      | 59.927 | 20 | 138 | 76   | 213  |
| 59.875 | 20 | CAAGTGAATTTGGATGGTGCT    | 59.985 | 21 | 219 | 355  | 573  |
| 60.431 | 20 | GCTTGTGTTCAAGCTGCTG      | 59.788 | 20 | 245 | 200  | 444  |
| 59.955 | 20 | GGTGCGGGATCAATAGGTTA     | 59.784 | 20 | 203 | 4270 | 4472 |
| 59.869 | 20 | AGGTGGGAGTGGAAACACAC     | 59.859 | 20 | 273 | 524  | 796  |
| 60.235 | 20 | GTTGCTGTTCTGACCCGACT     | 60.307 | 20 | 140 | 465  | 604  |
| 59.846 | 20 | CGGCATGATGCAGTAAGAGA     | 59.972 | 20 | 261 | 3250 | 3510 |

|        |    |                          |        |    |     |      |      |
|--------|----|--------------------------|--------|----|-----|------|------|
| 59.974 | 20 | TCAAAATCCTGCCTTGTTCC     | 60.051 | 20 | 238 | 61   | 298  |
| 59.462 | 21 | CCTTAAAACCCCTCCTCGGAT    | 59.415 | 20 | 251 | 619  | 869  |
| 59.861 | 21 | AAGGGCTTTGTGCATGAGAC     | 60.263 | 20 | 267 | 947  | 1213 |
| 60.074 | 22 | TGCCTCAACTTTGTGTGCTT     | 59.49  | 20 | 264 | 1320 | 1583 |
| 59.894 | 20 | TTGACATGTGGCATTGTGTG     | 60.003 | 20 | 155 | 1948 | 2102 |
| 60.315 | 20 | TGTTGCACATTGCTTGTTGA     | 59.877 | 20 | 241 | 2179 | 2419 |
| 60.255 | 20 | TCACAGGCAAATGACCAAGA     | 60.24  | 20 | 248 | 258  | 505  |
| 59.23  | 20 | CTTCCACATGGATGAAGTGC     | 59.09  | 20 | 280 | 582  | 861  |
| 60.227 | 20 | GAAGGCATGGCTCAGAGTTC     | 59.957 | 20 | 208 | 397  | 604  |
| 59.41  | 20 | ACACCATGGTTTCCAATGCT     | 60.24  | 20 | 276 | 6    | 281  |
| 60.003 | 20 | CCGTGATGGAACAACCTTCT     | 59.966 | 20 | 133 | 76   | 208  |
| 59.903 | 20 | AATTCACAAGCTCACAAAACG    | 57.947 | 21 | 244 | 483  | 726  |
| 60.025 | 20 | CCTAGCAAGGCTTCCATCTG     | 59.971 | 20 | 194 | 129  | 322  |
| 59.82  | 20 | AAGGTGAAAGAGACATCAACCAA  | 60.026 | 23 | 105 | 539  | 643  |
| 60.155 | 20 | CCGCAACTTGACAATGACAC     | 60.16  | 20 | 261 | 246  | 506  |
| 60.034 | 20 | CATTATCTCAAACGAGCGGC     | 60.742 | 20 | 246 | 166  | 411  |
| 60.223 | 20 | TGAATTGGCCTAAGCGAAAG     | 60.335 | 20 | 167 | 210  | 376  |
| 60.154 | 20 | CGAACAAGAGTCTTCCGAGG     | 59.982 | 20 | 142 | 589  | 730  |
| 59.109 | 20 | AAAGGCTCCTCTCTTCAGGG     | 59.95  | 20 | 163 | 2437 | 2599 |
| 60.755 | 20 | GGAAGTGCACAGGGTGATCT     | 60.12  | 20 | 133 | 617  | 749  |
| 57.15  | 24 | GCAATGCATCAGAGACTCCA     | 59.95  | 20 | 228 | 161  | 388  |
| 59.955 | 20 | TCCTAGGCGCTATTGAGGTG     | 60.365 | 20 | 276 | 92   | 367  |
| 59.065 | 20 | CACATAAGCGAAAACGCAAA     | 59.88  | 20 | 237 | 3694 | 3930 |
| 58.927 | 26 | TTAGTTTCATGAATGGAAGTGAAT | 57.035 | 25 | 100 | 5    | 104  |
| 60.033 | 20 | GGATCCTGATTCTCGACCAA     | 60.011 | 20 | 233 | 206  | 438  |
| 59.893 | 20 | TGGAATTGCTACACCTGCAT     | 59.152 | 20 | 203 | 623  | 825  |
| 57.617 | 26 | TGTTGACGAACGAGACAAGG     | 59.873 | 20 | 228 | 60   | 287  |
| 59.708 | 20 | TTTCGACAAATCATTGCAACA    | 60.103 | 21 | 211 | 1310 | 1520 |
| 59.702 | 20 | CGAGCACAAGTTCTCCACAA     | 60.025 | 20 | 131 | 2556 | 2686 |
| 60.018 | 20 | AAGGCAGCATGCTTGAAACT     | 60.022 | 20 | 260 | 2003 | 2262 |
| 60.156 | 20 | GGAAGTCCCTGGCATTGTCAT    | 59.934 | 20 | 242 | 225  | 466  |
| 59.415 | 20 | TAGGGATTTTGAAACGGTGC     | 59.938 | 20 | 264 | 27   | 290  |
| 59.673 | 20 | TGGACCATTTGTGCACTTGT     | 60.008 | 20 | 262 | 1649 | 1910 |
| 59.801 | 20 | AATTGCCCTACATGCTGAC      | 59.962 | 20 | 242 | 387  | 628  |
| 60.31  | 20 | TTTTGTGATTTCAGGGTCCG     | 60.863 | 20 | 280 | 221  | 500  |
| 60.172 | 20 | TTGGGGATGAGATGGGAATA     | 60.088 | 20 | 227 | 6625 | 6851 |
| 60.145 | 21 | AATGGCCCAGATTTGTTTTG     | 59.801 | 20 | 145 | 30   | 174  |
| 59.635 | 20 | CGAGAAAAGACAAAGAAGGGAA   | 59.865 | 22 | 103 | 1325 | 1427 |
| 60.49  | 20 | CATGAAGTGAAAGGGACGGT     | 59.966 | 20 | 259 | 9    | 267  |
| 60.159 | 20 | CGTAGTTTAATTTTGCCGGG     | 59.489 | 20 | 209 | 871  | 1079 |
| 57.037 | 20 | CTTGCAGCAACTTGTCAAA      | 60.172 | 20 | 224 | 280  | 503  |
| 60.212 | 23 | TTGGAGTCCATGAGCATCAG     | 59.787 | 20 | 268 | 36   | 303  |
| 60.074 | 20 | GGGGTAAAATCGAGGGGTAA     | 60.013 | 20 | 221 | 1423 | 1643 |
| 60.397 | 20 | TTGGGGAATGTTGAGAAGGA     | 60.43  | 20 | 269 | 966  | 1234 |
| 60.111 | 20 | TGCTGGCATCAAAATTGGTA     | 60.073 | 20 | 184 | 560  | 743  |
| 59.753 | 20 | AAGAGAGGACACCTCCGGTT     | 60.111 | 20 | 160 | 198  | 357  |
| 60.112 | 20 | GAGTTGCATGATGGCATGAG     | 60.233 | 20 | 138 | 230  | 367  |
| 60.177 | 20 | TTAGGGATTAAGCGGCAG       | 59.341 | 20 | 219 | 88   | 306  |
| 58.494 | 26 | CTTGTGAAATGAATGCACCG     | 60.111 | 20 | 172 | 535  | 706  |
| 60.088 | 20 | TATCGTTTTGCCGCTTATC      | 60.061 | 20 | 256 | 1129 | 1384 |
| 59.81  | 20 | GCACGCATTTGTGATTTTTG     | 60.118 | 20 | 217 | 1    | 217  |
| 60.128 | 20 | GAGTTTGAGGCCTGACGAAG     | 59.989 | 20 | 126 | 262  | 387  |
| 58.935 | 23 | CACAGTTCACCCCATTTTT      | 59.688 | 20 | 224 | 198  | 421  |
| 60.241 | 20 | TTGAGGTGTGGCTGGTATTG     | 59.566 | 20 | 238 | 214  | 451  |
| 60.461 | 20 | GCAAACCACGCCAAATAGAT     | 59.967 | 20 | 252 | 567  | 818  |
| 60.06  | 21 | GCCAGCAATAATCTCAGTGGA    | 60.228 | 21 | 264 | 700  | 963  |
| 60.312 | 20 | CCTAGGCATACCAAGCCATC     | 59.551 | 20 | 154 | 1    | 154  |
| 60.176 | 20 | TGCATGGCAAAGCTTCAATA     | 60.356 | 20 | 233 | 1032 | 1264 |

|        |    |                            |        |    |     |      |      |
|--------|----|----------------------------|--------|----|-----|------|------|
| 59.784 | 20 | AGCCGATAAAAATGGCACAC       | 59.967 | 20 | 231 | 689  | 919  |
| 60.241 | 20 | GATGAGGGTTGAAGTTGGGA       | 59.903 | 20 | 250 | 335  | 584  |
| 59.982 | 20 | GATGATGAAGGCCAGACGAT       | 60.042 | 20 | 261 | 350  | 610  |
| 60.766 | 20 | CAGAAATGGTGGCAACAAAGA      | 59.691 | 20 | 133 | 586  | 718  |
| 60.046 | 20 | TCGGAGACGAGAGAGGAGAG       | 59.81  | 20 | 190 | 574  | 763  |
| 59.614 | 20 | CCAGGGCAGTTGTTTCAAAT       | 59.971 | 20 | 238 | 307  | 544  |
| 60.048 | 20 | CCTCACTTCACCCTCACCAT       | 59.962 | 20 | 138 | 786  | 923  |
| 59.234 | 20 | CGGGGTCGTATCATATTTGG       | 60.031 | 20 | 115 | 475  | 589  |
| 59.517 | 20 | AATTTGATTGATGGTTTCGGA      | 59.264 | 21 | 105 | 130  | 234  |
| 60.975 | 20 | GTACCAGCAGAAGACTGGGG       | 59.721 | 20 | 238 | 1407 | 1644 |
| 59.993 | 20 | CGAGCATCAGTGAGACATCC       | 59.372 | 20 | 280 | 825  | 1104 |
| 60.146 | 19 | CGACTCCCTTGTGGAGAAAC       | 59.697 | 20 | 275 | 251  | 525  |
| 60.268 | 20 | TCCTTTTTGTATTCAAACCTCAACAC | 58.708 | 25 | 202 | 513  | 714  |
| 59.916 | 20 | CAAAACCAACAGCCGAGATT       | 60.11  | 20 | 149 | 3    | 151  |
| 60.356 | 22 | ACGTTTTGTTGTTTGGAGC        | 60.015 | 20 | 162 | 2397 | 2558 |
| 59.826 | 20 | TTTTTGACTTTTTATGGGGGT      | 57.539 | 21 | 264 | 198  | 461  |
| 58.385 | 22 | AATAAGGGGGTGCATGTGAG       | 59.813 | 20 | 175 | 225  | 399  |
| 59.933 | 20 | CGATGTCCAGAGGAACAACC       | 60.51  | 20 | 170 | 146  | 315  |
| 59.992 | 20 | TTTGTGTCGCAAGGTGAGAG       | 60.025 | 20 | 267 | 2663 | 2929 |
| 59.685 | 20 | TTTTCTTCACCCAAATTTAATCG    | 59.404 | 23 | 276 | 487  | 762  |
| 59.972 | 20 | GACGAAGAAGGTGTTGGTGG       | 60.545 | 20 | 264 | 197  | 460  |
| 59.74  | 20 | TTGACAATATTTAGTGTTTTGACA   | 58.99  | 27 | 173 | 543  | 715  |
| 58.729 | 25 | ACGCGTTAACTAACC GGGAT      | 60.741 | 20 | 261 | 1134 | 1394 |
| 59.969 | 20 | GCAGGAAGAGAGGAGAGGGT       | 59.952 | 20 | 230 | 742  | 971  |
| 60.15  | 20 | GGCATGTTTCGAGTTTGGTT       | 59.978 | 20 | 233 | 313  | 545  |
| 58.995 | 24 | GATTCCGGGTTCAATACTCG       | 59.387 | 20 | 280 | 484  | 763  |
| 60.261 | 20 | GAAGCTGCATTGGATGAACA       | 59.805 | 20 | 158 | 2124 | 2281 |
| 59.722 | 20 | GGTTTCGTCATAAGGCGGTA       | 59.96  | 20 | 264 | 538  | 801  |
| 59.951 | 20 | CAAATGTCTTCATCCCCACC       | 60.173 | 20 | 275 | 1652 | 1926 |
| 60.436 | 20 | AAACCCCTCTTAAGTCCTGA       | 59.088 | 21 | 254 | 292  | 545  |
| 60.081 | 20 | CACCATCACCTCCTCCCTA        | 59.92  | 20 | 241 | 960  | 1200 |
| 60.006 | 20 | GTGGACGCTCCAGATTGTTT       | 60.119 | 20 | 113 | 29   | 141  |
| 60.045 | 20 | GCCGATGATTTGCTACGATT       | 60.067 | 20 | 183 | 2942 | 3124 |
| 59.957 | 20 | TGCTCACTCATCCTCCAGTG       | 59.98  | 20 | 219 | 699  | 917  |
| 60.042 | 20 | ATTATCCAGTTTGGATTTTGTCT    | 57.292 | 24 | 135 | 1896 | 2030 |
| 59.041 | 20 | GTGTACCCTGAGGGACGGTA       | 59.844 | 20 | 146 | 93   | 238  |
| 60.181 | 20 | AGTGGCATGATAATAGCGGC       | 60.088 | 20 | 255 | 419  | 673  |
| 60.299 | 20 | TTTTAATGCTTTTCCGTGGG       | 59.937 | 20 | 190 | 2093 | 2282 |
| 60.044 | 20 | TGGAAGGTACGAGGTGGTC        | 59.966 | 20 | 187 | 402  | 588  |
| 59.805 | 20 | TCAGCTTCAACATCACCAGC       | 59.992 | 20 | 264 | 1859 | 2122 |
| 59.901 | 20 | CTATGTAGGGGCGTGCAAAT       | 59.982 | 20 | 203 | 29   | 231  |
| 59.592 | 20 | TCTTTCATTCAACGGTATTGTCA    | 59.505 | 23 | 193 | 629  | 821  |
| 58.721 | 20 | CCAATTTGAATGGTTATCACCTG    | 60.457 | 23 | 102 | 628  | 729  |
| 60.012 | 20 | CAGCTCATCGTGGATGCTAA       | 59.972 | 20 | 170 | 1187 | 1356 |
| 60.453 | 20 | ACCATAAGGCGCACAAAAAC       | 60.003 | 20 | 141 | 1193 | 1333 |
| 59.71  | 26 | GTCAAAGAGACAGGGGTTTCG      | 59.697 | 20 | 252 | 10   | 261  |
| 60.69  | 20 | TGCATCCAACGCTACAAATC       | 59.694 | 20 | 143 | 38   | 180  |
| 60     | 20 | TTTTAACTAACTCCGCCCCA       | 59.581 | 20 | 175 | 739  | 913  |
| 60.001 | 20 | GTTTGGACAGATTGCCTGGT       | 59.973 | 20 | 272 | 1005 | 1276 |
| 59.499 | 20 | ATGGCATCAGGAGGATCAAG       | 60.034 | 20 | 254 | 2279 | 2532 |
| 60.269 | 20 | ACCAATGGTGGTATGGTGTG       | 58.984 | 20 | 132 | 181  | 312  |
| 59.679 | 21 | TCTTGGAGCGACTCCTCACT       | 60.135 | 20 | 245 | 929  | 1173 |
| 59.694 | 20 | GTTTGTGCTGACGCAGGGTATT     | 60.14  | 20 | 210 | 501  | 710  |
| 59.992 | 20 | GATCGAACGGGTTACCTT         | 59.918 | 19 | 175 | 2468 | 2642 |
| 60     | 20 | GGCACACATTATGGTTTGGGA      | 59.251 | 20 | 251 | 163  | 413  |
| 60.05  | 20 | CCACATCGGTGAAGGTAACA       | 59.415 | 20 | 200 | 210  | 409  |
| 59.67  | 20 | TTCACACCTCACCATTCGAG       | 59.676 | 20 | 161 | 443  | 603  |
| 59.851 | 20 | ATTGTTCTTTCCCGTGCTTC       | 59.174 | 20 | 274 | 1937 | 2210 |



|        |    |                           |        |    |     |      |      |
|--------|----|---------------------------|--------|----|-----|------|------|
| 59.257 | 20 | TGAGTCAGCACTGTGGTTCC      | 59.872 | 20 | 155 | 409  | 563  |
| 60.088 | 20 | TTCCCTTACTTCTTCCCCC       | 59.393 | 20 | 265 | 495  | 759  |
| 60.255 | 20 | AGAAAAGAGTTTCAGCGCCA      | 60.132 | 20 | 214 | 1078 | 1291 |
| 59.805 | 20 | AGCAGCTCGATGGAGGTAGA      | 60.119 | 20 | 246 | 2153 | 2398 |
| 60.321 | 20 | GGGATAGTATCGGATCGCAA      | 59.885 | 20 | 129 | 69   | 197  |
| 59.24  | 21 | AGAGTGATCAACCGATTGCC      | 60.081 | 20 | 200 | 14   | 213  |
| 59.924 | 20 | TTGTGCCACATTTTTCTGA       | 60.088 | 20 | 185 | 742  | 926  |
| 59.964 | 20 | AACCCACCTGTGCTAACTG       | 60.028 | 20 | 190 | 429  | 618  |
| 60.159 | 20 | TTTGGGACGCTCTATTCTGG      | 60.206 | 20 | 108 | 258  | 365  |
| 59.705 | 21 | CCGTCAACCAAACGTATTCTC     | 59.485 | 21 | 276 | 720  | 995  |
| 59.982 | 20 | CCTGCACCAAATTTTCCATT      | 59.801 | 20 | 131 | 158  | 288  |
| 60.757 | 20 | TCTATATGCCCAAGCCAACC      | 59.923 | 20 | 259 | 601  | 859  |
| 59.894 | 20 | TGCTCATGAAATATCGTTGG      | 57.162 | 20 | 223 | 267  | 489  |
| 60.605 | 20 | TGTCCCGATAAAAAGAAGGA      | 59.5   | 20 | 279 | 1149 | 1427 |
| 59.762 | 20 | TTTTAAATGGACGTAAATGGATTG  | 59.218 | 24 | 126 | 15   | 140  |
| 59.924 | 20 | TTTAAAGTGTTGAGCGCGAA      | 59.625 | 20 | 235 | 60   | 294  |
| 59.955 | 20 | CGTTAGTCGTTCTGGGCTA       | 60.262 | 20 | 189 | 2968 | 3156 |
| 59.927 | 20 | TTTTGAGGTTCCGACCAGAC      | 60.088 | 20 | 181 | 265  | 445  |
| 59.097 | 20 | CCTGATTAGAAGATGGTGATGAA/  | 59.502 | 24 | 207 | 740  | 946  |
| 59.915 | 21 | CGCAATTATATTAACCTTTCGCTCA | 60.375 | 24 | 268 | 1478 | 1745 |
| 59.989 | 21 | CCACGTGGAATTATGGGAGT      | 59.67  | 20 | 177 | 1708 | 1884 |
| 60.081 | 20 | AGAGACTGTTGAAGCTCGGC      | 59.751 | 20 | 239 | 34   | 272  |
| 59.903 | 20 | TCCTAGTGTCTTGTCTCCCACA    | 59.762 | 22 | 183 | 1017 | 1199 |
| 61.201 | 20 | AATCGGCAAAAACCACAAAC      | 59.845 | 20 | 220 | 741  | 960  |
| 59.813 | 20 | TGCTGAAGAATCTGACACCG      | 59.984 | 20 | 276 | 217  | 492  |
| 58.019 | 20 | GTGATTCTGAGGCCATGAT       | 59.893 | 20 | 229 | 1692 | 1920 |
| 59.415 | 23 | GTTCTGCTTTGTGGTGGAT       | 59.973 | 20 | 277 | 966  | 1242 |
| 59.942 | 20 | GTCCCAACTGAAGTTCCCAA      | 59.943 | 20 | 166 | 283  | 448  |
| 59.651 | 20 | TCCACAATGGAAAATGCAA       | 59.907 | 20 | 209 | 2756 | 2964 |
| 59.992 | 20 | TGCTGGTGATCAAGTGGAAA      | 60.24  | 20 | 254 | 367  | 620  |
| 59.955 | 20 | CTGGAGCGGTAATCACAAGG      | 60.647 | 20 | 147 | 566  | 712  |
| 59.367 | 20 | ACCCGAGACAAAACCACAG       | 60.005 | 20 | 163 | 10   | 172  |
| 59.955 | 20 | GTGAGGGAATGCTCTCCAAG      | 59.803 | 20 | 280 | 83   | 362  |
| 59.483 | 20 | TTCTCCAGAGGCTCAGTGT       | 59.986 | 20 | 203 | 2805 | 3007 |
| 59.945 | 20 | ATACCTTCTTTTTCCCGCC       | 59.442 | 20 | 182 | 2231 | 2412 |
| 59.827 | 20 | GACCAGAACCTAATCTTGGA      | 58.108 | 21 | 270 | 536  | 805  |
| 60.154 | 20 | AAAAATCAAAGGCCACAAT       | 58.418 | 20 | 264 | 591  | 854  |
| 59.942 | 20 | CGTGTTATCTACAGCCCGT       | 60.015 | 20 | 217 | 2625 | 2841 |
| 60.044 | 20 | TACTCAATCAGCTCCAGCCC      | 60.362 | 20 | 202 | 1992 | 2193 |
| 60.073 | 20 | CCCCTCATGTTGGTGGTAAT      | 59.526 | 20 | 271 | 255  | 525  |
| 59.988 | 20 | AACATCATCGAGGTCGGTTC      | 59.934 | 20 | 192 | 919  | 1110 |
| 60.214 | 27 | GAGACCAATTTTGCTATGTAATTT  | 58.304 | 26 | 226 | 234  | 459  |
| 60.444 | 20 | GAAATAAGGATGTGTTATGAAGG   | 59.656 | 25 | 145 | 512  | 656  |
| 60.118 | 20 | AAAGAAAGCTTCAAGCAGCG      | 59.904 | 20 | 135 | 122  | 256  |
| 61.296 | 20 | CCAAGCCTGGAGACCTAAGA      | 59.425 | 20 | 220 | 20   | 239  |
| 60.34  | 20 | TGAGAATGGTGGGTGTGAAA      | 59.935 | 20 | 231 | 622  | 852  |
| 59.934 | 20 | AATGCAAACCAGTGAAAGGG      | 59.971 | 20 | 166 | 1158 | 1323 |
| 60.088 | 20 | CAGATTCTGGCACTGAGCAA      | 60.136 | 20 | 275 | 5356 | 5630 |
| 59.957 | 20 | CACTAGATTTCTGCACCGCA      | 60.011 | 20 | 275 | 237  | 511  |
| 60.074 | 20 | AATCTTGGGTCCAAACCCTC      | 60.169 | 20 | 230 | 248  | 477  |
| 59.691 | 20 | GCTTGCTTCCACCAGGTCT       | 60.402 | 19 | 279 | 155  | 433  |
| 60.173 | 20 | CGTCCATGCTCTGTTCTTCA      | 59.984 | 20 | 134 | 887  | 1020 |
| 60.17  | 20 | TTCAGCCTCCATTTACCTCA      | 58.298 | 20 | 255 | 2688 | 2942 |
| 58.028 | 22 | ATCGAGATGCTCTGATGCAA      | 59.507 | 20 | 277 | 20   | 296  |
| 57.372 | 25 | AGCTAGACACGTGGAGACGC      | 60.621 | 20 | 249 | 931  | 1179 |
| 59.902 | 20 | AGGGGAACGAAAATCTCTCC      | 59.513 | 20 | 221 | 2789 | 3009 |
| 59.575 | 24 | TGGGTGATCAGGAAAAATCA      | 58.897 | 20 | 171 | 60   | 230  |
| 59.133 | 20 | TGCGAGTGTTGCATCTGAAT      | 60.423 | 20 | 236 | 314  | 549  |

|        |    |                           |        |    |     |      |      |
|--------|----|---------------------------|--------|----|-----|------|------|
| 60.397 | 20 | CCACGAAGAACCTGGTTTGA      | 61.064 | 20 | 277 | 866  | 1142 |
| 59.727 | 20 | GGAGGACACCATTTCTCTGC      | 59.661 | 20 | 182 | 7747 | 7928 |
| 59.579 | 20 | ATCGAAATCTAAACCCGCAC      | 59.046 | 20 | 251 | 672  | 922  |
| 60.324 | 20 | TGAAGTTAGGAAATAAGGAGGTG   | 58.743 | 25 | 276 | 558  | 833  |
| 60.011 | 20 | ACACAAGTATGACCAGGGGC      | 59.851 | 20 | 182 | 19   | 200  |
| 59.951 | 20 | AAGAAAGTATCAGGCGCATCTT    | 59.42  | 22 | 187 | 26   | 212  |
| 59.973 | 20 | CCGAAGGCAACACCACTACT      | 60.171 | 20 | 266 | 2007 | 2272 |
| 59.109 | 25 | TGTTGAACGTGTACGTTGGG      | 60.463 | 20 | 228 | 590  | 817  |
| 60.223 | 23 | AGCACGTGTGAATATTGGGC      | 60.925 | 20 | 255 | 299  | 553  |
| 59.779 | 20 | CCTTCACACGATTGGAGCTT      | 60.255 | 20 | 275 | 660  | 934  |
| 59.803 | 20 | ATTGTACACATGGTGTGGGC      | 59.143 | 20 | 151 | 1611 | 1761 |
| 59.874 | 20 | TTTAGTGGCTGGAACCGAAG      | 60.241 | 20 | 220 | 517  | 736  |
| 60.205 | 20 | TGGCTCAAAAAGTTTCATATTTCTC | 60.022 | 25 | 119 | 1980 | 2098 |
| 59.922 | 20 | AAAAAGCCGCACTTACGAGA      | 60.018 | 20 | 251 | 11   | 261  |
| 60.187 | 20 | TTGGGTTAATCCGTGTAATCG     | 59.707 | 21 | 230 | 361  | 590  |
| 60.543 | 22 | AAGGAGGAGGTGAAGAAGCC      | 59.817 | 20 | 265 | 23   | 287  |
| 59.369 | 20 | TTGGAGAGTTGGGTACAAGC      | 57.797 | 20 | 135 | 176  | 310  |
| 60.033 | 20 | TGCATGCCGCATACTATTACT     | 58.368 | 21 | 241 | 1620 | 1860 |
| 60.615 | 20 | TTTCTCTTCCGATTTTTGG       | 59.131 | 20 | 253 | 918  | 1170 |
| 59.801 | 20 | GATGTATGTGCGATGGGATG      | 59.763 | 20 | 179 | 825  | 1003 |
| 60.158 | 20 | CCCCAATTTGTTTTACTCG       | 59.311 | 20 | 223 | 1381 | 1603 |
| 59.984 | 20 | CCTAATAAAATGGCCATGCG      | 60.295 | 20 | 147 | 1623 | 1769 |
| 59.875 | 20 | CTTCTGTTCCAGCAGCATT       | 60.397 | 20 | 124 | 252  | 375  |
| 58.94  | 20 | CGGAGACAAAGGGTCATTTT      | 59.526 | 20 | 239 | 174  | 412  |
| 59.926 | 20 | CCGCTGACAAACATCATCAC      | 60.12  | 20 | 230 | 5360 | 5589 |
| 60.177 | 20 | CTCGATCAAGACCCTATCGC      | 59.797 | 20 | 183 | 1073 | 1255 |
| 59.989 | 20 | TCGGATTAAGCTAGGGCAA       | 59.81  | 20 | 279 | 1048 | 1326 |
| 60.008 | 20 | AAACGAATCTGTCCGGTGGTC     | 59.973 | 20 | 264 | 2696 | 2959 |
| 59.971 | 20 | CAAACAAAAGGGCCTTCTCA      | 60.22  | 20 | 236 | 962  | 1197 |
| 60.232 | 20 | TGGTAGGTTTTGGAGGGTTG      | 59.824 | 20 | 280 | 659  | 938  |
| 60.052 | 20 | CACTCGAACCCAGTCAAACGA     | 59.873 | 20 | 228 | 732  | 959  |
| 59.847 | 20 | GACCACAACCAACCACATGA      | 60.27  | 20 | 246 | 742  | 987  |
| 60.096 | 20 | CTCACGCGAGGTCTTTCTTC      | 60.134 | 20 | 153 | 34   | 186  |
| 60.089 | 20 | AAATAGATCTTTTGTAAGCCCG    | 58.02  | 23 | 112 | 2970 | 3081 |
| 58.813 | 25 | ACAAATTTGCAGATGGAGGG      | 59.933 | 20 | 198 | 41   | 238  |
| 59.935 | 20 | GATGAGGAAGAAAGGGAGGG      | 60.008 | 20 | 253 | 1010 | 1262 |
| 59.923 | 20 | CGTGGCCTTGATTAATATGG      | 60.315 | 20 | 201 | 442  | 642  |
| 59.091 | 20 | GGAGGGAGAGAGGAGGAGAG      | 59.489 | 20 | 251 | 149  | 399  |
| 59.542 | 20 | GCATCGTCTCAACCCTTGAT      | 60.081 | 20 | 184 | 660  | 843  |
| 59.831 | 20 | CTCCCTCAAATCGTTGCTA       | 60.206 | 20 | 101 | 634  | 734  |
| 61.146 | 20 | TGATAGGGCACACAACCCTT      | 60.375 | 20 | 280 | 520  | 799  |
| 59.993 | 20 | TGAGATATTTAAATCCTTCCGTTT  | 57.452 | 24 | 249 | 99   | 347  |
| 60.349 | 20 | TCGTCCTTTCGACATTCTCC      | 60.195 | 20 | 169 | 2049 | 2217 |
| 60.366 | 20 | GACTCCCATTCCTCAAGCTCT     | 60.596 | 20 | 216 | 2437 | 2652 |
| 59.923 | 20 | CGGATTTCGGAATTGATGA       | 59.415 | 19 | 215 | 634  | 848  |
| 59.978 | 20 | GTGCCTTCTTCTAACTGGCG      | 60.015 | 20 | 220 | 502  | 721  |
| 60.053 | 20 | TTCGATTCAACAAAGTCCCC      | 59.91  | 20 | 224 | 272  | 495  |
| 60.169 | 20 | CTGAGACCCCTCATGTTGCT      | 60.261 | 20 | 197 | 425  | 621  |
| 60.081 | 20 | TCCAAGTTGCCTTTCAACCT      | 59.711 | 20 | 173 | 623  | 795  |
| 60.074 | 20 | AATTTGCATTGGGTTTCGAG      | 59.938 | 20 | 108 | 279  | 386  |
| 60.02  | 21 | CTTCGAAGCGATGGAGTAGG      | 59.971 | 20 | 101 | 20   | 120  |
| 59.861 | 20 | GTCTCCATGCTTGAGCCAAT      | 60.226 | 20 | 277 | 431  | 707  |
| 59.415 | 20 | TAATTAAGTCATAGAGCAGGGGC   | 58.853 | 23 | 100 | 24   | 123  |
| 59.716 | 20 | TCACGTCTTGTTGCATCACC      | 60.733 | 20 | 210 | 578  | 787  |
| 60.144 | 20 | AGGTGGAACAAGTAACGCAA      | 58.283 | 20 | 207 | 449  | 655  |
| 60.074 | 20 | TGAACCGGGTCTCTCGTAAC      | 60.111 | 20 | 174 | 2646 | 2819 |
| 58.214 | 20 | CAGCCCTCAGATTTTAGCGA      | 60.481 | 20 | 277 | 410  | 686  |
| 60.634 | 20 | TCGGTTGACCGAAAATAGGT      | 59.429 | 20 | 200 | 85   | 284  |

|        |    |                          |        |    |     |      |      |
|--------|----|--------------------------|--------|----|-----|------|------|
| 59.645 | 20 | GGATGTTTCATTTTGCCTGG     | 60.309 | 20 | 249 | 559  | 807  |
| 59.885 | 20 | TCCTCCATTTCCCACAACCTT    | 59.381 | 20 | 230 | 293  | 522  |
| 60.088 | 20 | GGCACATCGTGTGAATCAAG     | 60.12  | 20 | 162 | 242  | 403  |
| 59.871 | 20 | CGGACGTAAACGAAGGAAA      | 60.103 | 20 | 280 | 287  | 566  |
| 60.439 | 20 | TTGTTGTAGTATGGCAAGATCCA  | 59.527 | 23 | 199 | 383  | 581  |
| 60.095 | 20 | CCCAAGGCGAGCTCTAAGTT     | 60.884 | 20 | 201 | 139  | 339  |
| 59.48  | 26 | CAGTGTA AACCTTATTGGGGG   | 59.641 | 22 | 268 | 123  | 390  |
| 59.241 | 20 | TCAATGCTCTTTTCAACCCTTT   | 60.109 | 22 | 209 | 403  | 611  |
| 60.214 | 21 | TATCCTTGATGGAAATCGC      | 59.862 | 20 | 183 | 805  | 987  |
| 59.365 | 22 | ACTTCCCAGTCGTGGATGAG     | 60.112 | 20 | 210 | 337  | 546  |
| 60.119 | 20 | TCCTGAAGAATTTTCGGCATC    | 60.155 | 20 | 250 | 250  | 499  |
| 59.989 | 20 | CCCCTAATCCGAACACAAAA     | 59.795 | 20 | 158 | 778  | 935  |
| 59.972 | 20 | CCTCCCCAAATATCCCGAAT     | 62.062 | 20 | 278 | 2455 | 2732 |
| 59.927 | 20 | AGTTCAATAGAGGCAGCGGA     | 59.978 | 20 | 217 | 797  | 1013 |
| 59.964 | 20 | ATCGAAGATGAAAAAGGGCA     | 59.645 | 20 | 151 | 247  | 397  |
| 59.956 | 20 | AACGGCCGAGATTTGTTATG     | 59.96  | 20 | 255 | 577  | 831  |
| 59.044 | 22 | CGATTTCTACACCATTGTTCCA   | 59.861 | 22 | 211 | 2363 | 2573 |
| 58.227 | 20 | GTTCCGGGTGTGCAAAAATTC    | 60.352 | 20 | 275 | 361  | 635  |
| 58.571 | 24 | AGGTGAATCCGATGATGAGC     | 60.042 | 20 | 181 | 3    | 183  |
| 60.074 | 20 | CTCTTCCCTGCAGATGATGG     | 60.758 | 20 | 280 | 1442 | 1721 |
| 60.103 | 21 | ATGACTTCCAGTGCCAGGAC     | 60.12  | 20 | 175 | 894  | 1068 |
| 58.808 | 22 | TGCTCCAAAATGATTACGTGG    | 60.871 | 21 | 280 | 575  | 854  |
| 59.997 | 20 | CCCGACAATTTACCCATAC      | 60.051 | 20 | 234 | 239  | 472  |
| 60.019 | 24 | CGTGGTACTCGAGCTGTCAA     | 60.049 | 20 | 219 | 8    | 226  |
| 59.967 | 20 | CTGCTCCTGGAGTACATGACAA   | 60.312 | 22 | 228 | 309  | 536  |
| 59.734 | 20 | TTGACACGAATATGACACAAACA  | 59.003 | 23 | 191 | 276  | 466  |
| 60.065 | 20 | CTGCATCACCTTGCTTCTCA     | 60.136 | 20 | 177 | 733  | 909  |
| 60.34  | 20 | GCTAACCCCTCCGCTGTATGA    | 60.235 | 20 | 269 | 902  | 1170 |
| 60.005 | 20 | AATGCTTCCGACTTGCTCAT     | 59.843 | 20 | 273 | 714  | 986  |
| 59.936 | 21 | ATGCAAGAAAGACGTGGGAC     | 60.119 | 20 | 278 | 410  | 687  |
| 57.736 | 20 | AAGACCCTTGTGAGTGGTGG     | 60.002 | 20 | 215 | 24   | 238  |
| 57.865 | 20 | GGATAGGCGGTTGAGATTTG     | 59.528 | 20 | 221 | 1491 | 1711 |
| 60.13  | 20 | TTGTTGTGATGTGAAGAATTGTAA | 57.312 | 24 | 190 | 270  | 459  |
| 58.881 | 24 | AAAATCAAAGGCCCAACATG     | 59.801 | 20 | 119 | 1264 | 1382 |
| 59.751 | 20 | CACAACCAAACCAACCATCA     | 60.255 | 20 | 236 | 1730 | 1965 |
| 60.191 | 20 | CTCGATTTGGGTTTCTTCA      | 60.044 | 20 | 231 | 1278 | 1508 |
| 60.012 | 20 | TTGAAACGGAGGTTTGGTGT     | 60.388 | 20 | 207 | 493  | 699  |
| 59.07  | 25 | AAAACCGATGCAATTATGCC     | 59.801 | 20 | 280 | 101  | 380  |
| 60.059 | 21 | CCGTTTGAACAATTGAGAA      | 59.706 | 20 | 246 | 1465 | 1710 |
| 60.315 | 20 | CAACATGTCGGCATGATAAA     | 57.988 | 20 | 246 | 286  | 531  |
| 60.3   | 20 | GCATCGTTTATCCGATTGCT     | 60.067 | 20 | 248 | 16   | 263  |
| 59.996 | 20 | TGTA AAATCAATGCACCGGA    | 59.93  | 20 | 252 | 473  | 724  |
| 59.993 | 20 | ACAGGGGAGAGAGACAAGCA     | 59.986 | 20 | 192 | 36   | 227  |
| 59.995 | 20 | CGCTGGTTTTGGAGATCAAT     | 60.074 | 20 | 157 | 526  | 682  |
| 59.745 | 20 | TATAAACGCTCGTCTGCTGC     | 59.234 | 20 | 206 | 42   | 247  |
| 60.153 | 20 | CAAGGGTAAGGGAGGTGACA     | 59.959 | 20 | 210 | 750  | 959  |
| 60.407 | 20 | ACCGATCTCACCCCTTTTCT     | 59.935 | 20 | 134 | 585  | 718  |
| 60.008 | 20 | TGAAAAGGCTTCAATTTGGG     | 60.046 | 20 | 184 | 679  | 862  |
| 59.836 | 20 | GAAGAGTGTGGGGCTGAA       | 60.232 | 20 | 153 | 2110 | 2262 |
| 60.22  | 20 | CCTTCATTGGGCAGTTTTGT     | 59.971 | 20 | 215 | 297  | 511  |
| 58.028 | 22 | TTGCTTTGGGTTCAAATGGT     | 60.344 | 20 | 271 | 16   | 286  |
| 59.425 | 20 | CACTTCAACACTCCCCACAA     | 59.565 | 20 | 267 | 2814 | 3080 |
| 59.988 | 20 | ATCGGTTATTACCGGATCGC     | 61.031 | 20 | 157 | 601  | 757  |
| 59.373 | 20 | CCAATTTGAATGGTTATCACCTG  | 60.457 | 23 | 253 | 450  | 702  |
| 59.848 | 20 | TCGAGTTAGCGTGTCTGTGC     | 60.056 | 20 | 123 | 306  | 428  |
| 59.707 | 21 | GTGGAGGGGAGTATGGATT      | 60.015 | 20 | 265 | 140  | 404  |
| 59.224 | 20 | CAAATGACAGAATCGCGGTA     | 59.688 | 20 | 246 | 95   | 340  |
| 59.49  | 21 | GCAGTCAAAGGAGGAAGACG     | 59.989 | 20 | 269 | 573  | 841  |

|        |    |                           |        |    |     |      |      |
|--------|----|---------------------------|--------|----|-----|------|------|
| 60.012 | 20 | AGTTCACAACCCTGAATGCC      | 59.973 | 20 | 168 | 690  | 857  |
| 59.797 | 20 | GAAATGTTACACACGTCGG       | 60.008 | 20 | 221 | 262  | 482  |
| 60.332 | 20 | ATTGGCAATTAACCGTCAGC      | 59.967 | 20 | 124 | 394  | 517  |
| 59.853 | 20 | GAATTTTGCCACCGATGTTT      | 59.807 | 20 | 109 | 1638 | 1746 |
| 60.088 | 20 | CCTTGGGCAACTCACTCATT      | 60.111 | 20 | 262 | 42   | 303  |
| 59.955 | 20 | TCCGGCAAAAACCAAATTAC      | 59.81  | 20 | 240 | 2671 | 2910 |
| 60.285 | 20 | GTGGAGGGTTTTGTCTCCA       | 59.943 | 20 | 278 | 3387 | 3664 |
| 60.073 | 20 | CCATTGTCTGCTCCAACCTT      | 59.966 | 20 | 226 | 877  | 1102 |
| 59.894 | 20 | TGCTGCTCTTTTCTGGGTTT      | 59.993 | 20 | 133 | 77   | 209  |
| 60.041 | 22 | GCTTCAACGGTATCCAGTAACA    | 59.158 | 22 | 125 | 1000 | 1124 |
| 59.926 | 20 | GATGCCAACGTCATATTTGC      | 58.997 | 20 | 252 | 3617 | 3868 |
| 60.073 | 21 | TTGGCACGAAATTAGTTGTTTG    | 60.034 | 22 | 214 | 221  | 434  |
| 59.352 | 21 | TCCCCCTCTCTCTCCTTCTC      | 59.883 | 20 | 127 | 10   | 136  |
| 59.146 | 20 | TGTTGCAGCTCTTGCTCTTG      | 60.472 | 20 | 279 | 137  | 415  |
| 59.997 | 20 | TTTACGTGTTTGCGGATTTG      | 59.603 | 20 | 258 | 276  | 533  |
| 59.996 | 20 | GGCCGTTTTAAAATCGAGTG      | 59.586 | 20 | 206 | 703  | 908  |
| 59.906 | 21 | AAATGCATGCACCTGATTACA     | 59.055 | 21 | 169 | 913  | 1081 |
| 59.697 | 20 | GAGCTGTTATGCGTTTTGATGA    | 60.272 | 22 | 238 | 1700 | 1937 |
| 60.331 | 20 | GGTTTAACTTTTCAAATGGAACAA  | 58.903 | 26 | 276 | 144  | 419  |
| 59.95  | 20 | GGGCCTTGAAGTTCTCTGTG      | 59.844 | 20 | 134 | 271  | 404  |
| 59.986 | 20 | ATCACCTCATCACCGCCTAC      | 59.957 | 20 | 222 | 191  | 412  |
| 60.081 | 20 | ATGAAACACCCCCAAACAAA      | 60.066 | 20 | 208 | 3583 | 3790 |
| 59.41  | 21 | ATCCGGAAGGTCCAAAACCTT     | 59.805 | 20 | 221 | 564  | 784  |
| 60.218 | 20 | TCCAACACAAAACCTCTAAATTTTC | 59.821 | 25 | 228 | 537  | 764  |
| 58.561 | 25 | CGTCGAGAGATGCAACGTAA      | 60.011 | 20 | 106 | 8    | 113  |
| 60.104 | 21 | CCTCACGTGATATTTTTAGCACA   | 59.197 | 23 | 188 | 914  | 1101 |
| 59.926 | 20 | CGACGTTGCAAGAAAAGGTT      | 60.284 | 20 | 218 | 293  | 510  |
| 60.552 | 20 | TGCAATGTACAGCAGAAAGTGG    | 59.92  | 21 | 268 | 458  | 725  |
| 59.993 | 20 | CCTTTCTCTCTTCCCCGT        | 59.811 | 20 | 158 | 35   | 192  |
| 60.06  | 20 | CCAATTTGAATGGTTATCACCTG   | 60.457 | 23 | 130 | 807  | 936  |
| 60.014 | 20 | ATCCCCTTCTCTTCCCCGTA      | 59.897 | 20 | 179 | 1209 | 1387 |
| 60.272 | 20 | TAAAGGTCGAAAATGGCGAG      | 60.202 | 20 | 186 | 254  | 439  |
| 60.112 | 20 | TCCCCTTTTAAGGTTGATGG      | 58.876 | 20 | 269 | 1063 | 1331 |
| 60.003 | 20 | ATTAGGAAAAGGGGCAGACG      | 60.443 | 20 | 158 | 1269 | 1426 |
| 60.263 | 20 | GCAGCACCTTTCTAACAGC       | 60.022 | 20 | 167 | 2995 | 3161 |
| 60.255 | 20 | TGCAACCATGAAAACAAACAA     | 59.999 | 21 | 275 | 3149 | 3423 |
| 60.051 | 19 | TGCCGAAAACACCAAATA        | 61.214 | 20 | 280 | 390  | 669  |
| 59.929 | 20 | ACGTGTCAGAATCTGGGCTT      | 59.727 | 20 | 223 | 611  | 833  |
| 60.203 | 20 | CCGTTCTCTATCCGATTT        | 60.278 | 20 | 175 | 628  | 802  |
| 60.144 | 20 | CCACTTTTGAACGTGTGTGG      | 60.041 | 20 | 249 | 2452 | 2700 |
| 61.304 | 20 | GTTAAAAGTGGCAAGCGACC      | 59.752 | 20 | 247 | 145  | 391  |
| 60.567 | 20 | GCTTGAGATGGACTACCGGA      | 60.218 | 20 | 279 | 45   | 323  |
| 60.035 | 20 | TGGAATGAAGGGGTGAGATT      | 59.336 | 20 | 265 | 77   | 341  |
| 59.825 | 21 | GCTGCTTCTCGCTCATTTT       | 60.243 | 20 | 230 | 1377 | 1606 |
| 60.081 | 20 | TCGCCCATTTTCTCAACTTC      | 60.192 | 20 | 272 | 685  | 956  |
| 59.95  | 20 | ATCGGTTATCACCGGATCG       | 60.697 | 19 | 175 | 3832 | 4006 |
| 60.043 | 20 | GGGATTCAGGAAACAGGACA      | 59.903 | 20 | 256 | 3394 | 3649 |
| 60.159 | 20 | GCCGAAAGACTTAATCTCG       | 59.982 | 20 | 150 | 972  | 1121 |
| 59.942 | 20 | TTGCCACGACCAAACCTAT       | 60.365 | 20 | 274 | 263  | 536  |
| 60.603 | 20 | GCATCCTCCACGTTACCATT      | 59.82  | 20 | 157 | 269  | 425  |
| 59.72  | 21 | TCCGACCTTGAAGAATGAAGA     | 59.799 | 21 | 279 | 951  | 1229 |
| 59.875 | 22 | ACGACATACACAAGGGGCAT      | 60.263 | 20 | 233 | 661  | 893  |
| 60.261 | 20 | GCATTGAATGAATGGAGGTTT     | 59.382 | 21 | 169 | 39   | 207  |
| 60.103 | 20 | CGGATTTAAGGGTTATTACCTGAT  | 58.81  | 24 | 231 | 1785 | 2015 |
| 60.158 | 25 | TCTGGAGGAAAGCACCAATC      | 60.195 | 20 | 114 | 19   | 132  |
| 60.017 | 20 | TTTTACCCGACAAATCACA       | 59.941 | 20 | 262 | 305  | 566  |
| 60.218 | 20 | AACCTCATTGATTTGCAGGC      | 60.081 | 20 | 248 | 593  | 840  |
| 60.128 | 20 | CTGCATCTTGTGTCCTGGAA      | 59.831 | 20 | 269 | 1370 | 1638 |

|        |    |                           |        |    |     |      |      |
|--------|----|---------------------------|--------|----|-----|------|------|
| 57.857 | 24 | TGAGATTTGGGCAAGCTTTT      | 59.823 | 20 | 255 | 288  | 542  |
| 58.287 | 23 | TGAAATCCAAATAGGTTAGAATTC  | 59.664 | 25 | 198 | 1012 | 1209 |
| 59.593 | 20 | TGATATATGGCGTGTTGCGT      | 59.983 | 20 | 224 | 2209 | 2432 |
| 60.272 | 20 | CGCTGGTTTTGGAGATCAAT      | 60.074 | 20 | 159 | 525  | 683  |
| 60.032 | 20 | GGAAGGCAAGGAAACAACAC      | 59.574 | 20 | 272 | 578  | 849  |
| 59.973 | 20 | AATTCTTGACGCCATTTTC       | 60.081 | 20 | 237 | 653  | 889  |
| 60.11  | 20 | CACGAAACGAGATCGCAATA      | 59.833 | 20 | 186 | 10   | 195  |
| 59.931 | 20 | TGATTCATTTTCTGCACGGA      | 60.197 | 20 | 190 | 131  | 320  |
| 60.118 | 22 | AATCGTGCTATTTTTGCCTGA     | 59.734 | 21 | 238 | 254  | 491  |
| 60.11  | 20 | TCCTTGCTGACTAGGTGCT       | 60.012 | 20 | 164 | 977  | 1140 |
| 59.127 | 20 | AAAAATATGGCATCCCGGTT      | 60.389 | 20 | 233 | 539  | 771  |
| 59.955 | 20 | GCTTTACGAGCTGTTGTCCC      | 59.882 | 20 | 212 | 931  | 1142 |
| 59.984 | 21 | TGTAGCAGCGAAATGCAGTC      | 60.165 | 20 | 268 | 1119 | 1386 |
| 59.047 | 23 | TCTTCCGGATTTTAGGAGGC      | 60.522 | 20 | 256 | 10   | 265  |
| 60.025 | 20 | AGTGAACCCAGTGGGAGATG      | 59.962 | 20 | 226 | 725  | 950  |
| 59.962 | 20 | GGGATTCTGGAAGATGCAAA      | 60.014 | 20 | 264 | 2265 | 2528 |
| 59.755 | 21 | TCTAGGGGGTTGTTGCTTTG      | 60.103 | 20 | 230 | 1699 | 1928 |
| 58.825 | 22 | TTCGGTAAATCCAATGGTCA      | 58.818 | 20 | 251 | 782  | 1032 |
| 58.882 | 20 | GACAAAGTTGTAATTTGCGGC     | 59.644 | 21 | 270 | 907  | 1176 |
| 60.11  | 20 | ACACAAAATGGCAATGCAAA      | 59.976 | 20 | 271 | 1116 | 1386 |
| 60.37  | 20 | TTTATCGCACAAATATTTTGATTTT | 58.231 | 25 | 272 | 403  | 674  |
| 58.326 | 25 | TTGGAATGAATAAATGGAATGAA   | 58.357 | 23 | 255 | 17   | 271  |
| 59.345 | 21 | GCTATATTTCAACCCCGCAA      | 59.928 | 20 | 152 | 1685 | 1836 |
| 59.784 | 20 | TGCCGACTTTGTGGATGTAG      | 59.716 | 20 | 133 | 85   | 217  |
| 59.565 | 23 | TTTGATAAAAATTTGGCGGC      | 59.913 | 20 | 276 | 5    | 280  |
| 59.942 | 20 | TTCTCTCTCCTCCACGA         | 60.064 | 20 | 278 | 752  | 1029 |
| 60.11  | 20 | ACATGCAGAAAGAAGCCGTT      | 59.882 | 20 | 263 | 807  | 1069 |
| 60.46  | 20 | CCACTTTCAGCTCAATCTTGC     | 60.008 | 21 | 201 | 16   | 216  |
| 59.795 | 20 | CCATCTGTTCACTCACGG        | 60.154 | 20 | 258 | 2476 | 2733 |
| 59.989 | 21 | TTCTCAGCAATCATCGCAAC      | 59.955 | 20 | 276 | 616  | 891  |
| 60.003 | 20 | TCCAAGTTTTGAAGATGACCTC    | 58.293 | 22 | 275 | 519  | 793  |
| 60.224 | 20 | CATGAGCGAGTAAACCAGCA      | 60.011 | 20 | 222 | 428  | 649  |
| 60.755 | 20 | GAGTGCGCTCTGGGTAAACT      | 59.501 | 20 | 159 | 432  | 590  |
| 59.937 | 20 | TGTCCACATTGAAAATGA        | 59.75  | 20 | 240 | 112  | 351  |
| 60.169 | 20 | ACGTGGATGTTATGCACGAA      | 59.995 | 20 | 254 | 510  | 763  |
| 60.11  | 20 | AGTGCAATCCTTCCAATCCA      | 60.461 | 20 | 185 | 139  | 323  |
| 60.776 | 20 | TGCATGACTGGATGAAGAGG      | 59.787 | 20 | 240 | 1153 | 1392 |
| 59.7   | 20 | AACCAGAGACGCAGCATTTT      | 59.882 | 20 | 263 | 2353 | 2615 |
| 60.028 | 20 | AGGAATGTCCACCGAGAATG      | 59.927 | 20 | 154 | 102  | 255  |
| 59.933 | 20 | CCAACGGTCCCGTATTATTG      | 60.067 | 20 | 268 | 221  | 488  |
| 60.894 | 20 | TCTCTTTTTGGGATCAACGG      | 60.044 | 20 | 258 | 1596 | 1853 |
| 59.141 | 20 | TGGTACCTCCTCCTAATTTCTC    | 59.854 | 23 | 270 | 102  | 371  |
| 60.235 | 20 | GCCGGTAAATTCGTGTAGGA      | 59.96  | 20 | 211 | 473  | 683  |
| 59.42  | 20 | TCATGATTCCAGCTTACCCC      | 59.894 | 20 | 227 | 1986 | 2212 |
| 60.048 | 20 | CAATGCTCCCTTTTCTCAGC      | 59.955 | 20 | 213 | 1097 | 1309 |
| 59.596 | 20 | GAGACGCTGATGGGATTGTT      | 60.081 | 20 | 276 | 693  | 968  |
| 59.166 | 20 | TCCCGATTAAAGTTCCATGA      | 59.397 | 21 | 230 | 433  | 662  |
| 60.156 | 20 | TGGTGTGAGAGAGAAAAGGGA     | 59.829 | 21 | 159 | 1606 | 1764 |
| 60.046 | 20 | GACCTCCGATTTGTCAAGGA      | 60.05  | 20 | 268 | 1469 | 1736 |
| 58.627 | 21 | GTAGAGAGAAGTGGGCGGTG      | 59.867 | 20 | 146 | 24   | 169  |
| 59.767 | 20 | TGATGATGGAGCATTTGGTG      | 60.481 | 20 | 109 | 585  | 693  |
| 60.074 | 20 | AGCTTTGATCTTCGCCATGT      | 59.843 | 20 | 269 | 610  | 878  |
| 60.002 | 21 | TCGCTGTATAAATGCCTCG       | 61.113 | 20 | 274 | 535  | 808  |
| 59.13  | 24 | ACCCCTCTTCTCTATTGGC       | 59.536 | 20 | 256 | 445  | 700  |
| 60.644 | 20 | CAGATCAAAGATCCAACGCA      | 59.799 | 20 | 209 | 17   | 225  |
| 59.946 | 20 | TCCATGTCTTTTTCCCTTCA      | 58.117 | 20 | 187 | 1895 | 2081 |
| 59.677 | 22 | TGAAGTTAGGAAATAAGGAGGTG   | 58.743 | 25 | 162 | 562  | 723  |
| 59.969 | 27 | CGCTTATAAGAGCGAGCAAGA     | 59.903 | 21 | 274 | 226  | 499  |

|        |    |                           |        |    |     |      |      |
|--------|----|---------------------------|--------|----|-----|------|------|
| 59.505 | 20 | GCCCTCGTGAACATAGGAAG      | 59.694 | 20 | 238 | 3240 | 3477 |
| 60.465 | 20 | TCGGTTTTACGGATTGAGC       | 60.074 | 20 | 212 | 817  | 1028 |
| 59.708 | 20 | CTCATCGGGTTAATTGGGTG      | 60.184 | 20 | 277 | 884  | 1160 |
| 59.937 | 20 | TCAAACAGAGTGGGGAGGAG      | 60.229 | 20 | 227 | 288  | 514  |
| 60.293 | 20 | AGCACTGGTTTTGGAAGGTG      | 60.149 | 20 | 272 | 344  | 615  |
| 60.321 | 21 | GGCTCCCATTGTTTCTCATT      | 58.984 | 20 | 276 | 1326 | 1601 |
| 59.201 | 20 | CAACACCGAAGAGCTTCACA      | 60.025 | 20 | 223 | 206  | 428  |
| 59.88  | 20 | TAAAGGGGGACCATTTTTCC      | 59.992 | 20 | 244 | 271  | 514  |
| 58.679 | 21 | TGGTGAGGATTTAACGGGAA      | 60.301 | 20 | 210 | 124  | 333  |
| 59.864 | 20 | TCGTGTGATGCCTTGAATA       | 60.073 | 20 | 185 | 653  | 837  |
| 60.111 | 20 | ACTTGCTTAGTTCATGGCCG      | 60.27  | 20 | 135 | 223  | 357  |
| 59.767 | 20 | AAGTGTGTCGTTTCTTTGGA      | 57.376 | 21 | 266 | 204  | 469  |
| 60.096 | 20 | TGCCTTGCCTTTTAAGCACT      | 60.018 | 20 | 264 | 1554 | 1817 |
| 60.173 | 20 | CGCAACTGTTATTCGGGACT      | 60.132 | 20 | 246 | 202  | 447  |
| 60.034 | 22 | AAGGGGGTTATTAGTGGATCA     | 57.425 | 21 | 236 | 700  | 935  |
| 60.017 | 20 | CCCACCCATGCCATTATTAG      | 60.031 | 20 | 277 | 1192 | 1468 |
| 59.943 | 20 | TGTTGGGACAAAATGGTCAA      | 59.792 | 20 | 222 | 2019 | 2240 |
| 59.843 | 20 | TCTCTGTTTGCCTGCTTGTG      | 60.183 | 20 | 203 | 279  | 481  |
| 59.551 | 20 | TCGAGGATCAATCTCGGAGT      | 59.761 | 20 | 264 | 1106 | 1369 |
| 59.986 | 20 | TAAGTTTCTATTCGCCCCCG      | 61.27  | 20 | 197 | 581  | 777  |
| 59.294 | 21 | CCATGAATTCTTTTGGGGTG      | 60.162 | 20 | 129 | 732  | 860  |
| 60.836 | 20 | AAATATTGAGGTGGGGGTCC      | 59.881 | 20 | 146 | 118  | 263  |
| 59.883 | 20 | AGGCTTTGGCTCCTCAATTT      | 60.208 | 20 | 163 | 530  | 692  |
| 60.23  | 20 | TATTGCCCTATCTATGCGG       | 59.907 | 20 | 181 | 563  | 743  |
| 60.495 | 20 | TTAGCATAAATTTAGCCACCG     | 57.12  | 21 | 128 | 583  | 710  |
| 60.457 | 23 | TAACGATGGACTAGGGGCTG      | 60.088 | 20 | 219 | 11   | 229  |
| 59.795 | 20 | CACCTCCCTGGGGATTTTAT      | 60.011 | 20 | 194 | 2492 | 2685 |
| 59.856 | 20 | TCGCCCATGACTACACCATA      | 59.948 | 20 | 230 | 398  | 627  |
| 59.844 | 20 | TAATGTAATTGGCCCCGAAA      | 60.144 | 20 | 234 | 270  | 503  |
| 60.011 | 20 | TGGTTGTAATTGCACCAAATTTAC  | 60.045 | 24 | 104 | 344  | 447  |
| 60.035 | 20 | AGCGTGAGCTCATTTTCGAT      | 59.985 | 20 | 206 | 2322 | 2527 |
| 59.726 | 20 | ATGTGAATAGCCGTTGAGGC      | 60.103 | 20 | 256 | 30   | 285  |
| 59.155 | 27 | ATGAGTTATCACCGGATCGC      | 59.923 | 20 | 213 | 794  | 1006 |
| 58.787 | 20 | CAACGACCTTCATTTCGATCA     | 59.648 | 20 | 102 | 2    | 103  |
| 59.797 | 20 | GATGACGACTCCAACGACAA      | 59.682 | 20 | 203 | 1266 | 1468 |
| 60.081 | 20 | TGGTGAAAACCCCAATAGA       | 60.162 | 20 | 242 | 415  | 656  |
| 59.982 | 20 | ATCGTACGTATCGCCGTCTC      | 60.125 | 20 | 253 | 477  | 729  |
| 59.997 | 23 | GCACTCCATTCCAAAATTCG      | 60.448 | 20 | 211 | 150  | 360  |
| 60.299 | 20 | ATCCTGCCAAACCAAGAATG      | 59.933 | 20 | 112 | 35   | 146  |
| 60.038 | 20 | GTGCACTTGAAAATGCATCG      | 60.265 | 20 | 231 | 177  | 407  |
| 59.904 | 20 | TCAGAAACAATCTTTGTCTGTTCTC | 58.992 | 25 | 112 | 1239 | 1350 |
| 58.746 | 20 | CACCAAGTGGGAAATAGTGCT     | 59.111 | 21 | 145 | 1727 | 1871 |
| 60.045 | 20 | ACCCTCTCTCCACTCACCT       | 60.112 | 20 | 154 | 2369 | 2522 |
| 58.747 | 20 | CTGGCATATTTGTGTTGGCT      | 58.651 | 20 | 233 | 368  | 600  |
| 60.096 | 20 | GGTAGAAGAATAGGTGCATGAGA   | 57.533 | 23 | 269 | 781  | 1049 |
| 60.156 | 20 | GGACCGTGATGGACTGACTC      | 60.537 | 20 | 230 | 2853 | 3082 |
| 59.946 | 19 | CGTATCATACAAGTATGCTGTCCT  | 59.985 | 25 | 206 | 50   | 255  |
| 60.042 | 20 | CTGAATTGGCTTGTGGGTTT      | 59.971 | 20 | 225 | 680  | 904  |
| 59.296 | 20 | GTTGAATTTTCACCCCGGTA      | 59.662 | 20 | 262 | 1519 | 1780 |
| 59.101 | 21 | AAGGAGGTGTTATGAAGGGATT    | 58.028 | 22 | 167 | 1236 | 1402 |
| 59.945 | 20 | TTGCAACACAAAGCACGAAT      | 60.302 | 20 | 183 | 252  | 434  |
| 60.11  | 22 | TTTAGTCCATTCTTTCCGGCG     | 60.202 | 20 | 192 | 1994 | 2185 |
| 60.015 | 20 | GAGGCTTATGCATTGACCGT      | 60.103 | 20 | 193 | 48   | 240  |
| 59.483 | 23 | CATCTTTAATGGTGGCCTGG      | 60.323 | 20 | 221 | 2165 | 2385 |
| 59.992 | 20 | AAAGATCGGCACAAAATCG       | 60.074 | 20 | 127 | 944  | 1070 |
| 59.976 | 20 | TTTGGGGACAACACTGACAA      | 59.976 | 20 | 188 | 351  | 538  |
| 59.755 | 20 | CAAATCCTGCGACAAGTCCT      | 60.255 | 20 | 232 | 805  | 1036 |
| 59.813 | 20 | ATGTAATGCCTCGCCCTATG      | 59.945 | 20 | 252 | 9    | 260  |

|        |    |                          |        |    |     |      |      |
|--------|----|--------------------------|--------|----|-----|------|------|
| 59.988 | 20 | GAAGAAGGAAAGTTTGGGGG     | 59.912 | 20 | 217 | 1294 | 1510 |
| 59.971 | 20 | TCGGTACGAAAAATCGGAG      | 60.067 | 20 | 267 | 47   | 313  |
| 60.375 | 20 | GGTTCACGATTTGGGAAAAA     | 59.778 | 20 | 258 | 2487 | 2744 |
| 60.3   | 20 | CACCTCCATCTCCGATCATAA    | 59.902 | 21 | 202 | 695  | 896  |
| 60.125 | 20 | TGTGAGGAATCCACTCTCCC     | 60.048 | 20 | 270 | 36   | 305  |
| 59.845 | 22 | CACCAGATATTTGATGCGTGA    | 59.557 | 21 | 154 | 6    | 159  |
| 59.95  | 20 | ACCGTTAAAGAAACCGGACC     | 60.221 | 20 | 255 | 1152 | 1406 |
| 60.157 | 20 | TTGATCGCGACATTTGATTT     | 59.115 | 20 | 242 | 42   | 283  |
| 60.146 | 20 | TGAGGCATCTCTCTCTCACA     | 57.05  | 20 | 244 | 318  | 561  |
| 59.966 | 20 | TGAGGCAGTGTTGTTCTTCG     | 60.025 | 20 | 245 | 1321 | 1565 |
| 59.981 | 20 | CTGCCAAGGAACCACAAAAT     | 59.971 | 20 | 229 | 1265 | 1493 |
| 60.014 | 20 | CGGATTTAAGGGTTATTACCTGAT | 58.81  | 24 | 255 | 747  | 1001 |
| 60.224 | 20 | TTGGCCCTACTAACTTGAGCA    | 59.89  | 21 | 216 | 1489 | 1704 |
| 60.111 | 20 | TGAAGCGTCAAATCACAAGC     | 59.995 | 20 | 229 | 350  | 578  |
| 58.792 | 20 | CGTTTTGCTTCTCACCCCTC     | 59.853 | 20 | 241 | 1466 | 1706 |
| 59.43  | 21 | ATTGACAAGTGCAACCCTCC     | 59.973 | 20 | 191 | 1237 | 1427 |
| 59.512 | 20 | TCGTGTCTAGTGACGATGA      | 59.141 | 20 | 112 | 4751 | 4862 |
| 59.48  | 20 | TTCTCATCCAACGAGCTGAA     | 59.522 | 20 | 248 | 316  | 563  |
| 59.955 | 20 | GATCCTGTAAGCTCCACCCA     | 60.073 | 20 | 205 | 228  | 432  |
| 60.681 | 20 | ATATGCACTGGCGGACCTAC     | 59.985 | 20 | 148 | 267  | 414  |
| 60.152 | 20 | GGATTCCGAGTTTTCGATCC     | 60.777 | 20 | 279 | 441  | 719  |
| 59.92  | 20 | CTTGTGCGCAGAGGCATTAT     | 60.235 | 20 | 233 | 811  | 1043 |
| 59.971 | 20 | CRACTTCGGAAGCAAAATTC     | 59.823 | 20 | 133 | 2516 | 2648 |
| 59.739 | 20 | AAAATTTGGACTCACAACCTCAA  | 57.841 | 23 | 257 | 63   | 319  |
| 59.648 | 20 | GTGTTGGAAGAGGGGCATTA     | 59.933 | 20 | 274 | 853  | 1126 |
| 59.864 | 20 | AGCAATCGTGATAGGCAACC     | 60.103 | 20 | 139 | 2362 | 2500 |
| 60.209 | 20 | ATTTAACAACGGACGAACGC     | 60.003 | 20 | 267 | 252  | 518  |
| 59.805 | 20 | GATGGGTTATTGATCACGGG     | 60.014 | 20 | 176 | 3815 | 3990 |
| 59.727 | 20 | TTTGACCTCCTGCAAAATCC     | 60.051 | 20 | 197 | 167  | 363  |
| 60.214 | 20 | ATCGAATCGGAAAGTTCCCT     | 59.903 | 20 | 259 | 296  | 554  |
| 60     | 25 | CCAAAAGTTCACATCACTCCAG   | 59.633 | 22 | 190 | 3    | 192  |
| 59.774 | 20 | AAAAGAACTTTCTCCTCTGGCA   | 59.521 | 22 | 219 | 200  | 418  |
| 59.463 | 21 | CTGGTCAAATCATCCGAACC     | 60.317 | 20 | 243 | 4    | 246  |
| 59.992 | 18 | TATCAGGCAAATCCTTGGGA     | 60.405 | 20 | 228 | 15   | 242  |
| 59.565 | 20 | GGAGGCATTCGATCTTTGTG     | 60.603 | 20 | 178 | 197  | 374  |
| 59.979 | 20 | GGTTGGAGTGAGCGAAGAAG     | 59.989 | 20 | 226 | 128  | 353  |
| 60.074 | 20 | TTTTTAGGCTCTCGGAGCTG     | 59.724 | 20 | 241 | 179  | 419  |
| 59.834 | 20 | CCTTCGTGCAATCATCTTCA     | 59.799 | 20 | 194 | 4442 | 4635 |
| 59.722 | 20 | CCCAAGAATCAGAGGTCCAA     | 60.042 | 20 | 186 | 2249 | 2434 |
| 60.14  | 20 | TTGGAAGGAAAGCTCGAAA      | 59.931 | 20 | 246 | 1454 | 1699 |
| 60.032 | 20 | GAAGTGAATCAAGTGATGGCTC   | 58.794 | 22 | 168 | 31   | 198  |
| 60.065 | 20 | TGGAATGTCAAGTCAACACAA    | 57.556 | 21 | 179 | 891  | 1069 |
| 59.898 | 22 | CTTCGTGCGAGCAGGAATAG     | 59.971 | 20 | 276 | 218  | 493  |
| 60.031 | 20 | GTCATTGTATGGTGCGTTTCG    | 59.995 | 20 | 112 | 321  | 432  |
| 60.149 | 19 | GTCCCATGTTGCTGCTTTTT     | 60.118 | 20 | 219 | 46   | 264  |
| 59.882 | 20 | AGGCACTGGCTTGGATTATG     | 60.096 | 20 | 280 | 146  | 425  |
| 59.415 | 21 | TGATTGAGGCTTGAACAAA      | 59.247 | 20 | 279 | 1724 | 2002 |
| 60.043 | 20 | TTACATTCCTGTCCTGCAA      | 60.24  | 20 | 144 | 1112 | 1255 |
| 58.411 | 22 | TTGAATGCTCTGAATGCTGC     | 60.104 | 20 | 260 | 824  | 1083 |
| 60.278 | 20 | TTGAGCATGATTTTTGCTGG     | 59.809 | 20 | 266 | 493  | 758  |
| 60.187 | 20 | CAACCTCAAAAATGCCCACT     | 59.971 | 20 | 184 | 796  | 979  |
| 59.727 | 20 | TCGAACCACGTAATCCTTTG     | 59.982 | 21 | 279 | 988  | 1266 |
| 58.975 | 22 | CTCTAGCACCGACCCAAC       | 59.867 | 20 | 232 | 15   | 246  |
| 60.022 | 20 | CGTTAGCCTTCTGGATCAGC     | 59.978 | 20 | 213 | 208  | 420  |
| 59.935 | 20 | TGTGAAATCCGAAAAATGGA     | 58.94  | 20 | 245 | 224  | 468  |
| 60.12  | 20 | CTTCCCAAAGCCAGAGTGAG     | 59.982 | 20 | 272 | 1338 | 1609 |
| 60.033 | 20 | AAGGTCTCCTCTCCACCAT      | 59.929 | 20 | 139 | 470  | 608  |
| 59.891 | 20 | CACAACAAAAGCAACCCAA      | 59.603 | 20 | 276 | 226  | 501  |

|        |    |                         |        |    |     |      |      |
|--------|----|-------------------------|--------|----|-----|------|------|
| 60.853 | 20 | GCGTGGAGCATTAGCTTTC     | 59.988 | 20 | 223 | 0    | 222  |
| 59.84  | 20 | CCATAACGCACCCAAGAACT    | 59.993 | 20 | 188 | 2129 | 2316 |
| 59.996 | 20 | TCTCGAGAAAACGGGATTTG    | 60.184 | 20 | 226 | 629  | 854  |
| 60.183 | 20 | AAATGGTGTGATCTTGGACCTT  | 59.735 | 22 | 279 | 1834 | 2112 |
| 59.833 | 20 | CAACGTAACCTGGCAGCAGAA   | 60.05  | 20 | 235 | 466  | 700  |
| 59.595 | 21 | GAGCCTGACTGGTGTGGTTT    | 60.159 | 20 | 273 | 401  | 673  |
| 59.365 | 21 | TTTTGTCAGCAGATGTTCCG    | 59.995 | 20 | 274 | 1922 | 2195 |
| 59.515 | 22 | CTTTTAGCCAGCCCAGTTTG    | 59.876 | 20 | 274 | 48   | 321  |
| 59.935 | 20 | TGTGGAGCTGAAAACCACAC    | 59.726 | 20 | 269 | 1051 | 1319 |
| 59.654 | 23 | TGAATGTGCATGGAGGATGT    | 59.925 | 20 | 187 | 241  | 427  |
| 59.873 | 20 | TTGTTCTACGCACTCACATT    | 58.296 | 21 | 259 | 704  | 962  |
| 59.405 | 20 | TGCAAGTGTGCAACAGATCA    | 60.029 | 20 | 271 | 338  | 608  |
| 59.942 | 20 | GCAAGTAACCTAGTGGCCAAG   | 58.917 | 21 | 174 | 144  | 317  |
| 59.989 | 20 | CACCTTCGAGATTGCTAGGC    | 59.978 | 20 | 185 | 1681 | 1865 |
| 60.395 | 20 | CCGTTTACGTTTATCCATACCC  | 59.52  | 22 | 164 | 362  | 525  |
| 58.919 | 23 | AATTCGTTCCGGGATAGAGC    | 60.419 | 20 | 280 | 337  | 616  |
| 59.836 | 20 | GAAGAGGAGGCAGTTCATGC    | 59.957 | 20 | 256 | 185  | 440  |
| 59.94  | 20 | CTGCCTACCATTTCAGCACA    | 59.864 | 20 | 235 | 409  | 643  |
| 59.425 | 20 | TCATTAAAGCTAAGGCCCCA    | 59.677 | 20 | 252 | 1571 | 1822 |
| 59.385 | 22 | TTCCGTAGTTGGTTTAGTTCTTT | 59.515 | 24 | 244 | 691  | 934  |
| 59.975 | 20 | ACCATCAGATTCATTGTGCG    | 59.527 | 20 | 271 | 896  | 1166 |
| 60.03  | 20 | TCACCTTCCAATTCACCCTC    | 59.903 | 20 | 108 | 568  | 675  |
| 59.891 | 20 | AACAGAAGTGATGGGCTTTCA   | 59.726 | 21 | 230 | 85   | 314  |
| 60.05  | 20 | CGAACACCATTTTCTTCGGT    | 59.971 | 20 | 175 | 135  | 309  |
| 59.945 | 20 | GGCATCTCCTCTTGTCTTGG    | 59.803 | 20 | 237 | 2993 | 3229 |
| 60.656 | 20 | GTCCGCTATAAAGCCAGC      | 59.821 | 19 | 254 | 6640 | 6893 |
| 60.033 | 20 | CATTGCAAAATCTCGCTTCA    | 59.953 | 20 | 276 | 88   | 363  |
| 60.388 | 20 | TTTCGGTTTCTGCAATTTTTG   | 60.095 | 21 | 272 | 58   | 329  |
| 59.95  | 20 | CCTCAGACAGCTTCAAATCCC   | 61.138 | 21 | 216 | 728  | 943  |
| 60.378 | 20 | CATCACCGTCATCGTCTCAC    | 60.121 | 20 | 169 | 656  | 824  |
| 59.671 | 22 | GCTTGTGAAGATGTGCAGGA    | 59.992 | 20 | 276 | 1    | 276  |
| 59.7   | 20 | CCAGATCATACCTCCCCTCA    | 59.879 | 20 | 229 | 890  | 1118 |
| 59.694 | 20 | ATCGCCGCCTCTTACTGTTA    | 59.867 | 20 | 191 | 57   | 247  |
| 59.989 | 20 | TAACACGCAGTCAGTCCGTC    | 59.905 | 20 | 119 | 280  | 398  |
| 60.037 | 20 | AAGCAGCCATAACTTGCCTC    | 59.481 | 20 | 194 | 583  | 776  |
| 59.852 | 20 | GGAATTCTATCCGAGCACCC    | 60.797 | 20 | 243 | 1556 | 1798 |
| 60.022 | 20 | AGACTTGAGAGAGCCGCAAC    | 59.751 | 20 | 191 | 778  | 968  |
| 59.759 | 20 | GCACCCTCTCTCACTATCGC    | 59.981 | 20 | 234 | 1423 | 1656 |
| 59.951 | 20 | CAACTTCAGTGCCTCCCATT    | 60.111 | 20 | 243 | 8    | 250  |
| 60.119 | 20 | GAAGGAGAGTTCAGATGCG     | 59.95  | 20 | 129 | 2688 | 2816 |
| 59.315 | 22 | ATGTTATGCCCTAAGGGGGA    | 60.522 | 20 | 206 | 309  | 514  |
| 59.883 | 20 | CGACTTTTCACTATTCTCCGC   | 58.986 | 21 | 151 | 19   | 169  |
| 59.911 | 20 | GGTCCCTCCGTCATAAACCT    | 60.19  | 20 | 196 | 1432 | 1627 |
| 60.161 | 20 | AAATTCCAACGACAATAATTCCA | 59.616 | 23 | 255 | 589  | 843  |
| 58.536 | 25 | GAAATAAGGAGGTGTTATGAAGG | 59.323 | 24 | 152 | 1635 | 1786 |
| 59.907 | 20 | GAAAAGCTTGGGAATGGTGA    | 60.051 | 20 | 247 | 1074 | 1320 |
| 57.73  | 23 | CTTGCCACTTTATCCCTCCA    | 60.066 | 20 | 102 | 18   | 119  |
| 59.883 | 20 | GTTAGATGATGCCACTGCGA    | 59.83  | 20 | 280 | 2748 | 3027 |
| 59.79  | 20 | GCCTAGATAGGGAGCAGCAA    | 59.574 | 20 | 131 | 522  | 652  |
| 60.043 | 20 | CTTCCCCTGCAATCAAAGAA    | 60.184 | 20 | 189 | 3625 | 3813 |
| 59.988 | 20 | TTGCTGAAAAGCAAGCCTCT    | 60.27  | 20 | 222 | 564  | 785  |
| 60.16  | 20 | CCCTCCTATGCACTCCAAAA    | 60.066 | 20 | 238 | 3637 | 3874 |
| 59.609 | 20 | TGAGTGCCTATGCCTAACA     | 60.566 | 20 | 279 | 172  | 450  |
| 58.296 | 21 | GATACTCGCCATTTCCCCT     | 60.286 | 20 | 268 | 496  | 763  |
| 60.025 | 20 | GAGTCTGCAAAAGCAAAGCC    | 60.14  | 20 | 147 | 1659 | 1805 |
| 59.746 | 20 | AACACACGTCCGTTTCAATCA   | 60.008 | 20 | 226 | 3546 | 3771 |
| 59.993 | 20 | TGTGGCATGTTCTTCGAATC    | 59.654 | 20 | 241 | 747  | 987  |
| 60.014 | 19 | TCAGATGAAGCCAAAGAGGG    | 60.331 | 20 | 276 | 2066 | 2341 |



|        |    |                           |        |    |     |      |      |
|--------|----|---------------------------|--------|----|-----|------|------|
| 59.934 | 20 | TAGAGTAGCGGCTGCAGGTT      | 60.176 | 20 | 178 | 13   | 190  |
| 59.763 | 20 | CGCTCCCATTTTTGGTAGAA      | 60.067 | 20 | 124 | 587  | 710  |
| 59.263 | 20 | CCAAACACCCCCTTAGTGTT      | 58.812 | 20 | 249 | 865  | 1113 |
| 59.828 | 21 | GGGATGTTTGGAGAGACGAA      | 60.05  | 20 | 138 | 39   | 176  |
| 59.652 | 20 | ATCAGCAGCAACCAAGTTGA      | 59.445 | 20 | 199 | 540  | 738  |
| 59.369 | 20 | CACGACGAACTTTTACTTCA      | 58.96  | 21 | 214 | 559  | 772  |
| 59.381 | 20 | CCCACAGATCTTGGACTGGT      | 59.962 | 20 | 110 | 1408 | 1517 |
| 59.837 | 26 | GGCTGGATCCAATGGTCTTA      | 59.894 | 20 | 256 | 453  | 708  |
| 60.221 | 20 | GCTGACAACATGGTCGCTTA      | 59.871 | 20 | 153 | 813  | 965  |
| 60.141 | 21 | AAGTTTGGGGGAGGAGAAAA      | 59.912 | 20 | 256 | 381  | 636  |
| 59.903 | 20 | TGGTTGGAATTTTCTCCAGG      | 59.903 | 20 | 278 | 1174 | 1451 |
| 60.142 | 20 | CCTCCTGAACCAAATCCAAA      | 59.903 | 20 | 146 | 565  | 710  |
| 59.966 | 20 | AATTGTACATCAAAGGGGCG      | 59.823 | 20 | 173 | 947  | 1119 |
| 59.522 | 20 | CAACGGTTGCAATTTGATTC      | 59.016 | 20 | 226 | 508  | 733  |
| 59.836 | 20 | ACTCCATCTCTCTCCCGCTT      | 60.358 | 20 | 239 | 565  | 803  |
| 59.28  | 24 | CAGGTGGAAGGAAGAGGAAAG     | 60.225 | 21 | 221 | 732  | 952  |
| 59.31  | 21 | GAATCTTACCAGTGCCTGA       | 58.802 | 20 | 280 | 6061 | 6340 |
| 61.339 | 20 | CAATGGTGAATATTATAAAGGCA/  | 59.607 | 26 | 216 | 192  | 407  |
| 59.411 | 24 | TGCACTTGTGCCCTAAAAT       | 60.502 | 20 | 270 | 1771 | 2040 |
| 59.992 | 20 | AATTTCCCCGCGTTATTTCT      | 59.808 | 20 | 175 | 770  | 944  |
| 57.248 | 22 | TTGTAAGGATTCCACGTATTTG    | 59.351 | 24 | 260 | 352  | 611  |
| 59.922 | 20 | GACCAGCCTGACCTCAAATC      | 59.661 | 20 | 224 | 1059 | 1282 |
| 60.193 | 20 | AGAGCTCAGGATCTTGCGAA      | 60.24  | 20 | 151 | 3401 | 3551 |
| 59.945 | 20 | GCATGGTGAGAAGCGTTGAT      | 61.22  | 20 | 226 | 1292 | 1517 |
| 60.159 | 20 | TCGCCTCCTCTTTCTTCTCA      | 60.21  | 20 | 108 | 1079 | 1186 |
| 59.66  | 20 | CGCTTTCATACCATGCAAAA      | 59.702 | 20 | 227 | 376  | 602  |
| 60.119 | 20 | AACTCATCCAATAAGCCGC       | 59.34  | 20 | 259 | 1213 | 1471 |
| 60.051 | 20 | GTGGCAAAGCAATCCAACCTT     | 60.118 | 20 | 238 | 973  | 1210 |
| 59.894 | 20 | TCCTTGTCGATGATGACGAT      | 59.04  | 20 | 112 | 341  | 452  |
| 59.971 | 20 | TCTTGTTACCCACCTTTATCC     | 60.221 | 22 | 243 | 3097 | 3339 |
| 58.028 | 22 | TTTATTGTGCATGCCGTGTT      | 59.999 | 20 | 247 | 17   | 263  |
| 59.869 | 20 | CAATTCCGAAAGAAGGTGGA      | 60.044 | 20 | 262 | 3328 | 3589 |
| 59.769 | 20 | TGATTTCCCTGGATTTGCCTC     | 60.014 | 20 | 263 | 70   | 332  |
| 59.79  | 20 | GGCGGCTTACATTGTTTCTC      | 59.713 | 20 | 117 | 162  | 278  |
| 59.996 | 20 | AACGTCAAACGGTCTATGCC      | 60     | 20 | 144 | 3195 | 3338 |
| 60.608 | 20 | ACTAGCCATTGGCATGAAGG      | 60.096 | 20 | 150 | 882  | 1031 |
| 59.879 | 20 | CGACGCCTCAAATTTACTCC      | 59.708 | 20 | 214 | 513  | 726  |
| 59.906 | 23 | ATCAGGAGCTGCCAAAAGA       | 59.955 | 20 | 265 | 6259 | 6523 |
| 58.896 | 20 | CGGTAAGTCCCGACATTTTT      | 58.949 | 20 | 280 | 448  | 727  |
| 59.813 | 20 | AGCTGCTCCTTTCAAGCAA       | 60.27  | 20 | 274 | 453  | 726  |
| 59.805 | 20 | GGTCGTTGCTGGTTAATGG       | 60.365 | 20 | 143 | 338  | 480  |
| 59.711 | 22 | TGCGTTCTGAGTTTGTTCG       | 60.027 | 20 | 238 | 2766 | 3003 |
| 58.515 | 23 | TTGAAAATTGTTTTATTCCACATTC | 59.246 | 25 | 197 | 14   | 210  |
| 59.23  | 20 | AACTAGCGACACCCACCATC      | 59.997 | 20 | 153 | 25   | 177  |
| 60.088 | 20 | TCAGTTATGCTCTTCTCCCA      | 59.822 | 21 | 189 | 973  | 1161 |
| 57.29  | 25 | CGAACTGACCGAACCGTATT      | 59.993 | 20 | 242 | 0    | 241  |
| 60.257 | 20 | GA CTGATTCAATCTCCTCCA     | 59.079 | 21 | 212 | 2    | 213  |
| 60.378 | 20 | TGGCGGCTAGGTTTACAGAT      | 59.73  | 20 | 239 | 367  | 605  |
| 58.923 | 20 | GATCATGGGCTTGCAATCTT      | 60.043 | 20 | 255 | 3986 | 4240 |
| 59.957 | 20 | AAGGAGAAGCAACAGCGGTA      | 60.015 | 20 | 208 | 444  | 651  |
| 59.22  | 20 | CGATTCCGGCGTAGAAAATA      | 60.054 | 20 | 151 | 18   | 168  |
| 60.008 | 20 | CCACAAGAAAGCAGTCCTCC      | 59.844 | 20 | 217 | 1130 | 1346 |
| 60.329 | 20 | ATGAGCTCTTCGTCATTGGG      | 60.218 | 20 | 130 | 161  | 290  |
| 59.508 | 20 | CGAGGGCGAAGTATTGTCAT      | 60.096 | 20 | 255 | 145  | 399  |
| 59.801 | 20 | CGAATAACTGCAAAAGGCAG      | 58.582 | 20 | 201 | 856  | 1056 |
| 59.779 | 20 | CCAGACTGGGAAGTCAGCAT      | 60.261 | 20 | 160 | 231  | 390  |
| 59.67  | 20 | CAAAGCCATTAGCCTTGGAG      | 59.839 | 20 | 225 | 151  | 375  |
| 60.378 | 20 | TCAAAGGGATCAAAATTCCC      | 58.808 | 20 | 202 | 3426 | 3627 |

|        |    |                            |        |    |     |      |      |
|--------|----|----------------------------|--------|----|-----|------|------|
| 59.322 | 20 | TGAACGGTTAAAATAATTGCTGAA   | 59.91  | 24 | 277 | 189  | 465  |
| 58.618 | 23 | CCCCTTGAGTATGTCCCATC       | 59.213 | 20 | 236 | 1316 | 1551 |
| 59.068 | 20 | GGGAGGTTGCATTTTCGTATG      | 60.331 | 20 | 271 | 298  | 568  |
| 58.418 | 20 | TATACTTCCCAGCCACCCTG       | 59.948 | 20 | 142 | 9    | 150  |
| 60.192 | 20 | CCATGTAGGCGTAAAAATAGGA     | 58.224 | 22 | 139 | 763  | 901  |
| 59.021 | 20 | TACAGGCCCTGCAAGAAATTT      | 59.708 | 20 | 206 | 19   | 224  |
| 59.747 | 22 | CTCTTCACCTTCTTTTGCCG       | 59.986 | 20 | 201 | 566  | 766  |
| 60.142 | 20 | CACCCGGCCTCTTTATTTTT       | 60.305 | 20 | 132 | 1400 | 1531 |
| 60.045 | 20 | GGAGTCGCGGAATCAAATTA       | 60.038 | 20 | 205 | 349  | 553  |
| 60.837 | 20 | CGGAGCTTGAAAGATGAAGG       | 59.948 | 20 | 254 | 333  | 586  |
| 60.291 | 20 | CATGAGTCGATGATTGGCAC       | 60.08  | 20 | 138 | 53   | 190  |
| 60.02  | 20 | CCACGTTTTGGGGTCCAC         | 62.219 | 18 | 279 | 573  | 851  |
| 59.96  | 20 | TCAAACAACGTGAATGAGCA       | 58.835 | 20 | 250 | 347  | 596  |
| 59.953 | 20 | GCAAGCAAATCTAACGAGCC       | 59.988 | 20 | 181 | 454  | 634  |
| 59.622 | 20 | TCGTGTTTCTATGCTTCTGG       | 60.256 | 21 | 138 | 747  | 884  |
| 59.195 | 20 | CTCTCGTTCCAAATCCCAA        | 60.044 | 20 | 264 | 1633 | 1896 |
| 58.494 | 26 | TACGTCTTTGAGATCGCACG       | 60.011 | 20 | 100 | 12   | 111  |
| 59.888 | 20 | CCCATTTCAGCTTGCTCTC        | 59.955 | 20 | 223 | 283  | 505  |
| 60.015 | 20 | TCATCCGGTTTTAGTTTCGG       | 59.931 | 20 | 157 | 3088 | 3244 |
| 60.111 | 20 | GTGGACGCTCCAGATTGTTT       | 60.119 | 20 | 225 | 1562 | 1786 |
| 58.392 | 26 | TCAACTGCCTGCATTGTTTC       | 59.847 | 20 | 218 | 609  | 826  |
| 60.657 | 20 | ACCAGCCCTTTTCTTTCCCTC      | 59.691 | 20 | 270 | 4275 | 4544 |
| 58.773 | 20 | CACCAAATTTTCATCATTTTTAGTTC | 58.144 | 25 | 256 | 403  | 658  |
| 60.147 | 22 | CGGGGGAAGAATAATTGGTT       | 60.013 | 20 | 136 | 57   | 192  |
| 60.038 | 20 | CATGCATTGAGTTGGTGGAG       | 60.112 | 20 | 277 | 2223 | 2499 |
| 59.962 | 20 | GCAAGTTCAACCTTCTTGGG       | 59.711 | 20 | 280 | 1377 | 1656 |
| 58.028 | 22 | AATGCGTGCAACACACAAGT       | 60.23  | 20 | 156 | 14   | 169  |
| 59.962 | 20 | AGTATGCGCCAAAACGAAAC       | 60.138 | 20 | 229 | 514  | 742  |
| 59.973 | 20 | TGCACGTAGGCATGTTCAAT       | 60.142 | 20 | 251 | 110  | 360  |
| 60.081 | 20 | AGTCCGATTTCAACCAGGTG       | 59.966 | 20 | 205 | 641  | 845  |
| 60.49  | 20 | CATCCCCCAAAAAGAGGTC        | 59.322 | 19 | 278 | 833  | 1110 |
| 60.004 | 21 | TGGTTATGCAAGTGGAACGA       | 60.111 | 20 | 276 | 192  | 467  |
| 60.06  | 21 | TTCATGAGCTCGCTTTTATTGA     | 59.985 | 22 | 159 | 327  | 485  |
| 59.948 | 20 | CCTATGGTAGTATGGTGTGGGG     | 60.365 | 22 | 193 | 12   | 204  |
| 60.045 | 20 | GAAGGGGCGGAATTATCTTC       | 59.873 | 20 | 129 | 2403 | 2531 |
| 60.026 | 20 | TGCGTTTTGACAATATATAGGTGT   | 60.083 | 26 | 253 | 634  | 886  |
| 59.856 | 20 | CCCAAGCCAAACACTCTCTC       | 59.844 | 20 | 197 | 3751 | 3947 |
| 60.657 | 20 | TTCGATCTCCGTCAGCTCTT       | 60.096 | 20 | 239 | 692  | 930  |
| 60.074 | 20 | TTGCAGTTCAGCCTCTGCTA       | 59.888 | 20 | 261 | 249  | 509  |
| 60.353 | 20 | CCACCGAGCACCAAGTAAAT       | 59.993 | 20 | 270 | 1096 | 1365 |
| 59.872 | 20 | TTGCCTTGCACTTCATCAGA       | 60.539 | 20 | 266 | 235  | 500  |
| 60.06  | 20 | TGATTCCTATGCCTCGTGGT       | 60.483 | 20 | 240 | 116  | 355  |
| 58.771 | 20 | GGTCTCCGGTCCCTAAAATG       | 60.683 | 20 | 247 | 644  | 890  |
| 60.031 | 20 | GATGGGGATGGGTCACTTTA       | 59.605 | 20 | 272 | 221  | 492  |
| 59.41  | 20 | TAGGAATTTGCTGCTGCTGA       | 59.712 | 20 | 160 | 1089 | 1248 |
| 59.993 | 20 | CAAACCGGGAAGAACTACCA       | 59.964 | 20 | 234 | 689  | 922  |
| 59.797 | 20 | ACCCCGATGTGATGAACAAT       | 60.057 | 20 | 224 | 814  | 1037 |
| 59.778 | 20 | TCATGGTTTCTCTGTTGCGA       | 60.39  | 20 | 170 | 821  | 990  |
| 59.49  | 20 | GTGGCGTTGAAAATCTCCAT       | 59.939 | 20 | 177 | 632  | 808  |
| 59.246 | 20 | TTGTTGGAGCTCATGGACAG       | 59.831 | 20 | 206 | 609  | 814  |
| 59.823 | 20 | GCCGATGGAATCAAGAAAAA       | 60.016 | 20 | 188 | 2356 | 2543 |
| 59.849 | 20 | TGATTCTGACGAGGCAGATG       | 59.942 | 20 | 137 | 1912 | 2048 |
| 59.244 | 20 | ACTCGAAGAGTAGCGGTTGC       | 59.644 | 20 | 279 | 54   | 332  |
| 62.397 | 18 | CCTTTAGCTGGCAGGCATAC       | 59.867 | 20 | 238 | 23   | 260  |
| 59.992 | 20 | TCCCTCCCTCTTTAAAATCACA     | 59.939 | 22 | 144 | 3722 | 3865 |
| 58.951 | 22 | GTCTCAAGCCCGCCTTATTA       | 60.23  | 20 | 270 | 963  | 1232 |
| 59.716 | 20 | GACGAGCTGATCTTGGGAAG       | 59.95  | 20 | 235 | 1412 | 1646 |
| 59.778 | 20 | GGTGTTTTTATGGGCTGTCC       | 59.292 | 20 | 271 | 3419 | 3689 |

|        |    |                          |        |    |     |      |      |
|--------|----|--------------------------|--------|----|-----|------|------|
| 59.382 | 20 | ATGGTGGAGCAGTTTTCTG      | 60.111 | 20 | 104 | 58   | 161  |
| 59.721 | 20 | CTTTCCATCCTTTTTGGGGT     | 60.159 | 20 | 259 | 234  | 492  |
| 60.008 | 20 | CACTAAGTTGAGCGTTGCGA     | 60.195 | 20 | 251 | 787  | 1037 |
| 60.34  | 20 | TGGAAAAACAACCCAAATTGA    | 60.188 | 21 | 229 | 920  | 1148 |
| 59.953 | 20 | CCGAACCGAACTGATTTTGT     | 59.971 | 20 | 149 | 142  | 290  |
| 59.816 | 20 | TTGCAAACGTCAAACAAAATG    | 59.634 | 21 | 218 | 697  | 914  |
| 60.243 | 20 | CGTCTGATTGGGAGAATCCA     | 61.004 | 20 | 276 | 1016 | 1291 |
| 59.971 | 20 | CATAAGATGCACCTGCGAAA     | 59.833 | 20 | 254 | 319  | 572  |
| 60     | 20 | ATTGACGGGTTACAGTTC       | 59.827 | 20 | 241 | 220  | 460  |
| 60.089 | 20 | CAGACCTCCAAAAGCAGGAG     | 59.982 | 20 | 209 | 1227 | 1435 |
| 59.962 | 20 | GAATCCGAAAAATAAGGGGG     | 59.616 | 20 | 124 | 385  | 508  |
| 60.246 | 20 | ACCCACATCTCCCCTCTCTC     | 60.469 | 20 | 178 | 26   | 203  |
| 59.461 | 20 | TGTCAATGAACAAATAGGTCACA/ | 59.424 | 24 | 259 | 344  | 602  |
| 58.292 | 20 | ACCCGAGACAAAACACGAAC     | 60.012 | 20 | 237 | 239  | 475  |
| 60     | 20 | AATCACTCTGTGTGAGGCC      | 60.12  | 20 | 229 | 651  | 879  |
| 59.184 | 21 | TTGTCTAGTTGCAACCCCCT     | 59.592 | 20 | 276 | 2224 | 2499 |
| 60.44  | 20 | GAGTAGAGCTCGGCGAGAAA     | 59.859 | 20 | 259 | 533  | 791  |
| 59.682 | 20 | TGTTTCATCCATGTTTTGGGA    | 59.75  | 20 | 176 | 206  | 381  |
| 57.172 | 22 | TGCTGTTGGCCTGTAGTGAG     | 60.049 | 20 | 104 | 0    | 103  |
| 60.352 | 20 | CGTTCAATAAGATCACCGA      | 58.572 | 20 | 230 | 961  | 1190 |
| 61.029 | 20 | AATACGACGACGAAGCCAAC     | 60.14  | 20 | 188 | 54   | 241  |
| 60.201 | 20 | TGGAGATCGTGTGAGAGGTG     | 59.82  | 20 | 266 | 313  | 578  |
| 59.526 | 20 | CCTCTCAGATGCAGAGGACC     | 59.945 | 20 | 156 | 12   | 167  |
| 59.378 | 20 | TCTGAGGAGATTTTGGCAGG     | 60.331 | 20 | 241 | 557  | 797  |
| 59.648 | 20 | TTGGACCACAAACCCCTTTA     | 60.198 | 20 | 167 | 392  | 558  |
| 59.939 | 20 | TCATGGGAATTCACGAAACA     | 59.9   | 20 | 229 | 245  | 473  |
| 59.586 | 20 | ACCAAGCATGCTCATGTCAA     | 60.272 | 20 | 127 | 145  | 271  |
| 59.933 | 20 | CTGAGGTGACCTGGACCATT     | 59.962 | 20 | 269 | 34   | 302  |
| 60.206 | 20 | TGCATGAAAACCTCCCTCACA    | 60.24  | 20 | 224 | 585  | 808  |
| 60.21  | 20 | GTGAAACAGACCCACAACCC     | 60.261 | 20 | 191 | 377  | 567  |
| 59.878 | 20 | GAGGTGGGATATGATGGTGG     | 60.011 | 20 | 121 | 682  | 802  |
| 59.772 | 20 | CCAATTCATCAAATCCAGG      | 60.126 | 20 | 160 | 786  | 945  |
| 59.603 | 20 | GGCTAGCTGTCCATACAATGC    | 59.75  | 21 | 221 | 296  | 516  |
| 60.517 | 20 | ATGCGGTTCGATTAGAATTG     | 59.923 | 20 | 250 | 1305 | 1554 |
| 59.894 | 20 | AAGCTAGCACGTAAATGGGG     | 59.248 | 20 | 145 | 515  | 659  |
| 57.15  | 20 | ACGAGACCATCGTTCCATA      | 60.34  | 20 | 233 | 2    | 234  |
| 60.363 | 18 | TATTTTGGGCCTGAATGGAC     | 59.762 | 20 | 185 | 505  | 689  |
| 59.931 | 20 | TGAGAATGTGCTCAGACCGT     | 59.42  | 20 | 255 | 1035 | 1289 |
| 59.746 | 20 | GATTCGATTGCTTGCATCAC     | 59.234 | 20 | 256 | 280  | 535  |
| 58.65  | 20 | AGCCACCCTCTCTCGTAGTG     | 59.474 | 20 | 280 | 196  | 475  |
| 60.186 | 22 | TCGGTCAACATTGCTTTCAA     | 60.234 | 20 | 127 | 1333 | 1459 |
| 60.326 | 20 | AAACTGGTGCTCATGCTTTG     | 58.926 | 20 | 236 | 2967 | 3202 |
| 59.918 | 20 | CGTGGAGACAACGTGAAGAA     | 59.873 | 20 | 219 | 112  | 330  |
| 60.604 | 20 | GTCGTAGTCTTCCTCGTCGG     | 59.867 | 20 | 135 | 1562 | 1696 |
| 59.903 | 20 | GGGAATGGAATGAGCATGAG     | 60.426 | 20 | 249 | 73   | 321  |
| 59.927 | 20 | TAACGGAACCGTGGGATAAA     | 60.181 | 20 | 208 | 270  | 477  |
| 59.871 | 20 | GCACTCGAAGAGTAGCGGTT     | 59.644 | 20 | 254 | 2063 | 2316 |
| 59.948 | 20 | AGGACGTCGAGGGAGAGAAT     | 60.216 | 20 | 206 | 560  | 765  |
| 60.186 | 21 | CACTGCTTGCCACTTATGA      | 59.864 | 20 | 266 | 32   | 297  |
| 60.08  | 20 | CCTCCCATGGCTAGACTAA      | 59.146 | 20 | 262 | 312  | 573  |
| 60.118 | 20 | TTGCTCCATGTTATGCAATG     | 58.145 | 20 | 254 | 1295 | 1548 |
| 59.805 | 20 | CATGCAACAAACCAACCAAA     | 60.393 | 20 | 236 | 398  | 633  |
| 59.147 | 21 | GTTGAGATATTGGAGAAGATATG/ | 57.119 | 26 | 265 | 1684 | 1948 |
| 59.847 | 20 | CAACAAGATGCCAAAATAACAA   | 59.076 | 23 | 186 | 670  | 855  |
| 59.779 | 20 | CCAGTTCAAGAAAAGGCCAA     | 60.22  | 20 | 202 | 344  | 545  |
| 59.654 | 20 | CATCCCCATTACCTTAGTTAGCA  | 59.424 | 23 | 231 | 556  | 786  |
| 59.624 | 20 | TGACGACCGATATGTGCTTC     | 59.679 | 20 | 248 | 97   | 344  |
| 60.57  | 20 | GCGAGGAAATCAGAGAGTGG     | 59.95  | 20 | 273 | 17   | 289  |

|        |    |                                        |        |    |     |      |      |
|--------|----|----------------------------------------|--------|----|-----|------|------|
| 59.297 | 20 | TTTCCTTTCATTACACGTGCC                  | 59.989 | 21 | 266 | 39   | 304  |
| 59.82  | 20 | TTGATGCAATGATCTCATTCTTTT               | 59.976 | 24 | 190 | 407  | 596  |
| 60.081 | 20 | TGCACAAGCATGTTTTTCATT                  | 59.22  | 21 | 243 | 288  | 530  |
| 59.15  | 20 | AAACAGGCTAGGTCGGACTATTT                | 59.595 | 23 | 279 | 1510 | 1788 |
| 59.469 | 22 | GAAAATGCAAGGGTGGTTGT                   | 59.836 | 20 | 187 | 803  | 989  |
| 60.258 | 20 | TCTGTTTTTGTGTTTGGTTGCC                 | 60.004 | 21 | 233 | 144  | 376  |
| 60.309 | 20 | GCTAAAGCCATCTCCAATGC                   | 59.813 | 20 | 261 | 299  | 559  |
| 59.7   | 20 | CCTGGCAGCTTTTGATCTGT                   | 60.397 | 20 | 154 | 74   | 227  |
| 59.549 | 20 | ATGCTGCATCGGCAATAAAT                   | 60.453 | 20 | 221 | 602  | 822  |
| 59.898 | 20 | TAGCAAAGCCCAACCTCATC                   | 60.214 | 20 | 147 | 880  | 1026 |
| 60.032 | 20 | CATTTATTCCCGCAACAAC                    | 60.188 | 20 | 245 | 671  | 915  |
| 59.864 | 20 | GATGACAGAGCAATCGGGTT                   | 60.081 | 20 | 280 | 273  | 552  |
| 60.051 | 20 | CACAGATCTGGTGGAGGGTT                   | 59.962 | 20 | 154 | 519  | 672  |
| 59.858 | 24 | GGCAGTTAACAGGACCCAAA                   | 59.971 | 20 | 202 | 324  | 525  |
| 59.975 | 20 | TTGGGGATTAGTTCGCAAAG                   | 60.067 | 20 | 124 | 370  | 493  |
| 59.391 | 20 | ACCGATTGCGATGCTTAACT                   | 59.736 | 20 | 221 | 1373 | 1593 |
| 59.284 | 20 | AAAGAAATTGGACAGTGGCG                   | 60.11  | 20 | 169 | 3918 | 4086 |
| 60.121 | 20 | ATCTTCAACCCCCACCTCTT                   | 59.795 | 20 | 239 | 579  | 817  |
| 60.06  | 21 | CTGCAATCCAAAAGGGAAAA                   | 60.046 | 20 | 257 | 52   | 308  |
| 59.847 | 20 | GGGAAAAAGGGCTTGTGTT                    | 60.332 | 20 | 196 | 3675 | 3870 |
| 58.957 | 20 | TTTGAACACTCAATGCGCTC                   | 59.995 | 20 | 274 | 940  | 1213 |
| 59.781 | 20 | TTCTCGACCTCAAAGTGCT                    | 59.989 | 20 | 210 | 1299 | 1508 |
| 59.462 | 20 | ATCGTGCCACTTTTCTGTCC                   | 60.119 | 20 | 266 | 321  | 586  |
| 60.293 | 20 | GATAAGCAGCGAGAACTCCG                   | 60.118 | 20 | 229 | 28   | 256  |
| 60.049 | 20 | CTTGAAGCTCCAGCAAAACC                   | 59.993 | 20 | 142 | 926  | 1067 |
| 59.771 | 20 | CAAACCTTCCACCGACCTC                    | 59.697 | 20 | 213 | 14   | 226  |
| 60.612 | 22 | TGGGAATCCGGACACTAACT                   | 59.405 | 20 | 246 | 326  | 571  |
| 59.96  | 20 | AACCAGACCATTACCAAGCG                   | 59.993 | 20 | 247 | 1032 | 1278 |
| 60.228 | 20 | TGTATTAGGACCACCAGACCG                  | 59.861 | 21 | 198 | 656  | 853  |
| 59.927 | 20 | TACCCACCTCGAATATCCCC                   | 60.901 | 20 | 140 | 308  | 447  |
| 59.973 | 20 | CAACTAGGGGGTCTGAGGT                    | 60.363 | 20 | 144 | 1603 | 1746 |
| 60.235 | 20 | TCACGTGACTTATTTGGTGGA                  | 59.036 | 21 | 227 | 2858 | 3084 |
| 57.669 | 23 | TCATGAATCATCAATTCGAAACTT               | 59.849 | 24 | 228 | 21   | 248  |
| 60.088 | 20 | CCCCTGGTTGTTGAAGAAAA                   | 59.942 | 20 | 116 | 1834 | 1949 |
| 59.912 | 20 | TTCGCCCAATCTTCTCATT                    | 60.155 | 20 | 240 | 991  | 1230 |
| 59.545 | 20 | TGTTTTAATTTTTGTTAAGCATGCA <sup>A</sup> | 59.958 | 25 | 203 | 387  | 589  |
| 59.801 | 20 | CCGGGGTATGCTATAAACGA                   | 59.81  | 20 | 189 | 17   | 205  |
| 60.031 | 20 | GACAAGGAAAAAGAGCGCAG                   | 60.132 | 20 | 201 | 1549 | 1749 |
| 59.967 | 20 | CAAATGCGTGAAGATAGTGATG                 | 58.32  | 22 | 219 | 446  | 664  |
| 59.955 | 20 | CACCTAGTTGCCCTACAA                     | 59.986 | 20 | 152 | 537  | 688  |
| 59.83  | 20 | GCTTGATCGTCTCCTGCTTC                   | 60.104 | 20 | 127 | 669  | 795  |
| 60.08  | 20 | GTATCCTGCTGAGGTGGAGC                   | 59.834 | 20 | 272 | 2083 | 2354 |
| 57.55  | 20 | AATGCCCTCAGATGCTATGG                   | 60.059 | 20 | 215 | 0    | 214  |
| 60.112 | 20 | GTGGAGTGGTGGAGCAAGTT                   | 60.159 | 20 | 141 | 825  | 965  |
| 59.344 | 23 | TGAGACTTTGGTACGGGAGC                   | 60.255 | 20 | 236 | 328  | 563  |
| 59.997 | 20 | AGAGGCAGAGAGGTGACTGG                   | 59.579 | 20 | 278 | 120  | 397  |
| 59.517 | 20 | GGAATTCCATCCATCTCGAA                   | 59.831 | 20 | 181 | 158  | 338  |
| 60.013 | 20 | GGCATCCATACTTGCCACTT                   | 59.962 | 20 | 269 | 1182 | 1450 |
| 59.91  | 20 | GCATGCATACAAAACCAAACG                  | 61.284 | 21 | 160 | 4358 | 4517 |
| 59.776 | 20 | TCCTGCAATCTCTGAACCAA                   | 59.369 | 20 | 230 | 410  | 639  |
| 60.195 | 20 | GCATCATAGGACCCCAAAAA                   | 59.762 | 20 | 209 | 391  | 599  |
| 59.903 | 20 | GCTGCTTGATCCTGAATCCT                   | 59.39  | 20 | 252 | 108  | 359  |
| 59.293 | 20 | ACTACCATGCGGAAGGAATG                   | 59.955 | 20 | 229 | 772  | 1000 |
| 60.142 | 20 | TGTTTACGACACAGAACTTCA                  | 59.534 | 22 | 272 | 554  | 825  |
| 60.074 | 20 | TTTTTCTTTGGGTCATGTGATG                 | 59.839 | 22 | 268 | 691  | 958  |
| 59.634 | 20 | ATTTGATCCCCCAATTCAA                    | 59.067 | 20 | 128 | 45   | 172  |
| 60.081 | 20 | ACTCCTCTTTCGATCTGCCA                   | 59.95  | 20 | 212 | 2442 | 2653 |
| 59.996 | 20 | GAGTGCAGAGTGCAAAACCA                   | 60.032 | 20 | 135 | 511  | 645  |

|        |    |                           |        |    |     |      |      |
|--------|----|---------------------------|--------|----|-----|------|------|
| 59.98  | 20 | TGGGATTCATGGGTCAATTTT     | 59.991 | 20 | 208 | 746  | 953  |
| 60.025 | 20 | AATGCCTTCTTTTGGCTGTG      | 60.249 | 20 | 168 | 831  | 998  |
| 60.14  | 20 | TGGTCAGCATCCTACCAACA      | 60.112 | 20 | 207 | 1980 | 2186 |
| 60.031 | 20 | TTCTGGATGCATGAAAATTGA     | 59.101 | 21 | 265 | 491  | 755  |
| 57.916 | 25 | ACCAAATGGCTTAGGTGACG      | 59.993 | 20 | 169 | 1728 | 1896 |
| 59.874 | 20 | ATCAAGTTTCCATTCTGCCG      | 60.074 | 20 | 155 | 74   | 228  |
| 57.972 | 20 | TAGAGTCCCTCCGATTCCGTG     | 60.21  | 20 | 277 | 602  | 878  |
| 60.037 | 24 | TTGATGTTTGTATATGTTTCGTTCA | 58.542 | 25 | 276 | 241  | 516  |
| 60.096 | 20 | AATGAGGTCAATGGTCAGCC      | 59.934 | 20 | 197 | 1101 | 1297 |
| 60.307 | 20 | GTGTGGCGTGCTAACTGCTA      | 60.081 | 20 | 220 | 236  | 455  |
| 59.95  | 20 | GGCCCAACTCCACTAAATCA      | 59.933 | 20 | 201 | 60   | 260  |
| 59.807 | 20 | AAAACCTCCGGCATGGTACAC     | 59.859 | 20 | 272 | 594  | 865  |
| 59.059 | 20 | CCGAACCACGTACATCCTCT      | 59.989 | 20 | 171 | 697  | 867  |
| 59.592 | 20 | CCGTTCCATCAAGCATTTTT      | 59.938 | 20 | 234 | 1014 | 1247 |
| 60.053 | 20 | ATTCGATGGATTTTCGACGAG     | 60.036 | 20 | 119 | 7524 | 7642 |
| 60.032 | 20 | CACCCCACGAGACAATTTTT      | 60.005 | 20 | 108 | 747  | 854  |
| 58.687 | 21 | ACTAGTGGCAGCCATGTCCA      | 61.688 | 20 | 234 | 257  | 490  |
| 59.888 | 20 | CGCCGATATATGCGTCTTTT      | 60.082 | 20 | 247 | 346  | 592  |
| 59.935 | 23 | CCAATCCAAGTATCGTCGCT      | 60.096 | 20 | 258 | 769  | 1026 |
| 59.648 | 20 | TGCCATCGTTCACTTTACCA      | 60.111 | 20 | 194 | 1279 | 1472 |
| 60.476 | 19 | TGTTTCTGCCCAAGCTTCTT      | 59.993 | 20 | 280 | 997  | 1276 |
| 59.978 | 20 | GTAGTGGTCGACGGGCTTTA      | 60.132 | 20 | 265 | 227  | 491  |
| 60.907 | 20 | TCCAGTGTAGTTTACCCGGC      | 59.993 | 20 | 205 | 847  | 1051 |
| 59.818 | 21 | ATTCCATGTCCAGACCCATC      | 59.593 | 20 | 253 | 1091 | 1343 |
| 60.038 | 20 | ACGAACTCCTTCGATTCCCT      | 60.074 | 20 | 247 | 595  | 841  |
| 58.834 | 20 | ATTCTGCTATTCCCAGAGGT      | 59.925 | 20 | 225 | 0    | 224  |
| 58.629 | 22 | ATCCGTTCCGGTCTTCTACA      | 59.55  | 20 | 230 | 416  | 645  |
| 59.823 | 20 | GAGGGCAATTCTGATGAACC      | 59.488 | 20 | 264 | 392  | 655  |
| 60.153 | 21 | TTGCAAATATAAACGTAATGAAGC  | 57.618 | 24 | 203 | 226  | 428  |
| 60.257 | 20 | AGCTCCCAAGTCTGAGTGGA      | 59.986 | 20 | 184 | 435  | 618  |
| 59.937 | 20 | ATTTGGGTGAGAAATCGCTG      | 60.074 | 20 | 269 | 1029 | 1297 |
| 59.662 | 20 | CCCATTGAATTATGGGGTTG      | 59.872 | 20 | 108 | 1050 | 1157 |
| 59.042 | 21 | GCGATGTGGACACCTCAGAT      | 61.116 | 20 | 275 | 42   | 316  |
| 59.146 | 22 | ATGTCTGCCCAGCAGAGAAC      | 60.418 | 20 | 272 | 689  | 960  |
| 59.274 | 21 | TGCACAATCATCACACATAACC    | 59.326 | 22 | 153 | 722  | 874  |
| 59.376 | 23 | AGGAACGGGAGATTTTGCTT      | 60.074 | 20 | 186 | 267  | 452  |
| 60.42  | 20 | TTCCGGAGCATTACCCTATG      | 59.916 | 20 | 279 | 1677 | 1955 |
| 60.049 | 20 | AGGTGAGCCAGATGTAGCGT      | 59.898 | 20 | 238 | 656  | 893  |
| 59.939 | 20 | AGAGCGACAGCGAAAATGAT      | 59.985 | 20 | 226 | 335  | 560  |
| 60.055 | 20 | TGTGTTGAAACCCTCATCCA      | 59.935 | 20 | 250 | 1424 | 1673 |
| 59.923 | 20 | TGGTTGCCAGCTTACTGCTA      | 59.632 | 20 | 200 | 326  | 525  |
| 59.838 | 21 | TTGTCATGATTTGCGGGTTA      | 59.93  | 20 | 192 | 46   | 237  |
| 59.829 | 20 | TGCTTGTAGTGGGAAGAGAGTG    | 59.538 | 22 | 184 | 710  | 893  |
| 59.903 | 20 | GGATCTCCAAATCTGACGGA      | 60.011 | 20 | 238 | 819  | 1056 |
| 59.938 | 20 | TCGGGTTTCGATTCTCATTTT     | 60.014 | 20 | 257 | 10   | 266  |
| 60.015 | 20 | TGGTAGTGGTGGATATTGGTGA    | 60.11  | 22 | 256 | 317  | 572  |
| 59.635 | 20 | TGCTTTGACAATATTTAGTTTTTG  | 59.216 | 26 | 280 | 3629 | 3908 |
| 59.955 | 20 | CACATCCATGTTCTGTCTTT      | 59.572 | 20 | 263 | 163  | 425  |
| 60.18  | 20 | CGAGCTCGGTGAAGCTATTC      | 60.118 | 20 | 244 | 166  | 409  |
| 59.894 | 20 | TGGTGCCTGTTCCCAAATA       | 59.964 | 20 | 267 | 425  | 691  |
| 59.982 | 20 | TGATTGTGGACCAACAGCAT      | 59.967 | 20 | 269 | 80   | 348  |
| 59.945 | 20 | GTGTGGGGTGTATTGGGAG       | 60.088 | 20 | 232 | 1330 | 1561 |
| 59.671 | 21 | TGGACAAGGGAGAAAAAGGA      | 59.641 | 20 | 174 | 1724 | 1897 |
| 58.628 | 20 | TGGCGTAGTGTGGAGAATG       | 59.716 | 20 | 143 | 59   | 201  |
| 60.016 | 19 | TCAATTAGGTGTCCCACCGT      | 60.232 | 20 | 197 | 337  | 533  |
| 59.901 | 20 | CTTGAGTTCGGTCATCACCAT     | 59.981 | 21 | 154 | 963  | 1116 |
| 60.504 | 20 | TGTCTTCCACACAAATCCGA      | 60.088 | 20 | 250 | 1404 | 1653 |
| 59.953 | 20 | GGGTTCAAACCTCACTCAACA     | 59.997 | 21 | 177 | 618  | 794  |

|        |    |                          |        |    |     |      |      |
|--------|----|--------------------------|--------|----|-----|------|------|
| 60.073 | 20 | TGTGTGTCATTTGTTTTGTTAGGA | 59.464 | 24 | 268 | 114  | 381  |
| 59.931 | 20 | GGACGATCCTCATCCTTGAA     | 60.011 | 20 | 219 | 119  | 337  |
| 60.205 | 20 | CGTTGTAATGCCCCGTAAT      | 59.72  | 20 | 193 | 1266 | 1458 |
| 60.414 | 20 | GTGGAGTTCAAGCCCAAAAA     | 60.088 | 20 | 280 | 2108 | 2387 |
| 59.872 | 20 | AAAGGTAAGGGTCTCCCA       | 59.799 | 20 | 214 | 1477 | 1690 |
| 60.299 | 20 | TGCAGCTGTGGACCTACTTG     | 60.049 | 20 | 247 | 1033 | 1279 |
| 59.955 | 20 | TTTATGTGCGTTTTTGGGAA     | 59.05  | 20 | 277 | 302  | 578  |
| 60.216 | 20 | TTATCCTGTGCTTTTGCACG     | 59.872 | 20 | 211 | 2690 | 2900 |
| 60.278 | 20 | CTCCTTCCCTCCATTCCCTTC    | 60.008 | 20 | 139 | 74   | 212  |
| 60.323 | 20 | GCTTATTTGGCATGCTCTCC     | 59.813 | 20 | 202 | 246  | 447  |
| 59.736 | 19 | TGCGTTTTGATGATATATAGGTGT | 60.054 | 26 | 271 | 724  | 994  |
| 60.103 | 20 | TTTCCATCTTGGACCACACC     | 60.758 | 20 | 181 | 3669 | 3849 |
| 59.547 | 20 | TATTCTCGAAACAGTGCCA      | 60.401 | 20 | 278 | 2410 | 2687 |
| 59.962 | 20 | TCTTGGATTTGGAGGAATGG     | 59.864 | 20 | 208 | 358  | 565  |
| 60.177 | 20 | CCCTCGTATGCAGTGGTTTT     | 59.993 | 20 | 238 | 669  | 906  |
| 59.694 | 20 | CTGCTGAAGCCCTTCTCATC     | 60.096 | 20 | 239 | 12   | 250  |
| 60.315 | 20 | GGAATGTGGTGTAGATTTGTGC   | 59.364 | 22 | 183 | 221  | 403  |
| 58.976 | 22 | ATCATGAATGACACATGGCG     | 60.362 | 20 | 226 | 10   | 235  |
| 59.942 | 20 | TCACAAGGGTGAAAGGGAAC     | 59.943 | 20 | 206 | 97   | 302  |
| 59.84  | 20 | ACCACAGTGGCATTACACGA     | 60.032 | 20 | 270 | 716  | 985  |
| 59.464 | 20 | CTGCAACCGTTTCTTCACAG     | 59.485 | 20 | 114 | 403  | 516  |
| 60.549 | 20 | CACCTTCATCGGCATCAAC      | 60.064 | 19 | 213 | 683  | 895  |
| 58.866 | 20 | GAATAGGAATGGGGGAGAGC     | 59.866 | 20 | 221 | 959  | 1179 |
| 60.626 | 20 | TGGTTGGAGGGTAACATCGT     | 60.232 | 20 | 248 | 985  | 1232 |
| 60.554 | 19 | GCGAAGCGACATCACATAAA     | 59.839 | 20 | 140 | 25   | 164  |
| 60.294 | 20 | AACTTGTGTTGGTGGCTTCA     | 59.187 | 20 | 132 | 2018 | 2149 |
| 58.044 | 22 | TCAATCTCGTTGAAAAATGGTTT  | 59.871 | 23 | 261 | 818  | 1078 |
| 59.861 | 20 | ACTCCCTCCTAAGGACCCCT     | 60.316 | 20 | 122 | 0    | 121  |
| 59.993 | 20 | CGCTCGACTTTCTCGAAGAT     | 59.717 | 20 | 114 | 395  | 508  |
| 60.005 | 20 | TCATGTCACGTTCCAGTTTCA    | 60.144 | 21 | 279 | 1565 | 1843 |
| 58.725 | 20 | AAGGGAGTTTTTCACCCGAT     | 59.805 | 20 | 103 | 67   | 169  |
| 59.977 | 23 | CATGTGCCTTCTCTGCTTGA     | 60.136 | 20 | 255 | 7    | 261  |
| 59.962 | 20 | GGCCAACAAATCGTCAATCT     | 59.939 | 20 | 116 | 418  | 533  |
| 59.777 | 20 | CGCTCAACAACCACAACAGT     | 59.794 | 20 | 260 | 21   | 280  |
| 60.318 | 20 | CCATCGAAGCTCACTGTCAA     | 59.984 | 20 | 178 | 959  | 1136 |
| 60.17  | 20 | TGATGTTATAGTAAGCAAACCAAC | 57.922 | 25 | 197 | 736  | 932  |
| 60.195 | 20 | ATGCTGAAGGAGCCAAAAGA     | 59.955 | 20 | 158 | 290  | 447  |
| 60.12  | 20 | CCGTTGCCTTACCTTTTTCA     | 60.103 | 20 | 229 | 518  | 746  |
| 59.609 | 20 | GGACACCACGTTAGCATTCA     | 59.572 | 20 | 224 | 355  | 578  |
| 59.96  | 20 | TGGGGGAGATTTTTGTTTTG     | 59.772 | 20 | 231 | 966  | 1196 |
| 59.323 | 24 | ATCAAGAGCTCTCACCCACG     | 60.408 | 20 | 100 | 8    | 107  |
| 59.653 | 20 | AAACTACCACTGCGTCCCAC     | 60.035 | 20 | 264 | 674  | 937  |
| 60.594 | 20 | CGATAGGGATCTCTTCTGCG     | 59.933 | 20 | 241 | 335  | 575  |
| 60.315 | 19 | GCACCTCCTGTTAGCGAGAA     | 60.538 | 20 | 263 | 393  | 655  |
| 60.103 | 20 | ATTTCCACCATGATTTTCGGA    | 60.133 | 20 | 258 | 603  | 860  |
| 60.12  | 20 | TCCATACAGACACAACCCCC     | 60.634 | 20 | 197 | 271  | 467  |
| 60.483 | 20 | TGTCTGGAATGGAATGTGGA     | 59.893 | 20 | 274 | 4267 | 4540 |
| 59.986 | 20 | CCCCTACATTGGGAGTCAAA     | 59.784 | 20 | 210 | 911  | 1120 |
| 59.435 | 21 | AAACATGATACCGCCGAAAA     | 60.323 | 20 | 227 | 159  | 385  |
| 60.317 | 20 | ATTCAAGGTCACCATCCCAA     | 60.173 | 20 | 154 | 1421 | 1574 |
| 60.049 | 20 | TGGAAGCAACTCAATTTTGG     | 60.096 | 21 | 118 | 590  | 707  |
| 58.796 | 22 | TGGTCGAATGAGGAGTGAAA     | 59.215 | 20 | 256 | 133  | 388  |
| 60.074 | 20 | GCCTCTGCTTCACCAATTTT     | 59.316 | 20 | 265 | 241  | 505  |
| 60.056 | 20 | TGCAGACGAAACTCACAAGG     | 60.025 | 20 | 138 | 660  | 797  |
| 60.068 | 21 | GAAGGTGGTGTGCTGTGAA      | 59.726 | 20 | 274 | 198  | 471  |
| 60.416 | 20 | TCACCAAAGGAGGGGTTATC     | 60.173 | 21 | 262 | 711  | 972  |
| 59.542 | 20 | AGAAATGAGGGAGAAGGGGA     | 60.008 | 20 | 245 | 6310 | 6554 |
| 59.9   | 25 | ACAAATGTGTTCCGCTTGTT     | 58.132 | 20 | 280 | 14   | 293  |

|        |    |                           |        |    |     |      |      |
|--------|----|---------------------------|--------|----|-----|------|------|
| 59.943 | 20 | ATTATCGCAGCGAAGATGCT      | 59.973 | 20 | 202 | 47   | 248  |
| 59.439 | 20 | GGATTGCAGAAAAACCCAAA      | 59.916 | 20 | 198 | 1502 | 1699 |
| 60.029 | 20 | AATGTGATGTGAGCCACGAA      | 60.12  | 20 | 183 | 2520 | 2702 |
| 59.882 | 20 | TCCCGCATAATTTGGATTC       | 59.735 | 20 | 232 | 2    | 233  |
| 59.76  | 21 | AAGCTAACGAACACGGCT        | 59.943 | 20 | 276 | 599  | 874  |
| 59.694 | 20 | TTCACGTGTAGGAGCCAATG      | 59.716 | 20 | 263 | 410  | 672  |
| 59.3   | 20 | ATCCAACCTCAAGCAACCGTC     | 60.119 | 20 | 258 | 7    | 264  |
| 60.564 | 19 | GCATGCGTTGTCCAAATAAA      | 59.567 | 20 | 160 | 941  | 1100 |
| 59.966 | 20 | CTTTGGGCATTGTTCTCTGA      | 58.847 | 20 | 227 | 122  | 348  |
| 59.709 | 21 | TTTGGTCTCGTTGTATGAACAAA   | 59.544 | 23 | 244 | 432  | 675  |
| 58.707 | 21 | AACATGGGTACTGTTTCGCA      | 59.05  | 20 | 135 | 996  | 1130 |
| 58.901 | 21 | TTCATGTGTTTCGTAATGATCG    | 57.082 | 21 | 272 | 344  | 615  |
| 59.272 | 20 | GCACAATCAACTTGAGGCAA      | 59.847 | 20 | 180 | 27   | 206  |
| 60.156 | 20 | GAAAGGGGAAGGAGAAGTGG      | 60.045 | 20 | 131 | 19   | 149  |
| 60.049 | 20 | CCACGCTTGGCATTAGATA       | 58.794 | 20 | 160 | 364  | 523  |
| 60.015 | 20 | AATCCCATGTTGCTGCATTT      | 60.339 | 20 | 171 | 146  | 316  |
| 60.053 | 20 | GATGCAACTTCGGGAGTGAT      | 60.081 | 20 | 276 | 923  | 1198 |
| 59.903 | 20 | TGCCCCCTATGCAAATATC       | 59.757 | 20 | 202 | 590  | 791  |
| 59.988 | 20 | TGGCAACTCCATGAACAATTT     | 60.359 | 21 | 230 | 378  | 607  |
| 58.409 | 20 | AACAGCCAAGTATTGGTGCC      | 60     | 20 | 273 | 1359 | 1631 |
| 60.001 | 22 | TTCCATCTATCAATTCATTTTATTA | 58.89  | 27 | 223 | 297  | 519  |
| 59.88  | 20 | TGAAGTTAGGAAATAAGGAGGTG   | 58.743 | 25 | 120 | 854  | 973  |
| 59.859 | 20 | CCACACCCACACTCTCTCT       | 60.153 | 20 | 261 | 294  | 554  |
| 59.732 | 25 | TTTGCATGGATTAACAGCGA      | 60.215 | 20 | 203 | 95   | 297  |
| 59.913 | 20 | CTCACTCATTCCCTCGCTTCC     | 59.95  | 20 | 129 | 1672 | 1800 |
| 59.935 | 20 | GAAAAGGGGTGACCACAAAA      | 59.807 | 20 | 265 | 888  | 1152 |
| 60.049 | 20 | TTCCACGAATACAAGCGTTC      | 58.773 | 20 | 240 | 330  | 569  |
| 59.685 | 21 | TAAATTCGGGTCTTCCACCA      | 60.301 | 20 | 274 | 753  | 1026 |
| 59.911 | 20 | TGTAGCCCGCATGACTACAG      | 59.888 | 20 | 238 | 968  | 1205 |
| 59.922 | 20 | TCAGCAAGAACTCGAGCAAA      | 59.864 | 20 | 244 | 151  | 394  |
| 59.987 | 24 | ACCGTCGATGAAAAATCTGG      | 59.933 | 20 | 264 | 994  | 1257 |
| 60.517 | 20 | GGAGCAGGTTTCAAGTGAGA      | 60.533 | 20 | 275 | 4914 | 5188 |
| 59.459 | 20 | AACTTGGGCCTGGCTATCTT      | 60.096 | 20 | 277 | 2089 | 2365 |
| 59.302 | 23 | TCCAATATTTATGGCGATCTAACA  | 59.744 | 24 | 224 | 915  | 1138 |
| 59.973 | 20 | AACATTGTGAAGGAGGCTGC      | 60.263 | 20 | 260 | 1125 | 1384 |
| 59.823 | 20 | AGAATAATGCAGCGAGCGAT      | 59.973 | 20 | 242 | 1541 | 1782 |
| 59.929 | 20 | GAGGGTGGCTCATCTTCAAA      | 60.195 | 20 | 278 | 1505 | 1782 |
| 59.925 | 20 | TCAAGGGCCAAGATTTGTTC      | 60.051 | 20 | 148 | 122  | 269  |
| 60.14  | 20 | TTTGCCCCACACAACCTGATA     | 59.964 | 20 | 145 | 9415 | 9559 |
| 59.55  | 20 | TACGAATCACACTATGGGCA      | 57.572 | 20 | 148 | 444  | 591  |
| 60.606 | 21 | TTAAAGAAGGGTTGGCGATG      | 60.067 | 20 | 246 | 984  | 1229 |
| 59.098 | 20 | CCAATTTTATTGATAACTCACCA   | 58.865 | 23 | 216 | 54   | 269  |
| 59.997 | 20 | TTGCCCCCAACTGCTATTAC      | 59.96  | 20 | 191 | 282  | 472  |
| 58.148 | 21 | ATTGAGCTTGCCTTTCCAAT      | 59.713 | 20 | 266 | 1203 | 1468 |
| 59.971 | 20 | GGAGAGAAAGCTGGCTGATG      | 60.096 | 20 | 279 | 2676 | 2954 |
| 59.662 | 21 | TTTGCACATGAGCTTTTCCA      | 60.379 | 20 | 207 | 1250 | 1456 |
| 59.33  | 21 | GTCCGTTGGAAAAAGGATGA      | 59.91  | 20 | 221 | 369  | 589  |
| 59.585 | 21 | GCCCGTGTCCATAACACAAT      | 60.646 | 20 | 274 | 1796 | 2069 |
| 59.055 | 20 | TGCTTCTACCAATCAGTGC       | 59.992 | 20 | 111 | 20   | 130  |
| 59.989 | 20 | GGACAAGGGTCTGCATCATT      | 59.934 | 20 | 188 | 109  | 296  |
| 59.997 | 20 | CCAGAATTTTGAACCTCCAA      | 60.044 | 20 | 202 | 1581 | 1782 |
| 59.679 | 20 | GGAAGGCCTAGATTTGTCTTGA    | 59.725 | 22 | 197 | 2289 | 2485 |
| 60.046 | 20 | GCAGGACTTGTAACCTTGGG      | 59.592 | 20 | 165 | 915  | 1079 |
| 59.805 | 20 | TGGATTTTTGCCCTTGTTTT      | 59.429 | 20 | 279 | 315  | 593  |
| 59.809 | 20 | GGCAAACAACAGTTGCAAAA      | 59.752 | 20 | 273 | 703  | 975  |
| 59.864 | 20 | ACACACATGGGCTAGCTGAA      | 59.318 | 20 | 261 | 378  | 638  |
| 60.017 | 20 | CCTCAGCAAAATGCAGTTGA      | 59.988 | 20 | 248 | 447  | 694  |
| 59.83  | 20 | CATGGGGTTGGTTCCTATTG      | 60.044 | 20 | 227 | 563  | 789  |

|        |    |                          |        |    |     |      |      |
|--------|----|--------------------------|--------|----|-----|------|------|
| 58.924 | 22 | ATGCACATTGTGTCCCAAAA     | 59.823 | 20 | 194 | 727  | 920  |
| 59.927 | 20 | AGATTTGGACCCACCCCTAC     | 60.052 | 20 | 110 | 434  | 543  |
| 60.074 | 20 | TGACAAGATTCAATAAAGCCACA  | 59.639 | 23 | 226 | 838  | 1063 |
| 57.955 | 22 | GCCAGAGGAGTCCTTCACAG     | 59.986 | 20 | 161 | 215  | 375  |
| 60.493 | 20 | CAAAAGCAAGCCTCCTTCAC     | 59.993 | 20 | 258 | 152  | 409  |
| 60.061 | 20 | TTTTTGGTGTTTGATTGCGA     | 60.088 | 20 | 267 | 1924 | 2190 |
| 59.823 | 20 | CCATCGCCACCTTTTGTAAAT    | 59.823 | 20 | 247 | 3    | 249  |
| 60.523 | 20 | GGAGCGCACGAGAATTTTAC     | 59.851 | 20 | 241 | 449  | 689  |
| 59.592 | 20 | AAATGCATCTCAATTTTTGGA    | 57.239 | 21 | 228 | 539  | 766  |
| 60.201 | 20 | TATCACCAAGAGATGCCAC      | 58.516 | 20 | 112 | 407  | 518  |
| 59.993 | 20 | GCAACGAGAAATGGAGTGGT     | 60.119 | 20 | 184 | 1927 | 2110 |
| 59.91  | 20 | TCCTTTCCCAAGAGTCCAGA     | 59.773 | 20 | 154 | 1480 | 1633 |
| 59.969 | 20 | TGTACAAAAGCTATGCTTTCAAA  | 59.045 | 24 | 188 | 119  | 306  |
| 59.927 | 20 | TGCGACCTTGGTAGGTTTTTC    | 60.11  | 20 | 163 | 123  | 285  |
| 59.833 | 20 | ATGCTGCTTCTCCCTCACAT     | 59.834 | 20 | 170 | 2603 | 2772 |
| 59.957 | 20 | GTCGATGGGGCAGAAAAGTA     | 60.074 | 20 | 142 | 589  | 730  |
| 60.024 | 20 | TTCGAGTATCGCTCCGACTT     | 59.978 | 20 | 277 | 101  | 377  |
| 60.27  | 20 | GATGAGAAGTGGCAAAGGGA     | 60.195 | 20 | 214 | 29   | 242  |
| 59.473 | 23 | ATCTCTCAGCATTAGCCCCA     | 59.797 | 20 | 269 | 438  | 706  |
| 59.246 | 22 | AAGGAGGTGTTATGAAGGGATT   | 58.028 | 22 | 275 | 693  | 967  |
| 60.059 | 20 | AACTTTGCAGCTTCTGAGCC     | 59.763 | 20 | 231 | 239  | 469  |
| 59.864 | 20 | TTCAGGACGCTTTACCGAGT     | 59.875 | 20 | 252 | 169  | 420  |
| 60.012 | 20 | ACCAATGCGGATGCTCTAAC     | 60.103 | 20 | 263 | 3121 | 3383 |
| 59.872 | 20 | GCCCAAAGATGAACCAAGAA     | 60.051 | 20 | 192 | 677  | 868  |
| 58.423 | 20 | CCTTCGTCACCAACGAAGTT     | 60.149 | 20 | 265 | 647  | 911  |
| 60.184 | 20 | CAGGTGATTGAACTCAAAGCC    | 59.726 | 21 | 273 | 3201 | 3473 |
| 60.074 | 20 | GGTGGCAGGAAGTTGTACCT     | 59.065 | 20 | 212 | 1717 | 1928 |
| 60.112 | 20 | GGCCACAAGCCATTAGTGAT     | 59.962 | 20 | 262 | 318  | 579  |
| 59.904 | 20 | GGTGAAGCATGCAAAGATGA     | 59.805 | 20 | 260 | 888  | 1147 |
| 60.397 | 20 | CCTAAAGTGACCCCATCCA      | 59.784 | 20 | 279 | 828  | 1106 |
| 60.328 | 20 | GGATGGAGAGATTGCAGCAT     | 60.189 | 20 | 181 | 232  | 412  |
| 59.486 | 20 | CATCTATGCTCGCACATTCCG    | 60.388 | 20 | 229 | 2656 | 2884 |
| 60.167 | 20 | TCGCAATACTTCTGCCTCCT     | 59.978 | 20 | 145 | 1378 | 1522 |
| 60.343 | 20 | TATCAAGCTTGTCAGCCCCCT    | 59.836 | 20 | 248 | 1706 | 1953 |
| 60.122 | 22 | GTTGTGATGCAATTTGAGCC     | 59.131 | 20 | 235 | 1133 | 1367 |
| 61.061 | 20 | GCATCATTTGATTGGCAGTG     | 60.08  | 20 | 210 | 143  | 352  |
| 60.015 | 20 | CCCTGTAACAGTTGGTGCCT     | 60.028 | 20 | 229 | 1278 | 1506 |
| 58.621 | 20 | CCCTTGATTTAAGAGATCCAATG  | 59.004 | 23 | 278 | 210  | 487  |
| 59.827 | 20 | TTCAGAAATGCAATAAATTCCG   | 59.11  | 22 | 274 | 1111 | 1384 |
| 60.131 | 20 | AGCGCCTCCATATCAGAAGA     | 59.939 | 20 | 252 | 1660 | 1911 |
| 59.939 | 20 | CCGGGAGGGTTTTGATAAAT     | 60.013 | 20 | 270 | 20   | 289  |
| 59.955 | 20 | GGCCGTTTGTATTGAA         | 59.81  | 20 | 167 | 553  | 719  |
| 60.134 | 20 | TCAAATAGGTGGGTGGTGGT     | 60.088 | 20 | 235 | 46   | 280  |
| 59.489 | 25 | CATTCTCGCAGAGCATGTGT     | 60.016 | 20 | 280 | 1194 | 1473 |
| 61.08  | 20 | CCAGGAAGTATGGTGCAAA      | 60.118 | 21 | 195 | 476  | 670  |
| 59.712 | 20 | GATGCCCTAGGGACGTATCC     | 60.682 | 20 | 247 | 425  | 671  |
| 59.67  | 20 | ACCAGAATAGCCAGTGGTG      | 59.989 | 20 | 246 | 312  | 557  |
| 58.261 | 27 | TGTTTTGTGTTTTGACGTTTTGC  | 59.665 | 21 | 103 | 7    | 109  |
| 60.049 | 20 | GACCGCAGGATAATCCAGAA     | 60.036 | 20 | 182 | 891  | 1072 |
| 60.628 | 20 | TTGTTAGTTTTGGATGGTACGAAA | 59.817 | 24 | 226 | 442  | 667  |
| 59.614 | 20 | TTTTTGCAGGGAAAAAGCAT     | 59.699 | 20 | 266 | 2329 | 2594 |
| 60.156 | 20 | TGTGATCAAAGAAGAAAAATGAT  | 59.549 | 25 | 279 | 874  | 1152 |
| 59.969 | 20 | TAGTAAACCGACGTGGCAT      | 60.386 | 20 | 125 | 665  | 789  |
| 60.074 | 20 | TTCCTGCATATTGGAAAGGG     | 59.894 | 20 | 275 | 1850 | 2124 |
| 60.277 | 20 | CAATGGTGTCCATCCCTCTC     | 60.326 | 20 | 277 | 3152 | 3428 |
| 59.639 | 20 | GCACGTATCGACATTGCTTAAA   | 60.157 | 22 | 121 | 998  | 1118 |
| 60.365 | 20 | AGCTAGGAGGAAGGGCTGAC     | 59.979 | 20 | 212 | 1    | 212  |
| 59.864 | 20 | GCATCCAGCAGTGTAGGTGA     | 59.862 | 20 | 226 | 729  | 954  |



|        |    |                           |        |    |     |      |      |
|--------|----|---------------------------|--------|----|-----|------|------|
| 59.637 | 23 | GCCGGAGTGATGCAGTAGTT      | 60.285 | 20 | 197 | 233  | 429  |
| 59.989 | 20 | GCTCAATTTTAGTTGTGAAATCTTC | 60.065 | 26 | 138 | 2162 | 2299 |
| 59.773 | 21 | ACTCACACACCTTCACACGC      | 59.789 | 20 | 143 | 60   | 202  |
| 60.256 | 21 | CGATTACGCCTCTAAGAAAACA    | 58.589 | 22 | 240 | 193  | 432  |
| 60.029 | 20 | TCGTATGGTCTCCCCAGTTC      | 59.927 | 20 | 268 | 456  | 723  |
| 60.11  | 22 | TCCTGTATCGATTATCATTTTCAA  | 57.736 | 24 | 265 | 314  | 578  |
| 60.225 | 20 | TCTCAGACAAAACCTTCGCC      | 60.375 | 20 | 228 | 1425 | 1652 |
| 61.025 | 20 | GCTGATGTGCAAACAAAGAAA     | 58.956 | 21 | 264 | 2000 | 2263 |
| 59.236 | 24 | TGGCTAGAGAGATTCCACGA      | 58.543 | 20 | 185 | 369  | 553  |
| 59.953 | 20 | CAAGACCGGCCATTCTACAG      | 60.647 | 20 | 136 | 723  | 858  |
| 60.457 | 23 | CCCAGTGAATGATAAGGGGA      | 59.744 | 20 | 202 | 12   | 213  |
| 60.111 | 20 | CGATATGTTACGTAGGATGACGTT  | 59.374 | 24 | 220 | 1597 | 1816 |
| 60.025 | 20 | ATGTGTTCCATTGCGGTTTT      | 60.235 | 20 | 253 | 1053 | 1305 |
| 60.154 | 20 | TCTCAATAGCCCGTTTGGTC      | 60.074 | 20 | 151 | 113  | 263  |
| 59.296 | 20 | TGAGCATTATTAGCACCCCA      | 59.136 | 20 | 269 | 2365 | 2633 |
| 59.992 | 20 | GGTCCCTTTGATGGATTCT       | 60.133 | 20 | 253 | 76   | 328  |
| 60.24  | 20 | TTTTCTACGTACGCACACGC      | 60.058 | 20 | 251 | 577  | 827  |
| 60.031 | 20 | TCATCCACCACCCCTTTTTA      | 60.162 | 20 | 159 | 454  | 612  |
| 59.96  | 20 | ACCGTTCCACAACCTACTG       | 59.884 | 20 | 144 | 431  | 574  |
| 59.992 | 20 | TCAACAGCCAGCATTGTTTC      | 59.847 | 20 | 174 | 58   | 231  |
| 60.232 | 20 | CTGCACACACAAACCCTCAC      | 60.203 | 20 | 113 | 429  | 541  |
| 59.989 | 20 | GAATGTCGTTTCAAATAAAAAGGC  | 60.107 | 24 | 260 | 1191 | 1450 |
| 59.953 | 20 | ATGCATTGCACAGCTAACCA      | 60.288 | 20 | 212 | 148  | 359  |
| 60.021 | 20 | TCCGAAAAGGCGATAAAATG      | 60.033 | 20 | 226 | 74   | 299  |
| 59.971 | 20 | TGGGTATGGGCTTAAAATGC      | 59.795 | 20 | 209 | 1075 | 1283 |
| 59.809 | 21 | AATTGTGAACAGGTGGCAAG      | 58.623 | 20 | 245 | 547  | 791  |
| 60.032 | 20 | CCCCTGATCAAGTCCATCAC      | 60.326 | 20 | 252 | 766  | 1017 |
| 60.127 | 20 | ACAAAGTGATACATGCGCGA      | 60.288 | 20 | 206 | 602  | 807  |
| 59.933 | 20 | TGAATGTTCCCTTTGTGCTCG     | 59.84  | 20 | 168 | 484  | 651  |
| 57.795 | 21 | TCTTTTCGGCAACCAATTC       | 60.053 | 20 | 263 | 0    | 262  |
| 60.206 | 20 | CAAGCGGATTTGATGGATT       | 59.901 | 20 | 239 | 135  | 373  |
| 60.864 | 20 | AATCCCAAATCCCATCACTG      | 59.605 | 20 | 224 | 428  | 651  |
| 59.635 | 20 | TACCCATCTCTTTGCTGTGCG     | 58.874 | 20 | 261 | 426  | 686  |
| 59.948 | 20 | AAGGTCCGTAGTCCATCACG      | 59.989 | 20 | 233 | 3410 | 3642 |
| 59.767 | 20 | TTCTTCGCGAGCTTCTTGAT      | 60.235 | 20 | 252 | 1180 | 1431 |
| 60.241 | 20 | TGAAGCACCGAAAAATGTGA      | 60.234 | 20 | 254 | 1018 | 1271 |
| 59.982 | 20 | AGCGACGCATGACCTTATTC      | 60.243 | 20 | 233 | 1757 | 1989 |
| 60.096 | 20 | GATGGCACGGAGAGATGTTT      | 60.081 | 20 | 178 | 438  | 615  |
| 59.911 | 20 | TGCTCTCAGATCCGGCTTAT      | 59.939 | 20 | 239 | 1301 | 1539 |
| 59.931 | 20 | ATGGGTTATCACCAGATCGC      | 59.78  | 20 | 201 | 1013 | 1213 |
| 60.885 | 20 | CGATTTACACACGCGCAC        | 59.859 | 18 | 259 | 17   | 275  |
| 59.966 | 20 | CGCGGAGTTTAAGGAATGTT      | 59.225 | 20 | 213 | 1957 | 2169 |
| 59.924 | 24 | CCCGATTGACATCCCTAATG      | 60.148 | 20 | 222 | 444  | 665  |
| 59.685 | 21 | AAGATTGTGCCGATGGTGAT      | 60.348 | 20 | 173 | 459  | 631  |
| 59.2   | 24 | AGGCTGAGACTGAAACCACG      | 60.444 | 20 | 235 | 888  | 1122 |
| 60.054 | 21 | GTGACAAAAGGGCCTGAAAA      | 60.088 | 20 | 215 | 3131 | 3345 |
| 59.055 | 20 | GTTCTGCTTTGTGGTGGAT       | 59.973 | 20 | 234 | 35   | 268  |
| 59.81  | 19 | TTGATCCGATGGTCCAAAAT      | 60.133 | 20 | 156 | 108  | 263  |
| 60.051 | 20 | CCCCAAATTCCTAAGAACC       | 59.639 | 20 | 275 | 4496 | 4770 |
| 60.183 | 21 | ATCAAATGACAAAACGCCA       | 59.016 | 20 | 228 | 393  | 620  |
| 59.773 | 27 | AAAAATCCGTCACTAAATGGG     | 57.988 | 21 | 236 | 965  | 1200 |
| 59.311 | 24 | CCAACAAATTGCATTGGACA      | 60.357 | 20 | 214 | 2    | 215  |
| 59.394 | 23 | CAACGTGAGTTTGCCAAGAA      | 59.881 | 20 | 265 | 20   | 284  |
| 59.991 | 20 | TGTGTTAACCTTTGGCTCCC      | 59.971 | 20 | 179 | 1215 | 1393 |
| 60.708 | 21 | TTTTCCAGACGTGTCAT         | 58.201 | 20 | 265 | 485  | 749  |
| 60.074 | 20 | TGTTGGCATTCAAATCAACC      | 59.375 | 20 | 277 | 1178 | 1454 |
| 59.893 | 20 | AATTGTCTTGCTTTCCAGCC      | 59.316 | 20 | 128 | 101  | 228  |
| 59.52  | 20 | TGGGATGGACTTGGAAATCAT     | 60.135 | 20 | 150 | 111  | 260  |

|        |    |                          |        |    |     |      |      |
|--------|----|--------------------------|--------|----|-----|------|------|
| 60.384 | 20 | TTTAAGGGTTATCACCTGATTTTC | 57.757 | 24 | 101 | 1173 | 1273 |
| 59.817 | 20 | GCTCTTACCACGCCATTCTC     | 59.843 | 20 | 269 | 1393 | 1661 |
| 59.957 | 20 | TCCCATATTGCCACCCTTTA     | 60.146 | 20 | 228 | 854  | 1081 |
| 59.638 | 20 | GGCTGGCTCTGATCTTCAAC     | 59.957 | 20 | 248 | 2822 | 3069 |
| 59.141 | 20 | GCCTTTTAGGAGCTCTCTGC     | 58.437 | 20 | 231 | 258  | 488  |
| 59.957 | 20 | ATGCACAAACAATCCACGAA     | 59.972 | 20 | 214 | 2987 | 3200 |
| 60.033 | 20 | CTACAATGGGCAAGGCATTT     | 59.96  | 20 | 264 | 627  | 890  |
| 59.997 | 20 | TGTTGACCACTGTATCCCGA     | 59.96  | 20 | 216 | 711  | 926  |
| 57.422 | 20 | CAAAACTCAGGCCACTTACG     | 58.431 | 20 | 265 | 1237 | 1501 |
| 60.036 | 20 | AAATCCAGAAGCAATGCCTG     | 60.214 | 20 | 237 | 409  | 645  |
| 59.95  | 20 | AGTTCTGATGGGGTGGATTG     | 59.779 | 20 | 150 | 1067 | 1216 |
| 57.059 | 21 | CGGGTTGATTTTGTGTCTTG     | 59.021 | 20 | 278 | 1456 | 1733 |
| 59.743 | 21 | CATTGCCTCCTTTCATGAGC     | 60.744 | 20 | 234 | 1215 | 1448 |
| 59.853 | 20 | GGAAATTTTCGGGTGAACCT     | 60.166 | 20 | 223 | 1152 | 1374 |
| 60.124 | 20 | TTGCATCGCATTTCATCATTT    | 60.043 | 20 | 225 | 262  | 486  |
| 60.883 | 20 | TTAACATCAAGGAAAGCCCG     | 60.067 | 20 | 263 | 701  | 963  |
| 60.073 | 20 | ACTTGCAGGTTCTTGGAAT      | 59.74  | 20 | 178 | 1644 | 1821 |
| 60.104 | 21 | TGCATATGCGTTGTGTGTGT     | 59.621 | 20 | 235 | 4229 | 4463 |
| 60.088 | 20 | TGGAATTGTTTGGCATTGGA     | 59.907 | 20 | 259 | 1097 | 1355 |
| 59.429 | 20 | CCGCTTCTACAGTACTCCG      | 59.891 | 20 | 153 | 1866 | 2018 |
| 60.149 | 20 | TCGTCGAGAGTGAGGAGGAT     | 59.945 | 20 | 269 | 413  | 681  |
| 59.95  | 20 | TCTCCTCTCACGCACTCTCA     | 59.846 | 20 | 269 | 710  | 978  |
| 59.561 | 20 | TGTGTTGTTCGTCTCACGAT     | 60.162 | 20 | 128 | 1578 | 1705 |
| 59.924 | 20 | CCTGAAATGGGGTTTGAATG     | 60.162 | 20 | 236 | 1177 | 1412 |
| 59.564 | 20 | TTGGCAGAGGTGTGAGAGTG     | 60.022 | 20 | 154 | 423  | 576  |
| 59.657 | 25 | CATAGTGGCTGACCACCAGA     | 59.701 | 20 | 242 | 461  | 702  |
| 59.82  | 20 | TCTCCACAAGTTCCCGTTTC     | 60.088 | 20 | 112 | 2276 | 2387 |
| 60.103 | 21 | TACGGTTGAAAACAATGGCA     | 59.969 | 20 | 236 | 786  | 1021 |
| 60.096 | 20 | AGCAGCAGCAAACCAAGAGT     | 60.201 | 20 | 237 | 392  | 628  |
| 60.142 | 20 | TTTCTGGTGAAACCGACCTC     | 60.088 | 20 | 257 | 414  | 670  |
| 59.041 | 20 | CATTGGACGGATGGATTTGT     | 60.582 | 20 | 141 | 434  | 574  |
| 60.137 | 20 | TCAGCCTTGTTTGATGCTTCT    | 60.008 | 21 | 192 | 1550 | 1741 |
| 60.544 | 20 | GGTCCCGCGTCATAAAAT       | 59.776 | 19 | 200 | 793  | 992  |
| 60.177 | 20 | TTATGAAAACCGCAGCAGTG     | 59.872 | 20 | 197 | 318  | 514  |
| 59.871 | 20 | GAAATTGAGCTCCATAGCCG     | 59.807 | 20 | 243 | 394  | 636  |
| 60.16  | 20 | GTTGTGGGGCTGGAGATAAG     | 59.55  | 20 | 262 | 146  | 407  |
| 59.864 | 20 | GCCTCTGATGCAAGTCCTTC     | 59.957 | 20 | 261 | 2507 | 2767 |
| 60.088 | 20 | TCCTACCCATCTTTGCATCC     | 59.894 | 20 | 130 | 59   | 188  |
| 59.742 | 20 | TCCTCTGATGCCGGAACCTA     | 60.734 | 20 | 233 | 2227 | 2459 |
| 61.137 | 20 | GGTCTTCGGGTCTGGGTATT     | 60.19  | 20 | 229 | 1110 | 1338 |
| 60.624 | 20 | ATGTCGGCATTCAAGGTTTT     | 59.434 | 20 | 254 | 1034 | 1287 |
| 60.028 | 20 | TCAAAGCTTGAAGGCCTAGC     | 59.73  | 20 | 133 | 862  | 994  |
| 57.54  | 21 | AAACCCATGCTCCACAAAAG     | 59.971 | 20 | 258 | 43   | 300  |
| 59.862 | 20 | TCAAACCTCAAATGGTGCAA     | 60.088 | 20 | 243 | 36   | 278  |
| 59.247 | 20 | TTACGTAAAAATGGGTTATTATTC | 57.411 | 26 | 184 | 922  | 1105 |
| 59.49  | 24 | ATATGGGACGTCCAAAAACG     | 59.685 | 20 | 130 | 2774 | 2903 |
| 59.983 | 20 | CCAGATCTAATGGCCTCGTC     | 59.653 | 20 | 153 | 1133 | 1285 |
| 60.03  | 20 | TAGGCGGATTGGTTTTTGAC     | 59.938 | 20 | 187 | 914  | 1100 |
| 60.003 | 21 | ACCTTCCATAGGTTGGGAGC     | 60.328 | 20 | 111 | 87   | 197  |
| 60.958 | 20 | AAAGAGTGGGGGAGGTTTTG     | 60.332 | 20 | 260 | 400  | 659  |
| 59.776 | 20 | TTGTGAGAAGCCAAAGCTGA     | 59.716 | 20 | 168 | 3502 | 3669 |
| 59.685 | 20 | GATCATTACTGGCCATGGGT     | 59.635 | 20 | 246 | 1128 | 1373 |
| 59.844 | 20 | TTGTGTTCAAACTTTGCGG      | 59.746 | 20 | 211 | 904  | 1114 |
| 59.939 | 20 | TGGCATAGTCCTGAGTGGTG     | 59.701 | 20 | 246 | 479  | 724  |
| 59.971 | 22 | TTCTTCTATCCCAATTTGCTTG   | 58.385 | 22 | 280 | 2706 | 2985 |
| 59.744 | 20 | TCCCATTTCTTTTGTCCCA      | 60.28  | 20 | 181 | 1152 | 1332 |
| 60.249 | 20 | TTTTCTGCCACCAGAAATC      | 60.051 | 20 | 201 | 2551 | 2751 |
| 58.541 | 24 | TTTTTCTTTTGCAGGATATTCG   | 59.646 | 23 | 198 | 410  | 607  |

|        |                             |        |    |     |      |      |
|--------|-----------------------------|--------|----|-----|------|------|
| 60.24  | 20 TAGGTCACCGAATTCCATCG     | 60.853 | 20 | 279 | 46   | 324  |
| 59.517 | 22 TGCCTGCGTAATGGAGAAG      | 60.011 | 20 | 231 | 649  | 879  |
| 59.948 | 20 AAGGGAGGAATAGAGCCGAA     | 60.166 | 20 | 145 | 895  | 1039 |
| 60.286 | 20 TGACGGCCGATATTTACTCC     | 59.923 | 20 | 133 | 1096 | 1228 |
| 59.735 | 20 CCGTTGGTCAGAACCTTGAT     | 59.966 | 20 | 240 | 42   | 281  |
| 60.066 | 20 TTTTCGTTCTTTCTCAATTCG    | 58.542 | 22 | 202 | 36   | 237  |
| 60.637 | 19 CCAAATATTAGGGTTATCACACG  | 57.562 | 23 | 217 | 836  | 1052 |
| 60.192 | 20 TTTGAGTTTGCATCTAAGAAGGTG | 59.828 | 24 | 176 | 3217 | 3392 |
| 60.285 | 20 AGAGGGTGAGAGGGGACCTA     | 60.066 | 20 | 129 | 1516 | 1644 |
| 60.115 | 23 ACTAAATAGGCTAGGCCGGG     | 59.609 | 20 | 264 | 405  | 668  |
| 60.124 | 20 GGTTGTGGATTTGTGAATAAAAA  | 57.971 | 23 | 242 | 2451 | 2692 |
| 60.179 | 20 ATGGGCCCTCTAATCTCCAT     | 59.75  | 20 | 190 | 869  | 1058 |
| 59.968 | 20 GATGTTTTTCCAATGTGGGG     | 60.029 | 20 | 161 | 4224 | 4384 |
| 59.265 | 20 GAGCAAAGCTACCGAACTGG     | 60.015 | 20 | 178 | 610  | 787  |
| 59.874 | 20 CCCTTTTTTCATGGTGGTTGT    | 59.688 | 20 | 199 | 4398 | 4596 |
| 60.008 | 20 CTAATACCATGTGGCGGCT      | 59.982 | 20 | 275 | 10   | 284  |
| 59.166 | 20 GTAACCTGCCACCCCTGATA     | 59.813 | 20 | 260 | 1277 | 1536 |
| 59.882 | 20 TTTGCAATTTCTAGGTCGG      | 59.155 | 20 | 165 | 2376 | 2540 |
| 60     | 20 TGGGACCCGTCTTCTTATTG     | 59.926 | 20 | 192 | 1243 | 1434 |
| 59.813 | 20 TCGTAGTAGGAGCACGAAAACA   | 59.941 | 22 | 265 | 21   | 285  |
| 59.996 | 20 GTAGCTCCTGAATCCCCTCC     | 60.037 | 20 | 249 | 580  | 828  |
| 59.955 | 20 CCCCCTAACATATCCACGTTT    | 59.952 | 21 | 105 | 474  | 578  |
| 57.02  | 24 CATCGGAGTTCACAAGTTCG     | 59.288 | 20 | 154 | 0    | 153  |
| 59.394 | 27 AAAGAACGAAAACCACACGG     | 60.008 | 20 | 190 | 0    | 189  |
| 59.322 | 21 TAGGGCCCATCCTATCACAC     | 59.773 | 20 | 271 | 973  | 1243 |
| 59.943 | 20 TGGGGGTGGGAGTTTAAGAT     | 60.549 | 20 | 250 | 372  | 621  |
| 59.933 | 20 GGGAAAACCTCCACCAAAT      | 60.032 | 20 | 188 | 1036 | 1223 |
| 59.964 | 20 CCTGGATGATGCCAAGATTT     | 59.894 | 20 | 232 | 1908 | 2139 |
| 59.836 | 20 ATACATGCGTGTGCGTTCAT     | 60.026 | 20 | 269 | 2315 | 2583 |
| 60.134 | 20 TACCAATCCGGGTGATGTTT     | 60.051 | 20 | 211 | 1157 | 1367 |
| 59.99  | 20 ATCCCTGCTCCACTTTCTCA     | 59.803 | 20 | 112 | 491  | 602  |
| 58.869 | 20 TCTGATTTGTGCTAACCCCTCG   | 60.256 | 21 | 242 | 392  | 633  |
| 59.969 | 20 TGATTGACTCATATGCCCGA     | 60.033 | 20 | 221 | 420  | 640  |
| 60.112 | 20 GCAATACCCTAATCCAGCCA     | 59.923 | 20 | 221 | 357  | 577  |
| 60.314 | 20 GTCCGGTAGGGTGCATAAAA     | 59.823 | 20 | 225 | 558  | 782  |
| 59.967 | 20 TGGATTGAAATAAGGGGTGCG    | 59.756 | 20 | 138 | 229  | 366  |
| 59.679 | 20 GAAATCAGCACGAATCACACA    | 59.713 | 21 | 142 | 1010 | 1151 |
| 59.894 | 20 TAGGGTGAGGAAGAGGAGCA     | 59.943 | 20 | 193 | 465  | 657  |
| 59.978 | 20 AGTCAACCATGGCGTCTTCT     | 59.727 | 20 | 252 | 1394 | 1645 |
| 60.018 | 20 AAAACCGACCGCCTAGATTT     | 59.966 | 20 | 236 | 941  | 1176 |
| 60.096 | 20 GCTGAGCGGATTTAATCGTG     | 60.742 | 20 | 209 | 392  | 600  |
| 60.074 | 20 CACAAACATTCCAATGCAGC     | 60.119 | 20 | 269 | 736  | 1004 |
| 59.803 | 20 CGAGACATGGGAGCTCTAGG     | 59.966 | 20 | 192 | 2446 | 2637 |
| 57.743 | 20 GAATTTGTTGACGAATGGGG     | 60.17  | 20 | 277 | 748  | 1024 |
| 58.019 | 20 TGCGAGGATCTACGGACATT     | 60.624 | 20 | 268 | 737  | 1004 |
| 59.993 | 20 GCCGTTGTGTCGTTTTCTTT     | 60.154 | 20 | 198 | 74   | 271  |
| 59.869 | 20 ATCTCATCAGCAAGGCCAGA     | 60.914 | 20 | 221 | 1402 | 1622 |
| 60.228 | 20 GGTCAAATCGAGAACAACCC     | 59.386 | 20 | 251 | 718  | 968  |
| 60.005 | 20 GATGGTGCATTTTGTGATGC     | 59.939 | 20 | 260 | 523  | 782  |
| 60.344 | 20 TCTGTCATCGGTCCAGAGAA     | 59.34  | 20 | 277 | 2691 | 2967 |
| 59.496 | 20 TCAGGTTTCCACCTTTCTTGA    | 59.697 | 21 | 249 | 3334 | 3582 |
| 60.668 | 20 GCCATGGCCAAGAGTCTTAT     | 59.154 | 20 | 279 | 513  | 791  |
| 59.973 | 20 TGCTTCCAATGGTTGCATAG     | 59.688 | 20 | 248 | 9    | 256  |
| 59.986 | 20 TTGGGTGATAGGCCCAGTAG     | 59.948 | 20 | 169 | 501  | 669  |
| 60.088 | 20 TAGCCGACCCCAATTTAGTG     | 59.953 | 20 | 280 | 178  | 457  |
| 59.983 | 20 AGGTAATTTCCGGTCGCACAC    | 60     | 20 | 255 | 208  | 462  |
| 59.803 | 20 CCACCACCATCTTACAAGCA     | 59.566 | 20 | 265 | 87   | 351  |
| 60.019 | 19 GAATTCAGCATTCCATTCCC     | 59.324 | 20 | 146 | 26   | 171  |

|        |    |                          |        |    |     |      |      |
|--------|----|--------------------------|--------|----|-----|------|------|
| 59.746 | 20 | ATCACTTATCCCCCATGCCT     | 60.546 | 20 | 269 | 1254 | 1522 |
| 59.948 | 20 | GTTGAAGGGGCTGACAACAT     | 59.973 | 20 | 196 | 1872 | 2067 |
| 60.762 | 20 | AACATGATGAAGGTCCGAGG     | 59.927 | 20 | 188 | 1117 | 1304 |
| 59.945 | 20 | TGTGCTTTGAGCAACTCCAG     | 60.175 | 20 | 280 | 211  | 490  |
| 60.104 | 20 | TTGCGTGCAGGATCTAAGTG     | 60.011 | 20 | 272 | 201  | 472  |
| 57.894 | 20 | TCAATCCCCCACCAACTTA      | 60.162 | 20 | 262 | 459  | 720  |
| 57.681 | 27 | ATAACGGGATTGAAGGAGGG     | 60.145 | 20 | 196 | 20   | 215  |
| 59.935 | 20 | GCCTACATCCACTGGTCAAGA    | 60.126 | 21 | 280 | 2419 | 2698 |
| 60.478 | 23 | TATCATTGTTTCGCGAGCAG     | 59.976 | 20 | 183 | 86   | 268  |
| 60.565 | 21 | GGAGGCTGCTGACAAGATTC     | 59.957 | 20 | 231 | 394  | 624  |
| 59.994 | 21 | TCTGTCCTTGCCTGATTTCC     | 60.195 | 20 | 275 | 264  | 538  |
| 60.265 | 20 | TTGGGACCCCTTTCACATTA     | 60.162 | 20 | 175 | 1044 | 1218 |
| 60.14  | 20 | GATCAGAGAAAACAAGCCGC     | 59.962 | 20 | 261 | 241  | 501  |
| 60.088 | 20 | CCCCAGTTTTCTTCCATTT      | 60.159 | 20 | 220 | 374  | 593  |
| 59.91  | 20 | TGGAGTGTTGGATCTGTTGC     | 59.682 | 20 | 252 | 1040 | 1291 |
| 60.257 | 20 | GCCCAAAGTTAGATGTGACCA    | 59.985 | 21 | 203 | 13   | 215  |
| 57.303 | 25 | ACGAAAGCGGAGTTGAAAGA     | 59.993 | 20 | 249 | 484  | 732  |
| 60.14  | 20 | GGAACATTAAGGCGCATGAT     | 59.929 | 20 | 252 | 368  | 619  |
| 59.816 | 20 | TTCCCTCCTCTCTCTCCC       | 59.883 | 20 | 267 | 764  | 1030 |
| 60.231 | 20 | TGATTCGAACGCTTGATTTG     | 59.809 | 20 | 224 | 834  | 1057 |
| 59.9   | 20 | GACTAGCAAATTCGGGACG      | 59.708 | 20 | 255 | 415  | 669  |
| 60.02  | 20 | AATCCCACAATCCCTTCTCC     | 60.133 | 20 | 188 | 227  | 414  |
| 60.072 | 20 | GCAGAGGTGTATTCTGTTGCC    | 59.755 | 21 | 177 | 1361 | 1537 |
| 59.05  | 20 | AACTAATCCATGCTGCTGGC     | 60.243 | 20 | 212 | 18   | 229  |
| 60.448 | 20 | TTTGCAAGACATCCAACATCA    | 60.104 | 21 | 196 | 1452 | 1647 |
| 60.073 | 20 | TGACAATCACTTGCCACCAT     | 59.967 | 20 | 188 | 328  | 515  |
| 59.976 | 20 | TCCCTGTGCAATCACTCAA      | 60.24  | 20 | 169 | 2422 | 2590 |
| 59.734 | 20 | CCCTCATTTGTACGGACTTGA    | 59.978 | 21 | 255 | 493  | 747  |
| 59.801 | 21 | TAGGGACATCTGGGTGTGTG     | 59.388 | 20 | 182 | 2343 | 2524 |
| 59.883 | 20 | TGGAGGACCTCACGTGTGTA     | 60.154 | 20 | 257 | 2238 | 2494 |
| 60.192 | 20 | TCCTTGAACCTTCTCGGTGG     | 60.224 | 20 | 227 | 1462 | 1688 |
| 59.94  | 20 | TCCGGCTCCGATCTATACAC     | 60.059 | 20 | 276 | 1687 | 1962 |
| 60.736 | 20 | TGGTAAAAGCGCTCGTACA      | 59.509 | 20 | 272 | 260  | 531  |
| 60.081 | 20 | GGAGACCCCTACTTTGCCTC     | 60.074 | 20 | 186 | 761  | 946  |
| 59.72  | 25 | CTGTTTTGAGGGGGAGTGTA     | 59.959 | 20 | 186 | 527  | 712  |
| 59.903 | 20 | TCACTCTCCGACTTCCGAT      | 59.803 | 20 | 231 | 600  | 830  |
| 60.134 | 20 | CTCCTCCTCTCCAGCCATCT     | 60.891 | 20 | 208 | 1150 | 1357 |
| 59.795 | 20 | TGCTGCTTCTGGTTGATGAC     | 59.992 | 20 | 227 | 95   | 321  |
| 59.862 | 20 | ACAAAGCTCGAGTGGCATGT     | 60.865 | 20 | 103 | 5946 | 6048 |
| 57.201 | 21 | CAAACTATCGACTTTTTCGG     | 58.751 | 21 | 271 | 1236 | 1506 |
| 59.833 | 20 | TGAAGTTTCCCCGAATTTTG     | 59.91  | 20 | 138 | 499  | 636  |
| 60.058 | 20 | TTCAGAGTGCCTCTCTTGGG     | 60.523 | 20 | 148 | 2022 | 2169 |
| 60.119 | 20 | GTTTGGGTGCGAATTTGAGGA    | 59.91  | 20 | 264 | 66   | 329  |
| 59.673 | 20 | AAGACGAGCAGCAGCACATA     | 59.77  | 20 | 276 | 42   | 317  |
| 59.485 | 20 | ACCGGCCAAAGTAAGGCTAT     | 59.987 | 20 | 142 | 248  | 389  |
| 58.654 | 24 | GTGGCGATATCCGACTCACT     | 60.104 | 20 | 206 | 666  | 871  |
| 59.935 | 20 | ACCATCTCTCGCTCTGCAAT     | 59.981 | 20 | 212 | 978  | 1189 |
| 59.217 | 22 | AACGGCAGGATTAAGTCCCTA    | 59.973 | 21 | 118 | 60   | 177  |
| 59.534 | 19 | CGTTTTCAATCATGACTGTCC    | 60.368 | 21 | 198 | 3720 | 3917 |
| 60.182 | 20 | AATGGTGTTTCCACTTTTTGC    | 58.986 | 21 | 202 | 641  | 842  |
| 59.775 | 20 | TGCCGGATACAGATATGCAA     | 60.058 | 20 | 189 | 49   | 237  |
| 59.982 | 20 | GTGAAGAGGAGCAAATGGGA     | 60.195 | 20 | 104 | 192  | 295  |
| 60.34  | 20 | ACCCAATCCACCCTCTTCT      | 59.968 | 20 | 191 | 516  | 706  |
| 59.831 | 20 | CGAGTTTTGGTTCGGAAAAG     | 59.719 | 20 | 279 | 2155 | 2433 |
| 60.067 | 20 | TTGATTTGACATTTTTGGAGAGAA | 59.984 | 24 | 139 | 224  | 362  |
| 59.937 | 20 | GGGAGGGAATTAGGGATTGA     | 60.089 | 20 | 264 | 115  | 378  |
| 59.542 | 20 | TTTGAGTTGGGGGAATTTTG     | 59.772 | 20 | 243 | 332  | 574  |
| 59.143 | 22 | TTTTCAGTTTCGAATCAGTTAGG  | 57.644 | 23 | 277 | 539  | 815  |

|        |    |                          |        |    |     |      |      |
|--------|----|--------------------------|--------|----|-----|------|------|
| 59.357 | 20 | AACCCCTCCAAACCCTAGAA     | 59.799 | 20 | 233 | 416  | 648  |
| 59.773 | 20 | TCTAGGCATCGAGATGCAGTT    | 59.992 | 21 | 135 | 591  | 725  |
| 59.816 | 20 | CTATCATGGGCTGGAGGTGT     | 59.95  | 20 | 277 | 1086 | 1362 |
| 60.132 | 20 | GAGGGATCGAGAAAGGGAAC     | 60.015 | 20 | 213 | 1302 | 1514 |
| 59.894 | 20 | ACTCCAGGGTATTCCAGGCT     | 59.957 | 20 | 172 | 2338 | 2509 |
| 60.195 | 20 | TTCTCTAGCTGTGCCCTGT      | 60.012 | 20 | 107 | 625  | 731  |
| 59.789 | 20 | GCGTTTTGATGATATATAAGTGTT | 59.361 | 27 | 109 | 2594 | 2702 |
| 59.182 | 20 | ATTTCTAATGGGCGCTGAAA     | 59.682 | 20 | 196 | 26   | 221  |
| 60.968 | 20 | TCACGCAAGATGCAACAAAT     | 60.265 | 20 | 192 | 302  | 493  |
| 59.839 | 20 | GCACCAATTATAGGATTTTGGG   | 59.588 | 22 | 262 | 5795 | 6056 |
| 60.112 | 20 | TCCCTCTGCATATTTGTCCC     | 59.894 | 20 | 263 | 505  | 767  |
| 60.298 | 21 | AATAAGTTTGC GAACCGCAG    | 60.264 | 20 | 143 | 501  | 643  |
| 60.132 | 20 | TGCTGGAGCTACGATTAACCA    | 60.777 | 21 | 263 | 597  | 859  |
| 59.488 | 20 | ATTCCTCAAGCATCATTCCG     | 60.036 | 20 | 130 | 985  | 1114 |
| 58.547 | 21 | AACGGAGATTTGTCAAACGG     | 59.971 | 20 | 243 | 481  | 723  |
| 60.991 | 20 | GGGTTGTCACGGCTAGGATA     | 59.955 | 20 | 278 | 159  | 436  |
| 59.813 | 24 | ATTCGTGTTTGCAGTAGGGG     | 59.993 | 20 | 232 | 442  | 673  |
| 60.185 | 21 | GGGTTTAAATTTCTCGCATGG    | 59.411 | 20 | 217 | 1124 | 1340 |
| 60.08  | 20 | GCTGTGCGTCGATTTCTTTA     | 59.066 | 20 | 220 | 876  | 1095 |
| 61.08  | 20 | ACTCATGTGGATGGACGGAT     | 60.208 | 20 | 255 | 759  | 1013 |
| 59.198 | 20 | TTGGGATTAAGGCTTTGGTG     | 59.931 | 20 | 190 | 2304 | 2493 |
| 59.849 | 20 | GACTATGAAGGCTTGTGCGC     | 59.843 | 20 | 224 | 508  | 731  |
| 59.864 | 23 | AACCTCTTCTCCTGCACCAA     | 59.844 | 20 | 275 | 20   | 294  |
| 59.726 | 20 | AGGTTGGGAGTTGCTTCAGA     | 59.844 | 20 | 266 | 464  | 729  |
| 59.51  | 20 | ATCGGTATAGGGCTTGGGTT     | 59.688 | 20 | 164 | 1174 | 1337 |
| 59.981 | 20 | TCCTTGTGCTTTGGCTTTTT     | 59.861 | 20 | 209 | 4965 | 5173 |
| 60.827 | 20 | TGCTGACATTGACGGCTTAC     | 59.871 | 20 | 276 | 1749 | 2024 |
| 59.888 | 20 | TTCAACGAAGAAACCGAAAAA    | 59.723 | 21 | 239 | 796  | 1034 |
| 59.95  | 20 | ATTTACGGGTTTGTGCTTGC     | 60.003 | 20 | 267 | 450  | 716  |
| 59.834 | 20 | TCATCCCATTGTTCTACCC      | 59.605 | 20 | 237 | 25   | 261  |
| 58.695 | 20 | AAATGGGTGAGCCAATCACT     | 59.41  | 20 | 270 | 569  | 838  |
| 59.989 | 20 | GTGAGTGCATGCAAGTGGAC     | 60.328 | 20 | 227 | 547  | 773  |
| 59.823 | 20 | TGTTTGAATTATTTCTGTTG     | 57.176 | 20 | 194 | 394  | 587  |
| 60.111 | 20 | GAGTTCTTTTGTGTTGATGC     | 59.82  | 20 | 270 | 260  | 529  |
| 59.52  | 20 | CAATCCAAGAAGATGCACACA    | 59.707 | 21 | 264 | 1051 | 1314 |
| 59.445 | 20 | GGCTGGTTTGTGTTGAACATT    | 60.118 | 20 | 162 | 1547 | 1708 |
| 59.903 | 20 | GCATCAGAGCAAACGACAA      | 59.995 | 20 | 210 | 708  | 917  |
| 60.357 | 20 | CACGACCCAACACACACATT     | 60.333 | 20 | 191 | 513  | 703  |
| 58.857 | 20 | TGCATGATTGCTCCATGTCT     | 60.233 | 20 | 216 | 409  | 624  |
| 60.103 | 20 | AAGCTATTGGCGGAGTATGC     | 59.347 | 20 | 276 | 383  | 658  |
| 59.445 | 20 | CCTCGCGTAAACCCTTGTTA     | 60.124 | 20 | 267 | 2580 | 2846 |
| 59.78  | 20 | GTTTCATCTCAACCACGGGAG    | 60.51  | 20 | 259 | 356  | 614  |
| 59.917 | 20 | TCTTCGGATATTGGGTCTGG     | 59.887 | 20 | 271 | 961  | 1231 |
| 57.809 | 20 | ACCATGACCCTGAACAATGA     | 58.774 | 20 | 263 | 1640 | 1902 |
| 59.963 | 20 | GGTGTGTGTGGAAACTGACG     | 60.047 | 20 | 266 | 191  | 456  |
| 59.278 | 21 | ACAAGGCATCACTTACACAG     | 59.751 | 20 | 237 | 2260 | 2496 |
| 60.21  | 20 | GATTGGTGGGAGGTTAGGT      | 60.052 | 20 | 112 | 56   | 167  |
| 60.044 | 20 | TTAACCCACCAAAAAGTGC      | 59.839 | 20 | 194 | 472  | 665  |
| 60.111 | 20 | AGTCCTCAACTAAAGCCCC      | 59.848 | 20 | 116 | 330  | 445  |
| 59.812 | 20 | CCGAATCTTTTCTGTTGATCA    | 60.972 | 20 | 223 | 178  | 400  |
| 60.287 | 19 | TTGAGGCTACCATGGGAAAG     | 60.066 | 20 | 260 | 157  | 416  |
| 60.517 | 20 | TGGAGATTACCGGTTTTGT      | 59.288 | 20 | 188 | 478  | 665  |
| 59.885 | 24 | TCAAGCCATTTCCGAGAATC     | 60.155 | 20 | 260 | 724  | 983  |
| 60.22  | 20 | GCCATTACGGGTGAGGAATA     | 59.784 | 20 | 278 | 1254 | 1531 |
| 59.91  | 20 | GGAATGCTCTGTCTTGACCC     | 59.661 | 20 | 267 | 379  | 645  |
| 60.051 | 20 | TGCTGTTCAAAGGAAGCTGA     | 59.716 | 20 | 249 | 2499 | 2747 |
| 59.975 | 20 | TTTTGAGTTGGGATCTTCGG     | 60.044 | 20 | 274 | 788  | 1061 |
| 60.035 | 20 | CATTTAATGCTTCGTGGAAAAA   | 59.151 | 22 | 279 | 1354 | 1632 |

|        |    |                          |        |    |     |      |      |
|--------|----|--------------------------|--------|----|-----|------|------|
| 59.676 | 20 | GCAAATGGGGTACTTGGTTC     | 59.292 | 20 | 216 | 17   | 232  |
| 60.112 | 20 | TGCCTTATCTGTCAGTCCCC     | 60.073 | 20 | 211 | 1210 | 1420 |
| 60.232 | 20 | AAAAATTCTGGGAGGGGAGA     | 59.875 | 20 | 264 | 2122 | 2385 |
| 60.032 | 20 | CCTCCCTCACCTCCACACTA     | 60.104 | 20 | 277 | 1137 | 1413 |
| 60.214 | 20 | CCCTGTGAGTCTCAGCTCT      | 59.732 | 20 | 272 | 2246 | 2517 |
| 59.953 | 20 | CGAATTTGCAAAACCGAAAT     | 59.943 | 20 | 272 | 49   | 320  |
| 59.169 | 20 | TTCGTTTAAATCGATTGGGG     | 59.767 | 20 | 166 | 1075 | 1240 |
| 58.663 | 23 | GGCGCGACAGTTATAGAAGC     | 60.01  | 20 | 174 | 0    | 173  |
| 60.636 | 20 | TGGATGTGAATAGGGTGAAAA    | 60.177 | 21 | 240 | 482  | 721  |
| 60.096 | 20 | TCCTGTGAGCAGAAGGGAGT     | 59.986 | 20 | 165 | 143  | 307  |
| 57.624 | 26 | GCGTAAATTTTGAAAGAAGCA    | 57.304 | 21 | 280 | 2    | 281  |
| 58.393 | 20 | CAAGCGTGATTAGCCATCAA     | 59.833 | 20 | 247 | 210  | 456  |
| 59.872 | 20 | TCAGAGGAGCAGAATTGGGT     | 59.803 | 20 | 253 | 6125 | 6377 |
| 60.053 | 20 | AATGCAACGGTTTTAGTCGG     | 59.996 | 20 | 121 | 512  | 632  |
| 59.902 | 20 | TTCATGTTTGCTTAGCCGTG     | 59.872 | 20 | 262 | 2451 | 2712 |
| 60.008 | 20 | TGCAAAGTCATGGCTAAAGAAA   | 59.89  | 22 | 279 | 2284 | 2562 |
| 59.288 | 20 | GGATGGTTCTGTGCAGGAAT     | 59.934 | 20 | 275 | 377  | 651  |
| 58.874 | 20 | CGAACACAGGGCAATAGTGA     | 59.716 | 20 | 147 | 111  | 257  |
| 58.901 | 23 | TGTCCATTGATTGCTTGATCC    | 60.859 | 21 | 274 | 23   | 296  |
| 60.006 | 20 | AGAAATGGAAGATGCCATGC     | 60.043 | 20 | 195 | 130  | 324  |
| 60.757 | 20 | TGGATACCAAAAAGCTCCTGC    | 60.214 | 20 | 172 | 2192 | 2363 |
| 59.973 | 20 | CAACAAGAAAAATGGCGGTT     | 59.975 | 20 | 172 | 138  | 309  |
| 60.194 | 20 | GTTGAGGACAAAAACCCGAA     | 59.948 | 20 | 274 | 171  | 444  |
| 59.83  | 20 | TCGAGTTCGGCCTATTTAGTT    | 58.039 | 21 | 224 | 167  | 390  |
| 59.927 | 20 | TTCCAAC TAAGTCATCGGGG    | 59.926 | 20 | 225 | 558  | 782  |
| 59.96  | 20 | CGTTTTGACGATATATAGTGTTC  | 58.68  | 26 | 157 | 1871 | 2027 |
| 59.988 | 20 | ATTGCTGGAATCAGACGACC     | 60.081 | 20 | 249 | 1599 | 1847 |
| 59.893 | 20 | ATAAATTGCAGGCCGATACG     | 59.95  | 20 | 275 | 1909 | 2183 |
| 59.266 | 20 | TGTCACTGGGAAACGATTA      | 58.973 | 20 | 234 | 584  | 817  |
| 59.44  | 20 | GGAGTTAAAAGCACCATGAGG    | 60.001 | 22 | 267 | 1121 | 1387 |
| 60.074 | 20 | ATGACCCTCATTCAGCCAAC     | 59.934 | 20 | 231 | 114  | 344  |
| 59.717 | 20 | TCAAATTTTCTTCCGGTTCA     | 59.551 | 21 | 196 | 9295 | 9490 |
| 59.95  | 20 | TGCTATAGGGGAAACAACCG     | 59.953 | 20 | 169 | 1773 | 1941 |
| 59.434 | 20 | TAAGATTGGTTCGGTTCCA      | 60.439 | 20 | 277 | 957  | 1233 |
| 60.003 | 20 | TTTGAGTTTGCATCTAAGAAGTG  | 59.828 | 24 | 214 | 2497 | 2710 |
| 59.031 | 20 | AGAGGAGTTGGGAGAGCAGG     | 60.921 | 20 | 260 | 409  | 668  |
| 58.984 | 25 | TCAATGGACTACTCCCAGCC     | 60.073 | 20 | 244 | 2    | 245  |
| 60.16  | 20 | TGAGTTTGGTGTGTTGGCAT     | 60.008 | 20 | 241 | 315  | 555  |
| 59.944 | 20 | TGATAATGCAATGGCCGATA     | 59.882 | 20 | 228 | 103  | 330  |
| 60.183 | 20 | TCGATGATGACCTGCAGAAG     | 59.942 | 20 | 114 | 2570 | 2683 |
| 60.156 | 20 | TGAGATGGTCACCCTTCCTC     | 60.048 | 20 | 213 | 723  | 935  |
| 59.751 | 20 | CAGAAGTAAACAGACGGCCC     | 59.734 | 20 | 153 | 168  | 320  |
| 60.096 | 20 | TTGGTCATCGCAATTCGTAG     | 59.688 | 20 | 102 | 346  | 447  |
| 60.119 | 20 | TCGCAACAAGAAGTAAAAGGAA   | 59.052 | 22 | 258 | 270  | 527  |
| 60.022 | 20 | TGCTAGAATGACCTGATGCG     | 59.972 | 20 | 155 | 62   | 216  |
| 60.476 | 20 | GGAGTTTTCACACCCAGTA      | 59.82  | 20 | 220 | 839  | 1058 |
| 59.126 | 21 | TATATAAGAAACGGCGGCCA     | 60.424 | 20 | 109 | 1274 | 1382 |
| 60.066 | 20 | TTGTTGGGGAAGGAGAACAC     | 59.943 | 20 | 179 | 553  | 731  |
| 60.015 | 20 | CGTCAAGCAATGCCAGATAA     | 59.833 | 20 | 258 | 467  | 724  |
| 60.134 | 20 | ATGATGCAACATCCCTTG TG    | 59.374 | 20 | 191 | 5049 | 5239 |
| 59.813 | 20 | CAGAGGGTTTCCAAAATGTCA    | 59.956 | 21 | 204 | 1200 | 1403 |
| 59.851 | 20 | GAAAAATGGCAGAGTGCTCC     | 59.82  | 20 | 237 | 2209 | 2445 |
| 59.971 | 20 | CCTGGGTTCTTGTTTTGAA      | 59.942 | 20 | 242 | 1294 | 1535 |
| 60.169 | 23 | AATCCAAGGAGGCGAGATTT     | 60.039 | 20 | 216 | 8    | 223  |
| 57.499 | 24 | GGGCCAGAATTTTCAGTTTCA    | 60.051 | 20 | 178 | 9    | 186  |
| 59.671 | 19 | CGATTAGCGAGTGATGGGAT     | 60.059 | 20 | 104 | 0    | 103  |
| 58.503 | 21 | TGCTGTTTGCATTTTAAGATGAGT | 60.186 | 24 | 185 | 827  | 1011 |
| 58.211 | 25 | CTTGGCGCCTGATAGTCTCT     | 59.598 | 20 | 180 | 41   | 220  |

|        |    |                           |        |    |     |      |      |
|--------|----|---------------------------|--------|----|-----|------|------|
| 59.993 | 20 | CACAAACTCACACAATGGGC      | 60.008 | 20 | 204 | 1769 | 1972 |
| 59.292 | 20 | TGATCTTGGGGAATCTCTGG      | 60.003 | 20 | 127 | 13   | 139  |
| 60.227 | 20 | AAAGGTTTTGATTTTCCGGC      | 60.292 | 20 | 123 | 49   | 171  |
| 59.945 | 20 | ATGGGCTTTAGTCCCCTGTT      | 59.827 | 20 | 229 | 460  | 688  |
| 60.038 | 20 | TGGCTTCTGTTTCTCCATCA      | 59.369 | 20 | 249 | 745  | 993  |
| 59.653 | 20 | GGAAGGAAAGGAAAG           | 60.045 | 20 | 234 | 1149 | 1382 |
| 59.853 | 20 | TCAGTGTACCGTTCTCTGC       | 60.03  | 20 | 251 | 531  | 781  |
| 60.058 | 20 | CGTGGAGAAGTCATGTCA        | 59.676 | 20 | 205 | 1651 | 1855 |
| 59.969 | 20 | CTTGCAGGACATCAATCGAA      | 59.799 | 20 | 270 | 1505 | 1774 |
| 59.813 | 20 | GACGTAGCAAACGCAAGGTT      | 60.313 | 20 | 256 | 1522 | 1777 |
| 60.142 | 20 | TAGGGGCTAACCTTAGGGGA      | 59.918 | 20 | 218 | 218  | 435  |
| 60.034 | 20 | CTGGCCATTGATTCTCCCTA      | 60.029 | 20 | 186 | 2153 | 2338 |
| 59.763 | 20 | TCATGCTTATTTTGAAGGG       | 58.769 | 20 | 239 | 8300 | 8538 |
| 59.942 | 20 | ATACACGGCCGAGTGACTTC      | 60.142 | 20 | 193 | 800  | 992  |
| 60.051 | 20 | ACCAGCTAGTCTTTTGCCCA      | 59.875 | 20 | 257 | 1609 | 1865 |
| 60.104 | 20 | AGATTTTGCACCAACAACCC      | 59.836 | 20 | 170 | 1220 | 1389 |
| 60.173 | 20 | TTGGTTAATGCTTACGGGG       | 59.826 | 20 | 192 | 2664 | 2855 |
| 59.268 | 20 | AACGCTGGAAGAATGTGACC      | 60.119 | 20 | 272 | 838  | 1109 |
| 59.668 | 20 | AAACCGTGCATGAACTTTCC      | 59.978 | 20 | 129 | 296  | 424  |
| 60.315 | 20 | CACAGAGCGCACTCAAAGAG      | 59.922 | 20 | 252 | 260  | 511  |
| 59.75  | 20 | AAAACAGCAGCAGTATGCCA      | 59.493 | 20 | 246 | 3851 | 4096 |
| 60.126 | 20 | CTATCCGCAGGCCAAGATAG      | 59.823 | 20 | 224 | 319  | 542  |
| 59.462 | 21 | CAGCATGAATCAAACAACCAA     | 59.576 | 21 | 256 | 716  | 971  |
| 60.159 | 20 | ATTATCTCGATCGGCCTCCT      | 60.024 | 20 | 253 | 126  | 378  |
| 60.067 | 20 | TCACTGCGCTCATTGTAAGG      | 60.011 | 20 | 244 | 477  | 720  |
| 59.978 | 20 | GCATCGGACATTGGAGCTAT      | 60.066 | 20 | 260 | 580  | 839  |
| 59.6   | 20 | AGTTTTTGCGCAGGAATGTT      | 59.752 | 20 | 231 | 3370 | 3600 |
| 60.074 | 20 | TAGCCGATAAAAATGGCACC      | 59.928 | 20 | 279 | 449  | 727  |
| 59.933 | 20 | CATTCCATTCTCACCTCATC      | 59.351 | 21 | 116 | 1578 | 1693 |
| 59.982 | 20 | TTGTGCTTCAACACCCTTCA      | 60.278 | 20 | 181 | 891  | 1071 |
| 60.692 | 20 | TGCGTTTGTCTAACTTTATCAGG   | 59.734 | 24 | 268 | 2792 | 3059 |
| 59.737 | 20 | CAGGGGGACTTTAATGGGAT      | 60.011 | 20 | 269 | 137  | 405  |
| 60.361 | 20 | CCAAGTTCCAAGTGATCGGT      | 59.966 | 20 | 119 | 1142 | 1260 |
| 60.012 | 20 | GCGAGCAAACCTCGGTAAAG      | 60.018 | 20 | 256 | 2654 | 2909 |
| 60.008 | 20 | AAAACATGTGGAGGGCAGTC      | 59.973 | 20 | 233 | 227  | 459  |
| 60.111 | 20 | TGTAATGCCTCCTTTCAGCA      | 59.42  | 20 | 267 | 942  | 1208 |
| 60.197 | 20 | GGATTGCATGGTTTGCTTTT      | 59.945 | 20 | 273 | 224  | 496  |
| 60.121 | 20 | GACAACAGAAAAACCACGCA      | 59.74  | 20 | 271 | 53   | 323  |
| 59.995 | 20 | TCGGGGCGAATAGAGACTAA      | 59.801 | 20 | 179 | 317  | 495  |
| 59.546 | 20 | GGGATTAATTCCAGCATGA       | 59.722 | 20 | 238 | 1117 | 1354 |
| 59.984 | 20 | GCCACGCTCTTTCATTCAT       | 60.221 | 20 | 201 | 968  | 1168 |
| 60.142 | 20 | ATTGCATTCTTGGTGTGTGC      | 59.577 | 20 | 270 | 1056 | 1325 |
| 60.924 | 20 | TTTTAACGATGGATCATGTAAGGA  | 59.748 | 24 | 175 | 1408 | 1582 |
| 59.836 | 20 | ATTTCACTTTGCCAGCAACC      | 60.118 | 20 | 140 | 785  | 924  |
| 59.264 | 20 | CAGTCGGATTCGTTTTGGAC      | 60.495 | 20 | 202 | 1945 | 2146 |
| 59.853 | 26 | CAGATCTGATGGCCCAGATT      | 60.034 | 20 | 114 | 490  | 603  |
| 60.495 | 20 | TCAGTTTTAGTTGTTAGGTGTTTTC | 58.77  | 25 | 257 | 4870 | 5126 |
| 59.792 | 20 | GCACAATCAAACCTTGCCTT      | 60.118 | 20 | 163 | 2259 | 2421 |
| 59.973 | 20 | GAAAAGAGAGGGAGATGGGG      | 60.008 | 20 | 247 | 3217 | 3463 |
| 60.075 | 21 | TCAACTCTTGTGGATAACTATTTTC | 59.968 | 26 | 279 | 1209 | 1487 |
| 58.12  | 20 | GAACAGGTTGGTTTGCCTT       | 60.015 | 20 | 106 | 6    | 111  |
| 59.974 | 20 | TGCACAGCTCTAACAAACACAA    | 59.578 | 22 | 264 | 456  | 719  |
| 60.187 | 20 | TTCTCAGTGCTGATGTTGGC      | 59.992 | 20 | 278 | 568  | 845  |
| 60.074 | 20 | CTTGAAGCGCCTGTTTCTCT      | 59.757 | 20 | 228 | 245  | 472  |
| 59.955 | 20 | CCTTTGCCAGATTGTTGAAA      | 58.745 | 20 | 200 | 2038 | 2237 |
| 58.836 | 20 | CACAGCAGACGCAAAGAAAG      | 59.781 | 20 | 200 | 1881 | 2080 |
| 60.413 | 20 | TGCGTTTTGATGATATATAGGTGT  | 60.054 | 26 | 271 | 1314 | 1584 |
| 60.188 | 20 | TGGAAAGAACTGGTTCAGGG      | 60.081 | 20 | 182 | 545  | 726  |

|        |    |                           |        |    |     |      |      |
|--------|----|---------------------------|--------|----|-----|------|------|
| 59.946 | 20 | AAGGAGGGGAAGAATGGAGA      | 60.008 | 20 | 260 | 5715 | 5974 |
| 59.472 | 20 | TTCCAAAATCGCAAATCTCC      | 60.016 | 20 | 224 | 0    | 223  |
| 60.066 | 20 | TGGTGAAGAGTGTGTAGCCG      | 59.897 | 20 | 206 | 1090 | 1295 |
| 60.008 | 20 | ACCCGAGAGAGAGATCGTGA      | 59.945 | 20 | 185 | 323  | 507  |
| 59.823 | 20 | TGATAACAGTGAGGCCGGAT      | 60.483 | 20 | 261 | 559  | 819  |
| 59.955 | 20 | TTATGATGCCTAGTGGTTGGC     | 59.974 | 21 | 252 | 367  | 618  |
| 59.984 | 20 | GAGATCCCCGATGATTCTCA      | 59.971 | 20 | 226 | 552  | 777  |
| 59.937 | 20 | CTTGGATTGAAGCTCAGCAGT     | 59.63  | 21 | 260 | 441  | 700  |
| 60.039 | 20 | AAGCAAACGACTTGTTCCAGA     | 59.906 | 21 | 210 | 1661 | 1870 |
| 60.046 | 20 | CAGATAATGGTGGGCCAAAT      | 59.645 | 20 | 101 | 535  | 635  |
| 59.984 | 20 | TTCAAATGCCAGTTTTACG       | 59.706 | 20 | 186 | 1007 | 1192 |
| 59.561 | 19 | CATTTTTGGAGGAGATTCTTCG    | 60.068 | 22 | 104 | 1910 | 2013 |
| 59.587 | 20 | GTTATGATGGGAATGGGAGG      | 59.055 | 20 | 113 | 1869 | 1981 |
| 59.873 | 20 | CGTTTATCGATTAGCACCCG      | 60.468 | 20 | 216 | 713  | 928  |
| 58.874 | 20 | TTTGC GTGAACATCAACC       | 60.562 | 20 | 210 | 2764 | 2973 |
| 58.673 | 20 | ATGCAACGTCGAGGTTTTTC      | 60.118 | 20 | 243 | 224  | 466  |
| 59.906 | 21 | GCATAGGAATGCCAATTCAA      | 58.577 | 20 | 268 | 32   | 299  |
| 59.157 | 20 | TAATAGCCACGAAAGGGGTG      | 59.953 | 20 | 202 | 901  | 1102 |
| 59.967 | 20 | CCCCTTCCCAACCATCTAC       | 59.259 | 20 | 262 | 481  | 742  |
| 59.72  | 21 | TCCATTCCGAAAATCAAAGG      | 59.872 | 20 | 139 | 2    | 140  |
| 60.166 | 21 | GATTCTTTGAATCATATTCCACCTT | 58.865 | 25 | 275 | 256  | 530  |
| 57.452 | 26 | CTCTCTCTCCTCACCAAGCA      | 59.73  | 21 | 190 | 16   | 205  |
| 59.955 | 20 | TGTGAGAGGGGTAAAGGTGG      | 59.959 | 20 | 256 | 1045 | 1300 |
| 58.775 | 24 | GTTGGGCCCGTTAGGTTTAT      | 60.075 | 20 | 198 | 36   | 233  |
| 58.517 | 20 | CCTCGGTCTATCTCATTTTTATCA  | 58.715 | 24 | 272 | 1022 | 1293 |
| 59.803 | 20 | ATGATTGGGATGCCATGTTT      | 60.021 | 20 | 177 | 600  | 776  |
| 60.003 | 20 | TCGAAATTCCTTGAGGTTGG      | 60.044 | 20 | 148 | 2152 | 2299 |
| 58.974 | 20 | TGTGCACCCCATTAAGGTT       | 60.227 | 20 | 167 | 903  | 1069 |
| 60.236 | 20 | CCCAACCCTTCACACTCTTC      | 59.549 | 20 | 270 | 121  | 390  |
| 59.921 | 20 | TACATTCCATTGTTTCGGCA      | 59.93  | 20 | 158 | 551  | 708  |
| 60.171 | 20 | TGCAAATGAGAATTGGGACA      | 60.049 | 20 | 154 | 560  | 713  |
| 60.827 | 20 | ATCTTCGGCCTCTCTCTCC       | 59.919 | 20 | 124 | 2282 | 2405 |
| 60.158 | 20 | ACGGATTCACCAGAACAAGC      | 60.119 | 20 | 254 | 1975 | 2228 |
| 59.91  | 20 | AGTCAACATTTGGCCACAC       | 60.823 | 20 | 198 | 194  | 391  |
| 60.022 | 20 | GGGAAGACTGTGTGAAGGGA      | 60.088 | 20 | 143 | 68   | 210  |
| 60.011 | 20 | GGTGTGCTCGGATTTTTGAT      | 59.939 | 20 | 162 | 262  | 423  |
| 59.313 | 21 | TGCGAAATTTAAGCCAAGTG      | 58.958 | 20 | 228 | 559  | 786  |
| 59.82  | 20 | CCTTTGGACTAAACCACCCA      | 59.824 | 20 | 203 | 1835 | 2037 |
| 59.992 | 20 | ACTCCTTGATGGTGGAGGTG      | 59.962 | 20 | 219 | 1207 | 1425 |
| 60.081 | 20 | GTAATCGAATCTCGCCCTCA      | 60.177 | 20 | 165 | 565  | 729  |
| 59.971 | 20 | GGCCAACAACATGAAACTCA      | 59.547 | 20 | 196 | 1033 | 1228 |
| 60.346 | 21 | CGGCGCTGTTACTCTTCTC       | 60.154 | 20 | 221 | 1529 | 1749 |
| 60.197 | 20 | CAACTGGCCCTGATGGTAAT      | 59.813 | 20 | 255 | 248  | 502  |
| 60.012 | 20 | TCTCCACCACCATTCTCACA      | 60.088 | 20 | 242 | 1063 | 1304 |
| 59.866 | 20 | TTGTTTTGTGCGTTATGTGGA     | 60.022 | 21 | 190 | 1126 | 1315 |
| 59.935 | 20 | TCAACTTTCGGAAGCGTACA      | 59.464 | 20 | 271 | 391  | 661  |
| 60.525 | 20 | CACGGTTCTTCAGCAACTCA      | 60.025 | 20 | 261 | 177  | 437  |
| 59.769 | 22 | AAGGTGGAAAAGGGTTGCTT      | 59.976 | 20 | 264 | 574  | 837  |
| 59.889 | 20 | CCGATCAAAGCCTTCTCTTG      | 59.948 | 20 | 174 | 878  | 1051 |
| 59.976 | 20 | ACGGAATTTCACTATGCCG       | 59.96  | 20 | 230 | 1411 | 1640 |
| 60.434 | 20 | AAGCAAATGGATAGCGTGG       | 60.096 | 20 | 232 | 105  | 336  |
| 60.203 | 20 | ATAGATTCCAAGGGCAGGCT      | 60.06  | 20 | 266 | 1198 | 1463 |
| 60.249 | 20 | GGAAGTGGTCCCAGTTTGAA      | 59.943 | 20 | 189 | 318  | 506  |
| 60.102 | 23 | GCGGTATGACTTCATGGGAT      | 59.78  | 20 | 269 | 1176 | 1444 |
| 60.304 | 20 | CTGTGACACGGAAATTTGAGA     | 58.761 | 21 | 191 | 2083 | 2273 |
| 60.014 | 20 | TGTTGGATTTGGGATCCTCT      | 59.336 | 20 | 224 | 1493 | 1716 |
| 60.014 | 20 | ATTTGCACATCAAACCTCCCC     | 59.797 | 20 | 134 | 578  | 711  |
| 59.724 | 20 | GCCTTCTCGCTCTCCCTAT       | 59.947 | 20 | 270 | 5568 | 5837 |



|        |    |                          |        |    |     |      |      |
|--------|----|--------------------------|--------|----|-----|------|------|
| 59.945 | 20 | GGTGGGGGTTATCTCCTGAT     | 60.015 | 20 | 218 | 505  | 722  |
| 60.025 | 20 | AAAAACGGATGAGAAAGCGA     | 59.823 | 20 | 274 | 508  | 781  |
| 59.982 | 20 | GTTGAAAGGAGGGACGAACA     | 60.088 | 20 | 181 | 19   | 199  |
| 60.17  | 20 | CGTGTATATGCTCGAGATGGG    | 60.496 | 21 | 200 | 2155 | 2354 |
| 59.744 | 20 | TGTGTGATGGAGCTTCTTCTTC   | 59.478 | 22 | 198 | 1246 | 1443 |
| 60.096 | 20 | CTGCCACTCTGCAGGTACAA     | 60.049 | 20 | 265 | 635  | 899  |
| 59.803 | 20 | CCCTTAGCTACCCAAAAGCC     | 60.089 | 20 | 102 | 1248 | 1349 |
| 59.317 | 20 | CACACGCACACACAAAATCA     | 60.204 | 20 | 246 | 498  | 743  |
| 59.95  | 20 | CAACTTCCGCTTCTCCAAC      | 59.853 | 20 | 212 | 533  | 744  |
| 59.984 | 20 | GGGGCCAAGAAAAGAGTAG      | 60.068 | 20 | 200 | 883  | 1082 |
| 60.134 | 20 | TAACAACCTTCTGCGAACCC     | 60.11  | 20 | 194 | 642  | 835  |
| 59.823 | 20 | ATAAGAAGGGCTGCCGAAAT     | 60.061 | 20 | 240 | 1369 | 1608 |
| 59.609 | 20 | ACCAGGAATCGAATCAGCAC     | 60.081 | 20 | 216 | 613  | 828  |
| 58.743 | 25 | ATCAATGACCACCCAACCAT     | 59.91  | 20 | 197 | 0    | 196  |
| 59.967 | 20 | CTTGCTTATCCCTCGTCCAA     | 60.206 | 20 | 176 | 1218 | 1393 |
| 59.054 | 21 | GCCCAACACTAATTGCACCT     | 60     | 20 | 183 | 642  | 824  |
| 59.656 | 21 | ACAGTTGAGGCCCTTAGT       | 59.994 | 20 | 124 | 74   | 197  |
| 60.037 | 24 | CAAGAATAACACGCATCCGA     | 59.688 | 20 | 279 | 452  | 730  |
| 60.147 | 20 | GCATGGCCCTGTCAATTAGT     | 59.962 | 20 | 209 | 3530 | 3738 |
| 59.297 | 20 | GAATTGGGCAATGGAGAAGA     | 60.014 | 20 | 125 | 74   | 198  |
| 58.935 | 25 | CATGGACCCACATGTCATA      | 60.048 | 20 | 180 | 239  | 418  |
| 59.939 | 20 | CGATTCGAGTTCCTGGGTA      | 60.066 | 20 | 246 | 785  | 1030 |
| 60.089 | 20 | GACATTCGTCGTTGAGGTGA     | 59.682 | 20 | 197 | 30   | 226  |
| 59.757 | 20 | TCGAAAAAGGAAAAATAAAATTC, | 59.468 | 25 | 203 | 21   | 223  |
| 59.95  | 20 | TTTCGAAGATCAATGGACGA     | 59.2   | 20 | 274 | 2114 | 2387 |
| 59.945 | 20 | GCACAATGCACATACAAGGG     | 59.995 | 20 | 106 | 42   | 147  |
| 59.081 | 21 | AAAGGAGACTAGTGGCTGCG     | 59.639 | 20 | 261 | 518  | 778  |
| 60.056 | 20 | TGGCCTAATTTTGTGTGGTTT    | 59.37  | 21 | 219 | 1613 | 1831 |
| 59.597 | 20 | TCATACTGAGCTGAATAGTTACCC | 57.707 | 24 | 104 | 4    | 107  |
| 59.369 | 20 | CAGGATGGAGTGCTTCAGGT     | 60.261 | 20 | 145 | 626  | 770  |
| 59.973 | 20 | AAAAACATGAAGTCGGGCAC     | 59.978 | 20 | 199 | 30   | 228  |
| 60.195 | 20 | ACAGATTCCCGTAGCCACAC     | 59.997 | 20 | 250 | 697  | 946  |
| 59.927 | 20 | TACTTCGCACTTTTCCGTTG     | 58.964 | 20 | 205 | 687  | 891  |
| 59.823 | 20 | CCACCCACTGCATTCTCTCT     | 60.261 | 20 | 189 | 761  | 949  |
| 59.588 | 20 | CGAGGTTTGTACCGTTCAATTT   | 60.269 | 22 | 144 | 1016 | 1159 |
| 60.206 | 20 | TGTTTTATCGTCCTGAGGCA     | 59.272 | 20 | 264 | 502  | 765  |
| 58.379 | 22 | CCCTTCTTCTGATGTTACCGA    | 59.181 | 21 | 266 | 635  | 900  |
| 59.322 | 20 | CATCTTATAGCGTGCGGGTT     | 60.117 | 20 | 176 | 1566 | 1741 |
| 59.813 | 20 | CCGTTTCAATCGACACAACA     | 60.552 | 20 | 127 | 4973 | 5099 |
| 58.225 | 23 | GGTTTTTGAGGGTGGAGTGA     | 59.943 | 20 | 234 | 2351 | 2584 |
| 59.997 | 20 | ACCGTTGAGACAGTTGGGAG     | 60.151 | 20 | 253 | 1602 | 1854 |
| 60.012 | 20 | ATCGGAATTGATTTGATGCC     | 59.728 | 20 | 210 | 102  | 311  |
| 59.978 | 20 | TGCGTCTGCTAATCTCCCTT     | 59.978 | 20 | 267 | 1776 | 2042 |
| 59.709 | 20 | CCCGTGTAAGTGGTGCTTTT     | 60.03  | 20 | 245 | 2970 | 3214 |
| 59.966 | 20 | GAATGAACACTACGGCTTGGGA   | 60.074 | 20 | 207 | 123  | 329  |
| 60.029 | 20 | TGCCCTAACAGACCTTGACC     | 60.111 | 20 | 249 | 392  | 640  |
| 59.706 | 20 | TTGGCCAGGAAGTTAGAAGC     | 59.452 | 20 | 234 | 289  | 522  |
| 59.878 | 20 | TGTTGAGATGCCTCAATCAAA    | 59.262 | 21 | 274 | 427  | 700  |
| 59.95  | 20 | GAACGAGCATTGGAGGATTC     | 59.635 | 20 | 102 | 3913 | 4014 |
| 60.073 | 20 | TGGATTGGTTGAGAAGGGAG     | 60.042 | 20 | 141 | 1363 | 1503 |
| 60.214 | 20 | TTGCCATTTTCAATGATCCA     | 59.867 | 20 | 264 | 2065 | 2328 |
| 60.012 | 20 | CAACCACACAATGCTTTTGG     | 60.004 | 20 | 183 | 599  | 781  |
| 59.651 | 20 | TTTGTTTTGTAAATGGTGCTTGA  | 59.562 | 23 | 101 | 3093 | 3193 |
| 59.172 | 21 | GCTCAAGTTGATTGTAGCGG     | 58.529 | 20 | 260 | 136  | 395  |
| 60.277 | 20 | GCAGAAATTTGAACCGGGAT     | 61.184 | 20 | 215 | 543  | 757  |
| 59.694 | 20 | GCATAAGATTCAGACGGGGA     | 60.036 | 20 | 142 | 48   | 189  |
| 59.707 | 20 | GTTTGCTGTGCTGTCTGCAT     | 60.064 | 20 | 275 | 321  | 595  |
| 59.807 | 20 | GCTCTGCTTTGATCAGCTCC     | 60.249 | 20 | 237 | 448  | 684  |

|        |    |                          |        |    |     |      |      |
|--------|----|--------------------------|--------|----|-----|------|------|
| 60.095 | 20 | CGCTGGTAATAGGACCCTGA     | 60.088 | 20 | 194 | 4462 | 4655 |
| 60.343 | 20 | GACGGGGTTTCACTTTTTGA     | 59.948 | 20 | 233 | 369  | 601  |
| 59.978 | 20 | AATGGTAATCCGATTGGCTG     | 59.784 | 20 | 162 | 673  | 834  |
| 59.492 | 22 | CTGCATAGATGTCTGAACCGA    | 59.823 | 20 | 275 | 607  | 881  |
| 59.933 | 20 | AAATAAAGCGGCAACCACTC     | 59.229 | 20 | 179 | 1363 | 1541 |
| 60.096 | 20 | TGAGATGTCAACAGGGAACG     | 59.676 | 20 | 171 | 885  | 1055 |
| 60.051 | 20 | TTGCAAGTATTCTTTCGCA      | 57.257 | 20 | 225 | 541  | 765  |
| 59.919 | 20 | TCCATTCCGAAAATCAAAGG     | 59.872 | 20 | 222 | 2405 | 2626 |
| 59.391 | 21 | GGGTTTATTTGCTGGCTAGG     | 58.718 | 20 | 262 | 625  | 886  |
| 60.036 | 20 | TCCACCTCTCCACCAAATTC     | 59.903 | 20 | 211 | 3185 | 3395 |
| 60.034 | 20 | TGACGCTCGCAGTATTTTTG     | 60.014 | 20 | 244 | 640  | 883  |
| 59.664 | 20 | TGGCCTTGACAAACTAAAA      | 59.344 | 20 | 280 | 1126 | 1405 |
| 59.941 | 20 | GAATGGGAAAATGGAGGGAT     | 59.959 | 20 | 279 | 323  | 601  |
| 59.966 | 20 | TATTTAATGCCGCACCTTCC     | 59.928 | 20 | 204 | 1210 | 1413 |
| 60.128 | 20 | CCATTTCAAATCCTGGCTC      | 59.505 | 20 | 222 | 2692 | 2913 |
| 60.155 | 20 | TGCCAGAATGTTGTTCTGCT     | 59.293 | 20 | 261 | 612  | 872  |
| 59.851 | 23 | TTGAATATATTATCAAATCCAATC | 59.038 | 27 | 151 | 601  | 751  |
| 59.973 | 20 | CGTTATTGCGTTACGGGTTT     | 59.89  | 20 | 178 | 776  | 953  |
| 60.014 | 20 | TTTGTAAGTGGATCATGGATGG   | 59.685 | 22 | 131 | 630  | 760  |
| 59.864 | 20 | GTGAGAGGGAAAACGATGGA     | 60.05  | 20 | 170 | 1203 | 1372 |
| 60.066 | 20 | ACCACCAGAAAACGGTGAAG     | 60.005 | 20 | 197 | 181  | 377  |
| 59.888 | 20 | TCCATACGCACTGCTCTTTG     | 60.011 | 20 | 279 | 954  | 1232 |
| 59.84  | 20 | TCCAAAATCAGAAAATGGCA     | 59.087 | 20 | 247 | 584  | 830  |
| 60.116 | 20 | TCACACACACTCACACGCAT     | 59.772 | 20 | 265 | 457  | 721  |
| 59.722 | 20 | TGTCAACAAAAGCTTAAAACCTCC | 60.192 | 24 | 211 | 654  | 864  |
| 60.009 | 20 | CACGACGGATATTTGGCATA     | 59.401 | 20 | 276 | 627  | 902  |
| 60.206 | 20 | GAATTTTAGTGTTTCGGGCCA    | 59.938 | 20 | 272 | 224  | 495  |
| 60.088 | 20 | TACTGGAGTGGTCTGTCCCC     | 59.962 | 20 | 174 | 590  | 763  |
| 60.54  | 20 | GAAAAAGAGTGGCTTTTGCG     | 59.996 | 20 | 157 | 4818 | 4974 |
| 60.081 | 20 | GAATGCCGGTCTGAAAACAT     | 59.939 | 20 | 275 | 12   | 286  |
| 60.243 | 20 | TAGTTGGTGTGTGTGCTGGG     | 60.629 | 20 | 251 | 1147 | 1397 |
| 59.729 | 20 | GATGTTTACTCGCCCTGGAA     | 60.074 | 20 | 236 | 460  | 695  |
| 58.746 | 20 | GGCATATTTGGGGAGAGGTT     | 60.152 | 20 | 279 | 845  | 1123 |
| 59.779 | 20 | CCCACACTCTCCTCCAAAAG     | 59.691 | 20 | 242 | 192  | 433  |
| 59.679 | 20 | GTTCTAGCCCAAAACTGCCA     | 60.249 | 20 | 180 | 1459 | 1638 |
| 60.012 | 20 | ATGATCTTCTCACGGGAACG     | 60.073 | 20 | 210 | 2345 | 2554 |
| 59.691 | 20 | TAGAAAAGGTTCCGCCATCCC    | 61.303 | 20 | 242 | 3138 | 3379 |
| 60.081 | 20 | CTTACCACCGTTGATTCTT      | 59.966 | 20 | 104 | 104  | 207  |
| 59.973 | 20 | AATGTCCCGTTGAGTCTTG      | 59.966 | 20 | 179 | 693  | 871  |
| 59.933 | 20 | TCATGCAAGAAAACGTGGTT     | 59.174 | 20 | 184 | 1100 | 1283 |
| 60.192 | 20 | AGAGCATCCACGTCAGCTTT     | 60.02  | 20 | 165 | 1360 | 1524 |
| 59.779 | 22 | TTCGTGAAAACCGTTTAGG      | 59.968 | 20 | 279 | 88   | 366  |
| 59.604 | 20 | TCACAAACCTTGCTTTTCC      | 60.088 | 20 | 163 | 1544 | 1706 |
| 59.88  | 20 | TGAGGATGAAGTAGCGTTGG     | 58.874 | 20 | 185 | 635  | 819  |
| 59.855 | 20 | GGACATATTTGTGGGACGG      | 60.051 | 20 | 214 | 4035 | 4248 |
| 59.988 | 20 | TAATGTCCTTGGAGATGGGG     | 59.744 | 20 | 123 | 1198 | 1320 |
| 60.096 | 20 | GTCGCCTCTTTCAACGAC       | 59.997 | 20 | 229 | 922  | 1150 |
| 60.135 | 20 | CGTATTCAATAGACACATTGCCA  | 59.903 | 23 | 239 | 1657 | 1895 |
| 60.05  | 20 | CCAATTTTCCCAACTCAA       | 59.772 | 20 | 257 | 2278 | 2534 |
| 60.026 | 20 | AAGCAAGAAACCGCTTGAGA     | 60.132 | 20 | 211 | 4626 | 4836 |
| 59.918 | 20 | GGTCGATTACTCCACCCTCA     | 59.927 | 20 | 183 | 237  | 419  |
| 60.008 | 20 | ATCTGTCAGCATTTGGACCC     | 59.934 | 20 | 216 | 1003 | 1218 |
| 60.111 | 20 | CATTTGAAAGAATACAAAACGAC  | 58.295 | 24 | 280 | 255  | 534  |
| 59.778 | 20 | TTTGTTCCACCACTCCATCA     | 59.935 | 20 | 211 | 86   | 296  |
| 59.615 | 20 | ATGAGTGAGGCTGGAAGCTC     | 59.56  | 20 | 203 | 1115 | 1317 |
| 59.17  | 20 | TCGGACAGAAATAACCTCCG     | 60.066 | 20 | 130 | 9    | 138  |
| 59.002 | 20 | CACCAAATTCAAGCAATGGA     | 59.518 | 20 | 238 | 657  | 894  |
| 60.005 | 21 | TTTACATCATGTGGTCGCGT     | 59.995 | 20 | 234 | 1407 | 1640 |

|        |    |                           |        |    |     |      |      |
|--------|----|---------------------------|--------|----|-----|------|------|
| 59.51  | 20 | GGTACCGAAGTTGTCATCCG      | 60.375 | 20 | 225 | 1169 | 1393 |
| 60.639 | 20 | TAAAAATTGCATGCACCTGA      | 57.788 | 20 | 268 | 1788 | 2055 |
| 60.059 | 20 | ATCTCGCACGCGATAAAAAT      | 59.71  | 20 | 156 | 5015 | 5170 |
| 60.428 | 21 | GGCTGTTGCTGAGTGTGAGA      | 60.187 | 20 | 279 | 482  | 760  |
| 59.903 | 20 | GAGTATCGGCTGTGGGTTTC      | 59.556 | 20 | 264 | 2951 | 3214 |
| 59.572 | 20 | GCCACACCTGACATTGCATA      | 60.549 | 20 | 187 | 692  | 878  |
| 59.621 | 20 | TTCTTTTCTTGGGTGGATG       | 59.903 | 20 | 259 | 4376 | 4634 |
| 59.9   | 25 | AATAAGTGCTCCGACTCCGT      | 58.817 | 20 | 266 | 7    | 272  |
| 60.027 | 20 | GGAGCATTGCCATTGTAGGT      | 59.962 | 20 | 247 | 1453 | 1699 |
| 60.066 | 20 | TGTACTGAATGCATCAAAACCC    | 59.867 | 22 | 171 | 628  | 798  |
| 59.831 | 21 | CCCCATTCCCTCTCTCTCTC      | 60.149 | 20 | 266 | 32   | 297  |
| 60.081 | 20 | CAGGCTCTCTCTCTCTCCA       | 59.81  | 20 | 259 | 1398 | 1656 |
| 59.928 | 20 | GTGGGAGAAAATGGGGAGAAT     | 60.133 | 20 | 274 | 624  | 897  |
| 60.359 | 21 | TGCAATAGGTAGAGAAAAGTTGA   | 58.935 | 25 | 196 | 670  | 865  |
| 59.036 | 22 | TGTTATTATTGGAACAGCACCC    | 58.878 | 22 | 216 | 1680 | 1895 |
| 59.637 | 20 | TGTTGACTCCACATGTTTCA      | 59.992 | 21 | 258 | 2101 | 2358 |
| 57.078 | 21 | AGTGGTACACGTCGGGAAAA      | 60.41  | 20 | 249 | 406  | 654  |
| 59.882 | 20 | ACCATCGATCTCTGCTTGCT      | 59.981 | 20 | 256 | 478  | 733  |
| 58.664 | 21 | AAGTCAATTCCGTATGACAAAAA   | 57.752 | 23 | 194 | 62   | 255  |
| 60.407 | 20 | AGCAAAAAGTTCTCCGGCTT      | 60.373 | 20 | 232 | 1321 | 1552 |
| 59.946 | 21 | AAACTGCTGCCTTTTGCATT      | 59.889 | 20 | 232 | 739  | 970  |
| 60.19  | 20 | CATCTGCACCCATTTCCCTT      | 59.933 | 20 | 188 | 706  | 893  |
| 60.199 | 21 | CCGAGGAGAACTCTTTGGAT      | 58.323 | 20 | 269 | 1154 | 1422 |
| 58.649 | 20 | TGTACTGCCACTTGGGTGTC      | 59.597 | 20 | 154 | 1396 | 1549 |
| 59.933 | 20 | TGGATTCGTCCAAAAATTCC      | 59.739 | 20 | 240 | 22   | 261  |
| 59.924 | 20 | GGCCAGATTAATTCTTTGCG      | 59.682 | 20 | 227 | 1811 | 2037 |
| 59.801 | 20 | TCATTTGCGCTTGTCAATTC      | 59.816 | 20 | 279 | 757  | 1035 |
| 60.011 | 20 | GGGCGCTATCCATTATGAAA      | 59.892 | 20 | 120 | 1250 | 1369 |
| 59.955 | 20 | CAACAGAATTTGCCGAGACGA     | 59.988 | 20 | 255 | 638  | 892  |
| 59.115 | 21 | CGGCATTCTATTGTGTGAATG     | 59.052 | 21 | 232 | 1126 | 1357 |
| 60.219 | 20 | TCTCATTTATGCATCACTAATTTGA | 59.142 | 26 | 231 | 111  | 341  |
| 60.118 | 20 | CTGATTCCTTCTTCCCC         | 60.008 | 20 | 251 | 4672 | 4922 |
| 60.228 | 20 | GTGGACAAGAATGGTTTGGG      | 60.21  | 20 | 245 | 1890 | 2134 |
| 59.959 | 20 | CTCAGATCCTGACAGCCCAT      | 60.223 | 20 | 276 | 1334 | 1609 |
| 59.904 | 20 | CACACCCATGAAACTGCAAC      | 60.008 | 20 | 212 | 1528 | 1739 |
| 60.033 | 20 | CATGGTCTATGAAATGCCCC      | 60.155 | 20 | 244 | 740  | 983  |
| 59.569 | 20 | AAGCGAGAAGAAAGAGCGTG      | 59.898 | 20 | 274 | 1420 | 1693 |
| 59.756 | 20 | GGGCAGAGAACGTGCTTTAT      | 59.34  | 20 | 239 | 1696 | 1934 |
| 60.11  | 20 | CGATTTGGATTCGAATTCTGT     | 59.033 | 21 | 198 | 621  | 818  |
| 59.636 | 20 | GAGGAGAAGGAGGGAGGAGA      | 59.883 | 20 | 169 | 1078 | 1246 |
| 60.183 | 20 | GCCGACTCACCAACTTTCTC      | 59.851 | 20 | 212 | 39   | 250  |
| 59.722 | 20 | TCTGACTCGCTTTGATGTGCG     | 60.136 | 20 | 183 | 287  | 469  |
| 60.008 | 20 | GATCCAACGGCTGAAAATGT      | 59.939 | 20 | 240 | 3177 | 3416 |
| 59.545 | 20 | CACTCTCTGTTGCCCAATCTG     | 60.838 | 21 | 228 | 100  | 327  |
| 60.606 | 20 | TGTGAAAACGTTGGTTGTGAA     | 60.035 | 21 | 228 | 4478 | 4705 |
| 59.817 | 20 | CACACCCGACAAATTCTCAT      | 59.572 | 20 | 255 | 373  | 627  |
| 59.195 | 21 | CAAGACTGGACACTCCACCA      | 59.705 | 20 | 114 | 1176 | 1289 |
| 60.088 | 20 | CGGGAGAGCAAGTTTTGAAC      | 59.853 | 20 | 174 | 84   | 257  |
| 57.014 | 20 | TGATGTTGATAAAACTGATAAATG  | 57.4   | 25 | 279 | 627  | 905  |
| 58.876 | 21 | TCATCCAATGGTTTGGTTTG      | 59.222 | 20 | 275 | 700  | 974  |
| 60.362 | 20 | ACTGTGAAAGGTGCCCAAAC      | 60.012 | 20 | 273 | 663  | 935  |
| 59.862 | 20 | TTGGAGGAGACGATGAAACC      | 60.05  | 20 | 160 | 371  | 530  |
| 60.032 | 20 | AGTGCCGATTGAAGTGCTGT      | 60.865 | 20 | 232 | 1879 | 2110 |
| 60.162 | 20 | CGAAATAAGGAGGTGTTATAAAGI  | 60.434 | 25 | 227 | 1717 | 1943 |
| 60.374 | 20 | TTGCACGATAGCAGTAACGG      | 59.895 | 20 | 193 | 678  | 870  |
| 60.074 | 20 | GCTACAGCAGCCATTGATGA      | 59.979 | 20 | 159 | 1968 | 2126 |
| 59.44  | 20 | TGATTGCACCTTACATGGGA      | 59.924 | 20 | 255 | 2276 | 2530 |
| 60.104 | 20 | GATAAATTAATCGCTGGCTGG     | 58.73  | 21 | 103 | 726  | 828  |

|        |    |                           |        |    |     |      |      |
|--------|----|---------------------------|--------|----|-----|------|------|
| 59.971 | 20 | CATTTTGGAGGGAAAGTGGC      | 61.728 | 20 | 280 | 1706 | 1985 |
| 59.545 | 24 | TGAATGGTAAATGAACCGCA      | 59.93  | 20 | 109 | 2    | 110  |
| 59.864 | 20 | TACAAAACCATAACACGCGG      | 59.486 | 20 | 266 | 210  | 475  |
| 60.256 | 21 | TTTTCTTGCAAGTTCCGTT       | 59.724 | 20 | 221 | 0    | 220  |
| 59.595 | 20 | GTCCCTTGTTGGGCAGTAAA      | 59.971 | 20 | 260 | 1343 | 1602 |
| 59.286 | 22 | TCCACCCTCAGAAATTCAA       | 58.117 | 20 | 273 | 1959 | 2231 |
| 60.894 | 24 | CTTGCAGCATGGTCAAAGC       | 60.555 | 19 | 140 | 1695 | 1834 |
| 61.292 | 20 | TCACCACAACCAAACACAAAA     | 59.889 | 21 | 274 | 1075 | 1348 |
| 59.496 | 20 | TGCTCTCATTGTAATCTCCACC    | 59.198 | 22 | 161 | 1886 | 2046 |
| 60.036 | 20 | CGGTTATCACCGGATCGC        | 62.397 | 18 | 190 | 3149 | 3338 |
| 60.073 | 20 | ACTGAGATGCTCAAGCCGTT      | 60.02  | 20 | 209 | 1318 | 1526 |
| 59.882 | 20 | TCTGTCGCCTTGAATGATTG      | 59.799 | 20 | 245 | 860  | 1104 |
| 60.016 | 20 | TTTGGTACTTCATCATTTAAAAAC/ | 59.446 | 27 | 255 | 733  | 987  |
| 60.195 | 20 | CAATGCAGCAGGAACAAGAA      | 59.988 | 20 | 244 | 144  | 387  |
| 59.953 | 20 | TAGGGCCCTTAGTTCGTGTG      | 60.125 | 20 | 230 | 443  | 672  |
| 58.331 | 27 | GGAATTACTTTGGTTTTGGGG     | 59.575 | 21 | 233 | 378  | 610  |
| 59.198 | 20 | TGGACTCTGGAAGCTGGAGT      | 59.986 | 20 | 231 | 1087 | 1317 |
| 60.06  | 20 | TTGCCATAGATATGCACCGA      | 60.058 | 20 | 229 | 210  | 438  |
| 58.58  | 20 | GAGCTTTGGTGGAAACATCC      | 59.532 | 20 | 149 | 56   | 204  |
| 60.088 | 20 | ATGAACAGGTCCGGAATA        | 59.09  | 19 | 169 | 650  | 818  |
| 59.953 | 20 | GTTCCAATTTCTGTGTTGGT      | 59.694 | 20 | 173 | 4358 | 4530 |
| 60.352 | 20 | CGGTGTGGATTTTGTGTGAG      | 60.001 | 20 | 238 | 890  | 1127 |
| 60.032 | 20 | TGAACTGGTTTTTCGATCCC      | 59.91  | 20 | 183 | 5219 | 5401 |
| 60.008 | 20 | ATCGGGTAAGCAACATGACC      | 59.82  | 20 | 279 | 275  | 553  |
| 57.297 | 27 | AACATGTCATTGACCAGACCC     | 59.694 | 21 | 104 | 0    | 103  |
| 59.923 | 20 | TTGTTGCCACGTATCCTCAG      | 59.716 | 20 | 199 | 2002 | 2200 |
| 59.708 | 20 | CGTGAAGAGTTTCCCACCAT      | 59.966 | 20 | 212 | 2089 | 2300 |
| 59.805 | 20 | CGTGGGACAAACAAAGGAAG      | 60.52  | 20 | 233 | 1277 | 1509 |
| 59.734 | 20 | GGCAACAGTGGGATAATGCT      | 59.962 | 20 | 262 | 1540 | 1801 |
| 60.014 | 20 | GCAGCAACAACGTTAACAGC      | 59.541 | 20 | 142 | 1976 | 2117 |
| 60.096 | 20 | CCTCCAGAACCACAGCAAAT      | 60.111 | 20 | 180 | 66   | 245  |
| 59.651 | 20 | CTCAACCAAGGAAGTGTGG       | 58.187 | 20 | 277 | 618  | 894  |
| 59.967 | 20 | GCAAATTGGTCTAGAGAATTA/    | 58.51  | 26 | 158 | 1857 | 2014 |
| 59.933 | 20 | CTCAAACGCATGTGCTTCTC      | 59.596 | 20 | 271 | 2098 | 2368 |
| 59.973 | 20 | GACTCCCTTCTCAACCCTC       | 60.05  | 20 | 167 | 5032 | 5198 |
| 59.933 | 20 | CTTTTGCTGGGGAGGAGTT       | 59.269 | 19 | 276 | 2090 | 2365 |
| 59.935 | 20 | TTTTCGTCAAATAATCCAAGCA    | 59.603 | 22 | 210 | 753  | 962  |
| 59.84  | 20 | AATTATTTGTGGCGTCTGGC      | 59.967 | 20 | 251 | 416  | 666  |
| 59.966 | 20 | TCGATTTGGTCTATTTGCGC      | 60.038 | 20 | 211 | 709  | 919  |
| 60.049 | 20 | ACAGTTTCTGGCATGTGCTG      | 59.905 | 20 | 187 | 372  | 558  |
| 60.033 | 25 | ATAAGGAGGGTCCCTTGCAT      | 59.789 | 20 | 236 | 41   | 276  |
| 59.862 | 20 | ATGAATGTGGAAAGTGTGCG      | 59.572 | 20 | 186 | 255  | 440  |
| 58.201 | 20 | TGTAGCAGGAACAAATGCCA      | 60.257 | 20 | 246 | 78   | 323  |
| 60.543 | 20 | AAGGCACAAGTTCATGGAGG      | 60.111 | 20 | 112 | 767  | 878  |
| 60.124 | 20 | ATCGGTTATTACCGGATCGC      | 61.031 | 20 | 225 | 1851 | 2075 |
| 59.864 | 22 | TCCATTGATTGCCACTTTCA      | 60.049 | 20 | 268 | 324  | 591  |
| 59.813 | 20 | ATGGTGGATGAGTAGGCGAG      | 60.096 | 20 | 262 | 1758 | 2019 |
| 60.111 | 20 | GGTACCCTAATGGCAGAAA       | 59.933 | 20 | 160 | 252  | 411  |
| 58.506 | 20 | CGGAAATTTTCAACCAATTCA     | 59.797 | 21 | 237 | 4869 | 5105 |
| 60.187 | 20 | CATGGTAGAGGCCCTGTGTT      | 59.989 | 20 | 227 | 4060 | 4286 |
| 59.988 | 20 | AACACCCCATTTTGCTGTTC      | 59.836 | 20 | 223 | 293  | 515  |
| 59.816 | 20 | ATTGGATTTGGTGTCAAGC       | 59.939 | 20 | 204 | 15   | 218  |
| 59.962 | 20 | TCAAAATGCCAGTCTTCACG      | 59.84  | 20 | 202 | 1862 | 2063 |
| 59.992 | 20 | CCCATTTCCAATTCCATCAT      | 59.605 | 20 | 275 | 1458 | 1732 |
| 60.066 | 20 | GAATTAGGGTGGGCGAAAAT      | 60.15  | 20 | 259 | 429  | 687  |
| 60.008 | 20 | GAATGAGGGGAAGCATTCAA      | 60.014 | 20 | 256 | 753  | 1008 |
| 60.334 | 20 | TTAGTGTTTTGACATGATTACTCT  | 57.936 | 26 | 263 | 2750 | 3012 |
| 57.944 | 20 | CATCGAGAGCTTCCAAAAGG      | 59.948 | 20 | 251 | 803  | 1053 |

|        |    |                         |        |    |     |       |       |
|--------|----|-------------------------|--------|----|-----|-------|-------|
| 60.142 | 20 | TTGCATCTCTTTTGTGCGCTC   | 59.152 | 20 | 175 | 760   | 934   |
| 59.48  | 20 | TGAAGTTAGGAAATAAGGAGGTG | 58.743 | 25 | 201 | 5506  | 5706  |
| 57.59  | 23 | ATGTTGGTCCAAGTCCAAGC    | 59.973 | 20 | 251 | 67    | 317   |
| 60.074 | 20 | AGTTGAGGAAGCCGAACAAA    | 59.853 | 20 | 170 | 106   | 275   |
| 59.505 | 20 | GTGTTTCTGCGGTGGAGAAT    | 60.119 | 20 | 182 | 365   | 546   |
| 59.938 | 20 | AAATAGCCGTGTGGCATAGC    | 60.124 | 20 | 237 | 3169  | 3405  |
| 60.05  | 20 | CATGTCCAGCAAGGGAAAAT    | 59.933 | 20 | 158 | 1308  | 1465  |
| 59.982 | 21 | AGCACAGTGTTTTGCTTTGT    | 58.426 | 20 | 272 | 1153  | 1424  |
| 60.214 | 20 | CCGAAGAAATGGATCCTCAA    | 60.006 | 20 | 267 | 184   | 450   |
| 60.067 | 20 | AACAGTATGAGCAGCCAGCA    | 59.621 | 20 | 211 | 703   | 913   |
| 60.008 | 20 | AAAGGTGTGAGAGGGTGGTG    | 60.002 | 20 | 182 | 1075  | 1256  |
| 60.497 | 20 | TATGTGTGTGGTGGAAAGGGA   | 59.806 | 20 | 276 | 6831  | 7106  |
| 60.088 | 20 | GTCGGGCTAACGAGCTACAC    | 59.904 | 20 | 225 | 28    | 252   |
| 59.924 | 20 | TCTAATCCTCTCCCCTGTGC    | 59.234 | 20 | 163 | 10448 | 10610 |
| 60.081 | 20 | GGGGTTGAGTCCTTCCATTT    | 60.169 | 20 | 267 | 150   | 416   |
| 57.253 | 22 | TGGGGGTACAAAGAGCTCAG    | 60.246 | 20 | 215 | 835   | 1049  |
| 59.953 | 20 | GTGCGTGCATTTTTACGTGT    | 59.662 | 20 | 246 | 770   | 1015  |
| 59.926 | 20 | TTTCAAAGCCATGCTGTCTG    | 59.988 | 20 | 275 | 1654  | 1928  |
| 60.088 | 20 | ACACGGGCTTTTGAATTTTG    | 59.975 | 20 | 271 | 78    | 348   |
| 59.839 | 20 | GGTTGGGACGGATAATCGTA    | 59.645 | 20 | 269 | 2885  | 3153  |
| 59.997 | 20 | ATTTCTTTCCCTGCCAACT     | 59.94  | 20 | 273 | 560   | 832   |
| 60.624 | 20 | GCAGAAATCTGGACCCAAAA    | 60.051 | 20 | 228 | 2209  | 2436  |
| 60.331 | 20 | GCACTGAAGTGGTGAGTGGA    | 59.872 | 20 | 184 | 2763  | 2946  |
| 60.977 | 20 | TCAAATTTAACAGGCCGACA    | 59.157 | 20 | 190 | 584   | 773   |
| 59.866 | 20 | CGATCCAGTTGCCAAGAAAT    | 60.074 | 20 | 161 | 862   | 1022  |
| 59.737 | 22 | CATTGTCCGGGACTTTGTCT    | 59.966 | 20 | 189 | 1149  | 1337  |
| 60     | 20 | AGTTCTTCTGGATGCTGGGA    | 59.803 | 20 | 256 | 1709  | 1964  |
| 60.044 | 20 | AAAGCTAACCTCCCCACCTC    | 59.576 | 20 | 265 | 81    | 345   |
| 60.328 | 20 | AATCTCTATCGGCATGTGGC    | 60.066 | 20 | 217 | 3991  | 4207  |
| 59.824 | 20 | GGAAGACAAATATGGGACGG    | 59.244 | 20 | 160 | 40    | 199   |
| 59.797 | 20 | TCCATGCATTTTTATTATGTGA  | 60.199 | 23 | 279 | 292   | 570   |
| 59.871 | 20 | TTCATTGGATAACAACCGCA    | 59.93  | 20 | 274 | 443   | 716   |
| 60.124 | 20 | TGGCACCTTACCCATTTAGC    | 59.96  | 20 | 224 | 8     | 231   |
| 59.756 | 20 | TGTAGCTGGACCAAGAGGCT    | 60.012 | 20 | 280 | 3511  | 3790  |
| 59.523 | 20 | ATGTGTGCGTGTCCAAAAGA    | 60.16  | 20 | 215 | 781   | 995   |
| 59.606 | 21 | TCTACTGCCTGGAAATGCCT    | 59.836 | 20 | 278 | 1042  | 1319  |
| 59.248 | 20 | CCCTTGGTGTCTGTTATGACC   | 60.375 | 20 | 253 | 2571  | 2823  |
| 60.074 | 20 | GTCGTGGTGGTCTGATGATG    | 59.962 | 20 | 174 | 46    | 219   |
| 59.835 | 20 | ATTTGGGTAGAGGATGTGCG    | 59.955 | 20 | 173 | 0     | 172   |
| 60.11  | 20 | GGTCAAACATTGACCATATTTAC | 59.949 | 26 | 163 | 2284  | 2446  |
| 60.229 | 20 | GGTGTGGAAGGCGAATTAGA    | 60.074 | 20 | 259 | 105   | 363   |
| 59.859 | 20 | ACATGCCTCTTCCACAACCT    | 59.579 | 20 | 168 | 2330  | 2497  |
| 59.293 | 20 | TCGTGCTGCCATCAACTAAC    | 59.871 | 20 | 154 | 8     | 161   |
| 59.882 | 20 | TTCATGGGCGTTTCTTGATT    | 60.448 | 20 | 183 | 742   | 924   |
| 59.438 | 20 | TAGCTGTTTGTGCGATGACC    | 59.871 | 20 | 211 | 1637  | 1847  |
| 59.648 | 20 | TAGAAGGAGCTGATGGCGTT    | 59.978 | 20 | 229 | 226   | 454   |
| 59.903 | 20 | GACGCCATTTTCATCATACCA   | 59.355 | 20 | 231 | 1874  | 2104  |
| 59.055 | 20 | TCCCGTCATGGAAGAAAATC    | 59.871 | 20 | 152 | 34    | 185   |
| 60.349 | 20 | CCGCATTTTGTTATGCTTCC    | 60.456 | 20 | 269 | 44    | 312   |
| 59.879 | 23 | CTATGTTCCGTTTGGTTGGG    | 60.22  | 20 | 274 | 100   | 373   |
| 60.352 | 20 | CAGGCGCACAAACAGAAATA    | 59.872 | 20 | 246 | 47    | 292   |
| 59.939 | 20 | TCCGCACCTTGGTTAAAAG     | 60.103 | 20 | 218 | 4300  | 4517  |
| 59.75  | 20 | GGTTTTCATAATGAGGGCGA    | 59.901 | 20 | 242 | 1627  | 1868  |
| 60.081 | 20 | CGAGCAGACATAAAAAGGGC    | 59.845 | 20 | 224 | 432   | 655   |
| 60.123 | 20 | GTTTCTCGCAGAAGGTGGAT    | 59.288 | 20 | 245 | 223   | 467   |
| 59.7   | 20 | ACAGATTTGCCCTGTATGC     | 59.962 | 20 | 165 | 859   | 1023  |
| 59.985 | 21 | AAGCCTCAAAGCATGAAAA     | 59.823 | 20 | 265 | 30    | 294   |
| 58.962 | 23 | CTTTCATCAGCATGCCATC     | 59.399 | 20 | 131 | 0     | 130   |

|        |    |                           |        |    |     |      |      |
|--------|----|---------------------------|--------|----|-----|------|------|
| 60.073 | 20 | GGCCATCGCTAGGAAGTTTA      | 59.32  | 20 | 175 | 2637 | 2811 |
| 60.197 | 20 | AAACAAGAGCCGAAAAGGGT      | 60.11  | 20 | 251 | 1746 | 1996 |
| 59.685 | 20 | CAACAAACGTTGTCAATGGG      | 59.857 | 20 | 204 | 5382 | 5585 |
| 59.836 | 20 | ACCATATTTAAGGGTTATCACCTG  | 57.552 | 24 | 256 | 1760 | 2015 |
| 59.95  | 20 | GAGGCTGGAGCAAGAGAAGA      | 59.827 | 20 | 239 | 789  | 1027 |
| 60.014 | 20 | CACATCCCACATCCCTCTT       | 59.779 | 20 | 268 | 1229 | 1496 |
| 59.549 | 23 | CAAAAGTTGGGGAGTTCAA       | 59.942 | 20 | 226 | 69   | 294  |
| 59.467 | 21 | TTCTTGCCACTTTCTCCGAT      | 59.813 | 20 | 163 | 2369 | 2531 |
| 57.71  | 20 | GGGAACACCCTTGCTTGAGT      | 61.455 | 20 | 280 | 3478 | 3757 |
| 59.945 | 20 | TTATCCCTTCGCTTTCTCCA      | 59.778 | 20 | 159 | 2339 | 2497 |
| 58.224 | 24 | TTGCACATACACGCAGCATA      | 59.892 | 20 | 252 | 900  | 1151 |
| 60.014 | 20 | CGCAACTGAAAAACCAAACA      | 59.746 | 20 | 256 | 621  | 876  |
| 60.14  | 22 | AGTTCGGGGGAGTTAAAGA       | 59.934 | 20 | 116 | 159  | 274  |
| 59.35  | 20 | GCTGTTTTTGGGCAGTGATT      | 60.118 | 20 | 245 | 2211 | 2455 |
| 60.074 | 20 | TGCTCTGCACTCAAATCTGG      | 60.136 | 20 | 273 | 761  | 1033 |
| 60.039 | 20 | TTTACAATGCAATCGCCTCA      | 60.215 | 20 | 214 | 2709 | 2922 |
| 59.369 | 20 | AGAGAGAAAAGAATCCCCGC      | 59.789 | 20 | 173 | 9    | 181  |
| 60.025 | 20 | AACACTGAATCGCCTGGAAC      | 60.119 | 20 | 169 | 538  | 706  |
| 60.21  | 20 | CCACGATAAATGCTTCGGTT      | 59.96  | 20 | 235 | 2525 | 2759 |
| 58.56  | 20 | TCAACACCATTTATCATGTTTATCA | 58.367 | 25 | 277 | 1532 | 1808 |
| 60.119 | 20 | TCAAGGGCGTTTTTATATTTGA    | 58.675 | 22 | 268 | 189  | 456  |
| 60.008 | 20 | TCGTTTTACCTTTTGGCGAT      | 59.586 | 20 | 276 | 1961 | 2236 |
| 59.631 | 20 | AAGTACATTGAACGCCCTGC      | 60.14  | 20 | 242 | 3040 | 3281 |
| 59.566 | 20 | TGTCAGTTGCAACATTGCTT      | 57.896 | 20 | 267 | 1027 | 1293 |
| 59.89  | 20 | CACTTCAAACGTCGTCCAAA      | 59.734 | 20 | 280 | 1956 | 2235 |
| 60.022 | 20 | AATGAATCGAAAATGCTCGG      | 60.038 | 20 | 267 | 224  | 490  |
| 60.435 | 20 | GAAAGCTCCAACCACTCTGC      | 59.997 | 20 | 213 | 1689 | 1901 |
| 60.124 | 21 | AGGAATGTGGAGTTTGGTGG      | 59.82  | 20 | 253 | 726  | 978  |
| 60.011 | 20 | CCAGCGTAAGTCCAACACAA      | 59.758 | 20 | 133 | 332  | 464  |
| 59.967 | 20 | TGGGCTCTTCATCACTACCA      | 59.241 | 20 | 252 | 1331 | 1582 |
| 59.898 | 20 | GCTGCAGCAATGAATCTGAA      | 60.104 | 20 | 261 | 745  | 1005 |
| 59.927 | 20 | TTTTCCGATTTGTGTTGGTT      | 59.348 | 21 | 214 | 730  | 943  |
| 59.654 | 20 | AATCACAATAAGGCCCTCCA      | 59.387 | 20 | 198 | 827  | 1024 |
| 60.065 | 20 | GATCCCGCACAAATGAGATT      | 59.9   | 20 | 259 | 68   | 326  |
| 58.709 | 27 | CCTCGCTCTAATTTGGCTTG      | 59.975 | 20 | 194 | 20   | 213  |
| 58.559 | 20 | GCACCCTGCTTAAACCAGAC      | 59.74  | 20 | 198 | 2039 | 2236 |
| 59.93  | 21 | GCGTGTGGACTCCGTTTATT      | 60     | 20 | 146 | 579  | 724  |
| 59.556 | 20 | TGCTTGTTTGTGACTAATGCAA    | 59.415 | 22 | 107 | 3159 | 3265 |
| 59.625 | 20 | CCAAAATCCCTTCTTTGTCTTC    | 59.11  | 22 | 252 | 1729 | 1980 |
| 59.329 | 23 | TTTCAATTCCTCGATAGCAAGA    | 58.966 | 22 | 210 | 1767 | 1976 |
| 59.941 | 20 | TCGGTATGTTGACGATGGAA      | 59.924 | 20 | 225 | 208  | 432  |
| 59.988 | 20 | AACCTGCAAAAAGAAGCACAA     | 59.912 | 21 | 158 | 478  | 635  |
| 58.228 | 20 | CAAATTAGGCATCCACAACG      | 59.037 | 20 | 278 | 1341 | 1618 |
| 60.037 | 20 | ATCGTAGCCAAGAAAGCGAA      | 59.982 | 20 | 272 | 269  | 540  |
| 59.887 | 20 | CACTGGTGGTGGTAGTGGTG      | 59.907 | 20 | 241 | 340  | 580  |
| 60.096 | 20 | CTTCGAGGGCGAGTGTTAAG      | 60.008 | 20 | 191 | 407  | 597  |
| 59.61  | 20 | CTCAGCCTGTGTCGATTTCA      | 59.984 | 20 | 196 | 1364 | 1559 |
| 59.315 | 21 | TCTTTACCGCATAACACTCTACA   | 58.901 | 24 | 210 | 2135 | 2344 |
| 59.376 | 20 | TCCAAAGTTTTGTTGGTGCAG     | 59.734 | 20 | 264 | 382  | 645  |
| 60.074 | 20 | TTAGACCTCACACACCGACCT     | 59.631 | 21 | 243 | 1978 | 2220 |
| 60.004 | 20 | GCTGCTACCTTTAGTTGGTG      | 59.928 | 21 | 164 | 848  | 1011 |
| 58.93  | 20 | CTTTCGGCATTTCGTAAGGTC     | 59.708 | 20 | 200 | 7    | 206  |
| 60.232 | 20 | ATTGCTTTTGCTTAGAGGCG      | 59.63  | 20 | 280 | 3774 | 4053 |
| 60.074 | 20 | TGGACGCCCTAGATTGTTTC      | 60.074 | 20 | 180 | 21   | 200  |
| 60.135 | 20 | GTGGTTGGAGTGGGAGACAT      | 59.817 | 20 | 153 | 2004 | 2156 |
| 59.349 | 20 | CAAAACCACAAAACCTGTGACG    | 59.13  | 21 | 273 | 367  | 639  |
| 60.035 | 20 | CCGCATCCACTAAACCCTAA      | 59.953 | 20 | 250 | 440  | 689  |
| 60.096 | 22 | GGGCTTCTTTCTGGCTTTT       | 59.835 | 20 | 135 | 371  | 505  |

|        |    |                         |        |    |     |      |      |
|--------|----|-------------------------|--------|----|-----|------|------|
| 59.95  | 20 | AAGTCCACCACCCTTGTGAC    | 59.859 | 20 | 227 | 1141 | 1367 |
| 57.971 | 22 | TGCTATTCATCTCATTGCCA    | 57.8   | 20 | 229 | 1883 | 2111 |
| 59.973 | 20 | TCTTGGATTGTGCGTCAGAG    | 59.984 | 20 | 254 | 254  | 507  |
| 59.87  | 19 | TGACAGTGGAGGGAGAGAGAG   | 59.564 | 21 | 161 | 37   | 197  |
| 59.288 | 20 | CCCTATGTCAAAAGTGTGGGA   | 59.838 | 21 | 242 | 1039 | 1280 |
| 60.096 | 19 | AGAGGAGGCTCTTGGAGAGG    | 60.088 | 20 | 248 | 291  | 538  |
| 59.313 | 22 | TTAGGCCCAGACTTCGACAT    | 59.694 | 20 | 225 | 3    | 227  |
| 60.096 | 20 | GGTGAAGGTGTGGTTGCTTT    | 60.012 | 20 | 259 | 2768 | 3026 |
| 59.803 | 20 | TGTCCCAACATCTCGTCTCA    | 60.246 | 20 | 264 | 897  | 1160 |
| 59.462 | 21 | TCGACTGCCTTCAAGTAAAGC   | 59.646 | 21 | 278 | 785  | 1062 |
| 59.881 | 20 | TGATCGCTTATGCATTCCTTT   | 59.696 | 21 | 253 | 2934 | 3186 |
| 60.067 | 20 | TGGATGGTGGTAGGAGGAAG    | 59.92  | 20 | 232 | 946  | 1177 |
| 60.068 | 21 | GCTGTGTTTTGTGGCATGTT    | 59.621 | 20 | 236 | 2013 | 2248 |
| 60.134 | 20 | CATTCTGCAACACCAGCTTC    | 59.445 | 20 | 278 | 785  | 1062 |
| 59.736 | 22 | CTCGTTTTATTGCCATACA     | 59.542 | 20 | 206 | 185  | 390  |
| 60.052 | 20 | GAATGCTCTCCTTGCACACA    | 59.992 | 20 | 118 | 266  | 383  |
| 59.973 | 20 | TTGGGGGACCATTTTTGTTA    | 60.024 | 20 | 198 | 863  | 1060 |
| 59.988 | 20 | CTTCCACATTTGAGGGGAGA    | 60.042 | 20 | 202 | 1774 | 1975 |
| 60.203 | 20 | GTGCAACGGAACCTGGTCTTT   | 60.156 | 20 | 145 | 666  | 810  |
| 59.09  | 20 | TTTTGCAAACCAAGTTTCCC    | 59.953 | 20 | 152 | 4172 | 4323 |
| 59.993 | 20 | TTTTATCAATTCGGGGCTTG    | 59.901 | 20 | 194 | 192  | 385  |
| 60.074 | 20 | TGTTGGTTTGGTGAAGTTGGA   | 59.976 | 20 | 267 | 909  | 1175 |
| 60.175 | 20 | CCCTGAACAGGTATGGATAAAGG | 59.72  | 22 | 212 | 1089 | 1300 |
| 59.601 | 21 | TTTTATGCACAAGTGGCAGC    | 59.879 | 20 | 251 | 4990 | 5240 |
| 60.136 | 20 | AGGATCAAACCCAATCCACA    | 60.173 | 20 | 225 | 4172 | 4396 |
| 60.041 | 20 | GTGGACGTCCAGATTGTTT     | 59.827 | 20 | 138 | 1910 | 2047 |
| 59.94  | 20 | GCCCAAACCTACCGAATCAAA   | 59.938 | 20 | 266 | 2353 | 2618 |
| 59.632 | 20 | ACGCGTATGCATTGGTCATA    | 59.983 | 20 | 232 | 980  | 1211 |
| 59.182 | 20 | AAAAGGGCCTGAAAATCCAT    | 59.777 | 20 | 277 | 3176 | 3452 |
| 60.051 | 20 | TATTAACACAAATCCGGGGC    | 59.66  | 20 | 235 | 2252 | 2486 |
| 60.032 | 20 | ATGAGTGGCAGGGCAGATTA    | 60.624 | 20 | 279 | 2369 | 2647 |
| 59.688 | 20 | AAGTAAAGGAAGGCCGAAGG    | 59.72  | 20 | 138 | 985  | 1122 |
| 60.24  | 20 | CAGCACTGCACTTCTGAGAGTT  | 59.856 | 22 | 255 | 906  | 1160 |
| 59.924 | 20 | TTGCATCTGATGATGCCAAT    | 60.041 | 20 | 234 | 2212 | 2445 |
| 60.212 | 20 | TTTGGGAGTATGGTTGGAAA    | 57.917 | 20 | 235 | 1720 | 1954 |
| 60.177 | 20 | TTGCGGAGTTTTTCATTTTCC   | 60.053 | 20 | 168 | 1501 | 1668 |
| 59.894 | 20 | TCGGATTTCGATGCCTTATTT   | 59.507 | 20 | 252 | 170  | 421  |
| 59.903 | 20 | CCGAAAATCCCAAAGATGAA    | 59.872 | 20 | 133 | 2211 | 2343 |
| 60.713 | 20 | ATTGCATAAATGGGCCTTGA    | 60.289 | 20 | 259 | 870  | 1128 |
| 60.234 | 20 | AAAGGGAATGAAGCAGCAAA    | 59.823 | 20 | 230 | 1380 | 1609 |
| 59.844 | 20 | TCTGCAAATCCAGGAAACC     | 60.051 | 20 | 185 | 1868 | 2052 |
| 59.83  | 20 | TGATGGCATTCTTCTGGTTG    | 59.518 | 20 | 212 | 1092 | 1303 |
| 60.081 | 20 | CACCTCGAGATGGTAGGCAT    | 60.096 | 20 | 212 | 539  | 750  |
| 59.995 | 20 | GCAAGCCATCAGATTCCAGT    | 60.226 | 20 | 215 | 258  | 472  |
| 59.985 | 21 | ATCTGGAGCTGGTGAAGCAT    | 59.834 | 20 | 259 | 3812 | 4070 |
| 59.989 | 20 | GCTGGAGCCATTGAGAAAAA    | 60.331 | 20 | 222 | 1217 | 1438 |
| 59.337 | 23 | CGAGGCTATTCTTTTTGCCA    | 60.335 | 20 | 223 | 61   | 283  |
| 60.299 | 20 | TTTTCCCCACCAACAATCAT    | 60.029 | 20 | 273 | 1658 | 1930 |
| 59.972 | 20 | ATGTATGGGCCCTTAATCCC    | 59.873 | 20 | 227 | 131  | 357  |
| 59.939 | 20 | TTGCCAGTGCATTTTCATTC    | 59.67  | 20 | 155 | 484  | 638  |
| 59.973 | 20 | TCTTGTGGCTGTACTCCGTT    | 58.37  | 20 | 276 | 1252 | 1527 |
| 60.232 | 20 | GATGCACTTAGTGGTGCCAG    | 59.318 | 20 | 275 | 730  | 1004 |
| 60.111 | 20 | ATTTTGGGAGTAATGGGGCT    | 59.666 | 20 | 135 | 360  | 494  |
| 60.854 | 20 | CAAGAACCAGGGGATGACTAA   | 59.926 | 20 | 211 | 579  | 789  |
| 60.038 | 20 | TGCATGTGTATAATAACAACCGC | 59.808 | 23 | 162 | 8535 | 8696 |
| 59.284 | 20 | TATTGACCCACTTGTCTCCG    | 58.569 | 20 | 239 | 869  | 1107 |
| 59.992 | 20 | AGGTTTTGGGTTTAATGGGC    | 60.055 | 20 | 244 | 314  | 557  |
| 59.962 | 20 | CACAAGTACCCCTTTGCCAT    | 59.853 | 20 | 256 | 3171 | 3426 |

|        |    |                           |        |    |     |      |      |
|--------|----|---------------------------|--------|----|-----|------|------|
| 59.583 | 21 | GGGTCCTGTTGATCTTTTGC      | 59.532 | 20 | 280 | 219  | 498  |
| 59.965 | 23 | TGAATTGAAAGCTGAATCATGTG   | 60.124 | 23 | 238 | 22   | 259  |
| 59.933 | 20 | ATAGCGTCCACTCCACCAAC      | 59.997 | 20 | 171 | 1828 | 1998 |
| 59.679 | 20 | GGAAAATCTATTGCAGGTGCTC    | 60.102 | 22 | 278 | 1881 | 2158 |
| 60.28  | 22 | TTTTCTTCTCTTTGCAGCC       | 59.569 | 20 | 207 | 397  | 603  |
| 59.927 | 20 | GGGGTAAAAGGGTGGTGT        | 59.955 | 20 | 280 | 1264 | 1543 |
| 57.222 | 23 | TGTCGTCTGACATTGCCTACA     | 60.317 | 21 | 144 | 13   | 156  |
| 59.995 | 20 | ATTCTCAACACCCACAAGCC      | 59.973 | 20 | 219 | 520  | 738  |
| 60.05  | 20 | CCACCATTGCTAATCGTCTCT     | 59.955 | 20 | 137 | 3444 | 3580 |
| 59.679 | 20 | TTGCAGTTTTAGGCATATCGAA    | 59.753 | 22 | 246 | 104  | 349  |
| 59.799 | 22 | ATGCATGCAGCAAGTTGTTC      | 59.878 | 20 | 212 | 938  | 1149 |
| 60.732 | 20 | CAATGCAAGGGCTTAAAAGG      | 59.715 | 20 | 228 | 846  | 1073 |
| 59.94  | 20 | AGAACAAACGACTTCCACCAA     | 59.624 | 21 | 227 | 2489 | 2715 |
| 59.934 | 20 | CTTTCTGATGGGTGCCCTAA      | 60.066 | 20 | 233 | 587  | 819  |
| 60.038 | 20 | GAAGGCTGGTAACCCATCAA      | 59.933 | 20 | 213 | 205  | 417  |
| 60.945 | 20 | GGGGGTGTTTTAGAGCATCA      | 59.933 | 20 | 234 | 255  | 488  |
| 60.54  | 20 | ACACATCGTCCCTTAATCGC      | 59.962 | 20 | 214 | 741  | 954  |
| 60.185 | 20 | CCTACAATGCCACACCTCCT      | 59.989 | 20 | 198 | 72   | 269  |
| 60.351 | 22 | TTGTGGTGTGGAAGATCTGG      | 59.52  | 20 | 212 | 1173 | 1384 |
| 60.006 | 20 | ATTCCCTTTTGTCCCTTTCG      | 60.291 | 20 | 278 | 938  | 1215 |
| 60.009 | 20 | ATTCAATCTGCACCTCCTGG      | 60.073 | 20 | 192 | 129  | 320  |
| 60.015 | 20 | GGGTGGCTGTAATTGCTCAT      | 59.962 | 20 | 135 | 1036 | 1170 |
| 60.111 | 20 | ATCGTGGATACGTTGAAGGC      | 59.962 | 20 | 234 | 46   | 279  |
| 60.743 | 20 | CAAAAAGCGCTACAAGCACA      | 60.191 | 20 | 236 | 715  | 950  |
| 59.947 | 21 | ATTGCGCTCAAAGATATGGC      | 60.203 | 20 | 205 | 2196 | 2400 |
| 60.007 | 20 | CCAAAATTACATGGTTCGGTG     | 60.096 | 21 | 276 | 1483 | 1758 |
| 59.836 | 20 | TCTGGTAACCGAATTGCCTC      | 60.074 | 20 | 179 | 1085 | 1263 |
| 59.82  | 20 | TCAGGTTTATCAACATCATTTATC/ | 60.138 | 27 | 202 | 14   | 215  |
| 59.943 | 20 | GGATCTTTTGTGCTGGGAA       | 60.051 | 20 | 224 | 1565 | 1788 |
| 59.872 | 20 | AATGAAGGAAAAGGGCCATC      | 60.265 | 20 | 201 | 1950 | 2150 |
| 60.133 | 20 | TGAAGTTAGGAAATAAGGAGGTG   | 58.743 | 25 | 279 | 3047 | 3325 |
| 58.671 | 20 | TGAAGTGCTGACAAGGCATC      | 59.992 | 20 | 268 | 2380 | 2647 |
| 58.943 | 25 | CCACTTTTTGTTTTGGAGCAA     | 60.131 | 21 | 237 | 367  | 603  |
| 59.955 | 20 | CCCAACCTATTCTCACCCCT      | 60.183 | 20 | 135 | 1903 | 2037 |
| 60.744 | 20 | GATTGGTCCAGCAGGTTTGT      | 59.973 | 20 | 232 | 638  | 869  |
| 59.93  | 20 | TGCATCTCCTCCACCTATCC      | 60.034 | 20 | 171 | 434  | 604  |
| 60.088 | 20 | GCACAGCATGTGGAGTGAAG      | 60.473 | 20 | 237 | 1418 | 1654 |
| 59.131 | 24 | TTGTTGCGCAATGAAGACTC      | 59.995 | 20 | 251 | 17   | 267  |
| 60.016 | 20 | CATCATTCCCCTCCTTGA        | 60.003 | 20 | 221 | 432  | 652  |
| 60.298 | 20 | CATCCGTCCATTTCCAAGAT      | 59.75  | 20 | 249 | 2118 | 2366 |
| 60.205 | 20 | TTGGGATCTTGCATGAACAA      | 60.049 | 20 | 238 | 487  | 724  |
| 59.61  | 20 | AGCCATCATCCAACCACAAT      | 60.203 | 20 | 207 | 1039 | 1245 |
| 59.763 | 20 | GGTCAAATTGGGGATGAATG      | 59.991 | 20 | 139 | 1116 | 1254 |
| 60.042 | 20 | AACCCTTGATGTGGAGCTTG      | 60.111 | 20 | 238 | 1477 | 1714 |
| 60.111 | 20 | CCGCAAAAATCCTTCACAAT      | 59.938 | 20 | 226 | 3735 | 3960 |
| 60.088 | 20 | TATCCCCCTCTGGAGCTCTT      | 60.169 | 20 | 223 | 538  | 760  |
| 60.11  | 20 | TGCCTTTCCATGAACAAAAA      | 59.133 | 20 | 253 | 1565 | 1817 |
| 59.537 | 21 | TCAATATTGGGCAGAGGGAG      | 60.029 | 20 | 204 | 1828 | 2031 |
| 59.664 | 20 | GTTTTGAGGCTGCTCTGAAC      | 59.997 | 20 | 274 | 322  | 595  |
| 60.134 | 20 | AACAAGAAGGCCGGAAGAAC      | 60.61  | 20 | 179 | 380  | 558  |
| 59.778 | 20 | GGCGTGACACTTTTTCGATT      | 60.118 | 20 | 280 | 3602 | 3881 |
| 60.015 | 20 | ATTATCATTTCACCGCCAC       | 59.651 | 20 | 280 | 2625 | 2904 |
| 59.429 | 20 | TATAAATTTTGGCGCCGTTG      | 60.797 | 20 | 243 | 1152 | 1394 |
| 59.409 | 20 | ACCCAAACATTTATCCCCA       | 58.995 | 20 | 224 | 2376 | 2599 |
| 60.096 | 20 | CGAACAAAGCACACATGAGG      | 60.301 | 20 | 219 | 5550 | 5768 |
| 59.918 | 21 | TGTGTGCTGGATCATCTTCA      | 58.728 | 20 | 280 | 372  | 651  |
| 59.981 | 20 | CCGAATTTCTCCCAACTCAA      | 60.044 | 20 | 214 | 4541 | 4754 |
| 59.82  | 20 | TCCACATCTTTGGGATAGGG      | 59.744 | 20 | 241 | 141  | 381  |



|        |    |                          |        |    |     |      |      |
|--------|----|--------------------------|--------|----|-----|------|------|
| 60.06  | 20 | CCGGAGAGAAAAAGACACGA     | 60.366 | 20 | 250 | 1971 | 2220 |
| 59.988 | 20 | CGCTATGTACACGGTGTTC      | 60.203 | 20 | 236 | 1012 | 1247 |
| 60.594 | 20 | GTTTGCTTTGGGGTTGTGT      | 59.875 | 20 | 277 | 1330 | 1606 |
| 62.966 | 18 | GGTGCAGAATTCGAGGAGAG     | 59.95  | 20 | 192 | 9    | 200  |
| 61.016 | 20 | TCATACTCTGGCTGCTCGAA     | 59.697 | 20 | 272 | 2202 | 2473 |
| 59.955 | 20 | TTTGTGCATGCTTCAGTCTTG    | 60.042 | 21 | 209 | 2892 | 3100 |
| 59.948 | 20 | AGAAGCCCATATGGCATGAG     | 60.059 | 20 | 234 | 463  | 696  |
| 60.184 | 20 | TAGTGCATCCTGCCTGTTTG     | 59.864 | 20 | 229 | 1502 | 1730 |
| 60.294 | 20 | AAGTGAATCTTGGTGGCTTCA    | 59.726 | 21 | 155 | 40   | 194  |
| 60.165 | 20 | AAGGGAAATTCAGGGAAAA      | 59.75  | 20 | 274 | 362  | 635  |
| 59.994 | 20 | AATCACAGAATAAACGCCCG     | 59.96  | 20 | 254 | 3643 | 3896 |
| 59.622 | 20 | AGAGGCTCGTGTCTTTCCA      | 59.989 | 20 | 209 | 646  | 854  |
| 60.307 | 20 | AGTTGTCGGAATGGAGATGC     | 60.081 | 20 | 182 | 108  | 289  |
| 59.992 | 20 | AAGGACCTCAGCCTGCAGTA     | 60.012 | 20 | 189 | 2349 | 2537 |
| 60.081 | 20 | ACATATGGTGGTATGGTGCG     | 59.152 | 20 | 134 | 176  | 309  |
| 59.605 | 25 | TGCTTGATAGTGGGCATGTT     | 59.152 | 20 | 183 | 16   | 198  |
| 60.034 | 20 | GCTGCATCCCGATATGGTAG     | 60.457 | 20 | 223 | 2196 | 2418 |
| 59.727 | 20 | CGCATTGCACGTAGCTGTAT     | 59.925 | 20 | 248 | 1029 | 1276 |
| 59.933 | 20 | GAGGAGGTGTAGATCTGGCG     | 59.827 | 20 | 270 | 550  | 819  |
| 60.11  | 20 | TTCGACTTTTCAAGTTATTTTCAG | 59.74  | 26 | 275 | 72   | 346  |
| 59.155 | 21 | ACCAATACGTTTCGCTTACC     | 60     | 20 | 279 | 403  | 681  |
| 60.187 | 20 | TTTGGATGTTTACTATGGGGTG   | 58.74  | 22 | 251 | 1183 | 1433 |
| 60.999 | 20 | AGCAACCTCAAACCACAAGG     | 60.149 | 20 | 182 | 3    | 184  |
| 60.232 | 20 | TGCTGGATTCATAACACGGA     | 60.073 | 20 | 170 | 2271 | 2440 |
| 59.335 | 25 | GACTCAGACCCTGAGCTTCG     | 60.135 | 20 | 164 | 21   | 184  |
| 60.134 | 20 | TGCCATCAAATGCAAGTTTC     | 59.67  | 20 | 245 | 1159 | 1403 |
| 60.22  | 20 | TATTGTTGCTGCTGATCCCC     | 61.003 | 20 | 239 | 759  | 997  |
| 60.051 | 20 | CCCATCAGACCAGTTGACAC     | 58.94  | 20 | 158 | 993  | 1150 |
| 60.224 | 20 | GGAAACCCTGAAGAAACGAA     | 59.146 | 20 | 195 | 1904 | 2098 |
| 60.057 | 20 | ATTCAATCTCTGGGCTGTGG     | 60.073 | 20 | 225 | 5423 | 5647 |
| 60.199 | 20 | CGCCCGAGTAATATTTTCCA     | 59.922 | 20 | 263 | 2375 | 2637 |
| 59.995 | 20 | CTTCTCTCACATCCATCGCA     | 59.942 | 20 | 181 | 1199 | 1379 |
| 60.025 | 20 | CGATACCAGCAGAACCCATT     | 59.955 | 20 | 127 | 1211 | 1337 |
| 59.967 | 20 | TCCCATTTCTCCAAATTCA      | 60.244 | 20 | 171 | 3682 | 3852 |
| 60.03  | 20 | GCAACACTAGGCAACAGCAA     | 60.058 | 20 | 188 | 1756 | 1943 |
| 59.673 | 20 | TTGAGCTCATGTCAGCTGGT     | 59.577 | 20 | 259 | 441  | 699  |
| 59.96  | 20 | GCCTGCTCAACCTCAATTCT     | 59.434 | 20 | 150 | 2936 | 3085 |
| 59.037 | 20 | TCAAACCTGGTGTGTGGCT      | 60.203 | 20 | 277 | 9341 | 9617 |
| 60.405 | 20 | TGCATGTGGTGATTGGTAGA     | 58.486 | 20 | 259 | 1353 | 1611 |
| 60.255 | 20 | CCTCTGCTTTTTAGAGAGAGGGA  | 60.482 | 23 | 129 | 4109 | 4237 |
| 59.889 | 20 | CTTCTCATCCTGCGAACTCC     | 59.95  | 20 | 256 | 633  | 888  |
| 60.209 | 20 | GAACGCCGTTATGTTTCCTC     | 59.574 | 20 | 272 | 3394 | 3665 |
| 59.805 | 20 | ATGTCCTTTTGCTTATGCCG     | 60.096 | 20 | 216 | 1734 | 1949 |
| 59.984 | 20 | TTCTAGCTCTCCCCCTCTC      | 59.912 | 20 | 271 | 2194 | 2464 |
| 60.081 | 20 | TCTAACACGCAGCATCAAGG     | 60.011 | 20 | 236 | 2543 | 2778 |
| 59.982 | 20 | TTGCCTTTATTTCTTGGCAGA    | 59.84  | 21 | 227 | 1126 | 1352 |
| 59.831 | 20 | AATGCAGAGCAGCCAAGAAT     | 59.985 | 20 | 127 | 844  | 970  |
| 59.904 | 22 | CGAGGCATATCATGTTTCGGT    | 60.884 | 20 | 198 | 2234 | 2431 |
| 59.845 | 20 | TGCTACCTCGCATTGTTGAG     | 60.011 | 20 | 275 | 289  | 563  |
| 60.181 | 20 | CCCATCACCAAACAAAACCT     | 59.688 | 20 | 264 | 2588 | 2851 |
| 59.859 | 20 | TGCAATCGACGGAAACAATA     | 60.073 | 20 | 191 | 1222 | 1412 |
| 60.183 | 20 | GAAGTGCAGCATGAATTTGC     | 59.43  | 20 | 190 | 2802 | 2991 |
| 59.966 | 20 | GCTCGAAAGCACCAGTAAGG     | 60.015 | 20 | 231 | 1278 | 1508 |
| 60.315 | 20 | GATTCAAATCCCGATGGAAA     | 59.699 | 20 | 191 | 1355 | 1545 |
| 60.08  | 20 | AAATTTACCCACCCACTTG      | 59.688 | 20 | 114 | 2236 | 2349 |
| 60.148 | 20 | GCATACGGCTCACTCTACGG     | 60.817 | 20 | 259 | 940  | 1198 |
| 60.096 | 20 | CCCATTCCAACCATAGCAGT     | 59.813 | 20 | 223 | 3964 | 4186 |
| 60.103 | 20 | TGGCATTACGCATTACCACA     | 60.926 | 20 | 169 | 72   | 240  |

|        |    |                        |        |    |     |      |      |
|--------|----|------------------------|--------|----|-----|------|------|
| 59.916 | 20 | CAAGAAACCTTGGCACGAAT   | 60.11  | 20 | 209 | 3292 | 3500 |
| 60.095 | 20 | TTTGTTCGTGTTCCAAAGGA   | 59.145 | 20 | 278 | 4002 | 4279 |
| 60.05  | 20 | TGTTTGGTTTGTGAATTGGG   | 59.268 | 20 | 234 | 73   | 306  |
| 60.159 | 20 | TGAGCTGTGTTTAGGGCTGA   | 59.591 | 20 | 104 | 1837 | 1940 |
| 59.009 | 20 | AAAAGGTGACGAGGGTGATG   | 59.966 | 20 | 279 | 3302 | 3580 |
| 59.485 | 20 | CCCAATAACACCAATATCCG   | 59.065 | 21 | 132 | 2780 | 2911 |
| 59.04  | 20 | CCATAGCCAAGCACAAACATC  | 59.152 | 20 | 203 | 3636 | 3838 |
| 57.466 | 20 | GCAGTTGGAGTTGCTTTTGG   | 60.807 | 20 | 224 | 1310 | 1533 |
| 60.032 | 20 | TCTGTGGGACCAACTTCCTT   | 59.549 | 20 | 193 | 5445 | 5637 |
| 60.11  | 20 | ACACCCATTTCAAGCAGACC   | 59.973 | 20 | 252 | 534  | 785  |
| 59.67  | 20 | GGTTTATTCAACTGCAAAGCA  | 59.298 | 22 | 264 | 2151 | 2414 |
| 60.111 | 20 | CACCCACCTTTTTGTCTGTG   | 59.985 | 19 | 273 | 3800 | 4072 |
| 59.837 | 20 | GCATATTTAAAGAAGGCCAAGC | 59.301 | 22 | 221 | 3401 | 3621 |
| 59.603 | 20 | GCGTTGTCTTGTGTGGTGAT   | 59.603 | 20 | 110 | 24   | 133  |
| 60.195 | 20 | TGACGGGATTTAGGTGTTTTG  | 59.847 | 21 | 263 | 2627 | 2889 |
| 60.088 | 20 | AGCATTA AAAAGGCCATCCA  | 59.547 | 20 | 195 | 2558 | 2752 |
| 60.006 | 20 | CACCATTGATGCAGGTGAAG   | 60.112 | 20 | 212 | 3167 | 3378 |
| 59.973 | 20 | TGTGCAAATGCTACAGGTGA   | 60.309 | 21 | 224 | 4634 | 4857 |
| 60.12  | 20 | TAGCCGTGGTTTGTCAAGTG   | 59.758 | 20 | 250 | 1229 | 1478 |
| 60.081 | 20 | CATCATCGACTCGTCCCTTT   | 60.073 | 20 | 222 | 1324 | 1545 |
| 59.615 | 20 | CCAACAGTTGAATATGCCTACG | 59.536 | 22 | 261 | 710  | 970  |
| 59.964 | 20 | CGGGAGATGGTTGTTTGAGA   | 61.034 | 20 | 232 | 3102 | 3333 |
| 58.961 | 21 | CTGAAGCAGAAGCCCATCTC   | 60.096 | 20 | 256 | 2107 | 2362 |
| 61.119 | 20 | GAAC TTTGGTCGATCGTCGT  | 60.119 | 20 | 280 | 1289 | 1568 |
| 60.263 | 20 | AGCACACCAATCCGAAAATC   | 59.939 | 20 | 272 | 3888 | 4159 |
| 59.938 | 20 | CAAGAACAATAATCGGTGCAGA | 60.131 | 22 | 225 | 2534 | 2758 |
| 59.585 | 20 | CGCTTTGGTGCATCATCTATT  | 60.11  | 21 | 238 | 523  | 760  |
| 59.574 | 20 | TTGGAGAAAATTTTGTGGGC   | 59.916 | 20 | 179 | 1630 | 1808 |
| 60.147 | 20 | ATTCTCCGAATCCAGCACAC   | 60.081 | 20 | 260 | 1373 | 1632 |
| 61.155 | 20 | GGAATCGGAACCCTTTTAGC   | 59.909 | 20 | 277 | 2519 | 2795 |
| 59.82  | 20 | ATCTCAGGAACATTGCACCC   | 59.934 | 20 | 240 | 4974 | 5213 |
| 59.988 | 20 | CAATCATGGACTTCACGTCG   | 60.112 | 20 | 280 | 3252 | 3531 |
| 59.894 | 20 | GGAAAATGGGTGATGAGTGG   | 60.173 | 20 | 197 | 2032 | 2228 |
| 59.685 | 24 | TGTTTCAATCGTTCCTTTTCA  | 59.603 | 22 | 109 | 1620 | 1728 |
| 59.985 | 20 | CCCAAGCTGGTGGTTATGAT   | 59.813 | 20 | 196 | 2791 | 2986 |
| 59.97  | 20 | AAGACTCGTGTCCAACATTCA  | 59.639 | 22 | 275 | 397  | 671  |
| 58.726 | 20 | GGACCATTCACTGGCATTTC   | 60.326 | 20 | 218 | 3222 | 3439 |
| 60.127 | 20 | TTCCAAAAGCTGCTCGAAAT   | 59.96  | 20 | 231 | 772  | 1002 |
| 59.706 | 21 | GGCTAGCTGAAGGATTTCCA   | 59.41  | 20 | 258 | 2928 | 3185 |
| 60.073 | 20 | GTTGCCTCTCTATCCGCAA    | 60.352 | 20 | 275 | 21   | 295  |
| 60.049 | 20 | CGTTGGCCCGATATTTAGAG   | 59.564 | 20 | 229 | 1186 | 1414 |
| 59.945 | 20 | AACAGAGACGGAGGTGGATG   | 60.112 | 20 | 227 | 177  | 403  |
| 59.997 | 20 | GCTGCTGCTGTCTAAATCCA   | 59.178 | 20 | 257 | 18   | 274  |
| 59.247 | 20 | TGAAGATGGCACCTTGAGTG   | 59.831 | 20 | 237 | 804  | 1040 |
| 59.828 | 21 | TCGTGCATCACATAGAATGGA  | 60.088 | 21 | 210 | 1162 | 1371 |
| 59.946 | 20 | TTTTCTTCTCCGTCAACGCT   | 59.993 | 20 | 275 | 103  | 377  |
| 60.051 | 20 | CGCACTGACACCATCAAACCT  | 59.751 | 20 | 235 | 696  | 930  |
| 59.795 | 20 | CTCCAAAGCTCGACAGATCC   | 59.95  | 20 | 264 | 1772 | 2035 |
| 60.096 | 20 | CACCGATCCAGGTCATCTCT   | 60.072 | 20 | 260 | 142  | 401  |
| 60.045 | 20 | GGTGAAACCCAAACGTAGA    | 59.83  | 20 | 164 | 2635 | 2798 |
| 59.679 | 20 | TGCGTAAATATTGGCATGCTT  | 60.478 | 21 | 252 | 4262 | 4513 |
| 59.445 | 20 | TGTGTGTTGACCATGTATCGG  | 60.294 | 21 | 278 | 18   | 295  |
| 59.934 | 20 | GAATTCGTGTTTGGTGGCTT   | 59.978 | 20 | 247 | 1297 | 1543 |
| 59.542 | 20 | TGCGTTTCTGCGTTTTATG    | 59.88  | 20 | 258 | 2631 | 2888 |
| 59.961 | 25 | CATTCACGGAAAACCTGCACA  | 60.699 | 20 | 239 | 1285 | 1523 |
| 59.727 | 25 | ATGAGCTCGGTTCGAAATTG   | 60.214 | 20 | 249 | 1377 | 1625 |
| 60.032 | 27 | ATCTTGGCAATCCAAAGCTG   | 60.214 | 20 | 138 | 2    | 139  |
| 59.621 | 20 | TTAATCTTCGTCTTCGGCGT   | 59.845 | 20 | 277 | 715  | 991  |

|        |    |                          |        |    |     |      |      |
|--------|----|--------------------------|--------|----|-----|------|------|
| 59.849 | 20 | GGCTGTATGGGCTTGGACTA     | 60.096 | 20 | 124 | 3902 | 4025 |
| 60.3   | 20 | CTCTGTTATTTGCCTTGCCC     | 59.708 | 20 | 271 | 2108 | 2378 |
| 60.199 | 20 | ATGAATTCGCTGGAAACAG      | 60.074 | 20 | 268 | 2556 | 2823 |
| 59.901 | 20 | GATGATTTATCACCGAATCGC    | 59.387 | 21 | 103 | 4112 | 4214 |
| 59.801 | 20 | CCACCATGATTTGACACAC      | 59.812 | 20 | 166 | 5815 | 5980 |
| 59.848 | 20 | AAAATCATTGGAATCAGCCG     | 59.901 | 20 | 144 | 6076 | 6219 |
| 59.449 | 20 | CCTCGATGTTTAAAACCAGA     | 60.096 | 21 | 199 | 38   | 236  |
| 59.691 | 20 | GTGCATGTGTGTGTGTGGAA     | 60.053 | 20 | 237 | 552  | 788  |
| 59.779 | 20 | GCAACATGCTGATGGTGGTA     | 60.549 | 20 | 168 | 1124 | 1291 |
| 59.94  | 20 | ACGATCATCACATGAACCGA     | 59.925 | 20 | 160 | 2269 | 2428 |
| 60.103 | 20 | CGAAACGATTAGTTGAATGTGC   | 59.652 | 22 | 236 | 1957 | 2192 |
| 59.055 | 20 | CGGAACACAATTCGACAGAA     | 59.691 | 20 | 128 | 21   | 148  |
| 59.301 | 20 | CTGCTGCATTTGTTAAGCCA     | 60.014 | 20 | 193 | 6951 | 7143 |
| 60.073 | 20 | CTGGGGTGCAAGAGATTCAT     | 60.073 | 20 | 264 | 2230 | 2493 |
| 60.439 | 20 | TTTGTGCAATTTTCATCTCCC    | 59.93  | 21 | 102 | 1922 | 2023 |
| 59.735 | 20 | TTCTCACCCAAAATGGTGT      | 60.21  | 20 | 248 | 1798 | 2045 |
| 59.844 | 20 | CACCTCGAAGGTACCACCAT     | 59.844 | 20 | 219 | 1233 | 1451 |
| 59.052 | 22 | CTGAATTTGTGGTGGCAGTG     | 60.152 | 20 | 176 | 479  | 654  |
| 59.967 | 20 | AGGTTCTCACTCTCTCTCAGCC   | 59.249 | 22 | 257 | 785  | 1041 |
| 59.622 | 20 | GCATCGCCCTGTAAAGAAGA     | 60.352 | 20 | 254 | 2661 | 2914 |
| 59.962 | 20 | CCACCCACTCTCCCCTTAAC     | 60.736 | 20 | 219 | 985  | 1203 |
| 60.019 | 23 | GATTGGCCACTGGTGCTTAT     | 59.962 | 20 | 203 | 711  | 913  |
| 59.984 | 20 | GAGGCAAACACCCAATTGAT     | 59.797 | 20 | 232 | 1215 | 1446 |
| 60.974 | 21 | TCAAAACAAATGCTGTGGGT     | 59.024 | 20 | 265 | 1741 | 2005 |
| 59.954 | 20 | TGTGACCAATATCACAGATTCCG  | 58.502 | 22 | 277 | 9    | 285  |
| 59.962 | 20 | CTGCATAGCTGATATGTCCCA    | 58.761 | 21 | 153 | 1763 | 1915 |
| 59.333 | 20 | TCGGAAGGCAAGATCACTAGA    | 59.963 | 21 | 279 | 594  | 872  |
| 59.478 | 20 | CTGACAATTTCCAGCAGCAG     | 59.591 | 20 | 267 | 2532 | 2798 |
| 60.096 | 20 | CTGATTCACCTTCTTGCGGT     | 60.255 | 20 | 196 | 330  | 525  |
| 59.845 | 20 | GGAAACCTTGCAAATGCTGT     | 60.118 | 20 | 262 | 2972 | 3233 |
| 60.64  | 21 | GGAATGAATGGAGCGTGAGT     | 60.081 | 20 | 238 | 5322 | 5559 |
| 59.937 | 20 | TATATCTCCACGGACCACCC     | 59.629 | 20 | 264 | 718  | 981  |
| 59.851 | 20 | CCAGTCCTGTGAAAATGGT      | 59.966 | 20 | 137 | 643  | 779  |
| 58.201 | 20 | AGCTGCTGACTGCCAGTTTT     | 60.201 | 20 | 230 | 9045 | 9274 |
| 59.864 | 20 | CTTCGCTTTTCGCGATTTTA     | 60.456 | 20 | 226 | 7849 | 8074 |
| 59.722 | 22 | TGTCCAAAATTGTTGTCGCT     | 59.174 | 20 | 279 | 912  | 1190 |
| 60.151 | 20 | ACTCGGCCTAGTTCGTTGAA     | 59.875 | 20 | 245 | 382  | 626  |
| 59.782 | 21 | ATTACCTCTCCTGCCCCAGT     | 59.957 | 20 | 247 | 2562 | 2808 |
| 60.031 | 20 | GATCCCTTCTTTCTCAGCGA     | 59.508 | 20 | 142 | 2081 | 2222 |
| 59.96  | 22 | GGCTTCAGTTGGCAGGTATC     | 59.7   | 20 | 240 | 1403 | 1642 |
| 60.339 | 20 | CAAGCATGAAAACAACCGTG     | 60.149 | 20 | 147 | 335  | 481  |
| 59.962 | 20 | TGCTGTACTTGCATTGGAGG     | 59.864 | 20 | 255 | 641  | 895  |
| 58.743 | 25 | CGGTATGGTGTTCGTACCGAT    | 60.657 | 20 | 199 | 7    | 205  |
| 60.053 | 21 | TTGCACAAAACAGTTCACCC     | 59.591 | 20 | 270 | 7392 | 7661 |
| 59.347 | 20 | TTTCACCCACAAAATCATCA     | 57.35  | 20 | 279 | 2078 | 2356 |
| 59.629 | 21 | TTCTCTAATTCACCACCGCC     | 60.074 | 20 | 258 | 292  | 549  |
| 60.103 | 20 | TCCTGGATCACATTGGAACA     | 59.893 | 20 | 257 | 1979 | 2235 |
| 59.028 | 20 | TGTTGTTGGTGGAACTTGGA     | 59.976 | 20 | 270 | 2194 | 2463 |
| 60     | 20 | TGAGAAAACAAAAGTGGCCC     | 60.088 | 20 | 232 | 231  | 462  |
| 59.762 | 20 | AGAGTCGGAAGGCATATGTGA    | 59.708 | 21 | 101 | 274  | 374  |
| 60.264 | 20 | TGGGGAATGACTCACCCTA      | 58.93  | 20 | 211 | 4456 | 4666 |
| 59.912 | 20 | GATTCGAGTTTTGCTTCCCA     | 60.192 | 20 | 182 | 2288 | 2469 |
| 60.111 | 20 | CTTTGATTTCTCTCCGCACC     | 59.813 | 20 | 139 | 88   | 226  |
| 59.971 | 20 | TTGACAATATTTAGTGTTTTGACA | 58.99  | 27 | 146 | 4685 | 4830 |
| 60.418 | 20 | TGGGAATAGCGATTTTCTTT     | 59.922 | 21 | 191 | 3254 | 3444 |
| 60.132 | 20 | CACGCACACACAAATTCACA     | 60.204 | 20 | 193 | 1370 | 1562 |
| 59.971 | 20 | ATCTGAAAAAACTCGCGCT      | 60.022 | 20 | 186 | 5080 | 5265 |
| 58.926 | 24 | GTTGAAAAATCTGGCCTCA      | 60.051 | 20 | 172 | 38   | 209  |

|        |    |                          |        |    |     |      |      |
|--------|----|--------------------------|--------|----|-----|------|------|
| 60.245 | 20 | CCGGAAAAGAAAACCCACTT     | 60.324 | 20 | 225 | 281  | 505  |
| 59.724 | 24 | TTGTTAGCGAATTTTTGGTGG    | 59.986 | 21 | 266 | 166  | 431  |
| 59.864 | 20 | TCAGGTTGGCTCCATTTTTTC    | 60.051 | 20 | 167 | 1026 | 1192 |
| 59.938 | 20 | ACACCCGATTCGAGTAGCTG     | 60.277 | 20 | 273 | 2900 | 3172 |
| 59.009 | 23 | AGCGCCACCTCAAAGTAAA      | 59.883 | 20 | 204 | 1    | 204  |
| 60.103 | 20 | TCCTCCTCCCTTCTTCAAT      | 60.008 | 20 | 237 | 2253 | 2489 |
| 60.832 | 19 | TTCCCAGCGGATAAAAATTG     | 59.901 | 20 | 241 | 20   | 260  |
| 59.986 | 20 | AGATAAGGGTGCGATGTTCCG    | 60.096 | 20 | 278 | 6770 | 7047 |
| 60.011 | 20 | GGAATGTAGGGAACCGGAAT     | 60.017 | 20 | 251 | 3140 | 3390 |
| 59.894 | 20 | ATTTTCTCCACGCTTTTTGC     | 59.343 | 20 | 276 | 1156 | 1431 |
| 59.316 | 20 | CAACAAAAATCAAGCCATGC     | 59.161 | 20 | 264 | 2364 | 2627 |
| 59.984 | 20 | CCTTCTTCCACTGCTTTTTGC    | 59.993 | 20 | 243 | 14   | 256  |
| 60.165 | 20 | ACCTCAAACCCTTCTGCGTA     | 59.734 | 20 | 224 | 1753 | 1976 |
| 59.995 | 20 | GAAGCCGAGAAACAAAGACG     | 59.993 | 20 | 273 | 1642 | 1914 |
| 59.807 | 20 | TAGTTAAACACCCCACCCCA     | 60.081 | 20 | 165 | 2372 | 2536 |
| 59.939 | 20 | GCTTCAAACCTGGCTCTCGAT    | 59.579 | 20 | 121 | 3686 | 3806 |
| 59.64  | 20 | TCGGGTCTGCTCAAGTTTCT     | 59.989 | 20 | 237 | 162  | 398  |
| 59.933 | 20 | AATCGCCATGATTCTCCAAC     | 59.9   | 20 | 262 | 2083 | 2344 |
| 60.332 | 22 | TGAATTTGCCTTTGTACATTTTG  | 59.076 | 23 | 262 | 558  | 819  |
| 59.988 | 20 | GAATAGCCCAAGACGAGTGC     | 59.843 | 20 | 191 | 1704 | 1894 |
| 59.801 | 20 | CAATTCGAAAGTGA CTGCA     | 59.988 | 20 | 128 | 854  | 981  |
| 59.647 | 20 | TGGGGTGATATAAGATGATGCT   | 58.419 | 22 | 243 | 58   | 300  |
| 59.925 | 20 | CGAGAGGTGGGAAAAGTGAA     | 60.224 | 20 | 214 | 594  | 807  |
| 59.724 | 23 | TTTGGTTCATGTAGCCGACC     | 60.894 | 20 | 123 | 271  | 393  |
| 59.993 | 20 | CAATATGGGAACTTCGCGTT     | 59.96  | 20 | 210 | 210  | 419  |
| 59.963 | 20 | ATCTTGAATCCCCTTCTCCG     | 60.401 | 20 | 245 | 33   | 277  |
| 59.784 | 20 | AAGTCCCTCTCGGGTCTGAT     | 59.957 | 20 | 278 | 643  | 920  |
| 60.49  | 20 | GGAAGCTGCTCTTGAGTTGG     | 60.134 | 20 | 239 | 277  | 515  |
| 60.263 | 20 | ATCAAATTTTGGATCCGTGC     | 59.768 | 20 | 249 | 615  | 863  |
| 60.91  | 20 | GGTTGCACACTCCAACACAT     | 59.446 | 20 | 275 | 196  | 470  |
| 60.608 | 20 | TTCCATGATGCCTAGCATTG     | 59.646 | 20 | 102 | 51   | 152  |
| 60.103 | 20 | TGGA CTGATCAGCAGAGGAA    | 59.499 | 20 | 251 | 182  | 432  |
| 60.164 | 20 | CCTCGCCTTTACATCTGCT      | 59.598 | 20 | 173 | 51   | 223  |
| 58.999 | 20 | TGGCATTGTCTTGGTTGTTT     | 59.547 | 20 | 270 | 1819 | 2088 |
| 59.679 | 20 | TCTTCCTCATCTCCACCACC     | 60.048 | 20 | 223 | 526  | 748  |
| 59.967 | 21 | ATGCATCAAACAACAGGACG     | 59.572 | 20 | 150 | 77   | 226  |
| 60.009 | 20 | GCCAAAGAGTTGTTGGAAGC     | 59.859 | 20 | 162 | 1333 | 1494 |
| 60.04  | 20 | ATAGGCGGTCTGGAGAGTGA     | 59.827 | 20 | 276 | 723  | 998  |
| 59.962 | 20 | TAGAAGCATCTCCGAGGGAA     | 59.91  | 20 | 260 | 4999 | 5258 |
| 60.684 | 21 | TCCAAGACCCCAATTTGATT     | 59.22  | 20 | 242 | 539  | 780  |
| 59.947 | 21 | TCCAACCCATCTCCATTTA      | 60.126 | 20 | 270 | 1136 | 1405 |
| 57.459 | 20 | TGGTTGGATATTTCCCCTT      | 60.37  | 20 | 221 | 306  | 526  |
| 59.996 | 20 | AAACAGGGTTGGGAAGAAGC     | 60.476 | 20 | 160 | 9    | 168  |
| 60.111 | 20 | TGCCATTGCAGCTAGTCTTG     | 60.157 | 20 | 178 | 452  | 629  |
| 58.717 | 20 | ACTTTCACCACCGCGTACC      | 60.97  | 19 | 274 | 303  | 576  |
| 60.235 | 20 | AATATGTCAACTTTCCGGCG     | 59.96  | 20 | 229 | 67   | 295  |
| 60.593 | 20 | GGGCAAAAATGCCACTCTTA     | 60.074 | 20 | 144 | 78   | 221  |
| 60.074 | 20 | TTTGTGCGAATTAGGGATGC     | 59.901 | 20 | 136 | 3538 | 3673 |
| 58.999 | 20 | TTGTTGCACCGTGGAGATTA     | 60.111 | 20 | 153 | 84   | 236  |
| 60.036 | 20 | AATAGCAGCCAAGGCAGAAA     | 59.982 | 20 | 217 | 1511 | 1727 |
| 59.297 | 20 | CAATGCCGTTTGTGATCATT     | 59.4   | 20 | 243 | 7    | 249  |
| 60.082 | 21 | TTGGTAAAGATAAATGCATCTCAA | 58.244 | 25 | 246 | 359  | 604  |
| 59.04  | 20 | TTGGCAGCAACTACTACCATACT  | 58.053 | 23 | 261 | 2353 | 2613 |
| 60.91  | 20 | CTGTGGTTGATTTGTGGGTG     | 59.848 | 20 | 114 | 4    | 117  |
| 60.214 | 20 | TGTAGCCGACCCCAATTTAT     | 59.297 | 20 | 202 | 1495 | 1696 |
| 58.479 | 26 | GGTGCAGTCTCTTTCAAGGC     | 59.997 | 20 | 194 | 23   | 216  |
| 60.285 | 20 | TTGGTCTCGGGTTATGTTTTT    | 58.938 | 21 | 263 | 156  | 418  |
| 60.606 | 20 | TGGAGGAAATTTTGTAGCCG     | 60.067 | 20 | 110 | 91   | 200  |

|        |    |                           |        |    |     |       |       |
|--------|----|---------------------------|--------|----|-----|-------|-------|
| 59.955 | 20 | CGATGCCCTTGAGAATCAAT      | 60.036 | 20 | 233 | 4249  | 4481  |
| 60.839 | 20 | TCCCACCAAGTATTAATATGCTCA  | 59.768 | 24 | 185 | 0     | 184   |
| 59.971 | 20 | CACGCTCCTCTCCTCCATAG      | 59.966 | 20 | 181 | 1851  | 2031  |
| 59.347 | 21 | CCAGCCTAAATTCCATCACC      | 59.387 | 20 | 214 | 20    | 233   |
| 59.478 | 21 | TTATCAGAGTCGAGCAAGCG      | 59.322 | 20 | 212 | 61    | 272   |
| 59.941 | 20 | CCAATTTATTGGGATTAAGGC     | 57.539 | 21 | 119 | 1547  | 1665  |
| 59.803 | 20 | TCGTGGAGATCAATGTGCGAA     | 60.201 | 20 | 149 | 407   | 555   |
| 59.996 | 20 | CGGTTGTATGAAACCGTTAGA     | 57.706 | 21 | 201 | 7     | 207   |
| 59.389 | 20 | GCAGTTTGCTGTGCTTGTTTC     | 59.646 | 20 | 253 | 1081  | 1333  |
| 59.776 | 24 | CGAACTCGTAGCCCATCAAT      | 60.096 | 20 | 266 | 79    | 344   |
| 58.926 | 20 | AGCAGCTAATCGCCTCTCTG      | 59.882 | 20 | 176 | 7     | 182   |
| 60.02  | 20 | TGATGGGGAAATGGTTGAAT      | 59.991 | 20 | 166 | 863   | 1028  |
| 60.157 | 20 | TTTATTGCACCCAATTAGGATAA   | 57.692 | 23 | 248 | 268   | 515   |
| 58.036 | 23 | GAATTTGGGAAGAAATTTTCAGTT  | 57.779 | 23 | 261 | 192   | 452   |
| 58.601 | 23 | CGTGTGTGGGTGATCCAATA      | 60.24  | 20 | 237 | 30    | 266   |
| 59.993 | 20 | CTTCACTTCCATCCTCTGCC      | 59.803 | 20 | 116 | 462   | 577   |
| 59.989 | 20 | TTTAGACGGGCTCTTCTTGG      | 59.448 | 20 | 257 | 5708  | 5964  |
| 59.875 | 20 | TCGACAACATCTCCGATCAC      | 59.637 | 20 | 240 | 1549  | 1788  |
| 59.83  | 20 | TTTGATGGCTTCTGCCCTAT      | 59.668 | 20 | 144 | 324   | 467   |
| 60.801 | 20 | CCTTTGATGCCGATGTTCTT      | 60.074 | 20 | 256 | 11    | 266   |
| 60.103 | 20 | CGTAAAGAGGGGTAGGGGAG      | 59.949 | 20 | 231 | 1849  | 2079  |
| 59.745 | 20 | TCGCTATTGCATGGATCAAA      | 60.179 | 20 | 256 | 695   | 950   |
| 59.953 | 20 | CACCAATCCCACAACAACAA      | 60.255 | 20 | 114 | 1331  | 1444  |
| 58.283 | 20 | TGAAATACCATCCAGTCTGTCC    | 58.912 | 22 | 265 | 12031 | 12295 |
| 60.375 | 20 | CTTGCCTTGTGACTAGCGTC      | 58.677 | 20 | 260 | 2360  | 2619  |
| 59.95  | 20 | ACACCAGCCGAGAACATCAT      | 60.542 | 20 | 274 | 127   | 400   |
| 59.702 | 20 | GTCGATTTGCATAAGCCACA      | 59.694 | 20 | 197 | 21    | 217   |
| 59.538 | 21 | CGTACCACACGATGTTACCG      | 59.904 | 20 | 232 | 641   | 872   |
| 60.22  | 21 | TCTCACGCAAAGAACCGTATT     | 59.761 | 21 | 279 | 1347  | 1625  |
| 59.593 | 23 | AAGCTGATCCGTTCCAAAAA      | 59.685 | 20 | 262 | 500   | 761   |
| 59.077 | 21 | GCAATCAACAAAGCAACGAA      | 59.856 | 20 | 221 | 13    | 233   |
| 60.452 | 20 | GGTTGAAAATGTAAAGGAAATCTC  | 58.2   | 24 | 166 | 30    | 195   |
| 60.393 | 23 | AGGCCTGCACTCAAAGAAA       | 59.993 | 20 | 201 | 1     | 201   |
| 60.771 | 21 | GCGGACCGGCTATATACTTG      | 59.592 | 20 | 276 | 387   | 662   |
| 57.539 | 21 | TTCGATTGCTTAGATTGGTGG     | 60.081 | 21 | 172 | 14    | 185   |
| 60.214 | 23 | GGATACATTGCATTTGGGAAG     | 59.287 | 21 | 237 | 414   | 650   |
| 60.111 | 20 | GGGAGTCGGGCCCTATAGTA      | 60.299 | 20 | 276 | 687   | 962   |
| 60.218 | 20 | TGAGTTGCAACCAAACCAC       | 59.591 | 20 | 111 | 42    | 152   |
| 59.297 | 20 | TCAAAATGGAAACGTGGACA      | 59.941 | 20 | 188 | 9     | 196   |
| 60.021 | 20 | ATAGCTTGGCACCCCTACCCT     | 59.983 | 20 | 220 | 3     | 222   |
| 59.371 | 20 | TCATTCTCTTGAATTTGGTGA     | 59.546 | 22 | 259 | 58    | 316   |
| 59.978 | 20 | GTTGGGAGGTTTCGTACAT       | 59.827 | 20 | 208 | 4     | 211   |
| 60.214 | 20 | GTGGATGAGAGGGTTTACCG      | 59.405 | 20 | 258 | 1133  | 1390  |
| 59.827 | 20 | GGAAGTGCATACGAGTGGGT      | 59.997 | 20 | 260 | 698   | 957   |
| 60.088 | 20 | TGTGATGTGATTGGGAGAAATC    | 59.797 | 22 | 206 | 753   | 958   |
| 58.735 | 26 | ATCCATTTACACCCGGAGAC      | 59.786 | 20 | 274 | 298   | 571   |
| 57.646 | 24 | CTCGTTCTCTTCCCTCCCA       | 59.401 | 20 | 241 | 10    | 250   |
| 59.893 | 20 | TCTCCTTGCCGAAAATATG       | 60.031 | 20 | 224 | 863   | 1086  |
| 60.009 | 20 | CTGCACATGCTTTAGTCCCA      | 59.864 | 20 | 133 | 2025  | 2157  |
| 59.901 | 20 | CAGGAACATCGTTGTTTGGG      | 59.541 | 20 | 227 | 184   | 410   |
| 60.006 | 20 | CTGATGGTGATGGTGTTCG       | 59.96  | 20 | 216 | 1990  | 2205  |
| 59.406 | 20 | GCACCCCACTTACTTTCT        | 60.361 | 20 | 273 | 64    | 336   |
| 59.955 | 20 | CCCAAGACCCCAATTTGATT      | 60.91  | 20 | 100 | 17    | 116   |
| 59.52  | 20 | ACATTGGCTTGTGAGTTTCG      | 58.775 | 20 | 169 | 95    | 263   |
| 59.879 | 20 | AGCTGGGTGACTTGGATCAG      | 60.261 | 20 | 154 | 166   | 319   |
| 59.969 | 20 | CGGAGGTAGTTGGCATTGT       | 59.993 | 20 | 231 | 324   | 554   |
| 59.463 | 21 | GACGTGGTTTGCAGGCTATT      | 60.14  | 20 | 186 | 84    | 269   |
| 59.973 | 20 | TGCTTAATTCTTAATGTAATATCCC | 59.009 | 26 | 243 | 524   | 766   |

|        |    |                           |        |    |     |      |      |
|--------|----|---------------------------|--------|----|-----|------|------|
| 59.212 | 20 | AATCCTTTTGGTGATGCTGG      | 59.933 | 20 | 139 | 51   | 189  |
| 59.836 | 20 | GCCACATCAAAACTCGGAAT      | 59.939 | 20 | 266 | 2961 | 3226 |
| 60.119 | 20 | TTTTGCCAAGTTGTCTGCTG      | 60.027 | 20 | 258 | 275  | 532  |
| 59.784 | 20 | TTTTTCACACCAGAAACCAAA     | 58.161 | 21 | 151 | 35   | 185  |
| 60.379 | 20 | CATACTTGTGCCGGGTATGT      | 58.379 | 20 | 154 | 638  | 791  |
| 59.903 | 20 | AGGGGAAAAGAGAGAGGTGG      | 59.671 | 20 | 255 | 21   | 275  |
| 59.873 | 20 | TCAGAACCCGTCTCTGCTTT      | 59.989 | 20 | 238 | 1459 | 1696 |
| 59.22  | 20 | TCTTCCATGACAAAATGCCA      | 60.049 | 20 | 209 | 703  | 911  |
| 60.401 | 20 | GTTGGGCAGCCAAATATTGA      | 60.837 | 20 | 120 | 254  | 373  |
| 59.851 | 20 | CTGTAGCGTTGCTATCCCGT      | 60.292 | 20 | 275 | 301  | 575  |
| 60.277 | 20 | GATGATCGCTGATGTTTGGA      | 59.61  | 20 | 259 | 451  | 709  |
| 60.195 | 20 | CCCAAGACCCCAATTTGATT      | 60.91  | 20 | 260 | 176  | 435  |
| 60.134 | 20 | CCTCAACCAGCTTAAACCGA      | 60.241 | 20 | 278 | 389  | 666  |
| 59.964 | 20 | AATGTGTGCACGAAGAGCTG      | 60.056 | 20 | 169 | 1754 | 1922 |
| 60.332 | 20 | GCCTGAAATCTGTCAACCCT      | 59.141 | 20 | 241 | 202  | 442  |
| 60.008 | 20 | CTTTATGCGCTCAGCTCTCC      | 60.257 | 20 | 232 | 219  | 450  |
| 60.132 | 20 | GCGATTGCGCTTCAAATCTA      | 60.31  | 20 | 239 | 523  | 761  |
| 60.066 | 20 | ACCGATGTAACGGAATGAGC      | 59.962 | 20 | 203 | 240  | 442  |
| 59.667 | 20 | TGGAGGATAAAATTTGTAACACG/  | 59.782 | 24 | 142 | 397  | 538  |
| 59.997 | 20 | TGTAGCCGACCCCAATTTAT      | 59.297 | 20 | 147 | 1475 | 1621 |
| 60.073 | 20 | GATGCTACTCCCACAAACCC      | 59.41  | 20 | 234 | 278  | 511  |
| 60.066 | 20 | AAGTAGATTCCGGGCCATTT      | 59.799 | 20 | 203 | 564  | 766  |
| 60.218 | 20 | AAGGAAACCACATCTAACCTGTT   | 59.817 | 24 | 273 | 3    | 275  |
| 57.079 | 21 | TGCCCTATTTTTCTCCTCA       | 59.64  | 20 | 188 | 20   | 207  |
| 59.923 | 20 | TCGATCCCACGTATTGTGAA      | 59.924 | 20 | 143 | 37   | 179  |
| 59.898 | 20 | CGATGCTCCTGTGTCAAAAA      | 59.84  | 20 | 247 | 1541 | 1787 |
| 59.931 | 20 | AAGGTTGCGTACACCTGACC      | 60.035 | 20 | 133 | 249  | 381  |
| 59.972 | 20 | ATCATCCTCATCCCCATCAA      | 60.096 | 20 | 164 | 156  | 319  |
| 60.003 | 20 | ATGTTGAGCCCAACCCAAC       | 60.774 | 19 | 268 | 220  | 487  |
| 59.668 | 20 | TATCGGTTCCAAATCACACG      | 59.395 | 20 | 172 | 2015 | 2186 |
| 59.658 | 22 | TATTGGCTTTACAACCTGGGC     | 57.781 | 20 | 257 | 6    | 262  |
| 60.02  | 20 | AGGTTCCGGGAAGTCTGATT      | 59.935 | 20 | 265 | 67   | 331  |
| 58.576 | 20 | TTCTCTCCCAAGGTATTTCAA     | 59.939 | 22 | 208 | 1230 | 1437 |
| 59.833 | 20 | GCTCGGTTTCAGAGGAGTTG      | 59.989 | 20 | 189 | 305  | 493  |
| 59.2   | 20 | AAATTGTGGGCTACTGGTGC      | 60     | 20 | 231 | 86   | 316  |
| 59.718 | 20 | CCCAAGACCCCAATTTGATT      | 60.91  | 20 | 162 | 819  | 980  |
| 59.836 | 20 | GCAAGGGATCCTCTCCTTCT      | 59.778 | 20 | 203 | 534  | 736  |
| 59.95  | 20 | CGTCGGGTAGACCAATGACT      | 59.989 | 20 | 265 | 37   | 301  |
| 59.933 | 20 | TGTAGCCTACCATTCCGTAGAA    | 58.787 | 22 | 246 | 1199 | 1444 |
| 59.96  | 20 | TTGAAGATTCGGACGATGTG      | 59.648 | 20 | 172 | 1609 | 1780 |
| 60.754 | 20 | TTCGGCATAAAAATTGGTCA      | 59.004 | 20 | 267 | 71   | 337  |
| 59.107 | 24 | TTGATTGCTAATTCAATTTTTATAC | 59.326 | 27 | 206 | 60   | 265  |
| 60.134 | 20 | TGCAGACACTTCAAAGTTCCA     | 59.475 | 21 | 169 | 31   | 199  |
| 59.821 | 20 | CCGGATCGGTCTTAACTCTG      | 59.688 | 20 | 231 | 964  | 1194 |
| 60.91  | 20 | CTCCCAACTTGCAACCTAC       | 59.592 | 20 | 153 | 4    | 156  |
| 59.867 | 22 | TGCAGTATTGAATTACTTTCCG    | 57.065 | 22 | 250 | 59   | 308  |
| 60.169 | 20 | GCCTGATCTACAGCCTCGTC      | 59.981 | 20 | 266 | 86   | 351  |
| 59.316 | 20 | TGGATGATCAAGGCTCTCAA      | 59.322 | 20 | 251 | 293  | 543  |
| 58.999 | 21 | CGCGGCTAAATTTGAAAGAG      | 59.979 | 20 | 218 | 70   | 287  |
| 60.182 | 22 | GAATCAAGCAAGCGGAACTC      | 59.962 | 20 | 138 | 400  | 537  |
| 60.545 | 20 | TGGCAACTGTACAAACAATTCA    | 59.132 | 22 | 150 | 683  | 832  |
| 59.789 | 20 | ACATGTCAATTAAGAAGGAA,     | 57.538 | 25 | 185 | 383  | 567  |
| 59.938 | 20 | TTTTCGTCCCTTACCCTTTG      | 59.061 | 20 | 225 | 3    | 227  |
| 60.096 | 20 | CTTGCAAGGGAAGACGAAAG      | 59.986 | 20 | 254 | 206  | 459  |
| 59.491 | 20 | AAGTAATGTTGGTGTCCGGC      | 59.859 | 20 | 108 | 0    | 107  |
| 60.112 | 20 | GGCGATTGTCAACTTGGTTT      | 59.978 | 20 | 224 | 98   | 321  |
| 60.063 | 19 | GGGTTTAGGGTTGTACAGCAA     | 59.971 | 20 | 276 | 28   | 303  |
| 59.911 | 20 | TGAATATCACAGAATTTGGGAGG   | 60.19  | 23 | 147 | 253  | 399  |

|        |    |                         |        |    |     |      |      |
|--------|----|-------------------------|--------|----|-----|------|------|
| 60.11  | 20 | CTCCAGGCTGATGTTTCCAT    | 60.073 | 20 | 160 | 44   | 203  |
| 60.029 | 20 | ATGCATGGTGTAGGATCACG    | 59.399 | 20 | 121 | 526  | 646  |
| 59.955 | 20 | ATGGCCATTTTTCCACCATA    | 60.016 | 20 | 160 | 2748 | 2907 |
| 60.529 | 20 | CCCAAGACCCCAATTTGATT    | 60.91  | 20 | 268 | 652  | 919  |
| 59.297 | 20 | AAAATATAGCCAGCCAGCC     | 60.428 | 20 | 240 | 1    | 240  |
| 59.92  | 20 | CAGCCAACACGATCAAACAT    | 59.572 | 20 | 275 | 808  | 1082 |
| 59.978 | 20 | CTTCAGCAATTCTTCCTGCC    | 59.955 | 20 | 227 | 513  | 739  |
| 59.807 | 20 | TCTATTTCTGCATCCTGCC     | 60.177 | 20 | 177 | 4395 | 4571 |
| 60.474 | 21 | ACTTCCTGGCCAGACCTTTT    | 60.11  | 20 | 189 | 6    | 194  |
| 58.201 | 22 | ATTGTGCAATGGGAATGGAT    | 60.021 | 20 | 278 | 698  | 975  |
| 61.032 | 20 | TGCAAAGCGAAGAGAGACAA    | 59.864 | 20 | 246 | 292  | 537  |
| 59.986 | 20 | ATGGATTCTTGTTCGATGC     | 59.9   | 20 | 108 | 397  | 504  |
| 59.986 | 20 | CCTTGGAGAAAGTTGCGAAG    | 59.986 | 20 | 224 | 260  | 483  |
| 59.967 | 20 | ATGTAGCCGACCCCAATTTA    | 59.297 | 20 | 263 | 1735 | 1997 |
| 59.726 | 20 | GAGAGAAGCCAGGGATGACA    | 60.349 | 20 | 215 | 4    | 218  |
| 59.803 | 22 | GCTCTAATTGCATGGTCGGT    | 60.103 | 20 | 154 | 141  | 294  |
| 60.945 | 20 | ATGTAGCCGACCCCAATTTA    | 59.297 | 20 | 194 | 3484 | 3677 |
| 60.049 | 20 | ATTCTTCGGTTGGAGGTGTG    | 59.966 | 20 | 185 | 470  | 654  |
| 60.664 | 20 | CTCGGAAATTGAAAAGCAA     | 60.181 | 20 | 176 | 154  | 329  |
| 59.546 | 20 | TCAATCACCAATCAACAAAACC  | 59.708 | 22 | 205 | 154  | 358  |
| 61.034 | 20 | CGAATGAGAAAACTGGGGA     | 60.044 | 20 | 244 | 52   | 295  |
| 59.367 | 21 | CGACGGATTGATGCTAATTG    | 59.136 | 20 | 249 | 706  | 954  |
| 60.088 | 18 | ATAATAACCCCGCAAGGGTC    | 60.041 | 20 | 183 | 13   | 195  |
| 59.971 | 20 | TTACGGCCAAGGAATGAATC    | 59.901 | 20 | 274 | 959  | 1232 |
| 58.929 | 20 | TGTAGCCGACCCCAATTTAT    | 59.297 | 20 | 278 | 2429 | 2706 |
| 60.218 | 27 | ATGTAGCCGACCCCAATTTA    | 59.297 | 20 | 105 | 14   | 118  |
| 59.241 | 20 | GTGTTTTCTAGAGGCACGGG    | 59.734 | 20 | 161 | 869  | 1029 |
| 59.717 | 20 | CAAGTAAATGCTCGGCACTG    | 59.488 | 20 | 186 | 1822 | 2007 |
| 59.297 | 20 | CACACAATACGCACACACCA    | 60.071 | 20 | 235 | 0    | 234  |
| 57.142 | 24 | TGGACAGTAGCAAAGCCACA    | 60.449 | 20 | 276 | 330  | 605  |
| 59.726 | 23 | GCAAAATTGTTTGTGTTCTGTT  | 58.273 | 23 | 108 | 318  | 425  |
| 57.291 | 20 | ATCATTGAGGAGGGCGGTAT    | 60.682 | 20 | 260 | 1915 | 2174 |
| 60.362 | 21 | AGAGACAAGCCAACGCAAAT    | 59.882 | 20 | 266 | 1521 | 1786 |
| 59.654 | 22 | TGCTTCCCAAAGTCATTCC     | 60.051 | 20 | 217 | 186  | 402  |
| 59.933 | 20 | CAATGCATGAACCACACTCC    | 59.967 | 20 | 168 | 23   | 190  |
| 59.837 | 20 | ACCAAAGAACTTGCCACAC     | 60.012 | 20 | 270 | 1230 | 1499 |
| 60.073 | 20 | GGAAATTGAAGGGCAGTTGA    | 60.051 | 20 | 206 | 53   | 258  |
| 59.592 | 20 | TAAACCCTTTCCCCGAATGT    | 60.534 | 20 | 105 | 2216 | 2320 |
| 59.259 | 19 | TGAAATTCCCGATAAGTTGGAA  | 60.645 | 22 | 211 | 0    | 210  |
| 59.878 | 20 | GGGATTGTTATCGTGATGGC    | 60.163 | 20 | 242 | 156  | 397  |
| 60.366 | 20 | GAAATCAGAAGAACCATGCCA   | 60.066 | 21 | 259 | 288  | 546  |
| 59.992 | 20 | GCATTGGTGACATTGATTGC    | 59.939 | 20 | 185 | 2796 | 2980 |
| 59.556 | 20 | TGAAATATCATGTCCAGGTTTCT | 57.62  | 23 | 190 | 56   | 245  |
| 60.91  | 20 | CTCCAAGCTGATGCAACAAT    | 58.877 | 20 | 178 | 6    | 183  |
| 59.599 | 20 | ATGGAAAAATTTGCAGAGCG    | 60.209 | 20 | 229 | 2918 | 3146 |
| 60.39  | 20 | TTATCGTTTTAGCCAGCACA    | 59.325 | 20 | 266 | 770  | 1035 |
| 60.27  | 20 | AATATGATGGTGCGGTGGTC    | 60.613 | 20 | 273 | 71   | 343  |
| 59.96  | 20 | CCCAAGACCCCAATTTGATT    | 60.91  | 20 | 142 | 389  | 530  |
| 60.159 | 20 | CCAAAATGTAAATCGGCCAC    | 60.188 | 20 | 242 | 1372 | 1613 |
| 58.264 | 22 | ATCCGCCCTTGATACAGGT     | 59.376 | 19 | 179 | 2266 | 2444 |
| 60.384 | 20 | TCAAGCAAAAATTGAACCCC    | 59.916 | 20 | 214 | 156  | 369  |
| 60.032 | 20 | GTAGAGGCGTGACTTTGGCT    | 59.501 | 20 | 224 | 304  | 527  |
| 60.016 | 20 | GGTGTGAACAACCAGACATAAA  | 58.917 | 23 | 266 | 746  | 1011 |
| 59.585 | 20 | TCAGCAGCCATCTGTTCTTG    | 60.136 | 20 | 183 | 104  | 286  |
| 59.076 | 20 | GGACACCCGTGTTGAAGTTT    | 59.867 | 20 | 200 | 21   | 220  |
| 59.927 | 20 | CGACCCGTGATACCAGACTT    | 59.989 | 20 | 211 | 115  | 325  |
| 59.832 | 22 | CCATCACTCTGTGAACCGAC    | 59.101 | 20 | 128 | 59   | 186  |
| 59.486 | 20 | CATTTTATGCAGCGAATGTTG   | 59.227 | 21 | 164 | 22   | 185  |

|        |    |      |          |                     |        |    |     |      |      |
|--------|----|------|----------|---------------------|--------|----|-----|------|------|
| 60.008 | 20 | TTC  | ACTGTCG  | TCAAAGCTGG          | 60.025 | 20 | 252 | 324  | 575  |
| 59.939 | 20 | TCG  | ATCAA    | AATAACACCATTGC      | 59.838 | 22 | 195 | 1470 | 1664 |
| 59.992 | 20 | GAT  | TTTCG    | AGTTGCAGAGGC        | 59.962 | 20 | 183 | 1649 | 1831 |
| 59.759 | 19 | TC   | A        | AAGGGGTTATGTCCTCA   | 59.536 | 21 | 263 | 107  | 369  |
| 60.226 | 20 | TCA  | AGGTGGT  | GTTCCTCACA          | 59.976 | 20 | 238 | 32   | 269  |
| 59.993 | 20 | GGC  | AGCCTA   | ATATTGAGCAGTT       | 59.784 | 22 | 252 | 19   | 270  |
| 59.927 | 20 | GG   | ACCTA    | ATTTTCCCAAGG        | 59.639 | 20 | 219 | 1458 | 1676 |
| 59.945 | 20 | ACCA | ATGGT    | GGTATGGTGTG         | 58.984 | 20 | 131 | 201  | 331  |
| 60.156 | 20 | GAG  | ATGGG    | AGGTGGTCTTGA        | 60.048 | 20 | 181 | 20   | 200  |
| 60.187 | 20 | CAA  | ACCGGT   | GCTCCTTGAT          | 59.993 | 20 | 280 | 2107 | 2386 |
| 59.805 | 20 | GC   | ACAATGCC | AAGTAGCAGA          | 60.019 | 20 | 156 | 994  | 1149 |
| 60.469 | 20 | TC   | AGCAGCC  | ATCTGTTCTTG         | 60.136 | 20 | 161 | 17   | 177  |
| 60.529 | 20 | TT   | CCTAGCT  | AGCTTTCCAATTCA      | 59.549 | 23 | 227 | 725  | 951  |
| 60.035 | 20 | CG   | ATCCC    | ATCAAATCTGAGC       | 60.57  | 20 | 245 | 2799 | 3043 |
| 58.823 | 21 | TC   | ACTCATG  | CATCTCCACAA         | 60.256 | 21 | 249 | 8745 | 8993 |
| 59.297 | 20 | CCT  | ACTTG    | CATTGTGCTCCA        | 59.864 | 20 | 111 | 1    | 111  |
| 59.989 | 20 | AA   | AGTCG    | CAATCAGCAACAA       | 59.469 | 20 | 181 | 1650 | 1830 |
| 60.118 | 20 | TCT  | TTTACA   | AGGTGGGTGGC         | 59.971 | 20 | 162 | 412  | 573  |
| 59.101 | 20 | G    | ACTGGG   | CTTTTGGTTCAA        | 60.088 | 20 | 120 | 351  | 470  |
| 60.074 | 20 | TG   | TAGCCG   | ACCCAATTTAT         | 59.297 | 20 | 149 | 489  | 637  |
| 60.449 | 23 | CC   | CAAGAC   | CCCAATTTGATT        | 60.91  | 20 | 109 | 9    | 117  |
| 60.096 | 20 | G    | ATGG     | ACGTGACGATTTCT      | 60.081 | 20 | 263 | 156  | 418  |
| 59.329 | 24 | G    | TAA      | CCAGCAGTCCCCAAAA    | 59.971 | 20 | 149 | 227  | 375  |
| 59.948 | 20 | CG   | ACG      | AGAAAGTCGTGTCAA     | 60.025 | 20 | 178 | 306  | 483  |
| 60.317 | 20 | TG   | CACCA    | ACTTCCTCTCCTT       | 59.844 | 20 | 197 | 1    | 197  |
| 61     | 20 | G    | AAGCC    | AATTTGTTTGCAT       | 59.945 | 20 | 219 | 782  | 1000 |
| 59.91  | 20 | CT   | CCCT     | CTCAAACCATCG        | 59.665 | 20 | 238 | 27   | 264  |
| 60.138 | 22 | C    | TTT      | AGAACTTGCTCCACCA    | 59.364 | 21 | 268 | 16   | 283  |
| 60.051 | 20 | A    | AG       | AAACAGAAAGTTGCAGCAC | 60.109 | 23 | 107 | 2543 | 2649 |
| 60.11  | 20 | AT   | TGGA     | ACGACATTTGCCTC      | 59.939 | 20 | 240 | 1264 | 1503 |
| 59.829 | 20 | AC   | G        | TAGGGTTACCGGAGCTT   | 60.019 | 20 | 192 | 271  | 462  |
| 59.904 | 24 | TG   | ATGC     | AGACTCGAGGTACG      | 60.008 | 20 | 246 | 478  | 723  |
| 59.917 | 25 | CC   | CAAGAC   | CCCAATTTGATT        | 60.91  | 20 | 102 | 15   | 116  |
| 59.67  | 20 | T    | CTCC     | CAATTCACCCTACA      | 60.309 | 20 | 236 | 121  | 356  |
| 59.874 | 20 | CT   | CAAGTGG  | CTTCTATGGGC         | 59.836 | 20 | 102 | 4    | 105  |
| 61.171 | 19 | G    | T        | AAGCACCTCCTCCACCA   | 60.111 | 20 | 177 | 31   | 207  |
| 60.24  | 20 | AC   | GATG     | TGAAACGGAAAAGC      | 60.118 | 20 | 196 | 437  | 632  |
| 59.297 | 20 | CC   | CTTG     | ACTTTCAACCCAAA      | 59.942 | 20 | 222 | 12   | 233  |
| 58.837 | 23 | C    | CTG      | AACCTTCTGCAAAAATA   | 59.348 | 21 | 180 | 406  | 585  |
| 60.056 | 20 | CC   | CAAGAC   | CCCAATTTGATT        | 60.91  | 20 | 235 | 584  | 818  |
| 58.294 | 20 | TT   | CTTT     | TATGTGGGTTGCAAAA    | 59.511 | 22 | 224 | 1258 | 1481 |
| 59.297 | 20 | CT   | TCTT     | GCAATTCGTCATCA      | 59.799 | 20 | 203 | 4    | 206  |
| 60.365 | 22 | TT   | GATGG    | AGGCCTTATTTGC       | 60.038 | 20 | 258 | 295  | 552  |
| 59.547 | 20 | GG   | GATTTGG  | TGGTGAAAATG         | 60.029 | 20 | 150 | 469  | 618  |
| 59.923 | 22 | CA   | ACCC     | CTACTCTTTTCTTCCTT   | 59.222 | 23 | 173 | 32   | 204  |
| 59.292 | 20 | AT   | TGGG     | TATAACCCCGAAGC      | 60.041 | 20 | 224 | 2012 | 2235 |
| 59.7   | 20 | CC   | ATG      | ACCGGTGATTCTCTT     | 59.927 | 20 | 269 | 5637 | 5905 |
| 59.637 | 20 | CA   | ATGG     | ATGAAATCCCGAG       | 60.266 | 20 | 261 | 307  | 567  |
| 60.208 | 20 | T    | CCAGG    | TCTCTGTCGTTTC       | 60.238 | 20 | 145 | 101  | 245  |
| 59.735 | 23 | TT   | T        | CATTCTTTTCTCCTTT    | 58.307 | 22 | 166 | 335  | 500  |
| 59.938 | 23 | AC   | TCAT     | CGCCACCTAAATG       | 59.955 | 20 | 251 | 20   | 270  |
| 60.91  | 20 | GG   | TGC      | AGATTTAAATGTTATACAG | 59.731 | 26 | 185 | 4    | 188  |
| 60.91  | 20 | TG   | CCTG     | ATGAACATCCAAAA      | 60.049 | 20 | 268 | 4    | 271  |
| 60.91  | 20 | G    | CC       | AAATACCACTTGAAGC    | 59.574 | 20 | 280 | 4    | 283  |
| 60.034 | 20 | AT   | CG       | AGTTGGTGGAGTGGAC    | 59.969 | 20 | 219 | 471  | 689  |
| 60.91  | 20 | TG   | TTT      | CATTTTCAAGCGG       | 59.706 | 20 | 189 | 2    | 190  |
| 59.297 | 20 | CG   | ATG      | CGCAAATAAAAGACA     | 59.842 | 20 | 120 | 229  | 348  |
| 59.377 | 21 | CC   | CAAGAC   | CCCAATTTGATT        | 60.91  | 20 | 100 | 23   | 122  |



|        |    |                          |        |    |     |      |      |
|--------|----|--------------------------|--------|----|-----|------|------|
| 59.013 | 20 | TTTTGCATCTGGGTTCCCTC     | 60.051 | 20 | 129 | 3072 | 3200 |
| 60.088 | 20 | GCCTGAGATGGTAGACACCG     | 60.678 | 20 | 271 | 1034 | 1304 |
| 59.371 | 22 | TGCTGCCTTTGTTTTGTCAG     | 60.027 | 20 | 171 | 37   | 207  |
| 60.054 | 20 | ATTGTACCTGGACTCCTGCG     | 60.134 | 20 | 242 | 703  | 944  |
| 59.945 | 20 | CAGCGAAGAAATTCACCCAT     | 60.074 | 20 | 237 | 3405 | 3641 |
| 60.699 | 20 | GGGCGAGTCTCAAGAAACAG     | 59.989 | 20 | 155 | 31   | 185  |
| 60.196 | 20 | CAATGACGAATAGCAGCCAA     | 59.833 | 20 | 188 | 20   | 207  |
| 60.91  | 20 | CCTCGATCGCTTGATCTTA      | 60.309 | 20 | 229 | 7    | 235  |
| 59.726 | 21 | TTTGTGTCATAGAAGGCCCC     | 59.933 | 20 | 252 | 1526 | 1777 |
| 59.305 | 20 | ATTACAGCATGAGCAGTCCG     | 58.903 | 20 | 201 | 27   | 227  |
| 60.088 | 20 | CCGAGGTGAGATTCAAAGGA     | 60.187 | 20 | 241 | 1586 | 1826 |
| 58.187 | 22 | GACAATGTACGCACGGAATG     | 59.995 | 20 | 246 | 3    | 248  |
| 59.155 | 22 | ATCTATGGCTTCCGCTTGTG     | 60.235 | 20 | 278 | 27   | 304  |
| 60.293 | 20 | CATAAATGCATGCAACGTCC     | 59.96  | 20 | 113 | 264  | 376  |
| 60.91  | 20 | AGCAAAAATCGGCACTAACC     | 59.229 | 20 | 163 | 7    | 169  |
| 60.218 | 20 | CCGAAGTGCTAGACCCAAAG     | 59.869 | 20 | 179 | 73   | 251  |
| 58.119 | 21 | TTTCACGTGGTTTGGTCTGA     | 60.128 | 20 | 140 | 33   | 172  |
| 57.413 | 27 | TGGAGTGATTAATATGCAATTTTC | 60.563 | 26 | 245 | 35   | 279  |
| 60.399 | 18 | GCATACCTATCCGAGGGACC     | 60.682 | 20 | 178 | 31   | 208  |
| 60.91  | 20 | GCTTTCTTCAGCATGTTGTCC    | 59.874 | 21 | 168 | 7    | 174  |
| 59.924 | 20 | CCCAAGACCCCAATTTGATT     | 60.91  | 20 | 114 | 3    | 116  |
| 58.761 | 27 | CCCAAGACCCCAATTTGATT     | 60.91  | 20 | 111 | 6    | 116  |
| 60.074 | 20 | CCCTGAATTTGATCCTGGTG     | 60.309 | 20 | 238 | 1840 | 2077 |
| 60.074 | 20 | CTGCTTTCTTGCCTCGTCC      | 59.989 | 20 | 170 | 244  | 413  |
| 59.055 | 21 | TTGACAATGTGTCTACATCCA    | 59.05  | 22 | 198 | 69   | 266  |
| 59.957 | 20 | CCATAATTACCGGCGTCATC     | 60.175 | 20 | 183 | 313  | 495  |
| 60.053 | 20 | TCTGCACATCTGAATTTACAAAA  | 57.528 | 23 | 238 | 150  | 387  |
| 60.051 | 20 | AGCCCTCACACAACCAATTC     | 59.973 | 20 | 194 | 772  | 965  |
| 59.901 | 20 | CAATGATCGGTTTCAAGGGT     | 59.79  | 20 | 207 | 1409 | 1615 |
| 57.268 | 25 | CCTCTTCGGTTGGTTTTGAC     | 59.569 | 20 | 225 | 24   | 248  |
| 59.697 | 20 | ATACCTCTCCGTCCACGATG     | 59.95  | 20 | 272 | 358  | 629  |
| 59.638 | 20 | ATGTTGACTGATCAAGGGC      | 60.081 | 20 | 183 | 5633 | 5815 |
| 59.355 | 22 | TGGAGGACTAGATTTGGGGA     | 59.478 | 20 | 104 | 20   | 123  |
| 59.429 | 20 | AACTTTGTTGAATGAGCCCC     | 59.031 | 20 | 279 | 501  | 779  |
| 59.74  | 20 | GCCATTGGATTTCGATTTTGT    | 59.768 | 20 | 201 | 2    | 202  |
| 60.036 | 20 | TGAGGAAAGTGATCCTTGGG     | 60.042 | 20 | 112 | 16   | 127  |
| 59.133 | 23 | ATTTTTGGGCTACGACAACG     | 59.996 | 20 | 210 | 168  | 377  |
| 59.647 | 23 | ACGTCGACACTAAGGCCAAG     | 60.312 | 20 | 117 | 6    | 122  |
| 60.045 | 20 | AATGATGACCTCATCTCCGC     | 60.042 | 20 | 167 | 914  | 1080 |
| 60.088 | 20 | CCCAAGACCCCAATTTGATT     | 60.91  | 20 | 268 | 454  | 721  |
| 60.175 | 20 | CCCAAGACCCCAATTTGATT     | 60.91  | 20 | 111 | 6    | 116  |
| 59.787 | 20 | GCTGCATCAATGGAGCTTCT     | 60.514 | 20 | 280 | 1493 | 1772 |
| 59.984 | 20 | CCTTGAAATCGAACTCTCGC     | 59.955 | 20 | 216 | 951  | 1166 |
| 59.96  | 20 | TGGGAATAATCCAGGAACCA     | 60.126 | 20 | 237 | 293  | 529  |
| 60.066 | 20 | TTACGCTAGTCCGTGGGTTT     | 59.632 | 20 | 156 | 1051 | 1206 |
| 60.51  | 20 | TCCAATGAGACACACTCCCA     | 60.088 | 20 | 223 | 1624 | 1846 |
| 60.767 | 20 | TTCTGTGCATTGCCATTGAT     | 60.08  | 20 | 255 | 23   | 277  |
| 60.39  | 20 | AGGTGCATCCATGGTTCATT     | 60.203 | 20 | 253 | 826  | 1078 |
| 60.112 | 20 | ATGCAAGCTTTCCCACTCAC     | 60.263 | 20 | 266 | 3193 | 3458 |
| 60.17  | 20 | AAATGGTTCGTAACTGCCCA     | 60.365 | 20 | 222 | 353  | 574  |
| 60.196 | 20 | GGGTTTAGACGTCATGCACA     | 59.572 | 20 | 224 | 44   | 267  |
| 58.789 | 22 | CCCAAGACCCCAATTTGATT     | 60.91  | 20 | 104 | 17   | 120  |
| 59.297 | 20 | TCGAAGAAGCGAAAAACACC     | 60.331 | 20 | 122 | 1    | 122  |
| 60.365 | 20 | AAGCTTCGTAATATGGGCGA     | 59.704 | 20 | 150 | 2053 | 2202 |
| 59.907 | 20 | TGGGAGTCAACTGATTGCTTC    | 60.248 | 21 | 178 | 707  | 884  |
| 60.022 | 20 | GTCGAGACGGGACTGTGAAT     | 60.12  | 20 | 267 | 2144 | 2410 |
| 60.91  | 20 | GAGGATGGGCACATACTGGT     | 59.81  | 20 | 178 | 4    | 181  |
| 59.297 | 20 | CCGATCGAGCTGAGAAAAAG     | 60.088 | 20 | 280 | 4    | 283  |

|        |    |                          |        |    |     |      |      |
|--------|----|--------------------------|--------|----|-----|------|------|
| 60.045 | 20 | GATTTTCTTGGATCTCATGCC    | 58.586 | 21 | 262 | 614  | 875  |
| 57.335 | 25 | TCCGCACTTCAAATTCATC      | 60.983 | 20 | 243 | 35   | 277  |
| 60.77  | 20 | CCCAAGACCCCAATTTGATT     | 60.91  | 20 | 134 | 1    | 134  |
| 60.011 | 20 | TCTTACTGGTGCCGAAATC      | 60.074 | 20 | 183 | 292  | 474  |
| 59.248 | 22 | CCCAAGACCCCAATTTGATT     | 60.91  | 20 | 100 | 23   | 122  |
| 60.127 | 25 | CCCACACTTTGTGTCACCAC     | 59.89  | 20 | 265 | 518  | 782  |
| 60.91  | 20 | AAAAGAATGCAGCGCAAAGT     | 60.025 | 20 | 213 | 6    | 218  |
| 60.91  | 20 | TTTGCCGGTTCGATAACTCTC    | 60.214 | 20 | 252 | 771  | 1022 |
| 60.817 | 20 | GCATGGGCTTGTTTTCATTT     | 59.945 | 20 | 156 | 29   | 184  |
| 57.86  | 24 | TGTCTTGTGCTGAAGATGGTTC   | 60.299 | 22 | 262 | 27   | 288  |
| 59.88  | 20 | TACTGCTCTCTGGGGCATCT     | 59.973 | 20 | 194 | 1527 | 1720 |
| 60.443 | 22 | AAGCAATTGGAAGATGGTGC     | 60.081 | 20 | 213 | 651  | 863  |
| 59.995 | 20 | GCCCATTTTGATCACCATCT     | 59.756 | 20 | 247 | 445  | 691  |
| 59.146 | 20 | TATCGGATGGCTTATCCCAA     | 60.247 | 20 | 206 | 4966 | 5171 |
| 59.856 | 21 | AATCCGTTATTTCTCCCGGT     | 59.666 | 20 | 258 | 723  | 980  |
| 57.698 | 20 | GAGCTGATGGAAACACTTCG     | 58.443 | 20 | 276 | 1789 | 2064 |
| 60.91  | 20 | AAGCTTCAGCAGCTCTTTCG     | 60.037 | 20 | 175 | 7    | 181  |
| 59.94  | 20 | AAAATCGCACGACGAATACC     | 59.967 | 20 | 180 | 738  | 917  |
| 59.997 | 20 | CCTTCAATTGCCCTTCACAT     | 59.933 | 20 | 244 | 710  | 953  |
| 60.839 | 20 | CGTTCGACCCCTTCAATAAT     | 58.903 | 20 | 216 | 6    | 221  |
| 60.112 | 20 | GATTCGAATAGGAACGCGAG     | 59.807 | 20 | 210 | 2644 | 2853 |
| 59.84  | 20 | TTCCCAGCCACAATGTGTAA     | 59.964 | 20 | 249 | 110  | 358  |
| 59.505 | 20 | AGGCTGGTCTAAAGCGCATA     | 60.003 | 20 | 231 | 496  | 726  |
| 60.124 | 23 | TCTGATGTGAAATGTGTGGATAC  | 57.465 | 23 | 178 | 19   | 196  |
| 57.488 | 20 | TGTAGCCGACCCCAATTTAT     | 59.297 | 20 | 253 | 467  | 719  |
| 58.609 | 21 | GCATTTTCACTTAGCCGAGA     | 59.488 | 21 | 225 | 29   | 253  |
| 59.966 | 20 | GGTGAGGGAGAAAAAGGAA      | 60.414 | 20 | 236 | 131  | 366  |
| 59.546 | 20 | TGTCGAAACCATCGTTCCTC     | 61.046 | 20 | 271 | 55   | 325  |
| 59.668 | 22 | AATATAGTTATCACAGGATCACCA | 58.111 | 27 | 209 | 1409 | 1617 |
| 60.355 | 21 | GGGATTTTCATCCAAAACCTG    | 60.528 | 21 | 275 | 2145 | 2419 |
| 59.955 | 20 | GAGCAACTTCTTGGCTCGTT     | 59.621 | 20 | 255 | 18   | 272  |
| 59.609 | 20 | GTAGATCCATGTGGCCGTTT     | 60.348 | 20 | 195 | 985  | 1179 |
| 59.957 | 23 | TCTTCATCTGCCAGTGCTCA     | 60.711 | 20 | 136 | 18   | 153  |
| 60.082 | 21 | TTGTATGTCGAGTCGAGTGTGA   | 59.365 | 22 | 139 | 205  | 343  |
| 59.964 | 20 | GTTTCGATCGTTTGTCCCTCGT   | 60.119 | 20 | 268 | 51   | 318  |
| 59.871 | 20 | CGGCTTAGGGCAGATAACAG     | 59.861 | 20 | 127 | 1837 | 1963 |
| 59.982 | 20 | GCAACACCGGATTCACTTTT     | 59.978 | 20 | 210 | 2658 | 2867 |
| 60.006 | 20 | GAGAGGAGCGACACCAGTTC     | 59.993 | 20 | 141 | 340  | 480  |
| 59.297 | 20 | GCTGCACATATTATGCTTTGC    | 58.485 | 21 | 257 | 6    | 262  |
| 59.799 | 20 | CTCCTGCTTACCTCGATTC      | 59.95  | 20 | 225 | 174  | 398  |
| 58.997 | 22 | ATGATCTGAAGAAGCGTGGC     | 60.37  | 20 | 260 | 89   | 348  |
| 60.346 | 23 | ACCCTAATCCCACCCTTAC      | 60.052 | 20 | 123 | 2    | 124  |
| 59.812 | 20 | AGCATTGGCAAAGACGACTC     | 60.406 | 20 | 279 | 870  | 1148 |
| 59.931 | 25 | TCACAAAAATATTTCCCGGC     | 59.773 | 20 | 195 | 38   | 232  |
| 59.887 | 20 | GAACAAAACATTTGCGGGTG     | 60.206 | 20 | 221 | 3812 | 4032 |
| 58.649 | 20 | TAAAGGGCAGGGTGAAGTTG     | 60.103 | 20 | 205 | 9    | 213  |
| 60.377 | 20 | GTTTCGTCTTTCCCGTTCTCA    | 60.232 | 20 | 208 | 231  | 438  |
| 60.91  | 20 | AATAAAATGTCGTGAGCCCG     | 59.96  | 20 | 151 | 9    | 159  |
| 60.096 | 20 | TCTCCGTTGGAACAATAGGG     | 59.926 | 20 | 273 | 628  | 900  |
| 59.846 | 20 | GTGAGGAGGACGATGAGGAG     | 59.792 | 20 | 176 | 196  | 371  |
| 57.318 | 22 | GCGTGTTTGGGATGTTTAC      | 60.235 | 20 | 214 | 12   | 225  |
| 60.894 | 20 | ATTTGGCATCCATGTACGGT     | 60.081 | 20 | 168 | 2001 | 2168 |
| 59.34  | 20 | AGCTTCTGCCTGAATTTGGA     | 59.955 | 20 | 208 | 286  | 493  |
| 59.958 | 20 | AGAACATCACCTGCCTCACC     | 60.12  | 20 | 255 | 3311 | 3565 |
| 60.142 | 20 | GATCGAGCTAGCCCAGTTTG     | 59.978 | 20 | 216 | 74   | 289  |
| 60.206 | 20 | GCCTCAAGGTATGAAGCAGG     | 59.836 | 20 | 265 | 25   | 289  |
| 58.987 | 26 | GCCAAGTTGACACACACAGG     | 60.203 | 20 | 144 | 36   | 179  |
| 60.502 | 20 | GCTTGGGCAGAGTTTTGGTA     | 60.249 | 20 | 155 | 16   | 170  |

|        |    |                         |        |    |     |      |      |
|--------|----|-------------------------|--------|----|-----|------|------|
| 59.297 | 20 | TGTGTCATTGTTTCGTGGAA    | 58.514 | 20 | 100 | 3    | 102  |
| 60.469 | 20 | CAAAAGGTTTTTACTCTTACCAG | 60.077 | 25 | 137 | 444  | 580  |
| 60.401 | 20 | TGGGCTTTTAAGGAAGACGA    | 59.817 | 20 | 231 | 521  | 751  |
| 57.883 | 25 | ATTGCGTTGCTTAATGGGAG    | 60.096 | 20 | 275 | 263  | 537  |
| 58.054 | 24 | GCAGCCAAATACACTCAAACA   | 60.173 | 22 | 253 | 162  | 414  |
| 59.933 | 20 | GACTIONCATAGTGGAAAA     | 60.074 | 20 | 258 | 4604 | 4861 |
| 59.297 | 20 | CGACGCTGAATGAGCTAGAA    | 59.322 | 20 | 212 | 0    | 211  |
| 60.051 | 20 | AATCGAGAATGTGGACGGAG    | 60.073 | 20 | 223 | 826  | 1048 |
| 59.773 | 20 | GAGCGTGCGGAGCTAGTATC    | 60.147 | 20 | 198 | 127  | 324  |
| 59.934 | 20 | GGTAGGCTGGTAAGGGCTTC    | 60.096 | 20 | 162 | 7990 | 8151 |
| 60.415 | 20 | GGTGGTATGCTGTGGAGGAC    | 60.395 | 20 | 184 | 1    | 184  |
| 59.875 | 20 | CCCAAGACCCCAATTTGATT    | 60.91  | 20 | 249 | 529  | 777  |
| 59.917 | 20 | TTGCTTCCGTGTTTTATCCA    | 59.157 | 20 | 112 | 46   | 157  |
| 59.612 | 20 | CTGCAGCCATCTGTTCTTGA    | 60.136 | 20 | 204 | 3    | 206  |
| 60.111 | 22 | TGGTGCTGGAGGTGACAATA    | 60.112 | 20 | 268 | 368  | 635  |
| 58.736 | 21 | CAGACGCCAATTACAGGTGA    | 59.716 | 20 | 232 | 32   | 263  |
| 59.933 | 20 | CAAAAACGAAAGCAAGCTCA    | 59.226 | 20 | 257 | 4483 | 4739 |
| 60.91  | 20 | AACAAATCCTTTGGCACAGC    | 60.118 | 20 | 138 | 8    | 145  |
| 60.117 | 20 | GCTTCAGCGATCAACAAACA    | 59.995 | 20 | 180 | 1354 | 1533 |
| 59.297 | 20 | CTACCACAACACATGAGGCG    | 60.175 | 20 | 176 | 9    | 184  |
| 60.57  | 27 | AACCGTGTGCCCTAAAAAT     | 60.593 | 20 | 231 | 7    | 237  |
| 60.036 | 20 | TGAGGAAAGTGATCCTTGGG    | 60.042 | 20 | 112 | 11   | 122  |
| 59.784 | 20 | CCCAAGACCCCAATTTGATT    | 60.91  | 20 | 173 | 1218 | 1390 |
| 59.982 | 21 | AATGCTATTTGGAGCCATCG    | 60.06  | 20 | 209 | 32   | 240  |
| 59.547 | 20 | AATGGGGTGTGAGGAAATGA    | 60.173 | 20 | 189 | 571  | 759  |
| 59.966 | 20 | AATTCGAAAGTTTGCCAAAAA   | 58.773 | 21 | 106 | 287  | 392  |
| 58.348 | 24 | GGCCGATATTTGGCCTTTA     | 61.096 | 20 | 206 | 36   | 241  |
| 59.721 | 20 | TAAAGTTTGGTGACGACCGC    | 61.06  | 20 | 273 | 924  | 1196 |
| 59.897 | 20 | ACTATGGCCACCGTCACACT    | 60.453 | 20 | 146 | 496  | 641  |
| 60.073 | 20 | CATTTCTCCTCCGGTGTTA     | 59.926 | 20 | 188 | 920  | 1107 |
| 61.103 | 21 | AATGGAGTAGATTTTCCCATGA  | 57.552 | 22 | 153 | 204  | 356  |
| 60.588 | 22 | TTAATTATGGGACGGAGGGA    | 59.227 | 20 | 152 | 16   | 167  |
| 59.545 | 20 | AGCATGTAACATGTGTCCCT    | 58.603 | 22 | 269 | 1136 | 1404 |
| 60.05  | 20 | GGATTGCAAGATCGACAAT     | 60.043 | 20 | 253 | 1071 | 1323 |
| 60.065 | 20 | AGTAAAGGGTTTGCCTTGA     | 59.883 | 20 | 236 | 965  | 1200 |
| 59.694 | 20 | ACGAATTAGCGTTTGATGGC    | 60.103 | 20 | 279 | 2492 | 2770 |
| 60.274 | 20 | CTCCTGCACCAGAACTCTCC    | 59.986 | 20 | 244 | 178  | 421  |
| 60.12  | 20 | AAACATCTTGCCACAGGAGG    | 60.111 | 20 | 212 | 132  | 343  |
| 59.329 | 21 | TCCAAATGTAACTCGACCCA    | 58.973 | 20 | 185 | 1339 | 1523 |
| 59.971 | 20 | GAGCAACTTCTTGCTCGTT     | 59.621 | 20 | 114 | 513  | 626  |
| 59.901 | 20 | GAGGCTCCTTCAAACACTGC    | 59.997 | 20 | 234 | 287  | 520  |
| 60.461 | 20 | CCCATCACCACACATAAT      | 60.317 | 20 | 191 | 3173 | 3363 |
| 60.066 | 20 | CTCCCGTTTTCTCTCTCCTT    | 59.811 | 20 | 207 | 691  | 897  |
| 60.067 | 20 | CCACCCTAGCAAAGTTGAA     | 60.103 | 20 | 244 | 2593 | 2836 |
| 59.824 | 21 | AGATTGTCGCCAAAAACACG    | 59.971 | 20 | 208 | 177  | 384  |
| 59.32  | 20 | TGCTGGTCGCTATCTCTGAA    | 59.697 | 20 | 171 | 1780 | 1950 |
| 60.051 | 20 | TTGCTGACTCTTCAGCCATC    | 59.116 | 20 | 211 | 466  | 676  |
| 59.881 | 20 | AGCTAAAGTCGGGCCAAGAT    | 60.228 | 20 | 245 | 918  | 1162 |
| 60.43  | 20 | TGAAACTCCACTGCCCAAAT    | 60.495 | 20 | 208 | 2    | 209  |
| 59.865 | 22 | CTTCGAGGGGAGTGTTGAAG    | 59.837 | 20 | 276 | 43   | 318  |
| 59.648 | 20 | TGAAATGGTAGAAATCGCCG    | 60.961 | 20 | 212 | 47   | 258  |
| 59.887 | 20 | TGGATTATGTAGCTGACCCCA   | 60.337 | 21 | 125 | 318  | 442  |
| 59.988 | 20 | CCCTCGCTAACTCTTTGTGC    | 60.015 | 20 | 261 | 749  | 1009 |
| 59.577 | 20 | GTGAGAAATCGAGGTCCGAA    | 60.195 | 20 | 146 | 551  | 696  |
| 59.297 | 20 | ACGGGATTGAGTTCACGTTT    | 59.973 | 20 | 232 | 4    | 235  |
| 60.323 | 20 | ATAGGGCAGGCCTAAGGTGT    | 59.983 | 20 | 246 | 403  | 648  |
| 59.764 | 20 | GCCACACGAGGAATAGGAAA    | 60.074 | 20 | 222 | 736  | 957  |
| 59.869 | 20 | GGTGAATCAGCAGGGGTTTA    | 59.933 | 20 | 109 | 996  | 1104 |

|        |    |                          |        |    |     |      |      |
|--------|----|--------------------------|--------|----|-----|------|------|
| 59.453 | 24 | TCAAAAGTTATTTTCGAGGACGA  | 60.115 | 23 | 243 | 34   | 276  |
| 59.75  | 20 | TCCCAATTTACCTTTCCAC      | 59.767 | 20 | 272 | 2809 | 3080 |
| 59.566 | 20 | GGTCATGCGTTCAAGTTTT      | 59.978 | 20 | 254 | 344  | 597  |
| 60.011 | 20 | CCACAGTTGGATCTCGACAA     | 59.676 | 20 | 259 | 349  | 607  |
| 59.717 | 20 | ATCCATCTGTCTCCATTGC      | 59.893 | 20 | 242 | 1205 | 1446 |
| 60.91  | 20 | AGCTCGAAGTGAAGACGAG      | 59.745 | 20 | 222 | 8    | 229  |
| 60.074 | 20 | ATGATCCATATAGCCGACGC     | 59.914 | 20 | 244 | 1950 | 2193 |
| 59.955 | 20 | CCTTCAGCAGCCTTTGTCTC     | 60.134 | 20 | 188 | 1105 | 1292 |
| 60.16  | 20 | AGGGTTAAAGAAGCCGAAGC     | 59.856 | 20 | 255 | 57   | 311  |
| 60.067 | 20 | TCGGAAGCTTCAAGTCCAAT     | 59.813 | 20 | 247 | 282  | 528  |
| 59.843 | 20 | AACCGGATACAGCCACAAAG     | 59.993 | 20 | 144 | 249  | 392  |
| 59.7   | 20 | GAGAGGCCGGATGATCTACA     | 60.181 | 20 | 218 | 1    | 218  |
| 60.223 | 20 | CCTGAGGACTGATGGTGGTT     | 59.962 | 20 | 235 | 1214 | 1448 |
| 60.24  | 20 | AAGGACAGGACAGCCGTATG     | 60.134 | 20 | 267 | 821  | 1087 |
| 59.297 | 20 | GGTGAAAACCCGAGTTCAA      | 59.948 | 20 | 115 | 3    | 117  |
| 59.955 | 20 | TTGCTCAACTAGGCAATCCC     | 60.214 | 20 | 230 | 251  | 480  |
| 59.302 | 27 | AACCCTAAATCTTCATCACACG   | 58.124 | 22 | 277 | 632  | 908  |
| 60.014 | 23 | TCATGTAGTCGACCCCAATTT    | 59.302 | 21 | 101 | 387  | 487  |
| 59.488 | 22 | AAAAAGATTTTACGTGTTTCACGA | 59.169 | 24 | 110 | 61   | 170  |
| 59.894 | 20 | CTCATTATGATGCTCCGCCT     | 60.199 | 20 | 109 | 209  | 317  |
| 59.971 | 20 | CCTCTTGCATATTGTGGCCT     | 60.096 | 20 | 270 | 161  | 430  |
| 60.024 | 20 | TGCATTGGCTGAAGAAAGTG     | 59.988 | 20 | 111 | 2194 | 2304 |
| 59.903 | 20 | TCTTTGAGGGACATTCGGAC     | 60.05  | 20 | 142 | 349  | 490  |
| 59.649 | 20 | ACAGCGCTATAGGTTGCTCA     | 58.703 | 20 | 140 | 836  | 975  |
| 60.938 | 21 | CCCAAGACCCCAATTTGATT     | 60.91  | 20 | 179 | 2188 | 2366 |
| 59.297 | 20 | AATCAATACGGACTTTGCC      | 58.906 | 20 | 274 | 375  | 648  |
| 60.263 | 22 | CATGTCCCCAGAGATGAAAGA    | 60.058 | 21 | 208 | 6    | 213  |
| 60.899 | 19 | TGACAGGAGGAAATAATGAGATT  | 59.502 | 24 | 269 | 412  | 680  |
| 59.738 | 20 | ATGTAGCCGACCCCAATTTA     | 59.297 | 20 | 220 | 311  | 530  |
| 59.917 | 20 | TGACTACAACGACGATTCGG     | 59.716 | 20 | 251 | 118  | 368  |
| 58.502 | 21 | TGATACTTCGCATCTCACGG     | 59.823 | 20 | 157 | 1    | 157  |
| 60.91  | 20 | CACGGTCCCTTATCACGACT     | 59.989 | 20 | 110 | 2    | 111  |
| 59.784 | 20 | TTTGATTGGGAATAATTGGG     | 57.289 | 20 | 237 | 279  | 515  |
| 60.647 | 20 | GGCCTGAGCAATGGAATAAA     | 60.038 | 20 | 267 | 164  | 430  |
| 59.297 | 20 | GGTTGCACATAATAGCTGCG     | 59.353 | 20 | 228 | 0    | 227  |
| 59.973 | 20 | TCCCGGTACGACGAAATTAG     | 59.953 | 20 | 170 | 666  | 835  |
| 60.257 | 20 | CCTTTGTTGCACTAAGTTCCAAAT | 60.746 | 24 | 261 | 270  | 530  |
| 59.673 | 25 | TCGATTGTCCACAATTGCAT     | 59.931 | 20 | 169 | 1519 | 1687 |
| 59.297 | 20 | CGGCTAAAATCGGTCAAAC      | 59.586 | 20 | 247 | 1    | 247  |
| 59.799 | 20 | ATGAGGATTCTGTGGTGCCT     | 60.542 | 20 | 233 | 2    | 234  |
| 59.93  | 21 | TGTGGATATTCTTTAATTTGTGCC | 59.318 | 24 | 205 | 566  | 770  |
| 60.132 | 20 | CCAGCCTTCCAAATTACCCT     | 60.312 | 20 | 221 | 3213 | 3433 |
| 60.411 | 20 | GGCTACCGTGGACATGAGTT     | 59.997 | 20 | 165 | 3872 | 4036 |
| 59.929 | 20 | CCCGGATTGACACTCCTAGA     | 60.065 | 20 | 231 | 43   | 273  |
| 59.917 | 20 | CCAGCTCTTTCTGAACCCTG     | 59.982 | 20 | 252 | 448  | 699  |
| 59.578 | 21 | CCTGAAACGAGTGATGCTCC     | 60.801 | 20 | 137 | 65   | 201  |
| 59.359 | 21 | TTGGGACAAAAGAAGCTGAA     | 58.475 | 20 | 280 | 1930 | 2209 |
| 60.049 | 20 | GGATCGTTCTCCTCCTCCTC     | 60.157 | 20 | 271 | 502  | 772  |
| 58.698 | 22 | CCCAAGACCCCAATTTGATT     | 60.91  | 20 | 100 | 21   | 120  |
| 60.883 | 20 | ATGGTTTTTGCACCCATTTG     | 60.597 | 20 | 135 | 105  | 239  |
| 58.623 | 20 | CCAAGTTGAATTGTTAGTATCCGA | 59.453 | 24 | 279 | 381  | 659  |
| 60.218 | 20 | TGTAATGCATGGGGGAGAGT     | 60.34  | 20 | 226 | 38   | 263  |
| 60.155 | 20 | GGTCCATGAACCCTGGACTT     | 61.152 | 20 | 145 | 314  | 458  |
| 58.508 | 20 | CCGTCTCACTCCAATTGACA     | 59.676 | 20 | 246 | 158  | 403  |
| 60.427 | 20 | TGCAGATATGGAGCAATTTTT    | 57.413 | 21 | 244 | 15   | 258  |
| 58.067 | 19 | GCGTGACTCAACAGTGTGGT     | 59.789 | 20 | 182 | 0    | 181  |
| 59.989 | 20 | CCCAAGACCCCAATTTGATT     | 60.91  | 20 | 201 | 111  | 311  |
| 59.496 | 22 | CCCGTGGACGTAGATCAGTT     | 59.989 | 20 | 237 | 288  | 524  |

|        |    |                          |        |    |     |      |      |
|--------|----|--------------------------|--------|----|-----|------|------|
| 59.799 | 24 | CGT TACTTGCTGGAGCTAAAAAG | 59.64  | 23 | 158 | 58   | 215  |
| 59.894 | 20 | GGATGCATCAGTTGGAAGGT     | 59.934 | 20 | 271 | 842  | 1112 |
| 59.969 | 20 | GGAAGAGTGGGGGAGAAGAC     | 60.05  | 20 | 250 | 488  | 737  |
| 57.442 | 20 | CTCTAACCCAGCAGCAGACC     | 60.012 | 20 | 238 | 30   | 267  |
| 60.112 | 20 | TGCTCATTATTTGATTGGCG     | 59.662 | 20 | 214 | 14   | 227  |
| 58.518 | 22 | ACGATGCACAAGACATGAGG     | 59.707 | 20 | 167 | 237  | 403  |
| 59.872 | 20 | GGCAA AATTCGTTGGAGAAA    | 60.053 | 20 | 218 | 533  | 750  |
| 60.52  | 20 | GTCGACAGGCATAAGCTTCC     | 59.843 | 20 | 271 | 491  | 761  |
| 59.505 | 20 | TTGGTGCGATAACAATGGTG     | 60.379 | 20 | 244 | 489  | 732  |
| 59.415 | 21 | CCCAAGACCCCAATTTGATT     | 60.91  | 20 | 225 | 2612 | 2836 |
| 59.688 | 20 | GGTCACAACGGAACAACCT      | 59.867 | 20 | 230 | 1609 | 1838 |
| 59.786 | 20 | CACCCAAGTTTCTTCCAAGG     | 59.563 | 20 | 280 | 2159 | 2438 |
| 60.419 | 20 | AAACCCCTCGTGTTGTTTCA     | 60.388 | 20 | 247 | 1235 | 1481 |
| 59.894 | 20 | TCAGCAGCCATCTGTTCTTG     | 60.136 | 20 | 255 | 228  | 482  |
| 59.992 | 20 | CATGCGGAACCAGTTACAAA     | 59.585 | 20 | 274 | 369  | 642  |
| 59.502 | 20 | CTTAATGGGTGAGAGACCCG     | 59.545 | 20 | 147 | 1080 | 1226 |
| 60.197 | 20 | CTTCCCGCAAACGTTGTAT      | 59.996 | 20 | 155 | 417  | 571  |
| 58.783 | 22 | ATTTCCACCGTTCAGACAGG     | 59.966 | 20 | 275 | 52   | 326  |
| 60.443 | 22 | TAGCAGGCCAAAGAGGAAGA     | 60.088 | 20 | 150 | 45   | 194  |
| 59.948 | 20 | AATCAGAATGGTTGGTTGGC     | 59.797 | 20 | 190 | 83   | 272  |
| 59.888 | 20 | GGCCTGTGCTCATAGAGAG      | 59.973 | 20 | 269 | 885  | 1153 |
| 58.965 | 20 | TGAGGCAAGCATCAGAAAGA     | 59.673 | 20 | 235 | 122  | 356  |
| 60.053 | 20 | GCTAGTTGCACCCCTGTCTC     | 59.874 | 20 | 160 | 969  | 1128 |
| 57.968 | 20 | TGGAGAAGGAGGATCCATGT     | 59.46  | 20 | 184 | 35   | 218  |
| 59.801 | 20 | GGAAACCCCATCCAGAAGAT     | 60.133 | 20 | 175 | 680  | 854  |
| 59.734 | 20 | AAAGCTCGAACTTGTGGCAT     | 59.882 | 20 | 271 | 1559 | 1829 |
| 59.528 | 23 | TCCTTAGCCCAAGTTGTACCC    | 60.359 | 21 | 167 | 182  | 348  |
| 59.711 | 24 | GGTGAATTGTGTCGCTCCAT     | 60.935 | 20 | 272 | 2    | 273  |
| 59.145 | 21 | AAGTTTGCCCTATCAAACAGGA   | 60.001 | 22 | 279 | 2150 | 2428 |
| 59.297 | 20 | TGGTGGGAATCTTTTCATCG     | 60.832 | 20 | 164 | 9    | 172  |
| 59.254 | 20 | TGGGGAATTCACGGAGATTA     | 60.266 | 20 | 157 | 66   | 222  |
| 59.924 | 20 | CGCCTGAATATAGCCTTTGC     | 59.838 | 20 | 234 | 1346 | 1579 |
| 59.989 | 20 | TGGAAAACCATCATCAACCA     | 59.75  | 20 | 230 | 6892 | 7121 |
| 60.001 | 21 | TCCCTGTGCATTAATTTTTCA    | 58.148 | 21 | 237 | 50   | 286  |
| 60.02  | 20 | CCTCCGATTTCTTACCATGC     | 59.528 | 20 | 212 | 23   | 234  |
| 59.639 | 22 | TTGCTAGCCTCATCATTCCA     | 59.375 | 20 | 252 | 933  | 1184 |
| 60.051 | 20 | GCAAACAGAAAATGAGGGGA     | 60.051 | 20 | 149 | 523  | 671  |
| 60.068 | 20 | AACCAGCGCTAACACGAAAT     | 59.775 | 20 | 145 | 212  | 356  |
| 60.397 | 20 | TCCACCAATTTGTCCTAAA      | 57.917 | 20 | 132 | 560  | 691  |
| 60.27  | 20 | ACTCAGAATTCGATCGTGG      | 60.073 | 20 | 230 | 46   | 275  |
| 60.11  | 20 | CCACTATGACCATGCCCTCT     | 59.95  | 20 | 261 | 43   | 303  |
| 59.218 | 20 | AAATCCCACAAACGGAAACA     | 60.206 | 20 | 185 | 1475 | 1659 |
| 59.973 | 20 | GCTAGCACCTCTTCTATTGCTGA  | 60.183 | 23 | 119 | 108  | 226  |
| 60.221 | 18 | AGAAGAGGATGTTGGCGATG     | 60.218 | 20 | 185 | 28   | 212  |
| 59.198 | 20 | ACTTCATCATTGAGCCCCAG     | 60.073 | 20 | 280 | 217  | 496  |
| 60.053 | 20 | CCGTCGGTTTCTTGGATTTA     | 59.931 | 20 | 133 | 8305 | 8437 |
| 59.978 | 20 | ACTGCCCTTTCAAATGTTGC     | 60.118 | 20 | 274 | 992  | 1265 |
| 60.143 | 20 | GTCTCCAACGGCATCTCAAG     | 60.801 | 20 | 259 | 453  | 711  |
| 59.924 | 26 | AAGTGCACAAGCACTCGCTA     | 59.812 | 20 | 267 | 17   | 283  |
| 59.186 | 20 | GCAAGGCTGGAAGTAAAAG      | 59.993 | 20 | 226 | 13   | 238  |
| 59.542 | 19 | AACGTGCAACGAGAACTTCA     | 59.49  | 20 | 189 | 2510 | 2698 |
| 60.301 | 20 | GTAGTGGTATGGTGTGGGGG     | 59.966 | 20 | 277 | 646  | 922  |
| 59.872 | 20 | CAAAATTCATGACAACCGA      | 59.371 | 20 | 272 | 1132 | 1403 |
| 57.289 | 20 | GCGTCCAAATAACCGACT       | 60     | 20 | 271 | 65   | 335  |
| 59.939 | 20 | CTGATAGCTCCGACAACCGT     | 60.277 | 20 | 204 | 181  | 384  |
| 59.065 | 20 | ACCTTCGTCAAGGCAGAAGA     | 59.989 | 20 | 214 | 4    | 217  |
| 60.467 | 24 | GGTATGGGGTGTGTCGATT      | 59.488 | 20 | 277 | 108  | 384  |
| 59.82  | 20 | TGATCCACCCTATTTTGCATT    | 59.287 | 21 | 249 | 959  | 1207 |

|        |    |                           |        |    |     |      |      |
|--------|----|---------------------------|--------|----|-----|------|------|
| 58.188 | 24 | TGAATTCTTGACGTTCTCG       | 59.988 | 20 | 254 | 451  | 704  |
| 59.872 | 20 | ATGTAGCCGACCCCAATTTA      | 59.297 | 20 | 261 | 5784 | 6044 |
| 59.856 | 22 | TTGTTTTCATTTGAATAAATACGTC | 58.972 | 26 | 255 | 166  | 420  |
| 58.177 | 24 | TTGATTCGTGAACATTAGGCTC    | 59.229 | 22 | 135 | 55   | 189  |
| 60.134 | 20 | TCAAACCCTAACCCTTTCCC      | 60.159 | 20 | 246 | 15   | 260  |
| 59.914 | 20 | CAATTGAAGGGAAGGAAGCA      | 60.184 | 20 | 222 | 2230 | 2451 |
| 59.705 | 26 | GCGATAAATCTCTGACGATTGC    | 60.102 | 23 | 112 | 9    | 120  |
| 60.328 | 20 | TCGAGAAGTAATCGTCGGCT      | 59.978 | 20 | 245 | 484  | 728  |
| 60.162 | 20 | CACTGGAATGTCAAGGCAGA      | 59.831 | 20 | 101 | 163  | 263  |
| 61.968 | 18 | GAGCTACATTCCCGCCTTTA      | 59.32  | 20 | 194 | 8    | 201  |
| 59.425 | 20 | AGCGTCTTTCCCGAGTCTT       | 60.382 | 20 | 101 | 9    | 109  |
| 60.008 | 20 | ATGTAGCCGACCCCAATTTA      | 59.297 | 20 | 207 | 71   | 277  |
| 60.002 | 20 | TGTCCTATTTCCCAATCCCA      | 60.126 | 20 | 166 | 627  | 792  |
| 59.894 | 20 | GCCGAGACCAACTCTCTACG      | 60.012 | 20 | 178 | 1218 | 1395 |
| 59.623 | 20 | AGCCAATCTCCTCTCAGCAG      | 59.703 | 20 | 244 | 60   | 303  |
| 58.874 | 20 | TCTACGCGGCCATCTCTATT      | 59.829 | 20 | 215 | 2051 | 2265 |
| 60.051 | 20 | CCGGCAGTTACATATTCGCT      | 60.117 | 20 | 231 | 30   | 260  |
| 59.836 | 20 | ATAATCAAGGGTGCAGTCGC      | 60.103 | 20 | 167 | 644  | 810  |
| 60     | 20 | AGGTTGCGTACATCTGACCC      | 59.997 | 20 | 109 | 20   | 128  |
| 60.066 | 20 | TGAAACGGCTCCTTAACTGG      | 60.241 | 20 | 269 | 236  | 504  |
| 60.545 | 20 | CAAACAATTCATTGGTGTCTTG    | 59.411 | 23 | 178 | 410  | 587  |
| 60.315 | 20 | TCATCTCTTGCATCACTATGGG    | 60.096 | 22 | 265 | 98   | 362  |
| 60.074 | 20 | TCAATCGACAGCACTTCCAG      | 59.984 | 20 | 247 | 678  | 924  |
| 60.742 | 20 | GTTGGGCAGCCAAATATTGA      | 60.837 | 20 | 155 | 81   | 235  |
| 59.297 | 20 | GGTGTGTTGTCTGGTGCAAG      | 60.203 | 20 | 100 | 4    | 103  |
| 59.882 | 20 | CCTCGAACGTGTGTGTTAGC      | 59.365 | 20 | 233 | 1961 | 2193 |
| 59.96  | 20 | ATTGACATCGAAATCCTGGG      | 59.75  | 20 | 254 | 3    | 256  |
| 59.124 | 20 | AACTTATTTATGGGTGGCCG      | 60.082 | 21 | 204 | 1310 | 1513 |
| 60.263 | 20 | AGCTTCAGCTCCTCACCAA       | 60.134 | 20 | 172 | 24   | 195  |
| 59.916 | 20 | TTCCGACAAAATCAACACCA      | 59.941 | 20 | 240 | 6006 | 6245 |
| 60.153 | 20 | CAAGTTGAATCAGAACGGCA      | 59.84  | 20 | 225 | 515  | 739  |
| 60.014 | 20 | GGTTC AAGTGT TGGGAGGA     | 59.943 | 20 | 124 | 389  | 512  |
| 59.735 | 20 | CCACTAGAGATGACCTACAAGGA   | 60.063 | 25 | 177 | 608  | 784  |
| 60.573 | 20 | TGGTCTCTGTCCATTGTGCT      | 59.261 | 20 | 159 | 44   | 202  |
| 59.867 | 22 | CATCCAACATGAGGGAAGAG      | 58.071 | 20 | 202 | 2499 | 2700 |
| 58.943 | 20 | CGAGTTTTTGTCTTGCCTT       | 60.42  | 20 | 180 | 21   | 200  |
| 59.933 | 20 | TGATCAGATGCGAGCAAGC       | 61.257 | 19 | 134 | 2255 | 2388 |
| 59.455 | 20 | GGAAGGACCTAGGCCTGAAC      | 60.074 | 20 | 221 | 884  | 1104 |
| 59.536 | 21 | TTCAAGCAATAGGTCTTTAATATC  | 59.499 | 26 | 149 | 13   | 161  |
| 59.108 | 22 | TCTGATCCCCCAAGACCC        | 60.835 | 18 | 110 | 19   | 128  |
| 59.897 | 20 | CGAACAGGCCGACTAATAC       | 59.592 | 20 | 220 | 1218 | 1437 |
| 59.903 | 20 | ACTTTGAAGCTCGGAAACGA      | 59.993 | 20 | 218 | 38   | 255  |
| 60.249 | 20 | CCGCATCGGCCTATTTACTA      | 60.075 | 20 | 158 | 272  | 429  |
| 60.255 | 20 | AGTCACGAGCATGTTTGCAG      | 60.056 | 20 | 234 | 1793 | 2026 |
| 58.496 | 20 | TTCCCTGTAGAGGCAATGG       | 60.066 | 20 | 243 | 41   | 283  |
| 61.63  | 20 | GCCAAGATTTTTGCTCCTTG      | 59.823 | 20 | 274 | 3    | 276  |
| 60.015 | 20 | TCGTTGATTGTACGAGTCGC      | 59.871 | 20 | 183 | 108  | 290  |
| 60.692 | 20 | GGTAACGTTTTCCGACCAA       | 59.839 | 20 | 193 | 29   | 221  |
| 60.006 | 20 | GCGAAAGTTTTGGAAATCA       | 60.053 | 20 | 183 | 1413 | 1595 |
| 60.309 | 20 | ACACATAGGACGGTGGTGT       | 60.159 | 20 | 269 | 4485 | 4753 |
| 59.525 | 20 | CCACAGATTTCCCATGACTTG     | 60.36  | 21 | 167 | 392  | 558  |
| 59.615 | 20 | GATGACAATGATCCCCAAATG     | 60.006 | 21 | 272 | 1403 | 1674 |
| 59.927 | 20 | ATTGCACCATGCATTCCATA      | 59.775 | 20 | 257 | 89   | 345  |
| 60.021 | 20 | AGGTTGCGTACATCTGACCC      | 59.997 | 20 | 199 | 3355 | 3553 |
| 59.573 | 21 | TGTA CTCAATGAAATAGGGTGTGT | 57.629 | 24 | 245 | 581  | 825  |
| 59.859 | 20 | TTTTAGCCGACCCCAATTTA      | 59.429 | 20 | 100 | 321  | 420  |
| 59.95  | 20 | TGTCACACGTATTTTTGCAGC     | 59.79  | 21 | 252 | 66   | 317  |
| 59.909 | 20 | TCGAGGCAGAGAGGAGAGAG      | 59.962 | 20 | 247 | 60   | 306  |

|        |    |                           |        |    |     |      |      |
|--------|----|---------------------------|--------|----|-----|------|------|
| 60.597 | 20 | TGTAGCCGACCCCAATTTAT      | 59.297 | 20 | 161 | 317  | 477  |
| 59.989 | 20 | TACAGTCCGTGTTCCGATGA      | 60.112 | 20 | 157 | 17   | 173  |
| 59.35  | 21 | ATGTAGCCGACCCCAATTTA      | 59.297 | 20 | 134 | 90   | 223  |
| 59.955 | 20 | CGCTTGAAGAGCAGTCAGTG      | 59.922 | 20 | 118 | 656  | 773  |
| 59.943 | 20 | TCAGACGTAAGGAGCGTGTG      | 60.049 | 20 | 186 | 186  | 371  |
| 59.955 | 20 | ACGCAGTCTCTGGATCGAAT      | 59.834 | 20 | 213 | 59   | 271  |
| 59.864 | 20 | GCAACGGAAACAACCTCTTT      | 59.218 | 20 | 171 | 154  | 324  |
| 59.724 | 20 | ACCCTGGGGGCTATCTAGTG      | 60.34  | 20 | 175 | 3    | 177  |
| 59.952 | 20 | GCTCCCACCACAACCAAT        | 59.318 | 18 | 157 | 455  | 611  |
| 60.157 | 20 | TGTCTCCTTCCATTCTTTGG      | 60.042 | 20 | 136 | 549  | 684  |
| 60.017 | 20 | TGAGGGGGAAAAGAGAGGAT      | 60.008 | 20 | 168 | 607  | 774  |
| 60.103 | 20 | AGCCGACTTCACATAGTGGG      | 60.134 | 20 | 170 | 529  | 698  |
| 59.844 | 20 | CTCGAAACCACTCAACCCAT      | 59.966 | 20 | 230 | 436  | 665  |
| 59.979 | 20 | CGACGGAGTTGGAGAAGAAG      | 59.982 | 20 | 215 | 74   | 288  |
| 59.679 | 20 | TCCCGAATCAGATTGGTCTC      | 60.011 | 20 | 239 | 4    | 242  |
| 59.922 | 20 | TCGATCTTAGTTCGGTCCAGC     | 60.362 | 20 | 269 | 881  | 1149 |
| 59.927 | 20 | GTTGGTGGGATTTGAACCTG      | 60.21  | 20 | 208 | 1301 | 1508 |
| 59.411 | 20 | GCGTGCTGAATCTTAACCGT      | 60.278 | 20 | 234 | 575  | 808  |
| 59.966 | 20 | AGAATTCCGGTAAGCCCAAT      | 59.799 | 20 | 229 | 3711 | 3939 |
| 59.973 | 20 | TTCATGTAGCCAACCCCAAT      | 60.192 | 20 | 139 | 7215 | 7353 |
| 60.009 | 20 | CCCAAGACCCCAATTTGATT      | 60.91  | 20 | 269 | 32   | 300  |
| 60.073 | 20 | AACAAGACCAACAAGCACCC      | 60.012 | 20 | 160 | 674  | 833  |
| 60.003 | 20 | AGAGCAGAGCAAAGCAGCTC      | 60.187 | 20 | 275 | 873  | 1147 |
| 59.861 | 20 | AGTTGCGTACATCTGACCC       | 59.997 | 20 | 101 | 324  | 424  |
| 60.171 | 20 | TTTATTGGGGGAGAATTCTTGA    | 59.782 | 22 | 255 | 79   | 333  |
| 60.119 | 20 | TGGGAGTGAGTGAGTGTGTGT     | 59.181 | 21 | 260 | 2    | 261  |
| 60.074 | 20 | GACATGGAGGAGGGACGG        | 61.494 | 18 | 230 | 97   | 326  |
| 60.17  | 20 | AATGCTGTTAGGTGCATTGAA     | 58.307 | 21 | 205 | 221  | 425  |
| 59.138 | 20 | GATGATGATGCCACTCTTGG      | 59.04  | 20 | 134 | 58   | 191  |
| 58.697 | 20 | ATCGAAAAGAGGTGAGCGAA      | 59.955 | 20 | 250 | 567  | 816  |
| 59.604 | 20 | CTTTGCTTGAAAATGCCGTT      | 60.244 | 20 | 247 | 200  | 446  |
| 60.119 | 20 | ACGGTAGGGGGCAAAAATAC      | 60.075 | 20 | 262 | 54   | 315  |
| 58.292 | 25 | TGGCTTGATTTAGCCCATTT      | 59.547 | 20 | 210 | 1    | 210  |
| 59.845 | 20 | TTTCTCAACCTCGTATTCTTAGG   | 60.02  | 24 | 260 | 729  | 988  |
| 59.541 | 21 | GCAGACGTAACCTCGCAAAT      | 60.278 | 20 | 100 | 341  | 440  |
| 60.103 | 20 | GCACAAGTTGGATTCCATGA      | 59.502 | 20 | 101 | 989  | 1089 |
| 60.034 | 20 | ATCACGCACTGTTGTTGCTC      | 59.912 | 20 | 101 | 208  | 308  |
| 60.587 | 20 | CGCAACGGAAACAATCTCTT      | 60.249 | 20 | 132 | 56   | 187  |
| 61.383 | 20 | TAACCCAATCGCAGATTTCC      | 59.901 | 20 | 198 | 2    | 199  |
| 57.113 | 19 | TTTGCATACCTTCCGATCAA      | 59.112 | 20 | 244 | 12   | 255  |
| 59.809 | 20 | TGCAGATTGCGATGGATAAA      | 60.179 | 20 | 103 | 252  | 354  |
| 59.654 | 25 | TCCAGCACTCATCTGTTTTT      | 60.248 | 21 | 243 | 1051 | 1293 |
| 59.881 | 23 | TGCCTAATACTGTTTTACGTAGAG  | 58.155 | 25 | 276 | 121  | 396  |
| 59.81  | 20 | TGTAGCCGACCCCAATTTAT      | 59.297 | 20 | 158 | 3161 | 3318 |
| 59.84  | 20 | TGAATGCACAGAGAGATGGAA     | 59.384 | 21 | 193 | 11   | 203  |
| 59.772 | 21 | TGCCATGCTATCCTAGTATTCCG   | 59.257 | 22 | 225 | 466  | 690  |
| 60.905 | 20 | AGTTGCGTACATCTGACCC       | 59.997 | 20 | 117 | 1    | 117  |
| 59.639 | 20 | TGTCTATGTGCGTTTTTGGC      | 59.735 | 20 | 268 | 909  | 1176 |
| 58.989 | 25 | TAATCCCAAACCTCCCAACA      | 60.162 | 20 | 276 | 3    | 278  |
| 58.359 | 23 | TGCGACAAAACATTTAGGCA      | 60.251 | 20 | 269 | 188  | 456  |
| 59.603 | 20 | AAATTTAATGAACGCGTGCC      | 59.971 | 20 | 202 | 665  | 866  |
| 60.019 | 22 | TGCAAATTTTCAGCCATGAG      | 59.809 | 20 | 108 | 70   | 177  |
| 60.251 | 20 | ACCATCTTGGTGCCGTA         | 59.997 | 20 | 263 | 1093 | 1355 |
| 60.721 | 20 | TTTAAGTTTATTCATTTATGTTGAT | 57.211 | 27 | 274 | 156  | 429  |
| 58.544 | 21 | GGCATCATCAATAGCTTGGG      | 60.435 | 20 | 243 | 42   | 284  |
| 60.074 | 20 | GATGAGGCTGGGAACCAATA      | 59.894 | 20 | 164 | 7    | 170  |
| 59.768 | 20 | TTCCCAAATCATCTTACCC       | 59.727 | 20 | 243 | 87   | 329  |
| 60.736 | 18 | TCTTCGCCTTTGTCTGGAGT      | 59.989 | 20 | 100 | 4    | 103  |

|        |    |                           |        |    |     |      |      |
|--------|----|---------------------------|--------|----|-----|------|------|
| 60.997 | 20 | TGAGAAAAATGGAAGTGCCC      | 60.051 | 20 | 200 | 364  | 563  |
| 59.183 | 20 | CTTTTGGGCAAAGGATCAAA      | 60.046 | 20 | 266 | 67   | 332  |
| 59.476 | 20 | CCCAAATCCCCTTTTGACAT      | 60.91  | 20 | 117 | 568  | 684  |
| 59.933 | 20 | TCGTCAGGATAAAGGGTGGTC     | 59.927 | 20 | 182 | 166  | 347  |
| 60.015 | 20 | TTGTCATATGAATCATGAAATTGA  | 57.088 | 24 | 188 | 1    | 188  |
| 59.903 | 20 | GATGGTACAAGAGGCCGAAA      | 60.074 | 20 | 190 | 21   | 210  |
| 60.032 | 20 | ATCATACTGCACCCCTACGC      | 59.985 | 20 | 220 | 171  | 390  |
| 60.331 | 20 | TCGATGCCAAAATGTAGCAA      | 60.215 | 20 | 257 | 96   | 352  |
| 60.118 | 20 | GATCCTCATCCTCCTCCTCC      | 59.973 | 20 | 210 | 306  | 515  |
| 60.036 | 20 | TTTGGATAAAGTTATCAAGCTCTT  | 59.326 | 26 | 141 | 1280 | 1420 |
| 60.656 | 20 | TAGCAGGCCAAAGAGGAAGA      | 60.088 | 20 | 171 | 298  | 468  |
| 60.053 | 20 | CATGGACTTTACACATGCCG      | 59.988 | 20 | 195 | 3237 | 3431 |
| 60     | 20 | TGTGGCAAGGTTTTAGGAGG      | 60.103 | 20 | 208 | 3823 | 4030 |
| 59.575 | 24 | GGTTTACCACACAATTCAATCAA   | 58.776 | 23 | 147 | 26   | 172  |
| 59.161 | 20 | TTTCCCAACCTCAACATTC       | 59.767 | 20 | 195 | 0    | 194  |
| 59.762 | 20 | GGTGACCAAGTGGCATTCTT      | 59.973 | 20 | 275 | 118  | 392  |
| 60.711 | 20 | TGACATTTTTATGCTAGTTTGAGCA | 60.189 | 25 | 266 | 540  | 805  |
| 59.894 | 20 | TTTCGAAAGGCACAAGATCA      | 59.395 | 20 | 215 | 1136 | 1350 |
| 59.891 | 20 | CCCCGCTACAAAAGATTGAA      | 60.067 | 20 | 254 | 1176 | 1429 |
| 60.211 | 20 | AAAACCCTCAACATCCATGA      | 57.835 | 20 | 153 | 563  | 715  |
| 60.254 | 22 | TTGTTTTATCTGTGCCGTTGA     | 59.216 | 21 | 140 | 17   | 156  |
| 60.263 | 20 | ATACGTGCGACAATGACCAA      | 59.995 | 20 | 206 | 2445 | 2650 |
| 59.326 | 20 | TTCTTGCATGGGTATTGCTT      | 58.241 | 20 | 277 | 820  | 1096 |
| 60.088 | 20 | TCCGAAGTCTCAGTTGGGTT      | 59.697 | 20 | 272 | 433  | 704  |
| 59.955 | 20 | CTACCCTGGGTTTGTTCCTG      | 59.444 | 20 | 198 | 200  | 397  |
| 60.02  | 20 | CTCTCTCGCCCTCAAATACG      | 59.971 | 20 | 270 | 1243 | 1512 |
| 59.862 | 20 | AACACGATGGCGATGTATGA      | 59.955 | 20 | 136 | 294  | 429  |
| 59.694 | 20 | GGAAATAGCCTCTCCGATCC      | 60.003 | 20 | 237 | 731  | 967  |
| 59.909 | 19 | AGCCACAAACCTGAACCAAC      | 60.012 | 20 | 280 | 503  | 782  |
| 60.024 | 20 | TCATCATCGGGAGGAGTAGG      | 60.027 | 20 | 200 | 1109 | 1308 |
| 59.68  | 22 | TGTTAATAGGGCAAATGCCA      | 60.321 | 21 | 199 | 21   | 219  |
| 59.017 | 22 | CAATTTCAAGAACCCCAAA       | 59.772 | 20 | 254 | 18   | 271  |
| 59.598 | 20 | GAAACCACATCTAACCTGTTCT    | 57.578 | 22 | 120 | 11   | 130  |
| 59.74  | 20 | AAGGATTCCAGCCACAAAGA      | 59.67  | 20 | 260 | 2306 | 2565 |
| 59.894 | 20 | TCTCCTTTGTCATGTGCTCG      | 59.984 | 20 | 242 | 1415 | 1656 |
| 59.973 | 20 | CGCATCCAAATACTTGTTCTG     | 59.182 | 20 | 252 | 251  | 502  |
| 60.11  | 20 | GAGCAACTTCTTGCTCGTT       | 59.621 | 20 | 123 | 141  | 263  |
| 59.649 | 20 | CACGGGCACATAATGAACTG      | 59.988 | 20 | 220 | 1648 | 1867 |
| 60.277 | 20 | GCAGTGATCGGTTCTTCACA      | 59.837 | 20 | 244 | 298  | 541  |
| 59.994 | 20 | TTAGTTCATAGGCCCGTTGG      | 59.953 | 20 | 200 | 1097 | 1296 |
| 59.29  | 21 | GGATTCTTGAGCCAAAACG       | 59.685 | 20 | 253 | 53   | 305  |
| 60.049 | 20 | GTTTCAGGGCAGACTTGCTC      | 59.997 | 20 | 256 | 251  | 506  |
| 59.598 | 20 | AAAGGGGCTTCCAATCATCT      | 59.903 | 20 | 119 | 110  | 228  |
| 59.631 | 20 | TGTTGCAGCTCTTCTTCGTG      | 60.324 | 20 | 179 | 1455 | 1633 |
| 60.257 | 20 | AAGTTGTCATTTGCGCCTCA      | 60.636 | 20 | 243 | 574  | 816  |
| 59.996 | 20 | TCTCGGCATTCTCATCCTCT      | 59.91  | 20 | 229 | 2367 | 2595 |
| 59.184 | 21 | TCTTGGTTAATGGCGATGGT      | 60.331 | 20 | 271 | 186  | 456  |
| 59.465 | 20 | CCTGAAACGAGTGATGCTCC      | 60.801 | 20 | 216 | 14   | 229  |
| 60.407 | 20 | TTGTTGAAATTGGACCAGCA      | 60.088 | 20 | 234 | 2326 | 2559 |
| 59.996 | 20 | TCTTGTTTACCGCCTATCG       | 60.089 | 20 | 177 | 35   | 211  |
| 59.911 | 20 | TGGATTTGGATTTTATGGGT      | 59.991 | 20 | 252 | 1570 | 1821 |
| 60.111 | 20 | AGGCTTAACCAATTTGGGA       | 58.556 | 20 | 266 | 56   | 321  |
| 60.022 | 20 | TCCATAGTGTGCGGTGACAT      | 59.992 | 20 | 183 | 2202 | 2384 |
| 59.455 | 20 | CAAAATAGCCCGAGGTTGAA      | 60.067 | 20 | 143 | 92   | 234  |
| 60.014 | 20 | GCATGTGAGGGTGGTTGAGT      | 60.999 | 20 | 273 | 464  | 736  |
| 59.661 | 20 | TTCGTGATTAATTCCGACCG      | 60.827 | 20 | 167 | 411  | 577  |
| 60.196 | 20 | CTGCAGCCATCTGTTCTTGA      | 60.136 | 20 | 174 | 34   | 207  |
| 60.315 | 20 | TAAGACCAGTTTTGCCCTGG      | 60.103 | 20 | 175 | 763  | 937  |



|        |    |                          |        |    |     |      |      |
|--------|----|--------------------------|--------|----|-----|------|------|
| 60.399 | 20 | TCAACGACGAGCTGCTTAGA     | 59.888 | 20 | 121 | 9    | 129  |
| 60.307 | 20 | TGTGGGTTCTTTTATTAATCACTG | 58.605 | 25 | 276 | 309  | 584  |
| 60.374 | 24 | TGGAATTGTTGTAATCTCGCAC   | 60.003 | 22 | 255 | 27   | 281  |
| 57.829 | 27 | CTTTTGTACGGGTCGGGTTT     | 61.114 | 20 | 177 | 51   | 227  |
| 58.585 | 22 | TTTGCTTACGGAAACAGCAA     | 59.486 | 20 | 202 | 43   | 244  |
| 59.789 | 20 | CGCAATTTACAACCATTATCTTG  | 58.625 | 23 | 161 | 2282 | 2442 |
| 59.396 | 20 | TGATATAATGGCGTAGCGCA     | 60.219 | 20 | 270 | 19   | 288  |
| 60.036 | 20 | CGACTGGTCCGAATCTGAGT     | 60.261 | 20 | 241 | 752  | 992  |
| 60.131 | 22 | GCGACATTTAAGAGTTGGGG     | 59.569 | 20 | 259 | 1097 | 1355 |
| 61.032 | 20 | CCAAGTTCAGTCTTCTTCATCCA  | 60.646 | 23 | 263 | 771  | 1033 |
| 59.688 | 20 | TTGGAAATTCTCCTCCCTTTC    | 59.519 | 21 | 178 | 1    | 178  |
| 59.903 | 20 | TGGGAAGTTCAAGGAGGATG     | 60.042 | 20 | 139 | 178  | 316  |
| 59.963 | 20 | CCACCAATTTCTATTTCTTGC    | 59.844 | 22 | 224 | 12   | 235  |
| 60.176 | 20 | TGTAGCCGACCCCAATTTAT     | 59.297 | 20 | 148 | 763  | 910  |
| 60.224 | 20 | ATTTGCACTCCAAGACACC      | 60.119 | 20 | 178 | 297  | 474  |
| 58.544 | 21 | CACCAAAGCCTTAATCCCAA     | 59.931 | 20 | 128 | 38   | 165  |
| 60.033 | 20 | TGAACACAATCAGTATCGTAAATA | 60.514 | 27 | 159 | 137  | 295  |
| 60.155 | 20 | TTGCCAACCTCATTTGTTTT     | 58.12  | 20 | 280 | 90   | 369  |
| 60.088 | 20 | TGTAGCCGACCCCAATTTAT     | 59.297 | 20 | 140 | 271  | 410  |
| 60.27  | 20 | GTACGCAATCATGCATCACC     | 59.963 | 20 | 147 | 89   | 235  |
| 60.096 | 20 | AGATGATCCGAACGCAAAC      | 60.081 | 20 | 228 | 7    | 234  |
| 60.326 | 20 | GCCGCGTACTCTTGTCTCAT     | 60.428 | 20 | 255 | 163  | 417  |
| 60.096 | 20 | TCATGTAGTCGACCCCAATTT    | 59.302 | 21 | 221 | 67   | 287  |
| 59.943 | 20 | AAGTCCTCTCCGCACTTCAA     | 59.989 | 20 | 278 | 9    | 286  |
| 60.894 | 20 | GCTTCTCGATCGGTTCAAGTC    | 59.957 | 20 | 163 | 15   | 177  |
| 60.238 | 22 | TGTGTTGATGGAGCAAGAGG     | 59.831 | 20 | 171 | 55   | 225  |
| 59.799 | 20 | AGGGGGAGAGTTCTCTTGGA     | 60.186 | 20 | 199 | 146  | 344  |
| 59.882 | 20 | ACTCCACCAGCACGATTAT      | 59.434 | 20 | 217 | 10   | 226  |
| 60.046 | 20 | GCTGGAGCAAACCTTTCTGG     | 60.134 | 20 | 152 | 281  | 432  |
| 59.713 | 20 | CATTGATCGTATTTGGGATCTTC  | 59.693 | 23 | 136 | 199  | 334  |
| 59.767 | 20 | TGCAATGGCTTTTCATTGTT     | 59.161 | 20 | 195 | 210  | 404  |
| 60.012 | 20 | CGTGGCTGCCATCAGTATAG     | 59.322 | 20 | 184 | 14   | 197  |
| 59.518 | 20 | TCTCCTTACCACCTCCAAC      | 60.088 | 20 | 268 | 177  | 444  |
| 59.536 | 21 | GGCATTGCCATCAACTTT       | 60.859 | 19 | 262 | 7    | 268  |
| 60.12  | 20 | AAGCTGGAGCTAAGGGCTTC     | 60.117 | 20 | 171 | 160  | 330  |
| 57.787 | 23 | TCCACATTACGTTCTACG       | 59.566 | 20 | 223 | 772  | 994  |
| 60.467 | 20 | TCATGTGCAACTGTGTATGCT    | 57.779 | 21 | 235 | 25   | 259  |
| 59.649 | 27 | AGATCATCAAAGCCCCTCAA     | 59.629 | 20 | 101 | 10   | 110  |
| 59.623 | 21 | TTCCACTTGCTCGACTCTGA     | 59.701 | 20 | 269 | 15   | 283  |
| 60.044 | 20 | AGGAACAAAAATGGTGGCAG     | 59.971 | 20 | 173 | 574  | 746  |
| 60.081 | 20 | AAGTCTGCTTGATGTGGCCT     | 59.874 | 20 | 225 | 605  | 829  |
| 59.744 | 21 | TGATTTGCAATATGGTTTGA     | 59.018 | 21 | 274 | 226  | 499  |
| 59.957 | 20 | TCCCATCTCCTTTGATGAGG     | 60.003 | 20 | 181 | 28   | 208  |
| 61.195 | 20 | CAACATGCAACACCAAACAA     | 59.017 | 20 | 181 | 381  | 561  |
| 59.905 | 20 | TGGTGAAACCGGAGTCTAGC     | 60.255 | 20 | 205 | 82   | 286  |
| 60.081 | 20 | TGATGTTCTGAAACGAGTGA     | 59.278 | 21 | 184 | 19   | 202  |
| 59.297 | 20 | GTGCGGTACGGAAAGGAATA     | 59.96  | 20 | 195 | 5    | 199  |
| 60.017 | 20 | GGTAAGAAGCGGTGAAGCTG     | 60.015 | 20 | 167 | 634  | 800  |
| 59.984 | 20 | TTTTGAGGATTCTGGATGCC     | 60.014 | 20 | 160 | 11   | 170  |
| 60.184 | 20 | CCGACAAGGATCTTAGCCT      | 60.59  | 20 | 101 | 82   | 182  |
| 59.562 | 20 | TTCTCTCACACACACGCA       | 59.126 | 20 | 119 | 66   | 184  |
| 59.869 | 20 | TGGATCACTTGTCCCATCAA     | 59.893 | 20 | 156 | 10   | 165  |
| 59.366 | 21 | GAAAGGAAGTGGAGTCGCAG     | 59.989 | 20 | 166 | 189  | 354  |
| 59.882 | 20 | AGCATCATGAGGAGGAGCAT     | 59.792 | 20 | 171 | 85   | 255  |
| 59.89  | 20 | GCGGTTCTTCTCCATCACAT     | 60.081 | 20 | 260 | 38   | 297  |
| 60.142 | 20 | CTCTGCACTTCGTCCCTCCTC    | 60.135 | 20 | 228 | 106  | 333  |
| 60.015 | 20 | ATGTAGCCGACCCCAATTTA     | 59.297 | 20 | 110 | 259  | 368  |
| 60.224 | 20 | GAGGCGGGAAGGGTTGAC       | 62.969 | 18 | 237 | 182  | 418  |

|        |    |                           |        |    |     |      |      |
|--------|----|---------------------------|--------|----|-----|------|------|
| 59.867 | 23 | TTTTTCTTATTTTATCCCGATTTTT | 57.886 | 25 | 273 | 1586 | 1858 |
| 60.003 | 19 | CATATCTCTCTTTCTCCTTCTCTCT | 59.63  | 27 | 198 | 32   | 229  |
| 60.051 | 20 | GACCCACATAGTGGGAAAA       | 59.647 | 20 | 243 | 3372 | 3614 |
| 60.119 | 20 | GTGGGGAAAATGAGATGGAT      | 58.641 | 20 | 236 | 12   | 247  |
| 59.904 | 20 | GATTCTGTGGTACGTGCCCT      | 59.997 | 20 | 194 | 467  | 660  |
| 59.997 | 20 | GTTGGGCAGCCAAATATTGA      | 60.837 | 20 | 269 | 318  | 586  |
| 60.074 | 21 | CGAGCCTGGATTCTTCTCTG      | 60.088 | 20 | 274 | 48   | 321  |
| 59.861 | 20 | TTTCGAAATTGGGGGTTTT       | 60.5   | 20 | 236 | 26   | 261  |
| 60.239 | 20 | GCCCCTCGTATATAACTAAAGAAC  | 59.539 | 26 | 126 | 779  | 904  |
| 60.073 | 20 | TCTGCGTCTCCAAGTTCTCA      | 59.701 | 20 | 183 | 734  | 916  |
| 59.21  | 20 | TGGAGAAGTTAACCAAGGGG      | 59.024 | 20 | 106 | 230  | 335  |
| 59.95  | 25 | TGAACACTCAGTTGCATGCTT     | 59.505 | 21 | 257 | 417  | 673  |
| 59.993 | 20 | CCCCAGTGAACGAAAATTA       | 59.795 | 20 | 133 | 480  | 612  |
| 60.786 | 20 | TCTGCAGCCATCTGTTCTTG      | 60.136 | 20 | 160 | 20   | 179  |
| 60.075 | 20 | TGCCGATAAGACCTCTATGTGA    | 59.73  | 22 | 234 | 506  | 739  |
| 60.183 | 20 | GAAGATGAAGTGTCTGTTGCG     | 59.445 | 20 | 235 | 1404 | 1638 |
| 60.051 | 20 | TTGGGATTAAGGCTTTGGTG      | 59.931 | 20 | 233 | 709  | 941  |
| 60.235 | 20 | CGCTCGTTCTGATTTTCTGA      | 59.148 | 20 | 143 | 487  | 629  |
| 60.321 | 23 | GACATTAGGGCAAAGCCAA       | 60.074 | 20 | 120 | 54   | 173  |
| 58.654 | 24 | TGTCACGAACGGTTTTGATT      | 59.024 | 20 | 241 | 17   | 257  |
| 59.927 | 20 | TTGTTGTTTCCATTCCGTGA      | 59.941 | 20 | 157 | 405  | 561  |
| 59.82  | 20 | ATGACAGCTAGAGAGCCCA       | 59.973 | 20 | 174 | 9    | 182  |
| 59.989 | 20 | AGAGAAGGAAGGTGACGGGT      | 60.111 | 20 | 133 | 608  | 740  |
| 59.813 | 20 | AGAGGTCGTGGACGAGGTAG      | 59.325 | 20 | 162 | 44   | 205  |
| 59.874 | 20 | GGCCTTCAACTCTCTGCTTG      | 60.134 | 20 | 120 | 304  | 423  |
| 59.716 | 20 | TTCATGTAACCGACCCCAAT      | 60.051 | 20 | 165 | 4052 | 4216 |
| 59.682 | 20 | CTTTGACGTCATGGATGCTG      | 60.263 | 20 | 224 | 60   | 283  |
| 60.199 | 19 | ATCCCTCAGTTTTGTGCG        | 60.11  | 20 | 216 | 25   | 240  |
| 60.11  | 20 | ATAAGGAGGAGAGCGGTGGT      | 60.096 | 20 | 177 | 92   | 268  |
| 57.789 | 22 | AGGAAATGATCACAGGCCAT      | 59.366 | 20 | 236 | 245  | 480  |
| 60.192 | 20 | CAGCCGCAACTGAATTTATG      | 59.325 | 20 | 187 | 2269 | 2455 |
| 60.036 | 20 | AAATCTCCTAGCCGGAGACC      | 59.674 | 20 | 144 | 47   | 190  |
| 59.943 | 20 | GAAACAACCGAGCAGAAACC      | 59.717 | 20 | 151 | 338  | 488  |
| 60.483 | 20 | GGAGATGGAGGATGTGAAGC      | 59.617 | 20 | 166 | 56   | 221  |
| 59.834 | 20 | TCCCATCTAAGAATGGTCG       | 59.887 | 20 | 252 | 43   | 294  |
| 59.96  | 20 | CCCAAGACCCCAATTTGATT      | 60.91  | 20 | 164 | 1803 | 1966 |
| 59.469 | 20 | CGTFACTCCCACATGCACAC      | 60.032 | 20 | 269 | 356  | 624  |
| 60.36  | 21 | TGACAATTTATCATTTCTGTAAAC/ | 58.939 | 26 | 250 | 2472 | 2721 |
| 59.794 | 20 | GATCTCCCTATCTCCGGGAA      | 60.367 | 20 | 140 | 48   | 187  |
| 60.669 | 20 | TATGGTGGATTGGTGTGGAG      | 59.215 | 20 | 132 | 399  | 530  |
| 57.096 | 21 | AAACCAAACATGCTTCCACA      | 59.024 | 20 | 239 | 427  | 665  |
| 59.972 | 20 | GAAGGGGAATTCATGGAAG       | 60.632 | 20 | 233 | 862  | 1094 |
| 60.103 | 20 | CCGGTACATGACTTCGAGGA      | 61.055 | 20 | 122 | 356  | 477  |
| 59.95  | 20 | CCAAGATTTCCGAAACCAA       | 59.91  | 20 | 213 | 4    | 216  |
| 59.752 | 24 | GCTGATGATCCTGAGAAAACCTG   | 58.936 | 22 | 116 | 14   | 129  |
| 60.28  | 20 | TGCACTTCATTTCAATTTATGC    | 59.167 | 23 | 232 | 28   | 259  |
| 58.863 | 24 | GATTTTGTGTGGCGGGTTAC      | 60.235 | 20 | 214 | 19   | 232  |
| 59.988 | 20 | GCCCAATTTGTGAGAGTGGT      | 59.973 | 20 | 237 | 871  | 1107 |
| 60.188 | 20 | ATCTTCTCGCGATCAGTGCT      | 60.127 | 20 | 246 | 83   | 328  |
| 59.82  | 20 | ATAGTGGCAGCTCCATGTCC      | 60.104 | 20 | 266 | 197  | 462  |
| 60.637 | 20 | CAGGTTGACCTGTTTATGCAA     | 58.687 | 21 | 237 | 458  | 694  |
| 59.843 | 20 | ACGGTATTCAGGCTCGGAC       | 60.088 | 19 | 113 | 391  | 503  |
| 60.096 | 20 | CCGTTGAAGAGTTATGTGCAA     | 60.166 | 22 | 142 | 228  | 369  |
| 60.088 | 20 | ACCATGAACTCAAATGGTGA      | 57.908 | 21 | 196 | 1030 | 1225 |
| 60.088 | 20 | TTTTTGCCACATTCCCTCTC      | 60.051 | 20 | 168 | 173  | 340  |
| 60.124 | 20 | GTTTGGTCCGGTTAATGCAC      | 60.235 | 20 | 255 | 530  | 784  |
| 60.78  | 20 | TACGCTGCGCTGCACTAATA      | 60.706 | 20 | 257 | 7    | 263  |
| 60.301 | 20 | GAAATAGGGGGAATGCACAA      | 59.762 | 20 | 218 | 803  | 1020 |

|        |    |                           |        |    |     |      |      |
|--------|----|---------------------------|--------|----|-----|------|------|
| 59.861 | 20 | GCGAAAAATATTTCCAGCAA      | 57.92  | 20 | 193 | 805  | 997  |
| 60.22  | 20 | TACCGAAACAAGATCCGTCC      | 59.933 | 20 | 250 | 1141 | 1390 |
| 60.29  | 21 | TCATGATGCATACGAATGATAAA/  | 59.373 | 24 | 238 | 1266 | 1503 |
| 60.571 | 20 | ACTCTTGGCGGTTTTCGGT       | 60.656 | 18 | 131 | 57   | 187  |
| 60.081 | 20 | TGCCTTTTCAACCATTTTGAC     | 59.967 | 21 | 200 | 3134 | 3333 |
| 59.712 | 20 | TCAGATATTTAATTTGGCGGAGA   | 59.947 | 23 | 240 | 2046 | 2285 |
| 59     | 20 | TAGCAGGCCAAAGAGGAAGA      | 60.088 | 20 | 277 | 104  | 380  |
| 60.044 | 20 | GGAAATGGACCCACAACATC      | 60.034 | 20 | 234 | 2043 | 2276 |
| 59.04  | 20 | ACATCCTGCTGCATGTTCTG      | 59.862 | 20 | 235 | 3    | 237  |
| 59.621 | 20 | TGGTTTGATGTAACATTCCGA     | 58.881 | 21 | 259 | 297  | 555  |
| 60.095 | 20 | AATAGAGATTGCACTCGGGC      | 59.297 | 20 | 261 | 794  | 1054 |
| 59.813 | 20 | CAAATATTTTGGGCTCCCCT      | 60.143 | 20 | 218 | 181  | 398  |
| 59.973 | 20 | TTTTCCCTAACTCTCATCCTTTT   | 57.568 | 23 | 163 | 535  | 697  |
| 59.67  | 20 | TCAGCAGCCATCTGTTCTTG      | 60.136 | 20 | 257 | 40   | 296  |
| 59.685 | 20 | GCATCATCATCATCAAGCATC     | 59.049 | 21 | 272 | 360  | 631  |
| 59.992 | 20 | TTCTCAAGAATTTGGCACCC      | 60.051 | 20 | 189 | 3707 | 3895 |
| 59.962 | 20 | AGGTTGCGTACATCTGACCC      | 59.997 | 20 | 231 | 1002 | 1232 |
| 59.938 | 20 | CGTGCAAGCATCTAAATGGA      | 59.833 | 20 | 222 | 709  | 930  |
| 60.966 | 20 | AATTCTCGATCCAAACCACG      | 59.933 | 20 | 267 | 48   | 314  |
| 60.189 | 20 | GGTGAATCAGCAGGGGTTTA      | 59.933 | 20 | 145 | 285  | 429  |
| 60.046 | 20 | CCTGCTATCGCTTGAGAAG       | 60.11  | 20 | 255 | 61   | 315  |
| 59.411 | 20 | GCGAGTTCAAAGCTGTTTCC      | 60     | 20 | 164 | 141  | 304  |
| 62.522 | 18 | GGTTAATCGGGTCGGAATTT      | 60.02  | 20 | 174 | 15   | 188  |
| 60.206 | 20 | TCCAACCCTATCTATGGCTCC     | 60.293 | 21 | 256 | 225  | 480  |
| 60.274 | 20 | CGTAGGCGATTAGTGGAAGC      | 59.867 | 20 | 274 | 1042 | 1315 |
| 58.969 | 20 | TTTTTCTTGAAAGTACGTACACTT  | 58.23  | 27 | 243 | 768  | 1010 |
| 59.436 | 26 | ATGGGTTGGATTTGGTGTGT      | 59.95  | 20 | 185 | 4    | 188  |
| 58.997 | 22 | GGAGAAGGAGAAGCAGCAAA      | 59.694 | 20 | 276 | 329  | 604  |
| 59.709 | 21 | GGCAGCTTCTTCGTCAAAAC      | 60     | 20 | 146 | 583  | 728  |
| 58.259 | 23 | TTCAATTTGGGGTTTTTGTGC     | 60.712 | 20 | 122 | 174  | 295  |
| 59.341 | 22 | AGCCTTTTGTGGAGGATGAC      | 59.141 | 20 | 279 | 112  | 390  |
| 60.225 | 20 | TGTAAGCTCTGGAACGGAGG      | 60.388 | 20 | 258 | 31   | 288  |
| 61.106 | 20 | CTCGGGATCAATGACATTCC      | 60.281 | 20 | 180 | 4    | 183  |
| 59.992 | 20 | GTACCCACACGAAGACACC       | 60.284 | 20 | 213 | 469  | 681  |
| 59.038 | 20 | GAGTGGCCGACATTGAAGAT      | 60.081 | 20 | 261 | 100  | 360  |
| 58.556 | 24 | GCCGAACCCACTGTGATATT      | 59.82  | 20 | 221 | 35   | 255  |
| 59.499 | 20 | CACTGATCGTACACGATGGC      | 60.144 | 20 | 128 | 670  | 797  |
| 60.015 | 20 | CTTTTCGGGTATTTTCGGGT      | 60.177 | 20 | 131 | 84   | 214  |
| 59.799 | 20 | AGGGGATCGTAAAGCCTGAT      | 59.925 | 20 | 264 | 0    | 263  |
| 59.894 | 20 | ATATGTGGGGATAGGGGTGG      | 60.652 | 20 | 155 | 105  | 259  |
| 58.865 | 26 | CAATTCCTTACTGAATTTGGGG    | 59.711 | 22 | 187 | 276  | 462  |
| 60.112 | 20 | GGGTCACCCTAGATGGGTTT      | 60.575 | 20 | 202 | 30   | 231  |
| 59.315 | 21 | TTGTGGGACGGACCAAAAT       | 61.152 | 19 | 262 | 142  | 403  |
| 60.461 | 20 | GGGGCTATCTTGTGAGTTGC      | 59.7   | 20 | 233 | 0    | 232  |
| 60.025 | 20 | GGAATTGGAGTGGTCTGTGG      | 60.363 | 20 | 176 | 70   | 245  |
| 60.21  | 20 | TTTATGTAGATATGGAGCGATTTT  | 57.561 | 25 | 241 | 364  | 604  |
| 59.978 | 20 | TTCATCGACTCTCGCATCAG      | 60.096 | 20 | 262 | 416  | 677  |
| 58.307 | 21 | ATAGAGCTCCAACAGCTCGC      | 59.746 | 20 | 260 | 621  | 880  |
| 59.897 | 20 | TTATTTTTGCGGTAAAGGCG      | 60.089 | 20 | 187 | 380  | 566  |
| 60.063 | 19 | AACACGAACTTGCCGATTTT      | 59.615 | 20 | 279 | 25   | 303  |
| 59.784 | 20 | AATTGCAGGGGAACACAAAG      | 59.971 | 20 | 158 | 1728 | 1885 |
| 59.83  | 20 | TTTTGTAACCTGAGCAATTTATGG/ | 59.966 | 26 | 203 | 1624 | 1826 |
| 59.04  | 20 | TGTCCTCAGTAATCGCCTGA      | 59.394 | 20 | 256 | 79   | 334  |
| 59.923 | 20 | CGCCCAGTTTTGGTCATACT      | 59.993 | 20 | 140 | 45   | 184  |
| 59.313 | 20 | TTATTGAAAATCCTGATTTGATGA  | 57.712 | 24 | 190 | 3    | 192  |
| 60.11  | 20 | ATGAGTAAGCTGAGCCGGAA      | 59.978 | 20 | 268 | 202  | 469  |
| 60.03  | 20 | GCGTGACAAAATGGTAAAC       | 59.09  | 20 | 263 | 39   | 301  |
| 59.405 | 20 | ATTTAAAACCGATCCCACCC      | 59.888 | 20 | 277 | 160  | 436  |

|        |    |                          |        |    |     |      |      |
|--------|----|--------------------------|--------|----|-----|------|------|
| 59.971 | 20 | CAACGCCAAAACATCAAATG     | 59.969 | 20 | 239 | 72   | 310  |
| 59.982 | 20 | TCGTTCAATTCACGTAGAAGTTCA | 59.799 | 23 | 236 | 667  | 902  |
| 60.159 | 20 | TTCAGCGGATTGAGTGTCA      | 58.88  | 19 | 208 | 32   | 239  |
| 60.169 | 20 | AGCTGGATTACCAGTGCCTC     | 60.285 | 20 | 231 | 271  | 501  |
| 59.973 | 20 | AGTTGCTTTTGTGGAGCG       | 60.42  | 20 | 174 | 471  | 644  |
| 58.621 | 20 | GCCGCACACAGACCATACAT     | 61.966 | 20 | 268 | 1083 | 1350 |
| 60.843 | 20 | CGAAAGAAACACACGTGAGAA    | 58.96  | 21 | 226 | 224  | 449  |
| 59.993 | 20 | CATCAACTCAACAAAGCCGA     | 59.84  | 20 | 180 | 1084 | 1263 |
| 60.192 | 20 | GCCTCCCTCTTAGCCATCT      | 59.811 | 20 | 169 | 227  | 395  |
| 59.691 | 20 | TTGAATCCCAGATTGCATCA     | 60.009 | 20 | 181 | 660  | 840  |
| 59.779 | 20 | GCAACGGAAACAACCTCTTT     | 59.218 | 20 | 160 | 700  | 859  |
| 60.204 | 20 | TCCCATAGCATTTTTAGCC      | 60.038 | 20 | 197 | 618  | 814  |
| 59.479 | 20 | AAGATTTTATTATCCACATTGGG  | 59.113 | 23 | 273 | 90   | 362  |
| 59.827 | 20 | TTGTGTGCATGTATTGACAGGA   | 60.035 | 22 | 172 | 2436 | 2607 |
| 57.069 | 20 | CCTCGAACCTTCTGCAAAATA    | 59.348 | 21 | 280 | 713  | 992  |
| 59.823 | 20 | TTTTTGTATGGGTGCGGTTT     | 59.662 | 20 | 220 | 84   | 303  |
| 59.736 | 20 | GGCAAGAATCCTCACCAAGA     | 60.195 | 20 | 185 | 1012 | 1196 |
| 59.811 | 20 | TTTTACACGTTTCGCATTC      | 59.712 | 20 | 179 | 6    | 184  |
| 59.166 | 20 | GATGAACTTGCCCCAGCAT      | 59.934 | 20 | 239 | 6    | 244  |
| 59.893 | 20 | CCTGAAACGAGTGATGCTCC     | 60.801 | 20 | 214 | 93   | 306  |
| 59.981 | 20 | TGTAGCCGACCCCAATTTAT     | 59.297 | 20 | 191 | 841  | 1031 |
| 60.074 | 20 | GGTTTAGACCGATGTCTGTG     | 60.375 | 20 | 180 | 2410 | 2589 |
| 59.946 | 23 | GGAAGTTGGAATGGCATCAA     | 60.843 | 20 | 271 | 20   | 290  |
| 59.873 | 20 | GCATCACAGTTGAATGTGGG     | 59.967 | 20 | 164 | 279  | 442  |
| 60.422 | 20 | CTTAGGAAAGGCACGACACC     | 59.734 | 20 | 278 | 50   | 327  |
| 60.05  | 20 | TCGTAAACGAGTGTTGGAAAA    | 59.663 | 22 | 278 | 323  | 600  |
| 60.081 | 20 | CCCATAAAGCGAAATGGAGA     | 60.031 | 20 | 251 | 1189 | 1439 |
| 60.025 | 20 | GACAACACTGGAGCTGTGGA     | 59.872 | 20 | 240 | 4850 | 5089 |
| 59.964 | 20 | GGAGTGCATGCTCCAGACTC     | 60.989 | 20 | 153 | 52   | 204  |
| 60.053 | 20 | GCAGACGTAGGAACGGAGAG     | 60.012 | 20 | 125 | 17   | 141  |
| 58.072 | 26 | TTTACTCGCTCTTGCTCGGT     | 60.154 | 20 | 161 | 0    | 160  |
| 59.195 | 20 | TTGTATATGAATCATGAAATTGA  | 57.088 | 24 | 211 | 288  | 498  |
| 59.465 | 20 | TATCATCCTCGGAGGCAATC     | 59.998 | 20 | 230 | 153  | 382  |
| 59.823 | 20 | GGCAGTACTTGAACCTTCGC     | 59.882 | 20 | 123 | 47   | 169  |
| 59.897 | 20 | ACAGGAAACGTAAAGGCCG      | 60.118 | 19 | 215 | 42   | 256  |
| 59.697 | 20 | GAGCGCATGTTCCAGACTTT     | 60.406 | 20 | 105 | 5    | 109  |
| 59.983 | 20 | CATCTCCATGCCTTTGGTCT     | 60.073 | 20 | 129 | 458  | 586  |
| 59.968 | 20 | CCAGGTAGATGCCGTGATTT     | 59.955 | 20 | 245 | 0    | 244  |
| 59.808 | 20 | TGTAGCCGACCCCAATTTAT     | 59.297 | 20 | 268 | 277  | 544  |
| 60.336 | 20 | CTCACCGGAGAAAACCTCAC     | 59.697 | 20 | 204 | 103  | 306  |
| 59.982 | 20 | CACTGTGGTGGCATATCAGG     | 59.984 | 20 | 270 | 1    | 270  |
| 60.133 | 20 | GGAGGAAACAGTGGTGGAAA     | 59.943 | 20 | 249 | 600  | 848  |
| 60.202 | 20 | CCCGAACACTAGTGGGGTTA     | 59.846 | 20 | 265 | 212  | 476  |
| 58.019 | 20 | CACTCGTTTAATGTTACTTTGAC  | 57.266 | 25 | 280 | 192  | 471  |
| 60.431 | 20 | TTTGTATATCGTTTCCGTGTTTT  | 59.809 | 23 | 275 | 307  | 581  |
| 59.691 | 20 | CCCGAACGATGTCAGTACCT     | 59.989 | 20 | 129 | 202  | 330  |
| 59.75  | 20 | GGAAGGTTCTAGGGCCAAGT     | 59.576 | 20 | 194 | 52   | 245  |
| 58.936 | 21 | TGGAATCCGAGAAAATCAGG     | 60.006 | 20 | 196 | 4    | 199  |
| 59.95  | 20 | AAAAGTTTCCACACTTGCCG     | 60.147 | 20 | 271 | 83   | 353  |
| 59.705 | 20 | TTCAAATATTCGACTCCGGC     | 60.038 | 20 | 217 | 36   | 252  |
| 60.042 | 20 | GAGTCTTCCGACAAACCGAG     | 59.844 | 20 | 197 | 127  | 323  |
| 59.978 | 20 | GGTGGTCATTTTGGGGATATAA   | 59.787 | 22 | 180 | 114  | 293  |
| 60.303 | 20 | TAGAGGTGCCTGTGGTGACA     | 60.309 | 20 | 195 | 10   | 204  |
| 59.823 | 20 | TTTTTGGATCCACACCTTCA     | 58.947 | 20 | 259 | 836  | 1094 |
| 60.425 | 21 | CACCACCCCAACCAAATAAA     | 60.452 | 20 | 206 | 19   | 224  |
| 60.68  | 20 | CCCCTAAGCTAGCTCCCTT      | 59.864 | 20 | 113 | 81   | 193  |
| 59.861 | 20 | TATTTGTGCCTCGTTTCGTG     | 59.729 | 20 | 204 | 21   | 224  |
| 59.945 | 20 | CGACCTGCTCCTTTTCAATC     | 59.813 | 20 | 223 | 1137 | 1359 |

|        |    |                           |        |    |     |      |      |
|--------|----|---------------------------|--------|----|-----|------|------|
| 59.844 | 20 | ATAGCCGATCCCACAGAGTG      | 60.096 | 20 | 224 | 2365 | 2588 |
| 59.875 | 20 | TTTTGATGAAGGCGGGAATA      | 60.395 | 20 | 270 | 2462 | 2731 |
| 59.297 | 20 | GGATTGCAAAAAGACATCCCA     | 59.871 | 20 | 101 | 7    | 107  |
| 59.679 | 20 | CTAGGAAACAGCCCTCAACG      | 59.869 | 20 | 213 | 5033 | 5245 |
| 58.733 | 23 | CATGCCGAGTTTTTCTCATTT     | 59.215 | 21 | 276 | 344  | 619  |
| 60.134 | 20 | CTGGGCAGCCAAACATAGAG      | 60.786 | 20 | 105 | 100  | 204  |
| 59.42  | 20 | AACAGGGATTTTGAAGGTGC      | 59.031 | 20 | 163 | 498  | 660  |
| 59.822 | 21 | CCGACTAGGACTAAGGGTCCA     | 60.493 | 21 | 101 | 389  | 489  |
| 59.406 | 22 | GTGAAGGTGCTGGGAGAAAA      | 60.232 | 20 | 133 | 287  | 419  |
| 60.058 | 20 | AAGAGATGGGGGTCAAGGAC      | 60.314 | 20 | 190 | 231  | 420  |
| 60.915 | 18 | GTCGTCATCCCCCTAGTTCA      | 59.927 | 20 | 198 | 1    | 198  |
| 59.945 | 20 | AACTCACACCAAGTGGGTCC      | 59.859 | 20 | 249 | 1058 | 1306 |
| 60.096 | 20 | TCTCATCTCGAGCCTTTGGT      | 59.95  | 20 | 108 | 1038 | 1145 |
| 59.442 | 21 | CGTCAGTTCCACCGAAATCT      | 60.111 | 20 | 213 | 36   | 248  |
| 61.42  | 20 | GATGAGCCATGACCCTCCTA      | 60.034 | 20 | 194 | 6    | 199  |
| 60.119 | 20 | GGAAAAAGTGACTGGGCTTG      | 59.711 | 20 | 238 | 245  | 482  |
| 60.167 | 20 | TTGGTGGTTAGGGAGCTTG       | 60.103 | 20 | 161 | 673  | 833  |
| 60.133 | 20 | ATTGTCAAACCGAGAGAGC       | 60.406 | 20 | 216 | 323  | 538  |
| 59.948 | 20 | ATCATGTTGTCCCTTCTCG       | 59.927 | 20 | 264 | 3588 | 3851 |
| 59.788 | 20 | CATTTTCACGTGACCCTATTGA    | 59.861 | 22 | 250 | 654  | 903  |
| 59.95  | 20 | CGTCGGAGGGTTCAATAGAG      | 59.688 | 20 | 256 | 26   | 281  |
| 60.012 | 20 | GCTGCTGTCCATGAAGTTGA      | 59.992 | 20 | 233 | 84   | 316  |
| 59.571 | 20 | ATGTAGCCGACCCCAATTTA      | 59.297 | 20 | 132 | 874  | 1005 |
| 60.135 | 20 | TTGGTTAATGTAGCCGACCC      | 59.823 | 20 | 116 | 134  | 249  |
| 59.637 | 24 | TGGAATCCGAGAAAATCAGG      | 60.006 | 20 | 259 | 3    | 261  |
| 59.994 | 20 | CAGATCGGTTTACCACGACA      | 59.566 | 20 | 138 | 401  | 538  |
| 59.157 | 20 | GTGTTCCGATAATCGCCAGT      | 59.962 | 20 | 138 | 22   | 159  |
| 60.218 | 20 | AACAACATTAACAATCATGCCAA   | 59.288 | 23 | 210 | 1180 | 1389 |
| 59.817 | 20 | CTCCTCGCCTCCTACATCTG      | 59.966 | 20 | 200 | 644  | 843  |
| 61.387 | 19 | CCCCTAAGCTAGCTCCCT        | 59.864 | 20 | 123 | 8    | 130  |
| 59.823 | 20 | ATGTTAACGCACAATATTCCAA    | 57.175 | 22 | 274 | 438  | 711  |
| 59.287 | 21 | TCAAGGCAAATTCATTGTGTG     | 59.576 | 21 | 164 | 1171 | 1334 |
| 59.957 | 20 | TCCTTCCCTTTCCTGGA         | 60.045 | 20 | 256 | 77   | 332  |
| 60.151 | 20 | TCTGATCTCCGGTCGACAA       | 60.622 | 20 | 169 | 3128 | 3296 |
| 60.186 | 20 | GCACAACAACCACTAATCCG      | 59.05  | 20 | 111 | 108  | 218  |
| 60.386 | 20 | CACCAACTTGGCTACCCCTA      | 59.986 | 20 | 201 | 160  | 360  |
| 60.042 | 20 | TTGAACCCGATTTCTTGCA       | 59.097 | 20 | 182 | 314  | 495  |
| 60.103 | 20 | ACTCCATGGCAGAATGTTCC      | 59.934 | 20 | 157 | 3672 | 3828 |
| 59.972 | 20 | TAAATTGCCGTGTGAAACCA      | 59.969 | 20 | 240 | 769  | 1008 |
| 60.562 | 20 | CAAATGCATGTTTGTGCTCC      | 59.972 | 20 | 267 | 2885 | 3151 |
| 59.929 | 20 | CAGCATTGTCCAAAAGCTCA      | 59.988 | 20 | 253 | 1548 | 1800 |
| 59.457 | 20 | GCAGAAGCACGATGCTCTTA      | 59.326 | 20 | 149 | 771  | 919  |
| 60.081 | 20 | CTATGCAAATCAGTGCCGAA      | 59.833 | 20 | 158 | 236  | 393  |
| 60.339 | 20 | TGTTTGAAATTCCTGCCTCA      | 59.247 | 20 | 234 | 56   | 289  |
| 59.578 | 21 | GGTCAATGCAAATCCAATCA      | 59.33  | 20 | 280 | 456  | 735  |
| 61.087 | 20 | AGGGCTAAGAGGAAAGACCG      | 59.842 | 20 | 251 | 20   | 270  |
| 60.496 | 20 | CCATAATTACCGCGTCATC       | 60.175 | 20 | 120 | 106  | 225  |
| 60.11  | 20 | TTCCATAATTACCGGCATC       | 59.621 | 20 | 259 | 76   | 334  |
| 59.439 | 20 | CGTCAGAATATTTATTCCATGTGTT | 58.462 | 25 | 270 | 160  | 429  |
| 60.386 | 20 | GCAAAGGGGCTTATCCAAAT      | 60.28  | 20 | 191 | 47   | 237  |
| 60.644 | 20 | ATGTAGCCGACCCCAATTTA      | 59.297 | 20 | 118 | 2398 | 2515 |
| 60.43  | 20 | ATTGATACGGGCATTATCGG      | 59.643 | 20 | 186 | 958  | 1143 |
| 60.034 | 20 | ATCCCGGAAGAAGAACGAGT      | 60.074 | 20 | 265 | 858  | 1122 |
| 60.11  | 20 | TGTAGCCGACCCCAATTTAT      | 59.297 | 20 | 188 | 1195 | 1382 |
| 60.206 | 20 | GCTCCGCCAGTGACTGTATT      | 60.285 | 20 | 265 | 1299 | 1563 |
| 59.978 | 20 | CCACGTCAGCTGCTTTATCA      | 60.011 | 20 | 249 | 393  | 641  |
| 60.147 | 20 | TCTATTTCCAAGGCCAATGC      | 60.038 | 20 | 235 | 1689 | 1923 |
| 59.938 | 20 | TTTCTAAATCATGATGGTGAATA   | 59.123 | 26 | 264 | 105  | 368  |

|        |    |                          |        |    |     |      |      |
|--------|----|--------------------------|--------|----|-----|------|------|
| 59.971 | 20 | GGTTCGAAAACCGTTGTTGT     | 59.875 | 20 | 225 | 741  | 965  |
| 59.728 | 19 | CGGATTTTACGTGGTTCCGAT    | 59.823 | 20 | 190 | 10   | 199  |
| 59.238 | 20 | TGGGGGAATGTAATATCATTGAA  | 60.261 | 23 | 270 | 346  | 615  |
| 59.955 | 20 | CTTGGCTCATTGCAAGCATA     | 59.976 | 20 | 177 | 808  | 984  |
| 60.504 | 20 | CTTCTTCTCCCTTGTGTCCG     | 59.837 | 20 | 178 | 5    | 182  |
| 59.988 | 20 | CTCCCCGACTTCTCCAACCTT    | 60.619 | 20 | 194 | 0    | 193  |
| 59.814 | 20 | GTTTCGAGTCTCAATGGGGAA    | 60.05  | 20 | 110 | 1904 | 2013 |
| 60.309 | 19 | GTCGGCATTTCAGCAAGAAA     | 59.94  | 19 | 262 | 1796 | 2057 |
| 59.364 | 21 | AGATTTTTCGGAGTCACGACG    | 60.255 | 20 | 241 | 79   | 319  |
| 60.272 | 20 | GGGCCATTTCCATTAGC        | 60.238 | 18 | 278 | 61   | 338  |
| 59.836 | 20 | ACCAATGGTGGTATGGTGTG     | 58.984 | 20 | 125 | 105  | 229  |
| 60.183 | 20 | GCCATTGCCACGATGAATAC     | 61.27  | 20 | 258 | 1178 | 1435 |
| 60.025 | 20 | TCTTCGGGATTCTCCATGAC     | 60.011 | 20 | 247 | 14   | 260  |
| 59.942 | 20 | GCGGGCAAATTTCTTTTTCT     | 60.547 | 20 | 223 | 227  | 449  |
| 58.307 | 20 | GTCTTCTTGACGCCGCTC       | 59.663 | 18 | 100 | 26   | 125  |
| 59.467 | 21 | TCTAATGTTTCTCCACCGC      | 60.074 | 20 | 203 | 58   | 260  |
| 60.156 | 20 | GCAACAAGACTAAGGCGGAG     | 60.015 | 20 | 275 | 215  | 489  |
| 60.143 | 20 | GATAAGCAAATTTCCGGACG     | 59.547 | 20 | 268 | 8    | 275  |
| 59.52  | 20 | GTACAGCTAAAGCGGGGGA      | 60.22  | 19 | 169 | 9    | 177  |
| 60.261 | 20 | TCCCTCTGGTGGTTTTATGC     | 59.933 | 20 | 164 | 40   | 203  |
| 59.67  | 20 | AAAACCCAGTTCCTTGTGAT     | 59.668 | 20 | 145 | 1139 | 1283 |
| 59.32  | 20 | GAGAAGCCTTTGTTCTGGGA     | 59.405 | 20 | 117 | 2    | 118  |
| 60.011 | 20 | AATGGGGACAGACGAAAGTG     | 59.966 | 20 | 164 | 761  | 924  |
| 59.91  | 20 | TCGATTCCACATATCTCCACA    | 58.938 | 21 | 260 | 387  | 646  |
| 60     | 20 | AGAAGACCCAAGATGGCTCC     | 60.596 | 20 | 172 | 498  | 669  |
| 59.971 | 20 | TGGGTACAGGTTGTGGGTTT     | 60.126 | 20 | 200 | 90   | 289  |
| 59.923 | 20 | TCCTGCATGGCTGTAAACAC     | 59.722 | 20 | 273 | 486  | 758  |
| 59.172 | 19 | TGGGTTGCAAAATTAATCCG     | 60.671 | 20 | 230 | 654  | 883  |
| 60     | 19 | CGTCAGTTCACCGAAATCT      | 60.111 | 20 | 246 | 108  | 353  |
| 59.823 | 20 | CTCCTCGCTCTCTCCTCTCA     | 59.962 | 20 | 134 | 701  | 834  |
| 58.68  | 26 | CACAAAATTAAGCGCAAGCA     | 60.017 | 20 | 175 | 73   | 247  |
| 59.853 | 20 | CCCAAGACCCCAATTTGATT     | 60.91  | 20 | 218 | 48   | 265  |
| 58.695 | 24 | AAATGATGTCATGGGAGCTT     | 57.043 | 20 | 189 | 58   | 246  |
| 59.869 | 20 | TGAAGTTTTGGCTCATCTTATCA  | 58.888 | 23 | 150 | 24   | 173  |
| 61.167 | 20 | TCAACCGTCTTGAGATGCAG     | 59.984 | 20 | 163 | 211  | 373  |
| 60.126 | 21 | ACCCACTAACACCCCTCACA     | 60.275 | 20 | 192 | 54   | 245  |
| 59.761 | 20 | TACGGTGGAAAGATCGGAGTC    | 60.073 | 20 | 220 | 43   | 262  |
| 60.331 | 20 | GTGCGAGGGAGATTATGAGG     | 59.653 | 20 | 236 | 69   | 304  |
| 59.297 | 20 | CACCCACTCGTAGAATCCGT     | 59.989 | 20 | 155 | 6    | 160  |
| 57.925 | 24 | ACCAGGTTTGAAGTTGTCGG     | 60.005 | 20 | 161 | 3    | 163  |
| 58.858 | 20 | CCACCAGGTTGTACAGCAAA     | 59.609 | 20 | 272 | 1056 | 1327 |
| 59.112 | 21 | CAACTTGATCCCTATCACGC     | 58.173 | 20 | 222 | 18   | 239  |
| 60.193 | 20 | CAGGGCGTGACAGTAACTCA     | 59.897 | 20 | 275 | 756  | 1030 |
| 60.034 | 20 | GGAGTTCACTGTGGGATCGT     | 59.969 | 20 | 268 | 614  | 881  |
| 59.571 | 22 | CCTTCTCGTTGAGTCTGCT      | 59.598 | 20 | 265 | 1424 | 1688 |
| 59.925 | 20 | CGGGGAGGAATAGAATGCTT     | 60.411 | 20 | 181 | 22   | 202  |
| 59.933 | 20 | AGCAAATGGTGGAAATGAGG     | 59.933 | 20 | 145 | 128  | 272  |
| 58.965 | 20 | ACAGAAGACCCGAGCCTACA     | 59.867 | 20 | 229 | 701  | 929  |
| 59.929 | 20 | AAAAGCAGGAGATGACAGCC     | 59.434 | 20 | 228 | 544  | 771  |
| 60.857 | 20 | TCATAACATCGATGAGTGTGGAC  | 59.874 | 23 | 101 | 265  | 365  |
| 59.015 | 24 | TGGGGCTTTTTAGGGCTACT     | 60.089 | 20 | 256 | 67   | 322  |
| 60.088 | 20 | GGCCAAGTAAATTTGAAAGA     | 59.192 | 21 | 176 | 3    | 178  |
| 59.396 | 21 | CAAATCGGCATTATTTAATGGAA  | 60.052 | 23 | 176 | 562  | 737  |
| 60.065 | 20 | TGGGTCTTGGCTTATTGGTC     | 59.933 | 20 | 215 | 1635 | 1849 |
| 59.813 | 20 | TGCACATTTGGATTTACCGA     | 59.93  | 20 | 201 | 829  | 1029 |
| 60.076 | 24 | CCGTCTAGGGCTTCAACTTC     | 58.934 | 20 | 179 | 66   | 244  |
| 59.893 | 20 | TTCAAAAACCTCCAATTTATAACA | 60.042 | 26 | 222 | 1035 | 1256 |
| 59.853 | 20 | CCATCAAACCATCACCTCC      | 60.173 | 20 | 268 | 104  | 371  |

|        |    |                          |        |    |     |      |      |
|--------|----|--------------------------|--------|----|-----|------|------|
| 59.297 | 20 | TTTTTGTC AATGTGGGATTGAT  | 59.182 | 22 | 257 | 182  | 438  |
| 60.008 | 20 | GACGATGGTTGCCTTTGTTT     | 59.978 | 20 | 145 | 227  | 371  |
| 60.109 | 22 | GGGCTTCAACATCTCAAATCA    | 60.066 | 21 | 124 | 108  | 231  |
| 59.284 | 20 | CGAGAAAGAGAGAGATGGGG     | 58.963 | 20 | 102 | 282  | 383  |
| 60.21  | 20 | CTAGTCCGGTCCAAACCAA      | 59.964 | 20 | 170 | 2220 | 2389 |
| 59.886 | 20 | CAAGACCCCAATTTGATTGC     | 60.309 | 20 | 149 | 95   | 243  |
| 59.989 | 20 | GAAGAGCGCCAGTATGGGTA     | 60.235 | 20 | 196 | 3974 | 4169 |
| 60.721 | 20 | GTTTCATGTAGCCGACCCAAT    | 59.82  | 20 | 230 | 2587 | 2816 |
| 60.822 | 20 | TCTGCACCTCATCAATGCTC     | 59.95  | 20 | 280 | 907  | 1186 |
| 59.903 | 20 | GAGAACCAGATTGTAGCGGC     | 59.843 | 20 | 117 | 400  | 516  |
| 60.149 | 20 | TAGTGGATTGGGGAGGATGA     | 60.272 | 20 | 235 | 1817 | 2051 |
| 59.995 | 20 | TTAAGCTGATGATCTGGGGG     | 60.029 | 20 | 209 | 16   | 224  |
| 59.962 | 20 | ATGAGGTGACAGCCCTTGAG     | 60.261 | 20 | 117 | 0    | 116  |
| 59.969 | 20 | CAACAGGCTACCTCCTCCAC     | 59.721 | 20 | 198 | 282  | 479  |
| 59.297 | 20 | ACCTTGCGCCCTTTAAACT      | 60.129 | 20 | 108 | 6    | 113  |
| 60.393 | 20 | GTTGACGAGAGAACTGGGC      | 59.851 | 20 | 277 | 547  | 823  |
| 60.074 | 20 | CAGAAACCGGTGTTCCATTT     | 59.83  | 20 | 266 | 407  | 672  |
| 60.796 | 20 | CAATCAACCATCACATCCCA     | 60.177 | 20 | 228 | 0    | 227  |
| 60.111 | 20 | GAAATCCGATCCTGGACCTT     | 60.272 | 20 | 266 | 72   | 337  |
| 60.111 | 20 | CCCCAATTTACTGGGATCAA     | 59.617 | 20 | 197 | 529  | 725  |
| 60.186 | 20 | GCTGGGAACCAATCATCCTA     | 59.894 | 20 | 207 | 27   | 233  |
| 59.844 | 20 | ACTCACCTCTCCCTCGACCT     | 60.258 | 20 | 232 | 16   | 247  |
| 57.552 | 20 | TGATGCTTGGGATCTTAGGG     | 60.029 | 20 | 187 | 7    | 193  |
| 60.357 | 20 | AGGTGAATTTGGTCCTTCAA     | 58.54  | 21 | 278 | 672  | 949  |
| 60.91  | 20 | GTGGCACCTCCTGATTCAAT     | 59.934 | 20 | 104 | 0    | 103  |
| 58.315 | 21 | GATTACACGTTGGGCCTTCT     | 59.056 | 20 | 181 | 2059 | 2239 |
| 59.998 | 20 | TGAAAATAGTTGTGCCTGGG     | 58.623 | 20 | 208 | 246  | 453  |
| 59.969 | 20 | CTCCTCCCTGACGATATCCA     | 60.027 | 20 | 263 | 1112 | 1374 |
| 60.755 | 20 | AAGGGATATGTGGGTGGTGA     | 60.05  | 20 | 140 | 853  | 992  |
| 59.39  | 22 | TCTTCGGGATCACAAATTTGG    | 60.832 | 20 | 275 | 413  | 687  |
| 60.439 | 20 | TCAAACCTGATTGTTGCTGC     | 59.995 | 20 | 280 | 394  | 673  |
| 59.985 | 21 | GGGTTATCACCTGATTACTACCCA | 60.352 | 24 | 242 | 241  | 482  |
| 60.195 | 20 | AACTTTGGTTCATGTAGCCG     | 57.757 | 20 | 105 | 282  | 386  |
| 60.801 | 20 | CACAAACCAAAGGTGCATGT     | 59.465 | 20 | 218 | 16   | 233  |
| 60.232 | 20 | ACCAATGGTGGTATGGTGTG     | 58.984 | 20 | 205 | 0    | 204  |
| 60.035 | 20 | CTTCTCCTCCACAGACTCCG     | 59.978 | 20 | 277 | 275  | 551  |
| 60.362 | 20 | TAACGTTGTGTGCACCTTCC     | 59.615 | 20 | 253 | 2714 | 2966 |
| 60.211 | 21 | TCATCAACGTTCTTGGGTTCT    | 59.583 | 21 | 160 | 57   | 216  |
| 60.119 | 20 | AGCCTTATTTCCACCCACT      | 59.827 | 20 | 192 | 4056 | 4247 |
| 59.405 | 20 | GGAACCTGCTCAACTTGCTCC    | 59.997 | 20 | 254 | 38   | 291  |
| 59.505 | 20 | ATTGGCTGGATGTATTAGGATATT | 57.193 | 24 | 153 | 97   | 249  |
| 60.34  | 20 | TGCGTCCTCATTGTTTATGC     | 59.694 | 20 | 274 | 968  | 1241 |
| 59.933 | 20 | AAATGGTGGTTCATTTGGGA     | 60.029 | 20 | 172 | 2302 | 2473 |
| 60.883 | 20 | TGTAGCCGACCCCAATTTAT     | 59.297 | 20 | 280 | 37   | 316  |
| 59.805 | 20 | TCTGTTGAGCAGCAGCAACT     | 59.929 | 20 | 245 | 841  | 1085 |
| 59.869 | 20 | AACACTGGTAATGACGCTTCG    | 60.183 | 21 | 233 | 11   | 243  |
| 59.399 | 20 | TTTGTATGCTTGTAGTGGTTCCTT | 59.162 | 24 | 228 | 261  | 488  |
| 60.227 | 20 | AGGCTCGAACCATGCATATC     | 60.066 | 20 | 202 | 2140 | 2341 |
| 60.12  | 20 | GGCACAGTTTTCGATCTGGT     | 60.119 | 20 | 263 | 1802 | 2064 |
| 60.142 | 20 | ATTCCTTCCCCGTCATCTCT     | 59.896 | 20 | 239 | 1682 | 1920 |
| 59.864 | 20 | CTCCTCGCCTCCTACATCTG     | 59.966 | 20 | 234 | 174  | 407  |
| 58.381 | 25 | ATGGTAGAAATCGCCGCC       | 60.973 | 18 | 196 | 6    | 201  |
| 60.11  | 20 | TCCACCAATTTCTCCTCTGG     | 60.042 | 20 | 274 | 251  | 524  |
| 59.797 | 22 | CCACAAGTTATCACACCCCC     | 60.088 | 20 | 249 | 204  | 452  |
| 59.758 | 20 | GAGGACTCTGGAGAAGGGCT     | 59.952 | 20 | 239 | 328  | 566  |
| 58.487 | 20 | TATATTCTCGAAGGCGGCTG     | 60.323 | 20 | 264 | 656  | 919  |
| 60.27  | 20 | GTGTAGCCGACCCCAATTTA     | 59.823 | 20 | 102 | 254  | 355  |
| 60.132 | 20 | GTTTACGGAAGCATGATGGG     | 60.331 | 20 | 116 | 3175 | 3290 |

|        |    |                           |        |    |     |      |      |
|--------|----|---------------------------|--------|----|-----|------|------|
| 59.789 | 20 | GCCTGAAAATGGTCGTGATT      | 59.939 | 20 | 256 | 15   | 270  |
| 59.664 | 20 | TATCGATTCCGGTCACACCT      | 60.34  | 20 | 245 | 40   | 284  |
| 60.142 | 20 | CGCAATGGAAACAACCTCTT      | 60.11  | 20 | 246 | 2201 | 2446 |
| 60.21  | 20 | GCGATAGAGTTTCTGGTGCC      | 59.843 | 20 | 262 | 1437 | 1698 |
| 59.717 | 20 | AATGGAATGGTACGAGGGTG      | 59.67  | 20 | 144 | 617  | 760  |
| 59.998 | 20 | AGGAGTTTCCGGAGATCACA      | 59.655 | 20 | 145 | 187  | 331  |
| 58.726 | 25 | TTGTCCACCCCTCAATTCAT      | 60.173 | 20 | 263 | 18   | 280  |
| 59.971 | 20 | ATAATAGTGCCCCGAAAGGG      | 60.164 | 20 | 167 | 184  | 350  |
| 59.344 | 20 | TAAGCGTGACGACGAGAATG      | 60.011 | 20 | 167 | 41   | 207  |
| 60.014 | 20 | TGGATTTTGTATTGCCCGTT      | 60.188 | 20 | 183 | 47   | 229  |
| 60.05  | 20 | TGGAGTTGCAGATTTTTGGA      | 59.247 | 20 | 181 | 4690 | 4870 |
| 57.077 | 24 | ATCTGGCGCTTCAATGTTCT      | 59.843 | 20 | 159 | 10   | 168  |
| 59.708 | 20 | TCTGCAGCCATTTGTTCTTG      | 59.988 | 20 | 213 | 300  | 512  |
| 59.988 | 20 | GGTGGTTTTATGCACGCTTT      | 60.003 | 20 | 215 | 87   | 301  |
| 59.966 | 20 | ATGTAGGCAAAGGCTGCTGT      | 59.904 | 20 | 111 | 11   | 121  |
| 60.338 | 20 | TCCCAGAAAATTCTTTCCCTTC    | 59.943 | 23 | 199 | 375  | 573  |
| 59.942 | 20 | TTGGGGAGGATGAGAATGAG      | 60.003 | 20 | 216 | 5304 | 5519 |
| 59.966 | 20 | TTGCTCCTTAAAGCTCCTGC      | 59.73  | 20 | 195 | 2137 | 2331 |
| 59.938 | 20 | TTCAGCTCCAGGGTTTTTCAT     | 59.67  | 20 | 250 | 414  | 663  |
| 59.95  | 20 | CACTTTGTGTTAATTTAAAGGTCCG | 57.158 | 24 | 168 | 111  | 278  |
| 59.679 | 20 | GGGTGTTTGGTGGAGCAGTA      | 60.954 | 20 | 197 | 275  | 471  |
| 59.997 | 20 | GCGTCTCCAAGATCCCATAG      | 59.653 | 20 | 210 | 61   | 270  |
| 58.109 | 20 | ATGTAGCCGACCCCAATTTA      | 59.297 | 20 | 174 | 1686 | 1859 |
| 59.297 | 20 | TGAAGGTTTTGAATTCATTGAC    | 60.21  | 23 | 279 | 657  | 935  |
| 59.724 | 22 | TGACAATTCCTATGCTTAAACTCA  | 59.262 | 25 | 188 | 132  | 319  |
| 60.966 | 20 | CCTTTTCAAAGTGGACTATCAATT  | 59.472 | 25 | 170 | 185  | 354  |
| 59.853 | 20 | GTTCCGGTAGATCGACTTGCC     | 59.7   | 20 | 140 | 927  | 1066 |
| 60.243 | 20 | CTGTAGTGAAGTGGGACGGG      | 60.557 | 20 | 181 | 22   | 202  |
| 60.074 | 20 | CGTCCTAGTTCTTGTATCAAGTGA  | 58.941 | 25 | 190 | 16   | 205  |
| 59.297 | 20 | TTTTCTTGGACCAGGTTGC       | 60.088 | 20 | 162 | 4    | 165  |
| 59.948 | 20 | TGGGGGATAAAGATGCAAAG      | 59.894 | 20 | 160 | 1009 | 1168 |
| 60.91  | 20 | GTCTCCACCAGTTTTTGGGA      | 59.943 | 20 | 234 | 2    | 235  |
| 59.712 | 21 | TGAACGCATGAGGTAATGGA      | 60.073 | 20 | 272 | 0    | 271  |
| 59.945 | 20 | CAACCGAAACGCCTGTATCT      | 60.132 | 20 | 271 | 512  | 782  |
| 59.629 | 20 | CAACGGCTGGTCCTTGTATT      | 59.993 | 20 | 257 | 41   | 297  |
| 60.144 | 20 | CACGGGAATAAATTGTTGGA      | 58.334 | 20 | 169 | 535  | 703  |
| 59.924 | 20 | AATCATGTACACCCGCTTCG      | 60.914 | 20 | 196 | 147  | 342  |
| 59.971 | 20 | TCTGGAGCTGGATGATGATG      | 59.743 | 20 | 230 | 731  | 960  |
| 60.032 | 20 | TGAATGTACTTTAACCCTGCACC   | 60.327 | 24 | 212 | 556  | 767  |
| 60.02  | 20 | ACCCCAATTTGTTGGGATTA      | 58.995 | 20 | 240 | 766  | 1005 |
| 59.711 | 20 | AATTGATGATTCCAAAGCCG      | 59.901 | 20 | 234 | 849  | 1082 |
| 59.934 | 20 | GTGGATCATCAAGGTGAGGG      | 60.326 | 20 | 213 | 460  | 672  |
| 60.265 | 19 | CCATATAGTTGACCCCGCAT      | 59.668 | 20 | 164 | 229  | 392  |
| 59.985 | 20 | TGCAATGGCTTTTCATTGTT      | 59.161 | 20 | 227 | 186  | 412  |
| 60.226 | 20 | TGTGTGTGTCCCATATTCGC      | 60.399 | 20 | 229 | 4603 | 4831 |
| 59.42  | 18 | CCTCTCCTTCTAGCAACCCC      | 60.204 | 20 | 193 | 4    | 196  |
| 58.969 | 21 | CGCAATGTACCTTGGCTATG      | 59.206 | 20 | 147 | 704  | 850  |
| 60.807 | 20 | GGGGCTCAATTCTAAAAGCC      | 60.041 | 20 | 187 | 1574 | 1760 |
| 58.881 | 21 | TGGAGCTAAAAAGATTTTCACGA   | 60.238 | 23 | 167 | 83   | 249  |
| 59.121 | 27 | CATCGGTTTCTGGACAAGGT      | 59.966 | 20 | 268 | 15   | 282  |
| 59.867 | 20 | CACCAATTATCTCCAGCTCCA     | 58.67  | 20 | 255 | 253  | 507  |
| 60.375 | 20 | CATCAAACCCAAACCAACCT      | 59.688 | 20 | 163 | 278  | 440  |
| 59.993 | 20 | TGTAGCCGACCCCAATTTAT      | 59.297 | 20 | 222 | 796  | 1017 |
| 60.056 | 20 | GCCCAATCCAAACAAATCAG      | 60.309 | 20 | 179 | 631  | 809  |
| 60.063 | 19 | AGGTTCAAATCCCACCAACA      | 60.21  | 20 | 265 | 17   | 281  |
| 59.692 | 21 | CTCTCAATCCCAGACTTGCC      | 59.803 | 20 | 245 | 550  | 794  |
| 59.257 | 21 | TTTTGGAACGGGATTCGAT       | 60.259 | 19 | 211 | 498  | 708  |
| 59.948 | 20 | AGCCCCTTCGGTAAAAATGT      | 59.835 | 20 | 227 | 856  | 1082 |



|        |    |                          |        |    |     |      |      |
|--------|----|--------------------------|--------|----|-----|------|------|
| 59.452 | 20 | CGAAATCTCACGACGCATTA     | 59.833 | 20 | 109 | 1674 | 1782 |
| 59.96  | 20 | AACCGTGTACACCCCTACCA     | 60.149 | 20 | 262 | 814  | 1075 |
| 60.209 | 20 | CCCAAGACCCCAATTTGATT     | 60.91  | 20 | 228 | 2412 | 2639 |
| 60.125 | 20 | TGCTCGAGATCCCAATATCC     | 59.998 | 20 | 230 | 265  | 494  |
| 59.985 | 20 | TCATCACCACAAAATCCCA      | 59.75  | 20 | 184 | 1167 | 1350 |
| 60.232 | 20 | ATGTCGGTCAGCGATTCTTT     | 59.7   | 20 | 268 | 980  | 1247 |
| 59.73  | 20 | AATTCAATTACCTGCCGGA      | 58.024 | 19 | 128 | 105  | 232  |
| 59.332 | 21 | TGGAGGGAAGGAAGTTGTTG     | 60.081 | 20 | 187 | 1825 | 2011 |
| 59.95  | 20 | GTGGCAGAGATGGAGGATGT     | 60.08  | 20 | 245 | 2    | 246  |
| 60.272 | 20 | TTTGCCAAGCTATCCAAAGG     | 60.202 | 20 | 234 | 823  | 1056 |
| 59.879 | 20 | AAGCAGAAGAGTGCATTAATCGT  | 59.471 | 23 | 232 | 278  | 509  |
| 60.349 | 20 | CCAACCAAACCTCCCTCTTCA    | 60.081 | 20 | 244 | 4765 | 5008 |
| 60.025 | 20 | CAAAGACTACCTACAGATCCCC   | 60.241 | 23 | 264 | 65   | 328  |
| 60.328 | 20 | GGTCAGAGTGACCGTTGGTT     | 60.009 | 20 | 272 | 3883 | 4154 |
| 59.911 | 20 | CAGCTACCCATCTGCCAAGT     | 60.277 | 20 | 108 | 541  | 648  |
| 59.297 | 20 | CATGCAACAGAAAATGCCAC     | 60.119 | 20 | 266 | 2    | 267  |
| 57.46  | 22 | TGCAAAGCATACTTACAGAAACC  | 58.516 | 23 | 223 | 4    | 226  |
| 59.946 | 21 | CCGCTGAGATAATGCTCGTT     | 60.374 | 20 | 268 | 4226 | 4493 |
| 59.845 | 20 | CGATGGGGTCTTCTGATGAT     | 59.886 | 20 | 207 | 792  | 998  |
| 59.816 | 20 | TTTAATTAGTTCCACGCGCC     | 60.095 | 20 | 246 | 2217 | 2462 |
| 57.999 | 20 | CATGATGCAAAAATTTAATTAGCA | 59.485 | 25 | 230 | 1074 | 1303 |
| 59.82  | 20 | GTTACCAAACCTCCCACTCGT    | 60.009 | 20 | 227 | 21   | 247  |
| 59.988 | 20 | CAAGATTCCTCTCACCCCAA     | 60.042 | 20 | 213 | 502  | 714  |
| 59.962 | 20 | AATTGTGTCTGCTTCGGACC     | 60.119 | 20 | 248 | 977  | 1224 |
| 60.11  | 20 | ACAAGAACTCGATTTTCGCC     | 59.316 | 20 | 204 | 692  | 895  |
| 59.933 | 20 | GCCAACACCTCCTTGATGAT     | 59.934 | 20 | 142 | 789  | 930  |
| 60.014 | 20 | ATGGTGACAATCGTGCTGTC     | 59.557 | 20 | 214 | 1047 | 1260 |
| 60.096 | 20 | GAACCTCCTCTGTTCCCTCC     | 60.05  | 20 | 261 | 2283 | 2543 |
| 60.517 | 20 | TGAGAGGACACCCAAGTGGT     | 60.563 | 20 | 172 | 3    | 174  |
| 59.284 | 20 | TGAGAATTAGCAATTGAAGTTGAC | 57.791 | 24 | 266 | 534  | 799  |
| 60.051 | 20 | TTGCTGGCAGTGAAGCTCTA     | 59.888 | 20 | 209 | 625  | 833  |
| 60.074 | 20 | CCAAATAGCTTAGGAGGCC      | 60.055 | 20 | 237 | 16   | 252  |
| 60.042 | 20 | TCCTCAGCCGGTGTAGAAGT     | 59.867 | 20 | 241 | 513  | 753  |
| 59.946 | 20 | TGCTTGTGGACCAAAGATTG     | 59.691 | 20 | 145 | 1459 | 1603 |
| 60.636 | 20 | CCCCATCCCTAAGAACATCA     | 59.744 | 20 | 257 | 164  | 420  |
| 59.767 | 20 | TGTAGAGTTTTGGGTTCCGGC    | 60.11  | 20 | 112 | 470  | 581  |
| 60.017 | 20 | GACAACGATGGATACCCAC      | 60.057 | 20 | 237 | 56   | 292  |
| 60.088 | 20 | AGGCCACGTAAATACGAACG     | 60.018 | 20 | 256 | 806  | 1061 |
| 60.333 | 20 | TGCTTTCTCTCCTCCCAA       | 60.065 | 20 | 250 | 1589 | 1838 |
| 60.051 | 20 | GGAGGTGGGCTCTCATGTAA     | 60.073 | 20 | 185 | 330  | 514  |
| 59.574 | 20 | ACCTGTGTTCCGGGCTAAATG    | 59.993 | 20 | 133 | 29   | 161  |
| 60.24  | 20 | CTATGGGCCGATCCTATCAA     | 59.878 | 20 | 161 | 1006 | 1166 |
| 59.933 | 20 | GACCACCTGCATTCACAGAA     | 59.682 | 20 | 266 | 612  | 877  |
| 60.687 | 20 | ATTTGGAACCTTGTGCGTGT     | 60.419 | 20 | 181 | 200  | 380  |
| 61.059 | 21 | TTCCCTCAACCTAGACCTCG     | 59.28  | 20 | 138 | 31   | 168  |
| 59.3   | 20 | TGCATGTCTGATTCTGAGTACG   | 58.952 | 22 | 250 | 967  | 1216 |
| 60.299 | 20 | ATGCCACATAACGCATTCAA     | 59.96  | 20 | 263 | 573  | 835  |
| 60.034 | 20 | ACCAGCATTTTCAGAGCCAC     | 60.263 | 20 | 159 | 269  | 427  |
| 60.065 | 20 | GCAACCACGTACCATGACAG     | 60.032 | 20 | 200 | 5713 | 5912 |
| 59.84  | 20 | CCCAAGACCCCAATTTGATT     | 60.91  | 20 | 106 | 2447 | 2552 |
| 60.188 | 19 | GGAAACATCAACACACGCAT     | 59.425 | 20 | 152 | 618  | 769  |
| 60.212 | 24 | TGAGTGC GTTTG TACTCAACCT | 59.842 | 22 | 181 | 99   | 279  |
| 59.49  | 20 | GCTTGCAAATCACGTCAGTC     | 59.45  | 20 | 205 | 12   | 216  |
| 58.012 | 25 | AAAACGCATTTTGGAGTTTG     | 57.81  | 20 | 187 | 43   | 229  |
| 60.44  | 20 | CCACCATACTGGGTGCTCTT     | 59.989 | 20 | 156 | 835  | 990  |
| 60.019 | 20 | AGGCGGGACTGTGAATAATG     | 59.955 | 20 | 146 | 469  | 614  |
| 59.599 | 20 | CAATGAAGACTGAATCTCGGAA   | 59.312 | 22 | 203 | 1040 | 1242 |
| 59.982 | 20 | CTCGAAGCAGGGAAAATTG      | 59.817 | 20 | 248 | 44   | 291  |

|        |    |                            |        |    |     |      |      |
|--------|----|----------------------------|--------|----|-----|------|------|
| 60.015 | 20 | CAAGACCTACTGAGCCAGCC       | 60.012 | 20 | 240 | 332  | 571  |
| 58.147 | 20 | GATATCCGGTTTTGCTCACC       | 59.391 | 20 | 188 | 325  | 512  |
| 59.871 | 20 | AACTCCCCTCCATTCTCCAT       | 59.755 | 20 | 249 | 939  | 1187 |
| 58.998 | 20 | CGTGTTAAGTTGTTAACCAATACG   | 59.456 | 25 | 170 | 94   | 263  |
| 60.77  | 20 | ATCCTTTTCCGTCGCTTTTT       | 60.075 | 20 | 236 | 110  | 345  |
| 58.31  | 25 | CAAGTGG AATTCATGATGCG      | 60.073 | 20 | 134 | 31   | 164  |
| 60.436 | 20 | GTGCACAATCACCAAGATCG       | 60.12  | 20 | 234 | 875  | 1108 |
| 60.599 | 20 | GATTTTG TAAACTGCCCGGA      | 59.938 | 20 | 135 | 487  | 621  |
| 58.997 | 24 | GCCACTGAACTAGCACCACA       | 59.905 | 20 | 208 | 1    | 208  |
| 59.551 | 20 | CAATACTTGCCGTCGCCTAT       | 60.117 | 20 | 280 | 31   | 310  |
| 60.155 | 20 | GACGTGGTTTGCAGGCTATT       | 60.14  | 20 | 235 | 62   | 296  |
| 60.291 | 20 | AGGTTGCGTACATCTGACCC       | 59.997 | 20 | 239 | 1231 | 1469 |
| 60.224 | 20 | TTTCTGTTGTCAGCCCACTG       | 59.873 | 20 | 140 | 765  | 904  |
| 59.945 | 20 | TTTTGTGGATATTTGTTTATTGTCTC | 60.054 | 27 | 189 | 647  | 835  |
| 59.493 | 20 | TTATGCGATGATTGCAAGGT       | 59.14  | 20 | 265 | 477  | 741  |
| 60.135 | 20 | TAGGCATGGATTGCATTTGA       | 60.035 | 20 | 113 | 335  | 447  |
| 59.783 | 20 | CAACATTGGATTGAAAGGG        | 60.301 | 20 | 218 | 172  | 389  |
| 60.066 | 20 | GCTCGGTTTGGCTAGATTTG       | 59.845 | 20 | 248 | 7    | 254  |
| 59.457 | 20 | TCTTCATTTTTCTAGTGCGCTG     | 59.669 | 22 | 273 | 962  | 1234 |
| 58.761 | 25 | AGCCGAAATTTTTAGGTATCG      | 57.509 | 21 | 267 | 9    | 275  |
| 59.979 | 20 | CCGTGTGATAGGAACCATCC       | 60.195 | 20 | 246 | 546  | 791  |
| 59.948 | 20 | ACTACGATGTTGCGCCACCTT      | 59.621 | 20 | 209 | 38   | 246  |
| 59.73  | 20 | GATGAGGACGCTTAGGTGGA       | 60.218 | 20 | 258 | 80   | 337  |
| 60.132 | 20 | CCAATATGGTTTAAAATTCTTCCG   | 59.976 | 24 | 265 | 35   | 299  |
| 60.255 | 20 | ATCTCACATACATATAATTGAGCT   | 57.101 | 27 | 221 | 237  | 457  |
| 59.6   | 23 | AAGTAGTTGTTCCAGTGGCAAT     | 57.804 | 22 | 197 | 286  | 482  |
| 59.996 | 21 | TTGATGAGGAAAACAAGTGGG      | 59.956 | 21 | 165 | 478  | 642  |
| 59.933 | 20 | CAATCCTCAAAGAACCCEA        | 59.903 | 20 | 232 | 2637 | 2868 |
| 59.429 | 20 | CATACGGAAGCCTTTGTGCT       | 60.27  | 20 | 232 | 3    | 234  |
| 59.966 | 20 | GACGATCACCGGTTCTTGAT       | 59.934 | 20 | 239 | 189  | 427  |
| 59.914 | 20 | CCTGAGGATGAAGTGGAGGA       | 60.191 | 20 | 267 | 9    | 275  |
| 60.117 | 20 | TCGCACCACTTCACTTTCAC       | 59.88  | 20 | 234 | 293  | 526  |
| 59.864 | 20 | TGAAAATCCCCTCCCACTC        | 59.903 | 20 | 240 | 587  | 826  |
| 59.823 | 20 | ACCTTCAAGGGCATCATCAG       | 60.073 | 20 | 221 | 168  | 388  |
| 58.325 | 20 | GATGATCCACGCAACTCAA        | 59.654 | 20 | 101 | 233  | 333  |
| 60.118 | 20 | AGGTTGCGTACATCTGACCC       | 59.997 | 20 | 100 | 17   | 116  |
| 59.957 | 20 | TCCAACCTGGAGGATCAGGAC      | 60.048 | 20 | 272 | 6    | 277  |
| 59.931 | 20 | AGGAGGTGCCATACACGAAT       | 59.434 | 20 | 280 | 2604 | 2883 |
| 60.559 | 20 | TGTCAACACTGCCTTCTTGG       | 59.873 | 20 | 224 | 388  | 611  |
| 59.914 | 20 | TCAGTTCATGCTTGTCTGC        | 59.992 | 20 | 112 | 438  | 549  |
| 57.158 | 20 | GCGGATTTACAATTCGTGCT       | 60.103 | 20 | 229 | 904  | 1132 |
| 59.875 | 20 | GGAAAATCGGCTGAAGTCTG       | 59.813 | 20 | 275 | 2084 | 2358 |
| 59.325 | 20 | TGTAGCCGACCCCAATTTAT       | 59.297 | 20 | 171 | 273  | 443  |
| 59.883 | 20 | CTAGCCGATGACCTCAAAG        | 59.83  | 20 | 189 | 376  | 564  |
| 59.962 | 20 | CCAATGTAGGATTGGGTTGC       | 60.192 | 20 | 276 | 941  | 1216 |
| 60.132 | 20 | AAAGGTCAGATATTGAACATCATC   | 59.647 | 25 | 180 | 4383 | 4562 |
| 60.008 | 20 | GGTGATGATGGTGCTTGTTG       | 59.967 | 20 | 196 | 938  | 1133 |
| 59.606 | 21 | AAATTTTACCCGCAAAGAA        | 59.564 | 20 | 222 | 2527 | 2748 |
| 60.065 | 20 | TACCGACAATTTTTGCTCCG       | 60.989 | 20 | 168 | 294  | 461  |
| 59.14  | 21 | TGCAGTGGTGACGGAGTAAG       | 59.897 | 20 | 265 | 23   | 287  |
| 59.914 | 20 | GACACACACCATTCCAACA        | 60.27  | 20 | 213 | 1272 | 1484 |
| 59.566 | 20 | CATTAGGCTTGGGAGACGAA       | 60.206 | 20 | 193 | 673  | 865  |
| 59.907 | 20 | TGACAAGTGTTTGAGGGAGG       | 58.695 | 20 | 106 | 916  | 1021 |
| 59.898 | 20 | GAGCTTCTTGATTCCATGTCAA     | 59.316 | 22 | 252 | 973  | 1224 |
| 60.066 | 20 | GGTCGTA CTGGTGCCTGAAG      | 60.711 | 20 | 180 | 750  | 929  |
| 58.5   | 27 | TCACTCCGGATCAAATAGGC       | 60.036 | 20 | 114 | 7    | 120  |
| 60.24  | 20 | TGGTGGTAATGCCAAGAGAG       | 58.722 | 20 | 187 | 298  | 484  |
| 60.112 | 20 | TCGAACTTGTT CAGGCACAC      | 59.88  | 20 | 239 | 1454 | 1692 |

|        |    |                           |        |    |     |      |      |
|--------|----|---------------------------|--------|----|-----|------|------|
| 59.989 | 20 | GACACAGAGGCTGACGATGA      | 59.988 | 20 | 116 | 14   | 129  |
| 60.019 | 20 | CCGCCTCTATTTCCGTAACC      | 60.811 | 20 | 211 | 217  | 427  |
| 59.883 | 20 | CCGATCGATCAATCTGAAGG      | 60.56  | 20 | 177 | 434  | 610  |
| 59.955 | 20 | GGAAATAAATGGATTTTCGTGA    | 57.992 | 22 | 266 | 447  | 712  |
| 59.864 | 20 | TGTTCCCTTTACCAGAGGCGT     | 59.734 | 20 | 175 | 87   | 261  |
| 58.871 | 20 | GATCCGTA AACACCGTTGG      | 60.227 | 20 | 237 | 25   | 261  |
| 59.948 | 20 | TAATTGCCACAGGGAAAAGG      | 59.931 | 20 | 279 | 2547 | 2825 |
| 60.91  | 20 | CCATTGGTACAAAAGTTTGCC     | 59.37  | 21 | 110 | 6    | 115  |
| 60.206 | 20 | CGCAACCGTACCCTTGTAAT      | 59.883 | 20 | 165 | 2095 | 2259 |
| 60.673 | 20 | GGCACTGTCACCGGATTATT      | 59.82  | 20 | 276 | 240  | 515  |
| 58.456 | 21 | TGTAGCCGACCCCAATTTAT      | 59.297 | 20 | 126 | 7    | 132  |
| 59.42  | 22 | TGGATAAGAAATGGATCCGAA     | 59.355 | 21 | 237 | 278  | 514  |
| 57.992 | 20 | TTTGATTGGGAATAATTGGG      | 57.289 | 20 | 280 | 1731 | 2010 |
| 60.792 | 20 | GGAAGAATTAGTGGAGGGGC      | 59.903 | 20 | 164 | 195  | 358  |
| 60.04  | 20 | TCGTGTGGTTCGAATATGAAA     | 59.027 | 21 | 150 | 38   | 187  |
| 59.244 | 21 | CAAATGGGACAATCCATTCC      | 59.991 | 20 | 123 | 89   | 211  |
| 59.297 | 20 | CCTTATGGGGTACTGGGCTT      | 60.2   | 20 | 229 | 55   | 283  |
| 60.373 | 20 | TGTAGCCGACCCCAATTTAT      | 59.297 | 20 | 154 | 276  | 429  |
| 59.862 | 20 | GGAAGTGGGTTCTGTCCAAA      | 59.943 | 20 | 274 | 3874 | 4147 |
| 60.755 | 20 | GCCAACTAAGCGATCCATGT      | 60.103 | 20 | 166 | 927  | 1092 |
| 60.332 | 21 | TGATGAACCCACATCCAAT       | 60.995 | 20 | 231 | 47   | 277  |
| 59.65  | 24 | ACCCTGGCCATCTTCTTTCT      | 60.074 | 20 | 135 | 7    | 141  |
| 60.003 | 20 | TCACAAGGAGGGTCGAAATC      | 60.05  | 20 | 165 | 1307 | 1471 |
| 59.734 | 20 | ATAGTGGTATGGTGTGGGGG      | 59.405 | 20 | 197 | 354  | 550  |
| 59.79  | 20 | GCCTGCATGATTTTTATGGG      | 60.289 | 20 | 274 | 3319 | 3592 |
| 60.26  | 24 | ACAACCATTACCATCCACA       | 59.656 | 20 | 163 | 0    | 162  |
| 59.756 | 20 | TAGGGGTTGGCTCTCTGATG      | 60.21  | 20 | 277 | 322  | 598  |
| 59.739 | 20 | TCCACTTTTCGAATGTCCCT      | 59.526 | 20 | 272 | 6089 | 6360 |
| 61.63  | 20 | ACACAAGAAAATCCATCGCC      | 59.939 | 20 | 102 | 3    | 104  |
| 59.297 | 20 | AAAGCCATATGCGGTAGGTG      | 59.982 | 20 | 276 | 1    | 276  |
| 59.326 | 27 | GAATACCAACA ACTAAATACGCTI | 57.217 | 25 | 266 | 196  | 461  |
| 60.278 | 20 | TGCACCGTGTGCAGTTATTT      | 60.18  | 20 | 220 | 126  | 345  |
| 60.401 | 20 | TTCCCACTAACCAGCTCACC      | 60.111 | 20 | 273 | 2104 | 2376 |
| 60.91  | 20 | TCTTTAGTTAGCCCTTTGAGCC    | 59.079 | 22 | 234 | 1    | 234  |
| 59.894 | 20 | TCCTTTTGACACAAGAAAACCC    | 60.365 | 22 | 225 | 169  | 393  |
| 59.973 | 20 | CGACCTCCACCTCCTGTTAG      | 59.715 | 20 | 274 | 199  | 472  |
| 60.11  | 20 | AAACGAGAACTATGAAGCACCA    | 58.906 | 22 | 214 | 17   | 230  |
| 59.42  | 20 | TCCCAA ACTCCATAGGTTGC     | 59.933 | 20 | 251 | 574  | 824  |
| 59.933 | 20 | CCAGCCTTGTGAGACAGTCA      | 60.022 | 20 | 134 | 794  | 927  |
| 60     | 20 | GGGTCAGATGTACGCAACCT      | 59.997 | 20 | 247 | 987  | 1233 |
| 59.962 | 20 | AATCCACATTATTTCTCACTCACC  | 58.455 | 24 | 104 | 150  | 253  |
| 60.174 | 20 | TCATCCTCGGAAGCAATCTC      | 60.303 | 20 | 197 | 104  | 300  |
| 58.442 | 24 | TTTAGATAAGCATACCCATCACA   | 59.08  | 26 | 190 | 542  | 731  |
| 59.918 | 20 | CCGTGCCAGTACCTCCTCTA      | 60.269 | 20 | 253 | 74   | 326  |
| 60.607 | 20 | CTGGGTAAACCCACGGACTA      | 59.846 | 20 | 113 | 8    | 120  |
| 61.099 | 20 | CTCCACCCCTTACAAGCAAA      | 60.103 | 20 | 230 | 304  | 533  |
| 57.655 | 22 | CAGGCACCAACCAAGAGATT      | 60.111 | 20 | 194 | 231  | 424  |
| 59.664 | 20 | CCAATTTCCGGTCTCACAGT      | 59.966 | 20 | 264 | 147  | 410  |
| 59.077 | 20 | GCTTACACACGTTCTTGAGGG     | 59.788 | 21 | 243 | 509  | 751  |
| 59.356 | 19 | ACGATGACGTGGAAGTCGTT      | 60.577 | 20 | 251 | 2    | 252  |
| 59.789 | 24 | ATTTTACGTACACA ACTCGAA    | 57.364 | 22 | 140 | 2784 | 2923 |
| 60.074 | 20 | TCAATGGTTAAATTGGTATTTGATI | 59.073 | 26 | 199 | 108  | 306  |
| 59.797 | 20 | CCTTCTGCGAATCGTTCAAT      | 60.214 | 20 | 246 | 3    | 248  |
| 57.292 | 24 | TTAGGCTGAATTGGAATCCG      | 60.031 | 20 | 211 | 720  | 930  |
| 59.779 | 20 | ACTCGCTCGATCGTTGTTCT      | 60.02  | 20 | 202 | 479  | 680  |
| 58.932 | 23 | CCGAGACCCCAATTTGATT       | 59.735 | 19 | 118 | 21   | 138  |
| 58.46  | 21 | GAATGCAGCATCATCACACA      | 59.202 | 20 | 262 | 1793 | 2054 |
| 60.06  | 20 | GTTTTCCGGTGATCTTAGCG      | 59.708 | 20 | 231 | 351  | 581  |

|        |                            |        |    |     |       |       |
|--------|----------------------------|--------|----|-----|-------|-------|
| 59.933 | 20 TCATTGAAGTGACCCAACCA    | 59.935 | 20 | 243 | 2467  | 2709  |
| 60.011 | 20 CTGCAACCCGTAATGGAAC     | 60.365 | 20 | 217 | 3138  | 3354  |
| 60.111 | 20 CATCCCAACCACGTTAGCTT    | 59.993 | 20 | 182 | 1622  | 1803  |
| 60.235 | 20 AACTGATGCTGCTGCTGCTA    | 59.918 | 20 | 183 | 51    | 233   |
| 59.588 | 22 TCCAATCAAGTCGACAAACG    | 59.691 | 20 | 134 | 162   | 295   |
| 60.184 | 20 TGTAGCCGACCCCAATTTAT    | 59.297 | 20 | 233 | 397   | 629   |
| 59.871 | 20 ACCTTCATCATCCTCATCCC    | 58.741 | 20 | 250 | 3159  | 3408  |
| 60.278 | 20 AGGAGGCTTTCCAGGTCATT    | 60.074 | 20 | 115 | 3679  | 3793  |
| 58.446 | 24 CGTGGTTCGTCACGCTACTA    | 59.928 | 20 | 260 | 301   | 560   |
| 61.08  | 20 AGAGTGAGGCGATAGGCAAAA   | 59.978 | 20 | 223 | 264   | 486   |
| 59.813 | 20 CCTGTGTCAGGGCTAGCTTC    | 60.012 | 20 | 200 | 515   | 714   |
| 59.225 | 22 AAGGCAGCGACTGGAAATC     | 60.355 | 19 | 126 | 7     | 132   |
| 60.91  | 20 GCGGTGTATGTCCCTCAACT    | 59.997 | 20 | 249 | 5     | 253   |
| 59.55  | 20 TGCAGAGATGGACGTGTTGT    | 60.319 | 20 | 185 | 1515  | 1699  |
| 59.903 | 20 ATAATCCGGTCCCTTCCAAA    | 60.502 | 20 | 243 | 157   | 399   |
| 60.469 | 20 CTTGCTCGAATTCTTAGCCG    | 60.11  | 20 | 168 | 254   | 421   |
| 60.088 | 22 CCAACCCGCTTATCTAAAA     | 59.075 | 20 | 230 | 448   | 677   |
| 59.316 | 20 GGAACCTGCGAAAATGGAAG    | 59.685 | 20 | 129 | 88    | 216   |
| 60.025 | 20 GGCAACCCATTTCGTATCCTT   | 61.072 | 20 | 182 | 121   | 302   |
| 60.066 | 20 TCACTTCATAAAGTCCGCC     | 60.074 | 20 | 130 | 146   | 275   |
| 59.989 | 20 TCCGTCGTCTTTCTTTGCTT    | 59.993 | 20 | 151 | 4032  | 4182  |
| 60.493 | 21 TTCCTCTCGATCCTCGTTACA   | 59.822 | 21 | 104 | 8     | 111   |
| 60.118 | 20 TGTTGCTCATGACAAATTCAATC | 59.996 | 23 | 105 | 1384  | 1488  |
| 59.671 | 22 CATGTCAGAAATTGGGAGCC    | 60.461 | 20 | 189 | 158   | 346   |
| 59.651 | 20 GGGTCACACGAAAGTTTACAAG  | 58.675 | 22 | 194 | 461   | 654   |
| 60.149 | 20 CACTGTGGTGGCATATCAGG    | 59.984 | 20 | 271 | 32    | 302   |
| 59.43  | 20 CGTTCAAATCACCAACATCG    | 59.964 | 20 | 280 | 360   | 639   |
| 59.168 | 25 AGTTGGAAGCCTTGACATTGA   | 59.726 | 21 | 221 | 18    | 238   |
| 60.117 | 20 GGGGAGAAATGAAAAAGGGA    | 60.237 | 20 | 169 | 25    | 193   |
| 60.599 | 20 AAGGTTTTAACAGTCCTCCGA   | 57.854 | 21 | 227 | 4096  | 4322  |
| 60.035 | 20 CGAGCTCTAACTCCCCCTTT    | 59.842 | 20 | 200 | 231   | 430   |
| 60.175 | 20 CCAAGAGCAAGACGACAACA    | 60.025 | 20 | 156 | 3643  | 3798  |
| 58.759 | 21 CCAAATGAGCTCGGTTGATA    | 58.721 | 20 | 280 | 582   | 861   |
| 60.164 | 20 GGACCGGCCGTATTTATGAT    | 60.903 | 20 | 272 | 188   | 459   |
| 59.415 | 21 TGAACAAGCCTATTGCCTCC    | 60.214 | 20 | 273 | 74    | 346   |
| 58.987 | 20 CTTCACACATCCAATCCAAGAA  | 59.971 | 22 | 261 | 489   | 749   |
| 60.293 | 20 TTCACATTAGAGCACATGGAGG  | 60.132 | 22 | 219 | 331   | 549   |
| 60.032 | 20 CATGCTTTTCGTCTCGCATA    | 59.976 | 20 | 141 | 182   | 322   |
| 60.465 | 20 GCTAAAGTGCCTCGTGCTTC    | 60.162 | 20 | 159 | 4289  | 4447  |
| 59.89  | 20 TACATGGATTTCCAGCAGCA    | 60.22  | 20 | 268 | 10288 | 10555 |
| 59.964 | 20 TGAAGCAATTCAATTCAAGCA   | 59.434 | 21 | 233 | 328   | 560   |
| 60.251 | 20 TGCACTGCATTTCCCTTCGTA   | 60.401 | 20 | 251 | 71    | 321   |
| 60.005 | 20 TCAGCAACTCCTGCATATCG    | 59.972 | 20 | 201 | 479   | 679   |
| 60.271 | 20 CAGGTTGGGATGAAAGGAGA    | 60.042 | 20 | 212 | 0     | 211   |
| 59.971 | 20 TGAATTTGATATGGGGCACA    | 59.745 | 20 | 250 | 4272  | 4521  |
| 60.326 | 20 GCCAATTCGTCTCGTGATTT    | 60.081 | 20 | 137 | 329   | 465   |
| 59.415 | 20 ATTCTCTCTTCTTCGCCACG    | 59.574 | 20 | 259 | 70    | 328   |
| 59.951 | 21 GGTCCCAAAATCGACGTA AAA  | 59.801 | 20 | 252 | 120   | 371   |
| 60.315 | 20 TGGCATATAGTGGCCTCCTC    | 60.059 | 20 | 220 | 11    | 230   |
| 60.021 | 20 TGATCAAAATCGAGAAAGCG    | 58.991 | 20 | 256 | 442   | 697   |
| 60.173 | 20 TGAAAATGAATTGGGGTGGT    | 60.029 | 20 | 181 | 1975  | 2155  |
| 59.813 | 20 ATTCAGCCCTTAACTGCCAA    | 59.708 | 20 | 261 | 3     | 263   |
| 59.598 | 24 TGTTCCATCTAAGGCTCCCA    | 60.594 | 20 | 253 | 1     | 253   |
| 59.72  | 20 CTTTGCACATGAACAATCACAA  | 59.632 | 22 | 278 | 682   | 959   |
| 58.334 | 20 GCCATTGAAATTACCTGCAAAA  | 59.957 | 21 | 122 | 21    | 142   |
| 60.378 | 20 GTCGTTGGTTCTTCGTGCTT    | 60.299 | 20 | 177 | 338   | 514   |
| 58.623 | 23 TTCTCGCCCTCTAAGGTTTTC   | 59.843 | 21 | 272 | 568   | 839   |
| 60.145 | 20 GATTCTTTCGTGGAGTCCGA    | 60.195 | 20 | 257 | 275   | 531   |

|        |    |                          |        |    |     |      |      |
|--------|----|--------------------------|--------|----|-----|------|------|
| 57.589 | 23 | TCCAACCCAAGGTGAGTAGC     | 60.111 | 20 | 150 | 107  | 256  |
| 59.105 | 20 | TGAGGGGGAAAAGAGAGGAT     | 60.008 | 20 | 211 | 1187 | 1397 |
| 60.249 | 20 | AAACCAAAAACCCAAGACCC     | 60.068 | 20 | 264 | 2585 | 2848 |
| 59.415 | 20 | TTTTCCATTGGCATAGTTGAA    | 58.148 | 21 | 263 | 956  | 1218 |
| 59.925 | 20 | GGATGAGCTTTGGCTTCTTG     | 59.955 | 20 | 185 | 940  | 1124 |
| 60.197 | 20 | AACTCAACCCAACGCAAATC     | 59.978 | 20 | 157 | 36   | 192  |
| 60.326 | 20 | TGGGGGATTGTTGGAATTTA     | 59.988 | 20 | 157 | 199  | 355  |
| 59.82  | 20 | CAGAGCGCACTCGAAGAGTA     | 59.49  | 20 | 150 | 184  | 333  |
| 60.91  | 20 | TCAACATACCCAATTATTCCCA   | 59.055 | 22 | 133 | 11   | 143  |
| 60.02  | 20 | TCCTCCATAACTTTTTCTCACA   | 59.987 | 23 | 232 | 66   | 297  |
| 60.073 | 20 | AAGAACTCGCAGGTTCTTG      | 59.473 | 20 | 167 | 99   | 265  |
| 59.99  | 20 | GGTGAGAAGTACGCATGCAA     | 59.871 | 20 | 169 | 530  | 698  |
| 59.926 | 20 | GCAAGAGAATTGAAGAGCGG     | 60.096 | 20 | 269 | 17   | 285  |
| 60.11  | 20 | TCTTCCCAAAAGTCACCTG      | 60.081 | 20 | 184 | 701  | 884  |
| 60.158 | 20 | TCGTTGCCGGAAAATGAATA     | 61.319 | 20 | 264 | 255  | 518  |
| 59.767 | 21 | ATGTAGCCGACCCCAATTTA     | 59.297 | 20 | 102 | 42   | 143  |
| 59.871 | 20 | GGATTTGCTGTGGTAGGTGG     | 60.375 | 20 | 249 | 435  | 683  |
| 60.91  | 20 | CCGTGTGCATTTGTGTCAAT     | 60.436 | 20 | 105 | 1    | 105  |
| 60.016 | 20 | TCACTCCCTCCACATCTTCC     | 60.048 | 20 | 178 | 246  | 423  |
| 59.971 | 20 | AGCCCATGTTTTGAGAAATTG    | 59.077 | 21 | 207 | 105  | 311  |
| 60.008 | 20 | TTGGGAGAAGGGTTTGTGTC     | 59.943 | 20 | 150 | 416  | 565  |
| 60.172 | 20 | ACCAGATTTTTCCGGCTTCT     | 60.074 | 20 | 225 | 200  | 424  |
| 59.971 | 20 | GGAGAAGCACCTCCTCTGTG     | 59.986 | 20 | 227 | 255  | 481  |
| 59.671 | 21 | TGCCCATGTCCACTCAATAA     | 59.924 | 20 | 182 | 22   | 203  |
| 60.074 | 20 | CAGCCTCCAGCAAGTTATC      | 59.836 | 20 | 167 | 834  | 1000 |
| 59.674 | 20 | TTAAAAATGAAACCGGCCAA     | 60.287 | 20 | 235 | 1768 | 2002 |
| 59.957 | 20 | AGGTTGCGTACATCTGACCC     | 59.997 | 20 | 244 | 3030 | 3273 |
| 60.212 | 20 | CTCCGGATTTGGAGACTCTG     | 59.797 | 20 | 221 | 84   | 304  |
| 59.301 | 20 | TCAGACTTGGTGGCAATCAG     | 59.831 | 20 | 241 | 76   | 316  |
| 60.774 | 19 | TTCAACATTCAAAATTGGTATGAA | 59.665 | 25 | 272 | 18   | 289  |
| 60.045 | 20 | TCAAGTTTTTATTAGCATTTAAAC | 58.796 | 27 | 225 | 601  | 825  |
| 60.009 | 20 | GGCGATTGTCAACTTGGTTT     | 59.978 | 20 | 206 | 78   | 283  |
| 59.218 | 20 | CATGCAGACCACTTTTGGTG     | 60.152 | 20 | 247 | 52   | 298  |
| 60.111 | 20 | GCCTCGATCCTAACGTGTGT     | 60.142 | 20 | 173 | 1613 | 1785 |
| 59.336 | 20 | TCACCCCTCATTACATCAA      | 59.893 | 20 | 230 | 547  | 776  |
| 57.86  | 23 | CCATCTTCAAGCAAACAACA     | 57.316 | 20 | 248 | 1    | 248  |
| 60.065 | 19 | ATGGGAAGGGGTGGAGATAC     | 60.015 | 20 | 114 | 308  | 421  |
| 59.927 | 20 | CGGTTGTCATAAGACCACTTCA   | 60.03  | 22 | 119 | 7    | 125  |
| 60.103 | 20 | ATGGGATAAATTCGCTCACG     | 59.923 | 20 | 178 | 5069 | 5246 |
| 59.244 | 20 | AGGGGTAGGGGGTAGACCTT     | 60.068 | 20 | 115 | 108  | 222  |
| 60.074 | 20 | AGGACTGCCGACCTCTTCT      | 60.393 | 20 | 246 | 371  | 616  |
| 59.953 | 20 | AAAAACATTAAATCAAACGTACC  | 57.811 | 26 | 231 | 239  | 469  |
| 59.93  | 20 | AAGGGAGCTACAACCTTTCATC   | 58.783 | 22 | 229 | 196  | 424  |
| 58.948 | 19 | GAGAATATATCCCGGCACGA     | 59.885 | 20 | 155 | 0    | 154  |
| 60.074 | 20 | GAGTCATTAAGTGTGGTCTCGG   | 58.721 | 22 | 139 | 967  | 1105 |
| 59.861 | 20 | AACTGACTGTCGACCCTGCT     | 59.907 | 20 | 216 | 20   | 235  |
| 60.022 | 20 | CCAAGACCCCAATTTGATT      | 60.91  | 20 | 174 | 2648 | 2821 |
| 60.089 | 20 | TCAGCAGCCATTTGTTCTTG     | 59.988 | 20 | 164 | 231  | 394  |
| 60.039 | 20 | TGCATTACCTTTGAAGCACG     | 59.872 | 20 | 242 | 2019 | 2260 |
| 60.712 | 20 | TGCTGTTTTGTTATAACCCCG    | 59.876 | 21 | 250 | 59   | 308  |
| 59.907 | 20 | TGCTTCTGGTAGCAATGGTG     | 59.864 | 20 | 264 | 380  | 643  |
| 60.112 | 20 | GAATGAATTCGAAGTTTGGGA    | 59.009 | 21 | 149 | 408  | 556  |
| 59.726 | 21 | TGTAGCCGACCCCAATTTAT     | 59.297 | 20 | 125 | 1057 | 1181 |
| 59.03  | 21 | TTGAACAATGGTACCTCCTCC    | 58.898 | 21 | 134 | 11   | 144  |
| 60.096 | 20 | TTATAACGTGGGAACCAGCA     | 59.037 | 20 | 242 | 687  | 928  |
| 60.119 | 20 | AGAATCAAGCAATGGATGCC     | 60.043 | 20 | 196 | 598  | 793  |
| 60.439 | 18 | ACGGCGATGGCTAGAGTGTA     | 60.817 | 20 | 105 | 11   | 115  |
| 59.968 | 20 | AGGAAATGCGAGAGGGATTT     | 60.039 | 20 | 172 | 321  | 492  |

|        |                             |        |    |     |      |      |
|--------|-----------------------------|--------|----|-----|------|------|
| 60.221 | 20 TGAAGGCGGAGGTTTCATAG     | 60.206 | 20 | 200 | 202  | 401  |
| 59.931 | 20 GGATTTTTCGAAGCACTCCA     | 60.192 | 20 | 249 | 262  | 510  |
| 59.645 | 20 AGTGCGGGGTAAAAATGTTG     | 59.861 | 20 | 209 | 230  | 438  |
| 60.043 | 20 CTTTGTGGAGCGCGTG         | 61.555 | 18 | 133 | 171  | 303  |
| 60.623 | 21 GGTCTTAATATCCCCATTTGA    | 57.032 | 22 | 136 | 211  | 346  |
| 61.713 | 20 ACTCGTTCAAATCCTGCCAT     | 59.556 | 20 | 217 | 5781 | 5997 |
| 59.993 | 20 CCTTGGGATATTGTTTGGA      | 60.692 | 20 | 179 | 59   | 237  |
| 60.036 | 20 TGGGATTATGTTTGATTCA      | 57.804 | 21 | 119 | 13   | 131  |
| 59.002 | 20 TGGCTTCTTTGCACCTCTT      | 59.993 | 20 | 274 | 711  | 984  |
| 60.352 | 20 GTCATCCCTCGTCTCCAAA      | 60.05  | 20 | 191 | 124  | 314  |
| 60.134 | 20 CTCCTGCTTACCTCGAGTC      | 60.135 | 20 | 202 | 84   | 285  |
| 60.24  | 20 GCTGAGAGCAATACCGATGG     | 60.765 | 20 | 277 | 1784 | 2060 |
| 59.752 | 20 GTGGGAAGAATGCGAAGTGT     | 60.119 | 20 | 244 | 789  | 1032 |
| 58.781 | 23 CGGCTCAAAGGACAGATAGG     | 59.83  | 20 | 262 | 277  | 538  |
| 60.011 | 20 TGAATCAGCTCCGTAGGCTT     | 59.978 | 20 | 177 | 228  | 404  |
| 60.067 | 20 TCCACAACCTCTCATCTCCC     | 60.048 | 20 | 247 | 241  | 487  |
| 59.371 | 20 TCCTCACTGAGTCTTGATATTGTT | 57.06  | 24 | 269 | 512  | 780  |
| 60.008 | 20 GAACAATCAGCACCGTCAGA     | 59.837 | 20 | 196 | 1537 | 1732 |
| 59.823 | 20 GCGATATCACGTTTAACGGC     | 60.485 | 20 | 242 | 19   | 260  |
| 59.166 | 20 ACCTTCCAATCAGCCTGCTA     | 59.836 | 20 | 150 | 65   | 214  |
| 59.886 | 20 CACAATAACCATTCGTTCTCAA   | 57.692 | 22 | 240 | 157  | 396  |
| 59.42  | 20 GAGAGAGGGAGAGAGATCGGA    | 60.043 | 21 | 131 | 206  | 336  |
| 59.988 | 20 TGTGCAATGCAACAAGATGA     | 59.833 | 20 | 151 | 77   | 227  |
| 60.187 | 23 GGAATTGAGCAGCCTTTTTG     | 59.823 | 20 | 240 | 346  | 585  |
| 59.923 | 20 AACAAATGGCTGCTGTTAGCC    | 60.278 | 20 | 158 | 428  | 585  |
| 59.962 | 20 GAATAGCCCAAGGGAGGAAG     | 60.032 | 20 | 188 | 1639 | 1826 |
| 59.74  | 20 TGAGACTCGAACCTGTGAGC     | 59.129 | 20 | 219 | 30   | 248  |
| 59.853 | 20 CCTGAAATTTGGTAGGCGTG     | 60.493 | 20 | 221 | 1273 | 1493 |
| 60.024 | 19 ATTACCTGCCGAATGTTGC      | 62.128 | 20 | 110 | 33   | 142  |
| 60.073 | 20 TCGCTAGAATCTCATCCAGTTG   | 59.476 | 22 | 280 | 211  | 490  |
| 60.223 | 20 GATGTACGCACTTGGTGGTG     | 60.032 | 20 | 100 | 636  | 735  |
| 58.775 | 20 CCACAAAATAATAAGGCGGC     | 59.455 | 20 | 211 | 2    | 212  |
| 60.21  | 20 TCCACAAATCATGCGAAAAA     | 60.051 | 20 | 211 | 23   | 233  |
| 59.939 | 20 TCAACAGAGCATGAACCAGC     | 59.992 | 20 | 262 | 41   | 302  |
| 58.759 | 21 TTGCCATTATGCTCCAATGA     | 60.035 | 20 | 182 | 1739 | 1920 |
| 59.41  | 20 TGTTGGCATCAAGCTTCAAA     | 60.379 | 20 | 133 | 2369 | 2501 |
| 59.885 | 20 TTCCCATCATTACGACAAA      | 59.9   | 20 | 244 | 132  | 375  |
| 59.722 | 20 CTGAGCCATCGAGGTATGGT     | 60.096 | 20 | 280 | 230  | 509  |
| 60.111 | 20 GTTACCAAACAGCCCACTCC     | 59.454 | 20 | 279 | 676  | 954  |
| 59.916 | 20 AAACAGAATTGTGCTTGGGC     | 60.118 | 20 | 267 | 3048 | 3314 |
| 60.037 | 22 TAGCAACAGTTGGAAATGCG     | 59.872 | 20 | 128 | 6    | 133  |
| 60.301 | 20 AAGCTTGATGGTGGATGTTTG    | 59.985 | 21 | 239 | 207  | 445  |
| 60.049 | 20 ACCGTACTCCGAATGAATGC     | 59.962 | 20 | 162 | 2374 | 2535 |
| 60.277 | 20 CGGGACCGTGAATAATGACT     | 59.813 | 20 | 262 | 937  | 1198 |
| 59.853 | 20 AAAGTGAAGGTGACCAACGG     | 60.005 | 20 | 216 | 1430 | 1645 |
| 60.029 | 20 TGATTTGATCATCCCTGCAA     | 60.009 | 20 | 111 | 40   | 150  |
| 60.11  | 20 AGTCTCCTCGCTTTTCCTCC     | 59.957 | 20 | 279 | 3647 | 3925 |
| 60.096 | 20 AATTGTGCTATTATCTGCGCC    | 59.251 | 21 | 142 | 244  | 385  |
| 60.015 | 20 TGTAGCCGACCCCAATTTAT     | 59.297 | 20 | 133 | 127  | 259  |
| 60.326 | 20 TGCATGCATCTTTTTCTCTTTT   | 59.013 | 22 | 267 | 41   | 307  |
| 59.059 | 20 CGGTAAAGGGTTTCGATTTCA    | 59.931 | 20 | 269 | 870  | 1138 |
| 58.639 | 21 TAAGAGCCTTGCCTCTACC      | 59.752 | 20 | 213 | 287  | 499  |
| 60.096 | 20 GACAGGCCTGAGTTCGGTAG     | 59.867 | 20 | 249 | 3253 | 3501 |
| 59.859 | 20 CTTGGCATCCTCATGGAAGT     | 60.073 | 20 | 271 | 3948 | 4218 |
| 59.942 | 21 GAATGCATTGAGTCAAACATAAG/ | 58.323 | 24 | 190 | 612  | 801  |
| 60.118 | 20 TTTCTTTTGGCCAATGTTGA     | 59.133 | 20 | 265 | 191  | 455  |
| 60.206 | 20 CAAGAATGTTGACCAAGAGCA    | 58.912 | 21 | 215 | 242  | 456  |
| 59.813 | 20 GCTCTTACCCCATCCGAAA      | 60.074 | 20 | 244 | 304  | 547  |

|        |    |                           |        |    |     |      |      |
|--------|----|---------------------------|--------|----|-----|------|------|
| 59.047 | 20 | AAAACGGACACCAAATCAGC      | 59.978 | 20 | 277 | 12   | 288  |
| 59.557 | 21 | GGGTGTCCTCGACATTTTTTC     | 59.386 | 20 | 271 | 87   | 357  |
| 60.192 | 20 | ACGAAGTGGCTGAGGAAATG      | 60.255 | 20 | 278 | 59   | 336  |
| 60.413 | 20 | CTGCAACTTTCCATACGGCT      | 60.27  | 20 | 277 | 121  | 397  |
| 59.96  | 20 | AATTACCTTCACTCACCAGAAAA   | 57.008 | 23 | 277 | 78   | 354  |
| 59.749 | 21 | AAATTACAAACCCGCATCCA      | 60.188 | 20 | 210 | 417  | 626  |
| 59.443 | 23 | GGAGCAGAATGTGGAGAAGG      | 59.803 | 20 | 137 | 14   | 150  |
| 59.375 | 20 | TGCAGATGGAAGATGAGCAG      | 60.096 | 20 | 148 | 930  | 1077 |
| 60.11  | 20 | CTTGATATGGATCCGAGGCT      | 59.105 | 20 | 202 | 550  | 751  |
| 60.258 | 20 | ATGGGGGATGAGTTTGTGAG      | 59.779 | 20 | 219 | 58   | 276  |
| 60.076 | 20 | GGAAAGTGACCTCTGAAGCG      | 59.989 | 20 | 170 | 980  | 1149 |
| 60.31  | 20 | GAAAATTGGGGATCACATCG      | 60.133 | 20 | 232 | 90   | 321  |
| 59.926 | 20 | CCGTTTGATTCATCGGAAAC      | 60.309 | 20 | 110 | 837  | 946  |
| 60.195 | 20 | GGGTGGACTTGATTTGCACT      | 59.973 | 20 | 187 | 336  | 522  |
| 59.7   | 20 | ACCCGACCACAAAGGAATTA      | 59.288 | 20 | 262 | 363  | 624  |
| 60.044 | 20 | GATTCAAGCCCCAAAGTCAA      | 60.051 | 20 | 174 | 1069 | 1242 |
| 59.369 | 20 | ATGTAGCCGACCCCAATTTA      | 59.297 | 20 | 187 | 174  | 360  |
| 60.362 | 20 | TTGATTATCATGTCGCTCGC      | 59.799 | 20 | 111 | 983  | 1093 |
| 59.901 | 20 | ACTGATTGTACACGATGGCG      | 59.596 | 20 | 237 | 241  | 477  |
| 59.609 | 20 | GCGGATAAGCTCGAACAGTC      | 59.985 | 20 | 181 | 5    | 185  |
| 59.247 | 27 | CCCACATTTACTTGATGCATTCT   | 60.25  | 23 | 111 | 11   | 121  |
| 60.209 | 20 | TGTCAGGATATTGACAAGGTGC    | 60     | 22 | 170 | 2052 | 2221 |
| 57.334 | 23 | TGAATATCGGTTTCATCGCA      | 60.035 | 20 | 100 | 40   | 139  |
| 59.931 | 20 | ACCCAACACCAAATTATGCC      | 59.551 | 20 | 227 | 20   | 246  |
| 59.978 | 20 | GGAGCCACGCTACAGACAGT      | 60.476 | 20 | 250 | 4003 | 4252 |
| 59.962 | 20 | ATTTAATCCCGTGCAACGC       | 60.852 | 19 | 218 | 59   | 276  |
| 60.042 | 20 | CTTCAGGGCCAAATGTGAGT      | 60.111 | 20 | 270 | 4724 | 4993 |
| 60.448 | 20 | TGAAAGTGATTAGCATGACCCA    | 60.502 | 22 | 241 | 251  | 491  |
| 59.967 | 20 | CTGGTAAGGCTGTTGGGGTA      | 59.986 | 20 | 218 | 1333 | 1550 |
| 60.198 | 20 | CTCCTGTGGCCAAACAATCT      | 60.111 | 20 | 222 | 3478 | 3699 |
| 59.834 | 20 | GAAATTGGCTCCGAAATTGA      | 60.016 | 20 | 191 | 403  | 593  |
| 59.933 | 20 | AGCCATAAGCTCGGATAGCA      | 59.967 | 20 | 130 | 194  | 323  |
| 59.853 | 20 | CGTCCTTTTCAGTCAGCCTC      | 59.989 | 20 | 229 | 123  | 351  |
| 59.985 | 20 | TATCGTCGGAGGAGGAGCTA      | 59.933 | 20 | 177 | 941  | 1117 |
| 59.297 | 20 | GACACTTGGTGTGCAAAATCG     | 60.16  | 20 | 201 | 3    | 203  |
| 60.221 | 22 | GCGATGGTGTGTTGAAAGGAT     | 59.939 | 20 | 204 | 19   | 222  |
| 59.827 | 20 | ATCTGCAAAGTGCTGCTGTG      | 60.207 | 20 | 247 | 23   | 269  |
| 59.903 | 20 | TCTAGGGTTGACCCACCTCA      | 60.501 | 20 | 175 | 1689 | 1863 |
| 60.102 | 24 | TTTGGTTCGATCACGCCTAT      | 60.469 | 20 | 262 | 110  | 371  |
| 59.887 | 20 | GTGCTCAAGGTTTGAACCTCG     | 58.497 | 20 | 280 | 1261 | 1540 |
| 59.926 | 20 | TAGTCTCTGCCAAGTGGGCT      | 60.012 | 20 | 233 | 227  | 459  |
| 60.214 | 20 | TTTCCAAGACCGGAAACAAG      | 60.081 | 20 | 261 | 310  | 570  |
| 59.799 | 21 | AGAAGGCTTTTCGCCTTTTTTC    | 59.966 | 20 | 258 | 76   | 333  |
| 59.67  | 20 | CAATGGCGAAGGCAGTATTT      | 60.096 | 20 | 111 | 577  | 687  |
| 57.669 | 26 | GTTTCTCAATTATGTTATTAGCATC | 57.053 | 26 | 253 | 84   | 336  |
| 59.302 | 21 | TGGGCGTAAAATAGAGGTGC      | 60.096 | 20 | 225 | 5710 | 5934 |
| 58.738 | 20 | GGTACCGTCATTCCAATGCT      | 59.82  | 20 | 269 | 50   | 318  |
| 60.081 | 20 | TCGCTCCTCCAAGAACAACCT     | 59.989 | 20 | 110 | 66   | 175  |
| 60.058 | 20 | CAACCTTCGGATGAAGAAG       | 59.665 | 20 | 203 | 2430 | 2632 |
| 60.081 | 20 | CCTGCAGATCATTACATGTTT     | 60     | 22 | 186 | 55   | 240  |
| 59.927 | 20 | TTCGATGTATTGTTGGATAAATGTG | 58.808 | 24 | 216 | 404  | 619  |
| 59.813 | 20 | TTGGCTTTCTTTCTCCCTGA      | 59.926 | 20 | 275 | 352  | 626  |
| 60.468 | 19 | GCTCGGCGATACTTGTCTTC      | 59.985 | 20 | 244 | 16   | 259  |
| 60.176 | 20 | GCCCTCTGCTTTCAAATTCA      | 60.331 | 20 | 252 | 860  | 1111 |
| 60.018 | 20 | TCACCATCACCATCACCATC      | 60.189 | 20 | 259 | 744  | 1002 |
| 59.439 | 21 | CACTAACCTGAAGCCATGAGA     | 57.966 | 21 | 239 | 14   | 252  |
| 60.173 | 20 | TCAAATTTTTTCAGCTTCGCC     | 60.323 | 20 | 181 | 354  | 534  |
| 59.492 | 22 | CCCAAATGGATTGGGTTCTA      | 59.617 | 20 | 115 | 89   | 203  |

|        |    |                         |        |    |     |      |      |
|--------|----|-------------------------|--------|----|-----|------|------|
| 60.053 | 20 | TTCTTATCGTCCGATTTGCC    | 60.038 | 20 | 189 | 439  | 627  |
| 60.046 | 20 | CCCCTTTCGGTGTAGACAAA    | 59.964 | 20 | 275 | 972  | 1246 |
| 59.126 | 22 | CCCGAGGGAGTCACAATTTA    | 59.926 | 20 | 236 | 55   | 290  |
| 59.702 | 20 | CGCACGTTTGTATTTTTATTTTT | 57.532 | 23 | 108 | 263  | 370  |
| 58.998 | 20 | ATTACGCATCAGCACAATCG    | 59.718 | 20 | 277 | 92   | 368  |
| 59.831 | 20 | GTTACATCCCACCGGATTTG    | 60.051 | 20 | 269 | 217  | 485  |
| 59.522 | 20 | CACGTCTAGATGGCAAGCAA    | 60.011 | 20 | 209 | 2031 | 2239 |
| 60.375 | 20 | CTTCAATCAATCCCCCTGAA    | 59.864 | 20 | 261 | 4160 | 4420 |
| 60.039 | 20 | AAATGCACTGGTTAGGAGGG    | 59.052 | 20 | 195 | 1090 | 1284 |
| 59.78  | 22 | TGAGCAAATAAATTACAACGAA  | 59.322 | 25 | 252 | 3716 | 3967 |
| 59.91  | 20 | CCATGGCTTTTCAACCAGAT    | 59.933 | 20 | 255 | 707  | 961  |
| 58.906 | 21 | TAGCAGGCCAAAGAGGAAGA    | 60.088 | 20 | 271 | 61   | 331  |
| 59.991 | 20 | CACTTGCTTTGCCCGTTTAT    | 60.131 | 20 | 145 | 876  | 1020 |
| 59.955 | 20 | TTGTTTGATCTGTGGGTGGA    | 59.935 | 20 | 204 | 140  | 343  |
| 58.783 | 22 | ATTTTCGTCGCCCTCTTAT     | 59.93  | 20 | 228 | 71   | 298  |
| 60.037 | 20 | GGTGGTATGGTGTGCAGAAA    | 59.42  | 20 | 115 | 458  | 572  |
| 59.867 | 20 | AAGTAGGGTCAAACACGTGAAG  | 58.304 | 22 | 262 | 37   | 298  |
| 59.955 | 20 | GCCCATCTGACGATAGAAGA    | 57.834 | 20 | 172 | 594  | 765  |
| 60.339 | 20 | CACTCCTTTCGTTGCCAAAT    | 60.11  | 20 | 209 | 228  | 436  |
| 59.67  | 20 | CTAGATCATCAAATGCGCCA    | 59.792 | 20 | 273 | 586  | 858  |
| 59.823 | 20 | TTTGGTTCATGTAGTCGACCC   | 59.845 | 21 | 274 | 909  | 1182 |
| 59.925 | 20 | GGA CTGACAGAGATCGAGGG   | 59.792 | 20 | 249 | 24   | 272  |
| 59.945 | 20 | TCCATGGTGTACATAAATTGC   | 59.266 | 21 | 174 | 223  | 396  |
| 60.241 | 20 | TTGCATTTAGGAGAATCCCCG   | 60.031 | 20 | 248 | 11   | 258  |
| 59.916 | 25 | TCGAAATCATGGTTCGTCAA    | 60.049 | 20 | 253 | 969  | 1221 |
| 60.051 | 20 | GAGGCCAGTGATGACACAGA    | 59.827 | 20 | 143 | 3962 | 4104 |
| 60.189 | 20 | TTATCCAACCCAGCCAACAT    | 60.192 | 20 | 254 | 477  | 730  |
| 59.4   | 20 | TCTGTCTAATGTTTCCGCCG    | 61.157 | 20 | 238 | 773  | 1010 |
| 59.864 | 20 | GGTAGCTACTTCAGTGGCGG    | 59.898 | 20 | 187 | 59   | 245  |
| 60.511 | 20 | AGCATCGGCTGGTGAATTAT    | 59.556 | 20 | 273 | 104  | 376  |
| 59.247 | 20 | TCGTCCAGCTGATGGTAATG    | 59.673 | 20 | 222 | 15   | 236  |
| 59.795 | 20 | TCCCAAAGAGCAAACAGCTT    | 59.993 | 20 | 245 | 821  | 1065 |
| 59.67  | 21 | TCGGCCTCCGTCATTATTAG    | 60.053 | 20 | 268 | 253  | 520  |
| 60.096 | 20 | AGGCTGTGCTCATCCGTAGT    | 59.898 | 20 | 218 | 399  | 616  |
| 60.112 | 20 | TGTAGCCGACCCCAATTTAT    | 59.297 | 20 | 180 | 315  | 494  |
| 59.997 | 20 | CCATTTTCAAGATGTGCCCT    | 59.933 | 20 | 204 | 395  | 598  |
| 60.108 | 24 | TTGTTGCCACCACTGTTGTT    | 60.049 | 20 | 255 | 2    | 256  |
| 60     | 20 | CAGCTTCCCCCAATACTCAA    | 60.066 | 20 | 140 | 453  | 592  |
| 59.933 | 20 | TCCCCGTACACAGTGATTTTT   | 59.345 | 21 | 224 | 959  | 1182 |
| 59.43  | 20 | GCAGGCCAAAGAGGAAGAGT    | 60.903 | 20 | 244 | 243  | 486  |
| 59.844 | 20 | TGTTCCAAGCTTTTCTCCTCA   | 59.978 | 21 | 219 | 176  | 394  |
| 60.103 | 20 | TCACATTGCTCTGCAAGTCC    | 59.992 | 20 | 221 | 108  | 328  |
| 60.776 | 20 | ACAAGACCTGCTTCATTGGC    | 60.263 | 20 | 138 | 996  | 1133 |
| 60.184 | 20 | GGCAGCAGCCTCTTAATCAC    | 59.985 | 20 | 107 | 371  | 477  |
| 60.91  | 20 | TCAACCCAGCATATTCCACA    | 59.924 | 20 | 209 | 10   | 218  |
| 59.402 | 22 | TCGAACTTCCATCAACACAATC  | 59.978 | 22 | 206 | 417  | 622  |
| 60.088 | 20 | CCTGCGAACTTTCCTAGCAC    | 60.015 | 20 | 101 | 275  | 375  |
| 59.827 | 20 | AGCAGAGGAGGACGATGAAG    | 59.555 | 20 | 219 | 236  | 454  |
| 60.31  | 20 | CCGCACTTGACTACTCAGCA    | 60.199 | 20 | 267 | 551  | 817  |
| 57.404 | 20 | TCGGGATCTTGATGGTTCTT    | 59.483 | 20 | 275 | 187  | 461  |
| 60.37  | 20 | TCTCGTTTGACCAAATTTCC    | 59.91  | 20 | 277 | 428  | 704  |
| 60.285 | 20 | GTGGA ACTGCAGGGCTAGAG   | 60.012 | 20 | 268 | 453  | 720  |
| 60.27  | 20 | ATCTACAATCATGCTCGCCC    | 60.066 | 20 | 134 | 11   | 144  |
| 59.71  | 20 | TACCTTGTCGGTAAATCGCC    | 59.96  | 20 | 192 | 355  | 546  |
| 59.955 | 20 | GGGCTAATAATGCCCAAGGT    | 60.171 | 20 | 154 | 241  | 394  |
| 59.981 | 18 | CTTCAGCTTGTTTTGGAGG     | 59.846 | 20 | 109 | 9    | 117  |
| 59.72  | 20 | CATACACGGTCACGTCTCGT    | 59.622 | 20 | 157 | 336  | 492  |
| 60.745 | 20 | ACCATAAAAGTGCCCCGACTG   | 59.993 | 20 | 250 | 27   | 276  |



|        |    |                         |        |    |     |      |      |
|--------|----|-------------------------|--------|----|-----|------|------|
| 60.199 | 24 | GGCCAAAGTGGTGAATCAAG    | 60.495 | 20 | 279 | 2    | 280  |
| 60.257 | 20 | ATGTAGCCGACCCCAATTTA    | 59.297 | 20 | 232 | 268  | 499  |
| 59.971 | 20 | AACACAAATATGCCATGCAA    | 57.506 | 20 | 269 | 223  | 491  |
| 59.912 | 20 | CGATAGCAAACCTTTCCGAG    | 59.839 | 20 | 218 | 1163 | 1380 |
| 57.65  | 24 | GTTGAGGAAGCTGTTGGAGC    | 59.997 | 20 | 197 | 62   | 258  |
| 59.968 | 20 | GTCAATCCAATGACCATCC     | 59.995 | 20 | 211 | 204  | 414  |
| 59.138 | 22 | TCCCATGCAAACCTGAATCCT   | 60.461 | 20 | 220 | 1309 | 1528 |
| 59.904 | 22 | AGTGGCTCTTTCGTTACCA     | 60.015 | 20 | 123 | 3227 | 3349 |
| 60.232 | 20 | TGAGTAAGACCCTCACCAGTTG  | 59.253 | 22 | 187 | 39   | 225  |
| 59.855 | 20 | AGTTTGAAGAAAACCCGCCT    | 60.11  | 20 | 206 | 483  | 688  |
| 59.36  | 20 | GGAAGTTAGAGGAGGTGGGG    | 59.928 | 20 | 274 | 569  | 842  |
| 59.572 | 20 | TCCAATTAGGACAATCAAACCC  | 60.055 | 22 | 212 | 204  | 415  |
| 59.989 | 20 | CAGCTCGGTTGTCAAGTCTG    | 59.616 | 20 | 199 | 216  | 414  |
| 59.848 | 20 | CATGTGTGGGTGGTTCATGT    | 60.138 | 20 | 279 | 917  | 1195 |
| 59.322 | 20 | TCGTCGCAGAGCTAGTGAAG    | 59.49  | 20 | 268 | 803  | 1070 |
| 59.807 | 20 | AAACAGCAATTGGAACCTACTG  | 59.286 | 22 | 229 | 335  | 563  |
| 59.576 | 20 | CATGCTGGGAACTGTACTGG    | 59.161 | 20 | 276 | 1623 | 1898 |
| 59.297 | 20 | AACAAACATATGCTTTCCCAAGA | 59.891 | 23 | 142 | 4    | 145  |
| 60.032 | 20 | TAGCCAAGACCCCAATTTGA    | 60.439 | 20 | 144 | 2218 | 2361 |
| 59.959 | 20 | AACACGCGAGTTTAAGGGAG    | 59.378 | 20 | 224 | 121  | 344  |
| 59.955 | 20 | TAGGCCATGTGTAGCGACTG    | 59.888 | 20 | 277 | 326  | 602  |
| 60.201 | 20 | TTCGGGGAAGTCTGATTTTG    | 60.044 | 20 | 129 | 427  | 555  |
| 59.837 | 20 | TGCTAGCACCTCCTCTATTGC   | 59.629 | 21 | 216 | 71   | 286  |
| 59.073 | 24 | AGGCCCCCTTGTCAAATACT    | 59.827 | 20 | 161 | 51   | 211  |
| 59.836 | 20 | CACCGACAAATCCGGTAAAGT   | 59.853 | 20 | 234 | 1450 | 1683 |
| 60.12  | 20 | TTTCCCTTAGCCATGAATCG    | 60.031 | 20 | 210 | 539  | 748  |
| 60.128 | 20 | GGCGATTGTCAACTTGGTTT    | 59.978 | 20 | 207 | 1095 | 1301 |
| 59.752 | 20 | AAGCAAACCAATGCAACACA    | 60.157 | 20 | 263 | 1947 | 2209 |
| 60.074 | 20 | CTCTTCCACCTGTCTCACCG    | 60.85  | 20 | 275 | 5778 | 6052 |
| 59.574 | 20 | AGGTTGCGTACATCTGACCC    | 59.997 | 20 | 106 | 34   | 139  |
| 59.734 | 20 | TGATGCTTTTGCCTTTCTG     | 59.992 | 20 | 259 | 1505 | 1763 |
| 59.401 | 20 | TTGTTAACCCATTCCCACAA    | 58.719 | 20 | 185 | 121  | 305  |
| 59.645 | 20 | AAAGAGTTGACAGGGGCAAA    | 59.711 | 20 | 275 | 233  | 507  |
| 60.08  | 20 | TGGCTGTTGTTGAAGTTCGAG   | 60.025 | 20 | 229 | 2192 | 2420 |
| 60.048 | 20 | TCTCCCTCGATCCTTATCCC    | 60.367 | 20 | 127 | 1199 | 1325 |
| 57.589 | 25 | TTGATATCTTGGGCAATTGTAGA | 58.642 | 23 | 193 | 32   | 224  |
| 59.95  | 20 | CCTCTCATTACCCCTCATCC    | 59.46  | 20 | 212 | 11   | 222  |
| 59.555 | 20 | TCATCTTCTCCCTCCACCAC    | 60.048 | 20 | 151 | 178  | 328  |
| 60.646 | 20 | CCTTTCTGGACATGGATCGT    | 59.927 | 20 | 251 | 1195 | 1445 |
| 59.574 | 20 | ACGGTATTCAGGCTCGGAC     | 60.088 | 19 | 108 | 41   | 148  |
| 60.34  | 20 | AACCCACATACTCGAGGCAC    | 59.997 | 20 | 229 | 143  | 371  |
| 60.129 | 21 | ATACGTAAGGCCGAGAGCAA    | 59.867 | 20 | 136 | 212  | 347  |
| 59.762 | 20 | CTTGAAACCGGGGTAGGATT    | 60.18  | 20 | 245 | 34   | 278  |
| 59.978 | 20 | CGTGTTTCGTTCTAGCTTCC    | 59.875 | 20 | 231 | 245  | 475  |
| 60.263 | 20 | GATCGGAGATGGTGACGATG    | 61.474 | 20 | 210 | 1310 | 1519 |
| 58.502 | 20 | CACTTTGAGTGGCGATGGTA    | 59.716 | 20 | 250 | 31   | 280  |
| 59.853 | 20 | ATGGTGATTTGATGGGCATT    | 60.021 | 20 | 226 | 43   | 268  |
| 60     | 20 | CTCGGGATCAATGACATTCC    | 60.281 | 20 | 226 | 209  | 434  |
| 59.799 | 20 | AGATGCTGGTGGTACTTGGC    | 60.142 | 20 | 252 | 260  | 511  |
| 60.91  | 20 | ACGAACAAATCATATGGCCC    | 59.651 | 20 | 227 | 34   | 260  |
| 60.074 | 20 | ATGCGCTCTAACTTTCGCAT    | 60.01  | 20 | 205 | 964  | 1168 |
| 59.823 | 20 | AGGCAGGACACAAACGAATC    | 60.119 | 20 | 191 | 675  | 865  |
| 58.768 | 22 | TGACGTGCACATTTGTTATGG   | 60.43  | 21 | 106 | 4    | 109  |
| 59.88  | 20 | TGTGCTTGGAGGAGTGTGAG    | 60.022 | 20 | 267 | 277  | 543  |
| 59.997 | 20 | TCATGATGGTCCTGATGGAG    | 59.425 | 20 | 255 | 94   | 348  |
| 60.096 | 20 | ACCAATGGTGGTATGGTGTG    | 58.984 | 20 | 231 | 37   | 267  |
| 60.073 | 20 | TTTCTTTTTCCCGTCTCTCT    | 60.046 | 20 | 210 | 485  | 694  |
| 60.175 | 20 | AGAGTGAGGAGTTGCAGGA     | 59.986 | 20 | 193 | 2293 | 2485 |

|        |    |                           |        |    |     |      |      |
|--------|----|---------------------------|--------|----|-----|------|------|
| 57.065 | 22 | TGTGGACAAAATTTCAAAGTGG    | 59.876 | 22 | 271 | 4    | 274  |
| 60.529 | 20 | CCTCCATTATTGTGGTAGGACC    | 59.593 | 22 | 215 | 746  | 960  |
| 60.206 | 20 | TTTGATTGGGAATAATTGGG      | 57.289 | 20 | 127 | 24   | 150  |
| 60.042 | 20 | ACATTCGGGGGAGAAGGTAT      | 59.651 | 20 | 207 | 2    | 208  |
| 59.95  | 20 | GAAGACGACGATGTTGGGTT      | 59.973 | 20 | 201 | 402  | 602  |
| 58.776 | 21 | GCCACCTACAAGAATGCCTC      | 59.7   | 20 | 277 | 5    | 281  |
| 59.476 | 20 | AAGCAACATCCATCGAATTGT     | 59.448 | 21 | 271 | 1114 | 1384 |
| 60.066 | 20 | TTTGATTGGGAATAATTGGG      | 57.289 | 20 | 173 | 730  | 902  |
| 60.37  | 20 | TGGGTTGGGATCCTCAGTAG      | 59.92  | 20 | 132 | 17   | 148  |
| 60.263 | 20 | GCAACCGAGCTCTAACAAGC      | 60.162 | 20 | 249 | 80   | 328  |
| 61.269 | 18 | TCTGAACAATTTGCAGCTCG      | 60.134 | 20 | 120 | 8    | 127  |
| 59.443 | 20 | CTCTGCTTCAAGCTACTCGGA     | 59.906 | 21 | 187 | 2615 | 2801 |
| 59.838 | 20 | GTGGGCACTAAATCGGGTAA      | 59.823 | 20 | 267 | 2333 | 2599 |
| 59.405 | 20 | ACAATTGTGGTCGTGGGAAT      | 60.096 | 20 | 124 | 58   | 181  |
| 60.14  | 22 | AAGGTGTAGATCTGGCGGG       | 60.081 | 19 | 161 | 1113 | 1273 |
| 59.864 | 20 | CTCGTGCATTTTCTTGACA       | 59.84  | 20 | 260 | 896  | 1155 |
| 60.08  | 20 | GATCTTCATTGCGGGGATTA      | 59.862 | 20 | 134 | 1822 | 1955 |
| 60.074 | 20 | GAGGTGGAAGCACTTGTGTG      | 59.31  | 20 | 166 | 312  | 477  |
| 59.953 | 20 | TGCATCATGTGACTTTCATTTG    | 59.59  | 22 | 226 | 483  | 708  |
| 59.991 | 20 | ATCACAGCCCCGATAATGAG      | 59.917 | 20 | 202 | 372  | 573  |
| 59.518 | 20 | TCTGCACAAAACCTTTTCCC      | 60.088 | 20 | 272 | 1034 | 1305 |
| 58.875 | 22 | GCAAATCCATTTCTCTCCGA      | 60.155 | 20 | 149 | 47   | 195  |
| 59.6   | 21 | TTTCGTAATCCTGGATCGCT      | 59.668 | 20 | 258 | 327  | 584  |
| 60.27  | 20 | GCATTCCGAGTTTTGGATGT      | 59.939 | 20 | 180 | 11   | 190  |
| 59.918 | 19 | CCACTGCGCCATAGGAACTA      | 61.176 | 20 | 253 | 1435 | 1687 |
| 59.271 | 20 | TAGTTATTCCGCAACGGAGG      | 60.089 | 20 | 231 | 2914 | 3144 |
| 60.032 | 20 | CTCAAACCGAATGGAGGAA       | 60.044 | 20 | 174 | 556  | 729  |
| 59.297 | 20 | ATGGACATGATTTGGAGGGA      | 60.135 | 20 | 205 | 6    | 210  |
| 59.599 | 20 | TTGATCGAAATGGGAGTATGC     | 59.915 | 21 | 108 | 17   | 124  |
| 59.992 | 20 | ATTCTGCTGCTGTGACGATG      | 60.016 | 20 | 253 | 204  | 456  |
| 59.74  | 20 | GCGACTAGTGCTGTAGAAGGC     | 59.304 | 21 | 182 | 131  | 312  |
| 59.639 | 23 | TGGTTCTCCTCCCCTTTTCT      | 60.045 | 20 | 137 | 14   | 150  |
| 57.341 | 23 | AGGCCGAACCACCTATTTCT      | 59.962 | 20 | 219 | 0    | 218  |
| 59.49  | 20 | TCCCTCCCACATTCACTTTC      | 59.903 | 20 | 134 | 4    | 137  |
| 58.777 | 20 | TTGTGCCGATTCCCTTTTAC      | 59.938 | 20 | 244 | 4050 | 4293 |
| 60.011 | 20 | AGAGGTGGGTGGATATGCTG      | 59.95  | 20 | 175 | 592  | 766  |
| 58.741 | 24 | GGACGATTGCGTCACTGTTA      | 59.722 | 20 | 274 | 8    | 281  |
| 59.499 | 20 | CATGTAGCCGATCCCAATTT      | 59.784 | 20 | 116 | 234  | 349  |
| 59.218 | 22 | ACAACCAGTCTAAGCGGCAT      | 59.763 | 20 | 272 | 2481 | 2752 |
| 60.024 | 26 | CCCTGCATGTCAAATTGCTA      | 59.688 | 20 | 170 | 21   | 190  |
| 60.414 | 20 | TCAATGTCGCATATATTACTTTCC/ | 59.79  | 25 | 209 | 245  | 453  |
| 60.05  | 20 | AATTCACAAGCCCAAACGAC      | 59.978 | 20 | 227 | 1760 | 1986 |
| 59.059 | 24 | AACATGCGCTTCTTATATTTTGC   | 59.695 | 23 | 230 | 30   | 259  |
| 58.602 | 22 | TTCTCATGTCTTTGGCCTC       | 60.195 | 20 | 241 | 5    | 245  |
| 60.832 | 20 | TGAAGGATGCATCTTGCTGA      | 60.504 | 20 | 134 | 5    | 138  |
| 59.998 | 20 | TTTATCGATTGTTGCCCTCA      | 59.112 | 20 | 261 | 43   | 303  |
| 60.435 | 20 | TCAACTGGGAAAACCTGGTC      | 59.943 | 20 | 268 | 1731 | 1998 |
| 60.272 | 20 | GAAGGTGGTCGTGTCGAAGT      | 60.159 | 20 | 193 | 722  | 914  |
| 59.93  | 20 | CCGACGACCAAATGGATAAC      | 60.192 | 20 | 162 | 455  | 616  |
| 58.836 | 20 | ATCATGTTCTGCCTGTGCTG      | 59.862 | 20 | 279 | 3    | 281  |
| 59.624 | 21 | TCAATTCATGATGGTCATTTCA    | 58.82  | 22 | 230 | 992  | 1221 |
| 59.53  | 20 | TAGTCGTGGCACACAGGAAC      | 59.751 | 20 | 162 | 706  | 867  |
| 59.598 | 22 | AGGGACGCTATCGATTTGTG      | 60.096 | 20 | 253 | 3    | 255  |
| 60.066 | 20 | CACAAAACATGCATCAGCCT      | 59.722 | 20 | 228 | 49   | 276  |
| 60.012 | 22 | ATAGCAGGCTCGACCAAGAA      | 59.978 | 20 | 208 | 358  | 565  |
| 60.226 | 20 | TTCAGGGCTGCTGAATGATA      | 59.375 | 20 | 277 | 808  | 1084 |
| 60.891 | 20 | ATGGCCAAGTCAAAGTCACC      | 59.973 | 20 | 162 | 331  | 492  |
| 59.478 | 20 | AAATGCAACATGTGATCTCAAAC   | 59.013 | 23 | 221 | 475  | 695  |

|        |    |                          |        |    |     |      |      |
|--------|----|--------------------------|--------|----|-----|------|------|
| 60.218 | 20 | TAGAGGCTGCGAATTTCCAT     | 59.807 | 20 | 278 | 363  | 640  |
| 60.131 | 22 | AGCCATCTCAAGAGTCGTGG     | 60.408 | 20 | 271 | 350  | 620  |
| 59.851 | 20 | GATAGCCACCGTGATGCTCT     | 60.249 | 20 | 179 | 3246 | 3424 |
| 59.886 | 20 | CCAAGAATCTCGATTCCCAA     | 60.006 | 20 | 269 | 1071 | 1339 |
| 60.096 | 20 | CATCATGTTTAACTGGATTGTGC  | 59.397 | 23 | 202 | 190  | 391  |
| 59.097 | 22 | CACCAAAGCCTTAATCCCAA     | 59.931 | 20 | 151 | 6    | 156  |
| 60.111 | 20 | GGAAGTGGGGGTCGGTATAA     | 60.929 | 20 | 198 | 323  | 520  |
| 60.02  | 20 | GGTATGCTTGGAGGGTTGAA     | 59.933 | 20 | 195 | 366  | 560  |
| 59.297 | 20 | ACCTTTGAATGGATTGCTGG     | 59.933 | 20 | 130 | 7    | 136  |
| 59.855 | 21 | GTTGTTCAACAATTTGGCGTG    | 60.011 | 20 | 222 | 263  | 484  |
| 60.111 | 20 | CCATGGCAAGTGACTCAAGA     | 59.831 | 20 | 205 | 4486 | 4690 |
| 59.962 | 20 | ATCAAGCAAGCATCTCAGCA     | 59.704 | 20 | 163 | 808  | 970  |
| 59.585 | 20 | AACTGGAGCACAAACCGAAT     | 59.598 | 20 | 257 | 815  | 1071 |
| 59.975 | 20 | TTTTGCAATCGGAGCTCTTT     | 59.96  | 20 | 103 | 1000 | 1102 |
| 59.831 | 20 | GGTCGTTGGTAATTGGACGA     | 60.755 | 20 | 121 | 775  | 895  |
| 59.318 | 20 | GCTGAAAAATGCCAAGAACC     | 59.691 | 20 | 238 | 15   | 252  |
| 59.846 | 20 | TGGCTTGCAGAATCAAGAAA     | 59.542 | 20 | 241 | 967  | 1207 |
| 60.025 | 20 | GTGGTCATTTTAGGGGATGC     | 59.249 | 20 | 228 | 151  | 378  |
| 59.297 | 20 | CTACCCACCCAGGTCATCC      | 60.183 | 19 | 270 | 9    | 278  |
| 59.332 | 21 | CTTTTGTGAGCCATCTGCAA     | 59.988 | 20 | 210 | 49   | 258  |
| 60.038 | 20 | TGGTTCGTGATTGACGTCTC     | 59.682 | 20 | 233 | 544  | 776  |
| 59.934 | 20 | TCGTTGGAGTCTGAAAACCA     | 59.262 | 20 | 244 | 928  | 1171 |
| 59.87  | 20 | GGGTGTGACAGCCTAACCAT     | 59.851 | 20 | 221 | 13   | 233  |
| 59.84  | 20 | TGCAATGGCTTTTCATTGTT     | 59.161 | 20 | 259 | 96   | 354  |
| 59.552 | 23 | ATATTAACAGTCCGGCGTGG     | 59.845 | 20 | 237 | 180  | 416  |
| 60.336 | 20 | GTGGCGGTGGAGACTTGTAT     | 59.997 | 20 | 117 | 37   | 153  |
| 60.067 | 20 | TCCAAGAATCCCTTCCAAAA     | 59.476 | 20 | 272 | 235  | 506  |
| 59.574 | 20 | CGAAGACGTCAATTTGGTCA     | 59.691 | 20 | 243 | 1216 | 1458 |
| 59.943 | 20 | TTTTTAAGGTGGGGAGAATGT    | 57.596 | 21 | 250 | 43   | 292  |
| 59.659 | 23 | TGTAGGCATAACTATGATTGGGA/ | 59.768 | 24 | 117 | 2    | 118  |
| 59.761 | 21 | TCCAACTTATTGCATGTTGAACT  | 58.688 | 23 | 260 | 710  | 969  |
| 58.937 | 20 | AGTGACCCTGGGGCTATCTT     | 59.957 | 20 | 215 | 18   | 232  |
| 59.405 | 20 | GTTGGTGGGATTTGAACCTG     | 60.21  | 20 | 219 | 473  | 691  |
| 60.08  | 20 | TTTGCCTCCTTCTGCTATGA     | 59.566 | 20 | 260 | 105  | 364  |
| 59.894 | 20 | CCTCCCTTACCTTCAAACA      | 60.081 | 20 | 229 | 3207 | 3435 |
| 60.48  | 20 | TCCGCGTGTGCAATAAATAA     | 60.096 | 20 | 110 | 2998 | 3107 |
| 59.249 | 20 | CATATCACGCGGATACCACA     | 60.366 | 20 | 230 | 719  | 948  |
| 59.957 | 20 | ACCTCAGGTTGCTCCGAAC      | 61.219 | 20 | 179 | 288  | 466  |
| 60.005 | 20 | TTACATATTTCTTGC GGCCA    | 59.169 | 20 | 115 | 476  | 590  |
| 60.459 | 20 | AAATTGTTGCAATTCAGGG      | 59.801 | 20 | 269 | 448  | 716  |
| 59.456 | 22 | CGGGCTGATGTAGAGGAGAG     | 59.966 | 20 | 202 | 55   | 256  |
| 60.212 | 20 | CTCGTTTACAGCATAACGCGA    | 60.037 | 20 | 199 | 60   | 258  |
| 60.133 | 20 | CTTTATCAAGGGCTGGGGTT     | 60.312 | 20 | 273 | 959  | 1231 |
| 59.943 | 20 | AAGGAGATCCACTCTCGCAA     | 59.95  | 20 | 221 | 139  | 359  |
| 60.045 | 20 | GATGAGCTACTGGAGCGAGG     | 60.119 | 20 | 272 | 388  | 659  |
| 59.83  | 20 | GACGTTCGACTTCTTTCCGA     | 60.375 | 20 | 138 | 1360 | 1497 |
| 60.066 | 20 | TCAACGCTCACCTTACATC      | 59.837 | 20 | 209 | 76   | 284  |
| 59.297 | 20 | GCGTGGTTCCATCTCAAAT      | 59.939 | 20 | 153 | 8    | 160  |
| 59.962 | 20 | CTGGCCAACTCTCCCTTCTC     | 61.299 | 20 | 204 | 386  | 589  |
| 59.297 | 20 | CCAATGGCTACTTCTCTGCG     | 60.924 | 20 | 138 | 2    | 139  |
| 60.641 | 20 | TGAATGGGGAAGGAGAATCA     | 60.395 | 20 | 214 | 1001 | 1214 |
| 60.16  | 20 | TGGTGATTTGGGTTTGGAA      | 60.029 | 20 | 274 | 88   | 361  |
| 59.853 | 20 | CAGCATTCTATCTGGGCCAT     | 60.059 | 20 | 217 | 4463 | 4679 |
| 60.125 | 20 | TCAGGCAGAAAATGGGATTC     | 60.014 | 20 | 276 | 903  | 1178 |
| 60.074 | 20 | AGCCGTCCACAACACTTACC     | 60.035 | 20 | 241 | 61   | 301  |
| 60.232 | 20 | GTA CTCTGACCCCGCAAGA     | 60.255 | 20 | 254 | 31   | 284  |
| 59.94  | 20 | CCCAAATCAGAAACGCCTTA     | 60.067 | 20 | 247 | 57   | 303  |
| 60.096 | 20 | TTACCGGTCGGTTACCAGAG     | 59.986 | 20 | 218 | 23   | 240  |

|        |    |                           |        |    |     |      |      |
|--------|----|---------------------------|--------|----|-----|------|------|
| 59.691 | 20 | GAACGTGGGAGGTGAAGAGA      | 60.238 | 20 | 272 | 35   | 306  |
| 59.562 | 20 | GGGATAGCACGTCAATAATGC     | 59.452 | 21 | 279 | 815  | 1093 |
| 60.103 | 20 | TTTTTCTTGACCAAATAGGTT     | 57.875 | 22 | 228 | 332  | 559  |
| 59.454 | 21 | CGCTTACCTAGATGGGAGCA      | 60.365 | 20 | 216 | 0    | 215  |
| 59.309 | 20 | AAAAGTCGCCGTTACTGGTG      | 60.168 | 20 | 229 | 399  | 627  |
| 58.368 | 20 | CCCGAGAAATTGGTCTCAA       | 60.044 | 20 | 222 | 541  | 762  |
| 59.569 | 20 | TGCAAGGTCTTCTCCAACCT      | 59.844 | 20 | 211 | 46   | 256  |
| 60.271 | 20 | AATTTACGGGACCCTCAAGC      | 60.32  | 20 | 212 | 293  | 504  |
| 59.691 | 20 | GTCACGGAGAGCCCTGTTAT      | 59.166 | 20 | 130 | 939  | 1068 |
| 59.973 | 20 | CAAGACACTCGCTACAGGCA      | 60.199 | 20 | 195 | 451  | 645  |
| 59.823 | 20 | AGTCCTCCAATGAAGTCCCA      | 59.505 | 20 | 249 | 449  | 697  |
| 59.546 | 20 | GGGAAATGTGCCAGTTAGA       | 59.933 | 20 | 250 | 293  | 542  |
| 60.046 | 20 | AATTTGGATTGAAAATGAGAGATT  | 57.344 | 24 | 201 | 791  | 991  |
| 59.96  | 20 | ATTTTGAATTCGGCTTGTCG      | 60.074 | 20 | 267 | 860  | 1126 |
| 60.11  | 20 | TCAGGGTTTCAACATTTTCAGC    | 60.103 | 21 | 278 | 272  | 549  |
| 60.06  | 20 | AAGAAAAGAGAAGGCTCCGC      | 60.096 | 20 | 277 | 366  | 642  |
| 59.224 | 21 | GGGGAATTGATGGACATGAT      | 59.42  | 20 | 147 | 258  | 404  |
| 59.708 | 20 | TGATGCTCTACCACTGCACC      | 59.862 | 20 | 124 | 265  | 388  |
| 59.955 | 20 | AGACTACGGCCTCATCTCCA      | 59.827 | 20 | 156 | 892  | 1047 |
| 59.439 | 20 | GCGAAGACAACCACGGTAAT      | 60     | 20 | 262 | 2824 | 3085 |
| 60.051 | 20 | GCCCCTGTTTGCATGTAAT       | 59.829 | 20 | 224 | 480  | 703  |
| 60.212 | 20 | TGGTTGGTCTGATGATTGTGA     | 59.951 | 21 | 197 | 4    | 200  |
| 59.749 | 20 | TCCTCACCCCCTCTCTTTTT      | 60.045 | 20 | 247 | 14   | 260  |
| 59.499 | 22 | AACTTTGACTGCTATGCCGC      | 60.416 | 20 | 159 | 40   | 198  |
| 60.177 | 21 | AGAGCAAGAAAGCATGGGAA      | 59.955 | 20 | 185 | 2721 | 2905 |
| 60.096 | 20 | TCAGTCCCACCAATCACAAA      | 59.935 | 20 | 209 | 638  | 846  |
| 60.014 | 20 | AGAGAGGGCTTAGAGACGGG      | 59.972 | 20 | 250 | 13   | 262  |
| 59.973 | 20 | GCCAGCGTGATACTGATCCT      | 60.249 | 20 | 144 | 371  | 514  |
| 59.966 | 20 | GGATCAGCAGTGGCTTTCTC      | 59.957 | 20 | 124 | 871  | 994  |
| 60.122 | 20 | ATTCTTCGCATCAATCCCAC      | 59.9   | 20 | 277 | 244  | 520  |
| 59.387 | 20 | ATGCTCTCGTTTGCCTTGTT      | 59.882 | 20 | 254 | 8    | 261  |
| 59.805 | 20 | TCCACAAACGTGAAGTACGC      | 59.764 | 20 | 189 | 1171 | 1359 |
| 59.871 | 20 | GCTTCTCATGCCTCTAGGGT      | 58.5   | 20 | 243 | 79   | 321  |
| 59.571 | 20 | GGGTTTTGGTGTATGTGG        | 59.963 | 21 | 105 | 37   | 141  |
| 59.875 | 20 | TTGAACTGAAAAAGTGGGCA      | 59.293 | 20 | 147 | 5186 | 5332 |
| 60.073 | 20 | TGGCTAGCACAAATGAAATGA     | 59.315 | 21 | 250 | 71   | 320  |
| 58.056 | 27 | TTATTTTGCATGTGATATTGGAA   | 57.2   | 23 | 252 | 2    | 253  |
| 59.022 | 20 | GCAGGGTCGACTCAAAAATC      | 59.676 | 20 | 256 | 77   | 332  |
| 59.916 | 20 | GAACCCGATGAGGAAGATGA      | 60.011 | 20 | 205 | 149  | 353  |
| 60.032 | 20 | CCCAATGAGAAAAAGGCAAA      | 60.046 | 20 | 196 | 797  | 992  |
| 60.378 | 20 | GTCTATGCTGGGATCACCGT      | 59.957 | 20 | 238 | 2286 | 2523 |
| 58.751 | 21 | GGAGGGGTATTTTGGGGATA      | 59.846 | 20 | 124 | 33   | 156  |
| 60.088 | 20 | CATTTCCCGAAATAGCCAGA      | 60.031 | 20 | 273 | 123  | 395  |
| 59.855 | 21 | TTCGAAACACCTAGAACGG       | 60.103 | 20 | 120 | 156  | 275  |
| 59.988 | 20 | TGCAAAGTTCACATTCAGTCAG    | 58.975 | 22 | 183 | 1599 | 1781 |
| 60.006 | 20 | GGGCGAAATGACAAAAATTG      | 60.302 | 20 | 255 | 1847 | 2101 |
| 59.708 | 20 | CAAAGCAGCACAAAGTTTGGGA    | 60.027 | 20 | 269 | 1363 | 1631 |
| 60.074 | 20 | TTTTTAGGAGTCCCGAACCA      | 59.541 | 20 | 129 | 852  | 980  |
| 60.05  | 20 | AAGTGCACCTGAGCCATTCT      | 59.874 | 20 | 233 | 2126 | 2358 |
| 60.199 | 20 | ACGGAGGTCTTTGGGTTTT       | 59.972 | 20 | 182 | 448  | 629  |
| 59.579 | 20 | CCAGCACGACGAGTACGTTA      | 59.928 | 20 | 206 | 282  | 487  |
| 60.111 | 20 | TTCTTCTTTCCATTCACCCG      | 60.044 | 20 | 237 | 26   | 262  |
| 59.387 | 20 | TTCTTGTCATCATGCTTCG       | 59.799 | 20 | 182 | 140  | 321  |
| 59.931 | 20 | CCGGTACATGACTTCGAGGA      | 61.055 | 20 | 240 | 91   | 330  |
| 60.464 | 20 | GGAACCATTTTCGTTAAAATTATGA | 59.264 | 25 | 269 | 192  | 460  |
| 59.639 | 21 | GGTCCAATAAATGTGGGCCT      | 60.94  | 20 | 270 | 1619 | 1888 |
| 59.855 | 21 | TTCGAAACACCTAGAACGG       | 60.103 | 20 | 120 | 115  | 234  |
| 59.751 | 20 | TGGTCTGGGAGAACTCCA        | 59.682 | 20 | 221 | 968  | 1188 |

|        |    |                          |        |    |     |      |      |
|--------|----|--------------------------|--------|----|-----|------|------|
| 59.066 | 20 | TCACATTTAACCTATGAGTCTGCC | 59.565 | 24 | 109 | 692  | 800  |
| 60.221 | 20 | CTTTTGGTGATTGGGATGGT     | 59.647 | 20 | 199 | 459  | 657  |
| 60.34  | 20 | TTTGATTGGGAATAATTGGG     | 57.289 | 20 | 153 | 128  | 280  |
| 60.016 | 20 | TGTTTTGCGCAGTTATGGAG     | 59.872 | 20 | 248 | 41   | 288  |
| 59.997 | 20 | TGGTACCACGAGGAGGAAAA     | 60.486 | 20 | 154 | 726  | 879  |
| 59.302 | 21 | TCACCCAAGTCCAATCTATTCA   | 59.429 | 22 | 267 | 81   | 347  |
| 59.939 | 20 | AACGGGGAAAAACAAATTCA     | 59.292 | 20 | 278 | 52   | 329  |
| 60.005 | 20 | GGTGCCTGGTTAAGCATC       | 60.526 | 20 | 238 | 455  | 692  |
| 59.978 | 20 | CAAGGTGACTGCATCATTGG     | 60.112 | 20 | 197 | 83   | 279  |
| 59.946 | 20 | CCAGCACCTCCTCTATTGCT     | 59.454 | 20 | 267 | 16   | 282  |
| 60.11  | 20 | AGCGTGCATTTTCAGAGGTT     | 59.882 | 20 | 126 | 661  | 786  |
| 60.03  | 20 | CCTTGAGGAGCAATGGAGAC     | 59.803 | 20 | 275 | 3776 | 4050 |
| 60.214 | 20 | GGTCTCTGGATCAGGTTGAGA    | 59.243 | 21 | 175 | 324  | 498  |
| 59.42  | 20 | TTTGGAGGATTGACTATATCGGA  | 59.816 | 23 | 271 | 233  | 503  |
| 59.172 | 21 | CCCAAGACCCCAATTTGATT     | 60.91  | 20 | 276 | 1730 | 2005 |
| 60.126 | 20 | ACGTTAGAGGGAGTCAGGCA     | 59.867 | 20 | 186 | 1653 | 1838 |
| 59.51  | 20 | GCTTGTTATATCCCGCCAAA     | 59.928 | 20 | 227 | 28   | 254  |
| 60.154 | 20 | GAGGTGATCGGTTCAATTGGT    | 59.786 | 20 | 267 | 5475 | 5741 |
| 60.22  | 20 | CGTGTCTATTGAAACGATGAAAA  | 59.175 | 23 | 274 | 270  | 543  |
| 60.159 | 20 | TGCCTCTCTCCCTTGTGTCT     | 59.986 | 20 | 229 | 3121 | 3349 |
| 59.972 | 20 | CTGGAAGAGGTGGAATGCTC     | 59.803 | 20 | 200 | 728  | 927  |
| 60.067 | 20 | TGTTCTCTACAACCATGGCG     | 59.716 | 20 | 186 | 1030 | 1215 |
| 59.837 | 20 | TTCTAAAGTGCAGGATGGCA     | 59.42  | 20 | 224 | 43   | 266  |
| 59.549 | 20 | ATGTAGCCGACCCCAATTTA     | 59.297 | 20 | 191 | 2468 | 2658 |
| 57.423 | 27 | GATCACCTCGAACCTTCTGC     | 59.81  | 20 | 275 | 3240 | 3514 |
| 60.241 | 20 | GCTTGTTGTGGGCGATAAT      | 59.967 | 20 | 134 | 101  | 234  |
| 59.805 | 20 | GGAACACATCTGGTGCATTG     | 59.967 | 20 | 200 | 36   | 235  |
| 59.688 | 20 | AAGAGAAGCTCGAAGGGGTC     | 59.957 | 20 | 173 | 207  | 379  |
| 59.487 | 21 | ATGCAGGACAAACCCAATTT     | 59.292 | 20 | 226 | 1    | 226  |
| 60.12  | 20 | ATCTGCATTGCAAACCTGTCTG   | 59.871 | 20 | 272 | 5    | 276  |
| 59.997 | 20 | ATCTAGGAGGCTCATCCGGT     | 60.059 | 20 | 247 | 1554 | 1800 |
| 60.009 | 20 | ATGTTCCAGATCCATTTGCC     | 59.756 | 20 | 265 | 330  | 594  |
| 59.297 | 20 | TCGAGGTAAGTCGATCAGGC     | 60.362 | 20 | 110 | 2    | 111  |
| 59.697 | 20 | AAACGTGAGGTTTTGACGAGA    | 59.766 | 21 | 223 | 133  | 355  |
| 59.275 | 22 | AAGAAAGCCACCTGATCACT     | 60.125 | 21 | 166 | 56   | 221  |
| 59.836 | 20 | TTCATCTGTATTCGACTTCTCCA  | 58.847 | 23 | 280 | 69   | 348  |
| 59.948 | 20 | AAAAAGTGCCTCCCTCGATT     | 60.074 | 20 | 158 | 1629 | 1786 |
| 57.809 | 27 | CGTTCAGTGGTTCAAGTCT      | 57.771 | 20 | 280 | 186  | 465  |
| 60.843 | 20 | GCGAAACACGCATCTTTATG     | 59.329 | 20 | 248 | 21   | 268  |
| 60.495 | 20 | GCGATCTTGTCACCTACGCA     | 60.019 | 20 | 280 | 89   | 368  |
| 59.997 | 20 | ACCACCACCAACATCAAAT      | 59.95  | 20 | 173 | 36   | 208  |
| 60.426 | 20 | CTCATGGATCTTCATCGGCT     | 60.181 | 20 | 273 | 379  | 651  |
| 59.454 | 21 | AATCAAATCGCCATGGAAAG     | 59.901 | 20 | 220 | 247  | 466  |
| 59.997 | 20 | GCATCATGCTTTCCATACTCAA   | 60.103 | 22 | 140 | 934  | 1073 |
| 59.866 | 20 | GATGCCAACCAACAAGCATA     | 59.548 | 20 | 254 | 3200 | 3453 |
| 59.655 | 20 | ACTGCCAACACCGACTTAC      | 60.035 | 20 | 175 | 325  | 499  |
| 59.911 | 20 | AGCCTGCAAGGGGAAGAAGTT    | 60.382 | 20 | 212 | 243  | 454  |
| 59.717 | 20 | TGTAGCCGACCCCAATTTAT     | 59.297 | 20 | 239 | 479  | 717  |
| 59.816 | 22 | CTGACATGGGGGTCTGCTAT     | 59.95  | 20 | 258 | 304  | 561  |
| 60.011 | 20 | TTCTTGATACATGGGCGTCA     | 60.073 | 20 | 162 | 519  | 680  |
| 60.134 | 20 | ATTGCTTACTGCCGATTTG      | 60.096 | 20 | 161 | 95   | 255  |
| 59.562 | 20 | ACCGGGATCCTTTTCAACTT     | 59.805 | 20 | 189 | 309  | 497  |
| 59.434 | 20 | GGTGTGGCTCCTTGAATGT      | 59.973 | 20 | 118 | 2149 | 2266 |
| 59.41  | 20 | ATTGATGACGATGACGTGGA     | 59.925 | 20 | 119 | 888  | 1006 |
| 59.377 | 25 | GAAACTTCAAATGAATCTTCAACA | 58.769 | 25 | 107 | 429  | 535  |
| 59.955 | 20 | TCCTAGAATTCCAATACGTGGTT  | 58.941 | 23 | 108 | 376  | 483  |
| 59.967 | 20 | TCCAAGCAAGAGATTATCACTCC  | 59.739 | 23 | 208 | 85   | 292  |
| 59.75  | 20 | ATAGAAGCCTCTGAACGCCA     | 59.978 | 20 | 190 | 880  | 1069 |

|        |    |                           |        |    |     |      |      |
|--------|----|---------------------------|--------|----|-----|------|------|
| 59.904 | 20 | AGCCTTGCTCACGCATCT        | 59.688 | 18 | 267 | 663  | 929  |
| 60.096 | 20 | TGGATTGTTGATTTTTGCCA      | 59.907 | 20 | 265 | 13   | 277  |
| 60.046 | 20 | AAAAAGCCCGAACCTGACTT      | 60.11  | 20 | 203 | 38   | 240  |
| 60.309 | 20 | GCTGTCTTGATTTACCTTCACG    | 58.906 | 22 | 206 | 1188 | 1393 |
| 60.027 | 20 | TCAGCTGCGTTTTCAATTCATC    | 59.955 | 20 | 154 | 2413 | 2566 |
| 60.192 | 20 | AATGGTCACACCCTACAACAA     | 57.841 | 21 | 260 | 394  | 653  |
| 59.682 | 20 | TGTAGTCCTTCCTCACAAAGACA   | 58.898 | 23 | 260 | 134  | 393  |
| 59.508 | 21 | GGCACGTAGGCTACAGCTTC      | 60.044 | 20 | 205 | 84   | 288  |
| 59.945 | 20 | CAAAAGGTGGAAAGTCACCAA     | 59.994 | 21 | 211 | 3140 | 3350 |
| 59.945 | 20 | CATCCTCTGCGTCAGAATCA      | 59.942 | 20 | 247 | 261  | 507  |
| 59.727 | 20 | TCAAAGTCGATCTCGTCGTG      | 59.984 | 20 | 217 | 613  | 829  |
| 59.948 | 20 | CCCAAGACCCCAATTTGATT      | 60.91  | 20 | 259 | 2165 | 2423 |
| 60.353 | 20 | GCTTCAGAACAAGGAAGCCA      | 60.517 | 20 | 202 | 1236 | 1437 |
| 59.988 | 20 | TCAGTTGACTGCCCTCACAG      | 60.022 | 20 | 265 | 155  | 419  |
| 60.171 | 20 | GTTTGGACAAAGAGGGGTCA      | 59.943 | 20 | 272 | 455  | 726  |
| 60.081 | 20 | TCGAAATCTGGTCATTGAA       | 59.049 | 20 | 229 | 533  | 761  |
| 60.219 | 22 | TCCTTTCTGTGGTTTGGGTT      | 59.425 | 20 | 259 | 541  | 799  |
| 60.15  | 20 | TGATTTAAATAAAAATATGTTGCC, | 57.023 | 25 | 135 | 1587 | 1721 |
| 60.21  | 20 | AGCATCAAGCCTGCTCAACT      | 60.164 | 20 | 121 | 1221 | 1341 |
| 60.197 | 20 | TCCTCTCCCCACTGAACAAC      | 60.088 | 20 | 120 | 996  | 1115 |
| 59.17  | 22 | ATTTCTCAAATGGCGAGCTG      | 60.352 | 20 | 105 | 358  | 462  |
| 59.95  | 20 | GCAAAAAGGAGCGTATCGAG      | 59.982 | 20 | 142 | 337  | 478  |
| 58.601 | 23 | CACAAAATGAACGTGGTTCG      | 60.004 | 20 | 236 | 19   | 254  |
| 60.011 | 20 | TCGAATCAAGATTTCTCACGC     | 60.346 | 21 | 134 | 321  | 454  |
| 59.392 | 20 | ACACATCCTTCTCTCCGTGG      | 60.112 | 20 | 243 | 6    | 248  |
| 59.91  | 20 | GCAAGACTGGTTCCAAAAGC      | 59.859 | 20 | 198 | 9    | 206  |
| 60.01  | 20 | CGAACTAGCTCACGAGTCGAA     | 60.715 | 21 | 174 | 3094 | 3267 |
| 59.878 | 20 | GGATTGATGCTCCATTGCTT      | 60.043 | 20 | 198 | 442  | 639  |
| 59.971 | 20 | TTCAGTTGGGCAATTGGTCT      | 60.495 | 20 | 118 | 54   | 171  |
| 59.924 | 20 | CAGTGGGCAAACCAGATTTT      | 59.971 | 20 | 212 | 2055 | 2266 |
| 60.003 | 20 | ACACCTCCGTCAACACCTTC      | 60.009 | 20 | 280 | 271  | 550  |
| 59.95  | 20 | CATACGATATCACCGACCCC      | 60.036 | 20 | 261 | 535  | 795  |
| 59.813 | 20 | TTCTTGGCTGTGGAATCCTT      | 59.67  | 20 | 263 | 421  | 683  |
| 59.823 | 20 | CCAATGATTGTGGAATGAATGA    | 60.564 | 22 | 195 | 1169 | 1363 |
| 60.112 | 20 | TACGGTATCCGAAGAGGGTG      | 59.948 | 20 | 224 | 1972 | 2195 |
| 60.255 | 20 | GAATCTGAGCTGGAGTTGGG      | 59.803 | 20 | 234 | 655  | 888  |
| 59.405 | 20 | TCCGCACAAAGAAAATGATG      | 59.664 | 20 | 111 | 1184 | 1294 |
| 60.025 | 20 | TGGTTATGGAGGAGGAGGTG      | 59.92  | 20 | 203 | 142  | 344  |
| 60.226 | 20 | CCTCGATGATGATGTTGGTG      | 59.918 | 20 | 264 | 98   | 361  |
| 58.995 | 20 | TCTCCGCAATTCGAAAATC       | 60.153 | 20 | 262 | 71   | 332  |
| 59.891 | 20 | TTGACTTTACCCTCGGACCA      | 60.486 | 20 | 139 | 852  | 990  |
| 60.055 | 20 | CCCAAGACCCCAATTTGATT      | 60.91  | 20 | 109 | 65   | 173  |
| 58.2   | 23 | TCAGTCACAGATGCCCTGAG      | 59.98  | 20 | 243 | 0    | 242  |
| 60.025 | 20 | GGCTAGTAGTAGTGGGAGGAGAA   | 58.139 | 23 | 277 | 130  | 406  |
| 59.87  | 20 | AGTCGGTTAGCGTTGCTTGT      | 59.943 | 20 | 143 | 52   | 194  |
| 60.258 | 20 | GGAACCCAGGCACTGACTTA      | 60.111 | 20 | 231 | 150  | 380  |
| 59.927 | 20 | CTTGAAAATCTCGAAGCGG       | 59.953 | 20 | 152 | 62   | 213  |
| 60.005 | 20 | AGCAATTTCTTGGCTCGTTG      | 60.386 | 20 | 235 | 553  | 787  |
| 60.012 | 20 | CCTCCACCTAAGCACCCATA      | 59.948 | 20 | 273 | 131  | 403  |
| 60.249 | 20 | TTTCCAATCCAATTCCTTGAA     | 59.374 | 21 | 259 | 4    | 262  |
| 58.579 | 23 | GCGATATCCGTGTAGCATGA      | 59.676 | 20 | 242 | 453  | 694  |
| 60.251 | 20 | AACTTCTGCTTATCGCCTGC      | 59.62  | 20 | 185 | 140  | 324  |
| 60.353 | 20 | TCATGAAAATGAAAACGCAA      | 59.179 | 21 | 140 | 817  | 956  |
| 60.21  | 20 | GCCGGTCCCATAAACAAGTAA     | 59.823 | 20 | 253 | 1857 | 2109 |
| 60.063 | 20 | CCATATTGCACCCAGAGCTT      | 60.096 | 20 | 225 | 840  | 1064 |
| 60.247 | 20 | CCCAAGGCTGATGATCTTTT      | 59.126 | 20 | 209 | 1735 | 1943 |
| 59.218 | 20 | TTGCTGGATCTGATCTGTGG      | 59.787 | 20 | 223 | 173  | 395  |
| 60.073 | 20 | TCGTTCTTAAAAGTTATGGCACC   | 59.569 | 23 | 109 | 2959 | 3067 |

|        |    |                          |        |    |     |      |      |
|--------|----|--------------------------|--------|----|-----|------|------|
| 59.984 | 20 | GAGGTGTGTA AAAAGGCCGA    | 60.11  | 20 | 111 | 504  | 614  |
| 59.959 | 20 | CCCAAGACCCCAATTTGATT     | 60.91  | 20 | 184 | 1431 | 1614 |
| 61.479 | 19 | GGAGGTGGAGGATTAGGAGG     | 59.89  | 20 | 177 | 721  | 897  |
| 59.518 | 20 | ATGTAGCCGACCCCAATTTA     | 59.297 | 20 | 236 | 242  | 477  |
| 60.011 | 20 | ACACATTTACAACCCGGCAT     | 60.118 | 20 | 242 | 3122 | 3363 |
| 59.433 | 20 | ATTTTGGTGCGAGTCTACCG     | 60.132 | 20 | 227 | 1144 | 1370 |
| 59.966 | 20 | CTCAAGATGCGAAGCAAACA     | 60.134 | 20 | 268 | 85   | 352  |
| 60.469 | 23 | TGCCTGTATTATGAACGCCA     | 60.096 | 20 | 100 | 125  | 224  |
| 60.073 | 20 | TAGCATGGAGTTGTGCATGG     | 60.687 | 20 | 133 | 320  | 452  |
| 58.997 | 20 | GGGATTCTACAAGAAGCA       | 59.126 | 20 | 280 | 740  | 1019 |
| 59.988 | 20 | GGATTGGATAACAAAAGGGG     | 60.37  | 20 | 174 | 972  | 1145 |
| 59.548 | 20 | GCATTACAATGAACCACCGA     | 59.4   | 20 | 249 | 1928 | 2176 |
| 59.562 | 20 | CAAACACCAGAATTGCCCTT     | 59.971 | 20 | 150 | 76   | 225  |
| 58.971 | 21 | GTCGTTGCATGAGATGATGG     | 60.08  | 20 | 236 | 2401 | 2636 |
| 60.924 | 20 | TGTCATCCCAATAACGTCCA     | 59.774 | 20 | 103 | 49   | 151  |
| 60.69  | 20 | GCATGTCAATTGTCGAGCTT     | 58.879 | 20 | 273 | 25   | 297  |
| 59.351 | 20 | CAACTCTTGTGTCGGGTCCT     | 60.151 | 20 | 165 | 3    | 167  |
| 60.155 | 20 | TCCGATGATCAGTTGTTGGA     | 60.048 | 20 | 127 | 2185 | 2311 |
| 58.66  | 21 | TGTAGCCGACCCCAATTTAT     | 59.297 | 20 | 280 | 1437 | 1716 |
| 59.933 | 20 | AGTCCGCATAGGTTTCGATGT    | 59.579 | 20 | 227 | 189  | 415  |
| 59.993 | 20 | AACCTTATCCCAAATTCGC      | 60.15  | 20 | 119 | 446  | 564  |
| 60.91  | 20 | TGCATTTCTTTTTGAGTTGGG    | 60.096 | 21 | 200 | 6    | 205  |
| 60.035 | 20 | ATCAATTCCCAATCCCTTC      | 59.959 | 20 | 116 | 403  | 518  |
| 59.297 | 20 | GAGTGGGCGTTATGGTACT      | 59.997 | 20 | 149 | 7    | 155  |
| 59.583 | 21 | GACCGGGAAAATTACATAAACAA  | 59.182 | 23 | 280 | 26   | 305  |
| 60.319 | 20 | TGTAGCCGACCCCAATTTAT     | 59.297 | 20 | 206 | 1958 | 2163 |
| 59.691 | 20 | CTTCCCGTGATATTCCACTGA    | 59.94  | 21 | 221 | 1078 | 1298 |
| 60.192 | 20 | GTCGATCACAACAGCCAGA      | 59.837 | 20 | 240 | 9    | 248  |
| 59.396 | 20 | GGTGGGATTGGATTTGATTG     | 59.991 | 20 | 144 | 93   | 236  |
| 57.927 | 20 | GTTCATATAGCCGACCCCAA     | 59.784 | 20 | 144 | 1322 | 1465 |
| 59.997 | 20 | AAACGCATTCCCATCCATAA     | 60.153 | 20 | 121 | 42   | 162  |
| 59.933 | 20 | CAGCCATTCCCCTAAAGTCA     | 60.066 | 20 | 276 | 1233 | 1508 |
| 59.966 | 20 | AATTGTTGCTTCAAGGCTGC     | 60.395 | 20 | 201 | 1107 | 1307 |
| 59.813 | 20 | TTTGATGATGTTGCCTGGAG     | 59.648 | 20 | 259 | 119  | 377  |
| 60.015 | 20 | GACTTGCCGAAAATCAAGA      | 60.192 | 20 | 273 | 235  | 507  |
| 59.676 | 20 | GAGAAGAACATCCTCAGCCG     | 59.95  | 20 | 146 | 859  | 1004 |
| 60.375 | 20 | TCGTGTGTGTTTCCTCTCG      | 59.873 | 20 | 179 | 57   | 235  |
| 59.948 | 20 | GACCGAGCTTGGATTTTTCA     | 60.192 | 20 | 224 | 1000 | 1223 |
| 60.345 | 20 | TTTTGCTCATCTTGTCTGGG     | 58.847 | 20 | 279 | 65   | 343  |
| 60.031 | 20 | CCACCTTGTTGTGGATTCAA     | 59.389 | 20 | 186 | 494  | 679  |
| 60.406 | 20 | TTGCCATCATCTTCAATGGT     | 58.926 | 20 | 197 | 139  | 335  |
| 60.406 | 20 | TTGCCATCATCTTCAATGGT     | 58.926 | 20 | 187 | 139  | 325  |
| 60.853 | 20 | CCAATAACAAGGAAGGCCA      | 59.931 | 20 | 187 | 107  | 293  |
| 59.873 | 20 | TTGCATATTGAATACAATGTCGAT | 59.675 | 25 | 277 | 244  | 520  |
| 59.903 | 20 | AATTCTGGCCAGTCTCAAGC     | 59.434 | 20 | 170 | 1091 | 1260 |
| 60.299 | 20 | GCCCTCAATTTTATACTCGAAA   | 57.495 | 22 | 265 | 126  | 390  |
| 59.823 | 20 | TCATGGACCTGTTTCGTCAA     | 60.088 | 20 | 258 | 2613 | 2870 |
| 60.238 | 20 | ATCTCCATCCCTTTCCCCTT     | 61.002 | 20 | 120 | 20   | 139  |
| 60.051 | 20 | GTGGCTAAGCCCATGAAAAA     | 60.074 | 20 | 169 | 1182 | 1350 |
| 60.495 | 20 | CTCTGTGCACCATCAA ACTCA   | 59.889 | 21 | 203 | 914  | 1116 |
| 60.088 | 20 | AGGGCCAAGTCAATTGATGA     | 60.461 | 20 | 213 | 148  | 360  |
| 59.297 | 20 | TTCAAGACAAATGCAGACGG     | 59.84  | 20 | 275 | 5    | 279  |
| 59.971 | 20 | GAGCATGTGGGTCAGCAGT      | 59.844 | 19 | 257 | 109  | 365  |
| 59.897 | 20 | TTCTCATTCTCCGCAGTTC      | 60.34  | 20 | 189 | 2461 | 2649 |
| 60.073 | 20 | CCCAAGACCCCAATTTGATT     | 60.91  | 20 | 163 | 2133 | 2295 |
| 59.967 | 20 | CATCATCATCCTGTTGTCGG     | 59.918 | 20 | 248 | 143  | 390  |
| 59.938 | 20 | TATCGATGCACAAGATTCGC     | 59.799 | 20 | 237 | 505  | 741  |
| 60.035 | 20 | CCCTTTCGGGACATCTACAA     | 59.926 | 20 | 102 | 71   | 172  |

|        |    |                         |        |    |     |      |      |
|--------|----|-------------------------|--------|----|-----|------|------|
| 59.592 | 20 | TGCTTGCCTCGTTTAAATTTG   | 58.958 | 20 | 146 | 647  | 792  |
| 59.827 | 20 | TTTTCCCCTAAGCACAGCAT    | 59.708 | 20 | 179 | 113  | 291  |
| 59.907 | 20 | GCAACCGAGAGGTTATCGAC    | 59.7   | 20 | 168 | 2704 | 2871 |
| 60.173 | 20 | CAAGCACAAATCTCGATTACCA  | 60.131 | 22 | 187 | 269  | 455  |
| 59.055 | 21 | CAAATTCATGTGTGCGCCTA    | 59.542 | 20 | 262 | 610  | 871  |
| 59.992 | 20 | AAGAACTGCCAAAAGGCAAG    | 59.494 | 20 | 273 | 1635 | 1907 |
| 59.95  | 20 | ATGCATTCTATGCCAGTCC     | 59.923 | 20 | 187 | 993  | 1179 |
| 59.993 | 20 | TGTAGCCGACCCCAATTTAT    | 59.297 | 20 | 217 | 1650 | 1866 |
| 60.914 | 20 | TCCCAAACATCACCTCCTC     | 59.903 | 20 | 110 | 29   | 138  |
| 62.247 | 18 | ATTCCTATAATGCCCTCGC     | 60.267 | 20 | 121 | 28   | 148  |
| 59.942 | 21 | CAAAGAAATCATTACATTCGG   | 59.451 | 22 | 115 | 159  | 273  |
| 59.745 | 20 | GGAGGTGTTGGACAGCCTAA    | 60.111 | 20 | 274 | 115  | 388  |
| 59.743 | 24 | AATGGCCAATGACCAATACC    | 59.51  | 20 | 242 | 67   | 308  |
| 60.054 | 20 | AGTTGAATTTATGGCGGGTG    | 59.823 | 20 | 270 | 6    | 275  |
| 59.878 | 20 | TTCTGTTGATGCCAAATCTTGT  | 59.615 | 22 | 200 | 4164 | 4363 |
| 59.981 | 20 | ATGTAGCCGACCCCAATTTA    | 59.297 | 20 | 278 | 52   | 329  |
| 59.845 | 20 | TGGTTTCCATTCCTTCTATTG   | 60.177 | 22 | 197 | 45   | 241  |
| 59.83  | 23 | ATTTTCCCAGCCCTTCACTT    | 59.94  | 20 | 280 | 474  | 753  |
| 59.978 | 20 | GCACTGATAACTTCTCCCGC    | 59.843 | 20 | 203 | 100  | 302  |
| 59.989 | 20 | TGCACGTAGATGTCAGAGGG    | 59.855 | 20 | 231 | 82   | 312  |
| 59.974 | 20 | TAATCGCCCTTGCCAAATAG    | 60.054 | 20 | 182 | 1316 | 1497 |
| 59.964 | 20 | TCCCAATTACGGGAGATTCTT   | 59.785 | 21 | 223 | 4796 | 5018 |
| 60.042 | 20 | GGGACCTTTCAGTCACCAGA    | 60.088 | 20 | 126 | 1579 | 1704 |
| 59.72  | 24 | TCGGCATACTAATGATAATGTGA | 57.274 | 23 | 271 | 2829 | 3099 |
| 59.874 | 20 | TGGTGCCATCTTCTTCAACA    | 60.24  | 20 | 108 | 918  | 1025 |
| 59.967 | 20 | GGTTGCACAAAGTAGCTTCAACA | 60.347 | 22 | 212 | 81   | 292  |
| 60.195 | 20 | TACCAACTTTTGCCTTTCGG    | 60.103 | 20 | 276 | 1088 | 1363 |
| 59.752 | 22 | ACGTCGTAATCCGAAGTTCC    | 59.056 | 20 | 270 | 895  | 1164 |
| 59.867 | 20 | TGTGAGAATCCACAATCGGA    | 60.048 | 20 | 241 | 128  | 368  |
| 59.931 | 21 | ATCTCGAGCATGTGGTGGTT    | 60.542 | 20 | 280 | 487  | 766  |
| 59.886 | 21 | TGTGGAGCTTGATACGACGA    | 60.413 | 20 | 223 | 2179 | 2401 |
| 59.375 | 21 | TGAATCCCTATTGTCGAGAGC   | 59.283 | 21 | 192 | 875  | 1066 |
| 59.931 | 20 | TGAAACTGCGAGTTCAATCA    | 57.968 | 20 | 155 | 218  | 372  |
| 59.931 | 20 | TGAAACTGCGAGTTCAATCA    | 57.968 | 20 | 155 | 217  | 371  |
| 59.397 | 24 | TTGAAAAACCCTGGTCCCTTG   | 59.942 | 20 | 120 | 4    | 123  |
| 60.072 | 20 | AAAACCGTAATTTACACCCC    | 59.924 | 20 | 215 | 1332 | 1546 |
| 60.081 | 20 | TGAAATCGATCCCGATTATTCT  | 59.772 | 22 | 228 | 896  | 1123 |
| 59.962 | 20 | CGATGCGAACAAAAGGTTTC    | 60.617 | 20 | 237 | 1878 | 2114 |
| 59.297 | 20 | TTAATGGCTTGTGAATACGGC   | 59.978 | 21 | 263 | 14   | 276  |
| 59.297 | 20 | ATATCATTCCTCCGAGAGGCT   | 59.888 | 20 | 162 | 134  | 295  |
| 59.711 | 20 | CAAACCTCACCCAACCACTT    | 59.861 | 20 | 240 | 2238 | 2477 |
| 60.17  | 20 | AGGTTGCGTACATCTGACCC    | 59.997 | 20 | 183 | 139  | 321  |
| 60.157 | 19 | TTTCGGCCACCATTGTTATT    | 60.188 | 20 | 279 | 467  | 745  |
| 59.521 | 21 | ACCACCCTTGACCCTCTTCT    | 59.968 | 20 | 237 | 2664 | 2900 |
| 60.172 | 20 | AGGTCCATCAATGCCCATAA    | 60.155 | 20 | 196 | 127  | 322  |
| 60.517 | 20 | AACAAAGGAGACGAGTGCCT    | 59.914 | 20 | 274 | 121  | 394  |
| 59.824 | 21 | TCGTGGGTAAACACACCAAA    | 59.857 | 20 | 235 | 386  | 620  |
| 60.05  | 20 | AGGTGGTGTGGTTTCAGGAG    | 60.002 | 20 | 227 | 413  | 639  |
| 59.855 | 20 | ATGGCGAAAAGTGCAAAATC    | 60.081 | 20 | 124 | 840  | 963  |
| 60.195 | 20 | TTGTTTAGGGTTTTGGGCTG    | 59.968 | 20 | 269 | 1127 | 1395 |
| 59.912 | 20 | CACAACAAGGACTTGCATGG    | 60.152 | 20 | 100 | 56   | 155  |
| 60.15  | 21 | TTTCCAAAACACATTGTTTCAA  | 58.097 | 22 | 186 | 207  | 392  |
| 59.762 | 20 | CGTGAATTGTCCACATTGA     | 60.367 | 20 | 235 | 450  | 684  |
| 60.148 | 18 | TGGGAGTTCCGACCTGTTTA    | 60.486 | 20 | 245 | 3    | 247  |
| 61.329 | 20 | ACACCACGCATGTTTTTCAA    | 60.011 | 20 | 210 | 1725 | 1934 |
| 59.55  | 20 | TACATGCTTTTTCAAGCCCC    | 60.074 | 20 | 268 | 125  | 392  |
| 60.874 | 20 | CTCCTCCGCTTCTTCTTCT     | 60.088 | 20 | 261 | 812  | 1072 |
| 60.089 | 20 | TGTGCTCATGATAGCATTGA    | 57.874 | 21 | 204 | 334  | 537  |



|        |    |                          |        |    |     |      |      |
|--------|----|--------------------------|--------|----|-----|------|------|
| 60.384 | 20 | CGCAATCTTGAACAGGGTTT     | 60.11  | 20 | 265 | 2158 | 2422 |
| 59.818 | 21 | AGTCGACCTTACGTAGCGGA     | 59.898 | 20 | 207 | 563  | 769  |
| 60.074 | 20 | GCGAATTTTCATCCGTTTTTG    | 60.436 | 20 | 141 | 977  | 1117 |
| 60.118 | 20 | ATCCTGCACCACAACAAACA     | 60.008 | 20 | 205 | 1492 | 1696 |
| 60.005 | 21 | GAGGCTACTACATTTTGCCCC    | 59.979 | 21 | 192 | 25   | 216  |
| 59.697 | 20 | CCCAAGTCGGTTTCAACTTT     | 59.073 | 20 | 213 | 306  | 518  |
| 60.036 | 20 | CTCATCATTGGCTCCCATTT     | 59.894 | 20 | 178 | 97   | 274  |
| 59.302 | 23 | TCAGTATGTGATCCGCCTTTT    | 59.583 | 21 | 216 | 0    | 215  |
| 60.15  | 20 | CACGGATTCTGAATTGTCTTCT   | 59.184 | 21 | 269 | 734  | 1002 |
| 60.029 | 20 | GCAACGGAAACAACCTCTTT     | 59.218 | 20 | 169 | 142  | 310  |
| 59.688 | 20 | CCATTACCAACGGTCTTGCT     | 59.993 | 20 | 180 | 50   | 229  |
| 60.185 | 20 | TTCCGGCAGACAATGATATG     | 59.499 | 20 | 246 | 282  | 527  |
| 60.197 | 20 | GGTTGTGTACATCTAACCCAAA   | 60.028 | 23 | 116 | 706  | 821  |
| 59.82  | 20 | CCCGCTTCTCTTCTCTCCT      | 60.088 | 20 | 267 | 411  | 677  |
| 59.091 | 22 | AGATACGACCTTGCTCGCTC     | 59.603 | 20 | 154 | 320  | 473  |
| 60.734 | 20 | TGTGCTCTGAATAGGACCGA     | 59.394 | 20 | 228 | 3523 | 3750 |
| 60.138 | 20 | AGCACACCACAGACACAAGC     | 59.948 | 20 | 144 | 491  | 634  |
| 59.668 | 20 | TTTTACGCTTAAACTGGCCG     | 60.251 | 20 | 255 | 355  | 609  |
| 60     | 20 | ATTCTCCCATGCCCATCAC      | 60.708 | 19 | 182 | 219  | 400  |
| 60.06  | 20 | GCAAGAGATTCTTTGTGCGC     | 59.962 | 20 | 254 | 1265 | 1518 |
| 60.481 | 20 | CCTTCATAATTCTCGAAAGGTTTC | 58.342 | 23 | 215 | 24   | 238  |
| 60.012 | 20 | GGAGGAGGAGGTGGTGATTTC    | 60.86  | 20 | 222 | 446  | 667  |
| 59.957 | 20 | TCAAACCTCGTGTGAACCCAA    | 60.128 | 20 | 144 | 345  | 488  |
| 59.833 | 20 | GTGCCGCCAATAAGTTGTCT     | 60.14  | 20 | 245 | 474  | 718  |
| 59.986 | 20 | CTGAACCAGAAGAGCCGAAG     | 60.126 | 20 | 236 | 1649 | 1884 |
| 60.041 | 20 | GTCGTTGTTGGTGTGAGTGG     | 60.047 | 20 | 210 | 704  | 913  |
| 60.118 | 21 | CCACCTTCTCTCCTATCCACC    | 59.943 | 21 | 116 | 3    | 118  |
| 59.976 | 20 | TTCCCACATGCATTCAGAGA     | 60.201 | 20 | 262 | 420  | 681  |
| 60.025 | 20 | AGGTTGCGTACATCTGACCC     | 59.997 | 20 | 124 | 55   | 178  |
| 59.098 | 23 | ATTGTTTTGGCGTTTTCTCG     | 60.11  | 20 | 178 | 254  | 431  |
| 59.914 | 20 | TGTCTCAGGGAAGAGGCAGT     | 59.986 | 20 | 246 | 116  | 361  |
| 59.966 | 20 | ACCCAATTGTTGTGGATGCT     | 60.24  | 20 | 219 | 827  | 1045 |
| 60.27  | 20 | TCCGATGGAGCCTTAAAATG     | 60.031 | 20 | 205 | 1889 | 2093 |
| 57.39  | 20 | TCCAAATTCGTGTAAGAAATCA   | 57.314 | 22 | 109 | 266  | 374  |
| 60.214 | 20 | GACGTGGATCGATGTGATTG     | 59.925 | 20 | 139 | 1432 | 1570 |
| 60.014 | 20 | TCGAAACCGCTCTTCTTCAT     | 59.955 | 20 | 214 | 791  | 1004 |
| 61.146 | 20 | TTTGGTCACTTTGCACCTAAAA   | 59.663 | 22 | 168 | 500  | 667  |
| 59.888 | 20 | CCACCACCCACTCCAATACT     | 59.697 | 20 | 224 | 164  | 387  |
| 59.859 | 20 | TTTTGCGTTTTCGACTTGTG     | 59.888 | 20 | 110 | 733  | 842  |
| 59.533 | 20 | TCCACCGACTGTACGACTCA     | 60.309 | 20 | 108 | 0    | 107  |
| 59.993 | 20 | ATTGAAGAGCGATTCCGAGA     | 59.917 | 20 | 107 | 83   | 189  |
| 59.988 | 20 | AATTTTCGCCATTTGCTTGT     | 59.592 | 20 | 216 | 410  | 625  |
| 59.823 | 20 | GCATGGACAAGACGGGTAGT     | 59.997 | 20 | 172 | 1822 | 1993 |
| 60.197 | 20 | ATTGAGGTCAACCCAACGAC     | 59.827 | 20 | 131 | 901  | 1031 |
| 60.104 | 20 | AATTCGATTGCCTCTGCAAC     | 60.221 | 20 | 280 | 1328 | 1607 |
| 60.049 | 20 | TGCCATAACGGCTAGTCTCA     | 59.444 | 20 | 250 | 102  | 351  |
| 59.928 | 20 | TGCATTATATGGCCGTGACA     | 60.896 | 20 | 167 | 396  | 562  |
| 59.973 | 20 | AGATGCGACTTTTGTTTCCG     | 60.249 | 20 | 262 | 2169 | 2430 |
| 57.539 | 21 | CCGACGTGGAATCTGAAAAT     | 59.933 | 20 | 123 | 5    | 127  |
| 59.824 | 21 | CTATTTTTGGGCCTTTTCCC     | 59.782 | 20 | 256 | 560  | 815  |
| 59.948 | 20 | CGGGAAGACCAAAAAGTCAA     | 60.081 | 20 | 231 | 48   | 278  |
| 59.904 | 20 | TATTTGCTTAGTCGTGGCCC     | 60.096 | 20 | 157 | 750  | 906  |
| 60.031 | 20 | TTGCACTTTTTATGGGGGAG     | 59.931 | 20 | 268 | 47   | 314  |
| 59.935 | 20 | TAGCTACAGGTGGGGTTGG      | 59.986 | 20 | 258 | 98   | 355  |
| 60.048 | 20 | AAAGTGGAAGCGAAGGACAA     | 59.853 | 20 | 258 | 822  | 1079 |
| 59.651 | 20 | TTTTACGCAAATCCGAAGGA     | 60.56  | 20 | 178 | 544  | 721  |
| 60.103 | 20 | TTGTTGCAAAACGAGTGAG      | 60.027 | 20 | 211 | 146  | 356  |
| 59.933 | 20 | CAAACCTGCACCTCGTGAGAA    | 60.025 | 20 | 217 | 3480 | 3696 |

|        |    |                          |        |    |     |      |       |
|--------|----|--------------------------|--------|----|-----|------|-------|
| 58.647 | 25 | CTAATTGGATTCCCTCGGGT     | 60.145 | 20 | 167 | 1846 | 2012  |
| 60.348 | 20 | AGAGGAGGTGGAGGTGGATT     | 59.929 | 20 | 263 | 569  | 831   |
| 59.973 | 20 | AAGGCCTTATCCCCTAAGCA     | 60.055 | 20 | 112 | 24   | 135   |
| 59.585 | 20 | AATTCTTCCTTGGTGGGCTT     | 59.94  | 20 | 209 | 467  | 675   |
| 59.933 | 20 | GAAAATGCTGGAAATGAGGAA    | 59.148 | 21 | 160 | 269  | 428   |
| 60.329 | 20 | CACATCTCCGTTGGTGTGACG    | 60.154 | 20 | 239 | 118  | 356   |
| 59.646 | 20 | GCTCCAAGCACGGATATCAT     | 60.066 | 20 | 273 | 831  | 1103  |
| 59.967 | 20 | GTGGATGATGGGATTTCTCG     | 60.281 | 20 | 261 | 1496 | 1756  |
| 60.162 | 20 | TCAAGGGATCAAAGCCAAC      | 60.051 | 20 | 153 | 339  | 491   |
| 58.845 | 20 | ACATTTCAATGCCATTTCCA     | 58.82  | 20 | 195 | 630  | 824   |
| 59.91  | 20 | GGTTTTGATAAATACGATTTGCAT | 58.457 | 24 | 127 | 1220 | 1346  |
| 59.903 | 20 | CCTGCCATTCCATGTCTTCT     | 60.073 | 20 | 235 | 2294 | 2528  |
| 59.964 | 20 | CGGGGATCAAATGAAATCAA     | 60.64  | 20 | 248 | 555  | 802   |
| 60.21  | 20 | CCTCACAATTCCATGCACAC     | 59.967 | 20 | 131 | 422  | 552   |
| 59.901 | 20 | GACCCACATAGTGGGAAAA      | 59.647 | 20 | 236 | 9812 | 10047 |
| 59.685 | 20 | TGTAGCCGACCCCAATTTAT     | 59.297 | 20 | 181 | 341  | 521   |
| 59.959 | 20 | GGAGAATGGGTTGCTCTGAA     | 60.195 | 20 | 207 | 783  | 989   |
| 58.933 | 20 | AAACCAAGACCCCAATTTGA     | 59.264 | 20 | 107 | 12   | 118   |
| 58.586 | 21 | AGTTCATGTGGTTGTTGGCA     | 60.008 | 20 | 100 | 14   | 113   |
| 59.953 | 20 | TGCCAAAGTCTCCCATTTTC     | 60.051 | 20 | 239 | 3792 | 4030  |
| 60.022 | 20 | TGAGGAGCAACCATTACCAA     | 59.123 | 20 | 234 | 116  | 349   |
| 60.11  | 20 | CCCCGTCATGTAAAGTTTCG     | 60.357 | 20 | 188 | 93   | 280   |
| 59.971 | 20 | CAGAGCGCACTCGAAGAGTA     | 59.49  | 20 | 110 | 386  | 495   |
| 60.12  | 20 | AACCTACCCTCCCCATCATC     | 60.015 | 20 | 110 | 11   | 120   |
| 60.344 | 20 | GGAGTGGGAGAGAGATGCAG     | 59.945 | 20 | 275 | 129  | 403   |
| 59.042 | 21 | TGCCTCTTGGCATCTTTCTT     | 59.955 | 20 | 270 | 1884 | 2153  |
| 60.318 | 21 | TGAGCATGCACAATAAAAAGC    | 60.437 | 22 | 100 | 554  | 653   |
| 59.697 | 20 | AGGTTGCGTACATCTGACCC     | 59.997 | 20 | 174 | 7    | 180   |
| 60.326 | 20 | GATGATCCCCGATGTAGAA      | 59.709 | 20 | 249 | 174  | 422   |
| 58.224 | 22 | ACATGCAATGTTGGGCACTA     | 59.995 | 20 | 273 | 767  | 1039  |
| 59.794 | 20 | CCCGAACAATTTTTCTTTT      | 60.157 | 20 | 236 | 150  | 385   |
| 59.62  | 20 | ATGTCCGCCTTATGAGGTTT     | 59.009 | 20 | 279 | 1143 | 1421  |
| 59.997 | 20 | ATGGGTTGGTGGTTTGGATA     | 59.91  | 20 | 181 | 118  | 298   |
| 59.75  | 20 | AGGTTGCGTACATCTGACCC     | 59.997 | 20 | 125 | 32   | 156   |
| 58.952 | 22 | CACCTTAAGAGCCATCGTCA     | 58.874 | 20 | 217 | 132  | 348   |
| 59.195 | 20 | TTAGTTCCAAATTGTGCCCT     | 57.217 | 20 | 249 | 2472 | 2720  |
| 60.137 | 22 | GGAGGGTGTGAGTTTGAGG      | 59.549 | 20 | 211 | 665  | 875   |
| 59.773 | 20 | AAAAGCGTTGGAAAGCTGAA     | 59.996 | 20 | 182 | 85   | 266   |
| 60.78  | 20 | CCACCATGGAAAGTGCTTGT     | 60.954 | 20 | 272 | 74   | 345   |
| 60.218 | 20 | GCGTCATCTCCCACTCTCTC     | 59.952 | 20 | 117 | 249  | 365   |
| 60.17  | 20 | TGGATATCATTGTCGCTGCT     | 59.256 | 20 | 206 | 133  | 338   |
| 60.17  | 20 | TGGATATCATTGTCGCTGCT     | 59.256 | 20 | 209 | 133  | 341   |
| 59.993 | 20 | TCCTTTTCTTCATCCTCATCC    | 58.174 | 21 | 184 | 65   | 248   |
| 61.006 | 20 | AGTCGACGGTCAATTTCCAG     | 60.111 | 20 | 108 | 8    | 115   |
| 59.517 | 20 | AGAGATTGCCAGATAGGCGA     | 59.939 | 20 | 271 | 625  | 895   |
| 59.297 | 20 | CACGACAACCCAACACAAAC     | 59.897 | 20 | 212 | 9    | 220   |
| 60.131 | 22 | TGTTTCATCTGCTTGTTCCG     | 59.84  | 20 | 121 | 173  | 293   |
| 59.847 | 20 | TCGAAAATGGTATTTCGAGCC    | 60.038 | 20 | 223 | 301  | 523   |
| 60.3   | 20 | ATTTTCGTTGACCTCACAC      | 59.827 | 20 | 225 | 285  | 509   |
| 59.935 | 20 | AGAGGTATTTGCAGCGCAGT     | 60.044 | 20 | 210 | 1313 | 1522  |
| 60.025 | 20 | ATTACCTTCTCTCGCCGGAA     | 61.08  | 20 | 224 | 90   | 313   |
| 60.118 | 22 | TACATTAGCCGTAAACCGGG     | 59.847 | 20 | 272 | 51   | 322   |
| 58.946 | 22 | TTGAAAAGTTTGGATAATTCACGA | 59.885 | 24 | 268 | 26   | 293   |
| 59.905 | 20 | CGGGACTGTTTCTGAGTTC      | 59.697 | 20 | 123 | 1042 | 1164  |
| 59.729 | 23 | ATCATTCTCGGAGTTGAGCG     | 60.362 | 20 | 209 | 1055 | 1263  |
| 59.997 | 20 | ATTCGAAGCATAGATGCCCA     | 60.574 | 20 | 219 | 636  | 854   |
| 59.891 | 23 | TTTGGGAGGTTGGATGGATA     | 60.126 | 20 | 160 | 0    | 159   |
| 60.117 | 20 | GGAGTCTTCTGCATTTGGTTG    | 59.726 | 21 | 113 | 938  | 1050  |

|        |    |                           |        |    |     |      |      |
|--------|----|---------------------------|--------|----|-----|------|------|
| 58.297 | 25 | AGAAAAAGGGAGCATGAGCA      | 59.955 | 20 | 181 | 2    | 182  |
| 58.475 | 20 | CCCAAGACCCCAATTTGATT      | 60.91  | 20 | 194 | 2816 | 3009 |
| 60.088 | 20 | TCCTTGTTTCGATTCCAAACC     | 59.91  | 20 | 181 | 307  | 487  |
| 59.551 | 20 | GGGACAAGCTTCATTTGCAT      | 60.081 | 20 | 228 | 927  | 1154 |
| 60.036 | 20 | TATACACCATCATGACCGCC      | 59.23  | 20 | 144 | 868  | 1011 |
| 61.33  | 20 | TGGATCTGCAACTTCAGCAG      | 60.136 | 20 | 137 | 16   | 152  |
| 60.185 | 21 | GATACAGAGTCGGACGATGACA    | 60.142 | 22 | 278 | 261  | 538  |
| 59.927 | 20 | AGATTGCGTAAACCTGACCC      | 59.056 | 20 | 189 | 722  | 910  |
| 59.893 | 20 | CCCAAGACCCCAATTTGATT      | 60.91  | 20 | 110 | 1206 | 1315 |
| 59.67  | 20 | TTGGATAGTAGGATATGATAAGGC  | 58.812 | 27 | 246 | 175  | 420  |
| 60.488 | 20 | ACGTGGCCAAAACGATTCT       | 60.511 | 19 | 273 | 62   | 334  |
| 58.741 | 20 | GGAGACCCCTTCGAAAAATC      | 59.881 | 20 | 165 | 115  | 279  |
| 59.297 | 20 | TAAGGTTAGCAGTTTGGCCG      | 60.257 | 20 | 255 | 206  | 460  |
| 59.993 | 20 | TGAAGAGGAGGGGAATGATG      | 60.003 | 20 | 265 | 128  | 392  |
| 59.984 | 20 | GAATCCGCCACATTGCTTAC      | 60.478 | 20 | 134 | 127  | 260  |
| 60.195 | 20 | TGTAGAACCTTCCAATCCGC      | 60.074 | 20 | 266 | 186  | 451  |
| 58.991 | 20 | GCTTACCGGCGACTATCTCA      | 60.374 | 20 | 224 | 483  | 706  |
| 60.91  | 20 | GCCATGAAATTCCCATCACT      | 59.756 | 20 | 248 | 8    | 255  |
| 60.301 | 20 | TGTGCACCGACAGTTTTTGT      | 60.199 | 20 | 271 | 642  | 912  |
| 59.762 | 20 | CCAATTCGAAGCCCAAATTA      | 59.901 | 20 | 200 | 256  | 455  |
| 59.934 | 20 | ACCCAGAAAAACGAAACACG      | 60.008 | 20 | 158 | 147  | 304  |
| 59.934 | 20 | ATACGCGAGACCGTGTAAGG      | 60.154 | 20 | 164 | 306  | 469  |
| 59.919 | 20 | TAACAATGCACCCGAGATGA      | 60.073 | 20 | 217 | 26   | 242  |
| 59.95  | 20 | TCACTTTCCTTTTTTCGGACG     | 60.22  | 20 | 241 | 8    | 248  |
| 60.048 | 21 | CAAACCAAGGCAAAGAGAGG      | 59.846 | 20 | 241 | 295  | 535  |
| 59.697 | 20 | CGAGGTGATTTGGACCAGTT      | 59.966 | 20 | 112 | 1797 | 1908 |
| 60.372 | 20 | TCATAACAGTCTTCGACTAGCTTC  | 57.073 | 24 | 262 | 98   | 359  |
| 59.297 | 20 | TGATGTATGCCTGTGGGAAG      | 59.522 | 20 | 162 | 8    | 169  |
| 59.141 | 24 | TTGTGTGGAAAAGGGGAAAG      | 59.942 | 20 | 280 | 59   | 338  |
| 60.162 | 20 | GGTGACCAAAGAGGTGGGTA      | 59.82  | 20 | 243 | 229  | 471  |
| 60.692 | 22 | AATTGTTATCTCAGGCTACGCT    | 57.267 | 22 | 266 | 441  | 706  |
| 60.133 | 21 | AGTTTAAACCCTCCCAACCC      | 59.191 | 20 | 218 | 87   | 304  |
| 59.957 | 20 | CGAGCAAAGTAGTCCGTTTCTT    | 59.948 | 22 | 227 | 375  | 601  |
| 60.124 | 22 | TCACCAAAGGGACACACAAA      | 59.976 | 20 | 243 | 72   | 314  |
| 59.997 | 20 | CCTAACCTGCGTTGGAACAT      | 59.993 | 20 | 171 | 144  | 314  |
| 59.957 | 21 | TTTTGAGCAGGAATGTTCTTCA    | 59.861 | 22 | 252 | 70   | 321  |
| 59.838 | 20 | TCCTCAATAATCAAACCTCGG     | 59.03  | 21 | 214 | 947  | 1160 |
| 58.725 | 25 | TGAATTTGCGACATTATTCATTG   | 59.854 | 23 | 256 | 12   | 267  |
| 59.933 | 20 | CAAGTTCACATTGAAATCGACA    | 58.675 | 22 | 270 | 231  | 500  |
| 59.767 | 20 | TACAGTTGCCGAAAAATGCC      | 60.999 | 20 | 124 | 16   | 139  |
| 57.104 | 26 | CGATAGGTCCTCGATTACCC      | 59.508 | 20 | 223 | 298  | 520  |
| 57.289 | 20 | TTTGTGTTAATTATGTTTCAGTTTT | 58.306 | 27 | 250 | 1744 | 1993 |
| 59.959 | 20 | ATTGACTCCCACCAGGAGTG      | 59.962 | 20 | 144 | 461  | 604  |
| 59.757 | 20 | TCCCACAAAACCAAACACAA      | 59.834 | 20 | 262 | 1076 | 1337 |
| 59.873 | 20 | TTTCATCAAAGCCTGAAGCA      | 59.542 | 20 | 266 | 152  | 417  |
| 60.192 | 20 | CTCGGGATCAATGACATTCC      | 60.281 | 20 | 277 | 702  | 978  |
| 60.133 | 20 | GTTCTTGCTTCTCACCCCTGC     | 59.997 | 20 | 163 | 1406 | 1568 |
| 59.992 | 20 | TGGGTTCAATTATCAAGAATTGC   | 58.946 | 22 | 250 | 6    | 255  |
| 59.94  | 20 | GGGTTTTAGAGGGGAGTTGG      | 59.799 | 20 | 153 | 763  | 915  |
| 60.352 | 20 | AACTGGATTGACTTCACGGC      | 60.119 | 20 | 271 | 366  | 636  |
| 60.464 | 20 | AGCATGTGACATTTCCCGTT      | 60.384 | 20 | 277 | 1109 | 1385 |
| 59.693 | 22 | GAAAATGAGGTGGGATGTGCG     | 60.317 | 20 | 170 | 290  | 459  |
| 59.991 | 20 | TCTCTGAATCCGGCCTAGAA      | 59.91  | 20 | 218 | 2444 | 2661 |
| 60.176 | 20 | CTTCATATTGGGGCCCATC       | 60.103 | 19 | 251 | 470  | 720  |
| 59.901 | 20 | TGCCCTAATCACACATTTCT      | 59.443 | 21 | 172 | 237  | 408  |
| 60.12  | 20 | AACAACATAAGGGAAGGGGG      | 60.046 | 20 | 229 | 1455 | 1683 |
| 60.152 | 20 | AAGACCGTGGCGAAAATATG      | 59.96  | 20 | 108 | 1398 | 1505 |
| 59.993 | 20 | GTGGGACCTTGCTACTGAGC      | 59.874 | 20 | 261 | 1582 | 1842 |

|        |    |                           |        |    |     |      |      |
|--------|----|---------------------------|--------|----|-----|------|------|
| 59.901 | 20 | TTGGGAGAGGGAGAGAGACA      | 59.913 | 20 | 132 | 98   | 229  |
| 59.933 | 20 | GTTTTCTCCCAACAGGACCA      | 59.943 | 20 | 248 | 3494 | 3741 |
| 59.592 | 24 | ATTA AAAATGGTGCGAATGGG    | 59.66  | 20 | 263 | 1    | 263  |
| 59.344 | 20 | CGAAATCGCGGTATCTTGTT      | 60.096 | 20 | 222 | 290  | 511  |
| 59.982 | 20 | ACATACAGGGGTGAAAACCG      | 59.711 | 20 | 175 | 3656 | 3830 |
| 59.712 | 20 | TCAGCCTTCGCCACTACTCT      | 60.156 | 20 | 266 | 6780 | 7045 |
| 59.805 | 20 | GGAACCATTGAGAGGAGCAG      | 59.803 | 20 | 238 | 459  | 696  |
| 57.327 | 21 | CAAATTATTTTCAACCCTCATACC/ | 60.324 | 25 | 244 | 1439 | 1682 |
| 59.971 | 20 | GCAGTTGTTGCGGATAGTGA      | 59.871 | 20 | 271 | 86   | 356  |
| 60.408 | 20 | TGCGTGTGTAACCGAGAGAG      | 60.049 | 20 | 278 | 406  | 683  |
| 59.831 | 20 | TCCAAGGAACTTTTCTCCCA      | 59.641 | 20 | 271 | 2615 | 2885 |
| 60.02  | 20 | TACCCTAGCCCTACCGGAAC      | 60.332 | 20 | 249 | 553  | 801  |
| 60.008 | 20 | CTCTCCCACTATTCCCACCA      | 59.92  | 20 | 139 | 210  | 348  |
| 60.481 | 20 | TTTGCCAAGAGACACGACAC      | 59.88  | 20 | 200 | 1931 | 2130 |
| 59.892 | 20 | CCACCTCACGTAAAGCACAA      | 59.758 | 20 | 246 | 802  | 1047 |
| 58.595 | 21 | CGAATTGAATTAATTTTATGAAGC. | 59.807 | 26 | 212 | 99   | 310  |
| 60.066 | 20 | GCCCCACCAGAAAAAGGATA      | 61.173 | 20 | 104 | 20   | 123  |
| 59.887 | 20 | ATTAAGGGTTGAGGAGGGA       | 59.761 | 20 | 179 | 898  | 1076 |
| 60.081 | 20 | ATGAAGCTGAACTCGCTGCT      | 60.307 | 20 | 205 | 538  | 742  |
| 59.42  | 20 | ACCGTTAACGACACAAACC       | 59.757 | 20 | 155 | 24   | 178  |
| 59.992 | 20 | GAAACACAGCGGAATCAAT       | 59.939 | 20 | 266 | 1427 | 1692 |
| 59.182 | 22 | TCGTTGATGATGCAAAGAATG     | 59.679 | 21 | 252 | 180  | 431  |
| 59.716 | 23 | GAACCAAACTTGCTGACCC       | 59.574 | 20 | 100 | 50   | 149  |
| 58.754 | 23 | CCAAGTCCCCCTCATACAAA      | 59.784 | 20 | 166 | 0    | 165  |
| 60.184 | 20 | GACATCTGGCCATTTTCAC       | 60.326 | 20 | 270 | 150  | 419  |
| 59.688 | 20 | GGTGAAGACCCGAATTCAA       | 59.91  | 20 | 270 | 74   | 343  |
| 59.563 | 20 | AGGTTGCGTACATCTGACCC      | 59.997 | 20 | 115 | 46   | 160  |
| 59.819 | 20 | GGGCTTCGTTTGATGACTGT      | 60.119 | 20 | 214 | 62   | 275  |
| 60.053 | 20 | ACACGGGTGGAAGTGAGAGT      | 59.604 | 20 | 194 | 435  | 628  |
| 59.982 | 20 | CATCCACAGTGAAGACCACG      | 60.154 | 20 | 262 | 15   | 276  |
| 59.277 | 20 | CTACTCGCCCTCTCCATCAG      | 59.966 | 20 | 248 | 1219 | 1466 |
| 60.074 | 20 | ACACGACGGACGTAGAGCTT      | 59.937 | 20 | 161 | 72   | 232  |
| 59.751 | 20 | TGTGCTATAATGGACTACATCAA   | 57.873 | 25 | 182 | 1556 | 1737 |
| 59.853 | 20 | CTTGGGAGTTGCTTCGTAGG      | 59.869 | 20 | 173 | 239  | 411  |
| 59.997 | 20 | TTGGGTCCTATCCAGTTTGG      | 59.784 | 20 | 151 | 3843 | 3993 |
| 60.111 | 20 | GTAATCCCAAACCGAACACG      | 60.227 | 20 | 153 | 284  | 436  |
| 58.822 | 22 | TGCCATACAACCACTTGC        | 60.584 | 20 | 144 | 348  | 491  |
| 59.682 | 20 | GGAGATTCTCTTGGGCACTG      | 59.803 | 20 | 251 | 154  | 404  |
| 60.012 | 20 | TAGATGCACCGTTAGGAGG       | 60.088 | 20 | 147 | 112  | 258  |
| 60.173 | 20 | TTGACCGTACAAGATTGCGA      | 60.257 | 20 | 219 | 1016 | 1234 |
| 59.941 | 20 | TCTACCACTGCACCACGAGA      | 60.463 | 20 | 260 | 102  | 361  |
| 59.641 | 20 | CTGCAAAATGAGCAAAACCA      | 59.849 | 20 | 257 | 31   | 287  |
| 59.967 | 20 | TCCGGTCAAAAACAGAAACC      | 59.948 | 20 | 148 | 378  | 525  |
| 60.361 | 20 | CCTTCTTTAGAGGTTGGGGTG     | 59.977 | 21 | 242 | 158  | 399  |
| 59.694 | 20 | TTGGTATCTTCCTTGCCGTC      | 60.074 | 20 | 145 | 28   | 172  |
| 60.067 | 20 | CTTTGTGCGACCACTAAGCA      | 60.05  | 20 | 184 | 2541 | 2724 |
| 60.991 | 20 | TCGATCCTTTATGGATTGGAT     | 58.33  | 21 | 277 | 872  | 1148 |
| 59.297 | 20 | CAACTTGACATAGCATTCCCAA    | 59.996 | 22 | 112 | 2    | 113  |
| 60.214 | 20 | TCCTCTCACGCATTCTCTCA      | 59.656 | 20 | 137 | 413  | 549  |
| 58.158 | 20 | CCCAAGACCCCAATTTGATT      | 60.91  | 20 | 195 | 1    | 195  |
| 59.67  | 23 | AACCAATTGACAATGAGAGGAGA   | 59.99  | 23 | 251 | 95   | 345  |
| 59.703 | 20 | AAGAGTGCAGCCATCGTACA      | 59.47  | 20 | 184 | 185  | 368  |
| 59.685 | 20 | TGCCCTAGATCTCACACACG      | 59.855 | 20 | 211 | 450  | 660  |
| 58.746 | 20 | TGGTGATATTATTGTGATTCCCC   | 59.801 | 23 | 266 | 368  | 633  |
| 60.074 | 20 | TATGGATGCACCGTTATGA       | 59.769 | 20 | 247 | 23   | 269  |
| 59.975 | 20 | TTTTCATTTTTACTTACGCGTCT   | 57.35  | 23 | 214 | 166  | 379  |
| 59.985 | 20 | GACACGAACCCCTATCCAGA      | 59.927 | 20 | 225 | 306  | 530  |
| 59.182 | 20 | TGACGCACACAAACACTTCA      | 59.912 | 20 | 274 | 89   | 362  |

|        |    |                          |        |    |     |      |      |
|--------|----|--------------------------|--------|----|-----|------|------|
| 59.543 | 20 | TCCTTGAAATGCCGACTTCT     | 59.813 | 20 | 192 | 1320 | 1511 |
| 60.386 | 20 | AGAGACGGTGACGTATTGCC     | 60.142 | 20 | 137 | 588  | 724  |
| 59.722 | 20 | TGGGTTTTATTTTTGCCGAG     | 59.937 | 20 | 277 | 1958 | 2234 |
| 60.111 | 20 | TCTCCAAAATCGCAAACCTC     | 60.192 | 20 | 143 | 403  | 545  |
| 59.955 | 20 | GGACAAGGGTTCGAGTCTCA     | 60.238 | 20 | 113 | 15   | 127  |
| 59.934 | 20 | TCCCTAGAAGCGCACGAGTA     | 61.06  | 20 | 169 | 277  | 445  |
| 59.846 | 20 | CAGCAGTCTGGATCTCCCTC     | 59.945 | 20 | 252 | 4    | 255  |
| 59.823 | 20 | TAAAAATGAACGAGTCGCC      | 60.074 | 20 | 252 | 1151 | 1402 |
| 60.601 | 20 | TGACCACCTTTCTTTCCACC     | 59.943 | 20 | 139 | 16   | 154  |
| 60.187 | 20 | TTCTATTTTTTCAGAGTTGAACCA | 59.203 | 24 | 249 | 186  | 434  |
| 59.989 | 20 | TGGGTTTGGAGTGAAAACAA     | 58.995 | 20 | 272 | 1781 | 2052 |
| 59.916 | 20 | CACCTTGAATTGACTGCCATT    | 59.985 | 21 | 162 | 483  | 644  |
| 59.206 | 20 | TAACCCTAACCCCTCGCCTTT    | 59.96  | 20 | 265 | 51   | 315  |
| 59.955 | 20 | AGGCACGGTTCATGTGTGTA     | 60.032 | 20 | 252 | 420  | 671  |
| 57.717 | 21 | TGCCAGAACACATAAATTTTGAA  | 59.524 | 23 | 220 | 212  | 431  |
| 59.846 | 20 | TTAATCTGCGTCTCCAGGCT     | 59.978 | 20 | 143 | 335  | 477  |
| 60.014 | 20 | AACAAACCCATCACTCCGAC     | 59.827 | 20 | 257 | 1434 | 1690 |
| 59.405 | 20 | TCTCATTCTTACGAGTGCCG     | 59.024 | 20 | 217 | 186  | 402  |
| 62.174 | 18 | GAGGGTTTGTAGGTGCGAAG     | 59.734 | 20 | 133 | 0    | 132  |
| 59.943 | 20 | CTCTTGTTCTGGTGGTGGT      | 60.002 | 20 | 250 | 730  | 979  |
| 60.11  | 20 | TTGACGCGCTTGAAGTAGTG     | 60.195 | 20 | 143 | 131  | 273  |
| 59.234 | 21 | CCTTTGAACAAAGAGTGGGG     | 59.563 | 20 | 260 | 65   | 324  |
| 59.632 | 20 | TGTAGCCGACCCCAATTTAT     | 59.297 | 20 | 177 | 238  | 414  |
| 60.017 | 20 | GGAGGCATAAAAACCCCAAT     | 60.02  | 20 | 252 | 69   | 320  |
| 59.88  | 20 | TATATGCAGGTGTGCCTTGC     | 59.718 | 20 | 253 | 1881 | 2133 |
| 60.326 | 20 | GGTGCAAGAATTTCCAAAA      | 59.916 | 20 | 248 | 4    | 251  |
| 59.984 | 20 | CACAGGGCTTAGGAATGGAA     | 60.066 | 20 | 208 | 410  | 617  |
| 60.025 | 21 | ATAAGGGAAGATGCAGGCAG     | 59.292 | 20 | 201 | 504  | 704  |
| 60.576 | 21 | TGGCAATGATAAATGGGGTT     | 60.016 | 20 | 136 | 5    | 140  |
| 60.502 | 20 | ATGCGCTGCTAGGTTCAAA      | 59.873 | 20 | 267 | 350  | 616  |
| 59.938 | 20 | GAGTCATCCCAACCTTTGA      | 59.903 | 20 | 280 | 800  | 1079 |
| 60.005 | 20 | GGAGTCATCCACCTCAGGAA     | 60.048 | 20 | 253 | 396  | 648  |
| 60.008 | 20 | TGTAGCCGACCCCAATTTAT     | 59.297 | 20 | 187 | 2349 | 2535 |
| 60.508 | 20 | TTCACGCCTAATTAACCATTG    | 59.044 | 22 | 267 | 317  | 583  |
| 60.052 | 20 | ATGAGCAGGGTGGAGAGAGA     | 59.945 | 20 | 162 | 764  | 925  |
| 57.394 | 27 | GCTCAGGTTGTGCACGATAA     | 59.871 | 20 | 105 | 12   | 116  |
| 60.149 | 20 | CATTATCTAATGATTAACAGTTCC | 58.894 | 27 | 159 | 296  | 454  |
| 60.073 | 20 | TCAATGATCCAATCCCCACT     | 60.135 | 20 | 174 | 1047 | 1220 |
| 59.997 | 20 | TCTGTGTTGTGGGTTGCAGT     | 60.203 | 20 | 193 | 1608 | 1800 |
| 59.656 | 26 | AGGGTCCCTCCTTATTGACA     | 58.446 | 20 | 201 | 156  | 356  |
| 60.089 | 26 | ATTTTGGTCCAGTGCCAGTC     | 59.973 | 20 | 221 | 211  | 431  |
| 59.971 | 20 | GGTCGAGTAGAAGAACCCCC     | 59.935 | 20 | 193 | 310  | 502  |
| 59.803 | 20 | CTAACGCAAACCAGCAATCA     | 59.872 | 20 | 278 | 3473 | 3750 |
| 59.596 | 20 | TGTAGCCGACCCCAATTTAT     | 59.297 | 20 | 219 | 729  | 947  |
| 60.221 | 22 | GATTCTTGAAAATCGGCAGC     | 59.791 | 20 | 237 | 1446 | 1682 |
| 59.7   | 20 | AGTTTCGACATCGCATCTGG     | 61.208 | 20 | 279 | 407  | 685  |
| 60.173 | 20 | TGGGGATTGAACCCAGATAA     | 60.126 | 20 | 129 | 602  | 730  |
| 60.074 | 20 | GGTGGCTGTTATCGAAGGC      | 60.619 | 19 | 245 | 344  | 588  |
| 59.801 | 20 | AGTACTGCCCTCGAGGATT      | 60.096 | 20 | 202 | 227  | 428  |
| 59.817 | 20 | GAGTTGGCTCACGATACGGT     | 60.142 | 20 | 246 | 66   | 311  |
| 59.984 | 20 | GGAACAGAAGAAGCGGATCA     | 60.34  | 20 | 258 | 417  | 674  |
| 59.297 | 20 | TGCAGCTCCTCAAAAAGGTC     | 60.517 | 20 | 227 | 6    | 232  |
| 59.773 | 20 | TGGGGGTGCATTTAATGTTT     | 60.053 | 20 | 176 | 1689 | 1864 |
| 59.873 | 20 | CAGAGCGCACTCGAAGAGTA     | 59.49  | 20 | 220 | 821  | 1040 |
| 60.339 | 20 | TCAAAAAGAATAACGTGGGGTG   | 59.847 | 21 | 275 | 704  | 978  |
| 59.969 | 21 | GTTAGCCGACCCCAATTTTT     | 60.184 | 20 | 111 | 34   | 144  |
| 60.163 | 21 | GCAATAAATTTCTATGTTGCTCCA | 59.562 | 24 | 207 | 695  | 901  |
| 60.133 | 21 | AGTTTAAACCCCTCCCAACCC    | 59.191 | 20 | 239 | 99   | 337  |

|        |    |                          |        |    |     |      |      |
|--------|----|--------------------------|--------|----|-----|------|------|
| 59.971 | 20 | GGGACAGAGAAAGAATGCCA     | 60.195 | 20 | 273 | 0    | 272  |
| 60.181 | 20 | TGTAGCCGACCCCAATTTAT     | 59.297 | 20 | 264 | 148  | 411  |
| 60.116 | 21 | TCACACGTGACAATGAAAAGG    | 59.6   | 21 | 189 | 14   | 202  |
| 58.976 | 24 | CTCCCAATTCATGACCCTA      | 59.744 | 20 | 237 | 151  | 387  |
| 58.956 | 20 | GTGGCTTGCAAGAAAGAGTC     | 59.997 | 20 | 242 | 660  | 901  |
| 61.826 | 18 | AGGCCCCCTTGTCAAATACT     | 59.827 | 20 | 199 | 2    | 200  |
| 60.057 | 23 | TGCTCAAATATTTCAAAAAGCAA  | 58.963 | 23 | 276 | 2    | 277  |
| 60.019 | 20 | CCTCCCGAAAGAGGAGACTT     | 59.811 | 20 | 263 | 483  | 745  |
| 59.959 | 20 | AGCGATTCTCTTCGAGCAAG     | 59.859 | 20 | 152 | 136  | 287  |
| 60.11  | 20 | TCTCCCAATTCCTCTTCCT      | 60.008 | 20 | 100 | 31   | 130  |
| 60.073 | 20 | GGCAAGATCCACAGCCTTAG     | 59.836 | 20 | 279 | 164  | 442  |
| 59.788 | 24 | AAAAAGCCACGACCTCTTCA     | 59.853 | 20 | 267 | 873  | 1139 |
| 60.364 | 20 | TCATCCCTTCCAACCTTCTGC    | 60.195 | 20 | 224 | 938  | 1161 |
| 60.429 | 19 | CAACCTGTTGGGAGATTTTCG    | 60.486 | 20 | 172 | 31   | 202  |
| 59.807 | 20 | GAACCATTGAACTGCCGATT     | 59.939 | 20 | 256 | 145  | 400  |
| 59.75  | 21 | TCGCATTCTACTCCATTTTCC    | 59.172 | 21 | 268 | 112  | 379  |
| 59.17  | 20 | ATGGCAGCATTTCATGTAGCA    | 60.251 | 20 | 235 | 84   | 318  |
| 60.032 | 21 | AAGCCGATTTGTAAATTTGAGG   | 59.52  | 22 | 277 | 345  | 621  |
| 60.91  | 20 | GTTCAAAATGGCCTTACCGA     | 59.938 | 20 | 199 | 4    | 202  |
| 59.96  | 20 | TGCCAAAAGGAAAGATCACC     | 60.051 | 20 | 101 | 432  | 532  |
| 58.768 | 21 | CCCAATGAAAATCTGTCCGGT    | 59.79  | 20 | 173 | 32   | 204  |
| 60.584 | 20 | TTTGATTGGGAATAATTGGG     | 57.289 | 20 | 136 | 1686 | 1821 |
| 59.476 | 21 | AAAACAGACCCACCAAGAACA    | 59.482 | 21 | 276 | 6    | 281  |
| 59.485 | 20 | TGTAGCCGACCCCAATTTAT     | 59.297 | 20 | 122 | 615  | 736  |
| 59.966 | 20 | TTCCATTATTGCTTCCACCC     | 59.762 | 20 | 210 | 1498 | 1707 |
| 59.82  | 20 | GGGAGGTTTCGTCACACAGT     | 60.009 | 20 | 119 | 9    | 127  |
| 59.903 | 20 | GCAAAGGTTTTCCGATCAAA     | 60.053 | 20 | 219 | 77   | 295  |
| 59.746 | 20 | TTCTGGTTTTCAGTCGCTGTG    | 60.025 | 20 | 228 | 872  | 1099 |
| 58.148 | 21 | GTAGAGGTGTCAAACGGGC      | 59.598 | 20 | 279 | 91   | 369  |
| 59.931 | 20 | GAATTTGAAACCGAACCGAA     | 59.916 | 20 | 186 | 352  | 537  |
| 59.763 | 24 | GGCAAACCACCCTTTTCTTT     | 60.332 | 20 | 175 | 298  | 472  |
| 59.763 | 24 | GGCAAACCACCCTTTTCTTT     | 60.332 | 20 | 205 | 299  | 503  |
| 60.207 | 26 | ATAAGCAGCAGGGCATGAAT     | 59.696 | 20 | 215 | 376  | 590  |
| 59.933 | 20 | CGACGAAATCGATGACTGTG     | 60.263 | 20 | 255 | 503  | 757  |
| 59.953 | 20 | GATGCTCGAAGCGACAAAA      | 60.088 | 19 | 161 | 31   | 191  |
| 57.789 | 22 | TTTGGAAATTTTTTCAGAACACG  | 59.14  | 22 | 167 | 0    | 166  |
| 59.186 | 22 | GCGTGTGGATGATTTCTTT      | 59.939 | 20 | 268 | 840  | 1107 |
| 59.993 | 20 | TCGAGTCCACTGTGCAAGAT     | 59.42  | 20 | 162 | 1118 | 1279 |
| 59.398 | 23 | CTTGAAGGGACCCGTGAGTA     | 60.103 | 20 | 249 | 1248 | 1496 |
| 59.062 | 20 | TGGCCTCTCAGAAGGAGAA      | 60.065 | 20 | 145 | 109  | 253  |
| 60.186 | 20 | AATCTCGCTCACGACTCGAT     | 59.981 | 20 | 189 | 12   | 200  |
| 59.993 | 20 | GGTCATCTCTCCAAGTCAAA     | 59.126 | 21 | 257 | 160  | 416  |
| 59.535 | 20 | CGCTGTCTGTCCCTCCTTCTC    | 60.135 | 20 | 277 | 85   | 361  |
| 60.517 | 20 | TACCTACAACGTGAAGGCC      | 59.993 | 20 | 246 | 18   | 263  |
| 59.938 | 20 | TTCTCAGCCTCAGCTTCTGG     | 60.812 | 20 | 187 | 816  | 1002 |
| 59.322 | 23 | GCTCAAATCGGAATTCAAACA    | 60.067 | 21 | 167 | 8    | 174  |
| 59.6   | 21 | CGACTGGGCCTATCTATCA      | 60.051 | 20 | 273 | 570  | 842  |
| 58.902 | 22 | ATGGGCCCAACACCAGATA      | 61.143 | 19 | 211 | 661  | 871  |
| 60.111 | 20 | AAAATCCTGTGTAGCAGGGC     | 59.198 | 20 | 268 | 500  | 767  |
| 58.646 | 20 | TTTCCAAGGTTTGGGTTTCA     | 60.314 | 20 | 235 | 428  | 662  |
| 59.002 | 20 | TTTGATGCGCTCTAGTTGGA     | 59.566 | 20 | 222 | 104  | 325  |
| 60.91  | 20 | CCCAAGACCCCAATTTGATT     | 60.91  | 20 | 204 | 1    | 204  |
| 59.205 | 22 | AATCAACGAAATGAAACCGC     | 59.945 | 20 | 165 | 270  | 434  |
| 60.02  | 20 | ATCCGAGCAGCCTAATGAGA     | 59.939 | 20 | 217 | 581  | 797  |
| 59.978 | 20 | TCATTGCCCGAATAGAGTCC     | 60.036 | 20 | 221 | 119  | 339  |
| 59.89  | 20 | TGGGAATATCCATTCTTCC      | 59.581 | 20 | 147 | 257  | 403  |
| 59.935 | 19 | TTTCATTTGATATTTCCAGAGACC | 58.566 | 24 | 262 | 300  | 561  |
| 59.881 | 20 | GGGAGGCTATTTTGGAGAGG     | 60.032 | 20 | 168 | 828  | 995  |

|        |    |                         |        |    |     |      |      |
|--------|----|-------------------------|--------|----|-----|------|------|
| 59.773 | 20 | GCCTAAGAATGACTGAAACGG   | 58.847 | 21 | 202 | 273  | 474  |
| 60.073 | 20 | AAATTGGGCACCAGAATCAG    | 59.933 | 20 | 205 | 187  | 391  |
| 60.014 | 20 | CTGGACAGACAACTGGCAAA    | 59.873 | 20 | 273 | 2267 | 2539 |
| 59.314 | 21 | ATGTAGCCGACCCCAATTTA    | 59.297 | 20 | 211 | 2321 | 2531 |
| 59.452 | 20 | CCCAAGACCCCAATTTGATT    | 60.91  | 20 | 181 | 1060 | 1240 |
| 57.456 | 25 | GAAAAATACAGCTAATCGGTCCA | 59.533 | 23 | 239 | 283  | 521  |
| 59.993 | 20 | GTGCAGCAATACCAAACCT     | 60     | 20 | 182 | 173  | 354  |
| 59.839 | 20 | CATGTCAACCACCCTTGTC     | 60.416 | 20 | 203 | 803  | 1005 |
| 59.134 | 22 | ACGTGAGTTGGAGGAGTTGG    | 60.151 | 20 | 267 | 2146 | 2412 |
| 60.232 | 20 | TGTTGGGCCTTTGACCTTAG    | 60.103 | 20 | 164 | 509  | 672  |
| 59.366 | 21 | TTCTTCAGCTCCAAGTCGGT    | 59.989 | 20 | 244 | 61   | 304  |
| 59.312 | 21 | GCTTTAGTGGGACATCCGAG    | 59.694 | 20 | 254 | 1882 | 2135 |
| 59.982 | 20 | TACAATGGCCTGAGCAAGTG    | 59.864 | 20 | 175 | 565  | 739  |
| 60.074 | 20 | CTCTTCGAGCGAGTTCAAGC    | 60.419 | 20 | 151 | 258  | 408  |
| 59.911 | 20 | TTCACCCCGATTTCTTTTTG    | 59.91  | 20 | 266 | 534  | 799  |
| 60.291 | 20 | AGCTTTGCCGGTGTCAATA     | 59.597 | 20 | 273 | 2225 | 2497 |
| 59.829 | 20 | CGAGAAGTACCGGATGAAAA    | 60.066 | 20 | 190 | 730  | 919  |
| 59.993 | 20 | ACGACCTTGCTCATTGCTTT    | 59.882 | 20 | 277 | 297  | 573  |
| 59.288 | 20 | GCCGTTATCACTCAGTTTTCG   | 59.761 | 21 | 263 | 454  | 716  |
| 60.192 | 20 | TTCTACATGCCGGAATTCGT    | 60.469 | 20 | 170 | 23   | 192  |
| 59.94  | 20 | CACCGCAAATATACGAAGCA    | 59.725 | 20 | 160 | 861  | 1020 |
| 60.393 | 20 | CCCGGAGCTGATCTCAAGTA    | 60.353 | 20 | 226 | 525  | 750  |
| 60.088 | 20 | ATGCTGCATGCACTATTTGG    | 59.718 | 20 | 111 | 781  | 891  |
| 60.132 | 20 | CGAAACTGACATCCACCTT     | 59.966 | 20 | 221 | 90   | 310  |
| 60.269 | 20 | AGTTCGAGCAGGAAATGTGG    | 60.255 | 20 | 276 | 1396 | 1671 |
| 60.238 | 20 | GGGACAGGCTCTTGTGTTGT    | 60.159 | 20 | 155 | 21   | 175  |
| 60.012 | 20 | GATCGGCAGTGGCATTTT      | 59.61  | 18 | 117 | 498  | 614  |
| 60.612 | 20 | AAAAGAACGTGCAAGGATGC    | 60.257 | 20 | 216 | 1283 | 1498 |
| 59.682 | 20 | CCTAGCTGTGCACACCACAT    | 59.776 | 20 | 271 | 3603 | 3873 |
| 59.817 | 20 | CGGAACAACCTATCAGGCAT    | 59.955 | 20 | 260 | 3343 | 3602 |
| 59.013 | 22 | TCTCTTGCACTATGGGA       | 59.547 | 20 | 148 | 12   | 159  |
| 60.125 | 24 | AAAACGGTTGATTGCAGAGG    | 60.11  | 20 | 262 | 42   | 303  |
| 60.055 | 20 | TTCATATTCCTGGCGAATCC    | 59.862 | 20 | 233 | 2100 | 2332 |
| 59.18  | 23 | TTGTTTTAATGCATCGGCTG    | 59.702 | 20 | 157 | 1072 | 1228 |
| 59.844 | 20 | GGTGGTGCTCCAAATCCTAA    | 59.933 | 20 | 221 | 1725 | 1945 |
| 59.297 | 20 | TTGGGGACAAAGCAAATTC     | 59.916 | 20 | 137 | 16   | 152  |
| 59.993 | 20 | GTTTCGAGGTGTTGGACAG     | 60.545 | 20 | 275 | 95   | 369  |
| 60.048 | 20 | CAGAAAGGGGCAGATTCTTG    | 59.807 | 20 | 129 | 3316 | 3444 |
| 60.23  | 20 | ATGTCCCACCAATTTGTCCT    | 59.116 | 20 | 122 | 81   | 202  |
| 59.95  | 20 | TTCCCTCATTTGAACAAAACG   | 59.961 | 21 | 256 | 1106 | 1361 |
| 60.184 | 20 | CAAAATGAAGCAGACTGCCA    | 59.988 | 20 | 208 | 251  | 458  |
| 60.489 | 20 | ACATCAGATCTCCGTCAGCA    | 59.372 | 20 | 189 | 18   | 206  |
| 57.746 | 22 | TGATCTTGAAACCGTGATGG    | 59.496 | 20 | 263 | 3414 | 3676 |
| 59.894 | 20 | AAATGGACCCAACGTTGAAA    | 60.206 | 20 | 236 | 550  | 785  |
| 60.056 | 20 | TCCCTAATGCAAGGATGGAC    | 59.894 | 20 | 218 | 400  | 617  |
| 58.594 | 20 | CCTTGCTGTGCATTTAACCA    | 59.729 | 20 | 225 | 81   | 305  |
| 59.997 | 21 | TACATGCAACCTCCTGCTTC    | 58.877 | 20 | 242 | 1433 | 1674 |
| 59.247 | 20 | TGAGACGAGAGAGGGGGTAA    | 59.797 | 20 | 260 | 286  | 545  |
| 59.823 | 20 | TGGTTTTGGCAAACCTGTGAG   | 59.734 | 20 | 240 | 320  | 559  |
| 60.406 | 20 | TTGCAAGAAAACGTCCCGT     | 60.668 | 20 | 232 | 72   | 303  |
| 59.82  | 20 | CCCAAGACCCCAATTTGATT    | 60.91  | 20 | 149 | 65   | 213  |
| 60.006 | 20 | CCGCAGAGGCGATCTCTA      | 60.201 | 18 | 165 | 218  | 382  |
| 59.731 | 20 | AATGGGGTAGCCTGGAATTT    | 59.666 | 20 | 214 | 385  | 598  |
| 60.088 | 20 | TGATGGAACCGGGAAGTTAG    | 59.926 | 20 | 259 | 107  | 365  |
| 59.809 | 21 | CCAACCGAACTAGCAGAAAA    | 58.027 | 20 | 280 | 12   | 291  |
| 61.176 | 20 | CCATTGCTTAAGCTCCCTTG    | 59.839 | 20 | 203 | 260  | 462  |
| 59.874 | 20 | AAATTAATAATTGGGAGCGGG   | 60.142 | 20 | 275 | 45   | 319  |
| 59.199 | 20 | CAACCATGTCAGCCGTTAAA    | 59.585 | 20 | 118 | 178  | 295  |

|        |    |                           |        |    |     |      |      |
|--------|----|---------------------------|--------|----|-----|------|------|
| 59.657 | 20 | CATCGCATTCAATTACCCAA      | 59.377 | 20 | 161 | 436  | 596  |
| 60.014 | 20 | TCCAATTTATTGGGATTAAGGC    | 59.217 | 22 | 280 | 791  | 1070 |
| 60.056 | 20 | CATATCCATGGGTACGGAGG      | 60.029 | 20 | 222 | 909  | 1130 |
| 60.075 | 20 | CGTTGCAGAAAGTTTGCTTGA     | 60.172 | 20 | 103 | 111  | 213  |
| 60.599 | 20 | GGTGGTATGGTGTGGAGGAC      | 60.096 | 20 | 168 | 9    | 176  |
| 60.051 | 20 | AAGTGGTAGGCGGATTCCCTT     | 59.962 | 20 | 247 | 684  | 930  |
| 58.041 | 21 | TGATTGGTTAGAGAGTATGTGAAC  | 59.971 | 27 | 131 | 705  | 835  |
| 60.144 | 20 | TAATGGGGGTTTGAAGTTGG      | 59.657 | 20 | 116 | 200  | 315  |
| 59.7   | 20 | TGATCGGGTTCATTCTGGTT      | 60.317 | 20 | 152 | 324  | 475  |
| 60.555 | 20 | GATCACAACCAGTAAATATTGTAC  | 58.64  | 26 | 221 | 624  | 844  |
| 60.195 | 20 | CCAAACACCACAAATTGCAG      | 60.004 | 20 | 198 | 972  | 1169 |
| 59.926 | 20 | TTCTTGCTTTTTGCCATGTG      | 59.849 | 20 | 172 | 794  | 965  |
| 59.943 | 20 | AGAGATGCGCTGGATAAGGA      | 59.939 | 20 | 167 | 84   | 250  |
| 60.514 | 23 | AGGCTCGAGATGTTTCAACG      | 60.397 | 20 | 274 | 81   | 354  |
| 57.751 | 23 | TATGCATGGATGGTGTACCG      | 60.22  | 20 | 260 | 1060 | 1319 |
| 59.853 | 20 | AAACGATCGCCTACGAGAAA      | 59.845 | 20 | 210 | 49   | 258  |
| 59.742 | 20 | CAATTGCAAGGAATTTCCCA      | 60.807 | 20 | 231 | 253  | 483  |
| 59.803 | 20 | TGTTTAAAAGTTTCCTGCACAA    | 57.571 | 22 | 239 | 889  | 1127 |
| 59.992 | 20 | GCATCTTCTTTTGGGGATCA      | 60.014 | 20 | 122 | 1114 | 1235 |
| 59.945 | 21 | GGGACGAATAGGAGAGGGAG      | 60.03  | 20 | 199 | 10   | 208  |
| 60.688 | 20 | AGGCAAAACCCATGAAACAG      | 59.971 | 20 | 175 | 441  | 615  |
| 59.094 | 21 | CGCCGATCCCTACTTTTCTC      | 61.08  | 20 | 240 | 664  | 903  |
| 59.648 | 20 | GACCAAGAACCACTGCGTTT      | 60.156 | 20 | 280 | 778  | 1057 |
| 60.468 | 20 | AAAAGTACGTGGGTCTGTTGC     | 60.037 | 20 | 220 | 372  | 591  |
| 60.156 | 20 | TTCAAATTAGCAACAAAAATGAA/  | 58.007 | 24 | 252 | 297  | 548  |
| 59.79  | 20 | AGTTGTCTGGTGA AAAACCGC    | 60.156 | 20 | 251 | 811  | 1061 |
| 59.996 | 20 | AGAACTCCGATAATCCGCCT      | 60.06  | 20 | 272 | 1376 | 1647 |
| 60.103 | 20 | AAGGATGCCAATGCCATAAC      | 59.791 | 20 | 244 | 126  | 369  |
| 60.501 | 20 | TCCTCTTCTGCCATTTTCAAGC    | 60.483 | 20 | 202 | 1415 | 1616 |
| 60.299 | 20 | TGTGGCAGATGATCAAAGGA      | 60.201 | 20 | 207 | 3747 | 3953 |
| 58.054 | 25 | CTCAGGGAGTTCCATGACTCT     | 58.327 | 21 | 101 | 595  | 695  |
| 60.405 | 20 | AAAAAGCGACGAAGAACGAA      | 59.996 | 20 | 269 | 229  | 497  |
| 58.365 | 23 | AAAATTTTCATCAGTTATTTGCTCA | 58.388 | 25 | 177 | 28   | 204  |
| 59.56  | 21 | CCTTACATAAGGGCGGGGAAT     | 60.164 | 20 | 266 | 178  | 443  |
| 58.188 | 22 | CGTTAACCGGTACGAGCAGT      | 60.19  | 20 | 206 | 11   | 216  |
| 60.746 | 20 | CTTCTCCCCGTAGAAGCCAC      | 61.142 | 20 | 278 | 81   | 358  |
| 59.95  | 20 | AAACACCTCCTCCCCATACC      | 60.052 | 20 | 205 | 602  | 806  |
| 59.545 | 20 | ACTTGTTGCTTGGGAGCTTG      | 60.431 | 20 | 212 | 307  | 518  |
| 60.008 | 20 | AGTAACGTGTAGGCCGCATC      | 60.162 | 20 | 226 | 1158 | 1383 |
| 60.05  | 20 | TGCATGCTCATAATGCCATA      | 58.679 | 20 | 101 | 846  | 946  |
| 59.717 | 20 | GATGGGGACACTTCCAGAGA      | 60.048 | 20 | 221 | 364  | 584  |
| 60.365 | 20 | ACCCTTGCGAATCTGAAAGA      | 59.813 | 20 | 222 | 242  | 463  |
| 60.173 | 20 | TGCTTGTTTCTGCTTTTCAAGG    | 59.195 | 20 | 271 | 64   | 334  |
| 60.029 | 20 | ACTTCCGAGTTTTTGGCAGA      | 59.853 | 20 | 267 | 443  | 709  |
| 60.067 | 20 | CGCAATGTACTTTGGGTCG       | 60.119 | 19 | 171 | 347  | 517  |
| 60.91  | 20 | TGAGACAGTTCTCGTCGAA       | 59.545 | 20 | 176 | 6    | 181  |
| 59.701 | 20 | AGGTTTCGCTACTGGTCATGG     | 60.134 | 20 | 256 | 418  | 673  |
| 58.465 | 22 | TGAAGTTGAGGGATGCATTA      | 59.586 | 22 | 139 | 9    | 147  |
| 60.147 | 21 | AGGTCAGAGGTGACGGTTTG      | 60.151 | 20 | 245 | 797  | 1041 |
| 59.907 | 20 | AAAAATTTAGGGCGTTACGAA     | 57.906 | 21 | 276 | 1003 | 1278 |
| 60.014 | 20 | TTCAAACATTCTCCTTCCAAAA    | 58.716 | 22 | 122 | 24   | 145  |
| 59.964 | 20 | ACATGTCTTGCCTCAAACCC      | 59.973 | 20 | 206 | 163  | 368  |
| 59.763 | 24 | AATCCTTGACGAACGAATC       | 60.081 | 20 | 250 | 2683 | 2932 |
| 59.471 | 20 | GACAAAAATTTGGCGATGCT      | 60.081 | 20 | 274 | 57   | 330  |
| 60.035 | 20 | CTCCATAACTCCAACCCCT       | 60.183 | 20 | 210 | 490  | 699  |
| 60.134 | 20 | GGGTCGTTTCCAGCCAATCTAA    | 60.074 | 20 | 260 | 2090 | 2349 |
| 59.976 | 20 | TGTAGCCGACCCCAATTTAT      | 59.297 | 20 | 260 | 334  | 593  |
| 59.105 | 20 | ACGGTGACATTCTTTTGGC       | 60.119 | 20 | 272 | 374  | 645  |



|        |    |                           |        |    |     |      |      |
|--------|----|---------------------------|--------|----|-----|------|------|
| 59.831 | 20 | TTCCTGACGCTGAGGAAGTT      | 59.989 | 20 | 197 | 341  | 537  |
| 60.517 | 20 | CAATTGGAGGTTTGTGGTGTT     | 59.743 | 21 | 222 | 1    | 222  |
| 59.67  | 20 | TCCGAATATTCATTGCCCTC      | 59.862 | 20 | 278 | 173  | 450  |
| 59.882 | 20 | ACATCGAATTCCTTGGCGAG      | 60.214 | 20 | 241 | 1238 | 1478 |
| 59.94  | 20 | CCCCTACTTCCCCTGAACA       | 59.784 | 20 | 266 | 421  | 686  |
| 60.074 | 20 | CCCAAGACCCCAATTTGATT      | 60.91  | 20 | 171 | 4969 | 5139 |
| 60.498 | 19 | TCGCTAACATGGTTCGTTTTT     | 59.639 | 21 | 277 | 1222 | 1498 |
| 60.492 | 20 | CTTGCTCCCTTTGTTTCCAA      | 60.22  | 20 | 170 | 858  | 1027 |
| 59.926 | 20 | ATGTAGCCGACCCCAATTTA      | 59.297 | 20 | 191 | 268  | 458  |
| 59.942 | 20 | GATATGCGTACTTATCCTTACCG   | 57.031 | 23 | 252 | 510  | 761  |
| 59.697 | 20 | AAGACCTAAGCCACAAGGCA      | 59.875 | 20 | 168 | 258  | 425  |
| 60.059 | 20 | TTGCCTTCAATCGTACTCC       | 60.214 | 20 | 211 | 144  | 354  |
| 60.326 | 20 | TTGTCAACCCAACGCTACAC      | 59.615 | 20 | 232 | 4809 | 5040 |
| 59.673 | 20 | ATCCACCCTAGCATGTGGTC      | 59.81  | 20 | 176 | 370  | 545  |
| 59.733 | 20 | TTTTCCCATTTTGGTGCAAT      | 60.167 | 20 | 141 | 396  | 536  |
| 60.134 | 20 | CCCTCCAACATTCGTCTTCA      | 61.034 | 20 | 237 | 923  | 1159 |
| 60.678 | 20 | TCATCCAAGTTCGTGTGAAATC    | 59.978 | 22 | 219 | 19   | 237  |
| 60.188 | 20 | TCCAAAATCTCGGCTTCAAT      | 59.645 | 20 | 208 | 893  | 1100 |
| 60.066 | 20 | TTTTCATGGCCCTTTGTCTT      | 59.546 | 20 | 267 | 175  | 441  |
| 59.297 | 20 | GAGCTCGTTGAAGCTGGAAG      | 60.277 | 20 | 196 | 6    | 201  |
| 59.009 | 25 | TTCTGATCCTTTGCATTTAGCA    | 59.853 | 22 | 280 | 478  | 757  |
| 58.281 | 20 | GGTTGCCTGCACCAAGTAAT      | 60     | 20 | 160 | 3    | 162  |
| 57.727 | 23 | ATGTCCTTATCTGTTATGTTTTCTC | 57.249 | 27 | 279 | 1371 | 1649 |
| 59.637 | 20 | TGGTGATCTACATCTTCCCA      | 59.55  | 22 | 105 | 332  | 436  |
| 59.439 | 20 | TTTTGGAGGATTTGGAATGC      | 59.878 | 20 | 212 | 1207 | 1418 |
| 59.931 | 20 | GCAAGGTGATTCCTTGTTGTT     | 59.091 | 21 | 207 | 54   | 260  |
| 61.021 | 20 | TCGGACAACAATTCATTGAGA     | 59.112 | 21 | 204 | 450  | 653  |
| 59.502 | 20 | ACTTCCCCTCCACCACTTG       | 60.002 | 20 | 101 | 9    | 109  |
| 60.41  | 20 | CCCAAGACCCCAATTTGATT      | 60.91  | 20 | 151 | 1220 | 1370 |
| 59.94  | 20 | TGAAGGAAGAGAGAGAGGCG      | 59.82  | 20 | 208 | 381  | 588  |
| 59.297 | 20 | CCGTCTGCGCCTTAAGTTAG      | 60.032 | 20 | 208 | 4    | 211  |
| 60.517 | 21 | TCACGGAAAACCTAAGTGGC      | 60.11  | 20 | 234 | 573  | 806  |
| 59.556 | 20 | ACGCTTCATTTATCCCATC       | 59.9   | 20 | 222 | 849  | 1070 |
| 59.993 | 20 | TATCGATGGAGCAGCAATCA      | 60.329 | 20 | 252 | 2274 | 2525 |
| 59.988 | 20 | CTCGTCTCCGTGGATAAGC       | 59.836 | 20 | 102 | 290  | 391  |
| 60.005 | 20 | AAAGGAAATCCCCTCACCTG      | 60.298 | 20 | 211 | 197  | 407  |
| 59.711 | 22 | TTCAGGTTGAAGTCTTGGGC      | 60.232 | 20 | 267 | 481  | 747  |
| 58.89  | 22 | CATCGACCGGCTTCATTTAT      | 59.923 | 20 | 223 | 1272 | 1494 |
| 59.926 | 20 | TGTTATCTCCGACTTTGGGG      | 59.926 | 20 | 215 | 1293 | 1507 |
| 59.723 | 20 | CACAAAAGCAAGATTTGCA       | 59.992 | 20 | 252 | 705  | 956  |
| 60.02  | 20 | AAGTAAAACAGGCGAGGCA       | 59.883 | 20 | 249 | 863  | 1111 |
| 59.807 | 20 | GAACCCAAATCACGGAGGTA      | 59.79  | 20 | 208 | 836  | 1043 |
| 59.443 | 24 | CTTCTTCCCTCACAGCACC       | 59.844 | 20 | 146 | 0    | 145  |
| 59.985 | 20 | CCCAATACCCCAATTTGAT       | 60.614 | 20 | 223 | 968  | 1190 |
| 60.298 | 20 | TTAGTTGCTGGTGTGGTGA       | 60.152 | 20 | 272 | 2385 | 2656 |
| 59.617 | 20 | AAACCAGCTCATTTGTTGGC      | 60.118 | 20 | 165 | 2375 | 2539 |
| 60.051 | 20 | ACGCGGATTTGAAAATGAAA      | 60.436 | 20 | 213 | 822  | 1034 |
| 59.762 | 20 | TCGTATTCTTGGGTGAGCAA      | 59.272 | 20 | 269 | 2304 | 2572 |
| 60.119 | 20 | CTGATCGCATGCCTTAACAA      | 59.833 | 20 | 105 | 14   | 118  |
| 59.359 | 21 | TATTGGGGCGGGATTACATA      | 59.998 | 20 | 275 | 523  | 797  |
| 59.926 | 20 | AGGATTTTGGAGATGCGTTG      | 60.074 | 20 | 102 | 459  | 560  |
| 60.39  | 20 | CTGATCGGCCAAAACTAGC       | 59.845 | 20 | 272 | 1861 | 2132 |
| 59.989 | 20 | CATGATAAATTAACGTAAGTGAC   | 59.371 | 27 | 154 | 331  | 484  |
| 60.181 | 20 | CACCAGCTTCGACACACAGT      | 59.94  | 20 | 178 | 1841 | 2018 |
| 59.971 | 20 | TTGAGTATGGATCCACCGAA      | 58.923 | 20 | 260 | 1041 | 1300 |
| 60.042 | 20 | GGGAGTGGCTGAGCTTGTAG      | 60.012 | 20 | 115 | 446  | 560  |
| 59.523 | 20 | CAATCAAACCCCAAGACACA      | 59.389 | 20 | 206 | 581  | 786  |
| 59.521 | 20 | TTGTCTGGATCCTTTTGCCT      | 59.67  | 20 | 248 | 1699 | 1946 |

|        |    |                          |        |    |     |      |      |
|--------|----|--------------------------|--------|----|-----|------|------|
| 59.971 | 20 | CCTCCGCCTAGACTCCTTCT     | 59.972 | 20 | 277 | 347  | 623  |
| 59.084 | 20 | GCACTCTCACTTTGCCCTTC     | 59.997 | 20 | 230 | 1547 | 1776 |
| 59.945 | 20 | GAATCAGAGCCTTGTCCAGC     | 59.957 | 20 | 234 | 1235 | 1468 |
| 59.757 | 20 | GTCTGAAAAATCGGCGACAT     | 60.081 | 20 | 265 | 671  | 935  |
| 60.28  | 20 | TAAACGGCTCCGTGTAGACC     | 60.132 | 20 | 201 | 155  | 355  |
| 60.453 | 20 | AAGGGTGCCGACCAGTAATA     | 59.452 | 20 | 252 | 2897 | 3148 |
| 59.762 | 24 | TGCTAACAAATATGCATTCCAAA  | 59.526 | 23 | 267 | 197  | 463  |
| 60.713 | 20 | TTCACGTTCAATCCCTCACA     | 60.088 | 20 | 275 | 25   | 299  |
| 61.263 | 20 | AGCTGAGAGATTCCGGTTCA     | 59.95  | 20 | 157 | 2991 | 3147 |
| 59.992 | 20 | ACCCTTGTGAACAAACTCGG     | 60.005 | 20 | 132 | 143  | 274  |
| 59.948 | 20 | TCCACTGTGGTAGATGCCTG     | 59.701 | 20 | 247 | 824  | 1070 |
| 60.155 | 20 | TTTTGCGTGAATTGAGCTTG     | 59.992 | 20 | 175 | 411  | 585  |
| 60.154 | 20 | TTTTGGAAGGAGTGGTGGTC     | 59.943 | 20 | 138 | 1361 | 1498 |
| 60.159 | 20 | TGAAGCGAAAACTGAACGTC     | 59.05  | 20 | 279 | 58   | 336  |
| 60.074 | 20 | ATCCCCTCCAAATCCAAAC      | 59.996 | 20 | 172 | 475  | 646  |
| 60.469 | 20 | TGCTTTCATCACTGGCAGAC     | 59.992 | 20 | 158 | 853  | 1010 |
| 59.978 | 20 | AATGTCTCCCGAGTTTGCTG     | 60.255 | 20 | 110 | 307  | 416  |
| 59.007 | 20 | TCAATTACCTCCCAGAACG      | 59.926 | 20 | 273 | 4410 | 4682 |
| 59.84  | 20 | GGTTCTGGGCTGTAACCAAA     | 59.971 | 20 | 265 | 1070 | 1334 |
| 59.123 | 20 | TCATGAGCTCCGTGTTGAAA     | 60.39  | 20 | 234 | 131  | 364  |
| 60.126 | 20 | CCCATACCCACATTTCCAAG     | 60.044 | 20 | 109 | 1843 | 1951 |
| 60.157 | 20 | TCTCGGCATACCCATTCTTC     | 60.036 | 20 | 219 | 1186 | 1404 |
| 59.131 | 20 | TGTAGCCGACCCCAATTTAT     | 59.297 | 20 | 160 | 1275 | 1434 |
| 59.927 | 20 | CCACCACCACCCAATACTTC     | 60.088 | 20 | 220 | 114  | 333  |
| 58.409 | 22 | AAAATCCTAATTGCTTTGCACC   | 59.525 | 22 | 240 | 500  | 739  |
| 60.013 | 20 | ATAATTTATCCCGCAAGGGG     | 60.002 | 20 | 268 | 34   | 301  |
| 60.278 | 20 | TGCCAAGGGATATACCCAAA     | 60.146 | 20 | 242 | 1015 | 1256 |
| 59.617 | 23 | AAATGGAGGAACATGCCAAC     | 59.797 | 20 | 270 | 1946 | 2215 |
| 60.096 | 20 | TGTCTTTTGGTGTGTGGGAA     | 59.976 | 20 | 234 | 186  | 419  |
| 59.955 | 20 | AACCGACTTGAAACCTAGCG     | 59.378 | 20 | 220 | 104  | 323  |
| 59.978 | 20 | GGAGTACCACCACTTAGCCG     | 59.615 | 20 | 229 | 2658 | 2886 |
| 60.483 | 20 | ATGTCCACCTCTCAGCCTGT     | 59.713 | 20 | 268 | 137  | 404  |
| 60.836 | 20 | AGAAATCAACCACGTCCCAG     | 59.966 | 20 | 127 | 18   | 144  |
| 60.066 | 20 | ATGCCTCTGTTCTTCATCCG     | 60.218 | 20 | 265 | 2221 | 2485 |
| 59.853 | 20 | AAAATGAGGAGTGGGTGTCG     | 59.966 | 20 | 268 | 1095 | 1362 |
| 60.215 | 20 | GCCGAATTCAGTTTTTGGAA     | 60.053 | 20 | 228 | 1810 | 2037 |
| 60.074 | 20 | GATTGGTGGGAAGATGATGG     | 60.135 | 20 | 280 | 525  | 804  |
| 59.597 | 20 | TGACACAATACCCCTGGTCA     | 59.806 | 20 | 255 | 1060 | 1314 |
| 60.237 | 21 | ACGCCAATGGTTTAGAGACG     | 60.132 | 20 | 202 | 306  | 507  |
| 59.62  | 20 | ATGCTAACTCCCCTTCCCAT     | 59.789 | 20 | 261 | 29   | 289  |
| 60.91  | 20 | GTGAACTTGGGAGCTTCCTG     | 59.844 | 20 | 178 | 3    | 180  |
| 60.043 | 20 | TCTCCTCGTCATTGGAGAAAA    | 59.799 | 21 | 228 | 1383 | 1610 |
| 60.066 | 20 | CCAAACCCTCATCTTCCAAA     | 59.903 | 20 | 251 | 262  | 512  |
| 59.809 | 21 | CGCTTATTTTTGTAATGGAATTTG | 59.049 | 24 | 266 | 12   | 277  |
| 61.217 | 20 | TCCATATAGCCGACCTCACA     | 59.101 | 20 | 263 | 253  | 515  |
| 60.042 | 20 | ACAGGATGCCAGTTATGGGT     | 59.288 | 20 | 224 | 232  | 455  |
| 59.995 | 20 | TTGCTTCAACACAAATTTCAACA  | 59.25  | 22 | 213 | 423  | 635  |
| 60.243 | 20 | AGCCAAAATTTCTCCAAGG      | 60.423 | 20 | 253 | 1405 | 1657 |
| 59.83  | 20 | TCCGACATCAATGGCAGTAA     | 60.073 | 20 | 202 | 1062 | 1263 |
| 59.831 | 20 | CACTGGGACTAAGCGAGAGG     | 60.005 | 20 | 224 | 3223 | 3446 |
| 59.967 | 20 | CTCACCCCGCACTTCTTAAC     | 59.734 | 20 | 276 | 1081 | 1356 |
| 60.136 | 20 | TTATTTTCGCGGATCCAAGTC    | 60.038 | 20 | 219 | 225  | 443  |
| 60.91  | 20 | AATTTGGAACCCGCAACATA     | 60.188 | 20 | 156 | 9    | 164  |
| 60.162 | 20 | CTCGCCCTTAGAAGAGGTT      | 59.842 | 20 | 195 | 91   | 285  |
| 59.745 | 20 | TCAAGCAACATCGCTTCAAC     | 59.995 | 20 | 247 | 89   | 335  |
| 60.001 | 20 | TAAGGCAAGGAAAGCTCGAA     | 60.089 | 20 | 146 | 7    | 152  |
| 59.415 | 20 | GCCAAAGGATGAAATGGAGA     | 60.014 | 20 | 278 | 2341 | 2618 |
| 60.036 | 20 | GCAACAAAGATGGCCAAGAT     | 60.081 | 20 | 185 | 1446 | 1630 |

|        |    |                          |        |    |     |      |      |
|--------|----|--------------------------|--------|----|-----|------|------|
| 57.596 | 26 | TCGTATTCCTCATTAAAGCCCC   | 60.286 | 21 | 256 | 7    | 262  |
| 59.897 | 20 | CCCTGGACCTGCAAAAATAA     | 59.931 | 20 | 203 | 339  | 541  |
| 59.279 | 20 | TTGAATCCCGAGATGGTAGC     | 60.036 | 20 | 127 | 1269 | 1395 |
| 60.221 | 20 | CGGAAGTCTTTCCCATCAAA     | 60.044 | 20 | 221 | 404  | 624  |
| 59.836 | 20 | ACTAGGGAAGTTGGGAGGGA     | 59.928 | 20 | 237 | 173  | 409  |
| 60.096 | 20 | TTATGTCATCTTCCGCTCCC     | 60.036 | 20 | 136 | 577  | 712  |
| 60.05  | 23 | GAGGCATGGTTAGGTTTGGGA    | 59.933 | 20 | 220 | 726  | 945  |
| 60.096 | 19 | CCAAAATCTCGGCTTCAATC     | 59.645 | 20 | 242 | 723  | 964  |
| 60.91  | 20 | TGAATGTCTCTAGCGACCCA     | 59.394 | 20 | 117 | 9    | 125  |
| 60.032 | 20 | TTTGGGATGATGGTTTGGTT     | 60.029 | 20 | 139 | 8590 | 8728 |
| 59.861 | 20 | CCCAAGACCCCAATTTGATT     | 60.91  | 20 | 179 | 1716 | 1894 |
| 59.878 | 20 | AGGAACAAAAGGGAATCGGT     | 59.805 | 20 | 221 | 950  | 1170 |
| 60.34  | 20 | CTCCAATGTGATGTCACCG      | 59.96  | 20 | 155 | 40   | 194  |
| 60.486 | 20 | AAACTTTGGTTCATGTAGCCG    | 59.144 | 21 | 100 | 2146 | 2245 |
| 59.679 | 20 | AGTTTGAAGAAGCCGTGGAA     | 59.853 | 20 | 184 | 3851 | 4034 |
| 59.791 | 20 | CATCCATCACCGTTAATCCC     | 60.014 | 20 | 260 | 803  | 1062 |
| 60.025 | 20 | CAAAGAGTTGTTTTACAGACCATC | 59.626 | 25 | 210 | 472  | 681  |
| 58.213 | 22 | CATGCGTTGTCCATCATCTC     | 60.08  | 20 | 155 | 1422 | 1576 |
| 60.014 | 20 | AGGAGGAGAAGCCAAAGGAG     | 59.95  | 20 | 192 | 554  | 745  |
| 60.049 | 20 | CAACAGGAAGCCGTCAATTT     | 60.11  | 20 | 184 | 320  | 503  |
| 59.697 | 20 | CTCATCGTCAGAACAGGCAG     | 59.571 | 20 | 265 | 84   | 348  |
| 60.903 | 20 | CAGGCCAACTGAAATCTGAA     | 58.847 | 20 | 223 | 0    | 222  |
| 60.375 | 20 | TCGCTGGTCGGTAACTCTT      | 59.875 | 20 | 264 | 185  | 448  |
| 59.934 | 23 | ATGTGCAGCTAGTCCCTGCT     | 60.043 | 20 | 242 | 185  | 426  |
| 59.995 | 20 | TTCTGTGCTCAGTTCTCCA      | 59.855 | 20 | 165 | 1077 | 1241 |
| 59.182 | 20 | GCATAGTTCGAAGGACAATATGA  | 58.287 | 23 | 280 | 1489 | 1768 |
| 60     | 20 | GAGCCAGACAATGCAGTGAA     | 59.992 | 20 | 231 | 83   | 313  |
| 60.317 | 20 | TGATGTCAAAGCGTTCTCG      | 59.988 | 20 | 202 | 149  | 350  |
| 59.297 | 20 | CAATCGACCACCCGATATGT     | 60.603 | 20 | 252 | 139  | 390  |
| 59.83  | 20 | ATTCTATGCCTTCAGCAAATG    | 57.031 | 21 | 164 | 5    | 168  |
| 59.96  | 20 | GCTGAGCAATCTGGGACTTC     | 59.957 | 20 | 200 | 193  | 392  |
| 58.567 | 22 | AACCAATTGACAATGAGAGGAGA  | 59.99  | 23 | 258 | 125  | 382  |
| 59.874 | 20 | AGGCCAAGAAGGGAACATTT     | 59.94  | 20 | 258 | 88   | 345  |
| 60.366 | 20 | GATCTTTCATTGTGCTGCCA     | 59.805 | 20 | 250 | 888  | 1137 |
| 59.723 | 21 | AGAGGGAGGAAACTTGACCC     | 59.534 | 20 | 202 | 1    | 202  |
| 58.658 | 21 | TGTGGTCACACACTCCATGA     | 59.518 | 20 | 264 | 381  | 644  |
| 60.03  | 20 | GCAGTTGGATGACTGGGTTT     | 59.973 | 20 | 186 | 816  | 1001 |
| 59.955 | 20 | TGGAAATTGTCGTGTAGTGGTG   | 60.837 | 22 | 260 | 457  | 716  |
| 59.933 | 20 | CAGAAATGGCAGCAGAAACA     | 59.988 | 20 | 279 | 1372 | 1650 |
| 59.945 | 20 | GGTCATAGGAATTCGAGGCA     | 60.036 | 20 | 154 | 480  | 633  |
| 60.263 | 20 | GTTGCAACTTCCCACCTGAT     | 59.973 | 20 | 267 | 599  | 865  |
| 60.56  | 20 | TGATTCATTCATTTGTCAACACG  | 60.777 | 23 | 219 | 109  | 327  |
| 59.972 | 20 | TGTGCAGTATGTTACCGCGT     | 60.203 | 20 | 232 | 383  | 614  |
| 60.21  | 20 | TCTCTCTCCGTGTTGGTCC      | 60.238 | 20 | 217 | 347  | 563  |
| 60.081 | 20 | CCGCCTGTAGTTCCTCTCTG     | 60.005 | 20 | 235 | 386  | 620  |
| 59.43  | 20 | GGTGGCTCATAGGCTATCCA     | 60.059 | 20 | 276 | 57   | 332  |
| 60.567 | 20 | TTCCTCGCGAAATTAGCATT     | 59.816 | 20 | 275 | 170  | 444  |
| 59.992 | 20 | AGACATGTTGCGTTTCCCTT     | 59.598 | 20 | 219 | 1920 | 2138 |
| 60.221 | 20 | TCTCTCCGGAATTTTTGACG     | 60.184 | 20 | 267 | 3099 | 3365 |
| 59.429 | 20 | GTTTCATGTAGCCGACCCAAT    | 59.82  | 20 | 129 | 810  | 938  |
| 59.91  | 20 | AGCTTATCGAAACGCTCGAA     | 60.117 | 20 | 200 | 628  | 827  |
| 60.111 | 20 | TGATATTCATTTGCCCTTCTT    | 59.966 | 22 | 216 | 253  | 468  |
| 59.034 | 20 | AGATTTGCGGCTTCTCATAT     | 59.843 | 20 | 257 | 102  | 358  |
| 59.94  | 20 | CAGCCGGAATCTTTTTCTG      | 59.948 | 20 | 233 | 988  | 1220 |
| 59.653 | 20 | CGTTCACAACAACACACATGA    | 59.042 | 21 | 202 | 2688 | 2889 |
| 60.014 | 20 | GGTGTGAAAAAGAGGGTGGA     | 59.943 | 20 | 187 | 12   | 198  |
| 60.228 | 20 | ACCTCGTGCAAAAATTCCAG     | 60.11  | 20 | 260 | 351  | 610  |
| 60.223 | 20 | TCGATTCGGATTTTCTGACC     | 60.014 | 20 | 273 | 162  | 434  |

|        |    |                           |        |    |     |      |      |
|--------|----|---------------------------|--------|----|-----|------|------|
| 60.129 | 20 | TTTTCTCATGAACCATCCCC      | 59.727 | 20 | 104 | 3754 | 3857 |
| 59.881 | 20 | GACTTGAGGACATACATAGTGAA(  | 59.96  | 26 | 250 | 457  | 706  |
| 60.037 | 20 | TCAGTGGCTCGCTCATACAG      | 60.16  | 20 | 199 | 541  | 739  |
| 60.096 | 20 | AACTGCTCCGTCTGCATCAT      | 60.833 | 20 | 262 | 1378 | 1639 |
| 59.864 | 20 | GCAGGGTTTTCGACAAAAGA      | 60.227 | 20 | 259 | 614  | 872  |
| 59.691 | 20 | TTGCTTAATTCCTCATCCGAA     | 59.668 | 21 | 217 | 325  | 541  |
| 59.991 | 20 | CCGGATGTGAGGTTGAAGAT      | 59.927 | 20 | 278 | 5886 | 6163 |
| 60.065 | 20 | GTCCTTTTTCTCGAACGCAG      | 59.993 | 20 | 203 | 276  | 478  |
| 59.725 | 22 | GGATATCTATTTGCGCGCTT      | 59.331 | 20 | 230 | 112  | 341  |
| 59.983 | 20 | GCTCTTCGACGACCTCAATC      | 59.957 | 20 | 186 | 687  | 872  |
| 59.882 | 20 | AGCGTGAGAAACCCATTTTTG     | 60.11  | 20 | 258 | 60   | 317  |
| 59.955 | 20 | TTCCCATTTCTCCTTGCATC      | 60.014 | 20 | 235 | 116  | 350  |
| 58.969 | 20 | GTTTTCCGGTTGACAAATCG      | 60.344 | 20 | 208 | 1575 | 1782 |
| 60.008 | 20 | ACACCACCAATTCAGAGCC       | 59.973 | 20 | 280 | 1290 | 1569 |
| 58.758 | 21 | GGTTGGTAGTGGAGCTGGAA      | 60.111 | 20 | 128 | 828  | 955  |
| 59.495 | 21 | ACTCCATCACTTGGCCACTC      | 60.12  | 20 | 100 | 0    | 99   |
| 59.962 | 20 | TCGAATGCTCACGTTGAAAA      | 60.379 | 20 | 139 | 47   | 185  |
| 60.563 | 20 | GAGTTGTCAGAGGAGGCCAG      | 59.986 | 20 | 183 | 1959 | 2141 |
| 59.964 | 20 | AATTCGACAGCCATTCAACC      | 59.939 | 20 | 166 | 933  | 1098 |
| 59.83  | 20 | ATTCTCGTTTTCCACATGCC      | 59.939 | 20 | 199 | 256  | 454  |
| 60.075 | 20 | GTCATCGAGTGCTGCAAAAA      | 59.995 | 20 | 214 | 1069 | 1282 |
| 59.966 | 20 | TCACCATGTTGATGAAGCGT      | 60.12  | 20 | 123 | 172  | 294  |
| 60.581 | 20 | TGGAGTTCACGTAGCAAAACA     | 59.376 | 21 | 241 | 665  | 905  |
| 59.813 | 22 | TGTAGCCGACCCCAATTTAT      | 59.297 | 20 | 240 | 1166 | 1405 |
| 58.528 | 20 | CACCTCTTGCGGGGTATTAT      | 58.928 | 20 | 215 | 898  | 1112 |
| 59.927 | 20 | AAGATGAATGCTTTGACCGC      | 60.221 | 20 | 106 | 3022 | 3127 |
| 59.943 | 20 | AGCCCTTGCTTTCACCAGTA      | 59.875 | 20 | 255 | 739  | 993  |
| 60.015 | 20 | ATCATCCTCATCCCCATCAA      | 60.096 | 20 | 273 | 402  | 674  |
| 59.469 | 20 | GGCCATACCTTCAAACCCCT      | 60.187 | 20 | 141 | 411  | 551  |
| 59.955 | 20 | TGACCAATGAGTGCAGCTTGC     | 59.837 | 20 | 210 | 333  | 542  |
| 59.938 | 22 | CCGTATTTCTATGCCACGGT      | 59.845 | 20 | 262 | 190  | 451  |
| 60.258 | 20 | TATTGTGGTTGGATGGTTGG      | 59.097 | 20 | 274 | 10   | 283  |
| 59.995 | 20 | ATTCGTGATGGATGACTCC       | 59.893 | 20 | 238 | 307  | 544  |
| 59.774 | 20 | TTGGCATTGATGTATATTGGA     | 57.92  | 22 | 184 | 602  | 785  |
| 60.049 | 20 | CCCGAGATCTATCATGGTGC      | 60.448 | 20 | 125 | 370  | 494  |
| 59.971 | 20 | CTCAGTCTTCTCCGCCTCAG      | 60.275 | 20 | 134 | 228  | 361  |
| 60.22  | 20 | CTCCTCGCTCTCTCCTCTCA      | 59.962 | 20 | 131 | 755  | 885  |
| 60.241 | 20 | CCATCCTTTAAGTACTTTGACTTTT | 58.83  | 26 | 217 | 66   | 282  |
| 60.317 | 20 | CCCCAAATTCGACAAACAAT      | 59.662 | 20 | 221 | 194  | 414  |
| 59.297 | 20 | GGGGAAGAACTCATGAACGA      | 60.05  | 20 | 128 | 13   | 140  |
| 59.962 | 20 | ACCACAAATTAATCGGGCAC      | 59.691 | 20 | 129 | 434  | 562  |
| 59.587 | 22 | TGGAATAAGGCAAAAAGGAAA     | 58.726 | 21 | 277 | 2998 | 3274 |
| 59.116 | 20 | CTGCATGTTCTTTTGCCAGA      | 59.988 | 20 | 222 | 1178 | 1399 |
| 60.215 | 20 | AAGATGTCAATTTGTCGCC       | 59.939 | 20 | 279 | 35   | 313  |
| 57.789 | 21 | TGCGTGTTCATCCATTAT        | 59.96  | 20 | 220 | 4453 | 4672 |
| 59.845 | 20 | CCACTACTCCAACAGAGCA       | 60.022 | 20 | 195 | 463  | 657  |
| 59.882 | 20 | GCTTGAAGCTCTATGCAAATCA    | 59.636 | 22 | 179 | 332  | 510  |
| 59.939 | 20 | TGCATTTGACAATCGCATT       | 60.081 | 20 | 104 | 501  | 604  |
| 60.144 | 20 | CCTCTCCTCGAAAACCCTCT      | 59.811 | 20 | 229 | 437  | 665  |
| 60.187 | 20 | CATACCGGAGCAGATCCAAT      | 59.917 | 20 | 274 | 92   | 365  |
| 59.61  | 20 | AACCCCATATTGGTGGCATA      | 59.901 | 20 | 223 | 1816 | 2038 |
| 59.933 | 20 | AGCGTTCGCTTGAAACTGAT      | 60.022 | 20 | 111 | 354  | 464  |
| 59.935 | 20 | ATGTTGAGCCCAACCCAAT       | 60.188 | 19 | 214 | 1452 | 1665 |
| 60.388 | 20 | CAGCTGTCTCGCACAAGTTC      | 59.776 | 20 | 246 | 964  | 1209 |
| 59.297 | 20 | TCTTCCCATCTCATCAAGC       | 60.158 | 20 | 185 | 7    | 191  |
| 59.81  | 20 | CTACCCGGACTTGGATGTGT      | 59.844 | 20 | 194 | 120  | 313  |
| 59.483 | 21 | CCATGTGACAGAACCAATCG      | 59.96  | 20 | 230 | 217  | 446  |
| 60.412 | 18 | ATGGCAAAGGCTTGTGTTTC      | 60.118 | 20 | 137 | 20   | 156  |

|        |    |                         |        |    |     |      |      |
|--------|----|-------------------------|--------|----|-----|------|------|
| 59.964 | 20 | TGTGGAGTGGACCTCATTCA    | 60.088 | 20 | 196 | 100  | 295  |
| 59.9   | 20 | CCCTCAAGTTCACCTGCATT    | 60.111 | 20 | 198 | 594  | 791  |
| 59.986 | 20 | GGTTC AAGTGT TGGGAGGA   | 59.943 | 20 | 279 | 741  | 1019 |
| 60.002 | 20 | TGCGATGAAGAACAAGACCC    | 61.188 | 20 | 221 | 574  | 794  |
| 59.96  | 20 | ATGGTATGTGGGATGGCACT    | 60.081 | 20 | 244 | 4170 | 4413 |
| 59.415 | 20 | TTCCAACACACCATTCCCTGA   | 59.935 | 20 | 271 | 420  | 690  |
| 60.029 | 20 | ATGAGCACCTTGACAATCCC    | 59.934 | 20 | 216 | 1869 | 2084 |
| 59.297 | 20 | AATTGAAGAAAGCCGCACAT    | 59.713 | 20 | 141 | 8    | 148  |
| 60.012 | 20 | CAACACTCCCCACAACCTCCT   | 60.002 | 20 | 123 | 813  | 935  |
| 59.973 | 20 | CGCCGCACTCCTCTATACTT    | 59.499 | 20 | 136 | 68   | 203  |
| 59.957 | 20 | CTTCCAATGCAGAGTCCCAT    | 60.073 | 20 | 135 | 1003 | 1137 |
| 60.382 | 20 | CCAATCAAGGTCAATGCAGA    | 59.648 | 20 | 272 | 113  | 384  |
| 60.088 | 20 | GGGTCCATCATTCCCTTTCT    | 60.133 | 20 | 264 | 1094 | 1357 |
| 59.992 | 20 | TTGCAAAGGTTTTGGGATTC    | 59.916 | 20 | 176 | 896  | 1071 |
| 59.297 | 20 | TTTTCTGCATTAGGGTTTAGGG  | 59.515 | 22 | 115 | 3    | 117  |
| 59.983 | 20 | CCAGTTGCTTTCTTTCCAGC    | 59.993 | 20 | 229 | 527  | 755  |
| 60.24  | 20 | TGTTCCAATGGAGGAGACAA    | 59.059 | 20 | 238 | 1820 | 2057 |
| 59.716 | 20 | GCCCATTTACATCATTGGG     | 60.016 | 20 | 199 | 412  | 610  |
| 59.708 | 21 | GGAGTGGACAACGTAGGGAA    | 59.966 | 20 | 261 | 535  | 795  |
| 60.478 | 20 | ACAAAAGGAAATAGGCGGG     | 60.305 | 20 | 112 | 723  | 834  |
| 59.997 | 20 | CACAGCCGATCACACATTTT    | 60.12  | 20 | 181 | 36   | 216  |
| 59.84  | 20 | AAAAGGAAACAAAGCAGCCA    | 59.861 | 20 | 263 | 1456 | 1718 |
| 59.297 | 20 | GAATTGTGGAAACACCTCGG    | 60.353 | 20 | 120 | 4    | 123  |
| 60.628 | 20 | TGCAAACAAACCCGTACAAG    | 59.627 | 20 | 231 | 338  | 568  |
| 60.034 | 20 | CAGAAAAATAAAAGACATACGAA | 57.384 | 26 | 225 | 205  | 429  |
| 59.504 | 25 | ATCGAATCCGCTTTCATGTC    | 60.043 | 20 | 170 | 399  | 568  |
| 60.051 | 20 | ACCCCATATAGCGGGAAAAA    | 60.508 | 20 | 148 | 1413 | 1560 |
| 60.111 | 20 | CTTCCAGCTGAAACTGTGAGA   | 58.229 | 21 | 199 | 398  | 596  |
| 59.787 | 20 | TCAAAGCATCCCTTCTCTTACA  | 58.973 | 22 | 215 | 675  | 889  |
| 59.934 | 20 | GCGCATTGCAGAGATTGATA    | 59.944 | 20 | 222 | 2300 | 2521 |
| 59.85  | 20 | ATATGTTGGCCAGGCTGAAG    | 60.096 | 20 | 267 | 1037 | 1303 |
| 60.91  | 20 | TTGCAAGTACTCCATTTTGT    | 57.364 | 22 | 258 | 8    | 265  |
| 59.957 | 21 | TTTTGAGCAGGAATGTTCTTCA  | 59.861 | 22 | 234 | 131  | 364  |
| 60.088 | 20 | ATACAATGACGAAAACGCC     | 59.829 | 20 | 168 | 432  | 599  |
| 59.297 | 20 | GTACCAACGCAAGGCAAAT     | 60.003 | 20 | 147 | 3    | 149  |
| 59.882 | 20 | CATCGAGTGATCCATTGTGG    | 59.918 | 20 | 228 | 194  | 421  |
| 59.959 | 20 | ACATCGGATTCCAACCTCTCG   | 60.073 | 20 | 200 | 585  | 784  |
| 60.038 | 20 | CCCAAGACCCCAATTTGATT    | 60.91  | 20 | 184 | 1131 | 1314 |
| 59.873 | 20 | GCCCTGTCATTTTTGAGCAT    | 60.081 | 20 | 226 | 1112 | 1337 |
| 59.655 | 20 | CTAATCACCAACGCCCACTT    | 59.993 | 20 | 222 | 546  | 767  |
| 58.919 | 22 | AGAAAGCCTCTCCCTCCAAG    | 59.95  | 20 | 135 | 173  | 307  |
| 60.214 | 20 | GCATGCTATTACGCTAGCCC    | 59.866 | 20 | 232 | 8    | 239  |
| 59.874 | 20 | TTCAAATCTCGCCTACACCC    | 60.074 | 20 | 180 | 1124 | 1303 |
| 59.955 | 20 | AACATGGACGACCACGTGTA    | 59.88  | 20 | 184 | 571  | 754  |
| 59.101 | 23 | AAACAGCTTTCTCGGATGGA    | 59.813 | 20 | 164 | 1461 | 1624 |
| 59.981 | 20 | GTTCCCCAGAACGTCACT      | 60.009 | 20 | 228 | 482  | 709  |
| 60.015 | 20 | ACTGCTAGGAACGCAAGGAA    | 60.015 | 20 | 268 | 302  | 569  |
| 60.263 | 20 | CGTAAGCCAATGCAGTGAGA    | 60.011 | 20 | 279 | 2515 | 2793 |
| 58.819 | 20 | CCCACATATTCTTCAAGCGAA   | 60.081 | 21 | 252 | 42   | 293  |
| 59.835 | 20 | TTTCACGGATCCAAGTTTCC    | 59.91  | 20 | 137 | 1009 | 1145 |
| 59.989 | 20 | TTATGCCCAAACCTACCGAG    | 59.953 | 20 | 113 | 190  | 302  |
| 59.838 | 22 | TTTCTCCATTGTTACTGCAT    | 57.379 | 21 | 272 | 514  | 785  |
| 59.901 | 20 | TGGGTGCCTTTGTTCTTTTC    | 60.088 | 20 | 184 | 60   | 243  |
| 60.575 | 19 | GTTGAACGGGAACGGAECTA    | 59.971 | 20 | 259 | 241  | 499  |
| 59.711 | 20 | GAGGCGTATGAGATGGAGGA    | 60.181 | 20 | 186 | 405  | 590  |
| 60.184 | 20 | TCGATGAAGGGAAGAAGGAA    | 59.744 | 20 | 247 | 960  | 1206 |
| 59.928 | 20 | AACATCGAAGCTTTTGGCTG    | 60.386 | 20 | 263 | 679  | 941  |
| 59.933 | 20 | CCCAAGACCCCAATTTGATT    | 60.91  | 20 | 271 | 1080 | 1350 |

|        |                             |        |    |     |      |      |
|--------|-----------------------------|--------|----|-----|------|------|
| 60.123 | 20 AATCCCTCTTCTCCTCCACC     | 59.492 | 20 | 225 | 1633 | 1857 |
| 59.857 | 20 AGCACAAGAAAGAAACCCTGA    | 58.969 | 21 | 236 | 48   | 283  |
| 59.992 | 20 CAGGTTAGATGCCGACACAA     | 59.716 | 20 | 259 | 1727 | 1985 |
| 58.233 | 27 AGAGTAGCTGCTGCGGGTT      | 60.171 | 19 | 268 | 902  | 1169 |
| 60.015 | 20 GATTTCCCAAATCCCCTCTT     | 60.131 | 20 | 232 | 2808 | 3039 |
| 59.996 | 20 GCAATCTCTCAAAAGCAGCC     | 60.103 | 20 | 280 | 54   | 333  |
| 59.991 | 20 TCACAGCTGTTGGTGGAGAG     | 60.022 | 20 | 243 | 1427 | 1669 |
| 60.152 | 20 AGTTGGGCCTCTTCCAACCTT    | 60.11  | 20 | 275 | 709  | 983  |
| 59.456 | 20 GCGGCGGAGATAGTCTACTG     | 60     | 20 | 130 | 234  | 363  |
| 59.79  | 20 ATTCCACTCCACCACCTACG     | 59.844 | 20 | 172 | 2062 | 2233 |
| 60     | 20 AGTAGACTCCACCGCCTTGA     | 59.867 | 20 | 273 | 501  | 773  |
| 61.263 | 20 ATTTTCATTTGGTGCTTGCCT    | 59.574 | 20 | 184 | 3    | 186  |
| 59.698 | 23 CGGTATATAAGTCATGTGTTTGGT | 59.625 | 25 | 258 | 218  | 475  |
| 59.966 | 20 CCTTGGTTCGATCTCATCACA    | 59.631 | 20 | 236 | 1336 | 1571 |
| 60.035 | 20 TCGAGTTGATCTTGCCTTTG     | 58.999 | 20 | 252 | 68   | 319  |
| 59.861 | 20 GGAAGAAAAGTGCGATGACG     | 60.776 | 20 | 229 | 414  | 642  |
| 60.269 | 20 CCATACATGTGCTGGCAAAC     | 59.995 | 20 | 196 | 335  | 530  |
| 60.081 | 20 GATGAGGGAGGCACTAGACG     | 59.827 | 20 | 111 | 352  | 462  |
| 57.211 | 21 CCATGCCTTGTGTTTGTACG     | 60.027 | 20 | 173 | 14   | 186  |
| 59.935 | 20 AAATGACTAATCTTGAACATGCGA | 60.03  | 24 | 255 | 106  | 360  |
| 59.098 | 24 GAGCCACGACTACAGGCAAG     | 60.996 | 20 | 238 | 192  | 429  |
| 59.767 | 20 TGCACCTATTAATTGTTTCGG    | 58.688 | 21 | 116 | 433  | 548  |
| 59.864 | 20 CCAGCTTAAGCCTGCATTTTC    | 59.982 | 20 | 230 | 116  | 345  |
| 59.995 | 20 TGTCCGGTGGTGTGTAGTTG     | 60.477 | 20 | 223 | 64   | 286  |
| 60.074 | 20 TGTAGCCGACCCCAATTTAT     | 59.297 | 20 | 231 | 1027 | 1257 |
| 59.859 | 20 ATACAGTCGCCGTGGAAAAC     | 60     | 20 | 175 | 1    | 175  |
| 60.448 | 20 TTGGTAACGGTACCCACCAC     | 60.529 | 20 | 110 | 38   | 147  |
| 60.081 | 20 ATGTAGCCGACCCCAATTTA     | 59.297 | 20 | 196 | 552  | 747  |
| 59.297 | 20 AAAATCATCCCAATCCCAA      | 59.067 | 20 | 147 | 15   | 161  |
| 59.791 | 20 ACCTCGACAAACTCCACACC     | 60.009 | 20 | 246 | 614  | 859  |
| 59.297 | 20 TGTGGAAGGCGGAAAGATAC     | 60.074 | 20 | 218 | 4    | 221  |
| 60.029 | 20 CTGCTCCAGCGCTTTTCTAT     | 59.752 | 20 | 260 | 178  | 437  |
| 60.636 | 20 GAGAAGGCGGTGTATGGTGT     | 59.997 | 20 | 212 | 740  | 951  |
| 60.261 | 20 TCATTGGGAAAATGATTTGG     | 58.255 | 20 | 215 | 1910 | 2124 |
| 59.566 | 20 GAAGGAAGATGGATCGTGGA     | 60.011 | 20 | 219 | 510  | 728  |
| 59.808 | 21 AGTCGAACCGGATCATATCG     | 59.917 | 20 | 242 | 81   | 322  |
| 60.419 | 20 CAATCCTTTTGGCCTGGAC      | 59.67  | 20 | 220 | 23   | 242  |
| 60.156 | 20 CGAGGATGCTCTATCCGAAG     | 59.933 | 20 | 169 | 486  | 654  |
| 60.91  | 20 TGGCTGACAACCTTGTCTGG     | 59.873 | 20 | 195 | 2    | 196  |
| 59.706 | 22 ATGAGAATCTCCACCTCCCC     | 60.278 | 20 | 192 | 5    | 196  |
| 59.511 | 20 CTTCCCTCATTCCCTCCTTC     | 60.008 | 20 | 257 | 1971 | 2227 |
| 59.989 | 20 GTGAAAGCGCCATTCTTCTT     | 59.457 | 20 | 244 | 1812 | 2055 |
| 60.074 | 20 GCGAAGAATTGGTTGAGGAA     | 60.192 | 20 | 207 | 317  | 523  |
| 59.512 | 19 AAGGGGCAGTTAAAAATCGG     | 60.305 | 20 | 102 | 0    | 101  |
| 59.844 | 20 ACAGGCAATCTGCTTAGCCA     | 60.934 | 20 | 221 | 2149 | 2369 |
| 59.929 | 20 TGTAGCCGACCCCAATTTAT     | 59.297 | 20 | 280 | 660  | 939  |
| 59.938 | 20 AGGTCGTGATCCAGAAGGTG     | 60.112 | 20 | 155 | 555  | 709  |
| 60.786 | 20 TGCAACACCTCCATCATCTC     | 59.637 | 20 | 260 | 566  | 825  |
| 59.809 | 20 TTAGGAGTCGTGGGTGTTTT     | 59.449 | 20 | 106 | 418  | 523  |
| 60.036 | 20 CCCATCCCTTTATCGGAAGT     | 60.145 | 20 | 246 | 90   | 335  |
| 60.21  | 20 TAAGCTGAACCCCAACCAAA     | 60.472 | 20 | 212 | 341  | 552  |
| 58.307 | 23 CAATTTAGCTGAAATCTCAACCTT | 59.296 | 25 | 243 | 429  | 671  |
| 60.036 | 20 CATTTCAACGTCTCTGCCAA     | 59.84  | 20 | 277 | 90   | 366  |
| 57.114 | 27 TTATGTGGTGTCCATGTGGC     | 60.249 | 20 | 279 | 1017 | 1295 |
| 59.875 | 20 CTTCCCCGCATCTCTCATAG     | 59.79  | 20 | 138 | 18   | 155  |
| 59.83  | 20 GCTTTTGAAGTCCTTCCACG     | 59.853 | 20 | 201 | 37   | 237  |
| 60.375 | 20 GCCAACCTAACGCCACCTTA     | 62.257 | 20 | 270 | 137  | 406  |
| 60.16  | 20 CTTCCCCCTCTTTGAACTCC     | 60.045 | 20 | 106 | 8    | 113  |

|        |    |                           |        |    |     |      |      |
|--------|----|---------------------------|--------|----|-----|------|------|
| 60.206 | 20 | TCAACACATTCAGCAGGCTC      | 59.992 | 20 | 193 | 149  | 341  |
| 59.648 | 20 | CTCAATCGCAACTGCAAAAA      | 59.992 | 20 | 279 | 44   | 322  |
| 60.426 | 20 | AACGTTTCGCTCCAAACAATC     | 60.118 | 20 | 276 | 126  | 401  |
| 59.853 | 20 | CGCAATTGAATAAGAGGGGA      | 60.031 | 20 | 270 | 158  | 427  |
| 59.997 | 20 | TCTTTAGCAATGGACCTCGC      | 60.352 | 20 | 190 | 342  | 531  |
| 60.132 | 20 | ACCGAGATGCAAATTC AACCC    | 59.939 | 20 | 275 | 972  | 1246 |
| 60.174 | 20 | TGCAATGCTCCGAGTATGAG      | 59.972 | 20 | 250 | 311  | 560  |
| 59.966 | 20 | TTGGAGGAAAGCAAGGAAGA      | 59.926 | 20 | 231 | 582  | 812  |
| 60.104 | 20 | GAACGGTGCTTATTACGGGA      | 59.96  | 20 | 191 | 315  | 505  |
| 60.195 | 20 | TGAGGAAGATGTGCGCAGTTG     | 59.984 | 20 | 195 | 1    | 195  |
| 57.624 | 26 | AAATCACGTGTCTACATTTTTAATC | 59.769 | 26 | 230 | 426  | 655  |
| 59.933 | 20 | TTGGGATTAAGGCTTTGGTG      | 59.931 | 20 | 186 | 895  | 1080 |
| 58.56  | 25 | GTCTTCCGCGTGCGTATAAT      | 60.124 | 20 | 226 | 38   | 263  |
| 60.125 | 21 | CGTTTGATTGCGCGATAAAT      | 59.928 | 20 | 257 | 379  | 635  |
| 58.06  | 24 | TGGTGTTTCAGCAGAGTTTCG     | 60.025 | 20 | 109 | 0    | 108  |
| 59.097 | 22 | GCCGGTTCTTTGTGAATCAT      | 59.939 | 20 | 256 | 26   | 281  |
| 59.887 | 20 | TTCGAATTCAAAACTCCCAA      | 59.551 | 21 | 226 | 355  | 580  |
| 59.988 | 20 | ACGGCTATGCATCCAAAAAC      | 59.967 | 20 | 148 | 702  | 849  |
| 60.17  | 20 | GCTCCATTGTACGTTTCCCT      | 59.056 | 20 | 135 | 125  | 259  |
| 60.015 | 20 | GTTCAACAGGAGGTGAAGCC      | 59.703 | 20 | 212 | 2261 | 2472 |
| 59.813 | 22 | GGCGCACATTAGACATCCTT      | 60.103 | 20 | 151 | 16   | 166  |
| 60.266 | 21 | AGGCTTACTCGGTTTGGGT       | 59.998 | 20 | 279 | 179  | 457  |
| 60.34  | 20 | TCCTCCAATGTCTCGTACCC      | 59.927 | 20 | 236 | 561  | 796  |
| 60.353 | 20 | CACTTCCGCCACCATAAGAT      | 59.955 | 20 | 261 | 115  | 375  |
| 59.297 | 20 | CACAGGAGAAGATTTTCTTTTCAA  | 58.971 | 24 | 193 | 0    | 192  |
| 60.126 | 20 | CTGTCATGCAAGCAGCAACT      | 60.207 | 20 | 255 | 343  | 597  |
| 60.434 | 20 | CCGGAACATAAGTGCCAAAC      | 60.365 | 20 | 266 | 335  | 600  |
| 60.91  | 20 | TTGATGCAGTGTCTCCAG        | 59.984 | 20 | 245 | 5    | 249  |
| 59.925 | 20 | CTTGGAACTTGGACGGT         | 60.005 | 20 | 132 | 493  | 624  |
| 59.964 | 20 | GGCCATTGTTGTTGAGCTTT      | 60.118 | 20 | 239 | 1449 | 1687 |
| 60.048 | 20 | TTCTCTGCTTTGATGGAGGG      | 60.331 | 20 | 203 | 104  | 306  |
| 60.91  | 20 | TTTTCTGTTTTGTTCTCCTGC     | 58.539 | 22 | 263 | 5    | 267  |
| 58.897 | 20 | CGTCGATCACTTCAACCTTT      | 57.797 | 20 | 227 | 604  | 830  |
| 59.992 | 20 | AAGTGGGAAGTCTCGGATT       | 59.935 | 20 | 167 | 576  | 742  |
| 60.285 | 20 | TCTTCATGCACGACATCCTC      | 59.794 | 20 | 280 | 882  | 1161 |
| 59.903 | 20 | TCTTCCAAGATCACACAGCCT     | 59.859 | 21 | 249 | 1170 | 1418 |
| 59.978 | 20 | ATCCTTCAACCCCAAATTCC      | 59.996 | 20 | 242 | 1198 | 1439 |
| 59.986 | 20 | CGTGATAGCAGAGAAAGGGC      | 59.978 | 20 | 122 | 740  | 861  |
| 59.971 | 20 | CGAGAATATAGTGTGCGCGA      | 59.999 | 20 | 150 | 366  | 515  |
| 60.357 | 20 | AGTAAATCCGGGCCATTTT       | 60.15  | 20 | 124 | 870  | 993  |
| 57.539 | 21 | CAACCCCTGATAAGCAGAGC      | 59.836 | 20 | 148 | 6    | 153  |
| 60.534 | 22 | TTCTTTCTTAAGCTTGTGAACTT   | 57.936 | 24 | 152 | 937  | 1088 |
| 59.553 | 20 | GTAGCCAATGAGTTGGGGAA      | 59.933 | 20 | 237 | 213  | 449  |
| 60.081 | 20 | AGGTACGTTTCTGATCACCG      | 59.989 | 20 | 210 | 173  | 382  |
| 59.955 | 20 | CACAAAAGGGCCTCTGAATC      | 59.67  | 20 | 230 | 137  | 366  |
| 60.235 | 20 | GAGAAGCTGCGGAAGAGGTA      | 59.717 | 20 | 242 | 3659 | 3900 |
| 59.172 | 21 | ATGAGCAGACTTGATGCGTG      | 60.016 | 20 | 276 | 197  | 472  |
| 60.132 | 20 | CCCTCTTCCCCTTCAAACCT      | 60.045 | 20 | 241 | 968  | 1208 |
| 59.884 | 20 | ATTCGTACACCCAATCAGCC      | 59.82  | 20 | 199 | 201  | 399  |
| 59.443 | 20 | GCCACAGACCACAGTGCTTA      | 59.905 | 20 | 204 | 300  | 503  |
| 59.729 | 20 | ATTCAAACCGCCAAATTCAG      | 59.938 | 20 | 261 | 95   | 355  |
| 59.823 | 20 | GCGTGATGAATGTCACGAAC      | 60.128 | 20 | 211 | 384  | 594  |
| 59.792 | 20 | AATTAACAAGCCCCTGCCT       | 59.966 | 20 | 244 | 333  | 576  |
| 59.368 | 20 | TTTTCCATGCACATGTAAGTTTTT  | 59.822 | 24 | 106 | 119  | 224  |
| 59.955 | 20 | CTTTGCGGGTAAATCGAAGA      | 60.202 | 20 | 118 | 529  | 646  |
| 59.918 | 20 | TGACTGGCTTGTGAGAGGTG      | 60.022 | 20 | 205 | 455  | 659  |
| 58.304 | 24 | TGTAGCCGACCCCAATTTAT      | 59.297 | 20 | 170 | 1325 | 1494 |
| 59.748 | 20 | GAGTCGGCGTTAAGTGAACC      | 59.74  | 20 | 255 | 132  | 386  |

|        |    |                            |        |    |     |       |       |
|--------|----|----------------------------|--------|----|-----|-------|-------|
| 59.132 | 22 | ACTGTCCAACCAATGCACCT       | 60.431 | 20 | 168 | 462   | 629   |
| 59.813 | 20 | ACCTGATCGGTGCGATTAAC       | 59.962 | 20 | 272 | 420   | 691   |
| 60.123 | 20 | CCATCCCATCATTCCATCTC       | 60.096 | 20 | 265 | 800   | 1064  |
| 60.125 | 20 | TGGAGGAGGTCGCTAAAGAA       | 59.948 | 20 | 253 | 467   | 719   |
| 59.791 | 20 | TTCACCCTTGCCCTTCATAGG      | 60.066 | 20 | 139 | 2145  | 2283  |
| 60.181 | 20 | AGCAGTCGACGATCCCTTCAT      | 59.834 | 20 | 212 | 494   | 705   |
| 60.255 | 20 | CATACCTCATCCCGCAGATT       | 59.917 | 20 | 269 | 1803  | 2071  |
| 59.92  | 20 | CGTGAAGGGTGACTTGAAT        | 59.966 | 20 | 192 | 159   | 350   |
| 59.183 | 20 | GCTGACCTCACATATTGGGAA      | 59.947 | 21 | 247 | 10866 | 11112 |
| 59.32  | 20 | AGGGAGAATTAGTGGAGGGG       | 59.392 | 20 | 151 | 346   | 496   |
| 59.703 | 20 | TCGGGGAGAGTCAAGAGTTG       | 60.377 | 20 | 268 | 456   | 723   |
| 59.474 | 22 | CGTCTCCAAGGAAAAAGCAA       | 60.357 | 20 | 157 | 9     | 165   |
| 60.015 | 20 | TTGTTGCTGCAGTTGGTCAT       | 60.31  | 20 | 271 | 149   | 419   |
| 59.933 | 20 | TGGGCCAATTGAGTTTTTCT       | 59.546 | 20 | 200 | 534   | 733   |
| 60.264 | 20 | TTTCAATCACCATCAGGTGC       | 59.502 | 20 | 196 | 5825  | 6020  |
| 60.624 | 20 | TGCAAATACATCGAGCGTAGA      | 59.481 | 21 | 236 | 141   | 376   |
| 61.245 | 20 | CCTTTGGAACAGGGTATGGA       | 59.784 | 20 | 148 | 693   | 840   |
| 58.978 | 20 | AAGTGATCAGCCGAGGATTG       | 60.218 | 20 | 255 | 1041  | 1295  |
| 60.134 | 20 | CTCCGCCGAAATTTTGTA         | 60.946 | 19 | 214 | 370   | 583   |
| 59.935 | 20 | AAAAGGATATATTCCTACTGGGTTGC | 59.668 | 24 | 272 | 120   | 391   |
| 60.119 | 20 | GGGCATAGCATAGCCATAA        | 59.913 | 20 | 208 | 904   | 1111  |
| 59.715 | 24 | TGGAAGGCAACTGCTCAAAT       | 60.776 | 20 | 184 | 22    | 205   |
| 60.214 | 20 | CCCAAGACCCCAATTTGATT       | 60.91  | 20 | 137 | 2397  | 2533  |
| 60.008 | 20 | TGATCATAGGGTTCTTCGGC       | 60.036 | 20 | 165 | 2384  | 2548  |
| 60.011 | 20 | GCAACACCAACAACAACAGG       | 60.049 | 20 | 149 | 736   | 884   |
| 59.573 | 21 | TCTAGCTGTGAGATGTCTCTTGC    | 58.903 | 23 | 271 | 557   | 827   |
| 59.894 | 20 | GAGTGCATTAGGGTGGCAAT       | 59.962 | 20 | 268 | 1028  | 1295  |
| 59.933 | 20 | CCTTCCTTCGTCGATGTTGT       | 60.111 | 20 | 150 | 810   | 959   |
| 59.955 | 20 | GCAAAGGAAATTCACGAGGA       | 60.192 | 20 | 187 | 161   | 347   |
| 59.918 | 21 | GGTTCATGTAGCCGAAACCA       | 60.894 | 20 | 150 | 2174  | 2323  |
| 59.829 | 19 | GTCGTTTGCTCCTCTTTCCA       | 60.375 | 20 | 200 | 28    | 227   |
| 59.434 | 20 | GAGACATTTGGGGTAGACGC       | 59.556 | 20 | 251 | 188   | 438   |
| 59.835 | 20 | AACTCCCAATATGGTGCTGC       | 59.962 | 20 | 274 | 2016  | 2289  |
| 59.35  | 23 | CGGAAGTGATCACAAGGGTT       | 59.966 | 20 | 168 | 20    | 187   |
| 59.995 | 20 | GTCCTGATTAGGGATGCCAG       | 59.508 | 20 | 273 | 4335  | 4607  |
| 57.473 | 25 | GGGAAATTTGAGTGGATGCT       | 58.984 | 20 | 255 | 516   | 770   |
| 59.551 | 20 | CGTCGTCGTCGTCATCTTC        | 60.419 | 19 | 199 | 153   | 351   |
| 60.152 | 20 | TGTTTGAACGACTGCCTTTG       | 59.881 | 20 | 153 | 461   | 613   |
| 60.469 | 20 | GCCGACCCATTACTAATCCA       | 59.784 | 20 | 246 | 649   | 894   |
| 57.172 | 24 | CGGTATTCTCAAATGCACGA       | 59.688 | 20 | 199 | 1076  | 1274  |
| 60.21  | 20 | GCTGGAGCTGGAGTGGATAC       | 59.834 | 20 | 158 | 742   | 899   |
| 59.934 | 20 | CTGCTGCTGCTGTTGATGAC       | 60.778 | 20 | 195 | 408   | 602   |
| 59.957 | 20 | TTAGGTGAAGCCAACATCCC       | 59.933 | 20 | 153 | 1731  | 1883  |
| 60.331 | 20 | GTCTAACAAACGGCGGTGAT       | 60     | 20 | 101 | 69    | 169   |
| 59.297 | 20 | GCATAGCAAAAAGAAGGCCA       | 60.343 | 20 | 171 | 6     | 176   |
| 59.674 | 20 | GATGCGGAGGAGGATCATAA       | 59.998 | 20 | 162 | 1250  | 1411  |
| 60.209 | 20 | GATGGACTCCGATGACGATT       | 59.893 | 20 | 264 | 10    | 273   |
| 59.964 | 20 | CCTCTCTCTTCGTTTCATCCG      | 59.943 | 20 | 138 | 319   | 456   |
| 58.227 | 21 | GAAAATTCAAAGATTTGGGGG      | 59.645 | 21 | 149 | 1     | 149   |
| 60.081 | 20 | TCCCTCCAAGATCCAGATTG       | 60.003 | 20 | 259 | 43    | 301   |
| 59.779 | 20 | GCACATGCGGTCTGTATCAC       | 60.152 | 20 | 132 | 387   | 518   |
| 59.955 | 20 | GAAGACGCGAAGTGTGATGA       | 59.992 | 20 | 257 | 5     | 261   |
| 60.195 | 20 | TGGCTGAGTTAGATGCCCTT       | 59.836 | 20 | 279 | 1998  | 2276  |
| 59.73  | 20 | TTTGCAGCCGAACTACTGAA       | 59.609 | 20 | 257 | 565   | 821   |
| 58.071 | 20 | ATGTAGCCGACCCCAATTTA       | 59.297 | 20 | 183 | 854   | 1036  |
| 59.661 | 20 | ATGACGACAAAGCTGAGGCT       | 60.02  | 20 | 225 | 1907  | 2131  |
| 60.066 | 20 | GATGCTAGCCGGAGATGTTT       | 59.803 | 20 | 153 | 352   | 504   |
| 59.601 | 21 | GGAGCTATTGATGCCACCAT       | 59.923 | 20 | 230 | 2970  | 3199  |



|        |    |                           |        |    |     |      |      |
|--------|----|---------------------------|--------|----|-----|------|------|
| 59.688 | 20 | AGAGAGGGTGGGAATGGACT      | 59.929 | 20 | 267 | 0    | 266  |
| 58.894 | 20 | ATGTATAGGCTCGACGTGGC      | 60.125 | 20 | 216 | 149  | 364  |
| 60.517 | 20 | TGGCATAACACTGAAGTGACAA    | 59.245 | 22 | 271 | 18   | 288  |
| 59.927 | 20 | GCCACAAAAACACTTAGGCA      | 58.822 | 20 | 267 | 32   | 298  |
| 60.05  | 20 | TCCAGTTAAACCAACCTCGC      | 60.11  | 20 | 204 | 1650 | 1853 |
| 59.75  | 20 | AAGAGAGAGAAAGGGGCGAG      | 60.088 | 20 | 142 | 1234 | 1375 |
| 60.197 | 20 | TTCCATGCAACTTTCTACCAA     | 58.28  | 21 | 266 | 78   | 343  |
| 59.974 | 21 | TGGCATGTTGTCTTTTCCAA      | 60.088 | 20 | 106 | 27   | 132  |
| 60.108 | 24 | TCTGTGATGCAATGCGGTAT      | 60.104 | 20 | 233 | 310  | 542  |
| 60.088 | 20 | CCCGGGATTTCTAAATGGAT      | 59.978 | 20 | 240 | 965  | 1204 |
| 59.973 | 20 | GAAGAAGAATCTGAGCCAGCA     | 59.708 | 21 | 155 | 1097 | 1251 |
| 59.917 | 20 | GAGGAAACAGAAGCACTGCC      | 59.997 | 20 | 252 | 818  | 1069 |
| 59.297 | 20 | AGGAAGTGAAGTCGGACGAA      | 59.844 | 20 | 111 | 6    | 116  |
| 60.187 | 20 | GCGACTCACTTAAGGTTGTG      | 59.788 | 21 | 245 | 52   | 296  |
| 60.031 | 20 | TAGCACAATTGCCTCTGCAC      | 60.019 | 20 | 255 | 23   | 277  |
| 60.246 | 20 | TCCTAACTTTTATACCCGAAACAC. | 60.161 | 25 | 208 | 662  | 869  |
| 59.178 | 20 | TTATCTCCATTTGTTGCCGC      | 60.971 | 20 | 150 | 694  | 843  |
| 60.214 | 20 | ACACGATTAACTGCCTCGCT      | 59.904 | 20 | 120 | 2287 | 2406 |
| 59.94  | 20 | CCCCAATTAGTCGTAGCCCT      | 60.332 | 20 | 149 | 1473 | 1621 |
| 59.995 | 20 | TGCTGAAACTGGTGGAGTTG      | 59.873 | 20 | 115 | 1979 | 2093 |
| 59.989 | 20 | CCTCAATTGCCACCAATTTT      | 60.309 | 20 | 252 | 935  | 1186 |
| 57.578 | 22 | TGGGAAAGATTGAAGATGACG     | 60.059 | 21 | 258 | 116  | 373  |
| 59.297 | 20 | CAACATGTGTGGAGTGGTCA      | 58.928 | 20 | 107 | 13   | 119  |
| 59.992 | 20 | ACGTCTCTCGCACTCCTCAT      | 60.017 | 20 | 117 | 6    | 122  |
| 60.036 | 20 | TGCAAATAGAAGGCCAGCTT      | 59.982 | 20 | 150 | 2254 | 2403 |
| 59.511 | 21 | TTCCGGACCAAACCTTTAATGTAG  | 59.441 | 23 | 270 | 856  | 1125 |
| 60.435 | 20 | TGTGGATGAGCTGTTGGAG       | 59.831 | 20 | 244 | 2233 | 2476 |
| 60.012 | 20 | TTTTCAAGCAAAATTTCAATTAAGC | 59.911 | 25 | 276 | 297  | 572  |
| 59.95  | 20 | CCAGTAATGGCATCCTTGGT      | 59.813 | 20 | 198 | 40   | 237  |
| 59.745 | 20 | AATTTTTGGTTGAGGAGGGG      | 60.159 | 20 | 280 | 2837 | 3116 |
| 60.068 | 20 | TGTAGCCGACCCCAATTTAT      | 59.297 | 20 | 117 | 2537 | 2653 |
| 60.008 | 20 | TTAGGGGAGCTGCAACAAGT      | 59.875 | 20 | 198 | 1469 | 1666 |
| 60.326 | 20 | TGCAAACCTCAAAACTCAAAAA    | 59.774 | 22 | 207 | 3    | 209  |
| 60.207 | 21 | AATGACCGTCTTGATCGTCC      | 59.934 | 20 | 233 | 378  | 610  |
| 60.129 | 20 | ATCATCAATGCCATCCATT       | 59.982 | 20 | 205 | 240  | 444  |
| 59.916 | 20 | TGACAGTGCCATTCCATCAT      | 59.925 | 20 | 257 | 998  | 1254 |
| 59.688 | 20 | AAACCCATGCATTTGATTCC      | 59.628 | 20 | 221 | 519  | 739  |
| 60.016 | 20 | GAAGCCACATGGGAAAAAGA      | 60.051 | 20 | 256 | 36   | 291  |
| 61.585 | 20 | GGATCTAGTGCGGGTTACCA      | 59.955 | 20 | 181 | 31   | 211  |
| 60.012 | 20 | ATTTGGTAGACCTGAGGGGG      | 60.183 | 20 | 209 | 3263 | 3471 |
| 59.691 | 20 | TGAGTTTTGGGAGCAAATTACA    | 59.625 | 22 | 249 | 399  | 647  |
| 59.978 | 20 | CGCCTTCACTGCCAAAATAA      | 61.12  | 20 | 108 | 17   | 124  |
| 59.572 | 20 | ACCTGCCAACCAAAAACAAG      | 60.008 | 20 | 219 | 253  | 471  |
| 60.419 | 20 | CAGCCCAAGAAAAGATCTGC      | 59.955 | 20 | 210 | 152  | 361  |
| 59.673 | 20 | AAGGGGAATGAAATGGAACC      | 59.996 | 20 | 231 | 53   | 283  |
| 60.118 | 20 | AATGTAGCCAAACGCCTCC       | 60.088 | 19 | 206 | 638  | 843  |
| 59.784 | 20 | CCGGTTCAGTGGTCATTTCT      | 59.966 | 20 | 141 | 25   | 165  |
| 60.015 | 20 | GCTGGCTGTGATAGGCTAGG      | 60     | 20 | 216 | 794  | 1009 |
| 60.134 | 20 | GCTGAGCAGGTGGAAAAGTG      | 60.975 | 20 | 225 | 1202 | 1426 |
| 59.993 | 20 | ATTCTGTCTAGGCGCTGGAA      | 59.978 | 20 | 237 | 182  | 418  |
| 58.687 | 23 | TCAGCCCCAAATGAAGAATC      | 60.014 | 20 | 277 | 262  | 538  |
| 60.19  | 20 | AGTGGTCTTCTAGGTGGCA       | 59.721 | 20 | 123 | 1021 | 1143 |
| 59.929 | 20 | ATGGTTTGTGCCTGCAAAC       | 60.559 | 20 | 226 | 977  | 1202 |
| 59.862 | 20 | GCACCAACTCTTATTGGGGA      | 59.933 | 20 | 124 | 68   | 191  |
| 59.853 | 20 | AAATGTTCTCATCATCCCG       | 59.75  | 20 | 105 | 719  | 823  |
| 59.629 | 20 | GTTGATTTGGATCAAGGCGT      | 59.939 | 20 | 267 | 673  | 939  |
| 60.166 | 20 | AGTTTTTGGAGTCCACCCCT      | 59.834 | 20 | 280 | 732  | 1011 |
| 59.897 | 20 | CAGAGCCATCCCATTCAAGT      | 60.073 | 20 | 141 | 53   | 193  |

|        |    |                          |        |    |     |      |      |
|--------|----|--------------------------|--------|----|-----|------|------|
| 59.845 | 20 | TGATGCTGCGGAGTCAATAG     | 59.972 | 20 | 166 | 266  | 431  |
| 60.125 | 20 | TGATGAAGTAAAATAGTGAGTTAC | 57.311 | 27 | 258 | 158  | 415  |
| 59.971 | 20 | ACGTGGAGAGTGGTGGATTC     | 59.969 | 20 | 198 | 259  | 456  |
| 59.98  | 21 | ATGGATCGAACATTCACGAG     | 58.516 | 20 | 194 | 257  | 450  |
| 60.234 | 20 | CATCGCTTGCTTTCCATTTT     | 60.209 | 20 | 189 | 746  | 934  |
| 59.948 | 20 | TATTTGAAATGCTGAGCCCC     | 60.038 | 20 | 208 | 227  | 434  |
| 60.14  | 20 | AGACTGGTGTGCTGCTGTG      | 60.096 | 20 | 276 | 74   | 349  |
| 59.569 | 20 | ATCAATGGGCGGTGTAAAAG     | 59.823 | 20 | 166 | 712  | 877  |
| 60.096 | 21 | GGATACGCTGGAATGTTGC      | 60.478 | 20 | 279 | 704  | 982  |
| 60.081 | 20 | CCAACCCAGTTGGTTTCATC     | 60.21  | 20 | 233 | 680  | 912  |
| 60.065 | 21 | GCAAAAATTCAAGCCTTTTCC    | 60.069 | 21 | 216 | 167  | 382  |
| 60     | 20 | CCCAAGACCCCAATTTGATT     | 60.91  | 20 | 165 | 463  | 627  |
| 59.685 | 20 | TCAACAACACATCGTCTTCCA    | 60.144 | 21 | 165 | 72   | 236  |
| 59.957 | 20 | ATTCGAACATCTTCATCGGC     | 60.043 | 20 | 206 | 1775 | 1980 |
| 60.019 | 20 | GCAATGGAGAAGCAGCAAAT     | 60.361 | 20 | 244 | 1863 | 2106 |
| 59.957 | 20 | ATGGCCCTAAACACAGCAAG     | 60.132 | 20 | 137 | 554  | 690  |
| 60.91  | 20 | GGCGTGATGCTGGATGTAGT     | 61.099 | 20 | 211 | 4    | 214  |
| 60.91  | 20 | TCTTTATCCCTGGTGTGCTC     | 57.58  | 20 | 280 | 4    | 283  |
| 59.665 | 20 | AAGGAGGTGGTGGTGATTTG     | 59.82  | 20 | 217 | 1586 | 1802 |
| 59.989 | 20 | CAGGGAAATCCAATTCATGC     | 60.274 | 20 | 245 | 216  | 460  |
| 60.651 | 20 | CGATATGGCTCGTTTAGGGA     | 60.053 | 20 | 123 | 29   | 151  |
| 59.91  | 20 | CGGGTTTGAAGGGGATTTAT     | 60.013 | 20 | 240 | 1199 | 1438 |
| 60.269 | 21 | TGCAGTGAGATGCATAAGGA     | 57.937 | 20 | 280 | 1330 | 1609 |
| 59.898 | 20 | GCTACCTCATTGGCTTCGAG     | 59.978 | 20 | 245 | 473  | 717  |
| 60.21  | 20 | CGACATGAACTGCTAAGCCA     | 60.011 | 20 | 269 | 1054 | 1322 |
| 60.511 | 20 | TTGCATTCAGGTAGCACGAG     | 60.011 | 20 | 220 | 422  | 641  |
| 60.074 | 20 | CAGCCCATTAGCATTCCATC     | 60.435 | 20 | 208 | 159  | 366  |
| 60.175 | 20 | TATTGAAAAGCAAACCCTGG     | 59.931 | 20 | 213 | 400  | 612  |
| 59.711 | 20 | GAGTGTGTCTGGCAACATGG     | 60.162 | 20 | 136 | 57   | 192  |
| 59.548 | 20 | AGTTCCTGCAGCTCTTCTGC     | 59.898 | 20 | 145 | 1235 | 1379 |
| 60.132 | 20 | TCCGATCATAAGAAATCGCC     | 60.001 | 20 | 141 | 415  | 555  |
| 60.91  | 20 | GACACATGCTCGAAAGGGAT     | 60.081 | 20 | 180 | 7    | 186  |
| 60.271 | 23 | TGGGTAGGGAGTTTACCAA      | 60.345 | 20 | 243 | 395  | 637  |
| 60.91  | 20 | AAAGGGGAGCAAGAGGAAGA     | 60.319 | 20 | 112 | 9    | 120  |
| 60.362 | 20 | TGCACCGTATCTTAGGAGGC     | 60.235 | 20 | 187 | 396  | 582  |
| 60.34  | 20 | GTCAGGTTTCTGATCCGAGC     | 59.81  | 20 | 124 | 173  | 296  |
| 59.948 | 20 | TGCTCATCAACACTGCCTTC     | 59.992 | 20 | 232 | 1102 | 1333 |
| 60.191 | 20 | TGGAATAGGTTTCTTTGGAGACA  | 59.987 | 23 | 118 | 44   | 161  |
| 59.425 | 20 | AACCAACATGATGAGTGACCC    | 59.694 | 21 | 182 | 68   | 249  |
| 59.621 | 20 | GTCTTCGTCACTGCCGTCTC     | 61.021 | 20 | 186 | 413  | 598  |
| 59.502 | 20 | CACAACCTATTGCGCGACTCA    | 61.009 | 20 | 167 | 247  | 413  |
| 59.939 | 22 | CTTGGTCATTTAATGGGATCA    | 57.415 | 21 | 269 | 511  | 779  |
| 59.797 | 20 | CCCAAGACCCCAATTTGATT     | 60.91  | 20 | 176 | 145  | 320  |
| 59.966 | 20 | TACAACCCAAAAACCTTCGC     | 59.975 | 20 | 268 | 548  | 815  |
| 59.881 | 20 | TTTGAGGAGCCATGAGAAC      | 60.195 | 20 | 208 | 372  | 579  |
| 58.808 | 21 | GTTTATGTAGCCGACCCCAA     | 59.823 | 20 | 184 | 492  | 675  |
| 59.963 | 21 | GGTTATCTATGGATCACTACCC   | 57.813 | 23 | 212 | 542  | 753  |
| 60.046 | 20 | GAGGAGGGGTGGTTTGAGAT     | 60.314 | 20 | 147 | 81   | 227  |
| 59.67  | 24 | ATGTAGCCGACCCCAATTTA     | 59.297 | 20 | 175 | 3607 | 3781 |
| 60.11  | 20 | TGTGCACATCATGATTTGTT     | 59.987 | 21 | 252 | 1385 | 1636 |
| 59.579 | 20 | CCCCGTGTAAAATTCATTG      | 60.181 | 20 | 266 | 760  | 1025 |
| 59.297 | 20 | GCCCGAATGTAGATCTGCTC     | 59.803 | 20 | 161 | 4    | 164  |
| 59.693 | 24 | AAGATGAGCACCATTCTTTG     | 59.184 | 21 | 100 | 56   | 155  |
| 60.285 | 20 | AAGACCACTCAGTCGAACGG     | 60.298 | 20 | 207 | 49   | 255  |
| 59.877 | 20 | GCTTCTGGTGCAGCTCTTCT     | 59.898 | 20 | 256 | 154  | 409  |
| 59.823 | 20 | ATCGCTCACCGTAGCCTCTA     | 60     | 20 | 194 | 537  | 730  |
| 59.341 | 22 | AAAATGATTGCTTGGCTTGAA    | 59.712 | 21 | 253 | 589  | 841  |
| 59.962 | 20 | TTTTTCTTTTCTTGTGCATCA    | 59.307 | 24 | 253 | 563  | 815  |

|        |    |                           |        |    |     |      |      |
|--------|----|---------------------------|--------|----|-----|------|------|
| 60.507 | 19 | CACCCAAAAATCCTCTTCCA      | 59.903 | 20 | 170 | 81   | 250  |
| 59.958 | 20 | TCATCCTCCATTTTCAGCTCC     | 60.158 | 20 | 186 | 175  | 360  |
| 59.247 | 20 | GACCCACATAGTGGGAAAA       | 59.647 | 20 | 164 | 790  | 953  |
| 58.901 | 20 | TCTCTCATTCTCCATTGCCA      | 59.322 | 20 | 272 | 138  | 409  |
| 59.571 | 23 | GACGGCGTCGTTTTCTTG        | 60.39  | 18 | 257 | 145  | 401  |
| 59.79  | 20 | GACGGTGAAGCGTTTAGCAT      | 60.278 | 20 | 266 | 3017 | 3282 |
| 59.304 | 22 | GGTAGCCGACCCCAATTTAT      | 60.041 | 20 | 217 | 393  | 609  |
| 59.424 | 20 | CCACGATTTTGAAGGGATT       | 59.79  | 20 | 240 | 429  | 668  |
| 60.033 | 20 | GATCGTTCTCGGATGCATAAA     | 60.052 | 21 | 182 | 735  | 916  |
| 59.933 | 20 | CACAGTCTCCTCAATGGGGT      | 59.962 | 20 | 170 | 614  | 783  |
| 60.015 | 20 | GTAATTTTCAGCGGGGAACAA     | 59.938 | 20 | 155 | 4965 | 5119 |
| 58.888 | 23 | CGTCATGTGACACCTCATGC      | 61.206 | 20 | 207 | 125  | 331  |
| 59.993 | 20 | GAGTGCCCCCAAAGAGGTAT      | 60.328 | 20 | 248 | 1083 | 1330 |
| 60.001 | 20 | TTTTTAGGCGTTGAAATGGC      | 60.075 | 20 | 188 | 463  | 650  |
| 60.032 | 20 | AGCTTTTGACCAAGGAAGCA      | 59.993 | 20 | 161 | 191  | 351  |
| 61.067 | 20 | ATCCAAGTCCATCTCCTCCC      | 60.278 | 20 | 243 | 268  | 510  |
| 59.823 | 20 | GATTGCGAGGGATGGTCTAA      | 60.036 | 20 | 280 | 19   | 298  |
| 60.91  | 20 | AACTTCGACCCCTGGAECT       | 59.972 | 20 | 256 | 9    | 264  |
| 59.939 | 20 | GTTGCGTACATCTGACCCCT      | 59.997 | 20 | 173 | 3790 | 3962 |
| 60.066 | 20 | ATGTAGCCGACCCACATAG       | 59.836 | 20 | 101 | 714  | 814  |
| 60.096 | 20 | TGTTACCCGAGCTCAGATTG      | 59.984 | 20 | 238 | 3070 | 3307 |
| 60.195 | 20 | CCCATGTGACACTTCAGCAG      | 60.309 | 20 | 145 | 597  | 741  |
| 60.033 | 20 | TGACGGTGAAAAATAGCGAA      | 59.301 | 20 | 248 | 201  | 448  |
| 60.22  | 20 | CCCAAGACCCCAATTTGATT      | 60.91  | 20 | 177 | 157  | 333  |
| 60.126 | 21 | AGTGTGGAATGGTGAGAGGC      | 60.12  | 20 | 111 | 1594 | 1704 |
| 59.67  | 20 | ATCCTTTTCTTCTTGACGC       | 59.457 | 20 | 260 | 1281 | 1540 |
| 59.49  | 20 | TCATTTCTTTGACTTGCG        | 58.892 | 20 | 109 | 427  | 535  |
| 59.725 | 20 | TTCAATATTTAACTGAATTAACGC  | 57.55  | 26 | 280 | 445  | 724  |
| 59.571 | 20 | GAATGGAAAGGTGGGAGGTT      | 60.169 | 20 | 196 | 17   | 212  |
| 59.625 | 22 | TCGAGAGTTTCGGATTTTTGAA    | 59.809 | 21 | 118 | 342  | 459  |
| 59.526 | 20 | CCCAAGACCCCAATTTGATT      | 60.91  | 20 | 130 | 3022 | 3151 |
| 59.297 | 20 | AGCTACCGTATGAAAGGGGC      | 60.471 | 20 | 192 | 41   | 232  |
| 59.924 | 20 | CCCAAGACCCCAATTTGATT      | 60.91  | 20 | 257 | 4790 | 5046 |
| 59.297 | 20 | GTCATGGGTATGCAGGGAAC      | 60.203 | 20 | 186 | 7    | 192  |
| 60.557 | 20 | TTGTGTTTTGAGCACTTCGC      | 60.035 | 20 | 239 | 497  | 735  |
| 60.263 | 20 | CCCAAGACCCCAATTTGATT      | 60.91  | 20 | 171 | 1971 | 2141 |
| 59.845 | 20 | AATGGTGTCCACTTCCACC       | 59.679 | 20 | 193 | 628  | 820  |
| 60.044 | 20 | TTTTGAGAAGGTTCTTAATTTCTT  | 59.227 | 26 | 254 | 257  | 510  |
| 60.053 | 20 | ATTAGCAAATTTTCGGGACGA     | 59.547 | 20 | 270 | 384  | 653  |
| 59.273 | 20 | AAGAGCGTGCTTCAATCGTT      | 60.022 | 20 | 123 | 915  | 1037 |
| 60.27  | 22 | CCTCAAAAACCAATAAATGAATGC  | 60.871 | 24 | 166 | 112  | 277  |
| 59.556 | 20 | TGCTGACAATGATATGTGTTTCAT  | 58.039 | 23 | 222 | 557  | 778  |
| 60.016 | 20 | TGGCATCCAATCAACAAGAA      | 60.049 | 20 | 274 | 139  | 412  |
| 60.831 | 20 | TTGAAATTTTCGAGTTGGACG     | 58.745 | 20 | 274 | 609  | 882  |
| 59.297 | 20 | TGGCCAAATACCCGAATTTAT     | 60.385 | 21 | 206 | 5    | 210  |
| 59.853 | 20 | ATGTAGCCGACCCCAATTTT      | 60.562 | 20 | 163 | 978  | 1140 |
| 60.081 | 20 | TGGAAGTTTTACGAGAGCCG      | 60.378 | 20 | 228 | 260  | 487  |
| 59.988 | 20 | AACCCAGCGTAGAGGAGGTT      | 60.132 | 20 | 198 | 4806 | 5003 |
| 57.916 | 20 | TCGCGACAGTCAAAGAAAAA      | 59.585 | 20 | 169 | 0    | 168  |
| 59.851 | 20 | GCCGACCTCACATAGTTGAAA     | 60.125 | 21 | 223 | 320  | 542  |
| 60.455 | 20 | CCCGAATCCGTTACAAAAGA      | 59.931 | 20 | 209 | 86   | 294  |
| 59.773 | 20 | TCCTAATCCCCGAAATACC       | 59.978 | 20 | 271 | 545  | 815  |
| 60.278 | 20 | GTAACGCGGTGGAGAGAGAG      | 60.012 | 20 | 253 | 529  | 781  |
| 59.984 | 20 | TGGGGTGATTATGGTGGTTT      | 59.91  | 20 | 255 | 185  | 439  |
| 60.081 | 23 | ACACTTTCGAGATATAAATTCAGT  | 57.327 | 27 | 256 | 470  | 725  |
| 58.528 | 21 | TGTTTATGTTTGATGTTATGATTTG | 58.499 | 27 | 278 | 0    | 277  |
| 60.061 | 21 | TGGTTGCAAGTCTTTGGTTG      | 59.734 | 20 | 266 | 9    | 274  |
| 59.872 | 20 | GAAGCTGCCCTAATTCATCG      | 59.807 | 20 | 150 | 68   | 217  |

|        |    |                          |        |    |     |      |      |
|--------|----|--------------------------|--------|----|-----|------|------|
| 58.515 | 20 | CCTTTGACGTGGGAGTCATT     | 59.966 | 20 | 222 | 1173 | 1394 |
| 60.036 | 20 | CTCCTCGCTCTCTCCTCTCA     | 59.962 | 20 | 247 | 461  | 707  |
| 60.044 | 22 | GCACGTGCGTAGAGGGTAGT     | 60.343 | 20 | 224 | 470  | 693  |
| 59.789 | 20 | AAAATGACATGCAAGGAAAAA    | 57.299 | 21 | 228 | 950  | 1177 |
| 60.91  | 20 | TCTCCTTGTGGGAAAGTGG      | 60.081 | 20 | 153 | 8    | 160  |
| 60.517 | 20 | GTCGATCTTTACGACCCCAA     | 59.933 | 20 | 193 | 76   | 268  |
| 59.864 | 20 | CCCAAGACCCCAATTTGATT     | 60.91  | 20 | 219 | 3385 | 3603 |
| 60.328 | 20 | ACTAACTGAGCTTGAGCGCC     | 59.786 | 20 | 219 | 180  | 398  |
| 59.257 | 22 | TTTCACCTATGCATTTGCCA     | 60.073 | 20 | 275 | 3265 | 3539 |
| 59.982 | 20 | ATTCATTCCCATCCGTCAA      | 60.133 | 20 | 215 | 1764 | 1978 |
| 60.058 | 20 | ACATCAGTGTGTTTCGGTGGA    | 60.005 | 20 | 182 | 3545 | 3726 |
| 59.297 | 20 | TAGTCACACCAGCATTCCCA     | 60.112 | 20 | 210 | 2    | 211  |
| 59.91  | 20 | TCGATTAACGAAGTCTCTCCC    | 58.398 | 21 | 274 | 695  | 968  |
| 60.088 | 20 | CCATCAGAGCACGACAAAAC     | 59.293 | 20 | 214 | 1597 | 1810 |
| 59.569 | 20 | TGTCATCAACAAAACCCCAA     | 59.792 | 20 | 273 | 518  | 790  |
| 58.844 | 23 | AACTCCGCAATCACTTTGCT     | 59.882 | 20 | 208 | 630  | 837  |
| 59.995 | 20 | CCCCATTA AAAACAATGGTTAC  | 59.374 | 22 | 280 | 8218 | 8497 |
| 60.162 | 20 | GCCTCAGTTTTCAGCTTTGG     | 59.993 | 20 | 264 | 706  | 969  |
| 59.807 | 20 | ACCTACTAAGGCCTTCCCCA     | 59.955 | 20 | 276 | 171  | 446  |
| 59.77  | 20 | CCGATACCCTTGGATCTTGA     | 59.887 | 20 | 271 | 540  | 810  |
| 59.973 | 20 | TCATCCATGTCCAAGTCCAA     | 59.893 | 20 | 275 | 6185 | 6459 |
| 59.002 | 20 | ATGTAGCCGACCCCAATTTA     | 59.297 | 20 | 262 | 431  | 692  |
| 59.297 | 20 | CAAGGCTCCCCTTACAATA      | 60.066 | 20 | 272 | 2    | 273  |
| 59.849 | 20 | ATGTAGCCGACCCCAATTTA     | 59.297 | 20 | 267 | 2321 | 2587 |
| 59.993 | 20 | CATACCCTTACCGAGTGGT      | 59.844 | 20 | 189 | 731  | 919  |
| 59.662 | 20 | TCCAATCTCAAGGGGATGAG     | 60.003 | 20 | 262 | 205  | 466  |
| 59.964 | 20 | TGCATGTTGATGTGTCTGCT     | 58.816 | 20 | 271 | 948  | 1218 |
| 60.11  | 20 | TCCGACCCATCTACCAAGAG     | 60.065 | 20 | 253 | 253  | 505  |
| 60.025 | 20 | TGCATCAGAAAACTGGCTG      | 59.988 | 20 | 201 | 428  | 628  |
| 59.962 | 20 | TCTACTGGGATAGTTGCGGC     | 60.235 | 20 | 192 | 663  | 854  |
| 60.603 | 20 | CTTGGCTTCTGCTTCTGCTT     | 59.898 | 20 | 198 | 778  | 975  |
| 60.103 | 20 | GACTCAATGCTCCACCCAAT     | 59.934 | 20 | 232 | 1322 | 1553 |
| 60.006 | 20 | TCCTGCATGCATTTATTGGA     | 60.035 | 20 | 261 | 1656 | 1916 |
| 60.381 | 20 | TTTTCCAAGATGGGTATTCCG    | 57.551 | 20 | 222 | 502  | 723  |
| 59.779 | 20 | CGACAGGGAGTTCCACAGAT     | 60.112 | 20 | 233 | 3604 | 3836 |
| 59.226 | 20 | AATTGGTTTGA AATTACGCGA   | 59.485 | 21 | 249 | 2675 | 2923 |
| 59.971 | 20 | CATCTCCACCTTTTCCCTCA     | 60.042 | 20 | 171 | 220  | 390  |
| 60.284 | 21 | GTTCCCTGAATGCCCTGTTA     | 59.933 | 20 | 221 | 79   | 299  |
| 59.297 | 20 | ATCGACAAATGAATCCCCAA     | 60.133 | 20 | 109 | 6    | 114  |
| 59.42  | 20 | ATTGCTTCGTTTCATGGAGG     | 60.074 | 20 | 236 | 572  | 807  |
| 59.993 | 20 | CAGCAAGATGAGATCACCGA     | 59.942 | 20 | 266 | 4355 | 4620 |
| 59.853 | 20 | AGTGGCTGGTACGGAATACG     | 60.015 | 20 | 157 | 691  | 847  |
| 59.894 | 20 | TTCAAGAAAGCCACCGTCTT     | 59.853 | 20 | 145 | 509  | 653  |
| 59.739 | 20 | CAGGTGCCTGAAAATCACAA     | 59.691 | 20 | 262 | 281  | 542  |
| 59.464 | 20 | TGTCCTTAAAACCACCGGAC     | 59.83  | 20 | 125 | 456  | 580  |
| 60.052 | 20 | TCACCTCCATTGCTTTTTTCC    | 60.051 | 20 | 166 | 981  | 1146 |
| 59.794 | 20 | AAGGAAGGCCTTAGTTGGGA     | 60.068 | 20 | 279 | 1259 | 1537 |
| 59.926 | 20 | CTGAGAGAAGTCTGGGAGCG     | 60.275 | 20 | 209 | 931  | 1139 |
| 60.218 | 20 | TGCCTAGCTTGTGTTAAATTGC   | 59.45  | 22 | 196 | 107  | 302  |
| 60.08  | 20 | CACCGTCTCATCGACAAATG     | 60.112 | 20 | 225 | 412  | 636  |
| 59.392 | 21 | CACATTTGGGGTTGTGAATG     | 59.667 | 20 | 269 | 287  | 555  |
| 59.78  | 20 | TGACAATTAGCAACCCACCA     | 59.964 | 20 | 187 | 1291 | 1477 |
| 60.413 | 20 | CGAACTTCGTGACGTGAACA     | 60.906 | 20 | 148 | 160  | 307  |
| 59.703 | 20 | TTGGATACTGCACGTGGAAA     | 60.111 | 20 | 241 | 319  | 559  |
| 57.914 | 21 | GCACAACAATGATTTTTTCAGTCA | 60.032 | 23 | 270 | 1076 | 1345 |
| 59.682 | 20 | TGAATATTTAAAGGGATTGTTAG  | 60.006 | 26 | 235 | 915  | 1149 |
| 59.757 | 20 | TCAATGACAAAGGAAAACGATG   | 59.975 | 22 | 210 | 1    | 210  |
| 60.17  | 20 | ACCGTAAGGTTGCGAACATC     | 60     | 20 | 130 | 1260 | 1389 |

|        |    |                           |        |    |     |      |      |
|--------|----|---------------------------|--------|----|-----|------|------|
| 60.331 | 20 | CCCACTTGCATTCTCCACTAA     | 60.118 | 21 | 168 | 2181 | 2348 |
| 60.074 | 20 | GACGGTGTTGTACGTGATGG      | 59.88  | 20 | 168 | 312  | 479  |
| 60.388 | 20 | TAAAAGCAAAAAGGGCATGG      | 60.068 | 20 | 256 | 89   | 344  |
| 58.131 | 21 | GGCTAGGTTATGATGAGCCC      | 58.624 | 20 | 227 | 1339 | 1565 |
| 60.195 | 20 | CCCAAGACCCCAATTTGATT      | 60.91  | 20 | 131 | 1882 | 2012 |
| 59.94  | 20 | TAGGGGTGCTTCTGCTTCTC      | 59.574 | 20 | 156 | 719  | 874  |
| 59.982 | 20 | CTTCCCTTGCCTGAAACAAA      | 60.22  | 20 | 180 | 1    | 180  |
| 59.725 | 20 | TTGCAGAATGAAGAATTGCG      | 59.953 | 20 | 254 | 629  | 882  |
| 59.871 | 20 | TGGGTCCACTCCAATCTTC       | 59.903 | 20 | 203 | 424  | 626  |
| 59.254 | 20 | AAGGACCGAGTTGCAAGAAA      | 59.853 | 20 | 182 | 60   | 241  |
| 59.662 | 20 | CACATGTAAACAACCCACC       | 60.001 | 21 | 258 | 442  | 699  |
| 60.008 | 20 | TTTCATGATACCAATTTGCTC     | 59.945 | 22 | 235 | 186  | 420  |
| 59.862 | 20 | CTGGATTCAAACCCTCTCCA      | 60.042 | 20 | 245 | 229  | 473  |
| 59.055 | 22 | TCTGGAATGTTTTGAGTTAATGC   | 58.311 | 23 | 236 | 512  | 747  |
| 60.91  | 20 | GCCTATGCAATGTCACAACG      | 60.142 | 20 | 182 | 5    | 186  |
| 59.075 | 20 | CGAGTTCAAGTGCAAAACCA      | 59.881 | 20 | 164 | 71   | 234  |
| 59.572 | 20 | TGGGTTTTTTCACGTGTGCTA     | 60.149 | 20 | 187 | 3299 | 3485 |
| 59.897 | 20 | CAGCAGCCTTTCATCATCA       | 60.096 | 20 | 230 | 574  | 803  |
| 59.993 | 20 | ACCTCTAGCCCGGTGAACTT      | 60.132 | 20 | 209 | 4    | 212  |
| 59.79  | 20 | GGAGACCGAATTGGTAGCCT      | 60.464 | 20 | 200 | 41   | 240  |
| 59.42  | 20 | AAAAGCGAAGAGAGCGAATG      | 59.73  | 20 | 263 | 186  | 448  |
| 60.066 | 20 | ATCGAATTACCCGTTTGTGC      | 59.829 | 20 | 109 | 828  | 936  |
| 59.569 | 20 | CAATCGGCCAAAATGTATCC      | 60.153 | 20 | 110 | 127  | 236  |
| 59.983 | 20 | AATTCTCCCACCATGCAATC      | 59.756 | 20 | 252 | 3733 | 3984 |
| 59.808 | 22 | GAATCCACGACAAGGTGGTT      | 59.827 | 20 | 150 | 11   | 160  |
| 60.444 | 20 | AAGAGAGTTGCGAGAGCGAG      | 60.035 | 20 | 259 | 1981 | 2239 |
| 60.374 | 20 | CAGAGCTCGCTGTGTGAGTC      | 59.922 | 20 | 216 | 979  | 1194 |
| 59.881 | 20 | TTGTGTTGAGCTCCTTGTCCG     | 60.025 | 20 | 142 | 3641 | 3782 |
| 60.049 | 20 | TCATACGCATGAGGGATAAAA     | 58.122 | 21 | 237 | 127  | 363  |
| 59.297 | 20 | TCAAAAGGCAACATCCATGA      | 60.049 | 20 | 143 | 3    | 145  |
| 59.127 | 20 | TGGTGTAGATTAACACAACCTTGTA | 57.939 | 27 | 254 | 536  | 789  |
| 58.914 | 23 | TGTAGCCGACCCCAATTTAT      | 59.297 | 20 | 214 | 307  | 520  |
| 60.11  | 20 | TTATGGGAAGGAGATGCAGG      | 60.029 | 20 | 219 | 122  | 340  |
| 60.331 | 20 | GCGTTCAAATCCAGAATGT       | 59.939 | 20 | 213 | 2428 | 2640 |
| 60.117 | 20 | TCTTCCTGCCTCTCTGCTTC      | 59.827 | 20 | 258 | 2185 | 2442 |
| 59.946 | 21 | CCACGGTCATTTCTAGGGAA      | 59.926 | 20 | 275 | 682  | 956  |
| 59.077 | 23 | GCCCCTTGATTAACATCCATT     | 60.034 | 21 | 279 | 150  | 428  |
| 59.682 | 20 | CCCTACCCTGAAATTTTCCC      | 59.639 | 20 | 265 | 26   | 290  |
| 60.187 | 20 | GTGATGAAGCGTGTGAGGTG      | 60.319 | 20 | 120 | 1409 | 1528 |
| 59.116 | 23 | TCAAAACAGGGGATTTGAAGA     | 59.532 | 21 | 267 | 241  | 507  |
| 59.997 | 20 | GAAGGGCCTTGTCTTCCTCT      | 59.817 | 20 | 258 | 280  | 537  |
| 59.943 | 20 | GGAACACTATTTTCTGCAGCG     | 59.845 | 20 | 162 | 824  | 985  |
| 59.711 | 20 | ATCCCTACCTCAAGGGGATG      | 60.147 | 20 | 111 | 1208 | 1318 |
| 59.934 | 20 | GAGCTGCAACTAAGGCCAAC      | 60.022 | 20 | 220 | 129  | 348  |
| 59.966 | 20 | TTTTAATCACTATACCCGATTTGG  | 58.455 | 24 | 245 | 1181 | 1425 |
| 59.96  | 22 | TGTTAGCCACATTGGATGA       | 59.924 | 20 | 269 | 392  | 660  |
| 60.049 | 20 | TGGGACCAGAAAGATGAAGG      | 60.042 | 20 | 232 | 501  | 732  |
| 59.957 | 20 | GAGAACAAGTGGGTGCTCGT      | 60.307 | 20 | 199 | 39   | 237  |
| 60.117 | 20 | ACGATGATTCTCCGATGAG       | 60.034 | 20 | 128 | 1773 | 1900 |
| 59.889 | 21 | CAATCTGCACCACATTTGC       | 60.119 | 20 | 138 | 5009 | 5146 |
| 57.99  | 27 | CCCATTGCCCTCTTGTTTTA      | 59.931 | 20 | 182 | 226  | 407  |
| 59.297 | 20 | CGAGTTTATGACCATCCGGT      | 59.813 | 20 | 109 | 14   | 122  |
| 60.836 | 20 | GGTGAACCTTCCATCATTC       | 59.192 | 20 | 124 | 3    | 126  |
| 59.973 | 20 | TGGATTTATTCGGCTCAACC      | 59.901 | 20 | 246 | 364  | 609  |
| 58.997 | 21 | CATAGTTGGCCTGGAAAACG      | 60.493 | 20 | 213 | 417  | 629  |
| 61.079 | 21 | AACCGTCGGAATTACTGGTG      | 59.853 | 20 | 172 | 30   | 201  |
| 59.424 | 21 | AGTTCACACCCGAATCCAAG      | 59.966 | 20 | 173 | 254  | 426  |
| 60.232 | 20 | CCACATCATGCAAGGCTTTA      | 59.688 | 20 | 266 | 790  | 1055 |

|        |    |                           |        |    |     |      |      |
|--------|----|---------------------------|--------|----|-----|------|------|
| 60.011 | 20 | TGACATGATGGGGGAAGAAT      | 60.135 | 20 | 224 | 251  | 474  |
| 59.379 | 22 | ATAGAAGGGGGATCGGTTTG      | 60.145 | 20 | 229 | 874  | 1102 |
| 59.839 | 20 | AAAGCGAATGCCCTTTGTAA      | 59.72  | 20 | 245 | 2652 | 2896 |
| 60.051 | 20 | CGCCTTTGCTGGTGTTTATT      | 60.131 | 20 | 233 | 448  | 680  |
| 59.297 | 20 | ACGGAGAATGGAGATTCACG      | 60.073 | 20 | 251 | 14   | 264  |
| 59.974 | 20 | TCTGCTGCTTCATCTGCATT      | 59.704 | 20 | 139 | 1080 | 1218 |
| 59.823 | 20 | TGTCGGTGTTACCCCAATCT      | 60.232 | 20 | 171 | 1361 | 1531 |
| 59.807 | 20 | CAAAACATCATTACGACGC       | 60.119 | 20 | 250 | 331  | 580  |
| 59.95  | 20 | TGGGTTTATTGATGCACCTG      | 59.395 | 20 | 217 | 545  | 761  |
| 60.179 | 20 | TTCATCAAGAGATTACGTTTTATT/ | 58.427 | 27 | 148 | 112  | 259  |
| 60.353 | 20 | TGATATCGGGCTTTGAGCTT      | 59.807 | 20 | 206 | 578  | 783  |
| 59.911 | 20 | TCGGAGGAAGAAGACGAGAA      | 60.065 | 20 | 201 | 462  | 662  |
| 59.955 | 20 | CAAGAAAACAGTGGGGGAGA      | 60.081 | 20 | 216 | 1157 | 1372 |
| 59.851 | 20 | CGCATGTCATCACTCGCTAT      | 59.854 | 20 | 261 | 863  | 1123 |
| 60.073 | 20 | CCACTGTTGCTGCTGCTAGT      | 59.264 | 20 | 117 | 122  | 238  |
| 59.329 | 21 | CTGGGTAAACCCACGGACT       | 59.829 | 19 | 275 | 810  | 1084 |
| 59.978 | 20 | CTCTCCAAATCCCACCAAGA      | 60.042 | 20 | 248 | 1976 | 2223 |
| 60.148 | 20 | CGGGGGTGTTAGTTCAGAAT      | 58.909 | 20 | 272 | 49   | 320  |
| 59.955 | 20 | TCCCTCGAAGGTAAGAGCAA      | 59.948 | 20 | 164 | 131  | 294  |
| 60.395 | 20 | GCGACCAAATCGATACCCTA      | 59.923 | 20 | 235 | 415  | 649  |
| 60.969 | 20 | GCTAACCACCTCCAACGGTA      | 59.993 | 20 | 234 | 1638 | 1871 |
| 60.036 | 20 | AAAAATAAGCGCCACGTCAC      | 60.138 | 20 | 218 | 1105 | 1322 |
| 60.21  | 20 | GCTTGGAGAGAAGGAAGCAA      | 59.694 | 20 | 244 | 104  | 347  |
| 59.997 | 20 | ATTGGAATGTGAGAAACGCC      | 59.939 | 20 | 191 | 2501 | 2691 |
| 59.833 | 20 | TCCGTACACCTGGAATCCTC      | 59.927 | 20 | 273 | 1911 | 2183 |
| 59.985 | 20 | TCGTGCCTGTCTAACAATG       | 59.716 | 20 | 114 | 502  | 615  |
| 59.318 | 20 | CCAACACTTGTGCAAACCTCA     | 59.79  | 21 | 211 | 977  | 1187 |
| 59.969 | 20 | ATTCGATCGTAAAACAGCGG      | 60.096 | 20 | 159 | 196  | 354  |
| 60.366 | 20 | GCCCTGTTACATATTTCCCA      | 58.82  | 21 | 213 | 543  | 755  |
| 59.957 | 20 | TGTTCCCTCAAGTCGACAACG     | 59.873 | 20 | 219 | 2265 | 2483 |
| 60.159 | 23 | TTTCGCCCCCTATTTCTTCT      | 60.034 | 20 | 267 | 53   | 319  |
| 59.297 | 20 | TCTGCTAAAAATATGATGAATGCA  | 60.008 | 25 | 205 | 7    | 211  |
| 59.837 | 20 | AATACGACGAGGCGGTTTTA      | 59.609 | 20 | 271 | 1459 | 1729 |
| 60.232 | 20 | CGAACAATTTTCAAACGGCT      | 60.11  | 20 | 250 | 1318 | 1567 |
| 60.208 | 20 | GTAAATGGCCGAATCAGGAA      | 59.901 | 20 | 143 | 1656 | 1798 |
| 59.55  | 20 | GCAGTGCGACAAGCATTAAA      | 60.021 | 20 | 178 | 783  | 960  |
| 59.579 | 20 | GAGTCGGGCAATGCCTAATA      | 60.06  | 20 | 137 | 943  | 1079 |
| 59.262 | 20 | AAATAGTACAGTGGGTTTTGCTAC  | 59.023 | 25 | 216 | 1119 | 1334 |
| 59.297 | 20 | CCACTCCGTCTTCTTTTGGGA     | 60.224 | 20 | 241 | 23   | 263  |
| 60.042 | 20 | TTTGATTGGGAATAATTGGG      | 57.289 | 20 | 172 | 1008 | 1179 |
| 59.747 | 20 | CTTCAACTTGGCGCACTGTA      | 60.05  | 20 | 190 | 704  | 893  |
| 59.935 | 20 | AAACGCGTCCTGATAGGAAT      | 58.672 | 20 | 217 | 282  | 498  |
| 59.297 | 20 | CTAATGCAGGTCACCAGTCG      | 59.314 | 20 | 277 | 2    | 278  |
| 59.505 | 20 | CCAATTCAAGTCAGTGTTCCCTTT  | 59.552 | 23 | 257 | 262  | 518  |
| 60.642 | 20 | GGGTCAGATGTACGCAACATT     | 59.874 | 21 | 270 | 279  | 548  |
| 58.878 | 22 | AATGGGCCAACTACAGTGAA      | 58.076 | 20 | 250 | 2160 | 2409 |
| 59.271 | 22 | GAGATGGCCGACGTTAAAAT      | 59.046 | 20 | 177 | 0    | 176  |
| 57.778 | 27 | AGGACTTCCAACATTCGTGG      | 59.966 | 20 | 170 | 4    | 173  |
| 57.85  | 20 | TCCATTGAAGACGGACAACA      | 60.088 | 20 | 218 | 462  | 679  |
| 59.91  | 20 | TCACCGGTTTGTGAGTGGTA      | 60.001 | 20 | 255 | 134  | 388  |
| 59.996 | 20 | CTCCATCTCCATCCACGTCT      | 60.072 | 20 | 214 | 1847 | 2060 |
| 59.955 | 23 | AAAAAGTCCATCCCAAGAAAAA    | 59.013 | 22 | 254 | 325  | 578  |
| 59.93  | 21 | TACCCACTGGAGGTGAAAGG      | 59.959 | 20 | 273 | 1880 | 2152 |
| 60.376 | 20 | ACCCTACGAAGGGGAGACAT      | 59.817 | 20 | 276 | 351  | 626  |
| 59.934 | 20 | TTTCTTGTCTGCATTACGCG      | 60.134 | 20 | 196 | 345  | 540  |
| 57.853 | 20 | CTAATTTTACAAATTTAACGAGTG  | 57.347 | 27 | 184 | 299  | 482  |
| 60     | 20 | GCCTGTCTTTGGAACCCAT       | 59.973 | 20 | 176 | 5639 | 5814 |
| 60.229 | 20 | ATTGGAAGATTTGCTGTGG       | 60.074 | 20 | 128 | 554  | 681  |

|        |    |                          |        |    |     |      |      |
|--------|----|--------------------------|--------|----|-----|------|------|
| 59.602 | 20 | AGTTCCTATGGTTGTTGGCG     | 59.993 | 20 | 228 | 1145 | 1372 |
| 59.218 | 21 | GGAACCAAATTAATGGAGGAAA   | 59.207 | 22 | 145 | 670  | 814  |
| 60.91  | 20 | CATTGAATCCCTACTTGGCG     | 60.46  | 20 | 222 | 4    | 225  |
| 59.442 | 20 | CATCAAAGTTTTCCAACATCAA   | 59.02  | 23 | 263 | 364  | 626  |
| 60.073 | 20 | GAGCGATTCAACTTGCATGA     | 59.955 | 20 | 252 | 567  | 818  |
| 60.545 | 20 | GCCTTCATCATCTTCTTCGC     | 59.923 | 20 | 228 | 175  | 402  |
| 59.392 | 21 | CGGAAACAGAGCACATCAGA     | 59.984 | 20 | 229 | 342  | 570  |
| 60.201 | 20 | GATTCTCCACTCTCCCCTTTTT   | 59.947 | 22 | 169 | 953  | 1121 |
| 60.27  | 20 | AGGACAGTTCACATGCAACA     | 57.64  | 20 | 241 | 5924 | 6164 |
| 59.993 | 22 | TGCACGATTTACGCATTGAT     | 60.103 | 20 | 152 | 1810 | 1961 |
| 59.001 | 20 | CCGCGCAACAACAGTAACTA     | 59.934 | 20 | 113 | 61   | 173  |
| 59.688 | 22 | TCCAATCATTACCCTTGGCT     | 59.387 | 20 | 186 | 60   | 245  |
| 60.149 | 20 | CAATCCTACGCACTCCCATT     | 59.955 | 20 | 164 | 1900 | 2063 |
| 57.96  | 22 | TGTAGCCGACCCCAATTTAT     | 59.297 | 20 | 241 | 572  | 812  |
| 59.239 | 20 | GTGTGCAGGGAGACTGGACT     | 60.315 | 20 | 249 | 622  | 870  |
| 59.464 | 20 | TTCAAGTTTTGACAATGGGC     | 58.599 | 20 | 256 | 23   | 278  |
| 60.765 | 20 | ACAGGAAAAGCAAAGCGAAA     | 59.996 | 20 | 276 | 908  | 1183 |
| 60.388 | 20 | CACCGTCGAAACCAACTTTT     | 60.008 | 20 | 147 | 2895 | 3041 |
| 59.948 | 20 | AACGGCGTTTTGAATACTGG     | 59.996 | 20 | 175 | 526  | 700  |
| 59.545 | 20 | AAGGTCAAGTTCACACCAAACA   | 59.538 | 22 | 125 | 52   | 176  |
| 59.996 | 20 | GCGGAGAAATCTTCTTGTCG     | 59.955 | 20 | 233 | 533  | 765  |
| 60.012 | 20 | GCAAGAACACATGGGGAAGT     | 59.973 | 20 | 148 | 319  | 466  |
| 59.735 | 20 | TTGGGATTAAGGCTTTGGTG     | 59.931 | 20 | 280 | 359  | 638  |
| 59.297 | 20 | ACACAATCAGCACAGTGCAA     | 58.871 | 20 | 127 | 4    | 130  |
| 59.313 | 20 | CTTCTGCGTTTTCTCTCGAC     | 60.134 | 20 | 104 | 248  | 351  |
| 59.939 | 20 | AGACCTTGACTCGAACACC      | 60.307 | 20 | 272 | 56   | 327  |
| 59.864 | 20 | AGGGAAGCTCTTCGTATCA      | 59.95  | 20 | 177 | 480  | 656  |
| 59.834 | 20 | CAATGCTTATGTTCCCTCCC     | 59.387 | 20 | 235 | 851  | 1085 |
| 59.971 | 20 | TTGGTTCCCTATGTTGTCCCA    | 58.821 | 20 | 225 | 961  | 1185 |
| 59.624 | 21 | GGGCTTTCAAGCTATTGCAG     | 59.982 | 20 | 253 | 3325 | 3577 |
| 59.615 | 20 | TAGGGAGATGATGAGGTGCC     | 60.034 | 20 | 133 | 1654 | 1786 |
| 59.799 | 20 | ACGAGCCATTGTTGGATAGG     | 59.955 | 20 | 146 | 498  | 643  |
| 60.053 | 20 | TTTGCAAATCAATTGGACG      | 59.538 | 20 | 207 | 5    | 211  |
| 60.088 | 20 | CACCGCCTCCTCCTTATGTA     | 60.088 | 20 | 171 | 168  | 338  |
| 59.42  | 20 | TCCATTTTGCCATTCAAGGT     | 60.309 | 20 | 231 | 969  | 1199 |
| 59.95  | 20 | GAGAAGGTGCCCTGTTGAAG     | 59.844 | 20 | 220 | 2522 | 2741 |
| 59.985 | 21 | GATGAACCGAAACCTCTCCA     | 60.05  | 20 | 213 | 30   | 242  |
| 60.226 | 20 | TGGAGGCATCAATCTTGTGT     | 59.09  | 20 | 235 | 793  | 1027 |
| 59.907 | 20 | GAGGCGTCAGCTTACATTGG     | 60.796 | 20 | 266 | 848  | 1113 |
| 60.11  | 22 | GGAGCCATGAGACTAGACGG     | 59.827 | 20 | 208 | 281  | 488  |
| 60.045 | 20 | TTTTGCAATTTTCATTGGCTT    | 59.595 | 21 | 127 | 290  | 416  |
| 60.331 | 20 | TGAGTTCAAAATGTCAAAAGTATT | 60.614 | 26 | 242 | 463  | 704  |
| 60.703 | 18 | CTTGTCTCTGAACCACCACCT    | 60.002 | 20 | 183 | 11   | 193  |
| 60.074 | 20 | AGTTTGGGAGGTTGAATGGA     | 59.381 | 20 | 211 | 77   | 287  |
| 60.017 | 20 | TCCTCCACCAGCTTCTGAAC     | 60.386 | 20 | 118 | 1948 | 2065 |
| 59.78  | 20 | GGCCGCCTCATACTTTGTAA     | 60.096 | 20 | 151 | 209  | 359  |
| 60.263 | 20 | CGTTCTCTCTTGTCTCGCT      | 60.035 | 20 | 158 | 333  | 490  |
| 59.592 | 20 | AAGCGCAAATATATCCCGTG     | 59.95  | 20 | 226 | 5167 | 5392 |
| 57.117 | 20 | ATTGTTTTCCGCCATTCTTG     | 59.938 | 20 | 198 | 535  | 732  |
| 60.11  | 20 | TTGCTTCTTCTCCCTCCTCA     | 60.065 | 20 | 128 | 832  | 959  |
| 60.008 | 20 | CGTCTACGAGGACGTGCTAA     | 59.097 | 20 | 225 | 1100 | 1324 |
| 59.989 | 20 | TCCTTTGTCAGGTTTGGCTC     | 60.232 | 20 | 226 | 1397 | 1622 |
| 60.427 | 20 | GCATTGTATATTTGCGCCCT     | 59.956 | 20 | 275 | 893  | 1167 |
| 59.964 | 20 | CTCGAAGCCTTGACCTGAAC     | 59.989 | 20 | 224 | 1532 | 1755 |
| 59.031 | 20 | TATCGGAGGAGGATGTGGAG     | 60.027 | 20 | 241 | 554  | 794  |
| 60.349 | 23 | TTTTCCTTGGGTAAATTGCG     | 59.937 | 20 | 267 | 742  | 1008 |
| 59.793 | 21 | TGCCGGTACATACATGGAGA     | 59.948 | 20 | 224 | 54   | 277  |
| 59.769 | 20 | GTTCTTGGTTGGGAGGTGAA     | 59.943 | 20 | 252 | 2926 | 3177 |

|        |    |                         |        |    |     |      |      |
|--------|----|-------------------------|--------|----|-----|------|------|
| 59.844 | 20 | TTTTCAAGCAATTTCTGCCA    | 59.42  | 20 | 170 | 854  | 1023 |
| 59.566 | 20 | CATCTTTACTGCACCACCAGAA  | 60.168 | 22 | 261 | 1370 | 1630 |
| 60.042 | 20 | GCTGCCACCATCTTTCTTTC    | 59.82  | 20 | 184 | 1389 | 1572 |
| 59.966 | 20 | TCACGCCCAAAAATACTTCC    | 59.938 | 20 | 228 | 4    | 231  |
| 59.297 | 20 | AGTCATTCATTTCCCGTGCT    | 59.556 | 20 | 262 | 12   | 273  |
| 59.335 | 25 | TGGGAAGTGGGCAAAGATAG    | 60.066 | 20 | 249 | 1277 | 1525 |
| 60.074 | 20 | GAATTGGCCTTGCTTGCTTA    | 60.343 | 20 | 264 | 245  | 508  |
| 59.504 | 20 | CAGCATACTAAACCTCCCTG    | 58.73  | 21 | 245 | 31   | 275  |
| 60.24  | 20 | TTTGGACCAAGTCACACGAA    | 60.128 | 20 | 131 | 608  | 738  |
| 59.816 | 20 | GAGGAGATTTTACGGTGGCA    | 60.074 | 20 | 124 | 513  | 636  |
| 60.059 | 20 | GCCTACAGCAACTCCTTTGC    | 60.022 | 20 | 145 | 1224 | 1368 |
| 59.958 | 21 | GCAGCGTGTTAAAGTTTACGAA  | 59.489 | 22 | 206 | 921  | 1126 |
| 59.716 | 20 | TCCAGTCCCCATTCGTATTC    | 59.75  | 20 | 223 | 1353 | 1575 |
| 59.901 | 20 | GGTTCATGTAGCTGACCCCA    | 60.924 | 20 | 197 | 793  | 989  |
| 60.132 | 20 | ACTTCCAGCATACCTCCCCT    | 59.957 | 20 | 131 | 16   | 146  |
| 61.012 | 20 | AAAATGACGTGAAGTATGAAGGC | 59.557 | 23 | 242 | 1000 | 1241 |
| 60.041 | 20 | TTGGGAACAAGAGATTTTCGC   | 60.192 | 20 | 177 | 326  | 502  |
| 60.066 | 20 | ACGGGTTGAGTTCTTGTTGG    | 60.005 | 20 | 203 | 511  | 713  |
| 60.61  | 20 | CAAGCCATTAAGGTTGGGA     | 59.931 | 20 | 158 | 288  | 445  |
| 59.972 | 20 | GCTCTGACTTGTTCTTGGGC    | 59.997 | 20 | 160 | 97   | 256  |
| 60.006 | 20 | AATGGCGATGAAGGAGAAGA    | 59.773 | 20 | 247 | 933  | 1179 |
| 60.066 | 20 | GGCATGACTGGTCAAAGGAG    | 60.656 | 20 | 174 | 711  | 884  |
| 60.008 | 20 | TGTTACCGTTGCCGTTGTTA    | 60.029 | 20 | 231 | 370  | 600  |
| 60.91  | 20 | CAACAAATCCCTTTTTCCCA    | 59.772 | 20 | 235 | 9    | 243  |
| 59.734 | 20 | AGGAATCCCTCTTTCTCCCA    | 60.008 | 20 | 276 | 683  | 958  |
| 57.286 | 27 | TGCTGAGCTTAGGCTTAGTGG   | 59.799 | 21 | 241 | 1668 | 1908 |
| 59.694 | 20 | TTGAGCTTCGTTGAGGACT     | 60.134 | 20 | 246 | 27   | 272  |
| 59.909 | 21 | TGAGAATCATCAGCGGTACG    | 59.823 | 20 | 168 | 614  | 781  |
| 59.691 | 20 | CAGGGACTGCTAAAGGCAAA    | 60.378 | 20 | 195 | 1187 | 1381 |
| 59.988 | 20 | GTGTCGGCATCGATCATGTA    | 60.513 | 20 | 278 | 713  | 990  |
| 59.967 | 20 | AAATGGAGGCACTGATCTGC    | 60.226 | 20 | 272 | 691  | 962  |
| 59.859 | 20 | CCACATAGCAACGAAGCAGA    | 60.011 | 20 | 239 | 2326 | 2564 |
| 60.05  | 20 | ATGTAGCCGACCCACATAG     | 59.836 | 20 | 162 | 1066 | 1227 |
| 60.059 | 20 | TTCGGGTTTCACAATTCACA    | 59.941 | 20 | 211 | 957  | 1167 |
| 59.72  | 20 | TTTTTCGAAATCGTGCACCT    | 60.617 | 20 | 237 | 771  | 1007 |
| 59.971 | 20 | AGGCTTGTTGACCGCTTAGA    | 60.015 | 20 | 272 | 113  | 384  |
| 58.673 | 20 | GTGTAATGGCGGTGGAGAGT    | 59.997 | 20 | 115 | 258  | 372  |
| 59.229 | 22 | GCGAGTTGATGGTTTTGGAT    | 59.939 | 20 | 149 | 118  | 266  |
| 59.996 | 20 | CGACCTCCACTCTTCTCCAG    | 59.978 | 20 | 247 | 730  | 976  |
| 60.424 | 20 | GTTTCTGTGAAGAGCGGAGG    | 59.989 | 20 | 197 | 803  | 999  |
| 60.41  | 21 | AACAGGGTCCCTTCGTTTTT    | 59.842 | 20 | 206 | 567  | 772  |
| 60.91  | 20 | TCATTTTCAGTTTGCCTAAGCC  | 59.406 | 22 | 224 | 6    | 229  |
| 59.656 | 21 | TGTTGGTTCAAACTAATCCAAT  | 57.617 | 23 | 117 | 2516 | 2632 |
| 59.395 | 20 | CCTAGGCTCTCAGACACACG    | 58.621 | 20 | 229 | 296  | 524  |
| 59.984 | 20 | GTTACATCCCACGGATTTG     | 60.051 | 20 | 272 | 919  | 1190 |
| 60.123 | 21 | CCCTCATTTGGGATCTACCC    | 60.517 | 20 | 257 | 359  | 615  |
| 60.154 | 20 | AAAACAAACAAATGGCCGAC    | 59.845 | 20 | 209 | 1966 | 2174 |
| 59.602 | 20 | TCTGCTTCTGTTGCTGCTGT    | 59.929 | 20 | 113 | 3414 | 3526 |
| 60.91  | 20 | TCTGAACATGGGGAAAGACC    | 59.903 | 20 | 279 | 0    | 278  |
| 59.82  | 20 | CACGATTCATATGTGCTTCCA   | 59.557 | 21 | 249 | 46   | 294  |
| 60.206 | 20 | GGATCAAGTGGGCAAAGAAA    | 60.051 | 20 | 278 | 4497 | 4774 |
| 60.002 | 20 | CCCACGTACGATCTCAGGTT    | 59.989 | 20 | 205 | 199  | 403  |
| 60.111 | 20 | TCTACGATGATTTCCCTCCG    | 60.029 | 20 | 279 | 1512 | 1790 |
| 59.953 | 20 | GTGACCCCACAATCCAAATC    | 60.034 | 20 | 136 | 9    | 144  |
| 57.409 | 23 | TGGTGTGATAACGGCCATA     | 59.809 | 20 | 256 | 1759 | 2014 |
| 59.644 | 20 | GAGCTGGCCGTAGTTTCCCTA   | 59.476 | 20 | 279 | 404  | 682  |
| 59.768 | 20 | TTTTGCATGTGAAAAATGGTTT  | 59.385 | 22 | 207 | 968  | 1174 |
| 60.214 | 20 | TGAGGAAAATGGGTGGAAG     | 59.903 | 20 | 268 | 677  | 944  |



|        |    |                           |        |    |     |      |      |
|--------|----|---------------------------|--------|----|-----|------|------|
| 59.947 | 21 | AGCAATCTCTACAAGCGGGA      | 59.978 | 20 | 208 | 69   | 276  |
| 58.858 | 22 | GCTGTGCATTATCACCTACCTC    | 58.747 | 22 | 275 | 666  | 940  |
| 60.051 | 20 | GCAAGCATTTCACCACTT        | 60.118 | 20 | 258 | 392  | 649  |
| 60.28  | 20 | GCCTGAATAACGAATGTTGGA     | 59.952 | 21 | 134 | 356  | 489  |
| 59.872 | 20 | AAAAACAACAACAACCACTTCA    | 58.621 | 23 | 153 | 222  | 374  |
| 59.488 | 20 | TGGAGGTCTTCAGAGCAGGT      | 59.986 | 20 | 132 | 1359 | 1490 |
| 59.586 | 20 | TAGAAATTGAAATGGCCGGT      | 59.411 | 20 | 259 | 419  | 677  |
| 59.893 | 20 | TTGGAGAAACAGTGCTGCTG      | 60.175 | 20 | 192 | 991  | 1182 |
| 60.416 | 20 | AGGGCTCTGCTAAAACGACA      | 60.015 | 20 | 212 | 196  | 407  |
| 58.529 | 25 | TATTTTAAATTAAGAGCCACCCA   | 57.076 | 23 | 180 | 400  | 579  |
| 59.95  | 20 | ATGTTCTCGGAATCACCTG       | 59.927 | 20 | 227 | 647  | 873  |
| 59.953 | 20 | ATAGGCCTAACTCGAAGCCC      | 59.709 | 20 | 211 | 370  | 580  |
| 59.83  | 20 | AAAACCAACATTCACCACCTT     | 59.653 | 22 | 232 | 487  | 718  |
| 59.957 | 24 | AAAATTTATTGGGATTAAGGCTTT  | 59.995 | 25 | 194 | 754  | 947  |
| 60.042 | 20 | TCAAACCAGATGACCCAACA      | 59.935 | 20 | 205 | 875  | 1079 |
| 60.152 | 20 | TGTAGCCGACCCCAATTTAT      | 59.297 | 20 | 111 | 2141 | 2251 |
| 59.074 | 21 | GCTGCTGTCCACATAGCTGA      | 60.168 | 20 | 182 | 67   | 248  |
| 59.913 | 20 | TGGAGGATTTGTATGCGACA      | 60.073 | 20 | 157 | 2420 | 2576 |
| 59.933 | 20 | GATTTTACCCATGGTTGCTT      | 60.081 | 20 | 216 | 439  | 654  |
| 59.903 | 20 | ACCACTGCACCCTAAGATGG      | 59.989 | 20 | 235 | 496  | 730  |
| 59.993 | 20 | GGCAGCATTGAGGATTGATT      | 60.043 | 20 | 173 | 104  | 276  |
| 59.993 | 20 | GCTAAGGCTGAAAGCAATGG      | 59.982 | 20 | 175 | 698  | 872  |
| 59.938 | 20 | TCACTTCCACGAAACCCTTC      | 60.088 | 20 | 264 | 4820 | 5083 |
| 59.989 | 20 | CCTTCTTGGTCTGAGCTTGC      | 60.134 | 20 | 279 | 182  | 460  |
| 60.073 | 20 | TTGATCCTGAGAAAGCCGAT      | 59.773 | 20 | 274 | 436  | 709  |
| 60.074 | 20 | CTCCATTCCCATCTCTTCCA      | 60.003 | 20 | 214 | 1408 | 1621 |
| 59.845 | 21 | AGACAGGCATAACCATTGCC      | 59.962 | 20 | 263 | 17   | 279  |
| 59.882 | 20 | CCTGGAACCTTCTTTTGTGC      | 59.711 | 20 | 254 | 1768 | 2021 |
| 60.395 | 20 | GATGAAAGGGAGGTTCTGTA      | 60.05  | 20 | 133 | 534  | 666  |
| 59.927 | 20 | TGTAGCCGACCCCAATTTAT      | 59.297 | 20 | 185 | 1375 | 1559 |
| 58.432 | 20 | CCCAAGACCCCAATTTGATT      | 60.91  | 20 | 250 | 1864 | 2113 |
| 59.734 | 20 | TTGCCTCCTTACACTTATTTATCAG | 59.631 | 26 | 204 | 2436 | 2639 |
| 59.927 | 20 | TTTACACCGTTATCTGCCTC      | 60.074 | 20 | 127 | 252  | 378  |
| 60.011 | 20 | CCGCCTCTCCTCCTCTCTAT      | 59.935 | 20 | 279 | 1158 | 1436 |
| 59.762 | 20 | CCGACCCACATAGTAAAA        | 60.745 | 20 | 166 | 0    | 165  |
| 58.223 | 24 | AGGCAACACGCTTCATTACC      | 60.14  | 20 | 157 | 7    | 163  |
| 60.255 | 20 | TGCAAGCTGATAGGTGTTTCA     | 59.087 | 21 | 278 | 2179 | 2456 |
| 60.733 | 20 | GCTCTCATGCGTACAAGCCT      | 60.569 | 20 | 279 | 611  | 889  |
| 60.262 | 20 | GCTCCGTCCTGCTACATAGTG     | 59.965 | 22 | 172 | 926  | 1097 |
| 59.988 | 20 | TATGACGACGGCTCTGTCTG      | 60.008 | 20 | 259 | 192  | 450  |
| 58.48  | 20 | TGTGAACGGCACGACATATAA     | 60.006 | 21 | 265 | 196  | 460  |
| 59.989 | 20 | CACACACAATACGGGAGACG      | 60.025 | 20 | 279 | 2537 | 2815 |
| 59.964 | 20 | AGCGGAAGTACAAATGGACG      | 60.132 | 20 | 273 | 1459 | 1731 |
| 60.119 | 20 | GCAACATCATCCAGATTGGT      | 58.36  | 20 | 220 | 677  | 896  |
| 59.61  | 20 | GGTTGCCAAAAGAGGTTGAA      | 60.088 | 20 | 271 | 579  | 849  |
| 59.923 | 20 | AAATATTGCCGCTCATCAGG      | 60.06  | 20 | 279 | 622  | 900  |
| 59.059 | 20 | GTACAGGCTGGCATCCCTAA      | 60.096 | 20 | 191 | 2276 | 2466 |
| 60.134 | 20 | TGGCCTACGTTACTCAACCC      | 59.993 | 20 | 149 | 1069 | 1217 |
| 59.688 | 20 | TGCTATGCTTGGAAAGTTATGTGA  | 59.793 | 23 | 112 | 2594 | 2705 |
| 60.02  | 20 | TGCAAGAGAGCTTTGTGGTG      | 60.175 | 20 | 277 | 33   | 309  |
| 59.039 | 21 | AGGTTGTCACCCCAATAGCA      | 60.375 | 20 | 258 | 103  | 360  |
| 60.015 | 20 | CCCAAGACCCCAATTTGATT      | 60.91  | 20 | 124 | 2184 | 2307 |
| 60.102 | 22 | CAGCACAAAACAAAATGCTGA     | 59.903 | 21 | 279 | 654  | 932  |
| 60.014 | 20 | CCTTAATTTGCGACGGGTTA      | 59.958 | 20 | 247 | 166  | 412  |
| 59.903 | 20 | CCCAAGACCCCAATTTGATT      | 60.91  | 20 | 110 | 1104 | 1213 |
| 60.074 | 20 | CAATTCTTTGGTCGGGTTTC      | 59.406 | 20 | 108 | 2377 | 2484 |
| 59.948 | 20 | AAGCTGCCAGAGAACTTGA       | 60.134 | 20 | 103 | 1884 | 1986 |
| 60.11  | 20 | ATGGCAAGAACAGTCCCAAC      | 59.973 | 20 | 186 | 996  | 1181 |

|        |    |                           |        |    |     |      |      |
|--------|----|---------------------------|--------|----|-----|------|------|
| 60.128 | 20 | GGAGCACTGTGAGCTATGTGG     | 60.87  | 21 | 279 | 1080 | 1358 |
| 59.655 | 20 | ACCGCCTGATGATTTTGAAC      | 59.939 | 20 | 213 | 109  | 321  |
| 59.959 | 20 | CGATGATGCTGAGGGAAAAT      | 60.036 | 20 | 121 | 1505 | 1625 |
| 59.47  | 20 | GTCATGCTGCGTTGTGAGAT      | 59.87  | 20 | 275 | 7552 | 7826 |
| 59.677 | 20 | GGAACCGTGCGATTTTCTTA      | 60.074 | 20 | 214 | 203  | 416  |
| 59.702 | 20 | CATTGGCATGTAGTGATGGC      | 59.955 | 20 | 145 | 463  | 607  |
| 60.005 | 20 | TTAACGTGGGCGTTTTTCTC      | 60.11  | 20 | 166 | 13   | 178  |
| 59.522 | 20 | GCCTCGATCAATGTCCTTGT      | 60.081 | 20 | 189 | 104  | 292  |
| 59.242 | 22 | ATGGACTGTGGTGTGCATA       | 60.144 | 20 | 237 | 100  | 336  |
| 60.162 | 20 | TGGGCTAATAATGGAGCTGG      | 60.053 | 20 | 280 | 6109 | 6388 |
| 59.297 | 20 | TGTGGTTATTCCAACGACGA      | 59.964 | 20 | 273 | 0    | 272  |
| 59.297 | 20 | GGGAATTGGGATGAAAAGGT      | 59.996 | 20 | 204 | 43   | 246  |
| 59.247 | 20 | CCCAAGACCCCAATTTGATT      | 60.91  | 20 | 185 | 942  | 1126 |
| 60.155 | 20 | AAACACAACCTGGCATCCCTC     | 59.973 | 20 | 182 | 15   | 196  |
| 59.978 | 20 | TGAGAGTACGCACAGCAAGG      | 60.199 | 20 | 187 | 42   | 228  |
| 59.895 | 22 | AAATAAAATATATATGGGGTTCCA  | 58.563 | 27 | 172 | 95   | 266  |
| 60.462 | 20 | TTTTTGGATGGAAAAATGGC      | 59.751 | 20 | 137 | 1537 | 1673 |
| 60.082 | 21 | TGTAGCCGACCCCAATTTAT      | 59.297 | 20 | 166 | 1291 | 1456 |
| 60.05  | 20 | TACCACCGTAACCACCACCT      | 60.149 | 20 | 277 | 632  | 908  |
| 59.297 | 20 | TGCACCACAAGATGGTGAAT      | 59.967 | 20 | 188 | 8    | 195  |
| 60.344 | 20 | TTTTGAGGTTAGTTTGCCG       | 60.103 | 20 | 127 | 586  | 712  |
| 59.938 | 20 | ACCGTCTCATAGCCCATGTC      | 59.957 | 20 | 219 | 49   | 267  |
| 60.051 | 20 | TCTTGTCTTTCCCTTTTGC       | 60.227 | 20 | 173 | 167  | 339  |
| 60.444 | 20 | TTCAGATCATCCACCCACAA      | 59.893 | 20 | 152 | 590  | 741  |
| 60.05  | 20 | GGATCACCACAACTCCAG        | 60.363 | 20 | 280 | 2871 | 3150 |
| 60.143 | 20 | TTCACCGAAATGGTGTGTA       | 59.964 | 20 | 232 | 2131 | 2362 |
| 59.978 | 20 | CAAATTAATCAATCTCCTCCTCC   | 58.164 | 23 | 250 | 1898 | 2147 |
| 59.525 | 20 | AAGGAAGCTTTGCACCTGA       | 59.993 | 20 | 104 | 577  | 680  |
| 59.84  | 20 | AATTACGGCGTGGATTTTCA      | 60.323 | 20 | 215 | 38   | 252  |
| 60.039 | 20 | ATAATCAGCCTTTGCGTTGG      | 60.096 | 20 | 182 | 1669 | 1850 |
| 60.31  | 20 | AAAACACGTGTGGAAGGAGG      | 60.005 | 20 | 152 | 408  | 559  |
| 60.12  | 20 | TCCACGTTAATATGGATGCG      | 59.401 | 20 | 278 | 2494 | 2771 |
| 59.694 | 20 | TTGTCCAGCGATTTATTGGA      | 59.112 | 20 | 277 | 2845 | 3121 |
| 60.089 | 20 | GAGGTAGAGCTGCAGATGGC      | 60.127 | 20 | 188 | 107  | 294  |
| 59.724 | 20 | CCCAAACCTTCTCCCATCTCA     | 60.042 | 20 | 197 | 867  | 1063 |
| 59.297 | 20 | GGTCTTGGGGGTTAGATGT       | 60.052 | 20 | 127 | 3    | 129  |
| 59.934 | 20 | TGAGGATTCTACCCAGTCG       | 60.065 | 20 | 189 | 144  | 332  |
| 60.292 | 20 | GGGAGAAGAATTCACGAGCA      | 60.34  | 20 | 232 | 21   | 252  |
| 60.11  | 20 | ATGTTGCATGTGAGGTGCAT      | 59.999 | 20 | 264 | 327  | 590  |
| 59.813 | 20 | ATTGTGCATGCATGTGGTGT      | 60.896 | 20 | 135 | 1549 | 1683 |
| 59.112 | 21 | CATGTGGAAGTGTGGAATGG      | 59.806 | 20 | 266 | 341  | 606  |
| 59.962 | 20 | TTTGCAAATGACACACGAAA      | 60.14  | 21 | 268 | 1468 | 1735 |
| 59.928 | 20 | TGCCACCAAGGAGAGTACAA      | 59.288 | 20 | 144 | 403  | 546  |
| 59.9   | 20 | TGGGGATCTCATGGACATTT      | 60.135 | 20 | 245 | 835  | 1079 |
| 59.962 | 20 | ACACCTGACCAGACCTGACC      | 60.006 | 20 | 123 | 496  | 618  |
| 59.973 | 20 | CTCGTCACAATTTGCTTCCA      | 59.84  | 20 | 261 | 662  | 922  |
| 59.83  | 20 | CCCAAGACCCCAATTTGATT      | 60.91  | 20 | 201 | 1394 | 1594 |
| 60.365 | 20 | ACATCTGACCCCTCAAGACC      | 58.95  | 20 | 177 | 375  | 551  |
| 59.955 | 20 | ATCAGAAGATCCAGCATGGG      | 60.034 | 20 | 172 | 508  | 679  |
| 60.734 | 20 | TTGAATTTGCCTTAATAATTACCC/ | 59.991 | 25 | 269 | 20   | 288  |
| 60.035 | 20 | GGTTGCGTACATTTGACCCT      | 59.859 | 20 | 175 | 3292 | 3466 |
| 59.967 | 20 | CTCGGAAAATTTCCAACGAAA     | 60.046 | 20 | 272 | 896  | 1167 |
| 60.059 | 20 | GAGTATCGGTTTTGGGGGAT      | 60.017 | 20 | 178 | 1061 | 1238 |
| 59.259 | 22 | ATTCTTGCGTGCTCACCTTT      | 59.882 | 20 | 192 | 2089 | 2280 |
| 60.046 | 20 | ACGGACATGATACGACACGA      | 59.992 | 20 | 196 | 87   | 282  |
| 59.92  | 20 | CTCAGCCCTATTGTAGGCCA      | 60.227 | 20 | 236 | 1402 | 1637 |
| 59.858 | 20 | GCACGAACGTTTGAAGTAA       | 59.888 | 20 | 208 | 626  | 833  |
| 59.82  | 20 | ACCACAAGCTTCCACCAATC      | 59.973 | 20 | 277 | 209  | 485  |

|        |    |                          |        |    |     |      |      |
|--------|----|--------------------------|--------|----|-----|------|------|
| 60.029 | 20 | AGTGGAAATGTGGGGAGAGTG    | 59.962 | 20 | 219 | 740  | 958  |
| 60.363 | 20 | TATTACAGGGCCATTCACCC     | 59.645 | 20 | 169 | 525  | 693  |
| 58.646 | 22 | AATTTGGTTGATAAGGCCCC     | 60.02  | 20 | 275 | 191  | 465  |
| 58.465 | 22 | GCTTATGGATTTCCCCCAAT     | 59.984 | 20 | 207 | 5    | 211  |
| 60.045 | 25 | TTCCATTCGTAGATCCTATTACCA | 58.945 | 24 | 226 | 1256 | 1481 |
| 58.055 | 21 | CGGGCGGTTTTTAATGTTTA     | 59.835 | 20 | 236 | 86   | 321  |
| 60.201 | 20 | GAATAAGGAATTTCGCACCGA    | 60.038 | 20 | 189 | 17   | 205  |
| 60.352 | 20 | TGAAACCGTTCGTAAGAGGC     | 60.11  | 20 | 185 | 640  | 824  |
| 59.882 | 20 | TGCATTAAGGGTTGGAGACA     | 59.123 | 20 | 203 | 447  | 649  |
| 59.828 | 21 | TCGAAACCACTCAACCCATT     | 60.353 | 20 | 212 | 86   | 297  |
| 59.955 | 20 | AAGGCATGGGCAACTTAGAA     | 59.708 | 20 | 259 | 863  | 1121 |
| 59.984 | 20 | GGGTTTGGATAAGCCTGTGA     | 59.933 | 20 | 268 | 812  | 1079 |
| 60.162 | 20 | ACAACGAACAGCCGTTTAC      | 60.037 | 20 | 175 | 272  | 446  |
| 59.297 | 20 | TCTTGGGAGTGCATTTTCT      | 59.67  | 20 | 264 | 8    | 271  |
| 60.721 | 20 | TCGTCAAATCTTGGAGGCT      | 59.813 | 20 | 241 | 17   | 257  |
| 59.989 | 20 | GACCGTTTTAACAGACCGGA     | 59.971 | 20 | 145 | 708  | 852  |
| 60.019 | 20 | TACTACCCCATCTTCGCACC     | 59.955 | 20 | 219 | 396  | 614  |
| 59.988 | 20 | TTTCATGGCTGTGCACCTAC     | 59.722 | 20 | 252 | 787  | 1038 |
| 60.042 | 20 | CAAGAGCATCCCCTTACACA     | 59.831 | 20 | 200 | 945  | 1144 |
| 59.807 | 20 | ATGAAAGTTTTCCCGTGCC      | 59.925 | 19 | 103 | 316  | 418  |
| 60.34  | 20 | CGAGGAAACAAACGACCTGT     | 60.149 | 20 | 264 | 829  | 1092 |
| 60.074 | 20 | ATACAGCACGCCGAGAGACT     | 60.043 | 20 | 101 | 105  | 205  |
| 59.988 | 20 | TGCATATTAGTCTGCGGCTG     | 59.999 | 20 | 195 | 1134 | 1328 |
| 60.91  | 20 | CAAGCTGTGTGCCTCAAGAA     | 60.175 | 20 | 158 | 5    | 162  |
| 60.356 | 20 | TGAAGCTGATGTTGGCGTAG     | 60.011 | 20 | 238 | 387  | 624  |
| 59.986 | 20 | CAAATAATGGCTGCTGCAAA     | 59.842 | 20 | 212 | 827  | 1038 |
| 60.05  | 20 | GGTCTCGTGGTGGCTAGAAG     | 59.867 | 20 | 204 | 534  | 737  |
| 59.347 | 24 | TCCATGAAACATAAATCTTGCC   | 58.946 | 22 | 160 | 10   | 169  |
| 59.964 | 20 | AGCTGCATGAGCAGGAATTT     | 59.985 | 20 | 139 | 1144 | 1282 |
| 60.104 | 21 | GGCCATGGAGAAGAACAAGA     | 60.195 | 20 | 280 | 570  | 849  |
| 59.297 | 20 | TCCAGGTTATGTTCCACGGT     | 60.232 | 20 | 205 | 1    | 205  |
| 60.103 | 20 | GAAGGGTGGTTGTTCTGTGG     | 60.399 | 20 | 246 | 1205 | 1450 |
| 59.297 | 20 | TCACCATATGTTCAACCTGTCA   | 58.9   | 22 | 245 | 9    | 253  |
| 59.928 | 23 | AACGTAAATAGTTGCGCCTCA    | 59.793 | 21 | 258 | 4339 | 4596 |
| 60.234 | 20 | GCTGATACCGGCTTCTCATC     | 59.803 | 20 | 157 | 601  | 757  |
| 60.065 | 20 | CACCTCGCAGCTATCATCAA     | 59.972 | 20 | 228 | 87   | 314  |
| 59.992 | 20 | TGTCTCGTCCCTGCAACTGAC    | 60.03  | 20 | 163 | 1200 | 1362 |
| 60.048 | 20 | GCTTCAATTCCCCTGACAGA     | 60.195 | 20 | 252 | 863  | 1114 |
| 57.017 | 20 | CCTCCAGCATCCGAATATGT     | 59.917 | 20 | 160 | 476  | 635  |
| 60.517 | 20 | GGTGGGGAGGTGTAGTGGTA     | 59.697 | 20 | 235 | 3760 | 3994 |
| 59.978 | 20 | CATTGGTGAAGAATTTGGGG     | 60.162 | 20 | 176 | 1930 | 2105 |
| 59.873 | 20 | TGCTTCAAAAATTCAGCCAA     | 59.42  | 20 | 178 | 534  | 711  |
| 59.79  | 23 | CAAGAAACATCATCATGCCG     | 60.073 | 20 | 146 | 53   | 198  |
| 59.93  | 20 | TGGGCCTCCTCCTTAAGACT     | 60.204 | 20 | 276 | 502  | 777  |
| 59.918 | 20 | GTTTTTGTCGAGCCTTGAGC     | 60     | 20 | 218 | 155  | 372  |
| 59.405 | 20 | ATTCGACACCAATTTCTCCG     | 59.933 | 20 | 167 | 546  | 712  |
| 60.267 | 20 | ATGTGGGCTTATTGGGTGTG     | 60.636 | 20 | 203 | 160  | 362  |
| 60.111 | 20 | CTTTAACCCCTGCATCCTGA     | 60.066 | 20 | 116 | 1071 | 1186 |
| 59.844 | 20 | GGAGGGATGTTTCCAACCTCA    | 59.903 | 20 | 257 | 1000 | 1256 |
| 59.934 | 20 | TCCACACCTCCACCTCCTAC     | 59.962 | 20 | 262 | 224  | 485  |
| 60.134 | 20 | CCCAAGACCCCAATTTGATT     | 60.91  | 20 | 116 | 3012 | 3127 |
| 60.349 | 20 | CACCTTAGTTGTCAGGGGGA     | 59.959 | 20 | 136 | 1986 | 2121 |
| 59.569 | 20 | AGGTTGCGTACATCTGACCC     | 59.997 | 20 | 200 | 2366 | 2565 |
| 60.024 | 21 | TCCCGATATGGTAGACGGTT     | 59.269 | 20 | 244 | 847  | 1090 |
| 60.381 | 20 | CAGCTGAGGGAGGAGTTTTG     | 59.982 | 20 | 140 | 2987 | 3126 |
| 59.855 | 20 | ACAGGGTTGCTGGTTTCATC     | 59.973 | 20 | 166 | 525  | 690  |
| 60.096 | 20 | AACTACGGGTGGGGCTACTT     | 59.886 | 20 | 225 | 702  | 926  |
| 59.78  | 20 | GGTGGATCTTCGGTGAGCTA     | 60.218 | 20 | 228 | 557  | 784  |

|        |    |                          |        |    |     |      |      |
|--------|----|--------------------------|--------|----|-----|------|------|
| 59.955 | 20 | GGACGAGTTGGATCGTCTGT     | 60.12  | 20 | 263 | 2066 | 2328 |
| 59.297 | 20 | TCCTCTGCAAATGAACATTGA    | 59.262 | 21 | 268 | 7    | 274  |
| 60.91  | 20 | CATGCAATAAGTTGAGAAAAATG/ | 58.378 | 24 | 111 | 4    | 114  |
| 59.297 | 20 | TTCCAATTGCTTTCCTCACC     | 60.051 | 20 | 181 | 7    | 187  |
| 60.37  | 20 | TCAAATTTCCCAGCAGGACT     | 59.67  | 20 | 279 | 2169 | 2447 |
| 60.913 | 20 | CAGAGAAGTGGAAAATCCCG     | 59.665 | 20 | 119 | 474  | 592  |
| 60.102 | 24 | TCCATGGTCGACGAGTTGTA     | 60.112 | 20 | 267 | 658  | 924  |
| 59.697 | 20 | TTGTGCCCTTACCCAGTAGG     | 59.986 | 20 | 233 | 740  | 972  |
| 60.31  | 20 | AGATGTACTGACGGATCGGG     | 59.95  | 20 | 221 | 282  | 502  |
| 59.894 | 20 | TGCTGTTGATCAATGGGTGT     | 59.967 | 20 | 209 | 3603 | 3811 |
| 59.569 | 20 | TGACCACTACAATGTTTCGCC    | 59.572 | 20 | 266 | 477  | 742  |
| 60.05  | 20 | TGGCAATGCTCATCAGGTTA     | 60.22  | 20 | 269 | 226  | 494  |
| 59.812 | 20 | TGTAGCCGACCCCAATTTAT     | 59.297 | 20 | 198 | 2200 | 2397 |
| 57.804 | 20 | TTTCCCACCCACTCATCATT     | 60.173 | 20 | 263 | 3    | 265  |
| 60.91  | 20 | TTGTGGGAAATGGTTGCATA     | 59.786 | 20 | 213 | 5    | 217  |
| 60.416 | 20 | TGGTGGCTCTTTCAATTGCT     | 60.776 | 20 | 253 | 1518 | 1770 |
| 59.697 | 21 | GGGGAAATTCTGACAATGACAA   | 61.08  | 22 | 188 | 5765 | 5952 |
| 59.369 | 20 | CGTCTGATATGTTGGACGGA     | 59.522 | 20 | 218 | 1107 | 1324 |
| 59.807 | 20 | CTGGTGAAGGTTTGCAAGT      | 60.149 | 20 | 188 | 1148 | 1335 |
| 60.34  | 20 | AGCTTGTTTCGCTTCGACAGT    | 60.201 | 20 | 212 | 467  | 678  |
| 59.995 | 20 | GGCTTGACCCCTACTAAAGC     | 59     | 20 | 278 | 1069 | 1346 |
| 59.541 | 20 | CCCAAGACCCCAATTTGATT     | 60.91  | 20 | 122 | 3834 | 3955 |
| 60.081 | 20 | TTGTCAATTTTGAGTCCCAGG    | 59.956 | 21 | 257 | 521  | 777  |
| 59.903 | 20 | GAGATATCGTGGGCCTTCAA     | 60.036 | 20 | 134 | 3209 | 3342 |
| 59.297 | 20 | AGTTGGCATCCCAAAGTCAT     | 59.41  | 20 | 188 | 12   | 199  |
| 59.784 | 20 | TGTAGCCGACCCCAATTTAT     | 59.297 | 20 | 245 | 392  | 636  |
| 58.914 | 21 | GTAAGGAGGGAGGGAGATGG     | 59.89  | 20 | 200 | 624  | 823  |
| 59.962 | 20 | GCGTTTGGTCAAATCGTCAT     | 60.905 | 20 | 259 | 227  | 485  |
| 59.797 | 20 | GCAGCGGACTGTAAGTTTCC     | 59.882 | 20 | 218 | 384  | 601  |
| 59.546 | 22 | TGGCACCATGAGAGAGAATG     | 59.787 | 20 | 265 | 586  | 850  |
| 61.124 | 20 | TTCATGTAGCCAACCCCAAT     | 60.192 | 20 | 199 | 3346 | 3544 |
| 59.986 | 20 | GGAGCTCTTCGTCGAGATTG     | 60.096 | 20 | 262 | 678  | 939  |
| 60.02  | 20 | CAACAACGAATCTGCCAATG     | 60.111 | 20 | 248 | 660  | 907  |
| 59.415 | 20 | CAAAAATGGATTATGGGCAA     | 58.344 | 20 | 226 | 287  | 512  |
| 60.188 | 20 | CTTCTCCTTCGTTGGCTTTG     | 59.986 | 20 | 274 | 1339 | 1612 |
| 59.647 | 20 | GTTTGAAAGGCGTGGAGAAG     | 59.853 | 20 | 224 | 1805 | 2028 |
| 60.448 | 20 | GGATGTGGAGTTGTTCGGTTT    | 59.827 | 20 | 261 | 728  | 988  |
| 60.238 | 20 | ACTGCTAGGCATCAAGGCAT     | 59.866 | 20 | 168 | 756  | 923  |
| 60.376 | 20 | GATTCGGGTCTGGTGTCTGT     | 59.969 | 20 | 237 | 471  | 707  |
| 59.972 | 20 | CAGAAATCCGAAGCACGATA     | 58.869 | 20 | 239 | 249  | 487  |
| 60.044 | 20 | CACCGTCTGATGAAGAAGCA     | 59.984 | 20 | 275 | 563  | 837  |
| 59.813 | 20 | CTCCCCTATCTCCGCATACA     | 60.051 | 20 | 172 | 284  | 455  |
| 59.23  | 21 | CCATCATGCATTTTTCTTTCA    | 58.613 | 21 | 275 | 3222 | 3496 |
| 58.151 | 23 | AAGGGCCATAAATTGTGGAA     | 59.273 | 20 | 244 | 1085 | 1328 |
| 59.992 | 20 | TGTGGCCAGTACCACTACCA     | 60.025 | 20 | 254 | 284  | 537  |
| 60.599 | 20 | TCCACAGTCTCAAAGTGCAAA    | 59.475 | 21 | 279 | 3209 | 3487 |
| 59.609 | 20 | GTTGTACGTCGAGGCCGTAT     | 60.022 | 20 | 159 | 2012 | 2170 |
| 60.111 | 20 | GCCATCAGCACATCCCTATT     | 59.923 | 20 | 209 | 1398 | 1606 |
| 59.395 | 20 | AGAAAAGCGAAAACCTGCAA     | 59.996 | 20 | 248 | 164  | 411  |
| 59.133 | 20 | TGTAGCCGACCCCAATTTAT     | 59.297 | 20 | 263 | 2980 | 3242 |
| 59.978 | 20 | CACGGATTCTCTCCCTTCA      | 60.187 | 20 | 274 | 291  | 564  |
| 59.843 | 20 | TTGGTTTGGTTGGTGAAGTGA    | 59.976 | 20 | 274 | 710  | 983  |
| 60.291 | 20 | ATTCGTTGAAACCTGCTGCT     | 59.882 | 20 | 217 | 607  | 823  |
| 60.029 | 20 | TACTACTCCGTCCAACCCG      | 59.986 | 20 | 176 | 125  | 300  |
| 60.801 | 20 | TCTGCGTCTGAAATGTACGC     | 60.019 | 20 | 133 | 1012 | 1144 |
| 60.003 | 20 | AACCAAGACCCCAATTTGATT    | 59.563 | 21 | 273 | 3209 | 3481 |
| 59.996 | 20 | GATGGACCTGCTTCAGCACT     | 60.418 | 20 | 244 | 1288 | 1531 |
| 60.472 | 20 | CCAAACAAAACCAGCAACCT     | 60.008 | 20 | 218 | 1243 | 1460 |

|        |    |                          |        |    |     |      |      |
|--------|----|--------------------------|--------|----|-----|------|------|
| 60.27  | 20 | AAGTTGGGAGTCTCCTGCAA     | 59.844 | 20 | 274 | 3    | 276  |
| 60.111 | 20 | ATCAAGCAGCCCTTTGTCAT     | 59.7   | 20 | 219 | 2283 | 2501 |
| 58.062 | 21 | TTGTATCACCTCCGCCGTAT     | 60.352 | 20 | 230 | 248  | 477  |
| 60.103 | 20 | TTCCTGTGCGTGAATTTTGA     | 60.234 | 20 | 280 | 872  | 1151 |
| 59.55  | 20 | CCAATCACCTTCTGAGGAA      | 60.042 | 20 | 235 | 567  | 801  |
| 59.95  | 20 | CCCACCTCCGTCATTGAGTT     | 59.966 | 20 | 279 | 5651 | 5929 |
| 60.126 | 21 | ATGTAGCCGACCCCAATTTA     | 59.297 | 20 | 216 | 5360 | 5575 |
| 60.081 | 20 | AGACCATGCAAGTGGTTTGT     | 58.058 | 20 | 133 | 302  | 434  |
| 60.052 | 20 | GAAGATGGTGGCGGAGAG       | 59.291 | 18 | 244 | 979  | 1222 |
| 58.158 | 20 | CCCAAGACCCCAATTTGATT     | 60.91  | 20 | 160 | 544  | 703  |
| 59.7   | 20 | CGCGTGGGCTGTTAGTTTTA     | 61.166 | 20 | 272 | 1828 | 2099 |
| 59.644 | 20 | TGAGGAAAACCAGGAGCTTG     | 60.366 | 20 | 251 | 44   | 294  |
| 59.926 | 20 | ACCCTGATCATCCTTTGACG     | 59.927 | 20 | 199 | 1153 | 1351 |
| 59.9   | 20 | AGAGCTCTCTCACAGGCTGC     | 60.041 | 20 | 235 | 30   | 264  |
| 59.685 | 20 | CACTTGTGGCTTTTGGAGGT     | 60.149 | 20 | 276 | 1304 | 1579 |
| 60.606 | 20 | TCACGAAATCGAAGTGAACAA    | 59.307 | 21 | 257 | 635  | 891  |
| 60.223 | 20 | GCCTTCTTGGTCTGAACCTG     | 59.844 | 20 | 218 | 1393 | 1610 |
| 59.795 | 20 | AACCCGTTTACGTTAAATTTATGA | 58.113 | 24 | 243 | 2986 | 3228 |
| 60.91  | 20 | GAGATGATGGCAAGGAAAGC     | 59.78  | 20 | 125 | 6    | 130  |
| 59.939 | 20 | GTCACCGGAAGAGAAAGCAG     | 59.989 | 20 | 260 | 372  | 631  |
| 60.042 | 20 | TGGTTCATTTAGTCGACCCC     | 59.79  | 20 | 100 | 2019 | 2118 |
| 60.111 | 20 | CAGGTTTACGGGGCAGAATA     | 59.953 | 20 | 277 | 1122 | 1398 |
| 60.191 | 20 | TCGATTCTGTGCCAGTTCAG     | 59.984 | 20 | 177 | 900  | 1076 |
| 60.022 | 20 | ATGGAACTCCAAAAGGGGAC     | 60.169 | 20 | 155 | 2255 | 2409 |
| 60.91  | 20 | TGTAGCCCTTAAACTTGGACA    | 58.809 | 22 | 272 | 1    | 272  |
| 59.009 | 20 | ATATTTTGGGGAAAGGGGTG     | 59.882 | 20 | 168 | 1126 | 1293 |
| 59.926 | 20 | TGACACTGATGAGAAAGCCG     | 59.984 | 20 | 187 | 1193 | 1379 |
| 60.333 | 20 | AGCACGAGCCTCAAATCAT      | 59.843 | 20 | 273 | 960  | 1232 |
| 60.893 | 20 | AGAGAGTCGATTGCTTGGGA     | 59.95  | 20 | 191 | 1193 | 1383 |
| 59.864 | 20 | AGAAGGTCATGACGTCCCAC     | 59.969 | 20 | 135 | 669  | 803  |
| 59.989 | 20 | ACGTGAAGTGGGACTATCGG     | 59.989 | 20 | 232 | 126  | 357  |
| 60.688 | 20 | TGGAGAGTGCAGAGATGTCG     | 60.138 | 20 | 105 | 84   | 188  |
| 59.722 | 20 | ACACAAACGACACAAGTCCG     | 59.641 | 20 | 230 | 2277 | 2506 |
| 59.962 | 20 | CCGACCTCACTTAGTGGGAA     | 60.103 | 20 | 187 | 1069 | 1255 |
| 60.088 | 20 | CTTATCGGAAATCGAGCTGC     | 59.945 | 20 | 231 | 1132 | 1362 |
| 59.48  | 21 | CAGGCTTGCC TTCACATCTC    | 60.945 | 20 | 159 | 2070 | 2228 |
| 59.988 | 20 | GTGAGGGTGCTACCTTCCAA     | 60.111 | 20 | 266 | 556  | 821  |
| 60.461 | 20 | CCCAAGACCCCAATTTGATT     | 60.91  | 20 | 213 | 1750 | 1962 |
| 60.709 | 20 | TGCCTGCAATCAAATCTCAG     | 59.948 | 20 | 195 | 521  | 715  |
| 59.244 | 21 | GTTGAATATGGCGGAAGAGG     | 59.528 | 20 | 280 | 422  | 701  |
| 59.928 | 20 | TAAAGCCGTGTACCTCCACC     | 59.993 | 20 | 207 | 2567 | 2773 |
| 60.051 | 20 | TGTCCTTTGGGTTTCGTAAGG    | 59.964 | 20 | 259 | 2747 | 3005 |
| 59.757 | 20 | TCTGCAGAAGTCGTGAAACAA    | 59.624 | 21 | 187 | 2236 | 2422 |
| 59.993 | 20 | CCCAAGACCCCAATTTGATT     | 60.91  | 20 | 193 | 561  | 753  |
| 59.297 | 20 | CGAGATAGCCAAAAGCGAAG     | 60.11  | 20 | 114 | 7    | 120  |
| 59.833 | 20 | ACCCCAAGTTCTTCTTCGT      | 59.972 | 20 | 220 | 293  | 512  |
| 59.537 | 20 | CATTTGCTTGAAACGTCCAT     | 58.625 | 20 | 279 | 981  | 1259 |
| 60.08  | 20 | TGATCCCTGCCCTAAATCTG     | 60.029 | 20 | 223 | 2487 | 2709 |
| 58.409 | 20 | TCGCTGTGTATGCATGAGTG     | 59.436 | 20 | 226 | 475  | 700  |
| 60.469 | 20 | TGGCGAGTTTTATGCTGAGA     | 59.566 | 20 | 197 | 275  | 471  |
| 59.927 | 20 | AAACCCACATGCAGAAGAC      | 59.973 | 20 | 255 | 474  | 728  |
| 59.111 | 20 | ACAAATGGGGAGGAGGACTT     | 59.795 | 20 | 273 | 1857 | 2129 |
| 60.096 | 20 | TCGAGAGCAAACTTTTGGAA     | 59.982 | 21 | 280 | 139  | 418  |
| 59.872 | 20 | TGATTCAATATTAGCCGTCCT    | 58.912 | 21 | 272 | 828  | 1099 |
| 59.945 | 20 | TGAAAACCTTTGGGATGGGAG    | 59.903 | 20 | 248 | 213  | 460  |
| 60.315 | 24 | GCAGGTGGTGTTCCTCAAGT     | 60.012 | 20 | 136 | 0    | 135  |
| 60.366 | 20 | TCCTCTTCTCCTCGAGATGC     | 59.636 | 20 | 148 | 53   | 200  |
| 60.91  | 20 | GCGGAACCGTCCTAGTTACA     | 60.132 | 20 | 257 | 1    | 257  |

|        |    |                         |        |    |     |      |      |
|--------|----|-------------------------|--------|----|-----|------|------|
| 59.807 | 20 | TCATCATCAGCCAAACGGT     | 60.064 | 19 | 240 | 967  | 1206 |
| 61.003 | 20 | GCGTTTTCCAGACCAACAAT    | 59.978 | 20 | 198 | 13   | 210  |
| 60.038 | 20 | AACAAGGGTAGGGGAAGACC    | 59.299 | 20 | 258 | 4979 | 5236 |
| 60.009 | 20 | CTGGTAAACGGGTGTGGACT    | 59.884 | 20 | 189 | 2    | 190  |
| 59.655 | 20 | GTGTGCAAGGTGGTCAAAGA    | 59.726 | 20 | 273 | 68   | 340  |
| 59.297 | 20 | GCATGATACGAGCACGAGAA    | 59.979 | 20 | 206 | 11   | 216  |
| 59.42  | 20 | AAGGCTTTCAGGACAAGAA     | 59.993 | 20 | 201 | 1803 | 2003 |
| 59.931 | 20 | TGATTGTTTAGGCCAGGGTC    | 59.933 | 20 | 140 | 36   | 175  |
| 60.058 | 20 | TGAATTGAAAGCCACTGCAA    | 60.379 | 20 | 233 | 434  | 666  |
| 58.226 | 20 | CCCAAGACCCCAATTTGATT    | 60.91  | 20 | 142 | 656  | 797  |
| 60.019 | 20 | ACGATGATGATGAAGGAGGC    | 60.042 | 20 | 228 | 511  | 738  |
| 60.019 | 20 | TGAGGAGAGTGATGGTGGAA    | 59.18  | 20 | 226 | 2176 | 2401 |
| 59.962 | 20 | GTGGGTAGTATGCCGTGCTT    | 60.022 | 20 | 214 | 1575 | 1788 |
| 59.823 | 20 | TGTTGCAATTTGAGGCTTTG    | 59.849 | 20 | 133 | 4    | 136  |
| 59.939 | 20 | AAAAACCCCTCGACCATCTC    | 60.306 | 20 | 260 | 338  | 597  |
| 59.876 | 22 | GTTGAGTCCAACCCAACCC     | 60.207 | 19 | 228 | 347  | 574  |
| 60.034 | 20 | CCAGATCCATCTTCTCTCCA    | 60.003 | 20 | 131 | 1381 | 1511 |
| 59.734 | 21 | CGAAGGAATGCGTAAGAACTT   | 59.793 | 22 | 259 | 1585 | 1843 |
| 59.844 | 20 | AGCAATAAGGCAGCAGCAAT    | 60.01  | 20 | 167 | 643  | 809  |
| 59.903 | 20 | CTGCTTCAATCCTCCGACTC    | 59.95  | 20 | 180 | 359  | 538  |
| 59.955 | 20 | CATTATTGAGCCCATGCTT     | 59.923 | 20 | 273 | 1748 | 2020 |
| 59.758 | 20 | CCCAAGACCCCAATTTGATT    | 60.91  | 20 | 248 | 1729 | 1976 |
| 59.992 | 20 | TCTTGAATGGGCTTCTGGAT    | 59.629 | 20 | 239 | 4759 | 4997 |
| 60.179 | 21 | AGAAACAGATTGGGTGGGTG    | 59.82  | 20 | 142 | 1459 | 1600 |
| 60.11  | 20 | CCATGGATGCAACAATGACT    | 59.374 | 20 | 251 | 962  | 1212 |
| 60.074 | 20 | TTCATGCAACATTAAGCCGA    | 60.215 | 20 | 199 | 4460 | 4658 |
| 59.901 | 20 | AACAAACGGCCAAGAATCAC    | 59.978 | 20 | 223 | 433  | 655  |
| 59.955 | 20 | TGATGTTTGCATTTAAGATGAGT | 59.143 | 25 | 260 | 4637 | 4896 |
| 59.66  | 20 | GCATGGATGAATGGAGCTTT    | 60.043 | 20 | 157 | 1579 | 1735 |
| 59.526 | 20 | CCATTTTTGTTGAAGCCCAT    | 59.801 | 20 | 254 | 619  | 872  |
| 59.951 | 21 | GGTCGCCTTGTTCTTCTTT     | 60.61  | 20 | 250 | 5869 | 6118 |
| 60.91  | 20 | AAGCATAAAAGGCATCGCTC    | 59.461 | 20 | 126 | 4    | 129  |
| 59.972 | 20 | ATGGGACCAAACATGCAAT     | 60.059 | 20 | 216 | 3768 | 3983 |
| 60.644 | 20 | TCAGACCGCCGGTATAACTC    | 60.096 | 20 | 267 | 1608 | 1874 |
| 59.779 | 20 | TTGTGATTGGTTAGGGCTC     | 60.074 | 20 | 118 | 459  | 576  |
| 59.924 | 21 | TGGCATTGCGTATGAAAAAG    | 59.702 | 20 | 190 | 1596 | 1785 |
| 59.955 | 20 | ATCCAGGATGGTGGAAATCA    | 60.135 | 20 | 215 | 4606 | 4820 |
| 60.375 | 20 | GAAGCGAAAAGCATTGACC     | 59.829 | 20 | 276 | 496  | 771  |
| 59.989 | 20 | GCCAAGATCAGCAGATCACA    | 59.95  | 20 | 186 | 801  | 986  |
| 60.14  | 20 | TGCAACATGGTCAAACCTGG    | 60.552 | 20 | 129 | 381  | 509  |
| 59.807 | 20 | AATCGACACTCCACTTTTCG    | 60.111 | 20 | 183 | 357  | 539  |
| 60.91  | 20 | TGTGGCCAATCTTTGTTTT     | 58.12  | 20 | 258 | 5    | 262  |
| 59.473 | 20 | TGCTGCCAAACTAACTGCAA    | 60.578 | 20 | 279 | 1818 | 2096 |
| 59.807 | 20 | CAATACGCTGAATGCAAAGC    | 59.472 | 20 | 280 | 372  | 651  |
| 60.91  | 20 | AAAATGGATGGTGTCTTTGC    | 59.945 | 20 | 167 | 9    | 175  |
| 59.883 | 20 | TGCATGTTTTGTGTGTGTGG    | 60.046 | 20 | 278 | 1391 | 1668 |
| 60.415 | 20 | AGAGAGGTGGTGCAGATGCT    | 60.017 | 20 | 202 | 1202 | 1403 |
| 59.708 | 22 | GCTGGAAGAGTGCGGATAAT    | 59.297 | 20 | 202 | 4    | 205  |
| 58.762 | 25 | ATGGAGACATCTGGTGAGGG    | 59.92  | 20 | 211 | 1675 | 1885 |
| 59.239 | 22 | CGGCATCCATCTCAATCTTT    | 60.036 | 20 | 223 | 96   | 318  |
| 60.374 | 20 | TCTTTCAAATTCCTTCCCC     | 60.237 | 20 | 264 | 766  | 1029 |
| 59.49  | 22 | TGACAGCTGAATCAGTCGGA    | 60.557 | 20 | 238 | 1928 | 2165 |
| 59.82  | 20 | AAGCCCGTGAAAAAGGAAAT    | 59.945 | 20 | 253 | 1774 | 2026 |
| 60.04  | 20 | CTTTTGGCTATCTCGCTTCG    | 60.11  | 20 | 103 | 1944 | 2046 |
| 60.979 | 20 | AACTGCCACATGGACCGTAT    | 60.263 | 20 | 192 | 875  | 1066 |
| 60.17  | 20 | GGTAGCCGACCCCAATTTAT    | 60.041 | 20 | 236 | 1954 | 2189 |
| 60.11  | 20 | CCCAAGACCCCAATTTGATT    | 60.91  | 20 | 189 | 2576 | 2764 |
| 59.591 | 20 | TTTCACGAATTTTCATTCAGG   | 59.098 | 22 | 209 | 906  | 1114 |

|        |    |                        |        |    |     |      |      |
|--------|----|------------------------|--------|----|-----|------|------|
| 60.517 | 20 | CTTTAGCAACACCAGCCACA   | 59.904 | 20 | 226 | 1    | 226  |
| 59.226 | 20 | CATTCGCTTCCATTCATCTG   | 59.226 | 20 | 275 | 4929 | 5203 |
| 59.991 | 20 | CGCGAACAAATGATATAGGGG  | 60.302 | 20 | 217 | 312  | 528  |
| 60.284 | 20 | TGTAGCCGACCCCAATTTAT   | 59.297 | 20 | 222 | 2948 | 3169 |
| 60.074 | 20 | TTGACACACTCCCTCTGCTG   | 60.022 | 20 | 144 | 5314 | 5457 |
| 59.297 | 20 | TTTTTCAAGTGAAAGGTGCAA  | 58.451 | 21 | 155 | 7    | 161  |
| 59.943 | 20 | GTCCAAATCCGACAGATGCT   | 60.081 | 20 | 202 | 1431 | 1632 |
| 60.014 | 20 | ACGGAGAGAGCCAAGTCAGA   | 60.135 | 20 | 190 | 1672 | 1861 |
| 60.892 | 20 | GAGAAAGCCCAAATCCTTCC   | 60.017 | 20 | 270 | 0    | 269  |
| 58.963 | 20 | TTTCTGGATCCCATCTGAGG   | 60.003 | 20 | 151 | 837  | 987  |
| 59.986 | 20 | GAGAGTGTACGGACAGCAA    | 60.03  | 20 | 229 | 624  | 852  |
| 59.297 | 20 | CAAATGGCAGACAAAAACGA   | 59.706 | 20 | 239 | 5    | 243  |
| 59.735 | 19 | TGGGTCTTCCCTGATTTTTG   | 59.903 | 20 | 260 | 7    | 266  |
| 59.297 | 20 | ACGACGACCAAAGGAATGAG   | 60.111 | 20 | 259 | 29   | 287  |
| 59.297 | 20 | TCAATGCAGCATCCTGAAAC   | 59.805 | 20 | 133 | 4    | 136  |
| 59.297 | 20 | GCACTTTGAGCTGCATTGAG   | 59.746 | 20 | 152 | 3    | 154  |
| 60.032 | 20 | CCCAAGACCCCAATTTGATT   | 60.91  | 20 | 120 | 2993 | 3112 |
| 59.734 | 20 | TAGCCTCCAGGAATCAAGCA   | 60.874 | 20 | 183 | 3154 | 3336 |
| 60.111 | 20 | TGCATACCCAAGATTGTCTCC  | 59.947 | 21 | 276 | 517  | 792  |
| 59.955 | 20 | GGATTAATGGCCACGAAGAA   | 59.901 | 20 | 276 | 63   | 338  |
| 60.044 | 20 | GGTTTATGAAGCCAATCCCA   | 59.762 | 20 | 131 | 794  | 924  |
| 59.774 | 20 | ATTGCACCGACAAAAGAACC   | 59.978 | 20 | 234 | 3650 | 3883 |
| 59.457 | 20 | CCGGAGAGGGCATCATAGTA   | 60.051 | 20 | 206 | 1862 | 2067 |
| 60.152 | 20 | CCCAAGACCCCAATTTGATT   | 60.91  | 20 | 171 | 5787 | 5957 |
| 59.989 | 20 | ATTCCATCACCATGATCCGT   | 60.018 | 20 | 108 | 605  | 712  |
| 60.134 | 20 | AAGCCACAACCAATCAGCTC   | 60.263 | 20 | 131 | 2121 | 2251 |
| 60.134 | 20 | GTGATCGGGAGAGTCTTTGG   | 59.655 | 20 | 249 | 1099 | 1347 |
| 60.131 | 20 | GGTTGCTGGTAGTTTGCCAT   | 60     | 20 | 184 | 904  | 1087 |
| 59.297 | 20 | AGCACAATCTTCAGGTGGCT   | 59.874 | 20 | 260 | 8    | 267  |
| 59.973 | 20 | CTTTTGGGCAAAGGATCAAA   | 60.046 | 20 | 191 | 30   | 220  |
| 59.604 | 20 | TTTGTCTCCTGGTGTGGGA    | 59.109 | 20 | 180 | 2231 | 2410 |
| 59.752 | 20 | GTCCGAGAAAAAGTGGTGGA   | 60.088 | 20 | 136 | 1570 | 1705 |
| 60.226 | 20 | GGAAGATGCAGAAGCGAGAC   | 60.104 | 20 | 254 | 697  | 950  |
| 59.993 | 20 | CCGTACCCTCCTCCTAGACC   | 59.95  | 20 | 178 | 674  | 851  |
| 59.931 | 20 | AGATGGAGTCGTGTAGCGGT   | 59.751 | 20 | 142 | 23   | 164  |
| 60.103 | 20 | TGTGAAAAACACGTGACATCAA | 60.05  | 22 | 116 | 2240 | 2355 |
| 59.82  | 20 | GCAGAAGGAGCCAAAGAAGA   | 59.694 | 20 | 272 | 908  | 1179 |
| 60.15  | 20 | TGTTGTTGGATCCGTGTGTT   | 59.855 | 20 | 218 | 2835 | 3052 |
| 59.724 | 20 | TCGCTTATGGTTGGAGTGTG   | 59.716 | 20 | 276 | 280  | 555  |
| 59.994 | 20 | AGGCCAACACTGAAAACCAC   | 60.012 | 20 | 234 | 3770 | 4003 |
| 57.317 | 24 | GACAGCGAGTAAGCTGAGGG   | 60.156 | 20 | 147 | 118  | 264  |
| 60.353 | 20 | CTGTAGGCCCATAGCCACAT   | 59.978 | 20 | 220 | 138  | 357  |
| 59.297 | 20 | TTGCGTTCAACGATTTTCTG   | 59.849 | 20 | 150 | 7    | 156  |
| 60.053 | 20 | TGGAACAGCACAGACTGGAG   | 60.022 | 20 | 156 | 211  | 366  |
| 59.866 | 20 | CTGCTTTTTGTGATTGGGGT   | 59.971 | 20 | 162 | 226  | 387  |
| 60     | 20 | CCTTCACACCAAACACTGCAAA | 59.734 | 20 | 225 | 3486 | 3710 |
| 59.988 | 20 | ACGCGGTGATAAAATCTTGG   | 59.96  | 20 | 277 | 1658 | 1934 |
| 59.993 | 20 | CCTCCGTCCCTCTCTCTCTT   | 59.945 | 20 | 219 | 3108 | 3326 |
| 59.93  | 20 | TTTGCATCATGGTGTGTGTG   | 60.003 | 20 | 233 | 3803 | 4035 |
| 59.988 | 20 | ACAGCAGCAGCAATCATCAC   | 60.024 | 20 | 181 | 2626 | 2806 |
| 59.948 | 20 | TCATGACGAGCAGTGTCTCC   | 59.988 | 20 | 147 | 1770 | 1916 |
| 59.927 | 20 | TCAGCCTTCAAAAGTTGCCT   | 59.993 | 20 | 247 | 501  | 747  |
| 60.002 | 20 | CCGAATCCATCACATTCAAA   | 59.325 | 20 | 111 | 3717 | 3827 |
| 61.042 | 20 | ATTAACACCGGCATTGCTCT   | 59.597 | 20 | 234 | 2707 | 2940 |
| 59.893 | 20 | AATCCCAATCCCAATCACAA   | 59.991 | 20 | 114 | 699  | 812  |
| 60.241 | 20 | CCAATTTATTGGGATTAAGGC  | 57.539 | 21 | 265 | 3817 | 4081 |
| 59.955 | 20 | TCATATGACGCAATGCACCT   | 60.104 | 20 | 251 | 502  | 752  |
| 60.285 | 20 | TTGGAATGCAACTCAAACCA   | 60.088 | 20 | 161 | 20   | 180  |

|        |    |         |          |                  |        |    |     |      |      |
|--------|----|---------|----------|------------------|--------|----|-----|------|------|
| 59.184 | 21 | AAAGTGC | GGAATTTG | CTTTG            | 60.244 | 20 | 197 | 1229 | 1425 |
| 59.978 | 20 | TCCTAAT | ACGACTG  | CCCCACC          | 59.955 | 20 | 222 | 160  | 381  |
| 60.011 | 20 | TGAGAGA | AAGGCGA  | AAGAGGAG         | 59.82  | 20 | 203 | 781  | 983  |
| 59.297 | 20 | TGCACAT | TTTACA   | ACCAACAAAA       | 59.027 | 22 | 140 | 3    | 142  |
| 60.112 | 20 | TTCCCTC | TTTCGTC  | CTTGA            | 59.784 | 20 | 267 | 2779 | 3045 |
| 59.955 | 20 | ATGTAGC | CGACCC   | CAATTTA          | 59.297 | 20 | 157 | 3318 | 3474 |
| 60.096 | 20 | AAATCAT | AGCTCC   | GCCATTG          | 60.06  | 20 | 205 | 667  | 871  |
| 59.716 | 20 | TTCGCCC | CTTATCT  | ACATCG           | 60.053 | 20 | 171 | 487  | 657  |
| 59.823 | 20 | ATTATGC | GCTTACC  | GTGGTC           | 59.988 | 20 | 171 | 134  | 304  |
| 60.606 | 20 | TTGTGC  | CCTGA    | AAGATTGCAG       | 59.988 | 20 | 237 | 1573 | 1809 |
| 58.663 | 21 | TGAAAC  | CCCATG   | TGTTCCAGA        | 59.935 | 20 | 271 | 1336 | 1606 |
| 60.149 | 20 | CGGAAG  | TAGG     | AAAACACCCA       | 59.964 | 20 | 239 | 744  | 982  |
| 58.804 | 20 | GCAGCA  | AATATCA  | ACCTGGCT         | 60.243 | 20 | 226 | 2951 | 3176 |
| 59.165 | 20 | AACCAT  | GCTCTT   | CCACCAG          | 60.111 | 20 | 238 | 580  | 817  |
| 59.769 | 20 | CCACTT  | CCATTCT  | CTTCCCA          | 60.042 | 20 | 156 | 2336 | 2491 |
| 59.861 | 20 | GCCCA   | AGTGTA   | AAGAGTCGGT       | 59.212 | 20 | 238 | 158  | 395  |
| 59.831 | 20 | AGCGGC  | CATCCT   | CATAAATTG        | 60.06  | 20 | 248 | 1781 | 2028 |
| 59.476 | 20 | GCCATG  | TGTTTT   | ACTCCGAT         | 59.962 | 20 | 264 | 346  | 609  |
| 59.521 | 20 | TCCCA   | ACTTTTT  | GCATTTT          | 59.916 | 20 | 221 | 1310 | 1530 |
| 59.855 | 20 | TTTTG   | ACACCC   | AGTGTTGGA        | 59.976 | 20 | 274 | 327  | 600  |
| 59.973 | 20 | CCGAC   | CCCAAT   | TTATTTGAA        | 59.633 | 20 | 123 | 1998 | 2120 |
| 60.664 | 20 | GGTTG   | CGTAC    | ATCTGACCT        | 59.997 | 20 | 263 | 1012 | 1274 |
| 59.779 | 20 | TCAGT   | CAAAC    | CACTCGGTCA       | 60.285 | 20 | 194 | 1759 | 1952 |
| 60     | 20 | CTCC    | CAAAGT   | CACCTGCATT       | 60.111 | 20 | 160 | 604  | 763  |
| 60.175 | 20 | GGTTTT  | GCTG     | CGTTTGATTT       | 60.117 | 20 | 130 | 148  | 277  |
| 59.297 | 20 | ATCCC   | ATGTG    | CTGTGATGAA       | 59.925 | 20 | 224 | 4    | 227  |
| 60.91  | 20 | GAGAT   | GCTCTC   | GAAATGAATGC      | 59.938 | 21 | 239 | 10   | 248  |
| 59.297 | 20 | CTGG    | AGTAG    | GGGTCATTCCA      | 59.92  | 20 | 167 | 7    | 173  |
| 60.328 | 20 | AATG    | AAGATCA  | AGGCCGA          | 57.244 | 20 | 125 | 269  | 393  |
| 60.049 | 20 | GTTCT   | GCAA     | AAGAAAAGGCG      | 59.996 | 20 | 212 | 580  | 791  |
| 59.967 | 20 | TTCC    | ATGTC    | GAGTTTGTCG       | 59.691 | 20 | 207 | 964  | 1170 |
| 59.96  | 20 | CAAA    | ATCA     | ACCATATTTTCGCC   | 60.533 | 22 | 233 | 390  | 622  |
| 58.132 | 22 | TTCT    | AAACA    | ATTGGCTGCTGAA    | 59.89  | 22 | 235 | 5622 | 5856 |
| 59.272 | 20 | CGTAA   | CATGCC   | ACCAGTGAG        | 60.175 | 20 | 269 | 2293 | 2561 |
| 60.05  | 20 | GAGG    | AGAATG   | CGAAGGAGAA       | 59.508 | 20 | 227 | 3104 | 3330 |
| 59.586 | 20 | GATG    | CTGAC    | GTGACGACTGT      | 59.905 | 20 | 251 | 41   | 291  |
| 60.049 | 20 | CGAAC   | CCCTT    | GTCAAAGA         | 60.081 | 20 | 254 | 2601 | 2854 |
| 60.051 | 20 | AGCCT   | CCCTT    | TGGAGAAGAG       | 59.95  | 20 | 280 | 13   | 292  |
| 60.074 | 20 | ACACT   | TGACTT   | CCCGTGTCC        | 60.009 | 20 | 241 | 905  | 1145 |
| 59.873 | 20 | CAACT   | GCAAG    | ATTCAGCGAC       | 59.596 | 20 | 228 | 1674 | 1901 |
| 59.888 | 20 | ATGT    | AGCCG    | ACCCCAATTTA      | 59.297 | 20 | 165 | 2972 | 3136 |
| 60.773 | 20 | GTCG    | GTAAC    | AGTCTGGCACA      | 59.751 | 20 | 180 | 2    | 181  |
| 60.136 | 20 | CCCG    | ATCCCA   | ACTGAAATAA       | 59.756 | 20 | 278 | 734  | 1011 |
| 59.982 | 20 | TGCT    | GCGG     | ACAAATACTGA      | 60.401 | 20 | 256 | 16   | 271  |
| 59.135 | 20 | TTG     | AGTTG    | AGGTATGAGAAAAGTT | 58.919 | 25 | 280 | 311  | 590  |
| 58.992 | 20 | CTT     | GAGCAT   | GCACGATGAC       | 60.423 | 20 | 107 | 3    | 109  |
| 60.028 | 23 | TCAAT   | GCAGG    | ATGATTGCATA      | 60.05  | 21 | 181 | 21   | 201  |
| 59.297 | 20 | ACTG    | TTGCG    | TTATCCAAGCC      | 60.14  | 20 | 237 | 6    | 242  |
| 60.162 | 20 | CTG     | CTTCA    | CTAAATCCCCCA     | 60.066 | 20 | 118 | 156  | 273  |
| 59.985 | 20 | CTG     | GCTCC    | CCAAGAATTACA     | 60.066 | 20 | 271 | 429  | 699  |
| 60.035 | 20 | ATCT    | CTGT     | CCCCCTCGTTCT     | 60.073 | 20 | 213 | 595  | 807  |
| 59.765 | 20 | CGTT    | GCTGC    | ATTTCTAGGGT      | 60.27  | 20 | 252 | 2396 | 2647 |
| 59.883 | 20 | TTCG    | CCAC     | CTCATTCTAC       | 60.074 | 20 | 150 | 488  | 637  |
| 59.716 | 20 | ACCAA   | ACTCT    | CCTCCCGAAT       | 59.935 | 20 | 247 | 706  | 952  |
| 60.017 | 20 | GCA     | AGCAC    | ACACGTCGTAAT     | 59.794 | 20 | 252 | 2552 | 2803 |
| 59.845 | 20 | AGAC    | CAACA    | ATTCCAGGTGC      | 59.973 | 20 | 276 | 1263 | 1538 |
| 59.966 | 20 | GTGG    | CAGTT    | ATAGCGGTGGT      | 60.022 | 20 | 177 | 1699 | 1875 |
| 59.986 | 20 | TCTG    | TAGCA    | CTGCCCTTTT       | 60.154 | 20 | 149 | 3199 | 3347 |



|        |    |                           |        |    |     |      |      |
|--------|----|---------------------------|--------|----|-----|------|------|
| 59.775 | 20 | CGACTAGCCACGTTCAATCA      | 59.864 | 20 | 215 | 1222 | 1436 |
| 59.524 | 23 | TTTTACCTTAATCTTCACCCTTTTT | 57.969 | 25 | 256 | 1648 | 1903 |
| 60.528 | 20 | AAAGAGGTTGTTTCCGTTGC      | 59.218 | 20 | 229 | 1192 | 1420 |
| 60.335 | 20 | ATCATCGCCACATCGTGTA       | 59.955 | 20 | 130 | 426  | 555  |
| 59.795 | 20 | TCGTATCTGGTTGAAAGTTGTTG   | 59.187 | 23 | 258 | 1364 | 1621 |
| 60.187 | 20 | TTGAACACGATGGGCATTTA      | 59.93  | 20 | 226 | 2088 | 2313 |
| 59.795 | 20 | TTGATTCCACCTCTTCACCC      | 59.903 | 20 | 200 | 1311 | 1510 |
| 59.971 | 20 | CCCTACATAGGGGGAAAAGG      | 59.655 | 20 | 134 | 1947 | 2080 |
| 60.339 | 20 | ATGGATGCACCGATTAGGAG      | 59.917 | 20 | 188 | 2139 | 2326 |
| 59.297 | 20 | GCTACTCCCGACCATTCAA       | 60.074 | 20 | 136 | 14   | 149  |
| 60.011 | 20 | TGGCAGGAAATCACACAAAA      | 60.088 | 20 | 255 | 3323 | 3577 |
| 60.036 | 21 | TCCAATAAAATTTTGCCCA       | 60.123 | 20 | 219 | 216  | 434  |
| 59.962 | 20 | TAATCACCATGGACTTCCCC      | 59.605 | 20 | 145 | 2744 | 2888 |
| 59.603 | 20 | ATTTGATTAATTGGTGGCCG      | 59.66  | 20 | 105 | 1513 | 1617 |
| 60.033 | 20 | AGTTTGGGGCCTGAGTTTCT      | 60.11  | 20 | 158 | 293  | 450  |
| 60.046 | 20 | CAAGTCACCTTTGACTCGCA      | 60.025 | 20 | 275 | 3710 | 3984 |
| 59.964 | 20 | TCGAGAGCTCTGGTGTTTTG      | 59.161 | 20 | 204 | 2448 | 2651 |
| 60.523 | 20 | AATTCTTGAACGCGAGGAGA      | 59.955 | 20 | 258 | 371  | 628  |
| 58.163 | 21 | CCTACAAAATGGGTCTCTTTGA    | 58.238 | 22 | 165 | 2660 | 2824 |
| 59.641 | 21 | TCTTCAGAAGCTTGCTGTGC      | 59.47  | 20 | 267 | 2765 | 3031 |
| 60.91  | 20 | ATACCTCCATGAGCAATCCG      | 59.917 | 20 | 268 | 9    | 276  |
| 59.931 | 20 | TCTGAGCAGCCACATAAGACA     | 59.606 | 21 | 276 | 24   | 299  |
| 59.993 | 20 | TTTCCGCTGTTTCAAAAAT       | 59.564 | 20 | 273 | 112  | 384  |
| 60.074 | 20 | CTCTCAGTCCCAGACTTGCC      | 59.986 | 20 | 209 | 1361 | 1569 |
| 59.938 | 20 | GGTTCATGTAGCACATCCCA      | 59.374 | 20 | 167 | 4478 | 4644 |
| 60.066 | 20 | CTTCAACAGCTGCAATTTTCG     | 59.609 | 20 | 273 | 3119 | 3391 |
| 59.982 | 20 | AAAGCCCAAGCACCTTTCTT      | 60.242 | 20 | 214 | 1110 | 1323 |
| 59.522 | 20 | CACCCACACTTTAATCTAAGGGA   | 59.42  | 23 | 280 | 2597 | 2876 |
| 60.104 | 21 | TAAATGTGGAAATCGCATGG      | 59.377 | 20 | 263 | 1183 | 1445 |
| 60.227 | 20 | CAGTCAAGTTCGGGGAGAAG      | 59.837 | 20 | 249 | 446  | 694  |
| 59.297 | 20 | CACCCCAAATTCTCATCACC      | 60.173 | 20 | 178 | 7    | 184  |
| 58.711 | 21 | AAAATGAAAGGAGGGGTGCT      | 59.94  | 20 | 125 | 1078 | 1202 |
| 60.088 | 20 | TTGGTTCATGTAGCCGACCT      | 60.517 | 20 | 106 | 3438 | 3543 |
| 58.698 | 22 | CCACGGTCTCCCAATTCTTA      | 59.926 | 20 | 276 | 2776 | 3051 |
| 59.934 | 20 | CTGCCAAATCTGGGACTGTT      | 60.111 | 20 | 176 | 139  | 314  |
| 60.036 | 20 | GGGTGAGGGGATGTCTATCA      | 59.737 | 20 | 109 | 323  | 431  |
| 59.985 | 21 | TCGCATTGTGTCCAATAGGT      | 59.002 | 20 | 210 | 837  | 1046 |
| 60.187 | 20 | CGGTCTCTCAGTTAAGTCTATCTC  | 59.98  | 25 | 117 | 670  | 786  |
| 60.91  | 20 | TAACACCTTTGATGGCCAG       | 60.883 | 20 | 236 | 8    | 243  |
| 59.344 | 20 | CATTATGCAGGAACTCGCAA      | 59.833 | 20 | 267 | 5116 | 5382 |
| 60     | 20 | AGCCGGTTAAGGAGGGAGTA      | 60.089 | 20 | 267 | 125  | 391  |
| 59.496 | 22 | TTCAAGATTCTGAAAATTGCGA    | 59.832 | 22 | 247 | 2802 | 3048 |
| 60.029 | 20 | AGGCTCGCAGACAACAGAAT      | 60.02  | 20 | 218 | 2577 | 2794 |
| 59.556 | 20 | GATCGATCAGCTCCGAGAAG      | 60.057 | 20 | 267 | 1688 | 1954 |
| 59.112 | 20 | CTTCAGTTGAACACCCGTT       | 60.005 | 20 | 229 | 122  | 350  |
| 59.526 | 20 | AGGATACGTGGATGGAGACAA     | 59.42  | 21 | 154 | 692  | 845  |
| 59.138 | 20 | TTTGGTATGTGACCCCAACA      | 59.667 | 20 | 252 | 870  | 1121 |
| 60.111 | 20 | TGCACAAAGTTTTGTTTCCA      | 57.794 | 20 | 229 | 1848 | 2076 |
| 59.978 | 20 | TAGGGCTACCGGACACTACG      | 60.147 | 20 | 279 | 3700 | 3978 |
| 60.081 | 20 | CCAAGGCAGAGAAGTTGAGG      | 59.982 | 20 | 266 | 5968 | 6233 |
| 57.289 | 20 | AATCTCGACCATCCTTCCCT      | 59.896 | 20 | 155 | 5    | 159  |
| 59.92  | 23 | AGGGAAATGTGCAGGAATTG      | 59.933 | 20 | 215 | 1796 | 2010 |
| 60.272 | 20 | CCCAAGACCCCAATTTGATT      | 60.91  | 20 | 164 | 1897 | 2060 |
| 59.215 | 20 | ATGCTCGTTGAATTTCCGTC      | 60.081 | 20 | 186 | 1974 | 2159 |
| 59.301 | 20 | AAGTCCTACACACCAAGTTCATCA  | 59.964 | 24 | 216 | 1513 | 1728 |
| 59.989 | 20 | CTCAACCTCATTGCCATTT       | 59.933 | 20 | 221 | 1060 | 1280 |
| 60.012 | 20 | AGGATGGTACAGTTGGCTGG      | 59.989 | 20 | 162 | 3913 | 4074 |
| 59.297 | 20 | TGCCTCGAGAGTAAGAACCC      | 59.43  | 20 | 167 | 7    | 173  |

|        |    |                           |        |    |     |      |      |
|--------|----|---------------------------|--------|----|-----|------|------|
| 59.493 | 23 | CGAGCATAACAAGACTCGCA      | 60.157 | 20 | 241 | 466  | 706  |
| 59.744 | 20 | TGATGGTAGCAAGCAAAAAGG     | 58.917 | 20 | 246 | 148  | 393  |
| 59.971 | 20 | CCCAAGACCCCAATTTGATT      | 60.91  | 20 | 152 | 2071 | 2222 |
| 59.297 | 20 | CAGTCCTGCAGCAAGAAGAA      | 59.314 | 20 | 203 | 0    | 202  |
| 59.96  | 20 | TCCCTAACCATGTACCACCC      | 59.526 | 20 | 211 | 4354 | 4564 |
| 59.297 | 20 | TGGTGTAGATTGTGAATAAAAAGC  | 59.016 | 25 | 100 | 12   | 111  |
| 60.111 | 20 | GCAAAGAAATCAAAGGACCC      | 58.622 | 20 | 263 | 3314 | 3576 |
| 59.91  | 20 | TTGATCATTGGGAACACCA       | 59.75  | 20 | 259 | 5353 | 5611 |
| 59.605 | 20 | CCATTTGCAATGGACAAAAA      | 59.396 | 20 | 149 | 1582 | 1730 |
| 59.986 | 20 | ATCATGGGTGGTGTACCTT       | 60.096 | 20 | 258 | 8588 | 8845 |
| 59.297 | 20 | CCGCCATCTCGAAGTAATA       | 60.053 | 20 | 176 | 6    | 181  |
| 59.988 | 20 | CAGGAAGAAGGTGGGCAGTA      | 60.246 | 20 | 197 | 1965 | 2161 |
| 59.879 | 20 | TCATTGAAACCTCCTCCTCG      | 60.187 | 20 | 206 | 2784 | 2989 |
| 60.132 | 20 | GTTTGAATACGTTTGGCGGT      | 59.867 | 20 | 105 | 2185 | 2289 |
| 59.803 | 20 | ACTGAGTGCAAACAAGAGCG      | 59.239 | 20 | 194 | 23   | 216  |
| 59.933 | 20 | GCGGTATCAGAGTTGGCATT      | 60.103 | 20 | 261 | 1028 | 1288 |
| 59.894 | 20 | GAGTTTTGTGGCGGATTGTT      | 59.978 | 20 | 233 | 111  | 343  |
| 58.288 | 20 | GTATTCACGGCAGTGGAGT       | 59.997 | 20 | 248 | 955  | 1202 |
| 60.074 | 20 | ATCTCCCGGGATGTTAAAGC      | 60.286 | 20 | 167 | 2567 | 2733 |
| 59.297 | 20 | CGTTTCCTCTCATTTGCAGG      | 60.766 | 20 | 224 | 9    | 232  |
| 59.162 | 22 | GCTTGTAGTTTGGTTATGTGCGC   | 60.076 | 23 | 227 | 3095 | 3321 |
| 59.711 | 20 | GGAATTCCTTTGCAGTCAGC      | 59.82  | 20 | 277 | 2874 | 3150 |
| 59.962 | 20 | TTCACCAGTCCCATCAAACA      | 59.935 | 20 | 156 | 4387 | 4542 |
| 59.297 | 20 | CGCCTTCCTTGCTCTTAGAA      | 59.724 | 20 | 242 | 1    | 242  |
| 59.748 | 25 | AGGGAGAATTAGTGGAGGGG      | 59.392 | 20 | 134 | 35   | 168  |
| 60.11  | 20 | CAACTAAATTGCCCATGCT       | 59.96  | 20 | 212 | 3284 | 3495 |
| 59.925 | 20 | TGGATCCAGTGTGAAGGTCA      | 60.088 | 20 | 249 | 112  | 360  |
| 60.112 | 20 | ACACACCCAATTCTTCAGCC      | 59.973 | 20 | 224 | 316  | 539  |
| 60.103 | 20 | ACGCTTTCAGTGTGTCGTG       | 59.946 | 20 | 275 | 521  | 795  |
| 59.916 | 20 | TCATTTCAATTCGAACGCAG      | 59.809 | 20 | 269 | 801  | 1069 |
| 59.849 | 20 | GCATGCCCTTACAACGAAGT      | 60.14  | 20 | 174 | 604  | 777  |
| 59.98  | 21 | CCGGTTTTGTTAGGGTGTGT      | 59.751 | 20 | 139 | 1264 | 1402 |
| 60.255 | 20 | TAGAAACACCTTTGCGGCTC      | 60.386 | 20 | 223 | 1511 | 1733 |
| 59.82  | 20 | CAAGATAGGCCCGAAATCTG      | 59.662 | 20 | 232 | 685  | 916  |
| 59.992 | 20 | GGCCTTCAAAGCATAACCA       | 60.074 | 20 | 269 | 934  | 1202 |
| 60.074 | 20 | GAGCCATCTTGTGACTGCAA      | 59.992 | 20 | 269 | 265  | 533  |
| 59.452 | 20 | AAAACCCATTGAATTTGCCA      | 60.167 | 20 | 266 | 67   | 332  |
| 59.23  | 20 | CTAGACATCGCCGAACGAAT      | 60.235 | 20 | 275 | 1129 | 1403 |
| 60.186 | 21 | ACGGCAAATTAATGCGTC        | 59.971 | 20 | 268 | 1179 | 1446 |
| 60.365 | 20 | AAATTTGCCCTCTCCCTCTC      | 59.651 | 20 | 154 | 0    | 153  |
| 60.119 | 20 | GAGACTGTGGATGGGGAAGA      | 60.048 | 20 | 278 | 534  | 811  |
| 59.213 | 20 | GATGAAGACTTGAAGTTGGTGG    | 58.695 | 22 | 244 | 385  | 628  |
| 60.525 | 21 | TGTTTTCGGATCAAAGTTGG      | 59.961 | 21 | 265 | 2709 | 2973 |
| 59.679 | 20 | ATGCCTTTTTCTGCCATGAG      | 60.214 | 20 | 269 | 2282 | 2550 |
| 59.049 | 21 | AATATTGCTGAATCGAGCGG      | 60.196 | 20 | 193 | 1458 | 1650 |
| 59.979 | 20 | GGTCGGAGATGATGGTCCTA      | 59.886 | 20 | 166 | 1201 | 1366 |
| 59.787 | 20 | GGTCCGAATACCAACACCAC      | 60.096 | 20 | 257 | 997  | 1253 |
| 60.012 | 20 | CAGAGAGAGAGAATGCCCCA      | 60.488 | 20 | 272 | 260  | 531  |
| 60.357 | 20 | GCTTCTTGATCAAATTCCGC      | 59.791 | 20 | 274 | 926  | 1199 |
| 60.073 | 20 | AACCATCCGCGTGAAATTAT      | 59.301 | 20 | 258 | 798  | 1055 |
| 59.541 | 20 | ATGCCACCCCTACTCTTCT       | 59.957 | 20 | 215 | 739  | 953  |
| 59.828 | 21 | GGGGAGGGAGTTTTTGTTC       | 59.783 | 20 | 270 | 3825 | 4094 |
| 59.984 | 20 | GCTGTTTGGTTTGGCAACTA      | 58.822 | 20 | 208 | 369  | 576  |
| 59.955 | 20 | TTTGATGACCAAGGAGAGCC      | 60.195 | 20 | 215 | 128  | 342  |
| 60.112 | 20 | ATCAAATCGAAGACGCCAAG      | 60.214 | 20 | 182 | 378  | 559  |
| 58.165 | 23 | TGTGGAAATACCCTAAATTGGT    | 57.44  | 22 | 211 | 1339 | 1549 |
| 60.488 | 20 | TTCCTACCTTCACTAGTTTTCATGC | 59.946 | 25 | 187 | 322  | 508  |
| 60.025 | 20 | AGGCAGCAATGGCAATAAAC      | 60.103 | 20 | 263 | 801  | 1063 |

|        |    |                         |        |    |     |      |      |
|--------|----|-------------------------|--------|----|-----|------|------|
| 60.594 | 20 | GTCGAAGGCCTTTTCGAAGT    | 60.743 | 20 | 148 | 576  | 723  |
| 60.011 | 20 | TGAATCTGCAATTTTCTTGTTGA | 59.75  | 23 | 141 | 331  | 471  |
| 59.813 | 22 | TGCAGAAGGTCAGAGGAGGT    | 59.986 | 20 | 162 | 505  | 666  |
| 59.875 | 20 | CACACAAAATTGTGCCTTGC    | 60.157 | 20 | 255 | 25   | 279  |
| 60.008 | 20 | CGGTTGATTTTGAAGTGGCT    | 60.11  | 20 | 118 | 216  | 333  |
| 57.41  | 24 | AACAATTATTTGAGGCGCAAT   | 58.643 | 21 | 184 | 737  | 920  |
| 59.706 | 20 | GGGATGGTGAAGAGCAGTA     | 60.073 | 20 | 223 | 1342 | 1564 |
| 60.142 | 20 | TGCTCTACATTCGGTGGAAA    | 59.272 | 20 | 103 | 612  | 714  |
| 60.176 | 21 | CACAACCTCGCAAGACTCCAG   | 59.616 | 20 | 236 | 1006 | 1241 |
| 60.225 | 20 | CCCCGTATTTTCACAAATAAAA  | 58.001 | 22 | 237 | 89   | 325  |
| 59.859 | 20 | TTGTTAATGGGGTGGGGATA    | 59.872 | 20 | 278 | 701  | 978  |
| 59.899 | 21 | TATGGACGGTTCGGTCTAGG    | 59.948 | 20 | 271 | 1985 | 2255 |
| 59.559 | 20 | CCCGTATTTTCTTCGGGTTT    | 60.177 | 20 | 200 | 50   | 249  |
| 57.338 | 20 | TGTTTTATTTCCCCATTCCA    | 59.988 | 20 | 265 | 544  | 808  |
| 58.969 | 21 | TGGTGTGTTGTGGGTGATGAA   | 60.829 | 20 | 170 | 292  | 461  |
| 59.769 | 20 | ACATGGGGTTCGAGAATGAA    | 60.317 | 20 | 175 | 798  | 972  |
| 60.004 | 22 | CATATTCGTGATGGATTGGCT   | 59.799 | 21 | 211 | 33   | 243  |
| 59.496 | 20 | TGCAGTACAAATTTAGCTGGACA | 59.829 | 23 | 130 | 257  | 386  |
| 60.081 | 19 | ATTTGACGAAGAACGGCTTG    | 60.249 | 20 | 237 | 8    | 244  |
| 60.235 | 20 | CCCCCTGCCTTTCTTTCTAC    | 60.068 | 20 | 143 | 470  | 612  |
| 60.34  | 20 | AATCTTCTGGCTGCTTCGAC    | 59.579 | 20 | 202 | 256  | 457  |
| 59.746 | 20 | CGCAGTCTCCTTTTTCTTGG    | 59.986 | 20 | 193 | 342  | 534  |
| 59.644 | 24 | TGGGCGTTGTTCTGTACTTG    | 59.758 | 20 | 244 | 8    | 251  |
| 59.805 | 20 | TTTGATGGATTGTCCGCATA    | 59.891 | 20 | 208 | 1611 | 1818 |
| 59.626 | 22 | TCGGAGAGCTAACAGAGGGA    | 60.088 | 20 | 231 | 26   | 256  |
| 59.993 | 20 | TGCGCGTATGCATAAGGTAG    | 59.886 | 20 | 238 | 4347 | 4584 |
| 59.813 | 20 | CAGAGCGCACTCGAAGAGTA    | 59.49  | 20 | 243 | 335  | 577  |
| 60.074 | 20 | AAAACACCTGGGACCACAAT    | 59.162 | 20 | 213 | 224  | 436  |
| 59.003 | 20 | GCCAAGAATTGAAAAGGCAA    | 60.188 | 20 | 178 | 865  | 1042 |
| 59.195 | 20 | GGATTCAGCTGGAAAAACCA    | 60.051 | 20 | 183 | 132  | 314  |
| 60     | 20 | TGATCATCCTCAGTTGTTGATTG | 59.985 | 23 | 225 | 436  | 660  |
| 58.495 | 22 | TAGTTCGAAATGATTGCC      | 59.901 | 20 | 252 | 2206 | 2457 |
| 59.837 | 20 | CTTGTTTCCATTCCACCTGC    | 60.495 | 20 | 256 | 5815 | 6070 |
| 60.694 | 20 | AATATGTTTGAGGCTGCGCT    | 59.873 | 20 | 261 | 1260 | 1520 |
| 59.934 | 20 | GCCTTTCTCCTTTTCTTTAACCA | 60.114 | 23 | 278 | 857  | 1134 |
| 59.939 | 20 | TCTTCCGTAAAGCGAAGGAA    | 59.953 | 20 | 256 | 755  | 1010 |
| 59.903 | 20 | ATCATTACCAACACGCAAA     | 59.972 | 20 | 103 | 3060 | 3162 |
| 59.989 | 20 | CCCGTTGAAAAAGTCTGGAA    | 60.081 | 20 | 195 | 6515 | 6709 |
| 60.133 | 20 | TGTTGCAGATGTTTCTTCGG    | 59.84  | 20 | 186 | 757  | 942  |
| 59.848 | 20 | TCGGACTCCGTCCATAACAT    | 60.34  | 20 | 172 | 1506 | 1677 |
| 59.829 | 20 | ACGGTGTGATTGTTTCGTCA    | 60.008 | 20 | 219 | 12   | 230  |
| 59.996 | 20 | CGGTCAACCGATTCCCTATT    | 61.061 | 20 | 246 | 637  | 882  |
| 60.051 | 20 | TTTGTGGACCTAACGCATGA    | 60.111 | 20 | 146 | 390  | 535  |
| 59.752 | 20 | GGTTGGATGAAATAGTGCCG    | 60.331 | 20 | 160 | 11   | 170  |
| 59.933 | 20 | AGGGACGGTGCTATTTAGGG    | 60.332 | 20 | 245 | 98   | 342  |
| 59.894 | 20 | TCCGAGCCTGAGTCAATTCT    | 59.95  | 20 | 141 | 274  | 414  |
| 59.799 | 20 | CAATTTGGTTGGGTGCTTCT    | 59.971 | 20 | 203 | 32   | 234  |
| 57.372 | 23 | CGGATGAGATGCAAGAAAAA    | 58.843 | 20 | 278 | 1930 | 2207 |
| 59.806 | 20 | GAACCACTGAACCACGGAGT    | 60.009 | 20 | 103 | 706  | 808  |
| 60.149 | 20 | TTCAGCAGGCGTAGACATTG    | 60.011 | 20 | 239 | 279  | 517  |
| 59.923 | 20 | TTGCGGACGTCAAATTCTA     | 59.301 | 20 | 170 | 2172 | 2341 |
| 60.21  | 20 | AATGGGTTGTCCCCTTTTTC    | 60.032 | 20 | 199 | 115  | 313  |
| 59.892 | 20 | TTGCACCCTGAGCAATAACA    | 60.257 | 20 | 275 | 533  | 807  |
| 60.012 | 20 | TGCGTTGTCGAGTGGTGTAT    | 60.183 | 20 | 171 | 697  | 867  |
| 60.786 | 22 | GATTCTGCGAAACATGACGA    | 59.805 | 20 | 276 | 2031 | 2306 |
| 59.945 | 20 | TGTTAGAGTGGCCGAACCTC    | 60.255 | 20 | 204 | 168  | 371  |
| 59.541 | 20 | TTTGGGTCAATCATTTTGGTT   | 59.168 | 21 | 250 | 510  | 759  |
| 59.903 | 20 | CACGACCCAAATCAACTATTCA  | 59.861 | 22 | 236 | 1824 | 2059 |

|        |    |                           |        |    |     |      |      |
|--------|----|---------------------------|--------|----|-----|------|------|
| 60.156 | 20 | TGTCCTTTACAAGGCGGGTA      | 60.493 | 20 | 247 | 101  | 347  |
| 60.267 | 20 | GAATCCGAACCCTTCTCCTC      | 60.015 | 20 | 165 | 25   | 189  |
| 60.014 | 20 | CCTTGAATCTCAGCACCACA      | 59.831 | 20 | 230 | 898  | 1127 |
| 59.894 | 20 | CTTTGTTTTCCAATGTCGGT      | 59.971 | 20 | 260 | 2511 | 2770 |
| 59.948 | 20 | TCCGTGTGGCTAACAATTCA      | 60.111 | 20 | 262 | 77   | 338  |
| 60.11  | 20 | TTTGGCATTCTTTTTTCAGC      | 60.188 | 20 | 105 | 42   | 146  |
| 58.973 | 20 | TGATTTTGGCCTTTTCAGCAT     | 60.585 | 20 | 261 | 2650 | 2910 |
| 60.008 | 20 | TCTGGCACGAATGGTGAATA      | 60.073 | 20 | 234 | 610  | 843  |
| 60.081 | 20 | TGCGGGTAAGGAAATTTGTC      | 59.938 | 20 | 130 | 1732 | 1861 |
| 59.882 | 20 | TGCAATCTGCTCCATTTAACA     | 59.315 | 21 | 225 | 371  | 595  |
| 60.671 | 20 | TCTCAAGTTCGCCCTTTTTTC     | 59.429 | 20 | 260 | 1074 | 1333 |
| 59.772 | 20 | TGCTTCAAATAATGGCTTCA      | 60.574 | 21 | 228 | 118  | 345  |
| 60.791 | 21 | CATACATTTTATCATCCATTCGC   | 58.405 | 23 | 249 | 13   | 261  |
| 59.997 | 20 | TGTGAGCGTGTGTGAGTGAA      | 60.07  | 20 | 271 | 224  | 494  |
| 59.868 | 19 | TTTTGGCATAATCTGGACTAAACA  | 59.904 | 24 | 238 | 177  | 414  |
| 60.801 | 20 | AAAATACCATTAACACGCAGGA    | 58.567 | 22 | 240 | 538  | 777  |
| 59.974 | 21 | CGTCCCCTCTCTCCCTTAAC      | 60.067 | 20 | 222 | 48   | 269  |
| 60.046 | 20 | GAAAGGAAGAAACCGGCAAC      | 60.968 | 20 | 252 | 109  | 360  |
| 60.15  | 20 | TTGACAACAACCTTTGCCAGC     | 59.888 | 20 | 156 | 412  | 567  |
| 60.173 | 20 | TAGAGAACACGTGCAGAGGC      | 59.191 | 20 | 191 | 2684 | 2874 |
| 59.696 | 20 | TGGGGAGAATGTAATAGCCG      | 59.916 | 20 | 271 | 1433 | 1703 |
| 59.98  | 20 | TGATGACCTGGAGTTGTGGA      | 60.088 | 20 | 227 | 6797 | 7023 |
| 59.894 | 20 | AAATCGCACACATACCAGCA      | 60.142 | 20 | 115 | 450  | 564  |
| 60.089 | 20 | CACCATATTTGTGTTTCTCATTCCG | 60.625 | 24 | 209 | 127  | 335  |
| 60.263 | 20 | CCATGATCAACCATGCCATA      | 60.159 | 20 | 250 | 440  | 689  |
| 57.547 | 24 | TCTATCTCGGATCCAATGGC      | 59.998 | 20 | 224 | 1067 | 1290 |
| 59.907 | 20 | TGAGATTGGTTGGTGTGCTGAG    | 59.831 | 20 | 253 | 786  | 1038 |
| 60.088 | 20 | AACCTTTTCGATGAGGCCCTA     | 60.949 | 20 | 160 | 965  | 1124 |
| 59.903 | 20 | CCCCAGTTCCTCCCTACT        | 60.312 | 19 | 122 | 227  | 348  |
| 59.762 | 20 | TAGTATTGTCCCTCCACCCG      | 59.807 | 20 | 279 | 1629 | 1907 |
| 59.799 | 20 | TCATAAGGATTCGGCCAGAC      | 60.036 | 20 | 245 | 7    | 251  |
| 59.973 | 20 | TGCCAAGCGAATGACATTTA      | 60.215 | 20 | 208 | 226  | 433  |
| 60.797 | 20 | TCTTCAATGCCACAAGTGCT      | 59.445 | 20 | 263 | 1579 | 1841 |
| 57.987 | 27 | TCGTACCAAAATGTGCAACAA     | 60.022 | 21 | 126 | 0    | 125  |
| 60.11  | 20 | TTTCCCCTTCATGTCTACG       | 59.926 | 20 | 241 | 190  | 430  |
| 60.796 | 20 | ACGGTGAGGATTTGTGAAGG      | 59.966 | 20 | 256 | 82   | 337  |
| 59.037 | 23 | TCATGGAATGAAGTTCTCAAGC    | 59.316 | 22 | 107 | 563  | 669  |
| 57.578 | 20 | TGGAATTTTCCAAATCTGGCT     | 60.788 | 21 | 192 | 333  | 524  |
| 59.971 | 20 | TCCCATGTATGTAGATTGCTTCC   | 60.218 | 23 | 174 | 230  | 403  |
| 60.173 | 20 | TCTCGTCCTGACAAACTTCAA     | 58.483 | 21 | 214 | 82   | 295  |
| 60.027 | 20 | CTCTTGCGAGAAGTTGGAGG      | 60.126 | 20 | 238 | 49   | 286  |
| 60.117 | 20 | CGCCTTCAAGATCCACATTT      | 60.074 | 20 | 151 | 389  | 539  |
| 60.39  | 20 | TTTCGAGTATTGGTTAATGGCA    | 58.174 | 21 | 216 | 1349 | 1564 |
| 59.931 | 20 | TCACCTTATTTTCGCAATTTTCA   | 59.603 | 22 | 158 | 650  | 807  |
| 60.088 | 21 | CCGTAATGCGCCTGAGTAAT      | 60.117 | 20 | 262 | 1416 | 1677 |
| 59.939 | 20 | GGACCCAAAATGCCTATTCA      | 59.762 | 20 | 186 | 695  | 880  |
| 60.853 | 20 | GTACGGTAGCCAGTTCCCAA      | 59.993 | 20 | 170 | 13   | 182  |
| 60.439 | 20 | CCCATTTGAATCAACCCCTA      | 59.617 | 20 | 100 | 647  | 746  |
| 59.747 | 22 | GGTTGTTCTCTGGAAACTGTTG    | 58.744 | 22 | 273 | 312  | 584  |
| 60.395 | 20 | CAATGTCACATCCCAAGCAC      | 59.967 | 20 | 110 | 107  | 216  |
| 60.001 | 20 | ACGGTTCATGATATTGGGGA      | 60.014 | 20 | 261 | 877  | 1137 |
| 59.813 | 20 | CCCCAAAATTTCCCATTTCT      | 59.992 | 20 | 276 | 1365 | 1640 |
| 60.134 | 20 | GGGGGAATTTATCCCGACTA      | 59.978 | 20 | 121 | 446  | 566  |
| 59.382 | 20 | ACCTCCGGTTTTCCATTTCT      | 59.805 | 20 | 198 | 1348 | 1545 |
| 59.326 | 19 | ATAGGCCGGACTTTTCGACTT     | 60.096 | 20 | 203 | 180  | 382  |
| 59.429 | 22 | ATGTCGGTTTGGTTAACGG       | 59.724 | 20 | 173 | 11   | 183  |
| 60.066 | 20 | TGACCAAATCAAGGGGCTAA      | 60.439 | 20 | 235 | 1721 | 1955 |
| 59.03  | 20 | TGTCCACATTGGAAAAACA       | 59.792 | 20 | 246 | 338  | 583  |

|        |    |                           |        |    |     |      |      |
|--------|----|---------------------------|--------|----|-----|------|------|
| 59.337 | 21 | GGAACATTACAGTTGGCAAGC     | 59.629 | 21 | 241 | 2517 | 2757 |
| 59.997 | 20 | TAAAGCGTTGTCTTTGAGCG      | 59.25  | 20 | 243 | 1355 | 1597 |
| 59.95  | 20 | AGGTTTGAGGGCCATGACTA      | 59.55  | 20 | 238 | 754  | 991  |
| 60.125 | 20 | GCTTGTTACACCACACTGGG      | 59.06  | 20 | 157 | 1038 | 1194 |
| 58.111 | 25 | GACGCCACGTGTAAGACT        | 60.179 | 20 | 133 | 0    | 132  |
| 59.49  | 20 | AGGTGTCCCATACGGACTTG      | 59.844 | 20 | 154 | 0    | 153  |
| 57.696 | 20 | TGTAGGCAATTCAAGAAGCAA     | 58.57  | 21 | 177 | 729  | 905  |
| 60.188 | 20 | TGGTGAATTTCTTTTTGGCA      | 59.133 | 20 | 273 | 0    | 272  |
| 58.733 | 21 | TTCGACGAGATCCTAATGG       | 60.029 | 20 | 211 | 323  | 533  |
| 60.036 | 20 | GCAAATATTGCAGTCAGCCA      | 59.839 | 20 | 192 | 482  | 673  |
| 58.654 | 22 | GTTTTGTCAGAGGCCACCAT      | 59.973 | 20 | 186 | 1177 | 1362 |
| 60.936 | 19 | TCGAGTTTAGTTCTTCTGTAATGTT | 58.319 | 27 | 223 | 397  | 619  |
| 57.066 | 23 | CAACTAGGGGTGTTACGGT       | 59.884 | 20 | 204 | 712  | 915  |
| 60.257 | 20 | AGAGGAATGTAATCCCCCGT      | 59.651 | 20 | 228 | 160  | 387  |
| 59.19  | 21 | GGCGAATTAATAACACCACG      | 59.376 | 21 | 202 | 622  | 823  |
| 59.976 | 20 | TGCATTCTAAACTGCCAACG      | 59.872 | 20 | 212 | 686  | 897  |
| 59.931 | 20 | CCCAATTTTTGGGAAATCCT      | 59.992 | 20 | 164 | 496  | 659  |
| 59.077 | 20 | GCTTCCATGTATGAAGATCGC     | 59.688 | 21 | 181 | 17   | 197  |
| 59.973 | 20 | GGATCGAAAGGTTGTGGAAA      | 59.91  | 20 | 180 | 188  | 367  |
| 60.184 | 20 | TGGTGATTTTTGCCGTGATA      | 59.93  | 20 | 277 | 534  | 810  |
| 60.671 | 20 | GTTGCGGCCCATATAGTTGT      | 59.851 | 20 | 245 | 130  | 374  |
| 60.386 | 20 | GTTCTGAATTCCTCCTCCCC      | 59.874 | 20 | 230 | 224  | 453  |
| 60.02  | 20 | CCATTTGATCTTGCCATGACT     | 59.947 | 21 | 266 | 1740 | 2005 |
| 60.156 | 20 | AAATAGCAAGTTGATGGCGG      | 60.096 | 20 | 168 | 224  | 391  |
| 60.406 | 20 | TTCTTACGTTTCCTTTGGTGC     | 59.257 | 21 | 264 | 1189 | 1452 |
| 59.855 | 20 | AAAGTGCTTTTATATGCGGC      | 60.238 | 20 | 159 | 2    | 160  |
| 60.034 | 22 | TTCAATCTTCATCCGAGCC       | 60.155 | 20 | 164 | 0    | 163  |
| 59.795 | 20 | ATGGGTTGTTCCAAATCCAA      | 60.029 | 20 | 202 | 214  | 415  |
| 60.088 | 20 | CCCATGTCTTAAATACTTGCCA    | 60.369 | 23 | 269 | 1598 | 1866 |
| 60.461 | 20 | GGTTTGGGAGAAAAGCATCA      | 60.051 | 20 | 265 | 444  | 708  |
| 60.104 | 20 | CCCACTGACTCCTTCCATATCT    | 59.461 | 22 | 222 | 375  | 596  |
| 59.94  | 20 | AGGAAGGGGGAAAAGGAAAT      | 60.122 | 20 | 186 | 608  | 793  |
| 60.49  | 20 | CCCTATCAAACCCAGCAAGA      | 60.066 | 20 | 280 | 38   | 317  |
| 60.192 | 20 | AGAATCGACAGTTTGGACGG      | 60.111 | 20 | 226 | 586  | 811  |
| 59.875 | 21 | GCAATTTTGTGTTTTGTAAACTCA  | 59.539 | 25 | 273 | 593  | 865  |
| 59.569 | 20 | AGGCTCTGGTCTGCAACTGT      | 60.057 | 20 | 195 | 1385 | 1579 |
| 57.189 | 22 | TCATGATTCAAAGCAGTTGATTG   | 60.124 | 23 | 275 | 229  | 503  |
| 59.768 | 20 | TTTGTACGCAGCCATTACCA      | 60.133 | 20 | 223 | 940  | 1162 |
| 60.249 | 20 | TTCCAGAAATTGTGTTGGCA      | 60.088 | 20 | 263 | 2016 | 2278 |
| 60.126 | 20 | ATTGTCTCCCACCTGAGACG      | 60.112 | 20 | 229 | 2446 | 2674 |
| 60.014 | 20 | CATGGCTAATGGACTTCACAA     | 58.637 | 21 | 262 | 1089 | 1350 |
| 59.962 | 20 | GCTAGCAGCCTTGTCTGGAT      | 59.603 | 20 | 254 | 817  | 1070 |
| 60.538 | 20 | AAAGTCGCGTATTTTTCGTGA     | 59.772 | 21 | 249 | 353  | 601  |
| 60.594 | 20 | GGTGTCCCATTTCCAATGTT      | 59.508 | 20 | 228 | 2440 | 2667 |
| 60.894 | 20 | GGCATGTGTATCAGGTCGTG      | 59.992 | 20 | 157 | 6    | 162  |
| 60.199 | 20 | TCCAATTAATCCTAAACCACATTT  | 57.985 | 24 | 234 | 323  | 556  |
| 60.724 | 20 | GGGGTCTTGCGTACTAACA       | 59.993 | 20 | 248 | 142  | 389  |
| 59.411 | 20 | TTCTTTTTGACTTTTGAGCAGATG  | 59.933 | 24 | 267 | 547  | 813  |
| 60.074 | 20 | TGCTTTACACCCTCCAAAC       | 59.971 | 20 | 162 | 1795 | 1956 |
| 59.844 | 20 | CGATTTTTCACAGTAGCAGCA     | 59.122 | 21 | 279 | 835  | 1113 |
| 57.547 | 24 | TCAGTGTGTTGAATCACCTAATGG  | 59.007 | 23 | 184 | 691  | 874  |
| 59.888 | 20 | TGGGTTTCCAACACAAATCA      | 59.792 | 20 | 167 | 121  | 287  |
| 60.353 | 20 | TTTTGTTCCATGTTATTGCCA     | 58.922 | 21 | 212 | 4585 | 4796 |
| 59.992 | 20 | AAACTCCCACATGCACACAA      | 60.008 | 20 | 149 | 222  | 370  |
| 59.532 | 26 | GAAGTTTTGGAGATCCGACG      | 59.67  | 20 | 127 | 290  | 416  |
| 60.253 | 19 | AGGGGCAATTTGTAGACACG      | 59.993 | 20 | 280 | 813  | 1092 |
| 60.204 | 20 | ATCAAATTCGACTTGCCAC       | 59.939 | 20 | 243 | 115  | 357  |
| 60.27  | 20 | CCCATTGTTAACCCAAAACG      | 60.081 | 20 | 134 | 37   | 170  |

|        |    |                           |        |    |     |      |      |
|--------|----|---------------------------|--------|----|-----|------|------|
| 58.749 | 20 | TTAACGCGCGCCATATATTA      | 59.233 | 20 | 225 | 2883 | 3107 |
| 60.249 | 20 | AGTGAGACTGAATGATATGAC     | 58.279 | 24 | 240 | 214  | 453  |
| 60.209 | 20 | TTGTGAATTCATCGAGCCA       | 60.197 | 20 | 159 | 253  | 411  |
| 59.532 | 20 | GCTAAAGGCGGAACTCAGTG      | 60.015 | 20 | 193 | 3272 | 3464 |
| 60.12  | 20 | CTCCAGCTGTTGATGGGATT      | 60.073 | 20 | 274 | 949  | 1222 |
| 59.962 | 20 | TTGTTATTTTCATTAAGTTATTAGC | 57.628 | 27 | 136 | 3149 | 3284 |
| 59.933 | 20 | TAGCCAGAAAACCCCAGATG      | 60.066 | 20 | 258 | 471  | 728  |
| 59.79  | 20 | TCGTACACGAGGAGATGCTG      | 60.008 | 20 | 274 | 1087 | 1360 |
| 60.795 | 20 | ATGCAGCTTTAGCAGAGGGA      | 60.118 | 20 | 280 | 233  | 512  |
| 59.504 | 20 | TCTGCCATCATCCACCATTA      | 59.883 | 20 | 182 | 166  | 347  |
| 59.824 | 20 | TTTCGGATGTAACACAGGCA      | 60.111 | 20 | 130 | 1691 | 1820 |
| 60.395 | 20 | CCACCCTCTCTTTTTCCACA      | 60.081 | 20 | 275 | 62   | 336  |
| 59.727 | 20 | CTTCCCTCTGGATGGTGCTA      | 60.21  | 20 | 239 | 149  | 387  |
| 59.247 | 20 | TAATAGAAGCGGAGGAAGCG      | 59.586 | 20 | 225 | 827  | 1051 |
| 59.6   | 23 | TTGGAATTAACCGAGCCA        | 60.427 | 20 | 210 | 719  | 928  |
| 60.089 | 20 | CAATCCAATTCCTGTATGGAAAA   | 60.062 | 23 | 267 | 583  | 849  |
| 60.043 | 20 | TAGCAACTCGCTCTCCCAAT      | 59.978 | 20 | 198 | 103  | 300  |
| 59.935 | 20 | GAATGCAACGACACTCGAAA      | 59.847 | 20 | 202 | 1443 | 1644 |
| 60.029 | 20 | GAGAGCAAACACCCCAAGAT      | 59.141 | 20 | 132 | 49   | 180  |
| 60.06  | 20 | TGTGGGATGCAATGAATCTG      | 60.481 | 20 | 167 | 5358 | 5524 |
| 59.935 | 20 | ATGGGAAAGGAATTGCAACA      | 60.309 | 20 | 205 | 825  | 1029 |
| 60.05  | 20 | TTGATGGAATTAAGCTGCGA      | 59.401 | 20 | 250 | 201  | 450  |
| 59.986 | 20 | GCCTCTGCTTTCTCCTTCCT      | 60.096 | 20 | 276 | 2175 | 2450 |
| 59.793 | 21 | CTGTTGGATTTCAACTCGGG      | 60.486 | 20 | 241 | 1141 | 1381 |
| 59.995 | 20 | GCAGGCATACACTCCCACTT      | 60.142 | 20 | 173 | 384  | 556  |
| 59.964 | 20 | GTTGGCCCCCTTAGATCATT      | 60.152 | 20 | 202 | 607  | 808  |
| 60.045 | 19 | TCTAATGGAGATCAAGTTCGCTC   | 59.87  | 23 | 263 | 1674 | 1936 |
| 60.16  | 20 | CAGCCAATCAGAAAAGTCGG      | 60.766 | 20 | 140 | 3007 | 3146 |
| 60.195 | 20 | TTGCTTAATTACCATAAATGCTGA  | 58.866 | 25 | 240 | 1405 | 1644 |
| 57.953 | 22 | TCCACTCCATTGGTTCTTTTT     | 58.54  | 21 | 280 | 844  | 1123 |
| 59.982 | 20 | CGGGTAGGAATCAGTTTTCTG     | 59.564 | 20 | 154 | 1124 | 1277 |
| 59.939 | 20 | AAAATGTCAAATAAATTCTCCGAA  | 59.359 | 25 | 255 | 6398 | 6652 |
| 58.962 | 21 | TATCATTAAACGCCCGTAGGC     | 59.95  | 20 | 274 | 3241 | 3514 |
| 59.966 | 20 | CTTTCCAAATCCCTATGCGA      | 60.031 | 20 | 134 | 1124 | 1257 |
| 59.685 | 21 | CACCTCGCAACAATAAGACG      | 59.342 | 20 | 183 | 2130 | 2312 |
| 60.206 | 20 | TTGCCACCCCTAACATAAA       | 60.181 | 20 | 234 | 3    | 236  |
| 60.282 | 20 | TGGTTAGGGGTGTCAAGAGG      | 59.959 | 20 | 251 | 74   | 324  |
| 60.27  | 20 | TTTCGTGTTTAGCCTTTTCGC     | 60.376 | 20 | 257 | 13   | 269  |
| 59.286 | 20 | TTCCACCCTCTCCTTTTCTG      | 59.255 | 20 | 219 | 402  | 620  |
| 60.874 | 20 | GGTTTCGCTGATTTTGTGGT      | 59.978 | 20 | 256 | 638  | 893  |
| 60.074 | 20 | CCAATGGTGGTATGGTGTGA      | 60.088 | 20 | 214 | 173  | 386  |
| 60.573 | 20 | CAACACCCATGTGATTGCTC      | 59.967 | 20 | 186 | 5    | 190  |
| 57.132 | 27 | TCAATACCCGAGAATTGCAT      | 58.038 | 20 | 253 | 41   | 293  |
| 59.84  | 20 | AACTCCCACCGACAGTTTCA      | 60.545 | 20 | 268 | 345  | 612  |
| 57.432 | 26 | ATGCAAAAATACGGAAACGC      | 59.971 | 20 | 271 | 3    | 273  |
| 59.996 | 20 | ACTCGACTTGATTGCGAACC      | 60.263 | 20 | 249 | 0    | 248  |
| 59.276 | 20 | CCACTTTTGTGGTTCTCGT       | 60.005 | 20 | 263 | 41   | 303  |
| 59.956 | 21 | ATCAAGTCAATCCGAGTCCG      | 60.073 | 20 | 243 | 142  | 384  |
| 59.823 | 20 | GCAGCCCGAGAATTGTCTAC      | 59.843 | 20 | 229 | 1902 | 2130 |
| 59.892 | 20 | CCGAAAGAAACGGTGGTAAA      | 59.968 | 20 | 219 | 1369 | 1587 |
| 61.616 | 18 | ATTTGAACCCACGCCATAAA      | 60.188 | 20 | 174 | 0    | 173  |
| 57.743 | 23 | TGGTTTCCTTCATGCTTTTTTC    | 59.192 | 21 | 235 | 360  | 594  |
| 57.242 | 22 | TGCCAGGGAATTGGAAGTAG      | 60.066 | 20 | 105 | 0    | 104  |
| 59.716 | 20 | CAGACCGAATAGGAGTGCAA      | 58.874 | 20 | 215 | 161  | 375  |
| 59.862 | 20 | GGGAGAGTGGATGTGTAGGC      | 59.535 | 20 | 260 | 1201 | 1460 |
| 60.138 | 22 | CCTTAGTGGATTTTCATGGGC     | 59.387 | 20 | 280 | 1868 | 2147 |
| 60.34  | 20 | CCGTGGAATGAAATTGAGTCT     | 59.042 | 21 | 257 | 960  | 1216 |
| 59.95  | 20 | TGTCCAATCAAGAGGCAACA      | 60.24  | 20 | 149 | 73   | 221  |

|        |    |                         |        |    |     |      |      |
|--------|----|-------------------------|--------|----|-----|------|------|
| 59.864 | 20 | TCGTTTCGACATCCGTTACA    | 60.111 | 20 | 279 | 35   | 313  |
| 60.362 | 20 | GAGTTCGGTGGGTATGGATG    | 60.195 | 20 | 204 | 77   | 280  |
| 58.929 | 27 | CCCTCCAGCATACTGCTTA     | 60.227 | 20 | 226 | 1241 | 1466 |
| 59.839 | 20 | CGCATGTTACGTAAATCGTTAAA | 59.149 | 23 | 250 | 201  | 450  |
| 60.001 | 22 | AAACTGCCATGCACACCATA    | 59.995 | 20 | 278 | 308  | 585  |
| 59.77  | 20 | CCTTTCTTTTGACTGATGTGGA  | 59.215 | 22 | 223 | 174  | 396  |
| 57.963 | 22 | TGGAGTGGCATTGCAAGAG     | 60.975 | 19 | 168 | 878  | 1045 |
| 60.14  | 20 | CATCAGCAGCAGCAGAAGAG    | 60.032 | 20 | 156 | 127  | 282  |
| 60.096 | 20 | TCGCTATTGTATTTAGGCAGG   | 57.163 | 21 | 116 | 316  | 431  |
| 59.599 | 20 | CACCCTTGAGGTGTTTCATCA   | 59.52  | 20 | 176 | 159  | 334  |
| 59.925 | 21 | GCGGTTGATGATAGTCGGTAA   | 59.974 | 21 | 265 | 818  | 1082 |
| 59.824 | 22 | TCTCCATCTCCAACCTCACC    | 60.048 | 20 | 157 | 47   | 203  |
| 59.988 | 20 | TAAAATGGGCGAGAGTGAGG    | 60.206 | 20 | 128 | 1108 | 1235 |
| 59.894 | 20 | AAGTTCACCTTCGGAGATCG    | 59.284 | 20 | 271 | 336  | 606  |
| 59.917 | 20 | TATATTTGAGGCGGAGGAA     | 59.638 | 20 | 268 | 1211 | 1478 |

| FORWARD PRIMER2 (5'-3')  | Tm(C°) | size | REVERSE PRIMER2 (5'-3') | Tm(C°) | size |
|--------------------------|--------|------|-------------------------|--------|------|
| CGAATTGAAATGAATTCTACGTT  | 57.426 | 23   | TACCCCTACCCTTTGGGAAC    | 60.046 | 20   |
| CGAACGCTCCAAATTAGAATG    | 59.728 | 21   | CGATCCCCTTACCACCCTAC    | 60.569 | 20   |
| TTCCACCATTTCCCGATTTA     | 60.124 | 20   | AAACACGACCATTTTCAGGC    | 59.978 | 20   |
| AGCCGATCTGAGTCTGCTTC     | 59.709 | 20   | TTCTCATACTAAAAGGTCTTTC  | 59.662 | 27   |
| TGAATTCATAACCTTCCCATTCA  | 60.533 | 23   | AATTTCCAGAACTTTGGGGG    | 60.159 | 20   |
| AGCTCCACCTCCAAACAAGA     | 59.844 | 20   | GGCATTATGCTTCTGCCATT    | 60.067 | 20   |
| CTGGAGCAGCATCCAAAGTT     | 60.397 | 20   | GCTTGCATTCACCCAAAATC    | 60.457 | 20   |
| TGTGTTGTGTGGAATAAAAAGTTT | 60.217 | 25   | AATAAACGTGCCAAAAACCG    | 59.868 | 20   |
| TCTTCGTTTCTGGTCTGCCT     | 59.989 | 20   | CCATGCGCTAAAAGTCACA     | 59.872 | 20   |
| TGCAGCAATGGTTGTGATTT     | 60.119 | 20   | TGATTCTCCCTCTAATCTGTTTT | 57.985 | 24   |
| TGAGTCACGAGACACTTGCC     | 60.03  | 20   | GCGTCTACGGTGCAGAAAAT    | 60.278 | 20   |
| CCCTCGACACACACTCACAT     | 59.577 | 20   | TGTGCGTGAAAAACAGATGG    | 60.699 | 20   |
| TAAATCATCAGCCCACGTCA     | 60.073 | 20   | CCATCGATTCTCTCCTCG      | 59.903 | 20   |
| TGTTTGGCCAGCAGTAATCA     | 60.257 | 20   | CAATCTCGAAAATGGATGGC    | 60.414 | 20   |
| TTGACCGGAAGGTATGAACA     | 58.973 | 20   | CGTGAGAAGCAACCAAATGA    | 59.84  | 20   |
| TCGCTGACATCATCTTATGGA    | 59.241 | 21   | TTTTATCCTTACGCAATCCCA   | 59.442 | 21   |
| CAAGGGTTCAAGCATTGGAG     | 60.626 | 20   | CCCCACACCCTCATTCTCT     | 59.905 | 19   |
| TTCAAGCATTTGAGGGGTTT     | 59.546 | 20   | CAACACAAGAACTCACCTCCC   | 59.607 | 21   |
| CGGGGACACATAAACCTCAC     | 60.232 | 20   | TTCCACCGGTGTTCTTGAAT    | 60.353 | 20   |
| TTCCCTTTGCCCTCTATT       | 59.903 | 20   | TTGGGAGGGAGAGATTGTTG    | 60.042 | 20   |
| CCCACTGATTTGTGTGAGGA     | 59.52  | 20   | TTGGGCTAAGTGGAGTGAGTG   | 60.297 | 21   |
| AGTTTTCATGGATGGATGCC     | 59.756 | 20   | TCTCCATTTACTGCTTCCGA    | 59.831 | 21   |
| ACGCTCTTAACCACGGAAA      | 59.747 | 20   | TGTTGACTTGCTTTCTTGGC    | 59.05  | 20   |
| GATGACCATATCTCGTTTTAGCA  | 60.346 | 23   | GCTTAATCTTTCAACGCCGA    | 60.343 | 20   |
| TTTAATGGGCGGTTATGGAA     | 60.144 | 20   | CAAATATGCTTTCTTGATCATC  | 58.646 | 25   |
| GACATATCGTCGATCGGCTT     | 60.066 | 20   | GGTGCATGACACAGACCATC    | 59.97  | 20   |
| ATGGGTGGATGACTTTGGTG     | 60.634 | 20   | AATGATCTCATGGTGGAGGG    | 59.737 | 20   |
| TCTAACCCAAACCCAAACCC     | 60.938 | 20   | CGGTTTGACTTGCCCTAAA     | 60.103 | 20   |
| TTTCGTCCCGAAATTTTGT      | 59.429 | 20   | CATCCCCTTTTTCAGACGTT    | 59.028 | 20   |
| AGATGACAACCTTCGGCTTG     | 60.255 | 20   | CGCGAACTTTACAGGGCTAC    | 59.904 | 20   |
| AACTTGCCCCCTAAGCTTGT     | 60.13  | 20   | TTGGGCTCGAATCTCTTGT     | 59.813 | 20   |
| CCATCTATAGCGTTAGCGTG     | 59.772 | 21   | CGGAAGAATTAGAAACGGCA    | 60.202 | 20   |
| CCCACTTAGGAACATTTAGGGA   | 59.368 | 22   | ATCCAGCCAATTTTATCCCA    | 59.23  | 20   |
| TTGATACCTCCTCCACGAC      | 59.927 | 20   | TCGTAATGATCCCCAACTC     | 59.75  | 20   |
| GTTAGCGGAGTGAATGAGGG     | 59.694 | 20   | GGCCGTTTTAACGGTTTTG     | 60.342 | 19   |
| AATTGATCATGGCTTCTGGC     | 60.043 | 20   | AAAATCGCGCTTACATCACC    | 60.103 | 20   |
| GGAGTTTGACACCTAAAGCCC    | 59.99  | 21   | CTTTGGATGGATGAACTTGA    | 59.918 | 21   |
| ACAGGCTCTTTGGAAGACGA     | 59.989 | 20   | AAACCAACAGCCGAGATTTG    | 60.11  | 20   |
| TGGTATTACTGGAACGCGA      | 59.182 | 20   | CCGATATGCTATGCTTTTGCT   | 59.38  | 21   |
| TTTGTGGCTAACAGGTCCC      | 59.971 | 20   | CCATGTTGTAATTAATGTAGGG  | 57.155 | 24   |
| CGTGAAGGCTGGGACATACT     | 60.134 | 20   | GGTCACGAGAACACGCATAC    | 59.169 | 20   |
| ATTTGACATCTAATACCCAATAT  | 57.03  | 27   | CATCCACTCGCATCACAAAG    | 60.263 | 20   |
| GCGCTCTTCTAGCCTCAA       | 60     | 20   | CAAAGCGCACAGAGACAAA     | 60.172 | 20   |
| AGGATACCCTCTCAAACCCTAGT  | 58.616 | 23   | CGGAAACAAGCAACTACAGC    | 58.58  | 20   |
| GGGGCGTGACAAGTTATGTT     | 59.859 | 20   | ATGGATGCCGATATTTGAGC    | 59.891 | 20   |
| ATCAAACAGCTGAGGCTCGT     | 60.02  | 20   | ATTCCCATCGATTGAACCAA    | 60.133 | 20   |
| TCCAAATGCAAATCAGTGGA     | 60.049 | 20   | ACCCCACTAAACCCAACTT     | 57.435 | 20   |
| AATTCTAACCATCTTCTTTTGGC  | 57.932 | 23   | AGCCATTTTCCAAGAGCTTAA   | 59.416 | 22   |
| ATCCTCCACCCCACTTAAC      | 60.052 | 20   | CGACACGAACGGTTTAGGAT    | 59.993 | 20   |
| GAGAGTTGTAGGGCGACTGG     | 59.867 | 20   | CTTGACTTCAAACCCCAACG    | 60.52  | 20   |
| GACTGTTCCGAGCTTATCCGC    | 59.985 | 20   | AAATGAAGTGCAGGGTGGAG    | 60.111 | 20   |
| CGTACTGGCCTAAATAATGTCAAC | 59.05  | 24   | TCAGTGGTTGTAACATTGGCA   | 60.019 | 21   |
| GGAGAGCATGAAGAATGAACC    | 58.731 | 21   | CACCCGAAAACCGAATAAGA    | 59.931 | 20   |
| TGGTGAGATTTGTGGTTTGG     | 59.389 | 20   | GACCCTTAATGCAGGGTTTG    | 59.429 | 20   |
| TCGGTCGAAACCGAATAAAC     | 59.938 | 20   | AGCGGCTACGCTAATTCTGA    | 60.138 | 20   |



|                          |        |                           |        |    |
|--------------------------|--------|---------------------------|--------|----|
| ATTGGCAAATATCACCGGA      | 60.153 | 20 TGATCTCAACGGTATGCTCG   | 59.823 | 20 |
| CAATAATTTTGTTCACCAA      | 58.76  | 22 CAATCTGGATCGTTTGATACC  | 57.015 | 21 |
| ACGATGTCCTCTATCACCCG     | 59.95  | 20 TCCAAAAATCAAAGCTTGAAG, | 58.987 | 22 |
| TTCACAAACCACGTTGACATC    | 59.455 | 21 CGTCAGCATTACCCCAACT    | 59.993 | 20 |
| GATAGGCCCTAACTCGACCC     | 59.925 | 20 CATTTTACGAACGAACCACG   | 59.083 | 20 |
| TTGGGGTGATGACATTGAAA     | 59.75  | 20 GAGCAATGTTGGTTGCACAT   | 59.577 | 20 |
| AGAGAAAGATAGGGGGCGAA     | 60.166 | 20 AACAACAACCCACCCATTA    | 59.948 | 20 |
| GGGATGCCATTTCGTTAGTCC    | 61.606 | 20 CAAATCCCTCGTGTTCCTCC   | 59.526 | 20 |
| AATTTCGGGTTTTCCACGTAA    | 59.315 | 20 ACCGTCCATCTTAATGCAGC   | 60.103 | 20 |
| CCCCTTTGTCAACTTAGGCA     | 60.103 | 20 CAACAGTTTGGCATCAGAGC   | 59.445 | 20 |
| AGTTGATTCTAGGCGGCAT      | 60.978 | 20 GGTGTATGAAACCGTTAGTTC  | 59.826 | 23 |
| CGGTGGAGTGGTTTCACAG      | 60.137 | 19 TCACTCCGCCAACTAACAAA   | 59.317 | 20 |
| CAGAGGATCCAAATCCGAAG     | 59.623 | 20 TCCCATGAATGTTTGTGGTG   | 60.216 | 20 |
| GCTACCTTATTGATCCATTCTC   | 58.188 | 23 GCGCTTCTTTTGTATCCCAG   | 59.845 | 20 |
| GCATGAAATTGTGATTTTTGGTG  | 59.288 | 23 CATAAGACGATGCGAGGTGA   | 59.823 | 20 |
| TTGCCGGGAAAGTTTTTATA     | 60.427 | 20 GCCCCCTTCTGAATCTCCTA   | 60.537 | 20 |
| TCTCTCTTTTGGTTGGTGA      | 59.697 | 21 GATTCAAGCATGGAATCGCT   | 60.185 | 20 |
| TTGTGAATTGGGTATGTGAATCAT | 60.352 | 24 CCCATTCCCAAATCCCTTAT   | 59.846 | 20 |
| AAAATGTGCAATCTCAGCCA     | 59.276 | 20 GTCTTGACGATTCTCCACA    | 59.837 | 20 |
| ATGGTCGTTGACACGACAGA     | 60.162 | 20 TTATTGCCTACCAACCAGCC   | 59.96  | 20 |
| TGCAAGAATGGGTTTTTGAAT    | 59.442 | 21 CACACATAAATGGGTTATCAAT | 60.232 | 24 |
| TCTGCAGAAATAAGGGGTTCA    | 59.693 | 21 TCCAACAATCTCCCACTTGA   | 59.059 | 20 |
| GAGCACTCGAAAAGTAGCGG     | 60.154 | 20 ATATGCCAGTGCGTGTCTG    | 59.746 | 20 |
| CGAGGAGAACCTTGGAGTGA     | 60.377 | 20 TACGATCCCAACGGTATGCT   | 60.352 | 20 |
| TGAGTTTCAATTGCGTAGTCAA   | 59.808 | 23 TCCCTCTCTCTCTCTCGGT    | 59.694 | 21 |
| TCACAGACGGAGAGAGACACA    | 59.587 | 21 GTGGCGAACGAGAGAAGATT   | 59.434 | 20 |
| TCGAACTTACCTAGGCCATT     | 59.973 | 21 CGTTTTGGTTTGTTCCTACA   | 59.884 | 21 |
| TATTTTGGACGATTTTGGCC     | 59.773 | 20 GGGAAAGGATTTGCACGACTA  | 60.074 | 20 |
| TCGTCCGCTGCAGTAATATG     | 59.856 | 20 TCGGTACTGGGGCAGATAAG   | 60.088 | 20 |
| GTGGATTGTGTCTTGCAGGC     | 61.684 | 20 ACATTTTTGTGTTGCTCCCC   | 59.836 | 20 |
| ACGAAATGACCCTCATTCA      | 60.317 | 20 CCATACCTAACCTGTACCGTCC | 60.652 | 22 |
| CCGATCCCACCTGTTTTTA      | 59.795 | 20 GCTATCGAAACAACCCGAGA   | 60.074 | 20 |
| CCCCTCACATGCAATAAACCC    | 60.192 | 20 CCTTTTTCTTGCAAGGATTGA  | 59.325 | 21 |
| AAGGTGAACTCAAACGGCTC     | 59.333 | 20 GTTACCCGACCTGAAGGAGG   | 60.872 | 20 |
| CGTACAACCTGGTTTCATCCG    | 59.047 | 20 ACCGGCAAGAAGAAAACCTGA  | 59.853 | 20 |
| TCTCCCTCTCAATGCACCTT     | 59.803 | 20 TCATTAGCCATGTGTTCCCA   | 59.924 | 20 |
| TTAAGGAGCGGATTCACCAG     | 60.206 | 20 CATGAGCCGCTAGATTGACA   | 59.972 | 20 |
| TGGAAATTAGACGATTTACACAA/ | 59.048 | 25 GTGCGTGCCATTTATAAAACA  | 58.622 | 21 |
| ATTGGACACAACCCACACCT     | 60.135 | 20 CAGCCGAAAGAAGCAGGATA   | 60.481 | 20 |
| ATTAACCACCGCGCTACAC      | 60.025 | 20 TACGGGATCTCTTTGGTTTCG  | 60.066 | 20 |
| AAAAGGTGGTGGTGGTGTTC     | 59.721 | 20 TCCTCTCCTCTCTCACGC     | 59.679 | 20 |
| GTTGGGGTTAGGTATCGCCT     | 60.208 | 20 ATTCCTCTCAACCAAACCC    | 60.169 | 20 |
| ATTCCCCAAAACCGAATAA      | 60.361 | 20 GATGTGCAAAGCTGCTGAAG   | 59.746 | 20 |
| TTGGCAACTAGATCACTCGG     | 58.874 | 20 TGGACGTAAATACCCTTTTACC | 59.667 | 23 |
| TGGAAATTCATCCACGTTCA     | 59.9   | 20 GGAAACCCACAATCATCACC   | 60.034 | 20 |
| TGACTATAAGGGGTGTTTTGACA  | 58.551 | 23 ATGCGCGCTGCTTTAATAAT   | 59.873 | 20 |
| CGTGTGTGTTCTCTCGTGT      | 59.782 | 20 TGGGCAGTAGAATACCTCCG   | 60.088 | 20 |
| CCCAAACCTTCGTGTGTGTTCT   | 60.058 | 21 TTTTGTGTTGGGACAAAATGA  | 58.032 | 21 |
| AAGCTTGGCCATTCAACAAT     | 59.574 | 20 TTCGAGTGACACAAGGCAAG   | 60.025 | 20 |
| TGTTTCTAATCTACCATCGCA    | 59.609 | 22 ATTAGGCGACAACCAACTCG   | 60.132 | 20 |
| GATTAAATTGGCGGGTTTCA     | 59.773 | 20 AGAGACGGCAGAAGGTGAGA   | 60.135 | 20 |
| TTTTGTTTGTTCACAGTTG      | 58.5   | 20 ATGTCATTCTGTTGCGGGTT   | 60.384 | 20 |
| CCCATTATGGAATCTCACGG     | 60.148 | 20 TCACGGTCTATCTCAGCCAA   | 59.394 | 20 |
| ACAGCCGTCCATCTCCAATA     | 60.483 | 20 TGAAGTTAGGAAATAAGGAGG  | 58.743 | 25 |
| AAACAACAATTCATCAAATATCCC | 59.194 | 24 TTCTGGGCCCAAATCAATAC   | 59.762 | 20 |
| ACTTTGCATCCCAGTCAGGA     | 60.656 | 20 TTGGCCTTGCCATGTATATCT  | 59.447 | 21 |
| TTTGAGGTCCCAGCTGAACT     | 59.844 | 20 GGGAAAGCTATGATGGGGAAT  | 60.117 | 20 |
| TCACCGGAGAAGCTTAGGAA     | 59.948 | 20 TTGGGCTTTCATTTTTCAGC   | 60.188 | 20 |

|                          |        |                            |        |    |
|--------------------------|--------|----------------------------|--------|----|
| TTCCAATGATCCTGAGAGC      | 60.158 | 20 CAACAGTTTGGCATCAGAGC    | 59.445 | 20 |
| GCAAATGTAGCACGCAGAAA     | 60.021 | 20 AGGTAACGAGTGATGCTGGG    | 60.134 | 20 |
| TTGTGCACTTCATATCGCGT     | 60.288 | 20 TGTCAGATGACAAGGAAGAGG   | 59.844 | 22 |
| AAGTGAGAATGATGAGGGGCG    | 60.218 | 20 TCGGATCACATCACCACATC    | 60.349 | 20 |
| CTTCTTTAGGCCATCCACA      | 60.066 | 20 TCTCTCAATGTGGCAACGAG    | 59.984 | 20 |
| CACTGACATCCATCCATTGC     | 59.925 | 20 CATTCCACCGTTGAAAGATCA   | 60.878 | 21 |
| AGATAGTATGCCAATTTTTCTGTA | 59.113 | 24 ATTTATGCTGACCGGAGTGG    | 59.955 | 20 |
| TGGCACATTATTGGTCTCTCA    | 59.138 | 21 TGTGCGAAACAACCCAATTT    | 61.292 | 20 |
| ACGTACGTGTGTGTGTGCATT    | 60.009 | 21 ATTCCCTCCTCAACACCCTT    | 59.795 | 20 |
| AGAAGAGCAAATGGTGGTGG     | 60.111 | 20 ACCCCACTCCCTACATTTCA    | 59.259 | 20 |
| ACGAATTTGGTGTGGAATTG     | 59.716 | 21 AAGGAGATGACACCTAAACCC   | 59.864 | 22 |
| CAACGGTTGTCATTGTTTCC     | 58.874 | 20 TGGCTGTCATTATTTCTCATTTT | 58.262 | 23 |
| CAACATTTCTGTGGCCTTGAT    | 60.894 | 20 GGAATAATAAACACAAACAC    | 59.233 | 24 |
| CGGCCGGAATATCTAAAGTG     | 59.564 | 20 AATCCTTGAACCATTCCATCA   | 59.234 | 21 |
| ATATTGGATGTCTTGC GGCT    | 59.556 | 20 GAGGGCCAAAATCTTTAGTGG   | 59.952 | 21 |
| CGAAACTCACGAACCAAACA     | 59.734 | 20 TCTACGTGGCATGTGGACTC    | 59.707 | 20 |
| TTGCTTTCCAAAAGTTGTACG    | 59.333 | 22 CTTGAATTGAATTGGAGCAAA/  | 59.231 | 22 |
| CTTGTGCTGGTTCGGGTATT     | 59.853 | 20 TATAACCGTCGGCTTGCTTC    | 60.23  | 20 |
| CAATTTCCATGTTCCGCTCT     | 60.074 | 20 ATATCCACGAGAATGGCAGC    | 60.066 | 20 |
| CATCCCAAACCTCTCTCGCTC    | 59.95  | 20 AGCGGTTAGTGTGATGGAG     | 60.277 | 20 |
| AACATTTCCCTCAACACCTG     | 59.82  | 20 CCAAGACCCCAATTTGATT     | 60.91  | 20 |
| CGTCGATCCTTCTCATCTC      | 59.761 | 20 TCATCGACACCACTCATCGT    | 60.121 | 20 |
| TCCGCCACTGATCATTACAA     | 60.073 | 20 TTTGCTGCAGTCTGTCATGG    | 61.023 | 20 |
| CAATAACCCTTGGCTCGAAA     | 60.067 | 20 TGTCCGTTGCATGGTGTATT    | 59.847 | 20 |
| CGTCTTTATTTCCACCCCT      | 60.18  | 20 GATGTTGGGTCTGCAGAGGT    | 60.12  | 20 |
| TCTTCCCAAATTGGTTTCC      | 61.023 | 20 AAGCCCGATCTCAAACCTCT    | 60.212 | 20 |
| TTCCGAATTAACCACGACCT     | 59.429 | 20 TTAGCTTACACCAGCAACG     | 60.05  | 20 |
| GTTTTGGCTACGACAACGGT     | 60.037 | 20 TTGCCTAAAAGTTGCTCCC     | 59.338 | 20 |
| TCTGTGCTCTTTTCTCAGTCG    | 59.93  | 22 TTTACCGACGTCTCACCATC    | 58.57  | 20 |
| AGGGCTACTTGGCCCTAT       | 59.933 | 19 GAAGGTGTCTTCAATGGAGGT   | 59.484 | 22 |
| TTGGGAGGATTTTCTTTCG      | 59.244 | 20 AATCCGCACATGTTCCATCT    | 60.348 | 20 |
| TTCTTCATCTGTCACGTCG      | 59.831 | 20 CGAGCAATAATTTAACAATTTT  | 57.678 | 25 |
| CGACGAGCATGGAAGAGTAA     | 59.024 | 20 CTTAGCCCCCAAGTTTTCAA    | 59.198 | 20 |
| TGACGAGAGCAGAGCAGAGA     | 60.162 | 20 AACGCTAAAAGGCGACAAAA    | 59.89  | 20 |
| TGTCTGTGAGGTGGAACA       | 60.129 | 20 CGACCCGTCTCTTGTGACTT    | 60.298 | 20 |
| TCCCACGTAACGAATTTTCC     | 59.801 | 20 CAGGATGTGGTCATCCTCAC    | 58.886 | 20 |
| ACAAAAAGCAGCACAAACGTG    | 59.951 | 20 TATGGGGGAGCTGAACAAAA    | 60.439 | 20 |
| ACTGTCCTCTTAGACCGCCA     | 59.867 | 20 GACCGTTTTAACGGATTTGG    | 59.315 | 20 |
| GGCACGATAAGGACACGAAC     | 60.526 | 20 GGATCAGTAAAATAATAGGCA/  | 59.934 | 26 |
| AATACCCCGAGATGGTAGGC     | 60.173 | 20 ATCCGTGCCCTATCAGGAAT    | 60.682 | 20 |
| GTTGCCACCAATGTGTTTCA     | 60.413 | 20 CATCCTCAGCTCAGACAGCA    | 60.294 | 20 |
| TTTTGCGTTTCCAATTTGTG     | 59.579 | 20 CGATCCTCCTCCTTACATT     | 59.09  | 20 |
| AAACAATGCAAGTGATATTCATCC | 60.258 | 24 AAGGACTCAAGCCCCTCAAT    | 60.074 | 20 |
| GAGCTTGCACTCAGAGAGCTT    | 59.13  | 21 TGCATTTACCAGAGAGCTG     | 60.136 | 20 |
| GTGACCCTATGACGCCAAGT     | 59.997 | 20 GTGAAACGGAACAAGATTTGC   | 59.606 | 21 |
| TCCCGCTTCATAGCAAATTC     | 60.175 | 20 CCCAGATTTGTTCTACGCA     | 61.021 | 20 |
| CGTGTTTATGATCCTCCGGT     | 59.813 | 20 CGTGTCAACTGTGACGAGAAA   | 59.93  | 21 |
| AGTGCGTGCTTGTTC AATG     | 59.911 | 20 CCCTAACCTGATGCCAGTTG    | 60.508 | 20 |
| TTTGCGTTTGATATTTGAGAA    | 59.603 | 22 GCTATGCATCAACGCACAAT    | 59.724 | 20 |
| TTTCCACACCACGTCAGCTA     | 60.301 | 20 CGGCTGTTTTCTTTCTTTG     | 59.855 | 20 |
| CGACGGTTGTGATAACGATG     | 59.988 | 20 ATGGCTAACCATCAATTGCC    | 59.791 | 20 |
| CGTGTCTTCACTCATCCCA      | 59.676 | 20 TTATTGTTGCGAAGGGCCTA    | 60.58  | 20 |
| AACGCCAAAAGATTTTCCA      | 59.564 | 20 CTACTCCAAGTCCGACCCAA    | 60.103 | 20 |
| ACTCCCAAACCCACTATCA      | 59.259 | 20 CACAATATCAAGAACCCCAA    | 59.671 | 21 |
| TGAAGGAAACCAAGATGGG      | 59.903 | 20 TTGCATCATCCAGGCATTTA    | 60.035 | 20 |
| GCGATAGTGGTGAGGTCGAT     | 60.104 | 20 ATTTCAGCACCCCAACA       | 59.893 | 18 |
| GATGAACTCTTTGGGTGGG      | 59.505 | 20 CTAGCCCACTAATCCCAAACC   | 59.843 | 21 |
| AGAATGGCACAGACTCCAGAA    | 59.859 | 21 TGAACCTTCCATCTTCCACC    | 59.903 | 20 |

|                           |        |    |                        |        |    |
|---------------------------|--------|----|------------------------|--------|----|
| TTCCGACTTACCACCACACA      | 60.001 | 20 | ACCCCAATTCTTGATAGCC    | 60.152 | 20 |
| AACCCAGAAGAAAGACAGCAA     | 58.969 | 21 | TTGAGCTCCACATCAACACC   | 59.682 | 20 |
| AGACTCATGCGGCTCTTGAT      | 59.981 | 20 | TGCGTTTTGATGATATATAGGT | 58.933 | 25 |
| TCTGTGATCAACACCACAA       | 58.618 | 20 | GGCCGTATTAGCAGCGTAAA   | 60.246 | 20 |
| CGAGTGAGCATTGATGATGA      | 59.799 | 20 | AGCCACGTGTGTTCAATTGAG  | 59.751 | 20 |
| CCTCCAAATCTAACCCCTCC      | 59.761 | 20 | TCATCTGCCATAGCACCAA    | 60.22  | 20 |
| AAACACACACACCGTCTCCA      | 60.047 | 20 | CCAGATAGTTTGGCCGTTA    | 59.953 | 20 |
| TTTCGTGCATTCTACCTA        | 58.241 | 20 | TGAAAGCCTACCTTGCTTCC   | 59.452 | 20 |
| TCTCATTACGCTTTTCAGC       | 59.152 | 20 | GTTGAGCTCGGATAAGCTGC   | 60.125 | 20 |
| GGAGTCTCTCAGTTTCATCAAC    | 59.244 | 23 | CCTGACTTCGCTGTGGGTAT   | 60.134 | 20 |
| CCTTGAAGACAATGAAATTTTGG   | 59.865 | 23 | CCCACTCTATTTCTCTCATC   | 59.057 | 22 |
| TGTTATCCTTTGTGAGCCCC      | 59.933 | 20 | TCAATGCTCTTTTCAACCCTT  | 58.823 | 21 |
| GTTCAAGTCCGGCTCTTCAG      | 59.989 | 20 | GTGGTATGGTGTGGAGGACC   | 60.096 | 20 |
| ATTTGCACCTCCACGAATC       | 59.939 | 20 | GGCATCAGAGCCAAGTTAGG   | 59.836 | 20 |
| AGTGGGTTGGACTTCCACTG      | 60.002 | 20 | AAATCGGGAAACCAGTTTGA   | 59.406 | 20 |
| ACATTTTTCTTTTGGGCGAA      | 59.564 | 20 | TGACAAAGGGTGTGTTGGAA   | 59.976 | 20 |
| CATGAGAGAGAGGGCTGGAA      | 60.488 | 20 | ACGAGGGGAGTGACACTTGA   | 60.713 | 20 |
| CCCCAAAGTTATGGTGAAA       | 59.657 | 20 | TTGTGAGCGTGTAGCCATTT   | 59.347 | 20 |
| AAAGTGACGTGAGAGTTGG       | 58.932 | 20 | CCATTGAGACTCGAACCCAT   | 59.927 | 20 |
| CAATCAATCTCAGCCGTTTG      | 59.272 | 20 | ATGCCTCTCACATGCAACAA   | 60.272 | 20 |
| AAACATTTTACCACATGATTAAGA  | 58.774 | 26 | TCAAGTCTTCCAAGGCAAC    | 60.232 | 20 |
| ACCTTACATCCCCATCTCCC      | 60.015 | 20 | GGTGTGGTAATTTGTTGGGG   | 59.948 | 20 |
| CACCAAAGTATGATTAATCCCA    | 58.852 | 22 | TACGACTCTTTCAAGGGGGA   | 59.665 | 20 |
| GGTTTCACGTCGGAATATTGA     | 59.815 | 21 | CATGCATTAACATAGTTGGGC  | 58.057 | 21 |
| TCCGAATATGAAATCGGGTT      | 59.23  | 20 | GAGTTGGACTGGTTGCCTGT   | 60.159 | 20 |
| TCGAGAAGTTGTTTGTCTCAACA   | 59.944 | 23 | AATCAAAACAATACTAACATC  | 59.002 | 26 |
| TTGTCAATTTGCTGTGGTCC      | 59.547 | 20 | TTGAGAGGATTTGAGTTGGCT  | 58.923 | 21 |
| CCCCGAGGAAGCTAGAAAAA      | 60.674 | 20 | ACAATCAACCGATCACCGTT   | 60.24  | 20 |
| TCCACTCCCCTTTCCGTAG       | 60.103 | 20 | TGATTTCTAGATACGGGGC    | 58.998 | 20 |
| CCGGGCAGAGAGAGAGAAC       | 60.08  | 19 | GCGAGAAGTTAGTCAACGGG   | 59.875 | 20 |
| GGTGGGTTTGGAGAAGAGT       | 60.349 | 20 | GAAGACACTTGGGCCTGAAA   | 60.232 | 20 |
| TAATGACGGAGCTAGGGGG       | 60.037 | 19 | CTCCTCTCTGCTGAGCCAGT   | 59.883 | 20 |
| TAGGTCACGTCAGCAAACCA      | 60.301 | 20 | GCCTAGCCTATTTGAACCCA   | 59.182 | 20 |
| AGATAGGGGTTGGGGTGTTC      | 60.052 | 20 | TTTTTAAGGTGGGGAGAATGT  | 57.596 | 21 |
| CGTTGGACCTGAAAGAGCAC      | 60.833 | 20 | CAACCCAAGTTTACATGTGACC | 60.318 | 22 |
| AACCTTAACAAAATGAATCATCA   | 58.144 | 25 | AGGGGCTGTATAATGCGAAA   | 59.569 | 20 |
| TTCCAACCTCATTGCAATAC      | 57.62  | 21 | ACCATCCCGTTTCAAACCTCA  | 60.353 | 20 |
| AAAGCCTACCTTGCTTCCGT      | 60.262 | 20 | GAAATCCTTGAACCATTCCA   | 57.426 | 20 |
| GGAGAACTTGCTTCTTGGC       | 59.056 | 20 | ACAACCCTCCCCTCATTTCT   | 59.795 | 20 |
| ATCGATCCACATGCATGAAA      | 59.89  | 20 | GGACGGTTAATGATTGTCCC   | 59.105 | 20 |
| ACAATAACAAATGGCCACGG      | 60.617 | 20 | TATTCCGCCATAGAACCAGG   | 59.916 | 20 |
| GGACAGGATGGCGATTATTG      | 60.296 | 20 | CCGAAAGCTGCAAGTCCTAC   | 60.015 | 20 |
| TGCATTCTTTCCAGTCTCA       | 59.369 | 20 | TGAACCCTCCAATTCCAAGA   | 60.43  | 20 |
| TTCCGTTCCGTTCCATAAAT      | 59.273 | 20 | TCTTCGACGGAGGAGAATGT   | 59.803 | 20 |
| GGAAGCTGGTGTGCGATAAT      | 60.103 | 20 | GTGTGGGCTACCAAACACAG   | 59.06  | 20 |
| TAAAAATGGGAGATGAGGCG      | 60.031 | 20 | ACCGGGCCTTGCTCTCTAC    | 60.649 | 20 |
| TTTTAATTCATTAATCATATTTGCA | 57.16  | 27 | GAGGTTAAGGGGCAGACTT    | 59.576 | 20 |
| TCTCTCTGCGTCTCTCTCA       | 58.94  | 20 | TCCACCTAGTCTTTCAGCAGC  | 59.63  | 21 |
| TTGCTATTGAAAATGATCCCA     | 58.096 | 21 | GAATGAAGAATGTTTTGTCCG  | 59.42  | 21 |
| TCAAGACCTACCGAGCTTCTG     | 59.624 | 21 | TTCCCTTTTCGTACGATTGC   | 60.074 | 20 |
| TCGAAGGGGATTTTATGTGG      | 59.756 | 20 | GATCAAACACCAATCGCTCA   | 59.654 | 20 |
| TAGAAATGGGATACGGACGG      | 59.778 | 20 | TTAGATATGCAGCGCGGAC    | 59.952 | 19 |
| TTTGACAGACAAATCGCTCG      | 59.988 | 20 | GGTGGTTTTCAAACCTCCAA   | 59.807 | 20 |
| CGCAGATCTAATGGTCCAGAT     | 59.164 | 21 | TCATTCACCATATCCACCCC   | 60.404 | 20 |
| GCACCACAAACATGTCACAA      | 58.978 | 20 | TCAGAGCATCAGAGCGGTTA   | 59.697 | 20 |
| GGAGAAAGATGACGACGAGG      | 59.803 | 20 | GATAAAAATGGCACACGGCT   | 59.967 | 20 |
| CTTCGTCGTACAACCTCGTCAA    | 58.986 | 21 | GAAATCCCCTGCCAACCTT    | 59.031 | 20 |
| GTTTAGGCTCATGCCCATTC      | 59.533 | 20 | TGCACATTGAGACGACAAAAG  | 59.896 | 21 |

|                         |        |    |                        |        |    |
|-------------------------|--------|----|------------------------|--------|----|
| CGCCTTTTCACCTCAAATTC    | 59.685 | 20 | CTGTCCCGTTCTCTCTCTGC   | 60.135 | 20 |
| GCTACTTCCGACTCTCTCGC    | 59.337 | 20 | GCCGGTCTTCTTCTGACTTG   | 59.989 | 20 |
| CTTCCACGATCTCCCATACA    | 58.515 | 20 | TGAAGTTAGGAAATAAGGAGG  | 58.743 | 25 |
| TGCTAATCAGAACTTGGAGCA   | 60.018 | 22 | CTCGGTTGAGCTCGGATAAG   | 59.971 | 20 |
| ACCATGGTTTGAGACGGATT    | 59.263 | 20 | GCTTTTATTGACTCAAGATCCG | 59.75  | 23 |
| GATATTGACGGTTGGTTGGC    | 60.199 | 20 | CAACCCACACATTCAACAC    | 59.701 | 20 |
| CCACGTTTCACCCCTATCAT    | 59.67  | 20 | TCTGTTGTGCTGCTGCTTCT   | 59.929 | 20 |
| CCATGGGTGGTATGGTGTG     | 60.517 | 19 | ACAATGGTCCAAGACCGAAG   | 59.966 | 20 |
| GATCGGTGAGGAGATGAAGG    | 59.612 | 20 | AACCACCGAGCACCATGTAT   | 60.263 | 20 |
| ATTGCGAAGTTGGCTAGGTG    | 60.27  | 20 | TGTTGAATTTTGTCCCACA    | 59.792 | 20 |
| TTACGTGTTAAGCCTTGGGA    | 58.293 | 20 | TCTCACGATATCCTGCATCG   | 59.781 | 20 |
| ATGCGTGTGTGTCTGCATGT    | 61.271 | 20 | GCCTTTCATCATCTTCTCAA   | 59.259 | 21 |
| CTTCTCTTCCACATCCGGTA    | 57.739 | 20 | AAAGTGGATAAACCCCTGCGA  | 59.569 | 20 |
| TTCGATGTTGTAACGGAGACA   | 59.184 | 21 | CCTCATCATCGAACCACTT    | 59.927 | 20 |
| TGGCTCTCACTCACTCTCA     | 59.747 | 21 | AAACACACAAATTCCCACCC   | 59.55  | 20 |
| TCGATCGATAATAACGCTTTCA  | 59.717 | 22 | AGGGAAAGGAGATCGAGAGG   | 59.772 | 20 |
| ATGTGTCCTATCCCGTCCAC    | 59.661 | 20 | ATAATGGGGTTTCAGTCCGA   | 59.244 | 20 |
| CTTCCCACATGTCGTTCTT     | 59.966 | 20 | AGCTCTCAAGGACTCCACCA   | 59.986 | 20 |
| CATGGGAGAGGAACCTTGAA    | 60.042 | 20 | AAGAATTCGAGGGGAAGGTG   | 60.434 | 20 |
| GCTGCGAAGAACACAATCAA    | 59.995 | 20 | CGACCACCTCGACGATTACT   | 60.134 | 20 |
| TGCAGAGGTCTCCTTTGGTT    | 59.844 | 20 | AGTGCCAGATAGGCCGTTTA   | 59.73  | 20 |
| TCGAAACAGAAAATCCGAGG    | 60.184 | 20 | CCGTTTTGAGACGTTGTTCA   | 59.734 | 20 |
| GGGGCGTGACAATATCCTAA    | 59.784 | 20 | AACCATTTGGGGACGATTTT   | 60.411 | 20 |
| GTCGCTTGAATTGCGACATA    | 59.839 | 20 | GCATACCCCGTTTTCATTTA   | 59.66  | 20 |
| TGTGGTCCCAAATCTCCA      | 60.071 | 19 | GGAGAGTACGAGAGTGAGGAC  | 59.505 | 22 |
| TACAGATTATCAGCACGCGG    | 59.856 | 20 | CTACCGTCAAATCCTGGCTC   | 59.694 | 20 |
| CACTCACTCTCACTAGCCGC    | 58.78  | 20 | AGAGCCGGGTTTAAAGCAAT   | 60.095 | 20 |
| GATACGCATTCAAAGCTGAAGA  | 59.501 | 22 | TCCCCGTTTTTACTCGTCTG   | 60.103 | 20 |
| AGACTGGGGAATGGCTTCTT    | 60.074 | 20 | TCCTCCAGAAATTGGGAGTG   | 60.042 | 20 |
| TTGGGAATTCAAATGATTG     | 59.759 | 21 | TGTTGGCGTCGAGTTAATGA   | 60.257 | 20 |
| ACTCGCATTAAATGAGCCGTC   | 60.243 | 20 | CGTGTGTAAGTTTTGTGCGAG  | 59.444 | 21 |
| TGTCAACTTCCCTCACCCCTC   | 60.088 | 20 | TCTCCACTCTCTCCCACGAT   | 59.792 | 20 |
| CAGCACTGTGAGACTGAGGC    | 59.764 | 20 | TAACCACCTCTTGGGTCCAC   | 59.82  | 20 |
| GAAATAAGGCATCAAAGTTGTG  | 60.017 | 23 | TAGGCATTATTGGATTCCCG   | 59.751 | 20 |
| CGAGGGCATTATGGGAAGTT    | 61.191 | 20 | TAATCCCGCTGAAAATGAGG   | 60.031 | 20 |
| AATGATAATCTTCGCCGTGG    | 59.923 | 20 | ACCATCGTGCCTTTGTCTTC   | 60.119 | 20 |
| GCAATAAATCCACGTACAGGAA  | 59.013 | 22 | CACCGTACGTGCAACACTTT   | 58.701 | 20 |
| CACCTCCTTAGGTGCAAATC    | 58.851 | 21 | CTTTAGGGCCCTTGATTTCC   | 59.903 | 20 |
| TGGAAATGAAAGGCCAAGTC    | 60.051 | 20 | TCGACCTTAACCACCTCGAC   | 60.111 | 20 |
| CGAAGAACACACACTTTTGGG   | 60.568 | 21 | ACAAAAGGACGATTGGGATG   | 59.79  | 20 |
| ATCACCAACTGGCGAGAAAT    | 59.556 | 20 | GACTCTCCGGCTGTTTAGGA   | 59.43  | 20 |
| ACCCTATCTGCCCAATACC     | 60.039 | 20 | AGGGCTTTGAGTAACTGAGGT  | 59.81  | 22 |
| ACAAATGGCCAAGAAAGTTTACA | 59.926 | 23 | ACATAACTCTCCGGCCAATG   | 59.955 | 20 |
| GGGGACTTTTCACTTTTGGC    | 60.836 | 20 | CTCGAAATGCAGTGGTTGAA   | 59.84  | 20 |
| TGAAGAATTCCCTTGGGTTG    | 59.903 | 20 | CGGAATATCGAGAAGGTTATT  | 58.231 | 25 |
| TCATTTCTAACGATGATGGAAAA | 59.851 | 24 | CAACGGTGATGACGTGCTAG   | 60.175 | 20 |
| TCAATGGTTTTGGTTTGTCC    | 59.693 | 21 | TATTGCAAAGCGATTACCA    | 60.215 | 20 |
| ATTTACCTGCAGAAACGCT     | 59.882 | 20 | TTCGTGCTTGGTCAGGGTAT   | 60.517 | 20 |
| TTGGCCTTTCTTGATTGTCA    | 59.247 | 20 | CCACCATTTTTCTCCTCCAC   | 59.381 | 20 |
| TCCACTTAGGTTGGCTTTGC    | 60.249 | 20 | TTCAAGACTAAAATTGGTAAAC | 58.241 | 27 |
| TTCTCTTACACGTTTGGATT    | 57.315 | 21 | CGAGTGTGTACATGGGCATT   | 59.445 | 20 |
| GCATCAGAGCCGAGGTTAGA    | 60.504 | 20 | GCAACGGAATACCACTCGTT   | 60     | 20 |
| CACTCTATAGCAAGATCTCACGC | 58.327 | 23 | CCATTTTCAATCCTGTGCCT   | 59.933 | 20 |
| TTGTCGGGTCTTCATTTTT     | 59.546 | 20 | CAAGTTGATGCTAGTCTCCG   | 59.883 | 21 |
| TCCGCCCTTGATTAATAAAA    | 59.429 | 20 | CATTTAATGCACATCATATCAC | 59.228 | 25 |
| AAGTTGGGCTAAGTGGAGGG    | 60.488 | 20 | CCTTACTTAATGGGCGAAA    | 59.075 | 20 |
| TGCAGAGTAGTCCGGTCG      | 59.992 | 19 | TGGGAATGAAAAAGCCATGT   | 60.309 | 20 |
| TTAGGCCCATGTCGTTTTTC    | 59.938 | 20 | GAACCTCGTTAGTTGCTCCG   | 60.154 | 20 |

|                          |        |    |                        |        |    |
|--------------------------|--------|----|------------------------|--------|----|
| TATGTTGGACCAAAAAGCCC     | 59.801 | 20 | TTTCAATCCCAGCCATCAAT   | 60.274 | 20 |
| CCTCACACCCTTTACGCATT     | 59.993 | 20 | CCGGGTCAACAGATTGAACT   | 59.966 | 20 |
| CATTTCAATTCAGGAGCTTCG    | 59.831 | 21 | GGGGTACAACCTTTCACACG   | 60.269 | 20 |
| TCACGTTAAAGCATGGTATCATT  | 59.808 | 24 | TGTTGATCTAAGGATTCAAATT | 60.12  | 25 |
| ATCTCCGCCTGTGACAACT      | 59.727 | 20 | TTGTGTGATCGAACTACGTAA  | 57.469 | 23 |
| TCATCACGTAAACGGGGATT     | 60.192 | 20 | AGTTACAAGCCAACCCAACG   | 60.03  | 20 |
| ACAGCTTACACCGTTGAGCA     | 59.515 | 20 | GTCGCACTGCTGTTGGAAT    | 59.853 | 19 |
| AGCAAGGAGAAGTTCGTGGA     | 59.989 | 20 | CTTTGCCCCCTTCTCTCTT    | 59.821 | 20 |
| GGTGAACATTGGGAGCAAAT     | 59.797 | 20 | GAATCAAAGCATGTCATTTCA  | 57.752 | 22 |
| ACCGATTGTTGCATTTTAAGTT   | 57.764 | 22 | CCCAATTTTTGTACCCGA     | 60.54  | 19 |
| TGATTTGGAAGAAAACGATGG    | 59.924 | 21 | TCGGGTACGACAAAACAACA   | 60.004 | 20 |
| ACCCTACACTCTACACCTATTGTA | 57.104 | 27 | GGCTTCCATTACGAACCTCA   | 60.074 | 20 |
| GGGTAACCTGGTTCTGTAACCG   | 59.799 | 22 | CAACACCATTTCACCTCCT    | 59.82  | 20 |
| CCCACTAACCCCTTCATCACC    | 59.259 | 20 | CAACATGCAACCATCAAACA   | 60.408 | 21 |
| TGGATCGTATAGCTTTGCC      | 60.06  | 20 | TGCGACGGAATTTAAAAAGG   | 60.068 | 20 |
| CTTAGCCGAGAAGAACCCTG     | 60.008 | 20 | GACGGTGTAATATGGGTTTT   | 59.997 | 23 |
| ACTCCAAATGATAAAATCGTGG   | 58     | 22 | GAGTTTGTTCATCATTCCGA   | 59.925 | 21 |
| GAGAGTCTTACAAGCGGGT      | 59.455 | 20 | TTTTTATCCCATGTTTGTGCAT | 59.234 | 22 |
| TTTGAAGATATTAGTTCAATTTGT | 57.193 | 27 | TGCACACAAGACTTTGCCAT   | 60.31  | 20 |
| TTCCCTAGGATGAAAACCTTGC   | 58.315 | 21 | AAGAAAAGGAGTTAGTGGCTA  | 59.4   | 24 |
| ACGAACGGTTGGAATATCTAAA   | 57.713 | 22 | GGATGATCACCATTTCGAACC  | 60.143 | 20 |
| CATACAGTGAACACGCACCC     | 60.032 | 20 | ATCGAGTTCCTTCCGTTTT    | 59.94  | 20 |
| AAGTAGTTATGCGTATTGTTACCT | 58.804 | 27 | ACTGACAAAATTTCCGGACG   | 59.971 | 20 |
| CTTTGCGACGTAATCCCAT      | 59.96  | 20 | TTTGAGATCGGAGTGGCTCT   | 59.95  | 20 |
| AAATAATTGGCAACAAAGGGA    | 58.484 | 21 | GGACACCAGGGTGAGAATTG   | 60.363 | 20 |
| TTGTGCCTTTTATTTGAGTAAGAC | 59.299 | 25 | AAACATGATACGGCCGAAAA   | 60.323 | 20 |
| TGATTCCGATGAGATCCTGA     | 59.117 | 20 | CGCCGGTATTCGTGTAAGTT   | 60.018 | 20 |
| GCTTGTAATTTTTGGCTGGC     | 59.726 | 20 | CACGTGTCGACTTTTGATCG   | 60.301 | 20 |
| CGGGTTATTACCTGATTGCG     | 60.335 | 20 | ACAAAACATGCCCACTTC     | 59.836 | 20 |
| CACCAACCCATCAAGAATCC     | 60.173 | 20 | CCATGGTCGTCCAAATCTCT   | 59.927 | 20 |
| CAAACGAAAAAGCCGAAACT     | 59.379 | 20 | GCGTGTATCCGCCAAAAATA   | 60.831 | 20 |
| TCAAGATGAGGAATGAAAAAGAC  | 59.372 | 24 | CCATTTACCCCAACCCACTA   | 59.541 | 20 |
| GGAAATAAGGAGGTGTTATGAAA  | 60.434 | 25 | AATATCGTCGGAAATGTGCG   | 59.929 | 20 |
| GTGATGGTTGGTGTGATGG      | 59.656 | 20 | AACTCTCTCCCTCCTCTGCC   | 59.952 | 20 |
| AGGGGGAAGAGGTTGAAGAC     | 59.534 | 20 | AGGAACCAATTATCCCGAGC   | 60.286 | 20 |
| TTTGATAGAGCCGATTTGG      | 60.031 | 20 | GCCCAATACCGTGACATACC   | 60.081 | 20 |
| CGAAGTTTGCATTTTAAGATGAGT | 58.926 | 24 | AAACATGATTAACAATGATGG  | 59.553 | 25 |
| TGTTTTGTCTTTGTGGTGCG     | 60.732 | 20 | TGTGTATGGAATGAAAGGCTT  | 57.342 | 22 |
| TGGTACTGTTACGTATGCCAA    | 58.175 | 22 | CACCAGATGTCATGGTTTTCC  | 60.225 | 21 |
| TTAACCGTTGTTTTCCCTC      | 58.925 | 20 | TTCCATCTTTC AACCTCATCG | 60.059 | 21 |
| ACCATCAAGGTCAAACCTGC     | 59.973 | 20 | AATTTGACGGTGGCAATCAT   | 60.199 | 20 |
| ATTGCTGTTGTGTTGGCATT     | 59.054 | 20 | CCGAAATGAAGAAATGAGTTC  | 59.945 | 22 |
| TCTCAATGGGGACATCTGGT     | 60.326 | 20 | TGACGGGATTTAGGTGTTTTG  | 59.847 | 21 |
| GAGGGAGAAGATGAGGAGGG     | 60.149 | 20 | TTGATGATGGAATGAAAATGA  | 59.291 | 23 |
| AGGCGAGGGAGGAGATAGAC     | 59.801 | 20 | CAAGCATAAGGATTTTCGGA   | 57.845 | 20 |
| AAATATGTTTGTGCTGTGGGC    | 59.881 | 21 | CCAGAAGGTGCAGTGGTATG   | 59.161 | 20 |
| CGGATTTTACAAGCTCGAT      | 60.214 | 20 | CCCAAAAATAGCTACCGCAA   | 60.089 | 20 |
| CCGTGTTACCCTTCCATCTG     | 60.366 | 20 | TCACAAATAAGGAGGTGCC    | 59.933 | 20 |
| GGATTCTCAAATCTGACGG      | 59.483 | 20 | AATTGTGTGAATTCTAAATTT  | 57.862 | 26 |
| TTTTCCCCAAAACACCTCTG     | 59.942 | 20 | CGTCGATCTGGTGAAATGAA   | 59.648 | 20 |
| TCTTCTCAAACCCACAAACC     | 59.943 | 20 | CAAGAAGGAATGCACATGGA   | 59.648 | 20 |
| CCTAACAACAAAAGATAAAGTCA  | 59.181 | 27 | TGATGCTCCTCAGAAAGCAC   | 59.116 | 20 |
| ACCACCACCACCTCAACATT     | 60.135 | 20 | TTCCACAAAATCAACCCAT    | 60.029 | 20 |
| TCTGCGGTACATCAAATGA      | 60.073 | 20 | GAAGTTGAAATGGGAGAGCG   | 59.813 | 20 |
| TCACACTACTCTCACTAGCTGC   | 59.871 | 23 | ATTTGTTGCGTAGGGGCTAA   | 59.609 | 20 |
| AGATGTTCCAGAGTGGTGG      | 59.962 | 20 | ATGCCACCTGGAATTGAAAA   | 60.309 | 20 |
| ATTACCTCCACGCCGAGAG      | 60.225 | 19 | CTTACCGAATTTTGTCCCG    | 59.447 | 20 |
| TTGAAAATGGTGGAAATGGT     | 60.029 | 20 | CTTGCAACTGGTCAAATCA    | 59.84  | 20 |

|                          |        |    |                         |        |    |
|--------------------------|--------|----|-------------------------|--------|----|
| TGCACCCCAAGATGGTAAAC     | 60.755 | 20 | TGCCTTCTTGCCTGTTTCTT    | 59.993 | 20 |
| GCTTGCTGAGTTGGCATGTA     | 60.019 | 20 | GATTACATGATGCAGTGCCG    | 60.104 | 20 |
| ACACAGGGGCATATGTGTCA     | 59.837 | 20 | GGGGATGGTTATGCATGG      | 59.534 | 18 |
| AAAAATGTGCATGCAACTGA     | 57.761 | 20 | TGGCCACAAATGTTTCCTAGT   | 59.485 | 21 |
| TCTCTCTTTTTGGTTGGTGA     | 59.697 | 21 | GCGACATTTTGAGGGCTACT    | 59.34  | 20 |
| TGAGGTTTTGGGAGAAGGAG     | 59.255 | 20 | TTTATATCGCCGAAAATGCC    | 59.898 | 20 |
| TCAGTGCTGAACGTGTCAA      | 59.002 | 20 | GCAAGCATCTAGAGCGGTC     | 60.125 | 20 |
| GTGATTTGTCAGGTCGTGGA     | 59.525 | 20 | TGTGGATTAATATAGTGGTTCA  | 57.953 | 26 |
| AGTGTTTTGACATGATTACTCGTC | 57.373 | 24 | CTTGTGAAATGAATGCACCG    | 60.111 | 20 |
| AAATATCGGCCGTGAGATTG     | 59.923 | 20 | TCCAACCCCGAGACAAATAA    | 60.301 | 20 |
| ACTGCAGAAAAATTACGCC      | 60.257 | 20 | ACTCGGATTCGTACCTTTG     | 60.111 | 20 |
| GGCCACTAACACCAACCATC     | 60.24  | 20 | TTTGTGGTGACCTTGAGGAA    | 59.109 | 20 |
| GTTCTCGTTCAAACCCCTGA     | 60.088 | 20 | TGTTTTGATTCATTCCATTTCCA | 60.167 | 22 |
| TCTCACACACGCAGTTAGACA    | 58.053 | 21 | CACGACTTGCAATCCGTTTA    | 59.729 | 20 |
| ATTTAATGTCCCACCCCGA      | 59.999 | 19 | CTCCCAATCCGGTTCTATCA    | 59.887 | 20 |
| CAAATCTTTTTACCCGCCTC     | 59.685 | 20 | ACATGATTACCAACCGGCAT    | 60.081 | 20 |
| TTCTTGGCATCCAGTTCCTT     | 59.67  | 20 | TGCCCCGTTTTTCTTGTAAT    | 59.451 | 20 |
| AAGGGGGTTATTAGTGGATCA    | 57.425 | 21 | GAAGATGAGTTCGTGGAGGC    | 59.81  | 20 |
| AATTGGTGTATGGATTGTGTGA   | 59.124 | 23 | TTTGAAACCCATGGGATATA    | 59.909 | 22 |
| ACTATGTGCCCTCGCCAATA     | 60.49  | 20 | GCTAGGTCCTCCTTTTTGCC    | 60.208 | 20 |
| TTGCCCTGTTGAAATGTTTG     | 59.849 | 20 | GCATCAGTAAATCCTGCGCT    | 59.154 | 20 |
| TGTCCAGATAGCCTCACTGC     | 58.987 | 20 | CTTCTTGGGGACTTGCCATA    | 60.066 | 20 |
| GGGTATCGTCATTTATACAAAAAC | 58.388 | 25 | CAGCGTAAGAAAATAATTGATC  | 59.557 | 24 |
| ACCCCTCGTATGCACTCAAC     | 59.997 | 20 | TCTTTCCGCACCTTCACTTA    | 58.501 | 20 |
| CACCATCATCCTCAGAGCAA     | 59.787 | 20 | TGGTGGTGTGGTGTGAAGTT    | 59.89  | 20 |
| CGTGAATGAAAGTGATTGCG     | 60.257 | 20 | CGTTTGGATCCGATTTGGTA    | 60.692 | 20 |
| TAGATTTGGGCAGTGTGGTG     | 59.566 | 20 | GACCGGGTACAGAGCAAAAA    | 60.11  | 20 |
| GCGAATCGAACGAATCTGAA     | 61.258 | 20 | CGATCATTGTGCGAATCAGT    | 59.679 | 20 |
| ACACCTCCTTATTTCTAACTTCA  | 57.525 | 24 | TCGATTGGTTTGTGAATTGTG   | 59.43  | 21 |
| TCTCCCTTCTCTCTCGTG       | 59.525 | 20 | TTTCTCCCTTTCGGTCTCCT    | 60.183 | 20 |
| TGTTGTTGGTGGAGTTGAG      | 59.72  | 20 | CACCACTCCTCTTCTGCCT     | 59.45  | 20 |
| CGGAAAAGCTTGGATGAAAC     | 59.685 | 20 | TCGGTTTTACCGTTTTGAC     | 59.839 | 20 |
| TCTTTTGGTAGGTGAATGTATTGA | 59.016 | 25 | GAGGAGTAGGGTAGTGGCCC    | 59.957 | 20 |
| TCGTGTCAGAAATCGTCAGC     | 59.992 | 20 | GGGATGAAGTTGAATTGTTGG   | 59.278 | 21 |
| TCGCCCTGTTTAGGAGAGGA     | 59.948 | 20 | TTGGTGTGTTGCTGTTGGAGA   | 60.278 | 20 |
| ATGGCAATGGGACCAAGATA     | 60.155 | 20 | CGTGGTTCGATCGTAATTGA    | 59.542 | 20 |
| AATTCATCAACATGCAGCCA     | 60.08  | 20 | CCCAACCCCTGAGAACTTGA    | 60.081 | 20 |
| GGTGCTTGGTGAAGGAAGTG     | 60.69  | 20 | AGCCGTCGTATTCTAAACGC    | 59.388 | 20 |
| TGCAGTTGAGATGTCCTTGC     | 59.992 | 20 | CTGAATTCGAGCAGGTGGAT    | 60.218 | 20 |
| ACATGGGCCAAATGAGAGAC     | 59.934 | 20 | TGTGTAAAGTTGGTGGGGGT    | 60.126 | 20 |
| CGTTCCTCACTCACTCTCCC     | 59.835 | 20 | CCGGTGAAGTTGGATTATCG    | 60.323 | 20 |
| ATGGATTATCACCGGATCGC     | 61.961 | 20 | GCAAATTTGTGGAAAAACCG    | 60.335 | 20 |
| TAAATGGCAGTGTGGTTGA      | 59.964 | 20 | CGTTGGTTAATCCAGCCATC    | 60.331 | 20 |
| CAACAAAATTCTAAAATTGCAGG  | 57.955 | 23 | GCTAAACTTTAAAGGTGATGCC  | 59.692 | 23 |
| CGGATTTAAGGGTTATTACCTGAT | 58.81  | 24 | ACATGGGAAGGGCATTTC      | 59.741 | 19 |
| GAACACGAGAGGAAGAACGC     | 59.997 | 20 | TCCTTCAAGGCCAGATTGAG    | 60.331 | 20 |
| CGGCGAATGATGTTTCTAGG     | 60.597 | 20 | TTTCTCTCCAACCCACAACCTC  | 59.173 | 21 |
| CGCATTATGGTTATGCGAAA     | 59.562 | 20 | GGAGGAGGTTTGGAGCAGCTA   | 59.574 | 20 |
| TTTAACGGTTTGGAGCCTATTGA  | 58.806 | 22 | TCAAAAACCGGTGAAAAACC    | 59.817 | 20 |
| CTTGAAGAAAAACCCACA       | 59.942 | 20 | TTGATCATTGTTTCTCTCGTGG  | 60.11  | 22 |
| TATTCGAATGCGAGGGAAAG     | 60.167 | 20 | AAGATTTGATCATGGGCGTC    | 59.9   | 20 |
| TCATTCCAACCTCCTAATCAAG   | 58.188 | 22 | TGGACATCCTATGCAATGTG    | 57.907 | 20 |
| AATGTCGCCATCATATTTTGC    | 59.815 | 21 | CAAATCTTCGTTATCCCATTTG  | 60.187 | 23 |
| GCTCATTCTGCTTCTTCCGT     | 59.579 | 20 | TGTCCAAGTGATCACGCAGT    | 60.319 | 20 |
| TCGATCTGGAACCTCGAAAG     | 60.331 | 20 | TCAAATGGTAACCAATCACTA   | 59.328 | 24 |
| TCTTGACCGCAAGAAAGGTT     | 59.853 | 20 | CACCTGAATCCACTCACCT     | 59.962 | 20 |
| CTTCGGGCTAAACGAGTCAA     | 60.378 | 20 | CAGCATACCAAGGGCATTTC    | 59.96  | 20 |
| ATCCTTCTTATTTGCGCGT      | 59.93  | 20 | CTGAGTCATCTACAGGTCAATC  | 58.732 | 23 |

|                          |        |    |                         |        |    |
|--------------------------|--------|----|-------------------------|--------|----|
| GGATGTAATACGGTCTGTGC     | 57.104 | 21 | CCTTTCTGAATGTGGCTGCT    | 60.397 | 20 |
| CGTTCATTTCGTATTGGGCTT    | 59.96  | 20 | GATTAAGGGGAGAAGACGGGG   | 59.897 | 20 |
| ACGACTCACGACCCTACCAA     | 60.567 | 20 | TCATGTACGTTGCTTATGGCA   | 60.148 | 21 |
| TGTATGGTCTCCTTCCCTTTG    | 59.038 | 21 | TTCATATGGGAAGGGCATT     | 59.23  | 20 |
| CTCCAACACCTCCAACTTGC     | 60.69  | 20 | GTTTGGATATCGAGATCGGG    | 59.344 | 20 |
| TCTTTAGCCCAAGTTGTATCCAT  | 59.07  | 23 | CCCAACCCAAACTCACACAC    | 61.266 | 20 |
| AAAAATGGCGATGAAACCAG     | 59.938 | 20 | GCACTATCATCAAACCCG      | 60.331 | 20 |
| TGAGCTGTTATGCGTTTTGA     | 58.075 | 20 | GCCCAGATTTGTTCTTACGC    | 59.713 | 20 |
| ACACCGGATTTACGTGGTTC     | 59.717 | 20 | ACTGACATTCACAGGCATTG    | 57.067 | 20 |
| TAAGCAATGAGCGAAAAGCA     | 59.725 | 20 | AAAAGTTGATGCCAAAATTAG/  | 58.451 | 24 |
| GTTAAGTAACCGGAGAGGCG     | 58.858 | 20 | ATTCCCCCAATTTCTGCATT    | 60.511 | 20 |
| TCAGAAATTGTAGTCGCCCA     | 59.272 | 20 | CGTTTTCTACCTCAGGGCAA    | 60.241 | 20 |
| TTTGGAACTTGAGCAACTGG     | 58.897 | 20 | CCATCACCAGCTTTGTTGTG    | 60.152 | 20 |
| TCTGGGGTTTTCAGGTAGTCG    | 60.103 | 20 | CGATCGACAAAGAGTTTCCC    | 59.67  | 20 |
| CGCAGAAAATAAATCATGACCA   | 59.964 | 22 | TCCTTCCAGTCATTATCGCC    | 60.036 | 20 |
| AGAGGTAGAAGCACTTGTGTGG   | 58.532 | 22 | TGAGGGTCAACCAGGAAGTT    | 59.549 | 20 |
| ATCGATTAGGGCAACATTTCG    | 59.923 | 20 | TTCATGTTTCATCCCCCTTG    | 60.692 | 20 |
| CGCACGTCGAGAATTGAATA     | 59.833 | 20 | GTCACGCTCGAGAAAGAGGT    | 59.604 | 20 |
| TCGGGTTTTAGTGGAGAACG     | 60.103 | 20 | AATTTGGCCCCGTCTAAAAA    | 60.645 | 20 |
| TTTCGAGAAGCAGTTGGTGA     | 59.566 | 20 | TGTTGCTTGCCAAAATTTCA    | 60.229 | 20 |
| CCTTGACCATCAGATCCCAC     | 60.326 | 20 | TCTAAGAGATGATTGCACCTG/  | 58.986 | 23 |
| CTTACTCCCACCGATGTTTCG    | 60.508 | 20 | GGAATGTCCACTCGGTCAA     | 60.903 | 20 |
| CATGCATGCTCGTACTCACA     | 59.436 | 20 | GGCCAAGAAATATTGCTCCA    | 60.038 | 20 |
| TCCTTTTTGTCTTTCATTTCG    | 59.188 | 21 | CCCCATAACTCCTTTCCTG     | 60.674 | 20 |
| GCCTTGCTGCTGCTAGTTTT     | 59.797 | 20 | TTGAATCAACCCTTATCGCC    | 59.901 | 20 |
| CAGCCGGAGAAACTCATCTC     | 59.95  | 20 | CTGAAAGCCATGTTTCAGCA    | 59.988 | 20 |
| TGATCTTGCAACTTCATGCC     | 59.805 | 20 | CATCGACAAGCACAAGCAAT    | 59.871 | 20 |
| ACACTCGACAATTTGGGAGG     | 59.966 | 20 | TGATGAGTTTTGTGGGTCTTG   | 58.609 | 21 |
| TGCTTTTCAACTTAGAATTCATC/ | 59.363 | 25 | GCTCAAACCAGGATTCCAA     | 60.051 | 20 |
| GAGCTGAAGCGAGCTGATG      | 59.983 | 19 | GGGTATATGCCACAGGATCG    | 60.177 | 20 |
| AAACTATAGGTGTTTGGTAAACG1 | 57.059 | 25 | CGTTCGATTTGCCGTTTTAT    | 59.964 | 20 |
| ACAATTACAATGTTTATCCAATCC | 59.341 | 25 | CCAGCCCAATAACTCAACCT    | 59.052 | 20 |
| CAGGATCTCATCGGAACCAT     | 59.886 | 20 | TGATCAGCGTGTGTAACGA     | 58.863 | 20 |
| TTTCCGATTCTCAATTCCCA     | 60.384 | 20 | TCGTATGCTGTGGTTTTGGA    | 60.111 | 20 |
| TTTGTGCATGCGGACTATGT     | 60.142 | 20 | GGGCCGAGATTTGTTAGAGG    | 60.949 | 20 |
| TTGCGGAAGAAAACCTAACCG    | 60.236 | 20 | ACCTTCTCCGATGTCTGCCT    | 61.192 | 20 |
| AATCTCACAAACCCACACCC     | 59.679 | 20 | GCCCCCTTTTGAGAAGAAAG    | 60.18  | 20 |
| TTGGTCACTTACACAGCAATCA   | 59.245 | 22 | ACCCAGTACCACCACCTTG     | 60.545 | 20 |
| CCCCTTTGTCAACTTAGGCA     | 60.103 | 20 | GCATCAGAGCCACGGTTAG     | 59.41  | 19 |
| TGCAGTAGGTTGTAGGTAATAAA/ | 57.062 | 27 | AACGACGACGAAGAACGATT    | 59.74  | 20 |
| TGAATTTGGGTTCATGAATTTTGT | 60.445 | 23 | CATGGACCCACATGTCATA     | 60.048 | 20 |
| GGATTTTCTCGATTGCCAGA     | 60.155 | 20 | TCCAACGGCCATAAGTTCTC    | 60.074 | 20 |
| CGGGATTTTAGATGAGGTGG     | 59.382 | 20 | TCCATTCCGAAAATCAAAGG    | 59.872 | 20 |
| GGGCAGTAAGTTGAGTCCGA     | 60.255 | 20 | TGATTTTGGTGTGTTGGCAT    | 59.823 | 20 |
| CATGTTGATTGGTTGTTGGG     | 59.667 | 20 | ACATGGTTGGTTGCTTGTT     | 60.277 | 20 |
| GAAGGCTTACCCCTGCACTT     | 60.63  | 20 | CCAAGCTTTGTGAATTTTGA    | 59.272 | 22 |
| TTCCAAATCGCACTAAAGCA     | 59.443 | 20 | CATCCATACTATTATTTCTTCTC | 58.339 | 27 |
| TCCGTCCAATTCCAATAAG      | 59.756 | 20 | ACCTATGGTGGTATGGCGTG    | 60.657 | 20 |
| AATGCCCTATTTTTGGAGG      | 60.143 | 20 | CGAACCCCTCACACTTCTGGT   | 60.151 | 20 |
| GCACCACCATCTTCTTCGAT     | 60.081 | 20 | CATTCCCGCTGATTTCTTCT    | 59.269 | 20 |
| TCAGCAACCTGAAAGCATGT     | 59.445 | 20 | TTGGGTATCCAAAACCAAAA    | 59.195 | 21 |
| TTAAGGGGCGGTATCATTTG     | 59.789 | 20 | CCAACCAAAACATACGTTGC    | 58.942 | 20 |
| ATTTGGTGGATGGGACAAAA     | 60.029 | 20 | GCGTGAAATTATTAAGCCGC    | 59.722 | 20 |
| AGGGAAGAACTCGACATGC      | 59.288 | 20 | TGTTTGGCGTAAGAGACGTG    | 59.904 | 20 |
| GCCACCTCAGAAGATGGAAG     | 59.803 | 20 | GTCACACCCTCTCCCACACT    | 60.006 | 20 |
| CAATTCATAAAATACATAGAAAG( | 57.131 | 27 | ATTGAAGTCTGCTGTGCTGC    | 59.195 | 20 |
| CCAAGTTTTACCCCATCAACA    | 59.71  | 21 | ACTGTCACACACACCACCGT    | 59.96  | 20 |
| CAAACCCCATCACCAACTCT     | 59.82  | 20 | CACCAAATCAAGAACCCCC     | 60.157 | 19 |

|                          |        |                            |        |    |
|--------------------------|--------|----------------------------|--------|----|
| TTCGGCCTTTTGAACCTTTTT    | 60.095 | 21 TCACCTCCGTCTAAATTGCC    | 60.074 | 20 |
| TTCAGGCAATACCAGTTCCC     | 59.933 | 20 ACGTAAAATTCCGGTGCAA     | 60.356 | 20 |
| GAAGAACAATTACAATGTTTATCC | 57.771 | 26 TAGAGGACACTTGGACCTGAA   | 59.797 | 23 |
| TGTTTTGCAATTATTTTCGTGGT  | 58.084 | 21 ACATGCCCTAAAAACCGATG    | 59.823 | 20 |
| TGCATCAAGTTCTTCTCTAATTT  | 59.092 | 26 CGTTTTCTGCCTGATACCTT    | 59.476 | 20 |
| TGAACCGATGAACTAAAATCAA   | 59.885 | 24 TTAATGAACGGTCCGGTTTC    | 59.801 | 20 |
| TGCGAATGTTCAATCAGACC     | 59.654 | 20 GGTACCCCCACACAAACAAC    | 59.989 | 20 |
| AGAATGGGGAAGCTCCAAC      | 60.074 | 20 CCATTTGCAATGGACAATATAC  | 59.616 | 23 |
| AGTTGAACCTCGAACCGTTG     | 60.149 | 20 AATCAAGGCGTTCTCAAGG     | 59.312 | 20 |
| AATCATTGTGCGCATGTGTT     | 60.003 | 20 CTTTCATTGGATGTAGCCCC    | 59.387 | 20 |
| CTAGGCCCAAGGTAGTGGTG     | 59.61  | 20 GCCACTGAACCAAATGACCT    | 59.973 | 20 |
| ACGTGTTCAAGGTTGAAGGG     | 60.005 | 20 CCAGATATGGTTGTTTGCCC    | 60.192 | 20 |
| AACCAAACGCCCCCTAGATA     | 60.683 | 20 GCGATCGTTCACACACAATC    | 60.128 | 20 |
| TCGGCTGGGGTAGTAATTTG     | 59.953 | 20 CCGTCATCTATTAGCACCATCT  | 60     | 23 |
| CCGAGATAGGAGCAAGCACT     | 59.598 | 20 GGGTTTGGGAGGGTATCCTAT   | 60.264 | 21 |
| GGGAAGAAAACGACGAGAG      | 58.909 | 20 TCAACTGAGTTCCTACCCG     | 60.103 | 20 |
| GTTTCCCAAAGCCACAAAAA     | 59.953 | 20 AATTCCTCATCGCTGCTGCT    | 60.125 | 20 |
| AATGAGGAAATCCCTCGGAC     | 60.272 | 20 TACAAGTGCAAGAAGCGGTG    | 60.05  | 20 |
| CTCCAACACCTCCAACCTGC     | 60.69  | 20 GCTGGTACCTTCGGAACCTCA   | 60.255 | 20 |
| ATTTCTGCCCAAATTACC       | 60.02  | 20 AAGATGTCGCCTCTGCATTC    | 60.37  | 20 |
| TGAAACTCCATCAAACCTCTT    | 57.841 | 22 AAAAGTTCACTAAAACCTGCTT  | 57.086 | 24 |
| CACCGATGAATCAGGAATGA     | 59.451 | 20 CGATCTGGAGGGAATCAAAA    | 60.006 | 20 |
| GAGATTGGAGCGAAGAGTGG     | 59.95  | 20 AATCGCCATAGCAAGAGAGC    | 59.579 | 20 |
| TGTTTTGTAATTTCCCATGTTTG  | 58.816 | 23 CACCGAGCTTCTACACGTTG    | 59.51  | 20 |
| GTCAATTTTCTCAAGAAACCTCC  | 58.31  | 23 ATGTTGGCTCCGATTGAAAC    | 59.939 | 20 |
| AGAAACGCATCGTTTTCTGG     | 60.249 | 20 CCAAGTGGGAGATTGTTGGA    | 60.892 | 20 |
| TGATGATCAACGTTACCGATAC   | 57.512 | 22 CCAACAATTCCACTTCCTCC    | 59.381 | 20 |
| ATAACCCACCATCCTAGCC      | 60.039 | 20 TGAAGCCTTGTTCCCTTGCTT   | 59.993 | 20 |
| GAGGCAACTTGGTGGAGAAG     | 59.844 | 20 TAAGGTGGTGACGATAGGGC    | 59.955 | 20 |
| TAGAAGCAGTTTCCATGGGG     | 60.066 | 20 GACAGCTGTGATGAAGGCAA    | 59.992 | 20 |
| AAACAAGCCAATAAAGGCCA     | 59.586 | 20 TGATGCAGAGGAGAGGAGGT    | 59.945 | 20 |
| GTGGACCATAGCACAGCAGA     | 59.862 | 20 GAAGATTGTGGGGCGAGTAA    | 60.074 | 20 |
| GCTCAGGAGGATGGTGTATGT    | 60.08  | 20 CTCATGGATCAGGAATCTGGA   | 60.019 | 21 |
| GGTATACACGGTCCGGTTTG     | 60.11  | 20 TTTGGTAAATACAACATAATTG  | 58.757 | 26 |
| TGCGTGTGTATGCTGAGGTT     | 60.333 | 20 ATTGCAATTGCATGTGTGGAC   | 60.409 | 20 |
| CGGCCAAAAATCAATGTACC     | 60.188 | 20 AAGGAGGTGTTATGAAGGGAT   | 58.028 | 22 |
| TGCATTCATGTACTCAGCCC     | 59.679 | 20 TCATACGCGACCACGAAGTA    | 60.28  | 20 |
| GCCCATGGAGTCCAATCTAC     | 59.366 | 20 TGAGCAAAAGTAATAAGAGCA   | 58.341 | 24 |
| TCATTGGTCAAAGTGCAACA     | 60.142 | 21 TCTACAACCCAAACGCATGT    | 59.05  | 20 |
| TTCTGTTTCATCATCTTCGTCC   | 57.721 | 21 AATCCCAAAATCTATGGGGC    | 59.984 | 20 |
| CAGCTTGCAAAAGAGAGGAAA    | 59.755 | 21 GCAGCCACTATCCTTTCACC    | 59.7   | 20 |
| CACTCTCCCTCTTCTCTCTCG    | 59.756 | 22 CACAATTTCAAGAACCCCCA    | 60.724 | 20 |
| TCGAAATCGTAATAATCGGACA   | 59.455 | 22 AGAGTGCAGCAGCAAAAAGG    | 60.71  | 20 |
| CCCTTCCCCTTCTACCTCAA     | 60.426 | 20 ATCTCTGCTCCATGGGATTG    | 60.034 | 20 |
| TGTTCTCATTTCGTTTGCTCTAA  | 57.719 | 22 TCCAATATGTGGGGCAAAT     | 60.016 | 20 |
| TTTGTGTCTGCGGTAATGC      | 59.735 | 20 AGAAGACGCTCACACAGGCT    | 60.205 | 20 |
| AAGCTTCAGCGAGGTTACGA     | 60.154 | 20 TCCATTTTCTCACCCATA      | 60.126 | 20 |
| TGGAGTTGAGAGGAGTGAAGG    | 59.435 | 21 TGGTAGGTGGGTTTAGGTGG    | 59.705 | 20 |
| GCCTTCAATTTTATACCCGAGA   | 59.483 | 22 TGTGGTCAATTCACAATCCG    | 60.367 | 20 |
| CGAACAAGAGTCTTCCGAGG     | 59.982 | 20 TTTTGAATCTTTGTCCCAA     | 58.039 | 20 |
| GCCTAACGTGGCTCTGATGT     | 60.285 | 20 CTCACCTAAACCACTTTTGAAG  | 58.907 | 24 |
| AGCCTTCTAGCATCTTTGCTC    | 59.42  | 22 CGTGGTTTCGATCGTAATTGAT  | 59.837 | 21 |
| TCTCTGCCTGTGTCTGCAAT     | 59.577 | 20 GGTTTCGAGTCTCAATGGGAA   | 60.05  | 20 |
| CGACAAAATGGCGGAACAT      | 59.96  | 20 TCAATTGTACACGTGATTGAC   | 59.615 | 22 |
| GTTTCGCAAGAACAACGACAA    | 59.888 | 20 TCTGGACACATCCTTGTTTATC/ | 59.485 | 23 |
| TTGATAAATAGTGCAATCCCAACT | 58.988 | 24 TCTTTTGGGAATGGTTTGTTG   | 59.825 | 21 |
| GATTGTCTAAAACGTAAAGCTTG/ | 58.527 | 26 TCACCTCATGGGGAAATTTTA   | 59.26  | 21 |
| GGGACAAAAACCGAAGGAAT     | 60.166 | 20 CTCACTCACCTCTGTTCCA     | 58.803 | 20 |



|                          |        |                            |        |    |
|--------------------------|--------|----------------------------|--------|----|
| CGAAATTCCACCGACTCAAC     | 60.495 | 20 TTCTTGGAGGCTCTTGTTCCG   | 60.508 | 20 |
| TCTTGGGGAATGTGTGCAT      | 59.909 | 19 CTTTCCTCAACCGAGCTCAC    | 59.989 | 20 |
| TCCGTAGACCTTCCAACCAC     | 59.966 | 20 GGAGAAAGCCACAAATCTTTC   | 57.916 | 21 |
| TGGATATGTGGAAGCACGAG     | 59.673 | 20 AAATCAAAAGGCCACAATG     | 59.801 | 20 |
| TTGGGCCTGTCTTAATTTGG     | 59.931 | 20 TAGGGATCGCTCCAGAAAAA    | 59.778 | 20 |
| TGAAAGAAAGAGAAAAGGAATTT  | 58.221 | 25 AAATGCGCAATTTTAAACCCT   | 59.864 | 21 |
| CAGTGGATCGTTCTGCTTCA     | 59.984 | 20 CTCCCACCAACCTACCAAAA    | 59.824 | 20 |
| TTGATTGCAATAAGCAAATTTTAA | 58.045 | 24 CTCTCATTTACACCGCCTCA    | 58.874 | 20 |
| CGCGGATATCAATTATCAACA    | 58.525 | 21 AGTTTTGACATGAAAATTGAAT  | 57.739 | 24 |
| TCTGTAATCGAGTTCAAGAGAGA  | 58.861 | 25 TTCCTTCATTCTAAATGATTA/  | 58.94  | 26 |
| GCAAGGTGAGGAAGGAAGAA     | 59.405 | 20 CCGAATCCATCATCACACA     | 60.33  | 20 |
| ACGAGGAATGAAATCGATGG     | 59.894 | 20 TGGAAAGGGCATTAAATGAAA   | 59.42  | 21 |
| GCAAACCCGTGTTCTTCAAT     | 59.978 | 20 TCCGGATGAGGAAGTTATGG    | 59.887 | 20 |
| GCCTGCAGACAGACAAACAA     | 60.032 | 20 CAAAGTGGAATTTGCTTCCC    | 59.546 | 20 |
| TGCCATGGATATGATTGTTGA    | 59.76  | 21 TAAAAGCAGCACATGCAACC    | 59.879 | 20 |
| GGCATAAATTCATCTGAACAAGG  | 59.857 | 23 CCTGGGACACATAAGCCTCA    | 61.055 | 20 |
| GGATGAACGTCGGTCTGATT     | 59.82  | 20 CTGAAATGAAATCTTGCCCG    | 60.576 | 20 |
| GAATGTCATTGTTCCGGACCC    | 60.181 | 20 AACATGTGATGTGATCCCCA    | 59.611 | 20 |
| AATTCTTGGGCACAAACGAC     | 59.978 | 20 TCGCATCATCAACCTTCTGA    | 60.353 | 20 |
| AAAAGCAAAAGAGTCAGCCG     | 59.632 | 20 GCTAGCTCGGGAGAGAGGAT    | 60.081 | 20 |
| CCGCATGTCATGTTATTGGA     | 60.343 | 20 ACTAGCACGTGACCGGATTC    | 60.142 | 20 |
| CCAAAAATACCCCGAAAACC     | 60.393 | 20 CCAACCCAGAATTCGTCCTA    | 59.926 | 20 |
| AATCTCCCACCTTGGGCAAC     | 59.918 | 19 TGACGAAAACCTGCTTAAATCCT | 58.077 | 22 |
| GAGCTTTCTTTCTTCCGGGT     | 59.827 | 20 CACATCGACGACGCTACCTA    | 59.888 | 20 |
| ATGCCAGTCTTGAGCCAGAT     | 59.834 | 20 GCCCAATGGACTGTTTTCTT    | 59.031 | 20 |
| AGGTCTTTTACTTTTCAGACAACG | 59.765 | 25 GGAATAAAGGAGGTGTTATGA   | 59.323 | 24 |
| GTGAGCCGAGTAGTTGCAT      | 60.428 | 20 TGGACAAAATGAGTGGAGAGA   | 59.711 | 22 |
| AACTATCGTCTCGTGCCGTC     | 60.285 | 20 CGTCGAGTCTCCTCCAACCTC   | 59.986 | 20 |
| TCAACAACGATCCACTTTGC     | 59.697 | 20 ATGGGTGTGGGTGTTAGTGG    | 60.545 | 20 |
| GAGCGAGAGTAGAAGGAGCG     | 59.478 | 20 TTTGTCGGGTCATTGCTACA    | 60.111 | 20 |
| CTTCCCAAAGTCATTTCCCA     | 59.903 | 20 ACGATGATGTGATGGTGGTG    | 60.255 | 20 |
| CGAGGATCCGAGGATACAGA     | 60.173 | 20 GAGGGAATGAGGGATGGAAT    | 60.096 | 20 |
| TTGCCATATGTGAAACCTTC     | 59.815 | 21 AAATTCAGCAGGTCCACGAC    | 60.119 | 20 |
| GTCACGCCCCGACTATCTTA     | 60.096 | 20 GGAGTTGTTGATGAGGTGG     | 60.363 | 20 |
| CCCAATTTGCCCTTATATGC     | 59.282 | 20 GTTAAATCTCTTGCGAGGCG    | 59.982 | 20 |
| TCTGTTGTTGGCAGTTCTCG     | 60.025 | 20 ATCGCTGTCACCTTATTCCG    | 60.096 | 20 |
| GGGGGTCTGTCAAAAATTCC     | 60.537 | 20 ATGGACAGGTGGCGTTAATC    | 59.82  | 20 |
| CATCGATTTTCGTGGAGATTG    | 59.075 | 20 CGTATACCCTCAAACATCCGA   | 59.831 | 21 |
| TGTCAATTGGAGTAAACGG      | 59.541 | 20 TGCATGGTTTTGAGTTTTGTGA  | 60.142 | 21 |
| CCAGGACTGTTAGCCAAAGC     | 59.875 | 20 ACGGTACCACCCCAATACAA    | 59.971 | 20 |
| ATGGTTCGCCATAAAAATGC     | 59.801 | 20 ACCCCCATCAATCATGAAAA    | 59.991 | 20 |
| GTGGGCTTGATAGTGGGTTG     | 60.375 | 20 CTCCTCTCCTATTGCTCCC     | 60.306 | 20 |
| CCCCTTTTGGGTTATTACCTG    | 59.641 | 22 TCCATTCCGAAAATCAAAGG    | 59.872 | 20 |
| TACGTGGATTTGACAGTGCC     | 59.572 | 20 TCCATTTGTCTCCCTGCTCT    | 59.803 | 20 |
| GGAGAGAGGAAGAGGGATGG     | 60.149 | 20 GAACCACCACACCAAATTCC    | 60.073 | 20 |
| TTGTCCAAGCAAAATTGACG     | 59.706 | 20 CCATGCCCCAGTAATCATCT    | 59.773 | 20 |
| AAAGCTCAAATGAAGAGGGC     | 59.849 | 21 TGTCCCCATTGAACTTGTGA    | 59.935 | 20 |
| CGCGACACCTCTAGAACACA     | 60.049 | 20 TGACCAAAAAGAAGCCAAGG    | 60.22  | 20 |
| GGGAGGAAATTTTGAGGCTT     | 59.532 | 20 CGTCGCCTATTCTCGTTGTT    | 60.27  | 20 |
| TCATAGTTTTCATTTGGACACCTC | 59.415 | 24 TTCTGGATTATCCTGCGGTC    | 60.036 | 20 |
| CATAAGCCTACGAGCCCAAA     | 60.223 | 20 TTAGGCCAAAATGGAGATCGG   | 60.031 | 20 |
| ATCTTGCACCCTTTGTTTGC     | 60.118 | 20 ACCGAACCGATTTTGTCTTA    | 59.429 | 20 |
| TTTTGGAGAATTTTCTTTGCTC   | 59.048 | 23 TAGTGGGCTTTGGCACAAGT    | 60.689 | 20 |
| TGTTTGAGTTAGCAGCCAGG     | 59.072 | 20 CTTACATCTGAAAATTTGACGC  | 59.307 | 23 |
| CAAATTTGCCCTCGTATGCT     | 60.096 | 20 GGGGTTATCACTGGATCACG    | 60.195 | 20 |
| CTGCATGGAGACTTGCATCA     | 60.991 | 20 CAACCATCTTCGGAGAGAGC    | 59.95  | 20 |
| AATGGCTCATTCCCTTGTTG     | 59.933 | 20 TCCATGACAGGAACCAACA     | 59.935 | 20 |
| CGCACCTGAGGAGGTGTTAT     | 60.134 | 20 TGTTGGACAAGTTTAGCCCC    | 59.971 | 20 |

|                          |        |                           |        |    |
|--------------------------|--------|---------------------------|--------|----|
| CAATCCAATATCCCAATGTTTG   | 59.055 | 22 TGGCAGAAAGATTTTAGATATA | 59.31  | 26 |
| TTATCACAAAAGGAGGGGTT     | 59.69  | 21 TTTCTGAAGATCAACGAACGA  | 59.395 | 20 |
| TTGGGCCTGAATGGACTTTA     | 60.439 | 20 GGTTTTAGACCGAAACCGTTC  | 59.864 | 21 |
| GGAGGAGATGGAGACAGTCG     | 59.792 | 20 GACCACCAAGTCAGCACCTT   | 60.159 | 20 |
| ACGTCGTCTCAAAGGGTGTCT    | 60.159 | 20 AGAGCGGCAAGGAGAAAGAG   | 61.161 | 20 |
| TGGGCTTGAATTCAGGTATTG    | 59.946 | 21 AACATGTAACCTGTAATCTGTA | 57.047 | 27 |
| AAATGCTCGCTCTCACACCT     | 60.02  | 20 AAATTCTCCCATGGCAGTTG   | 59.933 | 20 |
| CGCGTCCCTTTTTACATGAT     | 59.96  | 20 TCAGTCGGCCTAAATATCCC   | 58.998 | 20 |
| TCCAGACTCAACCGGGTACT     | 59.574 | 20 CGGGAGCATGAAATGAAACT   | 60.074 | 20 |
| TCAGATCTGCGCTGAAAATAAA   | 59.985 | 22 ACCAATTTTCGATTTCTCCA   | 59.363 | 20 |
| CACATGCACACACGTGATTC     | 59.575 | 20 TTGTGGGACGGTTGAAAAAT   | 60.206 | 20 |
| ATGGAACAATCACATCGCA      | 59.931 | 20 TGGATAGGCCACCGAATTTA   | 60.281 | 20 |
| TTCTTGGCCAGCTCTAGGAA     | 60.088 | 20 CATACTTACACGGGGGAG     | 61.176 | 20 |
| TGCATGGTAGTTGGGTGGTA     | 59.84  | 20 GGTAAAGTAATGCAGCCCCA   | 59.96  | 20 |
| ACACATTTTTCTTTGGGCG      | 59.975 | 20 TGAATGAGCACCAGAATCC    | 60.248 | 21 |
| GACTTCGTGGCGGTATTCTC     | 59.7   | 20 TTATGCAAGCCCAGCCTAAT   | 59.704 | 20 |
| TGTCTCCATTTGTGTGTGTGT    | 57.381 | 21 CCTTCAAATAGGCATAACCGA  | 60.317 | 22 |
| ACCGACTCCACTTCAACAC      | 60.009 | 20 TCCAAAGGCTCCATCTATGC   | 60.177 | 20 |
| CGGATTCTCAAAGGTGGAA      | 60.044 | 20 TGAATCGATTAGGCTTATCTTG | 58.055 | 23 |
| TTGCTAACCAACTACGTTGAGA   | 57.658 | 22 CAACGAAATGAAGAGGGTGG   | 60.486 | 20 |
| TCGGAAGTCCAAAGATGACC     | 60.05  | 20 CGATGACCTTGAGTTTCGTT   | 60.111 | 20 |
| ACACGCCTTTATCCGATGAG     | 60.096 | 20 GAAGCAGGATGTGATACCCG   | 60.483 | 20 |
| ACAATTACAATGTTTGTGAAATCA | 57.636 | 25 AGGACACGTTGGACCTGAAG   | 60.151 | 20 |
| ACCCGTTCCCGTAGATTAG      | 60.2   | 20 TGGTTGTATGTCATTTAGCGG  | 58.57  | 21 |
| TCCATTCCACAACCCATTCT     | 60.173 | 20 GGCTTTACATTAAGCCCTG    | 59.708 | 20 |
| GGTCCAGTCAATGAAACGA      | 60.903 | 20 AATGGTGGTATGGTGTGGG    | 58.918 | 19 |
| AAGTCACGGGTTGACTAAAA     | 58.754 | 21 ACCAAATAGGGTAAGCCGTG   | 58.973 | 20 |
| CGTTTGAAAATGGGGAAAAA     | 59.783 | 20 ATCGGGCATTTCGACTACAG   | 60.096 | 20 |
| AGAAACACGCAACGCAAGTA     | 59.536 | 20 GACAGCCCAAGATTGAGAGG   | 59.803 | 20 |
| CACCATCCAGCGCTATAAAA     | 58.794 | 20 TCCAAGGCAAATTGAACTCC   | 60.051 | 20 |
| TGTGCCATTTGAGACCAGA      | 60.24  | 20 AGCGACAAAGTGTGATGACG   | 59.905 | 20 |
| GGTTGTAATGAGGCTTTCGG     | 59.569 | 20 TTGGTGGAAAGATTTGAGAAG  | 59.165 | 23 |
| AAGGGGAGTATCACTTGAATGC   | 59.487 | 22 AATGCTCATCGGATTCTTCG   | 60.177 | 20 |
| ATGCAAATCAGTCCCCTTG      | 59.933 | 20 CCCACCAACCCAGATCATAG   | 60.187 | 20 |
| GTGGCCTGTTCTCCCAACTA     | 60.111 | 20 TGTGGTGTGAGGGCTGTAAA   | 60.152 | 20 |
| TTTCGAAGATCAACGGATCA     | 59.2   | 20 CAGCACGCGCACTACATAAT   | 59.925 | 20 |
| CACGGGTCTTCATCCATTTT     | 59.79  | 20 GGACCAATTGGCACTTTGAT   | 59.797 | 20 |
| GCAAGAGAAAATTCTCCCAA     | 58.43  | 21 TCTCCCTTCTCTCTCGTG     | 59.525 | 20 |
| TGAAAGTGCCAACTTACGGA     | 59.317 | 20 GTTACCAAACACCCAAACCG   | 60.125 | 20 |
| CAATTGTTTTGCCCCAATC      | 60.167 | 20 CCCACCAGTAGTCTGCCACT   | 60.174 | 20 |
| CCAACCTTGTGCGAACAGTC     | 60.545 | 20 TTGCGAATTAGCAGCTTTGA   | 59.725 | 20 |
| TCTTCTAGCGTTGTCCAGCA     | 59.74  | 20 CCCAACCAACAAGAACCCTA   | 59.824 | 20 |
| GCAGGTTAGCGACGTTTTGT     | 60.313 | 20 CCCAGTTGCTCACAATGACA   | 60.722 | 20 |
| TTCTGTTTCATCATCTTCGTCC   | 57.721 | 21 AATCCCAAAATCTATGGGGC   | 59.984 | 20 |
| TTCTTTCCAGCCTGCAACT      | 59.993 | 20 TGGTAGGGTGGTAAACCAGG   | 59.705 | 20 |
| ACTCTGATGCGGAGAATCGT     | 59.834 | 20 CAATTCTCTCAACCAACCCC   | 59.381 | 20 |
| CTCATCAACCGCCAGGAATA     | 60.992 | 20 CATCATGTAGTAGCGGGCTG   | 59.322 | 20 |
| ATCCCAATTGTAGCCTGCAT     | 59.415 | 20 TCGTCGTCGTCAAACAAGAC   | 59.88  | 20 |
| TGCTGAGACATAGCGGACAC     | 60.016 | 20 CTGGGTTTTGGTGTGAATCC   | 60.21  | 20 |
| AAGAAGAATAAAGCTTCGGAAA   | 58.004 | 23 TGGACCGTTGAAATACAGAAA  | 59.492 | 22 |
| TGTGAACACAGCCTCACCTT     | 59.31  | 20 GTTCGTCGAGGTCATCGTCT   | 60.269 | 20 |
| CAGCCATGGATCAGCAGTAA     | 59.823 | 20 CTCATCTCTCTCGCCACTCC   | 60.096 | 20 |
| TCAGAAAAGTTCGAGCGTGA     | 59.716 | 20 AGAAAGCCCACCTGATATGC   | 59.154 | 20 |
| ATCACCAACTGGCGAGAAAT     | 59.556 | 20 CATTGCAACCAAAATGCGAT   | 60.837 | 20 |
| TCTTCATGGACGTGGAACAA     | 60.088 | 20 TGACAAAATATGGAACCACAA  | 59.37  | 23 |
| CAAGGTGTAGATCTGGCGGT     | 60.134 | 20 AGAGCAGCAACAGTGCAGAA   | 59.929 | 20 |
| AAAAGTCAAACCGGCACAAT     | 59.476 | 20 GCGCGCAATCACTCTCTT     | 60.257 | 18 |
| AAAAGGGGTTGATGATCGTTT    | 59.696 | 21 ATGCGGTTCAAAGGTAGGAA   | 59.569 | 20 |

|                          |        |    |                         |        |    |
|--------------------------|--------|----|-------------------------|--------|----|
| CGTAACGACACGAACGGTTT     | 60.973 | 20 | CATCCTCCTTTTCCCAATCA    | 59.864 | 20 |
| TTGCACAAATTCGTTTAGGC     | 58.819 | 20 | GGTTGACACACTCGAACCAA    | 59.571 | 20 |
| ACTTGCGATCGTTTCTGTCA     | 59.445 | 20 | GGTCCGAATGCTGGTATGTT    | 59.82  | 20 |
| TTCTTTTGTCAATGGAGCATCT   | 58.836 | 22 | GGGGATTTGATTGATGATCG    | 60.096 | 20 |
| TGCAATAACAAATTTGGGAAA    | 58.074 | 21 | GACTGCGGATCACCACACTA    | 59.707 | 20 |
| AATGAGGCTGCTTTGCAAGT     | 60.022 | 20 | TTTGTCCCCACAAATGTCTT    | 60.21  | 20 |
| CCCATGTGTCCACAAAACAA     | 60.255 | 20 | GAAGCAGAGCATTGATGGGT    | 60.226 | 20 |
| AAAAGGAAGGAAATCTGGGG     | 59.393 | 20 | GACGCCACATCATTCTCTCA    | 59.794 | 20 |
| TGCCCATCCATTTCTGTAT      | 60.155 | 20 | TGACATGTCTTTCACTCCAA    | 59.124 | 21 |
| AAGCACAAGAGACGAAGAGTCA   | 59.281 | 22 | AGCCTAACCGTGGCTCTGAT    | 61.173 | 20 |
| TCGCCTACCTTCTGCTCTGT     | 60.156 | 20 | TCATTAACCCGAATCCGTC     | 59.762 | 20 |
| ACCCTTGCATGCACAACATA     | 59.995 | 20 | GGCACAGCTCCACTTTCTTC    | 59.997 | 20 |
| GATGCATCAAGTCGACAATCA    | 59.67  | 21 | AGCCTTATCTCTGGCCGTG     | 60.368 | 19 |
| GTCCCCATTGAGACTCGAAC     | 59.511 | 20 | CAGAAAGTGCTTGTTGAGCG    | 59.781 | 20 |
| TAGAATCCGATGTATGGCCC     | 59.745 | 20 | TTCTCTGCGACGTAATTCCC    | 60.214 | 20 |
| CACCTGAAGGCGAAAAAGAG     | 59.986 | 20 | AGAAAAACGTGTGAACCATCA   | 59.517 | 22 |
| ACATACTCCACCAACTCGGC     | 59.997 | 20 | TGGAAAAATGCCCATCTACC    | 59.762 | 20 |
| CATATTTCCAAGTCACCTTCCA   | 58.949 | 22 | CGTGTTGTTTTGCTTGTTTCA   | 59.801 | 21 |
| CCAAAGGGGCTGCAATACTA     | 60.089 | 20 | GGTCTTGGGGGTTCAATGTA    | 59.647 | 20 |
| ACCATATTTAAGGGTTATCACCTG | 57.552 | 24 | GAAGGATTAGGCGAAGGAGG    | 60.166 | 20 |
| ATCAGCACGAATCACACAGC     | 59.87  | 20 | TGGCATTTCAGCTTTTGTAGC   | 60.391 | 21 |
| ACATTTATGTGTCAGCCCC      | 59.676 | 20 | TTGGTTCACACAACCACTCC    | 59.415 | 20 |
| ACTGAGCCCTGATTTGGAAG     | 59.284 | 20 | CTCTCGCTTTTCGCCTCTTA    | 59.861 | 20 |
| TCCTCTCGTGTTCTTCCTCG     | 60.523 | 20 | GGCTCACTCTCTGGCTCATC    | 60.104 | 20 |
| TCTTTCAACCTGAATTGCC      | 60.051 | 20 | TCTCGCCACACTACATGCTC    | 60.016 | 20 |
| AGCTATCAAGCACCGGAAAA     | 59.845 | 20 | CAAAAAGGGTGCGATTGTATG   | 60.362 | 21 |
| GATTTACCCAAAGCGCACTC     | 59.713 | 20 | GGTGAAATGGGAGGGCTAAC    | 60.693 | 20 |
| TTTTATCAAGCGAACCTCC      | 60.209 | 20 | CGAGGAAAATGCACTTCTGG    | 60.766 | 20 |
| TTTCGGACGATTTTGCTCTC     | 60.331 | 20 | CACATGTGCATGAATCGGTGT   | 57.712 | 20 |
| ACGAAATTGCCCTTGTATGC     | 59.967 | 20 | TGTCAAATCTCCTTCATTTGA   | 59.038 | 24 |
| CTGCAGCCTTCTTGCTCCT      | 59.745 | 20 | TGACGGGATTTAGGTGTTTTG   | 59.847 | 21 |
| CCGCCTGATTTGTTTCTCAT     | 60.074 | 20 | GGTATGCTGGAATTTTCGGA    | 59.901 | 20 |
| CAAAGCATAAACATCCCAGC     | 58.241 | 20 | TTCCATACGCAAATTCGCT     | 60.588 | 20 |
| GTGATGGCATTTCATCGTCAG    | 60.08  | 20 | TGCGTGTCTAAATGTGCCTC    | 59.871 | 20 |
| CGCCCCAGATTGTTTCTTAT     | 59.043 | 20 | AGCGTTGGATTTTTCAATGG    | 59.938 | 20 |
| GGGAGATGTTCTTTAGTCG      | 59.948 | 21 | TGATCTTTTCGCCATTAGAGA   | 57.592 | 21 |
| ACTTATTTGCATTGGGCCAC     | 59.829 | 20 | CTCCCAGTCTAAAAGTCCATGC  | 60.13  | 22 |
| TCGTACCCCAAACCTTGCCT     | 60.55  | 20 | TCTCTCCCACACACACGTA     | 60.309 | 20 |
| TCGACTGCCCTTTTACAC       | 60.11  | 20 | TCAAGTCGCTACTCACCATCA   | 59.455 | 21 |
| ATCACTCTGAGCCTCTCCCA     | 59.945 | 20 | ACAATGGAACGAGATCCAGG    | 59.927 | 20 |
| TCGTGCGGTCAATGATTTTA     | 60.073 | 20 | TTTTCTTGCTTTTGCTGTGAAA  | 60.034 | 22 |
| GGATTAGTTGCTTCAAGAGC     | 59.069 | 21 | TATAACCAGTGAGGGTCCCG    | 59.807 | 20 |
| CAATATTACAATGGGCAAGAGAG  | 59.826 | 25 | CAAGCTCAGTCTCAATGGGG    | 60.791 | 20 |
| CCAAAAATGGATGGAATGCT     | 59.762 | 20 | CTCTAGGGTTCAATTGGGCA    | 60.066 | 20 |
| GATCGACGTCCCAGATTTGT     | 59.934 | 20 | TTGCGATAGTTAACAGGCAGA   | 58.595 | 21 |
| CTCGTCTCCTCCACTTCCTG     | 59.978 | 20 | AACGCTGCCTCAAAGCTAA     | 60.152 | 20 |
| AAAGAACAAAATGACACGAAGA/  | 58.783 | 24 | TTTTGGTGTCTAATCCATTTGTC | 58.909 | 23 |
| AATGGTTCGGTTCCAGTTTC     | 58.886 | 20 | AAAGAGGTTGTTTCCGTTGC    | 59.218 | 20 |
| TTTTGTGATTTCCCATGTTTGT   | 59.225 | 22 | GAGAAACCGTAACCCAAGCA    | 60.11  | 20 |
| TCTCAACACTTCAACGGGAG     | 58.852 | 20 | GCTGCAGCAATAAAAATTCCC   | 59.688 | 20 |
| CCCGGCAACTTCTCAAATAA     | 60.067 | 20 | TGAGTTGTTGTCTCCAACCG    | 59.72  | 20 |
| CTGCAACAGCATAGTGGCAT     | 59.895 | 20 | TGCACTCATCAGAGTTATCGGT  | 59.763 | 22 |
| AGGAAATTGGGGGAAAATTG     | 59.992 | 20 | TTCAAACACGAGTCGCAAAT    | 59.322 | 20 |
| TCTTCCCATTTCCCAACAG      | 59.903 | 20 | CAGGAGGGTTCACACAACCT    | 60.002 | 20 |
| TCTCTCTGCAGGGGAGTCAC     | 60.55  | 20 | GTGGAATTTGGGGCTTGTA     | 59.801 | 20 |
| CGAAGGAGACTGGAACCGTA     | 60.246 | 20 | TCTTCGTCAATCCACCATCA    | 60.048 | 20 |
| GGGCCCTAGTCTGTCTCTT      | 59.699 | 20 | TGATATGGCACAGCAGCAAT    | 60.251 | 20 |
| ACACCTAAACCCAAAACCCC     | 59.955 | 20 | ATGCCAACACAAAAACACCA    | 59.864 | 20 |

|                         |        |    |                         |        |    |
|-------------------------|--------|----|-------------------------|--------|----|
| TGTCAACATTCAATCACAGCC   | 59.562 | 21 | ATTGATTACGAATCCTCGCC    | 59.001 | 20 |
| TTCTTCCCACCACTGGTTTC    | 59.943 | 20 | TTAGTGTGGCCGGTTTAATTG   | 59.876 | 21 |
| TGAATCCCATCGATCCATTT    | 60.096 | 20 | ACATATTTGTCCCCGGATTG    | 59.505 | 20 |
| GGCTCTTCTCTGTCCGCTAA    | 59.717 | 20 | ACCACGTACATCTTGTGTCCA   | 58.92  | 21 |
| GGTCACAGAGGTGCTCCCTA    | 60.112 | 20 | CAATCAGAGACGGTGAACGA    | 59.831 | 20 |
| AAGCTTGGTTTGCAGTCTCC    | 59.478 | 20 | TGCAATTTGTTTCTCTCCCA    | 59.247 | 20 |
| TTCTGAACGTGCAACTCGTC    | 60.032 | 20 | TGTGGATATGTAGATAATTTTT  | 58.476 | 27 |
| AAGAGCTCACGTGCCTATTGA   | 60.03  | 21 | TGGTAAAGGGACGGCATTAG    | 59.953 | 20 |
| CAAAAGCAAGAAAATGTGATTC  | 57.995 | 23 | TCCTTCTTCACTTTTGCTCACA  | 60.03  | 22 |
| CCACAAGCATTGCAGAGAGA    | 60.136 | 20 | CAACTGCAACAGCCCAATTA    | 59.729 | 20 |
| TGACGAAGGAGGGGTTAATG    | 59.926 | 20 | GGCCCGAGCTAAAAACATTG    | 61.816 | 20 |
| ATACCACTCGTTAATCCGGC    | 58.93  | 20 | ACCCCATTTCAATCCTGTGA    | 60.173 | 20 |
| GAGGGAGTTTCCGGAGAGAT    | 59.636 | 20 | CCATGTCTCTGGACTGGGAT    | 59.92  | 20 |
| TGGTTCAATGGGTATTTCGAC   | 59.677 | 21 | TCTTTTATGTGCACAATGCGT   | 59.244 | 21 |
| TGCATCAACTTATGCCAAAAT   | 58.174 | 21 | CCCCAGAATGCAGTCAACTA    | 58.722 | 20 |
| TGAAGTTAGGAAATAAGGAGGTG | 58.743 | 25 | TTCCACTTCCACTTCCATCA    | 59.059 | 20 |
| ACGCGATTTCACTCACAACA    | 60.31  | 20 | CCAGTAGATGCCCTCCTAAC    | 59.969 | 21 |
| ATGATGGGCACATGGATTTT    | 60.021 | 20 | AACGTCAACTAGCTCGCCAT    | 59.904 | 20 |
| GGTGTGGATGGAAAATGCT     | 59.797 | 20 | AACTTCCTCCAGCTCCGACT    | 60.393 | 20 |
| CGCTTTGGGACAGCAATTAG    | 60.762 | 20 | TTCGCATAATTTTTGTGAGAGG  | 60.017 | 23 |
| TCGAACAATCAAACCTCGTCG   | 59.84  | 20 | CCCTCTCTCTCTCGGTGTTG    | 59.978 | 20 |
| ATCCGCCATTGTTGAAACTC    | 59.939 | 20 | AATCAAGATCCGAGCACACC    | 60.081 | 20 |
| AACATGCTCTCCTTAGGCCA    | 59.836 | 20 | TGTGACTGCTCTGGTTGAGG    | 60.022 | 20 |
| TTCCCTCTCCTCCTCCATT     | 60.008 | 20 | TCATGGGAATTTGATCGTGA    | 59.859 | 20 |
| GACCAATTCGGTTTGGTGAC    | 60.218 | 20 | GAGTTGAACCCCTCTCACA     | 60.088 | 20 |
| CACGTGTCATCTTCTCAGCA    | 60.04  | 21 | GGGCCGATCCTATCAAAAAT    | 60.116 | 20 |
| GATGCATTCCATTTGTGGTG    | 59.781 | 20 | CATGCGCTAGATAACGACA     | 59.856 | 20 |
| TGGGCATGAATGACTGAAAA    | 60.049 | 20 | CGCAGATATGCGTTTCTCAT    | 58.897 | 20 |
| CTTGGACCAGATTGTCCCTC    | 59.505 | 20 | GCAAACGAGCCTTATTGTCC    | 59.713 | 20 |
| GCTGGAGCAGGTCTTTGTC     | 60.143 | 20 | AATGGAGAAGTGAACGCTT     | 59.882 | 20 |
| GGGGAAGTGTGATGTTTGGT    | 59.679 | 20 | TTCAGCAGAGCAGCCATATC    | 59.131 | 20 |
| AGGGTTGGGGTGCATATTTA    | 59.158 | 20 | CCTCAAATTGTTGAAAAACCG   | 59.478 | 21 |
| ATATGGGTTGGGTACGGGTT    | 60.187 | 20 | CCGTCCATCTCAAAAATGAA    | 58.546 | 20 |
| TGAAAATAAAAATGGAGTGATGT | 59.775 | 25 | TTTGGCAAGCAGCAATTATG    | 59.842 | 20 |
| TTTACGAGATGGAAGAAGCTGTT | 59.445 | 23 | TGAATTTCAAGTCATGGATTCTC | 59.136 | 24 |
| GCGAAATTCATGTTGACCCT    | 59.939 | 20 | TGCTATAAATGAAACCGGGG    | 59.789 | 20 |
| GAAATGCAAGGATTTCCCAA    | 59.878 | 20 | TCAAATCAAGGGCTAGGATGA   | 59.654 | 21 |
| GCATTGCTAGAGCCATTGATT   | 59.337 | 21 | GTGGACGCTCCAGATTGTTT    | 60.119 | 20 |
| CCCTCGGATGCTAGTGTTC     | 59.694 | 20 | AATATTCAGACGAAGCCCGA    | 59.668 | 20 |
| ACTCCCCTTCCCATGCTAAC    | 60.328 | 20 | AACGGGATTTACTGTTTTGACA  | 58.539 | 22 |
| AATCTCGCATCCCAATTCTG    | 60.036 | 20 | AGCCCGTACCCGGTCTATAA    | 60.702 | 20 |
| TGATGGGAATGGGAGGTATG    | 60.538 | 20 | ATTTGGTGCATTGATTTGCG    | 60.847 | 20 |
| AAAAGAGAGGGATGGGGAGA    | 60.008 | 20 | CATCCCCGACAAATTTTCAC    | 60.17  | 20 |
| TTTTGTGGCAGTCAAGTGGG    | 59.873 | 20 | GACAAATCCAAGTGGGAGGA    | 59.903 | 20 |
| GCCACATGAACATGAAATGC    | 59.939 | 20 | ACCATTTTCATTTCCGGGCTA   | 59.411 | 20 |
| TGGGCTAATCATTCTCAGCA    | 59.375 | 20 | ATGGGAAGAGGGGGTATGAG    | 60.147 | 20 |
| CCTCTTTCTTCGCCCTCCTCT   | 60.088 | 20 | CAGTCGGGGGTAACACTCTT    | 59.062 | 20 |
| AATGCCCACTGTTCTTCAGC    | 60.263 | 20 | CCTAGCTTTGCCCTCTTTC     | 60.332 | 20 |
| CGCCTGATTTGTTCTCATT     | 60.074 | 20 | TAAACCCTAAAAACGCGTGC    | 60.13  | 20 |
| GTCACCTCAGCCGTGTTCTG    | 59.467 | 20 | TTCCCCTTTGCCCTCTATTT    | 59.903 | 20 |
| TTGGTGCGATATTTGTTTCG    | 59.562 | 20 | GCCGATTCTTAATGGCTGTT    | 59.186 | 20 |
| CTCAATCTCAACCCAAACCC    | 59.381 | 20 | AGCACTCTGCGAGTCTCCTT    | 59.355 | 20 |
| AAGCTTGGCCATTCAACAAT    | 59.574 | 20 | TTGAGTGACACAAGGCAAG     | 60.025 | 20 |
| AGCTATGATGCTGATGCGTG    | 60.003 | 20 | CCCAAGATGACGAACAACAA    | 59.541 | 20 |
| GTTTTTCCACCGAATCAAGC    | 59.551 | 20 | TAAGGTGTCGCAATCTCCGT    | 60.657 | 20 |
| TGCTGCTAATTATCCCTCCAA   | 59.69  | 21 | ACTTTTTGCCTTTTGCTGGA    | 59.861 | 20 |
| ATGATTGGCTAGACATCGCC    | 60.066 | 20 | ATTGGAAGGTGACGAAATGG    | 59.79  | 20 |
| TCATCCATTTTGCACCTGAA    | 60.049 | 20 | CCCGACAGTGAATCGTACCT    | 59.989 | 20 |

|                          |        |    |                         |        |    |
|--------------------------|--------|----|-------------------------|--------|----|
| CATTTTGATCCTTGTGGCCT     | 59.933 | 20 | GCCGAAAACAAAGTCCAGTT    | 59.218 | 20 |
| ATGACAGAAGAGGGCGACGAT    | 59.834 | 20 | CCTTATTTCTATTCCCGCC     | 59.767 | 20 |
| TGGATGGCTAAGACAACAACA    | 59.184 | 21 | ATTCATATACACGTGCGTCTTT  | 57.801 | 23 |
| CACGAGAGAGGAAAGGGAGA     | 59.525 | 20 | GGCTGTGCTTTCTGGTTCAT    | 60.263 | 20 |
| CTACAGCTCTATCCCGTCCG     | 60     | 20 | GGTAGCAGCGATGAAGGAAC    | 59.843 | 20 |
| ATTTGCAAGTTCCAGCGATT     | 59.713 | 20 | GACAAAACGGGAAAATGGAA    | 59.778 | 20 |
| AACGTGCGAGGCGTAAGTTTG    | 60.305 | 20 | CCCCAACACACTCAACA       | 58.839 | 18 |
| AGCCAGGGCTTTTATCATGT     | 58.672 | 20 | TGGACGAGATTTAACCACCAC   | 59.79  | 20 |
| ATCAGGAGACAACGAGGTGG     | 60.112 | 20 | AAGCTCCGGAAGAAGGAAAG    | 59.955 | 20 |
| GCTTCATAGCATCTCTTGCTCA   | 59.758 | 22 | TGTGAAAGAGTATGTGCTTCCA  | 59.799 | 23 |
| GGTAAGCAGACTGCCAGGAC     | 59.874 | 20 | TGATCACGAGTACCTCCACG    | 59.701 | 20 |
| TGTGGCTGAATTTGACGATG     | 60.665 | 20 | CGACTAATCACGCCGCTTA     | 59.984 | 19 |
| GCACACAAGTTATTGGTTTCTATT | 60.209 | 26 | TGTCGACGATAACAAGGCAA    | 60.257 | 20 |
| TGATCTTACCGGGGCTAGTG     | 60.088 | 20 | CCCACGTAGCAATTGACAAA    | 59.585 | 20 |
| ATTTGCAAGATCAACGGACG     | 60.074 | 20 | ATTACGTGATCCAACGGTC     | 59.82  | 20 |
| AATTGAGCCTTTACAAACTCTCTA | 59.032 | 26 | TGCTTTCCCTCTCCATCAAT    | 59.629 | 20 |
| AGTTACCGCTTGCTCCTTGA     | 60.015 | 20 | ATATTCGAGTCATCCGCAGC    | 60.207 | 20 |
| TGCGATGTCTATGTGACGGT     | 60.144 | 20 | TAACACCAACCACACAGCGT    | 60.072 | 20 |
| AAGTCGGA CTCTTGTTCCGA    | 59.844 | 20 | CGAACGGATTCTTGATTCTTG   | 59.693 | 21 |
| TTCATCCTCCCTCATTTTCG     | 60.006 | 20 | CTTCGGCAAATACCACTCGT    | 60.132 | 20 |
| GGTGTCTACACGGTCCTCCT     | 59.027 | 20 | AAAACCTCACCGGAATCCTGA   | 59.526 | 20 |
| AAGGTGGGCATGAATTGGTA     | 60.192 | 20 | GATGCGATCACTGCCCTATT    | 60.066 | 20 |
| ACATCCATCTCAAACAATATCA/  | 57.575 | 24 | GGTGGCATGCTATCTACCCT    | 59.034 | 20 |
| GCAGTTTGGCATCAGAGTCA     | 59.992 | 20 | TACAGGGCTGCTTTGTCCTT    | 59.875 | 20 |
| TGTGACAGAGCTGAAATGGG     | 59.831 | 20 | GAACAAGACAGGGGTATAACC   | 59.762 | 22 |
| TGCGGATTGAACAAATCTGA     | 60.197 | 20 | CCAGAAGGATTCTTCGGCTA    | 59.406 | 20 |
| CGCATCTGTAAAGCAAAGCA     | 60.155 | 20 | CCGGTCCTGAGTTTGTGTTT    | 60.005 | 20 |
| TTGCTTCAATGCAAGCTGTC     | 60.142 | 20 | GCGTAGAGTTACCAAACCCG    | 59.632 | 20 |
| AAACGCCCCCTAACATTTTC     | 60.184 | 20 | GATTTTGCCTTGCA TGTTGA   | 59.67  | 20 |
| CCCTCGTCAACTACTTCCCA     | 60.103 | 20 | CGAGTGTGGAAGGGAGAGA     | 60.377 | 20 |
| AATTCATGCCAATTTCTGCC     | 59.907 | 20 | TGATTGGCAGAACCAGAAGA    | 59.369 | 20 |
| TTGTTTTCTCTTTGCATAATCAAT | 58.388 | 25 | AGTCTTTCTTCCGTGCGTTG    | 60.431 | 20 |
| CGTGCTTGCTTGAGTAGT       | 60.453 | 20 | CTCCACGTCATTTGGCTACA    | 59.716 | 20 |
| TATGAGCCCGCACATTATCA     | 60.058 | 20 | AAACATGCCTCCACATCCTC    | 59.934 | 20 |
| TTTTGTGCCTTCATTATGCC     | 58.627 | 20 | ATTTTGAAGTGTTTCGGGGA    | 59.406 | 20 |
| TTGGAAGGTATGTGAAATTTGGT  | 59.638 | 23 | GAGGCCTTGAGGCAGACTTA    | 59.574 | 20 |
| CTTGGCAAGGCTCTGAAATC     | 59.955 | 20 | GGCTGGTATCACCATAACGC    | 60.361 | 20 |
| CTGTTACTCTATCTGCATGCTCTG | 58.388 | 24 | AGGCTGTGAAAGCTCCATCT    | 59.043 | 20 |
| AAAGGGAGTTGCAGTCAGGA     | 59.844 | 20 | TTGTTATATGGCTGGGGCTAA   | 59.464 | 21 |
| CCTCACTTCTCCCCCTCTCT     | 59.801 | 20 | TGCAACACCAAGTAACCATCA   | 60.019 | 21 |
| GCACGCATTTCCACACATAC     | 60.003 | 20 | TTTTCTTTTCCCTTCTCC      | 59.505 | 20 |
| TCGAAAGCCTACCTTGCTTC     | 59.592 | 20 | ATTTCAATTCATGGGTTTCG    | 57.399 | 20 |
| CCACGCCTCTTTTGATGTTT     | 60.11  | 20 | CACGAGTGAGAAAGGGAGAG/   | 59.583 | 21 |
| GACCGAACCGAAACTGGTAA     | 59.971 | 20 | CCGAACCGAACCGAAATTAT    | 61.029 | 20 |
| TGCAAGATCCAAGGGATGTA     | 59.075 | 20 | GCCCAAAATTGCCCTTTAAT    | 60.148 | 20 |
| CAAACATTTATCTTGCACCTTGG  | 57.4   | 22 | AAATTTCCCTGCTTTCCAGTT   | 59.123 | 21 |
| ACAGCAGGGTGTTTGTGTGA     | 60.203 | 20 | TGATGCAGGTTGGAATCAGA    | 60.201 | 20 |
| ACTCGCGTCTCTCATCCATT     | 59.834 | 20 | GTTTGGGTTTCTGGGTGTGT    | 59.721 | 20 |
| GGGAGTATCACTGGAATGCG     | 60.483 | 20 | CAGCACGGACGGTTAAGATT    | 60.132 | 20 |
| CGACGCATAAAGAGGCAAAC     | 60.772 | 20 | CGTTTTGCTTTAGGTTACAAGG  | 59.722 | 23 |
| CAGTCGCTGTTTACCATTG      | 60.301 | 20 | CATCAACCACCAACATTGTTTC  | 60.132 | 22 |
| ACCGCCATTAAGTCCATAG      | 59.982 | 20 | TTTTCCCTCTTCTGGGATCA    | 59.6   | 20 |
| AAGGTTACCAAACACTACGCAA   | 59.663 | 21 | TGTTGAGGAAGAAGAGCGGT    | 59.989 | 20 |
| CCTAGTCGCTCGTGTTTCAG     | 60.984 | 20 | CATCATCCTCCTCTTCTCGG    | 59.755 | 20 |
| AAGAAGCGCGCTAAATCAGA     | 60.251 | 20 | TATTCCTCAGACCACTCGC     | 60.218 | 20 |
| GAACCAGAGGAGAAATAGGGAG,  | 60.082 | 23 | GCTGGTTACCTTCGAGCAAG    | 60.015 | 20 |
| TGATACCCTTGTCAGTTTTCCA   | 59.471 | 22 | TCTTGTTTCAGGTTATCGTCTA/ | 57.253 | 24 |
| TTCTTTTGAACCAGGCAACC     | 60.088 | 20 | ATTTTTCGCTAAAGGGGGAA    | 59.909 | 20 |

|                          |        |                            |        |    |
|--------------------------|--------|----------------------------|--------|----|
| CCAATCATGCTGGTTTTTCA     | 59.518 | 20 AAATGTTACCCCGCGTAGTG    | 59.883 | 20 |
| ATGCAACCAGATTCAAAGGG     | 59.933 | 20 TTGGGTTGTCTTGATCCCAT    | 60.173 | 20 |
| AAATTGCAAACCCAACCTAAGC   | 59.561 | 22 TAGGACTTTTATCCGCGCAC    | 60.23  | 20 |
| AAGGTTTGGCTTGACCTTGA     | 59.711 | 20 TGAAAACCCAAAACACATGC    | 59.42  | 20 |
| GGAAATGACACCCAAACCAC     | 60.073 | 20 TGATGGCTTATGGGGGACTA    | 60.288 | 20 |
| TCTCCACTCTCTCTCTCTCCC    | 59.175 | 22 TCAAGTCAACATAAACATAAA/  | 60.083 | 27 |
| ACCATATTTAAGGGTTATCACCTG | 57.552 | 24 AAATTGTTCCGTTTTGGCTC    | 59.067 | 20 |
| TAACTCAAATCTTGCCCCG      | 60.067 | 20 ATCGTGATTGCAACTCTGA     | 59.399 | 20 |
| TGCACGCCCTTAATATTGCT     | 60.608 | 20 GTAATGTCAAATGCGCAACG    | 60.14  | 20 |
| CAAGCCATGAGCCTTTGATT     | 60.214 | 20 TATGGGTTAGCGTGTGATCG    | 59.566 | 20 |
| AAAAATGGGGGAAATTTGATT    | 58.593 | 21 TTCAAAAATCAAAGGTGCAAA   | 58.408 | 22 |
| AAACCGTCCAAAATCGTATCC    | 60.068 | 21 TGACGGGATTTAGGTGTTCTG   | 59.978 | 21 |
| CTAGTGGCCATTCTTCAGGC     | 59.836 | 20 CATATATTTTCATTGGCCCCG   | 59.998 | 20 |
| CGTTTCGCAAATTAATCGGT     | 59.964 | 20 GCACTACATAAAAATGAACATTC | 59.095 | 26 |
| GGGCTCAATCTTGCTGCTAA     | 60.49  | 20 GACACCTAGCCCACCCACTA    | 59.989 | 20 |
| CAATGAAACCAAACCATCCA     | 59.222 | 20 ACGGCTCTGAAAAGTTGGAA    | 59.853 | 20 |
| AAGAACAGGCTGTGCCATTT     | 59.74  | 20 TTTATCTTGCCCATGGAACG    | 60.827 | 20 |
| TGCACTTTAAGAGGTGGTTGC    | 60.298 | 21 GTCCAGCTCTTCCAACCAAA    | 60.232 | 20 |
| TCGAAAATCAAAGGCACACA     | 60.234 | 20 GGGTTTTAAATTGGGGATTTTG  | 60.588 | 22 |
| ATCGGAACGCTCATCAAATC     | 60.043 | 20 TTTAGCCGATGAGAGGAGGA    | 59.91  | 20 |
| TAGCATTGTCCCGTATGGC      | 60.857 | 20 TCTTTTTCTTCGTACGGGT     | 59.711 | 20 |
| CCCTCTTGATGGATTTTTGA     | 57.584 | 20 TTTGTACGAAGGAGGCTTGG    | 60.241 | 20 |
| TTGGCAGACTACTTTGTGGGT    | 59.648 | 21 AAACAATCAACCAAGGATGAC   | 59.336 | 22 |
| CATTTATTTCTGCCCTCCA      | 59.894 | 20 GAGCGTTGTTGGCAAAGAT     | 60.257 | 20 |
| CCAGCACGATAGATACAAATCC   | 58.606 | 22 CAAACGCAACAACTGTTATC/   | 60.082 | 23 |
| TCGCTGGTTTTGTAGTCGTG     | 59.904 | 20 GAGTGAAGCAAGGGAACCAT    | 59.141 | 20 |
| ATTCTGTGCGATAGGTGCGT     | 59.579 | 20 GAAAGCTCATCAACTTTGAAAC  | 60.282 | 23 |
| TTGCATTAATGAGCCGTCAG     | 59.833 | 20 CAATATTACAATGGGCAAGAG   | 57.725 | 23 |
| GCGTTTTGACGATATATAGTGTTT | 60.194 | 26 TCATGGCTGTCAGATCTCGT    | 59.372 | 20 |
| TTTGAAACCGGCTTAATTTG     | 57.833 | 20 TGAGTTGCACCTTGCTATGC    | 60.019 | 20 |
| CTCTAACAAATGCCAGCCGT     | 60.27  | 20 GAGAAGGAGAAACGTGGTGC    | 59.844 | 20 |
| CCATTTAGTTCGCGGGTATG     | 60.335 | 20 TGCTTGTTGGCACCAGTAGA    | 60.449 | 20 |
| GCTTCACTCACTCACGCAGA     | 60.343 | 20 ACGGTGCGTGTCTATGACTG    | 59.776 | 20 |
| CACTGCTCTTTTTCTCGG       | 60.126 | 20 GCCTACAATTCTTTGAGGCG    | 59.845 | 20 |
| ATTTGATGGTTTTGGGTGA      | 60.17  | 20 CCATGCACTTCTTTCTTTGC    | 58.502 | 20 |
| AGGCACACCTGTATACCCCA     | 60.255 | 20 TTCCTGTTATCTGCCAGAAG    | 59.322 | 21 |
| ATTGCATCTTTGGGGATGAG     | 59.894 | 20 GGCAAGGACCACTAGCAAAA    | 60.249 | 20 |
| AAAATCGACCGCACATTTTAT    | 58.509 | 21 GGCACCGACATCAAGTTGTA    | 59.572 | 20 |
| GGATAGGCCCTAACTCGACC     | 59.925 | 20 GGGTGGGTTTGGAAAAGAGT    | 60.204 | 20 |
| CGTTGTCCTGAGCACGTTAG     | 59.51  | 20 TGCCTGTTCTTGGTGTCTT     | 59.339 | 20 |
| AGGGAGATCGTGGGAGAGAG     | 60.748 | 20 ACAAATTCGAGATCGAACGG    | 60.074 | 20 |
| TCCATGATATTGTTCTTCGG     | 59.77  | 21 AGCATCTGGAATGCAGGAAG    | 60.362 | 20 |
| TGATGAAGTTGGGTGTTGGA     | 59.935 | 20 TTTGGGCTAATGGGATGAAG    | 59.894 | 20 |
| CCTAAAATTGAACGAAACTCGAA  | 59.667 | 23 AAATAGGAGAATAGGGGCGTC   | 59.472 | 21 |
| TAGCCCCTTTGAGACCATTG     | 60.066 | 20 CCTCAGATGGAACAGTTGGA    | 60.096 | 21 |
| TCATCCAGTGTTGCTCTTGC     | 59.992 | 20 ATCCTCATCTTACCATCGC     | 60.042 | 20 |
| TTCCGATGGAATGCATTTTT     | 60.268 | 20 TCATAAGGATGCAAATCCGAG   | 60.045 | 21 |
| GACACAGAAACACACGCAGG     | 60.357 | 20 CGAAACAATAAGATGCTGTGT   | 60.18  | 23 |
| TCCAGTTCAACTCTTTCTCG     | 59.458 | 21 ATGATGGAATTGGGTGTTGG    | 60.439 | 20 |
| GTGTGGGTTCTCTCGTGT       | 60.009 | 20 GGTTACACAACCACTCCAC     | 58.834 | 20 |
| TTCCACTAGGGGTACCAAAATG   | 60.102 | 22 ACCCGTATGGGACAAAATCA    | 60.051 | 20 |
| AAAGCCAATCGAGTCTTGGA     | 59.813 | 20 GTGGAGGATTTTCTTTCCC     | 59.744 | 20 |
| GGATGGGGCTGTGATTGTAG     | 60.34  | 20 GCGGATCCAACATGAAGAGT    | 60.081 | 20 |
| CAATTCCGAACCGAATAAGC     | 59.547 | 20 CACGAACACACGCTCTCAAT    | 59.905 | 20 |
| CGAATAGAGTGATGAGCCAAC    | 57.436 | 21 AATAAAAGCCCCGATTTCTG    | 59.808 | 20 |
| GCAACGGAATACCACTCGTT     | 60     | 20 TTCGTGTCTATCCTCACCCC    | 59.927 | 20 |
| CACACCATACCCAAAGCCT      | 59.853 | 20 GCGGATAATCTGGAGATGGA    | 59.998 | 20 |
| TCTCAATCATGCGATCCAAA     | 60.159 | 20 ATTCACCACAAACCACCACA    | 59.701 | 20 |

|                         |        |                           |        |    |
|-------------------------|--------|---------------------------|--------|----|
| GGAAGCGCAATTAATACGGA    | 60.061 | 20 CCAAATTTGAGGGTTATTATTT | 58.433 | 24 |
| ACGATTTTGCCCTTGTATGC    | 59.967 | 20 GGGTATTTCTGGAAATCATTGA | 59.962 | 24 |
| CACGATAAGGGATGGATTCAC   | 59.259 | 21 ATGTGGTAATTTTCGCACCC   | 59.691 | 20 |
| CGAGGGAGTGATCAAGTGGT    | 60.112 | 20 CGAAAAAGAAGAGGTGAGCG   | 60.125 | 20 |
| TGTTCAAATGATTTTGGGGG    | 60.535 | 20 AAGGGCATAATCTATGATCGG  | 58.049 | 21 |
| ACACGCACGCATTCTTCTTT    | 60.837 | 20 TGTGTTTTTCAGTGTGTGGGA  | 60.033 | 21 |
| CGCGCCTTGCCTAATAATAA    | 60.202 | 20 TAATTGCACGGTAGTTTGCAC  | 58.762 | 21 |
| GCTGGAGCGTCCATCTGTTA    | 61.348 | 20 CAGATGTGGACGGGTCAC     | 59.545 | 20 |
| AGCCATCGCTCAACCTACAC    | 60.285 | 20 TGGCATTTTCGATCTCTGTG   | 59.799 | 20 |
| GGATCAGTTTCAATCCCATGA   | 59.741 | 21 AGGTTTCAGACCCAGGCTTTT  | 60.11  | 20 |
| CGACTGTGCTGCTGGAAAAT    | 61.375 | 20 GCAGGAAGTGATGAAGAGAAC  | 59.478 | 22 |
| CAAATGACCAAGGAGGAGTTACA | 60.391 | 23 TGGTGGTTTTTCAGATGCTCA  | 60.24  | 20 |
| CTGGATTGTATGTGTCCCCA    | 59.215 | 20 TCTAATTGGGATCTCCACGC   | 60.036 | 20 |
| TTACGTTATGTGGCCCGAAT    | 60.209 | 20 CGAAGCATTTTGATTTGCGT   | 61.131 | 20 |
| CCCATGTTTGTATTATTGTAGGG | 60.228 | 25 GCCATTGTGAGGAAGGTTGT   | 59.973 | 20 |
| CAGGGACGGGCATGTTACTA    | 60.904 | 20 GCAGCTTTACTTCAGCGTCC   | 60.162 | 20 |
| GAGCTTGGCAGAACGAGAAC    | 60.142 | 20 ATCAGAGCATCAGAGCGGTT   | 59.981 | 20 |
| CCTTATTTGATGCACGGACC    | 60.331 | 20 AGGGCTGCAAGTGTACATGA   | 59.318 | 20 |
| AGAAGTCTGCGAAGGTCAGC    | 59.751 | 20 AAGATGCATGTGTTCCCAT    | 60.203 | 20 |
| GCCAACTATGAGACATGCGA    | 59.83  | 20 CCAAAGCCCAATAAAACGA    | 59.937 | 20 |
| GCGTGACGCACAGTTTCTTA    | 60.058 | 20 TATTACCCCTTCCCGTTTG    | 60.892 | 20 |
| ACTGATGTCAATTTCCATATCCA | 58.316 | 23 CGGATTTAAGGGTTATTACCTG | 58.81  | 24 |
| GGCATATGCTTTTGCAAGTT    | 60.103 | 20 TAAATTGCACCCATCAACCA   | 59.786 | 20 |
| AAAAAGGGGTTTGGTTGGAG    | 60.193 | 20 CCAAGTACACTCCTCCTCCTG  | 58.804 | 21 |
| TTCGTCAAACCTCCCAAAT     | 59.569 | 20 TGATTTGAGTGTAACACGTCC  | 58.688 | 23 |
| GGCAACGGAATACCATTTGT    | 59.691 | 20 AACTTGGTGAGCGAGTGGT    | 59.769 | 20 |
| AGATGCTCCCTCTCCCATCT    | 60.179 | 20 AAAATGGCACATGGGTTGTT   | 60.096 | 20 |
| TCCAAGGGAAAGTGTTCAAGA   | 59.697 | 21 TGGTAAACCTCGTGCTTCC    | 60.11  | 20 |
| AGGAGGGGCAAAGAAAAGAC    | 59.691 | 20 AGCCGACTCCATTTATTGCT   | 58.814 | 20 |
| TCAAACACTAGCCTTTCCTC    | 59.508 | 21 CCTGTGGCTCAAACCTGAAT   | 60.111 | 20 |
| AAACACCTGGGACCACTGAT    | 59.279 | 20 GGCTCAAACATGTCAGCCTT   | 60.263 | 20 |
| GTGAAGAGTACAACCTACACCC  | 59.494 | 24 AGGGAGTGCTCTCACCTGAA   | 59.986 | 20 |
| AGCTGAAGAGCGAGATTGGA    | 60.24  | 20 TTGCACACCTCTCTCACAC    | 59.872 | 20 |
| GACTACTGGTCGGGGAACAA    | 59.966 | 20 TCTAGCCTTCCATTTGCTTGA  | 59.967 | 21 |
| CATGTGGCCTAACTTGACACA   | 59.624 | 21 GTTGGGAAACGATGGTTGTT   | 59.694 | 20 |
| AAACGCTTTGTTTTCCGTTG    | 60.145 | 20 GAGAGGAAGGTGTGGAGCAA   | 60.386 | 20 |
| CCGTATTCATTGTTTTCGGC    | 60.323 | 20 TGAAAATATCATCGGCCACA   | 59.891 | 20 |
| CAATCTAACCCAAACCCAT     | 59.647 | 20 GCACTCTGCGAGTCTCCTTG   | 61.3   | 20 |
| GTTCTCACCGGAGTTGGTTC    | 59.555 | 20 TTCCTAACAGTTTGGCATCAGA | 59.747 | 22 |
| TCCCACTAAAATTTTCCCGT    | 58.417 | 20 TGCGTTTTGACAATATATAGGT | 60.083 | 26 |
| AGTTGATGCTGCAAGAAGCC    | 60.547 | 20 GGCCTGAATTCACATCCATT   | 59.756 | 20 |
| GCATGCTAGTGCCTGTTGTG    | 60.481 | 20 CAAAATTACAAATGGCCAAGA  | 58.674 | 22 |
| TAAAAAATGGAAGTTGGCG     | 59.937 | 20 CCACTACATTCAGGGCCATT   | 59.813 | 20 |
| AGGAAGGAGGCAGAGAGGAC    | 59.952 | 20 TTACGCATGACCCCTAGACC   | 59.955 | 20 |
| TGAAATGGTGATTTGAGGGG    | 60.692 | 20 ATGAACGAATCAAGTCCGC    | 60.081 | 20 |
| AATGGATCTATAGAGCGCCG    | 59.301 | 20 TTCTGGCCACTTGTCTTCC    | 60.232 | 20 |
| GTGAGGAGTTCACGGAGGAG    | 59.835 | 20 CAACTCGCATACCCAAAAGA   | 58.771 | 20 |
| CCACAACAAACCCTAGTGGA    | 58.468 | 20 CAAATTTTCGCCGTTCTTTTT  | 59.231 | 20 |
| CGACTACTCAATCATCCAACCA  | 59.993 | 22 TCCGTCTTATTGGTCCGTTTA  | 59.46  | 21 |
| TCCAAGATTGAAGTTCGAGA    | 59.522 | 20 GCAGGTTTCATGTTGCTTCC   | 59.297 | 20 |
| TCCGTGACATCAAACACTCC    | 59.525 | 20 AAAACCCATCGAATGCTGAG   | 60.074 | 20 |
| AATTTTGATCGCCTTGTTG     | 60.074 | 20 CGCTGTATAATGGGGATCTCA  | 59.93  | 21 |
| GGGAAAAATTTGCAAGATGA    | 59.878 | 20 GATGGTTTGAAGATGGCGAC   | 60.47  | 20 |
| TCCCATGTGATTGATGATG     | 60.137 | 20 TTCGGACCATTCAAACCTCGT  | 60.495 | 20 |
| TCATCTGCTGAAAGGAGGGT    | 59.803 | 20 CGTGTATCCTCACCCGTT     | 59.853 | 20 |
| ATCGGCGAATTTATCTGCAA    | 60.557 | 20 CCGTCTCAACCTCTCAATC    | 59.655 | 20 |
| AGAACGCTGACGTGGAAGAT    | 59.874 | 20 CATTAAATCCTGTCCACATACA | 59.241 | 25 |
| TAAGCAATTGATTGTCCGCA    | 60.215 | 20 TGGTTGCAAGAGAATGGTTG   | 59.691 | 20 |

|                          |        |                            |        |    |
|--------------------------|--------|----------------------------|--------|----|
| ATGGCCACAAATGGTTCCTA     | 60.192 | 20 TGCAATGCATGGAGGAAATA    | 60.035 | 20 |
| TAGAGCCAACCAATGGTCC      | 59.933 | 20 TCCCTCTCTCTCAAGGCA      | 60.214 | 20 |
| TTAGGGTTTAAAATCGCGCA     | 60.564 | 20 TTCATTCTTTTTAGGAATGCCA  | 58.739 | 22 |
| CGTTGAGCCGAATGTGTTTA     | 59.729 | 20 TCTTTTCTTTTCTTTTATGCTCC | 60.234 | 24 |
| TTTCAATCCATTCACGTCCA     | 59.9   | 20 AGATTCTGGGGATTCTGCCT    | 60.037 | 20 |
| CCTTTCTAACAGTTTGGCATC    | 60.001 | 22 CATAGTTGACGCCCTTCGTC    | 60.657 | 20 |
| CGCCATTCTCTCTCCACTCT     | 59.555 | 20 AGGATGTGGGTTGAAGGTGA    | 60.363 | 20 |
| TGCGTGTTCTTGGTGTTCCT     | 59.339 | 20 CAAGCAAATTGTGGCTCTGA    | 59.988 | 20 |
| AGTGCAATCGCAAATCACAC     | 59.728 | 20 TCGTTGTGAATTACCCAAGAA   | 59.492 | 22 |
| TTGCTTCAATGCAAGCTGTC     | 60.142 | 20 GCGTAGAGTTACCAAACCCG    | 59.632 | 20 |
| TGACTCGCCGTAGAATCCTT     | 59.836 | 20 AACCTCGTTGCCAATCTGAC    | 60.119 | 20 |
| CCCACCTGGAAATCTCCTTC     | 60.822 | 20 ATCGTGTTCTCAAGGTTGC     | 60.119 | 20 |
| GATATTGACGGTTGGTTGGC     | 60.199 | 20 ACCCTCTCACTTCTCTCCCC    | 59.661 | 20 |
| ATGAACCAAGTCATTGCAGC     | 58.726 | 20 TCAATGTCCCAACAAATCCA    | 59.75  | 20 |
| GCCAAGCCAAAAGATACGTC     | 59.713 | 20 TGAGTGCTCAGGCACAGAAG    | 60.333 | 20 |
| AGGTTGGAGGGAATGGAGAG     | 60.447 | 20 ATGGCATCACTTCAACCCTT    | 59.41  | 20 |
| AAATACCATTTCATTTTGTAAACT | 57.172 | 27 CACAATTTCTGCTCTAATAAAT  | 58.809 | 25 |
| TGGTTAGAAAATGGAGCCC      | 59.17  | 20 ACTTTGTTGGTGGAGCGAAC    | 60.156 | 20 |
| CACGAGTGAAGAAAGGGAGA     | 58.001 | 20 CTTTATCCTTTGCGCGAGAC    | 59.982 | 20 |
| TTGATTGATCGACAGCATCC     | 59.61  | 20 GGACCGACCGGAATTTTTAT    | 60.02  | 20 |
| TGGGATTAATTTCCACCATGA    | 60.002 | 21 AGATTGATCCGAAAGGTCA     | 59.629 | 20 |
| TCAAATCATAGTCTTTCCTCGTTT | 60.02  | 25 TTCGTTTTTCCGTTGAACT     | 59.587 | 20 |
| TGAAGTTAGGAAATAAGGAGGTG  | 58.743 | 25 ACGTCTCCGTTGGATTGTA     | 60.375 | 20 |
| GCCGACACTTCTATCCAAA      | 60.074 | 20 TGCTCCCATTTAAACAACCC    | 59.801 | 20 |
| GAAATTTGCTAAGTCGAGAATA   | 58.255 | 24 TTTGGAAGAATCATAATCAAG   | 59.56  | 26 |
| AGGGACAGCTGTGGACTCTG     | 60.458 | 20 GGCACCAAGGACAGTTTAGC    | 59.74  | 20 |
| TTTGTGGTATCAGAGCCACG     | 59.716 | 20 AACCGTCCGTTACTTCTGA     | 59.875 | 20 |
| AGCATTTATGTGTCAGCCCC     | 59.962 | 20 TTCTCAACCTCGGCTCTGAT    | 59.95  | 20 |
| TGGTGAACGTGTTTTGTTGC     | 60.596 | 20 TGTTATCATGCCAATCCACC    | 59.205 | 20 |
| TCACCACCACCATCTTCAA      | 59.935 | 20 TTTCCCATGTTGTAATTAATGT  | 58.388 | 25 |
| TGTTGTTGGTGGAGTTGAG      | 59.72  | 20 CACCACTCCTTTTCTGCCT     | 59.45  | 20 |
| CATCTAAAGATAAGAATGGTAA   | 57.108 | 26 CATGGCCAAGTGTCAACAA     | 59.069 | 19 |
| GGCAAACATGAATTCGTTCC     | 60.318 | 20 TGGTGACTCTTGTCCCTCCCT   | 59.682 | 20 |
| GAAAATGGGAGAAGTTGGTGA    | 59.017 | 21 TGAGTTGGTTGTTAGTCCGGT   | 59.506 | 21 |
| CTTTTCTCCCCGTAATTC       | 59.772 | 20 GCCTTCTCGAATTTGTCTGC    | 59.962 | 20 |
| GCCCTTGATTTCCAAGATCC     | 60.777 | 20 ACTCGTCTCCCTTCGTTCT     | 60.532 | 20 |
| GGTCCCTCCATCCTTACTCC     | 59.755 | 20 GAGCTGGAGTTGAGAAACGG    | 59.989 | 20 |
| TGAGTTTTGAATTCGGACCC     | 59.91  | 20 ATTTGTTGGATATTTGCCCG    | 59.66  | 20 |
| CCAAGATGACGAAGACAGCA     | 59.984 | 20 GTGTTAATCGCTTCCGCATT    | 60.103 | 20 |
| GAAGGTAACGTGCTGAAGG      | 59.875 | 20 ACCCCACAGTAACCCTTTCC    | 60.088 | 20 |
| ACCGACTTCTGCACCATTTT     | 60.119 | 20 AATGCAGGAGGTCTCAGGAA    | 59.803 | 20 |
| TCGGTCTTGCTCCATTACC      | 60.074 | 20 GTTTTCAATCGCAGCCATCT    | 60.221 | 20 |
| TTTTTCTTTCCACAAACCCC     | 58.901 | 20 GGATCGACACTTGCCTTGTT    | 60.119 | 20 |
| TTTTCAGGAAGGGAAAAGCA     | 59.795 | 20 ATGACTCAACGGCTGGTTTC    | 60.119 | 20 |
| TTGTAAGGTAGGAAATTTTTGGC  | 59.804 | 24 CGGACATGGTACATTTTCTGC   | 60.38  | 21 |
| GGGTTTGAATTTTGAATGCTT    | 59.378 | 22 GTTGTGGCAGCTTTTGCTTT    | 60.428 | 20 |
| CCTTGAAAATCTGAGCGTCC     | 59.813 | 20 TTTTCTGCATTGTGCAAGAGA   | 58.637 | 21 |
| TTGGATTTGGCTAGGAATGG     | 59.894 | 20 GGAAAAAGCCGATCAAATCA    | 60.016 | 20 |
| CGTCCGAACACATTGAAGAA     | 59.691 | 20 GAGAGGGTTGTCAAAGAGCG    | 59.989 | 20 |
| GTCCTATCGGTACTCGGACG     | 59.574 | 20 CGTTACCTTCATCCCCTTCA    | 59.926 | 20 |
| TAGGGCAGATTTATGCCAGG     | 60.053 | 20 CAGCATGTGTGTGAGTGTGTG   | 59.828 | 21 |
| AGCCACGTCTCGTGTTCCTT     | 59.914 | 20 TTCGAGAGCTGTAACGGTGA    | 59.591 | 20 |
| AGCGAGTGGTTGTGAGGTG      | 59.881 | 19 ATCTTTTGCACGAGATGCCT    | 59.843 | 20 |
| GATTGCGACAAATGATAGCG     | 59.285 | 20 TCAGGGATAAGTGAGCTCGG    | 60.353 | 20 |
| TGAACCACCTCTGCAAACAA     | 60.278 | 20 CATCCGGGTTTGATACCTGA    | 60.713 | 20 |
| AACCCATTCCCACCTTATG      | 60.797 | 20 AGACTTCAATGCCCTCCTC     | 60.596 | 20 |
| AGCAATATTGGTGGGACGAG     | 59.955 | 20 TCTCCGAAAGGGAAACAAAGA   | 59.784 | 20 |
| TCATCTCCATCCCCAATAA      | 60.088 | 20 GAATGTCACGACCGACTG      | 60.162 | 20 |



|                          |        |    |                         |        |    |
|--------------------------|--------|----|-------------------------|--------|----|
| AAAAGCGAAGTGAAGCGAGA     | 60.27  | 20 | CGAGGACATTTACTCATGGGA   | 59.94  | 21 |
| GTGCAAATCTGGATCCTTCG     | 60.603 | 20 | CTCGTCGTGAACTCCCTGAT    | 60.261 | 20 |
| AAACTTGAGCAGTCAGTTCGATT  | 59.468 | 23 | ATACCCACCTCCTCCCTCAC    | 60.194 | 20 |
| AGCACCAGATTCTCCACCAG     | 60.261 | 20 | TCAGAAACAACTTGCCCTCA    | 59.415 | 20 |
| CTCCAACCTCCCTGTACTGC     | 59.721 | 20 | TAATCGAGGAAGAGGGGCAAA   | 59.778 | 20 |
| TAGTTGGAGGGAATGCTTCG     | 60.206 | 20 | TTTCTCTTTTGGTTGGTGAAGA/ | 60.129 | 23 |
| TTTGGCTCCTGAATCTCACA     | 59.369 | 20 | GTGGGTTGGGGAAAAGAAT     | 60.032 | 20 |
| TGTTGCCCTCTCCATTTTA      | 60.439 | 20 | GACAGGGGTTGGGGTTAAGT    | 60.088 | 20 |
| ATAAATATCAGGTGTTTTCTGAGT | 57.122 | 26 | AAGCTTGCGAGTGCATTTTT    | 60.025 | 20 |
| CCCTTTTAGGCTCAAATCTCTT   | 59.332 | 23 | CCATGAGATTGGTGGTTGTG    | 59.806 | 20 |
| TTTTCGCTCCCACTAAAAA      | 59.693 | 20 | AAATGCATGCACCTGATTACA   | 59.055 | 21 |
| TTTTTGCACCTATGCACAA      | 60.111 | 20 | TTTGACAATATCGCGACCCT    | 60.469 | 20 |
| TTCGGCCAGAGAGAAAAAGA     | 60.066 | 20 | TTCGAAATTATGAGGCTCCAA   | 59.668 | 21 |
| AGTGCCTTTCAGAGCTTTT      | 60.197 | 20 | TCGGGTTAGCAGATCAGGTC    | 60.218 | 20 |
| TCATGATATTTTTCTAAATTTTCC | 58.916 | 27 | CAAATAAATTTGTTTCCACCA   | 58.76  | 22 |
| CTCACCGTGGACGTAGATCA     | 59.701 | 20 | CGGGCGGTTTTGTAGTTAAA    | 59.993 | 20 |
| AGCGGCAGACGTTTCTAGTC     | 59.644 | 20 | TCCTTCCACCCAACAAAAG     | 59.942 | 20 |
| CCGGAGATGAGGATGCTTAG     | 59.79  | 20 | TACTGCATTGCGACCCTACA    | 60.28  | 20 |
| CCACAAACCGAGCTCACCT      | 61.263 | 19 | CCCCTTTTGTAAGTCCCCAT    | 60.046 | 20 |
| TTCATGGATAGAGCGTGCAA     | 60.366 | 20 | AAACATCGATCAGTCCCACC    | 59.786 | 20 |
| CTCCGTGCGGTGATTCAAGAG    | 60.791 | 20 | AATGGCTGGATTTAGTCCCT    | 57.611 | 20 |
| AATTCGCGGCTGAGATAGT      | 59.925 | 20 | TTTGGCTACAAATTGCTAGGG   | 59.262 | 21 |
| AGGAACAAATGAGAATGTTAGTG  | 58.763 | 24 | TTTTGGAAATCCTTGACC      | 59.916 | 20 |
| GAGGGATTTGGGACGATTTT     | 60.131 | 20 | ATTCCAAGATGGCAACTGCT    | 59.7   | 20 |
| GTAACGCGGAATGCTACTT      | 60.425 | 20 | TATTCACAGCATTCAAGGGG    | 58.572 | 20 |
| GGTGTCTTGGCAACAGGTC      | 60.555 | 20 | CAAATGAAAGGGGCTTCTGA    | 60.184 | 20 |
| TCAGTTTCGAGTTATGAAGTTAGC | 58.582 | 25 | ATACTGGTGTGCTGCTCA      | 59.318 | 20 |
| GTGGATTGAAGCATGAGCCT     | 60.226 | 20 | TATCTCAACACGCATCCAGC    | 59.83  | 20 |
| ATGGGGCTGTGGTTGTAGAG     | 59.989 | 20 | CCATCTCTCCCTCACTCATCA   | 60.207 | 21 |
| AGTGACTCACCTGAAACGCC     | 60.307 | 20 | AAATCGGACTGGACCATTGA    | 60.317 | 20 |
| CACCTGCAACAGAGGAGTCA     | 60.022 | 20 | GACAACGGGGATAGCCAGTA    | 59.955 | 20 |
| TCACATCAATTTTACACCCA     | 59.808 | 21 | TAAGGGTTGATTTTGTCC      | 58.879 | 20 |
| TGCCTGCTGAGTGTAAATGG     | 59.864 | 20 | TGTCTTGAGTTTGTATCTAAGA/ | 59.365 | 27 |
| TGCAAGCATCAAACAACACA     | 59.877 | 20 | TCAACTCACCTCACATTTCTC   | 59.187 | 22 |
| GTCCGGGATTTGTGTAATGC     | 60.199 | 20 | AAATATTTCTAGCACATGAAAT  | 57.859 | 25 |
| ACCTTACCCAACCCACTTCC     | 60.088 | 20 | GCTTGAAGAAGAGCAAAAATG   | 60.497 | 22 |
| TTGGTTGTGAGAATCGAAG      | 59.84  | 20 | CGAAACGAAACAAAGTCCGT    | 60.147 | 20 |
| ACGTCTTGATGTCGAAACCC     | 59.973 | 20 | TGGGGATTGGGTTGTCTTTA    | 60.162 | 20 |
| CTAGGGTTAGCATGCTTGGG     | 59.724 | 20 | CCTTTGTCAACTTGGGCAGT    | 60.149 | 20 |
| TCAACCGCCAGGATTATTTT     | 59.901 | 20 | TAAAACACCATTAACGCCCC    | 59.699 | 20 |
| TGATGGAATGGGGATTTGTC     | 60.526 | 20 | AGTCGGCATTCAAGTAGTCG    | 57.98  | 20 |
| ACCCACCTTTCTTGATTCT      | 60.169 | 20 | GAAGTTGTAGCATGGGCTTG    | 58.379 | 20 |
| AACGTGAATCTCGGATCAGC     | 60.226 | 20 | AATTGGAGCAAAATTGGCAG    | 60.074 | 20 |
| GCGCGTGATTGTATGTCAGT     | 59.753 | 20 | AAGCAGAATGCAAGCAAGGT    | 60.022 | 20 |
| CATCCAGGTTGCGTTTCAAT     | 59.79  | 20 | CAGCCTGATAAATGGGACAAA   | 59.946 | 21 |
| ATTGACTTGGGCTTTGCATT     | 59.574 | 20 | TAAGCGCACGCCAATACTTT    | 60.768 | 20 |
| CTCTTGTAAACAAACCCCATGT   | 58.035 | 22 | CTCTGTCTTCTCCCACTCCT    | 59.856 | 21 |
| AGTGGGCTAAGTGAGGTGGA     | 59.721 | 20 | TCAAAACAACACCCAACCAA    | 59.834 | 20 |
| CCAATGGAGAACCCTTTGTC     | 59.381 | 20 | CACAACAGCCTTGTCTCTGC    | 59.622 | 20 |
| CCAAGTCAATTCCTAGTGCG     | 58.379 | 20 | TTCGTAATTCCGGTTCTTG     | 59.931 | 20 |
| TTGACTTGTGACCCTCTCC      | 60.088 | 20 | GAAATTTCCCAACATTGCT     | 59.022 | 20 |
| CGAAATATCGTTCGCACAAA     | 59.702 | 20 | TGCAACTCGAGATGAGATGG    | 59.942 | 20 |
| GTTTCAGTTCTCCTCTGCGG     | 59.989 | 20 | CATCTCCTATCACTCCCCCA    | 59.879 | 20 |
| TTAGCGATGCGAATTGATG      | 59.976 | 20 | TCCACCACCTCCAAGTTTTT    | 59.425 | 20 |
| CAAATGGCCGAGAGAGAGTT     | 59.43  | 20 | CTCCTCACCTTTCTTTCC      | 60.045 | 20 |
| CCCCACAGATATCCCACCTA     | 59.623 | 20 | TTTGAAAAAGTCGGCTGAAAA   | 59.855 | 21 |
| TCATCATTCGACTTCCATGC     | 59.61  | 20 | AATTGGGACAGGATATGGCA    | 60.155 | 20 |
| AATCTCCATGTTCAAGACTTCA   | 58.646 | 22 | GCAGTACCCGTGAAGGTGAC    | 60.577 | 20 |

|                           |        |    |                         |        |    |
|---------------------------|--------|----|-------------------------|--------|----|
| TGTGACACCAATGTGATGGA      | 59.325 | 20 | ACGTGCAAAAAGTCAAGGCTC   | 60.44  | 20 |
| GCAAAGTGTGCGGTCAAAT       | 59.713 | 19 | TTGTCATAGCCAACCCAAAAC   | 59.853 | 21 |
| GAAAGAGAGGAGCCCGACTT      | 60.096 | 20 | TCGTGCGACATAGTATGGGA    | 60.096 | 20 |
| ATCTTCATAAGTGGAGGGGC      | 58.067 | 20 | TCCTCCATTTCCAATCTGCT    | 59.629 | 20 |
| ATGTGCCAAAACGTCCGTA       | 59.98  | 19 | TGGAAAGATTGAGATGGGATT   | 58.44  | 21 |
| TTGAAGATTTTCATGGTGGATTC   | 60.177 | 23 | TAGTGAACGTTGGGGACACA    | 60.001 | 20 |
| ATGTTTCAATGACACGTGGG      | 59.267 | 20 | GGCCCGAGTTGTTGAGATAG    | 59.694 | 20 |
| CCTTGACGAGGGCAAATTA       | 60.067 | 20 | TTTAAGCATTCTCTTGTAAATCC | 59.212 | 24 |
| TTACATTTTTCTGGCTCCCAA     | 59.573 | 21 | CTCCAGAGACCTACATGGGC    | 59.679 | 20 |
| TCAGTTTTCGAGTTATGAAGTTAGC | 59.749 | 26 | GCACATAAGATCGGACGGTT    | 59.962 | 20 |
| GTGCTTTCCTTGGCTCTCAT      | 59.434 | 20 | ATAGGGACAGGCACAGATGC    | 60.104 | 20 |
| TGCATGCACACTTGTAACCA      | 59.746 | 20 | AACAGGCGCCTTACCAGTTA    | 59.769 | 20 |
| TAGCAGGAAGAATGCGTGTG      | 60.011 | 20 | AATGAAATCCTTTGGGGTCC    | 59.996 | 20 |
| TTCATGCTGAGGTGTTGTGCG     | 60.873 | 20 | TGGGGCTTGGTTTTCTACTG    | 60.103 | 20 |
| GGCTGAACCATTACCTGAT       | 59.934 | 20 | TGACCCCAATTTCAACTGCT    | 60.495 | 20 |
| TTATATTTGGTCGGTGGGGA      | 60.009 | 20 | ATGTGGACGTCCCAGATTGT    | 60.246 | 20 |
| TTAAACCATGCACGTAGGCA      | 60.133 | 20 | CGAGTAGATCACAACGGCAA    | 59.864 | 20 |
| ATTGGTGACGAGAGAGTGGG      | 60.112 | 20 | GATCTTGGTTGTTGGGTTGTT   | 58.803 | 21 |
| TTGCAATTAGTGCATACAATGATA  | 58.693 | 25 | GCAAAGAACCAAATCTCTTCG   | 58.962 | 21 |
| ATCGCAAATAAAACAACCGC      | 59.971 | 20 | CAAAGGGCCGAGATTTGTTA    | 60.067 | 20 |
| CTGCACCCAAATTGGTTCTT      | 59.971 | 20 | TATATCAATGGCAGCCCAACA   | 59.914 | 20 |
| TCGCGAATTCAGCTAGAACA      | 59.712 | 20 | GTCCGATACGAGCTAAAGCG    | 60.003 | 20 |
| ACGTGTGTGTGATTGAGGGA      | 60.005 | 20 | TCGAAAGAGTTGACGAATGTT   | 57.468 | 21 |
| TGGTTATTACTCGAACCGGA      | 59.325 | 20 | ACCAAATGCCCTTGTATGC     | 59.829 | 20 |
| GACCGTGTAGGAAGGCTGAG      | 59.867 | 20 | ATCACAAAACCCTAGACGGC    | 59.056 | 20 |
| TAGGCACAAAACCCACCTTC      | 59.971 | 20 | ATAGGGATGGAAGGGTACGG    | 60.032 | 20 |
| AATGGCAGATTTGAAGACGG      | 60.074 | 20 | ACCTATCGTCTCCTCCCGAT    | 59.919 | 20 |
| GCCAACATCAACTGCGAGTA      | 59.871 | 20 | CTAATTCGCCCAATTTCCAA    | 59.901 | 20 |
| AGTTCAAGAAAGCCGTGGAA      | 59.853 | 20 | ATCGGGATTGGTGGAAACATA   | 60.014 | 20 |
| ACATCCTCATAACCCCAACA      | 60.05  | 20 | GTTCTCGCAAACAATGCTCA    | 59.995 | 20 |
| TTAAGACCCGATGCCTTTGT      | 59.569 | 20 | CCCCGAAAATTAATCATTGC    | 59.259 | 20 |
| CTCTATCAATCGGCTGGGAG      | 59.79  | 20 | TCAACATTGGGCATTTTCAA    | 59.907 | 20 |
| AAACCACCCCGTCTTTTCTT      | 59.842 | 20 | TTTCCAGCCTTCCTTCTCCT    | 60.319 | 20 |
| CTCCTTTCCATCTTCCCTCC      | 60.008 | 20 | AGTGAACCGAAGGTCCATTG    | 59.966 | 20 |
| AAATGAGACAAATGTGGGGG      | 59.647 | 20 | CGAATTTACCAGAAACCCGA    | 59.931 | 20 |
| GCACTGTGTGCCAAGAGAGA      | 60.187 | 20 | GCCACAATGTCATGCTTCAG    | 60.272 | 20 |
| TAGAGCTCGGAACATGGAGG      | 60.353 | 20 | AAAACATACTCAGCCACCGC    | 60.14  | 20 |
| TTTTCGTCCGTCACATAAAC      | 59.801 | 20 | ATGTAGGGTTCCTGTGGCTG    | 59.989 | 20 |
| CCGTACAATAACATCCTCCC      | 58.449 | 21 | AAAAGACCCTAAGCACTCACA   | 58.061 | 22 |
| GGCCTGATTTGCAATACTGTG     | 60.517 | 21 | ATTCTTGTGGTGTGTGGCA     | 60.008 | 20 |
| ACCCTCAAGCATCAGCATT       | 60.226 | 20 | AGCTTGTGGGCATGAATCTC    | 60.226 | 20 |
| ACAAAAGCCTGTGCGAGTCT      | 60.058 | 20 | ATTAAACGGGTAACCTCGGGC   | 60.204 | 20 |
| GATTTTGCACGAAGCAATGA      | 59.816 | 20 | ACGTGGTAGCACGAGAATTG    | 58.802 | 20 |
| TGAAAATGGGTACCACACACA     | 59.725 | 21 | CCTTCCTTCGTTTTTCTCCC    | 60.046 | 20 |
| GCGCTACATGCTTTGTGAAT      | 58.948 | 20 | CGGTTTGCTAGGTGATGGAT    | 59.955 | 20 |
| GCAGGTTTGAAGTAGGGTGT      | 59.212 | 20 | AAAGCTTTAAATGTGTTACAAA  | 59.182 | 26 |
| ATCTTTTTCGATGCCTCAAG      | 60.352 | 20 | TAGTGGCTACGGTTTCCAC     | 59.993 | 20 |
| TACGTCTGTTGAGGGTGCAA      | 60.301 | 20 | CCCATTTTTCTAGGCACCTTT   | 59.489 | 21 |
| CGATTGGGCTATCCTATCA       | 59.878 | 20 | CATTTCTAGCGAGCCGTTA     | 60.356 | 20 |
| TCGCTCTTCTTTCGTTTTGA      | 58.771 | 20 | CATGAGCGAGTAAACCACCA    | 59.716 | 20 |
| CGCAGAAACAATGATAGCGA      | 59.976 | 20 | TGGCATCAAATCTAGCCATT    | 58.187 | 20 |
| CTTTTTCGGGTTTGGACGTA      | 59.968 | 20 | TGACACGTCACACATTGGACT   | 60.063 | 21 |
| ACAATACAACTGTCGAGCTGAA    | 57.569 | 22 | TTTCACGCATTTCCACACAT    | 59.972 | 20 |
| GGCCACGATGGTTATTA         | 59.66  | 20 | CGAAAACACGGGAAAACAT     | 59.839 | 20 |
| GGCAGATGATGGTGGAGACT      | 60.08  | 20 | GTCGGACCAGCTCTCTATCG    | 59.973 | 20 |
| CCGTGTGTACAACAATAGCAA     | 57.242 | 21 | AATCTGACGGCCGATATTTG    | 59.923 | 20 |
| CCTCTCCTCTCAACTTGCTTG     | 59.218 | 21 | TCTAGGTGACGGACACACCA    | 60.154 | 20 |
| TAATTGGCCCTTGATCTCCA      | 60.405 | 20 | CTCAACCGATATCCCCTCCT    | 60.285 | 20 |

|                           |        |                           |        |    |
|---------------------------|--------|---------------------------|--------|----|
| GCATCTCTTGCTCTCTCGTTG     | 60.292 | 21 GAAGGTGGGAATTGTGGAAG   | 59.381 | 20 |
| GCAGAAGGAACTGATGGCTC      | 59.957 | 20 ATCCCCATTTTTCAAAAGCA   | 59.388 | 20 |
| GTGCACAAATTCAAAGGCGT      | 60.118 | 20 TGCTAAGAGAAAAGCCCCTCA  | 60.088 | 20 |
| CAGCAGAGCATACTGCCAAG      | 59.764 | 20 GGGAGACAGCAAAGCTCAC    | 59.997 | 20 |
| CTCTTGACTTCTGATCCGGC      | 59.95  | 20 AGCCACACATGTCACAAATGA  | 60.024 | 21 |
| CCTTATGAAAAACGTTGGGG      | 59.311 | 20 GGATGATAGAACTCTGGCGG   | 59.653 | 20 |
| AGCCTCGGATTTCTGTTC        | 60.578 | 20 TACCTTTTTGCCCTCGAATG   | 60.067 | 20 |
| CTAGGGTTAGCATGCTTGGG      | 59.724 | 20 CATAGGAGTTGGTTTCGCACA  | 59.716 | 20 |
| TACGGATGCATTGACATTT       | 58.994 | 20 CCGATTGGGCCTATCCTATC   | 60.623 | 20 |
| TTGGGGTTGTTGGAAGAAAA      | 60.314 | 20 CCAATGTGAGACCCTTAACC   | 58.423 | 21 |
| GGATTGGGCTTTGAGAATGA      | 60.014 | 20 CAGAGACTGACGCACGTTGT   | 60.096 | 20 |
| ACCGAAAATCCTTTCACCCT      | 59.805 | 20 TCAATCTAAAACCCGTGCAA   | 59.157 | 20 |
| CAGAAATTGCCTTGGTTGTT      | 59.601 | 21 TCAAGATTGTGCGAGCTGAT   | 59.552 | 20 |
| TGCAAGTGTGCACTTTGATT      | 59.381 | 21 ACCTGCACCAAATGGAGAG    | 60.111 | 20 |
| GGTCTTCTAGCCTCTCTCGC      | 58.378 | 20 CGTGGTTCGATCGTAATTGA   | 59.542 | 20 |
| AATCGCATTGCTATCATCCA      | 59.094 | 20 AGGGTAGACATGGGTTTCCC   | 60.052 | 20 |
| CGTCCCAAGTTTGTGTTGCTT     | 60.147 | 20 GAGGCGGTAGGAAACCCTAA   | 60.443 | 20 |
| TGAAACACTTTCACCTCCCC      | 59.943 | 20 CAGTTGGTCAGAGATGGCAA   | 59.831 | 20 |
| TGGCAAACAGGTCCCTAAAC      | 59.971 | 20 GGC GTTGACCAGTGTAGAT   | 59.997 | 20 |
| ATGGGATAGCACTTTTGCCA      | 60.469 | 20 TGGATGACACGCATCAAAT    | 59.931 | 20 |
| CGGATTTAAGGGTTATTACCTGAT  | 58.81  | 24 TATGGGAAGGGCATTTTCAG   | 59.894 | 20 |
| CGTGTGGTTATGACATCCGA      | 60.39  | 20 GCATTTTCATCCTCTTCCCAA  | 60.014 | 20 |
| CGTCGAAAGGGAAAGAAACA      | 60.22  | 20 ACTGCGAACCAACATCACTG   | 59.751 | 20 |
| ACTTCTTCCTTGTCATGGCG      | 60.255 | 20 TTCTCAGCTCGGGTTCCTAA   | 59.948 | 20 |
| CACAAAATGGATCGAAACGA      | 59.518 | 20 AATGCGCCTCCCCTTTAAT    | 60.821 | 20 |
| AAAAGCGTTATGCGTCGAGT      | 59.911 | 20 TCCTCTACCACCCGAAAGAA   | 59.665 | 20 |
| CCACAACCTGCAATTTACTGTGA   | 58.75  | 22 TGATGATGACAATGATATCGTC | 60.217 | 24 |
| GGATTGGAAGCAGTGCCTAA      | 60.214 | 20 TTAGGCCATGTTTGTCTGCTT  | 59.761 | 21 |
| GAGACACGTTGGGTCTGGTT      | 60.009 | 20 TGAGGCCTTCATTCAAAGC    | 60.331 | 20 |
| CACAACAGGAGGAGGCACTT      | 60.298 | 20 CAGCCGAAGTAACAAAGACGA  | 60.426 | 21 |
| CCAAGATTGAGGTCCGTTTC      | 59.526 | 20 CGCAATTGTGACTTGTGTCC   | 60.16  | 20 |
| ATCTGGGCACTCGGAGAATA      | 59.653 | 20 CGTCCACTTCATTGAATTTCTT | 59.531 | 23 |
| GGACGCACCAGATTGTTTTT      | 59.978 | 20 AATTGCATTACATGCTCCCA   | 58.994 | 20 |
| TTTTGACATCAACGGATGGA      | 59.9   | 20 GCACACCAAAGTGAAACCGT   | 60.996 | 20 |
| GAAAGTGGCTTTGATGGAGA      | 57.864 | 20 TCAACAAAGCATTGCAAAGTG  | 59.903 | 21 |
| TGCAATATGTTTATTTGCGGA     | 58.048 | 21 TCAAATACTAGCATATCGATGA | 58.499 | 26 |
| TTGCGATTTTCGTTTTCTT       | 59.699 | 20 ATCCACCACAAAGCAGGAAC   | 59.973 | 20 |
| GCCTGAATGTAATGCCGAAA      | 60.971 | 20 TCCACCCATATTGCACTCAA   | 59.924 | 20 |
| TACCGTTGGTTAATCCTGCC      | 59.823 | 20 TGTGAGAACCATCTCGGTGA   | 60.246 | 20 |
| CAGCTTTCGGCTTCTTCTTG      | 60.262 | 20 ATCAGCCACACCCAGATAGC   | 60.104 | 20 |
| GGAAATCCCGTACGCTATCA      | 59.923 | 20 ACATTGTCAGAAAGTGCCGA   | 59.293 | 20 |
| ATTTGGGAAAGGGGGAGTAA      | 59.639 | 20 TTTTCAAGAGCATTACGGA    | 59.395 | 20 |
| TGGTAACATTTGTCTTATTTGTTGC | 59.404 | 25 TGTGCTTGTATTGGAAGCATAA | 58.712 | 23 |
| GGCCTCAGCAGCTTCTCTAC      | 59.337 | 20 CCCACACCTCCTAAAGGGAT   | 60.183 | 20 |
| CGACCAAATGTGACTCGAAA      | 59.691 | 20 AATTTGTTTGATATTCAACCAC | 59.243 | 27 |
| TGTAGGCTTTGGTTTCCATTG     | 59.982 | 21 CTTTTAGGTTGCCTCGAACG   | 59.876 | 20 |
| GAGGAGCCATGTTTTGGTGT      | 59.973 | 20 GCGTGGAAGGCTGAATAAG    | 59.845 | 20 |
| GAAGATGGAGTAGAGAGAGAGA    | 59.94  | 27 CCAACTAACCAACCCCACTA   | 59.705 | 20 |
| CATTTCAACCCACCATCTCC      | 60.173 | 20 TGTCCAGCTCTTCAAACAA    | 59.415 | 20 |
| AACCGGATTTAGAGCAATCAA     | 59.97  | 22 CCAGCCCAATAACTTGACCT   | 59.052 | 20 |
| TAGGAACAAATCTGGGCCAT      | 59.387 | 20 TATACACGGCATAACATGGGG  | 59.136 | 20 |
| GGTGTGGTGGGGACATTTTA      | 60.474 | 20 TTTATGGGTCCAAACAACCTT  | 59.625 | 22 |
| GACACCCATTGCTGTGTGAG      | 60.162 | 20 CGTGTTAATTTCCCTTCCAA   | 59.795 | 20 |
| ATCCAACACCGCATCTTCTC      | 60.081 | 20 CAAATTTGATAGCGGTCTAATC | 59.557 | 24 |
| CAGACTAGAACGTAGACCTGGC    | 58.161 | 22 CTCAGGGACTAGTTGAGCGG   | 60.005 | 20 |
| GGATGTCAATTTAGCCCGAA      | 59.901 | 20 TCATCACCGTGCCAATTA     | 59.002 | 20 |
| CACACACAGAACACGCACTG      | 59.976 | 20 ATTTTCCCTCCAGTTGACCC   | 60.169 | 20 |
| TCAACAATCTCAAACCTGCAACC   | 60.154 | 22 AAGCGCAAGCACCTAGAAAT   | 59.138 | 20 |

|                          |        |    |                         |        |    |
|--------------------------|--------|----|-------------------------|--------|----|
| AACAACCTGGGTATCCCAA      | 59.146 | 20 | TGCACAGAAAATGAAAAGCG    | 59.992 | 20 |
| ACGGAATTGAATTTGGGACA     | 60.17  | 20 | AGCCATGTGAGAGGGAGAGA    | 59.945 | 20 |
| TGGTGTGATCTCATCCCTTG     | 59.473 | 20 | TCCAATGGATGTAATGAGTTAT  | 57.297 | 26 |
| TTCAGCAGTGCTTGGTGAAG     | 60.175 | 20 | AGCCGTCGTATTCTAAACGC    | 59.388 | 20 |
| GACGGGAAGATGAAAGGACA     | 60.05  | 20 | TCAAAGAGCTTTCTCTGTTTGC  | 58.906 | 22 |
| GCGCAGATCTAATGGTCCAG     | 60.765 | 20 | GTTGGGTGAAGATCATGGCT    | 59.934 | 20 |
| CTACCGGAGAGTGGTGGTGT     | 60.026 | 20 | GGAGCAATAAAGGGCAATCA    | 60.038 | 20 |
| CCGAATGATGTGCATTTTTG     | 59.93  | 20 | TATGGTATGCTGTCTGCGCT    | 59.474 | 20 |
| TTACATTCAGGCCTTTTGAACA   | 59.625 | 22 | TGCAGGACAATATCCATCACA   | 59.94  | 21 |
| TCTAACTCCATTTGTAATAGTAAG | 57.468 | 27 | ATCTCGTTTCAAGCCCAAAA    | 59.685 | 20 |
| GAGAAAGGAGATGGAGCGTG     | 59.95  | 20 | TGATGACGATCTTTTGAACCA   | 60.481 | 22 |
| GGGTGATGAGGCTTGAAGAA     | 60.195 | 20 | TTGGGCTAAAGTGGGATGAA    | 60.439 | 20 |
| CTGAGGTCCCGAGCTGATTA     | 60.353 | 20 | ATGCGCGTTTTTAGGGTTTA    | 59.624 | 20 |
| TTGGGTGGAACCTTCTTGCTT    | 59.711 | 20 | CAGAGTCCTGGGAGCTCATT    | 59.405 | 20 |
| GCAATGGGTAGCGGTA AAA     | 59.964 | 20 | TGTGCACAAGCTTGGAAAAAT   | 60.663 | 21 |
| AGCTGGTAGCCATTCTCCTG     | 59.454 | 20 | TCGCCTTTCATTTTCATAGCC   | 60.175 | 20 |
| TGCCTGAAAATGTCTGCAAG     | 59.988 | 20 | ACCATGAGCACAGGATTTGA    | 59.09  | 20 |
| CGTTCCCAAGCCTCCTATATC    | 59.938 | 21 | GGGACGGATCACTCTTTTGA    | 60.05  | 20 |
| GCTACGACTACGGCTATGGG     | 59.752 | 20 | ATGGAGGTATGGTGTATGGG    | 57.047 | 20 |
| AGCTGAGATTAAATCCCCCG     | 60.411 | 20 | CGCCAACCTATAAATCACGG    | 60.335 | 20 |
| TGGGATATCGTCTAACCAGCA    | 60.475 | 21 | TGACGATATATAGTGTTTTGAC  | 57.754 | 26 |
| GCAAATCCCAAAACCGAATA     | 59.773 | 20 | CCATGGGTGGTATGGTGTG     | 60.517 | 19 |
| TGAGCGAAGAACACGAAGAA     | 59.716 | 20 | AGCTGTTAGGGTTGTATAGTGA  | 57.436 | 27 |
| TAGTTGGGAAAGTTCACGGC     | 60.11  | 20 | GCCTTTGCCCTTTTTCTCTC    | 60.32  | 20 |
| CACCAACCCAACCCATTATC     | 59.91  | 20 | TTCAAAAACGAATTTGGCGT    | 60.468 | 20 |
| AGCATTCAATTGCTACCTGCC    | 60.243 | 20 | CTTGCCATGCATGTAAGGTG    | 60.134 | 20 |
| TCTGCACTCTCCATGAGTCG     | 60.138 | 20 | TCCTCTCGTGTTCATCCTCA    | 59.34  | 20 |
| CAAGTGCAGGCAACAGTTTG     | 60.485 | 20 | CGTCGATCTCAGTATCTTCGC   | 59.992 | 21 |
| CTTCTCCACCACCACTTTGC     | 60.69  | 20 | GGTAAATGGTTACCGGTTTGG   | 60.33  | 21 |
| CCAGGTGAGCTAGCCATAA      | 60.227 | 20 | AATCACGTTGCAAAAATAGCG   | 60.143 | 21 |
| TGGTGACTGCACAGAAGAGG     | 60.022 | 20 | CTTTTTCCCAATCAAACCCA    | 59.772 | 20 |
| AGGGACGAGTCCTAAAGGGA     | 60.067 | 20 | GTGAGGCATCAAGATGGACA    | 59.637 | 20 |
| ACGGCTGTCAATCATCACAA     | 60.12  | 20 | AGCCACCTCCTAGCCATCTC    | 60.756 | 20 |
| GGGATTTCAAGCAGCATTTA     | 60.038 | 20 | TCCCATGTTTGTAAATTATTGAC | 60.228 | 25 |
| AGAGGAGGGCTTCAACATGA     | 59.803 | 20 | TCTCTAAGTGCCCATGATTCTG  | 59.336 | 22 |
| TTGGCTAACAGTCCCTGAA      | 60.626 | 20 | TTTTGTGATTTCCCATGTTTG   | 58.374 | 21 |
| TAATGTGGAACCATAGGGGC     | 59.645 | 20 | AAAGTGGTGTGTTTCGAGGCT   | 59.769 | 20 |
| ACCTATCGTCTCCTCCCGAT     | 59.919 | 20 | CAGATTTGAAGGCCGGAATA    | 60.031 | 20 |
| GCCTCTTCTCTGCTAAAAGCC    | 59.76  | 21 | AGGGTGTGGTTATTCCAATCC   | 59.933 | 21 |
| CAAAATGAAAAGATTTGAAAAAC  | 57.523 | 24 | CACTCAGTGGACACATTGCC    | 60.162 | 20 |
| TCCTTCTCTCCGAATTCCAC     | 59.213 | 20 | ACTGACATTCACAGGCATTG    | 57.067 | 20 |
| TAGGCATGGCCTCAACTACC     | 60.096 | 20 | TGCAATGGAGGGACTTTCTC    | 60.195 | 20 |
| GATGGAACGGGGATTTGTTA     | 59.622 | 20 | CATGCATGATCAATGTTGTAAG  | 59.541 | 24 |
| TCGAGCATAAACACATCCCC     | 60.864 | 20 | TCATGATAATGCATGTCTCTGA  | 59.883 | 25 |
| AGCTACACTACCGTCTGAGAA    | 59.161 | 22 | AAACAGTGGGTTTCGCGTAT    | 59.499 | 20 |
| TCGATTGCTCTCCGATCTCT     | 60.057 | 20 | GACTAGTTTTCTGCGACGGC    | 60.022 | 20 |
| GCAAGACATGCAAGGCAGT      | 60.008 | 19 | TTTCTGCTCTCCCTCCAAC     | 61.67  | 20 |
| CAAGAGCAAATGCAGCAAAA     | 60.133 | 20 | TCAACGCATCTACAGGTTGC    | 59.871 | 20 |
| TCAGCAAAGTGCTAAATGGTTC   | 59.406 | 22 | TCCAATTGTTGTCTTCCATCTG  | 59.971 | 22 |
| TTGGTGGTTTGTATGCTATCG    | 58.57  | 21 | AGGTTTTGATGGTTGTGATTTG  | 58.858 | 22 |
| CTATCGCCCCTCCTAGCAAT     | 60.562 | 20 | AGTTGGCATCACAACCAACC    | 60.823 | 20 |
| CCTCGGGGAAGTTACAATCA     | 59.926 | 20 | TGACTCCTGGCTTACCCAAT    | 59.55  | 20 |
| TTGGGATTAAGGCTTTGGTG     | 59.931 | 20 | GCTTGACGTTTGTCTGTGA     | 60.917 | 20 |
| AAACAACGAATCCATTAAGTGAA  | 58.676 | 24 | TGGTCGTGAGATAGAGTGCG    | 60.008 | 20 |
| TTTCGGGACACGTTCTCTCT     | 59.844 | 20 | TTGGCATCTTCTCTCAAATTCA  | 59.823 | 22 |
| ATTGCCCCCTCATTTTCATT     | 60.511 | 20 | TGTTTTCGATGTGCATGGAGT   | 60.12  | 20 |
| TTGTCAATTGGTTGTGGCTGT    | 60.008 | 20 | ACCTGTGAAAGCGATCGTG     | 59.846 | 19 |
| ATGAAATGACGAAAATGCC      | 59.768 | 20 | AAAATCAAAGGCCACAATG     | 59.801 | 20 |

|                           |        |                           |        |    |
|---------------------------|--------|---------------------------|--------|----|
| TATTTGCATGGGTCATTGGA      | 59.745 | 20 TAAAAAGATGAGCCCACCCA   | 60.439 | 20 |
| CACAAATGGGGTATTTGCTT      | 59.685 | 20 TGAATGTTATCAAGGGTGG    | 58.27  | 20 |
| GATAGGCCCTAACTCGACCC      | 59.925 | 20 GAGCTCTGGTTCCACAGAC    | 59.841 | 20 |
| CGAGTTTGTTCGAGATGA        | 59.988 | 20 CGAAAATGCCCTTTTATGCT   | 59.212 | 20 |
| TGGCTCAAAGACAAGTCCC       | 60.232 | 20 CATCAAGAGTCGGCTGTCAA   | 59.984 | 20 |
| TAATTTGGTTGGCCATTGT       | 60.053 | 20 AAGAGGAAGAAGGGGTGAA    | 60.045 | 20 |
| AACTCCATTTGCAACTAAGGC     | 58.771 | 23 TCATCCCGTTTCAAACCTCAA  | 59.097 | 20 |
| TTTCAAGAAAAGGGTGCAT       | 59.546 | 20 CCCTCAAACCTCCCTTTTCC   | 59.912 | 20 |
| GACGTCGGTTTGGTTAAAGG      | 60.736 | 21 CCACCAAGTATCGGTCCAGT   | 59.844 | 20 |
| GACCCATTTAGAACCCACGTT     | 60.103 | 21 TGATGAAAAACAATTGACCAA  | 58.045 | 22 |
| TGGAACAATTTTTGCCACAT      | 58.869 | 20 CCTCAAAATCTTTGAAGGCTCT | 59.024 | 22 |
| GAGAAAAACGACGTGAGGGA      | 60.232 | 20 CAACTGAGTCCCCTATCCGA   | 60.065 | 20 |
| TTTTGGAGTATTCCGTGCCT      | 59.569 | 20 TGTTGCGATTTTCATTTTCCT  | 59.578 | 21 |
| TCCACTTGACGAGGTCACTG      | 59.864 | 20 CCCTCATAACTCCTGACTGCTC | 60.268 | 22 |
| ATATTTCAATTCATGCCACGC     | 58.458 | 20 TTCAACCATCAACTCCACCA   | 59.935 | 20 |
| GTCGAGGAGTATACGGAGCG      | 59.859 | 20 AACCATCGATGCATTCACAA   | 59.931 | 20 |
| ACGTA AAAACCTTCCACCC      | 60.089 | 20 AAATCATGTTCCGTCCCAAG   | 59.79  | 20 |
| ATGCATGCACGTGAATATGG      | 60.375 | 20 TCAGTTTCGAGTTATGAAGTTA | 58.582 | 25 |
| ACGGATATGCCCTTGTATGC      | 59.813 | 20 GCCGATTTGGAGATCTATGG   | 59.486 | 20 |
| TGATGCTTACCTGAACAGCAC     | 58.94  | 21 TTAATGGCCTCGGTATTCTG   | 59.922 | 20 |
| ACAAGGATTGCGAACTCAGC      | 60.406 | 20 GTTTGTTGGGCTCAGGTCAT   | 59.973 | 20 |
| CCCCTCTCAACAACCAACAAT     | 59.82  | 20 ACGGTGAGGGGGAAAAATAG   | 60.18  | 20 |
| GAAATTGCCTGCTTCCAAAG      | 59.823 | 20 CATATGCATCCGCAATTCTG   | 60.058 | 20 |
| AGAGCCGGGTTTAAAGCAAT      | 60.095 | 20 TGTTGTGTTCTGTCCGATT    | 60.008 | 20 |
| CCACTTCTAGGCAAACACC       | 59.592 | 20 GGTTATCGTTGTTGGGGATG   | 60.051 | 20 |
| GTTGGTCATGAGCTGGGACT      | 60.12  | 20 CGTCACGGTTATCCTTCGTT   | 59.993 | 20 |
| TGGTGCAGTGGTAGAGCATC      | 59.862 | 20 TTTAGCAGAGTTGGTGAAATCA | 57.952 | 23 |
| GACCACAATCAAACACCAAGG     | 60.262 | 21 CACCCTAACACGCACAAATG   | 60.027 | 20 |
| CCAAATTGATTTCCACCCAC      | 60.029 | 20 GAGATTGGGGACTTGGTGAA   | 59.903 | 20 |
| GGTGGTGTGGAGGAGAGAAG      | 59.682 | 20 ACACCCCTCCTCAATTTCT    | 59.795 | 20 |
| TTTTCCATTATTTTCGTTGGAGA   | 59.838 | 23 ATGCACCAAAAATTGACACG   | 59.444 | 20 |
| TTAATGCTTTGAAGGGGTGC      | 60.074 | 20 GTGATTGTATCGCCACCTCA   | 59.527 | 20 |
| GGGGAAGATGTCGTGAAGAA      | 60.05  | 20 GACCGCTAAAAACCGTGAAA   | 60.11  | 20 |
| TAATTCGTATTTTCGGTCCGC     | 59.928 | 20 GGGCTTTGTCTTTTTGAAGG   | 58.809 | 20 |
| GCCCAAAAATTTAACGACCC      | 60.528 | 20 GCCGTACATGAAAGACAAAAC  | 60.039 | 22 |
| CCAACACAACACAGGTTCTCA     | 59.626 | 21 TGGGAAATTATGGATTGGGA   | 59.95  | 20 |
| CCCATGTTGTTTGTAAATTATTGAT | 59.853 | 26 AGAACACGAGGAACTTGGGA   | 59.697 | 20 |
| ATTTGGAAACCTCCCCTCC       | 60.169 | 20 TCAACTCAGAGCTCCATGCT   | 58.699 | 20 |
| CTCTCGCTAGGCGACTTTGT      | 59.78  | 20 AAATGTGAATGAAACAAGCGG  | 59.989 | 21 |
| GCAGCTAGGCTCCCTCTAT       | 59.968 | 20 GATTTAGGCCAAGGCAATCA   | 60.038 | 20 |
| GGGAGTGATTGAGGGAGTGA      | 60.048 | 20 TGCGAATCAATTATCCCAA    | 58.958 | 20 |
| TTTTGCAACAAAGAACCAACA     | 59.236 | 21 GGGTGTTTTGACAATATCACGA | 59.73  | 22 |
| TCATGTCACGTCAAGCATCA      | 59.823 | 20 AAAGATCTCTGCAAGTCCGC   | 59.579 | 20 |
| CGCTATGAGTCACGGGTACA      | 59.74  | 20 TGCTCTCAACCATACTGGTC   | 60.126 | 21 |
| GCCAAAAATGAAACAATGCC      | 60.31  | 20 AATTTTCGTTTCATGCCCAAG  | 59.938 | 20 |
| TGTACACGTGTGGCTAGCGT      | 60.393 | 20 TTGAGCTGTTATGCGTTTTGA  | 59.5   | 21 |
| CGAAGAATTTTGTGCCATGA      | 59.664 | 20 TCACCAGGTACGTGCTCAA    | 60.301 | 20 |
| TTGTTGAACGCATAATTCGATA    | 58.25  | 22 AAGTTGGTGGGTTGAATGCT   | 59.454 | 20 |
| CGTTCCTCAGAGTTTCCAGC      | 59.989 | 20 TGTGATATGAAGGGTCGCAA   | 60.073 | 20 |
| CAAACCTTCTGGATTGACTTTGAA  | 59.682 | 24 TAACCCAAACCCACCCAATA   | 59.91  | 20 |
| CTCAACACTCTGTTTTCTCTCAC/  | 60.007 | 25 ATATGCCCGGTAAGAGCA     | 59.569 | 20 |
| CGTGTCTCTCAAACCTGGT       | 60.151 | 20 CCGACCCATCTCTTGACT     | 60.112 | 20 |
| TCTATTATATGTCATGTTTTGCATT | 57.462 | 27 CGTCTTGGTGTGAGCGTTAG   | 59.51  | 20 |
| ACCCATCCCTTAATCAACCC      | 59.881 | 20 ATCAACATGCAAGCATCCAA   | 60.08  | 20 |
| GACGCGAGATTTACGTGGTT      | 60.14  | 20 GCTCTCATTGTAATCTCTCCCA | 59.739 | 23 |
| TTTCATGTTTAGCATTTGCGT     | 58.368 | 21 CAGCTCCAATCCATCTCCAT   | 60.034 | 20 |
| GGGGTAGTATTGAGTCCGCA      | 59.955 | 20 TCTAGCACGGTTGCAATCAA   | 60.401 | 20 |
| CTTTGCGACGTAATCCCAT       | 59.96  | 20 TGCGAACTCAGTGCTACTCG   | 60.347 | 20 |

|                          |        |                           |        |    |
|--------------------------|--------|---------------------------|--------|----|
| AAGCAGGAAGTCATGGTTGC     | 60.263 | 20 GTTCGACTGATGGGTGCTTT   | 60.119 | 20 |
| ATTTAATCACGTGCAACGCA     | 60.14  | 20 ATTCAAAAATGAGTGGACCAG, | 58.554 | 22 |
| CATCCAATAGCCGAACAAAAA    | 59.95  | 21 TGGCCTTCTTCTTCCAAGT    | 60.366 | 20 |
| AACTGCGATGCTCCAAAAGT     | 59.882 | 20 TCCTAAATGTGGGAAGTGGG   | 59.784 | 20 |
| TGCAGAGAAAGCAATTGTCTG    | 60.134 | 20 TGTGGAAGCAAATGGTTAGC   | 58.773 | 20 |
| AGCACAATACAAACATGTCCAC   | 57.538 | 22 CATGGGACCACAGGATAGGA   | 60.737 | 20 |
| TTGTGTGTTATACGTGTGGGTG   | 59.29  | 22 CCTGCACCATCACCTTTTCT   | 60.111 | 20 |
| TCAAGGTCTTCGCTGGTTCT     | 59.989 | 20 GTTTCGTGATGATTCGGGAT   | 59.756 | 20 |
| TATATGATGTAGGCCGCGTG     | 59.567 | 20 CGAAATTGATGTGTTGGCAT   | 59.4   | 20 |
| TGGACATGGCAATTATTCTTGA   | 60.323 | 22 GAACCCTGGTCTTCACCATT   | 58.842 | 20 |
| ATGGGTTCCCTTACCCCTTTG    | 60.046 | 20 CCTACACCACCCCTACTCCA   | 59.837 | 20 |
| AGCAGGAGGACTGAGGTTGA     | 59.986 | 20 TGGTACCATACGCGAAATCC   | 60.721 | 20 |
| TCCTTTCTCCAAGTCTCACCT    | 57.969 | 21 ATCAATCTTACGGACTGGCG   | 60.096 | 20 |
| AGCAAGGGAAACTGATGGTG     | 60.111 | 20 AAGATCGTGCAAATTTGAAA/  | 59.672 | 23 |
| GGATTTAGCGGTTATTACCTGA   | 57.387 | 22 GGATAGGCGGTTGAGATTTG   | 59.528 | 20 |
| ATTCTCGCGTCTGACTCCTC     | 59.56  | 20 TCAGTTTGGTTTATGAGTAGGA | 59.15  | 25 |
| CAGTTGTGTTGTGGCAGCTT     | 59.946 | 20 ATGGCCTGATTTGTTTCTCG   | 60.074 | 20 |
| TTTGAGATCGGAGTGGCTCT     | 59.95  | 20 CATCGGACCATTTTCTGACA   | 59.496 | 20 |
| CCGACGTTGTAGTGGAGTT      | 60.028 | 20 GCGCTTTTTGCTGATATTT    | 59.349 | 20 |
| TCAACCGTGCCTGTATGTTT     | 60.035 | 20 GAATGTGTACTGTGCAGGGC   | 59.169 | 20 |
| GAAGATGATGGTGAAAGGGG     | 59.336 | 20 TAACTCCGTATTCTTGCGGG   | 60.089 | 20 |
| CTCACTTAGGGATATATTTAGGGA | 57.128 | 26 AGGAGGAGCAAGAGAGGACC   | 59.952 | 20 |
| AGACATGCATCGTTTGTACTCTTC | 59.722 | 24 TATGGGTCAGAAAAGCCCAC   | 59.933 | 20 |
| TTCAACAACCTTTAGCCCAA     | 59.293 | 20 GCGTTGCGTATGGAAGAATC   | 60.615 | 20 |
| TCAACGCCCATATTGTTTC      | 60.701 | 20 ATTTGGGGTGAGCTTCACAA   | 60.495 | 20 |
| AGATATTTAGGGTCCCCGT      | 59.651 | 20 GATGTTGATTGCTGCGAAGA   | 59.955 | 20 |
| ATGTTGCGCTTTTCTCCTTC     | 59.457 | 20 CGTTAAATCTCTGTGTTGAATC | 58.016 | 24 |
| ACGGGCAGTACTCCAAAATC     | 59.056 | 20 CTTGTCACCTTTCTCCCTCGC  | 59.989 | 20 |
| AAATGAAGGGTTGAGCATCG     | 60.074 | 20 CCTGTTTCAGAGGGGATGAA   | 60.042 | 20 |
| AGAACGTTGGGAGGGAAGTT     | 59.972 | 20 ATGGACCACCCACCAAATA    | 59.91  | 20 |
| CTGAACCTGAACCACCAACC     | 60.399 | 20 GGAACAAGAGCTCGAGCAAG   | 60.277 | 20 |
| GTTGATAAATTACAAAAATTTAAG | 58.406 | 27 TAAGCGGACCCCAACTACAG   | 60.125 | 20 |
| ACACCAACCCATTTGCTCTC     | 59.973 | 20 GACATGGGCAAGACCAACTT   | 59.973 | 20 |
| TGTGTATATCTGATAGCCGTAGCA | 58.876 | 24 TTTGCTGCTGATGTTTGTCC   | 59.847 | 20 |
| AGGGGAGTTATCACTGGATCA    | 58.46  | 21 TGAATAAAACATGGAAATAATC | 58.939 | 26 |
| TTTCTTGGGGGAGCTAGGTT     | 60.068 | 20 GCAGTTTTGCTCCCACTCTC   | 59.997 | 20 |
| GTCCCAGCCTCAGATACAA      | 60.073 | 20 TGTTCAGAAAGGAGGTTGAA   | 59.697 | 21 |
| GACAACACCTGAGATGCCCT     | 60.12  | 20 GGTGATACATCAGGCAACA    | 59.527 | 20 |
| CCTCTGCCTTATTGATGGGA     | 60.029 | 20 TGCATGATGAGGTCTTCGAG   | 59.942 | 20 |
| ACGTGTTACCCTCTCAATTTATCA | 58.995 | 24 TTCGACTTAATCAATAAAGATA | 57     | 27 |
| ATTTAGGCATTCCCACCTTTG    | 60.19  | 21 CTCCAATCTCCAATCCATGC   | 60.426 | 20 |
| GCATTCCCAGAAAATCCTCA     | 60.014 | 20 CGTGGTTCGATCGTAAATGA   | 59.542 | 20 |
| TCGTCTGCAAGAAAATGGGT     | 60.636 | 20 CCGAAGGGATAGGATTGTTG   | 59.382 | 20 |
| AGAGATTGTGGGGCTTGATG     | 60.073 | 20 AACTTGCTGTTTTGGATGGAA  | 59.601 | 21 |
| CAACCCAAACCCACTTTTCA     | 59.688 | 20 CTTGGGAGAACTTGCTTTGA   | 58.077 | 20 |
| GCATCTCTCTCTTGCTGTCATT   | 58.699 | 22 TGAATAAGAGTTCAATGAATTT | 59.912 | 26 |
| CCATTTTGACATGATCGACG     | 59.924 | 20 AAGGAGGTGTTATGAAGGGAT  | 58.028 | 22 |
| ACGTGTCTACAAAACCTTGCTGC  | 59.493 | 22 ACACGCTTGTCAAACATTTCT  | 57.402 | 21 |
| CAAGGCATGGGAGGATAGAG     | 59.647 | 20 TGTGCAGAGGGACTTTAATGC  | 60.264 | 21 |
| GCGAGACGAACCCAAAGTAA     | 60.11  | 20 TAAGTTGATGTGTGCAGGGG   | 59.566 | 20 |
| ATTAAGGTGGCTGGCATGT      | 59.457 | 20 ACAAACTAATCAAGTTCCGCA  | 57.439 | 21 |
| CTTGTCTCCGTCCTATTGGC     | 59.694 | 20 TTATTATCTCGATCCAACCAA  | 57.725 | 23 |
| TTGCGCTTGGTTTGTAGACTT    | 59.934 | 21 GACATGATTAATCGTCCCCC   | 59.218 | 20 |
| CTGTCTCCGGTCCATGAAAT     | 59.927 | 20 TTGAACAATGGTACCTCCTCCT | 59.864 | 22 |
| GCGAAAACAACAGACAGCAA     | 60.035 | 20 TTTGGGGTATGGAGAAGCAG   | 60.066 | 20 |
| GAAAGGCTTGTGTGCATCTTC    | 59.874 | 21 TAGTTCACCAACTCCGGGAC   | 59.966 | 20 |
| TATCACAGAGCCACGACGAC     | 59.862 | 20 TTCTCTTCTATTTCTTTCTTT  | 58.425 | 27 |
| GACATATTTTTCCCCTTTCCA    | 57.91  | 21 CGGACCGGGTGGTCTAATA    | 61.972 | 20 |

|                           |        |    |                        |        |    |
|---------------------------|--------|----|------------------------|--------|----|
| ATCAAATAAGTCACGGCGCT      | 59.736 | 20 | CATTTGGATCCTCAAGTGGG   | 60.309 | 20 |
| CTCGCCATTTCCCTGTCTTA      | 60.206 | 20 | GGGCCTGGTAATCCATTCTT   | 60.152 | 20 |
| TCGTGATATTGGGAAACAATGA    | 60.188 | 22 | TGTTGCCGTCAGTTCATGTC   | 60.733 | 20 |
| AGCATTAAAATTGTTGGTCCC     | 57.987 | 21 | TTGGGATATCCGTTTCTTGG   | 59.756 | 20 |
| GGATACCCTCCCAAACCCTA      | 60.011 | 20 | AAACTTCTTTCCAACCGGAAT  | 58.991 | 21 |
| GCGGATTTTATTCTCGTTCAA     | 59.202 | 21 | TTGGATCATGATTTGAGTTGA  | 59.077 | 23 |
| ATGAAAAGGTAGGGACAAAA      | 57.596 | 21 | AATGACCGATCTCTATCCCA   | 59.925 | 22 |
| CAAGCAACAAGCCAATAGCA      | 60.014 | 20 | GCGGATTACTCCGTACTION   | 60.096 | 20 |
| AGTTATCAAGATGGCCACGG      | 59.955 | 20 | AAGGAAACAAAAGCTCGTT    | 57.983 | 20 |
| TTTTACCCAAAACACCCCTG      | 59.696 | 20 | ATTGGGGATGGAAAATTGGT   | 60.245 | 20 |
| TTTTTGGGAAATCCTTGCAC      | 59.916 | 20 | GGAATTGTCCCCTTCGTTTT   | 60.166 | 20 |
| CCCAACCACTTTCACTGGAG      | 60.536 | 20 | GCATGATCAGGGTAAAATCCA  | 59.776 | 21 |
| CGAAAGTGAACCAACCCGT       | 60.149 | 20 | TCAGGGTTTTAGCCACAAGG   | 60.103 | 20 |
| TGCTCCTAGTTAGCACACAATT    | 58.288 | 23 | GGGAATGAGAACTTTGGAGC   | 60.067 | 21 |
| TGAAGTTAGGAAATAAGGAGGTG   | 58.743 | 25 | GAAGGGACAACGACTACGGA   | 60.111 | 20 |
| GCCCCATTTTCTTAGGGTTT      | 59.311 | 20 | CCATTTCCCTTCTTTCTCC    | 59.875 | 20 |
| CTTGAGGCTCAGAGGTTTG       | 59.982 | 20 | AATCGAACCCACGAGAGCTA   | 59.836 | 20 |
| AAGGTTGGCATCACCTCTTC      | 59.141 | 20 | AAAATGCTGACATTGGAGGC   | 60.081 | 20 |
| GTGCTTTTAGCTTGGGCAA       | 60.376 | 20 | TGATTGAAGCAAAGAACCAG   | 59.861 | 22 |
| CACGAACGGCTGGAATATCT      | 60.096 | 20 | TCATTCCACCCACGAACTTT   | 60.353 | 20 |
| TAATAGGTGCGGTTTGAGG       | 59.953 | 20 | GCATGTTGTCACCCCTACCT   | 59.851 | 20 |
| TGGAGGAATGAAGGTGAAGG      | 60.042 | 20 | CCTCAACTACCCAAACCCAC   | 59.304 | 20 |
| GGAGAGAGGGAGGGAGAAAA      | 59.749 | 20 | CCGAACCACGTACATCCTCT   | 59.989 | 20 |
| CCCTTGGTATTCTCCCTGTG      | 59.401 | 20 | TAACAGGGTCGGCTCATTTT   | 59.569 | 20 |
| TGCTGTGGCAATATGATGCT      | 60.251 | 20 | GAGGGGAGGAGGAAGAGGAT   | 60.918 | 20 |
| TGACATACATGGTTGGGGA       | 59.623 | 20 | CTCCCATTTTCGTTTTCTTT   | 60.553 | 20 |
| GCTAATGCTTCAGCACCACA      | 60.019 | 20 | ACCTCAATCCCCATAACCC    | 59.881 | 20 |
| TTGATCGTCAAGCTCGTGTC      | 59.992 | 20 | GGCCAACATTTTTCAACTGG   | 60.344 | 20 |
| TAAGGAGATGTGTGCATGGG      | 59.522 | 20 | CAGTTTTCGAGTTATGAAGTTA | 59.339 | 26 |
| CCTCACTTTCAATGCTCGTG      | 59.44  | 20 | ATACGAGCCCGAAGGCTTAT   | 60.082 | 20 |
| CACCAAACTCCACCTTCAAC      | 59.482 | 21 | TCCTAAGAGATTTGATTGAAAA | 59.651 | 25 |
| GTTGGCAAACAGGTCCCTTA      | 59.971 | 20 | ATTAAATGCGCCTCCCACTT   | 60.821 | 20 |
| GGGAAAAGAGTTATCACTTGAA    | 58.682 | 23 | CCGAGCCCTCTCTTCTCTCT   | 60.23  | 20 |
| TTGATTCATACAAGTCATCTTTATC | 57.459 | 27 | TTTAGAACGCAATGGTGCTG   | 59.872 | 20 |
| AGGAAATAAGGAGGTGTTATGAT   | 58.113 | 26 | ATGAACCTATTTTCGTTGCCG  | 59.96  | 20 |
| TTGTGACTGGATTGGCATGT      | 59.967 | 20 | CGGGGTGTAACCTTGCTTGAT  | 59.993 | 20 |
| AAAAATGAACCGTAACCGGC      | 61.066 | 20 | AGTTTCGCTTTTGCTGATGGT  | 59.882 | 20 |
| AGTGAGAGGAAGACAGGCGA      | 60.135 | 20 | GTTATGCGTTTTGACGGGAT   | 59.829 | 20 |
| ATGCAACTCAAAGGGAGGAA      | 59.67  | 20 | GACACTGAAACCGAACCGAG   | 60.69  | 20 |
| ATCAATGGCCACAAATGGTT      | 60.059 | 20 | GAGCGTGACTIONTCCACCGTT | 60.142 | 20 |
| ATGATTTTGGTGTGTTGGCA      | 59.823 | 20 | CACATGTACGCGCTCTTGAT   | 59.895 | 20 |
| CATAAAACATACCTCGGCATCA    | 59.853 | 22 | AATCCCAATTAATTTGCGCCA  | 59.259 | 20 |
| AATCACGTCAATCCGAACC       | 59.797 | 20 | CCTCAATCACTCACACGCAC   | 60.319 | 20 |
| TGCCACTATAATTGTATGGTCTCG  | 60.27  | 24 | CCTAGTTGGCACAAACTCCC   | 59.592 | 20 |
| TACACCTTACCCACCCAACC      | 59.569 | 20 | GGATGGTGTGTTGTGGCTTGT  | 60.823 | 20 |
| CACAAACACACTTGGGAGGA      | 59.565 | 20 | CTTGGTGGGACAAGAACTCC   | 59.549 | 20 |
| TTGGCCACATAGCTCTTTCTC     | 59.467 | 21 | GTGGTAAACGAGACCCAGCA   | 61.096 | 20 |
| GCAAGAACTTGGCACCATTT      | 60.118 | 20 | TGTTCCCTGGCAGCTACTCT   | 60.012 | 20 |
| ACGTTTTTGTAAACGTTGCCT     | 57.794 | 22 | GGTTCCTAAGCAGCCAGATG   | 59.836 | 20 |
| GGACGCTCCAGATTGTTTCT      | 59.288 | 20 | CAAAGGCCACAAATGGTTAT   | 59.685 | 20 |
| AATGGTGCATGCAGTCAAAT      | 59.005 | 20 | GGCAAGTGGGTTACCGATTA   | 59.823 | 20 |
| CCCCAAACCCATTTCTAAT       | 59.882 | 20 | GGGATTTGTGGCAAGAAAA    | 59.916 | 20 |
| CATTTAGGATATTTCTATTCTTGC  | 57.631 | 27 | ACTCGTAAACGACACGAACG   | 58.851 | 20 |
| AGGATACCGGAGTGTTACAG      | 59.989 | 20 | AAGGAGTTTCATGCCCTTT    | 59.94  | 20 |
| CTCCGCCAGTTGGATACTA       | 60.088 | 20 | TCAATAAACCCCTCCGAATGC  | 59.901 | 20 |
| CATCCACCACCTGTCCACTC      | 61.434 | 20 | TCTTGCTGGGTCTTTCTTT    | 58.909 | 20 |
| TACTCACACGCACACCCAC       | 60.639 | 20 | GAACAAGAGAGACAAGGCCG   | 59.989 | 20 |
| TTGCTAGGGCCAAGGAGTTA      | 59.839 | 20 | CGGAAATTATTTTAAACCCCG  | 59.633 | 22 |

|                          |        |                           |        |    |
|--------------------------|--------|---------------------------|--------|----|
| TTCGAGTTCATATACACAATAAAT | 58.52  | 26 CGTGCAATTAATTCAAATCTT  | 59.476 | 24 |
| CGTGATGCATGATGGGTATC     | 59.763 | 20 TCGTTTTGATGATATATAGGT  | 60.054 | 26 |
| GGTCTCCGGTCCATGAAATA     | 59.75  | 20 AGAATAACAACAATGAAGTG   | 59.42  | 26 |
| ATGTGAATAGCCGTTGAGGC     | 60.103 | 20 GAAAGCCAGCATTGAAACCT   | 59.316 | 20 |
| TCACATATAAGAATGTCTCCGGT  | 57.647 | 23 TCGGGTTAAACAAACATAGATT | 57.292 | 23 |
| TATTTTCCCAACCTCCACCA     | 60.162 | 20 CATCCATGCAATGGAGATGA   | 60.444 | 20 |
| TTGTGCGAACCATGAAAAAC     | 59.566 | 20 GTGAAATTTGGCCTTGGAAA   | 59.916 | 20 |
| GCAAAGGTCGCGAAAGATAC     | 59.851 | 20 ATCATTTATTTTCGGCAACGC  | 59.935 | 20 |
| GGCATCATAATCAACCATCCA    | 60.547 | 21 GTTTTGAACGGTCTGGTTTCG  | 60.529 | 20 |
| CGACAGAAAGTAACCCCAA      | 59.964 | 20 TGATATCTTTGAAGAACAATTA | 57.905 | 27 |
| TTGTTACCCCACTTCATTCA     | 60.213 | 21 GTACGTTGGAACACGTGGC    | 60.024 | 19 |
| CGTTTTCCATTGTTTAGCCGT    | 59.996 | 20 CTGCTGACACCACCTCACAT   | 59.738 | 20 |
| ATTGGTCGAGAGAAAGGGCT     | 60.212 | 20 TCGTAAGATTTTTAAAAGAATT | 60.128 | 27 |
| AAGTGATCTACGTCCACGGG     | 59.989 | 20 ACCGAATGGCGGTTACCTAT   | 60.582 | 20 |
| GTATGTCGGTGCAAGGAGT      | 59.997 | 20 TAGCACTTCTGCCTGGGTTT   | 59.875 | 20 |
| GCACAAGTTTGGCCTTCATT     | 60.118 | 20 ATGGTGGCTGCATGTCATTA   | 59.955 | 20 |
| GTTGGCAAACAGGTCCCTTA     | 59.971 | 20 AATGCGCCTCCCTCTTTAAT   | 60.061 | 20 |
| ATTCAACACACGACATGGGA     | 59.812 | 20 AGAATTGAGTTTTTCAACTCTA | 59.961 | 27 |
| GCCACGACAGATAAACGTGA     | 59.722 | 20 CCCAAAAAGGGATAACATGC   | 59.273 | 20 |
| AAGCATCTATTTTCGACCACTGA  | 60.143 | 23 CCCGCATCACTTGAACCTTT   | 60.255 | 20 |
| CTGCTTAAAGCCAGTCCAG      | 60.008 | 20 TCCACGGGAGAGAATGAGAG   | 60.34  | 20 |
| ACCGCGTTGAGGATAGATA      | 59.551 | 20 CAATTTGACGTGATTTAACGTG | 58.978 | 23 |
| TTTGCTGAGAAATCTAATGCG    | 58.2   | 21 TCTGCGACCCTTCACTCTTT   | 59.989 | 20 |
| TCCAACCCATTATCAAAACCC    | 60.768 | 21 GGAGGAATTGGGATTTTTGG   | 60.482 | 20 |
| CCACCTTGAGTTACATGCTCC    | 59.607 | 21 AAGAAGGGTTGTGGCTCAGA   | 59.844 | 20 |
| TGACGAATTCTCAAGTTTGTAC   | 59.276 | 23 TGAATGAGATGAGAGGAGGGA  | 59.746 | 21 |
| CGATATCTCTATTCCGGCGA     | 60.153 | 20 CCTCCATGTTCTCATCGTC    | 60.475 | 20 |
| GAGAGAGAGTCGGCAATTCG     | 60.096 | 20 CCGCCATGTTTCGATGAT     | 60.444 | 18 |
| AGGACCATTCCAGCTTTCT      | 60.074 | 20 TCCCATTTTTGATCACCTC    | 59.727 | 20 |
| TACGATGGGCTTTAAGCAGG     | 60.223 | 20 ACTCCGCCAATGATGAATTT   | 59.391 | 20 |
| GTTTCTGCATTGTTGCATAGC    | 58.453 | 21 GGGGTTGTAICTCGTGGGATA  | 59.67  | 20 |
| TTCAGAAGGCCAAAGGTGAT     | 59.67  | 20 TTTTCCGGAGTTCACCTCAC   | 60.088 | 20 |
| GTGAGTGCGCATTGATGTTT     | 60.281 | 20 GGAATTCACAAAGGCCAAAG   | 59.711 | 20 |
| AATGGTCCGGGGTGATTT       | 59.987 | 18 ACCACACGTGTTGGCTAGG    | 59.606 | 19 |
| TCACAGGCATTGTCAGTGTGT    | 60.219 | 21 TCGATATTCGGCTTGGTTTT   | 59.547 | 20 |
| GCCAAGAACAACCTCTCTCC     | 58.868 | 20 ATCTTGCTGCTCCAAGGTGT   | 59.874 | 20 |
| TAGGGATTGAGGGTGATTGG     | 59.744 | 20 GTGGGTAGGGGTGTTCAAAA   | 59.688 | 20 |
| TGGATAGACTCATAGCCCGTG    | 60.103 | 21 TCATGCTGCATATATAAATGTC | 57.652 | 27 |
| TGACATTGCCTAGAAAGTGGG    | 60.118 | 21 GAACGCGGTCGAGAAAGAT    | 60.355 | 19 |
| GCAGGGCTGAGTACACGAAT     | 60.285 | 20 TCGGAGCGATAAGGAATCTG   | 60.309 | 20 |
| AAGAACACACAATTCATGTGGAA  | 59.392 | 23 AGGCGTCGCTGTAATAGTCC   | 59.364 | 20 |
| TGGATGTCTTTGATTTGCGA     | 60.197 | 20 ATCACTCTCACCCATTTCCG   | 59.927 | 20 |
| CTATAGCCCCGATTCAAA       | 59.916 | 20 GGAATTCCTTCTCAACTCC    | 60.05  | 20 |
| ATTGGGAGAAAAGAGGGGAA     | 59.875 | 20 TCACCACTCACTTCTCCGT    | 60.713 | 20 |
| GAGGGTTGATGGGTGATTA      | 58.751 | 21 AGGGCATCACTAGAAAGCCA   | 59.836 | 20 |
| TCCATTCCGAAAATCAAAGG     | 59.872 | 20 TCATTTTCCGCACCCATATT   | 60.153 | 20 |
| AATGAAACATCAACAATCCAAA   | 57.018 | 22 CAAATTGATTATGAAGAAATTC | 58.222 | 25 |
| TTAATTTAGTCCGGGAACG      | 59.931 | 20 GACATGGCTTTGCCATTAT    | 59.791 | 20 |
| AAAATCAAAGGCCACAATG      | 59.801 | 20 GCTAGGGTTTTTCTGGGGAG   | 60.068 | 20 |
| TGTGTATGTGTGAGTGTTCGTGA  | 60.127 | 23 CACACACTCTATAAATGCACT  | 57.108 | 24 |
| GGAAATCCATGATCCGAAAA     | 59.699 | 20 ATTTGTGGGTGGTTCGTGAT   | 60.096 | 20 |
| GCCGATCATTGATAGAGCGT     | 60.207 | 20 GAACGAGGAGAAGGACATGC   | 59.81  | 20 |
| AACACAGAGACAAGCACCCC     | 60.159 | 20 GTCCACTTTGTTTCTGCTGC   | 58.498 | 20 |
| TGTGAGTGAAGTGCCTGTGAG    | 59.624 | 20 ACCTCTCATCACCGTTCCAG   | 60.112 | 20 |
| CACGGTCGAGAAAGAGTTCGT    | 60.444 | 20 TGCATATCTTGGTGAGTGTATG | 59.897 | 23 |
| GGTCTTGAACAGGACAGGA      | 60.088 | 20 TGGGGTTCTGCCTATCAGAC   | 60.073 | 20 |
| CCCATCCTCATTTTTCTTTCA    | 59.006 | 21 CACATTCATCGAATCACATGC  | 59.947 | 21 |
| TAAGGTGGCTGGGGTGATTA     | 60.323 | 20 GACGGTCAGCCACTCAATCT   | 60.269 | 20 |



|                           |        |                            |        |    |
|---------------------------|--------|----------------------------|--------|----|
| CGCCATCTTGTTGGAATTTT      | 59.938 | 20 TTGGGAGAATTTTCAACTCTTG  | 58.352 | 22 |
| TCCCATGTTGTAATTAATGTAGGG  | 59.089 | 24 CACAAAGGCAGCACTTGTTTC   | 59.49  | 20 |
| CCTTAAATCAATCCCAGCCA      | 59.894 | 20 ACATGCTTTTGCATACCACG    | 59.614 | 20 |
| CTCCCACGCACACATACATC      | 59.992 | 20 TTTCTTTCCCTCCAAAACA     | 59.518 | 20 |
| TGGTACTGTTCCCTCAGCCC      | 60.111 | 20 TCTCTCTGGTTGGTGAAGAAA   | 58.955 | 22 |
| TTCTCAGTTCTCCCCTCAAA      | 57.424 | 20 CAACGGTCATGATTTACCA     | 60.367 | 20 |
| CTTCACGTGGACTGCTTTCA      | 60.025 | 20 ACACGAGTGTGGAAAGGGAG    | 60.151 | 20 |
| TGCGAAGTACCCTTCAGAGG      | 60.388 | 20 TTCGAATTATCTTCAGGCCG    | 60.167 | 20 |
| TAGAACCGGCATACTCAGGG      | 60.088 | 20 TTCCGGTCCAAACCAAATTA    | 60.16  | 20 |
| GTCCACGGTGGTTTGAGAGT      | 60.009 | 20 TCCTTCGACACTCTTTTGGG    | 60.224 | 20 |
| CCAAGTTTGGGACTTAAGCG      | 59.741 | 20 ATCGTCACCATCTCCACTCC    | 59.928 | 20 |
| TATATTGTGGGGTGGATGGG      | 60.266 | 20 CTGGATTGGCCTTGTCTTGT    | 60.111 | 20 |
| CCAGCATTGTTTCCCATTTT      | 60.309 | 20 GAGTCGAGGAAGATCGGTCA    | 60.349 | 20 |
| AATATCCGATCCCTTGGAGC      | 60.252 | 20 AATTGGCAAATATGCGAGGA    | 60.424 | 20 |
| GCAAAATAACCACATTTGAAGG    | 58.543 | 22 ATCGGTTATCACCGGATCG     | 60.697 | 19 |
| CCAATCTAGGGTTCATCACCA     | 59.799 | 21 TCGAGTGAGACCGAAGTGAC    | 58.968 | 20 |
| TCGAACGAATATGTTGCATCC     | 60.852 | 21 ATTCAAAGGGCATTTTTCGTC   | 59.022 | 20 |
| CTACGAGCATCATCATGTGTTT    | 57.783 | 22 TTTTTATACAAGGGGCGGAA    | 59.429 | 20 |
| TTCCACTGCCAATGAAATGA      | 60.049 | 20 CTCTGCTGTGAGCATTTCGAT   | 59.143 | 20 |
| GATTGGATGAGAAGAACCGC      | 59.635 | 20 TGTAAGGCCCATAAATCGCAT   | 60.31  | 20 |
| TTTGTGCGGTCATTACTATTACGA  | 59.802 | 24 GTGATAACCTTGAGGAAACTTC  | 59.19  | 23 |
| GATCATCTCGGGTCCAAGG       | 60.423 | 19 GGGTGGGTTTGGAAAAGAGT    | 60.204 | 20 |
| CACGGTCCGAGTTCATAGGT      | 59.989 | 20 AAATGCCAAATAAAGCTAAATC  | 57.912 | 23 |
| ACCATGTTTCCATCGGTTGT      | 60.096 | 20 ACTATGCATGGGTTCCGTTT    | 59.82  | 20 |
| TCTCTCTCAAACGCATGTGG      | 59.984 | 20 TTGTGCAGATTGTCAAACCC    | 59.547 | 20 |
| TCTCTCTCTGACGCCATTCA      | 59.656 | 20 TTCGCCCCCTTCTAGAGTCAA   | 59.948 | 20 |
| TGAGTAAAACGTGTTTGTGAGAA   | 57.555 | 23 AAAACACGCACACACAAGGA    | 60.199 | 20 |
| GGATCGAAAAGAGAGGGAGG      | 60.147 | 20 CCATGTTTGTAAATTATTGTAGG | 57.155 | 24 |
| TCTGCTACACCCAAAATCCC      | 59.933 | 20 ACCTAGAACTGGCCTCACGA    | 59.867 | 20 |
| AATGGATGAAAAGCTGCCAC      | 60.081 | 20 GGAGAGAGAGGCAGACATCG    | 60.096 | 20 |
| AGAAATTTTGTACACCCCG       | 59.83  | 20 GGCCCTATGCATGTGAAGTT    | 59.962 | 20 |
| TGCAAATCTTGACATTGGTG      | 59.576 | 21 TCACTCTCGAGCCTAACCGT    | 60.012 | 20 |
| TGGAGTCCTAAACTAAACCTCTA/  | 57.014 | 25 ATGTTGGAAACCCTTCCCAT    | 60.422 | 20 |
| ACATTTTTCCACACTCAGCG      | 58.775 | 20 GGATTCTCCTCCTTCTTG      | 60.008 | 20 |
| ACCCTATTTTGGCGTAGCCT      | 59.987 | 20 GCTTCGACCTCATTGTTGT     | 60.119 | 20 |
| TCTTGATAGTACTTTTTCATGGAAC | 58.093 | 27 GGAATCGAACCTGGGTCTCT    | 60.456 | 20 |
| GCCTCCATTGTTGCTTGAAT      | 60.081 | 20 GAATCACACCAACGCCTTTT    | 59.978 | 20 |
| TTTGTGTGTTTTGATTTAGTTATT  | 59.682 | 27 GTTTTTGACATAACTTAGGTGT  | 59.358 | 26 |
| AGAGATCGACGCCTTGACAT      | 59.834 | 20 AAGAGCTTCTGCGTCTTTTCG   | 59.898 | 20 |
| CATATCAGCCAAAGGGAGGA      | 60.029 | 20 GTGTGCACCACGTCACTTC     | 60.171 | 20 |
| AAATGCAGGGAAGATTGTGG      | 59.933 | 20 GTTAAGCCGAATGAAGGTGG    | 59.569 | 20 |
| GGAACATGTGTGTGCTCCAG      | 60.162 | 20 TTGGCATTGTGAAGCCATA     | 60.073 | 20 |
| CCGAGATGGCTGCATTA         | 59.777 | 19 GGGTGGAAACCCTAGATGACA   | 59.779 | 20 |
| CGGATTAGCGTGTGCTGTAA      | 59.752 | 20 TTCTCACCAGTCTGTCAACCA   | 59.294 | 21 |
| TTGCACAGTACATGCGTTCA      | 59.902 | 20 TCTTTGGCATTTCCTGGTC     | 60.051 | 20 |
| ATTCTGAGCTGGCGTGAAAG      | 60.538 | 20 ATGAGGGCTGCAAATTGAAA    | 60.585 | 20 |
| TATCAATGGTGATGATGGCG      | 60.307 | 20 ATCCCCTCAACAACCTCAGC    | 59.141 | 20 |
| TGAAAAACAGAAACCGAGATCA    | 59.724 | 22 TTGGCTACAATACAACGCCA    | 60.133 | 20 |
| GGGATGCCATTCGTAAGTCC      | 61.606 | 20 AAAAATCGTCCCAAATCCCT    | 59.644 | 20 |
| CGCTAAATTTGATCGTCTTCC     | 58.844 | 21 AGATCCGCACTCATCTTGCT    | 59.981 | 20 |
| CACGTTGGACTTTGGATTGA      | 59.541 | 20 GGGTTTTGCTGTCTTTTCCA    | 60.088 | 20 |
| AAGGCAGATGGACGGTAGAA      | 59.694 | 20 GGGGTTAAGATTTGGGGAAC    | 59.51  | 20 |
| CTTCTTTGAATAGCGTGCCC      | 59.845 | 20 ATAGGCTTGGGAAAGCAGGT    | 60.096 | 20 |
| CTCCCCCTCTTGAACCTTCT      | 59.811 | 20 CGATAAATGGTTGACGGCTT    | 59.96  | 20 |
| CGATGATATTTCTGGGGTGC      | 60.296 | 20 CATTGATCGTACACGATGGC    | 59.955 | 20 |
| CTCTTGTTGCCCTCCAATC       | 59.844 | 20 CCTCTGCAGCTTCCAAAGAC    | 60.134 | 20 |
| CTGATCTTGCCAAGTTTCCA      | 58.847 | 20 CGCATCATGTTGTTGGAAGT    | 59.572 | 20 |
| ACGGTTGTGATCATTTCGTC      | 59.967 | 20 CCTTGCTTAGTTGCTTTGGG    | 59.876 | 20 |

|                          |        |    |                         |        |    |
|--------------------------|--------|----|-------------------------|--------|----|
| GCACTCGCCACAATGTCAG      | 61.494 | 19 | GTCAC TTGCGGGTATTGGAC   | 60.384 | 20 |
| GCCCTTCTTCAAAAAGTCCG     | 61.088 | 20 | GCATAGTTCATTCAAAAATGTC  | 58.689 | 23 |
| TTTGAGATTAGGCTATAAGGAATT | 57.089 | 27 | TTTAAACTGACGGCCGAGAT    | 59.708 | 20 |
| AGTTTTCTCCCCTTCGTTGC     | 60.61  | 20 | TTCTCTCCAGCCAAAAAGA     | 59.926 | 20 |
| TGGGTGGTCGTATCCACTTT     | 60.232 | 20 | CCCAAAAATTGAACATATCGA/  | 58.848 | 22 |
| TGAGACACCCCATCTCTTC      | 60.048 | 20 | TTTGGTATTGGAGGAATCGC    | 59.901 | 20 |
| CACGAGATTTACGTGGTTCCG    | 59.195 | 20 | GCCTTCTAGCATCTCTTGCTC   | 58.451 | 21 |
| ATCGATGTCGGTAAAGGCAG     | 60.096 | 20 | GATGATGATTGCCCATTTT     | 59.587 | 20 |
| TCTGTACGTGTGTGAATGGCT    | 59.228 | 21 | GCATAATCACACGGAGGCTT    | 60.103 | 20 |
| ATTTGGTGGGGTTACATTGG     | 59.406 | 20 | GGTTAAAGATCAAACCAAACA   | 59.801 | 23 |
| TATTACAGAATGCACCGCCA     | 60.096 | 20 | AAAAATCCGCACACATGGAT    | 60.199 | 20 |
| GATTGAAGGGGTGCTTGAAA     | 60.051 | 20 | TTTGGATCCGAACATCCATT    | 60.133 | 20 |
| AAACACGCAACACAAAGCAG     | 59.951 | 20 | TAATTCATTCACGCGCAATC    | 59.668 | 20 |
| CCATCCCACCAGCATTTAGT     | 59.813 | 20 | ACGTTGATAAGCCATCCCAG    | 59.955 | 20 |
| CTTCGAGCCTCTGCTATTGG     | 60.11  | 20 | AACCTCATTGCTCTCCGCTA    | 59.978 | 20 |
| CCCAGCCAATGGAGATTACA     | 60.853 | 20 | ACGCCTTTATGTGACGTGGT    | 60.44  | 20 |
| CTTCCTCATCATGCATCCCT     | 60.034 | 20 | TAAGACTGGTGGGAGTTGGG    | 59.959 | 20 |
| TGAACATGCTCCTATTTTAATACA | 59.731 | 26 | GGTGTTACAATTTACCCGGC    | 60.235 | 20 |
| AAAATGCCCTTGTATGCTGC     | 60.103 | 20 | TGCTATGTACCGTCCAACCTC   | 60.008 | 21 |
| AATTTGGCAGAGGATGGAGA     | 59.629 | 20 | TCCAAAAGCAATAATGCAA     | 59.146 | 20 |
| CCAACGCTACTTGGCCTTAC     | 59.769 | 20 | TGTTGGACTTTTGGCCTTG     | 61.029 | 20 |
| TGCATTCTTGAAAGCTGGTG     | 59.988 | 20 | CACGTCTCACACCCTTGGAT    | 60.987 | 20 |
| TTAGGGGTGAGAATAGCCA      | 59.523 | 20 | TCGTGTTCTATATTCCCGTATCC | 60.226 | 23 |
| GTCACTACCAGTCCCCACT      | 60.006 | 20 | TTGACCACAGCAGTACGACC    | 59.751 | 20 |
| TGACATCTTTGATTTGTTTTGC   | 59.156 | 23 | TTGAACCTGGGACCTTTTCAG   | 60.081 | 20 |
| ATAGTGGTATGGTGTGGGGG     | 59.405 | 20 | GGTCCAATATGAAGCCCAA     | 59.762 | 20 |
| CAGGGCAATACGTTTTTCGT     | 59.996 | 20 | GCGGAGCCATATGTCATTTT    | 59.929 | 20 |
| GCATGCTTCTGACCAATTCA     | 59.805 | 20 | GGATCTTGGTTTGGTGTGTTGA  | 59.822 | 21 |
| ATTACAAATGGCCAAGAGGG     | 58.903 | 20 | AATCTCCTCCTGCATAGCGA    | 59.939 | 20 |
| AATAATCCACGCCAAACTGC     | 59.967 | 20 | TATCCCCAACTGTTTCAGCC    | 59.933 | 20 |
| GAGAAAGCATGTTCTGCACG     | 59.596 | 20 | CATCGACGCCATATCTTTGA    | 59.646 | 20 |
| CTAGTTGGGCTTAGTGGGGG     | 60.855 | 20 | TGGAGAGGGTGTGGTGAT      | 60.363 | 20 |
| CGTGTATGCCATCTGCAATC     | 60.104 | 20 | GGGTATTTATGATATTTCCAAC, | 57.935 | 26 |
| AGGGCTGAGAGCCTGAAACT     | 60.532 | 20 | AATAAGCGGGTTAGGGTTGG    | 60.197 | 20 |
| TGAGAATGGCCGAGAGTTTG     | 61.316 | 20 | GGGCGAGTTAAGCTCGAATA    | 59.456 | 20 |
| TATCCTCTCAACGCTTGGCT     | 59.978 | 20 | GAACTCAAACCTGGTTGGGGA   | 59.943 | 20 |
| TCTTTGTCCGTTTTTCGTGA     | 59.293 | 20 | GTTTATCCATGGCGCATTTT    | 59.801 | 20 |
| TGAGGGGTGCCAAGACTTTA     | 60.626 | 20 | CTTGATTTTCCTTCCTCCCC    | 59.875 | 20 |
| AGTGCCGTAATAAATTGGATCA   | 58.521 | 22 | CGGTCCAGTCTAAACCCAAA    | 59.964 | 20 |
| CGTTAATGCACACAGCTTCAA    | 59.926 | 21 | AATGGCGAAGAAAGCTACCA    | 59.845 | 20 |
| GCAGCAATGGTGAAGTAAAG     | 59.445 | 20 | TGTTTTCTAAAAATAGGACACA  | 59.056 | 25 |
| CCAAAAACACACATTGGACA     | 57.837 | 20 | GCCTATCAGGTCGTTGTGGT    | 59.997 | 20 |
| GTCAACTTTGGCAACGGAAT     | 59.978 | 20 | AATGCGCCTCCTTCACTTTA    | 59.845 | 20 |
| TCCCATAGCATCTTTTGCTCT    | 58.941 | 21 | GTGGATTGTTCTGCCCTTGT    | 59.973 | 20 |
| TTTTGGGCAAAAATACCCCT     | 60.519 | 20 | TTCCACTTGCAGCATTTAACA   | 59.359 | 21 |
| ACCGCCATATTTGGTTGACT     | 59.316 | 20 | TGGACAAAAGTACCAGGGCT    | 59.592 | 20 |
| GGTGTGACTGAAGTATTTGC     | 58.201 | 21 | ATTTCCGGTGAATGCAAGACC   | 59.939 | 20 |
| TGGTACAAAATTTAGGGTTATTAC | 58.558 | 27 | CAATATCAGCTCGGACCACC    | 60.483 | 20 |
| TGTCTGCAAACATGATGACG     | 59.248 | 20 | TCATATGTCACGTTAAGACATG  | 59.406 | 24 |
| CGCATACCACATATCATCGC     | 59.944 | 20 | GGTGTGTTGGGAAGGAAGTGA   | 59.943 | 20 |
| TGGCTCCAACCTTGTTTTG      | 59.734 | 20 | CCATGTGTATGCTGCTGGTC    | 60.144 | 20 |
| TACCAACCCAACCCACTCAT     | 60.088 | 20 | TGTGAAGAACTCCCTTGGGT    | 59.549 | 20 |
| CGATTCGAAGAAATGCATCA     | 59.769 | 20 | AAATCCTAACAGTGGGGCCT    | 59.827 | 20 |
| CAAATCCGAAATTCTCCCA      | 59.872 | 20 | GGGGGAAGGAGAAGTAGTGG    | 59.928 | 20 |
| TCATTCTCAAGCCACTCCCT     | 59.803 | 20 | CCGAGGTGGAGTAGTATCCG    | 59.569 | 20 |
| GTGGGTGAGAAAGAGAGATAGAC  | 58.175 | 24 | GGAATACGATTCGGAGCATC    | 59.491 | 20 |
| GCAAAAGTAATAAAGAGCGACAC  | 59.861 | 24 | CATCCCCAAACTCTCGTCTG    | 60.646 | 20 |
| GGAAATTTCTTTCTTCCTCACG   | 60.441 | 23 | ACGTTTCTTTAACCGCCTCA    | 59.747 | 20 |

|                           |        |                           |        |    |
|---------------------------|--------|---------------------------|--------|----|
| CTCCATTACTCACCCCA         | 60.769 | 20 CTCTGTCACCCAGAAAACC    | 59.549 | 20 |
| GCTCAGGACCGATGAATGAT      | 60.042 | 20 AAGGTGTCGAATGCTGAGAGA  | 60.005 | 21 |
| TGTAGCCGGAATATGAGCCT      | 59.691 | 20 CTTAAAATGTCGCCGAAAA    | 60.068 | 20 |
| TGGACTGTGGGAATACTGGAC     | 59.835 | 21 CATGTGTCTTATGTTTCGAGG  | 59.209 | 21 |
| TTCGATGATAACTATGGGTTTTGT  | 58.863 | 24 GCTACCCTTTTTGACCTACGG  | 60.008 | 21 |
| TCGAAATTTGGCAAACAATCT     | 59.578 | 21 TGTTGTTCCGGTTGATTTGA   | 59.941 | 20 |
| CCAACCTTGCCTATCCGTT       | 59.195 | 20 GAGTTTGGGAGTTGAGCTGG   | 59.844 | 20 |
| CCGGGCCATTTGTTTTATTA      | 59.669 | 20 AATTGCGGAGTTGCTGTTTT   | 60.257 | 20 |
| CATTGTTTGTGTGTCGGAGG      | 60.001 | 20 GGGTCTCGCATAAAATGGAA   | 59.901 | 20 |
| TCGGTTATTACCGGATCGC       | 60.812 | 19 CAAAGGCCCAATGGTTAT     | 59.685 | 20 |
| TGAATTAATGATGTCAGATATTGT  | 57.283 | 26 TTCCCCAGTGTACACAGAC    | 59.55  | 20 |
| AATTTTCTACAAAACAAGACCAA   | 57.083 | 25 TATCAGTGACCACCAACCA    | 59.806 | 20 |
| TTGCTCTAAGCTTCATCCGC      | 60.626 | 20 CAAAATAGGGGGAAAAACGA   | 58.917 | 20 |
| CCTCCGATTTCTGTTCAA        | 60.184 | 20 CTCTCATCTCTCACCTCACC   | 59.115 | 23 |
| TTCAAATCCGAAAATCGGTC      | 59.878 | 20 TCTTATGCCAACAAGACGAA   | 59.758 | 22 |
| TGCTCTTATGCTTTGTTAAATTAGC | 60.001 | 27 TATATGCTCGGTTTCATGC    | 59.832 | 20 |
| CAAGCTATTTGAGGCAACAG      | 60.025 | 21 AGCAATGTTGTTGGGTGGTT   | 60.277 | 20 |
| TGAAAGTAGCCGAGAGTTTACAA   | 58.273 | 23 ATCAATGCTTACCCGCAATC   | 59.929 | 20 |
| TCGTTGCATCTGTGAGCTTT      | 59.596 | 20 AAATCGTGTTCGTGCATCA    | 60.119 | 20 |
| TCGAGAAATGCCACATGCTA      | 60.366 | 20 TTGCCTAACTCCTCCTCCT    | 60.204 | 20 |
| AAAATCACCGCAAAAATTG       | 59.943 | 20 TCTTTGGGCAGAACCATTT    | 60.051 | 20 |
| ACCATATTTAAGGTTATCACCTG   | 57.552 | 24 GAGAAAGTTTTCTTCGCACG   | 59.993 | 20 |
| GAGGATTAATAGGCTGCCCC      | 59.894 | 20 GGTCTTTTGTGTTAACATCATG | 58.553 | 23 |
| TGCCAAGTCTAAAGCCACTG      | 59.072 | 20 AGCTGTCCCTTTCCCTGTT    | 60.11  | 20 |
| CTTGTTCCCTCATTTGCTCA      | 58.847 | 20 GACGGAGGTGATTCTTTGGA   | 60.05  | 20 |
| ACAATATTTAACGCAGCTAAACG   | 57.734 | 23 CACGTGACAGTCATACAAATA  | 58.634 | 24 |
| AGGCCTACCGATCCAACTT       | 59.962 | 20 GGATGATGTGTAACCCCTCG   | 60.195 | 20 |
| TCCCACTCGCCTGATACCTA      | 60.615 | 20 CCCGAGCTAGAGGAAGAGGA   | 60.988 | 20 |
| GGATGGAATGATGTTGGTAGAA    | 60.068 | 23 CCTCCTTTTGCTTGTTGGA    | 60.22  | 20 |
| AACCCTAAATTTGTATCCGAATG   | 59.56  | 24 TCACCATAGGATTCTCTCAATC | 59.615 | 24 |
| TTAGAAAGTAAGTGGTTCGGTT    | 59.561 | 25 GGGTTCCACGTCATAAAAA    | 59.662 | 20 |
| ACATGCAGGAATTTTACCA       | 58.976 | 20 TCTGCATTCTTGATATCGG    | 59.792 | 20 |
| GCATCTCTTGCTCTCTCATTG     | 57.78  | 21 TCAGCCTTATCTCTTGCCGT   | 59.978 | 20 |
| ATTTCTTTCAATGGGGGAC       | 59.996 | 20 GCAAAATGGCTGTGGAGAAT   | 60.081 | 20 |
| GCGGGGGAGATATAGAGAG       | 60.017 | 20 TACGGTTCCAAATTGCTCCT   | 59.569 | 20 |
| GCATGCTCTATCTGTTACAGGGT   | 59.693 | 23 AAGCCTCCAGATTTAAGCCC   | 59.688 | 20 |
| ATTGCCAAGATCTACGGTT       | 58.53  | 20 ACGCCAGCCTCACTCAA      | 60.557 | 18 |
| CTGCAGATGTCTCCTTTCC       | 59.803 | 20 TGTTCTTGTGTGTGCGTG     | 60.412 | 20 |
| TGCCATCTCGAAAAACAATG      | 59.664 | 20 ATCGCCAAATTTACGTCACC   | 59.829 | 20 |
| TGGAATCCGAGAAATTCAGG      | 60.006 | 20 TTTACGATATGTACCGTTCCCA | 59.253 | 22 |
| GACTTAAATTGCTGCAGACGC     | 60.039 | 21 AAAACCCGGAATGGGTAAAA   | 60.393 | 20 |
| TGCACTAACCACTTGATTT       | 59.485 | 21 CGACCTCGTGCTAATGATGA   | 59.823 | 20 |
| ATTAGGGTTGAGGTTGACCG      | 58.909 | 20 AAAAATGGATCGGATACGGA   | 59.23  | 20 |
| GCATCCCAAGCCATACAAAC      | 60.339 | 20 GAGATCGGAGTACTCTGGC    | 59.952 | 20 |
| GAATGCTGGGCTGATAAGGA      | 60.177 | 20 GCAGTTGCGATCAGCAGTAA   | 60.165 | 20 |
| CTCTCTGGTTGGCTGTTTT       | 60.134 | 20 GCACAATTAATGCGCGATA    | 59.705 | 20 |
| TGGCAATGAAAGAAACACA       | 60.088 | 20 ATCTGCAGCAGCTGAATCAC   | 59.147 | 20 |
| ACTTTGGCAACGGAATACCA      | 60.365 | 20 ATCAGAGCCGAGTTGAGAA    | 59.95  | 20 |
| ACAACCATCCAACCACAACA      | 59.701 | 20 CTACAAAATGCGCGAGATCA   | 59.976 | 20 |
| AAACATGCTTGCTCTTGTCG      | 59.076 | 20 GGGGAACTTTAATTTTGTC    | 59.708 | 21 |
| GCAACCTCAATGCTTCTCAA      | 59.002 | 20 CCGTTGAGCCGAATGTTTTA   | 60.989 | 20 |
| TGAATCCGTATCCTTATTGTTGC   | 60.214 | 23 CTGCGACGAGGGTCTACCTA   | 60.41  | 20 |
| TCAACATTTTGTGCATTGGA      | 58.519 | 20 ACGAAATTGCCCTTGATGC    | 59.967 | 20 |
| TGATTGGTCAGTTTGTCCGA      | 60.088 | 20 CTCCCCTTGCTGAAAAAGAA   | 59.424 | 20 |
| GAATTTCCCCAGCTCTCTC       | 60.154 | 20 TTTGCTGTGTGTTTCTCTCG   | 59.873 | 20 |
| TATGGAGTGGAGCAAAACGG      | 61.021 | 20 AAGAATTCTGCCTCCTGCAA   | 59.955 | 20 |
| TTTAAACCCTAAACGCGCA       | 60.593 | 20 TGCTATCGATGTGTTGGCAT   | 60.104 | 20 |
| TCACCTAATTGCATCCCCAT      | 60.155 | 20 CCACGTTCCGGTCTGTATTT   | 59.853 | 20 |

|                         |        |                             |        |    |
|-------------------------|--------|-----------------------------|--------|----|
| GAGACAGAGAGAGGCGATGC    | 60.255 | 20 TCTCAACCATCACGAAATGC     | 59.654 | 20 |
| GACAAAATAATTGGGGAGCA    | 59.077 | 21 TGAAATTTGGAAATAAGGAGG    | 59.382 | 23 |
| CCGGCGTCTTTGTATTGAGT    | 60.132 | 20 TCTTTCAGCACAAATGCGAG     | 60.134 | 20 |
| CATTATCATCATCAATATCACAG | 59.64  | 26 TCTGAAGGCCGATATTTGCT     | 59.807 | 20 |
| CAATCTGACGGCCGATATTT    | 59.923 | 20 CATGTGGACCATCGATCTTG     | 59.918 | 20 |
| TGCGCTGAAAATGTATCCTG    | 59.833 | 20 GTCAGACCAGCTCCCCTTC      | 59.783 | 19 |
| GTGTGCATGCATGGTTTAGG    | 59.995 | 20 TGAAGCTTGGAAAGTGATGAA    | 58.488 | 21 |
| TTAGCCCTAATGGCCTGCT     | 61.066 | 20 TGGATTTTCATCATCAAGTCTCC  | 59.954 | 23 |
| CTGGTGACTTTGAGGAGGGA    | 60.229 | 20 ACGGCAGCTTCTCTCATGTT     | 60.02  | 20 |
| AGTGAGGCCCTTTTACGTT     | 59.998 | 20 CGGATGGCTAACCTTTTCTG     | 59.702 | 20 |
| AATTGAAATAAAGGCGCCAG    | 59.212 | 20 TGTGAATGTGGTTTATTTGGC    | 58.4   | 21 |
| AATCGTGGTTCAAAAATCGG    | 59.801 | 20 AAAATCTCAAACCGTGAGATG    | 58.695 | 22 |
| TTCGGTTGCAATTTTAGTTGTT  | 59.931 | 23 TTTCCGTTTGAACCTTTTCATTTT | 59.098 | 23 |
| CAGGGGCATATGTGTCAAAA    | 59.395 | 20 ACGGATTTAAAGGTTATTACCT   | 58.84  | 26 |
| TGGGAATTTGCCCAAATAAG    | 59.767 | 20 GCCTTTGCCCTTTCTCTAT      | 59.688 | 20 |
| AAACCGGACCGAACTGAAC     | 59.958 | 19 TTTCCGAATATGAAAACCGC     | 59.907 | 20 |
| GGTCCATTGGTCTTTTGTATTG  | 58.353 | 22 TGGATATGGTTTTTGCAGGG     | 60.692 | 20 |
| ATTACCTACCTGCTCGCACC    | 59.222 | 20 TCGTCCAACCAAATTGTTGAT    | 60.22  | 21 |
| CTTCATGGGGCAATGGGATA    | 62.865 | 20 TGACAATGTTATCGATGGCG     | 60.488 | 20 |
| GTGGTGAAGAGGCAATGTT     | 59.973 | 20 TAAACCATGCACGTACGCAT     | 60.021 | 20 |
| AAATAGGTCCATCCCTGCCT    | 59.789 | 20 TGTCGAGACAATCGTGAGAGA    | 60.402 | 20 |
| AAAAGGAGTTTTGACGGGATT   | 58.991 | 21 GGGTTTAAAATAGCGCGTTG     | 59.624 | 20 |
| TAAATAAGGCGGTGGGTGAA    | 60.315 | 20 AATTAAGATTTTCGGGAAATTAC  | 57.21  | 25 |
| AAAAGTAATGCATATGTTTTCTA | 57.308 | 27 CCAGTGCACATCAAAATTCC     | 58.976 | 20 |
| CATGCACCTGAACATGCC      | 59.61  | 18 TGGAGGTACTTGTGGAATTCTT   | 60.391 | 23 |
| ATGGTTGAATTTTCGTACCCG   | 59.685 | 20 CGAACCAAGGGAAAACAATGG    | 60.336 | 20 |
| ACTAAACCAAACCCACCCCT    | 59.593 | 20 CAATCAACATGCAAGCATCA     | 59.232 | 20 |
| ACACCCCTTAGATTTTGGG     | 60.046 | 20 AAACAGCCGTTATCAGCCAC     | 60.14  | 20 |
| TCGTTCCCTTCGTCTTACT     | 59.844 | 20 CCTTGGCTATAAAAAGGGGC     | 59.93  | 20 |
| ATAAATGTTCAAACCGGCCA    | 60.188 | 20 GCGGGTAAATATCAGTTTTTGA   | 59.101 | 23 |
| TAAACCATGCACGTAGGCA     | 60.133 | 20 TTTGTGATGCTCCATGCTTC     | 59.805 | 20 |
| CAAAGAAGAGTGGGCTTTGG    | 59.846 | 20 CCATTCAAGGGTTAGGGCTT     | 60.312 | 20 |
| GTCAATCCAACGTCCCAAT     | 59.653 | 20 TTGAATGGCAAGGATTGGTT     | 60.309 | 20 |
| CCTCTCGCATTTTCTTTGCT    | 59.717 | 20 AGATGCGCCATTTTAGTGGT     | 59.597 | 20 |
| AATCACATCAACACCTCAGCC   | 59.989 | 21 TGGGTTCAAAGGGAATTCTG     | 59.903 | 20 |
| CTCCCCTACTACACTCGCCA    | 60.269 | 20 AACCTCAGTGTTCAGCAGA      | 59.622 | 20 |
| AAAGCAAATCCTCCCAAAT     | 59.777 | 20 CATGGTGGTGGAGAGGAGAT     | 59.92  | 20 |
| TCATCGCCCTTGATCTCTCT    | 59.91  | 20 GTACGGTTGCTCATCAGCCT     | 60.285 | 20 |
| TGGATTTTCATCGTTTCGCAA   | 60.049 | 20 TTTCCACCGAAAGCTACAG      | 60.241 | 20 |
| AACCACATTAGGCCATGCAC    | 60.786 | 20 ACTCTGAGCTTGGGAAACCA     | 59.844 | 20 |
| ACGTCGCTTTTAGGGTTGG     | 60.118 | 19 CCAAGACCCCAATTTGATT      | 60.91  | 20 |
| TATGCATTTGCACCTGAGGA    | 60.22  | 20 GGAGTGTAATCAAATGAGAGC    | 58.391 | 23 |
| AGGGGTGTAGGCAAAAGACC    | 60.361 | 20 TGTGCTTTGTGTTGGTGGAT     | 60.008 | 20 |
| TAGGGCAATTGGTAGGTTTCG   | 59.953 | 20 TGTTTTCATGTTTCATGTGTCCA  | 59.864 | 22 |
| TTCCAGAGTCAATCCAGGCT    | 59.803 | 20 ATGAAACTGCGTTCCCACTC     | 60.119 | 20 |
| GCTTCCAAAAGAAAGAGCCC    | 60.32  | 20 TCACAGGAGGGTTCACACAA     | 60.129 | 20 |
| TGTTTCCGTTTTATCAGCA     | 59.157 | 20 GCATAGGTTGTTTCATCATCTTC  | 58.642 | 23 |
| TCATTTATGAAGCAAGGGGG    | 59.894 | 20 GGAACCCGAGCTGGACTAAC     | 61.019 | 20 |
| ATGCAAATTGATGAGGCCAT    | 60.304 | 20 AGTGGGGAGCCTTACCTTGT     | 59.994 | 20 |
| CAACCCTACCTCCTTCTCCC    | 59.928 | 20 TGGGAATTTGCCCAAATAAG     | 59.767 | 20 |
| CTGCAACACCATTGCAGAGT    | 59.905 | 20 AGGCCTAAAATGCAAGCTCA     | 59.982 | 20 |
| TATAGGGCGGTGGTAGTTGC    | 59.982 | 20 CTACCTATGGCCTGCTTCCA     | 60.227 | 20 |
| TGGTGAAGATGTGGGTTGAG    | 59.52  | 20 CATTCCAATTTCTTGCCTCC     | 59.505 | 20 |
| AGCACGTAACATACATTGCCC   | 59.903 | 21 ACCTGGACTCATGTGGCTTC     | 60.12  | 20 |
| GGCTCACTGCTTCTTTCTCG    | 60.277 | 20 TGTCTCCCACATTCATGGTTT    | 60.225 | 21 |
| CAATTGGTAGCAAACCATGAA   | 58.544 | 21 TCGAAAGCCTACCTTGCTTC     | 59.592 | 20 |
| CCCCATTTTCGTCAGTTTCAT   | 59.79  | 20 TCTTACCGGAGCTTGTTGT      | 59.734 | 20 |
| CCCAAAAATGGGTTATTATTTGA | 59.047 | 23 GGAAAATGTGGATGAAATTTGC   | 60.4   | 22 |

|                          |        |                            |        |    |
|--------------------------|--------|----------------------------|--------|----|
| CACCGTTGTCTTTAAGCCGT     | 60.168 | 20 CCAAATCTATAGTTATCACAG   | 58.976 | 27 |
| GCTGATCTCCATCTCCAAGC     | 59.917 | 20 AGGAGGAGCAGCAAGAACAA    | 60.134 | 20 |
| TTGGGAAAAATAAAGAGGAAACC  | 59.731 | 23 GAACATCAGCGGGCATATCT    | 60.066 | 20 |
| AAATCCCACCTACCCAAACC     | 59.919 | 20 GGAAGGGTGATGGATTGA      | 59.727 | 20 |
| CAATCCCCACTGCATCTTAG     | 58.173 | 20 TTGTGTGTGCCAGTAGGGC     | 59.597 | 20 |
| TGCTTCCAATTCCTTCTCC      | 59.244 | 20 TTAACCCTAAAAACGCGCA     | 60.593 | 20 |
| TCCTAATTTGGAAAGTACTGGTT  | 59.36  | 24 TGCAGTGGATTTTTGGTGAT    | 58.976 | 20 |
| AAATCCGGGTTGATTTGATG     | 59.622 | 20 CGGCCGTGTAGTTAACCAT     | 59.883 | 20 |
| GTTGGCTGGATCTCCTGAAA     | 60.195 | 20 ACCCAGTAATCTCAGCCGTC    | 59.166 | 20 |
| TCATTCCGAAAATCAAAGGC     | 60.016 | 20 ACGCGTTTTGGCATAAGAAT    | 59.614 | 20 |
| GGGATGGGAAGAGCATTAAAG    | 59.917 | 21 TGACGTGGCATTTCAGAGA     | 60.39  | 20 |
| TCAATTGCACGTTTCAAAGC     | 59.856 | 20 TTCGTTTGGCATGTTTGTGT    | 60.011 | 20 |
| CTCAGAATCCCATTAGAAGGGT   | 58.6   | 22 CATTGTACTACATGGATGAATC  | 60.03  | 26 |
| TTGAAGGGATAAGAATTTCAAAA  | 57.986 | 24 TTGACGTTTCACCTAACCCA    | 59.021 | 20 |
| ACCTGATTCCAGTTGGATGG     | 59.779 | 20 AGCAAGACCTCCACACACAA    | 59.31  | 20 |
| CGAATAGGGATGGAATGAGC     | 59.486 | 20 CAAAAGGCCCTCAATGGTTA    | 59.931 | 20 |
| AAATCCTATCCGGTCAACCC     | 60.017 | 20 CGTGGCTGGAAAAGTTTAGG    | 59.741 | 20 |
| AGGGTGAAAGGAGAGGGAGA     | 60.186 | 20 TATTTTCGAGAAATGGCACCC   | 59.901 | 20 |
| TCGGGCTCGAATTTATCAAC     | 60.038 | 20 TGCGTTTTGACAATATATAGGT  | 60.083 | 26 |
| GTCGCTCCCATGTTGTAAT      | 59.82  | 20 CACCCTCTCCGAACAACATT    | 59.966 | 20 |
| ATCTCGGCTACGAAGTGCAT     | 59.866 | 20 CGGAGTAGATCTCAACACGCT   | 59.511 | 21 |
| GCTTGGTGAAGGAAGTGAGG     | 59.844 | 20 TATTCTAAACGCCGGTGAGG    | 60.089 | 20 |
| GTCCTCCGAACTCATGGTGT     | 59.969 | 20 TTAAACTTCAGCCCGTACCC    | 59.087 | 20 |
| TTACCCGGACAATAAATCCG     | 59.655 | 20 AATCGAAACACATCCCCAAA    | 60.17  | 20 |
| GCTTCTTCAGCACGGAACTC     | 60.142 | 20 TCAACCTCGCAGATTGATTC    | 58.799 | 20 |
| TCCATTCAACCATTTTCAA      | 58.792 | 20 AAAAAACCAATGGTGGAGC     | 59.836 | 20 |
| CAACGCACGGGTAAAAGACT     | 60.168 | 20 CAAATGCTCGAGGGCTAAAA    | 60.335 | 20 |
| AGAGCATTTTCATGCCATTTTT   | 59.976 | 22 TTGATCGATTGTTTTCTTGGC   | 60.067 | 21 |
| GCACACAAGTTATTGGTTTCTATT | 60.209 | 26 CAATAAGTGAGTGACTTCCCCC  | 59.864 | 22 |
| TACTGCCTTGTGTTGCGTGT     | 60.37  | 20 TGAAGTGTTATGCGTTTTGACA  | 59.274 | 22 |
| AAATTGTGGAGTTGCCGTTT     | 59.476 | 20 TGAGTTATGAAGTGTTATGAAG  | 59.11  | 25 |
| CCAATTTGATGAGGGTCCAC     | 60.173 | 20 AGTCGCTGCAATTTCCAGTT    | 59.882 | 20 |
| TGGATTATCCTGCGGTCACT     | 60.483 | 20 CACTCTCCTGCTCCAGCTCT    | 59.883 | 20 |
| TGTGTCGGGGGTACAAAAGT     | 60.269 | 20 CGGTTAGTCCAGCCATCTCT    | 59.308 | 20 |
| AAATTATATTCTCGTTCTTCGC   | 58.222 | 23 ACCAATGGTGGTATGGTGTG    | 58.984 | 20 |
| TCGAAAGCCTACCTTGCTTC     | 59.592 | 20 ATTTCAATTCATGGGTTTCG    | 57.399 | 20 |
| TCAACACTTGAGACAACGC      | 59.88  | 20 TGCGCTAACAAAGGTCCCTAT   | 59.73  | 20 |
| CGCGTTTTTGGGGTTAAATA     | 59.835 | 20 AATCATCAAACCCCGCATT     | 60.153 | 20 |
| TCATCAATTAGCAACTTCCCA    | 58.227 | 21 TTGTGTTGGCTTTGCATTGT    | 60.157 | 20 |
| CGAAATTGAATGGCAAGGAT     | 59.901 | 20 ATGAAACGCCACTTCAAACC    | 59.978 | 20 |
| ATCGAGGCGTGACATCTACC     | 60.104 | 20 GGGTTATTATTTGATCATCCTCC | 57.809 | 23 |
| CGGAAGAATAAGAAACGGCA     | 60.202 | 20 ACGGATTTAAGGGTTATTACGT  | 58.461 | 23 |
| TTCAAAAGTGCAACAAATCTGC   | 60.285 | 22 TGAAATTAGATTCGAAATTGCA  | 57.856 | 23 |
| ACCTGAGTGGGTGTAGGTGC     | 60.033 | 20 ACCCAACACAAACCCAAAAG    | 59.728 | 20 |
| TGAGCTCGGACCTCCAGTAT     | 59.827 | 20 TCAGACCTACGTGCGATTTG    | 59.864 | 20 |
| TGCAACGAACAAATCTCATTG    | 59.72  | 21 ATTTCTGCTGCGTACTTGCC    | 60.416 | 20 |
| CGTCAATCAATGATGCGATTA    | 59.534 | 21 CCCCTTGGTGATGAGAATGT    | 59.779 | 20 |
| CGTTCCCTCCAATTTTCAGA     | 60.044 | 20 ACGGGAGAGGCATACAAATG    | 59.955 | 20 |
| TCCAACACCCACCACATTTA     | 59.667 | 20 CGATCACACTCCAAATGCAC    | 60.12  | 20 |
| GCACTCGGAACAACGAAAAT     | 60.118 | 20 TCGAGGAGCGTGGTTTTAAG    | 60.378 | 20 |
| TGGCCATGATTCATTTCTG      | 59.474 | 20 TGGAACCATGGGTAAAACAA    | 58.719 | 20 |
| TTTTCCATTTAGACCCAAA      | 59.415 | 21 CCACACGACATACGATACACG   | 59.92  | 21 |
| CGAAAATTGAAAATTTATCCCC   | 59.921 | 23 TTAATGCAAACGGGATGTCA    | 59.93  | 20 |
| TGGACCTCATATGTCATAACCA   | 57.821 | 22 TGTTACTTTTCATCGCACTCAA  | 58.489 | 22 |
| ACTTGCGGGGTTGTTAAAGA     | 59.609 | 20 TGCCTGATTTACACCCGATA    | 59.953 | 20 |
| AAAGTCTCTACCCCTTCGCA     | 59.989 | 20 GGTTCCTCCGGTGATCGTA     | 59.933 | 20 |
| TCGATGTTGTAATTCATCCGAG   | 59.96  | 22 GGAATGGGGATTTTCAACC     | 60.358 | 20 |
| CTATGCCCATGGAGGTATGG     | 60.17  | 20 ACTTGTCCACCCACATGACA    | 59.846 | 20 |

|                           |        |                            |        |    |
|---------------------------|--------|----------------------------|--------|----|
| CAAACGCTTTATTGAACTTCTGG   | 60.166 | 23 CCCATAACAATCCCCTCAA     | 59.617 | 20 |
| CCCATGTGTCCACAAAACAA      | 60.255 | 20 ACCCAAGATTTTTGCCACAG    | 59.971 | 20 |
| CTTGCTTTCCAATGTTCCGT      | 60.11  | 20 TCACTCGCGCTAGATTCTCA    | 59.847 | 20 |
| ATTTACTAATTTATCCACCTCGAT  | 57.088 | 26 TTGATTCTGGAATATCCCGC    | 59.862 | 20 |
| TCTATACGCGGAACCAT         | 60.352 | 20 TCGTTGTAAACCCGTAAGGC    | 59.996 | 20 |
| TCCTTCTCTCCCCATTTTC       | 60.38  | 20 CATCACACAAAACCAAGTGGG   | 59.848 | 20 |
| ACGTTTATCCATTTGCCGAC      | 59.829 | 20 CCCGGTATGCTGACGATAAC    | 60.352 | 20 |
| ATAAAGTGCAGCAGACGGGA      | 60.796 | 20 CATCACCAAAGACAACCACG    | 60.001 | 20 |
| GCTCTTCGAATTCTCTCCC       | 60.293 | 20 TCACAACATGACAGCAACCC    | 60.58  | 20 |
| AAAACCGTTCTCACCCCTTC      | 60.34  | 20 TCATGCCTTAAAATCCACGG    | 60.827 | 20 |
| ATCTCGGCCCTTAGATCTGC      | 60.702 | 20 GAGATGGTTGCACCATAACG    | 59.002 | 20 |
| TCACTTCAATTTTCGAGCCC      | 60.192 | 20 TTTGTGACGAGATCATGGCT    | 59.245 | 20 |
| ACATGTAAATAATCGTCAAGTTC   | 58.632 | 27 AAATATTTCTAGCACATGAAAT  | 57.859 | 25 |
| TTTACCAAACTGCCATCCA       | 59.013 | 20 GGTTTTGACCATATTTACTGTT  | 59.631 | 26 |
| AGTGATCTGGATGCTCCTGC      | 60.381 | 20 TCAACAACCAGTCCACTCCA    | 60.129 | 20 |
| TTCGTGTCTATCCTCACCCC      | 59.927 | 20 ACTGTGGACTCCGGTTCATC    | 59.969 | 20 |
| TGATCGTCTTCACTCTCTTGC     | 59.621 | 22 TGAAAAGCTTTGAGTGTGCCT   | 60.045 | 21 |
| CCAGATCGCGACCCTATAGAT     | 60.445 | 21 TCGTTATACAAATATCAGGCA   | 59.061 | 25 |
| AAAATCAAAGGCCACAATG       | 59.801 | 20 TTCAGCATATTCTTTGGACGG   | 60.081 | 21 |
| CATTAGCAGCTGGGGATTTT      | 59.182 | 20 ATCGCTCCACATGACACGTA    | 60.144 | 20 |
| TCATAGTTGACGCCCTTCT       | 59.694 | 20 GTTGGTCCATTTGCCATTGT    | 60.624 | 20 |
| AAATTTGGGTCAAACCCCTT      | 59.549 | 20 TGAAATTGTCATCTCCCCCT    | 59.336 | 20 |
| TCGTATGCTGCCCTAAAAC       | 60.096 | 20 TTCTTTTACTTTGCATGCTACTT | 59.476 | 26 |
| GAGCTGTTACCTCCGTGGAC      | 59.727 | 20 TGAAAGATGGTGGCAAAA      | 60.034 | 19 |
| AGACATGGCGATACGACGTT      | 60.547 | 20 GGGAGGGAGGAGAGAGAAGA    | 59.883 | 20 |
| GTGTCCAACATCCCATTTCC      | 60.034 | 20 TCCTTATCGTGAGAGACCCG    | 60.21  | 20 |
| GCATCTCTTGCTCTCTCATTG     | 57.78  | 21 ACCATCGTTACCGATTTCCA    | 60.192 | 20 |
| TGGACGATTTTGCCCTTTTA      | 60.427 | 20 AAATTTAACATGGTCCGCCA    | 60.188 | 20 |
| TTTGTTGTTTCCCAAGTTGC      | 58.649 | 20 AAAAACCCTGATGTGGATGC    | 59.797 | 20 |
| TTTGCTTGATCCAATGGTGT      | 58.976 | 20 TTCCTTGGACCAAATAGCC     | 59.019 | 20 |
| TGCGTGATGCAGACATATTG      | 59.259 | 20 ATAATGCAGCCTCCCATTTG    | 59.923 | 20 |
| GGACACCAGGGTGAATGAGT      | 59.817 | 20 CCAAGTCTTGCATTTGGTTG    | 59.17  | 20 |
| CATAGTGATCGTCGGTGCAT      | 59.552 | 20 TCCCAACTCAAGGACACTC     | 60.088 | 20 |
| TTTGACCTTGCAATTGCTGTC     | 59.847 | 20 GGAATCATGCTACTACACGTCC  | 59.66  | 22 |
| GGAAATAAGGAGGTGTTATGAAG   | 59.323 | 24 CCCATTAATAGCGATATATGTA  | 58.562 | 27 |
| AATTGATGGAAGAAGGCACG      | 60.074 | 20 GGACATGGACACCTAACCCA    | 60.634 | 20 |
| CTCCATCGTCGAAGTCATCA      | 59.787 | 20 GAAGTCGAACCTTACCGCTG    | 59.875 | 20 |
| TGCGTGTGTATGCTGAGGTT      | 60.333 | 20 GGATGGGTTATCACTTGAATAC  | 58.769 | 23 |
| TGGCGCATTTTACTGATATTTG    | 59.989 | 22 TGAAGTTAGGAAATAAGGAGG   | 57.525 | 24 |
| CGCAACGTTCTGAAACTGAA      | 60.027 | 20 TCCCTCCAAGGAATCTGATG    | 60.003 | 20 |
| TCTTGCACTCGTCTCTGTGC      | 60.333 | 20 AGCGCAACTCCTATACACCG    | 60.292 | 20 |
| AACTTCAGTCAACTAAGGCGCT    | 59.608 | 22 AGGAGAGAAAACCGAGAAGT/   | 57.808 | 23 |
| TCGATAATGCACTTTATCAGAGTT  | 57.221 | 24 AGCCCTTGCAAGAATTGAGA    | 59.955 | 20 |
| TTGGCATGTAAATCAGCCAC      | 59.548 | 20 GCTCCTTGTGCATCACTCAA    | 59.992 | 20 |
| GATGATCACGATGAAGCCAA      | 59.61  | 20 AGAAGTCTCAAGTCAATGTATC  | 58.417 | 26 |
| CATGCACGGAAAACCTGAAA      | 59.706 | 20 GAACGGAGAAAATATCACGAA   | 58.25  | 22 |
| ACCCAATAACCGATGAGTCG      | 59.813 | 20 CGCTCCACAAAGATCTCACA    | 59.984 | 20 |
| TTCATTGCGTTTTACAGCCA      | 60.251 | 20 TCTCAGCTTCCCACCATTA     | 60.594 | 20 |
| CGAATAGTAGAAGCTGCGGG      | 59.996 | 20 CCGTTGTGAGAATGGACGTA    | 59.566 | 20 |
| TTGGTGTATACTTTTGTAGTGATC/ | 58.276 | 27 GGGTGGTACCTCACCTGTGT    | 59.732 | 20 |
| GAAAATTCGGGTCTGGGATT      | 60.131 | 20 GCCTTGAGGGGGAGAATTAG    | 60.032 | 20 |
| GAGAATAGATAGTTAGAGAGAGA   | 58.82  | 27 GTTGGGACTTCAACCCAAA     | 59.807 | 20 |
| CTTCTCACCGTCGACCAAT       | 60.111 | 20 CATTTACCACCTCCATTCC     | 60.173 | 20 |
| TTCTCAGCATATGGGAAGGG      | 60.029 | 20 TCATCGGTCCACTAGCACAA    | 60.263 | 20 |
| ACTGCCTTTTTCTGCTGTG       | 60.431 | 20 TGTGGAAGGGTGTGTGATGT    | 59.846 | 20 |
| TTTTGAGCCTATCTTGGAGCA     | 59.967 | 21 TGATCTTACCTTAAATCTGCA   | 57.9   | 23 |
| TTCTTTGAATCATCTTCCACCTT   | 59.123 | 23 AAGTTTGGGGGAGGAGAAAA    | 59.912 | 20 |
| CGGCTTCTCAACCATAGTC       | 59.694 | 20 AAGGAGGTGTTATGAAGGGAT   | 58.028 | 22 |

|                           |        |                            |        |    |
|---------------------------|--------|----------------------------|--------|----|
| AACAAAAATGGCCAAAATCG      | 59.81  | 20 GCCGGAGATTTTTCAAGGTT    | 60.431 | 20 |
| CAACTCCACATGTTGCCATC      | 59.967 | 20 TTCTCCTCCCCTTAGCTTCC    | 59.783 | 20 |
| CTTTTTAGCATGCGAGAGGAA     | 59.617 | 21 ACCTCAACAAACCACCCAAA    | 60.246 | 20 |
| TCAACAACATGCAAGCATCA      | 59.833 | 20 AATCTACTAACCCACCCACC    | 60.862 | 20 |
| GGATGAGAGACTCGGGTTCA      | 60.199 | 20 AATGGCCATCTCTTCCCTT     | 59.903 | 20 |
| GGGAATGTGCAAATAGCAAAG     | 59.6   | 21 TGTTGAGAATTGCCAAACCA    | 60.088 | 20 |
| TCAGCCCAGCCCAATATTAC      | 59.923 | 20 ACCTATGGTGGTATGGTGTAG/  | 57.448 | 23 |
| TCTCTCTCATCCGACCCCTA      | 59.755 | 20 GAAAGTGGTGGGGGTTTTTC    | 60.569 | 20 |
| TGATCATCGAGGCAGAGAAA      | 59.476 | 20 AGGAAACCCATTGTGGTCAG    | 59.82  | 20 |
| GGGCAAACTTGAACAGCTC       | 59.859 | 20 TGTCCATGAGAAATGGGGTT    | 60.173 | 20 |
| GATCGGAGTTGCCTAAGTGG      | 59.694 | 20 TGCACAATAACAAGCACCCAT   | 59.995 | 20 |
| GCACAACCACTCCACAAAGAT     | 60.028 | 21 CCCCAATTGGAGTGTCTGTT    | 59.82  | 20 |
| ACCACAAGCAAGCATTTCCT      | 59.74  | 20 ATGGTGGTTTGGTGGAAAGAA   | 60.21  | 20 |
| CCGTTCATTTTCGGTTCAGT      | 59.971 | 20 ATTATGGCGCCGCTATTGTA    | 60.452 | 20 |
| TCGAAGGTGAACTCGGTCTT      | 59.844 | 20 AACCGTCGAATTGTCTGGAG    | 60.111 | 20 |
| GATAGGCCCTAACTCGACCC      | 59.925 | 20 TCCACGGTGATGCTAGAGTG    | 59.855 | 20 |
| AGAGTTCACCAAGGTACTTTAATA/ | 57.201 | 27 CCGTTTTCGAACCTAAAAGTGA  | 59.254 | 21 |
| TGGGCACATTTGAATCTTGA      | 60.049 | 20 TGTTTTCAATCGCAACCATC    | 59.523 | 20 |
| GAAAAGAACTTCAAAGGGGTCA    | 59.61  | 22 GGGCAGGGCTTTGTTTTAAT    | 60.312 | 20 |
| AAATTGAGCTCCATAGCCGA      | 59.807 | 20 AGCTTCCATGGAGTTGATG     | 60.073 | 20 |
| CACACACTCACTACTCCCA       | 58.154 | 20 GGAAGCACTTTTTGAACGGT    | 59.218 | 20 |
| TTCGGGTATTCACCCTGTTG      | 60.745 | 20 TCAGCCGACTTTTTAATGGC    | 60.209 | 20 |
| AAGGGTTATCACCTGATTTTCTC   | 57.73  | 23 TTTTAAATGGACGGTGATGATT  | 59.616 | 23 |
| GCTGAAATCCATGGAGGAGA      | 60.158 | 20 GGTGTTTGTTGCTTCGCTTT    | 60.292 | 20 |
| TTGACTGATTGGAGCAGTGG      | 59.831 | 20 CAAACAGCTGGAAATGGTGA    | 59.691 | 20 |
| TCAAATCTTCAACATGCAAGC     | 58.909 | 21 AGCCTAAGGAATAAACACCTA/  | 59.735 | 24 |
| GGACGATGTCATGTGCCTAA      | 59.527 | 20 GGGATGAGTTATCACTTGAATA/ | 59.765 | 25 |
| CACGTGCGTCAACTCCTTTA      | 59.904 | 20 CCTATGGTGGTATGGTGTGGA   | 60.501 | 21 |
| AAACACGCAACACAAAGCAG      | 59.951 | 20 CAAGGCTAAACAAAGCCCAA    | 60.236 | 20 |
| CGAAGAGATGGAAGTAGCGG      | 59.971 | 20 CCTATCAGGGGTGCTTCCT     | 60.455 | 20 |
| GGGGTTATCACTGGATCGTG      | 60.195 | 20 CATGAAAATCATGTTCCGCA    | 60.466 | 20 |
| GTTTTGGCTCCAGCGACTAA      | 60.386 | 20 CTCCAAAATGGTGCAGTCCT    | 60.111 | 20 |
| ACACCAAATCTGTTAGTTTACCAA  | 58.2   | 25 ACACGAATCAAATCAATGGC    | 58.424 | 20 |
| AGATGCCCATTTTGATCAGG      | 59.894 | 20 ACAAACAAGACCAAGTGGGG    | 59.861 | 20 |
| ATGATCCCATTATCGCAAG       | 59.885 | 20 GACTTGTGTGGGGAATGGAT    | 59.636 | 20 |
| AAGCTGAGTGAGTGTGCGAA      | 59.776 | 20 ACCGACGTGGCCTAACATAG    | 60.015 | 20 |
| CTTTGTGCTTTGCTGCTGTT      | 59.269 | 20 CAAATGTTGCACAATCATTGAC  | 58.945 | 22 |
| CCCATTCTCTCCATCCCTTT      | 60.264 | 20 GTTTGGATATCGAGATCGGG    | 59.344 | 20 |
| CACGAGTGAAGAAAGGGAGA      | 58.001 | 20 ATCATAGTTGACGCCCTTCG    | 60.096 | 20 |
| AATACTTTCCGTACCCGTCG      | 59.993 | 20 CCAAAACCATCGCACAATTA    | 59.42  | 20 |
| CCCATTACAAGACCTCCTC       | 59.505 | 20 GTTGACTGCTTTGGCTTGGT    | 60.299 | 20 |
| GAGGAAGATAAATGTGGGACG     | 58.516 | 21 GCTCGAAACACAATCAAACCC   | 59.606 | 21 |
| TCATTCTTCGGCTGACTTT       | 59.813 | 20 TGTGGTTCGATATTTTGTGG    | 59.736 | 22 |
| AAGGGGAAGTTCTGCATGTG      | 60.111 | 20 AGTTGGAGCCTGCAATTGAT    | 59.7   | 20 |
| CGTCAGAAACCTCTCGCATT      | 60.397 | 20 TTCCTAACTTCATAACTCGAAG  | 59.436 | 26 |
| GCCAACTTTTTCTTGAGGCAC     | 59.859 | 20 ATTAACCGTGAAAATGGCGA    | 60.323 | 20 |
| GGAGGAAGAACACGAGGGAT      | 60.456 | 20 GCAAACCATACACGAACACG    | 60.035 | 20 |
| TGTGTTGTCTTTTAGATCAATGTTT | 59.53  | 26 ACTCCGAGGACGATGAACAA    | 60.656 | 20 |
| TCAAGGGTAATTTTTCAGGCA     | 59.573 | 21 TCGTAAATAACAAGTGGATG    | 59.829 | 25 |
| TAGTTAGCATGGGGGAATGC      | 59.923 | 20 GACCGTCTGCGCTGTAGATT    | 60.428 | 20 |
| TTTAATTTGGCCGGATTGTC      | 59.773 | 20 GCCGGAGATTATCCATCATT    | 58.812 | 20 |
| GAAAACCTGATATGCGCGTTG     | 59.329 | 20 AAGGCCGAGATTTGTTAGAGG   | 59.733 | 21 |
| GCCTCCAAGCACAGGTACAG      | 60.854 | 20 ATGGCTTGAAAAGATGGTG     | 59.933 | 20 |
| CCACTTAGGAATTTTCATCAAATGA | 60.339 | 27 AAATCCTGTCAATGAAAAAGC/  | 59.997 | 23 |
| TTCTTGGACACAAGTATGGCTC    | 59.242 | 22 TGTGAATCATCAGCTTTGCC    | 59.805 | 20 |
| TGATGCTGATGAAGAATCGG      | 59.756 | 20 TTGCAATGGACCTAAGCATTC   | 60.089 | 21 |
| GAGGGGACAGACAGATGAGC      | 59.799 | 20 AGGTTGATCATTTCATCGC     | 59.9   | 20 |
| GTGAACAACAATCCCCACCT      | 59.679 | 20 GAGAATCCATGGCGGAAGTA    | 60.036 | 20 |

|                          |        |                            |        |    |
|--------------------------|--------|----------------------------|--------|----|
| TCAAATCTTCAACATGCAAGC    | 58.909 | 21 CACCCATTTCATCCCTCATT    | 59.605 | 20 |
| TGTAATGCTACAGTTCTTAATTTG | 57.643 | 26 ATTGAGCGACGGAGTTTCTG    | 60.397 | 20 |
| CCCAACGACCGGTTATATTTT    | 59.957 | 21 AGTTGGAGCCCAACAAATGA    | 60.495 | 20 |
| AAGCCCCGATCTCAAACCTCT    | 60.212 | 20 TCTTCCCAAAATTGGTTTCC    | 61.023 | 20 |
| GCAAACCTGATTGACCCGAAT    | 59.939 | 20 CTCTCATTTCCCAACGAA      | 60.044 | 20 |
| GCTTAAACAAAATGGCATTAAAA  | 57.584 | 23 CATGGAATGGCTGTCAGATG    | 60.072 | 20 |
| ACGGTTAAGATTGACGACGC     | 60.278 | 20 TGAGGACGAATATGCCCTTG    | 60.992 | 20 |
| CACGCACTCACATGTTCACTC    | 60.374 | 21 CAACGTTTTGTTCTGTTTGTG   | 60.096 | 21 |
| ATTGGGCATTTTACGCGATA     | 60.153 | 20 ATGTGGGCTACGAGAAATGG    | 59.955 | 20 |
| CAGTTATCACCGGATCACGA     | 59.522 | 20 CACGTGGCATGATAATAGCG    | 60.118 | 20 |
| TGATCTCAACGGTATGCTCG     | 59.823 | 20 CCTCCCGTCTAATCTCCACA    | 60.065 | 20 |
| GGGTAGTATGTAGCACCCCG     | 59.336 | 20 CGGAAATGACCCATAATGA     | 60.523 | 20 |
| TAGCTATGCTGCAGGTTCCA     | 59.59  | 20 GCAGCTACGTTTGTGTGCAT    | 59.942 | 20 |
| GTTTTCTCTATTGGGGTGGC     | 58.504 | 20 AGATCCATGTTTCATCTCCC    | 58.741 | 20 |
| ACAACCTATAAATAAGATCTCAA  | 57.587 | 27 GATGATCACGATGAAGCCAA    | 59.61  | 20 |
| CCTGCTGGTTCTTGCTTCTC     | 60.134 | 20 AAGCCCGATGATGTCTTGTC    | 60.081 | 20 |
| CATTTGCGCACACAGAGATGC    | 60.423 | 20 TGTGTACCCACATCCTCCAA    | 59.806 | 20 |
| CAAATTACCCCGTATGCAG      | 60.202 | 20 TTTTGTAGTCAATCAACGGTTAC | 59.178 | 25 |
| ACCAATAGGTCATGGGTTTCG    | 59.67  | 20 CGAAACTCACCCATTATGC     | 60.331 | 20 |
| CAAACCCGAAAAATCGGTTA     | 59.805 | 20 CTGGTTTGCGTGGTTCTTTT    | 60.147 | 20 |
| TTGTGGTTTTATCACACCCG     | 59.293 | 20 CTGTTGGCCGTTGTTTTACA    | 59.627 | 20 |
| ACCCTTTTCGGGGCATAAAT     | 61.703 | 20 TTGACACGCGAAAAATGATG    | 60.644 | 20 |
| TAAACCTTTGTGCGGTTGC      | 59.72  | 19 CCCTATTTAGCTTTCTTTGCGA  | 59.885 | 22 |
| TCCAAACCCAATCTATTCCG     | 59.756 | 20 TATGGAATTCCGACGAGCAT    | 60.435 | 20 |
| GATTGCCGCTCTGATAAAC      | 59.674 | 20 TGTGCAACTTGTCTGGTCTCA   | 60.494 | 21 |
| TATGATGGAAAAAGGCCGAG     | 60.031 | 20 AGTTCTGGCCGTGCATTG      | 60.84  | 18 |
| TGTCATGAATGCCAGTGTA AAA  | 59.087 | 22 TGAATCCGAGAAAAATCAGG    | 60.006 | 20 |
| CGAAGATGGTTTCGTGTAAGC    | 59.761 | 21 TCCGATTTTTGGGTAGCAGC    | 60.096 | 20 |
| TTATGGGTTTTTGCCGTTTC     | 59.81  | 20 ATGTGCGCGTGTACTTATCG    | 59.782 | 20 |
| GGGTGTGGAAAAGAACCTGA     | 59.943 | 20 TATTGGGGGAAGAAGCACTG    | 60.066 | 20 |
| CAATCAGCACGTGTTCTTGC     | 60.459 | 20 TTGAATCCATTGGTGAAGCA    | 60.049 | 20 |
| CAACATCACCAAAAACCCCT     | 59.688 | 20 TGAGAGAAACATTAATTCCTC   | 59.9   | 25 |
| GCACACTCAGATCACACAGGA    | 59.888 | 21 GGTGGTGGAAAGACCAGACA    | 60.966 | 20 |
| ACCAAGATTTGATCATGGGC     | 59.756 | 20 ATCAA AATAGGGCAGGGGTT   | 59.666 | 20 |
| ATGGAGGCAAGCTACTCGAT     | 58.914 | 20 TTTTGCTGTGGCTTGTGAAC    | 59.888 | 20 |
| CGGGAACATGATCCGAATA      | 60.66  | 20 CCGGTCATTTGTCTTTTTGG    | 60.336 | 20 |
| ATATTGCAAATGGCCGAGAG     | 60.06  | 20 AATACAGCCGCTCTTGAAC     | 59.34  | 20 |
| GCCGAGTGATCCTCTCTCAT     | 59.364 | 20 AGACGATTGAAACCCTCCCT    | 59.935 | 20 |
| ATCATGGCCACGTAGAGAGG     | 60.096 | 20 ATCCGCTTTCCCAAGTTTCT    | 60.074 | 20 |
| TTTAATCCCAAACTGCCCT      | 60.664 | 20 ACCATATTTAAGGGTTATCACC  | 57.552 | 24 |
| TCCACCTCACTTTTCCCTTG     | 60.081 | 20 GAGAGCGGTGACGATTTCTC    | 59.957 | 20 |
| ACAGCTCTTCAAACCTGGACACA  | 59.953 | 22 GCGGATGTAATTTGGGTGAA    | 60.701 | 20 |
| AACCGGTTAAAAATCGGACC     | 60.055 | 20 AAACCGAGAAAGAAACATTTCT  | 59.926 | 24 |
| ACAAACACCTGGGACCTCAA     | 60.399 | 20 TTGTTAGTGCGTGTGTTTGGG   | 59.627 | 20 |
| GAAGCCTCAAATCACAACCC     | 59.532 | 20 CGAACTTAGAAGGGCCACTG    | 59.869 | 20 |
| GCTCAAACCTGTTCTGAATGCG   | 59.596 | 20 TCTCTTTTGGTTGGTGAAGGA   | 59.697 | 21 |
| CTGGCAAAGATTCTTGGGAT     | 59.126 | 20 TTGTGTGATCAAGGGTCCTG    | 59.52  | 20 |
| CATTGCCTAGAAAGTGGGAAA    | 59.211 | 21 GCTAATGGTGCCACAGTTGA    | 59.722 | 20 |
| TGCCAATTAAGATTGCGATG     | 59.662 | 20 ATCAAAGGCCACAAATGGTT    | 59.292 | 20 |
| TCATTCACATCGTCTCTGCAA    | 60.406 | 21 TCCAACTTCTTGCTGGTTGA    | 59.415 | 20 |
| TCGAATGCACTCAAACCTCCA    | 60.39  | 20 GGTATCACCCGGATCACGA     | 59.311 | 19 |
| GTGGCCGCATTGTATGAAA      | 60.482 | 19 ACTCCCTTCCCATCTCAAT     | 59.755 | 20 |
| GGAGAACCGTGCACATGATT     | 59.934 | 20 ATGGGAAGGGGAGTTAGCAT    | 59.789 | 20 |
| CCAAAACCGACACTCCCTTA     | 59.964 | 20 AGCTCACTAGGATGGCAAGC    | 59.603 | 20 |
| CCATAGAAAATGTTGTTAGCAGG  | 59.577 | 24 AAAAATCATGCCACCGTACC    | 59.691 | 20 |
| CAGATTTTGAACCTGTAAGTGA   | 58.831 | 25 GTTTTAACGAATAAACATGTTCT | 58.53  | 25 |
| TTCAATTCATAAATATGTCGAAGA | 60.136 | 27 TGTTTTACGAATAAACATGTTCT | 59.448 | 26 |
| CATCTTTTGCGAATTGTTGC     | 59.305 | 20 ATCCATCATCTTCCGTGAGC    | 60.042 | 20 |



|                          |        |    |                         |        |    |
|--------------------------|--------|----|-------------------------|--------|----|
| GCTGCAAGCATGTATTTGTCA    | 59.894 | 21 | GGTTTTCAACCCATGTTTTG    | 59.211 | 21 |
| CTTAAGACCCGATGCCTTTG     | 59.702 | 20 | CAAATTTTCCGCTTTGTCGT    | 60.11  | 20 |
| TTATCTCCACGATCCAAGGC     | 60.036 | 20 | GGTTATTAGTTATTACGGATTT/ | 57.055 | 27 |
| TTTCTGACGAAATTGCCCTT     | 59.685 | 20 | CGGACTTCCCTTTCTGCAAA    | 59.853 | 20 |
| TTCTTTGTCCCTCTCCTTGC     | 59.405 | 20 | CTTCGAACATGCACACTCGT    | 59.905 | 20 |
| ATACCGCCATATCGGACAAA     | 60.175 | 20 | TTGACCGAGTGAAGTAAACCC   | 59.087 | 21 |
| CGTCCAACGAATCAAGACAA     | 59.691 | 20 | GGTTGACATGAGCGCATAAA    | 59.694 | 20 |
| GGAGCCTCCGAACCTTTGAA     | 60.324 | 19 | AGCCCTCAACTCTCCCTCTC    | 59.952 | 20 |
| TTGTGTACCAAGACATTTGTGTG  | 58.522 | 23 | ACCGGATCAGCTCTCTTTCTC   | 59.972 | 21 |
| CGACTATCTGCAGGAGGCAT     | 60.384 | 20 | TCGTCTATCACCTTCCGTCTG   | 60.262 | 21 |
| ACACCGGATTTACGTGGTTC     | 59.717 | 20 | TTGATTCCCTTTTGTCCCTATTT | 58.142 | 23 |
| TGGATAAGTCTATCAAGATTTAAT | 58.272 | 27 | GGAGCTTCAGTCTTTTCATCTCC | 59.466 | 22 |
| TTCCCCATGTCTTGATAGCC     | 59.894 | 20 | TTTACGGGGGAGAATTGTTG    | 59.795 | 20 |
| ACTTTTGTGGAAAAGTGCG      | 60.147 | 20 | TTTTCTCAACCGAGCTCACC    | 60.375 | 20 |
| TGATCATAACTCTCTCGCGTT    | 60.407 | 23 | TCTACGACCGAAATTCACTCC   | 59.184 | 21 |
| TTGTGAGTCGTTTGTCTTGGT    | 59.679 | 22 | CGAACAAAGGGAAAAACAATG   | 58.121 | 20 |
| TGACCACCCAACCACTAA       | 59.848 | 20 | CCAAGGGGAGAGAGGTCAAT    | 60.447 | 20 |
| TCCCCGGAATAATTGTTATTTCTA | 59.945 | 24 | GCCAAATCAACTTTTGACGG    | 60.481 | 20 |
| GGTGTCCAAATGTTGGGTCT     | 59.679 | 20 | AGGATCGGCATATCGAGAAA    | 59.628 | 20 |
| TGTTCAATGAGGAAATTATAAAGC | 59.13  | 25 | TTTGCAAAACATTCTGACTTTG  | 58.007 | 22 |
| TGTTGAGGGTTGTTTATTATGGG  | 59.991 | 23 | GACTTTGATCAAGTGATAACAT  | 57.805 | 25 |
| GTGGGGACATGCTTGAAAAT     | 59.797 | 20 | TCGGATAATCTGAAAGCGAA    | 58.455 | 20 |
| CCCAAACCCACTCAACCTTA     | 59.824 | 20 | ATCCTCCCCTTCTTGCTTA     | 60.032 | 20 |
| AAAAACCCTTCCACCCATTT     | 59.549 | 20 | ATGTCAAAAATGCCCTTCA     | 60.309 | 20 |
| GTGTGATGTGTGTGTGTCGTG    | 59.499 | 21 | CCCTCCTCACCTCCTCTCTT    | 59.801 | 20 |
| CTGCAAGCATTGAAGTTGAAA    | 59.097 | 21 | CCAAAATGGAGAGGAATAATG   | 57.132 | 22 |
| TCACCACCAAAAATCAAACA     | 59.792 | 20 | GACGAAGGAACAGCTTCACC    | 59.851 | 20 |
| CGGACGGTCGAATCAATTA      | 59.484 | 19 | GTGTTTCGGAGTGTTGGGT     | 59.867 | 20 |
| TTCTCGTGTTTATCCTCGCC     | 60.214 | 20 | ACCACTCCACAAAGATCTCAC/  | 59.622 | 22 |
| GGGAAACAATGGATACTCCTTC   | 58.826 | 22 | ATCCCATACATGTCCGTCGT    | 60.081 | 20 |
| AAATGCGGTGGAGATGTAGA     | 58.173 | 20 | TGCAATGCTTCAATTCATCC    | 59.628 | 20 |
| TTGCGTACCAAGTTTTTGGC     | 61.027 | 20 | CATTTGCCATCCAATTTTCC    | 60.132 | 20 |
| TTGGTAGCCTGGATAGCACC     | 60.096 | 20 | GGAGGGGAGTTGTTGGGTAA    | 61.103 | 20 |
| GGGAAGAAGTGAAGGAAGGG     | 60.045 | 20 | TATGTTGGCGAACACAGGTC    | 59.572 | 20 |
| ATGCAACTAGGGTTCGCTTG     | 60.27  | 20 | AAATCCCTTTTCTCTCCCA     | 59.875 | 20 |
| TTGGGAACCGATTCTATCCA     | 60.266 | 20 | TTGAATGGTTATCACCTGATCG  | 59.823 | 22 |
| CGCCCAAAAATCTAACATTCC    | 60.659 | 21 | GCGGAAATTACTTACAGCCA    | 57.926 | 20 |
| TCCATTTCTGAGTTGAGGGG     | 60.042 | 20 | GAATCCATGCAAACAGCAA     | 59.67  | 20 |
| TTTCCCTGATCATGAACCT      | 59.336 | 20 | ATGCGCGTTTTTAGGGTTTA    | 59.624 | 20 |
| GACAACCTTCGGCTTGAAAA     | 60.227 | 20 | CATGTTTGGTGACTTGGTGC    | 60.001 | 20 |
| CTAGCTTCGGTACAAACCGC     | 59.904 | 20 | ACATCCAGGAACCACTTTCG    | 59.966 | 20 |
| GGATGAGCATCCATGTCAGA     | 59.591 | 20 | AGCCCCCATTTTTCATTTTC    | 60.13  | 20 |
| AACACCAGTGAAGCAAGCAA     | 59.49  | 20 | TCTGCAGTCTCCGTTTTTCA    | 59.566 | 20 |
| TAGCAGGCTGACCGTAGTGC     | 61.532 | 20 | CTCCGAAAGCACCTAACCTG    | 59.869 | 20 |
| CTGAAAACCTCGCCGAACTA     | 60.378 | 20 | GGACCGGACCGTTAGGTAAT    | 60.074 | 20 |
| GGTCCAATATGAAGCCCAAA     | 59.762 | 20 | CCCACATTGTTGGAGATTA     | 58.27  | 20 |
| CCTCCTTCAGCCAAAATGA      | 60.184 | 20 | GAGGTTTTGACGAGATTTAGGT  | 59.187 | 23 |
| TTTCTCGGAGTTTTAGACG      | 60.366 | 20 | ATGGTGGTATGGTGTGGAGG    | 60.51  | 20 |
| CCTTCGTCAACTTTGGCAAT     | 60.11  | 20 | AACTTGGTGAGCGAGTGGTT    | 59.769 | 20 |
| CCCAACCAAGAACATTGAGG     | 60.345 | 20 | CGAAAATGAGCTTCCACACC    | 60.636 | 20 |
| TGGTAGCTTTGAGACACGATT    | 57.496 | 21 | TTGATTCTTGAGTACACCATCG  | 57.757 | 22 |
| TCGTGATTGCAACTCTGAT      | 59.399 | 20 | TGAGTTACCTTGAATCACCC    | 58.898 | 21 |
| TCGTGATCGAACACGTAAA      | 60.111 | 20 | CCATTTTCATCTTCGGCATT    | 59.901 | 20 |
| TTGATGGTGAACAAACGGAA     | 59.941 | 20 | TTTCATGTTTTGGAGCATGATT  | 59.456 | 22 |
| GCGTGGAAGAAAAGATCCCT     | 60.578 | 20 | TTTCATGTTTTGGAGCATGATT  | 59.673 | 20 |
| CCCATTTCTAACTACCCAAATCC  | 59.962 | 23 | AGGCTTGAAGAATGATGAAGA   | 59.739 | 23 |
| TGAAACATGGATTGCCACAT     | 59.781 | 20 | ATCATTGTTTCGCAAGCAGA    | 59.425 | 20 |
| CGAGTATGCTGACGGAAAT      | 60.096 | 20 | TTTCAACCATCTTGTCTGTGG   | 60.008 | 22 |

|                          |        |    |                        |        |    |
|--------------------------|--------|----|------------------------|--------|----|
| TGTTAACCAAAAAGAAGAATCGT  | 57.104 | 23 | TGAGAGAGATGGGATTTTAGA  | 58.779 | 24 |
| ATGCCCTTCTATGCTGAGGA     | 59.797 | 20 | TCTGTATCGTCCGCGATGTA   | 60.243 | 20 |
| CGACCGGGCTGTATTTTAAAC    | 59.474 | 20 | CGGCCGGTTTGTAAACCTT    | 60.883 | 18 |
| TCCATTTGCAATACTATGGCTTT  | 59.884 | 23 | TGCACCCCTTTGACATCAGTT  | 59.139 | 20 |
| AAAATGGGCGAGAGTTTTCA     | 59.685 | 20 | TTTTTGTGGTTCCAGGTTG    | 59.862 | 21 |
| GGTGTCCGAACTTTATATGGC    | 58.456 | 21 | ATCCTAGCTTCCGCATCCTT   | 60.194 | 20 |
| AGATGACAACCTTCGGCTTG     | 60.255 | 20 | GCGGAAGGCATTTAAAACAG   | 59.72  | 20 |
| TCTGCCTCGTCTGGCTAGTT     | 60.156 | 20 | TGGTGTGTACTTTTGTAGCAAT | 59.618 | 24 |
| TAGAAGGAAAAACACGGGA      | 59.541 | 20 | CAAAGAGCTGTGGGAGAGC    | 60.134 | 20 |
| TGGTTTTGGGATTTTAAACAATTA | 57.59  | 23 | GATGATGCATGTATACTATCAA | 57.305 | 26 |
| AAACTCGTAAAGTGTGCGCG     | 60.305 | 20 | GATTAGGAATGAGGGGAGGG   | 59.722 | 20 |
| GGAAAATATCAAGTCAACACAAA  | 58.257 | 25 | TCACACTCACGCACTCACAA   | 60.07  | 20 |
| TGTCATCGTCTCAACCCTTG     | 59.676 | 20 | TTCGTAGCATGATTTAAATGGT | 59.021 | 24 |
| GGGACAATGGAGTTCACGTT     | 59.827 | 20 | CCCAAGTGCACAAGTGTTC    | 59.187 | 20 |
| TGTTGGCAATTCTAGAGCCC     | 60.214 | 20 | ATGATTGGGACACGTGTTTG   | 59.267 | 20 |
| CCGACATTTTGGAGTATGCC     | 60.331 | 20 | GTGCAGTAGGGTTGTCGTT    | 60.035 | 20 |
| TTGTGCGCATATACGATCACT    | 58.133 | 21 | AAGGAGGTGTTATGAAGGGAT  | 58.028 | 22 |
| CTGCTTCAGCTCAGTGTGGA     | 60.333 | 20 | TTACAAACACCGATTCGCAC   | 59.59  | 20 |
| GGTTATCACCGGATCACGAC     | 60.203 | 20 | ACGAAGGGTATTTTGGGAAA   | 58.417 | 20 |
| CCGAAAATTCAATCCTCGAT     | 58.974 | 20 | CACCACCGTAAACCGTCAC    | 59.864 | 19 |
| TCCCAACTAAAATATGCTGCAA   | 59.624 | 22 | CTGATTCCGTCGACAAGCTC   | 60.945 | 20 |
| CCTGACAGTTTGGCATCAGA     | 59.831 | 20 | TGTATCACACAACGGTTCATCA | 59.888 | 22 |
| TTGCAGAAAATGGAGAGGAGA    | 59.94  | 21 | CACCAACCCAACCCATTAAC   | 59.948 | 20 |
| AGTGTGCGAACGGTATAGG      | 60.154 | 20 | GGGTGGTTATGGTTTGTAGGTC | 60.385 | 22 |
| TAATAGGCTGCCCTCCTCT      | 60.187 | 20 | TCCGCCTTGACTCCTTCTAC   | 59.43  | 20 |
| GCAATTAGGGCTGAGCAAAA     | 60.343 | 20 | TCGACCAAAAATTTAAAGTCCT | 57.036 | 22 |
| CAACACAACAATACCACACAGGT  | 59.733 | 23 | TGTGGATATGTAGATGATTTTT | 59.637 | 25 |
| TGTAGATGGCCTAAGACGGTG    | 60.139 | 21 | TAAAATTTGTCCCCTTGCG    | 59.937 | 20 |
| AGGCTCCAAATCAAATCCC      | 60.265 | 20 | CCATCACACTAACCTCCCTCA  | 59.974 | 21 |
| TTTGTTCTACTCACTCACATTA   | 58.436 | 26 | GGGAGAATCCAATGGTGA     | 59.727 | 20 |
| TTGAATTAACCTCCAAAACGTG   | 60.25  | 23 | CAAACCTTGGCACTTGCATA   | 59.729 | 20 |
| CAGACATTGAGTTTGGATGG     | 60.36  | 21 | ACTGCTTGTGGACAGTGCAT   | 59.341 | 20 |
| ATTGAATTCGATCAAGTGCG     | 58.723 | 20 | GCATGCAAATCTTGAGCTGT   | 59.031 | 20 |
| GGAACCTATGTGACATCCAGC    | 59.425 | 21 | ATTGGAATTGGAACCAGCTTT  | 59.828 | 21 |
| ATACCCTACCCGTTTACCCG     | 59.96  | 20 | TGAGAAGCTCAATGGAGACG   | 59.112 | 20 |
| ATGCACATGTTTATCGCACG     | 60.554 | 20 | TTGGAGTTGGAGCAACGTAA   | 59.317 | 20 |
| TCGCTCATCCAAGTAAGTCG     | 59.024 | 20 | TCCTCTATCCATGAATCTTTCA | 59.966 | 24 |
| GACGCATGCCAGCTAATAGG     | 60.762 | 20 | TGGTATTGGTCCACCTGTGA   | 59.806 | 20 |
| CTCTTTCCTTGCTCCCCTCT     | 59.95  | 20 | AAAAGTCAGCCGAGAAATTCA  | 58.962 | 21 |
| ACGGATATGCCCTTGTATGC     | 59.813 | 20 | TTGACAATATTTAGTGTTTGAC | 58.99  | 27 |
| ATGTGCGCCTTTAACCTTG      | 60.131 | 20 | TTGTCAAATCTCATTCTTTGC  | 60.01  | 24 |
| AATACGGTCCGTGCATGTTT     | 60.257 | 20 | CCACACGAGCCTTCTTCTTC   | 59.989 | 20 |
| AGAACAAGCTAAGGCACCCA     | 59.875 | 20 | ACCTTGAGGACTTCTTGGGG   | 60.48  | 20 |
| ACCTCCAAGTCTAAGCAGCC     | 58.551 | 20 | GTCCTGGCACTTTGCTTGAC   | 60.844 | 20 |
| GCACTTGCTTGGATTGTCAG     | 59.445 | 20 | GTCCTCCGAACTCATGGTGT   | 59.969 | 20 |
| TCGTTGATTGCATAGTGGGA     | 60.073 | 20 | GGATACGCATCAACACACCA   | 60.399 | 20 |
| TGGTGGTTGTTCTTTGGGAT     | 60.21  | 20 | TGGGACTCAAGCTGTTGTTG   | 59.873 | 20 |
| TCCTCTCGTGTCTTACCC       | 60.238 | 20 | GTTTGACAGCCCGACAAGAT   | 60.119 | 20 |
| GCCGTGAATCCACCATTAGT     | 59.82  | 20 | AAATTTTCTGTTTGCCACG    | 59.975 | 20 |
| TTGGTGAGTGTATGGAGCCC     | 60.924 | 20 | AGAAAGCCTACCTCGCTTCC   | 59.983 | 20 |
| ATTTGAAAATCAAAGGCC       | 60.26  | 20 | AACCGGTTAAAACCGAACC    | 60.089 | 20 |
| GAGTCACACAGTTTGGCACTT    | 57.845 | 21 | GGGAGATCTTGCAGGATAGG   | 58.691 | 20 |
| GCCTTAAAAGGTGGTGTGGA     | 59.971 | 20 | ACCATTACCCGGATGAAAA    | 60.17  | 20 |
| ATGCAACACAACCAAAGCAA     | 60.157 | 20 | GACGACCGATATTTGCTCCT   | 59.154 | 20 |
| TTGCTGTGTTGGATGGAAAA     | 60.088 | 20 | TTCATGAAATCAAGCAAACCA  | 59.982 | 22 |
| ATGAGCCACAGTTCCAATCC     | 59.934 | 20 | CAAGAGTGAGTGAGGAGGGG   | 59.828 | 20 |
| GTCCGTGAAGTTTAGCGACC     | 59.74  | 20 | CAAGACAACCGAGCAAGTGA   | 60.025 | 20 |
| CCGAGTTCGTTCTCGTAAG      | 59.869 | 20 | CCAACCCATTCTTACCAAC    | 60.21  | 20 |

|                           |        |                            |        |    |
|---------------------------|--------|----------------------------|--------|----|
| AATGAATGCACCGGATTAGC      | 59.929 | 20 TTGGAAAATGAGGAATGGGA    | 60.244 | 20 |
| GCATGGTTATCCTCGTTGT       | 59.82  | 20 GGGTTCGTTGTTAGCTTTCG    | 59.747 | 20 |
| ATTCGTCATCAAATTAAGCCT     | 57.001 | 22 GCCCGTGATAATGACGAGAT    | 59.923 | 20 |
| GGCGAGAATGGAGGAGAAA       | 60.288 | 19 TTGGATCCCAATGAAAATGAA   | 60.117 | 21 |
| AGCCAGTCTCCACCTCAAGA      | 59.986 | 20 GGCCGTAGAGAGAGGGATTT    | 59.674 | 20 |
| CGAATTCGGGATACCAGAGA      | 60.029 | 20 AGAGCGAGAGATGGACGATT    | 58.995 | 20 |
| GGCCTAATAGGGTTGTGTGC      | 59.457 | 20 CAGAACTTGTCTGGTGGTG     | 60.194 | 20 |
| GAGACGAGAGAAAAGAGTGCG     | 59.367 | 21 TCTCACAAGACGAAGGTGC     | 59.01  | 20 |
| TGGCAAAAAGCTAATATTTTCAGC  | 60.762 | 24 CTGTTCTTGCGAAAATTATC    | 57.614 | 21 |
| CACCGTTGTCTTTAAGCCGT      | 60.168 | 20 AAAGAGGTGTTATGAAGGGAC   | 59.817 | 24 |
| GTGGTCGGTTTCAAGTTTGG      | 60.388 | 20 AAGCACACAATAACCAAAGTA   | 59.08  | 25 |
| TCCTCGTATCCGTTCTCCAC      | 60.073 | 20 TCTCTCCACTTGCTTGTG      | 59.007 | 20 |
| TGGGAGTCCTTTCCAACATT      | 59.381 | 20 CCAGCTTCGAACGTTGTATGT   | 60.183 | 21 |
| ATACATGTCATGCCCGTTTG      | 59.276 | 20 CAAGGAGTTGTACCTGATAGC   | 60.539 | 23 |
| GGTGGTTTTGTAAACGTGTTTCT   | 59.377 | 23 TTAGCAGCAGATGCAAAGGA    | 59.712 | 20 |
| AACACCTGTGAAAGGGATCG      | 59.966 | 20 TCAGGCCATCTCCTTGTGTT    | 59.803 | 20 |
| GTTGGCAAACAGGTCCCTAA      | 59.971 | 20 TGTGCTGCTGGAAAATTGAA    | 60.379 | 20 |
| TTCGGAGTTATGAAGTTAGCACC   | 59.68  | 23 ATCACCAGCACCATCGTACA    | 59.992 | 20 |
| ATTAGCAAATTTCCGGACGA      | 59.547 | 20 GAGGGGGAAAAGAGAGGATG    | 60.008 | 20 |
| CGACCATAACAAAGAAAACACG    | 59.553 | 22 TTCAGCTGACATTGGGTTGA    | 60.24  | 20 |
| GGACATGATTCATTTTCTGCG     | 60.463 | 21 TCGTAACTGAAAATCATCGGC   | 60.089 | 21 |
| GGGAGGAGAGGAAATTGAGG      | 60.008 | 20 TTGGGAAAGCACTATGGACC    | 59.933 | 20 |
| GGTGCTCAAAAATCCGAAAA      | 60.053 | 20 TCACTCATTCAAGAACATAGCC  | 59.761 | 23 |
| ATGAGATAAGGGGGTGTTCG      | 60.201 | 21 TGACATGCTCTTAAGGATGGG   | 60.081 | 21 |
| ACCCTCCTTCAGCCAAAAAT      | 59.94  | 20 TCATAGTCAAACACGATTGCTT  | 57.452 | 22 |
| TCCCTATTTTCGTCTCCCA       | 59.5   | 20 AACTGCACATGAAACATTTGTC  | 58.606 | 22 |
| CGAAGAGTGTGGAATCAAACC     | 59.583 | 21 AGAAGTGGGTGTGTGCTGAA    | 59.31  | 20 |
| CACACAGATTTGACATCGAAAGA   | 60.161 | 23 TTCCAGGAAATCGGGAGAT     | 59.425 | 19 |
| TGATTTAAGGGGGTGTTCG       | 59.801 | 20 CACGCGCAGAGGAGATCTAT    | 60.526 | 20 |
| TGATTAGTACCGATGAATCAACC/  | 60.595 | 24 CACGTACTTAACCAAAAATATGC | 60.177 | 24 |
| ACCTATGGAAGCCCCAAACT      | 59.827 | 20 ACCCACTACCACATCCCTCA    | 60.238 | 20 |
| GACTGCCCAAAGAACCAAAA      | 60.088 | 20 AGAAGGCGGATAAGGTTGGT    | 59.962 | 20 |
| TCAACATGCAACCAACAAAAA     | 59.999 | 21 CCACTAACCCCTTCATCACC    | 59.259 | 20 |
| CAGGAACCCTTTCTCTCATCC     | 60.059 | 21 TGAGGGAGTTGTTAATTGTGCG  | 59.131 | 22 |
| TGCCAATGCTTGTCATAGGT      | 59.152 | 20 ATTTCCAAATCGGTACATGC    | 57.424 | 20 |
| GCATCGTCTCAACCCTTGAT      | 60.081 | 20 AAACCCATTTATAACGGCGA    | 59.323 | 20 |
| GTGGCTCTTGCTTCTGCT        | 59.604 | 20 GACTTACGTTCCGCCAACTC    | 59.74  | 20 |
| CGTGTCTTCATCCTTTCCC       | 59.526 | 20 GTCAACAGCTCGGTACAGCA    | 60.056 | 20 |
| GCATGGTTTGTTCAATGCAG      | 60.119 | 20 CCATCTTCGTCCACCTCTTC    | 59.655 | 20 |
| AACCTCGGCTCTGATACCAA      | 59.694 | 20 CTAGGGTTAGCATGCTTGGG    | 59.724 | 20 |
| CCTTCCCATTTCTCTCTCC       | 60.008 | 20 TCAGGTCTGCCCTTACCTC     | 59.284 | 20 |
| CATTGGCATTGTAAGCTTCG      | 59.325 | 20 AATTAATTGCTGGGTAAAACTE  | 58.277 | 24 |
| TTATCCTCCTCCAATCGAA       | 59.458 | 20 TTTGCCTCTCCATCTCCATC    | 60.158 | 20 |
| TTGATGATGGAGGACGACAA      | 60.048 | 20 GCAAAACTTAGGAACGAAGCA   | 59.527 | 21 |
| GATCACTAACGGCCGGAATA      | 59.923 | 20 TTGAAATCCTTGAACCGTGTC   | 59.963 | 21 |
| GGGGTGTGTGTTGTGCTAA       | 59.465 | 20 ACCATCTCGGGTTGTAGTGC    | 59.997 | 20 |
| GCTACGCCTAATTGCTTGCT      | 59.658 | 20 TGCTTTATGTTGTTGATCCGTC  | 60.003 | 22 |
| GCATGCATATCGCAGAGAGA      | 60.088 | 20 TTGTTGCAGCAGATGCTTTC    | 60.142 | 20 |
| TTGGAGCTGCTAGGATTCGT      | 59.978 | 20 CCGTCGTCGTTATGAAGAAAA   | 60.117 | 21 |
| TCAACATCGTTTATCAGTTTTGTT  | 57.815 | 24 AGTGAAATTATTCGTTGATAAA  | 57.681 | 27 |
| ACCACCACATGTCCCTTGAT      | 60.096 | 20 TGGTGGGTTGAATGCTATGA    | 59.924 | 20 |
| GTTTTGACAATATTTAGGTGTTTTC | 57.818 | 26 ACATGGACGTCCCAGATTGT    | 60.246 | 20 |
| ACGACTCCAATCAGCAAAA       | 60.636 | 20 GGTAGGGTGGGGATGAGATT    | 60.015 | 20 |
| TCTCTCTCGACGGTGAAGGT      | 59.986 | 20 GCGTGTACGTCCCCTAAGAA    | 60.132 | 20 |
| AGTAAGGCTTTTCTAACTTATTGG. | 58.239 | 27 CCCTGCACCTCTTCAAATC     | 59.67  | 20 |
| CGGCCGGAATATCTAAAGTG      | 59.564 | 20 TCATTTCAATTCATGAGCTTCG  | 60.209 | 22 |
| ATTTCCGTTCAATTTTGCCA      | 60.302 | 20 TAAAACAATAAGGTCGCCCG    | 59.958 | 20 |
| TGGTGGCCATATATACGCAAT     | 60.075 | 21 GCAGTGACGGATGTTTGTGA    | 59.572 | 20 |

|                         |        |    |                        |        |    |
|-------------------------|--------|----|------------------------|--------|----|
| ACTTTGGCAACGGAATACCA    | 60.365 | 20 | GCGAGCGAGTAGGTTGTGAG   | 61.136 | 20 |
| TTCCAAATACCCAGTCCCAA    | 60.162 | 20 | TATCATTCTATGGTGGGGCG   | 60.681 | 20 |
| TCTATCTTCGGCCCCCTTCT    | 60.166 | 20 | ATGGTTCGCCATAAAAAATGC  | 59.801 | 20 |
| GCGAAGCTTTTCCAACCTCAC   | 60     | 20 | CTTTACCCCATCTCCACCCT   | 60.183 | 20 |
| TACACGAATAGCGGTTGCTG    | 59.895 | 20 | TGCACACTTTCTGGGTTTCAG  | 59.873 | 20 |
| CCTTGGAGAAAAGGACGACA    | 60.224 | 20 | GATGAAGGTGTTGTTTCACATC | 59.459 | 22 |
| AACTTTCGATCGCATCATCC    | 60.043 | 20 | CGCGCTCTACTTTTTAATTAC  | 60.473 | 23 |
| ATGGGTTATTACCGGATCGC    | 60.903 | 20 | TCGACATTGTTTGAGTGCAA   | 58.835 | 20 |
| TAAAACTTCAAACCACGGGA    | 58.121 | 20 | TATGCCATTTTCATCTGGGG   | 60.66  | 20 |
| TCACAAGCATGCAAGATAAGGT  | 59.775 | 22 | GCCATTTAAAAAGTCGGCTG   | 59.72  | 20 |
| GGATGGACCGGATGTTAGAA    | 59.75  | 20 | GGATGGTGGTGAAACTCAA    | 60.758 | 20 |
| TATTTTCGCCGAAAATTTGA    | 60.385 | 20 | TAAACGGGCCAATTTAAACG   | 59.835 | 20 |
| ACAAGCACGAACACACACAC    | 58.155 | 20 | AGCTTGACCCCCAAATAAA    | 59.586 | 20 |
| CGATGGCTAGCTTCACCTTC    | 59.978 | 20 | CACGTGAAAAATCTCAACGG   | 59.17  | 20 |
| CAATCGGAGAACGTCGAGAT    | 60.218 | 20 | CTTCGCCACTGTTACCCTTC   | 59.734 | 20 |
| AATTTTCGGCCTAGGATCTGG   | 60.411 | 20 | ACGTGTCCGAGTGTGTTGAA   | 60.203 | 20 |
| GTCTTTTGCAGTTGGGAAGG    | 59.711 | 20 | ATGCAAGCTTTGTTTGGGAG   | 60.249 | 20 |
| AAAATGCCCTTGTATGCTGC    | 60.103 | 20 | GGTGTGTTGTTCTGCACTGG   | 60.203 | 20 |
| TTGGATTCAGATCGTGGAAA    | 59.049 | 20 | TGTGAACTCGGTGAACCTCA   | 60.285 | 20 |
| TTAAATTTTCGAACGCCTGC    | 60.205 | 20 | TATCGGATTAATGGAATAAGC  | 57.771 | 23 |
| ATCACCATAACGCACCCCTA    | 60.214 | 20 | TCGGTGTATGCTGTAAACGAA  | 59.24  | 21 |
| TTTCAGGAGCCATAGTTCGG    | 60.206 | 20 | CAGTCACGACTTGCCAAAAA   | 59.881 | 20 |
| CCTCCCCCTTGATTTAGCTC    | 60.032 | 20 | TCGTATGAATTTTTGTATGGAC | 58.927 | 23 |
| TGAAGGGGATAGCATTTTGG    | 59.894 | 20 | GTTTACCCATAGCGCACTCG   | 60.658 | 20 |
| GACCCTTGGATCACATCAGAA   | 59.918 | 21 | CCAACACTATTCGGTTTGGG   | 60.22  | 20 |
| AAGAAAGCCCACCTGATTTG    | 59.17  | 20 | TTGAATCCTCACAATATAACCT | 59.283 | 27 |
| AAATTGCTTGCCTCTGCCTA    | 59.982 | 20 | AGCCAAATTTGCAACCTCAG   | 60.249 | 20 |
| CATGCAGGTTAGCAAGGAGA    | 59.024 | 20 | TCAATTATGTCATGAATGTTCA | 57.148 | 24 |
| AAACAAAGGGGACCACAAAA    | 59.308 | 20 | TTGTCGTGGTTCGGTATTCA   | 59.964 | 20 |
| ACGTCCACGGAGAGGTTAGA    | 59.721 | 20 | ACTGACATCCACAGGCATTG   | 59.551 | 20 |
| ATGCCATACGGACGTTGAAT    | 60.221 | 20 | ACCCATCACCTTCGTCAGAG   | 60.112 | 20 |
| CGAGTTATGAAGTTAAGAAATAA | 57.563 | 27 | TGCAAATCCAAAGGTCAACA   | 60.088 | 20 |
| ATCACCGGTACCATCGTCTC    | 59.81  | 20 | GTCGAGGGTTTGGAGCTGTA   | 60.255 | 20 |
| AAGTTCCACCCAGGTGTCTG    | 60.002 | 20 | TTGGTGAGTAGGATGAGGGC   | 60.073 | 20 |
| TTGTGGACAGTGCATAGGCT    | 59.318 | 20 | TCATGAATGAAGCAGAAGAGG  | 59.955 | 22 |
| CCCTTGATGCAGCCATTTT     | 59.96  | 20 | AGTACCGAACTGGAGACCCC   | 60.371 | 20 |
| TTCGAGTCATACGGAGGAGG    | 60.21  | 20 | AGCGAAGTGGCAAACCTTGAT  | 59.882 | 20 |
| GGGTTGGGCATCACAAATAG    | 60.192 | 20 | TTATCATAGGATCACCCCTCC  | 57.807 | 21 |
| TAAAAAGTTGAGCCCACCCA    | 60.472 | 20 | CCCCTGTATGCAGTCCATTT   | 59.813 | 20 |
| GTCCTTTCGTTTAACTCCTCCA  | 59.631 | 22 | TCCAAATTACAATCGTCGCC   | 60.837 | 20 |
| GTCAACTTTGGCAATGGGAT    | 59.797 | 20 | ACGTTTCGGCTCGAGAGTAAA  | 60.015 | 20 |
| TATGCGGTGTTTTGGTTTGA    | 59.969 | 20 | GTCGACCTCGATGCATTTG    | 60.217 | 19 |
| CGAATCTTGACCGCTGATTT    | 60.214 | 20 | CCCAAAATTGCGAATGCTAT   | 59.928 | 20 |
| GGATCCCACTGAATTGTGCT    | 59.934 | 20 | CGAACTTAGTCGACCTACATGC | 58.789 | 22 |
| AAGAGGAATTGAACCCAGGA    | 58.568 | 20 | TGGTATTACCCCTCAGGTCG   | 59.807 | 20 |
| TCGCCCTTTCACAAATTAGG    | 60.067 | 20 | ATCTGGTATCAGAGCCACGG   | 60.096 | 20 |
| AGGGGGTGAATAGCCTCACT    | 59.957 | 20 | ATGGCTTCCATGGTGGTTTA   | 60.192 | 20 |
| CTAGTCAGCCATTTGAGCC     | 59.836 | 20 | CAACCATCCCAAACCTCACA   | 59.389 | 20 |
| TATGGGATCCTAGCCCTCCT    | 59.881 | 20 | TTGTATGCTGAGGCTTGTC    | 60.019 | 20 |
| GGCTAATTTGATGCACGGAT    | 59.929 | 20 | GCCACTAAGCCACCTTCAA    | 60.249 | 20 |
| AAAAATCACGCCACCATTAGT   | 58.504 | 21 | CCAAATTTAAGGGTTATCACCT | 58.849 | 23 |
| TGGATCAAATGTTTGGTTGC    | 59.375 | 20 | CATAGAGAAGGGTTATCACTTC | 57.097 | 25 |
| AAGCAGCCATTAAGAGTCGG    | 59.476 | 20 | ATTCGGATGGGAAAACACAA   | 60.17  | 20 |
| ACGCCTGAATATCGGTCATC    | 59.923 | 20 | GCGGAATACGAAGAGTCACC   | 59.7   | 20 |
| CCTAGATGACAACCTTCGGC    | 59.694 | 20 | CGAAGTAATGCTCACACGGA   | 59.864 | 20 |
| TGCCCTCAATCTCGAAAAAT    | 59.645 | 20 | GATTCACATTGGCGGATACA   | 59.355 | 20 |
| GCGGTTAGGCTTCCACCTAT    | 60.471 | 20 | CTTGCTGGTGAAACTCCTT    | 59.328 | 20 |
| AAACTCCTCAAACCTTCTCC    | 58.701 | 21 | TTGGCATCCATCGTAACAGA   | 60.073 | 20 |

|                          |        |    |                         |        |    |
|--------------------------|--------|----|-------------------------|--------|----|
| TCTCCTTACATAATTTGCCCTCA  | 59.977 | 23 | TGAGAAGTGCTTGGCAAAA     | 59.585 | 20 |
| GGAAAAGGGCTCTTGGACAT     | 60.443 | 20 | CACTTGTTCTATTGCCAACG    | 60.54  | 21 |
| CCACAACACCAGAGCAACTG     | 60.348 | 20 | TTCACCTCACCTTTTCGATCC   | 60.05  | 20 |
| CCTCACACATTAGCCCTCT      | 60.261 | 20 | CTGAGATTTGACTGCGCCA     | 60.011 | 20 |
| TGATGTCCTTCTCCTTGCT      | 59.803 | 20 | GGAGTTGGGCTAAGTGGGAT    | 60.328 | 20 |
| TGTTACGGGAGCTTTGATA      | 59.272 | 20 | CGCTTTGTTTTCGTGTGTTGA   | 59.888 | 20 |
| CGAGTGCATGAGCTTGAGAG     | 59.88  | 20 | AAAATTAGGGGTAGGCACGG    | 60.197 | 20 |
| TTGGTGATGGTGATGAATGTTT   | 60.096 | 22 | ATGCGCGATTTTAAACCCTA    | 59.586 | 20 |
| CCATGCATGCAAAATTGAAC     | 59.937 | 20 | TGGTCTCAACGATATGCTCG    | 59.823 | 20 |
| TCAGCTGAACAGGAATGTGTG    | 59.889 | 21 | CAACACAAGGACATCCATCG    | 59.96  | 20 |
| GTGTAGAAGTTGGCACGCAG     | 59.515 | 20 | AAAGGGCGATGACACAAAAC    | 59.978 | 20 |
| GTTTCATGTACGGTCCGGTTC    | 60.24  | 20 | ATCACGAGATGGGGACTCAG    | 60.072 | 20 |
| TGATGCAGTATATAATCCTTAATC | 57.536 | 27 | TGTTAAATTTTGGAAAGAGAAAT | 57.381 | 27 |
| ATGCTGTGAGATTCGCATGA     | 60.386 | 20 | GCAGAAAACCTTTGTTGGGA    | 60.088 | 20 |
| TTCAAGCTGAGATCGACGAA     | 59.673 | 20 | CCCATCGTCGAGATCAAAC     | 60.461 | 20 |
| TGCATGCACCTGATTACAAA     | 58.703 | 20 | TGGCTGCAAATTGAAAGTGA    | 60.379 | 20 |
| GTCCATATCATTATCAAATGTTGA | 58.746 | 27 | AATTGAGAAGGGGGAGAGGA    | 60.008 | 20 |
| CAGAATCACCATCAACACCG     | 59.96  | 20 | CAATCCTTTCCTCTTTC       | 59.875 | 20 |
| GTAGGAGATGGAGTTGGGCA     | 60.073 | 20 | TTTCGAGGATTGTGATTCCC    | 59.871 | 20 |
| TCTCATGCAATGAAATCCGA     | 60.159 | 20 | TTTCTTTGAGTGGGATGCAA    | 59.247 | 20 |
| ATATCTGGAGGCGGGAACTT     | 59.925 | 20 | TGCTTCTCAAACCTGATTAGGT, | 57.037 | 24 |
| TACCCAAACCCACCAACCTA     | 60.081 | 20 | AACGAAAAATTGGGTTCAA     | 59.292 | 20 |
| GCACCATCAGAGCAACAGTC     | 59.425 | 20 | AAACCGTAGTGGGTAAAATTC   | 58.892 | 23 |
| GTTAGGAGGATGCCACCAAG     | 59.55  | 20 | TTGGGTGATGTGCTTGAAGA    | 60.24  | 20 |
| CGACTCATGTTGTTCCATGC     | 60.12  | 20 | ACCGGGTTCGTATCAACCTT    | 60.61  | 20 |
| CCTCTAATGGCCGAAAATGA     | 60.031 | 20 | TCTTCGTGTTCTTCGTCGTG    | 60.025 | 20 |
| TAGATGGGCTAAGTGGGGTG     | 59.948 | 20 | GGAGGAATGAAGGTGAAGGG    | 60.822 | 20 |
| GGAAAGTCTCACTCGCAAGG     | 59.989 | 20 | AGAAGAAATCCAATAGAGTT    | 58.814 | 26 |
| CATGCGGTATCATGGTGATG     | 60.779 | 20 | TGCCTAATTTATAGATAATGGA  | 59.68  | 25 |
| TGATCCAGTCACGTTTCACAA    | 60.144 | 21 | AAATATGATCTTACTCCCCTG   | 58.89  | 25 |
| TCTCGCCTCAACGAGAAGAT     | 60.096 | 20 | GGGGTAACTTGTCATCCCCT    | 60.052 | 20 |
| AAATCAAAGCCCAATGG        | 59.801 | 20 | CTGAAATCCTGGGCGTAGAT    | 59.15  | 20 |
| CTCATTGAGTTGACCCAGCA     | 59.831 | 20 | CTTTGTCCAAACAAATGAAAAC  | 59.062 | 23 |
| TCACACCCTCTCCCCTCTC      | 60.243 | 20 | GATGGGTTCTGTAATCCCGA    | 59.75  | 20 |
| ATTTTTCCCCTTTTACCC       | 60.226 | 20 | ATTGTGACATGGCCGAAATC    | 60.733 | 20 |
| AATTTTCTGGCAGCCTTTGA     | 59.823 | 20 | AAGAAGACCGAGAGACACAC/   | 58.991 | 22 |
| TGCAAGCACAATTCGATCA      | 59.931 | 19 | GAGAAAAGACAATTCGGCCA    | 60.192 | 20 |
| TCGAACCGCGAAAGAGTAAG     | 60.514 | 20 | GCACACGAGCTCTCACTCAC    | 59.771 | 20 |
| CAACGGTATGCTCGGATTTT     | 59.96  | 20 | TAGCCGATAAAAATGGCACC    | 59.928 | 20 |
| CGTTGTCTATGCACGCATTT     | 59.759 | 20 | GACTCTCGCACCATCCATTT    | 60.081 | 20 |
| TTTTGGCTTGTTGCTTGTTG     | 59.888 | 20 | AATTTGTACACACGTCCACCA   | 58.813 | 21 |
| AAATATACCCCGCATGCTA      | 59.304 | 20 | GTCTCAACCTTGATTGCGT     | 60.119 | 20 |
| TCAACATGCAACCATCAAAAA    | 59.961 | 21 | CATGATCCAACCTTATTCTCC   | 59.666 | 22 |
| TCGCACAAATGATCGTGAAT     | 60.08  | 20 | AGTCATGCGATCTGAACGTG    | 59.862 | 20 |
| GCTTTCTTAACTTGTTGGAACCAT | 59.945 | 24 | GCATGCTCTGTTTTCTGCAA    | 60.142 | 20 |
| CCGTTGGAGTTAGTTTGAGCA    | 60.29  | 21 | TGCGAAAATTTCTGGAATCA    | 59.232 | 20 |
| ATTAAGGCTGGAATTGGGG      | 60.143 | 20 | CAATTTTGTCTGCTGCATGG    | 60.257 | 20 |
| ACAAGGGGCAGAAGGATTTT     | 59.94  | 20 | TTGCAATATTTCAACTACGAGCA | 58.52  | 22 |
| TAAGAGATCCGAAGCCAAGG     | 59.406 | 20 | AAAAAGTTTTCCGCTTTCGG    | 60.568 | 20 |
| ACCCGTGGACGTAGATCATT     | 59.288 | 20 | TTACGAAAATACACGTTCCGGG  | 59.876 | 21 |
| GCAAGGTAGGCTTTTGAAC      | 58.604 | 20 | TCCCAGTGTACACAGACT      | 59.113 | 20 |
| TGGAATCGAAATGATGAAGC     | 58.646 | 20 | TCTGCACGCTGCAATAACTC    | 60.165 | 20 |
| GGGAGGGTGGTTAGGTTAG      | 59.685 | 20 | TTAGGATCGGAATATCGAGAA,  | 57.857 | 22 |
| CATCGGAGCGATAAGGAGTC     | 59.797 | 20 | ACTTTGGCAAATCACACAGAT   | 57.186 | 21 |
| ATTTTTGGTGGGTTTCGTCA     | 60.206 | 20 | ATGTTTTGTGAAAGTCCCGC    | 59.978 | 20 |
| AAGGTGGGAAAGAATTTGGC     | 60.299 | 20 | CATGGTAAAGAAACGGTGGA    | 59.847 | 21 |
| TGATGCCCAAATTCCTACC      | 59.933 | 20 | GATAATTAGTGGAGGCGGCA    | 60.06  | 20 |
| TTTTGTTGTTTCCCAAGTTGC    | 60.004 | 21 | GAGAAGAGGTCGGGAAGAGG    | 60.328 | 20 |

|                          |        |    |                         |        |    |
|--------------------------|--------|----|-------------------------|--------|----|
| TGGTTGAATGCTATGGATGC     | 59.504 | 20 | TCGTGTTTGGGCATTACTCA    | 60.111 | 20 |
| GTCAAGGACTTACCGCTGGA     | 60.255 | 20 | TACCGACGAATGGTTGTTC     | 59.964 | 20 |
| AAAAGGTTCCCTCCAGAAA      | 59.912 | 20 | ATTTCTCAGTCCCTGCCTCC    | 60.596 | 20 |
| GCTCGAGCTGGATGAGAATG     | 61.058 | 20 | TGTTCAATCTGCCACCAAAA    | 60.088 | 20 |
| CCGGATAATTCAAACGTTGC     | 60.323 | 20 | GTGTGGGGGATTGTTGAAAT    | 59.508 | 20 |
| TCGCTTGAATTGCGACATAA     | 60.356 | 20 | CACAATCCCAACAAAAAGAAA   | 59.007 | 22 |
| TATGGGTTAGCGTGTGATCG     | 59.566 | 20 | GTTGATAAAAATGGCACCCG    | 60.188 | 20 |
| CAAAGAACCCAGCATGAAT      | 59.933 | 20 | AGTTGCTTAGCGACCCATA     | 59.73  | 20 |
| GGAAAATGTCTTGTGGTCCC     | 59.239 | 20 | GTGGTTCGGGTATTCACGTT    | 59.717 | 20 |
| TTCGGACTTATGAAGTTAGCACC  | 59.68  | 23 | GGAGTTGCAGTTTTGGATGA    | 58.697 | 20 |
| GGCTGTGAGATCTAGCGTGA     | 59.143 | 20 | CTGTTCTGTCTTTGCACGA     | 60.025 | 20 |
| TGATCTATGGAAGCCCCAAA     | 60.405 | 20 | AATGGAGACACCTAAGCCCA    | 59.55  | 20 |
| TCCCATGTTGTAATTAATGTAGGG | 59.089 | 24 | CAAATTTTCGGTTTGTGGCT    | 59.975 | 20 |
| CGAATTTGCAAACCGAAAT      | 59.943 | 20 | TTTCAAAAACCGAAAAACCG    | 59.951 | 20 |
| TCCATGAAAGCTCACCTCT      | 59.803 | 20 | CTACCCAACCCACTAACCCA    | 59.705 | 20 |
| ATGATGGAATTGGGTGTTGG     | 60.439 | 20 | CCTAACCCACTAATGACCC     | 58.24  | 20 |
| CGCTTAGGCCACCAATACAT     | 59.982 | 20 | TTCGTGATTATTGCTGCTGG    | 59.833 | 20 |
| CGCTCAAATCACAACCCCTT     | 60.11  | 20 | TTGACCTGAGGACGGATACC    | 59.927 | 20 |
| CATCTGGTGAAGGTTTGCCT     | 60.111 | 20 | TATTACAGGGGCCAGTCGTT    | 59.452 | 20 |
| TCAGTTAATATCCCCGCGAG     | 59.916 | 20 | CCTCACCTTACCACCATCT     | 59.962 | 20 |
| CTTGTGTTGTACCGAATGCGA    | 59.729 | 20 | GAAGCCTCAAATCACAACCC    | 59.532 | 20 |
| CAACTGGAGAAGCTTGGACC     | 59.844 | 20 | CAGTTGAAAAATTGCCAAAAC   | 60.014 | 22 |
| GACAAATCAGGGGGTTTGGT     | 60.979 | 20 | AGCCATTTAAAAGTCGGCTG    | 59.361 | 20 |
| GCAAGTTTCCGTAGCTGGAG     | 60.015 | 20 | CTGCTCTCTTGATTCATGGC    | 58.544 | 20 |
| ACACAGATCATCTCGGGTCC     | 59.928 | 20 | TTGAGGAGGCTTCAAATCC     | 59.244 | 20 |
| ATCGATCGGCTTATGAAACG     | 60.06  | 20 | CCCATGCATGTAAACTGA      | 59.395 | 20 |
| AAGAGATGGTCCGCTCTGA      | 59.95  | 20 | CTAGCTCCTTCCCCTTACC     | 60.204 | 20 |
| GGAGGTTTCGACGTGGTTTC     | 60.504 | 19 | ATAGGTTTCGTAGCCCACCC    | 60.208 | 20 |
| CATCACACCACATCTCAAATGAC  | 60.292 | 23 | GCATTATAACCACCGCAACA    | 59.448 | 20 |
| CATGTCCTCTAGGTGTGCGCC    | 60.678 | 20 | GAGTAGGAGTCCGGAGCAAA    | 59.43  | 20 |
| ACTCAGGCCTCACTCCCTTT     | 60.252 | 20 | TGACCGGACGAAAATACTCC    | 59.933 | 20 |
| GAATCACGGCCATTTTCAAG     | 60.448 | 20 | TTGGCCTGTTACGACTCAAG    | 58.923 | 20 |
| GATGTCCGAGATGATCCACC     | 60.297 | 20 | TACAGTCGACCTCAGCTCCC    | 60.408 | 20 |
| GGCGATGAGAGAAGGAAATG     | 59.773 | 20 | TAAAACCGACATCCCCTACTC   | 59.79  | 20 |
| AAGTCTAATCGCCTGGCAAA     | 59.845 | 20 | CATTTGGAAAATCAATGGATG   | 59.638 | 22 |
| GTCTCCACCCCTAGAAACC      | 59.795 | 20 | TTCAATACTTTGAGGATAGATT  | 59.474 | 27 |
| AATGTGAATGCCAGCTACCC     | 59.962 | 20 | GTGTGTCACTCCCCGATCTT    | 59.969 | 20 |
| ATTACCATATTTAAGGGTTATCAT | 57.31  | 27 | GAGAGAAGTTTTCGGTGGTGG   | 59.697 | 20 |
| ATGCCAGCCAGACAATTTTT     | 59.574 | 20 | TGTTGTCCGGTTCTCTCTCC    | 60.238 | 20 |
| AAGGCGTCTCGAGTGAAAAA     | 59.993 | 20 | GTTCCAATACCGCTTCCAAA    | 59.938 | 20 |
| AAATACGACACCGAAAGGGA     | 59.429 | 20 | AGCGGTTATTACCGGATCG     | 59.93  | 19 |
| AGAGTCGGTGGAATGGATG      | 59.927 | 20 | TCTCACGCACTCACGATCTC    | 60.146 | 20 |
| GCCGGCAGTTTATATAGGGA     | 59.058 | 20 | ATTTTTACGGTTGGGCCAT     | 62.456 | 20 |
| TGACACCTAGCCCAAACCTC     | 60.111 | 20 | TGAGGGAGGGAAAGAGAATTA   | 57.863 | 21 |
| TCTGAGACGACGGTGATACAA    | 59.303 | 21 | AAGCTCGCAGAGTCACGAAT    | 60.164 | 20 |
| CCTCGCACATTCAATTTCT      | 60.074 | 20 | GGATTGAAGGCTGTGTCGAT    | 60.081 | 20 |
| GAAAAAGTCAGCCGAGAGAAAA   | 60.001 | 22 | TCGCCCTTTCACAAATTAGG    | 60.067 | 20 |
| TGATGTTGATTTGGGTTCAA     | 57.35  | 20 | CCGATCCCATCCCTTAATTT    | 59.978 | 20 |
| ACACTCACTCTCACTAGCCGC    | 59.685 | 21 | ACGCTCCACCAAAGGAGTA     | 59.734 | 20 |
| AAATCGCACGGCTTATCCTA     | 59.704 | 20 | GAAATGTGATTTGATGGGC     | 60.141 | 20 |
| TGGCTCAAATCCGATGATTC     | 60.953 | 20 | CATTCCTTTTTATGTGTTTGTTC | 59.38  | 25 |
| AACCACGGAAATTACGAAA      | 59.315 | 20 | TGTGGGTTAGCATTGATCG     | 59.542 | 20 |
| TCTGCTAGGGTTGGGAGAGA     | 59.943 | 20 | CGGTTGGATTGCTGAAAAC     | 60.11  | 20 |
| TTTTGGACGATTTTTCCCTTT    | 59.81  | 21 | GTTAAAAACCGACTGCACC     | 59.476 | 20 |
| TTTGCAAACATCCAACCTACGA   | 59.216 | 21 | CCACAATTTTAGGCAGTTTCG   | 59.634 | 21 |
| CTTCGGAACCTATCCACCG      | 59.688 | 20 | ACCTCCACCTCCATTTCTCC    | 60.314 | 20 |
| TAGCCCCAATTTTGTACCC      | 60.902 | 20 | AAAATCTTACACCTGGAGCCA   | 59.027 | 22 |
| ATGTGGATGAAATTGGGCAT     | 60.021 | 20 | TATGGTTTTTCGCCCATTA     | 60.144 | 20 |

|                            |        |    |                        |        |    |
|----------------------------|--------|----|------------------------|--------|----|
| GACCTCCCCTAGTAGCACGA       | 59.308 | 20 | TCCGAGTTGAAGTAGTGGCTT  | 58.994 | 21 |
| TGAAAACCTGAAAACCTAGGAACGAA | 59.366 | 24 | TGCGTTTTGATGATATATAGAT | 58.21  | 26 |
| TGCAAGGTGCTTTGAGAATG       | 59.988 | 20 | TCCATCTTAATGCAGCAACG   | 59.833 | 20 |
| TCCAGGAGATCGAACGAAAT       | 59.629 | 20 | AGGAAAATGTGTGCGAGAGGG  | 59.137 | 20 |
| GTCAACTTTGGCAATGGGAT       | 59.797 | 20 | CTCCCAACATTTCGTGTGTGT  | 59.441 | 20 |
| GACGCCTTTAAATCAGGTGC       | 59.713 | 20 | TGAGGAGCGTTGATCTTGTG   | 59.984 | 20 |
| CGCTACAGTTCACACGTTCCG      | 60.507 | 20 | ATCAGACGGTATTGCCCTTC   | 59.009 | 20 |
| TCAAAATTTCCAAAAATCAAAGC    | 59.509 | 23 | AGAAATCGAAGCTTGGAGCA   | 60.096 | 20 |
| CAGGTTCCGACCTCAAACAC       | 60.545 | 20 | TCTGCAAAAATGAACAAACTAT | 59.639 | 25 |
| CAAGGCATTTATCTGGGCAT       | 59.923 | 20 | CACGAGTGAAGAAAGGGAGAC  | 59.072 | 21 |
| TCGAATCTCAAACCCTAGCC       | 59.269 | 20 | GCCGCGAAACAGACATAAAT   | 60.103 | 20 |
| TTCTTTGGGACACAATCCAT       | 60.173 | 20 | CGGTAACACAAAAATTGCAGAA | 59.685 | 22 |
| GGGCTAGTCTGCAACACAT        | 60.142 | 20 | AACATGCTTCACCATATCCAA  | 57.957 | 21 |
| CCCGATTTGTAAGGTTCCAT       | 58.762 | 20 | ATATGGAAGGCAGTGGTTCG   | 59.955 | 20 |
| GCTCTACAATATTACAATGGGCA/   | 59.46  | 24 | AATTGCAAGAAGCAAATCGG   | 60.209 | 20 |
| TGTGATAGGATAGGGCCAGC       | 60.059 | 20 | CTCAGGCAAGCAAAAATGCTA  | 59.206 | 20 |
| AGGACACGTTGGACCTGAAG       | 60.151 | 20 | GGACCTTATCGCGAAGACAA   | 60.214 | 20 |
| GCTTGAAAAGCCATGCAAAT       | 60.217 | 20 | GGGGTCGAGAATGTATGAAGG  | 60.698 | 21 |
| GTGAATCTCATCCGTCCGTT       | 59.934 | 20 | TGCAAGAAAGTGGACTGCAA   | 60.574 | 20 |
| TTGATTTCCAAGTGAAGGCTG      | 60.234 | 21 | CTCTCAATGGACCAGCACCT   | 60.261 | 20 |
| CTCACGTGATTTAGTTGTTCTCA    | 57.113 | 23 | GCCCTTAGAACCTTGAATCTGA | 59.725 | 22 |
| TCTTCCCGCAAGACGAATAC       | 60.214 | 20 | TTTGTCTGCGTGGACAAGTT   | 59.339 | 20 |
| AAGCACGGCTTGTGCTATCT       | 60.044 | 20 | TAATGCATTCGCCAACTGAG   | 59.833 | 20 |
| CCCCAGAAACACCAACTTGT       | 59.861 | 20 | CCATCCCATCTCTCCTACG    | 59.502 | 20 |
| TATAACGACACGGCCATTGA       | 59.953 | 20 | CCCTCGAATGCACTCAAAC    | 60.255 | 20 |
| TGAAATCCTTGAACCATTCCAT     | 60.542 | 22 | GGTGCCCTACTTCTTTGGT    | 60.361 | 20 |
| AGAATTCGTGCCCTCATT         | 59.528 | 20 | GTTGGCATTCAAATCAACCA   | 59.375 | 20 |
| CTCACGCAGTCTCTGGATCA       | 60.138 | 20 | CGACGGATATTTGTTCTTGTG  | 58.161 | 21 |
| ATGCTGACGATAACAAGGCA       | 59.301 | 20 | TTCCCATCTAATCTCGTCCG   | 60.029 | 20 |
| TGAGGTTGGAGTGTGTGGAA       | 60.129 | 20 | GGGAGACAAACACACTCTCTT  | 58.843 | 22 |
| GGGAGGGAGGGAGAGATAGG       | 61.291 | 20 | CCACCCACACCTAAGGAAGA   | 59.959 | 20 |
| GGAAGAATGATGGAATTGGG       | 59.175 | 20 | CCCCTAACCCCAACTAAC     | 58.292 | 20 |
| TTGAACAATTGAACACCGGA       | 59.941 | 20 | TCATTGTGATGTGTGGGAAAA  | 59.808 | 21 |
| GACACGCATAAAGGGACCAC       | 60.384 | 20 | CGACTTGTGCTTGTTCGGTA   | 59.758 | 20 |
| TCACAATAGGGCATGGGACT       | 60.34  | 20 | GGAGGGACAGCCTAGAACTTT  | 58.864 | 21 |
| CACTCACACTTTGCACACTGAA     | 59.986 | 22 | ATCTCGGCTACGAAGTGCAT   | 59.866 | 20 |
| GGCAGATGCCTTTGAAGAAC       | 59.82  | 20 | ACTCCCACCTGAAAAAGGGT   | 59.834 | 20 |
| AAAACAAGAAAGCCCACCAT       | 58.554 | 20 | CCCACACATTTGAGGGGAAGA  | 60.892 | 20 |
| CATCAAATCTCTAATTGCACCC     | 58.582 | 22 | GGCAACTTGGGAGTTGAAAA   | 60.088 | 20 |
| AGTTGAAAGAGCCATCAGCC       | 59.434 | 20 | AAAATGACACGCAAAAAGGG   | 59.975 | 20 |
| AAATGGGGAGATGATGAACG       | 59.75  | 20 | CAATCTGACGGCCGATATTT   | 59.923 | 20 |
| GTCCATTCAAGTCGTGGTCC       | 60.372 | 20 | TTGTCACACATTTACACACACG | 58.016 | 22 |
| GAAAAACATTTTCTCTTGAACGG    | 59.194 | 23 | TGGACTTAACTGGTAGCCCG   | 60.125 | 20 |
| CACAACAATACCACGCAGGT       | 59.49  | 20 | TGGATGTGTAGATGATTTTTGG | 59.329 | 23 |
| TTGTTGCCGTTAAAGTGTGG       | 59.627 | 20 | GAAGCGATCCTTACAGGCAG   | 59.978 | 20 |
| GAGGGAGAGAAGGGAGGAGA       | 59.883 | 20 | ACACACACGATGGATCGAAA   | 59.967 | 20 |
| CACGAGATTTACCTGGTTCCG      | 58.228 | 20 | CAAGGCAATATCTAGCAAGGG  | 58.865 | 21 |
| CAGCTACCATTTTCTGTGG        | 60.112 | 20 | CCATTTTTACATGCCGCAAT   | 60.7   | 20 |
| TGCAAACACCACAACAATCA       | 59.563 | 20 | CCTCACCAACTCAACCCACT   | 60.002 | 20 |
| CACCCCTCCACTCTCTCATT       | 59.101 | 20 | GGTGCTCAAAAATCCGAAAA   | 60.053 | 20 |
| ACCACGCATGGTTGAGTACA       | 60.032 | 20 | AGGTGCTGTGTGATGTTGGA   | 60.162 | 20 |
| CACCAACATCATCGAACAGG       | 59.96  | 20 | TTTTCACCGTCCAAAACACA   | 59.981 | 20 |
| TTGTCACATACACGTTGGGAA      | 59.873 | 21 | GAGCATGCAGAAGATGTGGA   | 59.95  | 20 |
| CACCACAATGAAGTGGATGC       | 59.967 | 20 | TGCAAGCTAACCGCTAGAAT   | 57.835 | 20 |
| ACAACAATGTCGCGAAACAA       | 60.157 | 20 | CACGTGTCAAAAATTTGCTTG  | 57.823 | 20 |
| CTCAATCTCTCGTGCTCACTG      | 58.765 | 21 | GGATGGGAGTACATTGGTGG   | 60.05  | 20 |
| TCAAAAGCAATCAAATATCCCA     | 59.433 | 22 | TTAAGTTTGGGGGTGAGGTG   | 59.824 | 20 |
| CAAAAGATCGGCTATTTGGTG      | 59.595 | 21 | GCGTTTTGATGATATATAGGTG | 57.758 | 25 |

|                          |        |    |                         |        |    |
|--------------------------|--------|----|-------------------------|--------|----|
| TGGATGCCTTTCATTTAGGTG    | 59.946 | 21 | TTGCATCGACTTTTGATTGG    | 59.809 | 20 |
| CGGAAGCGCACATTAAGATT     | 60.23  | 20 | TTTCACTTAGCTCATTGATTTTC | 58.14  | 24 |
| TTGGCAAAAAGCACAAAAAG     | 58.979 | 20 | AGAAGTAGGGCACTCCATCG    | 59.308 | 20 |
| CCGTGGTGCCTATATCCATT     | 59.807 | 20 | CGAACCACCACACCAAATTC    | 61.196 | 20 |
| TCAATAGAAAATGAGTTTGAGTTT | 60.059 | 26 | TCAACAGTCAACAAGCACACA   | 58.908 | 21 |
| GGTTTGGGTTCCGACTGTAG     | 59.449 | 20 | TTTAAGGGTTATCACCTGATTT  | 57.757 | 24 |
| GAATGATGAACCCCTTCCCT     | 60.133 | 20 | GAGGAAACCAGCTGTCCAAG    | 59.844 | 20 |
| TTCTTGCTTGCTGTCCCTCT     | 60.134 | 20 | CATGCCTCAAACAACCTCAA    | 59.691 | 20 |
| CAACAAGCTGTCAACCCAAA     | 59.734 | 20 | CCATTCACACACACACTCAGA   | 58.078 | 21 |
| GTCGGCAAACCAGAGCTAAC     | 59.882 | 20 | AAGTGTTGCACCGACTTGTG    | 59.794 | 20 |
| TTTTACCCTCCCATGCTTTG     | 59.931 | 20 | CCTCATCGTCGGATTTTAGG    | 59.523 | 20 |
| CCAGTTCAACTCTCTTCCG      | 59.837 | 20 | CTAGGTGGCTGCTGTGTGAG    | 59.641 | 20 |
| GGCTTTCTAACTTGTGGAACC    | 60.376 | 23 | TTCCATTTATTTCAATTCATGGG | 59.908 | 23 |
| AGGAATAGGGCCGAGAAAAA     | 60.034 | 20 | GGACACAATGCACACCTCAC    | 60.013 | 20 |
| GCGTCCCTTTTACATGATCG     | 60.469 | 20 | TCGGTCGTCAGATTGAGAAA    | 59.369 | 20 |
| TGTGGCTCAAAGAAGTGCAG     | 60.175 | 20 | GCCTCCTTTTCTCTTCTTGACA  | 59.998 | 22 |
| TGGATGATGAGGCTTGAAGA     | 59.322 | 20 | TGCATGTATTTGGGCTAAAGTG  | 60.02  | 22 |
| GAGGGGTGGTCAAAAGAAAT     | 60.306 | 20 | TTTACCCGTTGCATGTGTGT    | 59.888 | 20 |
| TCGTCAAAAATAATTAAGGCCA   | 60.013 | 23 | GAGACGATCGAACAGCATGA    | 59.95  | 20 |
| TGAATTAAGTGAAGAATGATGAG/ | 59.709 | 27 | CATCAACCCAAACCCATTTTC   | 60.029 | 20 |
| TAACCAAACCCCAATTTCA      | 60.024 | 20 | GCTGCTGAAGAGACAAGGGA    | 60.678 | 20 |
| GCAGGAAGCTTCAACTCCAG     | 60.134 | 20 | CATTGCTGCTATGCCTGAAA    | 59.976 | 20 |
| TTGCTTTTTGGGGATTTTTG     | 59.916 | 20 | GTGGCCTGAGATAGCCGTTA    | 60.235 | 20 |
| GGAGTGTAGTTCCCCAACA      | 59.82  | 20 | ATTTTCCCTCTGCTCCGTCT    | 60.212 | 20 |
| ATCCCAAGATTCACCACAGC     | 59.934 | 20 | GAGTGAGGAGCAGAGGGATG    | 59.945 | 20 |
| TGTGTGCAATGTGTGTGTGTT    | 59.523 | 21 | CAAATGCATTCAAAGCCAC     | 59.161 | 20 |
| ACAAATAGATCGGGGGAAGG     | 60.145 | 20 | GACCGCGAAGTTTACATGGT    | 60     | 20 |
| CGACTACAGGAACTGAGGGG     | 59.715 | 20 | TGGGGTGACAGACCACAGTA    | 59.997 | 20 |
| CACTTCTGCGGCTGAAAAAT     | 60.386 | 20 | CCAATTAACGTTCCATTCACAA  | 59.736 | 22 |
| GAATGCTGGGAGATCAAGGA     | 60.158 | 20 | TTTCTACTCCCTTCCCCTGC    | 60.569 | 20 |
| GACTTTGGGCGACTTTGAAC     | 59.717 | 20 | GGTGGCTTCTCTTTCGTTTT    | 59.878 | 21 |
| TCTGTGCTCTTTTCTCAGTCG    | 59.93  | 22 | TCTTCGACCCAACACCATATTC  | 61.099 | 22 |
| ATGAAGTTAGAAAATAAGGAGGT  | 57.239 | 26 | GCGTTTTGTAAATTGGCGTAA   | 60.016 | 21 |
| AACTGCCCTCCAATGCTAAC     | 59.198 | 20 | TCATCTTGTCATTTTCGCCA    | 60.197 | 20 |
| TGAACACAGAAATCACGTTGC    | 59.755 | 21 | AGCGGTTATTACCGGATCG     | 59.93  | 19 |
| ATGTGGCATCCTATCAACCC     | 59.635 | 20 | ACGGCTGGCATTGTTAGAG     | 60.27  | 20 |
| ATACCAGCATTTTCCAGCCA     | 60.469 | 20 | TGTTGTTGTTGTTGCTGCTG    | 59.504 | 20 |
| AATTGGGCCATTCACTTCAA     | 60.309 | 20 | TATGGGTTATCACCGGATCG    | 60.544 | 20 |
| TTGCCGATTAGGATTTCTGTT    | 59.547 | 20 | GTTCTCCTTCCCCCTTCTT     | 60.787 | 20 |
| CAAGCACTATGAAAGCTAAATAC  | 58.302 | 27 | TTGATTTTAAAGCAGGATCTTT  | 58.898 | 24 |
| ACGCTTGCTCCCTTAATCTT     | 59.962 | 20 | GCTTCAGTCACGCACACT      | 60.104 | 20 |
| TTTTTACCATTTTGCCTCG      | 59.937 | 20 | TATGGGTTATCACCGGATCG    | 60.544 | 20 |
| TCGTGTGTGTGAGTGAACCA     | 59.737 | 20 | TCTCTCACACCGAACACCCT    | 60.713 | 20 |
| AAGGGAGGAATAGAGCCGAA     | 60.166 | 20 | AACACACACGCACTCACACA    | 59.818 | 20 |
| GCGTATAACCGTAGGCTTGC     | 59.769 | 20 | TTGTCCAGTGTGTGTTTTTGG   | 59.495 | 21 |
| TCCAGTGACAAAACCGACA      | 60.128 | 20 | CCCAAGCCACATACTTTGGA    | 60.883 | 20 |
| ACTCTCGTGGATTTAGCGT      | 59.874 | 20 | GATGGTTTCCGAAAGTGGA     | 59.91  | 20 |
| CGGGAATTGATTCCTTCTTG     | 59.5   | 20 | GGGCTCAGTAAACTGCTCTCA   | 59.63  | 21 |
| CCAACACATGATTTGGAGCTT    | 59.985 | 21 | CCCAAACATTTGAGGGTTGT    | 59.688 | 20 |
| CTTCGCCAAAACCTTGATGT     | 60.11  | 20 | TTTTATGTAAATTGTCGTGCGT  | 57.373 | 22 |
| CCCCTGTTCTTCATACCCTG     | 59.401 | 20 | GCTTGGTGAAGGAAGTGAGG    | 59.844 | 20 |
| AAAAATATTAGTCCAAGTTGTGGC | 57.828 | 24 | TTACCATCATTCTTGCCATT    | 59.287 | 21 |
| CGAACCCAACCCACAATAAA     | 60.587 | 20 | TGACCCTTTGATGTTATACACG  | 59.393 | 23 |
| CCACCGAGCACCAAGTAAAT     | 59.993 | 20 | TGGAGGTCGGAGAGAGAGAA    | 60.064 | 20 |
| AGTTGGGCTTAATGGTGTGG     | 59.853 | 20 | TGGTGACTTGAAGAAATTTGG   | 57.715 | 21 |
| AGGAGATGGAGAGAAAGTGTG    | 59.878 | 22 | GTGGGTTTAAAGTGGGGTGTG   | 60.126 | 20 |
| GAATCAACTCCAATCCGGTG     | 60.317 | 20 | CCAGATTCAAACCCCTACCCA   | 59.784 | 20 |
| TTGACCGTCCAACCTTCAA      | 59.262 | 20 | AATGATTCCTTGGCACTTGG    | 59.933 | 20 |



|                          |        |    |                         |        |    |
|--------------------------|--------|----|-------------------------|--------|----|
| CACGAATGGGACCTCCTTTA     | 59.926 | 20 | GGATGCTGATGGAGGGAATA    | 59.854 | 20 |
| TGGATGATGAGGAGGAGGAC     | 60.008 | 20 | GGACCAACTTGGAAAGTACCG   | 59.449 | 20 |
| TACTGCTCTTGAACCTCGCCA    | 59.74  | 20 | CAAGGAACATGGACTTGCTG    | 59.288 | 20 |
| TTACAATGGCCAAGAGGATT     | 57.155 | 20 | GGGTGGTAGATGAAGAACCG    | 59.405 | 20 |
| GAGTTGGTCATTTGAAGCGAG    | 59.867 | 21 | ATTGAATCTACGTCCACGGG    | 59.813 | 20 |
| TTTTGTTTGTCCAGGTTG       | 58.5   | 20 | ATCGCTCGGGCTCATATCTA    | 59.791 | 20 |
| TCTTCCTCTCCCTCCGTTT      | 60.183 | 20 | CGCTCCACAAAGATCTCACA    | 59.984 | 20 |
| GATTTGAACTTGGAGGGCAG     | 59.67  | 20 | TGCATGCAAAACTGAGCTTC    | 60.142 | 20 |
| TGCATGGTTAATGTTGTAAGGG   | 59.758 | 22 | GCCAATGATAGAACGCCAAT    | 59.929 | 20 |
| TGTTCTGATTTTCTGCACCG     | 59.84  | 20 | CTCTGCATGTACGCTACCTACC  | 58.954 | 22 |
| GGCTGAGTACACGAATGCAC     | 59.323 | 20 | TCGTGTAAGTTAGCCGGGAC    | 60.132 | 20 |
| CTTTTCACACGAGGTCACGA     | 59.873 | 20 | CCCTGCACCCTTTTAAATCA    | 59.931 | 20 |
| CACGTTGGGATCTAGGCAAT     | 59.955 | 20 | AAGGAATGGTTTGATGGGTG    | 59.647 | 20 |
| TCCAGTTTTCAATGGTGCAA     | 60.088 | 20 | GCCATGGTTAAGTTGCTCGT    | 60.14  | 20 |
| CCCTAACTGGCTTCGGTACA     | 60.125 | 20 | AAATTGACAGCGATGGAAGC    | 60.221 | 20 |
| ATGTATTGCATGCCACCTTT     | 57.97  | 20 | AGGGGTTATCACCTGAATGC    | 58.864 | 20 |
| TGTCTGATGATAACTGGCCG     | 59.673 | 20 | CTGGAAAACTTCCCACCAA     | 59.942 | 20 |
| CGGAATACCGCTCGTAAGTC     | 59.73  | 20 | CGAGCGAGTGGTTGTGTAAG    | 59.51  | 20 |
| ATGATTTTGGTGTGTTGGCA     | 59.823 | 20 | GCTCATGGTTCAGGGTTCAT    | 59.934 | 20 |
| TCGACCCGGACAATCTCTAC     | 60.073 | 20 | ATCCGCCTACATTGGATGAC    | 59.78  | 20 |
| CATATGGCGCTCCACCTACT     | 60.118 | 20 | GTTGCAGGTCTGCGAGAAAT    | 60.406 | 20 |
| TGAAATCTCCCGTACTTCCG     | 60.066 | 20 | GGGCACCTACTTGTGTTGTA    | 60.023 | 21 |
| TGCCATAACGGTTGTATGAA     | 59.809 | 20 | ACCTCTGCCTCGTCTGGTTA    | 59.867 | 20 |
| TTTTATCTGAATGCTAGATGTTG  | 58.809 | 25 | TGTCCGTGAAGTGAAAGACG    | 59.873 | 20 |
| GAAAAATAGCATGCCTTCGC     | 59.822 | 20 | CGCACAATATCATGCATTAC    | 59.975 | 21 |
| AAACGGAAATACGAATGCGA     | 60.456 | 20 | TGGTGTAAATAATTTGGTTTCAT | 60.006 | 24 |
| TGTGTACTTCCCTACTCATAAGCA | 59.296 | 25 | GTATCGCCGTCGTGTTCTTT    | 60.14  | 20 |
| AGGTACAGCCATTCGTCCAC     | 59.997 | 20 | GTTTACAACCTCACACGCGG    | 59.245 | 20 |
| GTGGCTGCTTTTCATCCATT     | 60.081 | 20 | CCATATTTAAGGGTTATCACAT  | 59.713 | 27 |
| ATCAGCCAAATCAATCTCGG     | 60.036 | 20 | TTCCTCCCTCGTTTTTCGAT    | 60.929 | 20 |
| TATGATGGGAAGGGTGGGTA     | 60.006 | 20 | CCCGTTTGTCCAATGCTAT     | 59.823 | 20 |
| TCCACTCACGAAAACACGAC     | 59.726 | 20 | ATAACCCGGTCAACAAGCTG    | 59.993 | 20 |
| GGTGGGAGCAGACAGAAAAG     | 59.844 | 20 | CAAAGACGGGCTAAAATGT     | 59.087 | 20 |
| GAAGCGCAGTCATTTAAGGC     | 59.988 | 20 | TTGTTGCAGTTGTGGGTGAT    | 60.008 | 20 |
| ACTCATTGTAATCTCTCTCAAAG  | 58.087 | 26 | CATCAACTCCATCCCCATTC    | 60.135 | 20 |
| CACCTTCATCTTACCACCA      | 59.52  | 20 | CCACAATAGCTTGGCACCTT    | 60.132 | 20 |
| ACACTAAACCCGCGTATTGC     | 60.025 | 20 | TGGTTGCGTAAGTTTTGGTG    | 59.627 | 20 |
| GGATACCCTCCCAAACCCTA     | 60.011 | 20 | CTTGATTGGTTGACGTCCCT    | 59.966 | 20 |
| ACGAGCCTCGAGGTAGCTG      | 60.706 | 19 | AGAGCTGCGTTTTGATCTG     | 60.538 | 20 |
| GTCCACGGTGGTTTGAGAGT     | 60.009 | 20 | TTTGCTGTGGGGAGTAAACA    | 59.17  | 20 |
| CGAATGGGAGAGAGTGGATG     | 60.612 | 20 | TCTGCCTCACCACCAATGTA    | 60.112 | 20 |
| AACAATTACAATGTTTATGAAAAT | 59.12  | 27 | CAGGCCCAATACCTTGACAT    | 59.813 | 20 |
| ATCTTACCTCCGTTCCGAC      | 60.328 | 20 | CCTCCGAACTCATGGTGTTA    | 58.569 | 20 |
| TCCTCACTCTCACTAGCCGC     | 60.7   | 20 | CTTCCCTAAACCCCTGTGCT    | 60.488 | 20 |
| ATATAGCCGTTGGGCTTGTG     | 59.982 | 20 | CCTTTGTCAACTTGGGCAGT    | 60.149 | 20 |
| TCAACTCACCTCACATTTCTC    | 59.187 | 22 | TGCAAGCATCAAACAACACA    | 59.877 | 20 |
| TCCAAGAACTACGCCAACA      | 59.317 | 20 | CGTTTTAATTTTCGGGAAGC    | 58.739 | 20 |
| TGGAGTTTAAATGTAGAGGCGAA  | 60.134 | 23 | TGACTAAGGTCCCATCACGA    | 59.086 | 20 |
| TTTAGTGTTTTGACATGATTACTC | 57.557 | 25 | TCAACCGCCAGGATTATTTT    | 59.901 | 20 |
| GTATCGGTGTAGCGTGGCTT     | 60.162 | 20 | AAATCTACCTCTGCCACCCC    | 60.328 | 20 |
| GCATTAGCAAATCCCGAAAA     | 60.04  | 20 | TTGTCATCTACAACACGACGC   | 59.779 | 21 |
| ATGTTCGAAGCAGCCAAACT     | 59.882 | 20 | TTTTGGATGACGGAAGGAAG    | 60.044 | 20 |
| TGTTCCGGTCCGAGTTTATT     | 59.429 | 20 | GGATGTTTCTGGAGCGATCT    | 59.243 | 20 |
| TCCTTCTTAAAGTCTTAATCGGA  | 59.658 | 24 | TGATTTTCCGTCATCGTGAA    | 60.049 | 20 |
| TTGGGGGTTTAGGGTTCTCT     | 59.799 | 20 | TTTGGCAATGTCAGGATCAA    | 60.049 | 20 |
| TACGGCAACTGTGGTTTCAA     | 60.149 | 20 | TACATGGGACGATTCCGATT    | 60.155 | 20 |
| GTGTTTGCAGAAATCGCCTT     | 60.257 | 20 | TATTGAGTTCGGGGAGATGC    | 60.036 | 20 |
| GACCCAACCTACCAAACCCAC    | 59.162 | 20 | GTGGAGAGGAGGGATGATGA    | 60.008 | 20 |

|                          |        |    |                         |        |    |
|--------------------------|--------|----|-------------------------|--------|----|
| AACGATCCTACACAATGGCG     | 60.914 | 20 | CCTGGATCACGGGTTTAATA    | 57.43  | 20 |
| TGGGGACTGACCTTTGAGAG     | 60.229 | 20 | GGGTGAAAAATGATTCAGAGG   | 60.299 | 22 |
| TGGCAACAAACAAAGCTGAG     | 60.027 | 20 | GATGCGAGGATCCTTTTTCA    | 60.155 | 20 |
| TGATGGGTGATGATGGAAAA     | 59.707 | 20 | TGCGTTTTGACAATATATAGGT  | 60.083 | 26 |
| CCAAGGATCACAAGTGGATG     | 58.93  | 20 | CCACTCTTCGATGGAACCAC    | 60.51  | 20 |
| TTTTGTGCGCCATTTTCTTT     | 59.564 | 20 | GCGGTTATTACCGGATCGTT    | 61.058 | 20 |
| TGATTGATCTTAAGTCAAAAGAC  | 59.465 | 25 | TCTTTCCGAGTCTTCCGCT     | 60.081 | 19 |
| TTCACGAATAAACATGTTCCAGA  | 59.505 | 23 | GCAATATTCAACTACGAGCATC  | 59.292 | 23 |
| TCGCCACAATCCTGATATT      | 60.296 | 20 | GTGGCGTTATTGGGTTTCATT   | 59.691 | 20 |
| CGCACCTATTAGGGTCGGAT     | 61.21  | 20 | AGCCTAGTCGCGATTTTTGA    | 59.982 | 20 |
| TAACGAGAAAATTCGGCCAC     | 60.074 | 20 | ATGGAAGTGGGTTTCGAATG    | 59.79  | 20 |
| GGATGTCCGAGGTGGAGTAG     | 59.53  | 20 | AGCCACTCCCTCCAAAAGAT    | 60.074 | 20 |
| CCTCATCCGAACAGAATTGAA    | 60.059 | 21 | TATGCACGAAGCCAATTCAC    | 59.694 | 20 |
| GGAGCAGATGGAAAGACCAG     | 59.803 | 20 | TCGTCCCATCTTTTACCCTC    | 58.981 | 20 |
| TTTTTCGCAAGCCACTAAAA     | 58.608 | 20 | TTTGAACTCTCGGCCTCTTG    | 60.508 | 20 |
| CAGGAAAGAAATGGGCTTCA     | 60.184 | 20 | TTAACGGGCGTTTTTGTAGG    | 59.993 | 20 |
| AAGCGAAACTGTTGTATGCTGT   | 58.978 | 22 | AATAAAATGTACGGGCGCTG    | 59.985 | 20 |
| CGAGCTGTTATGCGTTTTGA     | 60.014 | 20 | CGAGTGTGAGGCTGTGAGAG    | 59.757 | 20 |
| CCCGAGTTGAGTCTCTGATA     | 60.065 | 20 | CACACGCACACACATCCATA    | 60.029 | 20 |
| CCCCTACTCCAACCCTTCAT     | 60.183 | 20 | TCTTACGGAATTCCACTGGG    | 59.926 | 20 |
| GCAAATCTATCTCATACAAGGCG  | 60.128 | 23 | CGTCATAGTCAAAGCAACCG    | 59.342 | 20 |
| TGGTTTGGTTGTCACCTTCTTG   | 60.045 | 22 | GGGCTGGTCATTCCCTTAGT    | 60.328 | 20 |
| TTAGTTAGCAAGGGGGAGGG     | 60.435 | 20 | TTCAAAGGGCATTMTTGTCC    | 59.916 | 20 |
| CCCATACTTAATTCATAACCCAA  | 57.09  | 23 | AACACTTGAGGAAGGATGATG   | 58.646 | 22 |
| CTGCAGACATTTCTCGGTGA     | 59.984 | 20 | GCTTTTTCGACTTTGATCCG    | 59.823 | 20 |
| TTCGATGATAACTATGGGTTTTG  | 58.079 | 23 | GTGACCCATTTTCGATCACC    | 60.181 | 20 |
| CTCTCAATGGACCAGCACCT     | 60.261 | 20 | GAAAATCAAAGGGCCACAAA    | 59.916 | 20 |
| TGATGGAGAAGTTACGATGGC    | 60.088 | 21 | ATCGGTTATTACCGGATCGC    | 61.031 | 20 |
| GAGGTTTTGACATAACTTAGGTGT | 59.398 | 27 | ATGTTTGAATATCGGGGCA     | 60.153 | 20 |
| CCCAAGGGAAGTTGACTGAA     | 60.081 | 20 | TGGCACAATAGGAAAGCAAG    | 58.917 | 20 |
| GGAGCCATTCGATCTTTGTG     | 60.603 | 20 | ACAACTTATGGACCGCTGG     | 59.993 | 20 |
| TGCTCCGAGACCTTAGACTCA    | 60.141 | 21 | CGTACCCCACTTGGTAAAA     | 60.776 | 20 |
| AGAATCCCAGATTTTCATGC     | 59.083 | 20 | GAGGTTACGCCAAACATGC     | 59.141 | 19 |
| GCTGGAAGATAAGATGTGAACG   | 58.861 | 22 | TTATAACCGATCCCACCCCT    | 60.391 | 20 |
| TGTAGATGGGGGTAGGATGG     | 59.623 | 20 | CTGGCAGTTGGGGAATTAGA    | 60.066 | 20 |
| TCCAAAATTGTGTTACGGGT     | 57.85  | 20 | ATATGAAGTGGGGATGGACG    | 59.629 | 20 |
| GAAGAGAAAGCGCGATCATT     | 59.556 | 20 | CATCCACTTAAAGCAAGGCAA   | 60.25  | 21 |
| GTGGGTTAGCACGTGATCG      | 60.128 | 19 | GCTACGACATTGCCCTATGA    | 58.749 | 20 |
| AAAACTTGGGATTTAGGCCA     | 59.83  | 21 | AAATTAATAATTATGGCAACTTT | 57.89  | 25 |
| CGGAAATACCTCGCCTCATA     | 60.053 | 20 | GAGAACCACGGACAACCCTA    | 59.966 | 20 |
| GCCATGATCTCATGATTCAAAA   | 59.907 | 22 | GCACCGTCGATTTCTAGTGTT   | 59.256 | 21 |
| TTCGGTTAATCCAAAGGTCAA    | 59.438 | 21 | TTTTCCGACTCAAGGCATCT    | 59.813 | 20 |
| TTGAATGGCAAGGATTGGTT     | 60.309 | 20 | TCTTGCACATCTTGGTGAGTG   | 59.889 | 21 |
| GTGTAATAGTACATACAATGCAGC | 58.539 | 26 | ACCTGTAGAATCTCTTACTCTA  | 57.215 | 27 |
| TAGAAGCCCCAAACTTTGCT     | 58.973 | 20 | GATGGAGACACCTAAGCCCA    | 60.073 | 20 |
| GAAAGGGCCGATCCTATCAT     | 60.252 | 20 | ACTTTGCAAGTCACCGGTTT    | 60.156 | 20 |
| CGCGCACAAAGAACTTTACA     | 60.052 | 20 | GATAGAAGGCCGATTGACGA    | 60.177 | 20 |
| CACTTGACCTGAAAAGGGA      | 60.081 | 20 | CCTTGAATCGAGTTTACATGTA  | 59.038 | 25 |
| GCCTTTTGGCATGCAGTATT     | 60.103 | 20 | CGAGCCTTCTCGTTGATTTT    | 59.955 | 20 |
| CGTGAAGCATGAATCACTC      | 60.423 | 20 | TGTTGAAGTTTGGGTGTTGG    | 59.435 | 20 |
| GGAATGCGAGATGGAAGAAA     | 60.155 | 20 | CACTGTTGGAATCACATGCC    | 59.967 | 20 |
| GGTATGTCTCGGTGTTTCATGG   | 60.248 | 21 | TTCATCAGGTCGTGGATTGA    | 60.048 | 20 |
| GAAAATTGGTTGTTATCCACAAG  | 57.617 | 23 | CGGTTGCTTATTTGTTCTGT    | 59.226 | 20 |
| CAATACCGTGACATGCCTTG     | 59.988 | 20 | TACGTCAACGGTGGTTTGAG    | 59.609 | 20 |
| ACCCAAACAAGAAAATCCC      | 60.032 | 20 | ACTCACCGTGCTCTCCTCAT    | 59.866 | 20 |
| GATGGGAATGGGAGGTATGA     | 59.563 | 20 | TCCCGTTTTACCCTTGAATG    | 59.795 | 20 |
| GCCACCACACGAGTATATCAA    | 59.889 | 22 | CCTCACTCTTTTACGCCTTCC   | 60.248 | 21 |
| TCCTCTTTCTTTTTGCGAGC     | 59.708 | 20 | TCACCGTGTGTTTCCTGTTC    | 59.571 | 20 |

|                          |        |    |                         |        |    |
|--------------------------|--------|----|-------------------------|--------|----|
| TGTAGGCGCCTCTGATCTTT     | 59.978 | 20 | ACATGCAAACATGGAACATTG   | 59.312 | 21 |
| CTCGCGTTCGACTCCTTAAC     | 60.015 | 20 | TTGATCAAGACCTTTTGGGG    | 59.903 | 20 |
| TGCTCTCTTTGTAATCTCTCCCA  | 60.379 | 23 | TTTTGGCTGCTCCTTTGACT    | 59.993 | 20 |
| GTGCAGTTGTCAGCAGAGGA     | 60.187 | 20 | GATGTTCCACAAAACCACCC    | 60.073 | 20 |
| GCGAAATCAAAGAATCCGAA     | 60.153 | 20 | GGACCGCGAACTTAGAGGAG    | 61.275 | 20 |
| GGAAATCAATCACAGCCGTT     | 59.939 | 20 | TGAAACAATGCCTGGAAACA    | 60.088 | 20 |
| AGATGAGCCCACCCACTTTT     | 60.883 | 20 | GATGATTGCACCATAACGCA    | 60.498 | 20 |
| CCAAGTTATGATGGGAAGGG     | 59.24  | 20 | TGTTGTCATAACAAAATGACA   | 59.837 | 24 |
| CGAAATGAAATCCTGGCTTC     | 59.645 | 20 | TCGCCATATTCGATCACAAA    | 60.035 | 20 |
| TCAGAAACTTTGAGCAGAAGAA   | 59.238 | 22 | GTTGAGCTCGGAATACCTG     | 59.694 | 20 |
| CAAGCCAAAAGCACAAAGT      | 60.284 | 20 | GGAGTGAAAATGGGTGTTGG    | 60.21  | 20 |
| TGATGGCGATAATTACATGGTG   | 60.588 | 22 | TGTTGACTTACCAACAGTTCAC  | 58.255 | 23 |
| CCCCAAACATCACACACAAG     | 59.848 | 20 | GTCGGCATGACGTAGTTTGA    | 59.722 | 20 |
| GAGTTCGTCAAACCTCCCAA     | 60.088 | 20 | GGCCAAATATTTCCCTACCG    | 60.508 | 20 |
| ACTTGCTCCCAGACTCAATA     | 59.978 | 20 | ACCATATTTAAGGGTTATCACC  | 57.552 | 24 |
| CTGAGATTCCCATCACCAT      | 59.737 | 20 | CCCGTGACACAACAGATCAC    | 60.005 | 20 |
| TTGACATGATTTGTTAACGGG    | 58.4   | 21 | AGTCCCCATTAAAGATGTAAGT  | 57.81  | 25 |
| GGCCTCCTGTCCAATTTTTA     | 59.019 | 20 | TCATAAGTTAACATAAAACCAA  | 59.079 | 27 |
| GAGGACACGTTGGACCTGAT     | 59.969 | 20 | GGGTGGGTTTGGAGAAGAGT    | 60.349 | 20 |
| ACTCACTCTACTAGCCGCAG     | 59.824 | 21 | AATACGACGGCGAAGAAAGA    | 59.845 | 20 |
| CAATCATCTAGCCCTCTAACATCT | 59.682 | 25 | CTTGACTATCGGGTTCCAA     | 59.926 | 20 |
| ATCCTCGCCTCCTTCTTCTC     | 59.919 | 20 | AAGGCCACACTCCAAGAAAA    | 59.711 | 20 |
| GCCACGTTAGGCTCAAGAGT     | 59.501 | 20 | CATCCCAGTTGTCTTGGGAG    | 60.501 | 20 |
| TGCAAACCCATTTAAAACCC     | 59.677 | 20 | ATTCATGTCACACCCTCCC     | 59.636 | 20 |
| GATATGGAAGAGTGGCACCG     | 60.483 | 20 | CGGTACAGATTACAGCACGC    | 59.371 | 20 |
| ACCGGCTACTTGTGAATTCCT    | 60.012 | 21 | TTTTCGAGTTTCTTGTCTCCA   | 58.994 | 22 |
| ATGTGCATGAACACGGATGA     | 59.925 | 20 | TCGAGAGCTGAGAGACAAAGA   | 59.112 | 22 |
| CCCAATGACGGAGACAGAAT     | 59.927 | 20 | ACCCTCCTTCAGCCAAAAAT    | 59.94  | 20 |
| TGGTTGGAGGAAAATCTTGTG    | 59.956 | 21 | ACACTTTTAACTCCAAACCAGC  | 59.098 | 23 |
| CGTGTAAATCACCATCATCGG    | 59.799 | 20 | GTTGGCGATTTTCATACGGT    | 59.829 | 20 |
| GGAGTCTCTCTCGCTGATGC     | 60.255 | 20 | AGGGGAAGGAAAGAGAACGA    | 60.183 | 20 |
| AGAGGGACAAAGCAAACGA      | 59.853 | 20 | AACGGTTATCACTGGATCGC    | 59.962 | 20 |
| GGCATCAGAGCCACGTTAG      | 59.41  | 19 | ATACCCGTCGGTGTTCTCTG    | 59.989 | 20 |
| TGAACGGTTGAAATTTGCTC     | 58.747 | 20 | ATTTGCTTAAATGAATCAATG   | 57.325 | 23 |
| CGAAAACCTTGAGAGCTCGTT    | 60.908 | 21 | TTGTTTTTATTAAACAAGACCAT | 58.895 | 25 |
| GGTCCTCTAGCCTGCATTTG     | 59.836 | 20 | TCCGTCATCGACCACTATCA    | 60.072 | 20 |
| GAGGGGAAAAGAAGAGTGGG     | 60.045 | 20 | CGGCCGGTTTTTAAATGTTTA   | 59.835 | 20 |
| CCATTTGCATATTATTTTTGCAC  | 58.502 | 23 | TGAGTGGAACGATCCATATAA   | 60.427 | 25 |
| TCAAGAGCCTCCGACTTTTTC    | 59.55  | 20 | GGACCCCACTCACACGATT     | 60.851 | 20 |
| CGAGCGAGAGGAGAGAGAAA     | 59.966 | 20 | AGACGAGGAAGAACAACGGA    | 59.844 | 20 |
| CAAATGGCCAAGAGAGTTTACA   | 59.267 | 22 | ATTAAATGCGCCTCCCACTT    | 60.821 | 20 |
| GCCTGAATCGACGACAAACT     | 60.263 | 20 | CTGCATTGTCAGTAGTCCG     | 59.465 | 20 |
| CGATTTGGATTGCAATTCTGT    | 59.033 | 21 | TCTACAAGATCAACCGCCTG    | 58.874 | 20 |
| GAAACAAAGAACGTGCACACA    | 59.797 | 21 | CCCGTACCTCAATTAAGGGG    | 59.719 | 21 |
| GGAAGGATGTGAGATGGTGG     | 60.326 | 20 | CCGAATTCCTCTACCGTCAA    | 60.066 | 20 |
| ATGAGGTGAAGGTAAGGGGG     | 60.183 | 20 | TGCACACTGTCACACTCCAA    | 59.905 | 20 |
| TTTGAATGGATGGTGGTGA      | 59.75  | 20 | TATTGGAGCAGCTGGGAAAT    | 59.668 | 20 |
| AGGGGCTTAAGATCCAGAA      | 60.032 | 20 | CCATTTCATCACCTCACATC    | 60.188 | 21 |
| CCGCCCTTCCCTACAAAA       | 60.961 | 18 | ATAAGAGGTATTTTGACAGTAT  | 57.206 | 25 |
| ATTCCCGTCGCCCTACTTAT     | 59.82  | 20 | ATCGATGTGTTGGCATTCAA    | 59.931 | 20 |
| GCGCACCGATATGATAGACC     | 60.465 | 20 | CCACCCGTGTATGTCATGTG    | 60.722 | 20 |
| CCCTAAGATAATGCCACCCA     | 59.778 | 20 | TGACACGAAATTGACGGAAG    | 59.691 | 20 |
| GGCCCTAACTTGACCCAGAT     | 60.328 | 20 | AGCCGGATTTAGAGCAATCA    | 59.807 | 20 |
| GAACAAAGCTTGTACACGG      | 59.339 | 20 | TCCCTGTGTTCCGAAGAACT    | 59.697 | 20 |
| CCCAGACTCGATAACTGGCT     | 59.308 | 20 | CGCGTCAATGTTTTCCATGT    | 61.866 | 20 |
| TGGCTGTGGACTCAGTTGTT     | 59.31  | 20 | TGGACTTCTCCAATCCATGC    | 61.016 | 20 |
| CCAAAAGACGATCTGGGATG     | 60.452 | 20 | CTGCAATTCCTTCTGAACCC    | 59.67  | 20 |
| GAGGGTAGGGGTTCAAGTCC     | 59.795 | 20 | CTCGTTCTTCTTCATCTAAAC   | 57.05  | 24 |

|                          |        |                            |        |    |
|--------------------------|--------|----------------------------|--------|----|
| TGCGAGCCATCAACATGTAA     | 61.225 | 20 CCGAGGGGTTTAGGGAATTA    | 60.136 | 20 |
| TCATGCACGAAACTCTTGA      | 60.39  | 20 ATCATCAAATTGCCAGGGAC    | 59.756 | 20 |
| TCCTTGAATATGAGAACTTGTTA  | 57.989 | 27 CAACACTCAATTATAGGAAAA   | 59.318 | 27 |
| ACCAAACATGGGGATATGAAA    | 59.009 | 21 GGGTAGTTGAAATGCAAGCC    | 59.574 | 20 |
| AGCCCATATTTTCCACCAA      | 59.273 | 20 GGGGAAGAGAATCAAGAGGG    | 60.008 | 20 |
| GGATTTTGTGAATCACGGGT     | 59.653 | 20 CACTGATTCGCACAAGGATT    | 58.724 | 20 |
| TTTTCTTGGCCATAGGCATC     | 60.038 | 20 ACATATTCCATGGTCCCCAA    | 59.871 | 20 |
| GCATGCATCCCACTCTAC       | 59.12  | 20 CAAATGTGSCCTTTCCATTT    | 59.801 | 20 |
| ATCTGAATTTTCGATGCCGAC    | 60.043 | 20 TGCATCACATTTGTTCATATCG  | 59.448 | 22 |
| CCCCAAATTCACATGCTTTC     | 60.309 | 20 ATCTCCATCTCCTTCCTCCG    | 60.553 | 20 |
| CACATCGCTATCGTCCATGA     | 60.653 | 20 TTTTTGCCCTTGTATGCTCC    | 60.074 | 20 |
| TTTAAATGCACACCCCTTCT     | 58.616 | 21 TTGGGTTTTTACGAAAGGCA    | 60.46  | 20 |
| TTGATGCATGAAGACAGCAAG    | 60.003 | 21 CGTTCATTTTCGTACCTTTAGAA | 60.307 | 26 |
| GAGAGAGTTGATTGTGGGGG     | 59.505 | 20 TGCCTTTAGTAGCCAGCACC    | 60.407 | 20 |
| CCGTTGGAATCAGTAATGGC     | 60.331 | 20 GGAAGGCGTTGACATTTGAT    | 59.939 | 20 |
| ATACAGTGCAGATGCGCGTT     | 61.799 | 20 GAATGTTGTCCCGGACTCCT    | 61.291 | 20 |
| AAAGACAAACCAGCAGAGCA     | 58.65  | 20 TGGTAGTGAAATAAACATAAA   | 59.645 | 26 |
| TAAATGTTTCAGCCCATAGAATTT | 58.233 | 24 GGTTTTACGAACCACAATCCA   | 59.716 | 21 |
| GAAAACGAGAGAGTGAGGCG     | 60.134 | 20 TACATTTCCCAACCACTCC     | 59.647 | 20 |
| CTCTTCTTCCCAAATTGCC      | 60.929 | 20 AAAAATGGTTATTATTGGATCA  | 57.553 | 24 |
| CATAATGAGAGGCGGTTGGT     | 59.955 | 20 AAAATGGAGGCGATTTTGTG    | 59.938 | 20 |
| TGTATGCACCTGAACATGCC     | 60.549 | 20 TCCGTATGCTGTGGATGAAA    | 60.073 | 20 |
| TCAAGAGTCCCCTTGGTCTG     | 60.229 | 20 ATGGCATATGAGGCTTGGTC    | 59.923 | 20 |
| TACCCCATATGCAGTGGA       | 59.741 | 19 GCCTATGCAGTCACAAATGC    | 59.306 | 20 |
| TTGGCTTGTTTTTGCACCTA     | 59.344 | 20 ATCGCAATTCGATTAGGCAC    | 60.067 | 20 |
| CCCAGCTATATTGCATTACAA    | 59.985 | 22 CATGTTGCGTAATAGGCGAG    | 59.349 | 20 |
| GAGGGGGCTTTTCTTTTAC      | 60.053 | 20 ACGATTACAACGCAACATCG    | 59.614 | 20 |
| GAGGAACCTCTTAAATGCAGTG   | 59.317 | 23 TTTTACACCACCGAAAAATGC   | 59.861 | 21 |
| CCGACGGTTGTAGTGGAGTT     | 60.028 | 20 AAAAATCCCCTCGAATGCTT    | 59.909 | 20 |
| ATGTAATGCGCACGTTGAAA     | 60.14  | 20 TCCAATGGATGGAAATGGTT    | 59.991 | 20 |
| TCGGCTGTCAAAGACAAAAA     | 59.439 | 20 GAAAGGACAGTAGGTGATCGE   | 58.658 | 21 |
| TCTGGCCAATTGTGAAATGA     | 60.049 | 20 GGGTGAAATAGCATGCAAGG    | 60.469 | 20 |
| GCCCCACCCTTCTATCTCT      | 60.037 | 20 TGCCGCTGAACATATTGAAA    | 60.215 | 20 |
| GGCTTTCTTAACTTGTTGGAACC  | 60.376 | 23 CCTCTGCACCCTTTGAAATC    | 59.67  | 20 |
| GATGATGGAATTTGGGTGCT     | 59.756 | 20 GACCCTAATACCACTAACCC    | 59.133 | 22 |
| AACGGGGCCATTATCTTTTC     | 60.15  | 20 CCTTCAACAAATGGTTCATGC   | 60.359 | 21 |
| TCTGGGGGAGATTTGTTGAG     | 60.042 | 20 TTTCCAGGATCGAATTGAGAA   | 59.631 | 21 |
| TCACTCTCACGCACCTTCAC     | 60.03  | 20 TTCAAACCTGGTTCTCGTCC    | 60.088 | 20 |
| AGATTTAAACAGTGGCTGCG     | 58.054 | 20 CAACATCACCAAACACTCCG    | 60.001 | 20 |
| AGTTCGAAAGCCTACCTCGC     | 60.894 | 20 TTCATCATTTTATTTATAAGCT  | 59.91  | 26 |
| GGTGTCTGGAACAAGGGAAA     | 59.943 | 20 TTGGTTGGTGGAAGAAATCA    | 58.947 | 20 |
| TGGTTAGTATTGGAACGCGAC    | 60.011 | 21 TTTCCATGTTCCGTGTTTCA    | 59.941 | 20 |
| GTTATGCGATCTGCTCGTGA     | 59.979 | 20 AGCACTGATTCGCACAAATG    | 59.871 | 20 |
| TCTGATTCGGGAAAACATGA     | 59.049 | 20 TGTCCGATTTGCCGTTCTAT    | 60.469 | 20 |
| GGTTTGCAGGTACGAGGTGT     | 60.035 | 20 TCCAGCATTTGTATGTCCCA    | 59.924 | 20 |
| GTTGCTTTCGGTGTTTGTCC     | 60.538 | 20 CATGAACCTGAAACAGCGTG    | 60.301 | 20 |
| AGGAAGCGAGGTAGGCTTTC     | 59.983 | 20 CCTCCCAACTCCAATATCACA   | 59.799 | 21 |
| CCATACGATCTGTCCCTCGT     | 59.95  | 20 TTGAATCATTTGCGTTGCAT    | 60.081 | 20 |
| CAATTTATTTACCGAGGGTTTCG  | 59.743 | 22 GACCTGCCAAAAAGTCAAGG    | 59.711 | 20 |
| AATTATCGTCCGTCCCAAG      | 61.061 | 20 CGTTCGGAACACTTCAGGG     | 59.728 | 20 |
| GAAATATCCACCGAACGGAA     | 59.762 | 20 CTTAGGTGTTTTGACATGTTCA  | 59.164 | 25 |
| TATGGGAAGAGGGGACTGAA     | 59.478 | 20 CCCACTTCCTCCAACAGTA     | 59.959 | 20 |
| GAATTGGTGAATGATTAGAGAA   | 57.257 | 23 TGTTGTAATGAGGCTTTTGAA   | 59.625 | 22 |
| TTGAGTTATGAAGTTTGCACC    | 59.271 | 22 AGCGCTTTTTGCCAGATATT    | 58.992 | 20 |
| CCTCCGTGGACGTAGATCAT     | 59.95  | 20 TTTCCCATCACCATCACTT     | 60.173 | 20 |
| ATCTGGGCCATTAGATCGTG     | 59.917 | 20 CCGCCTGATTTGTTTCTCAT    | 60.074 | 20 |
| TAAACTCCCCCTCAAACCAA     | 59.401 | 20 TCCGATGACTAAATGGAAGAC   | 59.569 | 22 |
| AATCTTGGGACCTCCCTTGT     | 59.795 | 20 ACTTCCGTATATGTCGCCG     | 59.982 | 20 |

|                           |        |                            |        |    |
|---------------------------|--------|----------------------------|--------|----|
| TGCAGGTTTGTGAATTCG        | 59.706 | 20 ACACAATGCCAAACATGGG     | 60.232 | 19 |
| CACGAGAGTTGAAAGGGAGC      | 59.989 | 20 TGGTCCTGGGAACCTAACAG    | 59.959 | 20 |
| CAAATGGAGGTGAGAGGTTTG     | 59.578 | 21 ATGGCGGTGAAGATGGTAAC    | 59.82  | 20 |
| TTCCCTCTCCTCCCTCTCTC      | 59.883 | 20 CCTTGGCGGTTTCATATCAGT   | 59.955 | 20 |
| TCCTGAGTGGCGATAAAGAAA     | 59.831 | 21 GAGAAGTTGTCCGTTTGGGA    | 60.088 | 20 |
| ATAGAGCAGCAGACGCGATT      | 60.147 | 20 GGACCTTGCCAGAAACCAA     | 59.943 | 20 |
| GAGGCGGTTAAAGAAACGTG      | 59.747 | 20 GCATACTCTACCAATCCCC     | 59.366 | 20 |
| GGTGGCCTTACTCCACTGAA      | 60.111 | 20 TCCAGCATTCTTGAACACA     | 60.24  | 20 |
| GTCGTATACTGCCGCCACTT      | 60.162 | 20 AATCATGTTGCTACACGTTGCT  | 59.705 | 22 |
| GGAGAGGAATCAAGTCGACAA     | 59.274 | 21 GACTCGGGTAGTCAAGTTTGC   | 58.854 | 21 |
| GAGGGTGTITAGGGTTGCAG      | 59.592 | 20 TGTACAAAAGCTTGTGGTGAA   | 59.836 | 23 |
| TTTTTCGATCCTGTGCTGTG      | 59.84  | 20 GCAACGGAATACCACTCGTT    | 60     | 20 |
| AGGCTAGCACAGAATGGCT       | 59.104 | 20 GCACACTCGAAGAGTAGCGA    | 59.344 | 20 |
| CAAATGGCCAAGAGAGTTTACA    | 59.267 | 22 AAAAATACCAAAGTCGATTATC  | 59.264 | 25 |
| CAAACATAGAAACATGGACGCT    | 59.158 | 22 TATGGGTTATCACCGGATCG    | 60.544 | 20 |
| ATTCATACTTTCTGCCCCC       | 60.152 | 20 AAAAGCATTTCACACGTTCTG   | 57.947 | 21 |
| AATGCATGCACCTGATTACAA     | 59.055 | 21 AAATAATTTCCGAAACCGCC    | 60.148 | 20 |
| TTCTCAAGCTTGTCAACCCC      | 60.232 | 20 CACACGTTATATTTATAGTTTTG | 59.19  | 27 |
| GAAGCGAGTTCCGAAATGAA      | 60.331 | 20 GCGAATTCAGCTAGAACAACA   | 59.541 | 22 |
| TTCTGTCTTGGATGATGAGGC     | 60.211 | 21 TAGCTTATCACTATCACCTCT   | 59.255 | 25 |
| GGGCAATTATGTTGGAGGTG      | 60.192 | 20 ACGGTTACATACTCCTGCC     | 59.997 | 20 |
| CCTCACCTTCTCTCCACTCTCT    | 59.101 | 22 TGCAACCAACAAAAACAACA    | 58.626 | 20 |
| ACGATGTCCTCTATCACCCG      | 59.95  | 20 TCCTTGGAACCTAGAAATGGTT  | 59.001 | 22 |
| GAGTAATGCATCGCCTGGAT      | 60.066 | 20 GGGAGAATGCCTTGTITCAA    | 60.051 | 20 |
| TATCCTAGGGGAGACAGGGG      | 60.277 | 20 ATCCTTTTCGCCATCTTGAA    | 59.645 | 20 |
| GGGTTGAAGTAAATGAGGTG      | 58.423 | 21 ATGATGGAATTGGGTGTTGG    | 60.439 | 20 |
| TGTCAAGATTGGTCTCGTTTT     | 57.315 | 21 TCTAATAGCAAGAGAGACCGG   | 59.871 | 22 |
| CCGCAATTTTGTCTTTGGT       | 59.975 | 20 TTTTCAGCATTGAAACCAGCA   | 60.379 | 20 |
| CCTAAGTGCCTACGTGTTGGA     | 60.175 | 21 GATTTCCCACCCTTCTTCTTG   | 59.926 | 21 |
| TCCAGATGCCTTCATTTTTCA     | 60.57  | 21 TGCCTCTAATGCACACAAGAA   | 59.478 | 21 |
| AGCTGACTGGTGGTCTTTGG      | 60.298 | 20 CGGAATCAACCCTCAAACCTC   | 59.526 | 20 |
| TCTGGCTCTTTTCCAGAGCA      | 61.196 | 20 GGGTGATTGTAGCCAGCTGTA   | 60.147 | 21 |
| GAAGTTTTGATCAATTTTCACTCG  | 59.938 | 25 CTCGCTAACGGCACTAAACC    | 59.904 | 20 |
| CACATGTTGCCATCTCCAAG      | 60.112 | 20 GGTATTGTCGGAACCTTCGCT   | 59.198 | 20 |
| CCATGAGTCCATGACCCTTC      | 60.326 | 20 AAAGCAGGCAGTAGAAGCCA    | 60.154 | 20 |
| GGAGTCTCTCTCGCTGATGC      | 60.255 | 20 GACGATTGAGAGAAAGCGGA    | 60.483 | 20 |
| GGCTGACCCAATACCTCAAA      | 59.933 | 20 AAATTTATTGTAATCTTCCCTCC | 59.594 | 26 |
| GGAGAAAAAGAGATTGAGAGGG,   | 60.189 | 23 AACCCAACCCACTAACCCAT    | 60.34  | 20 |
| TCAAACGTGAGGTGATGGTT      | 58.984 | 20 ATCAATGGTCCACATCGGTT    | 60.057 | 20 |
| TTTTCAGTTCGGGCGATTTA      | 60.56  | 20 TTCCTCTTGTCCGCATTTTT    | 59.685 | 20 |
| TACGTTGGACCTGAAAAGGG      | 59.964 | 20 AACAATTACAATGTTTATGAAA  | 57.992 | 26 |
| TGCCTTCAGGGCATTATCT       | 59.668 | 20 TGGTTGTGTGAACCAACTCTG   | 59.626 | 21 |
| CCTTGAACCGAGAAAATGGA      | 60.044 | 20 CCAAGCTTTTCCAACCTCACC   | 59.711 | 20 |
| CCTTGGCGGATCATATCACT      | 59.917 | 20 CTGCTCAATCATCTCCGTCA    | 59.942 | 20 |
| TTAATGGACGTCGTGACTGC      | 59.722 | 20 CAAGCTCATTTTGTGTCCCA    | 59.691 | 20 |
| ATGAGTTATCACCGGATCGC      | 59.923 | 20 CTCAGCATAACGGGAAGGGTA   | 60.088 | 20 |
| TATGTGATAGGCTACGGCCC      | 59.945 | 20 CGTGAATGAAAGCGATCGTA    | 59.833 | 20 |
| AGCTGTTAGGGTTGTATAGTGAGT  | 57.436 | 27 TGGAAGCATCAACCACTCTG    | 59.831 | 20 |
| CCCCAGTAGTTCCCATCAAA      | 59.784 | 20 TTCCCAACTCCATCATCACA    | 59.893 | 20 |
| TACCCAACCCACTAACCCAA      | 60.081 | 20 GAATTTGGAGAGGGAGGGAG    | 60.008 | 20 |
| AATGGCAGAAAGCAAAGAGGA     | 59.955 | 20 AAAGGGATTACCTGCCTTC     | 60.443 | 20 |
| CAATGTTACAAAATGGGCGA      | 59.42  | 20 TTGGATTTTATTGATCCTGC    | 58.494 | 20 |
| CATTTGATAGTTGTTTTTGTGGTG/ | 60.185 | 25 AGACTCTTCAACAATTCTACAC  | 58.586 | 27 |
| GTGACTTATGGGGGCTCAAA      | 59.933 | 20 GACACCCAATCCCATGAAAC    | 60.034 | 20 |
| AGATTTGGGTGATGTGTGGC      | 60.79  | 20 ATTTGCGTCGCCTAATGAAC    | 60.103 | 20 |
| TGGATTGATTATGCTTTGCC      | 58.577 | 20 TGCTGAGAGTGTGTTGGCAT    | 60.473 | 20 |
| GATCCCAGACACCGTAAGGA      | 59.927 | 20 CCCTCAATCGATCCATGTCT    | 59.886 | 20 |
| ATTCCGTTTTTAAGTCCGGC      | 60.312 | 20 CCTTGTATCGATCCCGTGT     | 59.813 | 20 |

|                           |        |                            |        |    |
|---------------------------|--------|----------------------------|--------|----|
| CTTTACCCTTTTGTAAACATAAAAA | 57.251 | 27 TTTGGTTCAATGGGTTATTCG   | 59.685 | 21 |
| AGTCCCAACCACTTTCACTG      | 57.611 | 20 GCATGATCAGGGTAAAATCCA   | 59.776 | 21 |
| ACCCTCTCCCTCTCTTTGCT      | 59.439 | 20 AGATTTTCGAGTTCGTACCCG   | 60.255 | 20 |
| ATTGCCACGAGAGAGATTG       | 60.218 | 20 AGAACGGGCAGCAGTCTAAA    | 60.015 | 20 |
| TGATCAACAGAGAATGCAAGC     | 59.016 | 21 AGCATTTGAGATCGGAGTCG    | 60.362 | 20 |
| ATATGCGGGCTGGAAGACTA      | 59.691 | 20 TGCTCACCTTCGATCTCTGA    | 59.656 | 20 |
| GGAAACAACACAACCAAGGG      | 60.246 | 20 GGTGGGAGGGAATTTGAGAT    | 60.133 | 20 |
| CTAGCAAGGCTTCCATCTGC      | 60.118 | 20 TGTGTTTTATCCCTCGCACA    | 60.111 | 20 |
| CACCACCCTGCTTCTTTCTC      | 59.844 | 20 AGAACATGGTTTCCGAGCTG    | 60.255 | 20 |
| TTCACACTACCGCCATTTCA      | 60.111 | 20 TCTCCCCCTCTTCCCTCTTA    | 60.139 | 20 |
| CCTTGAAGACAATGAAATTTTGG   | 59.865 | 23 CACCTCACCTTCTCTCCACTC   | 58.885 | 21 |
| CGTGGTTCGATCGTAATTGA      | 59.542 | 20 TGCCTCAAGGCTAAACAAGG    | 60.378 | 20 |
| TCGGGAGTCTGTATTGAGCC      | 60.218 | 20 ACAGAAATTGCCTCTGTTGTT   | 58.37  | 22 |
| GGAGAAATCAAGAGGAGGGG      | 60.008 | 20 CCACAAGAAAGCATTCTCTCC   | 59.67  | 20 |
| TTGTGGTTCGATCGTAATTGA     | 59.027 | 21 CCTGCCTCAAGGCTAAACAA    | 60.378 | 20 |
| GGTTCTCACAGGAGGGTTCA      | 60.088 | 20 CTCGTGTTTCTTCGTCCTCC    | 59.844 | 20 |
| AGTGAGTGCAGAGCAAGGT       | 60.205 | 20 TACACCGAAGGATATCCCCA    | 60.148 | 20 |
| ACTCCACCCTCTCTGGTTC       | 60.504 | 20 AACAAAGTGTGTTTGTGAGTGGC | 59.969 | 22 |
| TTTTTACGATTTTGCCTCG       | 60.068 | 20 TTTTGTCCGAAACATCCCTC    | 59.91  | 20 |
| GGACACGGTTTCTAATGTTTTG    | 58.539 | 22 AACTCTGCCGAGAAATGTGT    | 59.727 | 20 |
| CCTTTCATGTTATTCTTTTCTCACC | 59.472 | 25 TGGATTATCCTGCGGTGAGT    | 60.483 | 20 |
| TGCCCTCGATGCTATAAGTTG     | 59.298 | 22 GGTAAATTTTGTCCCTAGTTA   | 59.109 | 25 |
| GAACCAAAGTGAGCCCGATA      | 60.074 | 20 TTCTTGCGTGGTGTGTAG      | 59.758 | 20 |
| GCAGTATGCTGACGAGGTGA      | 60.016 | 20 GAAGACACGGTTGGACAAAAA   | 60.001 | 21 |
| TGGATCGTATCACAAGCCCT      | 60.483 | 20 TGTAGTGGTTCGTGGACTGC    | 59.751 | 20 |
| GTTTAGCTGCTTGGTTGGGA      | 60.249 | 20 AGCTTCCATGGAGGTTGATG    | 60.073 | 20 |
| CGATTCCCATACCAATTCGAC     | 60.155 | 20 GGGCTCAAATATCGGACAAG    | 59.528 | 20 |
| ATCCTTGACGACTGTTTGGC      | 60.119 | 20 ACTCCCCTGTTTGGGAATGT    | 60.607 | 20 |
| GCCAATTTGATAGAAGCCCA      | 60.038 | 20 TCGTGGAGAACTATCCAAGG    | 59.181 | 21 |
| ATCGTGGAAATTCCTTAATGTG    | 59.281 | 23 CCCCTACGTTGAAATTGTGCG   | 60.357 | 20 |
| TCAAAGTTAGCACCCGAACC      | 60.11  | 20 TTCGTTGATTTGAAACTCTAAA  | 59.028 | 24 |
| CGGAGTGTATTGCGAACTCA      | 59.864 | 20 CATCGGACCATTTTCTGACA    | 59.496 | 20 |
| TGTTCTCTCTCGCTGCAC        | 59.446 | 20 TACCTCATCACCATCCCCAT    | 60.011 | 20 |
| GGTTTCCATGTTTACCCAC       | 60.073 | 20 TCCGTTGTTGCTTTCTCTC     | 60.375 | 20 |
| ACCTCGAAGGATTTGGCTTT      | 60.074 | 20 TAGGAAAATCATGCACGTCG    | 59.688 | 20 |
| GCAGGTGAGGGACAAGAATG      | 60.656 | 20 GGGTTATCACCTGAATGCAA    | 58.423 | 20 |
| ACACCGTCAATCACAACACA      | 58.371 | 20 GAAGGTGGGCATAAGAGACG    | 59.694 | 20 |
| ACTGCGGATGCCCTAATATG      | 59.945 | 20 ACGCGGAGATAGAGACAAGG    | 59.454 | 20 |
| CAGCCTTCTCTGGGAACATA      | 60.066 | 20 CATTTATGAAGCAAGGGGGA    | 59.894 | 20 |
| CACCCACACCAGACCAACAT      | 61.735 | 20 GAGTCTTATCGCCTCCGGT     | 60.599 | 20 |
| CACCTGAAAGGAAGGCAAAA      | 60.22  | 20 ACATAGCGCCGGAATACTTG    | 60.117 | 20 |
| AATCCTTTAGGCCGACAACA      | 59.569 | 20 CATTTCCCCCAACTTCACAT    | 59.647 | 20 |
| TTGGGCCGATCCTATCATT       | 60.247 | 20 ACTTTCTCGCCTGGATTTTG    | 59.312 | 20 |
| CTCCAAAGAAAGCCAAATGC      | 59.823 | 20 TAGAACATTAGCGGGATGGG    | 59.916 | 20 |
| GTCGAGAGAAAGGGCTGAGA      | 59.679 | 20 GGATGAATTGATGGTTTTTGG   | 59.125 | 21 |
| CCATGGGAAATGGTTAGTTGA     | 59.671 | 21 TCATGGAATTTGAAAGTTTGG   | 59.429 | 22 |
| TTGAATGGAAATACCCTCTTAGG   | 58.576 | 23 CAGGAGCAAACAAGTGGACA    | 59.873 | 20 |
| GTGGTATGGAAAATGGGCAC      | 60.059 | 20 GGAGAGGGAAAAGTTGGGAG    | 60.045 | 20 |
| TGTTTTGTAGGCCTGCCTTT      | 59.747 | 20 TCCGAGATCAGCGAATTTTT    | 59.784 | 20 |
| CGTCCACGTCCTCTAGGTGT      | 60.174 | 20 GTGGAAGAGAAGATGCTCGG    | 59.95  | 20 |
| GTCGACACAATTGGCTCCTT      | 60.119 | 20 CAGAGCGCTAGAGGTTTTCC    | 59.218 | 20 |
| TACCGGCTTCAACAGCTTCT      | 60.015 | 20 TAAAACCCGACACCTGCAA     | 60.096 | 19 |
| GAATCTTGTACATTTACCAATGT   | 59.961 | 27 TGGGAAAGATTATTGGAACCTT  | 58.864 | 22 |
| CGATACCCGAACCGTATCAC      | 60.214 | 20 GAATCCTTTCACGGATCGAA    | 60.014 | 20 |
| GCACAAGTGCCAAAGAGTCA      | 60.032 | 20 TCTTGCAATGAAGAACGTCG    | 59.988 | 20 |
| CAAGGGTACCATCCTGTGTG      | 58.852 | 20 GCAAGGCCAATGGAAATATG    | 60.289 | 20 |
| ATGGTGGAGTTCTTCGATGC      | 60.081 | 20 TCATCTTCAACCCCAACTC     | 59.903 | 20 |
| GTGCTCTGGCTCATTCCCTA      | 60.362 | 20 TGCTGGTGTGAAATGGAAAA    | 60.088 | 20 |

|                          |        |                            |        |    |
|--------------------------|--------|----------------------------|--------|----|
| CTGTAAGGGGAGCAATCGAA     | 60.206 | 20 AAACGCTCGTAGTGTCCCAG    | 60.312 | 20 |
| TCACATTCTGCGATTGCTAA     | 58.017 | 20 TGCCTGGTTCAGATTGAGTTA   | 59.332 | 21 |
| AAGGGTAGCTGGCATTTCGTA    | 59.73  | 20 TCCTCATGTACGTTGTTTATGG/ | 59.393 | 23 |
| GACCGGTTAGACCGGATTTT     | 60.187 | 20 AGTGATTGAGGGTGATTGGTT   | 58.364 | 21 |
| TCTCTCCCTTTCCACACTCG     | 60.377 | 20 CAGTCAACGTGCGCATTAT     | 59.759 | 20 |
| TGACGAATTCTCAAGTTCCTCAC  | 60.655 | 23 CACTGCACAATCAACCGTCT    | 59.751 | 20 |
| AGAAGCTGCTCCTTTCCACA     | 60.134 | 20 AACTCCCCACGAACTCC       | 59.896 | 18 |
| TGGTCGGTGAATGAATGTA      | 59.774 | 20 TTTTGATGATATATAGGTGTTTT | 58.782 | 27 |
| GGTATGGTAGCCCTTCACGA     | 59.955 | 20 CGACTTGTCTGGTTCGATA     | 59.716 | 20 |
| GAGAGAAAAGGTGGCAGGTG     | 59.844 | 20 GCCTCCTCTCTTTCCACCA     | 59.53  | 20 |
| CATAGGCCAAAGCCCAAATA     | 59.922 | 20 AATAGTGGTGGGAGGAGGCT    | 59.957 | 20 |
| TGGCCTGGCTTAGTTGTATTG    | 60.138 | 21 TGAGGGATGCCATAAGGAGT    | 59.508 | 20 |
| GTCTTCTCCGCTTTGTGTG      | 60.833 | 20 GGATGGCTTGTTCACTCTCC    | 59.661 | 20 |
| ACGTCAGCATCTACCCCAAC     | 59.997 | 20 GTTTCAGCCGTTTGGTTTTG    | 60.514 | 20 |
| CAACACATTCAATACATTCTCCAA | 60.154 | 25 CGTTTCCGACTACCCTTGAA    | 60.103 | 20 |
| AATGTTTGATGCATTTTCGCA    | 60.081 | 20 GCCACCCTCCCATATTATCA    | 59.605 | 20 |
| CTCTCTCGCCTCGCTTTCTA     | 59.993 | 20 AAGTTTATCCCAGCTCCGCT    | 60.228 | 20 |
| GACGAGATTGTCGAGTGCAA     | 59.992 | 20 TTATTTGCGTGAACAATGGTG   | 59.476 | 21 |
| CGACGAGAAAGTCGTGTCAA     | 60.025 | 20 TCATGATAATGCATGTCTCCG   | 59.514 | 21 |
| CATGTAAATTCTTGGTCATTCTCA | 58.188 | 24 TCTGTTGGCAAACACAGGTC    | 59.726 | 20 |
| CCCAAGCTATCACTCATCACC    | 59.565 | 21 GCGCACTCACACTTTCTGAC    | 59.628 | 20 |
| TGTTTTCGCGTTTCCTCTCT     | 59.993 | 20 ACGGTACGAGCACAAACACA    | 60.222 | 20 |
| GCAACGGAATACCACTCGTT     | 60     | 20 TGATCCTGTGTGCCTGTGTT    | 60.162 | 20 |
| GAGAGAGAAGGGGGAGGAGA     | 59.883 | 20 TGGCAGAAGTGGGAGTCTTT    | 59.844 | 20 |
| ATGCACGTAGGCATGTTCAA     | 60.142 | 20 TGTGAAAATTTGGTTGCAGAA   | 59.192 | 21 |
| CATTCAAGGGGCATTTTTGT     | 59.801 | 20 CAAAGGCCCAATGGTTAT      | 59.685 | 20 |
| GGGCTCGAATTCAAACTGA      | 60.192 | 20 GAAGAAAGAGGGGGAGATGC    | 60.154 | 20 |
| GGAGGGTTTTAGCGTGATAGG    | 59.973 | 21 CCAACTATCCATGAGAAATGAC  | 59.843 | 23 |
| CCACCCAAACCCATTATCAC     | 59.91  | 20 GGAATCATCACCATGCAACA    | 60.339 | 20 |
| GCATTTGGAGCAAGGCTAAG     | 59.982 | 20 CCTTCGGCTTGAAAACAAGA    | 60.357 | 20 |
| TTTTGTAGTTTCCCATGTTGTCA  | 59.411 | 23 CCAATCTCAACAACACACGC    | 60.16  | 20 |
| ATGCCCTCATGACTCTCACC     | 60.08  | 20 GGACGCCACAAATTGTTTCT    | 59.978 | 20 |
| TCTGGACCATCAGATTTGGA     | 59.009 | 20 GCCATTCAAATAAAAATCAAGC  | 60.833 | 23 |
| AGAAAATGCATGCGAAGAGC     | 60.499 | 20 GTGGGGAAAGAGTTTTCGTA    | 60.11  | 20 |
| AAAGGGAAAACAGTTGGAAGC    | 59.623 | 21 GTCGCTGCAATTTCCAGTTT    | 60.257 | 20 |
| CAATATTACAATGGCCAAGAGAG  | 59.826 | 25 GCAGGCAGCTGATATGTTCA    | 59.979 | 20 |
| CGGACCGAGAACTTAGAGGA     | 59.425 | 20 CCCTAGCCTTTGCCTCTTT     | 60.332 | 20 |
| TTGCCATATTTAAGCCGAGG     | 60.054 | 20 TCATGATATAGTTTTTCGTGGC/ | 59.507 | 23 |
| TGTGTTGTCTTTTTCGTGTTG    | 59.7   | 22 ATGATCGACCAACCCTGTT     | 59.786 | 20 |
| CATGATTTTGCAACTTACCATTT  | 59.788 | 24 GATGTCCCCATTGAGACTCG    | 60.475 | 20 |
| CGTTGAACCCTAAATTGGACA    | 59.847 | 21 GCGACGTTACCCACTTTTAC    | 60.559 | 20 |
| TTTCGGCCAAAAGAAAAGAA     | 59.805 | 20 TGGCAACAAGATACCCAAA     | 59.964 | 20 |
| CCATCTCTCGTCAGTCGTCA     | 59.98  | 20 TTTCAATGGGAATCGGAAAC    | 59.739 | 20 |
| AATGAGAAGCCCAATGGAGA     | 59.629 | 20 CAGTTGAACCAACACCCCT     | 59.861 | 20 |
| CCGTTGCCTCTTTTGAACCT     | 59.853 | 20 CAGGTGGATCCAGCAGTGTA    | 59.701 | 20 |
| CGGAGGTTTGATATGGTTTCA    | 59.809 | 21 CAACGCCATGCATTTATCCT    | 60.857 | 20 |
| GGAGGATTCTTTCCCTGTC      | 59.874 | 20 TCTGTTGCTCCAAATCATTCA   | 59.262 | 21 |
| GTGGCATGGGGAAGCTACTA     | 60.096 | 20 CCTAACCTTGGGCTCTGATG    | 59.688 | 20 |
| CACTGTGTAGAAACATAAACTGC  | 58.944 | 24 CGTCAACACGAAATCACCAT    | 59.42  | 20 |
| GAAGCCGTGGGACATAAGAG     | 59.694 | 20 GGGATGGGAAGAGCATTTAAG   | 59.917 | 21 |
| GGGTTTTGCAGGATTGTGAT     | 59.797 | 20 GAAACATGTAGTCCGCCTCG    | 60.657 | 20 |
| TTGTGTTACAATGATGGGGG     | 59.097 | 20 AATGAGCTCGCATAACACCC    | 60.103 | 20 |
| GTTGGAGGTGCCAAAACCTGT    | 60.012 | 20 TTTGAAGGAATTCGAGTGGG    | 60.044 | 20 |
| GGGGTGTTTTGACCTAATCG     | 59.288 | 20 CGGTATCACCCCTCCTTTTCA   | 59.926 | 20 |
| CGAAATAGGGTTGGTGAAGC     | 59.569 | 20 TCTATTTGGAGTTGGGGCAC    | 59.933 | 20 |
| CGGAACCCTCTCTTACCC       | 60.067 | 20 TCTCACACCCTTTTCAACTTCTC | 59.781 | 23 |
| GGAAAACGACGAAGAAATGG     | 59.546 | 20 CCGACATGGGGAAATTGTAG    | 60.184 | 20 |
| TATGCATCCCAAATTTCCGT     | 60.153 | 20 GGTTCGTTTTCGTCTGATT     | 59.978 | 20 |

|                          |        |    |                        |        |    |
|--------------------------|--------|----|------------------------|--------|----|
| CCGAAATGGAGATCAGGTTG     | 60.452 | 20 | CAGCAATTTTCGATTTCAACG  | 59.301 | 20 |
| GGGGCTTAGATCACCGAAGT     | 60.464 | 20 | TAAAGGAGCCCAGAAAAGCA   | 59.953 | 20 |
| CCAAACGCATCAAATTCTCA     | 59.664 | 20 | CTCTGGTCCCCCTTTCTCTC   | 60.186 | 20 |
| TCCATTTACATCCGATGAA      | 59.859 | 20 | TCATGAATCCAACGTACGCA   | 61.081 | 20 |
| AAACAGTCTTCGGGACACCA     | 60.545 | 20 | TTTCCTTATGCGGTTCTTGG   | 60.067 | 20 |
| TCTACGTCCACGGAGAGGTT     | 59.721 | 20 | TCTCTGTGCATCTCGGCTAA   | 59.697 | 20 |
| CCGAACTTTTGGCCTTCATA     | 60.067 | 20 | TGAAGTTAGGAAATAAGGAGG  | 57.525 | 24 |
| AACTTCTCCTCCCAATCGCT     | 60.212 | 20 | CCGCACGAGAATCCATACAT   | 60.884 | 20 |
| CGATACCCTCCCAAACCTA      | 61.05  | 20 | CAAGCAAAGGCCAATATCGT   | 60.096 | 20 |
| GTCTGCATGCAAGATAGTACGG   | 59.797 | 22 | TCAATGCATGATACGCCCTA   | 60.058 | 20 |
| ATTGCCATCACCTTCTCCAC     | 59.934 | 20 | ATGCTCGACTTATGCGGTCT   | 59.866 | 20 |
| AAAATCTTTGAAACGGGTGG     | 58.925 | 20 | ACAAACCAAAGTTGCGATCC   | 59.978 | 20 |
| TCGGATCTGGGTATTTGACTG    | 59.94  | 21 | GATCGCTCATGCATCAAGAA   | 59.914 | 20 |
| GATATTGGGCCGAAGAGTTG     | 59.528 | 20 | ACCATATTTAAGGGTTATCACC | 57.552 | 24 |
| AGGGGTCCAGAAAAGTATGAT    | 59.795 | 20 | TGAAACATGAGGCCTTGCTA   | 59.42  | 20 |
| CCAATACGAAGCCCAAATCA     | 60.827 | 20 | TAGTGGTATGGAGTGGGGGA   | 60.187 | 20 |
| GGGAAAGTTCGTTTTTGCCT     | 60.463 | 20 | CGTGGATGCCCTAGATTGTT   | 59.955 | 20 |
| ATCACCACGAAGTCTACAAAAC   | 59.968 | 24 | GGACCGGTTAGACCGAATTT   | 60.187 | 20 |
| CGCGCCTACAATTCAAAGTA     | 58.982 | 20 | ACCAAGGAGAGTGAGCCAAA   | 59.844 | 20 |
| AATCCCCACTTTTTCGCTTT     | 59.945 | 20 | CGACACGGATTGAATCACAC   | 59.967 | 20 |
| CATAATGCCCTCGAATGCTAA    | 60.068 | 21 | ACAAGGCATGCAATCAAATG   | 59.548 | 20 |
| TGGTATATGGAGGAATGCC      | 59.605 | 20 | TGAAAAGGCCGGCATAAATA   | 60.405 | 20 |
| GAGAATCTGGTTCTGGTGCC     | 59.661 | 20 | CACCACAAATCATGATGAGCA  | 60.533 | 21 |
| CACATCAACACACCCACACA     | 59.878 | 20 | CCCTCTCTTCTCAACACCA    | 60.229 | 20 |
| GACCGATCGAAACACACTGA     | 59.682 | 20 | CCATTGGCATTCTTCCATTT   | 59.762 | 20 |
| TCCGTCACGTCTGGAAAAAT     | 60.495 | 20 | CGAAAATCAATGGATGGGAT   | 59.581 | 20 |
| GTCAACTTCGGCAATGGAAT     | 59.939 | 20 | AGCTCGGTTGTGGAAAAATC   | 59.174 | 20 |
| GGAAATTGATGGATTTGGGA     | 59.558 | 20 | GTACGCAGTTGGGAGAGGAA   | 60.255 | 20 |
| TTTGGTTCGGAAATAGGTGG     | 59.795 | 20 | GAAAAGCTTGGCCATTCAAC   | 59.691 | 20 |
| TCCCATGTTGTAATTAATGTAGGG | 59.089 | 24 | AGGGGCAAATGTTGATGAAA   | 60.309 | 20 |
| ATTCTGACTTGAATTCGCGG     | 60.214 | 20 | TTCCCCCTTTTCTCTCGTCT   | 60.183 | 20 |
| CCCCTCCTAACTTTGCTGC      | 59.822 | 19 | GTTGAAGGTGACGCTCAAAA   | 58.9   | 20 |
| TTGACCCACCATTGTCAAGA     | 59.935 | 20 | CGTAAAATTCCGGTGCAAAT   | 59.832 | 20 |
| GTCCCACAAAAGCTCAGAGG     | 59.844 | 20 | AACTGTGGAAAGGGAGCTGA   | 59.844 | 20 |
| CTCAGCATTGGAAGGGTA       | 60.066 | 20 | AAGCAAGTTCGATATATTTAA  | 58.273 | 25 |
| CGGAAGCAATTTTATCATAGAAG  | 60.006 | 25 | GCGATTCTCATTCCAATTCAA  | 60.031 | 21 |
| TGATGTCCCTTCTCCTTGCT     | 59.803 | 20 | CCCTAAGATAATGCCACCCA   | 59.778 | 20 |
| ATCAACCACCACCTTCGTTT     | 59.827 | 20 | AGGTCTTGACAGGTTGTGGG   | 60.002 | 20 |
| TTCTGTGCCGCATTTATGAT     | 59.14  | 20 | AGGATACAAGGCAAAGGCA    | 59.708 | 20 |
| TTTTCGAGTTATGAAGTTAGCACC | 58.926 | 24 | TTAATGCGTTCACACCCTCA   | 60.111 | 20 |
| CCCAAGGTCAGTGAACAAC      | 60.399 | 20 | CCAAGAACACTCTCCACTCTCC | 60.288 | 22 |
| CACATAGCAATTTTCGGGGT     | 59.823 | 20 | ACAACTAATCAAGTTCCGCA   | 57.439 | 21 |
| TTTCTTTACACCGAAAACG      | 58.794 | 20 | GTTATATCTATAGGGAGGGTTA | 57.293 | 26 |
| GCTACCCTTTTGGACCTACGG    | 60.008 | 21 | AATTCGATGATAACTATGGGTT | 58.407 | 24 |
| TATGCTTCAATGGACCAGCA     | 60.22  | 20 | TGGAAAGAAGGGAAAGTCAA   | 57.367 | 20 |
| GCACGAAGAAAGGATTCACG     | 60.776 | 20 | GTTTCCTTTGTTGAGCGAGC   | 60     | 20 |
| TTGGTTCACACAACCACTCC     | 59.415 | 20 | AGTTTACGGGGGAGAATTGG   | 60.18  | 20 |
| TGAATGATTTAATAACCTATGGTG | 58.467 | 25 | CCGAGCTTGAGATGTACCAA   | 58.874 | 20 |
| ACCAATTTTTCGTCGTGCTC     | 60.118 | 20 | CATTACACACGCACACACG    | 59.848 | 20 |
| CAATGTGAAATGGGCAAGAG     | 59.123 | 20 | TCTCTGAAAAGTTGAAGCCCA  | 59.978 | 21 |
| GTTTCGCACAACCTCTCCACT    | 60.307 | 20 | CCTCCGACGTCATTCTTGTT   | 60.111 | 20 |
| TGCAAGAAAATCCAGCTTCA     | 59.542 | 20 | TCCTCCTCCTCACACTGCTT   | 59.986 | 20 |
| CGTGCAATTCGAAGCTACAA     | 59.872 | 20 | CTCTGACCTTGAGGGCTTTG   | 59.982 | 20 |
| CAGCCGAAAACCAATCT        | 60.11  | 20 | ATTTGCGATTTATGATGGCG   | 60.802 | 20 |
| CCGTTTTTGTCCATGGAAGT     | 59.83  | 20 | CGTGAGGAAAACCGTGATT    | 59.971 | 20 |
| ACACTACTCTCACTAGCCGC     | 59.685 | 21 | GCTCAGCCCAACTTCCTAAA   | 59.452 | 20 |
| TGAGCAAAGCATTTTGGATG     | 59.809 | 20 | AAATGCACGCGAGACAATA    | 59.493 | 20 |
| CCATTTGCAATACTAAGGCTTTC  | 59.224 | 23 | TCTGTCCCGTCTTCTCGTT    | 59.844 | 20 |



|                          |        |    |                         |        |    |
|--------------------------|--------|----|-------------------------|--------|----|
| AGCAATAGCAGGTTCCGGAGA    | 59.978 | 20 | GGCCGATTGGAGTATAACGA    | 59.923 | 20 |
| GCATATTGGCAAGAAACAACA    | 58.69  | 21 | AAGCTTTCTGAATTTGTTTGCA( | 59.946 | 23 |
| GTTTGGGGCTTGATTGATGT     | 59.797 | 20 | TTTGCATGTGTTGCAAATGA    | 59.691 | 20 |
| CAAGCAAACCACTCACTCTCC    | 59.899 | 21 | AGATCCATGGCTCCAACATC    | 59.893 | 20 |
| TGAGATTTACATGGCAACA      | 58.62  | 20 | AAGGAGGTGTTATGAAGGGAT   | 58.028 | 22 |
| CTCCTCCGGGAGACTCTAC      | 60.208 | 20 | CTCCGATTTCTTGGTGTGGT    | 59.966 | 20 |
| AATTCATTTCCCCTCGACCT     | 59.766 | 20 | CCAGTCTCAACAAACGTGGA    | 59.72  | 20 |
| GGTCCATTGGTCTTTTGTATTGA  | 60.102 | 23 | ACAGCTCTACCCGCAACTA     | 59.898 | 20 |
| GATTGCATCACGTCTCTCA      | 59.794 | 20 | CGAAAAATTTAAAATCAAACG/  | 60.521 | 25 |
| CATGGACTCACGCTCTCTCA     | 60.138 | 20 | GGGAATGAAGAAGTTTCGCA    | 60.192 | 20 |
| TCCCAATTCAACGACAACAA     | 59.941 | 20 | TTGGTGAGGTGGCATCATAA    | 59.924 | 20 |
| ACATTCAATCCCAGCCATTC     | 59.756 | 20 | TGCAGATTGACGAAGGAAGA    | 59.522 | 20 |
| TCATTCTCTTCTATCTCTCTCGA  | 58.885 | 26 | TGGGAGGAGGCTTAGGATCT    | 60.169 | 20 |
| TAACTGCCATTTCCCGATTC     | 59.901 | 20 | TAGGGGCAAGCCCTTAAAAT    | 59.93  | 20 |
| TTCGTCCGAAATACTCCAC      | 59.933 | 20 | CACTTATAGATGGGTTAGCGTC  | 59.972 | 24 |
| GTGGCATGGGGAAGCTACTA     | 60.096 | 20 | TTTCTGAGCCTAACCTTGGGT   | 60.116 | 21 |
| TCTTACAGTAGGGTGGAAAACAA. | 59.138 | 24 | AATTTTCGACTTTGCCGTGT    | 59.615 | 20 |
| TGCATTTTCTTCTTTCTTTTCA   | 58.236 | 23 | TCCTGACCCTTTTTGAGATTGT  | 59.976 | 22 |
| GGAGAAGAAAGAATGAGGAATG/  | 58.837 | 23 | GGGTACATGTTACGTGCCCT    | 59.74  | 20 |
| GACAGATGGAGGGTGTGTGA     | 59.502 | 20 | ACAGGTATCCGAAGGGATGA    | 59.361 | 20 |
| CGTTTAGCCGCAAGTTTCTC     | 60.018 | 20 | AACGGTAGCCATCACAATTTTT  | 59.778 | 22 |
| CGAATTTTGTGTGGACCGTA     | 59.439 | 20 | TGGGTTTCATCGGAAGAGTTC   | 60.05  | 20 |
| TAAAAGGCCAAGCAAGGAAA     | 59.826 | 20 | GCCGATCATGTCCTCAAAGA    | 61.159 | 20 |
| CTGGCTTCTCTTGCTCTCTCA    | 60.02  | 21 | ACCACGCCAGTCAGGTAAC     | 60.035 | 20 |
| ATGCCGAGTCTTGTTGATGA     | 59.245 | 20 | CCAATGACACGACACAAACA    | 58.974 | 20 |
| ATTGAGTCAAGGGCGGATAC     | 59.009 | 20 | GTTCAATCCGTCACTCCTC     | 59.81  | 20 |
| TTGTAATGTGGCATGCGTTT     | 59.999 | 20 | GAAATGGTGTAAAAGGGGGT    | 57.759 | 20 |
| GGTGGCACGCATCTGTAAC      | 60.136 | 19 | TGGACACCCCAGATTGTTTT    | 60.21  | 20 |
| TGATGTTTAAAGTCGTCCGC     | 58.773 | 20 | TGCTTACTGTTGTATGGGGTG   | 58.566 | 21 |
| GTTTCCACTGTTATGCTGCG     | 59.347 | 20 | ATCGGATCTGCGATCTAACG    | 60.199 | 20 |
| GATTTGCAAGCCTATGGTGG     | 60.469 | 20 | GAGTTCGTCAAACCTCCCAA    | 60.088 | 20 |
| CAGCCGAGAGAGATGAGGAG     | 60.238 | 20 | TACGAGACCGAAAGGAAAAA    | 57.49  | 20 |
| GGAGAAGGGTTCGGACTAGG     | 60.067 | 20 | GCGCAGCAGCATGTTAAATA    | 60.009 | 20 |
| GGAAAAGGGAAGAACAAGGC     | 60.053 | 20 | ACCAATCCACTGCATGAACA    | 59.967 | 20 |
| GAGGGGACCTTCCTTTTCTG     | 60.045 | 20 | GTGGCCTTTGTGGGCTACTA    | 60.132 | 20 |
| GATGCGAATACAGCACGAAA     | 59.839 | 20 | TCCATTTGCATCCAGATTTGT   | 60.324 | 21 |
| CTAGCCGTCGTTTTTGCATT     | 60.264 | 20 | TGAATTGGTGACACACACGA    | 59.541 | 20 |
| CTGACGTCTTGTTGGGAGTGA    | 59.864 | 20 | TGATCTGGAATCTGCGATGT    | 59.197 | 20 |
| GCTATACCGATTTTCGTGCG     | 59.71  | 20 | TTGAGGACATTTATTCGTGCG   | 59.946 | 21 |
| CGGGTGCTTGAGAGAGTTGT     | 60.444 | 20 | GCCCCTAAGCTCGTAGATCC    | 60.194 | 20 |
| TATTTGCCTTCACCTTTGCC     | 60.074 | 20 | TGCAACGCCAACTACAAAAG    | 59.911 | 20 |
| CGGAATTCACTTCTTTGCTGA    | 60.372 | 21 | TGCCTAACGTTAAATGGGCT    | 59.609 | 20 |
| TGTTGGACTGTGTTGGGCTA     | 60.152 | 20 | GGCTTCCAAAGCTTCCACTT    | 60.743 | 20 |
| GGAGAAGAATTTGGAGAGGGA    | 59.637 | 21 | CCACTAACCCAAACCCATCA    | 60.605 | 20 |
| AACGGTATGCTCGGATTTTG     | 59.96  | 20 | TGCTGTGAATTGTCCAGCTC    | 59.992 | 20 |
| GCTCAAGCTTGCTGTTTTCC     | 60.14  | 20 | AACATGGTTGGGCTAAGTGG    | 59.853 | 20 |
| GGTTGTAATGAGGCTTTCGG     | 59.569 | 20 | GAATTGGTGAAAGATTAGAG.   | 57.58  | 24 |
| TTTTTCTACCTGCCATTGC      | 60.074 | 20 | TTCCTTCAATCCATGCAACA    | 60.049 | 20 |
| TGTGGCTCTGTGGATTCTTG     | 59.831 | 20 | TGCCAGCGTATTGTGAAGAG    | 60.011 | 20 |
| TGTGAGATTGTGTGGCAA       | 59.705 | 20 | AAGGCAAAGGCTGGTCTTCT    | 60.382 | 20 |
| GCCGAGATTTGTTATGCGTT     | 60.103 | 20 | GGCTTGCCCTTAACCCTATC    | 59.93  | 20 |
| GAACAACACACTGCCCTGAA     | 59.726 | 20 | CCCCAAGAACACTCAAGAACA   | 60.133 | 21 |
| CCCACACCTCTTTGCTTTGT     | 60.149 | 20 | CCTTCAACCACCTTGTAGC     | 59.592 | 20 |
| ACAGGTGGTCGTAAAGCCAA     | 60.55  | 20 | CACTTTTCCAGTCTGCTCCC    | 59.844 | 20 |
| GAAGAGGAAAATAAAAATAATCCC | 59.945 | 25 | AATCGGACCGGATCGTTAAT    | 60.531 | 20 |
| CTGTTGTTGGAGCTGTGCAT     | 59.905 | 20 | TTAAACAAAGCGTGCAGACG    | 60.052 | 20 |
| TTGTTGCCCGAGAGCTTTAT     | 59.845 | 20 | TATCAAACGAAGATGTGGCG    | 59.688 | 20 |
| CGATGTTGCTGGATTGTGAG     | 60.263 | 20 | AGATTTCGATTTCCCCGAAC    | 60.265 | 20 |

|                         |        |    |                         |        |    |
|-------------------------|--------|----|-------------------------|--------|----|
| AATGGCTGCAATTATCCCTG    | 59.923 | 20 | CCCCAGTAACCAACGCATAC    | 60.249 | 20 |
| ATCAACGCCCATGATCAAAT    | 60.163 | 20 | GGGGTACCCAATATTCTCCG    | 60.391 | 20 |
| CAAATGCCCAAGAGGGTTTA    | 59.931 | 20 | CAGCACAAGCAGGGAGTTTT    | 60.431 | 20 |
| TGGGCTGTACCATAAAAGCC    | 59.96  | 20 | GGAGTGCTCATGATCCGTAGA   | 60.233 | 21 |
| AGCGGACGATAGATACACCG    | 60.118 | 20 | ACGAACAGAATCCTCATCCG    | 60.073 | 20 |
| TTTGCCCAAACAAATGAAAA    | 59.026 | 20 | TTTGACCGAACCGTTGTGTA    | 60.004 | 20 |
| CGATCAATAAAGCTGCACACA   | 59.887 | 21 | ATGATGCAAATCACCTTCGT    | 58.019 | 20 |
| CGCACTACTAGGGTTTGGGA    | 60.125 | 20 | GGACGGCCATAAGAAGTCCT    | 60.464 | 20 |
| TCATTCTCAAGCCACTCCCT    | 59.803 | 20 | TCGGGGTATCAGAAATCGAG    | 60.029 | 20 |
| TGAAAAAGGACTCTTGGGCA    | 60.745 | 20 | GTCTCTGGAGCTCTTTCCCC    | 60.336 | 20 |
| AGAGGTAGCCATTTACGCGA    | 59.867 | 20 | CTGTAGGCGCCATCTTTTTTC   | 59.845 | 20 |
| CGGTAATCCTGCCATCTCT     | 59.15  | 20 | AATTTTTTCGATCATGTGGGC   | 59.768 | 20 |
| ACACCACCACCTCACTGTCA    | 60.045 | 20 | TCGTGTGTGTGAATTAATAATGA | 58.136 | 23 |
| AAATTCTTGATTCGCCACCA    | 60.448 | 20 | TATATATGGGTTATCACCTGAT  | 57.071 | 24 |
| AACCACAATGGTTGCTCTCC    | 59.973 | 20 | CATTCTGTGTTCTCTGTTTTCGA | 59.696 | 24 |
| GACCTGGCTCGTTAGCTGAT    | 59.459 | 20 | CATGGCGTTGTATTTGTGCT    | 59.614 | 20 |
| TTCCAAAGCAACGTAACATGA   | 59.216 | 21 | AATGTGCGTGCTTGCATAAG    | 59.902 | 20 |
| GTGGTGAAAAAGGGTGGCT     | 59.958 | 19 | CACCCTCTCTTCTGGTCAGC    | 59.986 | 20 |
| TGCATGCTCTATGCAAGAATTT  | 59.881 | 22 | ACCTGCACCAAAATGGAGAG    | 60.111 | 20 |
| CAATGATTGTCAAATAGAGTTC  | 58.718 | 26 | CCTCCCAGCTCACGTTCTAC    | 59.867 | 20 |
| GGATACCCTCCCAAACCTTA    | 60.011 | 20 | TTTCTTCCATTCCATGGTCC    | 59.727 | 20 |
| TGCATGCATATTCCATACCA    | 58.371 | 20 | AATAATGCCGAGTCTGGTGG    | 59.955 | 20 |
| TGCACAGCATATGCCTTTCT    | 60.251 | 20 | TTGACATGGAAGTGCACCAG    | 60.722 | 20 |
| GCTCCTCCTTGGTACTCACAA   | 59.343 | 21 | GTTCCGGGATCGATTTGTGTT   | 59.797 | 20 |
| CGAGATGTCTTCAGGGCATT    | 60.218 | 20 | CAACAGTTTGGCATCAGAGC    | 59.445 | 20 |
| CCTCCTTCTATCTCCCCTGC    | 60.169 | 20 | TGTGTGTGAGTGTGTGGGTG    | 60.088 | 20 |
| ACGCTCTTGAAATATGCGCT    | 60.01  | 20 | CTCTCACGTCAGGTTACCA     | 59.864 | 20 |
| TCTCACCTCCCAAACCTCT     | 61.021 | 20 | GAGAAGGGGAGAGGGACTGT    | 59.661 | 20 |
| AAAAGGTTAGTGGGCTGAGGA   | 60.116 | 21 | TCAACAGAGAATGCAAGCAAA   | 59.6   | 21 |
| TTGAGCTAGCTTTTGTGGTGG   | 60.426 | 21 | CGGATTAGCCACGGTCATAG    | 60.481 | 20 |
| CACGCACAAGTACATCTCGG    | 60.324 | 20 | TGGAAGAGAGATGGAGGGAA    | 59.731 | 20 |
| GCCTTGGTCATGCCATTTAT    | 59.791 | 20 | CCTTGTCCGTATTCATTCCG    | 60.323 | 20 |
| CGACGATTGACCCAAAACCTC   | 60.495 | 20 | GGTAAGGGTAGGGTACGGGT    | 59.101 | 20 |
| CTTCACCGTCCAATAAACCG    | 60.357 | 20 | CCTTAACATGTCGGGTTCTGT   | 59.853 | 20 |
| GAAAATCAAAGGCCCAAAA     | 59.916 | 20 | CCTTCCATTCCGAAAATCAA    | 59.872 | 20 |
| AGAAGGCAATCTATCCCGTG    | 59.15  | 20 | ACTTCCGCCTTGTTCTTTGA    | 59.853 | 20 |
| TTCGTCGTTGTTACTGGCCT    | 60.689 | 20 | GATTAACCTCGCATCCCTCA    | 60.036 | 20 |
| TCTGATAAGGTTCGAATTCACG  | 59.225 | 22 | ATCACCAACCAATACGGGAC    | 59.532 | 20 |
| ATGGGCTTCGAGTTTGGATA    | 59.528 | 20 | CAAAGGCCCAATGGTTAT      | 59.685 | 20 |
| GGCGACAGGGATAAGAATCA    | 60.036 | 20 | GACATCTCCCTCTCCGACC     | 59.583 | 19 |
| TGGTAGTGTTGAGTTGGCGA    | 60.301 | 20 | CTCGCTCTCGCTCTCACTCT    | 60.182 | 20 |
| GCATCGTGCTACTGAGTGCT    | 60.063 | 20 | GACTGTGAGGAAACGTGCAA    | 59.88  | 20 |
| ACAAGATTCGAAATCACATTCAA | 59.884 | 24 | GGGGAGAATGTAATATCCCGA   | 59.992 | 21 |
| GTCCACGGTGGTGCTAGAGT    | 60.182 | 20 | AGCCCTAACTCGACCCAGAT    | 60.096 | 20 |
| ATTCTTCTTCAACCTCCGCC    | 60.578 | 20 | ATATTTTTGATGACGCGGGA    | 60.289 | 20 |
| AATGCAAGATCTTAGTGGGATAA | 57.017 | 23 | TGGAGGTGAAGAGAGGGAGA    | 59.913 | 20 |
| TGCGAAAGTTGAGCTGAGAA    | 59.864 | 20 | ACTATCAGCCGCCAAATGAT    | 59.556 | 20 |
| TCATCTTGGCATGGTCAAAG    | 59.648 | 20 | AATTCAAGGATTCAAGCCCA    | 59.505 | 20 |
| TTCTAGTTCCTACCGCGTG     | 60.262 | 20 | GCCCAAAAAGAACACTCACC    | 59.574 | 20 |
| ACTTGAGCGTAACCACGTCC    | 60.179 | 20 | CTGCCAAAACCTGCACAAA     | 59.888 | 20 |
| CTGCTTAAAGCCAGTCCAG     | 60.008 | 20 | TGAAAGTGATTCCCCTTGATT   | 58.491 | 21 |
| GGGCATTATTTAAACCCCGT    | 59.915 | 20 | GGAATAAAGGAGGCGTTATGA   | 58.213 | 21 |
| ATTGAATCTACGTCCACGGG    | 59.813 | 20 | GTTGGACTCAAGTCATGCGA    | 59.837 | 20 |
| AACTTAGAGTTTAGAGAGAGGAA | 58.346 | 27 | CCCCTTCATTCAACACCAAC    | 60.21  | 20 |
| TTGAAATCCCATCTACCCA     | 60.266 | 20 | ATGTCTCAGCCGATCGATTT    | 59.658 | 20 |
| TGACAACCATCACCTCGAAA    | 60.088 | 20 | TGTCCGTTGCATGGTGTATT    | 59.847 | 20 |
| TCCTGCCATCTCTCAATGTG    | 59.787 | 20 | AATCGATCCTGGTGCAAATC    | 59.9   | 20 |
| ACGGAGGTGTACGATGGAAG    | 59.989 | 20 | CCGTAAGTACCGGACGAACTC   | 59.898 | 20 |

|                          |        |                           |        |    |
|--------------------------|--------|---------------------------|--------|----|
| GCCAACACTCCAAAGAAATGA    | 60.103 | 21 TCAGTAGCCACCATCTTCCC   | 60.073 | 20 |
| TTCTCTCAATATTTTCAACACA   | 59.878 | 24 GGTGGTTTTGGATGATGGAT   | 59.464 | 20 |
| TCAAGCCATGAAACAACACG     | 60.699 | 20 CACCTAAAGCCCATGCATTT   | 59.96  | 20 |
| GCGTGTGGAAGAGGACAAAA     | 61.216 | 20 CCCCTTGAACCTCAGCAATA   | 60.066 | 20 |
| CAGCATTCAAATGCGAACAG     | 60.401 | 20 CAGTGGCTACCGAGCATTTT   | 60.27  | 20 |
| GCACTGCATACGGCTCAATA     | 59.862 | 20 TCCCAAATGAAAGAATGGA    | 60.244 | 20 |
| TCCGAAAATCAAAGGCTCAC     | 60.192 | 20 GAAAACGCCAAAAATCGTGT   | 59.982 | 20 |
| TCTGGAAATGGGGAACAG       | 59.903 | 20 CGAATTCTCTCTGCAAACCT   | 60.019 | 22 |
| ATCTTGACCGCTGATTTTGG     | 60.074 | 20 GGCGGCAGAGAGAGAGAATA   | 59.676 | 20 |
| TCTGTTGTCTCTCCATCCCC     | 60.048 | 20 TGTCCGAAAAGGCAAAAATC   | 60.053 | 20 |
| TCGGAAGACACCTATTTGCC     | 60.074 | 20 TCGATTTCTTAGTGCCGGAT   | 59.668 | 20 |
| CCACCATCTCTCATCCCTCT     | 59.052 | 20 CACCCCGAACAGAGTCAAAT   | 59.966 | 20 |
| GAACGCAAATGCGATATGAA     | 59.668 | 20 TGGAGGAAAGAGCTTGAATC   | 57.047 | 20 |
| AAACCTTACTGTCACGCGCT     | 59.943 | 20 GGCACCTTGTGTTTAGCCC    | 59.74  | 20 |
| TAACCTCAAATTATCGGCG      | 59.922 | 20 GTTAGCCACCAATGAGGCAT   | 59.962 | 20 |
| TCTATATACTCGCATACCCAA    | 59.051 | 25 TCTAGTGATGACGGGGAGGT   | 59.53  | 20 |
| CATGATTCAGAATCGTGCG      | 60.22  | 20 TTTGTTTTCCAAGCCCCATA   | 60.294 | 20 |
| CTGAGCAGACCAGTCCAACA     | 60.022 | 20 TCTGGGAACTTGAACCTGGAA  | 59.697 | 21 |
| TCTCGTCCCTTTGTGCTTGT     | 60.833 | 20 ACGTCTTTGTGTCGAAACCC   | 60.012 | 20 |
| AAAGGTATGGGAAAATGCC      | 60.02  | 20 TTCGATAAACTTTACCAACAC  | 59.817 | 24 |
| GCCCCACGTATGATTGTCTT     | 59.82  | 20 CGAGCAGAGCTTCTTCAAC    | 60.277 | 20 |
| TTCTCATGTTGTAATTAATGTAGG | 59.318 | 27 GGACGTCTTTCTTGAGCAGC   | 60.142 | 20 |
| GCCACTTTCCTTAACCAAAA     | 58.286 | 21 GGTGTTGGTATATGGACCC    | 59.91  | 20 |
| TGTCCTCACTCGTTTCCTCT     | 57.416 | 20 ACGACGCAACATGATTTTTG   | 59.59  | 20 |
| AGATGTGAACCAAGAACCCG     | 59.966 | 20 AGGTAGCGAGAGAGGGGAAA   | 60.34  | 20 |
| CCTAACCTTGGGCTCTGATG     | 59.688 | 20 CTTTGTGAAGTAGTCGCCCC   | 59.734 | 20 |
| GCATCAGAGCCCAAGGTTAG     | 59.836 | 20 CAACTTCGGCAACGGAATAC   | 60.502 | 20 |
| TGAGGAATCGAACAAGGACA     | 59.215 | 20 TGACAATATTTAGTGTTTTGAC | 57.78  | 26 |
| GGAATTTGATCCCCACACAC     | 60.034 | 20 GCTCCGGTCTGGAACAATAA   | 60.074 | 20 |
| CACCCATCACCTCCATTTTC     | 60.173 | 20 GAGGACGTTGTGGTGGTCTT   | 60.009 | 20 |
| CTGTATCAAACGACGTGCC      | 59.199 | 20 CTGACTAACGCCATTCTT     | 60.27  | 20 |
| TTATAAACTGTTACTCCTGGGTGC | 58.698 | 24 AAGGAGGTGTTATGAAGGGAT  | 58.028 | 22 |
| TCGAACCATTACATCCTGA      | 60.048 | 20 AAATGGGAAGACAGCGACAC   | 60.119 | 20 |
| TGTGCCATAAAAATGGTTCAT    | 57.885 | 21 ATGTGGCTTGAGATCGTGTAT  | 57.152 | 21 |
| GGTAACCGATGTATGACCCG     | 60.074 | 20 TCGACCGAAGAGCTATCCAT   | 59.797 | 20 |
| AGCCTTCAATCCTTGCATGT     | 59.7   | 20 TTTTATGTAAATTGTCGTGCGT | 57.373 | 22 |
| TGTTGCGCGTGCTTTAAATA     | 60.401 | 20 CTGGGTTACACTGAGCGGAT   | 60.134 | 20 |
| TATTATGATTCCGGGTTCCG     | 59.616 | 20 AGAGACTGCGGTGCAAGACT   | 60.205 | 20 |
| CTTGTGCTTCCACCAAATCA     | 59.691 | 20 TTCAACCAGGCAAAGACCAC   | 61.075 | 20 |
| GCTCTTTTGATCGATCTGCC     | 59.923 | 20 CCGGAATAGCATCAGTTGGT   | 59.955 | 20 |
| CACGCATGAATTCTGTTGGA     | 60.665 | 20 GGCTGTCAGATGATGTAAGTTC | 59.256 | 23 |
| AATGCATGGAGTTTGTCTGT     | 60.384 | 20 GCATTGCGTTGATTATGCAG   | 59.14  | 20 |
| GCATTGAGGTTGCTTGGAAAT    | 60.081 | 20 GATTGGCTCCATCCTCTTCA   | 60.158 | 20 |
| GAAGGAGGAGAAGTTTGGGG     | 60.045 | 20 GTTCCCTTTGGCCTTCATT    | 60.299 | 20 |
| GAGAATGAGGGAGGGAGGAG     | 60.149 | 20 CTTTCTTCTTCATTTGCGCG   | 59.953 | 20 |
| CAAACCATTCAACGGGAACT     | 59.83  | 20 TAGGTGTAGGTAGCCAGGGG   | 59.073 | 20 |
| TGTTGTGTGGACTCTCCAG      | 59.705 | 20 GCACTATCTCTCCCTCACCG   | 59.827 | 20 |
| TCACAAATCGATGGTCTGGA     | 60.048 | 20 CAGTGGATTTGGTGGATGTG   | 59.806 | 20 |
| CGAGTGCCATTCTGACAGTG     | 60.463 | 20 GCCTCAAATCACAAGCCCTA   | 60.214 | 20 |
| GAACCAACTCTGTGAGAACCAA   | 59.232 | 22 GTTCGCTCGAGAATATCCCA   | 60.177 | 20 |
| ATCGTGTCTTCGCTCACCT      | 59.874 | 20 GTCAACTTTGGCAACGGAAT   | 59.978 | 20 |
| CTCCTGCTTCCAACCTCGAC     | 59.989 | 20 CAAGAGCTGAAGATGTGATTG  | 60.022 | 22 |
| CGGAACGCTTAATGCAAAAC     | 60.619 | 20 GTTCGAATGGATTTGTTGGG   | 60.17  | 20 |
| GCACACCTCGTCTCACAA       | 60.03  | 20 TCTGCTCCTTCTTCTCCAA    | 60.065 | 20 |
| TCCACGGAGAGGTA AAAAGC    | 59.312 | 20 ACGACCCTGTAAGGTTCTTTGA | 60.033 | 22 |
| TATTCCTTAAACCCACCC       | 59.882 | 20 GCGAAGAAGAGGGGAAGAAT   | 59.789 | 20 |
| GCGACTAACAAAGTGGA        | 59.911 | 20 TTCTACAGCGAATGATGCC    | 61.141 | 20 |
| AAATGCGCAATTTTAAACCT     | 59.864 | 21 AATCATTCCATTCCCCGATT   | 60.345 | 20 |

|                          |        |                            |        |    |
|--------------------------|--------|----------------------------|--------|----|
| CCGAAATCTGTAAATCCTAGCCT  | 60.001 | 23 AAGGAGGTGTTATGAAGGGAT   | 58.028 | 22 |
| CATTAAATGCGCCTACACTTT    | 57.077 | 21 ATGTTGGCAAACACAGGTCA    | 60.008 | 20 |
| TTTCTCCGATAACCGTGTGG     | 60.883 | 20 GGTCGTGCGGATTTCAATTTG   | 60.309 | 20 |
| TGCCAATGATCACCAAACC      | 60.322 | 19 AAAAAGCCCCTACCAAGCTG    | 60.603 | 20 |
| TTCAAATGCACGTGTTGGAT     | 59.972 | 20 GTTGCTCGGAATTCATGCTT    | 60.221 | 20 |
| GCTGATGCACCGAGCTAGTA     | 59.203 | 20 TATGCGGATGAGCAGAAATG    | 59.792 | 20 |
| GTGCTGAAAGCCCCAATTTA     | 60.074 | 20 AAATACGGTCTGTGCATGTTT   | 57.167 | 21 |
| GAGTTCTAGCCTCAAGCAACG    | 59.276 | 21 TTTGATGGTTATGGTATGGTGG  | 59.451 | 22 |
| ATTCATTCTGCCACCTCTGG     | 60.073 | 20 TTGATGATGGGGAAGAGACC    | 59.862 | 20 |
| CATTCAAGGGGCATTTTTGT     | 59.801 | 20 CAAAATAACCAAATCAGCAT    | 59.788 | 24 |
| CTGTCACCATCACCAACCAC     | 59.846 | 20 TATAACCCGTGTGTGGGTTT    | 57.729 | 20 |
| TCTGTTGGCAAATAGGCACA     | 60.257 | 20 CAAGTGTGAGAGGCAAGTG     | 59.616 | 20 |
| TTTCTCTCGATGCACTCTCG     | 59.267 | 20 CGTTGTGATAACCCACCTCC    | 60.232 | 20 |
| TTCGATGATAACTATGGGTTTGT  | 57.589 | 23 TGTGGAACCTGTGTTTGTACCC  | 59.797 | 22 |
| TAGGCAAAAACCTCCGTCCA     | 60.608 | 20 GCGCAAGTACAACAACATGC    | 60.333 | 20 |
| CAATGAAAATGCCACGTCTG     | 60.111 | 20 ACTTGTATCACTGGAAGAATTC  | 57.019 | 24 |
| GGGGTGGAGAGAAAAAGAGG     | 60.045 | 20 CAATTTTCATTGCCCTCAC     | 60.309 | 20 |
| CCACATTTTTCCCGACTGTT     | 59.83  | 20 GAGAATGCCCTGTATGCTT     | 59.154 | 20 |
| TCACGCTCCATCTCCTTTCT     | 59.95  | 20 GTGGTGTAGCGATGGTGAGA    | 59.707 | 20 |
| GGCATTGTATACCGGTTGG      | 60.074 | 20 AGAGCCACGTTAGGCTCAAG    | 59.639 | 20 |
| TGCGAACTCAGTGCTACTCG     | 60.347 | 20 TCAACAGAGAATGCAAGCAAA   | 59.6   | 21 |
| CGAGTGAGAGAGTGAGTGCG     | 59.915 | 20 ATAGGGTTCTGAGACCGGGA    | 60.842 | 20 |
| TCACACAGCACCTGATCACA     | 59.858 | 20 CGAGGTAGGCTTTGAAACA     | 60.378 | 20 |
| TACGATCCGAGTGCCTCTTT     | 59.836 | 20 TGATCTTAGTGATTTTTCTTCGT | 60.02  | 25 |
| TTCGAATACCCTAATAACCCGA   | 59.708 | 22 GACAACAGTCACGTGGCATC    | 60.171 | 20 |
| AGTTTGATGAGGGCATCCAC     | 59.934 | 20 GTGTCAGCGTGTCTCTCACG    | 60.685 | 20 |
| CCACAAAGATCTCGCACAGA     | 59.984 | 20 TGGTTCATGCCATTGTGAAT    | 59.781 | 20 |
| TTGTTTTGTCCACACTTGGC     | 59.591 | 20 GAAATTTACGAAACAACGAA    | 57.795 | 21 |
| TTGTTTGGTTAAGACGGTTGC    | 60.025 | 21 TCTTCCAAGATGGGAATGGA    | 60.395 | 20 |
| GTGGACGTCCAGATTGTTT      | 59.827 | 20 ACCGTCTGGTCATCCCTTTT    | 60.746 | 20 |
| CGCGAACTTAGATGGGCTAC     | 59.867 | 20 TTTCTCTTTGGTTGGTGAAGA   | 58.955 | 22 |
| CGAAAACCTCAATTTAAAAGGCTC | 60.47  | 24 TGAACCTCTGAAACCTCGT     | 59.697 | 20 |
| ACACTTGTCAAATCTCCTTAATT  | 59.109 | 26 GCTCGAGCTCAGACATCAAGA   | 60.839 | 21 |
| GCTCATCGTCATTCTCCACC     | 60.633 | 20 TTCCAAGCTTTAATTGCGGA    | 60.691 | 20 |
| GGGGTCTTCTTTGGGACTC      | 59.912 | 20 TATCCCGTGGGTCAAATACG    | 60.576 | 20 |
| ATAAGCTGAAGATGGGGCCT     | 60.06  | 20 TGGATGCGAAACATGAAAAA    | 60.051 | 20 |
| CACGCTATCTCGTTGCTCTC     | 58.777 | 20 TTTACCACCGCCTTAATTC     | 59.938 | 20 |
| AGGACAAGGGCAATCGTATG     | 59.955 | 20 TTGATATCCCCATCCTCCAA    | 60.088 | 20 |
| TTTTGCGGTGTGCATTTAGA     | 60.251 | 20 CCTTTCAGGCATTTAAGTGGAC  | 60.122 | 22 |
| CCCAATCTCTAGTTGCAGGC     | 59.836 | 20 GGTTCAAAGGGAGGGAGAC     | 59.912 | 20 |
| ATCATGCACAAAATAAAAAGGGA  | 59.741 | 23 TCAGTTTCTGAGTTTTGAGTTT  | 59.835 | 24 |
| TCTCACACACGTTTACACCCA    | 60.057 | 21 GTCTAAGCTTGTTAACCCCGG   | 60.008 | 21 |
| CAAATTTAGCCCAAAAAGC      | 59.699 | 20 TTTTCGACCAATAGGAACGG    | 59.931 | 20 |
| TCGCACCCTCTGTTCTCTCT     | 60.135 | 20 GAGATGTGGTGGTGGTATG     | 59.801 | 20 |
| TAGCCATGTAGGTGCCTGTG     | 59.74  | 20 AAAGTCCAAATGTTGGCGAG    | 60.11  | 20 |
| CCGTCCTCTCCATCACTCTC     | 59.792 | 20 TAAATCACAAAACCCACGCA    | 59.969 | 20 |
| AAGACCAGTTTTTCAGGGGG     | 60.332 | 20 CCCAGCAACTGTTGGCTACT    | 60.312 | 20 |
| TCGGATCGGATACCCAAATA     | 60.11  | 20 TTTTAGTAGGGTTTTCAAGTTC  | 58.424 | 25 |
| TTTCCACGGAAGGAACTGAC     | 60.088 | 20 CATGCTTGAATGAAAACCACA   | 59.576 | 21 |
| GGTCTGACAGGTTAGAGGC      | 59.841 | 20 TTGTAGGGGCAATGATGAAA    | 59.363 | 22 |
| TCCTCTTTCAGGTCCAGGTG     | 60.229 | 20 CAGCCCAATAACTCAACCTAC   | 59.892 | 22 |
| CCTTCTCCATCACCACTTG      | 60.501 | 20 GGTAATGGTTACCGGTTTGG    | 60.33  | 21 |
| CTTGTCCACCCACCACTTCT     | 60.002 | 20 TCCACTGTCTTGTGCCTCAG    | 60.022 | 20 |
| CCGGTCTAAACCCGGAATA      | 59.764 | 19 GAGCCGGAGTGAGATGATGT    | 60.231 | 20 |
| AACACAAACGCTAAACCCGT     | 59.54  | 20 AAGAGTGGGAAAGAAAGGGC    | 59.691 | 20 |
| TTGTAGTCATCCATGGGGGT     | 60.05  | 20 CTTTGAATTGCAGCTCGACA    | 60.134 | 20 |
| TTTGAGATCCATCCCTCAA      | 58.06  | 20 TTTCTTGTGTGTGTGCATGTG   | 59.203 | 21 |
| GGGTTATCACCTGATTTTCTCC   | 58.826 | 22 TACGAATCTCAAGGGGCAAC    | 60.074 | 20 |

|                           |        |    |                         |        |    |
|---------------------------|--------|----|-------------------------|--------|----|
| TGCCGAAGATTTACTCCTAATTA   | 59.188 | 25 | CGTAGTTTGTGGGGGAAATAA/  | 60.102 | 22 |
| GTGGCTAGATGCAAGCCTTT      | 59.481 | 20 | TATGCAGATTGGTGTGTGGC    | 60.549 | 20 |
| CAAATCTTCGAGTACAGAAATGG,  | 59.667 | 24 | CGTGCTGAGCTTATTCACCA    | 60.011 | 20 |
| AGCAGCTGATGCACATATTCC     | 60.258 | 21 | TGCGCAACCAATGTAATAGC    | 59.731 | 20 |
| CTTCACTTGAATTGAGGGGG      | 59.521 | 20 | TCGTGTCCGGTTTGTGTATT    | 58.9   | 20 |
| GCCTGTTTTAGCGTTCTTCG      | 60.018 | 20 | CACATTGTCACCCTCACCAC    | 59.846 | 20 |
| ATGCGCGTTTTTAGGGTTTA      | 59.624 | 20 | CTCGAAGGTGACTATCCCGA    | 60.21  | 20 |
| GCTGAGCATTTTTAGCACCC      | 59.851 | 20 | GCAGCATCCTTCACCATTTT    | 60.081 | 20 |
| TTTTGTGAAACAATAATGACTTTG, | 57.874 | 25 | TTTGCAGTAGGGTTGGAGATG   | 60.118 | 21 |
| TTCCAGCTAATCTGGTCCGT      | 59.694 | 20 | TGAAACAACATGGTCCGCTA    | 60.111 | 20 |
| CCACTCTCTCACACGCAGAA      | 60.178 | 20 | AAGACGACGCCCTTTTAAT     | 59.966 | 20 |
| GGCAAAGGCAGCCTAAAG        | 59.967 | 19 | CGTTTTGATGATATATAGGTGT  | 59.637 | 27 |
| TTATGGGAAGAGGGGGAGAC      | 60.264 | 20 | ACCCTTAATCTTTGTGGTTGTG/ | 59.791 | 23 |
| GTGGCATCGTGAGGAGTGTT      | 61.146 | 20 | TTTGAGTTTGCATCTAAGAAGG  | 59.828 | 24 |
| CACGCCCTACAAAACAATGA      | 59.585 | 20 | TTTGGTTTTATCGAAGAGGCA   | 59.707 | 21 |
| TTGGTGCATGCCTTTTGTTA      | 60.111 | 20 | CCACCCCTAAGTGGATGAGA    | 59.92  | 20 |
| AGCAACACTTGTCCCACGTT      | 60.611 | 20 | CAGGAGCACTACAGTTCACGA   | 59.097 | 21 |
| GAAAATCAAAGGCCACAA        | 59.916 | 20 | CGGCCAAGATTTGTTAGAGG    | 59.702 | 20 |
| CAACACACATCCTTCATGCAC     | 60.024 | 21 | CATTCGGTTGAACCCTCAGT    | 59.966 | 20 |
| TGATGGTGTTCCTTGTTT        | 60.21  | 20 | GGATTGATGAATTTCCATTCG   | 59.221 | 21 |
| CTGTGCATTCCACATTTCCA      | 60.517 | 20 | CCATCATTCCAATTCAGGAA    | 59.748 | 21 |
| TCCAGGTGTGAATAGCATTT      | 59.443 | 21 | TTGACCAAGATACACCTTGCAT  | 59.499 | 22 |
| AACCTTTGTTAGCCCGTTGA      | 59.609 | 20 | GCTCTTTTATTTACCTTTTATGC | 60.067 | 26 |
| AGCGTTATTACCGGATCG        | 59.93  | 19 | ATGACGGTTGTGGGACTGTT    | 60.284 | 20 |
| TGCCGTCCTTCAATCTCTT       | 59.813 | 20 | GAGAAATTTTCGATGTTTCCACA | 59.067 | 22 |
| TGAATCTGGGGAGAGAGACG      | 60.34  | 20 | TATGTTTCGGCCCGGTATTA    | 60.165 | 20 |
| TGGCAAACCAAGATACACA       | 59.964 | 20 | GGTTCAATTTGGACGTTTGG    | 60.206 | 20 |
| TCCTTAAACATAACGAGATCAA/   | 58.388 | 25 | ATGAATCTCATGTTATTGAGTG  | 57.225 | 25 |
| TTTTACCAATTTGCCCTCG       | 59.937 | 20 | CGTTTGCCATCCATCTCAAT    | 60.864 | 20 |
| CTCTTCTCTCTCCGCCCTT       | 60.088 | 20 | AAATCTCCCTCGTTCGTCOA    | 59.67  | 20 |
| ACAAATCCACCAGAAACCCA      | 60.21  | 20 | CTTGTGAACTCCGATGGACA    | 59.676 | 20 |
| ATCTCTTTTCCCCACGAGT       | 59.935 | 20 | TGAAGAGGCAATGCAATCTG    | 59.948 | 20 |
| ATTACGGCCACGCTAAGTTG      | 60.152 | 20 | GTAGAAGCGTCCGAGGAATG    | 59.836 | 20 |
| CCCTCTCATTCAACACCCC       | 60.31  | 19 | TCGGCAGAAAAGAAGAAGGA    | 60.066 | 20 |
| ACCTACTGCCGTGTTTCGATT     | 59.621 | 20 | ATGGCCAGATTTGTTTTGA     | 60.309 | 20 |
| TTCATGAATGGATGTGTTTTGTT   | 59.238 | 23 | GCGGAACATGATGAATGAAC    | 58.929 | 20 |
| TTGACAATATTTAGTGTTTTGACA  | 58.99  | 27 | GAGAGAAGTAGCAAGCGCGA    | 60.955 | 20 |
| ATTTGCTTGATCCAACGGTC      | 59.939 | 20 | ACGAGCTCATTATTCTCCGC    | 59.439 | 20 |
| ACCCTTCATTGTCTATTCTCATT   | 57.52  | 22 | ACACACAAGCCTCGCTCTTT    | 60.058 | 20 |
| TGACCATTTTGCAACTCTCCT     | 59.726 | 21 | AAACCGTTCAAGAAAAGGGA    | 58.669 | 20 |
| TGGCCGTGAATGTATGAGAG      | 59.673 | 20 | CGTGCGTAGGAGAGAAGAGG    | 60.149 | 20 |
| AATGAAGAAAATAGGACTAATGA   | 59.438 | 27 | CTTGTGGCTTGCAAACATCT    | 58.926 | 20 |
| ATCGTGAGAAGCGTTCGATCT     | 59.981 | 20 | ATGCAGTGGGTTTTGAATGG    | 60.755 | 20 |
| GCTTGCTCAGCTTCTCGTTT      | 59.904 | 20 | GCATTTGAAAGTTTTATATGA   | 60.438 | 27 |
| TTTTCGGATCGGTAGAAGGA      | 59.64  | 20 | ACTTACGGAATTCCACTGGG    | 58.909 | 20 |
| CCAAATGCATGCAGCTTCTA      | 59.976 | 20 | ACGTAACCTTGGTGTAGCCG    | 60.052 | 20 |
| GCCAAATGTTGGATGAGCTT      | 60.081 | 20 | ATGTATGGCAGGTGACCCAT    | 60.081 | 20 |
| TTGGAAGCCATGCAAATAA       | 59.146 | 20 | AGTTGTCAATGGAGGTTGGG    | 59.82  | 20 |
| AATTGGACACAGAATGCGCT      | 60.667 | 20 | AGAGCGAAGAAAGCAGATGG    | 59.717 | 20 |
| TTTCTTTTGTGACGCAATCG      | 59.849 | 20 | ATGTGGAGCAACGTGAACAA    | 60.16  | 20 |
| CATAGTGGAGGGATGTGGCT      | 59.95  | 20 | AAAATTCTGGCATGCCTCTG    | 60.214 | 20 |
| ACAAATGGCCAAGAGAGTTTACA   | 60.048 | 23 | GCATTAATGAGCCTCCCAC     | 59.533 | 20 |
| TCAAAGATGGAGGTTGGAGG      | 60.042 | 20 | ATGCTGGTAGAGGCAACGAT    | 59.723 | 20 |
| AAACTTGTCTCACGCGGGTA      | 60.689 | 20 | TGATACAGGTGTTCCAAACAA1  | 59.777 | 23 |
| CGTTCGATTTGCCGTTTTAT      | 59.964 | 20 | TCTGTTTCCAGTCGTCTCCA    | 59.388 | 20 |
| CTCTCCTAGGGATGAGTCCG      | 58.84  | 20 | GATGAAGCAACGAGGGTTGT    | 60.119 | 20 |
| AAATCAGACGGGCAGTTGAG      | 60.255 | 20 | AAATCCGTTTTTGCCTTCC     | 60.292 | 20 |
| TTAGGGTTTTAAAATCGCGCA     | 60.564 | 20 | CGGCAACCCTGATACTTAGC    | 59.73  | 20 |

|                           |        |                            |        |    |
|---------------------------|--------|----------------------------|--------|----|
| GAGGACACTTGGACCTGAAAA     | 59.173 | 21 TAGTCGGGCAACTGGAGCTA    | 60.924 | 20 |
| TCCTCGCAGGAGTTCAGAA       | 59.95  | 20 TGCCACCCTAGATCCGTTAC    | 59.955 | 20 |
| CCGTGATTTAAGGAGTCGGT      | 59.052 | 20 AAACAAAAATATAGCTAATGC   | 59.231 | 25 |
| AGCTGTTAGGGTTGTATAGTGAG   | 57.436 | 27 TTGACGAGTCCATTGTGCAT    | 60.12  | 20 |
| GTGATGTGGTGTGGAACATT      | 58.172 | 21 GGGAGAGGATCAAGAGAGGA    | 59.763 | 21 |
| TCACCAAGTCCAGCCTTCTT      | 59.844 | 20 GATGTATCGCCAAAGGAGA     | 60.036 | 20 |
| CTCACGTGGAGGATCGTTTT      | 60.111 | 20 CTGCCTTCCAACCATACACA    | 59.566 | 20 |
| GAGTGTCCGGTCTGAAGGTCC     | 59.688 | 20 AATGGGACTGGCGATTGTAG    | 59.955 | 20 |
| GTTTTGTGAGAGGCGAGAGG      | 59.989 | 20 ACCGGTTGGACTGGTTGTAA    | 60.269 | 20 |
| GCAAGCTTCTCTAACACGGC      | 60.162 | 20 TCCTACACTTCTGCCAAGC     | 60.397 | 20 |
| AAGCTCTTTTCGTGTCCCAA      | 59.853 | 20 TGGCAACAAATATGACTGCAT   | 59.055 | 21 |
| TCTACCTGTTGCTGTGTGCC      | 59.905 | 20 TGCATGTGCATGGAAATTAGA   | 60.088 | 21 |
| TCCTGTAATGCTATCTCAATGTTG  | 59.135 | 25 TCTTTGAATTCAGCACGCTA    | 57.257 | 20 |
| CCAAATCATTGTATTTTCATGTTTC | 60     | 25 TTTGATGATATATAGGTGTTTT  | 57.624 | 26 |
| ACACCAAATTTTCATCATTTTTCAA | 58.397 | 23 GATGGTGGGTCTGAACGAAT    | 59.786 | 20 |
| AGCTTTATGCGTTTGCAGGT      | 59.911 | 20 TCTTCAAGAAATCCGCCATC    | 60.155 | 20 |
| TCAACATGCAACCAACAAAAA     | 59.999 | 21 CCCATTTCTAACTACCCAAATC  | 59.962 | 23 |
| CATTATTATCAACGGCTGCAA     | 58.712 | 21 GGTGTTGATGACGTGGCTTCT   | 60.119 | 20 |
| TGCCAGTTGCCATTTTTCA       | 60.073 | 20 AAACAAAGCCTGTTTCCAGC    | 59.359 | 20 |
| TGAGAGGAAGAAAGAAGATGGA    | 58.121 | 22 CCCACCCCACTACTCAAGAA    | 59.959 | 20 |
| TCTAAAGAAAAACAAAAGAAGTTC  | 57.236 | 26 GCTTTCCATTTTGCTTTTTA    | 58.427 | 21 |
| TGGAGCAACAAAGATGGAAA      | 59.247 | 20 TTGTGATTTGGTGTGTGTATGG  | 60.067 | 23 |
| TAACAAAGAAAGGCGGATCG      | 60.202 | 20 AACGGCTTGGATTCTTTCCT    | 60.074 | 20 |
| ATCCCTTTTGCTTTTGCTGA      | 59.823 | 20 GACGATATCCCTTGCACGAC    | 60.492 | 20 |
| CCTTGCTCTCTTGCCTTGAC      | 60.134 | 20 TAGCCCATTATCTCCCACCA    | 60.288 | 20 |
| AACGCAAGATGGGAAAAATG      | 59.938 | 20 GCCTCTGCTATTACATGCCA    | 58.897 | 20 |
| CAAGCAGGTAATATCAGTTTTCC   | 59.271 | 24 ACATCGGCAGTGACTTTGTG    | 59.751 | 20 |
| GGATCCCAAATCACCAACAA      | 60.56  | 20 TTGTGGCAGGTTATTCATGC    | 59.548 | 20 |
| CCACCAACTCCGGTAAAGAA      | 59.964 | 20 TCCGCAATTCGTCTATCGTT    | 60.606 | 20 |
| TAACCGACCACGACACCATA      | 59.84  | 20 CGGCTTACCAGTTTCTTTT     | 59.355 | 20 |
| GGTTATCACCGGATCACGAC      | 60.203 | 20 AGATGGTGGGTGAGATTTGG    | 59.779 | 20 |
| GGCGGTAGGAGTTGATGATG      | 60.483 | 20 CACACGTTCTTCCCAGATT     | 59.966 | 20 |
| CGGAATGTGATCGAATAGCA      | 59.646 | 20 TCACCTGCGATATTCAACGA    | 60.22  | 20 |
| GATTTGCCCTTTTGGCCAT       | 59.893 | 19 GATGATTGCACCATAATGCG    | 59.921 | 20 |
| TGTCGAATGCAGGGTTGATA      | 60.073 | 20 CCGAGATTGTTGGGGTCTAA    | 59.926 | 20 |
| CAAGAAACGCGCCATGTAT       | 59.703 | 19 CATCCATCTGAGCATTGGAA    | 59.604 | 20 |
| TCAGGAAGATCATCTGCGG       | 59.884 | 19 CGTTCTGAGCTGCCTTTCTT    | 59.757 | 20 |
| AGCAGCAATTTCCGAAAAGA      | 59.96  | 20 AGGGTCCCACCACCTAACAT    | 60.489 | 20 |
| AACACTGCACGCATTTTGTAG     | 59.911 | 20 AAATCACGTAACAAATTTTCATT | 58.93  | 25 |
| GGAGACGGAGAAATCAGACG      | 59.803 | 20 AGATGCTGGAATCTTCGTGG    | 60.218 | 20 |
| TCCAGTGTCTCCATCTCGTG      | 59.82  | 20 GTTGGCATTGCAGGCTAACT    | 60.278 | 20 |
| CCACATTCTTGCTTCTGCTG      | 59.591 | 20 TCCATTAAGAATTTCCCATGC   | 58.888 | 21 |
| CAACAAAGCAACAAAACATTGAA   | 60.062 | 23 CAGTGCGGACGGTTAAGATT    | 60.132 | 20 |
| TGAGCATGTGGAGAGCAAAG      | 60.136 | 20 GAAGCTGGTGCAATTGTTTG    | 59.322 | 20 |
| TTTTGAATGGCACAGATTGG      | 59.518 | 20 CTTTAATTTCTTGGTGGCGG    | 59.581 | 20 |
| GAGAGATGCTGGTAGAGGCG      | 60.119 | 20 TGACGATGAGACGTGTAGGG    | 59.701 | 20 |
| CCATAAACACCGTGTCCAAA      | 59.293 | 20 ACTTTCTTCACTACTGGAACCTT | 58.132 | 26 |
| TTTGGCATCAATGCATCCTA      | 60.035 | 20 TAAGAACTCTGGCTCCAAGG    | 57.147 | 20 |
| AGAAAATGGTGCACAAACCC      | 59.836 | 20 TCATGCACGTGTTTCACAAA    | 59.721 | 20 |
| AACACATCGGCACAGGTACA      | 60.032 | 20 AAAAATCTCAGGGACGGGAC    | 60.306 | 20 |
| GCAGCTGTCACGCACTTTTA      | 60.203 | 20 GTTTGCTTCCACGGCTAAAC    | 59.752 | 20 |
| GAGGATGCAGACGAACCAAGT     | 60.269 | 20 GTGTCGATTGTGTTTCATGCC   | 59.975 | 20 |
| TAAGCCTTGTAGTCGCGGAT      | 59.867 | 20 ATACTTTGGCCCAGTTCGTG    | 59.993 | 20 |
| TGTGCTGTCCACAACCTGAT      | 60.162 | 20 TCGAGTGTTTCGTTAGTTAGTGA | 59.876 | 24 |
| CCTCTCGCATTTCTCTTGCT      | 59.717 | 20 TTGTTCTTGTCCCACAGACG    | 59.72  | 20 |
| ACCCAAAGTGCCCTTTTATG      | 58.949 | 20 ATTTTCGAAGATCAACGGACG   | 60.074 | 20 |
| GCCTTAAACTCGCGTATTGG      | 59.742 | 20 CCCATCGATTGAAACAAACA    | 59.371 | 20 |
| GGATCTACGAGATTTGCTCCC     | 60.053 | 21 TTCGTTCTTAATTAGCGCCG    | 60.347 | 20 |

|                          |        |    |                        |        |    |
|--------------------------|--------|----|------------------------|--------|----|
| TGAAGCGTGAAAGTCAATCG     | 59.988 | 20 | AGCGTCGATCTGGTGAAATC   | 60.226 | 20 |
| TTGAAATTATACGAAGCCGGA    | 59.573 | 21 | GCGATCGAGAGAGAGAGGTG   | 60.246 | 20 |
| GATGCAGTGGGGTTTTGTTC     | 60.362 | 20 | CCAAACAACGATCGACAATG   | 59.964 | 20 |
| TCAAACGATTCCCAAATGG      | 60.671 | 20 | TGACGTTAAGAGAGTTTTCACT | 59.855 | 24 |
| ATTGCCACCCTTATCCACTG     | 59.813 | 20 | TTTGGCAAGGGTTTGAAAAG   | 60.081 | 20 |
| TTCCCTTCTCATTTCATGC      | 60.014 | 20 | AATCCGAGGAATCGAGTGA    | 59.629 | 20 |
| AAGGCAACATCTATCGAGGG     | 59.15  | 20 | GAACGGGGATTTGTCAACTG   | 60.353 | 20 |
| AGTACTGCAATTCTGCCCGT     | 59.763 | 20 | CTTCCTCACACATTCAGCCC   | 60.656 | 20 |
| GGTGGTTGGAGATCTTTGGA     | 59.903 | 20 | ACCAACGTCCCTCATCTACG   | 59.989 | 20 |
| TGGGTTTTAGGTGTCATTGC     | 58.476 | 20 | GCAAACGGTATAGGATCGGA   | 59.923 | 20 |
| CCGGATTTGGAGAAATCAAA     | 59.872 | 20 | TGGCTCTCACACTCACTCTCA  | 59.747 | 21 |
| AGCAGCGAAGGAAAACTTG      | 59.632 | 20 | TGGAGTTCGGCTTAATGGTC   | 60.074 | 20 |
| TCTCCGACCACATTCCTCTC     | 60.199 | 20 | TTGCAGAAGTCGAAATGGTG   | 59.84  | 20 |
| CAACCAATGAGGCTCAGACA     | 59.831 | 20 | AACACGTGGAGATGACACCA   | 60.005 | 20 |
| TGGAACCATGTTCAATCCCT     | 60.173 | 20 | TGGCTCCATTTGTAAATCACC  | 59.815 | 21 |
| ACAAGGCAGTACCCGTGAAG     | 60.171 | 20 | TCACACAGATTAACACTGAA/  | 60.128 | 26 |
| AGCCACCTGATTTTCTTCA      | 59.67  | 20 | TGGAAATTTGACACGCTTT    | 60.617 | 20 |
| CGAAGTATGACTCGCCACCT     | 60.277 | 20 | CGCGAAGTACCTGCGTTAT    | 58.956 | 19 |
| AAGGGTTGGTATCATTTGAACA   | 58.353 | 22 | CTGCTGGACCTCCACAACCT   | 60.298 | 20 |
| ACCGGGTATCGGAAATTAGG     | 60.034 | 20 | GGGGGAAAAAGAAAGTTGA    | 60.271 | 20 |
| GTGAAACCCCAATTGTGTC      | 60.073 | 20 | GAATCAATCACGTTTCGCAT   | 58.575 | 20 |
| TGCGTTTAAACAACCCAAAA     | 59.094 | 20 | TTTGGAGATGGTGATGGTGA   | 59.893 | 20 |
| TTATTTTTCTCAAATGCTATGCAA | 58.109 | 24 | TAGTCTTCTCCCGTGCGTT    | 59.875 | 20 |
| TTTCAGCAATTCGAAGGTCC     | 60.192 | 20 | CAGCAAGAAAAATACACCAGC  | 60.298 | 22 |
| TGGGAGAATTTGTGGGAGAA     | 60.43  | 20 | CCTTGGCCTTCTGACATCAT   | 60.073 | 20 |
| TCTAAGCTTGTTAACCCCG      | 59.221 | 20 | TGACACTCACGCACACACAC   | 60.437 | 20 |
| AGCATAACAGCTGGCAAACA     | 59.493 | 20 | TAAAAAGGACCGTACCTGCG   | 60.124 | 20 |
| GGTTCGGTCACTTAGTTCG      | 59.55  | 20 | AGCCCGAGCCTAAGCATATT   | 60.211 | 20 |
| CAGATTACTGTGTGCGGCTG     | 60.472 | 20 | CCCCCTTAACTACCACTTATGA | 58.515 | 23 |
| CAACTCCGAATTCGAATTACC    | 59.716 | 22 | AAATCCCGTTCTGGGAAACT   | 59.805 | 20 |
| TGAGTCAATCCGCATTA        | 59.401 | 20 | GAGGGATTTGGGACGATTTT   | 60.131 | 20 |
| CTTGCCCTTCACTCTCATC      | 59.803 | 20 | TTAGAAACGGAGGTTGGGTG   | 59.964 | 20 |
| TGGAGTTGTCAGTTCCTTCCA    | 60.674 | 21 | TGAGCCTATCTTGAGCACA    | 59.547 | 20 |
| TTGACCAAGGTGAGAATTTGAA   | 59.587 | 22 | CTCTTCCCTCTCATCTCTCTCG | 59.717 | 22 |
| CTTTTTCTATGTGTGACAAAGC   | 58.003 | 23 | GTTCCGGCGTTAGGAGAAATG  | 59.708 | 20 |
| AGCATTACCTGGGCATTTG      | 59.96  | 20 | CCTCGCACATTTCAATTCCT   | 60.074 | 20 |
| TGCTCCGAAACATGAAAAATC    | 60.067 | 21 | ACGTTAAGGAGGGGATCCAT   | 59.651 | 20 |
| GATCATGCTGGAAGCACGTA     | 59.83  | 20 | CGTCCACGGAGAGGTTAGAG   | 59.861 | 20 |
| CGCACTGATCCAACTTTTCA     | 59.84  | 20 | TTACGAGCGCATAGCCTTTT   | 60.006 | 20 |
| CCCTAAGTTTGCATCTCCCA     | 60.066 | 20 | GACCTTAGTTGCGAAGACGG   | 59.875 | 20 |
| CTCCACCCTCTCACTTCCAC     | 59.682 | 20 | GGTTTCTTACTCGGGCTCCT   | 59.713 | 20 |
| AAAATGTCGCCGAAAATCAG     | 60.074 | 20 | GAAAAATCAAAGGCCCAAA    | 59.916 | 20 |
| TGCTCCAGTAGGTTCCCAAC     | 60.111 | 20 | GAGTTTATCAGCGGTCTCGC   | 59.985 | 20 |
| TTCTGTCCCGTTTTCTTCGT     | 59.711 | 20 | GGCTTCTTAACTTGTTGGAAC  | 60.376 | 23 |
| ATGTGGAGAAAGCTCTGCGT     | 60.02  | 20 | CGTGATCGCTGCAACTCTAA   | 60.157 | 20 |
| ATCGATGGCCAAGATTGCT      | 60.585 | 19 | ATTCGGGAGATGTTCCAGTG   | 59.927 | 20 |
| TCCTTTTCTTTTCTGAGCACC    | 59.871 | 22 | CATTGGGGACAATGTTGGTT   | 60.474 | 20 |
| CATGCTGTGCAGCAGTAGGT     | 60.08  | 20 | CATAATGTCCCGTTGAACC    | 60.051 | 20 |
| CTACCGACCTTGGTCTGAA      | 60.103 | 20 | TTTTCTGGAACGTGAAAATC   | 59.054 | 21 |
| TTTCTACCAAATCTCCCA       | 59.359 | 20 | TGTACCTAAAAAGTTGTTCCCA | 58.258 | 24 |
| TGGATCTCGGAATATCCAGC     | 59.998 | 20 | ACCACTCCACCCATACAAA    | 60.088 | 20 |
| CCGATTGACATCCCTACCTG     | 60.331 | 20 | CGTCACAGCCTCTTCAACAA   | 60.025 | 20 |
| CCAAGAAAATATCGGCAGC      | 59.845 | 20 | CTTGTTCCGGTAGGTAGCCA   | 60.125 | 20 |
| ACGCAGACAACACACACACA     | 59.818 | 20 | TGAGCCCGTAAATCACACAA   | 60.111 | 20 |
| ACGTGAATGCCAAAGCTACC     | 60.14  | 20 | TTCTTCCACGTCTCTAGGTG   | 59.338 | 21 |
| TGAATGAAGGGATTTACCA      | 58.897 | 20 | TCTCTCACGCACTCTCACAAA  | 59.76  | 21 |
| GCGAAGCACCGAGACTACTG     | 61.136 | 20 | TCGTGTTTATTGCAGTTTT    | 59.322 | 20 |
| GTCAAATCGCCTGAGAAGGA     | 60.34  | 20 | AAGGAGGTGTTATGAAGGGAT  | 58.028 | 22 |

|                           |        |                           |        |    |
|---------------------------|--------|---------------------------|--------|----|
| AATGCACTGACTTGGCATGA      | 60.272 | 20 TCTCGAAAATTGAATGACAAGC | 59.202 | 22 |
| TTCCCCCTTTCAAAGAACAA      | 59.518 | 20 TTTGTACATGCATTCCAGC    | 60.675 | 20 |
| TTGGCCTAAAATCCCAACAC      | 59.801 | 20 TTTCTCATTGGCAGTCACCA   | 60.24  | 20 |
| CGAACTCAATTTGATCCGAAA     | 60.06  | 21 TGATTCCTCCTCACTTGCCT   | 59.803 | 20 |
| CCACTTTGGTGACTAACGCA      | 59.758 | 20 TTGAATTCGGACATGAGCAA   | 60.197 | 20 |
| TATTTCCGGTTCAAACCTCG      | 59.931 | 20 TGTTTTCTTCCCCACACACA   | 59.976 | 20 |
| TTACCCAACCCACTAACCCA      | 60.081 | 20 CTTGGAGCTTTGATCCTTGC   | 59.955 | 20 |
| ACACACGAGCAAGCAAATGA      | 60.459 | 20 GGGGGCATTTCCTCACTATTA  | 59.795 | 20 |
| TATCCCGTTTTCTTTGTTCCG     | 59.931 | 20 TGCCATCTCCTCATCACTTG   | 59.787 | 20 |
| CGAATCCGTTTTCCAACAGT      | 59.971 | 20 CAAATTCAGAATGCTGCCC    | 60.585 | 20 |
| TGATTCAAAGGCTGATAATGGTT   | 59.857 | 23 TCACTGGAATGCTATGGTGC   | 59.679 | 20 |
| TGTGATCGACGATTGGAAAG      | 59.648 | 20 ACGGATTTAAGGGTTATTACCT | 57.667 | 23 |
| GGAAATTATTGGGAGGGAATG     | 59.499 | 21 TTGCGCATAAATATTGGTTTCT | 59.89  | 23 |
| CACGCACAAAGAAGATCTCTACA   | 59.571 | 23 GTATGCTCCTGGGTTGGAAA   | 59.933 | 20 |
| CATTGTTTTCTCTCCCAA        | 59.903 | 20 TTAGTTATATGTATGGGGATGG | 57.868 | 27 |
| TTCAGCCTGTATGTTGGGGT      | 60.375 | 20 TCTTTTTCTGAACGATGAGC   | 59.443 | 21 |
| TTTCTCCAGCTTCTACCA        | 59.807 | 20 TTTCTTTCTTTGAGCATAACGA | 59.302 | 23 |
| TCCCACTTTGTCTCCCAATC      | 59.903 | 20 CGCTGCTCTAACACAAACGA   | 60.195 | 20 |
| CAGGAGAACTCGGCTGAATC      | 59.95  | 20 CCAGGCAAATAGCTACCGAG   | 59.861 | 20 |
| CATTCAAGTAAAACATGGCG      | 60.111 | 20 GGAGTGATGAGAGAGGAGCG   | 60.096 | 20 |
| TCTCACTAATGGGCCAAAGG      | 60.066 | 20 ACTCGGAGGTGAAGGTGAGA   | 59.835 | 20 |
| AAGTTCGAATTCTCCCACC       | 60.306 | 20 AGGATCTTAATTGGTTCGATTT | 59.762 | 24 |
| TTGTTGTTTCACAAAATTTAAGCTC | 59.653 | 25 ATTTATGGTGGCTGCGGTTA   | 60.343 | 20 |
| TGCTATGGACGAAATTGGTG      | 59.542 | 20 GCACATTGATATCGTGTCCAA  | 59.415 | 21 |
| CACGTGCGTCAACTCCTTTA      | 59.904 | 20 CCTATGGTTGTATGGTTTGGAA | 57.354 | 21 |
| AACAATTACAATGTTTATCCAATC  | 59.207 | 27 CCATCCATTTGCAACCATAA   | 59.232 | 20 |
| TTCACGTACCCCTCATGTCA      | 59.96  | 20 CTGCAACTGGACCGAAAAAT   | 60.11  | 20 |
| GATCCAGTTCAAGTGCCCAT      | 59.934 | 20 GTTGTTCAAAATTCGTCCAAAA | 59.01  | 22 |
| AATGCATGCACCTGATTACAA     | 59.055 | 21 CGGGGCGTGACATTAGTTAT   | 59.845 | 20 |
| ACGCAACAGCTCATGACAAG      | 60.056 | 20 GAAGAGGTTATCCCTCGTCCA  | 60.449 | 21 |
| TAGGGATGAAGAACCCGTTG      | 59.926 | 20 CAGCCCACTTTGACCAACTT   | 60.149 | 20 |
| TGAAGTGTTATGCGTTTTGACA    | 59.274 | 22 CTAAGGATCAACCGCCTG     | 59.702 | 20 |
| TCAACTGCATTGTTCCAG        | 59.691 | 20 CATTCGAACATCATCATCCG   | 59.883 | 20 |
| TGATCTTACGCGCACATCTT      | 59.449 | 20 TTCCTTGGACCAAATAGCCT   | 59.952 | 21 |
| GGAAGAGACCAGAAGTCCCC      | 60.05  | 20 ATTGATCGCATTGAGGAAA    | 60.414 | 20 |
| AGTTCGAGGTGGGCTTTTCT      | 60.247 | 20 AAACAATTTTCTGGCCATGC   | 59.945 | 20 |
| CCCCAAATGAGGAACTTTGA      | 59.903 | 20 CCATCCCACCAGCATTTAGT   | 59.813 | 20 |
| CACACATGCGTTCATTACAA      | 60.164 | 20 GTTAAGGGCCATCAGGGATT   | 60.152 | 20 |
| TAAAACCATGCACGTAGGCA      | 60.133 | 20 AACGAAGGTACGGTAAGCGA   | 59.769 | 20 |
| TTCGAGTTGATTCCATCCA       | 59.049 | 20 GGAATGACTTGTAGCAGCC    | 59.7   | 20 |
| AGATTTTCTGTCTCCTTTCTCAA   | 59.777 | 24 GGGTCAATCGGCAAAAATAA   | 59.773 | 20 |
| TCAATAAACCCCTCCGAATGC     | 59.901 | 20 TAAATTGCTCCGTCTCCAGC   | 60.352 | 20 |
| ACACCTGTGAAAGGGATCGT      | 59.43  | 20 ATGGTGTCTTCCATCAGGC    | 59.934 | 20 |
| TCGGAATTTTACGTGGTTTG      | 58.531 | 20 GGGTTGCCAGGTTGAATAAA   | 59.801 | 20 |
| GAGACGATCGAACGACATGA      | 59.794 | 20 TGTAAGCAGGTATCATCATAAC | 58.854 | 24 |
| TAGTGGGCTTTGGCACAAGT      | 60.689 | 20 TTTCTCCCAACGTAGCCAAC   | 60.11  | 20 |
| AGCTGGTTTGAGGGAGATGA      | 59.803 | 20 TTACTCTCCACTCCCGTTC    | 59.966 | 20 |
| TCAAAAATCCAAGGGTGGAG      | 59.903 | 20 GGAAGGATGAAAGGGGGTAG   | 59.761 | 20 |
| CGACCCTCATCAACTTCCTT      | 59.137 | 20 AAGGCATGAGGATTTTAGAAA  | 59.175 | 23 |
| ATGGTGGTATGGTGTGGAGG      | 60.51  | 20 CAAGGTACTCGCTACGAGCC   | 60.037 | 20 |
| GGAATCAGTTTCGTATCCC       | 59.341 | 20 CCATTTTGTGCCCTTGATTT   | 59.801 | 20 |
| CAGAAATGGCATTGGTTGTTC     | 60.359 | 21 ATTGAGTTTGGGAGAAGCGA   | 59.813 | 20 |
| CGCATGATGTAACGTGAAGG      | 60.134 | 20 CCCAGAGAGCATACTTCCGA   | 60.353 | 20 |
| TGATTATCCGCTTACGTTTTT     | 57.918 | 22 TGACTCACTATGGGCACAGC   | 59.862 | 20 |
| TCACATCCTCAGCACAAACC      | 59.682 | 20 TTGGTGAGGTGAGGTGAAAA   | 59.109 | 20 |
| CATGGACTTTTGACGAGCCT      | 60.255 | 20 CGGTTTGTTCGTGTTTGA     | 59.603 | 20 |
| CAGAATTAGCCTTACCAAGATGG   | 59.194 | 23 TACGCATCAAGACAACCTCCG  | 59.864 | 20 |
| ACAAGATCAACGCTCCTCGT      | 59.874 | 20 GAGCGAGGAGAGGAGAGACA   | 59.817 | 20 |



|                           |        |                            |        |    |
|---------------------------|--------|----------------------------|--------|----|
| AAGAGTTATCACCGGATCGC      | 59.154 | 20 AAACCGGAAAAGTGAAGAA/    | 59.967 | 21 |
| GGATGCAAGGTGAAC TTGGT     | 59.973 | 20 GGTGGGCTTAGTTGAGGTGT    | 59.065 | 20 |
| AGAAGAAGCAGAGACCGACG      | 59.745 | 20 TTCAATCAAACCAACGAAACA   | 59.048 | 21 |
| TGGGGTTGGAGGTTTTTTGTA     | 60.198 | 20 CAATGTA AATGCCAATCTCTTT | 57.835 | 23 |
| GCTCGACCTCGTGAGCTACT      | 59.775 | 20 TTCTCAGCATATGGGAAGGG    | 60.029 | 20 |
| GCGGATTATCACATTGAGGAG     | 59.542 | 21 CACATTCTGAGGATGGAATC/   | 59.933 | 22 |
| GAAAATACCC TTCGCATCCA     | 59.901 | 20 TGGCAGTAGATT CATTCTATCT | 58.871 | 26 |
| CGCCGGACTATTCTCTGAAG      | 59.971 | 20 GCTCCCAAGTTGTGAAGCTC    | 59.997 | 20 |
| CGGGCTTGCATGAGTTTAAT      | 60.096 | 20 TTCACACCATT CGCCA ACTA  | 60.111 | 20 |
| ACCTGCTCTTATATCCATTTTAATT | 57.552 | 26 CACA ACTCCACCTGACATAATC | 59.906 | 23 |
| CCCGGACTATCGAATCAACT      | 59.006 | 20 GATTATGGCATACTGTGGG     | 58.723 | 20 |
| AAAGATTACTCATGTGATATTGCC  | 57.463 | 24 CCATTATGTCGATATCCATCCA  | 59.507 | 22 |
| TCCGGTCCAATTCCAATAAG      | 59.756 | 20 CCTATGGTTGTATGGTGTGGA   | 58.215 | 21 |
| CCGGAAGGAGGAGAAGAAG       | 60.311 | 20 ATTCTGAACCAACTGGCACC    | 59.973 | 20 |
| TTTTCGTACACAATTGAGGAA     | 59.625 | 22 GAAAAGCAAGGAAAAAGCCA    | 59.451 | 20 |
| TGGAACCAAGACATATGGGA      | 58.77  | 20 AAGACAACAGGCCA ACTTGC   | 60.299 | 20 |
| TACGTGATCGGACACGAGAA      | 60.263 | 20 AATTTGTGTGGCCATTTGGT    | 60.096 | 20 |
| ATCCTCCTTGCTTCCTCCAT      | 60.037 | 20 GAAGCAAATTCCAAGATGACG   | 59.699 | 21 |
| TTCAATCATGGAATCGTTTCG     | 59.474 | 20 CAACCCTACCTCCTTCTCCC    | 59.928 | 20 |
| TCGTCAA AATGCAAGACGTG     | 60.844 | 20 ACGTGGCCTTTGATGGTAAA    | 60.365 | 20 |
| AAATCAAACCTCAACCCGTC      | 58.886 | 20 AACACTATCACAAGTTCCGAC   | 60.047 | 23 |
| GGTAGAGGAGCTGATGTGGC      | 59.834 | 20 TCCCATTTGTTCTACCCAAA    | 60.162 | 20 |
| CCCCTTACTGCTAACACCGA      | 60.125 | 20 ACCTTCTTGGGATGTAGGGG    | 60.183 | 20 |
| CAGTTTTGCAAGGATTGAGAGA    | 59.494 | 22 ATGTTGTGAAGCACATGGGA    | 59.967 | 20 |
| GTGGTGGGAAACAAGAACCT      | 58.891 | 20 CAAATCCCTCTTTTCTTATTCTC | 58.05  | 24 |
| CGCTAAGGAGAGGCAAAATG      | 59.975 | 20 TCTCCATTCCACCATCATCA    | 59.85  | 20 |
| TGCAGATGCTCTCCACTTTG      | 60.136 | 20 TGCATTTATCAGCTTTATCAGC/ | 59.895 | 23 |
| GCAAATGCTCCTGCACTTCT      | 60.547 | 20 GCCAAATTAAGACCATATTTT   | 59.68  | 25 |
| TTCATGTGTCAATTCTGGG       | 59.343 | 20 TGCATCCATGATATGGCG      | 59.988 | 18 |
| CACCAATCCATCAGCCTCT       | 60.073 | 20 TCTGTAAACCGACCTCCAC     | 59.966 | 20 |
| TCGTTGCAAGTTTGGAAAA       | 61.528 | 20 ATAGGCTCCCCCGATCATAA    | 60.623 | 20 |
| TTACTAAAATACCCCGCGA       | 59.45  | 20 GGGAGAAAAGGGGAAATAAG    | 60.173 | 22 |
| TAGTTGGGCTTAATGGGGTG      | 59.817 | 20 GATGAACTCTCTTGGGTGGG    | 59.505 | 20 |
| AAACGAAGGAGACGATCGAA      | 59.813 | 20 CTCTCATTCCGGTGTGGATT    | 59.927 | 20 |
| TTGATTTTAAGAGGTGATATGATA  | 59.397 | 27 TCTCATTCCCAAATGTCGTT    | 59.42  | 21 |
| TTCAATGTTAGCAGTTACAATCCT  | 58.404 | 25 AAGGGTGT TTTCTCTGCATCA  | 59.726 | 21 |
| GTTTTTGTACATCGGCGGAG      | 60.502 | 20 ATGGTGACGAGAGAGCGAGT    | 60.017 | 20 |
| ACAAATGGCCAAGAGAGAGTT     | 57.922 | 21 TTCTTCGCATGCTTATTTGG    | 58.912 | 20 |
| AGGAGGTGCGGTGTTAGAGA      | 59.867 | 20 AAAAAATGGCAGACGGCAG     | 60.096 | 20 |
| TTATCAAGCCCACCGTAAGTG     | 60.004 | 21 AACCGGGATAAAATAGGGCA    | 60.508 | 20 |
| AACGAAAAGAGAAAGAGGGC      | 57.668 | 20 ATTATCATATTTAAGGGTTATC/ | 57.31  | 27 |
| TGAATTCATGTACACATTTGGAA   | 57.94  | 23 TTTCACTCTTCACGTTTGCCT   | 59.958 | 22 |
| CCCTGGATACG GTCGAGA       | 59.91  | 20 AAAACCCTAAACAACCAGTGA   | 57.717 | 22 |
| TGCGTTTTGACAAGATTTGC      | 59.856 | 20 CACGTCTCCCAAACCTAGA     | 60.103 | 20 |
| TCGGAAGAAACAACTAGAAAG/    | 58.674 | 24 AACAAACAATCCCGTGCAA     | 58.895 | 20 |
| GCGATGAAATGTACGTTAGAGA    | 57.104 | 22 TTGCAAAAGTCACACTCTGTCA  | 59.534 | 22 |
| CAGCCCCTTTCAATTTTCTG      | 59.679 | 20 TCTCCTACAACAACCCTCGG    | 60.103 | 20 |
| GGAGGGATGATGAAGATGGA      | 59.821 | 20 AGACCCAACTACCAAACCCA    | 59.304 | 20 |
| GCACCAGATGTCGTGGATTT      | 60.935 | 20 CACGTTGGGAGCACACTCTA    | 59.897 | 20 |
| TGAATGGATTTTTGGCATGT      | 58.82  | 20 TTGTCCGTTTATTTTTCACACG  | 59.904 | 22 |
| TGTTTTATTAACCTCAATTGTAA/  | 57.051 | 25 CCTTGCAACGGATCTGATTT    | 60.074 | 20 |
| GTTGAAGATGGGAAACCCCT      | 60.169 | 20 GAATCGCAGAACCGATGATT    | 60.043 | 20 |
| CCGAAATTTTACGTGGTTTCG     | 60.348 | 20 CCTTATTGTTGGGTGTGGGA    | 60.605 | 20 |
| GATGCATGCACGTGAATAAGA     | 59.709 | 21 AGATCTAAGGGCCGAGATTTG   | 59.696 | 21 |
| TAGGGTTTCAAACATCGCC       | 59.938 | 20 ACGGCTCAGAATGGAGAAAA    | 59.813 | 20 |
| CTCTTTCGGGTTCTCAACCA      | 60.224 | 20 GTGGTACTTGCACGCACATT    | 59.646 | 20 |
| GCGATTCTTCCGATGCTGT       | 60.243 | 20 TAACATGTAGTCATGCGGGC    | 59.572 | 20 |
| ATGGTGGTTTGGTGAAGAA       | 60.21  | 20 TGTGAGGTGAAGTGTGGAGTG   | 59.766 | 21 |

|                         |        |    |                        |        |    |
|-------------------------|--------|----|------------------------|--------|----|
| TTTGCACTACTGCATGGGCTA   | 60.237 | 20 | GCTACGAGCCACAGCTACAG   | 58.854 | 20 |
| GGCAACGGAATACCATTTGT    | 59.691 | 20 | TCGATCCTGTGTGTGCATTT   | 60.12  | 20 |
| AAACACAGCTACCAAAGCCG    | 60.305 | 20 | TCCATTTATCGGAGTTACGGTT | 59.737 | 22 |
| GCTTAAAACAATTATTGAACCCG | 59.009 | 23 | CACCTCACGCACTCCACTAA   | 59.897 | 20 |
| CCAGTTCGGCGATATATGGTA   | 59.824 | 21 | AAATTGATGGAACGGGGATT   | 60.378 | 20 |
| GAAGGGAAGGGAAGAATGG     | 59.875 | 20 | TTGTCACATTTTTGGTGTTC   | 58.964 | 22 |
| TAATGGCTGCCTATCAACCC    | 59.923 | 20 | GAACCAAAGCTTTCTTGCCA   | 60.365 | 20 |
| CATGTGAGAAACGTCCCCTT    | 59.966 | 20 | GATCCAAATTTCAACCCCGT   | 60.92  | 20 |
| CAAAATTTAAGGGTTATTATTGA | 59.806 | 27 | GGCCTATAAATGCGTTTGGT   | 58.969 | 20 |
| CCCCTCATTTTTTCGTTTTCA   | 59.91  | 20 | AGAGACGACAGCGAGAGGAG   | 59.883 | 20 |
| CAGTTTCCACACGCCAATAA    | 59.585 | 20 | CATGCAAGCAGCACTTCAAT   | 60.019 | 20 |
| TCATCATGAAACACCCTAGAAAA | 58.616 | 23 | GAGGTAGCTGGGAGGAGGAG   | 60.349 | 20 |
| TTGACCCACCTTTGACCAAT    | 60.21  | 20 | TTGGCCGTGAATTTTTCTGT   | 60.481 | 20 |
| ATCGTAGTGAAGTAGCCGCC    | 59.364 | 20 | CATGAAATTGTTGGGGGTTT   | 59.523 | 20 |
| CTTGTGAGTTGGTGAGGCAA    | 59.873 | 20 | TCTTCACCTATTATTTCAACAA | 57.674 | 26 |
| GTGTTGCTGATGCAGACAGG    | 60.473 | 20 | TCTTCGAGTACGCTCTGGGT   | 60.012 | 20 |
| TGGAGTAGGGAGCCTCGTAA    | 59.83  | 20 | TGCGTGACGGTTGGTATAAT   | 58.92  | 20 |
| TGGTTATTACCTGATCACCATCC | 59.959 | 23 | TGGTTTTTCTCCCCAGTGAC   | 59.943 | 20 |
| GTGCTCAGTGGACACATTGC    | 60.328 | 20 | TAAAACCATGCACGTAGGCA   | 60.133 | 20 |
| TTAATGGACACCTCTGCGG     | 61.021 | 20 | TCTTGCAGCCACATCTTGAG   | 60.136 | 20 |
| ACGGTCACCATTTTTGTGGT    | 60.134 | 20 | ACAAAGCTTACGCATCCAAA   | 58.439 | 20 |
| AATACATCCAGTCATCCCGC    | 59.78  | 20 | TCCATCGGCTACTTTGAAGG   | 60.206 | 20 |
| CCACTCGTGCATCACTCAAG    | 60.463 | 20 | TCTCGTGTGACCGTAATCAT   | 59.499 | 22 |
| AAATTGGCATTACGGGTCAA    | 60.188 | 20 | CAGAAATGCCACAGCAGAAA   | 59.988 | 20 |
| CACTTCCGACTTCTTTTGCC    | 59.853 | 20 | AAAATTTTTGGGCTTATCATGT | 59.256 | 24 |
| GGGGCTTTGAATCTACCAA     | 59.019 | 20 | CTTTCACGGGAGAAAGTTGC   | 59.853 | 20 |
| ATCCATCTCATGTTGGGCAC    | 60.758 | 20 | TTGTGTGGATCAATAACTGTCA | 59.54  | 24 |
| ATAGAGGGAGGGGAGGGTTT    | 60.144 | 20 | TTAAGGTTGGCTTGGGTTTG   | 59.968 | 20 |
| TGAACTAAGGAGGTGTTATGACA | 59.249 | 25 | CGCATGTTGTTGTAGTGGCT   | 59.788 | 20 |
| AACAAACCGTGTTAACATCCC   | 58.732 | 21 | TTAAGAGATAGTACCGGATCC  | 58.853 | 23 |
| CTCATCTCTCGCTCTCCCTC    | 59.232 | 20 | GAGGTGCGGTTCTGTAGAG    | 59.721 | 20 |
| CCCGTTCCATCACACTTCTT    | 59.966 | 20 | ACCACTCTTTGGGGCAATA    | 59.429 | 20 |
| TGCTTGAAAGACAATTGAATG   | 60.11  | 22 | CACGCATGTTTCTGTCATCC   | 60.12  | 20 |
| TCCATCACCAGATCATTTTCG   | 59.451 | 20 | GGAACCACTCACCGTGTCT    | 60.009 | 20 |
| CGAAGGTTGGGTGGTAGAGA    | 60.103 | 20 | TAAAATGGCACACATCGGAA   | 59.93  | 20 |
| CAATACAACTGCCGAGCTGA    | 60.011 | 20 | TGTACCACACTTGCTCGGTG   | 60.779 | 20 |
| TGCTTGATCCAACGGGTTAT    | 60.331 | 20 | GCACTGCATAACAAGCGTACA  | 59.955 | 21 |
| ACAATTCTTGAAGCCCAAA     | 59.546 | 20 | CGTATGAGCTCTGAGAGTGAG  | 59.315 | 23 |
| TTTCTCAACCGAGCTCACCT    | 59.989 | 20 | CGTGTGTGAGTCCCCATGTA   | 60.44  | 20 |
| TAATGGCCACCAAGCTTTTC    | 60.074 | 20 | CTCCAACATCCAACCTCCAT   | 59.779 | 20 |
| ACGACGGAAATATGGAGCAA    | 60.469 | 20 | TGGTGGGGCTTAATTAGGTG   | 59.817 | 20 |
| ACACTTGCCAAGGGCATAAC    | 60     | 20 | TGGTAGAAGGCCGATTTGTC   | 60.074 | 20 |
| TGATGGTTGTGATTTGTTAGAGG | 59.007 | 23 | AGCAGGATAAGGGGTGTTGTT  | 59.878 | 21 |
| CGGCTGAGGACGAGAATTAG    | 59.971 | 20 | TGGTTAACCGAAAACCGAAG   | 59.968 | 20 |
| CGGGTTTGAACCCTCAATAA    | 59.795 | 20 | TAGGGTTTGACAGCGCCTAC   | 60.27  | 20 |
| ACTGCCCAACAATGGCTTAC    | 60     | 20 | AAGCATTCCAAACACCATCC   | 59.797 | 20 |
| TAAGGGCGGTATCACCTGAA    | 60.46  | 20 | AAATAATCGAAGGTGACTGTC  | 59.885 | 23 |
| CCAACACTCTGCTCTCTCCC    | 59.986 | 20 | TCTCGTTCCAAATGGGATTC   | 59.871 | 20 |
| AACGTAAACCCCTGGTCAAA    | 59.331 | 20 | TGCTTCTTGAAACTTTCTTCAT | 59.84  | 25 |
| TCCCAAATTATATCCTCTCCCA  | 59.637 | 22 | GCGGACGTTGAATAGCTTGT   | 60.278 | 20 |
| AAAATCAAGTTTAGGTGCGTCA  | 58.811 | 22 | AATTGCTTCAATGTCACCCC   | 59.797 | 20 |
| GAAAGGCCACAATGGTTATT    | 60.068 | 21 | GAAGGGATCATGCGTTTCTC   | 59.635 | 20 |
| AATCCCTTACATGTCCGTCG    | 59.813 | 20 | TGGAAAAGAATTCGTCCTCG   | 60.184 | 20 |
| CCACTGATGTGAGCCAACCTG   | 60.309 | 20 | GAGTGACATCTTCGAGTGTTCC | 59.914 | 22 |
| ATTCTTGCCGATGTTTACCG    | 59.96  | 20 | ATGACGAGAAAATGGTTCCG   | 59.933 | 20 |
| TGACTCTCAATGCCTTCTACCC  | 60.63  | 22 | AGCCCCTTTGAGCTAAGGTA   | 58.098 | 20 |
| TCAAAGAATCCACCATGCAA    | 60.049 | 20 | GCTTGTTTAGGGAGAGCACG   | 60.015 | 20 |
| AGCTGTTAGGGTTGTATAGTGAG | 57.436 | 27 | AGTTCTCCAGACTCCCGTT    | 60.111 | 20 |

|                          |        |                            |        |    |
|--------------------------|--------|----------------------------|--------|----|
| AATTTGACAAACAAACGGC      | 59.982 | 20 TGCAAAACGATTCCTTCCTT    | 59.685 | 20 |
| GGCGGTGGTAGGAAGAACT      | 60.496 | 20 CCGAATTTCTTTGCACAGGT    | 60.11  | 20 |
| GAAAACATGCTTGAAAGCC      | 59.691 | 20 TGAAATGAAGAAAAAGAAATT   | 57.512 | 23 |
| TGGGACGGAGGGAGTATATG     | 59.767 | 20 TGGAGAAGGGACAAATGGAG    | 60.042 | 20 |
| TGGAATTGAATGTGGGAGTG     | 59.343 | 20 ACCAATATCCAACGGCAAGA    | 60.331 | 20 |
| GGTGGTAGCTTTCCGACAAA     | 60.11  | 20 TTTCAAAATCCCCACAAGC     | 59.916 | 20 |
| CAGTACCCCTCTTTGGACCC     | 60.736 | 20 TGAAGGTTGGAGGAATGGAG    | 60.042 | 20 |
| AAAAATGCAGATTATGCTCCAC   | 58.275 | 22 TTCATACCAGCTTGAAGGGG    | 60.066 | 20 |
| TCAATATCATCGCCATTTTGAA   | 60.282 | 22 TAGTGTGTACGGGCAATGT     | 60.032 | 20 |
| CTTCGGCCGGTTTAAGATTC     | 60.92  | 20 TATGGGTTATCACCGGATCG    | 60.544 | 20 |
| CCGCATACGCGCTAATAAT      | 60.102 | 20 TGAAGTTAGGAAATAAGGAGG   | 58.743 | 25 |
| CTCCCGTGCTTCATCGTAGT     | 60.277 | 20 GGAAAATGGTTGCAAAAGGA    | 59.916 | 20 |
| TGCACAATATGTTGGGAGGA     | 59.924 | 20 GCCGTTATAGTGTGGGATCTTT  | 59.398 | 22 |
| GCCTAACTAATGGCACGGAC     | 59.597 | 20 TCATGCACGCAAATAACCT     | 59.186 | 20 |
| GTTATCATGGGAAGGGGAGG     | 60.517 | 20 TTTCTGTCGGAAAAATTCACC   | 59.916 | 20 |
| CAAACGAGGAGCAAAAATCAG    | 59.869 | 21 AACTACCCTCCTCGTCCCT     | 59.991 | 20 |
| TTTGTCCAAACAAATGAAAACA   | 58.097 | 22 GTAATGCTAGCCGGAAAACG    | 59.742 | 20 |
| GTGACTGGTGAGGGATGGAC     | 60.383 | 20 AATCTTGCGAACCAAACACC    | 59.978 | 20 |
| GCCTCTTGGGGTCTTAATCA     | 59.126 | 20 GATGTTGCGTTGTGCGTATT    | 59.62  | 20 |
| AGCCACGATTCCTGATTTTG     | 60.074 | 20 AGGAAATAAGGAGGTGTTATG   | 58.113 | 26 |
| AAACACGCAACACAAAGCAG     | 59.951 | 20 GAATCTGCAGCAAGTTTCCC    | 59.82  | 20 |
| TGGAGTTGGTGGTGTCTTCA     | 60.129 | 20 CTGCAAAATTGGCTGAGTTG    | 59.464 | 20 |
| TCATCGGGGTGTAACGAGAT     | 60.34  | 20 ACGTGTGGATGGAATGCTA     | 59.002 | 20 |
| CACTGCCAGCAGTCGATAAA     | 60.011 | 20 GCAGTTGGTGGTCGTGTAGA    | 59.751 | 20 |
| AATGGATGGTTGTGATTGAGTT   | 58.293 | 22 TGAATGAAGTACGGCGATTT    | 58.241 | 20 |
| GTCCACGTGCTTTCCTCTGT     | 60.307 | 20 TGAGTACAGGTGTGGCTTGC    | 59.905 | 20 |
| AGTCGAAGGTCGCGTGTAAAT    | 59.763 | 20 TTTCTATTCTTTATAATTGCCAT | 58.633 | 27 |
| GCTGGCAATCCTTCTTCTCT     | 60.713 | 20 ATTGACAGTTGCAGTTGGTGA   | 60.31  | 20 |
| CATTCAAGGGGCATTTTTGT     | 59.801 | 20 AAGGGCACCGCTAATGTAGA    | 59.73  | 20 |
| TTCTCTTGCATTGTCCACA      | 60.24  | 20 GCTTTGTGCGTTTCTCCATC    | 59.676 | 20 |
| CATTGTGTTTTCTCCATATTTTCA | 58.116 | 24 CATCCCAAGTTACTCCCAGC    | 59.55  | 20 |
| TTCTCAACCACGACCCCTAC     | 59.966 | 20 GCGTTGCCCTCTCTCATCT     | 59.709 | 20 |
| TGTTTGAGTGGTTTTTCTTGA    | 59.626 | 22 AACCATAGATTGAAGGCCCA    | 59.387 | 20 |
| CCTCTCACTCCCCTCCATC      | 59.638 | 20 CACAGCGAGGTTTGAAAAT     | 60.11  | 20 |
| CCTGAAACTCCAAATATTCTTCTT | 60.267 | 26 TGACGGTCAAGATTTGCTCA    | 60.39  | 20 |
| CTTGCCCTACATCAGCCCTC     | 59.836 | 20 TTCCATCCTTCTTTGCTGCT    | 59.955 | 20 |
| TCCGGTGAACCTTCCAACCT     | 59.697 | 20 TTAACCTCCCGTGGACGTAG    | 59.986 | 20 |
| GGACGGAGGGAGTACGTCTT     | 60.511 | 20 TTTTTGGCAATTTGTGACGA    | 60.088 | 20 |
| TTGTTGAAACCTAATGCCA      | 59.157 | 20 GGGGGTTATCATGGGATCAA    | 61.666 | 20 |
| AAAAAGGAAGGAGGGAGCTAA    | 58.527 | 21 ACCTGCTTTTGTGCATAGGTT   | 58.781 | 21 |
| AAAACATGTATGGGATTGAAGAA  | 57.563 | 23 AAATGATAGGGCACACAGCC    | 59.962 | 20 |
| TGTGGTTGCGTCCTTATGAA     | 60.111 | 20 GCAGTGATGCCTGATGAAAA    | 59.805 | 20 |
| AAACATGGAGGGGTCAAACA     | 60.21  | 20 AAACCTGGCTGGACTGATGT    | 59.579 | 20 |
| GGGGTGAATTTGGGAGAGTT     | 60.169 | 20 AAGTGAAACTGCTGTATGCTG/  | 57.719 | 22 |
| TAGGATACCCTCCCAAACCC     | 60.011 | 20 ATTTGGGGATGAATCTGACG    | 59.75  | 20 |
| TCTCATTACGCTTTTCAGC      | 59.152 | 20 GTTGAGCTCGGATAAGCTGC    | 60.125 | 20 |
| TTTTGAGCTTCCGCGAGTAT     | 59.982 | 20 CTAGCCTGGTCGTTTTGGAA    | 60.241 | 20 |
| TGGACTTAAGTACCCTTTTACCAA | 59.115 | 25 TCAACGGTTTTGATTTGTTCC   | 59.831 | 21 |
| TGGGGTGGTTAAGTTGTGGT     | 60.126 | 20 GTGCATGGTAGGGCAAACCTT   | 60     | 20 |
| TTTTGCTAGGGACCGAAACC     | 61.327 | 20 TGCGTTTTGACAATATATAGGT  | 60.083 | 26 |
| AAGTATGCTGACGCTGGGTT     | 59.763 | 20 ATGGCTGGGCTCTGAAATTA    | 59.668 | 20 |
| CAACTTCCCTCCACCTTCA      | 60.081 | 20 GCGAATTCAAACCCCTTGTA    | 59.938 | 20 |
| GAGGACAGTCTGGGTGCAGT     | 60.315 | 20 TAACACCACCACCCACACAC    | 60.178 | 20 |
| CAAATATTTTGTAGTTTCCCATGT | 59.948 | 26 ACAATGGCCAAGAGAGTTTA/   | 57.433 | 22 |
| TCGAGCTCTCCTTTTGGAA      | 60.066 | 20 TTTTTGACAGCGAAAGTCCC    | 60.227 | 20 |
| GCCCAAATAGTTGGGGTT       | 60.055 | 20 TTTCCCTTTGCTCTCTATTTT   | 58.887 | 22 |
| GGATTTTCGAAATTTTCTCGC    | 60.035 | 21 AAAATGCAAATGCCGAAGAT    | 59.552 | 20 |
| CTGCATCGAGTATCGCTCAA     | 60.119 | 20 CAACTCCAACCTGAAGAACACG  | 60.326 | 22 |

|                          |        |    |                         |        |    |
|--------------------------|--------|----|-------------------------|--------|----|
| CGTGGTTCGATCGTAATTGA     | 59.542 | 20 | GCAATCCATTCCGTACAAGG    | 60.331 | 20 |
| TTCTTTAATCACCGCACCAA     | 59.157 | 20 | GATCGACGCCTCAGATTTGT    | 60.226 | 20 |
| TTCTGGTCGAGCTGGAAGAT     | 59.95  | 20 | CCTCTAGCATCTCTTGCTCTCA  | 58.983 | 22 |
| TTGTGATTTGTTCCACAAGA     | 59.01  | 21 | AGCAAGATTGATCCTCCTCG    | 59.386 | 20 |
| TGTTACGCCGATTAGTGTCG     | 59.752 | 20 | ACAGGGTACTCAGTGGACGC    | 60.182 | 20 |
| AAAAGAAAAAGTGAAGGGCTCA   | 59.411 | 22 | CCACGAAGCATCATCATAACC   | 58.953 | 20 |
| TCCTAAAAACGTTCCGCTGT     | 59.747 | 20 | TTTCCAACATCCAAACGGC     | 59.938 | 20 |
| AAGAACAATTACAATGTTTATCCA | 58.084 | 27 | CACACTATTAGGGTTTGGGAGC  | 59.757 | 22 |
| TGCAGAGCTCCATGACAGAA     | 60.711 | 20 | CCCCGAAAAACCTCTATCT     | 59.415 | 20 |
| TCAACAGAGAATGCAAGCAA     | 58.129 | 20 | CGAGCTCGGACCTTCAGTAT    | 59.454 | 20 |
| ACATGATTTGATGGTGCCTC     | 58.36  | 20 | AGGGCAAAAATAACCAACCC    | 60.055 | 20 |
| TGCGTTTTGACAATATATAGGTGT | 60.083 | 26 | AGACGACCGAACAAAATGCT    | 59.74  | 20 |
| ACTTCCCAGGATCGATTTGA     | 59.483 | 20 | TCACATGGTGATGCCTTCTAA   | 59.138 | 21 |
| AATGCAAAAATATGAGGCCG     | 59.928 | 20 | TCAATGGTGGCTTCATTTCC    | 60.843 | 20 |
| TTGGTGGAAAAAGGTTAACGA    | 59.478 | 21 | CTCGTGACAAAAGCCGTGA     | 59.904 | 20 |
| TGACGAGAGAGAAAAGCGAA     | 58.874 | 20 | TAAAACCATGCACGTAGGCA    | 60.133 | 20 |
| AAGGGGGTTATTAGTGGATCA    | 57.425 | 21 | TGGGGTCTTGCGCTACTAAC    | 59.993 | 20 |
| TGTGCGTGTATGCAATGTGT     | 59.621 | 20 | AGGGATGTTTGCACCTGAAT    | 59.41  | 20 |
| ATGGAACGTTGATTGCCATT     | 60.199 | 20 | TGAAGTTAGGAAATAAGGAGG   | 57.525 | 24 |
| TCCTGCATCCTATCACATGG     | 59.476 | 20 | AGAGTTTTCATCTTACCTTGAG  | 59.234 | 24 |
| TCTCGACTAATTATTATGCCTACC | 58.678 | 26 | TTGTGGGGTTGTGGTGAATA    | 59.667 | 20 |
| AATTTAAATTTGGGGAGGGG     | 59.034 | 20 | TTAGGTATGGCTCGGTTTTCG   | 60.089 | 20 |
| CAGACCGTCGAATTTAGACCA    | 60.118 | 21 | TTTTAAAGAGCTGGGGGCTT    | 60.197 | 20 |
| TTTGGGACGATTTTCTCTCTATG  | 59.617 | 23 | AGCGATTTTTAAACCCACCC    | 60.184 | 20 |
| CTGCTGCAGAGAAGGTAGGG     | 60.149 | 20 | TAATTGAATTCCTGGGTCCG    | 59.756 | 20 |
| TCGTTTGTGTGTTCTTCGTG     | 58.305 | 20 | TGGCTATTTTGGTTTCTACAAC  | 58.731 | 23 |
| GGTTGTTTTAATTTGCTCCCA    | 58.976 | 21 | TATCAGGCTTGATGATGGCA    | 60.182 | 20 |
| CTTTTCTTTACACCACAAGGA    | 60.377 | 22 | AATGCGGAAATCTATGGCTG    | 60.06  | 20 |
| TCAATGGCTCAAAAAGTTTCA    | 58.4   | 21 | TGAAGCATCGTTTGTGTTTTC   | 58.81  | 21 |
| AATGAAATAGAATTCGCGAGG    | 58.349 | 21 | TGGTTTATATTTGTTGATTTGC  | 58.141 | 23 |
| ACACACACATTACATTAACCGA   | 59.985 | 25 | GGGTGTTTCATGGTTTCGATTC  | 60.181 | 20 |
| CGCATGTTTCGATCTTCAGTG    | 60.413 | 20 | TCGAGTCCAATGTTGAAAGAA   | 59.724 | 22 |
| CACATCCCACCCAACCTCTCT    | 59.962 | 20 | ATGATGATGACGAGCTCACG    | 59.819 | 20 |
| TGGACGTAAATACCCTTTTACCA  | 59.667 | 23 | CTCCTTTTTGTCATTCACCTTTG | 60.022 | 23 |
| GAGCCCAAACCTCAATCAAC     | 59.532 | 20 | TGGACTGCGTTAGGGACTTT    | 59.734 | 20 |
| GGGCATGAATTCAAAACCTC     | 59.368 | 20 | CACCATAACCGCATGAATTTG   | 59.809 | 20 |
| TTCTCAGCTGTCAACGAATGA    | 59.581 | 21 | ATTTGGAGGAGGATGGGTTT    | 59.629 | 20 |
| ATCTCCGAGGGTGTGAGTG      | 60.072 | 20 | CTTCCTTGGGCACAACATTT    | 59.971 | 20 |
| CCCAATGCTATGGACAAACC     | 60.192 | 20 | ACGTGAAAAACGGGAATGAA    | 60.344 | 20 |
| CGTCTGAGCTCGGTAGAAGC     | 60.299 | 20 | CTCACACAATTTCACTCTTCAC  | 58.044 | 24 |
| GATCCGATGTCCCAAACACT     | 59.786 | 20 | TGGACTTCGTCACAACCAAA    | 60.128 | 20 |
| TTTACTTCGGAAGGCCATTG     | 60.067 | 20 | GACGGAGCAGAAATGGAAAA    | 60.192 | 20 |
| CATCCCAACCACTCATTTTCG    | 61.296 | 20 | GTGCGCATTCTTACTCCTC     | 59.843 | 20 |
| GTGTGGATTGATCTCTGGCA     | 59.637 | 20 | AAAAACCGCCACATCAGAAG    | 60.11  | 20 |
| GGTTAATCTCTCTATCTCTCTCAC | 58.624 | 27 | TTTGACCATGGTTTTGGGAT    | 60.029 | 20 |
| CAGTGTAGTTAGGCGGTTTGG    | 59.679 | 21 | TCAAACACGAGTAGAAAGGAT   | 57.147 | 23 |
| TGTCGGTCATTGAATTGTGAA    | 59.956 | 21 | TCTCCTTACCCATTTGGAG     | 60.042 | 20 |
| TTTTCATTTGATCACCTCCC     | 57.426 | 20 | AAAATCAAATTTGGGCCCTT    | 59.659 | 20 |
| TGCTTAGCCTCCTCCAACAT     | 59.836 | 20 | TGAAGTTAGGAAATAAGGAGG   | 58.743 | 25 |
| TTACGCGGACTCCTCAAAGT     | 59.875 | 20 | TCTGATTCTGGGATTTTGGC    | 60.014 | 20 |
| CTGGAACAACAGCTACGCTC     | 58.677 | 20 | GACGTGAACTCTCATGCCCT    | 60.269 | 20 |
| AAGTGCTCACAGATCCCACC     | 60.12  | 20 | CATTATTTAAAGCACGCGCA    | 59.872 | 20 |
| AAATAAGGAGGTGTTATGAAGGG  | 59.323 | 24 | CAAAAATGGATGCAAATACGG   | 60.192 | 21 |
| CCCCTGTATGCACCTCATTT     | 59.813 | 20 | AATGGTTTCGCTCTCTGTGG    | 60.255 | 20 |
| GTAGTGAAGGCAGCCCGTAG     | 59.898 | 20 | TGCTCTTACCTTTGTGTGC     | 60.032 | 20 |
| TTGGCACTGAGTACCCATTTT    | 59.485 | 21 | CGGCGGCATTCTAAATATGA    | 60.923 | 20 |
| CCCAGGTCTCAATCTTTTTGG    | 60.831 | 21 | GGGCCTCTTTTTGTCTGAAT    | 58.24  | 20 |
| GGTGCTGCTATTGAAGCCAT     | 60.243 | 20 | GTAGCTGCACATTGTCCGTC    | 59.323 | 20 |

|                           |        |                             |        |    |
|---------------------------|--------|-----------------------------|--------|----|
| GAAGGTGAACGTCGGTAGGA      | 60.111 | 20 CACCATCACCATCCTCACAT     | 59.184 | 20 |
| TGATAGAAACACTTCGCGAGC     | 60.537 | 21 TCCCTTCAATGGTGTTTCCT     | 59.381 | 20 |
| CACGCATCTCTCTTCCCT        | 59.555 | 20 ATAGGGGTCAAGTGTGGGTTG    | 59.697 | 20 |
| AATTGAGGCTCCAGATTTGC      | 59.273 | 20 ATGTACCCCGATGTGAGAGC     | 59.957 | 20 |
| AGGAGGCTACTTCCTGGAT       | 59.163 | 20 TGAACACGTTGCCAAAACAT     | 60.011 | 20 |
| GGGTTTCTATTGCTGGGGTT      | 60.187 | 20 TAAAAACTCGACCCGATGC      | 60.074 | 20 |
| CGATGGTCTGAGTTATCCTCTG    | 58.815 | 22 GTCAAATCAGGAAAACCCCTT    | 59.316 | 21 |
| TCGTGTGTAGGAAAAACATCG     | 58.687 | 21 GTTTTTGGAGGGAAAATGGC     | 60.653 | 20 |
| CGATCACGTTTTCCAGTTCC      | 60.495 | 20 GCCTTATCAGTCTCCGAAACC    | 60.089 | 21 |
| TCGTTTTGATGATGAGCTGG      | 59.799 | 20 CATGTTTTGTTTGGCTGTGG     | 60.004 | 20 |
| GCGGTTTGAGCCTAATTTTG      | 59.72  | 20 CGGTTAGAAAATGGACCGTTA    | 58.997 | 21 |
| GCATACACCGATAGCATTTTGA    | 59.992 | 22 AGAGCTTGGAGGATGGAGGT     | 60.216 | 20 |
| GAGTGCTGCAGCGTATGTGT      | 60.088 | 20 CGTTTTGATTTGTGTTGGCA     | 60.535 | 20 |
| CAATTGCTATAAATGAAACCGGA   | 60.203 | 23 TCTACCACTGCACCACGAGA     | 60.463 | 20 |
| AAACTTGCTTCCGTTGGATG      | 60.11  | 20 GCGTGCTGAATCTTAACCGT     | 60.278 | 20 |
| TCCTCAATTTCAAGTGTGGAAAA   | 59.587 | 22 GCGAATCGAACAAATCGAAG     | 60.721 | 20 |
| AATGTCATAAGGACCACGGG      | 59.67  | 20 TCAACAGAGAATGCAAGCAAA    | 59.6   | 21 |
| AAATTAAGTGGGGGTGGAGG      | 60.046 | 20 CTCAGCATTTCGAAAGGGTA     | 60.206 | 20 |
| TCCCAAATCTAGAAGCCACG      | 60.206 | 20 AGATGGCGGTAAACATGGAG     | 59.955 | 20 |
| TTCGATACGAATTTTCATACCAT   | 57.615 | 23 ACCCTAATTGAGTAGAAAACC/   | 58.212 | 24 |
| CAAATGACCAAGGAGGTTACAA    | 58.994 | 22 TGCTGACTTGATTTTCGAGC     | 59.152 | 20 |
| GCGAGTGTGCGCTAGTGTA       | 61.394 | 20 TGATACGACCTTGGGGGTTA     | 60.184 | 20 |
| TGAGCACGTATGGACACGAT      | 60.144 | 20 TCACCCAAAAAGGTTATTATTT   | 57.25  | 23 |
| TCACAGCAAAGATCTCACCG      | 59.984 | 20 AATTTACTCGCCTCTTCCGC     | 60.711 | 20 |
| TTGAATCCAGGATCTTGAGC      | 57.804 | 20 CACGCACATAAATTCGCAGTT    | 59.759 | 20 |
| GAGGGAGAGATGGATCGACA      | 60.16  | 20 TTGGTTATCGCTTGAACGAG     | 58.917 | 20 |
| TTGCTAGAGGTTTTGACGAGA     | 57.771 | 21 GCGTTTTGACAGGATTTGCT     | 60.257 | 20 |
| TGGATCTCGTGATGCCACT       | 60.222 | 19 TCTCAAAGTCTCATTTTCACA/   | 59.799 | 24 |
| ATCGGGATCGGTTTATGGTT      | 60.399 | 20 ACACCTTGTCTCCCAAATGC     | 59.973 | 20 |
| ATCCCGTCTGCGTTTATCAC      | 59.962 | 20 TATTCGCCTCGATCTCCATC     | 60.141 | 20 |
| TTCAAACGTGGCACCAATTA      | 59.969 | 20 TGGATGTGGTTGGTGAGTTG     | 60.416 | 20 |
| CACAAGATTTATGGGTTATCATTT  | 58.787 | 25 TTCGATTCTAGCTTCCGCAT     | 59.945 | 20 |
| AAAAGGTTAAGGGTGGGGTG      | 60.082 | 20 ATATCATGGCCGAAACCATC     | 59.61  | 20 |
| TTCCCATCAGTCAAGATCTACCT   | 59.114 | 23 TCTCTCCAACTCATTTTCGCA    | 59.522 | 20 |
| TTTTTCCCACTGGATTTTCG      | 59.91  | 20 CCCCTTAAGTGTGAACGCAT     | 59.993 | 20 |
| GCAATGGTGTTCATATGTGT      | 59.341 | 21 AGCTGGAATACAACACTACCCCA/ | 59.892 | 22 |
| GCTACGAAGACATCCACCAA      | 60.125 | 21 GCAAGCTCGATGTCTTATGC     | 58.628 | 20 |
| GCCTCCTTTTCTTTTCTCG       | 58.188 | 20 CTTAAGTTTGGGGGTGCAGA     | 60.103 | 20 |
| TGGGAGAATTTTCTGCTCTTG     | 59.438 | 21 AGCCGTTGAATGTGATATCTTG   | 59.114 | 22 |
| CCTCCCAACCCCAAATTTAT      | 59.882 | 20 ACCGAGTAGAGAAGGGGTGG     | 60.502 | 20 |
| ATCGGTTATTACCGGATCGC      | 61.031 | 20 TCGATATGTGTCCCTTCGTG     | 59.522 | 20 |
| CACTTAAATCCACCGCCATT      | 59.823 | 20 TTTGTCACCCTCTCCCAGTT     | 59.549 | 20 |
| TGAGGGACTTGGGTAGTTGC      | 60.111 | 20 TGCCTGAACAATGCTTTGAC     | 59.847 | 20 |
| ACAGAAGAACGGGCTTTGAA      | 59.853 | 20 TCATGAGCAATGTTTCTGCC     | 59.805 | 20 |
| TTTTTAATTCATCTTAACTGATGCA | 58.447 | 26 CGTTGATGGAATTCGAACCT     | 59.933 | 20 |
| GCGCAAAAATACTCGCTTTC      | 59.992 | 20 GCCGGGAACTTAGGATTAGC     | 60.061 | 20 |
| CGACAAATTTTCACACCCCT      | 59.83  | 20 GCAATGGAGTGGAGGAGAAG     | 59.803 | 20 |
| GATCTTTCCACAAACCGAGC      | 59.676 | 20 TCGAAGGGAGAGAGGAAGAA     | 59.087 | 20 |
| ACATTTTCGCCATGACAAT       | 60.199 | 20 CCTTTGAGGATGGATTGATGA    | 59.879 | 21 |
| AGCTCACGTTTTTCCCTCAA      | 59.853 | 20 GTCGCCTTGTGCGGATATTA     | 59.923 | 20 |
| TCCAATTCGAAAACCGGTAA      | 60.294 | 20 TTTTTCCGAGCAAATGAAAA     | 58.394 | 20 |
| AGGGCTAAGTGTGAGATTGGA     | 60.13  | 22 ACCACCTAGCAATGGTTTCC     | 58.912 | 20 |
| TGCGTTTGATCGTTAGCTGT      | 59.493 | 20 ACCGAGGACCACCTTGTATG     | 59.844 | 20 |
| TGCACGTAGGCATGTTCAAT      | 60.142 | 20 AAGCGTTGGAAGTTTGGTGT     | 59.78  | 20 |
| CCATCCATGCCTTGGTACTT      | 59.813 | 20 CTTCCATCTTGATCCCAAGC     | 59.629 | 20 |
| TCGAGTGATCGTGAGACAGTG     | 60.038 | 21 ACCTTGACGAGGTGGTTGAC     | 60.009 | 20 |
| GCGAAGAAACATTCAGGGAA      | 60.192 | 20 TTTCTCTTGGTTGGTGAAGA     | 58.955 | 22 |
| ATCGAGTAACTAGGCGCGA       | 60.003 | 20 AAGTGAGCCCCAAATCTCCT     | 60.074 | 20 |

|                           |        |    |                        |        |    |
|---------------------------|--------|----|------------------------|--------|----|
| ATGCATGTGTGCCAAGTGTC      | 60.614 | 20 | AAAATTCCAACGAGGTGCC    | 59.925 | 19 |
| ACAAAATGTGCAAAAATTCGC     | 59.114 | 21 | ACCATGAAGCACATCACAGG   | 59.551 | 20 |
| TATCCATGGAATGCCCAAAT      | 59.979 | 20 | ATTTCTTCTTTTGCCACCGA   | 59.685 | 20 |
| TGTTACATGGATGGATGGGTT     | 59.925 | 21 | TTCCGTCTACCCCTTTTCT    | 59.934 | 20 |
| GCAAACCAACATGTATCAAAA     | 57.628 | 22 | GCCTCTCAACCTCCAAAATG   | 59.67  | 20 |
| ATTTTGTGTTGGGCGAAAAT      | 59.32  | 20 | AAAAATAGAGTTATCACAGGA  | 58.199 | 26 |
| CTGGACCTTTCGGTCTTGA       | 60.224 | 20 | CACCCCGGGCTAGATATTTT   | 60.164 | 20 |
| AAGCAGGAGGTCCACAGTTG      | 60.298 | 20 | AGGGCAAGGTAGAATTCGCT   | 60.228 | 20 |
| GGTGCTCTCAAGGTTCTTGC      | 59.997 | 20 | TATGGGTTATCACCGGATCG   | 60.544 | 20 |
| GCTGGTGCATCCTCTTCTA       | 60.362 | 20 | TAATGCCCTCCAAAACCAAG   | 59.931 | 20 |
| TTGCGTTGGATCAATTTGTG      | 60.501 | 20 | CGCTGTAGATCTAACGGCTGA  | 60.549 | 21 |
| ATCGCACGTGCTAGATCCTT      | 59.866 | 20 | TGTCCGCCCTAATAAACCTG   | 59.953 | 20 |
| TGCAATCCGGATCAAAAGTT      | 60.448 | 20 | GAGGCAAATTATTCGGATTTTC | 58.99  | 22 |
| CAATCGGTTGTTTTCTCGGT      | 59.971 | 20 | CCCCATCAACCTCCATACTG   | 60.187 | 20 |
| TGAGCAAAGTAATAAGAGCGAC    | 60.422 | 24 | CCCAGACTCTCGTCTGATCC   | 59.792 | 20 |
| TTGTAATTATTGTAGGGAATAAAA  | 57.858 | 27 | CCAGCATGGGGAATGTTAAT   | 59.645 | 20 |
| ATCTCAGTGCGTGTGAGTGC      | 60.063 | 20 | CTGCTTTGTTTCCATCACGA   | 59.84  | 20 |
| ACGCCCCAGACTGTTTCTTA      | 59.734 | 20 | TCAGGTCCACGTATTTTCCC   | 59.79  | 20 |
| AAGGGTTATCACCTGATTTTCTC   | 57.73  | 23 | AATTTGCTTCTTTGCCGATG   | 60.209 | 20 |
| CGTCGGTCAGAACCTTGATT      | 60.111 | 20 | GGGTTATTACCTGATTACCTCC | 59.052 | 23 |
| CACTCACTCTCACTAGCCGC      | 58.78  | 20 | AACGACCAGGCGCTCTAATA   | 59.867 | 20 |
| CGGCTATAGCAAGGGTCAAC      | 59.73  | 20 | GCTTCCACTGCCTACTTTGC   | 60.022 | 20 |
| GCTATCCACGATGGACGATT      | 59.923 | 20 | AATTTGGCAGCTTCTTGTGC   | 60.395 | 20 |
| TGGCTGTGAATCATTGTTCCG     | 60.665 | 20 | TCGTGATTGACTTTGTCCA    | 60.24  | 20 |
| AAATGCGCAATTTTAAACCT      | 59.864 | 21 | TCCACCGTGGTTAGTTGACA   | 60.001 | 20 |
| CGGCACCAATTTATTGTGAA      | 59.42  | 20 | CAGCTCAGGGTGGAGAAAAT   | 59.284 | 20 |
| AGGTTGGTCCACAAGATTTACA    | 58.486 | 22 | CATCTGAGGAAGGCACATGA   | 59.787 | 20 |
| CATACCTCCCCTTACCATCG      | 59.264 | 20 | AAAGAACGAGTGGAGAGCGA   | 60.134 | 20 |
| TCCGAAATTTAAGGAGTCGG      | 59.155 | 20 | TCACAATATTTGAGGGTTATCA | 60.337 | 26 |
| ATCGTGGAGTAACTGCCTGG      | 60.134 | 20 | TGTGCGTAGAACAGAGAGCG   | 60.347 | 20 |
| TCTCAGGTGACAATAGGGGG      | 59.92  | 20 | AGGACATCGCGGAGAGTCTA   | 59.973 | 20 |
| TTTCTCACCCCATTTTCATCC     | 59.727 | 20 | CTCACCTCTTGGTGCCTCTC   | 59.986 | 20 |
| CAGAAACGTTTTCCCTGAGC      | 59.853 | 20 | TGAAAAGAAAAGAGGCACTCC  | 59.618 | 21 |
| GATTGTGCGTCTCGTTACCC      | 59.41  | 20 | GGTGAAGACGGCTTGTGAT    | 60.119 | 20 |
| TGCTATAAATGAAACCGGGG      | 59.789 | 20 | ATTTGGAAGATCAACGGACG   | 60.074 | 20 |
| CCCTTCGCATCTTACTGCAT      | 60.235 | 20 | GCTGTAGATTCAAAGGCCGA   | 60.352 | 20 |
| TTCTCACAAGCAAAGACCCA      | 59.415 | 20 | CCAACAACCTAATCATCCAAC  | 60.463 | 22 |
| GCGTAATATCAAATTTTTGGGTC   | 58.85  | 23 | CCACCAACTTGTCCACTCCT   | 60.002 | 20 |
| TTGAAAATCAAAGAGCCTCA      | 59.946 | 21 | GGCTTACATTTCCCATCAC    | 60.326 | 20 |
| TCTTAATTTGCATGTTTCGTTATAC | 57.939 | 25 | TTTTTGCGAGGGAGAATGTC   | 60.192 | 20 |
| GGTGCAAGTGTCAATAGAAGAGT   | 58.896 | 24 | CGGAAGAATTAGAAACGGCA   | 60.202 | 20 |
| AGAACTTGACGTGTGCGTG       | 59.946 | 20 | CTCCTGGTGAATGGCAAAGT   | 60.111 | 20 |
| TCTGAAGTCCAGCAACAGGA      | 59.545 | 20 | CGTGATGTGCAGTTCAAGGT   | 59.751 | 20 |
| AGGCAAGAACTGCCTGAAA       | 59.993 | 20 | TATGGTGGTATGGTGTGGGG   | 61.296 | 20 |
| TCATTCTCAAGCCACTCCCT      | 59.803 | 20 | CTGGTGTCAACCGGATGTC    | 60.005 | 20 |
| TTCCAGTTTGCTGCTAGGT       | 59.875 | 20 | TGCAAGAGCAGCAGGATATG   | 60.119 | 20 |
| CGAGATTCCGGAAGACAGAG      | 59.943 | 20 | CCGCCTACTCTCCCTTTTT    | 59.842 | 20 |
| TTTTGGTAAAGTTTTGAGATTCCA  | 59.107 | 24 | ATGCGAGCATCATACACGAG   | 59.854 | 20 |
| GGGCATCCAGATAGTTCAA       | 59.894 | 20 | CAGACGTCGCGATCAAATA    | 59.833 | 20 |
| TCCTTCAACCTTTTCTTGTG      | 58.279 | 21 | GGAGTTTGCTGTTGAGACCC   | 59.703 | 20 |
| CCAATTTGATGAGGGACCAC      | 60.173 | 20 | AGTCGCTGCAATTTCCAGTT   | 59.882 | 20 |
| TGGTTGAAAATCATTGTGGG      | 59.222 | 20 | AGCCTAAACACACACCTCA    | 59.186 | 22 |
| AAAGGGAATTTTGTCAACTGGA    | 59.85  | 22 | AGCAAGGGGCAAGTGTTATTT  | 60.014 | 21 |
| TTATGTGGTGGTTGGAGCCT      | 60.375 | 20 | ATCACATGCCATTCAGTCCA   | 59.925 | 20 |
| CGCGAAGAACAAGAGGAT        | 60.397 | 20 | GCTATAGAGCCGTTGTGGGA   | 60.235 | 20 |
| ACACGTGCCTCGTTTGAAT       | 60.559 | 20 | TCCATGCAATATGTATTAATC  | 58.854 | 26 |
| CAGCAGCAAAGCTTCGAAAT      | 60.658 | 20 | CGCATTGGATCTCTGGTTTT   | 60.074 | 20 |
| GGCCAACATATGGGATTTTG      | 60.016 | 20 | TTATGTGTTTCATCTGGGGCA  | 59.924 | 20 |

|                           |        |                            |        |    |
|---------------------------|--------|----------------------------|--------|----|
| CCACCTGTA CTCCACCACC      | 60.275 | 20 GAAAGCCTACTTGGCGATCTT   | 59.87  | 21 |
| CGACGTTGTCTTAACCTTGGA     | 60.154 | 21 AGTTCGAAAGCCTACCTCGC    | 60.894 | 20 |
| TTAGTTAAACTCACGCACGGC     | 60.312 | 21 ATGGGAAGAGGGGGTATGAG    | 60.147 | 20 |
| TTTTCCCTTCTTTTGGGAGG      | 60.395 | 20 GCAATTA AAAACCCCTCGAT   | 60.15  | 20 |
| GACCATCGGAGTGTGGAAT       | 59.786 | 20 TCTCTCTATCTTTTGGTTGGTG  | 59.304 | 24 |
| CACCCAAAATGGGTTATTATTG    | 59.404 | 23 TCATTCTCAGCATA CGGACG   | 59.823 | 20 |
| GCACGTTTTTGGCCTGATA       | 59.679 | 19 TGGATCCCGGAGTATAAGCA    | 60.427 | 20 |
| GCGGGGTTGTTGAAGAATTA      | 59.938 | 20 TGC GCGATTTTAAACCTAA    | 60.564 | 20 |
| TTACTGTTGCATGGACTGGG      | 59.566 | 20 CAATTACGAGGCCGAAAATC    | 59.547 | 20 |
| GGTATTCGTGATCGTGATTCT     | 60.215 | 22 TAAATCAAGTCCCAAGCGT     | 59.569 | 20 |
| CAGGGTTCGTAACCTAGGAGC     | 60.137 | 21 TCACTTCGAACCTTCTGCAA    | 59.566 | 20 |
| CAAGCGGAACAAACAAACAA      | 59.746 | 20 CCAATTCATTCAAGCAGCAG    | 59.42  | 20 |
| TTGGGACGAATATACCCTCG      | 59.778 | 20 CCAAAATTTATGGTTATCACAG  | 59.191 | 24 |
| ATCAAGCCTGATATGTTTGACTC   | 57.388 | 23 TGTGGGGAGATATGATACGGA   | 60.163 | 21 |
| GGCTGTT CAGCAATATGCAA     | 59.839 | 20 TGCAGGTGCTCTCTACACGA    | 60.767 | 20 |
| ACGGATTTAAGGGTTATTACATGA  | 58.008 | 24 TCGCATGCCACTAAAAATGA    | 60.215 | 20 |
| CATTTTTCCACCTTGTGCCT      | 59.971 | 20 GGTGAAGTCGGATTGTGGAT    | 59.786 | 20 |
| TGGGAAATGAAATGCGTGTA      | 59.93  | 20 AATAGAAAAACCACGCAGGG    | 59.087 | 20 |
| ATCGTCGCCTCTAGCCACTA      | 60     | 20 GTC AATGGCGTCTGGTTTTT   | 59.978 | 20 |
| GGTTTTACGAACCACAATCCA     | 59.716 | 21 AAATTTACATATTTGATCGGA   | 57.59  | 23 |
| TTTGACCTGAGGAGGTGTT       | 60.69  | 20 GCCCCATTACCACTAAACCA    | 59.685 | 20 |
| TTGCAGCTTGACATTCAGT       | 60.606 | 20 CGGGGGTAAGAAAGTCAACA    | 59.964 | 20 |
| TTCTCCTATCTTCCCCAGCC      | 60.537 | 20 GGGCTGCCAGAATAAAAAGG    | 60.92  | 20 |
| GCATGCAAGCATCTGGTAAA      | 59.839 | 20 TGGTGATGCCAGAACAGAAG    | 59.831 | 20 |
| AATCTCTCAATCGGCACACC      | 60.081 | 20 TTAGTGGTGCACAAAGCCAG    | 59.904 | 20 |
| TTAGGGTTTAAAATCGCGCA      | 60.564 | 20 CAACGGTTTTGGTTTGTTC     | 60.241 | 20 |
| TCCCATGTTATGGGAAGA        | 60.126 | 20 TGGCTGGTGCAGAGATTGTA    | 60.413 | 20 |
| TGATACACAGGAGTTTGC GG     | 59.716 | 20 GACTCACGGTTTTTCCGGAAG   | 59.711 | 20 |
| ACACCCACAAATCAACCACA      | 59.701 | 20 TCGGAAGATTGAACGTGTTG    | 59.691 | 20 |
| TCAAACCAAGTTCGAGAGTTG     | 60.275 | 21 TCGGACCAAATTACCCTTCA    | 60.301 | 20 |
| CTTCACGTGACTTGCTTCCA      | 60.025 | 20 TTGAACAATTGAACACCGGA    | 59.941 | 20 |
| GGTGATTTGGCATTAAAGGT      | 58.765 | 20 CGCGACAGAGTGGTATCAGA    | 60.008 | 20 |
| AAGCAATTTCAACATAGGTCGT    | 57.826 | 22 GGTGAATCTGTAAAAGGTCATC  | 59.885 | 23 |
| CGGCTCGAAATCAGAAAATC      | 59.784 | 20 GAGAGCCATTTGTGGACGTT    | 60.119 | 20 |
| CTCTGTAGTCGTGGTGGGCT      | 60.321 | 20 TTGTGGAGAACGAACTCGAA    | 59.415 | 20 |
| TTCAAAACCCAGATATCATAATC   | 59.637 | 25 CAATTGGACGCGCTTACT      | 60.407 | 20 |
| TAAAGAACCCTCCCCGAATC      | 60.258 | 20 AAAAACC GTTCCACATTCAA   | 59.348 | 21 |
| GAAGCACCGGTA CTGACAT      | 60.142 | 20 TCAAACAGAACACACCTTCCC   | 59.997 | 21 |
| TGTGATGTTGATTTTTGGTACATG, | 59.22  | 25 CAACCGCATAGGCACAGTAGT   | 60.204 | 21 |
| ACAAACGGTAATTTCCCTCC      | 60.053 | 20 TGCAAATTTCTTCGAGACCC    | 60.192 | 20 |
| GCAACGGAATACCACTCGTT      | 60     | 20 CCTCCCAACTTGTGTGTGTG    | 60.039 | 20 |
| TTGCTATTGCATGCTAAGAAGTG   | 59.588 | 23 TCAATTTGAATGGTTATCACCTC | 58.865 | 23 |
| TGTGGAATGGGAGATAACAGA     | 58.005 | 21 TTAACGACTTGAACCCATTTTT  | 57.74  | 22 |
| GTGTTGGACGCATCAGGTAT      | 58.444 | 20 CCTAGCTCCTTCCCCTTAC     | 60.204 | 20 |
| ACAACAATCCGGAGGTGAAG      | 59.966 | 20 GATTCCAACATGAAAGCCA     | 60.843 | 20 |
| CATGATCAAATCTTGGTGCG      | 60.073 | 20 TGTGATTTCTACCATTTATTCTT | 59.708 | 26 |
| TTACCTTTCTCGATCGGGTG      | 60.066 | 20 TTCTTGACGCACCATTTAC     | 59.697 | 20 |
| TCGCTTAATTGGTGATTGTGA     | 59.172 | 21 ATCCACACAACGCTTACT      | 60.577 | 20 |
| TATTTTTCGGCGAGATTGCT      | 59.816 | 20 GAGAATGTGAGACATCATCATC  | 59.059 | 24 |
| TCAATCAATTAGATTTTCGGCTC   | 59.601 | 23 AATTTACAGAACACAACGATC   | 59.531 | 23 |
| AACAGCAGGTGAGTTGGAGG      | 60.298 | 20 TGATGAAATGACATGGAAATG,  | 58.82  | 22 |
| TTTCACTGTTTCCACACATGC     | 59.606 | 21 AGGAGAACCAAACCGCATT     | 59.569 | 20 |
| AGAGCCATGTCTCCTTACG       | 60.408 | 20 CCACTCCCCACTGCAATAAG    | 60.508 | 20 |
| GTTGGATGGCTGGTTTCTGT      | 59.973 | 20 GACTCAACATAAATGGGGCG    | 60.331 | 20 |
| TTCTTTTCTCTCCCTCCCCT      | 59.252 | 20 GTGTTCTCGTGAGAGTGCCT    | 59.051 | 20 |
| AGCTTCTATCGCGCTCTCTC      | 59.083 | 20 TTCCAAACCTTTGTTCCGAG    | 60.081 | 20 |
| TGTTCTTCGTGTTCTATTTTCTCG  | 58.935 | 25 GTTCTGTATGTCAACGGCCC    | 60.384 | 20 |
| TGAAATGTGTTGGCTGGGTA      | 59.964 | 20 AATATCAGGGGGCGATTCTC    | 60.252 | 20 |

|                          |        |                            |        |    |
|--------------------------|--------|----------------------------|--------|----|
| CATGTTCAAGTTTTTGGGGCT    | 59.971 | 20 TGTCTGATCCCATCGGAAAT    | 60.281 | 20 |
| TATCAAAAACAACCCCGGAC     | 61.84  | 20 ATCGAACAGCATGAAAACCC    | 59.939 | 20 |
| GAGGAGAATTCATGGGGTGA     | 59.862 | 20 GGATGGTGATTATGGCTTGC    | 60.304 | 20 |
| CAAGTCAAGCAAGGTGGACA     | 59.873 | 20 TTCGAACTCTTGCCAGTTGA    | 59.566 | 20 |
| GCGACAAGTCTGCGTGTAT      | 58.955 | 20 TAGGGGCACACCAAGAGAAC    | 60.111 | 20 |
| CACATTCTCCGGTTTTTCGT     | 59.971 | 20 AGAACCCGGCAGAGAAAGAT    | 60.212 | 20 |
| GGAAGGGGAGACCGAAATTA     | 60.258 | 20 ACGACAGTGGACAAGGGAAT    | 59.43  | 20 |
| TGGCTAATCCCTGTTTTGAA     | 58.214 | 20 TCACTCCAAAGCATCAAGCC    | 61.329 | 20 |
| TAAAGCCAATAAAGTGGGGC     | 59.078 | 20 TCTGTTTGCCTTTTGAATCC    | 60.192 | 20 |
| AATGGTTGGGAAACAGGCTA     | 59.429 | 20 GCAGACTTTAAGGCAGCCAA    | 60.523 | 20 |
| CAAAGAAGGCAATCTATCCCA    | 59.168 | 21 CACGAGATTTACGTGGTTCG    | 59.195 | 20 |
| AATCCCAATTTCCCAACCTC     | 59.996 | 20 TGCTGTTGCTCTGCTTTGAT    | 59.746 | 20 |
| ATGGACCCACCTGTCATAA      | 60.05  | 20 TTTTGTGTCGGTTTTCTCG     | 61.029 | 20 |
| TCTCCATGCATGCAAACCTC     | 59.805 | 20 CTATCGTTTTCTCCGCCTTG    | 59.839 | 20 |
| CACGCACTCACACTCTGA       | 59.624 | 20 TAGGGGAAAAGGGGAAAGTG    | 60.284 | 20 |
| TCGGTAAAATCAACGTGAAAAA   | 59.511 | 22 ACGCAGTCTAGAGATATATGTI  | 57.442 | 26 |
| ATTGCTAGGGTAGCCTCCTT     | 57.088 | 20 TTTTGTGATCGATCTCGGGTG   | 60.972 | 20 |
| AAACGCCATGCAAAAATACG     | 60.859 | 20 CGCTTGAGAAAAGAAACGAG    | 60.125 | 20 |
| GCTGCACGTGTTACACCTAAAA   | 60.228 | 22 TTGTCATTGGGCATCGATTA    | 59.891 | 20 |
| AATAAAAGAGGAAGGCTGAGCTA  | 57.98  | 23 TTGTGGGAAGCATTCTCC      | 60.051 | 20 |
| CCATTTTCCAATCTTTCCCA     | 59.733 | 20 ATTTAGCCGTTTCTCGGTTT    | 59.966 | 20 |
| CAGTCACTCTCACTAGCCGC     | 58.78  | 20 GTCGACGCGATATTGTCCTT    | 60.103 | 20 |
| TGAATGCTCGTTGTCTCCAC     | 59.837 | 20 AACTGGCTAACCCATCACCA    | 60.375 | 20 |
| TACACACGCGCACACTTA       | 59.968 | 20 TTCACAATTAACAAGAACAATT  | 59.077 | 26 |
| TGGGTTCTCCTAGGCCTCTT     | 60.204 | 20 CAAGAGCAACAACACCATTCA   | 59.749 | 21 |
| CCATTCTGCCACAAAGATT      | 59.933 | 20 TGCTAACTCAAATTTTCGGTGC  | 60.258 | 21 |
| GCATCTCTTGCTCTCTCGTTG    | 60.292 | 21 CACGAGATTTACATGGTTTCGAT | 58.976 | 22 |
| CATCCATCCTTTACTGCACG     | 59.148 | 20 GATTCCCTCGTGGGATTGAAA   | 59.871 | 20 |
| AGGTAACAACAATCAAGGGA     | 57.663 | 22 GATTGTAACGTTATTTGGCCG   | 59.376 | 21 |
| TCCACCGTTGTCTTTAAGTCG    | 60.154 | 21 TTGAGGGAGAACTGCGGTAT    | 59.694 | 20 |
| GAGAAAAACGACGTGAGGGA     | 60.232 | 20 AACTGAGTCCCCTACCCGAT    | 59.817 | 20 |
| TGGTCAGTTTGATCGTTGGA     | 60.088 | 20 TTTGAGGCGAATCGAAATCT    | 59.784 | 20 |
| AGCATCTCTTGCTCTCTCATTG   | 58.842 | 22 AACCATCGTTGCTGATTTCC    | 59.939 | 20 |
| TCAAAACCCAAATCCGACTC     | 59.91  | 20 TTGTTAGTTTCCATTCCGCC    | 59.938 | 20 |
| GCACCAAGACAATGCCCTAT     | 59.962 | 20 GTGGGCGATTTAGCAGAACT    | 59.34  | 20 |
| CGTGTTTTACCGAAATGCG      | 60.118 | 19 CGGAAATTTTACCCGGATGT    | 60.902 | 20 |
| CAATCCTTTGAGTATGGATTGATG | 59.737 | 24 AATATCTCCCTTTTCGGCCA    | 60.764 | 20 |
| CGATCCGTGACTAAACCAT      | 59.955 | 20 GTCAAGTCAAACCTTGCCAAACT | 58.42  | 22 |
| AATGCGAGAACGAAAGAAA      | 59.823 | 20 GATCGCATCAGAGAGTCGGT    | 60.381 | 20 |
| CCTATGCCGCTTACCTTTTT     | 58.409 | 20 TCTTCCCAACTACTTTCCA     | 57.242 | 20 |
| CCAATACTGATGGTCCAAGC     | 59.607 | 21 TTACATCCCCGGAGATACCC    | 60.901 | 20 |
| CCCACTCCACCTTCTCCTAAC    | 59.98  | 21 TTGCTTCAGAGGTGAAATCACT  | 59.031 | 23 |
| CCGGGAGATGAAACTGTGTT     | 59.966 | 20 CCGCCATTCTCCGTTAACTA    | 60.089 | 20 |
| TCGTGAATGGCATGACTGAT     | 60.08  | 20 ACAGAACCAAAAAGGCAGTGG   | 60.149 | 20 |
| GAGGTACGGTGATATCATGCTTAC | 59.843 | 25 GCCGTCAATCATTTAGGAACA   | 59.952 | 21 |
| GATGGGGAGTTCAATGTCGT     | 59.786 | 20 CCATCTCCACCTCCATACTCA   | 59.935 | 21 |
| CCACGAAACATCAGCATACG     | 60.134 | 20 CGCCCCAAGTTGTTTCTTAT    | 59.087 | 20 |
| TTCAGTGCATATCTGACGGC     | 59.83  | 20 CATTTTGGACGGTCCTGTTT    | 60.353 | 20 |
| ATGGACGCCAATATTGTTT      | 59.162 | 20 GCATATACGAAGGGTATTTTGC  | 59.289 | 23 |
| TGTAGAGGAAGTTGGGGGTG     | 59.959 | 20 TCCCCTAACCGACAAAATG     | 59.795 | 20 |
| GTCAACTTGGGCAGTGGAAAT    | 59.973 | 20 AATTAATGTGGCATGGGGAA    | 60.016 | 20 |
| GGATCGCGTGAATTAGTGT      | 60.103 | 20 AATCAGCTCCATTTCTTGCC    | 59.273 | 20 |
| CATCTTTACCGCCACCATCT     | 59.955 | 20 CCGACAACGAAAGATGAAGA    | 58.847 | 20 |
| CTATGGCACTATGCCGGATT     | 59.945 | 20 GAGCAGTAGTGCCCTGAAG     | 60.012 | 20 |
| ACGCACACTTACGCATTCAG     | 59.935 | 20 AAACACTCTGTGTTGTTGGGAA  | 59.538 | 22 |
| TGAGCAACATGCTACAACCA     | 58.863 | 20 CGGGGCTTACCTAGTCTAA     | 59.331 | 20 |
| AATCATCTCCTCACTAATTCATC  | 57.69  | 24 CTTTTGATTCCCCATTAAAAG   | 58.925 | 24 |
| CCAACCATGTGCTTCTTTCA     | 59.691 | 20 AAGGACAAAACCGCAACAAG    | 60.147 | 20 |



|                           |        |    |                        |        |    |
|---------------------------|--------|----|------------------------|--------|----|
| GACCGCAGGATAATCCAGAA      | 60.036 | 20 | AGATTTGATCATGGGCGTTG   | 60.864 | 20 |
| GTTGGACTTTTCGAAGAGCAT     | 58.45  | 21 | AGCCGTGCCTTCAACATAAC   | 60.14  | 20 |
| GCAGAGTGATGGGTGAACAA      | 59.682 | 20 | GCTCCCTTAAACACGAATGTG  | 59.623 | 21 |
| CAAGGAAGGCATCCACATCT      | 60.073 | 20 | GCCCCTTAAACTCTCCTTGA   | 59.712 | 21 |
| TTAGCTCCAAGGGCCCTAAT      | 60.055 | 20 | TTCGAACTCATGCATTCATTTT | 59.592 | 22 |
| CTTCTGTTGGGGCGAAATTA      | 60.067 | 20 | GGTTTATTGGGCGTGATGG    | 60.074 | 20 |
| CCAATTGACTTCGTGGAGGT      | 59.966 | 20 | ATGCAAGCTCAGCCTAATGAA  | 59.996 | 21 |
| AGACCATGGTTCGGAGAGTG      | 60.112 | 20 | ACTAAACCACCCGTGAAGCA   | 60.55  | 20 |
| GGCATAAACTCCCTGGACA       | 59.933 | 20 | ACCGAATTCCTTCCAAGGTT   | 59.805 | 20 |
| TCACGTTATGGGGAGAATCC      | 59.75  | 20 | ACATGGAACAACATGAGCCA   | 59.967 | 20 |
| CAACGATGGTTGTTGAAACG      | 60.004 | 20 | GGTGATGTGCAACGCTATTG   | 60.142 | 20 |
| TGCGTTTTGACAATATATAGGTGT  | 60.083 | 26 | ACGAAAAATGTATTGGGGCA   | 60.188 | 20 |
| TTCAGTGGAACATGGTTTGC      | 59.547 | 20 | CTTTCCCGTGGACGTAGAT    | 61.256 | 20 |
| TTTTTGAGTCGGAAAAACG       | 60.081 | 20 | ATCGGTTATTACCGGATCGC   | 61.031 | 20 |
| GCATGCATCAACTGCAAATC      | 60.237 | 20 | TGGAAGTCAATGCTTCAAC    | 59.847 | 20 |
| TGATGTGGCTTCTTTAGGGC      | 60.214 | 20 | GCTTTCAATCCTCCAGCATC   | 59.78  | 20 |
| GTTGCTTCCATCGTCACCTT      | 60.119 | 20 | CACATTACACCACCTTCCC    | 60.088 | 20 |
| ATTTTGGCCTTTGATTTTCG      | 59.055 | 20 | GAGGTTTCCAACCTTGCTTCG  | 59.853 | 20 |
| CTCTCGTCTCCCTTGTTTGC      | 59.989 | 20 | TTGTGAGAACCAACTCGGTG   | 59.72  | 20 |
| GGGTGCTTGAAGATAAACATGAG   | 60.014 | 23 | GGTTGTTGCCGCTTCTACTT   | 59.383 | 20 |
| CTAAATTCGCATGGGAAGGA      | 60.031 | 20 | CGGCACGAAGTCTGGTAACT   | 60.312 | 20 |
| AACGCGAAGAACACAAGAGG      | 60.431 | 20 | ATTCAATTGCTGGTGGGAAGG  | 59.933 | 20 |
| CGCGAACTCAAATACCTTTC      | 59.708 | 20 | TGGAGATAGAATGAGATAGAA  | 57.684 | 26 |
| GTCTGCGAAGATTCAAGCGT      | 60.547 | 20 | CAACCCTACCTCCTTCTCCC   | 59.928 | 20 |
| TCCAAACAAGGCTCTATGGC      | 60.214 | 20 | CAAGAGCTCTCATTCTCTCCC  | 58.214 | 21 |
| ATTGTGTACCCGTCGTCTCA      | 60.162 | 20 | AGCATCAAAATTCAAAAGCGA  | 59.846 | 21 |
| TCATGCCCGTTTTATTTGA       | 59.004 | 20 | GATGAGAAGGGTGCACATGA   | 59.637 | 20 |
| GGATATCCGATCCGGTTTTT      | 59.984 | 20 | TCTCATGCCAACTAAGCCAA   | 59.42  | 20 |
| TGCTCTCATTGTAATCTCTCAA/   | 59.573 | 25 | AATTGATGGAACGGGGATTT   | 60.378 | 20 |
| ATGCTTAGGTGGATTTCCCA      | 59.387 | 20 | GACAAAACCTTCATGGGAGCG  | 60.636 | 20 |
| CACCATAATTTGACACACACACA   | 59.28  | 23 | TCATGATTCAAAAGCATCAAA/ | 58.278 | 22 |
| GCATATGATGTGCATATACGAAA   | 57.665 | 23 | TTTCACATGCCATACACCAAA  | 59.841 | 21 |
| GCTTATCCCTTACCGTTCA       | 60.074 | 20 | TCACCTTCGGTCAGAACCTT   | 59.697 | 20 |
| CGAAATGTGAAGCGTTTGAA      | 59.849 | 20 | GGGGTTGGAGGAAGAGAGAG   | 60.186 | 20 |
| TTGAACTCACACGTGAAGG       | 59.72  | 20 | ATGGAAGGGACGAGTTTGAA   | 59.526 | 20 |
| GGACAAAGGGTTTTCGATAA      | 59.938 | 20 | CGGTTAAAAACCGAACTGGA   | 59.968 | 20 |
| CAGGGGTAAAGTAGTCATTGTGCG  | 59.935 | 23 | TCTCCCTCTCAGTACTTTTCTT | 60.279 | 24 |
| AGCGTACATGGAATCCCAAC      | 59.82  | 20 | GAGATCGAAGGAGCTGATGG   | 59.91  | 20 |
| GGGCGTGACAAAACCTACCA      | 60.924 | 20 | TGATTACATCGATCCAACGG   | 59.35  | 20 |
| GGTGGTGCGAGAGTGATTG       | 60.263 | 19 | GGGTGGTTCGATTCAATATG   | 60.014 | 20 |
| CTCACTAGCCGCAGCTCTCT      | 60.058 | 20 | TGGAGCTCTTGTTCCTCACA   | 59.545 | 20 |
| GTTTCTCACCTTACCCAA        | 59.943 | 20 | GAATACCCCTACTTTGCC     | 59.666 | 20 |
| CACGTTATATTTATAGTTTTGTGGC | 59.144 | 26 | TCAACAACCTTGAACCTGCG   | 59.881 | 20 |
| CGGTTGTATGAAACCGTTAGTTG   | 60.658 | 23 | CTCTGCCTCGTCTGGCTAGT   | 59.769 | 20 |
| TCGGAGCTAAAACGGAGAAA      | 59.953 | 20 | GCTGGAGCTGAGAACATCGT   | 60.564 | 20 |
| GAGATGCAAGAGGCAGATCG      | 61.058 | 20 | AAAACATGCCTTTCGACCAC   | 59.978 | 20 |
| CCTTCCAACAGAACAACCTCG     | 59.76  | 21 | CCCCTCTTCTGCACGACTTA   | 60.388 | 20 |
| ATGCGCGTTTTTAGGGTTTA      | 59.624 | 20 | CATGCATGGCCATAACTCAC   | 59.955 | 20 |
| TGCTCTTTGACCAGCTGTTTT     | 60.045 | 21 | GGCAATTAATCAGGGCAAGA   | 60.038 | 20 |
| TACTTGCCTTGACCCTGACG      | 61.224 | 20 | ATATTACCTGCACAAGGCCG   | 59.982 | 20 |
| TTGGGGGAATGGAGAGAAAT      | 60.632 | 20 | GCATACACACCATCATTCTCG  | 59.016 | 21 |
| CAATTAACGGTAGCCATCACAA    | 59.89  | 22 | GAGATCGGAATCATGTGGGT   | 59.744 | 20 |
| ACGACTGTCGATCCACACAA      | 60.162 | 20 | CTGTTTCGCATACAAACACGC  | 60.324 | 20 |
| TCGAAACAGATCAAACTGCC      | 60.242 | 21 | TGTTAAGACCTCGTGGGGAA   | 60.486 | 20 |
| GTCCCAACTTGCTCATTTCA      | 58.697 | 20 | AAGATGGGCGAATAAGACCC   | 60.286 | 20 |
| TTTCGATCTTCATCGCCTCT      | 59.917 | 20 | TGTTGGGGTTGTTGTAGGGT   | 60.126 | 20 |
| AAGTTGTGCGAGCAGCTTACTTTG  | 60.122 | 23 | ACAAAATTGTGCCAAGGAG    | 59.971 | 20 |
| AGCGAGTTTCGAAATGGAGA      | 59.955 | 20 | TCGCGAATTCAGCTAGAACA   | 59.712 | 20 |

|                           |        |                            |        |    |
|---------------------------|--------|----------------------------|--------|----|
| GATAGCGTCATTGTTTGGCA      | 59.694 | 20 TGCAATGCATGGAGGAATTA    | 60.035 | 20 |
| GTTTCTTCTGCCAGCACCTC      | 59.997 | 20 TAAGGCAACGTCCCTCTCAC    | 60.255 | 20 |
| TGTTTACGGCTGCAAATTCA      | 60.251 | 20 AGTTATCTGTGGCCGATGCT    | 59.723 | 20 |
| CGTGGTTCCGATCGTAATTGA     | 59.542 | 20 AACCACATGTTCCCCTTCAG    | 59.82  | 20 |
| TGCACGTAGGCATGTTCAAT      | 60.142 | 20 AACGGACGAACAACGAAAAC    | 60.015 | 20 |
| CATCTTTGTA CTAGCCCTGC     | 59.89  | 21 AAACGACATCCTGACGCAAC    | 61.107 | 20 |
| GCCGAGTGCACCCATATCT       | 59.957 | 20 TTTATCATTGCTCGTTTTGGG   | 59.95  | 21 |
| CATTAAAGCTCGGTTCAATTTCA   | 60.464 | 23 GAACAAGGTTCCATTTACACAC/ | 59.875 | 22 |
| TCAATCCCCACCATTCAATT      | 59.991 | 20 TATTGTGGTTTAGGGCCACC    | 59.685 | 20 |
| TTGATCCAAGGGTGTATAATGG    | 58.694 | 22 TGCATCATCAAGTCTCCTCAA   | 59.384 | 21 |
| TCTCATGACTCCATCCTTCACTT   | 60.125 | 23 TTCGAAGTTACAAAAGGGCG    | 60.236 | 20 |
| GTTGACAACCTTGACATCAAATAC/ | 57.197 | 25 ATCCTTGCCTCTTGCCCTA     | 59.836 | 20 |
| TGACACGTTGGACCTGAAAG      | 59.72  | 20 GTTTGAATCCGAGTTTCCCA    | 59.91  | 20 |
| TGTAGTCAATGCTTTTGAGATTAT/ | 57.636 | 25 TTGAGCCATATTCATTTGCTTTT | 59.986 | 23 |
| TCGTGAAATGAAACCGCATA      | 60.073 | 20 TCTTGGGAGGGAAAATGACA    | 60.43  | 20 |
| TTCAACCCGAACAACAATGA      | 59.941 | 20 AGGGTCAAGTCATGTTCCCA    | 60.363 | 20 |
| TCTTTCAATTTTCAGCCCTCA     | 59.809 | 21 GGAGAGAGAGGCAGACATCG    | 60.096 | 20 |
| TTGGTTTGCTTGCAATTTGAA     | 60.229 | 20 TGAGGATGCAAGCCTCAATA    | 59.375 | 20 |
| TGGTGTCTTGGTGTTTTGG       | 59.435 | 20 GATAAGCCAGGGTATGGCAG    | 59.551 | 20 |
| GTCACCTTATCAACGATCCGA     | 59.947 | 21 AAGCTGGTGGATTGAATGCT    | 59.7   | 20 |
| TGGAAATTTTCGGGGAATAA      | 59.233 | 20 TCTCATACAATTCCCCACCC    | 59.605 | 20 |
| GTGCCTATTGCCGACGTAGT      | 60.162 | 20 AGGGTAGGGTCCCTGTATG     | 60.067 | 20 |
| GATCCAACAAGCAACAGGGT      | 59.973 | 20 GAGCACGAGGGTGAAAGTGT    | 60.307 | 20 |
| CGATTCGACGCTTTTTGAA       | 59.938 | 19 CCCAGCTGAATGCGAGTTA     | 59.956 | 19 |
| CGCCCCATGGAGAAGTTTAT      | 61.191 | 20 CCATTCCTGAGACCAAAAGG    | 59.521 | 20 |
| CGTGT CATAGGAAAACGAGC     | 58.379 | 20 AGTGTGGTGTTCATGAGC      | 59.758 | 20 |
| CAGCATGGCCATTACAACAG      | 60.134 | 20 CCCATCATTTGCGCTACAAA    | 60.827 | 20 |
| GGCGCAAGTTACGTGTTACC      | 60.564 | 20 AACGAATGTAACAATACGTAC/  | 57.736 | 25 |
| AAACGAGAAGAAAGCAGCCA      | 60.132 | 20 AGAGCACTCGTGGATTCTGG    | 60.408 | 20 |
| TACAAAGTCCCACGACCGAT      | 60.375 | 20 TTACAAAAATGCCCTTTCGC    | 60.075 | 20 |
| GCTTGACTTGCAACGATGAG      | 59.596 | 20 GGTACAGCCGAGTAGCGAAG    | 60.037 | 20 |
| ACGCTTTGGATGTGCTTTG       | 59.856 | 19 CCTCAAGGGGAAGAACACA     | 60.081 | 20 |
| CGCCGAGTTGGTTCTCTCTA      | 60.529 | 20 ATCCTGTGTGCCTGTGTTT     | 59.597 | 20 |
| TTCCTAGAAAGATCGGGCAA      | 59.778 | 20 ATCAGTTGTTGATTGGGCT     | 59.556 | 20 |
| TTCAGGATAAATATCAGTTTCATG  | 58.52  | 25 ACGATTTGGAATCGATAAGCA   | 59.561 | 21 |
| TGCAATCACACAATAACAAGCA    | 60.177 | 22 TACCTCTCCACGGCCTCTA     | 59.83  | 20 |
| CATGAATGGATGTGATTTGTTT    | 60.103 | 23 GGCCAATGGAATGGAGATAC    | 59.204 | 20 |
| ATCCGGAGTAAGTTCGAGGA      | 58.741 | 20 AATCTCACCAAGATGCCCAA    | 60.461 | 20 |
| AATTGATCTACGTCCACGGG      | 59.813 | 20 TGTAATGGAGGGGGAATCTG    | 59.744 | 20 |
| AAAGAAAAGGGAAAGGGCAG      | 59.698 | 20 ACAAACTTATGGACCGCTGG    | 59.993 | 20 |
| ACCGAAACCGTGTCTTCAG       | 60.149 | 20 GTGCACGAAATTGGAGGAAG    | 60.636 | 20 |
| TATGACTCGCAATGAGCCAC      | 59.83  | 20 CCTATGGTGGTATGGTGTGGA   | 60.501 | 21 |
| GTGACGCATTGTTTTGTGCG      | 60.157 | 20 GCGAAGGAACTGTGGAGAAC    | 59.851 | 20 |
| TCTGGGGGTTAGGTTGGTTT      | 60.581 | 20 AAAAATCGACAAATTATCAGT/  | 59.31  | 26 |
| CCCTAAGTTAATGCCACCCA      | 59.817 | 20 CACCTTTGCAAAAGGGAGAA    | 60.22  | 20 |
| CCTTTCTTGAGTTTCAACCCC     | 59.963 | 21 TTTGCAGCCTGAGTCAAGAA    | 59.716 | 20 |
| ATTCACAAGCGGCACTTCTT      | 59.882 | 20 AGTGTACGGGGCATAACCAG    | 59.875 | 20 |
| GCAGTTTTCAGAGCCGTCTT      | 59.621 | 20 GCGTGTTAAATTTGGATTCCC   | 60.541 | 21 |
| TGGCATAGTTTGGTTGTGGA      | 59.964 | 20 GTGGCGAATATTTGTTTTTGA   | 59.025 | 22 |
| TATTGACGAATCCATCGGCT      | 60.435 | 20 TTGCCTAGAAAATCCACACAA/  | 59.625 | 22 |
| GGAGTATTGGTCTCGTTGC       | 59.556 | 20 AATTCAATCCCCAAAAACCC    | 59.867 | 20 |
| TGCAAGGAAGAAAAACAACAA     | 59.774 | 22 GCCACTTTTGTCAAGGTGATG   | 60.544 | 21 |
| GCTTGCTGTGTTTTCTGTGCG     | 59.64  | 20 GGCTCTTCGGCAGTGAATAG    | 59.978 | 20 |
| TTCCCATGTTGTAATTAATGTAAG/ | 59.917 | 26 GAAAACGTGAGTTTCAGGC     | 59.859 | 20 |
| AGAATGGCCGAGAGTTTTCA      | 59.813 | 20 ATTGCCCTTGTTGTTTGGGAC   | 59.836 | 20 |
| CATGCAAACATCAGCCATTT      | 59.548 | 20 GGTCTATGGTTCGATTGGGTG   | 60.195 | 20 |
| TTGGGAAGAGGAAATGGACA      | 60.43  | 20 AAAACAGAAAAATCCCCTTC/   | 59.013 | 22 |
| AGAATCAGGGGAGGGAGAGA      | 60.149 | 20 TCCGTTGTAAAAAGACCGTTG   | 60.018 | 21 |

|                          |        |    |                         |        |    |
|--------------------------|--------|----|-------------------------|--------|----|
| TTCATACACACCCTTGCAGC     | 59.722 | 20 | GTGGGGTTAGCATGGTGAAT    | 59.676 | 20 |
| CTCCAGGAGTCGTGCTTGT      | 61.009 | 20 | TCACGCTAAAGAGGTGTTTTGA  | 59.92  | 22 |
| TTTATTATTTGGTCCCTCAACAAA | 58.876 | 24 | TCGTGCTCATTGTGTTGGT     | 60.16  | 20 |
| GGGTTCCCTGTGCTTTCAATTT   | 60.346 | 21 | GCCAGCCAGGAAAACACTAA    | 60.249 | 20 |
| AGTCCCTGATTCTTCCCTCG     | 60.586 | 20 | AATTCACGTGTTAGAGTTGATT  | 58.223 | 25 |
| GCTTCAGCCATCGAGTTTT      | 59.962 | 20 | ATTCATCGACACCAACACGA    | 59.967 | 20 |
| CCGAACTTATGGGCTAGGGT     | 60.332 | 20 | ATCCCCTTCATTCAGCACAC    | 59.934 | 20 |
| CGAAAAATGGTGGGAAAGAA     | 59.91  | 20 | TTGCATGTGAGCCAACCTCTC   | 59.992 | 20 |
| TGAGTTTCATTTCCGGCTTC     | 60.192 | 20 | ACTGACATTACAGGCATTG     | 57.067 | 20 |
| CTCATGTAGTGCTTTGGCGA     | 60.011 | 20 | TTAAACCCTAAAAACGCGCA    | 60.593 | 20 |
| AGTCCTAGAAGGCGACACCA     | 59.867 | 20 | GGGATGGAGGAGGAAAGAAG    | 60.008 | 20 |
| CTCACGAACACTCACGCACT     | 60.096 | 20 | CCGAAAAGCTGAAAGAAACC    | 58.949 | 20 |
| ATTGGTGACCAGATCAGGGA     | 60.326 | 20 | CCTGTTGTGCCATCAATTA     | 59.395 | 20 |
| GGAACCTGGGACGATTTTCTC    | 59.933 | 21 | TAGGATGATTGGCAACACGA    | 60.073 | 20 |
| CATCGTCTCCAGAATAGC       | 59.653 | 20 | TCCAATCAAGGCAAAGATCA    | 59.2   | 20 |
| CCTGCATGGACAACAGAAAA     | 59.691 | 20 | GGTGATGTGTGACGTTGGAG    | 60.005 | 20 |
| TGGCAGGTTGGAGACACATA     | 60.112 | 20 | GGGTTACAGCGAATGAAAG     | 60.636 | 20 |
| TAAATGATCTGCGAAAGCCC     | 60.175 | 20 | TGTGGTTGATGAGTTGGCAT    | 59.967 | 20 |
| TGTGCACTGTTTCTCTCTCA     | 58.804 | 22 | GTCTTCCCCTTCTCCTCAC     | 60.05  | 20 |
| GTCGGTGGCTGAAAGAAAAC     | 59.717 | 20 | AATTTGTTTTCCATCGTATTCCA | 59.616 | 23 |
| TGATTCAGATGTCAGCGAGC     | 60.104 | 20 | ATACCCTTCCCTCGATGTCC    | 60.154 | 20 |
| TTTGATGTCCAAAGTGGCTG     | 59.691 | 20 | TGGAATTCGCCATAAACAC     | 60.701 | 20 |
| AGTCGATTGTGTAGTTGTGGGT   | 58.508 | 22 | CTAGGCATGGAATCCGAGAA    | 60.17  | 20 |
| TGGTTCTAAATTCATGTTTCTGG  | 59.432 | 24 | TTGTTTGATATGGCAGGGGT    | 60.192 | 20 |
| TGTGAGAGGTGTGAAGCAGG     | 60.022 | 20 | CAAACATGCAAGTGCATATCA   | 59.631 | 22 |
| TCACTCTTTGCCTTCTCC       | 59.53  | 20 | TGCTGAGACATAGCGGACTG    | 60.16  | 20 |
| ACTTAACCGACCCTCATCCC     | 60.19  | 20 | GGTGGGTTGACGACAATAG     | 60.375 | 20 |
| CAAGAAACGGAGGGTGTGT      | 60.005 | 20 | TCAACTTCTTCAACAGGCCA    | 59.415 | 20 |
| TTCTCTTTGCAAACCTCG       | 60.357 | 20 | CAACCTAGAATGAGCATTGGC   | 59.722 | 21 |
| TCACGTTAAAGGAGGGTATCATT  | 58.941 | 23 | CACGGGTCTTTCTTCTCCA     | 60.224 | 20 |
| GACAGGAGGAAAGAATCGCA     | 60.34  | 20 | AAGCCAGTGCTGGTTGACTT    | 59.914 | 20 |
| GGCGCAGCATATATACACGA     | 59.714 | 20 | GCGTGTATTTTGACGTTGGA    | 59.59  | 20 |
| AATTGCCATCCCTCACACTC     | 59.934 | 20 | AAAACCTCCACCAACAGCAG    | 60.149 | 20 |
| TCGATCGGCCTATTTTTCTG     | 60.167 | 20 | TGCGTGATCTTGGTGTCTT     | 59.293 | 20 |
| TCGACTCCATAGTAGCCGAGTT   | 60.282 | 22 | AAAATTCGATGATTGGCTCG    | 60.038 | 20 |
| TTCCATCCTTTCTTCCATGC     | 60.014 | 20 | TCCTCCGTTTTTGGATTCTG    | 60.044 | 20 |
| ATTTTGGTCGAAACCGAATG     | 59.801 | 20 | TTGAAAACCAAACCGAACC     | 59.817 | 20 |
| TGTCTTATCCCCTGTCTCG      | 60.065 | 20 | TGGAGTCTTGAACAAGGGTCT   | 60.146 | 22 |
| TTGGCAGGTTGATCATAAATTG   | 59.832 | 22 | GTCACAATCCCGAAGCTCAT    | 60.081 | 20 |
| AGTGGCCTAATCCAAGCTGA     | 59.836 | 20 | TTAGGGTTTAAAATCGCGCA    | 60.564 | 20 |
| GAGGAGGTGCAAGAATTTCC     | 58.717 | 20 | CAAGCCATGGGTCTTTGATT    | 59.933 | 20 |
| CCCTTTTATGCTCACATCTTTT   | 58.835 | 23 | GAGATTGGTGGTTGTGGGAT    | 59.636 | 20 |
| TTTACGTGCCTGGCTTAGGT     | 59.769 | 20 | TGGAATAGGAAAGGTGCAGG    | 60.066 | 20 |
| GGAGTAGGGCCTTGGATGAT     | 60.293 | 20 | TCTTAATCCTTTGGCATTCAA   | 57.388 | 21 |
| ATTTTAAACATTGTTGGCGGC    | 59.838 | 20 | GGAATTTTGAAGGAGGGTG     | 60.663 | 20 |
| TACTGGCGTGGATTTTCTCC     | 60.074 | 20 | CGCGGATGGTTAAGATTGAG    | 60.597 | 20 |
| TGTTTGGTTTCTGCGTGAAG     | 59.881 | 20 | CAAATCAGGCACCAGCTAA     | 58.917 | 20 |
| CGATTTGCAAGTCTATGGCA     | 59.833 | 20 | CCCCAAACAACGAAATGAAT    | 59.662 | 20 |
| CATTGGTTAGCACTTGAATGAGA  | 59.28  | 23 | TCCATTCCGAAAATCAAAGG    | 59.872 | 20 |
| CTGCACCATAACAATATTCGACA  | 59.903 | 23 | GCCTCAAATCCTATTCTATTTTC | 59.549 | 24 |
| CGAAACGAGTTGCTGCTGTA     | 60.195 | 20 | AACCCTTCCAGTTCTGGTCA    | 59.549 | 20 |
| AACACACAGCCGCTACTCCT     | 59.937 | 20 | TACCACCGATCCCTCTGAAG    | 60.065 | 20 |
| ATAGTGGTATGGTGTGGGGG     | 59.405 | 20 | CACACAGACGAAACGTCACC    | 60.203 | 20 |
| GCCCTCCTTGATACCACAAA     | 59.933 | 20 | AACAAGTGCACCAGCACAAC    | 59.801 | 20 |
| AAAGGACCCGACCTTTTCAT     | 59.805 | 20 | GGGCAGATGCAACTACCTGT    | 60.142 | 20 |
| CCTTGATGAACTGTGGGTGA     | 59.52  | 20 | CAGCCCACAAATCCTTGACT    | 60.111 | 20 |
| CAACGACGTGCATCATTTCT     | 59.722 | 20 | ACTTGTTGAAATTCACCGGC    | 59.978 | 20 |
| ACATTTACAGGCCAAATCCTG    | 59.933 | 20 | TTGAGGCTCCCAACTTTTCA    | 60.232 | 20 |

|                         |        |    |                        |        |    |
|-------------------------|--------|----|------------------------|--------|----|
| CCTTCTTCTTGGCGTCAACT    | 59.473 | 20 | CGTACGGCATGTTTTATGTTTC | 59.429 | 22 |
| GGCTAGATGATGTAGATGTGATG | 60.02  | 24 | CTTCTACCACCTCTGCCTCG   | 60.005 | 20 |
| CTGTTCTCGACTCAGGGACC    | 59.835 | 20 | ACTCCCCCTCGAAGTTTTGT   | 59.972 | 20 |
| GCGCCACATCTTGTGAATA     | 59.694 | 20 | TTCATCAATTCTTTCTGCGCT  | 59.974 | 21 |
| TGTGATCAGGTGCTGTGTGA    | 59.858 | 20 | AATCTCCCGTAATTTGGCG    | 59.908 | 19 |
| TTCTCAGCATATGGGAAGGG    | 60.029 | 20 | TATGCGTTTTGACGGGATTT   | 60.323 | 20 |
| ATGCATGTGTGCAGGTGTTT    | 60.04  | 20 | TACCATATCTCCACCGCCTC   | 59.917 | 20 |
| GATCGTTGACCGTATGGGAT    | 59.635 | 20 | AGTAGAGAAGGGGAAGGGGG   | 60.797 | 20 |
| CAAACAAAGTCTGCAACCCC    | 60.529 | 20 | ATCGGTGAAGGTGTTCTGTT   | 59.973 | 20 |
| TGTTTTGCGAGCTTTTATTGG   | 60.245 | 21 | TGGTGTGCAATGCTACTGAA   | 60.309 | 21 |
| ACGGATTTAAGGGTTATTACCTG | 57.667 | 23 | TTGGATTGAGAAAGCGATCC   | 60.155 | 20 |
| AGGCCAATTTGTGAGTGTCC    | 59.973 | 20 | AGCCACAGAGTTGGAAAAA    | 59.711 | 20 |
| ATTTCTCACGCTGAAATGCC    | 60.221 | 20 | TTCGCACTTGGACTTTCTT    | 59.853 | 20 |
| ACAATGGCCAAGAACGTAAC    | 58.641 | 21 | TTCAAATGTTTTGTAAATTTCC | 59.653 | 24 |
| TTTCTTTTGCAGCTGGAGT     | 59.993 | 20 | TCGCTCTCTAGCGGATCTTT   | 59.316 | 20 |
| CCAATTTGAATGGTTATCACCTG | 60.457 | 23 | GAATGTAGGTATAAGACTGTG  | 58.156 | 27 |
| CATGCACAATCAAACCTTGC    | 60.119 | 20 | GGTTTGCCCTGTATCTCAA    | 59.933 | 20 |
| AACAATTGCACCTTTAATAGCAA | 57.978 | 23 | GGAACACGTGCAACATTGAT   | 59.425 | 20 |
| TGTCTCTTCTCCTCGCATT     | 59.95  | 20 | TTCTCTCGTGTTCATCCC     | 60.05  | 20 |
| CATGTTTCTCGATGGCTTT     | 60.074 | 20 | TTAGCCCATCAAAGTCCAGG   | 60.066 | 20 |
| TGGCTTTTATCAATGCCCTC    | 60.038 | 20 | GTTGCGTTCACATAAGCCT    | 60.14  | 20 |
| GTTATCACCGGATCGCAAC     | 58.941 | 19 | ATGTCCTTCATCACGCAAAA   | 59.127 | 20 |
| TGTTTATTTGAAGGGGCAGG    | 59.931 | 20 | AACCTTATAGGATGTCCGGCT  | 58.994 | 21 |
| TGGCGGCATTCTATATGACA    | 60.058 | 20 | AGACATCTTTGGCACCGAGT   | 59.727 | 20 |
| GAATTGTTGATGTTTTCCCA    | 59.654 | 21 | CGCGTCTATCGATACTGATCC  | 59.705 | 21 |
| CCCATCTTCTGCAAAAATCC    | 59.505 | 20 | CTAAAAAGGTCTGCCCTTGC   | 58.973 | 20 |
| GGTTGGGGTCAATTCTCAA     | 59.767 | 20 | GGCTTCCGAGTTTTCTGT     | 60.61  | 20 |
| GCACCCTTTTGGTGGTAGAA    | 59.971 | 20 | CAGTCCACACATGAAGCCAC   | 60.162 | 20 |
| TGTGTCATTCTTCCACTGC     | 59.682 | 20 | AAGGGGTATCATGGGATCA    | 59.055 | 20 |
| TCATTTAATATGGTCTGTGCGA  | 58.187 | 22 | CGGTTAAAAACCGAATCGAA   | 59.937 | 20 |
| TTAGGGTTTAAAATCGCGCA    | 60.564 | 20 | CGAAGTTAGAAAATAAGGAGG  | 57.269 | 24 |
| TGGTTAGCCAAAATGAG       | 59.931 | 20 | AAACCCTCAAATCCCAAAGC   | 60.299 | 20 |
| TTGTATTAGATTGTGGCTCCG   | 57.795 | 21 | CTTCTCGCGTCTGACTCCTC   | 60.284 | 20 |
| CACTCACTCTCACTAGCCGC    | 58.78  | 20 | GGGAATTGCCCAAATCACTA   | 59.762 | 20 |
| AGCAATGGTGGTCTTCTCGT    | 59.727 | 20 | TTTGTGTGCGTGGTGTGATT   | 60.008 | 20 |
| ATCTAAAGCACACACGCACG    | 59.935 | 20 | AAAAGGGGAGAAAAGAACGG   | 59.566 | 20 |
| TCTGCCTGTGCATCTCACAC    | 59.988 | 20 | CAGTGACCCTTTCGGAAAAA   | 60.081 | 20 |
| GCATTGGTAAAACCGGGATA    | 59.66  | 20 | TTCTCATTTCTCTCGTGCCA   | 59.522 | 20 |
| TGGTTATTACCTGAATACTCCA  | 57.591 | 23 | TTGGTAAAACCTCGAAGGATGG | 59.074 | 21 |
| GGTCGTCAAATCTCCTTCA     | 60.05  | 20 | TGTTGCACTTTTGAACAATGG  | 59.618 | 21 |
| GGATATAACCACCTCACCCAAA  | 59.945 | 22 | AGAGACGAAGGGGATGATGA   | 59.612 | 20 |
| GTTGATGCCCTTCGTCAACT    | 60.119 | 20 | CGTGTATCCTCACCCGTT     | 59.853 | 20 |
| TGTTGTGATCTGGCACTCT     | 59.42  | 20 | ACATAAAAGCCACCTGCC     | 59.947 | 19 |
| ATAGTAGCGACTGCGGGTTC    | 59.364 | 20 | TAGCATCGTGAGTAGCGTCG   | 60.18  | 20 |
| AGTCATTGGGCCACATAAT     | 59.273 | 20 | GGCATCACATGGTCTCTTGA   | 59.637 | 20 |
| TGAGCACGTACAGATAAAAGGG  | 59.29  | 22 | AGCCGATCGAGTTTTGGATA   | 59.668 | 20 |
| CGTAGACACCACCATCTCCA    | 59.545 | 20 | AGGCAGAAAAGAGGGAGGGAG  | 59.95  | 20 |
| GTGGCAGCATATCAACCCTT    | 59.962 | 20 | TGAACACTATCCCATCCCC    | 59.605 | 20 |
| CGTGGCAGGCTAATATCCAT    | 59.945 | 20 | AATAGACCCAGACACGGGCT   | 60.903 | 20 |
| ATTGTTGATGTGAGCTTCG     | 58.877 | 20 | TTGCTCAATGAACTCCTTTGG  | 60.234 | 21 |
| ATCGACATTCTTCTGCAGGC    | 60.37  | 20 | CCTTTCGATAATCCTCAGCA   | 60.17  | 20 |
| ACTCATTATTTCTCACTACCAAG | 58.405 | 25 | GGGTGGGCTCCATTTTTAGT   | 60.187 | 20 |
| TTCTGCTCTCTCTCGGTGGT    | 60.135 | 20 | AAAAGAAAAGGACGGGAGGA   | 60.046 | 20 |
| ACTTAGGACCAAAGCCCGAT    | 59.962 | 20 | GCCGAGATTTGTTATGCGTT   | 60.103 | 20 |
| TGGATTTTAGGGCTCATGCT    | 59.668 | 20 | ATGTGTGCGTGTAAAGCTGG   | 59.788 | 20 |
| CCAGTAAAGGACCATTTCGGA   | 59.926 | 20 | CTTGGGATGACGTGGAGATT   | 59.927 | 20 |
| CCAAGTCACCCAAGAATTGC    | 60.495 | 20 | TTGCCAAACACACATTTTCAA  | 59.999 | 21 |
| AAAATCAAAGGCCACAATG     | 59.801 | 20 | TTGGTCTCAGGAAAGGTGCT   | 59.844 | 20 |

|                          |        |                             |        |    |
|--------------------------|--------|-----------------------------|--------|----|
| CCGTGTCCAGTCTGTGTTTG     | 60.194 | 20 ATCCATGGTTGGTTTGGAGA     | 60.173 | 20 |
| GAATTACACAATCCTCGTGGG    | 59.302 | 21 TGCCTATTTTGAATTTTGGTG    | 57.705 | 21 |
| AGCCTAATGTCATTGCCTGC     | 60.243 | 20 TATGGGTTATCACCGGATCG     | 60.544 | 20 |
| CACATGTGCGACACATCAAC     | 59.575 | 20 TCGATCATAAGAGCATCCCC     | 59.998 | 20 |
| ATAACCCAGTCACTGTGGGC     | 59.851 | 20 CGTCCCACAAAATATGTCCT     | 57.393 | 20 |
| TCATGTTGGGTATTGTTGGC     | 59.251 | 20 CAGTTGGGTCAGTGACATGG     | 59.997 | 20 |
| AGTTAGGCGAGAAGAGGGGA     | 60.34  | 20 CGCTTAAAAACCGACCATA      | 59.958 | 20 |
| ACGGATTTATTGGTTATTACATGA | 58.262 | 26 GCCGAGATTTGTCAGAGGTT     | 59.288 | 20 |
| CTTCGGAActCTATCCGCC      | 59.782 | 19 CCCATTCTCTCCATCCCTTT     | 60.264 | 20 |
| GCAGATCCAGATGCTCCAAT     | 60.189 | 20 CAACTCAAATCGCAGCTGAA     | 60.134 | 20 |
| GCAACCCAATTCACCATTTT     | 59.668 | 20 CAAAATTCACCCAATCAG       | 60.162 | 20 |
| TGCCTTCGTTCCAAGTTTC      | 60.227 | 20 AAAATGCACCATTTCTTGCC     | 59.945 | 20 |
| ATCCTAAGTTCGCCCTGAT      | 59.925 | 20 TCGGAGTGAGAGGTTTTCTG     | 59.844 | 20 |
| CGAAATTGAATGGCAAGGAT     | 59.901 | 20 CAAACGCTATGAGAGCGAGG     | 61.06  | 20 |
| GCAGTTAACTCTAATTAATCCGT  | 60.196 | 27 TCCGGCTACTTCGAACTTTCT    | 60.379 | 21 |
| CTCTTCCCCACATTCAAAA      | 59.903 | 20 AACATGGGCAAGAAACAACC     | 59.836 | 20 |
| ACGGATGAAGAGAAATGGCA     | 60.603 | 20 CGGCATAGAATGTGTGGAAA     | 59.542 | 20 |
| CCCCGGTTTCATTTATAGCA     | 59.789 | 20 TTAATCCCTGAAAGTCGCGT     | 59.708 | 20 |
| CCGGTGAActTCTCCAActC     | 59.697 | 20 AGAACAAACCAAGGCAATTTCA   | 59.601 | 21 |
| ATGAGTTATCACCGGATCGC     | 59.923 | 20 CATTGTTCTGAATCGCGAAA     | 59.809 | 20 |
| TCCCATGTTGTAATTAATGTAGGG | 59.089 | 24 ACCATGATGAATGTGAGGCA     | 59.925 | 20 |
| TGTCCCATTTTCTTCGTTCC     | 59.91  | 20 ATTGGAACAATACTATAACAAC   | 57.118 | 26 |
| TCAATCGCAACCATCAATTTT    | 60.316 | 21 TTCTTGATGTGTTGGCAAGC     | 59.847 | 20 |
| GGCCGATATTTGCTCGTAGT     | 59.209 | 20 ATGGTCCATGGCCTGTTATG     | 60.603 | 20 |
| AGCGGAGATTGACGAGAGAG     | 59.703 | 20 TTAGTGGGCTAAGTGGGGTG     | 59.986 | 20 |
| AAGATCTACCTTTGGGTAACCGT  | 59.35  | 23 TTGCATCAAGTTTTAGAGCAGC   | 59.674 | 22 |
| TTTTCCCGCAATAACCACTC     | 59.938 | 20 AATCAGCGCTCCAGATTTGT     | 59.843 | 20 |
| ACAGAACAAGCATACGCACG     | 59.935 | 20 ACTTCCCTGCACAAAAGTCG     | 60.291 | 20 |
| TCGTGCACTGGTGTCTCTC      | 60.03  | 20 TCAAAGATGTCAAGGCGAAA     | 59.395 | 20 |
| TGACCCTTTGTGGGAAGAAG     | 60.081 | 20 TACAGGTTACCCTTCTGGG      | 59.959 | 20 |
| GGACTGGTTTGACACCTTTGA    | 59.997 | 21 CGGTGAAAGAAGGAAGGAAA     | 59.284 | 20 |
| CCCATTACTCCAAACCCAAA     | 59.657 | 20 TTCTTTTCTTTTCTTTCCATTTCA | 58.53  | 24 |
| CACGATCCATGAAAGCAAAC     | 59.127 | 20 GCCATCCTCTCCAAGCTACA     | 60.362 | 20 |
| TGCTCAAActTGAActTGAATAAA | 58.188 | 24 CGGCTATTTGAGACGACATT     | 57.849 | 20 |
| GATGCCTTGGTCTTCCTCAT     | 59.094 | 20 CGACCCAGATTCAAACCCTA     | 59.926 | 20 |
| TGATGAATGAAAGATGAAATGGA  | 59.402 | 23 ATGGTGGTGGGAGAAGAGAA     | 59.505 | 20 |
| TCTTTACCCGCTTTAGGTG      | 60.241 | 20 TCTTTCATCCCCATTACCA      | 60.126 | 20 |
| GAGGAGAAGAGGGAGGATCG     | 60.292 | 20 CGAACGGTATAGGATCGGAA     | 59.916 | 20 |
| ACCGATTGCTGAGCATTTCT     | 59.843 | 20 ATTCCAAAAATCAAAGGCC      | 60.13  | 20 |
| TGGAAAACCAAAGCAAAACA     | 59.178 | 20 ATGAAGACATGCTGGTGCTG     | 59.862 | 20 |
| CCTCCCTCATCTCTCCAATG     | 59.606 | 20 TGAGGCAAActGAAAAACCA     | 59.293 | 20 |
| CGAGCTGGCTTGAGCTACTT     | 59.92  | 20 GTCGATCCCACAGAGATTGG     | 60.475 | 20 |
| TTCTCTCCTCCATTTCCCCT     | 60.008 | 20 CTGTGCATTTGCAGACCACT     | 59.905 | 20 |
| TAATGGGTGTTTGTGCGAAG     | 59.585 | 20 AACAAGTTTGGGATTGCTCC     | 59.031 | 20 |
| TCTTGGTTCCACCGGTAGTC     | 59.966 | 20 CACCCCTTATCTTCCACAGC     | 59.55  | 20 |
| TGGGGTAAATATTTTGGGAGG    | 59.896 | 21 TACCTGCACGTTGCGTAGAC     | 59.935 | 20 |
| TTCGCCATTTTAAACAAGC      | 60.075 | 20 AAGGGGCAAGTTGGCTATTT     | 59.966 | 20 |
| GCTTCCCCTAGTGAACACA      | 60.111 | 20 CATCCTTTTGGACGAGCAAT     | 60.074 | 20 |
| ATTTGTGCCAGTGTCTTGC      | 61.107 | 20 TGATTGCATTATCAAGAACCA    | 59.485 | 23 |
| TTAGGGTTTAAATCGCGCA      | 60.564 | 20 TGCTCCTAGTTGGCACAAAA     | 59.464 | 20 |
| ATGGGTTCTTTTACCTCGG      | 60.18  | 20 AAAActTCTTAAGCCCCAA      | 59.939 | 20 |
| GCAACGGAATACCCCTCTT      | 60.32  | 20 CCTGTGTGCTGTGTTCTTA      | 59.745 | 20 |
| GAGAATTCCAACGACCTTCG     | 59.67  | 20 CCACCTATCTGCATCCACCT     | 59.95  | 20 |
| AATATTGAGCTCCATTGCCG     | 60.06  | 20 GCGGGTGAACGATAAACAT      | 59.829 | 20 |
| GACCAAActTCAGTAAGGGTAAC  | 59.723 | 25 TTGACCCCAATGGATCGTAG     | 60.713 | 20 |
| GTTATCACTTGATCATCCCC     | 58.174 | 21 TTGGTGTGGTGTGTTGCT       | 60.049 | 20 |
| TCGAGAAAATCGGAAGTTCG     | 60.323 | 20 ATTCGTTTTTCTTCCAGG       | 60.291 | 20 |
| TGGTGGATTTTGAATGTC       | 58.243 | 20 AGTTGAGTCGGACGAGTTG      | 60.298 | 20 |

|                         |        |                           |        |    |
|-------------------------|--------|---------------------------|--------|----|
| TCGATCAGTCGGTAAGTCCC    | 60.073 | 20 AGCATCAATGGAGTATTGAAA  | 57.835 | 23 |
| TGGGCTTTGATTCTTGCTTT    | 59.823 | 20 AATGTCGTGACACCTAGCCC   | 59.997 | 20 |
| CAGAAATTGCCTTGGTTGTTT   | 59.601 | 21 CCAGAGAGAAGTGAGCTCGG   | 60.275 | 20 |
| CGACTTGTCTGGTTAGGGT     | 60.028 | 20 TGGTAAATCACTAGACCCAAG  | 59.879 | 23 |
| AAAGAACTGGAATACCTCGGA   | 59.133 | 22 TTGCGGATTCTAAGATTGGG   | 60.031 | 20 |
| TGTGCAAGGTTGAACCAAGA    | 60.278 | 20 ATTCTGTGGGAAGAGCAAGC   | 59.434 | 20 |
| CTTGCCATTGATTTTGGTGA    | 59.518 | 20 ATGCCATTCAAACCTCAGC    | 60.081 | 20 |
| AACGTTTTTGTGAATGTTGCC   | 59.897 | 21 TGATGGATGGATGGTCTTGA   | 59.85  | 20 |
| CAAGGTGTAGATCTGGCGGT    | 60.134 | 20 TATGTATCGTCCGCGCTGTA   | 60.259 | 20 |
| TGAGAATGGGGAGGTGAGAG    | 60.191 | 20 TAGTGCCGTATTGTTTCCCC   | 59.823 | 20 |
| AACAGTTTCAATTCGCCACC    | 59.978 | 20 ACATCAGACTCCACCTTCCG   | 60.112 | 20 |
| TTCCGAATGCTGAGCTTTTT    | 59.96  | 20 TGAAGTAGGAAATAAGGAGGT  | 57.525 | 24 |
| GAGTTCGTCAAACCTCCCAA    | 60.088 | 20 CTTGAGCGTAAACACGTCCC   | 60.689 | 20 |
| TTTGTTCCTACTCACTCACATTA | 58.512 | 26 ATTTTTGCTTGCAGCCTTCT   | 59.114 | 20 |
| GAGGAGAGTTGATGGTGAGGA   | 59.243 | 21 CACCTAAACCCATAACCCCA   | 59.541 | 20 |
| CAGGGGTTGCACAATATGTTA   | 58.426 | 21 GGAGTATCACTTGAATGCACC  | 60     | 22 |
| GTTGGACCAAAAAGCCCTTA    | 59.064 | 20 AGGGGAGAGATGGAGGTGAT   | 59.889 | 20 |
| CTACTCCGTGGTGTCCAG      | 60.557 | 20 AGCTGATCCTGCGACATTG    | 59.959 | 19 |
| GAGGAGACGACGACGGTTT     | 60.253 | 19 CACTCCCCGTAAAACAAGA    | 59.964 | 20 |
| CAACCAGAAGCAGTGGGTTT    | 60.149 | 20 CCTCCGTGGACGTAGATCAT   | 59.95  | 20 |
| CTCGGTGTTCTCGCTTCATT    | 60.397 | 20 CGTTTCATTCCCATCCTAAA   | 59.756 | 20 |
| CGCCTTAAATATGCGTAGCC    | 59.738 | 20 GCCGTGTTAGCCAACGTAAT   | 60.025 | 20 |
| GTTGTCACGGCGTGTGATAG    | 60.183 | 20 TCGTAGTGGAAGTGACAGCG   | 60.049 | 20 |
| GTTGACCAAATTAGCCCCAA    | 59.801 | 20 ACCTTTTGCATTGTCAGCAA   | 59.322 | 20 |
| TGAGTGGTTTTGGTTGGAGAA   | 59.109 | 20 CTAAGCACCACAAGCAAGCA   | 60.195 | 20 |
| TCTTTCGGCTGACTTTTTCTTT  | 59.539 | 22 GAGCTTCCGCATCGTTCTTA   | 60.49  | 20 |
| GTGCCATTGATTTCTGAGGG    | 60.461 | 20 TGCATACGGAATTTTACGCAA  | 60.215 | 20 |
| AGGGAGAATCTATGGCAGCA    | 59.797 | 20 TTCGAAAATGCTCGTGAAT    | 58.361 | 20 |
| GAATGCTTAATGGGAAGCCA    | 60.038 | 20 TTGGAACGCGATACACAAAA   | 60.111 | 20 |
| TCAAGTTGAGCTCCAAATC     | 57.864 | 20 ATCTCCAAAACCCGACAACA   | 60.353 | 20 |
| TATGGGAAGGACATTTTCGG    | 59.756 | 20 TTGTTATGCATTTTACGGG    | 59.42  | 20 |
| TCGGCTGTAAGAGTGGAAAGG   | 60.388 | 20 CACTTAAGGGGGTTATCATTGC | 59.604 | 22 |
| AAATGTGATGTGGGTTGGGT    | 59.95  | 20 CATGAACGGTTTAGGATCGG   | 60.323 | 20 |
| GCTCCTGTGCCACTGGTTAT    | 60.142 | 20 TGCTGTTAATGAAGGCATCG   | 59.833 | 20 |
| CAAGCAAGCATTTCCTCCTC    | 59.955 | 20 CTTGCAAGGTGGTCGAAAAT   | 60.11  | 20 |
| GATCGGACGTCAACAAGAT     | 60.081 | 20 TGCCTCTTCAGATTTTTCGG   | 60.323 | 20 |
| TGTGCTTCTTTTCTCCCTC     | 59.405 | 20 AAAAATTGAAGCGCCAGAAA   | 59.832 | 20 |
| TGGTTTAAACAAATCGTGTTCG  | 59.904 | 22 GTGTCCGTTAAGCAGTAAAGA  | 60.228 | 23 |
| GATTCTTGTTCCGTGTGGT     | 59.827 | 20 CCTACTCCACCCCTTCATCA   | 59.92  | 20 |
| AGGTTGCTCTAAGGTGCCAA    | 59.875 | 20 GAACGATAACGCGTGTGAAA   | 59.735 | 20 |
| TGGTTACTGGAACGCGAC      | 60.011 | 21 TGAATGAATCACAAAAGGGGA  | 60.294 | 21 |
| GGGGTTATCACTGGATCACG    | 60.195 | 20 TTCAATTTCTGTGCCAAAA    | 60.088 | 20 |
| CCCTAACTCGACCCAGATCA    | 60.065 | 20 GGTTGAGGGTGTGTTTGGAG   | 60.399 | 20 |
| TGGGAAGAGTGGGTATGAGG    | 59.92  | 20 CCTCCCGTTTTCTTGCATTA   | 60.067 | 20 |
| CATGGAAGACTGATGGAGGC    | 60.622 | 20 TCCTTGTTGTTCTACAAAATAG | 60.056 | 24 |
| GACGAACATCACCATTCCCT    | 59.786 | 20 CACACCCACACGCACTTTAC   | 60.072 | 20 |
| GCAGATTCCCAAATCCAAAA    | 59.878 | 20 ATGTACGCATGGAATGGACA   | 59.805 | 20 |
| TCGAAATTCGTTGTTTTGTCC   | 59.967 | 21 CCGATCTTAATCTTCGCTGC   | 59.945 | 20 |
| CCGTGACTCTATTCGGGGA     | 59.948 | 20 GGAATTTGATGGATTTGGGA   | 59.558 | 20 |
| TGATGCACGATGTATGTCGAT   | 59.971 | 21 CTCAGATCCAAACGCCTAGA   | 58.048 | 20 |
| GAGAGAAAAGGGAAATCGGC    | 60.152 | 20 TTCGGGGCATACATGTGTTA   | 59.809 | 20 |
| CCTGCATGGACAACAGAAAA    | 59.691 | 20 GAGTTGGGGGATGAACTGTG   | 60.363 | 20 |
| CAAGGGTTATTGTGGTTGGG    | 60.081 | 20 GCTCCTAAAAATTGGTTTCTA  | 59.441 | 27 |
| AAACTCATATTCATCCAAAGG   | 57.132 | 22 CAGCATTGCTTGCACCTCTAA  | 59.264 | 21 |
| CAATATTACAAATGGCCAAGAGA | 59.11  | 24 TGTTTTGTAATTTCCCATGTTT | 58.816 | 23 |
| GTGCTTTGGAAAACATGC      | 58.353 | 20 CGAGTATTGGTTCAATAGAATT | 60.143 | 26 |
| ATGGGAAGAAAACGCAACAC    | 59.978 | 20 TGTACCGCAGTTCAGAGGTG   | 59.897 | 20 |
| CATTTGAGACGGACACATGC    | 60.12  | 20 ATCTACCTCGGCCATCTCCT   | 60.059 | 20 |

|                          |        |                           |        |    |
|--------------------------|--------|---------------------------|--------|----|
| CGTGGTTTCGATCGTAATTGA    | 59.542 | 20 TACCTCGAGACCGAACAAGG   | 60.246 | 20 |
| TCACATGAATGGACCCCTATC    | 59.62  | 21 GTGAAAAGTCACACGAAAACG  | 60.19  | 22 |
| GAGGGATTTGGGACGATTTT     | 60.131 | 20 TGGTTGTTGTGAGGGTTTCA   | 59.976 | 20 |
| GTGTGAAAGCCGAGAGAAGG     | 59.989 | 20 TTCTCACTCACACTGCCGTC   | 60.03  | 20 |
| ATCAAGGCGAGCCTCAATAA     | 59.807 | 20 GGGGTTATCATGGGATCAAG   | 59.055 | 20 |
| TTCGAGATGATGGTTGGTGA     | 60.048 | 20 CCCAGACCAATCCTTCAAAC   | 59.381 | 20 |
| TTAACAATCGCAATGCCAAG     | 59.702 | 20 ACCGGAACCGGAATTAGAAC   | 60.187 | 20 |
| ACATCGATCAGTTATCATGGGA   | 59.273 | 22 TGTGTTTTGACAATATTTAGTG | 58.633 | 27 |
| CAACCGAGTACCTAACCACAA    | 57.68  | 21 AGCCATCAACCCCTTAAACC   | 60.187 | 20 |
| AGGATAGGGAATAGCGTCCC     | 59.402 | 20 GTTCAAATCGATCAATCCGC   | 60.423 | 20 |
| TGAAACAGAGAGCCCCCTTA     | 59.807 | 20 GCAAATATTGGCCGTCAGAT   | 59.929 | 20 |
| TATAGGCGTTCCACTCAGGG     | 60.088 | 20 ATGGTGGTATGGTGTGGAGG   | 60.51  | 20 |
| TTGAACTTGAAAGCCCAACA     | 59.293 | 20 GGCTGCTTGTCTGGGATTA    | 60.214 | 20 |
| CCTTCTCCATCAACTGTGGG     | 60.501 | 20 GGGTCTACCCTTTTGCCTA    | 60.312 | 20 |
| TCCATTTTCAGGTCCTCACC     | 59.903 | 20 GACAGCCGTTGTCTGGAGTC   | 60.873 | 20 |
| TAGCCGATAAAAATGGCACC     | 59.928 | 20 CGGGATTTAGGTGTTTTGACA  | 59.847 | 21 |
| TTGTCATCACCTAGCTCCC      | 60.073 | 20 AGAACGAGAGAAATCGACGG   | 59.43  | 20 |
| CAAAAATCGGGAGAAGGTGA     | 60.044 | 20 CAGCCCCTTTTTCATTTTCA   | 60.046 | 20 |
| CAGTGGGTTTTTGGTATGA      | 59.389 | 20 GTGGACGTCCCAGATTGTTT   | 59.827 | 20 |
| TAGGACCACATTTTGTGCGC     | 60.894 | 20 ACAGCACCCACAAATAAGC    | 60     | 20 |
| CAGATGGTGGTGTACGGTTG     | 59.873 | 20 CTGAAACCCTAAGTTCCCCC   | 59.799 | 20 |
| TGCAGTGAGACCGAGTTGAC     | 60.03  | 20 TCGACCTACGAGAGTGAGGG   | 60.399 | 20 |
| AAACTTTCATTCCACCCACG     | 59.83  | 20 CAACTTTTCCGGTCCGTTTA   | 59.968 | 20 |
| AAAGATGAATTGGGGGAGGT     | 59.629 | 20 TGGGAAATAGAAGTGGGTCG   | 59.926 | 20 |
| TTGAGGGACAAAATCGACAA     | 59.097 | 20 TCTTCGATGAACTCTGAAATGC | 59.457 | 22 |
| CAGAACCGTTGTCTTTCAGC     | 58.497 | 20 CGAACCCCTTTCATTCTCAA   | 60.044 | 20 |
| GATAGCAGGTGTGATTGGGAA    | 59.947 | 21 TTTTCTTCAAATGCACAATAA  | 58.319 | 25 |
| GCATAGTTCGACGATGTAAGACA  | 59.307 | 23 CCATCGTCGCTATCACATTG   | 60.096 | 20 |
| AGGCTGATATCACCATACGC     | 59.084 | 21 GCAACAAATGGATGGTTGTG   | 59.823 | 20 |
| TCACACACGTTTATTCGAGACAC  | 60.088 | 23 GGCATCAAAGTTGTGATCAT   | 59.954 | 21 |
| TATTCTCGCTTCTTCGCCAC     | 60.49  | 20 TCCCACATTGGTTGGAGATT   | 60.173 | 20 |
| ATCGGAAGGAGCCTTGTCT      | 60.212 | 20 TTGCAATTAACGAAGTCCC    | 59.938 | 20 |
| CACTTCCCAATCCCTTTGTG     | 60.345 | 20 TTCGGTCACATTCAATAAGGC  | 59.952 | 21 |
| ATGTGGAATGAGGGTGAAGG     | 59.779 | 20 GTGCAAACCCATGATTGACA   | 60.376 | 20 |
| AGTGACAGTTTCACCTGCGA     | 59.467 | 20 CAGGCTTGCAGCAACTAACA   | 60.195 | 20 |
| TTCTGTGATCGCAAAAGGTG     | 59.84  | 20 ACAGCCCACTTCTAAAACGG   | 59.238 | 20 |
| TGACAAATAAATGAAATACAAGA  | 57.062 | 26 GAGGGAGTTGGTAAGAGGGG   | 59.928 | 20 |
| CTTTCATGGGTGATGGAAGC     | 60.461 | 20 AACGAAATCCTGCCAATCTG   | 60.074 | 20 |
| CATATCAAGTTCCCGCCATC     | 60.296 | 20 AAATGCAAGGCACCCATTAG   | 59.96  | 20 |
| GGTTGACTCTTTTACTTTAGCCGA | 60.176 | 24 GAGGCCTCGATCTTCTGTCA   | 60.497 | 20 |
| TTGAGCCAGTTTGTGTCCTT     | 58.342 | 20 TGGTTTGATTTTTGGTCGGT   | 60.206 | 20 |
| GATCTAGGAGAAAAGTGACATTC  | 58.94  | 26 CACTCTCAGCATATGCACGC   | 60.594 | 20 |
| ATGCTGCACGTTACAACACC     | 59.646 | 20 CAATTTGAGAATGGGATGGG   | 60.126 | 20 |
| CTTGCCGAATGTTTGTCTCC     | 60.636 | 20 TACCGCACTAAACCGTTCAA   | 59.226 | 20 |
| CACATGGGGAATATGCATCC     | 60.953 | 20 AACATTGCGGACTTGGTACA   | 59.05  | 20 |
| GCTTGGTCCGAAAATTTCAA     | 60.053 | 20 AACTGCTAAGGAAGATGAGAT  | 57.276 | 23 |
| TTTCGCGTGCTAATTTCTCA     | 59.585 | 20 CGTGATGCAACGCATTCTTA   | 60.807 | 20 |
| CGTCGCGTTGGATTAATTTT     | 59.964 | 20 TCCGAGAATCTGTTAGAGGAG  | 58.148 | 22 |
| TGCTTGTGGGTTTTGTTTTG     | 59.603 | 20 CAACCTTTTGCAAGCACTGA   | 60.027 | 20 |
| GTCCGATTTGGGGAGAGATT     | 60.272 | 20 TTCCATGCAACAATCAATGC   | 60.476 | 20 |
| TTCCAGAGGAGATGGGAATG     | 60.003 | 20 TTTTTATGCACAAGCCTCCC   | 60.074 | 20 |
| GGACAAGCTGTCGGATAAGC     | 59.843 | 20 ATTTGAATGGCAAGGATTGG   | 59.762 | 20 |
| GGTGGATGTACAGTAAAGGC     | 58.45  | 21 GGCATTCTCATCTCCACCAT   | 59.893 | 20 |
| TCCGATGATCAAGTCAGTGC     | 59.794 | 20 GCTAATGCAGATTGAGCGTG   | 59.596 | 20 |
| CCATCAAAAATTCCTCCCCT     | 60.124 | 20 ATCTGGTTATTTGCCCGAAA   | 59.411 | 20 |
| CAACGGACGCTATCGGTTAT     | 59.982 | 20 GATATGCGCGTTGGATTTTT   | 59.935 | 20 |
| CTCAATCCCGTCACCTTCAT     | 59.927 | 20 TCAAAAATATCCTCGCTGCAT  | 59.696 | 21 |
| GGGGGATGCCACTGTAGATA     | 59.773 | 20 CTATGCGCATGGGAGAGAGT   | 60.384 | 20 |

|                           |        |    |                        |        |    |
|---------------------------|--------|----|------------------------|--------|----|
| GGAGAATTCGAGAGATTGCG      | 59.917 | 20 | CCGTCTCGACGAAAGCTAAC   | 60.015 | 20 |
| TTTCGTACAGCCGTTTGTATG     | 59.729 | 20 | TGAGGCATGCAAAGATGAAG   | 59.948 | 20 |
| CACGTCCAGAGGAGACCAAT      | 60.112 | 20 | TTGCGTATGATAGGGTTAGCA  | 58.342 | 21 |
| AGTTCTCCAACATCATCGCC      | 60.081 | 20 | TGTGTTTCCACTCCCTCTCC   | 60.088 | 20 |
| CTCGCAAGGCAATCATCATA      | 59.792 | 20 | TTTCTTATTTCCCGGCTCCT   | 60.034 | 20 |
| ACCATCTCTGCTCTTCCCCT      | 60.216 | 20 | AAGACGGTGAGTTGAGGGTG   | 60.151 | 20 |
| TTCAACCTGATTTTCCCAC       | 59.767 | 20 | GGCTGCTAGAATGGCAGAAG   | 60.118 | 20 |
| TGCTGTGCGTAAATTAGCGT      | 59.537 | 20 | GGGATGTTTGTACCTGAATGC  | 59.307 | 21 |
| GCCGAGATTTGTTATGCGTT      | 60.103 | 20 | ATAAAAATGGCACCTGGCTG   | 59.96  | 20 |
| TAGAGCTGGAAGGCATCAGG      | 60.495 | 20 | CAAGAGGCAATCACGTTGAA   | 59.84  | 20 |
| TATTGGTTGGGTACGGGTTG      | 60.472 | 20 | TCCTTGCGTGGCATTATTTT   | 60.456 | 20 |
| TTTCTCATGTTGTAATTAATGTAGC | 59.318 | 27 | TTCAAGAGCAAGCAAAGATCT, | 59.7   | 24 |
| CGAAATCGAACCGGTAAAGA      | 60.067 | 20 | TACTGACTTGTTGTGCGGGA   | 60.301 | 20 |
| GGAACAAATGAGACTGTTTCTGC   | 60.165 | 23 | ACCCGAAAACCGGTTAAAAA   | 60.549 | 20 |
| AACATTCCTTTCTTCCACG       | 59.028 | 20 | CTGCTGTGATCAGCCATGTT   | 59.862 | 20 |
| TTCTTCTATCTTTTGATTACCGTTT | 59.171 | 27 | CCCGCATGTCATAACCACTA   | 59.42  | 20 |
| TTGCAACCGACATTTAGCAG      | 59.872 | 20 | CCAATGGCGATATTTCTGT    | 59.784 | 20 |
| TGCAACAAATGATCCCAGAA      | 60.049 | 20 | GTGGTGTCTATGTATGGGTGGA | 59.598 | 22 |
| ACGTGAATTGGATGAGCCAC      | 60.935 | 20 | TGGACATAAATTGTAGTGCCA  | 59.415 | 23 |
| GTGTTGTGCCTTAGCCCAT       | 60     | 20 | GTCCACGGGAGAGAGATGAG   | 59.792 | 20 |
| TGATGATGCTTCATGCCCTA      | 60.182 | 20 | CACCCTCCTTCCTCAAACAA   | 60.081 | 20 |
| CAAGAAATTGACATGTTGGCA     | 59.576 | 21 | AACAAAGGGGTTGGAGAAT    | 59.668 | 20 |
| GGGAAATTCTTGACCTCCTCC     | 60.183 | 22 | GTTACGCGTGCTCCTAACT    | 60.462 | 20 |
| AGCGTAAACACGTCCCATA       | 60.386 | 20 | GAGTTCGTCAAACCTCCCAA   | 60.088 | 20 |
| CCGGAATCGCATCAATACTT      | 59.923 | 20 | AAATAGCCAGCACCAAAACG   | 60.131 | 20 |
| GTCTTCTGAAGTTGCGACCC      | 59.851 | 20 | TCTCTCTTTTTTGGTAGGTCA  | 60.165 | 25 |
| ACTCTATCTCCAATCCATGC      | 58.08  | 21 | TAGAATGTTCCGAAATGGGC   | 59.901 | 20 |
| ACCTTCATTTGGGCCTCTTT      | 59.94  | 20 | TGTGAAGTGTGCTGATGTGA   | 58.855 | 21 |
| GGCCATGGACCATTACAAAT      | 59.51  | 20 | TGAACTCCTGTGTGCATTGG   | 60.722 | 20 |
| GCTGTAATTTCTTCCCGCT       | 60.582 | 20 | TGAAAATTAGAAACAGCACAT  | 60.051 | 25 |
| GTATTTGGTGGTGGGAGTGG      | 60.088 | 20 | TTTATCAGGGAAGGACGTGG   | 59.926 | 20 |
| GGGTCGTATCATTAGCCAT       | 59.78  | 20 | GTCCGGACGGAAAGATTACA   | 59.933 | 20 |
| AACATGGGGAGAATCGAGTG      | 59.927 | 20 | CTGTTATGTGCGTGCCGGTG   | 60.025 | 20 |
| CTCACTTCCCACACACATGG      | 59.997 | 20 | TAATTCCGATTTGGCAAGGA   | 60.395 | 20 |
| ACGGACAAAATGTACCCCAA      | 60.088 | 20 | TGGCGCCTTCTATTCTCCTA   | 59.938 | 20 |
| TATGGTGGACCGATACATGC      | 59.23  | 20 | ACCCGTACAATATCAACCACA  | 59.134 | 22 |
| ATGCAATGAACCATGCAAAT      | 58.849 | 20 | GAAGTGTTATGCGTTTTGACAA | 58.249 | 23 |
| ACGTGATCTATGTGACCGCA      | 60.144 | 20 | ATCTCACGATATCCCGCATC   | 59.884 | 20 |
| AACCATTGCACATGAGACGA      | 60.12  | 20 | AGAGGAATCTTCCAATTCA    | 59.94  | 22 |
| AAAGGATTGGAACCCAGGAT      | 59.766 | 20 | GACCAAGTGCACGAGCTACA   | 60.056 | 20 |
| GCCATCCATTCTGAAGATCAA     | 60.029 | 21 | CACATATGCAAGATTTAGCC   | 58.254 | 21 |
| GGGACTGTTAAGTTTCCGCA      | 60.11  | 20 | ATGAGCACCAAATCTTTGCC   | 60.081 | 20 |
| AATATGAAACCCAACGTCGC      | 59.829 | 20 | TATGCCCTTGATGCACAGC    | 59.718 | 20 |
| TTTTACCCGCGGAAATAACTT     | 59.858 | 21 | AATCCACACCCGAAATATGC   | 59.651 | 20 |
| ACTGCAGACGCGTGAATTT       | 59.46  | 19 | CAAATGGTTTGGGGTTTTTG   | 60.06  | 20 |
| CACGTAAGTTCGCAACAACC      | 59.245 | 20 | TCGGCATAGATGACTTAAAAGC | 58.544 | 22 |
| AACCGAACTCGAGCTTCTCA      | 60.134 | 20 | AGAATGGAGAGGGAGAAGGG   | 59.63  | 20 |
| TTTTGAACCCTAAAACTCGC      | 58.421 | 21 | TCACACTGCAACCAACATCA   | 59.705 | 20 |
| TTGTGTCTTAAAGTATAAAGGCAT  | 58.463 | 26 | TCCTTGCTAGGCTTTATCCG   | 59.451 | 20 |
| GGTTTTCGCAGAGACTTGGA      | 60.375 | 20 | TTTAAGGGTTATCACCTGATTT | 57.757 | 24 |
| GTAACCCCTACACCACCCCT      | 59.972 | 20 | GTTCCGGTGAAGATTGGAGGA  | 60.05  | 20 |
| ATTTTCGTTGGATTGCAAG       | 60.074 | 20 | AACCAAGATCAGGCTGCAAT   | 59.7   | 20 |
| TTGAAAAATTAAGGCCCA        | 59.538 | 20 | CTTAGGGGACACCCAAGTGA   | 59.959 | 20 |
| ATAGGATTTGTGAAGGCCGA      | 59.528 | 20 | GACTCGCAAAGACTTGAGGG   | 59.989 | 20 |
| TCCATTCAACCAATAGCCC       | 59.762 | 20 | TGACGTGCTGGTTGCCTAA    | 60.301 | 20 |
| GCATCTCTCTTGCTCTTATTG     | 57.559 | 23 | GACAATTGCAAATATGGCGA   | 59.525 | 20 |
| TAACCTTATTCGCCCAACG       | 59.958 | 20 | GCTGCATCGATGTATTGTGG   | 60.104 | 20 |
| AGAGATCGGGTTTGCTGAAA      | 59.813 | 20 | AACCCTGACCATTTTCTCCC   | 60.169 | 20 |



|                           |        |                           |        |    |
|---------------------------|--------|---------------------------|--------|----|
| ACCATTTTTCCTTGTCACCG      | 59.83  | 20 TCATTCTCGGGCAAAAATTC   | 60.016 | 20 |
| TGAAGTTAGGAAATAAGGAGGTG   | 58.743 | 25 GTCGCTACAAGCAGTCACCA   | 60.056 | 20 |
| GGTTATAGCTACGTGGGCGA      | 60.117 | 20 GCGACTTTTCAGTTTCCAG    | 59.853 | 20 |
| TGATGTCCCTGGAAGACCAT      | 60.326 | 20 ATTTGCAGATGCTGATGCTG   | 59.979 | 20 |
| TCACACACACACTCGCATACAT    | 60.104 | 22 TGCCTGTGTCTGAGGATGTT   | 60.319 | 20 |
| ACCTCAAGGAACACCACCAC      | 59.859 | 20 GCAAAATACCCTGAGTGGGA   | 59.933 | 20 |
| GTGCAGTAGGTCACGGGTTT      | 60.577 | 20 TGGAGGTCGAACTCAATTATG/ | 59.569 | 22 |
| TCTACGTCCACGGAGAAAGG      | 60.246 | 20 TCCAAGCCAACAGTCACTTG   | 59.873 | 20 |
| TTTTTGGCCTGGTTTTTCTG      | 60.081 | 20 ATAGCCAAGGCAGCTCTCAA   | 60.118 | 20 |
| CCATCCCTTTTTCGCTTTTT      | 60.412 | 20 ATGTGAACGAAGTACCCCGA   | 60.375 | 20 |
| GGAAGCTAGGCGGTTTTGAT      | 60.582 | 20 AAACGCTAGGCGGATCTAGG   | 60.721 | 20 |
| CTTCAGCCCCTCTAGGTTTG      | 58.931 | 20 TCTCACACTAGTGGCATCGC   | 60.016 | 20 |
| TTGTATTGTAAAGCCGCAACA     | 59.269 | 21 AAAGCGCGATTTTAAACCCT   | 60.095 | 20 |
| TTAATCCGTAAGAATAATCCATGC  | 58.535 | 24 TGGGACATTTTAAATTTGCCT  | 59.728 | 22 |
| ACGCGCGTTTTTGGATTTA       | 61.489 | 19 TTGGGCTAAAAAGGAACAAGA  | 58.862 | 21 |
| GGCGGATGAATAAACCTCTG      | 59.528 | 20 ATATTCAGACCTCCGCCACC   | 61.242 | 20 |
| GTCAAAACCCTGCCTTCAAA      | 60.088 | 20 GGAAGGGAAAGAACCCTTGG   | 59.912 | 20 |
| TACTTGGTTGAGCTTGGCG       | 59.996 | 19 GTGTTGAATCACATGTCCCG   | 59.812 | 20 |
| GCATTTTAAAACACGTGGCA      | 59.608 | 20 GCATGCATCTGTGGATCTA    | 59.788 | 20 |
| TTAACTTCGCCCTGATCTC       | 59.269 | 20 GGAATAAGGAGTTGTTATGA/  | 60.434 | 25 |
| ATTTGCTCCAACAAACCTCC      | 59.031 | 20 TTATTTTCTCTGTTGCGGGC   | 60.209 | 20 |
| GAGGTTGGCTTGCTGATTGT      | 60.263 | 20 TTTTACTTTGGCCGAATTGTC  | 59.111 | 21 |
| GCCAATTCATATTTATTTGTGATC1 | 58.85  | 26 TTAAATTTTCGAACGCCTGC   | 60.205 | 20 |
| AAAAATCTTGCTGCACCCAC      | 60.118 | 20 AGTTCGGATTTTTGGCATTG   | 59.938 | 20 |
| TTGACATTCGCATTTTAAAGAGTAG | 59.668 | 26 AGCTCCAATAGTTGCTTCGG   | 59.476 | 20 |
| ACTTGTGGCTATGCCTTGG       | 60.132 | 20 CACTGCGCACACTTTGTTTT   | 59.951 | 20 |
| CATGAAAATCATGTTCCGCA      | 60.466 | 20 AGCCGATTTCTTCACTCCC    | 60.578 | 20 |
| TGCAACCAAAACACACACAC      | 59.03  | 20 AAAATCAAAGGCCACAATG    | 59.801 | 20 |
| GGTTCGCTCAATTCAGAAA       | 60.192 | 20 TGGCGTCTGGTAAATCAACA   | 60.111 | 20 |
| ACCGGGCACTAAGGGATTAT      | 59.688 | 20 GCGAGAATTGGAGACGAGAC   | 59.957 | 20 |
| ACCTTGACCTTCAGGCTTCA      | 59.844 | 20 CGTGGAAATATTTGCATTGCC  | 61.218 | 20 |
| TGCGCGTTTCAATGATATGT      | 60.103 | 20 ACCACGCAGTTGAATTGCTA   | 59.347 | 20 |
| TGAAAATCTGACGAGCATGG      | 59.799 | 20 ATGGGAAACATGGCCTAGTG   | 59.813 | 20 |
| TGTGAGAGTGAGAGAGGGGG      | 60.388 | 20 AAAAAGGGAGAAAGAGGCCA   | 60.18  | 20 |
| CTGATTTCGCACAAATGATCG     | 60.22  | 20 AGGCCGGTTAAAGGAGAAAA   | 60.068 | 20 |
| CGGATTTAAGGGTTATTACCTGAT  | 58.81  | 24 GCGGAAATTAACCACAACCA   | 60.732 | 20 |
| TTCCCCTCATCTTCAAGTGG      | 60.042 | 20 ATGCGTGTTCGATATTGGGT   | 60.221 | 20 |
| TTGCGTGTCAAGTTTTTCC       | 59.74  | 20 TTGACCTTCTCGAGCACTGA   | 59.701 | 20 |
| CTTCATCCCTCAATCCCTCA      | 60.003 | 20 TCCCTCTACAAGATGGTGCC   | 60.073 | 20 |
| CGCGAAATGAGGAGCTTAAC      | 59.982 | 20 TCTCTTTTGGTTGGTGAAGAAA | 58.856 | 22 |
| GGGAAACCACAATCATCAC       | 60.034 | 20 GGACGCATCAGGTATAAAAGG  | 60.332 | 22 |
| GATGTCTCGAGTTCATGGCA      | 59.794 | 20 CGCATCTGATTTTTGCAATC   | 59.261 | 20 |
| CCCCCTATTTTATCCAACA       | 59.896 | 21 GAAGAAACCCCTTTTTCTTCTC | 58.513 | 23 |
| CGTGGTTCGATCGTAAATGA      | 59.542 | 20 ATCATCACCACAACCTCACCG  | 59.393 | 20 |
| CTCAGAAATCAAGCCGAACC      | 59.813 | 20 GGATGGTTTATGGATGGTGG   | 59.871 | 20 |
| CTTCTCTGGAAAGCCACCAG      | 59.982 | 20 TGTTCATACGCATTGGAAAAA  | 59.063 | 21 |
| CAGTATTACAGCCGTGGCAA      | 59.752 | 20 TTGAACCTCCCTCTCTCTCG   | 59.525 | 20 |
| TTCCCTTCCAGTTACACCGT      | 59.449 | 20 TAACGCCCCGTATTTTGAAT   | 59.323 | 20 |
| GCCATTATCTTGTTTTCAAAA     | 58.989 | 22 GTTTGGCCTTGCATTTGATT   | 59.945 | 20 |
| CACGAGCTCTTATTTGGCCT      | 59.476 | 20 TTTCTCCACCAAGCTTACACAA | 59.785 | 22 |
| TTAAGGGGTTTTGCAGGATG      | 59.931 | 20 GCGTTGTGTTTTCTTTGGAT   | 60.118 | 20 |
| TTGGACAATTCATAGAAAACCG    | 60.219 | 23 ATAGCCATTGGCCTAGCCTT   | 60.082 | 20 |
| GGTTTGGTGAATAATGATGGC     | 60.177 | 20 TGCTTTTCCGAATCTGTGAA   | 59.395 | 20 |
| GCTTCTTTCGCTTCTCATTG      | 59.238 | 21 TCAGCATGTTTTGGCTGTTC   | 59.847 | 20 |
| GTATTCCCGGTTTTCTCCAG      | 60.683 | 20 CCCCTAAACCGTAAATCAA    | 58.805 | 20 |
| GGACGTTTTCTCGTTTTTCA      | 60.088 | 20 TTGAAGTTGATCAAGCAAGGG  | 60.234 | 21 |
| ACCCATGCATTCAAACAACA      | 59.823 | 20 AACATTAATGGCGTCGAAGG   | 59.96  | 20 |
| AACCAGCTCGGTGATATATGGT    | 59.752 | 22 CGATCGTAATTGATCTACGTCC | 61.213 | 23 |

|                          |        |    |                        |        |    |
|--------------------------|--------|----|------------------------|--------|----|
| TGACGGGATTTAGGTGTTTTG    | 59.847 | 21 | GGTGCCAAAATTGCTCTTTC   | 59.691 | 20 |
| ACTCATTGGGGGATTGTTG      | 59.647 | 20 | ATTACGAGCCACGGCTACAG   | 60.292 | 20 |
| CACTGACATTTCTCGCTCA      | 59.984 | 20 | GCCAAAACAGACCAGAAAGG   | 59.711 | 20 |
| TGGCCACCTCCATTTCTAAC     | 59.933 | 20 | AGAAAAGCCGAATGCAGAAA   | 59.96  | 20 |
| TGAAATTCGATGAGCCTTT      | 59.645 | 20 | CGGTTATCACCGAATCGC     | 60.033 | 18 |
| GATATCACCGGCACTCCATC     | 60.312 | 20 | GCGATAGAAAAGATGGCGAC   | 59.813 | 20 |
| CACTCCACCAACTCGAACAC     | 59.152 | 20 | TTTCCACAAGTGAAGCAACG   | 59.881 | 20 |
| GGGGCTTTCAAACATTTCA      | 59.916 | 20 | AAGGCTATCGTTGCTTTCC    | 60.582 | 20 |
| AGAACACGAGGAACTTGGGA     | 59.697 | 20 | TACAAGGCCCGACTTGAGTT   | 59.734 | 20 |
| AGTCACCTTGTTCAAACGGG     | 60.005 | 20 | CTCCTTTTGCACCTTTTTGC   | 59.861 | 20 |
| GTGTGCGGTGTTGTCTGAGT     | 59.789 | 20 | ACACCCTCACCTCCCCTC     | 59.888 | 18 |
| GTGCAGGGGAGTGGTACATT     | 59.851 | 20 | GGAACTCCCCATAACTGCAA   | 59.933 | 20 |
| GCATATCGGTTGCGTCTCAC     | 60.492 | 20 | TTACGTAAAAATGGGTATTAT  | 57.717 | 27 |
| CATCAGTCCAGCCTTCTTGG     | 60.791 | 20 | CGTGACATGTTGCTGAGGTC   | 60.319 | 20 |
| TGATGTTTGCATTTGAAGAGG    | 58.759 | 21 | ATATGAGGATCCGATGTGGG   | 59.587 | 20 |
| CGTTTTGACAATATATAGGTGTTT | 58.178 | 26 | ATTTGGAAGATCAACGGACG   | 60.074 | 20 |
| AACGCCCATGATCAAATCTT     | 59.391 | 20 | AAGGAGGTGTTATGAAGGGAT  | 58.028 | 22 |
| TTTCTCAGCCAAGCTCACCT     | 60.134 | 20 | CCATGTAAATAGCCGTTGGG   | 60.202 | 20 |
| TCCCTTTATCTCCTCATTCAA    | 59.903 | 22 | TGATTTGTTGGGGCTTTAGG   | 59.931 | 20 |
| AAACCCTCGCCTCTCACTCT     | 60.393 | 20 | AAAACAAGAATTCGGCATCG   | 60.074 | 20 |
| TGATTCCATTCCATGCTTCA     | 60.009 | 20 | ACGAGTTCTGGAGCTAGCCA   | 60.156 | 20 |
| TTTTCGTAATCCCCTTTTCA     | 57.23  | 20 | TGAGTTTGCATCTAAGGAGGTC | 59.378 | 22 |
| ACTGTTTCCTGTTGCGCTGT     | 59.769 | 20 | TGAGGATACTCGATTTACGG   | 60.081 | 21 |
| AGACCACCGAAAAATGTTGG     | 59.83  | 20 | AGAGAAGGGTTATCACTTGAA  | 58.38  | 25 |
| AGGCTTGCAAGAAGCTGAAG     | 59.898 | 20 | TGGGCTCTTTGGATTTCAAG   | 60.184 | 20 |
| TCAGCGCCACGTATCCTAGT     | 60.817 | 20 | TCGTTTAAGCCAATATCATTGT | 59.44  | 24 |
| TCATTTGCGGTTATTTTCGG     | 59.767 | 20 | TTTTCAACCTCGCTATCGCT   | 59.982 | 20 |
| ACAGTCCCTGAAACAAACG      | 60.005 | 20 | TGCGCATTTATGAGTCCATT   | 59.14  | 20 |
| GCTCGGAATTTCTTTTCA       | 59.387 | 20 | GAGGAAAACAGAGGCTGTTCA  | 59.463 | 21 |
| AAAGGGATAAAGCCGTCGAT     | 59.93  | 20 | CTTGATTTCTTTGTGGCGGT   | 60.11  | 20 |
| CCTGCCATTTCTCTCGTGTT     | 60.255 | 20 | CACGTTAGGCTCAGGAGTGA   | 59.034 | 20 |
| ACAAAATGGCCAAGAGAGTTT    | 57.853 | 21 | TTCGTATCGCTTCCATGTTG   | 59.688 | 20 |
| AGGGCAAGAGAAAGGTTGGT     | 60.11  | 20 | TTCTTGCCAAATGAGCATC    | 61.121 | 20 |
| CAGAACCCGAAGTGAAGAGG     | 59.837 | 20 | TTGTTTTTCTTTGGGGCAG    | 60.081 | 20 |
| TCCACAGCAGAGTCTCCTCA     | 59.685 | 20 | TTTGTTTAACTCCCCTAATGC  | 59.937 | 24 |
| CAGAAAACCTTTCATGCCGCT    | 60.386 | 20 | TGTTTCCATTTCCATGGTACG  | 60.602 | 21 |
| GGCGTGCTTCTTGAGAAATC     | 59.962 | 20 | GATGATAGAAGGGGGCATGA   | 59.854 | 20 |
| TCTCTGTGGGTATTCTGGTG     | 59.974 | 21 | AATCCAGCAATTTGCCTTGT   | 59.574 | 20 |
| CTTTCTCTCCCGTGACGTA      | 60.246 | 20 | CAAAGTCCGGCGTAGAATGT   | 60.132 | 20 |
| AGCAAGGTGATGCGAGACTT     | 60.02  | 20 | CCTCTGTTTGTTCCTCCG     | 59.705 | 20 |
| ACGGGTATACTTGAGAAACACA   | 59.812 | 23 | CATGGCATGCACATTTTAGC   | 60.103 | 20 |
| TGCACATGTAAAACGATCCA     | 58.547 | 20 | AAGGGTTCGAACTCGGATCT   | 60.074 | 20 |
| GGACGGTTAAATTTTGTCCC     | 58.277 | 20 | GGTGGGAGCCTATAGCAACA   | 60.096 | 20 |
| GATTGGGGTGCAGAAGAGAA     | 60.195 | 20 | GCATTGGGACACCTAAGCAT   | 59.962 | 20 |
| TCATCGTCAATCGTCTGAGC     | 59.95  | 20 | CAATATTACAATGGCCAAGAG  | 57.725 | 23 |
| CATGGGCCTTGCATGTATAA     | 59.401 | 20 | AAACTCCCTTGGGTGAGAGAA  | 60.096 | 21 |
| TCTCGTTGCTATTCTTGCCA     | 59.566 | 20 | AGGTTTGTTTTAGGCCACG    | 61.242 | 20 |
| GAAAGGATGAAAATCATTGGCT   | 59.446 | 22 | CCATGTTAAAACGGGCACAT   | 60.617 | 20 |
| CCAATGGTTATCATCCCACC     | 59.871 | 20 | TTGAAACGGACAAACGATGA   | 60.088 | 20 |
| TTGGATCTTCTCCTCTCCA      | 59.731 | 20 | AAAAGGGAAAAACCCTCAGC   | 59.571 | 20 |
| TGGGGTATAAGGGCATAACGA    | 60.167 | 20 | AAAATACCCTTCCCCGAATG   | 60.013 | 20 |
| GCAGAAAACGGAGGAAAAGA     | 59.429 | 20 | AAGGGTGTGTCGCACTTCT    | 59.727 | 20 |
| CACTGGAAAAATGGCACCTT     | 59.971 | 20 | ACGACGAAGACGATGACACA   | 60.319 | 20 |
| GAACGAGGGCCTTCTTCAAT     | 60.578 | 20 | GTTTCATCACCTCCACCGAT   | 59.786 | 20 |
| GGTAAATCAATGTGAAATGATGG, | 59.956 | 24 | CATGCTAGAGGTGACGTTTTGT | 59.309 | 22 |
| ATCTATGGACCTTGCAGGA      | 59.508 | 20 | TTTTGTCTTTTGGGATTCGG   | 59.91  | 20 |
| GAAGAATCACCGGACTGAGC     | 59.81  | 20 | AATCCAACCCATTTGTGGAA   | 60.029 | 20 |
| CCACCTTCTTCTCCTTCCC      | 60.045 | 20 | CTAACATCGGAACTTGCCGT   | 60.132 | 20 |

|                           |        |    |                         |        |    |
|---------------------------|--------|----|-------------------------|--------|----|
| CCAAAGCCAAGTCAAAGACA      | 58.897 | 20 | TGGTGTACAGAGTGCATGTGA   | 58.719 | 21 |
| CCCAAAGATTTATAGGTTTTATTT  | 58.199 | 26 | GCGAATATAACCCGCTCTGA    | 60.196 | 20 |
| AACCACAGCCCTACATCTCG      | 60.134 | 20 | GACCTTGGGCGTTGATCTTA    | 60.074 | 20 |
| CCAATTTGAATGGTTATCACCTG   | 60.457 | 23 | GGGAGAGCGAGAGGAGAGAT    | 60.058 | 20 |
| GATAATATGGCCGAGAGTTTGC    | 59.962 | 22 | GTCCAAAGCCATTGCTTCAT    | 60.081 | 20 |
| AGCCACACATGTCACAAATGA     | 60.024 | 21 | CTGCGCAGATCTAATGGTCC    | 60.765 | 20 |
| ACGGATTTAAGGGTTATTACCTG   | 57.667 | 23 | AGGTGGCAACATAATCAGCC    | 59.962 | 20 |
| TGGAGAGCTCGAGAGAGAGG      | 59.962 | 20 | TCAATTTGCGCACGCATTAAA   | 60.211 | 20 |
| GCAAAAGCTTTCTCGACCAC      | 60     | 20 | TGTGATGTTGGAGTTGGGAG    | 59.52  | 20 |
| CTTCAAGCGGTCTTGATTCC      | 59.813 | 20 | AATCAGTGGCTTCCACGTTC    | 60.119 | 20 |
| TAGGGGGTGGTTGGTGTTTA      | 60.081 | 20 | TTTGCTGCCTTTATTGGAGG    | 60.202 | 20 |
| GATTTGATCCACTGGGGAGA      | 59.862 | 20 | TTCCTTCACTCCCCCTCTCT    | 60.186 | 20 |
| TCAATTAATGTTGTCATTATTCCA/ | 58.498 | 26 | TTCTTATTTCTCACTTTAAGACC | 58.093 | 27 |
| GAGACTTGCCAACGGTCAAT      | 60.119 | 20 | AAAAACCCTTCTGAAACCCG    | 60.324 | 20 |
| GA                        | 59.83  | 20 | TGTACTTCGCACTTCGGAGA    | 59.591 | 20 |
| TTCAAGGCCGATAAGATGGA      | 60.544 | 20 | ATGGGATTCACCTGCCTTCT    | 60.853 | 20 |
| TGGACTAGGGGCTGAAGAAA      | 59.807 | 20 | TAATTGTTTCGGGCTAACGG    | 59.958 | 20 |
| TAAATATGCAGCAGACGCGA      | 60.517 | 20 | AATAGGGGAAACCCACCAAC    | 59.919 | 20 |
| CGGAAAGGAAAACCGTAAAA      | 59.094 | 20 | GGGCGTTTTATTTCCCATCT    | 60.15  | 20 |
| ATCGGCTGAATAGCCGTATG      | 60.081 | 20 | GTCATTATACGGGCCCAAGA    | 59.784 | 20 |
| ACCTCGTCGTCCA             | 59.756 | 20 | TCGCCTAACTTATGCAATGAA   | 58.458 | 21 |
| CAGCTCCACTACTTCCTCCA      | 58.03  | 20 | TTACATCGTCCACCCCATTT    | 60.051 | 20 |
| GAAAGGGCTGAGGTATGGTG      | 59.55  | 20 | CGTGTGGTTTTGAAGCAAGA    | 59.881 | 20 |
| AAAATGGTTATTATTGGATCGC    | 57.149 | 22 | ACCACCGGCTAAACCAGTC     | 59.981 | 19 |
| CGTAGAGAATGTTGCCACGA      | 59.864 | 20 | TCGGATGAACGAGCTACTGA    | 59.547 | 20 |
| CCCCCTCCTTCGAACTACAT      | 60.319 | 20 | CAATTTTCGGCAGCATTACA    | 59.702 | 20 |
| ATGCGCGGGTGTAAAGTTAG      | 60.152 | 20 | GGGTTATCACCTGATCGCAA    | 60.864 | 20 |
| TCCTGTTCTCCGATCGTTTT      | 59.67  | 20 | TAGAGTTCCAAGAGGGGGCT    | 60.204 | 20 |
| GCCTTCGGATCTGGGTATTT      | 60.286 | 20 | GAAAATCGCTCAAACCAGG     | 59.685 | 20 |
| TGCTTCAGTCATGTCGTTCC      | 59.837 | 20 | CACTACTCATCATCCTCTCTTT  | 57.758 | 25 |
| GCAACGAAGATGGGAAATTG      | 60.448 | 20 | AGACGTTTTCAAGGTGAACGG   | 60.149 | 20 |
| CATCACACCACAAATGACTCTC    | 58.058 | 22 | TCATTTATGAAGCAAGGGGG    | 59.894 | 20 |
| CACGGCGTAACTACCATTCA      | 59.609 | 20 | AAGCTTGGGCTTTCTTCTCC    | 59.962 | 20 |
| TGTGGTTTGCTAGACATCGC      | 59.871 | 20 | GCGAGATCTTCGTCCATTTT    | 59.273 | 20 |
| GGACCTGAAAAAGGACTTTGG     | 59.963 | 21 | CAGACACTTCGTGGTGAACG    | 60.348 | 20 |
| ATGGCTGCTCCAATATCACC      | 59.923 | 20 | ATGCCAACCCGTCTTATTTG    | 59.823 | 20 |
| CATT                      | 59.079 | 20 | GGGTGGAGCAAATCTGAAA     | 60.051 | 20 |
| TAAAAGCCGATCGAGTTCGT      | 59.845 | 20 | CAAGCAAATTGTGGCTCTGA    | 59.988 | 20 |
| TCTCCACCCTCTCACTTCCA      | 60.795 | 20 | GATCGGTGAAGATTGGAGGA    | 60.011 | 20 |
| TCTACCACTGCACCACGAGA      | 60.463 | 20 | GCGAAAGACATACGGGGTTA    | 59.96  | 20 |
| TTGCGGAAACAATCCAGAGT      | 60.636 | 20 | CAGAGCGCACTCGAAGAGTA    | 59.49  | 20 |
| TCGATTGACTGGATTTCGTT      | 60.603 | 20 | TCACGTGCACCGTCATCTAC    | 60.756 | 20 |
| TCCTTTCGTTTAAGTTGCCG      | 60.236 | 20 | CCACGAGATCAAGAATGGAA    | 58.643 | 20 |
| TGGAGTTGGAGATGAAGGCT      | 59.803 | 20 | CCCGTTTTCGGAGTTTGTCTA   | 60.103 | 20 |
| CTAGCGGATTTCTCTGGCTC      | 59.174 | 20 | GGTTCTTTTCTTGCAGCACC    | 59.859 | 20 |
| ATCGGTTATTACGGATCGC       | 61.031 | 20 | AACCCAACCCACGCAATAAT    | 61.339 | 20 |
| GGTGATCAAGCGTTTCAATTA     | 60.089 | 21 | TCCACGGAGAACCTGAATTG    | 61.034 | 20 |
| TTCTTGCAAATGAATGTGAAATC   | 59.114 | 23 | TCCATGGATCTGGATCATCA    | 59.806 | 20 |
| ACACTCACTCTCTAGCCGC       | 58.86  | 21 | TTGGGTTGCTGAAAATAGGC    | 60.074 | 20 |
| CAATCTGGGGAGAGACGA        | 60.34  | 20 | AGGCCCGAGCTAAAAACATT    | 60.095 | 20 |
| TCCAATACCAATATCTCAGCACA   | 59.488 | 23 | TGCCTAGGTGGCTACTATGTGA/ | 59.791 | 22 |
| ATTCCACATTGATTCTGGG       | 59.605 | 20 | TTGTGATTCTGAAAATAGATC   | 58.337 | 25 |
| GAGTGCTTCTTGAAGCTGGG      | 60.134 | 20 | ATCGAAAGACGAACACGCTT    | 59.882 | 20 |
| CCCAATGATCTAGCCTCTCG      | 59.79  | 20 | GAAGATACTTCATGCTTGATAA  | 58.527 | 25 |
| TTCTTTCCCAAAGGACAA        | 59.518 | 20 | TGTGGGACAAGCAAATGAAA    | 60.088 | 20 |
| ATTGTGCCAAGCTTCTGGAT      | 59.7   | 20 | AACATGCACTTTCATTTCGTGTT | 59.545 | 22 |
| TTTTCTAACCGGACCACAT       | 59.288 | 20 | AAAGGTAGCGGGGTCTTTGT    | 59.998 | 20 |
| TCCCCATTGTTCTACCCAAA      | 60.162 | 20 | CCGCACGTAAGTGCTGATAA    | 59.934 | 20 |

|                          |        |    |                         |        |    |
|--------------------------|--------|----|-------------------------|--------|----|
| TTTGTGTGAGGAATTGTTGAAGA  | 59.64  | 23 | CCTAACCCCACTAATGACCCT   | 59.223 | 21 |
| TTTTTGGGTTGAAAATAGCG     | 57.833 | 20 | TTGACGTTGGATCTGCTTGA    | 60.39  | 20 |
| CCAACCATTGCAGAATCCTT     | 59.933 | 20 | CGACTCCTTTTCCCTTCACA    | 60.224 | 20 |
| GCACACATTTTTCTCCCAT      | 59.797 | 20 | ATGTTCCGAATCTTCGTCCA    | 60.461 | 20 |
| TTACTTTTCCGGCAACATCC     | 59.938 | 20 | GTGGCCCGTTTCTTATTTC     | 59.938 | 20 |
| AACCATGATGGGCAACAAAT     | 60.059 | 20 | CGCATATAGCTCGACTGCAA    | 60.14  | 20 |
| CGTGTAAATACCGGGATCG      | 60.202 | 20 | AAACCCTTCAAACAAATAAAA   | 58.132 | 24 |
| TGTTCTTGGTGTCTTGGTGTT    | 59.538 | 22 | TGAGTTGGTGGAGGGTTTTTC   | 59.943 | 20 |
| AATCCATCATGGGGTTTTCTT    | 59.523 | 21 | TCGAATTGAAGTTAAAGCTTAC  | 58.353 | 25 |
| ACAAATCAACGCGAATTCAA     | 59.161 | 20 | GAAACGAGTTCCGAAATGGA    | 60.051 | 20 |
| CTCTTCTTCAAACACCCCA      | 60.081 | 20 | TGAAGCCTTTAAATGGGCAC    | 60.074 | 20 |
| GGTGATTGTGGCTTGCAAT      | 60.905 | 20 | CACCCATTCAATCCCTCATT    | 59.605 | 20 |
| AGAGGAGCCCAAGATGTCAA     | 59.803 | 20 | GGACACAACAGAGGGGAGAA    | 60.088 | 20 |
| CAAGAATGCCCTGTATGCT      | 60.096 | 20 | GCGAATGCTATGCATTTTT     | 60.068 | 20 |
| ATCCACTGCCAACCTCATT      | 59.934 | 20 | AGGTAGCTGTCGTCTGGTT     | 59.792 | 20 |
| CAAGCCAAAAGCACAAAGT      | 60.284 | 20 | GGAGTGAAAATGGGTGTTGG    | 60.21  | 20 |
| GGGACCTTATCTTTGCCGT      | 60.32  | 20 | TGCTCTCTCATTGTAATCTCTCT | 59.688 | 25 |
| GGATGCTTTTCCCTTCTTC      | 60.017 | 20 | ATTGTTGTGGTGCCTTTTCA    | 60.011 | 20 |
| CTCCCTTTACCTCCCAAAG      | 59.927 | 20 | TTGGACGGAAGTCAGAATCC    | 60.05  | 20 |
| ATATGGTTTGACGCCTTTC      | 59.967 | 20 | GCTATTCTTGTGAGGGGGTG    | 59.55  | 20 |
| GAAGGAGGAGAAGTTTGGGG     | 60.045 | 20 | GCAACACAAACCCTACAGCA    | 59.764 | 20 |
| ACCAATACTCTTTCCCAACC     | 59.204 | 21 | TTGGGGGAGGGTTTAGGTAG    | 60.172 | 20 |
| GTCATGAGGACGGTGAGGAT     | 59.928 | 20 | AAAGAGAGCTGCAAATGGGA    | 59.955 | 20 |
| CAATCCCGACTGATTTGAT      | 59.894 | 20 | ATTGGGGAGGATAAAGGACG    | 60.145 | 20 |
| GAAAGCACAACTGCAGACCA     | 60.032 | 20 | CCTGGAAACAAGAAGCACC     | 59.711 | 20 |
| CACTTCTCTTCCGACCG        | 59.982 | 20 | AACTTTGATCGCGATGGATT    | 59.533 | 20 |
| GAATATTGTGCGTCCCATC      | 60.163 | 20 | TCCAGCAATTTAGCTTCT      | 59.955 | 20 |
| GCGTGCAATTTAATGATGA      | 59.668 | 20 | CACTTAAGGGGGTTATTAGTG   | 58.515 | 23 |
| GCCGCATTTAATCGAGAAG      | 59.816 | 20 | GCTGCTGTATTAAACCGAACG   | 59.793 | 21 |
| AAAACGGATCGGATACGGA      | 60.281 | 19 | TAAGGGTTATCACCGGATCG    | 59.778 | 20 |
| TGCTTTTCTAAATGGAGAGTTGG  | 59.78  | 23 | GGCTTTGCTTTAATCCATACAA  | 58.332 | 22 |
| TGCTGTAATGAACTGTTGTATG   | 60.454 | 25 | CGCCTGCTTGAGAGATTTTG    | 61.041 | 20 |
| GGATCATCAACGTTTGGCTT     | 59.939 | 20 | TGAGGGCAGTCAAAAATTCG    | 61.137 | 20 |
| TGGGTGAGGAATACCACTGT     | 57.84  | 20 | TGTTGAAACCAGATCGAAA     | 59.097 | 20 |
| ACTTTTAAGGATCAAGGATATTC  | 57.122 | 24 | GATCTACGTCCACGGGAGAG    | 59.679 | 20 |
| TCGAGTGTAACACGTCCCT      | 58.215 | 20 | CCCCAACAACGAAATGAAT     | 59.662 | 20 |
| TCCGATACCTACTACTGCGA     | 59.738 | 21 | GGAAAATAGGGCGAGGAAGA    | 60.522 | 20 |
| TTGGTATACTTTGATTCCCC     | 59.154 | 23 | GGCATTCTTGACCAAACCAT    | 59.797 | 20 |
| TTTAACCATGCACACCGAGA     | 60.111 | 20 | ACGGTCCCATCAGCAATAC     | 59.82  | 20 |
| TTCAACGGAGTGGAAGATCC     | 60.05  | 20 | TCCCCTCCACCCTCTATTT     | 60.264 | 20 |
| TCACAGTTTCGAGCTTCCAT     | 60.801 | 20 | TTGTAATCGGACCGGTTTT     | 59.801 | 20 |
| GCCTTTAATCAGCAATATAAGTCA | 57.658 | 25 | CACCTTCTGGACTCAGACGA    | 58.964 | 20 |
| TTCACTCGCATAAAAGTCTCG    | 58.187 | 21 | TGATTCCCGAAAGGAGTGAC    | 60.05  | 20 |
| TATCGGTTATCATCGGATCG     | 58.404 | 20 | AAATATCGGCCGTCAGATTG    | 59.923 | 20 |
| GCACAACCACTCCACAAAGA     | 59.726 | 20 | ATATAGCCGTTGGGCTTGTG    | 59.982 | 20 |
| CGATGTTTGTGGCTGTCTG      | 60.301 | 20 | GCGTTTTGACGATATATAGTGT  | 60.194 | 26 |
| TGGAACCAACTAATTGCCAAG    | 59.982 | 21 | CCCACTTTTCTCCCAAAT      | 60.159 | 20 |
| ACGTTACATCTTTGTGGCA      | 59.05  | 20 | CAAAGCATGCGTAAATCAA     | 59.702 | 20 |
| TTTCATTTTCATCGATTTTCTC   | 59.454 | 23 | AAGTAGTCCTTCTCGGGC      | 59.713 | 20 |
| TTCAATTTCTTGGCTCAGGG     | 60.184 | 20 | CCGAGAAGAACCCTGGAGTG    | 59.837 | 20 |
| AGCGTGACAAACATCACAGC     | 59.912 | 20 | TCCTGCCACATGTAATGGAA    | 59.924 | 20 |
| TGCATTCCAGACGTGTGTGT     | 61.236 | 20 | AGATTTCACTTTGCAACCGC    | 60.257 | 20 |
| AATGGATGCTTCTGGAGGTG     | 60.073 | 20 | AACAAACAAGCCCCCTCTTC    | 60.476 | 20 |
| AGAATCACGGCCATTTTCAG     | 60.074 | 20 | GTTGGCCTGTTACGAATCAA    | 58.625 | 20 |
| GGAATCTTGTGGCATGAGC      | 60.613 | 20 | TTTGCATCTTAGCGAGTTGG    | 59.062 | 20 |
| AAGGACGGAGAGAGAGAGCA     | 59.279 | 20 | TCGTATTGAATGAGGGAGGG    | 59.887 | 20 |
| CGCATTCAATAGCTACCCC      | 58.268 | 20 | GCATAGCTATTGGAATTTGGTT  | 59.795 | 24 |
| AAATGAATGTTGTGTTTGTGTA   | 57.687 | 25 | GCCATGTGGAAAATTTGGAT    | 59.628 | 20 |

|                          |        |                           |        |    |
|--------------------------|--------|---------------------------|--------|----|
| AATAAACCCACCTGCTGCAT     | 59.457 | 20 AATCTCCATCCAAGCACCAC   | 59.934 | 20 |
| ATATCGTCGTCTCCCGATGA     | 60.448 | 20 GCGAGGAATACGAAGAGTCG   | 59.978 | 20 |
| TCAAATCGTTTCTATCGTGCTT   | 58.901 | 22 CATCGAGCCCACTTAGTGCT   | 60.419 | 20 |
| TGTGCAAGGTTGAACCAAGA     | 60.278 | 20 ATTCTGTGGGAAGAGCAAGC   | 59.434 | 20 |
| GAAGAGGAGGAAAGAAAACGC    | 59.473 | 21 CGTATGCATGTCATGGAGGA   | 60.504 | 20 |
| AATTGCGTTAGGGATTTGATT    | 57.647 | 21 AGGAAATAAGGAGGTGTTATG  | 58.113 | 26 |
| GACTTGCCAACGGTCAATCT     | 60.119 | 20 GGGTTTTCTTGCCAAAAATG   | 59.429 | 20 |
| ATGGAACCACTTGTTGACCG     | 60.812 | 20 CGATCCATATGGCAAGAGAA   | 58.671 | 20 |
| CGAAGAACAATTACAATGTTTATC | 60.478 | 26 CGAAAAGGGGAAAGAAAAA    | 60.385 | 20 |
| TGCACCTGATCATGAACCTA     | 57.608 | 20 TGCGAATATAAAAATGAGAAA  | 59.158 | 25 |
| GTGACTCTCCCCTTCCATCA     | 60.048 | 20 ATCGGCGCTAGACGACATAC   | 60.265 | 20 |
| TTTTTAGAAGGATACTCACTACTC | 57.024 | 26 GCTGAGGAAAAAGGTGACGA   | 60.375 | 20 |
| ATATTCCCCGGTATGCCAA      | 59.987 | 19 AAGGAGGTGTTATGAAGGGAT  | 58.028 | 22 |
| ATCAAAGAAAACGGTGGTGG     | 59.83  | 20 TTTCTCTCCCCTCTTGTT     | 60.045 | 20 |
| ATCTCCACCAATGCACTTC      | 59.934 | 20 TCTTTAATCTTGCCCGCTG    | 60.335 | 20 |
| GCACATTTAATTCCAGGTGC     | 58.093 | 20 TCAATTACATTCCCCTGGGT   | 60.051 | 20 |
| CGAGCTCTGAAAATTCTCCCT    | 59.969 | 21 TCAACAGCAATGAATTTGTGG  | 59.576 | 21 |
| GGTGAATAGGCGGATAGCAA     | 60.06  | 20 TCAGCTGCGATGTCAATTTT   | 59.955 | 20 |
| CAGCCTCATTGTTACCG        | 60.493 | 20 GGTGACGGTTGAGAATGACG   | 61.527 | 20 |
| AAAGAGAAAACGAGGGTGC      | 60.61  | 20 AAATTGTGTGGGCGATTGAT   | 60.199 | 20 |
| AGGACAACCCATAACCCACA     | 60.088 | 20 AGCGTATTTCTTGATTGCCG   | 60.23  | 20 |
| AGTTTGAGACACACGAGCTT     | 60.058 | 20 CGTCCCTATTCCCCTCTCT    | 60.319 | 20 |
| TATCAACTCCATCTCCCCG      | 59.887 | 20 GTGCGTCTCTCGACGTTACA   | 60.056 | 20 |
| TTCAACGGTCCCACAAATTA     | 58.866 | 20 TTGTGACGTGGAAGAGAGAGA  | 60.028 | 22 |
| TCAGATCTGCGTGAAAATG      | 60.096 | 20 TCAGTGTTATCGAGCCTCTCAA | 60.015 | 22 |
| GCTGTTAATGGACGTCGTGA     | 59.722 | 20 CACTCAATCGGTTGTACCACAT | 59.78  | 22 |
| GTCCAATGTTTAGGCCCGTA     | 59.823 | 20 GAATGGAGGAGGATGCTTGA   | 60.158 | 20 |
| GCAATAAAGAGGGCTGGTGCT    | 59.481 | 20 GCCAAAACAAAACACACACG   | 60.05  | 20 |
| AGCCCTCATTCTCCCTTTA      | 60.032 | 20 TTGATGCTCGAAGAGGGACT   | 59.95  | 20 |
| GGCAATATGCTGACAGACGA     | 59.83  | 20 CGAAAAGCAAATTCATCAC    | 59.578 | 21 |
| GGAGTCTGAAAAGAGAGAGTTC   | 58.658 | 23 GTAGCGAGTGGTTTGGGAAG   | 59.734 | 20 |
| CATTCTTTCTCCTCCCCACA     | 60.042 | 20 GGGCCAGAAAACCAAGATT    | 60.299 | 20 |
| ACGACATCATGACGCAACAA     | 61.163 | 20 TGCTGGGATACACAGGGTTT   | 60.375 | 20 |
| AAGGGTTATCACCTGATTTTCTC  | 57.73  | 23 GCCCTCATGACTCTCAGCAT   | 60.381 | 20 |
| TCTAAATTGCGAGAATATGAGAG  | 57.816 | 25 TTTTATGATCAAATCTTATGAA | 59.741 | 25 |
| TGCTTCAAGGTAGGTTTATTAGGC | 60.047 | 24 TGGAATAGGTTGGGTCGTC    | 59.79  | 20 |
| TCGTATTGACGGGAGAAACC     | 59.933 | 20 TTGTTGGTGGATTGTGCATT   | 59.823 | 20 |
| ATCTATTGTCCCCTTGCT       | 59.789 | 20 TTTAAGGGTTATCACCTGATTT | 57.757 | 24 |
| CGAAGTTCCTCAGAACCCA      | 60.224 | 20 CACCTCCCAAACACAAAGGT   | 59.861 | 20 |
| AGAACTCCACTTGACACAGCA    | 59.622 | 20 TGACAGGTTGTGGGAACAAA   | 59.976 | 20 |
| CGATGCTGATGGAAAATGAA     | 59.622 | 20 AGATGAGATCAATGCCCCAG   | 60.034 | 20 |
| TGTTTGGTCAAACGAACGA      | 60.127 | 20 CCAGTTCAAAAGCATACCA    | 59.691 | 20 |
| GCTATGGTGGCCAATGTCTT     | 59.962 | 20 ATCCAGCCACAAAGAACAG    | 60.111 | 20 |
| AACTCCCCTTCTTTGCAT       | 59.94  | 20 CTTGCCATGTTCTGCTTCTCT  | 59.63  | 21 |
| GGCAAATGATTGATTGCCTT     | 59.907 | 20 AAGAAAAGAGACAATCCGGC   | 58.386 | 20 |
| GACTTTCATGTAGCGTGCCA     | 59.871 | 20 GAACGAATGCATGGGTGTAA   | 59.4   | 20 |
| TTTGCTGTGCGTCGTATTTT     | 59.879 | 20 AGCAGAACCCTCAAATCCCT   | 60.074 | 20 |
| TGCCACTTATTTAGGAGGT      | 57.268 | 20 AAGAAATGGGGTCGACATGA   | 60.317 | 20 |
| AGCACCTGATTACTCCCGAT     | 58.622 | 20 CAACGAAGGATTTGGTGTG    | 59.021 | 20 |
| CCGTGGACGTAGATCCTTGT     | 59.989 | 20 TTGATTGGACTTGTCTCTCGG  | 60.096 | 21 |
| TAGCTATTCACGTTGCACGC     | 60.044 | 20 TCTTCCAAGAATGGAGCAGC   | 60.483 | 20 |
| GGGGGAGAATTGAATTGCAG     | 61.706 | 20 ATTCATTTGCCCCGATTTT    | 60.389 | 20 |
| AATGCAAATACGAATATCATTATT | 59.205 | 27 CCACGAATCATGATCGAAAA   | 59.474 | 20 |
| TTCAATCCAAAAGACACATGC    | 59.982 | 22 AAAGATATATAATTCATTGAGC | 57.631 | 27 |
| CATTGTATCTTGTCTTGCCCTAAA | 59.577 | 24 TGATTTGAGAAAGCAGTAGGT  | 59.517 | 22 |
| ATTACCTTGATCGACGACGC     | 60.103 | 20 CCACCAGAACCGAAGTGATT   | 59.966 | 20 |
| CCTCTCTCAGCCCTAGCTT      | 60.11  | 20 GAGATGGAGTGGAGGCAGAG   | 59.945 | 20 |
| GTTTAAATGGGCGGGAAAAT     | 60.022 | 20 TGCAGCACTGAACAATCACC   | 60.885 | 20 |

|                          |        |                            |        |    |
|--------------------------|--------|----------------------------|--------|----|
| CATCCTCAATTTTCAGCACCC    | 60.461 | 20 GAGAAGAGAGAGACGGTGGC    | 59.131 | 20 |
| TGTGTCGATCCAACGGTCTA     | 60.112 | 20 CACCCGAAAATGAGTTATT     | 60.438 | 25 |
| CCTCTCCTCGTCTTGTGCTT     | 59.598 | 20 AGGCATTGCAGAGTTGAGAAA   | 60.008 | 21 |
| AAATGAACGGTCGAGATTGG     | 59.933 | 20 TGCCTTTTGACGATATATAGTG  | 59.092 | 25 |
| GGCTTGTGTTGAACCATTTTGA   | 59.967 | 21 AAATAGCTTATTGAATTTGATT  | 58.677 | 26 |
| CATGTCAATATCATCACGAGTTTG | 60.183 | 25 GCCAGATGTGAATGGGTCA     | 60.489 | 19 |
| AGGGAAAACCACTGCTCTCA     | 59.844 | 20 TCCCATTTCCATTTCCAAAC    | 59.599 | 20 |
| AAAATCAAGGGCTGTGATGG     | 59.933 | 20 CCACCACGGAAGAGAGGTAG    | 59.715 | 20 |
| TCCCGGATAATCCATTAACAA    | 59.134 | 21 TCCGATTAATGGGCTCTGAC    | 60.036 | 20 |
| TGCTGAGCATATTTTTCACCC    | 60.089 | 21 TTTTTGCCTGATATTTGTATAAC | 59.061 | 25 |
| TGCATTGTTTCGACGATGTAAC   | 59.605 | 21 GTTGGGGAGGCTACATTCTG    | 59.55  | 20 |
| TTAACACCAAACCATCTAATTAGT | 57.486 | 27 TTTCTGTGCGAGCTTAGCCTCA  | 60.277 | 21 |
| GTTACCGTCGTGGTTATGGC     | 60.257 | 20 TCTCTCCCTCTCTCTCTCGG    | 60.215 | 21 |
| TGGCAGAAAGATTTTAGATATAG/ | 59.31  | 26 ATTGGACGCATAACCCGTAA    | 60.209 | 20 |
| GCAGTCTGTAAGGCCTGGTC     | 59.874 | 20 GGAAGATCCGAGAACCACTG    | 59.655 | 20 |
| GGAACCCAACCACTTTTAT      | 59.919 | 20 TTGTTGAACCGTGTGCAAAT    | 60.011 | 20 |
| ATTCCAAAAATCAAAGGCC      | 60.13  | 20 GCTGACATGGCTTCGTATCA    | 59.83  | 20 |
| GGCAAGTTGAAGGAACAAGG     | 59.711 | 20 ACAACTGCACCACACCGTT     | 60.063 | 19 |
| TTCTCTCGTGTTCATCCC       | 60.05  | 20 CCTAGCAAGGCTTCCATCTG    | 59.971 | 20 |
| AAACCACGCAGGGATGAGTA     | 60.517 | 20 TGTGTGCTTTATTGGAGCGA    | 60.401 | 20 |
| CTAGCCATCCATTCGAAAA      | 60.031 | 20 CCGTTGAAACACGAGATGTG    | 60.152 | 20 |
| TGGCACAGAGAGTACATAGTTTC  | 60.575 | 25 GAACCGCCGAAAAGAATTA     | 61.263 | 20 |
| TCATGCACAAGGTGGAATGT     | 59.967 | 20 AAATTTTGGCTTTGTCGTCG    | 60.11  | 20 |
| GGAGGGAGAAGAGGGGAGAGA    | 59.883 | 20 AGCCTAAGTAATGGCGCAGA    | 60.003 | 20 |
| TTTGTTGCAAATATCAGGTCTTTT | 59.131 | 24 AGCCGGGTGTCAAATAAATG    | 59.823 | 20 |
| TTTTCCGTATGCTGACCCTC     | 60.074 | 20 CAATGCCTAGTTTACCCCA     | 59.817 | 20 |
| AATAACAGTGGTGGCCGAAA     | 60.365 | 20 TCCGGCCAAATTAAGAAA      | 59.538 | 20 |
| TCCGTTCTTCTGTTCTGGG      | 60.224 | 20 ACCAACCTCCATTGAAGAGC    | 59.141 | 20 |
| TTGCTTGGGATTTTATTTTGA    | 58.652 | 22 GTGGCAGCCATATATCCGTT    | 59.813 | 20 |
| TGTATGGGTCATTGGACGC      | 60.346 | 19 TTCCGTCTTTAGGCATGAGC    | 60.352 | 20 |
| GGATTTGGGGGTGAGAAGAT     | 60.133 | 20 ACCCACGACCGTGTACTTTC    | 59.891 | 20 |
| GGAGCAAATTGAGGCTGTCT     | 59.434 | 20 TGTTGCCGTAAACAATGGTC    | 59.444 | 20 |
| TTGTATCGTTCGGAAACGTG     | 59.585 | 20 CAGATGTGGACGGGTCACTA    | 59.545 | 20 |
| GCGCATTTTCTGCTGTTAGA     | 59.21  | 20 GGCAACGCAATTATCCATTT    | 59.801 | 20 |
| GTTTCGATGTTGTAAGGGAGGA   | 59.042 | 21 TGGTTCGATCGTAATTGATCT   | 57.168 | 21 |
| TCCACCGCTAATGAATGACA     | 60.073 | 20 TTTCTTGGTGGGATTTGGAG    | 59.903 | 20 |
| GAGGGAGACAAAAGGCATGT     | 59.141 | 20 GAGTTTGGCACTCTTGCACA    | 60.032 | 20 |
| CATATTTCAAATGCATGCCG     | 59.92  | 20 ACCCCAGGTCTCTTCAACCT    | 59.968 | 20 |
| CTAACACCAGCCTCTCTGCC     | 60.012 | 20 TGCAACCATTTTGTGGAAA     | 59.946 | 20 |
| CGGCTATATTAGCGATCCGT     | 59.216 | 20 TCGGATCGGATATCCAAAAA    | 60.225 | 20 |
| TCGAGTTATGAAGTTAGGAAATA/ | 58.22  | 27 CTTCGATGGAGTTCCTCCT     | 60.586 | 20 |
| TGATTCCAAACCCAGTCAT      | 60.173 | 20 ATGGGGTGAGACAAAGCAAG    | 60.111 | 20 |
| CAACTTCGGGACCACTCCTA     | 60.103 | 20 AAAAGAGCTTGGGCCTCTTC    | 59.962 | 20 |
| TTTCAGAAATTGCCTTGTTG     | 60.096 | 21 GTCCGACACAAGCTGAAGTG    | 59.467 | 20 |
| CCAAGCAATCAAGGCATTTT     | 60.074 | 20 ACCCACTTTTCAAATCAGCG    | 60.11  | 20 |
| TTCGGAGCATGATTTAAGTGG    | 60.081 | 21 GTGGGTGTGATCTTGACCCT    | 59.817 | 20 |
| CCAATGCCAATCATCCTCTT     | 59.894 | 20 GTCCCAATCTTTTCCACCCT    | 60.169 | 20 |
| GGAAAAACATGAGTTTAGGGTT   | 59.657 | 23 AAATTCCCGAAGAGCCATCT    | 60.039 | 20 |
| TGCTGTTGCATTTTCGATGTT    | 60.265 | 20 TTCTCTGTTCTGGCAGTGGA    | 59.545 | 20 |
| ATCCAGATCCTTGTGGTTGG     | 59.779 | 20 GTGGGCATGCCAAAAATATC    | 60.161 | 20 |
| TTCTATCTTCTGCGACGCT      | 60.118 | 20 CTGTGAAATTGCACGGCTTA    | 59.872 | 20 |
| TTCCCTTCTCATTCCATGC      | 60.014 | 20 TTCAAGTTTGGGGGTGTGAT    | 60.21  | 20 |
| TCAACGATTTTGGTTTGTTC     | 59.831 | 21 ATCAAGATTTAGGGGTATCAT   | 58.8   | 25 |
| TATTCTCCACCACCCACAT      | 60.05  | 20 CTTTCTTGGGGACTGTGAA     | 60.081 | 20 |
| TGGAGAAGCTCTTACGGCAT     | 59.978 | 20 TTTTTGGCGGGAAAAATAGC    | 61.226 | 20 |
| AATGGTTGTGGATCGCCTAA     | 60.331 | 20 TTGGAAGGAACGGATTTGAG    | 60.044 | 20 |
| TCCGGTCCAATTCCAATAAG     | 59.756 | 20 CCTATGGTGGTATGGTGTGGA   | 60.501 | 21 |
| TTGCAGTAAATATCGGTTTTCG   | 59.173 | 22 AAATGTCAATCCAACGGCTC    | 59.939 | 20 |

|                            |        |    |                        |        |    |
|----------------------------|--------|----|------------------------|--------|----|
| GCTGATTTGTGATGTTTGGAGA     | 60.118 | 22 | GTATTGGGAGCAAGGCAAGA   | 60.214 | 20 |
| GCCCTTCGAACAACAAAAAG       | 59.724 | 20 | CACACATCCTCACACTCAC/   | 60.697 | 22 |
| CCTCCACTGTTTTGTGCCAT       | 60.954 | 20 | TCCAACACAAATGAACCTGG   | 59.389 | 20 |
| CTCGTGAAGCGACGTGAATA       | 60.011 | 20 | CCCACATCCCCTCTCTCTC    | 59.638 | 20 |
| ATGGAATTGGGTGTTGGATG       | 60.439 | 20 | CACGAACGGTATAACATCGG   | 58.917 | 20 |
| AATGCTTTGATGTGTTGGCA       | 60.119 | 20 | CCCTCGTATGCAATGAATCTG  | 60.475 | 21 |
| CAAGATCGAACGGAACGAGT       | 60.255 | 20 | GTGAGGGGGTGACAGAAATG   | 60.363 | 20 |
| AGAAAATTCGAAAATTCCTCA      | 59.774 | 21 | CTGATTCGCTAGCTTCCCAC   | 59.978 | 20 |
| GGCAGTGGCCAATGAAATTA       | 60.837 | 20 | GGAACCAAGTCTTCAGATGC   | 57.288 | 20 |
| CTCAATCTGATGCACACTCAA      | 57.388 | 21 | ACCGACAAAAGGTAGGCTCA   | 59.734 | 20 |
| TTAATCTTGGCCGCTGATTT       | 59.682 | 20 | GCATCGTGTGAAGCATTGAT   | 59.685 | 20 |
| TAATTTTCGTCGGGATGGTT       | 59.273 | 20 | TCTTAGCGCAATGTAAGCGA   | 59.748 | 20 |
| GCAATCAACACGAAGCAGAC       | 59.45  | 20 | GGATTCCATCAACACCAACC   | 60.034 | 20 |
| TCAAATTTTGCGTAGCATCTCT     | 59.036 | 22 | CTCATTGGAATTTTCCGGGT   | 61.042 | 20 |
| TGAATCTGACTTCGATTATTTGTG,  | 60.017 | 25 | GCATTTGATGGAGGATCGAG   | 60.57  | 20 |
| TCAATTGGTGCAAGAAGACG       | 59.84  | 20 | CTGCCCATTTTACCCTTTTT   | 58.113 | 20 |
| AAAATCCCAACAATTCGCAC       | 59.807 | 20 | CATTTCTTCAAGCACACCA    | 59.691 | 20 |
| CCAGGCAAAAATGCGCTA         | 60.885 | 18 | TCCCATTTAGTATTTGCCG    | 60.827 | 20 |
| CAAAAACCGGTGAAAAATCG       | 60.327 | 20 | CGACGGTACACACTCCACAC   | 60.072 | 20 |
| TTGGGGTTGGCAATAAAAAC       | 59.677 | 20 | AAACCACCTCCGAAAACCTG   | 59.073 | 20 |
| TCTTGGTAAATGTTTGGGCA       | 59.013 | 20 | TCCAATGATTGTTTGGTCA    | 59.75  | 20 |
| GCTTGGTCTGAGCCTGCTAC       | 60.164 | 20 | CACTCACAGCCAACAGGGTA   | 59.745 | 20 |
| TATGGTTTTTGGCCACTTCC       | 59.801 | 20 | TCCAATTGCGAAAAGATTTG   | 58.744 | 20 |
| CATTCACATGGTCCCCTCTT       | 59.779 | 20 | TAAAACTCCCAATGGATCGC   | 59.901 | 20 |
| ATAGAGCCCCACGTTACAG        | 60.134 | 20 | GAATAAGGTGAGATGCGGGA   | 60.036 | 20 |
| AGGGTGCCAAGATTAACACG       | 59.993 | 20 | CAGAAACCATGGATCTGGAAA  | 59.918 | 21 |
| ATATTCGAACGGCCTTGTTG       | 59.96  | 20 | AAACGGCGAAGTGATACGAA   | 60.637 | 20 |
| ACTCAAGCACACACAGCTC        | 60.104 | 20 | TCCGGCAATCTCCTTAATTG   | 60.031 | 20 |
| AGCATTTGATTAATCCCCCA       | 59.23  | 20 | TCGACACGAATCCAAAACCTG  | 59.691 | 20 |
| AACAGCACGGACAGCTTCTT       | 60.058 | 20 | TGCAAACATTTTGAAGGACAA  | 59.192 | 21 |
| CGTAGCGAAGAAGCGAGAAT       | 59.752 | 20 | AAATCGGAAGCTGGATGCT    | 59.788 | 19 |
| CGAGGATGAGAGAGGAGACG       | 60.088 | 20 | ACCACTGCATTCACCTTCCC   | 59.973 | 20 |
| TTCTGATTGTAATGAATTGAGTC    | 59.569 | 25 | TTGCTCGCGAGATTTCTTTT   | 60.096 | 20 |
| CAAAACAGGAACCGCTGATT       | 60.11  | 20 | CATGCCAAGTGGTGTGATCT   | 59.551 | 20 |
| AGGTGCTTTGACTTATGTAAAGTT   | 58.12  | 25 | GGATGAGGTTGTATTGAAACTC | 59.891 | 23 |
| TTCGGAGCAAAGAAAAGCTC       | 59.708 | 20 | CCCTAGCCTTTGCCTCTTTC   | 60.332 | 20 |
| GTTCTGGCGTCCCCTTTT         | 60.104 | 19 | AGCGTTATTTTGCAGGTCG    | 60.264 | 20 |
| CGCGAGTTCATAACTCTCTCTCT    | 59.336 | 23 | GGTGAGGAGGAACACGAAAA   | 60.088 | 20 |
| CTCAGCATAACAGCAGTTTCATTT   | 58.6   | 23 | GGGTGGCCCTCAATTTTATT   | 60.02  | 20 |
| GAATAATGGGGGTGATGTGC       | 60.021 | 20 | CGGGGAAACATACGTCCTC    | 60.375 | 20 |
| TGGTTTCAATTTGGGTGGAT       | 60.029 | 20 | GGACAAATGTTTCATGGCCT   | 59.797 | 20 |
| ATTCGGAGCGAGGCTAAGTT       | 60.36  | 20 | TCTCTCTTGGTTGGTGAAGAAA | 58.955 | 22 |
| ATGCTCAATTTCCCAACTCG       | 60.074 | 20 | GCACCTATATACGCACGCAC   | 59.238 | 20 |
| TTCCATTTCACTTGAATGTTTGA    | 59.483 | 23 | TTGACCGATCTCATTTGAAAAA | 59.564 | 22 |
| CAAGTTCGGCCTTTGGTTTA       | 60.103 | 20 | CCAAAATCACAATCTATCAATC | 60.076 | 24 |
| ACAAGTGGTATAAACGGGCG       | 59.883 | 20 | CGTATACTTGCGGGGTTGTT   | 59.883 | 20 |
| TGGCGTTTGAAGGAATCAT        | 60.603 | 20 | TGAAATAGTAACCGCCGACC   | 59.96  | 20 |
| GAATTAGCATACTGGCTCATTTAT   | 57.238 | 25 | GAAGGATACAAAGGCTCGGA   | 59.269 | 20 |
| CGTTGAAGAGATTACGCAACA      | 58.978 | 21 | AACAGTTCAAGACCGTTTTCG  | 57.856 | 20 |
| CGAATTTGGTGTGGAATTGA       | 60.717 | 21 | AACCCACTACCCATTCCCTC   | 60.052 | 20 |
| CGGCCATCAGATATGGAGAT       | 59.877 | 20 | AAGGAGAGGAAGAAGCAGGG   | 59.95  | 20 |
| CTAACCCTCAAGGCCGGTA        | 60.125 | 20 | TTGAGCGAAAAGCCAAAGAT   | 59.96  | 20 |
| ACAAACTAATCAAGTTCGCA       | 57.439 | 21 | TTGGAAGCGTACATCAAGA    | 59.42  | 20 |
| CTTTTCACACGAGGTCACGA       | 59.873 | 20 | GTCCCGTTTTCTTGTTTCA    | 59.948 | 20 |
| CACAGGATGATGCAGAGGAA       | 59.787 | 20 | ATGAACGAACATCGTTGCTG   | 59.722 | 20 |
| CGCGATTTTAAACCCTAAAGAA     | 59.653 | 22 | ATTGAGGACGCCCAATGATA   | 60.296 | 20 |
| GAAATTTTCAATTTTTCGTCGTTATT | 57.054 | 25 | AACCAACATGCTTCTCATGC   | 60.133 | 21 |
| CCAAAGAAAAGTGCATTACAAAA    | 58.412 | 23 | CCACCAGGTTCTGCTACGTT   | 60.171 | 20 |

|                          |        |    |                        |        |    |
|--------------------------|--------|----|------------------------|--------|----|
| TGGGAAAATTGAAGAACATTTG   | 58.963 | 22 | TCTTAAGCATGCACGACTCC   | 59.028 | 20 |
| CAAGCTGATTTCCACCCTA      | 60.066 | 20 | TCTTCCCGTTTTGTTTCATC   | 59.91  | 20 |
| TGTTGATTGGTTCAGAAGCG     | 59.84  | 20 | ATTCCTCCTTTTCAGCACCC   | 60.443 | 20 |
| ATTTGATCAACAGGCGATCC     | 59.9   | 20 | CGATAGAGTGGGGACGTCAT   | 59.95  | 20 |
| CCAATGTGCACGCAAAATAC     | 59.999 | 20 | CCACTCTCTCCTCTTTCTCTC  | 58.958 | 24 |
| AGCTGGGAGGCTTGGTAAGT     | 60.268 | 20 | GTCGCCTCTTGAAACTCTGC   | 60.142 | 20 |
| CCCXCGTCATAAAAAGAAGA     | 60.202 | 20 | TTCGCACGCTATAAAACAAGA/ | 59.916 | 22 |
| TGGAGAGGGCTAAACAGTCG     | 60.388 | 20 | CCCTCCAGACGTGAAGAAAC   | 59.697 | 20 |
| AGAAGCGAGAAGGGAGGAAC     | 59.957 | 20 | TGCCTCATTTGTGTTAATTTGG | 59.868 | 22 |
| TATGCTCCTTTTGGTTTGGG     | 59.931 | 20 | TCAATTGAATCTGGCCCTTT   | 59.505 | 20 |
| GTCTTGGACGACTCTTGCCCT    | 59.455 | 20 | TTTAACTGTAGGGCACCCA    | 60.357 | 20 |
| CAACACATTGCCACACCAAC     | 60.895 | 20 | TTGCGCCTAAGGAGGAGTTA   | 59.975 | 20 |
| TGCGTTGACGTACACAGCTT     | 60.517 | 20 | GGATAGGCTAGATGACGTAGA  | 57.085 | 23 |
| AATATGTCTCCTCCGXCCTT     | 59.925 | 20 | TGCATTGGAAAAAGTTGTGG   | 59.561 | 20 |
| ATGATGTCAAGCCATCTCCC     | 59.893 | 20 | GATGTCTGGTTTTGGCCATT   | 59.797 | 20 |
| CAGCTGTCAATCTGCTCTG      | 59.88  | 20 | TGACAGCAAATCCCAGTCAG   | 59.831 | 20 |
| GAGTGGTGTGAGAAACGCA      | 59.88  | 20 | CCGTTCTCCACCTTTAAC     | 60.714 | 20 |
| TGAATTTTGTGAAATTGGGA     | 57.978 | 21 | TTGGAACGCCACTAGTTTCC   | 60.11  | 20 |
| AACGCGATATGGATGAAACC     | 59.791 | 20 | TGTGGTGTGTTAAATGCGTG   | 59.044 | 20 |
| GATATGAAGTGTCAATATAAGC   | 57.063 | 27 | CACCGTGCATTACAAGATGAC  | 59.065 | 21 |
| CCCCTCTCAGAGAGGTTTAC     | 59.835 | 20 | CAACCCTACCTCCTTCTCCC   | 59.928 | 20 |
| ATTACATGAATGCCGAGCTG     | 58.749 | 20 | TCTGAAGTTGTTCCCGAAATC  | 59.16  | 21 |
| ATCCATATGGCAACCCTCAG     | 59.773 | 20 | GAGGCGCGATACACTACACA   | 59.895 | 20 |
| CGACGACTCAGTCAAACCAA     | 59.873 | 20 | AATCCAAGCCATCCATTCTG   | 59.894 | 20 |
| GGAAACAAACCATCCTCAACC    | 59.239 | 20 | ATGGGGGTGGTTCAGCTTAT   | 60.578 | 20 |
| GCGAAGCACCGAGACTACTG     | 61.136 | 20 | GAGGCATTTGAATTGACGGT   | 59.939 | 20 |
| TGGACTTGGCTAAGAATGGC     | 60.214 | 20 | CAGCAGCCATTAAGAGTCGG   | 60.762 | 20 |
| TTTCATTTCCGATGGAAGGA     | 60.384 | 20 | CCACATATTCATTTCCCCCA   | 60.384 | 20 |
| CGTACTTTGGCAAATCACATAGA  | 59.197 | 23 | CTGTGTGATGTTGGAGGTGG   | 59.997 | 20 |
| CGGGTGTCAAAGGAAAGAA      | 60.044 | 20 | GGCTGCAGAAGTGTGATGA    | 59.992 | 20 |
| CTCCTGGGGAGGTGTTATGA     | 59.92  | 20 | TGTTTCAGCTATGTTTGCCGA  | 60.401 | 20 |
| TATATCACGGGGGACTCGAC     | 59.773 | 20 | TTGGGGGTGGGTTATCTCT    | 60.549 | 20 |
| TTGCCTCAATCTCCATAAATCA   | 59.547 | 22 | CCCAAATTTGGGGAAGAAAT   | 60.159 | 20 |
| GCGTAGACGGAATAAAATTCG    | 58.775 | 21 | GATAGCGATCGTGAGAGGGA   | 60.326 | 20 |
| CCAGGGAATCTTTTGAGCAC     | 59.67  | 20 | GTGGGTGCCTAGGTTTTCTG   | 59.592 | 20 |
| GCAGTTGGTCAGTTCCCAGT     | 60.159 | 20 | ATACGAACACTGCACCACCA   | 60.032 | 20 |
| TGCATAATTGTAGATAATGGACCC | 60.114 | 24 | CAAATTAGTGTGAGCACCGA   | 58.833 | 21 |
| GGCAGAGAAAGTTGTGCCTT     | 59.478 | 20 | TGAAGTCTCTCCTCCGCAAT   | 59.95  | 20 |
| ACGGTGGGCACTACAAGAAC     | 60.035 | 20 | TCCATTCCATGTCACAAACG   | 60.367 | 20 |
| AGCGGGATGAAGAATTGAGA     | 59.773 | 20 | TCGACGACAAAACAACATCC   | 59.547 | 20 |
| AAATATCGGCCGTCAGATTG     | 59.923 | 20 | ACTCGGGTCATTGGATTGAG   | 59.927 | 20 |
| GCTTGGTTGGCTTGAGTTTC     | 59.859 | 20 | AAAAGGGAAGGGGAAGTGAA   | 59.912 | 20 |
| GCGGTTGGATTTATTGCTGT     | 59.967 | 20 | GAAAGGAAGAATGCGAGTGG   | 59.813 | 20 |
| TTCTCTTGGTTGGTGAAGAA     | 58.955 | 22 | TAAGTTGGAGTGGAGTCGCC   | 60.255 | 20 |
| CCTCTTGATTTTCTCGCTCCT    | 59.969 | 21 | GGTTCAAAAATCCGGGAAAT   | 59.999 | 20 |
| TATGGTGTGCGGTTTGACA      | 59.774 | 20 | TAGCCTTAGCCCCAAAACAA   | 59.715 | 20 |
| CAAACTTCACGAAGAAAACACA   | 59.34  | 23 | CAGGGTTCGTTTGTTAGGA    | 59.964 | 20 |
| AGAACTTGACGTGTGCGTG      | 59.946 | 20 | CTTCTCCAAAACCTCACCA    | 60.081 | 20 |
| ATGCTTAAAAGAAAGCGGCA     | 59.985 | 20 | CCCTAGTTAGCTCCTAGATATT | 59.882 | 27 |
| CGGTGGATGTCTTGGTCTTT     | 59.966 | 20 | AGACAAAGTGGGAGGGCTTT   | 60.11  | 20 |
| AAGATTTTCGGACATCGCAT     | 59.533 | 20 | CAAGGATGAGATGAGGGCAT   | 60.034 | 20 |
| GTTGCCGGATAATTCAAACG     | 60.323 | 20 | ACCTATGGTGGTATGGTGTAG/ | 57.076 | 23 |
| TCCAGTATACAATTCCAACAGGA  | 59.433 | 24 | CTTACCCATTTCCACCAAC    | 60.21  | 20 |
| TAGTTTGTTCCTCCGCAAAA     | 60.46  | 20 | AGGGAAAATAGCTACTCCCAT  | 58.662 | 23 |
| TTTCTTCTTGGATTATGCGA     | 59.668 | 21 | CTTGAAAACCTCAAGCCCAT   | 59.17  | 20 |
| CCCCTAACCCAACCCATTA      | 59.541 | 20 | TTGGGATTTTTGGTTTGGAA   | 60.138 | 20 |
| TCCGAAATGTAACAGGGGAA     | 60.301 | 20 | TTATTTGCACGCGCAGTAAT   | 59.379 | 20 |
| TGTTTTGTAATTTCCCATGTTTGT | 59.577 | 24 | CGGCTTCTCTATCAGCCAG    | 60.11  | 20 |



|                          |        |    |                        |        |    |
|--------------------------|--------|----|------------------------|--------|----|
| GGAGAGAGAGAAAGCATGTATTC  | 59.934 | 25 | CCTCACCACCTCAAGCTTTC   | 59.844 | 20 |
| CCGCTTTCTCATTCTTCCA      | 60.323 | 20 | GGTTTACACGTGCGAGGAGT   | 60.179 | 20 |
| CCCTTAGATGTCTTCATCCCAA   | 60.312 | 22 | CACCAACTGCTTTATTGCCA   | 59.729 | 20 |
| AAATGGTCCACATGTTGTAAAAA  | 58.335 | 23 | TGATGAACTCGTCAATTGGAA  | 59.112 | 21 |
| TGAAAGGAAGCCAGAACTGAA    | 59.978 | 21 | TGTTGGGTTGGTTTGACAGA   | 59.976 | 20 |
| ATCGTATGCTGCCCTAAAA      | 59.569 | 20 | CACGTGTGGACATCCATATCA  | 60.256 | 21 |
| TGTGCTATCCTAACCAAAAGC    | 57.092 | 21 | TGCCGTGTAAATCCATCAAT   | 58.846 | 20 |
| AAAATCAAAGGCCCAACAATG    | 59.801 | 20 | TCGGACCAAATTACCCTTCA   | 60.301 | 20 |
| ATGAATTTTCTGCGAATGGG     | 59.901 | 20 | GTGGTGCTTAAAGTAGGCCG   | 59.769 | 20 |
| TTTGGGGTCTTCTGTCAAGG     | 60.081 | 20 | TTTGCAAACCCTACTTCACTCA | 59.785 | 22 |
| ATTGCCCATGAATGTCACCT     | 60.203 | 20 | CCTTCTCGAGATATTACTGGCG | 60.237 | 22 |
| CAATCGGCACACAAAAGCTA     | 59.872 | 20 | GCCCTATCACAACTCCGAAA   | 60.074 | 20 |
| CACAGAAGGAAAAGAGCGAGA    | 59.743 | 21 | CTGATCCAGCGATTCTTTCC   | 59.773 | 20 |
| ACTAGGCATGGAATCCGAGA     | 59.653 | 20 | TCGAAATCAGCATATCAAAC/  | 59.616 | 23 |
| CCCACAAAGTTCCAATCTTTTA   | 58.163 | 22 | ATTGTGCCCTATTCAACCA    | 60.192 | 20 |
| CTTACGGCATTAGAGATAATGATT | 58.452 | 27 | TTTGTGTGCATGGAATTTTTG  | 59.453 | 21 |
| TTCTAACAGAATAGAGCTTGGGG  | 59.705 | 24 | CACAAATTTGGGTTGCCAG    | 59.949 | 19 |
| ATATACGCCACATGCGATT      | 60.203 | 20 | AGGAGGTGGTGTACTGCTGC   | 60.329 | 20 |
| TATGGCCAATTCCGAACCTT     | 59.411 | 20 | GCAATGAATTAGCACCCACA   | 59.548 | 20 |
| TTTGAGCAGTTCCAATCTCTTG   | 59.494 | 22 | GGCCTCTCTGACTCGATG     | 60.096 | 20 |
| TTCTCGTACACGTGTCCAGTTT   | 59.702 | 22 | GCAAGATAAGGGAGTTGGCA   | 60.214 | 20 |
| GGTGGTATTTCTGTGTCGTGA    | 59.42  | 20 | TTACATCAACCCGTCAACCC   | 60.615 | 20 |
| GGGTCATCATGGGATCAAGT     | 59.593 | 20 | CCAGCGCAGACAGAATACAAT  | 60.285 | 21 |
| CTTAAGCCGAAAATTCCACG     | 59.715 | 20 | TTTCTGAGTCCACGAGTCC    | 60.238 | 20 |
| GGTGATTGAAATGATTAGCAACA  | 60.239 | 24 | TTCTGTATTAAGGTCACGGC   | 60.011 | 21 |
| CATCCGGGAGAAGGGTTAGT     | 60.319 | 20 | AGCCAGAGACTCGGATTCAA   | 59.95  | 20 |
| ACAGGAGCTCAGGGACTTCA     | 59.986 | 20 | CACCAGGCAGCACTAAAAGA   | 59.072 | 20 |
| CATGGCAAGCTTTCTCCTTC     | 59.955 | 20 | CCAACCTCCATTAACAACCC   | 59.146 | 20 |
| CAATTCCTCCCTTGAGACA      | 60.042 | 20 | TGAGGCTTTTAGATCGACCG   | 60.344 | 20 |
| GGTGTGGTAAAGACTTGGG      | 59.592 | 20 | GGAGCTGCTCTTTGAGATCG   | 60.24  | 20 |
| GCACCTGTAACACCCACACA     | 60.487 | 20 | CCCGTATATTCACGACTCGTTT | 60.257 | 22 |
| TGTTGCTTGTCTTGCACC       | 59.888 | 20 | AGCAAATTATTCACACCCGC   | 59.967 | 20 |
| ATTAACCTCGCTCGGATG       | 59.182 | 20 | GATCGACACATTCAGGCAA    | 59.654 | 20 |
| CAGAGACCGAAACCGGATAG     | 59.688 | 20 | CCTAAAAATCACCGTCGGAA   | 59.931 | 20 |
| TAGGGCCCTGCTAAAATTCA     | 59.677 | 20 | CATTTTGTGAGGGGTGAT     | 59.79  | 20 |
| TCGCTACATTTACGGATTGTG    | 58.713 | 21 | TTTGCTTAAATGGATCAATGG  | 58.98  | 22 |
| GCGAGAACCACAAAGCTCTC     | 60.142 | 20 | TGATGCGCATGAGATAGGAA   | 60.329 | 20 |
| CAATTGTTGCAAACAACCAAA    | 59.495 | 21 | GATTTAGTTTGGAATCGGC    | 59.51  | 20 |
| CGGTTGTTCCATCTCTAATCC    | 58.516 | 21 | CCAAGCCACACATCTCTCAA   | 59.831 | 20 |
| TGTTGGCGTTTTAATCTCCC     | 59.938 | 20 | CCGCACCAAGATTTAACCAT   | 59.823 | 20 |
| CATGTGTGTCGCTTTGATCC     | 60.12  | 20 | TGCGTTTTGACGATATATAGTG | 59.092 | 25 |
| CCACATTTAAGGGTTATCACCTG  | 59.654 | 23 | CTTTGATTTGCGTTGATTGG   | 59.157 | 20 |
| GGGATTCAATCTAGTCGACAATC  | 58.974 | 23 | TGCAGCCATATCTCTTGACAG  | 60.119 | 20 |
| TGCTAGAGCCCTTGATTTCC     | 59.41  | 20 | TGATTGAAATATGCCACCGA   | 59.891 | 20 |
| GAAATTAAGAATGTGGAGTGCAA  | 58.311 | 23 | GAGGCAGCATACCCATCACT   | 60.104 | 20 |
| CCAAAGGTGAAAATCGCACT     | 60.11  | 20 | TTGCGCTTTTGTGTTGTGAAA  | 59.321 | 20 |
| TGAATTCATTTATTTATTGTCGAT | 59.996 | 27 | CAGACTGATGGTCAAACAGAG  | 59.762 | 22 |
| ATGTGTGATGTATCCCGCT      | 60.226 | 20 | TGCCTATATTTTTGCGAGGC   | 60.192 | 20 |
| GTTTTGCAGGATGGAACCTCA    | 58.697 | 20 | TGTTGCCGTTTGATTGAAAG   | 59.706 | 20 |
| ATAACCCGGTCAACAAGCTG     | 59.993 | 20 | CTTCTCCCTCTTGCTTCCCT   | 59.95  | 20 |
| CCACGTGGAAGGACTGAAAG     | 60.68  | 20 | CAACTTTTCTCATGCGTCA    | 59.84  | 20 |
| TTTGAGGGGTGGATTTGTTT     | 59.767 | 20 | ACAGCATACAGCAGTTTCGTTT | 58.978 | 22 |
| ATCCGGAGTAAGTTCGAGGA     | 58.741 | 20 | AATTTACCAAGATGTCCAAG/  | 58.554 | 22 |
| GTTTGAGGCGGTACAAAGGA     | 60.11  | 20 | AGTTTTGGTGAAGACCGCAC   | 60.156 | 20 |
| CAAAGGATGAAAACGAGGGA     | 60.044 | 20 | TTTTCCGATGCTTATCCGTT   | 59.547 | 20 |
| GTTCAATTGGCTGAGGCATTT    | 60.081 | 20 | CGTTGCCGGTTAAAGCTAGT   | 59.424 | 20 |
| AGCCGTAGAGCCCTGTATGA     | 59.859 | 20 | GGTTTATCCATGACGCGTTT   | 59.829 | 20 |
| TTCTTCTTTAGAGTCGTTGC     | 59.892 | 22 | AAATTTTATGGGACGGAGGG   | 60.013 | 20 |

|                          |        |                           |        |    |
|--------------------------|--------|---------------------------|--------|----|
| GATCTGGTCACGACAGCTTTT    | 59.347 | 21 GAATCCAGAAGGGCAGTTGA   | 60.195 | 20 |
| TGTTATGATGGGAAGAGGGG     | 59.744 | 20 ACGCGCGTTTTTAGGGTTTA   | 61.796 | 20 |
| TGATTTGGCAGTTTGAGAGG     | 58.847 | 20 CCTCGACTTGACAACCTTTGC  | 58.497 | 20 |
| AACGTAAATGAGAAACATGCAAC  | 58.249 | 23 AGGTTTTTCAAACGATTGCC   | 59.067 | 20 |
| ATTTTCGAGCCAGACTGCT      | 60.02  | 20 GGAACTCCTCGATTGCTCTG   | 59.95  | 20 |
| TTCCCTACAAAACGAGACCAA    | 59.595 | 21 CCAAACCCAAACAATTTTGC   | 60.202 | 20 |
| TACGTAAAAACCTTTTCGCC     | 59.12  | 20 ACCATATTTAAGGGTTATCACC | 57.552 | 24 |
| TTCCATGATCAGAACGGATTG    | 59.886 | 21 ACCAATCTTGTTCTGGGTTCTT | 59.856 | 21 |
| TCACATCGGAAATTCGTCT      | 60.461 | 20 TGAAAGCGATTGTAAGCGTG   | 60.014 | 20 |
| GTGGGCAAATCAAATGTTCC     | 60.177 | 20 TGCCTTTTGACGATATATAGTG | 59.092 | 25 |
| GCAGAAGCGGGAACACTACTG    | 60.015 | 20 TTTCCCTATCTCTCCCAGCA   | 59.767 | 20 |
| GGTGACAGGCAGCTGAATCTA    | 60.412 | 21 CAAACTCCAAAGTCCAAACTC  | 60.012 | 22 |
| TTGGGGTTTTTCATTTTGAGG    | 59.772 | 20 TTTCCCTCTCCATCTCTAGCA  | 59.017 | 21 |
| TTTTGACGGGGTAAAATAAAACA  | 59.66  | 23 AGAATCTGCTTTGCCAGAA    | 59.955 | 20 |
| AAAAACATCGCTCTCTCCCC     | 60.578 | 20 CCTTCGAAAACACCACCATC   | 60.353 | 20 |
| TGGAACAGTTTGACACAACCA    | 60.033 | 21 CCGTTTTTCTATTTTCGTGC   | 59.586 | 20 |
| TCGTAGTCCCCTTCAGATCG     | 60.21  | 20 GAGGTGGTGGAGTGGTGTG    | 59.984 | 19 |
| ATGCTTGAAGCTATGGGTGC     | 60.243 | 20 CAAGAGAGAGGCCAGGAGAA   | 59.673 | 20 |
| AGCTACTGCCTCAATTCCCA     | 59.836 | 20 TTTTGATGATATATAGGTGTTT | 58.782 | 27 |
| ATCCCTCTACCGCCTTAGGA     | 60.053 | 20 TGAAAACACGATAAGCGACG   | 59.872 | 20 |
| TGCAAATTTACCAAGAACG      | 59.706 | 20 GACATGTCGCTCATGTCACC   | 60.13  | 20 |
| AATCGAAAATAACGTTGGCG     | 59.964 | 20 ACCTTTCTCACCTAATTACAAC | 58.919 | 24 |
| GCTATGCAGCCTCCATCTTC     | 59.946 | 20 TGCACGATTTGACTTGCCTA   | 60.401 | 20 |
| ATCATAGCCACGCATGTCAC     | 59.558 | 20 TCTACGACCACAATTTGTCCC  | 59.845 | 21 |
| CTTATTTCAAACGACCCCG      | 59.447 | 20 CAGACGGAAGCTAATCGGAG   | 59.971 | 20 |
| AGCCTCTGATTCACCCTGA      | 59.803 | 20 CAAATATTAGGCCAAAAACGC  | 58.687 | 21 |
| ACTCACACACCCATATGTCCC    | 59.57  | 21 TGAATTTCCATCGTTGATTTGA | 60.302 | 22 |
| TTTGCCCCTCAACCTAGAAA     | 59.679 | 20 TGGATGAAGGGGAGAGTGAG   | 60.191 | 20 |
| AACACATATGGGGACACGCT     | 60.263 | 20 TTTTCATCATAATATTGATTTT | 59.604 | 27 |
| ATGCGACGTATTGAGAAGCA     | 59.449 | 20 CAAACTAATAGCAATGGCCGA  | 60.102 | 21 |
| ATGTTCTCTCAGGCCACCAC     | 60.12  | 20 TGGAGGGATTTGTTTTCCAG   | 59.903 | 20 |
| TGGGTGAAAAGAAAAGGCAC     | 60.088 | 20 TGGCTCAAAAAGACAAGTCCC  | 60.232 | 20 |
| AAATGTTGGCTTCGTATCGC     | 60.103 | 20 GTGGGGATGGGAGGTTTATT   | 59.881 | 20 |
| CAAGTCAACAAGCAAGCCAA     | 60.027 | 20 GATCGTAGGGATAGAGGGGC   | 59.888 | 20 |
| CCATCTCGAAAAGATGGGAA     | 60.006 | 20 TTTGTTATTTTCGGGGTCTGG  | 59.795 | 20 |
| TGGCTAAAGATCGATGTGACTT   | 58.861 | 22 AATTTTGTGAATTTGGCCGT   | 59.32  | 20 |
| TTGGGCGAAAATACCCCTAT     | 60.508 | 20 GGGCCATAGATCTTGTGGAA   | 59.894 | 20 |
| TACAAGTGCAGCGGAAATGA     | 60.401 | 20 TCCTTGAATCCAGGTTGAGG   | 60.042 | 20 |
| AGGTTATGGTTCTTGATGGGG    | 60.06  | 21 CCCAATTTACCATCCTTCA    | 60.692 | 20 |
| GCGGTGGTGGAGAGAAAATA     | 60.074 | 20 GAGGGGTGGTTGAAATGATG   | 60.173 | 20 |
| GCATCGGGGCAATATTTAAG     | 59.415 | 20 CCAACGGGTAGATACCCAAG   | 59.308 | 20 |
| CACACGCGCATATCAGTTTC     | 60.288 | 20 GGTGTTGGCTGGAATGAGTT   | 59.973 | 20 |
| ATAAGGTGGCGATGAGTTGG     | 59.955 | 20 TCCATCAAATCCAGGTTGGT   | 60.173 | 20 |
| GGACACGTTGGACCTGAAAG     | 60.545 | 20 GGTTTCGAAAAGGTTAGGCT   | 59.593 | 20 |
| GTACCGCTGGATAATCCCCT     | 60.173 | 20 TTTGTGGTATCAGAGCCACG   | 59.716 | 20 |
| GAAAACGGAGACGACGACAT     | 60.119 | 20 CGAGAAAACAAAATTATACG   | 59.565 | 26 |
| TGGTTGTCACATCTTCATGC     | 58.019 | 20 TCGTTTTTGCCTCGAGAACT   | 60.944 | 20 |
| GTCAATGTGGGTGCTGTGTC     | 60.013 | 20 GGCATGTGAGGATGTTTGTG   | 59.967 | 20 |
| TGCATGGTCTTCGAAAGTAGGT   | 59.749 | 21 CAAGAGACGCATTAAGACGC   | 58.677 | 20 |
| TCGCATGCAACGATAGTAGG     | 59.856 | 20 CATTACACCAAGAAGGGGA    | 60.892 | 20 |
| TCAACGCAAAGTCCCTATCC     | 60.074 | 20 ATTCCCATCATCAAACCAA    | 59.991 | 20 |
| ACTTCACCGCCAAAACCTCTG    | 60.291 | 20 TGAGTGCGTGAAATCGAAAG   | 59.988 | 20 |
| TGATACATAGTGTTATTCTTTGGC | 59.504 | 25 TTTTAGTGTGGGGACATCCG   | 60.745 | 20 |
| GGATCTATTAACCGCCCC       | 58.856 | 21 TCGGATATTTTTGCTCACCC   | 59.901 | 20 |
| TTATCAGGCTGCCTACTCGG     | 60.365 | 20 CACAAGAAAATTATTGTCGCTC | 59.307 | 23 |
| GCAGGACAACACTACCATACGGA  | 60.008 | 21 GGTATCCATCTCGCCCATAG   | 59.368 | 20 |
| TTTGGGGTTTGTGAGGAAG      | 59.942 | 20 AAGACCCCATTTCCCCTAAA   | 59.639 | 20 |
| AGGCGTGTTTAGGCATCAAT     | 59.597 | 20 GGTCTCACGGGTGGTTTTTA   | 59.83  | 20 |

|                          |        |                           |        |    |
|--------------------------|--------|---------------------------|--------|----|
| CTTTGAGGTGGGCCAAAATA     | 59.931 | 20 CACCGCGTCTTTTCACTACA   | 59.904 | 20 |
| AACCCATGTTCTTCAGTTGGA    | 59.439 | 21 AATCATGGTGCACGAAATTG   | 59.4   | 20 |
| GTGCTGTTAAGCATCCCCAT     | 59.962 | 20 GCCCTTTCCCATATCAAAT    | 59.984 | 20 |
| CTGAAATCTCGCATCCCAAT     | 60.036 | 20 CTCTTGACTTCTGATCCGGC   | 59.95  | 20 |
| TGTCGATCGGTTAGCAATGA     | 60.22  | 20 CGAGATTCTCTCTCGCTCTCA  | 59.981 | 21 |
| AATGCGCCTATCACTTTAATTC   | 57.518 | 22 GGCAAGCTTGGGTATGTGTT   | 60     | 20 |
| CCCAAACCTTGGTTGCTCTTC    | 59.711 | 20 CTATCGTTCGATTTGCGGTT   | 60.096 | 20 |
| GCTATGAATGGCATCGAAGA     | 58.823 | 20 TGTTGGTGCTTGATGGTTGT   | 60.008 | 20 |
| GCAACTTTTGTACTCAGCCCT    | 58.525 | 21 CCAAACGACATTATGACGCA   | 60.523 | 20 |
| TTCCCAAATAAACCGTCAGC     | 59.938 | 20 AATGCTTCAATATCCGCCAG   | 60.06  | 20 |
| ACTGACATTCACAGGCATTG     | 57.067 | 20 TGTGTCGCGAATTTTGAACA   | 61.233 | 20 |
| GCCCCTTTGAGCCTAAGGTA     | 60.573 | 20 GCTCTTCTCAACCCTTTTATGC | 59.398 | 22 |
| TCCTCAGAACTTCAACGCTT     | 59.111 | 21 GCTTTTGTGCCGCTTGTAAAT  | 60.272 | 20 |
| ACTATCGACGTCCGGAGCTA     | 59.859 | 20 ATGTCACCTGCTCATGTTGC   | 59.714 | 20 |
| GTCGTTTACTCTTCCGGCT      | 58.462 | 20 TCCGTTGTATTTGTTGGGT    | 60.088 | 20 |
| TGAAATGGATCACATGCAAAA    | 59.922 | 21 GGTTGATGACGGATTTGTGA   | 59.348 | 20 |
| ATGACGAAAATTGCTTTGATCC   | 60.32  | 22 GAAACACATCGTTTCCTGGG   | 60.353 | 20 |
| ACCCAAAACCTCCCATATCC     | 59.881 | 20 TCTTTCCATCGGACCAAGTC   | 60.05  | 20 |
| AGATTGGGCTATTCGAGCCT     | 60.194 | 20 ATACACGTCGCCCTTCAATC   | 59.962 | 20 |
| GGAAACAAGTGGATGACGGT     | 59.827 | 20 ACAAAGCACAAATTGGGAAA   | 59.483 | 21 |
| GCAGTTTTGTGTGCCATGTG     | 60.064 | 21 TAACCTGCAACGGTCAAAAA   | 59.202 | 20 |
| GGTTGGATAATACATGGCGG     | 60.038 | 20 CTCTAGAGTGTTCGCGGTGC   | 58.677 | 20 |
| TCCTTTCGAATTTTCTCTTTT    | 59.631 | 23 ACGTGGAGTTCCAAATGCTC   | 60.119 | 20 |
| TGATCCTCCTAGGATAACCG     | 58.149 | 21 AGTATGCCGTTTTCTCTCCA   | 59.569 | 20 |
| GTGCGTGTGTGTAACCGTGT     | 60.556 | 20 ACCTCCTCTCCGTCGCTAGT   | 60.414 | 20 |
| ATCGAGGAGCTGTCATCCAA     | 60.769 | 20 TCTCTCCCTTTTCTCACGGA   | 59.92  | 20 |
| GACTACGTGATCCAACGGT      | 59.997 | 20 TGGTTATTACTGGAACGCGA   | 59.182 | 20 |
| TAGGGGAGGATCGAAGGATT     | 59.859 | 20 TCTTCAAAGGAACCGACTGG   | 60.224 | 20 |
| CACAATCCATCTTCAACCCA     | 59.343 | 20 ACCGGGTTTTCTTTTGT      | 59.72  | 20 |
| GGACCCAAATGATTGTACGG     | 60.051 | 20 CCCCAAATGGAGACGATAAA   | 59.756 | 20 |
| CTTAAAGTGCGGCCAAACG      | 61.68  | 19 AAGGTGACAATTGTGATAGCC, | 59.499 | 22 |
| TTATCTGGTCCGTATGGCGT     | 60.352 | 20 ATTTGTACGGCGTTTCCTCA   | 60.502 | 20 |
| TAAGTTGGCCTCTCGATCA      | 60.734 | 20 TCTGCACACCAATCGTATCC   | 59.527 | 20 |
| GAAACACGGAAAAAGCATGG     | 60.481 | 20 TGGGTGGTATTTGGTCCGAT   | 59.532 | 20 |
| ACAATGATGATGCCAATCCA     | 59.738 | 20 AACGCTCCAGATTTTCATGCT  | 59.843 | 20 |
| CAAATGGCCGAGAGGATTTA     | 60.031 | 20 CTAAGCATGGCAGCCAAAT    | 60.23  | 20 |
| CGCAGCAAAGTAGCATA CGA    | 60.177 | 20 GCGGAAAACAGGAAGGGTAT   | 60.32  | 20 |
| TTTAGTGTTTTGACATGATTACTC | 57.557 | 25 CCTCATATTTTCGAGAACC    | 59.528 | 20 |
| GCGTGTGGGAGTTGGTAAAT     | 59.859 | 20 CCCAAATGCAAGCTGTACCT   | 60.132 | 20 |
| TGAACTAATCAAGTCCGCAT     | 57.379 | 21 AACCCGCTTATATCGTGTCG   | 59.982 | 20 |
| TAGTAGGGTGCAGGGGATTG     | 59.948 | 20 CCACAGCTATGCCTAAGTGCT  | 59.553 | 21 |
| TCCCGATAGGCTTGAAGGAT     | 60.92  | 20 GGCATTCAAATCAACCATTG   | 58.82  | 20 |
| CTACATGGCCCTGCTCATTT     | 60.096 | 20 GGTCCGCTACATGAACCAA    | 60.894 | 20 |
| CGTGAAGTCCATCTCCCACT     | 60.112 | 20 AGTAGGAGGAGTGATCGGGG   | 60.468 | 20 |
| ATTAATAAAATTTGGAATGATAGA | 57.111 | 27 AACAACGGGAAAGTGAGCTG   | 60.291 | 20 |
| AAACTACCCTTGATCGCACG     | 60.132 | 20 ATTGAGCAGTTATCACCGGA   | 58.173 | 20 |
| CGACTCAGTCATGCACCATT     | 59.707 | 20 AAAAACGGGGCTAAGGATTG   | 60.305 | 20 |
| TGAAGTTAGGAATTAAGGAGGTG  | 58.743 | 25 TGAACTCACAAAGTATGGGG   | 59.838 | 21 |
| TTCCTCACGAATAAACCAAGC    | 59.215 | 21 TGAGAAGGGATTCGAGTTGC   | 60.34  | 20 |
| GAACGATTTGTTATCGAGGGA    | 59.033 | 21 AACCCCATGAAGCAGAGATG   | 60.073 | 20 |
| TTTGACTATGTCTGCGTGCC     | 59.871 | 20 TGCACGTGAATGCTTTATTTA  | 57.051 | 21 |
| CCTACAAAGCCACTCTAAGCG    | 59.187 | 21 AATGTTTTCGCCACGTGTTT   | 60.407 | 20 |
| ATCGGCTTATGTGAGGAACG     | 60.096 | 20 TGGTGATGTGACTTTTGGCA   | 60.019 | 21 |
| AATATGATTTACCCGGGACG     | 59.645 | 20 AGGACTCACTGAAGGAGGCA   | 59.986 | 20 |
| TCACAAGTGCAAGCACAATTC    | 59.903 | 21 CTTGCGTTTGATTGTTGAG    | 59.464 | 20 |
| TCGTCTAAGAAGGTGCTTT      | 57.671 | 20 GGAGCAAGAACTTGAGGCAT   | 59.434 | 20 |
| AGCGCTGAATGTCATTGGAT     | 60.634 | 20 ACCGATTTTGTTCCTTTTCAA  | 58.592 | 21 |
| TGGGAAGGGTTGTTACTGGA     | 60.345 | 20 TGAGGGGAGTGTTGAGATGA   | 59.18  | 20 |

|                           |        |    |                         |        |    |
|---------------------------|--------|----|-------------------------|--------|----|
| TGGCTGTGAATTGGAGATGA      | 60.201 | 20 | GTGACATTTTTAGGCGGGAA    | 59.938 | 20 |
| CCCTAGCTTTGCCCTCTTC       | 60.332 | 20 | CTCGTATGTACCGAATGCGA    | 59.712 | 20 |
| CAAGTAAGCGAGATTTTCTACATT  | 58.649 | 25 | AAGCCTAACAAAGTGGATATTA/ | 58.116 | 26 |
| TGATATCTTTGAAGAACAATTACA  | 57.905 | 27 | CCCTAACTCGACCCAGATCA    | 60.065 | 20 |
| GCACCTCCAATTGCTTTCTC      | 59.82  | 20 | CAGGTAAAACCTAAAATAGCG   | 60.36  | 23 |
| ATTCATTTGCGGGCTAATCCA     | 59.369 | 20 | TGGTTACTGGAACGCGA       | 59.182 | 20 |
| TGGATTGATGATGATGAGATTTT   | 58.381 | 23 | AGGCATACTTGGTTGATCCG    | 59.955 | 20 |
| CCTTCTCCGTCTGCAAACCTC     | 59.989 | 20 | CACACTAGGGCTTTGCTGCT    | 60.592 | 20 |
| TTGCACAGCCCTAATGCTAC      | 58.945 | 20 | AGCACTCCCTTTTACCACCA    | 59.592 | 20 |
| AATGTCGTTTGGCTTGTGGT      | 60.419 | 20 | TCTTCGATTGGAGTTCAGGC    | 60.34  | 20 |
| GCTGGTTTGAGGGAGATGAG      | 59.803 | 20 | TCAACTCCATTTGTATACTTCA/ | 59.068 | 26 |
| CCAATTTACTAATTCTTGATGAAT( | 59.314 | 27 | CAGATCTGATGGCCAGATT     | 60.034 | 20 |
| GTGGTCTAGGATGGGAGCTG      | 59.679 | 20 | TGATTCCTTCTCTGGCTGTTG   | 60.382 | 21 |
| AGGGGGTGGGAATTAACAC       | 59.919 | 20 | TGAACTAATCAAGTTCGCGT    | 59.761 | 21 |
| CGCATCCGACTCCTCAATTA      | 61.129 | 20 | GAATTTACCCTGATTCCAATG   | 60.542 | 22 |
| GTGAATGGGGATCAATTCCTT     | 60.01  | 21 | TCTTCGCTGTCTCTCAGCAA    | 60.008 | 20 |
| ATTAGTCTCCGCCCTCCACT      | 60.096 | 20 | AAAGGGAACCTTCTGTTTTAGC  | 58.034 | 22 |
| AGGGATCCCAAGGCACTACT      | 59.957 | 20 | CTTATTGCATGGCTTGGCTT    | 60.23  | 20 |
| TGGCTTATTTGGGCTCTTG       | 60.202 | 20 | ATCGGTTATTACCGGATCGC    | 61.031 | 20 |
| CGGCGGAGATAGACAGAGAG      | 60.111 | 20 | CTGGGCCACACCTAATAAA     | 59.817 | 20 |
| ACCATCAACCTCACCACTG       | 60.84  | 20 | CCTCTCTGCAACACCATTCA    | 59.831 | 20 |
| TGGTGGTGGAGAAAAGTGGAG     | 58.695 | 20 | ACCATCGAACCCACAAATA     | 60.051 | 20 |
| TGACATGCAGAGTTCAACAGC     | 60.048 | 21 | GGGGTGGGGTATGTTAGTT     | 59.805 | 20 |
| ATCCAATCCACATCCACTCC      | 59.593 | 20 | ATTTCTCCTCCATCATCCCC    | 60.096 | 20 |
| GCAGCCACAATTC AACATT      | 60.905 | 20 | TGCGTCAGAAAGGTGCCTAA    | 59.44  | 20 |
| CGGAAAATGGTTGGTGGTAG      | 60.22  | 20 | GCAAATCAAACCCTTGTCAAA   | 59.967 | 21 |
| CATGCCCATCTACCAAGACA      | 59.522 | 20 | ACTTCTCTGGCATCGCTTA     | 59.978 | 20 |
| TCAACATTTTTCCAGAATCG      | 59.924 | 21 | GAGCAGTTGGAGAGGGTGAG    | 59.986 | 20 |
| ATCATCAGTAGCGCCACCTT      | 59.723 | 20 | TGTTGCACCTTGTGCAGATT    | 60.31  | 20 |
| CGGACCGGACCGTAGATTA       | 60.858 | 19 | GATTTACGGTTTGGGCTTA     | 59.938 | 20 |
| TCTGAAAATCAAAGGCCAC       | 60.051 | 20 | ATCCGAAAATCAAAGCCC      | 60.26  | 20 |
| CATGTACGTTCTTCCCGTT       | 59.853 | 20 | CATGCACAGATTCCGTCACT    | 59.707 | 20 |
| AAACCAGTGTCTTGTTGGA       | 59.482 | 21 | CATGGTGCATGAAATTGGAG    | 59.924 | 20 |
| CGAAACCCCTTTCTCTCTCC      | 60.183 | 20 | CTTTTCGCAACTGGAAGAAC    | 59.853 | 20 |
| TCTCCCTCGGTAATTCCTT       | 59.897 | 20 | GCGTGTGAGTGTTGTTGTAAT   | 59.758 | 20 |
| AGGGGTGTATTAATAGGAGCA     | 58.188 | 23 | TCACATGAGATGATTAATTGGA/ | 59.343 | 24 |
| CCTCCATCATGAAAACCGAG      | 60.452 | 20 | CTGGAATAACCCAAGCCAAA    | 59.931 | 20 |
| TCTCCTCTGCACCAACCTCT      | 59.986 | 20 | TGATTCGGAGGAATACGAGG    | 60.029 | 20 |
| ACACAAAACCTACATCCCGTGC    | 59.912 | 21 | AACAGCAAATCCGAGACACA    | 59.293 | 20 |
| ACCAAATAGATGGCATTCAAGA    | 59.857 | 23 | CCATTTTCAGGTCCTCACCA    | 60.892 | 20 |
| TGGAAGTTCTCTCTCTCGC       | 59.679 | 20 | TCGGAGATCAGCTACGGTCT    | 59.973 | 20 |
| TATGAGAGTGGATCGTGGGC      | 61.037 | 20 | TGAAACTGCTGTATGCTGAGTT  | 59.424 | 25 |
| GGTTATGACTTGATCATGACCCT   | 59.231 | 23 | TGGCAAGAAAACAACAGCAT    | 59.322 | 20 |
| GCATATCAAATGGTGTGGG       | 60.067 | 21 | TCACAAAGAAATCAGCACGAA   | 59.454 | 21 |
| AAGGTGGCGTATGCTGAGAG      | 60.419 | 20 | TCAACGGTTTAAAATTGTTCTT  | 57.74  | 22 |
| CTCTCTTTCGTCCTTTTCCC      | 59.335 | 21 | TCCATCCACAGCAATGAAAA    | 60.049 | 20 |
| TTCCCGAGTAAGATGGATGG      | 59.887 | 20 | TCTTTCACTTCGATCCCACC    | 60.05  | 20 |
| CACTCCTCTTCTGCGTGGTT      | 60.444 | 20 | TGAGATTCTGTTTTCGGCTT    | 59.813 | 20 |
| GAACACACGAAGATTGGGAGA     | 60.104 | 21 | AGTATCGGCTTCGGAAACAA    | 59.708 | 20 |
| ACGGAATTCGGGGTAGAAT       | 59.666 | 20 | CATTGGGTGGAAGTGTAAGA,   | 58.994 | 22 |
| TGAAATCTTACTACTCCAAAAATC  | 58.36  | 27 | TTTGAGGAGGAAGAGGAGGA    | 58.937 | 20 |
| TCTTTGCGCTGACTTTTTCTTT    | 59.539 | 22 | TGGTCAGTTTGTCCGAATCTT   | 59.583 | 21 |
| AAGATCTACGTCCACGGGAG      | 59.162 | 20 | GCTGAAATTAGTTGAGGCACG   | 59.897 | 21 |
| CATGACTGCCAAGAAATCA       | 59.648 | 20 | TCATGTACCCACATGTCA      | 60.665 | 20 |
| CCACGAACATTCATCGGATA      | 59.35  | 20 | TTGGGTGTAAGACATAGAAG,   | 57.815 | 23 |
| AACAGAAAGCCACACATGTCAC    | 60.081 | 22 | GCGAAAACTCGAAAAACCA     | 60.223 | 20 |
| ACGGATTTAAGGGTTATTACCTG   | 57.667 | 23 | TGGATGATGTGATGTTTTTAGA  | 60.237 | 24 |
| CGCATTTCCATACATTTTTACG    | 59.407 | 22 | CCTATGGAAACTCAAATCCGA   | 59.03  | 21 |

|                          |        |    |                        |        |    |
|--------------------------|--------|----|------------------------|--------|----|
| CCAGGTACCGAAGGCATAGA     | 60.088 | 20 | CTCAACGGTATGCTCGGATT   | 60.096 | 20 |
| TGGCTTCAGCAGACAATGAG     | 60.136 | 20 | CTGGAACCTGGAGTCAGC     | 59.844 | 20 |
| ACGAGATCGAAGGGAGACAA     | 59.803 | 20 | GGAGAGAGGAGAACTGCGTG   | 60.135 | 20 |
| TCACGATGCGTCACAAGTTT     | 60.31  | 20 | TTCTCGCTTCTTCGCTATGG   | 60.617 | 20 |
| TGTTTTGGTAGCCACACAAT     | 58.9   | 20 | TGCCATTCTGTGCATCAACT   | 60.272 | 20 |
| TAAGGCAAAGCACGTGAGTG     | 60.05  | 20 | AAAGCCGATCGAGTTTTTCC   | 60.562 | 20 |
| TCAGATGAGTTGAATGGAACAGA  | 59.726 | 23 | TTGGTCAACCCCTTCTATCG   | 59.926 | 20 |
| CACTCGCATAAGTATGCATGAAA  | 60.164 | 23 | AATAGCGTGTGTTTTGCGTG   | 59.799 | 20 |
| TGCACGTTCACTAGCACACA     | 60.096 | 20 | CCCGTTTTGACTCTTTGAC    | 59.569 | 20 |
| CAAGAGCTTGAGCTCGGAGT     | 59.891 | 20 | ATGCTGCGTGAACAAAATG    | 59.735 | 20 |
| TTTTCAAATTGCATCCTAGCAA   | 59.732 | 22 | AACCGGTTAAAAATCGGACC   | 60.055 | 20 |
| AGAGTGGAGGCCATTTCTGA     | 59.803 | 20 | GCATGGCATGAAATTGTTGA   | 60.476 | 20 |
| TCAACAACCACTCCACTCCA     | 60.129 | 20 | TTTTTCCGGTGATGGATGAG   | 60.832 | 20 |
| TGCGTCAAAGCTCTTCAA       | 59.729 | 20 | TTGTCTAGCAATCTTCGAGTTT | 57.519 | 24 |
| TGGTCCAGATTTGTTCTACG     | 59.978 | 21 | TCGACAATGTTAAAAATCAAAT | 60.026 | 27 |
| GCACTCACATTTTCCCAAT      | 59.797 | 20 | TCAAGGAGTCACAACGTGAAA  | 59.324 | 21 |
| CTCAAATTGGAATTGGGCTG     | 60.439 | 20 | TGATGAACAAGCCGAACAAA   | 60.234 | 20 |
| GGGAGAAGAGAGAGTTAGGGTG   | 58.483 | 22 | ACGATCGTAAGGCGAAATTG   | 60.096 | 20 |
| CTTGAGCTTTGATCCTTGC      | 59.955 | 20 | TTACCCAACCCACTAACCCA   | 60.081 | 20 |
| AACCACCTTTACAAATGAGCTAGT | 57.599 | 24 | CGGACCTGCAGGAGATTATT   | 59.15  | 20 |
| TCACTTCATTACGAAAAACACCA  | 59.544 | 23 | GCAAATGCAATGACTGTTGG   | 60.119 | 20 |
| TGTGTCATCTAGTCCGGTGG     | 59.545 | 20 | GAGCGTTATTACCGGATCG    | 61.686 | 20 |
| TCCATTTCTCCACCGTTAG      | 59.926 | 20 | TACTGGATGGATACCCGAGC   | 59.917 | 20 |
| ACGGTAATTCACCGACCAAA     | 60.227 | 20 | CCAAGATCAATGGTTCCTAAGT | 59.879 | 23 |
| AAAAGTCATCCGCTATCTCGAA   | 60.224 | 22 | ACAATGCGAGTGCATTTTTG   | 59.735 | 20 |
| TTTTCACTTTGACCCCTTCTC    | 59.571 | 22 | GCAGTGTGTTTGAAGGAACA   | 59.888 | 20 |
| AAGCTGCATGCATTTAGAG      | 59.178 | 20 | GGGCTCGAAAATTGAAGTGA   | 60.192 | 20 |
| GCGCCGCTATCACTTTA        | 59.937 | 18 | CAGCTGAAAGGAGCCATCTC   | 60.096 | 20 |
| AGCGACGAACGGAAAAAGTA     | 59.883 | 20 | TTCGAAACACCCTGACATGA   | 60.088 | 20 |
| CCACATTTTCCCGATTGTT      | 59.662 | 20 | GCTCAAGGATTTTCGCAGAG   | 60.096 | 20 |
| AATGAGCAAAACGGTCCTTG     | 60.11  | 20 | AATTCTGTGCTGCTGCTGTG   | 60.207 | 20 |
| CAAAAAGGGATGAGCGACAC     | 60.636 | 20 | TCATAGGTAAAGCCGCAACC   | 60.096 | 20 |
| TGTTTCCCATTTTACCACA      | 59.792 | 20 | ATCGTCGGAATGGTAGTTGG   | 59.813 | 20 |
| CCAAGATAATGCCACCCAAA     | 60.692 | 20 | GGCTCAACAACACAATTCCA   | 59.547 | 20 |
| CTGCAAATGTCACACGTCAA     | 59.298 | 20 | GCTTCATGAATGGCATGACT   | 58.674 | 20 |
| ATTTCTTACAAAGCCATGC      | 60.081 | 20 | TGCAGTTCATCTTTCCTCA    | 60.539 | 20 |
| AAACTACGAACACACGCAC      | 59.801 | 20 | AAGAAACAACAGGGTACGAC   | 59.56  | 22 |
| GCATGCTAGCCTTGGCTTTA     | 60.497 | 20 | TTGGTAGGGGTCAGCACAAAT  | 60.375 | 20 |
| AAGAGGAGAGACGGAGAGGC     | 60.096 | 20 | GTGGCGTGGACTCTTTCTTC   | 59.851 | 20 |
| GGCGATCCTAAGAAATGCTG     | 59.807 | 20 | AGGTATCGTTCGCGCTGTAG   | 60.428 | 20 |
| GAAGTAAACGGCCAAAGTGC     | 59.752 | 20 | AGCAAGAAGGTTGCAACTGA   | 58.65  | 20 |
| CGAAATCTTACTTTGCGGCT     | 59.496 | 20 | CATGTCAACTGTGCAAGGGA   | 59.676 | 20 |
| CATCAAGTTTCCAAGGCAT      | 59.933 | 20 | CCGCTCACTCAATTCTTCGT   | 60.397 | 20 |
| TTGGTTGGTGAAGAAATCA      | 58.947 | 20 | GTCCGGAACAAGGGAAAGTT   | 60.34  | 20 |
| GACCGGGCTCACAGAATATG     | 60.483 | 20 | TAGCCTAAGTCGGGACAGGA   | 59.83  | 20 |
| TGCCAAAAACATTTCAACA      | 59.946 | 20 | AGAGGGCTTGCCTTTTGT     | 60.242 | 20 |
| AGGGGTTATCACCTGAATGC     | 58.864 | 20 | GAGAGAGATCGAGCGTGACA   | 59.239 | 20 |
| TGTTATCCTTTGTGAGCCCC     | 59.933 | 20 | CCTTCTTTTCTCCCGATA     | 60.382 | 20 |
| TACCACCTCCATGTTTCGTC     | 59.96  | 20 | TCGACTTGTGCAATCAGTCC   | 59.837 | 20 |
| CTGACATTTGACCTGAGCGA     | 59.984 | 20 | TTCTTTGGACAAAATGCC     | 59.916 | 20 |
| TTGGAAAATAACATGCATAGAAA  | 57.857 | 24 | TTTAAACGGCACGAGTTGGT   | 60.534 | 20 |
| AAACCAGAATGGAACCGGA      | 59.526 | 20 | ACGACACTCGAATGGAGGAA   | 60.656 | 20 |
| GCCGTAGTAACTCCAGCCAC     | 59.763 | 20 | GTGTGTGCGTGAGTGAAACA   | 59.321 | 20 |
| CTAGCAGGTCGACACGAACA     | 60.049 | 20 | CTAGCCGTTGGTGGGAGTAA   | 60.125 | 20 |
| TCATCTCAAATTTTATTGTGGA   | 58.066 | 22 | CCACAATATGTGGGGAAAAA   | 59.71  | 21 |
| CCACATACCATGCCAACAGA     | 60.39  | 20 | CACTCGAAAAAGGCATCCAT   | 60.074 | 20 |
| CCGAATGAAATTTTGTGTTTTCC  | 58.826 | 23 | TCGTTTTAGTTGGCCATAATCT | 57.848 | 22 |
| CCAATCCTTGACATTTTGG      | 60.162 | 20 | TTTTTCAGCACCACTTCA     | 57.867 | 20 |

|                          |        |    |                        |        |    |
|--------------------------|--------|----|------------------------|--------|----|
| GGCCAAGTTGGTGAAGTAGG     | 59.592 | 20 | GGACAGGCCCTGGACTTTAT   | 60.328 | 20 |
| TAAAAACACAGCCTCCCTGC     | 60.249 | 20 | TCTGAAAGGGATGACAGAATG  | 59.67  | 22 |
| CGTCGTTTCGTGTTCTTTCA     | 59.881 | 20 | GAAAGAGAGCCACGTGTGTG   | 59.467 | 20 |
| TCATGGTTGGGTGTTTTATCA    | 60.089 | 22 | TTTTCAAATCAGGCGCATA    | 59.286 | 20 |
| TTGATCCAAGGGTGATAATGG    | 58.694 | 22 | CTCTAACAAATGCCAGCCGT   | 60.27  | 20 |
| CGCTCAGGTTTGAATCTGTTT    | 59.369 | 21 | TAAATGCCCTGCTGTAGGAA   | 58.387 | 20 |
| CATGGTTGCAAAGGTGATTG     | 59.964 | 20 | TGTTGTGCAGTGGAGGACAT   | 60.162 | 20 |
| CCATATTTAAGCCCCAGCAA     | 59.922 | 20 | ATGCTTAATGTGCATGTGCG   | 60.697 | 20 |
| GGACCGCGTTTATGGTATTG     | 60.209 | 20 | CGCTCACAATGATGGATACG   | 60.096 | 20 |
| GAATGTCATGAGTTGAGGCG     | 59.245 | 20 | GGGGTCAGGGGGTTAATAAG   | 59.527 | 20 |
| AGTGCAAATTTGGGCTAGGA     | 59.708 | 20 | TGAACAAATTACACAAACAAA  | 60.54  | 25 |
| TCTGTTTGCGAAATTTGTTGA    | 59.335 | 21 | CATCAAGCAAACAACCAGCA   | 60.844 | 20 |
| TCCAACCTGTTTCGGACTAA     | 58.201 | 20 | TCGTGGAGTGAGTGGAAAGTG  | 59.864 | 20 |
| AGATTGGGCTATTCGAGCCT     | 60.194 | 20 | GGGAGCAATTTTTGCTTGAA   | 60.188 | 20 |
| ACTTTTGCCTCTTTGTCGT      | 59.78  | 20 | GACGCCTGAATATCGGTCAT   | 59.923 | 20 |
| ATGAGTTATCACCGGATCGC     | 59.923 | 20 | AAATCAAAGGCCAACAATGG   | 59.801 | 20 |
| TGTACAAATGCTGGAGGTCG     | 59.716 | 20 | GATGTTCTCCAACGACCATGT  | 59.842 | 21 |
| ATCGCCCACTTATTGAGCTG     | 60.235 | 20 | GTGGTGACAGTTCGATGTGG   | 60.005 | 20 |
| AGCTTGTAGAACGAGCCGAG     | 59.78  | 20 | AGATAGCGAAGGGAATTGGG   | 60.411 | 20 |
| TGGCTCAAAGCATGAACAAA     | 60.379 | 20 | TGAGCCAACTGAAAACACACA  | 60.331 | 21 |
| GGTTAATTGCTGGCAAATCG     | 60.456 | 20 | CCATGGCCTAGCTTTGGATA   | 60.053 | 20 |
| TGAAGCAATCAAAAACGGTG     | 59.706 | 20 | TGCATCTTGGCTCATGTGAT   | 60.233 | 20 |
| TGTGAAACGACGGTCTTGA      | 60.278 | 20 | TCCCTGTCCTTTTTCCCTTT   | 59.912 | 20 |
| TTGATTGTAATTCTCTGCACCAG  | 59.28  | 23 | TGCAAGCATCTTTGTCTCG    | 60.134 | 20 |
| AAAAACTGTAGTGGGTTAAAATTC | 57.487 | 25 | TCAGGAGCGGTTTGAACAAT   | 60.636 | 20 |
| TGTGACGAGCTTATGAACTATAC  | 59.767 | 25 | CGTGAGGTGAGGGATGAAGT   | 60.112 | 20 |
| TATTAACCCTTCATTGTTTTAAAT | 57.085 | 26 | GGTTGTGGTTTGGTTTCTTCA  | 59.861 | 21 |
| CAAATGAGCATGAGGGAGGT     | 60.073 | 20 | CTATCATCTCGGGGTGCAAT   | 59.917 | 20 |
| GCCGAGATTTGTTATGCGTT     | 60.103 | 20 | CGGGGTATTACATAAATGATGC | 58.285 | 22 |
| TTGATTCCCTCCCCACAATTC    | 59.727 | 20 | GCTTTGGGAGGTGGAGTTTT   | 60.476 | 20 |
| AACAATGAATGAGGTTGGGG     | 59.647 | 20 | ATTGAATCGGCAGGTCAAAC   | 59.939 | 20 |
| AACAGAAGCAAGATTCGACCA    | 59.867 | 21 | TTTTTGATGAGCTGGAGCCT   | 59.955 | 20 |
| TTTCTCCCATCGATAACCA      | 60.266 | 20 | AGGGCCGAGATTTGTAGAGG   | 60.59  | 20 |
| CTTGGGATGGGGGAGTATTT     | 60.011 | 20 | AAAAGAAGTGTGTGGGGGTG   | 59.861 | 20 |
| CCCAGTATCCCAAACCTCGAA    | 59.926 | 20 | TGGGGGCTTAACAAAGTCAC   | 59.971 | 20 |
| TGCTTTTCCATGGTGACTION    | 60.24  | 20 | TCCAAAATCTAATGCGCGTC   | 61.105 | 20 |
| TGAGAACCAAACACAAATGTCA   | 59.072 | 22 | AAAAATGAAATGTGGGGTGC   | 59.668 | 20 |
| AAAGCCAGATTCATTTTGCC     | 59.162 | 20 | GGGTATCTCTCGCTGCTTTG   | 59.978 | 20 |
| GGTATTGGCAAATGCAGGTT     | 59.829 | 20 | GTAGCCAGCTTGTTTTGGGA   | 60.249 | 20 |
| ACGCACCAATTTCTTCAA       | 60.481 | 20 | TGGTGTCTGAACAGCAGAGG   | 60.022 | 20 |
| TTTTGACATGATCACACCCC     | 59.193 | 20 | TGACTTCGCCATTTTCCACT   | 60.636 | 20 |
| CTGGGCCTATCCTATCATGG     | 59.363 | 20 | TGTCCCAAAATCGTGTCTCA   | 60.088 | 20 |
| GCCTTCTAGCTTCTCTTGCTTT   | 58.633 | 22 | GGATAGGTTGAAACTGCCCA   | 59.933 | 20 |
| AGATGCGTGCATAATTGCCT     | 60.636 | 20 | TGCGCATCTAGCTTGAGAGA   | 59.995 | 20 |
| TTGTTTAAATGCACACCCCTT    | 59.37  | 21 | CCCCGATTCTTTTAGCCTTC   | 60.034 | 20 |
| ATCGAACCGTTTTTCTGTGCG    | 60.11  | 20 | AGCCTTTGGGTCAAATCTG    | 59.17  | 20 |
| AGCCTTCTAGCATCTCTTGCTC   | 59.42  | 22 | CGACCTGGTGGGTTGTTCTA   | 60.943 | 20 |
| CACTCAATTCATTTACCTCCA    | 59.971 | 22 | ATGGAATAGCGTCCGAAGTG   | 60.096 | 20 |
| TCTCTCCACCAAATGTCCAA     | 59.059 | 20 | AAACATCAATGGCCTGATTTG  | 59.815 | 21 |
| GCGGCACACGAGGTATAAAA     | 61.019 | 20 | GCCCGGAACACAAATAGAGA   | 60.074 | 20 |
| TGTGGTATCAGAGCCACGAC     | 59.707 | 20 | ATGACACGCATAAAGGGACC   | 59.82  | 20 |
| TCTTTTGCTATGTCCTCACTCG   | 59.517 | 22 | CCAATGACACGACACAAAC    | 59.855 | 20 |
| AGGGAGGCAAAAAGAGGTTG     | 60.601 | 20 | AACTGTGGCAAGATCCATCC   | 59.934 | 20 |
| TGGGATATAGCGAGTTTGGTG    | 59.967 | 21 | ATAACCGTTCCCGCTCTTCT   | 60.096 | 20 |
| AGAATGCCCTTGATGCTGC      | 60.243 | 20 | CATAAAATGGACACGCACCT   | 58.502 | 20 |
| GCGTGTGAGTGTGTGTCAGA     | 59.46  | 20 | CACACACGCGCATATACAAA   | 59.211 | 20 |
| TTATATCTCCCACCAACCGC     | 59.784 | 20 | AAGTTAAGCGTGTTTGCCT    | 60.082 | 20 |
| TGGGATGAAAATAGGGGAAA     | 59.203 | 20 | TCGGATTTTTATAGGCTTCTTC | 59.997 | 24 |

|                          |        |    |                         |        |    |
|--------------------------|--------|----|-------------------------|--------|----|
| TGACGGGATTTAGGTGTTTTG    | 59.847 | 21 | TTCAATCATGAGCGTCCGTA    | 60.22  | 20 |
| AAGGGGGATCAAATCTAGTCTTTI | 59.766 | 24 | TTGGCGAAAATAGCCAAGTC    | 60.209 | 20 |
| CATTCAAGGGGCATTTTTGT     | 59.801 | 20 | GCGCTTTCAGGGTTTAAAAAT   | 58.386 | 20 |
| CAAAAATAGTCGTGGAGGGC     | 59.569 | 20 | TCATGATAGGATGGGGCTTC    | 59.854 | 20 |
| TTCTCGCCATCTCTCCCTAA     | 59.91  | 20 | TGGAAGGAGAAACGATGACC    | 60.05  | 20 |
| GCATCTCTTGCTCTCTCGTT     | 57.35  | 20 | CCACCTTTCATTCCGACTC     | 59.526 | 20 |
| CGTCTTCGTTCTCCGTCTTC     | 59.989 | 20 | GCTCCCTCCATTTTTGTGTG    | 60.495 | 20 |
| TCACTATAAGGTGGTGTTCCTACC | 58.524 | 24 | AACACAGCAGGTTTCGATCC    | 60.119 | 20 |
| GAATACTTGCCTCAGCTCCG     | 59.978 | 20 | AACTTCCCTTCATCAGCCCT    | 60.074 | 20 |
| ATTGAATCTACGTCCACGGG     | 59.813 | 20 | AGTCATGCGATCTGAACGTG    | 59.862 | 20 |
| GCCAGCTTTTTCTTCTCCAA     | 59.569 | 20 | AACAGAGAAGCCCACCTCCT    | 60.252 | 20 |
| CCCTTTACCTCACTGGTGA      | 59.959 | 20 | GTTTCGATGTGGTGGAGAAC    | 60.372 | 20 |
| TCACCCCATCTTCTCTCAC      | 60.048 | 20 | AGGTTGAATCGGTGAACTCG    | 60.111 | 20 |
| CACAGGTTCTCATCGCTCTG     | 59.571 | 20 | AATTTGTCGTTTGACCAGCC    | 59.978 | 20 |
| CATGGTGATAGAGCCGATT      | 59.917 | 20 | CCTCCTTCGACACTTTTTTCG   | 59.846 | 20 |
| CTTCTCGTGTCCGACTCCTC     | 59.986 | 20 | TGGAAATCCTCGTTTGATGA    | 59.049 | 20 |
| AGGGCGAAGAGAAATGTGAA     | 59.813 | 20 | CAAGCTTACCCGAGCTGAAC    | 60.015 | 20 |
| AAAATATGGGGTTTTCCCAA     | 59.428 | 21 | CCGATCATTGCTATCCTCAA    | 58.671 | 20 |
| ATTCTTGGGCTTTCATGACG     | 60.074 | 20 | TTTTCTCGAGTTTCACGCCT    | 59.993 | 20 |
| ACCCAAGACCTCAAGCTCAA     | 59.844 | 20 | TTTTGGTTCAGGGGTGGATA    | 60.162 | 20 |
| TGTTGAAATCTTGAACGGGTC    | 59.963 | 21 | TTGTCGATCCCTCCTCCAC     | 59.927 | 20 |
| AAAAACCGGAATTTTTAGGGT    | 59.08  | 21 | GAAAACAAGTGTTCGGGGAT    | 59.978 | 20 |
| ATATTTGTGCGTGCACCTGA     | 60.142 | 20 | TAACTGCCTCTTTGCACCTG    | 59.072 | 20 |
| GAGCACTGAGCAGAAAAGGG     | 60.134 | 20 | AATACCAGGCAAAAGAAGCG    | 59.361 | 20 |
| ATCGGTTATTACCGGATCGC     | 61.031 | 20 | TGAAACGGACGAACAATGAA    | 60.088 | 20 |
| GCGTTGAGAAGAAGGGAGAA     | 59.55  | 20 | CAGAACATTCTCATCCCGGT    | 59.927 | 20 |
| TCCCTAATCCCTCATTCA       | 59.315 | 20 | GCACAAAAACAAACGCAAAA    | 59.764 | 20 |
| GGTGAACCTTGAACAACCCC     | 59.284 | 20 | GGAGGATCACACCACGAATTA   | 59.805 | 21 |
| ACGACGGTGTGTTGATCTG      | 59.597 | 20 | GCCTCTCTCTTTCTCCCGAT    | 59.919 | 20 |
| TCGGAGATCAGCTACGGTCT     | 59.973 | 20 | CTCTCGTACGCTGCCTCTCT    | 59.914 | 20 |
| GTGGTAGAGCTCCCCTTGTG     | 59.721 | 20 | CAAACCACAGCCGACAATA     | 59.585 | 20 |
| TCCATCAGACAGTTTCTTGCAT   | 59.74  | 22 | CATGTGAGATTCCACGCTGT    | 59.707 | 20 |
| TCCCTCCTCAAATTTACCCC     | 60.124 | 20 | AAAATGACGAATGGGAGGG     | 59.735 | 19 |
| CGGGATCTTCATCCAATTCA     | 60.801 | 20 | AACTTGAGCAATGTTGGGCT    | 59.74  | 20 |
| CTTGAATAGGGTTTTCAGGG     | 59.816 | 21 | TTCGTATCTTGCCCATGGAT    | 60.296 | 20 |
| GAAAGGCACAAAGCGATAGG     | 59.845 | 20 | TGGACAGTTTGTCCGAATCTT   | 59.583 | 21 |
| GGTTGAACGATTCGGGTATG     | 60.192 | 20 | AAGGAGGTGTTATGAAGGGAT   | 58.028 | 22 |
| GCTCGTACGAAACCCTTGAG     | 59.875 | 20 | GAAATCCATCAACCAAACGG    | 60.17  | 20 |
| TTAATTTCCCGGTGGACTCA     | 60.301 | 20 | CCGAAGCTAAGACACAACCA    | 58.923 | 20 |
| TTTTGCTCGAGGGTTTTGT      | 59.724 | 20 | AAATTTGTTTCCCACCAAATA   | 58.744 | 23 |
| ATGCAACCCTCCCTTCTCT      | 60.074 | 20 | TTGATCACCACCCTCCATTT    | 60.173 | 20 |
| GACCTACAGACCGATCATGAAA   | 59.056 | 22 | TCCGGCTTCTGTAAATTTTCG   | 60.202 | 20 |
| TGCTCACATCTCTTTTTCTTTTT  | 58.761 | 24 | GATCACAGGCCATCTTTTCC    | 59.488 | 20 |
| TGCCTTATAAGCTCGAGAAAA    | 57.021 | 21 | CCGCATTTATGTGTGCAAAA    | 60.508 | 20 |
| CGCTAAAGCAGGATGTGGTT     | 60.27  | 20 | CAGCGAAGATGTGAGGATCA    | 59.942 | 20 |
| TCGCATTGACACATAATCGAA    | 60.088 | 21 | CGACGTGCTTTTGGTAATTG    | 59.226 | 20 |
| TAGCCGTTTATGACCGTTGA     | 59.182 | 20 | GAATTTTGTGATTGGGTGGG    | 60.029 | 20 |
| GGTGGAGCAAACCTTGGTCAG    | 60.69  | 20 | TTTTCAGTTGATGCCTGATGA   | 59.262 | 21 |
| TCTTGCCGATTCTCCTTGT      | 59.813 | 20 | CTTCCAGAAACCTGAGCAGC    | 60.134 | 20 |
| CGATGCTTTAAAAGATGTCAACC  | 60.017 | 23 | TGCCGTCTCACACATTAGAA    | 57.836 | 20 |
| AAAGAAAGAAATAGAGCTGCTGC  | 60.045 | 24 | CCCACCAATTTTGAGACGTT    | 59.83  | 20 |
| CGTCTGGTTGTTCCAAATAA     | 59.847 | 21 | GTTTAAACGAATGCTCCAGCG   | 60.772 | 20 |
| CGACTTGGCTCCATGTTGT      | 59.692 | 19 | CGCACTTGGCTCCTTTTTAG    | 60.011 | 20 |
| TGCATCCAGTGGCGTATCTA     | 60.243 | 20 | TTTAGTGTTTTGACATGATTACT | 59.896 | 27 |
| GAATTCGGATTTCGAGTCATATAA | 57.681 | 24 | CGATTTGGATTTCGAATTTTG   | 58.082 | 20 |
| TAGGCACCCAGGATGAAGAC     | 60.073 | 20 | GGTTTGCAGCATAAAAATGA    | 60.089 | 21 |
| GAAGCTTCAATGGAGGTGATTC   | 60.081 | 22 | AGAGAAACCTTGGCCCCTAA    | 60.068 | 20 |
| TCGGAATTGGATTATGTTGC     | 58.43  | 20 | AGCGCACTCAAACAATAGCC    | 60.416 | 20 |

|                          |        |    |                         |        |    |
|--------------------------|--------|----|-------------------------|--------|----|
| TCGGTCACAAAATTCGAAAA     | 59.133 | 20 | CAATGCCTAGTTTACCCCA     | 59.817 | 20 |
| AAATTTGGGTCAAACCCCTT     | 59.549 | 20 | GACCGAAAATGGAGGTTCAA    | 59.91  | 20 |
| CACATCTTGCAACCCACAGT     | 59.597 | 20 | CACACACTCACGCACACATT    | 59.183 | 20 |
| CCAATTTGAATGGTTATCACCTG  | 60.457 | 23 | GGAAAATGTCACCGGAAAAA    | 59.778 | 20 |
| GAGGCTTAAAGCTGTGCTGG     | 60.154 | 20 | CCCCTCGTATGCAGTCAAAC    | 60.517 | 20 |
| AGGATAAATGTGGCGAATGC     | 59.929 | 20 | CTAGGCATGGAATCCGAGAA    | 60.17  | 20 |
| TCCATCATCATAGGCGTCAC     | 59.482 | 20 | AACCAACCTTGCCACATAA     | 60.227 | 20 |
| CCATCATCCTCTCTCCAAA      | 60.003 | 20 | CAAAGAAAATGGCCAAAAA     | 59.916 | 20 |
| AGGTGGCACTCTGAAATCAA     | 58.287 | 20 | AGCGGTTATTACCGGATCG     | 59.93  | 19 |
| TGATGCTACCCACTTGCTCTT    | 59.89  | 21 | GTGGCGACATCCGAATAACT    | 59.962 | 20 |
| GAGCGTATGGGTAGAGCGAG     | 60     | 20 | CATAGCCGATAAAAAATGGCG   | 60.424 | 20 |
| GAAGAAGCCGACAATTTGCT     | 59.457 | 20 | TTTCGAAATCCCCTTTTTCA    | 59.497 | 20 |
| TTCTACCGCAACACAAGGTG     | 59.758 | 20 | TACAGAGCCACCATTTTCCC    | 59.933 | 20 |
| TGTAAGGGGGTGGGAATGTA     | 60.044 | 20 | AGAATATTCATGGGGTCCGA    | 59.2   | 20 |
| TATTTGCTCGAGCCCTTCAT     | 59.807 | 20 | AACCCGGATCGGAAAAATAC    | 60.02  | 20 |
| AGATCTTGCAACTCCCTCA      | 59.803 | 20 | TGAGTTGCACGTGTGTGAGA    | 60.07  | 20 |
| ATGTCGAAGAATCCGAATGG     | 59.894 | 20 | TTTGGGCACATTGCTCATA     | 60.073 | 20 |
| TGGACCGGTTAGATCGGATA     | 60.288 | 20 | AAATAATGTTTGTGCGGCCT    | 58.443 | 20 |
| TCCCCACCGTGGTATTTATC     | 59.505 | 20 | TGATGTGTGATGCCTCCCTA    | 60.072 | 20 |
| CGTTTGTGAAAAGAACGCAG     | 59.507 | 20 | GTGAAGGGCCAATTTCTTGA    | 60.051 | 20 |
| TCACTATAAATCATTTTTCTTGAC | 59.266 | 27 | ATAAGTTGGGTCACGGGTTG    | 59.711 | 20 |
| AGTCGTTTCATCCCTTTGTG     | 59.966 | 20 | CTACGTAGCCCCCAAATCAA    | 59.953 | 20 |
| GTTAGCCACTGTGACAACACAT   | 57.662 | 22 | AGGGCAGTCAAGACCATCAT    | 59.535 | 20 |
| GACTGTAATGCATGGCTGGA     | 59.679 | 20 | GTGTGTTTCATCACCAGTGCC   | 60.013 | 20 |
| ATTTGGAGGGGGTTGAAAAA     | 60.514 | 20 | CGAATATCCCCCAATTCAA     | 59.593 | 20 |
| TAGGGAAATTGGATCGTTGC     | 59.901 | 20 | GCCTGCCTATTAAACTCCCC    | 59.93  | 20 |
| TGGCTAAAATAGGAAGCCC      | 60.4   | 20 | TTTTGTTATGATAGGATAAAAC  | 58.996 | 26 |
| AAACACCACCTCCCTCACTG     | 60.002 | 20 | CCATGCTCAGGAATGCTACC    | 60.624 | 20 |
| CACGGTTAGGCTCGAGAGAG     | 60.149 | 20 | ATAGACCAACCGCCATTACG    | 59.845 | 20 |
| TTTACGAAAATGCCACCACC     | 60.732 | 20 | ATGCAGCTGTCCATTGTGAG    | 59.862 | 20 |
| AGCATCTCTCCATCACTCTCA    | 57.528 | 21 | TGAAACGGGGATTTGTCAAT    | 60.17  | 20 |
| TTCGAACCTGGTTTTCGTTC     | 60.088 | 20 | TCACCCACACACACAGAAT     | 60.928 | 20 |
| ACCTTGATGTGGTGGTGCTA     | 59.01  | 20 | ATGGAGAAAAGGTACGCACG    | 60.132 | 20 |
| CAAAACTCCCAATTTCCACC     | 59.264 | 20 | TGAATCGAGTGTTCCTTGCG    | 59.988 | 20 |
| TTTCCCTAGTCTAAGCCGA      | 58.925 | 20 | CATGAAAGGAAACAAAATCGA   | 59.098 | 22 |
| TGGGAGATGGTGGAGAGAGA     | 60.762 | 20 | TTTGTATGCGTTTTGACGA     | 57.846 | 20 |
| TCGCTTTTGCTTTTGCTTTT     | 60.13  | 20 | CCTTCTCCACCGTTCTTCA     | 60.224 | 20 |
| TCCAAAAGTCTGGTTGCTG      | 58.897 | 20 | ACAACCAAACAAGCCCGTAG    | 60.03  | 20 |
| TCACCTTTTCCCTCTTCCCT     | 60.045 | 20 | GACGTTGGTGGGATTTGAAC    | 60.218 | 20 |
| AACTCCCATCCGAGGTCCTA     | 60.842 | 20 | GGGCTGCACACGAATGATTA    | 61.98  | 20 |
| TAGTCCGTGGGTTTACCGAG     | 59.986 | 20 | AATGGGGAGGATAAACCGAG    | 60.145 | 20 |
| GAAGCAGCAACAATGATGGA     | 59.805 | 20 | TTCTCATCCACAGACCCCTC    | 60.048 | 20 |
| AGCAAAGAAGGAATGCAACC     | 59.316 | 20 | CTTCCAGCAAGAAAATCGGA    | 60.323 | 20 |
| GCGCGATTATCGAAGAGAGA     | 60.594 | 20 | TTTTGGTTGAATAGGGGTGA    | 57.917 | 20 |
| AATTTGCATGAGAGCCAAGC     | 60.361 | 20 | TGCAGGGCTGAGTATAGGGT    | 59.717 | 20 |
| TGGCCAGATTTGTTCTAC       | 59.933 | 20 | CAGCAAGGAACTGATGGACA    | 59.831 | 20 |
| CGTGTTCTAATCCCATGT       | 59.67  | 20 | CTCCCTAGGATGTGGGGGTA    | 61.084 | 20 |
| TTTTACGGGCAACGTACTCC     | 59.996 | 20 | ACCAGAGCGTACTCGAAGA     | 60.012 | 20 |
| AGCTATAAGATTGACTAGATCAA  | 57.118 | 26 | TTTTTCAATCATACTTCCGGTTT | 58.955 | 23 |
| CTTCTCGCGTCAGACTCCTC     | 60.284 | 20 | TTTTGACCAATCCTTTTGGG    | 59.772 | 20 |
| TCAATGATGGCCGAAAACCTT    | 60.448 | 20 | GTAAGAGACAATCCGGCCA     | 60.074 | 20 |
| CCAGCCGTTGATCATTACCT     | 59.955 | 20 | CCTCCATTCAAGCAGAAAAGC   | 59.955 | 20 |
| TGCCCTTTCTTTTAGGAGCA     | 59.953 | 20 | CGAAATTGCGAGTCCCTTAG    | 59.839 | 20 |
| AACGAACACGAGAGGTTTGG     | 60.149 | 20 | AGAGCCGTTGTGTCGAATCT    | 59.874 | 20 |
| TGCTACCTAGGAAGGCGATG     | 60.365 | 20 | GCCGTAGATCTAACGACCGA    | 60.235 | 20 |
| AAGGGACGACCGAACAAAAT     | 60.723 | 20 | TTCTTGATGTGTTGGCAAGC    | 59.847 | 20 |
| AACGGCGCGACAGTTATAGA     | 60.792 | 20 | AGATTTGGGCAGTGTGGTGT    | 60.431 | 20 |
| CATGAGCACTAATGAGCCGA     | 59.972 | 20 | CAATATGAGAATGGCCGAAA    | 58.576 | 20 |



|                          |        |    |                        |        |    |
|--------------------------|--------|----|------------------------|--------|----|
| GGGACAAAAATGCCCTTGTA     | 59.801 | 20 | GTGGACGTCCCAGATTGTTT   | 59.827 | 20 |
| ATTGAAGAAGTGCCGTAGCC     | 59.34  | 20 | CACGTGGCATTAACTGGTG    | 60.027 | 20 |
| TTTTGCCCTCGAATGCTATC     | 60.175 | 20 | GGGGAAGTTATTATTTGATCAC | 57.859 | 23 |
| AACCGTGATGGTTGGGATTA     | 60.051 | 20 | ACGGCGTACAAAAGGAAATG   | 59.996 | 20 |
| TCCTCAACTCTGAGCCGAAT     | 59.95  | 20 | GTCGTTGATGAAGCACCGTA   | 59.722 | 20 |
| TTAATGATGCGTTTTGGCA      | 60.074 | 20 | GTTCTACGCACTCACATTAAG  | 58.464 | 23 |
| ATGGGATAGTACCGGAACGC     | 61.091 | 20 | ATCCCGATTGAAGACGTTTG   | 59.933 | 20 |
| CTCACACACACTCGCATTCA     | 59.431 | 20 | CGATGACATTAACAATAACAA  | 60.095 | 26 |
| AATGAGGCTTTTTGGATCGAC    | 59.129 | 20 | GCGTCTTTGAGGTTCTCCAC   | 59.851 | 20 |
| AATGGCACACAGGTGAATGA     | 59.967 | 20 | ACGGATTCACCAGAACAAGC   | 60.119 | 20 |
| GGTCAACTTCGAACGAGGAG     | 59.844 | 20 | TGTGTGGCTTTTCTGCAAAC   | 59.888 | 20 |
| CGATTCGCAACAACAACAAC     | 60.157 | 20 | CTTCTTCTCCCCATCATGC    | 59.629 | 20 |
| AGCATTCAAGTCATGCACAGG    | 59.862 | 20 | TCGTTCAAAGATGGCTTGTC   | 60.242 | 21 |
| CCCATCTGCAAATATTGCCT     | 59.923 | 20 | TCTGTGGTTCCATTCCATCA   | 59.893 | 20 |
| AACCAACTAAGGGGGTCAAA     | 58.41  | 20 | CATTATCACAGGAGATTGGCA  | 58.586 | 21 |
| AACTAACCCGCACCACAAAC     | 59.898 | 20 | GCCTGAACCACCAACCTTGT   | 62.297 | 20 |
| TCATTTACCCATGAGCTTT      | 58.145 | 20 | CGCCTCCGTAGATACATGCT   | 60.257 | 20 |
| CCGTTTATCTTCCCCTCCAT     | 60.145 | 20 | GCCGCAGTTGAGATCTAAGG   | 59.978 | 20 |
| TCATACACGATGGGATCGAA     | 59.883 | 20 | GGAGGTTCCATGTTGGAAAA   | 59.767 | 20 |
| AACGTCAAGTATTCCGCCAC     | 60     | 20 | CTTGCCTTTAGCTTTAGCCC   | 58.299 | 20 |
| AATGATCAAACGATTTCGCC     | 59.907 | 20 | GATTGCGAGAGACCAAAGGA   | 60.34  | 20 |
| TGACATGGAAGGAAAAAGGG     | 59.903 | 20 | TGCGCTTCTCTGTTACAAGC   | 59.371 | 20 |
| TCTCCAAATTTGAGGGTTATCA   | 58.556 | 22 | ACGACAAATTCAGGGGCATA   | 60.331 | 20 |
| CAAATGGCCAAGAGAGTTACAA   | 59.267 | 22 | GAGAGACGACGGATCGAAAC   | 59.81  | 20 |
| CCCATTTTCGATCCTGTGAG     | 60.452 | 20 | GCAACGGAATACCACTCGTT   | 60     | 20 |
| AGCGGTTATTACCGGATCG      | 59.93  | 19 | AAACAAAAGGCAACTGATTTCG | 59.257 | 21 |
| CAAATGGCCAAGGGAGTTAC     | 59.429 | 20 | AATTTACATCCTCCCTCCC    | 60.133 | 20 |
| GGGGAAGCGGTTATTTTTGT     | 60.184 | 20 | TCATTTTACCACGTGCAAT    | 59.972 | 20 |
| AGAAATGACATCACCACGCA     | 60.12  | 20 | AATTCTCAACAAGGGGCTGA   | 59.67  | 20 |
| TCAAACAAGTAGATTAGTCCATAT | 57.069 | 26 | CGTTTGTGAGTTGCAATGG    | 60.149 | 20 |
| AGCAGGTTTTTGGTGGGAAGA    | 59.711 | 20 | GCGTTGGGATCGTGTTAAGT   | 60     | 20 |
| GAGAAGTGAAAGGGGCTCG      | 59.935 | 19 | TGAGCTTCCAACGTAAGTTTCA | 60.176 | 23 |
| ACAATGGCAAGAGAGTTGCT     | 57.542 | 20 | CAATGCTGCACATCAAGGTC   | 60.272 | 20 |
| CGAATACCTACCCCGTGAGA     | 59.948 | 20 | GGCATTTTGAGCATTGGATT   | 59.907 | 20 |
| CCACCTCTCCACGTCAAAC      | 60.151 | 20 | GTTGACGGCTGGAACCTTAG   | 59.734 | 20 |
| TCTCTTCAATAAGGTAACAACCA/ | 58.381 | 25 | ACCCTTACATTCCCGTTGTG   | 59.711 | 20 |
| TTCACGAAGTCTGCATTTGG     | 59.84  | 20 | TGCAAGTGGGAGGGAAGTAG   | 60.246 | 20 |
| CAATTCAACATGATGGTGCC     | 59.781 | 20 | TAATTTGGCAAACCTCTGGGC  | 60.074 | 20 |
| CAAAATTAAGGTGTTCCATCCC   | 58.829 | 23 | CCGTTTATATGCGGTCCAGT   | 59.845 | 20 |
| GACCAGTTCAAGGGAGGTGA     | 60.088 | 20 | CCACGTCTTGTGTTTCCATCTC | 59.583 | 21 |
| ATGGCCACAAATGGTTCCTA     | 60.192 | 20 | ACATTGTTTGGGAAAAACCTT  | 57.508 | 21 |
| AACCCCTTGTAGGAACAGCA     | 59.592 | 20 | TCGAAGGTCAATGGTTCACA   | 60.088 | 20 |
| GATCTACGTCCACGGGAGAA     | 60.073 | 20 | GCGCGGAGTTTAAGAAATGT   | 59.365 | 20 |
| CGAGATTTGACACGCAAGAT     | 58.877 | 20 | GCCATCAGATCTGCACTGAA   | 59.95  | 20 |
| TACGCGACCCATTCTTGATT     | 60.469 | 20 | CTCGTTTCTTGCTAGCTCGG   | 60.284 | 20 |
| CCAGTATTTGAGAGATGGGCA    | 60.081 | 21 | TGACGGGCAAGTGTTTATTA   | 60.111 | 20 |
| TGTCTTTAGCTCTGGTGTGGC    | 60.447 | 21 | AGGCCACCCTAATTTATGCC   | 60.171 | 20 |
| ACTCCAGCCACCATCTTCAC     | 60.12  | 20 | AGTGTGTGTATGCGCATGTGT  | 60.12  | 21 |
| GGACGGAGGGAGTAGTTTCC     | 59.935 | 20 | TGAGTCTGATGGACTGCCAC   | 59.827 | 20 |
| CGCGGAAATACTCTCGAAAC     | 59.845 | 20 | GATCTAACTAGGCCCGTCCC   | 59.925 | 20 |
| GACCAAGCATGTGGTTCCTT     | 59.973 | 20 | CAAGACTGGAAGCCCACAAT   | 60.111 | 20 |
| CCGTTAAATTACATGATTTTCCCT | 59.56  | 24 | GCAAACCCGTGTTCTTCAGT   | 60.156 | 20 |
| AACCACGTTTTGGCTAGTTCA    | 59.663 | 21 | TGTCCATGAAAGATTGGGGT   | 60.173 | 20 |
| GGAAAAGGGGAAGCAAAATC     | 59.888 | 20 | GATCGCCGAAGGTTTTTGTA   | 60.074 | 20 |
| TTCTCGTGTTCTCTCAC        | 60.238 | 20 | CACCCCGAGATAACTTTCCA   | 59.926 | 20 |
| TTTTATGGGGCGAAAATGTC     | 59.773 | 20 | TGTTACCAAGTTCGCAAGA    | 60.427 | 20 |
| GACAAGATCGTGCCAACAAA     | 59.697 | 20 | TGATGCTCCACTTCTACTCC   | 59.298 | 21 |
| TCGATTCGAATTATGAGGGC     | 60.001 | 20 | GAAGACATCTGGACGACGGT   | 60.12  | 20 |

|                          |        |                           |        |    |
|--------------------------|--------|---------------------------|--------|----|
| ATGGCAAAGGCATCAAAG       | 60.074 | 20 TTGTGTAATTGTGTTGTGCATC | 59.278 | 25 |
| ACGCGCTCAATAAACATTCC     | 60.103 | 20 AGGTTTCGGACAAACAACAGC  | 60.156 | 20 |
| CATGGTAAGCAGATTGGTTTTAAT | 59.439 | 26 GCTATGAGCATGTCATCAACA  | 57.291 | 21 |
| TCAGATTTGTTATGTGTTTTGACA | 57.312 | 24 TCCATTCGGAAAATCAAAGG   | 59.872 | 20 |
| GCCAGATATGGCTCGTTTA      | 60.06  | 20 GGGATCTCAACGATTCACCA   | 60.871 | 20 |
| CAACTTGAACCCGATTCTC      | 59.526 | 20 CAGCACTAACACACACACGC   | 58.952 | 20 |
| ATATTCGGAAGAGCGACCCCT    | 60.06  | 20 GCTCTTCTCCCTTTCCCAC    | 60.19  | 20 |
| TTCGATTTATCTTCAGGCCG     | 60.167 | 20 TATCCAATCGAATTCCCAGC   | 59.862 | 20 |
| ACAGGCCGTGTTTCGTATTGT    | 60.44  | 20 AACCCGCGAGTTGCTACTAA   | 59.904 | 20 |
| ACTCATGTCACGGCACACAT     | 60.038 | 20 GGTGTAGATCTGGCGGGTAG   | 59.574 | 20 |
| AAAAGCTCCTCCACAATTTGA    | 58.823 | 21 TCCATTTGACTTAACAAACCC  | 60.089 | 22 |
| ATTCGCACAAATGAACACGA     | 60.119 | 20 AGCTGAAATTGAGTTCGGGA   | 59.813 | 20 |
| TTGTGCATCAGCGTTACAG      | 59.864 | 20 TGAAGTGCGGGGTATTACAA   | 59.037 | 20 |
| TCTTACCCTGCGAAAAATGC     | 60.209 | 20 TTCTACGAATGTTGACGAAA   | 59.625 | 22 |
| CACGTGGCATGATAATAGCG     | 60.118 | 20 TTGAAAAAGCACACCTCCAA   | 59.293 | 20 |
| CCACTATTGATCCTGACGCC     | 60.483 | 20 AAATATTTGAGGGGTGCGTG   | 59.823 | 20 |
| TTGTTTCGTATTGGAAGTCGTG   | 60.032 | 22 GGTACAGAGCGAAAACGAGG   | 59.875 | 20 |
| TCTCTATCTCTTGGTTGGTGAA   | 59.411 | 24 AAGCATGAGTTGTGTGCTGG   | 59.905 | 20 |
| TCCACCGCTTTAAATTGCTT     | 59.72  | 20 TCTTACCGTCGGTCAAACCT   | 59.592 | 20 |
| GCATGTCACGTGAGGAAGAA     | 59.837 | 20 GTGGATCATGAGCGACCTTC   | 60.633 | 20 |
| TGCATTTTGCAGTTTGCATT     | 60.259 | 20 AGTGGTTATTACCGGATCGC   | 58.93  | 20 |
| CTTTTTCCATCAACCAACCC     | 59.264 | 20 TGATGGTGAATACGATTGGC   | 59.355 | 20 |
| TCACGGAATTAATAAGCCCC     | 59.043 | 20 TTTTAGGCCCGAATGAAATG   | 59.901 | 20 |
| TCTTCCGATCTCAGTTTTTCAA   | 58.949 | 22 GCTCAACCCTTCACCTCATC   | 59.661 | 20 |
| ACAACAAGCTGGGTTTCTGC     | 60.299 | 20 CCGGGGTAATCTCAAAACCT   | 60.18  | 20 |
| GCCTGCAAGAAAGCAATCTC     | 60.103 | 20 CACTGGTGCACGAGCATATT   | 59.746 | 20 |
| CATACTACTCTCACTAGCCGC    | 59.173 | 22 TAGCCCATTCGTGATTTATGG  | 59.803 | 21 |
| GTTGGAGGAATGGAGGGAAT     | 60.133 | 20 CGTCCATTCATCAAGATCCA   | 59.451 | 20 |
| TCTTTTCACTCGAGCCCAAC     | 60.375 | 20 TTGATGCAGCCCAATGTATG   | 60.488 | 20 |
| TTGCATTGCAGCAGTAGAGG     | 60.157 | 20 AGCGGGATTATCAGACGTGA   | 60.624 | 20 |
| AAAAGGTTCCATCTTTCGCA     | 59.685 | 20 GGGAGAAACAACCACCATG    | 60.21  | 20 |
| CTTGCCTTCTCCTTCTCCT      | 59.95  | 20 CATGAGCCTCCAAACCCTAA   | 60.066 | 20 |
| ATGTTCCCATTTACCTTGC      | 59.797 | 20 TCCGAAACTTTAGCACGAGAA  | 60.004 | 21 |
| GCTGCCTACAACAGCAACAA     | 60.058 | 20 GCAAGAACTCACGCCTTCT    | 59.621 | 20 |
| TTACTATGTGGTTGCGGTGC     | 59.614 | 20 TATCCACATGGCAAAAAGCA   | 60.073 | 20 |
| ATGATCAGGCCCATATTTTCG    | 59.745 | 20 TTTGGGTAGGCCTGAGTCTG   | 60.246 | 20 |
| TTTCTAATTTTCGCTCCC       | 60.381 | 20 AGCTTCAAACATTGATGGCA   | 59.276 | 20 |
| GCCAAAATCCCAACAAAAG      | 59.429 | 20 GCTTCGCAACGAAGGAATAC   | 59.851 | 20 |
| ACCTGCCTACGCAATACCA      | 60.523 | 20 CTCCAACCTGCCACAAAAT    | 59.971 | 20 |
| TTCGTGTGTCCTGTGCGTGT     | 60.203 | 20 GGGATGTGTGGGATTGATTC   | 59.995 | 20 |
| AGATGGCAGTTTTTCCCAGA     | 59.67  | 20 TCACGCAATCACACAGATCA   | 59.823 | 20 |
| ACGGCCATCAATATACACCAA    | 60.089 | 21 GGTGAACGTAGGGGTGAAAA   | 59.83  | 20 |
| TCGGTTACCCTATAGCATTTCG   | 59.111 | 21 TGCTATCGCGTAGAAATCCTT  | 59.002 | 21 |
| AAGGAAAACCAATGGGGAC      | 60.032 | 20 TGAAAGAAAACAAGAAAGAAT  | 60.499 | 26 |
| CTACGAGCCACGGCTACAC      | 59.48  | 19 CGAGGGAATTAGGAGGAGGT   | 59.531 | 20 |
| TATCGCCGTTAAGCTGCTCT     | 60.138 | 20 TGAAATAAAGGGGGAAAGGG   | 60.116 | 20 |
| AAAGATGGGAAAATGGGACC     | 59.996 | 20 AAATAAACATGGTTCGGGCA   | 60.188 | 20 |
| AGAAACTTGACGTGTGCGTG     | 59.946 | 20 TATCTGTCCTCTGCCTTGA    | 58.387 | 20 |
| AATGAGGTAAATTTGAGAATGATC | 58.165 | 25 TCGTTTTGATGATATATAGT   | 58.933 | 25 |
| CAAAGGCCACAATGGTTAT      | 59.685 | 20 TTTTGGGGATTATTTGCAG    | 59.767 | 20 |
| GTGTTTGGTCTCCCTCCTT      | 60.349 | 20 CCCATACCTGATGGGATCTG   | 60.15  | 20 |
| GTGGTTCGATCAAGGTGAGC     | 60.667 | 20 TTTGGAGGATCGACGTTACC   | 59.933 | 20 |
| GGCATTGTATACCCGTTG       | 60.074 | 20 GGTTGTGAGAACCAACTCTGT  | 59.664 | 22 |
| AATTTGCCCTCTCCCTCTC      | 59.651 | 20 CTGCTTATCGCCACTGTCAA   | 60.011 | 20 |
| CAAAACAGTATACAACGGGCA    | 58.619 | 21 AAATCGCACCAAAATCAACC   | 59.807 | 20 |
| TGCTATCGGCTAACGGTTTT     | 59.742 | 20 GAGGAGGAACCCATGGAGA    | 59.992 | 19 |
| CACAATCGATCAATAAAGCTGC   | 59.748 | 22 CATGGTTGAATGGATATGGCT  | 59.659 | 21 |
| GGCTTAGAGGGTGTTTTGACA    | 59.228 | 21 GGGGCGTGACAAGGATACTA   | 59.955 | 20 |

|                          |        |                           |        |    |
|--------------------------|--------|---------------------------|--------|----|
| AGCCTTACCAAAGGGGAAAA     | 59.939 | 20 CTGTCAATTTCTGGGAGCTGT  | 60.255 | 20 |
| AGGAAGAATTGGAAACTCGTGA   | 60.11  | 22 CAGATGGGAGGAGAGAACGA   | 60.34  | 20 |
| ATGATCTACGTCCACGGGAG     | 59.95  | 20 GGCAATATCAATCTCGGTGA   | 58.521 | 20 |
| TGGAGCTAGGGTTACCGATG     | 60.088 | 20 GGGGAAGCACAGTCTAGGGT   | 60.511 | 20 |
| AGCAAAGCTTTCTCGACCA      | 60.132 | 20 GGTGTTGTGTGATGTCGGAG   | 60.005 | 20 |
| TCGACATTGTAAGGAGATGGA    | 59.569 | 22 GTTLAGTGATGGAACGGGGA   | 59.79  | 20 |
| CCTTTGCCCAAACAGACTA      | 60.103 | 20 CACGTGGCGCTAATTGAGTA   | 59.895 | 20 |
| CATGCCATGGAGTCGTTCTA     | 59.673 | 20 CAGGCTCGTCGTGTTCAAG    | 60.6   | 19 |
| GGCAACGGAATATCACTCGT     | 59.962 | 20 TTCACCTCCATTTTCGATCC   | 59.871 | 20 |
| CACAACGCTTTCTGCTTCTG     | 59.781 | 20 AGCAAAAATGCCACGTATCC   | 59.967 | 20 |
| CTCGTTGGAGGCCAATAAAA     | 60.067 | 20 ACCCCACCTTCCCAAGTTAG   | 60.218 | 20 |
| GAAATAAGAAGGTGTTATGAAG   | 59.022 | 25 CAACTTGCAGGTGCTAACCA   | 59.904 | 20 |
| TCGCAGAAAATCAACTTCTCA    | 58.637 | 21 ACCCTCCTTCAGCCAAAAT    | 59.94  | 20 |
| TACACAGTGCCTGCTCCAAC     | 59.905 | 20 AGTGTCTCCAGTCTCCACCG   | 60.306 | 20 |
| GGAGAAAATCAGGTGATAACCT   | 60.885 | 24 GGGCTGAAAAGCCAATTAAC   | 59.963 | 21 |
| CACGATTGTCATGATAGTATGG   | 59.238 | 23 GGCATTGGACATCAACATGA   | 60.339 | 20 |
| TGGTGTCTTGGGGTTTTGT      | 60.246 | 20 TTTCTGGCTCCTCAGACACTT  | 59.989 | 20 |
| TTTGAGATCGGAGTGGCTCT     | 59.95  | 20 GCCTTAACCACTTTGAGGCA   | 60.249 | 20 |
| TCTTGGGAGTGAACATACATACA  | 57.171 | 23 AGTAGAGGCGGAGTGCTTTTT  | 59.556 | 21 |
| ACAGCAAGCATCCAGAAAGC     | 60.547 | 20 GCGTGTCTTGTGGGTAT      | 59.859 | 20 |
| GAGTTGAAATCCTGGTTCCG     | 59.526 | 20 CAAACCGGACTGGACCATTA   | 60.745 | 20 |
| ACAGAATATGCGTGATCGCC     | 61.034 | 20 CAAACCGGACTGGACCATTA   | 60.745 | 20 |
| ACCACGGCTGAATAAATTGC     | 59.967 | 20 GCTTTGGCTTTGGTGCATAA   | 61.131 | 20 |
| TCCGGTCCAATTCCAATAAG     | 59.756 | 20 CCTATGGTGGTATGGTGTGG   | 58.569 | 20 |
| TATTGTGAGAGGGGACAGGG     | 59.92  | 20 CTCTGCATGTTTGTGGGTG    | 60.152 | 20 |
| CCTTGCGCCCTTTAAACTA      | 59.381 | 20 TGGCGTATGCTGAGAGAATG   | 59.972 | 20 |
| TTTGTCCAAACAAATGAAACATTC | 60.128 | 24 AAAATCAAAGGCCACAATG    | 59.801 | 20 |
| CGAATGAGTGGATTTGGGAT     | 59.75  | 20 GGGAGTTATCATTGGATCAAGC | 59.805 | 22 |
| CAATTTTGCCTTGAATGCT      | 60.074 | 20 GGTGACATTAATCTTGGCA    | 59.952 | 21 |
| TGCGTTTACATTCAAGCAGTG    | 59.926 | 21 TCACCAAAGAAGTATATCCTC  | 58.707 | 23 |
| CATCTCTCCCACTCCTCAC      | 59.638 | 20 TTATCAAGGGCCCTACCTCC   | 60.278 | 20 |
| GTGTGTGTGCATGAGTGTCG     | 59.772 | 20 CCACCACCATCTCACCTTCT   | 59.962 | 20 |
| TGATTTTTAATGCCTTTCAGCTT  | 59.326 | 23 TGCCCTTTTAATCCACCTG    | 59.931 | 20 |
| TTCAAAGGTTTGGGCTTTTT     | 59.971 | 21 ATAGTTGTTAGAGGCGCGGA   | 59.867 | 20 |
| TGCACCTCCTCCTAATTAATCC   | 59.463 | 22 AGCTGAACGAGTAATTCTTGGT | 59.833 | 23 |
| TTTCTCTCTTTTGGTTGGTGAA   | 58.856 | 22 AAGATGCACGTAGGGAGGTG   | 60.134 | 20 |
| TGCAGCTGAAATCAATGAAAA    | 59.434 | 21 AGAGAAAACCCGGCTCGTAT   | 60.096 | 20 |
| GTAGTTTTGGGGCAAATGGA     | 59.801 | 20 TCAAACACTGCATTTCTGGGTT | 59.601 | 21 |
| CTTGATTCATCGAACGCAAA     | 59.809 | 20 CCTTTGAAAATTTTGGGCA    | 59.916 | 20 |
| TCATATGCGATGTTTTGCATT    | 59.046 | 21 AGAGCAAACCCATCAGTGG    | 60.111 | 20 |
| CCAAAGTTTATTTAACACGGAAG/ | 58.716 | 24 CAAATTCAAATGCCTCAGCA   | 59.809 | 20 |
| TTTCTTTCAATCGACGCTCC     | 60.331 | 20 TGAGTGACAAGACCCTGCTG   | 60.022 | 20 |
| TTGCTAAGCTCCAGCAACG      | 60.287 | 19 TCCCAATCACACCACTCTCA   | 60.088 | 20 |
| CGAGTCATCTAGCATCTCTTGC   | 59.246 | 22 CGTGGTTCGATCGTAATTGA   | 59.542 | 20 |
| ATCTGTTTCTTCTGCGGCTC     | 59.579 | 20 TTTGCTAACAATGATGGGCA   | 60.073 | 20 |
| ATTGATGGCAAGAGCAGGAC     | 60.226 | 20 GTGGGCTGTGGCTTTTGTAT   | 60     | 20 |
| CAGTGGGGTTGTTTTGAGTT     | 59.861 | 20 CCGAGACAGCACTCACGATA   | 60.008 | 20 |
| TCCATACACACCAAATAAAAAGA  | 59.707 | 25 TTGATCTGATGCACGAAAGG   | 59.799 | 20 |
| TTGGGGAATAATGTCGATCT     | 58.381 | 21 AATGGCCCCAAGAAAATAA    | 60.489 | 20 |
| GCATAAAGCTCATCTTGACA     | 59.08  | 21 AGCTGCATGCCTTCTCTTTC   | 59.723 | 20 |
| CGGTGAAGATTGGAGGAGAG     | 59.797 | 20 CCATCCCATCACTACCCATC   | 60.011 | 20 |
| CTTTGGAAAATTCGAGAGCG     | 59.953 | 20 TGTTTTCCCAAATTGGTTC    | 59.64  | 20 |
| ACGGCATAAAAATGGACTGC     | 59.967 | 20 ATCCTCATCTTTCCCAACC    | 60.133 | 20 |
| CCTTTGGTCTCGTTGAAAT      | 59.028 | 20 GTCCGCATTGAAAATGGAAT   | 59.768 | 20 |
| CATGAAAGACTCTATAGACAAGA  | 57.458 | 27 GCACTACCGGATAGGCTCAT   | 59.178 | 20 |
| AGGGTGTGTGAGAGACCGAG     | 60.306 | 20 AACACCCACCACACCTCATC   | 60.701 | 20 |
| TTGGATGCTTCAAATGTTGTT    | 59.982 | 22 GCCAAATTAAGGGCATGAAA   | 59.907 | 20 |
| GTTGAAAGCCACAAATGGT      | 59.978 | 20 TCTCCTCCCTTTTAATTCC    | 57.21  | 20 |

|                          |        |    |                        |        |    |
|--------------------------|--------|----|------------------------|--------|----|
| GCTAGGGCGATTGTATTGATG    | 59.583 | 21 | GCAAGCATTAGGCGTCTCTC   | 60.125 | 20 |
| TGATGTTGAAGAATCAGCGG     | 59.799 | 20 | GGTGAACCAAGCGGATAAGA   | 60.074 | 20 |
| CGTTGGTTAATCCTGCCATC     | 60.331 | 20 | CGTTAGGCTCGAGAGTGAAGA  | 59.766 | 21 |
| TTTCGAAAACATGCAATGGA     | 60.051 | 20 | TTTGGGGTTGGAATAGGTCA   | 60.162 | 20 |
| ATCACCCCTCACAGAACCA      | 60.363 | 20 | TTCCCGAATATCCCCCTAAC   | 59.978 | 20 |
| CAGAAGGGCAATGAATTGGT     | 59.933 | 20 | TCTTCAATCCTTCTTCCCCA   | 59.6   | 20 |
| CAATGGTGAATTGCGACTG      | 60.111 | 20 | TTCGAAAATGGAGGGATGAG   | 60.006 | 20 |
| AGCAAATGCCAATAAGGTGG     | 59.96  | 20 | TGTAAATGGCCCTCGTCTTC   | 60.074 | 20 |
| ATTGAGTCCCAATCTCGTGG     | 59.927 | 20 | CGGTAAGCGGAAAAATTCAA   | 60.068 | 20 |
| ACACTCTGCTAGGGTTGGGA     | 59.721 | 20 | CAGTCCACTTTTGAATGGCA   | 59.691 | 20 |
| GCAAGATCCATCCTCGCTAC     | 59.803 | 20 | CAGGCACATGCAAAAAGAAA   | 59.849 | 20 |
| TCGAATTTTATTATTGATTGAGCA | 57.936 | 24 | TCTTCATCCCATTGACCCAT   | 60.135 | 20 |
| TGGCAATTTTAAGATCGAATCC   | 60.274 | 22 | TTCCGATTGCAAGAAAAACA   | 59.277 | 20 |
| CCGCGTTTTGGAACTTTTA      | 60.102 | 20 | TTCATCATCTTCCCTTTCTGC  | 59.259 | 21 |
| TGTCACCTTGAAAGAATTACAAA  | 59.959 | 25 | ATACTGCCAAAACGGAACCA   | 60.365 | 20 |
| GAGTGACATCTTCGAGTGTTTCG  | 59.914 | 22 | ATGTCTCTTCTGGGAGGGT    | 59.929 | 20 |
| TTAGCAGCTTATACGTGTGAAAA  | 57.01  | 23 | GGTCATTTTAGCTTGATCAACA | 58.763 | 24 |
| TCCTTCTAATCGATTCTTCCACA  | 60.082 | 23 | TTGTTTCTCGATAGCCCGTT   | 59.708 | 20 |
| TGAAGAAGACGTGGTCGAGA     | 59.545 | 20 | ATCGTTTTGAGAACCGGAGA   | 59.67  | 20 |
| CGTTAGAGCCATCCCTTCTG     | 59.83  | 20 | AAGTTGCGGGTGCATCTAGT   | 59.763 | 20 |
| GAAGCGACACGGGTTATTTTT    | 60.358 | 21 | GGTCGGCTACATGAACCAAA   | 60.894 | 20 |
| GGGACTCGGATAAAAAGGGA     | 60.258 | 20 | AGCTGGCCATTTCTTGAGAG   | 59.574 | 20 |
| TTCTTCCATGTCGTGGTCAA     | 60.088 | 20 | GCGTGGTCTTGCCAATTTAT   | 59.967 | 20 |
| TCACACTCACTCACAACACACA   | 60.297 | 23 | CTCAAGCTCGTCACCCTTTT   | 59.473 | 20 |
| ATGTCCAAAATGGAAGCCTG     | 59.933 | 20 | AAGGAGGTGTTATGAAGGGAT  | 58.028 | 22 |
| TCCCTAGACTCCGTAATTGGA    | 58.657 | 21 | TTGATTCTGGAATATCCCGC   | 59.862 | 20 |
| TGTCCACATTGAAAATGA       | 59.75  | 20 | TGAAGACCTAAGCCACTCGC   | 60.538 | 20 |
| GCAAAAGGCAAAAGCAGAAG     | 60.131 | 20 | AAGTTGTGGCTGCAAATTC    | 60.118 | 20 |
| ACATCATGTAGTCGCGTGCT     | 59.349 | 20 | TTCTTTCTCATTCTCTCGGCTC | 60.096 | 22 |
| TTGAACAATTGAACACCGGA     | 59.941 | 20 | TCCTCATTGTTTGTGTGAAA   | 59.01  | 21 |
| TTGTGTTCTGCTTGCTGTC      | 60.032 | 20 | ATGCCTCAAACAACCTCACC   | 59.973 | 20 |
| TGCGTTTTGACAATATATAGGTGT | 60.083 | 26 | GGATGAGCTCCAATGTGTCA   | 59.637 | 20 |
| GGCGGAGAGGAGAGAGAGAT     | 60.058 | 20 | GACGCTCCACATGATGACAC   | 60.13  | 20 |
| AGGTGCCAGATTCTCATTGG     | 60.073 | 20 | AAAACCTGCGAAATGAGGAAGA | 58.962 | 21 |
| AATTATGTGCAAGCTCATCCG    | 60.11  | 21 | TACAAAACCAAGTGGCACCAG  | 59.609 | 20 |
| CGGGTGACATTGCCTAATTT     | 59.823 | 20 | CGATGTTTATTTGAGGCGCT   | 60.23  | 20 |
| TCACGTGTCATTGTAACCGC     | 60.584 | 20 | GAACGTCGTCATTGTAATTGG  | 58.146 | 21 |
| AATTGATTGCTGCTGCTGTG     | 60.019 | 20 | CCACGTGGCACTTCATCTAA   | 59.716 | 20 |
| CGTCAATTCATGGCTTCTGA     | 59.799 | 20 | CCAGCAGACAAAAAGCATCA   | 59.988 | 20 |
| ACGGAGAATTGATGTTCCCA     | 60.317 | 20 | TTCCATTGGGTTTTGGGTTA   | 60.024 | 20 |
| AAAACCCAGAAAAATGCAGC     | 59.205 | 20 | TGCCCTTCTGACTCTGTCT    | 59.986 | 20 |
| TCGCCTTTCTTTTCTAACCTC    | 59.155 | 22 | ACTGCCCAACAATGGCTTAC   | 60     | 20 |
| AATGATGAGCCATGCAACAG     | 59.679 | 20 | CCATGATTTCTTTAATTGATC  | 59.7   | 23 |
| TGTATTTTCGGAATTGCTTCA    | 58.291 | 21 | TGTTTTGCCCGTACGTTGTA   | 60.029 | 20 |
| CCACGAGATGGGGACATTTA     | 60.713 | 20 | AGCTGGCAGAGACCTTTTCA   | 60.134 | 20 |
| GGTTTCTTCTGCTTGTTGGC     | 59.859 | 20 | TTAGGCCCTCCCTACATCT    | 59.919 | 20 |
| ACTACACATCCGAACCTGCC     | 60.142 | 20 | CTCACCAGGCCAGGGTAGTA   | 60.126 | 20 |
| TTTTACGGTTCGGTTCAG       | 59.968 | 20 | TCCAACAAAACGAAAAAGT    | 57.25  | 20 |
| ACAATGGAAAACACGCAACA     | 60.011 | 20 | CGCTCTCTCATTGTAATCTCTC | 58.83  | 24 |
| CGCTGAGGGATCTGGTATGT     | 60.096 | 20 | CGATGGAGAACCCTTATTGG   | 59.382 | 20 |
| ATGCTGGATTTTTGGCATT      | 59.907 | 20 | GCCCAGCTTATTTGGTGAAA   | 60.074 | 20 |
| AAAATTTTCGGGTTTGGACC     | 60.034 | 20 | TCCGTGAGTTTACCCAAAGC   | 60.11  | 20 |
| GTTTCACTTTGGTACCCGGA     | 59.83  | 20 | AGGACTGGAGGAGAGCGAG    | 59.673 | 19 |
| AAAGTCGGCCAAGAAGAGAA     | 59.052 | 20 | TTCAAACATGGCAACAATGG   | 60.357 | 20 |
| CTAAGCGATGCCTAAGGCTG     | 60.131 | 20 | ACACCCAAAATCCTTTGCAC   | 59.836 | 20 |
| CTCTCACTAGCCGCAGCTCT     | 60.058 | 20 | TTCTTGGAATCATGTCCCT    | 60.461 | 20 |
| GGAAAATATCAAGTCAACACAAA  | 57.333 | 24 | TTCACGCCACATCACTCAAT   | 60.12  | 20 |
| GTGATTAGCATCACAGCCCA     | 59.679 | 20 | TTTGTACCAAAAAGTATATAAA | 57.58  | 27 |

|                          |        |                            |        |    |
|--------------------------|--------|----------------------------|--------|----|
| CAATCAACGCTAAAACATCTGA   | 57.98  | 22 TCGTTCAAGTCGGTCACATT    | 59.139 | 20 |
| GATATGGATGCCCCAGATTG     | 60.118 | 20 CAGATTTGCGCAGAAAATGA    | 59.953 | 20 |
| TGATTTTGGACGTTCTGCAC     | 59.697 | 20 AACTCAAACGACACCCTCG     | 60.149 | 20 |
| GGTTGTGGTGAAAAAGGGTG     | 60.246 | 20 AGTCACCGACAACCTCCAACC   | 60.009 | 20 |
| TTTTCCGAAGTACGAGCTGC     | 60.523 | 20 CATCCTGCTAACCACCCAAT    | 59.813 | 20 |
| CGGATTAGAAATCGGAACACTC   | 59.966 | 22 TCGTGAGAGATAGATATGGAG   | 57.233 | 24 |
| TCAAATGCACAAATCAATGG     | 59.41  | 21 GGGGTCTGACATTGTAATAAAC  | 58.812 | 23 |
| AAGTAGGGGGCTTCAATCCA     | 60.817 | 20 AGTTCACGTTCTGGGTTTGTAT  | 59.454 | 20 |
| ACATTTTCGATTAGGTGTGACAA  | 57.154 | 22 AGGGTGTATGTGAACCAACCA   | 60.141 | 21 |
| AATCGTGAGCAGCAGGTTTT     | 59.882 | 20 AATTTGGCTTGTACAGCGG     | 60.131 | 20 |
| TTTTCTTTGTCTTCAATGCCAG   | 59.379 | 22 CCTCCATTATCCACTCTCGC    | 59.653 | 20 |
| CACAATAAGGGTGGTATCATTTC  | 59.556 | 24 AGCAGAAAGGGGGAAAATTG    | 60.423 | 20 |
| AGGATAAAGTACGATGATTGACC  | 58.954 | 24 TTTTCCGGTTAACAAATCGC    | 59.943 | 20 |
| CACCACTGGCTCGAACTGTA     | 59.897 | 20 TGTCGAAATGGGAGTCACAA    | 60.088 | 20 |
| TTTTGCTTGCAGTGTCCATC     | 59.847 | 20 TCAGAACATGGGCAAATTCA    | 60.049 | 20 |
| GATAGGTGTGGCCAGTTTG      | 60.375 | 20 GGGACATCTTGGTGGGAATA    | 59.605 | 20 |
| CGTTGGACCTGAAAGAGGAC     | 59.697 | 20 GGGAACATTCGAGCCATAAC    | 59.391 | 20 |
| CATGGGTTATCACTTGAATGAGAC | 59.768 | 24 ATTGCGATGTGGAAGCTTTT    | 59.713 | 20 |
| TACGTTTAGATGTGCAGCCG     | 59.895 | 20 CAGATGATGTCCCAGCAAAA    | 59.648 | 20 |
| AAATTGAATTGTGAGTCCCG     | 57.517 | 20 ATCGTCCCCTCTCTTGACAG    | 60.356 | 19 |
| GGTCTGAAACCGGGATAG       | 60.683 | 20 TTGTGTGATCGAACCACGTT    | 60.008 | 20 |
| CCTAAAAGGAACTGTGGAGGC    | 60.116 | 21 TCGTCATCAACTTTTCCCCT    | 59.526 | 20 |
| TTTGACCTTTTACCTTGCCC     | 59.064 | 20 GGATAGGAATCTCAAGAGTAT   | 60.007 | 25 |
| ACTCAGGGTTCTTACGGTC      | 59.153 | 20 TCTCTCTTCTTGGTTGGTGAA   | 58.955 | 22 |
| GAGGAGCAATACTGCTTGTGG    | 59.89  | 21 ATTCGGACATCGAGATTTGG    | 59.894 | 20 |
| TTCTGGGATACACAAGGCGT     | 60.517 | 20 CGAATACTCCAAATGACACCA   | 59.861 | 22 |
| TTGGGTAGAAGGCATTGAGA     | 58.298 | 20 TTGAATATGCAATCACCAAAG   | 59.485 | 23 |
| AACATCAATCATAGTTCAACTTTA | 57.122 | 26 GGTGCACCACCCCTATCTTC    | 61.684 | 20 |
| GACTCCAAGCCCTGTTGTGT     | 60.159 | 20 GAAAACAGAGGTAGTGAATTG   | 57.489 | 24 |
| TTATGTGGCCCGAATGACTA     | 58.991 | 20 TTTAACAAACGTTTCGGAATTTT | 59.027 | 23 |
| ATATTCGATCCGGAAGGGTC     | 60.117 | 20 TTTACCATGATTTTCGATACAC  | 60.237 | 23 |
| TCCAGTAATTTGGGAAGGCT     | 58.646 | 20 TTTCTCCTCGTATGCGTATTCA  | 59.742 | 22 |
| CCTTTGGATATGGTGATTTGG    | 59.145 | 21 AGGGAAAACAGGGGTAGCTG    | 60.488 | 20 |
| TGATGAATTGACCAAAGCCA     | 60.049 | 20 ATAAGCAACGAAGGGAGTGC    | 59.34  | 20 |
| ACCGCACAAATCATTTCCCTC    | 59.939 | 20 AATCCAATCTTCGCCCTTTT    | 59.909 | 20 |
| TTCCAAACCTCTATCCCGTG     | 59.926 | 20 ATTTTATCCGACTGGCGTTG    | 59.96  | 20 |
| CATGGCCCTTTCTTACATT      | 59.933 | 20 ACAAATCACCCCTCACAA      | 60.21  | 20 |
| CCATAAAAAGTTAGGCAAGTCTA  | 59.231 | 26 TTTCACTTTTTGCACTCCCC    | 60.088 | 20 |
| ACAACATTCATCGTTCCCT      | 59.263 | 20 TCACCATAACGCACCCCTAT    | 60.214 | 20 |
| ACCATGTTGTGTCCGTGTA      | 59.726 | 20 CCAGGTGGAGTTACACCCAT    | 59.697 | 20 |
| GGCTGGCTCCAGTAGTTGTT     | 59.357 | 20 ATACCTGCAAGTGTGCGGGAG   | 60.134 | 20 |
| TCTGTGTGTTGAGAGATCAGTGAC | 59.566 | 24 TGAATCACTTTGCAAGCACC    | 59.847 | 20 |
| CAAAAACAGAGTGAGGGGGA     | 60.081 | 20 ATCAGTGAGGAGGGATGTGC    | 60.08  | 20 |
| TGTCCTTTTGGATCCAGTCC     | 59.903 | 20 TGAATCGCAAGCACATGAAT    | 60.228 | 20 |
| TTGCTGCCCTATTTTCTTTGA    | 59.84  | 21 TAAGCTGTCCAGGATTTGGG    | 60.066 | 20 |
| GCATACCATTATTGGCAGCA     | 59.549 | 20 GGGACTGTGAAACAGGGAAA    | 59.943 | 20 |
| CGCTCATTTTCTCACACCAA     | 59.84  | 20 GTTTTGAACCCTAGAGGGGG    | 59.799 | 20 |
| TATGCAAGAAACATGGCTGC     | 59.839 | 20 TTTTCTGCCAAACCTATCG     | 60.067 | 20 |
| TTAAACACTTCGCGCAGACA     | 60.578 | 20 CTCTTCAGCTGCTCTCCGTT    | 59.891 | 20 |
| AACTCACATCAGATTCCCCAA    | 59.396 | 21 TGCATGTGTGAATATCCGCT    | 60.104 | 20 |
| GCTTGGTTCGAGACTTGAGG     | 59.989 | 20 CCAAATAAGATCCGCCGTTA    | 59.922 | 20 |
| TCAGCGGCTTAACATGTTTCT    | 59.897 | 21 GAATCCGAATCTTTCACCCA    | 59.871 | 20 |
| TCCAAATGACCAACCAAACA     | 59.792 | 20 TGCTTTTACCAAGGTGAGGC    | 60.249 | 20 |
| CGGCTGGATTTTATCCCTAT     | 61.165 | 20 GGTAGTTTCAAGGTGGCTGC    | 59.74  | 20 |
| GCCCTGTTTCGTTTATGTCTT    | 60.119 | 20 TGCAGATATTGCTGCCAAAG    | 59.976 | 20 |
| TCCAAATGGATGAGGATGGTT    | 60.135 | 20 TGATGCCAACTCACCCATAA    | 59.924 | 20 |
| GATTTTGCCCCATATGCTA      | 59.757 | 20 GAACCGTTTAAACAACCCGA    | 59.839 | 20 |
| GGCTTTTGGAGGATGGAGAT     | 60.41  | 20 CATCTCTTGTCTCCCCAC      | 59.505 | 20 |

|                           |        |                           |        |    |
|---------------------------|--------|---------------------------|--------|----|
| TGCAGAAGTTTCGAGGGAGT      | 59.989 | 20 AAAGAAGATTCCGGCGAAGT   | 60.208 | 20 |
| TTCTTGCTGCTGTCCATTA       | 59.42  | 20 TTACCGTGTGTGTCATGTG    | 60.071 | 20 |
| CCATGTTTGTAAATTATTGTAGGGA | 58.388 | 25 AGAACACGAGGAACTTGGGA   | 59.697 | 20 |
| TCACTAGAATGCGCCCCTAT      | 59.691 | 20 GGGGAGCGATGATAGTTGTC   | 59.513 | 20 |
| GTGAGACCCATTCTCCCCTT      | 60.314 | 20 TTTATGGGTACATCGGGGTG   | 60.439 | 20 |
| GATTCTGATCGACCAGTGGG      | 60.475 | 20 AAGCAGGTTTTGATGGATGG   | 59.933 | 20 |
| TCGATTGACCCCTCATCTTC      | 60.011 | 20 ATCGTTGTCGAAATCCTTGC   | 60.081 | 20 |
| GTGGCTGGGAATTGCTGATA      | 61.003 | 20 ATGAATGGATTCCGGTCAA    | 60.133 | 20 |
| CCTCCCTTAGGGTTCCTCAC      | 59.928 | 20 TGTGTATACTCCACGGCGAA   | 60.134 | 20 |
| AAAAGGAGAGCCGGTCAAGT      | 60.247 | 20 TGGGGCCTACGAGAAATATG   | 59.916 | 20 |
| CTCGAGCAAGGAATAGACCG      | 59.971 | 20 GGATTTCCGTTGTTATTGCC   | 59.277 | 20 |
| TGCAACGCACTCAAGAAGTT      | 59.64  | 20 TGGTTAGCACCAAATAGCCA   | 59.182 | 20 |
| GTTTCCTCTTGGGTGGGTTT      | 60.725 | 20 GAAAGTTGGCTCAAGCTCGT   | 59.621 | 20 |
| CGACCCTGAGAGATTCTTG       | 59.797 | 20 CTGAGAGCTATACCGACGGC   | 60     | 20 |
| TCTCAACATGCTGTCTTCGG      | 59.984 | 20 GGGAGTGGGGGACTGTTATT   | 60.052 | 20 |
| TCACCATGAAGAAACCCACA      | 59.935 | 20 TTACCGTTCGGTCAGAACCTT  | 59.592 | 20 |
| GAACTGAGGATCTTGGGTGG      | 59.505 | 20 ATTTCTTGGCCTTCTTCGT    | 60.074 | 20 |
| TAGAGAAGCCGATGCAGAT       | 59.939 | 20 CCATCTGTCTTGGGGGAGTA   | 59.92  | 20 |
| ATGGTGGGGTTTTGTACCTG      | 59.569 | 20 GAAGTGCAGTTTCCCCTTCA   | 60.232 | 20 |
| TTCGGTTTTTACTCCCCTATG     | 58.188 | 22 AATGGAGCAAACATTACCGA   | 58.093 | 20 |
| CGTTGCTTTTAAACCACCGTC     | 60.534 | 20 CCATGTCAAGGGTTCGAAGT   | 59.966 | 20 |
| CCAGAATTTGCTGGGTTAGG      | 59.564 | 20 AGTTCATCAGCAAAGGTGCC   | 60.263 | 20 |
| TCAAGCTTAATTAGAAGAAAAGA   | 58.427 | 27 AATGCAGTGAATGGAGGGAG   | 60.073 | 20 |
| GAAAGCCTACCTCGCTTCCT      | 59.983 | 20 ACTTCCCCCATTCTTCATCC   | 60.133 | 20 |
| TTCGTCCGAAATACTCCCAC      | 59.933 | 20 CCCTTAAACCCTTGAGCCAT   | 60.312 | 20 |
| CTCAAATCTCTGCCCTCTGC      | 60.096 | 20 GGAAGAAATCCCCCAAGAC    | 59.744 | 20 |
| TGATTGCTGTGGTATGCTTTG     | 59.744 | 21 ATGTGTTTGGTTTTGGCTGC   | 60.934 | 20 |
| TCCCGTATACAAATCCAACAA     | 59.231 | 22 TGTGGTTGAAATCTAGCCCTT  | 60.001 | 22 |
| CAGAAATCCCGGTATCTTGA      | 59.887 | 20 GCACTGCTTTTTGGTGATGA   | 59.847 | 20 |
| TGTCGTTGTTGAATGTCGGT      | 60.008 | 20 TGACACAGATTTGGTGCTTG   | 58.246 | 20 |
| GGCTCCCCATTTCTCTCTCT      | 59.778 | 20 AGAGGTTAGGGTGTGGGGCT   | 59.994 | 20 |
| ATTTTCTGTCGAATGGTCCG      | 59.933 | 20 TTCATGCCACCTCCAATTTT   | 60.309 | 20 |
| CAAGAAACCTATCCACCCCA      | 59.784 | 20 GTCATCATCGTCTTCCCCAC   | 60.335 | 20 |
| TTTAATAATAATTCCCTCCTCTCG  | 57.159 | 24 TGTGTTTTGACAATATTTAGTG | 58.633 | 27 |
| AATCCCGTTCATCATAAA        | 59.091 | 20 GTTAGGGATACCGCTAGGCA   | 59.205 | 20 |
| TTTGATATACATGGTATTTAATTT  | 57.034 | 27 CTTGCAATGCTTTGATTGA    | 59.953 | 20 |
| CCCTAGCTTTGCCCTCTTTC      | 60.332 | 20 GCGAGGATTCATTCTTGGA    | 60.155 | 20 |
| TCGATTTGGATTGAAATTTGT     | 59.402 | 21 AAAGAGCACCTCCTGCTTGA   | 60.134 | 20 |
| GATGGAGATGGAGGGATTGA      | 59.821 | 20 CCTCCCGAATTTCTGTGTGT   | 59.966 | 20 |
| TGGTGACGATTATAAAATCAAAA   | 57.729 | 24 TTAGTCAATGGAGGGTGGGA   | 60.309 | 20 |
| ACTGGACTTCGACCTGGATG      | 60.112 | 20 CGTTGGATGTTAAGGATGCC   | 60.331 | 20 |
| GAGGCTGACGGATTTCCAC       | 60.616 | 19 CTCAGCCAACAAAACCTTCC   | 59.711 | 20 |
| CGGACTGAGCTGAGCTAAAA      | 58.405 | 20 TTGGTTGGGTTAGGTGTTGG   | 60.638 | 20 |
| TATCATCACCAGCTTGCACC      | 59.679 | 20 TGCTTAAAATGGGTTTTCCG   | 59.937 | 20 |
| GGCATTAAAATCCACCATTGA     | 59.652 | 21 TCAATGACCACACAACCACA   | 59.376 | 20 |
| CCCACGTGCACTTCTTTTGT      | 61.124 | 20 CACTAAATAAATATTTTGGCAT | 57.149 | 27 |
| TCGAAAGCATTTCGAGTTC       | 60.331 | 20 AAGCCTACAGGAAAGAAAGG   | 59.908 | 23 |
| TCGAGCTTGCTCAAAAGTCA      | 59.864 | 20 TCAAACACAATGACTTCGCC   | 59.697 | 20 |
| GATGAACACCCGAACCACTT      | 59.827 | 20 TTTTTGGGAAATCCTTGAC    | 59.916 | 20 |
| GGCAACGGTATACCACTCGT      | 59.882 | 20 CCTCCCAACATATTGTGCATT  | 59.699 | 21 |
| GACATCTTCGAGTGCTCGTT      | 58.028 | 20 CTGAAATCTCGCATCCCAAT   | 60.036 | 20 |
| CCCTCTTCCCTCTCCAAA        | 60.54  | 20 TAGTCACGTGCGATTTGGTC   | 59.722 | 20 |
| GCAGCAGAAATGAAGGGAAG      | 59.955 | 20 GTGAACACCCAAGGTGGAAC   | 60.261 | 20 |
| GATCTCCACCATTTACGGGA      | 59.75  | 20 TTATGCGGTTTATTGCGATG   | 59.562 | 20 |
| TGCTAATCTACGAATTTGGGA     | 57.416 | 21 TCAGTTTTTAAATCGTGGCCG  | 60.989 | 20 |
| TAAGGGCGGTATCACCTGAA      | 60.46  | 20 AACCTTTTACGGGGAAGGAA   | 59.808 | 20 |
| TCCACACAGAGACTGGAAC       | 58.712 | 21 GGAGTGTGGAGGAGGAGTG    | 59.682 | 20 |
| TGTATCACATATGGCAATCGAGA   | 60.358 | 23 CGTGGTTCGATCGTAAATGA   | 59.542 | 20 |

|                          |        |    |                        |        |    |
|--------------------------|--------|----|------------------------|--------|----|
| TTCTTTATTCACAATGAACTCAGA | 57.6   | 26 | AACAAGTCAAGGAGGGCAGA   | 59.844 | 20 |
| AGAGTGTGTGGCCGAAATC      | 60.119 | 20 | TGCATTTATCCGATTTATCAA  | 58.561 | 23 |
| AAATCAAACCGCCATCAAAC     | 59.807 | 20 | GTCGTGGATATGGGCTGACT   | 59.957 | 20 |
| CTTCTGAAAGGCTCAGCCAC     | 60.134 | 20 | TCATGTTAATTGGTGGTATCAT | 59.898 | 25 |
| TCGAGCATTTCAGACAATC      | 59.955 | 20 | GTGGCAGCTTCATCCATTTT   | 60.081 | 20 |
| GTCAAGGGCTTTTGTAAATTGTG  | 59.926 | 23 | ACAGGGCTTGGGACAAACTA   | 59.592 | 20 |
| ATCACGTTGAGGATTCGGAG     | 60.073 | 20 | TATCCAGTTTTACCACCGCC   | 59.823 | 20 |
| ACGCACTCACACACACGAA      | 59.922 | 19 | GGGTATGTGGACAGAGTGGG   | 60.238 | 20 |
| CAGCTCTCTATCATCCACGC     | 58.572 | 20 | ATTTGTGCGAGTCTCGTGTG   | 59.905 | 20 |
| GGTTGGTGGCATTGAAATTT     | 59.668 | 20 | TATTATCACGGTTTTCCGGG   | 59.655 | 20 |
| CCGTAAACAAAATGATGGTGA    | 59.736 | 22 | CATGTGTCTTCCACCATGAAG  | 58.995 | 21 |
| AGTAATTGAACCTTGGGCTAAA   | 57.063 | 22 | TCTTTCTTCCCTTGCTCCA    | 59.926 | 20 |
| TGACCACCACCTGTTGAAA      | 59.976 | 20 | CCAATGCATTACGAGTTGGTAC | 59.536 | 22 |
| TTGACAAACTCACATGGGTCA    | 59.992 | 21 | TCCTAGCCCTCAATCTCGAA   | 59.91  | 20 |
| ACAAACATTTGAGGAAGGCG     | 60.11  | 20 | GCACTCTCCAGCTCGATTTT   | 60.104 | 20 |
| CAAGCTTGGCGTTATGAATG     | 59.325 | 20 | ACTAGCAACGGAGATGCGTA   | 58.555 | 20 |
| AACCCCTTGTTTGCCTTTCT     | 59.976 | 20 | CACCCGACGTATTCGAGTTT   | 59.993 | 20 |
| ATGACATGGCATCGTCTCAA     | 60.08  | 20 | CTTCTTGCCGATGAAGATGAG  | 59.963 | 21 |
| AGGTGGAATTTGCGGGCTATT    | 59.799 | 20 | TTCATCATCAGCTGCTGTCC   | 59.95  | 20 |
| CGTGCAGCCTCTTCTAGCTT     | 59.92  | 20 | TGCCACAGTTTCATCTTCCA   | 60.24  | 20 |
| TTTTGCCACGAATTAGCAT      | 60.456 | 20 | CGGAGTTGAGGACTTAACGG   | 59.728 | 20 |
| ACCCATCTCCTAACACGCAT     | 59.434 | 20 | GGTTTGGAGCCATTTTGTGT   | 59.836 | 20 |
| GGTCTGTTTTCCATGCGCTA     | 59.933 | 20 | TGCACAACACAATACTAATGC  | 59.202 | 23 |
| ACACGTGTCGCAATCAGAAT     | 59.169 | 20 | TTGGGGGAGAATTGTTTGAG   | 59.903 | 20 |
| CACAACACACACGGACATCA     | 60.044 | 20 | TCTTGACGACTTCGAACCTG   | 59.007 | 20 |
| CACGAGTGAAGAAAGGGAGA     | 58.001 | 20 | ATCATAATTGACGCCCTTCG   | 59.923 | 20 |
| GAACACGACACGATACGCAC     | 60.192 | 20 | AATGGACCCTTGTTGGTTTG   | 59.688 | 20 |
| GCATCTCTCCCTTGCTCTCTT    | 60.11  | 21 | ATGGAAAATGGTGATTGGGA   | 59.991 | 20 |
| TTGAAGACATGGTTGGACAAA    | 59.01  | 21 | CCGCACACCCCTATCTTTTA   | 59.953 | 20 |
| GTGAAACGGAGGGAGTACACA    | 60.02  | 21 | ATTGCTTTGACACCACCACA   | 60.008 | 20 |
| AAGGATGCTGACCTAACCCC     | 60.328 | 20 | GACGAAAATTGCCCGTAAAA   | 59.943 | 20 |
| TGGTTATGCCTTCTTCTTCCA    | 59.693 | 21 | CCCGAATTTCCATAACTCA    | 59.756 | 20 |
| GAATGCGTTCCCAATAGCAT     | 59.929 | 20 | GAACATCGACTCACTGTATTGT | 57.373 | 24 |
| CTGCAAAGCATCACCAGAA      | 59.988 | 20 | CAGCTTCTGCTTCACACAGC   | 59.929 | 20 |
| ATCAATTTTTGAGTTATGATGTTT | 57.321 | 26 | CCCTCAAACAGATTCCCAG    | 59.521 | 20 |
| CATGTTACACGTGGACGCTC     | 60.183 | 20 | TGTCCGAAATTCTCTCACCC   | 60.05  | 20 |
| AGGGATTTTGGGACGATTTT     | 59.644 | 20 | ACTGCAACCCATCCTTTGAG   | 60.111 | 20 |
| TTGTGTGGTTGTGATTTAGTTATT | 59.328 | 26 | TTTTTGGGAAATCCTTGCAC   | 59.916 | 20 |
| AAGGAGGCCAGACTAAAGGC     | 59.848 | 20 | AAGTTGGAACGAGCGAAAAA   | 59.861 | 20 |
| GGGACGACGTTTTATGGTTG     | 60.227 | 20 | CTCCATGCCTCTGCTCTTTT   | 59.574 | 20 |
| ACGTCTTTCATGCACCAAT      | 58.158 | 20 | TGGGCCAGTAGCATGAATA    | 61.382 | 20 |
| CAACATACAGGCACGAAAATG    | 59.097 | 21 | CGTAGTTGCTACATGTTAAAGA | 57.052 | 25 |
| TCCACCCTATTTCTTGCTGC     | 60.214 | 20 | AAAATCAAAGGCCACAATG    | 59.801 | 20 |
| CCTCACATATATGCCCGTCC     | 60.177 | 20 | CCCCAGCAAATAAAAAGG     | 60.637 | 20 |
| ACACACACTCACGGCTTCAA     | 60.357 | 20 | CCCCAAGAGAGGATTTACA    | 60.042 | 20 |
| CCGAAATCTCAAATCCGAG      | 59.64  | 20 | ATTGCATTGCAGTTTCACCA   | 60.119 | 20 |
| TGGTCCCCTCAACACAAGAT     | 60.363 | 20 | ATGAAAATGGGCGAGAGTTT   | 58.647 | 20 |
| CCTAGCCTTTGCCCTCTTTT     | 59.85  | 20 | TGGGATTGAGCCCAAATAAG   | 59.894 | 20 |
| TCAAACATTCATCAATATACACAC | 58.864 | 25 | CCAATGACACGTTATGCTCAA  | 59.6   | 21 |
| GAAGCACGTGACAGCTAACG     | 59.664 | 20 | GTTGTTTTTGTGCGGATTT    | 59.982 | 20 |
| CAGAGAAAAGTGAGCTCGGG     | 60.126 | 20 | CAGAAATTTCTTGTTGCTC    | 58.823 | 21 |
| CAGGTGGAGTTTCATCCACA     | 59.52  | 20 | CGGGATTTAGGTGTTTTGAC   | 57.066 | 20 |
| GCCGTTTCAGATACCAGCTC     | 59.843 | 20 | ATCGATAATTCGCACCCAAG   | 59.923 | 20 |
| AATGCTGCAAAGTGTCAACG     | 59.911 | 20 | TCATCGAAAATCTGATCTGGG  | 60.021 | 21 |
| TAATTC AACCCACACCCCAT    | 59.91  | 20 | GGGAGATGAGGGGAAAAGAG   | 60.008 | 20 |
| AAACCCATCACCCACGTTTA     | 60.088 | 20 | GGCAATTTGTTAATTGTTTGAG | 59.456 | 24 |
| TTTGCGAGCAAATGAATAAGAG   | 59.516 | 22 | CTTTGAATTGCAGCTCGACA   | 60.134 | 20 |
| ACGAGGCCAAGAATGATGAG     | 60.218 | 20 | TCGTCCGAAAATCCTTTTAC   | 60.051 | 20 |

|                          |        |                           |        |    |
|--------------------------|--------|---------------------------|--------|----|
| TTTGGGCTATTTCCCAACAG     | 59.931 | 20 CAAATGATTTCCCTTTGATGG  | 59.26  | 21 |
| TCATTCACATCATCCCATGC     | 60.3   | 20 CACTTTCTGCACCCCAAAT    | 59.971 | 20 |
| AGGCTTTATGATCCATTCTCAA   | 59.135 | 23 ATACCGCTGACGACAACCAT   | 60.406 | 20 |
| TGTTCCCTCAAGCCGAAATCT    | 59.813 | 20 ATGTAGGGAAAGATGGCACG   | 59.955 | 20 |
| CCAAACCAATTCAAAAGGGA     | 59.772 | 20 TTCTGGTTTGCAAACTTTCTG  | 60.188 | 23 |
| CCCAGATGTTGAAATGGTGA     | 59.343 | 20 ATTGCTCTCCAACCCACAAC   | 59.973 | 20 |
| AAAATCAAAGGCCACAATG      | 59.801 | 20 ATTTCGAAAATCAACGGACG   | 59.938 | 20 |
| CCCTAATTCCAATTCCTCCTC    | 59.6   | 20 GCTGGTGTGGGAGAGAGAT    | 59.258 | 20 |
| TGCGTTTTGACAATATTTAGTGT  | 59.109 | 25 GGGTTGACATGGCTTCGTAT   | 59.82  | 20 |
| TCGGTTATTACCGGATCGC      | 60.812 | 19 CCCAGTCGTATCACTTTGGC   | 60.517 | 20 |
| CCACATAAAGGATTCCCGTG     | 60.184 | 20 CACAGGAACAAGAGCGAATG   | 59.44  | 20 |
| TCAAAAACAGAGGAGAAGGGA    | 58.895 | 21 TGTGTGGGTGTGTTGATGTG   | 59.878 | 20 |
| GAAGGCAATCTATCCCATGC     | 59.491 | 20 ACGGATTTGTCGATCGGTTA   | 60.331 | 20 |
| GGCCAAGTCTGGCCTATTTA     | 59.182 | 20 TGGGTCTAATAGAGCGGCAT   | 59.691 | 20 |
| TATCAGAGCCACGGTTAGGC     | 60.235 | 20 CTTGGCAACGAAATACCAT    | 59.96  | 20 |
| TGAAGAAAATCGAACCAGCA     | 59.395 | 20 TGTAGGGAGTGGGATGTGTG   | 59.388 | 20 |
| TGCTTGCATCAACTCATTAGG    | 58.931 | 21 CCCACTTCTTGCTTCCTG     | 59.691 | 20 |
| ACCAATGGTGGTATGGTGTG     | 58.984 | 20 GCCGGTCTAGTCAATGAAA    | 60.074 | 20 |
| TCGTATGATCCAACCTCGCA     | 60.22  | 20 TCACGTAGTGGGAAAAGGG    | 59.964 | 20 |
| GGAGATGTCTCACGGTTGGT     | 59.969 | 20 CTTATTGCCTCCATCGTCGT   | 60.096 | 20 |
| TGGCAGAACAAAACCTCATGC    | 59.847 | 20 CTTGATTCATGGCACACCAC   | 59.967 | 20 |
| AGATGGGTGGCAATCTTGAG     | 60.073 | 20 AATTGGGGTGCAGTTCAAAG   | 59.971 | 20 |
| CCATGCCACCTTCTATTGGT     | 59.813 | 20 ACACTTAGGGGGTTATTAGTG  | 59.26  | 24 |
| GGTGGTATGGTGTGGAGGAC     | 60.096 | 20 ATGCACACGTAACATCCACG   | 60.459 | 20 |
| GCGAAAATTCCACCATAGTCA    | 59.952 | 21 AACAAATATGGCCTCCCAA    | 59.273 | 20 |
| CAACAAATTAGCTGAATGGCAG   | 59.779 | 22 ATGACAACCCACCAGAAAGC   | 59.973 | 20 |
| GAGGGAGATCGACGTGAGAG     | 59.945 | 20 AGACCGAGCGCAATGAATTA   | 60.742 | 20 |
| TGGGGCCTACGAGAAATATG     | 59.916 | 20 AGCGGTTTAGTGGGTTGTGT   | 59.52  | 20 |
| GTCACCTCACACCCACTCG      | 60.207 | 20 CATTAAATGCCGGTCAAAGC   | 60.456 | 20 |
| AACAATGCCCGAAGATTGAA     | 60.448 | 20 TAAGATCGAACGATCCAGCC   | 60.177 | 20 |
| AGAAACGAAAGCACGACGAT     | 59.882 | 20 TGACCACCACGGAATTTGTA   | 59.816 | 20 |
| TCTTATAGCATCAACCGCCA     | 59.281 | 20 AAAAGAGAAAGAGGGCCGAT   | 59.307 | 20 |
| TGCAATCCAGTCGCATTTAG     | 59.833 | 20 AAAACACGAAACTTGATTGTG  | 58.71  | 23 |
| GGGGTTATCATGGGATCAAGT    | 59.895 | 21 CGGAATGAGCCACAGAATTT   | 60.074 | 20 |
| ACTGCCCTCTATTCCGATT      | 59.925 | 20 TGTTTGGTTGCTTGCTTGT    | 59.366 | 20 |
| ACACACACATGGATGGAGAGA    | 58.955 | 21 GGGGTCTTCTTTTGGGACTC   | 59.912 | 20 |
| GAATCGTAACATGTAACACAAA   | 59.332 | 26 TGTTCCCGACAAGAAAAGAA   | 59.71  | 21 |
| TCTGCCATGTGCTGAATTGT     | 60.272 | 20 CCAATTTGAATGGTTATTACCT | 59.191 | 24 |
| ACCACTTCTCCCTCGATGTG     | 60.112 | 20 TGGATGACGAGGTCGAGATT   | 60.622 | 20 |
| AAGCTTGGCCATTCAACAAT     | 59.574 | 20 TCGGAAATAGGTGGTTTTCG   | 59.931 | 20 |
| TTGTAAAACATGTATGGGATTGAT | 59.898 | 25 AGGAGCAATACTGCTTGTTGGA | 59.89  | 21 |
| CCACTTTCCTTCCCACTCA      | 60.081 | 20 CAACTTGGGCTAAGGATTTTG  | 58.751 | 21 |
| TTAGATCCGAGATGGTTGGG     | 59.887 | 20 ACTGCCTTCCAACACGTTT    | 60.156 | 20 |
| AATAAGTTCACCTTATGCGAAAG  | 57.806 | 25 TCCAATGGTAAAACAACGCTC  | 59.989 | 21 |
| CACTCTTCCACTTGCCCAT      | 60.111 | 20 AACATGGCCGGAGAATACAG   | 59.955 | 20 |
| CCCTTCCCACTTCATTTTT      | 60.159 | 20 TCGAGACTTCGGTTGGTTTC   | 60.232 | 20 |
| CGTGTCTGGTGTTCATGG       | 60.001 | 20 AATGGTGTGATGGCAGAAT    | 60.492 | 20 |
| AAGCCACAAAGTTGCATTC      | 60.118 | 20 GAGATGTGTGTGTGCGTGTG   | 59.772 | 20 |
| TGACGGGATTTAGGTGTTTTG    | 59.847 | 21 AATCATTCCCAGCCACACAT   | 60.203 | 20 |
| ATGCTCTACCAACTCGCTT      | 60.02  | 20 AACCGTCAGATTTCAAACCG   | 59.971 | 20 |
| TTGCTTCATTGGTGGTAACG     | 59.585 | 20 ATTCACTCACCACCGTCCAT   | 60.246 | 20 |
| AACCATGTCGAGGGTTTCAG     | 59.966 | 20 GAGGGAGAGAGAGCAGCAGA   | 59.969 | 20 |
| AACGGTTGAAACGTGGGTAT     | 59.218 | 20 CGGATGAACACCCCTACTTG   | 60.366 | 20 |
| CTGAAATGAAATCATGCCCC     | 60.274 | 20 TCAGCCTACTTTCGGCCTTA   | 59.975 | 20 |
| CTGCTATTGAAACAACCCCG     | 60.493 | 20 AACGATGCTGCCATGATTTT   | 61.014 | 20 |
| ATTCACAATGGCAAGGAACC     | 59.797 | 20 GGCACCAAAGAGATAGGCAG   | 59.836 | 20 |
| GCTCGAGTTTTCTTCGCAAC     | 60.14  | 20 TTAACCGCCAAACTCAAACC   | 59.975 | 20 |
| GGAATCAGCCGTTCTCACTT     | 59.288 | 20 TTAGATCATACACGTGGCCG   | 59.566 | 20 |



|                           |        |                           |        |    |
|---------------------------|--------|---------------------------|--------|----|
| TGCTCCTTCTCACTCTTCCA      | 58.669 | 20 CAAGTTGAAGTTATGCCCCC   | 59.429 | 20 |
| GCGGTTATCACCGGATCG        | 62.397 | 18 TCATGGAAACATGACGTGCT   | 60.12  | 20 |
| AGTTGGGAATTGGGATAGGG      | 60.011 | 20 GCCAAGACTTGCTGGGTA     | 60.249 | 20 |
| CAAACGTGGGGTAAATGACA      | 59.763 | 22 TATTTTGGGCCTGAATGGAC   | 59.762 | 20 |
| TCTTCACTCTCACTAGCCGC      | 58.343 | 20 GTCCACGGTGGTGTAGAGT    | 60.182 | 20 |
| TTTTCTCCGCATCACATCAC      | 59.654 | 20 CAGTTTTCGTTGCACCCTTT   | 60.147 | 20 |
| GCACTTAGGAGAGAGATTGTTGG   | 59.424 | 23 TGGTGAGGGCAACCTTTATC   | 59.933 | 20 |
| GCTCGAGGCATGTAAGAAGC      | 60.125 | 20 AGTGGGGGACTTATCTGTTAG/ | 58.224 | 23 |
| CAACATGTGCAGGTTGAGGT      | 59.597 | 20 TCCTATCATCGGTTGGTCGT   | 60.34  | 20 |
| TCCGGTCCAATTCCAATAAG      | 59.756 | 20 GGTGGTATGGTGTAGAGGACC  | 58.242 | 21 |
| CTACCCTTTCCGAACATCCC      | 60.683 | 20 CATTGGTATTGACAGCGTGC   | 60.142 | 20 |
| GGACCGAAAGTAGCGAACAA      | 60.249 | 20 GCACTCTCACGAGCTCACAC   | 59.771 | 20 |
| GCAGGCCTACTCTCCTGGAT      | 60.756 | 20 TCATGCCTAAATGTTTTGATGC | 59.971 | 22 |
| ATTCATTCTCCAACCATCGG      | 59.75  | 20 GAGAGCTTGCCGAGAGAAAG   | 59.454 | 20 |
| CCTTGTGGTATAGCGGTTGG      | 60.378 | 20 TGTGCTTCTCCAAGGCTTTT   | 59.993 | 20 |
| CCATCATTTCCCTCACCTCA      | 60.86  | 20 TGGAGGTTCAAACTGACTGG   | 60.133 | 21 |
| TTTTCCATCAATCCACTCCA      | 58.897 | 20 TTCAATTCTCTGCGTTGTGC   | 59.995 | 20 |
| ATCAGAACATGCACACAGGC      | 59.714 | 20 AAATTACGGCCACAACAAGC   | 60.003 | 20 |
| GGGTGAGTAACGGTGCAAGT      | 60.035 | 20 CTCCACTACCGTCGACAACA   | 59.745 | 20 |
| TGAATTTGGGACTCAACGAA      | 59.097 | 20 TGTCTGTGAGAATGGCCAAG   | 59.831 | 20 |
| GTGTGAAAAGGGAGTGCAT       | 59.973 | 20 GTCCAAGTCCAAGTCCGAAG   | 59.697 | 20 |
| GAGGCTCGCCATTGATAGAG      | 59.939 | 20 GCTAAAAATGTGGTTGGCGT   | 60.003 | 20 |
| ATGCGACAGAGTGTGTGAGG      | 59.897 | 20 ACAAATTTTCTCACCACCGC   | 59.978 | 20 |
| GGCTTTATTGTTTTGGGCCT      | 60.312 | 20 GACCGAAAACCGTTCAAAAA   | 59.953 | 20 |
| TCAAAGATGGAGGTTGGAGG      | 60.042 | 20 AAGGGATGATTGCACCTGAA   | 60.461 | 20 |
| ATGCGTTGACGCTATTGAAA      | 59.329 | 20 GGAATAAAGGGTGGTTGGGT   | 59.919 | 20 |
| CGAATCGGAGTGGATTTGAT      | 59.894 | 20 GTCAGAATGGATTGAGTGCG   | 59.245 | 20 |
| ACCCCAATTCCCATATGTT       | 60.131 | 20 TCCCTAACAAATCACACCGA   | 58.973 | 20 |
| CGGATTTAGCGGTTATTACCTGA   | 61.448 | 23 TGTCCAAACAAATAAAAAACAT | 60.139 | 24 |
| CTCTCGAGCCTAACTGTGGC      | 60.156 | 20 GCATGAGAAAATCCTCCCAAT  | 60.28  | 21 |
| TTCCAATTTTGGGAAATACTATGA  | 58.836 | 24 TGGGTGGTGGAAAAGAAGTT   | 59.425 | 20 |
| GGAGAGTTGTAGAGTCAAGTTGT,  | 57.416 | 26 ACGTCTTGGATCTCCGTTGT   | 59.579 | 20 |
| AAAGAGCATCAAACATCATTTCC   | 59.498 | 23 TATTGGTTTCGGATCGTGCT   | 60.469 | 20 |
| TCCCGTATACAAATCCAACAA     | 59.231 | 22 TGTGGTTGAAATCTAGCCCTTT | 60.001 | 22 |
| GAACCACCAAAGCAATACCA      | 58.476 | 20 CGCATCACTCTTTTAGCCA    | 59.062 | 20 |
| ACGGTACAGATTGCACACGA      | 60.183 | 20 GTTATGCGTTTTGACGGGAT   | 59.829 | 20 |
| TCACTTAGCTCTTGATTTTCATCAC | 59.864 | 26 GATTCGGAAGGTGACAACT    | 59.141 | 20 |
| CCTTAGAGCTCGGTTGCAGT      | 59.639 | 20 TCTGGATCTCACAGCTCACAC  | 58.983 | 21 |
| CGACCGAATACTACCCCTA       | 59.948 | 20 TTTTATCCCCAAAATGCCCT   | 60.489 | 20 |
| CAAGGAAGGAACCTCCATTTT     | 59.447 | 21 AGCCATGATAAATCCACCACA  | 60.207 | 21 |
| TCGATATGGCTCGGTAGGTC      | 60.059 | 20 AAAGCAATAATATTTGTGCCAT | 59.783 | 24 |
| ATCTAACGGCTGGCATTGT       | 59.597 | 20 CGCGGACACATCATGTAAC    | 59.995 | 20 |
| ACATTCTAGGGGGAGGGCTA      | 59.919 | 20 TCACACATAATTGAGTTATCAT | 59.685 | 26 |
| AATTCACCAACCCTCATCCA      | 60.173 | 20 AGGTGAGGGAGACAATGTGG   | 59.962 | 20 |
| TGCCTCAAATCAATAGCCCT      | 59.668 | 20 ACCGTGTCGGATACACATGA   | 59.837 | 20 |
| AATTGCCACCTGTATCGGAG      | 59.955 | 20 AGAGAGCATTCCCACAAACA   | 58.287 | 20 |
| TCGTGTGCTTGCTCGTTATC      | 60.019 | 20 GCAAGGACGAATTCCAAGAG   | 59.813 | 20 |
| TGTGAATGAGGTGTGGGTGT      | 59.846 | 20 TCCCCTATCGGTATTTTCCC   | 59.978 | 20 |
| ATTCCTCAACTGATTGGCTTG     | 59.933 | 20 CTAATCTGGGCAGCTTCTGG   | 59.971 | 20 |
| TGAGCAAGGGACAAATGTGA      | 60.24  | 20 ATTCTCCGCCACCTTTTCTT   | 60.074 | 20 |
| GATTGAAACCATGCCATTT       | 59.628 | 20 ACTTCACCCGTACGTTGCAC   | 61.016 | 20 |
| CCAAATTTAAGGGTTATCACCTG   | 58.849 | 23 GGCTAATTGTTGGCCTTTGA   | 60.074 | 20 |
| CCATGATCGAGTTCGGATGT      | 60.893 | 20 ATTAGGGGAGAGAGGGCTCA   | 60.169 | 20 |
| TATGAAGCATAACCATGCCG      | 59.543 | 20 CCATCCGACGGACTTACCTA   | 59.948 | 20 |
| TTGGGAAACAACGGAAGAC       | 59.948 | 20 GTGCACATTTCCCTTTACC    | 60.362 | 20 |
| TTGAGCTGTTATGCGTTTTGA     | 59.5   | 21 CGTGCCCTATTCACATTTT    | 57.635 | 20 |
| TAGAGTTGGCATCGGGAAAA      | 60.576 | 20 GACCAACGTGGCCTAACCTA   | 59.993 | 20 |
| GGCCAAGGGAAAGCTTTTAT      | 59.572 | 20 GACATTGCAGATTTTGATGAGC | 59.719 | 22 |

|                           |        |                           |        |    |
|---------------------------|--------|---------------------------|--------|----|
| TCGGCTTGAAAACGAGAAAT      | 59.823 | 20 TAAAAAGGAAACAGCCGTCG   | 60.236 | 20 |
| GCAGGAAAATGAAAAGTGGG      | 59.546 | 20 TTGATCACACACGCACAAA    | 59.721 | 20 |
| TCTTCTCCTTGTCTGCCTT       | 59.989 | 20 TCCAACTCATCTTTCGGACC   | 60.05  | 20 |
| GTAAGCAACTCCGGTGGGT       | 59.981 | 19 CCCTAATTTATGAAAGAGTGGC | 58.576 | 23 |
| AGAACCTGGTTGATTGGGTG      | 59.82  | 20 TTGTGTGGGTTCGATTCTTGA  | 60.088 | 20 |
| AATTTTGACGGCTCCAAGTG      | 60.11  | 20 AACACCAACCACGAACAACA   | 59.897 | 20 |
| AGCATCTACTCTGGCTCTCATTG   | 60.054 | 23 TCCATCCTCCATAATCCTGC   | 59.854 | 20 |
| TGGACCGGACGTGAACTATT      | 60.375 | 20 AGTCATCTCCAAATGCCTGC   | 60.226 | 20 |
| AACATGTTGATCTAAATAACGCAC  | 57.516 | 24 ATCGCCAAAACATTACCC     | 59.636 | 19 |
| CGTATTGCAGTGAAATTTTAGCA   | 59.352 | 23 GCATGCGACAACATGAATCT   | 59.685 | 20 |
| CAGACATGTGTACCACCCCA      | 60.285 | 20 AGTGTGTTTAGCAGGGACCG   | 60.171 | 20 |
| AAAACCGACAAAACCTCCCT      | 59.842 | 20 GTGTGGATGTGCGTGTTTTC   | 60.016 | 20 |
| CACCTGATCGCGACCCTAT       | 61.041 | 19 GGCTAGACCATTGTAAGGGG   | 58.528 | 20 |
| TTCTACACGCGCATGTCATT      | 60.288 | 20 TCCACGGATGTAAATTGTTCC  | 59.677 | 21 |
| TTACCACAATTTCCCTGTTTT     | 57.605 | 22 AGAAAGAATGTGGACGCCAT   | 59.556 | 20 |
| AGTCTGTGGCGTTCGATTCT      | 59.874 | 20 ACATTTTTCCACACTCAGCG   | 58.775 | 20 |
| TTTGCCCTTATTTAGCACGG      | 60.089 | 20 ATTTAGCATGGGAAGGGGAG   | 60.278 | 20 |
| GACAATTGAAAGAGCACTCGC     | 60.015 | 21 TGTGACTCATAACCATGGAGCA | 60.128 | 21 |
| GACAGTAATGGGGAGGGTGA      | 59.779 | 20 ACCATAGAACCACACGGCTC   | 59.997 | 20 |
| ACCTGCCCAGATCTCTCTGA      | 59.945 | 20 ACCATAGAACCACACGGCTC   | 59.997 | 20 |
| ATTTGCGGGGTTGTAAAGA       | 59.451 | 20 TCGTCCGAAAGAAACCTTTG   | 60.22  | 20 |
| GTAAGGCCAGGCACATTCAT      | 59.962 | 20 TCCGAACTCTTGAGAAGGA    | 59.92  | 20 |
| TCGAATTTCTAGCGTGATGG      | 58.869 | 20 GACAAGAGGATGAAGGCCAG   | 59.803 | 20 |
| GCTTAATGCGTAGCTGGGAT      | 59.347 | 20 AGTGATGGGCAGCTCTGTTC   | 60.418 | 20 |
| CAAACGTGAGTGGGAGATGT      | 58.566 | 20 CCGTCTCTCTTTTTCTTTT    | 59.829 | 20 |
| ATGGCGTTAGAATGCGAAAC      | 60.103 | 20 GGTGGCTTCATCGTGTGTTA   | 59.572 | 20 |
| GTTTTCGTGGCCTCACATTC      | 60.504 | 20 GGCAGGCACAGAAGAGAAGA   | 60.678 | 20 |
| GTGATAGCCAAAATTTACAACGTG  | 59.842 | 24 TCATTGACCAAGTCTTGACGA  | 59.278 | 21 |
| TGTGCTTATCCACCGACAAA      | 60.111 | 20 TCGAATAATGCAACCTACTCA  | 58.818 | 23 |
| AAAACACTAGATCTGCCACCG     | 60.132 | 20 CAAAGTTGATGCCCAAATC    | 60.309 | 20 |
| ATTC AAGTTCAATTGCGGCT     | 59.713 | 20 GCTTACTGATGCAGAAGCCC   | 59.985 | 20 |
| GGTAGAAATTCGCCCGCAGTA     | 60.23  | 20 ACCCCTCACATGCTCTTCAC   | 60.12  | 20 |
| TAATTTTTGTTTGCTGCCGA      | 59.328 | 20 TTCGTTGACCCCATATGTCA   | 59.774 | 20 |
| GATTACGTGATCCAACGGT       | 59.82  | 20 CAGCACCAGAATTGCTCCTA   | 59.024 | 20 |
| GATGGATGAAAAGGCTCACG      | 60.603 | 20 GATTGCCGACTGAACCTCAT   | 60.081 | 20 |
| CACCAAATTTTATCATTTTTAATTC | 57.837 | 27 CCCAATCATCCAACCACAAT   | 60.439 | 20 |
| TTGGAGCTTCAAACCTTAGGCT    | 59.561 | 22 CCCAACACTCCATTCTTCGT   | 59.966 | 20 |
| CACTTCACCATTCCACCATT      | 58.258 | 20 AACCAGAACGGCTTGAAAAA   | 59.724 | 20 |
| GATTTGCGAGGTTTTGGACA      | 59.91  | 20 CGATCGGTCAATCGAATTTT   | 59.901 | 20 |
| GCGACAATTCTGCGTGTTAT      | 58.801 | 20 GAAGCCTCAAATCACAACCC   | 59.532 | 20 |
| GAGCATAATCTTGGGGCTCA      | 60.177 | 20 TGTCGTAGATCACACGGTGG   | 60.593 | 20 |
| GCGGTTATCACCGGATCG        | 62.397 | 18 TCATGGAACATGACGTGCT    | 60.12  | 20 |
| TCGGAGCATGATTTAAGTGG      | 58.721 | 20 AACTCGATAACGGATGCTCG   | 60.235 | 20 |
| TTCCCTTTGCCCTCTATT        | 59.903 | 20 CCTTCAGAGGCATGGTTTGT   | 60.111 | 20 |
| ATCAGCGACGAGTCCAAGAC      | 60.418 | 20 ATCTACATCCACGGGAGGG    | 59.746 | 19 |
| CCAACAAAAGGTGTGTGCAT      | 59.465 | 20 GGGCCAACAATATCATGAGG   | 60.155 | 20 |
| GGCGACAGAAAAGAACGAG       | 59.993 | 20 CGATCCCTCTCTCACGTC     | 59.945 | 20 |
| GGTTGAAAATGGTGTGAGC       | 60.362 | 20 CTGAATGGATCGGAAGCAAT   | 60.036 | 20 |
| TAATTCCATTCAAGCCCCAC      | 59.762 | 20 AAATCCTTTCCCAATAAACG   | 59.216 | 21 |
| CGAGGCTTAATGGGGACATA      | 59.916 | 20 TGACACCGTTACGCAGACTC   | 59.905 | 20 |
| CCCTTTATTTTACCCACGA       | 59.795 | 20 TCCCCTAATTCACGTGTTGA   | 58.973 | 20 |
| TTGGAATTGCCAAAGACGAT      | 60.448 | 20 GCCGATTCCTCTTTCTCTC    | 60.293 | 20 |
| ACCGCTCGAATCCGTAATCT      | 61.173 | 20 TCGTCGATGATCGTATAGCAA  | 59.295 | 21 |
| GTGCGTGTGTATGCTGAGGT      | 59.783 | 20 AACACGCGTTTTTAGGGTTT   | 58.676 | 20 |
| TCTTGTTGGTGGGAAGAACA      | 59.109 | 20 CCCACCAAAGTCCAATA      | 59.824 | 20 |
| AGGATTGTGGAGGATGGTGT      | 59.232 | 20 GAAATGGGTTCTCTCTCCC    | 59.874 | 20 |
| CAATTTTCAATCACAGTTATAGT   | 58.222 | 26 ACGTGTGAGACTTCGTGTCG   | 59.94  | 20 |
| AATTATTTGCGGCTAACGGG      | 60.161 | 20 CTGCTGGACCTCCACAACCT   | 60.298 | 20 |

|                          |        |                            |        |    |
|--------------------------|--------|----------------------------|--------|----|
| GATGGAACCAACCTTGCACT     | 59.973 | 20 TGCCCCACCCAAGTATTTT     | 60.177 | 19 |
| TCCCTTGCTTTCTAACCCT      | 60.068 | 20 ATGGGAAGGGTATTTCTGGA    | 58.307 | 20 |
| TTCTTTGTCAATCCAACCA      | 58.947 | 20 CACGCCTCTCTTCCTCAC      | 60.135 | 20 |
| ATAAGTTTGTGCCTCCCGTG     | 59.993 | 20 CCTTCCCTTCTCCCTTTTG     | 60.04  | 20 |
| ATGGTGAATATGTGGGCTGG     | 60.603 | 20 CACACAAGCAACTTCCCTCA    | 59.873 | 20 |
| TCCTAAGCTTTTCCTGCTGC     | 59.73  | 20 GGCTTTTGCTTGCAATTTGT    | 60.251 | 20 |
| GCCTTTCATGTTTGATGGCT     | 60.081 | 20 CAACGAGCCTTCCCTTTGTC    | 59.853 | 20 |
| TCGAAGTGTTGATTGAATTGC    | 58.761 | 21 TGAAGAAGGAAGCTAAAATGC   | 60.03  | 23 |
| TCGAATCAATCTCACCCAATC    | 59.886 | 21 GCATTTGTTAGAGGTTTTGACC  | 60.389 | 23 |
| ACTATTGAAACAACCCCGGA     | 59.288 | 20 GGAGATCGACCAATTTGGAA    | 59.871 | 20 |
| GCAGTTACCTATCCCCACGA     | 59.955 | 20 ATCGAGGAATGATAGAGCCG    | 59.249 | 20 |
| ATGGAGAGTGGAGGTTGACG     | 60.112 | 20 CATCTCTCCTTCTCTTCTCGG   | 59.593 | 22 |
| GAAATGCACGAAACACGAGA     | 59.847 | 20 AAAAATGAAAACGTTACTTCTC  | 59.949 | 24 |
| TCTTCGGTCCGACCTTGAT      | 59.55  | 20 ATTGTGGACTCTTGGGGTTG    | 59.82  | 20 |
| GCTGGAACCCATGAATTTGT     | 59.797 | 20 CCCTTTTCTCCTTCTCGCTT    | 59.955 | 20 |
| TCTCTCACCTCACCTCTCCA     | 58.446 | 20 GGTCTCGATGGTGTGATCG     | 60.063 | 19 |
| GAAGAACGATTACAAAGTTTATC  | 59.101 | 26 CATATATGGGGAGCGTACCG    | 60.188 | 20 |
| GAACACAGAACATAAATCCGCA   | 60.003 | 22 GCCGAAAATACCCCAACTA     | 61.029 | 20 |
| GGGGTGGACTATTTCTTGCT     | 58.121 | 20 TGCTTGCCAGACTTTCAAT     | 60.776 | 20 |
| CCAGGGCATATACCCATTTG     | 60.031 | 20 ATTTCTGACCATTTTTGTG     | 59.801 | 20 |
| GTACCTGGCTGTAGGATGCC     | 59.579 | 20 AAGTCCACACAGGTGACTCGT   | 59.664 | 21 |
| CTCGGGATGCAGTGATTA       | 58.721 | 20 GATTGGCGAGGGGAGAGT      | 60.16  | 18 |
| TTGTGATGGTGATTGGATGG     | 60.177 | 20 TCAGCTCCAGCTCCTTGATT    | 60.096 | 20 |
| ACAAACTAATCAAGTTCCGCA    | 57.439 | 21 TTCGGAAGCGTACATCAAGA    | 59.42  | 20 |
| ACGGTGGGCCGAGTATATTA     | 59.32  | 20 CTCACGCATTCCCAGAAAAT    | 60.074 | 20 |
| AGTGAAGGTGACGAAATGGG     | 59.966 | 20 GATTCTCCCTACTCCACCCC    | 59.755 | 20 |
| TGCTCTAGGTAACCCACGG      | 60.125 | 20 CAGCAAGGAAAGCCTTTGAC    | 59.993 | 20 |
| ATTCTGCAAACCATCTTGG      | 59.933 | 20 AGAGCAAACCTCCGATGGCTA   | 59.978 | 20 |
| CTTCTTGGCGTGGTGTGTA      | 59.758 | 20 AAGACACCTAGTTGCCCCCT    | 59.994 | 20 |
| ATGAGCTTCGTGTCTGCCTT     | 60.02  | 20 AATTAGCCGAAATCCCACATC   | 60.116 | 20 |
| TTTCAAATGGAATTCATATAGCCA | 59.724 | 24 CTGTAGGTGCAGGGTTCGAT    | 60.134 | 20 |
| CCCCATCAGATCATCTCCTC     | 59.415 | 20 GAAGCCTCATCTCGGGTTC     | 59.753 | 19 |
| ACGAGACTGTCCGTCAACAA     | 59.31  | 20 ACGCACACTCACTTACGTC     | 59.948 | 20 |
| ATTGCAATGACTTGGCATGA     | 60.08  | 20 GGAACCGTGCAGCACTATTTA   | 60.145 | 21 |
| GGATCGAAAAGAGAGGGGAGG    | 60.147 | 20 TGCCAGTGAGGACAAAACAC    | 59.726 | 20 |
| CGTTTTCAAATCGGACAAACC    | 60.344 | 20 CGGTTATTAGTTATCACCCGAA  | 59.322 | 23 |
| TTATCAATTTTCAGGCCAA      | 59.087 | 20 GCGTTTTAACTCGTCGTGGT    | 60.176 | 20 |
| TTATAGCACCTCCACCTGC      | 60.096 | 20 GAGCTGAAGCACTTTGACCC    | 59.997 | 20 |
| TGGTGAGAGAAAATGGAGGG     | 60.042 | 20 TGGGAAGACAATTGGTGTGA    | 59.935 | 20 |
| ATCCGCCGAAAAGACAAATA     | 59.547 | 20 GAACCTGAAATGCAAGGAGC    | 59.82  | 20 |
| CTCCAACCTCCATCACCATCAT   | 59.794 | 21 GAAGTAGGCGAGAACGATGC    | 59.985 | 20 |
| TTGCAAAGTCAGACGTCATTG    | 59.896 | 21 ATGTTGGTAGCTGTTGGGG     | 59.853 | 20 |
| CCTCAGTTAGGATTCATGATCAT  | 60.155 | 27 GAACGTAAAAGGAAATGCATG   | 59.124 | 22 |
| ATAACCCACCAACCCAACCT     | 60.34  | 20 CCTTGTCTCCTGCCTTGAC     | 59.844 | 20 |
| TCATTTGATCACAAACCCCC     | 60.56  | 20 TCGGTAATTCACACGCACAT    | 59.995 | 20 |
| TGTGCAGAAAACAGAGCTGG     | 60.175 | 20 GTTGGCCCTTGATTGTTGTT    | 59.836 | 20 |
| CAGCTGACTGACAGAATGGG     | 59.415 | 20 AACTAAAGGGGAAGCTCTGCT   | 58.683 | 21 |
| ATCCAAGCATGATACCCCAA     | 60.155 | 20 CTGGGTACGGCTAGAAGGAA    | 59.331 | 20 |
| CGGATTCAAGCTGTGAGAAAC    | 59.867 | 21 AGGGTCGTTTCATGGATTACA   | 57.864 | 20 |
| GGATGTTGAGATCAGAACCACA   | 59.973 | 22 GATTTGGACAGACCACCACC    | 60.223 | 20 |
| TTGGGAACTGGATAACAAGGC    | 59.933 | 20 ACTCCACCCGTGGTAGACAG    | 60.026 | 20 |
| TGAGAAGGAAATTAATGTGTTTTA | 60.157 | 27 GAGGCCTAAGCCAGATAGCC    | 60.327 | 20 |
| TGTCATGTAATAGCCGTGCAA    | 60.148 | 21 CCGAATTCTATTCCGTCTGC    | 59.668 | 20 |
| CAGCACTCTGCATTTCCCTT     | 60.397 | 20 GCCTTTTTGCTTTGCTCATC    | 59.967 | 20 |
| CTTGAAGGATGAAGGTTGGG     | 59.521 | 20 TGTAACCTTGATTGCTAAGAAAT | 58.849 | 25 |
| ACTGCGAGTTGTTTCATGCC     | 61.248 | 20 GCATATCCAGCACGCTAACA    | 59.862 | 20 |
| GCTCAAAGCACATCTGCAA      | 60.142 | 20 GGTTTCATGTCTGTGTGCCAG   | 60.162 | 20 |
| AATGGCATTTCACCGTTA       | 60.188 | 20 TTTGCATGGGTCAAAGTGAG    | 59.691 | 20 |

|                          |        |                            |        |    |
|--------------------------|--------|----------------------------|--------|----|
| CATTTGGTGAGGAGGGAGAA     | 60.042 | 20 TCAAGTCCACATTTTGCAGC    | 59.847 | 20 |
| CATGTTTTTGCACAATTTCT     | 58.819 | 20 AGAGTGGTATCAGAGCGGGA    | 59.827 | 20 |
| TTCTCAGCATATGGGAAGGG     | 60.029 | 20 ACTTACACGTGTCCGCATCA    | 60.183 | 20 |
| GAGAGTGGAGAGAGAGGGAA     | 59.175 | 22 TTGGGATATGAAAATGACACC   | 57.261 | 21 |
| CCCTTTATTTGGTTGATCTAATGG | 59.973 | 24 AAAATGCCCTTGTATGCTGC    | 60.103 | 20 |
| TGTGCGAGTCGGTAATTCTG     | 59.864 | 20 CCCATCTGAAACACACAGGA    | 59.52  | 20 |
| GCAAAAGGAACACGTGTGAA     | 59.74  | 20 CCCCTCACCAATGTCTCACT    | 59.962 | 20 |
| AGAATTGGTATGCAAACGTGG    | 59.875 | 21 AAGAATTGATCATGCGCGTT    | 60.615 | 20 |
| TTAATCGCAGTCGTTTTTCG     | 58.958 | 20 TCTAATCGGTCAAGGATGGC    | 60.036 | 20 |
| ACGTGGCATGATAATAGCGG     | 60.876 | 20 ATTCCCACAACAAAATGCAA    | 58.869 | 20 |
| CCTCACCCATTACACACAC      | 59.846 | 20 CAACAAGCTGTCAACCCAAA    | 59.734 | 20 |
| GCCTACATCCACTGGGTTTG     | 60.375 | 20 CAGCTGAACCATCAAGAGTCA   | 59.022 | 21 |
| TCCAATGGATGAGGATGGTT     | 60.135 | 20 ATGGAAACAAGGGAAAAGTCAA  | 58.54  | 21 |
| ACAAGGAGGTAGCATCTGGC     | 59.313 | 20 TTAAGAGGGAGGGAAAAGGC    | 59.661 | 20 |
| TAAGAAATGCATGCACCTGA     | 57.86  | 20 CGACGTGTAATCACCCCTCAA   | 59.566 | 20 |
| CTGCTCGTTAATGCGAGTGA     | 60.157 | 20 ACGAGTCGGAGACAACCAAC    | 60.159 | 20 |
| CAAAAATCTAACGGCCCAGA     | 60.067 | 20 CCATAACCGTGTAAAAATGCA   | 59.769 | 22 |
| ATTGTGTGACGGGAAAAACC     | 59.694 | 20 GATGTGAATGCACCTGAATAC   | 60.395 | 22 |
| CGCTCTATCTTCTTCTTTCAGG   | 60.159 | 24 GGCCTCTTCTTCCACAAAA     | 59.288 | 20 |
| AAATAGCAAATGTTTAGCATGCA  | 59.621 | 24 GTGATTCACGCTAAAGCACAA   | 58.981 | 21 |
| CCTGTTTTGGTCCAACCTGT     | 59.861 | 20 TTCGTCGACTACTCATGCAA    | 57.997 | 20 |
| CATTTTCAATGACCCGAACA     | 59.371 | 20 CAAATCCCACCATTTAGCAC    | 57.944 | 20 |
| AACCCGTGACCTTTTGGTCT     | 60.776 | 20 AAAGACCCGCAACGTACAAC    | 60.037 | 20 |
| CTCTTTGCTGCCTGATCCTC     | 60.096 | 20 TCAACAGAAACGCACACACA    | 59.912 | 20 |
| AGAGGACATTTGGACCTGAAAA   | 59.976 | 22 ACGGTGGTGAAGAGTGATT     | 60.577 | 20 |
| AAAATTGCAGTGCCATCACC     | 60.905 | 20 GGGGATCCCTCGTATCTTTC    | 59.728 | 20 |
| GTGCAATTCAAGCGACATA      | 59.839 | 20 GCATCATTTTGGCCTTTGAT    | 59.907 | 20 |
| TGAGAAATGCAAAAAGCATGA    | 59.434 | 21 TTTGACTTTTCAGTATTGCGA   | 58.57  | 21 |
| GAGATATACCGGAAGGGGGA     | 60.11  | 20 ATTCGAACACCACCGACTTC    | 59.973 | 20 |
| CACTACTAGGGTTTGGGAGGG    | 59.866 | 21 CACATATTTCAACGAGTGCCA   | 59.6   | 21 |
| TGTCACCCAAGTCTCATGCT     | 59.261 | 20 CTTGCATGCATTGCTTAAGTCT  | 59.563 | 22 |
| CCCTCGAATGCTAAGCAAAA     | 60.335 | 20 CATGGGGAGAGGAGTTAGCA    | 60.21  | 20 |
| ACCGATTGTGAGCATGAAAA     | 59.127 | 20 CCAATATGGCGAACCACTCT    | 59.955 | 20 |
| GGCGACGAAATTAGAGAGGA     | 59.41  | 20 TTGATGGGGTGAAAATTCTTG   | 59.787 | 21 |
| TGCCCATCTCCATCTATTC      | 59.854 | 20 CTTTGTGGGAGTGAAGC       | 59.853 | 20 |
| TCCTCGGAATACACCTTCGT     | 59.55  | 20 AAGCATTGATGTCTGAATTTGA  | 58.755 | 23 |
| GTCATCTTGGGCAGTGAAT      | 59.934 | 20 CAACAGTTTGGCATCAGAGC    | 59.445 | 20 |
| CAATCTAACGAAATCTGCGG     | 58.387 | 20 TGTTGCCAGAAAAATTGTCG    | 59.706 | 20 |
| GTTGTGGTTGAGTGAGTGCG     | 60.357 | 20 CGTGTATGCTGCATGTTTGA    | 59.307 | 20 |
| ACTATTATGGCCGACCGTTG     | 59.845 | 20 CCTATGATGGTATGGTGTGGAC  | 59.195 | 22 |
| GGATATCCGAAACATCCGATT    | 59.998 | 21 GGGGTGTTCAAAAATATCCG    | 59.135 | 20 |
| CTGCACCATCTTCCCCTAT      | 59.955 | 20 GAATGAGCAGACGCGTTTTT    | 60.395 | 20 |
| AAACCCTTCTGCCCTTCTA      | 60.068 | 20 ACATTTGGCCATTATGGAGC    | 59.791 | 20 |
| AAGATGGAACGACCCGTGA      | 60.51  | 20 CGATAAATCATGCTGATATCGT  | 60.247 | 25 |
| AACCACCACCATTTGAAAGGA    | 60.21  | 20 ATGGGGCCTATTTTAGCGTT    | 59.829 | 20 |
| TCCAACACATCCCTACAACTTTT  | 59.791 | 23 AATCCCTCCCAAGTGTITT     | 59.668 | 20 |
| TGGCTGATGTTGTTGTTGGT     | 60.008 | 20 TTACATTGGTGCCTGCACTT    | 60.18  | 20 |
| CAAAAATATGGCCGTGAAC      | 60.188 | 20 CGTTTTGACAATATTTAGTGTTT | 59.39  | 27 |
| GTTAGGAAACGAAAGGGGGA     | 60.291 | 20 TCTCATATGACCACAACCCG    | 59.369 | 20 |
| TGGCTGAGGATGAATGAACA     | 60.201 | 20 CTCAATAATGCTGCTGCCTG    | 59.59  | 20 |
| TGCATGCATTTATTTGACAGC    | 59.722 | 21 AGGCTCACCCAAATATGGAA    | 59.387 | 20 |
| TTTTGGAGATTCTGGGTTTCG    | 60.044 | 20 TCCAACGGTGCAGTAAGTCA    | 60.301 | 20 |
| TTAAGGTGGTGTTCATGG       | 59.439 | 20 TCCATTCGAAAATCAAAGG     | 59.872 | 20 |
| GGGCGAATAAGAATGCGTAA     | 60.061 | 20 CCCATCTCCACGACGTTATC    | 60.34  | 20 |
| TAAAAACAGGGGCAAAGGTG     | 59.968 | 20 ACTCACTTACACACGCACGC    | 59.977 | 20 |
| AACTCGAATTGCAACGAAAA     | 58.413 | 20 GATCCATATTGGGTCAAACG    | 57.735 | 20 |
| GTGCTGAATGGAGTTGCTGA     | 59.992 | 20 TACCAAAGAGCAGGGAGGAA    | 59.807 | 20 |
| CCCAAAACATGCAAACACAG     | 60.004 | 20 GATCAGTATGGCAGTTGGGG    | 60.34  | 20 |

|                          |        |                            |        |    |
|--------------------------|--------|----------------------------|--------|----|
| GCGTTTTGACGATATATAGTGTTT | 60.194 | 26 CTGATCTGGGTTGGGAATTG    | 60.309 | 20 |
| TATGCGGAGAAAACACTGCACA   | 60.401 | 20 ATATGTGCTGGAGCCTTGCT    | 59.866 | 20 |
| GAAGCACATTGCAGCAAAAA     | 59.999 | 20 AGTCGCTCATCACTGTGTCTG   | 60.055 | 20 |
| TTGTGCTGAAAATCTCCTCAGA   | 59.993 | 22 ACACGCAAGTGTACGTGGTC    | 59.673 | 20 |
| AGCAAGTCAATTGGGGAATG     | 59.933 | 20 CATGCAAGTTTGCTCCTACTG   | 58.592 | 21 |
| AAGAAAGAGGGGAAGTGGGGA    | 60.045 | 20 TTTTCGAGGTCCATTTTCG     | 60.046 | 20 |
| CGGTTATCACCGGATCGC       | 62.397 | 18 AAAGTATTGGTCGATCGGTTTT  | 60.12  | 23 |
| TTGCACTCTGTGGAGCAATC     | 59.992 | 20 AGAGGGTGGTTTTCCCAAGT    | 59.834 | 20 |
| GATTTGATTCCTTTGTCCCC     | 59.636 | 21 GTACCATTTGTGCGGATTT     | 59.829 | 20 |
| TGCTTGTGATCTCATGCTCA     | 59.061 | 20 ACTCAAGTTTATTTGCCGGG    | 59.087 | 20 |
| AGCAATTGATTGAAATGCCC     | 59.907 | 20 CGGATTTATTGGTTATTACCTG, | 57.222 | 23 |
| AGAGGCGGCCTTTTTATTCT     | 59.355 | 20 GGGAAAGTGTTCATCAGGCCA   | 59.933 | 20 |
| TCCTCTTTCAGGTCCAAGTGT    | 58.78  | 21 GGTAGTTGATGAAAGCCGGA    | 60.074 | 20 |
| GATCAAGCTTCAGACCGGAG     | 59.95  | 20 TCACACTTTACACACACTGAAA  | 59.163 | 25 |
| GTGGGCTATGGCTCAAGTGT     | 60.142 | 20 TCAGAGCCCACGGTTAGTCT    | 59.867 | 20 |
| GCGGCTAGACTCAACCTCAG     | 60.156 | 20 GGGTTGTGTGCCCTATCATT    | 59.676 | 20 |
| CAAGAAACCATGGAGAATGGA    | 59.918 | 21 TTTCTTTGTGGGTTTGGGAC    | 59.807 | 20 |
| TCCTCTATCCATGAATCTTTCACA | 59.966 | 24 TCGCTCAACCAAGTAAGTCG    | 59.072 | 20 |
| TCTCTCTCTTTTTGGTTGGTG    | 59.908 | 23 TTGGGAGGAGAGATTGTTGG    | 60.042 | 20 |
| TTTCCCAAATTATGCTCACTCA   | 59.586 | 22 TCACCTGATGCCCTCTCTTC    | 60.349 | 20 |
| GTGATCTCGCCGCTTTAGAC     | 59.985 | 20 TGCTAACACCACGCCACTAC    | 59.788 | 20 |
| CACTCTCTCGAGCCTAACCG     | 60.149 | 20 AGCAGTTATTGTGATGTGGGTC  | 59.92  | 22 |
| GGTGCATAGAAATTGCTGCC     | 60.615 | 20 GTTGCCCTCATCTTGTTGCT    | 60.263 | 20 |
| AGCTGCTGGACGAAGAAAAA     | 60.132 | 20 TTGTGAACTTGTGGTGGTGG    | 60.454 | 20 |
| ATTCACTTCGGCAAATTGG      | 59.938 | 20 CTTTGACGATTTTCACAGAATA  | 57.899 | 24 |
| GACGTGTAACCATCACCCC      | 60.096 | 20 TGTGGAGAGGATTTTGGGAC    | 59.903 | 20 |
| AATCCCTTCTCCTCTCCA       | 60.008 | 20 TCCCAATTTACCAAACCT      | 60.403 | 20 |
| TTTCAAATTTGGCACTTAGCA    | 59.769 | 22 CAAGAGGGCGATCTGGTATC    | 59.653 | 20 |
| TCTTCTCGCAATCACTTTC      | 58.019 | 20 ATTTTTGGATGAGGCAGTGG    | 59.933 | 20 |
| TGCTGGCGACATTATCAAGA     | 60.366 | 20 TTTTCTGACCAACACCACCA    | 59.976 | 20 |
| AGAGGGTTATCATGGGATCAA    | 58.32  | 21 AAGGAGGAAGTGAGGGGAGA    | 60.186 | 20 |
| TCATATGCGTTTCGTCATTCC    | 59.504 | 20 TGACAATATTTAGTGTTTTGAC, | 57.78  | 26 |
| CTCTTCCCTCCCTCATTTC      | 60.008 | 20 CCTTCTCTTGGCCTCCTCT     | 59.95  | 20 |
| ATGGCGTTAGAATGCGAAAC     | 60.103 | 20 GGTGGCTTCATCGTGTGTTA    | 59.572 | 20 |
| TGTCATGCAAACAAACATGG     | 58.966 | 20 ATGCAACTCCCAAACGAACT    | 59.598 | 20 |
| TGATCGGCCTTGTATCACAC     | 59.527 | 20 AACAGCAGCAAACATGCAAC    | 59.918 | 20 |
| CCACCCGATCATTTGAATTT     | 59.622 | 20 TCACCACATTTAAGGGTTATCA  | 57.051 | 22 |
| GATTTGGACACCTAACCCCA     | 59.647 | 20 TTTGGGGTGTGGAGTTGT      | 60.246 | 20 |
| CCTCCGTTAAAGACTGTTTCATCA | 60.519 | 23 GGTGGGCTTGGTGTACTAACA   | 60.172 | 22 |
| TCCCAACTTTTTCTTCAAATCA   | 59.971 | 23 TGTAATAGGCCACACCACC     | 60.636 | 20 |
| GGAAATAAGGAGGTGTTATGATA  | 57.235 | 25 ATATGCAGTGGCTTGGGAAG    | 60.096 | 20 |
| CGACACATTTCAGACATTGGG    | 59.96  | 20 TGTGAGGCCCATCATACTTG    | 59.522 | 20 |
| CCGAGCTGAAAATCCACAAT     | 60.074 | 20 ACCGATTCTGCCTCACTCAT    | 59.685 | 20 |
| GCACGCAAATAATGGTTTCTT    | 59.137 | 21 GTACGAGGAGAGACCGCAAG    | 60.012 | 20 |
| AGGATAAATGTGGCGAATGC     | 59.929 | 20 TGTTTTGACAATATCACGACCC  | 59.73  | 22 |
| ACAGTGCTGTATTGCAACGG     | 59.788 | 20 GCAGATGCCACAAAAGGATT    | 60.081 | 20 |
| TGAAGGGGATTGGACTCT       | 59.505 | 20 GGCCGTGAGTCCATTGTAGT    | 59.997 | 20 |
| TGTATGCAAACAAGGGGAGA     | 59.123 | 20 AAACAGCTGGCATCTACGGT    | 59.763 | 20 |
| TGCGGATCTGTGAAAAATGT     | 59.127 | 20 ACTACATCAACCGCCAGCAT    | 60.547 | 20 |
| TGAAGTTAGGAAATAAGGAGGTG  | 60.026 | 24 CTGCTACACTCGACAGTCCG    | 59.641 | 20 |
| GTTGAGTAGGGCAGAAACGG     | 59.734 | 20 GGAGGGATCGGATAGAAAGG    | 59.859 | 20 |
| CTCTGGATATTGCTCGTCGG     | 60.755 | 20 ACCAATACTGGTCGGGCATA    | 60.214 | 20 |
| GATAAGTGCCAGGCTGGATG     | 60.624 | 20 AACAACTTATCTGCGACAAG,   | 59.813 | 22 |
| GAATAAACGGCGCCTACAA      | 60.095 | 20 GAGTGGCCACAGTCTCATT     | 60.12  | 20 |
| TTTATTTTGGCGTTTCGTGC     | 60.969 | 20 GAATTTCTTGGCCTACACCG    | 59.569 | 20 |
| CCACCGAGGAACATACAAGG     | 60.366 | 20 TATGCACTCTGCAACCAACC    | 59.722 | 20 |
| TATAAGCCAACCATCTCCC      | 59.916 | 20 TTTAGGTGCTCCAAGGGATG    | 60.066 | 20 |
| TGGTCATTTCTGTTATTTTCGATT | 58.967 | 24 CGATCCATCCCGTTAGTACG    | 60.344 | 20 |

|                         |        |     |                         |        |     |
|-------------------------|--------|-----|-------------------------|--------|-----|
| ACTGTCCTTGAGCTCGCAGT    | 60.205 | 20  | TGGTGTCTGCAAAAGCATT     | 59.847 | 20  |
| ACCAGACCCACACGTTTCTC    | 60.009 | 20  | GAACAAGAGGAGGGGTCCAT    | 60.314 | 20  |
| ACTTTGCCACCTCATATGCC    | 59.962 | 20  | GGAGATGCTTCTAACGCAGG    | 59.978 | 20  |
| ACCCGGTCTGATGAGTTGAG    | 60.112 | 20  | GCGCACTGAATTGTTGTTA     | 59.735 | 20  |
| TCATCTACAGGTCAATGGTGACA | 60.425 | 23  | AAGGGTCACGAATCCTTCCT    | 59.935 | 20  |
| TGGGTTATCACCGGATCG      | 60.282 | 18  | AAAATGCCCTTGTATGCTGC    | 60.103 | 20  |
| GAAAAATCAAAGGCCACAAA    | 59.916 | 20  | GGTAGGATTTGAACCTGCGA    | 60.074 | 20  |
| ATGGCATTCCCACATACACAC   | 60.47  | 20  | GGAAGAAATTGACTTCTGCTGC  | 60.381 | 22  |
| TTAAATGCACACCCCTTTCA    | 59.013 | 20  | CCGTCGATTTTCAGGTTTTG    | 60.472 | 20  |
| AAACCAGACCATGAACACCC    | 59.679 | 20  | CGGAGAGGACTTACCGGATT    | 60.455 | 20  |
| TATTCTTGATGGAACGGGGA    | 60.266 | 20  | TTCATTCAAGCTACCCACTCTT  | 59.317 | 23  |
| TGGCCATGTTGGTAGATTCA    | 59.924 | 20  | CGTTGGCCATGTTGGTAGAT    | 60.776 | 20  |
| TTGCTACATCATCCACAAA     | 59.924 | 20  | TTCACCACTCAATCTGCGAG    | 59.984 | 20  |
| TGGTTGCACCATAACACACC    | 60.287 | 20  | CGAAACGTAATCAGCAGTGA    | 59.941 | 22  |
| GGTGGTATGGTGTGGAGGAC    | 60.096 | 20  | ATGTCCACTTGTGTCACGGA    | 60.005 | 20  |
| CACCCCCAGATGAGCTAAAG    | 59.688 | 20  | CTTCGAACGATAGCTCCAC     | 59.836 | 20  |
| CGCTCACCGAGATAGTTCT     | 59.454 | 20  | TCATCATTTTCGATCCTGTGG   | 59.451 | 20  |
| CTCACCGCCTTAATATGCGT    | 60.117 | 20  | ACCCTCGAAATGGGTTTTTC    | 60.166 | 20  |
| TTCTAATCAAATCAAGCGACCA  | 59.72  | 22  | GGCAATTTGTCTTTCAATCCA   | 59.93  | 21  |
| CACCACCACATTACTGCCAC    | 59.88  | 20  | AGCATCTCCAATGCCAGGTA    | 60.624 | 20  |
| CGTGCGACGACTTAACTGAG    | 59.658 | 20  | GATCGGTTCCGTCAGACAAT    | 59.934 | 20  |
| CCAATCCTTGACATTTTGG     | 60.162 | 20  | CAGCACTTTTCATGTTGTTGC   | 59.381 | 21  |
| GTTGCCACGAACTCACCTTT    | 60.156 | 20  | GATATGATTTTGC CGGAGT    | 60.067 | 20  |
| AAGAAGCCTGTGTTAGGGCA    | 59.875 | 20  | CAGCAACGATTGGAGCATT     | 59.833 | 20  |
| TTTCATCTGGTTCCTTTGG     | 59.903 | 20  | TTTTGTGCGATGATATGGTTGTG | 59.261 | 23  |
| CTCTGGATAGCCCTGAATCG    | 59.79  | 20  | TGTAACAAATAAATTAACGTAC  | 57.577 | 27  |
| AAATGTCAGGCAAATCAGGC    | 60.081 | 20  | GCGTGTCTAGGTGTTCTTGG    | 59.788 | 21  |
| TTACATTTGATGGAACGGGG    | 60.555 | 20  | CTCATTGTAATCTCTCCCAAAG  | 57.927 | 24  |
| TGTGATGTTGGAGTTGGGAG    | 59.52  | 20  | CATGCATGATGTGATGTCAGTC  | 59.999 | 22  |
| TGATGGTTTATGCTCGTAAGG   | 57.795 | 21  | CCATTTACTAAGAACGACATGC  | 60.404 | 24  |
| TGTTGCACTGTGGTGTTC      | 59.751 | 20  | TTTTCGGATCGAAATTAGGTT   | 57.759 | 21  |
| TCCACTTGAAACTATCAGTCCA  | 57.331 | 22  | TTTTCTTTTGCACGACTGC     | 59.087 | 20  |
| CGGCACGAATCCAGTTTTT     | 61.016 | 19  | CGGAAGGAATGAGATGCTGT    | 60.218 | 20  |
| ACCCTATTCCACCCCTTCAT    | 59.513 | 20  | GCACAACCATGGTGAGAAAA    | 59.547 | 20  |
| TCTTATAGCATCAACCGCCA    | 59.281 | 20  | CACACGAAGGGTATTTTCGG    | 60.357 | 20  |
| CCCATCATCTCAATCCAATAT   | 57.875 | 22  | CCATTGGCTCGTTATTTTAGA   | 58.331 | 22  |
| AAATGAGTGGCTGGATTTTCG   | 60.074 | 20  | CAGATCGGGTCTTGAGGGTA    | 60.065 | 20  |
| GGAGAGAGGAAGGGAGATGG    | 60.149 | 20  | AGTATGCTTCTCCGAGTCCG    | 59.454 | 20  |
| CCGTGAATTCATGCCTGTC     | 60.064 | 19  | TGCATACAAAGGTAAGGAGGC   | 59.238 | 21  |
| TCATCCCCAAAATACCCTCA    | 60.126 | 20  | ATGGGAGAAAGACACGTGGA    | 60.51  | 20  |
| AATTTCTCTGGCCGACACTG    | 60.255 | 20  | TGGCAACATAGTTTATGCATCC  | 59.859 | 22  |
| TTGCCCTCAAATGCTATCAA    | 59.257 | 20  | ATTGTGAACCGGTGGTTCTT    | 59.308 | 20  |
| ATCGATTCAACTCATGGGGA    | 60.281 | 20  | GCATGATCAGGGTAAAATCCA   | 59.776 | 21  |
| GAAGAAGGTGATGTCATGGGA   | 59.918 | 21  | CACCTTACACCTCACACCCC    | 60.275 | 20  |
| TGCGTGCATGTATATGCTGA    | 59.85  | 20  | TTTTCTTCATTCCCATTATGTC  | 60.076 | 24  |
| CCATAACCGTCGCATAACTCA   | 60.891 | 21  | AACGGCCAAATCTAACGAAA    | 59.586 | 20  |
| AGGAGGAGAGAGAGTGTGGG    | 59.856 | 21  | ATTTCAAAAAGTGGGGTCCA    | 59.264 | 20  |
| GAAAAAGAAAAAGGGGTGGG    | 59.787 | 20  | GAAAGAAGAAGAGAGATAGAT   | 58.05  | 27  |
| CCGATGATGACGAACCTTCT    | 60.073 | 20  | TGAAGAGAGTCCCATCGTCC    | 60.199 | 20  |
| GGGGTGACAACTATCAACCAA   | 59.703 | 21  | CACAAACACAAAAACGCCTG    | 60.187 | 20  |
| CGGCCATTCTCTTTTCTTT     | 60.553 | 20  | GTCCAAACTTGACGCGCTAT    | 60.278 | 20  |
| AAAGGTGAACTTGGGGCTTT    | 59.976 | 20  | TTGGGCCTAAATGAGGTGTC    | 59.933 | 20  |
| AAGCTCCACCATCTCTTCCA    | 59.803 | 20  | TCTCCTTGTTCCGTGGACT     | 59.697 | 20  |
| TTTTTACAAACCTGCCACCC    | 59.839 | 20  | GATTTGATTCTTCGCGTTGG    | 60.585 | 20  |
|                         | 595    | 595 |                         | 595    | 595 |
| ACTTACCCAATCTTGGTGAACA  | 58.486 | 22  | GGATGGACCTTCCCAAACCTT   | 60.169 | 20  |
| ATTTCTCTCAGTCGGTGCCT    | 59.874 | 20  | CTTTTCCGTTCCCTTCATT     | 60.291 | 20  |
| CGGAGGGAATACAATGCTTTT   | 60.318 | 21  | TCCAGTACGCAGACTTTTT     | 57.951 | 20  |

|                          |        |    |                         |        |    |
|--------------------------|--------|----|-------------------------|--------|----|
| TTGGTTTGGTAGCCCTTTTG     | 59.968 | 20 | TTGCACAGCACTGTCCTACC    | 59.905 | 20 |
| GCATAGGAATATTAGCGGTGG    | 58.62  | 21 | CGGCTTCTCCCTATCAAATG    | 59.662 | 20 |
| TGGGCACTTTGGCTACTTTT     | 59.747 | 20 | AAAAACCCCGACTCAAATT     | 57.697 | 20 |
| CTGCGCAGATCTAATGGTCC     | 60.765 | 20 | GTGGACACCTTGTCAAAGCA    | 59.726 | 20 |
| GACCTTTTTACTCCCAGCCC     | 59.94  | 20 | TGACAATATTTAGTGTTTTGAC, | 57.78  | 26 |
| AGCAATTTGATTCCGTGCTA     | 58.388 | 20 | TAAATTTGAACTTTGCCCCG    | 59.937 | 20 |
| TCCGCATCATTTGATTGACT     | 59.079 | 20 | GTTGCCCAACAAGTTCGAGTT   | 60.156 | 20 |
| CAAGTTCTCCACAGCAAGCA     | 60.175 | 20 | TGCAAAATGGGGATTTGATT    | 60.132 | 20 |
| AAGAACAATTACAATGTTTATCCA | 58.084 | 27 | CACTTGGACCAGAAAAGGGA    | 60.081 | 20 |
| ATTCGTTCAAAAACGGCAAG     | 60.11  | 20 | CAGACGTTGCATGTGCTTCT    | 60.056 | 20 |
| TGCACACCTTATTTTTCTTCA    | 59.625 | 22 | GGGTGGCAGAGTTTGATGAT    | 59.934 | 20 |
| GCAAGTGGGAGGATGAGAGA     | 60.349 | 20 | GGATCCGAACCAGAAAACCT    | 60.306 | 20 |
| TGCATCCTTCCAACAAGTAGC    | 60.264 | 21 | GAACCAAGGGATTGAGTGGA    | 59.903 | 20 |
| GCTTCGATTCTCAATGTTCCA    | 60.207 | 21 | GTTTGTGAAGCAACTCGCA     | 60.035 | 20 |
| CTTCGATTCTCAGTGTTCCAGA   | 59.473 | 22 | GCTGATTCTGAAGGCATGGT    | 60.226 | 20 |
| CGAGAACTTTCAAGGACGC      | 59.993 | 20 | CCAGAACCCTGAAATTCGAT    | 59.933 | 20 |
| ACGATGAACTAGGGGCTGAA     | 59.694 | 20 | CCAACCATAATTGTTTCGGG    | 60.046 | 20 |
| CGTCCCAAGTTTGTGTTGCTT    | 60.147 | 20 | CGTCATAAACAGCCGGAAAT    | 59.96  | 20 |
| AAAGCGCAGAAATCCAAAAA     | 59.832 | 20 | CCCATAACCATGACAAACAAT(  | 59.975 | 22 |
| AAGGGTTATCACCTGATTTTCTC  | 57.73  | 23 | GATATTCAGTCTGCTGGCCG    | 60.765 | 20 |
| TTCAATACTTCCAGCCACCA     | 59.123 | 20 | GTGGGAAAAGTGTTTTTGC     | 59.452 | 20 |
| TTGAGTCGTTTGAATTTGTTG    | 60.011 | 22 | AAAATCACTAGCATGCACGG    | 58.799 | 20 |
| CCCCGGGTGCCTATATTAGT     | 60.055 | 20 | TTCATAGTCGGCTCAATCCC    | 60.036 | 20 |
| GAGGGGATGTTGGAGTGTGT     | 59.817 | 20 | CCTTGCTAGATGGCCAAAAA    | 60.202 | 20 |
| GCCCATTTGAGCCAATCTAA     | 60.038 | 20 | TCCACCTCATATCATTCCCAA   | 60.14  | 21 |
| GGAGCACCTCATAAATCCCA     | 59.894 | 20 | ATCCTTGTCTCCTGTCCCT     | 59.929 | 20 |
| GCGGTCATGTGATGATTTTG     | 59.931 | 20 | CCATTGCATGCGTCAGTATC    | 60.104 | 20 |
| CATGCAGGGCTGAGTACAAC     | 59.318 | 20 | TGCAGAGATGGTGATGGTGT    | 60.121 | 20 |
| AAAATTTTCTCACTGCACG      | 57.878 | 20 | TCCAAACCGCTGTAAACTCC    | 60.11  | 20 |
| TTTTGTGCTTCTTGCTGGTG     | 60.027 | 20 | ATGAGCTTTGTATGCCCCAC    | 59.962 | 20 |
| CAGTTATCACCGGATCGC       | 57.543 | 18 | AACAAACGCCATCAACATCA    | 59.972 | 20 |
| GGTTGTTCACAACTCCCCAC     | 60.261 | 20 | AATGATTGAAGCTTCCCCCT    | 59.903 | 20 |
| TGGCCCATGTACTGCTTA       | 60.134 | 20 | TGGATGCCTTTGATCTGTGA    | 60.201 | 20 |
| GACCTCGACGACAGGAAAAG     | 59.844 | 20 | CGAGTTGCTTCTATCGTCACC   | 59.89  | 21 |
| AAACTTCATGGGGGAAAACA     | 59.264 | 20 | TTGGCATGTAATGCGAGTTT    | 59.186 | 20 |
| CCCATGATTCCATGATCTCC     | 60.096 | 20 | AACAAGACGGACAAGTTGGG    | 60.005 | 20 |
| CCAAGAGACGTTTTTGTGAAA    | 59.286 | 22 | TTTGAAGCAATTGCATGAT     | 59.115 | 20 |
| GCCGGCCCTCTATCAATTA      | 60.009 | 19 | CACGTCAGCTTCATCTCCAA    | 59.984 | 20 |
| GAAGCACATGCAAGGATTGA     | 59.805 | 20 | ATGCGCTGTGTTCTTCATTG    | 59.871 | 20 |
| TCTCTCTCGTTCTTCTCTCTC    | 57.062 | 22 | AGCACCGACTGAAAATGAGG    | 60.255 | 20 |
| GGATCGTACCTTTTGCTTGC     | 59.713 | 20 | CTGTGCTGCTTCAATTCGTT    | 59.076 | 20 |
| AAAAGCCTGTTGGCAGGTAA     | 59.747 | 20 | AACCCATCCTCTCATCGAAA    | 59.483 | 20 |
| CCCAAAAATCTAACGGCCTA     | 59.075 | 20 | CTTGCATACATGGCATCGTC    | 60.104 | 20 |
| GTTATTCGTTCCGCCATTA      | 59.795 | 20 | AGCGATTTTCATGGAGATTGG   | 60.036 | 20 |
| CACATCATTCAAGGGGCATT     | 60.723 | 20 | GCACACAAATAATGGTTTCTTC  | 59.771 | 23 |
| GCATATCGCTCGATCAAAAA     | 58.867 | 20 | GCTGTATTTGCACAGTGCCT    | 58.955 | 20 |
| GGTTTCTGAATTTGATCCGC     | 59.51  | 20 | TTTTAAATGGATCGGCCTCTT   | 59.922 | 21 |
| GAAGAGGTGGATGCATGGTT     | 59.934 | 20 | AAACGGGTGAGCAAGACAAC    | 60.156 | 20 |
| GTTATCACCGGATCGCAAC      | 58.941 | 19 | CATTTTGAACGGTCCAGTTT    | 59.971 | 20 |
| AGTGGTGGTAAGCAACGGAC     | 60.035 | 20 | CATGTTTTTGGATTTTGGGG    | 60.024 | 20 |
| CCGTTGCACAAGTCACAGAG     | 60.5   | 20 | TCGAACCACTTTCAAGCCTC    | 60.375 | 20 |
| TATGATAGGCCACCGGTTTG     | 60.712 | 20 | GGCTTGGTTGTTGTAGATTCTG, | 60.528 | 23 |
| CCCATCGAAAAATTAATGCAA    | 59.791 | 21 | TTGGGAAGATCTCTCCATTCTG  | 60.569 | 22 |
| ATGTGAGAGACCCAGGTTCCG    | 60.112 | 20 | GGGTTATCACCTGAATGCAA    | 58.423 | 20 |
| TTCAAATACGGTAGACTTCCCA   | 58.628 | 22 | CGAATTAATCCGTCCAATGAA   | 59.781 | 21 |
| TGATTCACACGAGAGTGCAG     | 58.509 | 20 | TGAATCACTTTGCAAGCACC    | 59.847 | 20 |
| GGGGTTATCACTGGATCACG     | 60.195 | 20 | ATGCAACCGAAAATTAGGGA    | 59.411 | 20 |
| TTCCCTTCATTTTCGTTTTATTTT | 59.348 | 24 | TTTCTCATGCATATTTGTACACT | 59.962 | 26 |

|                           |        |                            |        |    |
|---------------------------|--------|----------------------------|--------|----|
| ATTACCCACCGAAAGGAAG       | 60.18  | 20 TTTGTTATGCGTTTTGACGA    | 57.846 | 20 |
| CATTACCCACACACACTTCA      | 59.385 | 22 AAATTTACCACGTGCAACC     | 60.796 | 20 |
| GAAGTTAGCACGTCAAGGGA      | 57.951 | 20 GCTTCCTCTGAATGCCAAAG    | 59.955 | 20 |
| GTGGACGCTCCAGATTGTTT      | 60.119 | 20 TCACGTTAAAGGGCGGTATC    | 59.96  | 20 |
| GGGCCATTATTTTCATCTCA      | 59.722 | 20 AGGCGTCGGTCACAATAAAG    | 60.132 | 20 |
| TCATGTATTTTTCTATGGACCG    | 60.082 | 23 TAGCCATGATCTCCCGATT     | 59.998 | 20 |
| ATCCGATGACTGGATGCTCT      | 59.642 | 20 GAGGGCTATGCTGATTTGTTCT  | 59.752 | 22 |
| TTTTCTTGATAAGCTCGAAGCA    | 59.275 | 22 GTGCGTGCCATTTGTCTTTA    | 59.735 | 20 |
| TCATCATCACACGCTGCTTT      | 60.423 | 20 GACCAGAGGAATTGTAGCCG    | 59.694 | 20 |
| CAGCAGAGAATGCAAGCAA       | 60.28  | 20 TCGGGGTATCAGAAATCGAG    | 60.029 | 20 |
| CCGTTCTTCATGCTCACGTA      | 59.864 | 20 CCATATAACGATGCCATCCC    | 60.001 | 20 |
| GCTCAAGGTCACACAAGCAA      | 60.032 | 20 GCAGAGGATAGACGGTTGGA    | 60.218 | 20 |
| TTTCTCTTGGTGAAAACCTCT     | 57.152 | 22 GGATAACCCCCACCAAACCT    | 59.919 | 20 |
| TGTAGATTGTTGTGAGGCGG      | 59.716 | 20 CCATCCCCCTCTCTTTCTCT    | 59.63  | 20 |
| TGGAGTTGAGATAATTTGCTGG    | 59.225 | 22 TTTGCTTCCAGTTTTGTCC     | 60.227 | 20 |
| TGCGTTTTGACAATATATAGGTGT  | 60.083 | 26 CAACAACAACAACGTCGTCC    | 60.049 | 20 |
| GTGCACAAGCAGGGGAAA        | 60.818 | 18 ACCGACAATTCATCTTTTTCTC/ | 59.994 | 23 |
| CTACGTTCCCTCAGGCTGCTC     | 60.156 | 20 GGCCGATTGCTGATATAGA     | 60.023 | 20 |
| GGTTAAGCAAAGGTGCAAGG      | 59.747 | 20 CAAGCCTAACACCACAAGCA    | 59.904 | 20 |
| TCTCTCGTTAACGTCCCATT      | 58.707 | 21 GAGCATGTCCGCAATTCTTT    | 60.221 | 20 |
| CATAAACTAAGGTGGAGATTGTT/  | 58.21  | 27 TTCTTGCTTCCCTGGTTTCTGA  | 59.978 | 21 |
| CTTGTTATGTTTCCATGAGCAGA   | 59.28  | 23 TACATTCATTGGGGTGTGGA    | 59.623 | 20 |
| GGATCTTATAGCATCAACCGC     | 58.686 | 21 TGGCAGATTTAATATTTACGTT( | 57.88  | 24 |
| CCGTTTTTACACCCCCTACA      | 59.719 | 20 GATTGTTGGGTGGCTTTTAC    | 60.362 | 20 |
| TGCGAGTCGCTGATTTTATA      | 60.51  | 20 GACCTGACACAACCCTCCAT    | 59.817 | 20 |
| GGAATAAAACCGTTTTACCCG     | 59.315 | 20 CATGTTACACGTGGACGCTC    | 60.183 | 20 |
| TCTCACACTTTGCACACTGAA     | 58.023 | 21 GGATCATGCTGGAAGCAGTT    | 60.226 | 20 |
| TGGCCACTTAGGCAAATAAAA     | 59.611 | 21 TGATACAAGTGTTGAAGCCAA/  | 58.346 | 22 |
| TGAATACGCGAGAACCCTG       | 59.864 | 20 GGCATGTTGACACCCTACT     | 59.851 | 20 |
| TTGAGCTTCGATCTCACGAA      | 59.673 | 20 CGGTGATAACTAGGAACAAAT(  | 58.941 | 23 |
| AAATCTTGTTGGATGTTAGTGGTTA | 58.577 | 26 CCCGGTATGCTGACGATAAT    | 59.807 | 20 |
| ATCTGAAGAGCTCCACGCTT      | 59.191 | 20 ATGGTTGCTTGATGGAGAGG    | 60.073 | 20 |
| TCGTTCTGCTCTTCTCTGTT      | 59.844 | 20 TTTGAGCAATTCGAAGGTCC    | 60.192 | 20 |
| TCCACGGTCTTTACGAATGG      | 60.883 | 20 TGGGTCCAAGAAAACCAAAG    | 59.942 | 20 |
| AAGAGCAGTAGCTATCGCCG      | 59.775 | 20 ACACGGAGGTGATGCCTATC    | 59.957 | 20 |
| AGTTATGATGGGAAGATGGGG     | 60.025 | 21 TGCCTTTTACGATATATAGTG   | 60.194 | 26 |
| GACGATTTGCAAGCCTATGG      | 60.606 | 20 ATGAGTTCGTCAAACCACCC    | 59.827 | 20 |
| GGGATACACACCTACCGTC       | 59.141 | 20 TGTAATCGAGGGAATCGGAG    | 60.029 | 20 |
| TCCAAAATGGAAATGGGAAA      | 60.103 | 20 AAGGCGATGAATTCTGATGC    | 60.185 | 20 |
| ACTCCCCAAAAATCCAAACC      | 60.032 | 20 CCCTTTTGTCAATTTCCGTTG   | 60.336 | 20 |
| CATGAGCAGGCTGTTTTTGA      | 59.988 | 20 TTCATGGATGGGGACTTGAT    | 60.135 | 20 |
| AGTTATGATGGCAGGATGGG      | 59.773 | 20 TGAAGTGAATGTACCGGAT     | 59.791 | 20 |
| CCAGACCTGGACCTACCAA       | 59.959 | 24 TCGACCTGGTGGATTGTTCT    | 60.51  | 20 |
| CGACAATCATCTAGTCCTCTAGCA/ | 59.934 | 20 ACTCCAGATTTTTTCGCCAAC   | 59.174 | 20 |
| GGCATGCATGTATCCGTATG      | 59.799 | 20 TCTCCCAACACTTCCCTCTG    | 60.229 | 20 |
| ACGACTGTCGATCCACACAA      | 60.162 | 20 TGAAGCAAGAAAAGGGGCT     | 59.94  | 19 |
| GGTGTCCCTCCATCCAAAGT      | 61.152 | 22 CAACATGAGACGCAAACACC    | 60.16  | 20 |
| AGCTTCTCTTGCTCTCTCATTG    | 58.109 | 20 CGCGTTACGAATCCAAGTTT    | 60.131 | 20 |
| GAGCCTTGAATCGCATCATT      | 60.185 | 24 AACCGAAAAATTAATCATCAC(  | 58.037 | 23 |
| TGAGAAATAAGAAACAATCTGGG   | 60.667 | 21 TAGGCAATGGAATACCTCCG    | 59.916 | 20 |
| TGGTTGTGTGAACCAACTCTG     | 59.626 | 21 CATGAGATTGGTGGTTGCAG    | 60.112 | 20 |
| TCCATGACTCTCAATGCCTTC     | 60.211 | 20 CGTGTATGTGTGAGTGTATA    | 59.332 | 26 |
| CTCCCTCTCTCTCGCACTA       | 59.697 | 20 AAAGTAGCGATGTCGGCAAT    | 59.736 | 20 |
| TGGATCAAACGTCGTCTCAC      | 59.682 | 20 AAAATCGAGAATTTTCCGGG    | 60.252 | 20 |
| TCTCCGAATTTCAAGAGGGA      | 59.744 | 22 TCAAGAAAGTTGTGGGGTTG    | 58.594 | 20 |
| TTTCGTCCATTGTAAGCAGTTC    | 59.271 | 20 GCAACATCTAATGGTTGTGGG   | 60.242 | 21 |
| GGCTCTCAGCATATGGGCTA      | 60.339 | 23 GGATATGCACGGGAACAAAC    | 60.199 | 20 |
| GCATATGTGCGTTTTATTCTTT    | 57.929 |                            |        |    |



|                          |        |                           |        |    |
|--------------------------|--------|---------------------------|--------|----|
| CATGGCACAGAAATCTTAAATGA  | 59.133 | 23 GTTCAAACATCGCATCCTCA   | 59.654 | 20 |
| CGGTTGTGCTCTTATGATGG     | 59.148 | 20 GCAAGACCAAATCACTCTTTCC | 60.117 | 22 |
| AAAAGCAATTAATGCGTTCACA   | 59.666 | 22 TGATTTTTCATGTTTCGGAGC  | 60.067 | 21 |
| CATTGCTACTGAATATTGTTCTTG | 59.566 | 27 GCAAAGATGACACGGAGGTT   | 60.119 | 20 |
| TCCGTGAAAGGAGCCTAAGA     | 59.948 | 20 CGCAAGCATGTTAATTTTATTC | 59.213 | 23 |
| TGGGGCTGCTTTACTGTTTT     | 59.747 | 20 GAATGCATTTCCGGTGACTION | 59.939 | 20 |
| TCCCATTTGTGTTTTCTTCG     | 58.597 | 20 AGTGAGAGAGAGGGGCTGCTG  | 59.883 | 20 |
| TAGAGCCCTTCTCCTCTCCC     | 59.912 | 20 TCTTCATCGTTGTAACCCTCG  | 60.118 | 21 |
| ACAATTTTGTACCCGCCAAG     | 59.861 | 20 TGCAAAACGGATGAAAAACA   | 60.088 | 20 |
| AAGAGGAAAATCCATCGGCT     | 60.039 | 20 TGGAAAAGCCATGCAAGTAA   | 59.301 | 20 |
| TGCTCAAAGTCATCATCCCA     | 60.201 | 20 CAACACTTCACAGCTTCTCCC  | 59.899 | 21 |
| TTGTTGAATTGGTCCTGCAA     | 60.088 | 20 AAAATGGATGGGGGTTAAGG   | 59.882 | 20 |
| CCAATAAAAATGGCACCCCTG    | 60.181 | 20 AACAAAGGGGCAATATGCTG   | 59.96  | 20 |
| CACACACTTCCATCACCCAA     | 60.416 | 20 AAGGAGGTGTTATGAAGGGAT  | 58.028 | 22 |
| TGCATCACTACCTCCTTGTTG    | 58.787 | 21 GGTTCAACGTCAACCAGTGC   | 61.566 | 20 |
| TTGGTTGGATTGGATTTTGG     | 60.535 | 20 AAAAAGAGACAAAAGGCAGC   | 59.144 | 21 |
| CCAAATCGGACTAATGCTGAA    | 60.081 | 21 ATTGGGATTGGTCGTTTTCAA  | 60.17  | 20 |
| ACTCGATAACGGATGCTCGT     | 59.723 | 20 TGGCTTCTGTACGATCCCAT   | 60.483 | 20 |
| ATCCCAGCCACACATTTCTT     | 59.41  | 20 CCAATGCTGCCCTTAGTGAT   | 60.096 | 20 |
| CACGAGTCCAGGCTACATCA     | 59.855 | 20 CAATTCCTTCCAACACCGAA   | 60.863 | 20 |
| TTCTTTCCCAAACCAACACC     | 59.807 | 20 CGTGTGTGTAACGTGTGTGTG  | 59.591 | 21 |
| GGTGTGGTGAGGCTGTTCT      | 60.159 | 20 AAGAAAATAACCACGTGCCCT  | 59.885 | 21 |
| GCGTGACAACAACAATTTTCG    | 60.157 | 20 TCGGGAGTCTGTATTGAGCC   | 60.218 | 20 |
| GCACACGACCGTGTATGAAC     | 60.04  | 20 ATCGGAGTTGATTTGATGCC   | 59.9   | 20 |
| CTATCCAACCACACGCACAC     | 60.032 | 20 TGCTTTTTATAACTCGCCCG   | 60.218 | 20 |
| GAGGATTCGACATTGGGAGA     | 60.011 | 20 CAAGGTTGGCTCGACTTTGT   | 60.291 | 20 |
| TACACAGCCCGTGTTCAATC     | 59.572 | 20 CTTTCCATGGCTATGCTTCTC  | 58.941 | 21 |
| TTCTCAGATTTCTGCACACT     | 57.528 | 21 CATGGGTTCTTTCCTCACAAA  | 59.956 | 21 |
| CTGCTTTGTGTTGCGTGTTT     | 59.951 | 20 GGTAGCAGCTGATATTCCTG   | 59.691 | 20 |
| ATCTTTTCACGCGGTTTCAT     | 59.574 | 20 TGGATGTTGGTTTTGAGCTG   | 59.691 | 20 |
| TGAAAGATGGGTGTGTTCTTG    | 58.609 | 21 TGCCTAAAGAACGTTACACGG  | 60.172 | 21 |
| CCCTACCCATTTACCCGTTT     | 59.939 | 20 GAGGAGAGACTCGAGATGCA   | 59.694 | 21 |
| GGCATGAGATTCTGTTGGGT     | 59.934 | 20 AACGAGGTAGCAAGTTGGACA  | 59.788 | 21 |
| TGGGCCCCACACTAATTTT      | 60.177 | 19 TGAGCGAGAAATTTTGTCCA   | 59.395 | 20 |
| TTGCCTTGAAAATGGGAAAA     | 60.407 | 20 GGCCGATCTCACTAAATCA    | 60.036 | 20 |
| CTCAAGATCGGATGCGAAA      | 59.892 | 19 AGTTATTATCATCTACAGGGGT | 57.754 | 27 |
| GGAGAGAGCGAGAGGAGAGA     | 58.95  | 20 GCGTTTTGATGATATATAGGTG | 58.907 | 26 |
| CTTCATTTTCGCGTTGGTTT     | 60.11  | 20 ATCGAAGTGACGATGGAAGC   | 60.226 | 20 |
| GTGAAGCGCTGATCTTGTA      | 60.144 | 20 GGCATGTAAATCAGCCATCC   | 60.304 | 20 |
| AACGAGAGTGGTTGAGGCAG     | 60.444 | 20 AAGGTGACAACCGATCAAAA   | 58.048 | 20 |
| CGGGTAATGTCGAGAGTGGT     | 59.989 | 20 AGTAGGAACCTTGATCCCCC   | 59.256 | 20 |
| AAACCAAAGACGATGTTGCC     | 59.978 | 20 CCGTGTACCGTGTATTGCTG   | 60.05  | 20 |
| TCCAATCGTTTTCAAATTCA     | 60.288 | 21 TGGCTGAAAGAAATAGCAGGA  | 59.967 | 21 |
| TAGACCTGGCATCTTGTTGGG    | 61.055 | 20 TGTTCTTCACGGTTCAATGC   | 59.697 | 20 |
| TTGAAATGTAACACAAAAGGAGA  | 57.925 | 24 AGGAGAGAGAGGGAGGGAGA   | 59.489 | 20 |
| TGATTTGTCATTGTTGGGGTT    | 60.081 | 21 CGACTCAGATGCTTCACAGC   | 59.733 | 20 |
| AACGAGAGAACTTTTCGACGC    | 59.621 | 20 GAGGATCGAGAGAGACGTGAC  | 59.142 | 21 |
| AAGAGCTTCTGCGTCTTTTCG    | 59.898 | 20 TCGGAGGAATACGGAGTGTT   | 59.55  | 20 |
| CATGCAAGGGTTTCGCTAGT     | 60.27  | 20 CACTTCCCACACGTTCCATA   | 59.415 | 20 |
| ATTAACGATTTCCCTTCGGG     | 60.143 | 20 GGCCTCATGAACTCTTGAATG  | 59.685 | 21 |
| CATGCTCCTATTTTAATACACCCC | 59.997 | 24 GTTTGGTATGGTGCCGTTTC   | 60.235 | 20 |
| AATCGAGCTTACACCCCAAA     | 59.569 | 20 CACACTTCCACACGAACACA   | 59.15  | 20 |
| AGAAGACGACGAGAGGGTGA     | 59.986 | 20 CCAACTGAGTCCACTACCCG   | 60.557 | 20 |
| TTGTCGTCGGATCAATGAGA     | 60.201 | 20 GGTTATCACCCGGATCGCT    | 58.462 | 18 |
| CACCAAATTTTCATATTTTAAATC | 58.035 | 25 TCCACACCATCTCAATCCAA   | 59.893 | 20 |
| TCGGTTTTTCTTGGGAGAGA     | 59.784 | 20 AACTCTATCTCTCACACAAT   | 57.487 | 27 |
| CATAACATGATTTTGCSCCC     | 60.016 | 20 GGAAATAAGGAGGTGTTATGA  | 59.323 | 24 |
| ACTTGCAAAATGATCCCCAA     | 60.309 | 20 AGCTCATGGATGTTTGACCC   | 59.934 | 20 |

|                         |        |                            |        |    |
|-------------------------|--------|----------------------------|--------|----|
| GGCAAACACAGGATCGATTT    | 59.939 | 20 CAACATTGCAAGCTGTGGAT    | 59.722 | 20 |
| CCAAGGACTGAGGCTTGTC     | 59.844 | 20 TTCCTAAGTCGTGTTGCGTG    | 59.904 | 20 |
| TCCCCTCGGAAAATCCTAGT    | 59.897 | 20 GTAGGAGCCCACAGTCCTTG    | 59.721 | 20 |
| TTCCCTTCCAATTTTGTCG     | 59.91  | 20 TTTTCTGCACATCCCAACA     | 60.088 | 20 |
| GTTCAAATCTAACGGCCAG     | 59.569 | 20 AGATATGCGAGATGGATGCC    | 60.028 | 20 |
| TCTAAGGGCCGAGATTTGTT    | 58.787 | 20 TTCTCAGCATATGGGAAGGG    | 60.029 | 20 |
| CACTGTTGCTCCGACTAGCA    | 60.199 | 20 TTTTGTATGATAGGATCAAA    | 58.947 | 26 |
| CTCACAGGGTCTTCCATCT     | 60.112 | 20 CGTGTGGGAAAGATATGCCT    | 59.955 | 20 |
| CGAAATTGAAATCGGACCAT    | 59.762 | 20 TCATCGATTACGTTGAGATGAA  | 58.595 | 23 |
| AAGAAGGATGGCGGAGAGTT    | 60.212 | 20 TCACCCACTCTCGTCACTTG    | 59.864 | 20 |
| TGTGAAAAACAGTGGCAGGA    | 60.278 | 20 GCCTTCAAATTGCGACTTTC    | 59.829 | 20 |
| CAGCAATTGGTTTTGAGGGT    | 59.971 | 20 ATGAATGCGACAACATTCCA    | 59.931 | 20 |
| ATGAGTTTGGTGTGTTGGCA    | 60.008 | 20 CCTTATTTTTAACCCATAAAAC  | 58.713 | 24 |
| CGCGGAGGAAATTATTTTTG    | 59.56  | 20 GCAATTCAGTGGGAAAGGAA    | 60.051 | 20 |
| GAATGAAATGAATGGCAGGG    | 60.274 | 20 TTACGAGCTTGCGAGATTGA    | 59.712 | 20 |
| GGATATGCTCAGTCCGGGTA    | 59.917 | 20 ATCAGTGACCACCCAACCAC    | 60.701 | 20 |
| AGAAACACGTTTTGCTTTTGA   | 57.616 | 21 GACTGAAAGAGAAGCAGCCG    | 60.277 | 20 |
| CACAATGCGTGTATTGACAGTG  | 60.096 | 22 GGCAACAAGCCGACAACACTAT  | 60.14  | 20 |
| GGCATGAATTCCTGGATTGC    | 60.423 | 20 AATGGGATATTCGGGGAAAA    | 60.329 | 20 |
| TATTTAGAGCAAGGACCGGC    | 59.32  | 20 TCTTTCATGCAATCGCTTTG    | 59.953 | 20 |
| TGAATTAACAGCGAGCATGG    | 59.833 | 20 GGGGAATTCTTGCAAATTGA    | 59.878 | 20 |
| TGGTTTCCCGTAGTCCTGAG    | 60.103 | 20 TCCTCAATCTGGTGCTTGTG    | 59.831 | 20 |
| GCGTCCGACACCTCAATTAT    | 59.962 | 20 TGGTTTCCGTTTATATGACGAA  | 59.637 | 23 |
| ACGCGAGATTTACGTGGTTC    | 60.14  | 20 TTTCTGTGGAAGGATACCGAC   | 59.933 | 20 |
| TTGCGATGCTTCTGCTAATG    | 60.118 | 20 GGCATCACGATGAGAGATGA    | 59.75  | 20 |
| CCCCATCCATGTTGTTTTTC    | 60.029 | 20 GCAGGATAAGGGAGTTAGCA    | 57.062 | 20 |
| ACCTTCATCGAGCGAGAACT    | 59.043 | 20 ATTCTGCAATAATCCCGTGC    | 59.929 | 20 |
| TGCTCTCTTTTTGGCTGGAT    | 59.955 | 20 CTTGTGGGAGGAAGAAACCA    | 60.081 | 20 |
| GTCCCTTTTTACCCCTCAA     | 58.02  | 20 TGTCAAAACACCTAAATCCCG   | 59.847 | 21 |
| AGGAAATAAGGAGGTGTTATGAT | 58.113 | 26 ATCGAGAGGAAAGTGGAGCA    | 59.95  | 20 |
| GCAGTAACCCCTCATCGGA     | 60.218 | 20 TTTTCCATATTTCTCACGTTCTC | 60.004 | 24 |
| TGGAACCAGCTCCGATTAAC    | 60.074 | 20 TGCGACGATGATGATACGAT    | 60.065 | 20 |
| TTGAAAAAATCCTAGCCACAA   | 59.573 | 21 TTTGGACTGTATCGGTCTACCA  | 59.494 | 22 |
| GACCGAATGTAATGAACCCG    | 60.192 | 20 GTCATGAACTAATCAAGTTCCA  | 58.175 | 24 |
| AAGAGCGGGAACAAAAGTGA    | 59.853 | 20 ATCTTGGTGGGACTACGTGC    | 59.997 | 20 |
| TGCATGCACCTGATTACACA    | 59.701 | 20 CTCTCCCTAACGTGCTAACTTC  | 59.955 | 23 |
| GGCAGCTAGGGTTGAAAGAA    | 59.452 | 20 CACTTGGGACCTTTGGATTG    | 60.345 | 20 |
| GCACATCAACCCACTCAATG    | 59.967 | 20 GGAGCCCATTGTTTTCTGA     | 60.051 | 20 |
| CATTTGCCTGACCTACCCAC    | 60.375 | 20 AAGCTGTGCATGAAGCAGTG    | 60.207 | 20 |
| AAGTGGATGGCAGCTTCTCT    | 59.043 | 20 TTGGAATTTCTGGGAGTGGT    | 59.381 | 20 |
| TGGGGCCAATTTACTCTCTG    | 60.066 | 20 CTTGTGCGATTTTGATGGGCT   | 60.074 | 20 |
| GGGAGCAAAGTGATTGTTG     | 60.636 | 20 CCGAATGTAGTGGATACGGC    | 60.352 | 20 |
| AGATTTTGAGTTCATGGGCG    | 60.074 | 20 CATGAACAAATGATGGCTGG    | 59.924 | 20 |
| GAACTATCTACAGGCCAGGGG   | 59.969 | 21 TGATAGGGCACACAACCCTT    | 60.375 | 20 |
| TCGCTTTTGTATGGACGACA    | 60.257 | 20 GACGGCACCAGCTTCTTTAG    | 60.015 | 20 |
| TTTCAAACACGTTTGCTACC    | 60.025 | 21 TCAATGTGGCGCAATTAATA    | 60.074 | 20 |
| TGTCTTCCATTTTATGCAG     | 59.648 | 20 CCTCTTCAAACAGAGAGCCG    | 60.126 | 20 |
| GCATCTCTCTCGCTCTCATTG   | 60.256 | 21 TTATTTTATGGTCTTCCAACATT | 58.49  | 26 |
| TCCATTCAAATCTTTCCA      | 57.983 | 20 TGGAGGACTGGTGCTCTTAG    | 58.03  | 20 |
| GGTGTGTGCGTGTGATGTTT    | 60.497 | 20 GCCTTGCTTGTCCATATTC     | 59.533 | 20 |
| AACCGATCCCCATATAACCG    | 60.764 | 20 GTAAAGGGTGAGTGGTGGGA    | 59.82  | 20 |
| CTGAATGACCTGCCTCCATT    | 60.073 | 20 TTGGATGGCGGATTCTCTAC    | 60.036 | 20 |
| TCTCTTTGTAATCTCCCCAAA   | 59.939 | 22 TGATGGTCCGGTTAATACTCG   | 59.831 | 21 |
| CCCTCTTCATCCTCCCTCTC    | 60.149 | 20 GACTTGAGCTTGTTCGGAGG    | 59.989 | 20 |
| CTGGGTTTCTTCTCTTCC      | 60.045 | 20 GACAGAACTGCTGGGACCAT    | 60.12  | 20 |
| CCTTCCCTAAAGCCCCACTA    | 60.435 | 20 TTCAAACAGTGCACGAGAG     | 60.025 | 20 |
| CCCAGCACTGCTTCTAGGAT    | 59.454 | 20 GGGACGACAAAAAGTTCCAA    | 59.948 | 20 |
| CAAGGGCTTGAGTAGCTTG     | 60.008 | 20 CGTCCATTGTAAACAGTTCCA   | 58.54  | 21 |

|                          |        |    |                         |        |    |
|--------------------------|--------|----|-------------------------|--------|----|
| ACGCGTCACACGTAATTCAG     | 59.788 | 20 | CTCAGCCGTACAGAAAAGGG    | 59.869 | 20 |
| GTGCCATAGCCACCTGATCT     | 60.104 | 20 | GAGTTGACAGTGGTGGCTGA    | 59.872 | 20 |
| ACGATTCAAGGTGATTTGGG     | 59.79  | 20 | GATGGATAAATGATTGCGGC    | 60.262 | 20 |
| TGGGTGAGACAAGATGAGGG     | 61.071 | 20 | CTCTCAAACCTCACGGCCTTC   | 59.989 | 20 |
| CCTTGACCAATCGATTTCTTG    | 59.555 | 21 | GACCGAGCCCATTCTTACAG    | 59.694 | 20 |
| CACTCGCTACGAGCCACA       | 59.705 | 18 | ATGAGTTTGTATGGAGCGAGG   | 60.218 | 20 |
| CCATCACCCGATTTTCTTCT     | 60.074 | 20 | TTTCATGTGGCATCAAGGTG    | 60.517 | 20 |
| CACCCACAAACTTTTCAACTTC   | 58.65  | 22 | GCACTCACTCTGGAACCCTT    | 59.305 | 20 |
| TGCAGACCTGATCAACCTCA     | 60.402 | 20 | TGGCAGCTCATAATCAGTGG    | 59.823 | 20 |
| TGCAAACGGATGGTCTGATA     | 60.073 | 20 | AGCAGCAGTGCAACTGAAAA    | 59.788 | 20 |
| AAAATAATCCCAAAACCAATGA   | 57.444 | 22 | ATGATCCTTCCAGCACTTGG    | 60.073 | 20 |
| AACGCACAACAAAATACAAAAG   | 58.777 | 23 | GCATTGAATGGACTTAGCCCT   | 60.465 | 21 |
| GGGTGAGTTGGCATCATTTT     | 59.797 | 20 | ATGCACCCTCACCCCTTTATG   | 59.813 | 20 |
| ACCCTGCCCAAAACTCTCTT     | 60.11  | 20 | CTTTCTTCTTCTCCTCCGCC    | 60.455 | 20 |
| CCCATTTCCATGCTTCAACT     | 59.933 | 20 | GACCCACTCCAACCTTTCCA    | 60.088 | 20 |
| GCGGGTAAATATCAATTTTCGAG  | 59.837 | 22 | GCACCTGAGGAGGTGTTATGA   | 60.126 | 21 |
| AATTGTGGCCTCACCTTCAG     | 60.111 | 20 | CCTTTTCATGCATTTGCTTC    | 60.585 | 20 |
| TGTGGGTTAGCACTTGATCG     | 59.716 | 20 | GAAACAGAGGGAGGGAAAGG    | 60.045 | 20 |
| TTCAAACACTATTTGGGGGA     | 57.917 | 20 | TTCAACAACCTCATCCACATCAA | 59.024 | 22 |
| TCGATTGCAATTTTCATACACA   | 58.161 | 22 | AAAAGGTTCCCCTTTCTCCTC   | 59.934 | 21 |
| TGGTATGACAATTGCAAGCAT    | 59.055 | 21 | AAAGAAAAAGTCGCTGCCAA    | 59.996 | 20 |
| CAGCCAACTCGATCTCATCA     | 59.942 | 20 | GATCAGGTGTCTGGGACGAT    | 59.928 | 20 |
| TTTGTGCATTCTTCCCTTCA     | 59.247 | 20 | GAGCAATTGTTGGACCGAGT    | 60.119 | 20 |
| TGCTTCTCCAAATCCATCTTC    | 59.259 | 21 | GCACCCCAGACCATTACAAC    | 60.24  | 20 |
| GAAGTGTGCCAACACCTTT      | 60.012 | 20 | ACCGACCAAAAATCAAACCA    | 60.206 | 20 |
| ACACTTGACGAAGCCCAACT     | 59.769 | 20 | TGGATCGACAATTAGCTGGA    | 59.226 | 20 |
| CACTCACTCTCACTAGCCGC     | 58.78  | 20 | CTACGTCAACGGTGGTGCTA    | 59.781 | 20 |
| CAATACCGTGACATGCCTTG     | 59.988 | 20 | GGACTTGGCTGGTTCTCAA     | 60.232 | 20 |
| ATGGCTGTTGATGTGGACAA     | 59.967 | 20 | TTAATCTTGGCCGCTGATTT    | 59.682 | 20 |
| TGGTTGCTGCTGCAAAATAG     | 60.014 | 20 | TGAAAATTTGAGGCTGCACA    | 60.379 | 20 |
| TCGAACTCCAATAGCAGCAA     | 59.566 | 20 | TCCTGATTTCACTTGGGAGG    | 60.042 | 20 |
| ATTTGTGCAAAAGTTTGGGG     | 59.839 | 20 | CCTTCAATGGAGGTTCAAGGA   | 60.042 | 20 |
| ATTGGTGAACCTCTCCCAA      | 59.381 | 20 | ACCGATTTTCCCCATTTTA     | 60.361 | 20 |
| TGGACAAGACAAGGCTAGGG     | 60.246 | 20 | GATTTGGTGAAAGCCCAAAC    | 59.41  | 20 |
| TATGGCACACCATACCAGGA     | 59.799 | 20 | GAGGCTTGATGATGCACAGA    | 59.95  | 20 |
| GCCCTTTTCATTGCTGTCAT     | 60.081 | 20 | TTTGAAGTGGCAACAATTCG    | 59.706 | 20 |
| AACGGTGACGAATGGTTCTC     | 59.973 | 20 | AACCGACATAATACACCGCC    | 59.713 | 20 |
| AATTGGAACATGGCGAGAC      | 59.939 | 20 | CCTTATGGTGGCTTGTGG      | 60.357 | 20 |
| GGTCAAACAACGAACCAAC      | 60.255 | 20 | AAACTTCCCGGACAGCATA     | 59.569 | 20 |
| TTTTCAACACCCTCACACCC     | 60.791 | 20 | GCGGCAGAATGAAGAAGAAA    | 60.469 | 20 |
| GGGGTTAGAGAGGGTGCATT     | 60.328 | 20 | TCCATGCAAGTCCATTCTGT    | 59.09  | 20 |
| TTCAACCCACTGCAGTACCA     | 60.152 | 20 | ATCGGTTATCACCGGATCG     | 60.697 | 19 |
| AGGAAAGGAAACCACCCATT     | 59.668 | 20 | CCGTGTCCGTGTACATTTG     | 58.394 | 19 |
| CCAATTGGTTTCGAGATGGA     | 60.832 | 20 | TCAACCATTTTTGTGCTCCTT   | 59.601 | 21 |
| CACCCACATTACATTAACCGA    | 59.625 | 22 | GCGCGCGCTGTATATCTAAC    | 60.898 | 20 |
| TGTGCCACATCAGCTTCTTC     | 59.992 | 20 | TTTTAGAGCATCCCCAGTGTG   | 60.118 | 21 |
| TCGCTGCCATATTCTTGACA     | 60.366 | 20 | ATTAATTATGGTGCAGCGGG    | 59.816 | 20 |
| GGACAGCAGCCATTA AAAAAGA  | 59.352 | 21 | ACAACTTATGGACCGCTGG     | 59.993 | 20 |
| ATACAATTCCACGCACCCTC     | 59.82  | 20 | TTTTGGTGTGGTGGTGTGT     | 60.05  | 20 |
| CCTTGACCAATCGATTTCTTG    | 59.555 | 21 | CGAACCCATTCTTACAGGCA    | 61.021 | 20 |
| ATCCACGAGGATGATGAAGC     | 60.042 | 20 | GCTGGCTGGTGAACCTTCTT    | 59.478 | 20 |
| TTTTCATTTGATTAGAAGTTCTGG | 58.439 | 25 | TTCATTCTGGGATAAGGAGCA   | 59.654 | 21 |
| CAGCAAACCTGAAGAACAAGGAA  | 59.534 | 22 | GGGTTTGGAAATGTTAGCTGG   | 59.429 | 20 |
| TAGCCAACTCGCTTAGCCTC     | 59.752 | 20 | CGTTTTGAGGGTGGATGACT    | 59.966 | 20 |
| GTCTGGTAATGGCCGACTA      | 59.955 | 20 | TTTGCAGATCTTCATCCAACA   | 59.262 | 21 |
| TTGGCAATGAGATACCGATG     | 59.499 | 20 | CATCCTCAATTCGATCCTGG    | 60.417 | 20 |
| TGAAATTTGAAGTCCATGCG     | 59.664 | 20 | TTCAGAAAGCCGAGAATTGC    | 60.469 | 20 |
| CCACACGAACTCATTTGACG     | 60.152 | 20 | CAATTTGTTTCGAATTTTGCTG  | 59.64  | 22 |

|                           |        |    |                         |        |    |
|---------------------------|--------|----|-------------------------|--------|----|
| TTTGAGAAAGTGGACCTCGG      | 60.224 | 20 | CCCTGCTTCTGAAACCTAGT    | 59.759 | 21 |
| AGCGTAACATTATGAAGCGA      | 59.756 | 21 | TCTTGGGAACCCCTTGAGATG   | 60.042 | 20 |
| AAAGCGCTCGTACATTTTATG     | 57.218 | 21 | GGATAAGGGAGTTTGCACCA    | 59.933 | 20 |
| AATAAATTCAGCGCAAACCG      | 60.095 | 20 | TGCATAGCCTCTACGAGTGAA/  | 60.039 | 22 |
| GTATGAATTCCGTGTTGGGG      | 60.051 | 20 | AGGAAGGGTCTCGTGTGTATG   | 59.076 | 21 |
| TCTTTTTGACATTTGGGTTCA     | 58.107 | 21 | AGGATCTCAAGCCATTTTCATGT | 59.968 | 22 |
| GTGGGTTGTTCTGATCTGGG      | 60.363 | 20 | TTGATCGACAGCATCCTAGC    | 58.979 | 20 |
| AATTCGCATGGTGACATCAG      | 59.527 | 20 | TTCTTGAGTCGGGGGAATTT    | 60.797 | 20 |
| GATGCGTTAATGTACACAACCTCC  | 59.839 | 24 | GGGAGATCTAGCAGGATACGC   | 60.209 | 21 |
| GTTGGGAACGAATTGGAGAA      | 59.91  | 20 | CGCCTAGAATTCGTCAAAGC    | 59.982 | 20 |
| CTTGGTGCGGAACATGACTT      | 61.096 | 20 | TGTGCAGATCTAATGGCACAG   | 59.879 | 21 |
| AAATCACGTTTGCAGCATGT      | 59.203 | 20 | ACGCACGCACTCAGTTACAC    | 59.977 | 20 |
| GTGTTACGATAGAATCACGCC     | 57.255 | 21 | GACGCCAATGGAACCTTTTA    | 59.938 | 20 |
| CTTGCCTCCACCATCTTCTC      | 59.803 | 20 | AAAATGGGTTTCCTTACCCG    | 60.048 | 20 |
| CGCTTAGAGGGTGTTTTGACA     | 60.29  | 21 | AAATTGAGCTCCATAGCCGA    | 59.807 | 20 |
| TTTTGACAATATATAGGTGTTTTG/ | 58.82  | 27 | CAAAAATGCCCTTGAATGCT    | 60.074 | 20 |
| AAATGGCATTGCTCCTCAAC      | 60.081 | 20 | GCAAAACCGTCTTTCCACTC    | 59.717 | 20 |
| CGCGGTGTTTTAACTTGCTT      | 60.298 | 20 | TCGAAACCCATTGACCTCAT    | 60.317 | 20 |
| CTCGATTAATGGGACCGAA       | 59.894 | 20 | ACCGAATGCACTCACACAAA    | 60.16  | 20 |
| CCTCACGACGACTCCAAAAC      | 60.69  | 20 | TGCACCGGAGAAGAACTACC    | 60.255 | 20 |
| TCGTGTTCTTCCCTCCTCTC      | 59.38  | 20 | TTTCTCAACCGAGCTCACC     | 58.945 | 19 |
| CTGAAAGGCAGGTGAAAGTCC     | 59.844 | 20 | ATCCGCCCTTATCTCTGTT     | 59.925 | 20 |
| AATGCGCGTTTTTAGGGTTA      | 59.624 | 20 | TTTCCCTCGATTCTCGTGTC    | 60.195 | 20 |
| TTTGAGTTGGGAGAGGGATG      | 60.042 | 20 | AGGTGTGCTGCTTTTCTTCG    | 60.571 | 20 |
| TCAGTGGCTACAAATCCCCT      | 59.55  | 20 | TCTAACTTGACCTCACCGCC    | 60.255 | 20 |
| TTGTTCCCTGTGGGATTAGG      | 59.784 | 20 | TCCGATATTAACGAGCGGT     | 59.569 | 20 |
| CTGACGGTTGGATTTTGCC       | 60.353 | 20 | AAAATGCCCTTGTATGCTGC    | 60.103 | 20 |
| CCAGGCTTGAGTTTCCTCAC      | 59.844 | 20 | CAAATCCAATGAAAGGGGA     | 59.733 | 20 |
| AAAATGCCCTCGAATGCTAA      | 59.682 | 20 | ATTTACGTGATCTGCGTCC     | 60.103 | 20 |
| TAAAGACATATCGCGACCCC      | 59.923 | 20 | TGCACCGTGTGCAGTTATTT    | 60.18  | 20 |
| GTCACATCTCGATCTTCGCA      | 59.95  | 20 | ACCAGCTGCACCTGTAACAA    | 59.365 | 20 |
| ACAGTCTGCAGGCCAAAACCT     | 59.914 | 20 | TCAGAGAGTCAGGATTGGGG    | 60.191 | 20 |
| GCAGGGGTACGCATTCTAC       | 59.597 | 20 | AAATGATCTACGTCCACGGG    | 59.813 | 20 |
| AAACGCGTCATGGATAAAC       | 59.829 | 20 | ACCGTTCATAAATGGTCCGA    | 60.192 | 20 |
| ATGGGAAGAGGGGTATGAGG      | 60.147 | 20 | AGGCGCATCTGATCTTAAAAA   | 58.979 | 21 |
| GGGACGATTCTGAAAGGTGA      | 60.05  | 20 | GAACGGCTGTGGTTTCAAAT    | 59.978 | 20 |
| TGCAATGCATGGAGGAAATA      | 60.035 | 20 | CCAACAATGCCAACAATGA     | 60.357 | 20 |
| CAATTTGCAGCCCTCATTTT      | 60.074 | 20 | AGAACATGGATCGGATGAGC    | 60.042 | 20 |
| ATACCACCCACCCTCTCTC       | 60.194 | 20 | AATTCTCGCGCCATTACAAC    | 60.103 | 20 |
| CTCGAATTCGGTTCAGAAA       | 60.184 | 20 | ATGGTAGCCATTTGAGTCGC    | 60.103 | 20 |
| ATCTCCTCCTCCACCGTGA       | 60.627 | 19 | TCCGCGGTTCTAATCTCCTA    | 59.801 | 20 |
| ATCTCCTCCTCCACCGTGA       | 60.627 | 19 | ATCAAGAGCCTCCTCGAACA    | 59.95  | 20 |
| TGAGGGTCTTTGCCATAGG       | 60.066 | 20 | CGATCGAAGACTCCATCCAT    | 60.034 | 20 |
| TTTTTATAACAGTGGGCGGC      | 59.964 | 20 | TTGCTCTAACAATTCTGAAACG  | 59.065 | 23 |
| CACGGGAAGCGTGATAATTT      | 59.96  | 20 | CGCCAGGGGAATTGTATTTA    | 59.789 | 20 |
| CGATCTTGCTCTACGTCTGGT     | 59.511 | 21 | GCAGCCATGGTATGGACTCT    | 60.104 | 20 |
| TCTCGCTCTACACTTTCGGTC     | 59.63  | 21 | GTGGTTTGGTCCGGTTAATG    | 60.088 | 20 |
| AAGCGAATCCAGGTAAGGCT      | 60.228 | 20 | GTGGATTTGGGGATGATGAC    | 59.995 | 20 |
| CTCTCGACTAGTTGGCGCAT      | 60.559 | 20 | CGTGGAGTCGACGACAATTA    | 59.716 | 20 |
| CGGCGGCTCTATAAAATTGA      | 60.185 | 20 | ATTCCACACACGCAACCATA    | 59.847 | 20 |
| TCATGGATCGACACGACAAT      | 59.925 | 20 | GCCAAATGCCTACAAATTGC    | 60.465 | 20 |
| TCCAGGGCTACTGGAGGTAA      | 59.688 | 20 | TTTGGCTTGTGAGCTCTTT     | 60.132 | 20 |
| TGACTTGGGGTCCATCTCTC      | 60.048 | 20 | ATGATGGAAATGGCAAAGC     | 59.907 | 20 |
| TGCATCAAGGAAAAACGAAA      | 59.277 | 20 | TTTTTGGCTCGTTGAGCTTT    | 59.996 | 20 |
| CATTGCATTTTATGCAGAGCA     | 59.856 | 21 | ATGCAAAGCATACTAAAGATG/  | 59.73  | 24 |
| ACTCAGGTGGTTCAAATCGG      | 59.966 | 20 | CGGCCCAATTATTGTCTCAT    | 59.784 | 20 |
| GTTGTGTTGCCTGCAGTTTG      | 60.347 | 20 | ACGACCCATTCAAGGTGAAA    | 60.353 | 20 |
| ATCACCCAAAGCCATTTAC       | 59.797 | 20 | TCGGTCTCCTTTGTCCAAC     | 59.697 | 20 |

|                          |        |    |                        |        |    |
|--------------------------|--------|----|------------------------|--------|----|
| AGTTTGAAGAAGACCGCACG     | 60.431 | 20 | CGACTCCGTATTGCATCGT    | 59.688 | 19 |
| ATTTGGAGGTTTTGGCAGTG     | 59.971 | 20 | CAAGCCCTAGTTCTTTCCCC   | 60.068 | 20 |
| AGTGCTCGAATATCTCCCC      | 60.431 | 20 | CATTGAATATGCATCACGCC   | 59.921 | 20 |
| ATTGATGTCCGAATGCAACA     | 59.931 | 20 | ACACGACAGGATGACACGAA   | 60.162 | 20 |
| CACACCTTCAGAAATGCAATG    | 59.184 | 21 | TTCACTACCAAGGGGTCTGC   | 60.111 | 20 |
| CCTAGCTTTGCCCTCCTTCT     | 59.976 | 20 | AATAGTTGGGAGCGGTTGAA   | 59.569 | 20 |
| CCATTGCATCACCATCAATC     | 59.738 | 20 | CCGGATATACAAACTACAGGG  | 59.758 | 22 |
| AAACCACATCCTTCGCAGAG     | 60.255 | 20 | GGGATGAATTTCCACCATGA   | 60.526 | 20 |
| TGTAATCTCTCTCGAAGTTATAGT | 57.16  | 27 | AAACACGCAACACAAAGCAG   | 59.951 | 20 |
| ACGAGATTTACGTGGTTCGG     | 59.993 | 20 | GCATCTCTCTCTTGCTCTATT  | 60.665 | 23 |
| TATTAGAGCCACAGCGGCAT     | 60.762 | 20 | ATCGGTTATTACCGGATCGC   | 61.031 | 20 |
| AACTCATTAATGTGCCGCC      | 59.967 | 20 | ATGTTCCGATTTTGAAACGG   | 59.801 | 20 |
| ATTTCGAAGATCAAAGGCC      | 60.399 | 20 | AGCCGTCGGATTTAACATTG   | 59.96  | 20 |
| CATGCCACAAACTCAAG        | 60.152 | 20 | TGCAGCTGATAGCACACTCC   | 60.168 | 20 |
| TGACATTTACGCAGTTTGTG     | 59.784 | 21 | GACGGAATTTCCGGTGTTTG   | 60.344 | 20 |
| TGAGCTTGGTTGGGAAAATC     | 60.051 | 20 | CAGTTGGTTTTGCATCATCG   | 60.111 | 20 |
| GGCTCCACAATGAACAAC       | 59.973 | 20 | CCTCGCCTACAAAACAAGGA   | 60.241 | 20 |
| CGAAGACACGATGTTGAACG     | 60.301 | 20 | CTTGAGGGATGACGGGAGTA   | 60.065 | 20 |
| CCCAGAATTGTAAAGCGCAC     | 60.637 | 20 | TGATAGGATCAATCCCCACAA  | 60.14  | 21 |
| GCACCGAAACAGAGCTGATA     | 59.028 | 20 | TGTGTGTGCTATCTGCGTGA   | 60.054 | 20 |
| GAGAATGAGGGAGGGAGGAG     | 60.149 | 20 | CTTTCTTCTTCATTTCCGCG   | 59.953 | 20 |
| TTCTTTCTCCTGCATCAC       | 60.195 | 20 | AGGACATGCTCAATGTCTGCT  | 59.889 | 21 |
| TCTGCAGCTGAGGAAGTTCA     | 59.855 | 20 | CACAGAGAATCAAACCAACAC  | 60.06  | 23 |
| GTGTGGTTGGGAAGGAGAAA     | 59.943 | 20 | AATGGACCAGCCACTACAGG   | 59.989 | 20 |
| TGAACTCTGCATCATCTCCG     | 59.942 | 20 | AACATCATCAAATCCCAGC    | 59.756 | 20 |
| GAGGCTTTTCGCTTTCTTT      | 59.966 | 20 | AACTGTCCCTACCTGCCCTT   | 59.994 | 20 |
| TTTTATCCCATGTTTGTGCAT    | 57.885 | 21 | ACCACTCCTCGCTCTCTCT    | 60.548 | 20 |
| CAGCGAATGTAACCGGATCT     | 60.096 | 20 | GAGCGGCGAAACAATAAAA    | 60.205 | 20 |
| GTTAGGTGACCCACCTTCCA     | 59.82  | 20 | TTAACAGCCATAAGCACAAGC  | 58.136 | 21 |
| TCTTTGAGTCAGGGCATCT      | 59.95  | 20 | GAGTCAAACATGCGATCCTT   | 57.735 | 20 |
| ATGCCATCTTTTCCCTTT       | 59.777 | 20 | GAGTGGAGGATTCGGTAAA    | 60.05  | 20 |
| TGCGTTTTGATGATATATAGGTG  | 58.933 | 25 | ATGCCAATGGCCCAATAAT    | 59.994 | 19 |
| GATGCTGAGGTGGAGTTGTG     | 59.261 | 20 | GCAAGTGGTCACGTGAAATG   | 60.16  | 20 |
| GGGCACGTAAGCCTAATGAA     | 60.096 | 20 | CCCTAATTTGTGAAAATGGGT  | 59.141 | 22 |
| TCCTTGTTACGGGAAAGTG      | 59.964 | 20 | GTTTCTCTGGTTGCACCATT   | 59.973 | 20 |
| AACTCCGCGAGAGAAATTGA     | 59.955 | 20 | CGAAAACCCTTTGCAAGTA    | 60.236 | 20 |
| TTTTTGACCATTGGTATTG      | 57.023 | 20 | GTTTCGAATCCTCTCTTCCC   | 60.015 | 20 |
| TGACGAATGATACCATTTAAGCA  | 59.507 | 23 | GGGTAGCCTTTCATTCCCTC   | 59.903 | 20 |
| AACTAAAACGATGAAATTTGGT   | 58.595 | 24 | TAAAGCAATTTTGCCCAAGG   | 60.068 | 20 |
| CATTCAAGGGGCATTTTTGT     | 59.801 | 20 | CTTGTCTCCATTCCATTGGC   | 60.461 | 20 |
| ACGTCAGTCCGTGGGTTTAC     | 59.891 | 20 | AGGCTATAAAGGAGCGAGAGT  | 57.926 | 22 |
| TGTTTTACGAATATACATGTTCC  | 60.501 | 25 | ACATATTTATACGCATATAGCA | 57.577 | 27 |
| TGCCCTAACGCCTTATCTTG     | 60.223 | 20 | CAGAGATTTGCTCGATTCC    | 59.917 | 20 |
| TGGCCTAACTTCTGGTGACA     | 59.288 | 20 | ATCTTCAACCTCATCACCCG   | 59.927 | 20 |
| GAGAGGAGTGAGATTGAGCGA    | 59.694 | 21 | GTGCGAGTGTTAACCGTTTCT  | 59.299 | 21 |
| CCCTACCCATTTACCCGTTT     | 59.939 | 20 | TCGACAATTTTAGAGACAACGT | 59.322 | 23 |
| TTCTTCCCCTACTGCTCATCT    | 59.803 | 20 | AGGGAAGGAAGGTTTAGGCA   | 60.068 | 20 |
| TCTGCTCCATTTTCACAACTG    | 58.912 | 21 | TGTAGCCCGGTGCTAGAGTT   | 59.898 | 20 |
| TTGGCCGTGAGTTCATTGTA     | 60.111 | 20 | CGTTGGACCTGAAAGAGGAC   | 59.697 | 20 |
| TGAGCCGTCAGTGCATTA       | 60.401 | 20 | AATGGCCAAGAGTCTCGCTA   | 59.978 | 20 |
| GTCACAGATGCGTGACACCT     | 59.744 | 20 | CTTGTGAAATCAATGCACCG   | 60.111 | 20 |
| ATGCATACATGACTCGAGCG     | 59.854 | 20 | TCGTCAAACCTCCCAAAC     | 59.569 | 20 |
| CGGGCCGTGTACTTTACAAT     | 59.883 | 20 | TCAAACCCTAGCCCATGAAC   | 59.933 | 20 |
| CGCGTTACGAATCCAAGTTT     | 60.131 | 20 | GGCACGAACCTCTTTCTCAT   | 59.288 | 20 |
| TTTTTAGGGTTTAAATCGCGT    | 59.118 | 22 | CGGTTAAAGGTGGTGCTAGG   | 59.626 | 20 |
| ATGATGGACAAGGCATCCTC     | 59.893 | 20 | TTGGTTGGGTAGCTTTGGAG   | 60.103 | 20 |
| AAGGCCACAATGGTTATTAGTT   | 60.02  | 23 | ACAATCGTCGGATTTAGCG    | 60.096 | 20 |
| AGAGAGGGGCGAGAGGTAGA     | 60.489 | 20 | CGGATGGACCGGATGTATTA   | 60.544 | 20 |

|                           |        |    |                        |        |    |
|---------------------------|--------|----|------------------------|--------|----|
| TTGTGACGGTGACTIONAGAGCC   | 58.882 | 20 | AGCTCGGTATGCGAGAGAGA   | 60.263 | 20 |
| ACCATATTTAAGGGTTATCACCTG  | 57.552 | 24 | GCAGTAAAATACGGCTGCGT   | 60.293 | 20 |
| GGCTACTGTTCCCGACTCAG      | 59.867 | 20 | CCTAGCCTTTGCCTCTTTC    | 60.332 | 20 |
| TGTCGTTTTCCCATGTTGCT      | 60.104 | 19 | GGCTTGTCTGGAGTTTGCTC   | 59.997 | 20 |
| GATTCTCCCAATCTGACGGA      | 60.011 | 20 | GCGTACCAAATCATGTGCGAA  | 59.548 | 20 |
| GTTTGTTGTTTGAGATTGTGG     | 59.378 | 22 | CACATGGAATTGCCTGAAGA   | 59.648 | 20 |
| TTGCCTTTCTTTCCCCTCTT      | 60.18  | 20 | CCATGAACACATTGATTGGC   | 59.781 | 20 |
| TGGATGGAGAGAATGAACCC      | 59.862 | 20 | CACCCGAAAACCGAATAAGA   | 59.931 | 20 |
| TTCTCACATAACTTAGCTGTTCTC/ | 57.502 | 25 | ACGGCCTGAATGACAGAAAT   | 59.556 | 20 |
| GTTATGATGGGAATGGTGGG      | 59.871 | 20 | CGGAGTGGGCTCATAAATGT   | 59.955 | 20 |
| TGGCTAATTTGGCAGCTTCT      | 59.982 | 20 | ATCCCAAGCCATACGAACTG   | 59.955 | 20 |
| AACCGGTTAAAACCCAGACC      | 60.089 | 20 | TTGGTCCTTTGTTCTTTGG    | 59.942 | 20 |
| GGTTATCACCGGATCACGAC      | 60.203 | 20 | ACACGGTCTCATGGCATAAA   | 59.002 | 20 |
| GCCAAGATTTCAGAATTCGC      | 59.791 | 20 | GTTTCCTCCACAACGCTCTC   | 59.851 | 20 |
| GTGTGTGCATGCATTTGTTG      | 59.595 | 20 | TTTGAATAACAAAACACTCGGG | 59.986 | 21 |
| TGCAAAGCATTTCACTTTGG      | 59.849 | 20 | TTCCTACTGGCTGTCCTTCG   | 60.388 | 20 |
| GAAGCATGAAGCAGCAATGA      | 60.104 | 20 | TTCAGATGCTCCACCTGTTG   | 59.831 | 20 |
| TCAATGTTGTAGAGGGGATTCA    | 59.429 | 22 | CAATAAGAAACACGCAACACA  | 60.082 | 23 |
| GTCAACCAATGCAGATGCTC      | 59.25  | 20 | CCGATCAACAATTTATGCC    | 60.153 | 20 |
| CCTCACAGCACCTTCTCTC       | 59.986 | 20 | TGTGCGCTTGAGTGTGTGTA   | 60.096 | 20 |
| CAATTTCAACCTTGTTGCCA      | 59.561 | 20 | TGACGTTCTTGCTGCTATGG   | 60.011 | 20 |
| TTAGAAACGGCATAACCCAGG     | 59.953 | 20 | GACACATGTCACGAATCGGT   | 59.399 | 20 |
| AGACAGCGATGGTGAAGAGG      | 60.408 | 20 | TAAACAACCATGTCGGCGTA   | 59.992 | 20 |
| AGTTCCCTCTTCTCTAACGC      | 59.001 | 21 | GATCGACCAATTGTGTGACG   | 59.967 | 20 |
| ACTCGAGATCGGTCCACCT       | 59.654 | 19 | ACGTCCATGGGAGAATGTGT   | 60.246 | 20 |
| ACCCAAAGGTCTCATTTCCA      | 59.381 | 20 | AGGGCCACATGATGATAACC   | 59.635 | 20 |
| AAAAGCACCAGCAATGTGAA      | 59.322 | 20 | GCCCGTCTCTTGGATATGAA   | 60.036 | 20 |
| ACGGTTCGAGAAAAAGCTAA      | 60.018 | 20 | ATTTCTCTCGTCACACGCT    | 59.874 | 20 |
| TTCCACAGACAACCTCACCA      | 60.129 | 20 | TCTTCGAATAAACCCCCACA   | 60.301 | 20 |
| GGATCGAAAAGAGAGGGAGG      | 60.147 | 20 | TGGAGGAAGAAGACAAGATGC  | 59.42  | 21 |
| ATGATGGGCGATTGAACACT      | 60.348 | 20 | GGAGTGGCTTGCGAACTTAG   | 60.015 | 20 |
| GGACTGCTGGATAATCCCT       | 60.293 | 20 | TGCGTGTGTTGTCGTGATTC   | 60.709 | 20 |
| ACGATCACTCCCTGTTACGG      | 59.989 | 20 | TAGATCACATTTGGCACGGA   | 60.073 | 20 |
| TCGGTAAGTCGTTAATGGAGG     | 59.098 | 21 | GTCTTTGCGGGTGAAAAGTT   | 59.218 | 20 |
| ACGATGCTGCTGTGAACAAA      | 60.459 | 20 | TCCAAACCAACAACACCTGA   | 59.976 | 20 |
| AACGGGAATGGTGTGTTGAT      | 60.096 | 20 | TCCGTTATGGGCCGTTAATA   | 60.165 | 20 |
| TGTGGCAACACCAATCACTT      | 60.008 | 20 | GGGACATTTTCTGCTTGCTG   | 60.776 | 20 |
| ACTCCAGCTACCGAAGCAGA      | 60.156 | 20 | ACATCTCCCTCACCTCTCC    | 60.469 | 20 |
| TAGCGATGAAGACGACGATG      | 59.972 | 20 | CATGCCATCAAATCAACAGC   | 60.08  | 20 |
| AAGAGATGACATTTTCGGCG      | 60.214 | 20 | GATACTCCGGCCAACTGAAA   | 60.074 | 20 |
| TTTCGATTTGGGGTGTAAACA     | 60.209 | 21 | TTGAACCTAGCCGGAGAAGA   | 59.948 | 20 |
| TTCCGGCGAGGATATATGAG      | 60.016 | 20 | GCTTGCCACGTCAACATAAA   | 59.735 | 20 |
| CAAAAAGGGAAGAGCGACAC      | 59.853 | 20 | TGACCGTTTCACCACAGGTA   | 60.001 | 20 |
| GGGATCCGACGTCCAATATAC     | 60.413 | 21 | AGATGTAGCAACCTATTTCTAA | 57.349 | 27 |
| AGTTTCGCGATCTCAACCAG      | 60.397 | 20 | TCTTGGACCAGATTGTCCCT   | 59.505 | 20 |
| AAAAATGATGCCAATCCAGC      | 59.907 | 20 | TGCATAGAAAAATATGTAAAA  | 58.929 | 27 |
| TGATTCTTTTGTGTTGTTTGC     | 57.795 | 21 | TCATGAGATCAGTTTGGGCA   | 60.201 | 20 |
| GGTGTGTTTTGGATTGTTGG      | 60.066 | 20 | GCATCAGTGTGTTGCCGAATA  | 59.694 | 20 |
| CCGCAATAATCCATACCTCA      | 58.455 | 20 | TCCCAATTTAAGGGTTATTACC | 59.555 | 24 |
| GGTGATTCGAGATGATCCGT      | 59.893 | 20 | GCTAATTGCATTCTCCCGAA   | 60.175 | 20 |
| CAGAAACTCACCATTTGCCA      | 59.691 | 20 | AACCAGCTGTCAGAAAGTGGG  | 60.298 | 20 |
| TGACGTGGTGTGTTGTTT        | 59.897 | 20 | TCCATGAGCAGAAAATGTGG   | 59.648 | 20 |
| GTGAATCACACTCCCCATC       | 60.184 | 20 | TGGCCTGTAGACCAATACCC   | 59.813 | 20 |
| AGAGCTGCCCAAGAAGGATT      | 60.349 | 20 | TGACTGCCACAGTTTCTCA    | 60.44  | 20 |
| CGAACTGGGAAAGGAGAAAA      | 59.284 | 20 | CGGTATTTGGGGCATGTAAT   | 59.547 | 20 |
| GACACTCTTCTTACCCCCA       | 60.088 | 20 | GATTGTTGGAAAGCTGGGAA   | 60.051 | 20 |
| TCTTGAACCGAACACGTAA       | 59.17  | 20 | AAGGACCAATGAGATGGGTG   | 59.779 | 20 |
| CTGCTGCCAAAAACTTAGC       | 60.018 | 20 | TGGTGAATGAAGGTGACGAG   | 59.676 | 20 |

|                         |        |    |                         |        |    |
|-------------------------|--------|----|-------------------------|--------|----|
| GGATGCCATTTGTAAGTCCG    | 60.331 | 20 | GGTGTGTGAGGTGTGTGAGG    | 60.045 | 20 |
| GGGACCTTATCTTTTGCCGT    | 60.32  | 20 | TGCTCTCTCATTGTAATCTCTCT | 59.688 | 25 |
| GCTTCTCGTTCCTGTTGAA     | 60.375 | 20 | CACACTGGACATCCCTTGAA    | 59.52  | 20 |
| AGGTCACCTCCTGCAAGAAA    | 59.844 | 20 | TGCTGCTGAACTTCTTGTGA    | 58.276 | 20 |
| TGAATGCTTACCGATGCGT     | 60.235 | 19 | TGCATATCTTCGTGTGTGCAT   | 60.158 | 21 |
| TCACCCTTTCTTTGATGGGT    | 59.381 | 20 | TCTCGAGTTCAAGCGTTGTG    | 60.175 | 20 |
| TGTCATGAATCGGTGCATTT    | 59.931 | 20 | GCCGAGATTTGTTATGCGTT    | 60.103 | 20 |
| TTTCGAGAACTCGGGATGAG    | 60.331 | 20 | CAAGATCCAAGGGCTGTGA     | 59.771 | 19 |
| TCCTTTTCCATTATCCATGTTTT | 58.787 | 23 | CGATCCGGTCTGATCCAA      | 60.582 | 18 |
| TCGGGTGCATAGGTTAAAGG    | 59.953 | 20 | GCAGCCATTCTATGCAAAT     | 60.067 | 20 |
| TGGATTGCATACCAACCAGAT   | 60.207 | 21 | ACGAAAAAGGGCATGAAAAA    | 59.564 | 20 |
| TGGCTTACACATGCAGATCC    | 59.679 | 20 | TTCACACGAGAGTGCAGATTG   | 60.04  | 21 |
| TGAAGGCTTTGATTCATCTCTCT | 59.496 | 23 | GCCAGAAATAGTGGATTTTGC   | 58.709 | 21 |
| CTTCCGCCATTCTACAAAA     | 60.067 | 20 | ACCATATTTAAGGGTTATCACC  | 57.552 | 24 |
| TGGAATTCGCAATATCCAAAG   | 59.914 | 21 | TTTTTAAAAGGAGACATTGCTG  | 58.494 | 24 |
| CCTTTGAACATCATGCGTTG    | 60.111 | 20 | TGTTGCAAGTAGTAAAGTAAAC  | 59.475 | 25 |
| CCAGCAGTTGGCTTCATTTT    | 60.249 | 20 | AGAAGGTTATCACCGGATCG    | 59.006 | 20 |
| GGCGGACATCAAAGGAATTA    | 59.901 | 20 | TGTAACCGCTGTTATCCCTCA   | 60.508 | 21 |
| ATCACGGACCCACATACAT     | 59.934 | 20 | CAAATTTCTGCCCTTTCCA     | 60.046 | 20 |
| ATTTGCAATGGACTGCCTCT    | 59.7   | 20 | GAGATATCTTGCGGCAGCTT    | 59.579 | 20 |
| TCGTGCCAACAATGACATTAC   | 59.605 | 21 | AGAGGGTATTTCGGGAAAGC    | 59.554 | 20 |
| ATGAGGATTGTCCCGTCAAG    | 59.927 | 20 | GGCTGGGATGTCATTCATTT    | 59.756 | 20 |
| TGAGCAAGCGCATTGTTTAT    | 59.472 | 20 | TGGAAGGAACAACCAACA      | 58.995 | 20 |
| TCTACTTCCCAACACCACCC    | 59.82  | 20 | TCTTCTGTCTGTCCCTGGCT    | 59.986 | 20 |
| TCCTTCTTTCTGCATTTGG     | 60.184 | 20 | ACAGCTTACCGGTTTGTTC     | 60.156 | 20 |
| ACAGGGCTGGTGTGTGTTTT    | 60.466 | 20 | ATGGCTGTTTTCCAATGAGC    | 60.081 | 20 |
| CATCTGATCCCAGCAAATGA    | 59.604 | 20 | GCCCACATTTCAACCAGTTT    | 59.836 | 20 |
| TCCATAAACAGGGAAGATGTGA  | 59.429 | 22 | AATTCAAATCTTAACCGCCG    | 59.078 | 20 |
| AAAATTCTGAAACCCCCAGG    | 60.159 | 20 | CCTTCCGTTTTCGACATCAC    | 60.495 | 20 |
| TGGGAACCTAGGAGAGCCTT    | 60.204 | 20 | CAACAGTTTGGCATCAGAGC    | 59.445 | 20 |
| AGATTTGGGGTGATGGGTTT    | 60.422 | 20 | GCCAACCACACAGTGAACAA    | 60.616 | 20 |
| CCGAAATGCAACGATAAACTC   | 59.6   | 21 | GTACAGTGGTGGTGTGCTCG    | 60.227 | 20 |
| TGGATGTGGTTGGTGAGTTG    | 60.416 | 20 | GGCTAATTGTTGGCCTTTGA    | 60.074 | 20 |
| CGAAGTAGCTCGAGCCGTAG    | 60.305 | 20 | TAGGAGCAAGCGAGGATGAT    | 59.939 | 20 |
| ATTCCAAATGAACAGCCG      | 59.938 | 20 | TTCGTGGATGCTATGCTCAC    | 59.83  | 20 |
| CAATCTCGAAAATGGATGGC    | 60.414 | 20 | GCACAATAATGCTTCTGCTC    | 58.53  | 20 |
| GGGAAAAGGGTGATGTTTT     | 60.032 | 20 | CATCCTTCGGCTTTTTACCA    | 60.067 | 20 |
| GCGCGTCACACTTTTATCCT    | 60.278 | 20 | AGGTGATTGTGGTGGGTCC     | 60.649 | 19 |
| GGGACAACGCCATTTATAGG    | 59.297 | 20 | GCCAATGCCTCATCTAAAG     | 59.668 | 20 |
| CCAGTGTGTGAAAATTTGTTCC  | 60.647 | 23 | AAAAGTTTGGCGTCATCACC    | 59.978 | 20 |
| TTTCAACGTCCGACAAGACA    | 60.278 | 20 | TCGAGCTGGCTGAAGAATTT    | 60.096 | 20 |
| GCAGACAGGGGAATCTTAGG    | 58.741 | 20 | ACGTAGGATATCACTAAATTGA  | 57.146 | 27 |
| TCCTCTAGCATCTCTTGCTCTC  | 58.055 | 22 | GGTGCAGCCTTATCTCTTGC    | 59.985 | 20 |
| TTTTACCGATAGAAGCCACA    | 59.595 | 21 | TGGGTAGCATATGTGATGG     | 59.375 | 20 |
| TATGCAGTGAGTTGCCCAA     | 60.257 | 20 | GCGTTTTGATGATATATAGGTG  | 58.907 | 26 |
| TCCCCGCGTATAGAAATCAC    | 59.923 | 20 | TCGTGCACAAAGTGGAATGT    | 60.16  | 20 |
| CAAGATGATGAAGGTCAAACGA  | 60.11  | 22 | CCCTTGAAGAACTCATCCCT    | 58.173 | 20 |
| GAGAAGGGTTATCACTTGAATAG | 59.113 | 25 | TCGTGAGAAGCGTTGATCTG    | 60.136 | 20 |
| ATAGGCACCCCTGGAAAAAG    | 60.312 | 20 | TAATGGAAACCAACAGCGTG    | 59.585 | 20 |
| GGTGAACCGCGTAAATCTGT    | 60     | 20 | TCGAACTGGAACCACACTTG    | 59.72  | 20 |
| CTTGCAATATCCGGTTCGATT   | 59.923 | 20 | AGTTTTGTGGTTCGAAGGTGC   | 60.156 | 20 |
| GGCACCATACTGCCGATATT    | 59.813 | 20 | TCATTGACAAACCATGTCCA    | 58.292 | 20 |
| CAACGGATAAACCGATTGCT    | 59.96  | 20 | GCAAACCCGTGTTCTTCAGT    | 60.156 | 20 |
| GCGATGGATTGATTCACGTA    | 59.504 | 20 | CCACCGAACTCGAACTTGT     | 60.149 | 20 |
| TTCACCCATTGTTTGCATA     | 59.93  | 20 | TTTGGCTGAGACGAATCAA     | 59.395 | 20 |
| TCGACATTCTAGCCACTGGA    | 59.394 | 20 | ATCTCCATCGTCTTCCATCG    | 60.034 | 20 |
| GCCACACGTATACCACGTCA    | 60.459 | 20 | ATCGGTTATTATCGGATCGC    | 58.88  | 20 |
| TGTGCACGAGAATACATCCAG   | 59.731 | 21 | AAGGGTTCTGCTGAGAACGA    | 59.989 | 20 |

|                          |        |    |                        |        |    |
|--------------------------|--------|----|------------------------|--------|----|
| GACATGGACGGGAAGAGAGA     | 60.199 | 20 | GTTAGCATGGGAAGGGAAGG   | 60.817 | 20 |
| CGTACATTGTCCATGCCTGA     | 60.539 | 20 | TAGGAATCACACGTGGTGGG   | 61.777 | 20 |
| GACAATTGCTCGCAAAGGAT     | 60.221 | 20 | TAATTCAAGCCACAAACCCC   | 59.801 | 20 |
| TTCTCATTTGCAACCGATGT     | 59.127 | 20 | ACCAACTCAAGCTCGAAAGC   | 59.621 | 20 |
| GCTGTTTCTCAGATCCTCGG     | 59.95  | 20 | TCCATAAACCATGCAAACCA   | 59.786 | 20 |
| ACATGACCCACCAAACATGA     | 59.656 | 20 | CACAAATGGAGGTGATGTGG   | 59.806 | 20 |
| TCTCTTTGGTTGGTGAAGAAA    | 58.955 | 22 | GAACTCAGGATGCCACTGT    | 60.12  | 20 |
| TGTTGGCTATTTGTTGCTCA     | 57.919 | 20 | CCATCGTGAAGAACAGACCA   | 59.676 | 20 |
| TGGTACTTGCAATGTTGGGA     | 59.964 | 20 | GCCATTTTCTTGCTTGCAGT   | 60.395 | 20 |
| CCTTTGGTGTGTTGAAGAGGA    | 57.77  | 20 | CCCCACTTCACCACTTCACT   | 60.002 | 20 |
| GGATGGGAGTCAATCCAGAA     | 59.862 | 20 | ATTGCTCTCGCTCTGTCCTC   | 59.709 | 20 |
| CAACGAGATACGCTGCAAGA     | 60.157 | 20 | ATAGGAGCCCCGGTAAGAAA   | 59.924 | 20 |
| TGTACATCTAGCTCTGTTGAATCT | 59.079 | 26 | GGACAGGATGATAAAGGCCA   | 59.894 | 20 |
| TGTTGGAGATGTGAAACATGC    | 59.562 | 21 | TCGAGATGAAAACATTGGCA   | 60.197 | 20 |
| TCGGTTTGGCCAATATTTCT     | 59.411 | 20 | TTCCACCCATATTGCACTCA   | 59.924 | 20 |
| GATATTTGATTTTGCGGGGA     | 59.735 | 20 | CATGGTGAGGTGACTGGGTT   | 60.84  | 20 |
| TGCTTTGGTGACTGAATGATG    | 59.707 | 21 | GCTCTAATCATGGCAGGTCC   | 59.658 | 20 |
| TGGTGGTATGGTATGGGGAC     | 60.317 | 20 | GGGGAGTAAAACGACCGAAT   | 60.187 | 20 |
| TCACGTCAACTTATCCCCC      | 59.79  | 20 | AAGAACCGTGGTTTTTGTCTG  | 60.008 | 20 |
| GAGAGGAAATTAGGAGGGGG     | 58.986 | 20 | TCCAAAATGAGACCAATCTTG/ | 59.546 | 22 |
| TCAAACAAAACCTACACCCA     | 60.248 | 21 | ACCATGCACCAATTCCTTTC   | 59.797 | 20 |
| TTCGATCTACTGGGCCACAT     | 60.483 | 20 | GTCTGATTGCCATGCTGAGA   | 59.95  | 20 |
| ACAGATGGACTCGCTGGTCT     | 59.866 | 20 | ATGATTTTTGCAGCGAAACC   | 60.081 | 20 |
| GGCAAATTAATAATGCCACT     | 58.188 | 21 | CAACAATGCCTTTGGTCTCA   | 59.691 | 20 |
| TTTGCCTTAGGGAAGTGTGG     | 60.103 | 20 | TCCAAGTCGAATATCTGCTG   | 60.22  | 21 |
| TGCCTACCAAACTAGGGG       | 59.986 | 20 | GAGCGAGGTGAGAAGAGGG    | 60.08  | 19 |
| TGGTGCCGTACCGATAATTT     | 60.209 | 20 | CATCCTGATCCACACAGTGC   | 60.121 | 20 |
| CATGGCTGGGAAGAGGACTA     | 60.21  | 20 | CCAAGTGCAGAGTAACGCAG   | 59.658 | 20 |
| CTGCCATAACCCGAAAAGA      | 60.067 | 20 | AGAAGTTAAAATAACGTACGT( | 59.214 | 26 |
| TGCCGTGTTATTGTGAGTCC     | 59.572 | 20 | AGGTTTCGTGTCGTTTTCAGG  | 60.149 | 20 |
| CTTTTCAATCGACCTTTGCC     | 59.685 | 20 | ATGCCATCACAAGGAAGAGC   | 60.226 | 20 |
| TTTTGCTGGGTTTTCTGGAC     | 60.088 | 20 | CCCGAATATTCTGTGCCAGT   | 59.955 | 20 |
| TGGAATCGCGATGAGATTTA     | 59.212 | 20 | TTTGTGAGGAGAGGCGTTCT   | 59.989 | 20 |
| CTTGAGGAAACGATCCCAGA     | 60.187 | 20 | CCGCTGATGAAATGATCTGA   | 59.756 | 20 |
| ACAAGTGTGCGCACAAACAA     | 60.199 | 20 | CTGGAGCCATTTTTGTGGAT   | 59.933 | 20 |
| AGAACCAAATGTGCAGGCTT     | 59.74  | 20 | AAAACACTTCGTCCAATGCC   | 59.978 | 20 |
| GTGCATTGGGTCAAAGAGGT     | 59.973 | 20 | TCGATTACTCCACCCTCACC   | 59.927 | 20 |
| AACATCGATCATCGTGCTCA     | 60.233 | 20 | TTGCAAGTCAAGGGGAAGTC   | 60.232 | 20 |
| TTGATCGAAAGGGAATCGAC     | 60.014 | 20 | TTACGTCCCGATCCCAATAA   | 60.146 | 20 |
| TCTCTTCTCCCCCTCTCCTC     | 59.883 | 20 | TTTCACAGCAGAGGGAAACC   | 60.232 | 20 |
| TGAACGGTTTTATTCGGGTTT    | 59.801 | 20 | TGAAGTATCGACGCATTACACA | 60.272 | 21 |
| CACGTGACATAAAATGCATCG    | 60.006 | 21 | AACATTTTCAAAAACGCCAA   | 58.187 | 20 |
| TGAAACCAGGGGAAAAAAGG     | 59.888 | 19 | ACCACCACCGTTAAATTCCA   | 60.088 | 20 |
| CGGCACAAAATTTTCCACTT     | 59.975 | 20 | CGGGAGTGGAGATAGCAGAA   | 60.353 | 20 |
| TTTGCTGCGGTACTTTTCAAT    | 59.772 | 21 | GGGTTGATAGATCGGGTTGA   | 59.75  | 20 |
| GACCGAAATACCCCAAAT       | 60.053 | 20 | GCGTGCTGAATCTTATCCGT   | 60.243 | 20 |
| TTCACAGTTTTTATTTGATCACC  | 58.986 | 23 | AGCATGATTTGGCTGGACTT   | 59.7   | 20 |
| GCTATAGAGCCGTTGAATGTGA   | 59.388 | 22 | GCAAATGCTTCTTACCCATCA  | 60.089 | 21 |
| ACGGGACCCTCATCTTCTCT     | 60.073 | 20 | CGGTA AAAACAATTTCGCACA | 59.603 | 20 |
| CATCTTATCCCAATTCTGTGA    | 58.903 | 22 | GAGAGAGAGTGTGGAGAGAG/  | 59.828 | 25 |
| AGCGGTATGTTTCGGATTTTG    | 59.96  | 20 | TTATACCACCGCCACCCTTA   | 60.202 | 20 |
| CGAGCCACAATACTTCGGAC     | 60.657 | 20 | CTGCCACTTTACGACCATCC   | 60.517 | 20 |
| GGATTTAGCGTTATTACCTGA    | 57.387 | 22 | TTCTTGATGTGTTGGCAAGC   | 59.847 | 20 |
| AGAAGATGCCGAAGGATGAA     | 59.773 | 20 | AAATGTTTCGTGCGAATGTGA  | 60.119 | 20 |
| AGGGAGTGCTCTCACCTGAA     | 59.986 | 20 | CATTCAAAAATTGATCACCCA  | 58.321 | 21 |
| AGGAGACGAAAGCTTCCCAT     | 60.212 | 20 | ATGCGTAAATGGATCCCTGA   | 60.296 | 20 |
| GGGTTCTCGTGATAAGCTCG     | 59.836 | 20 | AACGATGTATGGGATTGATGA  | 57.748 | 21 |
| GAGGGTTATCATGGGATCAAG    | 58.32  | 21 | AACAATCGTGCTGAAACGTG   | 59.764 | 20 |



|                          |        |    |                        |        |    |
|--------------------------|--------|----|------------------------|--------|----|
| GGGATTTATGACCGTTTGTCT    | 58.906 | 20 | CCCATAGACAAAAAGGCCAA   | 59.931 | 20 |
| AGGAGGCCTCTGAACCATTT     | 60.074 | 20 | CAAGTTGTATTCGGGTTGGG   | 60.22  | 20 |
| TGTGATGTTGGAGTTGGGAG     | 59.52  | 20 | ACCCTGTGTATCCCAGCAAA   | 60.375 | 20 |
| ATCGCGAGAAATTGAGAAGG     | 59.41  | 20 | AAAACACCAACACTTCTTGCA  | 58.677 | 22 |
| TGTTAAGCCTTGGGATGAATG    | 59.946 | 21 | CCGTTGTACATAAGCGGGTT   | 59.883 | 20 |
| CGTTGATTTGAGGCAGGTTT     | 60.636 | 20 | TGGTAGTTTGCCTTTTTCCG   | 60.103 | 20 |
| GGTGTCCGAGTTGTAGGCAT     | 59.997 | 20 | CACTGCATCACTCTCAAGCC   | 59.577 | 20 |
| TGCCAGTTTACTCCGAAAGG     | 60.241 | 20 | ACTCCGGTGTTCATTGTTT    | 59.827 | 20 |
| AGCTTCAAGTTTCTCCTTTTG    | 59.066 | 22 | AGACTATCAACAAGCCCCGA   | 59.694 | 20 |
| CAGAGGAAAGCTGAGATGGC     | 60.096 | 20 | GCCACCTGATCTAGCGATGT   | 60.249 | 20 |
| GTTTTCTCGATCTCACGCCT     | 59.434 | 20 | CCAGGTGTTATGACCCGAAC   | 60.232 | 20 |
| CATGGACCAATGGGACCTAC     | 60.05  | 20 | TCTTCGTCACAAACATCCCA   | 60.088 | 20 |
| TTTGTCTTGGTCCAGTCCC      | 59.943 | 20 | TGCCACTTAGAAAAGTAAAAA  | 57.794 | 23 |
| AACTCCATGCAAATCACACG     | 59.572 | 20 | GGTGAATCGTCAAACGTAC    | 58.987 | 20 |
| GCGGGTAGGGTAGGGACTAT     | 59.33  | 20 | TGGTGCCGTACCGATAATTT   | 60.209 | 20 |
| GGTCGCTTCGAGTTGTTTT      | 59.859 | 20 | GAAATTCTGCAGTTTCGGAGC  | 59.962 | 20 |
| GGAAATGGGAATGGGTTCTT     | 59.996 | 20 | TGGGGTCAGCTCTTGATTTT   | 60.195 | 20 |
| TGCAAATCTTACAGAATCAGCAA  | 60.652 | 24 | GTGCAGGGGATTGGTTAGAA   | 59.933 | 20 |
| CTCCACTCCCTGAGTATCCC     | 58.538 | 20 | CCGCTTTCCTAGAAACATC    | 59.845 | 20 |
| CCATCCCAATTATACGGTCC     | 58.974 | 20 | AGCTCCTCTTTCCTTTTGC    | 59.962 | 20 |
| CAATCCAGTGGCTCATGTTG     | 60.112 | 20 | AGTCACAGGATCCAAGAGCC   | 59.258 | 20 |
| GGAAATGGATCAACCAAACG     | 60.17  | 20 | CATCCCAACTCCCAAATA     | 58.794 | 21 |
| ATAAGCACGCCACAAAACCT     | 59.637 | 20 | AGAAGGAAGAAAGGGGGACA   | 60.045 | 20 |
| ACGGCCGTGTACTCTGTTTT     | 60.179 | 20 | ATGAAGCATGCAATTCGACA   | 60.228 | 20 |
| CACAGCATGGACTTTGTTGG     | 60.152 | 20 | TTCCACCCGAGCTTTAGTTTT  | 60.116 | 21 |
| CAAAGCAACCCTTAAGAGCG     | 60.011 | 20 | TCTTGTCTTGCCAGATCCTGT  | 59.859 | 21 |
| GTTTTGAGATGGGTGGTTGG     | 60.21  | 20 | TTTGATGTTGAAAATACCCC   | 58.796 | 21 |
| ACGATTAGCATCGCCACTGT     | 60.688 | 20 | ACATGCATGCTCGCAAATA    | 60.245 | 20 |
| TAGCCGGGTGCTGACATAAT     | 60.352 | 20 | GCAGCGTCAAATCAATAACC   | 58.241 | 20 |
| ATGGGAAGAAAACGCAACAC     | 59.978 | 20 | CGTGTGCAATGCATCTGGTA   | 61.713 | 20 |
| CCACATGCTATGCCTCAAAC     | 60.147 | 21 | ATGGTCTGGCTTATGTGGC    | 59.962 | 20 |
| TGTAATTATCTACAAAACGAGAC  | 58.343 | 26 | ACCCAACCAACCACAATAA    | 59.948 | 20 |
| TTCTATCCGCCAGTGCTCTT     | 59.978 | 20 | ATGGCCGAGATTTGTTATGC   | 59.929 | 20 |
| TGGCATTACAACTTCAAACCA    | 60.389 | 22 | TGTTTGCTGTAGATGTTGGG   | 58.687 | 21 |
| CAACTGCATCAGTCCCAT       | 59.551 | 20 | TTTGCCGACTTTAGAGCTG    | 60.514 | 20 |
| ACCTTGAGCTCTGATGCCAC     | 60.418 | 20 | TGGCATGGGGAAGCTACTAT   | 59.551 | 20 |
| AAGACTTCGCATCTCGGAAA     | 59.955 | 20 | TTCTCCCAAAGCTAATCGT    | 60.082 | 21 |
| GAGTTGGTCATTCTCAAGATGG   | 58.646 | 22 | GGAATTATGCCGAAAACAA    | 59.938 | 20 |
| GCGGAACTTCACTTCGCT       | 60.532 | 19 | ACTTTGAATCTGGCAACGTG   | 58.775 | 20 |
| GGAGCTCTCCCTCCTGAAT      | 59.778 | 20 | TTGTGTAATTGTGTTGTGTCGT | 59.468 | 23 |
| CACCAGCCATCCAAAGGTAT     | 59.813 | 20 | AGGAGCTTTCTGCGTGGATA   | 59.978 | 20 |
| GGCCCATGTGTTAAATCAAGA    | 59.815 | 21 | TTTCCCTTACGCATTCCTG    | 60.067 | 20 |
| AAGGAGGTGTTTGCATGTGA     | 59.139 | 20 | TCAGTTTTTGAGTTATGAATTT | 57.598 | 24 |
| AGCGCCTAGCGATTTCTACA     | 60.138 | 20 | AGCTGGTGTGAGTTGTACGC   | 58.962 | 20 |
| GCCGCACATTGATCTTACCT     | 60.103 | 20 | CAAATTTAAGGGTTATCACCT  | 58.849 | 23 |
| GGCTGTTGTCGTCTATGCCT     | 60.285 | 20 | TTTCGACCGACAAAAGGAG    | 60.22  | 20 |
| TAAGATACGGGCAGCGAAAC     | 60.23  | 20 | TCCCCAAAAGAAAATCTCC    | 60.237 | 20 |
| CTTCCCCTGTTCTTGCATGT     | 60.111 | 20 | AGCATCGAGCTTAACGGTCT   | 59.104 | 20 |
| GCGGAGCATTGTTCATAAAC     | 60.526 | 21 | AAAATGCAACCAGCATTAAA   | 58.72  | 22 |
| CGTGTACTCTGCCTCACAGC     | 59.648 | 20 | TACCCATTTGAAAATCCCCA   | 59.988 | 20 |
| TTTTTGTCTATATCGCTCAGTCAA | 58.484 | 25 | ATGAGGAGCGTCAATCAGGT   | 59.685 | 20 |
| TGGCGAAAAATGTTGACAGA     | 60.234 | 20 | GCCTGTTATGGCAACCAAT    | 59.829 | 20 |
| ACCTCTGCACTCTCCAGGAA     | 59.986 | 20 | CGATCCTGTGTGGCCTAAAT   | 59.955 | 20 |
| GGAGTCCCTTCTCCAGTC       | 60.05  | 20 | CTGCGCCGATATACTCACCT   | 60.257 | 20 |
| TCTGCAATGAACGAAAATGC     | 59.816 | 20 | GACACTTAGAGGGTGTTTTGAC | 59.97  | 24 |
| TGAATGAGGGTGTGGGACT      | 60.363 | 20 | TTCCAGATCCAAAATATCCACC | 60.02  | 22 |
| GGCTAACGGGCTACACAATTA    | 59.156 | 21 | TGGATCATGTAAGGAACAATG  | 59.738 | 23 |
| TGAATCCACCATGGAAGAGA     | 59.009 | 20 | TCGCAATGATACATGACCAGA  | 60.088 | 21 |

|                           |        |    |                        |        |    |
|---------------------------|--------|----|------------------------|--------|----|
| TCCAAAGGTGGCCAAAATAC      | 59.801 | 20 | GAAGAAAAGACATTCCGGCT   | 58.386 | 20 |
| TAAGGGCGGTATCACCTGAA      | 60.46  | 20 | TCAACCATCAGTCCCGAAGT   | 60.51  | 20 |
| TGGGCATAAAAACGTGCATA      | 59.958 | 20 | CCCCAAAGAGTTTCATTCCA   | 59.903 | 20 |
| TCATCAACAGCGAAGCAAGT      | 59.596 | 20 | GATTGAAGATCCCGGTGAAA   | 59.871 | 20 |
| GGCAGCACCAGAATTACTCC      | 59.7   | 20 | ATGCGCGATTTTAAACCCTA   | 59.586 | 20 |
| AAATTGTTGAAGTCGGTGGC      | 59.978 | 20 | CCCCCTAATCCCTAAATCCC   | 60.678 | 20 |
| GTAAAACAGCGCCCGTACAT      | 60.025 | 20 | TCTTGTTTCATATGGGGAGCC  | 59.894 | 20 |
| GCCTACAATAGCGACAAGGC      | 59.873 | 20 | ACGCAACCGTAAAGAACCTG   | 60.168 | 20 |
| ATGAACGTCGGTAGGAATGG      | 59.813 | 20 | GCACCACTTCACCTCCACTT   | 60.159 | 20 |
| AGGGACCACTAGACATTCCG      | 59.166 | 20 | TGGTATCAGAGCCATGACGA   | 60.225 | 20 |
| ACCTGGTTCTCGTTCAAAA       | 59.569 | 20 | GCACGAAGAAGGTTAAAGGC   | 60.116 | 21 |
| CATTGCGAGAAAAGCAGTCA      | 60.134 | 20 | CCAGCTCCGGAATGAAAATA   | 60.031 | 20 |
| TTTACCCAAAGCGAAGAAGC      | 59.474 | 20 | CTCGATAGGAAAGGATGCAA   | 57.916 | 20 |
| CTTAGTTAGCATGGGGGAAGG     | 59.967 | 21 | CAATCTTTGGGCGTGAGAGT   | 60.255 | 20 |
| CCGCTCAAATCACTCACTCA      | 59.984 | 20 | GTGCGTTGACCAGCATTT     | 58.186 | 18 |
| CCCCACATTTGTGGCATATAA     | 60.442 | 21 | AAGGACGTAACGGCTCTCAA   | 59.875 | 20 |
| GATCTCAACGCATCAACCGT      | 61.078 | 20 | TTTTGGAGATCTATGGCTGTCA | 59.708 | 22 |
| TAAATACTTGCTGCCCGAGG      | 60.223 | 20 | TCCACATTGTCTTGCACTCC   | 59.682 | 20 |
| GTAGGTGTGAGCCCAACGAA      | 61.096 | 20 | AAAGTGGGAGTTAGGGCACA   | 59.592 | 20 |
| TTCGATTCGCAACAATTGAG      | 59.809 | 20 | AGTTTTCCGGTAGCTGCCTT   | 60.262 | 20 |
| AGCACCTTATTGTGGCTTG       | 60.132 | 20 | ATGGTGAACCTGCCTTTGCTC  | 60.263 | 20 |
| GATGGGTTATTATTGGAACGAGA   | 59.242 | 23 | CGTTGAGCGGATTTAATCGT   | 60.096 | 20 |
| TTGTACGTCCAATATGTAAATTAT  | 57.296 | 27 | GACTGGAATTCTTTGCCGAG   | 59.813 | 20 |
| TTGCATGTGCATAACGGTTT      | 59.999 | 20 | CGTTATTAGTTATCACCCGAA  | 58.092 | 22 |
| CCTTTCCGACTCCTTCTTCC      | 60.183 | 20 | CATCATCACCTCGTCCCTCT   | 60.072 | 20 |
| AAGCAGGACGGTATTTTCCC      | 60.32  | 20 | CAAACCATCCAACCACAACA   | 60.255 | 20 |
| ATGAATCCAGGTGCCTCAGT      | 59.535 | 20 | TCCTTCAATCTCAGCCTTTCA  | 59.94  | 21 |
| ACCTAAGGGGGTGTGGCAT       | 60.61  | 20 | CTACAATTTCCGGCTGCCACT  | 60.27  | 20 |
| CGGAACCAACTTTTCAGCTCT     | 59.473 | 20 | CATATGGGCACAGACACTGG   | 59.984 | 20 |
| CGGAACCAACTTTTCAGCTCT     | 59.473 | 20 | CATATGGGCACAGACACTGG   | 59.984 | 20 |
| AGGGGCTGATTGTTGATGAG      | 60.073 | 20 | AAAGGAGCTTCTTGCACTGG   | 59.615 | 20 |
| GGTGATAGAAGGCTACGGCA      | 60.235 | 20 | CGTCAAGCATGAGCAACACT   | 60.056 | 20 |
| TCAAATCCTTCCATTCCCAA      | 60.244 | 20 | AGGGTTTTGAGGGTTTGCTT   | 59.976 | 20 |
| TTTTTGCGATGGAACATGAA      | 60.051 | 20 | CAAATCCCAACAAATGACCC   | 60.029 | 20 |
| GGGTACGGGTTGAGACAAAA      | 59.83  | 20 | ATGCAGACGAATAAGCGAGG   | 60.374 | 20 |
| CGACGACTTGTTGAAATGA       | 59.691 | 20 | GCATCCACCACCATCACATA   | 60.21  | 20 |
| TATTCTTTTACGCATGCCCC      | 59.928 | 20 | TACAAATGGGGTCTCTGATCG  | 60.713 | 20 |
| TCTATAGGGAAGTTATCACTGGA   | 59.464 | 26 | GAAAGCTAAAATTTGCAATCA  | 58.619 | 24 |
| CAACGGATTTGTTTGTTC        | 60.206 | 20 | AAAATCAAAGGCCACAATG    | 59.801 | 20 |
| TTTCAGAAACGAGGGCATT       | 59.685 | 20 | GACAAAGCAGGCACACAAC    | 58.935 | 20 |
| TGGTGTTTGATTTAGCGACG      | 59.729 | 20 | TTGAACGGAATCATGGACAA   | 59.9   | 20 |
| TTGATATTCAGTGAACGTGACAG   | 57.827 | 23 | TTTGTCTACCAGTTGCCCT    | 59.592 | 20 |
| CATCCTTCACCTGACCCATT      | 59.779 | 20 | GGCATGATTCTGCTGGTTTT   | 60.081 | 20 |
| TGGGGTGTGATGATAAGTGG      | 59.215 | 20 | GCACCAAGATTTGACCATGA   | 59.502 | 20 |
| CGGATTTAAGGGTTATTACCTGAT  | 58.81  | 24 | AAATGGTCCCCTCATGAACA   | 60.173 | 20 |
| CCATCGATCTTGCAAGTCA       | 59.942 | 20 | CAACCAGCAAACAAAAGCAA   | 59.888 | 20 |
| AAATTACACCTTTGTCATTTTTCAC | 57.864 | 25 | TATTTTAGGAAGGATCGGGG   | 58.011 | 20 |
| TTCGTTAAAGGGAATGCACA      | 59.157 | 20 | AAGCCTTCCATTCCGAAAAT   | 59.909 | 20 |
| TTATTGTTGAGGGAGTGGG       | 59.784 | 20 | TTTTACACGGGACCGTCAAT   | 60.227 | 20 |
| TTGCAATCCGATATCAACCA      | 59.891 | 20 | ACCCAGTTTCAGATGTTGG    | 59.82  | 20 |
| AAACAACTTGGTTCCACGC       | 60.015 | 20 | AATCCTCCTGCTGTGGTGAC   | 60.12  | 20 |
| TTGAAGCATGACCTGCAAT       | 59.276 | 20 | TTCTTTAACAACCCCGCAAG   | 60.103 | 20 |
| GATGCCGTTACCTTCAACT       | 60.119 | 20 | TCTTCTTCCACTCGCATCGT   | 60.945 | 20 |
| AGGGATAAGATTGGTGGTGATG    | 60.074 | 22 | AAGCGCACGTTTGAGTTTT    | 59.926 | 20 |
| GTCAAGCAATGAGAGGGGTC      | 59.661 | 20 | CAAATTGTTTGGGCTCGATT   | 59.938 | 20 |
| TTTTTCTCCAAAATTGCC        | 57.656 | 19 | TTCCAATGATGCATGGTTATG  | 59.247 | 21 |
| CGGTCATTATGTGGCGTATG      | 59.833 | 20 | TGTGTGTGTGCTCAGCAGTG   | 60.758 | 20 |
| CACATCACCCCTTCGTTTT       | 59.83  | 20 | GCAGGTAAATATCAATTTTCGA | 59.075 | 25 |

|                           |        |                           |        |    |
|---------------------------|--------|---------------------------|--------|----|
| GCTGGGCACTTGAAACCTAA      | 60.249 | 20 TGCCAGCAGAGAGGAGGTAT   | 59.973 | 20 |
| CTCTTTCCAGTTGTGTCTGG      | 59.748 | 21 GTTTACGCACGATGTTGGTG   | 60.035 | 20 |
| ATGCGAAGATAGGCATACCG      | 60.081 | 20 AATTAACATCACGGCCATCC   | 59.651 | 20 |
| CTTCTCCCACCTTCGTCTT       | 60.619 | 20 AACCGTTGGAATTTTAGAGTTA | 59.847 | 24 |
| AACGGAGATATCGGTTGTG       | 59.955 | 20 GTGGGCTTCGACTCTCAGAC   | 59.993 | 20 |
| GATGTGCAATTGTCTTTGCC      | 59.131 | 20 GCGCGTTGATCTACCAAAT    | 60.103 | 20 |
| ATCTTCCCGCCATTCTTTCT      | 60.039 | 20 AGGTGCTGAGGCGTTTCTT    | 60.005 | 19 |
| CCATTTCCCTATCTATAACCAATCA | 58.361 | 24 TGTTCCGATTTTGCGATTAT   | 60.289 | 20 |
| AAGGAGAGGAAGGTTGGCAT      | 60.074 | 20 TCCTCACCCCACTCCAATTA   | 60.309 | 20 |
| CGAGTTGGAACCTTGAAGGA      | 60.224 | 20 TGGACTCCGTGTGTATGACTG  | 59.606 | 21 |
| ACGTTGCTATCCAAGTCAA       | 58.379 | 20 GCACCTTTCATGTGCAATACC  | 60.388 | 21 |
| TATAACATCAACCGCCAGCA      | 60.096 | 20 CATGATTTGCAAGATGCCAG   | 60.22  | 20 |
| ATTCCAAGATAATCTCAATCG     | 57.214 | 22 CCGGCTCTGATACCATTGTT   | 59.955 | 20 |
| GCTCCCGTAGAACTTTCCCT      | 59.713 | 20 GGTCTTACATCTCCCAGGCA   | 60.073 | 20 |
| TGAGGAGCGTTGATCTTGTG      | 59.984 | 20 ACACGGTAACAAAATATATTG/ | 57.382 | 26 |
| GCAACAAGATGGTGCTCTCA      | 59.992 | 20 TCGGTTTCACCAATGGAAAT   | 60.17  | 20 |
| AAGGCCGAGATTTGTTAGAGG     | 59.733 | 21 TCTTTTGTCAAGGGCGAATC   | 60.192 | 20 |
| TGAAGTTCGAAATAAGGAGG      | 58.315 | 21 TCGTGCATCTTGCTACTTCG   | 60.157 | 20 |
| TCTTATCCATTTGCGCCATCC     | 59.862 | 20 AGGATTGTGCACTCAATGAATC | 59.059 | 22 |
| GGAGGGCTGTTTCTTCATCA      | 60.195 | 20 TTCCTCCTTTCCTTATGGG    | 59.536 | 21 |
| GAGGTGGGAAATCATCCCTT      | 60.133 | 20 TCCCGAATATTCCAACCTCA   | 60.266 | 20 |
| GGACCAAGTTGCTCTTCTCG      | 59.989 | 20 TTGGTGAAAGGAGACGAAGG   | 60.224 | 20 |
| CTCTGATTTCTCACGCCCTC      | 59.95  | 20 TGAGTGAACATGTGTGTGCG   | 60.373 | 20 |
| AATGAGCCGTCAGTGCATTA      | 59.301 | 20 ATCCAACCTCTGCATTTTGC   | 60.081 | 20 |
| CACTACATAAATTTGGCAAAGAG,  | 59.966 | 26 CGGTTAAAAATCGGACAGGA   | 59.931 | 20 |
| CCGGGAATTTTGAATGAACA      | 60.671 | 20 GCACCATATAATCGGGACGA   | 60.69  | 20 |
| ATCTTCCCAAGAGCTCACA       | 59.803 | 20 AAAGTGGCCGACAAAAACC    | 59.963 | 19 |
| CTTGCCCTTCACTCTCATC       | 59.803 | 20 GGATCGTTGATCGGGTTAGA   | 59.894 | 20 |
| TTGACGTGGGTGTTGGAATA      | 59.816 | 20 GATCTTTTCACTCGAGCCCA   | 60.34  | 20 |
| TCGAGATTTGCTCATGTTGG      | 59.799 | 20 CGACTGGCAAATACAAAAGTT  | 57.007 | 21 |
| GCCGAAAGCTGATCACAAAT      | 60.221 | 20 ATGGCTCCATTCTTCCTCT    | 60.037 | 20 |
| CAAGCCATCTGTGGTTGAGA      | 59.831 | 20 TCCCACCTGAAAATGGAAAA   | 60.28  | 20 |
| TGGTGGTTGAAGGAGGCTTA      | 60.626 | 20 TATTTTTCGGCCACCACTCTC  | 60.074 | 20 |
| ACCCTGAGGTGCTTTGTTCA      | 60.69  | 20 TGCCTCATCTCACTCATTTT   | 60.211 | 21 |
| TGTGGGTTCACTGGATACGA      | 59.96  | 20 GCGATGGGAACTCGTTAGAC   | 59.7   | 20 |
| AGGACAAATTTGGAATTTTAGGG   | 59.631 | 23 AATTGTTGAAACCGGTCCAG   | 59.83  | 20 |
| GGAAGGCCATGGTAGTTTGA      | 59.933 | 20 AATCACTAGCCCTCGCAAGA   | 59.978 | 20 |
| TAATGTCTTCCCATCCAGCC      | 59.894 | 20 GCAAAGCCTGCATTTGACTT   | 60.395 | 20 |
| TGGCCGTTTTTGAATCTATC      | 59.901 | 20 GGGAATTAGGGTTAGGGCAA   | 60.143 | 20 |
| GGGTTTCATTTTGATTCCCA      | 59.599 | 20 AGATGTGGAAAAGCCCAGAA   | 59.67  | 20 |
| CTTTCTTGCGAGAACCCTTG      | 59.986 | 20 TTCCGCTGAGCTTCTACTCC   | 59.717 | 20 |
| TTTTGACCAAATCAATCCCA      | 58.792 | 20 CCACCAAGCAGTGTTTATAGTA | 59.308 | 24 |
| CTCGTCCTATGCAAGCAACA      | 60.011 | 20 ATCCCCTCATGCATTCCTTT   | 60.662 | 20 |
| GGATTCAGCATTGTAAGGGG      | 59.387 | 20 TTGGACCATTTGTCCTTCAA   | 58.947 | 20 |
| TCTGAGAAAGCAGCTGGTGA      | 59.855 | 20 TGGTCAATACCAGAAAAATCC/ | 59.315 | 22 |
| AAAGAGTTGGGAAAAGTTATGAG   | 58.402 | 25 CCCCTTATTTGTGGTTCCAA   | 59.657 | 20 |
| CGCTATGAGTCACGGCTACA      | 60.035 | 20 GATTGATCCCAACCAGAGGA   | 59.862 | 20 |
| CCATAACCGTCGCATAACTCA     | 60.891 | 21 AAGCCCTAAATGCACTCGAA   | 59.845 | 20 |
| TTCAATTACAAGCCGCAGTG      | 59.872 | 20 TTCCACGAATTTGACACGAA   | 60.088 | 20 |
| TTTGCTAGAGGATTTTGTAAATATC | 58.427 | 27 TGAATTTTGTTCACCAA      | 58.841 | 20 |
| CGAAAGTTTTGGAATTTGAAGG    | 59.978 | 22 TTCAAAGAATTTGTGGTAGAAT | 59.119 | 25 |
| TGCACCATCTTCTCAACACC      | 59.682 | 20 TGCTCCAGTTTCTTTTGT     | 59.993 | 20 |
| GAAAAGGCACTCGAATTTCC      | 58.765 | 20 GTGGCACTGCACAAGTATGG   | 60.183 | 20 |
| TTTTACGCTAACGAAACGGG      | 60.123 | 20 TTCCTAAATCATTGGGGCAG   | 59.894 | 20 |
| ACACCAAACCCTCAAACAC       | 59.721 | 20 TTGGGAAGGATGAAGTTTGG   | 59.903 | 20 |
| TAGAGCAGGAAGAGCCGTGT      | 60.156 | 20 GGTGCCGTCCATAAAATAA    | 59.66  | 20 |
| CCACACTTTTAAATATTTAGCTG(  | 60.573 | 26 TGCTTGCATGAGAGATGGAG   | 60.096 | 20 |
| GCTAGAGCTCACTTACGAGC      | 59.54  | 21 TTGAAAAGAGCGCTGAACG    | 60.264 | 19 |

|                           |        |    |                         |        |    |
|---------------------------|--------|----|-------------------------|--------|----|
| TGCATGCCAACCTATAACGA      | 60.096 | 20 | AGATGGAGGCCGAGAGTTTT    | 60.212 | 20 |
| GATACGCGTCACACATGCTC      | 60.304 | 20 | TTCTACAACCACCCAAAGGG    | 59.824 | 20 |
| ATCCGATCCGAAGTATCCGT      | 60.682 | 20 | GGATATCCAAAATATCCGAAA   | 57.071 | 22 |
| AGATGCCAATCTTCCATTGT      | 57.043 | 20 | CGATCATATCCAATTTTCGTTTC | 59.369 | 23 |
| GAACCCAGCAACATCAACT       | 59.973 | 20 | CTTCATTACACCCGGCAAGGT   | 59.993 | 20 |
| CACTTGGAAAATGCGATGAGC     | 59.425 | 20 | GGATCTGCGAGATAAGCGAC    | 59.946 | 20 |
| TGAGGGGTGAAGACTTTTGG      | 60.081 | 20 | ACACCCTTGCAAATTATCGC    | 59.967 | 20 |
| TCTTAAAGCCCCTTGGTCTT      | 60.068 | 20 | TTGCAATATGTCCTTGCACC    | 59.548 | 20 |
| TTCTACTGGAAGTACGCCC       | 60.255 | 20 | AAAAACATGAGCGCACCAAC    | 61.071 | 20 |
| CACCCAAAAGGAGTTATTATTC    | 59.696 | 25 | TGACAGGAGATGGGACACAG    | 59.659 | 20 |
| AGAGGAGAGAAGAGCGGACC      | 60.096 | 20 | GGCTAATGTGTGGCAGTTTT    | 60     | 20 |
| TTTTGCTTTGTTTTGCTGG       | 58.979 | 20 | CATCTCAAACATTCAAAGAGAC  | 57.689 | 24 |
| AAAAATCAGCGAGGCAGAAA      | 59.96  | 20 | TACTGCCTTGCATTGGATCA    | 60.22  | 20 |
| GGTTGTTTAAATGCCCCCTT      | 60.055 | 20 | AGGACTTATTACCAATCATCCC  | 58.769 | 23 |
| TTTTCGCAAATTCTGTGTGG      | 59.706 | 20 | TCTCAGCTTTCTTGATGGGAA   | 59.94  | 21 |
| CCAGAATGACACTCGACGAA      | 59.831 | 20 | CCCCCAAATTTTACAAGCCT    | 60.177 | 20 |
| GAGAGAGGGGAGGAGATTGG      | 60.149 | 20 | TTGCCTTGGCCATTTAATA     | 60.275 | 20 |
| CTCTCCCTTCCACACTCGT       | 59.3   | 20 | TTGTCCATTCAATCCTGTGG    | 59.343 | 20 |
| GAAAGCCGTCGATGTAGCTT      | 59.481 | 20 | CAATTAACAATAGACTGACGC   | 60.404 | 24 |
| CAAACCCACTGCATTACCA       | 59.439 | 20 | GGAAGAGTGTGTGTTTGGC     | 59.339 | 20 |
| CATCAAAAATGTTTTCCCCC      | 59.111 | 20 | CGTCGTATTTTCCCAACAC     | 60.227 | 20 |
| CTCTCAATGCCTTCTACCCAA     | 59.322 | 21 | TGTAGCCCCCTTGAGCCTAA    | 59.839 | 20 |
| TGGCCACCCATTTTTACTA       | 60.181 | 20 | TTTTCTTTCCACAACCCCC     | 59.752 | 19 |
| TGATTGCACCATAATGCACC      | 60.352 | 20 | AACCATTGATTTGGTTGATTGA  | 59.182 | 22 |
| CCAGTTATCCATCCATTCCA      | 58.215 | 20 | TGACATTGCTAGCACCGAAC    | 59.871 | 20 |
| TTCAGATCCACTAGACATTTGAGC  | 59.789 | 24 | AAATGTAACAACTTTTGATCCC  | 58.549 | 24 |
| CTGCGCAGATCTAATGGTCA      | 59.972 | 20 | TGATGTGGCAGCTTTTCAAC    | 59.847 | 20 |
| CCCTCCAATCAATTTTCCAA      | 59.733 | 20 | ACGCCAGATTTATCACCCAG    | 59.955 | 20 |
| TCCCAAAAGAGTTGGGAATG      | 59.903 | 20 | ATCGGAGTTGATTTGATGCC    | 59.9   | 20 |
| CGAAACAAGTGGCTGCATAA      | 59.872 | 20 | TGCGAAATAAATGCACCAGA    | 60.215 | 20 |
| TTATGGGCCAATTATGCTCC      | 59.757 | 20 | ATGCGTTTTGATGATATATAGG  | 59.202 | 26 |
| GGAGAGTTCGCGAAATAACAT     | 58.341 | 21 | AACAATGAAATTTGGAACAAA   | 59.68  | 24 |
| CTGGACTGCCTTCATCTTCC      | 59.803 | 20 | GCTATCAGCAACAAAACCCC    | 59.574 | 20 |
| TAGGTGTGGGGAAATGGTGT      | 60.088 | 20 | CACCCTAAAATACGCCAACA    | 59.876 | 21 |
| ATGCATCGATGGAGGGAATA      | 60.26  | 20 | TCAAATGTAAAGCACTAGAGC   | 59.088 | 23 |
| CTTGCTGGCAACAAAACAA       | 59.888 | 20 | TTGACATTGCCTAGAAAGTGG   | 59.747 | 22 |
| AGCTGTTGCAGAAGCCATTT      | 60.022 | 20 | GTCGTGAGCTCTGTTGTGGA    | 60.03  | 20 |
| GTGCATGTTTCCATCGTGAA      | 60.526 | 20 | GGCTTTTGTCTCATGCACT     | 60.263 | 20 |
| GGGGATTGTAACATGTGGGT      | 59.386 | 20 | ATTCCATCCCTTGGCTCTTT    | 59.903 | 20 |
| CTGCAACACCATTGCAGAGT      | 59.905 | 20 | GATGAGTGGCAGTCGGTCTC    | 60.84  | 20 |
| TGCACATATCGGCTAAAGGA      | 59.281 | 20 | ATGTAATAGGGTTTGGGAAGG   | 57.006 | 21 |
| AGACCCTTCAACCCATAAC       | 60.052 | 20 | CCCGAAGAAGCCATCAAGTA    | 60.206 | 20 |
| GGCTGGCTTTCACTTCTCAT      | 59.434 | 20 | CATGACCACTCTTTCCTCCAC   | 59.564 | 21 |
| GAGAATTTTAATTCGTTTCATCTTG | 59.576 | 25 | TGATGGTGGAGCCTAGAAGG    | 60.21  | 20 |
| TGGTGGTATGGTGTGGAGAA      | 59.806 | 20 | ATGGATACAAGCAAGGGCAC    | 59.962 | 20 |
| GTAGGGGTGTACATGGTCCG      | 60.111 | 20 | TGCTTAATGGTTTTCGTGCTG   | 59.872 | 20 |
| CGTGCGTTGTAGTCGTGATT      | 59.788 | 20 | ACCGCTGGATAATCCCCTTA    | 60.653 | 20 |
| GGCCACAGCAGCTCAATAAT      | 60.243 | 20 | CGGTGTTGGATTGGTGAGTA    | 59.415 | 20 |
| CATCCAAAACCTCGAACCCAT     | 59.79  | 20 | ACGACGATGATGGGATTGTT    | 60.203 | 20 |
| CCCGTGCTTCAATATCCTGT      | 59.955 | 20 | CACTCCTTCACTCCCAGCTC    | 59.986 | 20 |
| TGAGTTTCCAGCGCAAAGTA      | 59.609 | 20 | GGCAGCTCATCAAGTTCACA    | 59.992 | 20 |
| ATGATTGTGCTCAATGGCAG      | 59.679 | 20 | CATGATCCATGTACCCATGC    | 59.61  | 20 |
| TGCCCCACTTCTTGGTAAA       | 60.608 | 20 | TCTTACCAACTGTACGCCA     | 60.301 | 20 |
| TGTTCAACTAATAATGCAGCG     | 58.075 | 22 | CAATTCAATTTGTTTCCAGAACC | 59.745 | 23 |
| TCAATAAACCCCTCCGAATGC     | 59.901 | 20 | AAATGCATGCACCTGATTACA   | 59.055 | 21 |
| TGCATGATCAATGTTGTAAGGA    | 59.041 | 22 | GCCGTAGCTTGTGAACGAGT    | 60.462 | 20 |
| AGGGGTTATTAGTGGAGTAAGCC   | 59.011 | 23 | CATTTCTTTTCCACCAACG     | 60.336 | 20 |
| AGTGTTTCTTGCCTGAAG        | 59.328 | 20 | ATCATATTCCGCCATCTCCA    | 60.26  | 20 |

|                          |        |    |                         |        |    |
|--------------------------|--------|----|-------------------------|--------|----|
| TCGGGAGGAAGAAGAAGAAAG    | 59.941 | 21 | TTTTGATTTTATTGGGATTTGTT | 58.024 | 24 |
| CACAGCTAGCGATGAAGACG     | 59.764 | 20 | CGAGCCAAATCTTCTTTTG     | 59.817 | 20 |
| TGACTTGAGGATTGTGTGCC     | 59.682 | 20 | GCGGTTATCACCGGATCG      | 62.397 | 18 |
| GCAGGATCGCCATAAGGATA     | 60.023 | 20 | GCCTTGGACTTTGAATTTGC    | 59.691 | 20 |
| TTGACAATATTTAGTGTTTTGACA | 58.99  | 27 | ATCCAATTTGGGCCATTTTA    | 59.124 | 20 |
| CTCGGAGGCTCCAACATCTA     | 60.353 | 20 | ACTTTTCCGATGGTGTGCTC    | 59.973 | 20 |
| CCAGTTCGGTGACATATGGTAAT  | 60.014 | 23 | CGTGGTTCGATCGTAATTGA    | 59.542 | 20 |
| TTGCTCCTTGCAACTTGATG     | 59.988 | 20 | GCCTCCATTTCTTGCTTCAG    | 59.955 | 20 |
| TATGGTGGTATGGTGTGGGG     | 61.296 | 20 | GAAGTGGATTGGAGACGGAA    | 60.05  | 20 |
| TATCAGGCCTGTGCAGTCAC     | 59.862 | 20 | TTTGGAAAACATGCAAAGGCA   | 60.229 | 20 |
| TTCGGGTTGCTTTTTGACTT     | 59.724 | 20 | AGGGGTTATCACCTGAATGC    | 58.864 | 20 |
| CACGTGGCATCGTAAGGAAC     | 61.494 | 20 | GTGGACGTCCCAGATTGTTT    | 59.827 | 20 |
| TGGCGGTGAAATAGTAAGG      | 59.953 | 20 | TCGAATTTGTTTAGGTGTGGC   | 59.989 | 21 |
| TCACATGCTGAATGACCAAC     | 58.019 | 20 | TGAGCCATGAACACCAACTC    | 59.682 | 20 |
| ATCGGTTATTACCGGATCGC     | 61.031 | 20 | TCTTGTGGCTCAAATTCCATC   | 60.066 | 21 |
| GGCGAGGACTGAAATTGGTA     | 60.074 | 20 | TGTTCCGAAAAGGAAAATGAG   | 59.188 | 21 |
| TTTTTGCCCCTTCTTCTT       | 60.048 | 20 | CGCATTATGTTGCCTTTGAA    | 59.702 | 20 |
| ATCGGTTATTACCGGATCGC     | 61.031 | 20 | GAAAAAGCCAAATGAATGGG    | 59.388 | 20 |
| CGTATCCATGGTTGAGGTCC     | 60.195 | 20 | GATCTTGCAAGCCCATGTTT    | 60.081 | 20 |
| TACTACTGAGAGCGACATCGG    | 60.008 | 20 | TGGAGCGTGTAATTTGCGTA    | 60.273 | 20 |
| TTGGACGAAAATGGTCTGT      | 60.353 | 20 | TGATAACCATGACCTCACGA    | 57.442 | 20 |
| CCACGGCTCTGATACCAAAC     | 60.517 | 20 | TGAGAAACATTAATGCGGC     | 58.771 | 20 |
| TGGATTTGGCTAAGAATGGC     | 60.038 | 20 | AACAGCCATTAAGTTCGGC     | 59.229 | 20 |
| AAAGCAAAAGAGGCGATTGA     | 59.96  | 20 | GTACCAGGGAGTCTCGGTCA    | 60.112 | 20 |
| GGAGATCACTTGCGGAGAAG     | 59.95  | 20 | CGATATTGTTGTTGCCGTGT    | 59.469 | 20 |
| AACTGTAATTCAGGCACCTACG   | 58.338 | 22 | CCAATTGGATATTGGTGGC     | 60.192 | 20 |
| CATTTTTCGATGAACCACCA     | 59.371 | 20 | CCGCCGTAAAGAAATCAATG    | 60.448 | 20 |
| CAATTTGCTCGATTTCTCCC     | 59.645 | 20 | CGGCTTAGCTGTTCTGTTGT    | 60.44  | 20 |
| TCGAAAATTCGCCACTATC      | 60.038 | 20 | GGTGCTGATGACGATTCTTG    | 59.245 | 20 |
| TGGTGCTCTTGTTTCGTCAC     | 59.88  | 20 | CGAGCTCGAGTTTGAATTTGT   | 59.508 | 21 |
| GTGGCAGATCTGAAAAACGG     | 60.636 | 20 | CGCCCTCTCCACCTATCTCT    | 60.746 | 20 |
| GCATTTTGCTACGTGGTTCA     | 59.735 | 20 | TGGCAAAGAGCAAGTCAAAT    | 58.502 | 20 |
| TGCACACAGCAGTTGTCAAA     | 60.071 | 20 | CATCAACTGGGATGCATGT     | 59.374 | 20 |
| TGATCATGCTCAACATGCAA     | 59.789 | 20 | TGCCATCCACTACACCAAAG    | 59.566 | 20 |
| AGACAAAAGTTTGAGGCCG      | 59.355 | 20 | AAATGTTGAAATACCGGGG     | 60.902 | 20 |
| CGCTAAAACCTGGAGTCAGCA    | 59.22  | 20 | GTGGGAGAGAGATCGATATTG   | 59.976 | 23 |
| ATCAGCCATGTTTGATCAGC     | 58.674 | 20 | ATAACACGGCACCTACCCAA    | 60.249 | 20 |
| TTTATTTTCATCCCTTGTCATGC  | 58.946 | 22 | CAGAACTACATCGCGCAAG     | 59.632 | 20 |
| TCCTGTTTTCTCAAGGCTCC     | 59.405 | 20 | GGGGTTATCATGGGATCAAA    | 59.439 | 20 |
| CAAAAATGGGTAGCCGAAAA     | 59.937 | 20 | GCATGCTGATAGGCAACAAA    | 59.839 | 20 |
| CTCTCTCTCAATTGCCACCC     | 59.803 | 20 | AGTTGGAGGTGATGATGGTG    | 58.349 | 20 |
| TGGTGTTTATGCTACTTTGAACG  | 59.238 | 23 | CATAAGGTTATGGCGGGTGT    | 59.708 | 20 |
| TGGAACACGTACCTTCTGATTC   | 59.101 | 22 | TCCAATTTTCTGCGATGAAG    | 58.843 | 20 |
| GATTCTTCGGCTCTTGCT       | 59.579 | 20 | TCTGGTTTGGAAAGGGAACAA   | 60.465 | 20 |
| TTTGTACCTGAATGCACCCTT    | 59.485 | 21 | TGTCAAACGTGGTGAATGAA    | 58.514 | 20 |
| CGTTGGACCTGAAAGAGGAC     | 59.697 | 20 | GTCCACGGTGGTTGAGAGT     | 60.009 | 20 |
| GCCTGAAAATGAACACCGTA     | 58.625 | 20 | ATTGGACCTGCCACCAATTA    | 60.192 | 20 |
| TGTGAATTTGCATCGTGTT      | 59.972 | 20 | AGCAATATCGATCTCGCAA     | 58.483 | 20 |
| CCGGTCAAACCAAATTACG      | 60.215 | 20 | ATGGATCAGTTAATCGGGCA    | 60.296 | 20 |
| TTCGAAAATTTAAAGGCCCA     | 59.538 | 20 | AAAATCAAAGGCCCAACAATG   | 59.801 | 20 |
| CCATGACCGATAAAAATGGC     | 60.153 | 20 | ATCTCAACGATATGGCTCGG    | 60.059 | 20 |
| GGCAACGACTATCGATCCAC     | 60.492 | 20 | TTCACAACTCACGCACACA     | 59.912 | 20 |
| CCCCTCTCTCTACCCGT        | 59.694 | 20 | TGAAGAGAGAGCTTCTGTCGG   | 59.876 | 21 |
| GCAACCGAAGTTTCATTTCA     | 58.747 | 20 | GTGTTTCGATACCGGGTTCTT   | 58.912 | 20 |
| CTCACCGTCGATCAAATCCT     | 60.073 | 20 | ACCCACCTCATTTTCAACA     | 60.21  | 20 |
| CATGCAAGACCCGAAGAAT      | 60.255 | 20 | GATGGAACCACTTGCATGTTT   | 59.851 | 21 |
| CACACATTTCTTCTACCAAAG    | 59.914 | 23 | TGCAAATACGGAAAATTTGAC   | 60.347 | 22 |
| TGTCGGTACCTTCGGAACCT     | 60.111 | 20 | TTCTTCTCACACCTCAGCC     | 60.386 | 20 |

|                          |        |                           |        |    |
|--------------------------|--------|---------------------------|--------|----|
| TATGCGATCTGCACGTGATT     | 60.251 | 20 TGAACAATTGAAACACCGGA   | 59.941 | 20 |
| TGACTGTGGCTTGCAAAGAG     | 60.175 | 20 TGATCCATTCCGACTTCCTC   | 60.011 | 20 |
| TGTATTCATGTGTCAGCGCA     | 59.859 | 20 CTCCTCCATCAAACCATTGTC  | 59.396 | 21 |
| ACTCCTGGAGGTCAATGCAC     | 60.12  | 20 TTGAGCTATAGTTGGAGGGTAC | 58.986 | 23 |
| ACACCCAATAGCTTGCTTGC     | 60.278 | 20 ACATCTGTGGAGCTGCTGTG   | 60.055 | 20 |
| CCCTCGAATGCACTCAAAC      | 60.255 | 20 TCTTTAGGTGCATCTCTTGACG | 59.517 | 22 |
| GTTTCAATCCGGTCTCTCA      | 60.05  | 20 GTGATTCATGGCCGAGGTA    | 59.466 | 19 |
| TTAATAAATTGTCGCGAACGG    | 59.975 | 21 TAATTTAAGCCCCATCCCT    | 59.637 | 20 |
| AAATACTCAGTAAACCAGATGAT  | 57.497 | 26 CAATTACCCTCAAGACCCGA   | 59.926 | 20 |
| AAGGGGAGTATCACTTGAATGC   | 59.487 | 22 GAGAAAACCGAGAAGCGAAA   | 59.569 | 20 |
| CCTAACCTTGGGCTCTGATG     | 59.688 | 20 AACACCTGTAATCGGGATCG   | 59.813 | 20 |
| CCACACTCAATACAATATGAACG, | 58.945 | 24 CAGATCGAGATCGATTGAAGC  | 59.931 | 21 |
| TTTTCGCTCCGACTAAAAA      | 59.826 | 20 CGCGTCAGATTTGTTATGTG   | 57.792 | 20 |
| GCATCAACGGCGTGTATTATT    | 59.873 | 21 ACCTGGTGTGTTGGCATTCT   | 60.431 | 20 |
| CATGCAATAGGTTGTGCAGC     | 60.288 | 20 GCGTCAATTACGTTCCATGA   | 59.548 | 20 |
| CAGCATATGCAAGCTCAAATTC   | 59.881 | 22 AGGGGTCAAACCTCCACTCT   | 59.968 | 20 |
| GATGAGTTCCTGAACCAGCAG    | 59.859 | 21 TGCCAAAAATTGTCATCCAC   | 59.375 | 20 |
| TGTCGCACAGAATGGTTGAA     | 61.277 | 20 AACTGGGCCATGATAGGTTG   | 59.813 | 20 |
| GTTGCGTGGTCACTCACCT      | 59.969 | 20 GGAATCCCTTCCCTCAACTCC  | 60.05  | 20 |
| TAACGGGCAGCCTAAGTACG     | 60.277 | 20 GGTGTTTGGGCTACTGGAGA   | 60.111 | 20 |
| TTTTGAAAATTTCCCGCATC     | 59.886 | 20 TTTTGGGAAATGGGGTATGA   | 59.988 | 20 |
| CGTTCACGTTCTGCGATTTA     | 59.872 | 20 CATACTAATCTCCCGCCCT    | 60.299 | 20 |
| CACTTTTGGGACCCCTTTTT     | 60.193 | 20 GAAACGATCGGAGGAGATGA   | 60.158 | 20 |
| GCAGGTGTGAATGGAGGAAT     | 59.934 | 20 CAGAAGCAGTGGAGGGAGAA   | 60.523 | 20 |
| TGTTGCATACGATGTGTAGCAG   | 59.822 | 22 TTGTTGGAGGATCTTCTTGAGA | 59.743 | 23 |
| TATGGGCCAACTAAAGCGAC     | 60.096 | 20 TGATTGAGAGATGGGGGTTT   | 59.862 | 20 |
| GGGCGTGACATAGTGGATTG     | 61.329 | 20 TGCATCTTGGAGGTGAGTAGG  | 60.262 | 21 |
| ATCTGCCCTATTGCTACCCC     | 60.307 | 20 TGGTACCTCCAACAAGAGGG   | 59.959 | 20 |
| TTTCATGGGCATTTGCTTTT     | 60.436 | 20 CTGCTGACTGAAGCGGGTAT   | 60.419 | 20 |
| CAAAAATTCGATCTTGGGGT     | 58.879 | 20 CACCCCTTTCCTTTACCCAT   | 60.046 | 20 |
| GAGGTGCTGTAAGGGTTGGA     | 60.111 | 20 GTTGTAGGCAAAGGGCGTA    | 60.131 | 20 |
| ACGCTAGTGTGTTTGCTTGC     | 59.151 | 20 CTGTATATTGTCATCCACGCA  | 57.113 | 21 |
| TTTATTTCTTTCCCGCCTCC     | 60.381 | 20 TGGGATAGGGCAACAATCAT   | 60.155 | 20 |
| AAAATGAACTTTATCGGATCTATC | 57.463 | 25 TTGTCATGTCCACCTCATTCA  | 59.951 | 21 |
| TGCTGACGAAGTACACTGGG     | 59.897 | 20 CATCCAAGACATGATCGCAC   | 60.08  | 20 |
| GTGTGCGTCTGAGTTCGTGT     | 59.948 | 20 TTTAAACCCCAACACCTTCG   | 59.833 | 20 |
| AAAGCCCATGTTTTGTCTGG     | 59.971 | 20 TGCAGGCTGACCAGTTCTAA   | 59.591 | 20 |
| CCCAACTGAAAACCTCCCT      | 60.332 | 20 AAGGATTTGCAGGTTGAGGA   | 59.67  | 20 |
| CAATCAATCCATCGTCTCCC     | 60.281 | 20 GAAAGGGACTGGGATTGAGA   | 59.065 | 20 |
| GCACGTGACATCTAACGGAA     | 59.722 | 20 TCAACTCTGTTTTTCACTCAC  | 59.858 | 24 |
| TAACCCACACACCCTAGA       | 60.224 | 20 CCCTTTGAATTTTGCCTCTG   | 59.679 | 20 |
| TCCGTCAAGGAGATCTTGAAA    | 59.799 | 21 CTGGGAGATTGCTTGAGACC   | 59.803 | 20 |
| GGGTGGCTTGATTTTGTTC      | 60.874 | 20 AGAATTCAGCAACAACTTCA   | 58.941 | 23 |
| CGGATCGCGACCCTATACAT     | 62.112 | 20 CATGGATCCGAAACATGAAA   | 59.325 | 20 |
| TTTAAAGCCTGCCCTTTTTG     | 59.359 | 20 AGGCACAATAGCCACGAATC   | 60.103 | 20 |
| CAATCCCTTTAAAATAGGTAATTG | 59.127 | 26 ACGAACTTGACACGAACACG   | 59.794 | 20 |
| CCTATCTTTGCCATACCCGA     | 59.916 | 20 AAGAGGGATATTCGGAGGGA   | 59.859 | 20 |
| TTACAACCAACATGCCCT       | 60.227 | 20 TTTGGGGCTACGTGTTCTTC   | 60.11  | 20 |
| AGGAAGAAGATTGTGCCACG     | 60.255 | 20 AGAGAAACTGGAACCCCCAC   | 60.349 | 20 |
| TGCCTACATCATTTACCCCA     | 58.843 | 20 GCGGTTATCACCGGATCG     | 62.397 | 18 |
| GCCAAATCCTAGCCACACAT     | 59.962 | 20 ATAGCGCATTTTTGCCTGAT   | 59.71  | 20 |
| GCACTATCCAATTTGCAACAA    | 58.69  | 21 GCTCGTGCTTATTTGTGGGT   | 60.14  | 20 |
| CTCACGTTTTTAGCCCAAGC     | 59.883 | 20 GGGGTGTGTTAATGATGGGA   | 60.439 | 20 |
| TCTTTTATGTGGGGGTGACA     | 58.821 | 20 GAATTTCCAGTTCCAACCA    | 59.767 | 20 |
| GTCTCCTTTCGCTGGACAAG     | 60.833 | 20 GCAAGATCCAATGGTTGTGA   | 59.502 | 20 |
| TGGGGTGTGTGTTCTTGAAA     | 59.976 | 20 CTTGTTGACTTTGCAGGGGT   | 60.149 | 20 |
| AGCAAAGAAATGCAGAAGGC     | 59.597 | 20 TTGCCATCCTCCTCCAATAG   | 60.029 | 20 |
| TCTCGCATTTGTGGTTCTCA     | 60.39  | 20 CAAGCAACAAATCGAGCATC   | 59.425 | 20 |

|                          |        |    |                        |        |    |
|--------------------------|--------|----|------------------------|--------|----|
| TCGTTCTTTCTTGCTTCCGT     | 59.993 | 20 | TGTTGATTTTGGACGATGGA   | 59.9   | 20 |
| GCATTTTGGGTTTATGTTTGG    | 59.221 | 21 | AGTTTTGAATGGCTTGGTGG   | 59.971 | 20 |
| TCCATCGAGTCAAGCTCAAG     | 59.112 | 20 | AGGGAGGTGGTTGATCAGAA   | 59.505 | 20 |
| TTGGAAGGGGAAATGAGAAA     | 59.476 | 20 | ACGGCTGTGTAGTGTGTTCG   | 59.819 | 20 |
| ACATCCACTGGCCAAGAATC     | 59.934 | 20 | AGCAAAAGCTGAGGTGTCAA   | 60.045 | 21 |
| CGAAAAACCAAAAACCCTCA     | 59.947 | 20 | GGCACGTGGAGCAATAAGTT   | 60.14  | 20 |
| GGCCAGTAACACAAAGGCAT     | 60     | 20 | TGAAAATCACCTTCAAGCCC   | 60.051 | 20 |
| ACCATTGTCCTGACGACTCC     | 59.969 | 20 | TAGTCGGCCGATAAGTTTGG   | 60.089 | 20 |
| TGAGAGATCAGTGAGCACGAG    | 59.299 | 21 | TCCTTCGAGCTCCTCACATT   | 59.95  | 20 |
| AGTAACCACCAATAACCGCC     | 58.836 | 20 | CGTGGAAATTTTATGGTTTGA  | 59.371 | 20 |
| TGTTGATCTTATGAGTGTGAAAAC | 58.734 | 25 | GTTTCAATCATGTCCGTCCA   | 59.348 | 20 |
| CAAAGGAACAAGGGGTTTGA     | 59.942 | 20 | CCCTCCCCTCTCACTTTCTC   | 60.186 | 20 |
| GGCGATCACTGTGCAATAAC     | 59.156 | 20 | CTACCCTGCTGATGAAACCC   | 59.55  | 20 |
| CTGGAGAATTGGGAGGCATA     | 60.029 | 20 | ATCAAAATCCATCCCATCCA   | 59.952 | 20 |
| TGGGAATTTTGTGGAGAAGC     | 60.051 | 20 | ACAGCCAGCTAGTCGGTTTG   | 60.453 | 20 |
| CATCTGAACAGTGTCAATTTTGC  | 59.668 | 23 | GAACCCACCCCTTCAAAT     | 60.169 | 20 |
| TCGAACCAAAGCAACACAAG     | 59.881 | 20 | TGCATGTGAGTTGCACTTGA   | 60.029 | 20 |
| GCCCTCAACTTTGTACGTGA     | 58.775 | 20 | TTTTGATGCAGCAACCATAAG  | 58.83  | 21 |
| TTGATTCGGAGGCTTGTTTT     | 59.685 | 20 | CATTGATTGATTCACAGCCC   | 58.926 | 20 |
| CCCCAAATGGAATTCAACAG     | 60.162 | 20 | GAAAGTATGGCTGCTCCTCG   | 59.978 | 20 |
| CACCCCTCGAGTTTCGTAAG     | 59.728 | 20 | TTTGGGTGTTCTGTACACGG   | 59.46  | 20 |
| CTTTGCTTTGCTGCACACTG     | 60.775 | 20 | GGGTCTCGCATAAAGTGGAA   | 60.074 | 20 |
| ACGCAGATGCCAACAAAAG      | 59.856 | 19 | TGATCTTGCTTGGTTGCTTG   | 59.988 | 20 |
| CCAGAGGATTTTGTCTGCTGT    | 60.397 | 20 | CACATGTGGAGAGCTTGTGC   | 60.473 | 20 |
| TGGCTGATGTGAAATCTGGA     | 60.201 | 20 | GATGTCACCATCGTTGTTTCG  | 59.967 | 20 |
| TTACCACGTTCTACGCTCA      | 60.449 | 20 | CCAACTTTGTGTTCTTGGA    | 59.734 | 20 |
| TCACAGGATTTAGCTGTTCTCA   | 57.635 | 22 | TTGTTAAAGGTTTCGACGGG   | 59.968 | 20 |
| CCTCTCATGTTTTCCCCAAA     | 59.903 | 20 | GCCAAGACTAGAGGCTGTGAA  | 59.63  | 21 |
| TTCTTTCACCCCTCCCATAA     | 59.359 | 20 | CAACCCACTTACCGGAGCTA   | 60.125 | 20 |
| TCCCAAAATCTCAATCCCAA     | 60.244 | 20 | ATGCGCGATTTTAAACCCTA   | 59.586 | 20 |
| CCCGTGACATGGAAACTCTT     | 59.966 | 20 | CTCAGAGTTGACGGATCGCT   | 60.555 | 20 |
| AGTAGCAGCTGTGGATTCCC     | 59.313 | 20 | AGGAAGATGGAGAGACGGTG   | 59.254 | 20 |
| GTTTTGCTGCCACCTTTTA      | 60.11  | 20 | TGCCAATGGAATAGTGATCG   | 59.499 | 20 |
| CGAGAGTGGTGAGAATGTCTG    | 59.415 | 20 | CCCACACTCACATGTACAAAC/ | 59.385 | 22 |
| GGGGGAGGAATGGTAGAGAG     | 59.89  | 20 | TTTTCTACCCAGCCATCTG    | 60.066 | 20 |
| ACTATTGTCGGACACTGGGA     | 58     | 20 | CGAACATGTAGTGGTCAAAC(T | 60.081 | 23 |
| TCGCCTTTAATTCTAGCAACA    | 57.757 | 21 | TGATTGAACAATGAGATCCAC/ | 58.976 | 22 |
| TCGAGAACTTGCTTGGTGACT    | 60.043 | 21 | TTTTTACCTTCTCCAGGGCA   | 59.679 | 20 |
| GGTGCACCTCGGATTTTTGAT    | 59.939 | 20 | ATGTCACCTGCCTTGCCTCTT  | 59.874 | 20 |
| GCAAACATATGGTGGCATT      | 58.362 | 20 | GGTCACACCGATGATGAATG   | 59.769 | 20 |
| TCAACAATTGGAGACAACGC     | 59.697 | 20 | GTTTTGCCTTAGATCCACCG   | 59.569 | 20 |
| TCCCCAAATTCTCTCCTCT      | 60.008 | 20 | ACCCGAATTACCACCCCTAC   | 59.94  | 20 |
| CCCATTAATAATCTTCCGAGC    | 58.647 | 20 | ACACACGAACACTCACCCAA   | 60.047 | 20 |
| CCTTGTTGGGTACAAGTGCT     | 60.028 | 20 | TTCGGCTACCCGATTCATTA   | 60.415 | 20 |
| ACTTCAAGCACTGGAATGAGA    | 57.528 | 21 | TTGCCTTTTGATTTTCGGTC   | 60.053 | 20 |
| TTCCCCAGAAATCGAACAAC     | 59.91  | 20 | GCAACCAAGTTGTCAACCAGT  | 60.066 | 21 |
| GGAAGTACGTCCTCCTGTG      | 60.713 | 20 | TTGACTGAACTTACCCATTT   | 57.16  | 21 |
| GAACAAGGGCAACTCGAAAG     | 59.853 | 20 | AAGAGCTCTCCTCCTCACGA   | 59.279 | 20 |
| TTTGTGTGGGCATGTTCAAG     | 60.552 | 20 | AGACCGGAGTAGATGACCTTC  | 57.321 | 21 |
| TTTTGGAGCATCTCCCATTT     | 59.505 | 20 | TTTTGACATCAAGATAAGGCA/ | 57.459 | 22 |
| TTCCGAAGCTCTTCAAGCTC     | 59.836 | 20 | AAAAATCCAGCAGGCAAAGA   | 59.823 | 20 |
| TCCTTCCAACAGAGGAAAG      | 59.255 | 20 | TTGTCCTCAACTGAAAGAATGC | 59.359 | 22 |
| TTACCCTAAGGGCATCCACA     | 60.323 | 20 | CCACAGCTTTCAACATCACG   | 60.301 | 20 |
| GGCCACTAAAACAGGGATCA     | 59.933 | 20 | AGATCGGAGCTGAGAAAGCA   | 60.24  | 20 |
| GGGTTTACCTATCCCGTGCT     | 60.208 | 20 | TCTCGCCATTCTCTCTTAACC  | 59.983 | 22 |
| CCTTTGCATAGAGTGCGACA     | 60.011 | 20 | TGACCTTGAAACCCCTTGAA   | 60.465 | 20 |
| ACTTGTCGAAGGAGACGCAT     | 59.874 | 20 | AGCTTGTCGAATGCATCAA    | 59.425 | 20 |
| TTGGCTCGTATGCAGTCAG      | 60.011 | 20 | GTAGATCCAAGGGCCGAGAT   | 60.431 | 20 |

|                           |        |                            |        |    |
|---------------------------|--------|----------------------------|--------|----|
| AAGAAAAATGAACATGGCCG      | 59.938 | 20 TCCATTCCGAAAATCAAAGG    | 59.872 | 20 |
| TCGTCACCCTTATCCTACCG      | 59.948 | 20 TTGGCTCCGGGTTGTAGTAG    | 60.125 | 20 |
| GCTTGGAACCTTAGCCCAAA      | 60.249 | 20 CATCGGTTTCATGCACTTGG    | 59.96  | 20 |
| CTCATGTACGTTACGATGGCA     | 59.623 | 21 CATTCCCTCCGAAGGCATTTA   | 60.031 | 20 |
| TGGTAGCTTGAATACAGTATGA    | 57.44  | 23 TGATAGGATACGGCCCATTC    | 59.745 | 20 |
| TTGATATCAGAGCCACTGCG      | 59.972 | 20 TTCTAAATGGTGGCCGAAAA    | 60.427 | 20 |
| CAAGGAGTGGAGGTCGGTAA      | 60.103 | 20 CCAACGGCTATTTACATGGG    | 60.202 | 20 |
| TAACGCTTTTCTTTGACCC       | 59.338 | 20 TGCATGCTATACGGCACTGT    | 60.31  | 20 |
| TTGACGATATATAGTGTGTTGACA  | 58.972 | 27 ACTAATAGCAGGCAAAATGCG   | 59.42  | 21 |
| AAGGAGGTGTTATGAAGGGATT    | 58.028 | 22 CCAAACCTCGGATCCAATGTACT | 60.242 | 22 |
| TCAAGGTAATGGGTCTAGCAAA    | 60.01  | 23 TTCTCCGATAATTTAAACGGATT | 59.662 | 25 |
| TTTTGGGTAATTGGTGAACCT     | 58.34  | 21 CAAAATTTGGGGCAAAAA      | 57.057 | 18 |
| GAAATCGGGTCCTCATCATC      | 59.296 | 20 TCTTAGAAGGGGGCCAAAGGT   | 60.068 | 20 |
| AAACAACCCAAGAAAAATACGG    | 59.307 | 22 ACTCCCAGAGGAAAAATGGGT   | 59.795 | 20 |
| AGGGGACTAGGGTTGAAGGA      | 59.928 | 20 TCAGAGGCACCTCATCCTCT    | 59.945 | 20 |
| ACTGTAGAATCCGGCGAGTG      | 60.277 | 20 TCAAAATCAAGTCTTCTCCG    | 59.298 | 21 |
| CCTAGAAAGAGAAGAAACAGAGC   | 59.255 | 24 GACCTCGCGAAAGAGACAAT    | 59.434 | 20 |
| CACCATCAGCAGAGAAAGCA      | 60.136 | 20 GGCAAGACATGGTGTGTTT     | 58.47  | 20 |
| GCCCTCATATTTGCTTTGC       | 59.688 | 20 TGTAGGGGACTCGCTTCAAC    | 60.255 | 20 |
| GGACGCTCCAGATTGTTTCT      | 59.288 | 20 GGGTTCAGCGTCATAAAAA     | 59.938 | 20 |
| CCTCCAAAAATATGGGCATT      | 58.761 | 20 TGGGTGATCTGAGAGGAAAAA   | 59.656 | 21 |
| CGTGATAAGAACAACCTCATGTCCA | 60.045 | 23 CCTCATCTGTTGTAACCACTAT  | 59.484 | 25 |
| GTAATTCTCACCATCCCCCA      | 59.779 | 20 CGGTGGAAGCTTTGTCTGTT    | 60.291 | 20 |
| ATGGCGTACCTTGCAGAGAG      | 60.419 | 20 TCACGCTAAGGGGTGGTATC    | 59.955 | 20 |
| CCGCCAACTTGATCACCTAT      | 59.955 | 20 TCCGTGCATGAGAGAGAGAA    | 59.656 | 20 |
| ATGGATCCTAAACGGCTCG       | 60.044 | 19 TGCAATGTCATCCTTTTCCA    | 60.049 | 20 |
| AACCATTGAGCAAAAACAATG     | 57.677 | 21 GCAGGTTGATCGAGGATGTT    | 60.081 | 20 |
| AGAGCCGGGTTTAAAGCAAT      | 60.095 | 20 GAGGACACTTGGACCTGGAA    | 60.088 | 20 |
| GTTCTTGAGCAGCTTCAGGG      | 60.134 | 20 GCTTCGTGTCTCTGTGGTCA    | 60.03  | 20 |
| GCAAGCCCATAAAGAGCAAA      | 60.343 | 20 AATTGAGGGAAATGTCAGCG    | 60.074 | 20 |
| TTTGACTTGCAGCCACTCTG      | 60.175 | 20 CCTTTTCTGTATTGGGGCTG    | 59.564 | 20 |
| GGGAAGGTTTGAACCGAAGT      | 60.34  | 20 GGTGGAGGAGGGTATTAAGAT   | 58.847 | 22 |
| TCGTGGCTTTGTTGAAACTG      | 59.881 | 20 CCTCTGGACCGACCATTTTA    | 59.926 | 20 |
| TAAGGGAGTGCTCCACATT       | 59.55  | 20 CGCAGAATCATGAGACACAAA   | 59.856 | 21 |
| TTCTTTTTCCACATTTGAAGTTCT  | 58.422 | 24 GCTGCTGTGTTTGTCTTGA     | 60.032 | 20 |
| TCGCAGCGAAACGTGAAC        | 62.18  | 18 TTGGGTGAGAGAAAGATAGAT   | 57.943 | 23 |
| AGCCATCAACAAATGCAATG      | 59.548 | 20 CAGCAGGCAGATCACAGGTA    | 60.008 | 20 |
| TGAGGAAAGGAATCAGAGCG      | 60.474 | 20 TTGGTCCACCAATCTTGTGA    | 59.935 | 20 |
| ATGGGAAGAGGGGGTATGAG      | 60.147 | 20 CCCAAAAATCTAACGACCCA    | 59.795 | 20 |
| GTCCAAACAAACCGGCATAC      | 60.235 | 20 TGAGGAGCGTTGATCTTGTG    | 59.984 | 20 |
| GCACACGTATTAGGACCTCCC     | 60.758 | 21 AATGATTTCAAACCCGCTG     | 59.938 | 20 |
| CACCCTGTGACAGATACAGCA     | 59.76  | 21 ACATAATGCCTTCCCGTGAC    | 59.82  | 20 |
| TATTATTTGCGCATGCACCT      | 59.197 | 20 AACAAATGATGGACACATGGC   | 59.223 | 20 |
| TACCAACAATCAGCAGTGGC      | 59.722 | 20 GAAATGATTGGAGAAGGGCA    | 60.014 | 20 |
| TGATCAGCGCAGTCCAGTAG      | 60.16  | 20 TCCTTGACCTCCTCTTGAT     | 59.803 | 20 |
| TGTAGAGCACTGCCAGATCAA     | 59.606 | 21 CCACTGCTGTCAGCTCAGTC    | 59.764 | 20 |
| GGGAAAGTTCGATGGTTTCAA     | 59.91  | 20 TGCACAACAATCTGCAATCTC   | 59.862 | 21 |
| CCTTTGAGGATGGATTGATGA     | 59.879 | 21 CGCGTCCGACTCCTTAACTA    | 60.399 | 20 |
| GTTGAACCTTACGTTGCT        | 59.101 | 20 TGAAGTTTGGCAAGGAAACC    | 60.088 | 20 |
| GCCTTGCAAGCCAGTTTATT      | 59.365 | 20 TTGGTAGGCCAGAGCTTGAT    | 59.836 | 20 |
| GGCCCTCAACGTTGGTATCT      | 61.268 | 20 ATGCAATTTTTGTGGGCAAT    | 60.196 | 20 |
| TTGCATGCATAACCCACAAT      | 59.816 | 20 TCAGCATGATATTGCGGAGA    | 60.329 | 20 |
| AGGCTTGAGTTTCTCACGA       | 59.989 | 20 CCAACAAATCCAATGAAAGG    | 59.302 | 21 |
| TCCAAAAACACCCCAATTC       | 59.64  | 20 TCTGGCTTTGATTTTGGTCC    | 60.051 | 20 |
| CCGAAAAGGGTATTGGGTT       | 60.048 | 20 ATCGCCTGTTTTACTTGCG     | 60.264 | 20 |
| TCCTCCGCAGTTAATTTTGC      | 60.209 | 20 TATGTGAGGAGGACGCTCT     | 59.973 | 20 |
| GCAACAGTTGTGGTTGATGG      | 60.008 | 20 TGGCTTGAGTGAAGTTGCAG    | 60.175 | 20 |
| TCGAAGCTTTGCTACTGGCT      | 60.292 | 20 CAGCAATGGAACCAAATTGA    | 59.518 | 20 |



|                          |        |    |                        |        |    |
|--------------------------|--------|----|------------------------|--------|----|
| CAAGATAACCCTTCGATTTAGGA/ | 59.875 | 24 | CGTTCAAATAAGTCTCGGGC   | 59.708 | 20 |
| GCCAATAACCTTCCTTGGT      | 60.187 | 20 | TGGGAACATTATGATGGGAAA  | 60.002 | 21 |
| CGTAAGGCCTACTCGAGCC      | 59.985 | 19 | ACCATGTAAGTGGACTGGCGT  | 60.453 | 20 |
| TTGGTGGCGGTAGGTAACCT     | 59.993 | 20 | CACCGGGTACTGAGGGATTA   | 59.807 | 20 |
| GTACGACATTGTTTGCCTC      | 59.351 | 20 | CACGTGTAATTAATTCGGTTAC | 60.057 | 24 |
| CCTTTGCCCTTTTCTCTCT      | 59.821 | 20 | GGGAATTGGCCCAAATAAGT   | 60.02  | 20 |
| GGAAGTTTTCCACACTTGG      | 59.425 | 20 | CATCAGTCTACAGCCAGGCA   | 60.008 | 20 |
| TGAAATTCATTGATCCGCA      | 60.197 | 20 | GAAAGATGAACCGGAAAGCA   | 60.192 | 20 |
| TCGAAATATCGGGGCATTAC     | 59.757 | 20 | ACTTTTGATGCCGAAGTACAA  | 57.439 | 21 |
| TTCTTTGACCAAAATAGCCT     | 59.952 | 21 | ACACATGTCGCCTTCTGGTT   | 60.577 | 20 |
| TGTGGTAACCGATTGGGATT     | 60.051 | 20 | CGAGGAATTTGAAGAACAATT  | 58.88  | 22 |
| TCAAAGCGATGGAACATAACA    | 59.172 | 21 | TAAGCCCTGAACCTGTGACC   | 60.111 | 20 |
| TGAGAGAGGACCGATTGGAG     | 60.34  | 20 | TTGAACTCACGATCTCACGC   | 59.992 | 20 |
| GCTGATGTGGGAAAATCTGG     | 60.461 | 20 | GCATAAATTGTGTTCCCGCA   | 60.701 | 20 |
| GGATTCCCCCTCGAAGTTT      | 60.257 | 19 | GTTGGGAATGAGCCCAATAA   | 59.762 | 20 |
| AGGGGGTTATCACTGGATCG     | 61.095 | 20 | CACTCGAAGGGAGGAAACAA   | 60.224 | 20 |
| AACCTTCAATTTATAACCGAAAC  | 59.299 | 25 | ATGGGAAGAGGGGGTATGAG   | 60.147 | 20 |
| AAGGAGGTGTTATGATGGGATT   | 58.714 | 22 | GAGTGTGTCGGGAGTGAGGT   | 60.161 | 20 |
| CTCTTTCCAATCTGGCCTTG     | 59.807 | 20 | ACAGGGTCAAATCGAGATGC   | 60.081 | 20 |
| AGAGAGAGAGAAACGCGAGG     | 58.917 | 20 | AGAGGAAGAAAGAAGGGGCA   | 60.319 | 20 |
| AAGTTTTAGCGAACCAGAA      | 59.853 | 20 | GAATGCTGCTGTTGTGCATT   | 59.878 | 20 |
| GCGTCGAGTACCACTTTTCC     | 59.74  | 20 | GCTTGGAGCATCACAAAGGT   | 60.263 | 20 |
| TTTTCTCTGGATCACACCCC     | 59.903 | 20 | AATGAAAGGGACACGTGGAA   | 60.353 | 20 |
| GCGTGGCTCAAGATATCAGC     | 60.915 | 20 | GGAATGGTGTGGGGAATATG   | 59.871 | 20 |
| TGCAAAAGTTTTTGTGGGT      | 58.174 | 20 | GCCCGTAAAAGAAGTCGTTG   | 59.747 | 20 |
| TCTCTCTCCACTCTTCCA       | 59.913 | 20 | TCACCATCACTGACTCTGCC   | 59.827 | 20 |
| AATCCAAGCGTTTGCTGTTT     | 59.752 | 20 | GGCCCTCTACTCCTGTGAT    | 60.477 | 20 |
| CTCTCCATTCTCTCGCTGCT     | 59.851 | 20 | ACGAACCACCACCACTGTTT   | 60.321 | 20 |
| CCTCCTTTAACCAAAAATCCG    | 59.825 | 21 | CATGATTGATTAATTCGTTTGT | 60.03  | 26 |
| GATTGAACTCCGAAAAGGCA     | 60.192 | 20 | TCCATGAAGGAAAAAGTCGG   | 60.044 | 20 |
| GTGGCGGTCAACAGAAAAC      | 60.156 | 20 | CTCCATTTCTTCTTCTGCG    | 59.948 | 20 |
| GGCCAATTTTGAAGCAGAAA     | 60.188 | 20 | AGCTGGCTCAACTACTCCA    | 60.012 | 20 |
| GGAACTGTGCCCAAAGATA      | 59.933 | 20 | CCTAGCTCTTGCCCTTTCT    | 59.976 | 20 |
| TGGACTGCTGTTTACAGAGAC    | 60.178 | 20 | CGCTCCTCGAGTTTCGTAAG   | 60.147 | 20 |
| TCTGTAGGTCTGTGCCACTT     | 59.777 | 21 | TGTAAAGTGAACAATGGAAGC  | 59.677 | 23 |
| CTGCAGATCTAAGGGCCAAG     | 59.971 | 20 | TCTTCGGTATGCTGACGATG   | 59.823 | 20 |
| AAGCAGCGACCAAATCAATC     | 60.221 | 20 | CCAATTTGAATGGTTATCACCT | 60.457 | 23 |
| TAGGTTTTAGTTTTGGGGC      | 60.177 | 20 | ACAGTGGCGAATGTATGCAA   | 60.142 | 20 |
| TGCAAGTTCAGACAAACCCA     | 60.278 | 20 | AGTTTTCGTTGTTTCCAGCC   | 59.218 | 20 |
| TGGTTCAACCTCCCAGATTC     | 59.903 | 20 | TCTGCTTAGCTTTTGGACGTT  | 59.167 | 21 |
| CCAAAGAAGTATTCTCACC      | 59.976 | 22 | GTGAAGTGGGGTAGAAGGCA   | 60.111 | 20 |
| TCATATCCAGAAATCCCCCA     | 60.088 | 20 | AACATGCACACAAGCACACA   | 59.785 | 20 |
| GCATCACCTCAACCCTTGAT     | 59.934 | 20 | TATATCGTGGCACCATTGCT   | 59.019 | 20 |
| AAGTTGCACAATCCTAATGATTA  | 57.046 | 24 | ATGTTTGCATTGCAGTTGGA   | 60.119 | 20 |
| TGATGGCTGACTCACAGCTT     | 59.577 | 20 | GCTTCAGCAAGGAAGATGCT   | 59.723 | 20 |
| GGTGCCAATTGAATGGAGTC     | 60.326 | 20 | GAAACCCGTGAACTAAACGC   | 59.615 | 20 |
| TTGTGGGAAATGATCCAAT      | 59.991 | 20 | TGTGAACCTTTTTCAGCCGT   | 60.668 | 20 |
| CGTGGTTTCGATCGTAAATGA    | 59.542 | 20 | TCCAACGTTGTAACACACACAC | 59.435 | 22 |
| TCTCCTTCTTCTTTCGTGG      | 59.401 | 20 | TGAAGCACAAACCAAGCTC    | 60.032 | 20 |
| ATAACCATACCACACCCCC      | 60.558 | 20 | TGGAATGTGTGGGAAAATGA   | 59.75  | 20 |
| GCTGCTGTAGTCGGAAGTTG     | 58.677 | 20 | GGCAACTTTTGATTCTTCTCG  | 58.962 | 21 |
| GAGTCTACGCTGATCTCGG      | 59.973 | 20 | CCCAATAACTCGCAATAGTTT  | 58.698 | 22 |
| TGACCATAATGCCCTATCA      | 58.794 | 20 | CACAATATTTGAGGGTTATCAT | 58.787 | 25 |
| CCCACGACATCAACTGGATA     | 59.369 | 20 | TTCCAATAACTCACAAAATTT  | 58.364 | 26 |
| CAAACCTAACTGAAATAGGAATG  | 59.802 | 25 | CAAATCAGCAATCGGACAA    | 59.664 | 20 |
| GGAAATTGATGGATTTGGGA     | 59.558 | 20 | GCACTGAGGCAGAGTACACG   | 59.648 | 20 |
| TCAAACCTGCAATCCAAAA      | 59.133 | 20 | TTATCCCTCGACTTTCCCT    | 59.897 | 20 |
| AAATAAGGATGTGTTATGAAGGG  | 58.049 | 24 | TGTTCCCAATTAATAAATGTT  | 57.601 | 24 |

|                          |        |                           |        |    |
|--------------------------|--------|---------------------------|--------|----|
| TCCACCCGAATTGGATAATG     | 60.523 | 20 AAAGAAGGACCTCCCGTGAA   | 60.988 | 20 |
| ATGTGTCGGCCTGAATATGG     | 60.744 | 20 ATGCTCTGGTTTTTGTGCTGGT | 59.74  | 20 |
| AACGTCATTTTATCCGCGTT     | 59.479 | 20 TTGATGGTGGTGGATATTGG   | 59.049 | 20 |
| TGGTGGGTTGAATGCTATGA     | 59.924 | 20 TCAGTTTCGAGTTTTGAAGTTA | 59.033 | 24 |
| TCACAAGCTTGAAAGCAACAA    | 59.641 | 21 GAACTGGTGGCAACTGGATT   | 59.973 | 20 |
| ACGCACTCTCAAGCACACAC     | 60.104 | 20 GATAGGGCCGAAAACAACAA   | 59.938 | 20 |
| CAAAGGCCACATTGGTTAT      | 59.685 | 20 CGTCCACGTGCATAATGAAA   | 60.523 | 20 |
| ATCATCGTACAGCTACCGGC     | 60.125 | 20 GTGGCACCAATCAACTCCTT   | 59.973 | 20 |
| CTAGCCTTTGCCCTTTTCT      | 59.85  | 20 GTTTGGAGAACAGGTAGCGG   | 59.734 | 20 |
| TGTATGGGGAGGGTTATCCA     | 60.006 | 20 CTACGGGAATGCACCAAGAA   | 61.021 | 20 |
| TGATTTAACTTGCATTCTTTTTCA | 58.072 | 24 GCCCACCATTATCTAAACCTG  | 59.737 | 22 |
| GAAGAAGGCGAAGTGGCTTA     | 59.592 | 20 TTTCAATTTCCACCTTCCACC  | 59.767 | 20 |
| CTAGCTCCTTCCCCTTCCACC    | 60.204 | 20 CGACATTAACACACGGTTCG   | 60.027 | 20 |
| ACAAAGTGGTGAGCATTCCC     | 59.973 | 20 AACCCACACATGCAAGACAA   | 60.008 | 20 |
| AGACCAAAGGTCACGGGTT      | 60.776 | 20 GATCATGAACCTCCAGGGAA   | 59.862 | 20 |
| CCCAAGATTTCCATAAGCA      | 59.894 | 20 CCAACACCTACACCAGGACA   | 59.435 | 20 |
| TTGACGATATATAGTGTGTTGACA | 58.972 | 27 AACGATTTCGATCCTGTGAGC  | 60.226 | 20 |
| CAGATTTTAGGATTTTCAGCTCAC | 57.228 | 23 CCCAAATTCAGGCTGTTTCAT  | 59.933 | 20 |
| CTCGGTCCGGATCTTTCAT      | 60.019 | 19 GTTCCAATCCTCCCCGTATC   | 60.526 | 20 |
| TTGAAGATATGCTACCCGGC     | 60.06  | 20 GACTTGATGCATGCTGCTGT   | 60.024 | 20 |
| AACCCCTGTGACCATCTGTC     | 59.817 | 20 CAAAATGAAGGCAATGAGCA   | 59.809 | 20 |
| TTGGAATCAAGTAGAACTGAAA   | 57.228 | 24 AAGCTATCCGCTGAAAAGCA   | 60.117 | 20 |
| GCCAAACGCCAAAGAAAAAT     | 61.298 | 20 TGTCACCGCTCCTAAAAGT    | 59.734 | 20 |
| CGAAATAGTTGGACATCGGC     | 60.469 | 20 TGGAACAACACTTCAACAACG  | 59.643 | 21 |
| AAAATTTGTTTCCCACCAATAA   | 58.744 | 23 TGCTAGAGGGTTTTGTTAATAT | 57.964 | 25 |
| TCTGACGTCTTGTGGGAGTG     | 59.864 | 20 TTGGTGGGAGATTGCTAGAG   | 57.894 | 20 |
| CGAATCGAGTATTGCTTCGC     | 60.876 | 20 TGTTTAATCAGGTAGAAAGTTE | 58.854 | 25 |
| GAATTGCTCACTCCTGCACA     | 59.992 | 20 ATGCGGCGCCTTTTTAAT     | 60.557 | 18 |
| GGATTTGACTGGTTGGGAGA     | 59.903 | 20 TTCTTCCCAATCCTCCTCT    | 60.008 | 20 |
| GTGTAGATCGCCATGGTGTG     | 59.992 | 20 GAATGCTTGGATGGGAAGAA   | 60.014 | 20 |
| CTCCTTTCCCCTCCAAGTTC     | 60.045 | 20 TTTCCCAAGGATCAGACGAC   | 60.05  | 20 |
| CACCCTCAACAAAAGGTCGT     | 60.005 | 20 CTTGCTCGTTTTATCCCTCG   | 59.839 | 20 |
| CAAAGGCCACAATGGTTAT      | 59.685 | 20 TCCTGACGAGCAAGGATAGC   | 60.504 | 20 |
| ACGAATCTTTTCGTGGAGCA     | 60.776 | 20 TTGGACACATAGTTCATGCCT  | 58.09  | 21 |
| TATTTGTCCGGTTCACCCAT     | 60.051 | 20 AATTAGGCTTGTGCGAACG    | 60.264 | 20 |
| TCTAATTACACATACACGTGGGC  | 58.958 | 23 TCCCGAACTCTTTCAGCACT   | 59.989 | 20 |
| AGGCTAGGCTGGATAAGTTTCA   | 59.415 | 22 CATCTTCTCATCTCAACTCCCA | 59.284 | 22 |
| GCCATAATTCCTTTCAAATTGC   | 59.822 | 22 AGTGGCGTCTACGGAATTGT   | 59.621 | 20 |
| CCCATGCATCCATATGAGAGA    | 60.838 | 21 GAATTCGTTTGATCGGGAAA   | 59.878 | 20 |
| AACATTGTTCTCCCCACAA      | 60.21  | 20 ATGTTGAAGAAGCACAGGCA   | 59.445 | 20 |
| CGAACGCTCCAAATTAGGTC     | 59.708 | 20 TGCAAATTAATCAACGGGG    | 60.671 | 20 |
| GACGTTAACAGAGGGGTGGA     | 59.966 | 20 CCGGCATCATCTGCTTTTAT   | 60.06  | 20 |
| GTACTIONCATGCGCTCAGCA    | 60.319 | 20 CCCGAATTCGATACAACAAC   | 59.329 | 21 |
| TGCTTTTGACGGAGTGTGAG     | 60.025 | 20 TTTTGAGGGAAAGTTGTGGA   | 58.173 | 20 |
| AATTAATGAATGGGTGGCG      | 59.66  | 20 TTTTGTGGACGGTGAAATGA   | 59.941 | 20 |
| GCAAGGCAATATCCTTGTGA     | 58.723 | 20 GATCGTGAATGATCTACGTCC  | 59.962 | 22 |
| GTCACGGGTTGAGTTTCAA      | 61.075 | 20 AATTCCTCATGACCCACAT    | 59.854 | 19 |
| CTAATGGCGAAGTGGATCGT     | 60.096 | 20 ATGGAAGAACACCCCATACG   | 59.67  | 20 |
| CATTTTACCGGCATGGTGT      | 60.617 | 20 TCCACCTTCTCACTTCCACC   | 60.088 | 20 |
| AACCCACATGCAAGTTTCGT     | 60.419 | 20 TTGGCTGATTGAATTTATGGA  | 58.096 | 21 |
| TCCATCTCCACGTACGACTG     | 59.701 | 20 ATCGATTACTCCCGCCTTTT   | 59.93  | 20 |
| TCTTCTCTCCCCGTTCAA       | 59.92  | 20 GCGGTCCAGATCTGCTACTCT  | 60.938 | 21 |
| TTTGTGATTTCAGTTTCCCC     | 59.91  | 20 GAAGTGAGGATCGTGAAGG    | 59.655 | 20 |
| TGAATTCGGTCAAGCATCTG     | 59.799 | 20 TTCTGCACACGAGCTCAATC   | 60.144 | 20 |
| TGGTGTGGGAAGAATCACA      | 59.935 | 20 CACAGCAAGCTGAAACAAA    | 60.027 | 20 |
| TGCCTTTCGTCAAAACATC      | 59.697 | 20 AAAGCAATGGCGGATACAAG   | 60.096 | 20 |
| AGAAATTCAAACCCGGAACC     | 60.166 | 20 GCCCTTGTGGATTGATTCA    | 59.756 | 20 |
| TTCTGCCTATCAGGTCGTCA     | 59.394 | 20 GTTTGGGCTTTTAGCCTTCA   | 59.338 | 20 |

|                           |        |                             |        |    |
|---------------------------|--------|-----------------------------|--------|----|
| TCATTTTACTTTTGGGGCGA      | 60.427 | 20 GGGATTTATTTTGGGGGTACA    | 59.774 | 21 |
| GCAATGATGGCTTTGGATTT      | 59.907 | 20 CCATCTTCCGTTGTGCGATTT    | 59.933 | 20 |
| TGCGTTTTGACGATATATAGTGTT  | 59.092 | 25 TGAAGTTTGATTTCCCAGCA     | 59.247 | 20 |
| TGGCTTTGCACATAATTTTCG     | 59.702 | 20 TGAAGAAAAGGTTGCTGCT      | 59.993 | 20 |
| TCTTCTCTCTCCCGTTCAA       | 59.92  | 20 GCGGTCCAGATCTGCTACTCT    | 60.938 | 21 |
| CACCCCACTTCTTTTCTTGA      | 60.081 | 20 TCTTCTTCTCCTCCCTGGGATT   | 60.008 | 20 |
| GACATGGGCACCTTATTGGT      | 59.676 | 20 TGTTTGTTATGGAGTGCCA      | 59.964 | 20 |
| ACATGAGCAGCATCGAAATG      | 59.83  | 20 ATTCTTCAATCAAGGCGTGG     | 60.074 | 20 |
| AAGGAGGTGTTATGAAGGGATT    | 58.028 | 22 AAGGCTCTGCATGCTCTTTT     | 59.222 | 20 |
| ATGAATGGCCATATTGGTT       | 58.977 | 20 GGGGAAATGGTCTTTCAAT      | 59.996 | 20 |
| TTTACGATTTGATAGCCCG       | 60.054 | 20 AAAATGGTTATTACTGGAACGC   | 57.304 | 22 |
| TTGGGGTTACCTCGAATCAA      | 60.301 | 20 TATGTGTGATTTTGGCTGGG     | 59.395 | 20 |
| AGAGTAGCACGACCCGAAGA      | 60.012 | 20 AACCACAGGATCGAAAAATGA    | 59.42  | 21 |
| TGAGATAAGGGGGTGTTTGC      | 59.933 | 20 CGATAAGGGCCTAGAAAAACA    | 59.64  | 22 |
| TGGTCTACTTCTATGGCGGG      | 60.088 | 20 CTTTTGTGAGGACTGAGGGC     | 59.844 | 20 |
| TTTGGTTTGGTTGGGATTGT      | 60.344 | 20 TGGGTTTATTCCCAAATGT      | 60.029 | 20 |
| TCCCTTTGATTCCCTTCTCA      | 59.6   | 20 GCTGCGACTTTCAACCAAAT     | 60.257 | 20 |
| GGCTACCCCTCTCGCTCTAC      | 60.37  | 20 CAGCTTCGATTTAGGGTTTCG    | 59.839 | 20 |
| GCTGATGTCGATTTTCCAGAT     | 59.143 | 21 CGCTTCCGGAGTGGATAATA     | 60.053 | 20 |
| AATTACAATGTTTTTCCAATCCC   | 58.246 | 23 ATAGCGGACACTTGGACCTG     | 60.134 | 20 |
| CGCATCAAGTTCCTCATCT       | 60.218 | 20 TCTTCCGATAGGTGTTGGG      | 59.926 | 20 |
| TCCCGTATACCTCCAATTTACA    | 58.385 | 22 TCGGTCAAATTCAACTCGT      | 58.201 | 20 |
| TCACATGTGGCGTCTTTTTTC     | 59.697 | 20 TTGTTGTTGGGTTGTTGGTG     | 60.292 | 20 |
| CTGTGGTGGAAAGGGTTGTCT     | 60.002 | 20 AGGTCTAGGCCCTCAAATC      | 59.536 | 20 |
| AACAACATCTCCAGCCCCA       | 59.55  | 20 AATCGAACTCTTGCCTTGTCT    | 60.022 | 20 |
| AGCTCTGGACTCTGCGTTTC      | 59.751 | 20 ACGTAATTTGGCGGTCTCAG     | 60.132 | 20 |
| CAAAGAACTTGGGACGGAG       | 59.705 | 20 CAAGACATGCGAATTGATGG     | 60.073 | 20 |
| AATTCTTCTCCGGAACACC       | 60.306 | 20 GCCTTCAACCAGACCACATT     | 59.973 | 20 |
| CTTACGGGGTTGTCCTTTA       | 59.964 | 20 ACTTTGGCGTTGCTTGTTTC     | 60.292 | 20 |
| AATCCGTGAACCATTCCATC      | 59.611 | 20 CTTTTCACACGAGGTCACGA     | 59.873 | 20 |
| CCTAGGAGTTCTCGCATTG       | 59.83  | 20 TGCAATCCAGTGAAAACCTCTG   | 58.912 | 21 |
| GGTTTGTTTGATTTGTTTGG      | 59.211 | 21 TCATGTTGCATATTATTTGGCA   | 59.256 | 23 |
| GGCGAGAGCTATGTGGAGAC      | 59.981 | 20 ATTTCCCAACAAACAGCAA      | 60.344 | 20 |
| CAAGATAAGGGAGCTGGCAC      | 59.836 | 20 GGCACACATCTGTGACATCC     | 59.97  | 20 |
| TTGAGATTGCGAATTCAACG      | 59.809 | 20 CGTGCTCACCATGAAACCTA     | 59.716 | 20 |
| GGGTTGGATCAACCACATTT      | 59.508 | 20 AGTTGGCACCAGATCACTCC     | 60.12  | 20 |
| CATCCACACAAGCACACACA      | 60.209 | 20 TCGTCACTATCTCGTCGTGG     | 59.855 | 20 |
| TGCACGTAGGCATGTTCAAT      | 60.142 | 20 AGCGGTTATTACCGGATCG      | 59.93  | 19 |
| CCAACCTCAGTGTGTGAGTGGTT   | 60.111 | 22 CCCTTTATCAACTTCGGCAA     | 60.067 | 20 |
| AGGATCGAATGAACAAACACG     | 59.985 | 21 CAAGGCTTGAAGCTGGTAGG     | 60.008 | 20 |
| TGTTCTGCCTGTTCTGCTTG      | 60.175 | 20 AACAAACGGTATCACCTGAACG   | 59.906 | 21 |
| GGTTATTAGTTATTACGGATTTAAI | 58.826 | 27 TTCGCGTGTGAGAGTTTTTG     | 60.027 | 20 |
| TAGGCAATGGAATACCTCCG      | 59.916 | 20 CACGGTTAGGCTCGAGAGAG     | 60.149 | 20 |
| CAATAAATTGGGGTTCGGCTA     | 59.789 | 20 TGTGAAGGTTGAGTTGGCAG     | 59.873 | 20 |
| GACTAGAGTTGGTTTCTTAAATGA  | 57.439 | 27 TGCGAACCTGGGTACACTTG     | 59.758 | 20 |
| AAGAAAATGGGCAGAAACGA      | 59.685 | 20 CGGCTGGGTACCAACTACAC     | 60.431 | 20 |
| TCATATATAAACGCCGGGA       | 60.13  | 20 GTGAAGGATGGATGCAGGAT     | 59.893 | 20 |
| CGAAAACATTTACATACGATGCC   | 60.593 | 23 GAATCGGTGAACAGTTCGGT     | 59.973 | 20 |
| AAAAACGAGCATTTTAGGGTTA    | 57.155 | 22 CACCAAATTTTCATCATTTTTAA1 | 58.865 | 26 |
| GTGAAACCAGACGACTGCAA      | 59.88  | 20 TTTCTGTTCCCGATCTGAGC     | 60.34  | 20 |
| TAGGTGTCGGATTTGGGAGA      | 60.452 | 20 TGGGAGAATCGAGATTTGTTTT   | 59.945 | 22 |
| AAGGTCCGCTCTTCTTTA        | 60.2   | 20 AAATTTGAGGGGGTTCATCC     | 59.996 | 20 |
| TAATTGAATGAACCTGCCCC      | 59.762 | 20 AGTCCCTTTTTGTTGCCTGA     | 59.711 | 20 |
| GGCTTCTAAGCTGCCGATAA      | 59.592 | 20 CATGAAGCGCTGATTGTTGT     | 59.871 | 20 |
| CTTGTGGAATGAAAGGGTGG      | 60.345 | 20 TGCATGCAAACTGAGCTTC      | 60.142 | 20 |
| GGAGGTGAAGATTGGGTGAA      | 59.903 | 20 ACGCTAACTTCCAAAATGCC     | 59.229 | 20 |
| TCCTTCTTGCTCCTTTTCC       | 60.683 | 20 CCGTGTGCATCACTACTTTGA    | 59.773 | 21 |
| AGCGTTTTTGCCTGATATT       | 58.992 | 20 GCACCAAATAATTCGACTTGC    | 59.605 | 21 |

|                          |        |    |                        |        |    |
|--------------------------|--------|----|------------------------|--------|----|
| ACCGCTTACATTCCGATTTG     | 59.96  | 20 | CTTAGCGAGCTTCAGGCATT   | 59.752 | 20 |
| AGCAATACTGTTTCCACCGC     | 60.14  | 20 | GCATTGATGGGATTCCACTT   | 59.756 | 20 |
| TTCAGCACTCCATCAGCAAG     | 60.136 | 20 | ACTTCCATTTTCTCTGCGA    | 59.813 | 20 |
| TGGCCAAAACATCAACTCAA     | 60.088 | 20 | TACCAGTTCAAAGGGTGGG    | 59.824 | 20 |
| GAGGTCTTTTGATCCCCACA     | 59.903 | 20 | GGGTTTGGAGGGGTATCCTA   | 60.011 | 20 |
| GGTGACGATGGTGATTGATG     | 59.769 | 20 | TGCATGCAAATAAGCTCCA    | 60.545 | 20 |
| GTAGTGAGTAGTCCGCCCG      | 59.757 | 20 | GATTTGCGTGGTCCATTGAT   | 60.733 | 20 |
| GTGACTTTTTCTGGGACGGA     | 60.088 | 20 | TCAGCCTCCATCAATTATCAA  | 59.547 | 22 |
| ATAGGGATCGGTGACAAAGG     | 58.861 | 20 | AGGGGTGACTTCATGGAATG   | 59.779 | 20 |
| GATGCAGCTTGGTCTCCTTC     | 59.957 | 20 | GAGACAGGCCTGGAAAAGAA   | 59.405 | 20 |
| CAGCACCAGAATTGCTCCTA     | 59.024 | 20 | CATGCTGCCGGAAGTAATTT   | 60.096 | 20 |
| TTGTCCAAATAATTCATCACCAA  | 59.221 | 23 | TGGACATATGGAGGGAAGGA   | 60.272 | 20 |
| CAACTCTTCGCCATCTGGTT     | 60.255 | 20 | TCCCTCTTGAGTGAGCTTTGA  | 60.119 | 21 |
| GGGACTGCACAATATGCCTC     | 60.492 | 20 | GCATTTTGGGTACACCTGCT   | 60     | 20 |
| TTGCTGCCACTACCTGTGAA     | 60.449 | 20 | ACAACAAGAACCAGGCATCA   | 59.139 | 20 |
| ATGGGCTGTCTCTTGATCA      | 60.622 | 20 | ATGGACTCCGAGGATGATGA   | 60.439 | 20 |
| TTCCATCCGAAATCCGAATA     | 60.225 | 20 | AGGGTTTCAAGAATCCACCC   | 60.169 | 20 |
| TTATACAAATGGGCGCATCA     | 59.92  | 20 | TTTTTGACGATTTTGCCTC    | 60.053 | 20 |
| CCTGCATTTTCGCAATCATA     | 59.662 | 20 | CCGACCTCGGTAAATGCTTA   | 60.089 | 20 |
| CCTTTTCACAAGTGGCATCA     | 59.691 | 20 | GCATTGTGATGTTGTTTGCC   | 59.979 | 20 |
| TTGGTTACGGGAATTGCATA     | 58.887 | 20 | TCCAATCGAAGATTCGGAAC   | 60.014 | 20 |
| AAATTCAATGACAATTGGAGGAA  | 59.708 | 23 | TTTGTAGAGATCTTGACGGGA  | 58.834 | 22 |
| TGGCATTAAATATTAGCCCC     | 60.018 | 21 | TGTGTATGAGAGCCGCAAAA   | 60.401 | 20 |
| GCCAATAATTTTAGCAAGCAA    | 58.513 | 22 | AGCTCTTGCAACTCCTTTGG   | 59.615 | 20 |
| AGGGACGAAGACCTTTGGTT     | 59.972 | 20 | CTGGCACATCTGCAGTTCAT   | 59.862 | 20 |
| CATGATCCCGTGAGATACCA     | 59.322 | 20 | AGCTGTGGGAGATGGAGTGT   | 59.713 | 20 |
| CACCACCATCACCTCCTCT      | 59.962 | 20 | GTGGATGGTCCTCAGCTGTT   | 60.12  | 20 |
| AAGGTATGTCAATTTGCCGC     | 59.967 | 20 | TGTGGAAATTATGGTTCCGC   | 60.701 | 20 |
| CGAATATGCAATCACAAAGAA    | 59.964 | 22 | CGAGAGGAAGAGAAAAATGGC  | 60.186 | 21 |
| CACGAGATTTACGTGGTTCCG    | 59.195 | 20 | GGCTTCTCTTGCCTCTCAT    | 60.873 | 20 |
| CTGCATGCACCTGATTACAA     | 58.288 | 20 | GCGTTCACACCTTCAGCATA   | 59.871 | 20 |
| TCACCTTCACTTCTGCTCA      | 59.545 | 20 | CGCCCTCAGATATGTCTCCA   | 61.168 | 20 |
| CATTTGTTGTGTTTTCTTGGA    | 60.011 | 22 | CCCATTAGCTTCATCCTCA    | 60.029 | 20 |
| ACACACACCGTGGACGTAGA     | 60.072 | 20 | CTTCAAATTTTGTGCCCAT    | 59.801 | 20 |
| CGTTAGACCTGTGGAGGGAA     | 60.103 | 20 | CAATACAAGTCCGAGCTGA    | 60.011 | 20 |
| AAAGTGCACAGAAAAATGACTTT  | 59.744 | 24 | TCCGATTTTAAACCCGAAAA   | 59.407 | 20 |
| CCAGCTCCTTACACTCGC       | 60.156 | 20 | GCAACCAGGTAATCATTGGC   | 60.526 | 20 |
| AAAAGTGAAGCCCACACACC     | 60.012 | 20 | AAACCCCAACGGACAGATTT   | 60.59  | 20 |
| ACAAACACGGAGATTTCAACAA   | 59.517 | 22 | TTCCACCTGATCCTGGTTTC   | 59.903 | 20 |
| GCGCTGTAGATCTAACGGATG    | 59.881 | 21 | ATTGCATCCACGGCTTACAT   | 60.361 | 20 |
| ATTTGGGTGTAGAGAGGGGG     | 60.183 | 20 | ACTTGGTACGCAGTTGGGAG   | 60.171 | 20 |
| CGCCAACAAAAATCTCCACT     | 60.11  | 20 | GATAAAACAGGGGAAAGGGC   | 59.777 | 20 |
| TTGTTGAAGGGTGGTTGTGA     | 59.976 | 20 | GGGCATTTGTATACCCGTTG   | 60.074 | 20 |
| GTTGCTTAGGGTCTGTTGGC     | 59.74  | 20 | GAAAGTATGGCTGCTCCTCG   | 59.978 | 20 |
| TTGCTTAGGGTCTGTTGGC      | 60.249 | 20 | TGCTCCTCGTGCCTAATCTT   | 59.978 | 20 |
| ATTTTTACCCCAAGTCCCA      | 60.403 | 20 | TCGACGATCACAATTTGTCC   | 59.502 | 20 |
| TCGTTTGGCACGTTTTGTAG     | 59.769 | 20 | CCCAAATTTTGACCATTTC    | 59.111 | 20 |
| CCTTGATTTCAACTGTCTCCG    | 59.72  | 21 | AAAACACATATGGTGACACGG  | 58.269 | 21 |
| TAAAACCGACACCCACTCC      | 59.83  | 20 | TCGGTGGCTGGAGAAAGTAG   | 60.388 | 20 |
| AGTTTCGATAGTTTTCATTTATTT | 57.978 | 26 | CCATAACTCCAAACCCAAA    | 59.657 | 20 |
| CAAGCGATGTGTGGTGAAC      | 60.16  | 20 | TCACATGGAAACATGTGGCT   | 59.967 | 20 |
| AGATGCAACATAGGGGAAGC     | 59.154 | 20 | GGAATTTAATTTCTGGCCCC   | 59.621 | 20 |
| GAAAGCATCGTTTTGGCTC      | 59.829 | 20 | CCAAAAGCTGGGTGAATC     | 59.711 | 20 |
| ACAATATGGTGTGGGTATTAAG   | 57.055 | 25 | TCTTAAAAGGGAGGGGCTAAT  | 58.295 | 21 |
| TCAGTTTTTGAGTTATGACGTTTG | 59.192 | 25 | CGTTTTAGGTATTTTGATGTTT | 58.937 | 24 |
| GAAATATGCATTTGTGTCACC    | 59.347 | 22 | TTATTTTGCATTTTCCCGC    | 59.913 | 20 |
| CACAATTCAAAATGAGTGAACC   | 58.528 | 23 | TGGTTACAAGCAGTGGCGTA   | 60.316 | 20 |
| TCTCTACACATAGAGACCAATTT  | 58.467 | 26 | ACATGGATTGTGCATTGAC    | 59.379 | 20 |

|                          |        |    |                        |        |    |
|--------------------------|--------|----|------------------------|--------|----|
| CACGGACGGGAAGAGATAAA     | 60.066 | 20 | AGGGGAGTGATCTCATGTGG   | 59.92  | 20 |
| CTGCCTCTTTCCACACCATT     | 60.111 | 20 | AGTAGCCGAGAAGGGTGGTT   | 60.132 | 20 |
| GCGACAATAACTGTCTGCGA     | 60.019 | 20 | TGCAGCAATTCAGTTCAGATG  | 60.003 | 21 |
| GCCTCCATAACGAGCTCATAG    | 58.965 | 21 | CCAATCCCACGATTTTTGAA   | 60.671 | 20 |
| AGGTGAGGGGTGCATGTTAG     | 59.989 | 20 | GTATGTGTGGCTGTGGATGC   | 59.999 | 20 |
| GCACAACGGCTATCTGGTTT     | 60.14  | 20 | CCTATGGTGGTATGGTGTGGA  | 60.501 | 21 |
| TGGCTCATTATGACCAAAA      | 60.049 | 20 | TCACCACCTTCACTGTGCTC   | 59.712 | 20 |
| CTACTTGCCTGCTGGAAGT      | 59.658 | 20 | TCTTTTCGTTGGCGATTTCT   | 59.823 | 20 |
| GGCATTCAAATTTCAAATCA     | 59.765 | 21 | TGGTACCTCCTCCTAATTTCC  | 57.165 | 21 |
| TTGTCTATTCTCCGATGGC      | 60.036 | 20 | ATGATGGGAAGGGTGGGTAT   | 60.272 | 20 |
| CAAAGGATCGAAAGGGTGAG     | 59.665 | 20 | AGCGAATGTTGTGAGAAGCA   | 59.596 | 20 |
| CCATCTTGATGCAGGTGACA     | 60.688 | 20 | ACTCGACACAAATCTGCACAA  | 59.354 | 21 |
| CGGTGGAAATGGCTGAGTAT     | 59.955 | 20 | CGGTTTTCGGTTTTCAAAAT   | 59.839 | 20 |
| CGATCCCAATCCCCTATTCT     | 60.11  | 20 | AGGGCTACAACCTCTCAGCCA  | 60.012 | 20 |
| AATTCAAGCATTTTCCGCTG     | 60.209 | 20 | ACCCGAAGCTACGTAAGCAA   | 59.904 | 20 |
| GCTGTCCACCATCTCCTCTC     | 59.799 | 20 | GCTTGAGTGCCTGTGTGAGT   | 60.104 | 20 |
| CCATAGTCCAAGATGTGGTGC    | 60.39  | 21 | ATTGGGAAGGGAATGTGTCA   | 60.173 | 20 |
| TGGATGGATGGATTAGCAGA     | 59.027 | 20 | CTAAACGACACCAGTGGCAG   | 59.36  | 20 |
| CCTCACCTTCTCCTCTTCCC     | 60.186 | 20 | TGCGGAAATTATGCCATTAAG  | 59.941 | 21 |
| ATGGGAAGAGGGGGTATGAG     | 60.147 | 20 | TTTCTTTGGACGAAAATGGC   | 60.053 | 20 |
| TTTTAAAAGGATTTATGGCATGAT | 58.122 | 24 | CATTTAGGCAGTGGCATTAA   | 59.688 | 20 |
| GGAAGAATGGACCCTAATTCAA   | 59.311 | 22 | AACATTTTCGGTTCATTGGG   | 59.662 | 20 |
| CGCTTTCACCAGAATCTTCC     | 59.813 | 20 | CCATTTTCCCTCCTCCATCT   | 60.264 | 20 |
| AAGTGTTCACAGACCG         | 60.005 | 20 | TGCATGATCGATATTGTAAGGA | 58.135 | 22 |
| CGCCAATTAATCATAGCCGT     | 59.95  | 20 | AGCATGAAATCTGGAGCGTT   | 59.843 | 20 |
| AGGCCATGTGTTTCGAGTTTC    | 60.119 | 20 | CCATTTCTTTTTCGATTCC    | 58.483 | 20 |
| AAGGGTTATCACCTGATTTTCTC  | 57.73  | 23 | GGTGTATGTAGGTCCGCCAC   | 60.263 | 20 |
| GATGGTGGACAAGAGAGGGA     | 60.048 | 20 | GAATTGACGGCCCTAAACAA   | 59.938 | 20 |
| GAAGTGTATGCGTTTTGACAAT   | 58.249 | 23 | CTATTGTTTCCTCCGCCTTG   | 59.702 | 20 |
| ACTGTCGGCAGAAAAGCAAG     | 60.571 | 20 | TGTGAATCAAGTACCCCGAA   | 58.973 | 20 |
| AAGAAAGGGGGAAACAACCTGA   | 59.963 | 21 | TCGAACCTGCCCTCATTATC   | 60.036 | 20 |
| AGTGTGTGTTTGTGCGTGTG     | 59.234 | 20 | CCACCAATCACCTCCTTCTC   | 59.505 | 20 |
| GGTCTTCCCCTTACCAAACC     | 59.668 | 20 | GGTGAGAGGAGCAGGAGTTTT  | 59.87  | 21 |
| TCCGACCGGTTTTTAAATCA     | 60.294 | 20 | AGTCGGATGCACGCTACTGT   | 60.886 | 20 |
| ACGTTTGATTTTTACTAGAACCA  | 59.141 | 24 | CTCTCTGCTGGCCAAAAGTC   | 60.134 | 20 |
| AACAACACAAAACCTACAGCA    | 59.58  | 22 | CAGCATTACAGCCGTGAGAA   | 60.011 | 20 |
| CCAAATTTACGTAGACCCAA     | 59.847 | 21 | ATGCAACTGACCTTCGTTCC   | 60.119 | 20 |
| TGCAGGGTATGCATGTTTGT     | 59.995 | 20 | GCAAATAGGCTTGTGGCTTC   | 59.851 | 20 |
| ACTCCCTATCCAACCTGCGAA    | 59.694 | 20 | CGTGTTTTTCCCCCTTTTTTC  | 60.674 | 20 |
| TGTGGCTTCTGCTGTTATGG     | 59.864 | 20 | TGTGTATCCATTGTCACGGG   | 60.24  | 20 |
| GAAGACCGAGGAGATTGTGC     | 59.81  | 20 | CAGCCAAATGTTGGGTTAGC   | 60.502 | 20 |
| ATCGCCTTACTCCATTCCA      | 59.528 | 20 | TCCACAACCAGGGGTAGAAC   | 59.82  | 20 |
| TTCGTGGAAGGGAGAGATTG     | 60.187 | 20 | CCTCGACGTTTTCTTCTTG    | 59.846 | 20 |
| AAGGCCCTTGGATTTGAGAT     | 59.903 | 20 | ATTTGTCTGCATACGGGCTC   | 60.103 | 20 |
| TTGTCCGTCAATATTAGGGATTT  | 58.809 | 23 | TTGGATGTTCCAAATACAGGC  | 59.815 | 21 |
| CGCCCCAAGATTTGATAATG     | 60.281 | 20 | TGTTGGACGAAAATGTCCTT   | 60.353 | 20 |
| TCACACAACCTCTGCGTCTCC    | 60.03  | 20 | ATCCCATTTCCCTCCTTGAC   | 60.133 | 20 |
| ACCAATGCACATTTCTGCT      | 60.526 | 20 | GGATTTTCTGAATTGTGGGTG  | 59.278 | 21 |
| GATTTCCAGGCATGAGGTGT     | 59.934 | 20 | CATGCAACAAAACACCTTC    | 59.024 | 20 |
| TGCTTTCGGGAAAAGCATAA     | 60.691 | 20 | AGACCGAGGCTAGCAAGAAA   | 59.218 | 20 |
| TCAAAGCTCCACAAGCTCCT     | 60.134 | 20 | ATGCATCCGTTAGATCAGGG   | 59.917 | 20 |
| TCCCACCTCCATCTCATCTC     | 60.008 | 20 | TCCAGCTGACGAGCATACTG   | 60.16  | 20 |
| TTAGACCAATCCCAGATCCC     | 58.787 | 20 | TCTGAATCTGATTGCGTTGC   | 59.955 | 20 |
| TGGGAATTGGTTTTGAATG      | 60.535 | 20 | CCGAGGACACATAAGCCTCA   | 61.196 | 20 |
| TGTCGTAGCATTTTTGTATGTTTT | 57.909 | 24 | TCCATTTCCGAAAATCGAAAG  | 60.009 | 20 |
| TGACGCCTAGAATCATCGAA     | 59.375 | 20 | GTAGGGTTTAAAATCGCGCA   | 60.095 | 20 |
| TGCATTGGCAAAGAAAGATG     | 59.809 | 20 | TCCGGTGAAACATTGACAAA   | 59.941 | 20 |
| GTGCAACGCACGTGTAATAA     | 59.662 | 20 | GATTAAGTTCTTAAGTCCTGG  | 59.716 | 24 |

|                          |        |    |                        |        |    |
|--------------------------|--------|----|------------------------|--------|----|
| GATTTCAATGGACAGGCACC     | 60.326 | 20 | GAGATGGTTGCACCATAACG   | 59.002 | 20 |
| CAGCCGTTTGTCCGATTTAT     | 59.96  | 20 | GGCACCAATTCTCATAATACAC | 58.891 | 23 |
| GGAAAAAGAAGATTGCACCTG    | 58.823 | 21 | TGGTCGCCGTGTCTGTAATA   | 60.134 | 20 |
| TCATGGGAAAACATGACAACA    | 59.808 | 21 | CGACAGGTGGGAGAGTCATT   | 60.112 | 20 |
| ATGCAAGGCATGTGCAATTA     | 60.103 | 20 | CACCGTTGTCTTTAAGCCGT   | 60.168 | 20 |
| GGGATTTTAGAGAGTATTGTGACC | 59.919 | 25 | ATACGGATCTCTGCCTCTCG   | 59.41  | 20 |
| CCCCTTTCTCTCCCTACAC      | 59.928 | 20 | GAGGTTTGCTTTTGTTGGA    | 60.088 | 20 |
| GGCCCACTTCTTGTAACA       | 59.971 | 20 | GTGAAATCCCATCCACAACC   | 60.034 | 20 |
| TCGACTTTAACCGTGGGTTT     | 59.971 | 20 | AAACACGAGCAAAACGACAA   | 59.366 | 20 |
| CACATGGGCATATGTGTCAA     | 60.25  | 21 | GGGAAGAGGAGGTATGAGGG   | 59.89  | 20 |
| GGGTTGACATGGCTTCGTAT     | 59.82  | 20 | GAAATAAGGAGGTGTTATGAA  | 59.323 | 24 |
| TCCCATTTCTGTGTTCTTCG     | 58.695 | 20 | GATGTTTTCCGGCTCAGTGT   | 60.119 | 20 |
| GCCTCCTCCTCCCTCTCTT      | 59.898 | 19 | GTGACGGTTGAGAATGACGG   | 61.527 | 20 |
| TTTTTACCCATTTTGCCT       | 60.519 | 20 | GGCTCAACCACATTCACTCA   | 59.682 | 20 |
| TTGCGAGTAATCTTGAGCGA     | 59.712 | 20 | GAGTTTTCATCTTACCTTGAGG | 58.333 | 23 |
| AATTGAGAGTAGCCGACCCC     | 60.464 | 20 | TCAAACGCATAAATAGTGCA   | 58.436 | 22 |
| CCACCCTACATAAAGCGGAA     | 59.953 | 20 | CATCAGATCCATACTCGGCA   | 59.629 | 20 |
| AACAATTGAGGAAGGATGATGAA  | 59.99  | 23 | TGTGTTGGGCTAAATTGGTG   | 59.439 | 20 |
| GCATGTATGCATATCCCTGG     | 58.823 | 20 | TGGGTATGTGATGTGGATGA   | 58.095 | 20 |
| CACTTTTCCAACAACATGCG     | 60.149 | 20 | TTGCTAAGTTGGGCCTATCG   | 60.223 | 20 |
| TCAGGGACTCATTTCCEAAC     | 59.903 | 20 | TGCTACTTCAGCGTCACCTC   | 60.03  | 20 |
| AGCAATCAGCTCCTGCAAAT     | 59.985 | 20 | CAAGCACGCCTCTCTTCTTC   | 60.277 | 20 |
| TACCAATCGGCAGAAGTTTG     | 58.771 | 20 | GTTGTTTTCATGACATTTGAGG | 59.336 | 22 |
| CGAATGAGCTCGATTTGGTT     | 60.214 | 20 | GCGAAGCACGTTTCAGTTCT   | 60.581 | 20 |
| ACACGGGAGACATTGCCATA     | 61.329 | 20 | CCGTTGCAAGAGTAATGGCT   | 60.27  | 20 |
| TTTAACCGAACGAAAATGCC     | 59.943 | 20 | ATCAGCAGGCGAGGTGTTAC   | 60.285 | 20 |
| AGATCCGACTGCCATGAAAC     | 60.081 | 20 | TTGATTAGTTCGTGCAACGC   | 59.879 | 20 |
| TATGAATTTTGGCCCTTGA      | 60.26  | 20 | GCCATATTCACCTCCACCAT   | 59.635 | 20 |
| AACTTTTTGGTTGGCAAGGA     | 59.587 | 20 | GTTTGGAGAGAGGATGTGGG   | 59.505 | 20 |
| CAAAAATGGTGGATCCAAGG     | 60.162 | 20 | ACACACAAATGGTTTGCCT    | 60.277 | 20 |
| AACAATGTTTCCCAATCCA      | 60.029 | 20 | TGGGTTGGTTTGCTTACCTT   | 59.471 | 20 |
| TGACGACCTTGTCTATCCAAC    | 59.525 | 20 | TTTACGGGTCAAAGAAACCA   | 59.478 | 21 |
| GCATCTCTTGCTCTCTCATTG    | 57.78  | 21 | TGGCTTGTGAACGTGTAACC   | 59.615 | 20 |
| GGAGATGCACTTCACCCAAT     | 59.934 | 20 | TAAACGAAACCCCGGATCTA   | 59.406 | 20 |
| AGAGGCATTTTGTGGGAGC      | 59.316 | 20 | ACTTGGAAAGTGCAGGGATG   | 60.111 | 20 |
| CAAAACCCGTTACATATCTTTGG  | 59.667 | 23 | TACCATCATTCTTGCCATT    | 57.887 | 20 |
| GAAGAAGTGGTGGCGGATTA     | 60.074 | 20 | CAAATGCGTCTCCAGTCA     | 59.84  | 20 |
| CATTCGGAATTCATTTGGGT     | 59.622 | 20 | TATCGGTTATCATCGGATCG   | 58.404 | 20 |
| GGGAGGAAGAAGAAGAAAAGG    | 58.451 | 21 | GGAATTTCTTGATACACATAC  | 59.918 | 26 |
| TTGGTGCTCCACTATATTGCC    | 59.974 | 21 | AATGGGATCTACATGCTGGG   | 59.773 | 20 |
| AGATGCCACTAACCTTGAA      | 57.268 | 20 | TTCTTTGTCGGCTTTTCTTT   | 59.861 | 20 |
| TCGAGATTGTGTTTGGGTGA     | 60.088 | 20 | AGTTGATGAAGCAGTGGCCT   | 59.874 | 20 |
| GTAACCGTCATGTTCCGGTC     | 60.24  | 20 | CCTCAAGACGCCACTCTCTC   | 60.135 | 20 |
| TATGAGATGTGGGGGAGAGG     | 59.879 | 20 | AGGGTATTTAAAGGCACGGG   | 60.197 | 20 |
| CAACTCTTCCCTCCCAATTC     | 59.926 | 21 | CGTTAAGATCAACGCGGATA   | 58.794 | 20 |
| AACGGTGAGTTATGGCAAGC     | 60.14  | 20 | CATGGAGATCGTACGTTTCGT  | 60.008 | 21 |
| TGTTAGAAACAAACGCGGCT     | 60.802 | 20 | CGATCTCCGAAGCTCAAAC    | 59.955 | 20 |
| GCTTCAATTGAGCAGAAGCC     | 60.103 | 20 | TTCCACAGTTTTGTACCCACTT | 59.827 | 23 |
| ACAATTACTCGAGCATCGCC     | 60.243 | 20 | TACACGCATATTCGCACACA   | 59.741 | 20 |
| ACAACGTGATACGCTGCAAG     | 59.935 | 20 | GATCGGAAGGATAAGAGCCC   | 60.003 | 20 |
| GTGTGCGTTAGAGAGAGGGC     | 60.02  | 20 | CGAGCTTAAACTGTTTCGGC   | 60.018 | 20 |
| ACCATATTTAAGGGTTATCACCTG | 57.552 | 24 | TGGCGTTAGATCATGGAGAA   | 59.226 | 20 |
| CTAAACCTTATCCCCACCG      | 60.545 | 20 | ACATTCGGATTTTGAAACGG   | 59.801 | 20 |
| CAAAATTTGGAACCTGTCTTCA   | 59.108 | 22 | TGCGCTGTGAATGGAAAATA   | 60.215 | 20 |
| CCAAGAAAATCCCAGAAGCA     | 60.184 | 20 | CTTCTGCTCCATCCTTTTGC   | 59.955 | 20 |
| ATATTCTCCGAACCGACAC      | 58.864 | 20 | ATACCAGCATTTTCCAGCCA   | 60.469 | 20 |
| AATTCCGTTTTTGCCTCTCA     | 59.685 | 20 | CGGACCGTGAAAGCTCTAAG   | 60.008 | 20 |
| CTCTTCATTCCCTCATCCA      | 60.003 | 20 | TTTACGATCTTAATCCGCCG   | 60.054 | 20 |

|                         |        |    |                         |        |    |
|-------------------------|--------|----|-------------------------|--------|----|
| TTCGAAACTGCATGAAAATCA   | 59.291 | 21 | TTTTGAATTCGTAACGGGG     | 59.805 | 20 |
| CACGTGTAAGGGTTGAAGAAGT  | 58.304 | 22 | TCGGGACGAAATTTTTGTATG   | 59.818 | 21 |
| CTGAAGAGCTGATGGCTTGA    | 59.267 | 20 | GGCAACGGAACAACAACCTTT   | 60.015 | 20 |
| TGAACTGGCTACTGGCTGTC    | 59.037 | 20 | GTTCAAATCCCACCAACACC    | 60.073 | 20 |
| GTGTAGATCGCCATGGTGTG    | 59.992 | 20 | GAATGCTTGGATGGGAAGAA    | 60.014 | 20 |
| GCGTCGTGGATCAAGGTAAT    | 59.962 | 20 | CCGAATAACCGAACCAATC     | 59.273 | 20 |
| ACGGTTACGGGCTGGTATTT    | 60.612 | 20 | TTCCAATAAACCGTTGGCTC    | 59.938 | 20 |
| GGACAGATCAGAAGCAAGGC    | 59.957 | 20 | CTTTCCTCATCTGCACCTCC    | 59.803 | 20 |
| AGAGCCACAAATTTTTCTTCAT  | 57.073 | 22 | CCTTCTGCTGGTAGAGCACC    | 60.012 | 20 |
| TGTGTGTGTGGTTCTATGTTGTG | 59.445 | 23 | ACACTTACCGCATTGGGATT    | 59.316 | 20 |
| GTTTTCCGGGCAGGTAACCTT   | 60.352 | 20 | TCGGAACGTTCTACACGAGTT   | 59.788 | 21 |
| TGCAGATCAATAAAATGGCG    | 59.662 | 20 | ACGACGATTCCAAGGTTTTG    | 59.971 | 20 |
| CAGGTAAGCCCTTCTCTGA     | 59.425 | 20 | CAACAGTTTGGTTTGGCTGA    | 59.734 | 20 |
| CACTCTGCTAGGGTTGGGAG    | 59.861 | 20 | AAATGATCTACGTCCACGGG    | 59.813 | 20 |
| TCTCAAGTTCAAATGCCAAGC   | 60.38  | 21 | GCTTCAGGGGGTGTGAAGTA    | 60.111 | 20 |
| AGCAATGTCAATCCCTCAGC    | 60.226 | 20 | CTCTCGCCCCAAACTTAGAA    | 59.448 | 20 |
| CTGCGATCCTTTATCGCTGT    | 60.374 | 20 | TTACCTCCTCCACCATCGAC    | 59.927 | 20 |
| CGCTGCACCTTCAAGTAACA    | 60.05  | 20 | GTTTCTGTCTATTGGGCCG     | 59.569 | 20 |
| TCACGAACTGCATCAAAGGA    | 60.39  | 20 | GAAAAGAAATGAACACCGGC    | 59.551 | 20 |
| GGTACAGCAGATGCCTCGTT    | 60.285 | 20 | AACTTTGCTGAGTTCGGGTG    | 60.291 | 20 |
| TTCTTATACAAAACCTCCACTCA | 59.098 | 24 | CACCGACATTTTTGTCCCTT    | 59.83  | 20 |
| TTGTTGGACCCCTAACTCA     | 60.345 | 20 | TCCGTGAATATTTAACCCGC    | 59.795 | 20 |
| CCGTAAGCCTCATTACAGCC    | 59.73  | 20 | TGCAATCACCAAAGAACTGA    | 57.806 | 20 |
| GGATGCGTCCAATCTAAAA     | 59.901 | 20 | TGTCCCCTATTTGGACGAAG    | 59.926 | 20 |
| AGAGGAAACCACCACCGTTA    | 59.449 | 20 | GAAATAAAGGCCCAGCTCCT    | 59.688 | 20 |
| TGTGGCATATTGATGATGGTG   | 60.213 | 21 | TCTGATGGCCAGATTTGTT     | 60.461 | 20 |
| TTTTCATTTGATCACGCCTC    | 58.697 | 20 | TATTGAGAATCCAAAGGGCG    | 60.031 | 20 |
| TTCCCCAGAGAAGTTGTTG     | 60.081 | 20 | AGAGGGTTATCATGGGATCAA   | 58.32  | 21 |
| AATGTTATCGCCCCAAAGTG    | 59.823 | 20 | CAAGCTTGTGGAGTACATGAG,  | 58.036 | 22 |
| GTGACAAGCATTCTCCACC     | 60.52  | 20 | GGTCGCATGTTACGTGTTTG    | 60.035 | 20 |
| CAAGGCCTTCTTGGTAGTG     | 59.728 | 20 | AATTGCCAAGTTTGCGAGAT    | 59.713 | 20 |
| TTGACACATAGCCCGATGAA    | 60.073 | 20 | ATTGGCTGAAATGGAGTTGG    | 59.933 | 20 |
| AAGCTGAAAAGTCGAGAAAATG  | 57.828 | 22 | GGAGATCCGTCGTGAAAAGA    | 60.195 | 20 |
| TCGATGAAATAGGGTCGAGG    | 60.029 | 20 | TAGATGCCCGGTTACCCTCT    | 60.836 | 20 |
| GGAGAAGGAGATTGGGAGGA    | 60.532 | 20 | GTCTGGGACAGACAACCGAT    | 59.969 | 20 |
| ACAGAGCTGAGGAGAGCGAG    | 60.033 | 20 | TCAATCCTTTGGAAACACTCCT  | 59.976 | 22 |
| AAATGGACCCACGAGATTTG    | 59.79  | 20 | TGCGTTCACACCTTCATATTT   | 58.161 | 21 |
| TTTTTGAGGGAACAATTTGAGAA | 59.971 | 23 | TTTGGTGGGACCTTTCAGTC    | 59.943 | 20 |
| TGCAATACCAATGAACTGA     | 58.62  | 20 | TTTCAGGAAAACAGAAGGGG    | 59.143 | 20 |
| TTCAATCAGCCAATGGACAA    | 60.049 | 20 | CAAACCAGTTGCACTGATCG    | 60.301 | 20 |
| GAAAATCGGACGTGAAGAG     | 59.813 | 20 | CCACCATCATCGACAATCAC    | 59.769 | 20 |
| AAACTTCGACTCTCGTTGGC    | 59.478 | 20 | ATTTAAGCTGCACTTTTATTCA/ | 57.118 | 25 |
| GGTTATCACCGGATCGCTAC    | 59.415 | 20 | TTCCACGTTTCATGTTTCCA    | 59.941 | 20 |
| TGCATTAGTCTTTGGCATTCA   | 59.315 | 21 | CTTGCGCCGCCTAAATAATA    | 60.202 | 20 |
| AAGGGAGGCTCTGCATCATA    | 59.797 | 20 | CTCCCACTTCCCTTGAAACA    | 60.081 | 20 |
| ATCCAAACCATCCATTCCAA    | 59.991 | 20 | CCCTCGGATGCTATGCTAAA    | 60.188 | 20 |
| GCCACAACCTCTGGTTTCTC    | 59.703 | 20 | CGTCCCAATTTGTCGTCTCT    | 60.111 | 20 |
| TGAACTTATGGGAAGGAGAACC  | 59.46  | 22 | AAGTTGGGGATCGTGCATAC    | 59.82  | 20 |
| CATAGCGAGGAAGTCCAAG     | 59.83  | 20 | CCCCTATATCCCATGACTC     | 58.133 | 20 |
| CCTCAAGAATGATCCAAGC     | 59.629 | 20 | GTTGGATTCGAGCAGCTCAT    | 60.37  | 20 |
| ATCATTACTGACCGCAACC     | 59.962 | 20 | CAGCCACCAAATCAAATCAA    | 59.518 | 20 |
| GTCCAATACGAAGCCCAAAT    | 58.906 | 20 | AGTGGTATGATGTGGGGGAC    | 59.511 | 20 |
| AAAAAGGGATGAAAAGGGGA    | 59.75  | 20 | CGGTGATTTGAAAAGAGGGA    | 60.044 | 20 |
| CAGAGGGCCGAGATTTGTTA    | 60.206 | 20 | AACTCTTCCGCCCTTCTAC     | 59.713 | 20 |
| GAAATGCTTCCAGGGACAGA    | 60.195 | 20 | AGGAATCTGCCCAAGTAA      | 60.817 | 20 |
| GCACACAGGTGAAGACGATT    | 58.727 | 20 | TGATTGGTGTGGTGAATTGG    | 60.216 | 20 |
| CTCCCTCCGTCCATAAACT     | 60.319 | 20 | TCCGTCCCAAGAAATGTGAT    | 60.317 | 20 |
| GCATTTTCTCCATGTGGGAT    | 59.756 | 20 | CCTCGTTGGAATTTTTCGAG    | 59.679 | 20 |

|                          |        |                            |        |    |
|--------------------------|--------|----------------------------|--------|----|
| TGTCCACAGCCACAAGTCTC     | 59.872 | 20 CAATGTAAGGGGGAGCAGAA    | 60.066 | 20 |
| CCCGAGGATAGTCTCAATGC     | 59.653 | 20 AACATGTTTGCTGGTGCTTG    | 59.764 | 20 |
| ACTTCGGCAAAGGAATACCA     | 59.569 | 20 GGCAAGCGAGTAGGTTGTGT    | 60.321 | 20 |
| TGGGGCGCGTATTTAGATTA     | 60.424 | 20 GGTTGTTAAAATGTCCACCCC   | 60.326 | 21 |
| CCCACACTCTGCTTTCCATT     | 60.111 | 20 AAACCTTGGCAACAGTCGTC    | 60.156 | 20 |
| ATGCATGGCATGAGTGTGAC     | 60.578 | 20 ATGTTTCATCAACGGACACG    | 59.42  | 20 |
| ACCGGAGTGTGAAGACGAAC     | 60.159 | 20 AAACAGGTTCCGGAGAAGACG   | 59.328 | 20 |
| AATCTGACACGTCGGGAACT     | 59.579 | 20 ATGAACATGCTCCTATTTTAAT, | 57.053 | 26 |
| ATCAGCAATGAGTTGCTCCA     | 59.399 | 20 CCCAGTGAGGTTGTGGAGAT    | 59.962 | 20 |
| CTGTGGTTGTCGTCTCTTGC     | 59.467 | 20 ATGTGGCGACAAATTTAGGG    | 59.823 | 20 |
| ATGTTCCGATTTTGAAACGG     | 59.801 | 20 TGCAATGCATGGAGGAAATA    | 60.035 | 20 |
| ACCTTACTCGAACAGCCCAA     | 59.734 | 20 CCCCTCTCTACACATTGACA    | 59.974 | 21 |
| GCGTTTTGACAATATTTAGTGTTT | 60.205 | 26 AGATTCTGCATCAGGCCTTC    | 59.39  | 20 |
| TTTACCACCACACCACATC      | 60.27  | 20 TGCCTGAACCAGAGAAGAGA    | 59.701 | 20 |
| TGAGAGAGAGGTTGTGGCCT     | 59.986 | 20 ACCGGTTGACCCCGAATTAT    | 62.535 | 20 |
| AAGAGTGTGTGTGTGGGTGTG    | 59.527 | 21 TTCCCCTCTCTCCTCCTCTC    | 59.883 | 20 |
| CCAAGCCCAAGACTCTGTTC     | 59.844 | 20 CTTGAATTATCGGCGGTGTT    | 59.96  | 20 |
| CAATACAACCTGCCGAGCTGA    | 60.011 | 20 CACGTTAGACCTGGAGGAGG    | 59.715 | 20 |
| TGGATTTTCCCAAATTCATC     | 58.726 | 21 CGGTGTGTTGGCATTGTTAG    | 60.027 | 20 |
| GTTTTGTTTTCGTTCCTCG      | 59.587 | 20 TATTTTTGAGCAGCCCAAG     | 60.202 | 20 |
| GACGGCAACAGGAGTTACATT    | 59.115 | 21 GCGATTTCAATTCCGACTTT    | 59.162 | 20 |
| AGGTGGCAACATAATCAGCC     | 59.962 | 20 TATGGGTCAGAAAAGCCAC     | 59.933 | 20 |
| GCTCTGCATTAGCAGCTTCC     | 60.265 | 20 GCGCAAGTGTATTGTACCAGG   | 60.569 | 21 |
| GGATTTGGTTGGTCAAGTGG     | 60.21  | 20 CAACGCCATAGGGAAGTGTT    | 59.993 | 20 |
| TCACATTCACACCTAACGCAA    | 60.165 | 21 GATAGTGGTGGGATCGGAAA    | 59.75  | 20 |
| TGAGACCTCTCAGTCCCAGG     | 60.388 | 20 CTCATCGGGTTAATTGGGTG    | 60.184 | 20 |
| TAAAGGCCGCATCCTATCAC     | 60.06  | 20 CGAGACTCACAAGGAGGAGG    | 59.978 | 20 |
| GCGGTTATCACCGGATCG       | 62.397 | 18 TCCGAAAATCAAAGGTCCAC    | 59.91  | 20 |
| CCAAGAATCAGTTAAGCCCG     | 59.702 | 20 TATCAAACGCAGCGATTACG    | 59.864 | 20 |
| AGGCCAAAAATGAACCACAC     | 59.836 | 20 AGCGACCATCAGACCAATGT    | 60.542 | 20 |
| CTAGGAAGCTGAGGAAGCCA     | 59.711 | 20 TCATTGAACTCCCCATCACA    | 59.893 | 20 |
| CGAGTCGGCAGACCTAAGAC     | 60.012 | 20 CCTATGGTGGTATGGTGTGGA   | 60.501 | 21 |
| GCCAGTGTCCATCCATTCT      | 59.934 | 20 CTCACGAAGCATTGCCACTA    | 60.011 | 20 |
| GTTTCAGGTGAGGCACAGGT     | 60.159 | 20 CATATCGGGTCAAAGCAACC    | 60.331 | 20 |
| AGTAGAAGCATTTCGTCCGG     | 59.336 | 20 GTTAAAATCTCCAATTGGGAA/  | 57.302 | 22 |
| TGAAATGACACTGGTTGATTTTG  | 59.89  | 23 AACATTTTGGGTCTTTGTCTG   | 57.578 | 20 |
| GTGATTGGCTGGAAGAGCAC     | 60.812 | 20 CATTTAATGCCCCAGCAAAG    | 60.448 | 20 |
| CTGACGGAACACGTCAGATTT    | 60.164 | 21 TGAACAGGTTGCATTTTAGATG  | 59.639 | 23 |
| CATACTCCACCGCCTTCAT      | 59.955 | 20 AACGGTACGTTCCGATTTTG    | 59.861 | 20 |
| CCACTCACGCACACCACTAC     | 60.227 | 20 CGACAAGAGAAAGAGGGTCTG   | 59.982 | 20 |
| TTCAGGGAATCTTCGAATAAAAA  | 59.14  | 23 AGGGAATTAGAGCGTGGGAT    | 59.925 | 20 |
| TTGAGGCTTGTGGTTCAGGT     | 60.69  | 20 TGGAGACGGCTGTTTTCTTT    | 59.853 | 20 |
| ATCGCGGAAGGTTTAGCATA     | 59.704 | 20 AGCAAGTGGTGGTGGATAGC    | 60.142 | 20 |
| TGCAAGCGGTTCCAGACAATA    | 60.401 | 20 GGCATTACCACATGCTCACA    | 60.549 | 20 |
| AAGAGCTCTCGACGCAAAAC     | 59.763 | 20 GAGATATTCTGTCCGATAGGTC  | 59.13  | 23 |
| CCCCGGTAAACAGAATTGAC     | 59.288 | 20 CACCGTTAATCGCAACAAAA    | 59.603 | 20 |
| ATGTATGGCCAGATTGGTT      | 59.129 | 20 ACTGTGAGGAGCGTCTGATTT   | 59.874 | 20 |
| TCCGGTCCAAATCCAATAAG     | 59.756 | 20 CCTATGGTGGTATGGTGTGG    | 58.569 | 20 |
| TGTTGGGATGAAATGTGAGG     | 59.343 | 20 CACCAGTTACCCGACTTCGT    | 60.028 | 20 |
| AGCCATGGATATGAAGTGGG     | 59.773 | 20 TCTTCCTTTTCTCGTTCACATAT | 58.4   | 24 |
| ATGCCACCAAAATCAAATCC     | 59.628 | 20 TATGGGTTATCACCGGATCG    | 60.544 | 20 |
| TCAAACCCTGTCAATCACCA     | 59.935 | 20 ATACGCAGTTGCTCGGAAGT    | 59.904 | 20 |
| CCCAATTTGCCCTTATATGC     | 59.282 | 20 TTTTCAAAGTTGTGATGTGGC   | 59.697 | 20 |
| TCTGGGTGAAAATCGAATGA     | 59.049 | 20 CTCAATCGTCGCCGATATTT    | 60.06  | 20 |
| TGCTGCAAGCTTAAGAAACAA    | 58.901 | 21 ACACCATGTGACGAAGGTTG    | 59.441 | 20 |
| TCTTTTTCGAACCGAACCAC     | 60.088 | 20 TTGTTAATCCACCAATTTGCC   | 59.69  | 21 |
| ATTTTTCTGATAAGCCGGGG     | 60.272 | 20 GGAGGCATTCGATCTTTGTG    | 60.603 | 20 |
| CATCAGTAGCGATCCGGTTT     | 60.096 | 20 ATGCCAAATTGTGTTGGGTT    | 60.096 | 20 |



|                          |        |                            |        |    |
|--------------------------|--------|----------------------------|--------|----|
| ATCGAAACCAGAACAGACCG     | 60.111 | 20 GATTGAAGATGTTGGGCGTT    | 59.939 | 20 |
| AACACCAACATGCTGACGAA     | 60.16  | 20 TTCGAAGATCAACGGACGAT    | 60.603 | 20 |
| AACCTCTCGTGCTCCAACAT     | 59.727 | 20 TTGGATTTTTGAAACGTGGA    | 58.987 | 20 |
| AGAATCGTCCCAAATTCCT      | 59.766 | 20 AAGCTTGCATTTTATCGGGA    | 59.682 | 20 |
| GTTTGGCCTCACTGGTGATT     | 59.973 | 20 AGCAACAAAACAAATATTGGA   | 59.788 | 24 |
| CGTACGAATTCTTGCCAGGT     | 60.132 | 20 GTGCTGTTTTGGTTGGTGTG    | 60.049 | 20 |
| TCACAACCAAAATCTTGCTCA    | 59.307 | 21 CCTGCCAGGACGAACTTGTA    | 61.224 | 20 |
| CCATTCAACGCAACCATTTT     | 60.732 | 20 ACGTTGTAGTTGAGGCCCTG    | 60.171 | 20 |
| ATGCTGCTGTTTTCCATTCC     | 60.081 | 20 TCACGAATTCTTCTTTCCTTCT  | 59.786 | 24 |
| AAATCATTGCTTGAGCTTGAAAT  | 59.306 | 23 TCAACTCAATAGGTTTTCGAGT  | 59.732 | 25 |
| CAATCCAAACTCTATTTTATCCGA | 59.778 | 25 ATTTGGCACCATTCTTCACC    | 59.797 | 20 |
| AGACCTGTCACCGTTTTGCT     | 59.769 | 20 GTGTCAGACGTCTCCTGGT     | 60.161 | 20 |
| ATTTTAGTTATCACAGGATCACCC | 57.577 | 24 CCGCGCTGTAGATTCAAAGT    | 60.407 | 20 |
| ACTTGGCCCACAAGAACAAG     | 60.149 | 20 GGTAGTGGGAACTTGCGAGA    | 60.255 | 20 |
| ACGGCCAATATTTGCTCCTA     | 59.569 | 20 GGCGCAATTGGAGATCTAAG    | 59.807 | 20 |
| TCAATCGTGACACCAAGGAG     | 59.676 | 20 AGGCTGAGATCTTCCAACG     | 59.43  | 20 |
| CACCGATGTTGAGGCCTACT     | 60.134 | 20 CGTCGAGAGAACTCAACGG     | 60.964 | 20 |
| TAGCCTCCGTATGCAGTGAA     | 59.444 | 20 GCCACATATGCAAAATATCAGC  | 59.486 | 22 |
| GTTTGCTGCTGCTGTTGTGT     | 60.104 | 20 TCGCTTATGAAGTGGCTCC     | 60.352 | 20 |
| CCATGCGCGGTCTAAATAAT     | 59.95  | 20 CTCCCAGGAAAAGCATCATC    | 59.629 | 20 |
| TTAGTGTTTTGACATGATTACTCC | 57.557 | 25 ACGTGACGAAAGTGGGAATC    | 59.973 | 20 |
| GGACCTCTGGACAATCCCTT     | 60.314 | 20 CGGCATTCGATCTTTGTGTA    | 59.688 | 20 |
| AACAGTGTACAACCCCGGAA     | 60.269 | 20 GTGGGTGGGATTGAACTTA     | 59.647 | 20 |
| ACTACAACATCATGCAAATCAAT/ | 57.395 | 25 AATAGATGCATGAAACATTTTC  | 57.786 | 24 |
| ACCAGTTGCAGTCTCTTGGC     | 60.453 | 20 AAGGAACAACGGTGGATGC     | 59.973 | 20 |
| GGGTCAAGGTGTCGGAAATA     | 59.79  | 20 TGTTGCGCGTGCTTTAAATA    | 60.401 | 20 |
| CAGCTCCAAGACATTCCACA     | 59.831 | 20 AAATTGCAAAGCGGTGTCTT    | 59.752 | 20 |
| ACAAATGTGGCGTATGCTGA     | 60.142 | 20 TCCTAGCCCTCAATCTCGAA    | 59.91  | 20 |
| CTTTTCCATCTTCATTCCA      | 59.864 | 20 AGATCCACCACTGCTTGGAG    | 60.261 | 20 |
| AGGTCATGGGGTATGTTTGC     | 59.676 | 20 TTGATTGTCTTTGCGTTGGA    | 60.234 | 20 |
| TCGGAGCATGAATTAAGTGG     | 58.721 | 20 ACGCGGACGGTACAGATTAC    | 60.022 | 20 |
| TGGCATATGTCCCAAGAGT      | 60.34  | 20 GTA AACGCTAGAAGGCCCC    | 60.095 | 20 |
| TGACCCAGCCTTTTTAGGATT    | 59.952 | 21 CCAACTTCCCATTCACTGT     | 59.82  | 20 |
| CACTTTGCAAGCCCATTCT      | 60.249 | 20 GGACAAGGATTGGAAAGCAA    | 60.051 | 20 |
| TTGCAAAAGAAATTGCTTAGCTT  | 59.604 | 23 TGGGTGTGATCTTGACCCTT    | 60.363 | 20 |
| GCCTCTCTGCTCACCAGGTA     | 60.555 | 20 CAAGCAAATCCCCTTCTCTG    | 59.807 | 20 |
| GCAGCACTCTGGACTCTCAA     | 59.288 | 20 CATGTTGCTTTTGCATGTGA    | 59.28  | 20 |
| CAACCTTTGAAGACTCCGTCA    | 60.275 | 21 GATGGGGATTTGCTTCATTC    | 59.324 | 20 |
| TGGATGGAGTCAAAGCCAAT     | 60.461 | 20 CGACAGCGTAATTGAAGCAA    | 60.014 | 20 |
| CGAAAATTCGGATCGGCTAT     | 61.256 | 20 TCCGAAATATCCGGTTTTTATT/ | 58.843 | 23 |
| AGGTTAGGAATGCATTAATACC/  | 59.283 | 25 AAGGGAGGGTTTCATTCTCA    | 58.568 | 20 |
| TACCATACGTAACGCCCAAA     | 58.958 | 20 CTGGCTCCCTATAGTGCTGG    | 59.853 | 20 |
| TGCATTCATCAATTTTTGGAG    | 58.613 | 21 ACGTGCCATGTGTTTGTGTCAT  | 59.887 | 20 |
| CACTCTCTCACCTTCCATCCA    | 60.245 | 21 TTTGCTGTAGGCCTTTTGTCT   | 60.018 | 20 |
| AGCCTCCCTCTCTTGCTCTC     | 60.238 | 20 TGGGCAGCTGTAAAACCTTC    | 60.249 | 20 |
| CGAAGAGCACACACTTTTGG     | 59.485 | 20 TGA ACTGGCCCAAGATCAAT   | 60.461 | 20 |
| TCTCGAGCTCAAATCCCAAG     | 60.474 | 20 GAACGATTAGTGTAGGTTGGG   | 59.898 | 22 |
| AAAGTTTTCCGCATGAATGG     | 59.938 | 20 TGAGCAGCCTAGATCAGCAA    | 59.847 | 20 |
| TATTTACAGCAGCGACAGC      | 60.165 | 20 TGTTGATTTATGGCGGATTG    | 59.377 | 20 |
| CCATTTCTGTTTCCCACAC      | 60.21  | 20 TTTCTCATTGGCAGTCACCA    | 60.24  | 20 |
| AGTGGTTCGTAGCCTGACTG     | 60.321 | 20 ACGGAAATCTAGGGAGCTGG    | 60.59  | 20 |
| GTGTCAAAGAACTCGGAGG      | 59.844 | 20 GTGGGTCCCTCTCTACAAA     | 60.088 | 20 |
| AAAGGAGATTCCAGCGATCA     | 59.773 | 20 TTTTTGTGCCTAAAATGCC     | 59.943 | 20 |
| GATCGACGGTCCGAAATTAG     | 59.528 | 20 TGTTGTCGCTTTAGCTCCCT    | 60.015 | 20 |
| TTCAGAGTGGCCATAGCAGA     | 59.547 | 20 GGGTTAAAAGAAACCCCAA     | 60.027 | 20 |
| CCGAAAATCTAAAGCCCACA     | 60.067 | 20 TACTTGGGATGCTCTCCACC    | 60.073 | 20 |
| GTTTCGATGGACCTCGATCAT    | 59.893 | 20 GAATGGAATTCCTCTAAAGC    | 59.622 | 23 |
| AGCAGAATGCAGTTGTTGGA     | 59.445 | 20 GAAGAAGCCAGGCAGAGAGA    | 59.827 | 20 |

|                           |        |                            |        |    |
|---------------------------|--------|----------------------------|--------|----|
| GGAAATAAGGAGGTGTTATGATG   | 60.02  | 25 AGAAGATTTCTGGGGTGGGT    | 59.795 | 20 |
| TCTCGAATGAATCCAAACCC      | 59.871 | 20 AGGGCCTTTTTGCAATTTGT    | 60.83  | 20 |
| TAGGCCGGTCTTTTAGCCTT      | 60.217 | 20 C GACTCGGGTTTTCGAGTTAG  | 59.869 | 20 |
| TTCAGCATTGTAAGGGGGAC      | 59.933 | 20 CGTGGTTCGATCGTAATTGA    | 59.542 | 20 |
| CTTGCACCAATAAAATTTGGC     | 59.485 | 21 TCAATCGAGCTACAAACGTG    | 57.506 | 20 |
| GGGGATTGGTAATGCAAGAA      | 59.762 | 20 AGGAAAGAGAAAGTGAGCCCC   | 59.817 | 20 |
| CCATTCCGAATATCAAAGGC      | 59.369 | 20 TTGTTGCATGTCATTGGTCA    | 59.516 | 20 |
| GTCACACAAGCTTGACTCGG      | 59.467 | 20 TGCGCATTTCTGATATCGTC    | 59.799 | 20 |
| CGTAAATTGTTGCAACCGAG      | 59.226 | 20 TTCGTGAATTATCCAAACTTTTC | 59.885 | 24 |
| GTTTACGCCTTGTTTTCGGA      | 60.11  | 20 GCGTTGGAGATGGTCTTACAA   | 60.125 | 21 |
| TAGAGCCCTTCAATGGACAA      | 58.298 | 20 CCAATGCGGATGCTCTTAAT    | 60.06  | 20 |
| CAACGGTACGTTCCGATTTT      | 59.861 | 20 ACCGCCCTCCTATTTTCGTAG   | 60.463 | 20 |
| GCCCAACTTATTTGGATATTTGA   | 59.268 | 23 AGAGGGAGGAAAGACTGGGA    | 60.186 | 20 |
| CCAGTTAAGAGCGTTGGAGG      | 59.869 | 20 CCCTACCCCATGATCTCAAA    | 59.744 | 20 |
| CACTTCTCGGAACGAACAAA      | 58.897 | 20 GGGGGTTATCACCTGATCG     | 60.142 | 19 |
| TTGCTCGTTTTAAACCGAT       | 59.586 | 20 TTTGATTTCTCCCCTACCCC    | 60.124 | 20 |
| ATTGGGCTCTATGGATGTGG      | 59.773 | 20 CCACCCGTTGATTTTTACT     | 59.83  | 20 |
| CGTGTCAATCCAAACAAATGC     | 59.972 | 20 CAGATCTATGGGCCGAGATT    | 59.105 | 20 |
| ACCAGAGTCCACCACCACTC      | 60.006 | 20 TGCTGGAAGGAAAAGGAGA     | 59.926 | 20 |
| GGTCTGATCTGTCTACCCTTG     | 59.994 | 22 GGCCGATATTTGCTCCTAGTT   | 59.606 | 21 |
| CCTCTTGACCTTCCTTTCC       | 60.045 | 20 AACACCTGGGTGAAACCAA     | 60.246 | 20 |
| TCCCAAATTTAGCCGATTGT      | 59.411 | 20 CACCTAAAATATTGGTTTCTAT  | 57.121 | 26 |
| GCCACACATGTCAGAAATGAA     | 59.562 | 21 TCACGTGGCATCATGAGAAG    | 60.84  | 20 |
| ATTTCTGCTCACTGCCTCGT      | 60.02  | 20 AGCAAACAAGAAACATGCC     | 60.118 | 20 |
| CCAAATTAAGGTCATATTGCACA   | 58.927 | 23 ACAGTGGGCTTGCAGGTATT    | 59.621 | 20 |
| GCGAAGTCAAACCACCAGAT      | 60.119 | 20 CAAATAATGGCCCTTAGCCA    | 59.922 | 20 |
| CTTCGCCCTTGGATGAAATA      | 60.031 | 20 ACCCCGGATCTACCATTTTT    | 59.532 | 20 |
| CGAATAGTAGCTTCTGCGGG      | 59.996 | 20 AAAAAGAAAAGAAAAGAAAG/   | 57.998 | 27 |
| ACTTTTGCACACACAGTCAC      | 59.953 | 20 ATGATGGAACATGAAAGCCC    | 59.756 | 20 |
| CGTCATCTTGGTCTGAGCCT      | 60.408 | 20 GCCTTCTCCGAGGAAAGATT    | 59.789 | 20 |
| ACGCCCCAGATTGTTTCTTA      | 59.569 | 20 GATTTTCATGTTTCGCGATTT   | 59.071 | 21 |
| CACTGGTCCGAGTTCTCCAT      | 60.112 | 20 TTGAAACGCTGCAGAAAGAA    | 59.729 | 20 |
| TGAGGAAGTTGATTTGTTGGG     | 59.956 | 21 ACGTCATTGGAAAATAATGCG   | 59.846 | 21 |
| AACGTCACCTTGAAACACCG      | 60.984 | 20 GGAAAGAACTCAATGTCGGC    | 59.676 | 20 |
| CGAACTAAAGAAATAGGGACGC    | 59.311 | 22 ACAGTTCATCTCCCGTCTCC    | 59.105 | 20 |
| CTGATAGGCCAACTGTGCAA      | 59.864 | 20 TCTCCATTGCTGTTGGGAAT    | 60.461 | 20 |
| TCATGGGGAATTCAAAGAGG      | 59.864 | 20 GCGGAAAGGAAACATCAAAA    | 60.053 | 20 |
| ACACGTGTGCTGACTTGTC       | 59.789 | 20 CCTATAGTGGTATGGTGTGGG   | 60.365 | 22 |
| TCGACAAAGAAATCATCGGA      | 59.2   | 20 GAAGAAGGTGAAATCGACGC    | 59.82  | 20 |
| GGTTATCACCTGATTTTCTCCC    | 58.826 | 22 GGCTAGCCTTTGAAGCAATG    | 59.982 | 20 |
| GCAAATATGATATGCCTGCAA     | 58.667 | 21 CGTTGCTTCTTCTACTCCT     | 59.893 | 21 |
| CAAGGGTAATCCCAAACCTT      | 57.904 | 20 GGGGAAGTGACAACCTCAAA    | 59.943 | 20 |
| AACCACAAAAGGATAAGTGGG     | 59.282 | 22 AGAGGGGGTATGAGTGAAAA/   | 59.813 | 21 |
| CGAAGCTTTGATGGTGTGAA      | 59.84  | 20 TGC GTTTTGACAATATTTAGTG | 59.109 | 25 |
| TGTTGCTCTTGCTCCAACAC      | 60.032 | 20 TGCATATTTCTCGATCCCGT    | 60.435 | 20 |
| CTCTCCACTCCCTTCACTGG      | 59.828 | 20 TGAGCAAACTGGTTCCCTT     | 59.711 | 20 |
| GCTGGCAGCTTCAACAGATA      | 59.178 | 20 TGTATGGCTTTCCCTTGCTT    | 59.708 | 20 |
| GGTTTTGATGGTTGTGATTTG     | 57.836 | 21 TGAACACCCTACTTGAGCC     | 60.111 | 20 |
| AACCTTGGAGTCCCTTCTCC      | 59.534 | 20 TGGAGGTGGTGAATTTGGAT    | 60.363 | 20 |
| TGGACCCCCGATTTATAGGT      | 60.391 | 20 AGTTCCACGATAGGAGGGTG    | 59.014 | 20 |
| TATTAACGGTCCGGTTCCTG      | 59.817 | 20 GCCATGTTTACGATGAAATGC   | 60.345 | 21 |
| AACGTCAGATATGGCTGTTGG     | 60.008 | 21 CAACAAGATTCGATAGAAGCC.  | 59.361 | 22 |
| GGAGCTTTACACTCCCCTCC      | 60.074 | 20 GATCTGCTGGCGGTCTTTAT    | 59.297 | 20 |
| CGCGTTTAGAAAAGGGAAGA      | 59.469 | 20 CAAAGGCTCCTTGATTTCAT    | 59.126 | 20 |
| TTTATCGTGGTGCATGTTTTT     | 58.084 | 21 CTGTAAGGCTTCATACCGGC    | 59.73  | 20 |
| CAAGTTTGC GTTGAATGGA      | 59.706 | 20 GAGACGCGAATGTTGAGACA    | 59.992 | 20 |
| TGTGAATTTTCA GATTGTGGTTTT | 59.793 | 24 TTTGAGCTGATCTTGAATGC    | 58.106 | 21 |
| AAAGGGTAAATATTGGGCCG      | 60.036 | 20 CTCCTCTCTAAAGGGACGC     | 60.34  | 20 |

|                          |        |    |                         |        |    |
|--------------------------|--------|----|-------------------------|--------|----|
| ACATTAATGCAGCCGCTCT      | 59.873 | 20 | CCAGTCTCTTTGGATCCTGC    | 59.803 | 20 |
| TGGTTCACATGGTTGATGGT     | 59.656 | 20 | TGGTATCCATAGCAAAGCGA    | 59.281 | 20 |
| AATAATTTCCAAAACCGCCA     | 59.3   | 20 | GATTGACGGGATCACAGGTT    | 59.786 | 20 |
| CAGTTTTGCTATCGTTTATCTTCG | 59.392 | 24 | TCTTACTGCCACACAAAATCAA  | 58.346 | 22 |
| ATTATTTTGCGGTTCCAACG     | 59.832 | 20 | TGGTAAAAGTGCTCAAGACGA   | 59.424 | 22 |
| GTCCAGCCCTAATATTGCACA    | 59.974 | 21 | TATTCCGCCGTGGTCTAAAG    | 60.089 | 20 |
| AAACAGGGGTACAAGGGTGA     | 59.304 | 20 | CACTCACACACGCACTCTCA    | 59.624 | 20 |
| ACAATGCTGCACTCCCTTG      | 59.846 | 19 | CAAACCTCGCTCAAAAAGACAC  | 60.453 | 22 |
| TGGTTTTGAAAGTGATCTGG     | 60.008 | 22 | CAAATAATGCTGCGTGATG     | 60.096 | 20 |
| GGGAGAATCGTGCATCGTT      | 59.934 | 20 | AGCCCGATAAGTTCGCAGTA    | 59.867 | 20 |
| GATTCTGGATTATCCTGCGG     | 59.486 | 20 | CGGAACCAGACCGAATATGA    | 60.853 | 20 |
| CCTCAAGATTGTGCAACCAA     | 59.691 | 20 | AGTCCGAAAATCCCAACAAT    | 58.36  | 20 |
| GGCCATCTATCCCTATCCGT     | 60.138 | 20 | AACATTA AAAATCGCCCGTG   | 59.832 | 20 |
| AAGGGAAAGAAACGGGCTTA     | 60.068 | 20 | ATCTTCTAATCACCGCCCT     | 59.925 | 20 |
| TCCTCCTTCTCTGCATTG       | 60.331 | 20 | TGAGTTGAGGAAGAATGGGG    | 60.042 | 20 |
| GTCAATGATAAATCGCGGGT     | 59.791 | 20 | TTTGGAGGATCGACGTTACC    | 59.933 | 20 |
| CGGTGTAAAGGAGGGGTGTA     | 59.846 | 20 | TCATTCAAGGAATTTACCAAG   | 59.064 | 22 |
| CACTTCTTCCCAAGGCACTC     | 59.844 | 20 | CGAATTCAAACTCTCCCGAA    | 60.184 | 20 |
| TGAATCAATTTAACATCATGCAAT | 58.44  | 24 | AGCTTCACAACAGGTTTCGC    | 60.44  | 20 |
| ATGCAACACACGCACATACA     | 59.621 | 20 | ATGACTGCAAGCAACCTGTG    | 59.905 | 20 |
| TCCTTGCACTGGGAAAAAGT     | 59.711 | 20 | CTCCACCCTGGTTCTAATGC    | 59.55  | 20 |
| AACATCAACCGTTCACCACA     | 59.855 | 20 | AATACCGGAAGAATTTGGC     | 60.15  | 20 |
| GTAGAGGGAGTTGGGGGTGT     | 60.23  | 20 | TTATGGGACACGTTGGTGAA    | 59.816 | 20 |
| TTATTGAGCGCCATTGATGA     | 60.179 | 20 | CCGCTATCGAAAATATAATCCC  | 59.732 | 23 |
| ACTTTTAAGGATCAAGGATATTC  | 57.122 | 24 | ATCCACGGGAGAGAATGAGA    | 59.612 | 20 |
| GTCTAAATTGCCCGTATGC      | 59.438 | 20 | AAAAGAGGGAGGGATACACC    | 58.452 | 21 |
| GGAAAAATAACAGGGGAGGG     | 59.639 | 20 | TTCTTCACCCAACAACCACA    | 59.976 | 20 |
| ATGGGCGAGAAATAGCAGTG     | 60.235 | 20 | GGAAAAGCAATCAAGATCCG    | 59.645 | 20 |
| TGACCAATAGGATGTTGCCA     | 59.924 | 20 | CTGGTCTCTACGACCAGCC     | 59.867 | 20 |
| CCATGAATGGAAAATGGAGG     | 60.126 | 20 | AAACAAAATGTGGGTGCCAT    | 60.096 | 20 |
| TAAAAGTCACGCTTGAACCA     | 57.008 | 20 | ACGGGTATTACCTGATCGC     | 58.93  | 20 |
| CCAATGGGTGACCAGTCTTT     | 59.82  | 20 | TGCAGTGAAGCATACACCGT    | 60.333 | 20 |
| GTTCGAACCGAACCATGAAC     | 60.362 | 20 | CAACTTTTTACACCACCTTC    | 59.482 | 21 |
| AATTGCCATTACCATTCCCA     | 60.016 | 20 | TACCCTTCATCTTCAACGCC    | 60.074 | 20 |
| GATTTTTTGAGGGTCTTGC      | 58.622 | 20 | AGGAGCAAAGCTGGAActCA    | 60.134 | 20 |
| CAGGAGACGCTCATTATCA      | 59.942 | 20 | TGAGGAGTACATGTGCAGGG    | 59.701 | 20 |
| CATCCACTCTGAAGTTTGAACA   | 57.856 | 22 | GGGTGGAGTTATGGCTGAAA    | 59.933 | 20 |
| GGACCAGGATTAGCCCAACT     | 60.328 | 20 | ACCATTTCAAGAATGCAGGG    | 59.933 | 20 |
| CATAAGGCCCACTTCAACCT     | 59.052 | 20 | CGGTTCAACCCTTTTGTAGG    | 59.466 | 20 |
| GGAGGGGTTTCCCTTACCTT     | 60.528 | 20 | CAACACAAGAActCACCTCCC   | 59.607 | 21 |
| TTTTCGGGAATCTTTCATGC     | 60.016 | 20 | TATGGAGAGTTCCAGCTGCC    | 60.362 | 20 |
| AAGGTCCCAGGTTCAAATCC     | 60.169 | 20 | TCTCGATCACTACAATCTTTGAI | 59.445 | 25 |
| GAGGGTTGTTGTGGGACTGT     | 59.859 | 20 | TGCCGTAACCTGTCATACCA    | 59.988 | 20 |
| AAATGAACGTAGCAAAGGGG     | 59.087 | 20 | TGCCCAATTCAATCATTTT     | 60.132 | 20 |
| TCTCTATCTTTTTGGTTGGTGA   | 59.203 | 24 | GAAGGAACGCTTACACGGAG    | 59.875 | 20 |
| CGGACCGTGAAAGCTCTAAG     | 60.008 | 20 | TTATCATTTTCGTCCCAAGG    | 59.756 | 20 |
| ACTAATGGATATGCGGCGAG     | 60.081 | 20 | TGAACATCTGTCACGTCTTCG   | 59.889 | 21 |
| GAGATTTGGGCGTTTACGTG     | 60.502 | 20 | CCTGGAActGTCATCACCT     | 59.962 | 20 |
| GCCGATTTTTGTCCCTATTT     | 60.15  | 20 | ATGGAGATTGGTTGGAATGG    | 59.605 | 20 |
| TTGTGTCCCTGAAAGAGGTG     | 58.695 | 20 | AGAAAGCCGGCAAActGTAA    | 59.883 | 20 |
| CACGACAAGAATCCAGCTCA     | 59.984 | 20 | GATCGAATCACCACTGCAA     | 59.654 | 20 |
| TGCCGAGAAGAGGAAGTGTT     | 59.989 | 20 | AACTGCCCAATCTGGATGTC    | 59.934 | 20 |
| AGATTACGAGAAGGAGGCGG     | 60.723 | 20 | CAATTAGGTCATCTCCAACGC   | 59.583 | 21 |
| GACACGTGGCGTAATCTTCA     | 59.722 | 20 | ACTTTTGGGGGACAAATCCT    | 59.668 | 20 |
| GAAGACACTTGGGCCTGAAA     | 60.232 | 20 | GTCCATTGTAGCGGTTGGAT    | 59.82  | 20 |
| CGTTAGAGAGCGTCCGGATA     | 60.365 | 20 | TCAACCATATCCACCCGAAT    | 60.014 | 20 |
| GAAAGGCTGCATGAGAGAGG     | 60.096 | 20 | TAGTCGCGTGCGATAATTTG    | 59.864 | 20 |
| TCATCTATCCCCGGTGTA       | 60.148 | 20 | CCTCGGGACGGTTACTACA     | 59.986 | 20 |

|                          |        |    |                         |        |    |
|--------------------------|--------|----|-------------------------|--------|----|
| TCACTTTGCTCGAAAGTTGC     | 59.199 | 20 | CTAAGGTCGGCGATAGCTTG    | 59.996 | 20 |
| TCCAGCCCATTCTTATTTGG     | 59.894 | 20 | TGGGTCCATCACTCCTCAAT    | 60.326 | 20 |
| CGTTGAAAGGAGAGCGACAT     | 60.397 | 20 | TGCACGTGTGTAGGGTTTGT    | 60.072 | 20 |
| CACGAAAAGATCAGCAAGCA     | 60.134 | 20 | GGAGGGCTGTGTGATATTGG    | 60.34  | 20 |
| AAGGAGGTGTTATGAAGGGAGT   | 58.15  | 22 | TGTTGCGCGTGTCTTAAATA    | 60.401 | 20 |
| TTCTCCCACGCACTTTCTCT     | 59.989 | 20 | GGAACGAACCAAAAGTCCAA    | 59.948 | 20 |
| ATGTAACCTCCACATCCCGC     | 59.82  | 20 | ATGCAAGAAAACAAGTGGGG    | 59.971 | 20 |
| TTCTCCCTCATCCCTCCTTT     | 60.008 | 20 | TATGGTCCTCACACCAACGA    | 59.96  | 20 |
| GGGTTCCCACGTCATAAAAA     | 59.662 | 20 | GCATCATCTTGTGTATTCTGTT  | 59.532 | 23 |
| TGCAACTCATTGCACCTACA     | 58.863 | 20 | CCTCCCATTGACGAAAGAAT    | 58.981 | 20 |
| CCTTTCTTCCGACTGCAAAA     | 60.357 | 20 | TTTGTCCCCTTGCTACCATC    | 59.933 | 20 |
| CCACCACTCGAAATATGGCT     | 59.955 | 20 | TATTGTGGAAGGACGGGAGA    | 60.452 | 20 |
| ACCGTGGCATCGAAGATTAG     | 60.096 | 20 | TGCAAATAACCATCACCCAA    | 59.786 | 20 |
| AAACCAATGCGAGGTAGGTG     | 59.993 | 20 | GGCAAACATGTGGGGTTTAG    | 60.227 | 20 |
| TTTTTAAGTTATCGGTGATGACAC | 59.829 | 25 | GTCCGTGGTTTTACCCAGTG    | 60.269 | 20 |
| ACGAGAAGCGCGAGTAATGT     | 60.044 | 20 | GCCTACGATCCAAATCCTGA    | 60.036 | 20 |
| TGGGTTCCATGAGAGAGAGG     | 60.191 | 20 | AGCCCCACATAATCCCACTT    | 60.578 | 20 |
| TGCGTTTTGATGATATATATGTGT | 59.956 | 27 | TGTACCCGACCAAGATTTGA    | 60.111 | 20 |
| TGTATCGCTGCAAAAAGCAC     | 60.021 | 20 | TTGCAAGAAAAGCCACACAC    | 59.888 | 20 |
| TTCCACCAAAAACCGAATA      | 60.16  | 20 | AAAAATTTAGTATGAGGTCAC   | 59.925 | 26 |
| CTTTGTGAATGAAATGGTTGCT   | 59.134 | 22 | AAAGGGAGTTCTCCCAAATCA   | 59.926 | 21 |
| CACCCTCCACACATCAAAAT     | 60.634 | 20 | ACATAAAGCCACCCCAACAA    | 60.227 | 20 |
| GACAACCCTTCGGTGCTAAA     | 60.11  | 20 | AAGGGAGCCCAATTGAAAAT    | 59.777 | 20 |
| CCTCGGGACGGTTTACTACA     | 59.986 | 20 | GAAAAGCTTGGCCATTCAAC    | 59.691 | 20 |
| CATTTCGATGGAGACGCATTA    | 59.646 | 20 | TCCCATTTGTGTGTTCTTCG    | 59.541 | 20 |
| GACTTTGTTGTGGTGGACCC     | 60.261 | 20 | GGTAGGTGCTCTGACTTGCC    | 59.874 | 20 |
| AGAAACGTTGAAGGACGTGG     | 60.149 | 20 | GGAGGAGAAGGAACAAACCC    | 59.912 | 20 |
| TGGGTTTTGTAATTTGACCCA    | 60.074 | 21 | AACTCGCTACGGGTTAGTCG    | 59.401 | 20 |
| TCGATTTTTGTCAAATCCCC     | 59.739 | 20 | TGAGATTTGGACGGTTATGATT  | 59.729 | 23 |
| CAGCTCAGGGTGGAGAAAAT     | 59.284 | 20 | GCGAACTCGGCTAGAACAAA    | 60.523 | 20 |
| CATAAACCCCTCACTCCGAGC    | 59.694 | 20 | GACGCCAATGATCAAAGAC     | 60.47  | 20 |
| CCCAATCTTGATTCCCAGAA     | 59.864 | 20 | CTGCAAGGGACAGCAAAAATA   | 58.917 | 20 |
| AAAATGCCCTTGATGCTGC      | 60.103 | 20 | TTGCAGAGGCGGAGAAGTAT    | 59.978 | 20 |
| ATAATGTTGGGTGAGGCCAA     | 60.192 | 20 | TTTCTGTTGCATTTTGCTG     | 59.849 | 20 |
| GGGAGGAGAAAGAAAAGCGA     | 60.817 | 20 | TTCTTTGAATCATCTTCCACCTT | 59.123 | 23 |
| GAACCCCTAGCACCATGTA      | 59.813 | 20 | GGTGTGCTCGGATTTTTGAT    | 59.939 | 20 |
| GCAACCAATTTTCTCTCTGCT    | 58.592 | 21 | CTATTTTCGCTGGCTTGGTG    | 60.762 | 20 |
| GCAATAGCATTCCAGTAACGG    | 59.622 | 21 | CACTGCTGTCCCTGCATCTA    | 60.008 | 20 |
| ACCCTTATAAATGCGCTTGAA    | 58.775 | 21 | AAGGCGGTTTTTGATACGTG    | 59.996 | 20 |
| CGGTGCATTTACTTGCAGAA     | 59.872 | 20 | TGTCTCAGAACTGTAACCCTE   | 58.898 | 23 |
| AATGCCTTTTGTTCATCC       | 59.945 | 20 | GAAAGGCAGATTTCCCAACA    | 60.051 | 20 |
| GTCCTGCCCTCTCATAGCTG     | 59.973 | 20 | AAGATGAAGATGACCACGGC    | 60.081 | 20 |
| TTCTAGTCCACCCGACCAAG     | 60.103 | 20 | TCCATCGTACGGTTGCATAA    | 59.953 | 20 |
| CGTCCACAGTGGTTTGAGAG     | 59.305 | 20 | AGGACACGTTGGACCTGAAA    | 60.545 | 20 |
| GTCGATACGGCATGACACAC     | 59.999 | 20 | TTCGAAGATCAACGGACGAT    | 60.603 | 20 |
| ATGCAGCCCATTGTTTCTC      | 60.081 | 20 | ATAAAAGCAAAAGACGGGGG    | 60.305 | 20 |
| ATCGTTCGTGGGATTTTTATC    | 60.034 | 21 | TGCCAGTAATTCACAACCCA    | 59.964 | 20 |
| CGGGTCGAGAGAGGAGAAAT     | 60.725 | 20 | CAATCAAGGGCTATGCAAAT    | 57.725 | 20 |
| TATGGGTTATCACCGGATCG     | 60.544 | 20 | TGGCAATTCTATGACCCTTGA   | 60.454 | 21 |
| ACGAAAAGAGAGCCTTGCAC     | 59.621 | 20 | CCGTTTTCCCGTGAATAG      | 60.308 | 19 |
| TGGCATCCACATGAGTTTA      | 59.924 | 20 | TCTCTGTGTGTGAACCTGCC    | 59.872 | 20 |
| TAAACAATGGTGCCTGAAGG     | 59.585 | 20 | ACCATATTTAAGGGTTATCACC  | 57.552 | 24 |
| TCTATAGCAAGATCTCACGCGA   | 57.452 | 22 | TTGTGCATCGTGTCTTGTG     | 59.298 | 20 |
| TCAAAAATCCAAGGGTGGAG     | 59.903 | 20 | GGGAAGGATGAAAGGGGTTA    | 60.124 | 20 |
| TCATCCAACACCCATCCATA     | 59.579 | 20 | TTGATGGTGACGTAGAACATTI  | 59.912 | 23 |
| CGCACACACTCTCTGATTCAC    | 59.482 | 21 | AAAGTGCCTGTGTGTGGTGT    | 60.121 | 20 |
| GCGTGGAATTCACCTCAAAT     | 59.939 | 20 | AACCTCCCCCTCCATCTCTA    | 59.89  | 20 |
| TCCGATTTCGAATACTCACC     | 59.894 | 20 | AGTGAACCAAACCCAGTCAA    | 59.482 | 21 |

|                           |        |                            |        |    |
|---------------------------|--------|----------------------------|--------|----|
| GTACGGATTGATGGAACGGT      | 59.676 | 20 TCATCTAGCATCTCTTGCTTTCA | 59.261 | 23 |
| CACACTTACGCCCTCTCCAT      | 60.134 | 20 GTGGAAGATTTCTTGGCAGC    | 59.82  | 20 |
| CGTAATGTTTTGGTGGGAAGA     | 59.847 | 21 ACGACCACAAAATGGGAGAA    | 60.353 | 20 |
| ACACAACCTTAGGTGTTCTCATTTG | 57.432 | 24 AACGGCGTTAACTAACCTGG    | 59.154 | 20 |
| CTTTTCGTCAAACCTGCTTC      | 59.853 | 20 ATATCGTTGACCATTCCCGA    | 60.155 | 20 |
| TTGTGAGCGCTATCATGGAG      | 59.972 | 20 GTCCACCCAATCACATTC      | 60.034 | 20 |
| ATGATTGCACCTGAATAAGCC     | 59.06  | 21 TATGTCGTTAGACGATGGCG    | 59.712 | 20 |
| TTGGATTATAGATGCACGAGGA    | 59.569 | 22 TAATGGGAATGGCTTGCTA     | 60.415 | 20 |
| GACAAACTTAGGGACCGCTG      | 59.734 | 20 CGACTTGTCTGGTTCGATA     | 59.716 | 20 |
| GGAAATACTTTTCCCGGAGG      | 59.772 | 20 ACCCCCACCAGATTTTCATT    | 60.422 | 20 |
| CATGGACGAAAATAGCCTCAG     | 59.716 | 21 TTTCTATGGACCGAAATGC     | 59.901 | 20 |
| CATGACTGCTTTGGTTCATGT     | 58.637 | 21 CGATTTGACCTCGGATAATCA   | 59.908 | 21 |
| CCCCAAGATATTGCAACTG       | 60.323 | 20 CTCCCACGGGAAACCATATT    | 60.929 | 20 |
| GAGCACTCGTGTGGGATTTT      | 60.119 | 20 CACACCTCCTCAAAGCACT     | 60.298 | 20 |
| AGGCAATCTAGGCGACAATC      | 59.297 | 20 GGGAGGGAGAGGGAGTATTC    | 60.27  | 21 |
| TCGTGTTCTTCACTCATTCCA     | 59.278 | 21 ACGATACTTCCCGGCTCTCT    | 60.233 | 20 |
| GTGAACGCTCTGTTACCAA       | 59.88  | 20 CGTCAATCGGCTTTGAAACT    | 60.249 | 20 |
| ACACCGATCCGTTCTACAC       | 59.851 | 20 AGTGCATATGCGAGGTGATG    | 59.704 | 20 |
| CCTCCAGTGCCCACTCTAAA      | 60.246 | 20 TGGTGGAGAAGAGAGGGAGA    | 59.913 | 20 |
| GGCAAGCAGTGGTCAAAGAT      | 60.263 | 20 AACCCGTTTGGAGTTGAACA    | 60.388 | 20 |
| GAAGGAGAACC GGGAGTGAT     | 60.456 | 20 TGTCTGAGGTGTGCTTCCTG    | 60.022 | 20 |
| TAAGGCAAGCAGTAAACGCC      | 60.397 | 20 CAATTCCGGCCAAATTAATA    | 59.778 | 20 |
| GCAAGGAATCTAACCTGCGA      | 60.352 | 20 AAAATGAAGGGTTGAGATGGG   | 60.173 | 21 |
| TGTTGGCATTCAAATCAACC      | 59.375 | 20 TCATTTTACCTTTCTGTTTTTG, | 59.107 | 24 |
| TACAGCACAAGCAAAATCGC      | 60.021 | 20 ATTCCTTCCCCTGGATGGT     | 60.575 | 20 |
| TCACAATGGCAACTCAAAGC      | 59.847 | 20 TGTCAACCCTGTTGAGCCTA    | 59.288 | 20 |
| CTTGTGGGACTCTCTCTCC       | 58.819 | 20 TCATGCAGGAAAAACCATCA    | 60.049 | 20 |
| GCCTTTCTTCATGCTTTCCA      | 60.331 | 20 TGCATTTTATTTACGTGGTTACT | 57.087 | 24 |
| ATTCGTGAATGACTACCCACG     | 59.867 | 21 AATTTGCAAAATTTAAAGGTCC  | 58.2   | 23 |
| GCACAACGTATATTCCCCTTTT    | 59.791 | 23 GTCATCGCATTCTCGATTCA    | 59.763 | 20 |
| GCCAACTCAAAAAGGGAGAAA     | 59.288 | 20 CACTGGCCAAGAATCAATCA    | 59.648 | 20 |
| TCCATCCCCTGAAATAGCTG      | 60.029 | 20 CCGTTGGATTTATCTTCTCCAT  | 59.333 | 22 |
| TGCACATTTAGGCTCTGACG      | 60.011 | 20 TTGCTCGAATTCATATTTTTATE | 57.083 | 24 |
| TCAACGTTGCTGCGTATGAT      | 60.288 | 20 GTAGCCCGAGTCAGATCGTC    | 59.834 | 20 |
| TACCGTGATTTCTTCCACC       | 59.79  | 20 TCCACCACACACAGGGTTAT    | 58.697 | 20 |
| ATTCTATCTCCTCTCCGCC       | 59.634 | 20 AGGGATGTGTTTGGACGGT     | 60.23  | 19 |
| CATCAACAACACCATCACCC      | 59.656 | 20 TCTCCATTCCATTGACCCAT    | 60.135 | 20 |
| GACAGCATAACGCGCTCATT      | 60.006 | 20 GATGAAAACGTGAGGCTGAAA   | 60.242 | 21 |
| GTTCGAACTGTTGCATGTGG      | 60.16  | 20 TTGGTTTTGGGGTTAATGA     | 60.024 | 20 |
| TTCTTTGGACAAAAATGCC       | 59.916 | 20 GTGGCAGTAAAATTGTGGGC    | 60.374 | 20 |
| GGTGTGCTCGAATTTTGGT       | 59.978 | 20 CTAGTGTGCCCTAGTTGC      | 59.757 | 20 |
| GACAGCCGATATTTGCTCCT      | 59.297 | 20 TTTGAACTCGGACGAAGAT     | 59.813 | 20 |
| TGTTCTACTATATGTCATGTTTT   | 58.033 | 27 GCAGTGTATCGATGGCGTA     | 59.718 | 20 |
| GAAGAAAACGGCTGAGCAAG      | 60.132 | 20 ACTCTCCATTCCATCAACGC    | 60.081 | 20 |
| AAAGAGCTTCTCCACACA        | 59.844 | 20 CCGAAAAATCAAAGGTCCAC    | 59.406 | 20 |
| ACCTTAACTTGCATGCACCC      | 60     | 20 GCATGCCTTGTACGGTTGAT    | 60.925 | 20 |
| GGGACTTGATTCCATGATAACC    | 59.537 | 22 CAACTTGGTCACCTCCTTGG    | 60.536 | 20 |
| GTGCATGCAAGGAAAATGAA      | 59.67  | 20 CCCTGGATTTTGATTGAGGA    | 59.864 | 20 |
| AAAACCCCATATCTGTGGCA      | 60.192 | 20 GAGTTGTGCAGCCAGGATCT    | 60.418 | 20 |
| GAACCTCGAACCGTTGAGAC      | 59.703 | 20 CGGGATTTAGGTGTTTTGACA   | 59.847 | 21 |
| TACAGTCGGGCAAGTCTCCT      | 59.867 | 20 TTGTTTCGGTGTGCTTCAG     | 59.881 | 20 |
| CCATCCCGCATCATAACAG       | 59.892 | 19 TTGGGACACATTCACGAAA     | 59.941 | 20 |
| GCATGTGGTCCCTAACTCAA      | 58.57  | 20 TGAGTTGGCCAAGAGAGTGA    | 59.545 | 20 |
| CGTGTGCGTGTATCCATGA       | 60.13  | 19 GGAAAAATCAAACAAAACAC    | 60.238 | 23 |
| CATCCAGTTATGTCAAGCG       | 59.148 | 20 CTTTGGGTTGAGCTTTTCCA    | 60.22  | 20 |
| CCTTGGATTTGACGCCTTA       | 60.067 | 20 CAACTGAATGCGATGTGAGG    | 60.263 | 20 |
| TTGGTTATCGCTTGAATGAGA     | 58.374 | 21 CGAAGGTTCCGGTATGATTT    | 59.933 | 20 |
| AGCTCCTGCTGACTGAGAGC      | 60.041 | 20 CTTTCACCAAAATGTGGCCT    | 59.971 | 20 |

|                              |        |                           |        |    |
|------------------------------|--------|---------------------------|--------|----|
| GATTGCAGCTCATCCTTGGT         | 60.226 | 20 TGTGCCATTTCTTGCACTTC   | 59.847 | 20 |
| TGTCCTTGTTTTCGGATGTT         | 59.963 | 21 TTCTTCAACCGATCAATGAAA  | 58.201 | 21 |
| TTCAGATGCTTGTTTTAGGTTCC      | 59.659 | 23 TCATGAGATCCTGGGTAGTGG  | 59.935 | 21 |
| AATGGCCGACACTGCTTTAC         | 60.14  | 20 TCAAAATCTTATGAAATCCGCC | 60.274 | 22 |
| TGTA AAAA ACTT CCTATACATAACC | 59.5   | 27 GGGATTGGGATGAGAAGAGA   | 59.016 | 20 |
| GTCCCGGAATGAAGAAGTT          | 60.306 | 20 ACAGACTCACGCCCTCTCAC   | 60.467 | 20 |
| TCAAATGTTGATCCAGCAGC         | 59.805 | 20 CGCAA ACTGGTCCGAGTTAG  | 60.817 | 20 |
| CCCTCCATTTCTCAAACCCT         | 60.298 | 20 CTTGAAAGTGACGTTGCTGG   | 59.485 | 20 |
| ACAAATATCAGTAAAAATGCGCT      | 57.188 | 23 GGTGTTAAAAGATGCCCTCG   | 59.569 | 20 |
| AGACAACCCACAAATCCGAC         | 59.827 | 20 CCCTCTTCTCCATCATCACC   | 59.46  | 20 |
| CTAACAGTCCGGTTCACGGT         | 60.028 | 20 CGATCGATTTTAGGGTTTTCC  | 59.795 | 21 |
| AACACAAGGA ACTTGGGACG        | 60.005 | 20 CTTTCCGCCTCTTCTCTTCT   | 59.955 | 20 |
| CCCAATTCTCCATCATTATTATTC     | 57.89  | 24 ATCAAGATCCAAGGGCTGTG   | 60.073 | 20 |
| CCACTCCATCACCATCACTG         | 59.954 | 20 TTACAGAAAATCGGATCGGG   | 59.894 | 20 |
| TCCGAATCTCGAGCCTTAAC         | 59.41  | 20 TTTCAACAAACACACACGCA   | 59.765 | 20 |
| GTTGAGATTTGGACGGGAGA         | 60.05  | 20 GACAACCAAGCACAAATCGAA  | 59.697 | 20 |
| ACAGCCCCTACTTCTCGTT          | 60.132 | 20 TCACCCTTCGAGCTTAAACA   | 59.869 | 21 |
| GCAAGATTTCAAAATCGCAT         | 57.843 | 20 CTTGTCTCCGTTCTGCTTCC   | 59.989 | 20 |
| TTTGAGGCAAGAAAAGGTTTG        | 59.366 | 21 ACTTGCACTCCCTGTCACCT   | 59.756 | 20 |
| GTCGGCCAAGAAGAGAGAAA         | 59.55  | 20 TGGAAACAATCAATTGACCA   | 58.855 | 21 |
| TCACATACTCATGCAAGCACA        | 58.878 | 21 CACAGCAGTAGGGTCCAAAA   | 58.773 | 20 |
| TGTCCATCGTAAAAACCTTC         | 59.963 | 21 CCCACCCCAATATCAAAA     | 60.369 | 19 |
| GAAGCATGCGAGACATTTCA         | 59.955 | 20 CCACTTCAAGATTGGGGAGA   | 60.042 | 20 |
| ACGCAATCGATCTTCCATTC         | 60.043 | 20 AACAGGATTTGCTCGCCTTA   | 59.845 | 20 |
| TCATGGTTACGAACCTCCAA         | 58.973 | 20 TCTATCTCATCCCCTCACCG   | 60.027 | 20 |
| CAAGGGCCGAGATTTGTTAG         | 59.702 | 20 TTATGGTGCTACTCCCACCC   | 59.813 | 20 |
| CATT CAGATCTCGTCCGTC A       | 59.787 | 20 CCACACACTGCTCACCTGAT   | 59.738 | 20 |
| CCGCCTCCTTTTCTCTTTCT         | 59.955 | 20 CGGAAGTCACTTAGGGTGG A  | 60.103 | 20 |
| CGGGCTAAACGGGTCTATTT         | 60.324 | 20 TGCAGTGGGTTTGATTGTGT   | 60.008 | 20 |
| TCATTCCA ACTTTGTAATCAAGAA    | 59.119 | 25 TTTTCAGTTAATGAGGTAATGC | 58.849 | 25 |
| GTGATGATAATAGGCGGCGT         | 59.951 | 20 CAGAAATTTTGGAGGCTGGA   | 60.184 | 20 |
| CCCAAGACCCCAATTTGATT         | 60.91  | 20 ATTGATAAATGCCGCAGACA   | 59.14  | 20 |
| TAGGCAGTGCAACGCATAAC         | 59.902 | 20 TTGATTTGTATATAAAGAGGCT | 58.367 | 25 |
| CGTGTGTGTGAGTTCGTGTG         | 59.811 | 20 TTCTTTCCACCGAAA ACTGC  | 60.227 | 20 |
| ACGATGCCTATGATTCTCCG         | 60.059 | 20 TCTTCTAAGGTGCCCATCTG   | 57.894 | 20 |
| AATCAGGGACCCAACAACAA         | 60.21  | 20 GCATTGGATTCTTTTATCCG   | 60.63  | 21 |
| TGTCATGGCAACAAACCCTA         | 59.964 | 20 ACGCAGCCGGAGTAGTTTTA   | 59.904 | 20 |
| TACCGTACCCTTCGCACC           | 59.522 | 18 TTTATGCCTATGTGGCTGCTT  | 59.756 | 21 |
| GACTCCCTTGAGCAAAGTGG         | 59.844 | 20 TGTTAGGTGGTGGGGTTGAT   | 60.088 | 20 |
| CTGAAGGCAACTTGAGGAGG         | 59.982 | 20 AGATCACCAAACCAACCAGG   | 59.82  | 20 |
| AAAATCCAACCATTACACG          | 58.325 | 20 TTGGTTTAAAAGTCGTTGTTGA | 58.405 | 23 |
| AGAGTTGGTGAGGGACATCG         | 60.112 | 20 AATCTAACTAATGGCGCGGA   | 59.704 | 20 |
| TGGAGGAATTCTTCTGCCAT         | 59.629 | 20 TCCAGCAGTTTCAATCACCA   | 60.24  | 20 |
| TTGATTGAACTACATTACAACAAC     | 57.557 | 27 TTTTACAATTCCTGGGGCAG   | 59.931 | 20 |
| CGGCATGCATGAGAGATTTA         | 59.792 | 20 CCTGCTCAAAGGGAGACAAG   | 59.982 | 20 |
| TGATCCATTTTGTGGCAGA          | 60.049 | 20 CAGCACCAAGAATGCAACAT   | 59.722 | 20 |
| GTCTTCCGGAGTACGAGCTG         | 60.012 | 20 TCAAATCGGAGGAGAAATGG   | 60.006 | 20 |
| AATCCTCGTAGCTCCCGTTT         | 60.096 | 20 AACAGTGCTTTTGTGATTCCA  | 58.269 | 21 |
| TTCGAATGCGGTTTATCACC         | 60.837 | 20 CACCGTGTGCAGATTTGTTG   | 61.18  | 20 |
| CCGAATACTTTCTTTTGTAGGC       | 57.198 | 22 TGGGATAAATCTTCAACACCG  | 59.809 | 21 |
| CAATGCAGAGATGGACGAAA         | 59.799 | 20 TATTCGCAGTAGCCGTGATG   | 59.856 | 20 |
| TGTTGCGTGGGCTTTTTATT         | 60.488 | 20 TTCACAGTTTTCATTTGATCAC | 58.986 | 23 |
| TTGATCATCCTGGAGTAAGATTG      | 58.2   | 23 AGTGTTTTGACATGATTACTCG | 57.373 | 24 |
| AAATCAGTCTCCATCCGTGC         | 60.081 | 20 GCAACGAAATCCGTAGCTGT   | 60.278 | 20 |
| ACCCTTGGTGAATTCATA           | 59.244 | 20 ATTAATCAATATAAGGTTGCAC | 57.338 | 25 |
| TGCAAATGAGGATGAACACG         | 60.665 | 20 GGTT CGAATCCTCCACTACAA | 59.042 | 21 |
| GATGATGATCGGTGGAGGTC         | 60.297 | 20 TATTGCTTCAACCTGCTGCC   | 61.304 | 20 |
| TCCAATCACCATTCAAGTG          | 59.343 | 20 CCTGTTCGTGTCGTACAT     | 59.597 | 20 |

|                           |        |                            |        |    |
|---------------------------|--------|----------------------------|--------|----|
| CCAGGATCGAATGGAGGATA      | 59.848 | 20 TGGTTCCAAGAAAGTAGCCG    | 60.241 | 20 |
| ATTTTCGTTGGAGGAGGGTT      | 59.805 | 20 ATCGTTTTCGACTGATTCGG    | 60.074 | 20 |
| CTATGACTCCACCCTGTGGG      | 60.377 | 20 TGCATTGTCAAAGTAGTTAACT  | 59.027 | 26 |
| GCGATGGGAAGATGGTAGAA      | 60.036 | 20 ATTCGTGCCAAGTTTATGCC    | 59.967 | 20 |
| AATTCAGCAAGAATGATAAATCG   | 57.507 | 23 GAGTGATTTGAAATAAAAATTTG | 59.694 | 26 |
| CCAAAAATTAAGGCCCAACA      | 59.805 | 20 AGGATGGCGTGATAGGTGAG    | 60.096 | 20 |
| CAAACCTGTTGAAGATTGTTTACGC | 59.966 | 24 CGAGTAAACCAAACACGTGAA   | 59.71  | 22 |
| AAAAGGGCACAAACAGCAAT      | 59.615 | 20 AATGGCATGCAACTGTTTGA    | 60.119 | 20 |
| GTTTCGCGCAAACAATGTTTAC    | 59.234 | 20 GTTAAAATCGAACCGAACCA    | 57.607 | 20 |
| TGGGTGTGGTGCTTTGAATA      | 59.964 | 20 ATTTCAACCTTTGCCAACGA    | 60.481 | 20 |
| CAAATTGATCCAACGACACG      | 59.964 | 20 CTTCTCCCCTTTCTCTCGCT    | 60.088 | 20 |
| GTGTTTATCTCCGCCTTTGT      | 60.119 | 20 TCCTCACCCTGTACCCCTC     | 59.962 | 20 |
| AAACCATTTTCAGACACGGG      | 59.83  | 20 CGAGATGGGGACAGTTGTTT    | 59.966 | 20 |
| ATCCATCAAGTTTGCACGGT      | 60.384 | 20 GACAGCCAGCTGAAGAAACC    | 59.997 | 20 |
| ATGCATGGGTATCAGGCTTC      | 59.923 | 20 ATAGGCAAATTCGGAGGCTT    | 60.061 | 20 |
| ACCTAATCATGTTTTGGGCG      | 59.823 | 20 AGAAATTTTGCAGCGAAACG    | 60.376 | 20 |
| CACCCACCCTTCCCTTTATT      | 60.046 | 20 GCGTGTGAGGTAGGAGATG     | 59.694 | 20 |
| ATGGGCCAGGGAATGTTAT       | 60.399 | 20 TTATTTGGAAGTGCAACCCA    | 59.013 | 20 |
| AATGATGGTGGAGCTGACCT      | 59.535 | 20 CACTCCAACCTTTGCAAGAACA  | 59.819 | 22 |
| TGGGAAGATCTCTCCGTCAT      | 59.612 | 20 ACTCCCCACTTTCCCTTGTC    | 60.349 | 20 |
| GGACAAGTGGCAATGTGTGA      | 60.58  | 20 GGAGGGAGACCATGTGAGTG    | 60.527 | 20 |
| GTTCCCAATATTTTCACG        | 59.135 | 20 TTACCACAGGCTTTTGGAGG    | 60.103 | 20 |
| GTTTTCTGCCGAAGCAAGAG      | 60.132 | 20 AAATATGGGTGAGGTGGCTG    | 59.813 | 20 |
| GTGGAAGTGTTTTGTGGGGT      | 59.721 | 20 GTTTAAAGTCCCTCACCCG     | 60.714 | 20 |
| TTGCCGCCTTTGATTACTCT      | 59.845 | 20 AAATACACAATTGAACCAACA   | 59.589 | 25 |
| AGCTGACGTGAAACCGAAAC      | 60.299 | 20 CGCCAAACTCATTCCCTTCAT   | 60.074 | 20 |
| GTGAGGGATAGTGAGACGGC      | 59.685 | 20 CCCTCTCCTCACCACTTC      | 59.682 | 20 |
| TGAAGCATGTACTACTCTGCAT    | 58.407 | 22 GGGCGAGCAATCTGTAAGTC    | 59.843 | 20 |
| TATGGGTTATCACCGGATCG      | 60.544 | 20 AAATCAAAGGCCAACAATGG    | 59.801 | 20 |
| CGTCTCACGACAAGAACGTG      | 60.5   | 20 ATTGCATGTGCGAAAAGGAT    | 60.478 | 20 |
| TCATGATGATTACATTTGTGTTGA  | 57.953 | 24 GTGTGCAGGGTTGAATCTGA    | 59.682 | 20 |
| CATGTGGATTCTATTCCGGC      | 60.296 | 20 AACAAAACCAGGCACACACA    | 60.049 | 20 |
| GAATGACACACGCACACACA      | 60.218 | 20 CTTCAGACGAAGCGATCACA    | 60.136 | 20 |
| GCCATCAAACCAACGAAAT       | 59.807 | 20 GGGCAGGTGGCTAATCACTA    | 60.096 | 20 |
| CTTCTGCGGTGTTCCAAGTT      | 60.291 | 20 TGCATGCTCACGCAAAGTAT    | 60.432 | 20 |
| CCAAAATCAACGTCCAGAT       | 59.79  | 20 GGTCAAAATTGGGGAAATGA    | 59.599 | 20 |
| CTATGTTCCCTGCTTCACCC      | 59.55  | 20 CCACGTGCTCCATACTTCCT    | 60.134 | 20 |
| TTTCATGGCTTTCTGGGTCT      | 59.67  | 20 AAAGCCGACAGACAACAAGG    | 60.291 | 20 |
| TGTATGCTGTAATGAACTGCTC    | 59.381 | 24 ATCCGAAACAAAAGGGACAA    | 59.406 | 20 |
| TCAGATATAACGGAGGAATCCAA   | 59.816 | 23 CTCCATCCTCTTGCTTCGAG    | 60.088 | 20 |
| TGAGGCTAGGGAAGGAATGA      | 59.767 | 20 ATGTGAAGAAGCTGCTGGCT    | 60.164 | 20 |
| GGGCCTTAGTCCATGTCCTT      | 60.328 | 20 GCCTACCTGCAATTGGACAC    | 60.526 | 20 |
| TGACCAACTCCATGTTTCCA      | 59.935 | 20 AAAATAGGCCCTTTTGCCTT    | 59.97  | 20 |
| CAATCAATTATGCTAACAATTACC  | 59.083 | 25 AAAAATGAGTGGTTTCATATTGC | 57.968 | 24 |
| GTTTCTGCATTTTGGGAAGC      | 59.691 | 20 TCCCTTGTCCTTACCTTT      | 59.69  | 21 |
| GATTCAGTAGCACAACCACCC     | 59.468 | 21 CCCTTTGAAAGTTGATGGTTT   | 58.085 | 21 |
| TGCTATTTTCAGCCAAACC       | 60.074 | 20 TTTTTCGAGCAACATCTTGTG   | 58.953 | 21 |
| CTTTCTGCATACTTTCCCG       | 59.702 | 20 TGAGATCACGAGTCCACGAG    | 59.98  | 20 |
| ATGGGATATGAGGGGAATGC      | 60.882 | 20 TGTTTTCAATCACAGCCACC    | 59.547 | 20 |
| CGGTAATTTGAAGTCAAGGGA     | 59.074 | 21 CCAATTGTCCATATTTCCGCC   | 60.153 | 20 |
| GCGGATGCTCTTAGTTACGC      | 60.01  | 20 TGTGAAAAATTTTCGAGCACA   | 57.891 | 20 |
| CTCCCAATCAATCCAGGTA       | 59.744 | 20 AGAGCATATCCAATGCCAGG    | 60.059 | 20 |
| TCTTTTCCGTGTCCATTTCC      | 59.91  | 20 TGGAAAACAATGCCTAACAGC   | 60.124 | 21 |
| TTATCATGCAATGAACGGG       | 59.377 | 20 CTCCTACATTATTTGGGGATTA  | 59.567 | 25 |
| AAAGATGGCCAAAACGTGTC      | 60.118 | 20 ACGGGCAGTTGTCCATTATC    | 59.82  | 20 |
| ACGTTGCAAGGTCTACCACC      | 60.035 | 20 CAGTCCCCGACTCAAAAATG    | 60.486 | 20 |
| TGCGTTTTGACGATATATAGTGT   | 59.092 | 25 GTGCAGTCGATATTTGCTCCT   | 59.354 | 21 |
| AGGTTGCGTACATCTGACCC      | 59.997 | 20 TCACAGCATACGAGGGACAA    | 60.263 | 20 |

|                           |        |                             |        |    |
|---------------------------|--------|-----------------------------|--------|----|
| AAGTCGATCGAGCAGAGTAACA    | 59.149 | 22 TCTCGCGGTTTTTCAGTTTCT    | 59.993 | 20 |
| AAGGGCCGAGATTTGTTAGA      | 58.787 | 20 TGGCCTTCCTCAATCTATGG     | 60.029 | 20 |
| TATGACTTCGGCATTACCGC      | 60.991 | 20 TCTTGCAATTGAGACCGCTA     | 59.566 | 20 |
| CGTGTCAAAAATCTGTTCATTTG   | 59.544 | 23 CATGGTTTGTCTCCATCAGA     | 59.648 | 20 |
| TTCAACTGGATATCAAACGCA     | 59.172 | 21 TCGATCACACAGAAAACACGA    | 60.294 | 21 |
| CATCCCTCCACATTTGCTCT      | 60.073 | 20 ATATTTTGGCATTGGAGCG      | 59.928 | 20 |
| TTTGAATACAATGCTTCATCCA    | 58.161 | 22 CCAATTACACAAATCAACCTGC   | 59.244 | 22 |
| CTGATGTGGCTGAAATCCAA      | 59.648 | 20 TGC GTTTT GACAATATATAGGT | 60.083 | 26 |
| CTTGAACATGGCCATCACAC      | 59.967 | 20 GCATGTGTGGGAGAAGAAAGA    | 60.248 | 21 |
| AATTAATGGGCATTGAGCA       | 60.424 | 20 TGCCAGGGTTATCTTGATCC     | 59.894 | 20 |
| ATTATTTGCATTGCTTGCCC      | 59.935 | 20 GAGGACAAGAGGTTGGGACA     | 60.088 | 20 |
| ATGTGTTGTGATGGGGGATT      | 59.91  | 20 TGAAC TTTGGCGTTCTTGTG    | 59.881 | 20 |
| ATGGATTGCAGAAAGATGGC      | 60.043 | 20 TTGTTTGGGGGTGTTGAGTT     | 60.246 | 20 |
| GACGGCTGATATTTGCTCCT      | 59.297 | 20 TTTGCACCTGAGGAGGTGTT     | 60.69  | 20 |
| TGTTATGCCTATCCCTATCAAGTA  | 57.02  | 24 TCCATACTCAACACAAGTCGA/   | 58.283 | 22 |
| TTTCTCCTTGAGCCTCTTCAA     | 59.181 | 21 TTGTCCAGCTGCTCTCACAC     | 60.187 | 20 |
| ATATCGCGGGCTAAGAACCT      | 60.082 | 20 ACAAAGCGATTTGTCGCCAC     | 60.118 | 20 |
| TCCGGAGAAAATGAAGAAGA      | 57.459 | 20 ATAATGATATTTTGAACGCAT    | 57.16  | 23 |
| TGGAACTCGAGAGGAAAGA       | 59.92  | 20 CGTTCACGAGTGGTGACAAA     | 60.757 | 20 |
| TGATTTTGATCCATTGCCCT      | 60.274 | 20 AAGGGTTTGGGCAGTCATAA     | 59.429 | 20 |
| ATCACGCTGATATCGCACAG      | 59.854 | 20 CCATCAAGGAAAGACGCATT     | 60.074 | 20 |
| CTCTGGGCTGATCAATTCAA      | 58.797 | 20 TCTGCCCTAAGATGAAACGG     | 60.206 | 20 |
| GGCTGAAATCTGGTCTTCCA      | 60.195 | 20 TGAATCAATCTTGTGCGTTGA    | 60.25  | 21 |
| TGAGTGCTAGACTATTGTAAAAAC  | 57.09  | 25 CGCCATAATTGACTGCAAAA     | 59.702 | 20 |
| TGTGAAGGGGTGTTCAAGTG      | 59.565 | 20 TGTTTGGCTTTTCGATTGTGA    | 60.234 | 20 |
| TTTTGAAACATGATGGCGTC      | 59.523 | 20 CACGTGGCATGATAATAGCG     | 60.118 | 20 |
| TCATTGATTTCAATTGCATAATCTG | 59.005 | 24 GATGATCGGAACGTGAAGCTA    | 60.228 | 21 |
| AATCCACGAAACGGTTTGAA      | 60.344 | 20 TCATCTTCTCCACCAAAGGA     | 58.201 | 20 |
| AAACAGCCCATGTGAGAACC      | 59.973 | 20 CAAGTGTGCGCAGTAGACGGA    | 60.049 | 20 |
| AAACCAATTGGCAACGAGAG      | 60.11  | 20 CCAGGCGTACAGTCAAAGGT     | 60.171 | 20 |
| CCGAATTTGGCTCTTTTCT       | 60.553 | 20 CGAGCAGAAAATCTGTGCAA     | 60.134 | 20 |
| ATCTGCTCCTCTCCTAGCCC      | 59.942 | 20 ATTAGAAAAATGCGCGATCC     | 59.174 | 20 |
| AGGATTTCTTCCCCAAAAA       | 59.75  | 20 CAGCTGCAGAGATGGAATCA     | 60.096 | 20 |
| TATCGCATCATTTCCCTCTT      | 59.486 | 20 CGCGTTACGAATCCAAGTTT     | 60.131 | 20 |
| CTCGGTCTCTGGACCTTTA       | 59.28  | 20 CTCCATGGTGCATTTCACAC     | 59.967 | 20 |
| GTTGGGCGATTTGAAGCTAA      | 60.209 | 20 TGGGTCACTCCTGTTTAGTGA    | 58.201 | 21 |
| GGCAATGGTTTGGTTTCAGT      | 59.836 | 20 TTGGCCATGTGAAAATCAGA     | 60.049 | 20 |
| CTTGAGGCCACACAAGAAG       | 60.822 | 20 CAATAGGTAGCTCGGATATGTG   | 59.891 | 23 |
| TATGCACGTGACTTGCTTCC      | 59.871 | 20 TGC GGATTGAACAAATCTGA    | 60.197 | 20 |
| ATCCCGGAAATAGTTCCAAA      | 58.368 | 20 GGCCTAGGCACCAAATCTTA     | 59.182 | 20 |
| GTTGCATAAACCTAGGCCA       | 59.96  | 20 CAAAACCCACACCCTGTACC     | 60.126 | 20 |
| CCTAGGTCAGTTCCAACCCA      | 59.959 | 20 CACCATACAAGCATTGAGCG     | 60.28  | 20 |
| AAGGTTTCAAGTGGCAAACG      | 60.147 | 20 CTTTCAATCGTTGATGGGGT     | 59.79  | 20 |
| CCCTAACCTAAAGTAAGGACCA    | 59.788 | 23 TCAAACCAAGAACCGACTGA     | 59.262 | 20 |
| CAATGCACCAGAGTAAGTTGGA    | 60.168 | 22 TGGTTTTATGTTTCTTTGGGA    | 59.865 | 23 |
| GTGGATGAAGATCCTGGACG      | 60.475 | 20 AGAGATGCCGGGGAAGTAAT     | 59.925 | 20 |
| TATCGAGCACCACCAATGA       | 60.073 | 20 TCTGTGAATCAAGCTCAAGCA    | 59.731 | 21 |
| TGATCCGAGCTTGGAATAGC      | 60.318 | 20 TTTCTCTCTTTTGGTGAAGAA    | 58.098 | 22 |
| GGTCTCCCTCCCTTTCTCTC      | 59.226 | 20 ACTGTGAAAGAGACCTCCGC     | 59.455 | 20 |
| CATGGAATTGAACTTTGGA       | 59.924 | 21 AGGTCGAGGATTGTCGTCTG     | 60.261 | 20 |
| TCGAACACCAAACCAATTCA      | 59.941 | 20 GCCGATGCTGAAGTGTGATA     | 59.83  | 20 |
| TGATGGCAACCAAGAACTCA      | 60.24  | 20 TCACCCTCATAATGTGTGGC     | 59.374 | 20 |
| TTGCATTTGGATGCATGATT      | 59.898 | 20 GGAATCTAGAACAGACCAATC    | 60.196 | 23 |
| TGTAAC TTTACGGCTTTTCTGGA  | 60.166 | 23 TGAGTCCATGACCCAAC TTTT   | 59.439 | 21 |
| TTTCTTCCATTGGCTTACC       | 60.051 | 20 CACATCAAATTGAGGACGATG    | 58.987 | 21 |
| GGACATGGGATTGGAGAAGA      | 59.862 | 20 AGGCGGCTAAATCAATCAA      | 59.682 | 20 |
| TCGAAAACCGGTTAAAGACC      | 59.064 | 20 TGAGAGTCTTCTTCTTGCACA    | 60.171 | 22 |
| TGAGAAACGAATGCACATGA      | 58.782 | 20 GTTCCCCAAGCTTCTTACA      | 59.17  | 20 |



|                          |        |                            |        |    |
|--------------------------|--------|----------------------------|--------|----|
| GGGCCAAAAGAACAACAAAA     | 59.953 | 20 ATTGTTCCACGCACTCACA     | 60.16  | 20 |
| TTGTTGTACCATTGTGAAAGAG   | 59.051 | 23 GTGCGTTGTGTTGACGTTG     | 59.768 | 19 |
| ACCCAGAGAGCACTCGAAGA     | 60.135 | 20 TTAGCATTTGACTACACTCCTC, | 58.151 | 24 |
| ATTTGAGTGGCTGACCCAAG     | 60.111 | 20 TGCTGGAGCAGTCATTTTTG    | 59.988 | 20 |
| AGAGAGAAAATTGCATCGGG     | 59.269 | 20 TTCCCGAAAATAAAAAGAAAA,  | 59.552 | 24 |
| CGCATTAAATTCGGAACAGA     | 58.769 | 20 GATAACATGCCATCACACGC    | 59.963 | 20 |
| TCGTGATCGGTTAAGAAATG     | 60.081 | 21 AATTTTCATCTTCACTGCCCG   | 60.074 | 20 |
| TGGGGTAATATAAAGGTTTCATCC | 58.223 | 23 GAGTGGGGATCAGTCATGGT    | 59.774 | 20 |
| CCGATTCAGATACTCCCAA      | 59.887 | 20 AACACCTTCCACGCAAACCTC   | 60.156 | 20 |
| TCGTGCGCAAAAATTATGAA     | 60.211 | 20 TGTGATTTTCATCCATTCGGA   | 59.859 | 20 |
| TTCTCAACTCGTCAACCCGT     | 60.69  | 20 CACACAATTGAGCACACACG    | 59.778 | 20 |
| TGGAGAGAGAGAAGATCGGC     | 59.636 | 20 CAACACACCACGCATTCTTC    | 60.16  | 20 |
| ACAATTGGATTAGTGACATGGCT  | 59.781 | 23 ATGCGCAGATCTAATGGTCC    | 60.066 | 20 |
| CACCAAAGGAAAATTGAATGG    | 59.302 | 21 TACAGGGGTTTGCCTTTAGC    | 59.225 | 20 |
| CCCTCCTCATTTCCAACATC     | 59.336 | 20 TGGCCCTTTTGTACACTTCA    | 59.17  | 20 |
| TGGTGTGGGGTTAATTTTCG     | 60.587 | 20 GTGCAGCACTAGGTCCATTG    | 59.318 | 20 |
| TCATTGTTTGAAGAGTGGGAAA   | 59.587 | 22 AATGAATCTACGTCCACGGG    | 59.813 | 20 |
| ATTTTCTTGGCCCAACCTTT     | 59.814 | 20 CACGCCGCATTTCTTCTAAC    | 60.772 | 20 |
| CCAACCTGTATCGCTCTTTCT    | 58.474 | 21 ATTTGCATGGCTCTGGGTAG    | 60.096 | 20 |
| AGTGACCGACTCAAATGGG      | 59.966 | 20 GGGGCGTATAGACGCAAATA    | 59.95  | 20 |
| TGCAAAGATGACAGAAACAAGA/  | 59.912 | 23 CGGATGGATGCTTCAAAGTT    | 60.074 | 20 |
| CGATATGCTTTGTTGGGGAC     | 60.331 | 20 TGGGGTTATTAGTGGATCAAGC  | 60.204 | 22 |
| AAACCCTCTCAAGAACTCCAAA   | 59.255 | 22 TGCACCTCCTCTTCAACAAC    | 58.854 | 20 |
| CATGTTAAGGAGGGGATCCAT    | 60.025 | 21 ATAATGTTGCGCGTGCTTTA    | 59.379 | 20 |
| TGGCTGGCGGTTTTAAATAAT    | 60.659 | 21 AGAGCAAAGTGTGAACTCTC    | 58.794 | 22 |
| TCGGGTCTCAACACATTCAC     | 59.525 | 20 AGAGAGAAAGTGGCAGTGGG    | 59.45  | 20 |
| ACGAACCGAGACTGACTGCT     | 60.057 | 20 TCGCCGTGTTTGTATTCTTG    | 59.729 | 20 |
| TCGAAGTCCCACCTCAGCTT     | 59.989 | 20 AACGCGCATTTTTAGGATTT    | 58.764 | 20 |
| TCCCTCTTTTGTATCTCGCC     | 59.269 | 20 TCAGCTCGGGAAGAAACTC     | 59.55  | 20 |
| ATGGGCACGGTACTTCATGT     | 60.263 | 20 CGCTATGTGACCATCTGTGG    | 60.136 | 20 |
| TGTTGTGTATAAGGAAGTTTTTCG | 57.546 | 24 GTGTTATACCCGTGCGTTCC    | 60.257 | 20 |
| TGAAACCTAAGTGGCCTGTCA    | 60.674 | 21 GATTGAATTGGTGGGTTTCG    | 60.17  | 20 |
| CCTTGCTGGTTTTTGAAGGA     | 60.22  | 20 TTTCTTCTCCCTCCCTCCAT    | 60.008 | 20 |
| TCGATCAAAGTTATGAATTGGAA/ | 59.851 | 24 TAGGGCAATCAAGCAAGGAG    | 60.344 | 20 |
| CTCCAGACCACCGCTACTTC     | 59.867 | 20 GGGCAAACTGTAATTGCTCA    | 60.124 | 21 |
| GCATCTCTTGCTCTCTCGTTG    | 60.292 | 21 ACACGAGATTTACGTGGTTCCG  | 60.045 | 21 |
| CAGGTCGAGGATTGTCGTCT     | 60.261 | 20 CATGGAATTGAACTTTTCGGA   | 59.924 | 21 |
| GGTGCCACGTGTCATACTCA     | 60.604 | 20 ACCTAAAACCCGACCCGAT     | 60.564 | 19 |
| TTTTTGGGAAATCCTTGAC      | 59.916 | 20 CGAACCATCGTCTCGTATCA    | 59.673 | 20 |
| GGATTGGACCTATAATATTGACCC | 59.848 | 24 TTGGGGAATGGAAGAATGAG    | 59.864 | 20 |
| TGCAGAATCATAAAGTGCAAAC   | 57.98  | 22 TTGGCAAATTTTCTTGACACA   | 60.229 | 20 |
| AGAGGAGAACGCCATTGTTG     | 60.255 | 20 TATTGAACTGCCTTTGCGCT    | 59.845 | 20 |
| CATGGCGGATTTACAACCTGA    | 59.542 | 20 CGATGCAGCAGAAAGACAAA    | 60.134 | 20 |
| TGCCCTCTTGATACCCCTC      | 60.073 | 20 AAGGGCTTTGTTGGTTTGTG    | 60.008 | 20 |
| TCCGACAAACACAAGAACCA     | 60.128 | 20 TTCATTCTTTGCATCCCTCC    | 60.014 | 20 |
| CTGTTAGCAAGTTCCACGCA     | 60.05  | 20 GGAGTGGTTCGGAGAGTTGAG   | 59.835 | 20 |
| AGCGAAATTGATCTCTGCGT     | 59.985 | 20 GAGCTGCAAAAACCATCACA    | 59.847 | 20 |
| CTGGGAAACCAATCTTGTCG     | 60.486 | 20 TGCTTCCGCATTTTCTTTTT    | 59.832 | 20 |
| CAAAGGCCACAGTGGTTAT      | 59.853 | 20 AACCTGACACGAACACGACA    | 60.203 | 20 |
| ATGATTGCACCATAACGCAC     | 59.43  | 20 CTGAGGATAAAGGTGGCGAA    | 60.206 | 20 |
| GAGACCCTCAACCTCACCT      | 60.504 | 20 CCGGAAAACACCATCAATCT    | 59.79  | 20 |
| GCCTTTCGAATTGGTGGTTG     | 60.481 | 20 CTCTCAGGGGCAGATACAGG    | 59.82  | 20 |
| GGCAGGAATGAGACACCAAT     | 59.934 | 20 TTTTGAACGTTTGCAGTTGG    | 59.746 | 20 |
| TGGACAAACAAGCCTCACTC     | 58.854 | 20 TGTTCTCGTATGATTACGCTCC  | 59.252 | 22 |
| CTCGTAGAAGGGCAGTGGAG     | 60.005 | 20 ACCATGCACGTAATCCCAT     | 60.081 | 20 |
| GGAACCATCATGCCGTTATT     | 59.651 | 20 TTGTTATTGAGAGGGCAGGC    | 60.214 | 20 |
| TGAATTCAATTGTGTTTTGGG    | 58.374 | 21 GATTGATGAGGGTTCCAAGC    | 59.488 | 20 |
| ATCCAAGGGTCAATAATGGTT    | 57.278 | 21 TGACTIONTGCATTTTGGGC    | 59.547 | 20 |

|                          |        |                           |        |    |
|--------------------------|--------|---------------------------|--------|----|
| TGGAGGAGTTCTTCCAGGAG     | 59.375 | 20 ACACACCTAGTGTGCTATCATC | 60.002 | 25 |
| CGAGTATCCTCCCACTCCAA     | 60.065 | 20 TTTCCCGGAGAGGAGAAAAT   | 60.011 | 20 |
| ATCGTGAGGAGCGTTGATCT     | 59.834 | 20 CCAAATTGCCCTTCTGTGTT   | 59.971 | 20 |
| AGGAGAGATTGTAACGACCCA    | 58.658 | 21 ACCAAGATTTGATCATGGCG   | 60.864 | 20 |
| CATTATTTAATGTAGGGTGGGTGA | 59.089 | 24 TAACATAATGGTTGGCGGCT   | 60.343 | 20 |
| TGCTTCCCTCAATGGTTTTTC    | 60.051 | 20 CATTGCATCTTCCCTTTTGG   | 60.439 | 20 |
| ACTGGCTGCTCTACGCTCTC     | 59.921 | 20 GTATTGCTCTGCCACAACA    | 59.871 | 20 |
| CATTGAAGATCCCGGACAGT     | 59.927 | 20 TACTCCTGCTCAACCTGGTG   | 58.879 | 20 |
| AAAAGGCCAGCCAGCTAAAT     | 60.224 | 20 CCACACCCTCTCCTCTGAA    | 60.229 | 20 |
| TTTGGATCACTAGGGCTTGG     | 60.066 | 20 AACCAGCCTAGGGTTGAGGT   | 59.994 | 20 |
| TCACGTGAGATGCTGAGTAGG    | 59.049 | 21 TGTAATCTGCCCGAAAACC    | 59.938 | 20 |
| GCTCTTCCCTTTTGTCTCTC     | 60.19  | 20 GGTAAACATTTTACGCGAGGC  | 59.713 | 20 |
| AGCGGTTATTACCGGATCG      | 59.93  | 19 AATGAACGCAACCCAAAAT    | 59.476 | 20 |
| CGCTACTCTTCGAGTGCGTT     | 60.73  | 20 CGCGGGGTTTAAAGTAATGTT  | 59.01  | 20 |
| CAATACACCGGTTCCAAGTG     | 58.897 | 20 TGGTGTACAGTAAGAGGCAAA  | 59.724 | 23 |
| GGAAGGGGAGTTAGCGTATG     | 58.671 | 20 ATCCTGCAATCATCACCCA    | 59.866 | 19 |
| ATCCGATGGATGAAAAGCTG     | 60.036 | 20 AATGAGGAAATCGACGATGG   | 59.894 | 20 |
| AGGAAAGAGCAAGCAACGTC     | 59.621 | 20 ACCCGGACAATGAGCAATAA   | 60.331 | 20 |
| AGCCTTTAAGACACGCCAAA     | 59.883 | 20 CTCCCCTCTTCGAATATCCC   | 59.859 | 20 |
| ACGCGTGGGTGATATGCTA      | 60.112 | 19 TGAACCAAACACCCGTGATA   | 59.816 | 20 |
| TCCAAAGTCACACTTGCTGC     | 60.032 | 20 TTGCCACCGATATCAAACAC   | 59.4   | 20 |
| AGTGATGGCGGATCTTATCG     | 60.059 | 20 CAAATCATGTGCGCTGAAAT   | 59.694 | 20 |
| TTTGGCCAGACATTAAGC       | 60.074 | 20 AGTTTGGTTCTGGCTCATGG   | 60.111 | 20 |
| AAATCCTTTCACAAACCCAC     | 59.836 | 20 GTCAAGTCGACCACCCTTGT   | 60.009 | 20 |
| CAAGAATCCAAGCTTGCCT      | 59.452 | 20 TGAACGAGGAGAAGGAAAA    | 59.784 | 20 |
| CTCATGGCGCTACATCACTT     | 58.903 | 20 CCAATTTGAATGGTTATCACCT | 60.457 | 23 |
| CGAAGAAAACACCCGGACTA     | 60.103 | 20 GAAGCCATTGATAATCACCGA  | 59.915 | 21 |
| AGAAAAGGGAGCTCCTCAGC     | 60.096 | 20 TCCTTCCCTGCATTTTCATTC  | 60.014 | 20 |
| TGAGTGAGTTGGCGAGAATC     | 58.96  | 20 TCATTTCAAAAATCAATGGATG | 59.291 | 23 |
| CTTATCCCTACACCGCCTCA     | 60.088 | 20 GTTTTGTAGCTCTCGTCGGC   | 60.022 | 20 |
| AAGAATCGAACGGGAGGAAG     | 60.569 | 20 TTCTTGTTAGCTGGTCTGGA   | 59.861 | 21 |
| TTGGGATTAAGGCTTTGGTG     | 59.931 | 20 TTTTGAACAATGATACCTTCTC | 58.271 | 24 |
| TTGTCAATTCCTCCCTTAGACA   | 58.694 | 22 TCATGGTGCTTGAAATTGGA   | 60.049 | 20 |
| GCATCTCTTGCTCTCTCGTTG    | 60.292 | 21 GTGGTAACATAAAGGGCCGA   | 59.823 | 20 |
| AAGGGGAGATGAAGGGTGAT     | 59.755 | 20 GCTACGAACTACGGGGTGAA   | 60.132 | 20 |
| GTCTATGTGCGTTTTTGGCA     | 59.735 | 20 GATGGGCTAGGAAGCGAAA    | 60.303 | 19 |
| CGGCGTTAGCCAAATCTAAG     | 59.868 | 20 CTTACCACCATTCACCACCC   | 60.088 | 20 |
| CAATAATGCCCTTTCATGT      | 59.645 | 20 AAAAACGAGGGCCAAAATCT   | 59.945 | 20 |
| GCGTCTCAAACAGGAGAGA      | 60.533 | 20 CTA AACACGCATTCTCTGC   | 60.637 | 20 |
| CGTCGTTCTTGATTCTTCCA     | 58.847 | 20 CAGCTCTCATTATTTCCGGC   | 59.807 | 20 |
| TACCGTTCAAGGTGCAATG      | 59.585 | 20 AGTGGAACCTGCTTCTCTCAG  | 58.533 | 21 |
| TGCGCTACAAAAACGAGTTC     | 59.111 | 20 TCACGATCGAACCACGTA AA  | 60.111 | 20 |
| AGTAGTTAGCATGGAAGGGGA    | 57.827 | 21 ATGGGGCTGTAGCGATGAT    | 60.464 | 19 |
| CGGGACCAAGTGACTTATTTTG   | 60.741 | 22 TAAAGTAGGGTGCAGGAGCG   | 60.399 | 20 |
| ATCGCATTGCCTCACTTTTT     | 59.713 | 20 AAGGCAGAGTTTTGCACGTT   | 59.92  | 20 |
| TTGGTACATGGATGGGGATT     | 59.871 | 20 ACCTGGTCTCCAAGTGATGG   | 59.962 | 20 |
| CTGATTTTCTCGGTAGCCCA     | 60.206 | 20 GGGAATCAA AACATTCCCT   | 59.996 | 20 |
| AGTGGGACATCCAGGAAAGT     | 58.44  | 20 GCCTGCCTTGAAACTATTG    | 59.708 | 20 |
| CATGAGAGCGGTGATTTTGA     | 59.799 | 20 AACTTGCGGGAATGAGTTG    | 60.11  | 20 |
| TGACAATTTTGCCTTTTCC      | 59.916 | 20 GCTGCAGATCTAACGACCAA   | 59.028 | 20 |
| AGTCCTAGCCCCACATCTCA     | 59.679 | 20 CGATTAACGGTCCGGTCTTA   | 59.953 | 20 |
| AATGCGGGCATAAGACCATA     | 60.31  | 20 TTAGACGTGAATTGCAAGCG   | 60.014 | 20 |
| TATGTTAACGGGGTTGGGAA     | 60.046 | 20 AGGCCCATCATACCACAGTC   | 59.81  | 20 |
| AGTCATTGCTGATATCGCCC     | 60.066 | 20 CATTTTGTGGCCTGTGTTTG   | 60.004 | 20 |
| GTCTCCCATTGATGCACT       | 59.934 | 20 GAGCTCACCGGTTCTTTTGA   | 60.375 | 20 |
| CGCCATTACCGTGGATTTAC     | 60.209 | 20 CAACGATGTGCTAGTTGTGGA  | 59.773 | 21 |
| CTGCACACATTGATGAAGGG     | 60.112 | 20 AACACAAAAGGGCTCATTCC   | 59.031 | 20 |
| CATCATTTTCTTCGACGGGT     | 59.933 | 20 AGAAGAGAGAGGGAGGGTGC   | 59.945 | 20 |

|                            |        |                            |        |    |
|----------------------------|--------|----------------------------|--------|----|
| TGCGCTTTTGT CAGTGTACC      | 59.911 | 20 TTACGGCAATTTGCATCAGA    | 60.215 | 20 |
| TTTGATGCCGGGAATGTAAT       | 60.153 | 20 ACTTTTCACGGACTGCCAAC    | 60.156 | 20 |
| CACGCTGATATCGCACAAC        | 59.895 | 20 AGATGGAACGACCCTGTGAG    | 60.112 | 20 |
| ATCCCAGAATGCCTACACCA       | 60.34  | 20 TTTTGTCTTTTGGGAACCA     | 60.314 | 20 |
| TTAAATGCACAGCACAGCTC       | 57.662 | 20 TAGGAAACCCGCCATACAAC    | 59.823 | 20 |
| TCAACTTATATTT CAGCGACGA    | 57.628 | 22 AGAAACTTACCGCCAAGTCG    | 59.378 | 20 |
| CCTGGATCAACAACAGCAGA       | 59.831 | 20 TGAAAAATGACGCCAAAATG    | 59.538 | 20 |
| AACGACACTCATCCGCTCTT       | 59.874 | 20 GTCGAGTGGGACCAAAGAA     | 60.088 | 20 |
| CTTTCACGGGTTTGAAGCTC       | 59.853 | 20 TCCAGTTTTGCTGGAAAAGG    | 60.22  | 20 |
| TTCATATATCACGTTAAGACATGC   | 58.031 | 26 ACCAAGTCATACATCATGTTAT  | 58.868 | 27 |
| TAACCCTTGTTAGCCCGTTG       | 59.99  | 20 TCTCACAGGATTTAGGTGTTCC  | 58.174 | 22 |
| TCAGCCAAATGCAGAGATGA       | 60.504 | 20 TCGATGAGGAATGGGAAGAA    | 60.538 | 20 |
| CTATAAGGTTGCACCCACGC       | 60.523 | 20 TTTGTGTGATTTTGACCCCA    | 59.792 | 20 |
| TCAATTTCTCTAACCTGTAAAATG   | 58.065 | 25 TTGAAATGGGAATGCAGGTT    | 60.309 | 20 |
| CCCATTCTCTTCATCCCTCA       | 60.003 | 20 TGCTGGTACCTTCGGAACTC    | 60.255 | 20 |
| AATACACCCCAAAGTGGAACC      | 59.969 | 21 TAAAAACCGAACCAGGTCTG    | 59.471 | 20 |
| CCAAATGTTAGGGTTATCACAGG    | 59.654 | 23 TGGACATTCACCTTGTGGGA    | 59.935 | 20 |
| AGATGATCTTGGCATCACCC       | 59.893 | 20 GTTGCTTCTTTAACGCTGGC    | 60.025 | 20 |
| AGCTTTGAAATGACATGGGC       | 60.081 | 20 TGCATACAACACGCAAATGA    | 59.716 | 20 |
| TGCATCATACGGCATAACATTT     | 58.928 | 21 TTCGGAATTTATAATATGGGCA  | 58.4   | 22 |
| TTGATCCTTTTTATGATAACCCAA   | 58.836 | 24 TTTGCTCGTGTGTTACAGGG    | 59.758 | 20 |
| TCAAAGAAAGAGAGTTTAGATCA    | 58.804 | 27 AAATATGCCACCTATTGCCG    | 59.816 | 20 |
| TTGAAATATACTTTTCATTT CAGC/ | 57.253 | 25 CTGTTTGGCTACGGAAGAGC    | 60.015 | 20 |
| CAATTCGAAGCCCAAATCAT       | 59.901 | 20 GGCCCTTCTCTTGAGTTGA     | 59.405 | 20 |
| AATGGGTGGGTTATAATGGGA      | 60.137 | 21 ATACCATGGCGTGCAAGAGT    | 60.547 | 20 |
| ACAATGTTTCACGTGGTTCCG      | 59.465 | 20 AATTAGTTGAGGCACGTGGG    | 59.993 | 20 |
| GCACTTGCCTATTCTTGGG        | 59.708 | 20 TTTGCATCAAACATGGCTTC    | 59.67  | 20 |
| TCCAACCGCTATTTGAATCC       | 59.901 | 20 GTTGC GACTCAACACCAGAA   | 59.88  | 20 |
| TTTAGTGTTTTGACATGATTACTCC  | 57.557 | 25 TCGATCTTCTTTCTTTCCAA    | 58.89  | 21 |
| TGCTTTAGGTCTTTGCCTGC       | 60.523 | 20 GTACAGGGTTCTCCAACCGA    | 59.966 | 20 |
| TCCTGCACTGTGTGTGTTCA       | 59.905 | 20 GGTGGCCATTGATAGGAGAA    | 59.894 | 20 |
| GAATGCAGCTTTGGTTTCTTG      | 59.875 | 21 AAAAAGGGATTATCACGGGG    | 60.013 | 20 |
| GGGAGAGAGAAGGGGAAGAG       | 59.367 | 20 GCGTTTTGGTGGATGAATTT    | 59.807 | 20 |
| AAGAAAAGGGGGAAAGGTGA       | 59.912 | 20 ACTCTGGCAGTGCAACTTGA    | 59.622 | 20 |
| TTATTGAATTTTCGCCCCAG       | 59.901 | 20 GGATTTTGATGTATGAGTTTGC  | 59.297 | 24 |
| TCCCTTTTACTTTATTCTTTCAA    | 57.604 | 24 TAACCTGAAAAGGGTTCCCC    | 60.159 | 20 |
| TGGACTAGGGGCTGAAGAAA       | 59.807 | 20 GGGTCGGGCTAATAGGCTAC    | 59.951 | 20 |
| CAAGGGGTATTTTTGTCCGA       | 59.795 | 20 TCATATGGGTTGGTGTGTTCA   | 59.682 | 21 |
| CCTGTGACTGTGCATGAAGTAAA    | 59.295 | 23 TGTGTTTTCAAAGCCTAGACA   | 57.63  | 22 |
| CGAACGATGACATGCTCCTA       | 59.823 | 20 CTAGATCGCGGGCAAGTAGT    | 59.499 | 20 |
| ACTTGCAAAGACTCCAGGC        | 59.478 | 20 AACCAAGCCTCAGCAAATG     | 60.249 | 20 |
| ATTCACACCATTTGCCATCC       | 60.591 | 20 TCTTTTCTCACACACCACGC    | 59.88  | 20 |
| AATCCCCGCTATCTAAGGA        | 59.888 | 20 TTCAAGGAGGAAACACGAGG    | 60.224 | 20 |
| TGGATACATGGGTGGATAATATG    | 58.461 | 23 TTTGTAATAACCCTTATTTTCGT | 59.73  | 25 |
| GCGAGGAAATTAAGCAGCA        | 60.476 | 20 AGAGGGGAGCTCGTACCATT    | 60.096 | 20 |
| AATCTCGCAGTGCAAAATCG       | 61.304 | 20 TCAAACCTCTTCCATCACCC    | 59.903 | 20 |
| TCAACTATTGCCCTTGAC         | 59.933 | 20 TTGCCAAATGGTGTAAATGTCA  | 59.841 | 21 |
| CAAGACCACGAGCCGTTAAT       | 60.132 | 20 ACTCACACACCTTCACACGC    | 59.789 | 20 |
| TCTCATA CAGCCAAA ACTTAGGA  | 58.089 | 23 TCAAGGTGTTGATGCTTGGA    | 60.24  | 20 |
| GTAATCTGGGATAACGGGGG       | 60.391 | 20 TGTGAGAGACGTCGTGTGTG    | 59.454 | 20 |
| GTAAGCATCGCCCTCCATAA       | 60.06  | 20 TGCAAGAGCTTAGAACGGGT    | 60.015 | 20 |
| CGTCAAAGGAAGATTCGGAG       | 59.807 | 20 GTACGGCTGAGCCTGATTG     | 59.41  | 19 |
| TGTCTAGGCATCAAGGAGCA       | 59.547 | 20 CTGTCGGATATCTAGGCCAAA   | 59.192 | 21 |
| AGGGGTTTCGAGTGGAAAATC      | 60.306 | 20 CGTGTATAATCGGAATCGCC    | 60.31  | 20 |
| AGAATTGGAACCCCAAACC        | 60.032 | 20 GCATT CAGTTGGGGTTGAGT   | 59.973 | 20 |
| GCCCCAAATCACAAACA ACT      | 59.836 | 20 ATTAATCCGATGGCCCTCAT    | 60.499 | 20 |
| CCCCTCGTATGCAGTCATTT       | 59.955 | 20 TACGATTGCCCCGTATTCTT    | 59.433 | 20 |
| ACCTTGACGCCATATGCAA        | 60.088 | 19 TGTTTTCTTTTACCTGTATTCAA | 58.442 | 27 |

|                         |        |                            |        |    |
|-------------------------|--------|----------------------------|--------|----|
| TGCTCCTCCTCTTCCTTTCA    | 60.065 | 20 GCCATAGCTTCTTGGTCTCG    | 59.978 | 20 |
| AATATGGGAGGGCTGGTTTC    | 60.152 | 20 CCACCTCATTTCCACACC      | 60.363 | 20 |
| TAACCCACCAAATGCTGTGA    | 59.964 | 20 ATCAACATACAATGTGCGGC    | 59.43  | 20 |
| AGCGTGAGAGATAGCCGAGA    | 60.263 | 20 TGAAAGAATATGAGTTTGAAC   | 60.004 | 24 |
| TTTCACCTACCAATTCCAGCA   | 60.487 | 21 CCAACCAAATCCGGTACTG     | 60.22  | 20 |
| CACGCGATACCATTCAGTTT    | 58.651 | 20 AGGCCTTGCTCTCTGTGG      | 59.745 | 20 |
| TTAGCTGCTGGGATTTTGCT    | 59.982 | 20 TGAGGAGAGGAGGAGATGGA    | 59.871 | 20 |
| CTAGCAATGGGGTGCTTGTT    | 60.132 | 20 ATCGAAAATGCCTCTCACCA    | 60.603 | 20 |
| TGTTTTGCTGTCATCGCTAGG   | 60.011 | 20 AATGAGTTGGTGTGTTGGCA    | 60.008 | 20 |
| AAGAATGGATTGGGTTGGGT    | 60.422 | 20 CGGTTGACAGCCGATTTTAT    | 59.96  | 20 |
| TTGGATAAATGGGAGGCTTG    | 59.894 | 20 TGGCTGGATAGTTTTGGCTC    | 60.214 | 20 |
| ATTGAATACGCGAGACCCAC    | 59.962 | 20 GATGCAGTGAATGGGAACCT    | 59.934 | 20 |
| GGTCAACCTACAGCACCGAT    | 59.997 | 20 AATTCTCCACGCTCAAGGAA    | 59.813 | 20 |
| CATGGGGAATGGAAAAAGAA    | 59.733 | 20 GGTAGCCTGCTGATGCAAAT    | 60.243 | 20 |
| GCCTCCTACCCCACTTCACT    | 60.511 | 20 CATGTCAAATATGGGCATCC    | 60.031 | 21 |
| GATCTCTGTCGCCATCGAAT    | 60.189 | 20 GAAAGTTTGGGGTGGGTTTT    | 60.068 | 20 |
| ACGCGCGTTTTTAGAGTTTA    | 57.824 | 20 TTTTCATATATCACGTTAAGACA | 59.191 | 27 |
| TATTTTGGGCACCCACCTAA    | 60.181 | 20 CCAAACGTATATGCCCTGGT    | 59.708 | 20 |
| TTTCCGAAACTTCCAATCAAGT  | 59.98  | 22 GCGTCGTTTCTTGAATTAGGG   | 60.962 | 21 |
| GTCGGTCCCTAAACCCAAAT    | 60.053 | 20 ACAATACACGCCACACAAGC    | 59.646 | 20 |
| TTTGGAGGTGCACACAACAT    | 60.008 | 20 AGCATTAAATGGTGCCCAAAT   | 59.301 | 20 |
| GGAAACCTTATGCGATTGGA    | 59.901 | 20 TCGTTTTGATGATATATATGT   | 59.956 | 27 |
| TGCTTGAGAGTGGGAGGAGT    | 59.986 | 20 GGGCAACCTCGAATCAATAG    | 59.528 | 20 |
| GCGAATACGTACGGGTGTG     | 60.003 | 19 TGAGAAAAGGTTGTACATGGC   | 60.534 | 22 |
| ATGCCTTTGCAATTTCTGCT    | 59.851 | 20 GGACACGAACTTGAGGAAGC    | 59.851 | 20 |
| TGTAGTGCATAAACTCGCCG    | 59.895 | 20 ATGCATGCACGTGAATATGG    | 60.375 | 20 |
| CTATCAGCGCTTCTTTCCGA    | 60.617 | 20 CAAATATTGGTTTCTTCCCGA   | 58.93  | 21 |
| TCGTCTCGTTTTCTTTCAT     | 60.776 | 20 TCCCACCATTACATCTTGA     | 59.893 | 20 |
| TAAATAGTGGCGGATCCAGG    | 59.916 | 20 ATGGCATTCAAGATTCTGCC    | 60.043 | 20 |
| CGCCAAGCACTCACAACCTA    | 60.05  | 20 GGGTTATCACCTGATTTCTCC   | 60.901 | 22 |
| AAGGGGGTTATTAGTGGATCA   | 57.425 | 21 CCCCCAATTCACCTCTTTTT    | 60.159 | 20 |
| AGGCTGGTATTTTGGCCTTC    | 60.451 | 20 CCGGGTTTTCGAAGTAGACCT   | 60.488 | 20 |
| TGATAATGCACTTCAATACAAGC | 59.688 | 24 CCTTGCCAACAAGATAGTGC    | 58.379 | 20 |
| CATCTCTTCTCCACCAACCG    | 60.646 | 20 TTAGCACAACCTGCACAAGCA   | 59.226 | 20 |
| ATCAAGAAATTCACCAGGCG    | 60.074 | 20 CGAAGGATGTGTTCAATTGTGA  | 59.556 | 21 |
| TACGATTTTTCGGTTTTCGG    | 59.937 | 20 GTTGGGACGGAGGGAGTATT    | 60.19  | 20 |
| CGAAAGAGTGCAGTGAGCAG    | 59.922 | 20 GCACCATAAAGTTCAACGAAC   | 60.039 | 22 |
| GTTGTGTACGCGAGAAACCA    | 59.764 | 20 CAACAGGTCTACCAATCCA     | 59.52  | 20 |
| CCCCCTTCTACTTTGGTCAGA   | 60.473 | 21 TGACGAGTTAGAATGGCAAAG   | 59.883 | 22 |
| AACGAGAAAAGACTGCTGCC    | 59.621 | 20 GGATCCAAGCTGACCAGTGT    | 60.12  | 20 |
| ATCGGTTATTACCGGATCGC    | 61.031 | 20 ATTTGGAAGATCAACAGGCG    | 60.214 | 20 |
| CAGGTGCGCCTTATCTCTCT    | 59.598 | 20 TGCATATATTAGGGGAAAAAT   | 57.826 | 26 |
| TGCATGATTTCTTCAATCTTCG  | 60.209 | 22 TCCTTTAACAAATTGGTGTAGT  | 59.768 | 26 |
| AAATCTGTCGGTTGCTTTGG    | 60.11  | 20 AGAAATTTGTGAATCGCCCA    | 60.448 | 20 |
| TGTTTTGTTGACAACGACTC    | 58.813 | 21 TGAGAGGTCTAGGGTTCGGA    | 59.797 | 20 |
| TTTTGTCTCACTAGTGTGTTTTG | 59.786 | 25 CCGCGCATGTATAAATTCCT    | 59.95  | 20 |
| AGTTTTAGCGTGTGAGGCGT    | 59.943 | 20 TCTTACCCAAACCCATCACC    | 59.647 | 20 |
| AGGACACGTTGGACCTGAAG    | 60.151 | 20 GATAGACGTCCACGGTGGTT    | 59.851 | 20 |
| TCACGATATCCACATTTAGCAT  | 57.162 | 22 TGTATGACATTTGGCTCCGA    | 60.073 | 20 |
| CATTGCAGAGAGGCAGTTCA    | 60.136 | 20 AATTCAGCCATGTAGGTGC     | 59.962 | 20 |
| TCCACCCCTAGATATCGATGTAA | 59.708 | 23 GCAGGCAGCAGCTGTAAAA     | 60.295 | 19 |
| TTGCGAACTAGTTGTCGTGC    | 60.05  | 20 CTGCCCACTAATCTGTAAAGG   | 60.015 | 22 |
| TCCCACTGCCCAAATTTATT    | 59.429 | 20 TGGCGGTAGGTAGCTCTTGT    | 59.898 | 20 |
| AGCATGAGAATCGGATGGAG    | 60.181 | 20 TCCGTGAACCGTTCTTCTTC    | 60.232 | 20 |
| CGATAAAAATGGCACCCAGT    | 59.823 | 20 AATGAGGCTGGGTGTGAGAG    | 60.261 | 20 |
| CGCTGCTTTCTGTTTTAGTTA   | 58.327 | 21 TCCGTTCAATCAACGAGGTT    | 60.495 | 20 |
| ATGCTTGTTCAGCTTGAGG     | 60.397 | 20 AATTCGGGTACCATCGACAG    | 59.813 | 20 |
| ACAGCGGCTTACTAGCTTCG    | 59.813 | 20 TCGGAAAACTCCTGAGTGAA    | 59.838 | 21 |

|                          |        |                            |        |    |
|--------------------------|--------|----------------------------|--------|----|
| AATTTCCCCAAATCATTCA      | 59.067 | 20 TGTGGTGTGACGGTGATTC     | 60.426 | 20 |
| CCCAAGTGGGATATTGTTGG     | 60.044 | 20 ACCTGTAGCCATGTGATTGTTG  | 59.92  | 22 |
| TTATCACATAAATAATGGTTTCTT | 57.797 | 27 GGGAACATGCTTCCTGAAAA    | 60.051 | 20 |
| GTAATGTTCTCATGCGCAGC     | 59.454 | 20 CGTTCCTTCTGATTGCGCCTC   | 59.955 | 20 |
| TTCTCTTGAATCGCCCCC       | 60.021 | 19 AAACCACATTTTACGTGCCA    | 58.942 | 20 |
| GGAGAGGCTCTTGGTTTTCC     | 60.19  | 20 GAAGAGCAGGGGTGTCTTTG    | 59.844 | 20 |
| TGGGCTTCATTTCTGTCAAA     | 59.247 | 20 TCGTCCCTTTTCGAATCATC    | 60.014 | 20 |
| CCCCGTTAAATCAAATCAA      | 59.633 | 20 TCATTCCCAGAAATCCTTCA    | 60.538 | 20 |
| ATCCACCAACCAACATTCC      | 59.508 | 20 GCAAAGGTTTGAAGTCCTGA    | 59.345 | 21 |
| ACCCATTTTCATGTCACCTCC    | 59.636 | 20 TGCTGTTTTGCTTGCTTGTT    | 59.656 | 20 |
| GCCACTGCGTTTGTAGAGA      | 59.076 | 20 CATTAAATCTCATACCCTCAGT  | 57.435 | 25 |
| CATACACTTTTCTCCCCCA      | 59.784 | 20 ATCAAGAGCACGGTGGTTTC    | 60.119 | 20 |
| CCGTCTTTGTTGTGGCTTTT     | 60.147 | 20 TCACTCCATCTTCACACCCA    | 60.088 | 20 |
| CCTCTGCAGCCTAAAACCAC     | 59.875 | 20 TTAGAATGGCGCCGATAGAC    | 60.196 | 20 |
| CCTCCACACCCAATCTTCAC     | 60.363 | 20 GCGGGGAAAAATAGGAAGAA    | 60.381 | 20 |
| GCAAGAAAGCAGTGCACCTA     | 59.224 | 20 TCCTCAATTTCTCCACCCTT    | 59.926 | 21 |
| TTGGCGTAGATTCCAATTGA     | 59.272 | 20 CTTTCCAAGCATCCAACCAC    | 60.495 | 20 |
| TCACTCATTGAGGATGGATTG    | 59.933 | 22 TACTTTTCGCATCCGACTCC    | 60.214 | 20 |
| TCCACGAATCGTAGTTGACG     | 59.716 | 20 TCTCGGTGAGCGAGTAGGTT    | 60.012 | 20 |
| AGTTGCCATCGTGTGTTTCA     | 60.16  | 20 GGTTTTGACCATATTTACTGTTT | 59.631 | 26 |
| GCTGCCACAAAATCATTTC      | 60.457 | 20 TTAGTTAGTACCGATTTCAAGG  | 57.499 | 24 |
| ACGTCCTCTAGGTGTCGTCC     | 59.179 | 20 TTCAAATGCACGTGTTGGAT    | 59.972 | 20 |
| GATTCGTTGCAGAAATCCGT     | 60.081 | 20 CATTGGGCCTTTGACCTTTA    | 59.931 | 20 |
| GTATTCCTTGGTCGGTCCCT     | 60.19  | 20 TTGTTCTTTGTTGCAGGAA     | 59.293 | 20 |
| TCGCTGATTTTGGTGAATTG     | 59.664 | 20 TGCCAGTGTCTCAATCCTCA    | 60.402 | 20 |
| TCTTTCCCATGGAGTTCAGG     | 60.042 | 20 CAAAACGTCCATTTTCAA      | 60.702 | 20 |
| GCTTAATTGTAACCGTTGTCAT   | 57.369 | 23 TTGGATTGAATGGATGTTTGG   | 60.55  | 21 |
| TGGCACTCAGTTAAGGGTCC     | 60.111 | 20 CAAAATGTCACAAATACCCC    | 59.054 | 21 |
| TTTATGCGTCGTGGATCAAG     | 59.688 | 20 TGTCATGGCATTTTTGTATGTTT | 59.288 | 23 |
| TGAATCCTTCCTTGCTAGTCAC   | 58.462 | 22 CATCGCTAAAGTTGGTGCAA    | 59.872 | 20 |
| CAATGTATCCAAACATGATGACG  | 60.124 | 23 CATGAAAATCATGTTCCGCA    | 60.466 | 20 |
| ATCAGGCAAAAACGTGCATT     | 60.511 | 20 GGGCCGATATTTGTTAGAGG    | 58.533 | 20 |
| CAAAGCGGGTAAAGGAACAA     | 60.103 | 20 TAAAGCTTATGGGCTGCCTC    | 59.456 | 20 |
| CGTGTGATTCTGTGGTGGAT     | 59.393 | 20 TTATATGACCCCCTCCCCTC    | 59.974 | 20 |
| CCACTCACATGGGAATTGTT     | 58.258 | 20 TTAAGGCACACTGCACCAAG    | 59.904 | 20 |
| CACTAGCCGGACACATCAGA     | 59.855 | 20 GTTTGGAGGAGCAAGTGGAG    | 59.844 | 20 |
| TTTTGAATTGGCAAACATGC     | 59.543 | 20 CATCATTTTCATTCCCAACCC   | 59.991 | 20 |
| GGGCATGTCCGAGTTCTTAG     | 59.694 | 20 GCCCCAAACGACTTACGAT     | 59.947 | 19 |
| TTCCATACGACATTGCAAGC     | 59.694 | 20 ACAACACCCTCAAATGGCTC    | 59.973 | 20 |
| CCAGAACCCAGCTTCTTCAG     | 59.982 | 20 CTTAACAAAAGCAAACCGCC    | 59.758 | 20 |
| TCAACGTACCTATTTTGTTCCTAG | 58.736 | 26 TTTCGAATGATTTTGCCTC     | 60.016 | 20 |
| CACACACAAGATTTGGGAGG     | 58.98  | 20 CGGTGCGATCCAGTAAAAAT    | 59.96  | 20 |
| TTGGTGAACCAAGGTGTTG      | 59.435 | 20 ATTTTCCCCAAATTTGTCCC    | 59.867 | 20 |
| GGGATAATGACGAGACGAA      | 59.894 | 20 TTGAATTGCTCTCCCTCCAG    | 60.331 | 20 |
| CCCATAAAATCGGATGGCTA     | 59.751 | 20 ATTACGTCCAAATTGCTCGG    | 59.96  | 20 |
| CAGCATACGGAAGGGTATT      | 60.117 | 20 CCGAGTGCTTGTATGCAGTG    | 60.472 | 20 |
| CTCAATAAAATGCTTCCAATCG   | 58.762 | 22 GCCACTCTTGCTTCCCTC      | 59.997 | 20 |
| ATCCAAGGAGCACACCTGAG     | 60.261 | 20 CCACCTTCTTTGCTTTCTG     | 59.846 | 20 |
| TCCCCATCTCTCTCATGG       | 60.152 | 20 TCCTTTCTTCTTACGGCACC    | 59.312 | 20 |
| CCAATTTGAATGGTTATCACCTG  | 60.457 | 23 TCGCGAACTCATAAATTGAAC   | 60.619 | 22 |
| ATTTGGCCCTATAAAATGCG     | 58.96  | 20 TGACCGTCCGTTTTGAAGAT    | 60.495 | 20 |
| ACCTCGCAGTCATTCCAGAC     | 60.269 | 20 CAAAAGTGTTATTTTGTTC     | 59.766 | 25 |
| AGGAGGGGGTATAATTTGAATAG  | 59.971 | 24 TGTTAATCAGTTTATGCATCTT  | 59.917 | 25 |
| TTGAAATTGGATATTTTCAAGAGA | 59.868 | 25 TGTCCTCCATTAAGCAAGCC    | 60.214 | 20 |
| GCAACGCAATCAAACTCAA      | 59.856 | 20 TGTGATGAGAGAGAGGGGCT    | 59.945 | 20 |
| CCGGGGGATTATAATATGGG     | 60.069 | 20 CGAAGGTACGGTATGCGATT    | 59.982 | 20 |
| CTGCTCCGATGAACCTCTGT     | 60.408 | 20 CCGGCGATAAGAGAGAGAAG    | 59.17  | 20 |
| GACCTCTACGAGGCATACCAA    | 59.208 | 21 TGGCAACTGCAAGTTCAAAG    | 60.027 | 20 |

|                         |        |    |                         |        |    |
|-------------------------|--------|----|-------------------------|--------|----|
| ATAGGGATTTCCGGATTTCCGG  | 60.109 | 20 | TTTTGGGAGAAGTATTGGGATT  | 58.864 | 22 |
| TCCACGGAGAGCGTCATAC     | 59.803 | 19 | CCAATTTGAATGGTTATCACCT  | 60.457 | 23 |
| CGAAACTGAGCTCCATAGCC    | 59.978 | 20 | GTTATGCGTTTTGACGGGAT    | 59.829 | 20 |
| GAAGCCCTTTCTTCCCAATC    | 60.017 | 20 | TAAGGGTCATGAAACGGACG    | 60.883 | 20 |
| TGAAACAACACGACCGGATA    | 59.964 | 20 | ATTCACCTCTGACGACTGGG    | 60.112 | 20 |
| CGGATGAATTTCACTTCACG    | 59.123 | 20 | GTTTGCAAAACTCCCAAACC    | 59.452 | 20 |
| TGTGTGTCGATGCCTGAAAT    | 60.12  | 20 | TTCCGAAAATATGCTCCACA    | 59.112 | 20 |
| ATCCGGTACCTCTCTCCTT     | 60.073 | 20 | AGAGGAGCCCCATTCACTT     | 60.037 | 20 |
| CCGTCAAGACATTCC         | 59.583 | 21 | TCGATGTGATGATGTGAT      | 60.039 | 20 |
| AATCCCCCAAACCAATTTCT    | 59.51  | 20 | GAGGTTTGCCATTCGTCT      | 60.119 | 20 |
| AGGGCTGAGTACACGAATGC    | 60.285 | 20 | AGGGTCCCACCCTTTTGTTA    | 60.581 | 20 |
| CGATGCAGAGAAGGGAAGAG    | 60.088 | 20 | TATGAACCCACCAGCATTCA    | 59.924 | 20 |
| CGGTTCAACTTCCCATGTTT    | 59.83  | 20 | TTCTAAGCTCGAGGGCACAT    | 59.978 | 20 |
| TTGACATTGAATCCCCTCATT   | 59.234 | 21 | GCTAGAGGGTTTTGTTAATATG  | 57.693 | 26 |
| CTTGCTTGCTGAGGTAAGGC    | 60.154 | 20 | TTAAGGCCAACTTCCCTCCT    | 60.068 | 20 |
| GGTAGCACCATCAGCAGACA    | 59.862 | 20 | AAAGGGCTTCAGGAATTTGG    | 60.423 | 20 |
| TAATGGCGCCGCTAATGTAA    | 61.44  | 20 | GCGCGCTGACTTATTCTAA     | 60.23  | 20 |
| GTTACCCCTACACGCAACT     | 60.035 | 20 | GGGGAAAATTATAGTTAGGG    | 57.532 | 22 |
| CCACATAAGCGTCATCTCAA    | 58.785 | 21 | CGATAGATTTCGATGAACCCC   | 59.344 | 20 |
| AGGGCTGCAGGAATTCAATA    | 59.668 | 20 | GCAATTGAAGGTTTGACCGT    | 59.978 | 20 |
| TTTGCCATCATAAACTCTATT   | 58.344 | 23 | GGCCTATTGAGCCAAGACTG    | 59.836 | 20 |
| CAGGGTTGGAAGTGAACCG     | 59.587 | 20 | GTGCATTTTTGGGAGCAAAT    | 59.945 | 20 |
| TCGGAAGGTTTATCCTCAGTG   | 59.181 | 21 | TTCAGAAACATGTCAACGTGAC  | 58.825 | 22 |
| ATCATTGCCGAACACCTTTC    | 59.939 | 20 | TCTCCGAGTCTTGCTCTCC     | 59.679 | 20 |
| CCACTTCCACAATCCTCGT     | 59.966 | 20 | TCCTGGCTTCAAACCAATG     | 61.001 | 20 |
| TCTCCTCCTCTCTCTACTCTC   | 58.237 | 25 | AATTGACCTTTGACGTTGGC    | 59.978 | 20 |
| GGTGGGTCTCCCTTACATT     | 60.052 | 20 | CACACAGATGACTAGTGTGG    | 60.133 | 24 |
| ACCCTCCGGTACACGAAAAT    | 60.61  | 20 | CGCTGGTTTTGGAGATCAAT    | 60.074 | 20 |
| GTGGAACCAGAGTGGCCTAA    | 60.111 | 20 | TCCGGTCCGATTACAATTTT    | 59.762 | 20 |
| TCGCAACTTACCTTTACCC     | 60.11  | 20 | GGCTTTTGCATGGTGACTTT    | 60.118 | 20 |
| TGTGGAACCAAACGATCAAT    | 58.824 | 20 | CTTCCAGAGGGATACCGTCA    | 60.065 | 20 |
| TTGGAATAGGTCCTTGGCTG    | 60.066 | 20 | AAATTATCGCTTCGTGTCCG    | 60.096 | 20 |
| TTAGTGTTTTGACATGATTACTC | 57.557 | 25 | TGCGACCTTAAATTTGGTGA    | 59.157 | 20 |
| GGGTTACCAAATTAGTTCGTCG  | 59.773 | 22 | TTCACTTTTACAACCTCCACATC | 58.721 | 24 |
| CTTTTCGCTGCATGTGTTGT    | 59.911 | 20 | GAACATAATGCCGAATGGA     | 59.901 | 20 |
| ATAAGCCACCCAACAATGC     | 59.829 | 20 | TGCATGTCTCATTTGTTTTGT   | 59.188 | 21 |
| GGATCATCTTCCCTCTCCCT    | 59.449 | 20 | AAGCCATGGTTCAATCATCA    | 58.926 | 20 |
| CAAGGCAAGGACCAGATCAT    | 60.073 | 20 | TTCACAAACCCATGTCCCTT    | 60.21  | 20 |
| AAGGAGGTGTTATGAAGGGATT  | 58.028 | 22 | GGAAGGAAACATTCTTTTGGG   | 59.801 | 21 |
| TCCCAAAGTATGGAAGGTT     | 59.381 | 20 | CTGCAGGGGATCATGACTTT    | 60.073 | 20 |
| ATGCAAAAGTTATGGTAACAAGA | 57.459 | 25 | AGATTGGGTACCCGACTG      | 59.844 | 20 |
| TTACCAAACGCCCAATAG      | 59.826 | 20 | AGATTCAAGGGCCGAGATTT    | 60.039 | 20 |
| TTGGTGAATGATTGACGATGA   | 59.916 | 21 | TCCATAGCCGATAAAATGGC    | 59.892 | 20 |
| AATCAATGGTCCACATCGGT    | 60.057 | 20 | AAAATCAAAGGCCACAATG     | 59.801 | 20 |
| TCTCTCTGGTTGGTGAAGGA    | 59.829 | 21 | CGACAAATGCAAGGCTACTG    | 59.488 | 20 |
| CGTGGTTGGTGTGAGATTTG    | 60.001 | 20 | TACATACAGTCAACGGCGGA    | 60.134 | 20 |
| TTACGATTCACCAATTCGCA    | 60.073 | 20 | CATGTGAGTGGCACGTGATT    | 60.604 | 20 |
| GCAAGAGATGAGCGATAGCC    | 60.088 | 20 | TATCATTTTGCCCAACCTCC    | 59.762 | 20 |
| GTAGTCGGCAGAACCAGAA     | 60.255 | 20 | CTGGATGGCAAGCTTTTAGC    | 59.982 | 20 |
| ATCACTGCATTTGCTCCTCC    | 60.081 | 20 | AGCGAATATTGCTTCACCGA    | 60.742 | 20 |
| TGCCTTATTTAGCCTCCCT     | 59.26  | 21 | AGCCTTGATTGGAACATGGA    | 60.461 | 20 |
| GCCAAAACCTTTGATCCCAA    | 59.916 | 20 | TGTAACCCAAACCAAGCACA    | 60.004 | 20 |
| CCACCTCATTTTCAACACCC    | 60.21  | 20 | AGAGGAGAGGCCAAGGAAAG    | 60.088 | 20 |
| CTACGAGCCACGGTTACAGG    | 60.7   | 20 | CCAGACCAACCAACTGAC      | 58.992 | 20 |
| AAACCGGGCCTACAAGATTT    | 59.835 | 20 | GCCCTCAAGAAATGCCAATA    | 60.038 | 20 |
| CACAAACAGCCCAAGGAAAT    | 59.971 | 20 | TGAATGCAGGACAAGAATGC    | 59.805 | 20 |
| GGAACAGAGCTTCAACGGAG    | 59.989 | 20 | CTTTGCCCTTTACTTGCTG     | 59.876 | 20 |
| ACAATTGGGATGAGCAGGAG    | 60.073 | 20 | ATGCCACATTTTCAAGATCC    | 59.934 | 20 |

|                          |        |                           |        |    |
|--------------------------|--------|---------------------------|--------|----|
| TGGTGGCCGAAAATTAGAGA     | 60.576 | 20 TCAACCATTTGTTTTTGCCA   | 59.946 | 20 |
| ACCAGAACGACGACACCTTC     | 60.159 | 20 TTAACCTCCCGTGGACGTAG   | 59.986 | 20 |
| CCCAGGCATAGAAAGAAAAGA    | 58.454 | 21 TGGTGGAGCGTCTGTTTTAAT  | 59.623 | 21 |
| CGTCGGTGTATGACCTGTTG     | 60.025 | 20 ACCAAGAGGCGTTGGTAGAA   | 59.734 | 20 |
| AACTTGCACCCAAATTCCAC     | 59.836 | 20 CGAAGGATTTGCAACTGGTAA  | 60.117 | 21 |
| CACAGAACGCTCTTTTGACAC    | 59.64  | 20 GACCCGAGGTTAATCCAGAA   | 60.074 | 20 |
| ACTATCACCCACCCACAAC      | 59.555 | 20 TGTCTCCATTCTATTGGCCC   | 59.894 | 20 |
| CTAAACCCAGGTGGCAGTGT     | 60.028 | 20 ACGCATGACTTTACCAACCC   | 59.859 | 20 |
| TTTGAAGGAGTGGGATCTGG     | 60.042 | 20 ATTAGCGAACATGGAGGTGG   | 59.955 | 20 |
| ACGGATCGGAATTTCTCAA      | 59.505 | 20 TCCGAGACAAGTTTCGTGAAC  | 60.284 | 21 |
| TTAATGGACGTCGTGAATGC     | 59.548 | 20 TCAAGTGGCATTTTTGTCCA   | 60.088 | 20 |
| CTAGAGGATTCGGCATTGGA     | 60.17  | 20 TTATTGTGTGGGGCAGAGGT   | 60.375 | 20 |
| GTTGGA AAAAGCCAATCGAG    | 59.685 | 20 TTTCCCTGAGCACGTTAGGT   | 59.734 | 20 |
| GTTCCAGGAGCCAGATAGGA     | 59.239 | 20 GATTCTGTATCCGCCATTGAA  | 59.915 | 21 |
| TTTGGAGAGATGGGGTCTG      | 60.042 | 20 GGCCCTAGGGTGGGATA      | 61.981 | 18 |
| TCCATCCACCTCTGCTTTTC     | 60.195 | 20 TTCGTTGATGATGGAATGCT   | 59.079 | 20 |
| ATTTGTCCAATGGTGCTTCG     | 60.894 | 20 ACCGCCGATGTGATTTTAAC   | 59.829 | 20 |
| GGAACCTGAGAATGGGGAAT     | 60.133 | 20 TGCATTTCAATCACACACCA   | 59.516 | 20 |
| CATGTGGATCATAACAAGGGT    | 59.598 | 22 CATTTTTCTCATGGAATGGA   | 59.748 | 21 |
| TCTACCAAGATCCTGCCTGC     | 60.362 | 20 TACAAGGCCACCTCAAGAC    | 60.111 | 20 |
| CGACTATTGTTTGTATCGCA     | 59.744 | 21 CGGAATACAATTCGACAGAAA  | 60.01  | 23 |
| TGCCTTGAGTAAGGGCATTTC    | 60.214 | 20 GAGGGGTGTTTCCAGACAAA   | 59.943 | 20 |
| TCACCACCTGAAGAGAGGCT     | 59.986 | 20 GTTGTTGAGTGGTCTCCGT    | 60.009 | 20 |
| CCGCTCCTCCTTTTCTTTTT     | 59.829 | 20 TCCCGGCTGAATGTTACAAA   | 61.389 | 20 |
| AAGGAGGTGTTATGAAGGGATT   | 58.028 | 22 AGGTAGGCACAGGGGTTTTTC  | 60.361 | 20 |
| GCAGCACATTGTGGTCTTCA     | 60.885 | 20 AAAATCTCTGCCCAATGCAG   | 60.214 | 20 |
| TTTGGGGGTGCATATTTCTC     | 59.762 | 20 TTGCCACCCCTCACTACAAT   | 60.375 | 20 |
| AGTATGTGGATCTGGGCTGC     | 60.104 | 20 AATGCCCTCAGATGCTATGG   | 60.059 | 20 |
| CTGCACCATCGCTATCTTCA     | 59.972 | 20 TCACCGAAATAAGGGTTTGG   | 59.795 | 20 |
| TGCAGTTGAGATAAGGGAGGA    | 59.822 | 21 ACGGGTCGTGTCAGAAATTG   | 60.954 | 20 |
| TGAACATGCTCATATTTTAATACA | 58.521 | 26 TTGCACAATTCTCAATCGGA   | 60.197 | 20 |
| CATCTCCAATGCCAGGTACA     | 59.522 | 20 AGGGTCCCACCACCTAACAT   | 60.489 | 20 |
| TCGCATTCTTATTCCGATGA     | 59.212 | 20 CTCACTCCAGTTTTTCACCCA  | 60.133 | 21 |
| TTGGGGTTATTTAGAGGGGC     | 60.143 | 20 GGAAGCAAAAATGGCAGAAG   | 59.823 | 20 |
| AGGCCACCAATTACAACAC      | 59.717 | 20 TGAATAAGTTGTGTGAGCAGG/ | 59.966 | 23 |
| CTTCTCTATGGCCCACATGC     | 60.624 | 20 CGTAAAAATGGTTATTATTGGA | 58.395 | 25 |
| CCCAAGAATGGGTTATTATTTGA  | 59.14  | 23 GCATCCTTTGCACCTTTGAT   | 60.081 | 20 |
| AATAGCCACTGTCGCCTACG     | 60.292 | 20 GCCCCCAATTTCTCTCTTTC   | 60.017 | 20 |
| CATGATCTGATGAGGCAGGA     | 59.743 | 20 ATCGCATTGATCCCAACTCT   | 59.513 | 20 |
| AATGTTGATAGGCCGAAACG     | 59.96  | 20 CCATCTACGCAAACCCAGTT   | 59.993 | 20 |
| GCCAAAAATGACGTTTTGCT     | 60.117 | 20 AAATTTCCAGATTCCTCGTCG  | 61.173 | 20 |
| GCTAGAAGCAGCCGTGACAT     | 60.569 | 20 TTGCGCGTGCTTTAAATAAT   | 58.524 | 20 |
| CCGGAATTTTACGTGGTTTG     | 60.215 | 20 CCACGACGGTTAAAGGAGAA   | 60.103 | 20 |
| CCCTTAGTATGCTGTCCGAAA    | 59.234 | 21 GGGGGTTATCACCTGATCG    | 60.142 | 19 |
| TTCATGAGCCTTCTTCAGCA     | 59.673 | 20 ATTTCTGCAATTGGGGTTCT   | 58.504 | 20 |
| TGAATTTGGTCTCCTTTGGC     | 60.051 | 20 TGTACCGTGACAAGACCTTTG/ | 60.583 | 22 |
| TCGTGTCACCAGAATCAAGC     | 59.837 | 20 CCACAACCCTTTCATCACCT   | 59.82  | 20 |
| CTCACATGAACGGACCATTG     | 59.96  | 20 CTCGCAAGCTTCGATTTCTT   | 59.73  | 20 |
| TTGTCCATGCAACCTACGAT     | 59.002 | 20 CAATTACACTGCATGGGCTG   | 60.134 | 20 |
| GCAGACA ACTGACAATGCAAA   | 59.903 | 21 ACGTGATTCTGCGTCTTTC    | 60.263 | 20 |
| GGTGGAAAGAAGCTAACCCC     | 59.94  | 20 AACATGGCCAACCCAAATAA   | 60.053 | 20 |
| CTCCTCCTCATCCTCGACAC     | 59.792 | 20 TGGCAGAAGTCGTTGAACTG   | 60.025 | 20 |
| AAGCCAAGTTAGCTCCAGA      | 59.077 | 20 CTCAGCATCGGAGCCATAAT   | 60.199 | 20 |
| TTGTTAGAGGTTTTGACGGGA    | 59.595 | 21 GATGGATCTTCGATTTTGTAC  | 59.819 | 26 |
| AATGAATGGCCCATATTGGTT    | 60.274 | 21 GTTTTCAATTTGATCACGCC   | 60.318 | 20 |
| CGAACATGACACAAATTGCC     | 59.972 | 20 ATGAGTTCGAGGCTCAATGG   | 60.218 | 20 |
| CCTCCACGAATGGTTTTGAT     | 59.79  | 20 CACAAGCAGTGAGATTGGGA   | 59.831 | 20 |
| ACACGGTCATGAATAAAATCGTT  | 59.664 | 23 CGTCCAGTTCACCTCATTGG   | 59.135 | 20 |

|                          |        |                           |        |    |
|--------------------------|--------|---------------------------|--------|----|
| ACTGACCAAGCATCCTCGAC     | 60.269 | 20 ACCCTGAATTCTCCCCAACT   | 59.795 | 20 |
| CATGAAAGCGGTGGAGATTT     | 60.074 | 20 AGTTCGTCAAACCTCCCCAAA  | 59.569 | 20 |
| AGACAAACAAAGCCAGGTGC     | 60.299 | 20 GAGAAAGTGTTTGTGGGGGA   | 59.943 | 20 |
| TCCAATTTCTTCGCGTAGGT     | 59.708 | 20 AATCTTTGAACAGCCGATGG   | 60.074 | 20 |
| CTACATGCTGAGATCGAGCG     | 59.722 | 20 CAACTTTTGC GGACAAAACA  | 59.746 | 20 |
| AAATAAAGGCTGCATGGCAC     | 60.103 | 20 ACCTCTTCGAGTTCGTCCAA   | 59.844 | 20 |
| ATTTGTTGCAGGGCAATACC     | 59.829 | 20 AGAGTGCGCGTTTTTCATCTT  | 60.022 | 20 |
| GCCGGATTCCCTTTTAAGAT     | 59.402 | 20 TCACGACATTATTTCCCTCAA  | 59.451 | 22 |
| ATTCCGTCCCAAAGGAAAAA     | 60.644 | 20 GTAGCCATGGAAGAATGCGT   | 60.103 | 20 |
| ATGCCCTTTTCTCGAACATC     | 59.129 | 20 TCAGATCTTAATCGTGGCCG   | 61.129 | 20 |
| TCGTGGCTGGTTAAGCTTCT     | 60.015 | 20 CCCGAATCCGTTACAACAAC   | 60.227 | 20 |
| ACACATCTCGAGGGATCGAC     | 60.08  | 20 TGAAGTTAGGAAATAAGGAGG  | 58.743 | 25 |
| ATGAAGTTAGGAAATAAGAAGGT  | 57.239 | 26 ATCGTGGGCGTAAATCATGT   | 60.221 | 20 |
| CCTTGAAGATCAAGACATCTACTC | 59.685 | 25 ATCTTCCAATTGGCGTTGAG   | 60.074 | 20 |
| AGGGCAATTGATCTTGCCTA     | 59.668 | 20 TCAATTGTCTTCGAGACGGA   | 59.369 | 20 |
| TGGAAAAACACAACAACCCA     | 59.834 | 20 TGCAACTCCTCTGACCTCCT   | 59.986 | 20 |
| ATGAGACCGGAAATGGATGT     | 59.218 | 20 CCACCACCAGAAGCAAACCTT  | 60.149 | 20 |
| TGGTGGAGGCTCGGTTATTA     | 60.46  | 20 GCATTACAGAAAGTTCCGCC   | 59.713 | 20 |
| AGCTTCACCAAGCTTTTCCA     | 59.993 | 20 TGAACAAGGGTAAGATGAACC  | 60.221 | 22 |
| AACCTCCTGCTGCTTATCCA     | 59.836 | 20 GCGGCTTCATCTTTACTTGC   | 59.988 | 20 |
| AAAACCTCAAATCCCCAAC      | 60.032 | 20 TTCACTGCTGACCGTGTTCT   | 59.467 | 20 |
| AAAATGACCAACCATTTCGGT    | 59.15  | 20 GTAAAGGGGGCACGAAAGTT   | 60.352 | 20 |
| TCAGTGATAGAAATTGAGGGGAA  | 59.952 | 23 CAATGTTTCAGCGAAGTGGA   | 59.84  | 20 |
| TTACGGGTTGGGCTGTAGAC     | 59.993 | 20 GGCTGGATTTTCGTCCCTATT  | 60.286 | 20 |
| AGAGGGTTATCATGGGATCAA    | 58.32  | 21 AAACGGTTGAAAAGCCATA    | 59.451 | 20 |
| ATGCCGACACCACACATATC     | 59.25  | 20 ACGTGGGGAGAGAGGAAGTT   | 60.111 | 20 |
| GGTGCACCCTCACTTTTGT      | 60.012 | 20 GTCACGGTGGTTCTTCATTG   | 58.984 | 20 |
| TAGGGTTCGAATCCCCACTC     | 61.211 | 20 CAATCATCCACGTCCTTGTG   | 59.96  | 20 |
| CATTGTAGCCTGCATTTCCA     | 59.688 | 20 CCACAGCTGAAAACGTAGCA   | 60.05  | 20 |
| TGGGAGAATTGGGCTAAGTG     | 60.066 | 20 CTTGATGCACGAATTTGGAA   | 59.664 | 20 |
| TTGGTATTGGATTGGAGATGC    | 59.776 | 21 AGAGACCAGACCGTTAGGGG   | 60.502 | 20 |
| AGAACTTCTCCATCAGGGCA     | 59.803 | 20 CCACTTATGTCGAAGATTTTTG | 59.933 | 24 |
| TGATCTCAAAGATCAACGGTTT   | 59.994 | 23 CTCTAAGGGATGATTGCACCA  | 60.081 | 21 |
| AAAGCACGCCAAAATTGTAGA    | 59.772 | 21 ATGGCGCTATCTGGTTGTTT   | 60.103 | 20 |
| CGATGGTTGGAAACAAATGG     | 61.118 | 20 CCCAAAAATAATTTGGGCCT   | 60.016 | 20 |
| ATTCATGAACCACAAAGGGG     | 59.647 | 20 TGGTGGTGGAGTTGTCTGAA   | 60.129 | 20 |
| TCACACCAAAGATGCTGCTC     | 59.992 | 20 GTTTGGGAAGGTTCCGATTT   | 60.166 | 20 |
| AAGTATTGGGGCAGCAAGTG     | 60.132 | 20 CAACACACAAAGCCACCATC   | 60.008 | 20 |
| GTGTTGTACGGCGCTAGGTT     | 60.197 | 20 AGTGGTTATTACCGGATCGC   | 58.93  | 20 |
| CCACATAATGTTGCGCATGT     | 60.41  | 20 ACTTGAATCGTGAGAAGCG    | 60.397 | 20 |
| TCCCTGCTCAAACACATCAG     | 59.831 | 20 AGGAAAAACGTGGCAGTCAG   | 60.291 | 20 |
| TTGTGGCTTCATGCAAATTC     | 59.67  | 20 TGCAGGGTATGCATGTTTGT   | 59.995 | 20 |
| CACGTAAATCCCTTGCACA      | 59.585 | 20 AGCATGGTTGCATACTGTGG   | 59.596 | 20 |
| TGTGGTATCAGAGCCACGAC     | 59.707 | 20 CAAACAATGGGACCACAAAA   | 59.268 | 20 |
| TCTGCAACAACAGAAGGATCA    | 59.43  | 21 AGTAAGAACCGCGAGCTGAA   | 60.154 | 20 |
| AGAGAAAAACGGTGGGTGTG     | 60.005 | 20 GTTTTAAACCAAGGCCTCCC   | 59.814 | 20 |
| AATGCAAAGGATTTGATCCG     | 59.901 | 20 AGGCAATGGACATGGAAGAA   | 60.461 | 20 |
| CTGTTCCCTCCCTTCAACAA     | 60.081 | 20 GACAAGCACTCATGTGATGGA  | 59.698 | 21 |
| GGACGCACCAGATTGTTTCT     | 60.119 | 20 GCATCTCTAATTGGACCCCA   | 59.894 | 20 |
| TGTAAGGTGCTCCACCATGA     | 60.112 | 20 AGAAATGCAAGATTGCGACA   | 59.425 | 20 |
| CCTCTTCATTTGCTTCTGGG     | 59.807 | 20 GTGCCGTGTACTTCCTCACC   | 60.577 | 20 |
| CAAAATCGGCATTTCCATTC     | 60.268 | 20 CAGTCATTGGATTGCATTGTG  | 59.98  | 21 |
| AAATGGCACTTCAATAATGGCT   | 59.87  | 22 ATGAAAATACGCGGGGAAAT   | 60.517 | 20 |
| TTTTCTCAACCGAGCTCACC     | 60.375 | 20 CCTCTCGTGTTTCTTCACCC   | 59.697 | 20 |
| TTATGCAGTTGGGAGATGA      | 60.201 | 20 CCCCCACCACACCTCTACTA   | 59.837 | 20 |
| GATGTGATTAATCCCACCATT    | 57.666 | 22 CCGAATCTTTTCGTGAATCAA  | 60.06  | 21 |
| AAGCGTCGTGGGCTTGAT       | 60.672 | 19 GATTTTGGGGAGGACAAGGT   | 60.169 | 20 |
| TTGAGCAATAAATCCAGGGAG    | 59.168 | 21 CCAAGTAAAGCTCGAACCCA   | 60.241 | 20 |



|                           |        |    |                         |        |    |
|---------------------------|--------|----|-------------------------|--------|----|
| GAAAGAGTGCTGCGGCTAGT      | 59.786 | 20 | TTTCATGATCCAGATGGACG    | 59.451 | 20 |
| CGCCACTCCAAACTTCAAAT      | 60.11  | 20 | GGAGCTACTCAGCCCATGAT    | 59.268 | 20 |
| GGGCTGGATACAATCCATCTT     | 60.167 | 21 | TGCGAAAAATTTGGTTCTTGT   | 59.617 | 21 |
| CTGCTGTGCGTCGATTTCT       | 60.152 | 19 | GTGGCACGATCATTGTTGTC    | 59.975 | 20 |
| CTGCTGTGCGTCGATTTCT       | 60.152 | 19 | GTGGCACGATCATTGTTGTC    | 59.975 | 20 |
| CAGCAAATCACCTCATCCCT      | 60.073 | 20 | CTCTTGATCACCTTCACCA     | 59.831 | 20 |
| GCTTTAGTAGGGTGCAAGCC      | 59     | 20 | CGTGCTCATGTCAGCAAGTC    | 60.627 | 20 |
| GCAGGTTAGCAGGATAAGGG      | 58.812 | 20 | ATCAATGGTCCACATCGGTT    | 60.057 | 20 |
| TGCAGGAGAACTAATCTTCAAAA   | 59.453 | 24 | TGCGTTTTGACAATATATAGGT  | 60.083 | 26 |
| TCTGGTTTCCAAACAAAGCC      | 60.088 | 20 | AACATGGATGGAGCTTCTGG    | 60.073 | 20 |
| TAACGCGAATATGCTGATGC      | 59.832 | 20 | ATCGGTTATCACCGGATCG     | 60.697 | 19 |
| AATGCCCCACTAATCCCTTC      | 60.152 | 20 | AGCTATCAGGAACCTATGTTTC  | 58.728 | 23 |
| GGGAACTCACTACTCTCATTTCC   | 60.514 | 24 | TCAAACAAGGCATAAAACTTTTC | 57.096 | 22 |
| CTTCCAGGAACTCCACTGC       | 59.844 | 20 | GAGAGGCTTCATCTTCTGCC    | 59.119 | 20 |
| TTGTTGACGTCACAGCTAAT      | 58.446 | 21 | GCAAAGAAGGGACGACTGAG    | 59.989 | 20 |
| CCGAATCCCGATAACTAAACA     | 58.953 | 21 | CACGTGTCAGCACACAATTTTC  | 60.214 | 21 |
| TGCTGCCTTAATCCACACTG      | 59.864 | 20 | TACAGCCCAGATTCCCAAGA    | 60.594 | 20 |
| GAGGCTTCAATCCGTCACTC      | 59.81  | 20 | TGATAGCGTTTTGCTGTATGC   | 58.998 | 21 |
| ATGCACACCCCGAGATACAT      | 60.226 | 20 | GCAGTGACTGAGGTTGGTGA    | 59.872 | 20 |
| TGGCGGAGGAGTCTTCTAAC      | 59.43  | 20 | ATCGCTTCTTCTTTCGCAGA    | 60.235 | 20 |
| GGTTATCACCTGATTTTCTCC     | 58.826 | 22 | CCCCTGGTTGTTATCCTTGA    | 59.784 | 20 |
| TAGGCCTTACATGCCGATCT      | 59.691 | 20 | GTGTGACATTGGCCAGACAT    | 59.399 | 20 |
| TGAAGGACAATGGAAGGCAT      | 60.461 | 20 | TCGATAGGACGTGTATGACGA   | 59.163 | 21 |
| GATGGCCGATATTTGCTCAC      | 60.444 | 20 | GGAGAAATTTGATTTGTTGGGA  | 60.164 | 22 |
| GCACCTCTATGGTTGGGAGA      | 60.073 | 20 | AACCCTTGGATCTGAAGCAT    | 58.595 | 20 |
| CACTGCGAGTTCAAGGATCA      | 59.984 | 20 | ATACTCTTCGATCCCAGCGTA   | 59.691 | 20 |
| TTTTGTGCGCAATTGTTTGT      | 59.062 | 20 | TGCTTTTTGTCGCGAATATG    | 59.842 | 20 |
| TGTGAGTGAGTGAGCGTGTG      | 59.624 | 20 | CGCCGCCATTATCTCTACTC    | 59.829 | 20 |
| CAGCCACGATGATATGACAA      | 58.069 | 20 | CCCCACTTTTAAATTGCGAA    | 59.937 | 20 |
| CGCTCTCTCTTTCCCTCA        | 59.82  | 20 | GATTGCGTAGTCGTGTGTGG    | 60.183 | 20 |
| ATTTCCGGTGTGAATTCGGTT     | 59.292 | 20 | TTAAACTACACATGTAATCCAT  | 58.07  | 27 |
| TTCTACCACCACCCATCTCG      | 60.913 | 20 | GGTTTGGCGGTTGATAAATG    | 60.188 | 20 |
| ACGCGCGCTTTTAGAGTTTA      | 60.17  | 20 | CGCGTTAACAGTGAAAACAT    | 60.046 | 21 |
| TTCATTTTTAAATCCTATATCAACC | 57.503 | 26 | TTGGGATGGAGGGAGTACAG    | 59.92  | 20 |
| TCCAACCAGGCTGAATAAG       | 60.066 | 20 | ACACAGAATTCGCCAAAAC     | 59.978 | 20 |
| GGTGCTCAAAAATCCGAAAA      | 60.053 | 20 | ACACCATCCACTCACCCAAT    | 60.096 | 20 |
| CAGATTTGTTATGCGTTTTGACA   | 60.048 | 23 | CTTTCTCATTCAACACCCCA    | 58.541 | 20 |
| TCGCATGGGAATATAATGGA      | 58.792 | 20 | GCTTAAGAATCGTGGCTTCG    | 59.982 | 20 |
| CAAAGAAAAATAAGGCCACCA     | 59.107 | 21 | AGCAAAAATAAAGGGGCTGC    | 60.566 | 20 |
| TTCGAATGTCATTTACCCCC      | 60.702 | 20 | AAAAAGTGGCAAATTGGGAA    | 59.429 | 20 |
| GGAGCAACCGAGTGATTGAT      | 60.081 | 20 | ACGGCACATCAAACACCATA    | 59.847 | 20 |
| CAACAAAAATGGCACTCTTTCA    | 60.145 | 22 | CATGGAACATCTGATCACGC    | 60.08  | 20 |
| AACTCAGGAGCAATTGGGTG      | 60.111 | 20 | GCAACAATGGAGCAGATCAA    | 59.805 | 20 |
| CATCTCCCAATTTTGATGCC      | 60.274 | 20 | CAAGCCTCCACAACACTCAA    | 59.873 | 20 |
| GGCTGTCTCTCACTCCTGGT      | 59.43  | 20 | TTGTATTTTGTCTGGCAGCG    | 59.872 | 20 |
| TTCACACATGCACCTCACCT      | 60.162 | 20 | AAAGGGAAAAGGACCGACAT    | 59.805 | 20 |
| GCACTCAACCACAACCAAGA      | 59.726 | 20 | ACCTCCCTCTTCTTTCCAA     | 60.045 | 20 |
| CGCCTAAAGCAATCAACTCC      | 59.845 | 20 | GATCCCGACGACCTCTCATA    | 60.034 | 20 |
| GGCCTTTCCATTTTCTCTC       | 60.017 | 20 | ACCCAACGTGCGTTACAAAC    | 59.757 | 20 |
| GGGTGTTTTGACAATATCGC      | 57.943 | 20 | CGGAGGCGATAGACAAAAGT    | 59.336 | 20 |
| CCCTTTGGTATGAGAAGCCA      | 60.066 | 20 | ATGGAGTGCACCTCCTCAAT    | 59.535 | 20 |
| GAAGTAGCAACCCCTACCC       | 59.827 | 20 | GGGGTGAATTTAAAGGGGAA    | 59.992 | 20 |
| TATGCAGACGAAAAGCGTG       | 60.014 | 20 | TTGACTAGGAGCACGCGAAT    | 60.934 | 20 |
| GCAAGGATTGTAGCAAAGGG      | 59.708 | 20 | CACTGTCTGGGGCTTTGTTT    | 60.149 | 20 |
| TAGCAATCAAGTCCCTTCGG      | 60.206 | 20 | ACACACTCTTCTCAGTGGACC   | 59.42  | 22 |
| CATTGCTTTCCGACTGTTCA      | 59.84  | 20 | CTTACCAAGTTTCTTCCCG     | 59.705 | 20 |
| TCCTTCTTGCTCCTTTTCC       | 60.683 | 20 | CACTTGGCATCACATGGTCT    | 59.551 | 20 |
| TCGATGAATGATGAGAAGCA      | 57.844 | 20 | CTTGTGGACAGTGCATGAGC    | 60.473 | 20 |

|                         |        |                            |        |    |
|-------------------------|--------|----------------------------|--------|----|
| AACCGAAAAAGAAACCTTTCAA  | 59.181 | 22 TGACAATATTTAGTGTTTTGAC, | 57.78  | 26 |
| GGTTTGC GTTAGATATGCC    | 59.438 | 20 TGAAACATGATACCGCCAAA    | 59.93  | 20 |
| ACTTTGATTTCTTGGTGGCG    | 60.11  | 20 GTCCCATTCTACTGCCAAA     | 59.933 | 20 |
| TACCGTGGTTTCTACCCCAA    | 60.22  | 20 CGTAAATCCGGCTTGAATTG    | 60.448 | 20 |
| TCATTTGTAGCTGCACTCGC    | 60.165 | 20 TGCAGACATGAAGAGGGTGA    | 60.402 | 20 |
| AAACTGAGTGATGCCAGCCT    | 59.874 | 20 TTACATGGCCAACGGGTATT    | 60.074 | 20 |
| GGAAGGCGACATGTTTCAAT    | 59.939 | 20 TTCTCATCCTTGCCTTGGT     | 59.67  | 20 |
| AGAACCCATGGACATGAAA     | 60.173 | 20 AAAGGAAAATTGGCAGGAT     | 59.777 | 20 |
| TTCGTGGAGCAAAAACATCA    | 60.234 | 20 TTCCCACCATGATTTCAACA    | 59.75  | 20 |
| CTTGTGAGCCATGTTGTTGG    | 60.152 | 20 TTGTTTATGCCGTTGATACAAA  | 59.437 | 23 |
| ACTGTGATGCCACTGCTGTC    | 59.905 | 20 CCTAAAATTGGGTCCGATCA    | 59.756 | 20 |
| TCAAACCTTGTGACTCTGCAA   | 59.475 | 21 TTCATTGGGGTAAAACCTTC    | 60.041 | 21 |
| CATCTAATGTCCATTTTTGCCA  | 59.832 | 22 TGGTTTGAACCATGATTTATTT  | 58.773 | 23 |
| TTTTCTCAACCGAGCTCACC    | 60.375 | 20 TTGGTTCGAGCCATTGTGTA    | 60.111 | 20 |
| CCATCCTGCACCATCATACA    | 60.353 | 20 AAGTCCACAGTTACCCGCAG    | 60.171 | 20 |
| AAATTGCACCTCGTCGACTC    | 60.263 | 20 TCATCATCCTCCTTTCACCC    | 59.862 | 20 |
| GCAATTATGGGGGACAGCTA    | 59.923 | 20 AACTCCAAATTTTGATGCATGT  | 58.493 | 22 |
| TTTGGATCCATAACATGAAAA   | 57.065 | 22 CAACCAAAAACCTCTCGACCC   | 59.569 | 20 |
| CCTGCCAACTTTCTTCATCC    | 59.67  | 20 CTATCCCCGAATGTGCCTAA    | 59.916 | 20 |
| CTCACCTTCAGGGGACAAAA    | 60.081 | 20 TGAAGTTTACACAACAAATCTA  | 59.348 | 26 |
| ATGGGTTATTACCGGATCGC    | 60.903 | 20 CCTCTCAGTCCCAGACTTGC    | 59.986 | 20 |
| TGTTGCGATTTTCATTTTCT    | 59.578 | 21 ATAGCTCAAGGGTTTTTCGCA   | 59.845 | 20 |
| TTCGTCACTGGATCTTGCTG    | 59.984 | 20 CGAGGGGTGCTAATAATTCAA   | 59.088 | 21 |
| CATTTCTTGACATCCCTT      | 59.933 | 20 TGCAATTGTTTCGTTCTTCA    | 60.234 | 20 |
| AGAACCACAACCCTTCTCCC    | 60.349 | 20 TGCCTACACAAATCCACCAA    | 59.964 | 20 |
| CAGAAATTGCCTTGGTTGTT    | 59.601 | 21 GGCAGTTATGACCGTTGGAT    | 59.82  | 20 |
| ATATGATCGCTCTCGCCTGT    | 59.826 | 20 TCACGCCTTCTCTCCAAT      | 59.95  | 20 |
| CGCCAAAACACAAACAAGA     | 59.746 | 20 TCTGCTTCGTTTCTCCATT     | 59.813 | 20 |
| GAAACCCCAATTGTCTCAA     | 59.767 | 20 ATCAACCCTCAACCCTCTCC    | 60.314 | 20 |
| TGTTTTCAATCTTGCCGTA     | 59.157 | 20 ATGTGGCCCTCAGATTTCA     | 60.461 | 20 |
| TGCGACATCATGAAATCTGG    | 60.631 | 20 GGTCCAAACCAAAATCGAGA    | 59.91  | 20 |
| GATTTATCGATCAACCATTTCTT | 57.707 | 24 TGCTTCCCTCACAACAACAA    | 60.278 | 20 |
| TCACCAATTTGAATGGTTATCA  | 57.873 | 22 GCGTTTTTGGCTGATATTT     | 59.081 | 20 |
| ATGGGCTCGAAGTTTCTTGA    | 59.813 | 20 ATCCAAAGAAACAGCAACCG    | 60.11  | 20 |
| TCAGAGGCGAGAACCAACTT    | 59.989 | 20 CTGGGAGCATGTGAGTGTG     | 60.309 | 20 |
| TGGTTTACCAAAAACCGAT     | 60.206 | 20 CTTACAATGTTGCCCCCAAG    | 60.357 | 20 |
| TGATTTGCATGCGTACTTGA    | 58.858 | 20 CATTTTTGTAAACCGCCTCG    | 60.48  | 20 |
| AGGGAAACGTTTTGGTGTTG    | 59.869 | 20 GGATTTTACAGGCCAAAGA     | 60.051 | 20 |
| CCAGAAACCCCAACAAAAA     | 59.811 | 20 CAGAGAAAAGTCGTCGGGAA    | 60.366 | 20 |
| TCGGATCACCTAGGTTTTGG    | 59.926 | 20 GAGTTCCCGCGTCATAAAAA    | 60.074 | 20 |
| TTCATTCACTCAGCACCGTC    | 59.837 | 20 GGGGAGAGTCAGGTAGGAGG    | 60.066 | 20 |
| CCATACTTCTCAGTTGGCA     | 59.716 | 20 TGATGAATGACGACACATGC    | 59.037 | 20 |
| CAGCTGCACCACAGAAGAAA    | 60.175 | 20 GCGGAGATTGTGGAAGAAGA    | 60.34  | 20 |
| CACATGAATGGATGTGATTTGTT | 59.606 | 23 TCAAACGCGTCTCAAATCCT    | 60.776 | 20 |
| CCATTTGCAATGGACAAAAA    | 59.396 | 20 AAGCCCATATCAGGGGTGTT    | 60.578 | 20 |
| CAGAGAGAAAGTTCAACAGGGA  | 58.574 | 22 CAATAAACGCCACATGAAA     | 59.42  | 20 |
| TCATGTCTCTTGGCCTTGTG    | 59.831 | 20 AAAATTCCAAACTCCGACCA    | 59.406 | 20 |
| TGGGCAAACCATCCTTTAC     | 59.801 | 20 CGAGTGCCGTACTTGAGAGA    | 59.187 | 20 |
| TGGCAGATGTTCTCCTCAA     | 59.369 | 20 GCGCTATTTTTAACCCCAA     | 59.11  | 20 |
| ATCGAATGCACACACTTCCA    | 60.12  | 20 TTGGTGATGAAATGCAGAGC    | 59.805 | 20 |
| GTGCTGTGTTGAAACCCCTT    | 60.012 | 20 TTGTCTCTTGCATCACTCCC    | 58.802 | 20 |
| CCCCAAATTGATGGTTTCAT    | 59.481 | 20 CACACATGTGGCTTTGCTTT    | 59.764 | 20 |
| CCTTCCCTTGACGACTTACG    | 59.728 | 20 TCTTACATTTCTCCCCAG      | 60.042 | 20 |
| TTCCACTTCTGTTGTGATTGC   | 60.154 | 22 TCGCCTCCAATACCAAGTCT    | 59.694 | 20 |
| GCATGCGGGGACATAATCTA    | 60.827 | 20 AGGGGCTCGAGAAAGAGAAG    | 60.088 | 20 |
| TGCAATTGCTTATGAGGGTG    | 59.688 | 20 CGGTATCACGGACGATTTTT    | 59.823 | 20 |
| TGGCCGAAAATTAGAGATGG    | 60.031 | 20 TCGTGTCTTCGTCGTGTT      | 59.88  | 20 |
| AGCCTTCTCTCAAATAAGGGTG  | 58.914 | 22 CAAATCATGTTGAAAGGAACC,  | 59.839 | 22 |

|                           |        |                            |        |    |
|---------------------------|--------|----------------------------|--------|----|
| TCTCCACGTTTCCATCTTCC      | 60.05  | 20 TTGAGTGGTTCGGGGATTAG    | 59.926 | 20 |
| GTCCGAGGATAACCCTTCT       | 59.397 | 20 TCGATAAATAGCCACATGCC    | 58.603 | 20 |
| TTTGAGATGCAGAAAGACATTGA   | 59.875 | 23 GGGACACCTCAGTGGTAGGA    | 59.962 | 20 |
| AACGAAATCGAGACACCGAC      | 60.119 | 20 TGTGAGGGACACAATTCTTGA   | 59.124 | 21 |
| TTTCTCAACTGAGATCCCCC      | 59.065 | 20 GGGGTGATTGGTAATAGCTCC   | 59.68  | 21 |
| TTTAGTGTTTTGACATGATTACTCC | 57.557 | 25 TCATGAGCGTTCGTCATTGT    | 60.272 | 20 |
| AAACTGGACTGGGTATCAACAA    | 58.486 | 22 ACCGACTCGAAACTGCAACT    | 59.914 | 20 |
| TTTTGGCAATTCCCTTCATC      | 59.878 | 20 CGCTTTATGAATTCAGCCGT    | 60.23  | 20 |
| AAAAAGCGTTGTCTTTGAGCA     | 60.046 | 21 AATTCCTATGGGTTTTGGGG    | 59.882 | 20 |
| CGTGCCAAGACTCAAAACAC      | 59.339 | 20 TGGGAGAAATCGATAATGGG    | 59.717 | 20 |
| CTGAGCCCTTCTTATTCATGTT    | 57.52  | 22 CAAAGGCCCAATGGTTAT      | 59.685 | 20 |
| ACACGTACAAAAGCCGGTC       | 60.037 | 20 GCGCAATTGCATCTATTGAA    | 59.809 | 20 |
| CCGTTTTGGGAGAAAAATCT      | 60.291 | 20 CAGAATTGGGTGTAGCAGCA    | 59.864 | 20 |
| ACACACCCCAAAAGAAGACG      | 60.005 | 20 CTGTACCACGCTTTTTCCGT    | 60.168 | 20 |
| TTTGCATTCAAACCTCACCG      | 59.706 | 20 AATTAGCTTCTTCGTCGCGT    | 59.138 | 20 |
| GCACATCAACACTCGCAAAT      | 59.728 | 20 AAGTTCGCGAGATCCAGAAG    | 59.574 | 20 |
| TCAAGAAAAATGGGGAGACG      | 60.044 | 20 TGTTAATCTGTTCCGGCCTC    | 60.074 | 20 |
| TCAGCTGAAGGAGGAGGAAG      | 59.673 | 20 GGGGACAATTCAACATTTGC    | 60.177 | 20 |
| ACCCTCTTCACCTCCCCTT       | 59.968 | 20 CAAAAGGTTTATCCCAGTCTCT  | 58.333 | 23 |
| TCATGCAATCACTATTAAGACTCC  | 60.036 | 25 GAATTTTTGGAAATGGTGTTC   | 58.831 | 22 |
| CAGGACCCATCTATCGCTGT      | 60.096 | 20 TAAGACACCAGGCAGTTCCC    | 60.111 | 20 |
| GCCTTGAGCAATTGGAGTA       | 60.214 | 20 AGCTTGAAACACACACACGC    | 59.953 | 20 |
| TGCACACTCGCAATTTCTTT      | 59.469 | 20 ATGAAGAAAATCTGGCGCTG    | 60.352 | 20 |
| GGTCTTGCCGGATTCATCTA      | 60.036 | 20 TGAAGTCGTCGTAGGAAAGC    | 58.104 | 20 |
| TCTGCATTAACCCCGCTTAG      | 60.223 | 20 CAAAGCTCAAGCTGATGCAA    | 60.28  | 20 |
| CCCACTCATCTTCAACCTCAA     | 60.096 | 21 GGGGATTTCTGTGCTTTTT     | 60.431 | 20 |
| CCTTTTCTTAGGCGTCTTGC      | 60.369 | 21 CGTTGTATGCTGCACAACT     | 59.788 | 20 |
| CTGCACCATTCTTTGGGT        | 60.111 | 20 CATTCCACAGGGACACACA     | 60.416 | 20 |
| GCGTGAGTCGGTGAGTGTAT      | 58.755 | 20 TAGGCCTACATCGAAGCCAT    | 59.691 | 20 |
| GCTGAGGGGAGACTACATGG      | 59.679 | 20 GTGACCCTTTGTACCGTTCC    | 59.308 | 20 |
| CGTTGGCAAGGTATCGATTT      | 59.96  | 20 AAGGAACGAACAAGTTTTCCA   | 59.543 | 22 |
| GGATGGAATGGATGTTTGG       | 60.526 | 20 GAATGTTGTCGTAGCCTGTCA   | 58.79  | 21 |
| TCCATTTAATATGTCGATGACCAC  | 59.976 | 24 GACGCTAACGCCATTACGAT    | 60.124 | 20 |
| CCTAACCTTGGGCTTTGATG      | 59.564 | 20 GTGGCATGGGGAAGCTACTA    | 60.096 | 20 |
| ATTCGACTCTTCATCAGCCG      | 60.362 | 20 GAGCACGCAGAGAAGCAATA    | 59.326 | 20 |
| ACTAAGGCTGATGGGGTTCA      | 59.55  | 20 GACAATCCGGCCAAATTA      | 59.773 | 20 |
| AATCATCCAAGCTCTGCAC       | 60.226 | 20 CTGGGACCTGATGGTCTGTT    | 59.962 | 20 |
| TTGAGATTCCGTGAGGACTGT     | 59.712 | 21 GTATCAGCAGCCACCCAAT     | 59.962 | 20 |
| AAAATTGACCCGATCATTGT      | 58.424 | 21 GCAAAGTGGAGATCATGGGT    | 59.934 | 20 |
| CAGCAAAATCCTTCACCTCAG     | 59.861 | 21 TCTTTAACCGCCACCAAAAC    | 59.975 | 20 |
| GCACCAAAAAGGAAAAATAATCC   | 60.071 | 23 GAGAGCAGTTTCGGACATAAA   | 57.518 | 22 |
| TTACCTCTGTTGGTGCACCTT     | 57.406 | 21 GCCAAAACACTACCCCTTTCAGA | 60.469 | 21 |
| TTTCTTTGTTACCATGGGGG      | 59.657 | 20 TTCAGCAAACCAGCTCTCCT    | 60.134 | 20 |
| TGGGACAAAACGGGAAATAG      | 59.795 | 20 TGCGAAGTTTGTCTTGTGC     | 60.035 | 20 |
| CCCGTATACACACCACGGAT      | 60.517 | 20 GCCTTTTGGGGTCTAAGGAG    | 60.068 | 20 |
| CGGCATGTTCCCTCAACTACA     | 59.716 | 20 TGGCTTTGCAATCTCATTTTT   | 59.712 | 21 |
| TAGACGAAGTTCGAAATGGG      | 60.066 | 20 TGTGAAAGTGGAAAACACCTT   | 59.482 | 21 |
| AAAGCATTAACAGCACGCCT      | 59.911 | 20 TGTCTCATTGTGCTCAAGCC    | 59.992 | 20 |
| GTAGCTTCAAACCTCCCGCTG     | 60.015 | 20 TCTTATCGTAGCTCGGTCGG    | 60.365 | 20 |
| TGAGTAAAAGCACGATTTTGG     | 59.758 | 22 AGGGGGTTATCATGGGATCA    | 61.3   | 20 |
| TTTCGTAATTTCTCCAGCC       | 60.074 | 20 GAGAAAGTGAAGAATCGATTG   | 59.717 | 23 |
| TGCAAGCACACTCAGACACA      | 60.235 | 20 TCACGCAAACAAATCCAAG     | 59.706 | 20 |
| GAGGCAAAGCAAGGCATAAG      | 59.982 | 20 TTCAAGTGTCCCATCACA      | 59.935 | 20 |
| TAAACCCAGGTGGCAATCTC      | 59.933 | 20 CCAACTTTCTCCCCTCTTC     | 60.045 | 20 |
| AACCAGACCGGACCGTTAAT      | 60.61  | 20 TGAAGCACAATGAAAACGGA    | 60.234 | 20 |
| ACTTACCGTCATTTCCGTCG      | 59.993 | 20 ACCCCACAACTTTTCTCTGC    | 59.187 | 20 |
| CACTAAATTGGTGATGGATGAA    | 57.487 | 22 TCTCAACAGCGTGTGGTT      | 59.339 | 20 |
| GGCCTAGGTTTCGAGGTAGG      | 60.089 | 20 CTTTAGGCGTTCAAAGGCA     | 60.368 | 20 |

|                           |        |    |                        |        |    |
|---------------------------|--------|----|------------------------|--------|----|
| TTTTCCCATGAAGCCAAAAC      | 59.916 | 20 | TGAAATGAAATCATGCCCT    | 60.274 | 20 |
| GCGCTCAAACCTAAGCATCC      | 59.988 | 20 | CATCCCCTTTATTCACCCCT   | 60.011 | 20 |
| CAATGGTCAAATTGCGACTG      | 60.111 | 20 | TGCACAACAAATAGGCCAAA   | 57.846 | 20 |
| TGCACTCTGTGATGGGAAAA      | 60.24  | 20 | TGGCAAAGCCCTTTCTACTT   | 58.973 | 20 |
| GTGCAGCAAAATTGCTTTGA      | 59.999 | 20 | CAACTCATTGTCAACCGCAC   | 60.16  | 20 |
| GCCTTCCATTCCAAAAATCA      | 59.878 | 20 | TTGCAAGGCTCTGAAATCAA   | 59.542 | 20 |
| GAGTGAGGGAAAGTGAAGCG      | 59.989 | 20 | AGGCTGATTGTGAACTCCAGA  | 59.859 | 21 |
| TGAAGTTAGGAAATAAGGAGGTG   | 58.743 | 25 | TCATGTTACACGTGGACGCT   | 60.183 | 20 |
| TTCGTATTTGTCTAGCGCCC      | 60.23  | 20 | CTCTTCCCAGCAAGAAAGGA   | 59.545 | 20 |
| TCGGTTGGATTTCTTTCTG       | 60.044 | 20 | AATTGTTCAATTTGCAACGGC  | 60.876 | 20 |
| CAATCTGACGGCCGATATTT      | 59.923 | 20 | TTAAATATTCATGGGCACGC   | 58.513 | 20 |
| TGGTGCAACCATTGGAGATA      | 59.924 | 20 | TCAGGCCTATCGAACCAAAG   | 60.206 | 20 |
| AGTCAGCGGAACCGTATCAC      | 60.142 | 20 | GTGACCCGCCTCATCTTCTA   | 60.218 | 20 |
| TGAAGTTAGGAAATAAGGAGGTG   | 57.525 | 24 | CAGGTTTATCAACAAGGTTTTG | 59.795 | 23 |
| ATTTCTTTTCTTGGGTGGG       | 60.159 | 20 | GCAAGCTAGAACCACCATT    | 59.198 | 20 |
| TTTGATGGCTTGAGTTTCCC      | 60.051 | 20 | CCTCCTCCTTTTCTTCCAG    | 60.175 | 20 |
| TTCACCCTCACACACACGAT      | 60.005 | 20 | TGCGTAGAACAGAGAGCGAA   | 59.888 | 20 |
| CCGTAGTTCCGAATGGTTGT      | 59.853 | 20 | CGAATTCTAGGCGATTCCTG   | 59.801 | 20 |
| CTTTGCCTTGTGAGAGGGAG      | 59.982 | 20 | GGGAAGAACGACGACGATAA   | 60.074 | 20 |
| TCCCTCTCTCCCCATTTTCT      | 60.008 | 20 | GGTTTGGTTGGAGAAAGCAA   | 60.088 | 20 |
| AACTCAAGATTCTGCATCGGA     | 59.828 | 21 | AAGCAACAATACCCCCACAA   | 60.227 | 20 |
| CTGTGTGATGTGGAGTTGGG      | 59.997 | 20 | AACCCTGTGTATCCCAGCAA   | 60.375 | 20 |
| CAGGAATTCGCTTTCTCCAA      | 60.323 | 20 | CTTTCTTGACCAGATTGCC    | 59.67  | 20 |
| TCACCCGGACCTCTTCTTAG      | 59.28  | 20 | GTCATCATGTTGGGTGCAG    | 59.967 | 20 |
| ACTGTCAACCCCTCCCTTCT      | 59.968 | 20 | CAAGCCTTGGACTTTGGGTA   | 60.103 | 20 |
| CGAAATTGAGCTTTTTGGGA      | 60.181 | 20 | AGGACGTTGATTTGTTGGGA   | 60.353 | 20 |
| CAATACCACCCCAACACACA      | 60.128 | 20 | AACCATGTGCTTACACCACG   | 59.49  | 20 |
| TATATGGGCCGTTAGATCGC      | 59.913 | 20 | CGGAGACTAGGGTTTGGGAT   | 60.319 | 20 |
| AAGCATTTCATTGGGCAGAG      | 60.214 | 20 | ACCCAAAATCCATTTTCC     | 59.867 | 20 |
| ATTAGCGTGCCTATTGCACA      | 59.353 | 20 | CTGCATGCACATAGAGTATTGC | 58.346 | 22 |
| AACGCCGTCTGGATTTTATG      | 59.96  | 20 | CCAATATTCTTCGGAGCGAG   | 59.801 | 20 |
| AAAAATATAAACCCCTGTCGTATCT | 58.581 | 26 | GTGGGGTATGGTCAACGACT   | 59.703 | 20 |
| ATCACGAGTTTTTCCCTTAAAA    | 57.036 | 22 | TTGAAGATCGATTGGCCATAA  | 60.409 | 21 |
| CACCGGTGAATGGAAAAATC      | 60.17  | 20 | TTCTTTCTGCATCCACCACA   | 60.24  | 20 |
| ATCACATTAATTTGGCGCA       | 59.032 | 20 | TAGGCCCATAAATGCTTCCA   | 60.415 | 20 |
| GATTAGCAAATTTGCGGACG      | 59.547 | 20 | GGAGTGAGGATTTGAGGTGG   | 59.505 | 20 |
| ACAACAATCAGCACACGGAT      | 59.014 | 20 | TTGACGAAGCAACCTCCTTT   | 59.853 | 20 |
| TCATGATTTGGCTTTAGGGC      | 60.038 | 20 | GGGCATGCACCTAGTCACTT   | 60.142 | 20 |
| AACAGAGCATTCCGTCTTG       | 60.255 | 20 | TCCCTACGAGGAAGTCAGGA   | 59.797 | 20 |
| ATTTCCCAAATACCAAGGGG      | 59.882 | 20 | TTGGTTTTGTTGGGATTGA    | 58.841 | 20 |
| ACCCTCGACGAAGTTTCTT       | 60.11  | 20 | ATTTGTTGGAGTTTGGTGC    | 59.83  | 20 |
| ACAAGAGTTGAAAATCCTCCCA    | 59.976 | 22 | TTTTTATTGTTTGCTCCGGG   | 59.937 | 20 |
| TAGGGTCCCACCACCTAACA      | 60.224 | 20 | TGTAGCCATTGGGGAAGGTA   | 60.323 | 20 |
| CGCAACACAAACAGACATCC      | 60.16  | 20 | CAACTCAAATGCATGGGAAA   | 59.518 | 20 |
| ATCGGTTATTACCGGATCGC      | 61.031 | 20 | GATGTGTGCTGGATGTCGTT   | 59.557 | 20 |
| CGAGGATCGAACCCACTTTA      | 60.066 | 20 | TCATTCATTCACTCAGGGG    | 60.058 | 21 |
| TTCTCAGATGTTTGGTCGGA      | 59.215 | 20 | TGTTACCTTTTGGCCATTT    | 60.344 | 20 |
| TGGTTTTATCAAGATTGGA       | 58.897 | 20 | ACTTTCTGGTCAACACTCACGA | 59.809 | 22 |
| AGTGGTAGGCCGAGTTCAA       | 59.734 | 20 | GGGATAAAATAAGGGGTTTCC  | 60.883 | 22 |
| AGTTGGTTGGAGCATTGAG       | 60.111 | 20 | TTTGGGCTGCAAATGATAAA   | 59.146 | 20 |
| TCAAGAAAGAATGTGGAGCAA     | 58.488 | 21 | CCGTCTCCTCCCTCTACCTC   | 60.208 | 20 |
| GCACATAGCGTCTTCGTCAA      | 60.019 | 20 | AAGAGCAACACATGCCAACA   | 60.31  | 20 |
| TTTCTTCTTTCTTGCTGTTTC     | 59.088 | 23 | GTGTGTCTGGTGGGGAAGAC   | 60.421 | 20 |
| TTTGGGGGAAGAAAAATGGT      | 60.514 | 20 | GGGGCCAATCCAAATTTAT    | 58.563 | 19 |
| TTTCCACCATGATATCGACAC     | 58.285 | 21 | GAGCGCAAAGCACAAAAATC   | 60.896 | 20 |
| GGCAACGGAATACCATTTGT      | 59.691 | 20 | CGTGTTTCATTTACCCCTT    | 59.966 | 20 |
| TTTCAAATTTACGAGGGAT       | 59.363 | 20 | ACTATGCTCACCCACTTGGC   | 60.142 | 20 |
| GCAGTTAGCACGATAAAGG       | 59.73  | 20 | CGCCCCACATTGTTTCTTAT   | 59.823 | 20 |

|                           |        |    |                         |        |    |
|---------------------------|--------|----|-------------------------|--------|----|
| CGTGTCCATTGAGTACCTCGT     | 60.043 | 21 | GGAGGAATGCAAGTTGTGGT    | 59.973 | 20 |
| ACTGCCGATAAAAATGGCAC      | 59.967 | 20 | AAAAATGAGCGGACCAAAAT    | 58.557 | 20 |
| TGAAGTTAGGAAATAAGGAGGTG   | 58.743 | 25 | GGGGTGAAAGCGGTTATTTT    | 60.184 | 20 |
| ATATGTTACCCGGCCAAAAC      | 59.691 | 20 | CGTGGTTTATCGGGAGTGAT    | 59.813 | 20 |
| GTGGTTTAGGTGAACCCCTG      | 59.304 | 20 | CTCCTTCCCAGACGAACATC    | 59.655 | 20 |
| TGGTTCAAACCATGATTCC       | 58.243 | 20 | TCGTCCAACITTAAGTGATTTT  | 60.037 | 24 |
| GAAAATTGGCGGTACAGTTGA     | 59.989 | 21 | TGGTTTGGAAATATACCGAAGTT | 60.115 | 23 |
| TCTTTCCTTGTTTCGGCATT      | 59.685 | 20 | GCGTAAGGGTGTTCTGTGAGT   | 60.179 | 20 |
| AAGCAAGCAAACGAGTCAAA      | 60.046 | 21 | ATGCCATGACACGAACAATG    | 60.399 | 20 |
| AACGTAGGAACTTACACAAAGTT   | 59.917 | 25 | GGCCGAATTATGCTTTTGAA    | 60.04  | 20 |
| GGCATTGTTGTACATTGGCT      | 58.504 | 20 | TGTGTCATCTTACACTTTCCAC  | 58.201 | 23 |
| TTCAAATTTGTTATTGATACCGAT  | 59.229 | 25 | CAATCTGCGAAACTGGGTCT    | 60.255 | 20 |
| TCCTTCCACATCTCTCCGTC      | 60.199 | 20 | TTCTTGCCAGAAAACCCTTA    | 59.679 | 20 |
| AGTTCCCTGCCCTTCTTGTT      | 60.11  | 20 | GAGAGTGCCTCACTTTTGTGG   | 59.899 | 21 |
| ATGATGAGGTCGAGATCGCT      | 59.792 | 20 | TTTCTCATGTCCCAGATTC     | 60.05  | 20 |
| CTGTCTCCTCCACCTCTTCG      | 59.978 | 20 | TTTCTTGCCGTGGTGTGTA     | 60.149 | 20 |
| ATCTCTGGCTACGCCACTGT      | 59.898 | 20 | TTCATCGCCTCTCCTCTTGT    | 59.95  | 20 |
| GCAGCCACAGTTGTTATGGA      | 59.722 | 20 | CATTTGCAATGGAAAAAGGG    | 60.294 | 20 |
| TCACGCGGAAATAAATCCAT      | 60.289 | 20 | AGCGGTTATTACCGGATCG     | 59.93  | 19 |
| AATGAAGACATCGGAGAGGG      | 59.09  | 20 | AAGAGGTTGGGGTGCTACT     | 59.994 | 20 |
| GTTGCTTTGCAGACCCTCTC      | 59.997 | 20 | CAAAGTCAATAGCCCAACCA    | 58.623 | 20 |
| AACCGGAGATCCAATCTCGT      | 60.853 | 20 | CGTTTGAGCTTTGTTTTCTTGA  | 59.553 | 22 |
| CATCCCTATCAACTCTTTCGATG   | 59.973 | 23 | GTCCCTTTTTACCCACCGAT    | 60.053 | 20 |
| CCCCTCAAATGCACTTCATAA     | 59.946 | 21 | GCATCCTCGTGTGTGGATTA    | 59.527 | 20 |
| TTGAACACACAGTTCATGCCT     | 59.202 | 21 | GCAAGACTCGATCAGGAAGG    | 59.95  | 20 |
| GAAATTCTAGGTCCGCCTCC      | 60.039 | 20 | TCCACTGTTCAAGTGGACGA    | 60.285 | 20 |
| TCGAAGCAAAGTCCTCATCC      | 60.34  | 20 | GTGGGGCCACACTTTTCTAT    | 58.912 | 20 |
| TGCGCCATAGATAAACCTGA      | 59.281 | 20 | CCAATTTGAATGGTTATCACCT  | 60.457 | 23 |
| TATGGAGCAACACAACCACG      | 60.574 | 20 | TCTCGTTTGGAGGAATTTGG    | 60.044 | 20 |
| AATGGGTTTTACACATTGGCA     | 60.103 | 21 | CCTCGTTTGCAGCAGTTACA    | 60.05  | 20 |
| TGTGACTTCAAAAACAGCCG      | 59.881 | 20 | ATTGCGGTAACAATTCGAGG    | 59.96  | 20 |
| GATCATTCCAAAAACAATGATG    | 58.349 | 23 | TTGTTTTCCGATTTACCA      | 58.987 | 20 |
| CGACCTTATAACATTTATTTTTCAT | 57.518 | 27 | CATATTTGATGGGACCTTACGA  | 58.831 | 22 |
| AAATCATGAGCGTCCGTCTT      | 59.7   | 20 | GATTTTGCCCCCATATGCTA    | 59.757 | 20 |
| AGACACCCTTTCCATCGTGA      | 60.51  | 20 | ATCCCAAATTCCCAACCTCT    | 59.629 | 20 |
| TCCATTCCGAAAATCAAAGG      | 59.872 | 20 | CCGCCTGATTTGTTTCTCAT    | 60.074 | 20 |
| GTTCAGTGTGCGCCTCGTAT      | 60.142 | 20 | CCCCCTACATTTCTTCATGC    | 59.387 | 20 |
| GTGTCAGGCATGTTTGTGG       | 60.008 | 20 | TCTTGTGGTAAGCAGCTCCA    | 59.591 | 20 |
| TCGAAAGGGTCAATTGAATG      | 58.546 | 20 | TATATCGGGGGCTGAGCATA    | 60.403 | 20 |
| GAATCGTGTCTTCTGGCAT       | 60.081 | 20 | CAAACCTCCACCATAACCGCT   | 59.993 | 20 |
| TTCAAATTTGTTATTGATACCGAT  | 59.229 | 25 | CAATCTGCGAAACTGGGTCT    | 60.255 | 20 |
| GCCACCAATTCGAAAAACAT      | 59.807 | 20 | AAGGGGACTTGCACAAACAG    | 60.149 | 20 |
| AGATGTCTTTTGATCAGTTGGTGA  | 60.04  | 24 | CGATATTGTGCCGTTTGTAT    | 60.721 | 20 |
| AACCGAGAGCATAACCTGACA     | 59.749 | 21 | CGGGTGAGAATAATTTAAAGC   | 59.887 | 23 |
| CTGCATTATCGCATCAGGAA      | 59.792 | 20 | CATCAGGTTCACTGGCAAAA    | 59.691 | 20 |
| TTAGTGTTTTGACATGATTACTCC  | 57.557 | 25 | AATAGGTCAAGATCGCCACG    | 60.096 | 20 |
| AAAATAAAGCTGGGCTGCTG      | 59.496 | 20 | TTCAATGCAGATGGGATTCA    | 60.009 | 20 |
| AACTTCATTATTTGGGGGTGC     | 60.068 | 21 | TGACATGGAATCAATGGTGG    | 60.177 | 20 |
| CCTCCTCAACAGAGGATATAGGA   | 58.747 | 23 | TTCATAATTTTGTGCTTTTGCT  | 58.083 | 23 |
| CCCAAATCGGCAAATAGGTA      | 59.789 | 20 | AAATCCCAGCCACACATTTT    | 59.797 | 20 |
| ATCCGGAACCTCGAAAGATT      | 59.903 | 20 | TCAAATGGTAACCAATCACTA   | 59.328 | 24 |
| TAGCCCTAACTCTTGCCCT       | 60.221 | 20 | CAGAGGCATGGTCTCAGTCA    | 59.98  | 20 |
| CGAGCCTCAGCCAAAATCTA      | 60.481 | 20 | TTGGAATTTGGAGGTGGAAG    | 59.903 | 20 |
| TCCACATCACATGACTTCTG      | 59.535 | 21 | GCTTCTCCCAATAATGCAA     | 60.038 | 20 |
| TTGCGATTGTTGAAGTGGAG      | 59.84  | 20 | GCCCACTCTTTCTAACCCTC    | 58.792 | 20 |
| GTAGGGGGCAGACATTAGCA      | 60.096 | 20 | CAGAAAAACCATGGGAGAGG    | 59.521 | 20 |
| GAATTGAGACCCATGCACCT      | 59.934 | 20 | AAAGCAAGCCTGGACTACCA    | 59.875 | 20 |
| GAAATTGCTAGTTCGGGCCCT     | 60.582 | 20 | GCCAATTCCGATTCAAACCTG   | 60.448 | 20 |

|                          |        |    |                         |        |    |
|--------------------------|--------|----|-------------------------|--------|----|
| TTACGCTAGTCCGTGGGTTT     | 59.632 | 20 | GGTTTTTCAGATACACGTGCCA  | 60.939 | 21 |
| TGAAGTTAGGAAATAAGGAGGTG  | 57.525 | 24 | ATGAGGAGGAGGAGTTGGGT    | 59.929 | 20 |
| TGCATGCATTTTAGCTTTGG     | 59.842 | 20 | TCAAAGGCCTAGAAGTGTTTTC  | 58.562 | 22 |
| TGGACATTTGGGTTTTCTCA     | 58.947 | 20 | AGGAAATGCAGTGTTTTTCAA   | 57.411 | 21 |
| AAAATGCCCTTGTATGCTGC     | 60.103 | 20 | CAGTTTTCATTTGATCAAGCCTC | 60.122 | 23 |
| ATAAAAATGGCACCTGGCTG     | 59.96  | 20 | GCGGTGAGTGATTGAAGGTT    | 60.119 | 20 |
| TGATTCACCTCCCATGATCC     | 60.692 | 20 | AAGTAGCACGACCAGATGGG    | 60.134 | 20 |
| GTCTCAATGGGACATTTGG      | 60.173 | 20 | TTCAATTGTATTAGCCGATTTTT | 57.072 | 23 |
| TTCCCGAAATCCGAATAAAA     | 59.367 | 20 | GAGAACCAAGGGTCAAGAAA/   | 59.61  | 22 |
| ACACAACCTCGGAACAACGAA    | 59.187 | 20 | CAAAAATCCAACACCTCTCAG/  | 59.513 | 23 |
| AAGAGACAAACAAGCATGGG     | 57.797 | 20 | TCACAATCGTCCATTTTTTCG   | 59.518 | 20 |
| GCTTTAGAGATGGGAGCACG     | 59.978 | 20 | TGTGAACCAGAGTCGGTGAG    | 59.864 | 20 |
| CATTCAATGAGGATGGCCC      | 60.118 | 20 | AACCGTGGCTAATCTGATGG    | 59.955 | 20 |
| GCCCCCTCTTTCAGTCTTTC     | 60.19  | 20 | TGACTCAAGTCTTCAACCAACA/ | 58.397 | 22 |
| TCTTCACCACCTGAAGAGGG     | 60.229 | 20 | GAAACGGAGGGTTGGTGTTA    | 59.83  | 20 |
| TTTGCTTGATCCAACGGTCT     | 60.636 | 20 | CGGTGGAATATGTATGGTTGTC  | 59.996 | 22 |
| CCAATTTGAATGGTTATCACCTG  | 60.457 | 23 | TGAGCTCTTCCGTGTCCTCT    | 60.135 | 20 |
| CAGAGGAGCCTCAAGATTGC     | 60.096 | 20 | CTTGCACCACCACTTCTCTCT   | 60.298 | 20 |
| TCATGCCAAAATTTTCATTCA    | 58.994 | 21 | GAGATTTCTCCTTCCACAGG    | 60.059 | 21 |
| CGAAACCCTCTCTAATTTGATTGA | 60.785 | 24 | TGCACACGCTACCTTAGTTGA   | 59.545 | 21 |
| GGTTATTATTTGATCACCTCCC   | 59.813 | 23 | AAATGAGTTGGCTGTCCCAC    | 59.973 | 20 |
| AAACGTGGAGCGAGCATAAT     | 59.736 | 20 | TTTAAGGGTTATCACCTGATTT  | 57.757 | 24 |
| TGCGAGTCATGCTCGATTAG     | 60.119 | 20 | TTAAACTTTCCATCGTCGCC    | 60.074 | 20 |
| TAGACGGTTGGAGAGATGGC     | 60.218 | 20 | AGTCCGGGGATAGTAATGGG    | 60.032 | 20 |
| AACACCAAAATATCGTCCCCG    | 59.685 | 20 | TCGTGGAACGAAACATCGTA    | 60.111 | 20 |
| TGAAGAAGATTCTCATCCCACA   | 59.67  | 22 | TGAAATTAGGAAATAAGGAGG   | 57.424 | 24 |
| CATTGTATTGGGCTGCTCCT     | 60.096 | 20 | TGCCACGTAATCACAGCCTA    | 60.28  | 20 |
| TCTTTCCCACTCGATTTTGC     | 60.192 | 20 | TCTGAGATTTTCATTTTGTCCG  | 59.202 | 22 |
| AAGTTGATGATCCCCGCATA     | 60.296 | 20 | TCAAATGCTCAAGGATCAATTC  | 59.162 | 22 |
| GATTCAGAATTTCTCCAGATGC   | 57.874 | 22 | GGCTGTGTGATCATGTTTGG    | 59.967 | 20 |
| TGTGAGGGACACAATTCTTGA    | 59.124 | 21 | AGTACCTGCCGACAAATGGA    | 60.517 | 20 |
| AAAAATTCCAATGGTGGCCT     | 60.542 | 20 | AGGCCACTGAGAGTGGTGAC    | 60.315 | 20 |
| ATGCAAGTTTTGCTTCCCAA     | 60.617 | 20 | TCAATGTTGATCAATGTGGGAT  | 60.059 | 22 |
| GAGCAGGGAGATAAGAGAGAGA   | 59.318 | 24 | TCATGCTTGAATCAAACAACA/  | 59.206 | 22 |
| GCATTCTTGAACCACTTGC      | 60.646 | 20 | AGGTTGTCCTGATGGTGGAG    | 59.962 | 20 |
| GGAGTTTCCGGTGTGAAGA      | 60.088 | 20 | CACTCTCACGAGCTCACACG    | 60.829 | 20 |
| TCCACAATTTGATCTCTCCT     | 58.729 | 21 | TTTTGCCATTTTCGAAATCC    | 59.886 | 20 |
| GGTAAACATGCACAGGTATAGAC  | 59.854 | 24 | AGGAAATAAGGAGGTATTATG,  | 60.302 | 26 |
| CGAGGCAGAAAAATCAAAGC     | 59.96  | 20 | ATTGCTTCCAATCGAACACG    | 61.032 | 20 |
| ATCAACCATTGATTCCCGAG     | 59.75  | 20 | CACGAGCCGCTAAAATAAA     | 60.218 | 20 |
| TCAATCCTTGTACCAACCA      | 59.935 | 20 | TGCTGCAGAGTGTTCTTTGG    | 60.175 | 20 |
| GGACACGCGGATCAGTATCT     | 60.104 | 20 | TGCGAATGATAATCAACATGA/  | 60.329 | 23 |
| AGGTCCCAGAAGCAAATATGA    | 58.659 | 21 | TCTTTTACTTGCAATTTCTGTT( | 59.4   | 25 |
| AATGGGAGAGCCAAACAATG     | 59.933 | 20 | AAATATTTACGCCGCTGTC     | 60.103 | 20 |
| CCCAGAAGCAGATCCATGTT     | 60.073 | 20 | CCACGTACACCGACAAACAC    | 59.922 | 20 |
| TCCTTGACCGGTAAAGATT      | 59.708 | 20 | TGATCAGCAGCTATGGAACC    | 58.826 | 20 |
| TCATGCATTACCATAACGAA     | 58.492 | 20 | GAATGATGGAAGCAATGCAA    | 59.628 | 20 |
| CACCGTGTACTCTGCCTTGA     | 59.897 | 20 | TTGGCAAACCCCTATTCAGG    | 59.931 | 20 |
| CCACTTTTGCATTGCCTTTT     | 60.11  | 20 | GTTGGTTACGGGAATTGCAT    | 59.691 | 20 |
| ATTTGGTCCCGTACAAGCAG     | 59.993 | 20 | GGCAAGGCTAAATGGTCAGA    | 60.214 | 20 |
| CGTTTCTTCCCTCATTTCCA     | 60.044 | 20 | GGCCAAAACATTGCTCCTATT   | 60.326 | 21 |
| GACTTGCTTGAAGAACATACA    | 58.108 | 22 | GGACAAATATGGTGATGGCA    | 59.205 | 20 |
| TCTGGAGTCCACTTCAAGCA     | 59.545 | 20 | TTGGCTCGTACCAAGAAAGG    | 60.241 | 20 |
| TCTCAGCCACAAAATTCGAT     | 58.298 | 20 | ATATCACATGCATGACCGGA    | 59.763 | 20 |
| GGGTTATCATGGGATCCATTC    | 60.225 | 21 | GGTTGACTCATGGAAAAAGCA   | 60.103 | 21 |
| AAGAAGCAATGGTCGCAAGT     | 59.882 | 20 | AAAAGGTGATGGGTGTTGGA    | 60.21  | 20 |
| AACTGGTTTGGTGGTTTGA      | 60.246 | 20 | CGTTTGGCGGATAGTTTTGT    | 59.996 | 20 |
| TGGAGGAAGCATTGGACTTT     | 59.67  | 20 | CGAAGGTGGGTTCTTGTGAT    | 59.966 | 20 |

|                          |        |                            |        |    |
|--------------------------|--------|----------------------------|--------|----|
| CCTTTTTGCTTTATTAGAAACCTG | 57.797 | 24 CCAAATAGGGCACAATCACA    | 59.395 | 20 |
| TTTTCGGTTTGTCTCATCCC     | 59.91  | 20 GAAGGGAGGGAATCTATTGTG   | 59.42  | 22 |
| TGGCGTGACACCATGTAAAA     | 60.967 | 20 TTGGATGAGATGATGGCAA     | 60.009 | 20 |
| TTTTGGTGGCGGTAGGTAG      | 59.99  | 20 AGGTGCTGCCCAAGAACTTA    | 59.875 | 20 |
| GTTTCCCTTTTCGATGCATGT    | 59.939 | 20 GGCTGCATTTTTATCCCAA     | 59.907 | 20 |
| CATTGATGGACCTGCTCTCA     | 59.787 | 20 AGAAGCGTAGCATTGAGGGA    | 59.978 | 20 |
| TCTACTATACCCTTGCAAATTATC | 58.82  | 27 AAACCCGACTTCTCCTTTG     | 60.467 | 20 |
| TTTGCATCGAGACCAGTTTG     | 59.84  | 20 GAGGCGATTGCTTAGGTGAA    | 60.352 | 20 |
| TGGTCCTTGACTAGTTCAATTTCA | 60.035 | 24 GTTTTCGTTGTCCCCACAAT    | 59.694 | 20 |
| TATACACCCCGCATCCATTT     | 60.038 | 20 AGACCCAAGCCTACCGAGTC    | 60.649 | 20 |
| TCCAATTTGCCCTTTTATGC     | 59.907 | 20 CTCCTGTCCATGAAATTGGG    | 60.309 | 20 |
| ATGCTAAGTTAGGCCTGCCA     | 59.867 | 20 CGTCCAGTGCCTGTGAATTT    | 61.096 | 20 |
| CCAAATGAAATGAAAACCGTG    | 60.209 | 21 GGGTCGACAAGCTTGAGAAA    | 60.375 | 20 |
| AAAATGGCGGTCAACTCAAG     | 60.11  | 20 AGGGAGGGAGAGTTTTGCAT    | 60.074 | 20 |
| ACATGACTCGAGCCTGTCT      | 59.866 | 20 TTTGGCACCCCTTTGTAATC    | 59.801 | 20 |
| CCTACGAAGAAATACTGCGCTT   | 59.939 | 22 CTTCAAGATTATGGTGGGGG    | 59.24  | 20 |
| TCTTTGTGGGGAAGAACAGC     | 60.232 | 20 TTCAACATGAAGTTCGACGC    | 59.847 | 20 |
| TCACCTCCATCTCTGCTCT      | 59.945 | 20 TCACCCGAATCTTTCGTTTC    | 60.051 | 20 |
| GCATGCATGAGCAAGAGACA     | 61.154 | 20 CGATCGATCATCGAAAAAT     | 59.862 | 20 |
| TCGTGATTCTCCCAAATC       | 59.871 | 20 ATGAGGCCCATCAACACAAT    | 60.203 | 20 |
| CAACCATTATTATCCAATCGAAC  | 58.736 | 24 ATCATGGCTGATCAAGCTCC    | 60.189 | 20 |
| GATCATGCATTTCGAAAGAA     | 59.775 | 20 TCCCAAAGTTTCACACGTCA    | 60.128 | 20 |
| TTTTCCCCAGATGTCTCAC      | 59.903 | 20 TGGGATTGATCCTACCCAAA    | 60.126 | 20 |
| TGGTCGAACACTCAGCAGTC     | 60.03  | 20 TTTTCATGAATTGCCTTCCC    | 59.878 | 20 |
| TTTTATGCGGCATTCATGTG     | 60.474 | 20 TTTAATTAGGTCCACGCGCT    | 59.742 | 20 |
| CTGCATTTTCTGCTGGTTCA     | 59.988 | 20 AACGGTCTTAATGCAATGGG    | 59.823 | 20 |
| ACGAAAACAAAAGGTACGGA     | 57.278 | 20 TGTCCGTGATGATCGGTTTA    | 59.924 | 20 |
| TGATTCGGTTAATCCAAGGG     | 59.756 | 20 ATGTTGCAGCTTTTCATCCC    | 60.081 | 20 |
| GAGGGGGTGAATCATTGGTA     | 59.605 | 20 TCATCCCAAGTCCAGAGCAT    | 60.622 | 20 |
| TCGGTTTGAGAACCAATGAC     | 58.543 | 20 TTTTTCAGCTCACTTTGTGATG  | 58.081 | 22 |
| AATCTTTCTTGGGGCCATCT     | 59.903 | 20 CCAGCAATAGCCCTCTGTGT    | 60.277 | 20 |
| TGGCACACTCTCATTGCTTC     | 59.992 | 20 TGGTGATTGCTCATTCTGGA    | 60.201 | 20 |
| GAACACCGAGAGCAAACCTC     | 59.851 | 20 GACCGTGTGCAATGAAACAG    | 60.16  | 20 |
| ATGCGTGTGGTCGATGAGTA     | 60.144 | 20 GTGGCATGCAAACGACATTA    | 60.532 | 20 |
| TTCCCTATGAAAACCGTGC      | 59.938 | 20 GCTGCAGATCTAAGGCCG      | 59.654 | 18 |
| GGAATAAACGGCCAATTCAA     | 59.773 | 20 TTA AAAAGTGC GGGGCATTAC | 59.964 | 20 |
| ACAAAGCCACCGTCAGAGTC     | 60.307 | 20 CATGATGAGAGTTGGGCAA     | 59.648 | 20 |
| CGTGTACTCCGCACTTCAGA     | 60.049 | 20 ATCGGAGTTGATTTGATGCC    | 59.9   | 20 |
| AATGCAATTGTGCATGCCT      | 60.096 | 19 TGGCGATTAATTTCCCTTCA    | 60.395 | 20 |
| TCCGTTTCAAATCCAAAA       | 60.273 | 20 TGTCCAACCTCAAAGAGGAAAA  | 57.441 | 21 |
| TCATTATCATCCGCCTTCAA     | 59.065 | 20 ACAA AAAAGCACAAACCCACC  | 59.875 | 20 |
| ATGGACCAATGCACCAAAT      | 60.059 | 20 GAGGTGTTACGCTCTCCAGC    | 60.02  | 20 |
| ACAATTTGCTGTGGCTGATG     | 59.722 | 20 TGC GGAGTTCAAGACTGATG   | 59.984 | 20 |
| TACGAAGCTGGAGGAAGTGG     | 60.388 | 20 CGGAGATTCTCTCTCTCCCC    | 60.292 | 20 |
| CATGTTTGCCTGTTTTGTGG     | 60.004 | 20 TTGTGCATCAAATAAACCCA    | 58.922 | 21 |
| TGCATCGATGATCTTGAAGG     | 59.756 | 20 CCCCCTATTGCTCAGACAAG    | 59.688 | 20 |
| TTGAGCGACGTATCTCCTTGT    | 59.89  | 21 TTGGGATTTACGAAAGATTG    | 59.924 | 21 |
| AGGAAAATGTGATAGCAGCG     | 57.999 | 20 TGCCGTTTTGTTTCATGTTTT   | 59.062 | 20 |
| CCGCGAAACAATGAAGGTAT     | 59.96  | 20 GGCTAATTGTTGGCCTTTGA    | 60.074 | 20 |
| ATCCGGATCTGATTGATTG      | 59.854 | 20 TCCGGATACGGATTATATCCA   | 60.36  | 22 |
| TCCACAGAGATTTCCACATC     | 59.918 | 21 TGCCTTAGATTCCACTTGGG    | 60.066 | 20 |
| GGTGACGATGGTGATTGATG     | 59.769 | 20 ATGCACGTAGGCATGTTCAA    | 60.142 | 20 |
| TCCAGAACATAAACACCGCA     | 60.111 | 20 CGAGCGTAGTCGTCGCTATT    | 60.564 | 20 |
| CTGGTACGTGCGACGATTG      | 60.195 | 20 TGAGCTCCTTAAGGGAATGC    | 59.41  | 20 |
| TTGGTGAGTGCAAGAGAAAGAA   | 60.03  | 22 GCATGTAGCCGTCCACAAT     | 60.925 | 20 |
| CACTCAAGTGGGGGATTGTT     | 59.82  | 20 TCCAGCGACTCATGTTGTTT    | 59.837 | 20 |
| TGATGATGATGGATTTAGCGA    | 59.079 | 21 GAGGGAGGGTCGTTTATCGT    | 60.328 | 20 |
| AGAAGACTCAATCATGGGCG     | 60.218 | 20 CCAAAGAAATGGGTTATTATTTG | 59.14  | 23 |

|                          |        |    |                        |        |    |
|--------------------------|--------|----|------------------------|--------|----|
| TGAACTCTGCATCATCTCCG     | 59.942 | 20 | CGAAATGCATGATTGAGGTG   | 60.073 | 20 |
| GCTGGTCGGTTAATTCCTCA     | 60.074 | 20 | CCCCGAAACTTTAGCGTAGA   | 59.357 | 20 |
| TCCGAAAATCAAAGACCCAC     | 59.91  | 20 | ACATGGATTGTGCTTTCGAC   | 58.572 | 20 |
| GGAAGACTCATTGCCAAAAA     | 60.051 | 20 | GGAGGGATTGAACGTAGGTCT  | 59.452 | 21 |
| GCATCTCTCCCATCTTCTGC     | 59.917 | 20 | CTTTTCTGGAAGGACCACCA   | 60.081 | 20 |
| AGTGTTTTGATCGAGTCGCC     | 60.263 | 20 | GCTTTGCGTGGTGGAAATTAT  | 59.967 | 20 |
| TTATGATATTTCCATAAGTCACAC | 57.297 | 26 | GCGAAAGAAAATGGTTTGAA   | 57.873 | 20 |
| GTCATGGTGTGGCACTGTC      | 60.013 | 20 | TGTGCATGAAGTGAAAGGGA   | 60.24  | 20 |
| CCACAAATCATCCATGCAAC     | 59.781 | 20 | TTGAAGTAGGGCATTGAGGC   | 60.214 | 20 |
| GGCAAGCGTCTTTGTTTGT      | 60.292 | 20 | GATAGTGGAGTTGTGAGCATCT | 58.878 | 23 |
| CCTTGATTTCCAGGATCCAA     | 59.864 | 20 | TGACGACCGATAATTGCTCC   | 61.003 | 20 |
| TCACATCTCATTGCCTCTGG     | 59.787 | 20 | TACTGCAGTGGAGTTGCCTG   | 60.049 | 20 |
| TAGGTAACCGGTTGACCTC      | 59.052 | 20 | CCAAAACTGATAAATGATGC   | 60.355 | 24 |
| GTACGAAAATGCCCTCGTA      | 59.96  | 20 | TTTTTGCCCTTTGATCTTCG   | 60.181 | 20 |
| ATGGAAGGTGGGCCTAAAGT     | 59.827 | 20 | TTCGTGAATAGTGCTGCCTC   | 59.028 | 20 |
| ACATTGAACGCTCCAAAACC     | 59.978 | 20 | TTCTACCCATTCTTCGCCAC   | 60.074 | 20 |
| GCCTCCCATATTGCTTTTT      | 60.28  | 20 | CGGGAGAAAATGAAAACCCT   | 60.291 | 20 |
| TTTGGCCTTTTTATTCCG       | 59.887 | 19 | CGGTCTCGGTTTGAATCTA    | 60.066 | 20 |
| ATACTAGTGCCTTGCCCGAG     | 59.359 | 20 | TCGAAAATGAACGATCGAGA   | 59.35  | 20 |
| TTCTAAAGGGGAAACGACAAA    | 58.727 | 21 | GCCCACCTGGTTTAAAGGAT   | 60.187 | 20 |
| TTCTCTCCACTGTGGCAATG     | 59.831 | 20 | GAGGGAGGGAAGATATTCGG   | 59.859 | 20 |
| AACGCCTTTCACCCCTAAAT     | 59.835 | 20 | TCCACCAAAAACCTGTCCAT   | 60.21  | 20 |
| GCTACCCATTTCCAGCATA      | 59.923 | 20 | AAAATCCGAGCCAGTTGTTG   | 60.11  | 20 |
| GGCAGAGTCACATTCCATT      | 59.934 | 20 | CGCTGCAACAAATACACACC   | 60.18  | 20 |
| ACGAAACCACGAAATCAAGC     | 60.118 | 20 | TCCAACCTTGTTTTCCGAC    | 59.948 | 20 |
| CCTCAGTTTCTCCCTACCA      | 60.229 | 20 | ATCACCGATTTGCAAACACA   | 59.972 | 20 |
| TGCAGCCCACTAAATCACAC     | 59.722 | 20 | ATAGGATTTCACTGCCTGCG   | 60.235 | 20 |
| GGGAGATGGGTTGAAACAGA     | 59.903 | 20 | TCACCAGTGCTTTGAGGATG   | 59.831 | 20 |
| ATCGAACCATTCCTGCTTTG     | 60.074 | 20 | TCACCTGATTTTCTCCCTCC   | 59.065 | 20 |
| CACTTACTTAAAGTCAACTCCCCT | 59.66  | 25 | TTGCACGCAGCATATTATGAA  | 60.247 | 21 |
| TCGAATGATTCAAAAGATTCACAA | 59.578 | 23 | TAGGCCTAAATGGTCGCATC   | 60.06  | 20 |
| AAAAGAGAAGCCCTCCAAGC     | 59.962 | 20 | CCAAATCCAAACCACCATTC   | 60.029 | 20 |
| CGGCAAAGAGTTATTCGGAG     | 59.839 | 20 | ATTCTGCTCGATTCCCAAGA   | 59.773 | 20 |
| AGTTGGTGAAGCTGGAGAC      | 60.453 | 20 | TTTGAAAAACAGAGCACCC    | 60.088 | 20 |
| TGATTTGGGACACTACAACA     | 59.992 | 21 | TTAATGGCCAAAAACAAGGG   | 59.805 | 20 |
| TGAATTGAATAATCCCAAATCAA/ | 59.583 | 24 | TGACATTTGTCTAACGATGGTG | 59.415 | 23 |
| TCACCGAAAAGATATGAAAATCA. | 59.851 | 24 | AATGTGATGCTCAGCAGTGGT  | 59.809 | 22 |
| TGCCAATACAAAACCAACCA     | 59.826 | 20 | TGGTTTGGGGTAGGAAATTG   | 59.657 | 20 |
| TGCGTTTTGACGATATATAGTGTT | 60.194 | 26 | AAAACGCGCTATTTTAAACCC  | 59.549 | 21 |
| GAGAGTCGGAGATGACCTGC     | 59.952 | 20 | TCACTGCATTAACCTACTCCC  | 58.264 | 22 |
| GCAATCGGTGACCTTTTCTT     | 59.174 | 20 | TATGTGGTCTGGCAGTCGTG   | 60.745 | 20 |
| TATCAGTTGGCAGGGGAGAG     | 60.21  | 20 | TTATCAGACAATCCCGGAGG   | 59.887 | 20 |
| TGTGATAGGATACGGCCCAT     | 60.177 | 20 | TGACACGGTGATTTACGTGG   | 60.427 | 20 |
| TGATGCTGCATTTTGTGTGA     | 59.833 | 20 | TGAATCCTCCCCATTGTTA    | 60.126 | 20 |
| CTTCAATCCCACCACCAAGT     | 59.82  | 20 | CTAATGCCCAACACAGCTT    | 60.132 | 20 |
| TGGATGTCATACGGGACTCA     | 59.918 | 20 | TGTGCGCTAAAGGTTTTCTT   | 59.883 | 20 |
| GAGCAGGATTCTGTGGAACC     | 59.661 | 20 | CCTTCTTTGGGTCAGTGCAT   | 60.111 | 20 |
| GGGCAGCTCACAAATCTCTC     | 59.957 | 20 | TTGTCTTCATCAAACGCCAG   | 59.84  | 20 |
| ACAATCGATTTCCCAACCAC     | 59.653 | 20 | AGGGAGGTGGCTCCTGTTAT   | 59.957 | 20 |
| AAAAGTGGCATTGTCCTA       | 59.586 | 20 | ATGATTGCGAAACAGGAAAAA  | 59.578 | 21 |
| GGAAATAAGGGGGTGTTATGA    | 57.796 | 21 | GAGCGCATTCCGAAGAGTAGC  | 60.265 | 20 |
| GGACCAACTATGGCACAACC     | 60.24  | 20 | TTCGGCCTTTGTATTGCTTC   | 60.209 | 20 |
| CACTTTTCATCTCCAACCCA     | 58.541 | 20 | TGAGAAGAACACATAAATTCTG | 59.772 | 23 |
| TCGGCTCTTTTCTTCTCG       | 59.702 | 20 | GTATGTGCGGTGAGGAGGAG   | 60.678 | 20 |
| TTATGCAGCAAAAATCCGAG     | 58.912 | 20 | CCTCCAGCTGTTAAAACCCA   | 60.103 | 20 |
| AGGAGAACCACGCATTTACG     | 60.132 | 20 | TTCGGAGTCTTCAGACAAATCA | 59.853 | 22 |
| CCATTCTGAGACCAAAAGG      | 59.521 | 20 | TCATGTGCTTCAGTCCTTGC   | 59.992 | 20 |
| GGAATGATTTCCCTGAGCAA     | 60.014 | 20 | AATGGAATACCGGTGCAAAA   | 60.188 | 20 |



|                           |        |                           |        |    |
|---------------------------|--------|---------------------------|--------|----|
| TGTCCATTGGCAGTTAGCAG      | 59.864 | 20 CTCTCTCCCCCTCCAAAAAC   | 60.045 | 20 |
| CCAATAGTTCTTCGGTCCCA      | 59.926 | 20 CAAAATGCTTTCGTTCCAT    | 59.938 | 20 |
| GCACTCGTTTCTTCTTCGC       | 60.14  | 20 TCCGGTGACTGAAAATAGCC   | 60.074 | 20 |
| TGAAATTCAATGATCGGACAA     | 58.954 | 21 ACTCCCTGTGCTTGTCTGG    | 60.298 | 20 |
| CTCTGCCTTAGGTGGCTTTG      | 60.008 | 20 ACACCTGGGTGAGACCAAAC   | 59.859 | 20 |
| CGTGTGGGATTTGGGTAAAA      | 59.723 | 21 TCCGATGGGGTATTCCACTA   | 60.148 | 20 |
| TTACCCTGGCCAGTCAGTTC      | 60.111 | 20 GGCTAGGCTTGTAGCAAAGG   | 60.389 | 21 |
| CGAAAACCGGTTAAAAACCA      | 59.841 | 20 CGCATTTTTGGCCTGATATT   | 59.928 | 20 |
| AGATCTTCCGATCGGTTCGT      | 60.99  | 20 TCCCCACCAAATTTAACCAA   | 60.024 | 20 |
| GAAAGGGTGCGCAATATTCT      | 59.186 | 20 TCCTTAATTCATTAATACATA  | 57.288 | 26 |
| TCTTATTCTCCCTCTCGCCC      | 60.673 | 20 GACTCATACCACCCCAAACTT  | 59.259 | 22 |
| GCTACGAGAACCGAAAATGG      | 59.708 | 20 CCCTCTCTCCCTCACTCAT    | 60.605 | 20 |
| TTCAGATGGTGTCAAAACCC      | 58.387 | 20 GTGTGATTGGCAGTGACAGG   | 60.162 | 20 |
| TTGTAATAAATCTTTAAAATGGGA  | 58.149 | 27 GCACGGCAGTGGAAGAATA    | 59.814 | 19 |
| CTCAGAATCCACTCCTGCAA      | 58.957 | 20 TCAGTACAATGGAGTGATGGC  | 59.621 | 22 |
| GGGTGTGGTACTTGGGACAG      | 60.275 | 20 AGTCAGCCGAGGAAATTCAA   | 59.813 | 20 |
| TTTTAGCCACTTTCTTGCCC      | 59.338 | 20 CGAAAAGCTGAGAAGATGGC   | 60.096 | 20 |
| TGGGTTATCACCGAATCGC       | 61.806 | 19 CGGCTGTCAACAGAAGTTCA   | 60.025 | 20 |
| CCGACCTTACATAGCGGAAA      | 60.089 | 20 TGGCATGTGGGGGTATAGTT   | 60.074 | 20 |
| GAGAAATGGCCCATGACTGT      | 59.934 | 20 TTTTGAGACACCCCAAGTCC   | 59.943 | 20 |
| GCCTCCTTTCATGCAATGTT      | 60.081 | 20 TGATTGGGTTAATCGGTTT    | 59.762 | 20 |
| GAGAAACCCGACATGCAAAT      | 59.939 | 20 TGGGACACTGTTTTCTTGGA   | 60.514 | 21 |
| CTCTCCTTCTGCGCACTTTT      | 59.757 | 20 TCCCCTGCTTCTAAAACCCCT  | 60.068 | 20 |
| GTAGGAACCGTGCAGCACTA      | 58.952 | 20 TTTCCAACAAATTCAGCAA    | 59.133 | 20 |
| AACCGCGTCTCTTAGTTTTATGA   | 59.362 | 23 TGAGAATGGTGGGAAGAAGCC  | 60.195 | 20 |
| TTGCACGAATGGTTGACAT       | 59.972 | 20 TGGCTTGGTCTTGATCTGTG   | 59.831 | 20 |
| TCATTTTGATTACTTTTACTATTCG | 57.299 | 27 GGAATAATGTATGAATGATCC  | 59.487 | 24 |
| AGTCGATTTTCTGCAACCGT      | 59.74  | 20 ACTGCCACCAGCCTTGTACT   | 59.792 | 20 |
| AGTTGCAGCGAAAACATGG       | 59.856 | 19 TGTTTGTGATCCCAATTGAA   | 57.35  | 20 |
| TTTTCTCAACCGAGCTCACC      | 60.375 | 20 TTGGTTCGAGCCATTGTGTA   | 60.111 | 20 |
| AATGCAATCCTTTCCTGACC      | 60.081 | 20 TATCCAGTGTGCTTTGCCA    | 60.257 | 20 |
| GGGAGCGACGATAATTGGTA      | 59.923 | 20 AAGTCGAAATTTGGCAACAA   | 58.267 | 20 |
| TTGGCAACTATCCCTAACGG      | 59.953 | 20 TGAGCACATGCCAAAATGTTA  | 60.126 | 21 |
| TCAAAACGGTCAAACGATGA      | 60.088 | 20 CCATGGCTGATAAAAATGGC   | 60.289 | 20 |
| ATGATAGGGCATGGCATTTT      | 59.258 | 20 CTAATGGGAAAAGCATTGGG   | 59.406 | 20 |
| AAGCAGGAAGTCATGCCACT      | 59.874 | 20 AACATGATAATGCTGATAAAA  | 59.715 | 26 |
| AGCAATTTGTGAAAGTGGGG      | 59.971 | 20 TCTTTGGCTCAATGGAGGTC   | 60.195 | 20 |
| TGATTCGAGTTTTGATGGGA      | 59.049 | 20 ACTTGAATCTGGACTCGGA    | 59.655 | 20 |
| CAAGAAGAGGACTGGTCCGA      | 60.377 | 20 CAACCGGCAGCATTTTTACT   | 60.131 | 20 |
| CCTCTTTTCGACCTTAATAAGCC   | 59.67  | 23 ACGGGTGGGAATGTATTAGG   | 58.646 | 20 |
| TGAAGGTAGGAAATAAGGAGGTC   | 58.703 | 23 TTAAGCCTACCACGCTGTCA   | 59.488 | 20 |
| GCTTCCATGTTTAGGCTTCG      | 59.845 | 20 TTTGGTTGAAGGTGCATGTC   | 59.547 | 20 |
| AAATCGAATCGTGAACACC       | 59.797 | 20 TTACAGTCCCCTGCTTTT     | 59.592 | 20 |
| GACCCTAGCTCTTGCCCTCT      | 59.979 | 20 TGAGGCCACTGACTTGAATG   | 59.831 | 20 |
| ACAACCGGCCTAATCCTTTT      | 59.835 | 20 CAAATAATGTGGCAATCCCC   | 60.016 | 20 |
| TGCGTTTTGATGATATATAGGTGT  | 58.933 | 25 TTCATCTGTAGCGTTTGAATG  | 59.772 | 23 |
| ATGTTGCATGAGTGAGCTGC      | 60.024 | 20 CAACAAATGCATCATCTGCC   | 60.08  | 20 |
| CGAAAATGACTGGCCATA        | 60.827 | 20 TCCTGATGGACAACCTGACCC  | 60.934 | 20 |
| TATGGGTTATCACCGGATCG      | 60.544 | 20 ATTTACCCATAGCGCACTCG   | 60.117 | 20 |
| AGTGACGGCCTAATGACAAA      | 58.228 | 20 GGAATATGATCGGTGCAAAA   | 60.807 | 20 |
| GTTACTCGTGGAGGTGCCAT      | 59.997 | 20 GGGTTCATCACCGATATGCT   | 59.78  | 20 |
| TGCAAGAATGGTGAGAGTGG      | 59.831 | 20 TATCAACCCAAAACCCCAAC   | 59.523 | 20 |
| CCCACGCCATATTCTCTCTC      | 59.653 | 20 TGTAGGGGAATCTCGTGGTC   | 59.927 | 20 |
| CCGTTTCCATTTACCACTCA      | 58.475 | 20 AATTTTGGAGATGGACCGTG   | 59.79  | 20 |
| CGGCAGAAGGAGAGAAGAAG      | 59.304 | 20 GGTAGTTGGCGTTGACTGGT   | 60.035 | 20 |
| GCGTAACTGGTATAGCGGC       | 59.769 | 20 GCTGACTAACCCATTCTTGTTT | 60.048 | 23 |
| CCTAATCGAAAACAGCACA       | 59.872 | 20 ATCTGAACAAATGGGCTTGG   | 59.933 | 20 |
| GAACCAAACCGGATGCTAA       | 59.938 | 20 ATACGACAGCGTGTGGACA    | 60.183 | 20 |

|                          |        |    |                        |        |    |
|--------------------------|--------|----|------------------------|--------|----|
| TCGAGGAGTTTACACGGAAGA    | 59.861 | 21 | ACTACCCAAACGTCCCAAAA   | 59.331 | 20 |
| CTCCCACCTTCCAACCTCAA     | 60.081 | 20 | AATGGTGGGGGTAACAACAA   | 59.948 | 20 |
| TGCGATCTATTTTGGCTTTTC    | 59.336 | 21 | TCTTTCTTGGAACATCTCGTCA | 59.853 | 22 |
| TTGGAACCTTTTACCCAG       | 58.922 | 20 | CCTGGTTCATTTACAGGAGA   | 60.042 | 20 |
| ATGCACGTAGGCATGTTCAA     | 60.142 | 20 | AACACACAAACGAATGGCAA   | 60.011 | 20 |
| CGAGGTTGCCCAAACCTCTTA    | 60.241 | 20 | AAGGAAACCTTAAAGGGCCA   | 59.939 | 20 |
| TTGGTGGTCTGGTGACTGAA     | 60.129 | 20 | GTGGTGGTGTGCGTTCATTA   | 60.436 | 20 |
| AGGTGCTACTAAGCCAGCACT    | 60.081 | 20 | TTGAACATGCATCCAAAGGA   | 60.049 | 20 |
| AGCTACATATTTTGATGCATACGC | 59.481 | 24 | ACCTGGAAACGCATATGGAG   | 59.955 | 20 |
| ACGAACAGCTTCATCATCCC     | 60.081 | 20 | CCTTTTCTGCATTTGGTGCT   | 60.249 | 20 |
| CCTAACCCCTTGACTGCAAGC    | 59.875 | 20 | GATGCGCCACCTTTATTGAT   | 59.929 | 20 |
| CAACTCCCAAATCCTCCAAA     | 59.903 | 20 | GAGGCATTCCATGAGGAAGA   | 60.158 | 20 |
| TCCCCATCAAATACTTGC       | 59.762 | 20 | GCTTGAAGCGAAAAAGGAGA   | 59.708 | 20 |
| ATGAATCCACACAAGTGGGC     | 60.79  | 20 | TCACCTGCACACACATTAC    | 59.101 | 20 |
| CAAAATTGGAACGACTTGCAT    | 59.989 | 21 | GGGGCTGTTGTGAAAGAAAC   | 59.574 | 20 |
| GTTAGCATGGGAAGGGGAGT     | 60.328 | 20 | TCAGTCAACCAACCAACTGC   | 59.726 | 20 |
| CAAACAACAATTCAGCAAATACC  | 59.494 | 24 | ATTGCACCTCGTAAACACCC   | 59.859 | 20 |
| CTCCTTCTGTTGATCCCCAA     | 60.042 | 20 | ACGGTGTGTCATCATTGGAA   | 59.812 | 20 |
| AGGACCTGCTGGATTGTCAG     | 60.261 | 20 | TTTACACCACAAAGTTGCCG   | 59.627 | 20 |
| CATCTGATTACCGCATTCTCG    | 60.611 | 21 | AAGGTCCTTCTCATTGGGCT   | 60.074 | 20 |
| AGAGGGTTATCATGGGATCAAG   | 59.307 | 22 | CCCATATTGGCAAGCATTTC   | 60.289 | 20 |
| TATATGGGTTATCGCCGGAT     | 59.127 | 20 | AACTCAACAACCCGTGAAGC   | 60.156 | 20 |
| CTGACTCGTGCCCTTATGGT     | 60.134 | 20 | CAATTGTCTGACCCCATCT    | 59.779 | 20 |
| TTCGAAATCTAACGATCCGC     | 60.175 | 20 | AGAAGCCAGGCAGCATAAGA   | 60.118 | 20 |
| GGATCGAGTCCATGCCATTA     | 60.833 | 20 | TGCTTGACAAGTGACATTGAA  | 57.882 | 21 |
| TACGTGTATGATGGAGGCCA     | 59.948 | 20 | CTTGCAAATTACCAAGGGATT  | 58.126 | 21 |
| GAACCACCACTGCATCACAC     | 60.013 | 20 | ACTGAAGCTCGAACCCCTCT   | 60.393 | 20 |
| GTAGGCGCAGGACCAATTTA     | 60.096 | 20 | GTGGCAGGAAGCATTCACTT   | 60.263 | 20 |
| ACCAAACCAAACCAAGCAAC     | 59.875 | 20 | AGGGGATTGGGATTTCTTGT   | 59.629 | 20 |
| GGGGACCATCTCAAATGTTTT    | 60.046 | 21 | CCAATCTCTTTCATCACTCTCG | 58.934 | 22 |
| GCAAAGTGCCACCAACACT      | 59.742 | 19 | TGCTGGTTGCATACTTGAC    | 60.876 | 20 |
| GGTTAGGATTTCTTTGCCA      | 58.315 | 21 | TGATTCCTCTACGGACCTG    | 60.065 | 20 |
| GCTGCAACGAAGAGTGACAA     | 60.183 | 20 | TGTGCACTCGATGATGTTTG   | 59.248 | 20 |
| GGGGTGCTATAAATGCCCTT     | 60.171 | 20 | CCAAACAACCTCCCTACCGAA  | 59.964 | 20 |
| TCTCCTCCCTTCGTCTCTCA     | 60.064 | 20 | AGCTCTTCATCGGTTGGATG   | 60.218 | 20 |
| TGCTTCCGAAGATCTCGATT     | 59.917 | 20 | CTGATGCATGTGGTAGGAGC   | 59.271 | 20 |
| GGTTGCTCTTGCTCTTCGAG     | 60.277 | 20 | CCATACAAAAGCGCCAAACT   | 60.131 | 20 |
| TTCATGGATTCAAAGGGGA      | 60.244 | 20 | TGTAGCTCCTCCTAATTTCTCT | 59.445 | 24 |
| GCGAATTTTGGTGTGGAAT      | 59.807 | 20 | CCCAACATCATCCCTCACTC   | 60.326 | 20 |
| TTCAGTTGGCCGAATGATTT     | 60.448 | 20 | AGTTCGAGGTGGGCTTTTCT   | 60.247 | 20 |
| CAGCACAACGTTCCATTGAT     | 59.572 | 20 | AATTTTGGCAACCGATCTTG   | 59.938 | 20 |
| CGATCTAACGGCCAGATT       | 60.044 | 19 | CTGCCGGAATCACATCAGTA   | 59.673 | 20 |
| AAGAGGGTTATGGGAGTGGG     | 60.183 | 20 | TCAAAAACCACAAACCACGA   | 59.981 | 20 |
| GGATAGTGGAATCGTGTGGC     | 60.348 | 20 | GCGCGTATGCACTCAAAGTT   | 60.14  | 20 |
| TTGCACTAGATCACTCCCTT     | 58.803 | 21 | TTGGGTTTTGATGATTGCTTT  | 59.442 | 21 |
| GGCGTCGGTTGATAGATTGT     | 59.962 | 20 | GTGGAAGCAAACCTCAACCGT  | 60.156 | 20 |
| AACTCCAGACACCACCTTCG     | 60.151 | 20 | TGTGGCCTTTTGTCACTTCA   | 60.278 | 20 |
| TGCAGTCTTACAGCCCAACA     | 60.449 | 20 | CATTTGGGAGGACAAAGGAA   | 59.903 | 20 |
| CAAAATGATGGCGATATGGA     | 59.333 | 20 | AGTGGAGTAGGCGGAAGGTT   | 60.132 | 20 |
| TTAAGGAACACACTTGCCCC     | 59.971 | 20 | GGCCTGTTCCCATTTCTCTCT  | 60.596 | 20 |
| GAAGACGATTAGCGTGCCAT     | 60.243 | 20 | GGACGTCCAAAACGGAAAT    | 61.08  | 20 |
| CAAGTAATGCGGAGCTAGGG     | 59.861 | 20 | GGGACTACCGTGATGGAAGA   | 59.927 | 20 |
| ACCACTTCTTTGCTACGGA      | 59.875 | 20 | CAAGTGAAATTGGATGGTGC   | 58.976 | 20 |
| AGTGTGAGCAAAAAGGGCAG     | 60.431 | 20 | TGAGAACTTTGTGGGCATCA   | 60.24  | 20 |
| CTCTTTGCCCTTCTCCATGC     | 59.955 | 20 | GGTGCGGGATCAATAGGTTA   | 59.784 | 20 |
| CTACTCGGCCTTGGAACTTG     | 59.869 | 20 | AGGTGGGAGTGGAACACAC    | 59.859 | 20 |
| ACGTTTGAATGCATTGGGTT     | 60.235 | 20 | AGTTGCTGTTCTGACCCGAC   | 60.307 | 20 |
| ATATCCCCTTGAGCCTCCAC     | 60.293 | 20 | CGGCATGATGCAGTAAGAGA   | 59.972 | 20 |

|                          |        |    |                        |        |    |
|--------------------------|--------|----|------------------------|--------|----|
| CATCCCTTAATCCCCATCCT     | 59.974 | 20 | ATCCTGCCTTGTTCCCTCCTT  | 60.074 | 20 |
| AAAGTGATTGTGAAACCGGAA    | 59.462 | 21 | TCGCTGACTTGTGGATTGAT   | 59.245 | 20 |
| TGTTTTTCCACAACCTCAACCC   | 59.861 | 21 | GAAGGAGAGGAAGGGCTTTG   | 60.319 | 20 |
| GACGGTATTTAGGTGTCCTCG    | 58.591 | 21 | TGCCTCAACTTTGTGTGCTT   | 59.49  | 20 |
| CTTTCCCATGCATCATCTT      | 59.894 | 20 | TTATGAGATTGGGGGTGGAA   | 60.126 | 20 |
| TCTTCGGGTGTTCTCGTTTT     | 59.711 | 20 | CATCACCGGCCTACAAAAT    | 59.823 | 20 |
| TTGAGGCGGTTAGGAGTTGT     | 59.734 | 20 | TCACAGGCAAATGACCAAGA   | 60.24  | 20 |
| ACCGGAATGAAAATCGGATA     | 59.23  | 20 | TCCACATGGATGAAGTGCC    | 60.489 | 19 |
| TCTTTGTTTTCAACGCCTCC     | 60.227 | 20 | AGATTGAATGCAACAGCACG   | 59.871 | 20 |
| CCACATGCTTAGAGATGGGC     | 60.624 | 20 | ACACCATGGTTTCCAATGCT   | 60.24  | 20 |
| CAAGTAATGCGGAGCTAGGG     | 59.861 | 20 | CCGTGATGGAACAACCTTCT   | 59.966 | 20 |
| AATCCAGTTGAGGAAAGCA      | 59.67  | 20 | AATTCACAAGCTCACAAAACG  | 57.947 | 21 |
| TTGCGAGAACCAACTCTGTG     | 60.025 | 20 | CTAGCAAGGCTTCCATCTGC   | 60.118 | 20 |
| ATGACACGCATAAAGGGACC     | 59.82  | 20 | AAAGGTGAAAGAGACATCAAC  | 60.026 | 23 |
| ATGATTGCCCCAGTTATCA      | 60.155 | 20 | CCGCAACTTGACAATGACAC   | 60.16  | 20 |
| GACGGGGTCGGATTATACCT     | 60.039 | 20 | CATTATCTCAAACGAGCGGC   | 60.742 | 20 |
| TTTGCCGTACACATCAGAGG     | 59.716 | 20 | TGAATTGGCCTAAGCGAAAG   | 60.335 | 20 |
| ATTCTCCATCCGACCATTCA     | 60.281 | 20 | CGAACAAAGAGTCTTCCGAGG  | 59.982 | 20 |
| TCTTTGGTGACCTGTTGGAA     | 59.109 | 20 | AAAGGCTCCTCTTTCAGGG    | 59.95  | 20 |
| CCATATTCCTCCGTTCCACA     | 60.713 | 20 | TTGGGAGAGGGATAGTGCTG   | 60.21  | 20 |
| TGCATTTTTAATTTATTTTCCTGA | 57.15  | 24 | TGCAATGCATCAGAGACTCC   | 59.95  | 20 |
| AATTATGTGGCCGAGGACAG     | 59.955 | 20 | CACCTCCTAGGCGCTATTGA   | 60.365 | 20 |
| CAGTAAAATGGACCCCTCT      | 58.989 | 20 | CACATAAGCGAAAACGCAA    | 59.88  | 20 |
| GAGGTTTTGACCATATTTACTGTT | 60.393 | 27 | TTAGTTTCATGAATGGAAGTGA | 57.035 | 25 |
| TCATAATGGTCTCCATCGCA     | 60.033 | 20 | TTGGATCCTGATTCTCGACC   | 60.011 | 20 |
| GGATTCATGAGATCGACGGT     | 59.893 | 20 | TTGCTACACCTGCATTGACG   | 60.865 | 20 |
| GCATATGCATTAATAACTTGAC   | 58.448 | 27 | TGTTGACGAACGAGACAAGG   | 59.873 | 20 |
| GGCGGTCAGGTGTTAATTTG     | 60.365 | 20 | TTTCGACAAATCATTGCAACA  | 60.103 | 21 |
| TTTTATGCATCGTGCCAAAG     | 59.702 | 20 | GGGTGATCATGGGAGAAATG   | 60.135 | 20 |
| TTGAATCAGCTGTTGCGATC     | 59.955 | 20 | AAGGCAGCATGCTTGAAACT   | 60.022 | 20 |
| CAGCCAAAAATCTTGGGAAA     | 60.046 | 20 | TGCATGATGTTTGCACGTTA   | 59.716 | 20 |
| GGTTATCACCGGATCGCTAC     | 59.415 | 20 | TGCACTCTTATGGCCTTTGA   | 59.42  | 20 |
| AGTGGCACCAAGTCGTAGGTT    | 59.646 | 20 | TGGACCATTTGTGCACTTGT   | 60.008 | 20 |
| AAAATCAAAGGCCACAATG      | 59.801 | 20 | TTTGACGAAATTGCCCTAC    | 59.938 | 20 |
| GCACCAATATTAGGCCATCG     | 60.31  | 20 | GTGATTCAGGGTCCCGTC     | 60.319 | 19 |
| ATTGAGCCAAGGAGGAGACA     | 59.803 | 20 | TTGGGGATGAGATGGGAATA   | 60.088 | 20 |
| ATCTCGAAAATGGATGACCC     | 58.789 | 20 | AATGGCCCAGATTTGTTTTG   | 59.801 | 20 |
| CAAGTGCAATCTTGCTTTGC     | 59.614 | 20 | CGAGAAAAGACAAAGAAGGG,  | 59.865 | 22 |
| GCGAAATTCGTTGGTTTGAC     | 60.49  | 20 | TATTTGGGTTGTCCCTCTG    | 59.926 | 20 |
| ATTACCGTCGTCATCTTGGG     | 59.813 | 20 | CGTAGTTTTAATTTGCCGGG   | 59.489 | 20 |
| TTTTTGGATGGAAAACCACT     | 57.037 | 20 | TTGCGAGCAACTTGTCAAAG   | 60.172 | 20 |
| TTATCATTGGAGTAAGCCCCT    | 57.708 | 21 | TTGGAGTCCATGAGCATCAG   | 59.787 | 20 |
| AACACATGGATTCAATGCCA     | 59.781 | 20 | GGGGTAAAATCGAGGGGTAA   | 60.013 | 20 |
| TCGCAAATTAGTGGCTTGCT     | 60.905 | 20 | TTGGGGAATGTTGAGAAGGA   | 60.43  | 20 |
| ATTTGGGTCTCTTCGACACG     | 60.111 | 20 | CCTGCAGCTTTGAGTTCCTC   | 60.134 | 20 |
| AAGCCAGCACATGCATACAC     | 59.753 | 20 | TGGGGGAGAATAATGTTGGA   | 60.126 | 20 |
| CATCGTCCATTGCTCGACTA     | 59.823 | 20 | GAGTTGCATGATGGCATGAG   | 60.233 | 20 |
| ATTGAAGACCGCCTCGATAA     | 59.668 | 20 | TTAGGGATTAAAAGCGGCAG   | 59.341 | 20 |
| GGAAGTTCATATTCACCTGAAGAC | 60.732 | 27 | CTTGTGAAATGAATGCACCG   | 60.111 | 20 |
| GGTAGCTGTCGTCGATGTGA     | 59.862 | 20 | TATCGTTTTGCCGCCTTATC   | 60.061 | 20 |
| CCGGGGTATGCTATAAACGA     | 59.81  | 20 | CGCATTTGTGATTTTTGCAC   | 60.118 | 20 |
| TCGTGAAACACTTCAACCCA     | 60.128 | 20 | CTGACGAAGGAAGGTTCTGG   | 59.837 | 20 |
| CCACCCATTATTTTGTAGGAA    | 57.934 | 22 | CACAGTTCACCCCCATTTTT   | 59.688 | 20 |
| ATTTTGGCATCCTCTTTCCC     | 60.265 | 20 | TTGAGGTGTGGCTGGTATTG   | 59.566 | 20 |
| GAATATGCATTGAGCTGCCA     | 59.799 | 20 | TTTCGGGGGCAATGTACTTA   | 60.315 | 20 |
| TTTCTCTTGGCAATGATCCA     | 59.2   | 20 | AGCCAGCAATAATCTCAGTGG  | 59.35  | 21 |
| AAATAGTTCGGGTTTTCGGC     | 60.312 | 20 | GGCTCGGCCTACTTAAGCTC   | 60.491 | 20 |
| CTTCTTGACGGCAACGTTTT     | 60.284 | 20 | TGCATGGCAAAGCTTCAATA   | 60.356 | 20 |

|                          |        |    |                         |        |    |
|--------------------------|--------|----|-------------------------|--------|----|
| ATGGAGGTTGGGTGGTAGTG     | 59.697 | 20 | AGCCGATAAAAATGGCACAC    | 59.967 | 20 |
| CTCCACTTCACCGGCTTTTA     | 60.241 | 20 | GGGTTTTGGAGATGAGGGTT    | 60.169 | 20 |
| AATACCCTTGTATGCTGCGG     | 59.982 | 20 | GGCCAGACGATAGTTACCGA    | 60.096 | 20 |
| TGGAATGGTTCAATCCCATTA    | 60.002 | 21 | CAGAATGGTGGCAACAAAGA    | 59.691 | 20 |
| TTAAATACCGACAACCCCA      | 60.046 | 20 | TCGGAGACGAGAGAGGAGAG    | 59.81  | 20 |
| CAACTGCACCACAAAGAACC     | 59.187 | 20 | TTTAAAACTTGGTTGGCGG     | 59.972 | 20 |
| GTTTCCCACCCTTCACTCAA     | 59.943 | 20 | CCTCACTTCACCCTCACCAT    | 59.962 | 20 |
| TCTACCCCTCAGAATCCTCG     | 59.234 | 20 | CGTCATAGATAACGGGGTCG    | 60.344 | 20 |
| GTTTGGGTAATAATTGCTGGG    | 59.315 | 20 | AATTTGATTGATGGTTTCGGA   | 59.264 | 21 |
| GAAAGTTGCAGCCAGTGAG      | 60.975 | 20 | CGTTTCATGTACCAGCAGAA    | 59.716 | 20 |
| AGTAATTGGCACCATAACCCG    | 59.708 | 20 | TTTTTGGATGCAGTGTGACC    | 59.547 | 20 |
| CTGTCCGTCACGTTGAACC      | 60.146 | 19 | GACTCCCTTGTGGAGAAACG    | 59.697 | 20 |
| TTCAAATTGCGGATGGATTT     | 60.268 | 20 | TTTGTATTCAAACCAACACAG   | 59.53  | 26 |
| GAAAATCAAAGGCCACAAA      | 59.916 | 20 | TACACAAAACCAACAGCCGA    | 60.149 | 20 |
| TGCACTTGTTCCTCAATATCA    | 60.356 | 22 | TCTTGTGTATGCCTTGCTGG    | 59.864 | 20 |
| CAATTTAAGTCGGCGAAGGA     | 60.202 | 20 | TTTTTGACTTTTTATGGGGGT   | 57.539 | 21 |
| AGGAAAAACCATCACAAAATTG   | 59.298 | 23 | AATAAGGGGGTGCATGTGAG    | 59.813 | 20 |
| CAATTCGACGACCAAATCCT     | 59.933 | 20 | ACCGATGTCCAGAGGAACAA    | 60.51  | 20 |
| GCACAGAGCAACCAATCTGA     | 59.992 | 20 | CTTTGTGTCGCAAGGTGAGA    | 60.025 | 20 |
| AAATGCCGAACTTCCAAGAA     | 59.685 | 20 | TTTTCTTCAACCAAATTTAATCC | 59.404 | 23 |
| TCAGATCGCTATCGTGTTCCG    | 59.972 | 20 | ACGAAGAAGGTGTTGGTGGA    | 60.545 | 20 |
| ATGCAGCCTCCAGCTTCTAC     | 59.603 | 20 | TTGACAATATTTAGTGTTTGAC  | 58.99  | 27 |
| AGAATAAATATGAACGAAAGCAC  | 59.536 | 26 | ACGCGTTAACTAACCAGGGAT   | 60.741 | 20 |
| GACCCTGAACCCCAAACA       | 59.943 | 20 | GCAGGAAGAGAGGAGAGGGT    | 59.952 | 20 |
| GTATCCCAGGCCGAATTTTT     | 60.15  | 20 | ATGTTTCGAGTTTGGTTGGC    | 59.978 | 20 |
| CTTTCTGTTTGAGAGGAAAAACA  | 57.731 | 23 | TTGGATTCCGGGTTCAATAC    | 59.622 | 20 |
| CTGTTGCTGGGAGAGGACAT     | 60.261 | 20 | CTTTTCTGGATGCAATGGCT    | 60.214 | 20 |
| GGCATTGTGACGACGCTAA      | 59.722 | 20 | CGGTATAGCCCGAACAAAGA    | 60.089 | 20 |
| ATATATTGTGACGAGGAGGGC    | 59.951 | 20 | AAATGTCTTCATCCCCACCC    | 60.95  | 20 |
| TGCAGTGCCTTGGACTTGT      | 60.51  | 20 | AAACCCCTCTTAAGTCCTGA    | 59.088 | 21 |
| ACCTGGCAAGATTCATCGAC     | 60.081 | 20 | CCACAAACACAAACGCAAAG    | 60.187 | 20 |
| ATGATGGGAAGGGTGGGTAT     | 60.272 | 20 | GTGGACGCTCCAGATTGTTT    | 60.119 | 20 |
| ATTTTCATCGAAATGCTGC      | 60.045 | 20 | GAAGACGATACCGCTGGAAG    | 59.836 | 20 |
| CGCAGCATCCTATTCACGTA     | 59.856 | 20 | TGCTCACTCATCCTCCAGTG    | 59.98  | 20 |
| TCCATGAAGGAGGAACAAGG     | 60.042 | 20 | TTATCCAGTTTGGATTTTGTCT  | 58.266 | 25 |
| AATGACTCAATCTGCAAGCG     | 59.028 | 20 | GTGTACCCTGAGGGACGGTA    | 59.844 | 20 |
| ATTTGGTCAAATCGTGGTCC     | 59.653 | 20 | AGTGGCATGATAATAGCGGC    | 60.088 | 20 |
| ACCAGAACCAACAAGCAAGC     | 60.299 | 20 | CCGTGGCTCTTTGATCCTTA    | 60.206 | 20 |
| TTCATTACCCCAACCCACTA     | 60.044 | 20 | GGAAGGTACGAGGTGGTCA     | 59.966 | 20 |
| GACGAAAGCAATGATGACGA     | 59.805 | 20 | TCAGCTTCAACATCACCAGC    | 59.992 | 20 |
| TCCGCCTTAATCCATCAAAC     | 59.901 | 20 | GTCCAATAACGCCAGCAAGT    | 60.14  | 20 |
| GATAGTCCATGCCCATGAT      | 59.592 | 20 | CAACGGTATTGTCATGTTATTG  | 59.311 | 23 |
| TGATTCTTTATGGCGTCTGA     | 60.591 | 21 | CCAATTTGAATGGTTATCACCT  | 60.457 | 23 |
| CTCTCGCCAACGTACCTCTC     | 60.012 | 20 | CAGCTCATCGTGGATGCTAA    | 59.972 | 20 |
| AAGCAGGACAGTAACAGCCG     | 60.453 | 20 | ATCCCGACATGGTGGATAAA    | 60.014 | 20 |
| TTCATAACATTTCTATCGGTATTC | 59.71  | 26 | ACAGGGGTTCGAATCAGCTA    | 59.694 | 20 |
| GCACCTGAGGAGGTGTTATGA    | 60.126 | 21 | TGCATCCAACGCTACAAATC    | 59.694 | 20 |
| GGTAAAGACCACGACCCAGA     | 59.966 | 20 | TTTTAACTAACTCCGGCCCA    | 59.581 | 20 |
| CACGTTGTCTGGAACATTG      | 60.001 | 20 | TTGCCTGGTTATCCTCGAAC    | 60.074 | 20 |
| ATGGACGAAGTGTGTGGTTG     | 59.441 | 20 | TCCACAGTCATGATCGCATT    | 60.08  | 20 |
| CCATGAGTCACGAGCTTACG     | 59.465 | 20 | ACCAATGGTGGTATGGTGTG    | 58.984 | 20 |
| TCCGGTCTATTCTCACCTCAA    | 59.679 | 21 | CTCTGGAGCGACTCCTCAC     | 60.135 | 20 |
| TGCTACTTTGTCCCGGATCT     | 59.694 | 20 | GCGTAGTGGTCAGTGGGACT    | 60.182 | 20 |
| ATTCGAATCGCCATTTTCAG     | 60.038 | 20 | GATCGAACGGGTTACCTT      | 59.918 | 19 |
| AACCCACAATACCACCTGA      | 60.088 | 20 | GGCACACATTATGGTTTGGA    | 59.251 | 20 |
| GTTGCTTCGAAGGTGGATGT     | 60.119 | 20 | CCACATCGGTGAAGGTAACA    | 59.415 | 20 |
| GACGAAGAAAAGGATGTCCG     | 59.67  | 20 | GGGATTCACACCTCACCAT     | 59.636 | 20 |
| GAAAGCAGTGACGAAGGGTC     | 59.851 | 20 | CCGTGCTTCCATCTTGTCAT    | 61.067 | 20 |

|                          |        |    |                        |        |    |
|--------------------------|--------|----|------------------------|--------|----|
| TCATCCTTAATTGGCTGCAA     | 59.257 | 20 | GGACGCTAGAGAAAAGCGTG   | 60.154 | 20 |
| TTGGTTGGTCACGAAAGATG     | 59.541 | 20 | TTCCCTTTACTTCTTCCCC    | 59.393 | 20 |
| AAACCTGGAAAAGACAGCCA     | 59.711 | 20 | AGAAAAGAGTTTCAGCGCCA   | 60.132 | 20 |
| AGCTAGTGTGCTGGCTGCTT     | 60.364 | 20 | AGCAGCTCGATGGAGGTAGA   | 60.119 | 20 |
| GCATCATATATGCGGTTGGA     | 59.362 | 20 | GGGATAGTATCGGATCGCAA   | 59.885 | 20 |
| TCGTGTTAAAGCACGGTATCA    | 59.24  | 21 | TACGGCGACTGAGACATACG   | 59.888 | 20 |
| AATGGACGTCATGACCGAAT     | 60.203 | 20 | TTGTGCCACATTTTTCTGA    | 60.088 | 20 |
| TACCAATGGACCACAAGCAA     | 59.964 | 20 | CAACCCACCTGTGCTAACT    | 60.028 | 20 |
| CCCTTCAATCCCAAGGTTTT     | 60.159 | 20 | TAGACGAGGCATTCTTTGGG   | 60.206 | 20 |
| GCTGTTTTCCATTTGATCTGC    | 59.705 | 21 | TCCGTCAACCAAACGTATTCT  | 59.485 | 21 |
| GGAGAAAATAGCAGCGCAAG     | 60.117 | 20 | CCTGCACCAAATTTTCCATT   | 59.801 | 20 |
| CAAGGTGGCTTCACACACAA     | 60.757 | 20 | CCAAGCCAACCAAAGCTTAC   | 59.747 | 20 |
| ATTCAATGGCAATCTCCTGG     | 59.894 | 20 | TGCTCATGAAATATCGTTGGTG | 60.886 | 22 |
| ATTGATGCCTGAAGAATGGG     | 59.894 | 20 | TGGATTTACCTCTTGGTGTGC  | 59.985 | 21 |
| TTGAATGGCAAGGATTGGTT     | 60.309 | 20 | TTTTAAATGGACGTAAATGGAT | 59.218 | 24 |
| AAGGCAATATGCTGACGGAC     | 60.103 | 20 | TTTAAAGTGTTGAGCGCGAA   | 59.625 | 20 |
| TATCGCTATGAGTCCCCACC     | 59.917 | 20 | CGTTAGTCGTTCTGGGCTA    | 60.262 | 20 |
| CCCCGACAATCATCACTCTT     | 59.927 | 20 | TTCGGACCAGACTACGGTTC   | 60.111 | 20 |
| CAACCCCTCTCCTTCTGTCA     | 60.229 | 20 | TGGAAACAAGTGGATAGTTAG  | 57.815 | 23 |
| ATGCTAATCCAAACGATCCC     | 58.86  | 20 | CGCAATTATATTAACCTTTCGT | 60.375 | 24 |
| TGTATTTTTCCCGTGAAGCAC    | 59.989 | 21 | CCACGTGGAATTATGGGAGTA  | 59.693 | 21 |
| ATGCATTTTCCAAGGCAGAC     | 60.081 | 20 | AGAGACTGTTGAAGCTCGGC   | 59.751 | 20 |
| TCCAGGTCCAAATGAAAAGG     | 59.903 | 20 | TGCCTCAATATCTGCTTCACTG | 60.407 | 22 |
| CGCACTCTGCAACACTGAAA     | 61.201 | 20 | CTCCAAATTGAGGCGAAAAA   | 60.181 | 20 |
| TTTCTCTCCGCACAATTCCT     | 59.813 | 20 | TGCTGAAGAATCTGACACCG   | 59.984 | 20 |
| CCCAATAGTTCAGCACCATCA    | 60.899 | 21 | ATTCTACGCCGTTCTTCGTG   | 60.27  | 20 |
| TGTTGTCAATCGAATTAACCGT   | 60.619 | 23 | GTTCTGCTTTGTGGTGGAT    | 59.973 | 20 |
| CATCTGATTCTGACGAGGCA     | 59.942 | 20 | GTCCCAACTGAAGTTCCCAA   | 59.943 | 20 |
| GGGGAGAGCAGGAAAATCAT     | 60.41  | 20 | TCCACAATGGAAAAATGCAA   | 59.907 | 20 |
| AAAGCTTCCGGTATCAGCCT     | 60.228 | 20 | GTGGAGAAGGAAGGGACACA   | 60.088 | 20 |
| CGTGATAAGCACCCCTCCAAT    | 59.955 | 20 | ATATAGTACCGACCGCCTGC   | 59.094 | 20 |
| CATTGGAGGGAGAAAAGGGAG    | 60.948 | 20 | ACCCGAGACAAAAACCACAG   | 60.005 | 20 |
| AGCATGGAGCCAAAAGAAAA     | 59.823 | 20 | GTGAGGGAATGCTCTCCAAG   | 59.803 | 20 |
| ATTGAATCTCCCACTTCCGA     | 59.483 | 20 | TTCCTCCAGAGGCTCAGTGT   | 59.986 | 20 |
| GGACTGCTCTCCTCATCTGG     | 59.945 | 20 | ATACCTTTCTTTTTCCCGCC   | 59.442 | 20 |
| CCGGCTATCTCACTCCAGAC     | 59.827 | 20 | GACCAGAACCTAATCTTGGGA  | 59.101 | 22 |
| AGATCCCGTATTCTCACCCC     | 60.154 | 20 | AAAAATCAAAGGCCCAACAAT  | 58.418 | 20 |
| CAGTCACAAAAGGGGGAAAA     | 59.942 | 20 | TCCTACAGCCCGTGGATAAC   | 59.955 | 20 |
| CCTCCGTTCAAATCAAGA       | 60.044 | 20 | ATGGCGACCATCAGAACTT    | 59.556 | 20 |
| ATTTAGTCCCATCAGCCAG      | 60.073 | 20 | TGAAACAAAAGGGAACGACA   | 59.145 | 20 |
| AATGCGCTTTCTGCAAATCT     | 59.988 | 20 | GAACATCATCGAGGTCGGTT   | 59.934 | 20 |
| CAATTTGATAATTTGAAGCTCTAT | 58.753 | 26 | GAGACCAATTTTGCTATGTAAT | 58.304 | 26 |
| CGTAACGTCAGTCTTCCC       | 59.875 | 20 | GAAATAAGGATGTGTTATGAA  | 58.049 | 24 |
| CACATGTCACGAGCCAAATC     | 60.12  | 20 | AAAGAAAGCTTCAAGCAGCG   | 59.904 | 20 |
| TATGGTGGTATGGTGTGGGG     | 61.296 | 20 | TCCAAGCCTGGAGACCTAAG   | 59.425 | 20 |
| ATGAGGGGAATGCACCACTA     | 60.34  | 20 | TGAGAATGGTGGGTGTGAAA   | 59.935 | 20 |
| GCCTTTGACATCCAGGACAT     | 59.934 | 20 | TACCAATCCATGTGCGAAAA   | 59.93  | 20 |
| CCAAAATTGATGTTGCCCTT     | 59.801 | 20 | CAGATTCTGGCACTGAGCAA   | 60.136 | 20 |
| GCCGTTCTTCCCTTCTCTCT     | 59.957 | 20 | CGGAATCATCAAACCCAACT   | 59.79  | 20 |
| TTTACGCACATACCCCCATT     | 60.074 | 20 | GAATCTTGGGTCCAAACCCT   | 60.169 | 20 |
| AAAGGAAACAGGAGCAACCA     | 59.711 | 20 | ACCAGGTCTCCTGGGTAAA    | 58.498 | 20 |
| CCCCGTCTCCACAAAATAA      | 59.795 | 20 | CGTCCATGCTCTGTTCTTCA   | 59.984 | 20 |
| CCGAGTATGACGACGTTCAA     | 59.716 | 20 | TTCAGCCTCCATTTACCTCA   | 58.298 | 20 |
| AAGGAGGTGTTATGAAGGGATT   | 58.028 | 22 | TCGAGATGCTCTGATGCAAT   | 59.507 | 20 |
| ACATCATGTAGGAAAATGTTTAC  | 58.165 | 26 | AGCTAGACACGTGGAGACGC   | 60.621 | 20 |
| CCATTGACACGCATGCTTAC     | 60.142 | 20 | AGGGGAACGAAAATCTCTCC   | 59.513 | 20 |
| TCAAACCTATTGTTGTTTCACAAA | 59.575 | 24 | TGGGTGATCAGGAAAAATCAC  | 59.782 | 21 |
| TCACCTAACCCCTCTCTTGG     | 59.133 | 20 | ATGCGAGTGTTGCATCTGAA   | 60.423 | 20 |

|                         |        |    |                        |        |    |
|-------------------------|--------|----|------------------------|--------|----|
| CTCTTCGGTGATCAAGCGTT    | 60.397 | 20 | TCCACGAAGAACCTGGTTTG   | 61.064 | 20 |
| AGAGGATTTGGAGAAGCCGT    | 60.212 | 20 | CCGCAAGTCAATAATGGAGG   | 60.46  | 20 |
| GGAGGATCCGTGATGTTCTG    | 60.475 | 20 | ATCGAAATCTAAACCCGCAC   | 59.046 | 20 |
| TTGTAATGTGTACCGTCCGC    | 59.469 | 20 | TGAAGTTAGGAAATAAGGAGG  | 58.743 | 25 |
| GTGGGGGATGATGTGGATTA    | 60.404 | 20 | ACACAAGTATGACCAGGGGC   | 59.851 | 20 |
| AGGCCTAATTGCCGTCTAT     | 59.951 | 20 | AAGAAAGTATCAGGCGCATCT  | 58.111 | 21 |
| CCGAGCTTCACATCCTCTTC    | 59.95  | 20 | CCGAAGGCAACACCACTACT   | 60.171 | 20 |
| AGAAACACAAAATTAGCATACA  | 59.908 | 26 | TGTTGAACGTGTACGTTGGG   | 60.463 | 20 |
| CAACAAAATCCTAGTCCATCCA  | 60.223 | 23 | GCACGTGTGAATATTGGGC    | 59.947 | 19 |
| AAAGGACCTTCCCACATTCC    | 60.169 | 20 | CAAGCTTATTCTGCCCAGA    | 60.344 | 20 |
| GGGCCTACACTATCTCTGCG    | 59.859 | 20 | CATGGTGTGGGCCATATATTC  | 59.915 | 21 |
| AGATGTTGCCACCTCAGCTT    | 59.874 | 20 | TTTAGTGGCTGGAACCGAAG   | 60.241 | 20 |
| TCATGACTCACGAGATGGGA    | 60.205 | 20 | GGCTCAAAAAGTTTCATATTTG | 60.022 | 25 |
| CCCAAGCATTAAAGCCCATA    | 59.922 | 20 | CTGCAGTTTAAGCGACACCA   | 60.05  | 20 |
| GGGGTGTGAAATTTGGAGA     | 59.767 | 20 | TTGGGTTAATCCGTGTAATCG  | 59.707 | 21 |
| CCCGTTATGATTCGTTAAATCG  | 60.543 | 22 | GTGAAGAAGCCGGAAGTGAA   | 60.375 | 20 |
| AGCCCCAATGATCCAGACT     | 60.853 | 20 | TTGGAGAGTTGGGTACAAGC   | 57.797 | 20 |
| TTGAGGGATGATGCATACGA    | 60.033 | 20 | TGCATGCCGCATACTATTACT  | 58.368 | 21 |
| GTGCGCAACATGTAAGAGGA    | 59.871 | 20 | CCGATTTTTGGTATATTGGGC  | 60.385 | 21 |
| GGGCTAAAATGGTGTGGAA     | 59.801 | 20 | ATGATGTATGTGCGATGGGA   | 59.763 | 20 |
| TTTCTGGAGGATCTGCATT     | 59.629 | 20 | CCCCAATTTGTTTTACTCG    | 59.311 | 20 |
| CTCGACTTCATCCGTTTGGT    | 60.111 | 20 | CCTAATAAAATGGCCATGCG   | 60.295 | 20 |
| TTCAAGCTAACCCAGCCAACC   | 60.249 | 20 | CTTCTGGTTCCAGCAGCATT   | 60.397 | 20 |
| CTGGTGCCATGATTTTCATC    | 58.926 | 20 | CGGAGACAAAGGGTCATTTTC  | 59.526 | 20 |
| CCGTGGAAGACAAGGGATAA    | 59.926 | 20 | CGTGACAAACATCATCACC    | 60.12  | 20 |
| AAACGCAAAACACATACGCAA   | 60.177 | 20 | CTCGATCAAGACCCTATCGC   | 59.797 | 20 |
| ACGATGTCGTGTAGGGAAGG    | 59.989 | 20 | AAGCTAGGGCAATACGTCCA   | 59.73  | 20 |
| CGAACATTGTCACCGTCAAC    | 60.008 | 20 | GAAACGAATCTGTCTGGTGGT  | 59.973 | 20 |
| TTGGCTCTGGTTTGTACCC     | 59.971 | 20 | CACGACAAGAAAGCCATGTG   | 60.301 | 20 |
| TAAGGGTGTGAGGTGAAACC    | 59.647 | 20 | TGGTAGGTTTTGGAGGGTTG   | 59.824 | 20 |
| AAGAGCAAAACCCAAAGCAA    | 59.861 | 20 | CACTCGAACCCAGTCAAACGA  | 59.873 | 20 |
| GAAATTGTGTTGCAGGCTCA    | 59.847 | 20 | GACCACAACCAACCACATGA   | 60.27  | 20 |
| CGCAATGCAATAAATGCAAC    | 60.103 | 20 | CTCACGCGAGGTCTTTCTTC   | 60.134 | 20 |
| AGCAAAGAAACAAACGGGA     | 59.724 | 20 | AAATAGATCTTTTGTAAGCCC  | 58.02  | 23 |
| GCAAATTTGGTCTCTATGTGTAG | 58.813 | 25 | TGTCTCCATTCTATTGGCCC   | 59.894 | 20 |
| AAAGGAGGTGGATCGGTTCT    | 59.935 | 20 | GGATGAGGAAGAAAGGGAGG   | 60.008 | 20 |
| AAATCAATCTCAGCCGCTTG    | 60.352 | 20 | CGGTTGACAGCCGATTTTAT   | 59.96  | 20 |
| CCGGTTATCCAATCCATTTTC   | 59.091 | 20 | GAGAGGGAGGGAGAGAGGAG   | 59.489 | 20 |
| GGCCAGATTTCTCCCTAGT     | 60.464 | 20 | GCATCGTCTCAACCCTTGAT   | 60.081 | 20 |
| CGTGGGTGTAGTGATGGATG    | 59.831 | 20 | TCCCTCCAAATCGTTGCTAT   | 59.528 | 20 |
| TGGCATCGTGAGGAGTGTT     | 60.263 | 19 | TGATAGGGCACACAACCCTT   | 60.375 | 20 |
| AGCCATGGAGTGGATTCAAG    | 60.073 | 20 | TGAGATATTTAAATCCTTCCGT | 57.452 | 24 |
| ACCCCCACTTCTCTGTTTTTC   | 60.349 | 20 | GTCCTTTCGACATTCTCCGA   | 60.195 | 20 |
| TGCATGAGAAATGAGCGGTA    | 60.366 | 20 | GAAAATCGACTCCCATTCCC   | 60.641 | 20 |
| ATGAGTTATCACCGGATCGC    | 59.923 | 20 | TCAAGTAAAATTTCCCGTTTCG | 59.107 | 21 |
| CGAGAATTAGCTGCCACTCC    | 59.978 | 20 | CGTGCCCTTCTTCTAACTGGC  | 60.015 | 20 |
| CCGGCTCCGATCTATACAAA    | 60.053 | 20 | TTCCCTCAGCTCATCCATTC   | 60.158 | 20 |
| AAAACCTCCAATCCCTCCAC    | 60.169 | 20 | CTCATGTTGCTTGATGCAC    | 60.272 | 20 |
| GCATTGGCGTTTTGAAGAAAT   | 60.081 | 20 | TCATGTTTCATCCAAGTTGCC  | 59.502 | 20 |
| ATCCGCCAAACCTTCTTCTT    | 60.074 | 20 | AGAATTTGCATTGGGTTTCG   | 59.938 | 20 |
| GAACCACCGAGTACCAAGTGA   | 60.02  | 21 | CGATTTGAAAAGCTTGCTCC   | 59.96  | 20 |
| AACGGTGGGAGAAATGAATG    | 59.79  | 20 | GTCTCCATGCTTGAGCCAAT   | 60.226 | 20 |
| GGTTATCACCGGATCGCTAC    | 59.415 | 20 | ATAATTAAGTCATAGAGCAGG  | 59.136 | 24 |
| CAACTCAGCAAGTCTGCAA     | 60.175 | 20 | CCTCTTGACCTCACGTCTTG   | 60.034 | 21 |
| TTCATGTGGGTGAGCTATGC    | 59.679 | 20 | AGGTGGAACAAGTAACGCAA   | 58.283 | 20 |
| AACGCTCCAGTTCATAGCGT    | 59.904 | 20 | TGAACCGGGTCTCTCGTAAC   | 60.111 | 20 |
| ATCGTTGAAGATATTCCGCA    | 58.187 | 20 | CAGCCCTCAGATTTTAGCGA   | 60.481 | 20 |
| AGAAAAGAGACGAACCGGC     | 60.743 | 20 | TCGGTTGACCGAAAATAGGT   | 59.429 | 20 |

|                           |        |    |                        |        |    |
|---------------------------|--------|----|------------------------|--------|----|
| AATTACATTGGGCCATCCTG      | 59.645 | 20 | ATGTTTCATTTTGCCTGGCT   | 59.574 | 20 |
| CAGCAAACATTGCGAAAAGA      | 59.992 | 20 | GGTTTCTTCCCAACGCTAC    | 60.856 | 20 |
| TCCAAATGCAACTGGTGAAA      | 60.088 | 20 | AGGCACATCGTGTGAATCAA   | 60.12  | 20 |
| CGTCGCAAGCACATAACAAT      | 59.759 | 20 | CGGACGTAAACGAAGGAAA    | 60.103 | 20 |
| TTCTCGGGATTTAACGTCCA      | 60.439 | 20 | TGTTGTAGTATGGCAAGATCCA | 58.174 | 22 |
| TAAGCTTAAAAGGCCGGTCA      | 59.847 | 20 | CCCAAGGCGAGCTCTAAGTT   | 60.884 | 20 |
| CCCAGATAATTTTATATGTGGTGA  | 58.345 | 25 | CAGTGTAACCTTATTGGGGC   | 59.641 | 22 |
| GTGATTGGTGGTTTTGTGGA      | 59.241 | 20 | TCAATGCTCTTTTCAACCCTT  | 58.823 | 21 |
| GGCTTCTTCTACCCAATCG       | 60.214 | 21 | CGTGCGATCCAATTAACA     | 59.562 | 20 |
| TCTCCAAAACAGTCCCTCTC      | 58.363 | 21 | ACTCCCAGTCGTGGATGAG    | 60.112 | 20 |
| GAAGTTCACCGCTTGACAT       | 60.119 | 20 | CACTCCTGAAGAATTCGGC    | 59.813 | 20 |
| AGGCGTCAAAGAGGAAGACA      | 59.989 | 20 | ACACCCCTAATCCGAACACA   | 60.232 | 20 |
| TTGTTTCAATGTCATGTGGTT     | 59.972 | 20 | CTCCCAAATATCCCGAAT     | 58.653 | 19 |
| GGTACTTCGAACCCTGCAA       | 60.11  | 20 | AGTTCAATAGAGGCAGCGGA   | 59.978 | 20 |
| CATGCAGGTTTTGTCCAATG      | 59.964 | 20 | CGAAGATGAAAAGGGCCTC    | 59.645 | 20 |
| GCCGCAATATACATGGCTTT      | 59.956 | 20 | TCTAACGGCCGAGATTTGTT   | 59.708 | 20 |
| GGTCTTTTTGCATTAGCCTTT     | 58.863 | 22 | CGATTTCTACACCATTGTTCCA | 59.861 | 22 |
| CTAGCAAATTTTCGGGATGAAA    | 59.199 | 21 | GTTCCGGGTGTGCAAAAATTC  | 60.352 | 20 |
| GGAGTTTTGACCTAATTAAGACCC  | 58.571 | 24 | GATGAGCATCAGAGGAAGGC   | 59.917 | 20 |
| TCTCATGTGACTGAGGGCAA      | 60.402 | 20 | CTCTCCCTGCAGATGATGG    | 60.758 | 20 |
| TTTATGCCCCCTCAATTTCTT     | 59.795 | 21 | ATGACTTCCAGTGCCAGGAC   | 60.12  | 20 |
| TGTTGCCTTGCAAATTTATTTCT   | 58.808 | 22 | GCTCCAAAATGATTACGTGG   | 58.093 | 20 |
| CTTCTCCTTGCTTTCCGTTG      | 59.986 | 20 | CCCGACAATTTACCCATAC    | 60.051 | 20 |
| TTTCGTGTTTCTTTGATTTTTCA   | 60.019 | 24 | AGGTAGAATGGTTGCGTTGC   | 60.14  | 20 |
| ACTCAATGGACACATGCCAA      | 59.967 | 20 | TGCTCCTGGAGTACATGACAA  | 59.621 | 22 |
| CGCAACCTCTAGAAACCCAC      | 59.734 | 20 | TGATTTGACACGAATATGACAC | 58.956 | 23 |
| CGTCTTAGATCCCTCCACA       | 60.065 | 20 | TGCATCACCTTGCTTCTCAG   | 60.136 | 20 |
| GGCCTGGGCCTACATAAGTT      | 60.34  | 20 | ATCTCAACCCTTGATTGCGT   | 59.556 | 20 |
| CACCAACATCACACTCGACC      | 60.005 | 20 | AATGCTTCGGACTTGCTCAT   | 59.843 | 20 |
| GCTTTTGGAGCTGTAGTCGG      | 60.015 | 20 | AAATCCTCAATGCAAAAAGCAA | 59.712 | 21 |
| TGGTTATTAGGGGATGGTGA      | 57.736 | 20 | GGCTAGCATGGACAACCCTA   | 60.096 | 20 |
| AATTTCAAACGAGATCTCAGGG    | 59.593 | 22 | GGATAGGCGTTGAGATTTG    | 59.528 | 20 |
| ATTCAAAAATCAAAGGCC        | 60.13  | 20 | AATTGTTGTGATGTGAAGAATT | 58.947 | 26 |
| GGAATTC AATTGTTTATTTGTTGC | 58.881 | 24 | CAAAGGCCCAATGGTTAT     | 59.685 | 20 |
| TTGTGTCGTGTTGTCGTCGTC     | 59.751 | 20 | CACAACCAACCAACCATCA    | 60.255 | 20 |
| CCTCACTGGAGGAAGGATCA      | 60.191 | 20 | CGGATTTGGGTTTCTTCAA    | 59.91  | 20 |
| GGCAACCCACTTGTAAGT        | 60.012 | 20 | TGAAACGGAGGTTTGGTGT    | 60.388 | 20 |
| TGATATTCTACCATCCTACTCAT   | 60.153 | 26 | AAAACCGATGCAATTATGCC   | 59.801 | 20 |
| TTTCCCTACTGGGACCCTAA      | 58.502 | 20 | CCGTTTGAACAATTGAGAA    | 59.706 | 20 |
| CCAAAATTGGCGGATAACTG      | 60.315 | 20 | CGAAAAGGTCAAATCTTGGA   | 60.102 | 22 |
| GAGCGCACTCGAAAAGTAGC      | 60.3   | 20 | ATCGTTTATCCGATTGCTGG   | 59.923 | 20 |
| AATCCAACGGTAAAACAGCG      | 59.996 | 20 | GCACCGGATTGTTGCTAGT    | 60.14  | 20 |
| ATTTGAATCCCAGGCCTCTT      | 59.903 | 20 | ACAGGGGAGAGACAAGCA     | 59.986 | 20 |
| CCGTGTGCGTGTGAATATC       | 59.995 | 20 | CGCTGGTTTTGGAGATCAAT   | 60.074 | 20 |
| ATCATAGCCATCCATTCCGA      | 60.26  | 20 | TATAACGCTCGTCTGCTGC    | 59.234 | 20 |
| TGAGGGGGAGCTGAAATAGA      | 59.767 | 20 | CAAGGGTAAGGGAGGTGACA   | 59.959 | 20 |
| CAGCTGGTATCTGCGTTCT       | 60.419 | 20 | ACCGATCTACCCCTTTTCT    | 59.935 | 20 |
| CGTCAATACCAAACGTCAC       | 60.008 | 20 | TGAAAAGGCTTCAATTTGGG   | 60.046 | 20 |
| CAGAAAGAGCCCATAGCCAC      | 59.836 | 20 | ATCACGGATTTGGAGGACAA   | 60.317 | 20 |
| TCAGCATGTTGCCATTAGGA      | 60.22  | 20 | TCATTGGGCAGTTTTGTTGA   | 60.088 | 20 |
| AAGGAGGTGTTATGAAGGGATT    | 58.028 | 22 | GCTTTGGGTTCAAATGGTTG   | 60.344 | 20 |
| ATCTCTTCTTCTGCCCCACC      | 60.596 | 20 | CACTTCAACACTCCCCACAA   | 59.565 | 20 |
| TGTTCTCAGCACTCTCAC        | 60.03  | 20 | ATCGTTATTACCGGATCGC    | 61.031 | 20 |
| GGGGTTCTTCTCCTTTCCAT      | 59.373 | 20 | CCAATTTGAATGGTTATCACCT | 60.457 | 23 |
| GAGGTGGCTTCTTAGGGCT       | 59.848 | 20 | TCGTGTCGAGTTAGCGTGT    | 60.056 | 20 |
| CAGCATGTTCCATGTTCAAGA     | 59.707 | 21 | GTGGAGGGGGAGTATGGATT   | 60.015 | 20 |
| CAAAGTTAACCACCCCAA        | 59.696 | 20 | TATGGTGAACAACTCGGC     | 60.894 | 20 |
| TTGGCCTCACGATAGCTCTAC     | 59.49  | 21 | GGTGCAGTCAAAGGAGGAAG   | 59.844 | 20 |

|                           |        |    |                         |        |    |
|---------------------------|--------|----|-------------------------|--------|----|
| TGTTTGACGATGAAATCCGA      | 60.049 | 20 | TGAGAGCGAGAAAGGGTTGT    | 59.989 | 20 |
| GACGGCTAGATTTCGATCCTG     | 59.797 | 20 | GAAATGTTCACACACGTCGG    | 60.008 | 20 |
| ACACCTTTTTCTTCCCCAGG      | 60.332 | 20 | ATTGGCAATTAACCGTCAGC    | 59.967 | 20 |
| ACACAACGAATTCCTACGGG      | 59.853 | 20 | GAATTTTGCCACCGATGTTT    | 59.807 | 20 |
| TTCAAACCTTTGCCACTTCC      | 60.088 | 20 | TTCTCCTTGGGCAACTCACT    | 59.844 | 20 |
| AATAAATTACGGGATGCCCC      | 59.88  | 20 | TCCGGCAAAAACCAAATTAC    | 59.81  | 20 |
| ACCAACTCGTCAGACAGCAA      | 59.467 | 20 | GTGGAGGGTTTTGTCTCCA     | 59.943 | 20 |
| AGAAGCAGTTGGGATGATGG      | 60.073 | 20 | TGAAGGGAATGGAAAGTTGG    | 59.903 | 20 |
| ATGCCATCTCATTTCAAGG       | 59.894 | 20 | GCTGCTCTTTTCTGGGTTTG    | 59.993 | 20 |
| AAGGGATGGTATCATTTGATCG    | 60.041 | 22 | GCTTCAACGGTATCCAGTAAC/  | 59.947 | 23 |
| TCTTATTGGGTTGTCCGAGG      | 59.926 | 20 | GATGCCAACGTCATATTTGCT   | 59.981 | 21 |
| AAAGAGAGAGTGCATGCGTGT     | 60.073 | 21 | TGGCACGAAATTAGTTGTTTG   | 58.736 | 21 |
| TGTGAGTGTGTCTCGTGTG       | 59.352 | 21 | TCCCCCTCTCTCCTTCTC      | 59.883 | 20 |
| TTTGAAGGAAAACGTCGCC       | 59.146 | 20 | TGCAGCTCTTGCTCTTGTTT    | 59.47  | 20 |
| GTGCCTGCTCCACTTTCTTC      | 59.997 | 20 | GCACACTCGAAAGGCAATCT    | 60.406 | 20 |
| TGTGCAAGTTTCGTAGGCAG      | 60.05  | 20 | GGCCGTTTTAAAATCGAGTG    | 59.586 | 20 |
| TGCAAGTTCGAGTTCAAGTT      | 59.906 | 21 | AATGCATGCACCTGATTACAA   | 59.055 | 21 |
| TCTCAGCTCGATAAGTGGA       | 59.697 | 20 | GAGCTGTTATGCGTTTTGATG   | 58.452 | 21 |
| CATATCCTTTGAACCGGCAC      | 60.331 | 20 | AGGTTTAACTTTTCAAATGGAA  | 59.667 | 27 |
| GATCGATCTGGGCTCTCTTG      | 59.91  | 20 | GGGCCTTGAAGTTCTCTGTG    | 59.844 | 20 |
| GGTGGAGAGTGAGGAAGCAG      | 59.986 | 20 | ATCACCTCATCACCGCCTAC    | 59.957 | 20 |
| TTGGAAGAGGAAAGTGGGTG      | 60.081 | 20 | AATGAAACACCCCCAAACAA    | 60.066 | 20 |
| CCACGATGATTTGATACACA      | 59.41  | 21 | GATCCGGAAGGTCCAAAAC     | 60.306 | 20 |
| CTATGCAGCCTCCAGCTTCT      | 59.74  | 20 | TCCAACACAAAACCTCTAAATTT | 59.821 | 25 |
| AGGTCATAAGTGTGTTTGAAGTTAT | 59.42  | 26 | CGTCGAGAGATGCAACGTAA    | 60.011 | 20 |
| TGGTCTTGGTCACGATTCTCT     | 59.712 | 21 | CCTCACGTGATATTTTTAGCAC. | 59.197 | 23 |
| CGGAGAGATTTGTGGGGTTA      | 59.926 | 20 | ACGTTGCAAGAAAAGGTTGC    | 60.292 | 20 |
| CCAAGCATGTGCAATTGTGT      | 60.584 | 20 | TGCAATGTACAGCAGAAAGTGG  | 59.92  | 21 |
| CTGGACGCATTAGTGGGTTT      | 59.993 | 20 | GTCGACTTCTCCCCCTCTTC    | 60.194 | 20 |
| TATAAGGATCAACCGCCTGC      | 60.06  | 20 | TCACCAATTTGAATGGTTATCA  | 57.873 | 22 |
| GGGGCTTACAGATGAAATCAA     | 60.014 | 20 | TCCCCTTCTTTTCCCGTAT     | 59.897 | 20 |
| TGGCTAGAGCATCAGACCAA      | 59.547 | 20 | TAAAGGTCGAAAATGGCGAG    | 60.202 | 20 |
| TGGTGCAGATGTCCTGGTTA      | 60.112 | 20 | TTCCCCTTTTAAAGTTGATGG   | 60.163 | 21 |
| TTACATCTCTACGCAGGGGC      | 60.235 | 20 | ATTAGGAAAAGGGGCAGACG    | 60.443 | 20 |
| GTGATCGCTGGTTCTTTCGT      | 60.263 | 20 | GCAGCAGCACCCCTTTCTAAC   | 60.022 | 20 |
| AGGTTGCGTCAGATTGGAAG      | 60.255 | 20 | TCATGCAACCATGAAAACAAA   | 59.961 | 21 |
| ATAACGATGATCCCGAGGC       | 59.869 | 19 | TGCCGGAAAACACCAAATA     | 61.214 | 20 |
| AATGATGTTAATCCAGCGGC      | 59.929 | 20 | GTGTCAGAATCTGGGCTTCC    | 59.661 | 20 |
| CATCTTACCCATCTCAGCA       | 59.787 | 20 | CCGGTTCTCCTATCCGATTT    | 60.278 | 20 |
| CATGCGTAAAGGCACAGTTG      | 60.316 | 20 | CATCGCGTCCACAAATACAC    | 59.995 | 20 |
| GTAGGTTCCGCACTGCTCTC      | 60.02  | 20 | TGAAAGGAGCTCTTCATGACC   | 59.42  | 21 |
| CAAGTATTCTCTCCCAGCC       | 58.741 | 20 | CGACTGCATCAGCAAACCTGT   | 60.056 | 20 |
| TCATATCATTGTTTCCGCGA      | 60.035 | 20 | GATCTTGTGGAATGAAGGGG    | 59.336 | 20 |
| CCACCTCAAAAACAAATGGTG     | 60.248 | 21 | GCTGCTTTCTCGCTCATTTT    | 60.243 | 20 |
| ACAAATCACGCGAGGAAATC      | 60.081 | 20 | TCGCCCATTTTCTCAACTTC    | 60.192 | 20 |
| AAAATGTGTTTGGGGTGGAA      | 60.066 | 20 | ATCGGTTATCACCGGATCG     | 60.697 | 19 |
| CGACTTGTACTGCGACGAAA      | 60.05  | 20 | GGGATTCAGGAAACAGGACA    | 59.903 | 20 |
| GGTGGTGTGCTGCTCTCT        | 60.159 | 20 | TCTCGCTAAGCAGCCTTTTC    | 59.867 | 20 |
| CCCAACTGAAAAAGTCCAAA      | 59.942 | 20 | TGCCACGACCAAAACCTATT    | 60.365 | 20 |
| CGCAGATCCCAGATTTGTTT      | 60.603 | 20 | ATTGCATCCTCCACGTTACC    | 59.82  | 20 |
| TGTTGCTTGAAGGTGATCAAT     | 58.215 | 21 | GAACCATCCGACCTTGAAGA    | 60.05  | 20 |
| ATATCAGGCCAAAAACGTGC      | 59.967 | 20 | TGCTGATCTTATAACGCGAA    | 57.172 | 20 |
| CAATGAGGTGTCTGCCCTCT      | 60.261 | 20 | TGGCACTTAGCATTGAATGAA   | 59.315 | 21 |
| CCCGAACTCCGAGTACAAA       | 60.103 | 20 | ACGGATTTAAGGGTTATTACCT  | 57.667 | 23 |
| TGCTGATCTATTTACATGCTTTTCA | 60.158 | 25 | GTGGCTTCTGTCTGGAGGAA    | 60.386 | 20 |
| AAAAGGAGGAGCGAGAAAGC      | 60.096 | 20 | TTTTCACCCGACAAATCACA    | 59.941 | 20 |
| GAAGATTGAAGCTCGGATGG      | 59.773 | 20 | AACCTCATTGATTTGCAGGC    | 60.081 | 20 |
| TAGCTGATCTCACGTGGTGG      | 59.855 | 20 | CTGCATCTTGTCCTGGAA      | 59.831 | 20 |



|                           |        |                            |        |    |
|---------------------------|--------|----------------------------|--------|----|
| TTTGAGCAAATTGATATTTTAATG( | 58.728 | 25 TGAGATTTGGGCAAGCTTTT    | 59.823 | 20 |
| AATTGTTGTCCATACATTTTGGAA  | 59.793 | 25 TGAATCCAAATAGGTTAGAA1   | 59.664 | 25 |
| ACCCAAGTGGGTAAACCCTT      | 59.593 | 20 TTCGTTTGGCACGTTTTGTA    | 60.147 | 20 |
| TGGGGATGGATTGATGAAGA      | 61.221 | 20 CGCTGGTTTTGGAGATCAAT    | 60.074 | 20 |
| AAAATCCTTTCCACAACCCC      | 60.032 | 20 AGGGAAGGCAAGGAAACAAC    | 60.476 | 20 |
| AGATGTGGGTGGTTTGCTTC      | 59.973 | 20 AATTCTTGACGCCATTTTC     | 60.081 | 20 |
| AGGGGTCCAAAAGCAGAAGT      | 60.11  | 20 ACCCTAGCTCGGAGAAGGAA    | 60.34  | 20 |
| ATGAGTTATCACGGATCGC       | 59.923 | 20 TGATTCATTTTCTGCACGGA    | 60.197 | 20 |
| TTTTCTGCACAGATTTGATGG     | 58.759 | 21 AATCGTGCTATTTTTGCCTGA   | 59.734 | 21 |
| AACCGGGCAAGAAGAAAAC       | 60.11  | 20 CTCCTGGCTGACTAGGTGC     | 60.012 | 20 |
| CGTTCTTCATGAGCCTGTAGC     | 60.03  | 21 AAAAATATGGCATCCCGGTT    | 60.389 | 20 |
| GCTTCGATGTTGATGCTTGA      | 59.955 | 20 GACGAACCCCTGAATCATGT    | 59.786 | 20 |
| TCGATCTGCAACTATAAGCCG     | 60.37  | 21 TGTAGCAGCGAAATGCAGTC    | 60.165 | 20 |
| ACCCAAAATGGGTTATTATTTGA   | 59.753 | 24 TCTCCGGATTTTAGGAGGC     | 60.522 | 20 |
| CAAGGCAGTGTCCACTTGAA      | 59.873 | 20 AGTGAACCCAGTGGGAGATG    | 59.962 | 20 |
| ATTGATGCCCTGGTTACAGC      | 59.962 | 20 CGTCTCGTTTTTCTTCCTCG    | 59.986 | 20 |
| TGCCAGAACTTACCGACCTAA     | 59.755 | 21 GGCTGCGTTTTCAGTTTTTC    | 59.867 | 20 |
| TCCAAATTTTATCAATTTCCAA    | 60.501 | 23 TTCGTTAATCCAATGGTCA     | 58.818 | 20 |
| CCCTCTGTGTGTGATTTCCG      | 61.513 | 20 GACAAAGTTGTAATTTGCGGC   | 59.644 | 21 |
| GTGTGTTTGTGACGGTGG        | 59.897 | 20 GCAAGAAACACAAGCCATT     | 60.118 | 20 |
| ATCTTGCATCGGCAAGAGAC      | 60.37  | 20 TTTTATCGCACAAATATTTTGA  | 58.231 | 25 |
| AAATCGATATTGAATTAAGGCTC   | 57.153 | 24 TTGGAATGAATAAATGGAATG/  | 58.357 | 23 |
| TTCACAAAGGGCTTTTCAGAC     | 59.345 | 21 ATATTTCAACCCCGCAACAG    | 59.823 | 20 |
| TTGGGTGGAATAGACTTGGG      | 59.784 | 20 AATGCCGACTTTGTGGATGT    | 60.384 | 20 |
| CAACATCATCATCAACATACCCA   | 60.496 | 23 TTTGATAAAAATTTGGCGGC    | 59.913 | 20 |
| AGCACTGCAACGCAACATAC      | 59.942 | 20 CCAGCTTCCCACATCATTTT    | 59.933 | 20 |
| GCCTGCGAAAATCACAAGAT      | 60.221 | 20 GAGCGCAGATATGAAGGAGG    | 59.939 | 20 |
| TAAGGGCGGTATCACCTGAA      | 60.46  | 20 TGCATGCCTATGCTACACAA    | 58.885 | 20 |
| GGGTAGGATTTTGAAGCGT       | 60.32  | 20 CCATCTGTTCACTCACGG      | 60.154 | 20 |
| TCAAAACCGGTGATTAAGTGC     | 59.989 | 21 CTTCTCAGCAATCATCGCAA    | 60.096 | 20 |
| GGGGTTCTGATCATTGAGGA      | 59.862 | 20 TCCAAGTTTTGAAGATGACCTC  | 58.293 | 22 |
| TGTTTTCGTTCTGAGAGGGG      | 60.224 | 20 AAACAAAATCAACCCACCCA    | 60.066 | 20 |
| GGTTCCCAGTTGGCATGTAA      | 60.755 | 20 AGTGCCTCTGGGTAAACTC     | 59.501 | 20 |
| GCCAGAATTCGAGTAGGCAG      | 59.978 | 20 TATGGTGGTATGGTGAGGGG    | 60.452 | 20 |
| AGTCCATTTCCACCCCTTCT      | 59.795 | 20 ACGTGGATGTTATGCACGAA    | 59.995 | 20 |
| GTTTCACAGGAGGCGGTTTA      | 60.11  | 20 TGCAATCCTTCCAATCCAGT    | 60.461 | 20 |
| CAGATTCAAAGACGGCGTTC      | 60.776 | 20 TGTTGTGCATGACTGGATGA    | 59.658 | 20 |
| TGAAACCTGGCATTACAAG       | 59.691 | 20 AACCAGAGACGCAGCATTTT    | 59.882 | 20 |
| CCAGCCGATTCTTTTCCAA       | 60.067 | 20 GAAGGAATGTCCACCGAGAA    | 60.05  | 20 |
| CGCGCACACAGTAGAGAGAC      | 59.801 | 20 CCAACGGTCCCGTATTATTG    | 60.067 | 20 |
| CGCGAGATTGATGGTAGAG       | 60.894 | 20 GGATCAACGGTCAGCATTTT    | 59.939 | 20 |
| GATCACTTCGTTCCCCCTG       | 60.459 | 19 TGGTACCTCCTCCTAATTTCTC( | 59.854 | 23 |
| TGCAGGCCGAGAAGTTTTAC      | 60.386 | 20 GCCGGTAATTTCTGTAGGA     | 59.96  | 20 |
| CCCACACACAATGCAAGAAT      | 59.42  | 20 GAATCCTCACCTCCCCAAAT    | 60.133 | 20 |
| ACCCTTTTACCCTTTCCCT       | 60.048 | 20 GCTTCTGCTTACTGCCCTTG    | 60.154 | 20 |
| GTCAGCACGCAATTTCTCAG      | 59.596 | 20 GAGACGCTGATGGGATTGTT    | 60.081 | 20 |
| TTTCAGACATTTGATCCCA       | 59.049 | 20 TCCCATTAAAGTTTCCATGA    | 59.397 | 21 |
| AAGTTCCAATTGTTACGGC       | 60.156 | 20 CGAGTGGAGTGAGAGGAGAC/   | 60.592 | 21 |
| CAAGCCCAAATCAAGGAAAA      | 60.046 | 20 AGGATCCCCTAGCTTCTTCG    | 59.805 | 20 |
| TCTCCTCTTCTCCCTCTCT       | 58.627 | 21 GTAGAGAGAAGTGGGCGGTG    | 59.867 | 20 |
| TAACAATGCAGTGGCTGACC      | 59.722 | 20 TGATGATGGAGCATTTGGTG    | 60.481 | 20 |
| CCCGAAAAATACTCCACACA      | 59.795 | 20 CTCAAGCTTTGATCTTCGCC    | 60.096 | 20 |
| TCAATCCCAAACCATATCCA      | 60.002 | 21 CGCCTGTATAAATGCCTCG     | 59.291 | 19 |
| TCAGCTTGTTAGTGTTCAGTTGA   | 59.13  | 24 TACAACAGGCCAAAATGGCT    | 60.502 | 20 |
| TTAACCTTCTGCCCTGCAT       | 59.708 | 20 CCAGATCAAAGATCCAACGC    | 60.603 | 20 |
| AGTTAATCCGACGGCTGAGA      | 59.836 | 20 TCCATGTCTTTTTCCCTTCA    | 58.117 | 20 |
| GGTGGTGAATCATCAGCTTT      | 57.577 | 20 TGAAGTTAGGAAATAAGGAGG   | 58.743 | 25 |
| TCAAAACATTTATTTATGCACACA  | 59.969 | 27 AAGAGCGAGCAAGAACTCCT    | 58.43  | 20 |

|                           |        |    |                         |        |    |
|---------------------------|--------|----|-------------------------|--------|----|
| CCAATGATGGGTAACGGAAT      | 59.505 | 20 | AGCCCTCGTGAACATAGGAA    | 59.694 | 20 |
| GTTTATGTTGCGAAATCGGC      | 60.465 | 20 | GTTTGGTTTCGGTTTTACGGA   | 59.839 | 20 |
| AGGGATTTTGGATGGAGAGC      | 60.41  | 20 | GGTTAATCGGTTCCGGACTCA   | 59.933 | 20 |
| ACATGCAATGAAAATGCCAA      | 59.937 | 20 | CTCAAACAGAGTGGGGAGGA    | 60.229 | 20 |
| ATTCTATGGTGCCCCCTCTC      | 60.293 | 20 | TGTGAAGCACTGGTTTTGGA    | 60.278 | 20 |
| CACGAAAATTTTGCATATCGG     | 60.321 | 21 | ACGGCTCCCATTGTTTCTC     | 60.065 | 19 |
| GAATGATGCATGCTCTCACC      | 59.201 | 20 | CCATCATCACAAGATGCCAC    | 59.925 | 20 |
| GCCATGGTTTTCGATTTTGT      | 59.807 | 20 | TAAAGGGGGACCATTTTTCC    | 59.992 | 20 |
| AGGATCTTCTCATTCCATCGAG    | 59.674 | 22 | TGGTGAGGATTTAACGGGAA    | 60.301 | 20 |
| GCAGCACCATAACCAGAAACA     | 59.722 | 20 | TCGTGTGATGCCTTGAATA     | 60.073 | 20 |
| GTTCTTGGAGCACCGACTA       | 60.255 | 20 | ACTTGCTTAGTTCATGGCCG    | 60.27  | 20 |
| TGAATGAGGGTTTTGTGGG       | 60.724 | 20 | AAGTGTTGTCGTTTCTTTGGA   | 57.376 | 21 |
| CTTCCCTGCGTTGCATAAT       | 60.096 | 20 | CTGCCTTGCTTTTAAGCAC     | 60.018 | 20 |
| CCCTGACCACCATCAATTTT      | 59.647 | 20 | CGCAACTGTTATTCGGGACT    | 60.132 | 20 |
| TGAGTGGATATATTGGGAAGGG    | 60.034 | 22 | TTAAGGGGGTTATTAGTGGATC  | 58.807 | 23 |
| GACCACCCCTGAAACTTGAA      | 59.943 | 20 | CCCACCCATGCCATTATTAG    | 60.031 | 20 |
| TGGAAGTTTTTGAATTGGGG      | 59.772 | 20 | TTGTTGAAACGAATCCGACA    | 60.088 | 20 |
| AAGCGATGCTCCAACCTTGAT     | 59.843 | 20 | TTTTGCACCCTATTGGCTCT    | 59.708 | 20 |
| GCAGATGGTGGCTTCAAATC      | 60.613 | 20 | TCGAGGATCAATCTCGGAGT    | 59.761 | 20 |
| GAACTGGGGTCAGCATTGAT      | 59.934 | 20 | TAAGTTTCTATTCGCCCCCG    | 61.27  | 20 |
| TCTCTCCCTTCTTCTGCTTCA     | 59.294 | 21 | TTGATGCTGAGGCATTTGTC    | 59.805 | 20 |
| AAGAAAGAAAAGTGTGGGGG      | 59.486 | 21 | AAATATTGAGGTGGGGGTCC    | 59.881 | 20 |
| CAAGATGGCATCATCCATTG      | 59.883 | 20 | TGATAACAGGGAATGGGGAG    | 59.744 | 20 |
| AGCATTGGCCTTGTCTGTC       | 60.263 | 20 | TATTGCCCTATCTATGCGG     | 59.907 | 20 |
| TTGTTCTTGTCCGTCGGATT      | 60.495 | 20 | TTAGCATAAAATTTAGCCACCG  | 57.12  | 21 |
| CCAATTTGAATGGTTATCACCTG   | 60.457 | 23 | TGGACTAGGGGCTGAAGAAA    | 59.807 | 20 |
| TTTGTGGGAATTCTATCGGG      | 59.756 | 20 | CACCTCCCTGGGGATTTTAT    | 60.011 | 20 |
| GTGGCAGCCATATATCCGTT      | 59.813 | 20 | TCGCCCATGACTACACCATA    | 59.948 | 20 |
| GCAGTTTCCTCACCTCCAAA      | 60.232 | 20 | TAATGTAATTGGCCCCGAAA    | 60.144 | 20 |
| CGCTCTTGATGCAAGTTGTC      | 59.596 | 20 | TGGTTGTAATTGCACCAAATTT, | 60.045 | 24 |
| ATGGAATTGGGATTGATGGA      | 59.952 | 20 | AGCGTGAGCTCATTTTCGAT    | 59.985 | 20 |
| GCACAACCACTCCACAAAGA      | 59.726 | 20 | TTTCGTGTGTGTTCCCTCTCG   | 59.873 | 20 |
| TTTTGATAATGGTTTTGTACACATI | 58.037 | 26 | ATGAGTTATCACCGGATCGC    | 59.923 | 20 |
| GATCTAAGGGCCGAGATTTG      | 58.74  | 20 | CAACGACCTTCATTGATCA     | 59.648 | 20 |
| CTGTGCGGTGCATTTGATGAT     | 59.527 | 20 | TTCAATTGGCAACAAACCAA    | 59.946 | 20 |
| TCCACCATTGATTTATGCGA      | 59.891 | 20 | TGGTGAAAACCCCAATAGA     | 60.162 | 20 |
| TGCTTTATGCCTTGCTCTT       | 59.982 | 20 | GATCGTACGTATCGCCGTCT    | 60.125 | 20 |
| GGGGTGTTTTGACAATATTACGA   | 59.997 | 23 | GGCACTCCATTCCAAAATTC    | 59.368 | 20 |
| GGCAGTCGTTTTGAGACGTT      | 60.299 | 20 | CATCCTGCCAAACCAAGAAT    | 59.933 | 20 |
| GATCGCGGGAATCAACTTTA      | 60.038 | 20 | GTGCACTTGAAATTGCATCG    | 60.265 | 20 |
| TCACCTGCATCTGGGTAACA      | 60.112 | 20 | TCAGAAACAATCTTTGTCTGTT( | 58.992 | 25 |
| TTCTGAGTTGGTGAAAACG       | 58.746 | 20 | CACCAAGTGGGAAATAGTGC    | 58.076 | 20 |
| GGTTTGGGGAAGAAAAGGAG      | 59.912 | 20 | ACCCTCTCTCCACTCACCT     | 60.112 | 20 |
| TTGCTATTGAGAGGAAGCGA      | 58.747 | 20 | TGGCATATTTGTGTTGGCTTT   | 60.37  | 21 |
| CTTTGGCAAATCAGGCGTAT      | 60.096 | 20 | AGGTAGAAGAATAGGTGCATG   | 58.501 | 24 |
| GTGCTGCTGCTGCTGTAAAC      | 59.818 | 20 | GGACCGTGATGGACTGACTC    | 60.537 | 20 |
| AATGTTATCGATGGCGTATGG     | 59.696 | 21 | CGTATCATACAAGTATGCTGTC  | 59.985 | 25 |
| CCAGACAAAATCCCCTCTCA      | 60.042 | 20 | AATCAATGAGAAACCCACGC    | 59.939 | 20 |
| ACATGATCTTGGATGGGCAC      | 60.758 | 20 | GTTGAATTTTACCCCGGTA     | 59.662 | 20 |
| TTTCTGCATGATTTGGATGA      | 57.609 | 20 | AAGGAGGTGTTATGAAGGGAT   | 58.028 | 22 |
| AAAATGAGCAGAGGCCGTTA      | 59.845 | 20 | TTGCAACACAAAGCACGAAT    | 60.302 | 20 |
| TTGAGCTGGTTGATTCATTTG     | 60.11  | 22 | TTAGTCCATTCTTTCGGCGT    | 59.708 | 20 |
| GTGGGCGCAAGTAAAGAGAG      | 60.015 | 20 | GGCTTATGCATTGACCGTCT    | 60.103 | 20 |
| TTGAACTGTTTCAAATCCATGA    | 59.483 | 23 | GCATCTTTAATGGTGGCCTG    | 60.469 | 20 |
| TTTGCTCTCTCACACATGCC      | 59.992 | 20 | AGATCGGCACAAAATCGTC     | 60.081 | 20 |
| ACAGTGCCTGTGTGTGTC        | 59.818 | 20 | TTTGGGGACAACACTGACAA    | 59.976 | 20 |
| ATCACCCCTCTCCAAGAAT       | 59.755 | 20 | AATCCCATCCCTCCATTGAT    | 60.354 | 20 |
| TTTCGAACTTCCATCCTGCT      | 59.813 | 20 | ATGTAATGCCTCGCCCTATG    | 59.945 | 20 |

|                          |        |    |                        |        |    |
|--------------------------|--------|----|------------------------|--------|----|
| ACCGCCGTCTGTAATAATGC     | 59.988 | 20 | CCCAATACCTCCCCTCTCTC   | 59.89  | 20 |
| AATTGCCTTGTGTTTCTGGG     | 59.971 | 20 | TGCACTTCGAGTTTTTGGTG   | 59.881 | 20 |
| TGCTGTGGAATACCTGGGTT     | 60.375 | 20 | AACAGTTCGGTTCACGATTTG  | 60.023 | 21 |
| GGAGAGGAGGAGGAGAATGC     | 60.3   | 20 | CACCTCCATCTCCGATCATAA  | 59.902 | 21 |
| GCTGAGATACGCGGTGGT       | 60.125 | 20 | GTGAGGAATCCACTCTCCCA   | 60.048 | 20 |
| TGATTCTATTCTGTGCTTCGGA   | 59.845 | 22 | TTTCAGGCTTCAAAAATCCA   | 58.334 | 20 |
| CCGATGGAAAATGGAAATTG     | 60.124 | 20 | TTGTATCAACGGTCCGGATT   | 60.192 | 20 |
| TATGCTGCCAAGTGTCAAA      | 60.545 | 20 | TTGATCGCGACATTTGATTT   | 59.115 | 20 |
| TGGGCCAAACCCTATATCAA     | 60.146 | 20 | TGAGGCATCTCTCTCACATT   | 59.043 | 22 |
| GGATTGTGGACTGCCTGATT     | 59.934 | 20 | TGAGGCAGTGTTGTTCTTCG   | 60.025 | 20 |
| CCAGTGTGAAGCAGTCCAA      | 59.873 | 20 | CTGCCAAGGAACCACAAAAT   | 59.971 | 20 |
| GGGTTGATCGTAATGGGATG     | 60.014 | 20 | CGGATTTAAGGGTTATTACCTG | 58.81  | 24 |
| TCCTCCTCCGTTTGTGAG       | 60.224 | 20 | TTGGCCCTACTAACTTGAGCA  | 59.89  | 21 |
| GGGATTGTGCCAAAGATAG      | 59.387 | 20 | TGAAGCGTCAAATCACAAGC   | 59.995 | 20 |
| AATTGTTCAACCTCTCCGCT     | 58.792 | 20 | TCGTTTTGCTTCTCACCTT    | 59.853 | 20 |
| CATGTGGTTGAATTTGTTCA     | 59.43  | 21 | AAACCACCCGAGTAACAACG   | 59.891 | 20 |
| ACGCAAAAGCAAGACACAAA     | 59.512 | 20 | TCGTGTCTAGTGCAGCATGA   | 59.141 | 20 |
| GAATCAACATTTTCATGCCA     | 59.48  | 20 | TCTCATCCAACGAGCTGAAA   | 59.522 | 20 |
| CATTGTGATAGGGTTCGGCT     | 59.955 | 20 | TCCTGTAAGCTCCACCCAAG   | 60.246 | 20 |
| CACATATAATCAGGGCGGA      | 60.681 | 20 | ATTATATGCACTGGCGGACC   | 59.813 | 20 |
| CCTGCAAGAGAGAGGTGAG      | 60.275 | 20 | GGATTCCGAGTTTTCGATCC   | 60.777 | 20 |
| TGGGTGGGAGATAAGAGGTG     | 59.92  | 20 | GGCATTATCGATCTTGGCAG   | 60.574 | 20 |
| AAAAACCAGCACCAATCCAG     | 59.971 | 20 | CGGAAGCAAAATTCACGAAG   | 60.742 | 20 |
| TTTTCTCGACACATAGAGTCCAA  | 58.893 | 23 | TCAATTTCTCTCTCCTGCACC  | 59.42  | 21 |
| TCATCCAAGTTCATGCAAGG     | 59.648 | 20 | AAAGCAGCCGCAAGAAGATA   | 60.117 | 20 |
| GCTCCACTTCTTCTTGCTGC     | 60.285 | 20 | AGCAATCGTGATAGGCAACC   | 60.103 | 20 |
| ATAATGGCGGGTACGTTGAC     | 59.713 | 20 | ATTTAACAACGGACGAACGC   | 60.003 | 20 |
| TCAACTGCTGCAAATGATCC     | 59.805 | 20 | CTTGCTATGGTTGATCGGGT   | 59.955 | 20 |
| GCGTCTCACCTAACCTCACC     | 59.727 | 20 | GCAAGGGTTTGATTGCATTT   | 59.945 | 20 |
| TTCCCCAGAGCTTGAGAGAG     | 59.673 | 20 | ATCGAATCGGAAAGTTCCT    | 59.903 | 20 |
| TTCCATGTAATAAAAAGTTTCCC. | 60     | 25 | CCAAAAGTTCACATCACTCCA  | 58.609 | 21 |
| CCAGATCATGGGTCACTCAA     | 59.473 | 20 | AAAAGAACTTTCTCCTCTGGCA | 59.521 | 22 |
| AAATCCGATGGTTGTAGTGGA    | 59.302 | 21 | TCAAACCCGACAAACCATTT   | 60.206 | 20 |
| GTCGGCGTTTTTCAGCACT      | 59.992 | 18 | TCAGGCAAATCCTTGGGATA   | 60.405 | 20 |
| GATAAGCCAGGGTATGGCAG     | 59.551 | 20 | GGAGGCATTTCGATCTTTGTG  | 60.603 | 20 |
| ATATGGGATTTTGCATGGGA     | 59.979 | 20 | ATTGCAGATGGATGTAGGGC   | 59.923 | 20 |
| ACAATCCATGCGTCCCTAAA     | 60.331 | 20 | TCATTTTTTCGTTGTCACGA   | 60.088 | 20 |
| ATGGCATGACTCTTGAGCCT     | 59.834 | 20 | GCTGTGCTAATTTGCGGAAT   | 60.238 | 20 |
| TTCTGATATGGAAATGCCCC     | 59.722 | 20 | CAAATGGACCCATCCTCAG    | 60.309 | 20 |
| GACGTGGTTTGCAGGCTATT     | 60.14  | 20 | TTTGGAAAGGAAAGCTCGAA   | 59.931 | 20 |
| GGTTTCCCTCCAAAAACAT      | 60.032 | 20 | AGAAGTGAATCAAGTGATGGC  | 59.771 | 23 |
| TGTCCCGGATATAAGCTTGG     | 59.916 | 20 | TGGAATGTCAAGTCAACACAA  | 57.556 | 21 |
| TTCAGACTCCAAAAACAAAGCA   | 59.898 | 22 | TTTCGTCGGAGCAGGAATAGT  | 59.836 | 20 |
| TACCTTGCATGCACATCAT      | 59.955 | 20 | GTCATTGTATGGTGCGTTTCG  | 59.995 | 20 |
| AGAAAGTTGCAGGCTGGCT      | 60.149 | 19 | AGTCCCATGTTGCTGCTTTT   | 59.74  | 20 |
| CCAGCTGACAATCCCCATAC     | 60.34  | 20 | AGGCACTGGCTTGGATTATG   | 60.096 | 20 |
| ATCCAAACTCCAACCTCCAT     | 58.297 | 20 | TGATTGAGGCTTGAACAAA    | 59.247 | 20 |
| GCATGATCAAAGAGGCCATT     | 60.043 | 20 | GCACAAACAGACCATCTCCA   | 59.682 | 20 |
| TCCTTGGCATAACATTCTCTCTC  | 58.411 | 22 | GCTGCTGGAAATGATGATGA   | 59.763 | 20 |
| TACTTTAGCCGCCAAGGAGA     | 59.975 | 20 | CATGGATTTTCTGGGTCTGC   | 60.461 | 20 |
| TCCCACCACCTCTACCCATA     | 60.187 | 20 | TTGACCAACGCTAATCACCA   | 60.111 | 20 |
| ATGTGATTGGGGAAGAATGG     | 59.605 | 20 | TCGAACCACGTAATCCTTTG   | 59.982 | 21 |
| CACAGCTGTCAATCAACAAGAAG  | 59.966 | 23 | CTCTTAGCACCCGACCCAAC   | 59.867 | 20 |
| CTGTCTCAGTACCGTTCGAA     | 60.022 | 20 | AACCCTCCATCGTTAGCCTT   | 59.962 | 20 |
| TTACTGTCAGTACGTGCGC      | 59.935 | 20 | CTGTGAAATCCGAAAAATGGA  | 59.924 | 21 |
| GACTTCTGGTGGACGACGAT     | 60.12  | 20 | CTCTTCCCAAAGCCAGAGTG   | 59.982 | 20 |
| CCCTGTCCATGGAAGTGAGT     | 59.962 | 20 | AAGGTCTCCTCTCCCACCAT   | 59.929 | 20 |
| CTGCAAGAAGGTTGCTCCTC     | 60.134 | 20 | CACAACAAAAGCAACCCAA    | 59.603 | 20 |

|                           |        |    |                        |        |    |
|---------------------------|--------|----|------------------------|--------|----|
| CCACCCTCCATTGCTCATAA      | 60.853 | 20 | ACATCTGTTCTGTTGCGTGG   | 59.751 | 20 |
| GTTGCTCAGATTGAGGAGGG      | 59.803 | 20 | CCATAACGCACCCAAGAACT   | 59.993 | 20 |
| ACCTGGGTCAGTTTCTCCCT      | 59.968 | 20 | TCTCGAGAAAACGGGATTTG   | 60.184 | 20 |
| ACGCGTGTGACATGTTCTTA      | 60.183 | 20 | AATGGTGTGATCTTGACCTT   | 58.364 | 21 |
| CGCGAGACATGAACGAATAA      | 59.833 | 20 | TTCAACGTAACCTGGCAGCAG  | 60.05  | 20 |
| TTGGCCTTGTCTCGTATAAA      | 59.595 | 21 | GAGCCTGACTGGTGTGGTTT   | 60.159 | 20 |
| TCGATTGTATTTAAGCACGCA     | 59.365 | 21 | TCAGCAGATGTTCCGATAGC   | 60.127 | 20 |
| TTGTCACTGCACTACGAGATGA    | 59.515 | 22 | CTTTTAGCCAGCCCAGTTTG   | 59.876 | 20 |
| TTGTTTATGCATCCAAGCCA      | 60.073 | 20 | TGTGGAGCTGAAAACCCACAC  | 59.726 | 20 |
| CCCATAAACCACTAAAGATGG     | 59.654 | 23 | GTGAATGTGCATGGAGGATG   | 59.925 | 20 |
| CAAGGCAAGACTTGTGGTCA      | 59.873 | 20 | TTGTTCTACGCACTCACATTA  | 58.372 | 22 |
| CTCCCGTGAGGTAAACATCC      | 59.405 | 20 | TGCAAGTGTGCAACAGATCA   | 60.029 | 20 |
| CCGACATTCAGCAGATGAGA      | 59.942 | 20 | GCAAGTAACCTAGTGGCCAAG  | 59.717 | 22 |
| AACCTTCGGACAGCTCTTGA      | 59.989 | 20 | CACCTTCGAGATTGCTAGGC   | 59.978 | 20 |
| ATCAGTGATCACACCTGCC       | 60.968 | 20 | CCGTTTACGTTTATCCATACCC | 59.52  | 22 |
| AAACATGGAATGAGTTAAGGGAA   | 58.919 | 23 | GTTCCGGGATAGAGCCAGTT   | 60.464 | 20 |
| GGTGTGCCTTGTCCAATTTT      | 59.836 | 20 | TATGGCGAGGAAGAAGAGGA   | 59.91  | 20 |
| AAGAGGGCCAGGAACAAAAT      | 59.94  | 20 | TTCCTGCCTACCATTTTACGC  | 60.214 | 20 |
| GTCAAATCGTGAACACCCCT      | 59.827 | 20 | CATTAAGCTAAGGCCCCAA    | 59.208 | 20 |
| TCAAACCATTATACCTACCGCA    | 59.385 | 22 | TCCGTAGTTGGTTTAGGTTCTT | 58.328 | 23 |
| TGCTTATCTTTTCGGGCTGT      | 59.845 | 20 | ACCATCAGATTCATTGTGCG   | 59.527 | 20 |
| CTACGTAGCTCGGTTCTCCG      | 60.03  | 20 | CATCACCTTCCAATTCACCC   | 60.173 | 20 |
| AGAGTGGTCTGCCCTTTTT       | 60.11  | 20 | AACAGAAGTGATGGGCTTTCA  | 59.726 | 21 |
| GAGTGGAGGATTCGGTGAAA      | 60.05  | 20 | TTTGTTCCTCCTCCCTCCTT   | 60.045 | 20 |
| CTGGAGCAGATCCCAGTCTC      | 59.945 | 20 | GGCATCTCCTCTTGTCTTGG   | 59.803 | 20 |
| CTGAGGCCAATTCCTCAGTG      | 60.791 | 20 | GTCCGCTATAAAGCCCAGC    | 59.821 | 19 |
| ACCACTACCACCAGCACCTC      | 60.033 | 20 | CATTGCAAAATCTCGCTTCA   | 59.953 | 20 |
| ACAAACGAAAGGGACCACAA      | 60.388 | 20 | TTTCGGTTTCTGCAATTTTTG  | 60.095 | 21 |
| TCAGCAGCCATTGAGACATC      | 59.95  | 20 | CTCAGACAGCTTCAAATCCCT  | 58.537 | 21 |
| AACAAAACAAAACAGGGGCA      | 60.378 | 20 | CATCACCGTCATCGTCTCAC   | 60.121 | 20 |
| CGAACCACGTTAAATCTCTGTG    | 59.671 | 22 | AAGATGTTGGGTTCTGACCG   | 59.966 | 20 |
| AGCTCAATGCACTTCCCAAT      | 59.7   | 20 | TCACCAGATCATACCTCCCC   | 59.737 | 20 |
| TAATCGTGTGATTGCCTC        | 59.694 | 20 | CATAAATCGCCGCTCTTAC    | 59.704 | 20 |
| AGGAGTCGGAGTGAAAAGCA      | 59.989 | 20 | GTTGGACCGGTTGGAATAGA   | 59.79  | 20 |
| TTTTGGCGATATGCAATCAA      | 60.037 | 20 | AAGCAGCCATAACTTGCCTC   | 59.481 | 20 |
| TTCACTTTTGGCATGTCAGC      | 59.847 | 20 | GGAATTCTATCCGAGCACCC   | 60.797 | 20 |
| TGCTGAGACAGTGGAAAGGTG     | 60.022 | 20 | TGTCTGTCTGTCTAGGCCCC   | 60.261 | 20 |
| GCGTGGTTGTGAGCGTATAA      | 59.759 | 20 | CTCACCGCCAACCTCTCTCTC  | 60.135 | 20 |
| CTGCTTTGTGTTGCGTGTTT      | 59.951 | 20 | TCGTTGGTCAACTTCAGTGC   | 59.88  | 20 |
| TTGCCAAGACATTTAACGCA      | 60.251 | 20 | AATTGAGACACAAAAGCGGG   | 60.11  | 20 |
| TTTACAAGATCAATGGTCCCAA    | 59.315 | 22 | TATGCCCTAAGGGGAGGTA    | 60.644 | 20 |
| TAACATCAACGGCTGCAAAA      | 60.251 | 20 | CGACTTTTCACTATTCTCCGC  | 58.986 | 21 |
| TCGACGTCTACAAAACGCAC      | 59.911 | 20 | AGGGGTCCTCCGTCATAAAC   | 60.19  | 20 |
| AGGAGGACGAGTGTGGTGAC      | 60.161 | 20 | TTCCAACGACAATAATTCCATT | 59.616 | 23 |
| CATTTTTAATTGCAAAATTAATCC/ | 58.536 | 25 | GGAAATAAGGAGGTGTTATGA  | 59.323 | 24 |
| CATGCACGTATGCATGTTCA      | 60.145 | 20 | GAAAAGCTTGGGAATGGTGA   | 60.051 | 20 |
| AAGGGTTATCACCTGATTTTCTC   | 57.73  | 23 | TTGCCACTTTATCCCTCCAC   | 59.933 | 20 |
| TAGCAAAAACGAAGCCACCT      | 59.883 | 20 | CACTGCGATTGCAGATTCAT   | 59.83  | 20 |
| CCCAAAATCAACGTCCAGAT      | 59.79  | 20 | TTCGTGCCTAGTTGGAAACA   | 59.317 | 20 |
| ACGATCATCAAAGAATCGGC      | 60.043 | 20 | TTCCCCTGCAATCAAAGAAG   | 60.184 | 20 |
| CGATTGTTTGGTTAATGGGG      | 60.046 | 20 | TTGCTGAAAAGCAAGCCTCT   | 60.27  | 20 |
| CACAAACCACTGAATCGCAC      | 60.16  | 20 | CCCTCCTATGCACTCCAAAA   | 60.066 | 20 |
| TCTGCGTACTTGCTTTCCA       | 59.609 | 20 | GAGTGCCTATGCCTAACAA    | 59.09  | 20 |
| TGAATATTGATTGGTCCATGC     | 58.296 | 21 | TACTCGCCATTTTCCCCTAA   | 59.542 | 20 |
| ATTACCCGCCAAAAGGAAG       | 60.305 | 20 | TCTCCCATTTCCAACCTGAG   | 60.042 | 20 |
| ATGTGCACAGCGAGGTATTG      | 59.746 | 20 | GGTTCATTACATGCGTGAC    | 59.975 | 20 |
| ACCAAAATGCACCAACACAA      | 59.864 | 20 | TGTGGCATGTTCTTCCAATC   | 59.654 | 20 |
| TTCCCTATGAAGCCCAG         | 60.014 | 19 | TCAGATGAAGCCAAAGAGGG   | 60.331 | 20 |

|                           |        |    |                         |        |    |
|---------------------------|--------|----|-------------------------|--------|----|
| ATCACTTCCGATCGAACCAC      | 59.934 | 20 | GTAGAGTAGCGGCTGCAGGT    | 59.668 | 20 |
| AACTACGGCCACATGAGCTT      | 59.763 | 20 | CGTCCCATTGTTGGTAGAA     | 60.067 | 20 |
| ATTTGTTACCCTGGACGAT       | 59.263 | 20 | ACCAAACACCCCTTAGTGTT    | 59.646 | 21 |
| GATTCTCACGCCATTCTCAA      | 58.799 | 20 | GGGATGTTTGGAGAGACGAA    | 60.05  | 20 |
| AAGCTGGCTTGTTCCTGTTC      | 59.478 | 20 | ATCAGCAGCAACCAAGTTGA    | 59.445 | 20 |
| TGGACAAGAAGCCATTGAAA      | 59.247 | 20 | CACGACGAACTTTTCACTTCA   | 58.96  | 21 |
| GTTTCCTGTCCAATTCCCAG      | 59.381 | 20 | CCCACAGATCTTGGACTGGT    | 59.962 | 20 |
| TTTCATTATTTATTGCAAGTTTTCG | 58.765 | 25 | GGCTGGATCCAATGGTCTTA    | 59.894 | 20 |
| ATCATCAATATTCCCGACGC      | 59.751 | 20 | GCTGACAACATGGTCGCTTA    | 59.871 | 20 |
| TGTTGAACGTCTCCAACCTCT     | 59.754 | 21 | AAGTTTGGGGGAGGAGAAAA    | 59.912 | 20 |
| GAGAAAAGGGGAGTTGAGGG      | 60.045 | 20 | TTCTTCCAGAAGTGGGCATC    | 60.195 | 20 |
| GAGCAGAACTTGC GGAGTC      | 60.142 | 20 | AACCCTCCTGAACCAAATCC    | 60.169 | 20 |
| TGGTGATTCTTTGGACTCCC      | 59.903 | 20 | AATTGTACATCAAAGGGGCG    | 59.823 | 20 |
| GTTAACCTTGCAAGCTGCCT      | 59.522 | 20 | TCAACGGTTGCAATTTGATT    | 59.016 | 20 |
| CTTGCTCCTAATCGTCGGTC      | 59.836 | 20 | AACTCCATCTCTCTCCCGCT    | 60.358 | 20 |
| GCCATGAACTATATTGATTTTCCA  | 59.28  | 24 | GGTGAAGGAAGAGGAAAGA     | 59.677 | 21 |
| GCCTCAAATATCTGCTCCAA      | 59.31  | 21 | TGCCTGATGAATTTCTCCTG    | 58.797 | 20 |
| GGTTTGGCAAAGCCTCAAT       | 61.339 | 20 | CAATGGTGAATATTATAAAGGC  | 59.607 | 26 |
| TCCTTTCTCAAATGAAGAGAAAC/  | 59.411 | 24 | AGTGC ACTTGTGCCCTAAA    | 60.689 | 20 |
| TGCAGAGATTTGTGGCAGAC      | 59.992 | 20 | AGAATTTCCCGCGTTATTT     | 59.808 | 20 |
| TTTTCAGTGGTGTGTTGTTT      | 57.248 | 22 | TGAAAAGGATTCCACGTATTT   | 58.128 | 23 |
| TATAAAAATGCAGCCAGGGG      | 59.922 | 20 | ACCAGCCTGACCTCAAATCA    | 60.656 | 20 |
| CAAACATCATGCAGAGGACG      | 60.263 | 20 | AGAGCTCAGGATCTTGCGAA    | 60.24  | 20 |
| AAAAACGCGGAAATCACATC      | 59.945 | 20 | CATGGTGAGAAGCGTTGATCT   | 60.27  | 21 |
| GTGCTGTTTTCCACCTCTGT      | 60.159 | 20 | GCTCGCCTCCTCTTTCTTCT    | 60.233 | 20 |
| GCGGCTCTGCAACTTTTAGT      | 59.66  | 20 | AAAACGCGCTTTCATACCAT    | 59.614 | 20 |
| TCAGGTTAGCCTTGCCGTT       | 59.734 | 20 | AACTCATCCA ACTAAGCCGC   | 59.34  | 20 |
| TTTGTTGGCCATTCTCCTTC      | 60.051 | 20 | ATGAACCTGCTTTTTGTGGC    | 60.118 | 20 |
| GCCCAAGATACTCCATCCAA      | 59.894 | 20 | GGAGAATCCGGTGGATAAAAA   | 60.137 | 21 |
| AGGCATTGGTTTGTGGAAG       | 59.971 | 20 | TGTTACCCACCTTTATCCTTT   | 59.741 | 22 |
| AAGGAGGTGTTATGAAGGGATT    | 58.028 | 22 | GATTTATTGTGCATGCCGTG    | 59.96  | 20 |
| ACTGACCGCCAATCATAAG       | 59.955 | 20 | TTAAGCAAGGGGATGACTCG    | 60.206 | 20 |
| GGTTGATGTCATCGTCATGG      | 59.769 | 20 | CCGGAGTGTGTTGATTTCT     | 59.966 | 20 |
| CGGCACAGATTACAGCACAC      | 60.333 | 20 | GCGGCTTACATTGTTTCTC     | 59.713 | 20 |
| ATGAATGCAAAATGGGCACT      | 60.339 | 20 | AACGTCAAACGGTCTATGCC    | 60     | 20 |
| TGAAAGGTAGGGTTTTCGCA      | 60.608 | 20 | ATGAAGGCCAACGTTCACTC    | 60.119 | 20 |
| TGCAAGTAAAATCGTCGTGC      | 59.879 | 20 | CGGAACCTCGTTCATTGTCA    | 59.691 | 20 |
| TGAAGTTGACGAAGAAGATGACA   | 59.906 | 23 | AGAAATCAGGAGCTGCCAAA    | 59.955 | 20 |
| TGGTTGAACTGTTGTCTGTCT     | 59.664 | 22 | CACGGTAAGTCCCGACATTT    | 59.853 | 20 |
| TTGAATCTCCGGCTGAAACT      | 59.813 | 20 | AAGCTGCTCCTTTCAAGCAA    | 60.27  | 20 |
| TTGGCCACAAATAAAAGGG       | 59.805 | 20 | TGGTCGTTGCTGGTTAATG     | 59.585 | 20 |
| TGAAACTCTCAACAGATTCCCAT   | 59.99  | 23 | TGCGTCTGAGTTTGTTCG      | 60.027 | 20 |
| CACTTAAGGGGTTATTAGTGGA    | 58.515 | 23 | TGAAAATTGTTTTATTCCACATI | 58.048 | 24 |
| TGGGAACACTCTTCAGGACA      | 59.23  | 20 | CTCGCCCTAACTAGCGACAC    | 60.037 | 20 |
| TTCCGGATTTTTATTGGAG       | 59.872 | 20 | TCAGTTATGCTCTTCTCCCCA   | 59.822 | 21 |
| CAGATTTGTTATGTGTTTTGACAA  | 57.29  | 25 | TTTATTTGGCCGAACTGACC    | 59.938 | 20 |
| ATGGTGGCTGAAATGCTTGT      | 60.526 | 20 | GACTGATTCAATCTCCTCCCA   | 59.079 | 21 |
| TTCTGCCCTTAAGGCTGTTG      | 60.378 | 20 | GTGGCGGCTAGGTTTACAGA    | 60.27  | 20 |
| CTTCTAAAGCTCCACCACACG     | 59.921 | 21 | GATCATGGGCTTGCAATCTT    | 60.043 | 20 |
| GGAACAGGCAGTTTCGACATT     | 60.119 | 20 | AAGGAGAAGCAACAGCGGTA    | 60.015 | 20 |
| CCAGGATGGTGATACATTTGG     | 60.059 | 21 | CGATTCGGCGTAGAAAATA     | 60.054 | 20 |
| GGAGAAATCAAGAGGAGGGG      | 60.008 | 20 | TAATTCGGCCAAAACCTTC     | 59.055 | 20 |
| TAAATAATGACCGCCATCCC      | 59.621 | 20 | ATGAGCTCTTCGTCATTGGG    | 60.218 | 20 |
| ATTTGAGGGGAAAGGAGAG       | 59.508 | 20 | GGAACACGACTCTTTCGAGG    | 59.844 | 20 |
| GGCATAGGTTTGGGTTTCAA      | 59.801 | 20 | GCACGAATAACTGCAAAGG     | 58.439 | 20 |
| AGTGAGCATGTTGTTGTGCC      | 59.758 | 20 | CCAGACTGGGAAGTCAGCAT    | 60.261 | 20 |
| TTCCCTCCTGTTGATGCTTT      | 59.67  | 20 | GCCATTAGCCTTGAGATGA     | 60.177 | 20 |
| TGTTTCGAGGCGTTTTCTAGG     | 60.378 | 20 | TCAAAGGGATCAAATTTCC     | 58.808 | 20 |

|                          |        |                            |        |    |
|--------------------------|--------|----------------------------|--------|----|
| GCAACGAAGGGAGGACTTTA     | 59.312 | 20 TGAACGGTAAAATAATTGCTC   | 59.91  | 24 |
| TTTGATGGGATGGTATGTTTATGT | 59.399 | 24 CCCCTTGAGTATGTCCCATC    | 59.213 | 20 |
| TTAACCAACATCCCATCTCCA    | 60.177 | 21 GGGAGGTTGCATTTTCGTATG   | 60.331 | 20 |
| AAAAATCAAAGGCCCAAT       | 58.418 | 20 CCAGCCAAGACCAACTCTTC    | 59.844 | 20 |
| GCCATCAAAGAGGAAACGA      | 60.192 | 20 CCATGTAGGCGTAAAAATAGG   | 59.119 | 23 |
| CGAATGAAACAAGTTGGGAAA    | 59.961 | 21 TACAGGCCCTGCAAGAATTT    | 59.708 | 20 |
| TGATTTACAGTTGGTAGCAGGAA  | 59.747 | 22 CGGGTTTTTCTTCAGCAGAC    | 59.853 | 20 |
| TTGCAGCATTCTCACCATGT     | 60.272 | 20 CACCCGGCCTCTTTATTTTT    | 60.305 | 20 |
| CTCTTCTTCCCAGTTTCCCC     | 60.045 | 20 GGAGTCGCGGAATCAAATTA    | 60.038 | 20 |
| GGGTATCATTTGAACGCGA      | 60.837 | 20 CCGGAGCTTGAAAGATGAAG    | 59.948 | 20 |
| CCCAAGCAAAGACGACACT      | 60.291 | 20 ACATGAGTCGATGATTGGCA    | 60.08  | 20 |
| AAGCTTCTGACATCCACGCT     | 60.02  | 20 CCACGTTTTGGGGTCCAC      | 62.219 | 18 |
| TAGGTGAAGGTGGATTTGGC     | 59.933 | 20 TCAAACAACGTGAATGAGCA    | 58.835 | 20 |
| TCTTTTGCAGCCCTCTTTA      | 59.953 | 20 GTTCCCCCAACTGAGAATCA    | 59.903 | 20 |
| GAAAAATGTATGGGGTCGGA     | 59.622 | 20 CGTGTTCCTATGCTTCTGGA    | 60.256 | 21 |
| AGGGACTTAACAAGCCATCG     | 59.195 | 20 ATTTCTCCCCTCTCTCTCG     | 59.772 | 20 |
| TTTCTCATACAAAAGACATTTCT  | 58.494 | 26 TTCTGTCTCCGCGAATTTT     | 59.823 | 20 |
| GATGCTCACAAGCAACCAAA     | 59.847 | 20 CCCATTTCAAGCTTGCTCTC    | 59.955 | 20 |
| ACCTTAGCAACGAAGGAGCA     | 60.015 | 20 CATCCGGTTTTAGTTTCGGA    | 59.931 | 20 |
| GCAAGTCTGGTACTTGGGGA     | 60.111 | 20 CATGTTACACGTGGACGCTC    | 60.183 | 20 |
| TGACTGTCATTTACCTCTTTATG  | 57.131 | 25 TCAACTGCCTGCATTGTTTC    | 59.847 | 20 |
| CATAGCTTGCTCACCAACCC     | 60.657 | 20 ACCCTTTGTCGGTGGATTTA    | 59.288 | 20 |
| TCGGTTCTGACCACTAAACG     | 58.773 | 20 CACCAAATTTTCATCATTTTTAG | 58.144 | 25 |
| TTTGGATCTGTTTGTGAGTTG    | 60.147 | 22 GTCCACGGGGGAAGAATAAT    | 60.017 | 20 |
| AAGACCTATCACACCGCCAC     | 59.997 | 20 TTTTGGTCTGGTCTGAGCCT    | 59.844 | 20 |
| ACCCTTTGTGGGAAGAGGAC     | 60.349 | 20 GCAAGTTCAACCTTCTTGGG    | 59.711 | 20 |
| AAGGAGGTGTTATGAAGGGATT   | 58.028 | 22 TAATGCGTGCAACACACAAG    | 59.354 | 20 |
| ACATGGGCAATAAGTCAGGC     | 59.962 | 20 GGCTATCAATGGTTGTTGGG    | 60.192 | 20 |
| GAAAATCTGCAGTGGGGTGT     | 59.973 | 20 ATGCACGTAGGCATGTTCAA    | 60.142 | 20 |
| CCAATCCGATCTCTCTGGAA     | 60.15  | 20 AGTCCGATTTCAACCAGGTG    | 59.966 | 20 |
| GGGCATAAGCTGTCAGGTCT     | 59.313 | 20 CTGCATCCCCAAAAGAG       | 60.578 | 19 |
| CCCAGCATCCGTTAGTTACAA    | 60.004 | 21 TTGGTTATGCAAGTGAACG     | 59.585 | 20 |
| CAAGTCCGGTTCAGTTTGA      | 61.064 | 20 TTCATGAGCTCGCTTTTATTGA  | 59.985 | 22 |
| GGCAAGGTAGTAGAGCCACG     | 59.898 | 20 CCTATGGTAGTATGGTGTGGG   | 60.365 | 22 |
| TCCCTTCTCAAACAACCCAC     | 59.943 | 20 GAAGGGGCGGAATTATCTTC    | 59.873 | 20 |
| ATCGCCAATACGTGAGTTCC     | 59.962 | 20 TCGTTTTGACAATATATAGGT   | 60.083 | 26 |
| TAGCGCTGCAGAATTCAGA      | 59.856 | 20 CTCCAAGCCAAACACTCTC     | 59.844 | 20 |
| GTAAATCACGAGACCGCCAG     | 60.657 | 20 TTGAATCTGGCCTTCGATCT    | 59.773 | 20 |
| AGAAATCCAGCAACCAATCG     | 60.074 | 20 ATTGCAGTTCAGCCTCTGCT    | 60.164 | 20 |
| TGAGGAATGAGAGCGTAGGG     | 60.353 | 20 ATCTTGACAGCTTGTCGGCT    | 60.02  | 20 |
| TCGTGCAAAATAGCACCAAG     | 59.872 | 20 TTGCCTTGCACTTCATCAGA    | 60.539 | 20 |
| GATGTTAATCCAGCGCCCTA     | 60.06  | 20 TGATTCCTATGCCTCGTGGT    | 60.483 | 20 |
| TGTAGAGCATGCGTTGTCTG     | 58.6   | 20 GGTCTCCGGTCCCTAAAATG    | 60.683 | 20 |
| TAATGGCCCTGAATCTTTTCG    | 60.031 | 20 AGATGGGGATGGGTCACTTT    | 60.575 | 20 |
| ACAACAAGATCCCCTGCAAT     | 59.41  | 20 AGCAGAGGGGAACACAACCTG   | 60.298 | 20 |
| TGGGTGCTTTTCTTGCTCTT     | 59.993 | 20 CATTCCCTGCTCAGACAACA    | 59.831 | 20 |
| CTGCCCTATTTCTTGTTCCA     | 60.066 | 20 GTCCCATATAATTTCCCCCG    | 60.219 | 20 |
| ACCCACTGCAATTACCTGGA     | 60.375 | 20 TCATGGTTTCTCTGTTGCGA    | 60.39  | 20 |
| CAGAGCGCACTCGAAGAGTA     | 59.49  | 20 TGGCGTTGAAAATCTCCATT    | 60.448 | 20 |
| TTCCCCCTTTTATGGTCAA      | 59.246 | 20 TTGTTGTTGGAGCTCATGGA    | 60.24  | 20 |
| TTATGCAGCCATCAGACCAA     | 60.22  | 20 GCCGATGGAATCAAGAAAAA    | 60.016 | 20 |
| TTCAAAAATGCCACTGCTTG     | 59.849 | 20 TGATTCTGACGAGGCAGATG    | 59.942 | 20 |
| GGATTTGCATCTACCATTGGA    | 59.776 | 21 GCCTGCTACACAGGGTTTTT    | 59.74  | 20 |
| CGGTTATCACCGGATCGC       | 62.397 | 18 CCTTAGCTGGCAGGCATAC     | 59.867 | 20 |
| TCTTGCTGCTGACACCAATC     | 59.992 | 20 TCCCTCCCTCTTTAAAATCACA  | 59.939 | 22 |
| TCAACAACGGTAAGTTGCTCTT   | 58.951 | 22 TCAAGCCC GCGTTATTAGAT   | 59.704 | 20 |
| CCCAGCACTTTCTGTGATT      | 60.111 | 20 CCGACGTACAGATGATGCAG    | 60.287 | 20 |
| TCAAGAATCCCTTTAGCCGA     | 59.778 | 20 TTTTGTCTTTTCATGGATGC    | 59.93  | 21 |

|                         |        |    |                        |        |    |
|-------------------------|--------|----|------------------------|--------|----|
| CCCCATTACCATCTTTCTCG    | 59.382 | 20 | GATCCTGCAACAAACCACAA   | 59.547 | 20 |
| AGGGAGTTGCTAGGGTGTGA    | 59.721 | 20 | GTGCTGATGATTTTGAGCCA   | 59.805 | 20 |
| GCTTTGCAAAGCGTTTCTC     | 60.138 | 20 | CACTAAGTTGAGCGTTGCCA   | 60.195 | 20 |
| CTTCCCCTTCGCTCCTACTC    | 60.34  | 20 | TCAAAATGGTCATGAAACACG  | 59.43  | 21 |
| TCAAAAACCGAAAACCGAAC    | 59.953 | 20 | ACCGAACCGAACTGATTTTG   | 59.971 | 20 |
| AATTCTATTGTAGCGGCCCA    | 59.569 | 20 | TTGCAAACGTCAAACAAAATG  | 59.634 | 21 |
| TGATGGGAAGGGAAGGTATG    | 59.744 | 20 | CGTCTGATTGGGAGAATCCA   | 61.004 | 20 |
| AAATCAGCACCCAACCAAAG    | 59.971 | 20 | CCCACACCCTCCATAAGATG   | 60.187 | 20 |
| ATGTTTGCAGTGGATGGACA    | 59.967 | 20 | ATTGACGGGGTTCACAGTTC   | 59.827 | 20 |
| GCTTGCATAGGCTTTCTTG     | 60.117 | 20 | CAGACCTCCAAAAGCAGGAG   | 59.982 | 20 |
| GGAAATGAAGCGAGTTTCCA    | 60.192 | 20 | GAATCCGAAAAATAAGGGGG   | 59.616 | 20 |
| TAAGAGTTGTCCGGAGTCGG    | 60.246 | 20 | CCCACATCTCCCCTCTCTCT   | 60.605 | 20 |
| TTGTTGAGAGGTGGCTGTGT    | 59.31  | 20 | TGTCAATGAACAAATAGGTCA  | 59.424 | 24 |
| GTCAATCATCCAACACACCAA   | 59.256 | 21 | ACCCGAGACAAAACACGAAC   | 60.012 | 20 |
| CGCGAGGGTTGTGATAAACT    | 60.132 | 20 | AATCACTCTGTGTGAGGCC    | 60.12  | 20 |
| TGGTATCAGGGTTTCAGCTTC   | 59.184 | 21 | CTTGTCTAGTTGCAACCCCC   | 59.592 | 20 |
| CCACCACTGTCAGAAAGCAG    | 59.461 | 20 | GAGTAGAGCTCGGCGAGAAA   | 59.859 | 20 |
| TTGAACCAGCTGACCATGTG    | 60.722 | 20 | TGTTTCATCCATGTTTTGGGA  | 59.75  | 20 |
| AATTTCTTGCTCCAAACCTTTA  | 57.172 | 22 | GGCCATGTTTGTTTCATTTT   | 60.177 | 20 |
| AATCAAAGAGCAATGAGCCG    | 60.352 | 20 | TCGGTTCAATAAGATCACCG   | 58.572 | 20 |
| GCAACAAATGCCAACGCTAT    | 61.029 | 20 | GAGAATACGACGACGAAGCC   | 59.843 | 20 |
| TGATGTGAGATGGGCTTGAG    | 59.787 | 20 | TGGAGATCGTGTGAGAGGTG   | 59.82  | 20 |
| CCTACCTAAGGAGGGAGGGA    | 59.526 | 20 | TGCAGCAATGCTAGAACCTG   | 60.157 | 20 |
| CCCTACGCACTCGTTTTTCT    | 59.378 | 20 | CTGAGGAGATTTTGGCAGGT   | 59.284 | 20 |
| CCTGCTGTTGATTTGATGGA    | 59.648 | 20 | GTTGCAATAAATCCGTGGGT   | 59.691 | 20 |
| AAATGGAATGTGGCGAAGAC    | 59.939 | 20 | TGTCATGGGAATTCACGAAA   | 59.9   | 20 |
| GAAAAATTCGTAAGTGGCCG    | 59.586 | 20 | AACCAAGCATGCTCATGTCA   | 60.272 | 20 |
| GGGACAGAAAGGAAAGCACA    | 60.232 | 20 | CTGAGGTGACCTGGACCATT   | 59.962 | 20 |
| CCAACAATTTGTTGTTGACC    | 60.206 | 20 | TGCATGAAAACCTCCCTCACA  | 60.24  | 20 |
| ACCAAACCCATTCTTGTTCCA   | 60.21  | 20 | GAAACAGACCCACAACCCAT   | 59.679 | 20 |
| TTGATGGATTTTTCAAGCCC    | 59.878 | 20 | GAAAATCGCCCAAAGATTCA   | 60.016 | 20 |
| GGCAGGTCAAAGGCTGTTTA    | 60.249 | 20 | CCAATTCCATCAAATCCAGG   | 60.126 | 20 |
| GTGCAAGCAAAAAGACGAAA    | 59.087 | 20 | GGCTAGCTGTCCATACAATGC  | 59.75  | 21 |
| AGGGAGCTGCAACAAGAAAC    | 59.478 | 20 | ATGCGGTCGGATTAGAATTG   | 59.923 | 20 |
| GTTATGATGGGAATGGTGGG    | 59.871 | 20 | AAGCTAGCACGTAAATGGGG   | 59.248 | 20 |
| AATGTGACCTCAATTGCAAAA   | 58.134 | 21 | ACGAGACCATCGTTCCATA    | 60.34  | 20 |
| ACTGGACCGGACCGTTTT      | 60.363 | 18 | ATTTGGATCGGTCTGGATTG   | 59.75  | 20 |
| TCCCCTATTTGGACAAGGTG    | 59.784 | 20 | TGAGAATGTGCTCAGACCGT   | 59.42  | 20 |
| GAGCTGCAGCATTTCTCACA    | 60.296 | 20 | GATTCGATTGCTTGCATCAC   | 59.234 | 20 |
| TTGGTCAGTTTCTTGCTTGC    | 59.05  | 20 | TTCTACTTTTGCCTCCCC     | 60.059 | 19 |
| TCGTGCATTACTIONGTTACTTG | 60.186 | 22 | GTCGGTCAACATTGCTTTCA   | 59.697 | 20 |
| GGAACCAATCTGGTGCATTC    | 60.326 | 20 | CAAACCTGGTCTCATGCTTT   | 58.926 | 20 |
| CACCACCGGACATACTCCTT    | 59.844 | 20 | CGTGGAGACAACGTGAAGAA   | 59.873 | 20 |
| CGCACACACCATCTGTGAAT    | 60.604 | 20 | GGTCGTAGTCTTCCTCGTCG   | 59.867 | 20 |
| TTCTCTTGAATTTGGTGGG     | 59.903 | 20 | AGGGAATGGAATGAGCATGA   | 60.426 | 20 |
| TGGGAACCAGATACGAGGAC    | 59.927 | 20 | TAACGGAACCGTGGGATAAA   | 60.181 | 20 |
| TGGAAATGGAATCCGAAGAC    | 59.871 | 20 | ACTCGAAGAGTAGCGGTTGC   | 59.644 | 20 |
| CTTCAAGGATTTGAGCCGAG    | 59.948 | 20 | TTGGGTACTTCCGACAGCTT   | 59.734 | 20 |
| GCTTCTTCTTGCTGTGAGTGG   | 60.186 | 21 | CTTGCCACTTATGAATCGG    | 60.46  | 20 |
| TGAAATCATGCTGGTTGCAT    | 60.08  | 20 | ACCTCCCCATGGCTAGACTAA  | 59.969 | 21 |
| TATTGGTCGTGGTGTTTTGC    | 59.444 | 20 | TTGCTCCATGTTATGCAATG   | 58.145 | 20 |
| ATATTGTCACATGGTCCGCA    | 59.805 | 20 | CATGCAACAAACCAACCAAA   | 60.393 | 20 |
| TGTGCCTTGATTCATTGAAAA   | 59.147 | 21 | AGTTGAGATATTGGAGAAGAT/ | 58.004 | 27 |
| TCAAGATTTTGTGTGGCTGC    | 59.847 | 20 | CCATATACAACAAGATGCCAA/ | 58.927 | 23 |
| CACCCCTGAAACTCCATCAT    | 59.779 | 20 | ATTGCTTCTGAGTTGACCG    | 60.255 | 20 |
| GACGACGATGAAAATCGTGA    | 59.654 | 20 | TCCCATTACCTTAGTTAGCAG  | 59.194 | 23 |
| ATATAAGGCAAAAACGCGCA    | 60.591 | 20 | TGACGACCGATATGTGCTTC   | 59.679 | 20 |
| TGTCGGTGGACTGATTTGTG    | 60.57  | 20 | GGCGAGGAAATCAGAGAGTG   | 59.95  | 20 |

|                          |        |                             |        |    |
|--------------------------|--------|-----------------------------|--------|----|
| CGTGAGAAGCGTTGATATGG     | 59.297 | 20 TTCCTTTCATTACACGTGCC     | 58.625 | 20 |
| CCTCTCACATGTCTCCACGA     | 59.82  | 20 TGATGCAATGATCTCATTCTTT   | 58.709 | 23 |
| TGCGTCCATTTCACTCAATC     | 59.654 | 20 TGCACAAGCATGTTTTTCATT    | 59.22  | 21 |
| CATGGAATTAGGGCTCAGTCT    | 58.28  | 21 TGTA AACAGGCTAGGTCGGA    | 58.379 | 20 |
| CACCAAATGTATGTGCATGAGA   | 59.469 | 22 AATTGAAATGGCGGAAAATG     | 59.773 | 20 |
| TGGGGATGGGGGTAAGTAAT     | 60.258 | 20 TCTGTTTTGTTTTGGTTGCC     | 60.004 | 21 |
| TCAACCGCCAGATTTTCTGT     | 60.636 | 20 GCTAAAGCCATCTCCAATGC     | 59.813 | 20 |
| TCAGTGCCAAACCAAGATA      | 59.42  | 20 CCTGGCAGCTTTTGATCTGT     | 60.397 | 20 |
| AAAGGTCCCTCACCAGTCAA     | 59.549 | 20 TTTCCCCAGTTTGTGTGCTT     | 60.529 | 20 |
| CTTTTCTCTGCTTATGCGCC     | 60.117 | 20 TAGCAAAGCCCAACCTCATC     | 60.214 | 20 |
| GGTGCTGCAACTGAACTGAA     | 60.032 | 20 TCTCATCTCTTCTCCTCGCC     | 59.636 | 20 |
| CTGTCACGTCTCTTCCACCA     | 59.864 | 20 GAGGGAATGATCAAAACCGA     | 59.871 | 20 |
| TGGCTATAGGACATCGAGGG     | 60.051 | 20 CTGTGTTTGAGGTTGAGCCA     | 59.873 | 20 |
| TTTGCATGGAATAAGAATTTTGAA | 59.858 | 24 TTGGATCAATTGGAAGCACA     | 60.049 | 20 |
| AATTCAAATTGTGCAAGGCG     | 60.074 | 20 TTGGGGATTAGTTCGCAAAG     | 60.067 | 20 |
| TGAAGACGAGATTTAGGGC      | 60.34  | 20 ATGCAGTTCCTTCTCCTGT      | 58.744 | 20 |
| AGTGGCCTCTGGCTGTTCT      | 60.001 | 19 AAAGAAATTGGACAGTGGCG     | 60.11  | 20 |
| CTCCACTGATGTGTGGATGC     | 60.121 | 20 AATCTTCAACCCCCACCTCT     | 59.795 | 20 |
| CATGAATTTTTGGGAAGCTGA    | 60.06  | 21 TTTTCTGCAATCCAAAAGGG     | 60.046 | 20 |
| CATGCAAAGTCTGGAACAT      | 59.722 | 20 GGGAAAAAGGGCTTGTTGTT     | 60.332 | 20 |
| TCTGTTTCAAGAAATGCTGGGT   | 59.859 | 21 TTTGAACACTCAATGCGCTC     | 59.995 | 20 |
| CATGACCCAATCAATGCAAC     | 59.781 | 20 GCAGTCAACAACCACGAAGA     | 59.88  | 20 |
| TGAAAAAGAAAAACGCGTCA     | 59.462 | 20 TTCTGTCCAAGCATGAATCG     | 59.799 | 20 |
| TGTACGTGCGTACGTGTGTG     | 60.293 | 20 CGGTCGGAAGAAGATTACGA     | 60.206 | 20 |
| TCCTGTTTGATGAAATGCCA     | 60.049 | 20 CTGAAGATGACATCCCCGTT     | 59.927 | 20 |
| GTCTGAGCGAGAGTGTGTGC     | 59.771 | 20 CCGACCTCTCCTCCTTTCTC     | 60.328 | 20 |
| CAAATGAGATTGGTTCGAGCTT   | 60.612 | 22 AGTGGGAATCCGGACACTAA     | 59.405 | 20 |
| ACAAAGTTTGAATGGCTTG      | 59.971 | 20 GCTTTCTTTTCTTCCCCCAC     | 60.053 | 20 |
| AAGCTCGGGCCTGAACTATT     | 60.228 | 20 CACCAGACCGGCTCATTTA      | 59.658 | 19 |
| ACTCAGAAATCCATCCCACG     | 59.927 | 20 CCCACCTCGAATATCCCCTA     | 61.023 | 20 |
| AGAAACCCATGTGCAACTCC     | 59.973 | 20 GCAACACGCTCCATCTTCTT     | 60.406 | 20 |
| CGCCTTTCATCTCCTGTAT      | 60.235 | 20 CACGTGACTTATTTGGTGGAA    | 59.898 | 22 |
| CATTAAAATGTGTATGCACCTGA  | 57.669 | 23 TCAATTCGAAACTTGAGGTA     | 60.162 | 24 |
| TGGGAATTTCTTGATGGAGG     | 59.864 | 20 CCCCTGGTTGTTGAAGAAAA     | 59.942 | 20 |
| AAGGGGGAAAAGAAAAGGGT     | 60.156 | 20 TTCGCCAATCTTCTCATT       | 60.155 | 20 |
| TATATGGCGGTGGAGATGTG     | 59.375 | 20 TGTTTAAATTTTTGTTAAGCATGC | 59.958 | 25 |
| ATAACCATTGTGGGCCTTTG     | 59.685 | 20 CCGGGGTATGCTATAAACGA     | 59.81  | 20 |
| TAAAAATGGGAGATGAGGCG     | 60.031 | 20 AGACAAGGAAAAAGAGCGCA     | 60.132 | 20 |
| GCGGCCAGTTCAATACAAAT     | 59.967 | 20 TGCCTGAAGATAGTGATGTGT    | 58.31  | 22 |
| AGAGAGAAAAAGCTTCGGGG     | 59.955 | 20 GTTTAGGTGCTTGTTGGGA      | 59.971 | 20 |
| GATGATCCGAGGATGAATGG     | 60.244 | 20 GCTTGATCGTCTCCTGCTTC     | 60.104 | 20 |
| TACCTTAGTGCCACCGATCC     | 59.955 | 20 GGTGGAGCAGTAGAGGTGGA     | 60.261 | 20 |
| AGACCGGACCGTTAGGTAAT     | 57.55  | 20 CCTAAAATGCCCTCAGATGC     | 59.668 | 20 |
| CTCAGTGTTAGTGCGCAAGC     | 59.812 | 20 GTGGAGTGGTGGAGCAAGTT     | 60.159 | 20 |
| TCCAAGATGAATAAATGAAAGGG  | 59.344 | 23 TGAGACTTTGGTACGGGAGC     | 60.255 | 20 |
| GCAAGAGAAGCCCTCACAAC     | 59.997 | 20 AGGCAGAGAGGTGACTGGTG     | 60.458 | 20 |
| CGTTTCCAGTGTTTGCTCTG     | 59.485 | 20 GGAATTCATCCATCTCGAA      | 59.831 | 20 |
| ACGGATTTAACCCCCAAATC     | 59.888 | 20 GGCATCCATACTTGCCACTT     | 59.962 | 20 |
| TAGGGGCCACTTTCTGTAC      | 60.111 | 20 GCATGCATACAAAACCAAACG    | 61.284 | 21 |
| ACTGAGAAGTCTGCGTGTG      | 60.251 | 20 TCCTGCAATCTCTGAACCAA     | 59.369 | 20 |
| TCCCCTCATCTTTGACTGC      | 60.195 | 20 GCATCATAGGACCCCCAAAA     | 59.762 | 20 |
| TTTGATTCCCACCTTCAA       | 60.28  | 20 GCTGCTTGATCCTGAATCCT     | 59.39  | 20 |
| TGTTTCGTGTTCTCGAACGAT    | 59.293 | 20 TACCATGCGGAAGGAATGAT     | 60.296 | 20 |
| GTCCAATAGCTTTGCGCAA      | 60.209 | 20 TGTTTCAGCACACAGAACTTC    | 59.534 | 22 |
| AAAGCAGCAAATTCGATG       | 60.386 | 20 TTTTCTTTGGGTCATGTGATG    | 59.839 | 22 |
| TTGCTTGTGGTGAAGAAGA      | 59.566 | 20 ATTTGATCCCCCAATTCAA      | 59.067 | 20 |
| GGTTTGGAGCAATGACGAGT     | 60.119 | 20 ACTCCTCTTTCGATCTGCCA     | 59.95  | 20 |
| ACTTGTGCTTGCCAGAAT       | 59.882 | 20 GAGTGCAGAGTGCAAACCA      | 60.032 | 20 |



|                          |        |    |                        |        |    |
|--------------------------|--------|----|------------------------|--------|----|
| AAACTCGGTTTGGGCTTTTT     | 59.98  | 20 | ATGTCCTTGCAATTCTTGCC   | 60.081 | 20 |
| CGCTTGTCTGAGTTGTGAA      | 60.025 | 20 | CAATGCCTTCTTTGGCTGT    | 60.249 | 20 |
| AGTTGCCGATTGGTAAGCAC     | 60.14  | 20 | TCCAACAACGGTCAGCATC    | 59.682 | 20 |
| TATGAGAAGGGCATTTCGG      | 60.031 | 20 | TCTGGATGCATGAAAATTGA   | 57.609 | 20 |
| TCACAGTTTGAAGTTTATGTCAT  | 59.466 | 27 | ACCAAATGGCTTAGGTGACG   | 59.993 | 20 |
| ATGTCAGTCTGCCAAAGGCT     | 59.874 | 20 | CTCCGTGTTACCATTTTGCC   | 60.365 | 20 |
| TCACGAACCCACATTTTACA     | 58.928 | 21 | TAGAGTCTCCGATTCCGTG    | 60.21  | 20 |
| TCGTAAAACATGAACTTCTTTGGA | 60.037 | 24 | TGATGTTTGTATATGTTTCGTT | 57.233 | 24 |
| AAAGCTGCGAAGAAAGTGGA     | 60.132 | 20 | AATGAGGTCAATGGTCAGCC   | 59.934 | 20 |
| GAGGCTATCGAGGCTTTTCC     | 60.307 | 20 | TGGCGTGCTAACTGCTAAGA   | 59.776 | 20 |
| TCCACCTTGAAGCTCTCGAT     | 59.95  | 20 | CCCCATGAACACACACACAT   | 60.138 | 20 |
| GATCCCCTTTTTGCTTCGTT     | 60.431 | 20 | AAAACCTCCGGCATGGTACAC  | 59.859 | 20 |
| TCCACAGACAGATTTCCCAA     | 59.059 | 20 | ACCGAACCCACGTACATCCTC  | 59.851 | 20 |
| TTACGCGTCAACTGGGAAAT     | 60.502 | 20 | CCGTTCCATCAAGCATTTTT   | 59.938 | 20 |
| CATCATCTTCGCTCCTCTCC     | 59.91  | 20 | ATTCGATGGATTTGACGAG    | 60.036 | 20 |
| AAGAAACCCCATGAAACC       | 60.032 | 20 | CAAAGCAAGTGTGCTCCAA    | 60.027 | 20 |
| CCACAATGTAAGGAGCACAAAC   | 59.54  | 22 | ACTAGTGGCAGCCATGTCCA   | 61.688 | 20 |
| TTCGCTTGCATTGACATAA      | 60.215 | 20 | CGCCGATATATGCGTCTTTT   | 60.082 | 20 |
| TCAAGAAGGGAGAAGGGGTT     | 60.045 | 20 | CAACTGTGATGTTCTTGTTTTG | 59.707 | 23 |
| TTTTCGACCGTCATGAGATG     | 59.648 | 20 | TGCCATCGTTCACTTTACCA   | 60.111 | 20 |
| AATTGCCTGCACCTCCAAT      | 60.476 | 19 | CAAGCTTCTTCCCACCAATC   | 59.67  | 20 |
| TTTGAGAAATGGAGCAGCCT     | 59.955 | 20 | GTAGTGGTCGACGGGCTTTA   | 60.132 | 20 |
| ATGGCGTTGTTATCGTTTGA     | 59.041 | 20 | TCCAGTGTAGTTTACCCGGC   | 59.993 | 20 |
| CCAAATTTCCAATACAAGGCA    | 59.818 | 21 | GATTCCATGTCCAGACCCAT   | 59.593 | 20 |
| ATATTTTCTTCCGCCGGAGT     | 59.93  | 20 | ACGAACTCCTTCGATTCCCT   | 60.074 | 20 |
| GCGGGGTTGTTAAAGAAGAG     | 58.834 | 20 | TTGGTTGACGTGGTTTGCTA   | 60.149 | 20 |
| AAATTC AACCTTGGATGCTACA  | 58.629 | 22 | TCCGTTCCGGTCTTCTACAT   | 59.55  | 20 |
| CCGTTTTGCACCAATTCTAT     | 59.823 | 20 | GCCAAGTCATATCAAATCCGA  | 59.915 | 21 |
| TGGGTCAATTCCAATTCAAAA    | 60.153 | 21 | CTTGCAAATATAAACGTAATGA | 58.479 | 25 |
| ATCTTGTTGCCATGCTGTGA     | 60.272 | 20 | AGTCCCAAGTCTGAGTGGA    | 59.986 | 20 |
| TCAAACCTTTAAATTGGCCG     | 59.937 | 20 | ATTTGGGTGAGAAATCGCTG   | 60.074 | 20 |
| TTCATTGCCTTTCGCAAGAT     | 60.721 | 20 | CCCATTGAATTATGGGGTTG   | 59.872 | 20 |
| TTCCAATTATCCATGTTTGCAT   | 59.193 | 22 | GAAATAATATGGGGCGTCCA   | 59.621 | 20 |
| TGGCAAGAAATAACAGCATAACC  | 59.146 | 22 | ATGTCTGCCCAGCAGAGAAC   | 60.418 | 20 |
| CCCCACAGACATATTGACTC     | 59.274 | 21 | TGCACAATCATCACATAAAC   | 60.306 | 23 |
| TGCAAACATGGGACTAATATGAA  | 59.376 | 23 | ACGGGAGATTTTGCTTGTTG   | 60.11  | 20 |
| ACCGCTTCAAACAAAAGCAG     | 60.42  | 20 | ATATTTGTTCCCTCCGGCTCC  | 60.286 | 20 |
| GGAGAGTGGAGGTTGTTGGA     | 60.088 | 20 | AGGTGAGCCAGATGTAGCGT   | 59.898 | 20 |
| CGTGCATTTCCAACCTCACAC    | 60.16  | 20 | AGAGCGACAGCGAAAATGAT   | 59.985 | 20 |
| CCCAAACCTTAATGCCCTTT     | 60.177 | 20 | TGTGTTGAAACCCTCATCCA   | 59.935 | 20 |
| CGAGCATCCCATTTTCTCTC     | 59.773 | 20 | TGGTTGCCAGCTTACTGCTA   | 59.632 | 20 |
| TCCACCCTTTAATGTCACCA     | 58.821 | 20 | TTGTCATGATTTGCGGGTTA   | 59.93  | 20 |
| AATTGCCCATGTTGGTTAGC     | 59.829 | 20 | GGGAAGAGAGTGAGAGTTTTG  | 59.507 | 22 |
| AGCCAAGAAATGGAGGGAAT     | 59.903 | 20 | ACAACAATGTTTCGCATTGGA  | 59.972 | 20 |
| GGCCTCCAACGTTTTCAATA     | 59.938 | 20 | TTGATTCGGGTTTCGATTCTC  | 60.014 | 20 |
| CGTCGTTGGTGCTATACCCT     | 60.015 | 20 | GGTGATATGCATTTGACATTG  | 60.217 | 22 |
| GGAACGCAGAGGATCAATTC     | 59.635 | 20 | TGCTTTGACAATTTTAGTGTTI | 59.901 | 27 |
| ATCTGGGCTACCGATTTGTG     | 59.955 | 20 | CGTCACACATCCATGTTCTG   | 60.45  | 20 |
| AAGTACATTCCTCCGAAAGG     | 60.18  | 20 | TCCTGTAGAAGCCTTGGA     | 59.807 | 20 |
| TGGCACAAGAATCCCTAAC      | 59.933 | 20 | GCGAGACAAGCCATCATTTT   | 60.081 | 20 |
| CCAACGAGAAGTCGAGAAGG     | 59.982 | 20 | TGATTGTGGACCAACAGCAT   | 59.967 | 20 |
| CTCCATCCCTGCTCTCAC       | 59.945 | 20 | TGAAGGTGTGTGGGGTGTTA   | 59.848 | 20 |
| GGTGTATCTTGATGGGTGGA     | 59.662 | 21 | TGGACAAGGGAGAAAAAGGA   | 59.641 | 20 |
| ATTAACGCACACACGTGACA     | 58.628 | 20 | CATGGCGTAGTGTTGGAGAA   | 59.716 | 20 |
| GGCCTACCAAACACGTTACAA    | 59.912 | 21 | TCAATTAGGTGTCCCACCGT   | 60.232 | 20 |
| TAAAATGAATGAAGGGCGG      | 59.901 | 20 | TTGAGTTCGGTCATCACCAT   | 58.933 | 20 |
| GCTCTTGATTTGCTCCATCC     | 59.78  | 20 | TTCTTCACTCTCCACCTCG    | 60.377 | 20 |
| TCTGGGCTGCTAAGAAAGGA     | 60.088 | 20 | GGGTTCAAACCTCACTCAACA  | 59.997 | 21 |

|                          |        |                            |        |    |
|--------------------------|--------|----------------------------|--------|----|
| TTTGCTGATGCCATTGAAAG     | 59.809 | 20 TGTGTGTCATTTGTTTTGTTAGC | 59.464 | 24 |
| CCGAATTCGACCTAACAAA      | 59.931 | 20 TGAAGCTGTGAACATCGCTC    | 60.144 | 20 |
| GAGGGAAAAGAGGGAAGGAGA    | 59.749 | 20 CGTTGTAATGCCCCGTAAAT    | 59.72  | 20 |
| AATCAATCGGCAAATTCAGG     | 59.901 | 20 GTTCAAGCCCAAAAATCACC    | 59.41  | 20 |
| TCGGAAAAAGATTCCCATTG     | 59.872 | 20 CAAAGGTAAAGGGTCCTCCC    | 59.799 | 20 |
| AGGGGGCTGAAAAATCAAAG     | 60.423 | 20 TGCAGCTGTGGACCTACTTG    | 60.049 | 20 |
| CATGGCAGTATTGGCATCAC     | 59.955 | 20 TCAATCTGCAAAGAAGCAGGG   | 60.234 | 21 |
| CATAATGACCCGCTAAAGGC     | 59.569 | 20 TTATCCTGTGCTTTTGCACG    | 59.872 | 20 |
| TTGGTGCTGACTTCCAACAA     | 60.278 | 20 TCCTTCCTCCATTCCCTTCT    | 60.008 | 20 |
| TAATAGCGGCCGATCTGAAG     | 60.323 | 20 GGCTTATTTGGCATGCTCTC    | 59.813 | 20 |
| GACGTCCTACTCGCCCACT      | 60.277 | 19 TGCGTTTTGATGATATATAGGT  | 60.054 | 26 |
| GCAGTTTTCCATATGTCGCT     | 60.103 | 20 CCATCTTGACCACACCATA     | 59.215 | 20 |
| GCCAACATGATGACCTGAAA     | 59.502 | 20 TATTCTCGCAAACAGTGCCA    | 60.401 | 20 |
| TCCACCCACTGTCCCTAGTC     | 59.962 | 20 AGCTGCTTGCCTTCTTGAT     | 60.162 | 20 |
| ATACATATGGACGCCCCAGA     | 60.177 | 20 ATGAAAATGCCCTCGTATGC    | 59.929 | 20 |
| GCCTTGCTTTCTCTCTCAA      | 59.694 | 20 CTGCTGAAGCCCTTCTCATC    | 60.096 | 20 |
| CGGGATCATAAAAACGCAAC     | 60.323 | 20 GGAATGTGGTGTAGATTTGTGC  | 59.364 | 22 |
| TCATGTCCATTGATCTGAAACAA  | 60.359 | 23 ATCATGAATGACACATGGCG    | 60.362 | 20 |
| CCAAACCAGGTGAAAAGGAA     | 59.942 | 20 TGAAAGGGAACTTTTGTGGG    | 59.942 | 20 |
| TTCTGAAAGCATGAACGGTG     | 59.84  | 20 GACCACAGTGGCATTACACG    | 60.032 | 20 |
| ATGCATATGGGTTGTGATGG     | 59.079 | 20 CTGCAACCGTTTCTTCACAG    | 59.485 | 20 |
| TGCATGACCAATGCAGTACC     | 60.549 | 20 CACCTTCATCGGCATCAAC     | 60.064 | 19 |
| TTGTTGGAATACGTGGGAAA     | 58.866 | 20 TGATACTGCTGGTTTGCAGG    | 59.864 | 20 |
| CGAAATCTTGCCCTTCACG      | 60.626 | 20 ATGGTTGGAGGGTAACATCG    | 59.67  | 20 |
| TGGGTTATCACCGGATCG       | 60.282 | 18 GCGAAGCGACATCACATAAA    | 59.839 | 20 |
| CGAAACCAATTTTTCATCCG     | 60.294 | 20 CGATCCAAATGCATGGTTCT    | 60.864 | 20 |
| GATCTGCCCATAAATTGTGTATGA | 60.102 | 24 TCAATCTCGTTGAAAAATGGTT  | 59.871 | 23 |
| TTTTCTTTTGGGCAGCAACT     | 59.861 | 20 AACTCCCTCCTAAGGACCC     | 59.415 | 20 |
| CAAACCTGAAGAGCCTCAGGG    | 59.982 | 20 CGCTCGACTTTCTCGAAGAT    | 59.717 | 20 |
| ACAGTATTCCCCCACCCTTT     | 59.553 | 20 TAGGGAGTCACTTCCGTTCC    | 59.137 | 20 |
| GCACCTGTGGAGGTGTTATG     | 59.01  | 20 AACATTATTGCGAGCGAACA    | 59.329 | 20 |
| TGGAATCCAAAGCTATTAGACCA  | 59.977 | 23 TCATGTGCCTTCTCTGCTTG    | 60.136 | 20 |
| GGGCTGAAGCTCCTTTCTTT     | 59.962 | 20 TATTGGCCAACAAATCGTCA    | 59.93  | 20 |
| AAAAACGGGAATCGGAATCT     | 59.777 | 20 CGCTCAACAACCACAACAGT    | 59.794 | 20 |
| GAACCAATCCACAAATCGC      | 60.318 | 20 ACCATTCCATCGAAGCTCAC    | 60.081 | 20 |
| AAAACACACCCAAACCCTCA     | 60.246 | 20 TGATGTTATAGTAAGCAAACCF  | 57.922 | 25 |
| GAGAATGGAACCTGCCTCCA     | 60.195 | 20 GATGCTGAAGGAGCCAAAAG    | 59.955 | 20 |
| GAGGATTGCACACTCCCACT     | 60.12  | 20 TGCAAACCAACACTTTCTGC    | 59.888 | 20 |
| CAAACCTAGAAACCCGTGGC     | 59.609 | 20 GGACACCACGTTAGCATTCA    | 59.572 | 20 |
| TGGTCCCAATACGTGTCTCA     | 59.96  | 20 GGGTAGAGGATTGGGAAGGA    | 60.264 | 20 |
| GGAAATAAGGAGGTGTTATGAAG  | 59.323 | 24 ATCAAGAGCTCTCACCCACG    | 60.408 | 20 |
| AATTTGATCAACACGTCCCC     | 59.653 | 20 CAAGAGGTCCGTACGGAAAA    | 60.103 | 20 |
| AAATTGACACACGCATGCAC     | 60.594 | 20 CGAGCTCTCCCCTTTATCCT    | 59.805 | 20 |
| CACATGTTCAAACACGCAACT    | 59.673 | 21 GCACCTCTGTTAGCGAGAA     | 60.538 | 20 |
| CCCTTGATGCTGCGTTTTT      | 60.131 | 20 ATTTCCACCATGATTTTCGGA   | 60.133 | 20 |
| CATGAGTTGTCACTCCCCAA     | 59.52  | 20 TCCATACAGACACAACCCCC    | 60.634 | 20 |
| GGGATCGTGACCAACACAAT     | 60.645 | 20 TGTCTGGAATGGAATGTGGA    | 59.893 | 20 |
| AGCCAGTGGTCCAGAGAGAA     | 59.986 | 20 TGAACATCACATGCTCCTCC    | 59.637 | 20 |
| GCCACAAATGTCACAAATCAA    | 59.435 | 21 ATGTTACATGTTGACGCCCC    | 60.646 | 20 |
| GAATTGAGTTCATCCCGGTG     | 60.317 | 20 AATTC AAGGTCACCATCCCA   | 60.173 | 20 |
| TGCAAGAAAATGATCCACCA     | 60.049 | 20 TGTGGTTGAAAGTCAGGAGG    | 58.695 | 20 |
| TGTGCAATTTGTAAGAAACACG   | 58.796 | 22 GCACCTCAAGTTATGGTCGAA   | 60.125 | 21 |
| TTATGAAGGAGGCGTGGAAC     | 60.074 | 20 TGCCTCTGCTTACCAATTT     | 60.776 | 20 |
| GTAGCACGTCTGCACTTGGA     | 60.056 | 20 TGCAGACGAAACTCACAAGG    | 60.025 | 20 |
| TGCATTTTGCATTTCTTCTC     | 60.203 | 21 GAAGGTGGTGTGCTGTGAA     | 59.726 | 20 |
| CAACTCGCGAGCGTAAATCT     | 60.543 | 20 TCACCAAAGGAGGGGTTATC    | 60.173 | 21 |
| CGATGGGAGCATTGTTATGA     | 59.499 | 20 AGAAATGAGGGAGAAGGGGA    | 60.008 | 20 |
| CGGATTTAAGGGTTATTACCTGAT | 58.81  | 24 ACAAATGTGTTCCGCTTGT     | 58.132 | 20 |

|                          |        |                            |        |    |
|--------------------------|--------|----------------------------|--------|----|
| GGTTGAGAACAAGGGGTTGA     | 59.943 | 20 GATCAAACCACACGAGAGCA    | 59.837 | 20 |
| GAATCATACCGCTTCTCGCT     | 59.439 | 20 GGATTGCAGAAAAACCCAAA    | 59.916 | 20 |
| GGATTTGGGTTGTTTGATGG     | 60.029 | 20 AATGTGATGTGAGCCACGAA    | 60.12  | 20 |
| TCTACACCATCCACCTGCAC     | 59.551 | 20 GTTCCATCTTCGAACTCCCA    | 60.05  | 20 |
| CGGGA AAAAGTCTCACAGTTG   | 59.76  | 21 ACACGGCTGTTTACGTGGTT    | 60.474 | 20 |
| GCAACTGGCGTGATTATTGA     | 59.694 | 20 TTTTTCACGTGTAGGAGCCA    | 59.317 | 20 |
| TATGCCCGGATTTTTGTTTT     | 59.3   | 20 AACACGGTTTGATTTGGTCC    | 59.694 | 20 |
| GTGCCACCAACTTGTTCA       | 60.564 | 19 CTGCATGCGTTGTCCAAATA    | 60.665 | 20 |
| AGTTTTAAAGGGGCCTTGCAT    | 59.966 | 20 TGGAACAAATTTGGGAAATGA   | 60.153 | 21 |
| TTTGATCATAATTTTCGCGCT    | 59.709 | 21 TTTGGTCTCGTTGTATGAACAA  | 59.544 | 23 |
| AACAATAGGACCTTCAGGCAA    | 58.707 | 21 CATGGGTA CTGTTTCGCATC   | 59.002 | 20 |
| TCCGTCATATAAATGCCACAA    | 58.901 | 21 AATTCATGTGTTTCGTAATGATC | 58.891 | 23 |
| TCGTTGGTCAAGGATAGCAA     | 59.272 | 20 GTAACCGTGATCTGGCACAA    | 59.572 | 20 |
| AACACTCACGCCTTCCAAAC     | 60.156 | 20 TGACGCTGATCCCAAATGTA    | 60.073 | 20 |
| AATCTGCGTCCATTTTCACC     | 59.939 | 20 CCACGCTTGGCATTTAGATA    | 58.794 | 20 |
| CTTTTGAGGGCGCAGTCTAC     | 60.015 | 20 AAATCCCATGTTGCTGCATT    | 60.339 | 20 |
| GATGACATCAGCACACGGAC     | 60.13  | 20 GATGCAACTTCGGGAGTGAT    | 60.081 | 20 |
| AAGGCCCTTGATTTGAGAT      | 59.903 | 20 TTTGCCCCCTATGCAAATA     | 60.275 | 20 |
| GAGCAGATTGGAAGAGGTGC     | 59.957 | 20 TGGCAACTCCATGAACAATTT   | 60.359 | 21 |
| TCACAAAGAGCATGTTACAG     | 58.409 | 20 CCAAGTATTGGTGCCTGCTT    | 60.132 | 20 |
| AAAAGCTATGGGGAAGAACACA   | 60.001 | 22 TCCATCTATCAATTCATTTTATT | 57.769 | 26 |
| GAACCAGACTGCACGTTTCA     | 59.88  | 20 TGAAGTTAGGAAATAAGGAGG   | 57.525 | 24 |
| GACTGGTTTCAGGTGGTGGT     | 59.859 | 20 CCACACCCACACTCTCTCT     | 60.153 | 20 |
| TTCTCTACAAAACGAGACCAATC  | 59.732 | 25 TTTGCATGGATTAACAGCGA    | 60.215 | 20 |
| TCTCTCCCTCTCCA ACTCCA    | 59.913 | 20 CCTCACTCATTCTCGCTTC     | 59.95  | 20 |
| TGCATGTGTCGTTTGTTGTG     | 60.204 | 20 TAAAGATGGAAGGGCTGGTG    | 60.066 | 20 |
| TTCAAATGACTTGGGCATGA     | 60.049 | 20 TTCCACGAATACAAGCGTTC    | 58.773 | 20 |
| TTCATCCAAAAGCAAAGGAAA    | 59.685 | 21 TAAATTCGGGTCTTCCACCA    | 60.301 | 20 |
| CGTTGTTCCGATCCGATTTT     | 59.823 | 20 TGTAGCCCGCATGACTACAG    | 59.888 | 20 |
| CGAAGATTTATGCGGGGTTA     | 59.922 | 20 TCTCTGCAACAGCCAGAAGA    | 59.855 | 20 |
| TGGATAAACAAAATTGATGGTTTC | 59.987 | 24 GCACCGTCGATGAAAAATCT    | 60.081 | 20 |
| CCCGGAATGAATTAGTTTGG     | 59.269 | 20 TTTTCAGGAAGCAAAGCTGG    | 60.493 | 20 |
| GAGAAGCAGCGGTAGGTGAT     | 59.459 | 20 GAACTTGGGCCTGGCTATCT    | 60.599 | 20 |
| CGTCCAAAATACCTTTTATTCCA  | 59.302 | 23 TTGTCGCAATCCAATATTTATG  | 57.629 | 22 |
| ACCCAGAAACAGCACAATCC     | 59.973 | 20 TGCACAGTACAATTC CCCCT   | 60.375 | 20 |
| TACCGTGGGCAACCTAAAAA     | 60.348 | 20 AGAATAATGCAGCGAGCGAT    | 59.973 | 20 |
| GCCATGGATGCGATAAAAGT     | 59.929 | 20 GCAGCCTCAAATCCAACCTA    | 60.214 | 20 |
| ATCTAGGGGCCGAGATTTGT     | 59.925 | 20 TATGCCAAAATTGCCCTTTC    | 59.907 | 20 |
| CGATTGTTGCGTGCATAAAC     | 60.14  | 20 TGCCCCACACA ACTGATAGA   | 60.112 | 20 |
| ACCCAAGCCATGGAGTAGAA     | 59.55  | 20 TACGAATCACACTATGGGCA    | 57.572 | 20 |
| TGAAGTCTAAAGGGAGACGGG    | 60.606 | 21 TAAAGAAGGGTTGGCGATGT    | 59.569 | 20 |
| CTTAAGCAAATTGCAAGCCA     | 59.098 | 20 GGGTCCAATTTCA TTGATAACT | 58.748 | 23 |
| GGAGTTGGCACCGTATCACT     | 59.997 | 20 TTGCCCCCAACTGCTATTAC    | 59.96  | 20 |
| GCAAGTTCTTGCAATTGGG      | 59.262 | 19 CGCCTGTTGAAGCAAACAGT    | 61.401 | 20 |
| AAGCAAACATTGTTCCAGGG     | 59.971 | 20 TGGAGAGAAAGCTGGCTGAT    | 60.096 | 20 |
| GGTACCCACATGAGAATCAA     | 59.662 | 21 TTGCACATGAGCTTTTCCAT    | 59.276 | 20 |
| GGCTCAATTATTTAGGCCCAT    | 59.33  | 21 CCGTTGGAAAAAGGATGAAA    | 59.91  | 20 |
| ATTGGACCGGACCATTAGTT     | 58.24  | 20 GCCCGTGTCCATAACACAAT    | 60.646 | 20 |
| GGGGTTATCATGGGATCAAGT    | 59.895 | 21 TGCTTCTACCAATCAGTGC     | 59.992 | 20 |
| GTTCTCTTCTTCTGCCACCG     | 59.989 | 20 TGACACTGATCTTTGCCACC    | 59.682 | 20 |
| ACTGTGCCGTAAGTGTGCTG     | 59.97  | 20 CCAGAATTTCGAACCTCCAA    | 60.044 | 20 |
| GAGTTGATCGTCGGTGCATA     | 59.679 | 20 TGGAAGGCCTAGATTTGTCTTG  | 60.603 | 22 |
| AGGATCGAGAGAGAGGGGAG     | 59.906 | 20 GCAGGACTTGTAACCTTGGG    | 59.592 | 20 |
| TTTTTACCATTTTGCCCTG      | 59.805 | 20 TTGGATTTTGGCCCTTGT      | 59.429 | 20 |
| CTCGTTCCGATTCAAATGCT     | 60.214 | 20 GGCAAACAACAGTTGCAAAA    | 59.752 | 20 |
| TGGA ACTGCATGCTAAGTGG    | 59.864 | 20 CAAGAAAAACACACATGGGC    | 59.024 | 20 |
| CGCTACAAACAAGGCAATCA     | 59.872 | 20 CCTCAGCAAATGCAGTTGA     | 59.988 | 20 |
| ACACAAGGATTGTTTTCCCG     | 59.83  | 20 TAGTACCTGCATGGGGTTGG    | 60.766 | 20 |

|                          |        |                           |        |    |
|--------------------------|--------|---------------------------|--------|----|
| CCTATTGCTTAAGACGACATGCT  | 59.826 | 23 ATGCACATTGTGTCCCAAAA   | 59.823 | 20 |
| CTCCATTGGTGGAACGAGAT     | 59.927 | 20 ATTTGGACCCACCCTACTC    | 60.052 | 20 |
| TAACCAATCGAATTCCCAGC     | 59.901 | 20 TGACAAGATTCAATAAAGCCA  | 59.639 | 23 |
| TGCAATTTATATGCTTTTGCAC   | 57.955 | 22 CCAATCCTGAACTTCTCCA    | 60.042 | 20 |
| CATAACAAGTGCGCAAAGGG     | 60.493 | 20 ATGCAGTCAAAGCAAGCCT    | 60.022 | 20 |
| CCCGCAAATTCATTATCT       | 59.928 | 20 TTTTTGGTGTTTGATTGCGA   | 60.088 | 20 |
| GGAGTCGGCCATGTAGCTTA     | 60.235 | 20 TCTGTGTTCAATACCGCAGC   | 59.871 | 20 |
| TGCACAATCGATTTACGTGG     | 60.523 | 20 AATAAGCCCGTTGGAAAGGT   | 59.835 | 20 |
| TGTCAGGAAATTGTTTCGCA     | 60.234 | 20 AAATGCATCTCAATTTTTGGAT | 58.916 | 23 |
| TTGTTTCAATCAAGGCCTCACA   | 60.24  | 20 TATCACCAAGAGATGCCAC    | 58.516 | 20 |
| AAACAGCAGAGAAGCCCAAA     | 59.993 | 20 ACGAGAAATGGAGTGGTTGC   | 60.119 | 20 |
| GAATTCGGGGTGTGTTGAGA     | 59.91  | 20 CCAAGAGTCCAGAACCAGA    | 60.229 | 20 |
| TGCGTTGTTTTACCATTGGA     | 59.969 | 20 CTGTACAAAAGCTATGCTTTCA | 59.901 | 25 |
| CTCGTCCAGGACAAATCCAT     | 59.927 | 20 GAGGTACCCTAGGCGAGAGG   | 60.225 | 20 |
| CATTGCCGCAAGATCAAGTA     | 59.833 | 20 TGGTATGCTGCTTCTCCCTC   | 60.362 | 20 |
| ATTCTAGCACCGTGAAACCG     | 60.132 | 20 GTCGATGGGGCAGAAAAGTA   | 60.074 | 20 |
| TCCAACCCCATTTACAAAA      | 60.024 | 20 TTTTCGAGTATCGCTCCGACT  | 59.978 | 20 |
| GTGGGTTTACCTAGAGCGCA     | 60.27  | 20 CGATTTGATGAGAAGTGGCA   | 59.799 | 20 |
| GGAATGAAGTATGTGGAGGAAG   | 59.473 | 23 TCTCTCAGCATTAGCCCCAG   | 60.495 | 20 |
| CGCCCTTTTAGTTAAAACCTTG   | 59.246 | 22 AAATAAGGAGGTGTTATGAAG  | 59.323 | 24 |
| GCTGGAATCCTGATGATGCT     | 60.189 | 20 AACTTTGCAGCTTCTGAGCC   | 59.763 | 20 |
| ATATAGCCGTTGGGCTTGTG     | 59.982 | 20 TTTGAAGGAAGATTGCGAGG   | 60.323 | 20 |
| TTCCTCCAGCGAGTCGTAGT     | 60.012 | 20 ACCAATGCGGATGCTCTAAC   | 60.103 | 20 |
| TGTGAGTTGCCACTCTCCAC     | 59.872 | 20 GAAGCCCAAAGATGAACCAA   | 60.051 | 20 |
| AGCCATGAATTTACCAGCA      | 61.588 | 20 CCTTCGTCACCAACGAAGTT   | 60.149 | 20 |
| TGATTCTTGATGGAAAGGCA     | 59.2   | 20 ATTGAACTCAAAGCCCTTGC   | 59.316 | 20 |
| GGCCAGAACTGCCATAAAA      | 60.074 | 20 AGGTGGCAGGAAGTTGTACC   | 59.065 | 20 |
| CCTCACAGGCAAATATGCAA     | 59.688 | 20 TTTTGGAAATCCGAGATGAGG  | 60.006 | 20 |
| CGCCAGCTCAATTTTATTCC     | 59.682 | 20 GGTGAAGCATGCAAAGATGA   | 59.805 | 20 |
| CTTGAGCAATGTGGAGCTTG     | 59.591 | 20 CCTAAAGTGACCCATTCCA    | 59.784 | 20 |
| TTAGGCTTCCCATCCCATA      | 59.523 | 20 GGATGGAGAGATTGCAGCAT   | 60.189 | 20 |
| TTTCGCTCTGATATCCCCT      | 59.486 | 20 CATCTATGCTCGCACATTCCG  | 60.388 | 20 |
| TATTCGCGTATGTAGCCCA      | 60.167 | 20 CTCGCAATACTTCTGCCTCC   | 59.978 | 20 |
| TCTCTCTGTTACACACACGC     | 60.343 | 20 TTATCAAGCTTGTGAGCC     | 60.214 | 20 |
| CCACAAAGCTCTTGGAAATAGG   | 60.122 | 22 AGTTGTGATGCAATTTGAGCC  | 60.133 | 21 |
| TAGTATTGGAGGTTGGGGGC     | 61.061 | 20 GGAGAAGGTGATGGGGCTAT   | 60.293 | 20 |
| GATTCTGCACAGCAATGTGG     | 60.272 | 20 CCCTGTAACAGTTGGTGCCT   | 60.028 | 20 |
| CGTTCCTACTTTGTGGTGA      | 58.621 | 20 CCCTTGATTTAAGAGATCCAAT | 59.004 | 23 |
| CAGTATCGGGAGTGAGAGGG     | 59.673 | 20 TTCAGAAATGCAATAAATTCCC | 59.11  | 22 |
| GATTTGGGGTTTCGGAGATT     | 60.131 | 20 CCGGCTTGGCAGTAATAAAA   | 60.089 | 20 |
| CCCTACCCATTTACCCGTTT     | 59.939 | 20 TGTTTCGCACAGGTGAATCAT  | 60.12  | 20 |
| TTGAAATGAATGGTCGTGA      | 60.049 | 20 GGCCGTTTGTGTTTATTGGAA  | 59.81  | 20 |
| TCAAATCCTAGCCACACACG     | 59.716 | 20 TCAAATAGGTGGGTGGTGGT   | 60.088 | 20 |
| TGCCAATTTAAGTTCGAATGAG   | 59.253 | 22 TTCTCGCAGAGCATGTGTAT   | 57.013 | 20 |
| AACCGGTTTGACCGATTTTC     | 61.08  | 20 TGGTGCAAATTGTGTTGAGAA  | 60.142 | 21 |
| TGCACCGGATAATACAGCAG     | 59.712 | 20 GATGCCCTAGGGACGTATCC   | 60.682 | 20 |
| AAGATCAGCTTTTCCACCC      | 60.443 | 20 ACCAGAATAGCCCAGTGGTG   | 59.989 | 20 |
| AGTTTATATCAATAGTTTTGTGTC | 57.108 | 26 TGTTTGTGTTTTGACGTTTGC  | 59.665 | 21 |
| GCAGGTGTAGGACTGGAGGA     | 60.261 | 20 GACCGCAGGATAATCCAGAA   | 60.036 | 20 |
| TTCAAGGAGTTTGGAGGGG      | 59.255 | 20 TTGTTAGTTTTGGATGGTACGA | 59.817 | 24 |
| TTCAATTGCTGCTGCAGTTTT    | 59.614 | 20 TTTTTCGAGGGAAAAAGCAT   | 59.699 | 20 |
| TTCAACCACGCTTGATAA       | 59.123 | 20 TGTGATCAAAGAAGAAAAATG  | 59.549 | 25 |
| GGCAATGGCTATTTGGCTA      | 60.061 | 20 TAGTAAACCGGACGTGGCAT   | 60.386 | 20 |
| AATTGTACAGTTGAGGCGG      | 59.993 | 20 TATTGGAAAGGGATCTGCCA   | 60.405 | 20 |
| GTTTCGTACCGAACACACC      | 60.277 | 20 TGGTGTCCATCCCTCTCAAT   | 60.326 | 20 |
| CAAAGCTCAGCCGACCTAGT     | 59.639 | 20 AGCACGTATCGACATTGCTTA  | 58.478 | 21 |
| TGCAAGAAAAACAAGCCCTC     | 60.365 | 20 GTGCTGCGTCTCATGTTGAT   | 59.87  | 20 |
| TTGTCGCTGGACACGATAAG     | 59.864 | 20 GGTAAATGTCGAGGCGTACT   | 60.162 | 20 |

|                           |        |    |                         |        |    |
|---------------------------|--------|----|-------------------------|--------|----|
| TCGACTGAAAATTTTGGCTAATC   | 59.637 | 23 | CCGGAGTGATGCAGTAGTTG    | 59.314 | 20 |
| ATTTCCCTTATGCCACTCCC      | 60.152 | 20 | GCTCAATTTTAGTTGTGAAATC  | 60.065 | 26 |
| CACGAGCTGTTAATCACCACA     | 59.773 | 21 | TGCTCTCAAGAACACGCACT    | 59.776 | 20 |
| TGGTTAACTCAATCTCAGCCG     | 60.256 | 21 | CGCCTCTAAGAAAACATAACTC  | 59.482 | 23 |
| TTAATCAGATGAGGGCAGGG      | 60.029 | 20 | ACAATCGTATGGTCTCCCCA    | 60.195 | 20 |
| TGGACCACACCTATCATAACCA    | 60.11  | 22 | ATCCTGTATCGATTATCATTTTC | 58.075 | 25 |
| GAACTCTGTGGGCGTCAGAT      | 60.269 | 20 | TCTCAGACAAAACCTTCGCC    | 60.375 | 20 |
| TTGGATTGGACATTGGGTAGA     | 60.177 | 21 | GCTGATGTGCAAACAAAGAAA   | 58.956 | 21 |
| ACACTCCTGTATGTAGTGACACG/  | 60.034 | 25 | TGGCTAGAGAGATTCCACGA    | 58.543 | 20 |
| TTTGGTTTTTGGTTTGCTCC      | 59.953 | 20 | ATCAAGACCGGCCATTCTAC    | 59.009 | 20 |
| TCACCAATTTGAATGGTTATCA    | 57.873 | 22 | CCCAGTGAATGATAAGGGGA    | 59.744 | 20 |
| CGCACGAGTTAGCATAGCTG      | 59.799 | 20 | CGATATGTTACGTAGGATGACC  | 59.374 | 24 |
| TGAGAGTTTCTGCGTTGGTG      | 60.025 | 20 | AATGTGTTCCATTGCGGTTT    | 60.235 | 20 |
| GTTGGCTTTTTGTTGCCACT      | 60.154 | 20 | CCTGAAATCTCAATAGCCCG    | 59.662 | 20 |
| CATCTTGATGTCCCCATTGA      | 59.296 | 20 | ACGAAAATCAAAAAGCCCAC    | 59.067 | 20 |
| GCTTCAGTTCTGTGGCATCA      | 59.992 | 20 | CAAAGCACAAACAGGGTCCTT   | 60.149 | 20 |
| CCGCAAACACCTATTAACCG      | 60.368 | 20 | TTTTCTACGTCAGCACACGC    | 60.058 | 20 |
| TGGATTTAGCCGATTCCAAG      | 60.031 | 20 | TGATTGGGTGCAACTGAGAG    | 59.831 | 20 |
| TCTGTGCTAACTCCGTGTGCG     | 60.049 | 20 | ACCCGTTCCACAACCTACTG    | 59.884 | 20 |
| CTTTGCACTCTCCAGCAATG      | 59.591 | 20 | TCAACAGCCAGCATTGTTTC    | 59.847 | 20 |
| GGTGAAGAAAGTGGGCTTCA      | 60.232 | 20 | CTGCACACACAAACCCTCAC    | 60.203 | 20 |
| AAGCAGTGGAACGAGGAAGA      | 59.989 | 20 | GAATGTCGTTTCAAATAAAAC   | 60.107 | 24 |
| CGCATTTTCATCTGCTTTTCA     | 59.953 | 20 | CATTGCTGACATGATTGCCT    | 59.679 | 20 |
| TTTTATTGGGGGTGCAACAT      | 60.053 | 20 | CCGAAAAGGCGATAAAATGA    | 60.033 | 20 |
| AAGCCTGGGCATTACATTTG      | 59.96  | 20 | TGGGTATGGGCTTAAATGC     | 59.795 | 20 |
| CACCGAATATTCCCAACTCAA     | 59.809 | 21 | AATTGTGAACAGGTGGCAAGT   | 59.511 | 21 |
| CCTTCCCTTAAGCCCATCTC      | 60.032 | 20 | TATCACCCCTAGCTCCCCTGA   | 59.647 | 20 |
| TAGCTCTGAGGCTGGTGCTT      | 60.299 | 20 | ACAAAGTGATACATGCGCGA    | 60.288 | 20 |
| CCACTTCTCCATTTGCATT       | 59.933 | 20 | ATTGCCTCAGGCGTAGTCAT    | 59.723 | 20 |
| CCGTAGCTGTTATTGATGGAAG    | 58.787 | 22 | TCTTTTCGGCAACCAATTTT    | 60.053 | 20 |
| CACCAGAATTTAGGCGGAGA      | 60.206 | 20 | ATGGATTTTCCCATGAGGTG    | 59.605 | 20 |
| CCGAATATCCCCAACTAAAA      | 60.023 | 21 | AATCCCAAATCCCATCACTG    | 59.605 | 20 |
| GTCTGCGTCGTCAGAAGGT       | 60.453 | 20 | TACCCATCTCTTTGCTGTGCG   | 58.874 | 20 |
| CATCTGAGCATTTGCAAGGA      | 59.948 | 20 | AAGGTCCGTAGTCCATCACG    | 59.989 | 20 |
| TTTGGCAACAGACAATTTGC      | 59.712 | 20 | TTCTTCGCGAGCTTCTTGAT    | 60.235 | 20 |
| CACAAGCTCGGAAGGGTAAA      | 60.241 | 20 | TAGGCTCCTGGTTTTTGTGC    | 60.249 | 20 |
| GCTGCAAACTGGAGGAGAG       | 60.134 | 20 | AGCGACGCATGACCTTATTC    | 60.243 | 20 |
| ATCGATTAGGTCGCACAAGG      | 60.096 | 20 | CTAGAAGGTTGATGGCACGG    | 60.647 | 20 |
| GCGCTGTAACCAACAACAGA      | 59.911 | 20 | CGGCTTATAGTCCCCAATGA    | 59.916 | 20 |
| AACAATGGCTTTAAAGGGGG      | 60.177 | 20 | ATGGGTTATCACAGATCGC     | 59.78  | 20 |
| TCTGCAACTCGACATCAACG      | 61.023 | 20 | CGATTTACACACGCGCAC      | 59.859 | 18 |
| TACCATTTTCGTCCGTCACA      | 59.964 | 20 | CGCGGAGTTTAAGGAATGTT    | 59.225 | 20 |
| TGGTTGATTAGATTACCGCTACA   | 58.71  | 23 | CCCGATTGACATCCCTAATG    | 60.148 | 20 |
| TGTCTCACGAGGATTTTCGAT     | 59.685 | 21 | AAGATTGTGCCGATGGTGAT    | 60.348 | 20 |
| AAAAGGGCCTATATCCAATATGA/  | 59.2   | 24 | AGGCTGAGACTGAAACCACG    | 60.444 | 20 |
| CAACTGCTCACCAGACATTGA     | 59.889 | 21 | GTGACAAAAGGGCCTGAAAA    | 60.088 | 20 |
| GGGTTATCATGGGATCAAG       | 59.055 | 20 | TGAGTAGAACAATCGTGCGG    | 59.864 | 20 |
| AACGCAGATCTGATGGCAC       | 59.81  | 19 | AGAATTGGGAAGGGTCCAC     | 60.169 | 20 |
| AGCCGTGTACTCTGCCTGAC      | 60.476 | 20 | ATGGAAAATCCCCAAATTCC    | 59.83  | 20 |
| AACAATGCAGTAGCTGGTTGG     | 60.183 | 21 | TCAAATGACAAAACGCCAT     | 59.016 | 20 |
| GGTGATTTTTGATTATAGGAATAT/ | 59.773 | 27 | AAAAATCCGTCACTAAATGGG   | 58.802 | 22 |
| GGAACAAAGACACCATTGATAAA   | 59.311 | 24 | TAGTACGCGGGCCAATTAGT    | 59.63  | 20 |
| TTTTGATAACGTCAAATCCAACA   | 59.394 | 23 | CAACGTGAGTTTGCCAAGAA    | 59.881 | 20 |
| TAAATGCCAATATGGGGGAA      | 59.976 | 20 | TGTGTTAACCTTTGGCTCCC    | 59.971 | 20 |
| TTTCATTGCAATATTCTTCGACA   | 59.616 | 23 | TATGTGGATGAAACCAGGGG    | 60.572 | 20 |
| TTTGTGCCTAAAATGCCCTC      | 60.074 | 20 | GTTGGCATTCAAATCAACCA    | 59.375 | 20 |
| CACTCCCAACTCACAATCCA      | 59.52  | 20 | AATTGTCTTGCTTTCCAGCC    | 59.316 | 20 |
| TATTTGCTGTTGTGGGGTTG      | 59.439 | 20 | TGGGATGGACTTGAATCAT     | 60.135 | 20 |

|                          |        |    |                        |        |    |
|--------------------------|--------|----|------------------------|--------|----|
| ACAAATGAACACTCCGGCAT     | 60.384 | 20 | TTTAAGGGTTATCACCTGATTT | 58.625 | 25 |
| AGGCAGAAAAGAGGAGGGAC     | 59.817 | 20 | TCAATCTCACGCACTCAACC   | 59.837 | 20 |
| TTGGAATGAATTTAAGGCGG     | 59.901 | 20 | TCCCATATTGCCACCCTTTA   | 60.146 | 20 |
| CTCGTTAGCAAGCAATGCAC     | 59.638 | 20 | AGGCTGGCTCTGATCTTCAA   | 60.096 | 20 |
| GAAAGAAGAGGGCTCCACAA     | 59.405 | 20 | TTTGAAGCATGTGTTAATTGCC | 60.006 | 22 |
| GCTGAAGAGGTCCAGCAATC     | 59.957 | 20 | AATGCACAAACAATCCACGA   | 59.972 | 20 |
| TTCATGTGAGGATATGGCGA     | 60.033 | 20 | CTACAATGGGCAAGGCATTT   | 59.96  | 20 |
| CAATGTCAGAGTGGTGGTGG     | 59.997 | 20 | TCCAGACACTGGGTTGTTGA   | 60.129 | 20 |
| TCTTCTCGCATACCAAAGGT     | 57.422 | 20 | ACAAAACCTCAGGCCACTTACG | 59.295 | 21 |
| ATTTGCGTGGGAATAATGA      | 60.153 | 20 | AAATCCAGAAGCAATGCCTG   | 60.214 | 20 |
| CCCAAGAAGCCCTTCTCTCT     | 59.95  | 20 | TGAAGCTGCATTCACTCTGC   | 60.296 | 20 |
| AAATGGATGCTGATAAATGGA    | 57.059 | 21 | TTTTTCGGGCTCCAACTT     | 59.671 | 19 |
| CGAGAGAGCTTTTCCTTGACA    | 59.743 | 21 | ATTGCCTCCTTTTTCATGAGCA | 60.744 | 20 |
| CAAACCTTAAACTGAGCGG      | 59.741 | 20 | GGAATTTTCGGGTGAACCT    | 60.166 | 20 |
| TTCCCTCCCTCATTTACC       | 60.124 | 20 | TTTGCATCGCATTTCATCATT  | 60.043 | 20 |
| TCCGTCGTTGTAGGAAATACG    | 60.004 | 21 | TTAACATCAAGGAAAGCCCG   | 60.067 | 20 |
| TTCTCTGTGGTGAAGGGAC      | 60.088 | 20 | ACTTGCAGGTTCTTGGAAT    | 59.74  | 20 |
| TGCAACGTGAGTAGTGACTION   | 60.104 | 21 | AGGTTGGGAGTTGGCTAGTG   | 59.208 | 20 |
| AAGGTACAAGTGGTTCCCC      | 60.088 | 20 | AGCTTGTGGAATTGTTTGGC   | 60.118 | 20 |
| TACCCAGACCCAAAGCAAAT     | 59.429 | 20 | CCGCTTCTACAGTACTCCG    | 59.891 | 20 |
| CAACAAAAGCGTGTTCATGG     | 60.149 | 20 | GGGGTTTCTGAGAGGGTTTC   | 59.912 | 20 |
| GACCGACGAGATAGCGAGAG     | 60.119 | 20 | AATGCCATGTGACAAACCAA   | 59.823 | 20 |
| CACCACAAAGCAATTGAAA      | 59.561 | 20 | TCGGGAAAATTTGTGGTTGT   | 60.206 | 20 |
| TGGGTGCCATTTCTATCACA     | 59.924 | 20 | CTGAAATGGGGTTTGAATGC   | 60.309 | 20 |
| TTAATGAGGGGCCACAAAGA     | 60.439 | 20 | TTGGCAGAGGTGTGAGAGTG   | 60.022 | 20 |
| TGATCTGGAAGTAAGGAATCCTA  | 59.657 | 25 | CTTTCAGGCGAGGAAGAGAC   | 59.162 | 20 |
| TCATTTTCTAGGTGAGGCG      | 60.206 | 20 | TCTCCACAAGTTCCCGTTTC   | 60.088 | 20 |
| TGGGGCTCTTGAGTTCTGTT     | 59.844 | 20 | TGGGAATATTGGCATTITTTGA | 60.137 | 21 |
| GGGAAAACCGATGAGATGA      | 59.871 | 20 | AGCAGCAGCAAACCAAGAGT   | 60.201 | 20 |
| TTCCCCAGCTCAAGACCTAA     | 59.807 | 20 | TTTCTGGTGAAACCGACCTC   | 60.088 | 20 |
| AAGTTGCATGCCATTTACCA     | 59.041 | 20 | GGACGGATGGATTTGTAAGC   | 59.391 | 20 |
| CTATTATGCCCTGCCTGAGC     | 59.829 | 20 | TCAGCCTTGTTTGATGCTTCT  | 60.008 | 21 |
| GGCTTGCTGACTTGGCATA      | 59.964 | 19 | GGTCCC CGCTCATAAAAT    | 59.776 | 19 |
| CCAAAATTGCGTGCAAAGTA     | 59.742 | 20 | TTATGAAAACCGCAGCAGTG   | 59.872 | 20 |
| GGATTTTGGATTGGTCGAGA     | 59.871 | 20 | ATTATCATTTCCACCGCCAC   | 59.651 | 20 |
| CAATGTTGGTGACGTCTTGC     | 60.16  | 20 | AGTTGTGGGGCTGGAGATAA   | 59.55  | 20 |
| TCACAGCTGGCATAACCAAG     | 59.864 | 20 | GCCTCTGATGCAAGTCCTTC   | 59.957 | 20 |
| TCACGGATTCACCAACTGAA     | 60.088 | 20 | ACGATCCCATATTTGCCAAG   | 59.784 | 20 |
| TTGCAAACCTTAATTGGTGCG    | 59.742 | 20 | CCTCTGATGCCGGAACCTAT   | 59.15  | 20 |
| CCTATATACGGGCATGGCATA    | 59.688 | 21 | GGTCTTCGGGTCTGGGTATT   | 60.19  | 20 |
| TATGAGTCGCACACAATGCC     | 60.697 | 20 | ATGTCGGCATTCAAGTTTTT   | 59.434 | 20 |
| ACTGGGTTGGTAGTTGCCAG     | 60.028 | 20 | TCAAAGCTTGAAGGCCTAGC   | 59.73  | 20 |
| AGAATTTCAAGGTAATGGGGA    | 57.54  | 21 | TCCACAAAAGATCATGCCAA   | 60.049 | 20 |
| GCACGTCTCTCGGACATACA     | 59.862 | 20 | GGTGCAAAAATTATGTGGGCT  | 59.829 | 20 |
| TCAAACCTACCACCCGAACA     | 59.021 | 20 | TTACGTAAAAATGGGTTATTAT | 57.411 | 26 |
| TTTGCACCTAAGAGGAGTTTTGA  | 58.249 | 23 | ATATGGGACGTCCAAAACG    | 59.685 | 20 |
| TCCACCGACAAACAACAAAA     | 59.981 | 20 | CCAGATCTAATGGCCTCGTC   | 59.653 | 20 |
| TGTTTAGGCCCAAATGGAAG     | 59.931 | 20 | TAGGCGGATTGGTTTTTTGAC  | 59.938 | 20 |
| GAAGCTAATGCATTCTGTGCG    | 60.003 | 21 | ACCTTCCATAGGTTGGGAGC   | 60.328 | 20 |
| GTTAAAGCCAAAAGTCGGGC     | 60.958 | 20 | GAGAAAGAGTGGGGGAGGTT   | 59.534 | 20 |
| ACAGCAGCAAGCAATAACGA     | 59.638 | 20 | TTGTGAGAAGCCAAAGCTGA   | 59.716 | 20 |
| CTCTTCCAGGAGACGAATG      | 59.797 | 20 | ATCATTACTGGCCATGGGTG   | 60.603 | 20 |
| TTGCACTTCTGGAGAACCT      | 59.844 | 20 | TGTATTCAACCAGCTGGCAA   | 60.257 | 20 |
| GGATCCATTTTGTGCGAGTT     | 59.939 | 20 | TGGCATAGTCCTGAGTGGTG   | 59.701 | 20 |
| CACACATGAAAAGATCTCCAA    | 59.971 | 22 | TTCTTCTATCCCAATTTGCTTG | 59.175 | 23 |
| ATCGCTCCCAATTATGGACA     | 60.296 | 20 | TCCCATTTCTTTTGTCCCA    | 60.28  | 20 |
| ACAGCTTTAGTGGGGCAAGA     | 59.875 | 20 | AGAAATCCCCCTCCTCATGT   | 59.755 | 20 |
| AACACATTTCTTCAACATTCATCA | 58.541 | 24 | TTTTCTTTTTGCAGGATATTCG | 58.439 | 22 |

|                           |        |    |                         |        |    |
|---------------------------|--------|----|-------------------------|--------|----|
| TCAACGGTTCACATCGGTTA      | 59.964 | 20 | CATAGGTCACCGAATTCCATC   | 59.259 | 21 |
| TGGAGAACTCATTCTTACTGCG    | 59.517 | 22 | CTTGCACTGCGTAATGGAGA    | 60.011 | 20 |
| ACGAACACACACGCACTCTC      | 59.948 | 20 | AGGGAGGAATAGAGCCGAAA    | 60.166 | 20 |
| GGCCAGATTTTCGTCCTTATT     | 60.286 | 20 | CAATCTGACGGCCGATATTT    | 59.923 | 20 |
| TGTTTTGCACGTGAATAAGCC     | 59.735 | 20 | AACGGTATGCTCGGATTTTG    | 59.96  | 20 |
| GGCTTAGCTGTTTCGTGGTTC     | 59.882 | 20 | TTTTCGTTCCTTCTCAATTTTCG | 58.542 | 22 |
| CGCCGACCAATCATGTAGA       | 60.637 | 19 | ACCAAATATTAGGGTTATCACAA | 58.348 | 24 |
| GGTGAAAAACTGATGTGGC       | 60.362 | 20 | TTTGAGTTTGCATCTAAGAAGG  | 59.828 | 24 |
| ACCCAAAGAAGAAAGCACCA      | 59.711 | 20 | AGAGGGTGAGAGGGGACCTA    | 60.066 | 20 |
| TCTTTGACGTTAATTTTCGAGA    | 60.115 | 23 | CGTAGATCCCTGTCTGGGTAG   | 59.569 | 20 |
| CCTGAAAGAATTTGGGGGAT      | 60.124 | 20 | AGGTTGTGGATTTGTGAATAAA  | 58.883 | 24 |
| ATCTCTGCCCCCATCTCTCT      | 60.179 | 20 | GACCGGCCGTAATAATGGTA    | 59.682 | 20 |
| CCCCTTTTATGGCCGACTA       | 59.953 | 20 | GATGTTTTTCCAATGTGGGG    | 60.029 | 20 |
| CATGTCGTGTCTGTGCAGAA      | 59.265 | 20 | TCGTCTCACGAGCAAAGCTA    | 59.888 | 20 |
| TTTTCTGCCTTGTGACACCT      | 59.844 | 20 | CCTTTTTTCATGGTGGTTGT    | 59.688 | 20 |
| TTGTGTGATCGAACCACGTT      | 60.008 | 20 | GGCAGCAATCAATTGGAAAT    | 59.907 | 20 |
| CGGCATCGATAATGGACACT      | 60.884 | 20 | GTAACCTGCCACCCCTGATA    | 59.813 | 20 |
| TTATCATCCGAAGAATGCCG      | 60.932 | 20 | TTTTCGAACAACATTGCGAC    | 59.712 | 20 |
| TCCGCAATTAACCTGGAAGG      | 60.067 | 20 | TGGGACCCGTCTTCTTATTG    | 59.926 | 20 |
| AGGGCTATGGGTGGTAGGAC      | 60.212 | 20 | TCGTAGTAGGAGCACGAAAAC   | 59.941 | 22 |
| CAATAAAGCCCGTCACGTTT      | 59.996 | 20 | GGATGCCAGAATCCATGACT    | 59.893 | 20 |
| GGCAGCCGATTGTAGTGAAT      | 60.103 | 20 | CCCCCTAACATATCCACGTTT   | 59.952 | 21 |
| AGCCGTGAGATTTACTTTTTAACTT | 57.02  | 24 | TCGGAGTTCACAAGTTCGAC    | 58.854 | 20 |
| GCGTTTTGACAATATATAAGTGTT  | 59.394 | 27 | AACGAAAACCACACGGGTTA    | 60.262 | 20 |
| CCAAACCAAACTCATCAACC      | 59.322 | 21 | GGGCCCATCCTATCACACTA    | 59.773 | 20 |
| TCTCCAACACACCTTTTCC       | 59.943 | 20 | ATGGGGGTGGGAGTTTAAGA    | 60.549 | 20 |
| GGAAAAAGGAAAGGTGAGGG      | 59.912 | 20 | GGGAAAACCTCCCACCAAAT    | 60.032 | 20 |
| CAACTCCCCCGTAGTTTTCA      | 59.964 | 20 | GATCCACTTGCCTTGATGCT    | 60.226 | 20 |
| TGGTGTTTGCTGGGATTTTT      | 60.344 | 20 | ATACATGCGTGTGCGTTCAT    | 60.026 | 20 |
| TCGAGCTGAACGAAAGAGGT      | 60.134 | 20 | TTACCAATCCGGGTGATGTT    | 60.051 | 20 |
| CCCCACCTTAGCGTTAAACA      | 59.99  | 20 | CCCTGCTCCACTTTCTCAAT    | 59.284 | 20 |
| AACCCAAAACAAAATGCATGA     | 60.216 | 21 | TCTGATTTGTGCTAACCCTCG   | 60.256 | 21 |
| GGCAAAAACACCAACGAAAT      | 59.845 | 20 | TGATTGACTCATATGCCCGA    | 60.033 | 20 |
| ACTCAACTCTGATCGGTGGG      | 60.112 | 20 | CATCCAAGAACCACAAAGCA    | 59.691 | 20 |
| GGAGATGGAGGGTTCAAGGT      | 60.314 | 20 | TCCGGTAGGGTGCATAAAAC    | 59.823 | 20 |
| ACAAAAATGCCCTTGAATGC      | 59.945 | 20 | TGGATTGAAATAAGGGGTCTG   | 59.756 | 20 |
| TGATATGGTGTGGGAGGTG       | 59.215 | 20 | GAAATCAGCACGAATCACACA   | 59.713 | 21 |
| AAACCAGAGAAATCCCCCAC      | 60.169 | 20 | AAGAGGAAGAGGCAGAAGGG    | 59.95  | 20 |
| GCTCAATGCGTAGGCTTCTC      | 60.125 | 20 | AGTCAACCATGGCGTCTTCT    | 59.727 | 20 |
| AAACCGCACTTTAGCTCGAA      | 60.018 | 20 | GACCGCCTAGATTTGTTGGA    | 60.074 | 20 |
| CCCTTGATGCTGCGTTTTT       | 60.131 | 20 | GCTGAGCGGATTTAATCGTG    | 60.742 | 20 |
| AGTTTCGATTGATTGACGG       | 60.074 | 20 | TGCAAAACGAGCAAGTGAAG    | 60.172 | 20 |
| CGTGAGGGCCTAAGAATGAC      | 59.694 | 20 | CGAGACATGGGAGCTCTAGG    | 59.966 | 20 |
| TTCCAACAATCTCAGCATCA      | 57.743 | 20 | ATGGGGAGCAGGAAGGATAC    | 60.293 | 20 |
| AAGTATTGATCGACGTGGGA      | 58.019 | 20 | ATCTGCGAGGATCTACGGAC    | 59.268 | 20 |
| GCACACAAGTTTGGGAGGAT      | 59.973 | 20 | GCCGTTGTGTCGTTTTCTTT    | 60.154 | 20 |
| CTGCCCTCCCTGTTCTTACG      | 59.869 | 20 | TCTCATCAGCAAGGCCAGAT    | 60.914 | 20 |
| CCCTAATCATCTCCCCTCT       | 59.35  | 20 | GGTCAAATCGAGAACAACCC    | 59.386 | 20 |
| CCTAGAGCACACTCGAAGGG      | 60.005 | 20 | TTGTGGATGGTGCATTTTGT    | 59.823 | 20 |
| CCTCCTCCATAGCAGCAAA       | 60.344 | 20 | CATCGGTCCAGAGAATCTGAG   | 59.812 | 21 |
| TGATCAAAATCCACACCTCG      | 59.496 | 20 | TTCAGGTTTCCACCTTTCTTG   | 59.201 | 21 |
| CAGAGTTTGTTCGCAACCC       | 60.668 | 20 | CCATGGCCAAGAGTCTTATCA   | 60.081 | 21 |
| GCACTGGTGGAACTGGATT       | 59.973 | 20 | TGCTTCCAATGGTTGCATAG    | 59.688 | 20 |
| TCCACCTCTCTGCTCCACTT      | 59.986 | 20 | TTGGGTGATAGGCCCAGTAG    | 59.948 | 20 |
| GAACCCAAACCTCAAGCTCA      | 60.232 | 20 | TAGCCGACCCCAATTTAGTG    | 59.953 | 20 |
| GGAAAGCGAGGTAGGCTTTCT     | 59.983 | 20 | AGGTAATTTTCGGTCGCACAC   | 60     | 20 |
| AGCCAGATTCTTGGTGGGA       | 59.803 | 20 | CCACCACCATCTTACAAGCA    | 59.566 | 20 |
| CCTTTCTCCATGGGCATCT       | 60.019 | 19 | ATCCTCAATAGCACCAGCGA    | 60.765 | 20 |

|                          |        |    |                       |        |    |
|--------------------------|--------|----|-----------------------|--------|----|
| TTGAGATTGGTCGACTGCTG     | 59.984 | 20 | TGCACCTTGAAGTTGTGGTT  | 59.187 | 20 |
| TGATTGGACAAAACGACCAA     | 59.941 | 20 | GTTGAAGGGGCTGACAACAT  | 59.973 | 20 |
| GTTTCTCTCACCTCCTCCCA     | 59.228 | 20 | AACATGATGAAGGTCCGAGG  | 59.927 | 20 |
| AGGGCCCAACAATTTCTTCT     | 59.94  | 20 | TGTGCTTTGAGCAACTCCAG  | 60.175 | 20 |
| GCATATGCATGGTTCTCACG     | 60.104 | 20 | GCAGTCCCAAAACAAGCAAT  | 60.118 | 20 |
| TGGTCCACCATTCTTTACTGA    | 59.471 | 22 | TCAATCCCCCACCACCTTA   | 60.162 | 20 |
| TGAAATTAGATTAAAGAAAAGAT  | 57.681 | 27 | ATAACGGGATTGAAGGAGGG  | 60.145 | 20 |
| TGGGGTGAATCAGTTCAACA     | 59.935 | 20 | GCCTACATCCACTGGTCAAG  | 58.158 | 20 |
| GGAAATAAGGAGGTGCTATGACA  | 59.515 | 23 | TATCATTGTTTCGCGAGCAG  | 59.976 | 20 |
| TGCAGCTCAAAAAGACAGTCC    | 60.565 | 21 | GGAGGCTGCTGACAAGATTC  | 59.957 | 20 |
| CACTTTTTGTGAAACCCCTCA    | 59.994 | 21 | GCCAAGTGCTTCGTTTTGTT  | 60.292 | 20 |
| AGGGGATTCTGCAATTTTC      | 60.265 | 20 | TTGGGACCCCTTTCACATTA  | 60.162 | 20 |
| AGTGGCTGGACTAAACCACG     | 60.171 | 20 | GATCAGAGAAAACAAGCCGC  | 59.962 | 20 |
| TCCCCATTAATCCCATCAGA     | 60.088 | 20 | GACCCCACTTTTCCTTCCAT  | 60.169 | 20 |
| TGCTACTACTGGCTCCGGT      | 59.898 | 20 | TGGAGTGTGGATCTGTTGC   | 59.682 | 20 |
| TCCGTGTGCGTATTCTTGAC     | 59.722 | 20 | GCCCAAAGTTAGATGTGACCA | 59.985 | 21 |
| TTTACATACAAGGAGACAGAATA  | 57.852 | 26 | ACGAAAGCGGAGTTGAAAGA  | 59.993 | 20 |
| ACTTGTCAATGCCGGTAAGC     | 60.14  | 20 | TCATTGCCATCGGAACATTA  | 59.891 | 20 |
| TCACAACGGGGTCAAATGTA     | 59.816 | 20 | CCCTCCTCTCTCTCCCTC    | 59.489 | 20 |
| ATCAGGCTCGAGTCCATGTC     | 60.231 | 20 | ATGACCGATGGTCGTGATTT  | 60.203 | 20 |
| CGGCATGAGATGAGATGAGA     | 59.9   | 20 | ACTAGCAAATTTCCGGACGA  | 59.708 | 20 |
| AACAGAGCAAGACGAGGCAT     | 60.02  | 20 | CTCCTGCCAGTCTTCAATCC  | 59.803 | 20 |
| GCCAAGGAAAGCATGGTAAA     | 60.074 | 20 | GCAGAGGTGTATTCTGTTGCC | 59.755 | 21 |
| AGCCAATCACTAACCAACACG    | 60.045 | 21 | ACTAATCCATGCTGCTGGC   | 60.243 | 20 |
| TCCGCCCTCGTGTTTTATTA     | 60.448 | 20 | TTGCAAGACATCCAACATCA  | 58.62  | 20 |
| CAGCATCCTTCATTTCCGTT     | 60.074 | 20 | TGACAATCACTTGCCACCAT  | 59.967 | 20 |
| CATTGCCATTGCAGAAGCTA     | 59.976 | 20 | CCCTGTGCAATCACTCAAAA  | 59.691 | 20 |
| GTGTCAGAGGCGGTTGTCTT     | 60.307 | 20 | CCCTCATTTGTACGGACTTGA | 59.978 | 21 |
| CATGATGCATTTTCCCAGTTC    | 60.324 | 21 | TAGGGACATCTGGGTGTGTG  | 59.388 | 20 |
| CCAACCAGCTTAGCGAAAAA     | 60.368 | 20 | TGGAGGACCTCACGTGTGTA  | 60.154 | 20 |
| CCAAACCAATATCACAGCC      | 60.192 | 20 | TCCTTGAACTTCTTCGGTGG  | 60.224 | 20 |
| AAAAAGTCCCAGCCAATCT      | 59.94  | 20 | CACGCCAATTCATCATCAC   | 59.931 | 20 |
| CCCACTAACCTTGTCTCCCC     | 60.736 | 20 | TGGTAAAAAGCGCTCGTACA  | 59.509 | 20 |
| GGTGTGCTCGGATCTTGATT     | 60.081 | 20 | CTTGATGGGCATTAACCAC   | 60.192 | 20 |
| AAGATTCTCTCTGTAGTTGTCC   | 59.72  | 25 | TCTCATTCTGGTTTGAGGGG  | 60.042 | 20 |
| CATCACGGCAAAGCAAGTAA     | 59.872 | 20 | TCACTCTCCGACTTCCGAT   | 59.803 | 20 |
| CGCAATGATAGACCACAACG     | 60.134 | 20 | CTCCTCTCCAGCCATCTCCT  | 60.891 | 20 |
| CCACCACTTTCTCTCTCCCA     | 60.229 | 20 | TGCTGCTTCTGGTTGATGAC  | 59.992 | 20 |
| AGCCAGGAAACGCTGAAATA     | 59.845 | 20 | ACAAAGCTCGAGTGGCATGT  | 60.865 | 20 |
| CCAAATTTAACAACCTGATGCAA  | 59.076 | 23 | CAAACATCGACCTTTTTCGG  | 58.751 | 21 |
| TTTCTTGCCCATATTCCACC     | 59.762 | 20 | TGAAGTTTCCCCGAATTTTG  | 59.91  | 20 |
| AGAAGCTTGTTGTCCGCTGT     | 60.058 | 20 | CAGAGTGCCTCTCTTGGGAA  | 60.523 | 20 |
| AATTGTTCTGCTCGTGGTC      | 60.119 | 20 | GTTTGGGTGCAATTTGAGGA  | 59.91  | 20 |
| CACTGGATCTGCCGATGTTA     | 59.673 | 20 | CTTCATCTTGAGAGAGCGCC  | 60.24  | 20 |
| CCATATGATGCTGATGCGAT     | 59.485 | 20 | TATGACCGGCCAAAGTAAGG  | 59.953 | 20 |
| AGTCACGTCTATTCATCATTGACA | 58.654 | 24 | GGCGATATCCGACTCACTGT  | 60.104 | 20 |
| GGACTGATGATCCGGTGACT     | 59.928 | 20 | ACCATCTCTCGCTCTGCAAT  | 59.981 | 20 |
| TTAAGATGTGCATGCATTTGA    | 59.217 | 22 | ACGGCAGGATTAAGTCCCTA  | 58.671 | 20 |
| GAAATTGTTGTTGTGTTTGGC    | 59.122 | 21 | CGTTTTCAATCATGACTGTCC | 60.368 | 21 |
| AAATTTTGCACCGCCATATC     | 59.801 | 20 | AATGGTGTTCCTTTTTC     | 58.986 | 21 |
| ACGCGAAGTAGCATGGTTTT     | 59.775 | 20 | TGCCGGATACAGATATGCAA  | 60.058 | 20 |
| ATAGGCTATGCACGGTCCAG     | 60.118 | 20 | GTGAAGAGGAGCAAATGGGA  | 60.195 | 20 |
| ATGCCACCACTTCCCTGATA     | 60.34  | 20 | CGTTTCTCGTTTTCATCTC   | 59.955 | 20 |
| CCAGATGTGAGGAGCAAACA     | 59.831 | 20 | TCGAGTTTTGGTTCGGAAAA  | 60.587 | 20 |
| TTCTAACGGCCCAGATTTTG     | 60.067 | 20 | TGATTTGACATTTTGGAGAGA | 59.984 | 24 |
| CAAAAATCTAACGGGCCAAA     | 59.937 | 20 | ATTGATGCGAGGCATGTGTA  | 60.104 | 20 |
| CCACGCTTCATTATCAACCA     | 59.542 | 20 | CGTAGTGGGTGAGGAATACCA | 59.861 | 21 |
| TGCTCTCAATTAATACACCCG    | 59.143 | 22 | TTTTCAGTTTCAATCAGTTAG | 58.445 | 24 |



|                          |        |                           |        |    |
|--------------------------|--------|---------------------------|--------|----|
| GCCAGCAGTAAAGAGGGTGT     | 59.357 | 20 AAACCCCTCCAAACCCTAGA   | 59.799 | 20 |
| CAAAACGAAATAAATGCGGC     | 60.444 | 20 TCTAGGCATCGAGATGCAGTT  | 59.992 | 21 |
| TGCCATTATGGTGCATTGTT     | 59.816 | 20 ACTATCATGGGCTGGAGGTG   | 59.95  | 20 |
| GCGCTTTTTCTTATCATGGC     | 59.822 | 20 GAGGGATCGAGAAAGGGAAC   | 60.015 | 20 |
| CAAGATGATGAGGGCCAAAT     | 59.894 | 20 GCTGACTCCAGGGTATTCCA   | 60.073 | 20 |
| GGAGACCAATTCTTGGCTGA     | 60.195 | 20 GTTCTCTAGCTGTGCCCTG    | 60.012 | 20 |
| CAATAAATTGGGGTCCGCTA     | 59.789 | 20 TGCCTTTTATGATATATAAGT  | 59.361 | 27 |
| TGGTTACTTACTGGAACGCGA    | 59.182 | 20 TTTCTAATGGGCGCTGAAAT   | 59.682 | 20 |
| CCGGCCTATCGTCTTCCTAC     | 60.968 | 20 TCACGCAAGATGCAACAAAT   | 60.265 | 20 |
| TGCTAATGGCAACTCGATCA     | 60.366 | 20 GCACCAATTATAGGATTTTGGC | 59.588 | 22 |
| GATACAGCTTGGCTTCTGGG     | 59.836 | 20 TCCCTCTGCATATTTGTCCC   | 59.894 | 20 |
| GCAAAAGTGCCTACTTCACCA    | 60.298 | 21 TGAATAAGTTTGCGAACCGC   | 61.131 | 20 |
| AAACCAACTATCTCGGTGCG     | 60.132 | 20 GCTGGAGCTACGATTAACCA   | 57.999 | 20 |
| TGACCTGGTGTCCCATCTCT     | 60.527 | 20 ATTCCTCAAGCATCATTCCG   | 60.036 | 20 |
| GCAATCTATCCCATAACAAGGC   | 58.547 | 21 CGAATGATGGAACGGAGATT   | 59.894 | 20 |
| TCCATCTTCTCTCAGGTGGG     | 60.191 | 20 TCTGTTCCACTTTCTCCATGC  | 60.248 | 21 |
| CAACCAATTCAACTTTCATTATGC | 59.788 | 24 ATTCGTGTTTGCAGTAGGGG   | 59.993 | 20 |
| CCGGATCATTGACATTTGTT     | 58.271 | 20 GGGTTTAAATTTCTCGCATGG  | 59.411 | 20 |
| TCCTGCCCATGACATAATCA     | 59.883 | 20 GCTGTGCGTCGATTTCTTTA   | 59.066 | 20 |
| ACAGTGGCTAAAATGCACCG     | 61.08  | 20 TGTGGATGGACGGATTTTCT   | 60.317 | 20 |
| AACACCTAGGGGCTTTGTTG     | 59.097 | 20 TTGGGATTAAGGCTTTGGTG   | 59.931 | 20 |
| CCTGCATCACAAAAGCAAAA     | 59.849 | 20 GAGATGAGCTTCTTGCTGGC   | 60.249 | 20 |
| TTTCTTGACTGTGGATTTCCAAT  | 59.864 | 23 ACCTCTTCTCCTGCACCAAA   | 59.844 | 20 |
| TGTTGGTTTGTGAGGTCAGC     | 59.726 | 20 TTGGGAGTTGCTTCAGATCC   | 60.195 | 20 |
| CGTCTGATTCTGTCGTAGTCG    | 59.465 | 20 ATCGGTATAGGGCTTGGGTT   | 59.688 | 20 |
| ATCGGATTCTGGGGGATAAC     | 59.981 | 20 TTCCTTGTGCTTTGGCTTTT   | 59.861 | 20 |
| GCATGCAAAGTTGCAAACAA     | 60.827 | 20 GCTGACATTGACGGCTTACA   | 59.871 | 20 |
| TTTATCTCTCGGCCAACACC     | 60.074 | 20 AAGTCCGAGAAAGCCTCTTG   | 58.67  | 20 |
| TGATGAAGGCACAGAGCATC     | 59.95  | 20 ATTTACGGGTTTGTGCTTGC   | 60.003 | 20 |
| TTGGGGGAGGGTTTAGGTAG     | 60.172 | 20 CATCAGCGTCACCTCAAAG    | 59.44  | 20 |
| CATATGGTGTGAGTTTGGG      | 58.695 | 20 CCTAAATGGGTGAGCCAATC   | 59.387 | 20 |
| CATCAGTTGTAGCTGGGGGT     | 59.989 | 20 GTGAGTGCATGCAAGTGGAC   | 60.328 | 20 |
| ACATGCCCTAAAAACCGATG     | 59.823 | 20 TGTTTGCAATTATTTCTGTTG  | 58.084 | 21 |
| AGACCAAACCTCAAGCATGG     | 60.111 | 20 TGGCCTGCTATTATTGACCA   | 59.136 | 20 |
| GGCCACTCAGTTACAAAGGTG    | 59.648 | 21 TCGAACTCAACGACCAAAAA   | 59.293 | 20 |
| TTCCAACAGCTCAAACAGCA     | 60.574 | 20 GGCTGGTTTGTGTTGAACATT  | 60.118 | 20 |
| GGTGGAACTGATTGGGAGAA     | 59.903 | 20 TTGCATCAGAGCAAAACGAC   | 59.995 | 20 |
| AAGTGCCTTGTGTGCACGA      | 60.357 | 20 CACGACCCAACACACACATT   | 60.333 | 20 |
| GTCCCTTCTTACATATGGCCC    | 59.68  | 21 TGCATGATTGCTCCATGTCT   | 60.233 | 20 |
| ACGACCCCAATTTTTGTCTG     | 59.83  | 20 AAGCTATTGGCGGAGTATGC   | 59.347 | 20 |
| ACCATTATGTGTGCGAGTGG     | 59.445 | 20 CCTCGCGTAAACCCTTGTTA   | 60.124 | 20 |
| AAAACCACGTCGTTCTTGCT     | 59.78  | 20 GAGGTTTCACTCAACCACGG   | 60.51  | 20 |
| CCAATGTATCATCCCTCGCT     | 59.917 | 20 CGATTGGGCCTATCCTATCA   | 59.878 | 20 |
| ACTGCTCCTCTCATGGTCAA     | 58.379 | 20 CCATGACCCTGAACAATGAT   | 58.201 | 20 |
| AATCCAATTGCAATCCCCTC     | 60.096 | 20 GGTGTGTGTGGAAACTGACG   | 60.047 | 20 |
| TGATTCCATGAACACCCTTTT    | 59.278 | 21 ACAAGGCATCACTTCACACG   | 59.751 | 20 |
| CAGGGGATCTCAAGCCTGTA     | 60.21  | 20 CCATGGCGATGAATGTAGTG   | 59.948 | 20 |
| CCCATGCTTGGGTTCTCTAA     | 60.066 | 20 TTAACCCACCAAAAAGGTGC   | 59.839 | 20 |
| AGGATTCACGAGTGACCCAG     | 60.112 | 20 AGCTCCTCAACTAAAGCCCC   | 59.848 | 20 |
| TTCCACCATGATTTGACAC      | 59.348 | 20 CCGAATCTTTTCTGTTGATCA  | 60.972 | 20 |
| GCGAGCAGACCAGAAGTCA      | 60.287 | 19 CTTGAGGCTACCATGGGAAA   | 60.066 | 20 |
| AAGGTGGAAGGGGAAGAATCC    | 59.373 | 20 TGGAGATTACCGGGTTTTGT   | 59.288 | 20 |
| TCGTGAGAAATTAATGGAACAAA  | 59.885 | 24 GAAATCAAGCCATTTCCGAG   | 59.645 | 20 |
| GCTTGGA AAAAGGGAGGAAT    | 59.532 | 20 GCCATTACGGGTGAGGAATA   | 59.784 | 20 |
| CATGCACATCCCTCTTTCAG     | 59.241 | 20 AAGGCGAGATCAATGTTTGG   | 60.074 | 20 |
| GCCAGTTCTTTTTCATGGGA     | 60.051 | 20 AGCTGTCCGGAGACTTTGAG   | 59.598 | 20 |
| GATCAAACACGCATCACCAC     | 59.975 | 20 AGGGGAGGATATGAACTCGG   | 60.285 | 20 |
| ACAACACGGAACCACTAGGC     | 60.035 | 20 TCCTCTCTCTCTCCATCACA   | 59.127 | 22 |

|                           |        |    |                         |        |    |
|---------------------------|--------|----|-------------------------|--------|----|
| CATGAACTCCATGAAGCATGA     | 59.664 | 21 | AGACGTACCTGGGTCATTGG    | 59.844 | 20 |
| ACCTGATCACTTGTCCGAGG      | 60.112 | 20 | CACTGCACATGCTGCCTTAT    | 59.895 | 20 |
| AGTGAACCATGGGTCCGTTA      | 60.232 | 20 | GGAGGGGAGAGTTTGAATCC    | 59.874 | 20 |
| GTTCAGCAACAGCTTGACCA      | 60.032 | 20 | CCTCCCTCACCTCCACACTA    | 60.104 | 20 |
| TCCGATAGGCAAACGACTC       | 60.214 | 20 | CCCTGTCGAGTCTCAGCTCT    | 59.732 | 20 |
| CAAAAACCGAAAAACCGAAA      | 59.951 | 20 | CGAATTTGCAAAACCGAAAT    | 59.943 | 20 |
| GAGAGCAACACATGCCAACA      | 60.885 | 20 | TTCGTTTAAATCGATTGGGG    | 59.767 | 20 |
| TCATTTGTTAGAGGTTTTGACCA   | 58.663 | 23 | GGGCGCGACAGTTATAGAAG    | 59.867 | 20 |
| ACATCGGCTCAAACCTCCAAA     | 60.636 | 20 | TGGATGTGAATAGGGTGGAA    | 58.77  | 20 |
| ACATGCCATTGCTACTGCTG      | 59.895 | 20 | TCCTGTGAGCAGAAGGGAGT    | 59.986 | 20 |
| TTTGATGATATATAGGTGTTTTGA  | 58.476 | 27 | GCGTAAATTTTGAAGAAGCA    | 57.304 | 21 |
| TTTGTTATTGGGGTATGGGAA     | 59.042 | 21 | CAAGCGTGATTAGCCATCAA    | 59.833 | 20 |
| GTCACCTGTCACCAGAGCAA      | 59.872 | 20 | GTCAGAGGAGCAGAATTGGG    | 59.803 | 20 |
| GAAAGCCCCCTTTTCTCAAC      | 60.053 | 20 | CCGAATGCAACGGTTTTAGT    | 59.996 | 20 |
| GCGTTCACGAAGAGGGTAAG      | 59.875 | 20 | TTCATGTTTGCTTAGCCGTG    | 59.872 | 20 |
| CGGACAAACACGACAACATC      | 60.008 | 20 | TTGCAAAGTCATGGCTAAAGA   | 59.89  | 22 |
| TAGGGATTCTGCTGAGGGTC      | 59.239 | 20 | GGATGGTTCTGTGCAGGAAT    | 59.934 | 20 |
| CGTACTGCTCCATCTTCAACC     | 59.749 | 21 | CGAACACAGGGCAATAGTGA    | 59.716 | 20 |
| CAAGAGTAGAGAAAATCCTCCCA   | 60.121 | 24 | TGTCCATTGATTGCTTGATCC   | 60.859 | 21 |
| GGAGTGGAGTGTGAGTGGGT      | 60.006 | 20 | ATTTGAATTTGGGAGGAGGG    | 60.124 | 20 |
| CAACTGACCAACAACAGCCA      | 60.757 | 20 | AAAAGCTCCTGCACTTCTCG    | 59.757 | 20 |
| TTTCTCTCTCCTCTCGCTGC      | 59.973 | 20 | TCGTCGGATGAAAAAGAACC    | 60.051 | 20 |
| ATCTCGGCCTAGCTGGATTT      | 60.194 | 20 | TTGAGGACAAAAACCCGAAG    | 60.081 | 20 |
| TAGACCCAGGCTTCGAGGTA      | 59.83  | 20 | CTCGAGTTCGGCCTATTTAGTT  | 58.973 | 22 |
| ATTCCATCACCCAACCTCTCG     | 59.927 | 20 | CATCGGGGTTTGAAGGTTTA    | 59.795 | 20 |
| TAAGGGCGTGGGATACTGAG      | 60.088 | 20 | CGTTTTGACGATATATAGTGT   | 58.68  | 26 |
| TCATCAACGAAGAAACGCTG      | 59.988 | 20 | TTTGAATGCCAACAGGTGAA    | 60.088 | 20 |
| GATGCCCTCCACATCAGATT      | 59.893 | 20 | AACCGTCGCCGACTTAAATA    | 59.609 | 20 |
| GTAGTTTACCTGGCTGGCGT      | 59.266 | 20 | TTTTATGTCACTGGGGAAACG   | 59.847 | 21 |
| TGTGAAGGCCTACGAACTGA      | 59.44  | 20 | TTGGAGTTAAAAGCACCATTG   | 59.625 | 22 |
| ATCTTGACCGCTGATTTTGG      | 60.074 | 20 | TGATGACGCCATGTTTCAAT    | 59.931 | 20 |
| TTTTCTTTGACCACGACCA       | 59.262 | 20 | TCAAATTTTCTTCCGGTTCA    | 59.551 | 21 |
| GGCACCTCAAATGCAAATCT      | 60.081 | 20 | TGCTATAGGGGAAACAACCG    | 59.953 | 20 |
| TGCTCCATTGCAAGAACATC      | 59.805 | 20 | CGGACCGTTAGGATTAGCAT    | 59.067 | 20 |
| CAAATTTCCATCCCTCTCCA      | 59.864 | 20 | TTTGAGTTTGCATCTAAGAAGG  | 59.828 | 24 |
| AGCAATGAGCAACATTACAGC     | 59.031 | 20 | GAGGAGTTGGGAGAGCAGG     | 59.929 | 19 |
| TTTTAATTCACGCACAATTACATT  | 58.984 | 25 | AATTTGCTGTCGACGGAATC    | 60.081 | 20 |
| TGTTGAATGTTGTGCCTCGT      | 60.16  | 20 | ATGAGTTTGGTGTGTTGGCA    | 60.008 | 20 |
| TACAAGCACAACAACACGCA      | 59.944 | 20 | TCGCAGATAGGATTTTTGCC    | 60.175 | 20 |
| TCAAACACTGCGCTTCAGTC      | 60.183 | 20 | TGTGTAGTCCTGTTCTGCG     | 59.897 | 20 |
| GGTTGCACCTCTGTTTTCGT      | 60.156 | 20 | TTCTCGACAGATTATCCGC     | 60.177 | 20 |
| TCCAACACTACGTGGGTGGTTT    | 60.269 | 20 | CAGAAGTAAACAGACGGCCC    | 59.734 | 20 |
| GACCCCACTTGCCAAAATTA      | 59.801 | 20 | TTGGTCATCGCAATTCGTAG    | 59.688 | 20 |
| CACAGGGAGAAGACGAACTCT     | 58.533 | 21 | TTGCTGCCAAAAAGAAAAA     | 60.701 | 20 |
| TGTGTTGGTCTGAGAGGCTG      | 60.022 | 20 | CCCAGAGATGCGGAAAATAA    | 60.031 | 20 |
| AGGTTTTTCAAGGAGTGCCC      | 60.476 | 20 | ATTTTCCGCCCTAGTGGAAT    | 59.799 | 20 |
| AATGTTTCTGGAATCACCTGG     | 58.898 | 21 | TATATAAGAAACGGCGGCCA    | 60.424 | 20 |
| TAAAGAATGCCACTCCAG        | 60.066 | 20 | ATGGAGACAGATGGAGTCCG    | 60.072 | 20 |
| GCAGAAGGCACCGAACTTAC      | 59.882 | 20 | CGTCAAGCAATGCCAGATAA    | 59.833 | 20 |
| TCCCCTACTTGCGTCCTCTA      | 59.83  | 20 | ATGATGCAACATCCCTTGTG    | 59.374 | 20 |
| AATGAAAAGGCCATTCGAGA      | 59.645 | 20 | CAGAGGGTTTCCAAAATGTCA   | 59.956 | 21 |
| GAGCATAGGGAAATGGGGTT      | 60.152 | 20 | GAAAAATGGCAGAGTGCTCC    | 59.82  | 20 |
| CAATGGCTTACCAACCTTT       | 59.971 | 20 | CCTGGGTTCTTGTTTTGAA     | 59.942 | 20 |
| CGGCTTGGATTATTTCTATTTT    | 60.169 | 23 | AAATCCAAGGAGGCGAGATT    | 60.039 | 20 |
| TTAGTTAGTACCGATTTTCAAGGTT | 57.499 | 24 | TCAAAAATATGTTGTCGGCG    | 59.562 | 20 |
| CCGAAAATACAGGCGCATA       | 59.671 | 19 | CCACAAAATCTGGGGTCTGT    | 59.82  | 20 |
| AAAGGTTTCTTAACTCTGCGA     | 59.433 | 22 | TGCTGTTTGCATTTTAAAGATGA | 60.186 | 24 |
| CAAAAACAACCTCAATATGGATCT  | 58.211 | 25 | AGACCGAAAGAAGTCCACCC    | 60.489 | 20 |

|                         |        |    |                        |        |    |
|-------------------------|--------|----|------------------------|--------|----|
| TTCCCCGATCAACAATCAAT    | 60.133 | 20 | CACAAACTCACACAATGGGC   | 60.008 | 20 |
| CCAATTTTCTCTTCGGGCTA    | 59.292 | 20 | GTCAGGACGGAGGAGTTGA    | 60.238 | 20 |
| ATTGTACGAAAAACCCCGTG    | 59.724 | 20 | AAAGGTTTTGATTTTCCGGC   | 60.292 | 20 |
| AGACAAACATAGGATGCCGC    | 60.103 | 20 | ATGGGCTTTAGTCCCCTGTT   | 59.827 | 20 |
| CCCGATACTTCACCCTTTCA    | 59.926 | 20 | TGGCTTCTGTTTCTCCATCA   | 59.369 | 20 |
| GTCTGATAGGATTGGCTCGG    | 59.653 | 20 | GGA CTGGAAGGAAGGGAAAG  | 60.045 | 20 |
| GAAGGTTCTGCAACGGAAAG    | 59.853 | 20 | CACCGTTCTCTGCAACAAAA   | 59.881 | 20 |
| AGCACGTGTTGAGGCTTCTT    | 60.058 | 20 | TGGGTGGTGTGATAGCATTG   | 60.39  | 20 |
| GGATGGAGTTCGGTCTGAAA    | 60.05  | 20 | CTTGCAGGACATCAATCGAA   | 59.799 | 20 |
| GTGTTCTCGGTTGATGCAGA    | 59.837 | 20 | ACATTCATCCGAGCAACTCA   | 59.245 | 20 |
| CCATGCACGTAAGCATGTTC    | 60.142 | 20 | GTAGGAGGCCAAAGTAGGGGC  | 60.096 | 20 |
| TATTAGGCCACCCCTAACC     | 60.034 | 20 | CCCCAAAACACCCCTAGAAT   | 60.046 | 20 |
| GCTTGCTCTTGCAACCTCTT    | 59.763 | 20 | CTCATGCTTATTTTGCAAGGG  | 59.728 | 21 |
| CCCAACAAACCCTTTCTCAA    | 59.942 | 20 | CACATGCCTGGAGCATAAC    | 60.144 | 20 |
| CATGGCATGCAAAGAAGAGA    | 59.948 | 20 | ACCAGCTAGTCTTTTGCCCA   | 59.875 | 20 |
| GAATGGGAAGTTCGGAATGA    | 59.871 | 20 | AGATTTTGACCAACAACCC    | 59.836 | 20 |
| CTTCCATTCCATTCCACACC    | 60.173 | 20 | CACCCAATTTGGTCGTTTTT   | 59.702 | 20 |
| CCCAAAAATGGTTTCACACAC   | 60.118 | 21 | AACGCTGGAAGAATGTGACC   | 60.119 | 20 |
| TCCGACCTAATGAAAGCGAG    | 60.344 | 20 | AAACCGTGCATGAACTTTCC   | 59.978 | 20 |
| GTGAGGTGGGCAGAGTCAGT    | 60.315 | 20 | AGTATTGGTTGCGGGTTCAC   | 59.859 | 20 |
| TCCAACCAACATCAAATGGA    | 59.75  | 20 | AAACAGCAGCAGTATGCCAG   | 59.101 | 20 |
| CAAATGGGAATCCATGAAGG    | 60.126 | 20 | TATCCGCAGGCCAAGATAGT   | 59.691 | 20 |
| CCGACAATAAGAAGAGAGGCA   | 59.462 | 21 | CAGCATGAATCAAACAACCA   | 58.099 | 20 |
| GCCACTGAACCAAGTGACCT    | 60.159 | 20 | ATTATCTCGATCGGCCTCCT   | 60.024 | 20 |
| ACAATGATATTCGCGAAGGC    | 60.067 | 20 | AAACGACAGAAGAAAGGGCA   | 59.853 | 20 |
| GTGGCCTCTAATCAGTTCGC    | 59.843 | 20 | GCATCGGACATTGGAGCTAT   | 60.066 | 20 |
| CCAAAAAGAGGATCCAGAA     | 59.097 | 20 | AGTTTTTGCGCAGGAATGTT   | 59.752 | 20 |
| TGATATGACCACAATGGCGT    | 59.805 | 20 | TAGCCGATAAAAATGGCACC   | 59.928 | 20 |
| AAATTCAAAAGCTGGGATGG    | 59.019 | 20 | CCATTCCATTCTCACCCCTCA  | 60.86  | 20 |
| GAGATTTAGTGCGCGAAAGG    | 59.982 | 20 | CTCCCATTTGTGCTTCAACA   | 59.691 | 20 |
| GGAAAAGGCATATTGTGGGTT   | 60.068 | 21 | TGCGTTTGTCTAACTTTATCAC | 59.734 | 24 |
| ATAGCTGCGAGGTAACGTGG    | 60.292 | 20 | CAGGGGGACTTTAATGGGAT   | 60.011 | 20 |
| GCACCACCCTACCCTTCTTT    | 60.361 | 20 | AAGTTCCAAGTGATCGGTGG   | 59.966 | 20 |
| AAGGTGTAGTTCGGGGTGTG    | 59.884 | 20 | GCGAGCAAACCTCGGTAAAG   | 60.018 | 20 |
| GTTTCCTCGAAAATCCACCA    | 59.91  | 20 | AAAACATGTGGAGGGCAGTC   | 59.973 | 20 |
| TTTTCAAACCCTGAACACCC    | 59.807 | 20 | TGTAATGCCTCCTTTCAGCA   | 59.42  | 20 |
| TTTCTCGCATTGGTCAATCA    | 60.197 | 20 | TGCTTTTCTTCTCGCTCTCC   | 59.836 | 20 |
| AGGTGCTGTGTGATGATGGA    | 60.121 | 20 | GACAACAGAAAAACCACGCA   | 59.74  | 20 |
| TGCTCGCTTTCATTTACAC     | 59.995 | 20 | TCGGGGCGAATAGAGACTAA   | 59.801 | 20 |
| CCTCTTTTGTTTCCATGCC     | 59.546 | 20 | GGGATTAATTCCCAGCATGA   | 59.722 | 20 |
| AGACGGAGGAGAAGAGGAGG    | 59.945 | 20 | GCCACGCTCTTTCATTTTAT   | 60.221 | 20 |
| AGAGCTCTTCAGTGGCGAAA    | 60.277 | 20 | ATTGCATTCTTGGTGTGTGC   | 59.577 | 20 |
| GTCGGGCTAACGTGCTACA     | 59.879 | 19 | TTTTAACGATGGATCATGTAAG | 59.748 | 24 |
| CTCGTGTAGAATCGCCTTCC    | 59.836 | 20 | ATTTCACTTTGCCAGCAACC   | 60.118 | 20 |
| TTTTGGGTTGGAGATGGTTT    | 59.264 | 20 | CAGTCGGATTCTTTTTGGAC   | 60.495 | 20 |
| CAAACGAAAAATTATCAACTGTA | 59.853 | 26 | AATTGCATCTTCGGTTTCGT   | 59.574 | 20 |
| ACCAAGTTGAGGGCATTGAA    | 60.495 | 20 | CAGGTTTAGTTGTTAGGTGTTT | 58.77  | 25 |
| CTGACCGGATCTCTCACTCC    | 59.792 | 20 | GCACAATCAAACCTTGCCTT   | 60.118 | 20 |
| GACAAAACCATCAGCCACCT    | 59.973 | 20 | GAAAAGAGAGGGAGATGGGG   | 60.008 | 20 |
| GGGGACTTTTTAACCAACCA    | 58.785 | 20 | TCAACTCTTGTGGATAACTATT | 59.968 | 26 |
| TGTGAGTGTGTGCAATGA      | 58.12  | 20 | GTTGGTTTGCCTTGTATCCT   | 59.978 | 20 |
| AGGGAATATCAGGGGAATGG    | 59.974 | 20 | TTGCACAGCTCTAACAAACAC  | 59.578 | 22 |
| ATCGAACTGGAGGAGGCTTT    | 60.212 | 20 | TTCTCAGTGTGATGTTGGC    | 59.992 | 20 |
| GGAAATCCAAGGCTACACGA    | 60.074 | 20 | TGAAGCGCCTGTTTCTCTCT   | 60.277 | 20 |
| ACAGGATAACGGATGCCTTG    | 59.955 | 20 | ACTTTGGCCAGATTGTTGAAA  | 59.601 | 21 |
| GGGGTGGTCTCATTCTAAA     | 58.836 | 20 | AAGAACCACGCGTAATCGAG   | 60.27  | 20 |
| TCGCGTGTCAATTCTAGACCA   | 60.413 | 20 | TGCGTTTTGATGATATATAGGT | 58.933 | 25 |
| GGCCTCAAGCAAATCAAA      | 60.188 | 20 | TTGCATGTCTGCCATCTTTC   | 59.805 | 20 |

|                           |        |    |                         |        |    |
|---------------------------|--------|----|-------------------------|--------|----|
| GTCATCGAGCCTAATCGAGC      | 59.946 | 20 | TGGTGTGGTTTTGGAAGTGA    | 59.976 | 20 |
| GCGATTTTAAACAAAAACGGG     | 59.472 | 20 | TCAACTCCCACGTCCACATA    | 59.96  | 20 |
| CATTTTCCCAAACCCACAAC      | 60.066 | 20 | CGGAGAGGAGCTGGTATTTG    | 59.83  | 20 |
| TGGTGACAAGTGGCATGTTT      | 60.008 | 20 | ACCCGAGAGAGAGATCGTGA    | 59.945 | 20 |
| CATTCAAAGCTTGCTTCCC       | 59.823 | 20 | ATGATAACAGTGAGGCCGGA    | 60.483 | 20 |
| CTGTCCCCACGGTCTAATGT      | 59.844 | 20 | TTATGATGCCTAGTGGTTGGC   | 59.974 | 21 |
| CGCATTGTCTCTCACCTCA       | 59.984 | 20 | ATCCAGTTTGCCTGGTTTTG    | 59.971 | 20 |
| AGACTGCACCTGCGGTAAC       | 59.937 | 20 | TTGGATTGAAGCTCAGCAGT    | 58.597 | 20 |
| CCTGGTGTCCACTGTGTTTG      | 60.039 | 20 | TCAAAGCAAACGACTTGTTCC   | 60.277 | 21 |
| TTGTTTTGGTGGGTTTGGAT      | 60.066 | 20 | CAGATAATGGTGGGCCAAAT    | 59.645 | 20 |
| ACCTGAGGGAGTTGATGTGG      | 59.962 | 20 | TTCAAATGCCAGTTTTCACG    | 59.706 | 20 |
| TCAAGGTCTGACGAAGTCGC      | 61.546 | 20 | CATTTTTGGAGGAGATTCTTCG  | 60.068 | 22 |
| CAGCCCTTGGCTCTTTTAGA      | 59.587 | 20 | TTATGATGGGAATGGGAGGT    | 59.055 | 20 |
| CCTACAAAAGCAAGGGCAA       | 60.236 | 20 | CGTTTATCGATTAGCACCCG    | 60.468 | 20 |
| CATCGATTGAACCAAACACCT     | 59.845 | 21 | TTTGCGTGTGAACATCAACC    | 60.562 | 20 |
| CCAAGCAAACACTACAAACCCA    | 58.673 | 20 | TAAGTTCGATGCCCGAAGTC    | 60.214 | 20 |
| TCCAACGTCAAAGTTGCTAGG     | 60.29  | 21 | GCATAGGAATGCCAATTCAA    | 58.577 | 20 |
| TGTCTATGCCGGTTTTTGAA      | 59.157 | 20 | TAATAGCCACGAAAGGGGTG    | 59.953 | 20 |
| AATTTGCGTTACATGGCAGC      | 59.967 | 20 | CCACTTCCAACCATCTACC     | 59.259 | 20 |
| TTGTTAGAGGTCTTGACGGGA     | 59.72  | 21 | GCCCTCACCTTTATGGTTT     | 60.187 | 20 |
| TTGGGGAGGAGAAAAGAGAA      | 58.833 | 20 | GATTCTTTGAATCATATTCCAC  | 58.865 | 25 |
| CTTATCCAACCTCAATTTATATGAT | 57.452 | 26 | TCTCTCTCCTCACCAAGCA     | 58.669 | 20 |
| ATGCGATGTGTGGTCAATA       | 59.955 | 20 | AGGGGTAAAGGTGGAAATGG    | 60.046 | 20 |
| GGTTATCACCTGATTACTACCCT   | 58.775 | 24 | TCCTTGTCATTGTGGATGGA    | 59.893 | 20 |
| GTCGTGCGATGTATGATGTG      | 58.517 | 20 | CCTCGGTCTATCTCATTTTTATC | 58.715 | 24 |
| GGGAGGAAGATGCAACTCAG      | 59.803 | 20 | TGATTGGGATGCCATGTTTA    | 59.745 | 20 |
| AAAGGCCACGTGTTAATTGC      | 60.003 | 20 | CAAGGAATCCGAAAAATGGA    | 59.872 | 20 |
| GCTATGGCTCGTATTCCTTCC     | 60.075 | 21 | TGTGCACCCCATTAAGGTT     | 60.227 | 20 |
| GGAAACGATCGTAATACGCC      | 59.438 | 20 | CCGTACATGTTGATTGCCAC    | 59.847 | 20 |
| TTGAGACGATGTGCGATAGG      | 59.823 | 20 | TACATTCCATTGTTTCGGCA    | 59.93  | 20 |
| ACTAGTTGTTGTGGCGGAG       | 60.171 | 20 | TCCTGCTCTTGCAAATGAGA    | 59.673 | 20 |
| TCATATATGTTCTGGCGGC       | 60.827 | 20 | CAATGCTCCTTACGATGCAA    | 59.833 | 20 |
| GATCGATCGGGAGTCAGAAA      | 60.158 | 20 | ACGGATTACCAGAACAAAGC    | 60.119 | 20 |
| TAGATTTGATCGGTTGGGA       | 60.266 | 20 | AGTCAACATTTGGCCACAC     | 60.823 | 20 |
| GTGGCTTGCTTGCTTCTTTC      | 60.14  | 20 | GGGAAGACTGTGTGAAGGGA    | 60.088 | 20 |
| ATCACCCCAACATCACCTA       | 60.05  | 20 | GGTGTGCTCGGATTTTTGAT    | 59.939 | 20 |
| TTGATTTTTAATGGGGCAAAA     | 59.313 | 21 | TGCGAAATTTAAGCCAAGTG    | 58.958 | 20 |
| GCTCAATTCTTGACCTTGC       | 59.82  | 20 | TTGGACTAAACCACCCATCC    | 59.647 | 20 |
| ATGGAGAAACACCAAGCGTC      | 60.119 | 20 | ACTCCTTGATGGTGGAGGTG    | 59.962 | 20 |
| GCTCATGATTTGGCCAGTTT      | 60.081 | 20 | GATTGTCGTCAACCTCCCAT    | 59.786 | 20 |
| AATTTGTGTTGGCTTCAGGG      | 59.971 | 20 | AGCATACAGTTCTCCGAGG     | 59.308 | 20 |
| GCGATCATTCTCGTGAAGAAA     | 60.346 | 21 | TCGGCGCTGTTTACTCTTCT    | 60.154 | 20 |
| GCTTGTACCCGTAGCGTGTT      | 60.197 | 20 | ATAAAGAACCCAACTGGCCC    | 60.187 | 20 |
| GTAGAGGGCGAGAACGACAG      | 60.012 | 20 | TCTCCACCACCATTCTCACA    | 60.088 | 20 |
| ATAATTGCCTAGCTGGCGTG      | 60.251 | 20 | TTGTTTTGTGCGTTATGTGGA   | 60.022 | 21 |
| TTCCACCATGACTTCAACA       | 59.935 | 20 | TTCGGAAGCGTACATCAAGA    | 59.42  | 20 |
| CCGGTGCACCATTTGATAAT      | 60.585 | 20 | CACGGTTCCTCAGCAACTCA    | 60.025 | 20 |
| TCGAGCAATCTGTAAGGTGAAG    | 59.517 | 22 | AAGGTGAAAAGGGTTGCTT     | 59.976 | 20 |
| TCTGCGGGATTTAGAGGATG      | 60.17  | 20 | TCTTCCTCCACCATTTTTGC    | 60.051 | 20 |
| TGAATTGCTCCACATACCCA      | 59.924 | 20 | ACGGAAATTTCACTATGCCG    | 59.96  | 20 |
| CTGTTTGTTGCCCTTCAAC       | 60.529 | 20 | AAGCAAATGGATAGCGTGG     | 60.096 | 20 |
| GTGTGGTCTGCAAAGTGTGG      | 60.203 | 20 | CGAACCTCAATGGGGTAGAA    | 59.926 | 20 |
| AATCGCTGAACTGTTTCCG       | 60.249 | 20 | GGTTCAGGTTGCGAATTGAT    | 59.939 | 20 |
| CACACACCTACTTTAATGACGCA   | 60.102 | 23 | GCGGTATGACTTCATGGGAT    | 59.78  | 20 |
| GGCCAACATGATTAGCATCC      | 60.304 | 20 | TCAGGAATGCTCCATATTCTCA  | 59.668 | 22 |
| TCTTGTGACGCGTTTAAATG      | 60.014 | 20 | TGTTGGATTTGGGATCCTCT    | 59.336 | 20 |
| TTTGGTGGTTTTGCAGATGA      | 60.088 | 20 | ATTTGCACATCAAACCTCCCC   | 59.797 | 20 |
| GGGACACCACGTAAGCATT       | 60.384 | 20 | GCCTTCTCGCTCTCCCTAT     | 59.947 | 20 |

|                          |        |    |                        |        |    |
|--------------------------|--------|----|------------------------|--------|----|
| GAGGAAAAATGAGCACCGTC     | 59.676 | 20 | GGTGGGGGTTATCTCCTGAT   | 60.015 | 20 |
| GCTAAACTCCAGCGCAAAAC     | 60.025 | 20 | AACGGATGAGAAAAGCGATTG  | 60.214 | 20 |
| CTCGCTCGGAAAAGCAATAC     | 59.982 | 20 | ATTGGGGGTAATAGACGGG    | 59.903 | 20 |
| GGTCACGATTGTTGGGTTTT     | 59.694 | 20 | CGTGTATATGCTCGAGATGGG  | 60.496 | 21 |
| TTTGGGATTCCTCTCGAAAA     | 59.617 | 20 | TGTGTGATGGAGCTTCTTCTTC | 59.478 | 22 |
| ACCTCGGACGCCTAAAGAAT     | 60.096 | 20 | TGCCACTCTGCAGGTACAAG   | 60.049 | 20 |
| TGACGAGTGCTGTGAATCCT     | 59.42  | 20 | CCCTTAGCTACCCAAAAGCC   | 60.089 | 20 |
| TTGAACTCCGTAGCAACCAA     | 59.317 | 20 | CACACGCACACACAAAATCA   | 60.204 | 20 |
| GCCATGTCTTCTCTTCGAG      | 59.95  | 20 | CAACTTTCGCTTCTCCAAC    | 59.853 | 20 |
| CTCACCTGCATCGTCTTTCA     | 59.984 | 20 | GGGGCCAAGAAAAGAGTAGC   | 60.208 | 20 |
| CTGCTCTCCAGAAGCAAACC     | 60.134 | 20 | AAATGCACAGAATGTGAGCG   | 59.871 | 20 |
| CCCATGGAACTCGGAATAA      | 59.756 | 20 | ATAAGAAGGGCTGCCGAAAT   | 60.061 | 20 |
| CGCAGGATTGTACGGTTGTA     | 59.609 | 20 | CTGGCAATTCAGTTGTCCT    | 60.111 | 20 |
| TGAAGTTAGGAAATAAGGAGGTG  | 58.743 | 25 | ATTATCCCAACCCAACCACA   | 59.91  | 20 |
| TGCGACAGTTTGTGTGATGA     | 59.868 | 20 | CTTGCTTATCCCTCGTCCAA   | 60.206 | 20 |
| GGATTGAGTTTTTAAAACCA     | 59.054 | 21 | ATAAAATGACAGCCCAACGC   | 59.967 | 20 |
| TTGGTTGAAAGATGAGGGAGA    | 59.656 | 21 | ACAGTTGAGGCCCTTAGT     | 59.994 | 20 |
| TCGATTAACCTGACAAGTTTTGAA | 60.037 | 24 | TAACACGCATCCGATGAAAG   | 59.688 | 20 |
| GGAGACAGGCGTTTTTGTT      | 60.156 | 20 | GCATGGCCCTGTCAATTAGT   | 59.962 | 20 |
| TATGAGAGACGAGCTCACGC     | 59.297 | 20 | GAATTGGGCAATGGAGAAGA   | 60.014 | 20 |
| TTGGTTATCATTGTCACAGTTTT  | 58.935 | 25 | CATGGACCCACATGTCATA    | 60.048 | 20 |
| AGGCCACCATACCACAATA      | 60.074 | 20 | CGATTCGAGTTCCTGGGTA    | 60.066 | 20 |
| CCCTCGTCACTTGTCTGTCA     | 59.864 | 20 | GACATTCGTCGTTGAGGTGA   | 59.682 | 20 |
| AAGAGCAACAGCGGAAGAAG     | 59.757 | 20 | TCGAAAAAGGAAAAATAAAAT  | 59.468 | 25 |
| AACGCCTTCCAAACTTTCA      | 59.724 | 20 | TTTCGAAGATCAATGGACGA   | 59.2   | 20 |
| ATTTGTTCAAATCCGCGAC      | 59.945 | 20 | GTGACGAGAGGATCACGGTT   | 60.12  | 20 |
| AACTTTGGAATCGACATTGCT    | 60.007 | 22 | AAAGGAGACTAGTGGCTGCG   | 59.639 | 20 |
| GTGAGCAACAGCAGGTGTA      | 60.056 | 20 | TTGGCCTAATTTTGTGTGGTT  | 59.37  | 21 |
| GGTTTACCCATAGCGCACTC     | 59.597 | 20 | GATCATACTGAGCTGAATAGTT | 59.641 | 26 |
| TTCTCCTCACAATGCTTCCA     | 59.369 | 20 | AGGATGGAGTGCTTCAGGTG   | 60.261 | 20 |
| ATTAGCTCCTTGCTGCGTGT     | 60.044 | 20 | AAAACATGAAGTCGGGCAC    | 59.978 | 20 |
| TCCAAGAATGAAGCCACTC      | 60.195 | 20 | AACGACGGTGGGTTGTTAAG   | 59.891 | 20 |
| AAGCTCAGTAGCGTTCTCGC     | 59.927 | 20 | TTGTACTTCGCACTTTTCCG   | 58.964 | 20 |
| ATATTGGTGGTCACATGGGG     | 60.317 | 20 | CCACCCACTGCATTCTCTCT   | 60.261 | 20 |
| AATGATTCCTCCCTTCCAT      | 59.588 | 20 | CGAGGTTTGTACCGTTCAATTT | 60.269 | 22 |
| CCGGTACATTCGGTAGATGG     | 60.206 | 20 | GGATGGTAGCTCTATGCCGT   | 59.178 | 20 |
| TTGAGCATTGATACAGTGGAGA   | 58.379 | 22 | TCCCTTCTTCTGATGTTACCG  | 59.181 | 21 |
| TCTCGATTCAACTCATCGGA     | 59.322 | 20 | TCACATCTTATAGCGTGCGG   | 59.856 | 20 |
| TCATTTGGAAGGAGCAACT      | 59.813 | 20 | CCGTTTCAATCGACACAACA   | 60.552 | 20 |
| TGTTAATGAAATTTACGCACACA  | 58.225 | 23 | TGGTGGATTGGAGATGGTTT   | 60.173 | 20 |
| TGACAACGGCTTGTATCTGC     | 59.871 | 20 | ACCGTTGAGACAGTTGGGAG   | 60.151 | 20 |
| GGGCTGTACTTCAGAGGCTG     | 60.012 | 20 | TCGGAATTGATTTGATGCCT   | 60.414 | 20 |
| TCACACGCTCAGTGAGGTTT     | 60.03  | 20 | TGCGTCTGCTAATCTCCCTT   | 59.978 | 20 |
| GTTCCACAAAAACAGGGTG      | 60.246 | 20 | AATGTTCTTCAAGGTTGGCG   | 60.11  | 20 |
| AGCGATTTAACCTCCCCTT      | 59.966 | 20 | AGGGGATTGCAAGCTTTTGT   | 60.074 | 20 |
| TTCGGGGAGTAGATGAATCG     | 60.029 | 20 | TGCCCTAACAGACCTTGACC   | 60.111 | 20 |
| ATTTGAAAAGGCCCGTTAG      | 60.305 | 20 | TTGGCCAGGAACCTTAGAAGC  | 59.452 | 20 |
| GGGAAAGATTGCAAATTCA      | 59.878 | 20 | GTGTTGAGATGCCTCAATCAA/ | 60.118 | 22 |
| CATCTTACCCGGCTTCTCTC     | 59.95  | 20 | AGGAGAAGATGCCTTGCTTG   | 59.574 | 20 |
| ACATTTAGCCACCATCTCC      | 59.934 | 20 | GAGTTTCTGCGAAAAGTGGG   | 59.853 | 20 |
| CAGGAAGTTTACCCGGAAGA     | 60.224 | 20 | TTGCCATTTTCAATGATCCA   | 59.867 | 20 |
| GTGGCTTGTGTTTCTTGGT      | 60.012 | 20 | TTGGGTGTTTTCAAGAAGCC   | 60.088 | 20 |
| GAATTTTGGAGATCGACGCC     | 59.651 | 20 | TTGTTTTGTAATGGTGCTTGA/ | 59.562 | 23 |
| TTGATTCTGCCATGTACAAA     | 59.172 | 21 | GGCTCAAGTTGATTGTAGCG   | 58.529 | 20 |
| TGAGTAAGCCGGTGCATTTA     | 59.325 | 20 | GCAGAAATTTGAACCGGGAT   | 61.184 | 20 |
| GGCGTGCATGTTTTATCTGA     | 59.694 | 20 | GAGAGGGAACCATTTGACGA   | 60.05  | 20 |
| GTGTATGCTGCCATGTGTC      | 59.999 | 20 | TGATCTGTTTCTGGCTTCCA   | 59.369 | 20 |
| TTGATTTGGCAATTCAACG      | 59.538 | 20 | GCTCTGCTTTGATCAGCTCC   | 60.249 | 20 |

|                         |        |    |                        |        |    |
|-------------------------|--------|----|------------------------|--------|----|
| CGCTTCGCCATTGTAATTTT    | 60.095 | 20 | ATAAAATAATCCGGGTCGGG   | 59.874 | 20 |
| ATGCCAACCCACGCTAATAA    | 60.343 | 20 | TTGAATGTTTCTGCTGACGG   | 59.84  | 20 |
| ATGAGAGCGAGCAAGGGTTA    | 59.978 | 20 | AATGGTAATCCGATTGGCTG   | 59.784 | 20 |
| TGATTA AAAACTGAACCGGACA | 59.492 | 22 | CGAACCGAATTCCATGTTTT   | 59.801 | 20 |
| AGAAATTGGTGGGAATGCAG    | 59.933 | 20 | AAATAAAGCGGCAACCACTC   | 59.229 | 20 |
| CACCGCCTCGTATCTTCATT    | 60.096 | 20 | AATGCAGCCGACTCTTTCTC   | 59.579 | 20 |
| ACCTCGTTTTGATGCCAGTC    | 60.119 | 20 | TTGCAAGTATTCTCTTCGCA   | 57.257 | 20 |
| GGCCTGATCTTACCTAGGGG    | 59.919 | 20 | AAAATCAAAGGCCACAATG    | 59.801 | 20 |
| CGTGATTCATGCCATATTTGA   | 59.391 | 21 | AGGGTTTTATTTGCTGGCTAGG | 59.638 | 21 |
| GGTTAATCCAACGGCTGAGA    | 60.074 | 20 | TCCACCTCTCCACCAAATTC   | 59.903 | 20 |
| GCTCCTCCTATCCACATCCA    | 60.034 | 20 | CTGCAAAGCAAACAACAGGA   | 60.027 | 20 |
| TGGATGCGTTGATTGAAAGT    | 59.127 | 20 | TGGCCTTGCAAAACTAAAA    | 59.344 | 20 |
| TTTCACCCAAATCACGAACA    | 59.941 | 20 | TCGATTCAGTTTCCCCACTC   | 60.05  | 20 |
| AAGGGGAGTGATTGTGTTTCG   | 59.966 | 20 | TATTTAATGCCGCACCTTCC   | 59.928 | 20 |
| TCGGTTGGTGAAGTTGTTGA    | 60.128 | 20 | CATTTCAAATCCTGGCTCC    | 59.505 | 20 |
| ACACGGATCGGAAATCCATA    | 60.155 | 20 | CCAGAATGTTGTTCTGCTGC   | 59.293 | 20 |
| TCCAACGGAAATCCTTATACTCA | 59.851 | 23 | TGAATATATTATCAAATCCAAT | 57.918 | 26 |
| AACCCACTTCCACAGAATGC    | 59.973 | 20 | GTCGTTATTGCGTTACGGGT   | 59.889 | 20 |
| TGCACATGCAAAGCTAAAGG    | 60.014 | 20 | CTGGATCATGGATGGTAAATC/ | 59.645 | 22 |
| CGATCACTGTAAGAACCGCA    | 59.864 | 20 | CGCCTCTACCAGACATGGTT   | 60.134 | 20 |
| AGACCCAAAATCGCACAAATC   | 59.939 | 20 | TGAAATGGGCTGTGAATGAA   | 60.049 | 20 |
| GCTGGGATATTTTGCCATGT    | 59.791 | 20 | TCCATACGCACTGCTCTTTG   | 60.011 | 20 |
| TCGAGCAGTTTGAATTGGTG    | 59.84  | 20 | TCCAAAATCAGAAAATGGCA   | 59.087 | 20 |
| TTGTGGGCTTATTTCCATCC    | 59.762 | 20 | TCACACACACTCACACGCAT   | 59.772 | 20 |
| ATTGTGTTGGTGCTTGATGG    | 59.42  | 20 | TGTCAACAAAAGCTTAAAACTC | 60.192 | 24 |
| TGCCATTTGATGGAGAATCA    | 60.009 | 20 | GATCATGCTTTTCTGACCG    | 60.603 | 20 |
| AAGCGAATCCAGGTAAGGCT    | 60.228 | 20 | GAATTTTAGTGTTTCGGGCCA  | 59.938 | 20 |
| GGCAGCAAGTTAACAAGGC     | 59.889 | 20 | TACTGGAGTGGTCTGTCCCC   | 59.962 | 20 |
| TCTCTTTCCCCCTCCTTTTG    | 60.54  | 20 | AAAAGAGTGGCTTTTGCGA    | 59.996 | 20 |
| CTCCCCACTTTCCTTCAACA    | 60.081 | 20 | TGCCGGTCTGAAAACATACA   | 60.111 | 20 |
| GCCATTGCACTTATGCTCCT    | 60.243 | 20 | GGGCCATTTGCTCTATTTGT   | 59.046 | 20 |
| ATGGACTTGCTGAAACACCC    | 59.973 | 20 | AGCTGCTAGGTTTGCGAATG   | 60.543 | 20 |
| ACGTTTTCCACCTTCAAGACA   | 59.624 | 21 | GGCATATTTGGGGAGAGGTT   | 60.152 | 20 |
| AACTCAATGGGGACATCAGG    | 59.779 | 20 | CCACACTCTCCTCCAAAAGG   | 59.691 | 20 |
| TGCAACTGCATGGGATAGTC    | 59.679 | 20 | TCTAGCCCAAAACTGCCAAT   | 59.708 | 20 |
| GGAGGAACTCCATCTCCCTC    | 60.012 | 20 | TGTCCGAGGTTTTCGTCTTCT  | 59.844 | 20 |
| GAGACAAAAAGCATTGCCC     | 59.691 | 20 | TCCAATGTGGTCCAATTTA    | 58.669 | 20 |
| AATGGAGATCCGTGCTTAC     | 60.081 | 20 | TCAGAGATTCTCCATTGGC    | 60.158 | 20 |
| GGTAAAAGGCCATGTGAACT    | 59.973 | 20 | CAAATGTCCCGTTGAGTCT    | 59.966 | 20 |
| TACACCAAATCTTGGCTCCC    | 59.933 | 20 | GATCATGCAAGAAAACGTGG   | 59.127 | 20 |
| TTTCGACCAATGAGAAAGGC    | 60.192 | 20 | TACCCTCCAACAGAGCATCC   | 60.073 | 20 |
| TGGTCTGCCTAATTTACTGCAA  | 59.779 | 22 | GGCTCATGGTTTTTGTGCT    | 60.118 | 20 |
| AGACTGTTCAAGGGCAGCAC    | 60.453 | 20 | TCACAAACCCTTGCTTTTCC   | 60.088 | 20 |
| GCACTTTGTCTTGACGCTGA    | 60.183 | 20 | TGAGGATGAAGTAGCGTTGG   | 58.874 | 20 |
| CCTCCGGTGGATACGTAAA     | 59.817 | 20 | GGACATATTTTGTGGGACGG   | 60.051 | 20 |
| CCAAGCACATCAGCTGAAAA    | 59.988 | 20 | CCTTGGAGATGGGGAATCTT   | 60.264 | 20 |
| TCCTGCTTTTCATCGCTCTT    | 60.096 | 20 | GTCGCCTCTCTTTCAACGAC   | 59.997 | 20 |
| CAGAAGGCTTGAGATTTGG     | 59.807 | 20 | CGTATTCAATAGACACATTGCC | 59.903 | 23 |
| CACTAAGTGGTGCTTTCGAGG   | 59.921 | 21 | CCAATTTTCCCCAACTCAA    | 59.772 | 20 |
| CACGTGGGACTACTGACCCT    | 60.026 | 20 | GAAGCAAGAAACCGCTTGAG   | 60.132 | 20 |
| TCTCATCCCCTGTTTTACC     | 59.903 | 20 | GGTCGATTACTCCACCCTCA   | 59.927 | 20 |
| TGTCAGCAGACATAGCAGGG    | 60.008 | 20 | CCAATCTGTCAGCATTGGA    | 59.648 | 20 |
| CCAGTCGAACCGACAAGATT    | 60.111 | 20 | CGACATAAAATTAAGTCAAATC | 59.071 | 25 |
| CGCTTTTACTCGAACCCAAA    | 60.236 | 20 | TTTGTTCACCACTCCATCA    | 59.935 | 20 |
| GGCTGTTGAAAACCCTTGC     | 59.615 | 20 | AGATGAGTGAGGCTGGAAGC   | 59.56  | 20 |
| AAAGCAATCAGTCAAAGGGG    | 59.17  | 20 | TATTCGGAAACTGGAATGGC   | 59.901 | 20 |
| GAGAGCAAGCAACAATCCAA    | 59.002 | 20 | TCCACCAAATTCAGCAATG    | 59.518 | 20 |
| TGAGTGAGTTGGCGAGAATC    | 58.96  | 20 | TTTACATCATGTGGTCGCGT   | 59.995 | 20 |

|                          |        |                            |        |    |
|--------------------------|--------|----------------------------|--------|----|
| CTATATAGGTCCCCGTCCC      | 59.51  | 20 ATTTTAGGGCAAACCATGCC    | 61.039 | 20 |
| CCCTGCGTGGTTTTCTTT       | 60.096 | 19 TAAAAATTGCATGCACCTGA    | 57.788 | 20 |
| AAGTCCTCCGCTCTAGCTC      | 60.117 | 20 ATCTCGCACGCGATAAAAAT    | 59.71  | 20 |
| GGAGGTTGAGATTTTGGAGG     | 58.568 | 20 GGCTGTTGCTGAGTGTGAGA    | 60.187 | 20 |
| TGAGAGGAAAATGGTTTGGG     | 59.903 | 20 CAAAGAGTATCGGCTGTGGG    | 60.647 | 20 |
| CCTCGATGGTAGACATGCAA     | 59.673 | 20 TAGCAGCCACACCTGACATT    | 59.318 | 20 |
| GTATGACAAGCAGCAGTGCC     | 59.476 | 20 GCAGAAAGATTTTGCAAGGC    | 59.967 | 20 |
| CGGATTTAAGGGTTATTACCTGAT | 58.81  | 24 AATAAGTGCTCCGACTCCGT    | 58.817 | 20 |
| TTTGGCTTGAACAGCACTTG     | 60.027 | 20 TGCAAGTGATGACCCAAAAG    | 59.691 | 20 |
| TTTTTGGAGCCGAGAAGAGA     | 60.066 | 20 TGTACTGAATGCATCAAAACCC  | 59.867 | 22 |
| GCGGATTATAATGGGTGAT      | 58.741 | 20 TCCCCATTCCCTCTCTCTCT    | 60.149 | 20 |
| GAATGTGGGCGATCTTGACT     | 60.081 | 20 CTCTCCACACGCACTAGCAA    | 60.199 | 20 |
| TATAAACCCGGAACGACCA      | 60.181 | 20 GTGGGAGAAATGGGGAGAAT    | 60.133 | 20 |
| CACTTTCATCCAAAATGCAC     | 60.359 | 21 TGCAATAGGTAGAGAAAAGTT   | 60.507 | 26 |
| GCACAAATTTCAATTCACGTT    | 59.036 | 22 TGTTATTATTGGAACAGCACCC  | 59.786 | 23 |
| GATGATGGTGTTCATGCTT      | 59.533 | 20 TGTTGACTCCACATGTTTCA    | 59.992 | 21 |
| ACCATTTAATTTCCAAAGGGTT   | 57.897 | 22 AGTGGTACACGTCGGGAAAA    | 60.41  | 20 |
| ATGCTTACGTGTTTCAGGGC     | 60.14  | 20 ACCATCGATCTCTGCTTGCT    | 59.981 | 20 |
| ACCTTGATATGATGGTTAGCA    | 59.501 | 22 AAGTCAATTCGATGACAAA     | 57.752 | 23 |
| GCGCAAGAGCTTTTTCTGAG     | 60.407 | 20 AAGCAAAAAGTTCTCCGGCT    | 60.373 | 20 |
| CACATCTTTAAGCCATGGGA     | 59.946 | 21 AAAACTGCTGCCTTTTGCAT    | 59.889 | 20 |
| AGATCCACGTTAGAACCCCC     | 60.19  | 20 CATCTGCACCCATTTCTTTT    | 59.933 | 20 |
| TCCGATCTCTGTTTCGATTTG    | 60.199 | 21 GAAAGCCGAGGAGAACTCTTT   | 59.114 | 21 |
| TGCAAATGGTACTAGGGACG     | 58.649 | 20 TTTTTGAGTAGGGGGAAGGC    | 60.423 | 20 |
| TCATACGGTTCGAAATCTCCC    | 59.894 | 20 TGGATTCGTCCAAAAATTCC    | 59.739 | 20 |
| GGACAGCAGGTGAGAGCAAT     | 60.418 | 20 GGCCAGATTAATTCTTTGCG    | 59.682 | 20 |
| GTAAAGCCCATTTGAACCCA     | 59.801 | 20 TCATTTGCGCTTGTCAATTC    | 59.816 | 20 |
| TGTAGCAACGCATCTTTGGA     | 60.401 | 20 GGGCGCTATCCATTATGAAA    | 59.892 | 20 |
| CCTCAATTTCTGCAGCCTTC     | 59.955 | 20 CTCTTTTCCATGGGGTAGCA    | 60.066 | 20 |
| TGGATGGGTTACTGGATCAAT    | 59.115 | 21 CGGCATTCTATTGTGTGAATGT  | 59.889 | 22 |
| TTATGGGACGGGGGAAGTAT     | 60.391 | 20 TCTCATTTATGCATCACTAATTT | 59.142 | 26 |
| GTGCGTTTTCGTCCAGAAAT     | 60.118 | 20 TTCACGTTCACTCTCGCATC    | 59.992 | 20 |
| ATTCGATGAATGTGCTGCAA     | 60.228 | 20 GGACAAGAATGGTTTGGGAA    | 59.767 | 20 |
| TTAGAGGTGTCCAACAGGGG     | 59.959 | 20 CAGATCCTGACAGCCCATCT    | 60.223 | 20 |
| CCACGCGCTCCTTAACCTTAC    | 59.904 | 20 CCTGAAACTCTCATCGCACA    | 59.984 | 20 |
| TTGATGGCATCGATGAGGTA     | 60.033 | 20 ATGGTCTATGAAATGCCCCA    | 60.155 | 20 |
| AAGGCACGGCCAAGATAATA     | 59.569 | 20 AAGCGAGAAGAAAGAGCGTG    | 59.898 | 20 |
| TCCGAATTCGAAAAGAAAA      | 59.633 | 20 GGGCAGAGAACGTGCTTTAT    | 59.34  | 20 |
| TGAATGTAGGTCGGGGTAGG     | 59.807 | 20 CGATTTGGATTTCGAATTCTGT  | 59.033 | 21 |
| AATTCATCACCACTCACCC      | 59.636 | 20 GCGCATGCAAATAGAGGAGA    | 60.318 | 20 |
| TCGTCCTCTCCCTTTCTTT      | 60.183 | 20 GCCGACTACCAACTTTCTC     | 59.851 | 20 |
| TGACACTCACGATTTACCGC     | 59.722 | 20 TCTGACTCGCTTTGATGTGCG   | 60.136 | 20 |
| GTTACAGTCATGGTCGTTTG     | 60.008 | 20 GATCCAACGGCTGAAAATGT    | 59.939 | 20 |
| TGGCAGAGTGGACTTCTCAA     | 59.545 | 20 CACTCTCTGTTGCCCAATCT    | 57.87  | 20 |
| CAGCCTGGTCCAAATAGCAC     | 60.657 | 20 TGTGAAAACGTTGGTTGTGAA   | 60.035 | 21 |
| TAGTTTTGGATAACCGTTTCG    | 59.817 | 20 CTATGGACGCAATCCTTTCC    | 59.528 | 20 |
| GGAAGAAATTA AAAACCCCA    | 59.195 | 21 ACCCAGCGAAGTCACAAGAG    | 60.444 | 20 |
| CTGGGATGGGAATGAATGAG     | 60.272 | 20 CGGGAGAGCAAGTTTTGAAC    | 59.853 | 20 |
| TCCTCAAAGCAATAACGCTAA    | 57.757 | 21 TGATGTTGATAAAAAGTATAAA  | 57.4   | 25 |
| TGATGTTTCATAATTTGGGCA    | 58.876 | 21 TCATCCAATGGTTTGGTTTG    | 59.222 | 20 |
| TCAGGCTTACAGCCATCCTC     | 60.362 | 20 TGCTTCCAATCAATTTTCCC    | 59.878 | 20 |
| TCATCCATTCCCAGTTCTCC     | 59.862 | 20 GGTTGGAGGAGACGATGAAA    | 60.05  | 20 |
| TCGCAGTAGGTAAGGCGT       | 59.904 | 20 AGTGCCGATTGAAGTGCTGT    | 60.865 | 20 |
| CACAAAAGGATGGGAATTGG     | 60.162 | 20 TGAAGTTACGAAATAAGGAGG   | 57.535 | 23 |
| ACATTTTCAACGGCACGATT     | 60.374 | 20 TGGTTTTTGCACGATAGCAG    | 59.872 | 20 |
| TCGCACAGATCGTTTATAG      | 60.119 | 20 GCTACAGCAGCCATTGATGA    | 59.979 | 20 |
| CTGCACCCTGCAAAAGTACA     | 59.904 | 20 GTCGACAATCAAGTTGCAGG    | 59.293 | 20 |
| CCATTGATAGCATGCGTGAC     | 60.104 | 20 GATAAATTAATCGCTGGCTGG   | 58.73  | 21 |

|                          |        |    |                        |        |    |
|--------------------------|--------|----|------------------------|--------|----|
| CAGGTGGGATTGTTTGCTTT     | 59.971 | 20 | ATTTTGGAGGGAAAGTGGCA   | 61.728 | 20 |
| TTGCTAATCTTCGATGTATCAACC | 59.545 | 24 | TAAATGAACCGCAAATTC     | 59.773 | 20 |
| GCCTTGCATTGTTGAAACTG     | 59.322 | 20 | TACAAAACCATAACACGCGG   | 59.486 | 20 |
| TGACAGATGCACTGATCCAAA    | 60.256 | 21 | TTTCTTGCAAGTTCCGTTT    | 59.724 | 20 |
| TGCATGTGTGCATGTTTGTT     | 59.595 | 20 | GAGTCCCTTGTGGGCAGTA    | 60.111 | 20 |
| TGCATTTGAATCCTTGAAAA     | 58.265 | 21 | TCCACCCTCAGAAATTCAAA   | 58.117 | 20 |
| TGATACCCTGCTTTAATGAAAA   | 57.906 | 23 | CTTGCAGCATGGTCAAAGC    | 60.555 | 19 |
| CGCAGCCTGAGTTGATTTAG     | 58.675 | 20 | TCACCACAACCAAACAAAA    | 59.889 | 21 |
| TGTGATGGAACGAGGATTTG     | 59.496 | 20 | GCTCTCATTGTAATCTCCACCA | 59.198 | 22 |
| TGAAGATACGAATCCTGGGC     | 60.036 | 20 | GCGGTTATCACCGGATCG     | 62.397 | 18 |
| TGTGAGGTTCTTTCCCCTTG     | 60.081 | 20 | ACTGAGATGCTCAAGCCGTT   | 60.02  | 20 |
| TGCTGCAAATGCTTCTCAAC     | 60.142 | 20 | TCTGTGCGCTTGAATGATTG   | 59.799 | 20 |
| TCATGTCCTCCAACATCCAA     | 59.893 | 20 | TTTGGTACTTCATCATTTAAAA | 59.446 | 27 |
| TCACTTCTGCCATTCTTCC      | 60.195 | 20 | CAATGCAGCAGGAACAAGAA   | 59.988 | 20 |
| GGTTTGGGCCTCGTGAATA      | 59.823 | 20 | TAGGGCCCTTAGTTCGTGTG   | 60.125 | 20 |
| TGAGAGAGAGAAAGATAATCCTA  | 58.331 | 27 | GGGAATTACTTTGGTTTTGGG  | 59.575 | 21 |
| CCGAAATCGGAGTTAGCATT     | 59.182 | 20 | TGGACTCTGGAAGCTGGAGT   | 59.986 | 20 |
| GCATAGGGAGATTTGCGGTA     | 60.06  | 20 | TGCCATAGATATGCACCGAG   | 59.67  | 20 |
| AATTCGGTGTATTTAGCCCC     | 57.948 | 20 | GAGCTTTGGTGGAAACATCC   | 59.532 | 20 |
| TCGGTCAATCCACAACCTCA     | 60.088 | 20 | CATGAACAGGTCCGCGAATA   | 61.965 | 20 |
| TTTGGCCGGACTAGTTATGG     | 59.953 | 20 | AGCTTCCGCAACAAGTTCTC   | 59.621 | 20 |
| TATTCTCTTTGCCACGCCTC     | 60.352 | 20 | CGGTGTGGATTTTGTGTGAG   | 60.001 | 20 |
| GATTGAAAAGGGTGGGTTT      | 60.032 | 20 | GAAGTGGTTTTTCGATCCCA   | 59.91  | 20 |
| CCCACAATCAACTTGCACAT     | 59.42  | 20 | TCATCGGGTAAGCAACATGA   | 60.073 | 20 |
| AGAGATCACTGATTATCTTTTCAA | 57.297 | 27 | ATGTCATTGACCAGACCCG    | 59.329 | 19 |
| GGCTATTGTGGCATGGAGAT     | 59.923 | 20 | CTTGTGCCACGTATCCTCA    | 59.716 | 20 |
| GATAAAGGTCGGCGTCAAAG     | 59.708 | 20 | AATGTAGTTGCAGCACGCAC   | 59.942 | 20 |
| TCGAATTGACATCTTCGTGC     | 59.805 | 20 | GGGACAAACAAAGGAAGTGG   | 59.425 | 20 |
| TGTGCCAAACCACTCTTGAC     | 59.726 | 20 | GGCAACAGTGGGATAATGCT   | 59.962 | 20 |
| TTCTCATGCCCTTCAAATC      | 60.014 | 20 | GCAACAACGTTAACAGCAGC   | 59.541 | 20 |
| ACAAAGACATGGTGGTGGGT     | 60.135 | 20 | CCTCCAGAACCACAGCAAAT   | 60.111 | 20 |
| GTCTCGATTGAATTTTCGCC     | 59.651 | 20 | ACTCAACCAAGGAAGTGTGG   | 59.097 | 21 |
| CAATGAGACCATGTTGGTGC     | 59.967 | 20 | GCAAAATTGGTCTAGAGAATT  | 57.367 | 25 |
| AACATTGGCTGGATTTCAAG     | 59.933 | 20 | ACGCATGTGCTTCTCAATCA   | 60.423 | 20 |
| TGTGTCCGGTGGTCATCTTA     | 59.96  | 20 | GAAGTCTTTTGTGGGGAG     | 60.729 | 19 |
| CCTTCCACCGCTACTCTCAC     | 59.867 | 20 | TTTCGTCAAATAATCCAAGCAA | 59.603 | 22 |
| TCCCCAGTCAATTTACACA      | 59.935 | 20 | GTGGCGTCTGGCTGATAAAT   | 60.103 | 20 |
| CAGCGTTTTTGTAGTCCATCA    | 59.84  | 20 | TCGATTTGGTCTATTTTCGGC  | 60.038 | 20 |
| ACGGTGGTGGAAAAGATGAC     | 59.827 | 20 | GGCATGTGCTGGCTATCTTT   | 60.243 | 20 |
| TGCATTGAAATTGACAGGGA     | 60.049 | 24 | ATAAGGAGGGTCCCTTGCAT   | 59.789 | 20 |
| TTCTAGAAATGCTCTCTTCTGA   | 58.845 | 20 | CCACCAAAAATGATTGCAGA   | 59.518 | 20 |
| TGCTAACATACGCATGAGGC     | 59.862 | 21 | CAGGAACAAATGCCATTGAG   | 59.123 | 20 |
| TTGACAGCTGTACCTGCTTGA    | 59.649 | 20 | CCAGAGAAGGGCTGAAAGAA   | 59.545 | 20 |
| CGACTTGCCTAGAATCGTT      | 60.543 | 20 | ATCGGTTATTACCGGATCGC   | 61.031 | 20 |
| CCTCCCCATGATTTTCTTT      | 60.124 | 22 | TCCATTGATTGCCACTTTCA   | 60.049 | 20 |
| TGGAAAGTCTGGACCTATGTT    | 59.864 | 20 | ATGGTGGATGAGTAGGCGAG   | 60.096 | 20 |
| ATTCTTGTCCACTGCTTGC      | 60.263 | 20 | GGTACCCTAATGGCAGAAA    | 59.933 | 20 |
| TTCCATCAGCATCTTGCAC      | 59.805 | 21 | CGAAATTTTCAACCAATTCA   | 59.797 | 21 |
| CCCATATTCATTAACGCTTGC    | 59.468 | 20 | GTTTCGTATCGGACGCCTAA   | 60.096 | 20 |
| GCCCCTGGTTTTGGTCTATT     | 60.187 | 20 | ACCCCATTTTGTGTTTCATC   | 59.797 | 20 |
| CATCTGCTGCTTTGTTTGA      | 59.988 | 20 | ATTGGATTTGGTGTGCAAGC   | 59.939 | 20 |
| TTTTAATCGCTCCGCATTT      | 59.696 | 20 | TCAAATGCCAGTCTTCACG    | 59.84  | 20 |
| CCACCTGAGGGAGTTGATGT     | 59.962 | 20 | GTCCCATTTCCACTTCCATC   | 59.192 | 20 |
| TGACAGCAAGCCAGATTGTC     | 59.992 | 20 | GAATTAGGGTGGGCGAAAAT   | 60.15  | 20 |
| GAATCAAGCTTAGGCCCA       | 60.214 | 20 | CACTGAATGAGGGGAAGCAT   | 60.073 | 20 |
| CCTGCAGATGACTGGCTACA     | 60.008 | 20 | GTTAGTGTGTTTACATGATTAC | 58.688 | 27 |
| TCATTTCAAGCAAAATCGCA     | 60.334 | 20 | CCGGATATTGGGAGAAATTG   | 59.227 | 20 |
| GCATTCTTAAATCCTCGGG      | 58.647 |    |                        |        |    |



|                         |        |    |                        |        |    |
|-------------------------|--------|----|------------------------|--------|----|
| GCTCAGGCTTACATGGGTGT    | 60.142 | 20 | CTTTCTCGGCAATACAAGCA   | 59.062 | 20 |
| AGCTACACCTGAGAGTGCCC    | 59.48  | 20 | TGAAGTTAGGAAATAAGGAGG  | 57.525 | 24 |
| CTTATGGTGGTATGGTGTAGAGG | 57.59  | 23 | CAAGTTCGAGTCCGAAGACC   | 59.844 | 20 |
| GCGGGTCAAGTTGAGGAATA    | 60.074 | 20 | AAGTTGAGGAAGCCGAACAA   | 59.853 | 20 |
| TTTCCCAGAATTTGCCTTCA    | 60.555 | 20 | GTGTTTCTGCGGTGGAGAAT   | 60.119 | 20 |
| AGGTTAGTGGTGCACGGTTC    | 60.035 | 20 | ACGTCCAGGGTTAGAGTCCC   | 60.371 | 20 |
| TGGTGGTGAATAGGGGACAT    | 60.05  | 20 | CCCTGTCCCAACAGTCATTT   | 59.82  | 20 |
| TGGTATGAGTTGGCTTTTTGG   | 59.982 | 21 | TTAGCACAGTGGTTTGCTTTG  | 59.024 | 21 |
| CTTTGGTTTTGGCAGGTCTC    | 59.711 | 20 | CCGAAGAAATGGATCCTCAA   | 60.006 | 20 |
| ATGCGAAACGAGAATAACCG    | 60.096 | 20 | AACAGTATGAGCAGCCAGCA   | 59.621 | 20 |
| TCTCTCAGAACCACGACACG    | 60.022 | 20 | AAAGGTGTGAGAGGGTGGTG   | 60.002 | 20 |
| ACCACAACCCATCACATTCC    | 60.497 | 20 | GGAAGGGAGCAAAGGTGTTT   | 60.476 | 20 |
| TAACGATGGACTAGGGGCTG    | 60.088 | 20 | ACCCTAATTGTTTCGGGCTT   | 59.835 | 20 |
| AAGACAAAACCTCGCAATGGG   | 60.11  | 20 | TCTAATCCTCTCCCCTGTCTG  | 59.234 | 20 |
| TCTTGTTCCAAGTCCCTTCG    | 60.224 | 20 | GGGGTTGAGTCCTTCCATTT   | 60.169 | 20 |
| TTGCTTTGGTCATACAAACATT  | 57.253 | 22 | CCACATCAAGAATCGGTGAA   | 59.496 | 20 |
| TTGGGTATTGTTAGCTCGGG    | 59.953 | 20 | ATTGTGCGTGCATTTTTACG   | 59.631 | 20 |
| TGGAACCTATTTCTCCACG     | 59.926 | 20 | GCATGAAGTCGGGTATTGCT   | 60.103 | 20 |
| AGAGTTAGGCGGAGGGTGCAT   | 60.096 | 20 | ACACGGGCTTTTGAATTTTG   | 59.975 | 20 |
| GCTTTGTGCCTGCATTATGA    | 59.839 | 20 | ACTAAGTTGGTTGGGACGGA   | 59.449 | 20 |
| GGGACGTGGTTAGCAGATGT    | 59.997 | 20 | TCCCACATCATCCCTTCATT   | 60.135 | 20 |
| ACAGCTGGCCTTGATGATA     | 60.624 | 20 | AAAGCAGCAAAAACCCACAG   | 60.284 | 20 |
| CACCTGCAAGAGAGGGAAAA    | 60.366 | 20 | GCACTGAAGTGGTGAGTGGA   | 59.872 | 20 |
| AATAGGTCGGGTTTTAGCC     | 60.32  | 20 | TCAAATTTAACAGGCCGACAT  | 59.465 | 21 |
| AGTCAGTGCTCACCGGATCT    | 59.866 | 20 | TGGCTCGAGGACTCATCTCT   | 60.096 | 20 |
| TCCATTTATCGGAGTTACGG    | 57.579 | 20 | CATTGTCCGGGACTTTGTCT   | 59.966 | 20 |
| GGTTTATTGGTGTCTGGTGCT   | 60     | 20 | GATTGTGCAGCAAATCCAA    | 59.67  | 20 |
| GAATTTAGTTTGGGCTGCCA    | 60.074 | 20 | AAAGCTAACCTCCCCACCTC   | 59.576 | 20 |
| GAATAAGCCTCCACACCCCT    | 60.328 | 20 | AATCTCTATCGGCATGTGGC   | 60.066 | 20 |
| TTGAACCAAACACCCCTAA     | 60.198 | 20 | GGAAGACAAATATGGGACGG   | 59.244 | 20 |
| GCCATGTGGAGGTTGATTTT    | 59.797 | 20 | TTCCATGCATTTTTATTATGTG | 59.725 | 23 |
| TTGGTGAAGATTCGATTCCC    | 59.871 | 20 | TCATTGGATAACAACCGCAA   | 59.93  | 20 |
| TTTACTCCGCCACGGTTAAG    | 60.124 | 20 | GGACGGCCTTTCTTCTTTCT   | 59.827 | 20 |
| ACAGGTGAAATGTCCAAGCC    | 59.973 | 20 | CACTGCGAAGCTTGAATCTG   | 59.74  | 20 |
| GAAAATGTCGTGAATGCCAA    | 59.523 | 20 | TCTCCAGAGCCTGCCTCTAC   | 59.703 | 20 |
| TGTGTTGATGCAAGTTTGGAC   | 59.606 | 21 | TTCTACTGCCTGGAATGCC    | 60.214 | 20 |
| ACGATTTACGCCGAGTTAGG    | 59.248 | 20 | CCTTGGTGCTGTTATGACC    | 60.375 | 20 |
| AAGCCTCCCAAGTCTCCAAT    | 60.074 | 20 | CAGTGATCGCAGGGGTTATT   | 59.955 | 20 |
| CCCCGAAAAAGTAATGGTGA    | 59.795 | 20 | ATTTGGGTAGAGGATGTGCG   | 59.955 | 20 |
| TACCCCTGCCATTAACCAA     | 60.181 | 20 | GGTCAAAACATTGACCATATTT | 59.949 | 26 |
| TTGGGGTGGAGAGAAGTGAG    | 60.229 | 20 | GAGGTGTGGAAGGCCGAATTA  | 60.074 | 20 |
| GTGTTGGACTTGGGTCTATCC   | 60.223 | 20 | ACATGCCTCTTCCACAACCT   | 59.579 | 20 |
| TCAGTCTGCACAGCTGACAA    | 59.293 | 20 | TCTGGAAGAGCCGTTGTTTT   | 59.853 | 20 |
| ACGATGGCTTTGCTGTTCTT    | 59.882 | 20 | GAATTCATGGGCGTTTCTTG   | 60.448 | 20 |
| AGGGCGTGCCTAATGGTATT    | 60.711 | 20 | TAGCTGTTGTGCGATGACC    | 59.871 | 20 |
| ATGGGCCTGCCTATTAGTGA    | 59.551 | 20 | TAGAAGGAGCTGATGGCGTT   | 59.978 | 20 |
| TTTCTGGGGAGTTCATGTCC    | 59.903 | 20 | TGACGCCATTTATCATAACC   | 59.355 | 20 |
| GGGGTTATCATGGGATCAAG    | 59.055 | 20 | AAATCATTCCCGTCATGGAA   | 60.133 | 20 |
| GGCCAGGAGATGAGTCAGAA    | 60.349 | 20 | CCCGCATTTTGTATGCTTC    | 60.456 | 20 |
| CCAAGATCAATGGTTCCTAAGTG | 59.879 | 23 | CATCGATTAATGGAGGCACA   | 59.499 | 20 |
| GAATGGCTTCGAGCTTACCA    | 60.352 | 20 | CTTTATGACAGGCGCACAAA   | 59.872 | 20 |
| GATGAGCCGAGGAGCAATAC    | 59.803 | 20 | TCCGCACCTTGTTTTAAAG    | 60.103 | 20 |
| TCCAATTCCGATACCTGACC    | 59.75  | 20 | GCGACCTCACAATCATAGCA   | 59.83  | 20 |
| GGCTGCAAACATTTGAGGAT    | 60.081 | 20 | GCAGACATAAAAAGGGCTGG   | 59.708 | 20 |
| TTTATGAAAAATGGCCCAA     | 60.123 | 20 | TCTCGCAGAAGGTGGATCAT   | 60.769 | 20 |
| GTTCCGATACGTCTGAAGGC    | 59.7   | 20 | TTAGGACAGATTTGCCCTG    | 60.066 | 20 |
| GGTAGGAACTGCATGACCAAA   | 59.985 | 21 | AAAGCCTCAAAGCATGAAA    | 59.823 | 20 |
| CAGGATAATCCAGAATCAACACA | 58.962 | 23 | ATCTTCACTCAGCATGCCA    | 59.399 | 20 |

|                          |        |    |                         |        |    |
|--------------------------|--------|----|-------------------------|--------|----|
| AATGTGCATGGTTGAAGCAA     | 60.119 | 20 | GGCCATCGCTAGGAAGTTTA    | 59.32  | 20 |
| TTTCAACATTCCAGCCGATCA    | 60.197 | 20 | AAACAAGAGCCGAAAAGGGT    | 60.11  | 20 |
| TTTCTTCCACGCCTTTCAAT     | 59.685 | 20 | CGTTGTCAATGGGATTTTCC    | 60.17  | 20 |
| CAGGACAAAGCAGATAGGGG     | 59.688 | 20 | ACCATATTTAAGGGTTATCACC  | 57.552 | 24 |
| GGAAGGAACAAGTGTGGGAA     | 59.943 | 20 | GAGGCTGGAGCAAGAGAAGA    | 59.827 | 20 |
| TGAGCACCTCCATTTCTTCC     | 60.195 | 20 | TTGGCTTCCATTTCTGTTCC    | 60.051 | 20 |
| TTTGAGTTGTGATGTTTGCATTT  | 59.549 | 23 | CAAAGGTTGGGGAGTTCAA     | 59.942 | 20 |
| GCTAGAGCCAAGGACATGAAA    | 59.467 | 21 | CAAAGTAGTGGGGGCAATG     | 60.357 | 20 |
| TATGAGATCTCGCCATGACA     | 57.71  | 20 | GGGAACACCCTTGCTTGAG     | 60.64  | 19 |
| CAAACAAAAGTCACGGCAA      | 59.746 | 20 | TTATCCCTTCGCTTTCTCCA    | 59.778 | 20 |
| GCTAAATATGAGTTTCTTCTTCCA | 58.073 | 24 | TTGCACATACACGCAGCATA    | 59.892 | 20 |
| TCAATCAAATCAAGGGGAGC     | 60.014 | 20 | CACGCAACTGAAAAACCAA     | 59.746 | 20 |
| GCCATCTATCTTGTTTCGTGACA  | 60.14  | 22 | AGTGTAGTTCCGGGGGAGTT    | 59.856 | 20 |
| TAATGCCACATGAGGAATG      | 59.35  | 20 | GTTTTTGGGCAGTGATTGCT    | 60.118 | 20 |
| TATCCGAGTTTTGCCAGGTC     | 60.074 | 20 | GACGATGCTCTGCACTCAA     | 60.144 | 20 |
| TCCGCAGAAACATATGACCA     | 60.073 | 20 | TTTACAATGCAATCGCCTCA    | 60.215 | 20 |
| TTCCAGTCTTCTGCCAATCA     | 59.369 | 20 | AGAGAGAAAAGAATCCCCGC    | 59.789 | 20 |
| TGCTTTCGTTCCAGGACTGTG    | 60.025 | 20 | CTGGTTCAGCTCCAATCTC     | 59.803 | 20 |
| GCAGCATAAGGCATAGGGAC     | 59.696 | 20 | CCACGATAAATGCTTCGGTT    | 59.96  | 20 |
| GCAAAATCGGCTAAACTATGG    | 58.775 | 21 | CAGGTTTATCAACACCATTAT   | 58.008 | 24 |
| TACTGGTCAGAATCACGGCA     | 60.263 | 20 | TCAAGGGCGTTTTTATATTTGA  | 58.675 | 22 |
| GTTTGATGACGTGTTTCGTG     | 60.008 | 20 | ATCGTTTTACCTTTTGCGA     | 59.586 | 20 |
| GTACGCGTTATTTGCCAACC     | 60.384 | 20 | AAGTACATTGAACGCCCTGC    | 60.14  | 20 |
| TGGAAGTTCTTGAGGTGCAA     | 59.415 | 20 | TCCGGCTCTTTAGTAACCTCAG  | 59.907 | 22 |
| CGGTTTCCTGTTTTCTCTG      | 59.705 | 20 | CACTTCAAACGTCTGCCAAA    | 59.734 | 20 |
| CTGTCTCCAGTGTCTTGCCA     | 60.022 | 20 | CGAAAATGCTCGGTTGAAAT    | 60.074 | 20 |
| GGCGTCTCATTTATGATCG      | 60.435 | 20 | GAAAGCTCCAACCACTCTGC    | 59.997 | 20 |
| CCATACGTTGGTAATGCAACC    | 60.124 | 21 | GGAATGTGGAGTTTGGTGGT    | 59.679 | 20 |
| TCTGCAAGTACCCCAAATC      | 59.933 | 20 | TGGGTGCTGGATACTGACTG    | 59.701 | 20 |
| CCACTGCATCACAAACCATTC    | 59.967 | 20 | GGGCTCTTCATCACTACCACA   | 60.126 | 21 |
| AAGGTCGACTAGCCAGCCA      | 59.898 | 20 | GCTGCAGCAATGAATCTGAA    | 60.104 | 20 |
| TTGCC TTCATATGTGGGGTT    | 60.192 | 20 | TTTTTCCGATTTGTGTTGGTT   | 59.348 | 21 |
| TGATGGCCCATGATTAAGA      | 58.917 | 20 | GCCCTCCATCAATACAGCAT    | 59.923 | 20 |
| AGCTATTCCCAAACCAACC      | 60.187 | 20 | TCGAACCAAATGCAAATGAA    | 60.051 | 20 |
| AATATGTGCTCTCATTTGATTACA | 57.519 | 26 | CCTCGCTCTAATTTGGCTTG    | 59.975 | 20 |
| AAATTCGTTCCGACTGTTGGA    | 58.201 | 20 | GCACCCTGCTTAAACCAGAC    | 59.74  | 20 |
| TGATGATTTTTGGCCTTTGTC    | 59.93  | 21 | CAGTAGCCGATGAATGCAGA    | 59.972 | 20 |
| TGGCGAAGAACTTCAATGACT    | 59.867 | 21 | GAGAGGCATTATCCAGGTCA    | 57.676 | 20 |
| TTACAATTACGAACGCGTGG     | 59.625 | 20 | CCAAAATCCCTTCTTTGTCTTCT | 59.992 | 23 |
| CATTAGTTCATCATTTTCATGG   | 59.329 | 23 | TTTTCAATTCCTCGATAGCAAG  | 60.207 | 23 |
| TTGACCGTCCAACAATTCAA     | 59.941 | 20 | TTCGGTATGTTGACGATGGA    | 59.924 | 20 |
| AGCACAAGAGGACGTATGGG     | 60.134 | 20 | TGTAAACAGTTCTTGGGTGGC   | 60.023 | 21 |
| CCACGACCAATTCTTACAGC     | 58.228 | 20 | GGCATCCACAACGATTAGAAA   | 59.952 | 21 |
| ATTCTCTCCAGCCCCTTCAT     | 60.037 | 20 | TCGTAGCCAAGAAAGCGAAT    | 59.982 | 20 |
| CCGTTTTATGGATGAGGAGA     | 59.887 | 20 | GGTGGTAGTGGTGCAGACAA    | 59.597 | 20 |
| ACGAACACCACGACAACAAA     | 60.049 | 20 | AAGAATGCAGGGCCTTAGGT    | 60.096 | 20 |
| TCATCATGTGATGCAGACCA     | 59.61  | 20 | CACATCATCGCATCGATTTT    | 60.041 | 20 |
| TGCCTGTATGAAAAAGCATCA    | 59.315 | 21 | TCTTTACCGCATAACACTCTA   | 60.121 | 25 |
| TGAATGGAACACACACACCA     | 59.376 | 20 | GACTGCTCTTCAGGCTCTGG    | 60.284 | 20 |
| TTCGGTAGGCCTGAATTGAC     | 60.074 | 20 | TTAGACCTCACACACCGACC    | 58.566 | 20 |
| TTTGGGTGAAGGGATTCTTG     | 59.903 | 20 | GCTGCTACCTTTCAGTTGGTG   | 59.928 | 21 |
| AGGCATTCGAAAAGCTCATT     | 58.93  | 20 | TTTCGGCATTTCGTAAGGTCT   | 59.708 | 20 |
| TCCTCTGGTTTCTGTTTGCC     | 60.232 | 20 | GCTTTTGCTTAGAGGCGGAT    | 60.84  | 20 |
| CATTGGCTGAGGTGGCTAAT     | 60.096 | 20 | TGGACGCCCTAGATTGTTTC    | 60.074 | 20 |
| AGGGAATGATGGAATGGTGA     | 60.135 | 20 | GTGGTTGGAGTGGGAGACAT    | 59.817 | 20 |
| TTTGCAAAACAAGCACGAT      | 59.349 | 20 | CAAACCAAAAACACTGTGACG   | 59.13  | 21 |
| AAGAATCGCCGTGAAGAGAA     | 59.955 | 20 | CCGCATCCACTAAACCCTAA    | 59.953 | 20 |
| AAAACAAGTCATCCATGTCCC    | 58.755 | 21 | GGGCTTCTTTTCTGGCTTTT    | 59.835 | 20 |

|                          |        |    |                        |        |    |
|--------------------------|--------|----|------------------------|--------|----|
| TCTTGCCTCCAAATTCAACC     | 60.051 | 20 | AAGTCCACCACCCTTGTGAC   | 59.859 | 20 |
| CTTACCTGCGTGTTTTACAACCTG | 58.932 | 23 | TGCTATTCATCTCATTGCCA   | 57.8   | 20 |
| GCCACAGTGGGAAGAACCAAT    | 59.973 | 20 | GCACCCCTTGTTTACTTGG    | 59.971 | 20 |
| GGCCATTGGGCTTATCCTA      | 59.87  | 19 | TGACAGTGGAGGGAGAGAGA   | 58.446 | 20 |
| TCGTACAGTAAACCCGAATGA    | 59.123 | 20 | CCCTATGTCAAAAGTGTGGGA  | 59.838 | 21 |
| GCCTCGCATGCTATTGCTA      | 60.096 | 19 | GCATTGGCTTTGCTTACTCC   | 59.851 | 20 |
| GCTTGAGTGTGGCACATTTAGT   | 59.313 | 22 | AGGCCAGACTTCGACATAG    | 59.308 | 20 |
| TCCTACCAGCCAAAACATCC     | 59.933 | 20 | GGGATGGTGTACCTTTTGA    | 59.933 | 20 |
| TGTCCTGAGAGGCAGGAAAT     | 59.803 | 20 | CAGGATCACATGTCCAACA    | 60.378 | 20 |
| TGGAATCGTTTGTCCACTTT     | 58.048 | 20 | TCGACTGCCTTCAAGTAAAGC  | 59.646 | 21 |
| CTTTGCTGTTCGTGGTTCAA     | 59.881 | 20 | TTGATCGCTTATGCATTCCCT  | 59.696 | 21 |
| CCATAGAAAACGGCCAGAAA     | 60.067 | 20 | ATGTTCCCTGTGGATGGTGGT  | 60.096 | 20 |
| ATTTTTAGCCATGGTCCCAC     | 58.765 | 20 | GCTGTGTTTTGTGGCATGTT   | 59.621 | 20 |
| CTTCGTCTTCTCCAACCTCGC    | 60.134 | 20 | TTCTGCAACACCAGCTTCTC   | 59.165 | 20 |
| TTCACTGAATTTGCCTGAAAAA   | 59.736 | 22 | GCTCGGTTTCATTGCCATAC   | 60.478 | 20 |
| GACCACTAATCCAACCCCT      | 60.052 | 20 | GAATGCTCTCCTTGCACACA   | 59.992 | 20 |
| GTTTCGTTGCGTCTGTCTTGA    | 60.032 | 20 | TTGGGGGACCATTTTGTTTA   | 60.024 | 20 |
| TCGCAAAAGTGATCTTCGTG     | 59.988 | 20 | TCTTCCACATTTGAGGGGAG   | 60.042 | 20 |
| ATGCGTGGGCGATATTATGT     | 60.203 | 20 | GAAAGTGCAACGGAAGTGGT   | 60.156 | 20 |
| TCAACACCCATCAAGATGCT     | 59.09  | 20 | TTTCCCTGTTTTAGGATGC    | 60.051 | 20 |
| TTCCACAATTGGATGCTTCA     | 60.049 | 20 | TTTTATCAATTCGGGGCTTG   | 59.901 | 20 |
| GACCCAAACGGAGCATCTAA     | 60.074 | 20 | AGGTGGGAGGTCAATTTGTG   | 59.82  | 20 |
| TCCAGAAGCAGTGAAGCACA     | 60.745 | 20 | CCCTGAACAGGTATGGATAAG  | 59.72  | 22 |
| TTTTCCACAGAAATGTTGGC     | 58.599 | 20 | TTTTATGCACAAGTGGCAGC   | 59.879 | 20 |
| TCGTCTTCATGCTCACTTCG     | 60.136 | 20 | GGATCAAACCCAATCCACAG   | 60.173 | 20 |
| AATGATGAGCCATGCAACAG     | 59.679 | 20 | GTGGACGTCCCAGATTGTTT   | 59.827 | 20 |
| TGTCACGGTCAGCACTTGTT     | 60.357 | 20 | GCCCAAACCTACCGAATCAA   | 59.938 | 20 |
| TCGGGGGAATAATAAGGGAA     | 60.45  | 20 | ACGCGTATGCATTGGTCATA   | 59.983 | 20 |
| TGGGTTTAGGGATTAGCTGC     | 59.182 | 20 | GCCTGAAAATCCATTTAGCG   | 59.682 | 20 |
| GATCCAATAAACAGCCCCAA     | 59.762 | 20 | TATTAACACAAATCCGGGGC   | 59.66  | 20 |
| GTGACGAGTTTGCGTGAGAA     | 60.032 | 20 | TGAGTGGCAGGGCAGATTAT   | 60.624 | 20 |
| ACCCAAACACCCATTCAAAC     | 59.55  | 20 | AAGTAAAGGAAGGCCGAAGG   | 59.72  | 20 |
| TCCTTGAATCAGCCACACAA     | 60.24  | 20 | CAGCACTGCACTTCTGAGAGT  | 59.856 | 22 |
| ATGTGGATTTCGTGTCCGATT    | 60.203 | 20 | TTGCATCTGATGATGCCAAT   | 60.041 | 20 |
| GAACCTCCTCGTTAGCTCCC     | 60.212 | 20 | GTTTGGGAGTATGGTTGGAA   | 58.798 | 21 |
| TTATGCCCTCCATTCTCTGC     | 60.177 | 20 | TTTGTGGGAAAAGTTGGGAG   | 59.942 | 20 |
| TTCTTTTATGGGCCATGAGG     | 59.894 | 20 | TTCGGATTCGATGCCTTATT   | 59.507 | 20 |
| CATTTTGCACCCCTCAATTT     | 59.801 | 20 | CCGAAAATCCCAAAGATGAA   | 59.872 | 20 |
| TTCGGTCAGATTATGTGGGG     | 60.713 | 20 | AAATGGGCCTTGAAATTTGG   | 61.011 | 20 |
| TGCTTCATGAACCGACAAAA     | 60.234 | 20 | AAAAGGGAATGAAGCAGCAA   | 59.823 | 20 |
| GGAAGTGAAGTTTGGGGTG      | 59.844 | 20 | CCTCTGCAAAATCCAGGAAA   | 60.184 | 20 |
| GGTTTACACTTTCCGGGTCA     | 59.83  | 20 | TGATGGCATTITTTCTGGTTG  | 59.518 | 20 |
| AACAAGGTTCCGTTCTGCAC     | 60.156 | 20 | CACCTCGAGATGGTAGGCAT   | 60.096 | 20 |
| ATGCACACCAACTGCCATAA     | 59.995 | 20 | TCAGCTCTTCTGCACGTCTC   | 59.446 | 20 |
| TGTCAAGTAACCATTAGGGC     | 59.985 | 21 | CAGGGCAGATATATTGGGGA   | 59.739 | 20 |
| ACCACCTGCCAACTATCTG      | 59.989 | 20 | GGAGGTGGATGGAGTGTGAG   | 60.527 | 20 |
| CAACAAGGTAAGTCAAGAACACA  | 59.337 | 23 | GTTGTGCCTAAATTCCGAGG   | 59.569 | 20 |
| AGCCTGGTTCCAAATTTTCC     | 60.299 | 20 | TTTTCCCACCAACAATCAT    | 60.029 | 20 |
| CCTCATTGCTGTGCTATCA      | 59.972 | 20 | ATGTGCAGCTTTATGGGAGC   | 60.243 | 20 |
| ACAATCGGAGTGCCATTTTC     | 59.939 | 20 | CATCTGAACTTTGCCAGTGC   | 59.445 | 20 |
| ACAGGAACAAGCCATCAAC      | 59.973 | 20 | TGTGGCTGTACTCCGTTATGA  | 59.209 | 21 |
| CAGCCCTGAGTGGTTTTTCT     | 59.328 | 20 | GATGCACTTAGTGGTGCCAG   | 59.318 | 20 |
| GAGAGGGGTGTTTGGTGCTA     | 60.111 | 20 | TGATTTTGGGAGTAATGGGG   | 59.617 | 20 |
| TTTAGACAGTTGCACCCAGC     | 58.926 | 20 | CAAGAACCGGGGATGACTAA   | 59.926 | 20 |
| GAAGTGCTTAAAACCTGCG      | 59.883 | 20 | TGCATGTGTATAATAACAACCC | 59.808 | 23 |
| CGGGAGAAATCTCGTTGGT      | 60.058 | 19 | TATTGACCCACTTGTCTCCG   | 58.569 | 20 |
| GAGGAGTAGAAGTCGGCGTG     | 60.012 | 20 | GGTTTTGGGTTTAAATGGGCT  | 60.055 | 20 |
| ATGACGCCATGGGTGTATCT     | 60.226 | 20 | CCAATTCACCCCTCTTTTT    | 60.159 | 20 |

|                           |        |    |                         |        |    |
|---------------------------|--------|----|-------------------------|--------|----|
| GCAGTGAAGAACGAATATGG      | 59.583 | 21 | GGGTCCTGTTGATCTTTTGCT   | 60.49  | 21 |
| TGAAGTTAGGAAATAAGGAGGTG   | 58.743 | 25 | CCTGTTTGGTACATGTCCGA    | 59.415 | 20 |
| GTGGAAGCCCATCTCCATAA      | 59.894 | 20 | ATAGCGTCCACTCCACCAAC    | 59.997 | 20 |
| GCCATGATGCCTGTGAAGTA      | 59.679 | 20 | GGA AAAATCTATTGCAGGTGCT | 58.341 | 21 |
| GGAATTTAGACGATTGATCCG     | 58.521 | 21 | TTTTCTTCTCTTTGCAGCC     | 59.569 | 20 |
| TTCCACCAGATACGGAGACC      | 59.927 | 20 | TCCGTCATCAGAAACCACAA    | 60.088 | 20 |
| ACGGATTTATTGTTATTACCTGA   | 58.008 | 24 | TGTCGTCTGACATTGCCTACA   | 60.317 | 21 |
| ACGACACATACGAATTGCCA      | 59.995 | 20 | ATTCTCAACACCCACAAGCC    | 59.973 | 20 |
| GTGGTCCATTGCTCAATCCT      | 59.934 | 20 | CCACCATTGCTAATCGTCCT    | 59.955 | 20 |
| TGAAATTTGGCTTGCAATTTG     | 59.679 | 20 | TGCAGTTTTAGGCATATCGAA   | 58.458 | 21 |
| TTTGAAATGGCAAACATCAA      | 57.606 | 20 | ATGCATGCAGCAAGTTGTTT    | 59.878 | 20 |
| ATGCAAAAATTGGTCCAACG      | 60.732 | 20 | AAAGGTTTTCAATGCAAGGG    | 59.064 | 20 |
| AAGAAGGGGGATTGTTGCTT      | 59.94  | 20 | AGAACAACGACTTCCACCAA    | 59.624 | 21 |
| AGGTCTTTCGAACCCCTTA       | 59.934 | 20 | CTCTTTGATTCCAACCCCAA    | 59.903 | 20 |
| TGGGAGCTTTATGATTTGGC      | 60.038 | 20 | GGCTGGTAACCCATCAAAGA    | 59.933 | 20 |
| ATGAAATGCATCAAATGCGA      | 60.043 | 20 | TGTGTGTGGCCACTAAAATGA   | 60.019 | 21 |
| CCCTTTTTCTCAAGGGAGGA      | 60.54  | 20 | ACACATCGTCCCTTAATCGC    | 59.962 | 20 |
| GATCAGCTTGCGAATTCAT       | 60.185 | 20 | CCTACAATGCCACACCTCCT    | 59.989 | 20 |
| CATGTTTCATGGCTATCATTGTC   | 60.351 | 22 | TTGTGGTGTGGAAGATCTGG    | 59.52  | 20 |
| CAGGAGAATTTGGATTCCGA      | 60.006 | 20 | TCCCTTTTGTCCCTTTTCGTA   | 59.541 | 20 |
| GTGACCGGTGGTTGTCTTCT      | 60.009 | 20 | CCTGGCAATTCCCCTTTAAT    | 60.143 | 20 |
| CTAAACTCCGCCAACTGCTC      | 60.015 | 20 | TACCTTGAGGTTGAGGGTGG    | 59.959 | 20 |
| CTGACATGGAAAGCACCCCTT     | 60.111 | 20 | TTTGAAAAAGGAATCGTGG     | 59.91  | 20 |
| AAGAATACCACCGCCAACCT      | 60.743 | 20 | TCTTGCAAAAAGCGCTACAA    | 59.764 | 20 |
| TTGAGGGTATCACCAATCTGC     | 59.947 | 21 | ATTGCGCTCAAAGATATGGC    | 60.203 | 20 |
| TTATGGAAACCACCCGAAGA      | 60.301 | 20 | CCAAAATTACATGGTTCGGTG   | 60.096 | 21 |
| CTGTTGCTTGGTGCAAGAGA      | 60.175 | 20 | TCTGGTAACCGAATTGCCTC    | 60.074 | 20 |
| GATTACGTGATCCAACGGT       | 59.82  | 20 | TCAGGTTTATCAACATCATTTA  | 60.138 | 27 |
| TTTCAATTCCTCCTGGCTTG      | 60.184 | 20 | GCCCATTTGCAGAATCCTAA    | 60.038 | 20 |
| CTTTTCCATTTCCGATCCAA      | 59.872 | 20 | GAAGGAAAAGGGCCATCTGT    | 60.443 | 20 |
| TGCACGTAGGCATGTTCAAT      | 60.142 | 20 | TGAAGTTAGGAAATAAGGAGG   | 58.743 | 25 |
| AGATGTGCATTACAGAGGGTGT    | 59.594 | 21 | TGAAGTGCTGACAAGGCATC    | 59.992 | 20 |
| CATCGTTAATGTTGATTTTTATTCC | 58.943 | 25 | CCACTTTTTGTTTTGGAGCA    | 58.794 | 20 |
| AGCCCTCCACGATAACATTG      | 59.955 | 20 | AAATGGGTCAATTTTGGCAG    | 59.801 | 20 |
| ATGACATGGCCATAACGAGG      | 60.744 | 20 | ATTGGTCCAGCAGGTTTGTG    | 59.973 | 20 |
| CAGCCATTTCCGACTAAGGA      | 60.206 | 20 | TGCATCTCCTCCACCTATCC    | 60.034 | 20 |
| GGTGGTGGTGTGAATAGGG       | 60.088 | 20 | AGCACAGCATGTGGAGTGAA    | 60.473 | 20 |
| TCACGTATGGATAAGGCTAAAGA   | 57.995 | 23 | TTGTTGCGCAATGAAGACTC    | 59.995 | 20 |
| GTTTCGATGTCGGGTTTCGTAT    | 59.82  | 20 | CATCATTCCCCTCCTCTTGA    | 60.003 | 20 |
| CTGTGTGCCTCCTCCTTTGT      | 60.298 | 20 | ACATCCGTCCATTTCCAAGA    | 60.317 | 20 |
| AGCCAATTGCCAACCAATAA      | 60.323 | 20 | TTGGGATCTTGATGAACAA     | 60.049 | 20 |
| TCGATTCTTGTCATCCATGC      | 59.61  | 20 | TTTCAATCACACCATCCCAA    | 59.75  | 20 |
| CGGTCAGTTACTCCGTGA        | 59.745 | 20 | GGTCAAATTGGGGATGAATG    | 59.991 | 20 |
| TTTCTGATGGGGTTGAGGAG      | 60.042 | 20 | CAACCCTTGATGTGGAGCTT    | 60.111 | 20 |
| TCTGAATGCCTGTTGGTTCC      | 61.046 | 20 | CCGCAAAAATCCTTCACAAT    | 59.938 | 20 |
| TCAGAAACCACTCCCTCACC      | 60.088 | 20 | CCCTCTGGAGCTCTTCTTCA    | 59.673 | 20 |
| TTGAGAGCAACCTACCTGGG      | 60.246 | 20 | TGCCTTTCCATGAACAAAAA    | 59.133 | 20 |
| CACATTTCCATTTCCATTGGT     | 59.537 | 21 | CAATATTGGGCAGAGGGAGA    | 60.029 | 20 |
| CACGCTTGCTAGACAACGAC      | 59.664 | 20 | ATCCCGACTGAGTGAATGA     | 60.475 | 20 |
| AAGAGAGGTCAAAGCTGCCA      | 60.134 | 20 | GAAGAACGAGGTGGGAGAAA    | 59.259 | 20 |
| CATCTCCGAAAATGGACTG       | 60.452 | 20 | GCGTGACACTTTTTTCGATT    | 60.118 | 20 |
| GGCGGTAGGTAGTTGTGCTC      | 59.621 | 20 | ATTATCATTTCCACCGCCAC    | 59.651 | 20 |
| TACACCAATTAACCCACCC       | 59.406 | 20 | TATAAATTTTGGCGCCGTTG    | 60.797 | 20 |
| TTTGCTGAGCATGTCATGTG      | 59.409 | 20 | CCCAAACATTTATTCCCCATT   | 59.774 | 21 |
| TGAGCAAAGAAGCCTCGAAT      | 60.096 | 20 | CGAACAAAGCACACATGAGG    | 60.301 | 20 |
| CAGAGAAGCAGACATGAGCG      | 59.88  | 20 | TGGCACAACAAAAGTAGAGAG   | 59.562 | 22 |
| AGCTTCATCTCTGCGTCCAT      | 59.981 | 20 | GTTCAAATTCTCCCTTCCCC    | 59.744 | 20 |
| CATCCAGGTCACCTTTTGT       | 59.82  | 20 | GGATGTTGATCGAATGGAGG    | 60.281 | 20 |

|                          |        |    |                         |        |    |
|--------------------------|--------|----|-------------------------|--------|----|
| AGGCCTCGATAAATCCGTCT     | 60.06  | 20 | TCCGGAGAGAAAAAGACACG    | 60.366 | 20 |
| CTCAGCAATTGCCAAAGACA     | 59.988 | 20 | GCGCTATGTACACGGTGTTG    | 60.203 | 20 |
| TCCCATTCAGGCTTGAGGTA     | 60.594 | 20 | TTTGCTTTGGGGTTGTGTTT    | 60.378 | 20 |
| TTTAATCGGGATCCGGGC       | 62.966 | 18 | CGCAAAGAGAGAAATCGAGG    | 60.088 | 20 |
| AGAGGGCTCCATGGAAATG      | 60.019 | 19 | TCATACTCTGGCTGCTCGAA    | 59.697 | 20 |
| ACCTCTGCCCCTGGATATG      | 59.95  | 20 | TTTGTGCATGCTTCAGTCTTG   | 60.042 | 21 |
| TGGTTGTTGCTGTCACTGT      | 60.203 | 20 | AGAAGCCCATATGGCATGAG    | 60.059 | 20 |
| CCAACTGCTTCTGGGGTAGA     | 60.246 | 20 | TAGTGCATCCTGCCTGTTTTG   | 59.864 | 20 |
| TCCGACCGGTTTTTAAATCA     | 60.294 | 20 | AGTGAATCTTGGTGGCTTCAA   | 59.726 | 21 |
| TCAACTAGTGCTGCGAATGC     | 60.165 | 20 | AGTGAAGGGAAATCCAGGG     | 60.298 | 20 |
| CCCCAGTCCCTGCATAGATA     | 59.91  | 20 | AATCACAGAATAAACGCCCG    | 59.96  | 20 |
| AAGCAGCCTCACACAAGTCA     | 59.622 | 20 | CACCTAGCAGCAGTGTGGAA    | 60.049 | 20 |
| CCAACGCATCCATATCATCA     | 60.307 | 20 | GCAGTTGTCGGAATGGAGAT    | 60.081 | 20 |
| GAATCTGTTGCGTCGTCTGA     | 59.992 | 20 | CAGTTGGCTTGTAAGTGGCA    | 59.904 | 20 |
| CAATTCGAAGCCCAAATCAT     | 59.901 | 20 | ACATATGGTGGTATGGTGCG    | 59.152 | 20 |
| CACCACATTTAGTGGTTATCATTT | 59.605 | 25 | GCTTGATAGTGGGCATGTTG    | 59.152 | 20 |
| ATCGAACGTAGGATTGGCAG     | 60.096 | 20 | GCTGCATCCCGATATGGTAG    | 60.457 | 20 |
| AGCACGGTCCCTTGACATT      | 59.478 | 20 | CTGGGGTTTGAGAGAAGCTG    | 59.982 | 20 |
| AATGAAACGGAATCCAGTCG     | 59.933 | 20 | AACTAACGTCCTCCCGTTCC    | 60.361 | 20 |
| CTTCGCTTTTGGCTATCTCG     | 60.11  | 20 | TTCGACTTTTCAAGTTATTTTTT | 59.74  | 26 |
| TGCACTTGCAAATTTAAGCTG    | 59.155 | 21 | GTTGCTTACACCGGATACAT    | 59.962 | 20 |
| CAGAGAGAAAATCGGTGGGA     | 60.187 | 20 | GGATGTTTACTATGGGGTGT    | 59.531 | 23 |
| ACGACTCCATGTTCCGACA      | 60.105 | 19 | AGCAACCTCAAACCACAAGG    | 60.149 | 20 |
| TTGGAGACCCTTCTTTGCTG     | 60.366 | 20 | TGCTGGATTACATAACACGGA   | 60.073 | 20 |
| CCAGACTTTTGGTCTCAATATATC | 59.335 | 25 | GGTCAGGCTACCCAACAGAG    | 59.721 | 20 |
| CAATTTGCGCTCTTGTTCTG     | 59.609 | 20 | TGCCATCAAATGCAAGTTTC    | 59.67  | 20 |
| GAAGTACCAACCGGTTCCCT     | 60.225 | 20 | TATTGTTGCTGCTGATCCCC    | 61.003 | 20 |
| CAATGTGAAGGGAAGTCAA      | 59.691 | 20 | CCCATCAGACCAGTTGACAC    | 58.94  | 20 |
| TTTTGGCATCAGCAACAGAA     | 60.379 | 20 | GGA AACCTGAAGAAACGAA    | 59.146 | 20 |
| AAATCCCTCCACCGTCTCT      | 59.935 | 20 | ATTCAATCTCTGGGCTGTGG    | 60.073 | 20 |
| GGATCTTCGAGGAGTGGTGA     | 60.199 | 20 | ACCTCCACCGTCAATACCAG    | 59.844 | 20 |
| CTATGCAATGCCACCACAAC     | 59.995 | 20 | TTCTCTCACATCCATCGCAG    | 59.942 | 20 |
| CTTCCGCTTTCAATCTTTG      | 59.953 | 20 | CGATACCAGCAGAACCCATT    | 59.955 | 20 |
| CTTCGAGTTTGAGAGGTCGC     | 60.134 | 20 | TCCCATTTCTCCAAATTCA     | 60.244 | 20 |
| TGTGTTTACAGACCGAGTCAGC   | 60.03  | 20 | GTCAGTGGCAACACTAGGCA    | 59.905 | 20 |
| TATGATGCTGGACAAGTCGG     | 59.673 | 20 | ATTGAGCTCATGTCAGCTGGT   | 59.889 | 21 |
| TTAAGCCTGTAATGGGGCAC     | 59.96  | 20 | AGCCTGCTCAACCTCAATTC    | 59.434 | 20 |
| TCTTTGATTTGGCTGCTTTGT    | 59.875 | 21 | TCAAAGTGGTGTGTGTGGCT    | 60.203 | 20 |
| TCTGGGATTGGGCTTTATCA     | 60.405 | 20 | TGCATGTGGTATTGGTAGAC    | 59.435 | 21 |
| TGTTGGTGTGATGGTTTTGG     | 60.255 | 20 | TCTGCTTTTTAGAGAGAGGGAC  | 58.924 | 23 |
| TCTGACAAGCAACAAATGGC     | 59.847 | 20 | CTTCTCATCTGCGAACTCC     | 59.95  | 20 |
| GGAGAAAGCAAAGAGCGAAA     | 59.708 | 20 | AGCAAAGCAAACAAGAACGC    | 60.564 | 20 |
| TTGCAGCAAATGGATCTGTC     | 59.805 | 20 | AAATTTGTCCCCAGACTCC     | 60.169 | 20 |
| TCTTCTGCCGTTGATGTCTG     | 59.984 | 20 | CTACAAGGCCAGATGCCAAT    | 60.096 | 20 |
| CGTCTTGGTCTCCATCAGGT     | 60.112 | 20 | TCTAACACGCAGCATCAAGG    | 60.011 | 20 |
| GCGAAAAGTAGATGCCGAAC     | 59.851 | 20 | TTGCCTTTATTTCTTGGCAGA   | 59.84  | 21 |
| CGATGTTTCTCGTCTCACCA     | 59.831 | 20 | CATTAATGCAGAGCAGCCAA    | 59.976 | 20 |
| TGCTTTGCCTAGGCCTATTAAG   | 59.904 | 22 | ACGAGGCATATCATGTTCCG    | 60.884 | 20 |
| ATCTTGCCGCTGTTAAGGAA     | 59.845 | 20 | TTTGCTACCTCGCATTGTTG    | 59.872 | 20 |
| TCCAGTTTCCGGTCAATGAT     | 60.317 | 20 | CCCATCACCAAACAAAACCT    | 59.688 | 20 |
| ACAATCTTGGTGGTTACGCC     | 59.859 | 20 | GCGCCAAATGATAGAGTGT     | 60.103 | 20 |
| TGAGCCTTGCTGACACTGTT     | 59.622 | 20 | GAAGTGCAGCATGAATTTGC    | 59.43  | 20 |
| CAAACCCCGAGTCTGATGTT     | 59.966 | 20 | CTCGAAAGCACCAGTAAGGC    | 60.015 | 20 |
| GACCCCTCAGCAGTGACAGT     | 60.315 | 20 | CCTCTGCAGATTCAAATCCC    | 59.629 | 20 |
| ATTGCTGAATGTTGATGGCA     | 60.08  | 20 | CCCAGCTGCCTTCTTTTCTA    | 59.587 | 20 |
| CCGATAAGAATGGATGTGGG     | 60.148 | 20 | GGCATAACGGCTCACTCTACG   | 60.817 | 20 |
| AGGGCAAGCATATCGTGTTT     | 60.103 | 20 | CCCATTCCAACCATAGCAGT    | 59.813 | 20 |
| CGTTAGAGTTTTGACGGGA      | 60.103 | 20 | TGGCATTACGCATTACCACA    | 60.926 | 20 |

|                         |        |                           |        |    |
|-------------------------|--------|---------------------------|--------|----|
| TGGTGAATATAGAAGGGCGG    | 59.916 | 20 AATGCAAGAAACCTTGGCAC   | 60.118 | 20 |
| GGGTGAGTCGAGAAATACGC    | 59.7   | 20 TTTGTTTCGTGTTCCAAAGGA  | 59.145 | 20 |
| CACACGCTGGAAGTCTTTA     | 60.05  | 20 TGTTTGGTTTGTGAATTGGGT  | 60.118 | 21 |
| AACTCCTCACAATTTCCCCC    | 60.169 | 20 TGAGCTGTGTTTAGGGCTGA   | 59.591 | 20 |
| ATCGTCTCAATAGTTGCCCC    | 59.009 | 20 TGATGGTGAGGATGCTGCTA   | 60.376 | 20 |
| ATAAAGTAGTAGGCCCGCCC    | 59.485 | 20 TTTGTGTCCCAATAACACCAA  | 60.124 | 22 |
| ACAAGAAACGGTGAGAACCC    | 59.04  | 20 ATCCATAGCCAAGCACAACA   | 59.152 | 20 |
| CTGATGCAGATGCAGACAGT    | 57.466 | 20 GAGCAGTTGGAGTTGCTTTTG  | 60.045 | 21 |
| GTTTCGTGCTCTTGAACGTGA   | 60.032 | 20 TCTGTGGGACCAACTTCCTT   | 59.549 | 20 |
| AAATGAAGTTGGGCAGTTCG    | 60.11  | 20 ACTCCATCCACTCAACACCC   | 59.817 | 20 |
| CAAGTTTGAAGGGTTTTGCTTT  | 59.682 | 22 ATGTTTCTGGCCCAAATTA    | 59.273 | 20 |
| CGACGTTTAAACAGCCGTAGC   | 60.821 | 20 CGTTTCTTGGTAGTTTGCCC   | 59.609 | 20 |
| TCAGGATGTTGCAGTCAAGG    | 59.831 | 20 GCATATTTAAAGAAGGCCAAG  | 59.301 | 22 |
| GTGCAATGTGAGTGGACGTT    | 59.603 | 20 GTCTTCGGGAAAGAAGGGTT   | 59.553 | 20 |
| GGTTCGAGTTTCGATGAGGA    | 60.195 | 20 GAGGTTTTGACGGGATTTAGG  | 59.822 | 21 |
| AAGCACGTACCACACAGCAC    | 59.826 | 20 AGCATTAAAAAGGCCATCCA   | 59.547 | 20 |
| CCAAGAAATCAAGGATCGGA    | 60.006 | 20 CACTTCCACCATTGATGCAG   | 60.112 | 20 |
| ATGCCAAGGAACCTGTTGTT    | 59.454 | 20 TGTGCAAAATGCTACAGGTGA  | 60.309 | 21 |
| AACGTGCTATTGTGTCGTCG    | 59.788 | 20 ACGGGAAGAAAGAGGGCTTA   | 60.2   | 20 |
| TGACTTTTGGGGTTTTCGAG    | 60.081 | 20 TCCCTTTCACTCACACACCA   | 60.129 | 20 |
| TTGTGGTTGAGTACGCCAAT    | 59.05  | 20 CCAACAGTTGAATATGCCTACC | 59.536 | 22 |
| GAATGGAAGGGTCGTCAAGA    | 60.05  | 20 CGGGAGATGGTTGTTTGAGA   | 61.034 | 20 |
| TGTTCTTCAAATGGGATGTCA   | 58.961 | 21 AGCAGAAGCCCATCTCCTTT   | 60.349 | 20 |
| CCCAAATCAATCAACTTTCCA   | 59.787 | 21 GAACTTTGGTCGATCGTCGT   | 60.119 | 20 |
| TGAGCTGGACGGACATTGTA    | 60.263 | 20 GCACACCAATCCGAAAATCT   | 59.939 | 20 |
| CAAGGCGTTGGA AAAATGAT   | 59.938 | 20 TCAAGAACAAATAATCGGTGCA | 60.131 | 22 |
| TTTTGCTTCCACTGCTTGAA    | 59.585 | 20 CGCTTTGGTGCATCATCTAT   | 58.749 | 20 |
| CCCTCTTCGTGTTCCAAC TG   | 60.68  | 20 TTGGAGAAAATTTGTGGGC    | 59.916 | 20 |
| GGAGACTTATGGAGGGGGAA    | 60.264 | 20 ATTCTCCGAATCCAGCACAC   | 60.081 | 20 |
| GAGCGTTAGCTCTTTCGCC     | 60.25  | 19 GGAATCGGAACCCTTTTAGC   | 59.909 | 20 |
| AACCTGTATTGGGACATCGC    | 59.82  | 20 GGAACATTGCACCCAGAGAT   | 59.934 | 20 |
| GTTTATCTTCGGCTTGCTGC    | 59.988 | 20 TCACTCATGGCTTCACGTTT   | 59.837 | 20 |
| TTATTCATGGTCCCCTTCCA    | 60.126 | 20 GGAAAATGGGTGATGAGTGG   | 60.173 | 20 |
| TGAATTTGCATCTAAGGAGGAG  | 58.467 | 22 AGCACCTAATTGTACCCCTGT  | 57.62  | 21 |
| AAGCAGCAATCTCTGCCATT    | 59.985 | 20 ACCCAAGCTGGTGGTTATGA   | 60.375 | 20 |
| GTGTGGATGTCCATCACTGC    | 59.97  | 20 AGACTCGTGTCCAACATTCA   | 58.201 | 21 |
| AAATCTGCATGCACCTGTTT    | 58.726 | 20 GACCATTCACTGGCATTTC    | 59.502 | 20 |
| AAACTTTTGTGGCAAATGG     | 59.839 | 20 TTCCAAAAGCTGCTCGAAAT   | 59.96  | 20 |
| CTCACCACAGAAGAGGGAGAA   | 59.435 | 21 GGCTAGCTGAAGGATTTCCA   | 59.41  | 20 |
| ACTCGAACGGGATCTTGATG    | 60.073 | 20 GTTGCCTCTCTATCCGCAA    | 60.352 | 20 |
| CAAGCAAACACCACAACACC    | 60.049 | 20 CGTTGGCCCGATATTTAGAG   | 59.564 | 20 |
| ATATATTGTGAGCCCTGGCG    | 59.945 | 20 GAGGAACAGAGACGGAGGTG   | 59.835 | 20 |
| TTTCTCAACCATGCATCCAA    | 60.049 | 20 GCTGCTGCTGTCTAAATCCA   | 59.178 | 20 |
| TTCTTCAATTTGCCTGTGGA    | 59.247 | 20 TGAAGATGGCACCTTGAGTG   | 59.831 | 20 |
| TCGCCTCTCAAGATTGTGAAT   | 59.828 | 21 CGTGCATCACATAGAATGGAA  | 59.557 | 21 |
| AACACGCACTCTTTCACACG    | 59.946 | 20 CGGGTGATTATAAATTGGCG   | 60.165 | 20 |
| TAATTGGGAACGGTGGTGTT    | 60.088 | 20 CGCACTGACACCATCAAAC    | 59.751 | 20 |
| GAATAAACGGCGGTAATGGA    | 59.795 | 20 CGCCTTCTCAGCTATGATCC   | 59.939 | 20 |
| CGTCATCGTATTGGCTTCT     | 60.096 | 20 TACCAAACCACAAAGCAGCA   | 60.293 | 20 |
| TTTTGGACCTCCCTTCTCT     | 60.045 | 20 GGGTGAAACCCAAACGTAGA   | 59.83  | 20 |
| TCTCCTCCGTGGACGTAGAT    | 59.679 | 20 GCGTAAATATTGGCATGCTTT  | 59.148 | 21 |
| GCTCTGATGCCAAACTGTTG    | 59.445 | 20 TGACCATGTATCGGTCTTTTCA | 59.993 | 22 |
| AGTGGCAAATGAGGAGATGG    | 60.073 | 20 GAATTCGTGTTTGGTGGCTT   | 59.978 | 20 |
| TTACAATGAATGACCAGCC     | 59.502 | 20 TGCCTTCTGCGTTTTTATG    | 59.88  | 20 |
| TGAGTTGTTCAATTCAGATGTTG | 59.961 | 25 TCACGGAAAACCTGCACAATG  | 60.699 | 20 |
| CAGTTTTTGGATTATGATGCTT  | 59.727 | 25 CGGTTGCAAATTGGATTTCAT  | 59.762 | 20 |
| TCTCTCTAACACACAAACAGAC  | 58.829 | 26 ATCTTGGCAATCCAAAGCTG   | 60.214 | 20 |
| GACTCGATTGGGACATCAGG    | 60.475 | 20 TAATCTTCGTCTTCGGCGTT   | 59.845 | 20 |

|                          |        |                            |        |    |
|--------------------------|--------|----------------------------|--------|----|
| CATTTTGCTTTGCAGGAACA     | 59.849 | 20 AAAGCCTTTCAACAGCCAAA    | 59.861 | 20 |
| TACCGATCGGGCTACAAATC     | 59.923 | 20 CTTCTGGAGCTGCAAACCTT    | 60.571 | 20 |
| AGTGAGAGAGAAAGTGCCGC     | 59.751 | 20 ATGAATTCCGCTGGAAACAG    | 60.074 | 20 |
| CTAAATCCGCTTCGAACGTC     | 59.845 | 20 GATGATTTATCACCGAATCGC   | 59.387 | 21 |
| CCGAATCCTTTCATAGAGCG     | 59.801 | 20 TTCCACCATGATTTTCGACAC   | 59.348 | 20 |
| CCGATCCCAATCTCTCCATA     | 59.848 | 20 CAGCATTACCATTTCCCGAT    | 59.784 | 20 |
| GTCCGTTGGTTTACCCAGAG     | 59.449 | 20 TCCTCGATGTTTAAAACCAG    | 60.096 | 21 |
| AGGAGTGGTTGAGAGGTGGA     | 59.682 | 20 GTGCATGTGTGTGTGTGGAA    | 60.053 | 20 |
| TGACCACAAATGTTTCCTCG     | 59.541 | 20 GCAACATGCTGATGGTGGTA    | 60.549 | 20 |
| GCATCGAAGGGATGACATTT     | 59.9   | 20 ACGATCATCACATGAACCGA    | 59.925 | 20 |
| GGTTCCAAGCCGTTTAGACA     | 60.11  | 20 CGAAACGATTAGTTGAATGTGC  | 59.652 | 22 |
| AGGGGTTATCATGGGATCAA     | 59.055 | 20 CGGAACACAATTTCGACAGAA   | 59.691 | 20 |
| AACTTGCGTAGCATCATCCA     | 59.301 | 20 TAAGCCAAGCACACATGAGG    | 59.864 | 20 |
| TCGATGCATACTTGTGGGA      | 60.073 | 20 GGTGCAAGAGATTCATGGCT    | 60.226 | 20 |
| GAGGAATTGCCAACCCATAA     | 59.762 | 20 CCAGTCAAAGTACCAGGAA     | 58.695 | 20 |
| TCGTCACGTGCGATTTTAAAC    | 59.735 | 20 CAAAATTCCTCCAACTCAA     | 59.772 | 20 |
| CCCAGTTCGTCGAGAAAGTC     | 59.844 | 20 AACTTGACAGAGTCGGGTGAT   | 59.727 | 20 |
| CAGACCATCTGGGAACTAATCAA  | 60.359 | 23 CTGAATTTGTGGTGGCAGTG    | 60.152 | 20 |
| TGGAGCGCAGGCTATAAGAT     | 59.967 | 20 GGTTCTCACTCTCTCTCAGCC   | 58.201 | 21 |
| TCTGCATTTGGTGGTACTGG     | 59.566 | 20 GACGATAATTCGTCCGTTGG    | 60.331 | 20 |
| GAAGCAACGGAAAGAAATGC     | 59.829 | 20 CCACCCACTCTCCCTTAAC     | 60.736 | 20 |
| GCAATAAAAAGACCTTGCATTTG  | 60.019 | 23 GATTGGCCACTGGTGCTTAT    | 59.962 | 20 |
| GGAATGGGATCTCTTCCACA     | 59.862 | 20 GAGGCAAACACCCAATTGAT    | 59.797 | 20 |
| CCAGGAAGACTCATTTCGATCC   | 60.974 | 21 GTCAAACAATGCTGTGGG      | 59.024 | 20 |
| ACTCACACCCACATCCATCA     | 59.801 | 20 TGTGACCAATATCACAGATTCC  | 58.502 | 22 |
| ATTGAAAGCCTCCCGTTTTT     | 59.945 | 20 CTGCATAGCTGATATGTCCCA   | 58.761 | 21 |
| CGGCTTCTCAACACCTTGG      | 60.796 | 20 TCGGAAGGCAAGATCACTAGA   | 59.963 | 21 |
| AGCAGACTGGTTCCAAAAGC     | 59.478 | 20 TGACAATTTCCAGCAGCAGT    | 59.445 | 20 |
| GGGGCTGCTTCTCTTCTCT      | 60.096 | 20 ACTGATTCACCTTCTTGC GG   | 60.255 | 20 |
| TACTGCAAATTCGCCTCTT      | 59.845 | 20 TTGGCTGTAGGAAACCTTGC    | 60.249 | 20 |
| TGGGTCTCAGATTCTTGGTCA    | 60.64  | 21 AATTGGAATGAATGGAGCGT    | 59.391 | 20 |
| GGGTATGCATCGCTCAGATT     | 60.066 | 20 TATATCTCCACGGACCACCC    | 59.629 | 20 |
| GGTACTGGTGGAACTGCCAT     | 59.851 | 20 TCCCTCTCCACAAAATCCTG    | 60.042 | 20 |
| AATGTTTCCTGCCACTCAA      | 58.201 | 20 CTTGGTACAATGGCTGGAGG    | 60.508 | 20 |
| GAACCATAACAAGCAGTGGCA    | 59.722 | 20 CTTCTGCTTTTCGCGATTTTA   | 60.456 | 20 |
| GGGAAACAACACTATCCCATTTG  | 59.588 | 22 TGTCCAAAATTGTTGTGCGCT   | 59.174 | 20 |
| AACTCTCTCCGCCATGATTG     | 60.218 | 20 ACTCGGCCTAGTTCGTTGAA    | 59.875 | 20 |
| TTCAGTACTTGGCCACTTG      | 58.773 | 20 ATTACCTCTCCTGCCCCAGT    | 59.957 | 20 |
| CCATTTTCTTATCTCGCCA      | 60.031 | 20 GCGTTTAATTCGTAATCCG     | 59.455 | 20 |
| TGCTGACAGGATTAATTGATGG   | 59.96  | 22 GCTTCAGTTGGCAGGTATCC    | 59.7   | 20 |
| TAAGCAAGCAAACAAGCCC      | 60.376 | 20 CAAGCATGAAAACAACCGTG    | 60.149 | 20 |
| GGCCACATGCTCAATTACCT     | 59.962 | 20 GCGCCTGCAGTTATTTGTTT    | 60.272 | 20 |
| TGAAGTTAGGAAATAAGGAGGTG  | 58.743 | 25 CGGTACGGTATGGTGTGCGTA   | 59.342 | 20 |
| GATCCTTCTCTCGTTATGGC     | 60.053 | 21 CCACCTCTGTGATCCATTCA    | 59.473 | 20 |
| TCGCGTAAACAACACGATCT     | 59.347 | 20 ATTTACCCACAAAATCATCA    | 57.778 | 21 |
| TTATCGGCTGTACTCTCTCGC    | 59.629 | 21 AGGCGGCATTCTCTAATTCA    | 59.807 | 20 |
| TCCTACAACCTCCGTTTCTG     | 60.103 | 20 GGTGTTCTGGGTGGAAAATG    | 60.21  | 20 |
| TCGGGACAACAATATCAGGTC    | 59.805 | 21 TGTTGTTGGTGGAACTTGGA    | 59.976 | 20 |
| ATCCCTCGCGCTCACTACTA     | 60     | 20 TAATGCAACAGCCAACAAGG    | 59.729 | 20 |
| TATGGGATTGGGTCTTTTGC     | 59.762 | 20 GAGTCGGAAGGCATATGTGA    | 58.672 | 20 |
| ATTAAGCACCTTTCGCGTG      | 60.264 | 20 TGGGGAATGACTCACCCTAA    | 60.36  | 21 |
| TTGTCTACCTTCTCGGGGTG     | 60.103 | 20 GATTCGAGTTTTGCTTCCCA    | 60.192 | 20 |
| CTGGTCCATTCAAACCTGCT     | 60.111 | 20 GCCTCCATGCTCCTATTCTG    | 59.797 | 20 |
| CCGCATCTTCTAACGAGAGG     | 59.971 | 20 TGACAATATTTAGTGTTTTGAC, | 57.78  | 26 |
| TCGCCGTCTCTACAAATAA      | 59.42  | 20 TGGGAATAGCGATTTTCTTT    | 59.922 | 21 |
| CTCTCCCTCCCTCAATCCTC     | 60.149 | 20 CACGCACACACAAATTCACA    | 60.204 | 20 |
| TATCATCCACCAAAATTGCGA    | 59.891 | 20 ATCTGAAAAACTCGCGCT      | 60.022 | 20 |
| TTTTCGAGTTATGAAGTTAGCACC | 58.926 | 24 ATGCGAATGGAGGTTGACTC    | 60.081 | 20 |

|                          |        |    |                         |        |    |
|--------------------------|--------|----|-------------------------|--------|----|
| CCGGCGTTCTGTTATCTTTC     | 59.708 | 20 | CCGGAAAAGAAAACCCACTT    | 60.324 | 20 |
| TGAGGTATGTTAGCCAAGTTCA   | 57.454 | 22 | TTGTTAGCGAATTTTTGGTGG   | 59.986 | 21 |
| AACCAACATGCACAACCAAA     | 59.864 | 20 | TTGGCTCCATTTTTCAAACC    | 59.916 | 20 |
| GGGTTCTGCGTCATAAAAA      | 59.938 | 20 | CCCGATTGAGTAGCTGAAA     | 60.344 | 20 |
| AGGAGAGAGAGTGTGGGTAGAC   | 59.945 | 24 | AGCGCCACCTCAAAAAGTAAA   | 59.883 | 20 |
| ATATCAGAAAGCCACACGGC     | 60.103 | 20 | TGATCAGGCTGCACTTTACG    | 60.011 | 20 |
| CGCCGGTGCCTATCATATT      | 60.832 | 19 | ATTGGTGCCTGCATGTATGT    | 59.878 | 20 |
| GAACACCTCTCCAGAGCCAG     | 59.986 | 20 | AAAGCTCAGTTCGATCCCCT    | 60.212 | 20 |
| CAGCAAATACTCTGCACCGA     | 60.011 | 20 | CATTGGAATGTAGGGAACCG    | 60.184 | 20 |
| TATTCCGAGTTTCATTCGGG     | 59.894 | 20 | CCAAATTTTCTCCACGCTTT    | 59.202 | 20 |
| GGAAATTGAAGCTGTTGCCT     | 59.316 | 20 | GCCCATACAATTTACAAGGA    | 59.815 | 21 |
| CGGGGTACACATTTGGAAC      | 59.711 | 20 | CCTTCTCCACTGCTTTTGC     | 59.993 | 20 |
| GTAGGGGTGCAATGAATCG      | 60.331 | 20 | ACCTCAAACCCTTCTGCGTA    | 59.734 | 20 |
| TTTCATCGTCTGCAACAAGC     | 59.995 | 20 | GGGGAAAGAAAAGCAAAAGG    | 60.048 | 20 |
| TCAGTCGAAACATCATGGGA     | 60.048 | 20 | ACCCCTACCCCTACCCCTACC   | 60.309 | 20 |
| GCGTTGAGAGGCTCACTTCT     | 59.751 | 20 | GCTTCAAACCTGGCTCTCGAT   | 59.579 | 20 |
| TTTTCTAGAGAGGGAGGGG      | 59.64  | 20 | GTCGGGTCTGCTCAAGTTTC    | 59.851 | 20 |
| TTTATCCCCCTTGCAATTCAG    | 59.894 | 20 | AATCGCCATGATTCTCCAAC    | 59.9   | 20 |
| GGAGAAAGTTGATTTGTTGGG    | 58.54  | 21 | TGAATTTGCCTTTGTACATTTTC | 59.076 | 23 |
| AGTGTGCTCCAACACAGTGC     | 59.948 | 20 | TGCAGAGGAATTGGTTGTCA    | 60.24  | 20 |
| GGCCAACCCATTTGACTTTA     | 59.801 | 20 | GTCGGATTGGATCGGAGATA    | 59.854 | 20 |
| GGGTGGTATGGTGGAAAGAAA    | 59.647 | 20 | TGGGGTGATATAAGATGATGC   | 57.38  | 21 |
| CATTCACCACATGAGATGCC     | 59.925 | 20 | ACGAGAGGTGGGAAAAGTGA    | 59.697 | 20 |
| CCCTTTGAGAATAATGACATTGG  | 59.724 | 23 | TTGGTTCATGTAGCCGACC     | 59.512 | 19 |
| TGAACCGTCACCGTCAATTA     | 59.964 | 20 | CAATATGGGAACTTCGCGTT    | 59.96  | 20 |
| GCGACATCCACATAACATGC     | 59.963 | 20 | TCCCTTCTCCGATCATCA      | 60.417 | 20 |
| TTTGGGAGTGGGTGGAATAG     | 59.784 | 20 | AAGTCCCTCTCGGGTCGTAT    | 59.957 | 20 |
| AGCCTTCAAAAACCATGCAA     | 60.617 | 20 | GGAAGCTGCTCTTGAGTTGG    | 60.134 | 20 |
| GTTGATTCCAGCAGCTTCGT     | 60.406 | 20 | ATCAAATTTTGGATCCGTGC    | 59.768 | 20 |
| CCCAAGACCCCAATTTGAT      | 59.59  | 19 | GGTTGCACACTCCAACACAT    | 59.446 | 20 |
| TCGTTGCCAGGGTAAATGAT     | 60.331 | 20 | GAAGCCACAAATGCAACATC    | 59.131 | 20 |
| CCGTTACCCTCGACTTTGAA     | 60.103 | 20 | TGGACTGATCAGCAGAGGAA    | 59.499 | 20 |
| AGTTGCAGCAGCATTCTCT      | 60.164 | 20 | CTCCCAAACCTCACCTCCT     | 60.48  | 20 |
| TCTGATCAAACCTGCTTCGG     | 58.999 | 20 | GGCATTGTCTTGTTGTTCA     | 59.547 | 20 |
| CGATCGGTGGATCTTGAAC      | 60.073 | 20 | GCCAATCCTAGCGATGAGAA    | 60.318 | 20 |
| GGATCGAGTAAGCGGAAATC     | 58.742 | 20 | CAGGACGGTTCCTCTCTTGA    | 60.377 | 20 |
| TGCATCAATCTCATTTCCCA     | 60.009 | 20 | CCAAAGAGTTGTTGGAAGCC    | 59.711 | 20 |
| ATCACTCTCGCTCGTCGTCT     | 60.167 | 20 | GGCTTGACACCGCTACTACC    | 59.763 | 20 |
| GCCATTACATGCAGGGTTCT     | 59.962 | 20 | AAGCATCTCCGAGGGAAAGT    | 60.212 | 20 |
| AAAATGGATTGATTTGGGAG     | 60.055 | 22 | TCCAAGACCCCAATTTGATT    | 59.22  | 20 |
| TGATCCCATGTTTTCTGCAT     | 58.926 | 20 | TCCAACCCATCTCCCATTTA    | 60.126 | 20 |
| TCCCTATAACCGATACACCGT    | 58.341 | 21 | TGGTTGGATATTTCCCCCTT    | 60.37  | 20 |
| CTTTTTGTATGGGTGCGGTT     | 59.996 | 20 | CAACGAAGAAACAGGGTTGG    | 60.52  | 20 |
| GCTTTGGAAGTTATGGTCGC     | 59.713 | 20 | TGCCATTGCAGCTAGTCTTG    | 60.157 | 20 |
| ATCGGGTGGAGATTGTTACC     | 58.717 | 20 | CTTTCACCACCGCGTACC      | 60.112 | 18 |
| CACCGGCAGCAGATTAAGAT     | 60.235 | 20 | AATATGTCAACTTTCCGGCG    | 59.96  | 20 |
| ATAAAGTGGCGGAGCTAGGG     | 60.593 | 20 | AACATAAACAGTGGCGGAGC    | 60.14  | 20 |
| TGCTGCATGAAAAATGAAGG     | 59.809 | 20 | TTTGTGCGGAATTAGGGATGC   | 59.901 | 20 |
| CCACAGCATTGACATTAGGG     | 58.999 | 20 | ACCGTGGAGATTAGGAGGGT    | 59.817 | 20 |
| CTGAAATCCCATTGCGATCT     | 60.036 | 20 | AAAACCTTCTCGCCCCATTCT   | 60.074 | 20 |
| TGTAGCCGACCCCAATTTAT     | 59.297 | 20 | CAATGCCGTTTGTGATCATT    | 59.4   | 20 |
| CATTTCCAATTTCCCTATCAAAA  | 59.243 | 23 | TTCATAAACTCGTGGAAATGA   | 58.798 | 23 |
| ACAAGTTCGAAACCTGGACC     | 59.04  | 20 | TTGGCAGCAACTACTACCATA   | 57.048 | 22 |
| CCCAAGACCCCAATTTGATT     | 60.91  | 20 | CTGTGGTTGATTTGTGGGTG    | 59.848 | 20 |
| AGTATGACGGCCATGGGTAA     | 60.214 | 20 | ATGTAGCCGACCCCAATTTA    | 59.297 | 20 |
| CTCAATATCTTACAATATCACAAT | 59.306 | 27 | GGTGCAGTCTCTTTCAAGGC    | 59.997 | 20 |
| TGTTCCGACTGAACTGGTGA     | 60.285 | 20 | TTGGTCTCGGGTTATGTTTTCT  | 59.871 | 22 |
| CGAGGCTGAATTTATGGCAC     | 60.606 | 20 | ATTTTGTAGCCGACCCCAAT    | 60.562 | 20 |



|                          |        |    |                         |        |    |
|--------------------------|--------|----|-------------------------|--------|----|
| CGAAATGATGACCCTCCACT     | 59.927 | 20 | CGATGCCCTTGAGAATCAAT    | 60.036 | 20 |
| GCTGCTAATGTGCGAGCTAACG   | 60.187 | 21 | TCCCACCAAGTATTAATATGCT  | 59.768 | 24 |
| GATTTTGCGGCGTTTGTATT     | 59.971 | 20 | TTCAATCACGCTCCTCTCCT    | 59.95  | 20 |
| GAAGCTTCTCACGATTCTTGG    | 59.066 | 21 | CCAGCCTAAATTCCATCACC    | 59.387 | 20 |
| CCAATATTTTTGGTCTCACGG    | 59.325 | 21 | TTATCAGAGTCGAGCAAGCG    | 59.322 | 20 |
| TGTTCCGGTGAATGTTTTGGA    | 59.941 | 20 | CCAATTTATTGGGATTAAGGCT  | 58.465 | 22 |
| AGCAATGCGAGGATGAAGAT     | 59.803 | 20 | GCAGCAGAAATCGTGGAGAT    | 60.37  | 20 |
| TCGCCTCGCTATTTGATTC      | 60.31  | 20 | CGTGTGATGAAACCGTTAGA    | 57.706 | 21 |
| TTTTATTAGAATGCCGGGGA     | 59.389 | 20 | GCAGTTTGCTGTGCTTGTTT    | 59.646 | 20 |
| TGAAAAAGATGGTAAAAACCTTC  | 59.776 | 24 | CGAACTCGTAGCCCATCAAT    | 60.096 | 20 |
| CAGCCAAACATTGAGCAGTT     | 58.926 | 20 | TCTGCAGCCATCTGTTCTTG    | 60.136 | 20 |
| TTTTCCCACCCAGATATCCA     | 60.126 | 20 | TGATGGGGAAATGGTTGAAT    | 59.991 | 20 |
| CAGAGCGCACTCGAATAACA     | 60.157 | 20 | GAGTTTATTGCACCCAATTAGE  | 59.687 | 25 |
| TTCGAACCTTCTGCAAAATATAA  | 58.036 | 23 | AGAATTTGGGAAGAAATTTCA   | 58.672 | 24 |
| AAGAACATTTATGGCAAACAACA  | 58.601 | 23 | TGAGATGTCCACAGCTTCCA    | 60.402 | 20 |
| CTACCACTGCCGGAAACAT      | 59.993 | 20 | AACCATAAGCCTGCCTTTCA    | 59.708 | 20 |
| TGCCCGCTAACCACTTATTT     | 59.609 | 20 | TTTAGACGGGCTCTTCTTGG    | 59.448 | 20 |
| TTTCTAGCCACAACCTTGGC     | 60.249 | 20 | TCGACAACATCTCCGATCAC    | 59.637 | 20 |
| AAATAATCAGGCTTCGTGCG     | 60.23  | 20 | TTTGATGGCTTCTGCCCTAT    | 59.668 | 20 |
| TCCTGAAACGAGTGATGCTC     | 58.96  | 20 | CCTTTGATGCCGATGTTCTT    | 60.074 | 20 |
| GTGTAAGGTTGGAAGCGAGC     | 59.882 | 20 | CGTAAAGAGGGGTAGGGGAG    | 59.949 | 20 |
| CCACCTACAGGTGCACAAGA     | 59.745 | 20 | TTCTGTTGGTCATTTTCCCC    | 59.767 | 20 |
| GTTACTTGGGAGATGGGGGT     | 60.052 | 20 | CACCAATCCCACAACAACAA    | 60.255 | 20 |
| ACCTTCTTGCAACCAACGTA     | 58.283 | 20 | TGAAATACCATCCAGTCTGTCC  | 59.878 | 23 |
| ATCGAACCGTGAACACCCTA     | 60.375 | 20 | GACTTGCCTTGTGACTAGCG    | 58.677 | 20 |
| TGAAAGCTCCTGCTTCACCT     | 60.134 | 20 | ACACCAGCCGAGAACATCAT    | 60.542 | 20 |
| ACAAAAATCCAACAACCCG      | 59.702 | 20 | TATGCAGGCACATACCGAAC    | 59.572 | 20 |
| TGTGATTTCAATTCGCATGTT    | 59.538 | 21 | CCACACGATGTTACCGTTCA    | 60.427 | 20 |
| CTATTCATCTGGCCGACCC      | 60.432 | 19 | TCTCACGCAAAGAACCGTATT   | 59.761 | 21 |
| TTGTAATGTTGGCTTCATGTT    | 59.593 | 23 | AAAGCTGATCCGTTCCAAA     | 59.685 | 20 |
| GGTTTTAATTGTGGGCTCTCAG   | 60.001 | 22 | GCAATCAACAAAGCAACGAA    | 59.856 | 20 |
| TTTTTCACGGTTGGAAAGGA     | 60.452 | 20 | ACATCTAAAGAAGCTAAAGGG   | 57.122 | 23 |
| TCACCAATCAACACTTGAACA    | 57.556 | 21 | AGGCCTGCACTCAAAAGAAA    | 59.993 | 20 |
| CCAAGGTGATGTCAAGTGTGA    | 59.581 | 21 | CAGCGGACCCGGCTATATACT   | 59.229 | 20 |
| CCAATTTATTGGGATTAAGGCT   | 58.465 | 22 | TTCGATTGCTTAGATTGGTGG   | 60.081 | 21 |
| CAGCAAAACAACCTTCATGTACGA | 60.214 | 23 | AGGATACATTGCATTTGGGAA   | 59.287 | 21 |
| TGTCAGGCACTCCAAAATCA     | 60.24  | 20 | GGGAGTCGGGCCCTATAGTA    | 60.299 | 20 |
| GATGTGGAGGTTGACGGAAC     | 60.372 | 20 | TGAGTTGCAACCAAAACCAC    | 59.591 | 20 |
| ATGTAGCCGACCCCAATTTA     | 59.297 | 20 | TCAAATGGAAACGTGGACA     | 59.941 | 20 |
| TACAAATCAAGCACGCAAGC     | 60.021 | 20 | GCACCTTACCCTCAAAACCA    | 59.971 | 20 |
| GTGAATTGGGTTTGACAATCG    | 60.22  | 21 | TCATTCCTCTTGAATTTGGTGA  | 59.546 | 22 |
| GGATCAGCAGTGGCTTTTTTC    | 59.82  | 20 | GATCGGGTTTTTTCGGGTATT   | 60.02  | 20 |
| GAAATAGCTTGGCCCTCGAT     | 60.551 | 20 | GTGGATGAGAGGGTTTACCG    | 59.405 | 20 |
| ACCTGCTCACCGATCAAGTC     | 60.269 | 20 | GGAAGTGCATACGAGTGGGT    | 59.997 | 20 |
| CCACAAGTTATCACACCCCC     | 60.088 | 20 | TGTGATGTGATTGGGAGAAA    | 57.41  | 20 |
| TTTTACGTTGTACGAATCCTATCT | 58.735 | 26 | TACATCCATTTACACCCGGA    | 59.774 | 20 |
| ACATCGCATACGTGTATGTTTAA  | 57.646 | 24 | CCGACGAATTCCTTTCAGTT    | 59.17  | 20 |
| TGTC AACGACGAGATGAAA     | 60.24  | 20 | CTGTGATAACACCCTGCCCT    | 59.989 | 20 |
| GGGACCTTTCAGTCACCAGA     | 60.088 | 20 | CTGCACATGCTTTAGTCCA     | 59.864 | 20 |
| ATGCTGGAAATTCGATTGGA     | 60.414 | 20 | CAGGAACATCGTTGTTTGG     | 59.541 | 20 |
| CATCGTCATCGTCATCCTTG     | 60.072 | 20 | CTGATGGTGATGGTGTTCG     | 59.96  | 20 |
| AAAGGGTTGTCTTCACTCG      | 59.183 | 20 | GCACCCACCTTACTTTCT      | 60.361 | 20 |
| GTGATGCCATAACATCGTCG     | 59.955 | 20 | CCAAGACCCCAATTTGAT      | 59.59  | 19 |
| TTTAAAAATCGGACCCGAGA     | 59.52  | 20 | CATTGGCTTGTGAGTTTCGAC   | 60.684 | 21 |
| TCGTGCAATAAACTCGTGC      | 59.879 | 20 | CATGGCATTGATGATGAACC    | 59.738 | 20 |
| CCAGCAAGGAGTAATTGGGA     | 60.066 | 20 | CGGAGGTAGTTGGCATTGT     | 59.993 | 20 |
| TGAAGGACCCGTCATAAAC      | 58.415 | 20 | GACGTGGTTTGCAGGCTATT    | 60.14  | 20 |
| CCATTTTTATCGGCTCTGGA     | 60.031 | 20 | TGCTTAATTCTTAATGTAATATC | 59.009 | 26 |

|                         |        |    |                         |        |    |
|-------------------------|--------|----|-------------------------|--------|----|
| TACGGCCGGGTAAATTACAT    | 59.212 | 20 | CAACCACAACAGCAGCCTAA    | 59.904 | 20 |
| TTACCTTGTGCGAAACGGAGG   | 60.103 | 20 | TCCTCCAAATTTCTCTCCCA    | 59.6   | 20 |
| GATTGTTGAAGGCCGACAGT    | 60.119 | 20 | GTGAGGTGCATGTGGATCAG    | 60.121 | 20 |
| CATGTAGCCGATCCCAATTT    | 59.784 | 20 | TTTTTCACACCAGAAAACCAAA  | 59.151 | 22 |
| TGGCAACTCAAAAATGCTCA    | 60.379 | 20 | TGTGCCCGTATATTTATGGCT   | 59.358 | 21 |
| ACTCCCCAATTTTCTCACC     | 60.169 | 20 | AGGGGAAAAGAGAGAGGTGG    | 59.671 | 20 |
| CCACCAGCAGAACAAGAACA    | 59.873 | 20 | TCAGAACCCTGCTCTGCTTT    | 59.989 | 20 |
| GCGACGGGTACATTCTCTA     | 60.096 | 20 | TCATCGAACAAGTCTCCAA     | 59.215 | 20 |
| GCCAGTTTTGGTCGACTG      | 60.55  | 20 | GTTGGGCAGCCAAATATTGA    | 60.837 | 20 |
| ACCGTCCACGTACAGTATTCC   | 59.851 | 20 | GTAGCGTTGCTATCCCGTCT    | 59.364 | 20 |
| ATTTCTTGCTTCCTCGCTT     | 60.34  | 20 | GATGATCGCTGATGTTTGGA    | 59.61  | 20 |
| TGAAAGAGCCTCCATCCCTA    | 59.767 | 20 | CCCAAGACCCCAATTTGATT    | 60.91  | 20 |
| TAGTGTAGGACCCCTCACGC    | 60.134 | 20 | CCGACTAAAACGACATGCAA    | 59.729 | 20 |
| TTACCAGGTGGCAACATTCA    | 59.964 | 20 | GGGGTTGAAGATGCCCTTAT    | 60.152 | 20 |
| ACCCTACATAGCGGGGAAAG    | 60.332 | 20 | AGGGCTGAAATCTGTCAAC     | 59.141 | 20 |
| GAGGGGAAAAGAGAGGATG     | 60.008 | 20 | ATCGAACCTCTCCACCTCAA    | 59.655 | 20 |
| ATGGGCGTCCACTTGTAGAG    | 60.134 | 20 | GCGATTCGCCTTCAAATCTA    | 60.31  | 20 |
| TCGACCCAAATAGAAGACCG    | 60.066 | 20 | GTTCCGGAGCAGTTGTCAT     | 60.119 | 20 |
| CAAGACCCCAAATGATTGGT    | 59.647 | 20 | TGGAGGATAAAAATTTGTAACA  | 59.782 | 24 |
| GTGGTCCACTCTAATGCCGT    | 59.997 | 20 | ATGTAGCCGACCCCAATTTA    | 59.297 | 20 |
| ATCAAGCGAAGAAGCAGAGC    | 59.866 | 20 | GATGCTACTCCACAAACCC     | 59.41  | 20 |
| AGGAATAAAGGCTGGTGGCT    | 60.096 | 20 | AAGTAGATTCCGGGCCATTT    | 59.799 | 20 |
| CATCTTCTTCTGGATGCGGT    | 60.218 | 20 | AAGGAAACCACATCTAACCTG   | 59.817 | 24 |
| CCAAGTTATTCACGGATCCTTTC | 61.027 | 23 | TGCCCTATTTTTCTCCTCA     | 59.64  | 20 |
| CATCGATTTTGGGCCTACTG    | 60.46  | 20 | TCGATCCCACGTATTGTGAA    | 59.924 | 20 |
| GGTAGACGCCAGCCAGTTAG    | 59.898 | 20 | CGATGCTCCTGTGTCAAAAA    | 59.84  | 20 |
| CAAACACGCCAATCATCAGT    | 59.572 | 20 | AAGGTTGCGTACACCTGACC    | 60.035 | 20 |
| CGCAACCATTTCAATTGTGAC   | 59.972 | 20 | TCCTCATCCCCATCAACATT    | 60.135 | 20 |
| TGGGCCTATCCTATCAGTCG    | 60.051 | 20 | ATGTTGAGCCCAACCCAAC     | 60.774 | 19 |
| AGGGTTTGAATTTTGTGGCA    | 60.344 | 20 | TATCGGTTCCAAATCACACG    | 59.395 | 20 |
| TTTGTGTCGATCAACTTGTGTG  | 59.658 | 22 | GTATTGGCTTTACAACCTGGGC  | 58.642 | 21 |
| GGCATATTCGCTTACGGGA     | 59.923 | 20 | AGGTTCCGGGAAGTCTGATT    | 59.935 | 20 |
| CGAAATGGAGATCCAAATCCT   | 60.272 | 21 | TTCGAAATTTGGTGTTAGCC    | 57.754 | 20 |
| GCAGCCAATCTCCTCTCATC    | 59.917 | 20 | TCTGAACAATTTGCAGCTCG    | 60.134 | 20 |
| CCGGATATCCAGTTTCATCC    | 59.2   | 20 | GGCTACTGGTGCAACCCTAA    | 60.132 | 20 |
| CAGCGAATCAATACGTGCAT    | 59.718 | 20 | CCCAAGACCCCAATTTGAT     | 59.59  | 19 |
| CGCCGAAGTCATTAGGTCTC    | 59.836 | 20 | AAGGGATCCTCTCCTTCTGC    | 59.778 | 20 |
| AACGAGCAAGAGGATGAGGA    | 59.95  | 20 | CGTCGGGTAGACCAATGACT    | 59.989 | 20 |
| ATTAGTTGGTGGAATTGCGG    | 59.823 | 20 | TGTAGCCTACCATTCCGTAGAA  | 58.787 | 22 |
| TAAGGTTGGCTGTAATGCC     | 59.96  | 20 | TGGACAAAATCATCCTGCTG    | 59.648 | 20 |
| CCCAAACCCCAATTTGATT     | 60.754 | 20 | CGGCATAAAAATTGGTCAAGA   | 59.95  | 21 |
| TTTTCCACCACTTATTCTTTTGA | 59.107 | 24 | TGATTGCTAATTCAATTTTTATA | 58.242 | 26 |
| TCGAATGTTGCTGCTCAAGT    | 59.596 | 20 | TGCAGACACTTCAAAGTTCCA   | 59.475 | 21 |
| AAGAAGAGGGAAAAGCCCAA    | 60.18  | 20 | CCGGATCGGTCTTAACTCTG    | 59.688 | 20 |
| CCCAAGACCCCAATTTGATT    | 60.91  | 20 | GTGCAAAGGACATCGGTAGG    | 60.517 | 20 |
| TTTCATGGGTACACATTTGAGC  | 59.867 | 22 | TGCAGTATTGAATTACTTTCCG  | 57.911 | 23 |
| GGGAAGGGGACAACATTTCT    | 60.169 | 20 | ATGTGGCCTGATCTACAGCC    | 60.104 | 20 |
| CGGATCCACTTTTCTGCTTT    | 59.312 | 20 | TGGATGATCAAGGCTCTCAA    | 59.322 | 20 |
| TGATCACACACGAGTCCATTT   | 58.999 | 21 | CGCGCTAAATTTGAAAGAG     | 59.979 | 20 |
| CGTTGGTGAAGAACAACATTTGA | 60.182 | 22 | TGATCAGAATCAAGCAAGCG    | 60.096 | 20 |
| CAAAGGGAATCAAATCTGGG    | 59.359 | 20 | TGGCAACTGTACAAACAATTC   | 59.132 | 22 |
| GATGGCCTCCACCTTCTAT     | 60.293 | 20 | ACATGTCAATTAAGAAAGG     | 57.538 | 25 |
| TTTGGTTCAATTAGCCGACC    | 59.938 | 20 | TTCGTCCCTTACCTTTGTTT    | 59.858 | 21 |
| TTCTCTTTGCCAGCATCT      | 60.096 | 20 | CTTGCAAGGGAAGACGAAAG    | 59.986 | 20 |
| AGGAGGATGACGACGATGAT    | 59.491 | 20 | CTGCTAGACCCAGTGGTGGT    | 60.174 | 20 |
| ACATTCTGGTCCGTAGGTGG    | 59.844 | 20 | GCGGATTGTCAACTTGGTTT    | 59.978 | 20 |
| CCACCATCGTCGTCTCATC     | 60.063 | 19 | TTGGGTTTAGGGTTGTCAGC    | 59.971 | 20 |
| CCACTCCACGTTTACGCTCT    | 60.312 | 20 | TGAATATCACAGAATTTGGGAC  | 60.19  | 23 |

|                          |        |                           |        |    |
|--------------------------|--------|---------------------------|--------|----|
| TCTACTTAGAGCAGGGCCGA     | 60.11  | 20 TTCTCCAGGCTGATGTTTCC   | 60.195 | 20 |
| AACCTTGGCTGGCTCCTAAT     | 60.096 | 20 ATGCATGGTGTAGGATCACG   | 59.399 | 20 |
| TTCGAAGCTTGGAGAACGAT     | 59.955 | 20 GCCAAGGGTAAGAGAAAACCC  | 59.94  | 20 |
| CAAAACCTTGGTGAACAGGC     | 60.529 | 20 CCAAGACCCCAATTTGAT     | 59.59  | 19 |
| ATGTAGCCGACCCCAATTTA     | 59.297 | 20 AAAATATAGCCAGCCAGCC    | 60.428 | 20 |
| GCATTCTTCTTCTTCTCGTG     | 59.813 | 20 CAGCCAACACGATCAAACAT   | 59.572 | 20 |
| CGTCAAGCTCTATGCTTCCC     | 59.978 | 20 CTTCAGCAATTCTTCTGCC    | 59.955 | 20 |
| TCAAACCTAAGACCGGGATG     | 59.926 | 20 TGATGGAGAATTTGGAGGCT   | 59.629 | 20 |
| GGCTCGAATTACAAAACCAA     | 59.111 | 21 ACTTCTGGCCAGACCTTTT    | 60.11  | 20 |
| TGCACTGCTTATCAGATTCAA    | 57.113 | 21 ATTGTGCAATGGGAATGGAT   | 60.021 | 20 |
| GTTGAAATGCTTGCATGGG      | 60.065 | 19 TGCAAAGCGAAGAGAGACAA   | 59.864 | 20 |
| CTGCCTCAGACTCTTCCACC     | 59.986 | 20 ATGGATTCTTGTTCGATGC    | 59.9   | 20 |
| TGCTCCTCCACCTCTGTTCT     | 59.986 | 20 CTACCCGGACTTGGATGTGT   | 59.844 | 20 |
| GGTTGTGTGCCATCATCAAG     | 59.967 | 20 TGTAGCCGACCCCAATTTAT   | 59.297 | 20 |
| AACTTGTGACTCCAGCTCCG     | 60.444 | 20 GAGAGAAGCCAGGGATGACA   | 60.349 | 20 |
| TTCTCATCTCCAGTCTCCATGA   | 59.803 | 22 TTGCATGGTCGGTAAACTCA   | 60.111 | 20 |
| AGAGGTTGGAGCAATGAGCA     | 60.945 | 20 TGTAGCCGACCCCAATTTAT   | 59.297 | 20 |
| ATTCTGGTCGCTCCACAGTC     | 60.269 | 20 ATTCTTCGGTTGGAGGTGTG   | 59.966 | 20 |
| CACCCCTATTCTTTTTGCC      | 60.664 | 20 CTCGGGAAATTGAAAAGCAA   | 60.181 | 20 |
| AGAAGATTTTTGCCACCCAA     | 59.546 | 20 TCAATACCAATCAACAAAAC   | 59.708 | 22 |
| CCATGACCCTCGACTTTGAA     | 61.034 | 20 CGAATGAGAAAACTGGGGA    | 60.044 | 20 |
| TTGCTGTCTCTGGCTCTTTCT    | 59.367 | 21 CGACGGATTGATGCTAATTG   | 59.136 | 20 |
| CTTGCCCACTCCACCACTT      | 61.117 | 19 ATAATAACCCCGCAAGGGTC   | 60.041 | 20 |
| AATGCAGGTTGAAAAGGTG      | 59.971 | 20 ATAGTTCGGTGACCCAGTG    | 59.844 | 20 |
| GCTTTCGTTGCACATCTTGT     | 58.929 | 20 ATGTAGCCGACCCCAATTTA   | 59.297 | 20 |
| CACATGTTGTCAAATAGATTCACT | 60.218 | 27 TGTAGCCGACCCCAATTTAT   | 59.297 | 20 |
| CAATCGTTCATGAGTTCGAG     | 59.241 | 20 GGTGTTTTCTAGAGGCACGG   | 59.734 | 20 |
| ACAGAATGAATGCCCAACT      | 59.41  | 20 CAAGTAAATGCTCGGCACTG   | 59.488 | 20 |
| TGTAGCCGACCCCAATTTAT     | 59.297 | 20 GTGGGCTTTTAGTGCCTTGA   | 60.249 | 20 |
| TCGGATTCTATTAGTGATTCAAGA | 57.142 | 24 GACAGTAGCAAAGCCACACG   | 59.515 | 20 |
| TCAAAATCATCACTCTCCACTCA  | 59.726 | 23 GCAAAATTGTTTGTGTTCTGT  | 60.793 | 24 |
| GGCTCATTACAAAAACGTAGG    | 59.946 | 23 ATCATTAGGAGGGCGGTAT    | 60.682 | 20 |
| CCTTGCAGAAAAAGGCTTAGG    | 60.362 | 21 AACGCAAATGCAAGGAAGTC   | 60.257 | 20 |
| TGGCAAGATTTGTTTTGACAG    | 58.808 | 21 AACCGCTTCTCAACTCCCTT   | 60.247 | 20 |
| ATTC AAGGCCAACAAATCCAG   | 59.933 | 20 GCAATGCATGAACCACACTC   | 60.128 | 20 |
| TCACACATGGAGAACGAAGC     | 59.837 | 20 ACACCAAAGAACTTGCCAC    | 60.012 | 20 |
| TTGTGATGGAGTAGAGGGGC     | 60.073 | 20 AATTGAAGGGCAGTTGATGG   | 59.933 | 20 |
| TCAGGCCTGTTTACACCCTT     | 59.592 | 20 CTA AACCTTTCCCGAATG    | 60.655 | 20 |
| ATGTAGCCGACCCCAATTT      | 59.259 | 19 GAAATTCCCGATAAGTTGGAA  | 58.049 | 21 |
| TCCGATGTTTCGATTTTCCAT    | 60.274 | 20 GGGATTGTTATCGTGATGGC   | 60.163 | 20 |
| CGTACATCCCCAAAGTCCTG     | 60.366 | 20 CAGAAGAACCATGCCAAAGAC  | 59.861 | 21 |
| CTTCAGCAGCAACTGATCCA     | 60.136 | 20 GCATTGGTGACATTGATTGC   | 59.939 | 20 |
| AGAATGTACCTTGGGTGCGCA    | 60.517 | 20 TGAAATATCATGTCCAGGTTTT | 57.62  | 23 |
| CCCAAGACCCCAATTTGATT     | 60.91  | 20 AATTTCTCCAAGCTGATGCAA  | 59.837 | 21 |
| AGACCCCAATTTGATTGGAA     | 59.22  | 20 ATGGAAAAATTTGCAGAGCG   | 60.209 | 20 |
| ATTTGCTCGCAACGATGTTA     | 59.329 | 20 TTATCGGTTTAGCCAGCACA   | 59.325 | 20 |
| ATCTAACGGCTGGCATTGT      | 59.597 | 20 AATATGATGGTGCGGTGGTC   | 60.613 | 20 |
| CCATATGCAAACATGCGAAG     | 60.096 | 20 CCAAGACCCCAATTTGATT    | 60.91  | 20 |
| TCATCTGTTTGGCCTGTAC      | 59.682 | 20 TTA AACCTACCCCTTCGCCT  | 59.96  | 20 |
| TGCATGAACTTTGTA AACCAT   | 59.822 | 24 ATCCGCCCTTGATACAGGT    | 59.376 | 19 |
| TGATACCACGTCAAGCAACC     | 59.572 | 20 TCAAGCAAAAATTGAACCCC   | 59.916 | 20 |
| AGGATAAAAGAGGCAGGGGA     | 60.032 | 20 GAGGCGTGACTTTGGCTAGT   | 59.501 | 20 |
| TGTAGCACGAGTGATGAGGC     | 60.016 | 20 GGTGTTGAACAACCAGACATA  | 60.182 | 24 |
| CGATCATCCCTCATCTGACA     | 59.585 | 20 CAGCAGCCATCTGTTCTTGA   | 60.136 | 20 |
| TAAAAGCGCACTTTGACGC      | 60.148 | 19 GGACACCCGTGTTGAAGTTT   | 59.867 | 20 |
| CGGAGGTGATCTCAAATGGT     | 59.927 | 20 CTCGACCCGTGATACCAGAC   | 60.533 | 20 |
| CAAACCATGAATAAGCAATCCA   | 59.832 | 22 TTGTCACAAGTTTGGGAGGG   | 60.923 | 20 |
| TTTGCTTACGGAAACAGCAA     | 59.486 | 20 TGCAGCGAATGTTGTTTTTA   | 57.997 | 20 |

|                         |        |                           |        |    |
|-------------------------|--------|---------------------------|--------|----|
| TTTCCCCTCCTCTCATCTT     | 60.008 | 20 TTCACTGTCGTCAAAGCTGG   | 60.025 | 20 |
| ATGGAAGCTGCATTGGAGAG    | 60.362 | 20 TCGATCAAAATAACACCATTGC | 59.838 | 22 |
| TGAGTAATTCCTCCATGGAA    | 60.126 | 20 GATTTTCGAGTTGCAGAGGC   | 59.962 | 20 |
| CCCAATTTTCCGCATTTTT     | 59.759 | 19 TCAGAAGGGGTTATGTCCTCAT | 59.827 | 22 |
| ATGTCCTGAAGATGCTGGC     | 60.226 | 20 AGACCAAGCTTCGTTGCATT   | 59.882 | 20 |
| GGAGAAAAGCATACGGGTGA    | 60.074 | 20 GGCAGCCTAATATTGAGCAGT  | 59.784 | 22 |
| TGGTTCAAGCACATTTCTG     | 59.691 | 20 GGACCTAATTTTCCCAAGG    | 59.639 | 20 |
| TGTCAAGTAGATCATGGGCG    | 59.673 | 20 ACCAATGGTGGTATGGTGTG   | 58.984 | 20 |
| TCTCCACATGCTGTCTCACC    | 59.827 | 20 GAGATGGGAGGTGGTCTTGA   | 60.048 | 20 |
| TGGAGATTCCGAGTTCTTG     | 60.187 | 20 CGGTGCTCCTTGTATCCATT   | 59.955 | 20 |
| CGTTGTGTGAGTGTGGTTGA    | 59.15  | 20 GCACAATGCCAAGTAGCAGA   | 60.019 | 20 |
| TGGGCAGCCAAATATTGAGT    | 60.469 | 20 CAGCAGCCATCTGTTCTTGA   | 60.136 | 20 |
| TCGACTTTGTTGGTTCCGT     | 60.529 | 20 TCCTAGCTAGCTTTCCAATTCA | 58.299 | 22 |
| CGAGGATCCTTACAACCAT     | 59.927 | 20 CGATCCCATCAAATCTGAGC   | 60.57  | 20 |
| TTTGTCTTTCCCTTTGATGCT   | 58.823 | 21 TTCACTCATGCATCTCCACA   | 60.256 | 21 |
| ATGTAGCCGACCCCAATTTA    | 59.297 | 20 CCTACTTGCAATTGTGCTCCA  | 59.864 | 20 |
| CTTTCGGAGTCACAGAAGGC    | 59.989 | 20 AAAAGTCGCAATCAGCAACA   | 59.469 | 20 |
| GGAAAAGTTGTGCATGGGTT    | 59.836 | 20 TCTTTTACAAGGTGGGTGGC   | 59.971 | 20 |
| CCGACCTCACATAGTGGGAA    | 60.913 | 20 GACTGGGCTTTTTGGTTCAA   | 60.088 | 20 |
| CAAAATCGATCTGCAACCCT    | 60.074 | 20 ATGTAGCCGACCCCAATTTA   | 59.297 | 20 |
| TGCATTCTGATAAAGAAAATCGC | 60.449 | 23 CCAAGACCCCAATTTGATT    | 60.91  | 20 |
| AGTCGATCTCGTCGGGTATG    | 60.096 | 20 GATGGACGTCGACGATTTCT   | 60.081 | 20 |
| GCTTGTGATGTAGAGAAATGAAG | 59.329 | 24 TAACCAGCAGTCCCAAAT     | 59.429 | 20 |
| CGAGGGTATAAGGGACGACA    | 59.948 | 20 CGACGAGAAAGTCGTGTCAA   | 60.025 | 20 |
| ATTCGAAGGTGTTGATCCCA    | 60.317 | 20 TGCACCAACTTCCTCTCCTT   | 59.844 | 20 |
| CACAAAATGTTGCTGCTCAA    | 59.903 | 21 GGAAGCCAATTTGTTTGCAT   | 59.945 | 20 |
| CAAACACCATCGCAAACAAG    | 60.149 | 20 CTTCCCTCTCAAACCATCG    | 59.665 | 20 |
| GGTGAGTTTGAAGCATTGCATA  | 60.138 | 22 ACCTTTAGAACTTGCTCCACCA | 60.165 | 22 |
| GGCCCAAAGATCTCAAACAA    | 60.051 | 20 AGAGAAACAGAAAGTTGCAGCA | 58.796 | 22 |
| ACAAATGAAGGCGAACAAGG    | 60.11  | 20 TCAAATTATCTGCTTCCCGC   | 60.175 | 20 |
| TCCTATCTATTCCGCGTGCT    | 59.829 | 20 GAATTGGCGACGTAGGGTTA   | 59.96  | 20 |
| AATCAATCAACTTACCACCACC  | 57.839 | 22 TGATGCAGACTCGAGGTACG   | 60.008 | 20 |
| GGAAATCCAATTAATACAGTCAG | 60.572 | 25 CCAAGACCCCAATTTGATT    | 60.91  | 20 |
| GGAGCATCCTTGTTGAATC     | 59.488 | 20 TCTCCCAATTCACCCTACA    | 60.309 | 20 |
| ACCCTTGAGCTTGCATCTGT    | 59.874 | 20 GCTCAAGTGGCTTCTATGGG   | 59.836 | 20 |
| TCGGTGACGAGGTGGAGT      | 60.252 | 18 GTAAGCACCTCCTTCCACCA   | 60.111 | 20 |
| TGGAACCATTGCAGTCAAGA    | 60.24  | 20 GAACGGAAAAGCTTCGTTTG   | 59.861 | 20 |
| ATGTAGCCGACCCCAATTTA    | 59.297 | 20 CCCTTGACTTTCAACCCAAA   | 59.942 | 20 |
| TGTGTACGTAGTTGAGCATGTTG | 58.837 | 23 CCTTAGGTAATGGTCGTCTTG  | 59.886 | 22 |
| ATTGCTTCCGCAATATCCAC    | 59.929 | 20 CCAAGACCCCAATTTGATT    | 60.91  | 20 |
| ATGTTGAGCCCAACCCAAC     | 60.774 | 19 TTCTTTTATGTGGGTTGCAAAA | 59.511 | 22 |
| TGTAGCCGACCCCAATTTAT    | 59.297 | 20 CTTCTTGCAATTCGTCATCA   | 59.799 | 20 |
| TTCGATGGTTGATCTTGATTG   | 58.56  | 21 TTGATGGAGGCCTTATTTGC   | 60.038 | 20 |
| ATTAGCAAATTTCCGGACGA    | 59.547 | 20 GGGATTTGGTGGTGAAAATG   | 60.029 | 20 |
| TGATGGATCGAATATTCTCACG  | 59.923 | 22 CAACCCCTACTCTTTTCTTCT  | 57.968 | 22 |
| ACACGATAGCCATAGCCGAC    | 60.125 | 20 AAAAGCACGAGAAAAGGGTG   | 59.355 | 20 |
| CACTCTCATGCTCCTCCTCC    | 59.945 | 20 TGAAGGACCTCCTGATTCTG   | 59.655 | 20 |
| GAAGTGGTGGCAGTCCATTC    | 60.52  | 20 GACAATGGATGAAATCCCG    | 60.133 | 20 |
| AGCAGCCCCTCTTTTGAAT     | 60.208 | 20 TTTCCAGGTCTCTGTCTGTT   | 59.697 | 20 |
| TCTGATTTAAACATGGTGGCT   | 57.23  | 21 TTTCAATCCTTTTCTCCTTT   | 58.307 | 22 |
| TCTTGTGAGACTGTTGTTCTGGA | 59.938 | 23 TCGCCACCTAAATGGAAAAG   | 60.067 | 20 |
| CCCAAGACCCCAATTTGATT    | 60.91  | 20 TGGTGCAGATTTAAATGTTATA | 60.495 | 26 |
| CCCAAGACCCCAATTTGATT    | 60.91  | 20 GATGCCTGATGAACATCCAA   | 59.456 | 20 |
| CCCAAGACCCCAATTTGAT     | 59.59  | 19 GCCCAAATACCACTTGAAGC   | 59.574 | 20 |
| GATGGATGAAAACCCACACC    | 60.034 | 20 GTTTACCTGGCTGACGTGGT   | 60.035 | 20 |
| CCCAAGACCCCAATTTGATT    | 60.91  | 20 TTCAAGCGGAAGTTCATTCA   | 59.395 | 20 |
| TGTAGCCGACCCCAATTTAT    | 59.297 | 20 CGATGCGCAAATAAAAGACA   | 59.842 | 20 |
| ATGATCGGATTTTGTGGAGA    | 59.377 | 21 CCAAGACCCCAATTTGATT    | 59.59  | 19 |

|                          |        |    |                        |        |    |
|--------------------------|--------|----|------------------------|--------|----|
| TTAAACTGGCACCCATCAAA     | 59.013 | 20 | CTTTGCTTTTGCATCTGGGT   | 60.249 | 20 |
| TTCCCTCGTTTGTCCACTT      | 59.569 | 20 | GCCTGAGATGGTAGACACCG   | 60.678 | 20 |
| TGCATAGAGGAAATTGCATAGC   | 59.371 | 22 | TCCCTAATGCTGCCTTTGTT   | 59.708 | 20 |
| CCTATAATTGAAGCCGCCAA     | 60.054 | 20 | GGGCTAGGGTTATCAGGGTC   | 59.789 | 20 |
| GGAGGAGATCGAGAGTGACG     | 59.945 | 20 | GACGACTACAGTGATGGCGA   | 59.862 | 20 |
| TTGCAAAAGTGATGTGACCG     | 60.699 | 20 | AGGGCGAGTCTCAAGAAACA   | 59.989 | 20 |
| TGGGCAGCCAAATATAGAGC     | 60.196 | 20 | CAATGACGAATAGCAGCCAA   | 59.833 | 20 |
| CCCAAGACCCCAATTTGAT      | 59.59  | 19 | CCTCGATCGCTTGGATCTTA   | 60.309 | 20 |
| TCAACTTTCCAAGTATGATGGC   | 58.697 | 20 | TTTGTGTCATAGAAGGCCCC   | 59.933 | 20 |
| AGCTGTGTCTCCAACTCCC      | 59.305 | 20 | CCGTGGTCGCTAGCAAATTA   | 61.139 | 20 |
| TGTTGATTTGGCTGTCAAGG     | 59.691 | 20 | CCGAGGTGAGATTCAAAGGA   | 60.187 | 20 |
| CAACGGTTTACAAGTGTGTTG    | 58.187 | 22 | TGACAATGTACGCACGGAAT   | 59.995 | 20 |
| AGCTTAAAGGTGGAGGATAGTGG  | 60.031 | 23 | ATCTATGGCTCCGCTTGTG    | 60.235 | 20 |
| CGTTTTTGTCAATGCGTCTG     | 60.293 | 20 | ATAAATGCATGCAACGTCCA   | 59.96  | 20 |
| CCCAAGACCCCAATTTGATT     | 60.91  | 20 | CGGCACTAACCAAGTTCTCG   | 60.817 | 20 |
| CTCATCCCTCGCACATTTCT     | 60.218 | 20 | CCGAAGTGCTAGACCCAAAG   | 59.869 | 20 |
| TTCACTTGCTCCTCTCCTATCA   | 59.077 | 22 | TTTCACGTGGTTTGGTCTGA   | 60.128 | 20 |
| CATATCATAAAGATAAAGACAGC  | 57.413 | 27 | TTGGAGTGATTAATATGCAATT | 59.389 | 26 |
| AGCTGCATCGAGCTTTGC       | 60.409 | 18 | GCATACCTATCCGAGGGACC   | 60.682 | 20 |
| CCCAAGACCCCAATTTGAT      | 59.59  | 19 | GCTTTCTTCAGCATGTTGTCC  | 59.874 | 21 |
| AACCCAGCAACCATCAAAAA     | 60.344 | 20 | CCCAAGACCCCAATTTGATT   | 60.91  | 20 |
| CAATTAAGTTCTACGAATTCATTT | 58.761 | 27 | CCCAAGACCCCAATTTGAT    | 59.59  | 19 |
| TGAACCACGACTTGAATGGA     | 60.088 | 20 | CCCTGAATTTGATCCTGGTG   | 60.309 | 20 |
| CAGGGTAGGAGCAAGGAGTG     | 59.861 | 20 | CTGCTTCTTGCTCCTCGTCC   | 59.989 | 20 |
| TGCAACACAATCATTATGGC     | 57.987 | 20 | TTCGACAATGTGTCTACATCCA | 59.05  | 22 |
| TTGATGAGCCATAACCCTCC     | 59.894 | 20 | CAATGACGAATAGCAGCCAA   | 59.833 | 20 |
| GTCCCAAAAAGGCAGAAACA     | 60.088 | 20 | TCTGCACATCTGAATTTACAAA | 57.528 | 23 |
| GAAATTTGGAAGTGCCTGGA     | 60.051 | 20 | AATCCGAACCTCGAGTCCT    | 60.074 | 20 |
| TGATTTTGGATTTTAGGCGG     | 59.901 | 20 | ACAATGATCGGTTTCAAGGG   | 59.79  | 20 |
| AATGAATAAGTTTGCATTTAAGAC | 57.268 | 25 | TCCTCTTCGGTTGGTTTTGA   | 60.605 | 20 |
| GCTCGTGTCCAAATCAAACA     | 59.697 | 20 | CTCTCCGTCCACGATGAACT   | 60.261 | 20 |
| GCAATGAACACTTAGCAGCG     | 59.638 | 20 | GTTCCAAGGGAAAAGGGAAG   | 59.912 | 20 |
| TCAGGTTTGACTTTCAATTCTCGT | 60.158 | 23 | TGGAGGACTAGATTTGGGGA   | 59.478 | 20 |
| CCGAAATTAACGTGGAGGAC     | 59.429 | 20 | AACTTTGTTGAATGAGCCCC   | 59.031 | 20 |
| TCACAAACCGCTGTTGTTTC     | 59.74  | 20 | GATCCTTGCCCTTTTCTGT    | 60.443 | 20 |
| GCCCGAGGTTGAAGATGATA     | 60.036 | 20 | GGAAGTGATCCTTGGGATG    | 59.336 | 20 |
| TGTGTTGTTTGTATGTCTTTGTGA | 59.133 | 23 | GGGCTACGACAACGGTTAAA   | 59.996 | 20 |
| TTTTTTTTTCTCAACAATTTTCG  | 59.647 | 23 | AGGGAGCAGCTGACTAGTGG   | 59.622 | 20 |
| TTTTGGGAGTTCTCCTCCCT     | 60.045 | 20 | AATGATGACCTCATCTCCGC   | 60.042 | 20 |
| CCTTTCCCTTGCATCTTG       | 59.702 | 20 | CCCAAGACCCCAATTTGATT   | 60.91  | 20 |
| TGAATATGCGGGAAGAAAGC     | 60.175 | 20 | CCCAAGACCCCAATTTGAT    | 59.59  | 19 |
| CATGGCTGAGAGGAAAAGGA     | 60.331 | 20 | GCTGCATCAATGGAGCTTCT   | 60.514 | 20 |
| TGCTGAGATGGAACCTTGACG    | 59.984 | 20 | GCCTTCTTCAGCTCCTTGAA   | 59.694 | 20 |
| CAATGAGAAGGCAAACACGA     | 59.84  | 20 | TGGGAATAATCCAGGAACCA   | 60.126 | 20 |
| CCAGCCCAATAGAGGTGAAA     | 60.066 | 20 | GGTTTACCCAGAACGCACTC   | 59.598 | 20 |
| TATGATCGTACACGATGGCG     | 60.51  | 20 | CCAATGAGACACACTCCCAA   | 59.52  | 20 |
| TTTTGTGTGTGTTTGAACG      | 59.221 | 20 | TTCTGTGCATTGCCATTGAT   | 60.08  | 20 |
| TTGGCGAGATCATTTCCTTC     | 60.155 | 20 | TAACTGACCTGCAGCGGAAT   | 60.796 | 20 |
| CGATTGTGGTGACGAAGATG     | 60.112 | 20 | GCAAGCTTTCCCACTCACAT   | 60.263 | 20 |
| ATCGTTGTGAATTTGGGGAA     | 60.17  | 20 | AAAATGGTTCGTAAGTCCC    | 58.952 | 20 |
| GCTTCCAGATCTGCCAAAGT     | 59.434 | 20 | GGGTTTAGACGTATGCACA    | 59.572 | 20 |
| TGGCATAACAAGCTAGGACAT    | 57.408 | 21 | CCCAAGACCCCAATTTGATT   | 60.91  | 20 |
| ATGTAGCCGACCCCAATTTA     | 59.297 | 20 | TCGAAGAAGCGAAAATCACC   | 60.331 | 20 |
| CGGTGGTTTAAATGGAGTTGC    | 60.365 | 20 | AGCTTCGTAATATGGGCGAG   | 59.343 | 20 |
| GGGCAAAAAGCCAATGAAATA    | 59.907 | 20 | TTGGGAGTCAACTGATTGCTT  | 59.726 | 21 |
| AACGAACGAAGCTGAGCAAT     | 60.022 | 20 | TCGAGACGGGACTGTGAATA   | 59.241 | 20 |
| CCCAAGACCCCAATTTGATT     | 60.91  | 20 | GAATCCCATATGCGAGGATG   | 60.26  | 20 |
| TGTAGCCGACCCCAATTTAT     | 59.297 | 20 | CCGATCGAGCTGAGAAAAAG   | 60.088 | 20 |

|                           |        |    |                         |        |    |
|---------------------------|--------|----|-------------------------|--------|----|
| TGACTTTCGGATTTTCGACC      | 60.051 | 20 | GATTTTCTTGGATCTCATGCC   | 58.586 | 21 |
| TAAATTTACTCGCTGGTCTATCTA  | 57.426 | 26 | TCCGCACTTGAAATTCATC     | 60.983 | 20 |
| CCTGAGGTTCCAGGGTCCAT      | 59.905 | 19 | CCCAAGACCCCAATTTGATT    | 60.91  | 20 |
| GATGAGATTCCTGAGGTTGA      | 60.011 | 20 | TCAGCAGCCATCTGTTCTTG    | 60.136 | 20 |
| AGAAATGCAAAGACCAAGAACA    | 58.882 | 22 | CCCAAGACCCCAATTTGATT    | 60.91  | 20 |
| TGTCAACCATAATATATGCATCGA  | 60.127 | 25 | AAATTGGGTGGTCCATCAAC    | 59.508 | 20 |
| CCCAAGACCCCAATTTGATT      | 60.91  | 20 | AAGAATGCAGCGCAAAGTCT    | 60.162 | 20 |
| CCCAAGACCCCAATTTGATT      | 60.91  | 20 | TTTTGCCGGTCGATAACTCT    | 59.708 | 20 |
| GCGAACACAGTTTTTCAGCC      | 60.817 | 20 | GCACACGCTGAAGGATCATA    | 59.83  | 20 |
| GCTCTTGAAATTTTCTTATTGTTCC | 58.842 | 25 | TGTCTTGTGCTGAAGATGGTTG  | 60.299 | 22 |
| TTGTGTCAGACTTGTTCCGC      | 59.88  | 20 | TGGCTCAAAAGTAAATGGGG    | 59.931 | 20 |
| CCCCAAACTTATTGACAAATG     | 60.443 | 22 | AGATGGTGCAGTTCTTTGGG    | 60.111 | 20 |
| GTCAGCGAATTGTTGCAGAA      | 59.995 | 20 | ATTGACGTCGTTGAAGAGCC    | 60.263 | 20 |
| TTGCATTTTTCATAGCCCAA      | 59.146 | 20 | TGTGTGTAGAGGGACAACGC    | 59.751 | 20 |
| CCTCAACCAGAGTCTCCTCC      | 58.819 | 20 | AATCCGTTATTTCTCCCGGT    | 59.666 | 20 |
| TATTCCACCACGCTCCTTAT      | 57.184 | 20 | GAGCTGATGGAAACTTTCG     | 58.443 | 20 |
| CCCAAGACCCCAATTTGATT      | 60.91  | 20 | GGATGTACCAGCATTGCCTT    | 59.962 | 20 |
| GTGAATAGCTGCTGGTGGGT      | 60.142 | 20 | AAAATCGCACGACGAATACC    | 59.967 | 20 |
| GAGAGCAAAGAGTTGGCACC      | 59.997 | 20 | CTCCTTCAATTGCCCTTAC     | 59.67  | 20 |
| GATGGATGGATCAGAACCGA      | 60.839 | 20 | CGTTCCGACCCTTCAATAATC   | 60.678 | 21 |
| AACAATTCGTGTCATGGTCG      | 59.42  | 20 | GATTCGAATAGGAACGCGAG    | 59.807 | 20 |
| CTTGCGGTCTTGAACATGAA      | 59.84  | 20 | ATGTCATGATCTTCCAGCC     | 59.893 | 20 |
| TGGCAGATTCCTTGATTTT       | 59.505 | 20 | AGGCTGGTCTAAAGCGCATA    | 60.003 | 20 |
| TGATAGCAGAATGATTGAAGCAA   | 59.867 | 23 | TCTGATGTGAAATGTGTGGATA  | 57.465 | 23 |
| TGGGACGATAAGGGATAGTG      | 57.488 | 20 | ATGTAGCCGACCCCAATTTA    | 59.297 | 20 |
| TGAGATTTTTGGTGTGAGTGGT    | 59.496 | 22 | GCATTTTTCACTTAGCCGAGA   | 59.488 | 21 |
| AGAACCCGGTTTGATCTGTG      | 59.966 | 20 | GGGTGAGGGAGAAAAAGGAA    | 60.414 | 20 |
| GTTAGTTGTTGGCCCGTTA       | 59.861 | 20 | GAGGATCGACTGCTCTGGTA    | 57.97  | 20 |
| TGGAATTCACATCAATGGTTC     | 59.668 | 22 | TCACCAAATAATATAGTTATCA  | 57.39  | 27 |
| CGAGATGTGAAGATTGAGGC      | 58.388 | 20 | GGGATTTTCATCCAAAAACCTG  | 60.528 | 21 |
| CATACCTCGGCCCTTGATGT      | 59.955 | 20 | GAGCAACTTCTTGGCTCGTT    | 59.621 | 20 |
| TACGCAAAGGCACTTCTCAA      | 59.609 | 20 | AAGTAGATCCATGTGGCCGT    | 59.434 | 20 |
| GAAGTACCTGCCTACTCGTCTGA   | 59.957 | 23 | CATCTTCATCTGCCAGTGCT    | 58.987 | 20 |
| GAGGGAGGCACTAAGAAATGG     | 60.082 | 21 | TGTATGTGCGAGTCCGAGTGTGA | 57.825 | 21 |
| GTCTCTTGGTCTGAGCCTGC      | 60.143 | 20 | GTTGATCGTTTTGTCCTCGT    | 60.119 | 20 |
| ACGCAATTCATCACAACCTGC     | 59.728 | 20 | CGGCTTAGGGCAGATAACAG    | 59.861 | 20 |
| CCCAGAAGCAGAAGAGGTTG      | 59.982 | 20 | AACACCGGATTCACTTTTGC    | 59.978 | 20 |
| GGGTCCACCTTTTTCTCCTC      | 59.912 | 20 | GAGAGGAGCGACACCAGTTC    | 59.993 | 20 |
| TGTAGCCGACCCCAATTTAT      | 59.297 | 20 | GCTGCACATATTATGCTTTGC   | 58.485 | 21 |
| CAGCCGAGAACATCATCAA       | 59.799 | 20 | AGGGGATCGTAAAGCCTGAT    | 59.925 | 20 |
| AGGTGGATTAGTTGTCGTTTTGA   | 59.92  | 23 | ATGATCTGAAGAAGCGTGGC    | 60.37  | 20 |
| TGTATATTCCTGAAGACGATGGC   | 60.346 | 23 | AATCCCACCCTTACCATT      | 60.422 | 20 |
| GGCATGCATAATGTGACACC      | 59.812 | 20 | AGCATTGGCAAAGACGACTC    | 60.406 | 20 |
| TGATGATTGAGTAAAAACGACAA   | 58.721 | 24 | TCACAAAAATATTTCCCGGC    | 59.773 | 20 |
| TGACACATGCACATTTACG       | 60.164 | 20 | GAACAAAACATTTCCGGGTG    | 60.206 | 20 |
| CCGTATCAAGCCACCAAGTA      | 58.649 | 20 | CATTTAAGGTGCAGCCTGGT    | 60.132 | 20 |
| TCGAGGAAGGAGAGGTGTTG      | 60.377 | 20 | TTCGTCTTTCCGTTCTCAG     | 60.366 | 20 |
| CCCAAGACCCCAATTTGAT       | 59.59  | 19 | AATAAAATGTCGTGAGCCCG    | 59.96  | 20 |
| TCTTTGCGATGAGCTCCTTT      | 60.096 | 20 | TCCGTTGGAACAATAGGGTC    | 59.79  | 20 |
| TTATCCCATCCCCCTTAACC      | 59.846 | 20 | GGACGATGAGGAGGAAGATG    | 59.612 | 20 |
| ATAAACTGTTACTCCTGGGTGC    | 57.318 | 22 | TTAATGGGAAATTGCGTTGG    | 60.671 | 20 |
| CTGCCACCGATTTGAACATT      | 60.894 | 20 | CGGGCCAGTTAAGCTTGTTA    | 60.257 | 20 |
| GACGCTTGGTTGGATAGCTT      | 59.34  | 20 | TCTGCCTGAATTTGGAAAGG    | 60.184 | 20 |
| CCGCCTCCGTAAATAAACAA      | 59.958 | 20 | CACAACAGAGCATTAGGCCA    | 59.864 | 20 |
| ATTCGCTACCGTGTGGAGTC      | 60.142 | 20 | GATCGAGCTAGCCAGTTTG     | 59.978 | 20 |
| CGGACAGAAGGATGGCTTTA      | 60.206 | 20 | GGCCTCAAGGTATGAAGCAG    | 59.836 | 20 |
| TGTTTTATTGTGCTTTGTCATTGT  | 57.745 | 25 | GCCAAGTTGACACACACAGG    | 60.203 | 20 |
| CATAAACCACTTCGAACGGC      | 60.502 | 20 | CCAGAGTTCGTTTTGGAAGG    | 59.705 | 20 |

|                            |        |                            |        |    |
|----------------------------|--------|----------------------------|--------|----|
| TGTAGCCGACCCCAATTTAT       | 59.297 | 20 ATGTGTCATTGTTTCGTGGAA   | 58.888 | 21 |
| CAGCTCTTCAAACCTGGGCAC      | 60.975 | 20 CAAAAGGTTTTTGACTCTTACC  | 60.077 | 25 |
| GATGCCACAACCTAGAAATCGC     | 59.728 | 21 TGGGCTTTTAAGGAAGACGA    | 59.817 | 20 |
| TGATGTAAAGAAACATTA AAAAAGC | 57.883 | 25 TTGATTGCGTTGCTTAATGG    | 59.702 | 20 |
| AGCCAAAAGATACTAACTTCCA     | 58.898 | 25 GCAGCCAAATACACTCAAAAC   | 60.173 | 22 |
| AATAAAGCGTGCCTCACCAC       | 60.14  | 20 GACTCCGCATAGTGGGAAAA    | 60.074 | 20 |
| GATGATGATGCCACTCTTGG       | 59.04  | 20 CGACGCTGAATGAGCTAGAA    | 59.322 | 20 |
| AAACGGAATCGAAGGTGATG       | 59.933 | 20 AATCGAGAATGTGGACGGAG    | 60.073 | 20 |
| GGAGAAGGATGAGCGAAATG       | 59.773 | 20 GAGCGTGCGGAGCTAGTATC    | 60.147 | 20 |
| GTGTGAAGGCCATGATTCT        | 59.934 | 20 GGTAGGCTGGTAAGGGCTTC    | 60.096 | 20 |
| TTCAGCCCAGCCCAATAATA       | 60.415 | 20 GTGGTATGCTGTGGAGGACC    | 60.395 | 20 |
| TCCTCCTGTCCTTGCAATCT       | 59.803 | 20 CCCAAGACCCCAATTTGATT    | 60.91  | 20 |
| TGGGCCGATCCTATCACTAC       | 59.917 | 20 TTGCTTCCGTGTTTTATCCA    | 59.157 | 20 |
| ATTCCCGAGACTGAGATGGA       | 59.612 | 20 CTGCAGCCATCTGTTCTTGA    | 60.136 | 20 |
| TTTCTGGTGGAGTTCATTGAGA     | 59.711 | 22 TGGTGTGGAGGTGACAATA     | 60.112 | 20 |
| TTCTCTGTGCTGATCGAAA        | 58.736 | 21 CAAAACAACCGAATTGCACA    | 60.535 | 20 |
| GACAAGGCGTGAAGGTGAGT       | 60.307 | 20 CAAAACGAAAGCAAGCTCA     | 59.226 | 20 |
| CCCAAGACCCCAATTTGATT       | 60.91  | 20 AGCACAACCCAAATGGTAGG    | 59.853 | 20 |
| CTATAGGCACGCCGAACAAT       | 60.117 | 20 GAAAACGTGCAGCTCAACAA    | 60.035 | 20 |
| TGTAGCCGACCCCAATTTAT       | 59.297 | 20 CTACCACAACACATGAGGCG    | 60.175 | 20 |
| CCCTTTAAGATAAAAATGAATATT   | 60.57  | 27 ACCGTGTGCCCTAAAAATA     | 59.338 | 20 |
| GCCCGAGGTTGAAGATGATA       | 60.036 | 20 GGAAAGTGATCCTTGGGATG    | 59.336 | 20 |
| ACAATCCCAATTGTATCCGC       | 59.651 | 20 CCCAAGACCCCAATTTGATT    | 60.91  | 20 |
| TGCAATAATTTTGGCCAACTC      | 59.957 | 21 AATGCTATTTGGAGCCATCG    | 60.06  | 20 |
| ATTAGCAAATTTGCGGACGA       | 59.547 | 20 AATGGGGTGTGAGGAAATGA    | 60.173 | 20 |
| ATTTGGGAGTGTTCCGACTG       | 59.966 | 20 ATTCGAAAGTTTGCCAAAAA    | 57.431 | 20 |
| ACTCGACTCAACCTATTTAGCAA    | 57.311 | 23 GGCCGATATTTGGCCTTTA     | 61.096 | 20 |
| AGTGGAGCTAGTGAGGGTGG       | 59.325 | 20 TAAAGTTTGGTGACGACCGC    | 61.06  | 20 |
| TGACCTCGTGAACCTGGCAA       | 60.301 | 20 CTATGCCCAAAAACGCTAGG    | 59.736 | 20 |
| TTCCATGGGTACAGAGGAGC       | 60.073 | 20 CATCATCAGGGGGAGTAGGA    | 59.879 | 20 |
| AGGAAGATGAAAAGACAAGCG      | 58.591 | 21 AATGGAGTAGATTTTCCCATGA  | 57.552 | 22 |
| TGCATCAGGCAAAAACCTTATCA    | 60.619 | 22 TTAATTATGGGACGGAGGGA    | 59.227 | 20 |
| AGCAGCTACAACGGTAAGGC       | 59.545 | 20 GAGCATGTAACCTCATGTGTCCC | 60.438 | 23 |
| TGTCCACCAAGACCAAAATGA      | 59.935 | 20 GGATTCCGAAGATCGACAAT    | 60.043 | 20 |
| GTGGTTATGGAGGAGACGGA       | 59.927 | 20 AGTAAAGGGTTTGCCTTGA     | 59.883 | 20 |
| GGCTCCGTTTTGGTGAATTG       | 60.365 | 20 ACGAATTAGCGTTTGATGGC    | 60.103 | 20 |
| GAGAGAAGCCAGGGATGACA       | 60.349 | 20 CTCCTGCACCAGAACTCTCC    | 59.986 | 20 |
| ATTCACACCTGCTCCAGTCC       | 60.12  | 20 AACAAGGGTTTCCATTGACG    | 59.83  | 20 |
| TGGGATCTATTTGATGAGGGA      | 59.329 | 21 TCCAAATGTAACCTGACCCAC   | 59.845 | 21 |
| TTAAGCCTTGGTCCATGTCC       | 59.933 | 20 GAGCAACTTCTTGGCTCGTT    | 59.621 | 20 |
| CGCATCTTTTGGGATGATTT       | 59.901 | 20 GAGGCTCCTTCAAACACTGC    | 59.997 | 20 |
| AGCTGCAGACCAACATGTCA       | 60.473 | 20 CCCATCACCCACCACATAAT    | 60.317 | 20 |
| TTGATCGGGTCCGACTTTAC       | 59.933 | 20 CTCCCCGTTTCTCTCTCCTT    | 59.811 | 20 |
| CCTCCGGAACCTCTCCTAACC      | 60.067 | 20 ATACAGTGCCACCACCACCT    | 60.307 | 20 |
| AAATTAATAACCTCGCCGGA       | 59.824 | 21 TCCAGATTCGTCCCAAAAAC    | 59.91  | 20 |
| GGCTCGCCAAGGTAGATAAAA      | 59.32  | 20 GAAACTTGATGCTGGTCGCT    | 60.406 | 20 |
| ATGAAGCCAAACCCTCAATG       | 59.933 | 20 TTGCTGACTCTTCAGCCATC    | 59.116 | 20 |
| GAACCTAGCGTCTCTACGCC       | 60.164 | 20 AGCTAAAGTCGGGCCAAGAT    | 60.228 | 20 |
| TGTGGAGAAAGGAATGGGAA       | 60.43  | 20 TGAAACTCCACTGCCCAAAT    | 60.495 | 20 |
| CCATGTAAGAAAAGTGAAGGG      | 59.865 | 22 TCGAGGGGAGTGTTGAAGTC    | 60.238 | 20 |
| CAAAATTA AAAATGCCCCCA      | 59.648 | 20 AAATGGTAGAAATCGCCGC     | 60.052 | 19 |
| TCATTGGCTATGGAGGTGGT       | 60.34  | 20 TGGATTATGTAGCTGACCCCA   | 60.337 | 21 |
| GAACGAGGTTGGCGTATTGT       | 60     | 20 TAGAAGGAAACCGAGAGCGA    | 60.088 | 20 |
| CATGAGGCTGCTGAACTCAC       | 59.577 | 20 GAGCCTTGGAGGAAGGAGAT    | 59.778 | 20 |
| ATGTAGCCGACCCCAATTTA       | 59.297 | 20 ACGGGATTGAGTTCACGTTT    | 59.973 | 20 |
| CGGGGTTTCGAGTTCATATTG      | 60.323 | 20 TATGCCCAAGACCTACCGAG    | 60.088 | 20 |
| TGCTGCCACACTCTCTCTGT       | 59.764 | 20 TCGAAAGCTTGTGAGCAAGA    | 59.864 | 20 |
| CATCAACATCATCCCCATCA       | 60.137 | 20 GGTGAATCAGCAGGGGTTTA    | 59.933 | 20 |

|                          |        |                           |        |    |
|--------------------------|--------|---------------------------|--------|----|
| TGGTTGAGCTAAAATCTTTGAGAA | 59.453 | 24 TTCAAAAGTTATTTTCGAGGAC | 59.667 | 23 |
| TTGGTGGTTTTTGGATGATG     | 59.222 | 20 TCCCAATTTACCTTTCCAC    | 59.767 | 20 |
| TGCTAAACGATGAGCTTGGAA    | 59.566 | 20 AGGTCATGCGTTCAAGGTTT   | 59.598 | 20 |
| CGTCGTCGCTACATGAAGAA     | 60.011 | 20 TGATGCCACAGTTGGATCTC   | 59.637 | 20 |
| GCCGTAGAGTAGATCGGTGG     | 59.717 | 20 CATTGCCACTCAAGAATCCA   | 59.648 | 20 |
| CCCAAGACCCCAATTTGATT     | 60.91  | 20 ATGAAGTGGCATCGCAGATT   | 60.634 | 20 |
| ATGCGAAACCGATCTTTCTG     | 60.214 | 20 ATGATCCATATAGCCGACGC   | 59.914 | 20 |
| CGTGGAGCCTATTTGGATGT     | 59.955 | 20 CTTCAGCAGCCTTTGTCTCC   | 60.134 | 20 |
| CAAAAACCCCGAATTCATTG     | 60.16  | 20 AGAGGGGGTTTTGAGGTTTGT  | 59.834 | 20 |
| TATGCCCGTGAAAAAGAAGG     | 60.067 | 20 ATCGGAAGCTTCAAGTCCAA   | 59.813 | 20 |
| AAATGGAGTCGAAGCAGCAT     | 59.843 | 20 GTAGGAACCGGATACAGCCA   | 59.955 | 20 |
| GGCGTCTCAAACGTATCTCC     | 59.7   | 20 GCCGGATGATCTACAAGCTC   | 59.803 | 20 |
| CAGCAAATGCAACAACACCT     | 59.764 | 20 CCTGAGGACTGATGGTGGTT   | 59.962 | 20 |
| GTGTGGCTGTTCACTTCTGG     | 59.139 | 20 CTTTAAGGACAGGACAGCCG   | 59.869 | 20 |
| ATGTAGCCGACCCCAATTTA     | 59.297 | 20 GGTGAAAAACCCGAGTTCAA   | 59.948 | 20 |
| GGAGCAAAGCTGTTGAGGTC     | 59.997 | 20 AAAATGCCCTCTTCTCCAC    | 60.443 | 20 |
| TTCAATCATATAGAATCTGCTCTT | 59.283 | 27 AACCTAAATCTTCATCACACE  | 58.124 | 22 |
| ATATGAGAAGAGCAAACCCACAA  | 60.014 | 23 TCATGTAGTCGACCCCAATTT  | 59.302 | 21 |
| TGCATCATTTAGCAATCTGCAT   | 60.617 | 22 AAAAAGATTTTACGTGTTTCAC | 59.169 | 24 |
| TCAACCAACTGGCACAGAAG     | 59.873 | 20 CTCATTATGATGCTCCGCCT   | 60.199 | 20 |
| GTGCGCTCTGATGACTGAAA     | 60.144 | 20 CCTCTTGCATATTGTGGCCT   | 60.096 | 20 |
| GAGGTTTTGGGGGTTGAAAT     | 60.032 | 20 TGCATTGGCTGAAGAAAGTG   | 59.988 | 20 |
| TGAAACTCCCCACAATCTCC     | 59.903 | 20 CTCTTTGAGGGACATTCGGA   | 60.187 | 20 |
| ACACACGCATACACACACGA     | 59.649 | 20 CACAGCGCTATAGGTTGCTC   | 58.703 | 20 |
| TGTGAAACCTCCTTCATGGT     | 57.971 | 20 CCCAAGACCCCAATTTGATT   | 60.91  | 20 |
| TTGCCTCTAATTTTGGCTCC     | 59.297 | 20 AATCAATACGGACTTTGCCCT  | 59.849 | 21 |
| TCTGGTCAACATCAATCTGAGC   | 60.263 | 22 CATGTCCCCAGAGATGAAAGA  | 60.058 | 21 |
| ATCGTTGGCCAGTCGGTTA      | 61.452 | 19 TGACAGGAGGAAATAATGAGA  | 59.502 | 24 |
| TCTAAATTGCAAAAGCGCAA     | 59.602 | 20 TGTAGCCGACCCCAATTTAT   | 59.297 | 20 |
| TATTCGGATCAAGAGGGTG      | 59.887 | 20 TGACTACAACGACGATTCGG   | 59.716 | 20 |
| TCCAGCCTTTACCTCTTTTTGT   | 59.304 | 22 TGATACTTCGCATCTCACGG   | 59.823 | 20 |
| CCCAAGACCCCAATTTGATT     | 60.91  | 20 AGGCTACATACATCCGCCAC   | 59.985 | 20 |
| CCCAAGAATGACTGGGGTAA     | 59.784 | 20 TTTGATTGGGAATAATTGGGT  | 58.163 | 21 |
| CTCTATCACAACCCAAGGCG     | 60.647 | 20 CACCTCCAATCCAGTATCGC   | 60.483 | 20 |
| TGTAGCCGACCCCAATTTAT     | 59.297 | 20 GCTGCGTTTTGTATGGAACTG  | 59.347 | 20 |
| GGTTCGTCTTCAACCACGAT     | 59.973 | 20 TTCCCGGTACGACGAAATTA   | 60.315 | 20 |
| GCAGGGCATGAACAAACAAT     | 60.905 | 20 CCTTTGTTGCACTAAGTTCCAA | 60.746 | 24 |
| GGCATTTTAACTTTGATCATTAAC | 59.267 | 25 TCGATTGTCCACAATTGCAT   | 59.931 | 20 |
| TGTAGCCGACCCCAATTTAT     | 59.297 | 20 GGCTAAAATCGGTCAAACG    | 59.586 | 20 |
| CTTCTCTCCTTCACCCTCA      | 59.375 | 20 TGATGAGGATTCTGTGGTGC   | 59.637 | 20 |
| GCATGAAACTTGAATGGAAA     | 59.93  | 21 TGCTTAGAAAATAGGAAATGT  | 59.212 | 24 |
| CGTGTACGAAGTCAACGATG     | 60.175 | 20 CCAGCCTTCCAAATTACCCT   | 60.312 | 20 |
| ATAAAATGGGAGCGGAGAGG     | 60.411 | 20 GATGTCCGCCGTTTCATAAT   | 59.791 | 20 |
| GGCATGAAACGGAATAGCAT     | 59.929 | 20 CCCGGATTGACACTCCTAGA   | 60.065 | 20 |
| AGAGGACCAGCACCAGAAAA     | 59.844 | 20 CCAGCTCTTTCTGAACCCTG   | 59.982 | 20 |
| TGTGAAATTCTCTGGGAGCA     | 59.369 | 20 GTTCCTGAAACGAGTGATGC   | 58.287 | 20 |
| TCTTGTTGTCGCGTTTAATGA    | 59.359 | 21 TTGGGACAAAAGAAGCTGAAT  | 58.823 | 21 |
| TGCATGAAATCAAACCTCCA     | 60.049 | 20 CGATGAATTGGGGGAGATAA   | 59.717 | 20 |
| AAAAACCAACTGAATTGCAAAA   | 58.698 | 22 CCCAAGACCCCAATTTGATT   | 59.59  | 19 |
| CCGATTCGTGGAAACCTGTA     | 60.883 | 20 GGTTATGGTTTTTGCACCCA   | 60.597 | 20 |
| TTTGGAAAGAAAATTCATCGG    | 59.042 | 21 AATGGAACCTAACCCAAGTTGA | 57.663 | 22 |
| GAAGGGGGAGACCGAAATTA     | 60.258 | 20 TGTAATGCATGGGGGAGAGT   | 60.34  | 20 |
| AGATCATCAAAGCCCCTCAA     | 59.629 | 20 GGTCCATGAACCCTGGACTT   | 61.152 | 20 |
| GTGTTTGTGTGTGTCTCCA      | 59.477 | 21 CCGTCTCACTCCAATTGACA   | 59.676 | 20 |
| TCAAACTCGGTCTTGACACA     | 60.427 | 20 ATGCAGATATGGAGCAATTTT  | 57.795 | 22 |
| AGTCCGTGTTCCGATGAGT      | 58.067 | 19 CATTCTATGCCATGCAGACG   | 60.243 | 20 |
| ATTAGCCCCATCAAGGGTTC     | 60.152 | 20 CCCAAGACCCCAATTTGATT   | 60.91  | 20 |
| TGAGCAACCTGAAAATTGAACA   | 60.648 | 22 CCCGTGGACGTAGATCAGTT   | 59.989 | 20 |



|                         |        |                            |        |    |
|-------------------------|--------|----------------------------|--------|----|
| CAGGTCAACTGAAATCTGAAAGA | 59.799 | 24 GCAGACCAAAGAGAAAGAGT/   | 59.595 | 23 |
| TCCCCTTTCTTGACCATCAG    | 60.042 | 20 AGGTGTTTTCCCACGTCATC    | 59.827 | 20 |
| ACGAGAACCCTCACATCACC    | 59.969 | 20 AGAGTGGGGGAGAAGACGAT    | 60.073 | 20 |
| TTGGTGCAAATGTGTTGAT     | 57.442 | 20 CTCTAACCCAGCAGCAGACC    | 60.012 | 20 |
| CTACAGTCCGTGTTCCGATG    | 59.161 | 20 TGCTCATTATTTGATTGGCG    | 59.662 | 20 |
| TCCCACATAGGAAAAACAAAA   | 57.157 | 21 ACGATGCACAAGACATGAGG    | 59.707 | 20 |
| AGAACCCCTTGATCATTCC     | 60.133 | 20 GGCAAATTCGTTGGAGAAA     | 60.053 | 20 |
| CAACGCGTTCTGCATTACAA    | 60.838 | 20 GTCGACAGGCATAAGCTTCC    | 59.843 | 20 |
| GGTTCATATAACCGACCCCA    | 59.505 | 20 TTGGTGCGATAACAATGGTG    | 60.379 | 20 |
| TCCCATAATTTACCTGGA      | 57.992 | 20 CCAAGACCCCAATTTGATT     | 60.91  | 20 |
| GTCATACCCACTGCTCCAC     | 60.395 | 20 GGTCAACGAAACAACCT       | 59.867 | 20 |
| TGTGCATATTGTTGGGAAG     | 59.395 | 20 CACCCAAGTTTCTTCCAAGG    | 59.563 | 20 |
| AGACGAGTGGCTGCTACCTG    | 60.611 | 20 AAACCCCTCGTGTGTTTCA     | 60.388 | 20 |
| TTGATGAGCCATAACCCTCC    | 59.894 | 20 CAGCAGCCATCTGTTCTTGA    | 60.136 | 20 |
| TTGGATTCCCACAATTCCAT    | 59.991 | 20 TTTGTTACATGCGGAACCAG    | 59.585 | 20 |
| TCGAACTCATCAAAGACCCA    | 59.215 | 20 CTTAATGGGTGAGAGACCCG    | 59.545 | 20 |
| AGCTTCGAACCCTGACCTTT    | 60.247 | 20 CTTCCCGCAAACGTTGTAT     | 59.996 | 20 |
| TTGGGCAACTGAAGATTAAG    | 59.667 | 23 ATTTCCACCGTTCAGACAGG    | 59.966 | 20 |
| CCCCAAACTTATTGACAAATG   | 60.443 | 22 TTGCAGTCTGAGCAAGGAGA    | 59.855 | 20 |
| AGAGGGAGAGTTCGGGAGAG    | 59.945 | 20 AATCAGAATGGTTGGTTGGC    | 59.797 | 20 |
| TGCAGCAGCCAAGACTTAGA    | 59.888 | 20 AGGGCCTGTGCTCATAGAGA    | 59.973 | 20 |
| CTCCAATCCATAGCAACCAA    | 59.946 | 21 TGAGGCAAGCATCAGAAAGA    | 59.673 | 20 |
| ATGTAACCATGGGCCAAAA     | 60.053 | 20 GCTAGTTGCACCCCTGTCTC    | 59.874 | 20 |
| GAATTGGTAGGGTTTTCTGTCG  | 59.871 | 22 TGGAGAAGGAGGATCCATGT    | 59.46  | 20 |
| GTCCAAATGTGATTGCCCTT    | 59.797 | 20 GAAACCCCATCCAGAAGAT     | 60.133 | 20 |
| CGGCATTATCAGTACGACCA    | 59.566 | 20 AAAGCTCGAACTTGTGGCAT    | 59.882 | 20 |
| CGTACGGAAATCTGATAGGAAA  | 59.528 | 23 CCTAGCCCAAGTTGTACCC     | 58.577 | 20 |
| CCAAATTTGTAATGCAAACAA   | 57.71  | 22 GGTGAATTGTGTCGCTCCAT    | 60.935 | 20 |
| ACCAATGGGTGAAAGAATATGG  | 59.945 | 22 AAGTTTGCCCTATCAAACAGG/  | 60.001 | 22 |
| ATGTAGCCGACCCCAATTTA    | 59.297 | 20 TGGTGGGAATCTTTTCATCG    | 60.832 | 20 |
| TACTCCCTCCGTCTCACTCC    | 59.254 | 20 ATTGGGGAAATTCACGGAGAT   | 60.526 | 20 |
| CCTCTGAAAGCTCGGTTAC     | 59.989 | 20 CCTTCGTTTATTGGGGATCA    | 59.756 | 20 |
| CAAAGCTCTTGATTCAAGC     | 59.955 | 20 TGGAAAACCATCATCAACCA    | 59.75  | 20 |
| TCAGTTCGGTCTAGGCTTCAA   | 60.001 | 21 TCTTCTAGCAGATGACCCTTT(  | 59.9   | 23 |
| CAGCGTTTGAGTCCAGGTTT    | 60.291 | 20 CCTCCGATTTCTTACCATGC    | 59.528 | 20 |
| GGTCATGTGTTGAGTTTCAA    | 58.61  | 21 TTGCTAGCCTCATCATTCCA    | 59.375 | 20 |
| ATGCAAGGTGCATGTGTCTC    | 59.714 | 20 GCAAACAGAAAATGAGGGGA    | 60.051 | 20 |
| CCTTTTATACGGGTCGGGT     | 60.068 | 20 ACCAGCGCTAACACGAAATC    | 60.278 | 20 |
| CGGAGATTCGCAAGTTCAGT    | 60.397 | 20 TCCACCAATTTGTCCTAAC     | 58.798 | 21 |
| CGTTGGCTCGACGTTATCTT    | 60.27  | 20 GAGCAGAAAATCGTGAAGGG    | 59.813 | 20 |
| TGGACCGAGTCATCTCTGTG    | 59.82  | 20 CCACTATGACCATGCCCTCT    | 59.95  | 20 |
| GCAACGGAAACAACCTCTTT    | 59.218 | 20 ACACAATCAAGGCATCAGCA    | 60.272 | 20 |
| TCTGGCCTGATCTACAGCCT    | 59.973 | 20 GCTAGCACCTCTTCTATTGCTG. | 60.183 | 23 |
| CTCTGCTCAGCCCCTTCA      | 60.221 | 18 AGAAGAGGATGTTGGCGATG    | 60.218 | 20 |
| GCTGTAGCTGACCCCAATTT    | 59.198 | 20 TGTCCATCATTCCAGGCATA    | 59.883 | 20 |
| GATGCGTTTGAAGGGAAAA     | 60.053 | 20 GCCCCTACAAGGAGTTCACA    | 60.111 | 20 |
| CCGAAGAGCATAGTTCAGCC    | 59.978 | 20 CTGCCCTTCAAATGTTGCT     | 60.249 | 20 |
| ATAAGGATTCCGGGTTTTCG    | 60.143 | 20 TCTCCAACGGCATCTCAAG     | 59.926 | 19 |
| GGTTATTTATTAAGTTGGAGGTG | 58.455 | 25 AAGTGCACAAGCACTCGCTA    | 59.812 | 20 |
| AATTCGAAAATTGCGTCTCC    | 59.162 | 20 GCAAGGCTGGAAGTCAAAG     | 59.993 | 20 |
| ATCACCTATGCATGTTGCCG    | 61.862 | 20 AACGTGCAACGAGAAGTTC     | 59.49  | 20 |
| CCATGTCACAAGTCACTCGC    | 60.319 | 20 GTAGTGGTATGGTGTGGGGG    | 59.966 | 20 |
| TTAGTGCACAAGAGCACCCA    | 60.44  | 20 CAAAATTCATGACAACCGA     | 59.371 | 20 |
| TTGATTGGGAATAATTGGGT    | 58.163 | 21 GCGTCAAATAACCGACT       | 60     | 20 |
| ACGGGTTAAAAATCCAACC     | 59.924 | 20 CTGATAGCTCCGACAACCGT    | 60.277 | 20 |
| TCGCATCTGGGATAATGAAA    | 59.065 | 20 CCACCGCTAATTTGGAGAAA    | 60.067 | 20 |
| TTGATTGGGAATATATTGGGT   | 57.28  | 22 GGTATGGGGTGTGTCGATT     | 59.488 | 20 |
| CCACACCCCTTTGACTGAT     | 59.82  | 20 TTGATCCACCCTATTTTGCAT   | 59.287 | 21 |

|                           |        |                            |        |    |
|---------------------------|--------|----------------------------|--------|----|
| TGCTAGGCATGTATTTATTATTGG, | 59.043 | 25 TGAATTCTTGCACGTTCTCG    | 59.988 | 20 |
| CCTCGTGCAAGCATTACAAA      | 59.872 | 20 TGTAGCCGACCCCAATTTAT    | 59.297 | 20 |
| TTCAAGGTTCTCGCTCTAATCC    | 59.856 | 22 TGTTTTCAATTTGAATAAATACG | 58.972 | 26 |
| GCATTATGTAAGCTCAAATAGGC   | 58.177 | 24 TGATTTCGTGAACATTAGGCTCT | 58.861 | 22 |
| CTCAAGATGCGAAGCAAACA      | 60.134 | 20 CGGATCAAACCCTAACCCCTT   | 60.18  | 20 |
| CTGATCACCCCTGTTTTGCCT     | 60.111 | 20 TCACTGCATGTTCCGAAAAG    | 59.84  | 20 |
| TTCGCTTTGATTATTAATCTTCTT  | 59.313 | 26 GCGATATAATCTCTGACGATTE  | 60.102 | 23 |
| GAAAGAAGCTCCCGAAGGAC      | 60.328 | 20 CTCGAGAAGTAATCGTCGGC    | 59.978 | 20 |
| CAAGACCCCATTTTGATTGG      | 60.162 | 20 CACTGGAATGTCAAGGCAGA    | 59.831 | 20 |
| CACCGGTTGGACCGTCTT        | 61.968 | 18 GGGGGCTATCTTGTGAGCTA    | 59.292 | 20 |
| TCATGATGGTCTCTGATGGAG     | 59.425 | 20 AGCGTTCTTTCCCGAGTCTT    | 60.382 | 20 |
| TGTGTTGGTTGCAGGTTTCAT     | 60.008 | 20 TGTAGCCGACCCCAATTTAT    | 59.297 | 20 |
| CAGTTGACACTTGGGGGACT      | 60.002 | 20 TCCCATGTTCCATTCCTCTC    | 59.862 | 20 |
| CCATGCTAATTTAGGGGAA       | 59.894 | 20 GTTCAAAGTCCGGTGACGAT    | 59.973 | 20 |
| AGAGGATGAAATCCCGAGG       | 60.401 | 20 AGCCAATCTCCTCTCAGCAG    | 59.703 | 20 |
| TGTGGAACCAACACGATTTT      | 58.874 | 20 TTCTACGCGGCCATCTCTAT    | 59.829 | 20 |
| AAGGGGCTTCTTGTGGAAT       | 59.94  | 20 CCGGCAGTTACATATTCGCT    | 60.117 | 20 |
| GGATCTTACGGAGTTGAGCG      | 59.836 | 20 ATAATCAAGGGTGCAGTCGC    | 60.103 | 20 |
| AAAGTTGGTGCCAGAACAA       | 60.529 | 20 AGGTTGCGTACATCTGACCC    | 59.997 | 20 |
| TGCCGTGACTTTATCAACA       | 60.257 | 20 GCCCCGCTCAGATAAACATA    | 60.06  | 20 |
| GTTTGGAGGTCAGGTGTTTCG     | 60.545 | 20 TGGCAATTGTACAAACAATTCA  | 59.288 | 23 |
| CCTTGTGCAAATTAATCCCG      | 60.315 | 20 CATCTCTTGCATCACTATGGGA  | 60.096 | 22 |
| TAGGAAAAGTCATCACGGC       | 60.074 | 20 ATCGACAGCACTTCCAGCTT    | 60.02  | 20 |
| CTTGAATATCGGCGAAGTGC      | 60.742 | 20 GTTGGGCAGCCAAATATTGA    | 60.837 | 20 |
| ATGTAGCCGACCCCAATTTA      | 59.297 | 20 GATGCCATATGCGATGATGA    | 60.427 | 20 |
| ACATCCATCATCATCAGCCA      | 59.882 | 20 ATGTAGCCGACCCCAATTTA    | 59.297 | 20 |
| ACTTCGCCACCAAGTTTGTT      | 60.156 | 20 ATTGACATCGAAATCCTGGG    | 59.75  | 20 |
| ATTATTGAATGGGCCAAAA       | 59.124 | 20 TCTCGTTTCAGCACCAAATCT   | 59.867 | 21 |
| TGGCTATCCTCAGCTGCTCT      | 60.263 | 20 TTCAGCTCCTCACCAAATCC    | 60.195 | 20 |
| TATATGTGGCCTTCTTCCCG      | 59.916 | 20 ACCATGTCCGGCAACATAAT    | 60.081 | 20 |
| CCTCCACTGGACACACCTCT      | 60.153 | 20 CAAGTTGAATCAGAACGGCA    | 59.84  | 20 |
| TCACTTATCCCTCCGAATGC      | 60.036 | 20 GGTTCAAGTGTGGGAGGA      | 59.943 | 20 |
| TAGCTCTGTTGCAGCCGATA      | 59.735 | 20 CCACTAGAGATGACCTACAAG   | 58.848 | 24 |
| AAAGCCAATTTTGGTGGGTT      | 60.573 | 20 TGGTCTCTGTCCATTGTGCT    | 59.261 | 20 |
| TCCAATCACTTACCAAATGCAC    | 59.867 | 22 TCCATTTCTAGACTGCGAGG    | 58.048 | 20 |
| TATTCAATTACCTTGCCGGA      | 58.109 | 20 GCTTGCATTTTCGACCAAT     | 60.257 | 20 |
| CTTTCCCGAGCATCAACATT      | 59.933 | 20 AGCAAGCGGAAATCACCAG     | 61.332 | 19 |
| CGTGTGAACCAGCAGATGAG      | 60.463 | 20 CTTAGGAGTCGGAGTGGGTG    | 59.715 | 20 |
| TCAGAAGGGGTTATGTCCTCA     | 59.536 | 21 TCAAGCAATAGGTCTTTAATAT  | 58.367 | 25 |
| CAAGTTCTTTCAAATTGGTGGAC   | 59.9   | 23 TCCACCAAACAATTTATGGAA   | 59.208 | 22 |
| CACATGGCTCAGACGACACT      | 59.897 | 20 ACGAACCAGGCCGACTAATA    | 59.592 | 20 |
| AACACTCACAGGCGGAGTTT      | 59.769 | 20 ACTTTGAAGCTCGGAAACGA    | 59.993 | 20 |
| GGTACAACATCATGCCACCA      | 60.249 | 20 ATAATGAGTAGGCCGCATCG    | 60.081 | 20 |
| AACCTCTGCCGTGAAATCTG      | 60.255 | 20 CAGCAAAGTCACGAGCATGT    | 60.056 | 20 |
| TGACCCTAGTGGAACACGG       | 58.496 | 20 TCCCTGTAGAGGCAATGGAG    | 60.21  | 20 |
| CAGCCATGAATGAGAGTGGG      | 61.63  | 20 TGCCAAGATTTTTGCTCCTT    | 59.823 | 20 |
| GCTCTCGCTGCTTCTGTTCT      | 60.043 | 20 TCGTTGATTGTACGAGTCGC    | 59.871 | 20 |
| ATAAAACCTGCCGGAATCG       | 59.908 | 19 GGTAACGTTTTCCGACCAA     | 59.839 | 20 |
| AAAATTGGAGACGGCATTG       | 59.938 | 20 GCGAAAGTTTTGGAAATCA     | 60.053 | 20 |
| TCCCTAATCCCCATTCTT        | 59.6   | 20 ACACATAGGGACGGTGGTGT    | 60.159 | 20 |
| GGGGGCCAAACAAATATACA      | 59.525 | 20 TTTCCCATGACTTGCTGTTTT   | 59.601 | 21 |
| GTACTTGTTCTGTTGCCCC       | 60.419 | 20 GATGACAATGATCCCCAATG    | 60.006 | 21 |
| CTGAAAGGTCCCAGGTTCAA      | 60.081 | 20 ATTGACCATGCATTCCATA     | 59.775 | 20 |
| GGCATTATGTCATGGTTCCC      | 60.021 | 20 AGGTTGCGTACATCTGACCC    | 59.997 | 20 |
| TGAAAAAGGGGTAGATCGGT      | 58.503 | 20 TGTACTCAATGAAATAGGGGT   | 57.629 | 24 |
| TATGGTAGCTGGCTCGACCT      | 59.859 | 20 TTTTGTAGCCGACCCCAATTT   | 60.645 | 20 |
| TCGCCAACTTCTCTGATTT       | 59.813 | 20 TGTCACACGTATTTTTGCAGC   | 59.79  | 21 |
| ATGCCCGAATTTTCCCTAAC      | 60.15  | 20 TCGAGGCAGAGAGGAGAGAG    | 59.962 | 20 |

|                          |        |                            |        |    |
|--------------------------|--------|----------------------------|--------|----|
| GTGGGCACCCAACAAAATTA     | 60.597 | 20 ATGTAGCCGACCCCAATTTA    | 59.297 | 20 |
| ACGTCGGGTAGACCAATGAC     | 59.851 | 20 TACAGTCCGTGTTCCGATGA    | 60.112 | 20 |
| AGAAATACATGCAGGGCTGAG    | 59.35  | 21 TGTAGCCGACCCCAATTTAT    | 59.297 | 20 |
| ACCAAGGGTGCGAGAATATG     | 59.955 | 20 AAGAGCAGTCAGTGGTTGGG    | 60.298 | 20 |
| TCCTCTTGGGTTGTTTCACC     | 59.943 | 20 GGATTACAGACGTAAGGAGCG   | 59.836 | 20 |
| AGAAAAAGAAGAGGGAGCGG     | 59.955 | 20 AGTCTCTGGATCGAATCCCC    | 60.421 | 20 |
| CGATTTATTGCTTGCCAATG     | 59.169 | 20 GCAACGGAACAACCTCTTT     | 59.218 | 20 |
| CATCATCATGTCCACCGAAA     | 60.33  | 20 ACCCTGGGGGCTATCTAGTG    | 60.34  | 20 |
| CGAGGAGGAGGAAGAGGAGT     | 59.945 | 20 GCTCCCACCACAACCAAT      | 59.318 | 18 |
| GCTTTGCAACACACATTTGG     | 60.157 | 20 TCCATTCTTGGGAAGACTG     | 60.042 | 20 |
| ATAAATCGAACCTCCCCACC     | 60.017 | 20 GGCTGTGGCAGAAAAGAGAG    | 60.134 | 20 |
| AATGCAACCTGAAAACCTCG     | 60.11  | 20 AGCCGACTTCACATAGTGGG    | 60.134 | 20 |
| GTCAGAAAAGCCCACCTCAA     | 60.232 | 20 CTCGAAACCACTCAACCCAT    | 59.966 | 20 |
| TACCTCCCCTGTTTTACCC      | 60.046 | 20 CGACGGAGTTGGAGAAGAAG    | 59.982 | 20 |
| GCTACATCCAATGCTGGTGA     | 59.679 | 20 TTCTTGCCCGACTTCTGAAT    | 59.813 | 20 |
| ACCGATATTTGGCCTTCGT      | 60.692 | 20 TCGATCTTAGTCGGTCCAGC    | 60.362 | 20 |
| CCATTGAGACTCGAACCCAT     | 59.927 | 20 GTTGGTGGGATTTGAACCTG    | 60.21  | 20 |
| GATTTTGCCCAAGAATACCG     | 59.411 | 20 GCGTGCTGAATCTTAACCGT    | 60.278 | 20 |
| CTTCACCGATCCAAGGAAAA     | 60.044 | 20 AGAATTCCGTAAGCCCAAT     | 59.799 | 20 |
| CACACATTCAACTGGATGGC     | 59.967 | 20 TTCATGTAGCCAACCCCAAT    | 60.192 | 20 |
| GGTTTGAATCCCACCAACAC     | 60.073 | 20 CCAAGACCCCAATTTGATT     | 60.91  | 20 |
| TATTGTGGCACTCTCCCCTC     | 60.073 | 20 AACAACAGCAGCAACAGTGG    | 59.946 | 20 |
| TGGAAGATGGAAGAGGATGG     | 60.003 | 20 GAGCAAAGCAGCTCATCTCC    | 60.249 | 20 |
| CACCTCAGCCACCCTAGAAG     | 59.861 | 20 TGAATCGACAGGCTTGAGTG    | 59.984 | 20 |
| AACAGATCGTGTTTCGTGTCG    | 59.751 | 20 TTTATTGGGGGAGAATCCTTGA  | 59.782 | 22 |
| ATGAGTCGGTTTGTGAGGC      | 60.119 | 20 TGGGAGTGAGTGAGTGTGTG    | 58.154 | 20 |
| GAAAGACCACGGCGATTTTA     | 60.074 | 20 GCGACATGGAGGAGGGAC      | 61.66  | 18 |
| TTACCGTTGACAAATTCCTC     | 59.662 | 20 AATGCTGTTAGGTGCATTGAA   | 58.307 | 21 |
| TCCTCGACGCTGAATGATCT     | 60.914 | 20 GATGATGATGCCACTCTTGG    | 59.04  | 20 |
| ACATGCAAATCCATTACCCA     | 58.697 | 20 CACAAGCACACTTGGGAGAA    | 59.873 | 20 |
| ACGTGGAGGACAGTGGTCTT     | 59.604 | 20 CTTTGCTTGAAAATGCCGTT    | 60.244 | 20 |
| CTCTTCTTCCCAATTTCCC      | 59.875 | 20 ACGGTAGGGGGCAAAAATAC    | 60.075 | 20 |
| CAGAAGATTCATATTGATTTTGAG | 59.034 | 26 TGGCTTGATTTAGCCCATTT    | 59.547 | 20 |
| AAGGCGGTGTATTATGTCGG     | 59.845 | 20 TCGTATTCTTAGGTTGCATAAC  | 59.924 | 24 |
| TGATCTCTCCCGTGAAAACAT    | 59.541 | 21 GTTTGATGTATGCGTCGCTG    | 60.288 | 20 |
| TTTTCTTGGCAAGTTCACCC     | 60.088 | 20 GAAAAATGTGCGAAGTGCTG    | 59.469 | 20 |
| ATGCAGGATGAGGAGGAATG     | 60.034 | 20 CTGCATCAAGCGTTGTTGTT    | 59.911 | 20 |
| TTTCCAACAATAACCCCGTG     | 60.587 | 20 GTCGCAACGGAAACAATCTC    | 60.646 | 20 |
| GCTCGCTGGATCCCTAGAAG     | 61.383 | 20 TAACCCAATCGCAGATTTCC    | 59.901 | 20 |
| TTGAAAACCGATTTCCCTT      | 57.113 | 19 TTTTGCATACCTTCCGATCA    | 59.112 | 20 |
| TTCCAAGCATTTGATGCAAG     | 59.809 | 20 TTGCAGATTGCGATGGATAA    | 60.179 | 20 |
| TGAGGTTCCAATTATATCCTTATG | 59.654 | 25 TTCCCAGCACTCATCTGTTTT   | 59.726 | 21 |
| TGTGATTTGGATGATGTGTAAGC  | 59.881 | 23 TGCCTAATACTGTTTTACGTAG  | 59.908 | 27 |
| TTTTTGAATGGCCGTTTACC     | 59.81  | 20 ATGTAGCCGACCCCAATTTA    | 59.297 | 20 |
| TTGTCAAGATTGGCTTCGTG     | 59.84  | 20 TTGAATGCACAGAGAGATGGA   | 59.384 | 21 |
| CGGCTTTTGTACATGCTTTC     | 59.772 | 21 TGCCATGCTATCCTAGTATTCG  | 59.257 | 22 |
| AAACATGCCAACATTCAGC      | 60.905 | 20 CAACGGTAAGGTTGCGTACA    | 59.65  | 20 |
| CTTCCAAAATAGGGGGTTCC     | 59.639 | 20 GTCTATGTGCGTTTTTGGCA    | 59.735 | 20 |
| TTTTGAATTAATGGTGAGAAATC  | 58.989 | 25 CCAAACCTCCCAACACATTC    | 60.21  | 20 |
| TCAGGTCGATATAATTTTGGGTTT | 59.978 | 24 AGGCATGATCAATCAGCTTGT   | 59.714 | 21 |
| CCCTTGGCCATTACTTGTGT     | 59.853 | 20 CAGCAATCGCAACTTCAGTC    | 59.596 | 20 |
| TCTCCCTACTCTTTCGTTGCTC   | 60.019 | 22 TAGGCAAAAAGGAAGCATGG    | 60.202 | 20 |
| GAACCCCATTTGTGGAAGAA     | 59.767 | 20 ATGACGCGGGTGTCTTATC     | 59.962 | 20 |
| TTTAAATGTATCCGCCGTGA     | 59.029 | 20 TTTAAGTTTATTCATTTATGTTG | 57.211 | 27 |
| TTGAAGATCCGGAAATTTGT     | 57.125 | 20 GGCATCATCAATAGCTTGGG    | 60.435 | 20 |
| GGATCGTAAAGCCTGGTGAA     | 60.074 | 20 GGCTGGGAACCAATAATCCT    | 60.152 | 20 |
| GAGAATGTTCCCGCTACTGG     | 59.694 | 20 TTCCCAAATCATCTTACCC     | 59.727 | 20 |
| ACAGTGGAGGAGCTCGCAG      | 61.753 | 19 TCTTCGCCTTTGTCTGGAGT    | 59.989 | 20 |

|                          |        |    |                        |        |    |
|--------------------------|--------|----|------------------------|--------|----|
| ATGTGGAATGACCCGGAAT      | 60.003 | 19 | TGAGAAAAATGGAAGTGCCC   | 60.051 | 20 |
| CGGACCAGACTCCAACCTTT     | 59.183 | 20 | CAAATTGGCCCCTGATCTTA   | 59.894 | 20 |
| GCACGTCCAGAGGAGACCTA     | 60.408 | 20 | CAAATCCCCTTTTGACATTT   | 60.041 | 21 |
| AAAATGCGGCATCTGAAAAC     | 60.081 | 20 | TCGTCAGGATAAGGGTGGTC   | 59.927 | 20 |
| CTTCATAGTACGCCACCCGT     | 60.015 | 20 | TGAATCATGAAATTGATAAGAT | 60.205 | 27 |
| TTCTCAATTTTGGGACCAG      | 59.903 | 20 | TGGTACAAGAGGCCGAAAAG   | 60.241 | 20 |
| TGATGTACGCACTTGGTGGT     | 60.032 | 20 | ATCATACTGCACCCCTACGC   | 59.985 | 20 |
| GGGGCGTGACAATATCAAAG     | 60.331 | 20 | CGATGCCAAAATGTAGCAA    | 59.702 | 20 |
| CACGTCAACAGGCGAGATTA     | 59.864 | 20 | GATCCTCATCCTCCTCCTCC   | 59.973 | 20 |
| GGATTCACGGATTGAGCCTA     | 60.036 | 20 | TTGGATAAAGTTATCAAGCTCT | 58.188 | 25 |
| AGGCCAACTGACATCTGGAA     | 60.656 | 20 | GAAGTGGAGGTACAGCCTGG   | 59.721 | 20 |
| TCACTATCCTCATCGGAGGC     | 60.181 | 20 | CATGGACTTTACACATGCCG   | 59.988 | 20 |
| TGTGACGGCAACCAGAAATA     | 60.111 | 20 | TGTGGCAAGTTTTAGGAGG    | 60.103 | 20 |
| TTTCATGTGTGCTTATTGTTTTCA | 59.575 | 24 | AGGTTTACCACACAATTCAATC | 59.687 | 24 |
| TGCAATGGCTTTTCATTGTT     | 59.161 | 20 | CCCAACCTCAACATTCTTGG   | 60.345 | 20 |
| TCTCCAACAAAATTCGGGA      | 60.418 | 20 | GGTGACCAAGTGGCATTCTT   | 59.973 | 20 |
| TGTCACCACGCTCCCTAAGT     | 60.711 | 20 | TGACATTTTTATGCTAGTTTGA | 60.189 | 25 |
| TCGTGAAAATCCGATTAGGG     | 59.894 | 20 | TTTCGAAAGGCACAAGATCA   | 59.395 | 20 |
| CCCCCTCTCTCAGCTAGGTT     | 59.834 | 20 | CCCCGCTACAAAAGATTGAA   | 60.067 | 20 |
| AGTTCTTGTTTCGCGATTTGC    | 60.395 | 20 | AAAACCCCTCAACATCCATGA  | 57.835 | 20 |
| CCCTGCTCAGTAGATTCCTTG    | 60.254 | 22 | TGTTTTATCTGTGCCGTTGAA  | 59.216 | 21 |
| AAGCTGCAGGGACAATTCAT     | 59.7   | 20 | ATACGTGCGACAATGACCAA   | 59.995 | 20 |
| CTGTTGAGAATAGCGAGCGA     | 59.322 | 20 | TTCTTGTCATGGGTATTGCTT  | 58.241 | 20 |
| TTGGCCAAACTGATCAACAA     | 60.088 | 20 | TTCCGAAGTCTCAGTTGGGT   | 59.697 | 20 |
| ACCCGCTATCAATGTTCCAC     | 59.82  | 20 | CTACCCTGGGTTTGTTCCTG   | 59.444 | 20 |
| GGTTGGTTGTGTCTACGGCT     | 60.035 | 20 | CTCTCTCGCCCTCAAATACG   | 59.971 | 20 |
| GGAGAGGATTGGATGGACAA     | 59.862 | 20 | GAACACGATGGCGATGTATG   | 59.955 | 20 |
| GACGTATGCCAAGCATTTC      | 59.694 | 20 | AGTTCAAGGATACCCCTGG    | 60.183 | 20 |
| ATTGTGGAGTTGCCATCA       | 59.909 | 19 | GCCACAAACCTGAACCAACT   | 60.012 | 20 |
| GTGCATGCAGCTGAAGATGT     | 60.024 | 20 | CATCATCGGGAGGAGTAGGA   | 60.027 | 20 |
| GGAGGTATACTTTGCTGCAGGT   | 59.68  | 22 | GTTAATAGGGCAAAATGCCA   | 57.662 | 20 |
| TCAGCAAAGAGTAGTTTCCCA    | 57.622 | 21 | CAATTTCAAGAACCCCAA     | 59.772 | 20 |
| GTTCCGGAGTTGGGTAGTTGC    | 59.598 | 20 | GGAACACATCTAACCTGTT    | 58.572 | 23 |
| ACCGACAAAAGCTAGGATCG     | 59.336 | 20 | AAGCTGGAGCTAAGGGCTTC   | 60.117 | 20 |
| ATGGTTGGATGGGCTAATCA     | 60.155 | 20 | TCTCCTTTGTCATGTGCTCG   | 59.984 | 20 |
| CACCTCCTTCCATGCAAACT     | 60.111 | 20 | CGCATCCAAATACTTGTTTCG  | 59.182 | 20 |
| CTCCATGCCTTTGGTCTTGT     | 60.111 | 20 | GAGCAACTTCTTGGCTCGTT   | 59.621 | 20 |
| TGGTGGAGGTTCTCCCTCTA     | 59.649 | 20 | ATGAACTGGTGGAGGTGGAG   | 59.962 | 20 |
| GAAGCTGAGCAACGAGAAGG     | 60.277 | 20 | TGCAGTGATCGGTTCTTAC    | 59.837 | 20 |
| AAGGTAGGTCTGCCCTGTT      | 59.994 | 20 | AAATGGCCCGTAGTTTAGGG   | 60.197 | 20 |
| TCGTCTCTCCCTATTCCCTCT    | 59.29  | 21 | GGATTCTTGAGCCAAAACG    | 59.685 | 20 |
| ACACCAATCACACCGTTGAA     | 59.855 | 20 | GTTTCAGGGCAGACTTGCTC   | 59.997 | 20 |
| CTCCCAAACCTCACCTCCT      | 60.48  | 20 | AAAGGGGCTTCCAATCATCT   | 59.903 | 20 |
| CGAAACATGTCAGGCAAAGA     | 59.84  | 20 | ATGTAGCCGACCCCAATTTA   | 59.297 | 20 |
| CCGTGCACAATTAGGACTGA     | 59.716 | 20 | AAGTTGTCATTTGCGCCTCA   | 60.636 | 20 |
| AATCCCTTGGGAAATGAACC     | 59.996 | 20 | TTCTCGGCATTCTCATCCTC   | 60.303 | 20 |
| GGGTCTAAAGATGTTGCCTCA    | 59.184 | 21 | TCTTGTTAATGGCGATGGT    | 60.331 | 20 |
| CACAAACCAAAGGTGCATGT     | 59.465 | 20 | TCCTGAAACGAGTGATGCTC   | 58.96  | 20 |
| TACTTTAGCTGGCAGGCACC     | 60.407 | 20 | TGTTGAAATTGGACCAGCAA   | 60.088 | 20 |
| ATTTTGAACGGTAACAGCCG     | 59.996 | 20 | CCATTCGGGACATCTTGTTT   | 59.79  | 20 |
| TGAAACTCCCAACCCATGTT     | 60.21  | 20 | GGGGCTGCTGATAGTGTGAT   | 60.104 | 20 |
| CAATGTTACGTTCAAGCCAA     | 59.585 | 20 | AGGCTTAACCAATTTGGGA    | 58.556 | 20 |
| AAGCATTGGCTTCAGCTGTT     | 60.022 | 20 | TCCATAGTGTGCGGTGACAT   | 59.992 | 20 |
| CTGGTGCTAGTACATCCGGC     | 60.678 | 20 | CAAATAGCCCGAGGTTGAA    | 60.067 | 20 |
| GATGGGCCTCTTCATTTTCA     | 60.014 | 20 | GCATGTGAGGGTGGTTGAGT   | 60.999 | 20 |
| CCTACTCCCCGTAAATTCC      | 59.661 | 20 | TTCGTGATTAATTCCGACCG   | 60.827 | 20 |
| TGGGCAGCCAAATATAGAGC     | 60.196 | 20 | CTGCAGCCATCTGTTCTTGA   | 60.136 | 20 |
| AAATGCCAAGAAAACCGAA      | 59.564 | 20 | TAAGACCAGTTTTGCCCTGG   | 60.103 | 20 |

|                         |        |                           |        |    |
|-------------------------|--------|---------------------------|--------|----|
| GCCAAAACCGTGTAGTTTGG    | 60.399 | 20 TCAACGACGAGCTGCTTAGA   | 59.888 | 20 |
| ACTCCGTGTTACCTTCTGC     | 60.307 | 20 GTGTGGGTTCTTTTATTAATTC | 59.323 | 26 |
| TGGAGTAATTGCATTACATTGAC | 60.374 | 24 TCATGTGATTCAGGGTTTAGGA | 59.429 | 22 |
| TGAACATTAAGAATATCTACTCA | 57.829 | 27 CTTTTGTACGGGTCGGGTT    | 59.838 | 19 |
| GAATATTATGGCACCATGGGTA  | 58.585 | 22 TTGCTTACGGAAACAGCAAG   | 59.108 | 20 |
| TAGCCGACCCCATTTTATTG    | 59.789 | 20 ACGCAATTTACAACCATTATCT | 59.375 | 24 |
| CAAAACCATGGCATTTTTGA    | 59.396 | 20 ATATAATGGCGTAGCGCAGC   | 60.241 | 20 |
| TGTACAAGAATCGTCACCGC    | 59.722 | 20 CGACTGGTCCGAATCTGAGT   | 60.261 | 20 |
| CGTATCATTGGTGAGCTTGA    | 58.785 | 21 GCGACATTTAAGAGTTGGGG   | 59.569 | 20 |
| AATCCTCAAGGACTGATGCAA   | 59.685 | 21 GCCTAACAATTACGAGGACAA  | 59.569 | 23 |
| AATTGGGGTGTGGAACTTG     | 59.688 | 20 TTTCTTGGAATTCTCCTCCC   | 59.519 | 21 |
| TCTATAAGCTTCGGGAGGCA    | 59.938 | 20 GGCAAGGTTGAGAAAATGA    | 60.192 | 20 |
| GCAATCATGCATCACCACAT    | 60.371 | 20 TGCTCTCTCTCTCTCTCCG    | 59.164 | 21 |
| GGCGTGTGTTGCCTTAGTT     | 60.176 | 20 ATGTAGCCGACCCCAATTTA   | 59.297 | 20 |
| TTCTTGGTCTCAAAGTCCG     | 60.224 | 20 GCACTCCAAGACACCTGGTT   | 60.159 | 20 |
| TTGAAGATCCGAAATTTGT     | 57.125 | 20 CACCAAAGCCTTAATCCCAA   | 59.931 | 20 |
| TTATCGTTAGCATACCGGGG    | 59.81  | 20 TGAACACAATCAGTATCGTAA  | 60.514 | 27 |
| AGATTGAGCCCGAAAATTGA    | 59.645 | 20 TTGCCAACCTCATTTGTTTT   | 58.12  | 20 |
| TGGTCAATGAACCAAAGCAA    | 60.088 | 20 ATGTAGCCGACCCCAATTTA   | 59.297 | 20 |
| GTAAGTAAGGCGGTGGCAGA    | 60.27  | 20 GCAATCATGCATCACCACAT   | 60.371 | 20 |
| CTTTCGATGCTCCTCTCGAC    | 60.096 | 20 GATCCGAACGCAAAACAATC   | 60.457 | 20 |
| ACTCCTGATGAACCCACAT     | 59.232 | 20 GCCGCGTACTCTTGTCTCAT   | 60.428 | 20 |
| AAGAGGCGTTTGGGAGAGTT    | 60.247 | 20 TCATGTAGTCGACCCCAATTT  | 59.302 | 21 |
| CTTTGCCCTCTCTCCATCTG    | 59.943 | 20 AAGCACTTGAATCCCACGAC   | 60.119 | 20 |
| TTTGGTTCATGTAGCCGACC    | 60.894 | 20 ACCCAATGGCCGTTTATGTA   | 60.074 | 20 |
| TGCAGAAGCATTATTCATCG    | 57.477 | 20 TGTGTTGATGGAGCAAGAGG   | 59.831 | 20 |
| CAGCCGAGAACATCATCAA     | 59.799 | 20 CAAGGGGACAGTAAAGCCTG   | 59.728 | 20 |
| CGCCCAGTTCTGGTCATACT    | 60.134 | 20 ACTCCCACCAGCACGATTAT   | 59.434 | 20 |
| CTAGATTGCGGGTTTTCCAA    | 60.067 | 20 GCTGGAGCAAACCTTCTGG    | 60.134 | 20 |
| AGGGCTTAAACTCGATTGGC    | 60.582 | 20 CATTGATCGTATTTGGGATCTT | 59.693 | 23 |
| AATTTGAGCTTTCCCAAC      | 60.431 | 20 TGCAATGGCTTTTCATTGTT   | 59.161 | 20 |
| AGAAGATCCGGACGAGGATT    | 60.037 | 20 CGTGGCTGCCATCAGTATAG   | 59.322 | 20 |
| TTGACGACGAAGCGATAAAA    | 59.443 | 20 GATCTCCTTACCACCTCCA    | 60.048 | 20 |
| TCAGAAGGGGTTATGTCCTCA   | 59.536 | 21 CCATTGCCATCAACTTTGAATA | 59.832 | 22 |
| GATCCCCTGCAAGTGTGACT    | 60.12  | 20 AAGAAGCTGGAGCTAAGGGC   | 60.117 | 20 |
| AGCATCTAAGGAACATGGATACT | 58.74  | 24 TCCACATTCACGTTCTACG    | 59.566 | 20 |
| CCGGAAGAAAGAGTGGGTTT    | 60.467 | 20 ATCATGTGCAACTGTGTATGCT | 58.187 | 22 |
| CAATATAAGAACATTTATGGCAA | 58.564 | 26 AGATCATCAAAGCCCCTCAA   | 59.629 | 20 |
| TGTGATTCGTTGTGTTTTGCT   | 59.234 | 21 TTCCACTTGCTCGACTCTGA   | 59.701 | 20 |
| TCCCAAACCTGAATCCTTCG    | 60.044 | 20 AACAGCAGTGGCAACAACAG   | 59.946 | 20 |
| CAAGCTCCAAGATTCTCCA     | 60.331 | 20 AAGTCTGCTTGATGTGGCCT   | 59.874 | 20 |
| TAAGTGTGATCACGAAATGCG   | 59.744 | 21 TTTGATTTGCAATATGGTTTG  | 59.84  | 22 |
| GATGCAGCAACTTCTCTCC     | 59.957 | 20 CTCCTGCTTACCTCGATTC    | 59.95  | 20 |
| GGTTCTCCCTACTCCCCCTC    | 61.195 | 20 CATGCAACACCAAACAATCA   | 58.966 | 20 |
| GTGCCACACTGCTCAACTA     | 59.905 | 20 GGAGGTCGAGATTCATCCCT   | 60.421 | 20 |
| CATCATCAACGTTCTTGGGTT   | 59.845 | 21 CCTGAAACGAGTGATGCTCC   | 60.801 | 20 |
| TGTAGCCGACCCCAATTTAT    | 59.297 | 20 GTGCGGTACGGAAAGGAATA   | 59.96  | 20 |
| AATCCGTACCAAATCCCTCC    | 60.017 | 20 TTGGAGTTCTTGATTTGGGC   | 60.051 | 20 |
| CGTTAGAGTGACCGTTGGT     | 60.028 | 20 TTTTGAGGATTCTGGATGCC   | 60.014 | 20 |
| ATGAAATTCAAAAGGGGGCT    | 59.777 | 20 CCGGACAAGGATCTTAGCCT   | 60.59  | 20 |
| TCAAATGCGAATGGTGTTC     | 59.523 | 20 TTCTCTCTCACACACACGCA   | 59.126 | 20 |
| CCGAAGTGCTAGACCCAAAG    | 59.869 | 20 GTCCCATCAAATCGGAAGA    | 59.871 | 20 |
| CCCCAACTTATTGACAAACG    | 59.366 | 21 ATGAGGAAGATGAGCCGAAA   | 59.773 | 20 |
| GGCAGTACTTGAACCTTCGC    | 59.882 | 20 AGCATCATGAGGAGGAGCAT   | 59.792 | 20 |
| TGGCGACTCTGTCTCTGA      | 59.846 | 20 GCGGTTCTTCTCCATCAT     | 60.081 | 20 |
| AAATTTATTTTGAGCCGGGG    | 60.142 | 20 GAGCTCTGCACTTCGTCCTC   | 60.292 | 20 |
| ACGTTTTCTTGCCCACAAAC    | 60.015 | 20 TGTAGCCGACCCCAATTTAT   | 59.297 | 20 |
| AGGGGAACACTCGAAAATCC    | 60.306 | 20 GAGGCGGGAAGGGTTGAC     | 62.969 | 18 |

|                          |        |    |                          |        |    |
|--------------------------|--------|----|--------------------------|--------|----|
| TGGACCATCAATCTCAATTATCA  | 59.287 | 23 | TTTTTCTTATTTTATCCCGATTTT | 57.886 | 25 |
| CCCAGAACACCAAGTTCACAC    | 58.992 | 20 | CATATCTCTCTTTCTCCTTCTCT  | 59.63  | 27 |
| TGACCTCGAGTCATCAACCA     | 60.246 | 20 | GACCCACATAGTGGGAAAA      | 59.647 | 20 |
| CTTTGTGGAGCGATGTTTGA     | 59.84  | 20 | GTGGGGAAAATGAGATGGAT     | 58.641 | 20 |
| ACGAACTAGCAAACCGGCTA     | 59.904 | 20 | GATTCTGTGGTACGTGCCCT     | 59.997 | 20 |
| GGAGAAAAGCATACGGGTGA     | 60.074 | 20 | GTTGGGCAGCCAAATATTGA     | 60.837 | 20 |
| TCCCTTTCTCTCTCTCTCG      | 60.074 | 21 | TCTTGGAGGAGGAGGATTCA     | 59.731 | 20 |
| CCCACAAAGGACCAAGAATG     | 60.345 | 20 | TTTCGAAATTGGGGGTTTTT     | 60.5   | 20 |
| AGCCGCGCCTAAATAGTTTT     | 60.239 | 20 | GCCCCTCGTATATAACTAAAG    | 60.536 | 27 |
| TTGATGAGCCATAACCCTCC     | 59.894 | 20 | TCTGCGTCTCCAAGTTCTCA     | 59.701 | 20 |
| TAATTCGCTGAAGCAGCAAC     | 59.21  | 20 | GTGGAGAAGTTAACCAAGGGC    | 59.85  | 21 |
| GCTCAACCTTCCGATGCTAA     | 60.352 | 20 | AAACTTCAGCACTATCATTGTT   | 58.398 | 25 |
| ACTTTTCTGCTTTGGCTGGA     | 59.993 | 20 | CCCCAGTGAACGAAAATTA      | 59.795 | 20 |
| CTGGGCAGCCAAACATAGAG     | 60.786 | 20 | CTGCAGCCATCTGTTCTTGA     | 60.136 | 20 |
| ATGAAAGCATTAAACCGCCA     | 60.456 | 20 | TGCCGATAAGACCTCTATGTGA   | 59.73  | 22 |
| GCACAGGTAGTGTTCATGG      | 60.183 | 20 | AAGATGAAGTGTCTGTTGCCA    | 59.445 | 20 |
| GATCAGATGCAAATGGAGCA     | 59.763 | 20 | TTGGGATTAAGGCTTTGGTG     | 59.931 | 20 |
| AAGCCCAACCACCAATTTT      | 59.782 | 19 | CCAGATCGCTCGTTCTGATT     | 60.362 | 20 |
| AAAGACAGAAAATCAGAGAGGC   | 59.535 | 23 | GACATTAGGGCAAAAAGCCAA    | 60.074 | 20 |
| TTTTAATTCCCCATATTACCAACA | 58.654 | 24 | TTGTCACGAACGGTTTTGAT     | 59.024 | 20 |
| AATGGGACAACCTCATCCTCG    | 59.927 | 20 | CCTTGTTGTTTCCATTCCGT     | 59.83  | 20 |
| GATAGCCGTTGGTGGTTGAT     | 59.82  | 20 | TGACAGCTAGAGAGCCCCAT     | 59.973 | 20 |
| TATTTTCTCACTCCCACCG      | 59.926 | 20 | AGAGAAGGAAGGTGACGGGT     | 60.111 | 20 |
| TCGGATCCACTTTTCTGCTT     | 59.813 | 20 | AGTAGAGGTCGTGGACGAGG     | 59.325 | 20 |
| GAACCCCTTCAGGATTCTCC     | 59.874 | 20 | GGCCTTCAACTCTCTGCTTG     | 60.134 | 20 |
| TAGCCAGTGGCCACCTTATT     | 59.592 | 20 | TTCATGTAACCGACCCCAAT     | 60.051 | 20 |
| AAATGCGGCTTCCATTTAGA     | 59.682 | 20 | CTTTGACGTCATGGATGCTG     | 60.263 | 20 |
| ATTACCTTCACTCGCCGGA      | 60.609 | 19 | ATTCCCTTCAGTTTTGTGCG     | 60.11  | 20 |
| CCAGATCTGCCAACGTTTTT     | 60.11  | 20 | GATGAGGAGGATGAGCGAAA     | 60.303 | 20 |
| TCTTTTCTTTTCTTTTATGCTCG  | 60.234 | 24 | AGGAAATGATCACAGGCCAT     | 59.366 | 20 |
| TATAAGGCAATTTGCGAGGC     | 60.192 | 20 | CCCTTTAATTGGTTGGTTGG     | 59.175 | 20 |
| CGCCTAGGGCTTCAACTTCT     | 60.884 | 20 | AAATCTCCTAGCCGGAGACC     | 59.674 | 20 |
| GTTTTGGGTCTCCACAAGA      | 59.943 | 20 | GAAACAACCGAGCAGAAACC     | 59.717 | 20 |
| CTTCGGAAGCGATCTCAAAAT    | 59.41  | 20 | GGAGATGGAGGATGTGAAGC     | 59.617 | 20 |
| GACGAGGATGAGGTTGAGGA     | 60.199 | 20 | TCCCATCTAAGAATGGTCG      | 59.887 | 20 |
| CCCCTCATGGATATCGTTTG     | 60.148 | 20 | CCAAGACCCCAATTTGATT      | 60.91  | 20 |
| CTGCGACAATTGCTCAAAAC     | 59.469 | 20 | CTCGTTACTCCCACATGCAC     | 59.165 | 20 |
| TGACCCACATAGTGGGAAAG     | 58.414 | 20 | TGACAATTTATCATTTCCTGTA   | 58.939 | 26 |
| GATGCAGATGAGGACGTGAA     | 59.794 | 20 | TCCCTATCTCCGGGAAGAAC     | 60.401 | 20 |
| TTCTTCGCTACGGCTACGAG     | 60.669 | 20 | CTATGGTGGATTGGTGTGGA     | 59.215 | 20 |
| AAAGTTGAGAACCATGATGA     | 57.096 | 21 | TTCAAACCAACATGCTTCC      | 59.967 | 21 |
| ATGCCGTGATTGAAACACAA     | 59.972 | 20 | GAAGAAGGGGAATTCATGG      | 60.632 | 20 |
| GGAGAAGAGGATTTCCAGGC     | 60.154 | 20 | CCGGTACATGACTTCGAGGA     | 61.055 | 20 |
| CTCCTTCTTGCTCTTCGTCG     | 60.269 | 20 | CCAAGATTTCCGAAACCAA      | 59.91  | 20 |
| GAATCAAGTATCTGATCTGAGCC  | 59.752 | 24 | AGCTGATGATCCTGAGAAAAC    | 59.899 | 23 |
| TGCTGCTGCTTTCTTCATTG     | 60.28  | 20 | GCACTTCATTTTCAATTTATGC   | 59.916 | 24 |
| GAGAAAACAAAAGATAGATGGAC  | 60.139 | 25 | GATTTTGTGTGGCGGGTTAC     | 60.235 | 20 |
| TTGCAGAATCCAACCTGCAAG    | 59.988 | 20 | GAGAGCATGAAATGCCCAAT     | 60.043 | 20 |
| CGAGATTTCAGAATGCCTCC     | 59.773 | 20 | ATCTTCTCGCGATCAGTGCT     | 60.127 | 20 |
| AGGGAACCACGAAGCACTTA     | 59.734 | 20 | ATAGTGGCAGCTCCATGTCC     | 60.104 | 20 |
| TGCGATTAAGGCTTTGGTGT     | 60.637 | 20 | TGAAACTCGTATGGTCACAGG    | 58.635 | 21 |
| GGTGGAGGCGAAAGTGTAGA     | 60.255 | 20 | ACGGTATTCAGGCTCGGAC      | 60.088 | 19 |
| GCCAGTCGATCTAACCCGA      | 60.096 | 20 | CACCGTTTGAAGAGTTATGTGC   | 59.677 | 22 |
| GAAATTGCATTGTCGTGTCTG    | 60.119 | 20 | ACCATGAACTTCAAATGGTGA    | 57.908 | 21 |
| AAACCAGAGCCCTCTCACAA     | 59.844 | 20 | TTTTTGCCACATTCCCTCTC     | 60.051 | 20 |
| ATTTTCAAACCGATCGACCA     | 60.309 | 20 | GTTTGGTCCGGTTAATGCAC     | 60.235 | 20 |
| GTTTCATGTAGACGACCCCAA    | 58.415 | 20 | TACGCTGCGCTGCACTAATA     | 60.706 | 20 |
| TTCGATCTCGTTGTGTTTCG     | 59.84  | 20 | CTGAAATAGGGGAATGCAC      | 59.387 | 20 |

|                           |        |    |                          |        |    |
|---------------------------|--------|----|--------------------------|--------|----|
| TCACATCGCTAGAACCACCA      | 60.263 | 20 | GCGAAAAATATTTCCAGCAA     | 57.92  | 20 |
| TGGCTCCACAATTCATAGCA      | 60.22  | 20 | CGAAACAAGATCCGTCCAAT     | 59.933 | 20 |
| TTGTTTCAAATGGGTATTCCG     | 59.685 | 21 | TCATGATGCATACGAATGATA/   | 59.373 | 24 |
| CGACGCTGAATGAGCTAGAA      | 59.322 | 20 | ACTCTTGGCGGTTTCGGT       | 60.656 | 18 |
| GCCATGCCTTCAGTTTTGAT      | 60.081 | 20 | TTTGCCTTTTCAACCATTTTTG   | 59.965 | 21 |
| TTGCACGAACAAAATTCGAC      | 59.712 | 20 | TTTCAGATATTTAATTTGGCGG,  | 59.832 | 23 |
| CATCGAATCAAATCCATCAGG     | 60.281 | 21 | TAGCAGGCCAAAGAGGAAGA     | 60.088 | 20 |
| AAGCATCAACTGCGGCTAAC      | 60.416 | 20 | GAAATGGACCCACAACATC      | 60.034 | 20 |
| GATGATGATGCCACTCTTGG      | 59.04  | 20 | TGCTGCATGTTCTGAAAACC     | 59.847 | 20 |
| AGGATTGGGGCGTGATAAAT      | 60.531 | 20 | TGGTTTGTATGTAACATTCCGA   | 58.881 | 21 |
| TTTCGCGCCTTATTTGTTTT      | 59.732 | 20 | AATAGAGATTGCACTCGGGC     | 59.297 | 20 |
| AAGCCGATTCTGAAGTTCCA      | 59.813 | 20 | CAAATATTTTGGGCTCCCCT     | 60.143 | 20 |
| GCCGCCAGTTAGTTGTCTTC      | 59.882 | 20 | TTTTCCCTAACTCTCATCCTTTT  | 57.568 | 23 |
| CCGTGCTATGATGAGCCATA      | 59.67  | 20 | CAGCAGCCATCTGTTCTTGA     | 60.136 | 20 |
| ACACCCCGTATTTTCGAATG      | 59.685 | 20 | AGCATCATCATCATCAAGCATC   | 60.073 | 22 |
| CATTGGCATTGCATGATAGC      | 60.066 | 20 | TTCTCAAGAAATTTGGCACCC    | 60.051 | 20 |
| CGAGGCTTAATGGATCGTGT      | 60.096 | 20 | AGGTTGCGTACATCTGACCC     | 59.997 | 20 |
| TAGATGTGGGCTTTTTCCGT      | 59.569 | 20 | CGTGCAAGCATCTAAATGGA     | 59.833 | 20 |
| GCGACGACTCTCCGTCTATG      | 60.966 | 20 | CCCATCACATGCATCAAGAG     | 60.072 | 20 |
| ATCTTGATCATGCAGCTCCC      | 60.189 | 20 | GCTTAGAGCAACGCGAGAAT     | 59.758 | 20 |
| TGGGTGGGTACCGATTA AAA     | 60.046 | 20 | TATCGACCCTGCTATCGCTT     | 59.829 | 20 |
| AAATTCAATTACCTGCCGGA      | 59.411 | 20 | GTTTCATGCAAGATTGAGCGA    | 59.955 | 20 |
| ATGACGTCGGCGGTGATT        | 62.522 | 18 | ATTTGAGTTTCGGGCTTTT      | 60.075 | 20 |
| TCGGCTAGTTTCATTGGAGG      | 60.206 | 20 | TCCAACCCTATCTATGGCTCC    | 60.293 | 21 |
| CATCCTTTCAATGGCAATCC      | 60.274 | 20 | GTAGGCGATTAGTGGAAGCG     | 59.867 | 20 |
| TTGGCTCTATTCATGGAGGTG     | 60.081 | 21 | TTTTCTTGAAAGTACGTACAC    | 58.23  | 27 |
| GAGAAAACAAAAGATAGATGAA    | 59.404 | 26 | ATGGGTTGGATTTGGTGTGT     | 59.95  | 20 |
| AACATGTTTTCAATCTTGACCGT   | 59.797 | 23 | GGAGAAGGAGAAGCAGCAAA     | 59.694 | 20 |
| TTGCACAGACATTATCGCATC     | 59.709 | 21 | AGGCAGCTTCTTCGTCAAAA     | 60.132 | 20 |
| AAACCTCCACCAGAAATTAAGA    | 59.02  | 24 | TTCATTTGGGGTTTTTGTGC     | 60.712 | 20 |
| TGCGTTAACGTACACA ACTTCA   | 59.341 | 22 | GCCTTTTGTGGAGGATGACA     | 61.046 | 20 |
| GTCCCAAGTAAGGTTCGGTTG     | 59.449 | 20 | TGTAAGCTCTGGAACGGAGG     | 60.388 | 20 |
| TCGAGGACGAATCCTTTCC       | 60.142 | 19 | CTCGGGATCAATGACATTCC     | 60.281 | 20 |
| CAAATTTTCCCCACTCAA        | 59.772 | 20 | GTACCCACACGAAGACACC      | 60.284 | 20 |
| GGCAAATAATTGATCGCCTT      | 59.038 | 20 | ATTCGCAAAGGGCTAGGAGT     | 60.228 | 20 |
| AGCATTTCAGGATATTA AAAACC/ | 59.378 | 25 | GCCGAACCCACTGTGATATT     | 59.82  | 20 |
| ATCGTTCATGGCATATTCAGG     | 59.799 | 21 | CACTGATCGTACACGATGGC     | 60.144 | 20 |
| ACGCTATGTACCTTGGGTGCG     | 60.015 | 20 | ACTTTTCGGGTATTTTCGGG     | 60.177 | 20 |
| GATGATGCTGGGAACCAATC      | 60.289 | 20 | AGGGGATCGTAAAGCCTGAT     | 59.925 | 20 |
| ATCATAACGAGGAGGAGGGG      | 60.285 | 20 | ATATGTGGGGATAGGGGTGG     | 60.652 | 20 |
| CGGGGAATTATATAAGTATGTCTT  | 59.636 | 27 | CAATTCCTTACTGAATTTGGGG   | 59.711 | 22 |
| ACGAGGGTGATGTTGGAGAG      | 60.112 | 20 | GGTCACCCTAGATGGGTTCC     | 60.575 | 20 |
| TCAATGCTTTGCCTATGTTCA     | 59.315 | 21 | GTGGGACGGACCAAATG        | 59.737 | 18 |
| TGTACCGGTATCATCCCCAC      | 60.461 | 20 | TGGGGGCTATCTTGTGAGTT     | 59.55  | 20 |
| GTGCTCCAGTTTGTCTGAA       | 59.88  | 20 | GGAATTGGAGTGGTCTGTGG     | 60.363 | 20 |
| CCAATTGGTTGACAAGACCC      | 60.21  | 20 | TTTATGTAGATATGGAGCGATT   | 57.561 | 25 |
| ACGATCATCCATCCATCCAT      | 59.978 | 20 | CTTCATCGACTCTCGCATCA     | 60.096 | 20 |
| TCAACGAATACCTGCTACCAA     | 58.307 | 21 | CAACAGCTCGCAAGATGAGA     | 60.287 | 20 |
| GAGAGGAGGGTGACGGTGTA      | 60.112 | 20 | TTATTTTTGCGGTAAAGGCG     | 60.089 | 20 |
| CCACCATCGTCGTCTCATC       | 60.063 | 19 | AAACACGAACCTTGCCGATTT    | 59.615 | 20 |
| TGGGGGAAGATTAGGGATTT      | 59.6   | 20 | AATTGCAGGGGAACACAAAG     | 59.971 | 20 |
| CTGACGTGGGTTCCATTTTT      | 59.83  | 20 | TTTTGTAACCTTGAGCAATTTATC | 59.966 | 26 |
| GATGATGATGCCACTCTTGG      | 59.04  | 20 | CCTCAGTAATCGCCTGATGG     | 60.615 | 20 |
| GTGGGGCAGCCAAATATAGA      | 59.923 | 20 | CCGGAATCATGGGTGTA AA     | 60.555 | 20 |
| GCGTCCGACTCCTCAACTAT      | 59.313 | 20 | TGATGAAATCAGTTGTTTGATA   | 59.457 | 26 |
| TTTGTTGGGAAGGTCGTAGC      | 60.11  | 20 | TAGCAGGCCAAAGAGGAAGA     | 60.088 | 20 |
| CGTAGGCCTAGTTGGCTCTG      | 60.03  | 20 | GCGTGCACAAAATGGTAAACT    | 60.053 | 21 |
| CATCGGTTAGTTCTCCACC       | 59.405 | 20 | CGATCCCACCCCTTAATTTT     | 60.502 | 20 |

|                          |        |                           |        |    |
|--------------------------|--------|---------------------------|--------|----|
| ATGGTTGCCTTTGTTTGGAG     | 59.971 | 20 AACATCAAATGAGGCTTGGG   | 59.933 | 20 |
| TGGCTCTAACGATGCCTTTT     | 59.845 | 20 TCGTTCATTACGTAGAAGTTC  | 59.799 | 23 |
| AGTCAACACTCCACCAAGCC     | 60.159 | 20 TTCAGCGGATTGAGTGTCA    | 58.88  | 19 |
| GGGAAATCCAAGTCCCAACT     | 60.169 | 20 GAGCTGGATTACCAAGTGCGT  | 60.285 | 20 |
| TCGTTACCCGAGTTGAGGTC     | 60.111 | 20 AGTTGCTTTTGTGGAGCG     | 60.42  | 20 |
| CCCCAATACCCAAATTAGA      | 58.621 | 20 ATCTCTTCGCCGCACAC      | 59.95  | 18 |
| AGTGTGGGTTTCGGTGT        | 59.353 | 20 CGAAAGAAACACACGTGAGA   | 60.318 | 22 |
| CACAAGTTATTGGCGAGGGT     | 59.993 | 20 CATCAACTCAACAAAGCCGA   | 59.84  | 20 |
| TCTCGAACCAATTCAGCC       | 60.192 | 20 AGCCTCCCTCTTAGCCATC    | 59.811 | 20 |
| AAGGAGGAAAAGAACCTGCC     | 59.691 | 20 TCACGTTTGTGAATCCCA     | 59.941 | 20 |
| TATCCAGCATGAGGGGA        | 59.508 | 20 GCAACGGAAACAACCTCTTT   | 59.218 | 20 |
| GGTTTTTGGTGGGAGGAAGT     | 60.204 | 20 CCATAGCTTGTGAGGGCATT   | 60.096 | 20 |
| CTCTATAGCCGCCTGCATTT     | 59.479 | 20 AGATTTTATTATCCACATTGGG | 57.808 | 22 |
| TGTATTCCGGTTCAACCCTC     | 59.79  | 20 TTGTGTGCATGTATTGACAGGA | 60.035 | 22 |
| TTGGAGTTGCATAAATTGTGG    | 58.544 | 21 CGAACCTTCTGCAAATAATG   | 59.253 | 22 |
| ACAATGAATAAACGGGGCTG     | 59.823 | 20 TATGGGCATAGGATTTTGGG   | 59.616 | 20 |
| TGTGAACACAGCCTCACCTT     | 59.31  | 20 GGCAAGAATCCTCACCAAGA   | 60.195 | 20 |
| GCTAGGAAGGCTCTTGGGAT     | 59.811 | 20 GCCTGCACAACAAATTTCAA   | 59.712 | 20 |
| GCAGCAACTTCCTCTCCTTC     | 59.166 | 20 AGGGGGAGAGTTCTCTTGGGA  | 60.186 | 20 |
| CCTGCCCTATCTGCATCAGT     | 60.24  | 20 CCTGAAACGAGTGATGCTCC   | 60.801 | 20 |
| ATGACTGCAGGAGATTCGCT     | 59.981 | 20 ATGTAGCCGACCCCAATTTA   | 59.297 | 20 |
| CGAAAAATGGGATGCTGAGT     | 60.074 | 20 TGGGTTTAGACCGATGTCGT   | 60.375 | 20 |
| GAACAACTGCTGCAAGGAAAA    | 59.946 | 23 TTGGAAGTTGGAATGGCATC   | 60.843 | 20 |
| AGCAGTGAACGGGACAAGC      | 60.453 | 20 GCATCACAGTTGAATGTGGG   | 59.967 | 20 |
| CTTCTCAGCCTCAGCCTCTG     | 60.422 | 20 CCTTAGGAAAGGCACGACAC   | 59.734 | 20 |
| TTGCTTTGGCTCACAGTACG     | 60.05  | 20 TTCGTAACGAGTGTTGAAA    | 59.663 | 22 |
| ATTTGCAGGAATTGGTGAGC     | 60.081 | 20 TCCATAAAGCGAAATGGAG    | 60.031 | 20 |
| CACGTGGAGAGCAATGACAC     | 60.319 | 20 GACAACACTGGAGCTGTGGA   | 59.872 | 20 |
| TGTCTCCGAGTTTGTTC        | 60.088 | 20 GGAGTGCATGCTCCAGACTC   | 60.989 | 20 |
| GGGAGTGGGTTATCGGTTTT     | 60.053 | 20 CAGACGTAGGAACGGAGAGC   | 60.012 | 20 |
| GGAACTTGATTATGTATCTGATGA | 58.072 | 26 GTTACTCGCTCTTGCTCGG    | 60.154 | 20 |
| AAAGCCACCTTATTGTTTCG     | 59.087 | 20 TTGTCATATGAATCATGAAATT | 57.088 | 24 |
| AGCCTTTTGTGGAGGATGAC     | 59.141 | 20 TATCATCTCGGAGGCAATC    | 59.998 | 20 |
| CACGACGAGGAGCATTATGA     | 59.823 | 20 GGCAGTACTTGAACCTTCGC   | 59.882 | 20 |
| CCCTTCCCTCTATTTCCGAC     | 59.897 | 20 ACAGGAAACGTAAAGGCCG    | 60.118 | 19 |
| GAACCTCGCAGGTTCTTTGGA    | 60.375 | 20 TCTTCTCCTTGAGAACGGC    | 59.55  | 20 |
| GCTCGTTGCAAGCATATGAA     | 59.983 | 20 AGCTTCCCCTCTTTGGTTGT   | 60.11  | 20 |
| AGTTGGGAGTTGGGAGTCCT     | 59.968 | 20 AATGTTAGCGACCCAGCATC   | 60.103 | 20 |
| GATCCATGTGTCCACGTGTC     | 59.808 | 20 ATGTAGCCGACCCCAATTTA   | 59.297 | 20 |
| CCTCACTCTCTCCCTCCCTC     | 60.336 | 20 CTCACCGGAGAAAACCTCAC   | 59.697 | 20 |
| CTTCAGCTTGGTTCTGGAGG     | 59.982 | 20 CCATAATGTCCGGCTGAATC   | 60.296 | 20 |
| TCCATCATTCCCTTTCTTGG     | 59.864 | 20 GGAGGAAACAGTGGTGAAA    | 59.943 | 20 |
| TTGCCAAGCTATCCAAAGGT     | 59.708 | 20 CCCGAACACTAGTGGGGTTA   | 59.846 | 20 |
| GCTGGATCACTATTTGGTGG     | 58.019 | 20 CACTCGTTAATGTTACACTTT  | 59.213 | 27 |
| ACCCGAACCGGAATACAAAT     | 60.431 | 20 TTGTTTATCGTTTCCGTGTTTT | 58.589 | 22 |
| ACGGCACCCACAATAAATTC     | 59.691 | 20 GATTCGCTCGATTCTGAAGG   | 59.917 | 20 |
| CCGGACAAGGATCTTAGCCT     | 60.59  | 20 TGGGATGAAATTCAAAGGG    | 59.733 | 20 |
| TTCTTACTGAATTTGGGGTTG    | 60.21  | 22 TGGAATCCGAGAAAATCAGG   | 60.006 | 20 |
| ATTCGAAGGTGTTGATCCCA     | 60.317 | 20 AAAAGTTTCCACACTTGCCG   | 60.147 | 20 |
| AGGTTTTGGAGTTTCCGTCA     | 59.569 | 20 TTCAAATATTCGACTCCGGC   | 60.038 | 20 |
| TTCTCCTCCCTTGATTTGG      | 60.042 | 20 AGAGTCTTCCGACAAACCGA   | 59.844 | 20 |
| GCTAATAATTCGGTGGCAGC     | 59.71  | 20 GGTGGTCATTTTGGGGATATA  | 59.787 | 22 |
| TCATCCTCGGAAGCAATCTC     | 60.303 | 20 CGACACATGAGCTATTGGGA   | 59.673 | 20 |
| AGTACCATTTCGGCCATTTG     | 59.823 | 20 TTGGATCCACACCTTCAAAA   | 58.947 | 20 |
| TCGTGACCACCATCTTAAC      | 58.57  | 20 CACCACCCCAACCAAATAAA   | 60.452 | 20 |
| TGACGGTGAAGAGGGTTGAC     | 61.113 | 20 CCCACTAAGCTAGCTCCCT    | 59.864 | 20 |
| TTTTCGTTTCTGGTTTCGCT     | 59.861 | 20 AACGGGATTTTCGAGTTGAGA  | 59.67  | 20 |
| GAGACCTCGAGTCGGAGATG     | 59.945 | 20 CGACCTGCTCCTTTTCAATC   | 59.813 | 20 |



|                         |        |                           |        |    |
|-------------------------|--------|---------------------------|--------|----|
| CTCGGGGGTCAACACTACAT    | 59.844 | 20 ACATACACGACGGCAGCATA   | 60.165 | 20 |
| ACGAGGGCGAACTGTAGATG    | 60.277 | 20 TTTTGATGAAGGCGGGAATA   | 60.395 | 20 |
| TGTAGCCGACCCCAATTTAT    | 59.297 | 20 GGATTGAAAAGACATCCCA    | 59.871 | 20 |
| TTTTCCCTCCAAAGCCAGTA    | 59.679 | 20 CTAGGAAACAGCCCTCAACG   | 59.869 | 20 |
| TGTTGCAATTCGTGTTAAATCTT | 58.733 | 23 ACATGCCGAGTTTTTCTCATTT | 60.007 | 22 |
| CGCCCAGTTCTGGTCATACT    | 60.134 | 20 GGCAGCCAAACATAGAGCAG   | 60.934 | 20 |
| TCACCAACATGCCCCGTATAG   | 59.42  | 20 AACAGGGATTTTGAAGGTGC   | 59.031 | 20 |
| TCCTCTCGATCCTCGTTACA    | 58.387 | 20 CCGACTAGGACTAAGGGTCCA  | 60.493 | 21 |
| GGCTTGCAATTTGAAAGTACAGA | 59.406 | 22 TTACATCACATGCCCCACAC   | 60.249 | 20 |
| CGATATGAACGAATGCGATG    | 60.058 | 20 ATGGGGGTCAAGGACAAAAT   | 60.422 | 20 |
| CATTGCCACCATCCGAAC      | 60.915 | 18 GTCGTCATCCCCCTAGTTCA   | 59.927 | 20 |
| CTTTGCTCGATCTATTCGGC    | 59.945 | 20 TTCAACTCACACCAAGTGGG   | 59.565 | 20 |
| AGCTTCTTTCAATCGCCTCA    | 60.096 | 20 CTCATCTCGAGCCTTTGGTC   | 59.95  | 20 |
| TCAAAATTATACCTGCCGGA    | 58.109 | 20 CGTCAGTTCCACCGAAATCT   | 60.111 | 20 |
| ATAATCCCGGCGTCATCAT     | 61.42  | 20 GGTGGTTTTATGCACGCTCT   | 60.14  | 20 |
| TGGGATAGGATTTGGTGTCC    | 59.605 | 20 GGAAAAAGTGAAGTGGGCTTG  | 59.711 | 20 |
| TTTTCCCATTGCACCAAAAT    | 60.167 | 20 TTTGGTGGTTAGGGAGCTTG   | 60.103 | 20 |
| AGGGGATCTTGGGAAGTGAT    | 59.755 | 20 ATTGTCAAACCAGCGAGAGC   | 60.406 | 20 |
| CCCGTGGAGACGAGGTATTA    | 59.948 | 20 TTAGTTTCGAGACCCATTGC   | 60.074 | 20 |
| CGTGGTGCACCTGCATACTT    | 59.788 | 20 TCATTTTCACGTGACCCTATTG | 59.861 | 22 |
| GGAGTGAATCGGTAGCAGA     | 60.218 | 20 CGTCGGAGGGTTCAATAGAG   | 59.688 | 20 |
| TGAGTGGGTCTCTGCTGTTG    | 60.022 | 20 GCTGCTGTCCATGAAGTTGA   | 59.992 | 20 |
| CGAGACTCATCCACTTGCAG    | 59.571 | 20 TGTAGCCGACCCCAATTTAT   | 59.297 | 20 |
| GTCAGACCAGCTCTCCTTCG    | 60.135 | 20 GTTAATGTAGCCGACCCCAA   | 59.823 | 20 |
| GAACAAAATAAAAATTTGGGAGG | 59.637 | 24 CACTACCCAAACCCACCAAC   | 60.126 | 20 |
| AAGGGGCACTGGTAAGGTCT    | 59.994 | 20 CGAGCCCATTTGTCTATCCAC  | 60.483 | 20 |
| TGCTTCCGTGTTTTATCCATT   | 59.465 | 21 GTGTTCCGATAATCGCCAGT   | 59.962 | 20 |
| GTCCATTTCTAGACTGCGGG    | 59.694 | 20 AACAAATTAACAATCATGCCA  | 59.288 | 23 |
| GCGGAATTCCTCAAAGAAGA    | 59.387 | 20 CTCCTCGCCTCCTACATCTG   | 59.966 | 20 |
| TTGGGGGTGACGTAGTCG      | 60.523 | 18 CCCACTAAGCTAGCTCCCCT   | 59.864 | 20 |
| ATGTGTGTGGCCATTTCAA     | 59.823 | 20 TTTATGTAAACGCACAATATTC | 59.715 | 25 |
| TGCGTCAGAAGATCCATTACA   | 59.287 | 21 GGTGTGTTTCAAGGCAAATTC  | 59.467 | 21 |
| TGCAGCAACTTCCTCTCCTT    | 60.134 | 20 TCCTTCCCTTTCCTGGAAT    | 60.045 | 20 |
| TGTCACACCCACGCATATTT    | 59.847 | 20 TCTGATCTCCGGTCGACAAT   | 60.622 | 20 |
| GGGAGAGTTCTCTGGGAAG     | 60.186 | 20 AGCACAACAACCACTAATCCG  | 60.045 | 21 |
| CAGTTCAGCAGCGGAATTTT    | 60.386 | 20 CTTGGCTACCCCTATCGTGA   | 60.088 | 20 |
| ACCACTCTCCCTTGCCTAT     | 59.957 | 20 TTGAACCCGATTTCTTGTC    | 59.097 | 20 |
| GCGGAATAGCATTACGTTT     | 60.103 | 20 TGGTGGCAAAGCAACTACAG   | 59.904 | 20 |
| TCCAAAACCATGCAATGAA     | 59.907 | 20 TAAATTGCCGTGTGAAACCA   | 59.969 | 20 |
| ATGGCGACATCAAACACAAC    | 59.425 | 20 CAAATGCATGTTTGTCTGCC   | 59.972 | 20 |
| GTCGCCAATTATTGATGCCT    | 59.929 | 20 CATTGTCCAAAAGCTCAGCA   | 59.988 | 20 |
| CATCACAGGCCATTAGTTGG    | 58.999 | 20 GCAGAAGCACGATGCTCTTA   | 59.326 | 20 |
| TGGTCCCTTCTTGTCCTTG     | 60.081 | 20 TATGCAAATCAGTGCCGAAA   | 60.215 | 20 |
| GATGATGATGCCACTCTTGG    | 59.04  | 20 CCTCAGTGCAGAAATGTCCA   | 59.831 | 20 |
| TCCATTTTTCTTCGTGCATTT   | 59.578 | 21 TGCAAATCCAATCATCTCCC   | 60.812 | 20 |
| GATCGTTCTGCAGGAGCTTG    | 61.087 | 20 AGGGCTAAGAGGAAAGACCG   | 59.842 | 20 |
| CACGATCATCCACATCTGA     | 60.496 | 20 CCATAATTACGGGCGTCATC   | 60.175 | 20 |
| TTCCCGAGACTGAGATGGAC    | 60.199 | 20 TTCCATAATTACGGGCATC    | 59.621 | 20 |
| TTCAAACCTTTGTTCCGCAA    | 59.321 | 20 CGTCAGAATATTTATTCCATGT | 58.462 | 25 |
| GGTAAGGTTGCGTACATCCG    | 60.386 | 20 GCGTAAACTAACTGGTGGGC   | 59.637 | 20 |
| CGTGTGAAAATGAAATCGCA    | 60.644 | 20 TGTAGCCGACCCCAATTTAT   | 59.297 | 20 |
| TCGAGTGATCGTGCCAATAA    | 60.22  | 20 ATCGGGATGCTGCTAAAAAC   | 59.186 | 20 |
| ACGATCGAATGATCCCTGAG    | 60.034 | 20 ATCCCGGAAGAAGAACGAGT   | 60.074 | 20 |
| TATAGGTGCTGGGGCTAACG    | 60.11  | 20 ATGTAGCCGACCCCAATTTA   | 59.297 | 20 |
| AGTTCCACGAACCAACCAAA    | 60.388 | 20 GCTCCGCCAGTGAAGTATT    | 60.285 | 20 |
| TCCTCGTCTCTAACTTGCAT    | 59.978 | 20 TCCCAACTTCTTCTCCTT     | 60.045 | 20 |
| ATTGTATGCGGGAAAAGTGG    | 59.823 | 20 TCTATTTCCAAGGCCAATGC   | 60.038 | 20 |
| TGTTTAAAGTCCATTCGGGC    | 59.938 | 20 TTCCTAAATCATGATGGTGAAT | 57.949 | 25 |

|                           |        |    |                        |        |    |
|---------------------------|--------|----|------------------------|--------|----|
| CGGAAGTAGGCCAAAAATGGA     | 60.067 | 20 | GGTTCGAAAACCGTTGTTGT   | 59.875 | 20 |
| AGGTGCACGTGACTCCAAC       | 59.728 | 19 | GGATTGGATTTCCTCACCAA   | 59.727 | 20 |
| CCCCTCCCCCTCTCATATT       | 60.096 | 19 | TGGGGGAATGTAATATCATTG/ | 60.261 | 23 |
| ATACCTCGGCCTTTGATGTG      | 59.955 | 20 | CTTGGCTCATTGCAAGCATA   | 59.976 | 20 |
| CATTGAAGAGCTCGCTGGAT      | 60.504 | 20 | CTTGTGTCCGACCTTGTTCA   | 59.72  | 20 |
| TGAGGTCGCTCACAGATGAC      | 59.988 | 20 | TTCCTCCTTCTTGAGATCG    | 59.356 | 20 |
| AATTTGGGAAGGCCTTTGTT      | 59.814 | 20 | GTTTCGAGTCTCAATGGGGAA  | 60.05  | 20 |
| TAGTACTGCAGGCGAAGCG       | 60.309 | 19 | CGGCATTTCAGCAAGAAAAA   | 59.938 | 19 |
| CCTTTAGAACTTGCTCCACCA     | 59.364 | 21 | GAAGCGTGGGAGAAGCTAAA   | 59.592 | 20 |
| TCCTTGGGGATAGTATGCTTG     | 59.054 | 21 | GTAGATTTTCGGGCCATTTCC  | 60.642 | 20 |
| AGGCCTGAAACTGATCGAAA      | 59.813 | 20 | ACCAATGGTGGTATGGTGTG   | 58.984 | 20 |
| CCCCTTAGGGTTCCTCATGT      | 60.183 | 20 | GCCATTGCCACGATGAATA    | 60.447 | 19 |
| CCTTCCACTCCTTGCTTGTC      | 59.844 | 20 | TCTTCGGGATTCTCCATGAC   | 60.011 | 20 |
| GAGGATATAGGGCATGGCAA      | 59.885 | 20 | GCGGGCAAATTTCTTTTTCT   | 60.547 | 20 |
| AGAGGTATTGGGGGATTGA       | 58.307 | 20 | GTCTTCTTGACGCCGCTC     | 59.663 | 18 |
| AATCTCTCAATCTTGCGTGC      | 58.048 | 20 | TCTAATGTTTCTCCACCGC    | 60.074 | 20 |
| CTAACTGAGCTGGCGGACTC      | 60.156 | 20 | GCAACAAGACTAAGGCGGAG   | 60.015 | 20 |
| GTCGTCGAGAGAAGCTCACC      | 60.143 | 20 | ATAAGCAAATTTTCGGGACGA  | 59.547 | 20 |
| TTAGACGTACGCACAGCAT       | 60.481 | 20 | GTACAGCTAAAGCGGGGGA    | 60.22  | 19 |
| CTGTGTCTCCAAGCTCCCAT      | 60.261 | 20 | TTGATGAGCCATAACCTTCC   | 59.894 | 20 |
| CATATGCTCCATACAGCCGA      | 59.67  | 20 | TAAAGTGCAATTTTCCCCGA   | 60.427 | 20 |
| GCGGCTCCTCCTATGTAA        | 60.185 | 19 | GAGAAGCCTTTGTTCTGGGA   | 59.405 | 20 |
| GGTCCGATTGAGGAGATGAA      | 60.011 | 20 | CAATGGGGACAGACGAAAGT   | 59.966 | 20 |
| GGGATGAATGAAAGAGGGGT      | 60.133 | 20 | TCGATTCCACATATCTCCACA  | 58.938 | 21 |
| TCAATCTCCACTCTTGCCCT      | 59.803 | 20 | TGTGAAACTTGACGGAATGG   | 59.541 | 20 |
| GACCGATTTGTGAAACCTG       | 60.353 | 20 | TGGGTACAGGTTGTGGGTTT   | 60.126 | 20 |
| CCCGCTTCGATATCATTTGT      | 59.923 | 20 | TGAATAATCCTGCATGGCTG   | 59.646 | 20 |
| ATGTTGAGCCCAACCCAAG       | 60.908 | 19 | TGGGTTGCAAATTAATCCG    | 60.671 | 20 |
| CCTCTGTCAAACCGAACCAA      | 61.064 | 20 | CGTCAGTTCACCGAAATCT    | 60.111 | 20 |
| GCTGTTGTATTCTCCTCCG       | 59.694 | 20 | CTCCTCGCTCTCTCCTCTCA   | 59.962 | 20 |
| CCAAATATTACAATAGCTCACAA   | 58.68  | 26 | TTTGTCTATGCTCTTCCCG    | 60.206 | 20 |
| TGAGAAAAGTTTGCTTCGGGT     | 59.853 | 20 | CCCAAGACCCCAATTTGATT   | 60.91  | 20 |
| TTTTAATACCCCATTTTACCAACA  | 58.695 | 24 | TTTTAAATGATGTCATGGGAGC | 58.946 | 22 |
| CCGAAGTGCTAGACCCAAAG      | 59.869 | 20 | AAAACACTAGCAATGACACTTC | 58.511 | 23 |
| GAGTCACTCACGCTCTTGCTC     | 60.345 | 21 | TCAACCGTCTTGAGATGCAG   | 59.984 | 20 |
| TTCAGCATGCAATACCAACA      | 60.126 | 21 | ACCCACTAACACCCCTCACA   | 60.275 | 20 |
| AGCTCCCTTCTCATCATCA       | 59.761 | 20 | ATCGGAGTCTGGTGGCTATG   | 60.096 | 20 |
| TCCATACTTGGCATCGGTTT      | 60.331 | 20 | GGTGCAGGGGAGATTATGAG   | 59.653 | 20 |
| ATGTAGCCGACCCCAATTTA      | 59.297 | 20 | CACCCACTCGTAGAATCCGT   | 59.989 | 20 |
| TTGTTTTCTTAAGTTGTGATTTGTC | 59.865 | 26 | ACCAGGTTTGAAGTTGTCGG   | 60.005 | 20 |
| TTTGTATATGCGAACAGCAC      | 59.75  | 21 | CCACCAGGTTGTACAGCAA    | 59.609 | 20 |
| TGAGCTGCACTTGTGTTTGTCTT   | 60.096 | 22 | CAACTTGATCCCTATCACGC   | 58.173 | 20 |
| GATCGAAAGGTGATTGGTGG      | 60.317 | 20 | CAGGGCGTGACAGTAACTCA   | 59.897 | 20 |
| GATGGGACCCACACAATTTT      | 60.034 | 20 | AGGAGTTCCTGTGGGATCG    | 60.112 | 20 |
| ACTCTCCTTTTCTCCACAAA      | 57.896 | 21 | CCTTCTCGGTTGAGTCTGCT   | 59.598 | 20 |
| ATCAGGCACATCACCATCAA      | 59.925 | 20 | CAAGACACGGGGAGGAATAG   | 59.545 | 20 |
| TTTTTATTCCGTGACCCTCG      | 59.931 | 20 | AGCAAATGGTGAAATGAGG    | 59.933 | 20 |
| TGAAAGTAATGCCCATGGAAC     | 59.815 | 21 | ACAGAAGACCCGAGCCTACA   | 59.867 | 20 |
| ATGCAGCAAAAAGTCTGAGCA     | 59.746 | 20 | AAAAGCAGGAGATGACAGCC   | 59.434 | 20 |
| GTTAATACCGCTGATGGCAA      | 58.653 | 20 | TCATAACATCGATGAGTGTGG/ | 59.874 | 23 |
| CACGTGCATTAATTATTGTTTTCA  | 59.015 | 24 | ATGGGGCTTTTTAGGGCTAC   | 59.463 | 20 |
| TAGCAGGCCAAAAGAGGAAGA     | 60.088 | 20 | AGGCCAACTGAAATTTGAAAG, | 60.109 | 22 |
| AGCTGGATGTGTAGCAAAGC      | 58.132 | 20 | CAAATCGGCATTATTTAATGGA | 60.052 | 23 |
| TTTCTCTCTGAGCCTTCCA       | 60.065 | 20 | TATTGGTCTGGAGGTGGAGC   | 60.073 | 20 |
| ATGCCTTATATGCCGGACAC      | 59.813 | 20 | TTGGGAACAAAGAGTGCAAA   | 59.293 | 20 |
| AGCATTCTCTAAATGGTTTCCA    | 57.888 | 22 | CCGTCTAGGGCTTCAACTTC   | 58.934 | 20 |
| GATCTCGATCGTGACCCAAT      | 59.893 | 20 | TCAAAAACCTCCAATTTATAAC | 58.928 | 25 |
| GGGAGTTTCGTTGAGCAAG       | 59.853 | 20 | GCACATCACCATCAAAACCA   | 60.376 | 20 |

|                          |        |    |                        |        |    |
|--------------------------|--------|----|------------------------|--------|----|
| TAAATTGGGGTCGGCTACAT     | 59.297 | 20 | TTTTTGTCAATGTGGGATTGAT | 59.182 | 22 |
| GGAGTCCGTGGTGAACAAGT     | 60.009 | 20 | GACGATGGTTGCCTTTGTTT   | 59.978 | 20 |
| CACCAATTCTCTAAATGGTTTCCA | 60.223 | 23 | TTCATCAGTCCCCTAGGG     | 60.065 | 20 |
| GTAGCTCCCTTCCCAACAGA     | 59.284 | 20 | ACGAGAAAGAGAGAGATGGG   | 59.825 | 21 |
| TTTTCAATGTCCACACCCCT     | 60.21  | 20 | ACTCATGGTCCAAGAATGGC   | 59.934 | 20 |
| ATGTCCTCAATCGATCCCAG     | 59.886 | 20 | TTACAAGGGAAAGGTTGCGT   | 59.609 | 20 |
| CTCACGGTTGGAAGAAGAGC     | 59.989 | 20 | AAGAGCGCCAGTATGGGTAA   | 59.73  | 20 |
| TCAAACCTGGACCATCCAACC    | 60.758 | 20 | GTTTCATGTAGCCGACCCAAT  | 59.82  | 20 |
| ACCCGGATTACTCCGATGAT     | 60.546 | 20 | CCTCATCAATGCTCAGCCTC   | 60.914 | 20 |
| GAGTCTCCGAGATAAGGCC      | 60.176 | 20 | GAGAACCAGATTGTAGCGGC   | 59.843 | 20 |
| CGAAGTTGTGCAAACCAATG     | 60.149 | 20 | TGCACGTGATACAGAGGAA    | 60.413 | 20 |
| TTGGTTGAAAGAGCATCGTG     | 59.84  | 20 | TTAAGCTGATGATCTGGGG    | 60.029 | 20 |
| GTGGCTTCTATGGGCAATGT     | 59.962 | 20 | ATCTTTCAAACCATGCGGA    | 60.448 | 20 |
| GGGCTGCAAATAGATGGAGA     | 60.177 | 20 | CAACAGGCTACCTCCTCCAC   | 59.721 | 20 |
| ATGTAGCCGACCCCAATTTA     | 59.297 | 20 | ACTTGCGCCCTTTAAACT     | 60.129 | 20 |
| ATGGCCTGCTCATAACAGCTC    | 60.393 | 20 | AGGAGATCCGGCGAGTAAGT   | 60.233 | 20 |
| CGGATGAATTTTTGTTGCT      | 60.074 | 20 | AGAAACCGGTGTTCCATTTG   | 59.83  | 20 |
| GAGCACGTTATTGGCTGGA      | 59.814 | 19 | CAATCAACCATCACATCCCA   | 60.177 | 20 |
| CCTTGGAGTTGTCCAGCATT     | 60.111 | 20 | TCCGATCCTGGACCTTAGAA   | 59.623 | 20 |
| CCCACCCAATCTACTCATGC     | 60.34  | 20 | CCCAATTTACTGGGATCAA    | 59.617 | 20 |
| ATCCAAGGGGATCGTAAAGC     | 60.286 | 20 | GCTGGGAACCAATCATCCTA   | 59.894 | 20 |
| AGAGTCTTCCGACAAACCGA     | 59.844 | 20 | ACTCACCTCTCCCTCGACCT   | 60.258 | 20 |
| ATTGGGATTAAGGCTTTGGT     | 57.552 | 20 | AAGGTTTCGGAAAGTGGGTT   | 59.842 | 20 |
| CCCCTCGAAATTAACCACG      | 60.357 | 20 | GGTGAATTTGGTCCTTCAA    | 57.488 | 20 |
| CCCAAGACCCCAATTTGATT     | 60.91  | 20 | GAGATGTGGCACCTCCTGAT   | 60.08  | 20 |
| GGTCTATATTGTGGTTTCCG     | 58.315 | 21 | ATTACACGTTGGGCCTTCTC   | 59.056 | 20 |
| AAACCTTAACGCCCTCACCT     | 59.998 | 20 | TCTCGACTTCCTTTTCCGC    | 60.467 | 19 |
| ACTCCGACATGGAGAACACC     | 59.969 | 20 | CCTTCCAATTCTCTGGGTCA   | 60.042 | 20 |
| AAGAAAAGTCATCAACGCC      | 59.174 | 20 | GAGAGAACGAGTGTGAGGG    | 59.986 | 20 |
| CCATTTTCCAAGAAAGGTTG     | 57.192 | 20 | TCTTCGGGATCACAATTTGG   | 60.832 | 20 |
| TTCTTCAATCCTCCAAGAGCA    | 59.94  | 21 | TCAAACCTGATTGTTGCTGC   | 59.995 | 20 |
| CGATGATCACGTCAAAAACCTA   | 59.996 | 22 | GGGTTATCACCTGATTACTACC | 60.352 | 24 |
| TTCTCGGTTCCGATCTTCAC     | 60.195 | 20 | AACTTTGGTTCATGTAGCCG   | 57.757 | 20 |
| TCCTGAAACGAGTGATGCTC     | 58.96  | 20 | CACAAACCAAAGGTGCATGT   | 59.465 | 20 |
| CGACCCGGTCCATATACAAA     | 60.576 | 20 | ACCAATGGTGGTATGGTGTG   | 58.984 | 20 |
| AAGTTGGCGTGGTGGTAGTC     | 60.035 | 20 | CTTCTCCTCCACAGACTCCG   | 59.978 | 20 |
| ACATTTTGGGCAGTGGAGT      | 59.454 | 20 | TAACGTTGTGTGCACCTTCC   | 59.615 | 20 |
| TCCTGAAATGAGTGATGCTCC    | 60.211 | 21 | TCTTGGGTTCTACCTTGACA   | 59.578 | 21 |
| TCACGTGCAGAGGAAGAAGA     | 59.701 | 20 | AGCCTTATTTCCCACCCACT   | 59.827 | 20 |
| ATGGTAGTATGGTGTGGGG      | 59.405 | 20 | TGACCATCAACCATTTGGAA   | 59.75  | 20 |
| CCATCAGGTTTGTCTCCAG      | 60.501 | 20 | ATTGGCTGGATGTATTAGGATA | 57.193 | 24 |
| GCTTTCCCAACATCAACAT      | 59.797 | 20 | TGCTATGCGTCCTCATTGTT   | 59.301 | 20 |
| TTGGGCTTCATCTTACCACC     | 59.933 | 20 | AAATGGTGGTTCATTTGGGA   | 60.029 | 20 |
| GACAACGGGACGGAAGATT      | 59.918 | 19 | TGTAGCCGACCCCAATTTAT   | 59.297 | 20 |
| GATCTGCAGCCATGTTGAAA     | 59.805 | 20 | AGTCTGTTGAGCAGCAGCAA   | 59.929 | 20 |
| CCGAAGTGCTAGACCCAAAG     | 59.869 | 20 | ACACTGGTAATGACGCTTCG   | 58.802 | 20 |
| GTCTGTGCCGCTAAAAATG      | 60.637 | 20 | TTTGTATGCTTGTAGTGGTTCT | 59.162 | 24 |
| CTTTGCTTTGACTTTCGGGT     | 59.355 | 20 | AGGCTCGAACCATGCATATC   | 60.066 | 20 |
| TCAGCAGGCATAAATTTCCC     | 60.038 | 20 | GAGGTGGAGCTGAAATTTGG   | 59.67  | 20 |
| TACGCGTCGTTGTCATTGTT     | 60.18  | 20 | ATTCCTTCCCCGTCATCTCT   | 59.896 | 20 |
| ATCGAAGATCTCCGCACACT     | 59.834 | 20 | CTCCTCGCCTCCTACATCTG   | 59.966 | 20 |
| TGTCACCCAACCTATAAAAGAAG  | 58.381 | 25 | AATGGTAGAAATCGCCGCC    | 62.223 | 19 |
| AATTTTCTTTTGCCGACACG     | 60.11  | 20 | ACCAATTTCTCCTTGGCCT    | 60.074 | 20 |
| CAGGGAATTGAAGATTGATGG    | 59.373 | 21 | CACAAGTTATCACACCCCA    | 59.262 | 20 |
| GCCACATGCTTTGTGTGAGT     | 59.758 | 20 | GGGCTGAGATGGATTTGAGA   | 60.158 | 20 |
| ACCCATAATTTTATTGGGGGA    | 59.283 | 21 | TATATTCTCGAAGGCGGCTG   | 60.323 | 20 |
| TGAAGATGCATTTTGCAGAGA    | 60.488 | 20 | GTGTAGCCGACCCCAATTTA   | 59.823 | 20 |
| CAATACAAGGGTTCTCGCGT     | 60.132 | 20 | GGTTTACGGAAGCATGATGG   | 60.331 | 20 |

|                          |        |                            |        |    |
|--------------------------|--------|----------------------------|--------|----|
| TAGCCGACCCCAATTTAATG     | 59.789 | 20 AATGGTCGTGATTCTAGCCG    | 60.096 | 20 |
| ATGTTGGAAAATGGATTCCG     | 59.622 | 20 TATCGATTCCGGTCACACCT    | 60.34  | 20 |
| AGCTGCAGATGCAAACTCA      | 59.746 | 20 CGCAATGGAAACAACCTCTT    | 60.11  | 20 |
| ATCGCGATACCACAAATTC      | 59.791 | 20 TGGAGACGGCGATAGAGTTT    | 59.836 | 20 |
| TAAAATTGCCCTATTGCGCT     | 59.717 | 20 CACCAACATCGAGTTCTTCG    | 59.288 | 20 |
| TATCATCCTCGGAGGCAATC     | 59.998 | 20 GGAGTTTCCGGAGATCACAC    | 59.511 | 20 |
| CATGAAACATTTCAAATATCATC  | 58.726 | 25 ACATCTGACACCCCAAGACC    | 59.817 | 20 |
| GGGAAACCACCCGTATTTTT     | 59.924 | 20 ATAATAGTGCCCCGAAAGGG    | 60.164 | 20 |
| AACGTAAAGAGGGGTAGGGG     | 59.344 | 20 AGGAAGCATAAAGTGCCGAA    | 59.845 | 20 |
| TGAATCAGAAAATCCCCTGC     | 60.014 | 20 GGATTTTGTATTGCCCGTTG    | 60.188 | 20 |
| TACACATCGCTTTCCCATCA     | 60.073 | 20 TGGAGTTGCAGATTTTTGGA    | 59.247 | 20 |
| TCACACCTCACTAATTTCTTGTT  | 57.077 | 24 CGCTTCAATGTTCTGTGGAA    | 59.84  | 20 |
| ATTTACAGCTCGGTTTCGGA     | 59.708 | 20 CTGCAGCCATTTGTTCTTGA    | 59.988 | 20 |
| TCTGAAAATTGGTGCTGCTG     | 59.988 | 20 CACTGGTGGTTTTATGCACG    | 60.027 | 20 |
| CAGATGTAGGAGGCGAGGAG     | 59.966 | 20 ACATGTAGGCAAAGGCTGCT    | 59.904 | 20 |
| TCGTGGTTCAACTGTTGCTT     | 59.339 | 20 TCCAGAAAATTCTTTTCCTTTC  | 59.943 | 23 |
| CCATCCTCATTTGCTCGATT     | 60.036 | 20 GGGAGGATTCCGTCTTTTTTC   | 59.881 | 20 |
| ACCCTCCTTTCACATGTTCCG    | 59.966 | 20 TTGCTCCTTAAAGCTCCTGC    | 59.73  | 20 |
| TCAACAATTTACGGGCTTCC     | 59.938 | 20 CTTCAGCTCCAGGGTTTTCA    | 60.366 | 20 |
| CTGATGAAGAAGACGAGGGC     | 59.95  | 20 CACTTTGTGTTAATTTAAAGGT  | 59.042 | 26 |
| ACACCCAAAACACATCAG       | 60.668 | 20 GGGTGTGTTGGTGGAGCAGTA   | 60.954 | 20 |
| TCCCTCTGGTGGTTTTATGC     | 59.933 | 20 GCGTCTCCAAGATCCCATAG    | 59.653 | 20 |
| TTTAACGGATATGCTTGGGA     | 58.109 | 20 TGTAGCCGACCCCAATTTAT    | 59.297 | 20 |
| ATGTAGCCGACCCCAATTTA     | 59.297 | 20 GAAGGTTTTGAATTCCATTGAC  | 60.21  | 23 |
| TGGGACAAGGTGACATAAAATG   | 59.724 | 22 TTGACAATTCCTATGCTTAAAC  | 59.262 | 25 |
| GGTGTGAGCAGCCTATCTG      | 60.966 | 20 CCTTTCAAAGTGGACTATCAA   | 59.472 | 25 |
| CTCTTTCGAGCCTCCTCTA      | 59.853 | 20 GACACGGCCTTTGAGTCAGT    | 60.307 | 20 |
| AGCCATGAGCAATAACAGCC     | 60.243 | 20 GATGAGTTCGCGTCTGTGTT    | 58.884 | 20 |
| CCGAAATCTTCAAGCCACAT     | 60.074 | 20 TTCGTCCTAGTTCTTGTATCAAC | 58.941 | 25 |
| ATGTAGCCGACCCCAATTTA     | 59.297 | 20 TTTTCTTGGACCAGGTTGC     | 60.088 | 20 |
| CCCAAATAGCCCAAATTTCA     | 59.931 | 20 TGGGGGATAAAGATGCAAAG    | 59.894 | 20 |
| CCCAAGACCCCAATTTGATT     | 60.91  | 20 GCAGGATCCAAACAATCCAT    | 59.756 | 20 |
| GGGCATTACATTTACGTTGGA    | 59.712 | 21 AACCTGTACGGTTATGCCCA    | 60.249 | 20 |
| CAGCCTCAGGACTCCTCATC     | 59.945 | 20 TGACCTGGTGAACGATAGCA    | 60.263 | 20 |
| TCAGAGCCATGGAAAAGGAT     | 59.629 | 20 CAACGGCTGGTCCTTGTATT    | 59.993 | 20 |
| TTATTTGGCGGGTTAATGGA     | 60.144 | 20 ACACGGGAATAAATTGTTGGA   | 59.192 | 21 |
| ACTCCCGCCCTCTACCTTTA     | 60.089 | 20 AATCATGTACACCCGCTTCG    | 60.914 | 20 |
| TCAAAAACCATGCCACTGAA     | 60.088 | 20 TCTGGAGCTGGATGATGATG    | 59.743 | 20 |
| ACTCAGTTCAAACCCTCCC      | 60.349 | 20 CACTGCACCTATAGATGGTGG   | 60.276 | 24 |
| CTTCGGCAGATCACTTAGCC     | 59.978 | 20 ACCCCAATTTGTTGGGATTA    | 58.995 | 20 |
| GCTTTGAGGGTCAAACCAAG     | 59.711 | 20 TTCTGGGAGGTATCTGCTGG    | 60.21  | 20 |
| ACCCCTTCTCCGTTTCTAA      | 59.934 | 20 GGTGGATCATCAAGGTGAGG    | 60.326 | 20 |
| ATGTTTCTGCCACGTGCATT     | 61.507 | 20 CCATATAGTTGACCCCGCAT    | 59.668 | 20 |
| CGCTTTGCTAGATTTTTGCC     | 59.985 | 20 TCAGGATTGAGTAAGCGGAAA   | 59.831 | 21 |
| TTAGTGTTTTGAACCGCCTT     | 59.609 | 20 TGTGTGTGCCCATATTCGC     | 60.399 | 20 |
| ACCGTAACCGCCAAACAC       | 59.42  | 18 CTCCCCAATTTGTACAGGA     | 59.784 | 20 |
| GGAGGTGGGGTTAATAGAAGG    | 58.834 | 21 CGCAATGTACCTTGGCTATG    | 59.206 | 20 |
| TTTGGCAGAATTGATTTGG      | 60.807 | 20 GGGCTCAATTCTAAAAGCCC    | 60.041 | 20 |
| TCACCGGAAACAATAACATCAA   | 60.223 | 22 TGGAGCTAAAAGATTTTCACC   | 60.238 | 23 |
| TTCTTCTGTACAATTAATGTCCAA | 59.121 | 27 GCTCCCTGATACCACGTCAT    | 59.957 | 20 |
| GTCCGTTGGGTGTTGACTT      | 59.867 | 20 CACACCATTATCTCCAGCTCC   | 59.565 | 21 |
| ATGGGTAGCCAGTTTCACCA     | 60.375 | 20 TCAAACCCAAACCAACCTCT    | 59.425 | 20 |
| CCCAGTTCGCCACTAACAAT     | 59.993 | 20 ATGTAGCCGACCCCAATTTA    | 59.297 | 20 |
| ATGCTGTGTTTGAGCGACTG     | 60.056 | 20 CCCAATCCAAACAAATCAGC    | 60.309 | 20 |
| CCACCATCGTCTCTCATC       | 60.063 | 19 CCTAGGTTCAAATCCCACCA    | 59.784 | 20 |
| TGTGATGAGATCGTGAACCTG    | 59.692 | 21 CCTCTCAATCCCAGACTTGC    | 59.803 | 20 |
| TCCATTTAATCCCCCTTCTTC    | 59.257 | 21 TTGGAACGGGATTCGATCT     | 60.41  | 19 |
| CTTGGCATTCTTTCTCGG       | 59.948 | 20 TCAAATAGCCCCTTCGGTAA    | 59.542 | 20 |

|                         |        |    |                         |        |    |
|-------------------------|--------|----|-------------------------|--------|----|
| AGTTATGTAGCCGACCCCAA    | 59.452 | 20 | CGAAATCTCACGACGCATTA    | 59.833 | 20 |
| CGCGGAAAGAGAGAGTTTTG    | 60.125 | 20 | AACCGTGTACACCCCTACCA    | 60.149 | 20 |
| ACCCAGTGA AAAATTGACCCA  | 60.21  | 20 | CCAAGACCCCAATTTGATT     | 60.91  | 20 |
| CACCCAAGGCAGAGAAAAAG    | 59.846 | 20 | TGCTCGAGATCCCAATATCC    | 59.998 | 20 |
| GCTGCAGAGGTGGTGTGTAA    | 59.905 | 20 | TCATCACCACAAAAATCCCA    | 59.75  | 20 |
| TTCAGGTTGAAGTCTTGGGC    | 60.232 | 20 | GGTATGTCGGTCAGCGATTC    | 60.492 | 20 |
| TCGTTTGAGTTCGAGCAAGA    | 59.716 | 20 | AATTC AATTACCTGCCGGA    | 58.024 | 19 |
| TTGTATGGCACGAGTTCTTGA   | 59.332 | 21 | TTCAC TTTGGAGGGAAGGAA   | 59.641 | 20 |
| ACTCGTCCTCCGTGGATATG    | 59.95  | 20 | GTGGCAGAGATGGAGGATGT    | 60.08  | 20 |
| GCGCAGTTGCCAAACTTATT    | 60.272 | 20 | TTGCCAAGCTATCCAAAGGT    | 59.708 | 20 |
| TATCCGAACCGACCCAAATA    | 60.146 | 20 | AAGCAGAAGAGTGCATTAATC   | 59.471 | 23 |
| GGATGGAGAGGAGGAAGGTC    | 60.012 | 20 | TGGAAGGGCAATTTAGTCCA    | 60.439 | 20 |
| TCAGAGACGGAAGAAGCACA    | 59.701 | 20 | CAAAGACTACCTACAGATCCC   | 60.241 | 23 |
| TGCCGACTCTTCTTCTCCTC    | 59.55  | 20 | GGTCAGAGTGACCGTTGGTT    | 60.009 | 20 |
| GCCTGGATATCTTGCTCCAA    | 60.177 | 20 | CAGCTACCCATCTGCCAAGT    | 60.277 | 20 |
| ATGTAGCCGACCCCAATTTA    | 59.297 | 20 | ATGCAACAGAAAAATGCCACA   | 60.119 | 20 |
| TGATATTTTCAATGATGGATCG  | 57.46  | 22 | GCAAAGCATACTTACAGAAAC   | 58.516 | 23 |
| CAAATGCAAATCTACCTGGGA   | 59.946 | 21 | CCGCTGAGATAATGCTCGTT    | 60.374 | 20 |
| TCGACGCGGAAGTAAATCTT    | 59.845 | 20 | CGATGGGGTCTTCTGATGAT    | 59.886 | 20 |
| TTGCCCATGCATACACATTT    | 59.816 | 20 | ACGCGCCGTCTAAATAATGA    | 60.608 | 20 |
| TTTTCGGTTACCATGTCGTT    | 57.999 | 20 | CATGATGCAAAAATTTAATTAG  | 58.335 | 24 |
| AAGGATGAGGAAGGCAAGGT    | 60.074 | 20 | GCTTTGAACTCGAGCTGTCC    | 60.142 | 20 |
| CAGCTGTGGAATCCCATTTT    | 59.933 | 20 | CAAGATTCTCTCACCCCAA     | 60.042 | 20 |
| GAGAAAGAATCAACTGCGGC    | 59.962 | 20 | TTGAATTGTGTCTGCTTCGG    | 59.84  | 20 |
| TCTTTTCTTTTCTTTCCCCA    | 60.034 | 21 | GCTACAACGAGCCCACTCTC    | 60.02  | 20 |
| CGTGGAGGGATTCTTGGTTA    | 59.926 | 20 | GCCAACACCTCCTTGATGAT    | 59.934 | 20 |
| TCGATCTCTTGCAAGGGT      | 59.95  | 20 | ATGGTGACAATCGTGCTGTC    | 59.557 | 20 |
| CGAGAAGATCTTGAGGTCGC    | 60.096 | 20 | GGAACCTCCTCTGTTCCCTC    | 60.05  | 20 |
| TTTGGTTCATGTAGCCGACC    | 60.894 | 20 | TGAGAGGACACCCAAGTGGT    | 60.563 | 20 |
| ACGGAGAAATTCGACTCAGG    | 59.284 | 20 | TGAGAATTAGCAATTGAAGTTC  | 58.584 | 25 |
| CCCACCATCACCGTTATTTT    | 60.051 | 20 | TTGCTGGCAGTGAAGCTCTA    | 59.888 | 20 |
| CGGAGAAATGGTTTCTGCAT    | 60.074 | 20 | CCCCAAATAGCTTAGGAGGC    | 60.055 | 20 |
| ATGAGGATGATGACGAAGCC    | 60.042 | 20 | AGCCAGTCTCAGTCTCTGC     | 59.738 | 20 |
| TTTGCACCAAAATGGACAGA    | 60.088 | 20 | TGCTTGTGGACCAAGATTG     | 59.691 | 20 |
| AATCATGTACACCCGTTTCG    | 60.636 | 20 | GCCCCATCCCTAAGAACATC    | 60.662 | 20 |
| GAAAGTGGGGGTTGATTGAA    | 59.767 | 20 | CGCTTCGTAGCCCTGAATAC    | 59.867 | 20 |
| AAATCGGGGTCGAAAAATCT    | 59.777 | 20 | GACAACGATGGATACCCAC     | 60.057 | 20 |
| AGGAGCAGGGGGATTTGTAG    | 60.455 | 20 | AGGCCACGTA AATACGAACG   | 60.018 | 20 |
| TTGCACAAGCTCTTGCACTC    | 60.333 | 20 | TCCTCCAAGATCACCATTC     | 59.862 | 20 |
| TTGTTGGCTATGCTCCAGTG    | 59.864 | 20 | GGAGGTGGGCTCTCATGTAA    | 60.073 | 20 |
| GATTTTACACCTGCAAGGGC    | 59.574 | 20 | CCTGTGTTTCGGGCTAAATGT   | 59.993 | 20 |
| TATGACACAATGTCCCGTGG    | 60.24  | 20 | ATATCGCCGTA ACTGGGTTG   | 59.845 | 20 |
| ACCAGGAACCAACACCAAAA    | 60.246 | 20 | GACCACCTGCATTCACAGAA    | 59.682 | 20 |
| TTAGCACGCTTGGATGTGAT    | 59.301 | 20 | ATTTGGAACCTTGTGCGTGT    | 60.419 | 20 |
| TCAAACCTTTCTCCAATTGCTT  | 60.109 | 22 | TTCCCTCAACCTAGACCTCG    | 59.28  | 20 |
| ATAGATCCGGAATGATCGGA    | 59.3   | 20 | TCGTAGTGCATGTCTGATTCTG  | 58.952 | 22 |
| TGCCTACATACCGACGTGAC    | 59.596 | 20 | ATGCCACATAACGCATTCAA    | 59.96  | 20 |
| AATTTCCACCACCACAAAAA    | 60.066 | 20 | ACCAGCATTTTTCAGAGCCAC   | 60.263 | 20 |
| CTGATCTACTCCGTCCCAA     | 60.065 | 20 | GCAACCACGTACCATGACAG    | 60.032 | 20 |
| TGCAAGAGAAAACACATCCG    | 59.84  | 20 | CCAAGACCCCAATTTGAT      | 59.59  | 19 |
| ATGGTGGAAACCAAGGCAT     | 60.188 | 19 | ATGGAACATCAACACACGC     | 59.425 | 20 |
| GCTGTAAATGAACTGCTGTATG  | 60.212 | 24 | CTGAGTGC GTTTGTACTCAACC | 59.842 | 22 |
| CAGAGCGCACTCGAAGAGTA    | 59.49  | 20 | CTCTGGATAAACCACGGAC     | 59.405 | 20 |
| TTGTCAATGAATCATGAAATTTT | 58.012 | 25 | AAAACGCATTTTGGAGTTTGT   | 58.664 | 21 |
| GTTTCGCTGAGGCAACAACCTT  | 60.44  | 20 | CCATGAATGAGCACACAACC    | 59.967 | 20 |
| CTGACTGCGCGACTTTGATA    | 60.157 | 20 | AGGCGGGACTGTGAATAATG    | 59.955 | 20 |
| GGCACCGGGTATTACATCAA    | 60.585 | 20 | CAATGAAGACTGAATCTCGGA   | 59.312 | 22 |
| ATGCAGCTCATGTCTGATGC    | 59.982 | 20 | CCCGGAAGAAAGACACAAGA    | 60.224 | 20 |

|                          |        |                            |        |    |
|--------------------------|--------|----------------------------|--------|----|
| AGCAAAAGGTCGTCCTGCTA     | 60.015 | 20 CCAAGACCTACTGAGCCAGC    | 60.012 | 20 |
| TTTAGGCCAAGTTGTACCCA     | 58.147 | 20 GGATATCCGGTTTTGCTCAC    | 59.391 | 20 |
| GATTCAGGGGAAATTCACGA     | 59.871 | 20 ACTCCCCTCCATTCTCCATC    | 60.278 | 20 |
| TGGAGGCGGATTATAGATGTG    | 59.93  | 21 CGTGTTAAGTTGTTAACCAATA  | 59.456 | 25 |
| GCGAAGCTATAGAGATCGGG     | 59.046 | 20 TGCACCAAAGGAGGTTCTCT    | 59.844 | 20 |
| TCCAAAGTTGGACTTATGTAAAA  | 57.079 | 24 CAAGTGAATTCATGATGCG     | 60.073 | 20 |
| TGAGCAACTGCCAAAACGTA     | 60.436 | 20 GCACAATCACCAAGATCGAA    | 59.654 | 20 |
| TCGGAGAGAGAGAATGGCTG     | 60.634 | 20 GATTTTGTAAACTGCCCGGA    | 59.938 | 20 |
| CATTGCGTCATACGATGTATTTAA | 58.997 | 24 GAGCATATCTTGGGGGCATA    | 59.885 | 20 |
| CTAGCCCAGCATATCCCAC      | 59.551 | 20 AATACTTGCCGTGCGCTATG    | 60.117 | 20 |
| CAAGCCATTACCATCACCT      | 59.813 | 20 GACGTGGTTTGCAGGCTATT    | 60.14  | 20 |
| TTTGAGCACCGAGTGGTTTT     | 60.668 | 20 AGGTTGCGTACATCTGACCC    | 59.997 | 20 |
| TTCTTCTCCCTCTGCTACGC     | 59.717 | 20 CTCGGAATCATTCCCCTTA     | 59.894 | 20 |
| AGCGAATCGAGATAGCCAAA     | 59.945 | 20 TTTGTGGATATTTGTTTATTGTC | 58.939 | 26 |
| AGCCACTGACAGCCACAGTA     | 59.493 | 20 TGCATGATTGCAAGGTTAT     | 59.14  | 20 |
| CTCTCGCTCCCTCTTTCTGA     | 59.82  | 20 TAGGCATGGATTGCATTTGA    | 60.035 | 20 |
| GCAAAATTAATAATGCCCCA     | 59.783 | 20 CCAACATTGGATTCGAAAGG    | 60.301 | 20 |
| CCCTAAGTTTGCATCTCCCA     | 60.066 | 20 TGCTCGTTTTGGCTAGATTT    | 59.845 | 20 |
| AGACGTAAATGGGCGTGAAT     | 59.457 | 20 TGGGAGTAGTCCAATTTTCTCG  | 60.474 | 22 |
| TCCTATTACTTCTCGACTTTAATC | 60.245 | 26 AGCCGAAATTTTAGGTATCG    | 57.509 | 21 |
| TCATTGGAGGTCCACACAAA     | 59.935 | 20 CCGTGTGATAGGAACCATCC    | 60.195 | 20 |
| GGCGGCTTCATTGCTTATAG     | 59.838 | 20 ACTACGATGTTCCGCCACCTT   | 59.621 | 20 |
| TATATCTGCTAGAGGGCGGC     | 59.438 | 20 GGACGCTTAGGTGGATGTGT    | 59.997 | 20 |
| CTTCCGCTTGCTTGTCTTC      | 60.132 | 20 CCAATATGGTTTAAAATTCTTC  | 59.976 | 24 |
| AGCGTAATAGCGTGCAAACC     | 60.293 | 20 ATCTCACATACATATAATTGAG  | 57.101 | 27 |
| AAAATTTTGTAGGTAATAGCAATC | 59.665 | 27 TGAAGTAGCAGATTGCGAA     | 59.566 | 20 |
| GCTCAACTTCACCAAAAATCG    | 59.738 | 21 TTGATGAGGAAAACAAGTGGG   | 59.956 | 21 |
| GGCTACAAAGGGACATCCAA     | 59.933 | 20 CAGGATACTGGCAAACAGCA    | 59.864 | 20 |
| CCCACATTTTCCACCTTAGC     | 59.429 | 20 CATACGGAAGCCTTTGTGCT    | 60.27  | 20 |
| TGCTCTTACAGTGAGTCTGG     | 60.178 | 20 GACGATCACCGTTCTTGAT     | 59.934 | 20 |
| GGCGGTACACCACACTACT      | 59.914 | 20 CCTGAGGATGAAGTGGAGGA    | 60.191 | 20 |
| AAGATTACGACGGCGATACG     | 60.117 | 20 ACCTTCGCACCACTTCACTT    | 59.769 | 20 |
| CTCCCATCATCTTTTTCCA      | 59.864 | 20 CTCAGCGTCTTGAAAATCCC    | 59.813 | 20 |
| ATCCCGTTGAAATATGCGAC     | 59.791 | 20 ACCTTCAAGGGCATCATCAG    | 60.073 | 20 |
| ACTCTAAGGGATGAATGCACG    | 59.208 | 21 TGATCCACGCAACTCAAAA     | 60.234 | 20 |
| CATGCGCTCAGCATAAAGAA     | 60.118 | 20 GGTGTGGCATATTTATCGGG    | 60.038 | 20 |
| GGATCAGCAGTGGCTTTCTC     | 59.957 | 20 GTCCAACCTGGAGGATCAGGA   | 60.048 | 20 |
| TTGGGATTAAGGCTTTGGTG     | 59.931 | 20 GCCCAATACGTCCATTTGAA    | 60.701 | 20 |
| AAACTGCCAAGTGCCAACAT     | 60.559 | 20 TCGAATCCTGTCAACACTGC    | 59.837 | 20 |
| GAACCGTCTCAGTTGTTGCG     | 60.844 | 20 TCAGTTCATGCTTGTCTGC     | 59.992 | 20 |
| CAAGACCTTTTTGTTGCTT      | 57.158 | 20 AGCGGATTTACAATTCGTGC    | 60.103 | 20 |
| GGTTCGAGCTACCGAAACAA     | 60.249 | 20 GGAAAATCGGCTGAAGTCTG    | 59.813 | 20 |
| TTTGCTGGATACCGCAAGTA     | 59.325 | 20 ATGTAGCCGACCCCAATTTA    | 59.297 | 20 |
| GAGAGGGAGAGAGAGGGGAA     | 59.883 | 20 CTAGCCGATGACCTCCAAAG    | 59.83  | 20 |
| TAATACCCCGAGTCTCCCT      | 59.783 | 20 AGGGAATAGCCACCAAAC      | 59.827 | 20 |
| TTACGCGGGAACCTACAGAC     | 60.132 | 20 CAGCTCCATGATACTCTCTAC   | 58.585 | 24 |
| ATGGAGGAGGAGGAAAAGGA     | 60.008 | 20 TGGTATGATGGTGTGTT       | 59.967 | 20 |
| TCGTTCAATTCACACACGTTT    | 59.606 | 21 AAAATTTTACCCGCAAAGA     | 59.564 | 20 |
| GGGGTTTTGAGGTTAGAGA      | 60.298 | 20 TACCGACAATTTTGTCTCCG    | 60.989 | 20 |
| GGTGGCTGAAGATAGGAATGA    | 59.14  | 21 CTGCAGTGGTGACGGAGTAA    | 59.897 | 20 |
| AGCAGAGTTTGTTCGTCGGT     | 59.914 | 20 CCAAGGAATCAGCAAACACA    | 59.691 | 20 |
| TGCGGAAGTAGCTTTGATGA     | 59.566 | 20 GCTTGGGAGACGAATCAATC    | 59.635 | 20 |
| GAGCCATTGATGGCATT        | 59.907 | 20 GTGACAAGTGTGAGGGAGG     | 59.607 | 21 |
| CAGAAAGCGCTTCGAGAAT      | 59.898 | 20 AGAGCTTCTGATTCCATGTCA   | 58.936 | 22 |
| GGTTTCGGAGGTATTGAGCA     | 60.074 | 20 GGTCTGACTGGTGCCTGAAG    | 60.711 | 20 |
| TGTTTGGATTTTATGAATTAGTAT | 58.5   | 27 TTGTGGGAAATTGGGAAAAG    | 59.772 | 20 |
| GGGGAGGAGGATTGGATAAG     | 59.722 | 20 TGGTGGTAATGCCAAGAGAG    | 58.722 | 20 |
| ACTGACCACCATCTTCTCCG     | 60.112 | 20 TCGAACTTGTTTCAGGCACAC   | 59.88  | 20 |

|                           |        |    |                        |        |    |
|---------------------------|--------|----|------------------------|--------|----|
| TCGCTCCTCCAAGAACAAC       | 59.989 | 20 | GACACAGAGGCTGACGATGA   | 59.988 | 20 |
| TGCTGTTTATCACGACGAGC      | 60.019 | 20 | CCGCCTCTATTTCCGTAACC   | 60.811 | 20 |
| AACTAGCGAAAAACGGACGA      | 59.883 | 20 | CCGATCGATCAATCTGAAGG   | 60.56  | 20 |
| AAGGTCAATATGCGGTGGAG      | 59.955 | 20 | AGGAAATAAATGGATTTTCGTG | 58.914 | 23 |
| CTCGAAAAACCAACACCCAT      | 59.83  | 20 | TGTTCCCTTTACCAGAGGCGT  | 59.734 | 20 |
| CCAACCAAATTGGACTTGTG      | 58.871 | 20 | AACACCGTTGGTCAATTGT    | 60.277 | 20 |
| AATTTTGAGCAAGGCCAATG      | 60.074 | 20 | TAATTGCCACAGGGAAAAGG   | 59.931 | 20 |
| CCCAAGACCCCAATTTGATT      | 60.91  | 20 | TGGTACAAAAGTTTGCCCAT   | 57.999 | 20 |
| CGCCTCTTGATTAACCTCCA      | 60.206 | 20 | AGATGTACGCAACCGTACCC   | 59.882 | 20 |
| TTTGGTCCCTTTCAATCC        | 59.856 | 19 | GGCACTGTCACCGGATTATT   | 59.82  | 20 |
| GGGTTAGTTATGGAACGATGC     | 58.456 | 21 | ATGTAGCCGACCCCAATTTA   | 59.297 | 20 |
| CATGTCACAACATGGAATCTCA    | 59.42  | 22 | GAAATGGATCCGAATGAGAAA  | 58.963 | 21 |
| CAGGATGGTTTGAAATGAGGT     | 58.898 | 21 | TTTGATTGGGAATAATTGGG   | 57.289 | 20 |
| TAATTTATCGATGGCGGACG      | 60.792 | 20 | GGGGCATTGTTGGGGATATAA  | 60.694 | 20 |
| TTGATTGCTTTAAATCCGGC      | 60.04  | 20 | TCGTGTGGTTCGAATATGAAAT | 59.343 | 22 |
| TTTAAAGTTGCCATTTAGCC      | 59.244 | 21 | TCCATTTCCCGAACAAGAAAC  | 59.91  | 20 |
| GCCAAAATCTGTATACCCCG      | 59.297 | 20 | ACCTTATGGGGTACTGGGCT   | 59.713 | 20 |
| AACCTTTTTGAGCTCCGCTT      | 60.373 | 20 | ATGTAGCCGACCCCAATTTA   | 59.297 | 20 |
| ACATGCATGACTTGGTGCTC      | 59.714 | 20 | GGAAGTGGGTTCTGTCCAAA   | 59.943 | 20 |
| TGTAGCCCACCCCAATTTAT      | 59.158 | 20 | GCCAACTAAGCGATCCATGT   | 60.103 | 20 |
| CGCTGAACGAGCTAGAACTTG     | 60.332 | 21 | GATGAACCCACATCCAATG    | 60.995 | 20 |
| GAGGAAGATACGATTTGAAACCT   | 59.531 | 24 | ACCCTGGCCATCTTCTTTCT   | 60.074 | 20 |
| AATGGGTGAGAGACCACGAC      | 59.969 | 20 | TCACAAGGAGGGTCGAAATC   | 60.05  | 20 |
| TGTTCTTTGTCGTGGTTTCG      | 59.734 | 20 | ATAGTGGTATGGTGTGGGGG   | 59.405 | 20 |
| ACAGGAATTGAAATGACGGG      | 59.79  | 20 | GGCCTGCATGATTTTTATGG   | 60.289 | 20 |
| TGCACAAAAATGTTTTAAAATTGC  | 60.26  | 24 | GAACAACCATTACCATCCA    | 59.193 | 20 |
| CAATAAGGATGGGTTTCCGA      | 59.756 | 20 | TAGGGGTTGGCTCTCTGATG   | 60.21  | 20 |
| TGGATTTGGAATCGGTTTTTC     | 59.739 | 20 | CTCCACTTTTTCGAATGTCCC  | 59.526 | 20 |
| CAGCCATGAATGAGAGTGGG      | 61.63  | 20 | ACAAGAAAATCCATCGCCTG   | 60.074 | 20 |
| TGTAGCCGACCCCAATTTAT      | 59.297 | 20 | CAAAGCCATATGCGGTAGGT   | 59.982 | 20 |
| TCATTTATTTCTTTTTATATGTGC, | 59.326 | 27 | AAGAATACCAACAATAAATAA  | 59.137 | 27 |
| TTCAAGTGTGCTTCCACCAA      | 60.278 | 20 | TTGCACCGTGTGCAGTTATT   | 60.18  | 20 |
| TGCTAGCATTGCGTGTTCCTCA    | 60.401 | 20 | TTCCCACTAACCAGCTCACC   | 60.111 | 20 |
| CCCAAGACCCCAATTTGATT      | 60.91  | 20 | TCTTTAGTTAGCCCTTTGAGCC | 59.933 | 23 |
| CGACCGATCCATTTTAGGAA      | 59.894 | 20 | TCCTTTTGACACAAGAAAACCC | 60.365 | 22 |
| CGAACCTAGGAAAAGTTGCG      | 59.876 | 20 | AGTGCTCATTGCATCCTTCC   | 60.226 | 20 |
| TGAACTCCTCCCAAGTCAGG      | 60.229 | 20 | AAACGAGAACTATGAAGCACC  | 58.906 | 22 |
| TTGATAAGCCAGCCACTTGA      | 59.42  | 20 | CGTTTCTGGCAATCTCCTTC   | 59.813 | 20 |
| GGGTAATGGCTTCAACTCCA      | 59.933 | 20 | CCAGCCTTGTGAGACAGTCA   | 60.022 | 20 |
| GCCGACCTGCACAAAGTTAT      | 60.14  | 20 | GGGTCAGATGTACGCAACCT   | 59.997 | 20 |
| CTGCATGGGCTATTTCCACT      | 60.096 | 20 | AATCCACATTATTTCTCACTCA | 58.455 | 24 |
| CGACACATGAGCTATTGGGA      | 59.673 | 20 | TCATCCTCGGAAGCAATCTC   | 60.303 | 20 |
| AAAGCAGTTAATAACGAAAAACC   | 58.442 | 24 | TTTTAGATAAGCATAACCATC  | 59.08  | 26 |
| AAAGTCTCCTGCTCGCTCTG      | 59.891 | 20 | CCGTGCCAGTACCTCCTCTA   | 60.269 | 20 |
| ATGTTCCACCTCCCAAGGTT      | 60.607 | 20 | AAACCCACGGACTAGCGTAA   | 59.632 | 20 |
| GACGGGTGTGGGCTAAAAAT      | 61.099 | 20 | CCGATAATTGCAACGACTCA   | 59.688 | 20 |
| ACGTGTGCATGTGAAATTTTTAT   | 58.493 | 23 | CAGGCACCAACCAAGAGATT   | 60.111 | 20 |
| TCCAAATCGCTCAAACATTG      | 59.664 | 20 | TCACAGTTTTCCCCCTTTTG   | 59.942 | 20 |
| ACCTAGACTCCGACGAAAAGC     | 59.899 | 21 | GCTTACACACGTTCTTGAGGG  | 59.788 | 21 |
| CACTCTCCTCAATGGCGTC       | 59.356 | 19 | GTGACTTCGAGCGCAGTTTT   | 60.581 | 20 |
| TGAGACTCAGATGAAATGTAGCC   | 58.475 | 23 | ATTTTACGTACACAACCTCGAA | 57.364 | 22 |
| TTTATGCATTGCCGTGAAAA      | 60.074 | 20 | TTCAATGGTTAAATTGGTATTT | 59.073 | 26 |
| ATCAGGATCGAGTAAGCGGA      | 59.797 | 20 | TTTCCCAACCTCAACATTC    | 59.767 | 20 |
| ACTTGTGAGACAAAAGAGAACAAA  | 57.292 | 24 | TAGCCACCACACTCAAGTCG   | 59.897 | 20 |
| CACGTCCCTCATCACTACCC      | 60.386 | 20 | ACTCGCTCGATCGTTGTTCT   | 60.02  | 20 |
| TCACATTTACAACCTACATCGG    | 57.573 | 22 | CCGAGACCCCAATTTGATT    | 59.735 | 19 |
| TGGCATTATTTTCGATTTGA      | 58.162 | 21 | GAATGCAGCATCATCACACA   | 59.202 | 20 |
| TTATATGCCACTCTTCCCGC      | 60.06  | 20 | TTTGAATGCAGGTGAAAT     | 60.309 | 20 |

|                          |        |                           |        |    |
|--------------------------|--------|---------------------------|--------|----|
| GTACTACCACCGGCGAAGAA     | 60.132 | 20 TCATTGAAGTGACCCAACCA   | 59.935 | 20 |
| CAACGGCCTTTCTTTAGCAG     | 60.011 | 20 AACTGCAACCCGTAAATGGA   | 60.365 | 20 |
| CTTGGGTGCCAGAGAAAAAG     | 59.846 | 20 CATCCCAACCACGTTAGCTT   | 59.993 | 20 |
| GCGATTGCGGCAGATACTAC     | 59.696 | 20 AACTGATGCTGCTGCTGCTA   | 59.918 | 20 |
| GCATTGAAAAATTA TACTGGGG  | 59.588 | 22 GATCGATTGAAAGGGACTCG   | 59.629 | 20 |
| TACTTGGGACGGGATGGTTA     | 60.184 | 20 ATGTAGCCGACCCCAATTTA   | 59.297 | 20 |
| AGAAGGCGAAGAATGCACAC     | 60.406 | 20 ACCTTCATCATCCTCATCCC   | 58.741 | 20 |
| TGTCGTCTGGACAAGAAAA      | 60.278 | 20 AGGTCATTGCAAGGAATGCT   | 59.7   | 20 |
| TCTTCTATACATAGTGCTTCCGGT | 58.446 | 24 TCAGACTTCGTGGTTCGTCA   | 60.44  | 20 |
| GTTTCGGTTCGGTTC AAT      | 61.08  | 20 AAGAGTGAGGCGATAGGCAA   | 59.978 | 20 |
| CTTCCACAGGCATTGGGTAT     | 59.813 | 20 TCCTGTGTCAGGGCTAGCTT   | 60.012 | 20 |
| ACAAATCACCAATCAACAAAACC  | 60.014 | 23 AAGGCAGCGACTGGAAATC    | 60.355 | 19 |
| CCCAAGACCCCAATTTGATT     | 60.91  | 20 TTTGGTGAAGTGTATGCGG    | 59.585 | 20 |
| CAATGGATGGTAAAGGCTC      | 60.461 | 20 TGCAGAGATGGACGTGTTGT   | 60.319 | 20 |
| GTTATGAAGGAGAGCGTGGC     | 59.843 | 20 ATAATCCGGTCCCTTCCAAA   | 60.502 | 20 |
| AACCCTCAGCAATATGCCAA     | 60.469 | 20 GCAAGCCTTAGTCAAGCCAG   | 60.154 | 20 |
| CGACAGAGTTGCAAGAAGTTG    | 60.088 | 22 GCCAACCCGCCTTATCTAAA   | 61.281 | 20 |
| AATCCCACTCTTTTTGCTGC     | 59.316 | 20 TTTCAGTTTGAACTTGCGA    | 59.439 | 20 |
| TCACGAGTTGGCTCTTTGTG     | 60.025 | 20 GCAACCCATTTCGTATCCTTT  | 58.906 | 20 |
| GCGTCTTTGAGGTTCTCCAC     | 59.851 | 20 TCACTTCATAAAGTCCGCC    | 60.074 | 20 |
| GAAGGCAGAGACCGTGAAAG     | 59.989 | 20 TCCGTCTCTTTCTTTGCTT    | 59.993 | 20 |
| CCGACTAGGACTAAGGGTCCA    | 60.493 | 21 TCTCGATCCTCGTTACTACTGG | 60.262 | 21 |
| AAAACAAAGGCCATGCTGAC     | 60.118 | 20 TGTTGCTCATGACAAATTCAAT | 59.996 | 23 |
| CAGCAACCACCAATACTCTTG    | 59.671 | 22 TCAGAAATTGGGAGCCCTAC   | 59.126 | 20 |
| AAGATCAGGGAAAAGGGAGC     | 59.651 | 20 AGGGTCACACGAAAGTTTACA, | 58.675 | 22 |
| AATCTGCAGCTTGGTTTTGG     | 60.249 | 20 CACTGTGGTGGCATATCAGG   | 59.984 | 20 |
| CCTGTCAAGACCCAATACGAA    | 59.978 | 21 CGTTCAAATCACCAACATCG   | 59.964 | 20 |
| TCCAAAATTAGTACAAGCATCAA/ | 59.168 | 25 GTTGAAGCCTTGACATTGA    | 58.697 | 20 |
| TCGCCTTCTTTTGCAGCTAT     | 60.117 | 20 AGGGGAGAAATGAAAAGGG    | 59.393 | 20 |
| TAAACTGTAAGCAGCACGCC     | 59.136 | 20 AAGGTTTTAACAGTCTCCGA   | 57.854 | 21 |
| ATGATCTCGACCTCCCTCCT     | 60.035 | 20 GAACGAGCTCTAACTCCCC    | 60.212 | 20 |
| CGTAAGGCTCTCCTCATGGA     | 60.353 | 20 CCAAGAGCAAGACGACAACA   | 60.025 | 20 |
| TGAAATGAGTTGGAATGAGGAA   | 59.546 | 22 CCAAATGAGCTCGTTGATA    | 58.721 | 20 |
| CACTGAGGCAGAGATGGAGA     | 59.074 | 20 GCAAAGACTCACGAGCAAGA   | 59.318 | 20 |
| CCATTCTCACGATTGTTGATG    | 58.987 | 21 AAAAATTTATTGGTTCGGCCC  | 60.022 | 20 |
| TGTGACGTCTAGCTCGATCC     | 58.987 | 20 TTCACACATCCAATCCAAGAA  | 58.961 | 21 |
| TTTCCACAAAGCGTCGTACA     | 60.293 | 20 TCACATTAGAGCACATGGAGG  | 58.736 | 21 |
| GGGTTGGGTTTTCTCCATTT     | 60.032 | 20 TGATCATGCTTTTCGTCTCG   | 59.948 | 20 |
| TCCACTGATTCCAGATGGTG     | 59.473 | 20 GCTAAAGTGCCTCGTGCTTC   | 60.162 | 20 |
| TAATGAAATTGGGTGGGAGC     | 59.762 | 20 CGCCACAAGATTAACCCAT    | 59.823 | 20 |
| CCGACTCCACATAGTGAAAA     | 59.978 | 21 TTCGAAAGGGAGATTTGAGC   | 59.387 | 20 |
| TTGCTTGCGGTATTGTTTTG     | 59.742 | 20 TGC ACTGCATTTCTTCGTA   | 60.401 | 20 |
| AAACCTCACCACAAACGGAG     | 60.005 | 20 ATCGAATTTCTTCGACCCCT   | 59.903 | 20 |
| TGTTGTTGAAAAAGGCGACA     | 60.271 | 20 TCAGGTTGGGATGAAAGGAG   | 60.042 | 20 |
| TAGGGCTTTTGTGTGGTTCC     | 59.971 | 20 GATATGGGGCACAAGAAACG   | 60.331 | 20 |
| GTCTCAATGGGGACATCTGG     | 60.326 | 20 ATAGGCCAATTCGTCTCGTG   | 60.096 | 20 |
| TGAGCAAGAAGGGTGTGAA      | 59.415 | 20 ATTCTCTCTTCTTCGCCACG   | 59.574 | 20 |
| CACCCAAATTTTCTTAAGCCC    | 59.83  | 21 GGTCCCAAATCGACGTA      | 59.801 | 20 |
| TGTAGCCGACCCCAATTTTA     | 60.315 | 20 ATCAAATCCACCGTCCAAA    | 60.17  | 20 |
| ATCCATCCATGCATTTTGGT     | 60.021 | 20 TCAAATCGAGAAAGCGAAAA   | 59.95  | 21 |
| ACCCATGGATCCAACCTTCAA    | 60.173 | 20 GTGAAAATGAATTGGGGTGG   | 60.029 | 20 |
| GGTTCATGTAGCCTACCCCA     | 59.813 | 20 ATTCAGCCCTTAACTGCCAA   | 59.708 | 20 |
| GAATGTCAAGATGAGAGATGGAA  | 59.598 | 24 CATCTAAGGCTCCAAGCAT    | 59.292 | 20 |
| CCGAACAACACTCAACTCCA     | 59.72  | 20 TTTGCACATGAACAATCACAA  | 58.588 | 21 |
| GGGTTGAGGCCACTATATCC     | 58.334 | 20 GCCATTGAAATTACCTGCAAA  | 59.957 | 21 |
| TACTCTCGAAAACAGCCG       | 60.378 | 20 AGAAACTGCTGAGACGGAGG   | 59.598 | 20 |
| ACGAAGCAATACACTTTTGAAGA, | 59.391 | 24 TTCTCGCCCTTAAGGTTTTTC  | 59.843 | 21 |
| CGCCTTCTGTAGCCAAGAG      | 60.147 | 20 GATTCTTTCGTGGAGTCCGA   | 60.195 | 20 |



|                         |        |    |                         |        |    |
|-------------------------|--------|----|-------------------------|--------|----|
| AGCTCTTCAATAAACAGAATCC/ | 58.528 | 24 | TCCAACCCAAGGTGAGTAGC    | 60.111 | 20 |
| GCACAATTA AAAATGCACCG   | 59.077 | 20 | TGAGGGGGAAAAGAGAGGAT    | 60.008 | 20 |
| CAAATCAATCGTTCCCCTTG    | 60.301 | 20 | AAACCAAAAACCCAAGACCC    | 60.068 | 20 |
| TTCAAATTCACAAACACGG     | 59.415 | 20 | TTTTCCATTGGCATAGTTGAAA  | 59.741 | 23 |
| ATACCGCAGATCCCTTCT      | 59.925 | 20 | GATGAGCTTTGGCTTCTTGG    | 59.955 | 20 |
| TTCGGACATGAGCAATTGAG    | 59.799 | 20 | AACTCAACCCAACGCAAATC    | 59.978 | 20 |
| CACGTAGGCGGCTTACTGT     | 60.326 | 20 | TGGGGGATTGTTGGAATTTA    | 59.988 | 20 |
| GGATTGCAACCTGGGACTTT    | 60.306 | 20 | CAGAGCGCACTCGAAGAGTA    | 59.49  | 20 |
| CCCAAGACCCCAATTTGATT    | 60.91  | 20 | TCAACATAACCAATTATTCCCA  | 60.292 | 23 |
| GATTTTATCCGGACGGGTTT    | 60.02  | 20 | TCCTCCATAACTTTTTCTCAC/  | 59.987 | 23 |
| ATCCACGATCTTTCCTTGG     | 60.074 | 20 | AAGAACTCGCAGGTTCTTGG    | 59.473 | 20 |
| GTTACTAAGGGTTGCGGGCT    | 60.503 | 20 | GGTGAGAAGTACGCATGCAA    | 59.871 | 20 |
| TCATTTTGGGACGGAGGTAG    | 59.926 | 20 | GGCAAGAGAATTGAAGAGCG    | 60.096 | 20 |
| AACAATCCCGGGAGAAAAAC    | 60.166 | 20 | TCTTCCCAAAAAGTCACCTG    | 60.081 | 20 |
| TGATATCCACCCGATCACT     | 60.158 | 20 | TAACATTTTTCGTTGCCGGA    | 61.344 | 20 |
| GCACAAATTGAAAGCACACAA   | 59.767 | 21 | TGTAGCCGACCCCAATTTAT    | 59.297 | 20 |
| TTGGTATGATGGAATGGGGT    | 59.871 | 20 | CTATTTGCTCGAATTTGGGG    | 59.542 | 20 |
| CCCAAGACCCCAATTTGAT     | 59.59  | 19 | CCGTGTGCATTTGTGTCAAT    | 60.436 | 20 |
| CAGCTGCTGTATCATCGTT     | 60.016 | 20 | TGAGGTTTCCATCACAACCA    | 59.935 | 20 |
| AGTTCCCCATTGCTGTTTTG    | 59.971 | 20 | GCCCATGTTTTGAGAAATTG    | 58.066 | 20 |
| TGAGCCTACATCTGTGCTGG    | 60.008 | 20 | GAGAAGGGTTTGTGTCCGAA    | 60.088 | 20 |
| GCCGTTAATATGCATTTGG     | 60.172 | 20 | TCTGTCTCCACTTCTTGGC     | 60.386 | 20 |
| CGGAGAGCTCGGTAAATGAG    | 59.971 | 20 | CCCTCAACCACCACCATATC    | 60.05  | 20 |
| AAGGAGCAGCTGTCTTTGTG    | 59.671 | 21 | GGGAAAGAGATGACAACCCA    | 59.903 | 20 |
| GCGGGAAAGGTGTAATCAGA    | 60.074 | 20 | CAGCCTCCAGCAAGTTATC     | 59.836 | 20 |
| GATTGGTTCAGCTATTCCGC    | 59.674 | 20 | TAAAATGAAACCGGCCAAA     | 60.287 | 20 |
| GGCTGGATTCTTGAGGTGAG    | 59.803 | 20 | AGGTTGCGTACATCTGACCC    | 59.997 | 20 |
| AAGAAGTAAGCCCGACCTCC    | 59.713 | 20 | CTCCGGATTTGGGACTCTG     | 59.797 | 20 |
| CGCAACTATCTGCACCATTC    | 59.301 | 20 | GGCTTGATGGTTTGGGAAA     | 59.801 | 20 |
| ATGTTGAGCCCAACCCAAC     | 60.774 | 19 | TCAACATTCAAAATTGGTATGA  | 59.665 | 25 |
| AATCATTGATTTGGCAAGC     | 60.045 | 20 | CAAGTTTTTATTAGCATTTTAA/ | 57.364 | 26 |
| GGGAGGTTTCGTACACAGT     | 60.009 | 20 | CTGGCCTGATCTACAGCCTC    | 59.973 | 20 |
| GCAACGGAAACAACCTCTT     | 59.218 | 20 | TGCAGACCACTTTTGGTGAA    | 60.278 | 20 |
| GGTAGCAGGTGAGGGTGA      | 60.111 | 20 | GCCTCGATCCTAACGTGTGT    | 60.142 | 20 |
| GTGGGTTGCACCAATTAGGA    | 60.755 | 20 | ATCTTCGAATCAGCCACCAC    | 60.081 | 20 |
| GCAGATAATCACGATTTAGTTGG | 57.86  | 23 | CATCTTCAAGCAAACAACACT   | 59.286 | 22 |
| AAGGGATCAATGAGCCACC     | 59.878 | 19 | ATGGGAAGGGGTGGAGATAC    | 60.015 | 20 |
| GATGTCCCATTTGAGACTCG    | 60.475 | 20 | CGGTTGTCATAAGACCACTTCA  | 60.03  | 22 |
| GGTGGTATTGATCATCCGCT    | 59.78  | 20 | ATGGGATAAATTCGCTCACG    | 59.923 | 20 |
| GAAGCCAGGGAAAGAATGAA    | 59.244 | 20 | GCAGTGACACCGATAGACGA    | 59.862 | 20 |
| TCGGCATTGAGTTTATCCC     | 59.901 | 20 | AGGACTGCCGACCTCTTCT     | 60.393 | 20 |
| TTATTTTTGATGGCGTCGGT    | 60.323 | 20 | AAAAACATTAATCAAAGT/     | 57.811 | 26 |
| ATTTTCGTCGCCCTCTTAT     | 59.93  | 20 | AAGGGAGCTACAACCTTTCATC  | 59.685 | 23 |
| GTTGCGTACATCTGACCCC     | 58.948 | 19 | CTACAAGCATGACTTGCCCA    | 59.864 | 20 |
| GCGGGACCTAGAATGTTGAA    | 60.074 | 20 | AGTCATTAAGTGTGGTCTCGGA  | 58.721 | 22 |
| CTGCCCTTAGCCGTTAGATG    | 59.861 | 20 | AGACAAAGGCTCTGCCATA     | 59.836 | 20 |
| CCTTCTCACTGACCTGCACA    | 60.022 | 20 | CCAAGACCCCAATTTGAT      | 59.59  | 19 |
| TAATTTACGGCTCGGTTTCG    | 60.089 | 20 | CAGCAGCCATTTGTTCTTGA    | 59.988 | 20 |
| AAATGGCCGAAGAGATTCT     | 60.039 | 20 | AAGCACGAGTGCTGTGATGT    | 59.498 | 20 |
| TGTTTCTGGTTTCAAATTGCG   | 59.967 | 21 | TGCTGTTTTGTTATAACCCCG   | 59.876 | 21 |
| ACGTGCCCTGTTCTCTCACT    | 59.907 | 20 | CTAATGGAGGCGACGAAGAC    | 59.836 | 20 |
| CACGTCCCAAGTCCTCATCT    | 60.112 | 20 | GAATGAATTCGAAGTTTGGGA   | 59.009 | 21 |
| TTCTTGTGAAGCACAACTCT    | 59.726 | 21 | ATGTAGCCGACCCCAATTTA    | 59.297 | 20 |
| CCCATACATTTGTGGGGATA    | 58.011 | 20 | TTGAACAATGGTACCTCCTCC   | 58.898 | 21 |
| ATCGTGACCAACCCAAACAT    | 60.096 | 20 | TTATAACGTGGGAACCAGCAG   | 60.004 | 21 |
| GACGATGTTTTGTTGCGATG    | 60.119 | 20 | AGAATCAAGCAATGGATGCC    | 60.043 | 20 |
| GTCTACCCCGCCAGATCC      | 60.439 | 18 | CGGCGATGGCTAGAGTGTA     | 59.98  | 19 |
| AACTACCCACCTTCTCCCT     | 59.968 | 20 | GAAATGCGAGAGGGATTTGA    | 60.155 | 20 |

|                         |        |    |                         |        |    |
|-------------------------|--------|----|-------------------------|--------|----|
| AAAATGAACGAGCATCCAGC    | 60.221 | 20 | CTGAAGGCGGAGGTTTCATA    | 60.206 | 20 |
| TTAGGTTTTGCCAGGATTG     | 59.931 | 20 | TCGAAGCACTCCACTGAAGA    | 59.701 | 20 |
| CCAAAATCTCGGCTTCAATC    | 59.645 | 20 | CAAGACGGGTTGTGGGATAC    | 60.232 | 20 |
| GTTCGAAGGGTTGAGGATGA    | 60.05  | 20 | CTTTGTTTGGAGCGCGTG      | 61.555 | 18 |
| GGGTTATATCCCCGTCTACCC   | 60.623 | 21 | AGGTCTTTAATATCCCCATTTG, | 57.99  | 23 |
| TGACTTATGCGTGCATGTGG    | 61.713 | 20 | GGACCGATTTGAGCATTITG    | 60.448 | 20 |
| GATGGACTCCGACGATGACT    | 60.08  | 20 | CCTTGGGATATTGTTTGGCA    | 60.692 | 20 |
| TCACTCCGGATCAAATAGGC    | 60.036 | 20 | AATGGGATTATGTTTGGATTC,  | 59.454 | 23 |
| AATTCCATGACATTGCCTACG   | 59.837 | 21 | TGGCTTCTTTTGCACCTCTT    | 59.993 | 20 |
| GATAAGCGGCTGAAGGTGAA    | 60.352 | 20 | AGTCATTCCCTCGTCTCCAA    | 59.655 | 20 |
| TGCAGCAACTTCCTCTCCTT    | 60.134 | 20 | AATTTGTACCCAGCATTCCG    | 59.823 | 20 |
| ATCCTGTGGTGGCATGTTTT    | 60.24  | 20 | GAGAGCAATACCGATGGCAG    | 60.765 | 20 |
| TGAGCGCACTCGAAAAGTAA    | 59.752 | 20 | GTGTGGGAAGAATGCGAAGT    | 60.119 | 20 |
| AACTTTAGTCGTCGTCATCATCA | 58.781 | 23 | CGGCTCAAAGGACAGATAGG    | 59.83  | 20 |
| GATACCACCTCGATCGCCTA    | 60.059 | 20 | TGAATCAGCTCCGTAGGCTT    | 59.978 | 20 |
| GGCGGAGTTCGATAACAAAA    | 60.074 | 20 | TCCACAACCTCTCATCTCCC    | 60.048 | 20 |
| CCTACCAAGACTTGACCACCA   | 60.013 | 21 | TCCTCACTGAGTCTTGATATTG  | 57.06  | 24 |
| CAGCAGGAGTGGTGCAGATA    | 60.008 | 20 | CATTTGACGGTCCATGTTTG    | 59.816 | 20 |
| CTCTAACATGCCATGGAGCA    | 59.823 | 20 | GCGATATCACGTTTAAACGGC   | 60.485 | 20 |
| GAGAGTCGGGTAAGTACTGAGCC | 58.894 | 20 | ACCTTCCAATCAGCCTGCTA    | 59.836 | 20 |
| CACTCCATCGGATCCAAGAT    | 59.886 | 20 | ACACAATAACCATTCTGTTCTCA | 58.552 | 23 |
| TGTTTAGGCTGCAGGAATCA    | 59.42  | 20 | GAGAGAGGGAGAGAGATCGG,   | 60.043 | 21 |
| CAACATTTCCGTGGTGTGTC    | 59.855 | 20 | TGTGCAATGCAACAAGATGA    | 59.833 | 20 |
| TCAATTGATTTTCGTAATCCTGG | 60.187 | 23 | TGGAATTGAGCAGCCTTTTT    | 59.823 | 20 |
| TAGGACGATAATCCCACGC     | 59.923 | 20 | ACGTCTTGACCAGTCCCCT     | 59.604 | 20 |
| GCATTAGTCCTGGTGGCATT    | 59.962 | 20 | GCTGCAGAAAGTGTGGTGA     | 60.032 | 20 |
| GATGCAGTTGAAAAGCACCT    | 60.263 | 20 | TGAGACTCGAACCTGTGAGC    | 59.129 | 20 |
| GTGGGGCCTTACACCAACTA    | 59.853 | 20 | TAAGGTGGGTTTTTGCCTTC    | 59.064 | 20 |
| CTCAATTTTTCCGGCGAAT     | 60.024 | 19 | TACCTGCCGGAATGTTGCT     | 61.591 | 19 |
| GGACTGTGATGGGCTAGGAA    | 60.073 | 20 | CGTAGAATCTCATCCAGTTGT   | 59.797 | 23 |
| TGCGGATTAGGGTAGCTTTG    | 60.223 | 20 | TGATGTACGCACTTGGTGGT    | 60.032 | 20 |
| AGAAACCAGCGACACATTGC    | 61.248 | 20 | CCACAAAATAATAAGGCGGC    | 59.455 | 20 |
| CCACAAATGGGGTTGACTTC    | 60.21  | 20 | TCCACAAATCATGCGAAAAA    | 60.051 | 20 |
| ACCAAACGATGCAGATTTCC    | 59.939 | 20 | CAGCTCCGAGCAAGTTATCC    | 59.978 | 20 |
| CAAATTTGATTGGCTCTGTGA   | 58.759 | 21 | TGCCATTATGCTCCAATGAA    | 60.035 | 20 |
| GCCCTTACAAGACCATCCAC    | 59.41  | 20 | ACCGATCTCACAAGCCAGAG    | 60.408 | 20 |
| ATGCCGGATCGAATAATCAG    | 59.885 | 20 | TTTTCCCATCATTACGACA     | 59.9   | 20 |
| AATATCTTCTCCCCTCCCA     | 59.722 | 20 | CTGAGCCATCGAGGTATGGT    | 60.096 | 20 |
| TGTATGCCCTGCAAAAACAAA   | 60.111 | 20 | TACCAAACAGCCCCTCCAC     | 60.954 | 20 |
| AAAAGAGGGGATGAGGCAAT    | 59.903 | 20 | AAACAGAATTGTGCTTGGGC    | 60.118 | 20 |
| CCAATTTATTGGGATTAAGGCA  | 60.037 | 22 | CCTCCCTCCAATTTCCACTT    | 60.298 | 20 |
| CCTCATTTTGAACCCGAATG    | 60.301 | 20 | GCTTGATGGTGGATGTTTGT    | 59.851 | 21 |
| CCCCAAACATCCAAGAAAGA    | 59.903 | 20 | ACCGTACTCCGAATGAATGC    | 59.962 | 20 |
| ATGAGATCCTTGCGCAACTC    | 60.37  | 20 | CGGGACCGTGAATAATGACT    | 59.813 | 20 |
| CGTTTCCAACACCGACCTAT    | 59.853 | 20 | GGCGGATGGTATTGAAGGTA    | 59.784 | 20 |
| CATTGGAGATGCCCTTAGGA    | 60.029 | 20 | GAATTCCACTGGACCTGCAT    | 59.934 | 20 |
| ATTGATTCCGAAACCTGCTG    | 60.074 | 20 | ATTGTTTGTGAGCTTCCGCT    | 59.882 | 20 |
| CCGACCACTCTGTTTGTGAGT   | 60.298 | 20 | AATTGTGCTATTATCTGCGCC   | 59.251 | 21 |
| GCTAGGTTTGTCTTCTGGCG    | 60.015 | 20 | ATGTAGCCGACCCCAATTTA    | 59.297 | 20 |
| TTCTCCTGAATGTCCCCACT    | 59.505 | 20 | TGCATGCATCTTTTTCTTTTT   | 59.013 | 22 |
| TCATCCAAACCTCAACCAGAC   | 59.958 | 21 | CGGTAAAGGGTTCGATTTCA    | 59.931 | 20 |
| TTATGCCTGTATTTCAATCG    | 58.639 | 21 | CGACCACAAGGTTAAGAGCC    | 59.734 | 20 |
| ACCTCAACAAGTGGGCCTTA    | 59.592 | 20 | GACAGGCCTGAGTTCGGTAG    | 59.867 | 20 |
| TTCCAGTAAACAGGCCCTTG    | 60.103 | 20 | AGGCTGCAGCTGATCAAAGT    | 60.164 | 20 |
| GAATATATCTTGCCGTTGCCA   | 59.942 | 21 | AGAATGCATTGAGTCAAACAT/  | 59.24  | 25 |
| TCACGTTTCACGCTTCCTAA    | 59.464 | 20 | TTTCTTTTGGCCAATGTTGA    | 59.133 | 20 |
| CGGACCAGCCTAGAATTTGA    | 60.206 | 20 | ACAAGAATGTTGACCAAGAGC   | 59.78  | 22 |
| GAATGGCGAAGAAGTGGAAA    | 60.192 | 20 | GCTCTTACACCCATCCGAAA    | 60.074 | 20 |

|                          |        |                            |        |    |
|--------------------------|--------|----------------------------|--------|----|
| CGAACCATAGTTGTTGGACG     | 59.047 | 20 TGTGACTGGGCACGATTTTA    | 60.111 | 20 |
| GCATAATCGAACTGGAGCTG     | 58.477 | 20 GGGTGTCTCGACATTTTTC     | 59.386 | 20 |
| GCAAACAATGATGGCACAGT     | 59.577 | 20 ACGAAGTGGCTGAGGAAATG    | 60.255 | 20 |
| GCCACCAAAAATCACACAAA     | 59.42  | 20 ACGGCTGCAACTTTCCATAC    | 60.14  | 20 |
| CCACTCCAAATCTCCCTTCA     | 60.042 | 20 AATTACCTTCACTCACCAGAAA  | 57.008 | 23 |
| GCTGCACACATCATTTGGAC     | 60.128 | 20 TGGAACATCGTGAATTTCTT    | 59.42  | 21 |
| TGTGGAACATCATCTAATCCA    | 59.443 | 23 ATCGAGGAGTTATGGGAGCA    | 59.653 | 20 |
| GCACAAATTGTTCCCATTC      | 59.375 | 20 GACGATGCTATGCAGATGGA    | 59.788 | 20 |
| TCGTACAAAGGAACCTGGGC     | 60.11  | 20 ACTTGATATGGATCCGAGGC    | 58.962 | 20 |
| TCCCCCTACCCCAAACATA      | 59.992 | 19 ATGGGGGATGAGTTTGTGAG    | 59.779 | 20 |
| GGGTTTTACCGCCGTTATTT     | 60.076 | 20 CGGAAAGTGACCTCTGAAGC    | 59.989 | 20 |
| TGATTTTCGCACGAGTGTTGT    | 60.31  | 20 CGGTTCTTACCATTACCCGA    | 59.817 | 20 |
| CCATTTCCGGTGGAAGAGTA     | 59.926 | 20 CGCTAGTCAAAGATGATGCG    | 59.59  | 20 |
| GCTTGACGACGCACTTGATA     | 60.019 | 20 GGGCTTGAAAATGTAAGCGA    | 60.209 | 20 |
| AGCAAGGCTTGATCAATGT      | 59.7   | 20 GAACCCGACCACAAAAGGAAT   | 61.115 | 20 |
| AGGCTTTCATAGCTGTCGT      | 60.044 | 20 CAAGCCCCAAAGTCAAAAAG    | 59.719 | 20 |
| TTCGATTCAAGGTCTCACGA     | 59.369 | 20 TGTAGCCGACCCCAATTTAT    | 59.297 | 20 |
| AAATGGGTGTGACTTGGA       | 59.951 | 19 TTGATTATCATGTCGCTCGC    | 59.799 | 20 |
| GCGGTGGATTTAGGATTTCA     | 59.901 | 20 TGATTGTACACGATGGCGAC    | 60.549 | 20 |
| GTTGCGTACATCTAACCCCC     | 59.316 | 20 GCGGATAAGCTCGAACAGTC    | 59.985 | 20 |
| AAATACAAATTCAAGGATTATAC/ | 57.021 | 26 CCCACATTTACTTGATGCATTC  | 60.25  | 23 |
| AGGCCGCAATCTTTTAATCA     | 59.682 | 20 TGTCAGGATATTGACAAGGTGC  | 60     | 22 |
| TTAATTAACCCAAACCAAACCTCT | 58.59  | 25 TGAATATCGGTTTCATCGCA    | 60.035 | 20 |
| TGGGATTAAGGCTTTGGTGT     | 59.429 | 20 ACCCAACACCAAATTATGCC    | 59.551 | 20 |
| GTTGCAAACGACTGGGAAT      | 59.978 | 20 TGGATCGGAATACTGTGTGG    | 59.369 | 20 |
| CCATCGATGTCAAACCACAG     | 59.96  | 20 ATTTAATCCCGTGCAACGC     | 60.852 | 19 |
| CCTCTTTCTGGGTGATGGA      | 60.042 | 20 CTTCAGGGCCAAATGTGAGT    | 60.111 | 20 |
| GCGATTGTCGGTGAGGTAAT     | 59.962 | 20 TCAATTTTCACAAAATAACGCA  | 59.542 | 23 |
| GCTATCCTCAGCCTTGCATC     | 59.946 | 20 CTGGTAAGGCTGTTGGGGTA    | 59.986 | 20 |
| AAGGGAGAGAGAGGGGAGTG     | 59.801 | 20 CTCCTGTGGCCAAACAATCT    | 60.111 | 20 |
| ATCGCAATCTCTCGGACACT     | 59.834 | 20 GTTCGGTTGTGAAATTGGCT    | 59.978 | 20 |
| ATTGGGCCTGAGTTTTGATG     | 59.933 | 20 CGAGCCATAAGCTCGGATAG    | 59.96  | 20 |
| CGCGGTTATTTATGTCCGTT     | 59.853 | 20 TCGTCTTTTCAGTCAGCCT     | 59.989 | 20 |
| GTCTAGCATCCTTTGGCAGC     | 59.985 | 20 CGAAAACCTGAAGATCGGGAA   | 60.184 | 20 |
| ATGTAGCCGACCCCAATTTA     | 59.297 | 20 GACACTTGGTGTGCAAATCG    | 60.16  | 20 |
| GGGTTTGTCTAGTTCATCCCA    | 60.221 | 22 GATGACGGATTGAAGGCTGT    | 60.081 | 20 |
| CCGAGGCTGAGATGGACTAC     | 59.827 | 20 ATCTGCAAAGTGCTGCTGTG    | 60.207 | 20 |
| ATTGAATGGGAGTCGCTGTC     | 60.081 | 20 CTAGGGTTGACCCACCTCAC    | 59.425 | 20 |
| TGATGGGTGAGTTTTATATGATGC | 60.102 | 24 TATTTTGGTTCGATCACGCC    | 60.837 | 20 |
| GCTGCAGATCACAGAGCAAA     | 60.296 | 20 GTGCTCAAGTTTGAACCTG     | 58.497 | 20 |
| ATCCTTCCACCTCGAATTT      | 59.766 | 20 TAGTCTCTGCCAAGTGGGCT    | 60.012 | 20 |
| TGTAGCCGACCCCAATGTAT     | 60.214 | 20 TTTCCAAGACCGGAAACAAG    | 60.081 | 20 |
| CCCCATTACTCACATCAGAA     | 59.799 | 21 AAGGCTTTCGCCTTTTTCAT    | 60.204 | 20 |
| TGAAACCTTCTGCCCTCAAT     | 59.67  | 20 AATGGCGAAGGCAGTATTTG    | 60.096 | 20 |
| AGCATGAGTACATACATTTCTAGC | 57.669 | 26 AGGTTCTCAATTATGTTATTAGC | 57.915 | 27 |
| TGGTGTAATTTTGAAGGGAG     | 58.936 | 21 TGGGCGTAAAATAGAGGTGC    | 60.096 | 20 |
| AAATCCCCAAAAGAACATGG     | 58.738 | 20 GCAAGCCCTTTCAAACATTC    | 59.691 | 20 |
| AGCCTTTTGTGAATGATGGC     | 60.081 | 20 AGATCGCTCCTCCAAGAACA    | 59.95  | 20 |
| ACTGCTTTCTACAACGCCT      | 60.058 | 20 ATCAACCTTCGGATGAAGA     | 59.483 | 20 |
| AGGATTCGATGTCTGCCAAC     | 60.081 | 20 CCTGCAGATCATTACATGTTT   | 60     | 22 |
| CTTGGGATATTGCTTGGCAT     | 59.923 | 20 TTCGATGTATTGTTGGATAATG  | 58.808 | 24 |
| CAAGGTGGGTAGCAAGAAGC     | 59.875 | 20 ATGCAATCACAGACTGCCCT    | 60.688 | 20 |
| GGTTCGTCGATTTGGACTC      | 60.468 | 19 CTCGGCGATACTTGTCTTCC    | 59.836 | 20 |
| ATCCAAGGGCTCGATTCTCT     | 60.176 | 20 CTATCGCCCTCTGCTTTCAA    | 60.481 | 20 |
| CGATCGTTGAAAACCCACTT     | 59.971 | 20 TCACCATCACCATCACCATC    | 60.189 | 20 |
| TTGTCCAAGTGGGAGATTGTT    | 59.439 | 21 AACTAACCTGAAGCCATGAG,   | 58.865 | 22 |
| GGGATTTTCGTTTGGATGAA     | 59.739 | 20 TCAAATTTTTCAGCTTCGCC    | 60.323 | 20 |
| TTCAAATACCTTGACCAACGA    | 59.492 | 22 ACCCAAATGGATTGGGTTCT    | 60.422 | 20 |

|                          |        |    |                         |        |    |
|--------------------------|--------|----|-------------------------|--------|----|
| ATTATTTGATGGGGGCACAA     | 60.016 | 20 | CCGATTTGCCGTTCTATCAT    | 59.923 | 20 |
| CGATCATTTCCGATAACGCT     | 60.06  | 20 | CCCCTTTCCGGTGTAGACAAA   | 59.964 | 20 |
| TGGTATGTGTTGATGCGTTCAT   | 60.187 | 23 | CCCGAGGGAGTCACAATTTA    | 59.926 | 20 |
| TGTA AACCGCCTCAAACCAT    | 60.365 | 20 | CGCACGTTTGTATTTTTATTTTT | 57.532 | 23 |
| TGGAGGCGGATTATAGATGTG    | 59.93  | 21 | ATTACGCATCAGCACAAATCG   | 59.718 | 20 |
| TCGACACAGTTCATCGGAAG     | 59.831 | 20 | GTTACATCCCACCGGATTTG    | 60.051 | 20 |
| TGCCTCATGTAATGGTGGAG     | 59.522 | 20 | GATGGCAAGCAAACCTGATGA   | 59.805 | 20 |
| TTTGCTTCAGCATTTCTCA      | 59.542 | 20 | CTTCAATCAATCCCCCTGAA    | 59.864 | 20 |
| GTCGGGGTAATCCGACCTAT     | 60.039 | 20 | ATGGACACGTCCAGATGAGA    | 59.05  | 20 |
| TTGACCGTACTGGTGTATGTACC  | 59.78  | 22 | TTGAGCAAATAAATTACAACC   | 59.322 | 25 |
| TGCAAAATTTGTGGGATGAA     | 59.907 | 20 | CCATGGCTTTTCAACCAGAT    | 59.933 | 20 |
| TCATCGAATCAAATCCATCAAG   | 59.901 | 22 | TAGCAGGCCAAAGAGGAAGA    | 60.088 | 20 |
| CCATTTTCCATCAACATCC      | 59.991 | 20 | TGTGATTCACTTGCTTTGCC    | 59.847 | 20 |
| TTACTATGCGGACTGGGACC     | 59.955 | 20 | TTTGTTCATGCCTCTCTCC     | 60.195 | 20 |
| AAGGGAGCTACAACCTTTCATC   | 58.783 | 22 | TTATCTCCCCATTTTCGTCG    | 59.894 | 20 |
| GGAGACAGCGGCTAGTAACG     | 60.037 | 20 | GTATGGTGTGCAGAAAAGCG    | 59.347 | 20 |
| GAATGTTGGAGCTACGAGGC     | 59.843 | 20 | AAGTAGGGTCAAACACGTGAA   | 58.304 | 22 |
| TCTCACACTGCAGAGGATGC     | 60.146 | 20 | GCCCATCTGACGATAGAAGA    | 57.834 | 20 |
| GTTTGTGATCATTACGCCC      | 60.339 | 20 | ACTCCTTCGTTGCCAAATG     | 60.11  | 20 |
| TTCATGTTTCGCGATTCAAC     | 59.67  | 20 | TAGATCATCAAATGCGCCAC    | 59.652 | 20 |
| GGAGCTGGTTTTGAGATGC      | 59.82  | 20 | TTTGGTTCATGTAGTCGACCC   | 59.845 | 21 |
| GAATGGCATGTGGATCTGTG     | 59.925 | 20 | AGAGTAACCACCTTCAGCCG    | 59.353 | 20 |
| ATTTGTTCAAATCCGCGAC      | 59.945 | 20 | GCGACGATTGAATGGTATCAA   | 60.852 | 21 |
| TACAGCTTGGTTTCGGAGGT     | 59.734 | 20 | TTGCATTTAGGAGAATCCCC    | 60.031 | 20 |
| GCATAGGATATTTATTACACCACC | 59.916 | 25 | TCATGGTTCGTAATAACGG     | 59.395 | 20 |
| GCCCTCAAATCTGACCAAAA     | 60.051 | 20 | GAGTCTGAGGTGGAGGTGGA    | 60.243 | 20 |
| TCACCACCACCATCATCATC     | 60.189 | 20 | TTATCCAACCCAGCCAACAT    | 60.192 | 20 |
| ACAATTTGATTGTGCGATGG     | 59.4   | 20 | TCTGTCTAATGTTTCCGCCG    | 61.157 | 20 |
| TTCACGCTATGATCCGTCTG     | 59.823 | 20 | GGTAGCTACTTCAGTGGCCG    | 59.898 | 20 |
| AATTGGCCCTCATTTCCATT     | 60.511 | 20 | AATAGCATCGGCTGGTGAAT    | 59.556 | 20 |
| TGCTCATCAAAAAGTTCCCA     | 59.247 | 20 | CGTCCAGCTGATGGTAATGA    | 59.673 | 20 |
| GCTGCCATGGAACTCTGAT      | 60.226 | 20 | TCCCAAAGAGCAAACAGCTT    | 59.993 | 20 |
| TGTACGGTGTAAATGCTTGTGC   | 59.67  | 21 | CTCGGCCTCCGTCATTATTA    | 60.053 | 20 |
| GTGAATCCTGGTATCCCGTG     | 60.195 | 20 | AGGCTGTGCTCATCCGTAGT    | 59.898 | 20 |
| CACGAGATGGGGACTCTTGT     | 60.112 | 20 | ATGTAGCCGACCCCAATTTA    | 59.297 | 20 |
| ACAAGTATCCACCACTCGCC     | 59.997 | 20 | ACCCATTTTCAAGATGTGCC    | 59.797 | 20 |
| CCTCCTCTATTGCTGATTTAAGGA | 60.108 | 24 | CCACTGTTGTTGCTGCTGTT    | 59.946 | 20 |
| GGCGTTTCTTTGTTGAGAGC     | 60     | 20 | CCCCTTTCTCCAGCTTTTTTC   | 60.18  | 20 |
| AATTGTGCTCCATTTCCAG      | 59.933 | 20 | CCCCGTACACAGTGATTTTTTC  | 59.345 | 21 |
| TCATCGAATCAAATCCATCG     | 59.43  | 20 | AGCAGGCCAAAGAGGAAGAG    | 61.027 | 20 |
| CTGGTCCACTTCCAGTTTTC     | 59.844 | 20 | GGGACAAGACTCAAACGAACA   | 60.141 | 21 |
| ATTCTACGGTGATTCGTGCGC    | 60.103 | 20 | TCTCCATCACATTGCTCTGC    | 59.95  | 20 |
| AGGCTTGCTCAACCAAATCA     | 60.776 | 20 | AGCCCTGCCACGTTCTATTA    | 59.73  | 20 |
| TGACGGTGTGCTGGAAGTAG     | 59.745 | 20 | GGCAGCAGCCTCTTAATCAC    | 59.985 | 20 |
| CCCAAGACCCCAATTTGATT     | 60.91  | 20 | ACCCAGCATATTCCACAAGG    | 59.813 | 20 |
| TTCTCAGTGCTATTTTGTCCG    | 59.402 | 22 | TTTGGGAAATATGGATCGAA    | 57.882 | 20 |
| AGAGGAGAAGAAAGCCGAGG     | 60.088 | 20 | CCTGCGAACTTTCTAGCAC     | 60.015 | 20 |
| AGGAGTTTTCTCTTTCCGC      | 59.827 | 20 | ACGATGAAGACGTCGGAGAA    | 60.801 | 20 |
| GTGCATGCAAGACAACAAGG     | 60.31  | 20 | CCGCACTTGACTACTCAGCA    | 60.199 | 20 |
| TCCATCTGTCATCTCATCCA     | 57.404 | 20 | TTCGGGATCTTGATGGTTCT    | 59.483 | 20 |
| GCTTACGTGAAAGTGGGGAA     | 60.11  | 20 | CCAAGAAAGTGGAGAAGCGA    | 60.508 | 20 |
| TTCTAAGGCGTGCATTTCC      | 60.23  | 20 | AGAAGTGTGGAAGTGCAGGG    | 60.298 | 20 |
| AGCTTTGGTTCATGTAGCCG     | 60.27  | 20 | CAGCGGAATCACTGTCACAT    | 59.707 | 20 |
| GGTGAAAATTCGAAACAC       | 60.352 | 20 | TACCTTGTCGGTAAATCGCC    | 59.96  | 20 |
| ACCCTAATCAACATCTGCCG     | 59.955 | 20 | AGGGCTAATAATGCCCAAGG    | 60.292 | 20 |
| GCGTCATCGTGACGTCTG       | 59.981 | 18 | CTTCAGCTTGGTTTTGGAGG    | 59.846 | 20 |
| TCGTGTCACCAGGTCAAAC      | 59.571 | 20 | CATACACGGTACGTCTCGT     | 59.622 | 20 |
| CGACCCACATAGTGGGAAA      | 60.745 | 20 | GCAGGGAACCATAAAAGTGC    | 59.574 | 20 |

|                          |        |    |                         |        |    |
|--------------------------|--------|----|-------------------------|--------|----|
| TCTTCCATCCAATAATTCCTGT   | 57.552 | 22 | GGCCAAAGTGGTGAATCAAG    | 60.495 | 20 |
| TGTGACTGCATAAAGGCCAA     | 60.257 | 20 | TGTAGCCGACCCCAATTTAT    | 59.297 | 20 |
| CGATTTCCCTCCACCAAGAA     | 60.044 | 20 | AACACAAATATGCCATGCAA    | 57.506 | 20 |
| CTTCGCTGCCATTTCTTCTC     | 60.096 | 20 | CGATAGCAAACCTTTCCGAG    | 59.839 | 20 |
| TTTCAAAAGATGAGCTACTAGCA/ | 59.573 | 26 | GTTGAGGAAGCTGTTGGAGC    | 59.997 | 20 |
| CCTTTAACCAAAAAGTGCCCA    | 59.968 | 20 | GGTCAATCCCAATGACCATC    | 59.995 | 20 |
| CATCTCTGCGTATGCATTCTT    | 58.012 | 21 | TCCCATGCAAACCTGAATCCT   | 60.461 | 20 |
| GCCACAATAACTTGTGAAACCA   | 59.904 | 22 | CAGTGGCTCTTTGCTTACC     | 60.015 | 20 |
| ACCACGTTGGGATCTTGGA      | 60.232 | 20 | GAACCGATGAGCAAAGTATTC,  | 59.229 | 22 |
| CCTTTTTCTGTTTCTTGCGG     | 59.855 | 20 | TTCGTCCCCTCGAGAGTTT     | 59.844 | 20 |
| TGGGAAAAGAAAATGGGAAA     | 59.36  | 20 | GGGAAGTTAGAGGAGGTGGG    | 59.928 | 20 |
| GTATGGTGAAGCGTCCCAAG     | 60.517 | 20 | TCCAATTAGGACAATCAAACC   | 60.055 | 22 |
| AACTGAGGACGGAGGGAGTT     | 60.111 | 20 | TTCTTGGCTCGTTCCTTAC     | 60.375 | 20 |
| TGTTACACACCCACCTTA       | 59.848 | 20 | TGTGTGGGTGGTTCATGTTT    | 59.701 | 20 |
| CATTTCAACACAAGGCAAGC     | 59.322 | 20 | GTCGTGCGAGAGCTAGTGAA    | 59.344 | 20 |
| CGTGGATATAACTCGGCCAT     | 59.807 | 20 | AACAGCAATTGGAACCTACTG,  | 60.054 | 23 |
| CCCCATATGAATCCTTTCCA     | 59.576 | 20 | TGCTGGGAACCTGACTGGAC    | 58.725 | 20 |
| TGTAGCCGACCCCAATTTAT     | 59.297 | 20 | AACAAACATATGCTTTCCCAAC  | 59.891 | 23 |
| GCAGCTGTTGATGCTGTTGT     | 60.064 | 20 | TAGCCAAGACCCCAATTTGA    | 60.439 | 20 |
| TGGAAGTGGAGGAGGATTTG     | 60.042 | 20 | AACACGCGAGTTTAAGGGAG    | 59.378 | 20 |
| GGGGTCTTGTGCTATAGCA      | 59.955 | 20 | ATCAGGTTGGACCAAAGGTG    | 59.82  | 20 |
| TGCCTTCTGAATGATGGACA     | 60.201 | 20 | AGGTTGCGGGGAAGTCTGATT   | 59.935 | 20 |
| GTTGTTGTTGGTGTGCTGC      | 60.207 | 20 | TGCTAGCACCTCCTCTATTGC   | 59.629 | 21 |
| TGATGTAGATATGGAGCGATTTTT | 59.073 | 24 | AGGCCCTTGTCAAATACT      | 59.827 | 20 |
| ATCAAGGGCCAGTCTGCTTA     | 59.836 | 20 | AACACAATAACGGTACCCGC    | 59.752 | 20 |
| ACAGTGGAGACGGAATCGAC     | 60.12  | 20 | TTGGTAATCTGATCCGAGGC    | 60.036 | 20 |
| TCTACCACCAATGACAGCA      | 60.112 | 20 | GGATCAGCAGTGGCTTTCTC    | 59.957 | 20 |
| CGAGCAGCTTCTAAAGGACG     | 60.284 | 20 | AAGCAAACCAATGCAACACA    | 60.157 | 20 |
| ATTGGCCTGAAAACACGAAG     | 60.11  | 20 | CTCTCCACCTGTCTCACCG     | 60.85  | 20 |
| GAAGTCATGCACGATGAAGC     | 59.404 | 20 | AGGTTGCGTACATCTGACCC    | 59.997 | 20 |
| TGTGGTTGTTGGTGTGACC      | 60.309 | 20 | TGATGCTTTTGCCTTTCTG     | 59.992 | 20 |
| TTGGAGGGTTTAGGTTCAA      | 59.401 | 20 | TTGTTAACCATTCCCACAA     | 58.719 | 20 |
| TCGGGCTTTGATTTCAAGAT     | 59.645 | 20 | AAAAGAGTTGACAGGGGCA     | 59.711 | 20 |
| TGCAATTTAGGCACATCAT      | 60.08  | 20 | GAAGTCGAGGAATTTGCTGC    | 59.962 | 20 |
| TCTGGTTCGGATTGACATGA     | 60.048 | 20 | CAATCCTTCATTCTCCCTCG    | 59.623 | 20 |
| TTCAGAATCATTTACTTCCAAGTT | 57.589 | 25 | TCTTGATATCTTGGGCAATTGT, | 58.642 | 23 |
| AAGAGGATTCTGTGGTGCGT     | 59.727 | 20 | CCTCTCATTACCCTCATCC     | 59.46  | 20 |
| GAGAGGAAGAAAGGCTGTGCG    | 59.162 | 20 | CTCTCTTCTCCCTCGGCT      | 60.23  | 20 |
| ACGATGTTGCCACAATTTCC     | 60.765 | 20 | CCTTTCTGGACATGGATCGT    | 59.927 | 20 |
| GGTGTAGATCTGGCGGGTAG     | 59.574 | 20 | CGTTCGATGAATGGGAGCTA    | 61.129 | 20 |
| CGGTCTAAAACCGAGCTGAA     | 60.378 | 20 | AACCCACATACTCGAGGCAC    | 59.997 | 20 |
| CAAAAAGGAACGCAAAAACAA    | 60.129 | 21 | AATACGTAAGGCCGAGAGCA    | 59.867 | 20 |
| GATTGGCCCAAACATCAGAC     | 60.326 | 20 | CTTCAAACCGGGGTAGGATT    | 60.18  | 20 |
| TTGTCAACTTGGTTTTGCCA     | 60.127 | 20 | CGTGTTGTTCTTAGCTTCC     | 59.875 | 20 |
| TGAAAGGCTGCAGCAAGATA     | 59.712 | 20 | GATCGGAGATGGTGACGATG    | 61.474 | 20 |
| GGGGCGTGACATTAACACTA     | 58.502 | 20 | TACACTTTGAGTGGCGATGG    | 59.716 | 20 |
| GCCGGAAGAAAAGACACAAG     | 59.853 | 20 | CCTCTCTTCTCCACCTTCCC    | 60.186 | 20 |
| ATCCGCAGTCAAACGTACC      | 60     | 20 | ATCAATGACATTCCGGTGCT    | 60.348 | 20 |
| CCCCAACCTTTTACTCCTCC     | 59.799 | 20 | AGATGCTGGTGGTACTTGGC    | 60.142 | 20 |
| CCCAAGACCCCAATTTGATT     | 60.91  | 20 | ATATGGCCCGTCTGGATTTT    | 60.531 | 20 |
| CGCAAGATGTTTCAGGGATT     | 60.074 | 20 | CTACTACATCCCCATGCGCT    | 60.118 | 20 |
| AATGTTTCTACGCATTGGGG     | 59.823 | 20 | TTAGGCAGGACACAAACGAA    | 59.317 | 20 |
| GGCAAATCTCAATTGTAGTGC    | 58.768 | 22 | TGACGTGCACATTTGTTATGG   | 60.43  | 21 |
| ACATGTGGTGGCAGGTTACA     | 59.88  | 20 | TATCAGATGCCGGTTGATGA    | 60.033 | 20 |
| TCTAGCCTGCTCAGCCTCTC     | 59.997 | 20 | TCATGATGGTCCTGATGGAG    | 59.425 | 20 |
| ACTGGGCTTCTCCGACCTAT     | 60.096 | 20 | ACCAATGGTGGTATGGTGTG    | 58.984 | 20 |
| GCTCTCCGACCCATATACCA     | 59.917 | 20 | TTTCTTTTTCCCGTCTCT      | 60.046 | 20 |
| TGTAGCCCGTGAAGTGTACCA    | 60.175 | 20 | GAGAGTGGAGGAGTTGCAGG    | 59.986 | 20 |

|                          |        |    |                        |        |    |
|--------------------------|--------|----|------------------------|--------|----|
| ACCCTCACTAGTTTCGGTTAGA   | 57.065 | 22 | TGGACAAAATTTCAAAGTGGTG | 59.876 | 22 |
| ACAACCAAGCAGGTCCAAAA     | 60.529 | 20 | TTGAAGTCATGTGTCTCCATT  | 59.454 | 22 |
| CGATACCCATAACGGGTGAG     | 60.206 | 20 | TTTGATTGGGAATAATTGGGT  | 58.163 | 21 |
| TGGTTTTGGGAGGAGAGAGA     | 59.773 | 20 | ACATTCCGGGGGAGAAGGTAT  | 59.651 | 20 |
| CGATGGGATCCAGAACTGT      | 59.927 | 20 | GAAGACGACGATGTTGGGTT   | 59.973 | 20 |
| GAAAATGCTGGAATGAGGA      | 57.735 | 20 | GCCACCTACAAGAATGCCTC   | 59.7   | 20 |
| ACGGCTAAAATCAGGAGCTG     | 59.476 | 20 | TTACAAGCAACATCCATCGAA  | 59.172 | 21 |
| TAAATCCTTCGAGGTCACCG     | 60.066 | 20 | TTTGATTGGGAATAATTGGGT  | 58.163 | 21 |
| GAATCAGTGCTTGCCGATCT     | 60.37  | 20 | CTGGGTTGGGATCCTCAGTA   | 59.92  | 20 |
| GTGGAAGCATCAAAGCAGGT     | 60.263 | 20 | TCAACTGCAACCGAGCTCTA   | 59.74  | 20 |
| CGTTATCGTGACGTCGGC       | 61.269 | 18 | TCTGAACAATTTGCAGCTCG   | 60.134 | 20 |
| CTTTTTGTTTTGGAGTGGGG     | 59.443 | 20 | TCTGCTTCAAGCTACTCGGA   | 58.9   | 20 |
| TAGCAACTGCACCAGGATGA     | 60.413 | 20 | TGGGCACTAAATCGGGTAAG   | 59.953 | 20 |
| CCGGATCCACTACAAGTTCC     | 59.405 | 20 | ACAATTGTGGTCGTGGGAAT   | 60.096 | 20 |
| TGCATCTGAATACACGAGGTTG   | 60.14  | 22 | CGAAGGTGTAGATCTGGCG    | 59.405 | 19 |
| CAATGCCAACACAACCAAAC     | 59.864 | 20 | CTCGTGCATTTTCTTGACA    | 59.84  | 20 |
| AATTGCAGCCAAAAGCATCT     | 59.851 | 20 | GATCTTCATTGCGGGGATTA   | 59.862 | 20 |
| TTCGACCCCAACTCAATAGC     | 60.074 | 20 | GGTTTTGAGGTGGAAGCACT   | 59.187 | 20 |
| TAGCCGACCCCAACTTATTG     | 59.953 | 20 | TGACTTTCATTTGTTAGCCCA  | 58.28  | 21 |
| TGAAACCCCATGATTTCCAT     | 59.991 | 20 | AATCACAGCCCCGATAATGA   | 60.296 | 20 |
| TTGCTGCACATTTTCCATTG     | 60.644 | 20 | TCTGCACAAAACCTTTTCCC   | 60.088 | 20 |
| TTGGACAGATTAGCACGGAA     | 59.272 | 20 | CCACCATTCTTGTGTTTGACA  | 60.817 | 22 |
| AATTGGCATTTTGTAGGCTCA    | 59.6   | 21 | TGTCTCTCAACACGGCATCT   | 59.42  | 20 |
| AGCTTTGGTTCATACAGCCG     | 60.27  | 20 | AGCATTCCGAGTTTTGGATG   | 60.074 | 20 |
| ATAAATCACCCGGAACCTCG     | 58.903 | 20 | CCACTGCGCCATAGGAACTA   | 61.176 | 20 |
| AAAGCAAACCGCTAACCCAT     | 60.849 | 20 | TAGTTATCCGCAACGGAGG    | 60.089 | 20 |
| ATTCTTGCTGTGTATCCC       | 59.934 | 20 | CTCAAACCGAATGGAGGAA    | 60.044 | 20 |
| TGTAGCCGACCCCAATTTAT     | 59.297 | 20 | ATGGACATGATTTGGAGGGA   | 60.135 | 20 |
| GACCCCAATTTGATTGGAAA     | 59.599 | 20 | TTTTTGTGTTGACTGGAGGC   | 60.139 | 21 |
| GAATCGATCCGACGACTCAT     | 60.042 | 20 | ATTCTGCTGCTGTGACGATG   | 60.016 | 20 |
| CAGGGTTAGCAGCAGCAGAT     | 60.559 | 20 | GCGACTAGTGCTGTAGAAGGC  | 59.304 | 21 |
| TGTATTGTCTTGATTGCAGGAAA  | 59.639 | 23 | ATGGTGTCAACACATTGGGA   | 59.656 | 20 |
| TGTAAAACCTGACTAACAAACA   | 59.189 | 25 | AGGCCGAACCACCTATTTCT   | 59.962 | 20 |
| CAGAGCGCACTCGAAGAGTA     | 59.49  | 20 | ATCACGTGAAGCCACACAAA   | 60.16  | 20 |
| ACAGAGGCACAGATTAGCAGC    | 59.659 | 21 | TTGTGCCGATTCCCTTTTAC   | 59.938 | 20 |
| TACTGCTGATTCAAGTGGCG     | 60.011 | 20 | ATGCTGATGGATGTGGATGA   | 59.882 | 20 |
| GCTAACCATTTACTTGCACATTTT | 60.288 | 25 | GGACGATTGCGTCACTGTTA   | 59.722 | 20 |
| AAAGCATTACGTAACGGGT      | 59.499 | 20 | ATTTTCATGTAGCCGATCCCA  | 60.296 | 20 |
| AACACTATCCACAAATCACCA    | 59.218 | 22 | CAACCAGTCTAAGCGGCATT   | 60.27  | 20 |
| TTCTTCGATGTATTGTTTGGATAA | 57.787 | 24 | CCCTGCATGTCAAATTGCTA   | 59.688 | 20 |
| CGGATTGCATCCAAGAAAAA     | 60.941 | 20 | TCAATGTGCATATATTACTTTT | 59.79  | 25 |
| TCCGTCATTTCCCACTCTC      | 60.05  | 20 | AATAGCTCGATTGAGCCGAA   | 59.945 | 20 |
| TGCATTCAACATCATTACAAAGTC | 59.059 | 24 | CATGCGCTTCTTATATTTTGC  | 57.667 | 21 |
| GGACTTTGGTGTGAGAAAATTG   | 58.602 | 22 | TCCTTCCTCATGTCTTTGGC   | 60.195 | 20 |
| TCTGAATTTACCAATCGGG      | 60.832 | 20 | TGAAGGATGCATCTTGCTGA   | 60.504 | 20 |
| GAGATTCCCGCATCCTATCA     | 59.998 | 20 | TTTATCGATTGTTGCCCTCA   | 59.112 | 20 |
| CGCCCGACTGAATTATCATC     | 60.435 | 20 | TGTTGTGGATTCAACTGGGA   | 59.935 | 20 |
| AGGTTGAAGATTCTGTCGAT     | 59.7   | 20 | GAAGGTGGTCGTGTCGAAGT   | 60.159 | 20 |
| AGATTTTGGATTCTGGCTG      | 60.074 | 20 | ACCGACGACCAAATGGATAA   | 60.192 | 20 |
| CCTCAAGACCCCAATTTGATT    | 60.173 | 21 | ATCATGTTCTGCCTGTGCTG   | 59.862 | 20 |
| CCCAAATGATTTCAAATGGA     | 59.624 | 21 | CAATTCATGATGGTCATTTGAG | 59.815 | 23 |
| GAAGGTGGGAGATGGAGTTG     | 59.505 | 20 | TAGTCGTGGCACACAGGAAC   | 59.751 | 20 |
| TGAGTGGTGAAGAAATTTAGGAA  | 59.987 | 23 | AGGGACGCTATCGATTTGTG   | 60.096 | 20 |
| CCCAGGCTCAAATTCCTACA     | 60.066 | 20 | ACACAAAACATGCATCAGCC   | 59.577 | 20 |
| TTGTTGATGGTTGAGAGGTGTC   | 60.012 | 22 | CAAACCACGCCAGACAGATA   | 59.716 | 20 |
| AGAATCACAATGCTCCTGGC     | 60.226 | 20 | TTTCAGGGCTGCTGAATGAT   | 60.744 | 20 |
| AAAATGATGATTCCGGGTCC     | 60.891 | 20 | GCCCAAACAACTAGCAAGC    | 59.889 | 20 |
| TCAATATGAATTGATCGCCG     | 59.478 | 20 | TGGAGGTTTTAGGTAATTGGAA | 58.952 | 23 |

|                         |        |    |                        |        |    |
|-------------------------|--------|----|------------------------|--------|----|
| ATTGCTCGATCCACCTCTTG    | 60.218 | 20 | GCGAATTTCCATGTCATCAA   | 59.48  | 20 |
| AAATCAAATTGTGTCGAGGCT   | 58.709 | 21 | AGCCATCTCAAGAGTCGTGG   | 60.408 | 20 |
| CTGGGTCTAAAATTCGGCAG    | 59.702 | 20 | GATAGCCACCGTGATGCTCT   | 60.249 | 20 |
| GGACTCCCATCGTCTCCATA    | 59.886 | 20 | TGGCTTCCATTTTAGCAACC   | 60.074 | 20 |
| GGAGCTGAGCAATGAGAAGG    | 60.096 | 20 | CATCATGTTTAACTGGATTGTG | 59.397 | 23 |
| TGAAGTTTCGAAGACTGGAAGA  | 59.097 | 22 | ACCACCAAAGCCTTAATCCC   | 60.187 | 20 |
| TTTCACCGTTGTCATAGCCA    | 60.111 | 20 | GGAAGTGGGGGTCGGTATAA   | 60.929 | 20 |
| CGTCATTCCGATCATCTCCT    | 60.034 | 20 | GGTATGCTTGGAGGGTTGAA   | 59.933 | 20 |
| TGTAGCCGACCCCAATTTAT    | 59.297 | 20 | ACCTTTGAATGGATTGCTGG   | 59.933 | 20 |
| TGAAAACGATTTAAACGTGGG   | 59.855 | 21 | GTGCTCTGCTCTGCTGTTTG   | 59.929 | 20 |
| CAAATCATGGAAACAGCACG    | 60.111 | 20 | TCCATGGCAAGTGACTIONAAG | 59.831 | 20 |
| GGGGAAGGAGAGAGAGAGGA    | 59.883 | 20 | ATCAAGCAAGCATCTCAGCA   | 59.704 | 20 |
| TGCATACCAAGTTATTGGCG    | 59.585 | 20 | AAACTGGAGCACAAACCGAA   | 60.668 | 20 |
| AGGGGGACCAAAATGAAAAC    | 60.032 | 20 | TTTTGCAATCGGAGCTCTTT   | 59.96  | 20 |
| ATTTTCTCATGGGTGTGGGA    | 60.173 | 20 | GGTCGTTGGTAATTGGACGA   | 60.755 | 20 |
| CTGCCATCTGGTACAACCTGC   | 59.318 | 20 | GAAAAATGCCAAGAACCTCG   | 59.685 | 20 |
| TATGGATGCACCGTTAGGT     | 60.214 | 20 | TGGCTTGCAGAATCAAGAAA   | 59.542 | 20 |
| GCAAAAATACCTGGCGACAT    | 59.967 | 20 | GTGGTCATTTTAGGGGATGC   | 59.249 | 20 |
| ATGTAGCCGACCCCAATTTA    | 59.297 | 20 | CTACCCACCCAGGTCATCC    | 60.183 | 19 |
| TGATCACAAACTTAGCGGACA   | 59.332 | 21 | TTTTGTGAGCCATCTGCAAC   | 59.847 | 20 |
| GCCTCGATTGATCCACTGAT    | 60.042 | 20 | TGTTTCGTGATTGACGTCTC   | 59.682 | 20 |
| AGACCGAACCACCCAATACA    | 60.232 | 20 | TCGTTGGAGTCTGAAAACCA   | 59.262 | 20 |
| AGTTCTAGTAGCCCGGAGCC    | 59.87  | 20 | ACCCAATACCCAACCCATT    | 60.166 | 20 |
| TGCGAATCATTCAATTCTGC    | 59.775 | 20 | TGCAATGGCTTTTCATTGTT   | 59.161 | 20 |
| GCAGACCTAACATAGTGGGAAAA | 59.552 | 23 | ACCAATTTGAACGGTTTGGA   | 60.206 | 20 |
| CTCCTCCACCCGTCTACAAG    | 59.715 | 20 | GCCGGTGGTGATTTGACTT    | 59.859 | 20 |
| CGAACCCATTAAGCCTCAAA    | 60.067 | 20 | CTCCAAGAATCCCTTCCAAA   | 59.097 | 20 |
| GGCTGGCTCTTTCAATCAGA    | 60.483 | 20 | CGAAGACGTCAATTTGGTCA   | 59.691 | 20 |
| GCTGCAGAAATGAGAGGAGG    | 60.096 | 20 | TTTTTAAGGTGGGGAGAATGT  | 57.596 | 21 |
| TTGGCCTAGACTTCACATTTTTC | 59.659 | 23 | TGTAGGCATAACTATGATTGGC | 58.532 | 23 |
| AATGCTTGCAAGGGTGTAAAGA  | 59.761 | 21 | AATCCAACCTATTGCATGTTGA | 58.556 | 23 |
| GTACCGATATCATCCCCACC    | 58.937 | 20 | GGGAAACAATCTTTTGGCA    | 59.916 | 20 |
| AGGTCAGATCGAAGGTCTCG    | 59.405 | 20 | TGTTGGTGGGATTTGAACCT   | 60.21  | 20 |
| GCATCTGGATCCTCCACAAT    | 59.893 | 20 | TTTGCGTCCTTCTGCTATGA   | 59.566 | 20 |
| TTGGTCGGATATTGCATTGA    | 59.891 | 20 | CCTCCCTTCACCTTCAAACA   | 60.081 | 20 |
| AGGGAAGTGTGGGGAAGAAG    | 60.48  | 20 | AATCCGCGTGTGCAATAAAT   | 60.351 | 20 |
| TGGCAACTCATACTACCCGA    | 59.148 | 20 | CATATCACGCGGATAACCACA  | 60.366 | 20 |
| GTGATCTTGAAGGAGCTGGC    | 59.957 | 20 | ACCTCAGGTTGCTCCGAAC    | 60.253 | 19 |
| GGTGGAGGTTATGGGAGGAT    | 60.015 | 20 | TTACATATTTCTTGCGGCCA   | 59.169 | 20 |
| GCGTGCACCTCAAGCAATAG    | 59.638 | 20 | CAGGGCCCTAGAAATTAGCA   | 59.315 | 20 |
| TGAAGTCTTGACAACGCATTT   | 58.419 | 21 | CGGGCTGATGTAGAGGAGAG   | 59.966 | 20 |
| AGTCTCCCTCGCCAGAAAAT    | 60.212 | 20 | TCGTTTACAGCATAACGCGAG  | 60.037 | 20 |
| CAAACATTATGCACCAAGCG    | 60.133 | 20 | AAGCTTTATCAAGGGCTGGG   | 60.573 | 20 |
| TATAGTTTACCCGTTGGCG     | 59.847 | 20 | AAGGAGATCCACTCTCGCAA   | 59.95  | 20 |
| TGAGAGAACCTCCCCCTTTT    | 60.045 | 20 | ATGAGCTACTGGAGCGAGGA   | 60.119 | 20 |
| CTCATGCCGGAGTTAGGAAG    | 59.83  | 20 | ACCATGGAGACGTTTCTGACTT | 59.579 | 20 |
| AAGCCCGTGAAAAAGAAGGT    | 60.11  | 20 | TCAACGCTCACCTTACATC    | 59.837 | 20 |
| ATGTAGCCGACCCCAATTTA    | 59.297 | 20 | GCGTGGTTCCATCTCAAAT    | 59.939 | 20 |
| GCCTTCTCGAATTTGTCTGC    | 59.962 | 20 | TGGCCAACCTCTCCCTTCTC   | 60.333 | 19 |
| ATGTAGCCGACCCCAATTTA    | 59.297 | 20 | CCAATGGCTACTTCTCTGCG   | 60.924 | 20 |
| CCGCAATTTGATTGGGAATA    | 60.641 | 20 | TGGGGAAGGAGAATCAATGT   | 59.336 | 20 |
| TCACGGGTTTGGGAATTA      | 60.16  | 20 | TTTGGTTGGTGATTTGGGTT   | 60.066 | 20 |
| CCTTTGTTTAGGGTAGCCCC    | 59.829 | 20 | CAGCATTCTATCTGGGCCAT   | 60.059 | 20 |
| TACTTGCCCTAGCGACTGCT    | 60.176 | 20 | TCAGGCAGAAAATGGGATTC   | 60.014 | 20 |
| AACGTTTTATCTTCGGTGCG    | 60.131 | 20 | AGCCGTCCACAACACTTACC   | 60.035 | 20 |
| TTCATCTGTAACGGGTGGGT    | 60.232 | 20 | TACTTCTGACCCCGCAAGAC   | 60.255 | 20 |
| ATCAGGTTGCCCTCCTTTTT    | 59.94  | 20 | ATTTAGGCCAGCCGACTT     | 60.096 | 20 |
| GTGGTATGGTGTGGAGGACC    | 60.096 | 20 | TTACCGGTCGGTACCAGAG    | 59.986 | 20 |

|                           |        |    |                         |        |    |
|---------------------------|--------|----|-------------------------|--------|----|
| TCTTCGTGTTTGTCCATTCG      | 59.691 | 20 | CGTGGGAGGTGAAGAGATTC    | 59.655 | 20 |
| CGCCATTTTCGTGTTTAATGA     | 59.562 | 20 | GGGATAGCACGTCAATAATGC   | 60.359 | 22 |
| TCTCGGATTCCATGCCTAAT      | 59.486 | 20 | TTTTTCTTGCACCAAATAGGTT  | 57.875 | 22 |
| CACAATTTGAGGTGTATGGCA     | 59.454 | 21 | GATGGGAGCACCTCAACAAC    | 60.52  | 20 |
| GCATTTGACAATCATGCACA      | 59.078 | 20 | AAAAGTCGCCGTTACTGGTG    | 60.168 | 20 |
| ATCATCCCCAAAGCAAAAAT      | 58.368 | 20 | GTTGCCACAGCGGTTCTAAT    | 60.14  | 20 |
| TCGTAAAGAATGGGCTGGAT      | 59.528 | 20 | TGCAAGGTCTTCTCCAACCT    | 59.844 | 20 |
| TTTGCAACGTGGTCTTCATC      | 59.697 | 20 | AATTTACGGGACCCTCAAGC    | 60.32  | 20 |
| CAACTGTCCTTGAAGAGGG       | 59.691 | 20 | AGTGTGTTGTACGGAGAGC     | 58.89  | 20 |
| GTGTGAAAAGGGAGTGCAT       | 59.973 | 20 | CCGAAGACACAAGACACTCG    | 59.461 | 20 |
| GGGATCCATTTAGCACAAG       | 60.461 | 20 | AGTCCTCCAATGAAGTCCCA    | 59.505 | 20 |
| TTTGGATTGCAACCTCCTTT      | 59.546 | 20 | GGGGAAATGTGCCAGTTAGA    | 59.933 | 20 |
| TCCTACCAATGCCTTCTTGG      | 60.066 | 20 | AATTTGGATTGAAAATGAGAG/  | 57.344 | 24 |
| CGTCCCCCTGAGATGAAATA      | 59.887 | 20 | ATTTTGAATTCGGCTTGTCTG   | 60.074 | 20 |
| AAATCCAGAACGCAGGTTTG      | 60.11  | 20 | CAGGGTTTCAACATTTTCTCAGC | 58.201 | 20 |
| TGGAGTAAAAGATGGTGGGG      | 59.784 | 20 | AAGAAAAGAGAAGGCTCCGC    | 60.096 | 20 |
| TTTGTGCTCACACTTCTCTCG     | 59.224 | 21 | TGTTATTTTGTCTGGGTTGGG   | 60.587 | 20 |
| AAGCCCACCTTATTGCTTGA      | 59.708 | 20 | GATGCTCTACCACTGCACCA    | 59.862 | 20 |
| CCCCGCACATAGTCAAGAAT      | 59.955 | 20 | GACTACGGCCTCATCTCCAC    | 59.685 | 20 |
| TGTCCGGTGTCTGTTTAATG      | 59.439 | 20 | AATTTGGCGAAGACAACCAC    | 59.978 | 20 |
| GCCAAACTTGTGCTGCAATA      | 59.879 | 20 | GCCCCTGTTTGAATGTAAT     | 59.829 | 20 |
| CTTGACGGTGAAGAGGGTTG      | 60.68  | 20 | TGTTTGGTCTGATGATTGTGA   | 59.951 | 21 |
| GGGAGGGAAGAGAGGAGAAA      | 59.749 | 20 | TTCCTCACCCCCTCTCTTTT    | 60.045 | 20 |
| TTGACCAAGATACACCTTGCAT    | 59.499 | 22 | ACTGCTATGCCGCATTCCTA    | 60.762 | 20 |
| TGGAATGATGAGGTGGGTAAT     | 60.177 | 21 | AAGAGCAAGAAAGCATGGGA    | 59.955 | 20 |
| ATTTGCTCTAACCAATGGCG      | 60.096 | 20 | ATGCAAGAATCAGTCCCACC    | 59.934 | 20 |
| AATCCCCCTTCTAGGGTT        | 60.014 | 20 | AGAGAGGGCTTAGAGACGGG    | 59.972 | 20 |
| CTCCATCGCCACATTATCT       | 59.917 | 20 | GCCAGCGTGATACTGATCCT    | 60.249 | 20 |
| TCTGCTACCCACCAATGACA      | 60.112 | 20 | GGATCAGCAGTGGCTTTCTC    | 59.957 | 20 |
| TCCCCCTCATCTCATCATT       | 59.821 | 20 | ATTCTTCGCATCAATCCCAC    | 59.9   | 20 |
| TGGCCCAACCTCAATATTCT      | 59.387 | 20 | TTGATCAGATTTCGAGCAAGC   | 59.105 | 20 |
| GCGTGATACCAATGGATGTG      | 59.805 | 20 | CAGAACCTCCACAAACGTGA    | 59.72  | 20 |
| TCTCAATCAAATCGGGGTCT      | 59.483 | 20 | GCTTCTCATGCCTCTAGGGT    | 58.5   | 20 |
| TCGGTTTTCCCTACTCTCCC      | 60.434 | 20 | GGGTTTTGGTGATGTATGTGG   | 59.963 | 21 |
| TTAGCTTCTGGTGGGCTGT       | 59.875 | 20 | GATCAGAAATTGCAGCTGGG    | 60.744 | 20 |
| TTTGCCGATCATCCACTACA      | 60.073 | 20 | GGGTTTCGACTTCTTATGGCT   | 58.267 | 20 |
| TTCTGTCAATTTATGTGTTAACTTC | 58.056 | 27 | CTTATTTTGCATGTGATATTGG/ | 58.153 | 24 |
| AATTTTTCCAACCTCATCCGC     | 59.022 | 20 | TGCGCTTATAGGGCTTTTTTG   | 60.347 | 20 |
| CTTTGTCCTTCTGGCTCA        | 60.366 | 20 | GAACCCGATGAGGAAGATGA    | 60.011 | 20 |
| GGGGGTTTTGGATGAACTTT      | 60.032 | 20 | CAACACCACAAACCCAATGA    | 60.255 | 20 |
| CATCCACCTTACACCATCA       | 60.378 | 20 | TGGTGTCTATGCTGGGATCA    | 60.072 | 20 |
| ATAATTTACGGCAATGGTG       | 57.401 | 20 | GGAGGGGTATTTTGGGGATA    | 59.846 | 20 |
| GAAAAGTGAAGCCAAACCAAA     | 60.088 | 20 | TTCCCGAAATAGCCAGATTG    | 60.031 | 20 |
| TCCGGTAATTCAACAAAACGA     | 60.342 | 21 | TTCGGAAACACCTAGAACGG    | 60.103 | 20 |
| CGACAACGTGAAATATGCTG      | 57.792 | 20 | TAAGACTGGCCATTGGCATA    | 59.136 | 20 |
| CGATCCAAGGAGAAAATCCA      | 60.006 | 20 | ATACGAGGGCGAAATGACAA    | 60.469 | 20 |
| TGCCTTCTTTAACAGCCCAT      | 59.708 | 20 | TGGAATGGAATGTTTGGGT     | 60.029 | 20 |
| CATGACAACCTTATCAGGCG      | 60.263 | 20 | TTTTTAGGAGTCCCGAACCA    | 59.541 | 20 |
| TCCCACGAGGAATTTGAGTC      | 60.05  | 20 | AAAAGTGCACCTGAGCCATT    | 59.74  | 20 |
| GACACGGAGGTGGTGGTTAT      | 59.703 | 20 | ACGGAGGTCTCTTGGGTTTT    | 59.972 | 20 |
| ACAACCTCGTCTTCCGTGGAT     | 59.579 | 20 | TGTGATTGTTGTGGCAAACC    | 60.413 | 20 |
| CAGAGCCAGCCTATCTCCAG      | 60.111 | 20 | TCGACCCAAATAGAAGACCG    | 60.066 | 20 |
| GCATGGGGTATTCAAGAGG       | 59.387 | 20 | TAAAATGCGCAGTTCGATCA    | 60.356 | 20 |
| GGCTCTGCAAGAATTTGAGC      | 60.103 | 20 | CCGGTACATGACTTCGAGGA    | 61.055 | 20 |
| AGTTTGGGTATCCGCTCCTC      | 60.464 | 20 | AGGAACCATTTTCGTTAAAATTA | 60.032 | 26 |
| AAGCCGAATTCGTTACAACA      | 58.294 | 20 | GGTCCAATAAATGTGGGCCT    | 60.94  | 20 |
| TCCGGTAATTCAACAAAACGA     | 60.342 | 21 | TTCGGAAACACCTAGAACGG    | 60.103 | 20 |
| CGTCACAGTTAGTCCAACG       | 60.361 | 20 | TGGTCTGGGAGAACTCCACT    | 59.682 | 20 |



|                           |        |    |                         |        |    |
|---------------------------|--------|----|-------------------------|--------|----|
| AAACGCATACCACATAAGCCA     | 60.391 | 21 | TCACATTTAACCTATGAGTCTG  | 59.565 | 24 |
| AGAAATCCAGCAGCAAATCG      | 60.352 | 20 | CTTTTGGTGATTGGGATGGT    | 59.647 | 20 |
| CCGAGAGATGTCTCCAGAA       | 60.34  | 20 | TTTGATTGGGAATAATTGGGT   | 58.163 | 21 |
| CGGGAATTCAAAGCATCACT      | 60.074 | 20 | TGTTTTGCGCAGTTATGGAG    | 59.872 | 20 |
| ACCTTGCTCGTGACCCATC       | 59.997 | 20 | CGGCCTAATTGTAACCTTGG    | 59.469 | 20 |
| TTGGGAGCAAATTTCAAGAG      | 57.945 | 20 | TCACCCAAGTCCAATCTATTCA  | 59.429 | 22 |
| AAAATTGGTGCGGATGTCTC      | 59.939 | 20 | CAACGGGGAAAAACAAATTC    | 59.292 | 20 |
| AGTTTTGACAAAACCGGTCA      | 60.388 | 20 | GGGTGCACTGGTTAAGCATC    | 60.526 | 20 |
| CCGGCTTAAAGGTGAAATGA      | 60.067 | 20 | CAAGGTGACTGCATCATTGG    | 60.112 | 20 |
| ATGTGGCCTGATCTACAGCC      | 60.104 | 20 | CCAGCACCTCCTCTATTGCT    | 59.454 | 20 |
| ACCCTCGAGCTCTTTTGGAT      | 60.212 | 20 | AGCGTGCATTTTCAGAGGTT    | 59.882 | 20 |
| GACGACTCAGCTTGACCACA      | 60.03  | 20 | TGAGGCTACATCGGTGATGA    | 60.225 | 20 |
| AAGGAAGTGGCATGCTTTTG      | 60.249 | 20 | GGTCTCTGGATCAGGTTGAGA   | 59.243 | 21 |
| TTTTGCTATTGTGGTGTTC       | 58.264 | 22 | ATCACAATGCCATCACCTCA    | 59.925 | 20 |
| GTGTGAACTTCTCCAACAACA     | 60.051 | 22 | CCCAAGACCCCAATTTGATT    | 60.91  | 20 |
| CCACCAGTACAAAACCACC       | 60.126 | 20 | CGTTAGAGGGAGTCAGGCAC    | 59.867 | 20 |
| GAATTTGGCCAAGTCGATTC      | 59.51  | 20 | TGGAGAAGTGGATAAACCCG    | 59.926 | 20 |
| AAGCTTGCAAGTAGGAGGCA      | 60.154 | 20 | GAGGTGATCGGTTCAATGGT    | 59.786 | 20 |
| TGTTGAGGCATGGCTATGAA      | 60.22  | 20 | CGTGTCTATTGAAACGATGAA/  | 60.056 | 24 |
| ACAGTTCAGCTCCACAACCC      | 60.159 | 20 | GTGCCTCTCTCCCTTGTGTC    | 59.841 | 20 |
| CATGTGCATCAAACGGAAAC      | 59.972 | 20 | AAGAGATTCACAGGATGCGG    | 60.218 | 20 |
| TGCTTACCTCCGGAATTTTG      | 60.067 | 20 | CGAGGGTGATGAAGGAGCTA    | 60.353 | 20 |
| TGAGATTCACTTGCCCTTC       | 60.195 | 20 | TCTAAAGTGCAGGATGGCAA    | 59.42  | 20 |
| ACTTCCCAGACCTTGTTCCA      | 59.549 | 20 | TGTAGCCGACCCCAATTTAT    | 59.297 | 20 |
| CTTCTTGACCAATAATAAAGAAA/  | 57.082 | 27 | GATCACCTCGAACCTTCTGC    | 59.81  | 20 |
| CCAAACCAACCTCGCTCTTA      | 60.241 | 20 | GTAGCTTGTGGTGGGCGAT     | 60.14  | 20 |
| AAGAGATAGGGGAAGGAGCG      | 59.805 | 20 | CCACATCCCCAAATCATAA     | 60.384 | 20 |
| CAAACATGGGAGGGTTTTGT      | 59.688 | 20 | CCGGACGTCTATAACCAGGAA   | 59.948 | 20 |
| CCAGACATCGAAGAAGCTGTT     | 59.487 | 21 | TGAATGATCTCAGCTCCGGT    | 60.769 | 20 |
| AGCCACCTGATGAACACCAT      | 60.395 | 20 | ATCTGCATTGCAAACCTGTCG   | 59.871 | 20 |
| GCTTGTCTCCACTTGAAGC       | 59.997 | 20 | TTGGTCTCTTAATGGCCACC    | 59.933 | 20 |
| GGGAGGTTTCGTCACACAGT      | 60.009 | 20 | GCCAAGTTGTCTGGAAGGTC    | 59.703 | 20 |
| ATGTAGCCGACCCCAATTTA      | 59.297 | 20 | TCGAGGTAAGTCGATCAGGC    | 60.362 | 20 |
| TGTACAACCAGTTGGGTTTCG     | 59.46  | 20 | AAACGTGAGGTTTTGACGAGA   | 59.766 | 21 |
| CCTAAGCAATTGATAGTGCCAA    | 59.275 | 22 | AGAAAGCCCACCTGATCACT    | 58.744 | 20 |
| TTTTCCACCAAGTTGCATT       | 60.344 | 20 | TTCATCTGTATTCGACTTCTCC/ | 58.847 | 23 |
| GATTTTGGGTTTGGAGACGA      | 59.91  | 20 | AAAAAGTGCCTCCCTCGATT    | 60.074 | 20 |
| TCGGTTTATACAATAACCAATTTA  | 57.809 | 27 | CGTTCAGTGTTCAAGTCT      | 57.771 | 20 |
| TGACATTCCTTCCATTGGC       | 60.843 | 20 | CAAAGCGAAACACGCATCT     | 60.003 | 19 |
| GTCACGGGTTCGAATTTCA       | 59.486 | 19 | GCGATCTTGCTACTTACGCA    | 60.019 | 20 |
| GCGAGTTTCTTGAGGTCGTC      | 59.997 | 20 | TACCCACCACCAACATCAA     | 59.667 | 20 |
| ACTCTGGGACGCTTTACCCT      | 60.132 | 20 | GGGAGGGTGTTGAGATTGAG    | 59.505 | 20 |
| TCGTGCAAGTTTTCAAGATCA     | 59.454 | 21 | GGGAGATGAGAGGGGGAATA    | 60.228 | 20 |
| ATTACACGGGTAAGGTTGCG      | 59.883 | 20 | GCATCATGCTTTCCATACTCAA  | 60.103 | 22 |
| AGGTGCTAGCAGCATGGAAT      | 59.866 | 20 | ATGCCAACCAACAAGCATAA    | 59.041 | 20 |
| ACGATCCTTCTGTCCCTTGA      | 59.655 | 20 | ACTGCCAACACCGACTTAC     | 60.035 | 20 |
| AAATCCCCTTCCATCATT        | 59.959 | 20 | GCGGATTTAGGAGTGTGAC     | 59.556 | 20 |
| ACCGTTGTGGTTCCGATTAC      | 59.717 | 20 | ATGTAGCCGACCCCAATTTA    | 59.297 | 20 |
| TCAATTCAAAATCAAACCATGC    | 59.816 | 22 | CATGGGGGTCTGCTATCATT    | 59.773 | 20 |
| TTGAATGTTACGGCAGAAG       | 59.84  | 20 | TTCTTGATACATGGGCGTCA    | 60.073 | 20 |
| TTACATAGCCGACCTCACA       | 60.263 | 20 | ATTGCTTACTGCCGATTTG     | 60.096 | 20 |
| GGTTAATGCATTTTGCCTGC      | 60.465 | 20 | ACCGGGATCCTTTCAACTT     | 59.805 | 20 |
| ACTTGGCACGATCCAATTTT      | 59.434 | 20 | AGGTGTGGCTCCTTGAAATG    | 60.111 | 20 |
| TCCCATGGCTGTTGTTCTTA      | 59.123 | 20 | ATTGATGACGATGACGTGGA    | 59.925 | 20 |
| TCTCCTGTACTTCGTTTAGACATC/ | 59.377 | 25 | GAAACTTCAAATGAATCTTCAA  | 57.492 | 24 |
| TGCACCGGTTAGGAGGATAG      | 60.088 | 20 | TCCTAGAATTCCAATACGTGGT  | 58.941 | 23 |
| ATGTTTATGTTGGGTGCTGA      | 59.967 | 20 | ATCCAAGCAAGAGATTATCAC   | 59.997 | 24 |
| GGGATCCAAACCTCGACATA      | 59.75  | 20 | TAGAAGCCTCTGAACGCCAT    | 59.978 | 20 |

|                         |        |                           |        |    |
|-------------------------|--------|---------------------------|--------|----|
| GACGTGCGAGAGGAGAACAT    | 60.418 | 20 AGCCTTGCTCACGCATCT     | 59.688 | 18 |
| AGCTTATGTTGCATGGAGGG    | 60.096 | 20 ATTGTTGATTTTTGCCAGGG   | 59.801 | 20 |
| TGCCATGATTGTTGAAGGAA    | 60.049 | 20 AAGCCCGAACCTGACTTTTT   | 60.11  | 20 |
| TCCTATGCATCCATTTGCAG    | 59.646 | 20 GCTGTCTTGATTTACCTTCACG | 58.906 | 22 |
| GATCAGCTCCAAAAGCTTGC    | 60.103 | 20 TCAGCTGCGTTTCATTCATC   | 59.955 | 20 |
| GGGCTGTTTTGAATCGAGA     | 60.192 | 20 GGTACACCCTACAACAATAA   | 59.818 | 23 |
| TGACATTGTGACCTTCAGGC    | 59.682 | 20 TTGTAGTCCTCCTCACAAAGA  | 60.198 | 24 |
| CCATGAAACTAGCCAAGCAC    | 58.379 | 20 GGCACGTAGGCTACAGCTTC   | 60.044 | 20 |
| GTCCACTCAGGCCCTACTTG    | 59.721 | 20 CAAAAGGTGGAAAGTCACCAA  | 59.994 | 21 |
| AAATCTTTTGGGGCGTTCTC    | 60.431 | 20 CATCCTCTGCGTCAGAATCA   | 59.942 | 20 |
| TGGAATTCAATCCAAGGACC    | 59.727 | 20 TCAAAGTCGATCTCGTCGTG   | 59.984 | 20 |
| TCAAAGTGGAAACCGAAACC    | 59.948 | 20 CCAAGACCCCAATTTGAT     | 59.59  | 19 |
| GGACGGTAACGAGCACCTAC    | 59.621 | 20 GCTTCAGAACAAGGAAGCCA   | 60.517 | 20 |
| GCATTTGTTGTTGTGGCATC    | 59.979 | 20 TCAGTTGACTGCCCTCACAG   | 60.022 | 20 |
| ACAAAACACAACAACCCCGT    | 60.171 | 20 TTTGGACAAAGAGGGGTCAG   | 60.081 | 20 |
| ATGCGGATGTTGTGGGTAAT    | 60.081 | 20 CTCGGAAATCTGGTCATTGAA  | 60.059 | 21 |
| TGTCAAGCTCTTGCATAGCAGT  | 60.219 | 22 TGGTTTGGGTTTTGATCACC   | 60.594 | 20 |
| AATAAAAGGCGGATTGACCC    | 60.15  | 20 TGATTTAAATAAAAATATGTTG | 58.957 | 27 |
| GGATACCTGGGTCCAGACAA    | 59.779 | 20 AGCATCAAGCCTGCTCAACT   | 60.164 | 20 |
| TATCCACTTCACTGGGGGTC    | 59.779 | 20 TCCTCTCCCACTGAACAAC    | 60.088 | 20 |
| CCAACCTCAGAATCATCTTTCA  | 59.17  | 22 TTCTCAAATGGCGAGCTGTA   | 59.566 | 20 |
| TTGATCTCAGTCAGCCATGC    | 59.95  | 20 GAGCAAAAAGGAGCGTATCG   | 59.982 | 20 |
| AATCAAAACATTTAGTTGGCACA | 58.601 | 23 CACAAAATGAACGTGGTTCG   | 60.004 | 20 |
| AGACTTCATCATCCCCATCG    | 59.886 | 20 TCGAATCAAGATTTCTCACGC  | 60.346 | 21 |
| ATATAGGCCCAAATCTGGCA    | 59.392 | 20 CACACACATCCTTCTCTCCG   | 59.257 | 20 |
| ACTCGGATGGGATCTTGATG    | 59.886 | 20 GCAAGACTGGTTCCAAAAGC   | 59.859 | 20 |
| AAGCATATGCCTTGCTTGCT    | 60.01  | 20 CGAACTAGCTCACGAGTCGAA  | 60.715 | 21 |
| AACCCTCCCCTCTCCAATA     | 59.761 | 20 GGATTGATGCTCCATTGCTT   | 60.043 | 20 |
| CAATGGACAACCAAGCCTTT    | 59.971 | 20 ACTTCAGTTGGGCAATTGGT   | 59.454 | 20 |
| TTGGTCCAGTGCCAGTATT     | 60.375 | 20 CAGTGGGCAAACCAGATTTT   | 59.971 | 20 |
| CCGTGTTGATGACTACGTG     | 60.175 | 20 ACACCTCCGTCAACACCTTC   | 60.009 | 20 |
| TCTCGCAGAGGAGGTCAAAT    | 59.95  | 20 CCATACGATATCACCGACCC   | 60.036 | 20 |
| AAGAAAGACGAAGCATGGGA    | 59.813 | 20 CTTTCTTGATGATCCCACA    | 59.648 | 20 |
| TAATGCGGGTAAAACCCCAA    | 60.178 | 20 CCAATGATTGTGGAATGAATG/ | 60.564 | 22 |
| TAGACACATGCCAACTCCCA    | 60.112 | 20 GCTTGAACATCCGAAAGAGG   | 59.813 | 20 |
| ACGACGACGAAAGATTGAG     | 60.255 | 20 AATCTGAGCTGGAGTTGGGA   | 59.803 | 20 |
| AGGGACAACGGTTCTGATA     | 59.405 | 20 TCCGCACAAAGAAAATGATG   | 59.664 | 20 |
| CCAGCAGACACGAAACAGAA    | 60.025 | 20 TGGTGGTTATGGAGGAGGAG   | 59.92  | 20 |
| CACCAACAGCTTGGTCTCAA    | 59.873 | 20 ATGCCCTCGATGATGATGTT   | 60.312 | 20 |
| TGGTTTGGGAATAATTGGGT    | 58.995 | 20 TGAAGGCCCTCTATTTCTC    | 59.361 | 20 |
| TAGGAGGCTGCAGAAAGAGG    | 59.711 | 20 TTGACTTTACCCTCGGACCA   | 60.486 | 20 |
| GGGTGGTTTATGGCCTTTTT    | 60.055 | 20 CCACAATGTCATCACAGATGC  | 59.983 | 21 |
| CATTTGGGGGTATTACAATTTT  | 58.2   | 23 CGCAACAAAATTCGAACTGA   | 59.849 | 20 |
| GCGTTTCTAAACTGCCTGC     | 60.025 | 20 AGGCTAGTAGTAGTGGGAGGA  | 59.049 | 24 |
| GACAGCTGCACGACATGATT    | 59.87  | 20 GTCGGTTAGCGTTGCTTGTT   | 60.313 | 20 |
| TTGGTTAATGTAGCCGACCC    | 59.823 | 20 AAACCTGAAGGAACCCAGG    | 60.332 | 20 |
| ATGTTGAGTCGGGAAGATG     | 59.927 | 20 GCTTGAAAAATCTCGAAGCG   | 60.096 | 20 |
| TGTCCCCTTCGTTCTTGTTT    | 60.088 | 20 AGCAATTTCTTGCTCGTTG    | 60.386 | 20 |
| TGGAGGGGATTTGTGTTTGT    | 60.21  | 20 GTCTCCACCACCTCCACCTA   | 59.962 | 20 |
| GAGTTGAATGGCGTATTGGG    | 60.331 | 20 TTTCCAATCCAATTCCTTGAA  | 59.374 | 21 |
| TGGTGTGCATAACGAGATTAGT  | 57.332 | 22 AAATGTCACGTGGATGCTGA   | 60.12  | 20 |
| AAATCTCACAGTCTTGCGCC    | 60.406 | 20 AACTTCTGCTTATCGCCTGC   | 59.62  | 20 |
| GGTTTGGATTGACAAGTCGG    | 60.353 | 20 TCATGAAAATGAAAAACGCAA  | 59.179 | 21 |
| GTTGTTCTTGGGATTGGTGG    | 60.21  | 20 GCCGGTCCCATACAAGTAA    | 59.823 | 20 |
| GTGCAGATGTGTCTGTGCT     | 60.063 | 20 TTGCACCCAGAGCTTCTTCT   | 60.134 | 20 |
| AGGCCACCGAAACTCTTACA    | 59.734 | 20 CCAAGGCTGATGATCTTTT    | 59.126 | 20 |
| AAAGAGGTTGTTCCGTTGC     | 59.218 | 20 TGCTGGATCTGATCTGTGGT   | 59.212 | 20 |
| TTCGTAATGATGCCACAGGA    | 60.073 | 20 TCGTTCTTAAAGTTATGGCAC  | 59.569 | 23 |

|                        |        |                           |        |    |
|------------------------|--------|---------------------------|--------|----|
| CGTTGACTGCTGGAGAATGA   | 59.984 | 20 TGCCGGATTTGGATAGATTC   | 59.862 | 20 |
| CACAAAAGCTGACCCAAGGT   | 60.149 | 20 CCAAGACCCCAATTTGATT    | 60.91  | 20 |
| ACCTGCACCACCACCAAG     | 60.59  | 18 GGTGGTGGATTAGGACATGG   | 60.05  | 20 |
| AATGATTGGGTGTCCATTGAA  | 60.044 | 21 ATGTAGCCGACCCCAATTTA   | 59.297 | 20 |
| ACAGCAATTCAAGTCCCACC   | 59.973 | 20 ACACATTTACAACCCGGCAT   | 60.118 | 20 |
| AAAGGTCCCCTTTCCAAGTC   | 59.415 | 20 ATTTTGGTGCAGTCTACCG    | 60.132 | 20 |
| TAGGGATGAAGAACCCGTTG   | 59.926 | 20 CTC AAGATGCGAAGCAAACA  | 60.134 | 20 |
| CCCATCTCTGTTTTCTTCATCA | 60.469 | 23 TACACCCCGTTTGCTTCTTC   | 60.11  | 20 |
| TCCCGGATCACTTGGTACTC   | 59.927 | 20 TAGCATGGAGTTGTGCATGG   | 60.687 | 20 |
| GGCTTGCGGGTCTTACTTAG   | 58.997 | 20 GGGGATTCTACAAGAAGCA    | 59.126 | 20 |
| ATACTTCCGTATTGCCGCAC   | 59.988 | 20 TGGATTGGATACCAAAGGG    | 59.617 | 20 |
| TTGCAATGTGGCATTCAATC   | 60.476 | 20 GCATTACAATGAACCACCGA   | 59.4   | 20 |
| TTTGCTGAATTTTCTTCGCA   | 59.562 | 20 TCAAACACCAGAATTGCCCT   | 60.495 | 20 |
| GGAAAATTGCTTTGAAGGTGC  | 60.953 | 21 CGAGGAATAGCTTGAGTGGG   | 59.83  | 20 |
| TAGTGGGGGTCAGAACATGC   | 60.924 | 20 GTTATTGCACAAGCGAGCAC   | 59.498 | 20 |
| ACCACA ACTGGTCGGTATGG  | 60.69  | 20 GCATGTCAATTGTCGAGCTT   | 58.879 | 20 |
| GCAGCAGCAACATACAAACC   | 59.351 | 20 CACCCGATTCTTCTTCTCCA   | 60.187 | 20 |
| ATTAAGCTTCTCCTCCGCC    | 59.82  | 20 TCCGATGATCAGTTGTTGGA   | 60.048 | 20 |
| TTTGTTGTGGAGTTTCAGGTGT | 59.538 | 22 TGTAGCCGACCCCAATTTAT   | 59.297 | 20 |
| ATTGCCTCCACAAGAATTGG   | 59.933 | 20 GAGTCCGCATAGGTTTCGATG  | 60.624 | 20 |
| AGCATTGGCTTTGCAAGACT   | 60.022 | 20 AACCTTATCCCAAATTCGC    | 60.15  | 20 |
| CCCAAGACCCCAATTTGATT   | 60.91  | 20 GCGAGTCGCGACCATATAAA   | 61.124 | 20 |
| GTTGTGCGTGCTTTTCTTCA   | 60.035 | 20 ATCAATTCCCAATCCCTTC    | 59.959 | 20 |
| ATGTAGCCGACCCCAATTTA   | 59.297 | 20 GAGTGGGCGTTATGGTGACT   | 59.997 | 20 |
| GTTCGAACTCCACTGTTCCA   | 58.697 | 20 CCGGGAAAATTACATAAACAA  | 60.01  | 24 |
| CATGTCACACTTCGCTCACC   | 60.319 | 20 ATGTAGCCGACCCCAATTTA   | 59.297 | 20 |
| AATTATGGCGTTGGGTGAAC   | 59.691 | 20 TTCCCGTGATATTCCACTGA   | 58.923 | 20 |
| TTCATGTAGCCAACCCCAAT   | 60.192 | 20 GAGTCGATCACAAACAGCCA   | 59.837 | 20 |
| GCTACCTCTCCCTCTCTCC    | 59.396 | 20 TGGTGGGATTGGATTTGATT   | 59.991 | 20 |
| CCATAGTTTAAGCAAGGGCA   | 57.927 | 20 TTGGTTCATATAGCCGACCC   | 59.784 | 20 |
| AGGTTGCGTACATCTGACCC   | 59.997 | 20 ACATCAACCCAAAAAGACCG   | 59.83  | 20 |
| GGGGTTGCAGAAGGTAATGA   | 59.933 | 20 CAGCCATTCCCCTAAAGTCA   | 60.066 | 20 |
| CCCCACAATGTCTCGTCTTT   | 59.966 | 20 ATCTTTGAACCGTGTGCCTT   | 59.598 | 20 |
| TGGACCATTATCGGACGTTT   | 60.192 | 20 TTTGATGATGTTGCCTGGAG   | 59.648 | 20 |
| CGCCTTCTTTGCACCTACTC   | 60.015 | 20 CTTGCCGAAAATCAAGAAC    | 59.685 | 20 |
| GGATTTGGCCCTGTGTGAT    | 59.676 | 20 CGGAGAAGAACATCCTCAGC   | 59.95  | 20 |
| AGGAAAGGACATGGCATTGA   | 60.461 | 20 TTCGTGTGTGTTTCTCTCG    | 59.873 | 20 |
| GTTTCCAACGAAGTTCCCAA   | 59.948 | 20 ACCGAGCTTGGATTTTTCAA   | 59.685 | 20 |
| CAAGACCCCAATTTGACTGG   | 60.345 | 20 TTTTGCTCATCTTGTCTGGG   | 58.847 | 20 |
| TAGATGGCTGGGAAAATTCG   | 60.031 | 20 ACCACCTTGTGTGGATTCAA   | 60.262 | 21 |
| GTTTTAACCTCTGCATCCCG   | 59.569 | 20 TTGCCATCATCTTCAATGGT   | 58.926 | 20 |
| GTTTTAACCTCTGCATCCCG   | 59.569 | 20 TTGCCATCATCTTCAATGGT   | 58.926 | 20 |
| CGACCGAATAATCCTGTGGA   | 60.853 | 20 CTC AAGAAAATTGCGGGTC   | 59.685 | 20 |
| CAGTGCTGTCCAAACCTCAA   | 59.873 | 20 TGCATATTGAATACAATGTGCA | 58.464 | 24 |
| AGAAGGAAATGGGAATGGCT   | 59.903 | 20 TCTTGTCCAAATGCCTCTGA   | 59.369 | 20 |
| AAAATGGTGGCTTTCTTCCC   | 60.299 | 20 AGCCCTCAATTTTATACTCGAA | 58.417 | 23 |
| GACAACATGGGGTTTTGGAC   | 60.073 | 20 TGTGGTGGATCTTGTTGAGC   | 59.682 | 20 |
| AACACGAGGTGGAGGATGAC   | 59.969 | 20 ATCGTTATTGCCGGATCCAT   | 61.42  | 20 |
| TTTCTCCAACATTGCTTCC    | 60.051 | 20 AGAAGTGGCTAAGCCCATGA   | 59.836 | 20 |
| CCAAGTCACCCAAGAATTGC   | 60.495 | 20 TCTGTGCACCATCAAACCTCA  | 58.784 | 20 |
| TTTGTTGTGGGTTACCCGAT   | 60.088 | 20 TTTCAAGAGAGGGCCAAGTC   | 59.405 | 20 |
| TGTAGCCGACCCCAATTTAT   | 59.297 | 20 GCAAGGGTGGTGTCTTATT    | 59.198 | 20 |
| GATTGTTGAAGGCCGACAGT   | 60.119 | 20 GAGCATGTGGGTCAGCAGT    | 59.844 | 19 |
| CAGCGATTCCAATGTCTGAA   | 59.799 | 20 TTCCTCATTCTCCGAGTTC    | 60.34  | 20 |
| ATGTCAAGGGCTCAAGGCTA   | 59.836 | 20 CCAAGACCCCAATTTGATT    | 60.91  | 20 |
| TGTGTGACTGCATGGAAGGT   | 60.162 | 20 CATCATCATCCTGTTGTCGG   | 59.918 | 20 |
| CATAGCCGATCATTCCCAGT   | 59.917 | 20 TATCGATGCACAAGATTCGC   | 59.799 | 20 |
| GTTTACCTGGCTGACGTGGT   | 60.035 | 20 TTTTCTATGACGCGGAAACC   | 60.074 | 20 |

|                          |        |                           |        |    |
|--------------------------|--------|---------------------------|--------|----|
| TATCCGTTCCGGCTGTACCTT    | 59.592 | 20 TGCTTGCCTCGTTTAATTTGT  | 59.772 | 21 |
| GTCAATGGGAACAACCGTCT     | 59.827 | 20 TAAGGCCTTTTCCCCTAAGC   | 59.695 | 20 |
| ATTGCAAGCAAAATCATCCC     | 59.907 | 20 GGTCAATTAGCAACCGAGAGG  | 59.694 | 20 |
| CCCCATCTCAACCAAATGAG     | 60.309 | 20 CAAGCACAAATCTCGATTACC/ | 60.131 | 22 |
| CCAATCATACATGCAAAGTGC    | 59.055 | 21 GTTCAAATTCCATGTGTCCG   | 58.979 | 20 |
| ACCATGACCGACATGCAGTA     | 59.992 | 20 CAAAAGGCAAGCCTCTCAAT   | 59.452 | 20 |
| GCTGCTCCTCATTGTCATCA     | 59.95  | 20 CATTCCATATGCCAGTCTGC   | 60.624 | 20 |
| CCGTAATGCCTGTCAACCT      | 59.993 | 20 ATGTAGCCGACCCCAATTTA   | 59.297 | 20 |
| AATCATGTACACCCGCTTCG     | 60.914 | 20 TCTCCCAAACATCACCTCC    | 59.903 | 20 |
| CAGCACCACCAGCGAGAA       | 62.247 | 18 GCGCTATTTATTGAGCACCC   | 59.71  | 20 |
| GCGGATAATACAATGGAGCA     | 58.603 | 20 CAAAGAAATCATTACATTCCG  | 59.451 | 22 |
| TGGCAGTCCATTCATCTGTC     | 59.637 | 20 TCTGAACAATTTGCAGCTCG   | 60.134 | 20 |
| TGGAAAACCTTTATCATTTCCTTG | 60.534 | 24 AATGGCCAATGACCAATACC   | 59.51  | 20 |
| TGGCCTTTTAATAGGATGCG     | 60.054 | 20 GCGGGTGACCTAATTCCATA   | 59.784 | 20 |
| TTGGGAATTTCTTCCATGC      | 59.878 | 20 AGATGATTCTGTTGATGCCAA  | 59.574 | 22 |
| TTTGACCAAACGGAACAACA     | 59.981 | 20 TGTAGCCGACCCCAATTTAT   | 59.297 | 20 |
| GTCCAAAAGCTTATCGGCTG     | 59.845 | 20 AAATGGTTTCCATTCTTCC    | 57.821 | 20 |
| TGAAATCCCTCAAATCTTACCA   | 58.556 | 22 ATTTTCCCAGCCCTTCACTT   | 59.94  | 20 |
| GAATCTTAGGACGCGACGAG     | 59.978 | 20 GCGGCACTGATAACTTCTCC   | 59.843 | 20 |
| CGAGTGAGGCTGGAAAGAAC     | 59.989 | 20 TGCACGTAGATGTCAGAGGG   | 59.855 | 20 |
| CCCATCATAGGAAAGGGAT      | 59.974 | 20 CCCTTGCCAAATAGGTTTCA   | 59.931 | 20 |
| CCGACCCCACTTAGTGAAAA     | 59.964 | 20 TCCTAAATCCCAATTACGGG   | 58.759 | 20 |
| ATTCAGAACTGGCCATGGAG     | 60.073 | 20 GGGACCTTTCAGTCACCAGA   | 60.088 | 20 |
| TGGTTTATGTAGCCAACACAATTT | 59.72  | 24 GTCGGCATACTAATGATAATGT | 58.115 | 24 |
| GGTCCCACTTCTCCTCTTC      | 59.874 | 20 GTGGTGCCATCTTCTTCA     | 59.682 | 20 |
| ATTAGCGCACCCACAAATCT     | 59.597 | 20 GGTTGCACAAAGTAGCTTCAC/ | 60.347 | 22 |
| GGTGCAGGAGTAGGTGCTGT     | 60.329 | 20 ATGGGCTTTTCTCACCCTTT   | 59.94  | 20 |
| TCGTCTTGATTTTGTCTGCAT    | 59.752 | 22 CGTCGTAATCCGAAGTTCCA   | 61.021 | 20 |
| TCGTCTCTACGACGAAACCC     | 60.255 | 20 TGTGAGAATCCACAATCGGA   | 60.048 | 20 |
| TCACAGACTCACAGTGTGGC     | 59.931 | 21 CTCGAGCATGTGGTGGTTC    | 60.263 | 19 |
| TGGATGATGGAAGAAAATCG     | 58.493 | 20 TGTGGAGCTTGATACGACGA   | 60.413 | 20 |
| ACTAAAAGGGAAAAGCCCCT     | 58.273 | 20 TGAATCCCTATTGTGCGAGAGC | 59.283 | 21 |
| TAGTTTGCAACAGTGACGCC     | 59.911 | 20 TGAAACTGCGAGTTCAATCA   | 57.968 | 20 |
| TAGTTTGCAACAGTGACGCC     | 59.911 | 20 TGAAACTGCGAGTTCAATCA   | 57.968 | 20 |
| TCCCTTTAAAAACACAAACCTTTT | 59.397 | 24 ACCAAAACACAAAAGCCTGC   | 60.154 | 20 |
| AAGCACGTCAGATGAGGGTC     | 60.269 | 20 AAAACCGTAATTTCACCCCC   | 59.924 | 20 |
| TTCATGGCTTGACAAACTCG     | 59.84  | 20 TGAAATCGATCCCGATTATTCT | 59.772 | 22 |
| ACAACCCGTAAAACCTCCACG    | 59.891 | 20 CGATGCGAACAAAAGGTTTC   | 60.617 | 20 |
| ATGTAGCCGACCCCAATTTA     | 59.297 | 20 TTAATGGCTTGTGAATACGGC  | 59.978 | 21 |
| ATGTAGCCGACCCCAATTTA     | 59.297 | 20 ATATCATTCCCCGAGAGGCT   | 59.888 | 20 |
| AATGGTACCCCAACTTCACG     | 59.711 | 20 TACTCGCTCCAAACTCCACC   | 60.255 | 20 |
| CGAGATTTATGAGAGCCCCA     | 60.17  | 20 CCAAGACCCCAATTTGATT    | 60.91  | 20 |
| GTTGGTGGATTTTGGGAAGT     | 58.741 | 20 TTTGCGGCCACCATTGTTATT  | 60.188 | 20 |
| TCTCGTGTAACGAACAAGCAA    | 59.521 | 21 CTTGACCCCCAGACTCGATA   | 60.065 | 20 |
| CGTTGCAGAAGTTTGCTTGA     | 60.172 | 20 AAGGTCCATCAATGCCATA    | 60.155 | 20 |
| CTTTTCGTCGTCCACGTTCT     | 60.291 | 20 AGTGCGTGAAGCAAGTACGA   | 59.664 | 20 |
| AACACCACAAGCGACAAGAC     | 58.78  | 20 TCGTGGGTAAACACACCCAAA  | 59.857 | 20 |
| CCTCACTCTGATGCTCTCCC     | 59.945 | 20 AGGTGGTGTGGTTTCAGGAG   | 60.002 | 20 |
| AACAGGTTTCAACAATCGGG     | 59.83  | 20 ATGGCGAAAAGTGCAAATC    | 60.081 | 20 |
| CAGCACGATTTTACTGGAA      | 59.84  | 20 CAGCTAAAATCCCCAAACCA   | 59.931 | 20 |
| AGCAAGCTGCTCTGGACAAT     | 60.164 | 20 CACAACAAGGACTTGATGG    | 60.152 | 20 |
| GGATGATGATGTTTCAAGTGGG   | 60.15  | 21 TTTTGTATTCCAAAACACATT  | 58.924 | 23 |
| CATCCTTGCCAAATTTCCATT    | 59.762 | 20 ACGTGAATTGTCCCACATTG   | 59.267 | 20 |
| ACCCCTTGCGGGTAATA        | 60.148 | 18 ATAGCTTGTGGGAGTTCCG    | 59.195 | 20 |
| CACGAACACCCCTGCATATC     | 61.329 | 20 ATTATTACCTCAACCGCCCC   | 60.041 | 20 |
| GCTTATCTGGACAACCCAG      | 59.55  | 20 TTTTCAAGCCCCACAACCTC   | 60.088 | 20 |
| GGCAACCTCAATGTCCAAA      | 60.874 | 20 CGGTATACGGCGAGGATTAG   | 59.586 | 20 |
| TATGGAGAAAATCCCTCCCC     | 60.089 | 20 GCATTTGATACCGTAGCAGTTC | 58.792 | 22 |

|                           |        |    |                        |        |    |
|---------------------------|--------|----|------------------------|--------|----|
| TTTGAAGGGCAAACCTCTGCT     | 59.993 | 20 | AACGAGGTGTGAAGGACCAT   | 59.43  | 20 |
| CGTGTGCAATTATTGGGTTT      | 60.237 | 21 | AGTCGACCTTACGTAGCGGA   | 59.898 | 20 |
| CAGGAGCAGGAGCTATCTGG      | 60.111 | 20 | GCGAATTTTCATCCGTTTTTG  | 60.436 | 20 |
| TGCATTTTTCACGTGCATTTT     | 60.118 | 20 | CATCCTGCACCACAACAAC    | 60.008 | 20 |
| TCGAAGCTGGAGATGTGACTT     | 60.005 | 21 | GGCTACTACATTTTGCCCTC   | 59.979 | 21 |
| CATGCAACCAAAACCACAAT      | 59.297 | 20 | CCCAAGTCGGTTTCAACTTT   | 59.073 | 20 |
| GCCGAGGTGAAATAGATGA       | 60.036 | 20 | CATCATTGGCTCCCATTTTC   | 60.274 | 20 |
| TCCACGTTTCTTAAAATATGG     | 58.067 | 22 | TCAGTATGTGATCCGCCTTTT  | 59.583 | 21 |
| GGCCGTTTGGAAATAGGATTT     | 60.15  | 20 | CACGGATTTCGAATTGTCTTC  | 58.145 | 20 |
| TAATCCATGGAAGGCTCCTG      | 60.029 | 20 | AACGGAAACAACCTCTTTGC   | 59.218 | 20 |
| TTGGTACTCACAAAACCCCC      | 59.688 | 20 | AGCCATTACCAACGGTCTTG   | 59.993 | 20 |
| GGAAATTGCTATGTTGGGA       | 59.762 | 20 | TTCCGGCAGACAATGATATG   | 59.499 | 20 |
| CAATGATGGGGTTGCTTTTT      | 59.801 | 20 | GGTTGTGTACATCTAACCCAA  | 60.028 | 23 |
| GGTTTCTTGCAGGAGAATGC      | 59.82  | 20 | ACTACCCGAGCTTCTCCCAT   | 60.096 | 20 |
| TGGAATGTCTTCCATTAAGTGC    | 59.091 | 22 | GATACGACCTTGCTCGCTCT   | 59.603 | 20 |
| GGACGGTTCACCAAAAATGA      | 60.734 | 20 | ATTTGGAGGTGGGTGCGATCT  | 60.714 | 20 |
| TAATGGGGAAGTCCTAGGGG      | 60.138 | 20 | TTGGCCTCCCTTTGTAGTTG   | 60.103 | 20 |
| ATACTGGCGGACAATATGGG      | 59.668 | 20 | GCAAACACCCCAATGACTA    | 60.755 | 20 |
| ACCACTGAATGCTACGAGGG      | 60.134 | 20 | ATTCTCCCATGCCATCAC     | 60.708 | 19 |
| TGGGCAAGAACGCTAATTCT      | 59.845 | 20 | GCAAGAGATTCTTTGTGCC    | 59.962 | 20 |
| TTGCAAGAAAATTGTCCCGT      | 60.481 | 20 | CCTTCATAATTCTCGAAAGTT  | 60.785 | 24 |
| CACCACCGCCCTACAAGTAT      | 59.875 | 20 | GGTGGTGGAGGTGATTCGTA   | 60.78  | 20 |
| ACGATGGCGACTTATGATCC      | 59.923 | 20 | TCAAACCTCGTGTGAACCCAA  | 60.128 | 20 |
| TAATTTCCCCAATTTTCCC       | 59.833 | 20 | GCCGCCAATAAGTTGTCTTC   | 59.713 | 20 |
| CTCACTCGAACTCGTCTCCC      | 59.986 | 20 | CCGATTCTGAACCAGAAGA    | 60.187 | 20 |
| GCCTAAGAAGCCCAAATTC       | 60.041 | 20 | GTTATCGAGGAGGTGCGTGA   | 60.073 | 20 |
| TGAAGTCCGGATCAACTTACG     | 60.118 | 21 | TTCTTCTTTAACCGACCACCA  | 59.595 | 21 |
| CAGCCATGCTTCTTATGCAA      | 59.976 | 20 | AGATTCCATGGGCATATTCG   | 59.745 | 20 |
| AGCCGATAAACTCAGCGAAG      | 59.615 | 20 | AGGTTGCGTACATCTGACCC   | 59.997 | 20 |
| TTGCAAAAATCAAGTATACGTTTGC | 60.277 | 24 | ATTGTTTTGGCGTTTTCTCG   | 60.11  | 20 |
| AAACACTGTGGCTCCAGCTT      | 59.914 | 20 | GTCTCAGGGAAGAGGCAGTG   | 59.986 | 20 |
| CCAACCTGATGTGGAGGAGGT     | 59.962 | 20 | ACCAATTGTTGTGGATGCT    | 60.24  | 20 |
| CACTGGCGACCTAGCAAAAT      | 60.27  | 20 | TCCGATGGAGCCTTAAAATG   | 60.031 | 20 |
| ACATTAACCACAATGGAGGC      | 57.39  | 20 | GTCCAAATTCGTGTAAGAAATC | 58.175 | 23 |
| GGAGCCCTGCATTTAGTTGA      | 60.214 | 20 | GACGTGGATCGATGTGATTG   | 59.925 | 20 |
| GGATGCCATTTCTTCTCCAA      | 60.014 | 20 | TCATTGAAACCGCTCTTCT    | 59.955 | 20 |
| CTTCCGATTTTCTCGGATTC      | 58.715 | 20 | TTTGGTCACTTTGCACCTAAAA | 59.663 | 22 |
| GCTTTCAAACCAGCACACA       | 59.888 | 20 | CCACCACCCACTCCAATACT   | 59.697 | 20 |
| GTTTCTTGGACAAAGCAGCC      | 59.859 | 20 | TGGATGGAGAAGGTCTGGAG   | 60.191 | 20 |
| ATCGGATGAAAGTTGCGATT      | 59.533 | 20 | ACCGACTGTACGACTCAGCC   | 60.329 | 20 |
| TGCTTTTGAGCCCTCTGTTT      | 59.993 | 20 | ATTGAAGAGCGATTCCGAGA   | 59.917 | 20 |
| AGGCAGCGAAAAATCAGCTA      | 60.117 | 20 | AATTTTCGCCATTTGCTTGT   | 59.592 | 20 |
| AAGGCAATGAGGCAAGAAAA      | 59.823 | 20 | TCATCGAGTCCGCACATTAG   | 59.823 | 20 |
| CAATACATGGCATTGGTGGGA     | 60.197 | 20 | ATCGACATTGAGGTCAACCC   | 59.786 | 20 |
| CCTCTGCAATCAATCAGCAA      | 59.948 | 20 | TCGATTGCCTCTGCAACATA   | 60.366 | 20 |
| CTTGTGGTTGTTGGTGTTC       | 60.049 | 20 | ATGCCATAACGGCTAGTCTCA  | 59.744 | 21 |
| TTCGAAAAGCCTAAGCCTGA      | 60.089 | 20 | TGCATTATATGGCCGTGACA   | 60.896 | 20 |
| ATTTGCAGGGAGAGCAAGAA      | 59.955 | 20 | AGATGCGACTTTTGTTC      | 60.249 | 20 |
| CCAATTTATTGGGATTAAGGCT    | 58.465 | 22 | CCGACGTGGAATCTGAAAAT   | 59.933 | 20 |
| TCGCCATTTTGAATTAACAC      | 59.824 | 21 | GCCAACAGATAATCGAAGCG   | 60.742 | 20 |
| CGGAAGGCATGAAGAAGAAG      | 59.948 | 20 | AGACCAAAAAGTCAATGCGG   | 60.11  | 20 |
| TACCTCTTTTCCACGCCAC       | 60.11  | 20 | TATTTGCTTAGTCGTGGCCC   | 60.096 | 20 |
| GGCCTTTTCTATCTCCTCGG      | 60.166 | 20 | TTGCACTTTTTATGGGGGAG   | 59.931 | 20 |
| GGCCGACGCATATACATTTT      | 59.822 | 20 | TAGCTACAGGTGGGGTTGG    | 59.986 | 20 |
| GAGGTGAGGTTCCATCTCCA      | 60.048 | 20 | AGCTGAAAGTGGAAAGCGAAG  | 59.757 | 20 |
| ACAAAAGATCGCAGCAGTCA      | 59.596 | 20 | TTTTACGCAAATCCGAAGGA   | 60.56  | 20 |
| AGTTTATGACCATCAGCCGC      | 60.103 | 20 | CGTTGCAAAACGAGTGAGAG   | 59.634 | 20 |
| GCCATGAACCTCATTTGGAT      | 59.756 | 20 | CAAACCTGCACCTCGTGAGAA  | 60.025 | 20 |

|                          |        |                           |        |    |
|--------------------------|--------|---------------------------|--------|----|
| AAAAATGTTTCTGTAGTGGTTGTT | 58.647 | 25 TTGGACACGTACACTTGCCT   | 60.222 | 20 |
| GTAACCTCATGATGCCGACC     | 60.348 | 20 AGGATTTACGGAGTGGATG    | 59.927 | 20 |
| AACATGGACTGGAAGTTGCC     | 59.973 | 20 GAAGGGCCTTGTCTTCTCT    | 59.817 | 20 |
| TCGCCAAATTCTTCAACAGA     | 59.395 | 20 AATTCCTCCTTGGTGGGCTT   | 59.94  | 20 |
| TTTTTATTCCGTGACCCTCG     | 59.931 | 20 GAAAATGCTGGAAATGAGGAA  | 59.148 | 21 |
| CATTTCCCATATTCTCCCC      | 60.337 | 20 CACATCTCCGTTGGTGTGAG   | 60.154 | 20 |
| TGATGATGATCCGCCATAGA     | 59.993 | 20 GGATGTATCAGGTGGTGGGT   | 59.511 | 20 |
| AGCTGCGCTAGCTGAACAAT     | 60.321 | 20 ACTGGAAGCGATCAATCCAC   | 60.081 | 20 |
| TTGGTCCCAAATCCCTACAA     | 60.162 | 20 AAGGGATCAAAGCCAACCT    | 59.94  | 20 |
| CCAAGTTACGTGGCGTAGAAC    | 59.685 | 21 ACATTTCAATTGCCATTTCCA  | 58.82  | 20 |
| CTCGATTTGTCCCCTATCCA     | 59.887 | 20 GGTTTTGATAAATACGATTTGC | 58.457 | 24 |
| TCCCACTCCCATTCAACTTC     | 59.903 | 20 GTGTCGCAGATGAATCCCTT   | 60.081 | 20 |
| AAGCAAAAGGGAAAACCCAC     | 60.332 | 20 CGGGGATCAAATGAAATCAA   | 60.64  | 20 |
| TTCCACAGACCAAAACCCAT     | 60.21  | 20 CCTCACAATTCCATGCACAC   | 59.967 | 20 |
| GGTCATTGCCTCGGATTA       | 59.901 | 20 TCTGATTGTACATGGTGGCG   | 60.539 | 20 |
| GCTTTTCCAGTGAAAATCCG     | 59.685 | 20 ATGTAGCCGACCCCAATTTA   | 59.297 | 20 |
| TGGGACTTGGAAGTAGGGTG     | 59.959 | 20 AATGAGAGGGGAGAATGGGT   | 59.755 | 20 |
| CAATGATTCATCCTCCGTTG     | 58.923 | 20 AAACCAAGACCCCAATTTGA   | 59.264 | 20 |
| TGATGATAATGAGTTGCTGGT    | 59.457 | 22 AGTTCATGTGGTTGTTGGCA   | 60.008 | 20 |
| TTTTGAAAAAGTGTGCCCC      | 59.953 | 20 GTCTCCCATTTTCCCGAAGT   | 60.306 | 20 |
| GCTGAGCTGAAGGAGATCCA     | 60.645 | 20 GTGGCGGCTAAAACCCTAAT   | 60.332 | 20 |
| TTAGAGGTGTCAAACGGGC      | 60.11  | 20 TAATTCAATCTTTGTCGCCG   | 58.769 | 20 |
| GTTAAATTCGCAAGGGGACA     | 59.938 | 20 CAGAGCGCACTCGAAGAGTA   | 59.49  | 20 |
| GGACTGGAGCAGGTGTGAAT     | 60.12  | 20 CCCTACCTGCAACCTACCCT   | 60.374 | 20 |
| CAATCAACAAAACAAGCCCC     | 60.344 | 20 TTGGGAGTGGGAGAGAGATG   | 60.191 | 20 |
| AATCACCTCGAATCAGTTTG     | 59.042 | 21 TGGCTTTGTACGTTTCTTG    | 59.881 | 20 |
| GCATAGGAATGAATGGAGAAGG   | 59.93  | 22 GCATGCACAACCTAAAAGCAA  | 59.019 | 21 |
| AGTTTGGGTGAGAACGAGGA     | 59.697 | 20 AGGTTGCGTACATCTGACCC   | 59.997 | 20 |
| TACTCCTCCGGATGATGAGC     | 60.181 | 20 ATATCACCACTCCACCACC    | 59.511 | 20 |
| AAAACGGAATCTACTTAGGGGA   | 58.224 | 22 GGATCTCAAGATCTGACGGC   | 59.768 | 20 |
| TTGGTTGTTGAAGATGTGGC     | 59.547 | 20 CCCCGAACAATTTTCTTTT    | 60.157 | 20 |
| ACTAGAAGCATTGGCGCTC      | 59.62  | 20 GATGTCCGCCTTATGAGGTT   | 59.009 | 20 |
| ATGTACACCCACTTCGGCTC     | 59.997 | 20 TATGGGTTGGTGGTTTGGAT   | 59.91  | 20 |
| CGTTGGATTGGATTCCTCAT     | 59.75  | 20 CCAAGATGACCCACCAATTT   | 59.647 | 20 |
| TTGAAGATGATACGTTGAACCC   | 58.952 | 22 TTTTGTTTTGTCCCCATCAA   | 58.841 | 20 |
| TGTAGTTAAGGCGGTGGTGA     | 59.195 | 20 AGTTCCAAATTGTGCCCTAA   | 57.217 | 20 |
| GGCATAATGATGTTGATTTGGA   | 59.666 | 22 GGAGGGTGTGAGTTTGGAG    | 59.549 | 20 |
| AACAGGGGGAGAATGGAGAT     | 59.755 | 20 AAAAGCGTTGGAAAGCTGAA   | 59.996 | 20 |
| TGGGGTCTGACTACATGAACC    | 60.78  | 20 CCACCATGGAAAGTGCTTGT   | 60.954 | 20 |
| ATCCTCAACTCCATCGCTTG     | 60.218 | 20 CTCTCCTTCAACCTCCTCCC   | 60.186 | 20 |
| AAATTCCGTGACCAAATCCA     | 60.17  | 20 TGGATATCATTGTCGCTGCT   | 59.256 | 20 |
| AAATTCCGTGACCAAATCCA     | 60.17  | 20 TGGATATCATTGTCGCTGCT   | 59.256 | 20 |
| ATTAACCTGGGGTGCAGTTG     | 59.993 | 20 GTCCTTTTCTTCATCCTCATCC | 59.037 | 22 |
| GCAAACCCTAATCGGCAGT      | 60.088 | 19 AGTCGACGGTCAATTTCCAG   | 60.111 | 20 |
| TCGAAAGGTCGGAAGAACAG     | 60.366 | 20 TCGCCGCTTCCAGATATTAC   | 60.196 | 20 |
| TGTAGCCGACCCCAATTTAT     | 59.297 | 20 CACGACAACCCAACACAAAC   | 59.897 | 20 |
| CACAAAATTTGCTTCAACTTCG   | 59.795 | 22 TGTTTCATCTGCTTGTTCGG   | 59.84  | 20 |
| TTCCATGCACTCTTTTGTGC     | 59.847 | 20 ATTATTGCGCTCGAAAATGG   | 60.061 | 20 |
| AGCTCGGGAGCAAGTACAAA     | 60.015 | 20 CGGTTGACCTCACCACGTAT   | 60.833 | 20 |
| TCACCCTCAACATTCCACA      | 59.935 | 20 AGCTCCGGTAGTGATGATGG   | 60.096 | 20 |
| TCTGTTTTGTGCGAGTCTGG     | 60.025 | 20 AATTACCTTCTCTCGCCGGA   | 61.08  | 20 |
| TGTTCAAATCTGTGAAGGCA     | 57.806 | 20 GGACGAAGCTACATTAGCCG   | 59.867 | 20 |
| TTCCATGAAACATAAATCTTGCC  | 60.194 | 23 TTGAAAAGTTTGGATAATTCAC | 59.885 | 24 |
| AGGCCAGAAGTCCAGCCTAT     | 60.233 | 20 CGGGACTGTTTCTGAGTTC    | 59.697 | 20 |
| TGTGAAAATCTCGGTTAATCCAT  | 59.729 | 23 GAGTTGAGCGCGACAAAAG    | 61.08  | 20 |
| CAATCAAATTGGGGTCTTG      | 60.162 | 20 ATTCGAAGCATAGATGCCCA   | 60.574 | 20 |
| GGGTTCAATGCATTTACTTCTTG  | 59.891 | 23 TTTGGGAGGTTGGATGGATA   | 60.126 | 20 |
| ATATAGCCGACCGCACAAAG     | 60.117 | 20 TGGAGTCTTCTGCATTTGGTT  | 59.726 | 21 |

|                             |        |    |                         |        |    |
|-----------------------------|--------|----|-------------------------|--------|----|
| TGAAATTGAAAACCTTAAAAATG/    | 57.09  | 24 | AGAAAAAGGGAGCATGAGCA    | 59.955 | 20 |
| TTCTTTTCAAGGTGCTTCA         | 58.475 | 20 | CCCAAGACCCCAATTTGAT     | 59.59  | 19 |
| GAGGACCTTCAAGGGTGTCA        | 60.088 | 20 | GCATGGATTCCTTGTTTCGAT   | 59.9   | 20 |
| AGATTGCTGTGATGTGGGTG        | 59.551 | 20 | CAGAAGTTCACCGTCGTTCA    | 59.873 | 20 |
| CCTCCATTTCTCATGCGATT        | 60.036 | 20 | TATACACCATCATGACCGCC    | 59.23  | 20 |
| ATTTTCCTGATGCCGATCC         | 59.846 | 19 | TCTGCAACTTCAGCAGCAAC    | 60.333 | 20 |
| ATGATCATCCAACGGTTTCA        | 58.772 | 20 | GATACAGAGTCCGACGATGAC   | 60.142 | 22 |
| TTTGGACCGGGACTGTAATC        | 59.79  | 20 | AGATTGCGTAAACCTGACCC    | 59.056 | 20 |
| TGTGGATGGTCTGAATGGAA        | 59.893 | 20 | CCCAAGACCCCAATTTGAT     | 59.59  | 19 |
| GCATCAAACATTTTCAGCCA        | 59.67  | 20 | TGGATAGTAGGATATGATAAGC  | 57.698 | 26 |
| CAGGGTAGGAAGCCCAAAGT        | 60.488 | 20 | ACGTGGCCAAAACGATTCT     | 60.511 | 19 |
| CCATCAGTTCCTTCTAGGGCT       | 59.721 | 21 | GGAGACCCCTTCGAAAAATC    | 59.881 | 20 |
| ATGTAGCCGACCCCAATTTA        | 59.297 | 20 | TAAGGTTAGCAGTTTGGCCG    | 60.257 | 20 |
| CTCGCACCAAATGGGTTAGT        | 59.993 | 20 | TCCAATCAGGAAACACGAG     | 59.831 | 20 |
| TGATGAAGAGACACCGAACG        | 59.831 | 20 | GAATCCGCCACATTGCTTAC    | 60.478 | 20 |
| TCTTCAACATTCCTGGGCTC        | 60.195 | 20 | GTAGAACCTTCCAATCCGCA    | 60.074 | 20 |
| CATCGGGTGAATGATTAAG         | 58.991 | 20 | AAACTGAAATAGGCGAAGCG    | 59.496 | 20 |
| CCCAAGACCCCAATTTGATT        | 60.91  | 20 | AGCCATGAAATTCCCATCAC    | 59.756 | 20 |
| TAACGGGAGAAATGGTCCAA        | 60.301 | 20 | GTGCACCGACAGTTTTTGTG    | 60.199 | 20 |
| TGATGGTATGGTGTGGAGGA        | 59.762 | 20 | AACACGTCACCGGTTATTC     | 59.717 | 20 |
| GGTGTGGAGGAGCAATTCAT        | 59.934 | 20 | CCTCCAAAAAGTCACCCAGA    | 60.081 | 20 |
| TTTGTGGATCTCCCGATTC         | 59.871 | 20 | ATACGCGAGACCGTGTAAGG    | 60.154 | 20 |
| GGGTTTAGGGTTTCCCATGT        | 59.919 | 20 | TAACAATGCACCCGAGATGA    | 60.073 | 20 |
| GTTTCATACCCCCACCACAC        | 59.95  | 20 | TCCTTTTTCGGACGTCTCAC    | 60.232 | 20 |
| GAACACATTGCTGAGAGCACA       | 60.048 | 21 | TGGAAGGTGGAACCTCATTT    | 59.381 | 20 |
| GTTTCTGATGTTGTTGCCGA        | 59.697 | 20 | AACGAGGTGATTTGGACCAG    | 59.966 | 20 |
| ATCTCATGTCCTCGCTCTG         | 60.372 | 20 | TCATAACAGTCTTCGACTAGCT  | 57.073 | 24 |
| ATGTAGCCGACCCCAATTTA        | 59.297 | 20 | TGATGTATGCCTGTGGGAAG    | 59.522 | 20 |
| TGTTTTTGAGAAGAAACAAGAAG     | 59.141 | 24 | ACTGTATTCATGGCCCTGCT    | 59.579 | 20 |
| ACCGTACTCCCAAGAACAA         | 59.449 | 20 | GGTGACCAAAGAGGTGGGTA    | 59.82  | 20 |
| CACGCAATATCTAGGCTATGGA      | 59.257 | 22 | AATTGTTATCTCAGGCTACGCT  | 57.267 | 22 |
| ATGTTGATGCTGTTTGGAGC        | 58.726 | 20 | AGTTTAAACCCTCCCAACCC    | 59.191 | 20 |
| GTAAGGATCGAGTGGGCAA         | 60.074 | 20 | CGAGCAAAGTAGTCCGTTTCTT  | 59.948 | 22 |
| CCTCCATCAGTTCGTCTAGGG       | 60.124 | 22 | GGATCACCAAAGGGACACAC    | 60.223 | 20 |
| GTCCGGGTATTGTCTGCTGT        | 59.997 | 20 | TATTCCTAACCTGCGTTGG     | 59.953 | 20 |
| AATGAAATCGTGCGAAAATG        | 58.627 | 20 | TTTTGAGCAGGAATGTTCTTCA  | 59.861 | 22 |
| TGAGGTGTGTGATTCCATGC        | 60.544 | 20 | CCTCAATAATCAAACCTCGGC   | 60.807 | 21 |
| TCATTTTTCATTTTTCATTTTCTTTTG | 58.685 | 25 | TGAATTTGCGACATTATTCATT  | 59.854 | 23 |
| GGCACACTATTTTGGAGGGA        | 59.933 | 20 | CAAGTTCACATTGAAATCGAC/  | 59.663 | 23 |
| TCGAATATTCCGGTGGTTTC        | 59.762 | 20 | TACAGTTGCCGAAAAATGCC    | 60.999 | 20 |
| AATAACATTAACCCTAAACCCT/     | 57.104 | 26 | TCCATCGCTGAAAGAAAACA    | 59.395 | 20 |
| TTTGATTGGGAATAATTGGGT       | 58.163 | 21 | TTTGTGTTAATTATGTTTCAGTT | 58.306 | 27 |
| ATCCTCCATTTCCCATTTC         | 59.959 | 20 | GAGATTGACTCCCACCAGGA    | 60.048 | 20 |
| AACTGGGCTGGCTAGGTGTA        | 59.757 | 20 | TCCCACAAAACCAAACACAA    | 59.834 | 20 |
| GCGCAAGCTCACCTTTCTAT        | 59.62  | 20 | TTTCATCAAAGCCTGAAGCA    | 59.542 | 20 |
| AAATCAGCCCGACTTGAAAA        | 59.685 | 20 | CTCGGGATCAATGACATTCC    | 60.281 | 20 |
| ACCTCATTCTCCCAATTCC         | 60.133 | 20 | TCGGAGTTGGAGTTCTTGCT    | 59.989 | 20 |
| CTGTTGCCGATCACTTCAA         | 59.84  | 20 | TGGGTTCAATTATCAAGAATTGC | 58.946 | 22 |
| TCATATTTTTCGTCGGAGGG        | 59.894 | 20 | GGGTTTTAGAGGGGAGTTGG    | 59.799 | 20 |
| TAAAGAGATGCTTGGTCGCC        | 60.352 | 20 | GTTAGCCAAGTGTATGCCCC    | 59.457 | 20 |
| ATAGTGGGGCCTCGTCTTTC        | 60.464 | 20 | TAGCATGTGACATTTCCCG     | 59.542 | 20 |
| AAATTATCAAATTTCCGGGACGA     | 59.693 | 22 | ATAACCGATCCACCTCCCTT    | 59.651 | 20 |
| CAATCAAATCCAATCCCACC        | 59.991 | 20 | TCTCTGAATCCGGCCTAGAA    | 59.91  | 20 |
| AGGATCTCGGGGAGCTAGAA        | 60.306 | 20 | CATCATATTGGGGCCCATC     | 60.103 | 19 |
| CGGGCCAATAAAATCTCAA         | 59.901 | 20 | TGCCCTAATCACACATTTCC    | 58.423 | 20 |
| CGATCAAGGAACACATGCAC        | 60.12  | 20 | CAACAACATAAGGGAAGGGG    | 59.284 | 20 |
| CAATGAACAGTTCGTCCGGTG       | 60.152 | 20 | ACAGTGAATGTGAGGGAGGC    | 60.12  | 20 |
| AAGACGAAAGCTGTCGAAA         | 59.993 | 20 | GTGGGACCTTGCTACTGAGC    | 59.874 | 20 |

|                          |        |                           |        |    |
|--------------------------|--------|---------------------------|--------|----|
| GAAGGGGTAGGAACTGGACC     | 59.795 | 20 GACAACGATGGATACCCAC    | 60.057 | 20 |
| ATGATGGACTTGCTTTTGGG     | 59.933 | 20 CTCCAACAGGACCAATGTT    | 59.82  | 20 |
| TTTGAATTGCTTTAATTTGTTGC  | 58.42  | 23 ATTAAAATGGTGCGAATGGG   | 59.66  | 20 |
| TGAACGCCGTTAAGTTTGAA     | 59.344 | 20 CGAAATCGCGGTATCTTGTT   | 60.096 | 20 |
| CAAAGGGGCTGAGTTGAGAG     | 59.982 | 20 AGGGGTGAAAACCGGATAAT   | 59.532 | 20 |
| TCAAATTTTGGCACTGTTGC     | 59.712 | 20 CAGCCTTCGCCACTACTCTC   | 60.156 | 20 |
| TCAGTTCGGTTTTCGTTTT      | 59.587 | 20 ACAATTGCACGATGTTTGGA   | 59.972 | 20 |
| TCCGTGCAGTAAAATGAAAAT    | 57.327 | 21 CAAATTATTTTCAACCCTCATA | 60.324 | 25 |
| ATCCACGTTTCGATCCAAAAC    | 59.797 | 20 GCAGTTGTTGCGGATAGTGA   | 59.871 | 20 |
| CGCCTCTGCTCTCTCTCTTC     | 59.579 | 20 ATCAGTGGAGAAAATTGGCG   | 60.074 | 20 |
| TGGTGCAACTCCATCAAATC     | 59.502 | 20 TCCAAGGAACTTTTCTCCCA   | 59.641 | 20 |
| AAACTCAGCGAAGTGGCAAT     | 59.882 | 20 TACCCTAGCCCTACCGGAAC   | 60.332 | 20 |
| GGAGGAGGGGAAGAGAGTTG     | 60.186 | 20 CTCTCCCACTATTCCCACCA   | 59.92  | 20 |
| CCACTTTTGGCGTTTGATTC     | 60.481 | 20 TTTGCCAAGAGACACGACAC   | 59.88  | 20 |
| TTAATGGGATGATAAGCGGC     | 59.892 | 20 CACGTAAAGCACAACGCATC   | 60.324 | 20 |
| GCTAAGTTGATTATGGTGGGC    | 58.595 | 21 TCGAATTGAATTAATTTTATGA | 60.204 | 26 |
| TCAGTTGCCCTTGGGATTAG     | 60.066 | 20 GCCCCACCAGAAAAAGGATA   | 61.173 | 20 |
| CCCATCCGAAATCTCTACA      | 59.887 | 20 GATTAAGGGGTTGAGGAGGG   | 59.761 | 20 |
| GCATCTTCCCACAAGCAAAT     | 60.081 | 20 CGTTTTTGCAGACATGAAGC   | 59.469 | 20 |
| TTTGCTGAATTTTCTTGCCA     | 59.42  | 20 CGACACAAACCCATTAAGCC   | 60.365 | 20 |
| GCAGCCACAAATGACAGAGA     | 59.992 | 20 GACAGAAACACAGCGGGAAT   | 60.119 | 20 |
| CATGAAAAATCCTCAATCCCT    | 57.98  | 21 TCGTTGATGATGCAAAGAATG  | 59.679 | 21 |
| GGCCAAACGTTTAGTCTACTTGA  | 59.716 | 23 GCATGAACCAAAACTTGCTG   | 59.322 | 20 |
| TGTTTCCATCTACACCTTGAGAAG | 59.69  | 24 CCAAGTCCCCCTCATAAAA    | 59.784 | 20 |
| ATTCCAGCCCAACACCATAG     | 59.813 | 20 GACATCTGGCCATTTTAC     | 60.326 | 20 |
| CGGCATCCACATAACATGAA     | 60.343 | 20 GGTGAAAGACCCGAATTCAA   | 59.91  | 20 |
| CAATTGAGATCCATGGGGAA     | 60.66  | 20 AGGTTGCGTACATCTGACCC   | 59.997 | 20 |
| TGATTTTGCTTTTGCATCGT     | 59.305 | 20 GGGCTTCGTTTGATGACTGT   | 60.119 | 20 |
| ATAAACATTGGGGGTGGGTT     | 60.166 | 20 ACACGGGTGGAAGTGAGAGT   | 59.604 | 20 |
| TTCTTATCTCTGCGCCGATT     | 59.945 | 20 CATCCACAGTGAAGACCACG   | 60.154 | 20 |
| GGAAAACGCATAATTCACCC     | 59.277 | 20 CCATCAGCTCCTCACTCTCC   | 59.945 | 20 |
| AGGATGAGGAAGGCAAGGTT     | 60.074 | 20 ACACGACGGACGTAGAGCTT   | 59.937 | 20 |
| GCATTGCATCCTATCCCATT     | 59.751 | 20 TTGTGCTATAATGGACTACATC | 59.34  | 27 |
| GGACTCGGCTTTTGAATCAG     | 59.813 | 20 CTTGGGAGTTGCTTCGTAGG   | 59.869 | 20 |
| TACATCTGACCCCAAGACCC     | 59.779 | 20 TTGGGTCTATCCAGTTTGG    | 59.784 | 20 |
| TCGGTTGCGTTGTTATTTGA     | 60.111 | 20 GGAGAGGCGTGGCAATAGTA   | 60.235 | 20 |
| AGCCATTCTTAAAAGCCTCATTT  | 59.675 | 23 TGCCATACAACACCACTTGC   | 60.584 | 20 |
| TGTCTCCCTCACACCCTCTT     | 59.682 | 20 GGGAGATTCTCTTGGGCACT   | 60.596 | 20 |
| AACAGGTTCAAACCAAGTGGC    | 60.012 | 20 TGCACCGTTAGGAGGTTAG    | 60.125 | 20 |
| ATCTTGAACCCCAACATCAA     | 60.173 | 20 TTTGACCGTACAAGATTGCG   | 59.729 | 20 |
| TGGAAAATCGTTGTTGACCA     | 59.941 | 20 CTCTACCACTGCACCACGAG   | 59.487 | 20 |
| TGAGAAGGTTTTCTGGGGAA     | 59.641 | 20 TGGAACACTGCAAAAATGAGC  | 59.847 | 20 |
| GACACCAATGCATTAACCCC     | 60.059 | 20 TCCGGTCAAAAACAGAAACC   | 59.948 | 20 |
| TTGAGGCAACATGCTTTTGA     | 60.379 | 20 CCTTCTTTAGAGGTTGGGGTG  | 59.977 | 21 |
| CCCAAGATGACTAACCGCTC     | 59.694 | 20 CCGTCGGAATCAATTACCAG   | 60.323 | 20 |
| CCTTAAAATCAGTCCCGCAA     | 60.067 | 20 GCGACCACTAAGCAACAACA   | 59.911 | 20 |
| CGGCCCAATATTTAGGCAT      | 59.765 | 19 TCGATCCTTTATGGATTGGAT  | 58.33  | 21 |
| ATGTAGCCGACCCCAATTTA     | 59.297 | 20 CAACTTGACATAGCATTCCCA  | 59.996 | 22 |
| GAGCCGAGCTCAGTCTGTTT     | 59.751 | 20 CTCTCTGCTCACGCTCTTCC   | 60.431 | 20 |
| ACCAAGAGACTGAAAGCTCCA    | 59.076 | 21 CCAAGACCCCAATTTGATT    | 60.91  | 20 |
| TTTGGGTTTTAAATTCGTTGAA   | 58.567 | 22 AACCAATTGACAATGAGAGGA  | 59.99  | 23 |
| ATCAACCTACACCGTCCACC     | 59.703 | 20 TAACGGGAGAAGAGTGCAGC   | 60.538 | 20 |
| GAAATCCAAAAGGCAACGAG     | 59.685 | 20 TGCCCTAGATCTCACACACG   | 59.855 | 20 |
| AAGGCCGCATCCTTTGATA      | 60.559 | 19 TGGTGATATTATTGTGATTCCC | 59.801 | 23 |
| TAATCCTTGAACCTCGGTGGC    | 60.074 | 20 GATCCATTTAGCAAACCCCA   | 59.762 | 20 |
| CAAGTCGGCAAAAATTGGAC     | 60.481 | 20 TTTTCATTTTACTTACGCGTCT | 57.35  | 23 |
| GAGTAATCGTCTCCGCTTGC     | 59.985 | 20 ATTCTCGTCGACACTTTGGC   | 60.263 | 20 |
| CTTGCCAGGTTGCAATTATG     | 59.182 | 20 CACTCCCATATCATCCCTGG   | 60.15  | 20 |



|                          |        |                             |        |    |
|--------------------------|--------|-----------------------------|--------|----|
| GCATTTGAAACAATGCCAAA     | 59.543 | 20 CAGTCCTTGAAATGCCGACT     | 60.255 | 20 |
| AAAGCCCAGAATTGTAGCG      | 59.517 | 20 AGAGACGGTGACGTATTGCC     | 60.142 | 20 |
| TCTGTGGTTGTTGGCATAGC     | 59.722 | 20 CTGGGTTTTATTTTTGCCGA     | 59.937 | 20 |
| CCCTTCAGCCACTGACCTAA     | 60.246 | 20 TCTCCAAAATCGCAAACCTC     | 60.192 | 20 |
| ACCATTGCACTCCGAATAGG     | 59.955 | 20 GGACAAGGGTTCGAGTCTCA     | 60.238 | 20 |
| ACTCACCTCTCCCTCGACCT     | 60.258 | 20 TCCCTAGAAGCGCACGAGTA     | 61.06  | 20 |
| CAGGAAAGAAGCCAGCAGAG     | 60.269 | 20 CAGCAGTCTGGATCTCCCTC     | 59.945 | 20 |
| CCTGGGTAAATCTACGGGCT     | 60.332 | 20 TAAAAATGAACGAGTCGCCC     | 60.074 | 20 |
| AGATGATGAATCCGCAGCAT     | 60.601 | 20 GACCACCTTTCTTTCCACCA     | 59.943 | 20 |
| CGTGAGAAGATTGGGAGGAA     | 60.187 | 20 TCCTATTTTTTCAGAGTTGAACC, | 59.203 | 24 |
| GTCTGGCCTTCTTCGTGTT      | 59.851 | 20 TTGGGTTTGGAGTGAAAACA     | 58.995 | 20 |
| GAATTCCCAACCAAAGCAAA     | 59.916 | 20 TCCACCTTGAATTGACTGCC     | 61.046 | 20 |
| AAAATACCCGCAAAGTCGGT     | 60.721 | 20 GCCTTTCTCATACCCTCGTG     | 59.694 | 20 |
| TATTTGAGGGTGTGCTTCCC     | 59.933 | 20 AGGCACGGTTCATGTGTGTA     | 60.032 | 20 |
| AGGAATCCCAATCAGAGAAAAC   | 58.578 | 22 TGCCAGAACACATAAATTTTTGA  | 59.524 | 23 |
| CTTCAGCTTGGTTTTGGAGG     | 59.846 | 20 ATGACGGATAGCAGCCAATC     | 60.066 | 20 |
| AAGCTCGTCGGATTTCTTCA     | 59.955 | 20 AACAAACCCATCACTCCGAC     | 59.827 | 20 |
| GCAATGTATATTGGGTGCGA     | 59.405 | 20 CCCAGTACCGAACGAGTACAA    | 60.038 | 21 |
| ATCTACAACAGGCGGCGG       | 62.174 | 18 CTTGGATGAAGAGGGAGGGT     | 60.447 | 20 |
| TGTGTTTTGCCTTCTCACG      | 59.881 | 20 CTCTTGTTCTGGTGGTGGT      | 60.002 | 20 |
| AGTTGGGACGGAGGGAGTAT     | 59.817 | 20 TTGACGCGCTTGAAGTAGTG     | 60.195 | 20 |
| CTCAAACCCATCATGAAATCC    | 59.234 | 21 CCTTTGAACAAAGAGTGGGG     | 59.563 | 20 |
| CGACTAATGCTCAAACGCTG     | 59.632 | 20 ATGTAGCCGACCCCAATTTA     | 59.297 | 20 |
| TTCCCGATTTCAAGTTGTTCC    | 59.91  | 20 GGAGGCATAAAAACCCCAAT     | 60.02  | 20 |
| AGGTCACGCCTGTTTCTGTT     | 59.769 | 20 TATATGCAGGTGTGCCTTGC     | 59.718 | 20 |
| CATCTGGGTGTGTGAGTTGTG    | 60.055 | 21 GAGGTGCAAGAATTTCCCAA     | 60.051 | 20 |
| AGTGAGTTGTGGTGCCTGAG     | 59.94  | 20 CACAGGGCTTAGGAATGGAA     | 60.066 | 20 |
| GAAATTTCTCCCTCGAGATG     | 60.025 | 21 GCTTAGTGCTTGGTGTGAA      | 59.224 | 20 |
| GGGTCCAACACTACGATAATGC   | 60.576 | 21 CTGGGTCTTGCTAAATTGC      | 59.708 | 20 |
| TTTCAAGCAACCTCGCTTTC     | 60.502 | 20 TGTTTTGTTTTGAGGGCAAT     | 60.344 | 20 |
| GACTACGATGAACTGGGGGA     | 59.927 | 20 TGCCACCACTCTTCTTACCC     | 60.111 | 20 |
| CAGTGAGCTCTCCGAAAAGG     | 60.126 | 20 GGAGTCATCCACCTCAGGAA     | 60.048 | 20 |
| AAACGGACAACCACTTTTCG     | 60.008 | 20 ATGTAGCCGACCCCAATTTA     | 59.297 | 20 |
| TCGCCACTGAAAGAAAGAGG     | 60.508 | 20 TCACGCCTAATTAACCATTG     | 57.731 | 21 |
| TCCAACCCTAATTCGTGAGC     | 60.074 | 20 ATGAGCAGGGTGGAGAGAGA     | 59.945 | 20 |
| CATTCAAATAAAAATGATGATGA  | 57.394 | 27 AGCTCAGGTTGTGCACGATA     | 59.47  | 20 |
| CACTGCCTACTCCACCAACA     | 59.745 | 20 CATTATCTAATGATTAACAGTT   | 58.894 | 27 |
| ATTGGCTGCAAAATGTGTCAA    | 60.119 | 20 TCAATGATCCAATCCCCACT     | 60.135 | 20 |
| GGCGTTTGTAGAGAAGCTGG     | 60.015 | 20 TCTGTGTTGTGGGTTGCAGT     | 60.203 | 20 |
| TGACTCGCGTAAAAGAATATAAA, | 58.574 | 25 AGGGTCCCTCCTTATTGACA     | 58.446 | 20 |
| CGAAATTAATTAAGGAAAAGATT  | 60.089 | 26 GATTTTTGGTCCAGTGGCAGT    | 59.973 | 20 |
| CACCTTTTTGTGGAAGCAT      | 59.971 | 20 GGGTCGAGTAGAAGAACCCC     | 59.935 | 20 |
| CGTGAGAATCTTCGACCTCC     | 59.803 | 20 GCGCAAAACAAAACACATTG     | 60.155 | 20 |
| ACGACATGAAGCTTCTGCAA     | 59.596 | 20 ATGTAGCCGACCCCAATTTA     | 59.297 | 20 |
| TCACAATAAACCTCCAGTTCCC   | 60.221 | 22 GAAAATCGGCAGCACTCATT     | 60.221 | 20 |
| ATTTTGCTCACCTGCTCAT      | 59.7   | 20 GTTTCGACATCGCATCTGG      | 60.217 | 19 |
| AATGGGGACATCAAGTTGGA     | 60.173 | 20 TGGGGATTGAACCCAGATAA     | 60.126 | 20 |
| TCTAATGTTTCCGCCTCCAG     | 60.206 | 20 GGTGGCTGTTATCGAAGGC      | 60.619 | 19 |
| ATTTTTATGGATTGTGCCGC     | 59.801 | 20 TTTGCACAGCAATTCCACAT     | 60.119 | 20 |
| TTTTTGTTTTGACGGGTCC      | 59.817 | 20 AGGAGTTGGCTCACGATACG     | 60.277 | 20 |
| CGCAGTTGATCTTCTGTCCA     | 59.984 | 20 GAAGGAACAGAAGAAGCGGA     | 59.55  | 20 |
| ATGTAGCCGACCCCAATTTA     | 59.297 | 20 TGCAGCTCCTCAAAAAGGTC     | 60.517 | 20 |
| CCGCATCACAATCCAAAAT      | 60.701 | 20 TGGGGGTGCATTTAATGTTT     | 60.053 | 20 |
| TAACGATGCCTTGCTTTCCT     | 59.845 | 20 CAGAGCGCACTCGAAGAGTA     | 59.49  | 20 |
| CGCATCTTCCGAGCTATCAT     | 60.339 | 20 TAACGTGGGGTGTACGTTGT     | 58.825 | 20 |
| TGGGCTAGTAATCTGGGTCC     | 59.006 | 20 TGTGTGAGTTTGGTTAGCCG     | 59.758 | 20 |
| TCCTAGGAAATTGCTGTCCAA    | 59.693 | 21 GCAATAAATTTCTATGTTGCTC   | 59.562 | 24 |
| ATGTTGATGCTGTTTGGAGC     | 58.726 | 20 AGTTTAAACCCCTCCCAACCC    | 59.191 | 20 |

|                          |        |    |                         |        |    |
|--------------------------|--------|----|-------------------------|--------|----|
| GCCACTTGTAACCTCCCAAA     | 59.971 | 20 | TGGGACAGAGAAAGAATGCC    | 60.195 | 20 |
| AATCTCGATGCCATCTCCTG     | 60.181 | 20 | ATGTAGCCGACCCCAATTTA    | 59.297 | 20 |
| TGCTAAAAACAAATGCCAAGG    | 60.116 | 21 | CACGTGACAATGAAAAGGGT    | 58.469 | 20 |
| TGATGGTGATAACACAATTGAAA  | 57.94  | 23 | CTCCCAATTCATGACCCTA     | 59.744 | 20 |
| TATCCGAATAGGCGAGGAGA     | 59.762 | 20 | CACCACCCCATCACAATAA     | 59.097 | 20 |
| AAAAATTGGTGCGGGTGC       | 61.826 | 18 | AAGGCCCCCTTGTCAAATAC    | 60.187 | 20 |
| GGAAAATTGGGTCAATAGCTCC   | 60.057 | 23 | TTGCTCAAATATTTCAAAAAGC  | 58.963 | 23 |
| TTGTTGCAGTAGCCATGCTC     | 60.019 | 20 | AACACCTCCCGAAAGAGGAG    | 60.619 | 20 |
| TGACGACGAACGAATTTGAG     | 59.84  | 20 | AGCGATTCTCTTCGAGCAAG    | 59.859 | 20 |
| TGTCAACGTAAAAGGAGGGC     | 60.11  | 20 | GTCCAGATCCAGAGACCCAA    | 60.048 | 20 |
| CCATTCATCGTCGAAGACCT     | 60.073 | 20 | TGGCCAGCAATATGGAATTT    | 60.289 | 20 |
| TGTTATTTGCACAATCATTTCC   | 57.572 | 22 | AAAAAGCCACGACCTCTTCA    | 59.853 | 20 |
| CGCCTAATGCTTTGCTTCTT     | 59.63  | 20 | TCATCCCTTCCAATTCTGC     | 60.195 | 20 |
| GATCAGCAGTGGCGTTGTC      | 60.429 | 19 | AGCCACGTCAAACCTGGGATA   | 60.517 | 20 |
| CATTCTTTCTCCGTCTTCCG     | 59.807 | 20 | ATTACTCGCGAAACCGACTG    | 60.27  | 20 |
| GCTTTTCAGTTGGCATTITTTG   | 59.75  | 21 | TCGCATTCTACTCCATTTTCC   | 59.172 | 21 |
| CACTTGCCTTGCACAACAAA     | 60.876 | 20 | ATGGCAGCATTTCATGTAGCA   | 60.251 | 20 |
| TTGGCAGCTAGTGCTCATTTT    | 60.032 | 21 | AGCCGATTTGTAAATTTGAGG   | 58.262 | 21 |
| CCCAAGACCCCAATTTGATT     | 60.91  | 20 | GTCGGACCATGATGGCTAAT    | 59.78  | 20 |
| TGTATGGGGTCATCCATCCT     | 60.011 | 20 | TAAGGCTTACGTATTGGCGG    | 60.109 | 20 |
| AGGATAGAATGAGGGTTTTCCC   | 59.685 | 22 | CCAATGAAAATCTGTCCGGT    | 59.79  | 20 |
| CGTGCGTGTTGAATTCATGT     | 60.584 | 20 | TTTGATTGGGAATAATTGGGT   | 58.163 | 21 |
| CGTGCCAATAATGACACAAA     | 58.046 | 20 | AAAACAGACCCACCAAGAACA   | 59.482 | 21 |
| CGTTGTGCTCTTGAAACTGG     | 59.485 | 20 | TTTGTTTCATGTAGCCGACC    | 60.894 | 20 |
| GTTTCCTCACTACACCCCGA     | 59.966 | 20 | TCCATTATTGCTTCCACCCT    | 59.387 | 20 |
| GTGGATCAGCAGTGGCTTTT     | 60.263 | 20 | GGGAGGTTTCGTACACAGT     | 60.009 | 20 |
| AATCAACTAAGCAGCGGTGG     | 60.27  | 20 | GCAAAGGTTTTCCGATCAA     | 60.053 | 20 |
| CATCAAAGCAGAGCAGCAC      | 59.746 | 20 | ATCGGGAAAACGAGGAAGTT    | 59.94  | 20 |
| ACGCATACGATCTTGATTATGG   | 58.992 | 22 | GTAGAGGTGTCAAAACGGGC    | 59.598 | 20 |
| TTGGGATTAAGGCTTTGGTG     | 59.931 | 20 | ATCAAACCGGAACCGTACA     | 60.227 | 20 |
| TGGTGAAAAATCAAATACTTGGA/ | 59.763 | 24 | TGACGTGCATGAAAGTTGCT    | 60.459 | 20 |
| GGTGAAAAATCAAATACTTGGA/  | 59.788 | 25 | GGCAAACCACCTTTTCTTT     | 60.332 | 20 |
| TGGAATAGCTTGATAAATGATTTG | 60.207 | 26 | TAATAAGCAGCAGGGCATGA    | 59.425 | 20 |
| AAATCATCACAAAGCCCAAA     | 60.309 | 20 | CGACGAAATCGATGACTGTG    | 60.263 | 20 |
| TAGCCGACCCCAACTTATTG     | 59.953 | 20 | GCTTAAGCGAGAAAAGCGG     | 60.237 | 19 |
| GGGGGAGAAAAATAAGAAAAA    | 57.789 | 22 | TTGGAATTTTTTCAGAACACG   | 57.797 | 21 |
| CGAGAACCAATAATGATGAGCC   | 60.821 | 22 | GCGTGTGGATGATTTCTTT     | 59.939 | 20 |
| TTTGGTTTTGCTCCTCTGCT     | 59.993 | 20 | ATCGAGTCCACTGTGCAAGA    | 59.42  | 20 |
| TGTGACCTTCTCCTTGTTTCTT   | 59.309 | 23 | CTTGAAGGGACCCGTGAGTA    | 60.103 | 20 |
| GAACGAACAGAGGCAGCATA     | 59.028 | 20 | TGGCCTCTTCAGAAGGAGAA    | 60.065 | 20 |
| CTCTCCTCCTTCTCCACC       | 60.186 | 20 | AATCTCGCTCACGACTCGAT    | 59.981 | 20 |
| AACCTTGGTTCATGTAGCCG     | 59.993 | 20 | GGTCATCTCTCCCAAGTCAAAC  | 59.979 | 22 |
| ATTGACAGCAGGGAGGTGAT     | 59.535 | 20 | TCTCTTTTCTCTCCCCGTT     | 60.183 | 20 |
| TTTGGTTCATGTAGCCGACC     | 60.894 | 20 | TACCTACAACGTGAAGGCC     | 59.993 | 20 |
| TGGTAAAATTCCAATTCCGGC    | 59.938 | 20 | CCTTCTCAGCCTCAGCTTCT    | 58.917 | 20 |
| AAATTACCGGGAGTTGAACTTT   | 58.141 | 22 | GCTCAAATCGGAATTCAAACA   | 60.067 | 21 |
| AATGGCAAAGGTAAATGAGCA    | 59.6   | 21 | ACCGACTGGGCCTATCCTAT    | 59.811 | 20 |
| AACCATTTAGAATTTTTCGGGA   | 58.902 | 22 | ATGGGCCCAACACCAGATAA    | 62.413 | 20 |
| CCCACCTTAGATACCGTTCCG    | 59.448 | 20 | AAAATCCTGTGTAGCAGGGC    | 59.198 | 20 |
| CAGCACTCCCAATTTATTGCT    | 59.238 | 21 | TTTCCAAGGTTTGGGTTTCA    | 60.314 | 20 |
| AGGCGAGACAACGAAATTCT     | 58.936 | 20 | TTTGATGCGCTCTAGTTGGA    | 59.566 | 20 |
| CCCAAGACCCCAATTTGAT      | 59.59  | 19 | CCCAAGACCCCAATTTGATT    | 60.91  | 20 |
| TGGAGAGTTTGGACATTTTGA    | 58.187 | 21 | AATCAACGAAATGAAACCGC    | 59.945 | 20 |
| GTAGCAGCTCGGTGAGGTTT     | 60.02  | 20 | AATCAGTGAGGCACCAATCC    | 59.934 | 20 |
| ATGGTTGCCTTTGTTTGGAG     | 59.971 | 20 | TCATTGCCCGAATAGAGTCC    | 60.036 | 20 |
| TGTTGGTGGTGGTGTCTTGT     | 59.89  | 20 | GGGAATATCCATTCGTTCCA    | 59.581 | 20 |
| GAGAGCAGTCCTTTTCCCG      | 59.935 | 19 | TTTCATTTGATATTTCCAGAGAC | 59.436 | 25 |
| CGTTCTTGCAACAACAAGA      | 59.881 | 20 | ATTCATGAAGGAACGCGAC     | 60.081 | 20 |

|                          |        |                          |        |    |
|--------------------------|--------|--------------------------|--------|----|
| TTTCTTGCCTCGATTCTTG      | 60.323 | 20 GCCTAAGAATGACTGAAACGG | 58.847 | 21 |
| TTGACCAGATAACATCGGCA     | 60.073 | 20 AAATTGGGCACCAGAATCAG  | 59.933 | 20 |
| TGTGGGGACGATTATTCCAT     | 60.014 | 20 GTCTGGACAGACAACTGGCA  | 59.872 | 20 |
| CAGGAAAACCCAGAAGTGAGA    | 59.314 | 21 TGTAGCCGACCCCAATTTAT  | 59.297 | 20 |
| GAAGCAAAAACAAACCCACC     | 59.452 | 20 CCAAGACCCCAATTTGAT    | 59.59  | 19 |
| AAAACCTCATAAACTGTCATGTC  | 57.456 | 25 AAAAATACAGCTAATCGGTCC | 57.848 | 22 |
| CTCTTGCTGCTTTTTCCACC     | 59.993 | 20 GTGCAGCAATACCAAACCT   | 60     | 20 |
| AATTGGGGTGCAAAACAAAG     | 59.839 | 20 AATGGGATCTGTTGCTGCAT  | 60.492 | 20 |
| GAACCCAAGAAGCAACATGTAAC  | 60.048 | 23 ACGTGAGTTGGAGGAGTTGG  | 60.151 | 20 |
| GTAGGGTTCATGTCCGGTTG     | 60.232 | 20 TGTTGGGCCTTTGACCTTAG  | 60.103 | 20 |
| CGTTCCAAACTTCGAAGAAAA    | 59.366 | 21 GGGAGACGACATTCTTCAGC  | 59.81  | 20 |
| TTGACAACATTGCCACATACC    | 59.312 | 21 GAGCTTTAGTGGGACATCCG  | 59.694 | 20 |
| GTGCATGGAAACATCCACAG     | 59.967 | 20 TACAATGGCCTGAGCAAGTG  | 59.864 | 20 |
| TCCAGCTATCCCGTTTTGTC     | 60.074 | 20 TCGGAAAGGAACTCTTCGAG  | 59.545 | 20 |
| TGCAGTGGCGTTGAACTAAC     | 59.911 | 20 TTCACCCCGATTTCTTTTTG  | 59.91  | 20 |
| CCACCTCACGCAAAAAGAGT     | 60.291 | 20 TAGCTTTGCCGGTGTATAA   | 59.325 | 20 |
| AAATAAGGCATGGGTTGTGC     | 59.829 | 20 GGAAATGGAAAGGCAACAAA  | 59.916 | 20 |
| ATAAAGAGGGGCAGGGTAA      | 59.793 | 20 TTTGGGATACGACCTTGCTC  | 60.074 | 20 |
| CGAAGTCTCAGGTTGATTG      | 59.288 | 20 TCAGTTTTCGACTTTTTGGGA | 59.71  | 21 |
| ATTCCGGTGACGGTTGAATA     | 60.192 | 20 AGTTTTAGGCGGGAAAGCTG  | 60.731 | 20 |
| AGAAAGGGGGAAAGCAAAGA     | 60.18  | 20 CACCGCAAATATACGAAGCA  | 59.725 | 20 |
| ACTTCTCCTCCACCGCTCT      | 60.393 | 20 CTCGAACACCATCTGATCCA  | 59.631 | 20 |
| CTTGAGAACTGACTTCGGG      | 59.837 | 20 ATGCTGCATGCACTATTTGG  | 59.718 | 20 |
| ACAGTAAAATGCTGCCCAGG     | 60.132 | 20 CGGAAACTGACATCCACCTT  | 59.966 | 20 |
| ACTCAGATCACTCAACCCGC     | 60.269 | 20 TTCGAGCAGGAAATGTGGAT  | 60.603 | 20 |
| CGAAGCATCACATTTGAACG     | 60.257 | 20 GGGACAGGCTCTTGTGTTGT  | 60.159 | 20 |
| CCACGTGAGCTAGAACCTC      | 60.012 | 20 GATCGGCAGTGGCATTIT    | 59.61  | 18 |
| CAATGAGGACATCCGAGGAG     | 60.612 | 20 CGTGCAAGGATGCAATAAAA  | 59.702 | 20 |
| TCCTCTGTTGTGTTGGATGC     | 59.682 | 20 AGCTGTGCACACCACATTTT  | 59.758 | 20 |
| ACAGACCCTCACACCATTCC     | 59.817 | 20 CTATCAGGCATTGCCCAACT  | 60.096 | 20 |
| TGTGTGCGATTTAATCCTAACCT  | 59.912 | 23 TCTCTTGCAGCACTATGGGA  | 59.547 | 20 |
| TCCATAAGCCATAGCTAAAAGAG  | 60.125 | 24 GTTAGTTGTTGGCCCGTTA   | 59.861 | 20 |
| GACACAACCACAACACCTGC     | 60.055 | 20 TTCATATTCCTGGCGAATCC  | 59.862 | 20 |
| TCATCATTTTTATCATGAATCCCA | 59.137 | 23 TTGTTTTAATGCATCGGCTG  | 59.702 | 20 |
| AACCTTCTCTCTGGTGCCAA     | 59.844 | 20 GCGACAACCATCTCTTCCAT  | 60.081 | 20 |
| ATGTAGCCGACCCCAATTTA     | 59.297 | 20 TTGGGGACAAAGCAAATTC   | 59.916 | 20 |
| GGAGAAAAGCATACGGGTGA     | 60.074 | 20 GTTTCGGAGGTGTTGGACAG  | 60.545 | 20 |
| TCCATTCTTCACATCCACA      | 59.893 | 20 CAGAAAGGGGCAGATTCTTG  | 59.807 | 20 |
| CTTCGCCGCATATGAAACTT     | 60.23  | 20 CACCAATTTCCCGATCTATT  | 60.027 | 21 |
| TTGAACTCGCTCCTCCATC      | 60.34  | 20 TTCCCTCATTTGAACAAAACG | 59.961 | 21 |
| AGGAAAGCATGAGTGGAGGA     | 59.803 | 20 CAAAATGAAGCAGACTGCCA  | 59.988 | 20 |
| AACCCTTTCACCGTCCTCTAA    | 59.984 | 21 ACATCAGATCTCCGTCAGCA  | 59.372 | 20 |
| GCAAAATGTGTTGATTGTTATTCC | 59.67  | 24 TGATCTTGAAACCGTGATGG  | 59.496 | 20 |
| TTTTAACCACCATTTCCCGA     | 60.16  | 20 AAATGGACCCAACGTTGAAA  | 60.206 | 20 |
| ATTTGCAAAATGCTGCTGTG     | 59.879 | 20 TCCCTAATGCAAGGATGGAC  | 59.894 | 20 |
| TCAGAGGTGCACTCGAAGTT     | 58.594 | 20 GCGTGGGATCATAACTGTCA  | 59.527 | 20 |
| GACCAGTTCACAAAAGTCCCA    | 59.997 | 21 ATGCAACCTCCTGCTTCT    | 59.818 | 19 |
| ATTACCCACCGACACATTC      | 59.532 | 20 GATGAGACGAGAGAGGGGGT  | 60.615 | 20 |
| ATATTTGGTTGGTTCAGCGG     | 59.823 | 20 CTGGTTTTGGCAAACGTGA   | 59.734 | 20 |
| AACTCGGCAAGATGAACTGC     | 60.406 | 20 TGCAAGAAAACGTCCCGTA   | 59.317 | 20 |
| CCGTGCCCAATAAATCCTTT     | 61.029 | 20 TGCAGGAACACCTGAATCAA  | 60.24  | 20 |
| CACATGCCATAACCGTTCAG     | 59.988 | 20 CCGCAGAGGCGATCTCTA    | 60.201 | 18 |
| TCAGAAAGGATCCTCCTCCA     | 59.731 | 20 TTCAGCTCATCAAATGGGGT  | 60.461 | 20 |
| TGGGTGTCAGAGATTCGTCA     | 60.246 | 20 TGATGGAACCGGGAAGTTAG  | 59.926 | 20 |
| CGTGTAGGATGGGAAATTGAA    | 59.809 | 21 CCAACCGAACTAGCAGAAAAC | 58.893 | 21 |
| CGATCTCACTTCGTGGGAA      | 59.771 | 19 CCATTGCTTAAGCTCCCTTG  | 59.839 | 20 |
| ACATGAAGAGGACGAAGCGT     | 59.874 | 20 GTGTTGGGGATTTGATCCAG  | 60.173 | 20 |
| ACCGCATGTCACTTCGAATA     | 59.152 | 20 CAACCATGTGAGCCGTTAAA  | 59.585 | 20 |

|                         |        |    |                        |        |    |
|-------------------------|--------|----|------------------------|--------|----|
| CCTATTTCCCAACCCAAACA    | 59.657 | 20 | TCGCATTCAATTACCCAACC   | 60.701 | 20 |
| GCATGGATCTTTGGGAGAAA    | 60.014 | 20 | TCCAATTTATTGGGATTAAGGC | 60.052 | 23 |
| GCCGGTCTCAGTCTGCTATC    | 59.981 | 20 | GTAATCCCCCTACTCCTCCG   | 59.783 | 20 |
| GCAGCCTTGGTTCTTGTTTC    | 59.859 | 20 | CGTTGCAGAAGTTTGCTTGA   | 60.172 | 20 |
| AGAGTTATTCAGGCCAGCCC    | 60.599 | 20 | GTGGTATGGTGTGGAGGACC   | 60.096 | 20 |
| GTTGCTCAAATTCTTCCCCA    | 60.051 | 20 | CATCAAGTGGTAGGCCGATT   | 59.955 | 20 |
| GTTCTGATGCTTACCAAACG    | 58.906 | 22 | TGATTGGTTAGAGAGTATGTG  | 59.971 | 27 |
| CACTGATCGTACACGATGGC    | 60.144 | 20 | ATGGGGGTTTGAAGTTGGAT   | 60.422 | 20 |
| GATAGGCGTTTGAAGGTGAC    | 59.7   | 20 | CGGGTTCATTCTGGTTCATC   | 60.317 | 20 |
| ACGATGCTCGAGGTTAGAG     | 60.555 | 20 | TTGATTTTGTATTGACCTA    | 57.586 | 25 |
| TTCCATGTTCTGGAGAAGCC    | 60.195 | 20 | AAATTGCAGCAAACCCAAAC   | 59.982 | 20 |
| CATTCCACCGGAAGGTCTTA    | 59.926 | 20 | TCTTGCTTTTTGCCATGTGA   | 60.379 | 20 |
| TGAAAACCCCCACTCAACTC    | 59.943 | 20 | AGAGATGCGCTGGATAAGGA   | 59.939 | 20 |
| CATCGAGACATATGCAAAAACA  | 58.701 | 22 | AACGAAAGAGCAAATGGGAG   | 59.312 | 20 |
| AATTTGAATTTGAAAAGTATGG  | 59.244 | 25 | TATGCATGGATGGTGTACCG   | 60.22  | 20 |
| TCCGGTGTCTTTTTCTTT      | 59.853 | 20 | ACGATCGCCTACGAGAAAAA   | 59.845 | 20 |
| GCACTGAAAAGTAGCGGTT     | 59.522 | 20 | CAATTGCAAGGAATTTCCCA   | 60.807 | 20 |
| ACGTCAACGCTCGTACCTTC    | 60.321 | 20 | TGTTTAAAAGTTTCCTGCACAA | 57.571 | 22 |
| TGATGAACTGCTGCCAGAAC    | 59.992 | 20 | GGCCATTTTCTGCTGTCATT   | 60.081 | 20 |
| TGCATAATCAACGGTCAATCA   | 59.945 | 21 | ATTCCCTTTGGGGACGAATA   | 60.502 | 20 |
| CAAAAATGGCATTCAAGCTG    | 59.301 | 20 | AGGCAAACCCCATGAAACAG   | 59.971 | 20 |
| TCTTTTCAACATGTAGCGCA    | 58.075 | 20 | CGCCGATCCCTACTTTTCTC   | 61.08  | 20 |
| TGAGCCACGCACTCTGTAGT    | 59.648 | 20 | GACCAAGAACCACTGCGTTT   | 60.156 | 20 |
| TTCTTCTCCTCTGCCTCCCT    | 60.468 | 20 | CCCCTGAAAACAAGAAACGA   | 60.081 | 20 |
| GAAGTTGGTGGGTTGTTTGG    | 60.246 | 20 | TTCAAATTAGCAACAAAAATG  | 58.007 | 24 |
| CCCAACTTCCAACATCGAAT    | 59.79  | 20 | TTTCATCGTCACAGCAGCAT   | 60.423 | 20 |
| AAATCCCCACCATTTCTCT     | 59.996 | 20 | GTAGTCTGGTCTCTGGCGG    | 59.867 | 20 |
| CGCCTTGAGTTTGGGTAAAA    | 60.103 | 20 | GATGCCAATGCCATAACTGA   | 59.504 | 20 |
| CAGATTGAATGTGGAACGGA    | 59.496 | 20 | TCCTCTTCTGCCATTTGAGC   | 60.483 | 20 |
| TTCATGTAGCCGACCCAAAT    | 60.331 | 20 | TGTGGCAGATGATCAAAGGA   | 60.201 | 20 |
| TGTTCTGTTAAACTTTCACATCT | 58.054 | 25 | TCAGGGAGTTCCATGACTCT   | 57.183 | 20 |
| TCGATCCGGGACTTCAAATA    | 60.405 | 20 | AGCGACGAAGAACGAAGGTA   | 60.015 | 20 |
| TTCAAATGAATCTTCAACAGGA  | 57.338 | 22 | AAAATTTTCATCAGTTATTTGC | 58.388 | 25 |
| TGAAGCCCAACAGATTGATTT   | 59.56  | 21 | TCAAATTTTGGCTCGAAAGG   | 60.181 | 20 |
| GAATTCTGAATGCATGGTTCTT  | 58.188 | 22 | GGGATGCTCAAAGTCTGCAT   | 60.226 | 20 |
| ATGGCGAGGGAGAGAGGTAG    | 60.746 | 20 | TTCTCCCCGTAGAAGCCAC    | 60.203 | 19 |
| TCAAAGTCCCTAACCATCCG    | 59.926 | 20 | AAACACCTCCTCCCCATACC   | 60.052 | 20 |
| CGACCTCACATAGTGGGACA    | 59.545 | 20 | TGTTGCTTGGGAGCTTGATA   | 59.42  | 20 |
| GTGCACATGTCAAGTTTGGG    | 60.008 | 20 | CCATCTCCTCAAAGCACCTC   | 59.803 | 20 |
| TTGACCCCAATCTCGACTTC    | 60.05  | 20 | TATGCATGCTCATAATGCCA   | 58.679 | 20 |
| CCGCTGATCTTTCTGCTCTT    | 59.717 | 20 | TGAATCAGCGAGTGAGGATG   | 59.942 | 20 |
| GATTGCCTTGTTTACCCGTG    | 60.365 | 20 | CTACACAACACCCTTGCGAA   | 59.758 | 20 |
| AATCTGGGGTTCAACAATGC    | 59.797 | 20 | TGCTTGTTTCTGCTTTGAGG   | 59.195 | 20 |
| CGGAGGAGTAGGGGATTAC     | 59.783 | 20 | TTACTGGCTCGTTCATGCAG   | 60.011 | 20 |
| TGGGCGAAAATTCAACTAGG    | 60.067 | 20 | GCAACGGAAACGTCTTTGTAA  | 60.159 | 21 |
| CCCAAGACCCCAATTTGAT     | 59.59  | 19 | TGAGACAGGTTCTCGTCGAA   | 59.545 | 20 |
| GTGAGCGAGGTGAAGAGTCA    | 59.129 | 20 | AGGTTGCTACTGGTCATGG    | 60.134 | 20 |
| CCAATTTATTGGGATTAAGGCT  | 58.465 | 22 | TTGAAGTTGAGGGATGCATTA  | 58.227 | 21 |
| GACACGCGGATCTGTGTCTAT   | 60.157 | 21 | AGGTCAGAGGTGACGGTTTG   | 60.151 | 20 |
| TGTGTGCAATTTGGTTCCAT    | 59.823 | 20 | AAAAATTTAGGGCGTTACGAA  | 57.906 | 21 |
| TGGTTGCCTTAAATGCTGTG    | 59.729 | 20 | TTCAAACATTCTCCTTCCAAAA | 58.716 | 22 |
| TCGTAAGTTGGAAAGGGTGC    | 60.11  | 20 | ACATGTCTTGCCCTCAAACCC  | 59.973 | 20 |
| TCCAAAATGAACTTGTAAATC   | 59.763 | 24 | GAATCCTTGACGAACGAAT    | 60.081 | 20 |
| AAGGGCCTTAACACCAACAA    | 59.471 | 20 | GACAAAAATTTGGCGATGCT   | 60.081 | 20 |
| TGATTCATCGCATTTACGGA    | 60.035 | 20 | ATCGATGATCACCCACATCA   | 59.724 | 20 |
| GCGGAGGTGGATATTGTGAT    | 59.78  | 20 | GGGTCGTTGAGCCAACTAA    | 60.074 | 20 |
| AAGCTAAGAGCTCCTTGGGG    | 59.976 | 20 | ATGTAGCCGACCCCAATTTA   | 59.297 | 20 |
| GATTGCCACGTGTAATGGGT    | 60.646 | 20 | TTCTCTTTGGCTTTTGCAGG   | 60.493 | 20 |

|                          |        |                            |        |    |
|--------------------------|--------|----------------------------|--------|----|
| GCAGCGAAAAATCGTAATCC     | 59.688 | 20 TTCCTGACGCTGAGGAAGTT    | 59.989 | 20 |
| TTTGGTTCATGTAGCCGACC     | 60.894 | 20 CAATTGGAGGTTTGTGGTGTT   | 59.743 | 21 |
| ATTCAGCTCTTGTTCCTCCA     | 59.67  | 20 CACGGCAAAGCATCTATGA     | 59.833 | 20 |
| GCACGAACCCATGACCTATT     | 59.82  | 20 GAATTCTTTGGCGAGATTGC    | 59.791 | 20 |
| CTCGCCCTTCTCTGTTTCTG     | 60.126 | 20 CCCACTATTTCCCCTGAACA    | 59.784 | 20 |
| CCCTGTTTCACATCATTCCC     | 60.173 | 20 CCCAAGACCCCAATTTGATT    | 60.91  | 20 |
| CTTCCACACATAATGCCGGT     | 60.776 | 20 GGCTAACATGATATTGCACCA/  | 59.859 | 22 |
| ATGCATGCAAACCAGGATCT     | 60.492 | 20 TACGACCACTTGCTCCCTTT    | 59.734 | 20 |
| CTACCGGAGGAAACCATGAA     | 59.926 | 20 TGTAGCCGACCCCAATTTAT    | 59.297 | 20 |
| CTTCCACCCTTGTTCCTCAA     | 59.942 | 20 AGATATGCGTACTTATCCTTAC  | 57.953 | 24 |
| ATGGTGTAAGGTGTGGAGG      | 59.697 | 20 CGAAGACCTAAGCCACAAGG    | 59.869 | 20 |
| AGATCCCTCCCTCGCTACAT     | 60.059 | 20 AGGTTTCGCCTTCAATCGTA    | 59.708 | 20 |
| GGGTGGTGAAGAATGAATGC     | 60.326 | 20 GTTGTCAACCCAACGCTACA    | 59.615 | 20 |
| CAAAACCTTCAATGGCCAAC     | 60.344 | 20 ATCCACCCTAGCATGTGGTC    | 59.81  | 20 |
| CACCAATCCGTAGAGAAGGC     | 59.694 | 20 TTTTCCCATTTTGGTGCAAT    | 60.167 | 20 |
| TTCTCTTGCAATGCTTCACG     | 60.134 | 20 CTCATGAAGCTTCTGTGC      | 61.087 | 20 |
| GGAAGAAGGCAAGGGAGAGA     | 60.842 | 20 TCATCCAAGTTCGTGTGAAATC  | 59.978 | 22 |
| GGTGCGGGATAAAAAATGTTG    | 60.188 | 20 AATCCAAAATCTCGGCTTCA    | 59.645 | 20 |
| ATATCAGCTCGCACAATCCC     | 60.066 | 20 TTTTTCATGGCCCTTTGTCT    | 59.546 | 20 |
| ATGTAGCCGACCCCAATTTA     | 59.297 | 20 GAGCTCGTTGAAGCTGGAAG    | 60.277 | 20 |
| TCCATTAACTCATCGTAAAATTC, | 59.009 | 25 TCTGATCCTTTGCATTTAGCA   | 58.52  | 21 |
| GGATGGGATAGTGATAGGCT     | 59.279 | 21 GGTTGCCTGCACCAAGTAAT    | 60     | 20 |
| CATATTCAGAGTCGTTTGAGCTT  | 57.727 | 23 TCTGTTATGTTTTCTCTAGTTTC | 57.187 | 27 |
| TCAGAAAAACAAGTGGGGGT     | 59.425 | 20 TGGTGATCTACATCTCTTCCCA  | 59.55  | 22 |
| TGAACTTTTTGTTCTGCGA      | 59.439 | 20 ACCACGACTATCAAGGCGAA    | 60.657 | 20 |
| CGAACAAAGAAACGGGGATAA    | 59.931 | 20 GGCTAAATTGACAGTCCTCGG   | 60.991 | 21 |
| TGGTTGCTCAATTATGAAGGC    | 60.089 | 21 TCGGACAACAATTCATTGAGA   | 59.112 | 21 |
| TCAATGGGGACATCTGAGTG     | 59.473 | 20 ACTTCCCCTCCACCACTTG     | 60.002 | 20 |
| CCAAGTGTTAGTGGCCAACC     | 60.41  | 20 CCCAAGACCCCAATTTGAT     | 59.59  | 19 |
| CTTTTGCTGCTCACTTGACG     | 59.928 | 20 TGAAGGAAGAGAGAGAGGCG    | 59.82  | 20 |
| ATGTAGCCGACCCCAATTTAT    | 59.585 | 21 CCGTCTGCGCCTTAAGTTAG    | 60.032 | 20 |
| CCAATGTGATTGGCTAGTTGC    | 60.517 | 21 CACGGAAAACCTAAGTGGCT    | 59.238 | 20 |
| ATGACCGAGGAGCAAATTGT     | 59.556 | 20 ATCACGCTTCATTTATCCC     | 59.9   | 20 |
| GTCGGATATGGGTTGTTTGG     | 60.051 | 20 TATCGATGGAGCAGCAATCA    | 60.329 | 20 |
| GTAGAGGTGCCTGTGGTGGT     | 60.033 | 20 CTCGTCTTCCGTGGATAAGC    | 59.836 | 20 |
| CGAGTAGCTGGGTCTGAAGC     | 60.156 | 20 AAAGGAAATCCCCTCACCTG    | 60.298 | 20 |
| TGTCAGTCAGGATTCTTTTGA    | 59.711 | 22 CTTGGGCAATATGTGGAAGC    | 60.606 | 20 |
| TTGAGCATATTTTGTGTTGCTG   | 60.177 | 23 CATCGACCGGCTTCATTTAT    | 59.923 | 20 |
| TTTAGTGGGAATCACGGGAG     | 59.926 | 20 GTTATCTCCGACTTTGGGGC    | 60.826 | 20 |
| TCCTTTCTTGGCTCCACATC     | 60.195 | 20 GAATTCAAGCCGGTTTCTGA    | 60.192 | 20 |
| AGTCGCAGCAGAGGATTGTT     | 60.02  | 20 AAGTAAAAACAGGCGAGGCA    | 59.883 | 20 |
| AACCCGAGTATCCTAACCCG     | 60.2   | 20 GAACCCAAATCACGGAGGTA    | 59.79  | 20 |
| CCCAGTTTATTGGGATTAATGTTT | 59.443 | 24 TTCTTTCCCTCACAGCACCT    | 59.844 | 20 |
| CCTTGCAATTAGGCAGAGCTT    | 59.615 | 20 CCCCAATACCCCAATTTGAT    | 60.614 | 20 |
| CCCAAAGGGAGGAGTGAAT      | 60.298 | 20 TAGTTGCTGGTGTGGTGGAG    | 59.745 | 20 |
| GACAATGCTGATCTCCTCCC     | 59.617 | 20 AAACCAGCTCATTTGTTGGC    | 60.118 | 20 |
| CCCCTTCATTAATGCACCAC     | 60.192 | 20 ACGCGGATTTGAAAATGAAA    | 60.436 | 20 |
| ACGTTGCATGTCCATGATTC     | 59.379 | 20 TCGTATTCTTGGGTGAGCAA    | 59.272 | 20 |
| CGAGCTCGATCATGCAACTA     | 60.119 | 20 GACACTGATCGCATGCCTTA    | 59.83  | 20 |
| TGGTGAAAAGTAAGCATGCAA    | 59.359 | 21 CTAAAGGTGTCAAACGGGC     | 59.609 | 20 |
| ATGTCATTACTCCACCGGA      | 60.195 | 20 AGGATTTTGAAGGATGCGTTG   | 60.074 | 20 |
| TTCGAATGCAACTGGAGA       | 60.39  | 20 CTGATCGGCCAAAACTAGC     | 59.845 | 20 |
| TTGACGAGCTTCCCTCTTGT     | 59.989 | 20 CATGATAAATTAACGTAAGTC   | 59.371 | 27 |
| AGATCGGACAACCCATCAAA     | 60.317 | 20 CACCAGCTTCGACACACAGT    | 59.94  | 20 |
| TTTTGCTCACCCCTAACCCAC    | 59.971 | 20 TGTTTCGAAAACATTGGTCCAT  | 60.22  | 21 |
| TCTCCACCCAAAAACCTCAC     | 59.943 | 20 GCGGTGGCTCTGTAGAAGAC    | 60.02  | 20 |
| GGGGCGTTACATGGACAATA     | 60.585 | 20 CAATCAAACCCCAAGACACA    | 59.389 | 20 |
| CCAAGGTTGAAAGGGATCTG     | 59.521 | 20 GCAGTATCAAGGGCTCTCGT    | 59.459 | 20 |

|                         |        |    |                        |        |    |
|-------------------------|--------|----|------------------------|--------|----|
| CCCAAACATGCAAAACCT      | 59.971 | 20 | GAAATGGGGAGGAGGATAGC   | 59.866 | 20 |
| TTACCTAGCAAGGGTTTGGG    | 59.084 | 20 | CACTTTGCCCTTCGTTTCAT   | 60.11  | 20 |
| AGAGAGACGGGGAAGAGGAG    | 59.945 | 20 | TCTCCGAATCAGAGCCTTGT   | 59.95  | 20 |
| GCCATAAGCCCATCAAATA     | 59.757 | 20 | CTGAAAAATCGGCGACATCT   | 60.214 | 20 |
| AATGGAAAATAAGCAGGGGC    | 60.28  | 20 | CAAAGCAAAAAGTTGGCGAT   | 60.244 | 20 |
| CACACTTCTCCTGCAACCAC    | 59.31  | 20 | AAGGGTGCCGACCAGTAATA   | 59.452 | 20 |
| GGAATCTTGTTTTAAGTATCCGA | 59.762 | 24 | TTGCTAACAAATATGCATTCCA | 59.526 | 23 |
| GCTCGTCTCGAGCTGTGTTT    | 60.743 | 20 | TTCACGTTCAATCCCTCACA   | 60.088 | 20 |
| TTTTTGATGACGCAGGAACC    | 61.012 | 20 | GATTCGGGTTCAAACCCTCT   | 60.306 | 20 |
| GAACCTCCTCTGTTCCCTCC    | 60.05  | 20 | ACCCTTGTGAACAAACTCGG   | 60.005 | 20 |
| AAAGGGTATGCAGCAGGATG    | 60.096 | 20 | ATACGCACGAACATGAGCAA   | 60.288 | 20 |
| GAGAATTCCCGCAGATCAAA    | 60.155 | 20 | TCGGATTCTTGGTTTTTCAG   | 60.044 | 20 |
| TTTGGTTTGTTGAACCCTCC    | 59.807 | 20 | TTTTGGAAGGAGTGGTGGTC   | 59.943 | 20 |
| CCACCCCTTCTTTTTTCATT    | 60.159 | 20 | TGAAGCGAAAACCTGAACGTCT | 60.045 | 21 |
| AGTGGCATCAAGACGAATCC    | 60.081 | 20 | ATCCCCTCCAAATCCAAAC    | 59.996 | 20 |
| ATTGCATCTTGGCCCAACTA    | 60.469 | 20 | TGCTTTCATCACTGGCAGAC   | 59.992 | 20 |
| GGCATGCATAGGTGTAGGCT    | 60.125 | 20 | AATGTCTCCCGAGTTTGCTG   | 60.255 | 20 |
| GTGAGCTCTGTTGGTCTTTGG   | 59.899 | 21 | TCAATTACCTCCCCAGAACG   | 59.926 | 20 |
| TGTAATGATCTTGCATCGCC    | 59.652 | 20 | GGTCTGGGCTGTAACCAA     | 59.971 | 20 |
| TGGAAGAGTGCCCAAATACA    | 59.123 | 20 | TTCATGAGCTCCGTGTTGAA   | 60.39  | 20 |
| CTTCGGCTCTCCAACCTTCAG   | 60.126 | 20 | CCATACCCACATTTCCAAGG   | 60.044 | 20 |
| CAGCTCCAATGCAGTAGCAA    | 60.157 | 20 | AATTCATGAAGGGCTCGTTG   | 60.074 | 20 |
| TTTCCAAATTTTCTCCTCCG    | 59.131 | 20 | ATGTAGCCGACCCCAATTTA   | 59.297 | 20 |
| AGATGGATGTTTCGAGTTGGG   | 59.927 | 20 | TCCACCACCACCCAATACTT   | 60.088 | 20 |
| GGCGAATTCTAAAGTGATCAAA  | 58.386 | 22 | AAAATCCTAATTGCTTTGCACC | 59.525 | 22 |
| AGGGCCAAATTTTATGGGAC    | 60.02  | 20 | ATAATTTATCCCGCAAGGGG   | 60.002 | 20 |
| TCAGTTTGCACACTTTCCCA    | 60.278 | 20 | TTGCCAAGGGATATACCCAA   | 60.146 | 20 |
| CATTTTTCTTAACGGATTCTCCA | 59.507 | 23 | AGGAACATGCCAACTTCTGG   | 60.111 | 20 |
| ACATGGTGGTTAGGGAGCAC    | 59.851 | 20 | TGTCTTTTGGTGTGTGGGAA   | 59.976 | 20 |
| GCAGGAACCATCGAGAAGAG    | 59.95  | 20 | AACCGACTTGAAACCTAGCG   | 59.378 | 20 |
| GCGTGGGAATTGTTTCAAGT    | 59.978 | 20 | CTAGAAGTCACCGGAAGCCA   | 60.388 | 20 |
| CATCATCCGTAAGCTCCAC     | 60.483 | 20 | CCTGTTGGGAGGTTCTTCAC   | 59.549 | 20 |
| GGGGTCCCTGTCTTATAGCG    | 60.836 | 20 | ATGCAAGGCAGAAATCAACC   | 60.081 | 20 |
| AGTCCCCATTGCCATAATGA    | 60.155 | 20 | ATGCCTCTGTTCTTCATCCG   | 60.218 | 20 |
| CCGTATAGTCCCGAGCAGAG    | 59.853 | 20 | AAAATGAGGAGTGGGTGTCTG  | 59.966 | 20 |
| TGCCTTGCGAATTGTGATTA    | 60.215 | 20 | ATGCCGAATTCAGTTTTTGG   | 59.938 | 20 |
| CATCCCCACTTTTTCGTTTA    | 59.795 | 20 | ATCAGCAAGAGATTGGTGGG   | 60.073 | 20 |
| AGCCATAAGCAACACGAAT     | 59.597 | 20 | CACAATACCCCTGGTCAAGC   | 60.375 | 20 |
| TGGGTGCGAACAACATTATTT   | 60.237 | 21 | GGTCTCTCATCCATTGGGA    | 59.862 | 20 |
| GCAGGCGATAAGCAGAAGTT    | 59.62  | 20 | TATGCTAACTCCCCTTCCCA   | 59.523 | 20 |
| CCCAAGACCCCAATTTGAT     | 59.59  | 19 | GTGAACCTGGGAGCTTCTCTG  | 59.844 | 20 |
| AGATCCAATCCAAATGCTGC    | 60.043 | 20 | TTCTCCTCGTCATTGGAGAAA  | 59.799 | 21 |
| GATTTCAACACTTGGGCTGT    | 59.973 | 20 | GCAAGAACCCTCATCTGCAT   | 60.226 | 20 |
| CACGTGTAGGATGGGAAATTG   | 60.234 | 21 | CGCTATTTTTGTAATGGAATTT | 59.049 | 24 |
| ATAGGTTGTTCAAAGCCGGG    | 61.217 | 20 | CCGACCTCACATAGTGGGAA   | 60.913 | 20 |
| CTTTGGGAGTGAATGGGAGA    | 60.042 | 20 | ACAGGATGCCAGTTATGGGT   | 59.288 | 20 |
| CGCCTAGACGCAGAAAAATC    | 59.982 | 20 | TTGCTTCAACACAAATTTCA   | 59.25  | 22 |
| ATTTCTGGCTATGCCTGTGC    | 60.243 | 20 | AGCCAAAATTTCTCCAAGG    | 60.423 | 20 |
| ATTTCCACTCATGGAACCCA    | 60.173 | 20 | TCCGACATCAATGGCAGTAA   | 60.073 | 20 |
| CCAATCACAGTCGAAGACGA    | 59.831 | 20 | CCACTGGGACTAAGCGAGAG   | 60.005 | 20 |
| GCGGCTACAACCAATTCAT     | 59.967 | 20 | CCCCGCACTTCTTAACAAAC   | 59.609 | 20 |
| CATGCCTCGAGTATGTGGTG    | 60.136 | 20 | TCGAAAGTAGGCGGGTTATG   | 60.089 | 20 |
| CCCAAGACCCCAATTTGATT    | 60.91  | 20 | TTTCTTGGGTGTCTTCGTT    | 59.569 | 20 |
| CCAATCAAATTGGGGTCTTG    | 60.162 | 20 | CTCGCCCTTAGAAGAGGTT    | 59.842 | 20 |
| AGCAGGCTCAGACCAAGAAG    | 59.745 | 20 | CATCGCTTCAACCCTTGTTT   | 60.11  | 20 |
| TACTTCAACCCACGTGACCA    | 60.001 | 20 | TGATAGCACGATCCACGAAG   | 59.823 | 20 |
| TCGGCAGCAGTTACATCTTG    | 60.011 | 20 | CCCAAGACCCCAATTTGATT   | 60.91  | 20 |
| AGAGAATGTGGTGGTGGAGG    | 59.962 | 20 | GCAACAAAGATGGCCAAGAT   | 60.081 | 20 |

|                           |        |                            |        |    |
|---------------------------|--------|----------------------------|--------|----|
| AATTGTTGCATCTATTTTCTAAATC | 57.596 | 26 CGTATTCCTCATTAAAGCCCC   | 58.533 | 20 |
| CAAGACCGTGACAGGCACTA      | 59.897 | 20 TGAACTTTTCCCTGGACCTG    | 60.081 | 20 |
| AATTGTCCCTCCACACCACT      | 59.279 | 20 TTGAATCCCGAGATGGTAGC    | 60.036 | 20 |
| AATCGCATTTTCTCGACGAC      | 60.221 | 20 AGTCCGGAAGTCTTTCCCAT    | 59.935 | 20 |
| CAGCCAAGAGCCCATAGTTC      | 59.836 | 20 ACTAGGGAAGTTGGGAGGGA    | 59.928 | 20 |
| TTTGGTCCGATCAGAGCTT       | 59.813 | 20 TTATGTCATCTTCCGCTCCC    | 60.036 | 20 |
| AAAATTTGTCCTTTCTACACGCA   | 60.05  | 23 ATTCTTGTGACGTTGGAGGC    | 60.119 | 20 |
| AAAACCTGCCTCAACCCAG       | 60.096 | 19 CTGTAACCCAAAATCTCGGC    | 59.569 | 20 |
| CCCAAGACCCCAATTTGATT      | 60.91  | 20 GCCAATTCAAATCTCCACCA    | 60.843 | 20 |
| ATGTCCCTGCTTCGCATATC      | 60.066 | 20 TTTGGGATGATGGTTTGGTT    | 60.029 | 20 |
| AAAACCCAATCAAACGCAAC      | 59.845 | 20 CCCAAGACCCCAATTTGATT    | 60.91  | 20 |
| GGCAGAATTTGAATGGGAAA      | 59.878 | 20 ATTTCTGCCATCCAATCAC     | 59.756 | 20 |
| GAGCAACCTGATGGAGATCAA     | 60.211 | 21 CTCCAAATGTGATGTCACCG    | 59.96  | 20 |
| GGAGGTTTAAAAGGTACCTGAA    | 59.499 | 22 CATGTAGCCGATCCCAATTT    | 59.784 | 20 |
| CCGTCGGCTAAAACACTACC      | 59.632 | 20 AGTTTGAAGAAGCCGTGGAA    | 59.853 | 20 |
| TCGATTTTGTAGGCTCGC        | 60.343 | 20 CATCCATCACCGTTAATCCC    | 60.014 | 20 |
| AGGATCATGTTCCGGCTCATC     | 60.042 | 20 CAAAGAGTTGTTTTACAGACCA  | 59.626 | 25 |
| TCAAAAACCAATTGATAGCACA    | 58.213 | 22 GCTTGAGTTTCAATGGGCAC    | 60.646 | 20 |
| GAATTCTTTCCTCCATGCCA      | 60.014 | 20 AGGAGGAGAAGCCAAAGGAG    | 59.95  | 20 |
| CCTCCCAAACCTTGAGACCAA     | 60.081 | 20 CAACAGGAAGCCGTCAATTT    | 60.11  | 20 |
| GAGGCGCAAACACTTCAAC       | 60.817 | 20 ACCATTTTTCCACTCCTCCC    | 60.169 | 20 |
| GCAGGCCAAAGAGGAAGAGT      | 60.903 | 20 CAGGCCAACTGAAATCTGAAA   | 60.234 | 21 |
| GCTTTGGACTIONCGAGTTTGA    | 60.375 | 20 CGCTGGTCGGTTAACTCTTC    | 59.875 | 20 |
| GACATTATCCATTTTATTGGGCA   | 59.934 | 23 TGCAGCTAGTCCCTGCTTTT    | 60.154 | 20 |
| GATCAAAATGGGCCTCAAGA      | 60.014 | 20 TTCTGTGCTCAGCTTCTCCA    | 59.855 | 20 |
| CAAGAAAGCGAAATGCTTCA      | 59.182 | 20 GCATAGTTCGAAGGACAATATC  | 58.613 | 24 |
| GGAAAGCACTCGCAAGAAAAC     | 60     | 20 CACCCAGAGTCCATTCCACT    | 59.962 | 20 |
| GTCACCCCATACCCACATA       | 60.317 | 20 TGATGTCAAAGCGTTTCTCG    | 59.988 | 20 |
| TGTAGCCGACCCCAATTTAT      | 59.297 | 20 CAATCGACCACCCGATATGT    | 60.603 | 20 |
| GGAGTGGGTGTCGGTTTTTA      | 59.83  | 20 TTATTCTATGCCTTCAGCAAATC | 58.474 | 23 |
| CGTTTCGATTTGCCGTTTTAT     | 59.964 | 20 CCGTCTTTGGAGCATGAAAT    | 60.074 | 20 |
| TTTGGTTTTAAATTCGTTGAA     | 58.567 | 22 AAAACCAATTGACAATGAGAG   | 59.864 | 23 |
| AGAACCAGACCTGCTTGCAT      | 59.874 | 20 CATAGGCCAAGAAGGGAACA    | 60.066 | 20 |
| CGACCCACATAGTGGGAAAG      | 60.366 | 20 CTTCCATCGTTTTTCAGGGAG   | 59.665 | 20 |
| TTTCGACGGTTTCAAAGAAAA     | 59.723 | 21 AGAGGGAGGAAACTTGACCC    | 59.534 | 20 |
| CTTTTGATTGGGAATAATTGGG    | 59.562 | 22 TGTGGTCCACACTCCATGA     | 59.518 | 20 |
| CTCTTTTGATGGTGGCCAAT      | 59.933 | 20 GCAGTTGGATGACTGGGTTT    | 59.973 | 20 |
| ATGTCTATCGTTTGGGCTGG      | 59.955 | 20 TGGAAATTGTCGTGTAGTGG    | 57.023 | 20 |
| AAGTAGACACGTGGGAAGCG      | 60.312 | 20 CAGAAATGGCAGCAGAAACA    | 59.988 | 20 |
| GGCTGACTCATGGAGAGGAG      | 59.945 | 20 TGGTCATAGGAATTCGAGGC    | 60.036 | 20 |
| GCACTGCCTCATCCAAACTT      | 60.263 | 20 GTTGCAACTTCCCACCTGAT    | 59.973 | 20 |
| CCCCTATCCCCACTGTTAG       | 60.56  | 20 GATTCATTCATTTGTCAACACG  | 57.999 | 22 |
| CCCTCGGACACTTTGACATT      | 59.966 | 20 TGTGCAGTATGTTACCGCGT    | 60.203 | 20 |
| TTCATGGTGGGGTGAGTTTT      | 60.21  | 20 TCTCTTCCGTGTTGGTCC      | 60.238 | 20 |
| GATTCTGGTTCGGTGATGCT      | 60.081 | 20 TGGCAGAATGAAGTCGACAG    | 59.984 | 20 |
| GCTCGTACATCGAGTGATGC      | 59.43  | 20 GTTGTTGCAGAAAAGGGGAA    | 60.088 | 20 |
| GTGGAGCTGTGGTGGTTAG       | 60.567 | 20 GTTCCTCGCGAAATTAGCAT    | 59.324 | 20 |
| TGCACCATGTGTCAGAGGAT      | 60.121 | 20 AGACATGTTGCGTTTTCCCTT   | 59.598 | 20 |
| AATGAGAAAATGAGGCGCAC      | 60.221 | 20 GATCCTTAGTGGATCGAGCG    | 59.797 | 20 |
| TGGCCAAAGACCAACCTATT      | 59.429 | 20 GTTCATGTAGCCGACCCAAT    | 59.82  | 20 |
| CGGATTGTTTTTGGAAAGGA      | 59.91  | 20 CGACGGATAGAAATCTCCGA    | 60.17  | 20 |
| AAGCTCTGTTCTGCGAAGG       | 59.757 | 20 TGATATTCCTTGCCCCTTCTT   | 59.966 | 22 |
| CCGTCTCCATTCTTCCACAA      | 61.034 | 20 AGATTTGCGGCTTCTCACAT    | 59.843 | 20 |
| AAGGCCCTCTCAAACCAAT       | 59.94  | 20 CCTCGAAATATCCTCCTCCC    | 59.859 | 20 |
| GAAGATGTATCAGGGCGAGG      | 59.653 | 20 ACGTTCACAACAACACACATG,  | 59.97  | 22 |
| GCATGAGGAAAAGGGATGAA      | 60.014 | 20 TAGTGCAGCATGTGGTGTGA    | 59.894 | 20 |
| CGGATGGTTGTTCCATCAT       | 60.582 | 20 ACCTCGTGCAAAAATTCCAG    | 60.11  | 20 |
| TCTTATTAGGGGCTTGTGCG      | 60.223 | 20 GGTTTCAAATGGGGTCTT      | 60.032 | 20 |

|                        |        |    |                        |        |    |
|------------------------|--------|----|------------------------|--------|----|
| TTGGTTCTCCTTTGGAGACG   | 60.224 | 20 | TTTTCTCATGAACCATCCCC   | 59.727 | 20 |
| ACGCGCTTGAATCAATTAGG   | 60.23  | 20 | GACTTGAGGACATACATAGTG, | 59.96  | 26 |
| GGAGATAGAGAGGGGCCAAC   | 60.037 | 20 | CTCAGTGGCTCGCTCATACA   | 60.16  | 20 |
| GCTGATCATCTTGGGGGTTA   | 59.894 | 20 | AACTGCTCCGTCTGCATCAT   | 60.833 | 20 |
| ACGAGTTGTTTGGTTGAGGC   | 60.156 | 20 | GCAGGGTTTTCGACAAAAGA   | 60.227 | 20 |
| AACGTATTCCTTCCCCACT    | 59.691 | 20 | TGCTTAATTCCTCATCCGAA   | 58.308 | 20 |
| TTCCCCACCATTTTCATCATT  | 59.991 | 20 | ATGACAGAGGCTCGTGAGGT   | 59.866 | 20 |
| AACATGCCATCTCAAGGGTC   | 59.934 | 20 | GTCCTTTTTCTCGAACGCAG   | 59.993 | 20 |
| GAAATTGCTCCCCTCTATCAA  | 59.572 | 22 | GGATATCTATTTGCGCGCTT   | 59.331 | 20 |
| TACGAGGTTAATGGATCCGC   | 59.923 | 20 | GCTCTTCGACGACCTCAATC   | 59.957 | 20 |
| CCCCAAGACCCCAATTTTAT   | 59.882 | 20 | GTGAGAAACCCATTTTGGCT   | 59.031 | 20 |
| TACTCCATTACAGACCCCGC   | 59.955 | 20 | CCATTTCTCCTTGCATCGTT   | 60.074 | 20 |
| GCACCCTCTCATGGATACTCA  | 60.088 | 21 | GTTTTCCGGTTGACAAATCG   | 60.344 | 20 |
| TTTGTGATGGGCAACTGGTA   | 59.964 | 20 | ACACCACCAATTTTCAGAGCC  | 59.973 | 20 |
| AAGTCGTCGTCATCATCCTC   | 57.644 | 20 | GGTTGGTAGTGGAGCTGGAA   | 60.111 | 20 |
| GAGCATGCCTAGATGTTGCTT  | 59.495 | 21 | GCAGGCTCAGACCAAGAAAG   | 60.134 | 20 |
| AGTCTCAATGGGGACACCAG   | 59.962 | 20 | TTCGAATGCTCACGTTGAAA   | 60.379 | 20 |
| ATCCTCCTCAGATCCTTGGC   | 60.563 | 20 | GATGCTGTTGAACCATCCCT   | 59.934 | 20 |
| TGTAGGCCAAATGTGTTGGA   | 59.964 | 20 | CAGCCATTCAACCAGCAGTA   | 59.864 | 20 |
| CCAAATGCTCCTCTACCGAC   | 59.694 | 20 | ATTCTCGTTTTCCACATGCC   | 59.939 | 20 |
| GGCTCGAAAAATAACCAA     | 60.075 | 20 | TCATCGAGTGCTGCAAAAAG   | 60.134 | 20 |
| TAGTCGAAAGTGGGGTGAG    | 60.103 | 20 | TCACCATGTTGATGAAGCGT   | 60.12  | 20 |
| CCTAAAGCCAGATCTCCGGT   | 60.59  | 20 | TGGAGTTCACGTAGCAAAACA  | 59.376 | 21 |
| CACTTACGAAATGTCAAGACGC | 59.813 | 22 | ATGTAGCCGACCCCAATTTA   | 59.297 | 20 |
| TTAGGACTACCGGTCCGATT   | 58.528 | 20 | CACCTCTTGCGGGGTATTATT  | 60.21  | 21 |
| CCGAATGATGAGAAGTGGGT   | 59.927 | 20 | GAATGCTTTGACCGCATACA   | 59.694 | 20 |
| TGAGGGAACCTTGTGAACCC   | 59.943 | 20 | TACATGTACGCCCCAAACAA   | 59.849 | 20 |
| AGCTTAGGGCAACACGAGAA   | 60.015 | 20 | CATCATTCCCATCACCATCA   | 60.137 | 20 |
| CAATTCCTTTGTGCGTGAGC   | 59.469 | 20 | CACGTATTTTGTCCAACGA    | 59.729 | 20 |
| ATCCATAAGCCGACCTCACA   | 60.483 | 20 | TGACCAATGAGTCGACTTGC   | 59.837 | 20 |
| ATGGACCAATATGTCATAACCA | 60.197 | 23 | CCGTATTTCTATGCCACGGT   | 59.845 | 20 |
| GAAGGGGGAGACCGAAATTA   | 60.258 | 20 | GTTGGATGGTTGGGTGATTG   | 61.025 | 20 |
| TGTTGAGCGACCAATCTC     | 59.837 | 20 | ATTCGTGATGGATGACTCC    | 59.893 | 20 |
| CATCATTGATTGTGGTCCG    | 59.774 | 20 | AATTGGCATTGATGTATATTG  | 59.506 | 24 |
| TCGAAATTGACACGATCCAA   | 60.049 | 20 | CCCAGGAGAATTAGGGTTCG   | 60.807 | 20 |
| TGGTTAAACTCCACCTTGGC   | 59.971 | 20 | TCTTTCTCCAATGCGACCTC   | 60.34  | 20 |
| GAACGAGCATCCATGTCAA    | 59.654 | 20 | CTCCTCGCTCTCCTCTCA     | 59.962 | 20 |
| ACAGAGAGGCGGTGGTAAAA   | 59.734 | 20 | CCATCCTTTAAGTACTTTGACT | 58.83  | 26 |
| CCATTTTGATGGAGACCGAG   | 60.452 | 20 | CCCCAAATTCGACAAACAAT   | 59.662 | 20 |
| TGTAGCCGACCCCAATTTAT   | 59.297 | 20 | GGGGAAGAACTCATGAACGA   | 60.05  | 20 |
| TCTCTCCCTAGAAAACGGCA   | 59.948 | 20 | ACCACAAATTAATCGGGCAC   | 59.691 | 20 |
| TTCCCTCTCAAAAACATCACA  | 59.587 | 22 | TGGAATAAGGCAAAAAGGAA   | 57.376 | 20 |
| AGTCGTCTCCTATCCCATCG   | 59.116 | 20 | GTGACGAGGAAGTAGCCCAG   | 59.867 | 20 |
| CGGTCAAACCAAATTACGC    | 60.356 | 20 | AAGATGTCATTTTGTGCGCC   | 59.939 | 20 |
| ACATGAATGTGTGTTTCATCA  | 58.751 | 22 | TGCGTGTTCATCCATTAT     | 59.96  | 20 |
| TGCCGTCTACAGAAATGTGG   | 59.716 | 20 | CCACTCACTCCAACAGAGCA   | 60.022 | 20 |
| CGAGGAGAAATTCTGGATGC   | 59.773 | 20 | GCTTGAAGCTCTATGCAAATCA | 59.636 | 22 |
| ATTCGGCATCAACCAACTTC   | 59.939 | 20 | GCGAGGCAATAGATGTGTGA   | 59.83  | 20 |
| TCTGCATGAACGCTTCTCAC   | 60.144 | 20 | CCTCTCCTCGAAAACCTCT    | 59.811 | 20 |
| CGCCAGCTACCATCTGAAAT   | 60.235 | 20 | CATACCGGAGCAGATCCAAT   | 59.917 | 20 |
| GCAACCATGATCTCATCGAA   | 59.61  | 20 | ACGTTATACTCACGCCCTGC   | 60.162 | 20 |
| TTTGGAGATCTTGGCTCCAC   | 60.195 | 20 | AGCGTTCGCTTGAAACTGAT   | 60.022 | 20 |
| TTAGTTGGATGGTTGGACA    | 59.935 | 20 | GTTGAGCCCAACCCAATTC    | 60.31  | 19 |
| TTGTCCAGCCCAATCTGAAT   | 60.461 | 20 | CAGCTGTCTCGACAAGTTC    | 59.776 | 20 |
| TGTAGCCGACCCCAATTTAT   | 59.297 | 20 | TCTTCCCATCTCATCAAGC    | 60.158 | 20 |
| GTCGCCTCACCTTCATCTTC   | 59.81  | 20 | ACTACCCGGACTTGGATGTG   | 59.844 | 20 |
| CCATTACCGATGCCTTACTTG  | 59.483 | 21 | TTGGCCAAGGACATAACCAT   | 60.192 | 20 |
| GACAGCGGTTGGTTCAGC     | 60.412 | 18 | GCAAAGGCTTGTGTTTCTCC   | 59.859 | 20 |



|                         |        |                           |        |    |
|-------------------------|--------|---------------------------|--------|----|
| TCGTAGGTTTTGGGTTTCCAC   | 59.83  | 20 TGTGGAGTGGACCTCATTCA   | 60.088 | 20 |
| GGTGAGCGATCAAATCCAT     | 59.9   | 20 CCCTTTTTGCACTTGCCTT    | 60.284 | 20 |
| TTCTTTTCTGATGAGGCGGT    | 59.813 | 20 GGTCAAGTGTGGGAGGA      | 59.943 | 20 |
| AGAGGGGTGTTGAAGGTGTG    | 60.002 | 20 GCGATGAAGAACAAGACCCA   | 61.188 | 20 |
| CCTCCGGCGATTACTACAAA    | 60.089 | 20 ATGGTATGTGGGATGGCACT   | 60.081 | 20 |
| TGGCTTCAGAAGAAACACCA    | 59.415 | 20 TTCCTGAACTGATTGACCCC   | 59.903 | 20 |
| GGTGGATCAAATGTTTTGGG    | 60.029 | 20 ATGAGCACCTTGACAATCCC   | 59.934 | 20 |
| ATGTAGCCGACCCCAATTTA    | 59.297 | 20 AATTGAAGAAAGCCGCACAT   | 59.713 | 20 |
| TAGGGAGTGGAGCAGCAACT    | 60.012 | 20 ACACTCCCCACAACCTCCTTG  | 60.002 | 20 |
| CTGCAGATGAGGGTCCTAGC    | 59.973 | 20 ATCTCTTATCTCGGCAGCCC   | 60.702 | 20 |
| GGTGTGCTGGAGATACCGAT    | 59.957 | 20 GCAGAGTCCCATAGCTCACC   | 59.834 | 20 |
| ACTGCTCGCTATTTGGATGC    | 60.382 | 20 TCCAATCAAGGTCAATGCAG   | 59.648 | 20 |
| GTAACAACGGTGGAAATGGG    | 60.088 | 20 TCCATCATTCCCTTTCTTGG   | 59.864 | 20 |
| TAAAGTGAACAACCTCCGGG    | 59.964 | 20 ATGGGCATTCAAGTGGGATTA  | 60.155 | 20 |
| ATGTAGCCGACCCCAATTTA    | 59.297 | 20 TTTTCTGCATTAGGGTTTAGGG | 59.515 | 22 |
| AAAGAACAATGCCCATCTG     | 59.933 | 20 CCAGTTGCTTTCTTTCCAGC   | 59.993 | 20 |
| CGTTCTTGCCAACCCTCTAC    | 59.734 | 20 TGTTCCAATGGAGGAGACAA   | 59.059 | 20 |
| TTGGCTCAAGCTTTGCTGA     | 59.716 | 20 GGCCCATTTACATCATTTGG   | 60.016 | 20 |
| TCCGTTGCTCCTACATCATTT   | 59.583 | 21 GGAGTGGACAACGTAGGGAA   | 59.966 | 20 |
| GGCATAGCCACGATTTCAA     | 59.637 | 19 ACAAAAAGGAAATAGGCGGG   | 60.305 | 20 |
| GCGAGTTTCTTGAGGTGCTC    | 59.997 | 20 ACTTTGTCACTACTCTCGGG   | 60.151 | 20 |
| GTGCATGAAACATCTGCTGG    | 60.272 | 20 AAAAGGAAACAAAGCAGCCA   | 59.861 | 20 |
| TGTAGCCGACCCCAATTTAT    | 59.297 | 20 GAATTGTGAAACACCTCGG    | 60.353 | 20 |
| CATTTTGTACCCGAGCGAG     | 60.628 | 20 ATGCAAACAAACCCGTACAA   | 58.942 | 20 |
| AGATGGGATGAATCTGGCTG    | 60.034 | 20 GAAAAATAAAAGACATACGAA  | 57.263 | 26 |
| TCAAATACATAATTAGCACGGAG | 59.504 | 25 GATCGAATCCGCTTTTATGT   | 60.043 | 20 |
| TCTGGATGCCTTGAAAAACC    | 60.051 | 20 AACCCCATATAGCGGGAAAA   | 60.508 | 20 |
| AAGAGGAAGGAGGTGACCGT    | 60.111 | 20 CTTCCAGCTGAAACTGTGAGA  | 58.229 | 21 |
| TGGAGCATCCAACATGAGAG    | 59.787 | 20 TCAAAGCATCCCTTCTTTACA  | 60.243 | 23 |
| TGGACTIONAGATGCTTGGGG   | 60.21  | 20 GCGCATTGCAGAGATTGATA   | 59.944 | 20 |
| CGACATGGTCATAAGGGTCC    | 60.195 | 20 ACAAGCAGGACCAAAACCAG   | 60.149 | 20 |
| CCCAAGACCCCAATTTGATT    | 60.91  | 20 TGCAAGTACTCCATTTTGTAT  | 59.12  | 24 |
| AATGAAATCGTGCGAAAATG    | 58.627 | 20 TTTTGAGCAGGAATGTTCTTCA | 59.861 | 22 |
| CGGAGACGGTAGAAGAGGTG    | 59.861 | 20 ATACAATGACGAAAACGCC    | 59.829 | 20 |
| ATGTAGCCGACCCCAATTTA    | 59.297 | 20 GTACCAACGCAAGGCAAAAT   | 60.003 | 20 |
| AGAGCGTAGAATCGCGAGAG    | 59.882 | 20 CATCGAGTGATCCATTGTGG   | 59.918 | 20 |
| AATCCCAAATTCATCCCTCC    | 59.959 | 20 CGACATCGGATTCCAACCTCT  | 60.073 | 20 |
| GGCCAAAATTGCCTCTATCA    | 60.038 | 20 CCCAAGACCCCAATTTGATT   | 60.91  | 20 |
| GCTCAAACAGAAGTCCCTGG    | 59.844 | 20 GCCCTGTCATTTTTGGAGCAT  | 60.081 | 20 |
| AAATAGGCTGGCAAAGGAGG    | 60.573 | 20 CTAATCACCACGCCCCTT     | 59.993 | 20 |
| CCAAAGCTTGAAGAAATGTTTG  | 58.919 | 22 CACGATGCATATGTTCTGGG   | 59.948 | 20 |
| GCAGACGAATTTAGTCGGGA    | 60.214 | 20 CTGGCAATGCCTATGTCAGA   | 59.823 | 20 |
| AAGTGATGAAGGCTGCCACT    | 59.874 | 20 TCGTCAGAATTTTTGGACCC   | 59.91  | 20 |
| AATCTCAAAGACGCGAGGA     | 59.955 | 20 AACATGGACGACCACGTGTA   | 59.88  | 20 |
| TCATTAGATTGGGAATAATTGGG | 59.101 | 23 ACAGCTTTCTCGGATGGAAA   | 59.813 | 20 |
| AGCTAATGCGGGAGAAGACA    | 59.978 | 20 GTTCCCCAGAACGTCACACT   | 60.009 | 20 |
| CCTCCTCCTCCACATTTCAA    | 60.042 | 20 ACTGCTAGGAACGCAAGGAA   | 60.015 | 20 |
| ACTGGCAGCAACTCATTTCC    | 60.263 | 20 TATTGCATGGTAATCCCGGT   | 60.038 | 20 |
| TCCTTTTGCCTTTTATGTGC    | 58.819 | 20 CCCACATATTCTTCAAGCGA   | 58.721 | 20 |
| GGACTCGGGTGAGTCTCAAG    | 59.835 | 20 ACTCCCACCAATAGTCAGCG   | 60.134 | 20 |
| CGGGTTCGAGTTGAGTCATTT   | 60.111 | 20 TTATGCCCAAACCTACCGAG   | 59.953 | 20 |
| TTGGGATAAAATCTCCGAAAAA  | 59.791 | 22 TTTCTCCATTTCGTTACTGCAT | 57.379 | 21 |
| TTTATCCCAAATTTGAGGCG    | 59.901 | 20 CTTTTCTCAGGCCTCACAC    | 59.844 | 20 |
| AAACCGTTCCACCCCTTTT     | 60.575 | 19 GTTGAACGGGAACGGAACATA  | 59.971 | 20 |
| TGCAACCATCCAAATCCTTT    | 60.309 | 20 GAGGCGTATGAGATGGAGGA   | 60.181 | 20 |
| TCGGAGAACGGAAAATTGAG    | 60.184 | 20 TTCGATGAAGGGAAGAAGGA   | 59.744 | 20 |
| GTCCATGTCCTCGTCCTCAT    | 59.928 | 20 GAACATCGAAGCTTTTGGCT   | 59.457 | 20 |
| AAGCTTGGAAATGCCTGTTG    | 60.249 | 20 CCCAAGACCCCAATTTGATT   | 60.91  | 20 |

|                          |        |                           |        |    |
|--------------------------|--------|---------------------------|--------|----|
| GCTTCTCTGAAATCCTCCCC     | 60.154 | 20 AATCCCTCTTCTCCTCCACC   | 59.492 | 20 |
| AGCAGGCTGAGAGAATGAGC     | 59.857 | 20 GCACAAGAAAGAAACCCTGA   | 57.923 | 20 |
| TGCACAGAAGATCCTGCAAC     | 59.992 | 20 AGCAGGTTAGATGCCGACAC   | 60.285 | 20 |
| TTTAAATCCAACTCACACATATAC | 58.233 | 27 AAGAGTAGCTGCTGCGGGT    | 60.171 | 19 |
| CGCTTTATGTATGCCTCGGT     | 60.117 | 20 GATTTCCCAAATCCCGTCTT   | 60.131 | 20 |
| CCACTTCCCAAATTTCCCTT     | 60.159 | 20 AAAACGGAAATCGAACAACG   | 59.975 | 20 |
| ATCCATGGGAATTGGACAAA     | 59.991 | 20 GAGAGGAAGCTAGCAAGGCA   | 59.859 | 20 |
| GTAATCAGGGCCATTCCCTT     | 60.152 | 20 TGGGCCTCTTCCAACCTTAAA  | 59.679 | 20 |
| TTCCACTTCTTCTCCTTGGC     | 59.405 | 20 GCGGCGGAGATAGTCTACTG   | 60     | 20 |
| TTGTATCCCCAGTTTCGTC      | 59.79  | 20 TAAACACATGCCACTCCAGC   | 59.722 | 20 |
| ATTTCAACTACGACGGCCAC     | 60     | 20 GTAGACTCCACCGCCTTGAG   | 59.867 | 20 |
| CACTCGAAGAGTAGCGGCTG     | 61.263 | 20 TTGGTGCTTGCTGCTAAAT    | 60.772 | 20 |
| TGTTTTTACCTGCGTATCTGTCA  | 59.698 | 23 CATGTGTTTGGTGATATAAAA  | 59.589 | 25 |
| GTTGACGGTTGGAAGATGGT     | 59.827 | 20 CCTTGGTCGATCTCATCACA   | 59.631 | 20 |
| GTTTACCTGACTGGCGTGGT     | 60.035 | 20 TCGAGTTGATCTTGCCTTTGT  | 59.867 | 21 |
| AGACACCCTGGAACAACACC     | 59.859 | 20 GGAAGAAAAGTGCGATGACG   | 60.776 | 20 |
| AGTGCTTCGGTCTGGATGAC     | 60.269 | 20 CCATACATGTGCTGGCAAAC   | 59.995 | 20 |
| AGGTCGGCATCATCTTCTTG     | 60.218 | 20 GATGAGGGAGGCACTAGACG   | 59.827 | 20 |
| ATCTCCACTTGTTGTCTCCAA    | 57.211 | 21 TGAGGGGTAGAGTTCCATGC   | 60.073 | 20 |
| ATTCCTCGGGTCTTGGAGT      | 59.935 | 20 AATGACTAATCTTGAACATGCC | 58.779 | 23 |
| TGATTTAGTAAAGTTGGAGGTGG/ | 59.098 | 24 GAGCCACGACTACAGGCAA    | 60     | 19 |
| AAGGACCCTTTGTGGGATTT     | 59.668 | 20 TGCACTCATTAAATTGTTTCGG | 58.688 | 21 |
| GGTTATGGTGCCTCGAGTCT     | 60.142 | 20 CCAGCTTAAGCCTGCATTTT   | 59.982 | 20 |
| TCAAATGTTTCGTCTTGCAGC    | 59.995 | 20 GTCGGGTGGTGTGTAGTTGA   | 59.441 | 20 |
| AATTGAATTCAGAGCACCCG     | 60.074 | 20 ATGTAGCCGACCCCAATTTA   | 59.297 | 20 |
| CCGACTACGACTATCCTCGC     | 59.859 | 20 TCGTAACGACAAATGGGACA   | 59.964 | 20 |
| AATCGTCGAATTCGGTTTCA     | 60.448 | 20 GCGACAAAACCTTGGTAACGG  | 60.534 | 20 |
| AACATACCATCGTGGCCAAT     | 60.081 | 20 TGTAGCCGACCCCAATTTAT   | 59.297 | 20 |
| ATGTAGCCGACCCCAATTTA     | 59.297 | 20 AAAATCATCCCAATTTCCAA   | 59.067 | 20 |
| GGATTTCAATTCAGCGCTTC     | 59.791 | 20 ACCTCGACAAACTCCACACC   | 60.009 | 20 |
| TGTAGCCGACCCCAATTTAT     | 59.297 | 20 TGTGGAAGGCGGAAAGATAC   | 60.074 | 20 |
| TCAGAATATGCAAGGGGGAG     | 60.029 | 20 AAAAGTGTCTGCTCCAGCG    | 60.571 | 20 |
| ACGGATTTCGAGTTTCAACGA    | 60.636 | 20 TGAAGAGTTGAGAAGGCGGT   | 59.989 | 20 |
| CAGAGGGAGCATGTGACCTT     | 60.261 | 20 TCATTGGGAAAATGATTTGG   | 58.255 | 20 |
| TAGTCATCGAGCAAGCCAAA     | 59.566 | 20 GGTTCGATGAAGGAAGATGGA  | 60.011 | 20 |
| TTGACCAATCACCAATCAACA    | 59.808 | 21 AGTCGAACCGGATCATATCG   | 59.917 | 20 |
| AGTGCAAATGTTGACGGGTT     | 60.419 | 20 ACAATCCTTTTGGAGCCTGGA  | 59.67  | 20 |
| CACGAGCTACTCTCCGCTTT     | 59.78  | 20 CGAGGATGCTCTATCCGAAG   | 59.933 | 20 |
| CCCAAGACCCCAATTTGATT     | 60.91  | 20 GGTGCTTTGCTGAGAAGAGG   | 60.134 | 20 |
| CACGCCAACTTACAACTATCG    | 59.706 | 22 GGGAAAGCAGGAGAGTAGGC   | 60.349 | 20 |
| CAAGCCTTGGACTGAGAGGT     | 59.45  | 20 CTTCCCTCATTCCCTCCTTC   | 60.008 | 20 |
| CCTTGAGCTCGTCAAAGTCC     | 59.989 | 20 TCTTCTGGTGCTTTCTTCC    | 59.405 | 20 |
| ATTGTTGAGAGCCGAAATGG     | 60.074 | 20 GTTGAGGAAGGAGAGCATGG   | 59.803 | 20 |
| TTGGTTCATGTAGCCGACC      | 59.512 | 19 AGGGGCAGTTAAAAATCGGA   | 60.792 | 20 |
| AAACCACCATTTCCGAAACA     | 60.206 | 20 ACAGGCAATCTGCTTAGCCA   | 60.934 | 20 |
| TTGCCAGTTCTTTTGTGGA      | 59.293 | 20 TGTAGCCGACCCCAATTTAT   | 59.297 | 20 |
| TCTGTTTTATTTCCCGTGC      | 59.938 | 20 GGAGAGGTTCGTGATCCAGAA  | 60.199 | 20 |
| GCTGAACAATGCCTCGAAA      | 59.94  | 19 TGCAACACCTCCATCATCTC   | 59.637 | 20 |
| TGCATTTTCATCGCTTTATGC    | 59.809 | 20 TTTAGGAGTCGTGGGTGGTT   | 59.449 | 20 |
| GCCGTCTGATTGGAGGATTA     | 60.036 | 20 AACCAGCCCATCCCTTTATC   | 60.152 | 20 |
| TTTTAAAACCGATCCCCACC     | 60.883 | 20 GTAAGCTGAACCCCAACCAA   | 59.971 | 20 |
| ATGAGCATGATGTGTCTTGAAT   | 57.135 | 22 CAATTTAGCTGAAATCTCAACC | 59.296 | 25 |
| GCCGTCTGATTGGAGGATTA     | 60.036 | 20 TTTCAACGTCTCTGCCAATG   | 59.84  | 20 |
| AAATATTTTAGAAAGAACAGATT  | 57.114 | 27 TGTGGCATGAAAAGTTTTGG   | 59.561 | 20 |
| GGAACAAACCCGACGTAAAA     | 59.839 | 20 CCCCTCACCTTTCTCTCCTC   | 60.186 | 20 |
| ACCGACCTTCCAAATTGTTG     | 59.83  | 20 GCTTTTGAAGTCCTTCCACG   | 59.853 | 20 |
| ATGGGTAGCCAGTTTCACCA     | 60.375 | 20 CCAACCTAACGCCACCTTA    | 58.635 | 19 |
| CAGTTCCATGTCACAAACGC     | 60.16  | 20 TTTCCAAACCAAGCTATCGG   | 60.067 | 20 |

|                          |        |    |                         |        |    |
|--------------------------|--------|----|-------------------------|--------|----|
| CCAATCAAACCCAACGAAAT     | 59.662 | 20 | TCAACACATTCAGCAGGCTC    | 59.992 | 20 |
| CATTTCCGACAACCTCGATGA    | 59.648 | 20 | CTCAATCGCAACTGCAAAAA    | 59.992 | 20 |
| CATCATTCCCTGCAATCCTC     | 60.426 | 20 | AACGTTGCTCCAAACAATC     | 60.118 | 20 |
| TACCCATTGTAACCCCTGC      | 59.685 | 20 | CGCAATTGAATAAGAGGGGA    | 60.031 | 20 |
| CCAGAACCATGGACACACAG     | 59.997 | 20 | AGCAATGGACCTCGCATAAA    | 60.606 | 20 |
| ATTGACAATTCTCGGGTTGC     | 59.939 | 20 | CTCTCTCCTAGGTCCGTCCC    | 60.208 | 20 |
| ACTGCTAGACCCAGTGGTGG     | 60.174 | 20 | TGCAATGCTCCGAGTATGAG    | 59.972 | 20 |
| AGGGTTGTAAGGGGTATCCG     | 60.068 | 20 | TTGGAGGAAAGCAAGGAAGA    | 59.926 | 20 |
| GAGCAGCTCGACAATGATGA     | 60.104 | 20 | GAACGGTGCTTATTACGGGA    | 59.96  | 20 |
| GGCCACCAAGAATCTCAGAA     | 60.195 | 20 | TGTTGTGGGAAAAAGGAAG     | 59.942 | 20 |
| GGGTTGTTAAGATTTAATGATTAT | 57.624 | 26 | TTTTTAATGCATAACGTTTCATT | 58.651 | 25 |
| ATGGTCGAGAGTGTTCTCGG     | 60.112 | 20 | TTGGGATTAAGGCTTTGGTG    | 59.931 | 20 |
| TCAAAGAAAGTGAGTAGAATCCA  | 58.56  | 25 | TTTCTAAGTCTTCCGCGTG     | 60.378 | 20 |
| TTGGTTCATGTAGCCGACTC     | 58.724 | 20 | CGTTTGATTGCGCCGATAAAT   | 59.928 | 20 |
| TGTGTTTCATGTTTGTGTGATAA  | 58.06  | 24 | TGGAGGTGGCTGTGATGATA    | 60.072 | 20 |
| TTTCGAAGACTGGAAGATTTGA   | 58.949 | 22 | GCCGGTTCCTTTGTGAATCAT   | 59.939 | 20 |
| TCAGTATTCATCGTGGCTGG     | 59.673 | 20 | TTCGAATTCAAAACTCCCAA    | 59.551 | 21 |
| TGAATATTGGGGTGGGAAAA     | 59.988 | 20 | CAGCGCTTCTTCTGCTTTCT    | 60.037 | 20 |
| AATCACGGGACCAAAATGAA     | 60.17  | 20 | AGCTCCATTGTACGTTTCCC    | 59.056 | 20 |
| TCTCCAGAGCAAATCGACCT     | 59.95  | 20 | GTTCAACAGGAGGTGAAGCC    | 59.703 | 20 |
| GCACATGTTAGCCAGAACTTTG   | 59.813 | 22 | GCGCACATTAGACATCCTT     | 60.103 | 20 |
| CGATTGTATTTGTGCTGCAAG    | 59.382 | 21 | AGGCTTTACTCGGTTTGGGT    | 59.998 | 20 |
| TCATTCTCTTACCAGGAAGC     | 60.34  | 20 | ATGGTTCCTCCAATGTCTCG    | 59.927 | 20 |
| GTGGAGGATTTGGTGGGAAT     | 60.95  | 20 | CACTTCCGCCACCATAAGAT    | 59.955 | 20 |
| TGTAGCCGACCCCAATTTAT     | 59.297 | 20 | GAAAGAGAGAGAGAGAGTCA    | 59.828 | 25 |
| TCCTCCATTTCCCAACAATA     | 60.126 | 20 | CTGTCATGCAAGCAGCAACT    | 60.207 | 20 |
| ATTTCTGTTCTCTTCCCCG      | 60.434 | 20 | ACCGGAACATAAGTGCCAAA    | 60.365 | 20 |
| CCCAAGACCCCAATTTGATT     | 60.91  | 20 | AGCATCCAAGCTCGACAAC     | 60.02  | 20 |
| TCATGGATTCATGGTGCAGT     | 59.925 | 20 | CAGAGCAAGAAAACATGCCA    | 59.988 | 20 |
| CCCGTTCAGACCACCTTTTA     | 59.964 | 20 | TGGGGGTGATCTGAGAGAAG    | 60.191 | 20 |
| GAGTCTCCATCCCACAGAA      | 60.048 | 20 | GCGAACCAGATGCATTATCA    | 59.652 | 20 |
| CCCAAGACCCCAATTTGATT     | 60.91  | 20 | TTTTCTGTTTTTGTTCCTGCT   | 59.462 | 23 |
| TGTTGGTAATTGGGATGAGGA    | 60.177 | 21 | CGTCGATCACTTCAACCTTT    | 57.797 | 20 |
| GTGACGCATCAGAAGACAA      | 59.992 | 20 | AAGTGGGGAAGTCTCGGATT    | 59.935 | 20 |
| CAGTAAACCCCATGGTCTGG     | 60.224 | 20 | GGTGGCATCATCAACAACAA    | 60.376 | 20 |
| GGGGATCACCAAACCTGAAGA    | 59.903 | 20 | TCTTCCAAGATCACACAGCCT   | 59.859 | 21 |
| CTTCTATGAAGCCCTCAGCG     | 60.11  | 20 | ATCCTTCAACCCCAAATTCC    | 59.996 | 20 |
| TGCAGAAGGTCTCCTCCAGT     | 59.986 | 20 | AGTTTTCGACGTGGATCAGG    | 60.111 | 20 |
| ATGGTTGCCTTTGTTTGGAG     | 59.971 | 20 | CGAGAAGATCTTGAGGTCGC    | 60.096 | 20 |
| CAACATTGCAAAATGGGACA     | 60.357 | 20 | GCGTGGTGGGGATTTAAGTA    | 59.823 | 20 |
| CCAATTTATTGGGATTAAGGCT   | 58.465 | 22 | CAACCCCTGATAAGCAGAGC    | 59.836 | 20 |
| TTACACGTGTGGGATATGGA     | 57.249 | 20 | TTCCTTTCTTAAGCTTGTGAAC  | 57.936 | 24 |
| GCAGCGCATCATCTTTTTCT     | 60.499 | 20 | GTAGCCAATGAGTTGGGGAA    | 59.933 | 20 |
| CACGTGAGGGAGGGTTTAGA     | 60.103 | 20 | AGGTACGTTCTGATCACCG     | 59.989 | 20 |
| TGCACCGGTTAGAAGGGTAG     | 60.125 | 20 | CACAAAAGGGCCTCTGAATC    | 59.67  | 20 |
| GGCAATTGACCACCGTAAAC     | 60.235 | 20 | ACGAATGCTTCGTCGTCTTC    | 60.406 | 20 |
| GGGATTCAGTGATTAAAGCGTC   | 59.972 | 22 | ATGAGCAGACTTGATGCGTG    | 60.016 | 20 |
| CGTTTAGTGGTGCAGGAAT      | 60.132 | 20 | CCTCTTCCCCTTCAAACCTCC   | 60.045 | 20 |
| CACCAAGTATTTCCGGTGGT     | 59.884 | 20 | ATTCGTACACCCAATCAGCC    | 59.82  | 20 |
| GGCGTAAGCAAATTTCAATCA    | 60.089 | 21 | GCCACAGACCACAGTGCTTA    | 59.905 | 20 |
| TGTTGCACTATTTGCTTGGG     | 59.729 | 20 | CAAACCGCCAAATTCAGATT    | 59.938 | 20 |
| GACTATGGCCAAAACCGTA      | 59.823 | 20 | AGCGTGATGAATGTCACGAA    | 60.272 | 20 |
| AGGACATCGGTCTGAGAGGA     | 59.792 | 20 | AATTAACAAGCCCTGCCT      | 59.966 | 20 |
| GTGATCCATATAGCCGACCC     | 59.228 | 20 | TTTTCCATGCACATGTAAGTTT  | 59.822 | 24 |
| GGTTCATGTAGCCGACCCTA     | 59.955 | 20 | TTTGCGGGTAAATCGAAGAT    | 59.547 | 20 |
| TCACAATCTCCCTACCCAGC     | 60.073 | 20 | GGAGGAGAGGGGTAGAATGG    | 59.89  | 20 |
| TGACAAATCAAAATAATTGCAAA  | 58.304 | 24 | TGTAGCCGACCCCAATTTAT    | 59.297 | 20 |
| ATTTGACTTTTCGTGCGAGC     | 60.395 | 20 | GAGTCGGCGTTAAGTGAACC    | 59.74  | 20 |

|                         |        |    |                        |        |    |
|-------------------------|--------|----|------------------------|--------|----|
| TGCTTGATTAGCATTTTATGGG  | 59.132 | 22 | CTGTCCAACCAATGCACCTA   | 59.566 | 20 |
| TTGAGGAAGCCGTTGAAGAT    | 59.813 | 20 | ACCTGATCGGTGCGATTAAC   | 59.962 | 20 |
| CCTCCGAAAAATTGGGAAAT    | 60.123 | 20 | CCATCCCATCATTCCATCTC   | 60.096 | 20 |
| CTTTGCCTTTTCTGCCTCTG    | 60.125 | 20 | TTCTGGAGGAGGTGCTAAA    | 59.948 | 20 |
| ATACGATCCATTTTGCCGAC    | 59.791 | 20 | CTGCAGCATTTTTCACCCTT   | 60.249 | 20 |
| AATCCTCAGTGCCATCAACC    | 59.934 | 20 | TGTCCTCATCCTCCTCATC    | 60.312 | 20 |
| CAGGTAAGTCCGCCATTAGC    | 59.73  | 20 | CATACCTCATCCCGCAGATT   | 59.917 | 20 |
| TCGAGGCTCGGTCAGTATTT    | 59.836 | 20 | CGTGGAAAGGGTGACTION    | 59.966 | 20 |
| TGGTCTCGACAACACAGTC     | 60.951 | 20 | GCTGACCTCACATATTGGAA   | 59.947 | 21 |
| AGCAAATAAATCGGCAGAGG    | 59.32  | 20 | ACACCATTTTGGAGGGAGAA   | 59.381 | 20 |
| GTCSAAGAACCTCGACAACC    | 59.703 | 20 | GGTCGGGGAGAGTCAAGAGT   | 60.648 | 20 |
| TGCTATTTTCATCTACCCACCA  | 59.474 | 22 | TTCGTCTCCAAGGAAAAAGC   | 59.429 | 20 |
| AAACGCCTAGCTCTCCACAA    | 60.015 | 20 | TGTTTGTGCTGCAGTTGGT    | 60.347 | 20 |
| GAGAATTGGGTAACCAGCCA    | 59.933 | 20 | TGTGTGTGTTGGTCGTGT     | 59.482 | 20 |
| ATGCTTGGGTCAAGTTGCTTT   | 59.74  | 20 | CCCAAGACCCCAATTTGATT   | 60.91  | 20 |
| GGCATGGTGCCATACCTAGA    | 60.884 | 20 | TGCAAATACATCGAGCGTAGA  | 59.481 | 21 |
| CAACAGCTTTCTGGTTCTCG    | 58.648 | 20 | CCTTTGGAACAGGGTATGGA   | 59.784 | 20 |
| TGAAGGAAAGGGATGGGTAG    | 58.978 | 20 | TTTAGCTTCTTGCGGAGGTC   | 59.592 | 20 |
| GACGAACTTTGCTCGTCTC     | 60.142 | 20 | CTCCGCCGGAAATTTTGT     | 60.946 | 19 |
| ATCTCGTGGGGGAAGACTTT    | 59.935 | 20 | TTCCTGGGTTGCTAAAACCTA  | 59.613 | 24 |
| GCATTTCCACGTTTCAAGAGT   | 60.119 | 20 | AGGGGCATAGCATAGCCATA   | 59.552 | 20 |
| TTCAACACTATTCAACACGACTG | 59.715 | 24 | ATTGGAAGGCAACTGCTCAA   | 60.776 | 20 |
| GAATGGAATTGAAGCAAGGC    | 59.651 | 20 | CCCAAGACCCCAATTTGATT   | 60.91  | 20 |
| GGCAGTTGCCAATTCTTCAT    | 60.081 | 20 | TGATCATAGGGTTCTTCGGC   | 60.036 | 20 |
| CGGCAGTTAAGGCTCAAAAG    | 60.011 | 20 | GGCAACACCAACAACAACAG   | 60.049 | 20 |
| TGAAGGCCTTAAATCACCAA    | 58.214 | 20 | TCTAGCTGTGAGATGTCTCTTG | 58.903 | 23 |
| ATCCATATACCGACCCACAA    | 59.894 | 20 | TGCATCCACTTGGTGAGAAA   | 60.24  | 20 |
| TTTAGGGGCTTTGTGCAATC    | 60.074 | 20 | CCTTCCTTCGTGATGTTGT    | 60.111 | 20 |
| CCTTCCGTTGCAGTTTGAAT    | 60.11  | 20 | GCAAAGGAAATTCACGAGGA   | 60.192 | 20 |
| CCTTCCATTTGAGGATTGACA   | 59.918 | 21 | TGGTTCATGTAGCCGAAACC   | 60.894 | 20 |
| CTGGGTAAACCCACGGACT     | 59.829 | 19 | TGTCGTTTGTCTCTTTCC     | 60.375 | 20 |
| GACAGAGGCCTTGAAGATT     | 59.434 | 20 | TGAGGTTTAAACGAGTTCGCA  | 59.464 | 20 |
| AGGTGCCGTTGATTATCTCG    | 60.096 | 20 | TTCTATCGAAGACCGCATCC   | 60.177 | 20 |
| TTCAGGTGTGATCAATGACAA   | 57.922 | 22 | CGGAAGTGATCACAAGGGTT   | 59.966 | 20 |
| CTGAACGCATTTCCAATTCA    | 59.84  | 20 | GTCCTGATTAGGGATGCCAG   | 59.508 | 20 |
| TGTACACAGTGAGGTCATACTAC | 57.473 | 25 | AGGGAAATTTGAGTGGATGC   | 58.984 | 20 |
| GGTGACATCCACTACCTGCAT   | 59.866 | 21 | CGTCGTGTCGTCATCTTC     | 60.419 | 19 |
| ATAATTTCCAGCCCCACTTC    | 60.152 | 20 | TGTTTGAACGACTGCCTTTG   | 59.881 | 20 |
| ATTCAAATGTGCTGCTGGCT    | 60.807 | 20 | GCCGACCCATTACTAATCCA   | 59.784 | 20 |
| AAATTAAGATGAGATTTGCTCTC | 59.826 | 27 | CGGTATTCTCAAATGCACGA   | 59.688 | 20 |
| GAATTGCCAGAGAAGAAGCG    | 60.096 | 20 | GGTGTGATTGTGGTGGTTG    | 59.701 | 20 |
| ACAAGCATCATCCTCCCAAC    | 59.934 | 20 | TTTTCCAATGGGGTTTGT     | 60.014 | 19 |
| TTCTCCTCTCTCGTCTCCA     | 60.064 | 20 | TTAGGTGAAGCCAACATCCC   | 59.933 | 20 |
| GCCATATCACGGTGGAAAAG    | 60.331 | 20 | CGACTGGAGGAGTCTTGAG    | 59.978 | 20 |
| TGTAGCCGACCCCAATTTAT    | 59.297 | 20 | GCATAGCAAAAAGAAGGCCA   | 60.343 | 20 |
| TATAGGTGGGGATGGGTGTG    | 60.452 | 20 | GATGCGGAGGAGGATCATAA   | 59.998 | 20 |
| TTTACCCGATCTTGCTTTGC    | 60.209 | 20 | ACTCCGATGACGATTGAAGC   | 60.226 | 20 |
| CACCGGAACCAAAACCTAGA    | 59.964 | 20 | CTCTCTCTCGTTCATCCGC    | 60.096 | 20 |
| GTTCTCCAAATTCTTCTCA     | 58.227 | 21 | GAAAATTCAAAGATTTGGGGG  | 59.645 | 21 |
| GGAATGGACGCAAGATCACT    | 60.081 | 20 | TCCCTCCAAGATCCAGATTG   | 60.003 | 20 |
| GTACATCTCCAAGACCCCA     | 59.779 | 20 | GTGCACATGCGGTCTGTATC   | 60.152 | 20 |
| GGTTCATGTAGCCGACCCTA    | 59.955 | 20 | TGTGGACCATGCATGCTAAT   | 59.955 | 20 |
| AATGCTCAGGGGAGTCACTG    | 60.261 | 20 | TGGCTGAGTTAGATGCCCTT   | 59.836 | 20 |
| CTAGGGCGGACTACCATCAG    | 59.711 | 20 | TTTGCAGCCGAACTACTGAA   | 59.609 | 20 |
| ACCGTTTTGTTACCATTTTGC   | 58.912 | 21 | ATGTAGCCGACCCCAATTTA   | 59.297 | 20 |
| GGATACATGACACCCGCTCCT   | 59.661 | 20 | ATGACGACAAAGCTGAGGCT   | 60.02  | 20 |
| AATCAAACCAACCCCAACAA    | 60.066 | 20 | GATGCTAGCCGGAGATGTTT   | 59.803 | 20 |
| CGCAGCGGAGAAAACATAGT    | 60.407 | 20 | CAGTGGAAAGCAAACCAAGA   | 60.269 | 21 |

|                          |        |    |                         |        |    |
|--------------------------|--------|----|-------------------------|--------|----|
| CATCAAACCCAAACCAACCT     | 59.688 | 20 | AGCTCCAAAACGCTGATGAT    | 59.843 | 20 |
| CACATGATTTGGGTTTGTGC     | 59.823 | 20 | TCAAGACCCCAATTTGATTGA   | 60.294 | 21 |
| TTTGGTTCATGTAGCCGACC     | 60.894 | 20 | TGGCATAAACTGAAGTGACA    | 59.245 | 22 |
| AATTGAGAGGTGGGACGATG     | 59.927 | 20 | GCCACAAAAAACTTAGGCAG    | 59.799 | 21 |
| TCAACTTGCGCACTGTATC      | 59.871 | 20 | TCCAGTTAAACCAACCTCGC    | 60.11  | 20 |
| CAATTTCTTTTTCCCCCTCC     | 59.75  | 20 | AAAGAGAGAGAAAGGGGCGA    | 60.455 | 20 |
| TGGTGCGAGAATGATTTGAA     | 60.197 | 20 | TTCCATGCAACTTTCTACCAA   | 58.28  | 21 |
| TCGTCACTTTCCTCTTCTCA     | 59.974 | 21 | CCATGCAAGGAATGGAAGAT    | 59.894 | 20 |
| TCACGATAAAACAATTTTGAATC  | 60.108 | 24 | TCTGTGATGCAATGCGGTAT    | 60.104 | 20 |
| GGACAGCGTAGGGAATGAAG     | 59.694 | 20 | CCCGGGATTTCTAAATGGAT    | 59.978 | 20 |
| GATGAATGGTTGGTCGCTTT     | 59.939 | 20 | GAAGAAGAATCTGAGCCAGCA   | 59.708 | 21 |
| AGATATGGAAGATGCGGTGG     | 59.917 | 20 | GGCATCTGGAGGAAACAGAA    | 60.195 | 20 |
| TGTAGCCGACCCCAATTTAT     | 59.297 | 20 | AGGAAGTGAAGTCGGACGAA    | 59.844 | 20 |
| CAGTTGCACCAAAAATTTCCC    | 60.344 | 20 | GCGACTCACTTAAGGTTGTG    | 59.788 | 21 |
| CAATCCGCCAATCCTCTTTA     | 60.031 | 20 | TGTAGCACAAATTGCCTCTGC   | 60.019 | 20 |
| TGCCTGAGGTCTTACCCTTG     | 60.246 | 20 | CCTAACTTTTTATACCCGAAACA | 58.616 | 24 |
| CGTAATTTTCAACCCCAACC     | 59.178 | 20 | TGCAAAACATTTACCTAGCC    | 60.124 | 21 |
| ATGGCAGTACATCGGAGCTT     | 59.723 | 20 | ACACGATTAACTGCCTCGCT    | 59.904 | 20 |
| GGCGTTTTCTAAGGCACAAG     | 59.883 | 20 | CCCAATTAGTCGTAGCCCT     | 60.332 | 20 |
| ACCATGCGATGAACACGTTA     | 59.995 | 20 | AATCCTTCGACGATGACTCG    | 60.218 | 20 |
| AGTCACGGCCCTTCTTAAT      | 59.962 | 20 | CCTCAATTGCCACCAATTTT    | 60.309 | 20 |
| TTCTCTGCCAACAATGAAATCT   | 58.836 | 22 | AAAAGTTTAGGGGCTCCAC     | 57.352 | 20 |
| ATGTAGCCGACCCCAATTTA     | 59.297 | 20 | CAACATGTGTGGAGTGGTCA    | 58.928 | 20 |
| CATGCACCTCTTGAAGCAAA     | 59.988 | 20 | ACGTCTCTCGCACTCCTCAT    | 60.017 | 20 |
| ATGGAGAAACGAGCATTGG      | 60.074 | 20 | TGCAAATAGAAGGCCAGCTT    | 59.982 | 20 |
| CCAATCAAATTGGGGTCAATA    | 59.511 | 21 | TCCGGACCAAACCTTTAATGTAC | 58.188 | 22 |
| ATGAATATCCTTCGTGCCA      | 60.435 | 20 | GGATGAGCTGTTTGGAGGAA    | 60.195 | 20 |
| ACTTGGGTTGTGCCAAAGTC     | 60.012 | 20 | TTTCAAGCAAAAATTTCAATTA  | 58.814 | 24 |
| CAAAACCAGGTCGCTCAAAT     | 60.11  | 20 | CCAGTAATGGCATCCTTGGT    | 59.813 | 20 |
| TCCGTTACCACTTCTCCAG      | 60.103 | 20 | CTTTGCTGCTGATGGTTCTG    | 59.591 | 20 |
| CGAAAATAAGCCAACCGAAA     | 60.068 | 20 | ATGTAGCCGACCCCAATTTA    | 59.297 | 20 |
| CTGTTGCAGGGAAGGCTAAG     | 60.008 | 20 | GTTAGGGGAGCTGCAACAAG    | 59.875 | 20 |
| GTCTCAATGGGACATCTGG      | 60.326 | 20 | TCGTCTTAAAATGCAACCTCA   | 59.758 | 22 |
| TTCCCATCCTTGTGATATGC     | 59.776 | 21 | AATGACCGTCTTGATCGTCC    | 59.934 | 20 |
| TGTCACCACTCCCAAACCTCA    | 60.129 | 20 | CCACCAGAAAAAGTGAGGGA    | 60.081 | 20 |
| TGCCCTTCCCGATTATAGTG     | 59.916 | 20 | TGTGACGTGAGGCTCCTATG    | 59.855 | 20 |
| CCTCCGCTTAGGAACTCTCA     | 59.569 | 20 | AAACCCATGCATTTGATTCC    | 59.628 | 20 |
| TGCGATGGATTTTTCTTTT      | 60.016 | 20 | GAAGCCACATGGGAAAAAGA    | 60.051 | 20 |
| AGGAGCTAGCACACCATCCC     | 61.585 | 20 | CACTTTTCTCCCGGATACGA    | 60.066 | 20 |
| AGGTGAAGCCCAGTCTGCTA     | 60.012 | 20 | ATCAACTGTTGTTTCCCCCA    | 60.21  | 20 |
| TGCCACCATTCTTTTGACAG     | 59.691 | 20 | TGAGTTTTGGGAGCAAATTACA  | 59.625 | 22 |
| GTGAAGATTAGCTCCGCCTG     | 59.978 | 20 | CGGATTTACGGATTGGATCT    | 58.857 | 20 |
| ATTCCAATTGACACACG        | 59.572 | 20 | CTGCCAACCAAAAACAAGGT    | 60.008 | 20 |
| CTCTTCGAGCGAGTTCAAGC     | 60.419 | 20 | ATCCTCAGCAGCCCAATATG    | 60.059 | 20 |
| ATTGCCTGACGAATCGTTTT     | 59.574 | 20 | AAGGGGAATGAAATGGAACC    | 59.996 | 20 |
| ATGCTTTGTGTTTTCTGCC      | 60.118 | 20 | AAATGTAGCCAAACGCCTCC    | 61.357 | 20 |
| GATTTATGTAGCCGACCCCA     | 59.784 | 20 | CCGGTTCAGTGGTCATTTCT    | 59.966 | 20 |
| AAACGGTTGGTCCAGAGATG     | 59.966 | 20 | GCTGGCTGTGATAGGCTAGG    | 60     | 20 |
| CTGCACTGTATCGGGAACCT     | 60.134 | 20 | TGAGCAGGTGGAAAAGTGCT    | 60.975 | 20 |
| TGTCAATGTTCTTCCCCTCC     | 59.903 | 20 | ATTCTGTCTAGGCGCTGGAA    | 59.978 | 20 |
| GTGAGCACCAAATTTATTATCGAA | 59.44  | 24 | TCAGCCCCAAATGAAGAATC    | 60.014 | 20 |
| AAATGGTGTGGAATGGGGAG     | 59.647 | 20 | AGTGGTCTTCTTAGGTGGCA    | 59.721 | 20 |
| CTGCGTACTTGCTCGGTAT      | 60.292 | 20 | ATGTTTTGTGCCTGCAAAC     | 60.559 | 20 |
| GACATGGTTGTGTTTTGTGC     | 59.862 | 20 | TTAACATGGAGCAAATGGCA    | 60.073 | 20 |
| AATTGCTTGTGTAGGGGTGG     | 59.853 | 20 | TGTTCTCATCATCCCGTTT     | 60.317 | 20 |
| GGCTTGATCTTTGAGATGGG     | 59.629 | 20 | AGTTGATTTGGATCAAGGCG    | 60.074 | 20 |
| CCGCCATCATCTCCATAATC     | 60.26  | 20 | GGAGCACTTCCGAGTTTTTG    | 59.853 | 20 |
| GGAACCAACACAAACACACG     | 59.897 | 20 | TCTTCTGGGTTGGACCATTC    | 59.903 | 20 |

|                          |        |    |                         |        |    |
|--------------------------|--------|----|-------------------------|--------|----|
| TAATCTTGCGCCTCACTTT      | 59.845 | 20 | TGATGCTGCGGAGTCAATAG    | 59.972 | 20 |
| GCCACATCACATCGAAAAGA     | 59.654 | 20 | TGAATGTACATAAGCTAGATA/  | 57.484 | 27 |
| CCACAGCTTCCCAAACAAAT     | 59.971 | 20 | TCGGATGTCGTGTCCAATTA    | 59.924 | 20 |
| TTGGAAACTCCGAAATCTTTG    | 59.188 | 21 | CAAAAACGAAGAATGAGGCA    | 58.892 | 20 |
| TCCATTTGCGACAAAAGACA     | 60.234 | 20 | GACATCGCTTGCTTTCCATT    | 60.221 | 20 |
| GGCATCCAATGCAACCTTAT     | 59.791 | 20 | TATTTGAAATGCTGAGCCCC    | 60.038 | 20 |
| ACGACGCCATTTACGTCTTC     | 60.14  | 20 | AGACTGGTGTGCTGCTGTG     | 60.096 | 20 |
| CAATTTGCGGTGGTAAGAGC     | 59.569 | 20 | AATCAATGGGCGGTGTAAAA    | 60.188 | 20 |
| TGTTCAATTCTCCCGAGTTGC    | 61.188 | 20 | GGATACGCTGGAAATGTTGC    | 60.478 | 20 |
| TTGTCCCGTCAAGAAAAAGG     | 60.081 | 20 | TCAACTTGTTGGGTTGGGTT    | 60.246 | 20 |
| TTCGCCACTGATGACAAATC     | 59.654 | 20 | AAAACGTGGTCAAATTC AAGG  | 58.983 | 21 |
| AAACGCGGTGATTTATCCAG     | 59.96  | 20 | CCCAAGACCCCAATTTGATT    | 60.91  | 20 |
| TCTGATCTCCGAAACCCATT     | 59.483 | 20 | TCAACAACACATCGTCTTCCA   | 60.144 | 21 |
| GGTCTTTCTGCATCTCCAGC     | 59.957 | 20 | GGGTGACCCAGAAGTTTTGA    | 59.943 | 20 |
| ATAGGGCTCCCTGCAAATCT     | 60.06  | 20 | GCAATGGAGAAGCAGCAAAT    | 60.361 | 20 |
| AGCAGGAGCAACTGTTGGAT     | 59.874 | 20 | ATGGCCCTAAACACAGCAAG    | 60.132 | 20 |
| CCCAAGACCCCAATTTGATT     | 60.91  | 20 | AAGTGAAAGAATGGCGTGATG   | 60.125 | 21 |
| CCCAAGACCCCAATTTGAT      | 59.59  | 19 | TCTTTATCCCTGGTGTGCTC    | 57.58  | 20 |
| CTCCACCACCACCACCTTAT     | 59.697 | 20 | GGCGGTGGTGATTTGTAAAC    | 60.235 | 20 |
| CAAAACCGAGAGCAGAGTCC     | 59.989 | 20 | CAGGGAAATCCAATTCATGC    | 60.274 | 20 |
| CTTGTTGCTCAGCACAGTGG     | 60.651 | 20 | ATGTATTTGAATCGGCCAGC    | 59.929 | 20 |
| TGGATTTGGGCAGAGAATTT     | 59.505 | 20 | CGGGTTTGAAGGGGATTTAT    | 60.013 | 20 |
| CAAGCCAACTTTGAGGAAACA    | 60.269 | 21 | TGCAGTGAGATGCATAAGGAT   | 59.736 | 22 |
| CCTTGCTAGGGCAGTACGAC     | 59.898 | 20 | TGAAGGCTCATCCCAGATTC    | 60.158 | 20 |
| TGGACATCCCGGATACTGAT     | 60.158 | 20 | CCAGTCAGGCACTCCAAAT     | 60.111 | 20 |
| AAGCTCGAAAACAATGTCGG     | 60.249 | 20 | GCATTCCTCAGAATAGCGGA    | 60.318 | 20 |
| ATCTTCAGCAAACCATTCGG     | 60.074 | 20 | GCCCATTAGCATTCCATCTG    | 60.435 | 20 |
| TAAGAATTGAATCGCAGGGC     | 60.175 | 20 | TGATTTCTCAGTTCGGAGG     | 60.187 | 20 |
| CTAGGTGTATGGCGGAGGAG     | 59.711 | 20 | CGTTGAGTGTGTCTGGCAAC    | 60.357 | 20 |
| CTTCTTCCCCTCCCAAACCT     | 59.548 | 20 | ATTCCGATGTTTCACGGGTA    | 60.192 | 20 |
| ACCTCTAGCCCGGTGAACTT     | 60.132 | 20 | CTTCTTTTCAAGCACTGGGC    | 59.993 | 20 |
| CCCAAGACCCCAATTTGATT     | 60.91  | 20 | AAGGACACATGCTCGAAAGG    | 60.255 | 20 |
| CGTTTTCTTTGATTTCCAAACAT  | 59.424 | 23 | TGGGTAGGGAGTTTCACCAA    | 60.345 | 20 |
| CCCAAGACCCCAATTTGATT     | 60.91  | 20 | AGGGGAGCAAGAGGAAGAAA    | 60.319 | 20 |
| AGCTCTCGACATCAAATCGG     | 60.362 | 20 | CTCCTTGATTCTTGCACCGT    | 60.255 | 20 |
| AAAGCAAAGCATGTTGGT       | 59.615 | 20 | GTCAGGTTTCTGATCCGAGC    | 59.81  | 20 |
| TGATGGAGATGAAAGTGGA      | 60.201 | 20 | TGCTCATCAACACTGCCTTC    | 59.992 | 20 |
| CCGGATAAGCGATTTCTTTG     | 59.677 | 20 | TGGAATAGGTTTCTTTGGAGAC  | 59.987 | 23 |
| ACCCAACCTTCAAGGTTCAA     | 59.425 | 20 | ACCAACATGATGAGTGACCC    | 58.186 | 20 |
| GGGTACTCGTAGTCAACGCC     | 59.621 | 20 | TCTTCGTCACTGCCGTCTC     | 60.13  | 19 |
| GGGATGCATCAAAGTTGTCA     | 59.502 | 20 | AACCATTGCACTCGAGATGAT   | 59.57  | 21 |
| TTCTTAGTCAAGGGGAAATGA    | 59.939 | 22 | CTTGTCATTTAATGGGATCA    | 57.415 | 21 |
| GTGGCCATTCTGGAAAACAT     | 59.797 | 20 | CCCAAGACCCCAATTTGATT    | 60.91  | 20 |
| TTTGCGGAAAACCTTTGAACC    | 60.089 | 20 | TACAACCCAAAACCTTCGC     | 59.975 | 20 |
| CTCGGATTTAAACTCGACGG     | 59.702 | 20 | AGTGCCAGACAATCCCAAAC    | 59.973 | 20 |
| GGATCCTAAAATTTGAAGGGG    | 58.808 | 21 | TTGTTTTATGTAGCCGACCC    | 59.823 | 20 |
| TCCCTAGCAAAAGAGAGAGGG    | 59.963 | 21 | GGGTTATCTATGGATCACTACC  | 57.813 | 23 |
| CGAGCTGTAATTGAAAGGGC     | 59.845 | 20 | GAGGAGGGGTGGTTTGAGAT    | 60.314 | 20 |
| GCTATTGAGCAATATCGAAAACC/ | 59.67  | 24 | TGTAGCCGACCCCAATTTAT    | 59.297 | 20 |
| GCAACGAACCCCAAGTCTAA     | 60.11  | 20 | TGCACATCATGATTTGTTTC    | 59.538 | 21 |
| GATTGCTCTCGCCTCAACTT     | 59.579 | 20 | CCCCGTGTAAAATTCATTTCG   | 60.181 | 20 |
| ATGTAGCCGACCCCAATTTA     | 59.297 | 20 | GCCCGAATGTAGATCTGCTC    | 59.803 | 20 |
| TGATTCTAAAATGAATCCAATCCA | 59.693 | 24 | CTCGAATCAGTTACCATCACCA/ | 59.993 | 22 |
| GCCGACATGACCTTAGCAGT     | 60.285 | 20 | AGAAAATCCGCATGCAAAAA    | 60.568 | 20 |
| TGCACATTTCAACAGCAACA     | 59.877 | 20 | AGCTTCTGGTGCAGCTCTTC    | 59.898 | 20 |
| ATGGGCATGAACACATTCAA     | 59.781 | 20 | ATCGCTCACCGTAGCCTCTA    | 60     | 20 |
| TCGTTAATTGGTTCCATTTTGA   | 59.341 | 22 | AAAATGATTGCTTGGCTTGA    | 58.361 | 20 |
| CCATGTCTTGAGAGTGGGGT     | 59.962 | 20 | TTTTCTTTTTCTCTTGTCA/    | 59.307 | 24 |

|                         |        |                             |        |    |
|-------------------------|--------|-----------------------------|--------|----|
| GTGGAGACTTAGGTGGGGG     | 59.365 | 19 CACCCAAAAATCCTCTTCCA     | 59.903 | 20 |
| TGCAGCTTGCTGCTGTTACT    | 59.958 | 20 ATGAAATTGGGGTGACTION     | 60.173 | 20 |
| GTCATGCTTCTTGTTGGGAAA   | 60.103 | 21 GACCCACATAGTGGGAAAA      | 59.647 | 20 |
| CCGAAACGCCATTATAATCAA   | 59.812 | 21 TCTCTCATTCTCCATTGCCA     | 59.322 | 20 |
| TTGTCAAAGAACACGTTACAT   | 58.187 | 22 GACGGCGTCGTTTTCTTG       | 60.39  | 18 |
| TACGGAGTGGATGGTGGTTT    | 60.232 | 20 GACGGTGAAGCGTTTAGCAT     | 60.278 | 20 |
| CATCGTCTGAATGAGTCATGTG  | 59.165 | 22 GGTAGCCGACCCCAATTTAT     | 60.041 | 20 |
| CAACCGAAATTTTTGGAAGG    | 59.424 | 20 ATGCAAACCACCACGATTTT     | 60.235 | 20 |
| TGATCATATTCGGAGCCACA    | 60.033 | 20 TTAATGATCGTTCTCGGATGC    | 60.052 | 21 |
| TATCACTTGCCCAGGGATTC    | 59.894 | 20 CACAGTCTCCTCAATGGGGT     | 59.962 | 20 |
| TACTCTGCCGCCAAAAGTCT    | 60.015 | 20 GTAATTTTCAGCGGGGAACAA    | 59.938 | 20 |
| TTGAGCCACTTATCATCTTTCAA | 58.888 | 23 CATGTGACACCTCATGCGA      | 60.273 | 19 |
| CGGAGGTAGTTGGCATTGT     | 59.993 | 20 TAAATATCCGATTGGCCAC      | 59.621 | 20 |
| AATGTAGAGCAGAGAGGCGG    | 59.598 | 20 TTTTTAGGCGTTGAAATGGC     | 60.075 | 20 |
| GACGTCTTGCAAGTGACGAA    | 60.032 | 20 TGCAGATGTAGTAGTGGCCG     | 59.888 | 20 |
| TCTCGTCACCCTACAAGCATC   | 60.27  | 21 ATCCAAGTCCATCTCCTCCC     | 60.278 | 20 |
| TTGGGGTTCGGCTACATTAAC   | 59.823 | 20 ATCCATCCTCAAGGGTTCT      | 59.755 | 20 |
| CCCAAGACCCCAATTTGATT    | 60.91  | 20 AAGCAAAAACCTTCGACCCCT    | 60.11  | 20 |
| AATCTCAAACCCGACAATGC    | 59.939 | 20 AGGTTGCGTACATCTGACCC     | 59.997 | 20 |
| GCTGATTCTGCAGTTTTCC     | 59.82  | 20 ATGTAGCCGACCCACATAG      | 59.836 | 20 |
| CAGCAAGATTGGGGGTATTC    | 59.387 | 20 TGTTACCCGAGCTCAGATTG     | 59.984 | 20 |
| ATTCATACCTGTCCCGACCA    | 60.195 | 20 CCCATGTGACACTTCAGCAG     | 60.309 | 20 |
| TCCACATGCAGAATCGGATA    | 60.033 | 20 CATGACGGTGAAAAATAGCG     | 59.182 | 20 |
| CAACGTTACCAGCTGCAGAG    | 59.658 | 20 CCAAGACCCCAATTTGATT      | 60.91  | 20 |
| TCCACTACTCCAATGTCTGCC   | 60.126 | 21 GTTTTGGCTGGTTTTGAGG      | 59.587 | 20 |
| TCGGGGTGGAGTGATTAATA    | 60.301 | 20 CGCACCAAAAAGTTGTTTGC     | 59.22  | 20 |
| TCAAGTTTGAGACGTTGCGA    | 60.574 | 20 TTCATTTCTTTGACTTGCG      | 58.892 | 20 |
| GCATGTCGGTGAATTGTAA     | 59.548 | 20 TTTTCAATATTTAACTGAATTA   | 58.651 | 27 |
| GGTTGACTCACACGTGGAAA    | 59.571 | 20 AGAGGGCCACAAACCCTATT     | 59.827 | 20 |
| TCCAGTAAATCAACGAAACGA   | 58.28  | 21 TCGAGAGTTCGGATTTTTGAA    | 59.809 | 21 |
| AGCTCGACTGTCTTTGGACC    | 59.455 | 20 CCAAGACCCCAATTTGATT      | 60.91  | 20 |
| TGTAGCCGACCCCAATTTAT    | 59.297 | 20 AGCTACCGTATGAAAGGGC      | 60.471 | 20 |
| ATCAACCACCCATCAGCAAT    | 60.203 | 20 CCAAGACCCCAATTTGATT      | 60.91  | 20 |
| ATGTAGCCGACCCCAATTTA    | 59.297 | 20 GTCATGGGTATGCAGGGAAC     | 60.203 | 20 |
| GGTGACAACCGCACGTAAT     | 60.817 | 20 TTGTGTTTTGAGCACTTCGC     | 60.035 | 20 |
| GAGTGCAAATCCCAGTGCTT    | 60.263 | 20 CCAAGACCCCAATTTGATT      | 60.91  | 20 |
| TGTTATTTTGTGGGTTTGCG    | 59.462 | 20 AATGGTGTCCACTTTCCACC     | 59.679 | 20 |
| CTTTGGAATTGGAAGGACGA    | 60.044 | 20 TTTTTGAGAAGGTTCTTAATTC   | 59.227 | 26 |
| GGGAGAAGAGGGTATAGCGG    | 60.053 | 20 GATTAGCAAATTTCCGGACG     | 59.547 | 20 |
| CAACCACAAATTTTCAGCG     | 59.202 | 20 AAGAGCGTGCTTCAATCGTT     | 60.022 | 20 |
| TGTATCTTCTCACGAGCATTGG  | 60.27  | 22 CTCAAAAACCAATAAATGAATC   | 57.774 | 23 |
| GAAGTACGGGCAAATGATTA    | 59.952 | 21 TGCTGACAATGATATGTGTTCA   | 58.039 | 23 |
| TATGCTACGACATCGGGACA    | 60.096 | 20 TGGCATCCAATCAACAAGAA     | 60.049 | 20 |
| ATTGTTTTAATGCATCGGCG    | 60.831 | 20 TGAAATTTTCGAGTTGGACGTT   | 59.601 | 21 |
| TGTAGCCGACCCCAATTTAT    | 59.297 | 20 TGGCCAAATACCCGAATTTAT    | 60.385 | 21 |
| GAACCTTCGGATTGGTTCTT    | 60.306 | 20 ATGTAGCCGACCCCAATTTT     | 60.562 | 20 |
| CCAAAAATGGTTGAGGGATG    | 60.162 | 20 TGGAAGTTTTACGAGAGCCG     | 60.378 | 20 |
| ACTCTCCAAAATGGCATTGG    | 59.933 | 20 AACCCAGCGTAGAGGAGTT      | 60.132 | 20 |
| AATCATGAAAACCGAAACCA    | 57.916 | 20 TTCGCGACAGTCAAAGAAAA     | 59.585 | 20 |
| ACTACCACGCCAATTATGCC    | 59.851 | 20 AGCCGACCTCACATAGTTGAA    | 59.749 | 21 |
| AAAAGAAAGAACCGAACCCG    | 60.455 | 20 TTTCTGCCCGTGGACATAGT     | 60.517 | 20 |
| TAGCTGACATTCTGGCTCCC    | 60.362 | 20 TAATCCCCGAAATACCCTC      | 59.978 | 20 |
| ATAACTCGAACAAGCGGC      | 60.278 | 20 GAGGAGTGATGAGGGGTTGA     | 60.048 | 20 |
| ATGCTCCTCAGTTGTGTCCC    | 60.12  | 20 TGGGGTGATTATGGTGGTTT     | 59.91  | 20 |
| TGTACCACCAATCTCAATTACCA | 59.257 | 23 ACATTTTCGAGATATAAATTC    | 57.327 | 27 |
| CCAGCAGTTGGCTCTATTTT    | 58.528 | 21 TGTTTGATGTTATGTATTTTCGTA | 58.454 | 27 |
| AGTTTTGGCCGGAATTGAAC    | 61.21  | 20 TGGTTGCAAGTCTTTGGTTG     | 59.734 | 20 |
| CATTCGGGAAAAAGGATCAA    | 59.872 | 20 TTCATCGCCGTAGCTAATCC     | 60.196 | 20 |

|                         |        |    |                         |        |    |
|-------------------------|--------|----|-------------------------|--------|----|
| ACGCGTTAGAAACGTACGAA    | 58.515 | 20 | TTTCCTTTGACGTGGGAGTC    | 60.088 | 20 |
| ATCCGAATGGATCAAAGCTG    | 60.036 | 20 | TCCTCGCTCTCTCTCTCAC     | 59.817 | 20 |
| TGACACAATTCGTTCTGCAT    | 57.671 | 20 | GCACGTGCGTAGAGGGTAGT    | 60.343 | 20 |
| CACCCTGAGATGACGAACAA    | 59.676 | 20 | AAAATGACATGCAAGGAAAAA   | 57.299 | 21 |
| CCCAAGACCCCAATTTGATT    | 60.91  | 20 | GCCGAACAAAGCAAAAAGAA    | 60.356 | 20 |
| TGTCCGGCAGAATACAAGGT    | 60.517 | 20 | GTCGATCTTTACGACCCCAA    | 59.933 | 20 |
| TTCAGACGCAGCAGAACTTG    | 60.324 | 20 | CCCAAGACCCCAATTTGATT    | 60.91  | 20 |
| TGTTTTTCGGCAAGCAAAAT    | 60.599 | 20 | ACTAACTGAGCTTGAGCGCC    | 59.786 | 20 |
| AGCAAGAGGCATGTTTTATTTGA | 60.141 | 23 | TTTCACCTATGCATTTGCCA    | 60.073 | 20 |
| TGAAATTTGGGGGTGTGTTT    | 60.066 | 20 | ACATCATGGCCTCCAGATTC    | 59.893 | 20 |
| ACTTTCTGCGGCAGTTCTGT    | 60.058 | 20 | GGAATTCTCCAATGCCAAGA    | 60.014 | 20 |
| TGTAGCCGACCCCAATTTAT    | 59.297 | 20 | TAGTCACACCAGCATTCCCA    | 60.112 | 20 |
| CGAAAACCTCAATGGGGAAAA   | 59.91  | 20 | TCGATTAACGAAGTCTCTCCC   | 58.398 | 21 |
| TGGTGCTCCAAAAATTGTCA    | 60.088 | 20 | ACCATCAGAGCACGACAAAA    | 59.293 | 20 |
| CCGGAGCCATAATTAGCAAC    | 59.569 | 20 | CAACAAAACCCCAACTCAGG    | 60.38  | 20 |
| TGAGATCAAGAATTATGGCAAGA | 58.844 | 23 | TAGCACAACCTCCGCAATCAC   | 59.871 | 20 |
| TCGAAAGCTTCACAACATGC    | 59.995 | 20 | CCCCATTAACAATGGTTACC    | 60.214 | 23 |
| CTCGTAGCTTTGGCTGCTTT    | 59.791 | 20 | GCCTCAGTTTTTCAGCTTTGG   | 59.993 | 20 |
| GCATATGGAAGAGCGGATTG    | 60.574 | 20 | ACCTACTAAGGCCTTCCCCA    | 59.955 | 20 |
| CTGAGGCAGCAACTTCAGTG    | 59.77  | 20 | TCCGATACCTTGGATCTTG     | 59.887 | 20 |
| GTGTGAAAAGGGAGTGCAT     | 59.973 | 20 | CAAAGACCTAAGGCACCAG     | 59.728 | 20 |
| GAGTTGAAAGGCATGCAAGA    | 59.002 | 20 | TGTAGCCGACCCCAATTTAT    | 59.297 | 20 |
| TGTAGCCGACCCCAATTTAT    | 59.297 | 20 | CAAGGCTCCCCTTCACAATA    | 60.066 | 20 |
| TCCAAGCAAGCACATTTTTG    | 59.849 | 20 | TGTAGCCGACCCCAATTTAT    | 59.297 | 20 |
| ACCAACGAAGCCACCTATTG    | 59.993 | 20 | CATACCCTTCACCGAGTGGT    | 59.844 | 20 |
| TTGTTTGGTTCACGGTTTTG    | 59.459 | 20 | TCCAATCTCAAGGGGATGAG    | 60.003 | 20 |
| ATCACGAGTCAAGAATGGGC    | 60.081 | 20 | TGCATGTTGATGTGTCTGCT    | 58.816 | 20 |
| GGCTTAAAGACAACGGTGGGA   | 60.11  | 20 | CCGACCCATCTACCAAGAGA    | 60.065 | 20 |
| CAGTCTCAGGTGCGTCAAAA    | 60.025 | 20 | GGCTGATGGATACACCGAGT    | 59.957 | 20 |
| GAAACATATGCACCTGCCCT    | 59.962 | 20 | AAAATTTTACTGGGGCGGAG    | 60.305 | 20 |
| CGAATGACCAGCCAAGAATC    | 60.603 | 20 | ACCCTATGATTTCCATCCCC    | 59.843 | 20 |
| TTAGCAGGTGCGGTTTTGAC    | 60.11  | 20 | AATGCTCCACCCAATGACTC    | 59.934 | 20 |
| GGTGAGGTCTGGTCAGGTGT    | 60.006 | 20 | TGCATTTATTGGACGCAAAA    | 60.074 | 20 |
| CACAGATGAGATGAGGCTGG    | 59.367 | 20 | TTTTCCAAGATGGGTATTCCG   | 57.551 | 20 |
| TACCAGATCCCCAGTCAGA     | 60.465 | 20 | CGACAGGGAGTTCACAGAT     | 60.112 | 20 |
| CACGTGTACGTGCGTTCATA    | 59.226 | 20 | ATTGGTTTTGAAATTACGCGA   | 58.161 | 20 |
| TTAAACCTCCACCAGTTGGC    | 59.971 | 20 | CTCCACCTTTTCCCTCACAA    | 60.081 | 20 |
| TGTGGCGTTGTAATAGGAGC    | 58.799 | 20 | TTAACTGGCAGAGCAGCCTT    | 60.154 | 20 |
| ATGTAGCCGACCCCAATTTA    | 59.297 | 20 | ATCGACAAATGAATCCCCAA    | 60.133 | 20 |
| AACGAATGTCACATCAACCG    | 59.42  | 20 | ACGACCAATTGCTTCGTTTC    | 60.118 | 20 |
| GCGTCTGGCTTCTTTTATG     | 59.845 | 20 | CAGCAAGATGAGATCACCGA    | 59.942 | 20 |
| AGTTTACCGTCTTCCGAGCA    | 59.875 | 20 | TTCACTACATCGCTGCATCC    | 59.83  | 20 |
| GATCCTCTGGGCCAAATGTA    | 59.894 | 20 | GCTCCATCAATGTGCTTCAA    | 59.805 | 20 |
| GATCCGAAATGAAAACCCAA    | 59.739 | 20 | CATCCCAGAACAAGGACCAC    | 60.363 | 20 |
| ATCCACCAAATCATCCACC     | 59.464 | 20 | CCAGATCTACAAATCCCCCA    | 59.744 | 20 |
| GGTCCTGGGTTTGGGACTAT    | 60.052 | 20 | ATTGTCCTCACCTCCATTGC    | 59.934 | 20 |
| TTCGATGTGCAGATGAGGAC    | 59.794 | 20 | AAGGAAGGCCTTAGTTGGGA    | 60.068 | 20 |
| TGCATAGTCAACCACCTTCA    | 60.112 | 20 | CTGAGAGAAGTCTGGGAGCG    | 60.275 | 20 |
| CTAATTAATTCACGCGCCG     | 60.583 | 20 | TGCCTAGCTTGTGTTAAATTGC  | 59.45  | 22 |
| AACAGATGGCCAAAAGCATC    | 60.081 | 20 | CACCGTCTCATCGACAAATG    | 60.112 | 20 |
| TCAACTTTCTTTCGAGCTGC    | 58.379 | 20 | CACATTTGGGGTTGTGAATG    | 59.667 | 20 |
| ATGTAGCCGACCCACAGTA     | 60.397 | 20 | TGACAATTAGCAACCCACCA    | 59.964 | 20 |
| TAATCACAGTCGAGTCCGCA    | 60.413 | 20 | CGAACTTCGTGACGTGAACA    | 60.906 | 20 |
| GGCAATTAGCCAAACCATGT    | 59.829 | 20 | GTGTTGAGTAGGGTGGTGGG    | 60.275 | 20 |
| TTGTAACACCCCAATTTGATT   | 59.528 | 23 | GCACAACAATGATTTTTCAGTC  | 60.032 | 23 |
| CGCCAACCCTCCTTCTTTAT    | 60.443 | 20 | TGAATATTTAAAGGGATTGTTT, | 60.006 | 26 |
| CACCTTAGGTACCGCTCGTC    | 59.757 | 20 | CAATGACAAAGGAAAACGATG   | 59.975 | 22 |
| TCCAGCTGTTCTTCCGAAAT    | 59.813 | 20 | ACCGTAAGGTTGCGAACATC    | 60     | 20 |



|                           |        |                           |        |    |
|---------------------------|--------|---------------------------|--------|----|
| TCCAGGAGCCAAGAAAGATG      | 60.331 | 20 CCCACTTGCATTCTCCACTA   | 58.722 | 20 |
| ATGAAATGAAGCTTCCACCG      | 60.074 | 20 GGACGGTGTTGTACGTGATG   | 59.88  | 20 |
| GGAGAGAGAGTGGAGTGCCT      | 59.585 | 20 TAAAAGCAAAAAGGGCATGG   | 60.068 | 20 |
| TAGAAGCCCATGGAGGAATG      | 60.029 | 20 CAAGATTGGTTTTGTGCATACT | 58.688 | 23 |
| GTCGAATCCACAGGGATGAT      | 59.744 | 20 CCAAGACCCCAATTTGATT    | 60.91  | 20 |
| CTGTCACGTGTTGCAGTCTT      | 59.94  | 20 TCTAGGGGTGCTTCTGCTTC   | 59.574 | 20 |
| CCAAGCCAGTTTGTCTGT        | 60.149 | 20 CAGTTCTTTGCCCTCCCTTG   | 59.846 | 20 |
| AAACCTTAGGCTTCTTGGC       | 59.725 | 20 TCCGATAGGGGGAGGATTAC   | 60.11  | 20 |
| TCATGGAGAGAGGAGAGGGA      | 59.871 | 20 ATCATCAGCACCCACTGTGA   | 60.121 | 20 |
| GGCTTAATACGTGTGTTGCG      | 59.254 | 20 GAAGGACCGAGTTGCAAGAA   | 60.375 | 20 |
| GGTTCATTTAACCGACCCAA      | 59.662 | 20 CATGTAAACAACCCACCTT    | 58.73  | 21 |
| GTGGGCAATCTTGTGTGTG       | 60.008 | 20 CATGATCACCAATTTGCTCAAT | 59.829 | 22 |
| GGTAGCACTGCATCTGTCCA      | 59.862 | 20 TGGATTCAAACCCTCTCCAC   | 59.903 | 20 |
| TCAAACAACAAACCGGTCA       | 59.981 | 20 TGTGAAGAACATCGATTATCTA | 58.142 | 26 |
| CCCAAGACCCCAATTTGATT      | 60.91  | 20 ATGTTTCTGTTCAACCCCA    | 60.21  | 20 |
| CGTTTCTTCATCATCATCCG      | 59.075 | 20 GGAAAGATCAAATGGGCAAA   | 59.878 | 20 |
| ACACCAAATGCATGAGACG       | 59.572 | 20 TTCACGTGTGCTATTTGGA    | 60.257 | 20 |
| CACTGCTCTACCACGATGT       | 59.897 | 20 AGCAGCAGCCTCTTCATCAT   | 60.127 | 20 |
| CCCTTCTTTCAAGCACTGG       | 59.846 | 20 ACCTCTAGCCCGGTGAACTT   | 60.132 | 20 |
| TAGATTTGAACGACACCCCC      | 59.79  | 20 TTTAAAATCGGACCGGAGA    | 59.52  | 20 |
| GGCTGGTTGATCTTAGCACG      | 60.796 | 20 AAAAGCGAAGAGAGCGAATG   | 59.73  | 20 |
| TTGCAGCAGTTCTTCTGGTG      | 60.175 | 20 ATCGAATTACCCGTTTGTGC   | 59.829 | 20 |
| TGGAAGGAGAGACGGCTTAG      | 59.569 | 20 CAATCGGCCAAAATGTATCC   | 60.153 | 20 |
| AAACGCCCTCCTTCTCTAGC      | 59.983 | 20 GAATTCTCCACCATGCAAT    | 59.756 | 20 |
| TTCGGTCCGATTAATCAAGAAT    | 59.808 | 22 AGCTGAATCCACGACAAGGT   | 59.727 | 20 |
| AGGCAAAATGGTGATTAGCG      | 60.096 | 20 ATGGAACAGTGCACAAAATG   | 59.572 | 20 |
| CTCGCATCTTCTACGCCAAT      | 60.374 | 20 CTGCTCGTGGAGAAATCCAT   | 60.218 | 20 |
| TTTTCCGAGCTTGTGTTGTG      | 59.881 | 20 GCTCCTGTGCTGAGCTTCT    | 59.751 | 20 |
| TGCAAAATGGATTCAAGTCA      | 60.049 | 20 CGCATGAGGGATAAAATAATC, | 58.96  | 22 |
| TGTAGCCGACCCCAATTTAT      | 59.297 | 20 TCAAAGGCAACATCCATGA    | 60.049 | 20 |
| ACAAATGCGATTCAAGTGACC     | 59.992 | 21 TGGTGTAGATTAACACAACCTG | 57.939 | 27 |
| TTTCGGACCATTGATATCTTTT    | 58.914 | 23 ATGTAGCCGACCCCAATTTA   | 59.297 | 20 |
| ACAACAATATGGCCAAGGGA      | 60.192 | 20 TTATGGGAAGGAGATGCAGG   | 60.029 | 20 |
| AAATGAACGTATGGCCTTGG      | 59.823 | 20 CTGTTTTAAGACAAGGGGCG   | 59.741 | 20 |
| AGAGGAGGAGGCTAAGCGAC      | 60.117 | 20 TCTTCTCCTGCCTCTCTGC    | 59.827 | 20 |
| TGTTGATTGGGAATAATTGGG     | 59.511 | 21 CCACGGTCATTTCTAGGGAA   | 59.926 | 20 |
| TGTGGATGAAGATGAAGATTTG    | 59.077 | 23 CGCCCTTGATTAACATCC     | 60.281 | 19 |
| GATGGTGTGACTGAAAGCCA      | 59.682 | 20 CCCTACCCTGAATTTTTCCC   | 59.639 | 20 |
| GTTGGCCCTCAAACCTAAT       | 60.187 | 20 GGGTCTTGTGCCAGGTAGAC   | 59.579 | 20 |
| ACACAACAAAAACAATAAAAGGC   | 59.856 | 24 TCAAACAGGGGATTTGAAGA   | 59.532 | 21 |
| ACTCAACACGGCCTGGATAC      | 59.997 | 20 AGAAGGGCCTTGTCTTCCTC   | 59.817 | 20 |
| TCTCCTTCCAACACCCAAAC      | 59.943 | 20 TCGCCGGAGATCTTGTTAGT   | 59.836 | 20 |
| CGTCGTCTTTTCTTCAACC       | 59.711 | 20 GAATCCCTACCTCAAGGGGA   | 60.264 | 20 |
| AAGGGGATGAAGCTGGAAGT      | 60.074 | 20 GAGCTGCAACTAAGGCCAAC   | 60.022 | 20 |
| ACCATCTGACGGACAAAAG       | 59.966 | 20 TTTAATCACTATAACCGATTTG | 58.455 | 24 |
| AACGTCACTTCTGGCTTGGTC     | 60.119 | 20 TCCAACGAGTGAATAAAGATG  | 59.229 | 22 |
| TTACAGTGGGCAGCAGTTTG      | 59.904 | 20 TGGGACCAGAAAGATGAAGG   | 60.042 | 20 |
| ATGTGGAGCCACACATACGA      | 59.992 | 20 AGAGAACAAGTGGGTGCTCG   | 60.444 | 20 |
| ACCAGTTGTTGAGTCTGCC       | 60.159 | 20 ACGATGATTCCTCCGATGAG   | 60.034 | 20 |
| TTCAACACACCAAAACACCAA     | 59.889 | 21 CAATCTTGCACCACATTTGC   | 60.119 | 20 |
| CTTTATTAATAATTTCTTTCACCAA | 57.99  | 27 CAATTCAATCAGGGTCAGGG   | 60.309 | 20 |
| ATGTAGCCGACCCCAATTTA      | 59.297 | 20 CGAGTTTATGACCATCCGGT   | 59.813 | 20 |
| CTATTGGGCCGTACCTCTCC      | 60.836 | 20 GGGTGAACCTTCCATCATT    | 59.192 | 20 |
| ACCATGCCAGACTTTGGTTC      | 59.973 | 20 GCACAGATTTGAGGTAGCC    | 59.843 | 20 |
| TTGCAAAATACCTAAAGGTTGGG   | 60.225 | 22 CATAGTTGGCCTGGAAAACG   | 60.493 | 20 |
| CCTACCCTCCTCAGGGTTAC      | 57.585 | 20 AACCGTCGGAATTAAGTGGT   | 59.853 | 20 |
| TTTTGCATATCTCCATTGCGT     | 59.424 | 21 GTTCACACCCGAATCCAAGT   | 59.827 | 20 |
| GCTTTTCAGGGAGTTGGTCA      | 60.232 | 20 CCACATCATGCAAGGCTTTA   | 59.688 | 20 |

|                          |        |    |                         |        |    |
|--------------------------|--------|----|-------------------------|--------|----|
| ACCCGCAAAAACACAAAAG      | 60.011 | 20 | ACTTGACATGATGGGGGAAG    | 59.779 | 20 |
| TTTCAATCACTTTTTCTCGACG   | 59.379 | 22 | TTTCACCCTCTGAAAACCTCG   | 60.224 | 20 |
| GCTCGAATATGCAACGACAA     | 59.839 | 20 | GCGAATGCCCTTTGTAAAAC    | 59.592 | 20 |
| GAAGGGAAGCATTCCAAACA     | 60.051 | 20 | ACGCCTTTGCTGGTGTATTAT   | 59.637 | 20 |
| ATGTAGCCGACCCCAATTTA     | 59.297 | 20 | ACGGAGAATGGAGATTCACG    | 60.073 | 20 |
| TTATGGGGGACCCTATCTCC     | 59.974 | 20 | TTCTGCTGCTTCATCTGCAT    | 59.704 | 20 |
| AACCGTTGATATTTGGCCTG     | 59.823 | 20 | TCAGTTCCTGTGGTTGTCCG    | 59.72  | 20 |
| AGTATGGGCATATGGCAAGG     | 59.807 | 20 | CCAAAAAGAGAGGCCAACAA    | 60.22  | 20 |
| TTGGGTGTGTGAGTGGTGT      | 59.89  | 20 | TGGGTTTATTGATGCACCTG    | 59.395 | 20 |
| TCAAATAGCCGATTGCATCA     | 60.179 | 20 | TCATCAAGAGATTACGTTTTAT  | 57.281 | 26 |
| GTGAAGTTGTCAATCCCCG      | 60.353 | 20 | AGCTGATATCGGGCTTTGAG    | 59.434 | 20 |
| CAATGTCTGGTTCGTGTTCCG    | 60.152 | 20 | TCGGAGGAAGAAGACGAGAA    | 60.065 | 20 |
| CGATGGATAAGGCCACTTGT     | 59.955 | 20 | AAAACAGTGGGGGAGAAACC    | 60.204 | 20 |
| AGGTGGCGGTAGAGCTTTTT     | 60.262 | 20 | CGCATGTCATCACTCGCTAT    | 59.854 | 20 |
| ACCAGCATTTCATCTCCTG      | 60.073 | 20 | CCACTGTTGCTGCTGCTAGT    | 59.264 | 20 |
| TGCGATCTAGAGTGTGGTGA     | 57.914 | 20 | CTGGGTAAACCCACGGACT     | 59.829 | 19 |
| CGGAAGACCAGAGGTGAGAG     | 59.978 | 20 | CTCCAAATCCCACCAAGAAA    | 59.903 | 20 |
| CGAGAATTTCTCGGATTCA      | 60.148 | 20 | TGATACGGGGGTGTTAGTTCA   | 60.234 | 21 |
| TAGTTCAGGCGGCAATTCTT     | 59.845 | 20 | TCCCTCGAAGGTAAGAGCAA    | 59.948 | 20 |
| GACAGCATTGCTTTGCCTTT     | 60.395 | 20 | CGCTTGGTCTTCTTGACCTT    | 59.473 | 20 |
| TCAACTCATGCAAATGCAGC     | 60.969 | 20 | ACGCACTTAGCAAGGAGGAA    | 60.015 | 20 |
| AGCTCCGGAGTTTTGAATGA     | 59.813 | 20 | AAAATAAGCGCCACGTCAC     | 60.138 | 20 |
| ACCTCACATGGTGGGAAAAA     | 60.21  | 20 | TTGGAGAGAAGGAAGCAAGC    | 59.694 | 20 |
| TCTCGAGCAGCTCACTGAAA     | 60.008 | 20 | ATTGGAATGTGAGAAACGCC    | 59.939 | 20 |
| TATTTAAACCACCGCACACG     | 59.486 | 20 | TCCGTACACCTGGAATCCTC    | 59.927 | 20 |
| AACAAAACCCGGATTGACAC     | 59.694 | 20 | TCGTGCCTGTCTAACAATG     | 59.716 | 20 |
| CCCACTCCCACTTCTCAACT     | 59.149 | 20 | CCAACACTTGTGCAAACCTCA   | 59.79  | 21 |
| TTTATCGCAAGAGACCCACC     | 60.074 | 20 | ATTCGATCGTAAAACAGCGG    | 60.096 | 20 |
| TTGAATCCTCAGCGTGATA      | 60.366 | 20 | AGCCCTGTTACATATTTCCCA   | 59.737 | 22 |
| TGCAAGGGTTTGAATAAGCC     | 60.074 | 20 | TGTTCCCTCAAGTCGACAACG   | 59.873 | 20 |
| CACAACCTTGATCAAATTGCAGA  | 60.159 | 23 | CTTTCGCCCCCTATTTCTTC    | 60.034 | 20 |
| TGTAGCCGACCCCAATTTAT     | 59.297 | 20 | TCTGCTAAAAATATGATGAATE  | 60.008 | 25 |
| GAGTCAGGGTGTGGTTCGAAG    | 59.835 | 20 | AATACGACGAGGCGGTTTTA    | 59.609 | 20 |
| CCTGAAGCTGTCCCAGGTAA     | 60.246 | 20 | CGAACAAATTTCAAACGGCT    | 60.11  | 20 |
| ATCCAAAGGGCTTGCTTCTT     | 60.208 | 20 | TGCAGGAACTGAAGCAGATG    | 60.136 | 20 |
| TAGATGCCTGTTGGGGTCTT     | 59.55  | 20 | GAGCAGTGCACAAAGCATTAA   | 60.165 | 20 |
| ATCCTGAGTTGCACACCCTT     | 59.579 | 20 | AGTGATGGTGGTGGTGTATGA   | 59.801 | 20 |
| TTGATTTGAAATTCGTCGGG     | 60.807 | 20 | AAATAGTACAGTGGGTTTTGCT  | 59.023 | 25 |
| TGTAGCCGACCCCAATTTAT     | 59.297 | 20 | TCCACTCCGTCTTCTTTTGG    | 60.224 | 20 |
| CCTCTGGAATGGGAGTTTCA     | 60.042 | 20 | TTTGATTGGGAATAATTGGGT   | 58.163 | 21 |
| AAAGTTTAAACCTGCCGGG      | 60.336 | 20 | CTTCAACTTGGCGCACTGTA    | 60.05  | 20 |
| TTCGTTTTCCCTCACAAACA     | 59.145 | 20 | GCGACAGCAATCCTCTACCT    | 59.459 | 20 |
| ATGTAGCCGACCCCAATTTA     | 59.297 | 20 | CTAATGCAGGTCACCAGTCG    | 59.314 | 20 |
| GATGGAATCCTGTCCTCTGG     | 59.46  | 20 | CCAATTCAAGTCAGTGTTCCCTT | 59.552 | 23 |
| GTTCCGGCCCTTCAATAATC     | 60.642 | 20 | CAGATGTACGCAACATTTCCC   | 60.38  | 21 |
| TTGGTATTTTGGCTACCAATTTT  | 59.306 | 23 | AATGGGCCAACTACAGTGAA    | 58.076 | 20 |
| TGCAGCTCTTAACTCTATCGGA   | 59.271 | 22 | TGGCCGACGTTAAAATATGA    | 59.029 | 20 |
| GCAATATCAATGTAAGATCATATT | 57.778 | 27 | AACATTCGTGGCATTGTT      | 60.235 | 20 |
| TGTTCCCGTGGTATGTTTTT     | 57.85  | 20 | TGTGGCAAGAGTCCATTGAA    | 60.24  | 20 |
| TAAGGAGGCGAGAGAATGGA     | 59.91  | 20 | ACCGTTTTGTGAGTGGTAGC    | 60.035 | 20 |
| CATCTTAGGAAGTGCTCGGG     | 59.83  | 20 | CTCCATCTCCATCCACGTCT    | 60.072 | 20 |
| TGAATTTCTGAAGGTTGGTTG    | 57.715 | 21 | AAAAAGTCCATCCCAAGAAAA   | 59.013 | 22 |
| GAATTTGCTTTGTCAATTGGGA   | 59.93  | 21 | CCATCACTACCCACTGGAGG    | 60.377 | 20 |
| TGCATTTCAAACACACACAA     | 59.563 | 20 | ACCCTACGAAGGGGAGACAT    | 59.817 | 20 |
| ACGATGCAACTGCACATAGC     | 59.902 | 20 | TTTCTTGTCTGCATTGAGCG    | 60.134 | 20 |
| TCCAATGCTTCCCTTCTTAATC   | 59.572 | 22 | CTAATTTTACAAATTTAACGAG  | 57.347 | 27 |
| GCACCCCTACAGCATTGTTT     | 60     | 20 | TTGCTCGAATTCATCGTCTG    | 59.948 | 20 |
| CTCCCTCCACTTTCTACCA      | 60.229 | 20 | ATTGGAAGATTTGCTGTGG     | 60.074 | 20 |

|                         |        |    |                        |        |    |
|-------------------------|--------|----|------------------------|--------|----|
| GCATTGCTTGACTGAGTTGC    | 59.602 | 20 | G TTCCTATGGTTGTTGGCGT  | 59.859 | 20 |
| TTTTGTTACGGGAATAACCCA   | 59.218 | 21 | GGAACCAAATTAATGGAGGAA  | 59.207 | 22 |
| CCCAAGACCCCAATTTGATT    | 60.91  | 20 | GCATTGAATCCCTACTTGGC   | 59.533 | 20 |
| TGTCTCGACGGACTGACACT    | 59.442 | 20 | CAACATCAAAAGTTTTCCAACA | 59.793 | 24 |
| GGAGACCTAAGGATGCACCA    | 60.073 | 20 | ACTCGAGCGATTCAACTTGC   | 60.547 | 20 |
| TTCAACAAGCCTTCAGTGGA    | 59.415 | 20 | GCCTTCATCATCTTCTTCGC   | 59.923 | 20 |
| TGGGTAGCTTACAAGTCCAGC   | 59.392 | 21 | AGAGCGGAAACAGAGCACAT   | 60.02  | 20 |
| TCATCATCTGGCTTTGTGGA    | 60.201 | 20 | TTCTCCACTCTCCCCTTTTT   | 57.827 | 20 |
| CCGCTACAATCTTTGGTGCT    | 60.27  | 20 | AGGACAGTTCACATGCAACAA  | 59.525 | 22 |
| TGAATCAGAAGAGAGTTTGCCA  | 59.993 | 22 | TGCACGATTTACGCATTGAT   | 60.103 | 20 |
| ATTCAAAGCATATGCCCTCC    | 59.001 | 20 | GCCATGAGGGGTAGAAATCA   | 59.894 | 20 |
| CGTGTGTTGAGTTTCTTGTTTGG | 59.688 | 22 | GTCCAATCATTACCCTTGGC   | 59.249 | 20 |
| CCGTTTCTCCAGTTGACGTT    | 60.149 | 20 | TCCTACGCACTCCCATTCTC   | 60.218 | 20 |
| AACCTAATCCATCCCAACTTTT  | 57.96  | 22 | ATGTAGCCGACCCCAATTTA   | 59.297 | 20 |
| TAGAAGGAGATGGGTCCTGC    | 59.239 | 20 | AGTGTGCAGGGAGACTGGAC   | 60.315 | 20 |
| TGAGAGGTGACAAACAGCGA    | 60.593 | 20 | TTCAAGTTTTGACAATGGGC   | 58.599 | 20 |
| TAGCTCATCGCAGGTTGGAT    | 60.765 | 20 | ACAGGAAAAGCAAAGCGAAA   | 59.996 | 20 |
| GTTAGATTGGACCCCATCCC    | 60.388 | 20 | GGTCCGCTATGTTTCGAAA    | 59.933 | 20 |
| TTGTGGAATAATTGACCGCA    | 60.073 | 20 | AACGGCGTTTTGAATACTGG   | 59.996 | 20 |
| GCTTTCGTGGTTTCGAGTCT    | 59.478 | 20 | AAGGTCAAGTTCACACCAAAC  | 59.538 | 22 |
| CGCAACTCAAACCCGTTTAT    | 59.996 | 20 | GCGGAGAAATCTTCTTGTCG   | 59.955 | 20 |
| GAATAGCCAGCAACTCCTGC    | 59.985 | 20 | GCAAGAACACATGGGGAAGT   | 59.973 | 20 |
| GCATTTCCGTGCAACAATA     | 59.735 | 20 | TGGGATTAAGGCTTTGGTGT   | 59.429 | 20 |
| ATGTAGCCGACCCCAATTTA    | 59.297 | 20 | ACACAATCAGCACAGTGCAA   | 58.871 | 20 |
| CAAACCCACCAACAAACAAA    | 59.313 | 20 | GTCTTCTGCGGTTTCTCTCG   | 60.134 | 20 |
| GTGGCGTGTGTTCCAGAATC    | 60.504 | 20 | AGACCTTGACTCGCAACACC   | 60.307 | 20 |
| GTCTTTCCACCCTCCATTT     | 60.169 | 20 | AGGGAAGCTCTTCGTCATCA   | 59.95  | 20 |
| ACATGAGAGCCTTGATCCT     | 59.834 | 20 | ACAATGCTTATGTTCCCTCCC  | 60.201 | 21 |
| ACAAACGATTTCCCGTCTTG    | 59.971 | 20 | TGGTTCCTATGTTGTCCCAA   | 58.821 | 20 |
| TCACGACGGAAACATGTAGTG   | 59.624 | 21 | GGGCTTTCAGCTATTGCAG    | 59.982 | 20 |
| AAGAGAACTTGACGAGCGG     | 59.615 | 20 | CCGTTTGGTCTTGGAACAT    | 59.83  | 20 |
| TCTTGATTGATCTTGGTGCG    | 59.799 | 20 | ACGAGCCATTGTTGGATAGG   | 59.955 | 20 |
| GGGAGTGGGTTATCGGTTTT    | 60.053 | 20 | TCAATCGATGAATTATGCGG   | 59.478 | 20 |
| GTGGGGGTGATTTGTAAACG    | 60.088 | 20 | CACCGCCTCCTCCTTATGTA   | 60.088 | 20 |
| AGGGAAGTGGAATAAGCCC     | 59.42  | 20 | CCATTTTGCCATTCAAGGTC   | 60.309 | 20 |
| TGCGAACAATCTCTCCTCCT    | 59.95  | 20 | AGAAGGTGCCCTGTTGAAGA   | 59.844 | 20 |
| TTGGTTCATGTAGCCAACCTC   | 59.985 | 21 | TGGATGAACCGAAACCTCTC   | 60.05  | 20 |
| AAACAGCTCCCATCATCAGC    | 60.226 | 20 | TGGAGGCATCAATCTTGTGT   | 59.09  | 20 |
| GGGAAATGGCTTGATAAAA     | 59.907 | 20 | GCGTCAGCTTACATTGGGAG   | 60.796 | 20 |
| GGGTACAGGTGGATGGTAAGA   | 58.778 | 21 | GGAGCCATGAGACTAGACGG   | 59.827 | 20 |
| TCCTGTGTGGTGTGTGTTTT    | 59.89  | 20 | TTTTGCAATTTTCATTGGCTT  | 59.595 | 21 |
| GCCACACAAATTATCGAGG     | 60.331 | 20 | TGTGATGTTTACAAAACGATAA | 59.314 | 26 |
| GAATTGGAGGCGGAGGAG      | 60.703 | 18 | ACCTTGCTCCTGAACCACCAC  | 59.859 | 20 |
| GCTCCTCTGTCCAAGTAGCG    | 60.156 | 20 | AGTTTGGGAGGTTGAATGGA   | 59.381 | 20 |
| GATGTCATCACCAAGGTCCC    | 60.184 | 20 | TCCTCCACCAGCTTCTGAAC   | 60.386 | 20 |
| GCCGAGGGTGATGTATCAAT    | 59.78  | 20 | CAAGTTAAATCCAAACGGGC   | 59.451 | 20 |
| ACGCCTCATCGTCAAAACTC    | 60.263 | 20 | TCTAGATCCCCCTGTCCCTT   | 59.89  | 20 |
| CTTATGCCAGGTTTTCTGGG    | 59.564 | 20 | AAGCGCAAATATATCCCGTG   | 59.95  | 20 |
| TCGCGAGTAAAACAAAAACAA   | 58.53  | 21 | TTTCCGCCATTCTTGACAGT   | 60.636 | 20 |
| AAAATTGTGGTTATTCGCCG    | 59.832 | 20 | TTGCTTCTTCTCCCTCCTCA   | 60.065 | 20 |
| TTTGAATCTTCCCTTCCCT     | 59.875 | 20 | CGTCTACGAGGACGTGCTAA   | 59.097 | 20 |
| CGAATAGAGGAGGGAAAGGG    | 60.025 | 20 | TCCTTTGTCAGGTTTGGCTC   | 60.232 | 20 |
| TCGGCAAACCCTTTTATCA     | 60.427 | 20 | GCAAATGTCGTGTTGAGTGG   | 60.16  | 20 |
| CGAAGGGACCACAAAAGGTA    | 59.964 | 20 | ACTCGAAGCCTTGACCTGAA   | 59.989 | 20 |
| GAAGGCAGTGATGGATTTGC    | 60.613 | 20 | AGGGCAAGAAACCAATCTCC   | 60.443 | 20 |
| TGCCAAGCTTATATTATTGGTGC | 60.349 | 23 | TTTCTTGGGTAAATTGCGT    | 59.451 | 20 |
| GCTAACGACGTAAAGGCAAATG  | 59.793 | 21 | TCTTGCCGGTACATACATGG   | 59.42  | 20 |
| ACACCGAGTGCAACTTCCCT    | 60.307 | 20 | GTTCTTGGTTGGGAGGTGAA   | 59.943 | 20 |

|                          |        |    |                        |        |    |
|--------------------------|--------|----|------------------------|--------|----|
| TTCTTCCACAGTTGGCTCCT     | 59.844 | 20 | TTCAAGCAATTTCTGCCAAA   | 59.42  | 20 |
| TTGCTCTGTGTTTTCTCA       | 59.566 | 20 | CATCTTTACTGCACCACCAGA  | 58.787 | 21 |
| CAATGAACTCCAAGGGGAGA     | 60.042 | 20 | GCCACCATCTTTCTTTCTCG   | 59.813 | 20 |
| GGTAATGTGGAAGAGGCTCG     | 59.836 | 20 | GAGTTCCATGGACGGAAGAA   | 60.05  | 20 |
| ATGTAGCCGACCCCAATTTA     | 59.297 | 20 | AGTCATTCATTTCCCGTGCT   | 59.556 | 20 |
| CCCAGACTGAGTTATTATTTGATC | 59.335 | 25 | GTGGGAAGTGGGCAAAGATA   | 59.933 | 20 |
| TAGGGAAACCCCAAGTTC       | 60.159 | 20 | GAATTGGCCTTGCTTGCTTA   | 60.343 | 20 |
| GAATAGTAGCGGCTGCAGGT     | 59.504 | 20 | CAGCATACCTAAACCTCCCTG  | 58.73  | 21 |
| TTGATGTTCTTTGGGTGCTG     | 59.691 | 20 | TTTGGACCAAGTCACACGAA   | 60.128 | 20 |
| AACAATAATATCGTCCGCCG     | 59.816 | 20 | TGCAAGTTTGAGCGAGATTG   | 60.134 | 20 |
| AGCCACTGCTTTTGTTGCTT     | 60.059 | 20 | GGATCCATCAAGCGTCCTAA   | 60.036 | 20 |
| TCATGCAAGAATGAATGTCCA    | 60.065 | 21 | GCAGCGTGTTAAAGTTTACGA/ | 59.489 | 22 |
| GAGATACCGATGTCCGGATG     | 60.303 | 20 | TCCAGTCCCCATTCGTATTC   | 59.75  | 20 |
| GGTATTTTCATCCCGCTCAA     | 59.901 | 20 | TAGGTTCTTCATTGCTTGCG   | 59.062 | 20 |
| AAGGGTTTCTTCAACCAGCA     | 59.711 | 20 | AATTGCCAATACCCAATCCA   | 60.016 | 20 |
| CCACAAATTCTGAAACCGAAA    | 59.961 | 21 | AAAATGACGTGAAGTATGAAG  | 59.557 | 23 |
| TAAACCCACTGCGTCTCCTC     | 60.255 | 20 | GGAACAAGAGATTTTCGCAGC  | 59.962 | 20 |
| AATATGGCATGAGACGAGGC     | 60.066 | 20 | AATCTGCACGGGTTGAGTTC   | 60.119 | 20 |
| GGATCGTGTGTTGGGATCAAT    | 60.61  | 20 | TGGCCACCTTTATTTTCCAC   | 59.801 | 20 |
| TAACCGAAACCTCAACCAGC     | 60.11  | 20 | GCTCTGACTTGTTCTTGGGC   | 59.997 | 20 |
| TCTGAATCCCTTTTCATCCG     | 60.006 | 20 | GAGCGGGGCATTTAGGTAAT   | 60.3   | 20 |
| CAGCCTTCCAGTTGGGATAA     | 60.066 | 20 | CTGGTCAAAGGAGAACGTGG   | 60.68  | 20 |
| ATCTCCTGTTACACCACCC      | 59.817 | 20 | TGTTACCGTTGCCGTTGTTA   | 60.029 | 20 |
| CCCAAGACCCCAATTTGATT     | 60.91  | 20 | TGGTCGAAAAGTACGCAAAA   | 59.344 | 20 |
| GCGCAGAAGGTGTAGTCGAT     | 60.428 | 20 | AGGAATCCCTCTTTCTCCCA   | 60.008 | 20 |
| AATGTATATTTGTTCTTTCTTGTT | 57.286 | 27 | TGCTGAGCTTAGGCTTAGTGG  | 59.799 | 21 |
| GAGCACGTTGTGTTCCACAG     | 60.357 | 20 | GGCTGGTGCAGTATGAGGAT   | 60.104 | 20 |
| GATGCAGGGATACTGATTCCA    | 59.909 | 21 | AATTCGCCTGAACTCCAAGA   | 59.813 | 20 |
| TGGCAAACAAAGGATGTCAG     | 59.691 | 20 | GGGACTGCTAAAGGCAAAGA   | 59.452 | 20 |
| TGAAAGGATCCCATAATTTCC    | 59.971 | 21 | GAGAACATGTGCAGTGTCCG   | 60.319 | 20 |
| TGCTCACCCACATTCACATT     | 59.967 | 20 | GCCGTCAAGGAGTCAAAAAT   | 59.174 | 20 |
| CCCCATATCTACCCCTCAT      | 59.859 | 20 | CCCTCCGAACGATATGAAGA   | 60.029 | 20 |
| ATGTGGTCACCTGGGGAATA     | 60.05  | 20 | TGGAAATGTGCTTTTGATCG   | 59.664 | 20 |
| CCTCGGATGAGTCGCATATT     | 60.059 | 20 | TGTTCCGGGTTTCACAATTC   | 59.941 | 20 |
| AAAATCTTGCCGCCTTGTTA     | 59.72  | 20 | TTTTTCGAAATCGTGACCT    | 60.617 | 20 |
| GCTCCAAGTTACTGGCCAAA     | 60.249 | 20 | AGGCTTGTTGACCGCTTAGA   | 60.015 | 20 |
| CTCCACGTTTTAACAACCGA     | 58.673 | 20 | AAAGTGTAATGGCGGTGGAG   | 59.993 | 20 |
| CATGAGATGAACAAGGTTTCG    | 58.215 | 21 | GCGAGTTGATGGTTTTGGAT   | 59.939 | 20 |
| GCGGGGATTATTGTTAGGGT     | 60.041 | 20 | CGACCTCCACTCTTCTCCAG   | 59.978 | 20 |
| GGCATTATCAGAATTTGGCG     | 60.424 | 20 | GGTTTCTGTGAAGAGCGGAG   | 59.989 | 20 |
| GCTGCATTGCTTCAAATGTCT    | 60.41  | 21 | AGGGTCCCTTCGTTTTTGT    | 60.34  | 20 |
| CCCAAGACCCCAATTTGAT      | 59.59  | 19 | TCATTTTCAGTTTGCCTAAGCC | 59.406 | 22 |
| TCCTTGAACTCTCAATCCAG     | 59.269 | 21 | TGTTGGTTCAAACTAATCCA   | 57.617 | 23 |
| TTTAACTTGTCCTCGTTGGT     | 59.331 | 20 | CCTAGGCTCTCAGACACACG   | 58.621 | 20 |
| CACCTCATCTTGCTTCGTCA     | 59.984 | 20 | TGAAGTGGGTATGAATGCCA   | 59.924 | 20 |
| GCAACGAAAAATACAAGCCA     | 58.819 | 20 | CCCTCATTTGGGATCTACCC   | 60.517 | 20 |
| CACAACACCACTCATCTCG      | 60.154 | 20 | GCACTCGGGATTACTTGAGC   | 59.843 | 20 |
| TATTGGAGAGGGAAGCAGGA     | 59.767 | 20 | CTCTGGTACGTCGATGGCT    | 60.277 | 20 |
| CCCAAGACCCCAATTTGAT      | 59.59  | 19 | TCTGAACATGGGGAAAGACC   | 59.903 | 20 |
| ATCTCGGGGTGCATTGTAAC     | 59.82  | 20 | TTCACGATTCATATGTGCTTCC | 59.967 | 22 |
| CGCCTCTGAATAACCTCCA      | 60.206 | 20 | TCAAGTGGGCAAAGAAAAGG   | 60.22  | 20 |
| CAGTGGTGAAGTCCCACCTT     | 60.002 | 20 | CCCACGTACGATCTCAGGTT   | 59.989 | 20 |
| CGAGGAAGACGATGTAACCC     | 59.55  | 20 | TTTCGATCCCATGGAAGAAG   | 60.006 | 20 |
| TAGCCGACCCCACTTATTG      | 59.953 | 20 | GAGAAGCTGATTGTGACCCC   | 59.661 | 20 |
| TTGAAAGGAAAAGAAACATAAAA  | 57.25  | 23 | TGGTGTGATAACGGCCATA    | 59.809 | 20 |
| ACTCGAAGAGTAGCGGTTGC     | 59.644 | 20 | GAGCTGGCCGTAGTTTCTA    | 59.476 | 20 |
| ATCGTGGGCAAATTTGAATC     | 59.768 | 20 | TTTTGCATGTGAAAAATGGTTT | 59.385 | 22 |
| CCGTCATGGCCCTACATTAC     | 60.214 | 20 | TGAGGAAAATGGGTGGAAAG   | 59.903 | 20 |

|                          |        |    |                         |        |    |
|--------------------------|--------|----|-------------------------|--------|----|
| GATTCATGTAGCTGACCCCAA    | 59.947 | 21 | GCAATCTCTACAAGCGGGAG    | 59.978 | 20 |
| CGAAGGATCAACTTCATAGTCG   | 58.858 | 22 | AGCTGTGCATTATCACCTACCT  | 59.693 | 23 |
| CCCCACAACGTTATTCATC      | 60.051 | 20 | GCAAGCATTTTCACCCACCTT   | 60.118 | 20 |
| TCCCCTCAAAGTTCAATGGT     | 59.381 | 20 | GCCTGAATAACGAATGTTGGA   | 59.952 | 21 |
| GCTGGTATCAAAAACGCCACT    | 60.14  | 20 | AAAAACAACAAACAACCCTT    | 58.621 | 23 |
| GGTCATCAATTCAGGAAGCC     | 59.488 | 20 | GTGGAGGTCTTCAGAGCAGG    | 59.986 | 20 |
| CACACTATCAACCGAACCGA     | 59.566 | 20 | TAGAAATTGAAATGGCCGGT    | 59.411 | 20 |
| GAACCATGATCTGCCTGGAT     | 59.893 | 20 | AAATTCACAGGGCCAATGAC    | 59.797 | 20 |
| GTTGAAGCCAAGCGTGCTAT     | 60.416 | 20 | TGAAAAACAGAATGGAGGGC    | 60.051 | 20 |
| TGACAAATAAAAACCTACAAAAT  | 59.231 | 26 | ATTTTAAATTAAGAGCCACCCA  | 57.337 | 23 |
| AGAGGAGGACGAGCATGAAA     | 59.95  | 20 | CATGTTCTCGGAATCACCT     | 59.927 | 20 |
| CATAGGGCAAGTACGGGAAA     | 59.953 | 20 | GGCATGTTGACACCCCTATT    | 59.676 | 20 |
| CACCGGTTTTGGATTTGACT     | 59.83  | 20 | AAAACCAACATTCACCACCTT   | 58.331 | 21 |
| CAAATTTAAGTGAGCTTTGCTTGA | 59.957 | 24 | AAATTTATTGGGATTAAGGCTT  | 58.94  | 24 |
| GAGCGAGTTCTTGATCGGAC     | 59.957 | 20 | TCAAACCAGATGACCCAACA    | 59.935 | 20 |
| CTGCACACTTTGGTCCATTG     | 60.152 | 20 | ATGTAGCCGACCCCAATTTA    | 59.297 | 20 |
| CCGGAACTCAATAACCAAAGA    | 59.074 | 21 | TACTGCATTTACTGCGCTGC    | 60.185 | 20 |
| CCAAAAGTTGGGGAAAATGA     | 59.772 | 20 | TGGAGGATTTGTATGCGACA    | 60.073 | 20 |
| CATTCATTTCCAGGCCACTT     | 59.933 | 20 | GGTGAAGAAAGCACCGGTTA    | 60.11  | 20 |
| TTGGAATCAAGAACCCCAA      | 60.28  | 20 | ACCACTGCACCCTAAGATGG    | 59.989 | 20 |
| CACATAGTGGGAAACGGCTT     | 59.993 | 20 | TGAGATCCAGAAGGTGTCCC    | 60.048 | 20 |
| AAACAGCAAGGAGAGGCAAA     | 59.993 | 20 | GCTAAGGCTGAAAGCAATGG    | 59.982 | 20 |
| GAGAAATGTTTCCGGCGATA     | 60.038 | 20 | ACTTCGCAGTGGACCAAATC    | 60.119 | 20 |
| GTGCAGAAAGGCAAAGAAGG     | 59.993 | 20 | TTACGCTAGTCCGTGGGTTT    | 59.632 | 20 |
| CATCAACATTCCTGGGCTCT     | 60.073 | 20 | TCCTGAGAAAGCCGATGTTT    | 60.34  | 20 |
| TTCCATAGCTGCTCCCAATC     | 60.177 | 20 | CTCCATTCCCATCTCTTCCA    | 60.003 | 20 |
| TTTGGTTCATGTAGTCGACCC    | 59.845 | 21 | ACAGGCATAACCATTGCCTC    | 59.962 | 20 |
| TGCACCAAGTATTGAACGAGC    | 59.871 | 20 | CCTGGAACCTTCTTTTGTGC    | 59.711 | 20 |
| CAACCATGGCAGTTGACAGT     | 59.597 | 20 | GATGAAAGGGAGGTTTCGTGA   | 60.05  | 20 |
| ATGTCCTGTTGATTCCGAGG     | 59.927 | 20 | ATGTAGCCGACCCCAATTTA    | 59.297 | 20 |
| CGTACGTTGTACGGGTTTAT     | 58.432 | 20 | CCAAGACCCCAATTTGAT      | 59.59  | 19 |
| GATTTTGTAGTCGCGGAGG      | 59.708 | 20 | TTGCCTCCTTACACTTATTTATC | 59.631 | 26 |
| TCATCGGGTCTAGGTGTTCC     | 59.927 | 20 | AAAATCACGAAGCTGATGCC    | 60.221 | 20 |
| AGGACAGAGCATCATCGCTT     | 59.981 | 20 | CCGCCTCTCCTCCTCTCTAT    | 59.935 | 20 |
| TATTTCCGACAATTCGGTCC     | 59.762 | 20 | ATCCATATAGCCGACCCAC     | 60.931 | 20 |
| CATTTAGTTTACTGGGATTAAGG  | 58.223 | 24 | GCAACACGCTTCATTACCAA    | 59.735 | 20 |
| AGTTGGAACCTCGAGCATTG     | 60.255 | 20 | TTGCAAGCTGATAGGTGTTTAC  | 60.44  | 22 |
| TGTGGCGACATGAATTTCC      | 60.474 | 19 | GCTCTCATGCGTACAAGCCT    | 60.569 | 20 |
| CACCTCCACGTGAATGATGT     | 59.393 | 20 | GCTCCGTCCTGCTACATAGTC   | 59.965 | 22 |
| CGACGAGCATCAAGAAAACA     | 59.988 | 20 | TATGACGACGGCTCTGTCTG    | 60.008 | 20 |
| ATCATAACGTTGGACACCTCA    | 58.869 | 21 | TGTGAACGGCACGACATATAA   | 60.006 | 21 |
| AAACAGAAGCAGAGGGACGA     | 59.989 | 20 | GGGCATTTTCACAGACGATT    | 59.939 | 20 |
| CTTCGCTTTCCCTTTACAC      | 59.853 | 20 | AGCGGAAGTACAAATGGACG    | 60.132 | 20 |
| GCATTTGGCTTGTTAGGAGG     | 59.708 | 20 | GCAACATCATCCAGATTGGT    | 58.36  | 20 |
| CGAGGGAGGTGAGGGACTAT     | 60.468 | 20 | GGTTGCCAAAAGAGGTTGAA    | 60.088 | 20 |
| TGAGCTTCAGGAATGTGTGG     | 59.831 | 20 | AAATATTGCCGCTCATCAGG    | 60.06  | 20 |
| TGTCTGAATTTGGTGGAGGAG    | 60.096 | 21 | GTACAGGCTGGCATCCCTAA    | 60.096 | 20 |
| CTGCCTCTCCTTCTTGTTC      | 60.134 | 20 | TGGCCTACGTTACTCAACCC    | 59.993 | 20 |
| TCATCAAACCCAAACCAACC     | 60.594 | 20 | TGCTATGCTTGAAGTTATGTG   | 59.793 | 23 |
| TAGGTCTGAGGTTGGATGG      | 59.92  | 20 | TGCAAGAGAGCTTTGTGGTG    | 60.175 | 20 |
| CGTTAAATGTCACGCGAATG     | 60.133 | 20 | TTCCCTTGATTTTCTCTGTG    | 57.643 | 20 |
| TGATTGCACCCAGTCACCTA     | 60.112 | 20 | CCAAGACCCCAATTTGATT     | 60.91  | 20 |
| TTCTTTTCTTTTGTACCCA      | 58.862 | 21 | CAGCACAAAACAAAATGCTGA   | 59.903 | 21 |
| TATGGTTTGGTCCGATGGAT     | 60.014 | 20 | TTGCCCTAAATCCTAGCCT     | 60.055 | 20 |
| TGGGTGATTGAGTTTCTCC      | 59.903 | 20 | CCAAGACCCCAATTTGAT      | 59.59  | 19 |
| TGGCCTAATCGTTTCTCAAC     | 60.074 | 20 | TCAATTTCTTTGGTCGGGTTT   | 59.406 | 20 |
| TCTAAAGCCTCCACGAAGA      | 59.948 | 20 | AGCTGCCAGAGAACTTGAA     | 60.134 | 20 |
| TGAAACCCTAGCGAACCAAC     | 60.11  | 20 | CTCTCTCCTTCAATGCCTGG    | 59.943 | 20 |

|                        |        |                           |        |    |
|------------------------|--------|---------------------------|--------|----|
| TCGTTGTTCCACACTTCCAC   | 59.571 | 20 GAGGAGCACTGTGAGCTATGT  | 60.081 | 22 |
| CTCTGTAGGCTTCTCCGCAT   | 59.598 | 20 ACCGCCTGATGATTTTGAAC   | 59.939 | 20 |
| TCTTGGTGGTTCTGGTAGGG   | 59.959 | 20 GAGAGCAGAAGGTGTAGGCG   | 60.156 | 20 |
| CTCAGCAACTACGTGCATCC   | 59.47  | 20 GTCATGCTGCGTTGTGAGAT   | 59.87  | 20 |
| CGGGCTCTTAAATTCATTCC   | 59.677 | 20 TAGCCATTGAAGCTGGAACC   | 60.214 | 20 |
| TAGGACTAGGGAAAACGGCA   | 59.702 | 20 GCTTTTCGGAGGAGGAAGAT   | 59.789 | 20 |
| ACTCCAACAACCTCGTCACCC  | 60.009 | 20 TTAACGTGGGCGTTTTTCTC   | 60.11  | 20 |
| TGGAGCAACTTCTTCGATCA   | 59.522 | 20 CCTCTTGTTGAGCTTCCACC   | 59.844 | 20 |
| TGATCCATATAGCCAACCTCA  | 58.052 | 21 ATGGACTGTGGTGTGCATA    | 60.144 | 20 |
| CTTACCCTTGTTCGTTGC     | 59.609 | 20 TGGGCTAATAATGGAGCTGG   | 60.053 | 20 |
| TGTAGCCGACCCCAATTTAT   | 59.297 | 20 GAATTCGGTAATGGCTGCAT   | 59.929 | 20 |
| TGTAGCCGACCCCAATTTAT   | 59.297 | 20 GGAATTGGGATGAAAAGGT    | 59.996 | 20 |
| GGTGCAAGAGATTGGGTTGA   | 61.046 | 20 CCAAGACCCCAATTTGATT    | 60.91  | 20 |
| GACAGAAGCAGAAATCGGGA   | 60.34  | 20 AAACACAACCTGGCATCCCTC  | 59.973 | 20 |
| CGAGGACCAGATTTGCATTT   | 60.074 | 20 TGAGAGTACGCACAGCAAGG   | 60.199 | 20 |
| TTTTTGATTGGGAATAATTGGG | 59.895 | 22 AAAATAAAATATATATGGGGT  | 58.563 | 27 |
| TTTTCTTGCAAAACGTGAGC   | 59.087 | 20 TTTTTGGATGGAAAAATGGC   | 59.751 | 20 |
| CGAAAAGATGTATGGCGAAAA  | 60.082 | 21 ATGTAGCCGACCCCAATTTA   | 59.297 | 20 |
| GGATTCGTGACTTTCAGGGA   | 60.05  | 20 CTACCACCGTAACCACCACC   | 60.149 | 20 |
| ATGTAGCCGACCCCAATTTA   | 59.297 | 20 TGCACCACAAGATGGTGAAT   | 59.967 | 20 |
| CACCAAAGCAAAAACATCCC   | 60.344 | 20 TTTTGAGGTTAGTTTGGCCG   | 60.103 | 20 |
| ACAATTTTCGTTTCGAGCTG   | 60.249 | 20 ACTGCACCCCGAAATGTTAG   | 59.993 | 20 |
| GCCATGAAAAACAAGGAGGA   | 60.051 | 20 CTTGTCGTTTCCCTTTTCT    | 59.355 | 20 |
| ACTGACCTTGGACTTCGCTG   | 60.444 | 20 TTCAGATCATCCACCACAA    | 59.893 | 20 |
| GTGAAAATCCTCCCTCGTGA   | 60.05  | 20 GATCACCACAACCTCCAGC    | 60.52  | 20 |
| ATCCGATATTCGCGGCTAAC   | 60.137 | 20 GAAGGATGACGCGAGAGAAG   | 60.096 | 20 |
| AAGCTGCTGTTGCCGTAGTC   | 60.602 | 20 CAAATTAATCAATCTCCTCCT  | 58.164 | 23 |
| TCAGAAAGAGGAGACGGAGG   | 59.525 | 20 AGGAAGCTTTCACCTTGAA    | 59.993 | 20 |
| TCACAAGAAACGACGCTTGA   | 60.574 | 20 CTGAATTACGGCGTGGATTT   | 59.96  | 20 |
| GGGAAGGGGGTACATGCTAT   | 60.039 | 20 AAGCTTCTGACTGAGCTGGC   | 59.898 | 20 |
| GCAGCAGCAAATACAGCATC   | 59.602 | 20 AAAACACGTGTGGAAGGAGG   | 60.005 | 20 |
| ACGACGCTGACAAAACCTCC   | 60.299 | 20 TCCACGTTAATATGGATGCG   | 59.401 | 20 |
| AGCTGTGATTTCTGCCACT    | 60.02  | 20 CAAGGTTCAATTGACTGCACA  | 59.749 | 21 |
| TCACTCAGGGGCTTTACCAC   | 60.111 | 20 GAGGAGACGAGAAGCTGGTG   | 60.135 | 20 |
| ATTGAATGCCAAAAGCTTCG   | 60.209 | 20 TTCAGACAATGAGGGCTGTG   | 59.831 | 20 |
| ATGTAGCCGACCCCAATTTA   | 59.297 | 20 GGGTCTTGGGGTTAGATGT    | 60.052 | 20 |
| CCTCATGAGCACAATTCCT    | 60.073 | 20 TGAGGATTCTACCCAGTCG    | 60.065 | 20 |
| TTTGGCCTCTCATGGATCTC   | 60.158 | 20 CAGAAAGTCACAAATGCGCT   | 59.076 | 20 |
| CTGCGTCCAGCATTCAATTA   | 59.833 | 20 ATGTTGCATGTGAGGTGCAT   | 59.999 | 20 |
| TCCCTTTTCAGAAGTCGCAT   | 59.813 | 20 ATTGTGCATGCATGTGGTG    | 59.977 | 19 |
| TGATGAATGAATGGTTCGACTC | 59.939 | 22 CATGTGGAAGTGTGGAATGG   | 59.806 | 20 |
| AACTGGACCATATTCGTGCG   | 59.962 | 20 TTGCAAAATGACACACGAAA   | 58.728 | 20 |
| CCAATATGTGGGGAAGAACG   | 60.184 | 20 TGCCACCAAGGAGAGTACAA   | 59.288 | 20 |
| ATTCTGGCAAATCATCGGAC   | 59.9   | 20 GGGGATCTCATGGACATTTG   | 60.135 | 20 |
| CACCACCCTCTCATGTCCTT   | 59.962 | 20 TTGCATGTCTGGAGCAGTTC   | 59.992 | 20 |
| GAGGAAATCACGACGGTGTT   | 59.973 | 20 CTCGTCACAATTTGCTTCCA   | 59.84  | 20 |
| TTTTTCATATTGCCACACG    | 59.42  | 20 CCAAGACCCCAATTTGATT    | 60.91  | 20 |
| GCAACTTTCAAGGAAGCCAA   | 60.365 | 20 CCTCAAGACCCCAATTTGAT   | 58.836 | 20 |
| TGGAACGTGTACGACAGGAA   | 60.152 | 20 ATCAGAAGATCCAGCATGGG   | 60.034 | 20 |
| GGTCCCACGTCATCAAAAA    | 60.734 | 20 TGAATTTGCCTTAATAATTACC | 58.893 | 24 |
| CCCACTTCATGCAGTTTCT    | 60.111 | 20 GGTGCGTACATTTGACCCT    | 59.859 | 20 |
| GTGTTGATGCATGGAGTTGG   | 59.967 | 20 CTCGGAAAATTCCAACGAAA   | 60.046 | 20 |
| ATGGAGCTATTGGATGCTGG   | 60.059 | 20 AATGATTGATGAGAACCGCC   | 59.9   | 20 |
| TTTTGGATTGATATGGATTGA  | 59.259 | 22 TGCCTGCTCACCTTTTACA    | 60.436 | 20 |
| ACCCTCAAACAATAACCC     | 59.919 | 20 ACGGACATGATACGACACGA   | 59.992 | 20 |
| ATGAGATGGGGACAGTCTGC   | 60.08  | 20 CTCAGCCCTATTGTAGGCCA   | 60.227 | 20 |
| CAAGCAAACGCAAAAATCAA   | 59.858 | 20 GCATCAATGCCTTCTCCAGT   | 60.226 | 20 |
| CAAATCCCACCAACACCTTC   | 60.21  | 20 ACCACAAGCTTCCACCAATC   | 59.973 | 20 |

|                          |        |    |                         |        |    |
|--------------------------|--------|----|-------------------------|--------|----|
| ATGGAATAATGAGTGGGGCA     | 60.155 | 20 | AGTGAATGTGGGGAGAGTG     | 59.962 | 20 |
| AACTCCCACCTTCCATCACA     | 60.363 | 20 | AATGACATAGGGCACCCCTT    | 60.578 | 20 |
| TCCAATTGTGCGTAGCCTTT     | 60.637 | 20 | TTGATTTCGTGAACATTAGGCTC | 59.229 | 22 |
| CCAATTTATTGGGATTAAGGC    | 57.539 | 21 | AGGTGCTTATGGATTTCCCC    | 60.152 | 20 |
| GAAAAAGAGTTCAAAGTTTGTGC, | 60.089 | 25 | TTCCATTTCGTAGATCCTATTAC | 58.945 | 24 |
| TGCCGAATAAAGCTAAATCCT    | 58.055 | 21 | AACCTCCCGGACTGGTAGAC    | 60.371 | 20 |
| TCAGCTCAATCCTTCGCTCT     | 60.24  | 20 | GAATAAGGAATTTCGCACCGA   | 60.038 | 20 |
| CGTCGAATTTTCGCTGATCTT    | 60.352 | 20 | GTCGCCAGAGTTCTGAAACC    | 59.851 | 20 |
| AAGTCAAGTGCCGCTCATT      | 59.882 | 20 | TGCATTAAGGGTTGGAGACA    | 59.123 | 20 |
| TGACAATTCGAGCTTGATCCT    | 59.828 | 21 | ATTCGAAACCACTCAACCCA    | 60.353 | 20 |
| TAGGCGATGTACCTTGGGTC     | 59.955 | 20 | AAAGGCATGGGCAACTTAGA    | 59.708 | 20 |
| TTGGAATGCGACAGAGACAG     | 59.984 | 20 | GGATAAGCCTGTGATTGGGA    | 59.894 | 20 |
| GACACCATTGACTGTGCTGG     | 60.162 | 20 | CGATCATGTCTTCCGGAGTT    | 60.073 | 20 |
| ATGTAGCCGACCCCAATTTA     | 59.297 | 20 | TCTTGGGAGTGCATTTTCT     | 59.67  | 20 |
| CAACAGGCACACTGGAATGA     | 60.722 | 20 | TCGTCAAATCTTGGAGGCT     | 59.813 | 20 |
| GCAAACCTCGAAGAATAGCGG    | 59.982 | 20 | GACCGTTTTAAACAGACCGGA   | 59.971 | 20 |
| AGTTGCATGCAGAGCATTG      | 60.019 | 20 | TACTACCCCATCTTCGCACC    | 59.955 | 20 |
| TGAAATGCCAAATCAGTTGC     | 59.67  | 20 | ATCCTGGCATTGACTGTTCC    | 59.934 | 20 |
| TTCCCACTTCAAGAATTCCG     | 60.044 | 20 | CAAGAGCATCCCACTTCAACA   | 59.831 | 20 |
| AGATTGTCGTCGTTCCATTG     | 58.57  | 20 | TGCCGATCGCAGTTATGTTA    | 60.237 | 20 |
| GGGAACCTTCTCTGTTCCCT     | 59.534 | 20 | TGAGGTCGCTCACAGACAAC    | 60.03  | 20 |
| AAAAATCTCCAGTCCGGCTT     | 60.074 | 20 | GACGGCTATTTTGTGAGGGA    | 60.074 | 20 |
| ATGCGCTATTTATGGATGCC     | 59.92  | 20 | TGCATATTAGTCTGCGGCTG    | 59.999 | 20 |
| CCCAAGACCCCAATTTGATT     | 60.91  | 20 | CTCTCCTCAAGCCAAGCTGT    | 59.745 | 20 |
| GTTTCATACTCACCTCCGGC     | 59.556 | 20 | TGAAGCTGATGTTGGCGTAG    | 60.011 | 20 |
| TGCAGGAGAAGAGGTGGTCT     | 59.986 | 20 | CAAATAATGGCTGCTGCAA     | 59.842 | 20 |
| CTGCCGATCAGATTGGTTTT     | 60.074 | 20 | GGTCTCGTGGTGGCTAGAAG    | 59.867 | 20 |
| AAGTGTGTCGAAATTGAGAAGAA  | 59.347 | 24 | TTCCATGAAACATAAATCTTGC  | 60.194 | 23 |
| CACAAAGGCAGCAGACGTTA     | 60.05  | 20 | AGCTGCATGAGCAGGAATTT    | 59.985 | 20 |
| CTGAGATGTCCCAGGTTCAA     | 58.641 | 20 | GGCCATGGAGAAGAACAAGA    | 60.195 | 20 |
| ATGTAGCCGACCCCAATTTA     | 59.297 | 20 | TCCAGGTTATGTTCCACGGT    | 60.232 | 20 |
| CCCGACCCAACTCAGTAGAA     | 60.103 | 20 | GGAAGCTTGTGGAGTTGTGG    | 60.69  | 20 |
| ATGTAGCCGACCCCAATTTA     | 59.297 | 20 | TCACCATATGTTCAACCTGTCA  | 58.9   | 22 |
| AAGGAAACCCTAGTTTCGTGTT   | 59.928 | 23 | AACGTAAATAGTTGCGCCTCA   | 59.793 | 21 |
| AGGACAACCTGACTGCCTGG     | 60.298 | 20 | GCTGATACCGGCTTCTCATC    | 59.803 | 20 |
| CCATCTAGTTCCTCACCGGA     | 60.065 | 20 | GGCCATCGGTACTTCACCTA    | 59.955 | 20 |
| TAAAACCCCTTCAAATCCC      | 59.992 | 20 | CCGTTCCATCAAAGACCTGT    | 59.966 | 20 |
| TCATCTCAAGACCACCCTCC     | 60.048 | 20 | TCGGACCGTAAAGCTTCAAT    | 59.708 | 20 |
| AGTCAAATGGGAAGGACTTCAT   | 58.967 | 22 | CCTCCAGCATCCGAATATGT    | 59.917 | 20 |
| CCACCTCCGTACCGTTACAC     | 60.291 | 20 | GTGGTGGGGAAGAGTAGTGG    | 59.425 | 20 |
| TGCTCGACAGGTCAAAGTG      | 60.025 | 20 | CATTGGTGAAGAATTTGGGG    | 60.162 | 20 |
| ATTGCTCTTTTACCCAGCGA     | 59.845 | 20 | TGCTTCAAAAATTCAGCCAA    | 59.42  | 20 |
| TGCATATACACACATGTTGACCA  | 59.79  | 23 | CGTGCAGTTTTGGAATTCTT    | 60.249 | 20 |
| GGCTGGGTAATAGCCTTTCC     | 59.93  | 20 | TACACGGAACAGACGCTTGA    | 60.449 | 20 |
| AGCTTAGCACAGCAGCATCA     | 59.918 | 20 | GGCGAATTTTGTGGTGAGAT    | 59.939 | 20 |
| GAGCAAGTGTGATGCGAAC      | 59.45  | 20 | CTTCCAGGGTACAACCTGCGT   | 60.171 | 20 |
| AGATGGGCCGGCTAAATATC     | 60.267 | 20 | GTGGGCTTATTGGGTGTGAA    | 60.755 | 20 |
| TCTTTGTGTAGCACCCCTC      | 60.111 | 20 | TTTAACCCCTGCATCCTGAG    | 60.066 | 20 |
| GTGGGGCTGTTATTGAGAA      | 59.933 | 20 | AAGGAAATGGAGACGAGCCT    | 60.212 | 20 |
| AGGCATTGGATTCAGTGGTC     | 59.934 | 20 | GTCCACACCTCCACCTCCTA    | 59.962 | 20 |
| TGGGTCTCTGCCTTTTCAAT     | 59.67  | 20 | CCCAAGACCCCAATTTGATT    | 60.91  | 20 |
| TGAGGACTGGGCTGATCTTC     | 60.349 | 20 | CACCTTAGTTGTCAGGGGGA    | 59.959 | 20 |
| TTTCTTCAAACCTCCACCGT     | 59.569 | 20 | AGGTTGCGTACATCTGACCC    | 59.997 | 20 |
| TGATGGAACCTTGTGTGCATGT   | 60.024 | 21 | CCCGATATGGTAGACGGTTTT   | 60.082 | 21 |
| CTCAGCTGCTGCTCTCAGTG     | 60.227 | 20 | GGAGTTTTGGGACACTGCTC    | 59.703 | 20 |
| TTACACGCGAGAAGAGAGA      | 59.855 | 20 | GACAGGGTTGCTGGTTTCAT    | 59.973 | 20 |
| AAGATAAAGGACGGCCGAGT     | 60.096 | 20 | AAACTACGGGTGGGGCTACT    | 59.886 | 20 |
| GCTTCCAGCAGAAATCATCC     | 59.78  | 20 | TGATCTGGTGGATCTTCGGT    | 60.475 | 20 |

|                          |        |    |                        |        |    |
|--------------------------|--------|----|------------------------|--------|----|
| AATGCAGTCCGGGTTTCATAG    | 59.955 | 20 | AGAGCAGAGGACGAGTTGGA   | 60.135 | 20 |
| TGTAGCCGACCCCAATTTAT     | 59.297 | 20 | TCCTCTGCAAATGAACATTGA  | 59.262 | 21 |
| CCCAAGACCCCAATTTGATT     | 60.91  | 20 | ACATGCAATAAGTTGAGAAAA  | 59.143 | 25 |
| ATGTAGCCGACCCCAATTTA     | 59.297 | 20 | TTCCAATTGCTTTTCTCACC   | 60.051 | 20 |
| TCGGGTAAACCTTTGCTGTT     | 59.609 | 20 | TCAAATTTCCAGCAGGACT    | 59.67  | 20 |
| AGTTTACAGAGCTTGCTCAGCG   | 61.016 | 20 | CAGAGAAGTGGAAAATCCCG   | 59.665 | 20 |
| CATTCAATTCGAAATTATGCATGT | 60.102 | 24 | ATCCATGGTCGACGAGTTGT   | 60.395 | 20 |
| CAGGGTTCCATTGCTCTCAC     | 60.51  | 20 | TTGTGCCCTTACCCAGTAGG   | 59.986 | 20 |
| GCAACCTGCAAGTCACATTC     | 59.297 | 20 | AGATGTACTGACGGATCGGG   | 59.95  | 20 |
| TAATGGGCCTTCACATCCTC     | 59.894 | 20 | GCTGTTGATCAATGGGTGTG   | 59.967 | 20 |
| GTTTTTGGACTAGCCCATCG     | 59.569 | 20 | GACCACTACAATGTTCCGCA   | 59.572 | 20 |
| GTTCAAATCCGGGTCTCTCA     | 60.05  | 20 | TGGCAATGCTCATCAGGTTA   | 60.22  | 20 |
| TTGTTCGTGATGGGTGAATGT    | 59.812 | 20 | ATGTAGCCGACCCCAATTTA   | 59.297 | 20 |
| CGCATGACACTGATCTATCG     | 57.804 | 20 | AATTTCCCACCCACTCATCA   | 60.173 | 20 |
| CCCAAGACCCCAATTTGAT      | 59.59  | 19 | TTGTGGGAAATGGTTGCATA   | 59.786 | 20 |
| TAAAGAGAACCACCAACCCC     | 58.884 | 20 | TGGTGGCTCTTTCAATTGCT   | 60.776 | 20 |
| TTGGATTCTTGTTCCTCA       | 59.532 | 21 | GGGGAAATTCTGACAATGACA  | 61.08  | 22 |
| TCCAGATTCAAGACCAAGCA     | 59.369 | 20 | TTGGACGGAATCCAAGATTT   | 59.363 | 20 |
| CGTCGCCAAAGTGTTCATA      | 59.729 | 20 | TGTGACGGCTAACATTCTGC   | 59.871 | 20 |
| ACTCCAAACGTTTCCACAA      | 60.388 | 20 | AGCTTGTTGCTTCGACAGT    | 60.201 | 20 |
| TTGTATCGTGTTCCGCACAT     | 59.995 | 20 | AGGCTTGCACCCTACTAAAGC  | 59.926 | 21 |
| TCCAGTTTCGAACATCTCAA     | 59.215 | 20 | CCCAAGACCCCAATTTGATT   | 60.91  | 20 |
| ATCAAGCCAGGATGCAGAAC     | 60.226 | 20 | TTGTCAATTTTGTAGTCCAGG  | 59.956 | 21 |
| TTTTGGGTGGAGAAATGGAG     | 59.903 | 20 | TTTTTATGCTGAAGCCCACC   | 60.074 | 20 |
| TGTAGCCGACCCCAATTTAT     | 59.297 | 20 | AGTTGGCATCCCAAAGTCAT   | 59.41  | 20 |
| CCCATGCCGAATGTTATTCT     | 59.784 | 20 | ATGTAGCCGACCCCAATTTA   | 59.297 | 20 |
| CATTATACCACGGAGGAAGGAA   | 60.197 | 22 | GTAAGGAGGGAGGGAGATGG   | 59.89  | 20 |
| CTCTTCCCCACACACTCAT      | 59.962 | 20 | GCGTTTGGTGAAATCGTCAT   | 60.905 | 20 |
| GTTGGGTTGGATTTGAGCAT     | 59.797 | 20 | GGCAGCGGACTGTAAGTTTC   | 59.882 | 20 |
| TGAAACATCCATTCTCCAAAGA   | 59.546 | 22 | AGAATGACCCACAAGCAAGC   | 60.263 | 20 |
| TAGATAACAGGCAATGCCGC     | 61.124 | 20 | CATGTAGCCAACCCCAATTT   | 59.685 | 20 |
| ACTCTTACAGCTCCCCTCCA     | 59.986 | 20 | TGGAGCTCTTCGTTCGAGATT  | 60.096 | 20 |
| GTTCTTAGCTGTCCGGCACTC    | 60.02  | 20 | CGAATCTGCCAATGTAAGCA   | 59.833 | 20 |
| GAGGGGGAAAAATTCGATCT     | 59.356 | 20 | CAAAAATGGATTATGGGCAA   | 58.344 | 20 |
| TATAAAGAGGGCAGCCGAAA     | 59.81  | 20 | CTTCTCCTTCGTTGGCTTTG   | 59.986 | 20 |
| CCTGATGAGGCTAAGGATGG     | 59.647 | 20 | AGTTTGAAGGCGTGGAGAA    | 59.853 | 20 |
| CCGAAAATGTCTTCATTGC      | 60.448 | 20 | CCGATCTCCCCTCTTTTCTT   | 59.646 | 20 |
| TTGAGGACCGGACTGACTTC     | 60.238 | 20 | GCTAGGCATCAAGGCATCAT   | 60.207 | 20 |
| CAGCATGAGGCAGATTGATG     | 60.376 | 20 | CTCCAACAGGAGTTTGGGAA   | 60.081 | 20 |
| CCGAATTCTGCTTCTCCAG      | 59.948 | 20 | CAGAAATCCGAAGCACGATA   | 58.869 | 20 |
| CCCCTGGGATATGTGTTTG      | 60.044 | 20 | GCACGATGGTGATGAAGATG   | 60.08  | 20 |
| AGATTTCCGAGCTTGTTGGA     | 59.813 | 20 | CTCCCCTATCTCCGCATACA   | 60.051 | 20 |
| TTGTCACTAAGCCAACACCAA    | 59.23  | 21 | ACCATCATGCATTTTTCTTTCA | 59.456 | 22 |
| GGAAATGATTGTTCTCCTAGGTCT | 59.073 | 24 | AAGGGCCATAAATTGTGGAA   | 59.273 | 20 |
| CCCCTTTTACCCATCCCTAA     | 60.007 | 20 | TTTCTCTTTCAACGCACACG   | 60.027 | 20 |
| GGCCTAAAGCTGATGGACCT     | 60.599 | 20 | CTCCACAGTCTCAAAGTGCAA  | 59.071 | 21 |
| TAGAAGGGCTTTGCTTCGTG     | 60.514 | 20 | GTTGTACGTCGAGGCCGTAT   | 60.022 | 20 |
| AGGGGACTCGTCAGGAAACT     | 60.111 | 20 | TCAACAACACCAACACCCAC   | 60.309 | 20 |
| TCTTTTTCCATTGCTCACGA     | 59.395 | 20 | GCCTCTGTCTGCCTATTTGC   | 59.985 | 20 |
| TACTGCATCGGTGTCTCACA     | 58.813 | 20 | TGTAGCCGACCCCAATTTAT   | 59.297 | 20 |
| GAAGGCAGCTTGATCGTAGG     | 59.978 | 20 | TGTCACGGATTCTCTTCCCT   | 59.655 | 20 |
| GGAGGAAGCATCTACGCAAC     | 59.843 | 20 | GTGGGTTTCAATTGGTCCAC   | 60.073 | 20 |
| CAATCAACGCTGTTTTTCCA     | 59.706 | 20 | ATTCGTTGAAACCTGCTGCT   | 59.882 | 20 |
| CAATAACGGCAACACAAACG     | 60.029 | 20 | ATCTCCCAGATTCAGGCTT    | 60.037 | 20 |
| CAGCTCCTCTCTCCAGATCC     | 59.079 | 20 | TCTGCGTCTGAAATGTACGC   | 60.019 | 20 |
| GGAAAGGTCACCGTGTGTCT     | 60.009 | 20 | AACCAAGACCCCAATTTGATT  | 59.563 | 21 |
| AACAAAATCCCTCCCCATTC     | 59.996 | 20 | CCTTGCTGGAGATACCGATG   | 60.615 | 20 |
| TGCCTTAACACAAAGGGGAA     | 60.472 | 20 | AAAACCAGCAACCTGGAATG   | 59.971 | 20 |



|                         |        |                           |        |    |
|-------------------------|--------|---------------------------|--------|----|
| AGCTTTGGTTCATGTAGCCG    | 60.27  | 20 GTTGGGAGTCTCCTGCAATG   | 60.656 | 20 |
| TACACGTTCCAGACTGTGCC    | 59.751 | 20 AAGGAGAAGCCAACATGACG   | 60.255 | 20 |
| TGAAACTGGACCTGGTATCAA   | 58.062 | 21 ATTGTATCACCTCCGCCGTA   | 60.352 | 20 |
| AATCTCGTTGCCGTTGGTAG    | 60.132 | 20 TTCCTGTGCGTGAATTTTGA   | 60.234 | 20 |
| TGGCACCTTACATCTCCTT     | 59.55  | 20 TTTCTTCTTCCATGGTTGC    | 60.051 | 20 |
| CGTTTTGCTTCTGCACTTCA    | 60.172 | 20 CCCACTTCCGTCATTGAGTT   | 59.966 | 20 |
| GGGACAAGCTATCACACAGGA   | 60.126 | 21 TGTAGCCGACCCCAATTTAT   | 59.297 | 20 |
| CAATGTACCATGGATCGCAA    | 60.343 | 20 AGACCATGCAAGTGTTTGT    | 58.058 | 20 |
| ATCATCAACTTCCGGTGGAG    | 59.927 | 20 GAAGATGGTGGCGGAGAG     | 59.291 | 18 |
| GGGGGAGTTAAGTTTGTGACTG  | 59.901 | 22 CCAAGACCCCAATTTGATT    | 60.91  | 20 |
| GGCTTATGTCCAACGCTCC     | 59.7   | 20 GCGTGGGCTGTTAGTTTTATG  | 59.661 | 21 |
| CAGAGCGCACTCGAAGAGTA    | 59.49  | 20 TGAGGAAAACCAGGAGCTTG   | 60.366 | 20 |
| TCTGGAAAAGAGAAGGCCAA    | 59.926 | 20 AGAAAACATTTGCAGCACCC   | 60.118 | 20 |
| TGTGGGAAAAACATCGATCA    | 59.9   | 20 GGGTGAAAACCTCCGTTCTGA  | 60.088 | 20 |
| TTCGGCAACTTTTGGAAGAT    | 59.685 | 20 CACTTGTGGCTTTTGGAGGT   | 60.149 | 20 |
| TACCTTTCTCGCCTAATGCC    | 59.32  | 20 TCACGAAATCGAAGTGAACAA  | 59.307 | 21 |
| CGCGAACTAATCCGTCCTTA    | 60.223 | 20 CCTTCTTGGTCTGAACCTGC   | 59.844 | 20 |
| CCCTCAATTTGTACCCGAA     | 59.795 | 20 CTTTTGTGTCAATTGGTTTATT | 57.181 | 24 |
| CCCAAGACCCCAATTTGATT    | 60.91  | 20 AAAAAGATGCATGAGCCTCG   | 60.352 | 20 |
| GCCAAAAGTAAAGGAAGGGG    | 59.939 | 20 CACCGGAAGAGAAAGCAGAG   | 60.126 | 20 |
| TTCAAAAAGTCATCCCCTGG    | 59.903 | 20 TGGTTCATTTAGTCGACCCC   | 59.79  | 20 |
| GTTTTGCCTTCTGCTGAACC    | 59.859 | 20 CAGGTTTACGGGGCAGAATA   | 59.953 | 20 |
| CTCTCCAATGGATCTAGCCG    | 59.79  | 20 TCGATTCTGTGCCAGTTCAG   | 59.984 | 20 |
| AAGCATTGGCTTCAGCTGTT    | 60.022 | 20 ATGGAACTCCAAAAGGGGAC   | 60.169 | 20 |
| CCCAAGACCCCAATTTGATT    | 60.91  | 20 CAATGTAGCCCTTAAACTTGC  | 59.564 | 23 |
| TTCCCATCCTCAGATTTACC    | 60.138 | 21 ATATTTTGGGGAAAGGGGTG   | 59.882 | 20 |
| TCTGGAAAAGAGAAGGCCAA    | 59.926 | 20 TGCAGCTCCTGTGAATTCTG   | 60.136 | 20 |
| GCATTGCTTGACTGAGTTGC    | 59.602 | 20 AGCACGAGCCTCAAATCAT    | 59.843 | 20 |
| CCACTGAATGTGAAGGCATTT   | 59.985 | 21 AGAGAGTCGATTGCTTGGGA   | 59.95  | 20 |
| ATGACTTCCCTGCAACCAAC    | 59.973 | 20 ACTGATTGAGAGGGCACACA   | 59.261 | 20 |
| GTCTCCAGCTGTTCTTTTCG    | 59.989 | 20 ACGTGAAGTGGGACTATCGG   | 59.989 | 20 |
| GAGTGAACAGCATGGTCTGG    | 59.261 | 20 TGGAGAGTGCAGAGATGTCG   | 60.138 | 20 |
| GATAAGGGGATTGATTGGCA    | 59.722 | 20 CACAAACGACACAAGTCCGT   | 59.641 | 20 |
| AGCCACGAGAGAATTTGCAT    | 59.843 | 20 CCGACCTCACTTAGTGGGAA   | 60.103 | 20 |
| TGCCCTCACAACAAATTC      | 60.088 | 20 TGTTTTGGGGAAAATCAA     | 60.138 | 20 |
| CGAGACCTAAATTGGTTGTGG   | 59.48  | 21 AGGCTTGCCTTCACATCTCT   | 59.043 | 20 |
| AAAAATCATTTATCCCCGGC    | 59.988 | 20 TGGGTTTTATCCTGTGAGGG   | 59.784 | 20 |
| ATGCTGATCCACCCTTTGAA    | 60.461 | 20 CCAAGACCCCAATTTGATT    | 60.91  | 20 |
| GCAGCTGAGCTAGGTGCATT    | 60.709 | 20 CAGTCCGCATTCTCCATTTT   | 60.074 | 20 |
| GCAATTTTCAAGTTAGGCA     | 57.899 | 20 GTTGAATATGGCGGAAGAGG   | 59.528 | 20 |
| TCAACATCTGCGATTGGAAG    | 59.799 | 20 TAAAGCCGTGTACCTCCACC   | 59.993 | 20 |
| AAGGCAAAGAATTTCCAGCA    | 59.823 | 20 TGCCTTTGGGTTTCGTAAGG   | 59.964 | 20 |
| AGTACCAGCCTGCCATCTTG    | 60.277 | 20 TCTGCAGAAGTCGTGAAACAA  | 59.624 | 21 |
| ACGCCATAACAAAGGACTCG    | 60.132 | 20 CCAAGACCCCAATTTGATT    | 60.91  | 20 |
| ATGTAGCCGACCCCAATTTA    | 59.297 | 20 CGAGATAGCCAAAAGCGAAG   | 60.11  | 20 |
| TCGGCATGTTGCTCTTTATG    | 59.833 | 20 ACAATCGCTTAGCATGCCTT   | 59.873 | 20 |
| GCGCTGAAAGAGGATGAGAT    | 59.537 | 20 CCATTTGCTTGAAACGTCC    | 59.112 | 19 |
| ACTTCTCCTCGTCCTCCTC     | 59.807 | 20 TGATCCCTGCCCTAAATCTG   | 60.029 | 20 |
| GCACTTGCACTCATTTTTGTG   | 59.381 | 21 TCGCTGTGTATGCATGAGTG   | 59.436 | 20 |
| AATGCAAGATGTGCCCTAT     | 59.415 | 20 TGGCGAGTTTTATGCTGAGA   | 59.566 | 20 |
| GGACTATCCACCAACTCCGA    | 59.927 | 20 GCCAAAAACCCACAACCTTA   | 59.839 | 20 |
| GTGCAGGCTTGCTTTTGTTA    | 59.111 | 20 AATGGGGAGGAGGACTTAC    | 60.314 | 20 |
| AATAAGATTTGCACGCTGGG    | 60.096 | 20 TCGAGAGCAAACCTTTTGG    | 58.623 | 20 |
| TGCTTGGCAATTCTACATGC    | 59.839 | 20 TGATTCAATATTAGCCGTC    | 58.912 | 21 |
| GTGGATGGTGAAGGACCCTA    | 59.779 | 20 TGAAAACCTTTGGGATGGGAG  | 59.903 | 20 |
| TGGTAGATCTGCTCCTTGTAGTA | 60.315 | 24 TATGCAGGTGGTGTTTTCCA   | 59.964 | 20 |
| CTGAAAGGGAGTTGGAAGCA    | 60.366 | 20 GTGCAACCCTTCTCTCTCCA   | 60.386 | 20 |
| CCCAAGACCCCAATTTGATT    | 60.91  | 20 TCGGAACCGTCCTAGTTAC    | 60.132 | 20 |

|                          |        |    |                        |        |    |
|--------------------------|--------|----|------------------------|--------|----|
| ACGCCAATTTGGATTTTGC      | 59.807 | 20 | CTCATCATCAGCCAAACGGT   | 61.067 | 20 |
| GGTCCTTCGTGCGCATATGAA    | 61.003 | 20 | AATGCGTTTTCCAGACCAAC   | 59.978 | 20 |
| AAATGTCATATACCCGCCCA     | 60.038 | 20 | AACAAGGGTAGGGGAAGACC   | 59.299 | 20 |
| GGTGGTGAGAACCACGACTT     | 60.009 | 20 | TTGACAACAGAACCTGCAC    | 59.88  | 20 |
| CCATCGGAAGTCTCAAGTCC     | 59.655 | 20 | TGTGCAAGGTGGTCAAAGAA   | 60.278 | 20 |
| TGTAGCCGACCCCAATTTAT     | 59.297 | 20 | GCATGATACGAGCACGAGAA   | 59.979 | 20 |
| GGGAGCCCTTGGATTTAGTT     | 59.42  | 20 | AAAGGCTTTGCAGGACAAGA   | 59.993 | 20 |
| GTTAATGTAGCCGACCCCAA     | 59.823 | 20 | TGATTGTTTAGGCCAGGGTC   | 59.933 | 20 |
| TGCACTTACAGCCAAGCAAC     | 60.058 | 20 | TGAATTGAAAGCCACTGCAA   | 60.379 | 20 |
| AATTGTGGGATAAAATCCCCTT   | 59.8   | 22 | CCAAGACCCCAATTTGATT    | 60.91  | 20 |
| GAGTGTTGCGCGAGTTGATA     | 60.019 | 20 | CCAATTTGATGACGACGATG   | 59.924 | 20 |
| AAAAGGCCAGGAGAGCTAGG     | 59.976 | 20 | TGAGGAGAGTGATGGTGGAA   | 59.18  | 20 |
| GGATTGAGCTCTTGTGTTGC     | 59.962 | 20 | AAACCACCATTGAAGGCTTG   | 59.971 | 20 |
| GTTTATGTAGCCGACCCCAA     | 59.823 | 20 | TGTTGCAATTTGAGGCTTTG   | 59.849 | 20 |
| GATAAGCAGAGCTCCATCGC     | 60.088 | 20 | AAAAACCCCTCGACCATCTC   | 60.306 | 20 |
| TGGTGAAAAATCAAACACTTGG   | 59.876 | 22 | CCTTTTAGTGGTCCGAGGC    | 59.679 | 19 |
| TTTCTGTTTGGGCGATTTTC     | 60.053 | 20 | CCAGATCCATCTTTCCTCCA   | 60.003 | 20 |
| TTTGATTAATCGGGCTATGA     | 57.306 | 21 | CGAACCTCATTTTGAAGGAA   | 60.184 | 20 |
| CTTCTCCGACGACAACCTTC     | 59.844 | 20 | AGCAATAAGGCAGCAGCAAT   | 60.01  | 20 |
| ATGCTTCTCCCCCTTGAAAT     | 59.903 | 20 | TTTCCACGACTGCTTTGTTG   | 59.881 | 20 |
| TCAGTTATAGCCGACCCCAC     | 59.955 | 20 | CAGGGTGGCTGCTGATTTAT   | 60.096 | 20 |
| AAGTCGTGCATTGACGTGAC     | 59.758 | 20 | CCAAGACCCCAATTTGAT     | 59.59  | 19 |
| TCAACAGACATTGCAGCCTC     | 59.992 | 20 | ATCTTGAATGGGCTTCTGGA   | 59.629 | 20 |
| TGGAACAAACAAACAAGCACA    | 60.179 | 21 | AGATTGGGTGGGTGCATTTA   | 60.192 | 20 |
| TTTGGCGTTTGAGTGTTTCCAG   | 59.881 | 20 | CCATGGATGCAACAATGACT   | 59.374 | 20 |
| CCCATTTTGACGCTCTGATT     | 60.074 | 20 | GACAACAACCTCCCACCACC   | 60.261 | 20 |
| GATTGATTCCGGTAGGCAAA     | 59.901 | 20 | GACTCACGGTGGAAACCCTAA  | 59.966 | 20 |
| TTTGACTCAGTTGAGCCCCT     | 59.844 | 20 | TGATGTTTGCATTTTAAGATGA | 59.143 | 25 |
| GCATAACCCGAACCCAATAA     | 59.66  | 20 | AAAGCATGGATGAATGGAGC   | 60.043 | 20 |
| GGGAAGATTTCGTGTTTCAGG    | 59.526 | 20 | CTCCATTTTGTGAAAGCCC    | 59.546 | 20 |
| TGACAGATGAATGGACCAACA    | 59.951 | 21 | TCTTCTTATGGGGAGCTGG    | 59.264 | 20 |
| CCAAGACCCCAATTTGAT       | 59.59  | 19 | AAGCATAAAAGGCATCGCTC   | 59.461 | 20 |
| CATTAGCTCCGTGATGCAGA     | 59.972 | 20 | TTGCAGTGTTCACTTACCCG   | 59.911 | 20 |
| GACCCGGAAAGGAAATTTTG     | 60.644 | 20 | GACCCGCGGTATAACTCTCA   | 60.096 | 20 |
| TATCCAATATAGGGCACGGC     | 59.779 | 20 | AAAGAGGCGGATTTGGAGTT   | 60.074 | 20 |
| CGTTGATTCTTCAAATCCCA     | 59.924 | 21 | CCACGACTTATTCATTGCGA   | 59.688 | 20 |
| GTATGTGGTAAGGCGAGGGA     | 59.955 | 20 | TCCAGGATGGTGGAAATCAT   | 60.135 | 20 |
| AGCCCGTTTCTGAAAGACTG     | 59.473 | 20 | GAAGCGAAAAGCATTGACC    | 59.829 | 20 |
| CGAAGATACAGTCCCACCGT     | 59.989 | 20 | GCCAAGATCAGCAGATCACA   | 59.95  | 20 |
| TCCAGGCCTTTAGTCAGTGG     | 60.246 | 20 | TGCAACATGGTCAAACCTGG   | 60.552 | 20 |
| TTACCTCCGAAGGAACGAGA     | 59.807 | 20 | AATCGACACTCCCCTTTTCG   | 60.111 | 20 |
| CCAAGACCCCAATTTGATT      | 60.91  | 20 | AAATGTGGCCAATCTTTTGT   | 59.758 | 22 |
| CCATCACCATCACTTCCAGA     | 59.473 | 20 | GCTGCCAAACTAACTGCAA    | 59.111 | 20 |
| GCGTACACGCGTATGACAAG     | 60.346 | 20 | AGCAATACGCTGAATGCAA    | 59.472 | 20 |
| CCAAGACCCCAATTTGATT      | 60.91  | 20 | AATGGATGGTGCTTTTGCTC   | 60.081 | 20 |
| TCTCCCTCCTCCTCCTCCTC     | 59.883 | 20 | TGCATGTTTTGTGTGTGTGG   | 60.046 | 20 |
| CCTCCCTCTAAAACCCGAA      | 60.415 | 20 | CATGAGAGAGGTGGTGCAGA   | 59.98  | 20 |
| TCAGTTCATGATACTTTGGGA    | 59.708 | 22 | TTCAATTGGCTGGAAGAGTG   | 58.847 | 20 |
| GCGTATTATTTTTCTCTCAATAGG | 58.762 | 25 | GACATCTGGTGAGGGGAGAG   | 59.638 | 20 |
| AGATGGTCACGGTAGACATGA    | 58.014 | 21 | CGGCATCCATCTCAATCTTT   | 60.036 | 20 |
| ACAAATCGGAAAAGAGCAGC     | 59.457 | 20 | CATCACTCCTCTCACTCGCA   | 60.138 | 20 |
| TTCAACACTGCAGATGAACAGA   | 59.49  | 22 | TGACAGCTGAATCAGTCGGA   | 60.557 | 20 |
| TCGGAAGCTTCAAGTCCAAT     | 59.813 | 20 | AAGCCCGTGAAAAGGAAAT    | 59.945 | 20 |
| TTCCGCAATTTTAGCATC       | 60.04  | 20 | CTTCGCTTTTGGCTATCTCG   | 60.11  | 20 |
| AGGCCGGTGTGCAAAATAAT     | 60.692 | 20 | AGTAGACCCATCCTCCTCCC   | 59.372 | 20 |
| AGATGCCGAGGACTTTTGTG     | 60.255 | 20 | GGTAGCCGACCCCAATTTAT   | 60.041 | 20 |
| AGAAGCAACCATCAACCGTC     | 60.119 | 20 | CCAAGACCCCAATTTGATT    | 60.91  | 20 |
| TGCAGAATCAACTGCTTGGT     | 59.445 | 20 | TTTCACGAATTTTTCATTCAGG | 59.098 | 22 |

|                         |        |    |                       |        |    |
|-------------------------|--------|----|-----------------------|--------|----|
| TTGGTTCATGTAGCCGACCT    | 60.517 | 20 | TTTAGCAACACCAGCCACAG  | 59.904 | 20 |
| TTCGTCCATATCAAGGCTCA    | 59.226 | 20 | CATTCGCTTCCATTCATCTG  | 59.226 | 20 |
| TCAAAAATGGATGGGGTGAT    | 59.991 | 20 | CGCGAACAAATGATATAGGGG | 60.302 | 20 |
| ACACCCGGACACAAGAATGT    | 60.284 | 20 | ATGTAGCCGACCCCAATTTA  | 59.297 | 20 |
| GAGTATTCTTGCCGTTGGGA    | 60.074 | 20 | CAATGCTACGGGAAGACGAT  | 60.096 | 20 |
| ATGTAGCCGACCCCAATTTA    | 59.297 | 20 | TTTTTCAAGTGAAAGGTGCAA | 58.451 | 21 |
| TGGTGAACCCAAACTCTTCC    | 59.943 | 20 | GTCTCCCTGCAGCAAAATTC  | 59.82  | 20 |
| GGAGGAAATTGGCATCAGAA    | 60.014 | 20 | ACCGAGAATGACACGACACA  | 60.162 | 20 |
| AAACAGCTTCTCTCTCCGGG    | 60.892 | 20 | GGCAAGGGACAAAGCAAATA  | 60.074 | 20 |
| AAAATAATGATAACGGCGGC    | 58.963 | 20 | GTGGTGATGGAGAGGCAGAT  | 60.08  | 20 |
| TGGTGAGCTTGAGGAGGTCT    | 59.986 | 20 | AACACAATAGGGATCGCTGC  | 60.103 | 20 |
| TGTAGCCGACCCCAATTTAT    | 59.297 | 20 | CAAATGGCAGACAAAAACGA  | 59.706 | 20 |
| CCGAGACCCCAATTTGATT     | 59.735 | 19 | TGATGGGTCTTCCCTGATTT  | 59.336 | 20 |
| ATGTAGCCGACCCCAATAAA    | 59.297 | 20 | AGACGACGACCAAAGGAATG  | 60.111 | 20 |
| ATGTAGCCGACCCCAATTTA    | 59.297 | 20 | TCAATGCAGCATCCTGAAAC  | 59.805 | 20 |
| ATGTAGCCGACCCCAATTTA    | 59.297 | 20 | GCACTTTGAGCTGCATTGAG  | 59.746 | 20 |
| AACCATCTTCCCAAACCT      | 59.668 | 20 | CCAAGACCCCAATTTGATT   | 60.91  | 20 |
| CCCAGTTTTTGTGCACTGA     | 59.734 | 20 | GGATAGCCTCCAGGAATCAA  | 59.08  | 20 |
| CGATTTCTTCTACCTCCCAATG  | 59.96  | 22 | TGGCATTTTAAGGCGTTTTTC | 60.075 | 20 |
| GTCTCCACATCCAGCTTTC     | 59.661 | 20 | GGATTAATGGCCACGAAGAA  | 59.901 | 20 |
| CAGTTTCAAGGGGAATCGAA    | 60.044 | 20 | TGTTTTATGAAGCCAATCCC  | 59.762 | 20 |
| AGGATGATGGTGGAGGTGAC    | 59.774 | 20 | ATTGCACCGACAAAAGAACC  | 59.978 | 20 |
| GAAGCTGCATGAGGTGATTG    | 59.399 | 20 | CCGGAGAGGGCATCATAGTA  | 60.051 | 20 |
| TCCTGCTTCCATTTTCTTGG    | 60.184 | 20 | CCAAGACCCCAATTTGATT   | 60.91  | 20 |
| GTTCTCCTTCGGAGTTGCAG    | 59.989 | 20 | CAGTACGCGCACTCACAAGT  | 60.12  | 20 |
| AGCCGACTTACATAGTGGG     | 60.134 | 20 | AGCAACCTGCCTCGACATAG  | 60.419 | 20 |
| ACGTTGTTGTTGATTGGGGT    | 60.134 | 20 | GGTGATCGGGAGAGTCTTTG  | 59.655 | 20 |
| AAATACAAAGCCAGCCAACG    | 60.131 | 20 | CTGGTACTCACCTTCTGG    | 59.861 | 20 |
| ATGTAGCCGACCCCAATTTA    | 59.297 | 20 | CAGTCAGGGAATGAGCACAA  | 59.831 | 20 |
| ACGTGTATTGGGTGGTCCAT    | 59.973 | 20 | TCTTTTGGGCAAAGGATCAA  | 60.555 | 20 |
| ACATGCAGAAGGCTCCACTC    | 60.418 | 20 | TTTGTCTCCTGGTGTTTGGA  | 59.109 | 20 |
| AACTTTTGCCTGAAACGCAT    | 59.752 | 20 | TGTTGCTTGTTCGATCTGG   | 59.84  | 20 |
| CCAACCTCTCGCCGTATCTA    | 60.227 | 20 | GGAAGATGCAGAAGCGAGAC  | 60.104 | 20 |
| CGTTTTCTTCTCGGTGCTC     | 59.993 | 20 | CCGTACCCTCCTCCTAGACC  | 59.95  | 20 |
| TTGGGATTAAGGCTTTGGTG    | 59.931 | 20 | TGGAGTCGTGTAGCGGTATG  | 59.74  | 20 |
| ATTTCTCATACGTGCCTGCC    | 60.103 | 20 | TGAAAAACACGTGACATCAAG | 59.22  | 22 |
| TGCACATGGTTATTGGATGC    | 60.352 | 20 | GAGAATTCCAGTACGGCGAG  | 59.836 | 20 |
| GATGCGGGGATTTAAAGTT     | 60.15  | 20 | CGTGAAATTTTGGGGTGAGT  | 59.83  | 20 |
| ATCATCACCGTGGATCATCA    | 59.724 | 20 | CGCTTATGGTTGGAGTGTGA  | 59.716 | 20 |
| AACTCTTACGAGGGACGGGT    | 59.994 | 20 | AGGCCAACACTGAAAACCAC  | 60.012 | 20 |
| AATAAAGTATGTGGGAAAGTCGA | 57.317 | 24 | ACAGCGAGTAAGCTGAGGGA  | 60.156 | 20 |
| GAAACACCATCTTCCCGGT     | 61.115 | 20 | CTGTAGGCCCATAGCCACAT  | 59.978 | 20 |
| ATGTAGCCGACCCCAATTTA    | 59.297 | 20 | TTGCGTTCAACGATTTTCTG  | 59.849 | 20 |
| GGGCTGTTATCGGATGCTAA    | 60.06  | 20 | TGGAACAGCACAGACTGGAG  | 60.022 | 20 |
| GATTCCTATCTTGCTCCCC     | 59.866 | 20 | ACCTGCTTTTTGTGATTGGG  | 59.971 | 20 |
| ATGCAACTTGCCAACCTACC    | 60     | 20 | TCCTTCACACCAAACCTGCAA | 60.278 | 20 |
| CTTCCAATGCCGACGTTAAT    | 59.96  | 20 | ACGCGGTGATAAAATCTTGG  | 59.96  | 20 |
| GTGAAGAAAATGCCGTTGGT    | 59.978 | 20 | CCTCCGTCCCTCTCTCTCTT  | 59.945 | 20 |
| TGCGTACATTTGATTGGGAA    | 59.93  | 20 | TTTGCATCATGGTGTGTGTG  | 60.003 | 20 |
| CGGTGGTTCTCATGCCTAAT    | 59.955 | 20 | ACAGCAGCAGCAATCATCAC  | 60.024 | 20 |
| TTAGGCTCTCAAAGGACGA     | 59.948 | 20 | AGTGGTCATGACGAGCAGTG  | 59.897 | 20 |
| CATTTGACCTCCACATCCT     | 59.927 | 20 | AACTCCGATGAACATCAGCC  | 60.081 | 20 |
| TGGAAAGAGAAGTTGTGGGG    | 60.081 | 20 | CCGAATCCATCACATTCAAA  | 59.325 | 20 |
| GGGTTTTGGTCAGCATTTTT    | 61.08  | 20 | ATTAACACCGGCATTGCTCT  | 59.597 | 20 |
| CGGGTTCGAAGAAAACCTTGA   | 60.22  | 20 | AATCCCAATCCCAATCACAA  | 59.991 | 20 |
| ATCGGCTGTTACTCCTTCCA    | 59.694 | 20 | CCAATTTATTGGGATTAAGGC | 57.539 | 21 |
| AGGCTGAAAAGGATGCTCAA    | 59.955 | 20 | TGCACCTTGAGTCATAACGG  | 59.716 | 20 |
| GTGTAAGTCGCGGTCTCGAT    | 60.285 | 20 | CCTGTTTTGAGCCTACTCCG  | 59.869 | 20 |

|                         |        |    |                        |        |    |
|-------------------------|--------|----|------------------------|--------|----|
| TCCATCAACCTAACAGCAACA   | 59.184 | 21 | CTGTCACCGAACACAAGCAT   | 59.751 | 20 |
| AAAAGGTGGCAACGAAAATG    | 59.975 | 20 | TCCTAATACGACTGCCACC    | 59.955 | 20 |
| GGAGATCCCAATGAAGAGCA    | 60.158 | 20 | TGAGAGAAGGCGAAGAGGAG   | 59.82  | 20 |
| ATGTAGCCGACCCCAATTTA    | 59.297 | 20 | TGCACATTTACAACCAACAAA/ | 59.027 | 22 |
| CTCATTGACGACATCCAACG    | 60.112 | 20 | TTCCCTCTTTTCGTCCTTGAA  | 59.784 | 20 |
| AGCGGGATAATGGAACAGTG    | 59.955 | 20 | TGTAGCCGACCCCAATTTAT   | 59.297 | 20 |
| CTGCTGCAAAAATATCCGT     | 60.096 | 20 | AAGATTGGAAGGGTGGTTCC   | 60.169 | 20 |
| TGCAACTTGAGGCTGAGAAA    | 59.716 | 20 | TTCTTGTAATGCCCTTTGG    | 59.931 | 20 |
| GTTTATGTAGCCGACCCCAA    | 59.823 | 20 | AAGAGAAAAGCCCAAGAGCC   | 59.962 | 20 |
| GATGCTTAGTTGCCATTTCG    | 60.606 | 20 | CCGTTGTTGCTGATCCTTTT   | 60.11  | 20 |
| ATCCCCTAGTGGCTCTGGTT    | 59.957 | 20 | TCCAAAGAAAAAGCAAAGGA   | 57.609 | 20 |
| AGAAGGAGGGGATGGAGAGA    | 60.149 | 20 | CGGAAGTAGGAAAACACCCA   | 59.964 | 20 |
| TTAACTCCGCCTGTGAGTGTT   | 59.788 | 21 | GCAGCAATATCAACCTGGCT   | 60.243 | 20 |
| AAAATCCCAGAATTGGTTTCG   | 58.879 | 20 | AACCATGCTCTTTCCACCAG   | 60.111 | 20 |
| TTACTTCGCCGTAGGTTTCG    | 60.257 | 20 | CCACTTCCATTCTCTTCCCA   | 60.042 | 20 |
| ATATATTCCACAGACGGCG     | 59.807 | 20 | GCCCAAGTGTAAAGATCGGT   | 59.212 | 20 |
| CAACTGCACTTGGATCCTGA    | 59.831 | 20 | GATAGCTTACAGCGGCATCC   | 59.835 | 20 |
| TGAGGTATGGATGATCGGAA    | 58.873 | 20 | GAGGGAAGTGGAGGTGATGA   | 60.048 | 20 |
| TCTCTACCCAAAACCTCCCA    | 59.521 | 20 | TTGTTTGATTTGCTGATGCC   | 59.67  | 20 |
| TCTGAAGCAGCTCCTGTGAA    | 59.855 | 20 | TTGGACTAAGGACACCAGGG   | 59.959 | 20 |
| GGGATATCTTTTGGGGAAA     | 59.957 | 20 | CCGACCCCAATTTATTTGAA   | 59.633 | 20 |
| GGGGCCCTGTCTAAAAATTG    | 60.664 | 20 | AGGTTGCGTACATCTGACCC   | 59.997 | 20 |
| GCATACATCTGACCCCAAG     | 60.34  | 20 | TCAGTCAAACCACTCGGTCA   | 60.285 | 20 |
| GCACGTAAAACCAACCGAGAT   | 60     | 20 | GTCGCAGAAGAAGGTCAAGC   | 60.142 | 20 |
| AAGACAAATACGACGACGGC    | 60.14  | 20 | AAAGTCTTTCATCTCCGCCA   | 59.813 | 20 |
| TGTAGCCGACCCCAATTTAT    | 59.297 | 20 | ATCCCATGTGCTGTGATGAA   | 59.925 | 20 |
| CCCAAGACCCCAATTTGATT    | 60.91  | 20 | AACGAGATGCTCTCGAATGA   | 58.544 | 20 |
| ATGTAGCCGACCCCAATTTA    | 59.297 | 20 | CTGGAGTAGGGGTCATTCCA   | 59.92  | 20 |
| GCGGTGTTTGTGTGTGAGAG    | 60.357 | 20 | AATGATAAGATCAAGGCCGA   | 57.244 | 20 |
| TTTTTGGCGATTCTTGTTCC    | 60.053 | 20 | GTTCTGCAAAAAGAAAAGGCG  | 59.996 | 20 |
| GGATCAGCCGAGTAATCCAA    | 60.036 | 20 | TTCCATGTCGAGTTTGTTCCG  | 59.691 | 20 |
| ATTGGTATGCGCAACAATGA    | 59.96  | 20 | AAAATCAACCATATTTTCGCC  | 58.005 | 21 |
| TGGTCTCATAACAAACCTGACA  | 58.132 | 22 | TTCTAAACAATTGGCTGCTGAA | 59.89  | 22 |
| GCCATGCGTAAACTAAAACCA   | 60.013 | 21 | CGTAACATGCCACCAGTGAG   | 60.175 | 20 |
| CACACCCTTACTTTCCCAA     | 59.824 | 20 | GGAGAATGCGAAGGAGAAGA   | 59.508 | 20 |
| AAAAGTGGCATTTTGCCTA     | 59.586 | 20 | GAGGTGTGATGATGCTGACG   | 60.279 | 20 |
| TGTGAATCCCAAATGCTTCA    | 60.049 | 20 | AGAATGGCACCTCACGAAAC   | 60.119 | 20 |
| GCATGAGAACTCCCACCAT     | 59.934 | 20 | AGCCTCCCTTTGGAGAAGAG   | 59.95  | 20 |
| CCATCATCGTGTTTCATCTGC   | 60.08  | 20 | ACACTTGACTTCCCGTGTCC   | 60.009 | 20 |
| TGTTGACGACGGAAGTGAAG    | 59.873 | 20 | ACAAGTCAAGATTCAGCGA    | 59.596 | 20 |
| GCAAGACAAACAAAGTGCCA    | 59.888 | 20 | TGTAGCCGACCCCAATTTAT   | 59.297 | 20 |
| TTATAAAACCGACCCACCCC    | 60.773 | 20 | GCCTCAAGATTGCAACCACT   | 60.263 | 20 |
| TCTTCTTGCATGTCTCGTCG    | 60.136 | 20 | TCCCGATCCCAACTGAAATA   | 60.266 | 20 |
| CGTTTTCTTATCTCTGCGCC    | 59.982 | 20 | GCTGCTGCGGACAAATAACT   | 60.416 | 20 |
| GCATTTTCCTCAAAAAGGGA    | 59.135 | 20 | TGAGTTGAGGTATGAGAAAAG  | 59.658 | 26 |
| GACGGAGTTGTGAAGGAATGA   | 60.104 | 21 | CTTGAAGCATGCACGATGAC   | 60.423 | 20 |
| CAATAGTCTAAGGGAGCACATGG | 60.028 | 23 | AATTCAATGCAGGATGATTGC  | 59.921 | 21 |
| ATGTAGCCGACCCCAATTTA    | 59.297 | 20 | ACTGTTGCGTTATCCAAGCC   | 60.14  | 20 |
| TTGACCTTGTAACCCCGTC     | 59.83  | 20 | CTGCTTCACTAAATCCCCCA   | 60.066 | 20 |
| CCGCGTTATTATTTGCAGGT    | 59.985 | 20 | CTGGCTCCCCAAGAATTACA   | 60.066 | 20 |
| AGCACACTCGAACAAAGCAA    | 59.64  | 20 | ATCTCTGTCCCCCTCGTTCT   | 60.073 | 20 |
| TTTTTCACGCACAACACACA    | 59.765 | 20 | TTCTAGGGTCGCAAGCAAAC   | 60.386 | 20 |
| TTCTCTCTCTCTCCCTCCC     | 59.883 | 20 | GTTCCGCCACCTCCATTTCTA  | 60.074 | 20 |
| CGTTGCCTGGCATTATTGAT    | 60.857 | 20 | ACCAAACCTCTCCTCCCGAAT  | 59.935 | 20 |
| GGGGAGATATGTTGGGGATT    | 59.843 | 20 | TCTTTCCACCCGAAATTGAC   | 59.91  | 20 |
| CGTAAGAGCATTGTTGGCTCC   | 59.845 | 20 | AGACCAACAATTCCAGGTGC   | 59.973 | 20 |
| GAGGTGGTCGGTTGGTAAGA    | 59.966 | 20 | GGTGTGGCAGTTATAGCGGT   | 60.022 | 20 |
| GAGCAAATGGCCTTGAGAAC    | 59.82  | 20 | TCTGCTAGCACTGCCCTTTT   | 60.154 | 20 |

|                          |        |    |                         |        |    |
|--------------------------|--------|----|-------------------------|--------|----|
| ATTGTGCAGTCCGGCTAAGT     | 59.763 | 20 | CGACTAGCCACGTTCAATCA    | 59.864 | 20 |
| TTTCGATGTCTGAATTACAACAAA | 59.524 | 23 | CTTTTACCTTAATCTTACCCTT  | 58.765 | 26 |
| CGATTTTATCCCTCGCAAAT     | 59.035 | 20 | AAAGAGGTTGTTTCCGTTGC    | 59.218 | 20 |
| GGACATCATCCACCGAGAAC     | 60.335 | 20 | ATCATCGCCACATCGTGTA     | 59.955 | 20 |
| AAGGGAGGGAATGAAGTGGT     | 59.795 | 20 | CGTATCTGGTTGAAAGTTGTTG  | 59.187 | 23 |
| GTA AAAATTGCCAAGTCCCA    | 59.801 | 20 | TTGAACACGATGGGCATTTA    | 59.93  | 20 |
| CAAAGAATTCCAACCCCAA      | 59.772 | 20 | TTGATTCCACCTCTTACCC     | 59.903 | 20 |
| GATTTGCAAGACATGCGAGA     | 59.955 | 20 | CCCTACATAGGGGGAAAAGG    | 59.655 | 20 |
| AGGGCATTACCTTTGCATCA     | 60.469 | 20 | ATGGATGCACCGATTAGGAG    | 59.917 | 20 |
| ATGTAGCCGACCCCAATTTA     | 59.297 | 20 | GCTACTCCCGACCATTCAA     | 60.074 | 20 |
| TGTAAGCTCACCAGCATTTCG    | 60.011 | 20 | TTTGGCAGGAAATCACACAA    | 60.088 | 20 |
| CAGCTTCAGGTTCTCTGTTGC    | 60.186 | 21 | TCCAATAAAAATTTGCCCA     | 60.123 | 20 |
| GAGATTGACTCCACCAGGA      | 60.048 | 20 | TAATCACCATGGACTTCCCC    | 59.605 | 20 |
| CCACTTATTTACTTCCGCCG     | 59.603 | 20 | CTGGGGGTGAATTTTGGTTA    | 59.657 | 20 |
| TTTCAAACCTGGTTGCCTC      | 60.088 | 20 | AGTTTGGGGCCTGAGTTTCT    | 60.11  | 20 |
| GTTGGGAAGGTAATTGGGGT     | 59.919 | 20 | CAAGTCACCTTTGACTCGCA    | 60.025 | 20 |
| ACTATGCCTGATGGGATTGC     | 59.923 | 20 | TCGAGAGCTCTGGTGTTTTG    | 59.161 | 20 |
| TACATCGCACAAAATCACGG     | 60.523 | 20 | ATTCTTGAACGCGAGGAGAA    | 59.955 | 20 |
| TTATTTTGGGATTCACCCATT    | 58.163 | 21 | ACCTACAAAATGGGTCTCTTTG  | 59.056 | 23 |
| TCGTTAAATGCCACTGTGTTG    | 59.641 | 21 | TCTTCAGAAGCTTGCTGTGC    | 59.47  | 20 |
| CCCAAGACCCCAATTTGATT     | 60.91  | 20 | CATGAGCAATCCGTGTTTTG    | 60.111 | 20 |
| GGGATTAAGGCTTTGGTGGT     | 60.187 | 20 | TCTGAGCAGCCACATAAGACA   | 59.606 | 21 |
| AGCAAAGAAGAGGTTGCCA      | 59.993 | 20 | CATATTTTTCCGGCTGTTTCA   | 59.95  | 21 |
| AAGAGGTGCATTTCAATCGG     | 60.074 | 20 | CCTCTCAGTCCCAGACTTGC    | 59.986 | 20 |
| GTTTACTTCCATTCCGCCAA     | 59.938 | 20 | TGGTTCATGTAGCACATCCC    | 59.374 | 20 |
| GGCGTCAGAGAGATCGAAAG     | 60.096 | 20 | GATGCATCCTCCATCTTGG     | 60.426 | 20 |
| ATCAATGGGCATTGGATGAT     | 59.982 | 20 | CACACAGCCAGACACACACA    | 60.426 | 20 |
| AAGCCGTTAAAGCGTGAAGA     | 60.018 | 20 | GGGATACAAATGAGTGTTTAGC  | 58.944 | 23 |
| TGAAAGTTGTGCCATTGACC     | 59.547 | 20 | GGCCAACACATTAATTCCAA    | 59.69  | 21 |
| TGTCTCCGTTGGAACACTGA     | 60.285 | 20 | GAGGTGGCTAAAGTGTGGGA    | 60.111 | 20 |
| ATGTAGCCGACCCCAATTTA     | 59.297 | 20 | ACCCCAAATTCTCATACCA     | 60.173 | 20 |
| CTTGAAATTTTTGTGTGGCAA    | 58.711 | 21 | AAAGGAGGGGTGCTGAATTT    | 59.94  | 20 |
| CCATGCAGTCACAGATCCAC     | 60.121 | 20 | TTGGTTCATGTAGCCGACCT    | 60.517 | 20 |
| AAAAAGTCGTGACCAAACAAA    | 58.698 | 22 | TCCATCAGTTGATGCCTTGA    | 60.201 | 20 |
| AGCAATCTGGTGGATTGAGG     | 60.073 | 20 | CTGCCAAATCTGGGACTGTT    | 60.111 | 20 |
| TACCTTCTCCGGAATCATGC     | 60.036 | 20 | TGGGTGAGGGGATGTCTATC    | 59.737 | 20 |
| TCAATGTTGGGCTACACTTC     | 59.985 | 21 | GGTTCGATTGTGTCCAATAG    | 59.002 | 20 |
| GACACAGTACGATCCCGACC     | 60.395 | 20 | CGGTCTCTCAGTTAAGTCTATC  | 59.98  | 25 |
| CCCAAGACCCCAATTTGATT     | 60.91  | 20 | AATAATGCTACACGCCTCCC    | 59.07  | 20 |
| CCGACCTCACATAGTGGGAA     | 60.913 | 20 | CATTATGCAGGAACTCGCAA    | 59.833 | 20 |
| ACCAATGCAAACAATCACCA     | 59.823 | 20 | ATACGGGATGTGGAATTGGA    | 60.014 | 20 |
| AGAATGCATTTGAGGACCCC     | 61.223 | 20 | TTTTCGATTTTCATCCTCATAGC | 58.337 | 22 |
| TGAAAATGGGGTGGTTGATT     | 60.029 | 20 | AGGCTCGCAGACAACAGAAT    | 60.02  | 20 |
| ATAATTCAGGAGGCACGCAT     | 59.556 | 20 | GATCGATCAGCTCCGAGAAG    | 60.057 | 20 |
| TCCCTTTCAATTACATCGCA     | 59.112 | 20 | ACTTCAGGTTGAACACCCGT    | 59.474 | 20 |
| AGGTCGGTTGAAAAGATGGA     | 59.526 | 20 | GGATACGTGGATGGAGACAA    | 58.359 | 20 |
| ATGGGTTTTGCCATCAATTT     | 59.138 | 20 | TTGTTTGGTATGTGACCCCA    | 59.667 | 20 |
| AAAGATCCAGTGTGGCAGG      | 60.111 | 20 | TGCACAAAGTTTTGTTCCATT   | 59.536 | 22 |
| ATAGTTCTCCGCTGCTCAA      | 59.978 | 20 | TAGGGCTACCGGACACTACG    | 60.147 | 20 |
| CAAGTGTTGGAAGACGGTT      | 60.149 | 20 | GCTTACAAGCGAGACCCAAG    | 60.015 | 20 |
| TTTGATTGGGAATAATTGGG     | 57.289 | 20 | GAGTAACTGGGCACCTCCA     | 60.111 | 20 |
| GAGAAAAACAGAGGAGCAACAA   | 59.92  | 23 | GTTTGGAGGAATGGGGAGAT    | 60.133 | 20 |
| ATGCTGCATCAACCAGTCAC     | 59.714 | 20 | CCCAAGACCCCAATTTGATT    | 60.91  | 20 |
| TCAAGGTGTCTCGATTTGA      | 59.215 | 20 | GACTCATCCACATGCTCG      | 60.279 | 20 |
| TTCCAACATGCTGCCTAAAA     | 59.301 | 20 | AGTCCTACACACCAAGTTCATC  | 58.639 | 23 |
| AGAGGCCAACAAAGAGACGA     | 59.989 | 20 | CTCATTGCCCATTTTCATGTG   | 59.924 | 20 |
| ATTTGGGATGCATGATGGTT     | 60.021 | 20 | AGGATGGTACAGTTGGCTGG    | 59.989 | 20 |
| ATGTAGCCGACCCCAATTTA     | 59.297 | 20 | TGCCTCGAGAGTAAGAACC     | 59.43  | 20 |

|                          |        |    |                         |        |    |
|--------------------------|--------|----|-------------------------|--------|----|
| TGAGGGATTAAGAAAGACATTGG  | 59.489 | 23 | CGAGCATAACAAGACTCGCA    | 60.157 | 20 |
| TCCCATATTTGGAGTCCAGG     | 59.744 | 20 | TGATGGTAGCAAGCAAAGGT    | 59.761 | 21 |
| GGATTTGCCAGTTTGAGGAA     | 60.051 | 20 | CCAAGACCCCAATTTGATT     | 60.91  | 20 |
| TGTAGCCGACCCCAATTTAT     | 59.297 | 20 | TTCAGTCTGCAGCAAGAAG     | 59.314 | 20 |
| GGGGTTGGGTTTTCGTATCT     | 60.053 | 20 | TCCCTAACCATGTACCACC     | 59.526 | 20 |
| ATGTAGCCGACCCCAATTTA     | 59.297 | 20 | TGGTGTAGATTGTGAATAAAA   | 60.155 | 26 |
| AAGCCTTTCATGTCACCAGG     | 60.111 | 20 | AGCAAAGAAATCAAAGGACCC   | 59.585 | 21 |
| TCCTACCTGATGGGCTATGG     | 59.91  | 20 | TTGATCATTTGGGAACACCA    | 59.75  | 20 |
| TGATCCATATAGCCAACCCC     | 59.605 | 20 | CCATTTGCAATGGACAAAAA    | 59.396 | 20 |
| GCTAAGGCCTGAACAACAGC     | 60.022 | 20 | ATCATGGGTGGTGTACCTT     | 60.096 | 20 |
| TGTAGCCGACCCCAATTTAT     | 59.297 | 20 | CCGCCATCTCGAAGTAATA     | 60.053 | 20 |
| CTCGAAAAAGTGCATCA        | 59.988 | 20 | CAGGAAGAAGGTGGGCAGTA    | 60.246 | 20 |
| ACATATATCCCTGTGCGCGT     | 60.382 | 20 | TCATTGAAACCTCCTCCTCG    | 60.187 | 20 |
| CACCGCCGTTCAAGTAAAGAT    | 60.132 | 20 | GGACAAGAATTTCTGCAGGC    | 59.82  | 20 |
| AGAAATCGGAAGATGCTCCA     | 59.773 | 20 | ACTGAGTGCAAACAAGAGCG    | 59.239 | 20 |
| TCTAACCCACCATTCTGC       | 59.933 | 20 | GCATTTTGCATTTGTTGACG    | 60.118 | 20 |
| TCCGTTGAAATAAGATCGGG     | 59.894 | 20 | GCGGATTGTTGACTTCCATT    | 59.939 | 20 |
| TGCTATGTGATGTTGGCTTGT    | 59.213 | 21 | GTATTCACGGGCAGTGGAGT    | 59.997 | 20 |
| TACTTCCACCCCTTTTTCCC     | 60.159 | 20 | CCTCCGACGATCTCTGTGTC    | 60.829 | 20 |
| ATGTAGCCGACCCCAATTTA     | 59.297 | 20 | CGTTTCCTCTCATTTGCAGG    | 60.766 | 20 |
| AACACCCAGTTTGAATTTAGCA   | 59.926 | 23 | GCTTGTTAGTTTGGTTATGTGC  | 60.076 | 23 |
| GGTCCAAAAACTCAGGCAAG     | 59.711 | 20 | TTGCAGTCAGCAGCAAAGT     | 59.788 | 20 |
| CGCCACGTAGAGGAAATTGT     | 60.132 | 20 | TTCACCAGTCCCATCAAACA    | 59.935 | 20 |
| ATGTAGCCGACCCCAATTTA     | 59.297 | 20 | CGCCTTCCTTGCTCTTAGAA    | 59.724 | 20 |
| AAAATTATGTAATAGTTTGCCGAC | 59.748 | 25 | ACACCATTTTGGAGGGAGAA    | 59.381 | 20 |
| TCAAAGCGAGACCTAATGGC     | 60.352 | 20 | CAACTAAATTGCCCATGCT     | 59.96  | 20 |
| ATATGTTTCGCTCTCCCCT      | 59.925 | 20 | TGTGAAGGTCAACGTGCTTC    | 59.88  | 20 |
| CAACGTGATGTCGATGGAAG     | 60.112 | 20 | CACCCAATTCTTCAGCCATT    | 59.933 | 20 |
| GCCGGTCAGTTAATCTGCAT     | 60.103 | 20 | CACGCTTTCAGTGTGTCGT     | 59.946 | 20 |
| GAGACCAAATCCAGCCATA      | 59.894 | 20 | TCATTTCAATTGGAACGCAG    | 59.809 | 20 |
| AAGCAGTGTCAATTTGCTCCA    | 59.445 | 20 | GCATGCCCTTACAACGAAGT    | 60.14  | 20 |
| TCACATACCTGCAACCATGAA    | 59.98  | 21 | GCTGTGAAAGTATGCCACCC    | 60.526 | 20 |
| AATGCTCCAACTTCGACTGG     | 60.255 | 20 | TCTAGAAACACCTTTGCGGC    | 60.386 | 20 |
| ACCTGGATTGCAATGGTTTG     | 59.79  | 20 | CAAGATAGGCCCGAAATCTG    | 59.662 | 20 |
| GAGCCATCTTGTGACTGCAA     | 59.992 | 20 | TGGGCCTTCAAAGCATAAC     | 60.074 | 20 |
| TGGGCCTTCAAAGCATAAC      | 60.074 | 20 | GAGCCATCTTGTGACTGCAA    | 59.992 | 20 |
| ACAGATGTGCTGACTGGGTG     | 59.738 | 20 | AAATCTCCAAGTCCCGTTCA    | 59.526 | 20 |
| TTGTGGTCTCACTCCTCAA      | 59.23  | 20 | GCCACTGCTTCCACACATAA    | 59.722 | 20 |
| TTGTGGTGTCTTGTGGTCTTG    | 59.626 | 21 | ACGGCAAATTAATGCGTC      | 59.971 | 20 |
| CGGCTGGTGCAGAGACTAAT     | 60.419 | 20 | AAATTTGCCCTCTCCCTCTC    | 59.651 | 20 |
| GATTGAGAATGACATGGGCA     | 59.456 | 20 | AAGCTGGCTCAATTGCTGAT    | 59.985 | 20 |
| GAGGAAGAGTTTCGGATGGA     | 59.213 | 20 | AGATGAAGACTTGAAGTTGGT   | 59.668 | 23 |
| CGGCAAATTAACAGACACG      | 60.525 | 21 | CGGATCAAAGTTGGATTTGA    | 59.924 | 21 |
| TGGTGCATAATGGCTCTGAC     | 59.679 | 20 | AATGCCTTTTTCTGCCATGA    | 60.585 | 20 |
| TCCACACACGTCTTCACATTT    | 59.049 | 21 | GAATCGAGCGGAAAGTTCAA    | 60.331 | 20 |
| TCAGCATTATGTGCTCTGCC     | 59.979 | 20 | ATGGTGCTTACAACGAAGGC    | 60.14  | 20 |
| CAGCAGAGATCATCCACCAA     | 59.787 | 20 | CTGGTCCGAATACCAACACC    | 60.232 | 20 |
| GAAGCACAACCAACCAACCT     | 60.012 | 20 | CAGAGAGAGAGAATGCCCA     | 60.488 | 20 |
| TTCGGTTTCATAAGGTTGTCG    | 59.982 | 21 | GCTTCTTGATCAAATTCCGC    | 59.791 | 20 |
| TCTACATTGTGCCTCCTCCC     | 60.073 | 20 | AACCATCCGCGTGAAATTAT    | 59.301 | 20 |
| CCACTCATTTTTCCACACGA     | 59.541 | 20 | AATGCGGTTTTCTCCTTTT     | 59.945 | 20 |
| GGCTCGAGTTGATGATCTTTG    | 59.828 | 21 | GGGAGGGAGTTTTGTTCC      | 59.783 | 20 |
| TCGATTTCTCGAATCGTT       | 59.645 | 20 | GCTGTTGGTTTGGCAACTA     | 58.822 | 20 |
| TATCGTTCCACATGCCTTCA     | 60.073 | 20 | TTTGATGACCAAGGAGAGCC    | 60.195 | 20 |
| CGAGATCCACGTGTCATTTG     | 60.112 | 20 | GACAATGGCCTAGACCGAAG    | 59.694 | 20 |
| AATTGTAGTCTTAAATTCCCGA   | 58.165 | 23 | TGTGGAAATACCCTAAATTGGT  | 57.44  | 22 |
| CATCTGCCATGCACCATTTA     | 60.488 | 20 | TCCTACCTTCACTAGTTTTCATC | 58.759 | 24 |
| TGTTCCGAGCTTGTGTTGAG     | 60.025 | 20 | TGGCATACTTGCTGAAATGC    | 59.839 | 20 |

|                          |        |                            |        |    |
|--------------------------|--------|----------------------------|--------|----|
| TCTCTCATTGGTGGCCCTTA     | 60.594 | 20 CGAAGGCCTTTTCGAAGTCT    | 60.865 | 20 |
| ATGCATTAAGCCGTGTGGT      | 60.395 | 20 TGAATCTGCAATTTTCTTGTTG/ | 59.75  | 23 |
| TCCATGACACTGAATATCCCA    | 58.785 | 21 TGCAGAAGGTCAGAGGAGGT    | 59.986 | 20 |
| AGAAATCCCGTGCGAGAGTA     | 59.836 | 20 CACACAAAATTGTGCCTTGC    | 60.157 | 20 |
| CCCCTTGGTTTTGGACCTA      | 59.824 | 20 CGGTTGATTTTGAAGTGGCT    | 60.11  | 20 |
| TTTCTGTTAGTCAAATCGAGAGA  | 58.223 | 25 AACAAATTTTGAAGGCGCAAT   | 58.643 | 21 |
| CGTTGAACGCGTATTGTTGT     | 59.656 | 20 GGGATGGTGAAGAGCAGTA     | 60.073 | 20 |
| GGATTGTGTGGCTACTGGCT     | 60.142 | 20 TTGCTCTACATTCGGTGGAA    | 59.272 | 20 |
| TGTCATGTCATCGTGTGCTTT    | 60.176 | 21 GTTCGGTTTTGTTCTCACCG    | 60.529 | 20 |
| TCTCAGATATGGGCGTCACA     | 60.225 | 20 ACCCCGTATTTTCACAAATAAA  | 58.766 | 23 |
| GCAGTTTTGGCACAGAATCA     | 59.847 | 20 TTGTTAATGGGGTGGGGATA    | 59.872 | 20 |
| TGTGGTTTGCCTCACTCTTC     | 58.854 | 20 TATGGACGGTTCGGTCTAGG    | 59.948 | 20 |
| TTATTTTTGGTACCCGGTGG     | 59.559 | 20 ATCCCGTATTTTCTTCGGGT    | 59.666 | 20 |
| ATTGATTTGCAACTCCCTTTT    | 57.734 | 21 TGTTTTATTTCCCCCATTCCA   | 59.988 | 20 |
| TTCACTGCTCTTTTCAACCCT    | 58.969 | 21 TGGTGTGTGGGTGATGAA      | 60.829 | 20 |
| GACGTGGAATGTGGATGATG     | 59.769 | 20 CATGGGGTTCGAGAATGAAA    | 60.832 | 20 |
| TTTTCCGACTTTGGCAAATACT   | 60.004 | 22 CATATTCGTGATGGATTGGC    | 58.797 | 20 |
| GTGGAATTGACGACTCCATTG    | 60.368 | 21 TGCAGTACAAATTTAGCTGGAC  | 59.829 | 23 |
| CAAATTAATAATGCGCCACG     | 60.081 | 19 ACGAAGAACGGCTTGAATGT    | 59.74  | 20 |
| TGGCGGAAAATTCAATCTGT     | 60.448 | 20 CCCCTGCCTTTCTTTCTAC     | 60.068 | 20 |
| TGGCGAGAAAACACTCAGATCC   | 60.34  | 20 ACGACGATCGACGGAATTTA    | 60.469 | 20 |
| TAGAAACACACGCAGGCAGA     | 60.596 | 20 CGCAGTCTCCTTTTTCTTGG    | 59.986 | 20 |
| TGAAGATTGCTTCCTTATGAATTG | 59.644 | 24 GCGGTTGTTCTGTACTTGGG    | 60.55  | 20 |
| TGCAGAGCAAATTCATGTCC     | 59.805 | 20 ATTCACAAGGAAATGGACGG    | 59.79  | 20 |
| ATGTTGGAAGAAACAAAACCTGGA | 59.9   | 23 TCGGAGAGCTAACAGAGGGA    | 60.088 | 20 |
| TCCAATCAAATCAAATGCGA     | 60.012 | 20 TGC GCGTATGCATAAGGTAG   | 59.886 | 20 |
| GAGTCTTGGGAAGCGAAATG     | 59.813 | 20 CAGAGCGCACTCGAAGAGTA    | 59.49  | 20 |
| TGTCGTGGTTCGGATATTCA     | 59.924 | 20 AAAACACCTGGGACCACAAT    | 59.162 | 20 |
| TCTTGTTTTCTCCCAAACC      | 59.003 | 20 TTGCCAAGAATTGAAAAGGC    | 60.188 | 20 |
| TGGGCTTCTTCAGCTTCTTT     | 59.195 | 20 AACCACCTTGTCGTGGATT     | 59.827 | 20 |
| GCCTTCTTGGTTTGAGCTTG     | 59.993 | 20 TGATCATCCTCAGTTGTTGATT  | 59.985 | 23 |
| GTTGCAATAATCAAGTTCAAGCA  | 59.311 | 23 TAGTTCCGAAATGATTGCC     | 59.901 | 20 |
| AGGAGCTTCTTTGGGGACAT     | 60.074 | 20 CCGCCCTCAAGCCTAGTTAT    | 60.593 | 20 |
| CCCCTATAACTCTCGGGGTG     | 60.694 | 20 ATGTTTGAGGCTGCGCTAGA    | 61.071 | 20 |
| CTCCATCGTCATCGAACTCA     | 59.787 | 20 GCCTTTCTCCTTTTCTTTAACCA | 60.114 | 23 |
| AATCGCAGAACATGAAACCC     | 59.939 | 20 TTCCGTAAGCGAAGGAAAA     | 59.826 | 20 |
| TCCCCTCATCTCTGCCTCTA     | 59.903 | 20 AATCATTACCAACACGCAA     | 59.972 | 20 |
| AGGCTGAAGCAAGAGAGACG     | 59.891 | 20 CCCGTTGAAAAAGTCTGGAA    | 60.081 | 20 |
| TCATGGTGAACACGATTTT      | 59.972 | 20 CCCGCCATACTGGTAAATGT    | 59.708 | 20 |
| AGGAGGGTAGGTGGTCTGGT     | 59.848 | 20 CCTTTGGAGGTAGGTTGCAC    | 59.592 | 20 |
| GAGAGGGGCCTTCTTTTAC      | 60.19  | 20 ACGGTGTTGATTGTTCTGCA    | 60.008 | 20 |
| AGAGGGACGAGGGACAATTT     | 59.935 | 20 CGGTCAACCGATTCCCTATT    | 61.061 | 20 |
| GTCATTACACCCGGAATGG      | 60.051 | 20 TTTGTGGACCTAACGCATGA    | 60.111 | 20 |
| TACATGGCTGGCGTAGTTTG     | 59.752 | 20 TAGTGTGCACTCATCCACCC    | 59.551 | 20 |
| ATGGGTGTTACCGTCTCTGG     | 59.844 | 20 AGGGACGGTGTATTTAGGG     | 60.332 | 20 |
| AAACAGTCGAAGTTCCCGTG     | 60.149 | 20 TCCGAGCCTGAGTCAATTCT    | 59.95  | 20 |
| ACTTGGGCCCGATCTATTTT     | 59.799 | 20 AATTTGGTTGGGTGCTTCTG    | 59.971 | 20 |
| AGGCATAAGAAAGGATGAATGTA  | 58.303 | 24 CGGATGAGATGCAAGAAAAA    | 58.843 | 20 |
| TGGTATGGTGTGGAGAACCA     | 59.806 | 20 TATACTCGCTACGAGCCACG    | 59.111 | 20 |
| TACGATGAAGGCTGCATTTG     | 59.833 | 20 TTCAGCAGGCGTAGACATTG    | 60.011 | 20 |
| GGTGGTAAAGGTCCCCACTT     | 60.088 | 20 TTGCGGACGTCAAATTTCTA    | 59.301 | 20 |
| GTTCAAATCCCACCAACGTC     | 60.218 | 20 AATGGGTTGTCCCCTTTTTT    | 60.032 | 20 |
| GCCCGATATTTATCAAGGCA     | 59.892 | 20 TGTTGCACCCTGAGCAATAA    | 60.257 | 20 |
| ACCCTAAGCAGAGGCTCACA     | 60.012 | 20 AGGTGCTTCTCCATCCTCT     | 60.216 | 20 |
| CACATGTCCCAAGTGATTTCAA   | 60.786 | 22 GCGAAACATGACGAGGCTAT    | 60.243 | 20 |
| GCAACAAATGAATTGGGCTT     | 59.945 | 20 CATGTTGTTAGAGTGGCCGA    | 59.716 | 20 |
| ATTTTTGGGAGGGAAAACGA     | 60.644 | 20 TTTGGGTCAATCATTTTGGTT   | 59.168 | 21 |
| ACAGGCTAGTGTGGGCGAC      | 60.179 | 20 CACGACCCAAATCAACTATTC/  | 59.861 | 22 |

|                          |        |    |                        |        |    |
|--------------------------|--------|----|------------------------|--------|----|
| TTTTTGGTACCAGAGCCACG     | 61.049 | 20 | ACGTTGTCCTTTACAAGGCG   | 60.168 | 20 |
| TTTGCCTATTTAAAGCCCC      | 60.267 | 20 | GAATTTGAGCAGGGAGCAAG   | 59.955 | 20 |
| CGAAATTGATCGAAGGAAGC     | 59.784 | 20 | CCTTGAATCTCAGCACCACA   | 59.831 | 20 |
| AGTGGATACGAGCAAGGGTG     | 60.134 | 20 | CTTTCGTTTCCAATGTCGGT   | 59.971 | 20 |
| AGCAGACGATGATGCAGAGA     | 59.688 | 20 | TCCGTGTGGCTAACAATTCA   | 60.111 | 20 |
| AAGAAAAGGCGTGAATGTGG     | 60.11  | 20 | TGGCATTCTTTTTTCAGCAT   | 60.585 | 20 |
| TTAGGAAAGCAGGCAACCTT     | 58.973 | 20 | ATGATTTTGGCCTTTCAGCA   | 60.585 | 20 |
| CACTAGCACCTCATGGCTCA     | 60.008 | 20 | GAGATTCTGGCACGAATGGT   | 60.081 | 20 |
| GCCATTCACCATCTCTCGTT     | 60.081 | 20 | CATCATGCGGGTAAGGAAAT   | 59.784 | 20 |
| GGGGGAAACCATTAGGAGAA     | 60.124 | 20 | TGCAATCTGCTCCATTTAACA  | 59.315 | 21 |
| AAATCCAAATAATTGCCGGA     | 59.259 | 20 | TCTCAAGTTCGCCCTTTTTTC  | 59.429 | 20 |
| CCCCCATGAAAAGTCAAAAA     | 59.772 | 20 | TTGCTTCCAAATAATGGCTTC  | 59.202 | 21 |
| CAAGTCAAATACCCGTGTCCA    | 60.791 | 21 | ACATACATTTTATCATCCATTC | 59.18  | 24 |
| ATAGCTCACCAACCGACCAAC    | 59.997 | 20 | ATGTGAAGGTGTGCGTGTGT   | 60.08  | 20 |
| CGTGTCAATGTCGACTCGTG     | 59.868 | 19 | TTTGGCATAATCTGGACTAAAC | 58.687 | 23 |
| CCTCCGTTTAAGGTGATGGA     | 59.926 | 20 | ACCATTAACACGCAGGATAAC  | 57.713 | 22 |
| TGAGAGCGAACTGCAATCCT     | 61.087 | 20 | CGTCCCCTCTCTCCCTTAAC   | 60.067 | 20 |
| TCTTTTGTTCGGAAATCGG      | 60.046 | 20 | AGAAAGGAAGAAACCGGCAA   | 61.088 | 20 |
| GAGATTTGGTCAAGGGAGCA     | 60.195 | 20 | TTGACAACAACCTTTGCCAGC  | 59.888 | 20 |
| GTCCAAGATGGGATTGGTTG     | 60.173 | 20 | TAGAGAACACGTGCAGAGGC   | 59.191 | 20 |
| CGGCATTTTCGGAAATTAAG     | 59.56  | 20 | TGGGGAGAATGTAATAGCCG   | 59.916 | 20 |
| GAGGAGCACCAAGTCAACTCC    | 59.841 | 20 | TGATGACCTGGAGTTGTGGA   | 60.088 | 20 |
| TCCATTATCTGGCCCTTTTG     | 59.894 | 20 | AGCAAATCGCACACATACCA   | 60.142 | 20 |
| CTAAAAGCCAGGGCCTACC      | 60.089 | 20 | CACCATATTTGTGTTTCTCATT | 60.625 | 24 |
| TGCAACCCTAAGAAAAGGGA     | 59.679 | 20 | CCATGATCAACCATGCCATA   | 60.159 | 20 |
| AGCTAGTAGGGCAAAGTTGATTA  | 57.547 | 24 | ACCCGGTGATCCGTATATCA   | 60.036 | 20 |
| AAATTGATTGGAGCATTGCC     | 59.907 | 20 | TTGAGATTGGTTGGTGCTGA   | 60.24  | 20 |
| TGCAATTCCACCAACTTTGA     | 60.088 | 20 | TGTGAACCTTTCGATGAGGC   | 61.188 | 20 |
| CCGGAATCTGAGAGAGATCG     | 59.903 | 20 | CCAGTTCCTCCCTACTCACT   | 59.608 | 21 |
| GCTTCTTCTGCCTGCATC       | 60.249 | 20 | TAGTATTGTCCCTCCACCCG   | 59.807 | 20 |
| CTTTGTCCCTAAACCCCTC      | 59.799 | 20 | TCATAAGGATTCGGCCAGAC   | 60.036 | 20 |
| CACATTTGGCTGGAAGGACT     | 60.111 | 20 | TGCCAAGCGAATGACATTTA   | 60.215 | 20 |
| GGGAAAAGGACAATTCCTCG     | 60.797 | 20 | CTCTTCAATGCCACAAGTGC   | 59.445 | 20 |
| GAAGCATTTACATGTAGAGTAT   | 57.987 | 27 | CGTACCAAATGTGCAACAAA   | 59.518 | 21 |
| ATTCGAGCGAGGGTTTTCTT     | 60.208 | 20 | TTTCCCCTTCATGTCCTACG   | 59.926 | 20 |
| TAGCACTTGGGATGAAGCGT     | 60.796 | 20 | AGGGTTAAAATTGGGAACGG   | 60.048 | 20 |
| AGCAATTTCAATTAACAATCACGA | 59.91  | 24 | TCATGGAATGAAGTTCTCAAGC | 59.316 | 22 |
| ACTCTCCATGGACGTAGGTG     | 57.578 | 20 | TGGAATTTTCCAAATCTGGCT  | 60.788 | 21 |
| GTTTCGGAGGATTCGGATTT     | 60.265 | 20 | TCCCATGTATGTAGATTGCTTC | 60.218 | 23 |
| TGAACTTGGGTTTGGTCCAT     | 60.21  | 20 | TCTCGTCTGACAAACTTCAA   | 58.483 | 21 |
| TGTTTCTGCAGGTTGCAAAG     | 60.027 | 20 | CCTCTTGCGAGAAGTTGGAG   | 60.126 | 20 |
| GAAATATCCCCTGGAGCCAT     | 60.117 | 20 | ATCGCCTTCAAGATCCACAT   | 59.513 | 20 |
| GCCCTTATTTCCGATGATG      | 59.369 | 20 | TTCGAGTATTGGTTAATGGCA  | 58.174 | 21 |
| TTGCAATTCCTAAACCAGCC     | 60.074 | 20 | TCACCTATTTTCGCAATTTTCA | 59.603 | 22 |
| TCAATGTGCCATGATTTAGCA    | 60.088 | 21 | TTAGCTCGCTAGGCTTCAGG   | 59.883 | 20 |
| GTCAATCCGCACTTGGATTT     | 59.939 | 20 | TGGACCCAAAATGCCTATTC   | 59.762 | 20 |
| ACCCATTCCCAAGAGATGCT     | 60.853 | 20 | TTGTACGGTAGCCAGTTCCC   | 59.993 | 20 |
| TATTGCATTTCTCACACGGG     | 59.542 | 20 | CCCATTTGAATCAACCCCTA   | 59.617 | 20 |
| TTTATTCCTGTGCCAAGTTGAA   | 59.625 | 22 | GGTTGTTCTCTGAAACTGTTG  | 58.744 | 22 |
| GTGGTATACCCAAAGCGCAC     | 60.395 | 20 | ACAATGTCACATCCCAAGCA   | 59.967 | 20 |
| CAACTCATGGTTGTCGGTTG     | 60.001 | 20 | GGTTCATGATATTGGGGACG   | 60.014 | 20 |
| ATGCTTTTGTCCATCTTCGC     | 60.221 | 20 | CCCCAAAATTTCCCATTTCT   | 59.992 | 20 |
| GTAATTGCTGGAGGCAAAGC     | 59.851 | 20 | GGGGGAATTTATCCCGACTA   | 59.978 | 20 |
| TGTTTATAGTCCCCCGGACC     | 60.929 | 20 | ACCTCCGGTTTTCCATTTCT   | 59.805 | 20 |
| GAAGTTTTGGGGATCCGAC      | 59.326 | 19 | AATAGGCCGGACTTTTCGACT  | 60.096 | 20 |
| TTGAAGAAATCAAATCCCACAA   | 59.429 | 22 | ATGTCGGTTTGGTTTAACGG   | 59.724 | 20 |
| CCTGATTAGCCACAAGGGAA     | 60.066 | 20 | ACCAAATCAAGGGGCTAACA   | 59.429 | 20 |
| TTGTGCTCGTACACTCGACA     | 59.03  | 20 | TGTCCCACATTGGAAAAACA   | 59.792 | 20 |



|                            |        |    |                         |        |    |
|----------------------------|--------|----|-------------------------|--------|----|
| TTCTCATCATCATCAGCTCCA      | 59.337 | 21 | AGGGACCTACAACCTGGGAAA   | 58.498 | 20 |
| TGTGTTTGCACAAGAGGAGG       | 59.873 | 20 | TAAAGCGTTGTCTTTGAGCG    | 59.25  | 20 |
| AGGGGTAGCGGTGTGTGTAG       | 60.051 | 20 | AGGTTTGTAGGGGCCATGACTA  | 59.55  | 20 |
| TTGCAGGCCATATGCTAGTG       | 59.856 | 20 | GCTTGTTACACCACACTGGG    | 59.06  | 20 |
| GAACGAGTTCGTTGACTAATTA/    | 58.111 | 25 | ACGCCACGTGTAAAGACTC     | 60.179 | 20 |
| CAGAGCGCACTCGAAGAGTA       | 59.49  | 20 | ACTGAGGTGTCCCATACGGA    | 60.386 | 20 |
| CAATCCTGTAATTCGCGTCT       | 57.849 | 20 | TGTAGGCAATCAAGAAGCA     | 57.1   | 20 |
| TTTTGCACCCGAATGTTAT        | 60.188 | 20 | TGGTGAATTTCTTTTTGGCAC   | 59.967 | 21 |
| TGGAATTTGTCCACCATAACA      | 58.733 | 21 | GACCTCGAATGATGTCCGTT    | 59.934 | 20 |
| GAGATATTTCCCGCTGTCCA       | 60.036 | 20 | GCAAATATTGCAGTCAGCCA    | 59.839 | 20 |
| GCAATGCATATTTAGGAAGTGG     | 58.654 | 22 | GCGCCTCTTTTCCTTTCTCT    | 60.096 | 20 |
| GCGAAACGAAATTTGGGA         | 59.598 | 18 | TTCGAGTTTAGTTCTTCTGTAAT | 58.63  | 27 |
| AAGTGAGTTAAGTTTTGACCCAA    | 57.066 | 23 | ATGGTTCGGTCTAACGGACA    | 60.375 | 20 |
| GTCATTTCTCGTTTCGCGTT       | 60.257 | 20 | TTCGGGACGAAATTTTCAA     | 60.407 | 20 |
| CCCATTCATCATGATTCCTTC      | 59.19  | 21 | GCGGAATTAATAACACCACG    | 59.376 | 21 |
| TGGTGCCTGTGAAAAACCA        | 59.976 | 20 | GGGTTCCCGTGTCAAAAAA     | 59.662 | 20 |
| ATGATGGCGTCATGTTTTCA       | 59.931 | 20 | AAATCCTTGCACCTCCTCCT    | 60.074 | 20 |
| GCAAATTAATGTGCCACG         | 59.077 | 20 | TGAAGATCGCTTCCATCTTTG   | 60.337 | 21 |
| GACTCGAACGAACCCCAAT        | 59.973 | 20 | GGATCGAAAGGTTGTGGAAA    | 59.91  | 20 |
| CACCCCGTATGGAAATTCAG       | 60.184 | 20 | ATGGTGATTTTTGCCGTGAT    | 60.199 | 20 |
| CCAATTTTTCAATCACCGGA       | 60.671 | 20 | TTGCGGCCCATATAGTTGTA    | 59.053 | 20 |
| GCCACGGATAAGTAACACCG       | 60.386 | 20 | CCTCCTCCCCATTCTGATTT    | 60.264 | 20 |
| AAGCTGACTCGCACATTCCT       | 60.02  | 20 | AATGGTATGTTGGCCATTTGA   | 60.067 | 21 |
| TCTCGTGGTGCAGTGGTAGA       | 60.463 | 20 | AAATAGCAAGTTGATGGCGG    | 60.096 | 20 |
| ACGCTCAAGCCATTCAAGTC       | 60.406 | 20 | TCCATGTGCTTACAAGTTTTGG  | 60.032 | 22 |
| TGACGTACGATCGAGTCCAG       | 59.855 | 20 | CAGGAGGGTTTCTAATCCGA    | 59.122 | 20 |
| TGGGAATTTAGGAATCGAGAGA     | 60.034 | 22 | ATCTTCATCCGAGCCATGAT    | 59.469 | 20 |
| CATCTTCAAGTCTGCAACGG       | 59.44  | 20 | ATGGGTTGTTCCAAATCCAA    | 60.029 | 20 |
| TATTTGTTGGTGGGTCGTT        | 60.088 | 20 | TGCCCATGTCTTAAATACTCTG  | 60.503 | 23 |
| TTGATGGGAGGCAACTCATT       | 60.461 | 20 | CAAGGTTTGGGAGAAAAGCA    | 60.22  | 20 |
| AAGCACGTCAGCACAGACAC       | 60.104 | 20 | CCCACTGACTCCTTCCATATC   | 58.46  | 21 |
| ACTGCCCCCTTCAATTCTT        | 59.94  | 20 | AGGAAGGGGGAAAAGGAAAT    | 60.122 | 20 |
| GACTATAATGGCCAGCACCG       | 60.49  | 20 | TCAAACCCAGCAAGAAAACC    | 60.088 | 20 |
| GGCCTGATTAATTGTGTGGG       | 60.192 | 20 | AGAATCGACAGTTTGGACGG    | 60.111 | 20 |
| AAAGGCTCAAGAACAATGCAA      | 59.875 | 21 | GCAATTTTGTGTTTTGTAAACT  | 59.539 | 25 |
| CAGGCGGAACTAGAGAGGAA       | 59.569 | 20 | TCAAACCTCCTCATGGCT      | 59.803 | 20 |
| TGGTGGATTTTTATTTATGCAA     | 57.189 | 22 | TGATTCAAAGCAGTTGATTGTT  | 60.159 | 23 |
| TGAGCCACCCAATTTAATC        | 59.762 | 20 | TTTGTACGCAGCCATTACCA    | 60.133 | 20 |
| ATAACGGGTAGGGCAGATCA       | 59.41  | 20 | TTCCAGAAATTGTGTTGGCA    | 60.088 | 20 |
| CGTCATGTCGTTCTTCCTCA       | 59.831 | 20 | ATTGTCTCCACCTGAGACG     | 60.112 | 20 |
| GGCCATTGCCAGACTACTA        | 60.096 | 20 | CATGGCTAATGGACTTCACAA   | 58.637 | 21 |
| GAGGCAGTCCCACATACAT        | 60.104 | 20 | GCTAGCAGCCTTGTCTGGAT    | 59.603 | 20 |
| AATCAAGAAGCCTCTGCACG       | 60.538 | 20 | AAGTCGCGTATTTTTCGTGA    | 58.439 | 20 |
| CCTGCATATGCCCTTGTCTAA      | 60.103 | 21 | TTGTGTGTAGGAGAATGCGG    | 59.716 | 20 |
| GGTCGGCTACATGAACCAAA       | 60.894 | 20 | CGTGTTCATGCCAATTTCTTG   | 60.111 | 20 |
| TTTTACTTTGTCGGCTCCGT       | 59.747 | 20 | TCCAATTAATCCTAAACCACAT  | 57.985 | 24 |
| CCTGGAATAATGTGGGTGAA       | 60.724 | 20 | TGGGGTCTTGCGTACTAAC     | 59.993 | 20 |
| TTATTGGCCGAAAATCCAAT       | 59.259 | 20 | TTCTTTTTGACTTTTGAGCAGAT | 59.933 | 24 |
| ATTGGCTTTCCCGAGAACTT       | 60.074 | 20 | CCAACCCCTCCATCTTTTCA    | 59.903 | 20 |
| AGTCTTGTGGCCAGAGAAA        | 59.844 | 20 | CGATTTTTCACAGTAGCAGCAT  | 59.429 | 22 |
| GCTAGTAGGGCAAAGTTGATTAG    | 57.418 | 24 | TCAGTGTGTAATCACCTAATG   | 59.007 | 23 |
| TTGTTTGCCACTTGCTTAC        | 59.888 | 20 | AGGGTGTGACAGAGGCAGAT    | 59.713 | 20 |
| AGTGGGGAGTTTAGTTCCCG       | 60.353 | 20 | TTGTTCCATGTTATTGCCAAA   | 58.922 | 21 |
| GCTGCAGATGGACTCACAAA       | 59.992 | 20 | GGCAACAGAACTCCCACAT     | 59.973 | 20 |
| TGTGTTATTTTCATATCTTTGTGCTG | 58.33  | 25 | GAAGTTTTGGAGATCCGACG    | 59.67  | 20 |
| ACTTCGTGGGCTTGGACTT        | 59.712 | 19 | AGGGGCAATTTGTAGACACG    | 59.993 | 20 |
| AAGTTTCTTTGGGACACCCC       | 60.204 | 20 | TGCCACTGGAATTTTGTTC     | 60.088 | 20 |
| CGTGTGCTGGGCTATTTTCT       | 60.27  | 20 | GGTCGAGCCTGCTACATAGG    | 59.859 | 20 |

|                          |        |                            |        |    |
|--------------------------|--------|----------------------------|--------|----|
| ATGGGTTTGAACGAACTGC      | 59.091 | 21 TTAACGCGGCCATATATTA     | 59.233 | 20 |
| CGAGATTCAAACGGTTGCT      | 60.249 | 20 AGTGAGACACTGAATGATATG,  | 58.279 | 24 |
| GTATGCAAAGGGAAAAGCGA     | 60.209 | 20 TGTGAATTC AATCGAGCCAA   | 60.197 | 20 |
| AGATTGAAGAAAAAGGGGGC     | 59.532 | 20 GACCAGCACAGTGAAGACGA    | 60.03  | 20 |
| AGACCAGACATCCACTTGCC     | 60.12  | 20 CAGCTGTTGATGGGATTGTG    | 60.112 | 20 |
| GCTTCATGTATGCTTGGTCC     | 59.301 | 20 TTGTTATTTTCATTAAGTTATTA | 57.628 | 27 |
| ATTATTCCGACGATCTCCCC     | 60.117 | 20 TAGCCAGAAAACCCCAGATG    | 60.066 | 20 |
| ACAATTTCCAGATGGAACGG     | 59.79  | 20 TCGTACACGAGGAGATGCTG    | 60.008 | 20 |
| TGGTTTGACATGTGATGGGA     | 60.795 | 20 TGATCATGAGGAGCAACCAA    | 60.201 | 20 |
| CGCAACAAGTTGTATGGAGC     | 59.347 | 20 TCTGCCATCATCCACCATTA    | 59.883 | 20 |
| TAACCATAGCAAACCCCCA      | 60.181 | 20 TTTCCGGATGTAACACAGGCA   | 60.111 | 20 |
| TTCTAGCTCGATTTCTCCG      | 59.546 | 20 CCACCCTCTCTTTTCCACA     | 60.081 | 20 |
| GGATTTTCTTCCCATGTCCA     | 59.727 | 20 CTTCCCTCTGGATGGTGCTA    | 60.21  | 20 |
| TCCAAAATCTGGTTGCTTGA     | 59.247 | 20 ATTAGGATAGGCAGCTCCGC    | 60.701 | 20 |
| TGCTTCCATTTGTGAAGATATGA  | 59.6   | 23 TGGAATTAACCCGAGCCAT     | 59.411 | 20 |
| GGATGGATATGGTTTGGCTG     | 60.155 | 20 CAATCCAATTCCTGTATGGAAA  | 60.062 | 23 |
| TGGAGGAAAGGAGCTGAAAA     | 59.926 | 20 TAGCAACTCGCTCTCCCAAT    | 59.978 | 20 |
| AGTCTCCGGGGACAAATTCT     | 59.935 | 20 GACCGAGAAGGAAGATGACG    | 59.803 | 20 |
| CGTGCTTGAACAAAAGCAAA     | 60.029 | 20 GCAAACACCCCAAGATTTCA    | 60.874 | 20 |
| TTGGATGGACTAAAGGGCAG     | 60.066 | 20 TGTGGGATGCAATGAATCTG    | 60.481 | 20 |
| TCCACCATGGAACACAGAAA     | 59.935 | 20 TGGGAAAGGAATTGCAACAT    | 60.309 | 20 |
| TCTTCCACGAGAATTGGACC     | 60.05  | 20 TGATGGAATTAAGCTGCGAA    | 59.401 | 20 |
| CGAGCTGAAAAAGACCAAGG     | 59.986 | 20 TGCTCCAATCTTCTCCACCT    | 59.803 | 20 |
| TTGAACGAAAATTGATGGTCC    | 59.793 | 21 AAATCCCGGTGACAAGAAAA    | 59.406 | 20 |
| GACGACCTGTGGACCTTCAT     | 59.969 | 20 GCAGGCATACACTCCCACTT    | 60.142 | 20 |
| GCCGCAAAGTTTCCATAAA      | 60.075 | 20 GTTGGCCCCCTTAGATCATT    | 60.152 | 20 |
| CGGATTGCCAAGCCTATTT      | 60.045 | 19 TTTCTAATGGAGATCAAGTTCG  | 59.75  | 23 |
| ATGGTGTCAAAGTTCACGCA     | 60.16  | 20 CCAATCAGAAAAGTCGGCTG    | 60.766 | 20 |
| AAGGCAACAAGAGATGGGAA     | 59.67  | 20 TTGCTTAATTACCATAAATGCT( | 58.866 | 25 |
| AATCATGCAACCACAACAATTA   | 57.953 | 22 TCCACTCCATTGGTTCTTTT    | 57.083 | 20 |
| AACCTGCAAAATGCCAAAAG     | 60.11  | 20 CGGGTAGGAATCAGTTTTTCG   | 59.564 | 20 |
| GCATCGACCTTGGACAAAAT     | 59.939 | 20 AAAAATGTCAAATAAATTCTCC  | 59.359 | 25 |
| AATGGCTCAGTAAACAATGGG    | 58.962 | 21 CATTACGCCCGTAGGCTAA     | 60.109 | 20 |
| TCAAGCAAAAATATTCCGCC     | 60.04  | 20 CTTTCCAAATCCCTATGCGA    | 60.031 | 20 |
| TTGCATCTTCATGTGCAATTC    | 59.685 | 21 CAACAATTCACCTCGCAACA    | 60.699 | 20 |
| TGCTCCCTCCAATTAAGACG     | 60.206 | 20 TTTGCCACCCCTAACAATA     | 60.181 | 20 |
| GCGCCATAAAAATGAAATG      | 60.282 | 20 TTAATCCCGACGTTTGAACC    | 59.801 | 20 |
| GTCAGCCGACTTTTATGGCT     | 59.34  | 20 TTTCTGTGTTAGCCTTTCGC    | 60.376 | 20 |
| GATGCGAATTGAATAAGGCAA    | 60.054 | 21 TTCCACCCTCTCCTTTTCTG    | 59.255 | 20 |
| TTGGCAACAAACAGAATCCC     | 60.874 | 20 GGTTTCGCTGATTTTGTGGT    | 59.978 | 20 |
| GAATGAAACGACACTGGGCT     | 60.119 | 20 CCAATGGTGGTATGGTGTGA    | 60.088 | 20 |
| ATTTGGTTCGGTTCGGTTTT     | 60.573 | 20 TTGCTCCCCATTTTGTITTC    | 59.916 | 20 |
| GTATTCATTGTACACAATAAGGAC | 57.094 | 27 TCAATACCCGAGAATTGCAT    | 58.038 | 20 |
| TTTGTATGACTTCGGCTTG      | 59.84  | 20 ACTCCCACCGACAGTTTCAT    | 59.43  | 20 |
| TTATCTAAAAACATGGGTAAAAA1 | 57.432 | 26 ATGCAAAAATACGGAAACGC    | 59.971 | 20 |
| TTTGAGGAGCTTTGCGTTTT     | 59.996 | 20 CGACTTGATTGCGAACCATTA   | 59.688 | 20 |
| AAAAGAGCAATGTGGCATCA     | 59.276 | 20 CCACTTTTGTGGTTCCTCGT    | 60.005 | 20 |
| GGTTCTTCAATGGAGTCGTCA    | 60.104 | 21 ATCAAGTCAATCCGAGTCCG    | 60.073 | 20 |
| ATGACAACCAAACATGCCCT     | 60.24  | 20 GCAGCCCAGAAATTGTCTAC    | 59.843 | 20 |
| GGCGGAAGCCATAATATCCT     | 60.267 | 20 CCGAAAGAAACGGTGGTAAA    | 59.968 | 20 |
| AAACGGGGTTGGGTTGTG       | 61.616 | 18 GAACCCACGCCATAAAACAC    | 60.235 | 20 |
| AACGATAACGGTAACGATAACAA  | 57.743 | 23 TGGTTTCCTTCATGCTTTTCT   | 60.109 | 22 |
| GGAAAGGAAAGCTAAAAAGGATT  | 57.242 | 22 AAGCCAAAATGATCGGCATA    | 60.424 | 20 |
| TGCAAAAAGCACTCTTCTGA     | 59.716 | 20 AGGAGTGC AATCGAACAAAGA  | 59.867 | 21 |
| GGCATGCGAGTGCTATTACA     | 59.862 | 20 GGGAGAGTGGATGTGTAGGC    | 59.535 | 20 |
| GCAGACCATAATGCTTTTGTG    | 58.307 | 21 CCTTAGTGGATTTTCATGGGC   | 59.387 | 20 |
| GAAGAAGATGTCAAGCCGGA     | 60.34  | 20 TCTAATCCGTGGAATGAAA     | 58.011 | 20 |
| ACCAAGAGAGAGAAAGGGGC     | 59.817 | 20 TGTCCAATCAAGAGGCAACA    | 60.24  | 20 |

|                          |        |                           |        |    |
|--------------------------|--------|---------------------------|--------|----|
| ACACTCATTCTGGGCCTCTG     | 60.261 | 20 TCGTTTCGACATCCGTTACA   | 60.111 | 20 |
| GTTCGAACCGAACCATGAAC     | 60.362 | 20 TGAGTTCGGTGGGTATGGAT   | 60.195 | 20 |
| TGCAACAATTTTTGGTATATATCT | 58.929 | 27 TGGCTTAACATTTCCCTCCA   | 60.439 | 20 |
| TTATTGCACAGCTTCATGCC     | 59.839 | 20 CGCATGTTACGTAAATCGTTAA | 60.289 | 24 |
| AAAGCTTTGTCCACATAGGAA    | 60.001 | 22 CCACAAAGCCCAATCTGAAT   | 59.933 | 20 |
| CACTGCTGCTGAGGAGTTTG     | 59.77  | 20 ACCTTTCTTTTACTGATGTGG/ | 60.026 | 23 |
| AAACATACCAACTCACCCTCC    | 57.963 | 22 AAAGATGGGTGGAGTGAGAA/  | 59.976 | 22 |
| GAGAAACTGCAGCAAAAGGC     | 60.14  | 20 ACCATCATCATCAGCAGCAG   | 59.819 | 20 |
| AATTTTGTATCGAGTTGGCG     | 60.096 | 20 TCGCTATTGTATTTAGGCAGGT | 58.007 | 22 |
| GAGAGTTCAACTTGGCGGAT     | 59.288 | 20 CACCCTTGAGGTGTTTATCA   | 59.52  | 20 |
| GGTCAGATCAAACCGAATCA     | 58.489 | 20 ATTAGCATTGGCGGTTGATG   | 60.857 | 20 |
| AGACAATCCATCTCCATCTGGT   | 59.824 | 22 CATGCCTGATGACTCGAGAA   | 59.942 | 20 |
| TCTGGTTTTGGGTTTTCTGC     | 60.088 | 20 TTGTGCCCCCAAGATTACAT   | 60.192 | 20 |
| ATCCGATCGAATGGACCTTA     | 59.344 | 20 AAGTTCACCTTCGGAGATCG   | 59.284 | 20 |
| CGCCTCGATTGAATCTTCTC     | 59.917 | 20 TCCAATCTCCATTTTTCCA    | 60.43  | 20 |

| PRDUC<br>T2 size<br>(hn) | start<br>(bp) | end<br>(bp) | FORWARD PRIMER3 (5'-3') | Tm(C°) | size |
|--------------------------|---------------|-------------|-------------------------|--------|------|
| 205                      | 1435          | 1639        | AACGAATTGAAATGAATTCTA(  | 59.396 | 25   |
| 173                      | 21            | 193         | CGAACGCTCCAAATTAGAATG   | 59.728 | 21   |
| 118                      | 241           | 358         | CCAATTTAGGCACCTTCTGC    | 59.708 | 20   |
| 134                      | 54            | 187         | CTGAGCTTCAGAGCCCAGTT    | 59.745 | 20   |
| 228                      | 599           | 826         | TTGAATTCATAACCTTCCCATT  | 59.22  | 23   |
| 149                      | 361           | 509         | AGCTCCACCTCCAAACAAGA    | 59.844 | 20   |
| 275                      | 14936         | 15210       | TGCAGATGCTTCAGTTTGT     | 59.445 | 20   |
| 187                      | 19            | 205         | TGTGTTGTGTGGAATAAAAAG   | 60.217 | 25   |
| 114                      | 667           | 780         | AAGAGCAGTTTTGGCTGGAA    | 59.993 | 20   |
| 274                      | 11            | 284         | GCAGCAATGGTTGTGATTTG    | 60.119 | 20   |
| 228                      | 82            | 309         | GAGTCACGAGACACTTGGCA    | 60.03  | 20   |
| 175                      | 20            | 194         | CTCCCTCGACACACACTCAC    | 59.278 | 20   |
| 209                      | 162           | 370         | TAAATCATCAGCCCACGTCA    | 60.073 | 20   |
| 204                      | 261           | 464         | TCATTGTTTGGCCAGCAGTA    | 60.257 | 20   |
| 241                      | 252           | 492         | GACCGGAAGGTATGAACAAC/   | 59.845 | 21   |
| 198                      | 414           | 611         | TCGCTGACATCATCTTATGGA   | 59.241 | 21   |
| 233                      | 369           | 601         | CTTGCTAGATGGCCGAAAAT    | 59.32  | 20   |
| 245                      | 380           | 624         | TCAAGCATTGAGGGGTTTT     | 59.546 | 20   |
| 228                      | 6             | 233         | CGGGGACACATAAACCTCAC    | 60.232 | 20   |
| 262                      | 15            | 276         | TTCCCTTTGCCCTCTATTT     | 59.903 | 20   |
| 151                      | 13            | 163         | CCCCTGATTTGTGTGAGGA     | 59.52  | 20   |
| 227                      | 16            | 242         | AGTTTTCATGGATGGATGCC    | 59.756 | 20   |
| 262                      | 512           | 773         | TCCAAGTTTTTACCCACCA     | 60.198 | 20   |
| 214                      | 28            | 241         | ATGACCATATCTCGGTTTAGC/  | 58.606 | 22   |
| 239                      | 623           | 861         | TTTTTAATGGGCGTTATGG     | 59.669 | 20   |
| 117                      | 200           | 316         | GATTTCTTGGTTCGGGATGA    | 59.871 | 20   |
| 156                      | 1             | 156         | GGGTGGATGACTTTGGTGTT    | 59.679 | 20   |
| 208                      | 8             | 215         | TCTAACCCAAACCCAAACCC    | 60.938 | 20   |
| 276                      | 14            | 289         | TTTCGTCCCGAAATTTTGT     | 59.429 | 20   |
| 243                      | 81            | 323         | AACCTTCGGCTTGAAAACAA    | 59.724 | 20   |
| 184                      | 121           | 304         | AACCTGGCCCTAAGCTTGT     | 60.13  | 20   |
| 218                      | 13            | 230         | CCATCTATAGCGTTAGCGTG    | 59.772 | 21   |
| 210                      | 1             | 210         | CCCCTTAGGAACATTTAGGG    | 57.624 | 21   |
| 206                      | 252           | 457         | TGATTTGCGATGATCTGCTC    | 59.914 | 20   |
| 266                      | 214           | 479         | GTTAGCGGAGTGAATGAGGG    | 59.694 | 20   |
| 214                      | 66            | 279         | AATTGATCATGGCTTCTGGC    | 60.043 | 20   |
| 175                      | 133           | 307         | GGGAGTTTGACACCTAAAGCC   | 59.99  | 21   |
| 275                      | 219           | 493         | AAGAAAAGAGACACCCGCA     | 59.853 | 20   |
| 163                      | 76            | 238         | TGGTTACTGGAACGCGA       | 59.182 | 20   |
| 136                      | 2141          | 2276        | AAGGATCGAAAACGAGGGAG    | 60.569 | 20   |
| 230                      | 2251          | 2480        | GATGGGATCACCTTGATTGG    | 60.135 | 20   |
| 173                      | 24            | 196         | ATTTGACATCTAATACCCAAC   | 57.03  | 27   |
| 175                      | 208           | 382         | ACAAATTTATTGCAGGCGCT    | 59.748 | 20   |
| 147                      | 28            | 174         | GGATACCCTCTCAAACCCTAG   | 57.667 | 22   |
| 241                      | 38            | 278         | TGGTCATTTTCATTCACCCA    | 59.75  | 20   |
| 224                      | 1023          | 1246        | GAGGCTCGTCTGGTCCATAG    | 59.827 | 20   |
| 144                      | 44            | 187         | TGATTGGTGATGAAGGTCCA    | 59.893 | 20   |
| 274                      | 28            | 301         | AATTCTAACCATCTTCTTTTGC  | 57.932 | 23   |
| 163                      | 132           | 294         | ATCCTCCCACCCCACTTAAC    | 60.052 | 20   |
| 122                      | 410           | 531         | GAGGGAGAAAAGGGGAGAGA    | 59.749 | 20   |
| 215                      | 30            | 244         | GACTGTTCGAGCTTATCCGC    | 59.985 | 20   |
| 239                      | 383           | 621         | CACGTAAGGCTAAATAATG     | 57.802 | 23   |
| 102                      | 781           | 882         | GAGAGCATGAAGAATGAACCC   | 59.719 | 22   |
| 157                      | 16            | 172         | GGTGAGATTTGTGGTTTGGAA   | 59.822 | 21   |
| 227                      | 16            | 242         | TCGGTCGAAACCGAATAAAC    | 59.938 | 20   |

|     |      |      |                        |        |    |
|-----|------|------|------------------------|--------|----|
| 235 | 406  | 640  | ATTACCGTGACAGTCCCTC    | 59.997 | 20 |
| 163 | 0    | 162  | CAATAATTTTGTTCACCAA    | 58.76  | 22 |
| 211 | 74   | 284  | CCCGGTGTAAAGAAATCGAA   | 59.931 | 20 |
| 270 | 952  | 1221 | TTTCAAAACCACGTTGACA    | 58.57  | 20 |
| 274 | 137  | 410  | GGATAGGCCCTAACTCGACC   | 59.925 | 20 |
| 166 | 1348 | 1513 | TATAGAAGCAGGCCAGCACA   | 59.59  | 20 |
| 118 | 3198 | 3315 | CGCTAAGATGGAGTTTTCGG   | 59.839 | 20 |
| 175 | 8    | 182  | GGGATGCCATTCGTTAGTCC   | 61.606 | 20 |
| 198 | 915  | 1112 | CAATTCGGGTTTTCCACGTA   | 60.722 | 20 |
| 154 | 0    | 153  | CCCCTTTGTCAACTTAGGCA   | 60.103 | 20 |
| 278 | 421  | 698  | CTAGGCGGCATTCTGTTGA    | 59.956 | 19 |
| 177 | 169  | 345  | AGTCGGTGGAGTGGTTTCAC   | 60.009 | 20 |
| 251 | 1849 | 2099 | TGTTCAGCAGAGGATCCAAA   | 59.369 | 20 |
| 102 | 0    | 101  | GCTACCTTATTGATCCATTCCT | 58.188 | 23 |
| 159 | 12   | 170  | GCATGAAATTGTGATTTTGGT  | 59.288 | 23 |
| 238 | 2598 | 2835 | AATGAATGCCAAAAATCCA    | 60.132 | 20 |
| 203 | 12   | 214  | CTCTCTTTTGGTTGGTGAA    | 59.201 | 21 |
| 159 | 924  | 1082 | TGGGTATGTGAATCATTTTCAT | 59.504 | 24 |
| 164 | 648  | 811  | TGCAATCTCAGCCACTCATT   | 59.399 | 20 |
| 184 | 4194 | 4377 | TGGTCGTTGACACGACAGAT   | 60.162 | 20 |
| 212 | 302  | 513  | ATGCAAGAATGGGTTTTTGA   | 58.066 | 20 |
| 236 | 51   | 286  | TGCATGTTATTTTCGTGTTGC  | 59.622 | 21 |
| 264 | 59   | 322  | GAGCACTCGAAAAGTAGCGG   | 60.154 | 20 |
| 184 | 61   | 244  | CGAGGAGAACCTTGGAGTGA   | 60.377 | 20 |
| 165 | 25   | 189  | TGAGTTTCAATTGCGTAGTCA/ | 59.808 | 23 |
| 205 | 315  | 519  | TCACAGACGGAGAGAGACAC/  | 59.587 | 21 |
| 277 | 1138 | 1414 | TTCGAACTTACCTAGGCCCAT  | 59.973 | 21 |
| 257 | 33   | 289  | TATTTTGGACGATTTTGCCC   | 59.773 | 20 |
| 227 | 422  | 648  | TCGTCCGCTGCAGTAATATG   | 59.856 | 20 |
| 202 | 473  | 674  | TGTCTTGCAGGCAATTCATAA  | 59.315 | 21 |
| 235 | 446  | 680  | TTCTAATTTTTCGCTCCCA    | 59.655 | 20 |
| 264 | 189  | 452  | CCGATCCCACCTTGTTTTTA   | 59.795 | 20 |
| 233 | 283  | 515  | ATTTGCCTAAAATGCCCTC    | 60.28  | 20 |
| 173 | 1217 | 1389 | AAAAGGTGAACTCAAACGGC   | 59.218 | 20 |
| 270 | 1522 | 1791 | CGTTGATCAAGCTGGAGGTAG  | 59.883 | 21 |
| 278 | 828  | 1105 | TCTCTCCCTCTCAATGCACC   | 60.349 | 20 |
| 181 | 120  | 300  | CGGATTCACCAGAACAAACC   | 60.353 | 20 |
| 113 | 1    | 113  | AGACGATTTACACAAAATGCA  | 57.86  | 24 |
| 272 | 1394 | 1665 | ATTGGACACAACCCACACCT   | 60.135 | 20 |
| 183 | 944  | 1126 | TTCTCTCCCCTCAACTCAA    | 59.773 | 20 |
| 269 | 2    | 270  | GAAAAGGTGGTGGTGGTGT    | 59.721 | 20 |
| 202 | 167  | 368  | GTTCTGCCCTCCTTTTCCTC   | 60.19  | 20 |
| 261 | 293  | 553  | TTCCCCAAAACCGAATAAT    | 60.361 | 20 |
| 131 | 230  | 360  | CTAGATCACTCGCCAACCA    | 61.196 | 20 |
| 219 | 31   | 249  | TGCTCTGCGGGATAAAATGT   | 60.606 | 20 |
| 108 | 40   | 147  | TGACTATAAGGGGTGTTTTGAC | 60.052 | 25 |
| 188 | 14   | 201  | TTGGGCTCGAGTGAAAAGAT   | 59.813 | 20 |
| 279 | 91   | 369  | TCCCAAACCTTCGTGTGTGT   | 59.034 | 20 |
| 239 | 21   | 259  | AAAGCTTGGCCATTCAACAA   | 60.617 | 20 |
| 205 | 684  | 888  | CCCCCTTAATTACTTTGTCACG | 59.767 | 22 |
| 144 | 1331 | 1474 | GAAACCCGCTGTTTGGTTTA   | 59.975 | 20 |
| 161 | 10   | 170  | TTTTGTTTGTCCAGGTTG     | 58.5   | 20 |
| 109 | 5018 | 5126 | CCCATTATGGAATCTCACGG   | 60.148 | 20 |
| 127 | 325  | 451  | GAATCACAGCCGTCATCTC    | 60.633 | 20 |
| 157 | 26   | 182  | AAACAACAATTCATCAAATATC | 59.194 | 24 |
| 278 | 249  | 526  | ACTTTGCATCCCAGTCAGGA   | 60.656 | 20 |
| 240 | 2148 | 2387 | TCCCAGCTGAACTCCGATAC   | 60.218 | 20 |
| 202 | 510  | 711  | CCTTGCAACAACTCGGATT    | 60.11  | 20 |

|     |      |      |                         |        |    |
|-----|------|------|-------------------------|--------|----|
| 190 | 43   | 232  | CCTCGTCGACTACTTCCCAA    | 60.246 | 20 |
| 250 | 2098 | 2347 | GCAAATGTAGCACGCAGAAA    | 60.021 | 20 |
| 278 | 650  | 927  | TTGTGCACTTCATATCGCGT    | 60.288 | 20 |
| 186 | 8    | 193  | GTGAGAATGATGAGGGCGAC    | 60.633 | 20 |
| 188 | 580  | 767  | CTTCCTTTAGGCCATCCACA    | 60.066 | 20 |
| 153 | 48   | 200  | CACTGACATCCATCCATTGC    | 59.925 | 20 |
| 226 | 620  | 845  | GATAGTATGCCAATTTTTTCGTG | 58.212 | 23 |
| 119 | 315  | 433  | TGGCACATTATTGGTCTCTCAT  | 59.457 | 22 |
| 217 | 100  | 316  | ACGTACGTGTGTGTGTGCAT    | 58.491 | 20 |
| 219 | 902  | 1120 | AGAAGAGCAAATGGTGGTGG    | 60.111 | 20 |
| 157 | 11   | 167  | CGAATTTGGTGTTGGAATTG    | 58.866 | 20 |
| 150 | 368  | 517  | CAACGGTTGTCATTGTTTCCT   | 59.883 | 21 |
| 254 | 881  | 1134 | CATTTTCGTGGCCTTGATTA    | 59.95  | 21 |
| 118 | 149  | 266  | CGGCCGGAATATCTAAAGTG    | 59.564 | 20 |
| 206 | 70   | 275  | GATGTCTTGCGGCTAGGATT    | 59.297 | 20 |
| 147 | 73   | 219  | CGAAACTCGTGAACCAACAA    | 59.734 | 20 |
| 234 | 20   | 253  | TTGCTTTCCAAAAAGTTGTACG  | 59.333 | 22 |
| 259 | 12   | 270  | CGTGGTTCGGGTATTCACTT    | 59.853 | 20 |
| 193 | 1264 | 1456 | TCGATTTTCATATTGCACGC    | 59.668 | 20 |
| 167 | 23   | 189  | CATCCCAAACCTCTCTCGCTC   | 59.95  | 20 |
| 266 | 58   | 323  | CAACACCTGACCACCCCTAC    | 60.275 | 20 |
| 241 | 9    | 249  | TCGTCGATCCTTCCTCATCT    | 59.761 | 20 |
| 280 | 207  | 486  | TGCACTTGAGTTGCTTTTGC    | 60.18  | 20 |
| 204 | 29   | 232  | CAATAACCCTTGGCTCGAAA    | 60.067 | 20 |
| 239 | 564  | 802  | GCAGAATTCCTCCTCCTCCT    | 59.778 | 20 |
| 103 | 411  | 513  | TCTTCCCCAAATTGGTTTCC    | 61.023 | 20 |
| 127 | 167  | 293  | GCTTCGTTGTTTGCTTCCA     | 59.98  | 19 |
| 248 | 987  | 1234 | AACGGACGTGTTTTGGCTAC    | 60.037 | 20 |
| 155 | 18   | 172  | TCTGTGCTCTTTTCTCAGTCG   | 59.93  | 22 |
| 136 | 178  | 313  | TCACCACCTAAAGAAGGGCT    | 60.116 | 21 |
| 159 | 6    | 164  | TTGGGAGGATTTTCTCTTGC    | 59.244 | 20 |
| 115 | 312  | 426  | TTCTTCATCTGTCACGTCG     | 59.831 | 20 |
| 269 | 314  | 582  | CGACGAGCATGGAAGAGTAA    | 59.024 | 20 |
| 202 | 572  | 773  | GTGTTGACGAGAGCAGAGCA    | 60.343 | 20 |
| 269 | 8    | 276  | TGTCCTGTTGAGGTGGAACA    | 60.129 | 20 |
| 275 | 1875 | 2149 | TCCCACGTAACGAATTTTCC    | 59.801 | 20 |
| 230 | 1248 | 1477 | ACAAAAAGCAGCACAAACGTG   | 59.951 | 20 |
| 270 | 166  | 435  | ACTGTCCTCTTAGACCGCCA    | 59.867 | 20 |
| 240 | 541  | 780  | GCACGATAAGGACACGAACC    | 60.526 | 20 |
| 246 | 514  | 759  | TAGTTTCCACAATACCCCG     | 59.679 | 20 |
| 155 | 212  | 366  | AAAACAATGTCGTTGCCACC    | 60.796 | 20 |
| 238 | 1548 | 1785 | TCAATGTTTTGCGTTTCCA     | 60.088 | 20 |
| 157 | 19   | 175  | CAATGCAAGTGATATTCATCG   | 57.66  | 22 |
| 126 | 96   | 221  | GAGCTTGCACTCAGAGAGCTT   | 59.13  | 21 |
| 136 | 15   | 150  | TGACCCTATGACGCCAAGTT    | 60.517 | 20 |
| 213 | 796  | 1008 | TCCCGTTCATAGCAAATTC     | 60.175 | 20 |
| 252 | 1799 | 2050 | ATCCTCCGGTGGAGATTTTT    | 59.766 | 20 |
| 248 | 447  | 694  | GCGAAACAAATTAGTGCGTG    | 59.373 | 20 |
| 255 | 407  | 661  | TGGCGTTTGATATTTGAGAAG/  | 59.72  | 22 |
| 273 | 938  | 1210 | TTCCACACCACGTCAGCTA     | 60.301 | 20 |
| 271 | 498  | 768  | AAAATGGCAGCGATGATAGG    | 60.06  | 20 |
| 250 | 221  | 470  | CGTGTTCTTCACTCATCCCA    | 59.676 | 20 |
| 185 | 1192 | 1376 | GCACTGAAACGCCAAAAGAT    | 60.257 | 20 |
| 267 | 19   | 285  | CTAGCCCACTACTCCCCAAA    | 59.191 | 20 |
| 153 | 2178 | 2330 | GATGAGTTCCGTGAGCATGA    | 59.794 | 20 |
| 272 | 860  | 1131 | GGTGGCGAGAGAAGTGAGAG    | 60.135 | 20 |
| 114 | 17   | 130  | TTGATGAACTCTTTGGGTGG    | 60.096 | 21 |
| 157 | 2193 | 2349 | AAGAATGGCACAGACTCCAG/   | 59.859 | 21 |

|     |      |      |                         |        |    |
|-----|------|------|-------------------------|--------|----|
| 102 | 269  | 370  | TGTGCCAACATTCCGACTTA    | 60.111 | 20 |
| 171 | 12   | 182  | AAACCCAGAAGAAAGACAGC,   | 58.969 | 21 |
| 214 | 561  | 774  | AGACTCATGCGGCTCTTGAT    | 59.981 | 20 |
| 279 | 480  | 758  | CTGTGATCAACACCACAAAA    | 59.6   | 21 |
| 240 | 516  | 755  | GTGAGCATTTTGGATGACGA    | 59.654 | 20 |
| 271 | 362  | 632  | CCCCTCCTCCATTCTTCTT     | 59.508 | 20 |
| 150 | 604  | 753  | ACGAGGGAGAGAGACGATGA    | 59.945 | 20 |
| 249 | 0    | 248  | TTCGTGCATTCTACCTATTT    | 59.864 | 22 |
| 157 | 81   | 237  | CTCTCATTACGCTTTTCAGC    | 60.147 | 21 |
| 167 | 2289 | 2455 | AGGAGTCCTCTCAGTTTCATC/  | 57.982 | 22 |
| 143 | 175  | 317  | CCTTGAAGACAATGAAATTTT   | 59.865 | 23 |
| 164 | 19   | 182  | TGTTATCCTTTGTGAGCCCC    | 59.933 | 20 |
| 184 | 61   | 244  | GAGGAAATTCGTCATTCCCA    | 59.871 | 20 |
| 191 | 9    | 199  | TGCACCTTCCACGAATCATA    | 60.073 | 20 |
| 196 | 82   | 277  | AGTTGGTCGGAACACTTCGT    | 59.622 | 20 |
| 151 | 77   | 227  | CGAAAATGCCCTTTTATGCT    | 59.212 | 20 |
| 273 | 11   | 283  | TGTGGCATGAGAGAGAGGG     | 59.92  | 19 |
| 149 | 52   | 200  | TCTCTCCCCAAAGTTATGGT    | 59.813 | 21 |
| 185 | 73   | 257  | AGTGCACGTCAGAGTTGGC     | 60.047 | 19 |
| 255 | 308  | 562  | CAATCAATCTCAGCCGTTTG    | 59.272 | 20 |
| 234 | 76   | 309  | AACATTTTACCACATGATTAAC  | 57.587 | 25 |
| 255 | 291  | 545  | CCCCAGCCATGTTAGAAGAA    | 60.066 | 20 |
| 233 | 1964 | 2196 | ACACCAAACCTGATTAATAATCC | 59.638 | 23 |
| 245 | 20   | 264  | GGTTTCACGTCGGAATATTGA   | 59.815 | 21 |
| 179 | 1421 | 1599 | TCCGAATATGAAATCGGGTT    | 59.23  | 20 |
| 194 | 1073 | 1266 | TCGAGAAGTTGTTTGTCTCAAC  | 59.944 | 23 |
| 266 | 142  | 407  | GGTCCCCTCCTAACTTTGCT    | 59.576 | 20 |
| 155 | 430  | 584  | CCCCGAGGAAGCTAGAAAAA    | 60.674 | 20 |
| 128 | 49   | 176  | ACTCCCACCTTCCGTAGCCT    | 60.132 | 20 |
| 185 | 14   | 198  | CGGGCAGAGAGAGAGAACC     | 60.08  | 19 |
| 202 | 222  | 423  | AGGGTGGGTTTGGAGAAGAG    | 60.48  | 20 |
| 119 | 338  | 456  | TTAATGACGGAGCTAGGGGG    | 61.309 | 20 |
| 166 | 230  | 395  | GTCACGTCAGCAAACCATTG    | 60.16  | 20 |
| 247 | 1094 | 1340 | GGTTTTGGGAAAAAGGGAGA    | 60.271 | 20 |
| 279 | 48   | 326  | CGTTGGACCTGAAAGAGCA     | 59.968 | 19 |
| 197 | 165  | 361  | GGTAAACTAAGCACACCTGTA   | 59.035 | 26 |
| 178 | 7    | 184  | TCCAACCTCATTGCAATACT    | 57.23  | 21 |
| 199 | 15   | 213  | AAAGCCTACCTTGCTTCCGT    | 60.262 | 20 |
| 120 | 92   | 211  | GGAGAAACTTGCTTCTTGCT    | 60.012 | 21 |
| 267 | 906  | 1172 | TCGACGATTTATTTTCATGCC   | 59.921 | 21 |
| 221 | 545  | 765  | AATAACAAATGGCCACGGAA    | 60.188 | 20 |
| 149 | 283  | 431  | CGTTATCAAAGGAAGGGCAG    | 59.702 | 20 |
| 209 | 356  | 564  | TGCATTCTTTCCAGTCTCA     | 59.369 | 20 |
| 196 | 1126 | 1321 | CCGTTCCGTTCCATAAATGA    | 60.692 | 20 |
| 175 | 782  | 956  | CAGGCCAACTCCTATCTGGA    | 60.21  | 20 |
| 209 | 68   | 276  | GGCGGAGGCAACTATAGAAA    | 59.32  | 20 |
| 256 | 561  | 816  | TTTTAATTCATTAATCATATTTG | 57.16  | 27 |
| 101 | 20   | 120  | CTCTCTCCTGCGTCTCTCTCA   | 60.018 | 21 |
| 255 | 689  | 943  | TGCTATTGAAAATGATCCCAC/  | 60.323 | 22 |
| 235 | 1842 | 2076 | TCAAGACCTACCGAGCTTCTG   | 59.624 | 21 |
| 133 | 3643 | 3775 | TCGAAGGGGATTTTATGTGG    | 59.756 | 20 |
| 239 | 73   | 311  | ATGGGATACGGACGGTTATG    | 59.528 | 20 |
| 128 | 2608 | 2735 | TTTGACAGACAAATCGCTCG    | 59.988 | 20 |
| 280 | 4    | 283  | GCGCAGATCTAATGGTCCAG    | 60.765 | 20 |
| 190 | 10   | 199  | CCATCCATTTTCATGCATTTT   | 58.77  | 20 |
| 247 | 226  | 472  | GGGAGAAAGATGACGACGAG    | 59.803 | 20 |
| 278 | 81   | 358  | TTCGTGCTACAACCTCGTCAA   | 57.897 | 20 |
| 272 | 428  | 699  | GTTTAGGCTCATGCCATTC     | 59.533 | 20 |

|     |      |      |                        |        |    |
|-----|------|------|------------------------|--------|----|
| 277 | 3    | 279  | CGCCTTTTCACCTCAAATTC   | 59.685 | 20 |
| 252 | 16   | 267  | GCTACTTCCGACTCTCTCGC   | 59.337 | 20 |
| 278 | 829  | 1106 | CTTCCACGATCTCCCATACAC  | 59.42  | 21 |
| 200 | 0    | 199  | TGCTAATCAGAACTTGGAGC   | 60.018 | 22 |
| 270 | 6814 | 7083 | TCTTACAACACAACCCCAAA   | 58.934 | 21 |
| 166 | 167  | 332  | CAGTCAGTGAAGGAGGTGG    | 60.702 | 20 |
| 261 | 311  | 571  | ACGCAAGCGATATGGAAAAG   | 60.23  | 20 |
| 138 | 24   | 161  | CATGGGTGGTATGGTGTGG    | 60.517 | 19 |
| 208 | 2    | 209  | AGAGCTTGGTGTGGTGCTT    | 59.914 | 20 |
| 192 | 1427 | 1618 | GAGCAAAAATTAAGCCCACG   | 59.72  | 20 |
| 186 | 27   | 212  | TTTACGTGTTAAGCCTTGGGA  | 59.634 | 21 |
| 129 | 114  | 242  | ACATGCGTGTGTGTCTGCAT   | 61.271 | 20 |
| 149 | 0    | 148  | CTTCTCTTCCACATCCGGTA   | 57.739 | 20 |
| 207 | 15   | 221  | TTCGATGTTGTAACGGAGACA  | 59.184 | 21 |
| 221 | 23   | 243  | TGGCTCTCACACTCACTCTCA  | 59.747 | 21 |
| 232 | 552  | 783  | TCGATCGATAATAACGCTTTCA | 59.717 | 22 |
| 254 | 160  | 413  | ACATGTGTCCTATCCCGGTC   | 59.661 | 20 |
| 204 | 3492 | 3695 | TCACAATCGCAACATCCAAT   | 59.931 | 20 |
| 187 | 516  | 702  | GTGGGTGCAGTTGGATTACC   | 60.24  | 20 |
| 162 | 1574 | 1735 | GCTGCGAAGAACAATCAA     | 59.995 | 20 |
| 232 | 184  | 415  | TGTGGAACAAGTGCAGAGG    | 59.873 | 20 |
| 260 | 45   | 304  | AACAGTTTTGCTCCCTCACG   | 60.291 | 20 |
| 167 | 28   | 194  | GGGGCGTGACAATATCCTAA   | 59.784 | 20 |
| 205 | 0    | 204  | TCGCTTGAATTGCGACATAA   | 60.356 | 20 |
| 135 | 175  | 309  | ATGTGGTCCCAAACCTCTCCA  | 60.363 | 20 |
| 260 | 689  | 948  | TCAGCACGCGGACTATATGA   | 60.388 | 20 |
| 147 | 24   | 170  | CACTCACTCTCACTAGCCGC   | 58.78  | 20 |
| 171 | 22   | 192  | TACGCATTCAAAGCTGAAGA   | 57.257 | 20 |
| 225 | 3393 | 3617 | CCTGTGGAGAAGAGGCTCAG   | 60.127 | 20 |
| 222 | 282  | 503  | TTGGGAATTCAAAATGATTCCG | 59.759 | 21 |
| 260 | 90   | 349  | TAAGCTTCCGGGAGGAAAAT   | 60.034 | 20 |
| 228 | 2995 | 3222 | CACCAGCCTCTCCTTCAAAC   | 59.844 | 20 |
| 171 | 1473 | 1643 | GCACTGTGAGACTGAGGCAG   | 59.764 | 20 |
| 164 | 25   | 188  | AAGGCATCAAAGTTGTCGAT   | 57.265 | 20 |
| 198 | 2    | 199  | CGAGGGCATTATGGGAAGT    | 59.902 | 19 |
| 230 | 96   | 325  | AATGATAATCTTCGCCGTGG   | 59.923 | 20 |
| 253 | 55   | 307  | AGCAATAAATCCACGTACAGC  | 59.912 | 23 |
| 166 | 200  | 365  | AAACACCTCCTTAGGTGCAAA  | 58.754 | 21 |
| 139 | 22   | 160  | AAAGGCCAAGTCAAGGATCA   | 59.67  | 20 |
| 202 | 267  | 468  | CGAAGAACACACACTTTTGGG  | 60.568 | 21 |
| 212 | 26   | 237  | CACCAACTGGCGAGAAATTA   | 58.771 | 20 |
| 275 | 315  | 589  | TACCGACCTCACTAGTCCCG   | 60.126 | 20 |
| 197 | 44   | 240  | CAAATGGCCAAGAAAGTTTAC  | 60.372 | 23 |
| 246 | 4    | 249  | GGGGACTTTTCACTTTTGGC   | 60.836 | 20 |
| 266 | 69   | 334  | TGAAGAATCCCTTGGGTTG    | 59.903 | 20 |
| 233 | 148  | 380  | TTTCTAACGATGATGGAAAAA  | 59.885 | 24 |
| 168 | 497  | 664  | TCAATGTTTTTGGTTTGTTC   | 59.693 | 21 |
| 277 | 2953 | 3229 | ATTTTTGGCATTTCACCTGC   | 59.945 | 20 |
| 123 | 1146 | 1268 | CAACATTTTGGCCTTTCTTGA  | 60.096 | 21 |
| 134 | 415  | 548  | GCCTCGACAACATCATCGTA   | 59.679 | 20 |
| 277 | 6003 | 6279 | ATTTCTCTTACACGTTTGGAT  | 59.059 | 23 |
| 115 | 223  | 337  | GACAAGAGCCGAAAAGTCGT   | 59.478 | 20 |
| 101 | 6    | 106  | TCTATAGCAAGATCTCACGA   | 59.284 | 23 |
| 219 | 3222 | 3440 | TGATTGTCGGGTCTTCATT    | 60.461 | 20 |
| 280 | 325  | 604  | CACATTAAGAGGAGGTATCAT  | 59.814 | 26 |
| 194 | 186  | 379  | AAGTTGGGCTAAGTGGAGGG   | 60.488 | 20 |
| 242 | 726  | 967  | CGGTCGGGTGATCCTAATTT   | 61.061 | 20 |
| 273 | 456  | 728  | CTGTTAGGCCATGTCGTTT    | 59.993 | 20 |



|     |      |      |                         |        |    |
|-----|------|------|-------------------------|--------|----|
| 270 | 616  | 885  | TATGTTGGACCAAAAAGCCC    | 59.801 | 20 |
| 192 | 417  | 608  | CGTTGTTTCCTCACACCCTT    | 60.005 | 20 |
| 154 | 19   | 172  | CATTTTCATTTTCAGGAGCTTCG | 59.831 | 21 |
| 122 | 270  | 391  | CCATTTTTATCTTCTATCTTC   | 57.938 | 25 |
| 202 | 182  | 383  | ACTCTGTGGTGACTIONCCTCC  | 60.315 | 20 |
| 266 | 255  | 520  | TCATCACGTAAACGGGGATT    | 60.192 | 20 |
| 238 | 203  | 440  | ACAGCTTACACCGTTGAGCA    | 59.515 | 20 |
| 205 | 376  | 580  | GGAGCAAGGAGAAGTTCTGTG   | 59.989 | 20 |
| 194 | 919  | 1112 | GGTGAACATTGGGAGCAAAT    | 59.797 | 20 |
| 234 | 239  | 472  | TTTACCGATTGTTGCATTTTAAI | 58.315 | 23 |
| 210 | 728  | 937  | TGATTTGGAAGAAAACGATGG   | 59.924 | 21 |
| 149 | 3    | 151  | ACCCTACACTCTACACCTATTC  | 57.104 | 27 |
| 201 | 12   | 212  | TGGTTCTGTAACCGAGTTGAAI  | 59.649 | 22 |
| 192 | 1    | 192  | CCCCTAACCCCTTCATCACC    | 59.259 | 20 |
| 114 | 223  | 336  | TGTGGAATATTGTCCCGGAT    | 60.014 | 20 |
| 158 | 62   | 219  | TACAACCGCCAAGGCTTATC    | 60.096 | 20 |
| 274 | 0    | 273  | TCCAAATGATAAAAATCGTGGT, | 59.748 | 24 |
| 258 | 229  | 486  | ACGGAGAGTCTTCACAAGCG    | 60.589 | 20 |
| 211 | 923  | 1133 | TCAATTTGTGTCTTATAAATTAI | 57.208 | 27 |
| 220 | 56   | 275  | CCTAGGATGAAAACCTTGCATG  | 59.225 | 22 |
| 144 | 0    | 143  | CGAACGGTTGGAATATCTAAA   | 58.643 | 23 |
| 229 | 662  | 890  | CTTCTCTCACAAATTCGCC     | 59.813 | 20 |
| 253 | 21   | 273  | AGTAGTTATGCGTATTGTTACC  | 57.666 | 26 |
| 188 | 22   | 209  | CTTTGCGACGTAATTCCCAT    | 59.96  | 20 |
| 121 | 437  | 557  | TGTATCAGTCACCACCTCCAC   | 58.421 | 21 |
| 168 | 0    | 167  | TGTGCCTTTTATTTGAGTAAGA  | 58.081 | 24 |
| 216 | 390  | 605  | TTCAGCCTTTTTCATGTGGA    | 59.247 | 20 |
| 201 | 20   | 220  | GCTTGTAATTTTTGGCTGGC    | 59.726 | 20 |
| 184 | 49   | 232  | CGGGTTATTACCTGATTGCG    | 60.335 | 20 |
| 127 | 227  | 353  | ACCAACCCATCAAGAATCCA    | 60.173 | 20 |
| 245 | 55   | 299  | GAAAAGCAAACGAAAAGCC     | 58.989 | 20 |
| 109 | 1    | 109  | CAAGATGAGGAATGAAAAGI    | 58.929 | 24 |
| 274 | 18   | 291  | GGAAATAAGGAGGTGTTATGA   | 60.434 | 25 |
| 222 | 15   | 236  | GTGATGTTGGTGTGATGG      | 59.656 | 20 |
| 263 | 18   | 280  | GAGGGGGAAGAGGTTGAAGA    | 60.565 | 20 |
| 238 | 130  | 367  | TTTGATAGAGCCGATTTGG     | 60.031 | 20 |
| 201 | 1821 | 2021 | CAGTTTTTAAGTTTCGAAGTTI  | 58.659 | 24 |
| 279 | 410  | 688  | TGAAGTGTCACTCAATGTGTCC  | 59.794 | 22 |
| 116 | 24   | 139  | TTGGTTACTGTTACGTATGCCA  | 59.74  | 24 |
| 137 | 537  | 673  | TGAAACACGCTTACCGTTTC    | 58.822 | 20 |
| 195 | 1365 | 1559 | ACCATCAAGGTCAAACCTGC    | 59.973 | 20 |
| 233 | 1409 | 1641 | TTGCTGTTGTGTTGGCATTAG   | 59.784 | 21 |
| 100 | 303  | 402  | GTCTCAATGGGGACATCTGG    | 60.326 | 20 |
| 277 | 44   | 320  | GGAGGGAGAAGATGAGGAGG    | 60.149 | 20 |
| 229 | 3427 | 3655 | AAGGCGAGGGAGGAGATAGA    | 60.306 | 20 |
| 230 | 3522 | 3751 | GGGCCACATTAGCTGTCT      | 60.088 | 19 |
| 280 | 5791 | 6070 | AATTTAGTCGGCCGATTTT     | 59.808 | 20 |
| 270 | 47   | 316  | TTGAACCGTGTTACCCTTCC    | 59.83  | 20 |
| 273 | 317  | 589  | TGTGCTCTCATTTGATTACACTI | 60.542 | 24 |
| 249 | 1995 | 2243 | TTTTCCCCAAAACACCTCTG    | 59.942 | 20 |
| 237 | 810  | 1046 | TCTTCTCCAACCCACAAACC    | 59.943 | 20 |
| 123 | 19   | 141  | CCTAACAAACAAAAGATAAAGT  | 58.045 | 26 |
| 247 | 147  | 393  | ACCACCACACCTCAACATT     | 60.135 | 20 |
| 231 | 32   | 262  | TCTGCGGTACATCCAAATGA    | 60.073 | 20 |
| 275 | 176  | 450  | TCACACTCACTCTCACTAGCTC  | 59.871 | 23 |
| 190 | 395  | 584  | GATGTTCCCAGAGTGGTGGT    | 59.817 | 20 |
| 226 | 375  | 600  | GTAACCCGAACCCTGTGC      | 60.368 | 19 |
| 224 | 1899 | 2122 | TGGAAAATGGTGGAAATGGTT   | 60.029 | 20 |

|     |      |      |                        |        |    |
|-----|------|------|------------------------|--------|----|
| 253 | 305  | 557  | GCACCCCAAGATGGTAAACA   | 60.755 | 20 |
| 252 | 374  | 625  | GCTTGCTGAGTTGGCATGTA   | 60.019 | 20 |
| 242 | 291  | 532  | ATTCGAAGATCAACGGACG    | 60.074 | 20 |
| 107 | 740  | 846  | TAAAAATGTGCATGCAACTGA  | 57.86  | 21 |
| 205 | 23   | 227  | TCTCTCTTTTTGGTTGGTGGA  | 59.697 | 21 |
| 230 | 21   | 250  | ACATTGGGAGAGGTGGAGGT   | 60.77  | 20 |
| 225 | 695  | 919  | TCAGTGCTGAACGTGTCAA    | 59.002 | 20 |
| 182 | 196  | 377  | CCGGAGTGATTTGTCAGGTC   | 60.51  | 20 |
| 119 | 20   | 138  | AGTGTTTTGACATGATTACTCG | 57.373 | 24 |
| 191 | 1598 | 1788 | AAATATCGGCCGTCAGATTG   | 59.923 | 20 |
| 273 | 72   | 344  | CACTGCAGAAAAATTCACGC   | 59.469 | 20 |
| 125 | 47   | 171  | AATCCCCTCTTGCTCCAAA    | 59.67  | 20 |
| 259 | 1139 | 1397 | TTGTTCTCGTTCAAACCCCT   | 59.569 | 20 |
| 237 | 1    | 237  | AAGAACACACACCAAGACAC   | 57.525 | 21 |
| 274 | 3165 | 3438 | ATTTAATGTCCCACCCCGAG   | 60.929 | 20 |
| 243 | 2725 | 2967 | CTCGCCGCTTAAAATTGTGT   | 60.264 | 20 |
| 277 | 47   | 323  | TTCTTGGCATCCAGTTCCTT   | 59.67  | 20 |
| 247 | 24   | 270  | AAGGGGTTATTAGTGGATCA   | 57.425 | 21 |
| 261 | 841  | 1101 | TTGGTGTATGGATTGTGTGA   | 57.298 | 21 |
| 224 | 2    | 225  | AATAGGCTTTTTGCCTTCCG   | 60.558 | 20 |
| 189 | 99   | 287  | CTGAACATTGCCTGCTTGA    | 59.988 | 20 |
| 256 | 478  | 733  | TGTCCAGATAGCCTCACTGC   | 58.987 | 20 |
| 237 | 5    | 241  | TGGGTATCGTCATTTATACAA  | 60.684 | 26 |
| 280 | 93   | 372  | CCCCTCGTATGCACTCAACT   | 60.134 | 20 |
| 183 | 96   | 278  | CACCATCATCCTCAGAGCAA   | 59.787 | 20 |
| 277 | 578  | 854  | TGAAAGTGATTGCGTCTCCA   | 60.39  | 20 |
| 180 | 18   | 197  | AGATTTGGGCAGTGTGGTGT   | 60.431 | 20 |
| 176 | 8    | 183  | GCGAATCGAACGAATCTGA    | 59.899 | 19 |
| 272 | 2822 | 3093 | CACCTCCTTATTTCTAACTTC  | 57.086 | 24 |
| 154 | 187  | 340  | TGCTCTCAGCTCTTTTGCCT   | 60.419 | 20 |
| 266 | 0    | 265  | GACACAAGAGAGGAGAGGCG   | 60.135 | 20 |
| 179 | 15   | 193  | TCGGAAAAGCTTGGATGAAA   | 60.692 | 20 |
| 237 | 18   | 254  | TCTTTTGGTAGGTGAATGTATT | 59.016 | 25 |
| 254 | 62   | 315  | GGTCGTGTCAGAAATCGTCA   | 59.682 | 20 |
| 119 | 464  | 582  | TCGCCTTGTTTAGGAGAGGA   | 59.948 | 20 |
| 258 | 2    | 259  | TATGGCAATGGGACCAAGAT   | 60.155 | 20 |
| 280 | 220  | 499  | TTCATCAACATGCAGCCATT   | 60.08  | 20 |
| 113 | 44   | 156  | GGTGCTTGGTGAAGGAAGTG   | 60.69  | 20 |
| 222 | 245  | 466  | TGCAGTTGAGATGCCTTGC    | 59.992 | 20 |
| 242 | 2644 | 2885 | ACATGGGCCAAATGAGAGAC   | 59.934 | 20 |
| 137 | 3118 | 3254 | AAAATTTGAGCACAGTGGC    | 60.257 | 20 |
| 256 | 246  | 501  | TATGGATTATCACCGGATCG   | 58.255 | 20 |
| 201 | 61   | 261  | TAAATGGCAGTGTGGGTTGA   | 59.964 | 20 |
| 200 | 107  | 306  | TCGCTAATTTCTAGATTTTCT  | 59.797 | 25 |
| 168 | 7    | 174  | ACGGATTTAAGGGTTATTACCT | 57.667 | 23 |
| 214 | 105  | 318  | AAAAATCATCACACGGGGAG   | 59.79  | 20 |
| 279 | 189  | 467  | GGCGAATGATGTTTCTAGGG   | 59.528 | 20 |
| 234 | 201  | 434  | CCCATTAATTTTCCACCCA    | 59.497 | 20 |
| 279 | 1498 | 1776 | TTTAACGTTTTGAGCCTATTGA | 59.687 | 23 |
| 239 | 379  | 617  | CTTGGAAGAAAAACCCACA    | 59.942 | 20 |
| 206 | 528  | 733  | ACTATTCGAATGCGAGGGAA   | 59.668 | 20 |
| 275 | 1204 | 1478 | CGTTGCACGGGATTAACCTC   | 60.502 | 20 |
| 149 | 1048 | 1196 | ATGTCGCCATCATATTTTGC   | 58.458 | 20 |
| 153 | 609  | 761  | GCTCATTCTGCTTCTTCCGT   | 59.579 | 20 |
| 269 | 988  | 1256 | CGATCTGGAACCTCGAAAGA   | 60.331 | 20 |
| 191 | 1423 | 1613 | GACCGCAAGAAAGGTTCTGA   | 60.375 | 20 |
| 252 | 1683 | 1934 | TTCGGGCTAAACGAGTCAAT   | 59.708 | 20 |
| 262 | 450  | 711  | GGGCACTCAACCCTCAATA    | 59.933 | 20 |

|     |      |      |                         |        |    |
|-----|------|------|-------------------------|--------|----|
| 230 | 18   | 247  | AGGATGTAAATACGGTCTGTG   | 58.149 | 22 |
| 197 | 451  | 647  | GACGTTCAATTCGTATTGGGC   | 60.339 | 20 |
| 229 | 30   | 258  | CGACTCACGACCCTACCAAC    | 60.567 | 20 |
| 213 | 1135 | 1347 | TGATGTATGGTCTCCTTCCCTT  | 59.827 | 22 |
| 255 | 226  | 480  | CTCCAACACCTCCAACCTTGC   | 60.69  | 20 |
| 270 | 36   | 305  | TGCTTCTACTAAAGTTGAATT   | 59.05  | 24 |
| 183 | 29   | 211  | AAAAATGGCGATGAAACCAG    | 59.938 | 20 |
| 122 | 0    | 121  | GAGCTGTTATGCGTTTTGATG/  | 60.272 | 22 |
| 149 | 23   | 171  | TCTTTGTCCACGGAGAGGTT    | 59.697 | 20 |
| 146 | 251  | 396  | AAGCAATGAGCGAAAAGCAG    | 60.658 | 20 |
| 142 | 14   | 155  | GTTAAGTAACCGGAGAGGCG    | 58.858 | 20 |
| 188 | 475  | 662  | TCAGAAATTGTAGTCGCCCA    | 59.272 | 20 |
| 161 | 33   | 193  | TTGGAACCTGAGCAACTGGAT   | 59.726 | 21 |
| 225 | 834  | 1058 | TCTGGGGTTTTAGGTAGTCG    | 60.103 | 20 |
| 216 | 929  | 1144 | CGCAGAAAATAAATCATGACC   | 59.964 | 22 |
| 137 | 25   | 161  | GAGGTAGAAGCACTTGTGTGC   | 57.463 | 21 |
| 194 | 67   | 260  | ATCGATTAGGGCAACATTCG    | 59.923 | 20 |
| 234 | 51   | 284  | CGCACGTCGAGAATTGAATA    | 59.833 | 20 |
| 238 | 87   | 324  | TCGGGTTTTAGTGGAGAACG    | 60.103 | 20 |
| 170 | 114  | 283  | GCCACCCTTAAGTGATTCG     | 59.569 | 20 |
| 130 | 487  | 616  | ACCTTGACCATCAGATCCCA    | 60.326 | 20 |
| 279 | 1554 | 1832 | GCTTACTCCCACCGATGTTT    | 59.556 | 20 |
| 260 | 250  | 509  | CATGCATGCTCGTACTACA     | 59.436 | 20 |
| 202 | 548  | 749  | TCCTTTTTGTCTTTCATTCGGT  | 59.98  | 22 |
| 131 | 540  | 670  | TTGCATTCCCACCCATTATC    | 60.532 | 20 |
| 104 | 607  | 710  | GTGAAGGAGTCGAAGGCAAC    | 59.851 | 20 |
| 198 | 1900 | 2097 | TGATCTTGCAACTTCATGCC    | 59.805 | 20 |
| 219 | 7    | 225  | AACTCGACAATTTGGGAGG     | 59.966 | 20 |
| 126 | 8    | 133  | TGCTTTCAACTTAGAATTCAA   | 59.363 | 25 |
| 258 | 101  | 358  | TGAGCTGAAGCGAGCTGAT     | 59.983 | 19 |
| 277 | 28   | 304  | AAACTATAGGTGTTTGGTAA/   | 58.242 | 26 |
| 160 | 11   | 170  | CAATTACAATGTTTATCCAATC  | 58.612 | 24 |
| 239 | 5    | 243  | CAGGATCTCATCGGAACCAT    | 59.886 | 20 |
| 265 | 649  | 913  | TTCCGATTCTCAATTCCCAT    | 59.32  | 20 |
| 181 | 750  | 930  | TGAGATCCTGGCTGTGTGAC    | 59.827 | 20 |
| 259 | 390  | 648  | TTGCGGAAGAAAATAACCG     | 60.236 | 20 |
| 251 | 14   | 264  | AATCTCACAAACCCACACCC    | 59.679 | 20 |
| 120 | 2    | 121  | TGGTCACTTACACAGCAATCA/  | 59.245 | 22 |
| 135 | 181  | 315  | GATCTGCACCCTCCATGAAT    | 59.893 | 20 |
| 200 | 28   | 227  | TGCAGTAGGTTGTAGGTACTA/  | 57.062 | 27 |
| 174 | 20   | 193  | GAATTTGGGTCATGAATTTTGT  | 59.135 | 23 |
| 253 | 877  | 1129 | TGCCAGAAGTTCATCGTTCA    | 60.39  | 20 |
| 201 | 19   | 219  | GGCTAGATGCAAGCCTTTGA    | 60.49  | 20 |
| 156 | 311  | 466  | GGGCAGTAAGTTGAGTCCGA    | 60.255 | 20 |
| 167 | 281  | 447  | TTGATTGGTTGTTGGGCATA    | 59.786 | 20 |
| 270 | 1268 | 1537 | GGCTTACCCCTGCACTTATG    | 59.592 | 20 |
| 102 | 2    | 103  | TCGCACTAAAGCAGAACGAA    | 59.752 | 20 |
| 219 | 690  | 908  | ATTCTCGCTTCTTCGCTACG    | 59.752 | 20 |
| 210 | 7    | 216  | CCCCTATTTTTGGAGGGAAA    | 60.116 | 20 |
| 280 | 3538 | 3817 | GCACCACCATCTTCTTCGAT    | 60.081 | 20 |
| 270 | 1539 | 1808 | CAGCAACCTGAAAGCATGTG    | 60.449 | 20 |
| 152 | 173  | 324  | TTAAGGGGGCGGTATCATTG    | 59.789 | 20 |
| 243 | 839  | 1081 | ACAAAAAGCAGACGAAGGGA    | 59.853 | 20 |
| 255 | 958  | 1212 | CATGCAATGCGATGTGTTTT    | 60.532 | 20 |
| 268 | 1349 | 1616 | GCCACCTCAGAAGATGGAAG    | 59.803 | 20 |
| 229 | 20   | 248  | CAATTCATAAAAATACATAGAA/ | 57.131 | 27 |
| 214 | 2    | 215  | CCCCATCAACACACATACACA   | 60.144 | 21 |
| 276 | 10   | 285  | CAAACCCCATCACCAACTCT    | 59.82  | 20 |

|     |      |      |                        |        |    |
|-----|------|------|------------------------|--------|----|
| 235 | 41   | 275  | TCGGCCTTTTGAAACTTTTT   | 58.852 | 20 |
| 138 | 821  | 958  | CATGCCTTGTTCCAGGCAATA  | 59.688 | 20 |
| 100 | 6    | 105  | GAAGAACAATTACAATGTTTA  | 57.771 | 26 |
| 223 | 610  | 832  | TGTTTGCAATTATTTTCGTGG  | 57.176 | 20 |
| 228 | 7    | 234  | TGCATCAAGTTCTCTTCTCTAA | 57.9   | 25 |
| 219 | 22   | 240  | TTGAACCGATGAAACTAAAAT  | 59.885 | 24 |
| 201 | 217  | 417  | GTTGGAAGTGCGAATGTTCA   | 59.697 | 20 |
| 111 | 2837 | 2947 | GGGAAGCTCCAAGTCTTTA    | 59.452 | 20 |
| 251 | 66   | 316  | AGTTGAACCTCGAACCGTTG   | 60.149 | 20 |
| 190 | 545  | 734  | AATCATTGTGCGCATGTGTT   | 60.003 | 20 |
| 264 | 2110 | 2373 | CACACCTACTAGGCCCAAGG   | 59.61  | 20 |
| 265 | 2049 | 2313 | ACGTGTTCAAGGTTGAAGGG   | 60.005 | 20 |
| 237 | 263  | 499  | AAAGGCATCTGAGCCGTTAC   | 59.34  | 20 |
| 136 | 106  | 241  | TCGGCTGGGGTAGTAATTTG   | 59.953 | 20 |
| 207 | 97   | 303  | GGAGCAAGCACTGCTCCTAA   | 60.678 | 20 |
| 258 | 201  | 458  | AAACAATTTTCAGCCGAGGG   | 60.059 | 19 |
| 278 | 1645 | 1922 | TTCCCAAAGCCACAAAATC    | 59.916 | 20 |
| 207 | 911  | 1117 | AAAATGAGGAAATCCCTCGG   | 60.258 | 20 |
| 187 | 68   | 254  | CTCCAACACCTCCAAGTTC    | 60.69  | 20 |
| 249 | 2127 | 2375 | ATTTCTGCCCAAATTACC     | 60.02  | 20 |
| 198 | 95   | 292  | TGAAACTCCATCAAAACCTCT  | 59.165 | 23 |
| 254 | 51   | 304  | AGGCAGCAATCAATTGAAA    | 60.585 | 20 |
| 128 | 1030 | 1157 | AGATTGGAGCGAAGAGTGGA   | 59.95  | 20 |
| 187 | 6    | 192  | TGTTTTGTAATTTCCCATGTTT | 59.577 | 24 |
| 277 | 28   | 304  | TGTCAATTTTCTCAAGAACT   | 60.825 | 24 |
| 205 | 149  | 353  | AGAAACGCATCGTTTTCTGG   | 60.249 | 20 |
| 102 | 8    | 109  | TGATGATCAACGTTACCGATA  | 57.512 | 22 |
| 208 | 167  | 374  | ATAACCCACCATCCTAGCC    | 60.039 | 20 |
| 202 | 397  | 598  | GTGAGAGGGGGTATCCAGGT   | 60.194 | 20 |
| 268 | 2628 | 2895 | CGTTTCAGTTTCGCCATTTT   | 60.11  | 20 |
| 216 | 48   | 263  | GATGTGAGACACGTGGCATT   | 59.557 | 20 |
| 214 | 1730 | 1943 | ATGCAGTGGACCATAGCACA   | 60.144 | 20 |
| 269 | 435  | 703  | AGGATGGTGATGTTGAAGCC   | 59.934 | 20 |
| 246 | 277  | 522  | TTTTCAAACCAAACCGACC    | 59.817 | 20 |
| 277 | 397  | 673  | TTGTGCGTGTGTATGCTGAG   | 59.483 | 20 |
| 138 | 1426 | 1563 | ATATCAGCGGCCAAAATCA    | 60.424 | 20 |
| 249 | 69   | 317  | CCTGCATGGTTTTTCTTTG    | 60.472 | 20 |
| 208 | 224  | 431  | CCCATGGAGTCCAATCTACC   | 59.213 | 20 |
| 202 | 229  | 430  | TCATTGGTCAAAGTGCAACA   | 60.142 | 21 |
| 183 | 20   | 202  | TCATCATCTTCGTCTAAAAAC  | 59.617 | 23 |
| 197 | 679  | 875  | GTCAGCTTGCAAAGAGAGG    | 59.749 | 21 |
| 242 | 5    | 246  | CACTCTCCCTCTTCTCTCTCG  | 59.756 | 22 |
| 119 | 2    | 120  | TCGAAATCGTAATAATCGGAC  | 59.455 | 22 |
| 272 | 129  | 400  | CCCTTCCCCTTCTACCTCAA   | 60.426 | 20 |
| 262 | 2    | 263  | TGTTCTCATTCGTTTGCTCTAA | 57.719 | 22 |
| 189 | 29   | 217  | TTGTCTGCGGTAATGCTTTG   | 59.872 | 20 |
| 100 | 453  | 552  | GAAGCTTCAGCGAGGTTACG   | 60.154 | 20 |
| 124 | 26   | 149  | TGGAGTTGGAGTTGAGAGGA   | 58.349 | 20 |
| 267 | 71   | 337  | GCCTTCAATTTTATACCCGAG  | 59.483 | 22 |
| 106 | 402  | 507  | CGAATCGCGAGTGCATATAA   | 59.825 | 20 |
| 239 | 68   | 306  | AGCCTAACGTGGCTCTGATG   | 60.419 | 20 |
| 100 | 1    | 100  | AGCCTTCTAGCATCTCTTGCT  | 57.618 | 21 |
| 274 | 796  | 1069 | CATTCTCTGCCTGTGTCTGC   | 59.577 | 20 |
| 201 | 1036 | 1236 | GGAACTATTGCCAATGCGAT   | 59.929 | 20 |
| 210 | 1075 | 1284 | TTGTTGCAAGAACAACGAC    | 59.888 | 20 |
| 236 | 220  | 455  | AAAATTGATAAATAGTGCAAT  | 59.994 | 25 |
| 102 | 1    | 102  | GATTGTCTAAAACGTAAAGCT  | 58.527 | 26 |
| 234 | 19   | 252  | GGGACAAAACCGAAGGAAT    | 60.166 | 20 |

|     |      |      |                        |        |    |
|-----|------|------|------------------------|--------|----|
| 155 | 967  | 1121 | CCGTGTGAACACAGACCTTC   | 59.152 | 20 |
| 251 | 17   | 267  | CAAATCTTGGGGAATGTGTG   | 58.821 | 20 |
| 263 | 3612 | 3874 | TCCGTAGACCTTCCAACCAC   | 59.966 | 20 |
| 151 | 283  | 433  | CATGGATATGTGGAAGCACG   | 59.948 | 20 |
| 270 | 1970 | 2239 | GAACACACTTGGGCCTGTCT   | 60.159 | 20 |
| 246 | 150  | 395  | GTGAAAGAAAAGAGAAAAGGA  | 58.916 | 26 |
| 239 | 257  | 495  | CAGTGGATCGTTCTGCTTCA   | 59.984 | 20 |
| 275 | 699  | 973  | TTGATTGCAATAAGCAAATTTT | 58.045 | 24 |
| 243 | 481  | 723  | TCGCGGATATCAATTATCAAC/ | 60.303 | 22 |
| 276 | 669  | 944  | TTCTGTAATCGAGTTCAAGAG/ | 60.076 | 26 |
| 267 | 43   | 309  | GAAAGCAAGGTGAGGAAGGA   | 59.405 | 20 |
| 193 | 317  | 509  | CGAGGAATGAAATCGATGGT   | 59.894 | 20 |
| 278 | 83   | 360  | GCAAACCCGTGTTCTTCAAT   | 59.978 | 20 |
| 239 | 196  | 434  | TTGCCTGCAGACAGACAAAC   | 60.032 | 20 |
| 244 | 124  | 367  | TGCCATGGATATGATTGTTGA  | 59.76  | 21 |
| 258 | 494  | 751  | GGCATAAATTCATCTGAACAA/ | 59.857 | 23 |
| 276 | 171  | 446  | GGATGAACGTCGGTCGTATT   | 59.82  | 20 |
| 117 | 1138 | 1254 | GAATGTCATTGTTCCGGACCC  | 60.181 | 20 |
| 150 | 667  | 816  | CCGTCGTCGTCAACTACAAA   | 59.758 | 20 |
| 273 | 221  | 493  | AAGCAAAAGAGTCAGCCGAA   | 60.132 | 20 |
| 261 | 252  | 512  | CCGCATGTCATGTTATTGGA   | 60.343 | 20 |
| 212 | 979  | 1190 | ATACCCCGAAAACCCTTTCA   | 60.534 | 20 |
| 142 | 4    | 145  | AATCTCCCACTTGGGCAAC    | 59.918 | 19 |
| 200 | 214  | 413  | GCTTTCTTTCTTCCGGGTTT   | 60.187 | 20 |
| 182 | 813  | 994  | ATGCCAGTCTTGAGCCAGAT   | 59.834 | 20 |
| 187 | 1221 | 1407 | GGTCTTTTACTTTTCAGACAAC | 58.909 | 24 |
| 201 | 1057 | 1257 | CACCTACACCCCTACTCCCA   | 59.837 | 20 |
| 219 | 846  | 1064 | GAACTATCGTCTCGTGCCGT   | 60.285 | 20 |
| 112 | 286  | 397  | CATTCATGCAGCATTCAACA   | 59.232 | 20 |
| 162 | 849  | 1010 | GCGTCAGAAGAGAGAGCGAG   | 60.577 | 20 |
| 260 | 1220 | 1479 | CTTCCCAAAGTCATTTCCCA   | 59.903 | 20 |
| 163 | 2290 | 2452 | ACAGAGGCTGAAGCAAGGAG   | 59.745 | 20 |
| 255 | 98   | 352  | GCCATATGTGGAAACCTTCTT  | 60.201 | 21 |
| 221 | 611  | 831  | TCACGCCCCGACTATCTTAT   | 59.551 | 20 |
| 160 | 132  | 291  | CCAATTTGCCCTTATATGC    | 59.282 | 20 |
| 219 | 328  | 546  | TACATCAACGCCGATGAAAA   | 60.073 | 20 |
| 253 | 593  | 845  | TGGGGGTCTGTCAAAAATTC   | 59.767 | 20 |
| 178 | 788  | 965  | ACATCGATTTTCGTGGAGATTG | 59.947 | 21 |
| 145 | 32   | 176  | CAATTGGAGTGAAACGGAGG   | 60.486 | 20 |
| 176 | 2209 | 2384 | CAACCATGACACACCCACAT   | 60.138 | 20 |
| 220 | 535  | 754  | ATGGTTCGCCATAAAAATGC   | 59.801 | 20 |
| 268 | 143  | 410  | GCTTGATAGTGGGTTGGGTG   | 60.375 | 20 |
| 121 | 18   | 138  | CCCCTTTTGGGTTATTACCTG  | 59.641 | 22 |
| 190 | 2251 | 2440 | TACGTGGATTTGACAGTGGC   | 59.572 | 20 |
| 222 | 396  | 617  | GGGAGAGAGGAAGAGGGATG   | 60.149 | 20 |
| 220 | 117  | 336  | TGTCCAAGCAAAATTGACGA   | 60.234 | 20 |
| 216 | 5    | 220  | AAAGCTCAAAATGAAGAGGGC  | 59.849 | 21 |
| 215 | 60   | 274  | CGCGACACCTCTAGAACACA   | 60.049 | 20 |
| 219 | 971  | 1189 | GTGGGGAGGAAATTTTGAGG   | 60.663 | 20 |
| 164 | 990  | 1153 | AGAAACACGTGTCACCTTGGAT | 57.266 | 22 |
| 139 | 334  | 472  | CCTACGAGCCCAAAGTTCAA   | 60.241 | 20 |
| 276 | 13   | 288  | CCGAAAACCAAACCGAATTA   | 59.805 | 20 |
| 115 | 1    | 115  | TTTTGGAGAATTTTCTTTGCTC | 59.048 | 23 |
| 261 | 157  | 417  | TGTTTGAGTTAGCAGCCAGG   | 59.072 | 20 |
| 186 | 510  | 695  | TCCGAAAATCAAAAACCCAC   | 59.778 | 20 |
| 116 | 249  | 364  | GCTGCATGGAGACTTGCAT    | 59.966 | 19 |
| 251 | 1258 | 1508 | GCCAAATATGGTTGCAGCTT   | 60.103 | 20 |
| 221 | 344  | 564  | CGCACCTGAGGAGGTGTTAT   | 60.134 | 20 |

|     |      |      |                        |        |    |
|-----|------|------|------------------------|--------|----|
| 138 | 209  | 346  | CAATATCCCAATGTTTGAATCC | 59.963 | 23 |
| 126 | 220  | 345  | TATCACCAAAGGAGGGGTT    | 58.359 | 20 |
| 264 | 633  | 896  | TTATTGTTTTGGGCCTGAATG  | 59.818 | 21 |
| 245 | 1073 | 1317 | GGAGGAGATGGAGACAGTCG   | 59.792 | 20 |
| 275 | 82   | 356  | ACGTCGTCTCAAAGGGTGTC   | 60.159 | 20 |
| 216 | 192  | 407  | GCTGGATATTTGGGCTTGAAT  | 60.294 | 21 |
| 148 | 49   | 196  | AAATGCTCGCTCTCACACCT   | 60.02  | 20 |
| 267 | 763  | 1029 | CGCGTCCCTTTTACATGAT    | 59.96  | 20 |
| 203 | 554  | 756  | CTCCGTTGTCGACAGAATCC   | 60.656 | 20 |
| 273 | 0    | 272  | TCAGATCTGCGCTGAAAATAA  | 59.985 | 22 |
| 246 | 1230 | 1475 | CCTTTCAATTCCAATGCTTCA  | 60.06  | 21 |
| 226 | 579  | 804  | ACCGTGTGGAAATGGAAAC    | 59.694 | 20 |
| 138 | 2375 | 2512 | TTTCTTGGCCAGCTCTAGGA   | 60.088 | 20 |
| 239 | 389  | 627  | TGCTTTTGCATGGTAGTTGG   | 59.729 | 20 |
| 144 | 82   | 225  | ACATTTTTCTTTGGGCGAA    | 59.564 | 20 |
| 157 | 414  | 570  | GACTTCGTGGCGGTATTCTC   | 59.7   | 20 |
| 153 | 46   | 198  | TGTCTCCATTTGTGTGTGTGT  | 57.381 | 21 |
| 221 | 17   | 237  | ACACCGACCTCCACTTCAAC   | 60.009 | 20 |
| 207 | 26   | 232  | TTCTCAAAGGTGGAAACCG    | 60.081 | 20 |
| 253 | 393  | 645  | GTTGCTAACCAACTACGTTGA  | 58.511 | 23 |
| 211 | 3409 | 3619 | GGAAGTCCAAAGATGACCCA   | 59.903 | 20 |
| 174 | 31   | 204  | TATTTCTCATCCACACCCCC   | 59.605 | 20 |
| 104 | 25   | 128  | GAACAATTACAATGTTTGTGA  | 60.394 | 27 |
| 280 | 270  | 549  | TGTACCTCTCGCTGCTCTGA   | 59.88  | 20 |
| 151 | 6492 | 6642 | CCACAACCCATTCTTCCATC   | 60.173 | 20 |
| 104 | 18   | 121  | GGGTCCAGTCAATGAAACGA   | 60.903 | 20 |
| 167 | 1252 | 1418 | CGGTGAAGATAAATTGCACG   | 59.182 | 20 |
| 210 | 780  | 989  | TCGTTTGAAAATGGGGAAAA   | 60.273 | 20 |
| 275 | 8    | 282  | TAGAAACACGCAACGCAAGT   | 59.536 | 20 |
| 260 | 227  | 486  | ACACCATCCAGCGCTATAAAA  | 59.622 | 21 |
| 171 | 118  | 288  | TGCCATTTTGAGACCAGACA   | 60.24  | 20 |
| 241 | 15   | 255  | GGTTGTAATGAGGCTTTCGG   | 59.569 | 20 |
| 239 | 22   | 260  | AAGGGGAGTATCACTTGAATG  | 59.487 | 22 |
| 242 | 2485 | 2726 | CAATGCAAATCAGTCCCCT    | 59.933 | 20 |
| 245 | 1975 | 2219 | GGGCTACTTCCCAACACAAA   | 59.971 | 20 |
| 219 | 199  | 417  | CACGAATGTGCTGATGATGG   | 61.12  | 20 |
| 215 | 790  | 1004 | ACACACGGGTCTTCATCCAT   | 60.246 | 20 |
| 167 | 444  | 610  | AGCAAGAGAAAATTCTCCCAA  | 59.372 | 22 |
| 150 | 1110 | 1259 | TGAAAGTGCCAACTTACGGA   | 59.317 | 20 |
| 236 | 3441 | 3676 | TTTTTGCCCAATCCATTTA    | 60.123 | 20 |
| 251 | 873  | 1123 | CCAACCTTGTCGGAACAGTC   | 60.545 | 20 |
| 128 | 444  | 571  | TGCTCTTCTAGCGTTGTCCA   | 59.74  | 20 |
| 198 | 376  | 573  | AAACCATACGCATGCAGGTT   | 60.395 | 20 |
| 199 | 20   | 218  | TCATCATCTTCGTCCTAAAAAC | 59.617 | 23 |
| 103 | 209  | 311  | GGCCAAACGTTATTGGAGAA   | 59.938 | 20 |
| 186 | 35   | 220  | GACATCAACTCTGATGCGGA   | 59.794 | 20 |
| 140 | 48   | 187  | TTATCTCATCAACCGCCAGG   | 60.992 | 20 |
| 182 | 32   | 213  | CAATCCCAATTGTAGCCTGC   | 60.469 | 20 |
| 276 | 104  | 379  | TGCTGAGACATAGCGGACAC   | 60.016 | 20 |
| 151 | 25   | 175  | AAAGAAGAATAAAGCTTCGC   | 59.187 | 24 |
| 238 | 28   | 265  | TGTGAACACAGCCTCACCTT   | 59.31  | 20 |
| 119 | 1832 | 1950 | AAATTCGCAGATAAAGGCCA   | 59.682 | 20 |
| 186 | 24   | 209  | TCAGAAAAGTTCGAGCGTGA   | 59.716 | 20 |
| 207 | 493  | 699  | ATCACCAACTGGCGAGAAAT   | 59.556 | 20 |
| 162 | 17   | 178  | CGTGGAACAATTACGACCCT   | 59.853 | 20 |
| 165 | 203  | 367  | AAGGTGTAGATCTGGCGGTG   | 60.134 | 20 |
| 224 | 758  | 981  | GTGAAAAGTCAAACCGGCAC   | 60.538 | 20 |
| 207 | 43   | 249  | AAAAGGGGTTGATGATCGTT   | 59.696 | 21 |

|     |      |      |                        |        |    |
|-----|------|------|------------------------|--------|----|
| 277 | 22   | 298  | ACGACACGAACGGTTTTGA    | 60.144 | 19 |
| 224 | 6    | 229  | TGCACAAATTCGTTTAGGCTT  | 59.772 | 21 |
| 160 | 3142 | 3301 | CTTGCATCGTTTCTGTCCAC   | 59.445 | 20 |
| 279 | 98   | 376  | TCTTTTGTCAATGGAGCATCTC | 60.256 | 23 |
| 239 | 256  | 494  | TGCAATAACAAATTTGGGAAA  | 58.074 | 21 |
| 245 | 2375 | 2619 | CAGAAGACCGATGTTTGCCT   | 60.255 | 20 |
| 141 | 295  | 435  | CCCATGTGTCCACAAAACAA   | 60.255 | 20 |
| 156 | 4224 | 4379 | TCTGGGGCAATGAACTATCA   | 59.075 | 20 |
| 218 | 3134 | 3351 | ATCAACTTTCTGCCCATCCA   | 60.461 | 20 |
| 129 | 64   | 192  | AAGCACAAGAGACGAAGAGT   | 59.281 | 22 |
| 165 | 525  | 689  | TCACCGGAATCCACTCTCTC   | 60.199 | 20 |
| 196 | 119  | 314  | TACCCTTGCATGCACAACAT   | 59.995 | 20 |
| 277 | 321  | 597  | GATGCATCAAGTCGACAATCA  | 59.67  | 21 |
| 160 | 1166 | 1325 | GAACCCGTGATCTTTTGGTC   | 59.386 | 20 |
| 268 | 90   | 357  | CCAAGGTGGAGTAGAATCCG   | 59.545 | 20 |
| 135 | 439  | 573  | CACCTGAAGGCGAAAAAGAG   | 59.986 | 20 |
| 227 | 269  | 495  | ACATACTCCACCAACTCGGC   | 59.997 | 20 |
| 134 | 16   | 149  | ACATATTTCCAAGTCACCTTCC | 59.755 | 23 |
| 280 | 236  | 515  | CCAAAGGGGCTGCAATACTA   | 60.089 | 20 |
| 222 | 13   | 234  | ACCATATTTAAGGGTTATCAC  | 57.552 | 24 |
| 148 | 93   | 240  | AGCACGAATCACACAGCAAC   | 59.912 | 20 |
| 206 | 43   | 248  | AGTCCCATGTATATTGCCG    | 59.668 | 20 |
| 152 | 3    | 154  | ACTGAGCCCTGATTTGGAAG   | 59.284 | 20 |
| 276 | 1417 | 1692 | ATTTGGTATCAGAGCCACGG   | 59.955 | 20 |
| 217 | 2641 | 2857 | GAATCCAGCTGTGGAGAAG    | 59.803 | 20 |
| 246 | 687  | 932  | GCTATCAAGCACCGGAAAAA   | 60.209 | 20 |
| 278 | 32   | 309  | CAAAGCGCACTCGAAGAGTA   | 59.366 | 20 |
| 146 | 3    | 148  | TTTTATCAAGCGCAACCTCC   | 60.209 | 20 |
| 264 | 7    | 270  | TTGTCGTATGCTGTCCGAAA   | 60.257 | 20 |
| 267 | 644  | 910  | ACGAAATTGCCCTTGTATGC   | 59.967 | 20 |
| 258 | 924  | 1181 | CTGCAGCCTTCTTGTCTCCT   | 59.745 | 20 |
| 194 | 595  | 788  | CAACCGCCTGATTTGTTTCT   | 60.11  | 20 |
| 273 | 755  | 1027 | ACAAAGCATAAACATCCCAGC  | 59.104 | 21 |
| 143 | 378  | 520  | GATGGCATTTCATCGTCAGTG  | 60.08  | 20 |
| 158 | 22   | 179  | ACGCCCCAGATTGTTTCTTA   | 59.569 | 20 |
| 107 | 209  | 315  | CAATTGGGGAGATGTTCTT    | 58.836 | 20 |
| 205 | 172  | 376  | TCACCTTTTTCTTCTCGGC    | 59.429 | 20 |
| 113 | 103  | 215  | CATTCGTACCCCAAACCTTGC  | 60.365 | 20 |
| 111 | 891  | 1001 | GAGTTGAAACTCGACTGCC    | 59.851 | 20 |
| 197 | 324  | 520  | GCAACCGTTCATCACTCTGA   | 59.837 | 20 |
| 229 | 27   | 255  | TCGTGCGGTCAATGATTTTA   | 60.073 | 20 |
| 247 | 15   | 261  | GGATTCAGTTGCTTCAAGAGC  | 59.069 | 21 |
| 132 | 233  | 364  | ACAATATTACAATGGGCAAGA  | 57.725 | 23 |
| 112 | 2989 | 3100 | GGCATGTGCTTGTGTAGTGC   | 60.342 | 20 |
| 162 | 359  | 520  | GATCGACGTCCCAGATTTGT   | 59.934 | 20 |
| 233 | 689  | 921  | CTCGTCTCCTCCACTTCCTG   | 59.978 | 20 |
| 135 | 46   | 180  | AAAGAACAAAATGACACGAA   | 57.978 | 23 |
| 255 | 575  | 829  | TTGATTAATGGTTCGGTTCCA  | 60.174 | 21 |
| 238 | 10   | 247  | TTTTGTGATTTCCCATGTTTGT | 59.225 | 22 |
| 228 | 2706 | 2933 | TCTCTCAACACTTCAACGGG   | 58.852 | 20 |
| 262 | 279  | 540  | ATAGCATCCATTATTCCCG    | 59.745 | 20 |
| 161 | 3162 | 3322 | CTGCAACAGCATAGTGGCAT   | 59.895 | 20 |
| 243 | 313  | 555  | AGGAAATTGGGGGAAAATTG   | 59.992 | 20 |
| 125 | 230  | 354  | TCTTCCCATTTTCCCAACAG   | 59.903 | 20 |
| 277 | 7154 | 7430 | CTCTCTCTGCAGGGGAGTCA   | 60.69  | 20 |
| 141 | 318  | 458  | CGAAGGAGACTGGAACCGTA   | 60.246 | 20 |
| 277 | 224  | 500  | GGGCCCTAGTCTGTCTCTT    | 59.699 | 20 |
| 215 | 187  | 401  | ACCTAAACCCAAAACCCAC    | 59.955 | 20 |

|     |      |      |                        |        |    |
|-----|------|------|------------------------|--------|----|
| 271 | 83   | 353  | TGTC AACATTCAATCACAGCC | 59.562 | 21 |
| 176 | 87   | 262  | TTTCCTTCTTCCCACCACTG   | 60.081 | 20 |
| 146 | 292  | 437  | CCCATCGATCCATTTCTCTC   | 59.44  | 20 |
| 194 | 1050 | 1243 | GGCTCTTCTGTCCGCTAA     | 59.717 | 20 |
| 229 | 2204 | 2432 | GGTCACAGAGGTCGTCCCTA   | 60.112 | 20 |
| 197 | 1737 | 1933 | GCAAGCTTGGTTTGCAGTCT   | 60.581 | 20 |
| 240 | 60   | 299  | AACTCGTCCACCCCTTCTTC   | 60.489 | 20 |
| 237 | 662  | 898  | TTCATTTTGATTGGTGTGCAA  | 59.961 | 21 |
| 147 | 11   | 157  | TTCAAAAGCAAGAAAATGTGA  | 57.995 | 23 |
| 189 | 1498 | 1686 | TTCAAATGCCCACTTTTTCC   | 59.916 | 20 |
| 277 | 28   | 304  | TGAAAAATGACGAAGGAGGG   | 60.044 | 20 |
| 158 | 0    | 157  | ATACCACTCGTTAATCCGGC   | 58.93  | 20 |
| 246 | 3447 | 3692 | AACACCGGAGAGGGAGTTTC   | 60.489 | 20 |
| 170 | 359  | 528  | TGGTTCAATGGGTTATTCGAC  | 59.677 | 21 |
| 127 | 78   | 204  | GTGCATCAACTTATGCCAAA   | 57.223 | 20 |
| 181 | 62   | 242  | TGAAGTTAGGAAATAAGGAGC  | 57.525 | 24 |
| 278 | 450  | 727  | ACGCGATTTCACTCACAACA   | 60.31  | 20 |
| 265 | 6    | 270  | ATGATGGGCACATGGATTTT   | 60.021 | 20 |
| 126 | 103  | 228  | GGTGTGGATGGAAAATGCT    | 59.797 | 20 |
| 242 | 56   | 297  | CGCTTTGGGACAGCAATTAG   | 60.762 | 20 |
| 115 | 301  | 415  | TCGAACAATCAAACCTCGTCG  | 59.84  | 20 |
| 272 | 1443 | 1714 | ATCCGCCATTGTTGAAACTC   | 59.939 | 20 |
| 117 | 4    | 120  | GGCCACCACAAAGGAATAAA   | 59.801 | 20 |
| 146 | 539  | 684  | TTCCCTCTCCTCCTCCATT    | 60.008 | 20 |
| 181 | 1525 | 1705 | GACCAATTCGGTTTGGTGAC   | 60.218 | 20 |
| 239 | 2810 | 3048 | CACGTGTCATCTTCTTCAGCA  | 60.04  | 21 |
| 244 | 684  | 927  | GTGGATGCATTCCATTTGTG   | 59.781 | 20 |
| 121 | 65   | 185  | GGGCTCTTGTTGATCCTTCA   | 60.195 | 20 |
| 200 | 1162 | 1361 | AGATTGCCCTCACATGCAA    | 59.09  | 20 |
| 185 | 432  | 616  | GCTGGAGCAGGTCTTTGTC    | 60.143 | 20 |
| 109 | 155  | 263  | GGGAAGTGTGATGTTTGGT    | 59.679 | 20 |
| 220 | 417  | 636  | TAGGGTTGGGTGCATATTT    | 59.158 | 20 |
| 223 | 889  | 1111 | TTATATGGGTTGGGTACGGG   | 59.406 | 20 |
| 279 | 278  | 556  | TTGAAAATAAAAATGGAGTGA  | 59.343 | 25 |
| 165 | 25   | 189  | TTTTACGAGATGGAAGAAGCT  | 59.445 | 23 |
| 201 | 5    | 205  | GCGAAATTCATGTTGACCCT   | 59.939 | 20 |
| 222 | 307  | 528  | ATGCAAGGATTTCCCAAAA    | 59.388 | 20 |
| 168 | 2    | 169  | GGCATTGCTAGAGCCATTGA   | 61.278 | 20 |
| 272 | 92   | 363  | CCCTCGGATGCTAGTGTTC    | 59.694 | 20 |
| 256 | 183  | 438  | CTCCCCTCCCATGCTAACT    | 60.455 | 20 |
| 269 | 12   | 280  | GTCTCTTCTGGGAGGGTTC    | 60.05  | 20 |
| 174 | 657  | 830  | GATGGGAATGGGAGGTATGA   | 59.563 | 20 |
| 107 | 61   | 167  | GCAGTGGAGTGGAGGAGAAG   | 59.986 | 20 |
| 144 | 1886 | 2029 | TATTGGCTCGGTTTCTTGCT   | 59.845 | 20 |
| 230 | 362  | 591  | AGGATTCCAGCCACATGAAC   | 59.934 | 20 |
| 246 | 143  | 388  | TGGGCTAATCATTCTCAGCA   | 59.375 | 20 |
| 106 | 2157 | 2262 | TTGTCTCTTTCTTCGCCTC    | 59.55  | 20 |
| 198 | 667  | 864  | ATCTGTTCCGAATGCGAGTT   | 59.7   | 20 |
| 237 | 25   | 261  | TCTTAAAGCATCAACCGCCT   | 59.845 | 20 |
| 156 | 34   | 189  | GTCACCTCAGCCGTGTTCTG   | 59.467 | 20 |
| 167 | 5    | 171  | TTGGTGCATATTTTGTTTCG   | 59.562 | 20 |
| 280 | 67   | 346  | CAATCTCAACCCAAACCCAT   | 59.647 | 20 |
| 259 | 12   | 270  | GAAAAGCTTGGCCATTCAAC   | 59.691 | 20 |
| 156 | 1485 | 1640 | TGCCCTTTACTGCCTATGT    | 59.592 | 20 |
| 116 | 349  | 464  | GTTTTTCCACCGAATCAAGC   | 59.551 | 20 |
| 269 | 344  | 612  | TGCTGCTAATTATCCCTCCAA  | 59.69  | 21 |
| 209 | 72   | 280  | ATGATTGGCTAGACATCGCC   | 60.066 | 20 |
| 136 | 31   | 166  | TCATCCATTTTGCACCTGAA   | 60.049 | 20 |



|     |      |      |                        |        |    |
|-----|------|------|------------------------|--------|----|
| 275 | 27   | 301  | ACCCATTTTGATCCTTGTGG   | 59.647 | 20 |
| 161 | 573  | 733  | CGACGATGGGAAGATGGTAG   | 60.474 | 20 |
| 159 | 586  | 744  | TGGATGGCTAAGACAACAACA  | 60.534 | 22 |
| 132 | 187  | 318  | TCGTGAGCTTCTCGATACCA   | 59.547 | 20 |
| 229 | 1428 | 1656 | CCTACAGCTCTATCCCGTCG   | 59.853 | 20 |
| 129 | 34   | 162  | TTTGCAAGTTCCAGCGATT    | 60.752 | 20 |
| 111 | 985  | 1095 | GTCGAGGCGTAAGTTTGAGC   | 60.022 | 20 |
| 200 | 31   | 230  | AGCCAGGGCTTTTATCATGT   | 58.672 | 20 |
| 204 | 2496 | 2699 | GAGACAACGGAGTGGAAGGA   | 60.238 | 20 |
| 246 | 60   | 305  | GCTTCATAGCATCTCTTGCTCA | 59.758 | 22 |
| 221 | 22   | 242  | TCTTGGTAAGCAGACTGCCA   | 59.591 | 20 |
| 109 | 2666 | 2774 | GGCTGAATTTGACGATGCTC   | 60.754 | 20 |
| 189 | 12   | 200  | GCACACAAGTTATTGGTTTCTA | 60.209 | 26 |
| 161 | 786  | 946  | GACCACGGGCGATAGTAAGA   | 60.096 | 20 |
| 126 | 151  | 276  | ATTTCGAAGATCAACGGACG   | 60.074 | 20 |
| 111 | 80   | 190  | CCCCTTACTCAATTTTAATTTG | 57.012 | 24 |
| 262 | 2704 | 2965 | GTTACCGCTTGCTCCTTGAC   | 59.882 | 20 |
| 191 | 169  | 359  | TGCGATGTCTATGTGACGGT   | 60.144 | 20 |
| 203 | 91   | 293  | AAGTCGGACTCTTGTTGCGA   | 59.844 | 20 |
| 147 | 94   | 240  | TTCATCCTCCCTCATTTTCG   | 60.006 | 20 |
| 257 | 1455 | 1711 | TGGTGTCTACACGGTCCTCC   | 60.987 | 20 |
| 204 | 670  | 873  | AGAAGAAAGGTGGGCATGAA   | 59.67  | 20 |
| 233 | 1745 | 1977 | ACATCCATCTCAAAACAATATC | 57.575 | 24 |
| 212 | 3056 | 3267 | GCAGTTTGGCATCAGAGTCA   | 59.992 | 20 |
| 194 | 1145 | 1338 | TGTGACAGAGCTGAAATGGG   | 59.831 | 20 |
| 257 | 148  | 404  | TTTTGTTTCGTTTTGTTGCG   | 59.758 | 20 |
| 262 | 607  | 868  | AACCTGCATTCCCAATTCAC   | 59.797 | 20 |
| 126 | 98   | 223  | GAGTGAAGATGAAGTGGGGG   | 59.505 | 20 |
| 235 | 1914 | 2148 | CCCCCTAACATTTTCCCACT   | 60.046 | 20 |
| 156 | 132  | 287  | CAGCCCGGTACAGAAGGTAA   | 60.125 | 20 |
| 265 | 194  | 458  | AATTCATGCCAATTTCTGCC   | 59.907 | 20 |
| 194 | 765  | 958  | TGTTTTCTTTTTGCATAATCA  | 57.152 | 24 |
| 248 | 136  | 383  | CGTTACAGCATCACTCGGAC   | 59.318 | 20 |
| 260 | 312  | 571  | TATGAGCCCGCACATTATCA   | 60.058 | 20 |
| 275 | 1281 | 1555 | TTTTGTGCCTTCATTATGCC   | 58.627 | 20 |
| 279 | 845  | 1123 | TGGAAGGTATGTGAAATTTGG  | 57.474 | 21 |
| 117 | 92   | 208  | TCTTGGCAAGGCTCTGAAAT   | 59.955 | 20 |
| 146 | 42   | 187  | TGTTACTCTATCTGCATGCTCT | 57.376 | 23 |
| 161 | 177  | 337  | AAAGGGAGTTGCAGTCAGGA   | 59.844 | 20 |
| 152 | 206  | 357  | TTCTCCCCCTCTCTCTCGAT   | 60.292 | 20 |
| 235 | 8    | 242  | CACATACTCACGCATTCCCA   | 60.539 | 20 |
| 162 | 31   | 192  | GCCTACCTTGCTTCCGTAGA   | 59.476 | 20 |
| 173 | 92   | 264  | GGTGCTTTCTGGTTCATCGT   | 60.119 | 20 |
| 229 | 179  | 407  | AGACCGAACCGAAACTGGTA   | 59.592 | 20 |
| 179 | 8    | 186  | TGCAAGATCCAAGGGATGTA   | 59.075 | 20 |
| 277 | 449  | 725  | CAAACATTTATCTTGCCTTGG  | 57.4   | 22 |
| 118 | 74   | 191  | ACAGCAGGGTGTGTGTGA     | 60.203 | 20 |
| 268 | 796  | 1063 | CTCGGTCTCTCATCCATTT    | 60.362 | 20 |
| 236 | 761  | 996  | GGGAGTATCACTGGAATGC    | 59.366 | 20 |
| 258 | 225  | 482  | ACGACGCATAAAGAGGCAAA   | 60.772 | 20 |
| 153 | 233  | 385  | CGCTGTTTCACCATTGGATT   | 60.894 | 20 |
| 254 | 406  | 659  | GCCCAAGTCTCATCTTCAA    | 60.195 | 20 |
| 177 | 142  | 318  | AAAGGTTCAACAACTACGCA   | 59.663 | 21 |
| 231 | 311  | 541  | CCTAGTCGCTCGTGGTTCA    | 59.992 | 19 |
| 279 | 820  | 1098 | GCGCGCTAAATCAGATCAAT   | 60.339 | 20 |
| 195 | 26   | 220  | CCAGAGGAGAAATAGGGAGA   | 58.845 | 22 |
| 250 | 11   | 260  | TGACCACTTTTTACGGATTTGA | 59.492 | 22 |
| 202 | 578  | 779  | TTCTTTTGAACCAGGCAACC   | 60.088 | 20 |

|     |      |      |                       |        |    |
|-----|------|------|-----------------------|--------|----|
| 216 | 3573 | 3788 | CCAATCATGCTGGTTTTTCA  | 59.518 | 20 |
| 186 | 592  | 777  | ATGCAACCAGATTCAAAGGG  | 59.933 | 20 |
| 273 | 470  | 742  | AATTGCAAACCCAATAAGC   | 58.311 | 21 |
| 245 | 3    | 247  | GGTTTGGCTTGACCTTGATT  | 59.031 | 20 |
| 138 | 88   | 225  | GGAAATGACACCCAAACCAC  | 60.073 | 20 |
| 136 | 93   | 228  | TCCACTCTCTTCTCTCCCTT  | 60.006 | 23 |
| 154 | 18   | 171  | ACCATATTTAAGGGTTATCAC | 57.552 | 24 |
| 276 | 71   | 346  | TAACTCAAATCTTGCCCCG   | 60.067 | 20 |
| 167 | 241  | 407  | CGAAGCAAACCTATTTCCCC  | 60.792 | 20 |
| 136 | 327  | 462  | AAAAACTCACTGGTCGTGCG  | 60.299 | 20 |
| 272 | 3    | 274  | AAAAATGGGGGAAATTTGATT | 58.593 | 21 |
| 146 | 1565 | 1710 | CGTCCAAAATCGTATCCGTTA | 59.84  | 21 |
| 147 | 1451 | 1597 | ATTCTTCAGGCTGCTGCTGT  | 60.164 | 20 |
| 269 | 1530 | 1798 | CGTTTCGCAAATTAATCGGT  | 59.964 | 20 |
| 155 | 49   | 203  | GGGCTCAATCTTGCTGCTAA  | 60.49  | 20 |
| 156 | 1160 | 1315 | CAATGAAACCAAACCATCCA  | 59.222 | 20 |
| 275 | 5583 | 5857 | GAACAGGCTGTGCCATTTCT  | 60.263 | 20 |
| 169 | 306  | 474  | GAGGTGGTTGCACCATAACG  | 61.355 | 20 |
| 268 | 142  | 409  | TCGAAAATCAAAGGCACACA  | 60.234 | 20 |
| 273 | 4676 | 4948 | GATCGGAACGCTCATCAAAT  | 60.043 | 20 |
| 217 | 661  | 877  | GCATTTGTCCCGTATGGCTA  | 60.857 | 20 |
| 252 | 1020 | 1271 | CCCTCTTGATGGATTTTTGAC | 58.491 | 21 |
| 216 | 1765 | 1980 | TTGGCAGACTACTTTGTGGG  | 58.773 | 20 |
| 165 | 549  | 713  | CATTTATTTCTGCCCTCCA   | 59.894 | 20 |
| 273 | 354  | 626  | CCAGCACGATAGATACAAATC | 59.536 | 23 |
| 275 | 545  | 819  | TCGCTGGTTTTGTAGTCGTG  | 59.904 | 20 |
| 110 | 8    | 117  | ATTCTGTGCGATAGGTGCGT  | 59.579 | 20 |
| 122 | 1666 | 1787 | CTTGCAATTAATGAGCCGTCA | 59.833 | 20 |
| 146 | 0    | 145  | GCGTTTTGACGATATATAGTG | 60.194 | 26 |
| 279 | 104  | 382  | AATCAATCTTTGAAACCGGC  | 59.022 | 20 |
| 249 | 194  | 442  | ACAAATGCCAGCCGTTAGAT  | 59.597 | 20 |
| 207 | 194  | 400  | CTATCCATTTAGTTCGCGGG  | 59.564 | 20 |
| 152 | 138  | 289  | TCTGCTTCACTCACTCACGC  | 60.343 | 20 |
| 270 | 2030 | 2299 | CACTGCTCTTTTTCTCGG    | 60.126 | 20 |
| 263 | 232  | 494  | GATTTTCGATGGTTTTGGGTG | 60.17  | 20 |
| 180 | 718  | 897  | GGCACACCTGTATACCCAC   | 60.119 | 20 |
| 269 | 1279 | 1547 | TGCATCTTTGGGGATGAGAT  | 60.426 | 20 |
| 258 | 93   | 350  | AAAATCGACCGCACATTTTA  | 58.161 | 20 |
| 260 | 596  | 855  | GATAGGCCCTAACTCGACCC  | 59.925 | 20 |
| 219 | 89   | 307  | ACGTTGTCCTGAGCACGTTA  | 59.365 | 20 |
| 275 | 557  | 831  | AGAGGGAGATCGTGGGAGAG  | 60.748 | 20 |
| 235 | 687  | 921  | CCATGATATTGTTCTTCGGA  | 59.77  | 21 |
| 219 | 23   | 241  | TGATGAAGTTGGGTGTTGGA  | 59.935 | 20 |
| 197 | 57   | 253  | CCTAAAATTGAACGAAACTCG | 59.667 | 23 |
| 155 | 184  | 338  | TAGCCCCTTTGAGACCATTG  | 60.066 | 20 |
| 134 | 589  | 722  | CGTATGACGTATTTTGGGGG  | 60.067 | 20 |
| 251 | 226  | 476  | TTCCGATGGAATGCATTTT   | 60.268 | 20 |
| 203 | 67   | 269  | CTGCACGGACACAGAAACAC  | 60.357 | 20 |
| 155 | 24   | 178  | TCCCAGTTCAACTCTTTCTCG | 59.458 | 21 |
| 123 | 274  | 396  | GTGTGGGTTCTCTCGTGTT   | 60.009 | 20 |
| 176 | 231  | 406  | TCCACTAGGGGTACCAAATG  | 58.82  | 21 |
| 195 | 19   | 213  | AAAGCCAATCGAGTCTTGGA  | 59.813 | 20 |
| 207 | 15   | 221  | AGAGATTTGAGCTTGGTGGG  | 59.284 | 20 |
| 190 | 170  | 359  | TTTAACCCGGAAACGTAGA   | 59.447 | 20 |
| 188 | 0    | 187  | CGAATAGAGTGATGAGCCAAC | 57.436 | 21 |
| 174 | 65   | 238  | GCAACGGAATACCACTCGTT  | 60     | 20 |
| 176 | 2657 | 2832 | ACACCATACCCAAAAGCCTG  | 59.853 | 20 |
| 278 | 396  | 673  | TCTCAATCATGCGATCCAAA  | 60.159 | 20 |

|     |      |      |                        |        |    |
|-----|------|------|------------------------|--------|----|
| 227 | 147  | 373  | GGAAGCGCAATTAATACGGA   | 60.061 | 20 |
| 197 | 68   | 264  | ACGATTTTGCCCTTGTATGC   | 59.967 | 20 |
| 278 | 150  | 427  | CACGATAAGGGATGGATTCAC  | 59.259 | 21 |
| 276 | 1089 | 1364 | ATTAATGAGCCGACTCGCAT   | 59.696 | 20 |
| 174 | 44   | 217  | TGTTCAAATGATTTTGGGGG   | 60.535 | 20 |
| 158 | 48   | 205  | CACGCACGCATTCTTCTTT    | 60.003 | 19 |
| 270 | 1589 | 1858 | TTAAGTCCTACCGCGCCTT    | 59.853 | 19 |
| 272 | 27   | 298  | AATCGTTGCTGGAGCGTC     | 59.95  | 18 |
| 177 | 75   | 251  | AGCCATCGCTCAACCTACAC   | 60.285 | 20 |
| 217 | 163  | 379  | TCATGGGATCAGTTTCAATCC  | 59.741 | 21 |
| 270 | 105  | 374  | ACTGTGCTGCTGGAAAATTG   | 58.926 | 20 |
| 210 | 53   | 262  | ACAAATGACCAAGGAGGAGT   | 57.626 | 21 |
| 255 | 156  | 410  | TGGATTGTATGTGTCCCCAG   | 59.215 | 20 |
| 246 | 123  | 368  | GTTATGTGGCCCGAATGACT   | 59.82  | 20 |
| 176 | 4    | 179  | CCCATGTTTGAATTATTGTAG  | 58.675 | 24 |
| 261 | 3368 | 3628 | TTGAAATTTTGGGGGAAAAA   | 59.251 | 20 |
| 115 | 549  | 663  | GAGCTTGGCAGAACGAGAAC   | 60.142 | 20 |
| 232 | 429  | 660  | GCCTTATTTGATGCACGGAC   | 60.478 | 20 |
| 204 | 314  | 517  | GGTTTTGTTTCAGAGGCCAG   | 59.711 | 20 |
| 191 | 226  | 416  | GGAGGAGTTCTCTGTGTCGG   | 59.835 | 20 |
| 274 | 429  | 702  | GCGTGACGCACAGTTTCTTA   | 60.058 | 20 |
| 208 | 681  | 888  | CTGATGTCAATTTCCATATCCA | 57.427 | 22 |
| 171 | 936  | 1106 | CCTGATAAATGGCACCCACT   | 59.813 | 20 |
| 258 | 3975 | 4232 | AAAGGGGTTTGGTTGGAGAC   | 60.204 | 20 |
| 157 | 99   | 255  | TCGTCAAACCTCCCAAACCTT  | 59.569 | 20 |
| 112 | 7    | 118  | GGCAACGGAATACCATTTGT   | 59.691 | 20 |
| 261 | 1647 | 1907 | CTCCCTCTCCCATCTCCAAT   | 60.412 | 20 |
| 186 | 2272 | 2457 | TCCAAGGGAAAGTGTTCAAGA  | 59.697 | 21 |
| 278 | 1042 | 1319 | GGAGGGGCAAAGAAAAGACT   | 59.691 | 20 |
| 235 | 53   | 287  | CGAAGTTTCGTAGAATTCGGA  | 59.348 | 21 |
| 261 | 35   | 295  | AACAAACACCTGGGACCACT   | 59.325 | 20 |
| 214 | 169  | 382  | TGTGAAGAGTACAACCTACAC  | 59.494 | 24 |
| 180 | 446  | 625  | CGAAAGCTGAAGAGCGAGAT   | 59.859 | 20 |
| 276 | 380  | 655  | GGTCGGGGAAACAAAGTACAA  | 59.83  | 20 |
| 208 | 20   | 227  | CAATTTCTTTCATGTGGCCT   | 59.184 | 21 |
| 265 | 327  | 591  | CAAACGCTTTGTTTTCCGTT   | 60.145 | 20 |
| 190 | 389  | 578  | CGTATTCATTGTTTTCGGCA   | 59.562 | 20 |
| 279 | 70   | 348  | CAATCTCAACCCAAACCCATA  | 59.671 | 21 |
| 122 | 2    | 123  | TTGGTTCACACAACCACTCC   | 59.415 | 20 |
| 179 | 62   | 240  | CTCCCACTAAAATTTTCCCGT  | 59.359 | 21 |
| 273 | 1346 | 1618 | GTGAGTGCCTGTGTGTGGTC   | 60.216 | 20 |
| 132 | 51   | 182  | GCATGCTAGTGCCTGTTGTG   | 60.481 | 20 |
| 277 | 707  | 983  | GCTCTCAAGGAGGAGAGCAA   | 59.827 | 20 |
| 204 | 325  | 528  | TCACAACAGGATTCAGGCAG   | 59.831 | 20 |
| 250 | 98   | 347  | TCACAAAAGATTCGATTCGG   | 60.06  | 21 |
| 276 | 573  | 848  | GGACTGCTGCTCCTCTAACC   | 59.043 | 20 |
| 231 | 27   | 257  | AGTGAGGAGTTCACGGAGGA   | 59.835 | 20 |
| 240 | 2016 | 2255 | TCTCAAACCAACAACAACCC   | 59.861 | 21 |
| 280 | 402  | 681  | CGACTACTCAATCATCCAACC, | 60.787 | 23 |
| 256 | 553  | 808  | AAGGGAGGAAAACGTAACCC   | 59.326 | 20 |
| 271 | 29   | 299  | TCCGTGACATCAAACACTCC   | 59.525 | 20 |
| 187 | 2314 | 2500 | AGACCGTGGTTGATCCAGAG   | 60.112 | 20 |
| 211 | 40   | 250  | GGGGAAAATTTGCAAGATGA   | 59.878 | 20 |
| 192 | 4158 | 4349 | CCCCATGTGATTGATGATGA   | 60.137 | 20 |
| 276 | 289  | 564  | TTCATCTGCTGAAAGGAGGG   | 60.331 | 20 |
| 170 | 75   | 244  | AAATCGGCGAATTTATCTGC   | 59.174 | 20 |
| 247 | 502  | 748  | CAGGTGCAGGGAAGAAATGT   | 60.111 | 20 |
| 233 | 1762 | 1994 | TAAGCAATTGATTGTCCGCA   | 60.215 | 20 |

|     |      |      |                         |        |    |
|-----|------|------|-------------------------|--------|----|
| 145 | 12   | 156  | ATGGCCACAAATGGTTCCTA    | 60.192 | 20 |
| 193 | 309  | 501  | CTCTCCGAACAAATGTGCAA    | 59.84  | 20 |
| 212 | 138  | 349  | TTAGGGTTTAAAATCGCGCA    | 60.564 | 20 |
| 162 | 22   | 183  | CGTTGAGCCGAATGTGTTA     | 59.729 | 20 |
| 222 | 1022 | 1243 | ATTCACGTCCACGTTTCTCC    | 59.973 | 20 |
| 168 | 10   | 177  | CCTTTCCTAACAGTTTGGCATC  | 60.001 | 22 |
| 130 | 43   | 172  | CGCCATTCTCTCTCCACTCT    | 59.555 | 20 |
| 253 | 212  | 464  | TGCGTGTTCTTGGTGTTCCT    | 59.339 | 20 |
| 129 | 160  | 288  | ATCCCAAGTCATCACCGCTA    | 60.483 | 20 |
| 133 | 99   | 231  | GAGTGAAGATGAAGTGGGGG    | 59.505 | 20 |
| 260 | 869  | 1128 | TTTCCGACACCCAATCCTAC    | 59.79  | 20 |
| 141 | 2556 | 2696 | CCACCTGGAAATCTCCTTCC    | 60.822 | 20 |
| 218 | 19   | 236  | GATATTGACGGTTGGTTGGC    | 60.199 | 20 |
| 269 | 34   | 302  | AATGAACCAAGTCATTGCAGC   | 60.133 | 21 |
| 182 | 89   | 270  | AAGCCAAAAGATACGTCGGA    | 59.708 | 20 |
| 262 | 398  | 659  | AGGTTGGAGGGAATGGAGAG    | 60.447 | 20 |
| 115 | 14   | 128  | AAAATACCATTTTCATTTTGTAA | 57.172 | 27 |
| 154 | 3562 | 3715 | ACTGAAAACAGCTTCCGTGG    | 60.291 | 20 |
| 190 | 2    | 191  | CACGAGTGAAGAAAGGGAGA    | 59.072 | 21 |
| 251 | 882  | 1132 | TGCATTGATTGATCGACAGC    | 60.79  | 20 |
| 244 | 1024 | 1267 | TGGGATTAATTTCCACCATGA   | 60.002 | 21 |
| 243 | 28   | 270  | TCAAATCATAGTCTTTCCTCGT  | 60.02  | 25 |
| 201 | 3    | 203  | TGAAGTTAGGAAATAAGGAGC   | 58.743 | 25 |
| 232 | 749  | 980  | TTTTCTCTCTCCGTCTCCCA    | 59.92  | 20 |
| 106 | 183  | 288  | GAAATTTTCGCTAAGTCGAGAA  | 58.255 | 24 |
| 256 | 2225 | 2480 | AGGGACAGCTGTGGACTCTG    | 60.458 | 20 |
| 276 | 188  | 463  | TGTGGTATCAGAGCCACGAC    | 59.707 | 20 |
| 200 | 44   | 243  | GCATTTATGTGTCAGCCCCT    | 59.962 | 20 |
| 186 | 334  | 519  | TGGTGAACGTGTTTTGTTGC    | 60.596 | 20 |
| 192 | 16   | 207  | TCACCACCACCATCTTCAA     | 59.935 | 20 |
| 274 | 5    | 278  | GTGTTTCGTTGGTGGAGTTGA   | 59.571 | 20 |
| 276 | 109  | 384  | CATCCTAAAGATAAGAATGGT   | 57.108 | 26 |
| 202 | 155  | 356  | GGCAAACATGAATTCGTTCC    | 60.318 | 20 |
| 171 | 30   | 200  | GGGAGAAGTTGGTGAATTTGA   | 59.017 | 21 |
| 216 | 179  | 394  | CCTTTCCTCCCCGTAAATTC    | 59.772 | 20 |
| 276 | 18   | 293  | ATCGATTATTACCGGATCGC    | 58.88  | 20 |
| 204 | 70   | 273  | CACACGCATTCTTCTCCCT     | 60.255 | 20 |
| 173 | 268  | 440  | TGAGTTTTGAATTCGGACCC    | 59.91  | 20 |
| 201 | 579  | 779  | AGACAGCAATACCAGGGGTG    | 59.989 | 20 |
| 144 | 2350 | 2493 | GTCGTGGCTCATTTTGAGGT    | 60.119 | 20 |
| 171 | 363  | 533  | ACCGACTTCTGCACCATTTT    | 60.119 | 20 |
| 247 | 18   | 264  | TCGGTCTTGCTCCATTACC     | 60.074 | 20 |
| 174 | 16   | 189  | TTTTTCTTCCACAAACCCCT    | 59.837 | 21 |
| 116 | 62   | 177  | CAGGAAGGGAAAAGCATCTG    | 59.807 | 20 |
| 177 | 577  | 753  | TGTAAAGGTAGGAAATTTTTGC  | 58.665 | 23 |
| 229 | 2043 | 2271 | GGGTTTGAAATTTTGAATGCT   | 58.1   | 21 |
| 248 | 481  | 728  | TTGAAAATCTGAGCGTCCAA    | 59.395 | 20 |
| 271 | 102  | 372  | GATTTGGCTAGGAATGGCAA    | 60.038 | 20 |
| 132 | 264  | 395  | TCGTCCGAACACATTGAAGA    | 60.24  | 20 |
| 192 | 6    | 197  | GTA CT CGGACGGGATCTTGA  | 60.073 | 20 |
| 273 | 1848 | 2120 | AGGGGAGGTGTTATTCAGGG    | 60.183 | 20 |
| 209 | 77   | 285  | TGTTTCTTCCACCTCCTGCT    | 59.844 | 20 |
| 212 | 6    | 217  | CGAGTGGTTGTGAGGTGAGT    | 58.725 | 20 |
| 229 | 430  | 658  | TCGCACAAATGATAGCGAAT    | 59.285 | 20 |
| 251 | 1216 | 1466 | TGAACCACCTCTGCAAACAA    | 60.278 | 20 |
| 188 | 151  | 338  | TGCATAAGACACCTAGCCCA    | 59.297 | 20 |
| 250 | 274  | 523  | TGATGACTGGGCAACTCAAG    | 59.831 | 20 |
| 236 | 606  | 841  | TCATCTCCATCCCCCAATAA    | 60.088 | 20 |

|     |      |      |                         |        |    |
|-----|------|------|-------------------------|--------|----|
| 233 | 465  | 697  | GAAAAGCGAAGTGAAGCGAG    | 60.27  | 20 |
| 277 | 399  | 675  | GCAAATCTGGATCCTTCGTT    | 59.129 | 20 |
| 253 | 114  | 366  | AAACTTGAGCAGTCAGTTCGA   | 59.468 | 23 |
| 240 | 18   | 257  | CTCCACCAGATCATCACCAA    | 59.473 | 20 |
| 212 | 3087 | 3298 | CCAACCTCCCTGACTGCAC     | 60.567 | 20 |
| 229 | 1723 | 1951 | TAGTTGGAGGGAATGCTTCG    | 60.206 | 20 |
| 221 | 225  | 445  | TGGCTCCTGAATCTCACAGA    | 59.499 | 20 |
| 219 | 76   | 294  | TCACACAGAATCCCTGTTGC    | 59.682 | 20 |
| 147 | 27   | 173  | ATAAATATCAGGTGTTTTCTGA  | 57.122 | 26 |
| 177 | 0    | 176  | CCCTTTTAGGCTCAAATCTCTT  | 58.117 | 22 |
| 178 | 220  | 397  | TTTTTCGCCTCCCACTAAAA    | 59.693 | 20 |
| 146 | 222  | 367  | TTTTTGCCACCTATGCACAA    | 60.111 | 20 |
| 189 | 36   | 224  | TCGGCCAGAGAGAAAAAGAA    | 60.066 | 20 |
| 265 | 106  | 370  | AGTGCGTTTGCAGAGCTTTT    | 60.197 | 20 |
| 124 | 97   | 220  | CATGATATTTTTCTAAATTTT   | 58.561 | 27 |
| 185 | 105  | 289  | CTCACCGTGGACGTAGATCA    | 59.701 | 20 |
| 269 | 1205 | 1473 | TTGTTTAGAACAGCGGCAGA    | 59.609 | 20 |
| 238 | 332  | 569  | AGGGTACCGGAGATGAGGAT    | 59.778 | 20 |
| 174 | 1    | 174  | CCACAAACCGAGCTCACC      | 60.246 | 18 |
| 117 | 194  | 310  | TCATGGATAGAGCGTGCAAT    | 59.256 | 20 |
| 278 | 21   | 298  | TCGGTGATTCAAGAGTGGAG    | 58.8   | 20 |
| 243 | 47   | 289  | CGGGCTGAGATAGTTGTTGA    | 58.874 | 20 |
| 100 | 1    | 100  | AAGGAACAAATGAGAATGTTA   | 59.957 | 25 |
| 196 | 5    | 200  | AGGGATTTGGGACGATTTTC    | 60.131 | 20 |
| 262 | 500  | 761  | ATGCTACTTGGGCGTACACA    | 59.224 | 20 |
| 164 | 3    | 166  | GGTGTCTTGGCAACAGGTC     | 60.555 | 20 |
| 178 | 26   | 203  | TCAGTTTCGAGTTATGAAGTTA  | 59.749 | 26 |
| 176 | 1840 | 2015 | TGGATTGAAGCATGAGCCTA    | 59.375 | 20 |
| 114 | 170  | 283  | ATGGGGCTGTGGTTGTAGAG    | 59.989 | 20 |
| 267 | 247  | 513  | CAGTGACTCACCTGAAACGC    | 59.467 | 20 |
| 197 | 492  | 688  | CACCTGCAACAGAGGAGTCA    | 60.022 | 20 |
| 170 | 89   | 258  | TCACATCAATTTTCACACCCA   | 59.808 | 21 |
| 187 | 173  | 359  | CATGATTGCCTGCTGAGTGT    | 59.862 | 20 |
| 181 | 390  | 570  | TGCAAGCATCAAACAACACA    | 59.877 | 20 |
| 238 | 53   | 290  | GATTTGTGTAATGCCCCGAT    | 59.651 | 20 |
| 127 | 392  | 518  | ACCTTACCCAACCCACTTCC    | 60.088 | 20 |
| 237 | 541  | 777  | ATCGAAGAGAATGTCGACGG    | 60.218 | 20 |
| 182 | 17   | 198  | ACGTCTTGATGTCGAAACCC    | 59.973 | 20 |
| 279 | 763  | 1041 | TAGGGTTAGCATGCTTGGGA    | 60.597 | 20 |
| 177 | 249  | 425  | CATCAACCGCCAGGATTATT    | 59.784 | 20 |
| 219 | 193  | 411  | GATGGAATGGGGATTTGTCA    | 60.526 | 20 |
| 229 | 83   | 311  | ACCCACCTTTCTTGGATTC     | 60.169 | 20 |
| 225 | 363  | 587  | AACGTGAATCTCGGATCAGC    | 60.226 | 20 |
| 103 | 591  | 693  | GCGTACATTTGCCCTAAGA     | 60.096 | 20 |
| 211 | 177  | 387  | CATCCAGTTTCGGTTTCAAT    | 59.79  | 20 |
| 214 | 206  | 419  | ATTGACTTGGGCTTTGCATT    | 59.574 | 20 |
| 203 | 164  | 366  | CTCTTGTAACAAAACCCCATG   | 58.035 | 22 |
| 252 | 93   | 344  | GTGGGCTAAGTGAGGTGGAG    | 59.721 | 20 |
| 242 | 338  | 579  | TCCAATGGAGAACCCTTTGT    | 59.381 | 20 |
| 204 | 3744 | 3947 | ACCAAGTCAATTCCTAGTGCG   | 59.252 | 21 |
| 170 | 392  | 561  | TTGACTTGTGACCCTCTCCC    | 60.088 | 20 |
| 277 | 1    | 277  | CATACCAAGTCCCAGGGAGA    | 59.92  | 20 |
| 215 | 278  | 492  | TGAGACTGCCTTCGTCACAC    | 60.03  | 20 |
| 222 | 490  | 711  | TTTCAATGGGTAGCTCAGGG    | 60.066 | 20 |
| 102 | 50   | 151  | CAAATGGCCGAGAGAGAGTT    | 59.43  | 20 |
| 235 | 953  | 1187 | CCCCACAGATATCCCACCTA    | 59.623 | 20 |
| 183 | 646  | 828  | TCATCATTCGACTTCCATGC    | 59.61  | 20 |
| 162 | 2    | 163  | AATCTCCATGTTCCAGGACTTCA | 58.646 | 22 |

|     |      |      |                         |        |    |
|-----|------|------|-------------------------|--------|----|
| 168 | 3636 | 3803 | TGTGACACCAATGTGATGGA    | 59.325 | 20 |
| 223 | 364  | 586  | GCAAAGTGTGCGGTCAAAT     | 59.713 | 19 |
| 164 | 44   | 207  | AGAGGAGCCCAGCTTCTTTC    | 60.096 | 20 |
| 257 | 88   | 344  | AATCTTCATAAGTGGAGGGGC   | 59.433 | 21 |
| 266 | 836  | 1101 | CAAAACGTCCGTATCGACAA    | 59.585 | 20 |
| 183 | 103  | 285  | CTTGAAGATTTTCATGGTGG    | 57.657 | 21 |
| 208 | 453  | 660  | ATGTTTCAATGACACGTGGG    | 59.267 | 20 |
| 167 | 158  | 324  | CTGGGTCTGGTGTGTTGTG     | 60.039 | 20 |
| 217 | 1291 | 1507 | TTTACATTTTTCTGGCTCCCA   | 59.573 | 21 |
| 163 | 3    | 165  | TGAAGTTAGGAAATAAGGAGC   | 58.743 | 25 |
| 261 | 4160 | 4420 | TCATCATCGTGCTTTCCTTG    | 59.799 | 20 |
| 162 | 136  | 297  | TGCATGCACACTTGTAACCA    | 59.746 | 20 |
| 129 | 2508 | 2636 | GGAAGAATGCGTGTGTGTTG    | 60.16  | 20 |
| 268 | 1303 | 1570 | ATGCTGAGGTGTTGTCGGTC    | 61.146 | 20 |
| 201 | 1628 | 1828 | GGCTGAACCATTACCTGAT     | 59.934 | 20 |
| 252 | 1109 | 1360 | GATCAGGTGGAATCAGGGAA    | 59.862 | 20 |
| 276 | 260  | 535  | TGCACGTAGGCATGTTCAAT    | 60.142 | 20 |
| 147 | 585  | 731  | AGCTTGGAAATTGGTGACGAG   | 60.255 | 20 |
| 173 | 1    | 173  | TGCAATTAGTGCATACAATGA   | 57.43  | 24 |
| 205 | 52   | 256  | ATCGCAAATAAAACAACCGC    | 59.971 | 20 |
| 118 | 1950 | 2067 | TCCACCGATCAAAGAGTTCC    | 60.05  | 20 |
| 173 | 31   | 203  | CTGATTCGCACAAATGATCG    | 60.22  | 20 |
| 248 | 88   | 335  | ACGTGTGTGTGATTGAGGGA    | 60.005 | 20 |
| 208 | 393  | 600  | TGGTTACTCGAACGCGA       | 59.325 | 20 |
| 241 | 145  | 385  | GACCGTGTAGGAAGGCTGAG    | 59.867 | 20 |
| 126 | 233  | 358  | TTCTAGGCACAAAACCCACC    | 59.971 | 20 |
| 232 | 95   | 326  | TCTGAGGATCCGAGCTCATT    | 59.91  | 20 |
| 277 | 319  | 595  | CCCCAAATCATTACCGAGAA    | 59.756 | 20 |
| 177 | 795  | 971  | GTTCAAGAAAGCCGTGGAAG    | 59.853 | 20 |
| 276 | 148  | 423  | CATCCTCATAACCCCCACAC    | 60.05  | 20 |
| 229 | 2166 | 2394 | CTTAAGACCCGATGCCTTTG    | 59.702 | 20 |
| 245 | 985  | 1229 | TTCTCTATCAATCGGCTGGG    | 60.17  | 20 |
| 167 | 418  | 584  | AAACCACCCGTCTTTTCTT     | 59.842 | 20 |
| 242 | 175  | 416  | TCCTTCCATCTTCCCTCCT     | 60.008 | 20 |
| 251 | 1823 | 2073 | AAATGAGACAAATGTGGGGG    | 59.647 | 20 |
| 256 | 950  | 1205 | GCACTGTGTGCCAAGAGAGA    | 60.187 | 20 |
| 280 | 1247 | 1526 | ATCCTTGATTTCTCGGAGGG    | 60.401 | 20 |
| 257 | 336  | 592  | GTTTTCGTCCGTCCCATAAA    | 59.801 | 20 |
| 226 | 4330 | 4555 | CACGTCCGTACAACACTACATC  | 59.424 | 22 |
| 267 | 82   | 348  | GTGGAGTGCCACAACACTAGCA  | 59.905 | 20 |
| 267 | 625  | 891  | ACCCTCAAGCATCAGCATT     | 60.226 | 20 |
| 224 | 1929 | 2152 | AGCCTGTGCGAGTCTCACTT    | 60.205 | 20 |
| 185 | 235  | 419  | CGGACACATAGTTGTGCGAG    | 60.324 | 20 |
| 220 | 275  | 494  | TGAAAATGGGTACCACACACA   | 59.725 | 21 |
| 147 | 1404 | 1550 | TGCAATTCATCAGTCTTGTGC   | 59.862 | 21 |
| 280 | 247  | 526  | GCAGGTTCGAAGTAGGGTGT    | 59.212 | 20 |
| 133 | 3837 | 3969 | TAATCTTTTTCGATGCCTCA    | 59.401 | 20 |
| 212 | 248  | 459  | GTTTTAAGTTTGGGGGTGGG    | 60.435 | 20 |
| 217 | 41   | 257  | CGATTGGCCTATCCTATCA     | 59.878 | 20 |
| 132 | 52   | 183  | CGCTCTTCTTTCGTTTTGAGA   | 59.755 | 21 |
| 280 | 287  | 566  | GCGAAACAATGATCGCATT     | 59.668 | 20 |
| 279 | 337  | 615  | CTTTTTCGGGTTTGGACGTA    | 59.968 | 20 |
| 102 | 38   | 139  | CAATACAACACTGTCGAGCTGAA | 58.464 | 23 |
| 152 | 239  | 390  | AAAGGCCACGATGGTTATT     | 60.562 | 20 |
| 255 | 260  | 514  | TGGAATTCATGGCAGATGA     | 60.009 | 20 |
| 180 | 286  | 465  | AACCGTGTGTACAACAATAGC   | 59.499 | 23 |
| 199 | 28   | 226  | CCTCTCCTCTCAACTTGCTTG   | 59.218 | 21 |
| 159 | 6    | 164  | ATTGGCCCTTGATCTCCATA    | 59.344 | 20 |

|     |      |      |                         |        |    |
|-----|------|------|-------------------------|--------|----|
| 225 | 75   | 299  | GCATCTCTTGCTCTCTCGTTG   | 60.292 | 21 |
| 245 | 1544 | 1788 | GCAGAAGGAACTGATGGCTC    | 59.957 | 20 |
| 154 | 593  | 746  | ACTGTCGGAAAGGTCGAGAA    | 59.844 | 20 |
| 178 | 420  | 597  | CAGCAGAGCATACTGCCAAG    | 59.764 | 20 |
| 215 | 105  | 319  | TTCGGTCCTTCTTCTCCTCA    | 59.92  | 20 |
| 181 | 232  | 412  | CCTTATGAAAAACGTTGGGG    | 59.311 | 20 |
| 170 | 2    | 171  | AGCCTCGGATTTCTGTTTC     | 60.578 | 20 |
| 279 | 83   | 361  | TAGGGTTAGCATGCTTGGGA    | 60.597 | 20 |
| 195 | 100  | 294  | TTACGGATGCATTCGACATT    | 58.994 | 20 |
| 125 | 47   | 171  | TGGGGTTGTTGGAAGAAAAA    | 60.314 | 20 |
| 118 | 205  | 322  | GGATTGGGCTTTGAGAATGA    | 60.014 | 20 |
| 173 | 203  | 375  | CCGAAAATCCTTTACCCTT     | 60.291 | 20 |
| 209 | 18   | 226  | CAGAAATTGCCTTGGTTGTTT   | 59.601 | 21 |
| 135 | 293  | 427  | TGACGCTGAAGTTAATGCAAG   | 59.122 | 21 |
| 105 | 102  | 206  | TTTGGTCTTCTAGCCTCTCTCG  | 60.144 | 22 |
| 220 | 241  | 460  | ATCGCATTGCTATCATCCAA    | 59.094 | 20 |
| 148 | 77   | 224  | TCATATGATGACAGCCAGCC    | 59.635 | 20 |
| 232 | 296  | 527  | GAAACACTTTCACCTCCCCA    | 59.943 | 20 |
| 275 | 69   | 343  | GTTGGCAAACAGTCCCTAA     | 59.971 | 20 |
| 156 | 1298 | 1453 | ATGGGATAGCACTTTTGCCA    | 60.469 | 20 |
| 190 | 10   | 199  | ACGGATTTAAGGTTATTACCT   | 57.667 | 23 |
| 155 | 495  | 649  | TTCTCCTCCCCTTAGCTTCC    | 59.783 | 20 |
| 150 | 132  | 281  | CGTCGAAAGGGAAAGAAACA    | 60.22  | 20 |
| 227 | 163  | 389  | GTTTTGGGGTACATGCCACT    | 59.717 | 20 |
| 158 | 615  | 772  | CACAAAATGGATCGAAACGA    | 59.518 | 20 |
| 238 | 619  | 856  | GCGTCGAGTACCACTTTTCC    | 59.74  | 20 |
| 173 | 73   | 245  | TCCACAACGCAATTTACTGTC   | 58.75  | 22 |
| 215 | 201  | 415  | TTAGGATTGGAAGCAGTGCC    | 60.214 | 20 |
| 263 | 2897 | 3159 | CAGGGTGGATGTACAAAGGC    | 60.375 | 20 |
| 213 | 2104 | 2316 | CACAACAGGAGGAGGCACTT    | 60.298 | 20 |
| 206 | 944  | 1149 | CCAAGATTGAGGTCCGTTTC    | 59.526 | 20 |
| 272 | 3927 | 4198 | TATCCCAATCTGGGCACTC     | 59.894 | 20 |
| 249 | 225  | 473  | GGACGCACCAGATTGTTTTT    | 59.978 | 20 |
| 235 | 102  | 336  | TTTGACATCAACGGATGGAA    | 59.9   | 20 |
| 225 | 0    | 224  | GAAAGTGGCTTTGATGGAGAT   | 58.254 | 21 |
| 174 | 88   | 261  | TGCAATATGTTTATTTTCGGGA  | 58.048 | 21 |
| 262 | 86   | 347  | TTGCGATTTTCGTTTTCTT     | 59.699 | 20 |
| 127 | 87   | 213  | GCCTGAATGTAATGCCGAAA    | 60.971 | 20 |
| 108 | 32   | 139  | GCAATGGAATACCGTTGGTT    | 59.691 | 20 |
| 166 | 735  | 900  | ATTTCCAGCTTTTCGGCTTCT   | 60.34  | 20 |
| 257 | 42   | 298  | TGGGAGCAAAAGGATGGTAA    | 60.439 | 20 |
| 239 | 2172 | 2410 | TTGGGAAAGGGGGAGTAAAT    | 59.639 | 20 |
| 269 | 948  | 1216 | ATGATATGCAAGAATTGTCAC   | 60.095 | 23 |
| 219 | 659  | 877  | ATGAGTTTAGGGAGGTCGGC    | 60.464 | 20 |
| 100 | 272  | 371  | CGTGCGACCAAATGTGACT     | 60.739 | 19 |
| 242 | 4467 | 4708 | TGTAGGCTTTGGTTTCCATTG   | 59.982 | 21 |
| 258 | 650  | 907  | GGAGCCATGTTTTGGTGTCT    | 59.973 | 20 |
| 102 | 1    | 102  | GAAGATGGAGTAGAGAGAGA    | 59.94  | 27 |
| 189 | 365  | 553  | CATTTCAACCCACCATCTCC    | 60.173 | 20 |
| 234 | 71   | 304  | AGAACCGGATTTAGAGCAATC   | 60.095 | 22 |
| 257 | 568  | 824  | GAACAAATCTGGGCCATCAG    | 60.461 | 20 |
| 171 | 257  | 427  | GGTGTGGTGGGGACATTTTA    | 60.474 | 20 |
| 192 | 1498 | 1689 | AGACACCCATTGCTGTGTGA    | 60.162 | 20 |
| 248 | 1385 | 1632 | ATCCAACACCGCATCTTCTC    | 60.081 | 20 |
| 189 | 64   | 252  | CAGACTAGAACGTAGACCTGC   | 60.845 | 23 |
| 279 | 69   | 347  | AATAGCCCGAGCCAAAATG     | 60.045 | 19 |
| 172 | 4560 | 4731 | AAAACGATGGTCGGTGTCTC    | 59.973 | 20 |
| 210 | 722  | 931  | GCCTTCAGTTTGATTTCTGTTTC | 60.116 | 22 |

|     |      |      |                         |        |    |
|-----|------|------|-------------------------|--------|----|
| 234 | 276  | 509  | TGGGTATCCCAAATTTCTCC    | 60.006 | 21 |
| 235 | 110  | 344  | AATCTAACTAATGGCGCGGA    | 59.704 | 20 |
| 158 | 383  | 540  | CGGAAAATTGTTGTCGAAA     | 60.836 | 20 |
| 162 | 65   | 226  | CTGATTTTCAGCAGTGCTTGG   | 59.591 | 20 |
| 205 | 71   | 275  | GAAACGACGGGAAGATGAAA    | 60.051 | 20 |
| 232 | 84   | 315  | CTGCGCAGATCTAATGGTCC    | 60.765 | 20 |
| 158 | 2936 | 3093 | CTACCGGAGAGTGGTGGTGT    | 60.026 | 20 |
| 257 | 101  | 357  | TCCATTCCGAAAATCAAAGG    | 59.872 | 20 |
| 176 | 10   | 185  | TGTTTACATTCAGGCCTTTTGA  | 59.625 | 22 |
| 149 | 36   | 184  | TTCTAACTCCATTTGTAATAGT, | 57.769 | 27 |
| 235 | 16   | 250  | GAAAGGAGATGGAGCGTGAT    | 59.243 | 20 |
| 199 | 109  | 307  | GGGTGATGAGGCTTGAAGAA    | 60.195 | 20 |
| 185 | 2379 | 2563 | CATGCATGCAAACTGAGGT     | 59.722 | 20 |
| 231 | 1071 | 1301 | TGGGTGGAACCTTCTTGCTTT   | 59.711 | 20 |
| 234 | 1550 | 1783 | CAAACGAATTGCAGCAGAGA    | 60.134 | 20 |
| 264 | 2202 | 2465 | AGCTGGTAGCCATTCTCCTG    | 59.454 | 20 |
| 244 | 265  | 508  | TGCCTGAAAATGTCTGCAAG    | 59.988 | 20 |
| 268 | 76   | 343  | CTCGTTCCCAAGCCTCCTAT    | 60.59  | 20 |
| 171 | 2554 | 2724 | CTACGACTACGGCTATGGGC    | 59.752 | 20 |
| 165 | 683  | 847  | AGCTGAGATTAAATCCCCCG    | 60.411 | 20 |
| 186 | 286  | 471  | GGGATATCGTCTAACCAGCAA   | 59.057 | 21 |
| 145 | 17   | 161  | CCAAAATGCAAATCCCAAAA    | 60.652 | 20 |
| 153 | 350  | 502  | CACAAGCACATTTGGGAGAA    | 59.691 | 20 |
| 205 | 222  | 426  | GGTTACTGTTCTCAGCCCA     | 60.111 | 20 |
| 179 | 230  | 408  | ACCAACCCAACCCATTATCA    | 59.91  | 20 |
| 127 | 1096 | 1222 | GGCAGGTCATGTGTATGTGG    | 59.837 | 20 |
| 205 | 10   | 214  | CCTTTGTCAACTTGGGCAGT    | 60.149 | 20 |
| 154 | 165  | 318  | AAGTGCAGGCAACAGTTTGA    | 59.49  | 20 |
| 213 | 50   | 262  | GCTTCAAGACATAGCAGCCA    | 59.178 | 20 |
| 274 | 46   | 319  | CCAGGTGAGCTAGCCATAA     | 60.227 | 20 |
| 247 | 457  | 703  | GGTGTGTGGAAGGAAGGTGT    | 59.859 | 20 |
| 147 | 167  | 313  | GAGGGACGAGTCCTAAAGGG    | 60.067 | 20 |
| 207 | 245  | 451  | GTGAGAGTGTGTGTCGTGGG    | 60.207 | 20 |
| 169 | 1909 | 2077 | GGGATTTCAGCGACGATTTA    | 60.038 | 20 |
| 263 | 180  | 442  | AGAGGAGGGCTTCAACATGA    | 59.803 | 20 |
| 163 | 67   | 229  | TTGGCTAACAGGTCCTGAA     | 60.626 | 20 |
| 265 | 203  | 467  | TAATGTGGAACCATAGGGGC    | 59.645 | 20 |
| 229 | 0    | 228  | GTTTCAAGGGTTTGATCGGA    | 59.91  | 20 |
| 254 | 3    | 256  | GCCTCTTCTCTGCTAAAAGCC   | 59.76  | 21 |
| 256 | 140  | 395  | TGAAAAGATTTGAAAAACATT   | 58.686 | 25 |
| 187 | 108  | 294  | GTCCTTCTCTCCGAATTCCA    | 59.213 | 20 |
| 214 | 187  | 400  | TAGGCATGGCCTCAACTACC    | 60.096 | 20 |
| 158 | 7    | 164  | GATGGAACGGGGATTTGTTA    | 59.622 | 20 |
| 100 | 430  | 529  | CTCGAGCATAAACACATCCC    | 58.173 | 20 |
| 127 | 29   | 155  | AGCTACACTCACCGTCTGAGA   | 59.161 | 22 |
| 201 | 865  | 1065 | TCTCGATTGCTCTCCGATCT    | 60.057 | 20 |
| 261 | 108  | 368  | GCAAGACATGCAAGGCAGT     | 60.008 | 19 |
| 194 | 215  | 408  | GCAGCAAAAATGCTGACTGA    | 60.142 | 20 |
| 158 | 283  | 440  | GCAAAGTGCTAAATGGTTCAA   | 59.298 | 22 |
| 186 | 98   | 283  | TTGGTGGTTTGTATGCTATCG   | 58.57  | 21 |
| 273 | 4087 | 4359 | GCCCCTCCTAGCAATTTGAA    | 61.432 | 20 |
| 198 | 5    | 202  | ACCCTCGGGGAAGTTACAAT    | 59.691 | 20 |
| 212 | 33   | 244  | TTGGGATTAAGGCTTTGGTG    | 59.931 | 20 |
| 205 | 2    | 206  | AACAACGAATCCATTAAGTGA   | 57.396 | 23 |
| 223 | 329  | 551  | CTTTCGGGACACGTTCTCTC    | 59.844 | 20 |
| 127 | 254  | 380  | AATTGCCCCCTCATTTTCAT    | 60.511 | 20 |
| 127 | 2520 | 2646 | AAGGCTCGATTAACCTGCGAA   | 59.982 | 20 |
| 119 | 1687 | 1805 | AATGCCCTATTTTTGGAGG     | 60.143 | 20 |



|     |      |      |                         |        |    |
|-----|------|------|-------------------------|--------|----|
| 168 | 178  | 345  | GTAGCTCAAGGGTTTTTCGCA   | 60.386 | 20 |
| 272 | 42   | 313  | CACAATGGGGGTATTTGCTT    | 59.685 | 20 |
| 241 | 829  | 1069 | GGATAGGCCCTAACTCGACC    | 59.925 | 20 |
| 245 | 1180 | 1424 | TGCGAGATGAGATCAACCTG    | 59.942 | 20 |
| 198 | 38   | 235  | GGCTCAAAGACAAGTCCCA     | 60.232 | 20 |
| 218 | 467  | 684  | TGTTAATTTGGTTGGCCCAT    | 60.053 | 20 |
| 158 | 39   | 196  | CCATTTGCAATACTAAGGCTTT  | 60.354 | 24 |
| 157 | 831  | 987  | TTTCAAGAAAAGGGTGCCAT    | 59.546 | 20 |
| 267 | 106  | 372  | ACGTCGGTTTGGTTTAAAGG    | 58.994 | 20 |
| 223 | 1    | 223  | CATTTAGAACCCACGTTTCAGG  | 59.48  | 21 |
| 176 | 95   | 270  | TGGAACAATTTTTGCCACAT    | 58.869 | 20 |
| 262 | 98   | 359  | GAAAAACGACGTGAGGGAGA    | 60.232 | 20 |
| 202 | 34   | 235  | GTTTTGGAGTATTCCGTGCC    | 59.434 | 20 |
| 193 | 590  | 782  | CACTTGACGAGGTCCTGGA     | 59.864 | 20 |
| 257 | 237  | 493  | TATTTCAATTCATGCCACGCC   | 61.761 | 20 |
| 278 | 1570 | 1847 | GCAGCAGATTCGATGAGGTT    | 60.37  | 20 |
| 243 | 45   | 287  | ACGTAAAAACCCTTCCACCC    | 60.089 | 20 |
| 100 | 163  | 262  | TCCTGATTTGGTGAATGTG     | 59.343 | 20 |
| 268 | 39   | 306  | ACGGATATGCCCTTGTATGC    | 59.813 | 20 |
| 241 | 25   | 265  | ATGATGCTTACCTGAACAGCA   | 59.27  | 22 |
| 137 | 30   | 166  | ACAAGGATTGCGAACTCAGC    | 60.406 | 20 |
| 106 | 73   | 178  | CCCCTCTCAACAACCACAAT    | 59.82  | 20 |
| 279 | 4548 | 4826 | AGAAATTGCCTGCTTCCAAA    | 59.823 | 20 |
| 245 | 185  | 429  | AGTCTCTGGAGCTCTTCCCC    | 59.952 | 20 |
| 198 | 3585 | 3782 | CCACTTCTAGGCAAACACC     | 59.592 | 20 |
| 273 | 63   | 335  | AAATTTTGAATGGTTCCCCC    | 59.867 | 20 |
| 221 | 571  | 791  | TCTCGTGGTGCAGTGGTAGA    | 60.463 | 20 |
| 132 | 316  | 447  | TTGACCACAATCAAACACCAA   | 59.849 | 21 |
| 125 | 543  | 667  | AAATTGATTTCCCACCACCA    | 60.029 | 20 |
| 104 | 20   | 123  | GGTGGTGTGGAGGAGAGAAG    | 59.682 | 20 |
| 194 | 727  | 920  | TTTCCATTATTTTCGTTGGAGA  | 59.838 | 23 |
| 254 | 2320 | 2573 | TAATGCTTTGAAGGGGTGCT    | 59.708 | 20 |
| 151 | 569  | 719  | AGATCACAAATCCCACCTGC    | 59.934 | 20 |
| 175 | 48   | 222  | TATTTCCGGTCCGCCAATTTA   | 60.275 | 20 |
| 218 | 141  | 358  | CCCAAAAATTTAACGACCCA    | 59.671 | 20 |
| 135 | 275  | 409  | CCAACACAACACAGGTTCTCA   | 59.626 | 21 |
| 155 | 5    | 159  | TTTCCCATGTTGTTTGTAAATTA | 59.147 | 25 |
| 166 | 610  | 775  | ATTTGGAAACCTCCCCTCC     | 60.169 | 20 |
| 162 | 214  | 375  | CGCTTGTTTCTCTCGCTAGG    | 60.284 | 20 |
| 175 | 103  | 277  | GGTCAACTGCGGATCAATTT    | 59.939 | 20 |
| 274 | 52   | 325  | GGGAGTGATTGAGGGAGTGA    | 60.048 | 20 |
| 238 | 1935 | 2172 | GCAACAAAGAACCAACATCC    | 60.919 | 21 |
| 218 | 283  | 500  | GAATCCCCCAACACAAAAA     | 59.64  | 20 |
| 264 | 275  | 538  | CTTCGCTATGAGTCACGGGT    | 60.277 | 20 |
| 226 | 210  | 435  | TGAAACAATGCCTGGAAACA    | 60.088 | 20 |
| 143 | 88   | 230  | GCAACTGTACACGTGTGGCT    | 59.826 | 20 |
| 278 | 215  | 492  | CGAAGAATTTTGTGCCATGA    | 59.664 | 20 |
| 207 | 442  | 648  | TTGTTGAACGCATAATTCGAT   | 58.25  | 22 |
| 274 | 41   | 314  | CGTTCCTCAGAGTTTCCAGC    | 59.989 | 20 |
| 104 | 19   | 122  | CAAACCTTCTGGATTGACTTTG  | 58.414 | 23 |
| 246 | 13   | 258  | TCAACACTCTGTTTTTCTCTCA  | 59.074 | 24 |
| 209 | 461  | 669  | CGTGTCCCTCAAACCTGGT     | 60.151 | 20 |
| 204 | 1    | 204  | TCTATTATATGTCATGTTTTGC  | 57.462 | 27 |
| 201 | 45   | 245  | CCCATCCCTTAATCAACCCT    | 60.011 | 20 |
| 118 | 0    | 117  | ACGCGAGATTTACGTGGTTC    | 60.14  | 20 |
| 227 | 309  | 535  | GTTTCATGTTTAGCATTTGCG   | 58.368 | 21 |
| 263 | 72   | 334  | TCGGGGTAGTATTGAGTCCG    | 59.948 | 20 |
| 178 | 441  | 618  | GGTCCTTTGCGACGTAATTC    | 59.574 | 20 |

|     |      |      |                        |        |    |
|-----|------|------|------------------------|--------|----|
| 214 | 1225 | 1438 | GCAGGAAGTCATGGTTGCTT   | 60.263 | 20 |
| 129 | 1214 | 1342 | TTAATCACGTGCAACGCA     | 59.852 | 19 |
| 189 | 999  | 1187 | CATCCAATAGCCGAACAAAAA  | 59.95  | 21 |
| 173 | 1488 | 1660 | GCGATGCTCCAAAAGTGAAT   | 60.221 | 20 |
| 231 | 431  | 661  | CCTTTGCTGAGGATTTGAGG   | 59.807 | 20 |
| 246 | 6    | 251  | TTAGCACAATACAAACATGTC  | 58.162 | 23 |
| 228 | 78   | 305  | TTGTGTGTTATACGTGTGGGT  | 60.124 | 23 |
| 240 | 136  | 375  | TTTCAAGGTCTTCGCTGGTT   | 59.853 | 20 |
| 225 | 228  | 452  | TATATGATGTAGGCCGCGTG   | 59.567 | 20 |
| 243 | 968  | 1210 | TGGACATGGCAATTATTCTTG  | 60.323 | 22 |
| 254 | 442  | 695  | ATGGGTTCCCTTACCCCTTTG  | 60.046 | 20 |
| 223 | 188  | 410  | AGCAGGAGGACTGAGGTTGA   | 59.986 | 20 |
| 230 | 287  | 516  | CCTTTCTCCAAGTCTCACCTAC | 59.797 | 23 |
| 250 | 27   | 276  | GCAAGGGAAACTGATGGTGT   | 59.973 | 20 |
| 114 | 13   | 126  | CGGATTTAGCGGTTATTACCT  | 61.448 | 23 |
| 116 | 1093 | 1208 | GCCGTGACAATCATTCAAAA   | 59.523 | 20 |
| 117 | 97   | 213  | GTGGCAGCTTTTCATCCATT   | 60.081 | 20 |
| 200 | 31   | 230  | TTTGAGATCGGAGTGGCTCT   | 59.95  | 20 |
| 208 | 563  | 770  | AAATCCGACGGTTGTAGTGG   | 59.853 | 20 |
| 253 | 3929 | 4181 | TTCAACCGTGCGTGTATGTT   | 60.035 | 20 |
| 225 | 139  | 363  | AAGATGATGGTGAAAGGGGA   | 59.336 | 20 |
| 256 | 38   | 293  | TCACTTAGGGATATATTTAGGC | 57.128 | 26 |
| 242 | 188  | 429  | AAGACATGCATCGTTTGTACT  | 59.265 | 24 |
| 247 | 714  | 960  | TTCAACAACCTTTCAGCCCAA  | 59.293 | 20 |
| 238 | 241  | 478  | TCAACGCCCCATATTGTTTC   | 60.701 | 20 |
| 252 | 2235 | 2486 | ATGAAACGCCCATTTTCTCA   | 60.448 | 20 |
| 267 | 162  | 428  | TCCTCGAAGAACCTTATCGC   | 59.41  | 20 |
| 191 | 3    | 193  | GGCAGTACTCCAAAATCACCA  | 59.985 | 21 |
| 233 | 51   | 283  | AAATGAAGGGTTGAGCATCG   | 60.074 | 20 |
| 246 | 78   | 323  | CGTTGGGAGGGAAGTTATCA   | 59.926 | 20 |
| 100 | 752  | 851  | CTGAACCTGAACCACCAACC   | 60.399 | 20 |
| 186 | 314  | 499  | GTTGATAAATTACAAAAATTTA | 58.406 | 27 |
| 221 | 515  | 735  | TCCGATAAACACCAACCCAT   | 60.051 | 20 |
| 275 | 43   | 317  | CAAGGATTCATGAAGAAGTGT  | 57.475 | 23 |
| 159 | 19   | 177  | AGGGGAGTTATCACTGGATCA  | 58.46  | 21 |
| 106 | 1362 | 1467 | TTTGGGCTTTCAAATGAACC   | 59.916 | 20 |
| 116 | 713  | 828  | GTCCCCAGCCTCAGATACAA   | 60.073 | 20 |
| 238 | 964  | 1201 | ACAACACCTGAGATGCCCTC   | 60.12  | 20 |
| 232 | 6019 | 6250 | GTTTTTGCACGTCTTCGGTT   | 60.154 | 20 |
| 265 | 93   | 357  | TACGTGTTACCCTCTCAATTTA | 59.038 | 25 |
| 244 | 499  | 742  | TTTAGGCATTCCCACCTTTG   | 59.931 | 20 |
| 142 | 138  | 279  | CCCAACTCTTCGGCTCAATA   | 60.206 | 20 |
| 165 | 24   | 188  | GTCTGCAAGAAAATGGGTGG   | 60.495 | 20 |
| 153 | 103  | 255  | CCTTGTAGAGATTGTGGGGC   | 59.55  | 20 |
| 124 | 346  | 469  | CCAACCCAAACCCACTTTC    | 60.195 | 19 |
| 222 | 49   | 270  | AGCATCTCTCTTGCTGTCAT   | 59.679 | 23 |
| 122 | 221  | 342  | CATTTTGACATGATCGACGG   | 59.924 | 20 |
| 243 | 655  | 897  | TCGAACGATTATTTGTTTGA   | 59.472 | 22 |
| 110 | 387  | 496  | TTTCAAGGCATGGGAGGATA   | 60.405 | 20 |
| 243 | 775  | 1017 | GATAGAGGCAGACGAACCCA   | 60.218 | 20 |
| 258 | 81   | 338  | ACATTAAAGGTGGCTGGCAT   | 59.457 | 20 |
| 279 | 543  | 821  | GAACGGTTCTCCACACACCT   | 60.009 | 20 |
| 280 | 1337 | 1616 | GCGGGCTTAAACACAATTTT   | 60.349 | 21 |
| 144 | 497  | 640  | CTGTCTCCGGTCCATGAAAT   | 59.927 | 20 |
| 136 | 701  | 836  | GCGAAAACAACAGACAGCAA   | 60.035 | 20 |
| 187 | 5643 | 5829 | GGCTTGTGTGCATCTTCTTC   | 59.874 | 21 |
| 255 | 58   | 312  | GTATCACAGAGCCACGACGA   | 59.862 | 20 |
| 101 | 2077 | 2177 | AGACATATTTTTCCCCTTTCCA | 58.864 | 22 |

|     |      |      |                        |        |    |
|-----|------|------|------------------------|--------|----|
| 209 | 2536 | 2744 | AGGCAAAGCACAAAGATGAGG  | 60.397 | 20 |
| 260 | 218  | 477  | TCGCCATTTCCCTGTCTTAC   | 60.074 | 20 |
| 160 | 0    | 159  | CGTGATATTGGGAAACAATGA  | 58.348 | 21 |
| 257 | 319  | 575  | GCATTAATAATTGTTGGTCCCT | 57.987 | 21 |
| 198 | 65   | 262  | TCCCTTTTCAGGTCCAAGTG   | 60.081 | 20 |
| 279 | 491  | 769  | GCGGATTTTATTCTCGTTCAA  | 59.202 | 21 |
| 101 | 343  | 443  | TGGAAAAGGTAGGGACAAAA   | 57.596 | 21 |
| 156 | 318  | 473  | CAAGCAACAAGCCAATAGCA   | 60.014 | 20 |
| 255 | 149  | 403  | AGTTATCAAGATGGCCACGG   | 59.955 | 20 |
| 144 | 45   | 188  | TTACCCAAAACACCCCTGAC   | 59.688 | 20 |
| 243 | 104  | 346  | TTTTTGGGAAATCCTTGAC    | 59.916 | 20 |
| 279 | 469  | 747  | CCAACCACTTTCACTGGAGC   | 60.69  | 20 |
| 200 | 305  | 504  | GAATACACCAACAGCCCCAG   | 60.375 | 20 |
| 269 | 0    | 268  | TGCTCCTAGTTAGCACACAAC  | 58.288 | 23 |
| 269 | 1    | 269  | TGAAGTTAGGAAATAAGGAGC  | 58.743 | 25 |
| 229 | 2112 | 2340 | GCCCCATTTTCTTAGGGTTT   | 59.311 | 20 |
| 268 | 2096 | 2363 | TTGGAGGCTCAGAGGTTTGT   | 59.844 | 20 |
| 215 | 2457 | 2671 | TCTACGGGTCACCTATTGGA   | 59.086 | 20 |
| 194 | 230  | 423  | AGGTGTGCTTTTAGCTTGGG   | 59.378 | 20 |
| 179 | 166  | 344  | CACGAACGGCTGGAATATCT   | 60.096 | 20 |
| 270 | 45   | 314  | TAATAGGTGCGGGTTTGAGG   | 59.953 | 20 |
| 106 | 10   | 115  | GGAGGAATGAAGGTGAAGGG   | 60.822 | 20 |
| 213 | 477  | 689  | AGAGGGAGGGAGAAAAGGTG   | 59.671 | 20 |
| 256 | 5    | 260  | CCCTTGGTATTCTCCCTGTG   | 59.401 | 20 |
| 245 | 390  | 634  | TGTGGCAATATGATGCTTTGA  | 60.088 | 21 |
| 280 | 5594 | 5873 | TGACATACATGGTTTGGGGA   | 59.623 | 20 |
| 160 | 579  | 738  | GCTAATGCTTCAGCACCACA   | 60.019 | 20 |
| 258 | 236  | 493  | ACACACCCACACCATTGAAA   | 59.701 | 20 |
| 101 | 384  | 484  | TAAGGAGATGTGTGCATGGG   | 59.522 | 20 |
| 170 | 659  | 828  | CACCTCACTTTCAATGCTCG   | 59.44  | 20 |
| 170 | 37   | 206  | CCAAAACCTCCACCTTCAACTG | 59.619 | 21 |
| 167 | 177  | 343  | AAGTCCGGCCATCTCTCTCT   | 60.358 | 20 |
| 255 | 459  | 713  | ATCATGGGGAAAAGAGTTATC  | 57.552 | 22 |
| 197 | 2    | 198  | TTGATTCATACAAGTCATCTT  | 57.459 | 27 |
| 243 | 0    | 242  | GGAAATAAGGAGGTGTTATGA  | 57.235 | 25 |
| 270 | 1022 | 1291 | TGCGATAGTTGGTTCTGCAA   | 60.401 | 20 |
| 277 | 107  | 383  | AAAATGAACCGTAACCGGC    | 59.815 | 19 |
| 279 | 996  | 1274 | GAGTGAGAGGAAGACAGGCG   | 60.135 | 20 |
| 255 | 35   | 289  | AATGCAACTCAAAGGGAGGA   | 59.67  | 20 |
| 115 | 43   | 157  | TCAATGGCCACAAATGGTTA   | 59.786 | 20 |
| 173 | 5    | 177  | GGTGTGTTGGCATTGCTAGA   | 59.722 | 20 |
| 107 | 456  | 562  | CATAAAACATACCTCGGCATC  | 59.853 | 22 |
| 168 | 361  | 528  | CAATTCCGAACCGAATAAGC   | 59.547 | 20 |
| 151 | 598  | 748  | TGCCACTATAATTGTATGGTCT | 60.27  | 24 |
| 150 | 169  | 318  | CACCTTACCCACCCAACCTA   | 59.705 | 20 |
| 197 | 12   | 208  | CACAAACACACTTGGGAGGA   | 59.565 | 20 |
| 245 | 812  | 1056 | GCATATTGCGACAAATAGCC   | 58.279 | 20 |
| 278 | 362  | 639  | TGTGCTGGTGTGATTTTTTC   | 59.847 | 20 |
| 255 | 104  | 358  | ACGTTTTTGTAAACGTTGTCCT | 57.794 | 22 |
| 143 | 334  | 476  | AAACATGATGCCAATCCAGC   | 60.874 | 20 |
| 173 | 12   | 184  | GTGCATGCAGTCAAATCGTT   | 59.728 | 20 |
| 110 | 382  | 491  | TGGCACCTAAACCATAAGGC   | 59.96  | 20 |
| 102 | 9    | 110  | CATTTAGGATATTTTCTATTCT | 57.631 | 27 |
| 212 | 435  | 646  | AGGATACCGGAGTGTTACG    | 59.989 | 20 |
| 179 | 688  | 866  | CTCCGCCAGTTGGATACTA    | 60.088 | 20 |
| 279 | 180  | 458  | CATCCACCACCTGTCCACTC   | 61.434 | 20 |
| 137 | 0    | 136  | TACTCACACGCACCCAC      | 60.639 | 20 |
| 258 | 585  | 842  | GCTAGGGCCAAGGAGTTAGG   | 60.221 | 20 |

|     |      |      |                        |        |    |
|-----|------|------|------------------------|--------|----|
| 109 | 358  | 466  | TAATCACGTCCTTATTAACCAA | 57.462 | 25 |
| 122 | 519  | 640  | GTGATGCATGATGGGTATCG   | 59.763 | 20 |
| 166 | 148  | 313  | GGTCTCCGGTCCATGAAATA   | 59.75  | 20 |
| 261 | 77   | 337  | GAATAGCCGTTGAGGCATGT   | 60.103 | 20 |
| 273 | 774  | 1046 | GTCACATATAAGAATGTCTCC  | 58.479 | 24 |
| 235 | 221  | 455  | ACAGAAACATTGACTCCGGG   | 59.966 | 20 |
| 270 | 172  | 441  | CATTGTGCGAACCATGAAAA   | 60.501 | 20 |
| 199 | 105  | 303  | GCGTCTGAGCAGAGGAAAAT   | 59.579 | 20 |
| 274 | 19   | 292  | TGGCATCATAATCAACCATCC  | 60.547 | 21 |
| 214 | 75   | 288  | CCCCAACTAGGGGATGAGTA   | 58.859 | 20 |
| 224 | 844  | 1067 | TGTTACCCCCACTTCATTAC   | 59.703 | 21 |
| 161 | 102  | 262  | CGTTTCCATTGTTTAGCCGT   | 59.996 | 20 |
| 116 | 135  | 250  | ATTGGTCGAGAGAAAGGGCT   | 60.212 | 20 |
| 211 | 13   | 223  | AAGTGATCTACGTCCACGGG   | 59.989 | 20 |
| 225 | 613  | 837  | TCCTCCAAAAACATCCAAC    | 59.767 | 20 |
| 187 | 6253 | 6439 | ATTGCACAAGTTTGGCCTTC   | 60.118 | 20 |
| 175 | 162  | 336  | CACACAAATGGATCGAAACG   | 59.964 | 20 |
| 253 | 1546 | 1798 | TTCAACACACGACATGGGAC   | 60.426 | 20 |
| 224 | 1019 | 1242 | TAAATAATGATTGGGGGCCA   | 59.976 | 20 |
| 239 | 8    | 246  | AGCATCTATTTTCGACCACTG  | 58.861 | 22 |
| 278 | 160  | 437  | CGTTTGGATCCGATTTGGTA   | 60.692 | 20 |
| 241 | 368  | 608  | CCGCGTTGAGGATAGATAG    | 59.685 | 20 |
| 279 | 148  | 426  | TTTGCTGAGAAATCTAATGCG  | 58.2   | 21 |
| 102 | 191  | 292  | CAACCCATTATCAAAACCCAC  | 59.054 | 21 |
| 238 | 45   | 282  | CCACCTTGAGTTACATGCTCC  | 59.607 | 21 |
| 267 | 453  | 719  | TGACGAATTCTCAAGTTTGTCA | 59.276 | 23 |
| 275 | 434  | 708  | TCAGAAGCCCCTGAACAAC    | 60.232 | 20 |
| 271 | 2174 | 2444 | AGAGAGAGTCGGCAATTCGT   | 59.043 | 20 |
| 239 | 41   | 279  | CACAAGGACCATTCCAGCTT   | 60.111 | 20 |
| 207 | 203  | 409  | TACGATGGGCTTTAAGCAGG   | 60.223 | 20 |
| 263 | 87   | 349  | AGTTTCTGCATTGTTGCATAGC | 59.433 | 22 |
| 156 | 273  | 428  | CCCAAAACCTCAAATCGTTG   | 60.336 | 20 |
| 263 | 2280 | 2542 | GTGAGTGCGCATTGATGTTC   | 60.281 | 20 |
| 279 | 1312 | 1590 | AATGGTCCGGGGTGATTT     | 59.987 | 18 |
| 253 | 32   | 284  | TCACAGGCATTGTCAGTGTGT  | 60.219 | 21 |
| 127 | 164  | 290  | TGTGCCAAGAACAACCTCCTC  | 58.854 | 20 |
| 233 | 210  | 442  | TAGGGATTGAGGGTGATTGG   | 59.744 | 20 |
| 101 | 107  | 207  | TGGATAGACTCATAGCCCGTG  | 60.103 | 21 |
| 204 | 37   | 240  | TGACATTGCCTAGAAAGTGGG  | 60.118 | 21 |
| 278 | 5    | 282  | GGCTGAGTACACGAATGCAC   | 59.323 | 20 |
| 181 | 329  | 509  | AAAGAACACACAATTCATGTG  | 59.392 | 23 |
| 170 | 341  | 510  | TGGATGTCTTTGATTTGCGA   | 60.197 | 20 |
| 237 | 92   | 328  | CTATAGCCCCCGATTCAAA    | 59.916 | 20 |
| 170 | 584  | 753  | ATTGGGAGAAAAGAGGGGAA   | 59.875 | 20 |
| 222 | 34   | 255  | AGAGGGTTGATGGGTGATTAA  | 59.704 | 22 |
| 169 | 92   | 260  | TTTTGCCCTCGAATGCTATC   | 60.175 | 20 |
| 268 | 579  | 846  | TCTAAATGAAACATCAACAAT  | 58.543 | 24 |
| 173 | 460  | 632  | GCTGCTGACTACCCACACAA   | 59.905 | 20 |
| 265 | 3    | 267  | AAAATCAAAGGCCCAATG     | 59.801 | 20 |
| 112 | 420  | 531  | CCGAAAGATTTCTTAAGCCTTT | 59.354 | 23 |
| 255 | 837  | 1091 | AATCCATGATCCGAAAATGC   | 59.728 | 20 |
| 158 | 56   | 213  | CTCCAATGGAACAGTAGCCG   | 60.647 | 20 |
| 100 | 311  | 410  | AACACAGAGACAAGCACCCC   | 60.159 | 20 |
| 181 | 8    | 188  | TTGTGAGTGACTGCGTGTGA   | 60.07  | 20 |
| 149 | 332  | 480  | ACACGGTCGAGAAAGAGTCG   | 60.444 | 20 |
| 151 | 263  | 413  | TGCCAGAAGAAAGCATCAAA   | 59.542 | 20 |
| 204 | 1469 | 1672 | CCCATCCTCATTTTTCTTTCAA | 60.285 | 22 |
| 246 | 53   | 298  | TAAGGTGGCTGGGGTGATTA   | 60.323 | 20 |

|     |      |      |                         |        |    |
|-----|------|------|-------------------------|--------|----|
| 204 | 64   | 267  | TCTTGTTGGAATTTTTCGGG    | 59.91  | 20 |
| 247 | 6    | 252  | CCCATGTTGTAATTAATGTAGC  | 60.228 | 25 |
| 278 | 18   | 295  | ATCAATCCCAGCCACACAAT    | 60.203 | 20 |
| 219 | 846  | 1064 | GCACATGAAATCAGGCACAC    | 60.128 | 20 |
| 103 | 158  | 260  | GGTACTGTTCCCTCAGCCCA    | 60.111 | 20 |
| 185 | 491  | 675  | AATTCTCAGTTCTCCCCTCAA   | 59.213 | 22 |
| 162 | 58   | 219  | TCACGTGGACTGCTTTCAG     | 60.025 | 20 |
| 246 | 41   | 286  | CGTGTTACCGTAGGGGTAG     | 60.423 | 20 |
| 235 | 128  | 362  | CGAAAGAATTAGAACCGGCA    | 60.202 | 20 |
| 217 | 1    | 217  | GTCCACGGTGGTTTGAGAGT    | 60.009 | 20 |
| 269 | 545  | 813  | AAGCGCAGAAAATATGGGAA    | 59.682 | 20 |
| 187 | 247  | 433  | TATATTGTGGGGTGGATGGG    | 60.266 | 20 |
| 110 | 705  | 814  | TCTTATAGCATCAACCGCCA    | 59.281 | 20 |
| 133 | 29   | 161  | GATCCCTTGGAGCTCAACAT    | 59.094 | 20 |
| 169 | 301  | 469  | CCTTGATACATATGCGGTTTT   | 58.521 | 22 |
| 238 | 76   | 313  | CCAATCTAGGGTTCATACCA    | 59.799 | 21 |
| 159 | 339  | 497  | CGAACGAATATGTTGCATCC    | 58.994 | 20 |
| 148 | 73   | 220  | ACTACGAGCATCATCATGTGT   | 58.667 | 23 |
| 144 | 63   | 206  | TGCCAATGAAATGAACCAAA    | 59.907 | 20 |
| 130 | 699  | 828  | GATTGGATGAGAAGAACCGC    | 59.635 | 20 |
| 279 | 9    | 287  | TTGTCGGGTCATTACTATTACG  | 58.578 | 23 |
| 271 | 79   | 349  | AGATCATCTCGGGTCCAAGG    | 61.391 | 20 |
| 253 | 2780 | 3032 | AACCGGTTAAAAATCGGACC    | 60.055 | 20 |
| 166 | 25   | 190  | AACCATGTTTCCATCGGTTG    | 60.615 | 20 |
| 223 | 80   | 302  | TCTCTCTCAAACGCATGTGG    | 59.984 | 20 |
| 216 | 1    | 216  | TCTCTGACGCCATTCAATCA    | 60.353 | 20 |
| 116 | 5    | 120  | TGAGTAAAACGTGTTTGTGAG   | 57.555 | 23 |
| 108 | 87   | 194  | GGGTTGTTGGCTAACACAGG    | 60.41  | 20 |
| 157 | 74   | 230  | TGTCGGTTGTCTGCTACACC    | 59.751 | 20 |
| 203 | 82   | 284  | GAAAAGCTGCCACATCACAA    | 59.847 | 20 |
| 190 | 510  | 699  | GCCTTCAGATCCCCTGTTTT    | 60.443 | 20 |
| 256 | 396  | 651  | TGCAAAATACCTTTTGTGCGT   | 59.505 | 21 |
| 280 | 2976 | 3255 | TGGAGTCCTAAACTAAACCTC   | 58.484 | 27 |
| 180 | 138  | 317  | GCTGCAATTCCTATTCAGCA    | 59.019 | 20 |
| 240 | 6511 | 6750 | AGCCCGTCACCAAGATTATG    | 59.955 | 20 |
| 174 | 10   | 183  | TCTTGATAGTACTTTTCATGGA  | 58.093 | 27 |
| 164 | 4061 | 4224 | GTTTGCCTCCATTGTTGCTT    | 60.118 | 20 |
| 112 | 7    | 118  | TTTTATTTTTGTGTGGTTTTGAT | 58.124 | 25 |
| 178 | 233  | 410  | AGAGGAAGCAGAGATCGACG    | 59.703 | 20 |
| 233 | 1114 | 1346 | TTTTCGACCAATAGGAACGG    | 59.931 | 20 |
| 180 | 10   | 189  | AAATGCAGGGAAGATTGTGG    | 59.933 | 20 |
| 179 | 748  | 926  | ACCATGGAACATGTGTGTGC    | 60.304 | 20 |
| 163 | 64   | 226  | CCGAGATGGCTGCATTAAA     | 59.777 | 19 |
| 243 | 1009 | 1251 | TCGGATTAGCGTGTCTGTGTA   | 60.28  | 20 |
| 196 | 0    | 195  | TTGCACAGTACATGCGTTCA    | 59.902 | 20 |
| 266 | 972  | 1237 | ATTCTGAGCTGGCGTGAAAG    | 60.538 | 20 |
| 183 | 58   | 240  | GGTGGAGTTGGTTCGAAGTT    | 59.04  | 20 |
| 191 | 96   | 286  | GAGAACAGAAAGAAGCGGAA    | 58.707 | 21 |
| 175 | 0    | 174  | GATGCCATTCGTAAGTCCG     | 59.09  | 19 |
| 178 | 85   | 262  | CGCTAAATTTGATCGTCTTCC   | 58.844 | 21 |
| 177 | 6    | 182  | GGATTGATTCCACCAACCAT    | 59.464 | 20 |
| 254 | 71   | 324  | GTTAGAAGGCAGATGGACGG    | 59.694 | 20 |
| 275 | 409  | 683  | CCTTCTTTGAATAGCGTGCC    | 59.845 | 20 |
| 164 | 298  | 461  | CCCTCCAACCATGCATAATC    | 60.155 | 20 |
| 177 | 1527 | 1703 | CGATGATATTTCTGGGGTGC    | 60.296 | 20 |
| 151 | 1046 | 1196 | TCTCTTGTTGCCCTCCAAC     | 59.844 | 20 |
| 159 | 1062 | 1220 | CACTGATCTTGCCAAGTTTCC   | 59.726 | 21 |
| 244 | 668  | 911  | TGCAATTAGGGTTTGGGGTA    | 60.181 | 20 |

|     |      |      |                         |        |    |
|-----|------|------|-------------------------|--------|----|
| 149 | 43   | 191  | CACTCGCCACAATGTCAGC     | 61.494 | 19 |
| 212 | 688  | 899  | CCCTTCTTCAAAAAGTCCGA    | 59.284 | 20 |
| 159 | 70   | 228  | TTTTTGAGATTAGGCTATAAGC  | 57.497 | 27 |
| 204 | 278  | 481  | AGTTTTCTCCCCTTCGTTGC    | 60.61  | 20 |
| 246 | 494  | 739  | TTGGGTGGTCGTATCCACTT    | 60.232 | 20 |
| 226 | 249  | 474  | TGAGACACCCCCATCTCTTC    | 60.048 | 20 |
| 108 | 302  | 409  | CACGAGATTTACGTGGTTCG    | 59.195 | 20 |
| 127 | 305  | 431  | CGATGTCGGTAAAGGCAGTT    | 60.132 | 20 |
| 214 | 741  | 954  | TCTGTACGTGTGTGAATGGC    | 58.111 | 20 |
| 280 | 95   | 374  | TTGGTGGGGTTACATTGGAG    | 60.605 | 20 |
| 203 | 898  | 1100 | TATTACAGAATGCACCGCCA    | 60.096 | 20 |
| 277 | 1571 | 1847 | TGTAGACGATGCATGGGAAA    | 60.073 | 20 |
| 109 | 42   | 150  | AAACACGCAACACAAAGCAG    | 59.951 | 20 |
| 228 | 13   | 240  | ACCATCCCACCAGCATTTAG    | 59.813 | 20 |
| 148 | 319  | 466  | CCTTCGAGCCTCTGCTATTG    | 60.11  | 20 |
| 259 | 2450 | 2708 | CCAGCCAATGGAGATTACAAA   | 59.946 | 21 |
| 133 | 329  | 461  | AGGATAGGAGCCCACCTTGT    | 59.957 | 20 |
| 273 | 86   | 358  | TGAACATGCTCCTATTTTAATA  | 59.731 | 26 |
| 242 | 496  | 737  | AAAATGCCCTTGTATGCTGC    | 60.103 | 20 |
| 261 | 292  | 552  | AGTTCGACGTTGAACAGTG     | 58.777 | 20 |
| 177 | 332  | 508  | CCAACGCTACTTGGCCTTAC    | 59.769 | 20 |
| 252 | 15   | 266  | GCATTCTTGAAAGCTGGTGA    | 59.002 | 20 |
| 176 | 883  | 1058 | GTAAGAACGAAAGCAGGCCA    | 60.386 | 20 |
| 216 | 325  | 540  | CACTCACCAGTCCCCACTCT    | 60.153 | 20 |
| 146 | 318  | 463  | TGACATCTTTTGATTTGTTTTGC | 59.156 | 23 |
| 280 | 211  | 490  | ATAGTGGTATGGTGTGGGGG    | 59.405 | 20 |
| 115 | 3602 | 3716 | ACCCACTGACCTTGGATGAG    | 59.962 | 20 |
| 251 | 205  | 455  | GCATGCTTCTGACCAATTCA    | 59.805 | 20 |
| 134 | 45   | 178  | ATTACAAATGGCCAAGAGGG    | 58.903 | 20 |
| 125 | 545  | 669  | TCCGAAGTTATCTCCAACGC    | 60.214 | 20 |
| 141 | 475  | 615  | GAGAAAGCATGTTCTGCACG    | 59.596 | 20 |
| 102 | 106  | 207  | GACTAGTTGGGCTTAGTGGGG   | 60.005 | 21 |
| 233 | 6    | 238  | CGTCTCGTGTATGCCATCTG    | 60.287 | 20 |
| 173 | 1235 | 1407 | GCTGAGAGCCTGAAACTGGA    | 60.678 | 20 |
| 238 | 28   | 265  | CAATATGAGAATGGCCGAGAC   | 59.677 | 21 |
| 247 | 330  | 576  | ATCCTCTCAACGCTTGGCTA    | 59.978 | 20 |
| 166 | 107  | 272  | TCTTTGTCCGTTTTTCGTGA    | 59.293 | 20 |
| 155 | 33   | 187  | AGTGGATTGTGATGAGGGGT    | 59.232 | 20 |
| 261 | 31   | 291  | GTGCCGTAATAAATTGGATCA   | 57.53  | 21 |
| 268 | 41   | 308  | CGTTAATGCACACAGCTTCAA   | 59.926 | 21 |
| 214 | 165  | 378  | TTTGGGGTTCGGTATTGATG    | 60.555 | 20 |
| 146 | 36   | 181  | CACCAAAAACACACATTGGA    | 57.837 | 20 |
| 279 | 73   | 351  | GTCAACTTTGGCAACGGAAT    | 59.978 | 20 |
| 255 | 114  | 368  | TCCCATAGCATCTTTTGCTC    | 57.915 | 20 |
| 217 | 446  | 662  | GAATATGCTGATGCTGGCTG    | 59.405 | 20 |
| 271 | 1493 | 1763 | ACACCGCCATATTTGGTTGA    | 61.149 | 20 |
| 280 | 1467 | 1746 | TCCTAATCTTTGTGGGCTAATG  | 59.977 | 23 |
| 245 | 39   | 283  | TTTGGTACAAAATTTAGGGTTA  | 58.49  | 27 |
| 274 | 331  | 604  | TTTTCTGAGATTGACGGCTG    | 58.999 | 20 |
| 150 | 980  | 1129 | GTCACCATCCGCCTTGTAT     | 59.82  | 20 |
| 212 | 299  | 510  | ACATGCAATTATGCACTCGC    | 59.724 | 20 |
| 156 | 28   | 183  | TACCAACCCAACCCACTCAT    | 60.088 | 20 |
| 250 | 1082 | 1331 | CGATTCGAAGAAATGCATCA    | 59.769 | 20 |
| 201 | 20   | 220  | ATTCTCCCACACGATCAACC    | 59.786 | 20 |
| 177 | 338  | 514  | TCATTCTCAAGCCACTCCCT    | 59.803 | 20 |
| 271 | 0    | 270  | TGGGTGAGAAAGAGAGATAG/   | 57.301 | 23 |
| 195 | 213  | 407  | GCAAAAAGTAATAAAGAGCGAC  | 59.861 | 24 |
| 219 | 21   | 239  | GGAAATTTTCTTTCTTCCTCAC  | 60.441 | 23 |

|     |      |      |                         |        |    |
|-----|------|------|-------------------------|--------|----|
| 129 | 1549 | 1677 | TGTGCGAGAAAGTACAAGGG    | 58.923 | 20 |
| 208 | 824  | 1031 | GCTCAGGACCGATGAATGAT    | 60.042 | 20 |
| 216 | 78   | 293  | GTGTAGCCGGAATATGAGCC    | 59.556 | 20 |
| 236 | 2510 | 2745 | GTGGACTGTGGGAATACTGGA   | 59.835 | 21 |
| 254 | 26   | 279  | TCGATGATAACTATGGGTTTTG  | 57.589 | 23 |
| 166 | 51   | 216  | AAGTCGAAATTTGGCAAACAA   | 59.617 | 21 |
| 237 | 561  | 797  | CTGCCTATCCGTTACCCTCC    | 60.836 | 20 |
| 232 | 5236 | 5467 | CGGTTCCGATTACGGTTTTA    | 59.826 | 20 |
| 141 | 1102 | 1242 | CCATTGTTTGTGTGTCGGAG    | 60.001 | 20 |
| 109 | 18   | 126  | ATCGGTTATTACCGGATCGC    | 61.031 | 20 |
| 121 | 4    | 124  | TTGAATTAATGATGTCAGATAT  | 58.51  | 27 |
| 220 | 66   | 285  | AATTTTCTACAAAACAAGACC,  | 57.963 | 26 |
| 171 | 233  | 403  | TTGCTCTAAGCTTCATCCGC    | 60.626 | 20 |
| 255 | 142  | 396  | CCTCCGATTTTCGTCTTCAA    | 60.184 | 20 |
| 184 | 19   | 202  | TCCGAAAATCGGTCAAAAAC    | 59.916 | 20 |
| 146 | 272  | 417  | TGCTCTTATGCTTTGTTAAATT/ | 58.961 | 26 |
| 135 | 1118 | 1252 | ACAAGCTATTTTCGAGGCAACA  | 59.897 | 21 |
| 203 | 15   | 217  | TGAAAGTAGCCGAGAGTTTAC   | 58.273 | 23 |
| 127 | 295  | 421  | CGTTGCATCTGTGAGCTTTT    | 59.076 | 20 |
| 207 | 81   | 287  | TCGAGAAATGCCACATGCTA    | 60.366 | 20 |
| 103 | 757  | 859  | AATTGCTCCGACGACTATGG    | 60.096 | 20 |
| 219 | 6    | 224  | ACCATATTTAAGGGTTATCAC   | 57.552 | 24 |
| 225 | 290  | 514  | CTCGAACTCGGTTCGAGAAAG   | 60.126 | 20 |
| 257 | 155  | 411  | TGCCAAGTCTAAAGCCACTG    | 59.072 | 20 |
| 185 | 261  | 445  | ACTTGTTCCCTCATTTGCTCA   | 59.726 | 21 |
| 120 | 56   | 175  | ACAATATTTAACGCAGCTAAAI  | 57.734 | 23 |
| 177 | 2324 | 2500 | AGGCCTACCGATCCAAACTT    | 59.962 | 20 |
| 245 | 387  | 631  | ATCAAACCTCGGCCTCTCTCC   | 60.735 | 20 |
| 177 | 98   | 274  | GGATGGAAATGATGTTGGTAG   | 58.765 | 22 |
| 277 | 10   | 286  | CCCTAAATTTTGTATCCGAATC  | 58.395 | 23 |
| 103 | 1413 | 1515 | TTTTAGAAGTAAGTGGTGTTC   | 59.561 | 25 |
| 164 | 1284 | 1447 | TGCAGGAATTTTCACCAAAG    | 58.745 | 20 |
| 195 | 17   | 211  | AGCATCTCTTGCTCTCTCATTG  | 58.842 | 22 |
| 193 | 201  | 393  | ACAAACCCAAGCAGACATCC    | 59.973 | 20 |
| 246 | 357  | 602  | GGCGGGGAGATATAGAGAG     | 60.017 | 20 |
| 267 | 76   | 342  | GCATGCTCTATCTGTTACAGGC  | 58.885 | 22 |
| 130 | 4    | 133  | GATTGCCCAAGATCTACGGTT   | 60.334 | 21 |
| 273 | 626  | 898  | CACACAGACACGGTGGAAAA    | 60.606 | 20 |
| 238 | 246  | 483  | TGCCATCTCGAAAAACAATG    | 59.664 | 20 |
| 188 | 36   | 223  | TGGAATCCGAGAAATTCAGG    | 60.006 | 20 |
| 280 | 8    | 287  | GACTTAAATTGCTGCAGACGC   | 60.039 | 21 |
| 216 | 192  | 407  | GACTAACCACCCTTGATTTG    | 59.485 | 21 |
| 208 | 994  | 1201 | GGGAATTAGGGTTGAGGTTGA   | 60.173 | 21 |
| 209 | 2    | 210  | CCAAGCCATACAAACTGCAA    | 59.729 | 20 |
| 140 | 328  | 467  | GAATGCTGGGCTGATAAGGA    | 60.177 | 20 |
| 169 | 133  | 301  | TCTCTCTGGTTGGCTGCTTT    | 60.134 | 20 |
| 149 | 1595 | 1743 | TGGCAATGGAAAGAAACACA    | 60.088 | 20 |
| 149 | 2    | 150  | GGCAACGGAATACCATTTGT    | 59.691 | 20 |
| 211 | 3424 | 3634 | CACAACCATCCAACCACAAC    | 59.701 | 20 |
| 254 | 440  | 693  | TCCAAGATTCATGTCGCAGA    | 60.353 | 20 |
| 279 | 45   | 323  | GCAACCTCAATGCTTCTCAA    | 60.38  | 21 |
| 194 | 790  | 983  | TGAATCCGTATCCTTATTGTTG  | 60.214 | 23 |
| 201 | 86   | 286  | GTCAACATTTTGTGCATTGGA   | 59.435 | 21 |
| 255 | 1    | 255  | TGATTGGTCAGTTTGTCCGA    | 60.088 | 20 |
| 237 | 100  | 336  | CCCAGCTCTCTCACTCTGCT    | 59.883 | 20 |
| 197 | 1857 | 2053 | TATGGAGTGGAGCAAAACGG    | 61.021 | 20 |
| 197 | 246  | 442  | TTTAAACCCTAAAACGCGCA    | 60.593 | 20 |
| 261 | 2347 | 2607 | TCACCTAATTGCATCCCCAT    | 60.155 | 20 |

|     |      |      |                        |        |    |
|-----|------|------|------------------------|--------|----|
| 274 | 1275 | 1548 | AGAGAGAGGCGATGCAAAAA   | 60.096 | 20 |
| 104 | 684  | 787  | AGACAAAATAATTGGGGAGC   | 60.001 | 22 |
| 219 | 3355 | 3573 | TATAGCTCCGGCAGCATTTT   | 59.838 | 20 |
| 265 | 907  | 1171 | CATTCATCATCATCAATATCAC | 59.64  | 26 |
| 174 | 12   | 185  | GATTCTTCCAATCTGACGGC   | 59.635 | 20 |
| 185 | 1009 | 1193 | GAACAAATCTGGGCCATCAG   | 60.461 | 20 |
| 162 | 27   | 188  | CCCAACTAACCACCCCACTA   | 59.705 | 20 |
| 208 | 51   | 258  | TTAGCCCTTAATGGCCTGC    | 60.181 | 19 |
| 214 | 815  | 1028 | TGGTGACTTTGAGGAGGGAG   | 60.229 | 20 |
| 212 | 830  | 1041 | CACAGTGAGGCCCTTTTAC    | 59.592 | 20 |
| 135 | 12   | 146  | ATTGAAATAAAGGCGCCAGA   | 59.682 | 20 |
| 187 | 962  | 1148 | AATCGTGGTTCAAAAATCGG   | 59.801 | 20 |
| 278 | 194  | 471  | TTCGGTTGCAATTTTAGTTGTT | 59.931 | 23 |
| 224 | 889  | 1112 | ACAGGGGCATATGTGTCAA    | 58.85  | 20 |
| 280 | 68   | 347  | GCCCAAATAAGTTGGAGTGG   | 59.429 | 20 |
| 252 | 109  | 360  | AATTTGAAACCGGACCGAAC   | 61.08  | 20 |
| 168 | 89   | 256  | TGGTCCATTGGTCTTTTGTATT | 58.353 | 22 |
| 178 | 697  | 874  | TCGGCTCAGATACGACCTGT   | 60.823 | 20 |
| 171 | 3    | 173  | TTCATGGGGCAATGGGATA    | 62.008 | 19 |
| 179 | 2171 | 2349 | GTGGTGGAAGAGGCAATGTT   | 59.973 | 20 |
| 245 | 466  | 710  | ATAGTCCATCCCTGCCTTC    | 60.293 | 20 |
| 221 | 326  | 546  | TTAAAAGGAGTTTTGACGGG,  | 59.978 | 22 |
| 242 | 168  | 409  | GATCGTAAATAAGGCGGTGG   | 59.433 | 20 |
| 188 | 11   | 198  | AAAAGTAATGCATATGTTTTCC | 57.308 | 27 |
| 234 | 26   | 259  | CATGCACCTGAACATGCC     | 59.61  | 18 |
| 265 | 275  | 539  | GGTTGAATTTTCGTACCCGTC  | 59.292 | 20 |
| 175 | 23   | 197  | CTAAACCAAACCCACCCCTC   | 60.581 | 20 |
| 240 | 94   | 333  | CAACCAAACCCCTTAGA      | 59.824 | 20 |
| 217 | 476  | 692  | CGTTCCTTCGTCTTGACTC    | 59.844 | 20 |
| 237 | 191  | 427  | ATAAATGTTCAAACCGGCCA   | 60.188 | 20 |
| 271 | 275  | 545  | TGCACGTAGGCATGTTCAAT   | 60.142 | 20 |
| 190 | 195  | 384  | CAAAGAAGAGTGGGCTTTGG   | 59.846 | 20 |
| 182 | 2116 | 2297 | GGACGCCCGAGATTATTTCT   | 60.419 | 20 |
| 227 | 104  | 330  | CCTCTCGCATTTCTCTTGCT   | 59.717 | 20 |
| 275 | 54   | 328  | CACATCAACACCTCAGCCC    | 60.105 | 19 |
| 276 | 178  | 453  | GGGGGAGAGACAAAGGAGAA   | 60.565 | 20 |
| 197 | 581  | 777  | CATTGTTTAACCGTCTGCC    | 60.365 | 20 |
| 265 | 1890 | 2154 | TCTTCTTTTCATCATCGCCC   | 60.155 | 20 |
| 134 | 2181 | 2314 | ACTAGAGGGGTCAGCCATT    | 59.957 | 20 |
| 101 | 373  | 473  | CAACCACATTAGGCCATGC    | 59.94  | 19 |
| 258 | 383  | 640  | AGGGTTGGATAACTCCATCG   | 58.861 | 20 |
| 178 | 67   | 244  | TATGCATTTGCACCTGAGGA   | 60.22  | 20 |
| 244 | 487  | 730  | AGGGGTGTAGGCCAAAAGACC  | 60.361 | 20 |
| 242 | 2567 | 2808 | GCAATTGGTAGGTTTCGTTGG  | 60.365 | 20 |
| 245 | 531  | 775  | CTTCCAGAGTCAATCCAGGC   | 59.803 | 20 |
| 172 | 53   | 224  | GCTTCCAAAAGAAAGAGCCC   | 60.32  | 20 |
| 264 | 243  | 506  | TGTTTCCGTTTTATCAGCA    | 59.157 | 20 |
| 172 | 10   | 181  | TCATTTATGAAGCAAGGGGG   | 59.894 | 20 |
| 266 | 179  | 444  | TGATGAGGCCATAACTGTGC   | 59.679 | 20 |
| 228 | 9    | 236  | CAACCCTACCTCCTTCTCCC   | 59.928 | 20 |
| 180 | 2102 | 2281 | GTGGGAATACCTGCAACACC   | 60.24  | 20 |
| 156 | 2634 | 2789 | CGGAAATGATAACAGCGGAT   | 59.923 | 20 |
| 242 | 632  | 873  | TGGTGAAGATGTGGGTTGAG   | 59.52  | 20 |
| 265 | 1365 | 1629 | GCACGTAACATACATTGCC    | 58.923 | 20 |
| 178 | 632  | 809  | GGCTCACTGCTTCTTTCTCG   | 60.277 | 20 |
| 236 | 35   | 270  | ACAATTGGTAGCAAACCATGA  | 59.384 | 22 |
| 260 | 23   | 282  | CCCCATTTTCGTGATTTTCAT  | 59.79  | 20 |
| 278 | 10   | 287  | CCCAAAAATGGGTTATTATTC  | 59.047 | 23 |



|     |      |      |                         |        |    |
|-----|------|------|-------------------------|--------|----|
| 167 | 342  | 508  | CCGTTGTCTTTAAGCCGTTG    | 60.659 | 20 |
| 258 | 770  | 1027 | GCTGATCTCCATCTCCAAGC    | 59.917 | 20 |
| 172 | 236  | 407  | TGGGAAAAATAAAGAGGAAA    | 58.542 | 22 |
| 273 | 172  | 444  | TTCTCATTTTCCCCGTCATC    | 59.871 | 20 |
| 280 | 785  | 1064 | TCCCCACTGCATCTTAGAATTT  | 59.966 | 22 |
| 201 | 401  | 601  | TCCCTCCCTCTCTTTTTCG     | 60.832 | 20 |
| 213 | 1637 | 1849 | TCCTAATTTGGAAAGTACTGG   | 59.36  | 24 |
| 222 | 99   | 320  | CGTCCCTCGAGTTTCGTAGA    | 60.388 | 20 |
| 117 | 7    | 123  | TGGCTGGATCTCTGAAAAT     | 59.629 | 20 |
| 218 | 134  | 351  | TCATTCCGAAAATCAAAGGC    | 60.016 | 20 |
| 275 | 6    | 280  | CTTTTGTAAAGTAGCCGCC     | 58.899 | 20 |
| 272 | 291  | 562  | TGCACGTTTCAAAGCATAGG    | 59.872 | 20 |
| 222 | 389  | 610  | TCAGAATCCCATTAGAAGGGT   | 57.599 | 21 |
| 204 | 262  | 465  | GAAATTGAAGGGATAAGAATT   | 58.995 | 25 |
| 275 | 234  | 508  | ACCTGATTCCAGTTGGATGG    | 59.779 | 20 |
| 193 | 2962 | 3154 | ACCGATCTTTTGGCATTCAA    | 60.448 | 20 |
| 186 | 466  | 651  | AAATCCTATCCGGTCAACCC    | 60.017 | 20 |
| 274 | 142  | 415  | GAGGGTGAAAGGAGAGGGAG    | 60.186 | 20 |
| 191 | 2888 | 3078 | TCGTGCTCAAGCATATGGAC    | 59.83  | 20 |
| 207 | 792  | 998  | CCCATACACAATTTGGGGTC    | 59.91  | 20 |
| 238 | 43   | 280  | ATCTCGGCTACGAAGTGCAT    | 59.866 | 20 |
| 143 | 314  | 456  | TGACGATTGCAACCTTTGTC    | 59.697 | 20 |
| 229 | 0    | 228  | GTCCTCCGAACCTCATGGTGT   | 59.969 | 20 |
| 223 | 352  | 574  | TTACCCGGACAATAAATCCG    | 59.655 | 20 |
| 134 | 1189 | 1322 | TCTTTCGCTCAACCTCCATT    | 59.813 | 20 |
| 239 | 896  | 1134 | TCCCATTCAACCATTTTCAA    | 58.792 | 20 |
| 210 | 138  | 347  | CAACGCACGGGTAAAAGACT    | 60.168 | 20 |
| 148 | 667  | 814  | AAGAGCATTTTTCATGCCATTTT | 59.976 | 22 |
| 221 | 14   | 234  | TTGGTTTTTAGTTAGCACACAA  | 58.49  | 25 |
| 166 | 97   | 262  | ATTTTCATGCGTGTCAAACCA   | 59.972 | 20 |
| 166 | 175  | 340  | AAAATTGTGGAGTTGCCGTT    | 59.476 | 20 |
| 111 | 30   | 140  | ACCAATTTGATGAGGGTCCA    | 60.173 | 20 |
| 180 | 30   | 209  | GATTCTGGATTATCCTGCGG    | 59.486 | 20 |
| 187 | 172  | 358  | ATGTGTCGGGGGTACAAAAG    | 59.711 | 20 |
| 101 | 18   | 118  | AAATTATATTCTCGCTTCTTCG  | 59.067 | 24 |
| 183 | 39   | 221  | GCCTACCTTGCTTCCGTAGA    | 59.476 | 20 |
| 134 | 231  | 364  | GAACATGTGTCGGAAGCTCA    | 59.837 | 20 |
| 236 | 41   | 276  | GCGCTTTTTGCCTGATATTT    | 59.349 | 20 |
| 267 | 210  | 476  | AAGGTGGGAAAGAATTTGGC    | 60.299 | 20 |
| 123 | 307  | 429  | CGAAATTGAATGGCAAGGAT    | 59.901 | 20 |
| 248 | 187  | 434  | CGAGGCGTGACATCTACCTT    | 60.277 | 20 |
| 213 | 36   | 248  | CGGAAGAATAAGAAACGGCA    | 60.202 | 20 |
| 185 | 150  | 334  | TCAAAAGTGCAACAAATCTGC   | 58.956 | 21 |
| 231 | 571  | 801  | GGAATGTAGTGTGCGCAAGA    | 59.871 | 20 |
| 246 | 116  | 361  | TGAGCTCGGACCTCCAGTAT    | 59.827 | 20 |
| 266 | 30   | 295  | GCAACGAACAAATCTCATTGG   | 60.496 | 21 |
| 129 | 680  | 808  | CGTCAATCAATGATGCGATTA   | 59.534 | 21 |
| 119 | 2234 | 2352 | CATGAGGCCGTTAGGATAA     | 59.916 | 20 |
| 236 | 774  | 1009 | TAATGATCCAACCCACCA      | 59.623 | 20 |
| 183 | 35   | 217  | GCACTCGGAACAACGAAAAT    | 60.118 | 20 |
| 247 | 122  | 368  | GCGCAGATCTAATGGACCAG    | 60.765 | 20 |
| 130 | 242  | 371  | TCCATTTTCAGACCCAAAAGA   | 58.117 | 20 |
| 250 | 2095 | 2344 | CGAAAATTGAAAATTTATTCC   | 59.921 | 23 |
| 240 | 1258 | 1497 | TGGACCTCATATGTCATAACC   | 58.709 | 23 |
| 117 | 178  | 294  | TTGCGGGGTTGTTAAAGAAT    | 59.451 | 20 |
| 218 | 35   | 252  | AAGTCTCTCACCTTCGCAA     | 59.989 | 20 |
| 223 | 48   | 270  | TCGATGTTGTAATTCATCCG    | 59.96  | 22 |
| 233 | 1131 | 1363 | ATGAACTATGCCCATGGAGG    | 59.773 | 20 |

|     |      |      |                        |        |    |
|-----|------|------|------------------------|--------|----|
| 220 | 1164 | 1383 | AAGAGCAAAACAATAACAAAC  | 59.732 | 23 |
| 271 | 103  | 373  | ACCCATGTGTCCACAAAACA   | 59.701 | 20 |
| 156 | 245  | 400  | CCTCTCATGGATTCGGGTAA   | 59.887 | 20 |
| 241 | 3    | 243  | AATTTACTAATTTATCCACCTC | 57.088 | 26 |
| 194 | 107  | 300  | CAACGATGAGGTGGCATGTA   | 60.539 | 20 |
| 195 | 291  | 485  | CTCCTTCTCTCCCCATTTT    | 59.508 | 20 |
| 254 | 1001 | 1254 | ACGTTTATCCATTTGCCGAC   | 59.829 | 20 |
| 209 | 189  | 397  | ATAAAGTGCAGCAGACGGGA   | 60.796 | 20 |
| 241 | 7    | 247  | GCTCTTCGAATTCTCCTCCC   | 60.293 | 20 |
| 229 | 9    | 237  | TTTAAAACCGTTCTCACCCC   | 58.925 | 20 |
| 239 | 4    | 242  | TCAGCACGCGCATTACATA    | 59.986 | 19 |
| 171 | 97   | 267  | ACTTCAATTTTCGAGCCCAA   | 59.685 | 20 |
| 115 | 0    | 114  | CATGTTAAATAATCGTCAAGTT | 57.898 | 26 |
| 188 | 278  | 465  | TTTACCAAAACTGCCATCCAC  | 59.853 | 21 |
| 115 | 193  | 307  | TTTTCTTTTTCCCGGTGATG   | 59.91  | 20 |
| 218 | 87   | 304  | TTCGTGTCTATCCTCACCCC   | 59.927 | 20 |
| 158 | 657  | 814  | TGATCGTTCTTCACTCTTTGC  | 59.621 | 22 |
| 156 | 693  | 848  | CCAGATCGCGACCCTATAGAT  | 60.445 | 21 |
| 249 | 124  | 372  | CAAAGGCCCAATGGTTAT     | 59.685 | 20 |
| 243 | 132  | 374  | GTCATTAGCAGCTGGGGATT   | 59.154 | 20 |
| 217 | 47   | 263  | CTCATAGTTGACGCCCTTCC   | 59.694 | 20 |
| 213 | 67   | 279  | AATTTGGGTCAAACCCCTTT   | 59.549 | 20 |
| 263 | 292  | 554  | TTTTACCAATTTGCCCTCG    | 59.937 | 20 |
| 277 | 248  | 524  | GAGCTGTTACCTCCGTGGAC   | 59.727 | 20 |
| 216 | 244  | 459  | AGACATGGCGATACGACGTT   | 60.547 | 20 |
| 144 | 88   | 231  | TGTGTGTCCAACATCCCATT   | 59.656 | 20 |
| 192 | 33   | 224  | GCATCTCTTGCTCTCTCATTGT | 58.699 | 22 |
| 222 | 87   | 308  | CGATTTTGCCCTTTTATGCT   | 59.212 | 20 |
| 272 | 29   | 300  | TTTGTTGTTTCCCAAGTTGCT  | 59.64  | 21 |
| 170 | 10   | 179  | ATTTGCTTGATCCAATGGTG   | 58.423 | 20 |
| 184 | 3    | 186  | TGCGTGATGCAGACATATTG   | 59.259 | 20 |
| 143 | 1642 | 1784 | TGTCCCATCTCGTGTGTA     | 59.96  | 20 |
| 275 | 339  | 613  | CATGCAGTCATGCACAATCA   | 60.282 | 20 |
| 261 | 495  | 755  | CTTTGACCTTGCATTGCTG    | 59.464 | 20 |
| 146 | 145  | 290  | AAATAAGGAGGTGTTATGAAG  | 59.323 | 24 |
| 252 | 49   | 300  | AATTGATGGAAGAAGGCACG   | 60.074 | 20 |
| 192 | 98   | 289  | CGAGAGAAAAAGAAAGGCGA   | 59.702 | 20 |
| 101 | 154  | 254  | GTGCGTGTGTATGCTGAGGT   | 59.783 | 20 |
| 254 | 213  | 466  | TGATGTTTGCATTTTAAGAGGA | 57.459 | 22 |
| 240 | 14   | 253  | ATCTCTACCGGACTGCGAAA   | 59.836 | 20 |
| 150 | 1    | 150  | TTCAACCAGGCAAAGACCAC   | 61.075 | 20 |
| 231 | 465  | 695  | GGAAGGAATATTTTCATCACAC | 59.635 | 24 |
| 148 | 47   | 194  | TCGATAATGCACTTTATCAGAC | 57.221 | 24 |
| 251 | 243  | 493  | GGTTGGTGAGTTGGCATGTA   | 59.42  | 20 |
| 116 | 570  | 685  | AGATGATCACGATGAAGCCA   | 59.197 | 20 |
| 237 | 576  | 812  | CATGCACGGAAACTTGAAA    | 59.706 | 20 |
| 208 | 773  | 980  | ACCGATGAGTCGTTTTGTGT   | 60.431 | 20 |
| 273 | 1770 | 2042 | CATTGCGTTTTACAGCCAAA   | 59.742 | 20 |
| 164 | 480  | 643  | TGATTTCCCTGAGAAGGGTG   | 60.042 | 20 |
| 232 | 29   | 260  | TTGGTGTATACTTTTGTAGTA  | 58.276 | 27 |
| 235 | 9    | 243  | ACCCGAATTTTTCGGATACC   | 60.02  | 20 |
| 189 | 2    | 190  | GAGAATAGATAGTTAGAGAGA  | 58.82  | 27 |
| 275 | 65   | 339  | CTTCTACCGTCGACCAAAT    | 60.111 | 20 |
| 237 | 103  | 339  | TTCTCAGCATATGGGAAGGG   | 60.029 | 20 |
| 267 | 1395 | 1661 | GCTGACTGGACTGCCTTTTT   | 59.478 | 20 |
| 262 | 67   | 328  | TGAGCCTATCTTGGAGCACA   | 59.547 | 20 |
| 280 | 65   | 344  | TCTTTGAATCATCTTCCACCTT | 57.786 | 22 |
| 227 | 81   | 307  | CACCATCTTCCCCTTCTGAG   | 59.649 | 20 |

|     |      |      |                         |        |    |
|-----|------|------|-------------------------|--------|----|
| 247 | 10   | 256  | CAAAAATGGCCAAAATCGTC    | 60.302 | 20 |
| 212 | 389  | 600  | CACATGTTGCCATCTCCAAG    | 60.112 | 20 |
| 205 | 25   | 229  | CTTTTTAGCATGCGAGAGGA    | 58.267 | 20 |
| 189 | 34   | 222  | TCAACAACATGCAAGCATCA    | 59.833 | 20 |
| 197 | 402  | 598  | CGCTGCACCTACAAATGAAA    | 59.872 | 20 |
| 228 | 1213 | 1440 | CCATTTCTTTGGCAAGTTGA    | 58.745 | 20 |
| 167 | 447  | 613  | AAGTAGCAGCACCGCAAAC     | 60.081 | 20 |
| 203 | 623  | 825  | TGCATCTCTCTCATCCGA      | 59.611 | 20 |
| 240 | 2392 | 2631 | TGATCATCGAGGCAGAGAAA    | 59.476 | 20 |
| 184 | 32   | 215  | GGCAAAACCTGAACAGCTC     | 59.859 | 20 |
| 187 | 816  | 1002 | GGATCGGAGTTGCCTAAGTG    | 59.694 | 20 |
| 130 | 4    | 133  | GCACAACCACTCCACAAAGA    | 59.726 | 20 |
| 204 | 585  | 788  | ATAATTTGCGCCATCACCT     | 60.531 | 20 |
| 151 | 254  | 404  | TGTAACGGTTCGATCTCACG    | 59.716 | 20 |
| 243 | 243  | 485  | TCGAAGGTGAACTCGGTCTT    | 59.844 | 20 |
| 218 | 446  | 663  | GGATAGGCCCTAACTCGACC    | 59.925 | 20 |
| 220 | 3    | 222  | AGAGTTCACCAAGGTACTTTA   | 57.201 | 27 |
| 218 | 1371 | 1588 | TGGGCACATTTGAATCTTGA    | 60.049 | 20 |
| 267 | 837  | 1103 | CCAAACGAAGTGAAGTGCAG    | 59.485 | 20 |
| 178 | 224  | 401  | TGTAGGCATGCTCAATTTGG    | 59.688 | 20 |
| 253 | 396  | 648  | ACACACACTCACTCACTCCCA   | 59.181 | 21 |
| 158 | 71   | 228  | GTTTCGTGGTTCGGGTATTCA   | 60.755 | 20 |
| 116 | 14   | 129  | AAGGGTATCACCTGATTTTCT   | 57.73  | 23 |
| 166 | 631  | 796  | AAGGATCTTGTTACGGGCCT    | 59.962 | 20 |
| 172 | 1757 | 1928 | TTGACTGATTGGAGCAGTGG    | 59.831 | 20 |
| 236 | 24   | 259  | TCAAATCTTCAACATGCAAGC   | 58.909 | 21 |
| 264 | 242  | 505  | TACGAGACTTTTGGGGGACA    | 60.486 | 20 |
| 248 | 214  | 461  | CACGTGCGTCAACTCCTTTA    | 59.904 | 20 |
| 243 | 44   | 286  | AAACACGCAACACAAAGCAG    | 59.951 | 20 |
| 232 | 648  | 879  | AGCCCTGTAGAGGAGCATCA    | 59.973 | 20 |
| 158 | 313  | 470  | TTTATTGGACGAAAATGCC     | 59.773 | 20 |
| 195 | 432  | 626  | TAAACCGTTGTTTTGGCTCC    | 59.975 | 20 |
| 278 | 26   | 303  | CAGTAACAAAGTAAGACATGA   | 58.534 | 26 |
| 132 | 283  | 414  | TTGCTTGAAACCAACTGTCTG   | 59.881 | 20 |
| 277 | 359  | 635  | CCCGATTATCGCAAGAACAT    | 59.923 | 20 |
| 249 | 252  | 500  | CGCACAAGCTGAGTGAGTGT    | 60.251 | 20 |
| 212 | 76   | 287  | GTTGTGCTTTGTGCTTTGCT    | 59.126 | 20 |
| 142 | 71   | 212  | TCCTCTTCCCATTCTCTCCA    | 59.731 | 20 |
| 103 | 19   | 121  | ACACGAGTGAAGAAAGGGAG    | 58.929 | 21 |
| 273 | 79   | 351  | AATACTTCCGTCACCGTCG     | 59.993 | 20 |
| 230 | 1103 | 1332 | CCCATTCACAAGACCTCCTC    | 59.505 | 20 |
| 237 | 346  | 582  | TGAATGAGGAAGATAAATGTG   | 60.19  | 23 |
| 147 | 193  | 339  | TTCATTCCTTCGGCTGACTT    | 59.813 | 20 |
| 245 | 679  | 923  | AAGGGGAAGTTCTGCATGTG    | 60.111 | 20 |
| 280 | 0    | 279  | CGTCAGAAACCTCTCGCATT    | 60.397 | 20 |
| 191 | 294  | 484  | GACCGCCAACTTTTCTTGAG    | 59.853 | 20 |
| 211 | 101  | 311  | AAAGGATCGAAACGAGGGAG    | 60.569 | 20 |
| 196 | 9    | 204  | TGTGTTGTCTTTTAGATCAATG  | 59.53  | 26 |
| 171 | 4755 | 4925 | TCAAGGGTAATTTTTCAGGCA   | 59.573 | 21 |
| 137 | 259  | 395  | TAGTTAGCATGGGGGAATGC    | 59.923 | 20 |
| 272 | 83   | 354  | TTTAATTTGGCCGGATTGTC    | 59.773 | 20 |
| 185 | 1778 | 1962 | AAAACCTGATATGCGCGTTGA   | 59.329 | 20 |
| 267 | 929  | 1195 | ACTGCCTCCAAGCACAGGTA    | 60.854 | 20 |
| 272 | 89   | 360  | CCACTTAGGAATTTTCATCAAAT | 60.339 | 27 |
| 180 | 364  | 543  | TGGACACAAGTATGGCTCTCA   | 59.303 | 21 |
| 195 | 871  | 1065 | TGCTGATGAAGAAATCGGATG   | 59.756 | 20 |
| 174 | 1024 | 1197 | GAAATCAACCGCGGAGTAAG    | 59.708 | 20 |
| 123 | 637  | 759  | GTGAACAACAATCCCCACCT    | 59.679 | 20 |

|     |      |      |                         |        |    |
|-----|------|------|-------------------------|--------|----|
| 226 | 20   | 245  | ACTGAAATTGGGATTTGTGGC   | 61.095 | 21 |
| 218 | 13   | 230  | TGTAATGCTACAGTTCTTAATT  | 57.643 | 26 |
| 275 | 2128 | 2402 | AAAACCCAACGACCGGTTA     | 60.213 | 19 |
| 140 | 246  | 385  | AGCCCGATCTCAAACCTCCTC   | 60.735 | 20 |
| 226 | 484  | 709  | GCAAACCTGATTGACCCGAAT   | 59.939 | 20 |
| 106 | 20   | 125  | AGCTTAAACAAAATGGCATTAA  | 59.54  | 25 |
| 192 | 2    | 193  | ACGGTTAAGATTCAGCACGC    | 60.278 | 20 |
| 201 | 29   | 229  | CTCACGAAAACACACGCACT    | 59.946 | 20 |
| 149 | 705  | 853  | AAAAATTGGGCATTTTGACG    | 59.81  | 20 |
| 141 | 69   | 209  | CAGTTATCACCGGATCACGA    | 59.522 | 20 |
| 243 | 16   | 258  | CTCAACGGTATGCTCGGATT    | 60.096 | 20 |
| 268 | 241  | 508  | GCACCCCGTATTTTAGGACC    | 60.562 | 20 |
| 178 | 1180 | 1357 | AGCTATGCTGCAGGTTCCAC    | 60.428 | 20 |
| 151 | 66   | 216  | AGTTTTCTCTATTGGGGTGGC   | 59.473 | 21 |
| 173 | 76   | 248  | CAACCTATAAATAAGATCTCA   | 57.587 | 27 |
| 138 | 727  | 864  | CCTGCTGGTTCTTGCTTCTC    | 60.134 | 20 |
| 179 | 364  | 542  | CATTTTCGCACACAGAGATGC   | 60.423 | 20 |
| 185 | 478  | 662  | CGTATATGTCGCCGAAAGT     | 59.982 | 20 |
| 134 | 230  | 363  | ACCAATAGGTCATGGGTTCCG   | 59.67  | 20 |
| 238 | 646  | 883  | CGGTTAGAAACCAGACCGAA    | 60.103 | 20 |
| 172 | 1167 | 1338 | AAAAATTTTCGATCGTTTCGG   | 59.055 | 20 |
| 278 | 145  | 422  | ACCCTTTTCGGGCATAAAT     | 61.703 | 20 |
| 258 | 30   | 287  | TTAAACCTTTGTGCGGTTGC    | 61.027 | 20 |
| 268 | 486  | 753  | TTCTGGTCCAAACCCAATCT    | 59.381 | 20 |
| 228 | 613  | 840  | CCACCCACTTTCTCTTGTC     | 59.549 | 20 |
| 208 | 656  | 863  | ATGGAAAAAGGCCGAGAAAT    | 59.909 | 20 |
| 201 | 884  | 1084 | CCAGTGTA AAAAAGATCGAGCA | 58.041 | 21 |
| 198 | 1004 | 1201 | GAAACGAAGATGGTTTCGTG    | 58.201 | 20 |
| 270 | 587  | 856  | TGTTATGGGTTTTTGCCGTT    | 60.223 | 20 |
| 161 | 2090 | 2250 | GGAAAAGAACCTGAATGCGA    | 60.192 | 20 |
| 207 | 215  | 421  | CACGTGTTCTTGCTCGTACC    | 59.365 | 20 |
| 180 | 49   | 228  | ACCAACATCACCAAAAACCC    | 59.55  | 20 |
| 274 | 0    | 273  | GCACACTCAGATCACACAGGA   | 59.888 | 21 |
| 213 | 31   | 243  | ACCAAGATTTGATCATGGGC    | 59.756 | 20 |
| 253 | 204  | 456  | AATGGAGGCAAGCTACTCGAT   | 60.243 | 21 |
| 165 | 2796 | 2960 | CGGGAAACATGATCCGAATA    | 60.66  | 20 |
| 126 | 75   | 200  | AATATTGCAAATGGCCGAGA    | 60.424 | 20 |
| 243 | 261  | 503  | TACGATACGAGGAGGGGTGT    | 59.43  | 20 |
| 261 | 3292 | 3552 | AGGATCATGGCCACGTAGAG    | 60.096 | 20 |
| 132 | 400  | 531  | GAAGGAGGTTGGGAGGAATG    | 60.822 | 20 |
| 272 | 1179 | 1450 | TCCACCTCACTTTTCCCTTG    | 60.081 | 20 |
| 232 | 248  | 479  | CAGCTCTTCAAACCTGGACACA  | 60.465 | 22 |
| 201 | 1102 | 1302 | AACCGGTTAAAAATCGGACC    | 60.055 | 20 |
| 180 | 28   | 207  | AACAAACACCTGGGACCTCA    | 60.399 | 20 |
| 249 | 6    | 254  | CAACCCTACCTCCTTCTCCC    | 59.928 | 20 |
| 169 | 287  | 455  | CAACTGTTCTGAATGCGAGC    | 59.596 | 20 |
| 174 | 1771 | 1944 | TTCATTCAATTTGCTCCTGG    | 58.695 | 20 |
| 261 | 40   | 300  | GACATTGCCTAGAAAGTGGGA   | 59.184 | 21 |
| 229 | 100  | 328  | TGTTGCCAATTAAGATTGCG    | 59.702 | 20 |
| 266 | 48   | 313  | CATTCACATCGTCTCTGCAA    | 58.352 | 20 |
| 120 | 690  | 809  | GGCATTGTATATGGAGGGCA    | 60.69  | 20 |
| 279 | 1191 | 1469 | GTGGCCGCATTGTATGAAAA    | 61.783 | 20 |
| 199 | 400  | 598  | GGAGAACCGTCGACATGATT    | 59.934 | 20 |
| 156 | 263  | 418  | CCAAAACCGACACTCCCTTA    | 59.964 | 20 |
| 211 | 11   | 221  | CCATAGAAAATGTTGTTAGCA   | 59.577 | 24 |
| 108 | 103  | 210  | CAGATTTTGAAACCTGTAAGT   | 57.574 | 24 |
| 277 | 130  | 406  | TCAATTCATAAATATGTCGAAC  | 59.021 | 26 |
| 195 | 710  | 904  | TTGCGAATTGTTGCAAATCT    | 59.305 | 20 |

|     |      |      |                         |        |    |
|-----|------|------|-------------------------|--------|----|
| 272 | 1566 | 1837 | TGCTGCAAGCATGTATTTGTC   | 59.894 | 21 |
| 276 | 955  | 1230 | AACTCAAGTTCCGATCGTGC    | 60.263 | 20 |
| 138 | 304  | 441  | TAATATTTGCCGCCCAAGAC    | 59.928 | 20 |
| 279 | 90   | 368  | TTCTGACGAAATTGCCCTTC    | 60.192 | 20 |
| 148 | 440  | 587  | TTCTTTGTCCCTCTCCTTGC    | 59.405 | 20 |
| 245 | 3281 | 3525 | CGCCATATCGGACAAACTCT    | 60.096 | 20 |
| 163 | 941  | 1103 | CGTCCAACGAATCAAGACAA    | 59.691 | 20 |
| 105 | 9    | 113  | GGAGCCTCCGAACCTTTGAA    | 60.324 | 19 |
| 181 | 1608 | 1788 | TTGTGTACCAAGACATTTGTGT  | 59.374 | 24 |
| 189 | 63   | 251  | CGACTATCTGCAGGAGGCAT    | 60.384 | 20 |
| 181 | 314  | 494  | GAACACCGGATTTACGTGGT    | 59.717 | 20 |
| 117 | 14   | 130  | TGGATAAGTCTATCAAGATTTA  | 58.272 | 27 |
| 273 | 14   | 286  | CACCGTTTATCCCCATGTC     | 60.051 | 20 |
| 230 | 418  | 647  | ACTTTTGTGGAAAAGTGGCG    | 60.147 | 20 |
| 104 | 23   | 126  | TTGATCATAACTCTCTCTCGCG  | 60.407 | 23 |
| 126 | 90   | 215  | TTGTGAGTCGTTTGTCTTGG    | 58.811 | 21 |
| 267 | 425  | 691  | TGACCACCCAACCACACTAA    | 59.848 | 20 |
| 280 | 146  | 425  | TCCCCGGAATAATTGTTATTTT  | 59.945 | 24 |
| 221 | 201  | 421  | GGTGTCCAAATGTTGGGTCT    | 59.679 | 20 |
| 195 | 39   | 233  | CAAGAACTTTAATTGTTTCATTG | 59.944 | 26 |
| 173 | 386  | 558  | TGTTGAGGGTTGTTTATTATGG  | 59.991 | 23 |
| 257 | 1089 | 1345 | TTAATGGTGGGGACATGCTT    | 60.192 | 20 |
| 139 | 489  | 627  | AAACCCACTAACCCAAACCC    | 59.955 | 20 |
| 267 | 483  | 749  | AAAACCCCTCCACCCATTTT    | 59.549 | 20 |
| 264 | 932  | 1195 | TGTGTGATGTGTGTGTGTCGT   | 59.499 | 21 |
| 280 | 30   | 309  | TGCAAGCATTGAAGTTGAAA    | 58.046 | 20 |
| 208 | 2825 | 3032 | GTTCCAGAACTCCGTCTCCA    | 60.238 | 20 |
| 247 | 150  | 396  | CGGACGGTCAATCAATTA      | 59.484 | 19 |
| 105 | 212  | 316  | TTCTCGTGTTCCTCGCC       | 60.214 | 20 |
| 182 | 24   | 205  | AGGGAAACAATGGATACTCCT   | 59.734 | 23 |
| 227 | 3    | 229  | CATAAATGCGGTGGAGATGTA   | 58.52  | 21 |
| 267 | 16   | 282  | TTGCGTACCAAGTTTTTGGC    | 61.027 | 20 |
| 277 | 620  | 896  | TTGGTAGCCTGGATAGCACC    | 60.096 | 20 |
| 273 | 60   | 332  | GTTTTCCGGAGGGAAATGTT    | 60.166 | 20 |
| 268 | 124  | 391  | CAAACCCTAGCCCAAGAACA    | 60.103 | 20 |
| 185 | 50   | 234  | TCTTTCCATTTTGCCCTTA     | 59.52  | 20 |
| 178 | 295  | 472  | CGCCCAAAAATCTAACATTCC   | 60.659 | 21 |
| 124 | 2368 | 2491 | GTCCCAAGCACCTTTCTTGA    | 60.232 | 20 |
| 128 | 417  | 544  | AAAGGGCGGTATCATTTGAA    | 59.411 | 20 |
| 249 | 11   | 259  | AGATGACAACCTTCGGCTTG    | 60.255 | 20 |
| 266 | 225  | 490  | CTAGCTTCGGTACAAACCGC    | 59.904 | 20 |
| 187 | 212  | 398  | ATGGGATATGATTCCGGTCA    | 59.975 | 20 |
| 217 | 327  | 543  | AAACACCAGTGAAGCAAGCA    | 59.49  | 20 |
| 244 | 298  | 541  | TAGCAGGCTGACCGTAGTGC    | 61.532 | 20 |
| 269 | 227  | 495  | GTGTGGTCTGAAAACCTCGCC   | 60.7   | 20 |
| 266 | 100  | 365  | ATATTCTCGCTTCTTCGCCA    | 59.945 | 20 |
| 140 | 393  | 532  | ACCCTCCTTCAGCCAAAAT     | 59.94  | 20 |
| 188 | 169  | 356  | CGTTTCTCGGAGGTTTCAGA    | 60.366 | 20 |
| 126 | 189  | 314  | CCTTCGTCAACTTTGGCAAT    | 60.11  | 20 |
| 166 | 237  | 402  | TGCCAACCTCCAAAATCTGT    | 60.495 | 20 |
| 170 | 57   | 226  | ATGGTAGCTTTGAGACACGAT   | 57.892 | 22 |
| 225 | 21   | 245  | ATCGTGATTCGCAACTCTGA    | 59.399 | 20 |
| 266 | 39   | 304  | TTTTTCGATTGTGCTTGCTG    | 59.992 | 20 |
| 209 | 302  | 510  | TTGATGGTGAACAAACGGAA    | 59.941 | 20 |
| 169 | 60   | 228  | ATGCGTGGAAGAAAAGATCC    | 59.129 | 20 |
| 114 | 132  | 245  | CCCATTTCTAACTACCCAAATC  | 59.962 | 23 |
| 208 | 1007 | 1214 | CTGAAACATGGATTGCCACA    | 60.517 | 20 |
| 200 | 698  | 897  | CGAGTATGCTGACGGGAAAT    | 60.096 | 20 |

|     |      |      |                        |        |    |
|-----|------|------|------------------------|--------|----|
| 231 | 303  | 533  | TGTTAACCAAAAAGAAGAATC  | 57.104 | 23 |
| 154 | 209  | 362  | ATGCCCTTCTATGCTGAGGA   | 59.797 | 20 |
| 260 | 2165 | 2424 | GACCGGGCTGTATTTTAACG   | 59.474 | 20 |
| 181 | 49   | 229  | TCCATTTGCAATACTATGGCTT | 58.654 | 22 |
| 103 | 23   | 125  | AAATGGGCGAGAGTTTTCAA   | 59.685 | 20 |
| 207 | 17   | 223  | AGGTGTCCGAACTTTATATGGC | 59.398 | 22 |
| 166 | 41   | 206  | AGATGACAACCTTCGGCTTG   | 60.255 | 20 |
| 194 | 171  | 364  | CTCTGCCTCGTCTGGCTAGT   | 59.769 | 20 |
| 216 | 86   | 301  | CGAGCCGGTAAATTTTCACT   | 59.225 | 20 |
| 231 | 1350 | 1580 | AGCAAATAAAAATTATGGTTT  | 60.61  | 25 |
| 279 | 17   | 295  | TAAAGTGTGCGGACGGTAT    | 60.523 | 20 |
| 121 | 3    | 123  | AGGAAAATATCAAGTCAACAC  | 58.257 | 25 |
| 174 | 643  | 816  | TTTTTACCATTTTGCCTGG    | 59.805 | 20 |
| 275 | 295  | 569  | GGGACAATGGAGTTCACGTT   | 59.827 | 20 |
| 184 | 1630 | 1813 | TTAATTGGACGGATATGCCC   | 59.621 | 20 |
| 259 | 76   | 334  | AAGTGACCGTTGGCTTCATT   | 59.598 | 20 |
| 132 | 808  | 939  | TTGTCGCCATATACGATCAC   | 57.029 | 20 |
| 145 | 63   | 207  | TCTGCTTCAGCTCAGTGTGG   | 60.333 | 20 |
| 175 | 212  | 386  | TAGGGGTTATCACCGGATCA   | 60.148 | 20 |
| 132 | 53   | 184  | CCGAAAATTCAATCCTCGAT   | 58.974 | 20 |
| 196 | 4    | 199  | TCCCAACTAAAATATGCTGCA  | 59.624 | 22 |
| 243 | 244  | 486  | TCCTGACAGTTTGGCATCAG   | 59.831 | 20 |
| 106 | 53   | 158  | TTGCAGAAAATGGAGAGGAG   | 59.94  | 21 |
| 178 | 1330 | 1507 | TGTCGCGAACGGTATAGGAT   | 60.49  | 20 |
| 108 | 308  | 415  | TTAATAGGCTGCCCTCCTCC   | 60.542 | 20 |
| 279 | 828  | 1106 | AGGGCTGAGCAAAAATCAAA   | 59.823 | 20 |
| 184 | 11   | 194  | CAACAATACCACACAGTTCA   | 58.458 | 22 |
| 227 | 797  | 1023 | AGATGGCCTAAGACGGTGAT   | 58.622 | 20 |
| 261 | 148  | 408  | GCTCCAAATCAAAATCCCCT   | 60.265 | 20 |
| 170 | 1    | 170  | TTGTTCTACTCACTCACATTA  | 57.186 | 25 |
| 101 | 93   | 193  | TGTTGAATTAACTTCCCAAAAC | 60.25  | 23 |
| 242 | 108  | 349  | CAGACATTGAGGTTTGGATGG  | 60.36  | 21 |
| 271 | 232  | 502  | GTGGTTCGAATTTCTGTAAC   | 60.362 | 20 |
| 273 | 88   | 360  | GGAACCTATGTGACATCCAGC  | 59.425 | 21 |
| 129 | 29   | 157  | ATTATCCGATTACCCGACCC   | 59.873 | 20 |
| 267 | 1015 | 1281 | ATGCACATGTTTATCGCACG   | 60.554 | 20 |
| 215 | 219  | 433  | TCGCTCATCCAAGTAAGTCG   | 59.024 | 20 |
| 204 | 363  | 566  | AGATGAAGACGCATGCCAG    | 59.959 | 19 |
| 144 | 752  | 895  | TTAACAATGGTGGCCGAAAT   | 60.188 | 20 |
| 248 | 2    | 249  | TTATCAGCATTGGGAAGGG    | 59.894 | 20 |
| 126 | 50   | 175  | ATGTGCGCCTTTTAACTTG    | 60.131 | 20 |
| 275 | 70   | 344  | AAATACGGTCCGTGCATGTT   | 60.257 | 20 |
| 119 | 67   | 185  | AGAACAAGCTAAGGCACCCA   | 59.875 | 20 |
| 274 | 539  | 812  | CCTCCAAGTCTAAGCAGCCT   | 58.695 | 20 |
| 160 | 92   | 251  | AGCACTTGCTTGGATTGTCA   | 59.445 | 20 |
| 221 | 52   | 272  | TCGTTGATTGCATAGTGGGA   | 60.073 | 20 |
| 247 | 1071 | 1317 | TTGGGATCTGCCTTTCCTA    | 59.767 | 20 |
| 225 | 222  | 446  | TCCTCCCAATTTTGTGTGT    | 60.21  | 20 |
| 280 | 551  | 830  | ATGTAGCAGGTTTTGTCGCC   | 60.14  | 20 |
| 179 | 642  | 820  | TGAGTGTATGGAGCCCATGT   | 58.96  | 20 |
| 127 | 385  | 511  | CAAAGGCCCAACAATGGTTAT  | 59.685 | 20 |
| 256 | 6    | 261  | GAGTCACACAGTTTGGCACTT  | 57.845 | 21 |
| 272 | 67   | 338  | GCCTTAAAAGGTGGTGTGGA   | 59.971 | 20 |
| 154 | 923  | 1076 | TGCAACACAACCAAGCAAT    | 60.157 | 20 |
| 101 | 13   | 113  | CTTGCTGTGTTGGATGGAAA   | 59.691 | 20 |
| 122 | 339  | 460  | ATGAGCCACAGTTCCAATCC   | 59.934 | 20 |
| 158 | 191  | 348  | GTCCGTGAAGTTTAGCGACC   | 59.74  | 20 |
| 225 | 171  | 395  | TCTTCCGCTGGTTTTCTGT    | 59.853 | 20 |

|     |      |      |                        |        |    |
|-----|------|------|------------------------|--------|----|
| 269 | 225  | 493  | AATGAATGCACCGGATTAGC   | 59.929 | 20 |
| 211 | 341  | 551  | GCAATGTGGGCTGAAATCTT   | 60.081 | 20 |
| 199 | 1143 | 1341 | ATTCGTCATCAAATTAAGCC   | 57.001 | 22 |
| 277 | 390  | 666  | GGCGAGAATGGAGGAGAAA    | 60.288 | 19 |
| 155 | 760  | 914  | CTCAAGATCCCAACCGACTC   | 59.655 | 20 |
| 210 | 76   | 285  | TCGAATTCGGGATACCAGAG   | 60.029 | 20 |
| 251 | 108  | 358  | CCTAATAGGGTTGTGTGCC    | 59.312 | 20 |
| 112 | 95   | 206  | GAGACGAGAGAAAAGAGTGC   | 59.367 | 21 |
| 169 | 705  | 873  | CGATTTGTATATTTTCCGAAAG | 59.092 | 23 |
| 220 | 18   | 237  | CACCGTTGTCTTTAAGCCGT   | 60.168 | 20 |
| 106 | 111  | 216  | GTCGCAGTGATGTCCTTCT    | 60.269 | 20 |
| 190 | 39   | 228  | TCCTCGTATCCGTTCTCCAC   | 60.073 | 20 |
| 200 | 1932 | 2131 | CGCCTACAAACACGCCTAAC   | 60.689 | 20 |
| 252 | 1478 | 1729 | ATGCCCGTTTGCAATATGA    | 59.906 | 19 |
| 118 | 545  | 662  | GCTATGGTGGTTTTGTAAACG  | 60.667 | 23 |
| 216 | 7    | 222  | AACACCTGTGAAAGGGATCG   | 59.966 | 20 |
| 234 | 340  | 573  | TTTGTGTTGGCAAACAGGTC   | 59.591 | 20 |
| 213 | 23   | 235  | TTCGGAGTTATGAAGTTAGCA  | 59.68  | 23 |
| 184 | 184  | 367  | GATTAGCAAATTTCTGGGACG  | 59.547 | 20 |
| 269 | 1372 | 1640 | CGACCATAACAAAGAAAACAC  | 59.553 | 22 |
| 265 | 336  | 600  | CGCAGATCTGATGGTCCAG    | 60.371 | 19 |
| 242 | 52   | 293  | ATTTAAACCGATCCCACCC    | 59.888 | 20 |
| 226 | 326  | 551  | AGGTGCTCAAAAATCCGAAA   | 59.685 | 20 |
| 101 | 216  | 316  | TGAGATAAGGGGGTGTTC     | 59.933 | 20 |
| 176 | 77   | 252  | CCTCCTTCAGCCAAAATGA    | 60.184 | 20 |
| 261 | 200  | 460  | TCCCTATTTTTCGTCTCCCAC  | 60.305 | 21 |
| 174 | 274  | 447  | CGAAGAGTGTTGGAATCAAAC  | 59.583 | 21 |
| 272 | 388  | 659  | TCACACAGATTTGACATCGAA  | 60.161 | 23 |
| 271 | 512  | 782  | TGATTTAAGGGGGTGTTC     | 59.801 | 20 |
| 264 | 17   | 280  | TGATTAGTACCGATGAATCAA  | 60.595 | 24 |
| 119 | 11   | 129  | TATGACCTATGGAAGCCCA    | 60.288 | 20 |
| 193 | 3696 | 3888 | GATTCGGTGGGAGAACAAAA   | 59.91  | 20 |
| 259 | 171  | 429  | TCAACATGCAACCAACAAAAA  | 59.999 | 21 |
| 277 | 97   | 373  | CAGGAACCTTTCTCTCATCC   | 60.059 | 21 |
| 264 | 890  | 1153 | TGCCAATGCTTGTATAGGTT   | 60.517 | 21 |
| 202 | 267  | 468  | GTCTCAACCCTTGATTGCGT   | 60.119 | 20 |
| 216 | 1962 | 2177 | AGTGGCTCTTGTCTTCTGCT   | 59.604 | 20 |
| 256 | 135  | 390  | TCCTTTCCCTTTCCTTTCCT   | 59.144 | 20 |
| 106 | 15   | 120  | ACCGTAGGCATGGTTTGTTT   | 59.859 | 20 |
| 222 | 0    | 221  | TCGATAAAGGGTGGAGGAGGA  | 59.623 | 20 |
| 257 | 317  | 573  | CCTTCCCATTTCTCTCTCC    | 60.008 | 20 |
| 117 | 129  | 245  | CATTGGCATTGTAAGCTTCG   | 59.325 | 20 |
| 278 | 4    | 281  | TATCCTCCTCCAATCGAAA    | 59.458 | 20 |
| 222 | 20   | 241  | TTGTTGATGATGGAGGACGA   | 60.048 | 20 |
| 155 | 148  | 302  | TACTAACGGCCGGAATATC    | 59.923 | 20 |
| 161 | 632  | 792  | AAGGGGTGTTGTGTTGTGCT   | 60.466 | 20 |
| 133 | 50   | 182  | GCTACGCCTAATTGCTTGCT   | 59.658 | 20 |
| 138 | 922  | 1059 | AAGCATGCATATCGCAGAGA   | 59.553 | 20 |
| 148 | 107  | 254  | CGTTGGAGCTGCTAGGATTC   | 59.978 | 20 |
| 234 | 305  | 538  | TTTTGTTATTATAGGATCAAAC | 58.722 | 25 |
| 195 | 1493 | 1687 | TACCACCACATGTCCCTTGA   | 59.806 | 20 |
| 132 | 1    | 132  | AGTTTTGACAATATTTAGGTGT | 58.65  | 27 |
| 260 | 122  | 381  | AACGACTCCAATCAGCAA     | 60.636 | 20 |
| 269 | 210  | 478  | TCTCTCTCGACGGTGAAGGT   | 59.986 | 20 |
| 195 | 15   | 209  | AACTCCATTTGTAATAGTAAG  | 58.438 | 27 |
| 113 | 81   | 193  | CGGCCGGAATATCTAAAGTG   | 59.564 | 20 |
| 246 | 866  | 1111 | CGATTTCCGGTTCAATTTTGC  | 60.436 | 20 |
| 263 | 99   | 361  | TGGTGGCCATATACGCAAT    | 60.075 | 21 |

|     |      |      |                       |        |    |
|-----|------|------|-----------------------|--------|----|
| 111 | 1    | 111  | CTTTGGCAACGGAATACCAC  | 60.365 | 20 |
| 203 | 829  | 1031 | TCCAAATACCCAGTCCCAA   | 60.162 | 20 |
| 161 | 38   | 198  | TCTCTATCTTCGGCCCTTT   | 60.166 | 20 |
| 243 | 393  | 635  | GCGAAGCTTTTCCAACCTCAC | 60     | 20 |
| 121 | 646  | 766  | CGAATAGCGGTTGCTGATTT  | 60.23  | 20 |
| 114 | 355  | 468  | TCCGAACCAAGTTTTTGTCA  | 59.145 | 20 |
| 208 | 779  | 986  | AAATTCACATGCGACATCCA  | 59.931 | 20 |
| 174 | 211  | 384  | ATGGGTTATTACCGGATCGC  | 60.903 | 20 |
| 247 | 1884 | 2130 | AAAACCTCAAACCACGGGAT  | 58.411 | 20 |
| 226 | 1109 | 1334 | ATCACAAGCATGCAAGATAAG | 59.252 | 22 |
| 258 | 82   | 339  | GGATGGACCGGATGTTAGAA  | 59.75  | 20 |
| 249 | 109  | 357  | AAGTCGCCAGAAAAGTGTCTG | 60.431 | 20 |
| 168 | 0    | 167  | ACAAGCACGAACACACACAC  | 58.155 | 20 |
| 185 | 3948 | 4132 | AAGCTAAGGATTGAAGCGCA  | 60.117 | 20 |
| 272 | 769  | 1040 | ATCAATCGGAGAACGTCGAG  | 60.218 | 20 |
| 155 | 43   | 197  | CCCATGCATGTAACAAACCA  | 60.234 | 20 |
| 251 | 691  | 941  | GCTGGCTTTTCTCTTGACA   | 60.517 | 20 |
| 258 | 27   | 284  | AAAATGCCCTTGTATGCTGC  | 60.103 | 20 |
| 228 | 111  | 338  | TTGGATTCAGATCGTGGAAA  | 59.049 | 20 |
| 100 | 9    | 108  | TTAAATTTTGAACGCCTGC   | 60.205 | 20 |
| 133 | 113  | 245  | TCACCATAACGCACCCCTAT  | 60.214 | 20 |
| 235 | 838  | 1072 | TTCGGGGTTGCACTGTATTT  | 60.365 | 20 |
| 212 | 587  | 798  | TAGTTTCGCCCTGCTTATG   | 60.223 | 20 |
| 155 | 809  | 963  | TGAAGGGGATAGCATTTTGG  | 59.894 | 20 |
| 274 | 431  | 704  | TTCTAGCAATTGACCCACCC  | 59.933 | 20 |
| 233 | 86   | 318  | CACCTGATTTGCTGGCTAGA  | 59.024 | 20 |
| 278 | 1216 | 1493 | ACACTTCCATCACTGCACCA  | 60.162 | 20 |
| 234 | 66   | 299  | TCATGCAGGTTAGCAAGGAG  | 59.024 | 20 |
| 279 | 46   | 324  | CAAACAAGGGGACCACAAA   | 60.756 | 20 |
| 123 | 75   | 197  | TCTACGTCCACGGAGAGGTT  | 59.721 | 20 |
| 239 | 521  | 759  | TTAACGGGGATACAGGATGG  | 59.64  | 20 |
| 134 | 1    | 134  | ATGAAGTTAAGAAATAAGGAG | 57.239 | 26 |
| 250 | 3    | 252  | CGGTACCATCGTCTCTCGTT  | 60.134 | 20 |
| 269 | 1337 | 1605 | CAAGTTCCACCCAGGTGTCT  | 60.002 | 20 |
| 277 | 250  | 526  | TGCATAGGCTGTCTCTTGA   | 59.547 | 20 |
| 267 | 320  | 586  | CCCTTGTATGCAGCCATTTT  | 59.96  | 20 |
| 135 | 483  | 617  | TTCGAGTCATACGGAGGAGG  | 60.21  | 20 |
| 158 | 55   | 212  | TGGGCATCACAATAGACGA   | 60.073 | 20 |
| 278 | 637  | 914  | AGTTGAGCCCAATTTT      | 60.723 | 20 |
| 275 | 146  | 420  | TGTCCTTTCGTTAACTCCTCC | 59.631 | 22 |
| 188 | 60   | 247  | GCAAGGCTTCCATATGCACT  | 60.243 | 20 |
| 273 | 818  | 1090 | TATGCGGTGTTTTGGTTTGA  | 59.969 | 20 |
| 225 | 605  | 829  | ATCTTGACCGCTGATTTTGG  | 60.074 | 20 |
| 260 | 398  | 657  | GGATCCCACTGAATTGTGCT  | 59.934 | 20 |
| 147 | 373  | 519  | GAGGAATTGAACCCAGGATCT | 59.387 | 21 |
| 262 | 84   | 345  | AGGCAATTAAGATTCGCCCT  | 60.061 | 20 |
| 107 | 14   | 120  | GGGGGTGAATAGCCTCACTT  | 60.328 | 20 |
| 164 | 326  | 489  | GCCCATTTGAGCCAATCTAA  | 60.038 | 20 |
| 171 | 87   | 257  | ATTGCCCTCATATGCAGTC   | 59.923 | 20 |
| 274 | 592  | 865  | TACGGCTAATTTGATGCACG  | 59.725 | 20 |
| 151 | 98   | 248  | AAAAATCACGCCACCATTAG  | 57.635 | 20 |
| 153 | 70   | 222  | TGGATCAAATGTTTGGTTGC  | 59.375 | 20 |
| 257 | 81   | 337  | AAGCAGCCATTAAGAGTCGG  | 59.476 | 20 |
| 243 | 15   | 257  | AATAAACTCCGACGCCTGAA  | 59.708 | 20 |
| 207 | 111  | 317  | CCCTAGATGACAACCTTCGG  | 59.545 | 20 |
| 159 | 269  | 427  | TGCCCTCAATCTCGAAAAAT  | 59.645 | 20 |
| 280 | 1698 | 1977 | AGCGGTTAGGCTTCCACCTA  | 61.125 | 20 |
| 168 | 12   | 179  | AAACTCCTCCAAACTTCTCCT | 59.637 | 22 |



|     |      |      |                         |        |     |
|-----|------|------|-------------------------|--------|-----|
| 255 | 23   | 277  | TCTCCTTACATAATTTGCCCTC. | 59.977 | 23  |
| 209 | 57   | 265  | TCCTCACTCTCACTAGCCGC    | 60.7   | 20  |
| 261 | 1415 | 1675 | GTTTGCAAGCAGTTACGGGT    | 60.176 | 20  |
| 190 | 36   | 225  | GCAGCCCTCTACCCTTCTTC    | 60.349 | 20  |
| 219 | 159  | 377  | TTGATGTCCCTTCTCCTTGC    | 60.195 | 20  |
| 254 | 395  | 648  | ACTGTTACGGGAGCTTTGA     | 60.833 | 20  |
| 277 | 441  | 717  | CGAGTGCATGAGCTTGAGAG    | 59.88  | 20  |
| 176 | 5004 | 5179 | TGGTGATGGTGATGAATGTTTT  | 60.096 | 22  |
| 262 | 47   | 308  | TGGAAAACAAAACACCCCAT    | 60.066 | 20  |
| 235 | 794  | 1028 | AGCTGAACAGGAATGTGTGC    | 58.884 | 20  |
| 257 | 11   | 267  | GTGTGTAGAAGTTGGCACGC    | 59.369 | 20  |
| 182 | 1286 | 1467 | TCCGATTTCAAACCCAAAAA    | 60.273 | 20  |
| 277 | 96   | 372  | 372                     | 372    | 372 |
| 266 | 999  | 1264 | ATGCTGTGAGATTCGCATGA    | 60.386 | 20  |
| 278 | 58   | 335  | TTCAAGCTGAGATCGACGAA    | 59.673 | 20  |
| 172 | 184  | 355  | ATGCGAAAAACATGGAAAGA    | 58.214 | 20  |
| 133 | 58   | 190  | TTAGATGATCTCATGAAGTGA(  | 57.71  | 26  |
| 220 | 150  | 369  | TTCTCCAACCAGAATCACC     | 59.903 | 20  |
| 221 | 340  | 560  | TCGGCAGTAGGAGATGGAGT    | 59.827 | 20  |
| 268 | 112  | 379  | CTCATGCAATGAAATCCGAA    | 59.622 | 20  |
| 203 | 5    | 207  | ATATCTGGAGGCGGGAECTT    | 59.925 | 20  |
| 229 | 26   | 254  | ACCAACCTAGCCCACTACCC    | 60.247 | 20  |
| 181 | 96   | 276  | GCACTCACTGAGGAACCCTT    | 59.305 | 20  |
| 118 | 171  | 288  | GTGAGGTGGGGTGTTAGGAG    | 59.425 | 20  |
| 175 | 352  | 526  | CGACTCATGTTGTTCCATGC    | 60.12  | 20  |
| 231 | 3484 | 3714 | TCCTCTAATGGCCGAAAATG    | 60.031 | 20  |
| 104 | 108  | 211  | TAGATGGGCTAAGTGGGGTG    | 59.948 | 20  |
| 255 | 18   | 272  | GAAAGTCTCACTCGCAAGGC    | 60.142 | 20  |
| 272 | 1072 | 1343 | TGCGGTATCATGGTGATGAA    | 60.905 | 20  |
| 204 | 611  | 814  | CCAGTCACGTTTCACAAGTCA   | 59.779 | 21  |
| 136 | 14   | 149  | ATCTCGCCTCAACGAGAAGA    | 60.096 | 20  |
| 174 | 192  | 365  | AAATCAAAGCCCACAATGG     | 59.801 | 20  |
| 258 | 253  | 510  | GTAATGCTAGCCGGAAAACG    | 59.742 | 20  |
| 126 | 805  | 930  | CACACCCTCTCCCACTCTCT    | 59.27  | 20  |
| 226 | 106  | 331  | ATGCTGTCAATTAGTGGGGG    | 59.813 | 20  |
| 158 | 0    | 157  | AATTTTCTGGCAGCCTTTGA    | 59.823 | 20  |
| 179 | 68   | 246  | CGAAAATTTGGTTGTTTTCCA   | 59.834 | 21  |
| 230 | 417  | 646  | CTTCGAACCGCGAAAGAGTA    | 60.514 | 20  |
| 225 | 106  | 330  | TTCAATTTCTTGGCTCAGGG    | 60.184 | 20  |
| 216 | 274  | 489  | CGTTGTCTATGCACGCATTT    | 59.759 | 20  |
| 245 | 86   | 330  | GGCTTGTTGCTTGTGGTTT     | 60.154 | 20  |
| 224 | 149  | 372  | AAATATACCCCCGCATGCTA    | 59.304 | 20  |
| 205 | 66   | 270  | TTCAACATGCAACCATCAAAA   | 59.961 | 21  |
| 221 | 50   | 270  | GATTCGCACAAATGATCGTG    | 60.08  | 20  |
| 277 | 4    | 280  | AAGGCTTTCTTAACTTGTGGAA  | 57.273 | 22  |
| 137 | 304  | 440  | CCGTTGGAGTTAGTTTGAGCA   | 60.29  | 21  |
| 259 | 346  | 604  | TATCACAGTTCACACCCCCA    | 59.806 | 20  |
| 187 | 56   | 242  | CAAGGGGCAGAAGGATTTTT    | 60.423 | 20  |
| 199 | 384  | 582  | AGAGATCCGAAGCCAAGGA     | 59.895 | 19  |
| 123 | 111  | 233  | CACCCGTGGACGTAGATCAT    | 60.801 | 20  |
| 254 | 263  | 516  | AGCAAGGTAGGCTTTCGAACT   | 59.556 | 21  |
| 261 | 1150 | 1410 | GTCATGCAGTGCTTCGGATA    | 59.83  | 20  |
| 279 | 5    | 283  | GGGGAGGGTGGTTAGGTTAG    | 59.685 | 20  |
| 140 | 300  | 439  | CATCGGAGCGATAAGGAGTC    | 59.797 | 20  |
| 118 | 522  | 639  | TGGTGGGTTTCGTCATAGGT    | 60.232 | 20  |
| 161 | 122  | 282  | AAGGTGGGAAAGAAATTTGGC   | 60.299 | 20  |
| 129 | 1529 | 1657 | TTTTCCAGCCTTTGTTGACC    | 60.088 | 20  |
| 209 | 30   | 238  | TTTGTTGTTTCCCAAGTTGC    | 58.649 | 20  |

|     |      |      |                         |        |    |
|-----|------|------|-------------------------|--------|----|
| 270 | 789  | 1058 | TCGGATGCTATGGTTGAATG    | 59.499 | 20 |
| 275 | 506  | 780  | TCAAGGACTTACCGCTGGAC    | 60.255 | 20 |
| 248 | 1297 | 1544 | AAGAAAAAGGTTCCCCTCCA    | 59.912 | 20 |
| 256 | 1078 | 1333 | TGCTCGAGCTGGATGAGAAT    | 61.058 | 20 |
| 276 | 91   | 366  | CGTTGCCGGATAATTCAAAC    | 60.323 | 20 |
| 237 | 3    | 239  | GTCGCTTGAATTGCGACATA    | 59.839 | 20 |
| 174 | 153  | 326  | TATGGGTTAGCGTGTGATCG    | 59.566 | 20 |
| 259 | 4025 | 4283 | TCACTCGTCAAAGAACCCC     | 60.088 | 20 |
| 261 | 685  | 945  | GGGAAAATGTCTTGTGGTCC    | 59.239 | 20 |
| 193 | 207  | 399  | TCGGACTTATGAAGTTAGCAC   | 58.403 | 22 |
| 269 | 23   | 291  | GGCTGTGAGATCTAGCGTGA    | 59.143 | 20 |
| 158 | 27   | 184  | TGATCTATGGAAGCCCCAAA    | 60.405 | 20 |
| 134 | 31   | 164  | CCCATGTTGTAATTAATGTAGC  | 59.089 | 24 |
| 269 | 425  | 693  | CGAAATAAAAACCGAACCGA    | 59.937 | 20 |
| 141 | 63   | 203  | TCCATGAAAGCTCACCTCT     | 59.803 | 20 |
| 115 | 685  | 799  | ATGGAATTGGGTGTTGGATG    | 60.439 | 20 |
| 196 | 458  | 653  | TTCACCGCCTGCTCTTATCT    | 59.978 | 20 |
| 280 | 138  | 417  | CGCTCAAATCACAAACCTT     | 60.11  | 20 |
| 245 | 2898 | 3142 | CTGGTGAAGGTTTGCCTTGT    | 60.149 | 20 |
| 227 | 307  | 533  | GGACACCCCATTCCTTAAT     | 59.881 | 20 |
| 219 | 351  | 569  | GTACCGAATGCGAGCAAGTT    | 60.278 | 20 |
| 239 | 558  | 796  | GAGCTGAATTGGTTCGCTTC    | 59.962 | 20 |
| 107 | 77   | 183  | GACAAATCAGGGGTTTGG      | 60.157 | 19 |
| 252 | 1121 | 1372 | GCAAGTTTCCGTAGCTGGAG    | 60.015 | 20 |
| 245 | 216  | 460  | ACACAGATCATCTCGGGTCC    | 59.928 | 20 |
| 222 | 360  | 581  | TTGCTCCGATCTCCATTTTC    | 60.155 | 20 |
| 177 | 1073 | 1249 | AAGAGATGGTCCGCTCTGA     | 59.95  | 20 |
| 220 | 162  | 381  | GGAGGTTGACGTGGTTTC      | 60.504 | 19 |
| 252 | 72   | 323  | TCACACCACATCTCAAATGAC   | 60.028 | 23 |
| 149 | 331  | 479  | GCTCGGAATTCATGTCCTCT    | 59.243 | 20 |
| 187 | 197  | 383  | AACTCAGGCCTCACTCCCTT    | 60.252 | 20 |
| 159 | 147  | 305  | AGAATCACGGCCATTTTCAA    | 60.448 | 20 |
| 216 | 13   | 228  | CGAGATGTCCGAGATGATCC    | 60.588 | 20 |
| 111 | 1    | 111  | GGGTTGTCGGCATAGAGAGA    | 60.218 | 20 |
| 277 | 680  | 956  | AAAAGTCTAATCGCCTGGCA    | 59.845 | 20 |
| 275 | 12   | 286  | GGTCCTCCCACCCTAGAAAC    | 59.795 | 20 |
| 119 | 102  | 220  | CTTATCTCAGGAACGACGGC    | 59.836 | 20 |
| 204 | 10   | 213  | ATTACCATATTTAAGGGTTATC  | 57.31  | 27 |
| 153 | 377  | 529  | ATTTTTCTCTTTCCCCACG     | 60.291 | 20 |
| 149 | 2858 | 3006 | AAGGCGTCTCGAGTGAAAAA    | 59.993 | 20 |
| 229 | 47   | 275  | GACACCGAAAGGGAGGAAAC    | 60.862 | 20 |
| 153 | 999  | 1151 | AAGGAGAGTGACAGCGAGGA    | 60.135 | 20 |
| 280 | 710  | 989  | TGGCCGGCAGTTTATATAGG    | 59.943 | 20 |
| 129 | 176  | 304  | TGACACCTAGCCCAAACCTC    | 60.111 | 20 |
| 175 | 4    | 178  | TCTGAGACGACGGTGATACAA   | 59.303 | 21 |
| 135 | 1091 | 1225 | CCTCGCACATTCAATTTCT     | 60.074 | 20 |
| 172 | 6    | 177  | GAAAAAGTCAGCCGAGAGAA    | 60.001 | 22 |
| 256 | 249  | 504  | TGATGTTGATTTGGGTTCAAGT  | 59.336 | 22 |
| 228 | 25   | 252  | CACTCACTCTCACTAGCCGC    | 58.78  | 20 |
| 152 | 41   | 192  | TGATTTTCTGAAATCGCACG    | 59.809 | 20 |
| 243 | 1124 | 1366 | GGCTCAAATCCGATGATTCTT   | 60.413 | 21 |
| 243 | 621  | 863  | ACCACGGAAATTACGGAAAA    | 59.315 | 20 |
| 211 | 494  | 704  | TCTGCTAGGGTTGGGAGAGA    | 59.943 | 20 |
| 139 | 51   | 189  | TTTGGACGATTTTTCCCTTTT   | 59.81  | 21 |
| 166 | 480  | 645  | TTTGCAAACATCCAACACTACGA | 60.166 | 22 |
| 182 | 224  | 405  | CTTCGGAACCTATCCACCG     | 59.688 | 20 |
| 280 | 228  | 507  | CCCCAATTTTGTACCCGAA     | 60.54  | 19 |
| 225 | 518  | 742  | GGTTAGGTCTCACGGGGAAT    | 60.19  | 20 |

|     |      |      |                        |        |    |
|-----|------|------|------------------------|--------|----|
| 257 | 210  | 466  | ATGGGGATGAAATTCAGGTG   | 59.605 | 20 |
| 190 | 306  | 495  | TGAAACTAGGAACGAAAACCTC | 58.114 | 23 |
| 117 | 2926 | 3042 | GACACTGCAAGGTGCTTTGA   | 60.032 | 20 |
| 266 | 143  | 408  | ATTCCAGGAGATCGAACGAA   | 59.629 | 20 |
| 220 | 88   | 307  | TTTGTCAACTTTGGCAATGG   | 59.561 | 20 |
| 202 | 269  | 470  | CTGGACGCCTTTAAATCAGG   | 59.702 | 20 |
| 246 | 1175 | 1420 | CGCTACAGTTCACACGTTCCG  | 60.507 | 20 |
| 195 | 26   | 220  | TCAAAATTTCCAAAAATCAAA  | 59.509 | 23 |
| 176 | 14   | 189  | CTCAGGTTCCGACCTCAAAC   | 59.697 | 20 |
| 141 | 43   | 183  | TTCAAGGCATTTATCTGGGC   | 60.038 | 20 |
| 110 | 216  | 325  | GCCCCTTGAAGTTTCGTAGA   | 59.312 | 20 |
| 240 | 2179 | 2418 | TTTTCTTGGGACACAATCC    | 59.767 | 20 |
| 280 | 928  | 1207 | GGGCTAGTCCTGCAACACAT   | 60.142 | 20 |
| 270 | 405  | 674  | CCCGATTTGTAAGGTTCCATT  | 60.061 | 21 |
| 188 | 6    | 193  | GCTCTACAATATTACAATGGG  | 58.236 | 23 |
| 249 | 99   | 347  | TGTGATAGGATAGGGCCAGC   | 60.059 | 20 |
| 274 | 25   | 298  | ACCTGAAGGGGGACTTTTTG   | 60.332 | 20 |
| 235 | 845  | 1079 | GCTTGAAAAGCCATGCAAAT   | 60.217 | 20 |
| 196 | 520  | 715  | TCCGTCCGTTTTTCATGATTT  | 60.309 | 20 |
| 265 | 1465 | 1729 | CCAAGTGAAGGCTGGTGATA   | 58.722 | 20 |
| 278 | 485  | 762  | TTGTCATTGTTAATCCCAAAC  | 59.262 | 23 |
| 203 | 254  | 456  | CAACGTCGAGTCGAGGAAGT   | 60.444 | 20 |
| 214 | 124  | 337  | AGCACGGCTTGTGCTATCTT   | 60.044 | 20 |
| 209 | 2473 | 2681 | ATGAATCGGGTGATGATGCT   | 60.312 | 20 |
| 149 | 261  | 409  | TATAACGACACGGCCATTGA   | 59.953 | 20 |
| 213 | 32   | 244  | GAAATCCTTGAACCATTCCA   | 57.426 | 20 |
| 231 | 659  | 889  | AGAATTCGTGCCCTCATT     | 59.528 | 20 |
| 274 | 79   | 352  | CTGGATCAAATCCCAACAC    | 60.173 | 20 |
| 177 | 752  | 928  | CCCGGTATGCTGACGATAAC   | 60.352 | 20 |
| 269 | 53   | 321  | TGAGGTTGGAGTGTGTGGAA   | 60.129 | 20 |
| 119 | 2    | 120  | GGGGAGGGAGGGAGAGATAC   | 61.291 | 20 |
| 102 | 1    | 102  | GGAAGAATGATGGAATTGGG   | 59.175 | 20 |
| 220 | 873  | 1092 | TGAACAATTGAACACCGGAA   | 59.941 | 20 |
| 263 | 223  | 485  | CCTCACAAAATGACACGCAT   | 59.572 | 20 |
| 135 | 294  | 428  | ATCACAATAGGGCATGGGAC   | 59.635 | 20 |
| 176 | 38   | 213  | CACTCACACTTTGCACACTGA  | 59.986 | 22 |
| 269 | 218  | 486  | GGCAGATGCCTTTGAAGAAC   | 59.82  | 20 |
| 232 | 255  | 486  | TTAAAACAAGAAAGCCCACCA  | 59.612 | 21 |
| 277 | 351  | 627  | TCATCAAATCTCTAATTGCACC | 60.326 | 23 |
| 103 | 173  | 275  | TGAAAGAGCCATCAGCCAAT   | 60.744 | 20 |
| 172 | 962  | 1133 | GGGGAGATGATGAACGGATA   | 59.709 | 20 |
| 222 | 135  | 356  | TGTCCATTCAAGTCGTGGTC   | 59.525 | 20 |
| 271 | 95   | 365  | AAAAACATTTTCTCTTGAACGC | 59.194 | 23 |
| 168 | 44   | 211  | ACACAACAATACCACGCAGG   | 59.49  | 20 |
| 231 | 61   | 291  | TTGTTGCCGTAAAGTGTGG    | 59.627 | 20 |
| 236 | 95   | 330  | GGGAGAGAAGGGAGGAGAG    | 59.883 | 20 |
| 257 | 53   | 309  | GGATTTGTCAACCGGAAAAC   | 59.269 | 20 |
| 183 | 825  | 1007 | CCAGCTCACCATTTTCATGTG  | 60.112 | 20 |
| 203 | 35   | 237  | TGCAAACACCACAACAATCA   | 59.563 | 20 |
| 248 | 169  | 416  | CACCCCTCCACTCTCTCATT   | 59.101 | 20 |
| 191 | 57   | 247  | GACAACAGAAAAACCACGCA   | 59.74  | 20 |
| 214 | 380  | 593  | GCACCAACATCATCGAACAG   | 60.12  | 20 |
| 217 | 1570 | 1786 | TGTTGTACATACACGTTGGG   | 60.331 | 21 |
| 265 | 52   | 316  | CACCACAATGAAGTGGATGC   | 59.967 | 20 |
| 246 | 91   | 336  | ACAACAATGTCGCGAAACAA   | 60.157 | 20 |
| 248 | 66   | 313  | TCGTGCTCACTGATCTCTTTC  | 59.751 | 22 |
| 220 | 522  | 741  | TCAAAAGCAATCAAATATCCC  | 59.433 | 22 |
| 156 | 384  | 539  | CAAAGATCGGCTATTTGGTG   | 59.595 | 21 |

|     |      |      |                        |        |    |
|-----|------|------|------------------------|--------|----|
| 110 | 342  | 451  | TGGATGCCTTTCATTTAGGTG  | 59.946 | 21 |
| 156 | 602  | 757  | AAACCGAATCTTTTCGTGGA   | 59.546 | 20 |
| 275 | 81   | 355  | CTTGGCAAAAAGCACAAAAA   | 58.979 | 20 |
| 252 | 389  | 640  | CGGAACCCTAACTAACGCAC   | 59.632 | 20 |
| 211 | 313  | 523  | CAATAGAAAATGAGTTTGAGT  | 58.504 | 25 |
| 109 | 224  | 332  | ATGCATCCTGGCCTTGTTTA   | 60.469 | 20 |
| 249 | 2030 | 2278 | GAATGATGAACCCCTTCCCT   | 60.133 | 20 |
| 121 | 579  | 699  | GTTCTTGCTTGCTGTCCCTC   | 59.997 | 20 |
| 261 | 180  | 440  | CAAGCTGTCAACCCAAAACA   | 59.734 | 20 |
| 214 | 355  | 568  | GTCGGCAAACCAGAGCTAAC   | 59.882 | 20 |
| 272 | 87   | 358  | TCTCCCAATTTTACCCTCCC   | 60.124 | 20 |
| 226 | 171  | 396  | CCAGGTTCAACTCTCTTCCG   | 59.837 | 20 |
| 100 | 27   | 126  | CCATTTGCAATACTAAGGCTTT | 60.047 | 24 |
| 273 | 1060 | 1332 | AGGAATAGGGCCGAGAAAAA   | 60.034 | 20 |
| 206 | 2083 | 2288 | ATCAACTAAATTTGGCGCGT   | 59.614 | 20 |
| 261 | 2336 | 2596 | GACATTGGCATTCTGCAA     | 59.67  | 20 |
| 147 | 21   | 167  | TCTTGGATGATGAGGCTTGA   | 59.322 | 20 |
| 229 | 1435 | 1663 | TTCTCCTTGTAGCGTGGGAG   | 60.388 | 20 |
| 276 | 157  | 432  | TCGTCAAAAATAATTAAGGC   | 60.013 | 23 |
| 102 | 18   | 119  | TGAATTACTTGAAGAATGATG  | 58.528 | 26 |
| 207 | 36   | 242  | CCAAACCCCAATTTCAATA    | 59.497 | 20 |
| 248 | 845  | 1092 | CAGGAAGCTTCAACTCCAGG   | 59.982 | 20 |
| 196 | 15   | 210  | TTTTGAAATGGGGAAAGACG   | 59.91  | 20 |
| 155 | 2183 | 2337 | TGGAGTGTAGTTCCCCAAC    | 59.82  | 20 |
| 191 | 490  | 680  | TCAATGCAACTCAAATCCCA   | 60.049 | 20 |
| 232 | 418  | 649  | TGTGTGCAATGTGTGTGTGT   | 59.523 | 21 |
| 223 | 68   | 290  | GGGGAAGGAAAAACACAACA   | 59.807 | 20 |
| 159 | 3649 | 3807 | CGACTACAGGAAGTGAAGGG   | 59.715 | 20 |
| 225 | 2381 | 2605 | CACTTCTGCGGCTGAAAAAT   | 60.386 | 20 |
| 213 | 1034 | 1246 | GCCCGTGAAGATCTCGTTTA   | 60.214 | 20 |
| 195 | 36   | 230  | CAGATACGCGGGTTCATTCT   | 60.096 | 20 |
| 100 | 31   | 130  | CTCTGTGCTCTTTTCTCAGTC  | 60.871 | 23 |
| 270 | 5    | 274  | ATGAAGTTAGAAAATAAGGAC  | 57.239 | 26 |
| 187 | 205  | 391  | AAACTGCCCTCCAATGCTAA   | 59.708 | 20 |
| 229 | 68   | 296  | CACAGAAATCACGTTGCAAAA  | 59.761 | 21 |
| 169 | 70   | 238  | TTGCCCATTTTGCCCTAATA   | 60.275 | 20 |
| 241 | 80   | 320  | ACCTCCCCTGCTCCATACTT   | 59.957 | 20 |
| 272 | 646  | 917  | CTACAGCAATTGGGCCATTC   | 60.469 | 20 |
| 106 | 3    | 108  | CTTGCCGATTAGGATTTTCGT  | 59.182 | 20 |
| 186 | 4    | 189  | CAAGCACTATGAAAGCTAAAT  | 58.302 | 27 |
| 249 | 96   | 344  | ACGCTTGTCCCCTTAATCCT   | 59.962 | 20 |
| 212 | 214  | 425  | TTTACCATTTTGCCCTCGAA   | 60.427 | 20 |
| 106 | 778  | 883  | TCGTGTGTGTGAGTGAACCA   | 59.737 | 20 |
| 148 | 261  | 408  | TTCTCAAACAAGGAAGGGA    | 59.641 | 20 |
| 230 | 53   | 282  | ACCGTAGGCTTGCTTCTGAC   | 59.501 | 20 |
| 273 | 1242 | 1514 | TCCAGTGACAAAAACCGACA   | 60.128 | 20 |
| 209 | 1737 | 1945 | CAGACAGAGAGATGCCACCA   | 59.98  | 20 |
| 234 | 104  | 337  | CCAATTGATCGGGAATTGAT   | 59.581 | 20 |
| 217 | 546  | 762  | ACATGATTTGGAGCTTGCTG   | 58.877 | 20 |
| 249 | 71   | 319  | TTCTTCGCCAAAACCTTGAT   | 59.685 | 20 |
| 107 | 39   | 145  | ATCCATCCTGTTTCTCCCCT   | 59.755 | 20 |
| 233 | 809  | 1041 | GGGTATCTAATTTGCTCTCATG | 59.029 | 23 |
| 211 | 532  | 742  | AACCCAACCCACAATAAACG   | 59.587 | 20 |
| 210 | 86   | 295  | AGCACCACATGCATTCAAAA   | 60.119 | 20 |
| 159 | 50   | 208  | AGTTGGGCTTAATGGTGTGG   | 59.853 | 20 |
| 105 | 76   | 180  | AGGAGATGGAGAGAAAGTGT   | 59.878 | 22 |
| 271 | 73   | 343  | CTCGGAATCAACTCCAATCC   | 59.483 | 20 |
| 217 | 433  | 649  | AAGGGGTTTTCTCTGGATCG   | 60.434 | 20 |

|     |      |      |                         |        |    |
|-----|------|------|-------------------------|--------|----|
| 250 | 442  | 691  | AATGGGACCTCCTTTACGCT    | 59.962 | 20 |
| 102 | 24   | 125  | AGTCCGCTGTTGTGGATGAT    | 60.542 | 20 |
| 265 | 484  | 748  | TACTGCTCTTGAACCTCGCCA   | 59.74  | 20 |
| 234 | 11   | 244  | ACAATGGCCAAGAGGATTACT   | 57.681 | 21 |
| 256 | 69   | 324  | GAGAGTTGGTCATTTGAAGCG   | 59.867 | 21 |
| 233 | 37   | 269  | TTTTGTTTGTCCAGGTTG      | 58.5   | 20 |
| 115 | 180  | 294  | TTCTCCTCTCCCTTCCGTT     | 60.183 | 20 |
| 173 | 376  | 548  | GATTTGAACTTGGAGGGCAG    | 59.67  | 20 |
| 156 | 40   | 195  | TGCATGGTTAATGTTGTAAGGC  | 59.758 | 22 |
| 212 | 49   | 260  | TGCGTCGTGTTCTGATTTTC    | 59.847 | 20 |
| 265 | 2    | 266  | AGGGCTGAGTACACGAATGC    | 60.285 | 20 |
| 277 | 70   | 346  | GCTTTCAAGGAGTGAGGCAC    | 59.997 | 20 |
| 220 | 141  | 360  | GTTGGGATCTAGGCAATCCA    | 59.894 | 20 |
| 197 | 3313 | 3509 | TCCAGTTTTCAATGGTGCAA    | 60.088 | 20 |
| 149 | 131  | 279  | TTCTCACATCCTTCTCGCCT    | 59.95  | 20 |
| 161 | 479  | 639  | CATTTATGTATTGCATGCCACC  | 60.102 | 22 |
| 189 | 5823 | 6011 | ACTGGCCGGCTAAGTTGATA    | 59.73  | 20 |
| 102 | 10   | 111  | GAATACCGCTCGTAAGTCCG    | 59.73  | 20 |
| 243 | 222  | 464  | TGATTTTGGTGTGTTGGCAT    | 59.823 | 20 |
| 246 | 1390 | 1635 | GTCGACCCGGACAATCTCTA    | 60.073 | 20 |
| 244 | 390  | 633  | CATATGGCGCTCCACCTACT    | 60.118 | 20 |
| 219 | 71   | 289  | ATGCATGATGTGATGCCAAT    | 59.77  | 20 |
| 231 | 29   | 259  | TGCCCATACGGTTGTATGAA    | 59.809 | 20 |
| 239 | 24   | 262  | TTTTATCTGAATGCTAGATGTT  | 58.809 | 25 |
| 212 | 157  | 368  | GGAAAAATAGCATGCCTTCG    | 59.682 | 20 |
| 256 | 243  | 498  | CGAATGCGAAATTGAAGTTG    | 59.301 | 20 |
| 248 | 23   | 270  | TGTGTACTTCCCTACTCATAAG  | 59.296 | 25 |
| 147 | 168  | 314  | AATGAACGGAGAACAGACCG    | 60.111 | 20 |
| 179 | 905  | 1083 | GAAAATGAAAATTGGGGGCT    | 60.13  | 20 |
| 229 | 3330 | 3558 | TCACATCACCGGCGTATAAA    | 59.953 | 20 |
| 270 | 146  | 415  | ATGATGGGAAGGGTGGGTAT    | 60.272 | 20 |
| 254 | 20   | 273  | TTCCACTCACGAAAACACGA    | 60.278 | 20 |
| 213 | 399  | 611  | GGTGGGAGCAGACAGAAAAG    | 59.844 | 20 |
| 169 | 366  | 534  | AAAATCCAGAAAGAAGCGCA    | 59.96  | 20 |
| 277 | 13   | 289  | TTGCTTACTCATTGTAATCTCTC | 59.404 | 26 |
| 183 | 21   | 203  | GCCACCTTACACCATCATCA    | 59.374 | 20 |
| 264 | 168  | 431  | ACACTAAACCCGCGTATTGC    | 60.025 | 20 |
| 230 | 244  | 473  | GGATACCCTCCCAAACCCTA    | 60.011 | 20 |
| 266 | 198  | 463  | CGAGCCTCGAGGTAGCTG      | 59.831 | 18 |
| 278 | 2    | 279  | CGGTGGTTTGGAGAGTGATTG   | 59.135 | 20 |
| 219 | 537  | 755  | TGAAGAGTCCGAATGGGAGA    | 60.737 | 20 |
| 136 | 19   | 154  | ACAATTACAATGTTTATGAAA/  | 57.992 | 26 |
| 202 | 249  | 450  | GTTCCGACCTCGAACACTTG    | 60.69  | 20 |
| 236 | 29   | 264  | TCCTCACTCTCACTAGCCGC    | 60.7   | 20 |
| 254 | 102  | 355  | TTTTATCGTCACCCCGTTTC    | 59.801 | 20 |
| 177 | 5    | 181  | CATCAACTACCCCTCACATTTCC | 59.454 | 22 |
| 234 | 613  | 846  | TCCAAGAACTACGCCAACA     | 59.317 | 20 |
| 234 | 51   | 284  | TTGGAGTTTAAATGTAGAGGC/  | 60.134 | 23 |
| 117 | 20   | 136  | TTTAGTGTTTTGACATGATTAC  | 57.557 | 25 |
| 186 | 249  | 434  | TAGCTGGTTTGTAGCGGGTT    | 59.769 | 20 |
| 238 | 1551 | 1788 | ATTGCATTAGCAAATCCCGA    | 60.424 | 20 |
| 149 | 121  | 269  | ATGTTCGAAGCAGCCAAACT    | 59.882 | 20 |
| 278 | 153  | 430  | ATAGTCGTGTTCCGGTC       | 59.997 | 20 |
| 183 | 3    | 185  | TCCTTCTTAAAGGTCTTAATCG  | 59.658 | 24 |
| 216 | 416  | 631  | TTGGGGGTTTAGGGTTCTCT    | 59.799 | 20 |
| 184 | 2834 | 3017 | TACGGCAACTGTGGTTTCAA    | 60.149 | 20 |
| 278 | 235  | 512  | TTTGTGTTTGCAGAAATCGC    | 59.856 | 20 |
| 115 | 172  | 286  | TCATTTTAAACCCAAACCCCA   | 60.024 | 20 |

|     |      |      |                         |        |    |
|-----|------|------|-------------------------|--------|----|
| 280 | 2128 | 2407 | AACGATCCTACACAATGGCG    | 60.914 | 20 |
| 125 | 74   | 198  | GATTGGGGACTGACCTTTGA    | 59.903 | 20 |
| 179 | 164  | 342  | TGGCAACAAACAAAGCTGAG    | 60.027 | 20 |
| 256 | 45   | 300  | TATCGACGTGATGGGTGATG    | 60.353 | 20 |
| 245 | 83   | 327  | GATCCAAGGATCACAAGTGG    | 59.918 | 21 |
| 230 | 146  | 375  | TTTTGTCGGCCATTTTCTTT    | 59.564 | 20 |
| 190 | 21   | 210  | AACTGCAAAAGAGATTTGATG   | 58.4   | 24 |
| 102 | 27   | 128  | TTCACGAATAAACATGTTCCAC  | 59.505 | 23 |
| 269 | 3    | 271  | CGCCACAATCCTGATATTT     | 59.784 | 20 |
| 274 | 195  | 468  | CGCACCTATTAGGGTCGGAT    | 61.21  | 20 |
| 220 | 507  | 726  | TAACGAGAAAATTCGGCCAC    | 60.074 | 20 |
| 209 | 6    | 214  | CCGAGGTGGAGTAGTATCCG    | 59.569 | 20 |
| 248 | 1996 | 2243 | TGCATTTACCTAGAACCCCC    | 58.903 | 20 |
| 248 | 345  | 592  | AGGAGCAGATGGAAAGACCA    | 59.803 | 20 |
| 250 | 78   | 327  | TTTTCGCAAGCCACTAAAAA    | 58.608 | 20 |
| 251 | 2252 | 2502 | CAGGAAAGAAATGGGCTTCA    | 60.184 | 20 |
| 158 | 23   | 180  | AAGCGAAACTGTTGTATGCTG   | 58.121 | 21 |
| 126 | 65   | 190  | TGTTTTCGAGCTGTTATGCG    | 60.014 | 20 |
| 143 | 21   | 163  | TAACCCGAGTTGAGGTCCTG    | 60.103 | 20 |
| 200 | 106  | 305  | ACTTGTCATCTCCACCGCTT    | 59.727 | 20 |
| 263 | 90   | 352  | GGAAGATGGAGAAATAAGGC    | 59.572 | 22 |
| 262 | 1982 | 2243 | TGGTTTGGTTGTCACCTTTCTTG | 60.045 | 22 |
| 172 | 126  | 297  | TTAGTTAGCAAGGGGGAGGG    | 60.435 | 20 |
| 100 | 427  | 526  | AACCCATACTTAATTCATAACC  | 59.053 | 25 |
| 243 | 9    | 251  | ATGATGTGGAGAAAGTCCCG    | 59.927 | 20 |
| 217 | 31   | 247  | TTCGATGATAACTATGGGTTTT  | 58.079 | 23 |
| 164 | 272  | 435  | AATGCTATGGACAAACCCGA    | 60.331 | 20 |
| 260 | 290  | 549  | TGGAGAAGTTACGATGGCAA    | 60.623 | 21 |
| 100 | 8    | 107  | GAGGTTTTGACATAACTTAGG   | 58.286 | 26 |
| 268 | 317  | 584  | GACTTCCCGTTGTGGCTAAA    | 60.11  | 20 |
| 150 | 540  | 689  | TTGTGTAAGCCGATCGAA      | 59.301 | 20 |
| 198 | 1708 | 1905 | TGCTCCGAGACCTTAGACTCA   | 60.141 | 21 |
| 234 | 64   | 297  | AGAATCCCGAGATTTATGC     | 59.083 | 20 |
| 127 | 94   | 220  | AGCTGGAAGATAAGATGTGA    | 59.797 | 23 |
| 228 | 245  | 472  | GGTGCTCCCATCATCTCTTC    | 59.617 | 20 |
| 257 | 1136 | 1392 | GTCCAAAATTGTGTTACGGG    | 57.85  | 20 |
| 280 | 733  | 1012 | AACCTTTTACTGGCCTTCC     | 60.476 | 20 |
| 119 | 35   | 153  | GTGGGTTAGCACGTGATCG     | 60.128 | 19 |
| 266 | 3628 | 3893 | GGGATTTAGGCCAAACGATTA   | 60.155 | 21 |
| 273 | 1606 | 1878 | CGGAAATACCTCGCCTCATA    | 60.053 | 20 |
| 193 | 393  | 585  | AGCCATGATCTCATGATTCAA   | 59.533 | 22 |
| 248 | 186  | 433  | TTCGGTTAATCCAAAGGTCAA   | 59.438 | 21 |
| 227 | 20   | 246  | ATTGAATGGCAAGGATTGGT    | 59.249 | 20 |
| 224 | 592  | 815  | AGTGTAATAGTACATACAATG   | 59.374 | 27 |
| 176 | 1    | 176  | AGCCCCAAACTTTGCTGAAT    | 60.987 | 20 |
| 270 | 73   | 342  | GATGTGGAGATGGGCTGACT    | 60.08  | 20 |
| 160 | 64   | 223  | CGCGCACAAAGAACTTTACA    | 60.052 | 20 |
| 183 | 8    | 190  | CCTGAAAAGGGACTTTTGGA    | 59.143 | 20 |
| 222 | 3460 | 3681 | GCCTTTTGGCATGCAGTATT    | 60.103 | 20 |
| 253 | 320  | 572  | CGTGCAAGCATGAATCACTC    | 60.423 | 20 |
| 262 | 371  | 632  | GGAATGCGAGATGGAAGAAA    | 60.155 | 20 |
| 126 | 441  | 566  | TGTCTCGGTGTTTCATGGATT   | 58.933 | 20 |
| 275 | 378  | 652  | AGAAAATTGGTTGTTATCCAC   | 58.549 | 24 |
| 181 | 44   | 224  | CAATACCGTGACATGCCTTG    | 59.988 | 20 |
| 278 | 4168 | 4445 | CAAGAAAATCCCACCTCCAA    | 59.903 | 20 |
| 142 | 143  | 284  | ATGAGAAGCGTGGATTTGGT    | 59.556 | 20 |
| 101 | 17   | 117  | GCCACCACACGAGTATATCAA   | 58.516 | 21 |
| 162 | 2772 | 2933 | CCTCCTCTTTCTTTTGGCA     | 59.564 | 20 |

|     |      |      |                         |        |    |
|-----|------|------|-------------------------|--------|----|
| 269 | 297  | 565  | CATGTAGGCGCCTCTGATCT    | 60.384 | 20 |
| 227 | 81   | 307  | ATCTCGCGTTTCTGACTCCTTA  | 59.978 | 20 |
| 151 | 73   | 223  | TGCTCTCTTTGTAATCTCTCCC, | 60.379 | 23 |
| 183 | 530  | 712  | AGCAGAGGAGGAGTTGCTGA    | 60.284 | 20 |
| 267 | 110  | 376  | GTCGCGAAATCAAAGAATCC    | 59.651 | 20 |
| 233 | 588  | 820  | TTGGCAGAAACATGGAAACA    | 60.088 | 20 |
| 143 | 484  | 626  | AAGATGAGCCCACCCACTTT    | 60.883 | 20 |
| 106 | 346  | 451  | TATGATGGGAAGGGTGGGTA    | 60.006 | 20 |
| 236 | 179  | 414  | GAAATGAAATCCTGGCTTCG    | 59.645 | 20 |
| 279 | 1    | 279  | TCAGAAACTTGGAGCAGAAG/   | 59.238 | 22 |
| 115 | 71   | 185  | TTGGGCTATGGTTTGGAGTT    | 59.429 | 20 |
| 212 | 824  | 1035 | TCTTTTCAATATTTATACCAAC( | 58.178 | 25 |
| 223 | 1767 | 1989 | AACCCCAACATCACACAC      | 60.533 | 20 |
| 236 | 68   | 303  | CCCCAAACAACGAAATGAAT    | 59.662 | 20 |
| 273 | 305  | 577  | GCTCCCGAGCTCAATATCAA    | 60.318 | 20 |
| 262 | 574  | 835  | TCGACATCCCAATTCTAGG     | 59.887 | 20 |
| 279 | 229  | 507  | TTGACATGATTTGTTAACGGG   | 58.4   | 21 |
| 135 | 53   | 187  | TGTTTTTCATCCCGTTTCATC   | 59.793 | 21 |
| 238 | 32   | 269  | GAGGACACGTTGGACCTGAT    | 59.969 | 20 |
| 240 | 24   | 263  | CTCACTCTCACTAGCCGCAG    | 58.932 | 20 |
| 237 | 38   | 274  | CAATCATCTAGCCCTCTAACAT  | 59.682 | 25 |
| 191 | 658  | 848  | TTCTCTGTCGCCAGATCCTT    | 59.95  | 20 |
| 178 | 21   | 198  | GAGCCACGTTAGGCTCAAGA    | 60.538 | 20 |
| 176 | 233  | 408  | CCCATTTAAAACCCTACGGA    | 58.805 | 20 |
| 271 | 829  | 1099 | GATATGGAAGAGTGGCACCG    | 60.483 | 20 |
| 247 | 320  | 566  | CCGGCTACTTGTGAATTCCT    | 59.195 | 20 |
| 278 | 535  | 812  | ATGTCGATGAACACGGATGA    | 59.925 | 20 |
| 262 | 1266 | 1527 | ATTTTAGAACGGGGGTGGAC    | 60.053 | 20 |
| 221 | 105  | 325  | TGGTTGGAGGAAAATCTTGTG   | 59.956 | 21 |
| 231 | 40   | 270  | CACCTCTGCCACTACCACT     | 60.321 | 20 |
| 222 | 37   | 258  | TTGTTCCAGCTTTCTCTCCC    | 59.405 | 20 |
| 207 | 421  | 627  | GAGGGACAAAGCAAAACGAA    | 60.227 | 20 |
| 215 | 154  | 368  | CATCAGAGCCACGTTAGGC     | 59.41  | 19 |
| 154 | 312  | 465  | TGAACGGTTGAAATTTGCTCT   | 59.738 | 21 |
| 216 | 1070 | 1285 | TAACCGAAAACCTTGAGAGC    | 57.096 | 20 |
| 141 | 614  | 754  | AGGGTCCTCTAGCCTGCATT    | 60.233 | 20 |
| 211 | 2186 | 2396 | GGGAAAAGAAGAGTGGGAC     | 59.912 | 20 |
| 257 | 681  | 937  | CTCCATTTGCATATTATTTTTGC | 57.819 | 23 |
| 177 | 1163 | 1339 | TCAAGAGCCTCCGACTTTTC    | 59.55  | 20 |
| 271 | 202  | 472  | TGAGGGTTTTGGAATCGAAG    | 60.044 | 20 |
| 124 | 4    | 127  | CAAATGGCCAAGAGATTTAC    | 59.267 | 22 |
| 179 | 480  | 658  | GCCTGAATCGACGACAAACT    | 60.263 | 20 |
| 202 | 104  | 305  | CGATTTGGATTTCGAATTCTGT  | 59.033 | 21 |
| 267 | 712  | 978  | ACAAAGAACGTGCACACACA    | 58.761 | 20 |
| 198 | 387  | 584  | TGGAAGGATGTGAGATGGTG    | 59.473 | 20 |
| 209 | 2035 | 2243 | GATGAAAAGGAACAGCGGAA    | 60.192 | 20 |
| 253 | 202  | 454  | TTTGAAATGGATGGTGGTGA    | 59.75  | 20 |
| 124 | 228  | 351  | AGGGGCTTAAGATCCCAGAA    | 60.032 | 20 |
| 112 | 101  | 212  | CTTCCGCCCTTCCCTACA      | 61.135 | 18 |
| 241 | 234  | 474  | CTACTCTCAATTCCCCTCGC    | 59.836 | 20 |
| 224 | 399  | 622  | CGCACCGATATGATAGACCA    | 59.523 | 20 |
| 247 | 103  | 349  | CCCTAAGATAATGCCACCCA    | 59.778 | 20 |
| 213 | 184  | 396  | TAGGCCCTAACTTGACCCAG    | 59.191 | 20 |
| 203 | 13   | 215  | AACAAAGCTTGTACACGGG     | 61.124 | 20 |
| 255 | 583  | 837  | CCCAGACTCGATAACTGGCT    | 59.308 | 20 |
| 228 | 245  | 472  | TTGGCTGTGGACTCAGTTGT    | 59.31  | 20 |
| 233 | 108  | 340  | CCAAAAGACGATCTGGGATG    | 60.452 | 20 |
| 149 | 255  | 403  | GGGTAGGGTTCAAGTCCTC     | 59.795 | 20 |

|     |      |      |                        |        |    |
|-----|------|------|------------------------|--------|----|
| 234 | 213  | 446  | TGCGAGCCATCAACATGTAA   | 61.225 | 20 |
| 242 | 3247 | 3488 | CATGCACGAAACTCTTGGAG   | 59.44  | 20 |
| 245 | 215  | 459  | ATGTATTCCTTGAATATGAGA  | 57.831 | 27 |
| 169 | 415  | 583  | TGCAACAAGCTCAAAAGTATG  | 60.437 | 22 |
| 110 | 362  | 471  | GCCCATTATTTTCCACCAAC   | 59.138 | 20 |
| 190 | 98   | 287  | GGATTTTGTGAATCACGGGT   | 59.653 | 20 |
| 110 | 4452 | 4561 | TTTTCTTGGCCATAGGCATC   | 60.038 | 20 |
| 260 | 1120 | 1379 | GCATGCATCCACCACTCTAC   | 59.12  | 20 |
| 193 | 90   | 282  | CGAGGGTTCGAGTTCACATT   | 60.111 | 20 |
| 277 | 946  | 1222 | TTTTCTCAATCATTCCCCC    | 60.995 | 20 |
| 272 | 3151 | 3422 | CAACACATCGCTATCGTCCA   | 60.687 | 20 |
| 208 | 25   | 232  | GGTTATTTAAATGCACACCCC  | 58.238 | 21 |
| 198 | 36   | 233  | GACACGACAACAACAACATCC  | 60.064 | 21 |
| 123 | 147  | 269  | GAGAGAGTTGATTGTGGGGG   | 59.505 | 20 |
| 261 | 91   | 351  | GTTGGAATCAGTAATGGCGG   | 60.331 | 20 |
| 101 | 59   | 159  | GGACCGCGAAGTATCTGTTA   | 57.849 | 20 |
| 141 | 96   | 236  | CAAAGACAAACCAGCAGAGC   | 58.65  | 20 |
| 131 | 150  | 280  | AAATGTTTCAGCCCATAGAAT  | 58.165 | 23 |
| 138 | 47   | 184  | GCTCACGGTGAAGAAGAAA    | 60.375 | 20 |
| 142 | 96   | 237  | TCTTCTTCCCAAATTGCCCT   | 60.929 | 20 |
| 248 | 1247 | 1494 | CATAATGAGAGGCGGTTGGT   | 59.955 | 20 |
| 261 | 166  | 426  | TGTATGCACCTGAACATGCC   | 60.549 | 20 |
| 179 | 177  | 355  | TCAAGAGTCCCCTTGGTCTG   | 60.229 | 20 |
| 265 | 735  | 999  | TTACCCCATATGCAGTGGA    | 61.11  | 20 |
| 273 | 104  | 376  | CAACGGAATTCGATTTTGG    | 60.294 | 20 |
| 211 | 330  | 540  | CCCAGCTATATTGCATTCACA  | 58.664 | 21 |
| 110 | 373  | 482  | AGAGGGGGCTTTTCTTTTCA   | 60.18  | 20 |
| 172 | 97   | 268  | CCAAAAAGCAAGGGATTTATA  | 58.968 | 23 |
| 175 | 304  | 478  | CCATTTTGCCCTTCGTATGT   | 59.823 | 20 |
| 280 | 287  | 566  | TGCGCACGTTGAAATAAAAA   | 60.246 | 20 |
| 221 | 9    | 229  | TCGGCTGTCAAAGACAAAAA   | 59.439 | 20 |
| 250 | 590  | 839  | TGGTATCTGGCCAATTGTGA   | 59.924 | 20 |
| 168 | 684  | 851  | GCCCCACCCTTCTATCTCTC   | 60.037 | 20 |
| 193 | 13   | 205  | GGCTTTCTTAACTTGTGGAAC  | 60.376 | 23 |
| 102 | 512  | 613  | AGATGATGGAATTTGGGTGC   | 59.756 | 20 |
| 214 | 1694 | 1907 | GAACGGGGCCATTATCTTTT   | 60.15  | 20 |
| 263 | 234  | 496  | TTTCTGGGGGAGATTTGTTG   | 59.903 | 20 |
| 247 | 66   | 312  | CTCTCACGCACCTTCACTCA   | 60.178 | 20 |
| 224 | 9    | 232  | CAGATTTAAACAGTGGCTGCG  | 60.807 | 21 |
| 190 | 106  | 295  | GTTCGAAAGCCTACCTCGCT   | 60.894 | 20 |
| 216 | 59   | 274  | TGTTGGGAATAGAGCCAAG    | 60.066 | 20 |
| 257 | 1324 | 1580 | TGGTTAGTATTGGAACGCGAC  | 60.011 | 21 |
| 210 | 249  | 458  | GTTATGCGATCTGCTCGTGA   | 59.979 | 20 |
| 216 | 1028 | 1243 | CTCTGATTCGGGAAAACATGA  | 60.059 | 21 |
| 210 | 1445 | 1654 | TGATTGGTTTGCAGGTACGA   | 60.111 | 20 |
| 251 | 2133 | 2383 | AAAAGTGGCCCCAAAATGAT   | 60.542 | 20 |
| 265 | 30   | 294  | AAGGAAGCGAGGTAGGCTTT   | 59.504 | 20 |
| 143 | 4437 | 4579 | ATACGATCTGTCCCTCGTGC   | 60.104 | 20 |
| 267 | 3    | 269  | TCGAATTCGCATTCAAATAA   | 58.301 | 21 |
| 170 | 364  | 533  | AGGATTGGGCAATTATCGTC   | 58.86  | 20 |
| 166 | 236  | 401  | TTGAGATCCCTTTTGTGGGA   | 60.43  | 20 |
| 247 | 533  | 779  | GGGAAGAGGGGACTGAAAGT   | 59.534 | 20 |
| 230 | 22   | 251  | GAATTGGTGAATGATTAGAG   | 58.224 | 24 |
| 149 | 242  | 390  | TTCGAGTTATGAAGTTTGCACC | 59.271 | 22 |
| 167 | 111  | 277  | CCTCCGTGGACGTAGATCAT   | 59.95  | 20 |
| 263 | 23   | 285  | TAACGTCCCAGATTTGCTCC   | 60.074 | 20 |
| 136 | 5527 | 5662 | TCTCGTAAACTCCCCCTCAA   | 59.665 | 20 |
| 250 | 284  | 533  | GGGACCTCCCTTGTATAGGC   | 59.789 | 20 |



|     |      |      |                        |        |    |
|-----|------|------|------------------------|--------|----|
| 264 | 5399 | 5662 | TGCAGGTTTGTGAATTTTCG   | 59.706 | 20 |
| 149 | 6    | 154  | CACGAGAGTTGAAAGGGAGC   | 59.989 | 20 |
| 273 | 100  | 372  | CAAATGGAGGTGAGAGGTTTC  | 59.578 | 21 |
| 194 | 42   | 235  | TCCTCCCTCTCTCCTTTTCC   | 59.749 | 20 |
| 163 | 689  | 851  | TTTCCTGAGTGGCGATAAAGA  | 59.831 | 21 |
| 147 | 88   | 234  | AATAGAGCAGCAGACGCGAT   | 60.147 | 20 |
| 142 | 4    | 145  | ATGAGGCGGTTAAAGAAACG   | 59.225 | 20 |
| 179 | 30   | 208  | GATGAAGCTGAACCGGCTAC   | 59.843 | 20 |
| 151 | 175  | 325  | GTCGTATACTGCCGCCACTT   | 60.162 | 20 |
| 258 | 20   | 277  | GGAGAGGAATCAAGTCGACA   | 59.274 | 21 |
| 221 | 55   | 275  | AATGAGGGATATGGTGGGTG   | 59.483 | 20 |
| 147 | 1486 | 1632 | CGTGTTTATCCTCACCCGTT   | 59.853 | 20 |
| 215 | 777  | 991  | AAGGCTAGCACAAGAATGGC   | 59.481 | 20 |
| 163 | 39   | 201  | CAAATGGCCAAGAGAGTTTAC  | 59.267 | 22 |
| 119 | 104  | 222  | ACAAACATAGAAACATGGACC  | 59.024 | 22 |
| 178 | 294  | 471  | ATTCATACCTTTCTGCCCC    | 60.152 | 20 |
| 233 | 915  | 1147 | AAATGCATGCACCTGATTACA  | 59.055 | 21 |
| 125 | 222  | 346  | AAGCTTGTCAACCCCTTTCA   | 59.711 | 20 |
| 182 | 1834 | 2015 | AGCGAGTTCCGAAATGAAGA   | 59.955 | 20 |
| 101 | 28   | 128  | TCTGTCTTGGATGATGAGGC   | 58.749 | 20 |
| 236 | 149  | 384  | TTATGTTGGAGGTGGAGGGA   | 60.309 | 20 |
| 184 | 31   | 214  | CCTCACCTTCTCTCCACTCTC  | 58.046 | 21 |
| 247 | 18   | 264  | CCCGGTGTAAGAAATCGAA    | 59.931 | 20 |
| 258 | 196  | 453  | TTTGTCCATAAAACTCGCC    | 59.938 | 20 |
| 195 | 122  | 316  | CTAGGGGAGACAGGGGGTAA   | 60.311 | 20 |
| 118 | 132  | 249  | GGGTTGAAGTAAATGAGGTC   | 58.423 | 21 |
| 114 | 201  | 314  | TCGACTGATTTACCCTTACA   | 57.234 | 21 |
| 186 | 676  | 861  | ACCATACTCATGGACTCCGC   | 59.957 | 20 |
| 211 | 53   | 263  | CCTAAGTGCCTACGTGTTGGA  | 60.175 | 21 |
| 280 | 66   | 345  | CCAGATGCCTTCATTTTTCA   | 58.695 | 20 |
| 250 | 987  | 1236 | CGACGAGGCTTGGATTTCTA   | 60.344 | 20 |
| 155 | 890  | 1044 | TGGCTCTTTTCCAGAGCAG    | 59.252 | 19 |
| 106 | 148  | 253  | TTTTGATCAATTTTCACTCGTA | 59.898 | 25 |
| 157 | 107  | 263  | TGCATGCAATCCTAACTCCA   | 60.22  | 20 |
| 185 | 4388 | 4572 | CATGAGTCCATGACCCTTCA   | 59.473 | 20 |
| 105 | 503  | 607  | TCTCGATCTTGCAATCCAAA   | 59.35  | 20 |
| 219 | 573  | 791  | CCCTTGAAACCACGGATCTA   | 59.926 | 20 |
| 116 | 11   | 126  | GGAGAAAAAGAGATTGAGAG   | 60.189 | 23 |
| 216 | 26   | 241  | AATGCCCCCAACTGCTAAC    | 59.947 | 19 |
| 277 | 322  | 598  | AGTTTTCAGTTCGGGCGATT   | 60.987 | 20 |
| 104 | 25   | 128  | TACGTTGGACCTGAAAAGGG   | 59.964 | 20 |
| 215 | 198  | 412  | CTGCCTTCAGGGCATTATC    | 59.668 | 20 |
| 204 | 49   | 252  | TCAACAATCCGACTTCATCG   | 59.648 | 20 |
| 178 | 248  | 425  | CCTTGGCGGATCATATCACT   | 59.917 | 20 |
| 246 | 1053 | 1298 | ATGCATTAATGGACGTCGTG   | 59.425 | 20 |
| 236 | 79   | 314  | TTGGCATCACAATCAACCAT   | 59.781 | 20 |
| 194 | 887  | 1080 | TAAAAGCCCAGTTCAGGTCG   | 60.241 | 20 |
| 218 | 18   | 235  | AGCTGTTAGGGTTGTATAGTG  | 57.436 | 27 |
| 196 | 107  | 302  | CCCCAGTAGTTCCCATCAA    | 59.784 | 20 |
| 103 | 27   | 129  | TACCCAACCCACTAACCCAA   | 60.081 | 20 |
| 169 | 1151 | 1319 | AATGGCAGAAGCAAAGAGGA   | 59.955 | 20 |
| 197 | 9    | 205  | CAATGTTACAAAATGGGCGA   | 59.42  | 20 |
| 276 | 822  | 1097 | CATTTGATAGTTGTTTTGTGG  | 58.526 | 24 |
| 204 | 4    | 207  | TGACTTATGGGGGCTCAAAC   | 59.933 | 20 |
| 258 | 56   | 313  | GTGTGGCGTAAGACCCGATA   | 60.914 | 20 |
| 107 | 1219 | 1325 | TGGATTGATTATGCTTTGCCT  | 59.561 | 21 |
| 180 | 495  | 674  | CCCAGACACCGTAAGGAAAA   | 59.964 | 20 |
| 151 | 56   | 206  | GAGTCGTAGTTGACGCCCTT   | 59.357 | 20 |

|     |      |      |                         |        |    |
|-----|------|------|-------------------------|--------|----|
| 194 | 83   | 276  | TTCTTTACCCTTTTGTAACATA/ | 57.251 | 27 |
| 190 | 47   | 236  | CGATAAGTCCCAACCACTTTC   | 58.566 | 21 |
| 184 | 470  | 653  | CAATCTACTCCCCTGGCCTA    | 59.146 | 20 |
| 158 | 58   | 215  | ATTGCCACGAGAGAGATTG     | 60.218 | 20 |
| 100 | 3    | 102  | TCAACAGAGAATGCAAGCAA/   | 59.6   | 21 |
| 215 | 46   | 260  | TATGCGGGCTGGAAGACTAC    | 60.235 | 20 |
| 261 | 1935 | 2195 | GAAAAGCACCACTGCAAA      | 59.888 | 20 |
| 209 | 38   | 246  | CCTTTGTCAACTTGGGCAGT    | 60.149 | 20 |
| 190 | 74   | 263  | CACCTTCTTTCCTTTCACCG    | 59.705 | 20 |
| 272 | 4084 | 4355 | CGCTGCCGTTACCTGATAAT    | 60.117 | 20 |
| 149 | 92   | 240  | AGGGGAAGATGAATTGAGGT    | 57.494 | 20 |
| 246 | 128  | 373  | CGTGGTTCGATCGTAATTGA    | 59.542 | 20 |
| 171 | 111  | 281  | TATTGAGTTCGGGGTGATGC    | 60.864 | 20 |
| 214 | 1380 | 1593 | TGGAGAAATCAAGAGGAGGG    | 59.209 | 20 |
| 261 | 87   | 347  | TTTTGTGGTTCGATCGTAATTG  | 59.868 | 22 |
| 119 | 38   | 156  | TCACAGGAGGGTTCACACAA    | 60.129 | 20 |
| 257 | 294  | 550  | GCAATTGAGAGTGAGTGCGA    | 60.144 | 20 |
| 152 | 379  | 530  | ACCCTCTCTGGTTCACGAAA    | 59.697 | 20 |
| 270 | 112  | 381  | TCCATTCCGAAAATCAAAGG    | 59.872 | 20 |
| 232 | 1259 | 1490 | AGGACACGGTTTCTAATGTTTT  | 59.462 | 23 |
| 216 | 200  | 415  | CCTTTCATGTTATTCTTTTCTCA | 59.472 | 25 |
| 149 | 95   | 243  | GAAATGATGATTTGACATTGC   | 59.281 | 22 |
| 189 | 442  | 630  | GAACCAAAGTGAGCCCGATA    | 60.074 | 20 |
| 271 | 226  | 496  | CGAGGTGATGAGTGACATGG    | 60.113 | 20 |
| 218 | 33   | 250  | ATCACAAGCCCTAGCTTTGC    | 59.481 | 20 |
| 130 | 59   | 188  | TTAGCTGCTTGGTTGGGAAG    | 60.378 | 20 |
| 256 | 18   | 273  | GGTAACCGATTCCCATACCA    | 59.505 | 20 |
| 279 | 276  | 554  | ATCCTTGACGACTGTTTGGC    | 60.119 | 20 |
| 243 | 763  | 1005 | TGCCAATTTGATAGAAGCCC    | 60.038 | 20 |
| 233 | 367  | 599  | CGTGGAATTCCTTTAATGTG    | 57.185 | 21 |
| 165 | 335  | 499  | TTAGCACCCGAACCAATTC     | 59.938 | 20 |
| 218 | 78   | 295  | CGGAGTGTATTGCGAACTCA    | 59.864 | 20 |
| 152 | 38   | 189  | GTTCTCTCTCGCTGCACA      | 59.446 | 20 |
| 272 | 136  | 407  | TCCAACAGTCACCCTCATCA    | 60.088 | 20 |
| 144 | 1364 | 1507 | ACACTCCCCTTAACCCGAAC    | 60.225 | 20 |
| 246 | 268  | 513  | CAGGTGAGGGACAAGAATGA/   | 59.706 | 21 |
| 157 | 2138 | 2294 | CCAAGAATGAGTTTTTGAAGG   | 59.974 | 22 |
| 180 | 203  | 382  | CCTCCTATAATCCGCTGCAC    | 59.691 | 20 |
| 242 | 20   | 261  | CAGCCTTTCCTGGGAACATA    | 60.066 | 20 |
| 256 | 8    | 263  | ACCCACACCAGACCAACATA    | 58.697 | 20 |
| 238 | 1895 | 2132 | CACCTGAAAGGAAGGCAAAA    | 60.22  | 20 |
| 209 | 19   | 227  | CGGTCTCCCACTTCAAATC     | 59.526 | 20 |
| 235 | 44   | 278  | TAAACAGCATCGCGTTTCAA    | 60.39  | 20 |
| 198 | 126  | 323  | CCGCCATAACCTGTTCAACT    | 59.993 | 20 |
| 165 | 149  | 313  | ATTGGTCGAGAGAAAGGGCT    | 60.212 | 20 |
| 275 | 713  | 987  | CCATGGGAAATGGTTAGTTGA   | 59.671 | 21 |
| 213 | 32   | 244  | CTTGAATGGAAATACCCTTT/   | 59.44  | 24 |
| 238 | 272  | 509  | AGGGTACAACCGTGCAAGAC    | 60.035 | 20 |
| 243 | 1669 | 1911 | TGTTTTGTAGGCCTGCCTTT    | 59.747 | 20 |
| 147 | 64   | 210  | GTTGCTCGGAATTCATGCTT    | 60.221 | 20 |
| 278 | 402  | 679  | TGACCAAATTTAGCGAGGG     | 60.067 | 20 |
| 239 | 92   | 330  | GAATTACCGCTTCAACAGC     | 59.713 | 20 |
| 216 | 1    | 216  | TGAATCTTGTACATTTACCAA   | 59.961 | 27 |
| 199 | 3196 | 3394 | CGATACCCGAACCGTATCAC    | 60.214 | 20 |
| 147 | 66   | 212  | TGCACAAGTGCCAAAGAGTC    | 60.032 | 20 |
| 156 | 1715 | 1870 | CAAGGGTACCATCCTGTGTGT   | 59.754 | 21 |
| 202 | 1585 | 1786 | CTTCTCAAGCTCCTCCAACG    | 60.126 | 20 |
| 217 | 281  | 497  | CAAGGTACTCGGTGAACACG    | 59.209 | 20 |

|     |      |      |                        |        |    |
|-----|------|------|------------------------|--------|----|
| 125 | 207  | 331  | TCAAGGTGCTGTAAGGGGAG   | 60.246 | 20 |
| 280 | 1131 | 1410 | TCACATTCTGCGATTGCTAA   | 58.017 | 20 |
| 123 | 105  | 227  | AATGACAAGCGGAAAGGGTA   | 59.569 | 20 |
| 102 | 29   | 130  | GACCGGTTAGACCGGATTTT   | 60.187 | 20 |
| 279 | 36   | 314  | CTCACACACCTCTCGCTCAC   | 59.603 | 20 |
| 215 | 216  | 430  | TGACGAATTCTCAAGTTCCTCA | 60.655 | 23 |
| 103 | 39   | 141  | AGCTGCTCCTTTCCACAGAA   | 60.134 | 20 |
| 118 | 2053 | 2170 | ACAAGTTGAAGGATGGCCTG   | 60.111 | 20 |
| 236 | 239  | 474  | AGCCAAGGTATGGTAGCCCT   | 59.983 | 20 |
| 204 | 1    | 204  | GAGAGAAAAGGTGGCAGGTG   | 59.844 | 20 |
| 230 | 34   | 263  | CATAGGCCAAAGCCCAAATA   | 59.922 | 20 |
| 238 | 667  | 904  | TGGCCTGGCTTAGTTGTATTG  | 60.138 | 21 |
| 214 | 18   | 231  | TCTTCTCCGCCTTTGTGTG    | 59.968 | 19 |
| 275 | 312  | 586  | ACGTCAGCATCTACCCCAAC   | 59.997 | 20 |
| 259 | 4    | 262  | ACAACACATTCAATACATTCTC | 59.7   | 25 |
| 239 | 393  | 631  | AATGTTTGATGCATTTTCGCA  | 60.081 | 20 |
| 165 | 1887 | 2051 | CTCTCTCGCCTCGCTTTCTA   | 59.993 | 20 |
| 275 | 178  | 452  | GACGAGATTGTCGAGTGCAA   | 59.992 | 20 |
| 232 | 1122 | 1353 | CGACGAGAAAGTCGTGTCAA   | 60.025 | 20 |
| 107 | 64   | 170  | TCATGTAAATTCTTGGTCATTC | 59.891 | 25 |
| 145 | 17   | 161  | CCAAGCTATCACTCATCACC   | 59.565 | 21 |
| 184 | 419  | 602  | TGTTTTCGCGTTTCCTCTCT   | 59.993 | 20 |
| 140 | 70   | 209  | GCAACGGAATACCACTCGTT   | 60     | 20 |
| 194 | 17   | 210  | GAGAGAAGGGGGAGGAGAGA   | 59.883 | 20 |
| 195 | 190  | 384  | AGGCATGTTCAATTGGGAAA   | 60.309 | 20 |
| 211 | 106  | 316  | AGCATTCAAGGGGCATTTTT   | 60.802 | 20 |
| 236 | 375  | 610  | GCAAAACCAAAGTACCACCG   | 60.399 | 20 |
| 101 | 2    | 102  | ATGGAGGGTTTTAGCGTGAT   | 58.53  | 20 |
| 225 | 52   | 276  | ACCCACCTACCAACATCAT    | 60.096 | 20 |
| 274 | 60   | 333  | GCATTTGGAGCAAGGCTAAG   | 59.982 | 20 |
| 181 | 44   | 224  | CGCCGCCAGCTTTAATTC     | 61.765 | 18 |
| 248 | 47   | 294  | GCCCTCATGACTCTCACCAT   | 60.08  | 20 |
| 280 | 309  | 588  | ACATAAAATGAACATGCTCCA  | 57.194 | 22 |
| 157 | 43   | 199  | AGAGCCAAAAAGCTGTGACG   | 60.571 | 20 |
| 214 | 3    | 216  | TCACACAAATAAGCAAGGCA   | 59.359 | 21 |
| 200 | 13   | 212  | ACAATATTACAATGGCCAAGA  | 57.725 | 23 |
| 211 | 58   | 268  | GTCCGCGAAGAAACATTCAG   | 60.776 | 20 |
| 218 | 53   | 270  | TTGCCATATTTAAGCCGAGG   | 60.054 | 20 |
| 162 | 18   | 179  | TGTCTTTTCGTGTTGAGTCG   | 57.44  | 20 |
| 150 | 839  | 988  | CATGATTTTGCAACTTACCATT | 59.788 | 24 |
| 178 | 33   | 210  | CCCTCAACAATGCAAAAAGC   | 60.617 | 20 |
| 125 | 570  | 694  | TTTTCGGCCAAAAGAAAAGA   | 59.805 | 20 |
| 215 | 1179 | 1393 | AGTCGTCACCCCGAACATAG   | 59.989 | 20 |
| 278 | 280  | 557  | AATGAGAAGCCCAATGGAGA   | 59.629 | 20 |
| 109 | 403  | 511  | CCGTTGCCTCTTTTGAACTC   | 59.853 | 20 |
| 151 | 18   | 168  | GCCGGAGGTTTGATATGGT    | 59.765 | 19 |
| 234 | 1483 | 1716 | ATGGAGGATTCTTTCCCTG    | 60.264 | 20 |
| 137 | 76   | 212  | TGGCATGGGGAAGCTACTAT   | 59.551 | 20 |
| 189 | 43   | 231  | CACTGTGTAGAAACATAAACT  | 59.708 | 25 |
| 276 | 1050 | 1325 | AGAAGCCGTGGGACATAAGA   | 59.694 | 20 |
| 272 | 132  | 403  | GGGTTTTGCAGGATTGTGAT   | 59.797 | 20 |
| 230 | 684  | 913  | TTGTGTTACAATGATGGGGG   | 59.097 | 20 |
| 199 | 340  | 538  | AGGCGAAAGCACAAGGACTA   | 60.015 | 20 |
| 128 | 87   | 214  | AGGGGTGTTTTGACCTAATCG  | 60.228 | 21 |
| 228 | 3663 | 3890 | CGAAATAGGGTTGGTGAAGC   | 59.569 | 20 |
| 206 | 355  | 560  | CGGAACCCTCTCTTACCC     | 60.067 | 20 |
| 247 | 338  | 584  | GAAAACGACGAAGAAATGGC   | 59.691 | 20 |
| 220 | 377  | 596  | AAGTGAAAATGGCAACCACC   | 59.836 | 20 |

|     |      |      |                        |        |    |
|-----|------|------|------------------------|--------|----|
| 146 | 111  | 256  | GTTCCGAAATGGAGATCAGG   | 59.483 | 20 |
| 198 | 2063 | 2260 | ACCGAAGTTCCTGCTCACAG   | 60.444 | 20 |
| 219 | 59   | 277  | CCAAACGCATCAAATTCTCA   | 59.664 | 20 |
| 229 | 1428 | 1656 | GCGTAGGCGTAAATTCAGGT   | 59.252 | 20 |
| 261 | 0    | 260  | AACAGTCTTCGGGACACCAA   | 60.545 | 20 |
| 248 | 795  | 1042 | TCTACGTCCACGGAGAGGTT   | 59.721 | 20 |
| 105 | 659  | 763  | AAACCGAACTTTTGGCCTTC   | 60.463 | 20 |
| 246 | 2938 | 3183 | AACTTCTCCTCCCAATCGCT   | 60.212 | 20 |
| 112 | 65   | 176  | TACGATACCCTCCCAAACCC   | 60.929 | 20 |
| 238 | 2146 | 2383 | TCTGCATGCAAGATAGTACGG  | 59.797 | 22 |
| 275 | 414  | 688  | ATTGCCATCACCTTCTCCAC   | 59.934 | 20 |
| 191 | 696  | 886  | TTTGAAACGGGTGGTTATGA   | 58.866 | 20 |
| 278 | 213  | 490  | ATCTGGGTATTTGACTGGGC   | 58.864 | 20 |
| 270 | 228  | 497  | GTCTGTGAGGTGGGCTGAGT   | 60.315 | 20 |
| 159 | 561  | 719  | GGGGTCCCAGAAAAGTATT    | 60.169 | 20 |
| 185 | 0    | 184  | ATATTCTCGCTTCTTCGCCA   | 59.945 | 20 |
| 262 | 367  | 628  | AAGTTCGTTTTTGCCTCTCG   | 59.494 | 20 |
| 124 | 267  | 390  | TCACCACGAAGTCTACAAAAA  | 59.968 | 24 |
| 223 | 4    | 226  | CGCGCCTACAATTCAAAGTA   | 58.982 | 20 |
| 141 | 365  | 505  | TGTGGGACAGCTGCTAATTG   | 59.864 | 20 |
| 256 | 504  | 759  | ACTTCCATAATGCCCTCG     | 59.902 | 19 |
| 190 | 223  | 412  | TGGTATATGGAGGAATGCC    | 59.605 | 20 |
| 193 | 2674 | 2866 | CTGGTCTGGTGGCAATGTA    | 59.566 | 20 |
| 268 | 10   | 277  | CACATCAACACACCCACACA   | 59.878 | 20 |
| 274 | 1393 | 1666 | GACCGATCGAAACACACTGA   | 59.682 | 20 |
| 168 | 1429 | 1596 | CGGTTTCCACAACAATAGCC   | 60.365 | 20 |
| 121 | 51   | 171  | GTCAACTTCGGCAATGGAAT   | 59.939 | 20 |
| 182 | 189  | 370  | GGAAATTGATGGATTTGGGA   | 59.558 | 20 |
| 197 | 106  | 302  | GGAATGCGTCGAGTACCACT   | 60.142 | 20 |
| 222 | 25   | 246  | CCCATGTTGTAATTAATGTAGC | 59.089 | 24 |
| 167 | 869  | 1035 | ATTCTGACTTGAATTCGCGG   | 60.214 | 20 |
| 278 | 27   | 304  | TCCCCTCCTAACTTTGCTGC   | 61.633 | 20 |
| 162 | 66   | 227  | CCCCTTGAACGACTATCCAA   | 59.926 | 20 |
| 116 | 657  | 772  | GTCCACAAAAGCTCAGAGG    | 59.844 | 20 |
| 204 | 31   | 234  | CTCAGCATTTGGGAAGGGTA   | 60.066 | 20 |
| 110 | 704  | 813  | CGGAAGCAATTTTATCATAGA  | 58.879 | 24 |
| 149 | 89   | 237  | TTGATGTCCCTTCTCCTTGC   | 60.195 | 20 |
| 108 | 1001 | 1108 | ATCAACCACCACCTTCGTT    | 59.827 | 20 |
| 214 | 179  | 392  | TCTGTGCCGCATTTATGATT   | 59.14  | 20 |
| 196 | 27   | 222  | TTTTCGAGTTATGAAGTTAGCA | 59.761 | 25 |
| 186 | 2    | 187  | ACCCAAGGTCAGTGAACAA    | 60.399 | 20 |
| 220 | 343  | 562  | TAGCAATTTTCGGGGTGAAA   | 60.427 | 20 |
| 176 | 1244 | 1419 | CTTTCTTTACACCGAAAACG   | 59.771 | 21 |
| 278 | 375  | 652  | AGTCGTCACCTTAGTGACCCA  | 59.631 | 21 |
| 261 | 1352 | 1612 | CTTCAATGGACCAGCACCTT   | 60.111 | 20 |
| 245 | 29   | 273  | CCTGCACGAAGAAAGGATTC   | 59.813 | 20 |
| 255 | 5    | 259  | TTGGTTCACACAACCACTCC   | 59.415 | 20 |
| 249 | 42   | 290  | TGAATGATTTAATAACCTATGC | 58.467 | 25 |
| 273 | 202  | 474  | CAATTTTTCGTCGTGCTCAA   | 59.849 | 20 |
| 152 | 50   | 201  | ACAATGTGAAATGGGCAAGAC  | 59.985 | 21 |
| 238 | 19   | 256  | ACAGATCTTTCCACGACCGA   | 60.656 | 20 |
| 202 | 696  | 897  | TGCAAGAAAATCCAGCTTCA   | 59.542 | 20 |
| 280 | 138  | 417  | TGCAATTCCAAGCTACAACG   | 59.872 | 20 |
| 148 | 1149 | 1296 | CTCCGAATTCAAAATCTCCG   | 59.64  | 20 |
| 225 | 400  | 624  | TAGCGTGATTTGTGGACGAG   | 59.864 | 20 |
| 243 | 29   | 271  | CACTCACTCTACTAGCCGC    | 58.78  | 20 |
| 127 | 239  | 365  | TGAGCAAAGCATTTTGGATG   | 59.809 | 20 |
| 174 | 19   | 192  | CCATTTGCAATACTAAGGCTT  | 59.224 | 23 |

|     |      |      |                        |        |    |
|-----|------|------|------------------------|--------|----|
| 278 | 790  | 1067 | GAGCAATAGCAGGTTCCGGAG  | 59.978 | 20 |
| 232 | 69   | 300  | CAAGCATATTGGCAAGAAACA  | 60.13  | 22 |
| 251 | 36   | 286  | TTGGGGCTTGATTGATGTTT   | 60.309 | 20 |
| 201 | 261  | 461  | CCACAATCATTCAAGCAAACC  | 60.359 | 21 |
| 142 | 71   | 212  | GAGATTTACATGGCAACACA   | 59.562 | 21 |
| 197 | 102  | 298  | ACTCCTCCGGGAGACTCCTA   | 60.208 | 20 |
| 250 | 1919 | 2168 | AATTCATTTCCCCTCGACCT   | 59.766 | 20 |
| 228 | 296  | 523  | GGTCCATTGGTCTTTTGTATTG | 60.102 | 23 |
| 222 | 1    | 222  | TGATTGCATCACGTCTCCTC   | 59.794 | 20 |
| 259 | 326  | 584  | CATGGACTCACGCTCTCTCA   | 60.138 | 20 |
| 223 | 194  | 416  | CACCCAACCATCAAATCACA   | 60.216 | 20 |
| 144 | 965  | 1108 | TCAATCCCAGCCATTCATTT   | 60.274 | 20 |
| 111 | 4    | 114  | CTCATTCTCTTCTATCTCTCT  | 59.741 | 27 |
| 242 | 836  | 1077 | TGGGTGAGGTGGAGGAAATA   | 60.309 | 20 |
| 200 | 202  | 401  | CCCCTAGCATAACGAAGGACA  | 60.088 | 20 |
| 245 | 157  | 401  | AATTAATGTGGCATGGGGAA   | 60.016 | 20 |
| 242 | 13   | 254  | TTACAGTAGGGTGGAAAACA   | 59.044 | 24 |
| 221 | 23   | 243  | AAACATGCATTTTCTTCTTTCT | 59.959 | 26 |
| 279 | 38   | 316  | TGAGTGTGTCTTGTGTTTTTG  | 60.096 | 23 |
| 110 | 5    | 114  | CAGATGGAGGGTGTGTGAAA   | 59.52  | 20 |
| 266 | 436  | 701  | CGTTTAGCCGCAAGTTTCTC   | 60.018 | 20 |
| 239 | 193  | 431  | CGAATTTTGTGTGGACCGTA   | 59.439 | 20 |
| 258 | 98   | 355  | TTAAAAGGCCAAGCAAGGAA   | 59.826 | 20 |
| 145 | 66   | 210  | TGGCTTCTCTTGCTCTCTCA   | 58.984 | 20 |
| 188 | 567  | 754  | TGCCGAGTCTTGTTGATGAT   | 59.245 | 20 |
| 112 | 710  | 821  | ATTGAGTCAAGGGCGGATAC   | 59.009 | 20 |
| 230 | 145  | 374  | TTGTAATGTGGCATGCGTTT   | 59.999 | 20 |
| 176 | 262  | 437  | AGGTGGCACGCATCTGTAA    | 60.279 | 19 |
| 237 | 167  | 403  | TTGATGTTTAAAGTCGTCGGC  | 60.124 | 21 |
| 233 | 719  | 951  | TTTCCACTGTTATGCTGCGT   | 59.347 | 20 |
| 269 | 834  | 1102 | TGCAAGCCTATGGTGGGTAT   | 60.352 | 20 |
| 210 | 0    | 209  | GCCGAGAGAGATGAGGAGTG   | 60.096 | 20 |
| 238 | 2987 | 3224 | GGCCCTGATCAGAATCAAAA   | 60.014 | 20 |
| 179 | 75   | 253  | GGGAAAAGGGAAGAACAAGG   | 59.912 | 20 |
| 192 | 2566 | 2757 | GAGGGGACCTTCCTTTTCTG   | 60.045 | 20 |
| 237 | 2012 | 2248 | CACTGCAAAGCTTAGGTGG    | 58.579 | 20 |
| 268 | 1054 | 1321 | TGATTGCTTTGGCCCTACTC   | 60.214 | 20 |
| 192 | 23   | 214  | TGACGTCTTGTGGGAGTGAC   | 59.712 | 20 |
| 164 | 402  | 565  | TACCGATTTTCGTCGCTCTC   | 60.352 | 20 |
| 268 | 329  | 596  | ACCCAATCTCCGTTCTTCT    | 59.935 | 20 |
| 154 | 9043 | 9196 | TTTCGTCTGCTATTTGCCT    | 59.845 | 20 |
| 248 | 1    | 248  | CGGAATTCACTTCTTTGCTG   | 58.501 | 20 |
| 205 | 335  | 539  | GGTTTCGGTTGTTTGTCCAC   | 60.255 | 20 |
| 101 | 30   | 130  | TGTGGGACTTTGAAAGAGGAC  | 59.314 | 21 |
| 245 | 918  | 1162 | CTCAACGGTATGCTCGGATT   | 60.096 | 20 |
| 174 | 6    | 179  | GCTCAAGCTTGCTGTTTTCC   | 60.14  | 20 |
| 266 | 7    | 272  | GGTTGTAATGAGGCTTTCGG   | 59.569 | 20 |
| 166 | 552  | 717  | CATCCAATTCCAATCCCACT   | 59.605 | 20 |
| 185 | 152  | 336  | GGTGTGGCTCTGTGGATTCT   | 60.12  | 20 |
| 245 | 781  | 1025 | ACTGCTGCAGGGCATAATGT   | 60.688 | 20 |
| 218 | 412  | 629  | TCTATCGGCCGAGATTTGTT   | 59.668 | 20 |
| 269 | 322  | 590  | ATCACGAACAACACACTGCC   | 59.603 | 20 |
| 229 | 1128 | 1356 | CACACCTCTTTGCTTTGTGC   | 59.49  | 20 |
| 148 | 397  | 544  | CAGGTGGTCGTAAAGCCAAC   | 60.55  | 20 |
| 208 | 136  | 343  | TCGAAGAGGAAAATAAAATA   | 60.055 | 25 |
| 230 | 2550 | 2779 | GGGCACTGCAGGTGACTAAT   | 60.142 | 20 |
| 169 | 143  | 311  | CGTCTAATCCACCGCCTAAA   | 60.089 | 20 |
| 185 | 217  | 401  | TCTGCTCTTCGATGTTGCTG   | 60.287 | 20 |

|     |      |      |                        |        |    |
|-----|------|------|------------------------|--------|----|
| 163 | 399  | 561  | AATGGCTGCAATTATCCCTG   | 59.923 | 20 |
| 273 | 34   | 306  | CATGATCAAATCTTGGTGCG   | 60.073 | 20 |
| 226 | 42   | 267  | CAAATGCCCAAGAGGGTTTA   | 59.931 | 20 |
| 209 | 152  | 360  | GGCTGTACCATAAAAGCCCA   | 59.96  | 20 |
| 194 | 161  | 354  | CCGAATTTTCCACTCCAGAA   | 60.044 | 20 |
| 190 | 2311 | 2500 | TTGCCCAAACAAATGAAAAAG  | 59.965 | 21 |
| 272 | 105  | 376  | CGATCAATAAAGCTGCACACA  | 59.887 | 21 |
| 260 | 191  | 450  | ACTTGGACCTGAAAGGGGAC   | 60.349 | 20 |
| 168 | 78   | 245  | TCGACCGAAGAGCTATCCAT   | 59.797 | 20 |
| 178 | 48   | 225  | TGAAAAAGGACTCTTGGGCA   | 60.745 | 20 |
| 163 | 625  | 787  | AGAGGTAGCCATTTACGCGA   | 59.867 | 20 |
| 138 | 31   | 168  | TAGGCAATGGAATACCTCCG   | 59.916 | 20 |
| 262 | 100  | 361  | CCACCACCTCACTGTCACAC   | 60.045 | 20 |
| 148 | 464  | 611  | AATTCTTGATTGCCACCAA    | 60.448 | 20 |
| 269 | 907  | 1175 | CCACAATGGTTGCTCTCCTT   | 60.111 | 20 |
| 201 | 1997 | 2197 | CCTGGCTCGTTAGCTGATCT   | 59.598 | 20 |
| 266 | 1323 | 1588 | TTCCAAAGCAACGTAACATGA  | 59.216 | 21 |
| 225 | 542  | 766  | AGGTCGTGGTGAAAAAGGG    | 59.951 | 19 |
| 133 | 53   | 185  | CTGCATGCTCTATGCAAGAAT  | 58.16  | 21 |
| 271 | 4    | 274  | CAATGATTGTCAAATTAGAG   | 58.718 | 26 |
| 218 | 76   | 293  | TAGGATACCCTCCCAAACCC   | 60.011 | 20 |
| 193 | 329  | 521  | AAAAGGGGCATTTTGCCTA    | 59.586 | 20 |
| 234 | 100  | 333  | TGCACAGCATATGCCTTCAT   | 60.251 | 20 |
| 239 | 252  | 490  | GCTCCTCCTTGGTACTCACAA  | 59.343 | 21 |
| 251 | 87   | 337  | CGAGATGTCTTCAGGGCATT   | 60.218 | 20 |
| 197 | 56   | 252  | CTCCTTCTATCTCCCCTGCC   | 60.169 | 20 |
| 208 | 238  | 445  | AGAGCGAAAACGCTCTTGAA   | 60.27  | 20 |
| 187 | 56   | 242  | TCTCTCACCTCCCCAAACCT   | 61.021 | 20 |
| 163 | 81   | 243  | GAAAAGGTTAGTGGGCTGAGC  | 60.116 | 21 |
| 258 | 173  | 430  | TGAGCTAGCTTTTGTGGTGG   | 59.072 | 20 |
| 155 | 356  | 510  | CTCGGACAAAATTCACCTCG   | 60.626 | 20 |
| 265 | 511  | 775  | GCCTTGGTCATGCCATTTAT   | 59.791 | 20 |
| 255 | 63   | 317  | GACGATTGACCCAAAACCTCG  | 60.495 | 20 |
| 202 | 4    | 205  | CCGTCCAATAAACCGAAGAG   | 59.564 | 20 |
| 156 | 184  | 339  | TCCATTCCGAAAATCAAAGG   | 59.872 | 20 |
| 218 | 225  | 442  | CCCGTGCAAGGCAATATCTA   | 60.98  | 20 |
| 161 | 438  | 598  | TCGTCGTTGTTACTGGCCTA   | 59.342 | 20 |
| 266 | 717  | 982  | TCTGATAAGGTTCGAATTCACC | 59.225 | 22 |
| 221 | 975  | 1195 | TGTTATGATTGGATCGCACC   | 59.355 | 20 |
| 147 | 375  | 521  | TGGGTTTTGGGCATTATGTT   | 60.053 | 20 |
| 268 | 428  | 695  | TGGTAGTGTTGAGTTGGCGA   | 60.301 | 20 |
| 273 | 450  | 722  | GTGCTTCAATGTCCACTGC    | 59.297 | 20 |
| 223 | 23   | 245  | CAAGATTCGAAATCACATTCA  | 60.336 | 24 |
| 223 | 41   | 263  | GTCCACGGTGGTGCTAGAGT   | 60.182 | 20 |
| 195 | 1109 | 1303 | ATTCTTCTTCAACCTCCGCC   | 60.578 | 20 |
| 206 | 214  | 419  | TGCCCTTAAGTTAGGACACTA  | 57.268 | 23 |
| 131 | 219  | 349  | TTTTAGGGGTGCGAAAGTTG   | 60.103 | 20 |
| 103 | 19   | 121  | ATCTTGGCATGGTCAAAGGT   | 59.41  | 20 |
| 279 | 48   | 326  | CCTAGTTCCTACCGCGTGTC   | 59.757 | 20 |
| 259 | 91   | 349  | ACTTGAGCGTAACCACGTCC   | 60.179 | 20 |
| 177 | 6    | 182  | CTGCTTAAAGCCCAGTCCAG   | 60.008 | 20 |
| 126 | 185  | 310  | AGGGCATTATTTAAACCCCG   | 60.036 | 20 |
| 224 | 298  | 521  | CCGAAATTTTACGTGGTTCG   | 60.348 | 20 |
| 108 | 3    | 110  | GAGTTTAGAGAGAGGAAATGC  | 57.33  | 26 |
| 163 | 1964 | 2126 | CGTAAACCATTCGAAATCCC   | 59.273 | 20 |
| 257 | 2217 | 2473 | TGACAACCATCACCTCGAAA   | 60.088 | 20 |
| 168 | 4    | 171  | TCTCTCCCTTCCACACTCG    | 60.377 | 20 |
| 141 | 622  | 762  | GACACCAAACGGAGGAAAA    | 59.948 | 20 |

|     |      |      |                        |        |    |
|-----|------|------|------------------------|--------|----|
| 208 | 285  | 492  | GCCAACACTCCAAAGAAATGA  | 60.103 | 21 |
| 161 | 22   | 182  | TCCTCCTCAATATTTTCAACAC | 58.616 | 23 |
| 280 | 46   | 325  | CAAGCCATGAAACAACACGA   | 60.699 | 20 |
| 203 | 201  | 403  | ATGCGTGTGGAAGAGGACA    | 60.263 | 19 |
| 156 | 2886 | 3041 | CAGCATTCAAATGCGAACAG   | 60.401 | 20 |
| 276 | 157  | 432  | TGCAATGCATGGAGGAAATA   | 60.035 | 20 |
| 109 | 25   | 133  | TCCATTCCGAAAATCAAAGG   | 59.872 | 20 |
| 103 | 289  | 391  | ATCTGGAAATGGGGAAAACA   | 59.22  | 20 |
| 215 | 162  | 376  | CCAATCTTGACCGCTGATTT   | 60.074 | 20 |
| 153 | 45   | 197  | GTTGTCTGAAACCCTTCCCA   | 59.943 | 20 |
| 251 | 298  | 548  | AAGACACCTATTTGCCCCCT   | 59.827 | 20 |
| 277 | 599  | 875  | CCACCATCTCTCATCCCTCT   | 59.052 | 20 |
| 167 | 1563 | 1729 | ACCCGAAATTCTCCCAACTC   | 60.306 | 20 |
| 259 | 1211 | 1469 | AAACCTTACTGTCACGCGCT   | 59.943 | 20 |
| 186 | 528  | 713  | TGTCTCTTCTCTCCCCCA     | 59.913 | 20 |
| 197 | 1    | 197  | CTCTATATACTCGCATACC    | 59.859 | 26 |
| 135 | 320  | 454  | CATGATTTGAGAATCGTGCG   | 60.22  | 20 |
| 249 | 351  | 599  | CTGAGCAGACCAGTCCAACA   | 60.022 | 20 |
| 174 | 177  | 350  | GTCTCGTCCCTTTGTGCTTG   | 60.833 | 20 |
| 251 | 15   | 265  | AAAGGTATGGGGAAAATGCC   | 60.02  | 20 |
| 163 | 143  | 305  | ACTGGGAGTCTGAGAGACGG   | 59.425 | 20 |
| 202 | 5    | 206  | TCTCATGTTGTAATTAATGTAG | 58.177 | 26 |
| 214 | 19   | 232  | AGCCACTTTCCTTAAACCAAA  | 59.203 | 22 |
| 106 | 4    | 109  | TGTCCTCACTCGTTTCTCT    | 57.416 | 20 |
| 256 | 555  | 810  | AGATGTGAACCAAGAACCCG   | 59.966 | 20 |
| 178 | 9    | 186  | CTAACCTTGGGCTCTGATGC   | 59.836 | 20 |
| 154 | 42   | 195  | GCATCAGAGCCCAAGGTTAG   | 59.836 | 20 |
| 268 | 189  | 456  | TGAGGAATCGAACAAGGACA   | 59.215 | 20 |
| 261 | 4527 | 4787 | GGAATTTGATCCCCACACAC   | 60.034 | 20 |
| 192 | 195  | 386  | ATCACCTCCATTTTCCCACA   | 60.173 | 20 |
| 144 | 350  | 493  | GCAGGTAACCAGGTCGTTTT   | 59.101 | 20 |
| 131 | 93   | 223  | ATAAACTGTTACTCCTGGGTGC | 57.318 | 22 |
| 235 | 1358 | 1592 | TCGAACCATTACATCCTGA    | 60.048 | 20 |
| 246 | 136  | 381  | TGTGCCATAAAAATGGTTCAT  | 57.885 | 21 |
| 223 | 164  | 386  | GGGGTGGTAACCGATGTATG   | 59.933 | 20 |
| 223 | 212  | 434  | ACAGCCTTCAATCCTTGCAT   | 59.7   | 20 |
| 214 | 1    | 214  | TGTTGCGCGTGCTTTAAATA   | 60.401 | 20 |
| 265 | 1453 | 1717 | TATTATGATTCCGGGTCCG    | 59.616 | 20 |
| 191 | 134  | 324  | TTGTGCTTCCACCAAATCAG   | 59.691 | 20 |
| 220 | 7    | 226  | GGCTCTTTTGATCGATCTGC   | 59.923 | 20 |
| 174 | 354  | 527  | ACGCATGAATTCTGTTGGAA   | 59.127 | 20 |
| 145 | 1051 | 1195 | CCCACCCAGATCATAGAAA    | 59.744 | 20 |
| 250 | 389  | 638  | TTGAGCATTGAGGTTGCTTG   | 59.988 | 20 |
| 279 | 89   | 367  | TAACAGCATTACAGCCGTGG   | 59.752 | 20 |
| 129 | 2    | 130  | GAATGAGGGAGGGAGGAGAA   | 60.532 | 20 |
| 250 | 387  | 636  | GGAAGCCGACTTTTAGTCA    | 59.312 | 20 |
| 117 | 325  | 441  | TGTGTTGTGTGGACTCTCCC   | 59.55  | 20 |
| 191 | 179  | 369  | TCACAAATCGATGGTCTGGA   | 60.048 | 20 |
| 139 | 106  | 244  | GAGTGCCATTCTGACAGTGC   | 59.425 | 20 |
| 277 | 0    | 276  | GAACCAACTCTGTGAGAACCA  | 59.232 | 22 |
| 174 | 44   | 217  | TCATCGTGTCTTCGCTCAC    | 59.992 | 20 |
| 204 | 253  | 456  | AACTTCGACAGCTCCTGCAT   | 60.02  | 20 |
| 157 | 394  | 550  | ACGGAACGCTTAATGCAAAA   | 60.619 | 20 |
| 161 | 238  | 398  | CGTCTCTCACAACCTCCACCA  | 59.864 | 20 |
| 273 | 130  | 402  | TCCACGGAGAGGTAAAAAGC   | 59.312 | 20 |
| 216 | 77   | 292  | CAATAGTTTTTGGCAGCGGT   | 60.131 | 20 |
| 280 | 793  | 1072 | GCATTTGCCTTTAGGAGCTG   | 59.982 | 20 |
| 246 | 37   | 282  | AATGCGCAATTTTAAACCCT   | 58.631 | 20 |

|     |      |      |                        |        |    |
|-----|------|------|------------------------|--------|----|
| 238 | 34   | 271  | CCGAAATCTGTAAATCCTAGC  | 59.145 | 22 |
| 167 | 5    | 171  | TGTTTTGTAATTTCCCATGTTT | 59.577 | 24 |
| 268 | 2749 | 3016 | ACCGTGTGGCATTGACAT     | 59.828 | 19 |
| 107 | 1391 | 1497 | TGCCAATGATCACCAAACC    | 60.322 | 19 |
| 140 | 4    | 143  | TTCAAATGCACGTGTTGGAT   | 59.972 | 20 |
| 158 | 14   | 171  | GCTGATGCACCGAGCTAGTA   | 59.203 | 20 |
| 146 | 323  | 468  | TGTGTCCAGCAGCAACTTTT   | 59.49  | 20 |
| 165 | 4291 | 4455 | CCTCAAGCAACGTATATCGTC  | 60.152 | 22 |
| 144 | 254  | 397  | ATTCATTCTGCCACCTCTGG   | 60.073 | 20 |
| 217 | 109  | 325  | CATTCAAGGGGCATTTTTGT   | 59.801 | 20 |
| 231 | 102  | 332  | GAACACCTCACCCCTGTCAC   | 60.421 | 20 |
| 181 | 32   | 212  | TCTGTTGGCAAATAGGCACA   | 60.257 | 20 |
| 175 | 268  | 442  | TTTCTCTCGATGCACTCTCG   | 59.267 | 20 |
| 201 | 18   | 218  | TTCGATGATAACTATGGGTTTC | 57.589 | 23 |
| 271 | 235  | 505  | TAGGCAAAAACCTCCGTCCA   | 60.608 | 20 |
| 274 | 102  | 375  | ATGAAAATGCCACGTCTGAA   | 59.127 | 20 |
| 154 | 68   | 221  | GGGTGGAGAGAAAAAGAGGG   | 60.045 | 20 |
| 197 | 331  | 527  | ACCACATTTTTCCCGACTGT   | 59.308 | 20 |
| 176 | 2    | 177  | TCACGCTCCATCTCCTTTCT   | 59.95  | 20 |
| 261 | 97   | 357  | GGGCATTTGTATACCCGTTG   | 60.074 | 20 |
| 112 | 85   | 196  | CCGAGGTGGAGTAGTATCCG   | 59.569 | 20 |
| 277 | 0    | 276  | CGAGTGAGAGAGTGAGTGCG   | 59.915 | 20 |
| 184 | 199  | 382  | TCACACAGCACCTGATCACA   | 59.858 | 20 |
| 250 | 666  | 915  | TACGATCCGAGTGCCTCTTT   | 59.836 | 20 |
| 279 | 589  | 867  | CTAGGTGAGCCATTTCGATTC  | 58.801 | 21 |
| 174 | 1617 | 1790 | ACATGTGTGTGGCATCACCT   | 59.879 | 20 |
| 122 | 41   | 162  | TCCACAAAGATCTCGCACAG   | 59.984 | 20 |
| 258 | 299  | 556  | TTGTCCACACTTGGCACTTT   | 59.187 | 20 |
| 207 | 92   | 298  | GCATGCAGACATGGGAGTTT   | 61.078 | 20 |
| 261 | 558  | 818  | GTGGACGTCCCAGATTGTTT   | 59.827 | 20 |
| 171 | 53   | 223  | CGCGAACTTAGATGGGCTAC   | 59.867 | 20 |
| 240 | 1627 | 1866 | CGAAAACCTCAATTTAAAAGGC | 60.47  | 24 |
| 277 | 453  | 729  | AAAGTGTTACGAACCATAAA   | 58.912 | 24 |
| 134 | 441  | 574  | GCTCATCGTCATTCTCCACC   | 60.633 | 20 |
| 195 | 1001 | 1195 | TATAATGGGAGGAGAGGGGG   | 60.103 | 20 |
| 188 | 596  | 783  | ATAAGCTGAAGATGGGGCCT   | 60.06  | 20 |
| 249 | 28   | 276  | ACACGCTATCTCGTTGCTCTC  | 59.659 | 21 |
| 221 | 3800 | 4020 | ACAAGGGCAATCGTATGAGG   | 59.955 | 20 |
| 274 | 1748 | 2021 | TTTTGCGGTGTGCATTTAG    | 59.742 | 20 |
| 248 | 877  | 1124 | CAATCTCTAGTTGCAGGCC    | 59.836 | 20 |
| 109 | 746  | 854  | TCATGCACAAAATAAAAAGGC  | 59.741 | 23 |
| 233 | 9    | 241  | TCTCACACACGTTTACACCCA  | 60.057 | 21 |
| 110 | 1355 | 1464 | GCCATCTTCTTTCCCCATTT   | 60.265 | 20 |
| 141 | 383  | 523  | CGCACCTCTGTTCTCTCTC    | 60.135 | 20 |
| 126 | 1547 | 1672 | TGTAGCCATGTAGGTGCCTG   | 59.74  | 20 |
| 132 | 346  | 477  | CGTCCTCTCCATCACTCTCC   | 59.792 | 20 |
| 258 | 286  | 543  | CAAGACCAGTTTTTCAGGGG   | 59.563 | 20 |
| 264 | 356  | 619  | ATCGGATCGGATACCCAAAT   | 60.366 | 20 |
| 125 | 269  | 393  | TTTTCCACGGAAGGAAGTGA   | 60.605 | 20 |
| 233 | 25   | 257  | TGACAGGTTTCAGAGGCAATG  | 59.831 | 20 |
| 104 | 41   | 144  | GTGCTGCCGCTATTGAGAGT   | 60.569 | 20 |
| 250 | 56   | 305  | CTTCTCCATCACACCTTGC    | 60.656 | 20 |
| 125 | 893  | 1017 | AGTGACCCAAATCATGAGCC   | 59.934 | 20 |
| 270 | 9    | 278  | CCGGTCTAAACCCGGAATA    | 59.764 | 19 |
| 167 | 765  | 931  | AACACAAACGCTAAACCCGT   | 59.54  | 20 |
| 268 | 1126 | 1393 | TGTAGTCATCCATGGGGGTT   | 60.05  | 20 |
| 171 | 180  | 350  | AGGGATGTTGAAACACTTTGC  | 59.091 | 21 |
| 213 | 98   | 310  | GGTTATCACCTGATTTTCTCCC | 59.734 | 23 |



|     |      |      |                         |        |    |
|-----|------|------|-------------------------|--------|----|
| 280 | 915  | 1194 | TGCCGAAGATTTACTCCTAATT  | 59.188 | 25 |
| 264 | 139  | 402  | TGATGGATTTGACGTTGCAT    | 59.931 | 20 |
| 190 | 3    | 192  | TCAAATCTTCGAGTACAGAAA   | 59.667 | 24 |
| 235 | 784  | 1018 | CAGCTGATGCACATATTCCAG   | 59.312 | 21 |
| 249 | 104  | 352  | CTTCACTTGAATTGAGGGGG    | 59.521 | 20 |
| 280 | 99   | 378  | TTATTTTCTTGGGTCGCTGG    | 60.067 | 20 |
| 242 | 108  | 349  | AATGCGCGTTTTTAGGGTTT    | 60.825 | 20 |
| 200 | 34   | 233  | CAATAAACCCACCGAATGCT    | 59.823 | 20 |
| 266 | 7    | 272  | TTTTGTGAAACAATAATGACTT  | 57.874 | 25 |
| 271 | 678  | 948  | TCCAGCTAATCTGGTCCGTT    | 59.694 | 20 |
| 178 | 427  | 604  | CTCCACTCTCTCACACGCAG    | 59.757 | 20 |
| 238 | 377  | 614  | GCAAAAGGCAGCCTAAAGAG    | 60.035 | 21 |
| 274 | 1896 | 2169 | GAGGGGGAGACATATGCTTG    | 59.508 | 20 |
| 150 | 802  | 951  | GGCATCGTGAGGAGTGTTG     | 60.263 | 19 |
| 254 | 851  | 1104 | TCACGCCCTACAAAACAATG    | 59.585 | 20 |
| 115 | 243  | 357  | TTGGTGCATGCCTTTTGTTA    | 60.111 | 20 |
| 251 | 2141 | 2391 | TGAAAAACAAGCGAGCAACA    | 60.557 | 20 |
| 142 | 433  | 574  | GGCGAATGCTATGCATTTTT    | 60.068 | 20 |
| 107 | 191  | 297  | CAACACACATCCTTCATGCAC   | 60.024 | 21 |
| 191 | 1760 | 1950 | TTGATGGTGTCCCTTGTT      | 60.21  | 20 |
| 265 | 1868 | 2132 | CACGAAGTCGTCATTAATTCC   | 59.996 | 22 |
| 247 | 17   | 263  | CATTCCAGGTGTGAATAGCA    | 60.899 | 21 |
| 161 | 389  | 549  | AGGAAATGATCACAGGCCAT    | 59.366 | 20 |
| 231 | 0    | 230  | AGCGTTATTACCGGATCG      | 59.93  | 19 |
| 270 | 734  | 1003 | GCCGTCCTTTCAATCTCTTG    | 59.813 | 20 |
| 126 | 73   | 198  | GCAAAGAGGATGAATCTGGG    | 59.629 | 20 |
| 268 | 530  | 797  | TGGGCAAACCAAGATACACA    | 59.964 | 20 |
| 207 | 671  | 877  | TCCTTAAACATAACGAGATCA   | 58.388 | 25 |
| 175 | 189  | 363  | TCGTATGCTGCCCTAAAC      | 60.096 | 20 |
| 255 | 17   | 271  | CTCTTCTCTCTCCGCCCTT     | 60.088 | 20 |
| 157 | 447  | 603  | AAATCCACCAGAAACCCACA    | 60.21  | 20 |
| 265 | 155  | 419  | GAATCCCATTGCAATCACC     | 60.141 | 20 |
| 261 | 396  | 656  | ATTACGGCCACGCTAAGTTG    | 60.152 | 20 |
| 111 | 431  | 541  | CCCCTCTCATTCAACACCC     | 60.31  | 19 |
| 101 | 106  | 206  | CCTACTGCCGTGTTGATTC     | 60.657 | 20 |
| 280 | 23   | 302  | TCATGAATGGATGTGTTTTGTT  | 57.849 | 22 |
| 190 | 1    | 190  | ATTTAGTGTGTTTGACATGATTA | 57.898 | 26 |
| 254 | 44   | 297  | GCTGACAGGGGAATTGTGAC    | 60.52  | 20 |
| 220 | 661  | 880  | TCTACCCTTCATTGTCATTCTC  | 58.707 | 23 |
| 227 | 1855 | 2081 | TGACCATTTTGCAACTCTCC    | 58.697 | 20 |
| 202 | 24   | 225  | TGAATGGCCGTGAATGTATG    | 60.343 | 20 |
| 164 | 71   | 234  | ATGAAGAAAATAGGACTAATC   | 58.32  | 26 |
| 227 | 210  | 436  | ATCGTGAGAAGCGTCGATCT    | 59.981 | 20 |
| 169 | 482  | 650  | GCCAGATTCTTTGGTGGAG     | 59.803 | 20 |
| 248 | 14   | 261  | ATCCTCGGAATCCATACCCT    | 59.611 | 20 |
| 253 | 563  | 815  | CAAATGCATGCAGCTTCTA     | 59.976 | 20 |
| 264 | 133  | 396  | CCTGTAGACGGCCAAATGTT    | 59.993 | 20 |
| 253 | 266  | 518  | TGGAAGCCATGCAAAATAAA    | 59.146 | 20 |
| 161 | 1339 | 1499 | GAAATTGGACACAGAATGCG    | 59.127 | 20 |
| 264 | 2148 | 2411 | TTTCTTTTGTGACGCAATCG    | 59.849 | 20 |
| 169 | 4809 | 4977 | ATAGTGGAGGGATGTGGCTG    | 59.95  | 20 |
| 126 | 4    | 129  | CAAATGGCCAAGAGAGTTTAC   | 59.267 | 22 |
| 255 | 322  | 576  | GGAATGGGGGAAATTTGATT    | 59.83  | 20 |
| 253 | 6304 | 6556 | TCTCACGCGGGTAAGTGATA    | 59.297 | 20 |
| 154 | 39   | 192  | CTATCGTTCGATTTGCCGTT    | 60.096 | 20 |
| 127 | 1133 | 1259 | TTGCAAGAAAAATAAAGGGCA   | 59.719 | 21 |
| 181 | 195  | 375  | ATCAGACGGGCAGTTGAGTT    | 59.727 | 20 |
| 153 | 1170 | 1322 | TTAGGGTTTAAATCGCGCA     | 60.564 | 20 |

|     |      |      |                         |        |    |
|-----|------|------|-------------------------|--------|----|
| 215 | 2    | 216  | AGAGGACACTTGGACCTGAA/   | 60.146 | 22 |
| 118 | 574  | 691  | AATCCTCGCAGGAGTTCAGA    | 59.95  | 20 |
| 271 | 385  | 655  | CCGTGATTTAAGGAGTCGGT    | 59.052 | 20 |
| 160 | 14   | 173  | AGCTGTTAGGGTTGTATAGT/   | 57.436 | 27 |
| 200 | 38   | 237  | TGATGTGGTGTGGAAACATT    | 57.17  | 20 |
| 226 | 2483 | 2708 | CACCAAGTCCAGCCTTCTTC    | 59.844 | 20 |
| 269 | 451  | 719  | CACGTGGAGGATCGTTTTCT    | 60.111 | 20 |
| 266 | 96   | 361  | CTGAAGGTCCCGTCATCATC    | 60.475 | 20 |
| 271 | 1310 | 1580 | TTTTGTGAGAGGCGAGAGGT    | 59.989 | 20 |
| 106 | 201  | 306  | GCGTACATGAGTCCAGCAAG    | 59.47  | 20 |
| 241 | 216  | 456  | TGCATGTTGCGATTTCAATTT   | 60.081 | 20 |
| 198 | 4000 | 4197 | TCTACCTGTTGCTGTGTGCC    | 59.905 | 20 |
| 126 | 49   | 174  | TCAAATGAACATAATCCTGTA/  | 59.33  | 25 |
| 149 | 616  | 764  | CCCAAATCATTGTATTTTATGT  | 57.81  | 23 |
| 213 | 553  | 765  | CACCAAATTTTATCATTTTTCAA | 57.548 | 22 |
| 134 | 1756 | 1889 | AGCTTTATGCGTTTGCAGGT    | 59.911 | 20 |
| 209 | 234  | 442  | CATCAACATGCAACCAACAA    | 58.966 | 20 |
| 198 | 1103 | 1300 | CATTATTATCAACGGCTGCAA/  | 59.989 | 22 |
| 244 | 2874 | 3117 | TCGTAGCCTGCTTTCTCTCC    | 59.717 | 20 |
| 115 | 9    | 123  | TGAGAGGAAGAAAGAAGATG/   | 59.111 | 23 |
| 280 | 646  | 925  | TCTAAAGAAAACAAAAGAAGT   | 57.236 | 26 |
| 249 | 247  | 495  | TGGAGCAACAAAGATGGAAA    | 59.247 | 20 |
| 144 | 400  | 543  | TCCTAACAAAGAAAGGCGGA    | 59.817 | 20 |
| 278 | 523  | 800  | ATCCCTTTTGCTTTTGCTGA    | 59.823 | 20 |
| 158 | 1579 | 1736 | TGATCCTTGCTCTCTTGCCCT   | 60.096 | 20 |
| 210 | 967  | 1176 | AACGCAAGATGGGAAAAATG    | 59.938 | 20 |
| 270 | 205  | 474  | ACAAGCAGGTAAATATCAGTT   | 59.974 | 25 |
| 200 | 433  | 632  | AGGATCCCAAATCACCAACA    | 60.173 | 20 |
| 280 | 636  | 915  | TCCTCAAACCAACTCC        | 59.943 | 20 |
| 137 | 247  | 383  | ATAACCGACCACGACACCAT    | 60.119 | 20 |
| 214 | 27   | 240  | GGTTATCACCGGATCACGAC    | 60.203 | 20 |
| 144 | 44   | 187  | GCGGTAGGAGTTGATGATGG    | 60.483 | 20 |
| 203 | 756  | 958  | CGGAATGTGATCGAATAGCA    | 59.646 | 20 |
| 174 | 2630 | 2803 | CTTTTTGCCATGTCAGCGT     | 59.856 | 19 |
| 224 | 1036 | 1259 | TGTCGAATGCAGGGTTGATA    | 60.073 | 20 |
| 243 | 186  | 428  | TCAAGAAACGCGCCATGTAT    | 61.554 | 20 |
| 235 | 2257 | 2491 | TCAGGAAGATCATCTGCGG     | 59.884 | 19 |
| 233 | 567  | 799  | AGCAGCAATTTCCGAAAAGA    | 59.96  | 20 |
| 148 | 45   | 192  | CATCCAACAGGTCAAGCAGA    | 59.831 | 20 |
| 141 | 148  | 288  | CAGACGAGCAGTTGAGTTCG    | 59.77  | 20 |
| 160 | 325  | 484  | TCCAGTGTCTCCATCTCGTG    | 59.82  | 20 |
| 179 | 1622 | 1800 | GCCACATTCTTGCTTCTGCT    | 60.547 | 20 |
| 206 | 21   | 226  | CAACAAAGCAACAAAACATTC   | 60.062 | 23 |
| 245 | 98   | 342  | TAGGCTTGAGCATGTGGAGA    | 59.547 | 20 |
| 205 | 1    | 205  | TTTTGAATGGCACAGATTGG    | 59.518 | 20 |
| 280 | 302  | 581  | AGATGCTGGTAGAGGCGAAG    | 59.598 | 20 |
| 223 | 54   | 276  | ACCATAAACACCGTGTCCAAA   | 60.139 | 21 |
| 253 | 354  | 606  | TAGGTCTTTGGCGGTCTTGT    | 59.734 | 20 |
| 278 | 182  | 459  | AAAATGGTGCACAAACCCAT    | 60.096 | 20 |
| 174 | 3449 | 3622 | GGAATGTGCAACAGGATGTG    | 59.967 | 20 |
| 261 | 1212 | 1472 | TTTTATTGCAGCTGTCACGC    | 60.021 | 20 |
| 194 | 90   | 283  | GCGCATTTTCTTTTTGTTC     | 59.704 | 20 |
| 251 | 2990 | 3240 | GTGTCTTCTTCGGCGTTTTTC   | 59.859 | 20 |
| 160 | 87   | 246  | TTGAAGTTCTGGAGTTGGC     | 60.232 | 20 |
| 153 | 7    | 159  | CTACCCCTCTCGCATTCT      | 60.59  | 20 |
| 208 | 193  | 400  | CCAAAGTGCCCTTTTATGCT    | 59.225 | 20 |
| 200 | 39   | 238  | CCGCACATGTTTCTCTCTCA    | 59.984 | 20 |
| 116 | 1020 | 1135 | TCTACGAGATTTGCTCCCAA    | 58.449 | 20 |

|     |      |      |                        |        |    |
|-----|------|------|------------------------|--------|----|
| 252 | 385  | 636  | TGAAGCGTGAAAGTCAATCG   | 59.988 | 20 |
| 177 | 1067 | 1243 | TGAAATTATACGAAGCCGGAA  | 59.573 | 21 |
| 208 | 35   | 242  | GATGCAGTGGGGTTTTGTTC   | 60.362 | 20 |
| 191 | 992  | 1182 | TTCCATTTTCCACCACTCA    | 58.947 | 20 |
| 204 | 206  | 409  | CATTGCCACCCTTATCCACT   | 59.813 | 20 |
| 188 | 221  | 408  | TTCCCTTCTCATTTCCATGC   | 60.014 | 20 |
| 240 | 58   | 297  | AAGGCAACATCTATCGAGGG   | 59.15  | 20 |
| 279 | 144  | 422  | AGTACTGCAATTCTGCCCGT   | 59.763 | 20 |
| 249 | 189  | 437  | TGGTTGGAGATCTTTGGAGG   | 60.042 | 20 |
| 192 | 247  | 438  | GGGTGGTTATGGGTTTTAGG   | 58.162 | 20 |
| 130 | 163  | 292  | GGATTGCTGAAAAGTGGCTC   | 59.82  | 20 |
| 213 | 61   | 273  | AGCAGCGAAGGAAAAACTTG   | 59.632 | 20 |
| 252 | 419  | 670  | TCTCTCCGACCACATTCCTC   | 60.199 | 20 |
| 146 | 586  | 731  | GGAGATGGGGAATTTTGACA   | 59.727 | 20 |
| 224 | 158  | 381  | TGGAACCATGTTCAATCCCT   | 60.173 | 20 |
| 219 | 601  | 819  | CTTGACAAGGCAGTACCCGT   | 60.171 | 20 |
| 253 | 565  | 817  | GCCCACCTGATTTTCTTCAA   | 60.051 | 20 |
| 279 | 30   | 308  | GAGAATCCACCCACCAAGTG   | 60.363 | 20 |
| 192 | 308  | 499  | AAGGGTTGGTATCATTGAACT  | 59.168 | 23 |
| 197 | 14   | 210  | CCGGGTATCGGAAATTAGGT   | 60.034 | 20 |
| 217 | 14   | 230  | GTGAAACCCCAATTGTGTC    | 60.073 | 20 |
| 274 | 67   | 340  | TGCGTTTAAACAACCCAAAA   | 59.094 | 20 |
| 273 | 20   | 292  | TTTATTTTCTCAAATGCTATGC | 59.274 | 25 |
| 158 | 71   | 228  | CCAAACGAACTCACGGGATA   | 60.883 | 20 |
| 189 | 136  | 324  | CTTGGGAGAATTTGTGGGAG   | 59.521 | 20 |
| 276 | 588  | 863  | CATGTCGATCAACACCACAA   | 58.921 | 20 |
| 248 | 84   | 331  | AGCATAACAGCTGGCAAACA   | 59.493 | 20 |
| 252 | 298  | 549  | TTAGCTCTGGTTTGGTTCCG   | 60.241 | 20 |
| 213 | 368  | 580  | CAGATTACTGTGTGCGGCTG   | 60.472 | 20 |
| 276 | 1632 | 1907 | CTTCCGAATTCCAATTACCA   | 57.551 | 20 |
| 149 | 199  | 347  | TGAGCTCATTCCGCATTA     | 59.401 | 20 |
| 140 | 14   | 153  | CTTGCCCTTCACTCTCATC    | 59.803 | 20 |
| 186 | 414  | 599  | TTGGAGTTGTCAGTTCCTTCC  | 59.173 | 21 |
| 122 | 87   | 208  | TTGACCAAGGTGAGAATTTGA  | 59.587 | 22 |
| 176 | 51   | 226  | CTTTTCTTATGTGTGACAAAG  | 58.003 | 23 |
| 252 | 200  | 451  | CAGAGCATTTACCTGGGCAT   | 60.096 | 20 |
| 256 | 21   | 276  | GCTCCGAAACATGAAAAATCA  | 60.067 | 21 |
| 171 | 262  | 432  | ATCTCGGTGACGAAGTGGAG   | 60.261 | 20 |
| 121 | 1375 | 1495 | CGCACTGATCCAACCTTTTCA  | 59.84  | 20 |
| 165 | 47   | 211  | TGGGCATATTAGCCTTGACC   | 59.923 | 20 |
| 217 | 211  | 427  | TCCACCCTCTCACTTCCACT   | 59.682 | 20 |
| 268 | 71   | 338  | ATGTCGCCGAAAATCAGTTC   | 60.081 | 20 |
| 192 | 3440 | 3631 | TTGGTCGTTGGTTCATGTGT   | 59.855 | 20 |
| 208 | 0    | 207  | TCTGTCCCGTTTTCTTCGTT   | 59.711 | 20 |
| 136 | 638  | 773  | CGGTGTGCTTTTCTTTCTCC   | 59.853 | 20 |
| 172 | 188  | 359  | CGATGGCCAAGATTGCTCTA   | 61.266 | 20 |
| 138 | 71   | 208  | TCCTTTTCTTTTCTGAGCACC  | 59.871 | 22 |
| 274 | 269  | 542  | ATTGAGACTGGCTTCCATGC   | 60.226 | 20 |
| 280 | 161  | 440  | TACCGACCTTGGTCTGAAC    | 59.966 | 20 |
| 280 | 442  | 721  | TTCCTACCAAATCTCCCCATT  | 59.652 | 21 |
| 146 | 3416 | 3561 | TGGATCTCGGAATATCCAGC   | 59.998 | 20 |
| 131 | 636  | 766  | CCTACCTGTTGCCACTCCAC   | 60.567 | 20 |
| 270 | 428  | 697  | ATGCGTAGAGCACCCCTCATT  | 59.723 | 20 |
| 177 | 299  | 475  | CACGCAGACAACACACACAC   | 59.818 | 20 |
| 126 | 260  | 385  | GTGGAAAAGAAGATGCTCGG   | 59.813 | 20 |
| 163 | 69   | 231  | GCCGTGAATGAAGGGATTT    | 59.886 | 19 |
| 122 | 7    | 128  | GCGAAGCACCGAGACTACTG   | 61.136 | 20 |
| 239 | 208  | 446  | TCAAATCGCCTGAGAAGGAG   | 60.474 | 20 |

|     |      |      |                        |        |    |
|-----|------|------|------------------------|--------|----|
| 182 | 255  | 436  | AATGCACTGACTTGGCATGA   | 60.272 | 20 |
| 278 | 29   | 306  | TGATCGATTTTCAGCCATGA   | 60.159 | 20 |
| 170 | 46   | 215  | ATTTTCAAGCGGCACATGAT   | 60.478 | 20 |
| 161 | 14   | 174  | CGAACTCAATTTGATCCGAAA  | 60.06  | 21 |
| 277 | 67   | 343  | CCACTTTGGTGACTAACGCA   | 59.758 | 20 |
| 185 | 287  | 471  | TATTTCCGGTTCAAACTCCG   | 59.931 | 20 |
| 154 | 25   | 178  | TACCCAACCCACTAACCCAA   | 60.081 | 20 |
| 238 | 260  | 497  | GACACACGAGCAAGCAAATG   | 60.459 | 20 |
| 239 | 370  | 608  | GGTGAAGACGGATCGTCAAT   | 59.934 | 20 |
| 269 | 247  | 515  | CGAATCCGTTTTCCAACAGT   | 59.971 | 20 |
| 207 | 3    | 209  | TTGATTCAAAGGCTGATAATG  | 59.857 | 23 |
| 117 | 136  | 252  | TGTGATCGACGATTGGAAAG   | 59.648 | 20 |
| 263 | 0    | 262  | GGAAATTATTGGGAGGGAATC  | 59.499 | 21 |
| 276 | 29   | 304  | CACGCACAAAGAAGATCTCTA  | 59.571 | 23 |
| 139 | 90   | 228  | AAATCGTGCAGCAAACATTG   | 59.735 | 20 |
| 272 | 1475 | 1746 | CTTCAGCCTGTATGTTGGGG   | 60.508 | 20 |
| 188 | 11   | 198  | TTTCCTCCAGCTTCTACCA    | 59.807 | 20 |
| 226 | 379  | 604  | TCCCACTTTGTCTCCAATC    | 59.903 | 20 |
| 228 | 106  | 333  | GTAAGAACCGGGCACTGAAA   | 60.11  | 20 |
| 233 | 2968 | 3200 | ATTAAGGGGGAGTGTTCGG    | 60.18  | 20 |
| 191 | 77   | 267  | TTGCCTTGTGCAGGTTACAG   | 59.904 | 20 |
| 170 | 650  | 819  | CCACCCCAAATTTTCATAA    | 59.497 | 20 |
| 264 | 509  | 772  | TTGTTGTTTCACAAAATTTAAG | 59.653 | 25 |
| 258 | 188  | 445  | TGGCATAAAATCCAACCATT   | 57.817 | 20 |
| 171 | 38   | 208  | CTTTATCCACGTCTCGCACA   | 59.864 | 20 |
| 227 | 32   | 258  | CAATTACAATGTTTATCCAATC | 58.177 | 26 |
| 122 | 554  | 675  | CCACGTCAGCATCTACCTCA   | 59.855 | 20 |
| 278 | 140  | 417  | AGCTCGAGCCAAGAAGTTCA   | 60.277 | 20 |
| 146 | 40   | 185  | TGCATGCACCTGATTACAAA   | 58.703 | 20 |
| 279 | 425  | 703  | GGATGATTCCGACGAGAAGA   | 60.158 | 20 |
| 276 | 407  | 682  | ACGAACCACTGGCTGAAATC   | 60.119 | 20 |
| 151 | 5    | 155  | TGAAGTGTTATGCGTTTTGACA | 59.274 | 22 |
| 274 | 339  | 612  | CAACTCCGAAAGGCATTCTT   | 59.312 | 20 |
| 183 | 42   | 224  | CAAATGATCTTACGCGCACA   | 60.807 | 20 |
| 261 | 379  | 639  | GAAGAGACCAGAAGTCCCCC   | 60.05  | 20 |
| 256 | 139  | 394  | AGAGTTCGAGGTGGGCTTTT   | 60.247 | 20 |
| 126 | 154  | 279  | CCCCAAATGAGGAACTTTGA   | 59.903 | 20 |
| 126 | 166  | 291  | CACACATGCGTTCATTCACA   | 60.164 | 20 |
| 205 | 88   | 292  | TGCACGTAGGCATGTTCAAT   | 60.142 | 20 |
| 245 | 602  | 846  | TTCGAGTTTGATTCCATCCA   | 59.049 | 20 |
| 219 | 491  | 709  | GATTTTCCTGTCTCCTTTCTCA | 59.777 | 24 |
| 138 | 106  | 243  | TTTTGCCCTCGAATGCTATC   | 60.175 | 20 |
| 215 | 2    | 216  | AACACCTGTGAAAGGGATCG   | 59.966 | 20 |
| 210 | 262  | 471  | CGGAATTTTACGTGGTTTGA   | 58.531 | 20 |
| 118 | 102  | 219  | TCGAACGACATGAAAATTCG   | 59.664 | 20 |
| 254 | 9    | 262  | AGTGGGCTTTGGCACAAGTA   | 60.689 | 20 |
| 276 | 278  | 553  | GAGCTGGTTTGAGGGAGATG   | 59.803 | 20 |
| 237 | 298  | 534  | ATGAAAACCGAAAATGGTGG   | 59.662 | 20 |
| 120 | 184  | 303  | ACGACCCTCATCAACTTCCTT  | 59.987 | 21 |
| 129 | 280  | 408  | CACTCATGTGGGGGATTGTT   | 60.634 | 20 |
| 233 | 48   | 280  | CGGAAATGACCCCATAATGA   | 60.523 | 20 |
| 149 | 55   | 203  | CAGAAATGGCATTGGTTGTTT  | 60.359 | 21 |
| 263 | 581  | 843  | CGCATGATGTAACGTGAAGG   | 60.134 | 20 |
| 107 | 376  | 482  | TTGATTATTCCGCTTACGTTTT | 57.918 | 22 |
| 171 | 35   | 205  | TCACATCCTCAGCACAAACC   | 59.682 | 20 |
| 165 | 502  | 666  | TTTTGACGAGCCTATGTGGA   | 59.272 | 20 |
| 200 | 1    | 200  | ACAGAATTAGCCTTACCAAGA  | 59.926 | 24 |
| 247 | 39   | 285  | CTCTCTCCTACCTGCGTGCT   | 59.769 | 20 |

|     |      |      |                        |        |    |
|-----|------|------|------------------------|--------|----|
| 193 | 348  | 540  | AAGAGTTATCACCGGATCGC   | 59.154 | 20 |
| 212 | 19   | 230  | TTTGATCCTTGCTTTGCCTT   | 59.823 | 20 |
| 213 | 645  | 857  | GAGACCGACGCCTTAACATC   | 59.7   | 20 |
| 196 | 298  | 493  | TGGGGTTGGAGGTTTTTGTA   | 60.198 | 20 |
| 231 | 767  | 997  | ACACTAACGCTCGACCTCGT   | 59.937 | 20 |
| 280 | 2118 | 2397 | GCGGATTATCACATTGAGGA   | 58.521 | 20 |
| 253 | 4    | 256  | AATACCCTTCGCATCCACTG   | 59.955 | 20 |
| 255 | 56   | 310  | CGCCGGACTATTCTCTGAAG   | 59.971 | 20 |
| 187 | 650  | 836  | GAACCCTTTTTGGTTTCCGT   | 60.2   | 20 |
| 276 | 443  | 718  | TCAATCAAATTTTATCAAACA  | 57.101 | 25 |
| 146 | 394  | 539  | AAACAACCCCGGACTATCG    | 59.799 | 19 |
| 232 | 106  | 337  | CAAAAGATTACTCATGTGATA  | 61.041 | 26 |
| 113 | 98   | 210  | CGTTGCCGGATAATTCAAAC   | 60.323 | 20 |
| 234 | 1735 | 1968 | TGGATGGGGACAAGACAAC    | 60.363 | 20 |
| 257 | 2822 | 3078 | TGGTTTTCGTACACAATTCGAC | 60.032 | 22 |
| 252 | 5328 | 5579 | TGGAACCAAGACATATGGGA   | 60.177 | 21 |
| 184 | 96   | 279  | TACGTGATCGGACACGAGAA   | 60.263 | 20 |
| 275 | 4639 | 4913 | CTCCTTGCTTCCTCCATCAC   | 59.803 | 20 |
| 172 | 898  | 1069 | CAATCATGGAATCGTTCGC    | 60.025 | 19 |
| 280 | 68   | 347  | CTTATGTCCCAAATCGCCAC   | 60.331 | 20 |
| 234 | 72   | 305  | AAAATCAAACCTCAACCCGTC  | 60.214 | 21 |
| 260 | 4182 | 4441 | GGTAGAGGAGCTGATGTGGC   | 59.834 | 20 |
| 172 | 446  | 617  | CCCCTTACTGCTAACACCGA   | 60.125 | 20 |
| 219 | 1009 | 1227 | TCAGTTTTGCAAGGATTGAGA  | 58.488 | 21 |
| 250 | 174  | 423  | GTGGTGGGAAACAAGAACCT   | 58.891 | 20 |
| 152 | 599  | 750  | AGGAATGGGCTCGTAGGTTT   | 59.962 | 20 |
| 245 | 527  | 771  | TGCTCTCCACTTTGATCCCT   | 59.803 | 20 |
| 217 | 2641 | 2857 | AAATGCTCCTGCACTTCTCG   | 60.538 | 20 |
| 219 | 381  | 599  | GTGTCAATTCCTGGGCTTCT   | 59.141 | 20 |
| 169 | 1832 | 2000 | CTCACCAATTCCATCAGCCT   | 60.073 | 20 |
| 232 | 1305 | 1536 | AATAATCGGTTGCAAGTTTGG  | 59     | 21 |
| 221 | 49   | 269  | ATACCCCGCGAAAAGTAAA    | 60.664 | 20 |
| 119 | 256  | 374  | GGCTTAATGGGGTGGAAAAT   | 60.02  | 20 |
| 241 | 112  | 352  | ACGAAAAACGAAGGAGACGA   | 59.853 | 20 |
| 276 | 488  | 763  | TGATTTTAAGAGGTGATATGA  | 58.255 | 26 |
| 219 | 63   | 281  | GCAGAAATTCCTTCTTGTTT   | 60.17  | 26 |
| 185 | 321  | 505  | GTTTTTGTACATCGGCGGAG   | 60.502 | 20 |
| 197 | 41   | 237  | ACAAATGGCCAAGAGAGAGT   | 57.922 | 21 |
| 255 | 527  | 781  | GGAGGTGCGGTGTTAGAGAG   | 59.867 | 20 |
| 236 | 1630 | 1865 | TATCAAGCCCACCGTAAGTG   | 58.649 | 20 |
| 134 | 331  | 464  | ACAACCCGTTTTAAAGCTCA   | 57.426 | 20 |
| 182 | 10   | 191  | TGAATTCATGTACACATTTGGA | 57.94  | 23 |
| 101 | 200  | 300  | GAGATATACGCAGGGGACGA   | 60.059 | 20 |
| 262 | 247  | 508  | GGCCGATATTTGTTATGCGT   | 59.822 | 20 |
| 247 | 2    | 248  | CGGAAGAAACAACTAGAAA    | 60.193 | 25 |
| 247 | 53   | 299  | GCGATGAAATGTACGTTAGAG  | 58.783 | 24 |
| 146 | 279  | 424  | GCTACTAACTTGATGCGGGG   | 59.73  | 20 |
| 114 | 8    | 121  | GGAGGGATGATGAAGATGGA   | 59.821 | 20 |
| 257 | 168  | 424  | CCAGATGTCGTGGATTTTTG   | 58.973 | 20 |
| 181 | 1118 | 1298 | TGAATGGATTTTTGGCATGTT  | 60.181 | 21 |
| 245 | 31   | 275  | TGTTTTATTAACCTCAATTGTG | 57.051 | 25 |
| 273 | 1244 | 1516 | GTTGAAGATGGGAAACCCCT   | 60.169 | 20 |
| 149 | 987  | 1135 | CCGAAATTTTACGTGGTTCG   | 60.348 | 20 |
| 102 | 171  | 272  | GATGCATGCACGTGAATAAGA  | 59.709 | 21 |
| 209 | 251  | 459  | CAATCGTTGCGACAAAAGA    | 59.849 | 20 |
| 262 | 61   | 322  | GCTCTGATGCCAACTGTTG    | 59.445 | 20 |
| 226 | 313  | 538  | GCGATTCTCCGTATGCTGT    | 60.243 | 20 |
| 182 | 28   | 209  | TGGTTTGGTGGAAAGAAATGA  | 58.947 | 20 |

|     |      |      |                        |        |    |
|-----|------|------|------------------------|--------|----|
| 272 | 29   | 300  | TTTGCATACTGCATGGGCTA   | 60.237 | 20 |
| 185 | 5    | 189  | GGCAACCGGAATACCATTTGT  | 59.691 | 20 |
| 216 | 240  | 455  | CAAAGCCGCTCCTAATGAAA   | 60.335 | 20 |
| 235 | 8    | 242  | GCTTAAAACAATTATTGAACCC | 60.546 | 24 |
| 264 | 83   | 346  | CCAGTTCGGCGATATATGGTA  | 59.824 | 21 |
| 239 | 1619 | 1857 | GAAGGGAAGGGAAAGAATGG   | 59.875 | 20 |
| 235 | 40   | 274  | TGCCTATCAACCCACCAAGT   | 60.375 | 20 |
| 165 | 1422 | 1586 | CATGTGAGAAACGTCCCCTT   | 59.966 | 20 |
| 227 | 34   | 260  | CAAATTTAAGGGTTATTATTC  | 59.806 | 27 |
| 137 | 2602 | 2738 | CCCCTCATTTTTTCGTTTTCA  | 59.91  | 20 |
| 277 | 110  | 386  | TCAGTTTCCACACGCCAATA   | 60.111 | 20 |
| 187 | 16   | 202  | TCATCATGAAACACCCTAGAA  | 58.616 | 23 |
| 260 | 137  | 396  | TTGACCCACCTTTGACCAAT   | 60.21  | 20 |
| 191 | 195  | 385  | ATCGTAGTGAAGTAGCCGCC   | 59.364 | 20 |
| 158 | 36   | 193  | GAGTTGGTGAGGCAAAGAGG   | 59.844 | 20 |
| 179 | 47   | 225  | GGAGGTTCTGATTGCTCCCT   | 60.596 | 20 |
| 279 | 64   | 342  | TGGAGTAGGGAGCCTCGTAA   | 59.83  | 20 |
| 236 | 15   | 250  | TGGTTATTACCTGATCACCATC | 59.959 | 23 |
| 174 | 158  | 331  | GTGCTCAGTGGACACATTGC   | 60.328 | 20 |
| 277 | 343  | 619  | TTAATGGACACCTCTGCGG    | 61.021 | 20 |
| 184 | 161  | 344  | GTTTTGTTTCCTGGGTTTGG   | 59.308 | 20 |
| 241 | 228  | 468  | AATACATCCAGTCATCCCGC   | 59.78  | 20 |
| 143 | 1016 | 1158 | CCACTCGTGCATCACTCAAG   | 60.463 | 20 |
| 182 | 865  | 1046 | AGTCAAATTGGCATTACGGG   | 59.823 | 20 |
| 174 | 2951 | 3124 | CCCTTCCCTTCCATTTTGT    | 60.159 | 20 |
| 251 | 2642 | 2892 | AGGGGCTTTGAATCTACCAA   | 59.952 | 21 |
| 210 | 37   | 246  | ATCCATCTCATGTTGGGCAC   | 60.758 | 20 |
| 186 | 2253 | 2438 | AATAGAGGGAGGGGAGGGTT   | 60.144 | 20 |
| 204 | 41   | 244  | TGAACTAAGGAGGTGTTATGA  | 59.249 | 25 |
| 214 | 43   | 256  | AAACAAACCGTGTTAACATCC  | 60.021 | 22 |
| 127 | 17   | 143  | CTCATCTCTCGCTCTCCCTC   | 59.232 | 20 |
| 233 | 31   | 263  | TCGATTCAGTTTCCCCACTC   | 60.05  | 20 |
| 127 | 920  | 1046 | TGCTTGAAAAGACAATTGAAT  | 60.11  | 22 |
| 165 | 446  | 610  | CATCACCAGATCATTTCGGA   | 59.451 | 20 |
| 245 | 1046 | 1290 | CGAAGGTTGGGTGGTAGAGA   | 60.103 | 20 |
| 260 | 25   | 284  | AATACAACCTGCCGAGCTGAAA | 59.897 | 21 |
| 215 | 50   | 264  | GCCGAAATCTGGCCTTCTAT   | 60.551 | 20 |
| 269 | 966  | 1234 | CCCAAATCCGTGGATAAAAA   | 59.633 | 20 |
| 165 | 232  | 396  | CTTTCTCAACCGAGCTCACC   | 59.989 | 20 |
| 221 | 624  | 844  | TAATGGCCACCAAGCTTTTC   | 60.074 | 20 |
| 275 | 1320 | 1594 | AACGACGGAAATATGGAGCA   | 60.469 | 20 |
| 197 | 434  | 630  | GTAACCAGCGCTACTTTCGC   | 60.046 | 20 |
| 117 | 2    | 118  | TGATGGTTGTGATTTGTTAGAC | 59.007 | 23 |
| 109 | 724  | 832  | GAGGAGCAGATGGTGTGAT    | 60.231 | 20 |
| 105 | 466  | 570  | TCGGGTTTGAACCCTCAATA   | 60.301 | 20 |
| 230 | 448  | 677  | GTCGACCGGCTTAGAAATGA   | 60.214 | 20 |
| 260 | 26   | 285  | AAGGGCGGTATCACCTGAA    | 60.467 | 19 |
| 238 | 928  | 1165 | CCAACACTCTGCTCTCTCCC   | 59.986 | 20 |
| 214 | 865  | 1078 | ACGTAAACCCCTGGTCAAAA   | 59.331 | 20 |
| 174 | 294  | 467  | TCCCAAATTATATCCTCTCCCA | 59.637 | 22 |
| 271 | 118  | 388  | AAATCAAGTTTAGGTGCGTCA  | 57.439 | 21 |
| 280 | 15   | 294  | TCCATTCCGAAAATCGAAAG   | 60.009 | 20 |
| 233 | 67   | 299  | GTCGTTGGTTCTTCGTGCTT   | 60.299 | 20 |
| 192 | 449  | 640  | CCACTGATGTGAGCCAACTG   | 60.309 | 20 |
| 139 | 422  | 560  | CTTGCCGATGTTTACCGTTT   | 59.996 | 20 |
| 275 | 110  | 384  | TGACTCTCAATGCCTTCTACCC | 60.63  | 22 |
| 251 | 1868 | 2118 | TCAAAGAATCCACCATGCAA   | 60.049 | 20 |
| 172 | 18   | 189  | AGCTGTTAGGGTTGTATAGTG  | 57.436 | 27 |

|     |      |      |                        |        |    |
|-----|------|------|------------------------|--------|----|
| 257 | 61   | 317  | AATTTTCGACAAACAAACGGC  | 59.982 | 20 |
| 276 | 10   | 285  | GCGGTGGTAGGAAGAACTG    | 59.734 | 20 |
| 185 | 61   | 245  | GGGCATGTTTAATTGGGAAA   | 59.638 | 20 |
| 176 | 197  | 372  | ATTTTATGGGACGGAGGGAG   | 60.145 | 20 |
| 184 | 1277 | 1460 | GGAATTGAATGTGGGAGTGC   | 60.326 | 20 |
| 120 | 2815 | 2934 | GTTGGTGCTGGCGTTTAACT   | 60.176 | 20 |
| 274 | 148  | 421  | CCAGTACCCCTCTTTGGACC   | 60.736 | 20 |
| 257 | 0    | 256  | AAAAATGCAGATTATGCTCCA  | 58.275 | 22 |
| 255 | 590  | 844  | TCAATATCATCGCCATTTTGAA | 60.282 | 22 |
| 263 | 637  | 899  | TTTTGGCATTTAACGTTTTCG  | 59.989 | 21 |
| 261 | 260  | 520  | GTGAGTATGCAGGCGACAAA   | 59.871 | 20 |
| 245 | 712  | 956  | TTCGGTTTTGAACCTTGGAG   | 60.081 | 20 |
| 260 | 12   | 271  | TGCACAATATGTTGGGAGGA   | 59.924 | 20 |
| 280 | 80   | 359  | AGCCTAACTAATGGCACGGA   | 59.73  | 20 |
| 264 | 229  | 492  | TTATCATGGGAAGGGGAGGT   | 60.517 | 20 |
| 211 | 72   | 282  | CAAACGAGGAGCAAAAATCA   | 58.892 | 20 |
| 194 | 380  | 573  | CTTTGTCCAAACAAATGAAAA  | 59.062 | 23 |
| 125 | 13   | 137  | GTGAGGGATGGACGAGAGAG   | 59.792 | 20 |
| 252 | 2566 | 2817 | GCCTCTTGGGGTCTTAATCA   | 59.126 | 20 |
| 226 | 94   | 319  | AGCCACGATTCCTGATTTTG   | 60.074 | 20 |
| 214 | 17   | 230  | AAACACGCAACACAAAGCAG   | 59.951 | 20 |
| 158 | 652  | 809  | GTTCTCATGCACCTTGGAT    | 59.934 | 20 |
| 152 | 80   | 231  | ATCATCGGGGTGTAACGAGA   | 60.34  | 20 |
| 207 | 770  | 976  | CACTGCCAGCAGTCGATAAA   | 60.011 | 20 |
| 159 | 0    | 158  | AATGGATGGTTGTGATTGAGT  | 58.293 | 22 |
| 207 | 429  | 635  | GTCCACGTGCTTTCTCTGT    | 60.307 | 20 |
| 271 | 6    | 276  | AGTCGAAGGTCGCGTGTAAT   | 59.763 | 20 |
| 186 | 821  | 1006 | AGCTGGCAATCCTTTCTTCC   | 60.713 | 20 |
| 202 | 23   | 224  | TTTTGCCCTCGAATGCTATC   | 60.175 | 20 |
| 199 | 39   | 237  | TCCCACATTGCATGAGAGAG   | 59.787 | 20 |
| 120 | 1    | 120  | CATTGTGTTTTCTCCATATTTT | 59.016 | 25 |
| 216 | 646  | 861  | CAATGGTGATGGCAGAAGTG   | 60.112 | 20 |
| 234 | 4    | 237  | TGTTTGAGTGGTTTTCTTGA   | 59.626 | 22 |
| 104 | 2    | 105  | CTCACTCCCCTCCATCACC    | 60.527 | 20 |
| 130 | 1    | 130  | ACCTGAACTCCAAATATTCTT  | 60.267 | 26 |
| 180 | 631  | 810  | TCTTGCCTTACATCAGCCCT   | 59.836 | 20 |
| 182 | 371  | 552  | CTCCGGTGAACCTCTCCAAC   | 59.697 | 20 |
| 191 | 50   | 240  | GGACGGAGGGAGTACGTCTT   | 60.511 | 20 |
| 237 | 67   | 303  | GAAACCTAATGCCATGGTTCA  | 59.815 | 21 |
| 176 | 253  | 428  | AAAAGGAAGGAGGGAGCTAA   | 57.181 | 20 |
| 179 | 86   | 264  | TTGTAAAACATGTATGGGATT  | 58.355 | 24 |
| 132 | 3813 | 3944 | CTGTGGTTGCGTCCTTATGA   | 59.716 | 20 |
| 216 | 1760 | 1975 | CAAACATGGAGGGGTCAAAC   | 60.21  | 20 |
| 248 | 472  | 719  | GCATCCTGAGTGGCGTAGAT   | 60.249 | 20 |
| 214 | 9    | 222  | TAGGATACCCTCCCAAACCC   | 60.011 | 20 |
| 179 | 71   | 249  | TCTCATTACGCTTTTCAGC    | 59.152 | 20 |
| 267 | 1002 | 1268 | GTCGCTTTCGATTTTGTGAGC  | 59.967 | 20 |
| 182 | 73   | 254  | GTTCTGGTGAAAAATTATGAA  | 57.752 | 23 |
| 271 | 1539 | 1809 | GGGTGGTTAAGTTGTGGTG    | 60.126 | 20 |
| 104 | 291  | 394  | TTTTTGCTAGGGACCGAAAC   | 59.202 | 20 |
| 242 | 350  | 591  | TTTGCCTATTTTGCCCATGT   | 60.323 | 20 |
| 150 | 85   | 234  | CTTGGGCTAAAATCCCAACA   | 59.931 | 20 |
| 188 | 1689 | 1876 | GGTTGATTGGTTTTCATGGC   | 60.177 | 20 |
| 100 | 8    | 107  | CAAATATTTTGTAGTTTCCCAT | 59.948 | 26 |
| 241 | 4198 | 4438 | GGCGAAACATATCCGGTAGA   | 59.923 | 20 |
| 223 | 187  | 409  | TGGGGTTGGAGATTTTGAAG   | 59.903 | 20 |
| 221 | 35   | 255  | GGATTTTCGAAATTTTCTCGC  | 60.035 | 21 |
| 274 | 1208 | 1481 | TCGCTCAAACACAAACACC    | 59.74  | 20 |

|     |      |      |                        |        |    |
|-----|------|------|------------------------|--------|----|
| 248 | 21   | 268  | CGTGGTTCGATCGTAATTGA   | 59.542 | 20 |
| 168 | 949  | 1116 | TTTCTTTAATCACCCGACCA   | 59.157 | 20 |
| 271 | 254  | 524  | GTAGCTTGCGAACGGGTAAC   | 59.775 | 20 |
| 278 | 20   | 297  | TTGTGATTTGTTCCCACAAGAA | 60.378 | 22 |
| 203 | 23   | 225  | GCACTGTGTTACGCCGATTA   | 59.759 | 20 |
| 265 | 239  | 503  | AAAAGAAAAAGTGAAGGGCTC  | 59.411 | 22 |
| 249 | 635  | 883  | CAGAGCTAATTCAAACCCCG   | 59.702 | 20 |
| 115 | 5    | 119  | GAAGAACAATTACAATGTTTTA | 58.084 | 27 |
| 253 | 2291 | 2543 | CTGCAGAGCTCCATGACAGA   | 60.294 | 20 |
| 112 | 21   | 132  | CAACAGAGAATGCAAGCAAA   | 59.097 | 21 |
| 271 | 84   | 354  | AACATGATTTGATGGTGCCTC  | 59.811 | 21 |
| 111 | 1    | 111  | TGCGTTTTGACAATATATAGGT | 60.083 | 26 |
| 215 | 27   | 241  | CTTCCCAGGATCGATTTGAA   | 60.006 | 20 |
| 214 | 549  | 762  | TGAGGCCGCTTCTATTTTT    | 58.966 | 20 |
| 108 | 0    | 107  | TTGGTGAAAAAGGTTAACGA   | 59.478 | 21 |
| 253 | 15   | 267  | TGACGAGAGAGAAAAGCGAA   | 58.874 | 20 |
| 107 | 17   | 123  | AAGGGGGTTATTAGTGGATCA  | 57.425 | 21 |
| 160 | 50   | 209  | TGTGCGTGTATGCAATGTGT   | 59.621 | 20 |
| 156 | 953  | 1108 | TGACATGGAACGTTGATTGC   | 60.526 | 20 |
| 211 | 46   | 256  | TTCCGGTCTGGTCGTCTTTA   | 60.626 | 20 |
| 187 | 35   | 221  | ATCTCGACTAATTATTATGCCT | 58.678 | 26 |
| 255 | 43   | 297  | AATTAATAATTTGGGGAGGGG  | 59.034 | 20 |
| 184 | 981  | 1164 | CAGACCGTCGAATTTAGACCA  | 60.118 | 21 |
| 250 | 0    | 249  | TTTGGGACGATTTTCTCTCTAT | 59.617 | 23 |
| 266 | 898  | 1163 | TGCTGCAGAGAAGGTAGGGT   | 60.012 | 20 |
| 235 | 65   | 299  | CTCGTTTGTGTGTTCTTCGTG  | 59.395 | 21 |
| 265 | 229  | 493  | TTGGTTGTTTTAATTTGCTCCC | 60.213 | 22 |
| 210 | 535  | 744  | TCCTTTACACCACAAGGAAAC  | 59.512 | 22 |
| 271 | 6    | 276  | TCAATGGCTCAAAAAGTTTCA  | 58.4   | 21 |
| 257 | 32   | 288  | AAATGAAATAGAATTCGCGAG  | 59.608 | 22 |
| 275 | 30   | 304  | CACACACATTACATTAAACCG  | 59.229 | 24 |
| 276 | 442  | 717  | TCGCATGTTCGATCTTCAGT   | 59.399 | 20 |
| 204 | 22   | 225  | CACATCCCACCCAACCTCTCT  | 59.962 | 20 |
| 233 | 488  | 720  | TGGACGTAAATACCCTTTTACC | 59.667 | 23 |
| 196 | 188  | 383  | AGCCCAAACCTCAATCAACA   | 60.495 | 20 |
| 225 | 565  | 789  | ATCCAACCACCCACGAACTA   | 60.232 | 20 |
| 240 | 2379 | 2618 | CTCGAAAAGTCTACCGGC     | 59.822 | 19 |
| 248 | 700  | 947  | AGTGAGCCTACACCACCACC   | 60.033 | 20 |
| 188 | 114  | 301  | CCCCAATGCTATGGACAAAC   | 60.192 | 20 |
| 170 | 97   | 266  | CGTCTGAGCTCGGTAGAAGC   | 60.299 | 20 |
| 123 | 270  | 392  | AGATCCGATGTCCCAAACAC   | 59.786 | 20 |
| 237 | 2945 | 3181 | ATGTGCTCTTCATGGGGAAG   | 60.073 | 20 |
| 222 | 23   | 244  | CATCCCAACCACTCATTTTCG  | 61.296 | 20 |
| 255 | 1892 | 2146 | GGTATGTGCGTGTGGATTGA   | 60.399 | 20 |
| 222 | 18   | 239  | GGTTAATCTCTCTATCTCTCTC | 58.624 | 27 |
| 160 | 67   | 226  | GCAGTGTAGTTAGGCGGTTTG  | 59.821 | 21 |
| 125 | 816  | 940  | TTGTCGGTCATTGAATTGTGA  | 59.956 | 21 |
| 197 | 56   | 252  | GTTTTCATTTGATCACCTCCC  | 58.347 | 21 |
| 177 | 147  | 323  | GATCTGCGAAATGCTTAGCC   | 59.951 | 20 |
| 254 | 585  | 838  | TCATCTTCCTTACGCGGACT   | 59.836 | 20 |
| 165 | 113  | 277  | ACTGGAACAACAGCTACGCTC  | 59.558 | 21 |
| 220 | 448  | 667  | AGTGCTCACAGATCCCACCT   | 59.713 | 20 |
| 110 | 10   | 119  | GAAATAAGGAGGTGTTATGAA  | 59.323 | 24 |
| 194 | 19   | 212  | CCCCTGTATGCACCTCATTT   | 59.813 | 20 |
| 191 | 470  | 660  | AGTAGTGAAGGCAGCCCGTA   | 59.898 | 20 |
| 245 | 241  | 485  | GCACTGAGTACCCATTTTGC   | 58.229 | 20 |
| 205 | 10   | 214  | CCAGGTCTCAATCTTTTTGGTT | 59.499 | 22 |
| 272 | 73   | 344  | TGCTGCTATTGAAGCCATTG   | 59.976 | 20 |



|     |      |      |                         |        |    |
|-----|------|------|-------------------------|--------|----|
| 150 | 1389 | 1538 | GAAGGTGAACGTCGGTAGGA    | 60.111 | 20 |
| 210 | 357  | 566  | TGAGGTTAAGGTGTGACAAAC   | 60.067 | 22 |
| 174 | 299  | 472  | ACACGCATCTCTCTTCCC      | 59.41  | 20 |
| 279 | 761  | 1039 | TGAGGCTCCAGATTTGCTCT    | 60.096 | 20 |
| 122 | 74   | 195  | GGCTACTTCCTGGATCACC     | 60.853 | 20 |
| 167 | 122  | 288  | GGAGTTTCTATCCGCCCTTC    | 60.039 | 20 |
| 202 | 55   | 256  | CGATGGTCTGAGTTATCCTCTC  | 59.652 | 23 |
| 121 | 38   | 158  | ATCGTGTGTAGGAAAAACATC   | 59.02  | 22 |
| 178 | 0    | 177  | GTTTTCCAGTCCCGATCAC     | 59.386 | 20 |
| 278 | 193  | 470  | GCTGGACAAATCTGGATGCT    | 60.226 | 20 |
| 279 | 11   | 289  | GCGGTTTGAGCCTAATTTTG    | 59.72  | 20 |
| 277 | 79   | 355  | GCATACACCGATAGCATTTTG   | 59.992 | 22 |
| 110 | 360  | 469  | AGAGTGCTGCAGCGTATGTG    | 60.23  | 20 |
| 230 | 410  | 639  | CCGGAGTATGCTATAAACGAA   | 58.355 | 22 |
| 225 | 80   | 304  | CCCGATGTCTGAAACTTGCT    | 60.255 | 20 |
| 207 | 47   | 253  | TTCTTCCTCAATTTAGTGTGG   | 59.215 | 22 |
| 231 | 75   | 305  | CACGGGGTTTCCAGACTTTA    | 59.964 | 20 |
| 186 | 43   | 228  | AAATTAAGTGGGGGTGGAGG    | 60.046 | 20 |
| 233 | 115  | 347  | GAGACACCTGGCAAACATGA    | 59.682 | 20 |
| 264 | 1341 | 1604 | CGATACGAATTTTCATACCATA  | 59.213 | 25 |
| 128 | 59   | 186  | GATTTTGGGACGATTTTCTCTC  | 59.965 | 23 |
| 225 | 1    | 225  | GCGAGTGTGCGCTAGTGTAG    | 58.703 | 20 |
| 280 | 308  | 587  | TGAGCACGTATGGACACGAT    | 60.144 | 20 |
| 150 | 2538 | 2687 | CTCCTGCGTAATATCGGAGC    | 59.829 | 20 |
| 171 | 485  | 655  | TTGAATCCAGGATCTTGAGC    | 57.804 | 20 |
| 172 | 81   | 252  | GGGAGAGATGGATCGACAGA    | 60.16  | 20 |
| 102 | 5    | 106  | GATTTGCTAGAGGTTTTGACG   | 58.516 | 22 |
| 180 | 2346 | 2525 | GGATCTCGTGATGCCACTG     | 60.222 | 19 |
| 279 | 2253 | 2531 | CATTCACTTGAGGAATGGGG    | 60.309 | 20 |
| 242 | 1654 | 1895 | ATCCCGTCTGCGTTTATCAC    | 59.962 | 20 |
| 147 | 2434 | 2580 | TTCAAACGTGGCACCAATTA    | 59.969 | 20 |
| 239 | 14   | 252  | CACAAGATTTATGGGTTATCA   | 58.787 | 25 |
| 172 | 316  | 487  | AAAAGGTTAAGGGTGGGGTG    | 60.082 | 20 |
| 188 | 165  | 352  | TTCCCATCAGTCAAGATCTACC  | 58.121 | 22 |
| 243 | 509  | 751  | TCCTCGACTGTTTTTCCCAC    | 60.088 | 20 |
| 273 | 1439 | 1711 | GCAATGGTGTTGCATATGTGT   | 59.341 | 21 |
| 277 | 2078 | 2354 | GCTACGAAGACATCCACCAA    | 60.125 | 21 |
| 105 | 212  | 316  | TGCCTCCTTTTCTTTTCTCG    | 60.826 | 21 |
| 116 | 13   | 128  | TGGGAGAATTTTCTGCTCTTG   | 59.438 | 21 |
| 183 | 3    | 185  | CCTCCAACCCCAAATTTAT     | 59.882 | 20 |
| 146 | 18   | 163  | ATCGGTTATTACCGGATCGC    | 61.031 | 20 |
| 266 | 709  | 974  | ACTTAAATCCACCGCCATTG    | 59.823 | 20 |
| 206 | 1156 | 1361 | TGAGGGACTTGGGTAGTTGC    | 60.111 | 20 |
| 235 | 1135 | 1369 | GACAGAAGAACGGGCTTTGA    | 60.375 | 20 |
| 146 | 622  | 767  | TTTTTAATTCATCTTAACTGATC | 58.447 | 26 |
| 147 | 335  | 481  | GCGCAAAAATACTCGCTTTC    | 59.992 | 20 |
| 124 | 172  | 295  | ATCTACCCTCATTCCCGAC     | 60.154 | 20 |
| 195 | 13   | 207  | GATCTTTCCACAAACCGAGC    | 59.676 | 20 |
| 203 | 91   | 293  | TAAAACATTTTTCGGCCATGA   | 59.004 | 20 |
| 230 | 295  | 524  | AGCTCACGTTTTTCCCTCAA    | 59.853 | 20 |
| 240 | 1102 | 1341 | CCAATTCGAAAACCGGTAAA    | 59.805 | 20 |
| 265 | 4    | 268  | AGGGCTAAGTGTGAGATTGG    | 58.331 | 21 |
| 145 | 690  | 834  | TGCGTTTGATCGTTAGCTGT    | 59.493 | 20 |
| 205 | 78   | 282  | TGCACGTAGGCATGTTCAAT    | 60.142 | 20 |
| 179 | 954  | 1132 | CCATCCATGCCTTGGTACTT    | 59.813 | 20 |
| 259 | 23   | 281  | TGACATCTTCGAGTGATCGTG   | 59.846 | 21 |
| 197 | 153  | 349  | GCGAAGAAACATTCAGGGAA    | 60.192 | 20 |
| 252 | 554  | 805  | GCGGCCAAAAGTAATTCAAA    | 60.075 | 20 |

|     |      |                             |        |    |
|-----|------|-----------------------------|--------|----|
| 144 | 44   | 187 ATGCATGTGTGCCAAGTGTC    | 60.614 | 20 |
| 237 | 1824 | 2060 CAAAATGTGCGAAAAATTCGC  | 58.278 | 20 |
| 242 | 18   | 259 TATCCATGGAATGCCCAAAT    | 59.979 | 20 |
| 178 | 837  | 1014 GTTACATGGATGGATGGGTTG  | 59.925 | 21 |
| 172 | 0    | 171 GCAAACCAAACATGTATCAAA   | 57.628 | 22 |
| 128 | 223  | 350 TGAATCCATTTTGTGTTGGG    | 59.222 | 20 |
| 260 | 4163 | 4422 TCTGGACCTTTCGGTTCTTG   | 60.224 | 20 |
| 261 | 28   | 288 AAGCAGGAGGTCCACAGTTG    | 60.298 | 20 |
| 247 | 767  | 1013 TTGGAGGTGCTCTCAAGGTT   | 59.844 | 20 |
| 242 | 361  | 602 GCTGGTGCATCCTCTTCCTA    | 60.362 | 20 |
| 260 | 320  | 579 TCGGTTGGATCAATTTGTGT    | 59.972 | 20 |
| 122 | 585  | 706 ATCGCACGTGCTAGATCCTT    | 59.866 | 20 |
| 229 | 1197 | 1425 GCAATCCGGATCAAAAGTTG   | 60.448 | 20 |
| 176 | 1276 | 1451 CCTGGTCAATCGGTTGTTTT   | 59.83  | 20 |
| 130 | 41   | 170 TGAGCAAAAGTAATAAGAGCC   | 60.422 | 24 |
| 193 | 3    | 195 TTGTAATTATTGTAGGGAATAA  | 57.858 | 27 |
| 237 | 149  | 385 ATCTCAGTGCCTGTGAGTGC    | 60.063 | 20 |
| 114 | 444  | 557 TAGACGCCCCAGACTGTTTC    | 60.255 | 20 |
| 274 | 18   | 291 AAGGGTTATCACCTGATTTTCT  | 57.73  | 23 |
| 209 | 283  | 491 GGTAGCTGTCGTCGATGTGA    | 59.862 | 20 |
| 239 | 82   | 320 CACTACTAGGGTTTGGGAGGG   | 59.866 | 21 |
| 244 | 177  | 420 AACGGCTATAGCAAGGGTCA    | 59.73  | 20 |
| 118 | 71   | 188 AAAGCTATCCACGATGGACG    | 60.096 | 20 |
| 128 | 693  | 820 TGGCTGTGAATCATTGTTCG    | 60.665 | 20 |
| 238 | 109  | 346 AATGCGCAATTTTAAACCCT    | 58.631 | 20 |
| 228 | 167  | 394 CGGCACCAATTTATTGTGAA    | 59.42  | 20 |
| 154 | 58   | 211 GGTTGGTCCACAAGATTTACA   | 58.486 | 22 |
| 244 | 159  | 402 TGTTGGCATCAAAATCAACAA   | 59.961 | 21 |
| 196 | 466  | 661 TCCGAAATTTAAGGAGTCGGT   | 59.952 | 21 |
| 254 | 23   | 276 AAGGAGATCATGGGATCGTG    | 59.886 | 20 |
| 169 | 44   | 212 TCCCCAAAATATCAGCCTTG    | 59.894 | 20 |
| 265 | 1237 | 1501 CTCATTTTGCACGTCTTCCA   | 59.84  | 20 |
| 213 | 62   | 274 CAGAAACGTTTTCCCTGAGC    | 59.853 | 20 |
| 118 | 785  | 902 AATGGTGGTGCATTTTGGT     | 60.277 | 20 |
| 151 | 83   | 233 CCGGGGTATGCTATAAACGA    | 59.81  | 20 |
| 270 | 23   | 292 CCCACAAATGAATGGTTGTG    | 59.667 | 20 |
| 225 | 230  | 454 TTCTACAAGCAAAGACCCA     | 59.415 | 20 |
| 246 | 1984 | 2229 GAGCGTAATATCAAATTTTTC  | 58.97  | 23 |
| 229 | 51   | 279 TCGAAAATCAAAGAGCCTCAA   | 59.946 | 21 |
| 124 | 1    | 124 TTCTTAATTTGCATGTTTCGTTA | 59.109 | 26 |
| 225 | 0    | 224 GGTGCAAGTGTCAATAGAAGA   | 57.558 | 23 |
| 198 | 22   | 219 AGAAACTTGACGTGTGCGTG    | 59.946 | 20 |
| 277 | 488  | 764 TGAGACCCAGTTAAGCACCA    | 59.288 | 20 |
| 215 | 185  | 399 CCTGGCAATGAAGACAGGTT    | 60.111 | 20 |
| 195 | 39   | 233 ATTCTCAAGCCACTCCCTCC    | 60.596 | 20 |
| 217 | 274  | 490 TGGCCTCAAAGTCTTCTTT     | 59.993 | 20 |
| 234 | 43   | 276 CGAGATTCGGGAAGACAGAG    | 59.943 | 20 |
| 256 | 2436 | 2691 TTTGGTAAAGTTTTGAGATTCC | 57.863 | 23 |
| 217 | 820  | 1036 GGGGCATCCAGATAGTTCAA   | 59.894 | 20 |
| 232 | 329  | 560 CTTCAACCTTTTCCTTGTCTCC  | 59.255 | 22 |
| 111 | 4    | 114 GGGACCACAAAATTATCCCC    | 60.245 | 20 |
| 103 | 105  | 207 TGTTGAAAATCATTGTGGG     | 59.222 | 20 |
| 224 | 513  | 736 AAGGGAATTTTGTCAACTGGA   | 58.54  | 21 |
| 246 | 1782 | 2027 TGGAGCCTACCATGACCATT   | 60.34  | 20 |
| 130 | 1119 | 1248 AACGCGAAGAACACAAGAGG   | 60.431 | 20 |
| 198 | 235  | 432 ACACGTGCCTCGTTTGAAT     | 60.559 | 20 |
| 274 | 5744 | 6017 CAGCAGCAAAGCTTCGAAAT   | 60.658 | 20 |
| 239 | 778  | 1016 GGCCAACATATGGGATTTTG   | 60.016 | 20 |

|     |       |       |                         |        |    |
|-----|-------|-------|-------------------------|--------|----|
| 166 | 389   | 554   | CCTCCACAAGTCGGATATGG    | 60.331 | 20 |
| 187 | 5     | 191   | CGACGTTGTCTTAACCTTGG    | 60.154 | 21 |
| 111 | 2108  | 2218  | TAGTTAAACTCACGCACGGC    | 58.992 | 20 |
| 249 | 284   | 532   | TTTCCCTTCTTTTGGGAGGT    | 59.912 | 20 |
| 206 | 30    | 235   | GTTGGAGGAGAGCTGTAGCG    | 60.156 | 20 |
| 197 | 12    | 208   | CACCCAAAATGGGTTATTATT   | 59.404 | 23 |
| 249 | 87    | 335   | GCACGTTTTTGGCCTGATA     | 59.679 | 19 |
| 213 | 31    | 243   | GCGGGGTTGTTGAAGAATTA    | 59.938 | 20 |
| 203 | 258   | 460   | GCATGGACTGGGGAAATGTA    | 60.723 | 20 |
| 189 | 8     | 196   | GGTATTCGTGATCGTGATTCT   | 60.215 | 22 |
| 187 | 5     | 191   | GGGTTTCGTAACCTAGGAGCTG  | 60.137 | 21 |
| 271 | 98    | 368   | CAAGCGGAACAAACAAACAA    | 59.746 | 20 |
| 239 | 12    | 250   | GGGACGAATATACCCTCGCT    | 60.307 | 20 |
| 187 | 801   | 987   | AAACACCCTTTTATTGGTTCTT  | 57.427 | 24 |
| 161 | 2903  | 3063  | TACCTGGGCTGTTCAAGCAAT   | 60.657 | 20 |
| 214 | 19    | 232   | CGGATTTAAGGGTTATTACATC  | 57.222 | 23 |
| 188 | 204   | 391   | CATTTTTCCACCTTGTGCCT    | 59.971 | 20 |
| 136 | 202   | 337   | GGAGGGCTGTGTGATTGATT    | 59.934 | 20 |
| 265 | 15    | 279   | ATCGTCGCCTCTAGCCACTA    | 60     | 20 |
| 191 | 34    | 224   | GGTTTTACGAACCACAATCCA   | 59.716 | 21 |
| 143 | 82    | 224   | TTTGACCTGAGGAGGTGTT     | 60.69  | 20 |
| 261 | 941   | 1201  | TTGCATCTAAGGCACTCAGC    | 59.178 | 20 |
| 279 | 497   | 775   | TTCTCCTATCTTCCCCAGCC    | 60.537 | 20 |
| 172 | 338   | 509   | AACTGGCATCCATACGAAGC    | 60.103 | 20 |
| 233 | 772   | 1004  | CAAATCTCTCAATCGGCACA    | 59.799 | 20 |
| 154 | 74    | 227   | AGGGTTTAAAATCGCGCATA    | 59.586 | 20 |
| 217 | 370   | 586   | TCCCATTGGTTATGGGAAGA    | 60.126 | 20 |
| 266 | 471   | 736   | GCGGATTCAACAAGTTCACA    | 59.697 | 20 |
| 209 | 94    | 302   | ACACCCACAAATCAACCACA    | 59.701 | 20 |
| 255 | 395   | 649   | CAAACCAAGGTCGAGAGTTGA   | 60.275 | 21 |
| 238 | 7     | 244   | CCAGCTCAGTGTGGGAAAAT    | 60.111 | 20 |
| 252 | 370   | 621   | AGGTGATTTGGCATTAAAGGT   | 59.717 | 21 |
| 234 | 338   | 571   | AAAAGCAATTTCAACATAGGT   | 60.281 | 24 |
| 253 | 13    | 265   | TCGGCTCGAAATCAGAAAAT    | 59.784 | 20 |
| 209 | 260   | 468   | CTGTAGTCGTGGTGGGCTTT    | 60.171 | 20 |
| 240 | 500   | 739   | TCACAAACCCAGATATCATAA   | 58.386 | 24 |
| 162 | 1275  | 1436  | CTTCTAAAGAACCCTCCCCG    | 60.061 | 20 |
| 106 | 176   | 281   | TAGACCTCCAACGAAGCACC    | 60.255 | 20 |
| 121 | 15    | 135   | ATGTGATGTTGTATTTTGGTAC  | 59.499 | 26 |
| 112 | 174   | 285   | CAAACGGTAATCCCCTCCT     | 60.18  | 20 |
| 212 | 41    | 252   | ATCATAGTTGACGCCCTTCG    | 60.096 | 20 |
| 117 | 229   | 345   | TGCTATTGCATGCTAAGAAGT   | 60.055 | 23 |
| 279 | 305   | 583   | TGTGGAATGGGAGATAACAGA   | 59.429 | 22 |
| 112 | 21    | 132   | GTGTTGGACGCATCAGGTAT    | 58.444 | 20 |
| 206 | 408   | 613   | ACAACAATCCGGAGGTGAAG    | 59.966 | 20 |
| 247 | 1     | 247   | ATGATCAAATCTTGGTGCGG    | 60.864 | 20 |
| 147 | 50    | 196   | TTACCTTTCTCGATCGGGTG    | 60.066 | 20 |
| 150 | 264   | 413   | CGCTTAATTGGTGATTGTGAA   | 60     | 22 |
| 153 | 227   | 379   | ATTTTTCGGCGAGATTGCTA    | 59.816 | 20 |
| 262 | 10    | 271   | TCAATCAATTAGATTTTCGGCT  | 59.601 | 23 |
| 128 | 81    | 208   | AACAGCAGGTGAGTTGGAGG    | 60.298 | 20 |
| 217 | 1781  | 1997  | TTTACTGTTTCCACACATGC    | 59.606 | 21 |
| 163 | 297   | 459   | GCCTGAAGGACCGTATCCTA    | 59.15  | 20 |
| 101 | 1105  | 1205  | GTTGGATGGCTGGTTTCTGT    | 59.973 | 20 |
| 205 | 5     | 209   | CTTCTTTTCTCTCCCTCCCC    | 59.252 | 20 |
| 231 | 820   | 1050  | TTCTATCGCGCTCTCTCTCA    | 59.002 | 20 |
| 106 | 4     | 109   | TGTTCTTCGTGTTCTATATTTCT | 58.935 | 25 |
| 202 | 10614 | 10815 | TCAACTCCAACCTGATGCCTG   | 59.831 | 20 |

|     |      |      |                        |        |    |
|-----|------|------|------------------------|--------|----|
| 220 | 883  | 1102 | CATGTTCAGTTTTTGGGGCT   | 59.971 | 20 |
| 272 | 0    | 271  | TATCAAAACAACCCCCGGAC   | 61.84  | 20 |
| 165 | 110  | 274  | AGCACAACACACACCCTCAC   | 59.63  | 20 |
| 168 | 249  | 416  | CAAGTCAAGCAAGGTGGACA   | 59.873 | 20 |
| 255 | 17   | 271  | GCGACAAGTCTGCGTGTTAT   | 58.955 | 20 |
| 208 | 217  | 424  | CCCTCATCGACTACTTCCCA   | 60.065 | 20 |
| 249 | 70   | 318  | TAACATGGAGGACAGGGGTC   | 59.779 | 20 |
| 276 | 326  | 601  | GGATTGCATTTGTGTAGTCTGC | 59.499 | 22 |
| 277 | 412  | 688  | CCAGACCAGTTGGTGATCAGT  | 60.018 | 21 |
| 254 | 5310 | 5563 | ATGCCTCTGGTTGTTGGAAT   | 59.41  | 20 |
| 219 | 373  | 591  | CAAAGAAGGCAATCTATCCCA  | 59.168 | 21 |
| 252 | 215  | 466  | CAATTTCCCAACCTCTTCCA   | 59.903 | 20 |
| 254 | 2270 | 2523 | TTCCGCGCTTTTTACTATGC   | 60.355 | 20 |
| 237 | 116  | 352  | AGCTCACCTTGTATCACC     | 60.12  | 20 |
| 154 | 240  | 393  | CGCACTCACACTCTGACA     | 59.624 | 20 |
| 241 | 301  | 541  | TTCGGTAAAATCAACGTGAAA  | 59.511 | 22 |
| 219 | 659  | 877  | ATTGCTAGGGTAGCCTCCTT   | 57.088 | 20 |
| 163 | 1499 | 1661 | AAACGCCATGCAAAAATACG   | 60.859 | 20 |
| 239 | 49   | 287  | AAGCTGCACGTGTTACACCTA  | 59.872 | 22 |
| 266 | 88   | 353  | AAATAAAAGAGGAAGGCTGA   | 59.17  | 24 |
| 191 | 2854 | 3044 | TCTTTCCCACTTCCCACATC   | 59.903 | 20 |
| 194 | 69   | 262  | ACAGTCACTCTCACTAGCCGC  | 59.685 | 21 |
| 245 | 82   | 326  | GGGCTTAGAATGCAATCCCT   | 60.419 | 20 |
| 151 | 585  | 735  | CGCGCACACTTACAAACT     | 59.974 | 20 |
| 263 | 583  | 845  | TCTTCTCCCTCTCTCCCTCC   | 59.883 | 20 |
| 213 | 535  | 747  | TGCCACAAAGATTTTCATCA   | 60.049 | 20 |
| 107 | 1    | 107  | GCATCTCTTGCTCTCTCGTTG  | 60.292 | 21 |
| 267 | 51   | 317  | AGGCATCCATCCTTTACTGC   | 59.154 | 20 |
| 152 | 1260 | 1411 | GGGATAGAGAACTGAATGAC   | 59.526 | 24 |
| 195 | 16   | 210  | TCCACCGTTGTCTTTAAGTCG  | 60.154 | 21 |
| 207 | 319  | 525  | GCCTAGGGGGAAAGTATGGA   | 60.278 | 20 |
| 236 | 1012 | 1247 | GGCAGTGAAGGACCAACAGT   | 60.159 | 20 |
| 171 | 74   | 244  | GCATCTCTTGCTCTCTCATTG  | 57.78  | 21 |
| 143 | 169  | 311  | TCAAAACCCAAATCCGACTC   | 59.91  | 20 |
| 215 | 572  | 786  | AGCACCAAGACAATGCCCTA   | 60.657 | 20 |
| 221 | 42   | 262  | CGTGTTTTACCGAAATGCGT   | 60.915 | 20 |
| 188 | 13   | 200  | TCCTTTGAGTATGGATTGATGA | 57.155 | 22 |
| 253 | 960  | 1212 | CGATCCGTCGACTAAACCAT   | 59.955 | 20 |
| 230 | 1111 | 1340 | ATGCGAGAACGGAAAGAAAA   | 59.823 | 20 |
| 280 | 264  | 543  | CCTATGCCGCTTACCTTTTT   | 58.409 | 20 |
| 258 | 450  | 707  | CCAATACTGATGGTCCAAGC   | 59.607 | 21 |
| 280 | 130  | 409  | TTGGATCCGTTTTATAATCGTG | 58.871 | 22 |
| 190 | 1184 | 1373 | TCTAACACGCGAATCTGACG   | 60.011 | 20 |
| 146 | 73   | 218  | TCGTGAATGGCATGACTGAT   | 60.08  | 20 |
| 142 | 6    | 147  | GAGGTACGGTGATATCATGCT  | 59.843 | 25 |
| 111 | 1901 | 2011 | ATGGGGAGTTCAATGTCGTC   | 59.786 | 20 |
| 264 | 147  | 410  | CCACGAAACATCAGCATAAG   | 60.134 | 20 |
| 278 | 174  | 451  | GGCCAGATTTGTTCTACTC    | 59.954 | 21 |
| 205 | 476  | 680  | GGACGCCCAATATTGTTTCT   | 58.906 | 20 |
| 167 | 178  | 344  | TGTAGAGGAAGTTGGGGGTG   | 59.959 | 20 |
| 271 | 29   | 299  | CCGTCCATCACTCCTTTTGT   | 59.966 | 20 |
| 113 | 387  | 499  | CATCTCATTGACCGATCCCT   | 59.886 | 20 |
| 201 | 516  | 716  | ATCAGCATCTTTACCGCCAC   | 60.103 | 20 |
| 276 | 995  | 1270 | TGGCAGATTGTTCAAGCAAC   | 59.847 | 20 |
| 271 | 72   | 342  | ACGCACACTTACGCATTGAG   | 59.935 | 20 |
| 212 | 152  | 363  | AGTTGGAATGAGCAACATGC   | 58.726 | 20 |
| 224 | 257  | 480  | AATCATCTCCTCACTAATTCCA | 57.69  | 24 |
| 191 | 1228 | 1418 | TACGTGTGTGCAGTTGCTGA   | 60.096 | 20 |

|     |      |      |                         |        |    |
|-----|------|------|-------------------------|--------|----|
| 157 | 35   | 191  | GACCGCAGGATAATCCAGAA    | 60.036 | 20 |
| 217 | 693  | 909  | TTGGACTTTTCGAAGAGCAT    | 57.546 | 20 |
| 264 | 81   | 344  | CCCGATTTCCATGCTTAAAA    | 59.901 | 20 |
| 262 | 384  | 645  | GTCAAGGAAGGCATCCACAT    | 59.934 | 20 |
| 278 | 2039 | 2316 | GGCCGTATCTCCGATTGTTA    | 59.923 | 20 |
| 168 | 160  | 327  | GTATCTTCTGTTGGGGCGAA    | 60.074 | 20 |
| 164 | 26   | 189  | CTGCCTTGCCAATTGACTTC    | 60.776 | 20 |
| 259 | 140  | 398  | AGACCATGGTTCGGAGAGTG    | 60.112 | 20 |
| 249 | 2022 | 2270 | TAGCTCACAGTGCACAAGGC    | 60.207 | 20 |
| 257 | 377  | 633  | TCACGTTATGGGGAGAATCC    | 59.75  | 20 |
| 159 | 1163 | 1321 | CAACGATGGTTGTTGAAACG    | 60.004 | 20 |
| 180 | 5    | 184  | TGCGTTTTGACAATATATAGGT  | 60.083 | 26 |
| 258 | 219  | 476  | TTCAGTGGAACATGGTTTGC    | 59.547 | 20 |
| 154 | 231  | 384  | TTGGAGTCGGAAAAACGAAG    | 60.22  | 20 |
| 234 | 414  | 647  | GCATGCATCAACTGCAAATC    | 60.237 | 20 |
| 224 | 5    | 228  | CTTTAGGGCCCTTGATTTCC    | 59.903 | 20 |
| 203 | 332  | 534  | GTTGCTTCCATCGTCACCTT    | 60.119 | 20 |
| 208 | 174  | 381  | TGGTTGTGATTGTAAAGGGGA   | 60.213 | 21 |
| 275 | 231  | 505  | CTCGTCTCCCTTGTTTGCTC    | 59.989 | 20 |
| 264 | 0    | 263  | GGGTGCTTGAAGATAAACATG   | 59.091 | 22 |
| 233 | 438  | 670  | CGCATGGGAAGGATGTTAAT    | 59.784 | 20 |
| 267 | 26   | 292  | CGCGAAGAACAACAAGAGGAT   | 60.397 | 20 |
| 167 | 218  | 384  | CGCGAACTCAAATACCCTTC    | 59.708 | 20 |
| 177 | 197  | 373  | CTATTCCGAACGCAGGTACG    | 60.648 | 20 |
| 251 | 618  | 868  | CCAAAGACAACGAACATCCA    | 59.541 | 20 |
| 270 | 382  | 651  | ATTGTGTCACCGTCGTCTCA    | 60.162 | 20 |
| 272 | 1550 | 1821 | TTCATGCCCGTTTTATTTGAC   | 59.824 | 21 |
| 232 | 88   | 319  | TCCGATCCGATTCCTTAAAA    | 59.479 | 20 |
| 156 | 9    | 164  | TGCTCTCATTGTAATCTCTCTC, | 58.289 | 24 |
| 276 | 316  | 591  | TGCTTAGGTGGATTTCCCAT    | 59.387 | 20 |
| 135 | 66   | 200  | TTCACCATAATTTGACACACAC  | 58.859 | 23 |
| 182 | 25   | 206  | GCATATGATGTGCATATACGA,  | 57.665 | 23 |
| 261 | 289  | 549  | TTATCCCTTCACCGTTCACC    | 59.79  | 20 |
| 279 | 195  | 473  | TTCGAAATGTGAAGCGTTTG    | 59.849 | 20 |
| 134 | 292  | 425  | TGAACTCACCACGTGAAGGA    | 60.285 | 20 |
| 196 | 2813 | 3008 | GCAGCGATAGCTGGAGACTT    | 59.746 | 20 |
| 276 | 93   | 368  | GGGTAAAGTAGTCATTGTCTG   | 59.812 | 23 |
| 220 | 313  | 532  | AGCGTACATGGAATCCCAAC    | 59.82  | 20 |
| 229 | 95   | 323  | TCTGTCACGTCATTGTGTCG    | 59.265 | 20 |
| 243 | 9    | 251  | GGTGGTGCAGAGTGATTGT     | 61.146 | 20 |
| 135 | 73   | 207  | ACTCACTAGCCGCAGCTCTC    | 59.921 | 20 |
| 164 | 74   | 237  | TCTCACCTTCACCCAAAAC     | 59.943 | 20 |
| 228 | 9    | 236  | TTTATAGTTTTGTGGGGTTATT  | 58.102 | 25 |
| 242 | 1    | 242  | CGGTTGTATGAAACCGTTAGT   | 60.658 | 23 |
| 118 | 10   | 127  | TCGGAGCTAAAACGGAGAAA    | 59.953 | 20 |
| 238 | 104  | 341  | TGAGCATGTGGAGAGCAAAG    | 60.136 | 20 |
| 215 | 49   | 263  | CCTTCCAACAGAACAACACTCG  | 59.76  | 21 |
| 271 | 166  | 436  | ATGCGCGTTTTTAGGGTTTA    | 59.624 | 20 |
| 184 | 1861 | 2044 | TGCTCTTTGACCAGCTGTTTT   | 60.045 | 21 |
| 250 | 89   | 338  | GGTACATTCTCCGGTGACCA    | 60.78  | 20 |
| 237 | 17   | 253  | TTGGGGGAATGGAGAGAAAT    | 60.632 | 20 |
| 274 | 0    | 273  | CAATTAACGGTAGCCATCACA   | 59.89  | 22 |
| 233 | 106  | 338  | ACGACTGTCGATCCACACAA    | 60.162 | 20 |
| 253 | 2263 | 2515 | TCGAAACAGATCAAAACTGCC   | 60.242 | 21 |
| 121 | 78   | 198  | AGTCCCAACTTGCTCATTTC    | 59.726 | 21 |
| 203 | 1791 | 1993 | CATCGCCTTCTCCTTAGCAG    | 60.11  | 20 |
| 185 | 22   | 206  | AGTTGTCGAGCAGCTTACTTTC  | 58.861 | 22 |
| 214 | 36   | 249  | GTTGGACTCAAGTCATGCGA    | 59.837 | 20 |

|     |      |      |                        |        |    |
|-----|------|------|------------------------|--------|----|
| 178 | 85   | 262  | GATAGCGTCATTGTTTGGCA   | 59.694 | 20 |
| 137 | 1884 | 2020 | GTTTCTTCTGCCAGCACCTC   | 59.997 | 20 |
| 258 | 2368 | 2625 | TGTTTACGGCTGCAAATTCA   | 60.251 | 20 |
| 131 | 2    | 132  | CGTGGTTCGATCGTAATTGA   | 59.542 | 20 |
| 227 | 328  | 554  | ATGCACGTAGGCATGTTCAA   | 60.142 | 20 |
| 272 | 227  | 498  | TGCATCTTTGTA CTAGCCC   | 58.877 | 20 |
| 256 | 190  | 445  | GCCGAGTGTACCCATATCT    | 59.957 | 20 |
| 175 | 37   | 211  | TTAAAGCTCGGTTCAATTTCA  | 57.589 | 21 |
| 221 | 33   | 253  | AAATCAATCCCCACCATTCA   | 59.991 | 20 |
| 199 | 0    | 198  | TTGATCCAAGGGTGTATAATG  | 58.694 | 22 |
| 262 | 550  | 811  | TCATGACTCCATCCTTCACTTC | 60.125 | 23 |
| 251 | 13   | 263  | GTTGACA ACTTGACATCAAAT | 57.197 | 25 |
| 234 | 47   | 280  | GTTGGACCTGAAAGGGGACT   | 60.349 | 20 |
| 177 | 440  | 616  | TGTAGTCAATGCTTTTGAGATT | 58.415 | 26 |
| 266 | 367  | 632  | CGGATTTAATCGTGGCTGTT   | 59.96  | 20 |
| 238 | 615  | 852  | TTCAACCCGAACAACAATGA   | 59.941 | 20 |
| 117 | 55   | 171  | TCTTTCAATTTTCAGCCCTCA  | 59.809 | 21 |
| 238 | 3032 | 3269 | TGCTTGCATTTGAAGTAGCG   | 60.155 | 20 |
| 256 | 98   | 353  | TGGTGTCTTGGTGT TTTGG   | 59.435 | 20 |
| 173 | 174  | 346  | CACGTGTCACCTTATCAACGA  | 59.624 | 21 |
| 216 | 90   | 305  | TGGAAATTTTCGGGAATAA    | 59.233 | 20 |
| 193 | 434  | 626  | GTGCCTATTGCCGACGTAGT   | 60.162 | 20 |
| 245 | 66   | 310  | TGCTTTGCGATAAGCATGAG   | 60.118 | 20 |
| 278 | 267  | 544  | ATCACTTCGATTGACGCTT    | 59.843 | 20 |
| 232 | 28   | 259  | CGCCCCATGGAGAAGTTTAT   | 61.191 | 20 |
| 215 | 650  | 864  | ACGTGTCATAGGAAAACGAGC  | 59.256 | 21 |
| 105 | 1929 | 2033 | GGTTGATCTGCAGGGAAGAA   | 60.195 | 20 |
| 215 | 400  | 614  | GCGCAAGTTACGTGTTACCC   | 60.564 | 20 |
| 154 | 962  | 1115 | GTCATTCCGGTTGTTTCAGG   | 60.353 | 20 |
| 248 | 428  | 675  | GATACAAAGTCCCACGACCG   | 60.375 | 20 |
| 265 | 219  | 483  | ACTTGCTTGACTTGCAACGA   | 59.64  | 20 |
| 267 | 258  | 524  | ACGCTTTGGATGTGCTTTG    | 59.856 | 19 |
| 128 | 293  | 420  | CGCCGAGTTGGTTCTCTCTA   | 60.529 | 20 |
| 241 | 3768 | 4008 | TTTCTAGAAAGATCGGGCA    | 59.778 | 20 |
| 270 | 560  | 829  | TCAGGATAAATATCAGTTTCA  | 57.252 | 24 |
| 131 | 85   | 215  | TGCAATCACACAATAACAAGC  | 60.177 | 22 |
| 275 | 281  | 555  | TGAATGGATGTGATTTGTTTGA | 58.869 | 22 |
| 101 | 7    | 107  | TCCGGAGTAAGTTCGAGGAT   | 58.741 | 20 |
| 123 | 275  | 397  | GGCGAGAGAGGGAGTATTT    | 59.674 | 20 |
| 107 | 554  | 660  | AAAAAGGAGGCATTCGATCC   | 60.399 | 20 |
| 180 | 2073 | 2252 | AACCGAAACCGTGTCTTCA    | 60.529 | 20 |
| 139 | 330  | 468  | CAACGGCTCTTTTCTCCAAC   | 59.853 | 20 |
| 161 | 323  | 483  | GCATTGTTTTTGTGCGCTTT   | 60.117 | 20 |
| 276 | 432  | 707  | TCTGGGGGTTAGGTTGGTTT   | 60.581 | 20 |
| 198 | 66   | 263  | ACCTAAACCATGAGAGGCC    | 60.328 | 20 |
| 204 | 1291 | 1494 | CCTTTCTTGAGTTTCAACCCC  | 59.963 | 21 |
| 278 | 1437 | 1714 | ATTCAACAAGCGGCACTTCTT  | 59.882 | 20 |
| 275 | 2252 | 2526 | CTGAGGCAGTTTTTCAGAGCC  | 60.134 | 20 |
| 146 | 281  | 426  | TGGCATAGTTTGGTTGTGGA   | 59.964 | 20 |
| 277 | 1139 | 1415 | CTATTGACGAATCCATCGGC   | 60.435 | 20 |
| 188 | 444  | 631  | ATTGGTCTCGGTTGCTGAAT   | 59.556 | 20 |
| 232 | 1097 | 1328 | TGCAAGGAAGAAAAACAAC    | 58.451 | 21 |
| 142 | 363  | 504  | GCTTGCTGTGTTTTCTGTGCG  | 59.64  | 20 |
| 194 | 27   | 220  | TCCCATGTTGTAATTAATGTAA | 59.917 | 26 |
| 199 | 48   | 246  | TGAGAATGGCCGAGAGTTTT   | 59.813 | 20 |
| 205 | 4615 | 4819 | TGCAAACATCAGCCATTTTC   | 59.67  | 20 |
| 266 | 4453 | 4718 | TGGGAAGAGGAAATGGACAG   | 60.042 | 20 |
| 202 | 37   | 238  | GAATCAGGGGAGGGAGAGAG   | 60.149 | 20 |

|     |      |      |                         |        |    |
|-----|------|------|-------------------------|--------|----|
| 238 | 2162 | 2399 | TTCATACACACCCTTGCAGC    | 59.722 | 20 |
| 251 | 213  | 463  | TCCAGGAGTCGTGCTTGTC     | 59.971 | 19 |
| 190 | 0    | 189  | TTGGTCCCTCAACAAATAATA/  | 57.644 | 23 |
| 130 | 343  | 472  | GTTCTGTGCTTTCAATTTGG    | 59.601 | 21 |
| 230 | 911  | 1140 | AGTCCCTGATTCTTCCCTCG    | 60.586 | 20 |
| 173 | 15   | 187  | CTCCTTCAGCTTCAGCCATC    | 60.096 | 20 |
| 117 | 15   | 131  | TCGGAGCTTCCGAACCTTATG   | 60.344 | 20 |
| 244 | 1470 | 1713 | GATAATGAAGGCGCGAAAAA    | 60.172 | 20 |
| 206 | 55   | 260  | ATTTCCGCTTCCTAGCTGT     | 60.228 | 20 |
| 263 | 82   | 344  | CATGTAGTCCGCTTTGCTGA    | 60.011 | 20 |
| 215 | 375  | 589  | AGTCCTAGAAGGCGACACCA    | 59.867 | 20 |
| 118 | 816  | 933  | ACTCACACACGCTCAAGCAC    | 60.104 | 20 |
| 185 | 9126 | 9310 | GCGAACATCATGAGGAGCTT    | 60.37  | 20 |
| 193 | 3    | 195  | GAGGAACTTGGGACGATTTTC   | 59.933 | 21 |
| 272 | 5397 | 5668 | CCATGAAGAGGCTCGGTAGA    | 60.353 | 20 |
| 222 | 97   | 318  | GACAACAGAAAAACCACGCA    | 59.74  | 20 |
| 122 | 700  | 821  | TGGCAGGTTGGAGACACATA    | 60.112 | 20 |
| 237 | 1104 | 1340 | TGCCTGCCCTACTAGAAAA     | 59.839 | 20 |
| 170 | 3    | 172  | TGTGCACTGTTTCTCTCTCA/   | 60.222 | 23 |
| 145 | 4091 | 4235 | CGGTGGCTGAAAGAAAACAG    | 60.796 | 20 |
| 176 | 98   | 273  | TCACCACTACCAAGCATGT     | 60.162 | 20 |
| 111 | 24   | 134  | TTTGATGTCCAAAGTGGCTG    | 59.691 | 20 |
| 269 | 59   | 327  | GTCGATTGTGTAGTTGTGGGT   | 57.431 | 21 |
| 217 | 634  | 850  | TGGTTCTAAATTCATGTTTCTT( | 59.432 | 24 |
| 141 | 1314 | 1454 | TGTGAGAGGTGTAAGCAGG     | 60.022 | 20 |
| 172 | 225  | 396  | CTCTCTTGCCCTCCTCCTCC    | 60.468 | 20 |
| 140 | 532  | 671  | CCCTCATCCCTCAATTTCT     | 60.264 | 20 |
| 245 | 2185 | 2429 | GGCTGACAGTCAAGGAGAGG    | 59.986 | 20 |
| 208 | 702  | 909  | TGGCTTCTCTTTGCAAACC     | 60.365 | 20 |
| 201 | 9    | 209  | TCACGTTAAAGGAGGGTATCA   | 60.126 | 24 |
| 144 | 1251 | 1394 | AAATTTCACTCTAGCGGGC     | 60.582 | 20 |
| 277 | 233  | 509  | GGCGCAGCATATACACGA      | 59.714 | 20 |
| 161 | 176  | 336  | AATTGCCATCCCTCACACTC    | 59.934 | 20 |
| 169 | 1948 | 2116 | ACGTTTTTCTGAGCACGTT     | 59.78  | 20 |
| 212 | 333  | 544  | TCGACTCCATAGTAGCCGAG    | 58.076 | 20 |
| 188 | 444  | 631  | CCTTTTATATGGCGACCGAA    | 59.922 | 20 |
| 256 | 334  | 589  | ATTTTGGTCGAAACCGAATG    | 59.801 | 20 |
| 266 | 301  | 566  | GACAGAAATTCTCCACCACGA   | 60.104 | 21 |
| 243 | 1013 | 1255 | TTGGCAGGTTGATCATAAATTC  | 59.832 | 22 |
| 211 | 7626 | 7836 | TGAAGTGGCCTAATCCAAGC    | 60.214 | 20 |
| 233 | 187  | 419  | AGAGGAGGTGCAAGAATTTCC   | 59.705 | 21 |
| 195 | 0    | 194  | CCCTTTTATGCTCACATCTCTT  | 60.026 | 24 |
| 217 | 649  | 865  | TTACGTGCCTGGCTTAGGTT    | 59.769 | 20 |
| 272 | 1064 | 1335 | TGCTTCATTATTGCGTCACC    | 59.694 | 20 |
| 280 | 2    | 281  | ATTTTAAACATTGTTGGCGGC   | 59.838 | 20 |
| 179 | 1447 | 1625 | TGATGAACTGGTTGCGTGAT    | 60.12  | 20 |
| 217 | 924  | 1140 | TGAACTGTTTGGTTTCTGCG    | 59.881 | 20 |
| 181 | 54   | 234  | CGATTTGCAAGTCTATGGCA    | 59.833 | 20 |
| 115 | 24   | 138  | CATTGGTTAGCACTTGAATGAC  | 59.28  | 23 |
| 247 | 76   | 322  | TGCACCATAACAATATTCGAC/  | 60.252 | 23 |
| 257 | 1280 | 1536 | ATCGAAGCAAATGGAGGAAA    | 59.645 | 20 |
| 227 | 1073 | 1299 | GGGATTCCAATCCGAAATCT    | 60.096 | 20 |
| 184 | 21   | 204  | ATAGTGGTATGGTGTGGGGG    | 59.405 | 20 |
| 241 | 644  | 884  | TTGCAGATGGGACTATGCAG    | 59.823 | 20 |
| 206 | 297  | 502  | CCTTGTGCAAATTAATCCCG    | 60.315 | 20 |
| 213 | 711  | 923  | TCCTTGATGAACTGTGGGTG    | 59.52  | 20 |
| 280 | 526  | 805  | CGACGTGCATCATTTCTCAT    | 59.679 | 20 |
| 261 | 986  | 1246 | CATTTCAGGCCAAATCCTGT    | 59.933 | 20 |

|     |      |      |                        |        |    |
|-----|------|------|------------------------|--------|----|
| 181 | 485  | 665  | CCTTCTTCTTGCGTCAACT    | 59.473 | 20 |
| 275 | 82   | 356  | TCTACGGAGGACGAGCTGTT   | 60.012 | 20 |
| 266 | 214  | 479  | CGACATGGCTACTGTTCTCG   | 59.465 | 20 |
| 280 | 1240 | 1519 | GCGCCACATCTTGTTGAATA   | 59.694 | 20 |
| 175 | 44   | 218  | TGTGATCAGGTGCTGTGTGA   | 59.858 | 20 |
| 198 | 514  | 711  | TTCTCAGCATATGGGAAGGG   | 60.029 | 20 |
| 253 | 324  | 576  | ATGCATGTGTGCAGGTGTTT   | 60.04  | 20 |
| 170 | 467  | 636  | TCGTTGACCGTATGGGATTT   | 60.192 | 20 |
| 152 | 166  | 317  | CAAACAAAGTCTGCAACCCC   | 60.529 | 20 |
| 276 | 676  | 951  | TTGATGAATCATGTTTTGCGA  | 60.066 | 21 |
| 279 | 14   | 292  | ACGGATTTAAGGGTTATTACCT | 59.498 | 25 |
| 192 | 991  | 1182 | CCTGCCCTCCAAGATCATAA   | 60.029 | 20 |
| 273 | 11   | 283  | ATTTCTCAGCTGAAATGCC    | 60.221 | 20 |
| 101 | 29   | 129  | ACAATGGCCAAGAACGTAAC   | 57.604 | 20 |
| 198 | 1217 | 1414 | TTTCCTTTTGACAGCTGGAGT  | 59.993 | 20 |
| 280 | 5    | 284  | CCAATTTGAATGGTTATCACCT | 60.457 | 23 |
| 233 | 216  | 448  | CATGAAGATACATGCACGGG   | 59.948 | 20 |
| 225 | 32   | 256  | AACAATTGCACCTTTAATAGC/ | 57.978 | 23 |
| 196 | 5    | 200  | ATTCCGATCAGCTTCAGCAT   | 59.803 | 20 |
| 152 | 229  | 380  | TGGTTTCTCGATGGCTTTCT   | 59.813 | 20 |
| 172 | 2734 | 2905 | GCTTTTATCAATGCCCTCCA   | 60.038 | 20 |
| 188 | 21   | 208  | GTTATCACCGGATCGCAAC    | 58.941 | 19 |
| 265 | 776  | 1040 | CCACATTAATTTGCGGCCTA   | 59.789 | 20 |
| 238 | 6804 | 7041 | AGCTCCACTCAAGCAATGGT   | 59.874 | 20 |
| 262 | 3221 | 3482 | TGATGTTTTCCCATTTTTG    | 58.308 | 20 |
| 271 | 228  | 498  | CCTTCAAATTGGGATGAGG    | 59.359 | 20 |
| 217 | 908  | 1124 | TATTTTTGGGTTTGGGGTCA   | 60.024 | 20 |
| 175 | 1078 | 1252 | GCACCCTTTGGTGGTAGAA    | 59.971 | 20 |
| 213 | 6    | 218  | TGTGTCATTCCCTTCCACTGC  | 59.682 | 20 |
| 226 | 380  | 605  | TCATTTAATATGGTCTGTGCGA | 59.507 | 23 |
| 152 | 115  | 266  | TTAGGGTTAAAATCGCGCA    | 60.564 | 20 |
| 230 | 1336 | 1565 | TGGGTTAGCCCAAAAATGAG   | 59.931 | 20 |
| 168 | 34   | 201  | TTGTATTAGATTGTGGCTCCGT | 58.653 | 22 |
| 202 | 32   | 233  | ACACTCACTCTCACTAGCCGC  | 59.685 | 21 |
| 216 | 938  | 1153 | AAGCAATGGTGGTCTTCTCG   | 60.255 | 20 |
| 198 | 75   | 272  | TCCTCACACCCCACTTTCA    | 60.129 | 20 |
| 158 | 488  | 645  | TCTGCCTGTCGATCTCACAC   | 59.988 | 20 |
| 271 | 312  | 582  | AGCATTGGTAAAACCGGGAT   | 60.562 | 20 |
| 192 | 33   | 224  | ATGGTTATTACCTGAATACTCC | 57.944 | 24 |
| 175 | 70   | 244  | CATGGTCGTCCAAATCTCCT   | 59.927 | 20 |
| 279 | 224  | 502  | GGATATAACCACCTCACCCAA  | 59.945 | 22 |
| 194 | 241  | 434  | ATCGTAGTTGATGCCCTTCG   | 60.096 | 20 |
| 202 | 16   | 217  | GCGAAACCGAAGAGAAGAAG   | 59.195 | 20 |
| 150 | 17   | 166  | GAATAGTAGCGACTGCGGGT   | 59.364 | 20 |
| 234 | 35   | 268  | TAGTCATTCGGGCCACATAA   | 58.991 | 20 |
| 153 | 215  | 367  | CTGAGCACGTACAGATAAAAAC | 60.188 | 23 |
| 254 | 794  | 1047 | CTTCCTTCCACGCCACATAC   | 60.517 | 20 |
| 147 | 28   | 174  | ATGCTCATCAAGGTCTGGCT   | 59.834 | 20 |
| 198 | 27   | 224  | CGTGGCAGGCTAATATCCAT   | 59.945 | 20 |
| 139 | 11   | 149  | ATTGTTTCGATGTCAGCTTCG  | 58.877 | 20 |
| 171 | 1213 | 1383 | ATCGACATTCTTCTGCAGGC   | 60.37  | 20 |
| 201 | 10   | 210  | TCATTATTTCTCACTACCAAG  | 57.94  | 24 |
| 115 | 80   | 194  | TCTCTCGGTGGTGTGTTGA    | 60.246 | 20 |
| 225 | 883  | 1107 | ACTTAGGACCAAAGCCCGAT   | 59.962 | 20 |
| 240 | 741  | 980  | GTGGATTTTAGGGCTCATGC   | 59.533 | 20 |
| 152 | 3147 | 3298 | CCATTCGGAATTGGTTCTGT   | 59.79  | 20 |
| 260 | 1306 | 1565 | CAGTTTCACCAAGTCACCCA   | 59.565 | 20 |
| 214 | 12   | 225  | AAAATCAAAGGCCCAATG     | 59.801 | 20 |



|     |      |      |                        |        |    |
|-----|------|------|------------------------|--------|----|
| 227 | 221  | 447  | CCGTGTCCAGTCTGTGTTTG   | 60.194 | 20 |
| 146 | 367  | 512  | GAATTACACAATCCTCGTGGG  | 59.302 | 21 |
| 218 | 1095 | 1312 | GCCTAATGTCATTGCCTGCT   | 60.243 | 20 |
| 260 | 368  | 627  | ACACATGTGCGACACATCAA   | 59.575 | 20 |
| 192 | 65   | 256  | TGGGGGTAAACTGTCCAAA    | 60.198 | 20 |
| 267 | 67   | 333  | ATTGTTGGGTATTGTTGGCG   | 60.617 | 20 |
| 162 | 879  | 1040 | GAGTTAGGCGAGAAGAGGGG   | 60.34  | 20 |
| 104 | 22   | 125  | CGGATTTATTGGTTATTACATG | 57.538 | 25 |
| 141 | 0    | 140  | CTTCGGAActCTATCCGCC    | 59.782 | 19 |
| 269 | 105  | 373  | GCAGATCCAGATGCTCCAAT   | 60.189 | 20 |
| 148 | 230  | 377  | GCAACCCAATTCACCATTTT   | 59.668 | 20 |
| 273 | 1246 | 1518 | TTGCCTTCGTTCCAAGTTTT   | 59.724 | 20 |
| 278 | 24   | 301  | ATCCTAAGTTCGCCCTGAT    | 59.925 | 20 |
| 277 | 38   | 314  | CGAAATTGAATGGCAAGGAT   | 59.901 | 20 |
| 261 | 565  | 825  | GCAGGTTAACTCTAATTAATCC | 60.196 | 27 |
| 259 | 867  | 1125 | TTCCCCACATTCAAAGAG     | 59.903 | 20 |
| 157 | 1039 | 1195 | ACGGATGAAGAGAAATGGCA   | 60.603 | 20 |
| 167 | 365  | 531  | CCCCGGTTTCATTTATAGCA   | 59.789 | 20 |
| 236 | 25   | 260  | CTCCGGTGAActTCTCCAAC   | 59.697 | 20 |
| 185 | 498  | 682  | CCCTTGATGCTGCGTTTTT    | 60.131 | 20 |
| 268 | 30   | 297  | CCCATGTTGTAATTAATGTAGC | 59.089 | 24 |
| 153 | 69   | 221  | CCGTGCATCCTATCCTGTTT   | 59.955 | 20 |
| 138 | 170  | 307  | TTCAATCGCAACCATCAATTT  | 60.316 | 21 |
| 260 | 248  | 507  | GGCCGATATTTGCTCGTAGTT  | 60.473 | 21 |
| 141 | 236  | 376  | TGCAAAAATGGTGAGAGTGG   | 59.691 | 20 |
| 227 | 35   | 261  | AGATCTACCTTTGGGTAAACCG | 57.252 | 21 |
| 239 | 115  | 353  | ATCATTGTTTCCCCGAACAG   | 59.79  | 20 |
| 279 | 57   | 335  | GCACGTGTGTGTGTGAAAAA   | 59.191 | 20 |
| 214 | 2782 | 2995 | CACTGGTGTCTCTCCCCTC    | 59.682 | 20 |
| 157 | 179  | 335  | CGACACACCTCCTCAACCTT   | 60.151 | 20 |
| 116 | 252  | 367  | GGACTGGTTTGACACCTTTGA  | 59.997 | 21 |
| 275 | 101  | 375  | CCCATTACTCAAACCCAAA    | 59.657 | 20 |
| 234 | 2213 | 2446 | ACGATCCATGAAAGCAAACA   | 59.127 | 20 |
| 279 | 2    | 280  | TTGCTCAAActTGAActTGAAT | 59.65  | 26 |
| 205 | 183  | 387  | ATGCCTTGGTCTTCTCATC    | 59.094 | 20 |
| 208 | 84   | 291  | TGATGAATGAAAGATGAAATG  | 59.402 | 23 |
| 169 | 351  | 519  | TCTTTCACCCGCTTTAGGTG   | 60.241 | 20 |
| 229 | 77   | 305  | GGAGAAGAGGGAGGATCGAG   | 60.292 | 20 |
| 144 | 113  | 256  | CATTCAAGGGGCATTTTTGT   | 59.801 | 20 |
| 247 | 449  | 695  | TGGAAAACCAAAGCAAACA    | 59.178 | 20 |
| 260 | 309  | 568  | CCCTCCCTCATCTCTCCAAT   | 60.412 | 20 |
| 256 | 324  | 579  | CGAGCTGGCTTGAGCTACTT   | 59.92  | 20 |
| 143 | 460  | 602  | CTTCTCTCCTCCATTTCCC    | 60.008 | 20 |
| 273 | 206  | 478  | TAATGGGTGTTTGTGCGAAG   | 59.585 | 20 |
| 262 | 142  | 403  | TTCCACCGGTAGTCATCACA   | 59.96  | 20 |
| 252 | 4225 | 4476 | GGGTAAATATTTTGGGAGGG   | 60.58  | 21 |
| 163 | 2598 | 2760 | GCGGGACAActACCAACAGT   | 60.035 | 20 |
| 246 | 2315 | 2560 | GCTTCCCCTAGTGAACACA    | 60.111 | 20 |
| 223 | 19   | 241  | AATTTGTGCCAGTGTCTTG    | 58.623 | 20 |
| 198 | 445  | 642  | TTAGGGTTTAAATCGCGCA    | 60.564 | 20 |
| 275 | 596  | 870  | GCAACAAGCGATTGAAGGTT   | 60.257 | 20 |
| 163 | 2    | 164  | ATACCCCTCTTTAATCCGGC   | 59.292 | 20 |
| 225 | 1380 | 1604 | ACTTTGGTTGCTGGTGTGGT   | 60.466 | 20 |
| 105 | 352  | 456  | ATTGCTCAAAGGTGATGGG    | 59.933 | 20 |
| 280 | 164  | 443  | GTGACCAAATTCAGTAAGGG   | 57.148 | 22 |
| 226 | 44   | 269  | GGTTATCACTTGATCATCCCC  | 58.174 | 21 |
| 152 | 39   | 190  | GAAGTTCGGCCATTCTTACG   | 59.708 | 20 |
| 255 | 591  | 845  | GGTGGATTTTGGAAATGTCA   | 58.243 | 20 |

|     |      |      |                        |        |    |
|-----|------|------|------------------------|--------|----|
| 239 | 358  | 596  | CCATAGCTCGATCAGTCGGT   | 60.24  | 20 |
| 172 | 85   | 256  | TGGGCTTTGATTCTTGCTTT   | 59.823 | 20 |
| 172 | 27   | 198  | CAGAAATTGCCTTGGTTGTTT  | 59.601 | 21 |
| 237 | 50   | 286  | ACGACTTGTCGTGGTTAGGG   | 60.028 | 20 |
| 166 | 45   | 210  | CCTCGGATAAATTATGGGAAA  | 59.213 | 22 |
| 191 | 19   | 209  | TGTGCAAGGTTGAACCAAGA   | 60.278 | 20 |
| 112 | 87   | 198  | CTTGCCATTGATTTTGGTGA   | 59.518 | 20 |
| 106 | 90   | 195  | ACGTTTTTGTGAATGTTGCC   | 58.529 | 20 |
| 256 | 632  | 887  | ACAAGGTGTAGATCTGGCGG   | 60.134 | 20 |
| 255 | 79   | 333  | TTTTGAGAATGGGGAGGTGA   | 60.43  | 20 |
| 198 | 575  | 772  | AACAGTTTCAATTCGCCACC   | 59.978 | 20 |
| 179 | 299  | 477  | TTTTTACGAATTTGCCCTCG   | 60.068 | 20 |
| 235 | 155  | 389  | AGTTCGTCAAACCTCCCAA    | 59.569 | 20 |
| 233 | 1    | 233  | TTGTTCTACTCACTCACATTA  | 57.23  | 25 |
| 113 | 29   | 141  | AGAGGAGAGTTGATGGTGAGC  | 60.252 | 22 |
| 279 | 16   | 294  | GCCATCAAGGAAATAAAGAAC  | 59.254 | 22 |
| 232 | 115  | 346  | GTTGGACCAAAAAGCCCTTA   | 59.064 | 20 |
| 257 | 365  | 621  | TTACCCAGAGCACACTCGAA   | 59.44  | 20 |
| 259 | 383  | 641  | ACAATGGAGGCTGGAGGAG    | 60.207 | 19 |
| 212 | 0    | 211  | TGAGAAATGCTCCAAAGCCT   | 59.955 | 20 |
| 167 | 270  | 436  | GTTCTCGCTTCATTGGCACT   | 60.406 | 20 |
| 187 | 116  | 302  | CCGCCTTAAATATGCGTAGC   | 59.738 | 20 |
| 172 | 284  | 455  | GTTGTCACGGCGTGTGATAG   | 60.183 | 20 |
| 226 | 392  | 617  | GAGTAGGTGGATGGAACCCA   | 59.779 | 20 |
| 208 | 180  | 387  | TTGAGTGGTTTGGTTGGAGA   | 59.109 | 20 |
| 209 | 33   | 241  | TCCTCAATTTTCGAATTCTCC  | 59.55  | 22 |
| 238 | 513  | 750  | GGGGCGAGTCTCTCAAGTTA   | 59.43  | 20 |
| 236 | 1908 | 2143 | ATTGTGAGGTCCCATTACC    | 59.636 | 20 |
| 200 | 82   | 281  | GAATGCTTAATGGGAAGCCA   | 60.038 | 20 |
| 271 | 110  | 380  | TCAAGTTGAGCCTCCAAATCT  | 60.242 | 22 |
| 181 | 89   | 269  | GCAATAAATGCGTTCACACC   | 59.044 | 20 |
| 194 | 114  | 307  | TCCCTTTATGATCATTCCGGC  | 59.862 | 20 |
| 256 | 158  | 413  | AAATGTGATGTGGGTTGGGT   | 59.95  | 20 |
| 181 | 245  | 425  | AAAGAATGGTGGAGGTGCAA   | 60.495 | 20 |
| 254 | 2570 | 2823 | ACCACAAGCAAGCATTTCCT   | 59.74  | 20 |
| 191 | 482  | 672  | GATCGGACGTCAACAAGAT    | 60.081 | 20 |
| 267 | 104  | 370  | TGTGCTTCTTTTCTCCCCTC   | 59.405 | 20 |
| 197 | 435  | 631  | TGGTTTAAACAAATCGTGTTCC | 59.904 | 22 |
| 214 | 2688 | 2901 | TCTTTCGATTCTTGGTTCCG   | 60.184 | 20 |
| 146 | 194  | 339  | GGTTGCTCTAAGGTGCCAAA   | 60.249 | 20 |
| 228 | 24   | 251  | TGGTTATTACTGGAACGCGA   | 59.182 | 20 |
| 277 | 23   | 299  | GGGGTTATCACTGGATCACG   | 60.195 | 20 |
| 265 | 2189 | 2453 | CCCTAACTCGACCCAGATCA   | 60.065 | 20 |
| 222 | 176  | 397  | GAGTGGGTATGAGGGGAACA   | 59.779 | 20 |
| 267 | 32   | 298  | CGAACGACAATGGTTTGAGA   | 59.691 | 20 |
| 188 | 385  | 572  | AGGGACGAACATCACCATTC   | 59.786 | 20 |
| 251 | 445  | 695  | GCAGATTCCCAAATCCAAA    | 59.878 | 20 |
| 278 | 88   | 365  | TCACGCATTCTCTTTCGACT   | 60.149 | 21 |
| 206 | 655  | 860  | TATTCGGGAAGTTATTGCG    | 59.922 | 20 |
| 168 | 199  | 366  | TGATGCACGATGTATGTCGAT  | 59.971 | 21 |
| 221 | 3067 | 3287 | GGGGAGAAGGAAGGAGAGAA   | 59.749 | 20 |
| 165 | 120  | 284  | CCTGCATGGACAACAGAAAA   | 59.691 | 20 |
| 158 | 394  | 551  | TGGTTGGGCATTCCATTATT   | 60.016 | 20 |
| 193 | 1104 | 1296 | AAACTCATATTCCATCCAAAGC | 57.972 | 23 |
| 102 | 23   | 124  | ACAATATTACAAATGGCCAAG  | 58.988 | 24 |
| 274 | 311  | 584  | TAGTGCTTTGGAAAACATGC   | 59.406 | 22 |
| 242 | 94   | 335  | GGGAAGAAAACGCAACACAT   | 59.978 | 20 |
| 121 | 2321 | 2441 | GTTGGAAGGGGGCTAATCAT   | 60.152 | 20 |

|     |      |      |                        |        |    |
|-----|------|------|------------------------|--------|----|
| 270 | 158  | 427  | CGTGGTTCGATCGTAATTGA   | 59.542 | 20 |
| 182 | 239  | 420  | ATCACATGAATGGACCCCTAT  | 59.91  | 22 |
| 247 | 19   | 265  | AGGGATTTGGGACGATTTTC   | 60.131 | 20 |
| 233 | 2263 | 2495 | TGCGGTTGTTTGTGTTTGT    | 60.05  | 20 |
| 272 | 265  | 536  | GCCTCAATAACATGAGGCGT   | 60.103 | 20 |
| 266 | 1282 | 1547 | GGTCGATGATTCGGCTAGAG   | 59.797 | 20 |
| 222 | 321  | 542  | TAACAATCGCAATGCCAAGA   | 60.215 | 20 |
| 102 | 150  | 251  | AAACATCGATCAGTTATCATG  | 60.089 | 23 |
| 175 | 0    | 174  | CAACCGAGTACCTAACCACAA  | 58.56  | 22 |
| 270 | 555  | 824  | AGGATAGGGAATAGCGTCCC   | 59.402 | 20 |
| 225 | 400  | 624  | GATCGGGGCGTTACATTA     | 59.795 | 20 |
| 209 | 54   | 262  | TGCAGACGAAACGTTACTGG   | 59.904 | 20 |
| 105 | 619  | 723  | TCCAGGCAGGTTTTAATTGTG  | 59.982 | 21 |
| 197 | 3383 | 3579 | CCTTCTCCATCAACTGTGGG   | 60.501 | 20 |
| 131 | 77   | 207  | TCCATTTTCAGGTCCTCACC   | 59.903 | 20 |
| 101 | 367  | 467  | TAGCCGATAAAAATGGCACC   | 59.928 | 20 |
| 177 | 100  | 276  | AGCTCACCTTGTATCACC     | 60.12  | 20 |
| 147 | 294  | 440  | ATTTTGAATCTCACCGTGGC   | 59.939 | 20 |
| 160 | 7    | 166  | TATGCAGTGGGTTTTTGGTG   | 59.439 | 20 |
| 184 | 74   | 257  | TAGGACCACATTTTGTGCGC   | 60.894 | 20 |
| 198 | 1053 | 1250 | CAGATGGTGGTGTACGGTTG   | 59.873 | 20 |
| 280 | 362  | 641  | ACCGAGTTGACAGCGAAAGT   | 59.914 | 20 |
| 253 | 737  | 989  | TTTCATCCGCCTTTCTTTTG   | 60.181 | 20 |
| 247 | 507  | 753  | AAAGATGAATTGGGGGAGGT   | 59.629 | 20 |
| 168 | 302  | 469  | TTTGAGGGACAAAATCGACA   | 59.097 | 20 |
| 277 | 294  | 570  | TCAGAACCGTTGTCTTTCAGC  | 60.425 | 21 |
| 270 | 64   | 333  | TGATCCCTAAATTGCCCTTCT  | 59.917 | 21 |
| 204 | 40   | 243  | TGCATAGTTCGACGATGTAAG  | 59.307 | 23 |
| 118 | 17   | 134  | AGGCTGATATCACCATAACGC  | 59.084 | 21 |
| 111 | 3    | 113  | CGTTTATTCGAGACACACACG  | 61.108 | 22 |
| 246 | 27   | 272  | ATATTCTCGCTTCTTCGCCA   | 59.945 | 20 |
| 131 | 3669 | 3799 | ATCGGAAGGAGCCTTGTTCT   | 60.212 | 20 |
| 235 | 1056 | 1290 | GCCATTATGCACTTCCCAAT   | 59.791 | 20 |
| 152 | 695  | 846  | GTTTTGGGCGAAACAAGAGA   | 60.227 | 20 |
| 193 | 732  | 924  | AGTGACAGTTTACCTGCGA    | 59.467 | 20 |
| 165 | 826  | 990  | TTCTGTGATCGAAAAGGTG    | 59.84  | 20 |
| 209 | 0    | 208  | TGACAAATAAATGAAATACAA  | 57.062 | 26 |
| 178 | 65   | 242  | CTTTCATGGGTGATGGAAGC   | 60.461 | 20 |
| 273 | 2754 | 3026 | CATATCAAGTTCCCGCCATC   | 60.296 | 20 |
| 102 | 13   | 114  | CGGTTGACTCTTTTACTTTAGC | 58.582 | 23 |
| 227 | 250  | 476  | TTGAGCCAGTTTGTGTCCTT   | 58.342 | 20 |
| 169 | 11   | 179  | AGATCTAGGAGAAAAGTGAC   | 59.765 | 27 |
| 239 | 773  | 1011 | GCACGTTACAACACCGACAA   | 60.618 | 20 |
| 196 | 583  | 778  | CTTGCCGAATGTTTGTCTCC   | 60.636 | 20 |
| 267 | 772  | 1038 | CATGGGGAATATGCATCCAC   | 60.953 | 20 |
| 279 | 208  | 486  | GCTTGGTCCGAAAATTTCAA   | 60.053 | 20 |
| 246 | 229  | 474  | TTCGTTTCGCGTGCTAATTT   | 60.749 | 20 |
| 255 | 103  | 357  | TCGTCGCGTTGGATTAATTT   | 60.456 | 20 |
| 199 | 533  | 731  | TGCTTGTGGTTTTGTTTTG    | 59.603 | 20 |
| 226 | 76   | 301  | CCGGACAGGTACACCCCTA    | 60.822 | 20 |
| 278 | 48   | 325  | CAGAGGAGATGGGAATGGAA   | 60.003 | 20 |
| 241 | 344  | 584  | GGACAAGCTGTCGGATAAGC   | 59.843 | 20 |
| 270 | 4473 | 4742 | GGGTGGATGTACAGTAAAGGC  | 59.415 | 22 |
| 272 | 645  | 916  | TCCGATGATCAAGTCAGTGC   | 59.794 | 20 |
| 226 | 65   | 290  | CCATCAAAAATTCCTCCCCT   | 60.124 | 20 |
| 118 | 68   | 185  | CAACGGACGCTATCGGTTAT   | 59.982 | 20 |
| 125 | 7    | 131  | TCAATCCCGTCACCTTCATT   | 60.317 | 20 |
| 226 | 103  | 328  | GGGGGATGCCACTGTAGATA   | 59.773 | 20 |

|     |      |      |                         |        |    |
|-----|------|------|-------------------------|--------|----|
| 223 | 343  | 565  | GGAGAATTCGAGAGATTGCG    | 59.917 | 20 |
| 235 | 198  | 432  | TTCGTACAGCCGTTTGATGA    | 60.257 | 20 |
| 259 | 7    | 265  | TAGATGCACCGTTAGGAGG     | 60.088 | 20 |
| 130 | 592  | 721  | TCTTGCTCCACTGTTGTTGG    | 59.873 | 20 |
| 119 | 571  | 689  | ATGCCATTTTCTTCACTCGC    | 60.221 | 20 |
| 210 | 609  | 818  | CCTTTTTCTTTCCTGCACCA    | 60.22  | 20 |
| 247 | 3    | 249  | GTTCAACCTGATTTTCCCCA    | 59.767 | 20 |
| 124 | 0    | 123  | TGTGCGTAAATTAGCGTTCG    | 59.902 | 20 |
| 216 | 162  | 377  | GTTATGCGTTTTGACGGGAT    | 59.829 | 20 |
| 215 | 298  | 512  | GCTCATAGAGCTGGAAGGCA    | 60.646 | 20 |
| 183 | 1027 | 1209 | TATTGGTTGGGTACGGGTTG    | 60.472 | 20 |
| 165 | 6    | 170  | TTCTCATGTTGTAATTAATGTA  | 59.318 | 27 |
| 264 | 388  | 651  | AGAGAATGTTGTCGCGGACT    | 59.874 | 20 |
| 125 | 769  | 893  | GGAACAAATGAGACTGTTTCT   | 60.165 | 23 |
| 154 | 244  | 397  | CGCTAACATTCCCTTCTTCC    | 60.082 | 21 |
| 271 | 271  | 541  | TTTCTTCTATCTTTTGATTACCE | 59.171 | 27 |
| 194 | 187  | 380  | CAACCGACATTTAGCAGCAA    | 59.872 | 20 |
| 211 | 651  | 861  | TGCAACAAATGATCCCAGAA    | 60.049 | 20 |
| 157 | 686  | 842  | AAAGTTTGGTGAAGTCCGCA    | 60.668 | 20 |
| 219 | 151  | 369  | CATTTGCAAACCGAACCTCT    | 60.11  | 20 |
| 157 | 524  | 680  | GCTGACAGAAATGGCATTGA    | 59.805 | 20 |
| 230 | 3179 | 3408 | GCAAGAAATTGACATGTTGGC   | 60.505 | 21 |
| 123 | 29   | 151  | TGGGAAATTCTTGTACCTCCTC  | 59.46  | 22 |
| 227 | 146  | 372  | AGCGTAAACACGTCCCCATA    | 60.386 | 20 |
| 219 | 46   | 264  | CCGGAATCGCATCAATACTT    | 59.923 | 20 |
| 263 | 143  | 405  | TCTTCTGAAGTTGCGACCCT    | 59.989 | 20 |
| 177 | 22   | 198  | CTCCTATCTCCAATCCATGC    | 57.139 | 20 |
| 227 | 1161 | 1387 | AACCTTCATTTGGGCCTCTT    | 59.94  | 20 |
| 276 | 325  | 600  | CACCGACGATCACTCCCTAT    | 59.95  | 20 |
| 260 | 779  | 1038 | GCTGTAATTTCTTCCCCGCT    | 60.582 | 20 |
| 166 | 3063 | 3228 | TCAATGTCCTCTGCTCGATG    | 59.942 | 20 |
| 252 | 9    | 260  | CTTGCAACAAATGAAACGGA    | 59.706 | 20 |
| 259 | 1051 | 1309 | GAGTGGGGAGAAAGGAAAGG    | 60.045 | 20 |
| 164 | 455  | 618  | CCTTGACTTCACGCCTTCTC    | 59.989 | 20 |
| 152 | 341  | 492  | CGGACAAAATGTACCCCAAC    | 60.088 | 20 |
| 181 | 61   | 241  | TATGGTGGACCGATACATGC    | 59.23  | 20 |
| 217 | 1807 | 2023 | TCGAAATTGCCCCCTGTAT     | 60.281 | 19 |
| 272 | 64   | 335  | CACGTGATCTATGTGACCGC    | 60.144 | 20 |
| 278 | 14   | 291  | AACCATTGCACATGAGACGA    | 60.12  | 20 |
| 219 | 48   | 266  | AGGATCGAGAGCTCAAATGC    | 59.537 | 20 |
| 123 | 50   | 172  | GCCATCCATTCTGAAGATCAA   | 60.029 | 21 |
| 152 | 204  | 355  | TGGGACTGTTAAGTTTCCGC    | 60.11  | 20 |
| 244 | 23   | 266  | AATATGAAACCCAACGTCGC    | 59.829 | 20 |
| 246 | 286  | 531  | TTTTACCCGCGAAATAACT     | 58.629 | 20 |
| 269 | 118  | 386  | TGCAGACGCGTGAATTTAATA   | 59.365 | 21 |
| 206 | 1453 | 1658 | CACGTAAGTTCGCAACAACC    | 59.245 | 20 |
| 201 | 6    | 206  | GAGTCTTACGACTCTCGG      | 60.284 | 20 |
| 258 | 553  | 810  | TTTTGAACCCTAAAACTCGC    | 58.421 | 21 |
| 156 | 112  | 267  | TGTGTCTTAAAGTATAAAGGC   | 58.463 | 26 |
| 206 | 835  | 1040 | GTAGCTCAAGGGTTTTCGCA    | 60.386 | 20 |
| 227 | 29   | 255  | AACCCCTACACCACCCCTAC    | 59.972 | 20 |
| 139 | 701  | 839  | ATGCTTTGTTGGGGACACAT    | 60.24  | 20 |
| 189 | 469  | 657  | TCACCTTCTCCCAAATGA      | 60.43  | 20 |
| 152 | 35   | 186  | TAGGATTTGTGAAGGCCGAT    | 59.528 | 20 |
| 224 | 1027 | 1250 | ACCAAATAGCCCCTCCACAT    | 60.578 | 20 |
| 216 | 3    | 218  | AGCATCTCTCTTGCTCTTAT    | 58.525 | 24 |
| 215 | 1913 | 2127 | CGACACTTAAATGCGTTTGC    | 59.373 | 20 |
| 241 | 692  | 932  | AGAGATCGGGTTTGCTGAAA    | 59.813 | 20 |

|     |      |      |                        |        |    |
|-----|------|------|------------------------|--------|----|
| 263 | 60   | 322  | ACATGGGAGTTACAGAGCCG   | 60.134 | 20 |
| 250 | 17   | 266  | TCAGTTTCGAGTTATGAAGTTA | 59.749 | 26 |
| 209 | 749  | 957  | TCGAATTCTGTAAGGCGGTT   | 59.708 | 20 |
| 203 | 1078 | 1280 | TGATGTCCCTGGAAGACCAT   | 60.326 | 20 |
| 159 | 40   | 198  | CACACTCGCATACATTCAAAC, | 59.656 | 22 |
| 118 | 342  | 459  | TCTTTGCTTCGGATGGAATC   | 60.155 | 20 |
| 163 | 203  | 365  | AAAGCGAGTTTCAATGATGAC  | 59.752 | 22 |
| 199 | 20   | 218  | ACGGAGAAAGGGGATAGAGC   | 59.674 | 20 |
| 222 | 1876 | 2097 | TCCACCAGACCAAGAAGGAC   | 60.088 | 20 |
| 150 | 300  | 449  | AATTGAGGGAGTGGGTGTTG   | 59.82  | 20 |
| 211 | 23   | 233  | GGAAGCTAGGCGGTTTTGAT   | 60.582 | 20 |
| 205 | 212  | 416  | CTTCAGCCCCTCTAGGTTTG   | 58.931 | 20 |
| 233 | 2185 | 2417 | TTGTTGTATTGTAAAGCCGCA  | 59.269 | 21 |
| 234 | 1478 | 1711 | AATCCGTAAGAATAATCCATG  | 57.192 | 22 |
| 159 | 64   | 222  | ACGCGCGTTTTTGGATTTA    | 61.489 | 19 |
| 242 | 4779 | 5020 | GGCGGATGAATAAACCTCTG   | 59.528 | 20 |
| 253 | 1288 | 1540 | TCGTAGTCAAACCCTGCCT    | 59.734 | 20 |
| 201 | 271  | 471  | TACTTGTTGAGCTTGCGC     | 59.996 | 19 |
| 214 | 293  | 506  | ATGGACGCCTCAGATTGTTT   | 59.556 | 20 |
| 130 | 2772 | 2901 | AACATTTAACTTCGCCCTG    | 59.087 | 20 |
| 226 | 81   | 306  | GGATGCAAACCTCCCTAAAA   | 59.019 | 20 |
| 125 | 283  | 407  | GCTTGCTGATTGTGGTTCAA   | 59.847 | 20 |
| 129 | 212  | 340  | TCATAGAGTTCGCTAATGATT  | 59.757 | 27 |
| 241 | 98   | 338  | AAAAATCTTGCTGCACCCAC   | 60.118 | 20 |
| 192 | 0    | 191  | TGACATTCGCATTTTAAGAGT  | 58.527 | 25 |
| 192 | 2168 | 2359 | CTCCTGAAGCCACGTTTATT   | 60.255 | 20 |
| 141 | 120  | 260  | CATGAAAATCATGTTCCGCA   | 60.466 | 20 |
| 143 | 2167 | 2309 | GCAACCAAAACACACACACA   | 59.03  | 20 |
| 146 | 1444 | 1589 | GGTTCGCTCAATTCAGAAA    | 60.192 | 20 |
| 229 | 1702 | 1930 | ACCGGGCACTAAGGGATTAT   | 59.688 | 20 |
| 178 | 146  | 323  | AGCTGCAGCCAGAGAAACAT   | 60.164 | 20 |
| 278 | 460  | 737  | TATGTGCGCGTTTTCAATGAT  | 60.103 | 20 |
| 248 | 2010 | 2257 | TGAAAATCTGACGAGCATGG   | 59.799 | 20 |
| 228 | 4090 | 4317 | ATGTCGCCACAGCCATAGAT   | 60.514 | 20 |
| 196 | 21   | 216  | CTGATTCGCACAAATGATCG   | 60.22  | 20 |
| 147 | 8    | 154  | ACGGATTTAAGGGTTATTACCT | 57.667 | 23 |
| 201 | 639  | 839  | CTTGATTCCATGACGAGCCT   | 60.218 | 20 |
| 225 | 81   | 305  | TAAACAATGAACCATGCCGA   | 59.93  | 20 |
| 174 | 268  | 441  | TCCCTCAACCATCTCACCTC   | 60.048 | 20 |
| 181 | 210  | 390  | CGCGAAATGAGGAGCTTAAC   | 59.982 | 20 |
| 241 | 5    | 245  | GGGAAACCCACAATCATCAC   | 60.034 | 20 |
| 200 | 1656 | 1855 | CGATGGTCAAGCATAACGAA   | 59.688 | 20 |
| 247 | 593  | 839  | TTTCCCCCTTATTTTATCCCA  | 59.513 | 21 |
| 274 | 163  | 436  | CCGTTGCTTTCTCTCTCGTT   | 59.615 | 20 |
| 272 | 295  | 566  | CTCAGAAATCAAGCCGAACC   | 59.813 | 20 |
| 251 | 93   | 343  | GAAACGGCCATTTACCTTCA   | 59.938 | 20 |
| 205 | 76   | 280  | ATTACAGAGGAGATGGCCGA   | 59.653 | 20 |
| 280 | 1431 | 1710 | TTCCCTTCCAGTTACACCGT   | 59.449 | 20 |
| 259 | 1854 | 2112 | TCAAGTCCTCACACACTGATG  | 59.31  | 22 |
| 180 | 608  | 787  | CACGAGCTCTTATTTGGCCT   | 59.476 | 20 |
| 237 | 252  | 488  | TTAAGGGGTTTTGCAGGATG   | 59.931 | 20 |
| 279 | 1637 | 1915 | TGGACAATTC AATAGAAAACC | 58.987 | 22 |
| 209 | 581  | 789  | GCATGCGCGTAGTTATATCG   | 59.36  | 20 |
| 213 | 249  | 461  | GCTTCTTTTCGCTTTCTCATTG | 59.238 | 21 |
| 208 | 2    | 209  | CGGGTTTCTCCAGCTTCTTT   | 60.733 | 20 |
| 202 | 1187 | 1388 | TAAGGTGGAAGGGGACGTTT   | 60.714 | 20 |
| 207 | 4583 | 4789 | GGCTTTTTGCTAATTGGCTG   | 59.853 | 20 |
| 266 | 91   | 356  | CCAGCTCGGTGATATATGGT   | 57.515 | 20 |

|     |      |      |                        |        |    |
|-----|------|------|------------------------|--------|----|
| 223 | 2    | 224  | CGGGATTTAGGTGTTTTGACC  | 60.579 | 21 |
| 227 | 73   | 299  | TATTTCCACTCATTGGGGG    | 59.617 | 20 |
| 176 | 1081 | 1256 | CACTGACATTTCTCGCTCA    | 59.984 | 20 |
| 171 | 1118 | 1288 | GTTGGCCACCTCCATTTCTA   | 59.933 | 20 |
| 202 | 175  | 376  | TGAAATCCGATGAGCCTTT    | 59.645 | 20 |
| 115 | 58   | 172  | GATATCACCGGCACTCCATC   | 60.312 | 20 |
| 245 | 3674 | 3918 | AGTCACCAAAGCTCCCCTC    | 59.305 | 20 |
| 232 | 295  | 526  | ACGACAAAATAGGGGGCTTT   | 59.835 | 20 |
| 225 | 31   | 255  | GAACACGAGGAAGTTGGGAC   | 59.555 | 20 |
| 233 | 474  | 706  | AGCAGGATCTTCCCCAAAAT   | 59.903 | 20 |
| 254 | 9    | 262  | TGTGCGTGTGTTTTTGTGTG   | 60.245 | 20 |
| 210 | 359  | 568  | GGTTGCTTCTTACAGGCTGG   | 59.875 | 20 |
| 164 | 491  | 654  | GCATATCGGTTCCGGTCTCAC  | 60.492 | 20 |
| 198 | 838  | 1035 | TCATCAGTCCAGCCTTCTTG   | 58.957 | 20 |
| 128 | 358  | 485  | TGATGTTTGCATTTGAAGAGG  | 58.759 | 21 |
| 140 | 9    | 148  | CGTTTTGACAATATATAGGTGT | 59.669 | 27 |
| 246 | 123  | 368  | ATCAACGCCCATGATCAAAT   | 60.163 | 20 |
| 252 | 24   | 275  | TTTCTCAGCCAAGCTCACCT   | 60.134 | 20 |
| 250 | 472  | 721  | TTGTTCCCCTTTATCTCCTCA  | 58.632 | 21 |
| 178 | 287  | 464  | TCTAAAACCCTCGCCTCTCA   | 59.948 | 20 |
| 154 | 1808 | 1961 | GGATCCGTGATCAAATGCT    | 59.9   | 20 |
| 267 | 505  | 771  | TCAGATTTTCGTAATCCCCTTT | 58.994 | 22 |
| 138 | 359  | 496  | CTGTGTCGTCGATCCCTTCT   | 60.261 | 20 |
| 268 | 87   | 354  | CACTGTCAAAGACCACCGA    | 59.72  | 20 |
| 255 | 2703 | 2957 | AGGCTTGCAAGAAGCTGAAG   | 59.898 | 20 |
| 280 | 477  | 756  | CAGCGCCACGTATCCTAGTAA  | 60.291 | 21 |
| 183 | 269  | 451  | TCATTTCCGGTTATTTTCGG   | 59.767 | 20 |
| 210 | 120  | 329  | ACAGGTCCCTGAAACAAACG   | 60.005 | 20 |
| 148 | 74   | 221  | TCCTTTCCAGAGGCAGAAACC  | 59.405 | 20 |
| 234 | 109  | 342  | AAAGGGATAAAGCCGTCGAT   | 59.93  | 20 |
| 102 | 4    | 105  | CCTGCCATTTCTCTCGTGT    | 60.255 | 20 |
| 228 | 5    | 232  | ACAAAATGGCCAAGAGAGTTT  | 57.853 | 21 |
| 222 | 310  | 531  | AGGGCAAGAGAAAGGTTGGT   | 60.11  | 20 |
| 201 | 577  | 777  | CAGAACCCGAAGTGAAGAGG   | 59.837 | 20 |
| 209 | 25   | 233  | TCCACAGCAGAGTCTCCTCA   | 59.685 | 20 |
| 260 | 2249 | 2508 | ACAGAAAACCTTTCATGCCGC  | 60.257 | 20 |
| 222 | 1962 | 2183 | TTGACAGATGACCCACAAA    | 59.935 | 20 |
| 159 | 2620 | 2778 | CTCTGTGGGTATTCTGGTGA   | 59.974 | 21 |
| 221 | 343  | 563  | CTTTCTCTCCCGTGGACGTA   | 60.246 | 20 |
| 182 | 773  | 954  | AGCAAGGTGATGCGAGACTT   | 60.02  | 20 |
| 225 | 1265 | 1489 | CGGGTATACTTGGAGAAACAC  | 59.017 | 22 |
| 206 | 754  | 959  | GGGAGATGTGGTGCTCATT    | 60.484 | 20 |
| 253 | 18   | 270  | GGACGGTTAAATTTTGTCCC   | 58.277 | 20 |
| 231 | 523  | 753  | GTTGTGTGTTGATTGGGGTG   | 59.701 | 20 |
| 156 | 91   | 246  | ATCGTCAATCGTCTGAGCCT   | 59.834 | 20 |
| 124 | 314  | 437  | CATGGGCCTTGCATGTATAA   | 59.401 | 20 |
| 198 | 4    | 201  | TCTCGTTGCTATTCTTGCCA   | 59.566 | 20 |
| 106 | 37   | 142  | GAAAGGATGAAAATCATTGGC  | 58.497 | 21 |
| 147 | 159  | 305  | TAAAACCATGCACGTAGGCA   | 60.133 | 20 |
| 173 | 387  | 559  | TGAATACCGTCAGGTTGCAG   | 59.716 | 20 |
| 162 | 98   | 259  | AATTAGCGTGTATGCTGGGG   | 59.982 | 20 |
| 274 | 48   | 321  | ACGGAGGAAAAGAAGGAACG   | 60.601 | 20 |
| 205 | 460  | 664  | AAAAATGGCACCTTTGACCA   | 60.344 | 20 |
| 140 | 587  | 726  | GAACGAGGGCCTTCTTCATT   | 60.578 | 20 |
| 231 | 1631 | 1861 | GGTAAATCAATGTGAAATGAT  | 59.956 | 24 |
| 209 | 2085 | 2293 | TCTATGGACCCTTGCAGGAA   | 60.594 | 20 |
| 280 | 332  | 611  | ATATTCATGCTCTCGGCGAC   | 60.207 | 20 |
| 246 | 605  | 850  | CTTGTGACCCTCACACCTT    | 60.002 | 20 |

|     |      |      |                        |        |    |
|-----|------|------|------------------------|--------|----|
| 189 | 264  | 452  | CAGAAACCAAAGCCAAGTCA   | 58.897 | 20 |
| 219 | 44   | 262  | ACCCAAAGATTTATAGGTTTTA | 58.862 | 27 |
| 121 | 99   | 219  | CACCCACAAATCAACCACAG   | 59.848 | 20 |
| 176 | 18   | 193  | CCAATTTGAATGGTTATCACCT | 60.457 | 23 |
| 278 | 42   | 319  | GATAATATGGCCGAGAGTTTG  | 59.962 | 22 |
| 181 | 204  | 384  | GCCACACATGTCACAAATGA   | 58.924 | 20 |
| 150 | 8    | 157  | CGGATTTAAGGGTTATTACCTC | 58.81  | 24 |
| 171 | 335  | 505  | GGAGTGGAGAGCTCGAGAGA   | 59.817 | 20 |
| 227 | 52   | 278  | AACAGAAAAATCACGCAGGG   | 60.11  | 20 |
| 242 | 239  | 480  | CTTCAAGCGGTCTTGATTCC   | 59.813 | 20 |
| 117 | 250  | 366  | ACACACTTAGGGGGTGGTTG   | 59.739 | 20 |
| 179 | 1891 | 2069 | ATCGTCGTCGTCTTCTTCGT   | 59.874 | 20 |
| 215 | 452  | 666  | TCAATTAATGTTGTCATTATTC | 59.207 | 27 |
| 173 | 412  | 584  | AGACTTGCCAACGGTCAATC   | 60.119 | 20 |
| 270 | 71   | 340  | GACTCATGCTCGGCATACAA   | 59.83  | 20 |
| 139 | 7    | 145  | TCAAGGCCGATAAGATGGAT   | 59.486 | 20 |
| 202 | 206  | 407  | TAACGATGGACTAGGGGCTG   | 60.088 | 20 |
| 229 | 57   | 285  | AAATATGCAGCAGACGCGAT   | 60.772 | 20 |
| 242 | 158  | 399  | TCGGAAAGGAAAACCGTAAA   | 59.559 | 20 |
| 232 | 44   | 275  | ATCGGCTGAATAGCCGTATG   | 60.081 | 20 |
| 157 | 230  | 386  | TTACCTCGTCGTCCAACCTCA  | 59.288 | 20 |
| 274 | 147  | 420  | CAGCTCCACTACTTCCTCCA   | 58.03  | 20 |
| 237 | 264  | 500  | GGGAGAAAGGGCTGAGGTAT   | 59.536 | 20 |
| 207 | 18   | 224  | CGTAAAAATGGTTATTATTGG/ | 59.898 | 25 |
| 248 | 28   | 275  | AGAATGTTGCCACGAACCTCA  | 59.293 | 20 |
| 228 | 360  | 587  | AACCCCTCCTTCGAACTAC    | 59.438 | 20 |
| 132 | 1262 | 1393 | ATGCGCGGGTGTAAGTTAG    | 60.152 | 20 |
| 198 | 15   | 212  | TTCCTGTTCTCCGATCGTTT   | 59.67  | 20 |
| 242 | 390  | 631  | CCTTCGGATCTGGGTATTTG   | 59.382 | 20 |
| 145 | 903  | 1047 | TGGACCAACATTTGTACGGA   | 59.816 | 20 |
| 207 | 736  | 942  | ATCAAGCAACGAAGATGGGA   | 60.603 | 20 |
| 105 | 33   | 137  | ACATCACACCACAAATGACTC  | 58.983 | 23 |
| 237 | 3879 | 4115 | CGGCGTAACTACCATTACC    | 60.386 | 20 |
| 129 | 126  | 254  | TGTGGTTTGCTAGACATCGC   | 59.871 | 20 |
| 278 | 23   | 300  | GGACCTGAAAAAGGACTTTGC  | 59.963 | 21 |
| 237 | 2420 | 2656 | AGGGACGAGGAAGAAGAAGC   | 59.811 | 20 |
| 218 | 39   | 256  | CATTCAGAAATGGCGATGAC   | 59.079 | 20 |
| 228 | 499  | 726  | TAAAAGCCGATCGAGTTCGT   | 59.845 | 20 |
| 212 | 9    | 220  | CTCCACCCTCTCACTCCAC    | 59.682 | 20 |
| 261 | 33   | 293  | CTCTACCACTGCACCACGAG   | 59.487 | 20 |
| 274 | 65   | 338  | ATTTGCGGAAACAATCCAGA   | 60.448 | 20 |
| 184 | 320  | 503  | CGATTGACTGGATTCTGTTA   | 58.721 | 20 |
| 202 | 49   | 250  | CAACCCGAGCAAGAACAACCT  | 60.291 | 20 |
| 232 | 1098 | 1329 | TTGGAGTTGGAGATGAAGGC   | 60.195 | 20 |
| 195 | 36   | 230  | GCTAGCGGATTTCTCTGGCT   | 60.997 | 20 |
| 273 | 20   | 292  | ATCGGTTATTACCGGATCGC   | 61.031 | 20 |
| 279 | 737  | 1015 | GGTGATCAAGCGTTCGAATTA  | 60.089 | 21 |
| 270 | 96   | 365  | TCCAATTTAGTTAAACACACC  | 59.411 | 23 |
| 238 | 26   | 263  | TCACACTCACTCTCTAGCCC   | 59.809 | 22 |
| 104 | 104  | 207  | GAGGGAGATATGTCGGCAAG   | 59.653 | 20 |
| 166 | 33   | 198  | GCATCCAATACCAATATCTCA  | 59.848 | 23 |
| 205 | 320  | 524  | TTCCACATTGATTCTGGGT    | 60.173 | 20 |
| 221 | 584  | 804  | GTGCTTCTTGAAGCTGGGAG   | 60.134 | 20 |
| 170 | 373  | 542  | CCCCAATGATCTAGCCTCT    | 60.422 | 20 |
| 272 | 474  | 745  | TTCCTTTCCAAAAGGACAA    | 59.518 | 20 |
| 278 | 0    | 277  | GCTTTTGGATAAGAATGCGG   | 59.682 | 20 |
| 116 | 335  | 450  | TTTTTCCTAACCGGACCACA   | 60.336 | 20 |
| 196 | 202  | 397  | TCCCCATTGTTCTACCCAAA   | 60.162 | 20 |

|     |      |                            |        |    |
|-----|------|----------------------------|--------|----|
| 143 | 3    | 145 TGATTTGTGTGAGGAATTGTTG | 60.393 | 23 |
| 212 | 146  | 357 TTTTGGGTTGAAAATAGCG    | 57.833 | 20 |
| 234 | 680  | 913 ATCCAACCATTGCAGAATCC   | 59.756 | 20 |
| 170 | 4    | 173 GCACACATTTTTCTCCCAT    | 59.797 | 20 |
| 176 | 28   | 203 TTACTTTTCCGGCAACATCC   | 59.938 | 20 |
| 101 | 304  | 404 CCTAGCCAAGTTTCACGAGC   | 60.015 | 20 |
| 267 | 37   | 303 ATACCGGGATCGAATCTTCC   | 60.117 | 20 |
| 280 | 40   | 319 GAAAAGAAAAAGAAGGCACT   | 59.539 | 22 |
| 135 | 272  | 406 CCATCATGGGGTTTTCTTACA  | 59.671 | 21 |
| 221 | 46   | 266 CAAATCAACGCGAATTC AAC  | 59.161 | 20 |
| 206 | 375  | 580 TCTTCTCAAACACCCCCAG    | 60.081 | 20 |
| 128 | 206  | 333 GAATTTGGATGGTGATTGTGG  | 60.044 | 21 |
| 238 | 351  | 588 CAAGAGGAGCCCAAGATGTC   | 59.803 | 20 |
| 259 | 684  | 942 TGCCCTGTATGCTTTTCTT    | 59.708 | 20 |
| 164 | 223  | 386 GTACCGAAGGGATGGAATCA   | 59.75  | 20 |
| 119 | 0    | 118 CAAAAGCACAAAGTCCACCC   | 60.529 | 20 |
| 209 | 780  | 988 CATCTTTAGGTTGATCCGGC   | 59.528 | 20 |
| 237 | 414  | 650 GATGCTTTTCCCCTTCTTCC   | 60.017 | 20 |
| 184 | 1163 | 1346 CTCCCTTACCTCCCCAAAG   | 59.927 | 20 |
| 240 | 211  | 450 ATATGGTTTGACGCCTTTGC   | 59.967 | 20 |
| 235 | 131  | 365 GAAGGAGGAGAAGTTTGGGG   | 60.045 | 20 |
| 122 | 11   | 132 CCAATACTCTTCCCAACCC    | 58.359 | 20 |
| 156 | 40   | 195 AACAGCCAGCTTTTGACCAT   | 59.74  | 20 |
| 142 | 35   | 176 CACGGGACGTTACAAGTTCA   | 59.609 | 20 |
| 279 | 702  | 980 TGAAAGCACAACTGCAGACC   | 60.032 | 20 |
| 196 | 12   | 207 CACTTTCTCTTCCGACCG     | 59.982 | 20 |
| 173 | 73   | 245 ATATTGTGCGTCCCATCTC    | 59.78  | 20 |
| 150 | 1203 | 1352 GCGTGCGAATTTAATGATGA  | 59.668 | 20 |
| 256 | 512  | 767 AGCCGCATTTTAATCGAGAA   | 59.816 | 20 |
| 237 | 2    | 238 AAAAACGGATCGGATACGGA   | 61.542 | 20 |
| 133 | 14   | 146 TGCTTTTCTAAATGGAGAGTTC | 59.78  | 23 |
| 219 | 8    | 226 ACCATATTTAAGGGTAATCAC  | 57.552 | 24 |
| 193 | 24   | 216 AAGGTCTCTTCGACGAGCTG   | 59.745 | 20 |
| 160 | 1463 | 1622 GGCGGGATATACTAATGTCCA | 60.062 | 22 |
| 185 | 5    | 189 ACTTTTAAGGATCAAGGATAT  | 57.122 | 24 |
| 192 | 222  | 413 CTCGAGTGTAAACACGTCCC   | 58.215 | 20 |
| 189 | 194  | 382 TCCGGATACCTACTACTGCGA  | 59.738 | 21 |
| 173 | 231  | 403 TGGTATACAACTTTGATCCCC  | 60.007 | 24 |
| 269 | 725  | 993 ATGCACACCGAGATGTGGTA   | 59.992 | 20 |
| 268 | 334  | 601 AACTGATGGGTTTTCAACGG   | 59.83  | 20 |
| 220 | 377  | 596 ATCAGTATGTCACGGCCTCA   | 59.116 | 20 |
| 266 | 251  | 516 AGCCTTTAATCAGCAATATAA  | 58.508 | 26 |
| 251 | 240  | 490 TTCACTCGCATAAAAGTCTCG  | 58.187 | 21 |
| 218 | 325  | 542 CCCTTGCATGCTGTGGATA    | 60.637 | 19 |
| 139 | 98   | 236 GTTGGTTTTACCCGAGTTG    | 60.388 | 20 |
| 168 | 1279 | 1446 CGATGTTTGTGGCTGTCTG   | 60.301 | 20 |
| 255 | 1028 | 1282 TTGGAACCAACTAATTGCCA  | 59.013 | 20 |
| 179 | 69   | 247 ACGTTCATACCTTTGTGGCA   | 59.05  | 20 |
| 243 | 123  | 365 TTCATTTTCATCGATTTTCTC  | 58.175 | 22 |
| 180 | 79   | 258 TCAATTTCTTGGCTCAGGGT   | 59.67  | 20 |
| 280 | 5907 | 6186 ATTGGTCAACCCCATCTCAA  | 60.173 | 20 |
| 235 | 2858 | 3092 TGAGTTGCACATGTGTGAGG  | 59.265 | 20 |
| 124 | 607  | 730 GCCATCGATCTTGTGGAAT    | 59.9   | 20 |
| 162 | 12   | 173 AGAATCACGGCCATTTTCAG   | 60.074 | 20 |
| 257 | 932  | 1188 TCTTGTTGGCATGAGCTTGT  | 59.445 | 20 |
| 215 | 406  | 620 CAAATCCCACAGCCATGAAT   | 60.723 | 20 |
| 260 | 267  | 526 CGCATTATTAGCTACACCCT   | 59.261 | 21 |
| 169 | 200  | 368 AAATAAATGAATGTTGTGTTG  | 58.463 | 26 |



|     |      |      |                         |        |    |
|-----|------|------|-------------------------|--------|----|
| 201 | 467  | 667  | AAACCCACCTGCTGCATAAT    | 59.457 | 20 |
| 201 | 42   | 242  | AACATATCGTCTCTCCCGA     | 60.483 | 20 |
| 246 | 993  | 1238 | GTCTCAAATCGTTTCTATCGTG  | 60.15  | 23 |
| 197 | 19   | 215  | TGTGCAAGGTTGAACCAAGA    | 60.278 | 20 |
| 198 | 706  | 903  | GAAGAGGAGGAAAGAAAACG    | 59.473 | 21 |
| 130 | 1309 | 1438 | AATTGCGTTAGGGATTTGATT   | 57.647 | 21 |
| 206 | 433  | 638  | AGACTTGCCAACGGTCAATC    | 60.119 | 20 |
| 226 | 12   | 237  | ATGGAACCACTTGTGACCG     | 60.812 | 20 |
| 256 | 20   | 275  | CGAAGAACAATTACAATGTTT,  | 60.478 | 26 |
| 236 | 22   | 257  | TGCACCTGATCATGAACCTA    | 57.608 | 20 |
| 146 | 1334 | 1479 | CCACAGCCTCATTCTCATT     | 60.073 | 20 |
| 231 | 1015 | 1245 | GTTTTTAGAAGGATACTACTA   | 57.781 | 27 |
| 198 | 236  | 433  | AATATTCCCCGGTATGCCA     | 59.987 | 19 |
| 273 | 319  | 591  | CAAAGAAAACGGTGGTGGAT    | 59.83  | 20 |
| 266 | 1140 | 1405 | AAAATCTCCCACCAATGCAC    | 59.797 | 20 |
| 234 | 1253 | 1486 | GCACATTTAATTCCAGGTCGT   | 58.965 | 21 |
| 244 | 133  | 376  | ACGAGCTCTGAAAATTCTCCC   | 59.841 | 21 |
| 118 | 86   | 203  | TTGAAGGCAGGCAACCTTAC    | 60.249 | 20 |
| 151 | 51   | 201  | CAGCCTCCATTTTGTTACCG    | 60.493 | 20 |
| 279 | 3737 | 4015 | AAAGAGAAAACGAGGGGTGC    | 60.61  | 20 |
| 251 | 574  | 824  | GGCATAATAATGGCAGTCCC    | 59.258 | 20 |
| 194 | 657  | 850  | AGTTTGGAGCACACGAGCTT    | 60.058 | 20 |
| 227 | 64   | 290  | TATTCAACTCCATCTCCCCG    | 59.887 | 20 |
| 257 | 2123 | 2379 | TTCAACGGTCCCACAAATTA    | 58.866 | 20 |
| 276 | 19   | 294  | CATCAGATCTGCGTGAAAA     | 60.096 | 20 |
| 200 | 249  | 448  | TCACTGGCAGCGAATATGAA    | 60.366 | 20 |
| 167 | 64   | 230  | CCCGATAGAGCATGTTCGAGT   | 60.24  | 20 |
| 241 | 5852 | 6092 | GCAATAAAGAGGCTGGTGCT    | 59.481 | 20 |
| 205 | 551  | 755  | AGCCCTCATTCTCCCTTTA     | 60.032 | 20 |
| 273 | 9    | 281  | GGCAATATGCTGACAGACGA    | 59.83  | 20 |
| 266 | 0    | 265  | GGAGTCTGGAAAAGAGAGAG    | 59.463 | 24 |
| 267 | 349  | 615  | ATGGCATTCTTCTCCTCCC     | 60.41  | 20 |
| 170 | 98   | 267  | AACGACATCATGACGCAACA    | 61.163 | 20 |
| 230 | 16   | 245  | AAGGGTTATCACCTGATTTTCT  | 57.73  | 23 |
| 156 | 30   | 185  | TCTAAATTGCGAGAATATGAG,  | 58.988 | 26 |
| 250 | 532  | 781  | TGCTTCAAGGTAGGTTTATTAC  | 60.047 | 24 |
| 177 | 123  | 299  | TACTGGAGGCGATAGGTGG     | 60.088 | 20 |
| 227 | 554  | 780  | TGGCTGCTCCTCATCCTTAT    | 59.797 | 20 |
| 137 | 3948 | 4084 | ACTCGCGAAGTTCCTTCAGA    | 60.134 | 20 |
| 256 | 27   | 282  | GCCACCATTGAGAACTCCAC    | 60.52  | 20 |
| 241 | 3085 | 3325 | CACCACATAATGGACGTTGG    | 59.691 | 20 |
| 251 | 1236 | 1486 | ACGAGCTTTTATCGAACGGA    | 59.845 | 20 |
| 159 | 3047 | 3205 | GCTATGGTGGCCAATGTCTT    | 59.962 | 20 |
| 241 | 1053 | 1293 | AACTCCCCTTCTCTTGCAT     | 59.94  | 20 |
| 251 | 504  | 754  | TTGAAAACACTAGAGATGGCCGA | 59.831 | 21 |
| 260 | 887  | 1146 | TGACTTTCATGTAGCGTGGC    | 59.871 | 20 |
| 217 | 8166 | 8382 | ACTTTCACTTTCCCACGCAC    | 60.156 | 20 |
| 233 | 43   | 275  | TGCCACTTATTTTCAGGAGGT   | 57.268 | 20 |
| 272 | 3249 | 3520 | TAGCACCTGATTACTCCCGA    | 59.716 | 21 |
| 230 | 30   | 259  | CGTGGACGTAGATCCTTGTG    | 59.161 | 20 |
| 222 | 923  | 1144 | GCCCAGTATGTTACGGTGGT    | 59.74  | 20 |
| 179 | 0    | 178  | GGGGAGAATTGAATTGCAGTA   | 59.033 | 21 |
| 231 | 2329 | 2559 | ATGCAAATACGAATATCATTAT  | 58.103 | 26 |
| 106 | 175  | 280  | TCAATCCAAAAGACACATGC    | 59.615 | 22 |
| 113 | 238  | 350  | TTTACATTGTATCTTGTCTTGC  | 59.457 | 24 |
| 240 | 627  | 866  | ATTACCTTGATCGACGACGC    | 60.103 | 20 |
| 120 | 1926 | 2045 | CCTCCTCTCAGCCCTAGCTT    | 60.11  | 20 |
| 257 | 124  | 380  | TAAATGGGCGGGAAAATAGG    | 60.963 | 20 |

|     |      |      |                        |        |    |
|-----|------|------|------------------------|--------|----|
| 242 | 1161 | 1402 | AATTTTCAGCACCCCAAATC   | 61.053 | 20 |
| 121 | 287  | 407  | ACCCTTGATTGTGTGATCC    | 59.786 | 20 |
| 145 | 4778 | 4922 | TGTAACCTGGTCGCCTCGTA   | 59.342 | 20 |
| 122 | 397  | 518  | TAGTTGGGACAAAAATGCC    | 59.801 | 20 |
| 194 | 108  | 301  | AAGCTGTCCCTTGCAAAAAT   | 58.836 | 20 |
| 184 | 130  | 313  | CATGTCAATATCATCACGAGT  | 60.183 | 25 |
| 150 | 500  | 649  | TTTTGGAGGGAAAACCACTG   | 59.942 | 20 |
| 169 | 65   | 233  | GGGCTGTGATGGGTTGTTAG   | 60.375 | 20 |
| 112 | 1749 | 1860 | CTCACTCTCGTCGCTTACCC   | 60.012 | 20 |
| 274 | 890  | 1163 | GCTGAGCATATTTTTACCCA   | 60.089 | 21 |
| 247 | 13   | 259  | TGCATTGTTCGACGATGTAAC  | 59.605 | 21 |
| 174 | 9    | 182  | TTAACACCAAACCATCTAATT  | 57.486 | 27 |
| 149 | 123  | 271  | GGTTACCGTCGTGGTTATGG   | 60.11  | 20 |
| 112 | 2    | 113  | TGGCAGAAAGATTTTAGATAT  | 59.31  | 26 |
| 264 | 1121 | 1384 | TAAGGCCTGGTCCTAAGCAA   | 59.839 | 20 |
| 228 | 20   | 247  | CCGCTGCTATCTTTTATGGC   | 59.838 | 20 |
| 184 | 1787 | 1970 | CAAAAATCAAAGGCCACAT    | 59.801 | 20 |
| 215 | 837  | 1051 | GGCAAGTTGAAGGAACAAGG   | 59.711 | 20 |
| 227 | 51   | 277  | TTCCTCTCGTGTTCATCCC    | 60.05  | 20 |
| 266 | 21   | 286  | GGACAAAAGAAAACCACGC    | 59.592 | 20 |
| 133 | 204  | 336  | CCGAAAATCAAAGGCCTACA   | 60.067 | 20 |
| 268 | 5    | 272  | GGCACAGAGAGTACATAGTTT  | 59.309 | 25 |
| 179 | 954  | 1132 | TCATGCACAAGGTGGAATGT   | 59.967 | 20 |
| 169 | 204  | 372  | AAAGGTGAGGGAGAGTGGGT   | 59.968 | 20 |
| 261 | 521  | 781  | GAGTTTGTGCAAATATCAGG   | 59.957 | 25 |
| 261 | 635  | 895  | ATTACGTCGATCCAACGGTC   | 59.82  | 20 |
| 106 | 777  | 882  | ACAGTGGTGGCCGAAAATTA   | 60.365 | 20 |
| 216 | 74   | 289  | CCCCAATCTCCGTTCTTCTT   | 60.434 | 20 |
| 234 | 506  | 739  | TTGCTTGGGATTTATTTTGA   | 57.337 | 21 |
| 264 | 8    | 271  | ATTTGTATGGGTCATTGGACG  | 59.56  | 21 |
| 262 | 66   | 327  | AAAGTTGAAGGATTTGGGGG   | 60.159 | 20 |
| 193 | 204  | 396  | AGGAGCAAATTGAGGCTGTC   | 59.434 | 20 |
| 208 | 41   | 248  | TCGGGACCTCTTGTATCGT    | 59.55  | 20 |
| 260 | 226  | 485  | GCGCATTTTCTGCTGTTAGA   | 59.21  | 20 |
| 130 | 19   | 148  | AGTTTCGATGTTGTAAGGGAGG | 59.998 | 22 |
| 181 | 162  | 342  | TCCACCGCTAATGAATGACA   | 60.073 | 20 |
| 104 | 92   | 195  | AGAGAGGGAGACAAAAGGCA   | 59.014 | 20 |
| 206 | 147  | 352  | AAATGCATGCCGGGATATAA   | 60.137 | 20 |
| 248 | 36   | 283  | CAGCCTCTCTGCCTTTTGTG   | 60.134 | 20 |
| 245 | 271  | 515  | TCGGCTATATTAGCGATCCG   | 60.172 | 20 |
| 194 | 0    | 193  | ATGAAGTTAGGAAATAAAGAC  | 57.239 | 26 |
| 270 | 123  | 392  | TGTCACAAAGAGAGGGGGAG   | 60.229 | 20 |
| 242 | 778  | 1019 | CTATTCCAACCTTCGGGACCA  | 59.926 | 20 |
| 154 | 42   | 195  | TTCAGAAATTGCCTTGTTG    | 58.745 | 20 |
| 255 | 2724 | 2978 | GGGAACCATCATGGAATTG    | 59.991 | 20 |
| 132 | 70   | 201  | TCGGAGCATGATTTAAGTGG   | 58.721 | 20 |
| 147 | 86   | 232  | CCAATGCCAATCATCCTCTT   | 59.894 | 20 |
| 256 | 51   | 306  | AAGGAAAAACATGAGTTTAGC  | 59.774 | 23 |
| 205 | 108  | 312  | AATGCTGTTGCATTTTCGATG  | 59.694 | 20 |
| 277 | 967  | 1243 | CCAGATCCTTGTGGTTGGAC   | 60.363 | 20 |
| 117 | 101  | 217  | GACCTTGCTCGCTGCTATCT   | 59.746 | 20 |
| 187 | 343  | 529  | ATGGTCCCCTCTTCTTTGCT   | 60.074 | 20 |
| 114 | 170  | 283  | CAACGATTTTGGTTTGTTCCT  | 58.983 | 21 |
| 196 | 5223 | 5418 | ATTCTCCACCACCCACATA    | 60.05  | 20 |
| 160 | 322  | 481  | GAATGTTCCCAATCCTCAA    | 59.727 | 20 |
| 242 | 523  | 764  | AATTTGACCATTTGCCAAC    | 59.668 | 20 |
| 207 | 93   | 299  | CGTTGCCGGATAATTCAAAC   | 60.323 | 20 |
| 182 | 63   | 244  | TTGCAGTAAATATCGGTTTTCC | 59.173 | 22 |

|     |      |      |                         |        |    |
|-----|------|------|-------------------------|--------|----|
| 273 | 197  | 469  | GAGCTGATTTGTGATGTTTGG/  | 60.118 | 22 |
| 243 | 2630 | 2872 | AGCCCTTCGAACAACAAAAA    | 59.724 | 20 |
| 216 | 19   | 234  | TCCACTGTTTTGTGCCATTT    | 59.024 | 20 |
| 104 | 865  | 968  | GTGGAAAAGGAGCAAATGGA    | 60.051 | 20 |
| 269 | 709  | 977  | GATGGAATTGGGTGTTGGAT    | 59.464 | 20 |
| 268 | 355  | 622  | TTGGCATTCAAATCAACCAC    | 59.375 | 20 |
| 267 | 40   | 306  | ACAAGATCGAACGGAACGAG    | 60.255 | 20 |
| 120 | 19   | 138  | AAAATTCGAAAATCCCCAAA    | 59.659 | 21 |
| 238 | 66   | 303  | GCAGTGGCCAATGAAATTA     | 59.957 | 21 |
| 226 | 270  | 495  | ACTCAATCTGATGCACACTCA/  | 58.371 | 22 |
| 139 | 218  | 356  | TTTTAATCTTGGCCGCTGAT    | 59.682 | 20 |
| 193 | 51   | 243  | TAATTTTCGTCGGGATGGTT    | 59.273 | 20 |
| 220 | 0    | 219  | TCTTTCTCGACGTTTCCTGC    | 60.517 | 20 |
| 269 | 914  | 1182 | TCAAATTTTGCCTAGCATCTC   | 58.057 | 21 |
| 237 | 30   | 266  | TCATGAATCTGACTTCGATTAT  | 59.533 | 25 |
| 112 | 865  | 976  | CAATTGGTGCAAGAAGACGA    | 59.84  | 20 |
| 239 | 110  | 348  | CTTGGGCTAAAATCCCAACA    | 59.931 | 20 |
| 280 | 357  | 636  | AAATACCAGGCAAAAATGCG    | 59.964 | 20 |
| 149 | 1833 | 1981 | CAAAAACCGGTGAAAAATCG    | 60.327 | 20 |
| 261 | 170  | 430  | GTTGGGGTTGGCAATAAAAA    | 59.677 | 20 |
| 215 | 748  | 962  | TCTTGGTAAATGTTTGGGCAG   | 59.982 | 21 |
| 171 | 1245 | 1415 | TTACGCTAGTCCGTGGGTTT    | 59.632 | 20 |
| 179 | 62   | 240  | CTTCCGGTCTTTTTCCCTT     | 59.566 | 20 |
| 249 | 2    | 250  | CTCTCTCCCTCTCCCACACA    | 60.388 | 20 |
| 188 | 1304 | 1491 | ATAGAGCCCCACGTTTACAG    | 60.134 | 20 |
| 221 | 168  | 388  | AGGGTGCCAAGATTAACACG    | 59.993 | 20 |
| 183 | 60   | 242  | TCTTGATATTCGAACGGCCT    | 59.668 | 20 |
| 157 | 293  | 449  | AAGCACACACACGCTCAGAC    | 60.104 | 20 |
| 277 | 1444 | 1720 | AGCATTGATTAATCCCCCA     | 59.23  | 20 |
| 189 | 275  | 463  | CAAATTCACAACAGCACGG     | 60.149 | 20 |
| 247 | 275  | 521  | AGCAATGACTGTCCTGAGCC    | 60.418 | 20 |
| 270 | 943  | 1212 | GAGAGGAGACGCCATTTTTG    | 59.813 | 20 |
| 272 | 646  | 917  | CTGATTGTAAATGAATTGAGTC  | 59.569 | 25 |
| 219 | 387  | 605  | CACCTCTACATGGTTCCGGT    | 59.844 | 20 |
| 143 | 58   | 200  | GGTGCTTTGACTTATGTAAAGT  | 57.994 | 25 |
| 229 | 125  | 353  | TGGAGATATGGTAGCGGTCC    | 59.917 | 20 |
| 108 | 15   | 122  | TGTTTTCTGTTCTGGCGTCC    | 61.216 | 20 |
| 253 | 14   | 266  | CGCGAGTTCATAACTCTCTCTC  | 58.37  | 22 |
| 268 | 34   | 301  | TCAGCATAACAGCAGTTTCATTI | 57.599 | 22 |
| 207 | 896  | 1102 | GAATAATGGGGGTGATGTGC    | 60.021 | 20 |
| 277 | 299  | 575  | TCAAAGACATCCTGCCAACA    | 60.24  | 20 |
| 209 | 22   | 230  | ATTCGAGCGAGGCTAAGTT     | 60.36  | 20 |
| 268 | 1    | 268  | GCTCAATTTCCCAACTCGTC    | 59.676 | 20 |
| 251 | 63   | 313  | GCTTCCATTTCACTTGAATGTT  | 58.239 | 22 |
| 206 | 6209 | 6414 | ATTGGGCCTATCAATGCAAG    | 59.923 | 20 |
| 225 | 655  | 879  | AAGTGGTATAAACGGGCGTG    | 59.883 | 20 |
| 247 | 171  | 417  | GCGTTTGAGAGGAATCATGG    | 60.603 | 20 |
| 157 | 0    | 156  | GAATTAGCATACTGGCTCATTI  | 57.238 | 25 |
| 248 | 94   | 341  | CGTTGAAGAGATTACGCAACA   | 58.978 | 21 |
| 138 | 4    | 141  | AAAACGAATTTGGTGTGGAA    | 59.348 | 21 |
| 275 | 548  | 822  | CGGCCATCAGATATGGAGAT    | 59.877 | 20 |
| 153 | 3440 | 3592 | GGTCCGACATTTCAACCAC     | 60.218 | 20 |
| 107 | 8    | 114  | ACAACTAATCAAGTCCGCA     | 57.439 | 21 |
| 241 | 117  | 357  | CTTTTACACGAGGTCACGA     | 59.873 | 20 |
| 221 | 450  | 670  | ATTTTGGCACAGGATGATGC    | 60.874 | 20 |
| 222 | 925  | 1146 | CGCGATTTTAAACCCTAAAGA   | 58.45  | 21 |
| 212 | 21   | 232  | GAAATTTCAATTTCGTCGTT/   | 57.054 | 25 |
| 235 | 105  | 339  | ACCAAAGAAAAGTGCATTACA   | 59.169 | 24 |

|     |      |      |                       |        |    |
|-----|------|------|-----------------------|--------|----|
| 263 | 745  | 1007 | TGGGAAAATTGAAGAACATTT | 58.963 | 22 |
| 257 | 1002 | 1258 | TCCACCTTCTTCCACCACTC  | 60.088 | 20 |
| 217 | 68   | 284  | CCTTTGATTTCTTGGTTCCG  | 59.541 | 20 |
| 258 | 866  | 1123 | CTCATTTGATCAACAGGCGA  | 59.799 | 20 |
| 151 | 641  | 791  | GTAATGAAATGGGCAGTGGG  | 60.192 | 20 |
| 277 | 269  | 545  | CGACTTTTTCAAGCTGGGAG  | 59.986 | 20 |
| 127 | 671  | 797  | TCCC GCGTCATAAAAAGAAG | 60.202 | 20 |
| 267 | 1520 | 1786 | CCTGAATTTCTTGGCCTGTC  | 59.67  | 20 |
| 232 | 40   | 271  | AGGAAGAAGCGAGAAGGGAG  | 60.088 | 20 |
| 123 | 73   | 195  | TATGCTCCTTTTGGTTTGGG  | 59.931 | 20 |
| 240 | 1571 | 1810 | GGGCGCTTGTAGACTTTTCA  | 60.386 | 20 |
| 246 | 1939 | 2184 | CAACACATTGCCACACCAA   | 59.987 | 19 |
| 217 | 111  | 327  | TGCGTTGACGTACACAGCTT  | 60.517 | 20 |
| 237 | 312  | 548  | AAATATGTCTCCTCCGGCCT  | 59.925 | 20 |
| 118 | 1856 | 1973 | ATGATGTCAAGCCATCTCCC  | 59.893 | 20 |
| 206 | 230  | 435  | CAGCTGTCAATCTGCTCTG   | 59.88  | 20 |
| 259 | 1031 | 1289 | CAAGCTCAACGAAAAGCAA   | 59.226 | 20 |
| 275 | 117  | 391  | GGGACATATTGCATTTGGTTG | 60.067 | 21 |
| 275 | 3166 | 3440 | AACGCGATATGGATGAAACC  | 59.791 | 20 |
| 182 | 8    | 189  | GATATGAAGTGCACAATATA  | 57.063 | 27 |
| 204 | 13   | 216  | GCGAAGAACATTCAGGGAA   | 60.192 | 20 |
| 264 | 57   | 320  | CCGAGCTGGTGGACAAATA   | 59.658 | 19 |
| 247 | 47   | 293  | ATCCATATGGCAACCCTCAG  | 59.773 | 20 |
| 206 | 2038 | 2243 | TTTCTGGGTTACACCCCAAC  | 59.688 | 20 |
| 130 | 368  | 497  | TGAAGGGTTGAAAAGATGTGC | 59.956 | 21 |
| 184 | 10   | 193  | GCGAAGCACCGAGACTACTG  | 61.136 | 20 |
| 260 | 94   | 353  | CCTTCACGAGTGGTGACAAA  | 59.72  | 20 |
| 112 | 2403 | 2514 | TCATTTCCGGATGGAAGGAAC | 59.871 | 20 |
| 125 | 0    | 124  | GGCAAATCACATAGATATCAG | 59.117 | 23 |
| 195 | 4491 | 4685 | AACTGACGGGTGATCAAAGG  | 59.966 | 20 |
| 133 | 99   | 231  | TTATGAGTTTGCTCCTGGGG  | 60.066 | 20 |
| 234 | 0    | 233  | GGGACTCGACCACCTAACAG  | 59.574 | 20 |
| 181 | 740  | 920  | AAAAAGCCTCAAACCATCAA  | 57.338 | 20 |
| 266 | 108  | 373  | AACTTATGGCGTAGACGGAA  | 57.395 | 20 |
| 184 | 83   | 266  | GTTCTCTGCCCAACTGCTCT  | 59.604 | 20 |
| 186 | 462  | 647  | TGCGTTCGAGTTCAGAGTTG  | 60.175 | 20 |
| 148 | 1493 | 1640 | TGCATAATTGTAGATAATGGA | 60.114 | 24 |
| 269 | 162  | 430  | GGCAGAGAAAGTTGTGCCTT  | 59.478 | 20 |
| 150 | 789  | 938  | CGGATCGACACGATAAGGAT  | 59.917 | 20 |
| 105 | 494  | 598  | GAAGCGGGATGAAGAATTGA  | 60.155 | 20 |
| 233 | 43   | 275  | AAATATCGGCCGTCAGATTG  | 59.923 | 20 |
| 219 | 98   | 316  | GTACGTCCCAGTCATCCACC  | 60.246 | 20 |
| 253 | 239  | 491  | ACAGCGGTTGGATTTATTGC  | 59.967 | 20 |
| 225 | 20   | 244  | TTTCTCTTGGTTGGTGAAGA  | 58.955 | 22 |
| 217 | 467  | 683  | TGAAGCGCAAGTATTTTTCG  | 59.098 | 20 |
| 251 | 231  | 481  | TATGGTGATCGGGTTTGACA  | 59.774 | 20 |
| 138 | 43   | 180  | CAAACTTCACGAAGAAAACA  | 59.34  | 23 |
| 101 | 5    | 105  | AGAACTTGACGTGTGCGTG   | 59.946 | 20 |
| 203 | 192  | 394  | ATGCTTAAAAGAAAGCGGCA  | 59.985 | 20 |
| 175 | 2759 | 2933 | CGGTGGATGTCTTGGTCTTT  | 59.966 | 20 |
| 162 | 69   | 230  | GTGCTTCAACCGACCGTTAC  | 60.559 | 20 |
| 255 | 23   | 277  | AGAGTTATTCAGCCCAGCCC  | 60.599 | 20 |
| 204 | 42   | 245  | TCCAGTATACAATTCCAACAG | 59.433 | 24 |
| 268 | 588  | 855  | TAGTTTGTTCCTCCGCAAAA  | 60.46  | 20 |
| 134 | 1    | 134  | ATGCGATTAGCAGACCAAGA  | 58.477 | 20 |
| 103 | 5    | 107  | CCCATTATCAAAACCCACCA  | 60.418 | 20 |
| 278 | 11   | 288  | AGGGGATTGTAACAGGGGAT  | 59.513 | 20 |
| 240 | 8    | 247  | TGTTTTGTAATTTCCCATGTT | 58.816 | 23 |

|     |      |      |                         |        |    |
|-----|------|------|-------------------------|--------|----|
| 274 | 44   | 317  | GTGGTATCACATCACAACCTTTT | 58.93  | 24 |
| 240 | 1094 | 1333 | CCGCTTTCTCATTTCTTCCA    | 60.323 | 20 |
| 235 | 469  | 703  | TCCCTTAGATGTCTTCATCCCA  | 60.817 | 22 |
| 240 | 431  | 670  | AAAAATGGTCCACATGTTGTA   | 58.335 | 23 |
| 152 | 109  | 260  | CAAAGTGGAGAAGGCATGAA    | 58.847 | 20 |
| 272 | 86   | 357  | ATGCTGCCCTAAAACCTTCC    | 60.451 | 20 |
| 279 | 445  | 723  | ATGTGCTATCCTAACCAAAGI   | 57.49  | 22 |
| 275 | 24   | 298  | GAAAAATCAAAGGCCACAA     | 59.916 | 20 |
| 197 | 84   | 280  | ATGAATTTTCTGCGAATGGG    | 59.901 | 20 |
| 240 | 61   | 300  | GGGTGAATTTTTGGGGTCTT    | 60.032 | 20 |
| 190 | 2    | 191  | ATTGCCCATGAATGTCACCT    | 60.203 | 20 |
| 266 | 370  | 635  | CAATCGGCACACAAAAGCTA    | 59.872 | 20 |
| 130 | 0    | 129  | CACAGAAGGAAAAGAGCGAG    | 59.743 | 21 |
| 269 | 41   | 309  | AAACTAGGCATGGAATCCGA    | 59.528 | 20 |
| 210 | 0    | 209  | CCACAAAGTTCCAATCTTTTAC  | 59.215 | 23 |
| 245 | 2    | 246  | TTACGGCATTAGAGATAATGA   | 57.643 | 26 |
| 161 | 135  | 295  | TCTAACAGAATAGAGCTTGGG   | 57.663 | 22 |
| 220 | 398  | 617  | ATGCGATTCCACGTCAAAT     | 60.339 | 20 |
| 211 | 14   | 224  | GGCCAATTCCGAACTTTCTC    | 60.94  | 20 |
| 224 | 5    | 228  | TTTGAGCAGTTCCAATCTCTTG  | 59.494 | 22 |
| 146 | 596  | 741  | TCTCGTACACGTGTCCAGTTTT  | 59.702 | 22 |
| 274 | 799  | 1072 | AGGGTGGTATTTTCGTGTCGT   | 59.333 | 20 |
| 279 | 41   | 319  | GGGTCATCATGGGATCAAGT    | 59.593 | 20 |
| 232 | 90   | 321  | CTTAAGCCGAAAATTCCACG    | 59.715 | 20 |
| 186 | 655  | 840  | TGGTGATTGAAATGATTAGCA   | 59.002 | 23 |
| 189 | 906  | 1094 | GATCGCATGTTCGAATTTCA    | 59.628 | 20 |
| 139 | 1047 | 1185 | TCACAGGAGCTCAGGGACTT    | 59.986 | 20 |
| 221 | 14   | 234  | TTTCATCTCACATGGCAAGC    | 59.805 | 20 |
| 246 | 397  | 642  | CAATTCCTCCCTTGGAGACA    | 60.042 | 20 |
| 255 | 1025 | 1279 | GGGTGCTGGTAAAGACTTGG    | 59.592 | 20 |
| 230 | 315  | 544  | ACCTGTAACACCCACACACG    | 59.358 | 20 |
| 145 | 5421 | 5565 | TGTTGCTTGTCTTGCACC      | 59.888 | 20 |
| 168 | 3    | 170  | CGCTCGGATGCCATATAAAA    | 60.923 | 20 |
| 274 | 1977 | 2250 | CAGAGACCGAAACCGGATAG    | 59.688 | 20 |
| 275 | 2458 | 2732 | TAGGGCCTGCTAAAATTCA     | 59.677 | 20 |
| 263 | 86   | 348  | CGCTACATTTACGGATTGTGA   | 58.713 | 21 |
| 160 | 219  | 378  | GCGAGAACCACAAAGCTCTC    | 60.142 | 20 |
| 279 | 402  | 680  | CAATTGTTGCAAACAACCAAA   | 59.495 | 21 |
| 261 | 246  | 506  | CGGTTGTTCCATCTCTAATCCT  | 59.482 | 22 |
| 274 | 40   | 313  | GGCGTTTTAATCTCCCCACT    | 60.32  | 20 |
| 168 | 591  | 758  | GTGTGTCGCTTTGATCCTCA    | 59.837 | 20 |
| 205 | 12   | 216  | CCACATTTAAGGGTTATCACCT  | 59.654 | 23 |
| 236 | 34   | 269  | GCATGATCAATGTTGTAATAGC  | 60.102 | 24 |
| 260 | 185  | 444  | GCTAGAGCCCTTGATTTCCA    | 59.41  | 20 |
| 142 | 1983 | 2124 | GAAATTAAGAATGTGGAGTGC   | 58.311 | 23 |
| 122 | 96   | 217  | CCAAAGGTGAAAATCGCACT    | 60.11  | 20 |
| 278 | 65   | 342  | TGAATTCATTTATTTATTGTC   | 59.996 | 27 |
| 173 | 85   | 257  | TTAATGCAACCGCATGTTTC    | 59.567 | 20 |
| 258 | 0    | 257  | TTTTGCAGGATGGAACCTCAT   | 58.145 | 20 |
| 274 | 828  | 1101 | ATAACCCGGTCAACAAGCTG    | 59.993 | 20 |
| 275 | 1771 | 2045 | CACGTGGAAGGACTGAAAGA    | 58.852 | 20 |
| 137 | 1059 | 1195 | AATTGAGGGGCTTGAATGAA    | 59.505 | 20 |
| 103 | 19   | 121  | TCCGGAGTAAGTTCGAGGAT    | 58.741 | 20 |
| 194 | 50   | 243  | GTTTGAGGCGGTACAAAGGA    | 60.11  | 20 |
| 186 | 185  | 370  | CAAAGGATGAAAACGAGGGA    | 60.044 | 20 |
| 271 | 0    | 270  | TTGGGTTTGTGTTGCTTCAA    | 60.127 | 20 |
| 280 | 1492 | 1771 | GCCGTAGAGCCCTGTATGAT    | 59.178 | 20 |
| 256 | 363  | 618  | TCCTTTAGAGTCGTTGCACAA   | 59.92  | 22 |

|     |      |      |                        |        |    |
|-----|------|------|------------------------|--------|----|
| 178 | 3239 | 3416 | GAAAGATCTGGTCACGACAGC  | 59.866 | 21 |
| 137 | 287  | 423  | AGAGGGGGTATGATGGGAAC   | 60.015 | 20 |
| 280 | 105  | 384  | TGATTTGGCAGTTTGAGAGGT  | 59.726 | 21 |
| 196 | 702  | 897  | AACGTAAATGAGAAACATGCA  | 57.397 | 22 |
| 240 | 2194 | 2433 | ATTTGAGCCAGACACTGCT    | 60.02  | 20 |
| 239 | 523  | 761  | TTCCCTACAAAACGAGACCAA  | 59.595 | 21 |
| 150 | 72   | 221  | TTACGTAAAAACCCCTTTCGCC | 60.342 | 21 |
| 201 | 11   | 211  | CTTCCATGATCAGAACGGA    | 58.643 | 20 |
| 219 | 103  | 321  | AATATGGAGATTTGCGCGAT   | 59.534 | 20 |
| 273 | 1011 | 1283 | TGGGCAAATCAAATGTTCT    | 60.309 | 20 |
| 101 | 3204 | 3304 | GCAGAAGCGGGAACACTAG    | 60.015 | 20 |
| 129 | 0    | 128  | GGTGACAGGCAGCTGAATC    | 59.361 | 19 |
| 108 | 1250 | 1357 | TTTGAACGAGGCGGATTTAG   | 60.202 | 20 |
| 258 | 448  | 705  | TTTGACGGGGTAAAATAAAAC  | 59.66  | 23 |
| 244 | 48   | 291  | AAAAACATCGCTCTCTCCCC   | 60.578 | 20 |
| 177 | 78   | 254  | TGGAACAGTTTGACACAACCA  | 60.033 | 21 |
| 228 | 111  | 338  | TCGTAGTCCCCTTCAGATCG   | 60.21  | 20 |
| 228 | 539  | 766  | ATGCTTGAAGCTATGGGTGC   | 60.243 | 20 |
| 252 | 382  | 633  | GCCCTACTTATGCCCAAAT    | 60.171 | 20 |
| 162 | 3243 | 3404 | ATCCCTCTACCGCCTTAGGA   | 60.053 | 20 |
| 147 | 4252 | 4398 | CAAATTTACCAAGAACGCA    | 59.706 | 20 |
| 204 | 3329 | 3532 | CATGCATGTGGAGGAAAGAA   | 59.648 | 20 |
| 197 | 691  | 887  | TTTCTGGACTAAATTGCCCG   | 60.067 | 20 |
| 164 | 522  | 685  | GGGATAAATCATAGCCACGC   | 59.397 | 20 |
| 161 | 481  | 641  | CTTATTTCAAACGACCCCG    | 59.447 | 20 |
| 154 | 2504 | 2657 | TTAACCATTTGCTGTGCAA    | 60.251 | 20 |
| 142 | 132  | 273  | CTCACACACCCATATGTCCC   | 58.643 | 20 |
| 110 | 489  | 598  | AAATTGATTTCCCTCCACCC   | 59.996 | 20 |
| 119 | 896  | 1014 | AACACATATGGGGACACGCT   | 60.263 | 20 |
| 135 | 3807 | 3941 | CATGCGACGTATTGAGAAGC   | 59.449 | 20 |
| 277 | 1439 | 1715 | ATGTTCTCTCAGGCCACCAC   | 60.12  | 20 |
| 239 | 136  | 374  | CCCTCAGTAAAAGCCAATCG   | 59.702 | 20 |
| 139 | 1137 | 1275 | AAATGTTGGCTTCGTATCGC   | 60.103 | 20 |
| 265 | 17   | 281  | CAAGTCAACAAGCAAGCCAA   | 60.027 | 20 |
| 265 | 2433 | 2697 | CCATCTCGAAAAGATGGGAA   | 60.006 | 20 |
| 141 | 356  | 496  | AAGTGGCTAAAGATCGATGTG  | 58.861 | 22 |
| 255 | 504  | 758  | ATTTGGAAGATCAACGGACG   | 60.074 | 20 |
| 186 | 30   | 215  | TACAAGTGCAGCGGAAATGA   | 60.401 | 20 |
| 179 | 167  | 345  | GGTTATGGTTCTTGATGGGG   | 59.101 | 20 |
| 173 | 70   | 242  | GCGGTGGTGGAGAGAAAATA   | 60.074 | 20 |
| 278 | 687  | 964  | TGCATCGGGCAATATTTA     | 59.867 | 19 |
| 131 | 570  | 700  | CACACGCGCATATCAGTTTC   | 60.288 | 20 |
| 179 | 86   | 264  | AACGATAAGGTGGCGATGAG   | 60.096 | 20 |
| 261 | 43   | 303  | TGCTCTCACAGTCACCCTCA   | 60.614 | 20 |
| 260 | 87   | 346  | CCTCCACAAATGGTGACAAA   | 59.389 | 20 |
| 260 | 579  | 838  | ACGACGACATTAGACCACCC   | 59.851 | 20 |
| 165 | 80   | 244  | TGGTTGTCACATCTTCATGC   | 58.019 | 20 |
| 140 | 1804 | 1943 | GTCAATGTGGGTGCTGTGTC   | 60.013 | 20 |
| 217 | 1327 | 1543 | GTGCATGGTCTTCGAAGTAGG  | 59.749 | 21 |
| 207 | 108  | 314  | TCGCATGCAACGATAGTAGG   | 59.856 | 20 |
| 179 | 92   | 270  | TCAACGTCTTCAACGCAAAG   | 60.027 | 20 |
| 189 | 466  | 654  | CACTTCACCGCCAAAACCTCT  | 60.291 | 20 |
| 265 | 150  | 414  | GTGATACATAGTGTATTCTTT  | 60.197 | 26 |
| 209 | 26   | 234  | GGATCTATTACTAACCGCCCC  | 58.856 | 21 |
| 271 | 583  | 853  | TATCAGGCTGCCTACTCGGT   | 59.859 | 20 |
| 184 | 630  | 813  | GCAGGACAACACTACCATACGG | 60.008 | 21 |
| 277 | 1370 | 1646 | CGGAATATCAACTCGGAAGC   | 59.668 | 20 |
| 238 | 1564 | 1801 | AGATTGAGGCGTGTTTAGGC   | 59.34  | 20 |

|     |      |      |                        |        |    |
|-----|------|------|------------------------|--------|----|
| 218 | 2310 | 2527 | AGAGACCAAAATCCCAGGCT   | 60.074 | 20 |
| 177 | 417  | 593  | AAGCAAACCCATGTTCTTCAG  | 59.228 | 21 |
| 263 | 4427 | 4689 | TGTTAAGCATCCCCATCTCC   | 59.894 | 20 |
| 227 | 22   | 248  | AATCTCGCATCCCAATTCTG   | 60.036 | 20 |
| 160 | 331  | 490  | AGCAATGAACAACACGCAAC   | 59.77  | 20 |
| 255 | 3    | 257  | AAATGCGCCTATCACTTTAATT | 58.77  | 23 |
| 213 | 585  | 797  | CCCAAACCTGGTTGCTCTTC   | 59.711 | 20 |
| 134 | 2022 | 2155 | GCTATGAATGGCATCGAAGA   | 58.823 | 20 |
| 267 | 174  | 440  | AACTTTTGTACTCAGCCCTGC  | 58.525 | 21 |
| 201 | 2273 | 2473 | TGGTTCCCAAATAACCGTC    | 59.662 | 20 |
| 212 | 8    | 219  | CTGACATTCACAGGCATTGT   | 57.067 | 20 |
| 239 | 100  | 338  | GCCCCTTGAGCCTAAGGTA    | 60.573 | 20 |
| 240 | 43   | 282  | TCCTCAGAAACTTCAACGCTT  | 59.111 | 21 |
| 216 | 257  | 472  | CCGGAGCTAGGCTTTTGAGT   | 60.884 | 20 |
| 127 | 0    | 126  | GTCGTTTACTCTTCCGGCT    | 58.462 | 20 |
| 213 | 556  | 768  | TGAAATGGATCACATGCAAA   | 58.464 | 20 |
| 252 | 75   | 326  | TGACGAAAATTGCTTTGATCC  | 60.067 | 21 |
| 240 | 954  | 1193 | ACCCAAAACCTCCCATATCC   | 59.881 | 20 |
| 206 | 19   | 224  | AGATTGGGCTATTCGAGCCT   | 60.194 | 20 |
| 243 | 45   | 287  | GTGGATGACGGTTGTGTTCA   | 60.426 | 20 |
| 217 | 1469 | 1685 | GCAGTTTTGTGTGCCATGTG   | 60.064 | 21 |
| 231 | 68   | 298  | GGGGCCCTAAGTTAGATTGG   | 59.793 | 20 |
| 273 | 0    | 272  | CCTTTCGAATTTTTCCTTTTTG | 60.423 | 23 |
| 279 | 1320 | 1598 | GATCCTCCTAGGATAACCGA   | 58.603 | 22 |
| 254 | 0    | 253  | GCGTGTGTGTAACCGTGTGT   | 60.556 | 20 |
| 134 | 834  | 967  | TCGAGGAGCTGTCATCCAAT   | 60.769 | 20 |
| 111 | 783  | 893  | ACTACGTCGATCCAACGGTC   | 59.997 | 20 |
| 176 | 179  | 354  | CAAGATCCGGCTCGGTATAA   | 60.053 | 20 |
| 200 | 1399 | 1598 | ACACAATCCATCTTCAACCCA  | 60.225 | 21 |
| 181 | 4638 | 4818 | CCCAAATGATTGTACGGGTC   | 60.051 | 20 |
| 280 | 124  | 403  | TTAAAGTGCGGCCAAACG     | 60.775 | 18 |
| 165 | 650  | 814  | ATCCCCGGAGATTCTTTCAG   | 60.401 | 20 |
| 203 | 606  | 808  | AAGTTGGGCCTCTCGATCAT   | 60.99  | 20 |
| 258 | 33   | 290  | ACGAAACACGGAAAAAGCAT   | 59.615 | 20 |
| 271 | 434  | 704  | AATGATGATGCCAATCCAGC   | 60.843 | 20 |
| 231 | 79   | 309  | TGGCCGAGAGGATTTACAAG   | 60.206 | 20 |
| 193 | 149  | 341  | CGCAGCAAAGTAGCATACGA   | 60.177 | 20 |
| 175 | 19   | 193  | TTTAGTGTTTTGACATGATTAC | 57.557 | 25 |
| 245 | 252  | 496  | ATACATGCGTGTGGGAGTTG   | 59.445 | 20 |
| 103 | 37   | 139  | ATGAACTAATCAAGTCCGCA   | 57.379 | 21 |
| 188 | 3269 | 3456 | GTGCAGGGGATTGGTTAGAA   | 59.933 | 20 |
| 234 | 80   | 313  | AAATTTCCCGATAGGCTTGAA  | 59.922 | 21 |
| 112 | 36   | 147  | TGGCCCTGCTCATTTTTATT   | 59.547 | 20 |
| 279 | 737  | 1015 | CGTGAAGTCCATCTCCCACT   | 60.112 | 20 |
| 152 | 278  | 429  | ATTAATAAAATTTGGAATGAT  | 57.111 | 27 |
| 240 | 29   | 268  | AAACTACCCTTGATCGCACG   | 60.132 | 20 |
| 247 | 277  | 523  | AACTTGGGGTAACGAGTGA    | 59.449 | 20 |
| 129 | 3    | 131  | TGAAGTTAGGAATTAAGGAGC  | 57.525 | 24 |
| 268 | 5193 | 5460 | CTTCCTCACGAATAAACCAAG  | 60.129 | 22 |
| 119 | 757  | 875  | CGCATGGAAATATACAGAACC  | 59.985 | 22 |
| 189 | 34   | 222  | TTTGAATATGTCTGCGTGCC   | 59.871 | 20 |
| 235 | 1247 | 1481 | CAAAGCCACTCTAAGCGTATC  | 59.558 | 22 |
| 161 | 1963 | 2123 | TCGAGTTGTACCGACTGC     | 59.905 | 20 |
| 245 | 696  | 940  | TGAAAACCTGCAGCACGAGAT  | 59.596 | 20 |
| 224 | 369  | 592  | TTTCACAAGTGCAAGCACAA   | 59.044 | 20 |
| 239 | 171  | 409  | ACTCGTCTCAAGAAGGTGCTT  | 59.569 | 22 |
| 231 | 642  | 872  | AGCGCTGAATGTCATTGGAT   | 60.634 | 20 |
| 273 | 352  | 624  | ATCCAACGGATGTTGTTGGT   | 60.096 | 20 |

|     |      |      |                        |        |    |
|-----|------|------|------------------------|--------|----|
| 192 | 1186 | 1377 | TTGATGGCTGTGAATTGGAG   | 59.648 | 20 |
| 185 | 17   | 201  | CCCTAGCTTTGCCCTCTTC    | 60.332 | 20 |
| 165 | 1300 | 1464 | AAGTAAGCGAGATTTTCTACA  | 59.362 | 26 |
| 184 | 9    | 192  | TGATATCTTTGAAGAACAATTA | 57.905 | 27 |
| 239 | 4924 | 5162 | CCTCCAATTGCTTTCTCCAA   | 60.184 | 20 |
| 256 | 1038 | 1293 | GGAACAAAAACGGCAAAGTT   | 59.111 | 20 |
| 266 | 2    | 267  | TGATGATGAGATTTTAGTCCA  | 59.502 | 24 |
| 163 | 2868 | 3030 | CCTTCTCCGTCTGCAAACCTC  | 59.989 | 20 |
| 249 | 65   | 313  | GTTGCACAGCCCTAATGCTA   | 58.945 | 20 |
| 207 | 586  | 792  | TAGATCTGGGCAATGTGTGG   | 59.522 | 20 |
| 277 | 28   | 304  | GAGCTGGTTTGAGGGAGATG   | 59.803 | 20 |
| 105 | 18   | 122  | ACCAATTTACTAATTCTTGATG | 59.206 | 27 |
| 241 | 1349 | 1589 | ATCTCATATTGCCACACCCG   | 60.744 | 20 |
| 172 | 51   | 222  | AATTTTTGTAAGGGGGTGGG   | 59.918 | 20 |
| 280 | 43   | 322  | CGCATCCGACTCCTCAATTA   | 61.129 | 20 |
| 229 | 1225 | 1453 | TGATGTACCCGAAAGGTTGA   | 58.973 | 20 |
| 183 | 84   | 266  | GGGGACAGATTGTGGTTCAT   | 59.636 | 20 |
| 176 | 84   | 259  | AGGGATCCCAAGGCACTACT   | 59.957 | 20 |
| 101 | 129  | 229  | TGCATGCTGATGATTGTGTG   | 60.282 | 20 |
| 234 | 70   | 303  | ATGATCGCCACAAACATCAA   | 59.931 | 20 |
| 196 | 506  | 701  | CCATCAACCTCACCACTG     | 59.938 | 19 |
| 208 | 22   | 229  | AGTGGTGGTGGAGAAAAGTGA  | 59.607 | 21 |
| 220 | 8    | 227  | CCTCAACACCAAAGCTTGAA   | 58.897 | 20 |
| 165 | 223  | 387  | GGGGTAAGACCCACCTCATT   | 60.052 | 20 |
| 280 | 33   | 312  | AGCAGCCCACAATTCAACAT   | 60.526 | 20 |
| 143 | 787  | 929  | ACTCGGCAAAACTGAAATCG   | 60.249 | 20 |
| 191 | 1006 | 1196 | GGACGCTGACCATCACTGTA   | 59.707 | 20 |
| 208 | 119  | 326  | TCAACATTTTTCCAGAATCG   | 59.924 | 21 |
| 178 | 598  | 775  | ATCATCAGTAGCGCCACCTT   | 59.723 | 20 |
| 270 | 481  | 750  | TCAAATTCGAAATTCGGACC   | 59.878 | 20 |
| 135 | 64   | 198  | AAAATCAAAGGCCCACAATG   | 59.801 | 20 |
| 219 | 299  | 517  | TACGTTCTTCCCCGTTTTTG   | 59.968 | 20 |
| 143 | 121  | 263  | TGGTTGGAGTTGTCAGTTCCT  | 59.607 | 21 |
| 214 | 471  | 684  | CGAAACCCCTTTCTCTCTCC   | 60.183 | 20 |
| 195 | 105  | 299  | TTCCCTCTCCTTCTCCCTC    | 59.749 | 20 |
| 182 | 63   | 244  | GGGGTGTATTAATAAGGAGC   | 57.616 | 23 |
| 180 | 2622 | 2801 | CCATGGTGGGCTAAGTTCAG   | 60.508 | 20 |
| 200 | 420  | 619  | TCTCTCCTCTGCACCAACCT   | 59.986 | 20 |
| 151 | 551  | 701  | GGCATGAAATATCATCCGAGA  | 59.877 | 21 |
| 126 | 30   | 155  | CCAAAATAGATGGCATTCAAG  | 59.078 | 22 |
| 240 | 43   | 282  | TGGAAGTTCTCTCCTCTCGC   | 59.679 | 20 |
| 181 | 301  | 481  | TCGTGGGCGTAAATCATGT    | 59.94  | 19 |
| 226 | 37   | 262  | GGTTATGACTTGATCATGACC  | 59.231 | 23 |
| 185 | 70   | 254  | CGAACTAAAGAAATAGGGGCC  | 60.095 | 21 |
| 173 | 127  | 299  | TGGCGTATGCTGAGAGATGA   | 60.526 | 20 |
| 150 | 341  | 490  | TCTCTTTCGTCCTTTTTCCC   | 58.359 | 20 |
| 130 | 65   | 194  | TTCCCGAGTAAGATGGATGG   | 59.887 | 20 |
| 119 | 222  | 340  | TTAACCTAGCCCCCTCTTC    | 59.549 | 20 |
| 278 | 15   | 292  | GAACACACGAAGATTGGGAG   | 60.104 | 21 |
| 164 | 548  | 711  | CAAATACGACGGAAAATCGG   | 60.315 | 20 |
| 153 | 31   | 183  | TGAAATCTTACTACTCCAAAA  | 58.36  | 27 |
| 106 | 256  | 361  | TCTTTCGGCTGACTTTTTCTTT | 59.539 | 22 |
| 271 | 133  | 403  | AAGATCTACGTCCACGGGAG   | 59.162 | 20 |
| 277 | 281  | 557  | TGACTGCCCAAGAAATCACA   | 60.24  | 20 |
| 190 | 861  | 1050 | TTCCACCACGAACATTCATC   | 59.348 | 20 |
| 256 | 1554 | 1809 | TTCAAGAAAACAGAAAGCCAC  | 59.898 | 22 |
| 177 | 10   | 186  | CGGATTTAAGGGTTATTACCTC | 58.81  | 24 |
| 276 | 43   | 318  | CGCATTTCCATACATTTTTACG | 59.407 | 22 |



|     |      |      |                        |        |    |
|-----|------|------|------------------------|--------|----|
| 273 | 452  | 724  | TTTGCCGACCTTATCTCCAC   | 60.074 | 20 |
| 268 | 427  | 694  | ATGGCTTCAGCAGACAATGA   | 59.399 | 20 |
| 164 | 74   | 237  | AACGAGATCGAAGGGAGACA   | 59.803 | 20 |
| 222 | 393  | 614  | ATCACGATGCGTCACAAGTT   | 59.169 | 20 |
| 228 | 3301 | 3528 | TGTTTGGTAGCCACACAAT    | 58.9   | 20 |
| 182 | 120  | 301  | GCGTCGTCATTTTCAGATCC   | 60.613 | 20 |
| 231 | 1310 | 1540 | TCAGATGAGTTGAATGGAACA  | 59.726 | 23 |
| 272 | 587  | 858  | CACTCGCATAAGTATGCATGA  | 60.164 | 23 |
| 133 | 468  | 600  | CACTCACACACACGCACTTG   | 59.976 | 20 |
| 156 | 26   | 181  | GCTTGAGCTCGGAGTTCTTC   | 59.313 | 20 |
| 249 | 207  | 455  | TTTCAAATTGCATCCTAGCAA  | 59.732 | 22 |
| 272 | 119  | 390  | GGAGAGTGGAGGCCATTTCT   | 60.596 | 20 |
| 175 | 449  | 623  | CCTGCCCTAATTCTGGAAAA   | 59.155 | 20 |
| 280 | 135  | 414  | TGCGTCAAAGCTCTTCAA     | 59.729 | 20 |
| 174 | 62   | 235  | TCCAGATTTGTTCTACGCA    | 59.272 | 20 |
| 249 | 62   | 310  | TCCCCTCAAGATTTCTCAA    | 59.6   | 20 |
| 277 | 532  | 808  | AGAAATTGAGCTGGGCTACG   | 59.476 | 20 |
| 104 | 4    | 107  | GGGAGAAGAGAGAGTTAGGG   | 60.246 | 23 |
| 174 | 134  | 307  | TGGAGCTTTGATCCTTGCTT   | 59.955 | 20 |
| 153 | 0    | 152  | AACCACCTTTACAAATGAGCT  | 57.599 | 24 |
| 209 | 30   | 238  | TCACTTCATTACGAAAAACAC  | 59.544 | 23 |
| 250 | 2231 | 2480 | GTGTGTCATCTAGTCCGGTGG  | 60.438 | 21 |
| 256 | 2251 | 2506 | TCCATTTCTCCACCGTTAG    | 59.926 | 20 |
| 137 | 1263 | 1399 | CGGTAATTCACCGACCAAAC   | 60.227 | 20 |
| 187 | 110  | 296  | AAGTCATCCGCTATCTCGAA   | 57.515 | 20 |
| 206 | 79   | 284  | TTTTATTCTTGACCCCTTCTC  | 59.571 | 22 |
| 130 | 14   | 143  | AAGCTGCATGCATTTCAAG    | 59.178 | 20 |
| 275 | 44   | 318  | GCGCCGCCTATCACTTTAAT   | 61.434 | 20 |
| 265 | 681  | 945  | GCGACGAACGGAAAAAGTAA   | 60.244 | 20 |
| 245 | 28   | 272  | CCACATTTTTCCCGATTGTT   | 59.662 | 20 |
| 191 | 1248 | 1438 | AATGAGCAAAACGGTCCTTG   | 60.11  | 20 |
| 210 | 24   | 233  | AACAAAAAGGGATGAGCGAC   | 59.174 | 20 |
| 147 | 91   | 237  | TGTTTCCCATTTTCACCACA   | 59.792 | 20 |
| 253 | 25   | 277  | AGATAATGCCACCCAAACCC   | 60.94  | 20 |
| 246 | 45   | 290  | TCTGCAAATGTCACACGTCA   | 59.868 | 20 |
| 182 | 1074 | 1255 | CCAAGAGGAGTTGAAGTCGC   | 59.989 | 20 |
| 139 | 387  | 525  | TTCCACAGACGACACACACA   | 59.737 | 20 |
| 203 | 137  | 339  | ACGTGGTCTCTCCCTTTTT    | 59.972 | 20 |
| 252 | 1199 | 1450 | CTGCTACCAACTGCAAAGCA   | 60.195 | 20 |
| 185 | 90   | 274  | CATTCAAGGGGCATTTTTGT   | 59.801 | 20 |
| 149 | 353  | 501  | AGTAAACGGCCAAAGTGCTC   | 59.383 | 20 |
| 119 | 7    | 125  | CCCCGAAATCTTACTTTGC    | 60.792 | 20 |
| 176 | 1434 | 1609 | CATCAAGTTTCCCAAGGCAT   | 59.933 | 20 |
| 237 | 1    | 237  | TGGTTGGTGAAGAAATCAA    | 58.947 | 20 |
| 248 | 608  | 855  | TTAAATACGACCGGGCTCAC   | 59.96  | 20 |
| 201 | 1919 | 2119 | AAGATGATCTCCACATGCC    | 59.893 | 20 |
| 144 | 61   | 204  | AGGGGTTATCACCTGAATGC   | 58.864 | 20 |
| 231 | 8    | 238  | TGTTATCCTTTGTGAGCCCC   | 59.933 | 20 |
| 235 | 764  | 998  | TCCATGTTTCGTCATCACCAT  | 59.769 | 20 |
| 249 | 22   | 270  | CTGACATTTGACCTGAGCGA   | 59.984 | 20 |
| 104 | 48   | 151  | TTGGAAAATAACATGCATAGA  | 57.857 | 24 |
| 241 | 244  | 484  | TCTGGTTCCGGTTCCAATAG   | 59.926 | 20 |
| 182 | 426  | 607  | TAACTCCAGCCACTTTCCC    | 59.284 | 20 |
| 146 | 465  | 610  | CACTAGCAGGTCGACACGAA   | 60.049 | 20 |
| 207 | 406  | 612  | TTCATCTCAAATTTATTGTGG  | 59.442 | 23 |
| 183 | 2598 | 2780 | TCGTATAGCTTTCCCCCACA   | 60.46  | 20 |
| 203 | 285  | 487  | CGAATGAAATTATTTGTTTTCC | 59.656 | 24 |
| 168 | 127  | 294  | CCCAATCCTTGACATTTTG    | 60.162 | 20 |

|     |      |      |                        |        |    |
|-----|------|------|------------------------|--------|----|
| 166 | 454  | 619  | CCAAGTTGGTGAAGTAGGCAC  | 59.782 | 21 |
| 210 | 507  | 716  | TAAAAACACAGCCTCCCTGC   | 60.249 | 20 |
| 203 | 134  | 336  | CGTCGTTTCGTGTTCTTTCA   | 59.881 | 20 |
| 234 | 207  | 440  | CATGGTTGGGTGTTTTATCA   | 58.254 | 21 |
| 267 | 26   | 292  | GTTGATCCAAGGGTGTATAATC | 59.493 | 23 |
| 210 | 372  | 581  | CGCTCAGGTTTGAATCTGTTT  | 59.369 | 21 |
| 250 | 1109 | 1358 | CATGGTTGCAAAGGTGATTG   | 59.964 | 20 |
| 200 | 2012 | 2211 | TCCCACAGTCATCACTTCCA   | 60.088 | 20 |
| 219 | 4938 | 5156 | TGGACCGCGTTTATGGTATT   | 60.209 | 20 |
| 130 | 468  | 597  | GAATGTCATGAGTTGAGGCG   | 59.245 | 20 |
| 188 | 462  | 649  | AAACTCCCGCTCAAATAGCA   | 59.845 | 20 |
| 180 | 1587 | 1766 | TCTGTTTGCGAAATTTGTTGA  | 59.335 | 21 |
| 280 | 105  | 384  | GTTTCGGACTAAACTGGCGG   | 61.895 | 20 |
| 235 | 847  | 1081 | AGATTGGGCTATTCGAGCCT   | 60.194 | 20 |
| 244 | 221  | 464  | ACTTTTGCCTCTTGTCTG     | 59.78  | 20 |
| 106 | 24   | 129  | ATGAGTTATCACCGGATCGC   | 59.923 | 20 |
| 264 | 54   | 317  | TGCTACGGTTTCTTCTCCG    | 60.378 | 20 |
| 160 | 2970 | 3129 | ACGATCGCCCACTTATTGAG   | 60.096 | 20 |
| 234 | 20   | 253  | AGCTTGTAGAACGAGCCGAG   | 59.78  | 20 |
| 124 | 2844 | 2967 | TTGGCTCAAAGCATGAACAA   | 60.379 | 20 |
| 171 | 195  | 365  | AATTGCTGGCAAATCGTAGC   | 60.238 | 20 |
| 163 | 302  | 464  | TGAAGCAATCAAAAACGGTG   | 59.706 | 20 |
| 113 | 615  | 727  | ATTGTGACCGTGAACCCAGT   | 60.284 | 20 |
| 215 | 11   | 225  | TGATTGTAATTCTCTGCACCAC | 60.028 | 24 |
| 116 | 19   | 134  | AAAAACTGTAGTGGGTTAAAA  | 57.487 | 25 |
| 270 | 46   | 315  | TGTGACGAGCTTATGAAACTA  | 59.767 | 25 |
| 221 | 1    | 221  | TATTAACCCTTCATTGTTTTTA | 57.085 | 26 |
| 216 | 18   | 233  | ACAAATGAGCATGAGGGGAGG  | 60.073 | 20 |
| 202 | 31   | 232  | GTTATGCGTTTTGACGGGAT   | 59.829 | 20 |
| 280 | 5    | 284  | TTGATTCCCTCCCAACAATTC  | 59.727 | 20 |
| 255 | 451  | 705  | GAATTGAGGATGTGGGATCG   | 60.281 | 20 |
| 260 | 3987 | 4246 | ACAGAAGCAAGATTCGACCA   | 59.867 | 21 |
| 241 | 96   | 336  | TAATTGATAAGCGGCCCAAA   | 60.405 | 20 |
| 206 | 994  | 1199 | CTTGGGATGGGGGAGTATTT   | 60.011 | 20 |
| 186 | 397  | 582  | CCCAGTATCCCAAACCTCGAA  | 59.926 | 20 |
| 246 | 970  | 1215 | TGCTTTTCCATGGTGACTGA   | 60.24  | 20 |
| 264 | 1949 | 2212 | TGAGAACCAAACACAAATGTC  | 59.928 | 23 |
| 278 | 805  | 1082 | AAAGCCAGATTCATTTTGCC   | 59.162 | 20 |
| 205 | 252  | 456  | ATTGGCAAATGCAGGTTGTT   | 60.374 | 20 |
| 270 | 166  | 435  | AACGCACCAATTCCTTCAA    | 60.481 | 20 |
| 280 | 215  | 494  | TTTTGACATGATCACACCCT   | 60.225 | 21 |
| 261 | 18   | 278  | CCGACTGGGCCTATCCTATC   | 60.807 | 20 |
| 278 | 49   | 326  | AGCCTTCTAGCTTCTTGTCTT  | 59.514 | 23 |
| 279 | 524  | 802  | ATGCGTGCATAATTGCCTCT   | 60.636 | 20 |
| 148 | 120  | 267  | TGTTTAAATGCACACCCTTT   | 59.37  | 21 |
| 227 | 1758 | 1984 | ATCGAACCGTTTTTCTGTCTG  | 60.11  | 20 |
| 269 | 0    | 268  | GCCTTCTAGCATCTTGTCTC   | 58.451 | 21 |
| 142 | 14   | 155  | CACTCAATTCATTTACCTCCA  | 59.971 | 22 |
| 169 | 97   | 265  | TCTCTCCACCAAATGTCCAA   | 59.059 | 20 |
| 237 | 60   | 296  | GCGGCACACGAGGTATAAA    | 59.703 | 19 |
| 238 | 251  | 488  | TTTGTGGTATCAGAGCCACG   | 59.716 | 20 |
| 132 | 6    | 137  | TCTTTTGTATGTCCTCACTCG  | 59.517 | 22 |
| 121 | 34   | 154  | AGGGAGGCAAAAAGAGGTTG   | 60.601 | 20 |
| 219 | 44   | 262  | TGGGATATAGCGAGTTTGGTG  | 59.967 | 21 |
| 120 | 91   | 210  | GCTCAGCATAACGAAGGGT    | 60.285 | 20 |
| 105 | 1639 | 1743 | TGCGTGTGAGTGTGTGTCAG   | 60.593 | 20 |
| 193 | 1293 | 1485 | TTCATCGAAAAATGAGCCCT   | 59.645 | 20 |
| 278 | 1344 | 1621 | TGGGATGAAAATAGGGGAAA   | 60.13  | 21 |

|     |      |      |                        |        |    |
|-----|------|------|------------------------|--------|----|
| 139 | 14   | 152  | GAGGTTTTGACGGGATTTAGG  | 59.822 | 21 |
| 272 | 1    | 272  | GGGGGATCAAATCTAGTCTTT  | 57.666 | 22 |
| 279 | 222  | 500  | CCACAAATCAATCACAGCCTT  | 59.985 | 21 |
| 180 | 2551 | 2730 | GCATAGTGCTCCAAAAAGGC   | 59.851 | 20 |
| 199 | 50   | 248  | TTTCTCGCCATCTCTCCCTA   | 59.91  | 20 |
| 147 | 45   | 191  | TCTAGCATCTCTTGCTCTCTCG | 59.125 | 22 |
| 179 | 418  | 596  | CGTCTTCGTTCTCCGTCTTC   | 59.989 | 20 |
| 240 | 16   | 255  | TTTCTCACTATAAGGTGGTGT  | 59.509 | 25 |
| 189 | 1267 | 1455 | GTCGTATTTGACGGCGAGAT   | 60.103 | 20 |
| 239 | 233  | 471  | ATTGAATCTACGTCCACGGG   | 59.813 | 20 |
| 198 | 414  | 611  | GCCAGCTTTTTCTTCTCCAA   | 59.569 | 20 |
| 126 | 82   | 207  | CCCTTTACCTCACTGGTGA    | 59.959 | 20 |
| 200 | 334  | 533  | TCACCCCATCTTCTCTCAC    | 60.048 | 20 |
| 271 | 1002 | 1272 | CAGGTTCTCATCGCTCTGTG   | 59.571 | 20 |
| 260 | 808  | 1067 | CATGGTGATAGAGCCGGATT   | 59.917 | 20 |
| 200 | 9    | 208  | CTTCTCGTGTCCGACTCCTC   | 59.986 | 20 |
| 244 | 15   | 258  | GGGCGAAGAGAAATGTGAAA   | 60.192 | 20 |
| 183 | 542  | 724  | AAAATATGGGGTTTTCCCAA   | 58.15  | 20 |
| 262 | 4675 | 4936 | ATTTCCAGCCTTGGCTTCTT   | 60.208 | 20 |
| 118 | 171  | 288  | CTGAACCCAAGACCTCAAGC   | 59.844 | 20 |
| 164 | 1271 | 1434 | TGTTGAAATCTTGAACGGGTC  | 59.963 | 21 |
| 280 | 84   | 363  | AAAAACGCGAATTTTTAGGG   | 58.308 | 20 |
| 228 | 6    | 233  | GCGTGACCTGATTACACAC    | 60.192 | 20 |
| 241 | 960  | 1200 | GCACTGAGCAGAAAAGGGAA   | 60.517 | 20 |
| 154 | 23   | 176  | ATCGGTTATTACCGGATCGC   | 61.031 | 20 |
| 270 | 67   | 336  | CACATTCAGTGGGAGCAGAA   | 59.831 | 20 |
| 245 | 127  | 371  | TCCCCTAATCCCTCATTCA    | 59.315 | 20 |
| 238 | 558  | 795  | GGTGAAACTTGAACAACCCC   | 59.284 | 20 |
| 106 | 959  | 1064 | ATCTGGAACAAGGTGGTGA    | 60.363 | 20 |
| 185 | 329  | 513  | GAGACGAGGGACAGAGCAAG   | 60.135 | 20 |
| 272 | 1480 | 1751 | GCTCCCCTTGTGACACTGTT   | 60.159 | 20 |
| 259 | 304  | 562  | TCCATCAGACAGTTTCTTGCA  | 59.74  | 22 |
| 266 | 92   | 357  | CTTTATGTTTTTCCCTGCGG   | 59.581 | 20 |
| 266 | 429  | 694  | GGATCTTCATCCAATTCAGCA  | 60.029 | 21 |
| 250 | 240  | 489  | TGGAATAGGGTTTTCAGGGTT  | 59.69  | 21 |
| 280 | 130  | 409  | CAAAGCGATAGGCAAAGGA    | 60.335 | 20 |
| 192 | 1226 | 1417 | CTTAGGTTGAACGATTCGGG   | 59.564 | 20 |
| 208 | 4    | 211  | CCCTTGAGAGTTTCACCACC   | 59.549 | 20 |
| 207 | 502  | 708  | TTAATTTCCCGGTGGACTCA   | 60.301 | 20 |
| 108 | 279  | 386  | TTTTGCTCGAGGGTTTTGTT   | 59.724 | 20 |
| 253 | 876  | 1128 | ATGCAACCCTCCCTTTCTCT   | 60.074 | 20 |
| 224 | 0    | 223  | GACCTACAGACCGATCATGAA  | 59.056 | 22 |
| 279 | 4    | 282  | TGCTCACATCTTTTTCTCTTT  | 59.952 | 25 |
| 278 | 40   | 317  | ATGCCTTATAAGCTCGAGAAA  | 58.666 | 23 |
| 152 | 488  | 639  | TGAGCCCAATTTAGTCAGCC   | 60.214 | 20 |
| 137 | 1309 | 1445 | CATCGCATTGACACATAATCG  | 59.968 | 21 |
| 250 | 1200 | 1449 | TAGCCGTTTATGACCGTTGA   | 59.182 | 20 |
| 227 | 1431 | 1657 | TTTTGGGATGGACCAAGTTT   | 59.264 | 20 |
| 251 | 1904 | 2154 | CGATTCTCCTTGTCTCCG     | 59.807 | 20 |
| 164 | 2303 | 2466 | CGATGCTTTAAAAGATGTCAA  | 60.017 | 23 |
| 266 | 66   | 331  | GAAAGAAATAGAGCTGCTGG   | 57.913 | 22 |
| 280 | 112  | 391  | TCGTCTGGTTGTTCCAAA     | 60.072 | 19 |
| 275 | 1009 | 1283 | CGACTTGGCTCCATGTTGTTA  | 61.064 | 21 |
| 104 | 2147 | 2250 | TGGTTTGTCTGCATCCAGTG   | 60.722 | 20 |
| 169 | 58   | 226  | GAATTCGGATTCGAGTCATAT  | 57.681 | 24 |
| 280 | 504  | 783  | GTCCACCCCTTTGAAACTT    | 60.204 | 20 |
| 120 | 11   | 130  | GAAGCTTCAATGGAGGTGATT  | 60.081 | 22 |
| 278 | 687  | 964  | TCGGAATTGGATTATGTTGCT  | 59.424 | 21 |

|     |      |      |                         |        |    |
|-----|------|------|-------------------------|--------|----|
| 179 | 63   | 241  | ACCCTCGAATGCTATGACCA    | 60.483 | 20 |
| 217 | 204  | 420  | ATTTGGGTCAAACCCCTTTT    | 59.549 | 20 |
| 159 | 409  | 567  | ACACATCTTGCAACCCACAG    | 59.597 | 20 |
| 275 | 19   | 293  | CCAATTTGAATGGTTATCACCT  | 60.457 | 23 |
| 275 | 693  | 967  | GAGGCTTAAAGCTGTGCTGG    | 60.154 | 20 |
| 255 | 11   | 265  | TAAATGTGGCGAATGCTGAG    | 59.833 | 20 |
| 236 | 3    | 238  | TCCATCATCATAGGCGTCAC    | 59.482 | 20 |
| 195 | 259  | 453  | CTCCATCATCCTCTCTCCCA    | 60.152 | 20 |
| 268 | 1528 | 1795 | GCGAAGTATTTTCGTCGTGAT   | 57.848 | 20 |
| 201 | 193  | 393  | TTGATGCTACCCACTTGCTCT   | 59.89  | 21 |
| 201 | 78   | 278  | AGCGTATGGGTAGAGCGAGA    | 60     | 20 |
| 227 | 1029 | 1255 | GAAGAAGCCGACAATTTGCT    | 59.457 | 20 |
| 177 | 572  | 748  | CCCCATCTCGGATCTCTACA    | 60.027 | 20 |
| 187 | 1210 | 1396 | AATTTTTGTAAGGGGGTGGG    | 59.918 | 20 |
| 247 | 862  | 1108 | CGACTCCATTTGGGTTTTGT    | 59.83  | 20 |
| 199 | 324  | 522  | CAGATCTTGCAACTCCCTC     | 59.803 | 20 |
| 268 | 2805 | 3072 | CGAAGAATCCGAATGGAGAA    | 60.148 | 20 |
| 270 | 547  | 816  | TGGACCGTTAGATCGGATA     | 60.288 | 20 |
| 258 | 712  | 969  | CATCCCACCGTGGTATTTA     | 60.439 | 20 |
| 243 | 1470 | 1712 | ACCGTTTGTGAAAAGAACGC    | 60.154 | 20 |
| 274 | 200  | 473  | TCATTTTTCTTGTAGCGTATTAC | 58.583 | 26 |
| 204 | 218  | 421  | CAGTCGTTTCATCCCTTTGT    | 59.966 | 20 |
| 242 | 8    | 249  | AGCCACTGTGACAACACATAT   | 57.601 | 22 |
| 182 | 69   | 250  | GACTGTAATGCATGGCTGGA    | 59.679 | 20 |
| 260 | 2294 | 2553 | TTTGGAGGGGGTTGAAAAT     | 60.514 | 20 |
| 183 | 28   | 210  | TGATGCTGAAATCGTGGAAA    | 60.197 | 20 |
| 225 | 500  | 724  | ATCTCGTTGAGGATGCTTGC    | 60.37  | 20 |
| 232 | 2201 | 2432 | CCCTCACTGGCTCACACTCT    | 60.458 | 20 |
| 152 | 41   | 192  | TGAAAAGCGGTTGTGTGAAC    | 59.74  | 20 |
| 263 | 218  | 480  | TTTACGAAAATGCCACCACC    | 60.732 | 20 |
| 127 | 80   | 206  | AGCATCTCTCCATCACTCTCA   | 57.528 | 21 |
| 271 | 4    | 274  | TTCGAACCTGGTTTTCGTTC    | 60.088 | 20 |
| 157 | 9    | 165  | AATACCTTGATGTGGTGGTGC   | 59.732 | 21 |
| 206 | 1331 | 1536 | AAAACCTCCCAATTTCCACCA   | 59.264 | 20 |
| 121 | 760  | 880  | TCCCCTAGTCTAAGCCGAAAA   | 60.203 | 21 |
| 276 | 96   | 371  | TGGTGGAGAGAGACCATGAA    | 59.18  | 20 |
| 116 | 4325 | 4440 | TTCGCTTTTGCTTTTGCTTT    | 60.13  | 20 |
| 238 | 87   | 324  | AAACTCTGGCTGCTGGTGAT    | 59.874 | 20 |
| 240 | 873  | 1112 | TCACCTTTTCCCTTTCCCT     | 60.045 | 20 |
| 151 | 672  | 822  | ACTCCCATCCGAGGTCCTAA    | 60.842 | 20 |
| 165 | 2263 | 2427 | TTTGGTGACTIONGAAAGTCCC  | 59.943 | 20 |
| 145 | 1902 | 2046 | GCAGCAACAATGATGGAGTG    | 60.272 | 20 |
| 213 | 27   | 239  | AGCAAAGAAGGAATGCAACC    | 59.316 | 20 |
| 279 | 98   | 376  | TCGAAGAGAGAACGGTTCAA    | 59.978 | 21 |
| 276 | 78   | 353  | CCCCGGAGCTTCATAACTAA    | 59.178 | 20 |
| 167 | 1336 | 1502 | CAGATCTGATGGCCCAGATT    | 60.034 | 20 |
| 254 | 1737 | 1990 | CGTGTTCTAATCCCATGT      | 59.67  | 20 |
| 108 | 524  | 631  | TTTTACGGGCAACGTACTION   | 59.996 | 20 |
| 221 | 57   | 277  | AGCTATAAGATTGACTAGATC   | 57.118 | 26 |
| 277 | 255  | 531  | CTCGCTCAGACTCCTCACT     | 60.757 | 20 |
| 113 | 487  | 599  | ACTGATGGGGTTCAGGAAGA    | 59.505 | 20 |
| 192 | 923  | 1114 | AGCCGTTGATCATTACCTCG    | 60.096 | 20 |
| 182 | 191  | 372  | GCATTAGCAACTGCCCTTTC    | 59.851 | 20 |
| 126 | 35   | 160  | ACACGAGAGGTTTGGGAGAA    | 59.697 | 20 |
| 160 | 1281 | 1440 | TACGGTGAAAATGGATCTTGG   | 59.809 | 21 |
| 123 | 217  | 339  | GCTCACCTGGATGATAGCCT    | 59.268 | 20 |
| 166 | 278  | 443  | AACGGCGCGACAGTTATAGA    | 60.792 | 20 |
| 157 | 430  | 586  | TGCATGAGCACTAATGAGCC    | 59.979 | 20 |

|     |      |      |                        |        |    |
|-----|------|------|------------------------|--------|----|
| 241 | 680  | 920  | GGAAAAATGGTGATGTGGCT   | 59.797 | 20 |
| 266 | 1209 | 1474 | AAGTGCCGTAGCCACAAAAA   | 60.669 | 20 |
| 192 | 278  | 469  | CACCGAATGCTGTGACTTGT   | 59.751 | 20 |
| 141 | 186  | 326  | AACCGTGATGGTTGGGATTA   | 60.051 | 20 |
| 162 | 671  | 832  | CGGGATCTTCTCAACTCTG    | 59.797 | 20 |
| 185 | 229  | 413  | TGATGCGTTTTTGGCATAAGA  | 60.215 | 20 |
| 251 | 1325 | 1575 | ATGGGATAGTACCGGAACGC   | 61.091 | 20 |
| 165 | 385  | 549  | CGCACACACGAACTAACACA   | 59.373 | 20 |
| 276 | 54   | 329  | CTTTTGGATCGACCCATCTT   | 58.981 | 20 |
| 187 | 504  | 690  | TGGCACACAGGTGAATGAGT   | 60.162 | 20 |
| 169 | 673  | 841  | AATCATCCAATTTGCTTGCC   | 59.907 | 20 |
| 185 | 74   | 258  | CCACGTAAAATTCCGGTGTC   | 60.227 | 20 |
| 255 | 6044 | 6298 | TGGAGATCATTTTCAGGCACA  | 60.201 | 20 |
| 268 | 452  | 719  | CCATTTTGGTATTTGCCCTG   | 60.181 | 20 |
| 236 | 487  | 722  | AACCAACTAAGGGGGTCAAA   | 58.41  | 20 |
| 182 | 216  | 397  | CTAGCCCTCGTGATCAGTCC   | 59.827 | 20 |
| 224 | 67   | 290  | TCATTTACCCATGAGCTTT    | 58.145 | 20 |
| 240 | 1019 | 1258 | TCCAACCTTCCACTCCCC     | 60.088 | 20 |
| 156 | 59   | 214  | TCATACACGATGGGATCGAA   | 59.883 | 20 |
| 225 | 2706 | 2930 | AACGTCAAGTATTCCGCCAC   | 60     | 20 |
| 228 | 235  | 462  | TCCGCGAGAGAATTAAGGAA   | 59.916 | 20 |
| 238 | 1428 | 1665 | TGACATGGAAGGAAAAAGGG   | 59.903 | 20 |
| 217 | 34   | 250  | TCTCCAAATTTGAGGGTTATCA | 58.556 | 22 |
| 236 | 16   | 251  | ACAAATGGCCAAGAGAGTTAC  | 60.048 | 23 |
| 160 | 100  | 259  | GCATCAGAGCCGAGGTTAGA   | 60.504 | 20 |
| 275 | 17   | 291  | CGGTTATTACCGGATCGCT    | 59.93  | 19 |
| 266 | 44   | 309  | TACAAATGGCCAAGGGAGTT   | 59.429 | 20 |
| 143 | 1236 | 1378 | GGGGAAGCGGTTATTTTTGT   | 60.184 | 20 |
| 220 | 230  | 449  | CAGAAATGACATCACCACGC   | 60.12  | 20 |
| 189 | 2    | 190  | TCAAACAACCTAGATTAGTCCA | 57.952 | 27 |
| 192 | 3373 | 3564 | ACAGCAGGTTTTTGGTGGAA   | 60.529 | 20 |
| 146 | 3182 | 3327 | GGGATGTTGTCTTCGACTGAA  | 60.104 | 21 |
| 232 | 48   | 279  | TTACAATGGCAAGAGAGTTGC  | 59.044 | 22 |
| 242 | 400  | 641  | ATTTCGTATACTGTTCCGCCGC | 60.124 | 20 |
| 210 | 1348 | 1557 | CACTCCGCTCTCATTCTTC    | 59.95  | 20 |
| 252 | 57   | 308  | TCTCTTCAATAAGGTAACAAC  | 58.381 | 25 |
| 238 | 563  | 800  | GGGTGTGGAAGCAAAGAAAA   | 60.088 | 20 |
| 131 | 782  | 912  | ATTCAACATGATGGTGCCAA   | 59.781 | 20 |
| 154 | 67   | 220  | CAAAATTAAGAGTGTCCATCC  | 58.829 | 23 |
| 279 | 4276 | 4554 | ATGGCTGCTTAAATTGTGGC   | 60.103 | 20 |
| 161 | 828  | 988  | ATGGCCACAAATGGTTCTTA   | 60.192 | 20 |
| 251 | 82   | 332  | ATGATAGCATTCAAGGGGCA   | 60.435 | 20 |
| 248 | 281  | 528  | AATGATCGTTGGAAAGCCAG   | 60.074 | 20 |
| 209 | 1231 | 1439 | CGAGATTTGACACGCAAGATT  | 60.264 | 21 |
| 234 | 661  | 894  | GCGACCCATTCTTGATTTTC   | 59.51  | 20 |
| 263 | 2013 | 2275 | CCAGTATTTGAGAGATGGGCA  | 60.081 | 21 |
| 266 | 38   | 303  | GGTGTGGCTAAATTTGTTCCG  | 58.147 | 20 |
| 239 | 92   | 330  | CCCTATTCCTGCAACACAC    | 60.232 | 20 |
| 273 | 102  | 374  | GGGACGGAGGGAGTAGTTTC   | 59.935 | 20 |
| 246 | 158  | 403  | GCGGAAATACTCTCGAAACG   | 59.845 | 20 |
| 208 | 80   | 287  | ATTTCTCGCATCTCACCAC    | 60.081 | 20 |
| 245 | 213  | 457  | CCGTTAAATTACATGATTTTCC | 59.56  | 24 |
| 242 | 1734 | 1975 | AACCACGTTTTGGCTAGTTCA  | 59.663 | 21 |
| 256 | 830  | 1085 | AAAAATGAAATGGCCACCA    | 60.167 | 20 |
| 222 | 18   | 239  | GTTCTCGTGTTCTCTCTCA    | 60.238 | 20 |
| 199 | 78   | 276  | GTGCGTGTGTATGCTGAGGT   | 59.783 | 20 |
| 234 | 104  | 337  | GACAAGATCGTGCCAACAAA   | 59.697 | 20 |
| 183 | 1328 | 1510 | ATGAGGGCTTTGTGAACGAC   | 60.119 | 20 |

|     |      |      |                         |        |    |
|-----|------|------|-------------------------|--------|----|
| 211 | 309  | 519  | ATGGCAAAGGCATCAAAAG     | 60.074 | 20 |
| 208 | 1227 | 1434 | CTTCACGCGCTCAATAAACA    | 60.014 | 20 |
| 125 | 0    | 124  | TGGTAAGCAGATTGGTTTTAA   | 58.41  | 25 |
| 139 | 1    | 139  | TCAGATTTGTTATGTGTTTTGA  | 57.312 | 24 |
| 239 | 678  | 916  | GCCCAGATATGGCTCGTTTA    | 60.06  | 20 |
| 260 | 59   | 318  | CAACTTGGAAACCCGATTCTC   | 59.526 | 20 |
| 193 | 1297 | 1489 | TTGGTCTCCATCTTCCGCT     | 59.655 | 20 |
| 195 | 386  | 580  | CCATCTGAAAAATGCAACCA    | 59.518 | 20 |
| 139 | 281  | 419  | AGGCCGTGTTTCGTATTGTGT   | 60.44  | 20 |
| 280 | 373  | 652  | ACTCATGTCACGGCACACAT    | 60.038 | 20 |
| 252 | 98   | 349  | GCACACATAGAAAAGCTCCTC   | 60.27  | 22 |
| 276 | 19   | 294  | GATTCGCACAAATGAACACG    | 60.119 | 20 |
| 222 | 3    | 224  | TTGTCGATCAGCGTTACAG     | 59.864 | 20 |
| 184 | 465  | 648  | TCTTACCCTGCGAAAAATGC    | 60.209 | 20 |
| 258 | 140  | 397  | TCGTGTTGGCGCTATTACAT    | 59.21  | 20 |
| 268 | 29   | 296  | CCACTATTGATCCTGACGCC    | 60.483 | 20 |
| 244 | 193  | 436  | TTGTTTCGTATTTGGAAGTCGTG | 60.032 | 22 |
| 235 | 9    | 243  | TTCTCTATCTCTCTTGGTTGGT  | 59.411 | 24 |
| 197 | 11   | 207  | TCCACCGCTTTAAATTGCTT    | 59.72  | 20 |
| 167 | 694  | 860  | GCATGTCACGTGAGGAAGAA    | 59.837 | 20 |
| 245 | 2657 | 2901 | AATGCAGTTCGGTTGGAGAT    | 59.556 | 20 |
| 269 | 118  | 386  | TACTTGGTTGAGCTTGCGG     | 59.996 | 19 |
| 205 | 203  | 407  | TCACGGAATTAAGCCCC       | 59.043 | 20 |
| 103 | 5    | 107  | TCTCCGATCTCAGTTTTTCA    | 57.533 | 21 |
| 249 | 538  | 786  | AACAAGCTGGGTTTCTGCAC    | 60.299 | 20 |
| 221 | 409  | 629  | GCCTGCAAGAAAGCAATCTC    | 60.103 | 20 |
| 261 | 16   | 276  | TCATACTACTCTCACTAGCCC   | 60.956 | 23 |
| 232 | 23   | 254  | TGAAGGTTGGAGGAATGGAG    | 60.042 | 20 |
| 235 | 207  | 441  | GATCTTTTCACTCGAGCCCA    | 60.34  | 20 |
| 209 | 3    | 211  | TTGCATTGCAGCAGTAGAGG    | 60.157 | 20 |
| 128 | 724  | 851  | CCAGCCATAATTCTGCATCA    | 59.646 | 20 |
| 140 | 1067 | 1206 | ATGACTCCTGCAACTTGCCT    | 59.874 | 20 |
| 187 | 1618 | 1804 | CCATTTACCTTGCCAAAAA     | 60.836 | 20 |
| 264 | 108  | 371  | TACAGTGAGCCTGCTGCCTA    | 59.764 | 20 |
| 201 | 444  | 644  | ACTATGTGGTTGCGGTGCTT    | 60.581 | 20 |
| 279 | 3278 | 3556 | TCAGGCCCATATTTTCGATGT   | 60.296 | 20 |
| 255 | 235  | 489  | CCTAATTTTCGCCTCCCACT    | 60.443 | 20 |
| 241 | 46   | 286  | GCCAAAATCCCAACAAAAAG    | 59.429 | 20 |
| 190 | 2460 | 2649 | CCTGCCTACGCAAATACCAG    | 60.648 | 20 |
| 278 | 897  | 1174 | GCGTGTGCTGTCAGAAATTG    | 60.31  | 20 |
| 262 | 1058 | 1319 | TCCCTTGCTAGATGGCAGTT    | 59.836 | 20 |
| 199 | 108  | 306  | CGGCCATCAATATACACCAA    | 59.257 | 20 |
| 196 | 16   | 211  | TCGGTTACCCTATAGCATTCTG  | 59.884 | 22 |
| 266 | 4212 | 4477 | GGACCTGATCTAACCACGGA    | 59.927 | 20 |
| 255 | 2    | 256  | CTACGAGCCACGGCTACAC     | 59.48  | 19 |
| 214 | 250  | 463  | GCCGTTAAGCTGCTCTCAAG    | 60.292 | 20 |
| 247 | 974  | 1220 | ATGGTAGCATAGCCCGTGTC    | 59.985 | 20 |
| 236 | 6    | 241  | GAAGAACTTGACGTGTGCG     | 59.49  | 20 |
| 244 | 1913 | 2156 | TTGTAGCTTGCTAAATTAATGA  | 57.062 | 24 |
| 193 | 3    | 195  | CAAAGGCCCAATGGTTAT      | 59.685 | 20 |
| 194 | 11   | 204  | GTGTTTGGTCTCCCCTCCTT    | 60.349 | 20 |
| 216 | 47   | 262  | TTCGATCAAGGTGAGCTACG    | 59.024 | 20 |
| 186 | 119  | 304  | GGCATTGTATACCCGTTGG     | 60.074 | 20 |
| 232 | 41   | 272  | ATGGCGATTACGTACCCTGA    | 60.352 | 20 |
| 251 | 739  | 989  | ACAAAACAGTATACAACGGGC   | 59.447 | 22 |
| 214 | 355  | 568  | TGCTATCGGCTAACGGTTTT    | 59.742 | 20 |
| 272 | 140  | 411  | CACAATCGATCAATAAAGCTG   | 59.748 | 22 |
| 264 | 65   | 328  | AGGCTTAGAGGGTGTGTTTAC   | 60.165 | 22 |

|     |      |      |                        |        |    |
|-----|------|------|------------------------|--------|----|
| 203 | 1109 | 1311 | CACCACGGCTAGTTTCACAA   | 59.758 | 20 |
| 237 | 0    | 236  | GGAAGAATTGGAAACTCGTGA  | 59.16  | 21 |
| 157 | 120  | 276  | GTCCACGGGAGAGAATGAGA   | 60.199 | 20 |
| 254 | 100  | 353  | CCTTCCAATGGACTTCCTCA   | 60.042 | 20 |
| 204 | 74   | 277  | GACAACAGAAAAACCACGCA   | 59.74  | 20 |
| 138 | 53   | 190  | CATGCATGATCGACATTGTAA  | 59.448 | 22 |
| 237 | 73   | 309  | ATTGCTTCCCCTCTTCCATT   | 59.903 | 20 |
| 237 | 1618 | 1854 | TCTTCCCAGCTAGCATGACTT  | 59.091 | 21 |
| 176 | 53   | 228  | GTTGATGCCCTTCGTCAACT   | 60.119 | 20 |
| 216 | 3    | 218  | AACGCTTTCTGCTTCTGCAT   | 60.162 | 20 |
| 143 | 871  | 1013 | TCACAAGCCTTGCATTTGTC   | 59.847 | 20 |
| 127 | 20   | 146  | GGAAATAAGAAGGTGTTATGA  | 60.434 | 25 |
| 256 | 76   | 331  | TCGCAGAAAATCAACTTCTCA  | 59.996 | 22 |
| 223 | 2952 | 3174 | TCACCTTACACAGTGCCTGC   | 59.905 | 20 |
| 280 | 9    | 288  | GAGAAAATCAGGTGATAACCC  | 57.73  | 23 |
| 234 | 25   | 258  | TGCGAATCAATTAGTGTGAGA  | 58.439 | 22 |
| 225 | 105  | 329  | TGGTGTCTTGGGGTTTTGT    | 60.246 | 20 |
| 273 | 363  | 635  | TCAGTACTACCCACGGGCTC   | 60.134 | 20 |
| 234 | 0    | 233  | TTGGGAGTGAACATACATACA  | 60.064 | 26 |
| 238 | 2776 | 3013 | ACAGCAAGCATCCAGAAAGC   | 60.547 | 20 |
| 113 | 167  | 279  | ACAGAATATGCGTGATCGCC   | 61.034 | 20 |
| 269 | 7    | 275  | CAGAATATGCGTGATCGCCT   | 61.161 | 20 |
| 138 | 18   | 155  | GGATTTTTACCACGGCTGAA   | 59.938 | 20 |
| 199 | 113  | 311  | GTTGACGGATAACCCAAACG   | 60.227 | 20 |
| 245 | 1835 | 2079 | CCCTATTGTGAGAGGGGACA   | 59.92  | 20 |
| 139 | 219  | 357  | TGCGCCCTTTAAACTAAGG    | 59.381 | 20 |
| 222 | 211  | 432  | AACTTTGTCCAAACAAATGAA  | 59.828 | 24 |
| 187 | 529  | 715  | ATCGAATGAGTGGATTTGGG   | 59.75  | 20 |
| 263 | 582  | 844  | TCCATTCCGAAAATCAAAGG   | 59.872 | 20 |
| 148 | 525  | 672  | TGCGTTTACATTCAAGCAGTG  | 59.926 | 21 |
| 209 | 600  | 808  | CACATCTCCTCCCACTCCTC   | 59.638 | 20 |
| 137 | 89   | 225  | GTGTGTGTGCATGAGTGTGCG  | 59.772 | 20 |
| 207 | 15   | 221  | TGATTTTTAATGCCTTTCAGC  | 57.104 | 21 |
| 266 | 34   | 299  | CCTCGAATGCTATGACCGAA   | 61.129 | 20 |
| 279 | 561  | 839  | CCGTGCACCTCCTCCTAAT    | 60.081 | 19 |
| 209 | 4    | 212  | TCTCTTTTTGGTTGGTGAAGA  | 58.955 | 22 |
| 240 | 184  | 423  | TGCAGCTGAAATCAATGAAAA  | 59.434 | 21 |
| 248 | 641  | 888  | GTAGTTTTGGGGCAAATGGA   | 59.801 | 20 |
| 196 | 659  | 854  | CTTGATTCATCGAACGCAA    | 59.809 | 20 |
| 104 | 1722 | 1825 | CATATGCGATGTTTTGCATTTT | 59.867 | 22 |
| 243 | 0    | 242  | CCAAAGTTTATTTAACACGGA  | 59.842 | 25 |
| 203 | 634  | 836  | TGTTTCAATGCCACATAGGC   | 59.548 | 20 |
| 185 | 38   | 222  | TTGCTAAGCTCCAGCAACG    | 60.287 | 19 |
| 108 | 38   | 145  | CAATCTGGACGATACTCAATC  | 59.592 | 22 |
| 113 | 2757 | 2869 | ATCTGTTTCTTCTGCGGCTC   | 59.579 | 20 |
| 186 | 355  | 540  | GGGAATTACGGGATGTGAGA   | 59.75  | 20 |
| 245 | 4141 | 4385 | GGTTGTTTTGAGTTCCTCCA   | 59.943 | 20 |
| 146 | 3    | 148  | TGTCCATACACACCAAATAAA  | 59.707 | 25 |
| 269 | 123  | 391  | TTGGGGAAATAATGTCGATCT  | 58.381 | 21 |
| 252 | 4215 | 4466 | TGCATAAAGCTCATCTTGAC   | 59.08  | 21 |
| 193 | 110  | 302  | CGGTGAAGATTGGAGGAGAG   | 59.797 | 20 |
| 252 | 209  | 460  | CTTTGGAAAATTCGAGAGCG   | 59.953 | 20 |
| 136 | 1434 | 1569 | CTGAAGTGAACGGCATAAA    | 59.872 | 20 |
| 266 | 1    | 266  | CCTTTGGTCTCGGTTGAAAT   | 59.028 | 20 |
| 195 | 49   | 243  | CATGAAAGACTCTATAGACAA  | 57.458 | 27 |
| 198 | 118  | 315  | AGGGTGTGTGAGAGACCGAG   | 60.306 | 20 |
| 199 | 198  | 396  | TGGCTTGTATGTTCTGATCACC | 60     | 22 |
| 218 | 51   | 268  | TTGTTCGAAAGCCACAAATG   | 59.706 | 20 |

|     |      |      |                         |        |    |
|-----|------|------|-------------------------|--------|----|
| 260 | 0    | 259  | GCTAGGGCGATTGTATTGATG   | 59.583 | 21 |
| 165 | 263  | 427  | GCGTTGTGGTTAGGAGAAGG    | 59.734 | 20 |
| 158 | 6    | 163  | TACCGTTGGTTAATCCTGCC    | 59.823 | 20 |
| 244 | 125  | 368  | TTTCGAAAACATGCAATGGA    | 60.051 | 20 |
| 207 | 657  | 863  | ACCCCTCACAAGAACCAAGA    | 59.549 | 20 |
| 160 | 31   | 190  | AATGAATTGGTGGAGGGGTT    | 60.422 | 20 |
| 183 | 127  | 309  | AAAACGTTGGAAAAACACGG    | 59.876 | 20 |
| 124 | 753  | 876  | AGCAAATGCCAATAAGGTGG    | 59.96  | 20 |
| 161 | 40   | 200  | CGTGGTGCAGAGTCGTAGAG    | 59.641 | 20 |
| 208 | 24   | 231  | CACTCTGCTAGGGTTGGGAG    | 59.861 | 20 |
| 170 | 109  | 278  | GCTACCAAGCATCCACTTCC    | 59.7   | 20 |
| 263 | 113  | 375  | TTCGAATTTTATTATTGATTGA( | 59.121 | 25 |
| 271 | 286  | 556  | AACATGGCAATTTTAAGATCG,  | 59.864 | 23 |
| 211 | 29   | 239  | TTGCATGAACAACGTGGAAT    | 59.972 | 20 |
| 246 | 228  | 473  | TGTCACCTGAAAGAATTACA/   | 59.959 | 25 |
| 155 | 2    | 156  | TGAGGTCCCTTGTTTTCTAACC  | 59.499 | 22 |
| 174 | 524  | 697  | AATTAGCAGCTTATACGTGTG/  | 58.594 | 25 |
| 244 | 1913 | 2156 | TCCTTCTAATCGATTCTTCCAC. | 60.082 | 23 |
| 217 | 9710 | 9926 | TGAAGAAGACGTGGTCGAGA    | 59.545 | 20 |
| 265 | 2506 | 2770 | CACACCTCCTCCGACATCTT    | 60.112 | 20 |
| 159 | 0    | 158  | AAGCGACACGGGTTATTTTT    | 58.629 | 20 |
| 179 | 84   | 262  | GGACTCGGATAAAAAGGGA     | 60.258 | 20 |
| 264 | 2781 | 3044 | GCTGAGGCTTCTTCCATGTC    | 59.957 | 20 |
| 148 | 6    | 153  | CACACTCACTCACAAACACAC   | 59.744 | 23 |
| 215 | 1026 | 1240 | TTGAACGTACCCTCGATTCC    | 59.933 | 20 |
| 151 | 92   | 242  | CTCCCTAGACTCCGTAATTGG/  | 59.61  | 22 |
| 244 | 294  | 537  | CCCACATTGGAAAATGAGAAA   | 59.787 | 21 |
| 109 | 195  | 303  | AGCAAAAGGCAAAAGCAGAA    | 60.131 | 20 |
| 148 | 1147 | 1294 | ATCATGTAGTCGCGTGCTGT    | 59.349 | 20 |
| 207 | 55   | 261  | TGAACAATTGAACACCGGAA    | 59.941 | 20 |
| 174 | 973  | 1146 | TGCTGTCCCTCTAGCAGGT     | 60.012 | 20 |
| 146 | 1    | 146  | TGCGTTTTGACAATATATAGGT  | 60.083 | 26 |
| 181 | 202  | 382  | AGCGAGAGGAAAGGGAAGAC    | 60.088 | 20 |
| 247 | 160  | 406  | TGGAAGATGAGTTGCAGCAG    | 60.136 | 20 |
| 201 | 1060 | 1260 | ATTATGTGCAAGCTCATCCG    | 58.749 | 20 |
| 225 | 73   | 297  | CGGGTGACATTGCCTAATTT    | 59.823 | 20 |
| 195 | 243  | 437  | TCACGTGTCATTGTAACCGC    | 60.584 | 20 |
| 218 | 2319 | 2536 | AATTGATTGCTGCTGCTGTG    | 60.019 | 20 |
| 170 | 428  | 597  | TCGTCAATTCATGGCTTCTG    | 59.799 | 20 |
| 143 | 4044 | 4186 | CGGAGAATTGATGTTCCCAT    | 59.75  | 20 |
| 244 | 179  | 422  | TGCAGCTAATTTTCTGCTGG    | 59.206 | 20 |
| 190 | 5    | 194  | TCTCGCCTTTCTTTTCTAACC   | 59.155 | 22 |
| 107 | 225  | 331  | TCTCAACCAATGATGAGCCA    | 60.201 | 20 |
| 225 | 214  | 438  | TTTACGGATCGAAAATTCTCCT  | 59.123 | 22 |
| 132 | 209  | 340  | CCACGAGATGGGGACATTTA    | 60.713 | 20 |
| 179 | 303  | 481  | GCTTCGATCCGTTCAATCTC    | 59.78  | 20 |
| 242 | 1186 | 1427 | GAAATGCATCTCATTGGGT     | 59.9   | 20 |
| 205 | 1231 | 1435 | AACCGATTA AAAACCGGACC   | 60.055 | 20 |
| 137 | 344  | 480  | CGCAACACGAGTAGCAAAGA    | 60.195 | 20 |
| 234 | 736  | 969  | CGCTGAGGGATCTGGTATGT    | 60.096 | 20 |
| 240 | 1676 | 1915 | GCTGGATTTTTGGCATTCT     | 59.907 | 20 |
| 235 | 1077 | 1311 | TTTTTCGGTTCGGTTCAAAG    | 60.081 | 20 |
| 215 | 118  | 332  | GTTTCACTTTGGTACCCGGA    | 59.83  | 20 |
| 140 | 408  | 547  | AAGTCGGCCAAGAAGAGAAA    | 59.052 | 20 |
| 118 | 48   | 165  | CTAAGCGATGCCTAAGGCTG    | 60.131 | 20 |
| 185 | 64   | 248  | TCTCACTCTCACTAGCCGCA    | 59.88  | 20 |
| 185 | 15   | 199  | GGAAAATATCAAGTCAACACA   | 58.257 | 25 |
| 261 | 596  | 856  | TGTGATTAGCATCACAGCCC    | 59.679 | 20 |



|     |      |      |                        |        |    |
|-----|------|------|------------------------|--------|----|
| 199 | 42   | 240  | AAACAAACAATCAACGCTAAA  | 59.976 | 24 |
| 257 | 276  | 532  | TATGGATGCCCCAGATTGTT   | 60.155 | 20 |
| 225 | 22   | 246  | TGATTTTGGACGTTCTGCAC   | 59.697 | 20 |
| 166 | 104  | 269  | GTGGAAGTAGGTGGTGGTGG   | 60.275 | 20 |
| 189 | 96   | 284  | TGACGTTTTCCGAAGTACGA   | 59.317 | 20 |
| 262 | 87   | 348  | AATAGCGCAAACGGATTAGAA  | 58.906 | 21 |
| 273 | 31   | 303  | TCAAATGCACAAATTCATGG   | 59.41  | 21 |
| 254 | 446  | 699  | TCGGTGTGCAGTGTTTAAG    | 59.758 | 20 |
| 204 | 628  | 831  | TTACATTTGATTAGGTGTGAC  | 58.612 | 24 |
| 249 | 567  | 815  | AAATCGTGAGCAGCAGGTTT   | 59.882 | 20 |
| 258 | 739  | 996  | TGCCTTGCTCTGTACAAGATTT | 59.044 | 22 |
| 245 | 32   | 276  | CACAATAAGGGTTGGTATCAT  | 59.556 | 24 |
| 280 | 791  | 1070 | GGATAAAGTACGATGATTGAC  | 58.013 | 23 |
| 168 | 1163 | 1330 | TGATCTTCTTGCCACCACTG   | 59.831 | 20 |
| 166 | 494  | 659  | CAGTGTCATCCATCCAAGA    | 59.473 | 20 |
| 280 | 34   | 313  | ATAGGTGTGGCCAGTTTGA    | 60.375 | 20 |
| 162 | 42   | 203  | AGGACACGTTGGACCTGAAA   | 60.545 | 20 |
| 124 | 21   | 144  | AACATGGGTTATCACTTGAATC | 59.308 | 24 |
| 264 | 31   | 294  | AGTAGACGCGACTTTGGTGG   | 60.312 | 20 |
| 219 | 360  | 578  | TGAAACTAAAAATGCCAAGCA  | 58.482 | 21 |
| 124 | 47   | 170  | GGTTCTGAAACCGGGATAGG   | 60.683 | 20 |
| 208 | 411  | 618  | TTGAAGAAGTCAAATGGGGC   | 60.051 | 20 |
| 186 | 1012 | 1197 | ATTTGACCTTTTACCTTGCCC  | 59.363 | 21 |
| 207 | 125  | 331  | GACTCAGGGTCTTCACGGT    | 59.153 | 20 |
| 239 | 68   | 306  | AGTCCTTCGGAGGAGCAATA   | 58.886 | 20 |
| 227 | 64   | 290  | GAGAGGGCTTCTTCTGGGAT   | 59.778 | 20 |
| 219 | 26   | 244  | TAGAAGGCATTGAGAGTCGC   | 58.201 | 20 |
| 251 | 590  | 840  | CATCTGAAATAGATCATTTACA | 57.409 | 27 |
| 228 | 288  | 515  | AGACTCCAAGCCCTGTTGTG   | 60.298 | 20 |
| 280 | 123  | 402  | TGTTACATTATGTGGCCCGA   | 59.809 | 20 |
| 231 | 656  | 886  | AATATTCGATCCGGAAGGGT   | 59.627 | 20 |
| 275 | 646  | 920  | CCAGCATTGTTTGACATGA    | 58.099 | 20 |
| 122 | 7    | 128  | ACCTTTGGATATGGTGATTTGC | 59.945 | 22 |
| 245 | 246  | 490  | CAAACCCGAGCTTCCATAAAA  | 60.067 | 20 |
| 279 | 1615 | 1893 | TCCTTTCACTAACCCGATGC   | 60.074 | 20 |
| 277 | 452  | 728  | AACCTCTATCCCGTGCAATG   | 59.955 | 20 |
| 107 | 4    | 110  | CATTTGCCTTGTCACAGCAT   | 59.722 | 20 |
| 149 | 2    | 150  | TTCCATAAAAAGTTAGGCAAG  | 57.727 | 24 |
| 245 | 127  | 371  | ACAACATTCATCGTCCCT     | 59.263 | 20 |
| 198 | 742  | 939  | TGTTGTTTCCACACCCATGT   | 59.701 | 20 |
| 237 | 651  | 887  | GGCTGGCTCCAGTAGTTGTT   | 59.357 | 20 |
| 184 | 221  | 404  | ATCTGTGTGTTGAGAGATCAG  | 59.859 | 25 |
| 177 | 66   | 242  | CAAAAACAGAGTGAGGGGGA   | 60.081 | 20 |
| 122 | 194  | 315  | TGTCCTTTTGGATCCAGTCC   | 59.903 | 20 |
| 251 | 5    | 255  | TTGCTGCCCTATTTTCTTTGA  | 59.84  | 21 |
| 261 | 261  | 521  | AAGCAATCAAAAGCTCCAGG   | 59.452 | 20 |
| 196 | 805  | 1000 | CGCTCATTTTCTCACACCAA   | 59.84  | 20 |
| 182 | 1596 | 1777 | CCATGTCCCCTTTCTACCAA   | 59.784 | 20 |
| 245 | 303  | 547  | AACACTTCGCGCAGACAAAT   | 60.837 | 20 |
| 192 | 39   | 230  | AACTCACATCAGATTCCCCAA  | 59.396 | 21 |
| 242 | 56   | 297  | TCGAGCTTGGTTTCGAGACTT  | 60.134 | 20 |
| 274 | 836  | 1109 | TCAGCGGCTTAACATGTTTCT  | 59.897 | 21 |
| 250 | 686  | 935  | AAGCCAACCGCAAAATCTAA   | 59.72  | 20 |
| 267 | 1    | 267  | CGGCTGGATTTTATCCCTAT   | 61.165 | 20 |
| 183 | 917  | 1099 | GCCCTGTTTCGTTTATGTCTT  | 60.119 | 20 |
| 278 | 3    | 280  | TCCAATGGATGAGGATGGTT   | 60.135 | 20 |
| 261 | 117  | 377  | CCCCATATGCTATGCTTTG    | 60.302 | 20 |
| 255 | 199  | 453  | AAGGCTTTTGGAGGATGGAG   | 60.569 | 20 |

|     |      |      |                         |        |    |
|-----|------|------|-------------------------|--------|----|
| 117 | 331  | 447  | GGCGAGTCTCGTCCTTGTAG    | 60.012 | 20 |
| 103 | 1211 | 1313 | GTTCCCTTGCTGCTGTCCATT   | 60.263 | 20 |
| 138 | 0    | 137  | CCATGTTTGTAAATTATTGTAGG | 58.388 | 25 |
| 248 | 68   | 315  | ATCACTAGAATGCGCCCCTA    | 59.691 | 20 |
| 255 | 489  | 743  | CATGTGAGACCCATTCTCCC    | 60.326 | 20 |
| 138 | 164  | 301  | ATTCTGATCGACCAGTGGGT    | 59.384 | 20 |
| 205 | 274  | 478  | CATCGATTGACCCCTCATCT    | 59.886 | 20 |
| 278 | 4    | 281  | GCTGGGAATTGCTGATATTGA   | 60.052 | 21 |
| 224 | 28   | 251  | CCTCCCTTAGGGTTCCTCAC    | 59.928 | 20 |
| 178 | 303  | 480  | AGCCGGTCAAGTAGAGGGAT    | 60.096 | 20 |
| 278 | 81   | 358  | CGAGCAAGGAATAGACCGAG    | 59.971 | 20 |
| 182 | 62   | 243  | AATTTAATTCCGTGCAACGC    | 59.971 | 20 |
| 272 | 14   | 285  | ATGTTTCCTCTTGGGTGGGT    | 60.607 | 20 |
| 258 | 386  | 643  | CGACCCTGAGAGATTCTTG     | 59.797 | 20 |
| 229 | 635  | 863  | GGGCGGTGTAAGAGATTGAA    | 60.074 | 20 |
| 170 | 26   | 195  | TCACCATGAAGAAACCCACA    | 59.935 | 20 |
| 208 | 1413 | 1620 | AACTGAGGATCTTGGGTGGA    | 59.505 | 20 |
| 223 | 2444 | 2666 | TAGAGAAGCCGGATGCAGAT    | 59.939 | 20 |
| 219 | 801  | 1019 | ACCTGGGAGCATGTTTCTTG    | 60.111 | 20 |
| 243 | 551  | 793  | TTCGGTTTTTACTCCCACTATG  | 58.188 | 22 |
| 267 | 86   | 352  | TCTTATATCCCCGCCACTGT    | 59.41  | 20 |
| 130 | 1846 | 1975 | AAAATCCGATCTCCGAAACA    | 59.505 | 20 |
| 115 | 6    | 120  | TCAAGCTTAATTAGAAGAAAA   | 58.427 | 27 |
| 251 | 257  | 507  | AGAAAGCCTACCTCGCTTCC    | 59.983 | 20 |
| 204 | 137  | 340  | CCGAAATACTCCCACCCTTT    | 60.18  | 20 |
| 279 | 1814 | 2092 | CTCAAATCTCTGCCCTCTGC    | 60.096 | 20 |
| 224 | 90   | 313  | TGCTGTGGTATGCTTTGATTG   | 59.744 | 21 |
| 148 | 11   | 158  | TTCCCGTATACAAATCCAAC/   | 59.231 | 22 |
| 193 | 277  | 469  | GGATAATCAGAATCCCCGGT    | 59.981 | 20 |
| 239 | 384  | 622  | GTCGTTGTTGAATGTCGGTG    | 60.008 | 20 |
| 184 | 761  | 944  | GGCTCCCCATTTCTCTCTCT    | 59.778 | 20 |
| 124 | 134  | 257  | ATTTTCTGTGCAATGGTCCG    | 59.933 | 20 |
| 110 | 41   | 150  | GCTGCATGAACACCAAGAAA    | 59.847 | 20 |
| 104 | 753  | 856  | AATAATAATTCCCTCCTCTCGA  | 57.781 | 24 |
| 271 | 74   | 344  | AAATCCCCGTTCCATCATAA    | 59.091 | 20 |
| 150 | 52   | 201  | TTTGATATACATGGTATTTAAT  | 57.034 | 27 |
| 207 | 5    | 211  | CCCTAGCTTTGCCCTCTTTC    | 60.332 | 20 |
| 196 | 9    | 204  | TCGATTTGGATTCGAATTTGT   | 59.402 | 21 |
| 259 | 771  | 1029 | GGCGGTGCTTAACTATGGAG    | 59.73  | 20 |
| 242 | 544  | 785  | TGGTGACGATTATAAAATCAA,  | 57.729 | 24 |
| 276 | 137  | 412  | TCGACCTCGAATTCTCATCA    | 59.322 | 20 |
| 274 | 492  | 765  | GAGGCTGACGGATTTCCAC     | 60.616 | 19 |
| 276 | 22   | 297  | CGGACTGAGCTGAGCTAAAAT   | 58.756 | 21 |
| 277 | 112  | 388  | CCAGCTCCATCATCTCTTCC    | 59.761 | 20 |
| 270 | 125  | 394  | TGGCATTAAAATCCACCATTG   | 60.554 | 21 |
| 245 | 21   | 265  | CCCACGTGCACTTCTTTTGTA   | 61.092 | 21 |
| 117 | 224  | 340  | TGAACACAGCTCGAAAGCAT    | 59.596 | 20 |
| 268 | 251  | 518  | TCGAGCTTGCTCAAAAGTCA    | 59.864 | 20 |
| 210 | 65   | 274  | GATGAACACCCGAACCACTT    | 59.827 | 20 |
| 224 | 57   | 280  | GGCAACGGTATACCACTCGT    | 59.882 | 20 |
| 125 | 72   | 196  | TGACATCTTCGAGTGCTCGTT   | 60.991 | 21 |
| 132 | 2076 | 2207 | CTCCCTCTTCCCTCTCCA      | 60.695 | 20 |
| 277 | 379  | 655  | AGAGCAAAGAGTGGGGTGAA    | 59.844 | 20 |
| 266 | 12   | 277  | GATCTCCACCATTTACGGGA    | 59.75  | 20 |
| 158 | 135  | 292  | TGCTAATCTACGAATTTGGGA   | 57.416 | 21 |
| 192 | 81   | 272  | TAAGGGCGGTATCACCTGAA    | 60.46  | 20 |
| 276 | 6    | 281  | TCCACACAGAGACACTGGAA    | 57.683 | 20 |
| 267 | 64   | 330  | TGGCAATCGAGATATAATTGG   | 57.62  | 21 |

|     |      |      |                        |        |    |
|-----|------|------|------------------------|--------|----|
| 278 | 4    | 281  | TTCTTTATTCACAATGAACTCA | 57.6   | 26 |
| 239 | 782  | 1020 | AAGAGTGTTGTGGCCGAAAT   | 59.598 | 20 |
| 182 | 1119 | 1300 | GCTAGGGGTCTGCAAATCAA   | 60.214 | 20 |
| 193 | 3395 | 3587 | TGAATCCGTTTCACTCGTCA   | 60.24  | 20 |
| 207 | 1234 | 1440 | TGCAGACAATCCCACATGAT   | 59.925 | 20 |
| 246 | 1891 | 2136 | AAAGAAGTCAAGGGCTTTTGT  | 58.5   | 22 |
| 175 | 803  | 977  | AATCACGTTGAGGATTCGGA   | 60.461 | 20 |
| 127 | 79   | 205  | GCACTCACACACGAAAGA/    | 59.937 | 21 |
| 249 | 697  | 945  | CTATCATCCACGCATTGAACA  | 59.557 | 21 |
| 139 | 521  | 659  | TCTTTACCCTTGGTTGGTGG   | 59.824 | 20 |
| 192 | 5021 | 5212 | AACAAAAATGATGGTGAAGTC  | 59.666 | 23 |
| 226 | 118  | 343  | AATTGAACCTTGGGCTAAAGT, | 57.063 | 22 |
| 224 | 418  | 641  | CCGTGATGTAATAGGACGTGG  | 60.256 | 21 |
| 253 | 607  | 859  | TCGATTGACAAACTCACATGG  | 59.556 | 21 |
| 182 | 976  | 1157 | CAAACATTTGAGGAAGGCGT   | 60.11  | 20 |
| 213 | 41   | 253  | CAAGCTTGGCGTTATGAATG   | 59.325 | 20 |
| 250 | 175  | 424  | ACCCCTTGTTTGCCTTTCTT   | 59.976 | 20 |
| 279 | 469  | 747  | GCATCGTCTCAACCCTTGAT   | 60.081 | 20 |
| 184 | 1071 | 1254 | AAGTGGAATTTTCGGGCTAT   | 59.799 | 20 |
| 272 | 4528 | 4799 | GTCCACGCAATACCATCCTT   | 59.82  | 20 |
| 248 | 110  | 357  | ATTTTGCCACGAATTAGCA    | 60.456 | 20 |
| 141 | 324  | 464  | ACCCATCTCCTAACACGCAT   | 59.434 | 20 |
| 227 | 14   | 240  | GGTCTGTTTTCCATGGCCTA   | 59.933 | 20 |
| 250 | 82   | 331  | ACGTGTCGCAATCAGAATGT   | 59.169 | 20 |
| 250 | 113  | 362  | CACAACACACACGGACATCA   | 60.044 | 20 |
| 105 | 11   | 115  | ACACGAGTGAAGAAAGGGAG.  | 58.929 | 21 |
| 147 | 299  | 445  | CGTGTGTTATCGTGTTCTG    | 59.64  | 20 |
| 186 | 84   | 269  | GCATCTCTCCCTTGCTCTCTT  | 60.11  | 21 |
| 230 | 355  | 584  | TTTTGAAGACATGGTTGGACA  | 59.01  | 21 |
| 280 | 46   | 325  | TGAAACGGAGGGAGTACACA   | 59.135 | 20 |
| 250 | 100  | 349  | TGCTGACCTAACCCCAAAT    | 59.592 | 20 |
| 143 | 25   | 167  | TGGTTATGCCTTCTTCTTCCA  | 59.693 | 21 |
| 168 | 231  | 398  | ATGCGTTCCTCAATAGCATT   | 59.929 | 20 |
| 233 | 107  | 339  | CTGCAAAAGCATCACCAGAA   | 59.988 | 20 |
| 206 | 663  | 868  | ATCAATTTTTGAGTTATGATGT | 57.321 | 26 |
| 220 | 28   | 247  | GTGGACGCTCCAGATTGTTT   | 60.119 | 20 |
| 212 | 25   | 236  | GAGGGATTTTGGGACGATTT   | 60.131 | 20 |
| 140 | 2    | 141  | TTGTGTGGTTGTGATTTAGTTA | 59.328 | 26 |
| 248 | 78   | 325  | AGACTAAAGGCCAAGAGGGC   | 59.848 | 20 |
| 168 | 612  | 779  | ATGACAGTTGGGTTTCTGGG   | 59.82  | 20 |
| 269 | 108  | 376  | ACGTCTTTCATGCACCAAT    | 58.158 | 20 |
| 278 | 23   | 300  | CAACATACAGGCACGAAAATC  | 59.097 | 21 |
| 269 | 10   | 278  | GGAACCCATCCACCCTATTT   | 59.881 | 20 |
| 227 | 4360 | 4586 | ATTTTGGCGCGAAACATAAG   | 60.095 | 20 |
| 259 | 18   | 276  | GTCACACACACTCACGGCTT   | 59.789 | 20 |
| 131 | 241  | 371  | ACACCGTGGACGTAGATCGT   | 60.453 | 20 |
| 224 | 232  | 455  | ATGGTCCCCTCAACACAAGA   | 60.363 | 20 |
| 279 | 13   | 291  | CCTAGCCTTTGCCCTCTTTT   | 59.85  | 20 |
| 199 | 91   | 289  | CTCAAACATTCATCAATATAC/ | 59.74  | 26 |
| 277 | 4    | 280  | TGGAAGCACGTGACAGCTAA   | 60.596 | 20 |
| 167 | 262  | 428  | CAGAGAAAAGTGAGCTCGGG   | 60.126 | 20 |
| 280 | 1935 | 2214 | CAGGTGGAGTTTCATCCACA   | 59.52  | 20 |
| 250 | 944  | 1193 | TCCTCCCTTACTTGCCTTGA   | 59.807 | 20 |
| 222 | 782  | 1003 | ATGCAAACAATGCTGCAAAG   | 59.879 | 20 |
| 170 | 280  | 449  | AACCGCTCTGATGCTCTTGT   | 60.02  | 20 |
| 233 | 222  | 454  | AAACCCATCACCCACGTTTA   | 60.088 | 20 |
| 271 | 652  | 922  | GCGAGCAAATGAATAAGAGTC  | 59.501 | 22 |
| 268 | 81   | 348  | ATGTGACCCACCTTACGAGG   | 59.844 | 20 |

|     |      |      |                        |        |    |
|-----|------|------|------------------------|--------|----|
| 228 | 60   | 287  | ATTTCCCAACAGTGCCAAAC   | 59.836 | 20 |
| 270 | 879  | 1148 | TCATCCCATGCGTGTATGTT   | 59.805 | 20 |
| 135 | 3    | 137  | GGCTTTATGATCCATTCTCAA  | 58.2   | 22 |
| 276 | 411  | 686  | GTGTTCCCTCAAGCCGAAATC  | 59.676 | 20 |
| 168 | 896  | 1063 | CCAAACCAATTCAAAGGGA    | 59.772 | 20 |
| 256 | 131  | 386  | TTCGATCCCAGATGTTGAAA   | 59.049 | 20 |
| 156 | 227  | 382  | CAAAGGCCACAATGGTTAT    | 59.685 | 20 |
| 211 | 508  | 718  | TCCCTAATTCCAATTCCCCT   | 59.6   | 20 |
| 164 | 2    | 165  | TGCGTTTTGACAATATTTAGTG | 59.109 | 25 |
| 200 | 23   | 222  | TATCGGTTATTACCGGATCGC  | 61.005 | 21 |
| 274 | 131  | 404  | CCACATAAAGGATTCCCGTG   | 60.184 | 20 |
| 187 | 114  | 300  | TCAAAAACAGAGGAGAAGGG   | 60.214 | 22 |
| 280 | 1280 | 1559 | AAATAGGAGGCTTGATCGGC   | 60.551 | 20 |
| 146 | 53   | 198  | GGCCAAGTCTGGCCTATTTA   | 59.182 | 20 |
| 156 | 83   | 238  | CACGGTTAGGCTCGAGAGAG   | 60.149 | 20 |
| 274 | 118  | 391  | TCGTGAAGAAAATCGAACCA   | 59.247 | 20 |
| 247 | 38   | 284  | GATCGATTTTCAGCATCATTGG | 60.429 | 21 |
| 201 | 17   | 217  | ACCAATGGTGGTATGGTGTG   | 58.984 | 20 |
| 275 | 127  | 401  | CTTCGCACGAGTGTGAAAG    | 59.634 | 20 |
| 184 | 122  | 305  | TAATGGTGTGCTGGGTTGA    | 59.964 | 20 |
| 232 | 333  | 564  | TGGCAGAACAAAACACTCATGC | 59.847 | 20 |
| 213 | 77   | 289  | GATATGAGGCCAAACTGGGA   | 59.894 | 20 |
| 280 | 7706 | 7985 | CCATGCCACCTTCTATTGGT   | 59.813 | 20 |
| 196 | 2394 | 2589 | GGTGGTATGGTGTGGAGGAC   | 60.096 | 20 |
| 195 | 584  | 778  | GCGAAAATTCCACCATAGTCA  | 59.952 | 21 |
| 172 | 950  | 1121 | ACAACAAATTAGCTGAATGGC  | 59.652 | 22 |
| 226 | 264  | 489  | AGAGGGAGATCGACGTGAGA   | 59.945 | 20 |
| 164 | 0    | 163  | TGGGGCCTACGAGAAATATG   | 59.916 | 20 |
| 268 | 150  | 417  | GTCACCTCACACACCACTCG   | 60.207 | 20 |
| 207 | 98   | 304  | CAGCTATCGAAACAATGCCC   | 60.606 | 20 |
| 188 | 462  | 649  | GTCGTGAGAGAAGCTCACC    | 60.143 | 20 |
| 214 | 16   | 229  | TCTTATAGCATCAACCGCCA   | 59.281 | 20 |
| 269 | 102  | 370  | TGCAATCCAGTCGCATTTAG   | 59.833 | 20 |
| 240 | 27   | 266  | GGGGTTATCATGGGATCAAG   | 59.055 | 20 |
| 203 | 1153 | 1355 | ACCAACTGCCCTCTATTCC    | 60.328 | 20 |
| 273 | 369  | 641  | ACACACATGGATGGAGAGAC/  | 58.955 | 21 |
| 277 | 2015 | 2291 | GAATCGTAACATGTAACACAC  | 59.332 | 26 |
| 253 | 469  | 721  | ACCGTGCAATCCAATTTAGC   | 59.967 | 20 |
| 272 | 72   | 343  | GGCGGCATTCTATGAGGTAA   | 60.06  | 20 |
| 264 | 21   | 284  | GAAAAGCTTGGCCATTCAAC   | 59.691 | 20 |
| 143 | 13   | 155  | TGATTGTAAAACATGTATGGG, | 59.898 | 25 |
| 178 | 33   | 210  | TCGTGATCATTCTTGCCTTG   | 59.799 | 20 |
| 190 | 19   | 208  | TCACCAAGGATAGCCACCAT   | 60.34  | 20 |
| 267 | 1    | 267  | AATAAGTTCACTTTATGCGAA/ | 58.116 | 26 |
| 213 | 189  | 401  | AACCCCAACCAACTCCTAC    | 60.088 | 20 |
| 126 | 42   | 167  | ATCCGCCATTGACCTCATAC   | 59.78  | 20 |
| 201 | 396  | 596  | CGTGTCTGGTGTTCATGG     | 60.001 | 20 |
| 263 | 984  | 1246 | AGCCACAAAGTTGCATTCT    | 59.74  | 20 |
| 153 | 9    | 161  | CGGGATTTAGGTGTTTTGACA  | 59.847 | 21 |
| 233 | 381  | 613  | AATGCTCTACCAACTCGCT    | 60.02  | 20 |
| 254 | 21   | 274  | TGCTTCATTGGTGGTAACGA   | 60.111 | 20 |
| 249 | 235  | 483  | ACAACCATGTGAGGGTTTC    | 59.827 | 20 |
| 257 | 1262 | 1518 | ACGGTTGAAACGTGGGTATG   | 60.668 | 20 |
| 133 | 129  | 261  | CTGAAATGAAATCATGCCCC   | 60.274 | 20 |
| 214 | 456  | 669  | CTATTGAAACAACCCCGGAC   | 59.288 | 20 |
| 259 | 6    | 264  | ATTCACAATGGCAAGGAACC   | 59.797 | 20 |
| 110 | 506  | 615  | TCGCATGCTTTGGTGATTAG   | 59.833 | 20 |
| 120 | 448  | 567  | TGGATGCACCAGATTGTTTC   | 59.502 | 20 |

|     |      |      |                        |        |    |
|-----|------|------|------------------------|--------|----|
| 274 | 1    | 274  | CTGCTCCTTCTCACTCTTCCA  | 59.73  | 21 |
| 229 | 38   | 266  | GCGGTTATCACCGGATCG     | 62.397 | 18 |
| 254 | 1087 | 1340 | AGTTGGGAATTGGGATAGGG   | 60.011 | 20 |
| 131 | 28   | 158  | CCTAAACTTCAAACGTGGG    | 59.901 | 22 |
| 104 | 63   | 166  | CACTTGGACCTGAAAAAGGA   | 57.77  | 20 |
| 259 | 1668 | 1926 | CTCATTTTCTCCGCATCACA   | 59.799 | 20 |
| 234 | 0    | 233  | GCACTTAGGAGAGAGATTGTT  | 59.424 | 23 |
| 279 | 53   | 331  | GCTCGAGGCATGTAAGAAGC   | 60.125 | 20 |
| 280 | 1005 | 1284 | CAACATGTGCAGGTTGAGGT   | 59.597 | 20 |
| 175 | 131  | 305  | CGTTGCCGGATAATTCAAAC   | 60.323 | 20 |
| 114 | 487  | 600  | CTTCCGAACATCCCAACAA    | 60.863 | 20 |
| 139 | 883  | 1021 | CCGAAAGTAGCGAACAAACC   | 59.747 | 20 |
| 230 | 232  | 461  | GAAGCAGGCCTACTCTCTCTG  | 59.187 | 20 |
| 160 | 180  | 339  | ATTCATTCTCCAACCATCGG   | 59.75  | 20 |
| 249 | 128  | 376  | GTGGTATAGCGGTTGGCATC   | 60.361 | 20 |
| 123 | 172  | 294  | CCATCATTTCCCTCACCTCA   | 60.86  | 20 |
| 207 | 373  | 579  | TTCCATCAATCCACTCCACC   | 60.725 | 20 |
| 144 | 2234 | 2377 | GCGTACACCCATTTTGAAGG   | 60.365 | 20 |
| 159 | 78   | 236  | GGGTGAGTAACGGTGCAAGT   | 60.035 | 20 |
| 205 | 103  | 307  | TGAATTTGGGACTCAACGAAG  | 60.096 | 21 |
| 226 | 19   | 244  | GTGTGGAAAAGGGAGTGCAT   | 59.973 | 20 |
| 278 | 1311 | 1588 | GAGAGGCTCGCCATTGATAG   | 59.939 | 20 |
| 206 | 429  | 634  | ATGCGACAGAGTGTGTGAGG   | 59.897 | 20 |
| 232 | 213  | 444  | TGTTTTGGCCTAAATGGAC    | 59.801 | 20 |
| 245 | 24   | 268  | ATTGGAGAGGAAAAATGGGG   | 60.124 | 20 |
| 205 | 51   | 255  | GCGTTGACGCTATTGAAATG   | 59.329 | 20 |
| 158 | 69   | 226  | ATGCCTCAAATCACAACCC    | 59.797 | 20 |
| 134 | 119  | 252  | AGAAACGTGCGTGACCAATC   | 59.973 | 20 |
| 188 | 14   | 201  | GGATTTAGCGGTTATTACCTG/ | 57.387 | 22 |
| 110 | 18   | 127  | CTCTCGAGCCTAACTGTGGC   | 60.156 | 20 |
| 198 | 39   | 236  | TCCAATTTTGGGAAATACTATC | 57.592 | 23 |
| 191 | 28   | 218  | AGGAGAGTTGTAGAGTCAAGT  | 58.31  | 27 |
| 220 | 4327 | 4546 | AAGAGCATCAAACATCATTTCT | 58.188 | 22 |
| 152 | 11   | 162  | TTCCCGTATACAAATTCCAAC/ | 59.231 | 22 |
| 262 | 467  | 728  | GAACCACCAAAGCAATACCAC  | 59.35  | 21 |
| 211 | 249  | 459  | CGGTACAGATTGCACACGAC   | 60.183 | 20 |
| 142 | 8    | 149  | TTCACTTAGCTCTTGATTTTCA | 60.182 | 26 |
| 203 | 105  | 307  | CCTTAGAGCTCGGTTGCAGT   | 59.639 | 20 |
| 207 | 412  | 618  | GAAACCCGACCGAATACTCA   | 59.933 | 20 |
| 269 | 40   | 308  | CAAGGAAGGAACCTCATTTT   | 59.447 | 21 |
| 199 | 76   | 274  | TTTCGATATGGCTCGGTAGG   | 60.053 | 20 |
| 190 | 97   | 286  | TAACATGTAGTCATGCGGGC   | 59.572 | 20 |
| 273 | 45   | 317  | AGGGGGAGGGCTATACTCAA   | 59.919 | 20 |
| 182 | 514  | 695  | CAATTCTCCATGCACACCAG   | 60.112 | 20 |
| 228 | 16   | 243  | AGCCCTAGAATCTGCCCTCT   | 59.443 | 20 |
| 204 | 546  | 749  | GCCAGTCCAATGGTCGTA     | 59.997 | 20 |
| 260 | 1432 | 1691 | GCTTGCTCGTTATCGATGGT   | 60.243 | 20 |
| 237 | 60   | 296  | GTGAATGAGGTGTGGGTGTG   | 59.846 | 20 |
| 238 | 68   | 305  | ATTCCCAACTGATTGGCTTG   | 59.933 | 20 |
| 168 | 76   | 243  | TGAGCAAGGGACAAATGTGA   | 60.24  | 20 |
| 170 | 525  | 694  | ATTGAAACCATGCCCATTTT   | 59.628 | 20 |
| 150 | 7    | 156  | ACCAAATTTAAGGGTTATCAC  | 59.579 | 24 |
| 236 | 222  | 457  | TATCCCATGATCGAGTTCCG   | 60.822 | 20 |
| 111 | 87   | 197  | TATGAAGCATAACCATGCCG   | 59.543 | 20 |
| 110 | 362  | 471  | GTTCTTTGGGAAACAACGGA   | 59.948 | 20 |
| 139 | 12   | 150  | TTGAGCTGTTATGCGTTTTGA  | 59.5   | 21 |
| 250 | 443  | 692  | TTAGAGTTGGCATCGGGAAA   | 60.576 | 20 |
| 255 | 2067 | 2321 | GCCAAGGGAAAGCTTTTATCA  | 60.552 | 21 |

|     |      |      |                         |        |    |
|-----|------|------|-------------------------|--------|----|
| 127 | 144  | 270  | GACAACCTTCGGCTTGAAAA    | 60.227 | 20 |
| 166 | 13   | 178  | GCAGGAAAATGAAAAGTGGG    | 59.546 | 20 |
| 278 | 585  | 862  | TTCTTCTCCTTGTCGTGCCT    | 59.989 | 20 |
| 194 | 314  | 507  | CGGTGGGTGTTTGATGAAG     | 59.944 | 19 |
| 213 | 1213 | 1425 | GGGTGGGTCACCTCACTCATT   | 59.817 | 20 |
| 262 | 58   | 319  | TCTGAAATTTTGACGGCTCC    | 60.192 | 20 |
| 222 | 94   | 315  | GCATCTACTCTGGCTCTCATTC  | 59.927 | 23 |
| 258 | 2646 | 2903 | AATGGACCGGACGTGAACTA    | 60.375 | 20 |
| 136 | 98   | 233  | AACATGTTGATCTAAATAACG   | 57.516 | 24 |
| 249 | 867  | 1115 | CGTATTGCAGTGAAATTTTAGC  | 59.352 | 23 |
| 199 | 1696 | 1894 | CAGACATGTGTACCACCCCA    | 60.285 | 20 |
| 260 | 583  | 842  | ACCGACCACCCTCTTTTTCT    | 59.972 | 20 |
| 195 | 70   | 264  | CACCTGATCGCGACCCTAT     | 61.041 | 19 |
| 125 | 1726 | 1850 | TAGGTTGACGATGGGTTCT     | 59.405 | 20 |
| 153 | 91   | 243  | TTACCACAATTTCCCTTGTTTT  | 57.605 | 22 |
| 254 | 287  | 540  | TTTCAGTTGGCAGTGCAGAG    | 60.175 | 20 |
| 115 | 43   | 157  | TTTGCCCTTATTTAGCACGG    | 60.089 | 20 |
| 239 | 399  | 637  | GCCCAAATATCCATCAACA     | 59.652 | 21 |
| 207 | 206  | 412  | CCTGCCAGATCTCTCTGAT     | 59.359 | 20 |
| 269 | 146  | 414  | TGTAACCGTGATTGGGAGGT    | 60.232 | 20 |
| 259 | 33   | 291  | TTGCGGGGTTGTTAAAGAAT    | 59.451 | 20 |
| 155 | 909  | 1063 | CTTGTAAGGCCAGGCACATT    | 60.132 | 20 |
| 259 | 78   | 336  | TCGAATTTCTAGCGTGATGG    | 58.869 | 20 |
| 255 | 51   | 305  | GCTTAATGCGTAGCTGGGAT    | 59.347 | 20 |
| 142 | 0    | 141  | CAAACGTGAGTGGGAGATGTA   | 60.03  | 22 |
| 217 | 549  | 765  | AAACGCGAAGTTTGGTGAAT    | 59.615 | 20 |
| 269 | 2187 | 2455 | TATCATCTGTCTGAAGCTCGC   | 59.131 | 20 |
| 253 | 227  | 479  | CCAAAATTTACAACGTGATCA   | 60.488 | 24 |
| 274 | 571  | 844  | AATGTGCTTATCCACCGACA    | 59.002 | 20 |
| 251 | 33   | 283  | AAAACACTACGATCTGCCACCG  | 60.132 | 20 |
| 257 | 97   | 353  | TCAAGTTCAATTGCGGCTTA    | 59.443 | 20 |
| 279 | 626  | 904  | CGCCGCAGTATAGCAAAAAT    | 60.246 | 20 |
| 209 | 443  | 651  | TGTTTGCTGCCGATACTTTC    | 58.92  | 20 |
| 145 | 183  | 327  | TAAAAAGATGAGCCACCCA     | 60.439 | 20 |
| 272 | 153  | 424  | AGGATGGATGAAAAGGCTCA    | 59.629 | 20 |
| 181 | 543  | 723  | CACCAAATTTTATCATTTTTAA  | 57.837 | 27 |
| 117 | 9    | 125  | TTGGAGCTTCAAACTTAGGC    | 58.64  | 21 |
| 280 | 1057 | 1336 | TCACTTCACCATTCCACCATT   | 60.225 | 21 |
| 164 | 447  | 610  | TTCGGAGGTTTTGGACAATC    | 59.91  | 20 |
| 120 | 20   | 139  | GCGACAATTCTGCGTGTTAT    | 58.801 | 20 |
| 268 | 2655 | 2922 | TGAGCATAATCTTGGGGCTC    | 60.177 | 20 |
| 231 | 38   | 268  | GCGGTTATCACCGGATCG      | 62.397 | 18 |
| 222 | 13   | 234  | TTCGGAGCATGATTTAAGTGG   | 60.081 | 21 |
| 177 | 43   | 219  | ATCGGAGTTGATTTGATGCC    | 59.9   | 20 |
| 265 | 212  | 476  | ATCAGCGACGAGTCCAAGAC    | 60.418 | 20 |
| 265 | 388  | 652  | GCATGAAGATGACGAGATGC    | 59.358 | 20 |
| 171 | 100  | 270  | GATGAGGGAGGAAGAAAGGC    | 60.154 | 20 |
| 182 | 789  | 970  | TGGTGTGAGCTCATCCAAGA    | 60.402 | 20 |
| 212 | 3333 | 3544 | CCAGGGCAAACAGAAATCA     | 61.001 | 20 |
| 129 | 1480 | 1608 | TACGGGTTTCGAGGCTTAATG   | 60.089 | 20 |
| 245 | 630  | 874  | GCCACCTCACTCTTGCTACC    | 59.874 | 20 |
| 269 | 4161 | 4429 | ATGGATATTGTGGCTGGTGG    | 60.603 | 20 |
| 277 | 35   | 311  | AACCGCTCGAATCCGTACT     | 59.708 | 19 |
| 257 | 32   | 288  | TGCGTGTGTATGCTGAGGTT    | 60.333 | 20 |
| 267 | 70   | 336  | CAAAAACCCTAGCTCTTGCC    | 58.973 | 20 |
| 214 | 136  | 349  | AGGATTGTGGAGGATGGTGT    | 59.232 | 20 |
| 276 | 1098 | 1373 | ACAATTTTCAATCACAAAGTTAT | 58.938 | 27 |
| 141 | 101  | 241  | AATTATTTTCGGGCTAACGGG   | 60.161 | 20 |

|     |      |      |                        |        |    |
|-----|------|------|------------------------|--------|----|
| 100 | 143  | 242  | AGTGATGGAACCAACCTTGC   | 59.973 | 20 |
| 203 | 32   | 234  | TCCCTTGCTTTCTAACCCCT   | 60.068 | 20 |
| 241 | 40   | 280  | TTCCTTTGTCATTCCAACCA   | 58.947 | 20 |
| 160 | 45   | 204  | ATAAGTTTGTGCCTCCCGTG   | 59.993 | 20 |
| 256 | 623  | 878  | GTGAATATGTGGGCTGGGAA   | 60.723 | 20 |
| 212 | 2416 | 2627 | TCCTAAGCTTTTCCTGCTGC   | 59.73  | 20 |
| 265 | 348  | 612  | CTCTTTGGTGGTGTTCCTT    | 60.149 | 20 |
| 156 | 16   | 171  | GCTTGATTGATCGAAGTGTG/  | 60.257 | 22 |
| 111 | 2365 | 2475 | CTCGAATCAATCTCACCCAA   | 58.643 | 20 |
| 233 | 79   | 311  | CTATTGAAACAACCCCGGAC   | 59.288 | 20 |
| 274 | 309  | 582  | GCAGTTACCTATCCCCACGA   | 59.955 | 20 |
| 244 | 24   | 267  | AAGCTGTCGATGATGGTGGT   | 60.542 | 20 |
| 280 | 27   | 306  | ACACATTTTTCTTTGGGCG    | 59.975 | 20 |
| 230 | 20   | 249  | TTCTTCGGTCCGACCTTGTA   | 60.626 | 20 |
| 224 | 252  | 475  | GTTTGCTGGAACCCATGAAT   | 59.797 | 20 |
| 159 | 15   | 173  | CCTCACCTCTCCATTCTCTCA  | 59.39  | 21 |
| 272 | 6    | 277  | TTGAAGAACGATTACAAAGTT  | 59.101 | 26 |
| 175 | 91   | 265  | CACAGAACATAATTCCGCAA   | 60     | 22 |
| 279 | 56   | 334  | GGGGTGGACTATTTCTTGCT   | 58.121 | 20 |
| 221 | 289  | 509  | TTCCATCCAAATTAGCCAGG   | 59.894 | 20 |
| 148 | 214  | 361  | CGTACCTGGCTGTAGGATGC   | 60.678 | 20 |
| 214 | 1420 | 1633 | ACAATCTCGGGATGCAGTG    | 59.647 | 19 |
| 230 | 1071 | 1300 | CAACTTCCTGGTCCAATGGT   | 59.82  | 20 |
| 111 | 37   | 147  | ACAACTAATCAAGTTCGCA    | 57.439 | 21 |
| 120 | 10   | 129  | ACGGTGGGCCGAGTATATTA   | 59.32  | 20 |
| 218 | 356  | 573  | AGTGAAGGTGACGAAATGGG   | 59.966 | 20 |
| 275 | 144  | 418  | TGCTCTAGGTAAACCCACGG   | 60.125 | 20 |
| 254 | 1310 | 1563 | TTTTCCCATTCCTGCAAAC    | 59.916 | 20 |
| 184 | 67   | 250  | GGTTGAGAAACGAAGGCGTA   | 60.249 | 20 |
| 211 | 1041 | 1251 | AATGAGCTTCGTGTCTGCCT   | 60.02  | 20 |
| 245 | 269  | 513  | TTCAAATGGAATTCATATAGCC | 58.513 | 23 |
| 141 | 145  | 285  | CTCCCCATCAGATCATCTCC   | 59.415 | 20 |
| 237 | 205  | 441  | ACGAGACTGTCGGTCAACAA   | 59.31  | 20 |
| 131 | 130  | 260  | TGGGTTTTTACTGGATCACCA  | 60.213 | 21 |
| 233 | 25   | 257  | GAAGAACACGAGGGATTTGG   | 59.526 | 20 |
| 239 | 737  | 975  | GTTTCAAATCGGACAAACCG   | 60.344 | 20 |
| 235 | 1094 | 1328 | TTCATCAATTTTCAGGCCAAC  | 59.93  | 21 |
| 163 | 1613 | 1775 | ACCAATAACCTGCCCCTCTT   | 59.827 | 20 |
| 157 | 1812 | 1968 | TGGTGAGAGAAAATGGAGGG   | 60.042 | 20 |
| 131 | 1256 | 1386 | TCCGCCGAAAAGACAAATAA   | 60.56  | 20 |
| 178 | 390  | 567  | TCCAACCTCATCACCATCAT   | 58.721 | 20 |
| 218 | 227  | 444  | TTGCAAAGTCAGACGTCATTG  | 59.896 | 21 |
| 190 | 264  | 453  | CCTCAGTTAGGATTCACTGATC | 60.155 | 27 |
| 205 | 112  | 316  | TGACACCTAGCCCATAACCC   | 59.813 | 20 |
| 180 | 66   | 245  | TCATTTGATCACAAACCCCC   | 60.56  | 20 |
| 242 | 83   | 324  | TGCAGAAAACAGAGCTGGAA   | 59.716 | 20 |
| 219 | 567  | 785  | GCCATGATTTTACGCTGACTG  | 59.399 | 20 |
| 164 | 226  | 389  | TCCAAGCATGATACCCCAAT   | 60.155 | 20 |
| 174 | 347  | 520  | CCGATTCAAGCTGTGAGAA    | 61.316 | 20 |
| 102 | 482  | 583  | GGATGTTGAGATCAGAACCAC  | 59.973 | 22 |
| 233 | 1792 | 2024 | TGTTGGAGCACTGTTTGGAG   | 59.873 | 20 |
| 173 | 68   | 240  | TGAGAAGGAAATTAATGTGTT  | 60.157 | 27 |
| 268 | 48   | 315  | TGTCATGTAATAGCCGTGCAA  | 60.148 | 21 |
| 184 | 1919 | 2102 | GCACTCTGCATTTCCCTTCT   | 59.434 | 20 |
| 250 | 91   | 340  | GCTTGAAGGATGAAGGTTGG   | 59.67  | 20 |
| 266 | 143  | 408  | TGCCTCTCATACTGCGAGTT   | 58.625 | 20 |
| 280 | 209  | 488  | TAACCCAAAAATCAAACGGG   | 59.671 | 20 |
| 266 | 6    | 271  | TGGCATTTTCCCACGTTAAT   | 60.188 | 20 |

|     |      |      |                        |        |    |
|-----|------|------|------------------------|--------|----|
| 121 | 65   | 185  | CATTTGGTGAGGAGGGAGAA   | 60.042 | 20 |
| 146 | 629  | 774  | CATGTTTTGCGCAATTTCT    | 58.819 | 20 |
| 255 | 127  | 381  | TTCTCAGCATATGGGAAGGG   | 60.029 | 20 |
| 117 | 295  | 411  | GAGAGTGGAGAGAGAGAGGG   | 59.175 | 22 |
| 197 | 8    | 204  | GCCCTTTATTTGGTTGATCTAA | 60.095 | 24 |
| 146 | 394  | 539  | TGTGCGAGTCGGTAATTCTG   | 59.864 | 20 |
| 224 | 75   | 298  | TAGCATGCAAAAGGAACACG   | 59.872 | 20 |
| 222 | 1571 | 1792 | AATTGGTATGCAAACGTGGA   | 58.895 | 20 |
| 122 | 574  | 695  | TTTGACGGCACAATTCTGTT   | 59.174 | 20 |
| 270 | 377  | 646  | GCCGCTCTGAAGACATCAAC   | 60.956 | 20 |
| 272 | 42   | 313  | CCTCACCCATTACACACAC    | 59.846 | 20 |
| 272 | 84   | 355  | GAAAGCCTACATCCACTGGG   | 59.55  | 20 |
| 219 | 0    | 218  | TCCAATGGATGAGGATGGTT   | 60.135 | 20 |
| 154 | 873  | 1026 | GTTGCAAGAGAGAGAAGGGG   | 59.014 | 20 |
| 262 | 9    | 270  | AAGAAATGCATGCACCTGATT  | 59.614 | 22 |
| 240 | 273  | 512  | AGTCTTCGGGCTGAGTTGAA   | 59.989 | 20 |
| 271 | 16   | 286  | CAAAAATCTAACGGCCAGAA   | 60.067 | 20 |
| 246 | 128  | 373  | ATTGTGTGACGGGAAAACC    | 59.694 | 20 |
| 162 | 6    | 167  | CGCTCTATCTTCTTCTTCTCAC | 60.159 | 24 |
| 227 | 8    | 234  | AAATAGCAAATGTTTAGCATG  | 59.621 | 24 |
| 174 | 2416 | 2589 | TTTTGGGAACTTGTCTCTGG   | 59.942 | 20 |
| 280 | 38   | 317  | GCATTTTCAATGACCCGAAC   | 60.318 | 20 |
| 256 | 8    | 263  | CGTGACCTTTTGGTCTCAGG   | 60.68  | 20 |
| 164 | 105  | 268  | TTCTCTTCCTGGGCCTTTTT   | 60.18  | 20 |
| 147 | 0    | 146  | GACATTTGGACCTGAAAAGG   | 60.332 | 22 |
| 151 | 4533 | 4683 | ATTGCAGTGCCATCACCAT    | 59.941 | 19 |
| 200 | 118  | 317  | TTTAAAGCAGGCGGAACATT   | 59.72  | 20 |
| 266 | 357  | 622  | AGAAATGCAAAAAGCATGACC  | 59.219 | 21 |
| 278 | 116  | 393  | GATATACCGAAGGGGGAGA    | 60.11  | 20 |
| 263 | 8    | 270  | CACTACTAGGGTTTGGGAGGG  | 59.866 | 21 |
| 251 | 209  | 459  | TGTCACCCAAGTCTCATGCT   | 59.261 | 20 |
| 196 | 218  | 413  | GCACTGGGAGGTTATCGTTG   | 60.517 | 20 |
| 252 | 189  | 440  | CCGATTGTGAGCATGAAAAC   | 59.127 | 20 |
| 274 | 85   | 358  | TCTGCACACTCCTCCAACCTG  | 60.022 | 20 |
| 244 | 1166 | 1409 | GCCCCATCTCCATCTATTCA   | 59.854 | 20 |
| 149 | 364  | 512  | GAGGGGAAATCTATCGCTGA   | 59.224 | 20 |
| 154 | 233  | 386  | CCTTTGTTCATCTTGGGCAGT  | 60.111 | 20 |
| 249 | 21   | 269  | CAATCTAACGAAATCTGCGGT  | 59.238 | 21 |
| 221 | 364  | 584  | GTTTTTGGTTGTCGTGGGTT   | 59.734 | 20 |
| 252 | 74   | 325  | ACTATTATGGCCGACCGTTG   | 59.845 | 20 |
| 169 | 53   | 221  | GGATATCCGAAACATCCGATT  | 59.998 | 21 |
| 252 | 49   | 300  | CTGCACCATCTTCCCGTAT    | 59.955 | 20 |
| 184 | 115  | 298  | AAACCCTTCTGCCCTTCTA    | 60.068 | 20 |
| 175 | 133  | 307  | AAGATGGAACGACCCTGTGA   | 60.51  | 20 |
| 206 | 26   | 231  | TTCAACAACCACCACCATTG   | 60.255 | 20 |
| 149 | 347  | 495  | TCCAACACATCCCTACAACCTT | 59.791 | 23 |
| 266 | 3210 | 3475 | GGCTGATGTTGTTGTTGGTG   | 60.008 | 20 |
| 134 | 996  | 1129 | CCAAAAATATGGCCGTGAAC   | 60.188 | 20 |
| 258 | 24   | 281  | AGGGGGAGGATGAAGAACAC   | 60.314 | 20 |
| 205 | 113  | 317  | TGGCTGAGGATGAATGAACA   | 60.201 | 20 |
| 217 | 2103 | 2319 | TGCATGCATTTATTTGACAGC  | 59.722 | 21 |
| 128 | 1207 | 1334 | TTTTGGAGATTCTGGGTTCG   | 60.044 | 20 |
| 125 | 1044 | 1168 | TTAAGGTGGTGTTCATGG     | 59.439 | 20 |
| 205 | 1572 | 1776 | GGGCGAATAAGAATGCGTAA   | 60.061 | 20 |
| 122 | 27   | 148  | TAAAAACAGGGGCAAAGGTG   | 59.968 | 20 |
| 210 | 9    | 218  | AACTCGAATTGCAACGAAAA   | 58.413 | 20 |
| 187 | 1850 | 2036 | TGGGAGGATCTTCAGATTGG   | 60.003 | 20 |
| 127 | 65   | 191  | ACAAACCCAAACCCAAAACA   | 60.103 | 20 |



|     |      |      |                         |        |    |
|-----|------|------|-------------------------|--------|----|
| 114 | 4    | 117  | TGCGTTTTGACGATATATAGTC  | 60.194 | 26 |
| 179 | 2197 | 2375 | AAACCTTCTGGCTGAACCAA    | 59.711 | 20 |
| 150 | 376  | 525  | CGAAATAAGCCGCCAAAATA    | 60.055 | 20 |
| 224 | 251  | 474  | TTGTGCTGAAAATCTCCTCAG/  | 59.993 | 22 |
| 276 | 2912 | 3187 | CAGCAAGTCAATTGGGGAAT    | 59.933 | 20 |
| 248 | 7    | 254  | TCATGGATGCCATGTGAAGT    | 59.925 | 20 |
| 137 | 39   | 175  | CGGTTATCACCCGATCGC      | 62.397 | 18 |
| 219 | 394  | 612  | TTGCACTCTGTGGAGCAATC    | 59.992 | 20 |
| 236 | 0    | 235  | TTTGATTCCTTTTGTCCCCT    | 58.477 | 20 |
| 270 | 808  | 1077 | TGCATTACAGCTTGTTCAGT    | 59.55  | 21 |
| 183 | 468  | 650  | GCAATTGATTGAAATGCCCT    | 59.907 | 20 |
| 190 | 156  | 345  | AGAGGCGGCCTTTTTATTCT    | 59.355 | 20 |
| 179 | 31   | 209  | CTTTCAGGTCCAAGTGCCTC    | 58.78  | 21 |
| 183 | 359  | 541  | ATGCTGAAAGCACGTGACAG    | 60.056 | 20 |
| 246 | 139  | 384  | GTGGGCTATGGCTCAAGTGT    | 60.142 | 20 |
| 231 | 31   | 261  | CGTCCACGACCTCCACTATT    | 59.989 | 20 |
| 190 | 4815 | 5004 | CAAGAAACCATGGAGAATGG/   | 59.918 | 21 |
| 209 | 354  | 562  | CCATGAATCTTTCACATTTTTCT | 58.976 | 23 |
| 279 | 15   | 293  | CTCTCTCTCTTTTGGTTGGTG/  | 59.908 | 23 |
| 138 | 2114 | 2251 | TTTCCCAAATTATGCTCACTCA  | 59.586 | 22 |
| 216 | 1241 | 1456 | TCTCGCGCTTTAGACATTT     | 59.982 | 20 |
| 253 | 18   | 270  | CTCTCTCGAGCCTAACCGTG    | 60.149 | 20 |
| 257 | 270  | 526  | GGTGCATAGAAATTGCTGCC    | 60.615 | 20 |
| 235 | 118  | 352  | AGCTGCTGGACGAAGAAAAA    | 60.132 | 20 |
| 224 | 148  | 371  | ATTCACTTCGGCAAATTGG     | 59.938 | 20 |
| 201 | 941  | 1141 | GACGTGTA AACCATCACCCC   | 60.096 | 20 |
| 198 | 3    | 200  | CATTTCACTCCACATTCCCC    | 60.173 | 20 |
| 208 | 343  | 550  | TTCAAAATTTGGCACTTAGCA   | 58.482 | 21 |
| 279 | 1229 | 1507 | TTCTCGCAATCACTTTCTTT    | 58.962 | 21 |
| 278 | 1213 | 1490 | CTCCAAATATCCCTTCCCC     | 59.6   | 20 |
| 233 | 14   | 246  | GAGGGTTATCATGGGATCAAG   | 58.32  | 21 |
| 144 | 344  | 487  | GCGTTCGTCATTCCAAATGT    | 60.905 | 20 |
| 192 | 337  | 528  | TCTTCCCTCCCTCATTTCCT    | 60.008 | 20 |
| 216 | 137  | 352  | AAACGCGAAGTTTGGTGAAT    | 59.615 | 20 |
| 269 | 2411 | 2679 | TCATGCAAACAAACATGGTG    | 58.966 | 20 |
| 193 | 1137 | 1329 | TGATCGGCCTTGTATCACAC    | 59.527 | 20 |
| 101 | 235  | 335  | ATACCACCCGATCATTTGAA    | 57.735 | 20 |
| 103 | 264  | 366  | GGCTAATGGGATGAAAGGCT    | 60.419 | 20 |
| 111 | 918  | 1028 | TCCTCCGTTAAAGACTGTTCA   | 57.47  | 21 |
| 246 | 61   | 306  | CCCAACTTTTTCTCAAATCA    | 58.274 | 22 |
| 172 | 5    | 176  | GGAAATAAGGAGGTGTTATGA   | 57.235 | 25 |
| 111 | 1411 | 1521 | TTGGCACCAAATCATCTCA     | 60.049 | 20 |
| 191 | 205  | 395  | CCGAGCTGAAAATCCACAAT    | 60.074 | 20 |
| 273 | 77   | 349  | GCACGCAAATAATGGTTTCTT   | 59.137 | 21 |
| 176 | 240  | 415  | GGATAAATGTGGCGAATGCT    | 59.929 | 20 |
| 188 | 842  | 1029 | ACGGTACAATCCCATAGCA     | 60.214 | 20 |
| 265 | 31   | 295  | CACGTTAGACCTTGAAGGGG    | 59.587 | 20 |
| 132 | 1152 | 1283 | GCAAACAAGGGGAGATTTGT    | 59.031 | 20 |
| 277 | 370  | 646  | TGCATGCACCTGATTACAAA    | 58.703 | 20 |
| 134 | 7    | 140  | TGAAGTTAGGAAATAAGGAGC   | 60.026 | 24 |
| 131 | 1478 | 1608 | CTCTGCTTTGTTGGCTTCT     | 59.615 | 20 |
| 115 | 1    | 115  | CTCTGGATATTGCTCGTCGG    | 60.755 | 20 |
| 203 | 519  | 721  | ATAAGTGCCAGGCTGGATGA    | 60.624 | 20 |
| 153 | 303  | 455  | CTCCGCTAGTCAAACGATCC    | 59.836 | 20 |
| 280 | 55   | 334  | TTTATTTTGGCGTTTCGTGC    | 60.969 | 20 |
| 107 | 963  | 1069 | CCACCGAGGAACATACAAGG    | 60.366 | 20 |
| 258 | 552  | 809  | AATGCCAATCACAGCATTCA    | 60.08  | 20 |
| 271 | 465  | 735  | TGGTCATTTCTGTTTATTTCA   | 58.967 | 24 |

|     |      |      |                       |        |     |
|-----|------|------|-----------------------|--------|-----|
| 257 | 359  | 615  | ACTGTCCTTGAGCTCGCAGT  | 60.205 | 20  |
| 131 | 845  | 975  | ACCAGACCCACACGTTTCTC  | 60.009 | 20  |
| 250 | 980  | 1229 | TGCCACCTCATATGCCACTA  | 60.096 | 20  |
| 213 | 6    | 218  | CCCGGTCTGATGAGTTGAGT  | 60.112 | 20  |
| 266 | 74   | 339  | GGATGATAAAGGCCAAACAA  | 60.312 | 22  |
| 145 | 22   | 166  | GATGGGTTATCACCGGATCG  | 62.397 | 20  |
| 229 | 76   | 304  | CACCCACAAATCAACCACAG  | 59.848 | 20  |
| 193 | 851  | 1043 | GCATTCCCATAACACACAAA  | 59.251 | 20  |
| 188 | 103  | 290  | TAAATGCACACCCCTTCAA   | 59.013 | 20  |
| 252 | 19   | 270  | ATGAACACCCCTAGTGACCG  | 59.844 | 20  |
| 162 | 106  | 267  | ATTCTTGATGGAACGGGGAT  | 60.526 | 20  |
| 153 | 27   | 179  | CGTTGGCCATGTTGGTAGAT  | 60.776 | 20  |
| 186 | 1080 | 1265 | TTGCCTACATCATCCCACAA  | 59.924 | 20  |
| 228 | 829  | 1056 | TGGTTGCACCATAACACACC  | 60.287 | 20  |
| 222 | 67   | 288  | GTGGTATGGTGTGGAGGACC  | 60.096 | 20  |
| 140 | 695  | 834  | CACCCCAGATGAGCTAAAG   | 59.688 | 20  |
| 147 | 2    | 148  | CTCGCTCACCGAGATAGGTT  | 59.454 | 20  |
| 207 | 612  | 818  | CTCACCGCCTTAATATGCGT  | 60.117 | 20  |
| 197 | 21   | 217  | CAAATCAAGCGACCATTATGA | 58.639 | 21  |
| 202 | 13   | 214  | ACCACCACATTACTGCCACA  | 59.88  | 20  |
| 270 | 1270 | 1539 | ACATCGTGTGGAAATTGCAG  | 59.572 | 20  |
| 210 | 831  | 1040 | CCAATCCTTGACATTTTG    | 60.162 | 20  |
| 220 | 225  | 444  | CGTAGAGAATGTTGCCACGA  | 59.864 | 20  |
| 228 | 111  | 338  | AAGCCTGTGTTAGGGCATTG  | 60.132 | 20  |
| 192 | 38   | 229  | TCATCTGGTTCCTTTGGA    | 60.43  | 20  |
| 189 | 1066 | 1254 | AACAACCTCATTTGGTGCGT  | 60.419 | 20  |
| 231 | 120  | 350  | TCAGGCAAATCAGGCAATTT  | 60.585 | 20  |
| 162 | 395  | 556  | CACGACGGTTAAATCACAGG  | 59.047 | 20  |
| 164 | 43   | 206  | GTGTGATGTTGGAGTTGGGA  | 59.367 | 20  |
| 277 | 1645 | 1921 | TGATGGTTTATGCTCGTAAGG | 58.653 | 22  |
| 201 | 470  | 670  | CCTTGTTGCACTGTGGTGT   | 59.641 | 20  |
| 155 | 14   | 168  | TCCACTTGAAACTATCAGTCC | 59.069 | 24  |
| 248 | 4    | 251  | CGGCACGAATCCAGTTTT    | 61.016 | 19  |
| 280 | 99   | 378  | ACCCTATTCCACCCCTTCAT  | 59.513 | 20  |
| 258 | 115  | 372  | TCTTATAGCATCAACCGCCA  | 59.281 | 20  |
| 280 | 171  | 450  | CCCATCATCTCAATCCAATA  | 59.988 | 25  |
| 266 | 443  | 708  | AAATGAGTGGCTGGATTTG   | 60.074 | 20  |
| 220 | 506  | 725  | GGAGAGAGGAAGGGAGATGG  | 60.149 | 20  |
| 142 | 636  | 777  | CCGTGAATTCATGCCTGTCT  | 61.067 | 20  |
| 273 | 133  | 405  | CATCCCCAAAATACCCTCAA  | 59.617 | 20  |
| 234 | 62   | 295  | GCTCAAGGCTCAGAGGACAG  | 60.284 | 20  |
| 268 | 104  | 371  | TGAGCATTATTAGCACCCCA  | 59.136 | 20  |
| 199 | 267  | 465  | AATCGATTCAACTCATGGGG  | 59.75  | 20  |
| 170 | 456  | 625  | GAAGAAGGTGATGTCATGGG  | 59.918 | 21  |
| 257 | 398  | 654  | TGCGTGCATGTATATGCTGA  | 59.85  | 20  |
| 265 | 285  | 549  | CCATAACCGTCGCATAACTC  | 58.12  | 20  |
| 248 | 17   | 264  | GGAGGAGAGAGAGTGTGGG   | 58.819 | 20  |
| 131 | 606  | 736  | TGCTATGGATAAATGTGGCG  | 59.543 | 20  |
| 260 | 222  | 481  | TGCATCGAAATCTTTGCATT  | 59.261 | 20  |
| 101 | 9    | 109  | GGGGTGACAACATCAACCAA  | 59.703 | 21  |
| 254 | 3    | 256  | CGGCCATTCTTTTTCTTT    | 60.553 | 20  |
| 233 | 28   | 260  | TGGATGCAAAGGTGAACTTG  | 59.691 | 20  |
| 279 | 65   | 343  | GCTCCACCATCTTTCCACT   | 59.258 | 20  |
| 107 | 2489 | 2595 | TTTACAAACCTGCCACCCAC  | 60.786 | 20  |
| 595 | 595  | 595  | 595                   | 595    | 595 |
| 243 | 49   | 291  | CTTACCCAATCTTGGTGAACA | 57.593 | 21  |
| 131 | 611  | 741  | TGGGTGACTCAGAAATGACG  | 59.676 | 20  |
| 280 | 34   | 313  | CGGAGGGAATACAATGCTTT  | 60.318 | 21  |

|     |      |      |                        |        |    |
|-----|------|------|------------------------|--------|----|
| 169 | 64   | 232  | TTTGTGGTTGGTAGCCC      | 59.839 | 20 |
| 110 | 495  | 604  | CATAGGAATATTAGCGGTGGC  | 58.62  | 21 |
| 226 | 307  | 532  | GGGCACTTTGGCTACTTTTG   | 59.747 | 20 |
| 118 | 27   | 144  | CTGCGCAGATCTAATGGTCC   | 60.765 | 20 |
| 257 | 602  | 858  | TTTTACTCCCAGCCCTTGA    | 59.679 | 20 |
| 133 | 797  | 929  | TAGCAATTTGATTCCGTGCT   | 58.388 | 20 |
| 266 | 264  | 529  | CACAAAATTTGTATGCGGC    | 59.077 | 20 |
| 224 | 1058 | 1281 | TTCCGGCTGAAAGACGTTAT   | 59.708 | 20 |
| 108 | 15   | 122  | GAAGAACAATTACAATGTTTA  | 58.084 | 27 |
| 251 | 1697 | 1947 | ATAGATCGGATTGGCCCTCT   | 59.888 | 20 |
| 277 | 150  | 426  | ACGCAAATACGACTGGCTTT   | 59.775 | 20 |
| 257 | 1861 | 2117 | GCAAGTGGGAGGATGAGAGA   | 60.349 | 20 |
| 276 | 1255 | 1530 | GCATTGATCACAAGCAATCG   | 60.228 | 20 |
| 229 | 100  | 328  | TGCTTCGATTCTCAATGTTCC  | 60.207 | 21 |
| 279 | 101  | 379  | GCTTCGATTCTCAGTGTCC    | 57.448 | 20 |
| 215 | 416  | 630  | CGAGAACTTTCAAGGACGC    | 59.993 | 20 |
| 247 | 297  | 543  | AACGATGAACTAGGGGCTGA   | 59.694 | 20 |
| 239 | 1034 | 1272 | CGTCCCAAGTTTGTTGCTT    | 60.147 | 20 |
| 252 | 408  | 659  | AAAAGCGCAGAAATCCAAAA   | 59.832 | 20 |
| 265 | 20   | 284  | AAGGGTTATCACCTGATTTTCT | 57.73  | 23 |
| 178 | 301  | 478  | TTCAATACTTCCAGCCACCA   | 59.123 | 20 |
| 186 | 21   | 206  | TTCGGCCAAATTAAGAAAA    | 59.952 | 22 |
| 198 | 343  | 540  | TTAAGGCATCCCATCCTACG   | 59.916 | 20 |
| 277 | 321  | 597  | GTGAGGGGATGTTGGAGTGT   | 59.817 | 20 |
| 209 | 145  | 353  | GGCATTGTTGTTAGCCACT    | 60.14  | 20 |
| 219 | 666  | 884  | GAATACAGGCCGGCTAACAA   | 60.096 | 20 |
| 224 | 3526 | 3749 | CTATTGCACTGCGGTCATGT   | 59.746 | 20 |
| 247 | 8    | 254  | AACATGCAGGGCTGAGTACA   | 59.318 | 20 |
| 147 | 13   | 159  | AAAATTTTCTCACTGCACG    | 57.878 | 20 |
| 267 | 92   | 358  | TTTTGTGCTTCTTGCTGGTG   | 60.027 | 20 |
| 119 | 0    | 118  | CAGTTATCACCGGATCGC     | 57.543 | 18 |
| 184 | 281  | 464  | CTTGTTCCTTCCCATCT      | 60.298 | 20 |
| 147 | 10   | 156  | TGGCCCATGTACACTGCTTA   | 60.134 | 20 |
| 224 | 675  | 898  | CGACGACAGGAAAAGAAGGA   | 60.366 | 20 |
| 279 | 974  | 1252 | TTCCACTCAAAGGGTCCTC    | 59.112 | 20 |
| 265 | 240  | 504  | CCCATGATTCCATGATCTCC   | 60.096 | 20 |
| 197 | 31   | 227  | ACCAAGAGACGTTTTTGTGA   | 60.062 | 23 |
| 183 | 380  | 562  | TTGCAGCACTTTCAACATCAC  | 59.903 | 21 |
| 144 | 415  | 558  | GAAGCACATGCAAGGATTGA   | 59.805 | 20 |
| 178 | 1    | 178  | ATCTCTCTCGTTCTTCTCTCT  | 57.481 | 23 |
| 280 | 49   | 328  | GGATCGTACCTTTTGCTTGC   | 59.713 | 20 |
| 130 | 109  | 238  | ACAGAAAAGCCTGTTGGCAG   | 60.431 | 20 |
| 141 | 104  | 244  | CCCAAAAATCTAACGGCCTA   | 59.075 | 20 |
| 254 | 661  | 914  | GGTCCGCCATTACCATCTA    | 59.784 | 20 |
| 217 | 143  | 359  | ACATCATTCAAGGGGCATTT   | 59.249 | 20 |
| 251 | 711  | 961  | GCATATCGCTCGATCAAAAA   | 58.867 | 20 |
| 269 | 2    | 270  | GGTTTCTGAATTTGATCCGC   | 59.51  | 20 |
| 248 | 1566 | 1813 | ATGGGAAAAGGACCGAAGAG   | 60.434 | 20 |
| 256 | 49   | 304  | GTTATCACCGGATCGCAAC    | 58.941 | 19 |
| 173 | 902  | 1074 | GGTGGTAAGCAACGGACATT   | 59.859 | 20 |
| 273 | 130  | 402  | CCGTTGCACAAGTCACAGAG   | 60.5   | 20 |
| 280 | 989  | 1268 | GATAGGCCACCGTTTGAA     | 60.848 | 19 |
| 229 | 240  | 468  | TTCCCATCGAAAAATTAATGC  | 58.927 | 21 |
| 115 | 159  | 273  | ATGTGAGAGACCCAGGTTCCG  | 60.112 | 20 |
| 246 | 765  | 1010 | TTTCAAATACGGTAGACTTCCC | 59.886 | 23 |
| 243 | 157  | 399  | GTGATTCACACGAGAGTGCAE  | 59.482 | 21 |
| 180 | 140  | 319  | AGGGGGTTATCACTGGATCA   | 59.213 | 20 |
| 223 | 516  | 738  | TCCCTTCATTTTCGTTTTATTT | 58.2   | 23 |

|     |      |      |                         |        |    |
|-----|------|------|-------------------------|--------|----|
| 183 | 359  | 541  | AATTACCCACCGAAAGGAA     | 60.534 | 20 |
| 151 | 82   | 232  | CATTACCCACACACACTTC/    | 59.385 | 22 |
| 141 | 116  | 256  | GAAGTTAGCACGTCAAGGGAC   | 58.994 | 21 |
| 117 | 35   | 151  | GTTCCATGTTACCCGTGGAC    | 60.096 | 20 |
| 236 | 311  | 546  | AGATACAGCTCTTGTGGGCG    | 60.419 | 20 |
| 229 | 298  | 526  | CATGTATTTTTCCTATGGACCG  | 60.082 | 23 |
| 259 | 47   | 305  | ATCCGATGACTGGATGCTCT    | 59.642 | 20 |
| 106 | 120  | 225  | TTTTCTTGATAAGCTCGAAGCA/ | 59.275 | 22 |
| 255 | 67   | 321  | ATCATCATCACACGCTGCTT    | 59.276 | 20 |
| 126 | 188  | 313  | TACATCGCGTTCAGTATCGG    | 59.712 | 20 |
| 215 | 75   | 289  | GCTCTTTTGGGAGACAATGC    | 59.82  | 20 |
| 248 | 1264 | 1511 | GTCACACAAGCAATTCGTCTG   | 60.31  | 20 |
| 252 | 15   | 266  | TTTCTCTTGGTGGAAAACCTT   | 57.152 | 22 |
| 258 | 141  | 398  | TGATGATGATGCCATTTTCC    | 59.284 | 20 |
| 266 | 8    | 273  | TGGAGTTGAGATAATTTGCTGC  | 59.225 | 22 |
| 201 | 4    | 204  | TGCGTTTTGACAATATATAGGT  | 60.083 | 26 |
| 279 | 11   | 289  | GCACAAGCAGGGGAAAAA      | 59.774 | 18 |
| 139 | 936  | 1074 | CTCTACGTTCCCTCAGGCTGC   | 60.156 | 20 |
| 275 | 489  | 763  | GTTAAGCAAAGGTGCAAGGG    | 59.747 | 20 |
| 275 | 61   | 335  | TCTCGTTAACGTCCCATTTACA  | 59.514 | 22 |
| 205 | 11   | 215  | CATAAACTAAGGTGGAGATTG   | 58.21  | 27 |
| 103 | 14   | 116  | GACTTGTTATGTTTCCATGAGC  | 59.148 | 23 |
| 212 | 167  | 378  | GGATCTTATAGCATCAACCGC   | 58.686 | 21 |
| 263 | 434  | 696  | CCCCCTACATCTGACCCATA    | 59.623 | 20 |
| 263 | 55   | 317  | GCGAGTCGCTGATTTTATAA    | 59.019 | 20 |
| 278 | 496  | 773  | GGAATAAAACCGTTTACCGT    | 60.102 | 21 |
| 124 | 8    | 131  | CTCTCACACTTGCACACTGA/   | 59.134 | 22 |
| 199 | 448  | 646  | TGTATGGCCACTTAGGCAAA    | 59.182 | 20 |
| 140 | 395  | 534  | GTTTCATCGTGAACCTGCGTA   | 59.871 | 20 |
| 222 | 544  | 765  | AGCGTGCCATGTGTTATCAG    | 59.746 | 20 |
| 202 | 0    | 201  | AATCTTGTGGATGTTAGTGGTT  | 57.35  | 25 |
| 146 | 6839 | 6984 | AATCTGAAGAGCTCCACGCT    | 59.191 | 20 |
| 217 | 1    | 217  | TCGTTTCGTCCTCTTCCTGTT   | 59.844 | 20 |
| 115 | 278  | 392  | CATGATCCACGGTCTTTACG    | 58.999 | 20 |
| 173 | 588  | 760  | ACACACACAACCACCACCAG    | 60.383 | 20 |
| 100 | 509  | 608  | GGATGCGCACGAAATTAATAC   | 59.473 | 21 |
| 247 | 17   | 263  | GACGATTTGCAAGCCTATGG    | 60.606 | 20 |
| 279 | 320  | 598  | GGGATACACACCTACCGTC     | 59.141 | 20 |
| 147 | 4574 | 4720 | TCCAAAATGGAAATGGGAAA    | 60.103 | 20 |
| 270 | 38   | 307  | CTGCCGTTTTTGTTCGTC      | 59.746 | 20 |
| 138 | 664  | 801  | AAGTTCGTGCAAGATGGTGG    | 60.111 | 20 |
| 211 | 31   | 241  | AGTTATGATGGCAGGATGGG    | 59.773 | 20 |
| 261 | 674  | 934  | ACCAGACCTGGACCTACCAA    | 59.425 | 20 |
| 263 | 40   | 302  | CGACAATCATCTAGTCCTCTAC  | 59.934 | 24 |
| 144 | 748  | 891  | GGCATGCATGTATCCGTATG    | 59.799 | 20 |
| 208 | 22   | 229  | ACGACTGTGATCCACACAA     | 60.162 | 20 |
| 173 | 586  | 758  | CTCCATCCAAAGTTGCTGAA    | 58.847 | 20 |
| 257 | 67   | 323  | GCTTCTCTTGCTCTCTCATTG   | 57.031 | 21 |
| 162 | 292  | 453  | CTTGATTCCATGACGAGCCT    | 60.218 | 20 |
| 203 | 157  | 359  | GAGAAATAAGAAACAATCTGC   | 58.212 | 23 |
| 136 | 30   | 165  | TGGTTGTGTAACCAACTCTG    | 59.626 | 21 |
| 266 | 254  | 519  | GAGTCCATGACTCTCAATGCC   | 59.676 | 21 |
| 237 | 96   | 332  | CATCTTTCTTCTTCGACGCC    | 59.955 | 20 |
| 233 | 4300 | 4532 | TGGATCAAACGTCGTCTCAC    | 59.682 | 20 |
| 271 | 314  | 584  | TCTCCGAATTTCAAGAGGGA    | 59.744 | 20 |
| 278 | 11   | 288  | TTTCGTCCATTGTAAGCAGTTC  | 59.271 | 22 |
| 261 | 79   | 339  | TCTCAGCATATGGGAAGGGT    | 59.508 | 20 |
| 176 | 4    | 179  | GCATATGTGCGTTTTATTCTTT  | 57.929 | 23 |

|     |      |      |                        |        |    |
|-----|------|------|------------------------|--------|----|
| 250 | 268  | 517  | CATGGCACAGAAATCTTAAAT  | 59.133 | 23 |
| 205 | 606  | 810  | AAAAAGAGCCATCGACAAA    | 58.865 | 21 |
| 276 | 130  | 405  | AAAAGCAATTAATGCGTTCAC  | 59.666 | 22 |
| 248 | 106  | 353  | CATTGCTACTGAATATTGTTCT | 59.566 | 27 |
| 169 | 244  | 412  | GGGGAGAACACCGATCCTAT   | 60.154 | 20 |
| 217 | 1277 | 1493 | TTGGGGCTGCTTTACTGTTT   | 59.747 | 20 |
| 276 | 53   | 328  | CTCCCATTTGTGTTTTCTTCG  | 59.595 | 21 |
| 272 | 56   | 327  | AAACCCTGCTTTGTGCAATC   | 60.118 | 20 |
| 271 | 333  | 603  | CAATTTTGTACCCGCCAAGT   | 59.861 | 20 |
| 214 | 52   | 265  | AAGAGGAAAATCCATCGGCT   | 60.039 | 20 |
| 142 | 504  | 645  | CAGCAGGTAAAGCCTCCAAA   | 60.378 | 20 |
| 223 | 69   | 291  | TTGTTGAATTGGTCCTGCAA   | 60.088 | 20 |
| 230 | 34   | 263  | CAAATCTTTTTCACCGCCTC   | 59.685 | 20 |
| 170 | 428  | 597  | CACACTTCCATCACCCAACA   | 60.416 | 20 |
| 255 | 12   | 266  | TGCATCACTACCTCCTTGTTG  | 58.787 | 21 |
| 258 | 31   | 288  | TTGGTTGGATTGGATTTTGG   | 60.535 | 20 |
| 218 | 701  | 918  | CCAAATCGGACTAATGCTGA   | 58.721 | 20 |
| 217 | 120  | 336  | ACTCGATAACGGATGCTCGT   | 59.723 | 20 |
| 256 | 766  | 1021 | ATCCAGCCACACATTTCTT    | 59.41  | 20 |
| 173 | 109  | 281  | CGAGTCCAGGCTACATCACA   | 59.855 | 20 |
| 200 | 1133 | 1332 | ATACCTTCTGTCCCCTTCG    | 60.319 | 20 |
| 190 | 96   | 285  | GGTGTTGGTGAGGCTGTTCT   | 60.159 | 20 |
| 211 | 57   | 267  | GCGTGACAACAACAATTTTCG  | 60.157 | 20 |
| 177 | 377  | 553  | TCAGTGAGTTTCAAGCCGTG   | 60.025 | 20 |
| 207 | 1324 | 1530 | CACACGCACACCTTTCAAT    | 59.751 | 20 |
| 188 | 49   | 236  | GAGGATTCGACATTGGGAGA   | 60.011 | 20 |
| 185 | 111  | 295  | TACACAGCCCGTTCATTC     | 59.572 | 20 |
| 278 | 534  | 811  | TTCCTCAGATTTCTGCACACT  | 57.528 | 21 |
| 167 | 72   | 238  | CCGATTGACAAATCTCCGTT   | 59.933 | 20 |
| 241 | 673  | 913  | TAGGATCTTTTACGCGGTT    | 59.708 | 20 |
| 265 | 3    | 267  | TGAAAGATGGGTGTGTTCTTG  | 60.529 | 22 |
| 144 | 84   | 227  | CGTACGGCTAAGGGTAGGGT   | 60.385 | 20 |
| 191 | 391  | 581  | GGCATGAGATTCTGTTGGGT   | 59.934 | 20 |
| 274 | 83   | 356  | GTAGTTGGCTGCATTTGTGG   | 59.199 | 20 |
| 237 | 2051 | 2287 | GTATGCTGGCGGAATTTTTG   | 60.456 | 20 |
| 246 | 770  | 1015 | ATCGGATGCGAAATTGGAC    | 60.828 | 19 |
| 182 | 127  | 308  | GAAAGGAGAGAGCGAGAGGA   | 59.848 | 21 |
| 203 | 3435 | 3637 | GGTTTAACTGGCCCAACTT    | 60.221 | 20 |
| 195 | 248  | 442  | GTGAAGCGCTGATCTTGTGA   | 60.144 | 20 |
| 278 | 236  | 513  | TAACGAGAGTGGTTGAGGCA   | 59.44  | 20 |
| 272 | 488  | 759  | CGGATTGACGACAAGGACAT   | 60.924 | 20 |
| 223 | 2    | 224  | TGCCTTCTTCCACTCTTGGT   | 59.844 | 20 |
| 240 | 54   | 293  | TCCCAATCGTTTCAAATTC    | 60.288 | 21 |
| 259 | 35   | 293  | ACGTAGACCTGGCATCTTGTG  | 60.186 | 21 |
| 230 | 251  | 480  | TTGAAATGTAACACAAAAGGA  | 57.925 | 24 |
| 278 | 36   | 313  | CGGATGGTGAATTTGTGATTT  | 59.677 | 21 |
| 266 | 82   | 347  | AACGAGAGAACTTTCGACGC   | 59.621 | 20 |
| 157 | 86   | 242  | AAGAGCTTCTGCGTCTTTCG   | 59.898 | 20 |
| 150 | 12   | 161  | CTGATGGAGGGTAGGGATGA   | 59.879 | 20 |
| 202 | 887  | 1088 | TGCCAACACCTTCTTCTCT    | 59.844 | 20 |
| 188 | 672  | 859  | CATGCTCCTATTTTAATACACC | 59.997 | 24 |
| 238 | 527  | 764  | AATCGAGCTTACACCCAAA    | 59.569 | 20 |
| 168 | 40   | 207  | GGGGAAAAAGGGTGAAGAAG   | 59.912 | 20 |
| 116 | 2010 | 2125 | TAGCAAAAATGTCCCCTGCT   | 59.708 | 20 |
| 218 | 217  | 434  | CACCAAATTTTCATCATTTTAA | 58.865 | 26 |
| 247 | 188  | 434  | GTGTAGGGAGTGGGATGTGC   | 60.395 | 20 |
| 186 | 352  | 537  | CCATAACATGATTTTGCCCC   | 60.016 | 20 |
| 243 | 305  | 547  | GTGGAAGCCGAAGCATGTAT   | 60.103 | 20 |

|     |      |      |                       |        |    |
|-----|------|------|-----------------------|--------|----|
| 258 | 24   | 281  | GGCAAACACAGGATCGATTT  | 59.939 | 20 |
| 146 | 895  | 1040 | TTCACCAAGGACTGAGGCTT  | 59.844 | 20 |
| 158 | 350  | 507  | GTACCCCAACGAGTAACGA   | 59.853 | 20 |
| 195 | 767  | 961  | CATCAGACTCCGCAATTTCA  | 59.799 | 20 |
| 165 | 3538 | 3702 | GTTCAAATCTAACGGCCCAG  | 59.569 | 20 |
| 240 | 3    | 242  | AAGGGCCGAGATTTGTTAGA  | 58.787 | 20 |
| 175 | 1789 | 1963 | CGTCACTGTTGCTCCGACTA  | 60.049 | 20 |
| 217 | 961  | 1177 | TGCGTCTTTCCTTGATGTTG  | 59.84  | 20 |
| 280 | 756  | 1035 | CGAAATTGAAATCGGACCATA | 59.781 | 21 |
| 106 | 1    | 106  | GATGGCGGAGAGTTTTATCG  | 59.668 | 20 |
| 268 | 37   | 304  | CAACCGCATAGTTAGGAGGC  | 59.73  | 20 |
| 149 | 507  | 655  | CAGCAATTGGTTTTGAGGGT  | 59.971 | 20 |
| 259 | 209  | 467  | GGTGTGTTGGCATTGCTAGA  | 59.722 | 20 |
| 237 | 1067 | 1303 | ACTTCCTGAGTTTGTGGCGA  | 60.833 | 20 |
| 242 | 152  | 393  | ATGGCAGGGGGCTTATTTAT  | 59.664 | 20 |
| 259 | 22   | 280  | GGATATGCTCAGTCCGGGTA  | 59.917 | 20 |
| 254 | 66   | 319  | AGAAACACGTTTTGCTTTTGA | 57.616 | 21 |
| 128 | 61   | 188  | CACAATGCGTGTATTGACAGT | 60.096 | 22 |
| 207 | 421  | 627  | GGCATGAATTCTTGATTGC   | 60.423 | 20 |
| 251 | 482  | 732  | CGGCCTAACATATCCCACA   | 60.712 | 20 |
| 198 | 138  | 335  | TGAATTAACAGCGAGCATGG  | 59.833 | 20 |
| 141 | 1856 | 1996 | CAGTTCAAAATGTTTCCCG   | 60.336 | 20 |
| 126 | 81   | 206  | AGTAAGAAAGCCACCTGCC   | 60.63  | 20 |
| 265 | 26   | 290  | AGACGCGAGATTTACGTGGT  | 59.763 | 20 |
| 280 | 2387 | 2666 | CAGTCGCATACTTCCCATCA  | 59.673 | 20 |
| 199 | 405  | 603  | TATCCCCATCCATGTTGTT   | 59.871 | 20 |
| 249 | 18   | 266  | TAACACCTTCATCGAGCGAG  | 59.024 | 20 |
| 150 | 342  | 491  | TTGCTGCTCTTTTTGGCT    | 60.27  | 20 |
| 258 | 113  | 370  | GTCCCTTTTTACCCCTCAA   | 58.02  | 20 |
| 264 | 10   | 273  | GGAAATAAGGAGGTGTTATGA | 57.235 | 25 |
| 166 | 45   | 210  | GCAGTAACCCTCTCATCGGA  | 60.218 | 20 |
| 140 | 250  | 389  | GGAACCAGCTCCGATTAACA  | 60.074 | 20 |
| 190 | 77   | 266  | TTTGGAAAAATCCTAGCCACA | 59.573 | 21 |
| 257 | 93   | 349  | GACCGAATGTAATGAACCCG  | 60.192 | 20 |
| 276 | 154  | 429  | GGCACAATTCGTACAGGGAT  | 59.82  | 20 |
| 245 | 284  | 528  | CACGGCTTCAAATTGTTCT   | 60.11  | 20 |
| 237 | 1259 | 1495 | GGCAGCTAGGGTTGAAAGAA  | 59.452 | 20 |
| 172 | 65   | 236  | TACACGCACATCAACCCACT  | 60.032 | 20 |
| 205 | 673  | 877  | TTCATTTGCCTGACCTACCC  | 59.933 | 20 |
| 196 | 2113 | 2308 | GAATTGCCATGTCCATGTGT  | 59.223 | 20 |
| 176 | 1968 | 2143 | TGGGGCCAATTTACTCTCTG  | 60.066 | 20 |
| 100 | 337  | 436  | TTCCGTAGGGAGCAAAGTGA  | 60.766 | 20 |
| 235 | 281  | 515  | GATTTTGAGTTCATGGGCGT  | 59.939 | 20 |
| 280 | 135  | 414  | GAACTATCTACAGGCCAGGGC | 59.969 | 21 |
| 263 | 35   | 297  | TTGTATGGACGACACGCACT  | 60.183 | 20 |
| 238 | 329  | 566  | GGGGTACGTGCCATAAAAACT | 60.122 | 21 |
| 108 | 902  | 1009 | CGCATGATAGCATTCTCCAG  | 59.4   | 20 |
| 273 | 108  | 380  | GCATCTCTCTCGCTCTCATTG | 60.256 | 21 |
| 207 | 349  | 555  | TCCATTCAAATCTTTCCA    | 57.983 | 20 |
| 249 | 159  | 407  | AGTTAGTCGGAGCCTTCGTG  | 59.496 | 20 |
| 275 | 257  | 531  | CTCATGTAACCGATCCCCAT  | 59.629 | 20 |
| 138 | 3632 | 3769 | CTGAATGACCTGCCTCCATT  | 60.073 | 20 |
| 188 | 103  | 290  | GCTCTCTTTGTAATCTCCCC  | 59.184 | 21 |
| 161 | 246  | 406  | TCCCTCTTCATCCTCCCTCT  | 60.149 | 20 |
| 185 | 322  | 506  | CTGGGTTTCCTTCTTCC     | 60.045 | 20 |
| 177 | 5573 | 5749 | CACAAAACCCTCACACCCTT  | 59.861 | 20 |
| 278 | 752  | 1029 | CCCAGCACTGCTTCTAGGAT  | 59.454 | 20 |
| 174 | 132  | 305  | CAAGGGCTTGAGTAGCTTGG  | 60.008 | 20 |

|     |      |                              |        |    |
|-----|------|------------------------------|--------|----|
| 274 | 64   | 337 AACGCGTCACACGTAATTCA     | 60.18  | 20 |
| 165 | 1618 | 1782 GTGCCATAGCCACCTGATCT    | 60.104 | 20 |
| 169 | 163  | 331 CTCTGTCTAGTGGCGAAGCC     | 60.156 | 20 |
| 131 | 29   | 159 GCGTGAGTTACGAAAGAGTGC    | 59.928 | 21 |
| 254 | 3    | 256 CCTTGACCAATCGATTTCTTG    | 59.555 | 21 |
| 270 | 308  | 577 CACTCGCTACGAGCCACAG      | 60.773 | 19 |
| 216 | 0    | 215 CCATCACCGCATTTTCTTCT     | 60.074 | 20 |
| 257 | 37   | 293 TCACCCACAAACTTTTCAACTT   | 58.65  | 22 |
| 132 | 344  | 475 CCTGATCAACCTCACCTTC      | 59.505 | 20 |
| 278 | 5001 | 5278 GGTAGCTTCGACAAGCCATT    | 59.34  | 20 |
| 138 | 2    | 139 AAAATAATCCCAAACCAATG     | 57.444 | 22 |
| 243 | 24   | 266 ACGCACAACAAAATACAAAAC    | 57.454 | 22 |
| 231 | 18   | 248 GCATCATTTTGGCCTTTGAT     | 59.907 | 20 |
| 233 | 219  | 451 GGTCTACCTCTGCATTTCCG     | 59.694 | 20 |
| 226 | 673  | 898 CCCATTTCCATGCTTCAACT     | 59.933 | 20 |
| 123 | 51   | 173 GCGGGTAAATATCAATTTCGA    | 59.837 | 22 |
| 200 | 1251 | 1450 AATTGTGGCCTCACCTTCAG    | 60.111 | 20 |
| 250 | 45   | 294 TGTGGGTTAGCACTTGATCG     | 59.716 | 20 |
| 276 | 1082 | 1357 GTTCAAACACTACATTTGGGGGA | 58.798 | 21 |
| 263 | 289  | 551 TCGATTCGAATTTTCATACACA   | 58.161 | 22 |
| 275 | 57   | 331 TGGTATGACAATTGCAAGCAT    | 59.055 | 21 |
| 226 | 194  | 419 CAGCCAACCTCGATCTCATCA    | 59.942 | 20 |
| 153 | 534  | 686 TGCTTTGTGCATTCTTCCCT     | 60.776 | 20 |
| 137 | 24   | 160 TGCTTCTCCAAATCCATCTTC    | 59.259 | 21 |
| 233 | 413  | 645 AAGTGTGCCAACACCTTTC      | 60.012 | 20 |
| 114 | 380  | 493 GCCAAATGCCTACAAATTGC     | 60.465 | 20 |
| 110 | 17   | 126 AACTCACTCTCACTAGCCGC     | 59.685 | 21 |
| 230 | 21   | 250 CAATACCGTGACATGCCTTG     | 59.988 | 20 |
| 228 | 1581 | 1808 ATGGCTGTTGATGTGGACAA    | 59.967 | 20 |
| 225 | 3463 | 3687 GCCAGAGCTTCTATGGTTGC    | 59.985 | 20 |
| 217 | 121  | 337 TCGAACTCCAATAGCAGCAA     | 59.566 | 20 |
| 172 | 370  | 541 CCTTTGATCCATCACGGAAT     | 59.75  | 20 |
| 278 | 291  | 568 TGGGAAAGAAAGGGTGTACC     | 60.207 | 21 |
| 108 | 104  | 211 TGGACAAGACAAGGCTAGGG     | 60.246 | 20 |
| 161 | 5216 | 5376 ATGGCACACCATACCAGGAT    | 60.081 | 20 |
| 278 | 920  | 1197 GCCCTTTTCATTGCTGTCAT    | 60.081 | 20 |
| 138 | 30   | 167 ACGGTGACGAATGGTTCTCT     | 59.579 | 20 |
| 176 | 432  | 607 TACGCGCGGAACATACATAA     | 60.117 | 20 |
| 228 | 376  | 603 AAGGTCCAAACAACGAACCA     | 60.388 | 20 |
| 107 | 293  | 399 CCCACACTCTCCTCATTTTCA    | 60.096 | 21 |
| 218 | 129  | 346 GAATGGTGGTGTGTTGTTCCC    | 60.073 | 20 |
| 280 | 1298 | 1577 TCAACCCACTGCAGTACCAA    | 60.152 | 20 |
| 169 | 239  | 407 ACGTGGACAAGTCTCGCCTA     | 60.854 | 20 |
| 264 | 147  | 410 TAGTGGTGACAAGTGTGGGG     | 59.435 | 20 |
| 155 | 62   | 216 CACCACATTACATTAAACCG,    | 59.625 | 22 |
| 280 | 212  | 491 GTGCCACATCAGCTTCTTCA     | 59.992 | 20 |
| 274 | 6    | 279 TCTCGTGCCATATTCTTGA      | 59.523 | 20 |
| 113 | 655  | 767 GGACAGCAGCCATTA AAAAG/   | 59.352 | 21 |
| 212 | 54   | 265 CCTATTCCCTCGATTCAGCA     | 60.17  | 20 |
| 247 | 3    | 249 CCTTGACCAATCGATTTCTTG    | 59.555 | 21 |
| 166 | 426  | 591 ATCCACGAGGATGATGAAGC     | 60.042 | 20 |
| 257 | 919  | 1175 TTTCAATTTGATTAGAAGTTCTG | 57.172 | 24 |
| 266 | 305  | 570 TTCAGCAAACCTGAAGAACAAC   | 59.534 | 22 |
| 189 | 644  | 832 TAGCCAACCTCGCTTAGCCTC    | 59.752 | 20 |
| 245 | 32   | 276 CTGGTAATGGCCGGACTAAA     | 59.953 | 20 |
| 182 | 48   | 229 TTGGCAATGAGATACCGATG     | 59.499 | 20 |
| 267 | 825  | 1091 TGCGAAGTAGACGTGGATGT    | 59.318 | 20 |
| 173 | 256  | 428 CACTTGGAAACTCCACACGA     | 59.72  | 20 |

|     |      |      |                        |        |    |
|-----|------|------|------------------------|--------|----|
| 248 | 577  | 824  | CTCTCCTTCTGCGCACTTTT   | 59.757 | 20 |
| 258 | 964  | 1221 | GCGTAACATTATGAAGGCGAC  | 59.627 | 21 |
| 280 | 21   | 300  | AAAAAGCGCTCGTACATTTTA  | 59.724 | 23 |
| 182 | 161  | 342  | CATAGACAAGCCCCTCTCCA   | 60.21  | 20 |
| 275 | 485  | 759  | TATGAATTCCGTGTTGGGGT   | 60.051 | 20 |
| 223 | 469  | 691  | TCTTTTTGACATTTGGGTTCA  | 58.107 | 21 |
| 229 | 329  | 557  | TGTGGGTTGTTCTGATCTGG   | 59.52  | 20 |
| 280 | 576  | 855  | CGCATGGTGACATCAGTACAC  | 60.048 | 21 |
| 241 | 245  | 485  | TGCGTTAATGTACACAACCTCC | 60.455 | 23 |
| 259 | 228  | 486  | GTGGGCTTGAGCATGTACT    | 60.142 | 20 |
| 280 | 48   | 327  | GCCATGATCTCCTGATTCAA   | 60.029 | 21 |
| 268 | 1201 | 1468 | ACCGAAAATCACGTTTGCAG   | 61.06  | 20 |
| 105 | 46   | 150  | AGTGTTACGATAGAATCACGC  | 58.289 | 22 |
| 219 | 139  | 357  | TCTTGCCTCCACCATCTTCT   | 59.803 | 20 |
| 118 | 35   | 152  | TGACGCTTAGAGGGTGTTTTG  | 60.29  | 21 |
| 264 | 0    | 263  | TTTTGACAATATATAGGTGTTT | 58.82  | 27 |
| 163 | 242  | 404  | GTTCAACCAAACGGAAATGG   | 60.206 | 20 |
| 257 | 66   | 322  | CGCGGTGTTTTAACTTGCTT   | 60.298 | 20 |
| 144 | 516  | 659  | CTCGATTAAATGGGACCGAA   | 59.894 | 20 |
| 258 | 508  | 765  | ACCTCACGACGACTCCAAAA   | 60.69  | 20 |
| 123 | 288  | 410  | TCTCGTGTCTCCTCCCTC     | 59.38  | 20 |
| 200 | 278  | 477  | GGAATTGTGTGGGTCGATCT   | 59.786 | 20 |
| 272 | 901  | 1172 | TGCGCGTTTTTAGGGTTAAT   | 59.624 | 20 |
| 260 | 84   | 343  | TTTGAGTTGGGAGAGGGATG   | 60.042 | 20 |
| 259 | 508  | 766  | TCAGTGGCTACAAATCCCC    | 59.933 | 20 |
| 280 | 704  | 983  | TCCCTGTGGGATTAGGATTG   | 59.744 | 20 |
| 225 | 456  | 680  | TGACGGTTGGATTTTGCCT    | 60.353 | 20 |
| 207 | 141  | 347  | AGGCTTGAGTTTCCTCACGA   | 59.989 | 20 |
| 218 | 14   | 231  | TGCTATCGTCCTGATTGGTG   | 59.673 | 20 |
| 157 | 284  | 440  | TAAAGACATATCGCGACCCC   | 59.923 | 20 |
| 171 | 3367 | 3537 | TGTCACATCTCGATCTTCGC   | 59.95  | 20 |
| 195 | 1356 | 1550 | AACAGTCTGCAGGCCAAAAC   | 60.299 | 20 |
| 135 | 527  | 661  | GATCAGTTACCCGAACTGCC   | 59.556 | 20 |
| 217 | 71   | 287  | AAACGCGTCATGGATAAACC   | 59.829 | 20 |
| 143 | 17   | 159  | ATGGGAAGAGGGGTATGAGG   | 60.147 | 20 |
| 256 | 376  | 631  | GGGACGATTCTGAAAGGTGA   | 60.05  | 20 |
| 197 | 34   | 230  | GGGACGAAAATAACCCTCGT   | 60.187 | 20 |
| 122 | 86   | 207  | CAATTTGCAGCCCTCATTTT   | 60.074 | 20 |
| 261 | 721  | 981  | TCAAAGTCCAAACTGCCTCC   | 60.232 | 20 |
| 169 | 360  | 528  | TTGAAGCACCAACCTGTTCA   | 60.278 | 20 |
| 154 | 2    | 155  | ATCTCCTCCTCCACCGTGA    | 60.627 | 19 |
| 124 | 2    | 125  | ATCTCCTCCTCCACCGTGA    | 60.627 | 19 |
| 229 | 3014 | 3242 | CGAGTTGCCAATCATTTCT    | 60.074 | 20 |
| 224 | 359  | 582  | AAAAGTAACACGTGCCGTCC   | 60.037 | 20 |
| 214 | 1172 | 1385 | ATATCATGGACACGGGAAGC   | 59.78  | 20 |
| 279 | 548  | 826  | TCGATCTTGCTCTACGTCTGG  | 60.544 | 21 |
| 139 | 21   | 159  | TCTCGCTCTACACTTTCGGTC  | 59.63  | 21 |
| 260 | 359  | 618  | CGAATCCAGGTAAGGCTTGA   | 60.206 | 20 |
| 199 | 1002 | 1200 | ATATTCGCTGCATCAACGC    | 59.814 | 19 |
| 137 | 597  | 733  | CGGCGGCTCTATAAAATTGA   | 60.185 | 20 |
| 233 | 1195 | 1427 | TTAGGTCATGGATCGACACG   | 59.522 | 20 |
| 262 | 6193 | 6454 | TTCCAGGGCTACTGGAGGTA   | 59.688 | 20 |
| 142 | 323  | 464  | TGACTTGGGGTCCATCTCTC   | 60.048 | 20 |
| 242 | 2352 | 2593 | TTCCATGCATCAAGGAAAA    | 59.087 | 20 |
| 186 | 385  | 570  | TTGCATTTTCTGTTTTGAGA   | 58.4   | 21 |
| 164 | 651  | 814  | ACTCAGGTGGTTCAAATCGG   | 59.966 | 20 |
| 254 | 1480 | 1733 | AGCATTGCTGTGCTGATGAT   | 59.43  | 20 |
| 159 | 293  | 451  | ATCACCCAAAGCCATTTAC    | 59.797 | 20 |



|     |      |      |                        |        |    |
|-----|------|------|------------------------|--------|----|
| 157 | 156  | 312  | AGTTTGAAGAAGACCGCACG   | 60.431 | 20 |
| 214 | 98   | 311  | GATGTGTGCCCAAAGGAGT    | 59.973 | 20 |
| 242 | 4    | 245  | AGTGCTCGAATATCTCCCC    | 60.431 | 20 |
| 239 | 1659 | 1897 | ATTGATGTCCGAATGCAACA   | 59.931 | 20 |
| 133 | 340  | 472  | CACACCTTCAGAAATGCAATG  | 60.037 | 22 |
| 251 | 81   | 331  | CCTAGCTTTGCCCTCCTTCT   | 59.976 | 20 |
| 213 | 113  | 325  | CTCCATTGCATCACCATCAA   | 60.481 | 20 |
| 179 | 568  | 746  | TCGCAGAGCGAAAAGTATCA   | 59.712 | 20 |
| 114 | 2    | 115  | TGTAATCTCTCTCGAAGTTATA | 57.16  | 27 |
| 111 | 369  | 479  | AGATTTACGTGGTTCGGTCG   | 59.993 | 20 |
| 200 | 197  | 396  | TAGAGCCACAGCGGCATAGT   | 60.955 | 20 |
| 135 | 543  | 677  | AACTCATTAAATGTGCCGCC   | 59.967 | 20 |
| 166 | 2364 | 2529 | GAAGATCAAAGGCCACATC    | 59.488 | 20 |
| 188 | 767  | 954  | TGCCCACAACACTCAAGAA    | 60.278 | 20 |
| 117 | 435  | 551  | TGACATTTACGCAGTTTGTCTG | 59.784 | 21 |
| 135 | 4579 | 4713 | GAGCTTGGTTGGGAAAATCA   | 60.051 | 20 |
| 131 | 869  | 999  | GGCTCCCACAATGAACAAC    | 59.973 | 20 |
| 264 | 39   | 302  | CGAAGACACGATGTTGAACG   | 60.301 | 20 |
| 275 | 159  | 433  | CCCAGAATTGTAAAGCGCA    | 59.818 | 19 |
| 191 | 48   | 238  | GCACCGAAACAGAGCTGATA   | 59.028 | 20 |
| 135 | 26   | 160  | GAGAATGAGGGAGGGAGGAG   | 60.149 | 20 |
| 243 | 61   | 303  | CTCGGAGACCCATTTCTCTG   | 59.797 | 20 |
| 117 | 325  | 441  | GGTGGCCAACAGTTTTGATT   | 59.836 | 20 |
| 240 | 1414 | 1653 | GGGAAGGGAAGAAGGAGAGA   | 59.749 | 20 |
| 167 | 679  | 845  | TTCTAATTTGGTTACGCCGC   | 60.095 | 20 |
| 257 | 1424 | 1680 | GAGGCTTTTCGCTTTCTTT    | 59.966 | 20 |
| 238 | 37   | 274  | TTTTATCCCATGTTTGTGCAT  | 57.885 | 21 |
| 280 | 3169 | 3448 | CAGCGAATGTAACCGGATCT   | 60.096 | 20 |
| 159 | 1713 | 1871 | GTTAGGTGACCCACCTTCCA   | 59.82  | 20 |
| 189 | 381  | 569  | TCTTTCGAGTCAGGGCATCT   | 59.95  | 20 |
| 251 | 655  | 905  | TTCTCCTCCCTCCTTCAACA   | 59.773 | 20 |
| 244 | 5    | 248  | TGCGTTTTGATGATATATAGGT | 60.054 | 26 |
| 124 | 517  | 640  | TACTGATGACTGACGTGGG    | 60.748 | 20 |
| 271 | 72   | 342  | CGAGGAAGTTTTACGAGAAT   | 61.133 | 22 |
| 278 | 912  | 1189 | ACATTAGTGCATCGTCTGCG   | 59.895 | 20 |
| 217 | 861  | 1077 | GCGGAACCTCCTGAATTTGAA  | 60.192 | 20 |
| 280 | 94   | 373  | TTTTTGCACCATTGGTATTGT  | 57.94  | 21 |
| 126 | 475  | 600  | TGACGAATGATACCATTTAAG  | 59.507 | 23 |
| 170 | 270  | 439  | GAACAAAAACGATGAAATTT   | 60.149 | 25 |
| 223 | 93   | 315  | ACATTCAAGGGGCATTTTTG   | 59.801 | 20 |
| 224 | 965  | 1188 | CAGAGTATCCCGGTGTGGT    | 59.844 | 20 |
| 199 | 1883 | 2081 | TTTACGAATATACATGTTCCA  | 58.485 | 24 |
| 108 | 838  | 945  | TGCCCTAACGCCTTATCTTG   | 60.223 | 20 |
| 230 | 2300 | 2529 | TGTGGCCTAACTTCTGGTGA   | 59.288 | 20 |
| 261 | 0    | 260  | GAGAGGAGTGAGATTGAGCG   | 59.694 | 21 |
| 213 | 2508 | 2720 | ACCCTACCCATTTACCCGTT   | 59.46  | 20 |
| 123 | 937  | 1059 | TTCTTCCCCACTGCTCATCT   | 59.803 | 20 |
| 146 | 20   | 165  | TGCTCCATTTTCACAACTGAAC | 60.154 | 22 |
| 274 | 100  | 373  | GTGGGTTTGGAGAAGAGCAG   | 59.844 | 20 |
| 139 | 8    | 146  | TGAGCCGTCAGTGCATTA     | 60.401 | 20 |
| 249 | 51   | 299  | AGTCACAGATGCGTGACACC   | 59.744 | 20 |
| 181 | 259  | 439  | ATGCATACATGACTCGAGCG   | 59.854 | 20 |
| 249 | 513  | 761  | CGGGCCGTGACTTTACAAT    | 59.883 | 20 |
| 144 | 8    | 151  | CGCGTTACGAATCCAAGTTT   | 60.131 | 20 |
| 247 | 103  | 349  | TTTTTAGGGTTTAAATCGCGT  | 59.118 | 22 |
| 276 | 406  | 681  | ATGATGGACAAGGCATCCTC   | 59.893 | 20 |
| 179 | 0    | 178  | GGCCACAATGGTTATTAGTT   | 57.874 | 21 |
| 251 | 12   | 262  | GAGAGAGGGGCGAGAGGTAG   | 60.489 | 20 |

|     |      |      |                        |        |    |
|-----|------|------|------------------------|--------|----|
| 211 | 57   | 267  | TTGTGACGGTGACTAGAGCC   | 58.882 | 20 |
| 280 | 16   | 295  | TTACCATATTTAAGGGTTATCA | 58.789 | 26 |
| 209 | 193  | 401  | GACCGCGAAGTATCTGCTGT   | 60.428 | 20 |
| 280 | 62   | 341  | CGTTTCCCATGTTGCTTGTA   | 59.585 | 20 |
| 267 | 925  | 1191 | ATCACCATTGGATTCTCCCA   | 60.135 | 20 |
| 278 | 417  | 694  | TTGGTTGTTTGAGATTGTGGTT | 59.378 | 22 |
| 253 | 150  | 402  | TTGCCTTTCTTTCCCTCTT    | 60.18  | 20 |
| 157 | 362  | 518  | AACTGTGAACGGCGCTAATC   | 60.278 | 20 |
| 279 | 11   | 289  | TTTCTCACATAACTTAGCTGTT | 58.762 | 26 |
| 276 | 135  | 410  | TTATGATGGGAATGGTGGGT   | 59.871 | 20 |
| 249 | 56   | 304  | TCTGGCTAATTTGGCAGCTT   | 59.982 | 20 |
| 247 | 1250 | 1496 | AACCGGTTAAAACCCAGACC   | 60.089 | 20 |
| 255 | 424  | 678  | GGTTATCACCGGATCACGAC   | 60.203 | 20 |
| 207 | 1930 | 2136 | AAGAAACCCACAAAAAGCCC   | 60.332 | 20 |
| 256 | 63   | 318  | GTGTGTGCATGCATTTGTTG   | 59.595 | 20 |
| 251 | 938  | 1188 | AAGAATTGATGCCAACCCAC   | 59.797 | 20 |
| 260 | 149  | 408  | GAAGCATGAAGCAGCAATGA   | 60.104 | 20 |
| 194 | 227  | 420  | GCATGATCAATGTTGTAGAGG  | 59.457 | 22 |
| 156 | 700  | 855  | AAGTCAACCAATGCAGATGCT  | 59.755 | 21 |
| 165 | 675  | 839  | CCAGCACCTTCTCTCCACTC   | 59.986 | 20 |
| 278 | 1494 | 1771 | CAGCTGACGAACACTCCCTT   | 60.444 | 20 |
| 276 | 108  | 383  | ATACCCAGGGGCATATGTGT   | 59.009 | 20 |
| 232 | 282  | 513  | AGACAGCGATGGTGAAGAGG   | 60.408 | 20 |
| 172 | 1002 | 1173 | GGTTCCTCTTCTCTAACGC    | 58.001 | 20 |
| 227 | 69   | 295  | AACTCGAGATCGGTCCACCT   | 61.052 | 20 |
| 253 | 60   | 312  | ACCCAAAGGTCTCATTTCCA   | 59.381 | 20 |
| 275 | 5585 | 5859 | TTGTCAAAAGCACCAGCAAT   | 59.322 | 20 |
| 206 | 948  | 1153 | AACGGTCGCAGAAAAAGCTA   | 60.018 | 20 |
| 276 | 340  | 615  | TCCACAGACAACCTCACCAA   | 60.129 | 20 |
| 210 | 28   | 237  | AACACGAGGAACTTTGGACG   | 60.149 | 20 |
| 218 | 17   | 234  | TCTAGAGCCACTCCCTCCAA   | 59.943 | 20 |
| 270 | 119  | 388  | GATAAGCCAGGGTATGGCAA   | 59.923 | 20 |
| 167 | 262  | 428  | CCGGGCCATTACAATAAATG   | 60.033 | 20 |
| 243 | 27   | 269  | CGGTAAGTCGTTAATGGAGGA  | 59.098 | 21 |
| 137 | 106  | 242  | AGGTACGATGCTGCTGTGAA   | 59.47  | 20 |
| 203 | 2706 | 2908 | ACGGGAATGGTGTGTTGATT   | 60.096 | 20 |
| 213 | 1785 | 1997 | AAATGTGGCAACACCAATCA   | 59.823 | 20 |
| 246 | 1169 | 1414 | GGGGATAAGAATCAGGGGAG   | 59.722 | 20 |
| 191 | 722  | 912  | TAGCGATGAAGACGACGATG   | 59.972 | 20 |
| 159 | 1422 | 1580 | CGCTTCTGCAAGAGATGACA   | 60.287 | 20 |
| 238 | 31   | 268  | TTCGATTTGGGGTGTAAACA   | 58.866 | 20 |
| 260 | 2535 | 2794 | TTCCGGCGAGGATATATGAG   | 60.016 | 20 |
| 233 | 15   | 247  | CAAAAAGGGAAGAGCGACAC   | 59.853 | 20 |
| 171 | 106  | 276  | GGATCCGACGTCCAATATACA  | 59.659 | 21 |
| 234 | 346  | 579  | CGCGATCTCAACCAGAAAAC   | 60.776 | 20 |
| 179 | 356  | 534  | AAAAATGATGCCAATCCAGC   | 59.907 | 20 |
| 149 | 19   | 167  | TGATTCTTTTGTGTTTGCT    | 58.787 | 22 |
| 260 | 1229 | 1488 | GGTGTTTTTGGATTGGTTGG   | 60.066 | 20 |
| 145 | 1018 | 1162 | ACCGCAATAATCCATACCTCA  | 59.31  | 21 |
| 273 | 268  | 540  | GGTGATTCGAGATGATCCGT   | 59.893 | 20 |
| 269 | 1040 | 1308 | AAACTACCATTGCCAACC     | 59.836 | 20 |
| 175 | 668  | 842  | TGACGTGGTGTGTGGTTTT    | 59.897 | 20 |
| 108 | 42   | 149  | GTGAATCACACTCCCCATC    | 60.184 | 20 |
| 227 | 1541 | 1767 | TTACCTCATCAGAGCTGCCC   | 60.362 | 20 |
| 274 | 319  | 592  | CGAACTGGGAAAGGAGAAAA   | 59.284 | 20 |
| 269 | 346  | 614  | GACACTCTTCTCACCCCA     | 60.088 | 20 |
| 231 | 83   | 313  | CCGAACCACGTAAATCTGTG   | 59.047 | 20 |
| 125 | 699  | 823  | AGCTGCTGCCCAAAACTTA    | 60.018 | 20 |

|     |      |      |                         |        |    |
|-----|------|------|-------------------------|--------|----|
| 101 | 42   | 142  | TGACCCCCTTTGTCAACTTT    | 59.425 | 20 |
| 197 | 163  | 359  | AGGATTGTTGACTGCCAGGT    | 59.579 | 20 |
| 169 | 1789 | 1957 | GCTTCTCGTTCCTGTTGAA     | 60.375 | 20 |
| 203 | 4779 | 4981 | TGAAATGCACCACTCGTTTG    | 60.699 | 20 |
| 241 | 134  | 374  | CTGAATGCTTACCGATGCG     | 60.373 | 19 |
| 137 | 303  | 439  | TCACCCTTTCTTTGATGGGT    | 59.381 | 20 |
| 170 | 328  | 497  | GTCATGAATCGGTGCATTTG    | 59.931 | 20 |
| 190 | 705  | 894  | CGAGAACTCGGGATGAGAGA    | 60.488 | 20 |
| 268 | 352  | 619  | TCCTTTTCCATTATCCATGTTTT | 59.96  | 24 |
| 212 | 1073 | 1284 | GGTGCATAGGTTAAAGGGCA    | 59.96  | 20 |
| 280 | 381  | 660  | GCATACCAACCAGATCTACGC   | 59.611 | 21 |
| 183 | 550  | 732  | TCCTTGGATCTTGATGGCTT    | 59.629 | 20 |
| 240 | 2170 | 2409 | GAAGGCTTTGATTCATCTCTCT  | 59.496 | 23 |
| 190 | 607  | 796  | CTTCCGCCATTCTACAAAA     | 60.067 | 20 |
| 227 | 246  | 472  | TGGAATTCGCAATATCCAAA    | 58.958 | 20 |
| 134 | 576  | 709  | GGGATCGATTTTTCAAGGGT    | 60.131 | 20 |
| 258 | 1151 | 1408 | TGGCTTCATTTTGCAGTCAC    | 59.847 | 20 |
| 155 | 674  | 828  | GGCGGACATCAAAGGAATTA    | 59.901 | 20 |
| 198 | 360  | 557  | ATCACGGACCCACATACAT     | 59.934 | 20 |
| 264 | 56   | 319  | TGCAATGGACTGCCTCTGTA    | 60.413 | 20 |
| 271 | 56   | 326  | GGAATGTTATTGTTCTGTCG    | 59.041 | 20 |
| 267 | 146  | 412  | AGCTGTAGGTCGGATGAGGA    | 59.827 | 20 |
| 181 | 360  | 540  | TGAGCAAGCGCATTGTTTAT    | 59.472 | 20 |
| 269 | 343  | 611  | CTTCCCAACACCACCCTAAA    | 59.824 | 20 |
| 235 | 1404 | 1638 | TCCTTTCTGCATTTGGGTTT    | 60.051 | 20 |
| 171 | 524  | 694  | AACAGGGCTGGTGTGTGTTT    | 60.466 | 20 |
| 242 | 66   | 307  | AACGGGATGCTTTCAAATG     | 59.938 | 20 |
| 268 | 1274 | 1541 | TTCCATAAACAGGGAAGATGT   | 58.949 | 22 |
| 144 | 813  | 956  | TTGGAACCTTGCTTCGGAAAG   | 60.357 | 20 |
| 209 | 31   | 239  | CTTGGGAACCTAGGAGAGCC    | 60.204 | 20 |
| 220 | 580  | 799  | ATTTGGGGTGATGGGTTTTT    | 60.278 | 20 |
| 198 | 408  | 605  | GACCGAAATGCAACGATAAAC   | 59.47  | 21 |
| 233 | 15   | 247  | TTGGCATGTAAATCAGCCAC    | 59.548 | 20 |
| 249 | 307  | 555  | CGAAGTAGCTCGAGCCGTAG    | 60.305 | 20 |
| 167 | 15   | 181  | CCAAAATTGAACAGCCGATT    | 59.938 | 20 |
| 250 | 150  | 399  | CCCTCAATCTCGAAAATGGAT   | 60.272 | 21 |
| 211 | 346  | 556  | GGGGAAAAGGGTGATGTTTT    | 60.032 | 20 |
| 135 | 55   | 189  | AGCGCGTCACACTTTTATCC    | 60.278 | 20 |
| 162 | 337  | 498  | GGGGACAACGCCATTTATAG    | 59.297 | 20 |
| 203 | 2430 | 2632 | TGAGGATATTCCAGTGTGTGA   | 59.485 | 23 |
| 213 | 567  | 779  | TTCAACGTCGGACAAGACAA    | 60.278 | 20 |
| 274 | 1172 | 1445 | AGCAGACAGGGGAATCTTAGC   | 59.721 | 21 |
| 208 | 93   | 300  | CCTCTAGCATCTCTTGCTCTCT  | 59.048 | 23 |
| 166 | 63   | 228  | CCGATAGAAGCCACATGTAA    | 59.967 | 21 |
| 197 | 544  | 740  | TTGCCCAAATATGCAGTGAG    | 59.688 | 20 |
| 110 | 971  | 1080 | TTTAAGTCGTTGTCGTTGCG    | 59.911 | 20 |
| 225 | 2837 | 3061 | CAAGATGATGAAGGTCAAACC   | 60.11  | 22 |
| 130 | 18   | 147  | GAGAAGGGTTATCACTTGAAT   | 59.113 | 25 |
| 221 | 215  | 435  | ATAGGCACCCCTGGAAAAAG    | 60.312 | 20 |
| 245 | 69   | 313  | GGTGAACCGCGTAAATCTGT    | 60     | 20 |
| 126 | 227  | 352  | GCATTATCCGGTCGATTGTC    | 60.304 | 20 |
| 275 | 122  | 396  | TCGTTTCAGAGCTGGGTAGG    | 60.388 | 20 |
| 258 | 19   | 276  | AACCGATTGCTTTTTGATCG    | 60.074 | 20 |
| 279 | 744  | 1022 | CAAAGTCTTGCGATGGATTG    | 59.272 | 20 |
| 182 | 73   | 254  | TTCACCCATTGTTTGCATA     | 59.93  | 20 |
| 209 | 76   | 284  | TTTTCCGATTGACAAATCCC    | 59.739 | 20 |
| 262 | 1244 | 1505 | TGCCACACGTATAACCACGTC   | 60.459 | 20 |
| 237 | 54   | 290  | TGTGCACGAGAATACATCCAG   | 59.731 | 21 |

|     |      |      |                         |        |    |
|-----|------|------|-------------------------|--------|----|
| 201 | 428  | 628  | GAGACATGGACGGGAAGAGA    | 60.199 | 20 |
| 264 | 146  | 409  | ACATCACCGGCATATTCACC    | 60.613 | 20 |
| 214 | 1832 | 2045 | GACAATTGCTCGCAAAGGAT    | 60.221 | 20 |
| 166 | 1275 | 1440 | TTCTCATTTGCAACCGATGT    | 59.127 | 20 |
| 106 | 1297 | 1402 | CTCAGATCCTCGGAAAACCA    | 60.187 | 20 |
| 252 | 316  | 567  | ATGACCCACCAAACATGACA    | 59.656 | 20 |
| 164 | 0    | 163  | TCTCTCTTGGTTGGTGAAGAA/  | 58.955 | 22 |
| 223 | 277  | 499  | CGAATGTTTCTCCTTTCTTGG   | 58.82  | 21 |
| 273 | 1028 | 1300 | TGGTACTTGCAATGTTGGGA    | 59.964 | 20 |
| 113 | 248  | 360  | CAAAATTTGGCATCAAATTCA/  | 59.82  | 22 |
| 268 | 121  | 388  | GGATGGGAGTCAATCCAGAA    | 59.862 | 20 |
| 127 | 259  | 385  | ATGTCTTGCCGGAAGTGTCT    | 59.727 | 20 |
| 178 | 4    | 181  | ACATCTAGCTCTGTTGAATCTT  | 57.773 | 25 |
| 221 | 110  | 330  | TGGAGATGTGAAACATGCCTT   | 60.511 | 21 |
| 156 | 13   | 168  | TCGGTTTGGCCAATATTTCT    | 59.411 | 20 |
| 142 | 390  | 531  | GATATTTGATTTTGC GGGA    | 59.735 | 20 |
| 251 | 1254 | 1504 | GCTTTGGTGACTGAATGATGC   | 60.661 | 21 |
| 230 | 75   | 304  | GTGGTATGGTATGGGGACCA    | 60.317 | 20 |
| 192 | 357  | 548  | TCACGTCAACTTATTCCCCC    | 59.79  | 20 |
| 262 | 150  | 411  | AGAGAGGAAATTAGGAGGGG    | 59.913 | 21 |
| 220 | 2032 | 2251 | TCAAACAAAACCCTACACCCA   | 60.248 | 21 |
| 186 | 1086 | 1271 | TTCGATCTACTGGGCCACAT    | 60.483 | 20 |
| 246 | 513  | 758  | GGAGTCATCGGTCTCTGCAT    | 60.231 | 20 |
| 152 | 328  | 479  | AGGCAAAATTA AAAATGCCAC  | 58.188 | 21 |
| 127 | 928  | 1054 | GCTTCGTTTTATTTGGCAGG    | 59.72  | 20 |
| 259 | 113  | 371  | TGCCTACCAAACACTAGGGG    | 59.986 | 20 |
| 171 | 779  | 949  | CCGTACCGGAATTTAACGAA    | 59.826 | 20 |
| 197 | 2302 | 2498 | GCCATGTCTAGCATTGGGAT    | 59.923 | 20 |
| 251 | 1080 | 1330 | CTGCCATAACCCGAAAAAGA    | 60.067 | 20 |
| 190 | 165  | 354  | TGCCGTGTTATTGTGAGTCC    | 59.572 | 20 |
| 132 | 2089 | 2220 | TTTGCCCATCTTCAA ACTCC   | 60.051 | 20 |
| 206 | 2596 | 2801 | TGCTTTCGGCCTTACAATCT    | 59.845 | 20 |
| 186 | 2496 | 2681 | TGGAATCGCGATGAGATTTA    | 59.212 | 20 |
| 214 | 304  | 517  | AACCCGATCCTTGAGGAAAC    | 60.306 | 20 |
| 254 | 20   | 273  | AACAAGTGTGCGCACAAACA    | 60.199 | 20 |
| 120 | 383  | 502  | GAGAACCAAATGTGCAGGCT    | 60.263 | 20 |
| 279 | 381  | 659  | GGTCGACTTACGCCATGAAT    | 59.962 | 20 |
| 276 | 91   | 366  | AGCCTCTATCCCCATGTCCT    | 59.919 | 20 |
| 200 | 2700 | 2899 | TTGATCGAAAGGGAATCGAC    | 60.014 | 20 |
| 274 | 681  | 954  | TCTCTTCTCCCCCTCTCCTC    | 59.883 | 20 |
| 239 | 544  | 782  | TTCAGGAGGCCTATGAGACG    | 60.353 | 20 |
| 197 | 70   | 266  | CACGTGACATAAAATGCATCG   | 60.006 | 21 |
| 223 | 49   | 271  | TGAAACCAGGGGAAAAAGG     | 59.888 | 19 |
| 249 | 165  | 413  | CGGCACAAAATTTTCCACTT    | 59.975 | 20 |
| 169 | 764  | 932  | TTGCTGCGGTACTTTCATTTT   | 59.772 | 21 |
| 252 | 203  | 454  | ATTTTGACCGAAATACCCCC    | 59.888 | 20 |
| 260 | 78   | 337  | TTCACAGTTTTTCATTTGATCAC | 58.986 | 23 |
| 260 | 61   | 320  | GGCTATAGAGCCGTTGAATGT   | 58.366 | 21 |
| 134 | 117  | 250  | TGATACGGGACCCTCATCTT    | 59.361 | 20 |
| 124 | 439  | 562  | TACAAACCACCTTAACTCCGC   | 60.395 | 22 |
| 223 | 933  | 1155 | CAGCGGTATGTTCCGATTTT    | 59.96  | 20 |
| 274 | 81   | 354  | CGAGCCACAATACTTCGGAC    | 60.657 | 20 |
| 141 | 20   | 160  | CGGATTTAGCGGTTATTACCTC  | 61.448 | 23 |
| 132 | 444  | 575  | AAGAAGATGCCGAAGGATGA    | 59.773 | 20 |
| 146 | 14   | 159  | GGGAGTGCTCTCACCTGAAT    | 59.258 | 20 |
| 276 | 2091 | 2366 | AGGAGACGAAAGCTTCCCAT    | 60.212 | 20 |
| 221 | 153  | 373  | GGGTTCTCGTGATAAGCTCG    | 59.836 | 20 |
| 279 | 21   | 299  | AGAGGGTTATCATGGGATCAA   | 58.32  | 21 |

|     |      |      |                        |        |    |
|-----|------|------|------------------------|--------|----|
| 276 | 190  | 465  | AGGGATTTATGACCGTTTGC   | 58.906 | 20 |
| 146 | 80   | 225  | GGTTGTGGCTCTGGTTCTGT   | 60.159 | 20 |
| 219 | 8    | 226  | GGAGCTGTGTGATGTTGGAG   | 59.261 | 20 |
| 272 | 2325 | 2596 | CAGATCGCGAGAAATTGAGA   | 59.101 | 20 |
| 269 | 156  | 424  | CATGTAAAGCCTTGGGATGAA  | 59.946 | 21 |
| 127 | 43   | 169  | CGTTGATTTGAGGCAGGTTT   | 60.636 | 20 |
| 122 | 1119 | 1240 | GGGTGTAAGAAGGTTTGGCA   | 59.971 | 20 |
| 113 | 374  | 486  | TTTACTCCGAAAGGGACGAA   | 59.679 | 20 |
| 228 | 2    | 229  | GCTTCAAGTTTCCTCCTTTTG  | 58.111 | 21 |
| 123 | 2295 | 2417 | GTTGGAGAGTTGACGGTGGT   | 60.009 | 20 |
| 214 | 295  | 508  | CGCCTCCGGACTTTAACTCT   | 60.753 | 20 |
| 186 | 96   | 281  | GCACCCCTACATTCATCGTT   | 59.82  | 20 |
| 243 | 315  | 557  | AGTCCCCGGTCCGTAATA     | 60.553 | 20 |
| 133 | 299  | 431  | AACTCCATGCAAATCACACG   | 59.572 | 20 |
| 186 | 249  | 434  | TACTTTGCGGGTAGGGTAGG   | 59.108 | 20 |
| 196 | 141  | 336  | CGCTTCGAGTTGTTTTACA    | 60.027 | 20 |
| 252 | 216  | 467  | GGAAATGGGAATGGGTTCTT   | 59.996 | 20 |
| 218 | 2391 | 2608 | TGCTTAAGTGCTATGCAAATCT | 58.307 | 23 |
| 278 | 1371 | 1648 | TCTCCACTCCCTGAGTATCCC  | 60.462 | 21 |
| 261 | 456  | 716  | CCATCCCAATTATACGGTCC   | 58.974 | 20 |
| 211 | 240  | 450  | GTGGACGCTCCAGATTGTTT   | 60.119 | 20 |
| 234 | 430  | 663  | ATCAAGGAGGGGAAATGGAT   | 59.588 | 20 |
| 159 | 993  | 1151 | GATAAGCACGCCACAAAACC   | 60.511 | 20 |
| 270 | 25   | 294  | CCCTTTCTCCTCTCCCCTC    | 60.186 | 20 |
| 179 | 1997 | 2175 | CCACAGCATGGACTTTGTTG   | 60.152 | 20 |
| 261 | 2000 | 2260 | CAAAGCAACCCTTAAGAGCG   | 60.011 | 20 |
| 151 | 102  | 252  | GTTTTGAGATGGGTGGTTGG   | 60.21  | 20 |
| 159 | 5    | 163  | ATTGCCCCAGGAATCTTGTT   | 60.693 | 20 |
| 280 | 266  | 545  | TAGCCGGGTCGTGACATAA    | 60.08  | 19 |
| 200 | 95   | 294  | GGGAAGAAAACGCAACACAT   | 59.978 | 20 |
| 273 | 288  | 560  | CCACATGCTATGCCTCAAAC   | 59.152 | 20 |
| 244 | 484  | 727  | TTATCTACAAAACGAGACCAA  | 57.613 | 25 |
| 109 | 1390 | 1498 | TCTATCCGCCAGTGCTCTTT   | 59.978 | 20 |
| 182 | 799  | 980  | TGGCATTACAAACTTCAAACC, | 60.389 | 22 |
| 207 | 2649 | 2855 | ACCAACACTGCATCAGTCCC   | 60.999 | 20 |
| 232 | 78   | 309  | TTGAGCTCTGATGCCACAAT   | 59.399 | 20 |
| 277 | 148  | 424  | GAAGACTTCGCATCTCGGAA   | 60.483 | 20 |
| 142 | 4    | 145  | GAGTTGGTCATTCTCAAGATG  | 58.646 | 22 |
| 279 | 161  | 439  | GCCAGAGATTTCCGCTAACC   | 61.091 | 20 |
| 241 | 97   | 337  | CCTTCCTGAATGCTGCTTCT   | 59.574 | 20 |
| 102 | 18   | 119  | CACCAGCCATCCAAAGGTAT   | 59.813 | 20 |
| 180 | 1823 | 2002 | GGCCCATGTGTTAAATCAAGA  | 59.815 | 21 |
| 103 | 329  | 431  | TTAAATGACCTTGGGATGCG   | 60.827 | 20 |
| 248 | 233  | 480  | AGCGCCTAGCGATTTCTACA   | 60.138 | 20 |
| 244 | 3669 | 3912 | AGCCGCACATTGATCTTACC   | 60.103 | 20 |
| 278 | 546  | 823  | TGTTTTGGTCTCACCGGAAT   | 60.353 | 20 |
| 204 | 702  | 905  | AATAAGATACGGGCAGCGAA   | 59.704 | 20 |
| 235 | 112  | 346  | CTTCCCCTGTTCTTGCATGT   | 60.111 | 20 |
| 269 | 493  | 761  | CGCGGAGCATTGTTCATA     | 60.235 | 19 |
| 229 | 75   | 303  | TTTACCCCCAAGTCTCCTA    | 59.521 | 20 |
| 139 | 9    | 147  | TTTTGTCTATATCGCTCAGTCA | 57.221 | 24 |
| 248 | 92   | 339  | TTGGCGAAAAATGTTGACAG   | 59.706 | 20 |
| 234 | 98   | 331  | TTTGTAAAGTCCGGCCATCTC  | 60.074 | 20 |
| 174 | 989  | 1162 | CATCTAGGGGAGCAAATGGA   | 60.029 | 20 |
| 211 | 914  | 1124 | TCTGCAATGAACGAAAATGC   | 59.816 | 20 |
| 259 | 259  | 517  | GAATGAGGGTTGTGGGACTG   | 60.363 | 20 |
| 138 | 27   | 164  | GGGCTAACGGGCTACACAA    | 61.036 | 19 |
| 276 | 2356 | 2631 | GAGCTGGAAAAGAGAGGGAA   | 59.948 | 21 |

|     |      |      |                        |        |    |
|-----|------|------|------------------------|--------|----|
| 119 | 275  | 393  | TCCAAAGGTGGCCAAAATAC   | 59.801 | 20 |
| 181 | 250  | 430  | TAAGGGCGGTATCACCTGAA   | 60.46  | 20 |
| 258 | 867  | 1124 | ATTTGGGCATAAAAACGTGC   | 59.838 | 20 |
| 157 | 15   | 171  | TCATCAACAGCGAAGCAAGT   | 59.596 | 20 |
| 267 | 228  | 494  | ACAATTGGCAGCACCAGAAT   | 60.526 | 20 |
| 210 | 970  | 1179 | GGTGGACTGTAGTGGGCAGT   | 60.033 | 20 |
| 270 | 0    | 269  | GTA AACAGCGCCCGTACAT   | 60.025 | 20 |
| 141 | 442  | 582  | TGTTGGCCTATGGTGCAGTA   | 60.134 | 20 |
| 184 | 249  | 432  | ATGATACGCAAGCGGAAGAC   | 60.243 | 20 |
| 277 | 7    | 283  | AGGGACCACTAGACATTCGCT  | 60.146 | 21 |
| 201 | 702  | 902  | AACCTGGTTCTCGTTCCAAA   | 59.569 | 20 |
| 266 | 1179 | 1444 | CAAACGTATGGAGTTGTGCG   | 60.172 | 20 |
| 189 | 766  | 954  | GGATGAGAGATTTGGGTTTCG  | 59.483 | 20 |
| 141 | 4    | 144  | TTAGTTAGCATGGGGGAAGG   | 59.04  | 20 |
| 125 | 275  | 399  | GACCGCTCAAATCACTCACTC  | 59.866 | 21 |
| 252 | 9    | 260  | ACCCACATTTGTGGCATA     | 59.639 | 19 |
| 165 | 253  | 417  | AGATCTCAACGCATCAACCG   | 61.208 | 20 |
| 237 | 117  | 353  | TAAATACTTGCTGCCCGAGG   | 60.223 | 20 |
| 231 | 50   | 280  | CCAACGAAACCACTGACAAA   | 59.585 | 20 |
| 243 | 513  | 755  | TTCGATTCGCAACAATTGAG   | 59.809 | 20 |
| 234 | 1485 | 1718 | AGCACCTTATTGTGGCTTG    | 60.132 | 20 |
| 147 | 31   | 177  | GATGGGTTATTATTGGAACGA  | 59.242 | 23 |
| 280 | 1780 | 2059 | TTGTACGTCCAATATGTAAATT | 57.296 | 27 |
| 125 | 2896 | 3020 | TGCATATACATACGCGCACA   | 59.736 | 20 |
| 280 | 24   | 303  | CGGACTCCTTCTTCCTTCT    | 59.811 | 20 |
| 264 | 8    | 271  | CAATGGTTGTGGGGGAGTTA   | 60.605 | 20 |
| 230 | 983  | 1212 | AGTTGGGGATGAATCCAGGT   | 60.575 | 20 |
| 190 | 145  | 334  | ACCTAAGGGGGTGTTCAT     | 60.61  | 20 |
| 139 | 35   | 173  | TACCAGGGTCAACAATGACG   | 59.415 | 20 |
| 139 | 35   | 173  | TACCAGGGTCAACAATGACG   | 59.415 | 20 |
| 181 | 1712 | 1892 | CTAATGCTTATGCTGCTGCG   | 59.77  | 20 |
| 144 | 322  | 465  | CCTATTTGCCTTCCCTCCAT   | 60.278 | 20 |
| 252 | 439  | 690  | CTCCACATGGAATCCCCTTA   | 59.744 | 20 |
| 177 | 1155 | 1331 | TTTTTGCATGGAACATGAA    | 60.051 | 20 |
| 236 | 101  | 336  | ACCCGAATTGACATGCCTAC   | 59.82  | 20 |
| 181 | 86   | 266  | TCGACGACTTGTTGAAATG    | 59.691 | 20 |
| 174 | 633  | 806  | TATTCCTTTACGCATGCCCC   | 59.928 | 20 |
| 114 | 15   | 128  | TCATCTATAGGGAAGTTATCA  | 59.464 | 26 |
| 145 | 34   | 178  | CAACGGATTTGGTTTGTCC    | 60.206 | 20 |
| 202 | 149  | 350  | TGGGATTACACATTTGCCT    | 60.331 | 20 |
| 115 | 131  | 245  | TGGTCATCCCTTTCTGACCT   | 59.505 | 20 |
| 229 | 803  | 1031 | TTGAATTGATATTCAGTGAAC  | 60.276 | 25 |
| 213 | 1346 | 1558 | TCATCCTTCACCTGACCCAT   | 60.326 | 20 |
| 164 | 157  | 320  | TGGGGTGTTCATGATAAGTGG  | 59.215 | 20 |
| 139 | 8    | 146  | CGGATTAAGGGTTATTACCTC  | 59.9   | 25 |
| 200 | 58   | 257  | CGATGAGCATAGAGAGTGCG   | 59.722 | 20 |
| 232 | 171  | 402  | AAATTACACCTTTGTCATTTTT | 57.864 | 25 |
| 162 | 741  | 902  | TCGTTAAAGGGAATGCACAA   | 59.157 | 20 |
| 279 | 474  | 752  | GAGTGGGGGTTTTGAGTTTG   | 59.425 | 20 |
| 264 | 591  | 854  | GCAATCCGATATCAACCAGC   | 60.444 | 20 |
| 235 | 4230 | 4464 | AACTTGGTTCCACGCAAAC    | 60.015 | 20 |
| 231 | 286  | 516  | TTGAAGCATGACCTGCAAAT   | 59.276 | 20 |
| 238 | 863  | 1100 | CTTCAACTCGACCTTTTCCG   | 59.846 | 20 |
| 154 | 72   | 225  | GGGATAAGATTGGTGGTGATG  | 59.115 | 21 |
| 265 | 301  | 565  | AATGCCTGCTTGCCTTAAA    | 59.853 | 20 |
| 256 | 177  | 432  | TTTTTCTCCAAAATTGCC     | 57.656 | 19 |
| 243 | 273  | 515  | TGTGGCGTATGTTAGAGGCA   | 60.28  | 20 |
| 272 | 211  | 482  | CAATCCAGCCATTCATTTT    | 59.762 | 20 |

|     |      |      |                        |        |    |
|-----|------|------|------------------------|--------|----|
| 163 | 18   | 180  | AGCTGGGCACTTGAAACCTA   | 59.875 | 20 |
| 177 | 117  | 293  | TCTTTCCAGTTGTGTCCTGG   | 58.695 | 20 |
| 254 | 94   | 347  | GGCATACCGCAAATCAACTT   | 59.967 | 20 |
| 113 | 578  | 690  | CTTCCTCCCACCTTCGTCTT   | 60.619 | 20 |
| 258 | 492  | 749  | GGAGATATCGGTTGTGCGAA   | 59.894 | 20 |
| 277 | 801  | 1077 | GGATGTGCAATTGTCTTTGC   | 59.131 | 20 |
| 253 | 37   | 289  | TTACATCTTCCCGCCATTC    | 59.901 | 20 |
| 276 | 219  | 494  | ACCATTTCCCTATCTATACCAA | 59.104 | 25 |
| 162 | 292  | 453  | AAAAGGAGAGGAAGGTTGGC   | 59.691 | 20 |
| 199 | 482  | 680  | GAGCGAGTTGGAAGTTGGAA   | 60.375 | 20 |
| 280 | 1120 | 1399 | CACGTTGCTATCCAAGTCA    | 59.864 | 20 |
| 248 | 519  | 766  | ATAACATCAACCGCCAGCAT   | 60.361 | 20 |
| 269 | 688  | 956  | AATTCCCAAGATAATCTCAATC | 58.532 | 23 |
| 191 | 1510 | 1700 | CCCGTAGAACTTTCCCTGGT   | 60.353 | 20 |
| 162 | 199  | 360  | TTGTGAAATGAATGCACCAAA  | 59.961 | 21 |
| 109 | 305  | 413  | TGCAACAAGATGGTGCTCTC   | 59.992 | 20 |
| 115 | 4    | 118  | GGCCGAGATTTGTTAGAGGTT  | 59.607 | 21 |
| 274 | 48   | 321  | TGAAGTTCGAAATAAGGAGC   | 58.315 | 21 |
| 257 | 198  | 454  | TCTTATCCATTTGCGCCATCC  | 59.862 | 20 |
| 269 | 140  | 408  | TTGGAGGGCTGTTTCTTCAT   | 59.67  | 20 |
| 165 | 161  | 325  | AGGTGGGAAATCATCCCTTC   | 60.133 | 20 |
| 235 | 93   | 327  | GACCAAGTTGCTCTTCTCGG   | 59.989 | 20 |
| 108 | 301  | 408  | TCTCTGATTTCTCACGCCCT   | 59.95  | 20 |
| 272 | 11   | 282  | TAAATGAGCCGTCAGTGCAT   | 59.301 | 20 |
| 264 | 1832 | 2095 | CACTACATAAATTTGGCAAAG, | 58.849 | 25 |
| 105 | 86   | 190  | AATTTTGAATGAACACGGCA   | 59.016 | 20 |
| 174 | 660  | 833  | CTTCCCAAGAGCTCACATC    | 59.803 | 20 |
| 134 | 39   | 172  | CTTGCCCTTCACTCTCATC    | 59.803 | 20 |
| 253 | 92   | 344  | TGACGTGGGTGTTGGAATAA   | 59.816 | 20 |
| 204 | 425  | 628  | TGCGTGGTTTTTCTGTTGTC   | 59.74  | 20 |
| 269 | 135  | 403  | AAACAGCGCCCATATCTTG    | 60.096 | 20 |
| 246 | 389  | 634  | CTTACAACCGCAAGCCATCT   | 60.27  | 20 |
| 166 | 216  | 381  | TGTTGAAAATGGTGGTTGA    | 59.941 | 20 |
| 161 | 1542 | 1702 | TGATTTTCATCCGAATGTCCA  | 59.859 | 20 |
| 203 | 741  | 943  | TGTGGGTTCACTGGATACGA   | 59.96  | 20 |
| 201 | 315  | 515  | GGACAAATTTGGAATTTTAGG  | 58.775 | 22 |
| 269 | 51   | 319  | ATCGATCCACGTTGAAAAC    | 59.939 | 20 |
| 232 | 580  | 811  | ACAACGCAATTGTTCCCTT    | 59.476 | 20 |
| 220 | 31   | 250  | TCCAAACTGTATGGTCCGGT   | 60.232 | 20 |
| 273 | 1638 | 1910 | CCCATAGAACCATTCCCCTT   | 60.011 | 20 |
| 249 | 281  | 529  | CTTTCTTGCGAGAACCCTTG   | 59.986 | 20 |
| 216 | 156  | 371  | GACCAAATCAATCCCATAGCA  | 59.776 | 21 |
| 199 | 1690 | 1888 | GGCAGCAGTATTCATGGGAT   | 59.923 | 20 |
| 227 | 44   | 270  | GGATTCAGCATTGTAAGGGG   | 59.387 | 20 |
| 222 | 232  | 453  | CCCACCAAAAAGTTGTGAAG   | 60.38  | 20 |
| 258 | 23   | 280  | TGGGAAAAGTTATGAGTCTAG  | 59.317 | 26 |
| 273 | 56   | 328  | CGCTATGAGTCACGGCTACA   | 60.035 | 20 |
| 280 | 107  | 386  | CCATAACCGTCGCATAACTC   | 58.12  | 20 |
| 163 | 1462 | 1624 | AATTACAAGCCGCAGTGGAC   | 60.14  | 20 |
| 124 | 10   | 133  | TTTTGCTAGAGGATTTTGTTAA | 57.359 | 26 |
| 164 | 698  | 861  | CGAAAGTTTTGGAATTTGAAG  | 59.978 | 22 |
| 117 | 51   | 167  | GCACCATCTTCTCAACACCA   | 59.682 | 20 |
| 204 | 66   | 269  | GAAAAGGCACTCGAATTTCC   | 58.765 | 20 |
| 222 | 3385 | 3606 | TAGATTGCTGTTGGCCATTG   | 59.688 | 20 |
| 111 | 1209 | 1319 | GAATGATGACACCCAAACCC   | 60.034 | 20 |
| 262 | 806  | 1067 | AGAGCAGGAAGAGCCGTGTA   | 60.156 | 20 |
| 200 | 32   | 231  | CCACACTTTTAAATATTTTAGC | 60.573 | 26 |
| 107 | 62   | 168  | GCTAGAGCTCACTTCACGAGC  | 59.54  | 21 |

|     |      |      |                        |        |    |
|-----|------|------|------------------------|--------|----|
| 191 | 1559 | 1749 | TTATTCCCCAAGCAGGAATG   | 59.894 | 20 |
| 134 | 226  | 359  | GATACGCGTCACACATGCTC   | 60.304 | 20 |
| 215 | 1067 | 1281 | GGGGTGTTCAAAAATATCCG   | 59.135 | 20 |
| 149 | 156  | 304  | AGATGCCAATCTTCCATTGT   | 57.043 | 20 |
| 278 | 921  | 1198 | CTCGATGCAAATCGTGCTTA   | 59.976 | 20 |
| 230 | 470  | 699  | ACTTGAAAATGCGATGAGCA   | 59.425 | 20 |
| 122 | 391  | 512  | GGTGATCGATGGCATTCTT    | 59.9   | 20 |
| 245 | 2331 | 2575 | CCCTTGGTCCTTGAGCATT    | 60.066 | 20 |
| 113 | 23   | 135  | TTCTACTGGAAGTACGCCC    | 60.255 | 20 |
| 214 | 13   | 226  | CACCCAAAAGGAGTTATTAT   | 59.696 | 25 |
| 209 | 1535 | 1743 | AGGAGAGAAGAGCGGACCTC   | 60.096 | 20 |
| 241 | 1757 | 1997 | TTTTGCTTTGTTTTGCTGG    | 58.979 | 20 |
| 190 | 34   | 223  | AAAATCAGCGAGGCAGAAAA   | 59.96  | 20 |
| 150 | 729  | 878  | GGTTGTTAAATGCCCCCTT    | 60.055 | 20 |
| 202 | 1398 | 1599 | TCTGTGTGGGTGTGTGTGAA   | 59.568 | 20 |
| 150 | 3187 | 3336 | CACCAGAATGACACTCGACG   | 60.309 | 20 |
| 120 | 1438 | 1557 | TGTTTGCAAGTTGATCGGAG   | 59.84  | 20 |
| 174 | 10   | 183  | TCTCTCCCTTTCCACACTCG   | 60.377 | 20 |
| 108 | 390  | 497  | GAAAGCCGTCGATGTAGCTT   | 59.481 | 20 |
| 191 | 437  | 627  | CGATGTAGCTTCGCCCATAC   | 60.626 | 20 |
| 228 | 45   | 272  | CCATCAAAAATGTTTTCCCC   | 59.111 | 20 |
| 238 | 9    | 246  | TCTCAATGCCTTCTACCCAA   | 58.298 | 20 |
| 274 | 68   | 341  | TGGCCACCCATTTTTACTA    | 60.181 | 20 |
| 108 | 56   | 163  | TGATTGCACCATAATGCACC   | 60.352 | 20 |
| 178 | 93   | 270  | ACCAGTTATCCATCCATTCCA  | 59.115 | 21 |
| 257 | 624  | 880  | TCAGATCCACTAGACATTTGAC | 58.475 | 23 |
| 134 | 114  | 247  | CTGCGCAGATCTAATGGTCA   | 59.972 | 20 |
| 228 | 32   | 259  | TCCCTCCAATCAATTTTCCA   | 60.244 | 20 |
| 250 | 161  | 410  | TTTCAGCGACATGTTTTTCG   | 59.849 | 20 |
| 188 | 989  | 1176 | CGAAACAAGTGGCTGCATAA   | 59.872 | 20 |
| 100 | 706  | 805  | TTATGGGCCAATTATGCTCC   | 59.757 | 20 |
| 179 | 3    | 181  | GGAGAGTTCGCGAAATAACAT  | 58.341 | 21 |
| 278 | 1010 | 1287 | CTGGACTGCCTTCATCTTCC   | 59.803 | 20 |
| 213 | 150  | 362  | TTTGGATAGGTGTGGGGAAA   | 60.162 | 20 |
| 265 | 4583 | 4847 | TCAATGCAATAACAGCAAAAA  | 57.022 | 21 |
| 280 | 117  | 396  | CTTGCTGGCAACAAAAACAA   | 59.888 | 20 |
| 163 | 1144 | 1306 | GGGACGATTCTGAAAGGTGA   | 60.05  | 20 |
| 151 | 150  | 300  | AACAAAGCTCTTCTGGCG     | 59.757 | 20 |
| 148 | 1312 | 1459 | TGACCATTGAGAAAGGGAGG   | 60.042 | 20 |
| 157 | 77   | 233  | GCTGGCCATTTATTGGTGTG   | 60.339 | 20 |
| 184 | 835  | 1018 | TTAAGGGTGTGAGGATGCAC   | 59.985 | 21 |
| 226 | 82   | 307  | GACCCTTACCCCCATAACT    | 60.052 | 20 |
| 254 | 2352 | 2605 | TTAAAAGTGGGCTGGCTTTC   | 59.338 | 20 |
| 269 | 219  | 487  | GAGAATTTTAATTCGTTTCT   | 59.576 | 25 |
| 106 | 1381 | 1486 | TGGTGGTATGGTGTGGAGAA   | 59.806 | 20 |
| 258 | 137  | 394  | GTAGGGGTGTACATGGTCCG   | 60.111 | 20 |
| 280 | 55   | 334  | TGCCGTGGTTTCGATATACCT  | 60.352 | 20 |
| 189 | 1053 | 1241 | AAAACAAATGCGTGGGCTTA   | 60.488 | 20 |
| 206 | 538  | 743  | CCTCCCCAAGATATCATCCA   | 59.703 | 20 |
| 204 | 811  | 1014 | ACCCGTGCTTCAATATCCTG   | 59.955 | 20 |
| 165 | 12   | 176  | CTAATGAGTTTCCAGCGCAA   | 59.062 | 20 |
| 247 | 6    | 252  | TTGTGCTCAATGGCAGAACT   | 59.445 | 20 |
| 126 | 750  | 875  | GCCCCACTTCTTCGTTAAAA   | 59.202 | 20 |
| 251 | 4378 | 4628 | TGTTCAACTAAATAATGCAGC  | 58.075 | 22 |
| 140 | 161  | 300  | TTTTGCCCTCGAATGCTATC   | 60.175 | 20 |
| 237 | 44   | 280  | CATGCATGATCAATGTTGTAAC | 60.258 | 23 |
| 216 | 18   | 233  | GGGGTTATTAGTGGAGTAAGC  | 58.117 | 22 |
| 185 | 892  | 1076 | AGGTGGTTTCTTGCCTGAAG   | 59.328 | 20 |



|     |      |                             |        |    |
|-----|------|-----------------------------|--------|----|
| 274 | 19   | 292 AACGATCGGGAGGAAGAAGA    | 61.095 | 20 |
| 219 | 212  | 430 GGCCACTTTGTTGTGCTGTA    | 59.764 | 20 |
| 128 | 1345 | 1472 GACCGAGATCGAACCCTTTT   | 60.443 | 20 |
| 271 | 338  | 608 GCAGGATCGCCATAAGGATA    | 60.023 | 20 |
| 275 | 14   | 288 TTTAGTGTTTTGACATGATTAC  | 57.557 | 25 |
| 198 | 100  | 297 CTCGGAGGCTCCAACATCTA    | 60.353 | 20 |
| 267 | 169  | 435 TGCATGATCGATATTGTAAAGC  | 59.468 | 23 |
| 258 | 365  | 622 TGTCAAATCCGACGTCAAAA    | 60.088 | 20 |
| 240 | 41   | 280 CTATGGTGGTATGGTGTGGG    | 58.569 | 20 |
| 127 | 127  | 253 TCCACATAGGAAAACCCCAA    | 60.162 | 20 |
| 183 | 163  | 345 TTTCCGGTTGCTTTTTGACT    | 59.724 | 20 |
| 178 | 4    | 181 CACGTGGCATCGTAAGGAA     | 60.671 | 19 |
| 250 | 1378 | 1627 AGACGAGGAGATGTTGGTCCG  | 60.261 | 20 |
| 207 | 338  | 544 TGCCACCATATCCATAAAACA   | 58.758 | 21 |
| 106 | 21   | 126 ATCGGTTATTACCGGATCGC    | 61.031 | 20 |
| 166 | 1088 | 1253 GGCGAGGACTGAAATTGGTA   | 60.074 | 20 |
| 153 | 785  | 937 TTTTGCCCTTCTTTCTTT      | 60.048 | 20 |
| 129 | 21   | 149 ATCGGTTATTACCGGATCGC    | 61.031 | 20 |
| 176 | 906  | 1081 CGTATCCATGGTTGAGGTCC   | 60.195 | 20 |
| 223 | 61   | 283 AAActCAATTCCCATGTCCG    | 59.79  | 20 |
| 268 | 476  | 743 GGGAAGGGTATTTTGGGAAA    | 59.992 | 20 |
| 226 | 29   | 254 AACACGGCTCTGATACCAA     | 60.517 | 20 |
| 249 | 170  | 418 TTCTGATAAGCCAGGGGATG    | 60.029 | 20 |
| 235 | 86   | 320 AAAGCAAAGAGGCGATTGA     | 59.96  | 20 |
| 277 | 572  | 848 GAGATCACTTTCGGAGAAGC    | 60.104 | 20 |
| 263 | 455  | 717 AAActGTAATTCAGGCACCTA   | 59.61  | 23 |
| 248 | 105  | 352 TCCGATTCATTTTTCGATGA    | 59.04  | 20 |
| 229 | 1332 | 1560 TCAACCTCACAATTTGCTCG   | 59.84  | 20 |
| 227 | 124  | 350 TCGAAAATTCGGCCACTATC    | 60.038 | 20 |
| 280 | 679  | 958 GAAGAAAGACCACCTGCAC     | 59.703 | 20 |
| 168 | 18   | 185 TGTGGCAGATCTGAAAAACG    | 59.84  | 20 |
| 251 | 91   | 341 GGCATTTTGCTACGTGGTTC    | 60.511 | 20 |
| 152 | 2232 | 2383 GCTTGCACACAGCAGTTGTC   | 60.672 | 20 |
| 268 | 551  | 818 TGATCATGCTCAACATGCAA    | 59.789 | 20 |
| 102 | 276  | 377 GACAAAAAGTTTGAGGCCGT    | 59.218 | 20 |
| 280 | 364  | 643 AAAAATCACGAGACAACGAA    | 59.091 | 23 |
| 234 | 2798 | 3031 ATCAGCCATGTTTGATCAGC   | 58.674 | 20 |
| 135 | 161  | 295 TTTATTTTCATCCCTTGTCATGC | 59.857 | 23 |
| 222 | 62   | 283 CTGTTTTCTCAAGGCTCCCA    | 60.366 | 20 |
| 269 | 1279 | 1547 GAAAGGCAAAGATGGGTTCA   | 60.051 | 20 |
| 111 | 66   | 176 CTCTCTCTCAATTGCCACCC    | 59.803 | 20 |
| 167 | 5    | 171 TGGTGTATGCTACTTTGAAC    | 59.238 | 23 |
| 197 | 641  | 837 GGAACACGTACCTTCTGATTC   | 59.921 | 23 |
| 215 | 133  | 347 GATTCTTCGGCTCTTGTGCT    | 59.579 | 20 |
| 275 | 164  | 438 TCTTGCGCATTGATTTTGTC    | 59.816 | 20 |
| 140 | 39   | 178 ACGTTGGACCTGAAAGAGGA    | 59.697 | 20 |
| 230 | 739  | 968 TGCCTGAAAATGAACACCGT    | 61.475 | 20 |
| 175 | 80   | 254 TTGTGAATTTGCATCGTGGT    | 59.972 | 20 |
| 173 | 23   | 195 CTTTTCCGGTCAAACCCAAA    | 59.947 | 20 |
| 152 | 402  | 553 TCGAAAATTTAAAGGCCCAA    | 59.538 | 20 |
| 218 | 41   | 258 GGCTCCATGACCGATAAAAA    | 59.901 | 20 |
| 233 | 103  | 335 GGCAACGACTATCGATCCAC    | 60.492 | 20 |
| 238 | 217  | 454 ACCCTCTTCTCTCTACCCG     | 59.694 | 20 |
| 244 | 98   | 341 TGCAACCGAAGTTTCATTTT    | 58.747 | 20 |
| 234 | 180  | 413 CTCACCGTTCGATCAAATCCT   | 60.073 | 20 |
| 158 | 6    | 163 CATGCAAGACCCGAAGAACT    | 60.255 | 20 |
| 280 | 681  | 960 CACACATTTCTTCTACCAA     | 57.593 | 21 |
| 165 | 312  | 476 TGTCGGTACCTTCGGAACCTC   | 60.111 | 20 |

|     |      |      |                        |        |    |
|-----|------|------|------------------------|--------|----|
| 254 | 65   | 318  | TATGCGATCTGCACGTGATT   | 60.251 | 20 |
| 251 | 116  | 366  | CTGTGGCTTGCAAAGAGTGA   | 60.175 | 20 |
| 275 | 2329 | 2603 | TGTATTCATGTGTCAGCGCA   | 59.859 | 20 |
| 172 | 6288 | 6459 | GTGCACTCCTGGAGGTCAAT   | 60.12  | 20 |
| 178 | 1316 | 1493 | ACACCCAATAGCTTGCTTGC   | 60.278 | 20 |
| 211 | 142  | 352  | CCCTCGAATGCACTCAAAC    | 60.255 | 20 |
| 228 | 70   | 297  | ACAATTCGGGGAAGGAGAGT   | 59.935 | 20 |
| 234 | 168  | 401  | TTAATAAATTGTGCGAACGG   | 59.975 | 21 |
| 262 | 50   | 311  | AAATACTCAGTAAACCAGATG  | 57.497 | 26 |
| 258 | 41   | 298  | GGGAGTATCACTTGAATGCA   | 60.753 | 22 |
| 158 | 1    | 158  | CTAACCTTGGGCTCTGATGC   | 59.836 | 20 |
| 259 | 22   | 280  | TCCACACTCAATACAATATGA  | 58.945 | 24 |
| 253 | 90   | 342  | TTTTCGCCTCCGACTAAAAA   | 59.826 | 20 |
| 187 | 0    | 186  | GCATCAACGGCGTGTATTATT  | 59.873 | 21 |
| 240 | 1832 | 2071 | GCATGCAATAGGTTGTGCAG   | 60.288 | 20 |
| 211 | 128  | 338  | AGCATATGCAAGCTCAAATTC  | 59.881 | 22 |
| 227 | 127  | 353  | GATGAGTTCCTGAACCAGCAG  | 59.859 | 21 |
| 246 | 0    | 245  | CGCACAGAATGGTTGAATTT   | 58.625 | 20 |
| 108 | 640  | 747  | TCCACTCACCTAAACCCGAC   | 59.966 | 20 |
| 167 | 3631 | 3797 | TAACGGGCAGCCTAAGTACG   | 60.277 | 20 |
| 242 | 700  | 941  | AATTTCCCGCATCACACTTC   | 59.939 | 20 |
| 279 | 148  | 426  | ACGTTACGTTCTGCGATTT    | 60.699 | 20 |
| 117 | 148  | 264  | CACTTTTGGGACCCCTTTTT   | 60.193 | 20 |
| 250 | 80   | 329  | GCAGGTGTGAATGGAGGAAT   | 59.934 | 20 |
| 278 | 107  | 384  | TGTTGCATACGATGTGTAGCA  | 59.822 | 22 |
| 158 | 2338 | 2495 | TATGGGCCAACTAAAGCGAC   | 60.096 | 20 |
| 232 | 24   | 255  | GGCGTGACATAGTGGATTGT   | 58.444 | 20 |
| 198 | 168  | 365  | TGCCCTATTGCTACCCCTAA   | 59.564 | 20 |
| 243 | 524  | 766  | GGGCTTATTCCGTCATTTCA   | 59.901 | 20 |
| 249 | 163  | 411  | AAAAATTCGATCTTGGGGTGT  | 59.696 | 21 |
| 164 | 361  | 524  | TCTCGAGGTGCTGTAAGGGT   | 59.867 | 20 |
| 273 | 102  | 374  | GCTAGTGTGTTTGCTTGCAACT | 59.63  | 22 |
| 219 | 477  | 695  | TTTATTTCTTTCCCGCCTCC   | 60.381 | 20 |
| 181 | 502  | 682  | AAAAATGAACTTTATCGGATC  | 58.637 | 26 |
| 237 | 50   | 286  | AGGACCCTGCTGACGAAGTA   | 59.867 | 20 |
| 247 | 406  | 652  | GTGTGCGTCTGAGTTCGTGT   | 59.948 | 20 |
| 169 | 103  | 271  | GCCCATGTTTTGTCTGGATT   | 59.797 | 20 |
| 269 | 25   | 293  | CCCAACTGAAAACCTCCCT    | 60.332 | 20 |
| 111 | 204  | 314  | CAATCAATCCATCGTCTCCC   | 60.281 | 20 |
| 131 | 55   | 185  | GCACGTGACATCTAACGGAA   | 59.722 | 20 |
| 130 | 156  | 285  | GTCACTAACCCACACACC     | 60.135 | 20 |
| 123 | 1    | 123  | TCCGTCAAGGAGATCTTAAAA  | 59.799 | 21 |
| 272 | 320  | 591  | GGGTGGCTTGATTTTGTTC    | 60.874 | 20 |
| 216 | 25   | 240  | CGGATCGCGACCCTATACAT   | 62.112 | 20 |
| 262 | 243  | 504  | CCTGCCCTTTTTGACAGTTG   | 60.659 | 20 |
| 250 | 377  | 626  | TGGTAAGTGATAGGTAATGTC  | 59.603 | 26 |
| 211 | 389  | 599  | CCTATCTTTGCCATACCCGA   | 59.916 | 20 |
| 246 | 47   | 292  | CCTTACAACCAAACATGCC    | 60.227 | 20 |
| 179 | 124  | 302  | TGCATTCACACAAGGCATCT   | 60.272 | 20 |
| 251 | 836  | 1086 | TGCCTACATCATTTACCCCAA  | 60.195 | 21 |
| 230 | 903  | 1132 | GCCAAATCCTAGCCACACAT   | 59.962 | 20 |
| 274 | 1343 | 1616 | TTTGGTGACATGACCACGAC   | 60.426 | 20 |
| 208 | 232  | 439  | CTCACGTTTTTAGCCCAAGC   | 59.883 | 20 |
| 136 | 866  | 1001 | TTCTTTTATGTGGGGGTGACA  | 60.213 | 21 |
| 280 | 461  | 740  | TCTCCTTTGCGTGGACAAGT   | 60.833 | 20 |
| 209 | 1923 | 2131 | TGGGGTGTGTGTTCTTAAA    | 59.976 | 20 |
| 221 | 1782 | 2002 | AGCAAAGAAATGCAGAAGGC   | 59.597 | 20 |
| 171 | 684  | 854  | TGGTTCTCACTAAAACGCGA   | 59.464 | 20 |

|     |      |      |                        |        |    |
|-----|------|------|------------------------|--------|----|
| 122 | 1048 | 1169 | TCGTTCTTTCTTGCTTCCGT   | 59.993 | 20 |
| 248 | 585  | 832  | GCATTTTGGGTTTATGTTTGGT | 59.99  | 22 |
| 276 | 125  | 400  | CTCCATCGAGTCAAGCTCAA   | 59.112 | 20 |
| 144 | 597  | 740  | TGGAAGGGGAAATGAGAAAA   | 59.476 | 20 |
| 246 | 11   | 256  | ACATCCACTGGCCAAGAATC   | 59.934 | 20 |
| 230 | 3    | 232  | TCACGAAAAACCAAAAACCC   | 59.817 | 20 |
| 221 | 19   | 239  | GGCCAGTAACACAAAGGCAT   | 60     | 20 |
| 158 | 867  | 1024 | TACCCGTCTCCATCTTCTGG   | 60.065 | 20 |
| 162 | 27   | 188  | TGAGAGATCAGTGAGCACGAC  | 59.299 | 21 |
| 221 | 19   | 239  | AAGTAACCACCAATAACCGCC  | 60.122 | 21 |
| 233 | 660  | 892  | ATGTTGATCTTATGAGTGTGAA | 59.039 | 26 |
| 256 | 1649 | 1904 | TGTTGAAAATGGTGGTTGA    | 59.941 | 20 |
| 116 | 63   | 178  | CTGATAACAATGGGCGATCA   | 59.499 | 20 |
| 220 | 296  | 515  | ATTGGGAGGCATATCACGAG   | 59.917 | 20 |
| 166 | 161  | 326  | TGGGAATTTTGTGGAGAAGC   | 60.051 | 20 |
| 262 | 1190 | 1451 | AACAGTGTCAATTTTGCAAATC | 59.549 | 23 |
| 210 | 455  | 664  | CAACAATCGAACCAAAGCAA   | 59.706 | 20 |
| 280 | 57   | 336  | GCCCTCAACTTTGTACGTGAA  | 60.161 | 21 |
| 224 | 152  | 375  | AAGATTGATTCCGAGGCTTG   | 59.269 | 20 |
| 118 | 1962 | 2079 | CCTTCGGAAGTGGATTTTA    | 60.202 | 20 |
| 163 | 184  | 346  | AGACGACAATCTTCGGCTTG   | 60.397 | 20 |
| 230 | 172  | 401  | TGCATCAGATTCAGGGAAAA   | 59.2   | 20 |
| 251 | 2053 | 2303 | AATCACGGCAGTTCCAATATG  | 59.837 | 21 |
| 209 | 557  | 765  | AGAGGATTTTGCTGCTGTGG   | 60.397 | 20 |
| 267 | 1746 | 2012 | TGGCTGATGTGAAATCTGGA   | 60.201 | 20 |
| 104 | 26   | 129  | TCACCACGTTCTACGCTCAA   | 60.449 | 20 |
| 100 | 12   | 111  | TCTCACAGGATTTAGCTGTTCT | 60.424 | 24 |
| 111 | 277  | 387  | CCTCTCATGTTTCCCAAAA    | 59.903 | 20 |
| 245 | 181  | 425  | TTCCTTTCTTCATTTTCGCC   | 59.273 | 20 |
| 269 | 1580 | 1848 | CTCCAAAATCTCAATCCCA    | 59.864 | 20 |
| 233 | 407  | 639  | CCCGTGACATGGAAACTCTT   | 59.966 | 20 |
| 277 | 220  | 496  | AGTAGCAGCTGTGGATTCCC   | 59.313 | 20 |
| 263 | 1670 | 1932 | AGCCATTTTTGTTTTGCTGC   | 60.251 | 20 |
| 190 | 286  | 475  | AAGAAAAACAGGGGAAAGGG   | 59.433 | 20 |
| 268 | 36   | 303  | GGGGGAGGAATGGTAGAGAG   | 59.89  | 20 |
| 194 | 292  | 485  | CTATTGTCGGACACTGGGATT  | 58.923 | 21 |
| 268 | 439  | 706  | TCAAATCATAAGACAATCGCC  | 57.71  | 21 |
| 264 | 4236 | 4499 | TCGAGAACTTGCTTGGTGACT  | 60.043 | 21 |
| 230 | 603  | 832  | CACTCGGATTTTTGATCGGT   | 59.933 | 20 |
| 134 | 742  | 875  | GCAAACATATGGTGGCATT    | 58.362 | 20 |
| 220 | 588  | 807  | TCAACAATTGGAGACAACGC   | 59.697 | 20 |
| 271 | 1897 | 2167 | CTCCCCAAATTCTCTCCTC    | 60.008 | 20 |
| 261 | 6    | 266  | CCAACACAAAACAGGGAAA    | 58.5   | 20 |
| 175 | 60   | 234  | CCTTGTGGGGTACAAGTGCT   | 60.028 | 20 |
| 279 | 698  | 976  | AACTTCAAGCACTGGAATGAG  | 59.295 | 23 |
| 250 | 66   | 315  | CTTCCCAGAAATCGAACAA    | 60.044 | 20 |
| 124 | 250  | 373  | GAAGTACGTCCTCCTGTGC    | 60.873 | 20 |
| 249 | 379  | 627  | ATGAACAAGGGCAACTCGAA   | 60.636 | 20 |
| 217 | 251  | 467  | GACTCTTCGCTAGGTGGGGT   | 60.649 | 20 |
| 218 | 408  | 625  | TTTTGGAGCATCTCCATTT    | 59.505 | 20 |
| 232 | 103  | 334  | AATTCATGGCTGTTCCAAGC   | 60.081 | 20 |
| 270 | 1678 | 1947 | CCTTCCAACAGAGGAAAGA    | 59.255 | 20 |
| 262 | 76   | 337  | TTACCCTAAGGGCATCCACA   | 60.323 | 20 |
| 230 | 854  | 1083 | GGCCACTAAAACAGGGATCA   | 59.933 | 20 |
| 174 | 279  | 452  | TATCCCGTGCTCCAATCTCT   | 59.653 | 20 |
| 274 | 2717 | 2990 | CCTTTGCATAGAGTGCGACA   | 60.011 | 20 |
| 152 | 1883 | 2034 | ACACTTGTCTGAAGGAGACGC  | 60.453 | 20 |
| 209 | 1377 | 1585 | TATGCTGTGATTTGGCTCG    | 59.833 | 20 |

|     |      |      |                          |        |    |
|-----|------|------|--------------------------|--------|----|
| 181 | 173  | 353  | AAAAATGAACATGGCCGAAG     | 59.938 | 20 |
| 276 | 322  | 597  | TCGTCACCCTTATCCTACCG     | 59.948 | 20 |
| 183 | 7    | 189  | ATTGCTTGGAACCTTAGCCCA    | 59.708 | 20 |
| 135 | 17   | 151  | TGTACGTTACGATGGCATGA     | 58.575 | 20 |
| 255 | 17   | 271  | TGGTAGCTTGAATACACGTATC   | 57.44  | 23 |
| 172 | 445  | 616  | TTGATATCAGAGCCACTGCG     | 59.972 | 20 |
| 267 | 681  | 947  | GGTCGGTAAGACGACTTGGA     | 60.111 | 20 |
| 229 | 2767 | 2995 | TTTCTTTCCGACCCATCAACA    | 59.097 | 20 |
| 242 | 2    | 243  | TGACGATATATAGTGTTTTGAC   | 57.754 | 26 |
| 181 | 15   | 195  | AAATAAGGAGGTGTTATGAAG    | 59.323 | 24 |
| 189 | 14   | 202  | TCAAGGTAATGGGTCTAGCA     | 60.01  | 23 |
| 277 | 742  | 1018 | TTTGGGTAATTGGTGAACCTT    | 58.34  | 21 |
| 103 | 6147 | 6249 | AATCGGGTCCTCATCATCCT     | 60.682 | 20 |
| 258 | 130  | 387  | AAACAACCCAAGAAAAATACC    | 59.307 | 22 |
| 129 | 1788 | 1916 | AGGGGACTAGGGTTGAAGGA     | 59.928 | 20 |
| 203 | 336  | 538  | TAGAATCCGGCGAGTGAAAT     | 59.668 | 20 |
| 271 | 23   | 293  | CCTAGAAAGAGAAGAAACAG,    | 59.255 | 24 |
| 268 | 842  | 1109 | TGGTTTTCTCACCATCAGCA     | 60.24  | 20 |
| 234 | 8    | 241  | CCGAATTTGCTAGGTTGGTC     | 59.569 | 20 |
| 275 | 319  | 593  | CATGGACGCTCCAGATTGTT     | 61.067 | 20 |
| 245 | 521  | 765  | TTTCCCTCCAAAAATATGGG     | 58.735 | 20 |
| 270 | 390  | 659  | CGTGATAAGAACAACACTCATGTC | 60.045 | 23 |
| 224 | 1064 | 1287 | CCCCACCACATTCTTGATA      | 60.572 | 20 |
| 260 | 298  | 557  | TCGAATCGAGTTCGGGTAAT     | 59.528 | 20 |
| 180 | 1600 | 1779 | CGAAAATAGGTCGAACCGAA     | 60.067 | 20 |
| 111 | 430  | 540  | ATCCTAAACGGCTCGGAAAA     | 60.92  | 20 |
| 208 | 83   | 290  | AACCATTGAGCAAAAACAATC    | 57.677 | 21 |
| 230 | 780  | 1009 | TTTTGCCTTTGCTGTTCCCTT    | 59.861 | 20 |
| 220 | 73   | 292  | GGGAGGACAGTCCGTAGACA     | 60.112 | 20 |
| 274 | 1632 | 1905 | ACTGTGGGCAATACCAGCTT     | 59.621 | 20 |
| 239 | 465  | 703  | TGACTTGCAGCCACTCTGAC     | 60.187 | 20 |
| 197 | 490  | 686  | TCCAACCTCCTCCATTCTTG     | 60.042 | 20 |
| 207 | 466  | 672  | TGTTCTGGCTTTGTTGAAA      | 60.271 | 20 |
| 237 | 15   | 251  | AGGGAGTGCTCCACATTAG      | 59.162 | 20 |
| 217 | 291  | 507  | TCTTTTTCCACATTTGAAGTTCT  | 57.12  | 23 |
| 239 | 447  | 685  | TCGCAGCGAAACGTGAAC       | 62.18  | 18 |
| 228 | 656  | 883  | CCATCAACAAATGCAATGGA     | 60.321 | 20 |
| 265 | 889  | 1153 | ATCAGAGCGCAGAGGATTTT     | 59.034 | 20 |
| 122 | 19   | 140  | ATGGGAAGAGGGGGTATGAG     | 60.147 | 20 |
| 236 | 352  | 587  | CCAAACAAACCGGCATACTT     | 59.861 | 20 |
| 266 | 265  | 530  | GCACACGTATTAGGACCTCCC    | 60.758 | 21 |
| 209 | 117  | 325  | CACCCTGTGACAGATACAGCA    | 60.058 | 22 |
| 151 | 531  | 681  | GCGCATGCACCTAATTACAC     | 59.214 | 20 |
| 205 | 131  | 335  | CAACAATCAGCAGTGGCAAT     | 59.722 | 20 |
| 273 | 2185 | 2457 | ATGATCAGCGCAGTCCAGTA     | 59.425 | 20 |
| 240 | 271  | 510  | TTGTAGAGCACTGCCAGATCA    | 59.606 | 21 |
| 254 | 1032 | 1285 | CAGGAAAAATGCGTGTGTTG     | 60.149 | 20 |
| 109 | 270  | 378  | GGTTAACCCATGTACGCAA      | 58.413 | 20 |
| 226 | 139  | 364  | TGGTTGAACCCTTACGTTGC     | 60.924 | 20 |
| 174 | 95   | 268  | GCCTTGCAAGCCAGTTTATT     | 59.365 | 20 |
| 260 | 754  | 1013 | TCAAGCCCTAATTCCAAAACC    | 60.299 | 21 |
| 215 | 28   | 242  | TACCTCTGAGGGGAAGACGA     | 59.797 | 20 |
| 213 | 164  | 376  | TCAACTTCTGTTCCGACACG     | 59.873 | 20 |
| 260 | 1445 | 1704 | GTCGGGAAAGAGACATCCAA     | 60.05  | 20 |
| 145 | 2656 | 2800 | AGCAGCCGAAAAAGGGTATT     | 60.095 | 20 |
| 198 | 3089 | 3286 | AGGCTTAAACCAGGACCGAT     | 59.962 | 20 |
| 259 | 809  | 1067 | GCAACAGTTGTGGTTGATGG     | 60.008 | 20 |
| 274 | 972  | 1245 | TTCGAAGCTTTGCTACTGGC     | 60.658 | 20 |

|     |      |      |                        |        |    |
|-----|------|------|------------------------|--------|----|
| 238 | 24   | 261  | CAAGATAACCCTTCGATTTAGC | 58.703 | 23 |
| 213 | 637  | 849  | AACTGGCCCAATAACCTTCC   | 60.187 | 20 |
| 242 | 1694 | 1935 | CGTAAGGCCTACTCGAGCC    | 59.985 | 19 |
| 249 | 327  | 575  | TTGGTGGCGGTAGGTAACCTC  | 59.993 | 20 |
| 263 | 32   | 294  | CAGTGTACGACATTGTTTGCG  | 60.224 | 21 |
| 258 | 55   | 312  | TAGCCTTTGCCCTTTTCTC    | 60.683 | 20 |
| 242 | 741  | 982  | GGGAAGTTTTCCCACACTTG   | 59.425 | 20 |
| 159 | 261  | 419  | TGAAATTCACCTTGATCCGCA  | 60.197 | 20 |
| 253 | 104  | 356  | TTCGAAATATCGGGGCATTA   | 60.242 | 20 |
| 197 | 35   | 231  | TTTCCTTGACC AAAATAGCC  | 60.299 | 21 |
| 265 | 1391 | 1655 | GGATTACGGCAGCGATTTTA   | 60.061 | 20 |
| 267 | 163  | 429  | TCAAAGCGATGGAACATAACA  | 59.172 | 21 |
| 164 | 26   | 189  | GAGGACCGATTGGAGAAGTG   | 59.655 | 20 |
| 267 | 184  | 450  | ATCATGAATGCTGATGTGGG   | 59.327 | 20 |
| 261 | 22   | 282  | CCCCTCGAAGTTTCGTAGAAT  | 59.601 | 21 |
| 214 | 21   | 234  | AGGGGGTTATCACTGGATCG   | 61.095 | 20 |
| 241 | 1275 | 1515 | ACCTTCAATTTTATAACCGAAA | 58.155 | 24 |
| 247 | 217  | 463  | TTGGACAAAAATACCCTTTCTC | 59.865 | 23 |
| 204 | 780  | 983  | ACCTCTTTCCAATCTGGCCT   | 60.074 | 20 |
| 198 | 65   | 262  | GAGGGGATTGCCTAAAATTGA  | 60.266 | 21 |
| 276 | 2368 | 2643 | AGCGAACCAGAACCGAACTA   | 59.875 | 20 |
| 275 | 526  | 800  | AAACTTCGAAAGCGAAATGC   | 59.479 | 20 |
| 128 | 1381 | 1508 | TTTTCTCTGGATCACACCCC   | 59.903 | 20 |
| 123 | 833  | 955  | ATTAAGGAATTGGAGGCGTG   | 59.043 | 20 |
| 225 | 183  | 407  | TGCAAAAGTTTTTGTGGGT    | 58.174 | 20 |
| 242 | 71   | 312  | CCACCTTACTCACGCCTCTC   | 59.867 | 20 |
| 106 | 280  | 385  | ATCCAAGCGTTTGCTGTTTC   | 60.257 | 20 |
| 214 | 410  | 623  | CTCTCCATTCTCTCGCTGCT   | 59.851 | 20 |
| 217 | 125  | 341  | CCTCCTTTAACCAAAAATCCG  | 59.825 | 21 |
| 242 | 79   | 320  | GATTGAACTCCGAAAAGGCA   | 60.192 | 20 |
| 204 | 291  | 494  | GTGGCGGTCAACAGAAAACCT  | 60.156 | 20 |
| 245 | 2694 | 2938 | TCAGGAACCTGCAATTAGGC   | 60.214 | 20 |
| 259 | 126  | 384  | TTGGGAGGAGGAGATTGTTG   | 60.042 | 20 |
| 230 | 594  | 823  | TGGACTGCTGTTTCAGAGACG  | 60.178 | 20 |
| 225 | 4954 | 5178 | TGTGCCCACTTAAAAATTTGG  | 59.855 | 21 |
| 215 | 959  | 1173 | CTGCAGATCTAAGGGCCAAG   | 59.971 | 20 |
| 162 | 1227 | 1388 | TAACGACAATGCTTCATGCC   | 59.694 | 20 |
| 113 | 292  | 404  | ATTTGGGTTTTAGGCTTGGG   | 60.177 | 20 |
| 242 | 2201 | 2442 | TGCAAGTTCAGACAAACCCA   | 60.278 | 20 |
| 174 | 4368 | 4541 | GGTTCAACCTCCCAGATTCA   | 59.903 | 20 |
| 273 | 41   | 313  | TGATTTCTCACCTTGTTTGTG  | 60.008 | 22 |
| 269 | 160  | 428  | ATCCAGAAATCCCCCAACTC   | 60.133 | 20 |
| 160 | 270  | 429  | GCATCACCTCAACCCTTGAT   | 59.934 | 20 |
| 270 | 526  | 795  | AAGTTGCACAATCCTAATGAT  | 57.046 | 24 |
| 143 | 1416 | 1558 | CTTGATGGCTGACTCACAGC   | 59.577 | 20 |
| 150 | 697  | 846  | TGCCAATTGAATGGAGTCAG   | 59.648 | 20 |
| 188 | 1444 | 1631 | AATTGTGGGGAAATGATCCA   | 59.991 | 20 |
| 134 | 4    | 137  | CGTGGTTCGATCGTAAATGA   | 59.542 | 20 |
| 274 | 257  | 530  | CCCGAAATAAGCTGCGTAGA   | 60.356 | 20 |
| 114 | 45   | 158  | ATAACCATACCCACACCCCC   | 60.558 | 20 |
| 255 | 4357 | 4611 | GCTGCTGTAGTCGGAAGTTGA  | 60.586 | 21 |
| 202 | 413  | 614  | GGAGTCCTACGCTGATCTCG   | 59.973 | 20 |
| 211 | 256  | 466  | TTGACCATAATGCCCTATCA   | 60.16  | 21 |
| 278 | 177  | 454  | ATCTCATGCCTTAGAGGGGG   | 60.422 | 20 |
| 232 | 3220 | 3451 | CAAACCTAACTGAAATAGGAA  | 59.802 | 25 |
| 148 | 416  | 563  | GGAAATTGATGGATTTGGGA   | 59.558 | 20 |
| 189 | 1800 | 1988 | TTCAAACCTTGCCAATCCAAA  | 59.133 | 20 |
| 270 | 89   | 358  | AAGGATGTGTTATGAAGGGAT  | 57.577 | 24 |

|     |      |      |                         |        |    |
|-----|------|------|-------------------------|--------|----|
| 163 | 713  | 875  | CAGTCCACCCGAATTGGATA    | 60.713 | 20 |
| 215 | 46   | 260  | ATGTGTCGGCCTGAATATGG    | 60.744 | 20 |
| 249 | 408  | 656  | ATAGTTCCGTCGTCGTTGGT    | 59.478 | 20 |
| 168 | 150  | 317  | TGGTGGGTTGAATGCTATGA    | 59.924 | 20 |
| 132 | 1028 | 1159 | TCACAAGCTTGAAAGCAACAA   | 59.641 | 21 |
| 156 | 4    | 159  | ACGCACTCTCAAGCACACAC    | 60.104 | 20 |
| 240 | 8    | 247  | AAAATCAAAGGCCACATTG     | 59.801 | 20 |
| 172 | 453  | 624  | CTCCACACCAGCTGTGTCAT    | 59.738 | 20 |
| 160 | 32   | 191  | CCTTTGCCCTTTTCTCTCT     | 59.821 | 20 |
| 116 | 89   | 204  | TGTATGGGGAGGGTTATCCA    | 60.006 | 20 |
| 210 | 95   | 304  | TGATTTAACTTGCATTCTTTTTT | 59.518 | 26 |
| 215 | 338  | 552  | AGGATGAATCGAGGGAGGTC    | 60.421 | 20 |
| 155 | 6    | 160  | CTAGCTCCTTCCCCTTCACC    | 60.204 | 20 |
| 213 | 627  | 839  | ACAAAGTGGTGAGCATTCCC    | 59.973 | 20 |
| 280 | 389  | 668  | CCTGAGACCAAAGGTCACG     | 60.68  | 20 |
| 181 | 2977 | 3157 | CCCAAGATTTCCCATAAAGCA   | 59.894 | 20 |
| 162 | 3    | 164  | TTGACGATATATAGTGTTTTGA  | 58.972 | 27 |
| 186 | 1    | 186  | GATTTTAGGATTTCACTCACT   | 57.228 | 23 |
| 276 | 62   | 337  | TAATTCACGCACCTCGGTC     | 59.664 | 19 |
| 235 | 1081 | 1315 | ATGGAAAACCACGAGTGGAG    | 59.966 | 20 |
| 138 | 100  | 237  | AGGCCAGTAAACTCCCCATT    | 59.827 | 20 |
| 206 | 79   | 284  | TTGGAAATCAAGTAGAACTGA   | 57.228 | 24 |
| 276 | 1164 | 1439 | TACAGCCAAACGCCAAAGA     | 60.386 | 19 |
| 276 | 4152 | 4427 | CGGCGAAATAGTTGGACATC    | 60.469 | 20 |
| 114 | 1167 | 1280 | AAAATTTGTTTCCCACCAAATA  | 58.744 | 23 |
| 152 | 144  | 295  | CTGACGTCTTGTGGGAGTGA    | 59.864 | 20 |
| 237 | 1111 | 1347 | ATCGAGTATTGCTTCGCTTCA   | 59.996 | 21 |
| 279 | 135  | 413  | TCACTCCTGCACATTTCTG     | 59.831 | 20 |
| 248 | 1574 | 1821 | GGATTTGACTGGTTGGGAGA    | 59.903 | 20 |
| 224 | 122  | 345  | TGGTGTGCTTGGATTTTGA     | 60.088 | 20 |
| 159 | 2069 | 2227 | ATGCTTTCCAGCCAAGAGAA    | 59.955 | 20 |
| 233 | 419  | 651  | TGAAGTCGTCACCCTCAACA    | 60.285 | 20 |
| 177 | 2    | 178  | CAAAGGCCACAATGGTTAT     | 59.685 | 20 |
| 152 | 50   | 201  | AACGAATCTTTTCGTGGAGC    | 59.316 | 20 |
| 150 | 115  | 264  | TATTTGTCCGGTTCACCCAT    | 60.051 | 20 |
| 242 | 101  | 342  | AATTACACATACACGTGGGCT   | 57.046 | 21 |
| 278 | 1    | 278  | GGCTAGGCTGGATAAGTTTCA   | 59.415 | 22 |
| 179 | 58   | 236  | GCCATAATTCCTTTCAAATTGC  | 59.822 | 22 |
| 277 | 10   | 286  | CCATGCATCCATATGAGAGAG   | 60.059 | 22 |
| 247 | 101  | 347  | AACATTGTTCTCCCCACAA     | 60.21  | 20 |
| 258 | 240  | 497  | CAAAGAGGAAATTCGAACGC    | 59.823 | 20 |
| 228 | 86   | 313  | TTAACAGAGGGGTGGACTGG    | 59.959 | 20 |
| 133 | 65   | 197  | GTA CTCTCATGCGCTCAGCA   | 60.319 | 20 |
| 279 | 40   | 318  | GGAGAATGCTTTTGACGGAG    | 59.813 | 20 |
| 249 | 2281 | 2529 | CAAGAAACACCACCAGCAAA    | 59.734 | 20 |
| 196 | 157  | 352  | GCAAGGCAATATCCTTGTGAG   | 59.722 | 21 |
| 278 | 87   | 364  | TCACGGGTTTCGAGTTTCAA    | 60.224 | 19 |
| 278 | 132  | 409  | CTAATGGCGAAGTGGATCGT    | 60.096 | 20 |
| 129 | 42   | 170  | ATTTTACCGGCATGGTGT      | 59.205 | 20 |
| 269 | 585  | 853  | GCAACGGAAACAACCTCTTT    | 59.218 | 20 |
| 210 | 91   | 300  | TCCATCTCCACGTACGACTG    | 59.701 | 20 |
| 103 | 388  | 490  | GGATCGCATATCCCAAGATG    | 60.26  | 20 |
| 117 | 2    | 118  | TTTGTGATTCAGTTTCCCC     | 59.91  | 20 |
| 229 | 211  | 439  | TGAATTCGGTCAAGCATCTG    | 59.799 | 20 |
| 182 | 711  | 892  | TGGTGTGGGAAGAATCACA     | 59.935 | 20 |
| 268 | 0    | 267  | GGGTAAATACATGGGCTGGA    | 59.645 | 20 |
| 246 | 2243 | 2488 | AGAAATTCAAACCCGGAACC    | 60.166 | 20 |
| 154 | 721  | 874  | TTCTTCAGTCCCTACCGTCG    | 60.246 | 20 |

|     |      |      |                        |        |    |
|-----|------|------|------------------------|--------|----|
| 122 | 342  | 463  | ATCATTTTACTTTTGGGGCG   | 58.943 | 20 |
| 270 | 95   | 364  | TTGAAGGGTCTCTTGATG     | 60.042 | 20 |
| 146 | 4    | 149  | TGCGTTTTGACGATATATAGTC | 59.092 | 25 |
| 280 | 129  | 408  | GGAAGATTCAAACCCCATCA   | 59.727 | 20 |
| 109 | 402  | 510  | GGATCGCATATCCCAAGATG   | 60.26  | 20 |
| 124 | 158  | 281  | TTCCATGTGCATGCAGAAAT   | 60.08  | 20 |
| 255 | 1821 | 2075 | GACATGGGCACCTTATTGGT   | 59.676 | 20 |
| 266 | 823  | 1088 | TCATGTCGCCGATCATAAAA   | 60.035 | 20 |
| 165 | 17   | 181  | AAATAAGGAGGTGTTATGAAG  | 59.323 | 24 |
| 272 | 3    | 274  | ATGAATGGCCCATATTGGTT   | 58.977 | 20 |
| 257 | 440  | 696  | TTTACGATTTTCGATAGCCCG  | 60.054 | 20 |
| 184 | 165  | 348  | GCCCAGTCATTTTGTCCCTA   | 59.933 | 20 |
| 249 | 475  | 723  | AAAGAGTAGCACGACCCGAA   | 59.875 | 20 |
| 111 | 15   | 125  | TGAGATAAGGGGGTGTTC     | 59.933 | 20 |
| 120 | 1588 | 1707 | TGGTCTACTTCTATGGCGGG   | 60.088 | 20 |
| 175 | 310  | 484  | ACCGTGAACACCCCTAGGTA   | 59.328 | 20 |
| 260 | 265  | 524  | TGACATCCCTTTGATTCCCT   | 59.336 | 20 |
| 184 | 321  | 504  | GGCTACCCCTCTCGCTCTAC   | 60.37  | 20 |
| 158 | 86   | 243  | TGAAAAAGATTGCTGATGTCG  | 58.906 | 21 |
| 100 | 1    | 100  | CAATTACAATGTTTTCCAATC  | 60.64  | 24 |
| 194 | 266  | 459  | CGCATCAAGTTCCTCATCT    | 60.218 | 20 |
| 239 | 1332 | 1570 | TCCCGTATACCTCCAATTTACA | 59.632 | 23 |
| 216 | 323  | 538  | AGAGTGGACTGGGTTGTTGG   | 60.002 | 20 |
| 140 | 1127 | 1266 | GTTGTCTGGGCCACAAAGAT   | 59.973 | 20 |
| 133 | 43   | 175  | CAACTATCTCCAGCCCATC    | 59.508 | 20 |
| 280 | 511  | 790  | TCTGCGTTTCAGTCTCTCC    | 60.533 | 20 |
| 114 | 36   | 149  | AAAGAACTTGGGACGGAGG    | 60.467 | 20 |
| 237 | 22   | 258  | AATTCTTCCTCCGGAACACC   | 60.306 | 20 |
| 154 | 595  | 748  | CAATTTCTTCACGGGGTTGT   | 59.83  | 20 |
| 134 | 147  | 280  | GTTCCGTTTTCTTGTTTCG    | 59.587 | 20 |
| 191 | 47   | 237  | CTAGGAGTTCTCGCATTGG    | 59.83  | 20 |
| 207 | 94   | 300  | ACTTCAAAATCTAACGGCCT   | 59.146 | 21 |
| 192 | 532  | 723  | GCGAGAGCTATGTGGAGACC   | 59.981 | 20 |
| 147 | 227  | 373  | AGGGAGCTGGCACTAGATCA   | 59.973 | 20 |
| 207 | 1159 | 1365 | TGCAGTCGTCCAAAACGATA   | 60.257 | 20 |
| 274 | 1303 | 1576 | GGGTTGGATCAACCACATTT   | 59.508 | 20 |
| 236 | 1142 | 1377 | ACACAAGCACACACATGCAA   | 59.785 | 20 |
| 155 | 487  | 641  | ATGCACGTAGGCATGTTCAA   | 60.142 | 20 |
| 126 | 27   | 152  | CCAACTCAGTGTGTGAGTGGT  | 60.111 | 22 |
| 248 | 80   | 327  | GGATCGAATGAACAAACACG   | 58.976 | 20 |
| 212 | 3929 | 4140 | TGTTCTGCTTGCCTGCTTG    | 60.175 | 20 |
| 149 | 3    | 151  | GGTTATTAGTTATTACGGATTT | 58.826 | 27 |
| 140 | 95   | 234  | GATCTGCACCCTCCATGAAT   | 59.893 | 20 |
| 251 | 15   | 265  | CAATAAATTGGGGTCGGCTA   | 59.789 | 20 |
| 220 | 11   | 230  | GACTAGAGTTGGTTTCTTAAAT | 57.439 | 27 |
| 164 | 478  | 641  | AAGAAAATGGGCAGAAACGA   | 59.685 | 20 |
| 190 | 20   | 209  | TCATATATAAACGCCGGGA    | 60.13  | 20 |
| 225 | 1882 | 2106 | CGAAAACATTTACATACGATG  | 60.593 | 23 |
| 205 | 149  | 353  | TTTTAGGGTTAAAAATAGCGC  | 58.109 | 22 |
| 239 | 2089 | 2327 | CCAGACGACTGCAAAAACAA   | 59.881 | 20 |
| 275 | 271  | 545  | CTAGGTGTCGGATTTGGGAG   | 59.545 | 20 |
| 181 | 81   | 261  | ATTGTTGCTTTGCCATCTCC   | 60.081 | 20 |
| 153 | 344  | 496  | AGAAACAAACGGAATGTCGG   | 59.971 | 20 |
| 205 | 1376 | 1580 | GGCTTCTAAGCTGCCGATAA   | 59.592 | 20 |
| 280 | 91   | 370  | CTTGTGGAATGAAAGGGTGG   | 60.345 | 20 |
| 263 | 799  | 1061 | GGAGGTGAAGATTGGGTGAA   | 59.903 | 20 |
| 130 | 550  | 679  | TCCTTCCTTGCTCCTTTTCC   | 60.683 | 20 |
| 271 | 166  | 436  | AATAGCGCTTTTTGCCTGAT   | 58.992 | 20 |

|     |      |      |                         |        |    |
|-----|------|------|-------------------------|--------|----|
| 191 | 772  | 962  | ACCGCTTACATTCCGATTTG    | 59.96  | 20 |
| 213 | 1084 | 1296 | ACTGTTTCCACCGCTTGA      | 59.769 | 20 |
| 199 | 304  | 502  | TTCAGCACTCCATCAGCAAG    | 60.136 | 20 |
| 180 | 7    | 186  | TGGCCAAAACATCAACTCAA    | 60.088 | 20 |
| 232 | 123  | 354  | GGTCTTTTGATCCCCACAGA    | 59.903 | 20 |
| 204 | 8    | 211  | GGTGACGATGGTGATTGATG    | 59.769 | 20 |
| 271 | 0    | 270  | AGTAGTTCGCGCCGTGTCTA    | 59.757 | 20 |
| 258 | 88   | 345  | GGCATTTTGGGAAAGACAAA    | 59.916 | 20 |
| 225 | 1918 | 2142 | CGTATAGGGATCGGTGACAAA   | 59.831 | 21 |
| 248 | 169  | 416  | GATGCAGCTTGGTCTCCTTC    | 59.957 | 20 |
| 236 | 176  | 411  | AAAATGGTCCCCTCATGGA     | 60.119 | 19 |
| 256 | 830  | 1085 | TTTGTCCAAATAATTCATCACC  | 59.221 | 23 |
| 268 | 2531 | 2798 | CTTCCAACCTTCGCCATCT     | 59.43  | 20 |
| 214 | 1221 | 1434 | GGGACTGCACAATATGCCTC    | 60.492 | 20 |
| 272 | 146  | 417  | TTGCTGCCACTACCTGTGAA    | 60.449 | 20 |
| 206 | 51   | 256  | ACTGCTTGTGGACAGTGCAT    | 59.341 | 20 |
| 127 | 1820 | 1946 | TCATGGTTCGAAGAAGCTTGA   | 59.522 | 20 |
| 246 | 1641 | 1886 | TATACAAATGGGCGCATCAA    | 59.92  | 20 |
| 211 | 621  | 831  | ACATTCTCGGCTTCTTCCTG    | 59.43  | 20 |
| 206 | 507  | 712  | TCCTCCTTTTCACAACTGGC    | 60.232 | 20 |
| 201 | 99   | 299  | TCAAGTTGGTTACGGGAATTG   | 59.847 | 21 |
| 203 | 961  | 1163 | AAATTCAATGACAATTGGAGG   | 58.418 | 22 |
| 188 | 1350 | 1537 | TGGCATTAAATATTAGCCCCC   | 60.018 | 21 |
| 268 | 3    | 270  | GCCAATAATTTTTAGCAAGCA/  | 58.513 | 22 |
| 111 | 404  | 514  | AATGACTGCTGGAACAAGGG    | 60.111 | 20 |
| 236 | 646  | 881  | CATGATCCCGTGAGATACCA    | 59.322 | 20 |
| 167 | 304  | 470  | CCGCTCAACAGCGTACAATA    | 59.895 | 20 |
| 255 | 789  | 1043 | GTCAATTTGCCGCTTGATCT    | 60.221 | 20 |
| 266 | 43   | 308  | CGAATATGCAATCACCAAAGA   | 58.639 | 21 |
| 107 | 36   | 142  | CACGAGATTTACGTGGTTCG    | 59.195 | 20 |
| 273 | 65   | 337  | AAAACATGCATGCACCTGATT   | 58.229 | 20 |
| 223 | 24   | 246  | CACATTCACTTCTCCCTGA     | 58.641 | 20 |
| 232 | 784  | 1015 | CATGCATTTGTTGTCGTTTTCT  | 60.039 | 22 |
| 132 | 191  | 322  | ACACACACCGTGGACGTAGA    | 60.072 | 20 |
| 141 | 45   | 185  | CACACATTCTCACGCATTCC    | 60.12  | 20 |
| 262 | 681  | 942  | AAGTGCACAGAAAAATGACTT   | 58.487 | 23 |
| 136 | 805  | 940  | GTTCAGGTTGGTAGCTCGGA    | 60.255 | 20 |
| 118 | 1888 | 2005 | CTGCCAACTGAATGAAAGCA    | 59.988 | 20 |
| 167 | 2083 | 2249 | AACAAACACGGAGATTTCAAC   | 59.517 | 22 |
| 156 | 673  | 828  | GCGCATCTGTAATGTCCAGC    | 61.758 | 20 |
| 252 | 1596 | 1847 | ATTTGGGTGTAGAGAGGGGG    | 60.183 | 20 |
| 267 | 52   | 318  | ACGTGCACTTCCACTCACAC    | 59.789 | 20 |
| 178 | 101  | 278  | TTGTTGAAGGGTGGTTGTGA    | 59.976 | 20 |
| 178 | 473  | 650  | GTTGCTTAGGGTCTGTTGGC    | 59.74  | 20 |
| 163 | 325  | 487  | TTGCTTAGGGTCTGTTGGC     | 60.249 | 20 |
| 241 | 391  | 631  | GAGACGGGCTCACTAAAAA     | 59.312 | 20 |
| 104 | 72   | 175  | TACCCCGCTACCACCAATAG    | 59.839 | 20 |
| 224 | 1285 | 1508 | CCTTGATTTCAACTGTCTCCG   | 59.72  | 21 |
| 154 | 2593 | 2746 | TTAAACCGACACCCACTCC     | 59.83  | 20 |
| 270 | 51   | 320  | TTTTTAGTTTCGATAGTTTTCAT | 58.852 | 27 |
| 185 | 182  | 366  | ACAAGCGATGTGTGGTGA      | 60.16  | 20 |
| 142 | 2669 | 2810 | AGATGCAACATAGGGGAAGC    | 59.154 | 20 |
| 224 | 247  | 470  | AAGCACATCACCGGCTACTC    | 60.285 | 20 |
| 280 | 138  | 417  | ACAATATGGTGTGGGTATTA/   | 57.156 | 26 |
| 136 | 83   | 218  | TCAGTTTTTGAGTTATGACGTT  | 58.418 | 24 |
| 173 | 117  | 289  | GAAATATGCATTTGTCGTCACC  | 59.347 | 22 |
| 164 | 2    | 165  | ACAATTCAAAAATGAGTGAAC   | 58.528 | 23 |
| 279 | 32   | 310  | TCTCTACACATAGAGACCAAT   | 58.467 | 26 |



|     |      |      |                        |        |    |
|-----|------|------|------------------------|--------|----|
| 249 | 159  | 407  | GACACGGACGGGAAGAGATA   | 60.073 | 20 |
| 272 | 87   | 358  | CCCATCGTTGAAATGGTTTT   | 59.662 | 20 |
| 236 | 165  | 400  | GCGACAATAACTGTCTGCGA   | 60.019 | 20 |
| 264 | 1561 | 1824 | GCCTCCATAACGAGCTCATAG  | 58.965 | 21 |
| 277 | 21   | 297  | GGGGTGCATGTTAGCCTCTA   | 60.096 | 20 |
| 190 | 5    | 194  | AGCACAACGGCTATCTGGTT   | 59.763 | 20 |
| 261 | 82   | 342  | ACATATTCCACTCCGCAAGC   | 60.103 | 20 |
| 195 | 129  | 323  | CTACTTGCGTGCTGGAAGT    | 59.658 | 20 |
| 181 | 258  | 438  | GGCCATTCAAATTTCAAATCA  | 59.765 | 21 |
| 262 | 1166 | 1427 | TGTCTATTCTCCGATGGCT    | 59.653 | 20 |
| 246 | 21   | 266  | AGGATCGAAAGGGTGAGTGA   | 59.655 | 20 |
| 263 | 248  | 510  | CGAACACGATCCGACATTAC   | 59.002 | 20 |
| 135 | 178  | 312  | CGGTGGAAATGGCTGAGTAT   | 59.955 | 20 |
| 225 | 667  | 891  | GAGCTGCGACATTTTCAACA   | 59.995 | 20 |
| 254 | 588  | 841  | GAAATTCAAGCATTTTCCGC   | 59.666 | 20 |
| 233 | 157  | 389  | GTAAGAACCACCGTCCACC    | 60.284 | 20 |
| 159 | 3705 | 3863 | CCATAGTCCAAGATGTGGTGC  | 60.39  | 21 |
| 273 | 2    | 274  | TGGATGGATGGATTAGCAGAG  | 60.044 | 21 |
| 197 | 273  | 469  | ATTCTTTCTCATCACCCCG    | 61.211 | 20 |
| 155 | 171  | 325  | ATGGGAAGAGGGGTATGAG    | 60.147 | 20 |
| 168 | 167  | 334  | TTTTAAAGGATTTATGGCATC  | 58.122 | 24 |
| 146 | 25   | 170  | GGAAGAATGGACCCTAATTCA  | 59.311 | 22 |
| 276 | 470  | 745  | CGCTTTCACCAGAATCTTCC   | 59.813 | 20 |
| 184 | 56   | 239  | ACAGACGGCCCAATGATAGA   | 60.483 | 20 |
| 185 | 192  | 376  | CGCCAATTAATCATAGCCGT   | 59.95  | 20 |
| 194 | 998  | 1191 | CAGTAGGCCATGTGTTGAG    | 59.314 | 20 |
| 160 | 14   | 173  | AAGGGTTATCACCTGATTTTCT | 57.73  | 23 |
| 209 | 182  | 390  | GGAGGGTTAGATGGTGGACA   | 59.779 | 20 |
| 173 | 0    | 172  | GAAGTGTTATGCGTTTTGACA  | 58.249 | 23 |
| 195 | 156  | 350  | GTCGGCAGAAAAGCAAGAGA   | 60.657 | 20 |
| 231 | 397  | 627  | AAAGGGGAAACAACACTGAGA  | 59.963 | 21 |
| 246 | 91   | 336  | AGTGTGTGTTTGTGCGTGTG   | 59.234 | 20 |
| 279 | 185  | 463  | ATTTTTCCTTGTTGGGGTGG   | 60.938 | 20 |
| 126 | 326  | 451  | TCCGACCGGTTTTTAAATCA   | 60.294 | 20 |
| 274 | 780  | 1053 | CGTTTGATTTTCACTAGAACC  | 58.358 | 23 |
| 268 | 2    | 269  | CAACACAAAACCCTACAGCA   | 57.251 | 20 |
| 259 | 1315 | 1573 | CCAAATTTACGTAGACCCAA   | 59.847 | 21 |
| 172 | 288  | 459  | TGCAGGGTATGCATGTTTGT   | 59.995 | 20 |
| 251 | 3827 | 4077 | CTCCCTATCCAACACTGCGAAA | 60.206 | 20 |
| 277 | 1289 | 1565 | TCAGCCTTTTATCGACTCCG   | 60.344 | 20 |
| 189 | 177  | 365  | CAACGATCAAATTCGCTTCA   | 59.809 | 20 |
| 180 | 795  | 974  | TCGCCTTACTCCATTCCAA    | 60.576 | 20 |
| 218 | 1106 | 1323 | CGTGGAAGGGAGAGATTGAA   | 60.187 | 20 |
| 234 | 1211 | 1444 | AAGGCCCTTGGATTTGAGAT   | 59.903 | 20 |
| 278 | 2552 | 2829 | TCCGTCAATATTAGGGATTTAT | 60.272 | 24 |
| 219 | 49   | 267  | CGCCCAAGATTTGATAATG    | 60.281 | 20 |
| 190 | 108  | 297  | CAACTCTGCGTCTCCTTCC    | 59.989 | 20 |
| 253 | 846  | 1098 | ACCAATGCACATTTCTGCT    | 60.526 | 20 |
| 258 | 1918 | 2175 | GATTTCCAGGCATGAGGTGT   | 59.934 | 20 |
| 233 | 79   | 311  | TGCTTTGCGGAAAAGCATAA   | 60.691 | 20 |
| 232 | 105  | 336  | AAGCTCAAAGCTCCACAAGC   | 59.763 | 20 |
| 248 | 205  | 452  | TCCCACCTCCATCTCATCTC   | 60.008 | 20 |
| 265 | 40   | 304  | GACCAATCCCAGATCCCTAA   | 58.787 | 20 |
| 279 | 165  | 443  | TTTGGGAATTGGGTTTTGAA   | 60.138 | 20 |
| 280 | 609  | 888  | TGTCGTAGCATTTTGTATGTT  | 59.109 | 25 |
| 218 | 104  | 321  | TGACGCCTAGAATCATCGAA   | 59.375 | 20 |
| 239 | 1329 | 1567 | ATGTCGTATTTGCATTGGCA   | 59.96  | 20 |
| 257 | 677  | 933  | CAGTATGTCCGCTTTAGCG    | 60.782 | 20 |

|     |      |      |                        |        |    |
|-----|------|------|------------------------|--------|----|
| 184 | 298  | 481  | GATTTCAATGGACAGGCACC   | 60.326 | 20 |
| 143 | 265  | 407  | AGCCGTTTGTCCGATTTATG   | 59.96  | 20 |
| 193 | 3854 | 4046 | CCAGGAAAAAGAAGATTGCA   | 58.823 | 21 |
| 113 | 531  | 643  | AATCCCTTAATTGGAAGCCA   | 59.795 | 21 |
| 241 | 714  | 954  | AGTTTGATGCAAGGCATGTG   | 59.722 | 20 |
| 153 | 5    | 157  | TTGGGGATTTTAGAGAGTATT  | 59.802 | 25 |
| 255 | 266  | 520  | ACCCCCTTCTCTCCCTACA    | 59.928 | 20 |
| 167 | 203  | 369  | GGCCACTTCTTGTAACA      | 59.971 | 20 |
| 252 | 95   | 346  | TCGACTTAACCGTGGGTTT    | 59.971 | 20 |
| 224 | 556  | 779  | CGAGATTACCCCTGTATGCTG  | 59.601 | 21 |
| 162 | 291  | 452  | GGTTGACATGGCTTCGTAT    | 59.82  | 20 |
| 268 | 92   | 359  | TCCATTTCTGTGTTCTTCGT   | 59.583 | 21 |
| 269 | 183  | 451  | GCCTCCTCCTCCTCTCTT     | 59.898 | 19 |
| 220 | 39   | 258  | TTTTACCCCATTTTGCCCT    | 60.519 | 20 |
| 242 | 99   | 340  | TGAGTACAAGCGGGTGACAA   | 60.301 | 20 |
| 280 | 44   | 323  | AATTGAGAGTAGCCGACCCC   | 60.464 | 20 |
| 202 | 57   | 258  | GTACAGCTGAAATCTCCCGC   | 59.843 | 20 |
| 167 | 39   | 205  | TGGCTGGAGAGTACAAAACCT  | 59.812 | 23 |
| 202 | 943  | 1144 | GCATGTATGCATATCCCTGG   | 58.823 | 20 |
| 223 | 1175 | 1397 | CACTTTTCCAACAACATGCG   | 60.149 | 20 |
| 277 | 123  | 399  | TCAGGGACTCATTCCCAAC    | 59.903 | 20 |
| 272 | 1222 | 1493 | AGCAATCAGCTCCTGCAAT    | 59.985 | 20 |
| 273 | 408  | 680  | CAATCGGCAGAAGTTTGCTA   | 59.062 | 20 |
| 257 | 1236 | 1492 | GTAATCGATCCCGAATGAGC   | 59.658 | 20 |
| 187 | 2771 | 2957 | CACGGGAGACATTGCCATA    | 60.487 | 19 |
| 245 | 57   | 301  | CGGACGAATTAATCACAGCA   | 59.688 | 20 |
| 254 | 407  | 660  | ATATGGGTTGTGATCTCGC    | 59.923 | 20 |
| 192 | 1448 | 1639 | TATGAATTTTGCCCTTGGA    | 60.26  | 20 |
| 279 | 705  | 983  | AACTTTTGGTTGGCAAGGA    | 59.587 | 20 |
| 200 | 87   | 286  | AAATTGGCAAAAATGGTGGA   | 60.167 | 20 |
| 265 | 145  | 409  | TGTTCCCAATCCACATT      | 60.029 | 20 |
| 251 | 677  | 927  | GACGACCTTGTCATCCAACA   | 59.525 | 20 |
| 183 | 68   | 250  | AGCATCTTGCTCTCTCATTG   | 58.842 | 22 |
| 179 | 40   | 218  | GGAGATGCACTTCACCCAAT   | 59.934 | 20 |
| 256 | 88   | 343  | AGAGGCATTTTGTGGGAGC    | 59.316 | 20 |
| 243 | 169  | 411  | CAAAACCCGTTACATATCTTTC | 59.667 | 23 |
| 240 | 1499 | 1738 | GAAGAAGTGGTGGCGGATTA   | 60.074 | 20 |
| 249 | 361  | 609  | ACATTCGGAATTCATTTGGG   | 59.622 | 20 |
| 278 | 618  | 895  | GAAGAAAAGGCAAGAAGTAC   | 59.433 | 22 |
| 138 | 134  | 271  | TTGGTGCTCCACTATATTGCC  | 59.974 | 21 |
| 253 | 22   | 274  | TGATAGATGCCACTAACCCCTT | 59.111 | 22 |
| 109 | 950  | 1058 | TGAGAATCCTGGGCTTTGTC   | 60.195 | 20 |
| 242 | 56   | 297  | GTAACCGTCATGTTCCGGTC   | 60.24  | 20 |
| 280 | 1087 | 1366 | TATGAGATGTGGGGGAGAGG   | 59.879 | 20 |
| 214 | 2487 | 2700 | TTCCCTCCAATTCTGTTTTT   | 59.801 | 21 |
| 171 | 2003 | 2173 | TCAACGGTGAGTTATGGCAA   | 60.111 | 20 |
| 102 | 261  | 362  | TGTTAGAAACAACGCGGCT    | 60.802 | 20 |
| 234 | 1489 | 1722 | CAGTAAATTTTGTGGCGGG    | 60.348 | 20 |
| 197 | 133  | 329  | TCGCCACAATTTGATACCT    | 60.331 | 20 |
| 134 | 442  | 575  | ACAACGTGATACGCTGCAAG   | 59.935 | 20 |
| 226 | 363  | 588  | CGTTGCATTCGTCTTCTCA    | 59.988 | 20 |
| 257 | 11   | 267  | TTACCATATTTAAGGGTTATCA | 58.789 | 26 |
| 190 | 288  | 477  | CTAAACCTTATCCCCACCG    | 60.545 | 20 |
| 274 | 13   | 286  | CAAAATTTGGAACCTGTCTTC  | 59.108 | 22 |
| 207 | 1075 | 1281 | CTGCCTTCTCCACCATCTTC   | 59.803 | 20 |
| 120 | 286  | 405  | TTATATTCTCCCGAACCGACA  | 59.42  | 21 |
| 236 | 238  | 473  | TTCGTGATCTTTGTTGCGTC   | 59.847 | 20 |
| 147 | 88   | 234  | GACACCTCCAACCTTGCCAAT  | 59.973 | 20 |

|     |      |      |                        |        |    |
|-----|------|------|------------------------|--------|----|
| 198 | 11   | 208  | TTCGAAACTGCATGAAAATCA  | 59.291 | 21 |
| 274 | 2    | 275  | ACACGTGTAAGGGTTGAAGAA  | 58.304 | 22 |
| 278 | 3147 | 3424 | TATCATTCCGCGCTATGTCC   | 60.962 | 20 |
| 248 | 1192 | 1439 | TGAACTGGCTACTGGCTGTC   | 59.037 | 20 |
| 225 | 144  | 368  | GAGAAAATGGCAATCGGAAA   | 60.016 | 20 |
| 233 | 25   | 257  | TTTATGCGTCGTGGATCAAG   | 59.688 | 20 |
| 264 | 148  | 411  | GGTTACGGGCTGGTATTTTG   | 59.338 | 20 |
| 258 | 1291 | 1548 | GGACAGATCAGAAGCAAGGC   | 59.957 | 20 |
| 234 | 1228 | 1461 | AGAGCCACAAATTTTTCTTCAT | 57.073 | 22 |
| 238 | 21   | 258  | TGTGTGGTTCTATGTTGTGAGA | 59.958 | 24 |
| 186 | 579  | 764  | CAGCAGGTTTCTGTTCCGTT   | 60.291 | 20 |
| 183 | 3077 | 3259 | TGCAGATCAATAAAATGGCG   | 59.662 | 20 |
| 195 | 768  | 962  | AAAACGATGGATGACCCCTA   | 59.244 | 20 |
| 169 | 21   | 189  | ACACTCTGCTAGGGTTGGGA   | 59.721 | 20 |
| 256 | 88   | 343  | CCACTGGACCAAGTGACCTA   | 58.565 | 20 |
| 174 | 482  | 655  | AATGTCAATCCCTCAGCAGC   | 60.226 | 20 |
| 248 | 297  | 544  | CTCTCGCTGCGATCCTTTAT   | 59.574 | 20 |
| 238 | 416  | 653  | TCGCTGCACCTTCAAGTAAC   | 59.076 | 20 |
| 266 | 6    | 271  | CACGAACTGCATCAAAGGAG   | 59.44  | 20 |
| 272 | 469  | 740  | AAAGGCAGAATCCACATGGT   | 59.41  | 20 |
| 121 | 343  | 463  | TTCTTATACCAAACCTCCACT  | 59.832 | 25 |
| 255 | 1157 | 1411 | TCTACCACCGGAGATCTGT    | 59.53  | 20 |
| 200 | 258  | 457  | TTGCAAGCCTGTGGTAGGTA   | 59.342 | 20 |
| 238 | 156  | 393  | CCTCCACTTCGACAAGAAGC   | 59.989 | 20 |
| 150 | 2176 | 2325 | AGAGGAAACCACCACCGTTA   | 59.449 | 20 |
| 190 | 1360 | 1549 | TGTGGCATATTGATGATGGTG  | 60.213 | 21 |
| 184 | 270  | 453  | TTGTTTGCGCTCAACAATG    | 59.42  | 19 |
| 163 | 470  | 632  | TTCCCCAGAGAAGTTGTTG    | 60.081 | 20 |
| 260 | 32   | 291  | CGCCCCAAAGTGCTTTAATA   | 60.089 | 20 |
| 178 | 1342 | 1519 | GGTGACAAGCATTCTCCAC    | 60.52  | 20 |
| 263 | 618  | 880  | AAGGCCTTCTTGGTAGTGG    | 60.488 | 20 |
| 237 | 496  | 732  | TTTGACACATAGCCCGATGA   | 60.073 | 20 |
| 255 | 449  | 703  | AAGCTGAAAAGTCGAGAAAA   | 58.643 | 23 |
| 159 | 514  | 672  | TCGATGAAATAGGGTCGAGG   | 60.029 | 20 |
| 178 | 81   | 258  | GGAGATTGGGAGGAATGGAG   | 60.791 | 20 |
| 178 | 155  | 332  | GAGGAGAGCGAGCAAGAAAA   | 59.836 | 20 |
| 196 | 142  | 337  | ATGGACCCACGAGATTTGTT   | 59.263 | 20 |
| 193 | 445  | 637  | TTTTTGAGGGAACAATTTGAG  | 59.971 | 23 |
| 261 | 103  | 363  | GCATGTGTGAGATGGAATTGT  | 59.866 | 22 |
| 193 | 403  | 595  | TTCAATCAGCCAATGGACAA   | 60.049 | 20 |
| 216 | 385  | 600  | AAATCGGACGTCGAAGAGTG   | 60.255 | 20 |
| 246 | 134  | 379  | ACTTCGACTCTCGTTGGCAG   | 60.589 | 20 |
| 145 | 59   | 203  | CACCGGATCGCTACCCTAT    | 59.925 | 19 |
| 143 | 855  | 997  | TGCATTAGTCTTTGGCATTCA  | 59.315 | 21 |
| 206 | 437  | 642  | AAGGGAGGCTCTGCATCATA   | 59.797 | 20 |
| 230 | 352  | 581  | GCTGAGCATTTTCTTCACCC   | 59.82  | 20 |
| 188 | 28   | 215  | GCCCACAACCTCTGTTTTCTC  | 59.703 | 20 |
| 262 | 96   | 357  | TGAACTTATGGGAAGGAGAAC  | 59.46  | 22 |
| 228 | 1301 | 1528 | CATAGCGAGGAAGTCCCAAG   | 59.83  | 20 |
| 255 | 144  | 398  | CGAATATCAGCCACCCTTTC   | 59.528 | 20 |
| 160 | 114  | 273  | ATCATTACTGACCGCGAACC   | 59.962 | 20 |
| 203 | 195  | 397  | GACCCGGTCCAATACGAAG    | 60.324 | 19 |
| 120 | 2081 | 2200 | AAAAAGGGATGAAAAGGGGA   | 59.75  | 20 |
| 142 | 143  | 284  | CGCGTGCTGTAATCTGTACC   | 59.371 | 20 |
| 227 | 243  | 469  | GCTTCCAGGGACAGATATGC   | 59.658 | 20 |
| 275 | 72   | 346  | AGCACACAGGTGAAGACGATT  | 59.784 | 21 |
| 206 | 2176 | 2381 | ACTCCCTCCGTCCCATAAAC   | 60.19  | 20 |
| 181 | 899  | 1079 | GCATTTTCTCCATGTGGGAT   | 59.756 | 20 |

|     |      |      |                        |        |    |
|-----|------|------|------------------------|--------|----|
| 220 | 158  | 377  | CATGTCCACAGCCACAAGTC   | 60.162 | 20 |
| 205 | 3750 | 3954 | GGTGATAAGCCTTGCCCTTT   | 60.451 | 20 |
| 123 | 280  | 402  | AGCCTTGATCTGCACTCTCC   | 59.56  | 20 |
| 154 | 607  | 760  | TGGGGCGCGTATTTAGATTA   | 60.424 | 20 |
| 221 | 58   | 278  | CATTAATCACCAATTCGCCC   | 60.153 | 20 |
| 279 | 478  | 756  | TATGCATGGCATGAGTGTGA   | 59.656 | 20 |
| 255 | 722  | 976  | CCGGAGTGTGAAGACGAACT   | 60.298 | 20 |
| 279 | 735  | 1013 | GAATCTGACACGTCGGGAAC   | 60.52  | 20 |
| 131 | 1406 | 1536 | TCAGCAATGAGTTGCTCCAT   | 59.399 | 20 |
| 199 | 314  | 512  | CTGTGGTTGTCGTCTCTTGC   | 59.467 | 20 |
| 219 | 38   | 256  | ATGTTTCGGATTTTGAAACGG  | 59.801 | 20 |
| 228 | 2891 | 3118 | CAGCCCAACTCAACATCAAA   | 59.691 | 20 |
| 118 | 0    | 117  | GCGTTTTGACAATATTTAGTGT | 60.205 | 26 |
| 256 | 357  | 612  | CCGTATCTCCTCACGCACTT   | 60.277 | 20 |
| 200 | 1243 | 1442 | TTGTGGCCTGTGTGAGAGAG   | 60.022 | 20 |
| 265 | 17   | 281  | AAGAGTGTGTGTGGGTGTG    | 59.527 | 21 |
| 190 | 106  | 295  | CTACGTGAGGCGGTGATTTT   | 60.132 | 20 |
| 125 | 27   | 151  | TCACAATACTGCCCAGC      | 59.871 | 20 |
| 229 | 200  | 428  | TGGATTTTCCCAAATTC AATC | 58.726 | 21 |
| 125 | 1044 | 1168 | GTTTTGTTTTCGTTCCTCG    | 59.587 | 20 |
| 278 | 1256 | 1533 | TGCAATGTGCAGACTTAGCTT  | 60.082 | 22 |
| 201 | 181  | 381  | AGGTGGCAACATAATCAGCC   | 59.962 | 20 |
| 258 | 2942 | 3199 | TTATACCTGCGGGTGTGT     | 60.249 | 20 |
| 267 | 1561 | 1827 | TTTGGTTGGTCAAGTGGGT    | 60.246 | 20 |
| 191 | 86   | 276  | TCACATTCACACCTAACGCAA  | 60.165 | 21 |
| 279 | 10   | 288  | TGAGACCTCTCAGTCCCAGG   | 60.388 | 20 |
| 260 | 74   | 333  | TAAAGGCCGCATCCTATCAC   | 60.06  | 20 |
| 114 | 17   | 130  | CGGTTATCACCGGATCGC     | 62.397 | 18 |
| 243 | 145  | 387  | CCAAGAATCAGTTAAGCCCG   | 59.702 | 20 |
| 184 | 2549 | 2732 | AACCACACGGCGAGATAGAG   | 60.277 | 20 |
| 249 | 1345 | 1593 | AAGCTGAGGAAGCCACTCAC   | 59.604 | 20 |
| 132 | 454  | 585  | CGAGTCGGCAGACCTAAGAC   | 60.012 | 20 |
| 210 | 595  | 804  | ACGTGTTTTCATACGGCCAG   | 60.944 | 20 |
| 271 | 569  | 839  | GGAGGCATGGAAGAGAATGA   | 60.158 | 20 |
| 134 | 265  | 398  | AGTAGAAGCATTTCGTGGG    | 59.336 | 20 |
| 153 | 1282 | 1434 | TTGACATGGTGTAGTCATCAAC | 59.906 | 23 |
| 201 | 420  | 620  | GTGATTGGCTGGAAGAGCA    | 59.934 | 19 |
| 255 | 2016 | 2270 | CTGACGGAACACGTCAGATT   | 58.725 | 20 |
| 211 | 519  | 729  | CATACTCCACCGCCTTCAT    | 59.955 | 20 |
| 187 | 348  | 534  | CACTCACGCACCCACTACC    | 60.227 | 20 |
| 234 | 900  | 1133 | TTCAGGGAATCTTCGAATAAA  | 59.14  | 23 |
| 206 | 311  | 516  | TGAGGCTTGTGGTTCAGGTT   | 60.69  | 20 |
| 274 | 308  | 581  | ATCGCGGAAGTTTAGCATA    | 59.704 | 20 |
| 186 | 517  | 702  | TGCAAGCGGTT CAGACAATA  | 60.401 | 20 |
| 244 | 451  | 694  | AAAGAGCTCTCGACGCAAAA   | 60.27  | 20 |
| 269 | 184  | 452  | CCCGTAAACAGAATTGACC    | 59.288 | 20 |
| 166 | 15   | 180  | ATGTATGGCCAGATTGGTT    | 59.129 | 20 |
| 194 | 23   | 216  | CCGTCCAAATCCAATAAGA    | 59.756 | 20 |
| 272 | 182  | 453  | TGTTGGGATGAAATGTGAGG   | 59.343 | 20 |
| 227 | 192  | 418  | GGATATGAAGTGGGAGCCAA   | 59.894 | 20 |
| 189 | 436  | 624  | GCAATTGCAGGCTTATTCCA   | 61.105 | 20 |
| 267 | 39   | 305  | TCAAACCCTGTCATTCACCA   | 59.935 | 20 |
| 234 | 1    | 234  | CCCAATTTGCCCTTATATGC   | 59.282 | 20 |
| 135 | 331  | 465  | GGGTGAAAATCGAATGACGA   | 60.843 | 20 |
| 270 | 627  | 896  | TGCTGCAAGCTTAAGAAACAA  | 60.183 | 22 |
| 233 | 36   | 268  | TCTTTTTCGAACCGAACCCAC  | 60.088 | 20 |
| 200 | 7    | 206  | GGGACTGCTGGATAATCCCT   | 60.293 | 20 |
| 230 | 84   | 313  | ACTAACTAGACCGGGCCGT    | 60.019 | 20 |

|     |      |      |                         |        |    |
|-----|------|------|-------------------------|--------|----|
| 217 | 957  | 1173 | TGATTCTGGGTTTCCAGTCC    | 59.903 | 20 |
| 212 | 2224 | 2435 | AACACCAACATGCTGACGAA    | 60.16  | 20 |
| 209 | 47   | 255  | AACCTCTCGTGCTCCAACAT    | 59.727 | 20 |
| 221 | 247  | 467  | AATCGTCCCAAATTCCTTT     | 59.644 | 20 |
| 277 | 522  | 798  | AACTAACGGTCTGGTTCCGA    | 59.592 | 20 |
| 174 | 550  | 723  | TCAAAATTGGCACGATACGA    | 60.073 | 20 |
| 277 | 227  | 503  | TCACAACCAAATCTTGCTCA    | 60.154 | 22 |
| 275 | 1069 | 1343 | AATCACCATTCAACGCAACC    | 60.765 | 20 |
| 275 | 951  | 1225 | ATGCTGCTGTTTTCCATTCC    | 60.081 | 20 |
| 198 | 8    | 205  | AATCATTGCTTGAGCTTGAAA   | 58.025 | 22 |
| 265 | 332  | 596  | TTCAATCCAAACTCTATTTTAT  | 59.778 | 25 |
| 110 | 39   | 148  | TGAGACCTGTCACCGTTTTG    | 59.72  | 20 |
| 125 | 39   | 163  | TTTTAGTTATCACAGGATCACC  | 57.201 | 23 |
| 131 | 3909 | 4039 | ACTTGGCCCACAAGAACAAG    | 60.149 | 20 |
| 275 | 154  | 428  | ACGGGCACTGTTTTACCATT    | 59.359 | 20 |
| 102 | 961  | 1062 | TTTCAATCGTGACACCAAGG    | 59.541 | 20 |
| 234 | 105  | 338  | CACCGATGTTGAGGCCTACT    | 60.134 | 20 |
| 268 | 175  | 442  | CATGGACGAAAATAGCCTCC    | 59.528 | 20 |
| 275 | 174  | 448  | GGGGTGTGTTGTTGCTGTTT    | 59.875 | 20 |
| 209 | 2039 | 2247 | CCATGCGCGGTCTAAATAAT    | 59.95  | 20 |
| 195 | 11   | 205  | TTGACAATATTTAGTGTGTTTGA | 58.99  | 27 |
| 139 | 60   | 198  | GGACCTCTGGACAATCCCTT    | 60.314 | 20 |
| 274 | 21   | 294  | CAGTGTAACAACCCCGGAATC   | 60.232 | 20 |
| 280 | 27   | 306  | CTACAACATCATGCAAATCAA   | 57.395 | 25 |
| 166 | 1432 | 1597 | TCCACAATCACTTGTGCCTC    | 59.682 | 20 |
| 144 | 257  | 400  | CAAGAACGAGAGGGTCAAGG    | 59.837 | 20 |
| 245 | 2    | 246  | CAGCTCCAAGACATTCCACA    | 59.831 | 20 |
| 235 | 252  | 486  | CAAATGTGGCGTATGCTGAG    | 60.28  | 20 |
| 212 | 285  | 496  | GCATTCCTTTCCCATCTTCA    | 60.014 | 20 |
| 149 | 205  | 353  | AGGTCATGGGGTATGTTTGC    | 59.676 | 20 |
| 188 | 172  | 359  | TTCGGAGCATGAATTAAGTGG   | 60.081 | 21 |
| 122 | 11   | 132  | AATTGGCATATGTCCCCAAG    | 59.645 | 20 |
| 239 | 273  | 511  | TTCGACTCGTTTGAAATCGG    | 61.137 | 20 |
| 199 | 1388 | 1586 | ATCCAACGGATGAAAAGCTG    | 60.074 | 20 |
| 217 | 473  | 689  | TTGCAAAAGAAATTGCTTAGC   | 59.604 | 23 |
| 169 | 821  | 989  | TTTGTGCCTCTGATCCCAAT    | 60.461 | 20 |
| 150 | 74   | 223  | TTGCAGCACTCTGGACTCTC    | 59.288 | 20 |
| 222 | 2636 | 2857 | TGAATGGACTGTGTTCTTGGA   | 59.124 | 21 |
| 261 | 8    | 268  | ATGGATGGAGTCAAAGCCAA    | 60.461 | 20 |
| 259 | 889  | 1147 | CGAAAATTCGGATCGGCTA     | 61.051 | 19 |
| 278 | 53   | 330  | GGTTAGGAATGCATTAATAAC   | 58.456 | 24 |
| 267 | 1364 | 1630 | GATACCATACGTAACGCCCAA   | 59.734 | 21 |
| 236 | 105  | 340  | TGCATTCATCAATTTTTGGAGT  | 59.456 | 22 |
| 118 | 157  | 274  | TGGAGCATGGAGAAAACCTGC   | 61.329 | 20 |
| 251 | 154  | 404  | AGCCTCCCTCTTTGCTCTC     | 60.238 | 20 |
| 240 | 80   | 319  | CGAAGAGCACACACTTTTGG    | 59.485 | 20 |
| 175 | 350  | 524  | TCTCGAGCTCAAATCCCAAG    | 60.474 | 20 |
| 190 | 138  | 327  | AGTTTTCCGCATGAATGGAG    | 60.074 | 20 |
| 236 | 962  | 1197 | CACCATATTTACAGCAGCG     | 60.28  | 20 |
| 268 | 543  | 810  | TCTCCATTTCTGTTTCCCA     | 60.43  | 20 |
| 268 | 130  | 397  | GAGAGTGGGTCGTAGCCTGA    | 60.408 | 20 |
| 184 | 2825 | 3008 | GTCGTCAAAGAACTCGGAGG    | 59.844 | 20 |
| 239 | 405  | 643  | AAAGGAGATTCCAGCGATCA    | 59.773 | 20 |
| 266 | 431  | 696  | AGATCGACGGTCCGAAATTA    | 59.528 | 20 |
| 234 | 256  | 489  | GGCCATAGCAGAATTTGGAC    | 59.533 | 20 |
| 187 | 425  | 611  | CCGAAAATCTAAAGCCCA      | 60.067 | 20 |
| 222 | 2847 | 3068 | GTTCGATGGACCTCGATCAT    | 59.893 | 20 |
| 212 | 1142 | 1353 | TCACCCAATTTTGGATTCT     | 59.22  | 20 |

|     |      |      |                        |        |    |
|-----|------|------|------------------------|--------|----|
| 122 | 44   | 165  | GGAAATAAGGAGGTGTTATGA  | 60.02  | 25 |
| 233 | 1624 | 1856 | TCTCGAATGAATCCAAACCC   | 59.871 | 20 |
| 182 | 4    | 185  | AATAGGCCGGTCTTTTAGCC   | 59.593 | 20 |
| 166 | 51   | 216  | GCATTGTAAGGGGGACAGAG   | 59.55  | 20 |
| 109 | 15   | 123  | GCTTGCACCAATAAAATTTGG  | 59.485 | 21 |
| 248 | 5477 | 5724 | GCAATCCGTA CTGGCCATTT  | 59.967 | 20 |
| 218 | 266  | 483  | GCCATCCATTCCGAATATCA   | 60.638 | 20 |
| 160 | 675  | 834  | GTCACACAAGCTTGACTCGG   | 59.467 | 20 |
| 156 | 414  | 569  | CGTAAATTGTTGCAACCGAG   | 59.226 | 20 |
| 169 | 523  | 691  | GAAGAAAGCGCGGTAGTCAG   | 60.154 | 20 |
| 280 | 36   | 315  | TAGAGCCCTTCAATGGACAAT  | 58.659 | 21 |
| 182 | 34   | 215  | AACGGTACGTTCCGATTTTG   | 59.861 | 20 |
| 187 | 608  | 794  | GCCCAACTTATTTGGATATTTG | 59.268 | 23 |
| 210 | 195  | 404  | CAGTTAAGAGCGTTGGAGGG   | 59.869 | 20 |
| 110 | 448  | 557  | CACTTCTCGGAACGAACAAAA  | 60.269 | 21 |
| 279 | 86   | 364  | GTTTTACGTGGTTTCCGAGC   | 59.615 | 20 |
| 238 | 390  | 627  | CTTGGCTATGTTGGGATTGG   | 60.323 | 20 |
| 114 | 1005 | 1118 | CAAATGCCACGAGATTTACG   | 59.182 | 20 |
| 122 | 451  | 572  | ACTATTCACATATCGCCGCC   | 59.951 | 20 |
| 270 | 147  | 416  | TGGTCTGATCTGCTACCCTT   | 59.994 | 22 |
| 172 | 304  | 475  | ACCTTCCTTTCCGTTCTGT    | 59.972 | 20 |
| 138 | 282  | 419  | GCCGATTGTTTTCTTGATT    | 59.022 | 20 |
| 198 | 336  | 533  | TCCTAGCCACACATGTCAGAA  | 59.303 | 21 |
| 159 | 1622 | 1780 | ATTTCTGCTCACTGCCTCGT   | 60.02  | 20 |
| 271 | 2836 | 3106 | CCAAATTAAGGTCATATTGCA  | 58.927 | 23 |
| 172 | 916  | 1087 | GCGAAGTCAAACCACCAGAT   | 60.119 | 20 |
| 274 | 828  | 1101 | CTTCGCCCTTGGATGAAATA   | 60.031 | 20 |
| 190 | 505  | 694  | TTACCTGGCTGGCGTAGTTT   | 59.769 | 20 |
| 194 | 371  | 564  | TCGGGGATTAACCTCCTCT    | 59.897 | 20 |
| 280 | 178  | 457  | TTCAAATCCCACAAACGTCA   | 59.941 | 20 |
| 215 | 81   | 295  | CGCCCCAGATTGTTTCTTAT   | 59.043 | 20 |
| 227 | 2438 | 2664 | TGGTCCGAGTTCTCCATTCT   | 59.655 | 20 |
| 219 | 65   | 283  | AAAAATATGGGGTTTTCCCAA  | 59.428 | 21 |
| 280 | 114  | 393  | AAACACCGCCGCTTTTTAC    | 60.124 | 19 |
| 254 | 11   | 264  | CGAACTAAAGAAATAGGGACC  | 59.311 | 22 |
| 236 | 3106 | 3341 | ACCTGATAGGCCAACTGTGC   | 60.142 | 20 |
| 113 | 380  | 492  | TGTGTTTCATGGGGAATTCAA  | 59.75  | 20 |
| 196 | 178  | 373  | GTTTCTTTGCCACGTAACGC   | 60.678 | 20 |
| 222 | 171  | 392  | TCGACAAAGAAATCATCGGAC  | 60.066 | 21 |
| 148 | 24   | 171  | GGGTATCACCTGATTTTCTCC  | 58.826 | 22 |
| 204 | 186  | 389  | AGCAAATATGATATGCCTGCA  | 59.613 | 22 |
| 279 | 162  | 440  | CAAGGGTAATCCCAAACCTT   | 57.904 | 20 |
| 100 | 126  | 225  | AACCACAAAAAGGATAAGTGC  | 59.282 | 22 |
| 140 | 329  | 468  | CGAAGCTTTGATGGTGTGAA   | 59.84  | 20 |
| 251 | 5672 | 5922 | GTTGCTCTTGCTCCAACACA   | 60.032 | 20 |
| 192 | 1043 | 1234 | CGTTTTAGACAAGCCATT     | 60.11  | 20 |
| 179 | 525  | 703  | GCTGGCAGCTTCAACAGATA   | 59.178 | 20 |
| 185 | 0    | 184  | GGTTTTGATGGTTGTGATTTGT | 58.72  | 22 |
| 194 | 0    | 193  | AACCTTGGAGTCCCTTCTCC   | 59.534 | 20 |
| 272 | 761  | 1032 | CCTGGACCCCGATTTATAG    | 60.514 | 20 |
| 248 | 444  | 691  | TATTAACGGTCCGGTTCCTG   | 59.817 | 20 |
| 153 | 760  | 912  | ACGTCAGATATGGCTGTTGG   | 58.597 | 20 |
| 246 | 922  | 1167 | GGGAGCTTTACTCCCCTC     | 60.074 | 20 |
| 279 | 69   | 347  | GCGCGTTTAGAAAAGGGAAG   | 61.198 | 20 |
| 160 | 9    | 168  | TTTATCGTGGTGCATGTTTTT  | 58.084 | 21 |
| 204 | 3502 | 3705 | ACCTTGTCATGAACCTCCA    | 60.363 | 20 |
| 231 | 354  | 584  | TGTCTGCATCTCTAAACCAA   | 57.573 | 22 |
| 211 | 288  | 498  | CGAACTTTTTACAGCACGCA   | 60.052 | 20 |

|     |      |      |                        |        |    |
|-----|------|------|------------------------|--------|----|
| 208 | 177  | 384  | CCTGGAGAAGGTCAATTTGC   | 59.67  | 20 |
| 244 | 163  | 406  | GGCAAATGGTTCACATGGTT   | 60.624 | 20 |
| 195 | 138  | 332  | ACCTCGGCACATTTACCAA    | 60.365 | 20 |
| 246 | 457  | 702  | CAGTTTTGCTATCGTTTATCTT | 59.392 | 24 |
| 277 | 93   | 369  | CGGTTCCAACGACTGAAATC   | 60.495 | 20 |
| 268 | 144  | 411  | TCGGTAATTTAGTCCAGCCCT  | 59.973 | 21 |
| 161 | 1295 | 1455 | AAACAGGGGTACAAGGGTGA   | 59.304 | 20 |
| 217 | 1978 | 2194 | TTTAAACAATGCTGCACTCCC  | 58.773 | 20 |
| 201 | 11   | 211  | TGGTTTTGAAAGTGTGATCTGC | 60.008 | 22 |
| 201 | 260  | 460  | AACGGGAGAATCGTGTATC    | 59.934 | 20 |
| 189 | 30   | 218  | TTGATTCTGGATTATCCTGCG  | 60.045 | 21 |
| 269 | 272  | 540  | TCCTCAAGATTGTGCAACCA   | 60.24  | 20 |
| 271 | 3256 | 3526 | GGCCATCTATCCCTATCCGT   | 60.138 | 20 |
| 153 | 270  | 422  | GACAACCATGTTGGGGTTTC   | 60.073 | 20 |
| 266 | 3207 | 3472 | TCCTCCTTTCCTCTGCATTG   | 60.331 | 20 |
| 263 | 64   | 326  | TCGCGGGTTTGAAAATAACT   | 59.586 | 20 |
| 213 | 918  | 1130 | CGGTGTAAAGGAGGGGTGTA   | 59.846 | 20 |
| 267 | 13   | 279  | TCACTTCTTCCCAAGGCACT   | 59.844 | 20 |
| 203 | 142  | 344  | TGAATCAATTTAACATCATGCA | 58.44  | 24 |
| 152 | 39   | 190  | TGCAACACACGCACATACAT   | 59.621 | 20 |
| 274 | 938  | 1211 | ATTCCTTGCCTGGGAAAAA    | 59.546 | 20 |
| 232 | 163  | 394  | ACATCAACCGTTCACCACAA   | 59.855 | 20 |
| 151 | 251  | 401  | ATGTAGAGGGAGTTGGGGGT   | 59.676 | 20 |
| 272 | 112  | 383  | TTATTGAGCGCCATTGATGA   | 60.179 | 20 |
| 189 | 25   | 213  | ACTTTTAAGGATCAAGGATAT  | 57.122 | 24 |
| 271 | 62   | 332  | TTGGTCTAAATTGCCCGTA    | 60.315 | 20 |
| 211 | 171  | 381  | GGGGAAAAATAACAGGGGAG   | 59.639 | 20 |
| 271 | 606  | 876  | ATCCACGCTGCAGAGAAACT   | 60.02  | 20 |
| 173 | 440  | 612  | GCCAAGTGGCACCCTCTAT    | 60.142 | 20 |
| 264 | 6672 | 6935 | CCATGAATGGAAAATGGAGG   | 60.126 | 20 |
| 102 | 825  | 926  | AAAGTCACGCTTGAACCATAA  | 60.05  | 23 |
| 206 | 1119 | 1324 | CCAGACTGTGGCCTCTCCTA   | 60.399 | 20 |
| 195 | 88   | 282  | CGAACCATGAACACCCTTA    | 60.745 | 20 |
| 185 | 1340 | 1524 | AATTGCCATTACCATTCCCA   | 60.016 | 20 |
| 257 | 621  | 877  | GATTTTTGGAGGGTTCTTGCT  | 59.585 | 21 |
| 202 | 7    | 208  | CAGGAGACGCTCATTATCA    | 59.942 | 20 |
| 235 | 150  | 384  | CACATCCACTCTGAAGTTGA   | 57.856 | 22 |
| 197 | 1510 | 1706 | GACCAGGATTAGCCCAACTG   | 59.55  | 20 |
| 278 | 1498 | 1775 | CCTTCATAAGGCCCACTTCA   | 60.066 | 20 |
| 275 | 489  | 763  | CTTGCTAGATGGCCGAAAAT   | 59.32  | 20 |
| 228 | 5760 | 5987 | TTTTCGGGAATCTTTCATGC   | 60.016 | 20 |
| 265 | 167  | 431  | GGAACAAAAAGGTCCCAGGT   | 60.204 | 20 |
| 205 | 53   | 257  | AATGAGGGTTGTTGTGGGAC   | 59.679 | 20 |
| 210 | 1449 | 1658 | AAATGAACGTAGCAAAGGGG   | 59.087 | 20 |
| 125 | 11   | 135  | CTCTCTATCTTTTTGGTTGGTG | 60.045 | 25 |
| 256 | 20   | 275  | TCCATGCTCAGAAGTGTTCG   | 59.984 | 20 |
| 183 | 254  | 436  | ACTCTGCATCCACCTTGCTT   | 59.874 | 20 |
| 256 | 1129 | 1384 | CAGATTAGGAGATTTGGGCG   | 59.662 | 20 |
| 277 | 36   | 312  | TGATCACCCAAAATAACGGC   | 60.701 | 20 |
| 221 | 139  | 359  | TTGTGTCCCTGAAAGAGGTGT  | 59.607 | 21 |
| 274 | 84   | 357  | CACCCCAAAAAGAACAAAAA   | 59.811 | 20 |
| 272 | 1138 | 1409 | CCGAGAAGAGGAAGTGTTC    | 59.989 | 20 |
| 255 | 1192 | 1446 | CGAGATTACGAGAAGGAGGC   | 59.031 | 20 |
| 225 | 266  | 490  | TGACACGTGGCGTAATCTTC   | 59.722 | 20 |
| 249 | 97   | 345  | AGAAGACACTTGGGCCTGAA   | 59.844 | 20 |
| 280 | 2295 | 2574 | ATTATGGGTGGGGTCATGTG   | 60.317 | 20 |
| 239 | 155  | 393  | AAAGGCTGCATGAGAGAGGA   | 60.096 | 20 |
| 280 | 106  | 385  | CCCCGGTGTAAGAAATTGA    | 59.795 | 20 |

|     |      |      |                        |        |    |
|-----|------|------|------------------------|--------|----|
| 209 | 830  | 1038 | CATCAGACCCATCTTTGTGC   | 59.09  | 20 |
| 180 | 308  | 487  | TCCAGCCCATTCTTATTTGG   | 59.894 | 20 |
| 269 | 1008 | 1276 | GACGTTGAAAGGAGAGCGAC   | 59.997 | 20 |
| 127 | 290  | 416  | TATCCAGCAGCAACATCTCG   | 59.972 | 20 |
| 128 | 87   | 214  | AAGGAGGTGTTATGAAGGGAC  | 57.273 | 21 |
| 219 | 561  | 779  | TCTCCCACGCACTTTCTCTT   | 59.989 | 20 |
| 264 | 782  | 1045 | TGCAACCCTTTTCTCTCACC   | 60.232 | 20 |
| 165 | 2062 | 2226 | TTTCTCCCTCATCCCTCCTT   | 60.008 | 20 |
| 182 | 43   | 224  | CAGAGCGCACTCGAAGAGTA   | 59.49  | 20 |
| 279 | 681  | 959  | CGCAGTAATAGCATGCCAAA   | 59.864 | 20 |
| 178 | 205  | 382  | TTCTCCTTTCTTCCGACTGC   | 59.55  | 20 |
| 238 | 266  | 503  | AAATATGGCTGTTAGCCCCC   | 60.171 | 20 |
| 263 | 1806 | 2068 | ACCGTGGCATCGAAGATTAG   | 60.096 | 20 |
| 175 | 169  | 343  | ACCAATGCGAGGTAGGTGAA   | 60.517 | 20 |
| 268 | 8    | 275  | TTTTAAGTTATCGGTGATGACA | 58.612 | 24 |
| 215 | 4116 | 4330 | GGTCATGGACGATAGCTGGT   | 59.957 | 20 |
| 201 | 109  | 309  | CGTGAAGATTTGGGTTCCAT   | 59.79  | 20 |
| 170 | 0    | 169  | TGCGTTTTGATGATATATATGT | 58.859 | 26 |
| 277 | 173  | 449  | GTATCGCTGCAAAAAGCACA   | 60.021 | 20 |
| 236 | 656  | 891  | ATTGAGCGGGTATGGTTTTG   | 59.823 | 20 |
| 165 | 36   | 200  | TTTGTGAATGAAATGGTTGCT  | 58.134 | 21 |
| 207 | 189  | 395  | ACCCTCCACACATCAAATG    | 60.634 | 20 |
| 242 | 204  | 445  | TTTCCTACGACAACCCTTCG   | 60.103 | 20 |
| 153 | 345  | 497  | ACTCCTCGGGACGGTTTACT   | 59.994 | 20 |
| 114 | 2498 | 2611 | AGGAAGGATGGATCTTGCAG   | 59.239 | 20 |
| 236 | 895  | 1130 | AGCTCCGACTTTGTTGTGGT   | 59.769 | 20 |
| 173 | 357  | 529  | TGCGACACCGATTAATACCA   | 59.953 | 20 |
| 110 | 57   | 166  | TGGGTTTTGTAATTTGACCCA  | 60.074 | 21 |
| 243 | 164  | 406  | CAAATAAACCCGAATGCTG    | 60.315 | 20 |
| 114 | 697  | 810  | AGGAACGATTCACCGGCTAT   | 60.846 | 20 |
| 276 | 201  | 476  | CATAAACCTCACTCCGAGC    | 59.694 | 20 |
| 172 | 506  | 677  | GGCCAACTGAAGTTGATCGT   | 60.119 | 20 |
| 266 | 170  | 435  | AAAATGCCCTTGTATGCTGC   | 60.103 | 20 |
| 240 | 1535 | 1774 | AATAATGTTGGGTGAGGCCA   | 60.192 | 20 |
| 218 | 273  | 490  | TTTGGGGGAGGAGAAAGAAA   | 60.9   | 20 |
| 142 | 298  | 439  | ATAAAAATGACACTCGGCGG   | 59.96  | 20 |
| 278 | 211  | 488  | GCAACCAATTTTCTCTCTGC   | 57.544 | 20 |
| 274 | 194  | 467  | GCAATAGCATTCCAGTAACGG  | 59.622 | 21 |
| 276 | 345  | 620  | TGCGCTTGAATAAGAGAATCA  | 58.664 | 21 |
| 226 | 2921 | 3146 | TCTTTTGCGCTTTCGAGAAT   | 60.096 | 20 |
| 203 | 189  | 391  | AATGCCTTTTGTTCATCC     | 59.945 | 20 |
| 235 | 624  | 858  | GTCCTGCCCTCTCATAGCTG   | 59.973 | 20 |
| 270 | 2458 | 2727 | TTCTAGTCCACCCGACCAAG   | 60.103 | 20 |
| 153 | 38   | 190  | ACGTCCACAGTGTTTTGAGA   | 59.152 | 20 |
| 245 | 423  | 667  | GTCGATACGGCATGACACAC   | 59.999 | 20 |
| 186 | 3253 | 3438 | AAATCTGGTGGCGATCAAAG   | 60.074 | 20 |
| 218 | 447  | 664  | TCGGTCGTGGGATTTTTATC   | 59.762 | 20 |
| 280 | 83   | 362  | CGGGTCGAGAGAGGAGAAA    | 60.472 | 19 |
| 135 | 22   | 156  | TATGGGTTATCACCGGATCG   | 60.544 | 20 |
| 168 | 1001 | 1168 | CCGATCAAATGAATTTTTGC   | 58.082 | 20 |
| 264 | 802  | 1065 | AAATCAATGGCATCCCACAT   | 60.021 | 20 |
| 174 | 766  | 939  | ATGGTGCGTGAAGGAGATATC  | 59.97  | 21 |
| 126 | 1    | 126  | CTCTATAGCAAGATCTCACGC, | 58.464 | 23 |
| 240 | 41   | 280  | AGGTGAAGAGAGGGAGAGGG   | 59.801 | 20 |
| 165 | 45   | 209  | ATCATCCAACACCCATCCAT   | 59.869 | 20 |
| 152 | 65   | 216  | TGATTCACTCACATGCACTGG  | 60.739 | 21 |
| 214 | 334  | 547  | GCGTGGAATTCACCTCAAAT   | 59.939 | 20 |
| 263 | 214  | 476  | TCCGGATTCGAATACTCACC   | 59.894 | 20 |



|     |      |      |                        |        |    |
|-----|------|------|------------------------|--------|----|
| 183 | 391  | 573  | GGATTGATGGAACGGTGATT   | 59.611 | 20 |
| 198 | 751  | 948  | GCCCAAGATGTTAAGCTTGC   | 59.851 | 20 |
| 153 | 1    | 153  | CGTAATGTTTTGGTGGGAAGA  | 59.847 | 21 |
| 256 | 30   | 285  | ACACAACTTAGGTGTTCTCATT | 57.432 | 24 |
| 223 | 334  | 556  | ATCTGCCTGAGAGGGAATCA   | 59.761 | 20 |
| 280 | 648  | 927  | CAAGCAGGAGTGACTIONAGGC | 60.012 | 20 |
| 245 | 274  | 518  | TGATTGCACCTGAATAAGCC   | 58.723 | 20 |
| 278 | 908  | 1185 | TGGATTATAGATGCACGAGGA  | 59.569 | 22 |
| 279 | 41   | 319  | TGACAAACTTAGGGACCGCT   | 59.734 | 20 |
| 234 | 719  | 952  | GAAATTTGTCGACCACACCA   | 59.394 | 20 |
| 252 | 651  | 902  | CATGGACGAAAATAGCCTCA   | 58.721 | 20 |
| 249 | 166  | 414  | TCATGACTGCTTTGGTTCATGT | 60.559 | 22 |
| 271 | 3658 | 3928 | CCCCAAGATATTGCAACTG    | 60.323 | 20 |
| 236 | 497  | 732  | CATTCCTGGTGGCCATAGAT   | 59.773 | 20 |
| 109 | 371  | 479  | AGGCAATCTAGGCGACAATC   | 59.297 | 20 |
| 238 | 138  | 375  | TCGTGTTCTTCACTCATTCCA  | 59.278 | 21 |
| 224 | 2620 | 2843 | AAAAAGTGAGGAGCGGTGAA   | 59.853 | 20 |
| 137 | 734  | 870  | GATCCGTTCTACACATGCC    | 60.348 | 20 |
| 238 | 107  | 344  | CCTCCAGTGCCCACTCTAAA   | 60.246 | 20 |
| 268 | 10   | 277  | TTAGGCAAGCAGTGGTGA     | 59.464 | 20 |
| 232 | 2480 | 2711 | CCCTCCGCACCTATTATCAA   | 59.916 | 20 |
| 181 | 40   | 220  | TAAGGCAAGCAGTAAACGCC   | 60.397 | 20 |
| 205 | 2009 | 2213 | AACCTGCGACATGATGATTG   | 59.527 | 20 |
| 251 | 415  | 665  | GTTGGCATTCAAATCAACCA   | 59.375 | 20 |
| 117 | 144  | 260  | TGCAGATTCATTGCCATTGT   | 60.08  | 20 |
| 279 | 1856 | 2134 | TCACAATGGCAACTCAAAGC   | 59.847 | 20 |
| 101 | 3461 | 3561 | CTTGTGGGACTCTCTCTCCC   | 58.819 | 20 |
| 279 | 380  | 658  | CCATTTAACTTTCTGATTGTG  | 57.817 | 24 |
| 106 | 542  | 647  | AGTTTCCCTCAACCACGTGTA  | 59.506 | 21 |
| 241 | 1492 | 1732 | GATTCTCATTAAAGCACAAC   | 58.766 | 22 |
| 246 | 418  | 663  | AGGCCAACTCAAAGGGAGA    | 61.123 | 20 |
| 243 | 3503 | 3745 | TCCATCCCCTGAAATAGCTG   | 60.029 | 20 |
| 275 | 428  | 702  | TTTAGGCTCTGACGGTCCAC   | 60.255 | 20 |
| 270 | 186  | 455  | AATTTCAACGTTGCTGCGTA   | 59.373 | 20 |
| 104 | 169  | 272  | TACCGTGATTTCCCTCCACC   | 59.79  | 20 |
| 148 | 817  | 964  | ATTCTATCTCCTCTCCGCC    | 59.634 | 20 |
| 277 | 113  | 389  | ATCAACAACACCATCACCCC   | 60.497 | 20 |
| 259 | 137  | 395  | GACAGCATACGCGCTCATT    | 60.006 | 20 |
| 247 | 12   | 258  | GTTCGAACTGTTGCATGTGG   | 60.16  | 20 |
| 252 | 71   | 322  | ACAAAAATGCCCTCGTATGC   | 59.967 | 20 |
| 188 | 618  | 805  | GGTGTGCTCGAATTTTTGGT   | 59.978 | 20 |
| 195 | 1581 | 1775 | ATTCTCCCAATCTGACAGCC   | 59.094 | 20 |
| 175 | 446  | 620  | TGTTCTCTACTATATGTCATGT | 58.033 | 27 |
| 250 | 285  | 534  | AGAAGAAAACGGCTGAGCAA   | 60.132 | 20 |
| 235 | 458  | 692  | AAAGAGCTTCCCTCCACACA   | 59.844 | 20 |
| 277 | 196  | 472  | TTCAGTCGATTTTTGGGACA   | 59.097 | 20 |
| 112 | 65   | 176  | GGACTTGATTCCATGATAACC  | 59.537 | 22 |
| 260 | 91   | 350  | AGTGCATGCAAGGAAAATGA   | 59.276 | 20 |
| 214 | 151  | 364  | AAAACCCCATATCTGTGGCA   | 60.192 | 20 |
| 246 | 366  | 611  | ACCGTTGAGACTACCGGTT    | 59.065 | 20 |
| 268 | 354  | 621  | CAGTCGGGCAAGTCTCCTAC   | 59.867 | 20 |
| 277 | 1993 | 2269 | AGGCACATCGTTGACGTAAG   | 58.802 | 20 |
| 223 | 343  | 565  | GCATGTGGTCCCTAACTCAAC  | 59.468 | 21 |
| 256 | 1244 | 1499 | ACGTGTGCGTGTATCCATGA   | 61.035 | 20 |
| 277 | 382  | 658  | CATCCCAGTTATGTCAAGCG   | 59.148 | 20 |
| 245 | 1782 | 2026 | CAGTCCTTGGATTTTGACGC   | 60.636 | 20 |
| 244 | 22   | 265  | TTGGTTATCGCTTGAATGAGAC | 59.229 | 22 |
| 110 | 2831 | 2940 | CTCTCCAGCTCCTGCTGACT   | 59.883 | 20 |

|     |      |      |                         |        |    |
|-----|------|------|-------------------------|--------|----|
| 119 | 2311 | 2429 | AGTTTTCTGGAAGGGATGG     | 60.298 | 20 |
| 280 | 842  | 1121 | GTCCTTGTTTTCGGATGTTCA   | 59.963 | 21 |
| 275 | 1521 | 1795 | GCATTGAGAAAAGTGGTGCTT   | 59.373 | 21 |
| 145 | 757  | 901  | AATGGCCGACACTGCTTTAC    | 60.14  | 20 |
| 271 | 50   | 320  | TTGTA AAAACTTCCTATACATA | 59.5   | 27 |
| 270 | 41   | 310  | GTCCCGGAATGAAGAAGTT     | 60.306 | 20 |
| 257 | 190  | 446  | AGCGACACGGGTTATTTTTG    | 59.996 | 20 |
| 257 | 1408 | 1664 | TCCCCCTTCTCATTCCCTA     | 60.757 | 20 |
| 256 | 2314 | 2569 | ACAAATATCAGTAAAAATGCG   | 57.188 | 23 |
| 167 | 193  | 359  | AGACAACCCACAAATCCGAC    | 59.827 | 20 |
| 236 | 734  | 969  | ACTAACAGTCCGGTTCACGG    | 60.028 | 20 |
| 254 | 33   | 286  | CACAAGGAACTGGGACGAT     | 59.966 | 20 |
| 200 | 4    | 203  | CCCAATTCTCCATCATTATTAT  | 59.864 | 26 |
| 186 | 16   | 201  | CCACTCCATCACCATCACTG    | 59.954 | 20 |
| 275 | 504  | 778  | TCGAGCCTTAACATGAACCA    | 59.272 | 20 |
| 205 | 468  | 672  | TTGAGATTTGGACGGGAGAG    | 60.187 | 20 |
| 187 | 357  | 543  | CCCCTACTTCCTCGTTCTCC    | 60.067 | 20 |
| 276 | 1246 | 1521 | TGCAAGATTTCAAATCGCAT/   | 60.572 | 22 |
| 210 | 964  | 1173 | TGAGGCAAGAAAAGTTTTGTG   | 60.269 | 21 |
| 147 | 252  | 398  | GAAAAAGTCGGCCAAGAAGA    | 59.429 | 20 |
| 156 | 7    | 162  | TCACATACTCATGCAAGCACA   | 58.878 | 21 |
| 166 | 321  | 486  | GTCCATCGTGAAAAACCTTCA   | 59.963 | 21 |
| 212 | 561  | 772  | GAAGCATGCGAGACATTTCA    | 59.955 | 20 |
| 255 | 2977 | 3231 | ACGCAATCGATCTTCCATTC    | 60.043 | 20 |
| 105 | 28   | 132  | GCGATCAGAAATGCTAGGGT    | 59.297 | 20 |
| 212 | 160  | 371  | GTAATCTGTACCGTCCGCGT    | 60.022 | 20 |
| 228 | 1184 | 1411 | ACCACTTGACATTTTTGCC     | 59.836 | 20 |
| 253 | 296  | 548  | CCTCAACACCACCACCTTTT    | 59.861 | 20 |
| 218 | 271  | 488  | CCCTAATTGTTTCGGGCTTC    | 60.792 | 20 |
| 199 | 22   | 220  | TCATTCCAACTTTGTAAATCAAG | 57.875 | 24 |
| 187 | 21   | 207  | GTGATGATAATAGGCGGCGT    | 59.951 | 20 |
| 252 | 14   | 265  | CCCAAGACCCCAATTTGATT    | 60.91  | 20 |
| 279 | 2504 | 2782 | GCAGTGCAACGCATAACAGT    | 59.942 | 20 |
| 259 | 110  | 368  | GTGAATTGGCGTGAGTGTGT    | 59.603 | 20 |
| 246 | 2687 | 2932 | TGCCTATGATTCTCCGATGA    | 59.179 | 20 |
| 192 | 502  | 693  | AAATCAGGGACCCAACAACA    | 60.21  | 20 |
| 183 | 604  | 786  | TGTCATGGCAACAAACCCTA    | 59.964 | 20 |
| 280 | 551  | 830  | TACCGTACCCTTCGCACC      | 59.522 | 18 |
| 221 | 0    | 220  | CTCCCTTGAGCAAAGTGGAC    | 59.844 | 20 |
| 261 | 1671 | 1931 | GCTGAAGGCAACTTGAGGAG    | 60.134 | 20 |
| 277 | 210  | 486  | CCATTCACACGTGCTTATCA    | 58.129 | 20 |
| 279 | 326  | 604  | GAGGGAGGGGAGAGAGATTG    | 60.149 | 20 |
| 213 | 1327 | 1539 | TCTGCCATAGCAGCTTACCA    | 59.59  | 20 |
| 183 | 4    | 186  | TTGATTGAACTACATTACAAC/  | 57.557 | 27 |
| 181 | 116  | 296  | TTGGATTCCCAAGCTTTTTG    | 60.046 | 20 |
| 187 | 4666 | 4852 | TTTGTTGGCAGACATTTGGA    | 60.088 | 20 |
| 122 | 62   | 183  | GTCTTCCGGAGTACGAGCTG    | 60.012 | 20 |
| 145 | 885  | 1029 | AATCCTCGTAGCTCCCGTTT    | 60.096 | 20 |
| 190 | 20   | 209  | TTCGAATGCGGTTTATCACC    | 60.837 | 20 |
| 234 | 198  | 431  | CCGAATACTTTCTTTTGTAGGC  | 58.131 | 23 |
| 256 | 731  | 986  | CAATGCAGAGATGGACGAAA    | 59.799 | 20 |
| 205 | 11   | 215  | TTAATGTTGCGTGGGCTTTT    | 60.488 | 20 |
| 248 | 1459 | 1706 | GTTGATCATCCTGGAGTAAGA   | 59.027 | 24 |
| 213 | 121  | 333  | AAATCAGTCTCCATCCGTGC    | 60.081 | 20 |
| 268 | 613  | 880  | ACCCTTGGTCGAATTCCATA    | 59.244 | 20 |
| 273 | 75   | 347  | GATGAACACGCGCAAACT      | 59.862 | 19 |
| 163 | 2162 | 2324 | GATGATGATCGGTGGAGGTC    | 60.297 | 20 |
| 182 | 127  | 308  | TCCCAATCACCATTCAAGTG    | 59.343 | 20 |

|     |      |      |                        |        |    |
|-----|------|------|------------------------|--------|----|
| 210 | 11   | 220  | CCAGGATCGAATGGAGGATA   | 59.848 | 20 |
| 181 | 9    | 189  | ATTTTCGTTGGAGGAGGGTT   | 59.805 | 20 |
| 244 | 256  | 499  | AGAAAGGGAGGGTAACGAGG   | 59.571 | 20 |
| 211 | 147  | 357  | GGTAGAATAAGCGACGGCAG   | 59.867 | 20 |
| 269 | 3473 | 3741 | AATTCAGCAAGAATGATAAAT  | 57.507 | 23 |
| 186 | 93   | 278  | CCAAAAATTAAGGCCCAACA   | 59.805 | 20 |
| 191 | 3146 | 3336 | AATTCATTCTTCCATTTGCACT | 57.747 | 22 |
| 168 | 339  | 506  | GTGGATTCACATGCCTGAAA   | 59.502 | 20 |
| 205 | 344  | 548  | TCGCGCGAATATTGTTACAT   | 59.197 | 20 |
| 275 | 883  | 1157 | ATGGGTGTGGTGCTTTGAAT   | 60.24  | 20 |
| 209 | 302  | 510  | CAAATTGATCCAACGACACG   | 59.964 | 20 |
| 245 | 432  | 676  | ACCCTAAGGACTTCGTGCCT   | 60.132 | 20 |
| 164 | 254  | 417  | TCTTGGACTCGGGTCTTTTG   | 60.224 | 20 |
| 236 | 1310 | 1545 | CCATCAAGTTTGCACGGTTA   | 59.585 | 20 |
| 268 | 153  | 420  | AGGCTTCTCAAAATGCATGG   | 60.214 | 20 |
| 275 | 385  | 659  | ACCTAATCATGTTTTGGGCG   | 59.823 | 20 |
| 199 | 525  | 723  | CACCCACCCTTCCCTTTATT   | 60.046 | 20 |
| 112 | 1905 | 2016 | GCCAGGGAAATGTTATGGAA   | 59.762 | 20 |
| 230 | 1013 | 1242 | GAGGATTTTTGGTGGTTTGG   | 59.264 | 20 |
| 140 | 12   | 151  | TTGGGAAGATCTCTCCGTCA   | 60.737 | 20 |
| 203 | 2417 | 2619 | TTCATTCATCGAAGCACACA   | 58.782 | 20 |
| 220 | 477  | 696  | TCAACCCCCACGTTATCTCT   | 59.405 | 20 |
| 175 | 140  | 314  | GTTTTCTGCCGAAGCAAGAG   | 60.132 | 20 |
| 230 | 1562 | 1791 | GTGGAAGTGTTTTGTGGGGT   | 59.721 | 20 |
| 117 | 621  | 737  | TTTTGCCGCCTTTGATTACT   | 59.72  | 20 |
| 217 | 50   | 266  | AGCTGACGTGAAACCGAAAC   | 60.299 | 20 |
| 186 | 615  | 800  | ACGAAATTAGGGAGGGGAGA   | 59.897 | 20 |
| 261 | 184  | 444  | TCACTCTGCATAGCATTAGCA  | 57.3   | 21 |
| 261 | 49   | 309  | TATGGGTTATCACCGGATCG   | 60.544 | 20 |
| 234 | 485  | 718  | CTCACGACAAGAACGTGGAG   | 59.461 | 20 |
| 252 | 197  | 448  | TCGAGCACTTTTTCTTTGTAG, | 58.382 | 23 |
| 163 | 704  | 866  | CATGTGGATTCTATTCCGGC   | 60.296 | 20 |
| 166 | 2    | 167  | GAATGACACACGCACACACA   | 60.218 | 20 |
| 135 | 1196 | 1330 | AGCCATCAAAACCAACGAAA   | 60.481 | 20 |
| 267 | 1901 | 2167 | CACTCTTCTTCTGCGGTGT    | 60.444 | 20 |
| 252 | 385  | 636  | CCAAAATCAACGTCCCAGAT   | 59.79  | 20 |
| 239 | 489  | 727  | CCGACAACATGTTCCCTGC    | 60.517 | 20 |
| 242 | 142  | 383  | TTGGTGCAAGGTATGTTTGC   | 59.59  | 20 |
| 168 | 38   | 205  | TGTATGCTGTAATGAAACTGC  | 59.381 | 24 |
| 272 | 1048 | 1319 | TTCAGATATAACGGAGGAATC  | 59.816 | 23 |
| 227 | 476  | 702  | GAAGGGTGAGGCTAGGGAAG   | 60.204 | 20 |
| 263 | 4399 | 4661 | GGCCTTAGTCCATGTCCTTG   | 59.55  | 20 |
| 151 | 1671 | 1821 | TGACCAACTCCATGTTTCCA   | 59.935 | 20 |
| 171 | 682  | 852  | CAATCAATTATGCTAACAATTA | 59.87  | 26 |
| 218 | 268  | 485  | GTTTCTGCATTTTGGGAAGC   | 59.691 | 20 |
| 268 | 200  | 467  | GATTCAGTAGCACACCACCC   | 59.468 | 21 |
| 139 | 839  | 977  | TGCTATTTTCAGCCCAAACC   | 60.074 | 20 |
| 217 | 412  | 628  | GTTGCTATTGCGGGCTTTAC   | 59.748 | 20 |
| 128 | 170  | 297  | GGAATATGGGATATGAGGGG/  | 59.822 | 21 |
| 210 | 341  | 550  | CGGTAATTTGAAGTCAAGGGA  | 59.994 | 22 |
| 271 | 10   | 280  | GCGGATGCTCTTAGTTACGC   | 60.01  | 20 |
| 238 | 681  | 918  | TACCTCCCAATCAATCCAG    | 59.744 | 20 |
| 277 | 113  | 389  | GTGTCCATTTCCCCCTTTCT   | 60.169 | 20 |
| 136 | 10   | 145  | AATGAACGGGCTCATTTTTC   | 59.022 | 20 |
| 124 | 6    | 129  | AAAGATGGCCAAAACGTGTC   | 60.118 | 20 |
| 240 | 774  | 1013 | GAAGGCAAAGAGAGCGAAGA   | 59.836 | 20 |
| 121 | 1    | 121  | TGCGTTTTGACGATATATAGTC | 59.092 | 25 |
| 248 | 25   | 272  | TACATCTGACCCCAAGACCC   | 59.779 | 20 |

|     |       |       |                         |        |    |
|-----|-------|-------|-------------------------|--------|----|
| 152 | 268   | 419   | TTGCATTGACACAATCAAGTG   | 58.172 | 21 |
| 148 | 0     | 147   | AAGGGCCGAGATTTGTTAGAG   | 59.733 | 21 |
| 251 | 365   | 615   | TATGACTTCGGCATTACCGC    | 60.991 | 20 |
| 214 | 133   | 346   | CACGTGTCAAAAATCTGTTCA   | 57.234 | 21 |
| 102 | 13    | 114   | TCAACTGGATATCAAACGCAA   | 59.172 | 21 |
| 144 | 2123  | 2266  | TGCACTTCAGTTTTGGTGA     | 60.278 | 20 |
| 277 | 95    | 371   | GTTTGAATACAATGCTTCATCC  | 59.002 | 23 |
| 164 | 312   | 475   | TGATGTGGCTGAAATCCAAC    | 59.502 | 20 |
| 170 | 7     | 176   | CTTGAACATGGCCATCACAC    | 59.967 | 20 |
| 109 | 260   | 368   | ATTAATGGGCATTGAGCAA     | 60.424 | 20 |
| 124 | 170   | 293   | ATTATTTGCATTGCTTGCCC    | 59.935 | 20 |
| 110 | 955   | 1064  | ATGTGTTGTGATGGGGGATT    | 59.91  | 20 |
| 183 | 2717  | 2899  | ATGGATTGCAGAAAGATGGC    | 60.043 | 20 |
| 116 | 1135  | 1250  | GAATTCTCCCAAACGACGG     | 59.526 | 20 |
| 279 | 368   | 646   | GTGTTATGCCTATCCCTATCAA  | 57.816 | 25 |
| 175 | 3890  | 4064  | TTTCTCCTTGAGCCTCTTCAA   | 59.181 | 21 |
| 204 | 691   | 894   | CGGGCTAAGAACCTTTCTCC    | 60.2   | 20 |
| 225 | 615   | 839   | TCCGGAGAAAATGAAGAAGA    | 58.89  | 21 |
| 193 | 277   | 469   | TCTTGGGAACTCGAGAGGAA    | 59.92  | 20 |
| 211 | 197   | 407   | TGTCTCCAAAACAATGGGTG    | 59.389 | 20 |
| 196 | 398   | 593   | GTCGGACGATTAATCACGCT    | 60.103 | 20 |
| 229 | 48    | 276   | TTTGATCCCTAGAGTGGCCT    | 58.741 | 20 |
| 202 | 0     | 201   | TTACGTCGATCCAACGGTCT    | 60.517 | 20 |
| 107 | 18    | 124   | TGAGTGCTAGACTATTGTAAA   | 57.09  | 25 |
| 275 | 73    | 347   | TTTATTCCTCCACCCTTCACA   | 60.162 | 20 |
| 222 | 381   | 602   | ATGATGGCGTCATGTTTTCA    | 59.931 | 20 |
| 211 | 685   | 895   | CATTGATTTTCATTGCATAATCT | 59.005 | 24 |
| 278 | 1231  | 1508  | AATCCACGAAACGGTTTGAA    | 60.344 | 20 |
| 254 | 1108  | 1361  | AAACAGCCCATGTGAGAACC    | 59.973 | 20 |
| 208 | 180   | 387   | AAACCAATTGGCAACGAGAG    | 60.11  | 20 |
| 229 | 206   | 434   | TTCCGAATTTGGCTCTTTTC    | 59.273 | 20 |
| 172 | 97    | 268   | ATCTGCTCCTCTCCTAGCCC    | 59.942 | 20 |
| 253 | 490   | 742   | ATTGAGGATTTCTTCCCCCA    | 60.632 | 20 |
| 155 | 366   | 520   | TTGAATCCATGACGAGCCTT    | 60.603 | 20 |
| 264 | 3     | 266   | TCGGTCTCTGGGACCTTTAG    | 59.28  | 20 |
| 276 | 14872 | 15147 | TTGGGCGATTTGAAGCTAAA    | 60.691 | 20 |
| 204 | 176   | 379   | AGGCAATGGTTTGGTTTCAG    | 59.971 | 20 |
| 279 | 226   | 504   | CTTGAGGCCACACAAGAAG     | 60.822 | 20 |
| 267 | 20    | 286   | TATGCACGTGACTTGCTTCC    | 59.871 | 20 |
| 189 | 1589  | 1777  | TCCCGAAATAGTTCCAAAAT    | 59.666 | 21 |
| 176 | 13    | 188   | GTTGCATAAACCTAGGCCA     | 59.96  | 20 |
| 256 | 281   | 536   | AGGTCAGTTCCAACCCACAG    | 60.002 | 20 |
| 257 | 1151  | 1407  | GGTTTCAAGTGGCAAACGAT    | 59.978 | 20 |
| 179 | 1459  | 1637  | CCCTAACCTAAAGTAAGGAC    | 59.788 | 23 |
| 251 | 1528  | 1778  | TCAATGCACCAGAGTAAGTTG   | 60.168 | 22 |
| 230 | 141   | 370   | GATGAAGATCCTGGACGGTG    | 60.475 | 20 |
| 247 | 140   | 386   | TAAGTCTGGGCTGGTAAGG     | 60.262 | 20 |
| 257 | 213   | 469   | TGATCCGAGCTTGGAATAGC    | 60.318 | 20 |
| 179 | 1166  | 1344  | GAGTCTCCCTCCCTTTCTC     | 59.226 | 20 |
| 161 | 260   | 420   | CATGGAATTGAACTTTTCGGA   | 59.924 | 21 |
| 245 | 178   | 422   | TCGAACACCAAACCAATTCA    | 59.941 | 20 |
| 274 | 63    | 336   | TGATGGCAACCAAGAACTCA    | 60.24  | 20 |
| 177 | 1341  | 1517  | AATTGCATTTGGATGCATGA    | 59.898 | 20 |
| 186 | 742   | 927   | GGCTTTTCTGGAATATAAAGC   | 59.297 | 22 |
| 209 | 1469  | 1677  | AAATTCGACAGCCACAGACC    | 60.119 | 20 |
| 267 | 283   | 549   | GGACATGGGATTGGAGAAGA    | 59.862 | 20 |
| 276 | 211   | 486   | TCGAAAACCGGTTAAAGACC    | 59.064 | 20 |
| 276 | 465   | 740   | TTGAGAAACGAATGCACATGA   | 60.25  | 21 |

|     |      |      |                        |        |    |
|-----|------|------|------------------------|--------|----|
| 182 | 60   | 241  | GGGCCAAAAGAACAACAAAA   | 59.953 | 20 |
| 271 | 2325 | 2595 | TTGTTGTACCATTGTGGAAAG/ | 58.054 | 22 |
| 262 | 196  | 457  | GCGGCTTCCTACGTCATAAA   | 60.23  | 20 |
| 179 | 1004 | 1182 | ATCTCACCACAAACATGGCA   | 59.967 | 20 |
| 112 | 339  | 450  | AGAGAGAAAATTGCATCGGG   | 59.269 | 20 |
| 276 | 866  | 1141 | TCGCATTAAATTCCGGAACAG  | 58.769 | 20 |
| 190 | 307  | 496  | AAGATCAGCATTCCGTTTGG   | 60.074 | 20 |
| 233 | 1211 | 1443 | CCCATTTATGGGGTAATATAA/ | 58.9   | 24 |
| 252 | 1284 | 1535 | CCGATTGATACTCCCCAA     | 59.887 | 20 |
| 226 | 263  | 488  | CGTGCGCAAAAATTATGAAA   | 59.715 | 20 |
| 198 | 87   | 284  | ACAAAACAGGGGACAAGGGT   | 60.64  | 20 |
| 108 | 72   | 179  | AGTGATGGTGGGTGGAAGAA   | 60.363 | 20 |
| 199 | 8    | 206  | CAATTGGATTAGTGACATGGC  | 58.976 | 22 |
| 244 | 131  | 374  | ACACCAAAGGAAAATTGAATC  | 60.089 | 22 |
| 130 | 318  | 447  | TCCCTCCTCATTTCACAT     | 59.336 | 20 |
| 270 | 134  | 403  | TTCAAGGTTTTGGTGTGGG    | 60.756 | 20 |
| 208 | 24   | 231  | TCATTGTTGAAGAGTGGGAA/  | 59.587 | 22 |
| 238 | 950  | 1187 | TTTTCTTGGCCCAACCTTTA   | 59.559 | 20 |
| 271 | 1266 | 1536 | CCAACCTGTATCGCTCTTTC   | 57.422 | 20 |
| 185 | 621  | 805  | CGACTCAAATGGGTACCT     | 59.966 | 20 |
| 148 | 1201 | 1348 | TGCAAAGATGACAGAAACAAC  | 59.912 | 23 |
| 161 | 985  | 1145 | ATGCGATATGCTTTGTTGGG   | 60.857 | 20 |
| 257 | 1022 | 1278 | AAACCCTCTCAAGAACTCCAA  | 59.255 | 22 |
| 143 | 349  | 491  | CAGATCTGGCGATATCAATGG  | 60.442 | 21 |
| 122 | 7    | 128  | GGCTGGCGGTTTTAAATAAT   | 58.151 | 20 |
| 274 | 14   | 287  | TTCGGGTCTCAACACATTCA   | 60.088 | 20 |
| 154 | 918  | 1071 | AAAAGGGGGAAACTCGCTAA   | 60.068 | 20 |
| 273 | 356  | 628  | TCGAAGTCCCCTCAGCTT     | 59.989 | 20 |
| 101 | 672  | 772  | AAATGTGACCGGATTCATCG   | 60.723 | 20 |
| 179 | 5229 | 5407 | CCTCACAGGGTCATTCCATC   | 60.326 | 20 |
| 271 | 54   | 324  | TGTTGTGTATAAGGAAGTTTT  | 57.546 | 24 |
| 169 | 78   | 246  | TTTTGAAACCTAAGTGGCCTG  | 59.254 | 21 |
| 196 | 1591 | 1786 | GAGGTTGATGTTGTCGGGT    | 59.827 | 20 |
| 136 | 163  | 298  | TCGATCAAAGTTATGAATTGG/ | 59.851 | 24 |
| 265 | 4044 | 4308 | AGACCACCGCTACTTCTCCA   | 59.867 | 20 |
| 109 | 132  | 240  | AGCATCTCTTGCTCTCTCGTT  | 58.444 | 21 |
| 157 | 15   | 171  | TATGGATCTTTGGCAGGTCG   | 60.992 | 20 |
| 277 | 351  | 627  | GGTGCCACGTGTCATACTCA   | 60.604 | 20 |
| 177 | 281  | 457  | AAATCCTTGACCTCCTCCT    | 60.074 | 20 |
| 246 | 1032 | 1277 | GGATTGGACCTATAATATTGA( | 59.848 | 24 |
| 157 | 1029 | 1185 | CTTGCGAATCATAAAGTGCA/  | 60.186 | 24 |
| 196 | 110  | 305  | GGAGAACGCCATTGTTGATT   | 59.939 | 20 |
| 244 | 153  | 396  | TCATGGCGGATTTACAACCTG  | 59.542 | 20 |
| 270 | 1051 | 1320 | CCGGGGTCTGATACTTTCAA   | 59.926 | 20 |
| 142 | 3780 | 3921 | CAAATACGGCCATAAAGGA    | 59.789 | 20 |
| 217 | 382  | 598  | CCACGTTACGCTCAATTTCA   | 59.729 | 20 |
| 264 | 168  | 431  | AGCGAAATTGATCTCTGCGT   | 59.985 | 20 |
| 271 | 992  | 1262 | GCCTATGTGTCTGGGAAACC   | 59.41  | 20 |
| 268 | 850  | 1117 | CAAAGGCCACAGTGGTTAT    | 59.853 | 20 |
| 170 | 44   | 213  | GATGATTGCACCATAACGCA   | 60.498 | 20 |
| 280 | 580  | 859  | TTATTGGCAGCGACCAAGTT   | 60.637 | 20 |
| 226 | 162  | 387  | CAAGAGGAATTGAACCCAGG   | 59.521 | 20 |
| 165 | 602  | 766  | GGCAGGAATGAGACACCAAT   | 59.934 | 20 |
| 269 | 1024 | 1292 | GTGGACAAACAAGCCTCACTC  | 59.76  | 21 |
| 233 | 156  | 388  | CTCGTAGAAGGGCAGTGGAG   | 60.005 | 20 |
| 215 | 14   | 228  | CCTGGGTCTGTGAGAGAGGA   | 60.388 | 20 |
| 253 | 94   | 346  | GTGAATTCATTGTGTTTTGGG  | 59.225 | 22 |
| 184 | 0    | 183  | ATCCAAGGGTCAATAATGGTT  | 57.278 | 21 |

|     |      |      |                       |        |    |
|-----|------|------|-----------------------|--------|----|
| 210 | 75   | 284  | TGGAGGAGTTCTTCCAGGAG  | 59.375 | 20 |
| 209 | 1061 | 1269 | CCCATTTTTGACGGCTCTAA  | 60.067 | 20 |
| 220 | 499  | 718  | TAATCTACCCCCAGCATCCA  | 60.288 | 20 |
| 273 | 584  | 856  | GGAGAGATTGTAACGACCCA  | 57.58  | 20 |
| 124 | 19   | 142  | AATGTAGGGTGGGTGACTATT | 57.914 | 23 |
| 161 | 503  | 663  | TGCTTCCCTCAATGGTTTTTC | 60.051 | 20 |
| 250 | 2573 | 2822 | CGCTCTCTGATGGTCTCACA  | 60.138 | 20 |
| 134 | 376  | 509  | TTGAAGATCCCGGACAGTTC  | 60.05  | 20 |
| 248 | 335  | 582  | CGCACATCGTAGAAAATGGA  | 59.688 | 20 |
| 251 | 1437 | 1687 | TTTGGATCACTAGGGCTTGG  | 60.066 | 20 |
| 168 | 35   | 202  | TGGAAAGGTGAGAAGAATCA  | 59.711 | 22 |
| 175 | 10   | 184  | CCCTAGCTCTTCCCTTTG    | 60.193 | 20 |
| 114 | 66   | 179  | AGCGGTTATTACCGGATCG   | 59.93  | 19 |
| 209 | 824  | 1032 | CGCTACTCTTCGAGTGC GTT | 60.73  | 20 |
| 243 | 660  | 902  | ACACCGGTTCCAAGTGATCT  | 59.43  | 20 |
| 232 | 259  | 490  | GGAAGGGGAGTTAGCGTATG  | 58.671 | 20 |
| 250 | 67   | 316  | GAAAAGCTGCCACATCACAA  | 59.847 | 20 |
| 218 | 257  | 474  | AGGAAAGAGCAAGCAACGTC  | 59.621 | 20 |
| 273 | 411  | 683  | AGCCTTTAAGACACGCCAAA  | 59.883 | 20 |
| 245 | 86   | 330  | CGCGTGGGTGATATGCTAGT  | 61.071 | 20 |
| 263 | 995  | 1257 | GTCACACTTGCTGCTGCCTA  | 60.207 | 20 |
| 261 | 5409 | 5669 | ATTTGTTCTGGGAAGGGTCC  | 60.169 | 20 |
| 208 | 127  | 334  | CATTAAGCCTCACCCCTCA   | 60.066 | 20 |
| 125 | 28   | 152  | ACACCCAAAATCCTTGCAC   | 59.836 | 20 |
| 146 | 385  | 530  | CAAGAATTCCAAGCTTGCCT  | 59.452 | 20 |
| 280 | 1202 | 1481 | GCTACATCACTTCCCCACAA  | 58.57  | 20 |
| 148 | 270  | 417  | CGAAGAAAACACCCGGACTA  | 60.103 | 20 |
| 218 | 1954 | 2171 | AAGGGAGCTCCTCAGCCTAC  | 59.979 | 20 |
| 194 | 2371 | 2564 | TTACCCTCATATGCCACAA   | 58.843 | 20 |
| 251 | 993  | 1243 | CACCGCCTCATCTCTGATTT  | 60.218 | 20 |
| 233 | 1890 | 2122 | CGGGAGGAAGACGAAGAGTA  | 59.425 | 20 |
| 215 | 36   | 250  | TTGGGATTAAGGCTTTGGTG  | 59.931 | 20 |
| 172 | 10   | 181  | CAATTCCTCCCTTAGACACAA | 59.64  | 23 |
| 238 | 146  | 383  | GCATCTCTGCTCTCTCGTTG  | 60.292 | 21 |
| 239 | 102  | 340  | TTTTGACACGTAGCGACACC  | 59.764 | 20 |
| 279 | 2    | 280  | TGTGCGTTTTTGGCATAGTG  | 60.698 | 20 |
| 185 | 773  | 957  | AGAGTGATTGTAGGCGGTCCG | 60.277 | 20 |
| 242 | 79   | 320  | GTTTTGACCTAATCGCACCC  | 59.434 | 20 |
| 254 | 185  | 438  | AAGCTTTAAACGCAGAAGCG  | 59.801 | 20 |
| 200 | 917  | 1116 | CGACGTCGTTCTTGATTCTTC | 59.867 | 21 |
| 216 | 776  | 991  | TACCGTTTCAAGGTGCAATG  | 59.585 | 20 |
| 166 | 1439 | 1604 | GAATTTGCGCTACAAAAACGA | 60.252 | 21 |
| 148 | 232  | 379  | TTAGTAGTTAGCATGGAAGGG | 59.194 | 23 |
| 183 | 285  | 467  | TCGAATTGATGTTTGATCCAT | 57.872 | 21 |
| 122 | 1115 | 1236 | CAAAATATCGCATTGCCTCA  | 59.662 | 20 |
| 240 | 2466 | 2705 | ATTTGGTACATGGATGGGGA  | 59.871 | 20 |
| 189 | 484  | 672  | TTGAGCCCTGCCAAAATATC  | 60.038 | 20 |
| 266 | 125  | 390  | CGAATTTTAGTGGGACATCCA | 59.809 | 21 |
| 111 | 754  | 864  | TCATGAGAGCGGTGATTTTG  | 59.799 | 20 |
| 204 | 294  | 497  | GCTATCACGCGAATGGGTAT  | 59.951 | 20 |
| 266 | 384  | 649  | AGTCCTAGCCCCACATCTCA  | 59.679 | 20 |
| 274 | 179  | 452  | TAATGCGGGCATAAGACCAT  | 60.31  | 20 |
| 168 | 954  | 1121 | TTATGTTAACGGGGTTGGGA  | 60.046 | 20 |
| 238 | 2180 | 2417 | GCTGTAAAGTTTCGGGTTCA  | 60.11  | 20 |
| 183 | 135  | 317  | AGTCTCCCCATTTGATGCAC  | 59.934 | 20 |
| 155 | 70   | 224  | ACTCGATGAGTAGCGGATGC  | 60.393 | 20 |
| 197 | 117  | 313  | CCCCTTCAAGTAGCTGCAC   | 59.875 | 20 |
| 166 | 565  | 730  | GCAACCAATACCATGCCTCT  | 59.962 | 20 |

|     |      |      |                         |        |    |
|-----|------|------|-------------------------|--------|----|
| 157 | 338  | 494  | CTGTGCGCTTTTGTGTCAGTGT  | 60.096 | 20 |
| 129 | 1999 | 2127 | ATTTTGATGCCGGGAATGTA    | 60.153 | 20 |
| 232 | 974  | 1205 | CACGCTGATATCGCACAAC     | 59.895 | 20 |
| 228 | 471  | 698  | ATCCCAGAATGCCTACACCA    | 60.34  | 20 |
| 210 | 74   | 283  | TTAAATGCACAGCACAGCTC    | 57.662 | 20 |
| 250 | 691  | 940  | TCAACTTATATTTTCAGCGACG  | 59.236 | 24 |
| 160 | 128  | 287  | TCAACAACAGCAGAAATCGG    | 59.84  | 20 |
| 182 | 662  | 843  | AACGACACTCATCCGCTCTT    | 59.874 | 20 |
| 255 | 759  | 1013 | TTCTTTCACGGGTTTGAAGC    | 60.227 | 20 |
| 221 | 3    | 223  | TTCATATATCACGTTAAGACAT  | 58.031 | 26 |
| 245 | 2    | 246  | TAACCCTTGTTAGCCCGTTG    | 59.99  | 20 |
| 277 | 69   | 345  | ATCAGCCAAATGCAGAGATG    | 58.826 | 20 |
| 279 | 123  | 401  | CTATAAGGTTGCACCCACGC    | 60.523 | 20 |
| 162 | 4    | 165  | TCAATTTCTCTAACCTGTAAAA  | 58.065 | 25 |
| 167 | 326  | 492  | CAACTTGCCCTCTCTCTTCG    | 60.126 | 20 |
| 227 | 231  | 457  | AATACACCCCAAAGTGGAACC   | 59.969 | 21 |
| 150 | 12   | 161  | CCAAATGTTAGGGTTATCACA   | 59.654 | 23 |
| 216 | 1068 | 1283 | CCTTCATCCCCTGTCTTGAA    | 60.042 | 20 |
| 146 | 2395 | 2540 | ATGGTTGCCTGCGAGTCTAT    | 59.723 | 20 |
| 273 | 102  | 374  | AAAATGCATCATAACGGCATA   | 60.233 | 22 |
| 252 | 703  | 954  | TGATCCTTTTTATGATAACCCA  | 57.592 | 23 |
| 268 | 10   | 277  | TTAGATCAAGTGTGTTGAAA    | 58.765 | 27 |
| 255 | 159  | 413  | TTGAAATATACTTTTCATTTCA  | 57.253 | 25 |
| 277 | 68   | 344  | ATTCGAAGCCCAAATCATGT    | 59.391 | 20 |
| 222 | 169  | 390  | GGGTGGGTTATAATGGGATTG   | 60.137 | 21 |
| 270 | 170  | 439  | CACGGGAGGTGAAAATTGAG    | 60.486 | 20 |
| 238 | 1241 | 1478 | TGGGCACTTTCCTATTCTT     | 59.708 | 20 |
| 197 | 454  | 650  | TCCAACCGCTATTTGAATCC    | 59.901 | 20 |
| 103 | 8    | 110  | TTAGTGTTTTGACATGATTAC   | 57.557 | 25 |
| 174 | 141  | 314  | TGCTGCTTTAGGTCTTTGCC    | 60.523 | 20 |
| 245 | 5450 | 5694 | CACGAACACATGAGGGAATG    | 59.96  | 20 |
| 131 | 1006 | 1136 | TGAATGCAGCTTTGGTTTCTT   | 59.875 | 21 |
| 280 | 470  | 749  | ACAGAGGGGAGAGAGAAGGC    | 59.801 | 20 |
| 275 | 1149 | 1423 | AAGAAAAGGGGGAAAGGTGA    | 59.912 | 20 |
| 265 | 462  | 726  | CTTATTGAATTTTCGCCCA     | 59.901 | 20 |
| 115 | 0    | 114  | TCCCCTTTTACTTTATTCTTTCA | 57.604 | 24 |
| 161 | 218  | 378  | TAACGATGGACTAGGGGCTG    | 60.088 | 20 |
| 177 | 184  | 360  | TCAAGGGGTATTTTTGTCCG    | 59.795 | 20 |
| 229 | 215  | 443  | TGTGACTGTCGATGAAGTAAA   | 60.095 | 24 |
| 108 | 9    | 116  | CGAACGATGACATGCTCCTA    | 59.823 | 20 |
| 107 | 197  | 303  | ACTTGCAAAAGACTCCAGGC    | 59.478 | 20 |
| 213 | 101  | 313  | ATTCACACCATTTGCCATCC    | 60.591 | 20 |
| 121 | 512  | 632  | AATCCCCGCCTATCTAAGGA    | 59.888 | 20 |
| 267 | 69   | 335  | TGGATACATGGGTGGATAATA   | 58.461 | 23 |
| 128 | 429  | 556  | GCGAGGAAATTAAGCAGCA     | 60.476 | 20 |
| 273 | 2134 | 2406 | CCTGTGCTTGTTGTGTCGAT    | 59.751 | 20 |
| 138 | 498  | 635  | TCAACTATTGCCCTTGAC      | 59.933 | 20 |
| 145 | 374  | 518  | CAAGACCACGAGCCGTTAAT    | 60.132 | 20 |
| 195 | 11   | 205  | CAAACTCTCATAACGCCAAA    | 57.14  | 22 |
| 225 | 486  | 710  | TGTAATCTGGGATAACGGGG    | 59.64  | 20 |
| 160 | 3004 | 3163 | GTAAGCATCGCCCTCCATAA    | 60.06  | 20 |
| 232 | 635  | 866  | TCGGAGAAAGAATTAGCCCA    | 59.778 | 20 |
| 271 | 395  | 665  | TGTCTAGGCATCAAGGAGCA    | 59.547 | 20 |
| 100 | 185  | 284  | AGGGGTTTCGAGTGGAAAATC   | 60.306 | 20 |
| 201 | 570  | 770  | AGAATTGGAACCCCAAAACC    | 60.032 | 20 |
| 207 | 619  | 825  | GTCAGCCCAAATCACAAAC     | 60.362 | 20 |
| 279 | 214  | 492  | CCCCTCGTATGCAGTCATTT    | 59.955 | 20 |
| 179 | 296  | 474  | TCAGACGAAACATCCCTTCA    | 59.215 | 20 |

|     |      |      |                        |        |    |
|-----|------|------|------------------------|--------|----|
| 142 | 197  | 338  | TCAAAGCAACCTTCCAACC    | 60.088 | 20 |
| 267 | 210  | 476  | TCGGCCAGAGAGAAGAAAAG   | 59.688 | 20 |
| 234 | 520  | 753  | CCCTCACCCCTTTACGGTTTT  | 60.214 | 20 |
| 190 | 99   | 288  | GAGCGTGAGAGATAGCCGAG   | 60.263 | 20 |
| 267 | 61   | 327  | TTCACCTACCAATTCCAGCAT  | 59.443 | 21 |
| 278 | 63   | 340  | ACACGCGATAACCATTGAGTTT | 59.513 | 21 |
| 242 | 4    | 245  | TTAGCTGCTGGGATTTTGCT   | 59.982 | 20 |
| 151 | 1291 | 1441 | TGTTTCGTCGCTGGAACATG   | 59.864 | 20 |
| 166 | 394  | 559  | TGTTTGCTGTCATCGCTAGG   | 60.011 | 20 |
| 278 | 559  | 836  | ATTGGGTTGGGTATTGATGC   | 59.51  | 20 |
| 218 | 649  | 866  | TTGGATAAATGGGAGGCTTG   | 59.894 | 20 |
| 194 | 554  | 747  | TTCACCCGTGACTTTGACTG   | 59.72  | 20 |
| 169 | 659  | 827  | GGTCAACCTACAGCACCGAT   | 59.997 | 20 |
| 249 | 122  | 370  | TCATGGGGAATGGAAAAAGA   | 60.244 | 20 |
| 278 | 611  | 888  | GCCTCCTACCCCACTTCACT   | 60.511 | 20 |
| 172 | 995  | 1166 | ATCTCTGTCGCCATCGAATC   | 60.189 | 20 |
| 234 | 410  | 643  | ACGCGCGTTTTTAGAGTTTA   | 57.824 | 20 |
| 221 | 97   | 317  | TTATTTTGGGCACCCACCTA   | 60.181 | 20 |
| 206 | 1271 | 1476 | TTCCGAAACTTCCAATCAAGT  | 58.682 | 21 |
| 223 | 1276 | 1498 | GGTCCCTAAACCCAAATCGT   | 60.053 | 20 |
| 243 | 230  | 472  | CATTTGGAGGTGCACACAAC   | 60.008 | 20 |
| 199 | 971  | 1169 | GGAAACCTTATGCGATTGGA   | 59.901 | 20 |
| 235 | 2961 | 3195 | TGCTTGAGAGTGGGAGGAGT   | 59.986 | 20 |
| 222 | 71   | 292  | CGAATACGTACGGGTGTGC    | 60.003 | 19 |
| 213 | 576  | 788  | TAGATTTTCATTGCCGCCTC   | 60.175 | 20 |
| 279 | 182  | 460  | GGCCAAATCCTAGCCACATA   | 59.923 | 20 |
| 196 | 301  | 496  | TAAAATGATCAACCGCCTGC   | 60.971 | 20 |
| 253 | 484  | 736  | ACTCGTCCTCGTTTCTTTGC   | 59.478 | 20 |
| 258 | 1550 | 1807 | CTGAATCCGCCATGATAGT    | 59.917 | 20 |
| 211 | 595  | 805  | CGCCAAGCACTCACAAACTA   | 60.05  | 20 |
| 224 | 12   | 235  | AAGGGGGTTATTAGTGGATCA  | 57.425 | 21 |
| 188 | 1396 | 1583 | GCTGGTATTTTGGCCTTCAT   | 59.046 | 20 |
| 247 | 2581 | 2827 | TCAGAGAAGAAGAAAGAGAG   | 59.088 | 24 |
| 241 | 45   | 285  | CATCTCTTCTCCACCAACCG   | 60.646 | 20 |
| 259 | 1898 | 2156 | CACCAGGCGCAGAGTATTTT   | 60.27  | 20 |
| 141 | 339  | 479  | CTCAATGTAGCTTCGCCCAT   | 60.235 | 20 |
| 120 | 409  | 528  | CCATCTTCAACCCGTCCTT    | 59.966 | 20 |
| 134 | 974  | 1107 | TGTTGTGTACGCGAGAAACC   | 59.764 | 20 |
| 107 | 13   | 119  | ACCCCTTCTACTTTGGTCA    | 58.498 | 20 |
| 176 | 3756 | 3931 | AACGAGAAAAGACTGCTGCC   | 59.621 | 20 |
| 131 | 38   | 168  | ATCGGTTATTACCGGATCGC   | 61.031 | 20 |
| 277 | 896  | 1172 | CAGGTGCGCCTTATCTCTCT   | 59.598 | 20 |
| 195 | 216  | 410  | TGCATGATTTCTTCAATCTTCG | 60.209 | 22 |
| 256 | 774  | 1029 | GGGAAAGCCTCAAGTCCAAT   | 60.443 | 20 |
| 243 | 642  | 884  | TTGTTTTGTTGACAACGACTC  | 60.19  | 22 |
| 144 | 3    | 146  | TTTTTGCTCACTAGTGTCGTTT | 59.786 | 25 |
| 135 | 47   | 181  | AGTTTTAGCGTGTGAGGCGT   | 59.943 | 20 |
| 158 | 41   | 198  | AGAGGACACGTTGGACCTGA   | 60.713 | 20 |
| 226 | 500  | 725  | CATATCACGATATCCACATTTA | 60.127 | 25 |
| 176 | 821  | 996  | TGCAGAGAGGCAGTTCATTG   | 60.136 | 20 |
| 280 | 1213 | 1492 | CCGTACGGCTTGAATGTAGG   | 60.514 | 20 |
| 185 | 927  | 1111 | TTGCGAACTAGTTGTCGTCG   | 60.05  | 20 |
| 203 | 170  | 372  | TCCCACTGCCCAAATTATT    | 59.429 | 20 |
| 263 | 446  | 708  | AGAGCATGAGAATCGGATGG   | 60.181 | 20 |
| 196 | 1558 | 1753 | CGATAAAAATGGCACCCAGT   | 59.823 | 20 |
| 280 | 50   | 329  | CGCTGCTTTCGTGTTTAGTTAC | 59.142 | 22 |
| 239 | 701  | 939  | GGGGGAGAGTTGGAGATCAT   | 60.278 | 20 |
| 183 | 379  | 561  | CAGCGGCTTACTAGCTTCGT   | 59.813 | 20 |



|     |      |      |                         |        |    |
|-----|------|------|-------------------------|--------|----|
| 177 | 125  | 301  | CCCCCAAATCATTGAGCATA    | 60.66  | 20 |
| 259 | 413  | 671  | GCCCAAGTGGGATATTGTTG    | 60.192 | 20 |
| 161 | 4    | 164  | ATCACATAAATAATGGTTTCTT  | 57.797 | 27 |
| 177 | 456  | 632  | TGCGTCAGAAGGTGTCCTAA    | 59.44  | 20 |
| 243 | 83   | 325  | CCCCCGTGCATTAATAAAATC   | 60.385 | 21 |
| 265 | 210  | 474  | GGAGGAGAGGCTCTTGGTTT    | 59.817 | 20 |
| 199 | 852  | 1050 | TGGGCTTCATTTCTGTCAAA    | 59.247 | 20 |
| 153 | 808  | 960  | ATTTGGAAACTTGAACCCCC    | 60.032 | 20 |
| 233 | 899  | 1131 | CAAAATCCACCAACCAAACA    | 59.268 | 20 |
| 204 | 16   | 219  | CCAAAACCCATTTTCATGTCA   | 59.222 | 20 |
| 248 | 225  | 472  | GGCCACTGCGTTTGTAGAG     | 60.827 | 20 |
| 229 | 205  | 433  | ACTTTTCCTCCCCATCATC     | 60.133 | 20 |
| 191 | 2618 | 2808 | TCTTACTTTCCGCCATTGCT    | 59.845 | 20 |
| 159 | 1180 | 1338 | CCTCTGCAGCCTAAAACCAC    | 59.875 | 20 |
| 174 | 180  | 353  | ACCTCCACACCCAATCTTCA    | 60.363 | 20 |
| 235 | 164  | 398  | GCAAGAAAGCAGTGCACCTA    | 59.224 | 20 |
| 278 | 59   | 336  | TTGGCGTAGATTCCAATTGA    | 59.272 | 20 |
| 115 | 2872 | 2986 | CACTCATTTGAGGATGGATTG/  | 59.933 | 22 |
| 152 | 86   | 237  | GGTGCTTTCTGGTTCATCGT    | 60.119 | 20 |
| 235 | 321  | 555  | AATGTGGCATGGGTCAAGAT    | 60.203 | 20 |
| 268 | 1062 | 1329 | TCATTTTTCAATCCCAGCCT    | 59.505 | 20 |
| 102 | 9    | 110  | ACGTCCTCTAGGTGTCGTCC    | 59.179 | 20 |
| 263 | 782  | 1044 | GATTCGTTGCAGAAATCCGT    | 60.081 | 20 |
| 219 | 2784 | 3002 | TGCAAGGACAAGCTCAGAAA    | 59.716 | 20 |
| 230 | 39   | 268  | TGATTTGCTGATTTTGGTG     | 59.664 | 20 |
| 274 | 571  | 844  | CTTTCCCATGGAGTTCAGGA    | 60.042 | 20 |
| 103 | 0    | 102  | GCTTAATTGTAAACCGTTGTCA  | 57.369 | 23 |
| 156 | 356  | 511  | GCACTCAGTTAAGGGTCCGA    | 60.255 | 20 |
| 241 | 310  | 550  | ATAAGCCGTTTATGCGTCGT    | 59.636 | 20 |
| 176 | 22   | 197  | TGAATCCTTCCTTGCTAGTCAC  | 58.462 | 22 |
| 256 | 377  | 632  | CAATGTATCCAAACATGATGA/  | 60.124 | 23 |
| 202 | 241  | 442  | ATCAGGCAAAAACGTGCATT    | 60.511 | 20 |
| 264 | 348  | 611  | AATATCAACCACCAAAGCGG    | 59.823 | 20 |
| 148 | 1194 | 1341 | TCAGCAGCCATCATTGTTT     | 59.276 | 20 |
| 266 | 1191 | 1456 | CCACTCACATGGGAATTGTT    | 58.258 | 20 |
| 147 | 1054 | 1200 | ATCGGAGCATGACGAAGAAC    | 60.226 | 20 |
| 218 | 3589 | 3806 | TTTTGAATTGGCAAACATGC    | 59.543 | 20 |
| 204 | 325  | 528  | GGCATGTCCGAGTTCTTAGC    | 59.843 | 20 |
| 228 | 959  | 1186 | TTCCATACGACATTGCAAGC    | 59.694 | 20 |
| 249 | 704  | 952  | CCAGAACCCAGCTTCTTCAG    | 59.982 | 20 |
| 218 | 0    | 217  | TCAACGTACCTATTTTGTTCT,  | 57.56  | 25 |
| 242 | 85   | 326  | ACACACACAAGATTTGGGAGC   | 59.876 | 21 |
| 122 | 41   | 162  | CTTCAGGAGATCGGGGACTT    | 60.586 | 20 |
| 228 | 183  | 410  | CGGATAATGCTCGAATCCAT    | 59.885 | 20 |
| 251 | 144  | 394  | ATCCTGTCCATCACCCATA     | 60.011 | 20 |
| 262 | 201  | 462  | CAGCATACGCGAAGGGTATT    | 60.117 | 20 |
| 168 | 8    | 175  | TCAATAAAATGCTTCCAATCG   | 57.792 | 21 |
| 147 | 1059 | 1205 | ATCCAAGGAGCACACCTGAG    | 60.261 | 20 |
| 225 | 816  | 1040 | GTGTTACGGTGTCTCTCCC     | 60.408 | 20 |
| 215 | 12   | 226  | TCACCAATTTGAATGGTTATCA  | 57.873 | 22 |
| 260 | 276  | 535  | ATTTGGCCCTATAAAATGCG    | 58.96  | 20 |
| 146 | 64   | 209  | CCTCGCAGTCATTCCAGACT    | 60.408 | 20 |
| 150 | 23   | 172  | GGAGGGGGTATAATTTGAATA   | 59.165 | 23 |
| 114 | 1    | 114  | TTTGAATTTGGATATTTTTCAGG | 60.18  | 25 |
| 221 | 118  | 338  | AAGGCAACGCAATCAAAACT    | 59.752 | 20 |
| 222 | 12   | 233  | CTCCTGAGCCTTATCCCTCC    | 60.169 | 20 |
| 162 | 422  | 583  | TCTCTTCTCTCTCCCTCCC     | 59.883 | 20 |
| 268 | 515  | 782  | TGACCTCTACGAGGCATACCA   | 60.663 | 21 |

|     |      |      |                        |        |    |
|-----|------|------|------------------------|--------|----|
| 183 | 56   | 238  | ATAGGGATTTTCGGATTTTCGG | 60.109 | 20 |
| 161 | 1854 | 2014 | TTCCACGGAGAGCGTCATAC   | 61.208 | 20 |
| 232 | 284  | 515  | GAAACTGAGCTCCATAGCCG   | 59.978 | 20 |
| 251 | 138  | 388  | AAGTGAAGCCCTTTCTTCCC   | 59.691 | 20 |
| 146 | 2862 | 3007 | TTGCGTTGTGGATACAGCAT   | 60.142 | 20 |
| 188 | 13   | 200  | CGGATGAATTTCACTTCACG   | 59.123 | 20 |
| 169 | 798  | 966  | CATTCTCTCAAATCGTGGCA   | 59.799 | 20 |
| 141 | 297  | 437  | ACACAGATCACAAATGGCGA   | 60.12  | 20 |
| 199 | 3    | 201  | CCGTCAGTTTCAAGACATTCC  | 59.583 | 21 |
| 235 | 154  | 388  | AATCCCCCAAACCAATTTCT   | 59.51  | 20 |
| 143 | 201  | 343  | GCAGGGCTGAGTACACGAAT   | 60.285 | 20 |
| 134 | 1954 | 2087 | GAAGGGAAGAGGAAGATGCC   | 60.154 | 20 |
| 237 | 327  | 563  | CGGTTCAACTTCCCATGTTT   | 59.83  | 20 |
| 174 | 324  | 497  | TGACATTGAATCCCCTCATT   | 57.775 | 20 |
| 248 | 1543 | 1790 | GCTTGCTTGCTGAGGTAAGG   | 60.154 | 20 |
| 190 | 2014 | 2203 | GGTAGCACCATCAGCAGACA   | 59.862 | 20 |
| 262 | 208  | 469  | TTAATGGCGCCGCTAATGTA   | 61.44  | 20 |
| 112 | 520  | 631  | AAGTGGTTCACCCCTACACG   | 59.884 | 20 |
| 226 | 665  | 890  | ACCACATAAGCGTCATCTCAA  | 59.637 | 22 |
| 122 | 4    | 125  | GGGCTGCAGGAATTC AATAA  | 60.038 | 20 |
| 278 | 973  | 1250 | TTTTGCCATCATAAACTCTATT | 59.557 | 24 |
| 261 | 73   | 333  | CCATTTTCAGCCAAGCTGTTT  | 60.249 | 20 |
| 280 | 1114 | 1393 | TCGGAAGGTTTATCCTCAGTG  | 59.181 | 21 |
| 211 | 369  | 579  | CATTGCCGAACACCTTTCTT   | 60.11  | 20 |
| 256 | 669  | 924  | TGACTCCACCCACCCATTAT   | 60.05  | 20 |
| 244 | 1    | 244  | CCTCTCCTCTCTCTACTCTC   | 59.156 | 26 |
| 251 | 311  | 561  | GGGTGGGTCTCCCTTACATT   | 60.052 | 20 |
| 227 | 2295 | 2521 | ATACCCTCCGGTACACGAAA   | 59.312 | 20 |
| 201 | 283  | 483  | AGTGGAACCAGAGTGGCCTA   | 59.721 | 20 |
| 190 | 1446 | 1635 | TCGCAACTTCACCTTTACCC   | 60.11  | 20 |
| 197 | 635  | 831  | AATGTGGAACCAAACGATCA   | 58.824 | 20 |
| 239 | 90   | 328  | TTGGAATAGGTCTTGCTG     | 60.066 | 20 |
| 189 | 21   | 209  | TTTAGTGTGTTGACATGATTAC | 57.557 | 25 |
| 205 | 96   | 300  | GGGTTACCAAATAGTTCGTCC  | 59.773 | 22 |
| 175 | 121  | 295  | TTGTTGTTTTCAACCCCTCC   | 59.807 | 20 |
| 138 | 19   | 156  | CACCCAAACAATGCACAATC   | 59.823 | 20 |
| 255 | 3115 | 3369 | GGATCATCTTCCCTCTCCCT   | 59.449 | 20 |
| 262 | 1440 | 1701 | TCATTCCGGGCAGTAAGTTC   | 60.074 | 20 |
| 250 | 1914 | 2163 | AAGGAGGTGTTATGAAGGGAT  | 58.028 | 22 |
| 271 | 169  | 439  | TCCCAAACCTGATGGAAGGTT  | 59.381 | 20 |
| 176 | 4    | 179  | TGCAAAAAGTTATGGTAACAAG | 57.203 | 25 |
| 198 | 815  | 1012 | TTTACCAAAAACGCCCAATA   | 60.178 | 20 |
| 218 | 5    | 222  | TGGTGAATGATTGACGATGAA  | 59.916 | 21 |
| 140 | 10   | 149  | TCGAAAATCAATGGTCCACA   | 59.9   | 20 |
| 176 | 20   | 195  | TCTCTCTTGTTGGTGAAGGA   | 59.829 | 21 |
| 265 | 456  | 720  | CGTGGTTGGTGTGAGATTTG   | 60.001 | 20 |
| 212 | 1611 | 1822 | TACGATTCACCAATTCGCAC   | 59.548 | 20 |
| 266 | 1246 | 1511 | CAGCGACAATTTGCAAGAGA   | 60.134 | 20 |
| 190 | 525  | 714  | CAAAGGTAGTCGGCAGAACC   | 59.734 | 20 |
| 185 | 1042 | 1226 | ATCACTGCATTTTCGTCTCC   | 60.081 | 20 |
| 252 | 102  | 353  | TGCCTTTATTTTAGCCTCCC   | 58.337 | 20 |
| 236 | 2106 | 2341 | CCTCACATCGCCAAAAACTT   | 60.11  | 20 |
| 191 | 3    | 193  | CCTCATTTTCAACACCCAC    | 60.21  | 20 |
| 278 | 90   | 367  | CTACGAGCCACGGTTACAGG   | 60.7   | 20 |
| 234 | 814  | 1047 | AAACCGGGCCTACAAGATTT   | 59.835 | 20 |
| 223 | 371  | 593  | TTTCTCCCTCTCTCCCTTCC   | 59.749 | 20 |
| 160 | 469  | 628  | GAGGAACAGAGCTTCAACGG   | 59.989 | 20 |
| 232 | 694  | 925  | AAACAATTGGGATGAGCAGG   | 59.933 | 20 |

|     |      |      |                        |        |    |
|-----|------|------|------------------------|--------|----|
| 243 | 910  | 1152 | AATGGTGGCCGAAAATTAGA   | 59.411 | 20 |
| 213 | 53   | 265  | CTAACCTAGGTGGTGCCAA    | 59.986 | 20 |
| 280 | 31   | 310  | CCCAGGCATAGAAAGAAAAG,  | 60.889 | 23 |
| 248 | 1943 | 2190 | CGTCGGTGTATGACCTGTTG   | 60.025 | 20 |
| 227 | 390  | 616  | CAGATTCCCCTCCATCCTA    | 59.887 | 20 |
| 242 | 1049 | 1290 | GTTGTGGTCTTTTCAGCGTG   | 59.339 | 20 |
| 264 | 202  | 465  | AACACTATACCCCACCCAC    | 59.555 | 20 |
| 187 | 206  | 392  | CTAAACCCAGGTGGCAGTGT   | 60.028 | 20 |
| 139 | 489  | 627  | AAGGAGTGGGATCTGGGAGT   | 59.929 | 20 |
| 271 | 62   | 332  | TCGGATCGGATATCCAAAAA   | 60.225 | 20 |
| 243 | 529  | 771  | TCCCAACATTAGGGGGAAAT   | 60.37  | 20 |
| 227 | 138  | 364  | GGCATTGGAGGAAAGACAGA   | 60.195 | 20 |
| 177 | 404  | 580  | GTTGGAAAAAGCCAATCGAG   | 59.685 | 20 |
| 203 | 665  | 867  | TTTTTGGAAATTTTCGCACG   | 60.94  | 20 |
| 263 | 26   | 288  | CGAAGCCAAACCTAGGAAGG   | 61.096 | 20 |
| 242 | 474  | 715  | TCCATCCACCTCTGCTTTTC   | 60.195 | 20 |
| 274 | 242  | 515  | TCGTACAAATTGCCACAAATG  | 59.476 | 21 |
| 201 | 637  | 837  | GGAACCTGAGAATGGGGAAT   | 60.133 | 20 |
| 188 | 1123 | 1310 | CATGTGGATCATAACAGGG    | 58.709 | 21 |
| 236 | 124  | 359  | TCTACCAAGATCCTGCCTGC   | 60.362 | 20 |
| 276 | 1051 | 1326 | CGACTATTGTTTGTTCATCGCA | 59.744 | 21 |
| 233 | 70   | 302  | GGGCTAGATTTGTTGCCTTG   | 59.708 | 20 |
| 242 | 611  | 852  | AGGCTACTTGCCCCTATGT    | 59.983 | 20 |
| 176 | 10   | 185  | CCGCTCCTCCTTTTCTTTTT   | 59.829 | 20 |
| 194 | 15   | 208  | AAGGAGGTGTTATGAAGGGAT  | 58.028 | 22 |
| 162 | 221  | 382  | GCAAGGTAGTAAGCATGGCTC  | 59.919 | 21 |
| 245 | 488  | 732  | TTTGGGGGTGCATATTCTC    | 59.762 | 20 |
| 254 | 379  | 632  | GTGGATCTGGGCTGCATTAT   | 59.923 | 20 |
| 163 | 825  | 987  | TCAACCACACCTCCAACCTCA  | 60.129 | 20 |
| 279 | 173  | 451  | TGCAGTTGAGATAAGGGAGG/  | 59.822 | 21 |
| 104 | 87   | 190  | TGAACATGCTCATATTTTAATA | 58.521 | 26 |
| 196 | 71   | 266  | AGCATCTCCAATGCCAGGTA   | 60.624 | 20 |
| 207 | 902  | 1108 | TTTCGCATTCTTATTCCGATG  | 60.047 | 21 |
| 184 | 629  | 812  | GGGTTATTTAGAGGGGCTG    | 59.793 | 20 |
| 264 | 739  | 1002 | AGGCCACCAATTACAACAC    | 59.717 | 20 |
| 113 | 1050 | 1162 | CGCATGCACATGCATTATTT   | 60.505 | 20 |
| 140 | 16   | 155  | CCAAGAATGGGTTATTATTTG  | 59.973 | 24 |
| 190 | 41   | 230  | AGACCGCAATAGCCACTGTC   | 60.285 | 20 |
| 166 | 605  | 770  | CATGATCTGATGAGGCAGGA   | 59.743 | 20 |
| 238 | 125  | 362  | TTAATCGGGCTCTGAGCAGT   | 59.978 | 20 |
| 174 | 1518 | 1691 | AGAGCTTCTCCAACGCAGTC   | 59.751 | 20 |
| 132 | 1557 | 1688 | GCTAGAAGCAGCCGTGACAT   | 60.569 | 20 |
| 278 | 188  | 465  | ATTGAATCTACGTCCACGGG   | 59.813 | 20 |
| 188 | 534  | 721  | ACCCTTAGTATGCTGTCCGAA/ | 60.021 | 22 |
| 141 | 66   | 206  | TCATGAGCCTTCTTCAGCAA   | 59.673 | 20 |
| 100 | 887  | 986  | GATGGAGGAGGACAAAAGGG   | 60.822 | 20 |
| 168 | 422  | 589  | GTTTCCGCCGGAGAAATAAT   | 60.28  | 20 |
| 268 | 57   | 324  | TCCTTACAACCTCACCTCCG   | 60.103 | 20 |
| 166 | 77   | 242  | TGTCCATGCAACCTACGATT   | 59.002 | 20 |
| 278 | 118  | 395  | GCAGACAACCTGACAATGCAA/ | 59.903 | 21 |
| 276 | 2487 | 2762 | GTGGAAAGAAGCTAACCCCC   | 59.94  | 20 |
| 141 | 220  | 360  | ACTCCTCTCGATGCCCTTCT   | 60.358 | 20 |
| 232 | 696  | 927  | GCAGCAAGCTCTTTTCAATG   | 58.799 | 20 |
| 131 | 213  | 343  | TTGTTAGAGGTTTTGACGGGA  | 59.595 | 21 |
| 107 | 23   | 129  | TTCGAAAAATGAATGGCCC    | 60.771 | 19 |
| 207 | 477  | 683  | TTGACAAGCCAATTCGAACA   | 60.234 | 20 |
| 206 | 1667 | 1872 | CCTCCACGAATGGTTTTGAT   | 59.79  | 20 |
| 114 | 1165 | 1278 | CACGGTCATGAATAAAATCGT  | 57.5   | 21 |

|     |      |      |                       |        |    |
|-----|------|------|-----------------------|--------|----|
| 272 | 501  | 772  | CCAAGTACCAAGCATCCTC   | 60.656 | 20 |
| 254 | 139  | 392  | ACATGAAAGCGGTGGAGATT  | 59.556 | 20 |
| 128 | 1022 | 1149 | AGACAAACAAAGCCAGGTGC  | 60.299 | 20 |
| 164 | 621  | 784  | CATGCCATCGTAACATGAA   | 60.343 | 20 |
| 174 | 570  | 743  | CTACATGCTGAGATCGAGCG  | 59.722 | 20 |
| 277 | 390  | 666  | AAATAAAGGCTGCATGGCAC  | 60.103 | 20 |
| 112 | 438  | 549  | TAAAGATGGAGGGTGAGGCA  | 60.594 | 20 |
| 232 | 3382 | 3613 | TCAAGCCCAAAGATGTCTCA  | 59.369 | 20 |
| 204 | 355  | 558  | AATTCCGTCCCAAAGGAAAA  | 60.644 | 20 |
| 184 | 388  | 571  | ATGCCCTTTTCTCGAACATC  | 59.129 | 20 |
| 124 | 560  | 683  | TCGTGGCTGGTTAAGCTTCT  | 60.015 | 20 |
| 149 | 695  | 843  | AGGCCAAGGTATTTGTGTGG  | 59.853 | 20 |
| 144 | 2    | 145  | ATGAAGTTAGGAAATAAGAAC | 57.239 | 26 |
| 251 | 144  | 394  | CCTTGAAGATCAAGACATCTA | 59.685 | 25 |
| 262 | 582  | 843  | AGGGCAATTGATCTTGCCTA  | 59.668 | 20 |
| 144 | 2838 | 2981 | GAGAAGGTGGACAGAGGCTG  | 59.986 | 20 |
| 142 | 248  | 389  | TGAGACCGGAAATGGATGTA  | 58.923 | 20 |
| 260 | 385  | 644  | TGGTGGAGGCTCGGTTATTA  | 60.46  | 20 |
| 188 | 394  | 581  | GGCCATTAAAGCTTCACCAA  | 60.074 | 20 |
| 238 | 168  | 405  | ATCATCAACCTCTGCTGCT   | 59.834 | 20 |
| 173 | 167  | 339  | AAAACCTCAAATCCCCAAC   | 60.032 | 20 |
| 262 | 1644 | 1905 | GAAAATGACCAACCATTTCGG | 60.17  | 20 |
| 208 | 251  | 458  | TCAGTGATAGAAATTGAGGGG | 59.952 | 23 |
| 273 | 376  | 648  | GAACACAAGACCCCATGTCC  | 60.223 | 20 |
| 248 | 17   | 264  | AGAGGGTTATCATGGGATCAA | 59.307 | 22 |
| 239 | 186  | 424  | AGACAAGGACACACCACACG  | 59.623 | 20 |
| 276 | 555  | 830  | GGTGCACCCTCACTTTTGT   | 60.012 | 20 |
| 196 | 721  | 916  | TAGGGTTCGAATCCCCACTC  | 61.211 | 20 |
| 239 | 2434 | 2672 | TTCCAGCAAAACATTGACG   | 59.706 | 20 |
| 229 | 198  | 426  | ACACCCAAGCCCACACTTAC  | 59.891 | 20 |
| 262 | 69   | 330  | TCCCATTTTGGGATGAATTT  | 59.067 | 20 |
| 262 | 1588 | 1849 | CATCAGGGCAGAGATTCGTT  | 60.218 | 20 |
| 126 | 322  | 447  | TGATCTCAAAGATCAACGGT  | 59.994 | 23 |
| 102 | 6954 | 7055 | TCTACCTAAAGCACGCCAAAA | 59.897 | 21 |
| 222 | 416  | 637  | GACGATGGTTGAAACAAATC  | 60.22  | 21 |
| 235 | 155  | 389  | ATTCATGAACCACAAAGGGG  | 59.647 | 20 |
| 173 | 6944 | 7116 | GATGCTGCTCAATCCGAAAT  | 60.185 | 20 |
| 213 | 184  | 396  | ACAAGTATTGGGGCAGCAAG  | 60.132 | 20 |
| 110 | 833  | 942  | CACGGACGAAATGTGAGAAA  | 59.691 | 20 |
| 253 | 936  | 1188 | CCACATAATGTTGCGCATGT  | 60.41  | 20 |
| 256 | 565  | 820  | CCTGCTCAAACACATCAGGA  | 59.831 | 20 |
| 162 | 303  | 464  | GTGGCTTCATGCAAATTCAA  | 59.67  | 20 |
| 258 | 780  | 1037 | CACGTAAATCCCTTGACACA  | 59.585 | 20 |
| 254 | 250  | 503  | TTTGTGGTATCAGAGCCACG  | 59.716 | 20 |
| 242 | 249  | 490  | TGCAACAACAGAAGGATCAG  | 59.43  | 21 |
| 246 | 129  | 374  | CGTGCAGTTGGGTAAAGGAT  | 59.993 | 20 |
| 243 | 1835 | 2077 | AATGCAAAGGATTTGATCCG  | 59.901 | 20 |
| 181 | 3095 | 3275 | GCCTTCCTTCTCCTGTTCC   | 60.19  | 20 |
| 121 | 205  | 325  | GGACGCACCAGATTGTTTCT  | 60.119 | 20 |
| 132 | 1155 | 1286 | TGTAAGGTGCTCCACCATGA  | 60.112 | 20 |
| 245 | 82   | 326  | CTCTTCATTTGCTTCTGGGG  | 59.807 | 20 |
| 155 | 346  | 500  | TCCATTCCCCATCTTATTGG  | 59.576 | 20 |
| 265 | 92   | 356  | CGAACTACAAATGGCACTTCA | 60.166 | 22 |
| 100 | 16   | 115  | TTTTCTCAACCGAGCTCACC  | 60.375 | 20 |
| 218 | 3484 | 3701 | AAAAACAGCCACCAACCAGT  | 59.496 | 20 |
| 239 | 26   | 264  | TGATGTGATTAATCCCACCAT | 60.306 | 23 |
| 186 | 3273 | 3458 | AAGCGTCGTGGGCTTGTAT   | 60.672 | 19 |
| 266 | 1296 | 1561 | TTTTGAGCAATAAATCCAGGG | 59.065 | 21 |

|     |      |      |                         |        |    |
|-----|------|------|-------------------------|--------|----|
| 225 | 151  | 375  | TCCGAGGGAGAGAAAGAGTG    | 59.525 | 20 |
| 270 | 158  | 427  | CGCCACTCCAACTTCAAAT     | 60.11  | 20 |
| 247 | 198  | 444  | AATGATTGTCACAGTTGGGCT   | 59.468 | 21 |
| 197 | 325  | 521  | CTGCTGTGCGTCGATTTCTT    | 61.513 | 20 |
| 197 | 314  | 510  | CTGCTGTGCGTCGATTTCTT    | 61.513 | 20 |
| 266 | 396  | 661  | CAGCAAATCACCTCATCCCT    | 60.073 | 20 |
| 185 | 2    | 186  | AGCTTTAGTAGGGTGCAAGCC   | 59.926 | 21 |
| 128 | 118  | 245  | AGCAGGTTAGCAGGATAAGGC   | 59.755 | 21 |
| 134 | 1391 | 1524 | TTGCAGGAGAACTAATCTTCA/  | 59.453 | 24 |
| 269 | 2377 | 2645 | TCTGGTTTCCAAACAAAGCC    | 60.088 | 20 |
| 173 | 512  | 684  | CTGGCTGGGCTTTGAAATTA    | 60.202 | 20 |
| 208 | 1217 | 1424 | TTTTAGATCCAATGCCCCAC    | 59.762 | 20 |
| 131 | 227  | 357  | TGATGTTTTCTAGAGGGAAAC   | 60.05  | 25 |
| 245 | 749  | 993  | TCCTTTCCATTGGAGGAAAC    | 58.956 | 20 |
| 238 | 885  | 1122 | ATTGTTGACGTCACAGCTAA    | 58.446 | 21 |
| 186 | 29   | 214  | CCGAATCCCGATAACTAAACA   | 58.953 | 21 |
| 276 | 231  | 506  | TGCTGCCTTAATCCCACTG     | 59.864 | 20 |
| 205 | 415  | 619  | GCTTCAATCCGTCCTCCTC     | 59.81  | 20 |
| 272 | 493  | 764  | ATGCACACCCCGAGATACAT    | 60.226 | 20 |
| 274 | 221  | 494  | GGCGGAGGAGTCTTCTAACA    | 59.43  | 20 |
| 187 | 36   | 222  | GGTTATCACCTGATTTTCTCCC  | 59.734 | 23 |
| 264 | 1021 | 1284 | ATGGCCTTATTTGGCCTACC    | 60.171 | 20 |
| 215 | 1688 | 1902 | GGACAATGGAAGGCATTCTG    | 60.461 | 20 |
| 277 | 202  | 478  | GGCCGATATTTGCTCACATT    | 59.929 | 20 |
| 267 | 49   | 315  | GCACCTCTATGGTTGGGAGA    | 60.073 | 20 |
| 233 | 72   | 304  | CGTGTTTTTGGTGAAGCCT     | 60.147 | 20 |
| 272 | 2434 | 2705 | ATTTTGTGCGCAATTGTTTG    | 58.532 | 20 |
| 256 | 20   | 275  | GATAGTGCGTGTGTGCAAGC    | 60.491 | 20 |
| 280 | 710  | 989  | GCAGCCACGATGATATGACA    | 60.663 | 20 |
| 151 | 677  | 827  | TCAATCGCACCGTCACTAAA    | 60.257 | 20 |
| 198 | 924  | 1121 | CATTTGCGTGTGAATTCGGT    | 60.755 | 20 |
| 255 | 115  | 369  | TTCTACCACCCCATCTCG      | 60.913 | 20 |
| 240 | 96   | 335  | ACGCGCGCTTTTAGAGTTT     | 60.166 | 19 |
| 219 | 13   | 231  | TTCATTTTTAAATCCTATATCA/ | 57.503 | 26 |
| 222 | 232  | 453  | GTCCAACCAGGCTGAATAA     | 59.933 | 20 |
| 114 | 251  | 364  | CAGATTCCAAAAACGGGAAA    | 59.91  | 20 |
| 108 | 3    | 110  | CAGATTTGTTATGCGTTTTGAC  | 60.048 | 23 |
| 198 | 221  | 418  | CGCATGGGAATATAATGGAGA   | 59.765 | 21 |
| 261 | 626  | 886  | TCCTCCACTACCCAAAACAA    | 58.049 | 20 |
| 274 | 260  | 533  | TTCGAATGTCATTTACCCC     | 60.702 | 20 |
| 154 | 4635 | 4788 | GTCTCTTCAGCATCCTTCGC    | 60.104 | 20 |
| 194 | 347  | 540  | CAACAAAATGGCACTCTTTC/   | 60.145 | 22 |
| 163 | 2271 | 2433 | CTCAGGAGCAATTGGGTGAT    | 60.073 | 20 |
| 178 | 787  | 964  | TGGATGATTTTGTGGTGTGG    | 60.216 | 20 |
| 213 | 161  | 373  | AGGGCTGTCTCTCACTCCTG    | 59.579 | 20 |
| 171 | 368  | 538  | CGCACACAAAACACACACAC    | 59.669 | 20 |
| 111 | 1147 | 1257 | ACTGCACTCAACCACAACCA    | 60.203 | 20 |
| 116 | 562  | 677  | ACACCCCTACCCTCTGTTCC    | 60.23  | 20 |
| 207 | 840  | 1046 | GGCCTTTCCATTTTCTCTC     | 60.017 | 20 |
| 254 | 20   | 273  | GGGTGTTTTGACAATATCGC    | 57.943 | 20 |
| 247 | 1146 | 1392 | CCCTTTGGTATGAGAAGCCA    | 60.066 | 20 |
| 217 | 303  | 519  | GCTCTTCTCCCCAACTACC     | 60.074 | 20 |
| 279 | 580  | 858  | ATGGCCGAGATTGTATGAGC    | 60.066 | 20 |
| 241 | 88   | 328  | GCAAGGATTGTAGCAAAGGG    | 59.708 | 20 |
| 241 | 1020 | 1260 | TAGCAATCAAGTCCCTTCGG    | 60.206 | 20 |
| 236 | 354  | 589  | CATTGCTTTCCGACTGTTCA    | 59.84  | 20 |
| 136 | 380  | 515  | TCCTTCTTGCTCCTTTTCC     | 60.683 | 20 |
| 120 | 128  | 247  | TCACCTTATGGACTCAGACGA/  | 59.734 | 22 |

|     |      |      |                        |        |    |
|-----|------|------|------------------------|--------|----|
| 165 | 943  | 1107 | AACCGAAAAAGAAACCTTTCA  | 59.913 | 23 |
| 182 | 179  | 360  | GGTTTGC GTTAGATATGCCC  | 59.438 | 20 |
| 267 | 452  | 718  | GTCGAGGTGATCTCAACGGT   | 60.12  | 20 |
| 163 | 354  | 516  | TTACCGTGGTTTCTACCCCA   | 60.22  | 20 |
| 241 | 174  | 414  | TAATGAATAGGGGCGAGTGC   | 60.06  | 20 |
| 261 | 177  | 437  | AAACTGAGTGATGCCAGCCT   | 59.874 | 20 |
| 237 | 393  | 629  | AAGGCGACATGTTTCAATCC   | 59.939 | 20 |
| 236 | 139  | 374  | GCAGCACGAGCTCTGTCATA   | 60.319 | 20 |
| 221 | 1306 | 1526 | CGTGGAGCAAAAACATCAAA   | 59.706 | 20 |
| 222 | 185  | 406  | GTTGTTGGCCCACTTTCAAC   | 60.397 | 20 |
| 243 | 292  | 534  | AGCCAGATCCAAAATCATGC   | 60.043 | 20 |
| 185 | 648  | 832  | TCTGACCCGAATATGTCCATT  | 59.259 | 21 |
| 237 | 401  | 637  | TTCATCTGTCTCCTACTCCAAG | 59.899 | 23 |
| 153 | 14   | 166  | TTTCTCAACCGAGCTCACCT   | 59.989 | 20 |
| 241 | 497  | 737  | CCATCCTGCACCATCATACA   | 60.353 | 20 |
| 192 | 1218 | 1409 | AAATTGCACCTCGTCGACTC   | 60.263 | 20 |
| 231 | 394  | 624  | CAATGCCTCGTCAATTATG    | 60.096 | 20 |
| 230 | 848  | 1077 | TTTGATCCATAACATGAAAA   | 57.065 | 22 |
| 223 | 841  | 1063 | GCCAACTTTCTTCATCCGTC   | 59.676 | 20 |
| 205 | 1627 | 1831 | TCACCTTCAGGGGACAAAAC   | 59.943 | 20 |
| 217 | 23   | 239  | ATGGGTTATTACCGGATCGC   | 60.903 | 20 |
| 208 | 259  | 466  | TGTTGCGATTTTCATTTTCC   | 58.601 | 20 |
| 209 | 1388 | 1596 | TTCGTCAGTGGATCTTGCTG   | 59.984 | 20 |
| 240 | 26   | 265  | AATGAATGGAAACGAGGTGC   | 59.939 | 20 |
| 135 | 919  | 1053 | GAACCACAACCCTTCTCCCT   | 60.349 | 20 |
| 156 | 29   | 184  | CAGAAATTGCCTTGTTGTTTC  | 59.601 | 21 |
| 231 | 643  | 873  | GCCAACGATATGATCGCTCT   | 60.207 | 20 |
| 215 | 126  | 340  | CGCCAAAACACAAACAAGA    | 59.746 | 20 |
| 227 | 21   | 247  | GGAGTGAGACGGAGGGAGTA   | 59.254 | 20 |
| 152 | 169  | 320  | ATGTTTTCAATCTTGCCGT    | 59.434 | 20 |
| 249 | 162  | 410  | GCACCGGATTGTTTCTCATT   | 59.939 | 20 |
| 268 | 1783 | 2050 | ATTTATCGATCAACCATTCTT  | 57.324 | 24 |
| 191 | 14   | 204  | CCAATTTGAATGGTTATCACCT | 60.457 | 23 |
| 229 | 172  | 400  | GGGCTCGAAGTTTCTTGATG   | 59.813 | 20 |
| 223 | 764  | 986  | GAGGCGAGAACCAACTTGAG   | 59.989 | 20 |
| 210 | 881  | 1090 | TGTGTTTATCATGGGCCAAA   | 59.786 | 20 |
| 195 | 584  | 778  | TTTGATTTGCATGCGTACTTG  | 59.756 | 21 |
| 150 | 511  | 660  | ACAAGGGAAACGTTTTGGTG   | 59.869 | 20 |
| 177 | 161  | 337  | TACCCAGAAACCCCAAACAA   | 60.198 | 20 |
| 257 | 497  | 753  | GGTCTGGATCGGATCACCTA   | 59.886 | 20 |
| 247 | 0    | 246  | TTCATTCACTCAGCACCGTC   | 59.837 | 20 |
| 235 | 347  | 581  | ATCCGCTGCATACAGTCACA   | 60.296 | 20 |
| 243 | 603  | 845  | TGGATTTCCGCAAATTTCTT   | 59.525 | 20 |
| 181 | 21   | 201  | CACATGAATGGATGTGATTTG  | 58.201 | 22 |
| 262 | 23   | 284  | CCATTTGCAATGGACAAAAA   | 59.396 | 20 |
| 280 | 357  | 636  | CAGAGAGAAAGTTCAACAGGC  | 59.551 | 23 |
| 233 | 174  | 406  | GTTATCAGCAAATCTGGCCG   | 60.606 | 20 |
| 211 | 214  | 424  | GTGGGCAAACCATCCTTTA    | 59.801 | 20 |
| 279 | 139  | 417  | CCCCGAACTGATGACAATA    | 60.713 | 20 |
| 266 | 1100 | 1365 | TAGGTTATGGGCTGCCTCAC   | 60.096 | 20 |
| 259 | 488  | 746  | TCGTACGATCTTCCCACTCC   | 60.073 | 20 |
| 164 | 191  | 354  | CCCCAAATTGATGGTTTCAT   | 59.481 | 20 |
| 126 | 113  | 238  | CCTTCCCTTGACGACTTACG   | 59.728 | 20 |
| 271 | 178  | 448  | TTCCACTTCTTGTGTGATTGC  | 60.154 | 22 |
| 277 | 524  | 800  | TTCTCTCACTAGTCAGCCCCA  | 59.997 | 21 |
| 255 | 856  | 1110 | GCTTATGAGGGTGAGTTGGC   | 59.7   | 20 |
| 155 | 934  | 1088 | CGAAAATTAGAGATGGCCGA   | 60.167 | 20 |
| 273 | 727  | 999  | GCCTTCTCTCAAATAAGGGTG  | 58.783 | 22 |

|     |      |      |                         |        |    |
|-----|------|------|-------------------------|--------|----|
| 207 | 240  | 446  | TCCACGTTTCCATCTTCCTC    | 60.05  | 20 |
| 250 | 181  | 430  | AGTCCGAGGATAACCCTTCC    | 59.397 | 20 |
| 272 | 51   | 322  | GCAGAAAGACATTGATAACCA   | 59.891 | 23 |
| 252 | 200  | 451  | AATCGAGACACCGACGAACT    | 59.727 | 20 |
| 191 | 123  | 313  | CCCCTCCTCTCGAACTCTTT    | 59.811 | 20 |
| 131 | 16   | 146  | TTTAGTGTTTTGACATGATTAC  | 57.557 | 25 |
| 207 | 287  | 493  | AAACTGGACTGGGTATCAACA   | 58.486 | 22 |
| 280 | 127  | 406  | TTTTGGCAATTCCTTCATC     | 59.878 | 20 |
| 254 | 45   | 298  | CAACAACACATGCTTCGACA    | 59.298 | 20 |
| 254 | 151  | 404  | ACGTGCCAAGACTCAAAACA    | 59.339 | 20 |
| 134 | 996  | 1129 | ACTGAGCCCTTCTTATTCATGT  | 58.358 | 23 |
| 145 | 2043 | 2187 | CTCCTAGCTTTGCTGAGCGT    | 59.92  | 20 |
| 195 | 243  | 437  | CGGCCAAACCAATAAATACG    | 60.198 | 20 |
| 120 | 455  | 574  | TCTCTCTCACCTCCGCACTT    | 60.135 | 20 |
| 215 | 1451 | 1665 | TCAAACCTCACCGCATCATC    | 59.654 | 20 |
| 267 | 1445 | 1711 | GCACATCAACACTCGCAAAT    | 59.728 | 20 |
| 171 | 3307 | 3477 | CCGTGACAGGTCAAAACCTT    | 60.005 | 20 |
| 209 | 719  | 927  | TCAGCTGAAGGAGGAGGAAG    | 59.673 | 20 |
| 128 | 3519 | 3646 | AACCCTCTTCACCTCCCACT    | 59.968 | 20 |
| 226 | 25   | 250  | TCATGCAATCACTATTAAGACT  | 60.036 | 25 |
| 232 | 233  | 464  | ACCCATCTATCGCTGTCGTC    | 60.104 | 20 |
| 219 | 340  | 558  | CCAAGGCCGTACCTACTCAA    | 60.125 | 20 |
| 237 | 622  | 858  | TGCAGCGAAGAAAGAAAATG    | 59.182 | 20 |
| 224 | 735  | 958  | GGTCTTGCCGGATTCATCTA    | 60.036 | 20 |
| 212 | 2992 | 3203 | TGCATTAACCCCGCTTAGAA    | 60.58  | 20 |
| 213 | 340  | 552  | CCCCTCATCTTCAACCTCAA    | 60.096 | 21 |
| 217 | 558  | 774  | GGCGTTCTTGCTATTGTTTG    | 58.439 | 20 |
| 121 | 2757 | 2877 | GGGTTTCTTCCCTCGATTGT    | 60.306 | 20 |
| 224 | 118  | 341  | GCGTGAGTCGGTGAGTGTAT    | 58.755 | 20 |
| 182 | 113  | 294  | CTCTCGTTTGATGCAGCAGT    | 59.191 | 20 |
| 270 | 654  | 923  | TTCCAGCACGATCACCCTA     | 60.263 | 20 |
| 107 | 1358 | 1464 | TCTCATCATCTGCCAAAAA     | 59.2   | 20 |
| 255 | 531  | 785  | TCCATTTAATATGTTCGATGACC | 59.202 | 23 |
| 235 | 51   | 285  | GCCTAACCTTGGGCTTTGAT    | 60.451 | 20 |
| 265 | 351  | 615  | TAGCTGATAAGGCCGAGGAC    | 59.434 | 20 |
| 277 | 195  | 471  | CTAAGGCTGATGGGGTTCAG    | 59.688 | 20 |
| 139 | 78   | 216  | CCTTATCCAACGCTCCGTTA    | 60.089 | 20 |
| 262 | 4780 | 5041 | TTGAGATTCCGTGAGGACTG    | 58.8   | 20 |
| 229 | 631  | 859  | AAAACCTGACCCGATCATTG    | 57.517 | 20 |
| 208 | 524  | 731  | CAGCAAAATCCTTCACCTCA    | 58.847 | 20 |
| 280 | 139  | 418  | CCAAAAAGGAAAAATAATCCT   | 59.984 | 26 |
| 176 | 414  | 589  | GCAACTTGCATTATGGATTTTA  | 58.985 | 24 |
| 246 | 44   | 289  | TGCAATTGGTGTTTTGGTTG    | 60.393 | 20 |
| 159 | 558  | 716  | CTGGGACAAAACGGGAAATA    | 59.795 | 20 |
| 273 | 3    | 275  | CCCGTATACACACCACGGAT    | 60.517 | 20 |
| 266 | 80   | 345  | CGGCATGTTCTCAACTACA     | 59.716 | 20 |
| 240 | 512  | 751  | TAGACGAAGTTCGAAATGGG    | 60.066 | 20 |
| 273 | 65   | 337  | AAAGCATTAAACAGCACGCCT   | 59.911 | 20 |
| 255 | 91   | 345  | CTTCAAACCTCCCGCTGAATC   | 59.813 | 20 |
| 268 | 2403 | 2670 | TGAGTAAAAGCACGATTTTGG   | 59.758 | 22 |
| 129 | 364  | 492  | CGTAATTTTCTCCAGCCATT    | 59.96  | 20 |
| 160 | 242  | 401  | TGCAAGCACACTCAGACACA    | 60.235 | 20 |
| 223 | 498  | 720  | GAGGCAAAGCAAGGCATAAG    | 59.982 | 20 |
| 239 | 3346 | 3584 | TCTAAACCCAGGTGGCAATC    | 59.933 | 20 |
| 229 | 138  | 366  | ACCAGACCGGACCGTTAATA    | 59.312 | 20 |
| 214 | 1564 | 1777 | ACTTACCGTCATTTCCGTCG    | 59.993 | 20 |
| 279 | 1318 | 1596 | CACTAAATTGGTGATGGATGA   | 57.487 | 22 |
| 179 | 311  | 489  | GGCCTAGTTTTGAGGTAGG     | 60.089 | 20 |

|     |      |      |                        |        |    |
|-----|------|------|------------------------|--------|----|
| 202 | 799  | 1000 | TTTTCCCATGAAGCCAAAAC   | 59.916 | 20 |
| 225 | 548  | 772  | CATGCAGCTAAAGTGGCAAA   | 60.014 | 20 |
| 196 | 253  | 448  | AAATATCGGCCGTCAGATTG   | 59.923 | 20 |
| 155 | 800  | 954  | ACAGCCATCAAAGTGGTGGT   | 60.431 | 20 |
| 218 | 566  | 783  | AGGCCACTGGTTCTCGTATG   | 60.134 | 20 |
| 202 | 496  | 697  | GCCTTCCATTCCAAAAATCA   | 59.878 | 20 |
| 251 | 2090 | 2340 | AGTGGGGAGTGAGGGAAAGT   | 59.968 | 20 |
| 135 | 2    | 136  | TGAAGTTAGGAAATAAGGAGC  | 58.743 | 25 |
| 269 | 95   | 363  | TTCGTATTTGTCTAGCGCCC   | 60.23  | 20 |
| 189 | 886  | 1074 | CTTGAAATTCGCAACAGCAA   | 59.992 | 20 |
| 210 | 157  | 366  | TTGGCTTTGAACACCATCAA   | 60.088 | 20 |
| 275 | 102  | 376  | CGCCTCTGCTCTCTGTTTCT   | 59.891 | 20 |
| 198 | 1158 | 1355 | ACCGTATCACCGGAAACGTA   | 60.249 | 20 |
| 140 | 24   | 163  | ATGAAGTTAGGAAATAAGGAC  | 57.086 | 24 |
| 192 | 517  | 708  | TGTGCCCCCATGATGTTAAT   | 60.983 | 20 |
| 264 | 787  | 1050 | CCCGGCTTGAACATAATTCT   | 60.443 | 20 |
| 181 | 459  | 639  | TCACTCACGAAAAGACACGC   | 60.032 | 20 |
| 201 | 1283 | 1483 | ACCGTAGTTCGAATGGTTG    | 59.853 | 20 |
| 136 | 168  | 303  | TCCATCCATCACCATCTTCA   | 59.85  | 20 |
| 185 | 299  | 483  | TCTTCCCTCTCTCCCCATTT   | 60.008 | 20 |
| 262 | 856  | 1117 | TTTGGTTGCGAAACTCAAGAT  | 59.738 | 21 |
| 221 | 104  | 324  | CTGTGTGATGTGGAGTTGGG   | 59.997 | 20 |
| 239 | 3552 | 3790 | ACAGGAATTCGCTTTCTCCA   | 59.813 | 20 |
| 202 | 248  | 449  | TCACCCGGACCTCTTCTTAG   | 59.28  | 20 |
| 171 | 1216 | 1386 | CCCTCCCTTCTTGGTTTCTC   | 60.045 | 20 |
| 201 | 170  | 370  | CGAAATTGAGCTTTTTGGGA   | 60.181 | 20 |
| 251 | 240  | 490  | AAAGCAATACCACCCCAACA   | 60.227 | 20 |
| 268 | 228  | 495  | TATATGGGCCGTTAGATCGC   | 59.913 | 20 |
| 155 | 1001 | 1155 | AAGCATTTTATTGGGCAGAG   | 60.214 | 20 |
| 276 | 378  | 653  | AGCGTGCCTATTGCACATTT   | 60.667 | 20 |
| 252 | 1879 | 2130 | AACGCCGTCTGGATTTTATG   | 59.96  | 20 |
| 279 | 602  | 880  | AAACCCTGTCGTATCTCATATT | 59.685 | 27 |
| 238 | 268  | 505  | ATTTCCGATTACAACGAGGG   | 59.96  | 20 |
| 259 | 110  | 368  | GGAAAAATCTCCAGACGCAG   | 59.813 | 20 |
| 250 | 38   | 287  | ATCACATTAATTTGGCGCAG   | 59.978 | 21 |
| 173 | 676  | 848  | ATTAGCAAATTTCCGGACGA   | 59.547 | 20 |
| 155 | 431  | 585  | ACAACAATCAGCACACGGAT   | 59.014 | 20 |
| 142 | 645  | 786  | TCATGATTTGGCTTTAGGGC   | 60.038 | 20 |
| 274 | 106  | 379  | TTGACGAGGGAGGATTAGGA   | 59.623 | 20 |
| 244 | 153  | 396  | TACCAAGGGGCTTCCCTAT    | 59.793 | 20 |
| 259 | 21   | 279  | CGCCTCACTTCGTCTTCTTC   | 60.134 | 20 |
| 139 | 47   | 185  | AAAAGGGTGTGTGGATTGAA   | 57.894 | 20 |
| 147 | 371  | 517  | TAGGGTCCCACCACCTAACA   | 60.224 | 20 |
| 171 | 195  | 365  | TGCTCCGTTTTTCGATTCTCT  | 59.955 | 20 |
| 142 | 19   | 160  | ATCGGTTATTACCGGATCGC   | 61.031 | 20 |
| 235 | 813  | 1047 | AAAGTGCAGCCCACCATTAC   | 60     | 20 |
| 196 | 29   | 224  | TCAGATGTTTGGTCGGAAAA   | 59.097 | 20 |
| 223 | 213  | 435  | GTGGGTTTCATCAAGATTGGA  | 59.782 | 21 |
| 254 | 966  | 1219 | GTGGTAGGCCGAGTTCAAAT   | 59.056 | 20 |
| 206 | 88   | 293  | AGTTGGGTTGGAGCATTGAG   | 60.111 | 20 |
| 245 | 843  | 1087 | TCAAGAAAGAATGTGGAGCA/  | 58.488 | 21 |
| 231 | 2586 | 2816 | GCACATAGCGTCTTCGTCAA   | 60.019 | 20 |
| 170 | 11   | 180  | TTCCTTTCTTGCTTGTTCCTTC | 59.088 | 23 |
| 181 | 629  | 809  | CCCCAGCAAGCAGTCTATCT   | 59.454 | 20 |
| 159 | 409  | 567  | TTTCCACCATGATATCGACAC  | 58.285 | 21 |
| 255 | 7    | 261  | GGCAACGGAATACCATTTGT   | 59.691 | 20 |
| 269 | 5680 | 5948 | ATTTCCAATTTACGAGGGA    | 59.363 | 20 |
| 121 | 68   | 188  | CAGGTTAGCACGATAAGGGC   | 59.73  | 20 |



|     |      |      |                         |        |    |
|-----|------|------|-------------------------|--------|----|
| 280 | 263  | 542  | GAAGGTTGGAAAGCGTTCTG    | 59.853 | 20 |
| 236 | 1169 | 1404 | TGCATGCAAAATTGAGCTTC    | 59.96  | 20 |
| 252 | 6    | 257  | TGAAGTTAGGAAATAAGGAGC   | 57.525 | 24 |
| 190 | 491  | 680  | TTAGGACCCATAATCTGCCG    | 59.916 | 20 |
| 247 | 1685 | 1931 | GTGGTTTAGGTGAACCCCTG    | 59.304 | 20 |
| 210 | 238  | 447  | GGTTCAAACCATGATTCCA     | 58.243 | 20 |
| 123 | 4054 | 4176 | GCGCCAGATGACCAGATTTA    | 61.141 | 20 |
| 118 | 102  | 219  | TTCTTTCCTTGTTTCGGCAT    | 59.685 | 20 |
| 206 | 164  | 369  | AAAGCAAGCAAACGAGTCA/    | 60.046 | 21 |
| 263 | 92   | 354  | CGTAGGAACCTACACAAAGTT   | 59.917 | 25 |
| 133 | 23   | 155  | AGGGCATTGTTGTACATTGG    | 58.352 | 20 |
| 106 | 17   | 122  | TCAAATTTGTTATTGATACCGA  | 58.024 | 24 |
| 174 | 547  | 720  | CTTCCACATCTCTCCGTCGT    | 60.261 | 20 |
| 199 | 181  | 379  | AAGTTCCTGCCCTTCTTGT     | 60.11  | 20 |
| 280 | 725  | 1004 | TGTGGATGATGAGGTCGAGA    | 60.205 | 20 |
| 261 | 393  | 653  | GGAGACCTCTACGAGACCCC    | 60.073 | 20 |
| 264 | 46   | 309  | ATCTCTGGCTACGCCACTGT    | 59.898 | 20 |
| 209 | 1691 | 1899 | GTGGAAGCTTCGATGGAGAA    | 60.34  | 20 |
| 198 | 61   | 258  | ATCACGCGGAAATAAATCCA    | 60.289 | 20 |
| 214 | 709  | 922  | GCACCTTTCCTGAGACCAAT    | 59.141 | 20 |
| 238 | 320  | 557  | GTTGCTTTCGAGACCCTCTC    | 59.997 | 20 |
| 159 | 26   | 184  | CGGAGATCCAATCTCGTTTC    | 59.629 | 20 |
| 117 | 16   | 132  | CATCCCTATCAACTCTTTCGAT  | 59.973 | 23 |
| 276 | 256  | 531  | TCAAATGCACTTCATAAGCCC   | 60.089 | 21 |
| 157 | 179  | 335  | TTGAACACACAGTTCATGCC    | 58.081 | 20 |
| 215 | 119  | 333  | ATTCTAGGTCCGCCTCCTGT    | 60.096 | 20 |
| 143 | 600  | 742  | TCGAAGCAAAGTCCTCATCC    | 60.34  | 20 |
| 234 | 336  | 569  | AAATGATGTCAATCCAGCCG    | 60.864 | 20 |
| 215 | 484  | 698  | ACAACCACGTGACAACATCC    | 59.288 | 20 |
| 236 | 990  | 1225 | TGGGTTTTACACATTGGCAT    | 58.747 | 20 |
| 206 | 3307 | 3512 | CAACATCTGTGAAATTGCGG    | 60.111 | 20 |
| 178 | 33   | 210  | AGATCATTTCAAAAACAATG,   | 59.272 | 24 |
| 273 | 190  | 462  | CGACCTTATAACATTTATTTTT( | 57.518 | 27 |
| 243 | 369  | 611  | AAATCATGAGCGTCCGTCTT    | 59.7   | 20 |
| 111 | 581  | 691  | GACACCCTTTCATCGTGAG     | 60.51  | 20 |
| 131 | 85   | 215  | CTTTTTGCCCTCGTATGCTC    | 59.845 | 20 |
| 268 | 756  | 1023 | ACCAAGAGGTTCAAGTGTCCG   | 60.151 | 20 |
| 193 | 1201 | 1393 | AAGCAGAATGCAAGCAAGGT    | 60.022 | 20 |
| 279 | 115  | 393  | TTGTGACCAATGAAAAGAGCA   | 59.307 | 21 |
| 235 | 550  | 784  | TGTGAATCGTGTCTTCTGG     | 59.676 | 20 |
| 108 | 17   | 124  | TCAAATTTGTTATTGATACCGA  | 58.024 | 24 |
| 215 | 129  | 343  | CAGACCATTGAAAACAGCA     | 59.84  | 20 |
| 272 | 89   | 360  | GATGTCTTTTGATCAGTTGGTG  | 59.091 | 23 |
| 179 | 2224 | 2402 | AACCGAGAGCATAACCTGAC/   | 59.749 | 21 |
| 276 | 1119 | 1394 | TCTGCATTATCGCATCAGGA    | 60.329 | 20 |
| 223 | 15   | 237  | TTTAGTGTTTTGACATGATTAC  | 57.557 | 25 |
| 202 | 421  | 622  | GCTGCTGCATCATACGAAAC    | 59.454 | 20 |
| 236 | 418  | 653  | AACTTCATTATTTGGGGGTGC   | 60.068 | 21 |
| 272 | 1845 | 2116 | ACCTCCTCAACAGAGGATATA   | 59.53  | 24 |
| 129 | 508  | 636  | CTCTTGGACTCCCCAAATCG    | 59.665 | 20 |
| 274 | 480  | 753  | GTCGGACGAAACCATGAAAC    | 60.362 | 20 |
| 242 | 607  | 848  | ATAGCCCTAACTCTTGCCCC    | 59.576 | 20 |
| 270 | 467  | 736  | TGTACTCTGTGCAGTGCAGAA   | 59.191 | 20 |
| 124 | 466  | 589  | TCCACATCACATGACCTTCTG   | 59.535 | 21 |
| 177 | 460  | 636  | TCTCATCTGCTTGTGCTTGC    | 60.144 | 20 |
| 105 | 451  | 555  | AGGGGGCAGACATTAGCATA    | 59.551 | 20 |
| 129 | 332  | 460  | GCGGAACTCAAATGAAAGC     | 59.829 | 20 |
| 187 | 1417 | 1603 | AGGAACCAGACCCACTTTTG    | 59.037 | 20 |

|     |      |      |                        |        |    |
|-----|------|------|------------------------|--------|----|
| 191 | 5    | 195  | TGCACTCGAAGAATAGCGAC   | 59.178 | 20 |
| 224 | 3    | 226  | TGAAGTTAGGAAATAAGGAGC  | 58.743 | 25 |
| 155 | 688  | 842  | CATTTTAGCTTTGGGAGCCA   | 60.202 | 20 |
| 251 | 224  | 474  | AGGATTAGGTGGACATTTGGG  | 60.06  | 21 |
| 194 | 27   | 220  | CCATTGATTTCCAAGATCCG   | 60.266 | 20 |
| 242 | 1    | 242  | ATCGGGTACCGAAGGGATAG   | 60.166 | 20 |
| 248 | 869  | 1116 | TGATTCACCTCCCATGATCC   | 60.692 | 20 |
| 207 | 252  | 458  | ATGGGTTTCGAGTCTCAATGG  | 59.927 | 20 |
| 203 | 335  | 537  | TTTCCCGAAATCCGAATAAA   | 59.367 | 20 |
| 259 | 1279 | 1537 | AACACAACCTCGGAACAACGA  | 59.187 | 20 |
| 273 | 244  | 516  | AGAGACAAACAAGCATGGGT   | 58.709 | 21 |
| 227 | 118  | 344  | GCTTCTCCATGGCTTTTTGA   | 60.331 | 20 |
| 261 | 591  | 851  | CATTCATATGAGGATGGCCC   | 60.118 | 20 |
| 147 | 395  | 541  | CGGTACGGTAACGGTAAGGA   | 59.876 | 20 |
| 184 | 1    | 184  | TCTTACCACCTGAAGAGGG    | 60.229 | 20 |
| 220 | 7    | 226  | TTGCTTGATCCAACGGTCTA   | 59.272 | 20 |
| 201 | 19   | 219  | CCAATTTGAATGGTTATCACCT | 60.457 | 23 |
| 153 | 485  | 637  | CAGAGGAGCCTCAAGATTGC   | 60.096 | 20 |
| 217 | 546  | 762  | TCAGAGTGCTCAAACCAAGA   | 60.03  | 22 |
| 212 | 1136 | 1347 | CGAAACCCTCTCTAATTTGATT | 60.785 | 24 |
| 219 | 1128 | 1346 | GGGTTATTATTTGATCACCTCC | 59.813 | 23 |
| 161 | 624  | 784  | ATAAAACGTGGAGCGAGCAT   | 59.736 | 20 |
| 245 | 1462 | 1706 | TGCGAGTCATGCTCGATTAG   | 60.119 | 20 |
| 256 | 245  | 500  | TAATTTGCATGAGACGCCAA   | 60.215 | 20 |
| 258 | 462  | 719  | AAATATCGTCCCGGTGATTG   | 59.645 | 20 |
| 246 | 345  | 590  | TGAAGAAGATTCTCATCCCAC  | 59.954 | 23 |
| 153 | 420  | 572  | GCTACAGGAAGTCAACGGCT   | 59.501 | 20 |
| 204 | 707  | 910  | CCACTCGATTTTGCTGGTTT   | 60.11  | 20 |
| 247 | 1431 | 1677 | TAAAAGTTGATGATCCCCGC   | 59.901 | 20 |
| 215 | 988  | 1202 | TCGACAGAATTAGCATATTTCC | 59.788 | 24 |
| 106 | 90   | 195  | TGTGAGGGACACAATTCTTGA  | 59.124 | 21 |
| 213 | 3553 | 3765 | AAATTCCAATGGTGGCCTCT   | 60.693 | 20 |
| 231 | 955  | 1185 | CGGCTAAATTGCCTACATCC   | 59.569 | 20 |
| 193 | 1    | 193  | AGAGCAGGGAGATAAGAGAG   | 59.318 | 24 |
| 113 | 2187 | 2299 | TTGCATGCCTGAGAGAGAGA   | 59.812 | 20 |
| 214 | 361  | 574  | GGAGTTTCCGGTGTGAAGA    | 60.088 | 20 |
| 254 | 1273 | 1526 | CTCCACAATTTGATCTCTCC   | 58.729 | 21 |
| 157 | 837  | 993  | GGTAAACATGCACAGGTATAG  | 59.854 | 24 |
| 229 | 3423 | 3651 | ACGAGCTTCTGCTGCATTTT   | 60.162 | 20 |
| 272 | 201  | 472  | CAACCATTGATTCCCGAGAT   | 59.75  | 20 |
| 260 | 2253 | 2512 | CTTGTCACCAACCAAACCAA   | 59.435 | 20 |
| 269 | 206  | 474  | TCACGCGAATGAGTGTTACAA  | 60.309 | 21 |
| 280 | 1013 | 1292 | GGTCCCAGAAGCAAATATGA   | 57.61  | 20 |
| 244 | 845  | 1088 | CAAAGCAGAAATGGGAGAGC   | 59.955 | 20 |
| 208 | 783  | 990  | AGTCTGACCACCACCACACA   | 60.045 | 20 |
| 258 | 83   | 340  | TCCTTGACCGCGTAAAGATT   | 59.708 | 20 |
| 173 | 174  | 346  | TGTTCATGCATTCACCATACG  | 60.395 | 21 |
| 220 | 2854 | 3073 | AACTGCATTTCCAAGCACC    | 60.118 | 20 |
| 156 | 1299 | 1454 | TCGCTACCACGAACTAACCC   | 60.132 | 20 |
| 254 | 2510 | 2763 | AAACTCCACATGGGCAAAAC   | 59.836 | 20 |
| 175 | 2715 | 2889 | ACGGATCCGATCAAGTTCAA   | 60.461 | 20 |
| 245 | 186  | 430  | AGACTTGCTTGAAGAACATA   | 59.101 | 23 |
| 273 | 2297 | 2569 | CCACTTCAAGCAGTGCAGTC   | 59.622 | 20 |
| 185 | 335  | 519  | GAATCTCAGCCACAAAATTCC  | 59.699 | 21 |
| 204 | 25   | 228  | GGGTTATCATGGGATCCATTC  | 60.225 | 21 |
| 190 | 251  | 440  | AAGAAGCAATGGTTCGCAAGT  | 59.882 | 20 |
| 258 | 198  | 455  | AACTGGTTTGGTGGTTTGGGA  | 60.246 | 20 |
| 218 | 10   | 227  | AAAGTGGAGGAAGCATTGGA   | 59.67  | 20 |

|     |      |                             |        |    |
|-----|------|-----------------------------|--------|----|
| 239 | 2685 | 2923 AACCTTTTTGCTTTATTAGAAA | 59.585 | 26 |
| 201 | 577  | 777 TTTCCGTTTTGTCTCATCCCT   | 59.526 | 20 |
| 237 | 0    | 236 GCGTGACACCATGTAAAAGT    | 59.912 | 21 |
| 244 | 639  | 882 TTTTTGGTGGCGGTAGGTAG    | 59.99  | 20 |
| 252 | 514  | 765 TTGTTGTTTTCATCCCCTCC    | 59.767 | 20 |
| 216 | 474  | 689 CATTGATGGACCTGCTCTCA    | 59.787 | 20 |
| 256 | 1984 | 2239 AAAATTTCTACTATACCCTTGC | 57.252 | 26 |
| 268 | 66   | 333 TTTGCATCGAGACCAGTTTG    | 59.84  | 20 |
| 147 | 213  | 359 TCACAAGATTGTATGGTCCTTC  | 59.485 | 23 |
| 213 | 952  | 1164 TTATACACCCCGCATCCATT   | 60.038 | 20 |
| 226 | 50   | 275 TTCCCTCTCCAGCAATGTTT    | 60.195 | 20 |
| 263 | 2253 | 2515 AAGTTAGGCCTGCCATTGTG   | 60.132 | 20 |
| 182 | 12   | 193 TCCAAATGAAATGAAAACCG    | 58.454 | 20 |
| 231 | 123  | 353 CATTTTCATGGCAACCACAC    | 59.823 | 20 |
| 272 | 1035 | 1306 ACATGACTCGAGCCTGTCTT   | 59.866 | 20 |
| 276 | 878  | 1153 CCTACGAAGAAATACTGCGCT  | 59.939 | 22 |
| 197 | 990  | 1186 TGGCTGTGTGACGTTTTACC   | 59.615 | 20 |
| 208 | 495  | 702 ACCTCCATCTCTGCTCCTCA    | 59.945 | 20 |
| 115 | 15   | 129 CATGCATGAGCAAGAGACAG/   | 60.152 | 21 |
| 234 | 123  | 356 TTCCATTTCTGTGATTCCTCC   | 59.871 | 20 |
| 135 | 14   | 148 CAACCATTATTATTCCAATCGA  | 58.736 | 24 |
| 219 | 498  | 716 TGCATTCGCAAAGAAGAAAA    | 59.562 | 20 |
| 261 | 2460 | 2720 GGTCTCCTGCAATGTGCTTT   | 60.263 | 20 |
| 264 | 2854 | 3117 AACTATGGAAAGTTGCCCCC   | 60.187 | 20 |
| 104 | 122  | 225 TTTATGCGGCATTCATGTGT    | 59.96  | 20 |
| 266 | 179  | 444 CTGCATTTTCTGCTGGTTCA    | 59.988 | 20 |
| 241 | 836  | 1076 CGAAAACAAAAGGTACGGATC  | 61.205 | 22 |
| 194 | 76   | 269 TGATTTCGGTTAATCCAAGGG   | 59.756 | 20 |
| 143 | 2842 | 2984 AGCCTTGACTTGATTGGCTG   | 60.397 | 20 |
| 230 | 646  | 875 TGGGGTGTATGACTAGAATG    | 57.562 | 23 |
| 268 | 4388 | 4655 GGGCCATCTTGAAAATTGA    | 59.878 | 20 |
| 259 | 365  | 623 CCACCCTCGCATAAGACTGT    | 60.134 | 20 |
| 276 | 101  | 376 TACAATCGGGGAATCACACA    | 59.774 | 20 |
| 103 | 6    | 108 GTAGATGCGTGTGGTTCGATG   | 60.144 | 20 |
| 147 | 974  | 1120 TTTCCCTATGAAAACCGTGC   | 59.938 | 20 |
| 136 | 66   | 201 AAGCTGTCGGAAGTGGAGAC    | 59.455 | 20 |
| 271 | 33   | 303 ACAAAGCCACCGTCAGAGTC    | 60.307 | 20 |
| 214 | 1647 | 1860 CTGCTTTGTCCAGCATTTC    | 59.988 | 20 |
| 159 | 401  | 559 AAATGCAATTGTGCATGCCT    | 61.432 | 20 |
| 257 | 133  | 389 GATTCCGGTTTCAAATCCAA    | 59.739 | 20 |
| 258 | 1620 | 1877 TCATTATCATCCGCCTTCAA   | 59.065 | 20 |
| 127 | 911  | 1037 ATGGACCAATGCACCAAAT    | 60.059 | 20 |
| 181 | 59   | 239 TGGAACACAAAAGCATGG      | 59.691 | 20 |
| 215 | 26   | 240 TACGAAGCTGGAGGAAGTGG    | 60.388 | 20 |
| 145 | 1559 | 1703 CATGTTTGCCTGTTTTGTGG   | 60.004 | 20 |
| 197 | 270  | 466 TGCATCGATGATCTTGAAGG    | 59.756 | 20 |
| 231 | 14   | 244 TGTTTGAGCGACGTATCTCCT   | 59.89  | 21 |
| 234 | 1925 | 2158 AGGAAAATGTGATAGCAGCGT  | 58.874 | 21 |
| 132 | 282  | 413 TCATATCATTGTTCCGCGA     | 60.035 | 20 |
| 250 | 383  | 632 TCCGGATCTGATTCGATTG     | 59.544 | 19 |
| 127 | 371  | 497 TCCACAGAGATTTCCACATC    | 59.918 | 21 |
| 263 | 8    | 270 GGTGACGATGGTGATTGATG    | 59.769 | 20 |
| 224 | 226  | 449 CCAGAACATAAACACCGCAA    | 59.585 | 20 |
| 250 | 250  | 499 CTGGTACGTGCGACGTATTG    | 60.195 | 20 |
| 277 | 422  | 698 TTTGACTTGGTGAGTGCAAGA   | 59.475 | 21 |
| 275 | 726  | 1000 ATTGTTGGATTTGACGGCAT   | 60.199 | 20 |
| 238 | 251  | 488 TGATGATGATGGATTTAGCGA   | 59.079 | 21 |
| 150 | 777  | 926 TGGATTTGTTCCGCAAAAT     | 60.302 | 20 |

|     |      |      |                        |        |    |
|-----|------|------|------------------------|--------|----|
| 150 | 821  | 970  | TTCTAATTTGGTTACGCCGC   | 60.095 | 20 |
| 133 | 274  | 406  | GCTGGTCGGTTAATTCCTCA   | 60.074 | 20 |
| 216 | 17   | 232  | TCCGAAAATCAAAGACCCAC   | 59.91  | 20 |
| 173 | 922  | 1094 | GGAAGACTCATTGCCCAAAA   | 60.051 | 20 |
| 238 | 502  | 739  | GCATCTCTCCCATCTTCTGC   | 59.917 | 20 |
| 135 | 390  | 524  | AGTGTTTTGATCGAGTCGCC   | 60.263 | 20 |
| 278 | 5    | 282  | TTATGATATTTCCATAAGTCAC | 57.297 | 26 |
| 234 | 157  | 390  | GTCATGGTGTGGCACTGTC    | 60.013 | 20 |
| 237 | 459  | 695  | CCACAAATCATCCATGCAAC   | 59.781 | 20 |
| 277 | 59   | 335  | GGCAAGCGTCTTTGTTTGT    | 60.292 | 20 |
| 165 | 53   | 217  | TGATGTGGCTTCTTTAGGGC   | 60.214 | 20 |
| 132 | 1531 | 1662 | AATGGGGAACCTTCTCTGGG   | 60.298 | 20 |
| 253 | 423  | 675  | TAGGTAACCGGTTTCGACCTC  | 59.052 | 20 |
| 217 | 140  | 356  | TAGTACGAAAATGCCCTCG    | 60.089 | 20 |
| 240 | 507  | 746  | AGGTGGGCCTAAAGTTTGGT   | 59.864 | 20 |
| 212 | 1569 | 1780 | TTCCCAGAAAACCTCACCAG   | 60.081 | 20 |
| 230 | 935  | 1164 | CCCCTCAATCATCCTCCTT    | 60.264 | 20 |
| 252 | 151  | 402  | GGCCTGAGTTGGCTTGTT     | 60.248 | 19 |
| 233 | 877  | 1109 | ATACTAGTGCCTTGCCCGAG   | 59.359 | 20 |
| 124 | 118  | 241  | TTCTAAAGGGGAAACGACAA   | 58.727 | 21 |
| 148 | 1565 | 1712 | TTTGCGATAGTACACGTGGC   | 59.759 | 20 |
| 172 | 1066 | 1237 | CAATTCCTGTGGGCTACTCC   | 59.55  | 20 |
| 239 | 230  | 468  | AGGAATGCTACCCATTTCCC   | 60.152 | 20 |
| 251 | 983  | 1233 | TCCCATTCCCAATCTTACCA   | 60.126 | 20 |
| 230 | 570  | 799  | AAACCACGAAATCAAGCAGG   | 60.11  | 20 |
| 212 | 172  | 383  | TCCCATCAACCCTCAGTTTC   | 59.903 | 20 |
| 268 | 119  | 386  | CTGGCCACCCTCTATATTGC   | 59.551 | 20 |
| 162 | 2699 | 2860 | GGGAGATGGGTTGAAACAGA   | 59.903 | 20 |
| 225 | 1547 | 1771 | ATCGAACCATTCCTGCTTTG   | 60.074 | 20 |
| 217 | 578  | 794  | TCACTTACTTAAAGTCAACTC  | 59.189 | 25 |
| 231 | 566  | 796  | TTGATCGAATGCTTAATTGCTT | 58.896 | 22 |
| 225 | 156  | 380  | AAAAGAGAAGCCCTCCAAGC   | 59.962 | 20 |
| 153 | 1348 | 1500 | CGGCAAAGAGTTATTCGGAG   | 59.839 | 20 |
| 141 | 335  | 475  | GAAGACGGATCGTTGATTGG   | 60.461 | 20 |
| 269 | 3788 | 4056 | TTACGAAAATGCTTCCTTCCA  | 59.707 | 21 |
| 269 | 70   | 338  | TCAATGAATTGAATAATCCCA  | 58.357 | 23 |
| 210 | 48   | 257  | TCACCGAAAAGATATGAAAAT  | 59.851 | 24 |
| 154 | 21   | 174  | TGCCAATACAAAACCAACCA   | 59.826 | 20 |
| 256 | 0    | 255  | GCGTTTTGACGATATATAGTG  | 60.194 | 26 |
| 221 | 3952 | 4172 | GACTTCTTTTCGAACGTCGC   | 60     | 20 |
| 276 | 2751 | 3026 | GCAATCGGTGACCTTTTCTT   | 59.174 | 20 |
| 225 | 2622 | 2846 | GGTGGTTATCAGTTGGCAGG   | 60.375 | 20 |
| 280 | 210  | 489  | TTAAAGCCAAGTCCAGGTCG   | 60.241 | 20 |
| 273 | 1154 | 1426 | ATGCTGCATTTTGTGTGAGG   | 59.722 | 20 |
| 237 | 1130 | 1366 | TCAATCCCACCACCAAGTCT   | 60.363 | 20 |
| 144 | 77   | 220  | CTCGGGTATATCAGCTCGGA   | 60.192 | 20 |
| 250 | 5285 | 5534 | GAGCAGGATTCTGTGGAACC   | 59.661 | 20 |
| 184 | 786  | 969  | GGCAGCTCACAAATCTCTCC   | 59.957 | 20 |
| 216 | 350  | 565  | TCCCCAGCACAGTTATTTCC   | 59.933 | 20 |
| 169 | 85   | 253  | AAAAAGTGGCATTGTTGCC    | 59.93  | 19 |
| 115 | 27   | 141  | AGGAAATAAGGGGGTGTTATC  | 58.756 | 22 |
| 218 | 546  | 763  | GGACCAACTATGGCACAACC   | 60.24  | 20 |
| 280 | 1610 | 1889 | CTTTTCATCTCCAACCCAAAA  | 59.05  | 21 |
| 214 | 39   | 252  | TTCTCGCTCTCTTCGCA      | 60.104 | 19 |
| 237 | 1001 | 1237 | GTTATGCAGCAAAAATCCGA   | 58.771 | 20 |
| 275 | 1919 | 2193 | CGCATTTACGAGATGACACG   | 60.28  | 20 |
| 280 | 4899 | 5178 | CCATTCCTGAGACCAAAAGG   | 59.521 | 20 |
| 202 | 1558 | 1759 | GGAATGATTTCCCTGAGCAA   | 60.014 | 20 |

|     |      |      |                         |        |    |
|-----|------|------|-------------------------|--------|----|
| 223 | 51   | 273  | TGTCCATTGGCAGTTAGCAG    | 59.864 | 20 |
| 268 | 213  | 480  | CCAATAGTTCTTCGGTCCCA    | 59.926 | 20 |
| 239 | 674  | 912  | GCACTCGTTTCTTTCTTCGC    | 60.14  | 20 |
| 133 | 246  | 378  | TTCCCTTTTTCATTACACCATC  | 60.055 | 22 |
| 183 | 740  | 922  | TCCGTGGACCTCATTTTCTC    | 60.05  | 20 |
| 177 | 185  | 361  | CGTGTGGATTGGGTAAAA      | 59.723 | 21 |
| 232 | 73   | 304  | ACCCTGGCCAGTCAGTTCTA    | 59.721 | 20 |
| 209 | 788  | 996  | CGGTGTCCTATTCCGATTC     | 59.387 | 20 |
| 142 | 795  | 936  | AGATCTCCGATCGGTTTCGT    | 60.99  | 20 |
| 159 | 445  | 603  | GAATGAAAGGGTGCGAATA     | 60.971 | 20 |
| 169 | 698  | 866  | TCTCTTATTCTCCCTCTCGCC   | 59.933 | 21 |
| 226 | 72   | 297  | TGACCTGGGACCCTTGATA     | 60.309 | 20 |
| 142 | 1037 | 1178 | TCGACTTCAGATGGTGTCAA    | 59.278 | 21 |
| 278 | 1014 | 1291 | TGTAATAAATCTTTAAAATGGC  | 57.036 | 26 |
| 167 | 606  | 772  | CTCAGAATCCACTCCTGCAA    | 58.957 | 20 |
| 278 | 169  | 446  | GGTGTGGTACTTGGGACAGG    | 60.275 | 20 |
| 219 | 248  | 466  | TTTTAGCCACTTTCTTGCCC    | 59.338 | 20 |
| 201 | 73   | 273  | TATGGGTATCACCGAATCGC    | 61.919 | 21 |
| 257 | 1533 | 1789 | AACCGACCTTACATAGCGGA    | 59.592 | 20 |
| 275 | 143  | 417  | ATTTGAGAAATGGCCCATGA    | 60.274 | 20 |
| 235 | 76   | 310  | GGCAATGGAAAAATCACTGG    | 60.309 | 20 |
| 195 | 284  | 478  | GAGGAGTGAGAAACCCGACA    | 60.238 | 20 |
| 142 | 8    | 149  | GCACTTTTCTCAACCTCGCT    | 59.621 | 20 |
| 248 | 223  | 470  | GTAGGAACCGTGCAGCACTA    | 58.952 | 20 |
| 261 | 442  | 702  | AACCGCGTCTCTTAGTTTTATG  | 59.362 | 23 |
| 100 | 941  | 1040 | TTGCACGAATGGTTTGACAT    | 59.972 | 20 |
| 270 | 943  | 1212 | TCATTTTGATTACTTTTACTATT | 57.299 | 27 |
| 275 | 660  | 934  | TGGTGTTCCTCCACAATCG     | 59.541 | 20 |
| 237 | 605  | 841  | AAGTTGCAGCGAAAACATGG    | 61.196 | 20 |
| 156 | 43   | 198  | TTGGTTCACACAACCACTCC    | 59.415 | 20 |
| 256 | 1190 | 1445 | GCAATCCTTTCCTGCCAAT     | 60.081 | 20 |
| 175 | 131  | 305  | GAAGTTGGGAGCGACGATA     | 60.214 | 20 |
| 203 | 1838 | 2040 | TGGCAACTATCCCTAACGGT    | 59.452 | 20 |
| 220 | 189  | 408  | TCAAAACGGTCAAACGATGA    | 60.088 | 20 |
| 108 | 1461 | 1568 | CTAGCAACGATGATAGGGCA    | 58.895 | 20 |
| 205 | 447  | 651  | AAGCAGGAAGTCATGCCACT    | 59.874 | 20 |
| 216 | 837  | 1052 | GCAACAATTCACAAGAGCCA    | 59.847 | 20 |
| 230 | 12   | 241  | TTCGAGTTTTGATGGGAACA    | 59.097 | 20 |
| 221 | 3482 | 3702 | AGAGGACTGGTCCGAGGAAT    | 60.073 | 20 |
| 251 | 70   | 320  | AAGTAGGTCCTCTTTTCGACCT  | 58.892 | 23 |
| 137 | 60   | 196  | TGAAGGTAGGAAATAAGGAGC   | 59.461 | 24 |
| 248 | 272  | 519  | GCATTATCCGGTCGATTGTC    | 60.304 | 20 |
| 126 | 279  | 404  | AAATCGAATCGTGAACACCC    | 59.797 | 20 |
| 177 | 113  | 289  | AGACCCTAGCTCTTGCCCTC    | 59.979 | 20 |
| 145 | 41   | 185  | CAATGAACAACCGGCCTAAT    | 59.823 | 20 |
| 105 | 1    | 105  | TGCGTTTTGATGATATATAGGT  | 57.703 | 24 |
| 198 | 1438 | 1635 | ATGTTGCATGAGTGAGCTGC    | 60.024 | 20 |
| 265 | 132  | 396  | ATGACTGGCCCATATTGGAT    | 59.083 | 20 |
| 100 | 176  | 275  | TGCTGTGGTTGATTGACTGG    | 60.722 | 20 |
| 227 | 14   | 240  | GGAATTGTGATTAGTGACGGC   | 59.448 | 21 |
| 269 | 850  | 1118 | AGTTACTCGTGGAGGTGCCA    | 60.711 | 20 |
| 104 | 176  | 279  | TCGAATTTCTGATGTTGGGAC   | 59.925 | 21 |
| 163 | 1186 | 1348 | ATCATGTTCTGCATGTTGC     | 59.533 | 20 |
| 273 | 906  | 1178 | ACCACTCATCAAAGGAGGGC    | 61.429 | 20 |
| 245 | 411  | 655  | CGGCAGAAGGAGAGAAGAAG    | 59.304 | 20 |
| 121 | 1036 | 1156 | GTTAACTGGTATAGCGGCGG    | 59.63  | 20 |
| 180 | 2919 | 3098 | AATTTGACCATTGGACCTGC    | 59.797 | 20 |
| 263 | 1277 | 1539 | ATTTGCGAAACCTAAACCC     | 60.184 | 20 |

|     |      |      |                       |        |    |
|-----|------|------|-----------------------|--------|----|
| 176 | 531  | 706  | TCGAGGAGTTTACACGGAAGA | 59.861 | 21 |
| 146 | 284  | 429  | GGTTCAAAAATCGGACTGGA  | 59.91  | 20 |
| 250 | 600  | 849  | GCGATCTATTTTGGCTTTTCA | 59.336 | 21 |
| 154 | 212  | 365  | CTTGAAACCTTTTACCCCA   | 58.922 | 20 |
| 276 | 403  | 678  | AGTGATAAAAATGGCACCCG  | 59.823 | 20 |
| 257 | 1135 | 1391 | ATTCAGCTTGACGAGGTTGC  | 60.406 | 20 |
| 177 | 184  | 360  | TTGCGGGTTTCTCACGTTAT  | 60.502 | 20 |
| 215 | 214  | 428  | AACATGGTTGGAGTGGGAAC  | 59.679 | 20 |
| 261 | 1    | 261  | GCTACATATTTTGTGCATACC | 59.363 | 24 |
| 245 | 590  | 834  | TCACCAAATTGAGGGGTGAT  | 60.173 | 20 |
| 187 | 496  | 682  | TAGCCCTAACCCCTTGACTGC | 59.336 | 20 |
| 125 | 355  | 479  | CAACTCCCAAATCCTCCAAA  | 59.903 | 20 |
| 260 | 186  | 445  | ACAAATTGGTTTTGGCGTTC  | 59.845 | 20 |
| 279 | 1181 | 1459 | ATGAATCCACACAAGTGGGC  | 60.79  | 20 |
| 240 | 2085 | 2324 | CAAATTGGAACGACTTGCAT  | 59.989 | 21 |
| 218 | 15   | 232  | AGTTAGCATGGGAAGGGGAG  | 60.455 | 20 |
| 111 | 22   | 132  | ACAAACAACAATTCAGCAAAT | 59.374 | 24 |
| 156 | 1532 | 1687 | CTCCTTCTGTTGATCCCCAA  | 60.042 | 20 |
| 216 | 758  | 973  | GGAGAAGGGAGCCGAAGTAG  | 60.34  | 20 |
| 135 | 32   | 166  | CGTTTCTCATCTGATTACCGC | 59.722 | 21 |
| 100 | 21   | 120  | GAGGGTTATCATGGGATCAAG | 58.32  | 21 |
| 224 | 95   | 318  | ATATATGGGTTATCGCCGGA  | 59.127 | 20 |
| 120 | 275  | 394  | TCTCCTTTGTTTTTCGTGGC  | 60.227 | 20 |
| 214 | 47   | 260  | TTCGAAATCTAACGATCCGC  | 60.175 | 20 |
| 146 | 446  | 591  | GGATCGAGTCCATGCCATTA  | 60.833 | 20 |
| 125 | 162  | 286  | TACGTGTATGATGGAGGCCA  | 59.948 | 20 |
| 243 | 243  | 485  | AATGAACCACCACTGCATCA  | 59.967 | 20 |
| 191 | 1238 | 1428 | CAAGTACAAATTGCCACCCC  | 60.227 | 20 |
| 166 | 239  | 404  | AACCAAACCAAACCAAGCAA  | 60.378 | 20 |
| 169 | 68   | 236  | GGGGACCATCTCAAATGTTTT | 60.046 | 21 |
| 206 | 8    | 213  | GCAAAGTGCCACCAACACT   | 59.742 | 19 |
| 158 | 2914 | 3071 | TGGTTAGGATTTCTTTTGCC  | 58.315 | 21 |
| 230 | 2662 | 2891 | AAAATGGCTGCAACGAAGAG  | 60.386 | 20 |
| 225 | 489  | 713  | GAGCATTGCGGGTGCTATAA  | 60.06  | 20 |
| 262 | 334  | 595  | TCTCCTCCCTTCGTCTCTCA  | 60.064 | 20 |
| 203 | 4045 | 4247 | CCATTCATGCATCCAATCTG  | 59.883 | 20 |
| 144 | 2011 | 2154 | GATGGCTTGGTACGCTTTTC  | 59.713 | 20 |
| 177 | 416  | 592  | TTCATGGATTCAAAGGGGA   | 60.244 | 20 |
| 145 | 179  | 323  | TTTGATCCTTGCTTTGCCTT  | 59.823 | 20 |
| 278 | 19   | 296  | TTCAGTTGGCCGAATGATTT  | 60.448 | 20 |
| 126 | 2853 | 2978 | CAGCACAACGTTCCATTGAT  | 59.572 | 20 |
| 189 | 186  | 374  | CGATCTAACGGCCCAGATT   | 60.044 | 19 |
| 169 | 498  | 666  | CAACGGTTTATCTGCGGAAT  | 59.96  | 20 |
| 172 | 828  | 999  | CCGGACATGCTAACGAGACT  | 60.277 | 20 |
| 264 | 1017 | 1280 | TTTGCACTAGATCACTCCCCT | 58.803 | 21 |
| 244 | 3169 | 3412 | AGGGGAGGATAACTGAGCGT  | 60.096 | 20 |
| 278 | 133  | 410  | TGATTGCAAAGAACCTCCAA  | 59.247 | 20 |
| 216 | 368  | 583  | TGCAGTCTTACAGCCCAACA  | 60.449 | 20 |
| 273 | 836  | 1108 | CAACCAAATGATGGCGATA   | 59.377 | 20 |
| 196 | 10   | 205  | TGTGTGTGTTGGTGGTAAA   | 59.425 | 20 |
| 217 | 469  | 685  | CGTGCCATGTTTCCATGATA  | 60.343 | 20 |
| 137 | 77   | 213  | GCAAGTAATGCGGAGCTAGG  | 60.003 | 20 |
| 219 | 355  | 573  | GCGAGCTCACCACTTCTTTC  | 60.142 | 20 |
| 182 | 200  | 381  | AGTGTTGAGCAAAAGGGCAG  | 60.431 | 20 |
| 204 | 4269 | 4472 | TGAGGCTCTTTCCTTCTTC   | 59.694 | 20 |
| 276 | 521  | 796  | TATTACAAGTTGTCGCCCCC  | 59.823 | 20 |
| 141 | 465  | 605  | ATGATGCCAAGTCTTCGGTT  | 59.556 | 20 |
| 205 | 3306 | 3510 | CAGCGGCAGCGATAAACTAT  | 60.384 | 20 |

|     |      |      |                         |        |    |
|-----|------|------|-------------------------|--------|----|
| 233 | 61   | 293  | CATCCCTTAATCCCCATCCT    | 59.974 | 20 |
| 204 | 619  | 822  | AAAGTGATTGTGAAACCGGAA   | 59.462 | 21 |
| 277 | 947  | 1223 | TGTTTTCCACAACCTCAACCC   | 59.861 | 21 |
| 209 | 1375 | 1583 | TGTCAGCTACCTAACAGCTGG   | 60.074 | 22 |
| 223 | 1948 | 2170 | TTTCCCATGCATCATCTTT     | 60.274 | 20 |
| 280 | 2109 | 2388 | CCTTATGCGTTCCAAAATGG    | 60.315 | 20 |
| 249 | 257  | 505  | CCACTCCCTTTTGGCAGTTA    | 60.103 | 20 |
| 278 | 582  | 859  | ACCGGAATGAAAATCGGATA    | 59.23  | 20 |
| 116 | 397  | 512  | TCTTTGTTTTCAACGCCTCC    | 60.227 | 20 |
| 264 | 18   | 281  | GGAAAAAGAAACCCACATGC    | 59.41  | 20 |
| 132 | 77   | 208  | GCAAGTAATGCGGAGCTAGG    | 60.003 | 20 |
| 236 | 491  | 726  | GGACCAGAAATCCCAGTTGA    | 59.903 | 20 |
| 193 | 129  | 321  | TTGTGAAAAGTGGTTGCGAG    | 59.881 | 20 |
| 106 | 539  | 644  | GACACGCATAAAGGGACCAC    | 60.384 | 20 |
| 259 | 248  | 506  | TGATGATTGCCCCAGTTAT     | 60.155 | 20 |
| 248 | 164  | 411  | AGACGGGGTCGGATTATACC    | 60.039 | 20 |
| 275 | 102  | 376  | TAAATACCAAGCTCCGCCTG    | 60.223 | 20 |
| 237 | 494  | 730  | TGATTGGCTGTATAGGCGTG    | 59.712 | 20 |
| 162 | 2438 | 2599 | TTCTTTGGTGACCTGTTGGA    | 59.109 | 20 |
| 173 | 680  | 852  | GCCCACCACCTGATAACAAA    | 60.755 | 20 |
| 229 | 161  | 389  | TGCATTTTTAATTTATTTTCCTG | 57.15  | 24 |
| 280 | 92   | 371  | AGGTGCAAAGGATGAAATGC    | 60.081 | 20 |
| 240 | 3691 | 3930 | AGTTCCATGGCAGTAAAATG    | 59.985 | 21 |
| 101 | 4    | 104  | AGGTTTTGACCATATTTACTGT  | 60.393 | 27 |
| 235 | 206  | 440  | TCATAATGGTCTCCATCGCA    | 60.033 | 20 |
| 198 | 623  | 820  | GGATTCATGAGATCGACGGT    | 59.893 | 20 |
| 228 | 60   | 287  | AATTTACTAATTTATCCACCTC  | 58.189 | 27 |
| 279 | 1242 | 1520 | ACAAAACAAAATGTTGGCCC    | 59.708 | 20 |
| 268 | 2556 | 2823 | CAGTTTTATGCATCGTGCCA    | 60.665 | 20 |
| 160 | 2103 | 2262 | TTTTTACACGAGGCGAAACC    | 60.11  | 20 |
| 236 | 120  | 355  | GAACGTCCAGTGCCAAAGTT    | 60.156 | 20 |
| 126 | 27   | 152  | GGTTATCACCGGATCGCTAC    | 59.415 | 20 |
| 274 | 1637 | 1910 | AAGTGGCACCCAGTCGTAGGT   | 59.646 | 20 |
| 250 | 387  | 636  | AAAATCAAAGGCCACAATG     | 59.801 | 20 |
| 276 | 221  | 496  | GCACCAATATTAGGCCATCG    | 60.31  | 20 |
| 264 | 6588 | 6851 | TAAATTGTTGGCAGCGTTTG    | 59.742 | 20 |
| 144 | 31   | 174  | AATCTCGAAAATGGATGACCC   | 60.145 | 21 |
| 136 | 1292 | 1427 | ATGGCATCCCACAAGTATCC    | 59.635 | 20 |
| 169 | 9    | 177  | GCGAAATTCGTTGGTTTGAC    | 60.49  | 20 |
| 180 | 900  | 1079 | TGGATTGATGTGGGTGTGAG    | 60.378 | 20 |
| 223 | 280  | 502  | GTTTTTGGATGGAAAACCACT   | 57.943 | 21 |
| 265 | 39   | 303  | GAGTTATCATTGGAGTAAGCC   | 60.212 | 23 |
| 267 | 1377 | 1643 | ACTTTTCCGGCCTCTCATTT    | 60.074 | 20 |
| 270 | 965  | 1234 | TCGCAAATTAGTGGCTTGCT    | 60.905 | 20 |
| 209 | 560  | 768  | ATTTGGGTCTCTTCGACACG    | 60.111 | 20 |
| 231 | 198  | 428  | CAAAGCCAGCACATGCATAC    | 60.288 | 20 |
| 118 | 250  | 367  | CAGGCATTAGCAAATCAA      | 59.809 | 20 |
| 218 | 89   | 306  | TTGAAGACCGCCTCGATAAT    | 59.668 | 20 |
| 177 | 530  | 706  | TTCATATTTCACTTGAAGACTTG | 58.494 | 26 |
| 216 | 1169 | 1384 | TCTCACCTTCGGTCAAACC     | 60.088 | 20 |
| 214 | 1    | 214  | CCGGGGTATGCTATAAACGA    | 59.81  | 20 |
| 115 | 262  | 376  | TCGTGAAACACTTCAACCCA    | 60.128 | 20 |
| 280 | 142  | 421  | TGGACCATGTTTTAACTGTATC  | 58.935 | 23 |
| 155 | 297  | 451  | TTAACTCAAAGCACGAGGGG    | 60.241 | 20 |
| 217 | 474  | 690  | ATTTCTGATGGTCAGGCCAA    | 60.461 | 20 |
| 259 | 706  | 964  | TTTCTTTGGCAATGATCCA     | 59.2   | 20 |
| 269 | 1    | 269  | AAATAGTTCCGGTTTTTCGGC   | 60.312 | 20 |
| 239 | 1026 | 1264 | ACGGCAACGTTTTACGTCTT    | 59.677 | 20 |

|     |      |      |                        |        |    |
|-----|------|------|------------------------|--------|----|
| 226 | 694  | 919  | GAAATGGAGGTTGGGTGGTA   | 59.647 | 20 |
| 260 | 335  | 594  | CTCCACTTCACCGGCTTTTA   | 60.241 | 20 |
| 252 | 350  | 601  | AATACCCTTGTATGCTGCGG   | 59.982 | 20 |
| 201 | 518  | 718  | TTCAAGAGCCTAGGAAGAGGC  | 59.963 | 21 |
| 191 | 573  | 763  | CCCCTTTTACCATTCCACT    | 59.82  | 20 |
| 198 | 457  | 654  | AACTGCACCACAAAGAACCA   | 59.187 | 20 |
| 223 | 701  | 923  | TGTGATCCGTTGAGGAATGA   | 60.048 | 20 |
| 127 | 475  | 601  | TCTACCCCTCAGAATCCTCGT  | 60.081 | 21 |
| 222 | 13   | 234  | TTTGGGTAAAATTGCTGGGT   | 59.315 | 20 |
| 246 | 1407 | 1652 | GAAAGTTGCAGCCCAGTGA    | 59.976 | 19 |
| 206 | 934  | 1139 | AGTAATTGGCACCATACCCG   | 59.708 | 20 |
| 274 | 251  | 524  | CTGTCCGTCACGTTGAACC    | 60.146 | 19 |
| 197 | 513  | 709  | TTCAAATTGCGGATGGATTT   | 60.268 | 20 |
| 153 | 3    | 155  | GAAAATCAAAGGCCACAAA    | 59.916 | 20 |
| 193 | 2397 | 2589 | TGCACTGTTTTCCCAATATCA  | 60.356 | 22 |
| 267 | 195  | 461  | TCGGCGAAGGAAAACAATTA   | 60.56  | 20 |
| 176 | 224  | 399  | TGACACGATCGTTAATTAATC  | 59.06  | 23 |
| 172 | 146  | 317  | CAATTCGACGACCAAATCCT   | 59.933 | 20 |
| 268 | 2663 | 2930 | ACAGGGCAGCACCTATTGAC   | 60.142 | 20 |
| 275 | 488  | 762  | AAAATGCCGAACTTCCAAGA   | 59.685 | 20 |
| 263 | 197  | 459  | TCAGATCGCTATCGTGTTCCG  | 59.972 | 20 |
| 171 | 545  | 715  | CTATGCAGCCTCCAGCTTCT   | 59.74  | 20 |
| 262 | 1133 | 1394 | AAGAATAAATATGAACGAAAC  | 59.536 | 26 |
| 131 | 841  | 971  | TTCGTGGTGTAAATGGCAAAA  | 59.969 | 20 |
| 230 | 313  | 542  | GTATCCCAGGCCGAATTTTT   | 60.15  | 20 |
| 277 | 490  | 766  | CTTTCTGTTTGAGAGGAAAAAC | 57.731 | 23 |
| 204 | 2124 | 2327 | GCCATCACCAACCTCTATGG   | 60.34  | 20 |
| 249 | 538  | 786  | GGCATTGTCAGACGACGTAAT  | 60.015 | 21 |
| 274 | 1652 | 1925 | ATATATTGTGCAGGCAGGGC   | 59.951 | 20 |
| 264 | 282  | 545  | GCAGTGCCTTGGACTTGTG    | 60.51  | 20 |
| 162 | 960  | 1121 | ACCTGGCAAGATTCATCGAC   | 60.081 | 20 |
| 112 | 30   | 141  | TATGATGGGAAGGGTGGGTA   | 60.006 | 20 |
| 208 | 2942 | 3149 | ATTTTCATCGGAAATGCTGC   | 60.045 | 20 |
| 136 | 782  | 917  | TACGCAGCATCCTATTCACG   | 59.856 | 20 |
| 134 | 1896 | 2029 | ATTTTCAACGGTGGGAACTG   | 59.83  | 20 |
| 150 | 89   | 238  | AATGACTCAATCTGCAAGCGT  | 59.896 | 21 |
| 259 | 415  | 673  | GGTCAAATCGTGGTCCATTC   | 60.181 | 20 |
| 267 | 2093 | 2359 | CGAAACCAGAACCAACAAGC   | 60.668 | 20 |
| 186 | 402  | 587  | TACCCCCACCCACTACTCTG   | 59.837 | 20 |
| 267 | 1856 | 2122 | GAAAGCAATGATGACGACGA   | 59.805 | 20 |
| 280 | 29   | 308  | TCCGCCTTAATCCATCAAAC   | 59.901 | 20 |
| 184 | 629  | 812  | GATAGTCCATGCCCATGAT    | 59.592 | 20 |
| 102 | 628  | 729  | ATGATTCTTTATGGCGTCTG   | 59.057 | 21 |
| 172 | 1185 | 1356 | TCTCGCCAACGTACCTCTCT   | 60.012 | 20 |
| 224 | 1193 | 1416 | AGGGAGGAGAGAGAAGGCAA   | 60.468 | 20 |
| 243 | 10   | 252  | TTCATAACATTTCTATCGGTAT | 59.71  | 26 |
| 140 | 41   | 180  | TTTGCACCTGAGGAGGTGTT   | 60.69  | 20 |
| 170 | 744  | 913  | ATTGCGGTAAAGACCACGAC   | 60     | 20 |
| 261 | 1005 | 1265 | GGAATGCCTCCACAACATTT   | 59.797 | 20 |
| 231 | 2181 | 2411 | TCTCACATATTTCCATTGCG   | 59.499 | 20 |
| 129 | 184  | 312  | AAGCACTTGCTACGAGCCAC   | 60.602 | 20 |
| 246 | 929  | 1174 | TCCGGTCTATTCTCACCTCAA  | 59.679 | 21 |
| 145 | 501  | 645  | TTTGCTACTTTGTCCCGGAT   | 59.569 | 20 |
| 211 | 2432 | 2642 | ACACGATGATGATGAAGGCA   | 60.08  | 20 |
| 174 | 240  | 413  | CTCCCAACCCACAATACCAC   | 60.088 | 20 |
| 206 | 204  | 409  | ATGAGAGGACTGCGAGGAAG   | 59.555 | 20 |
| 165 | 443  | 607  | GACGAAGAAAAGGATGTCCG   | 59.67  | 20 |
| 263 | 1937 | 2199 | GAAAGCAGTGACGAAGGGTC   | 59.851 | 20 |



|     |      |      |                        |        |    |
|-----|------|------|------------------------|--------|----|
| 240 | 409  | 648  | ATCGTGAAAAGCACGGTGA    | 59.199 | 20 |
| 266 | 494  | 759  | TTTTGTAGGTGTGAGGCCAA   | 59.17  | 20 |
| 218 | 1074 | 1291 | CTGGAAAAGACAGCCATCGT   | 60.255 | 20 |
| 248 | 2151 | 2398 | AAGCTAGTGTGCTGGCTGCT   | 60.364 | 20 |
| 127 | 71   | 197  | GGCATCATATATGCGGTTGG   | 61.077 | 20 |
| 253 | 14   | 266  | TCGTGTTAAAGCACGGTATCA  | 59.24  | 21 |
| 184 | 743  | 926  | TAATGGACGTCATGACCGAA   | 59.924 | 20 |
| 191 | 429  | 619  | TACCAATGGACCACAAGCAA   | 59.964 | 20 |
| 122 | 258  | 379  | CCCTTCAATCCCAAGGTTTT   | 60.159 | 20 |
| 277 | 720  | 996  | GCTGTTTTCCATTTGATCTGC  | 59.705 | 21 |
| 206 | 83   | 288  | AGCGCAAGAGCATAAGCATT   | 60.145 | 20 |
| 250 | 601  | 850  | AAGGTGGCTTCACACACAAA   | 59.187 | 20 |
| 223 | 267  | 489  | ATTCAATGGCAATCTCCTGG   | 59.894 | 20 |
| 100 | 1120 | 1219 | ATTGATGCCTGAAGAATGGG   | 59.894 | 20 |
| 124 | 17   | 140  | AATTGAATGGCAAGGATTGG   | 59.762 | 20 |
| 265 | 30   | 294  | AAGGCAATATGCTGACGGAC   | 60.103 | 20 |
| 217 | 2940 | 3156 | CCAAGGGCATTACTCTGAT    | 59.955 | 20 |
| 173 | 265  | 437  | CCCCGACAATCATCACTCTT   | 59.927 | 20 |
| 114 | 863  | 976  | CAACCCCTCTCCTTCTGTCA   | 60.229 | 20 |
| 266 | 1480 | 1745 | GCTAATCCAAACGATCCCG    | 60.42  | 19 |
| 177 | 1708 | 1884 | TTCCCGTGAAGCACTAGTTT   | 58.893 | 21 |
| 241 | 32   | 272  | ATCAATGCATTTTCCAAGGC   | 59.907 | 20 |
| 238 | 1017 | 1254 | CATGGAATCTTTCCAGCAC    | 60.461 | 20 |
| 249 | 741  | 989  | CGCACTCTGCAACTGAA      | 59.742 | 19 |
| 277 | 216  | 492  | TACCCGCCATTGTTTCTCTC   | 60.074 | 20 |
| 246 | 1692 | 1937 | CCAATAGTTCAGCACCATCA   | 60.899 | 21 |
| 280 | 963  | 1242 | TTGTCAATCGAATTAAACCGT  | 57.181 | 21 |
| 164 | 285  | 448  | TGATACTTTTGAATCGGGGC   | 59.901 | 20 |
| 207 | 2758 | 2964 | AAAGGGGAGAGCAGGAAAAT   | 59.171 | 20 |
| 250 | 178  | 427  | TTTGTTCAATCGCTTTGCTG   | 59.992 | 20 |
| 221 | 566  | 786  | TCAAAGCTTTGATGGAGCA    | 59.542 | 20 |
| 172 | 1    | 172  | CATTGGAGGGAGAAAGGGA    | 59.988 | 19 |
| 278 | 85   | 362  | GCATGGAGCCAAAAGAAAAA   | 60.188 | 20 |
| 202 | 2806 | 3007 | ATTGAATCTCCCACTTCCGA   | 59.483 | 20 |
| 183 | 2230 | 2412 | TGCTCTTGCACTTGAGCCTA   | 59.888 | 20 |
| 270 | 536  | 805  | CCGGCTATCTCACTCCAGAC   | 59.827 | 20 |
| 266 | 589  | 854  | GATCCCGTATTCTCACCCCT   | 60.154 | 20 |
| 210 | 2625 | 2834 | CAGTCACAAAAGGGGGAAAA   | 59.942 | 20 |
| 265 | 1992 | 2256 | AATCCCTCCGGTTCAAATC    | 60.131 | 20 |
| 232 | 255  | 486  | TCAGTCCCATCAGCCAGATT   | 60.622 | 20 |
| 193 | 919  | 1111 | AAAATGCGCTTTCTGCAAAT   | 59.859 | 20 |
| 225 | 235  | 459  | TCAATTTGATAATTTGAAGCTC | 60.214 | 27 |
| 149 | 508  | 656  | CGTAACGTCAGCTTCTTCCC   | 59.875 | 20 |
| 178 | 79   | 256  | TCTGAAACCACACCTCCACA   | 60.129 | 20 |
| 221 | 20   | 240  | CTATGGTGGTATGGTGTGGG   | 58.569 | 20 |
| 232 | 621  | 852  | TATGAGGGGAATGCACCACT   | 60.34  | 20 |
| 222 | 1158 | 1379 | GCTCAAGTTTCCGAGCTGAC   | 60.142 | 20 |
| 265 | 5366 | 5630 | AATCCAAGATGGTGTCCCAG   | 59.779 | 20 |
| 208 | 237  | 444  | GCCGTTCTTCCCTTCTCTCT   | 59.957 | 20 |
| 231 | 248  | 478  | TTCCAATCCAGTTTTCTGGG   | 59.903 | 20 |
| 277 | 147  | 423  | CAGGAGCAACCATTTTGTGA   | 59.691 | 20 |
| 198 | 823  | 1020 | ACTTCACCCATTTCCACCAA   | 60.21  | 20 |
| 193 | 2750 | 2942 | CCTGAGCGGATAAATCCAGA   | 60.17  | 20 |
| 276 | 20   | 295  | AAGGAGGTGTTATGAAGGGAT  | 58.028 | 22 |
| 250 | 930  | 1179 | CATCATGTAGGAAAATGTTTAC | 57.372 | 25 |
| 224 | 2786 | 3009 | GTGGACGTCCCAGATTGTTT   | 59.827 | 20 |
| 171 | 60   | 230  | TCAAATCATTGTTGTTTACAA  | 59.575 | 24 |
| 237 | 314  | 550  | CACCTAACCCCTCTTGGC     | 61.008 | 20 |

|     |      |      |                       |        |    |
|-----|------|------|-----------------------|--------|----|
| 278 | 866  | 1143 | CTCTTCGGTGATCAAGCGTT  | 60.397 | 20 |
| 102 | 7842 | 7943 | AAACCCCTCCATCAACAAGA  | 59.381 | 20 |
| 272 | 651  | 922  | GCTGAAGCAATCGAGAAGGT  | 59.579 | 20 |
| 148 | 686  | 833  | TACAGCGTGGACGGTACAGA  | 60.324 | 20 |
| 180 | 21   | 200  | ATTAGTGGGGGATGATGTGG  | 59.483 | 20 |
| 187 | 26   | 212  | AGGCCTAATTGCCGTCCTAT  | 59.951 | 20 |
| 111 | 2162 | 2272 | TCCGAGCTTCACATCCTCTT  | 59.95  | 20 |
| 229 | 589  | 817  | AAACACAAAAATTAGCATACA | 57.517 | 24 |
| 254 | 299  | 552  | CAACAAAAATCCTAGTCCATC | 60.223 | 23 |
| 258 | 654  | 911  | CCTTCCCACATTCCACATCT  | 59.779 | 20 |
| 154 | 1600 | 1753 | GGGCCTACACTATCTCTGCG  | 59.859 | 20 |
| 222 | 515  | 736  | ATGTTGCCACCTCAGCTTCT  | 59.874 | 20 |
| 118 | 1980 | 2097 | TCATGACTCACGAGATGGGA  | 60.205 | 20 |
| 144 | 11   | 154  | CCCAAGCATTAAAGCCATA   | 59.922 | 20 |
| 166 | 425  | 590  | GCTCCAAACTTGATCCGAGA  | 60.34  | 20 |
| 256 | 23   | 278  | CCTTATCCCGTTATGATTGTT | 59.251 | 22 |
| 208 | 103  | 310  | TCAGACCAAATCAGAAGGCA  | 59.369 | 20 |
| 242 | 1619 | 1860 | TGAGGGATGATGCATACGAA  | 60.033 | 20 |
| 225 | 937  | 1161 | ATCACAAAATTCACACCCCG  | 60.615 | 20 |
| 181 | 825  | 1005 | GGGCTAAAATGGTGTGGAA   | 59.801 | 20 |
| 224 | 1380 | 1603 | TCCTTCCTCAGATTGGCAT   | 59.629 | 20 |
| 223 | 1547 | 1769 | ACTCGACTTCATCCGTTTGG  | 60.111 | 20 |
| 125 | 251  | 375  | TCAAGCTAACCAGCCAACCT  | 59.875 | 20 |
| 216 | 197  | 412  | CATCATTTACCTCCTATCGC  | 59.542 | 21 |
| 229 | 5360 | 5588 | CCGTGGAAGACAAGGGATAA  | 59.926 | 20 |
| 184 | 1072 | 1255 | AAAACGCAAACACATACGCA  | 60.177 | 20 |
| 271 | 1048 | 1318 | ATGTCGTGTAGGGAAGGCTG  | 60.134 | 20 |
| 265 | 2696 | 2960 | ACGAACATTGTCACCGTCAA  | 60.008 | 20 |
| 276 | 962  | 1237 | CTGGTTTGTACCCCTTCCA   | 59.824 | 20 |
| 277 | 662  | 938  | TGATGGGTGAAACCATCTCA  | 59.893 | 20 |
| 150 | 810  | 959  | AAGCAAGAGCAAAACCCAAA  | 59.861 | 20 |
| 245 | 743  | 987  | AAAGCTGTGGTCGGCATAAG  | 60.27  | 20 |
| 149 | 38   | 186  | TTCGAACGCAATGCAATAAA  | 60.211 | 20 |
| 113 | 2969 | 3081 | CGAGTTCAGCTCGTTTTTCA  | 59.195 | 20 |
| 134 | 41   | 174  | AGCAAAATTGGTCTCTATGTG | 59.656 | 26 |
| 254 | 1010 | 1263 | TCTAAAAACCGACACCCAC   | 59.83  | 20 |
| 173 | 445  | 617  | GAGAAATCAATCTCAGCCGC  | 59.923 | 20 |
| 256 | 149  | 404  | CCGGTTATCCAATCCATTTT  | 59.091 | 20 |
| 169 | 675  | 843  | TCCTCCTAAAATAACGGCCA  | 59.542 | 20 |
| 100 | 634  | 733  | TGTCGTGGGTGTAGTGATGG  | 60.44  | 20 |
| 279 | 521  | 799  | GTGGCATCGTGAGGAGTGT   | 59.682 | 19 |
| 205 | 143  | 347  | AAAGTCCTACATGCCGGTTG  | 59.993 | 20 |
| 167 | 2049 | 2215 | CCCCACTTCCTCTGTTTCAC  | 59.549 | 20 |
| 223 | 2437 | 2659 | TTTATGGAGTGGCACTGTGG  | 59.566 | 20 |
| 241 | 634  | 874  | ATGAGTTATCACCGGATCGC  | 59.923 | 20 |
| 221 | 502  | 722  | GCGAGAATTAGCTGCCACTC  | 60.125 | 20 |
| 181 | 272  | 452  | CCGGCTCCGATCTATACAAA  | 60.053 | 20 |
| 188 | 425  | 612  | AAAACCTCCAATCCCTCCAC  | 60.169 | 20 |
| 182 | 623  | 804  | GTTGATAGATGGGCATTGGC  | 60.304 | 20 |
| 110 | 279  | 388  | AAACGTTGCCTCAATTTTCG  | 60.11  | 20 |
| 254 | 20   | 273  | GGAACCAACCGAGTACCAAGT | 58.917 | 20 |
| 262 | 446  | 707  | ACGGTGGGAGAAATGAATGA  | 60.317 | 20 |
| 101 | 24   | 124  | GGTTATCACCGGATCGCTAC  | 59.415 | 20 |
| 212 | 587  | 798  | CAACTCAGCAAGTCCTGCAA  | 60.175 | 20 |
| 211 | 445  | 655  | TGAAATTCATGTGGGTCAGC  | 59.502 | 20 |
| 188 | 2632 | 2819 | CTTGATTCCGGATCGCTTTTC | 59.784 | 20 |
| 247 | 440  | 686  | ATCGTTGAAGATATTCCGCA  | 58.187 | 20 |
| 119 | 166  | 284  | ATCTGGTATCGGAGCCAGG   | 60.042 | 19 |

|     |      |      |                         |        |    |
|-----|------|------|-------------------------|--------|----|
| 247 | 559  | 805  | AATTACATTGGGCCATCCTG    | 59.645 | 20 |
| 214 | 162  | 375  | ATATTCGGATCAGGAATGCG    | 59.885 | 20 |
| 163 | 242  | 404  | TTCCAAATGCAACTGGTGAA    | 60.088 | 20 |
| 261 | 306  | 566  | ACGTCGCAAGCACATAACAA    | 60.324 | 20 |
| 198 | 383  | 580  | TTCTCGGGATTTAACGTCCA    | 60.439 | 20 |
| 203 | 137  | 339  | AGCTTAAAAGGCCGGTCAAT    | 60.095 | 20 |
| 268 | 123  | 390  | CCCAGATAATTTTATATGTGGT  | 57.101 | 24 |
| 209 | 403  | 611  | GTGATTGGTGGTTTTGTGGA    | 59.241 | 20 |
| 248 | 805  | 1052 | GGCTTCTTCTCTACCCAATCG   | 60.214 | 21 |
| 209 | 338  | 546  | CTCTCCAAAACAGTCCCTCTC   | 59.365 | 22 |
| 253 | 250  | 502  | TGAACATATCGTCCCCTTCC    | 59.75  | 20 |
| 161 | 778  | 938  | ATGAATTGCCACTCGACCTC    | 60.081 | 20 |
| 277 | 2455 | 2731 | CGTTCATTGCATGTGGTTACA   | 60.43  | 21 |
| 179 | 835  | 1013 | CCCATCTCGAACATTCCTGT    | 59.927 | 20 |
| 149 | 247  | 395  | CATGCAGTTTTGTCCAATG     | 59.964 | 20 |
| 258 | 577  | 834  | GCCGCAATATACATGGCTTT    | 59.956 | 20 |
| 213 | 2361 | 2573 | GTTCTTTTTGCATTAGCCTTTG/ | 59.795 | 23 |
| 276 | 360  | 635  | GACTAGCAAATTTCCGGATGA   | 59.172 | 21 |
| 168 | 3    | 170  | GGAGTTTTGACCTAATTAAGA   | 58.571 | 24 |
| 258 | 1464 | 1721 | TTCTCATGTGACTGAGGGCA    | 60.402 | 20 |
| 232 | 837  | 1068 | AAGAAATTTATGCCCCCTCAA   | 59.795 | 21 |
| 279 | 575  | 853  | TGTTGCCTTGCAAATTATTTCT  | 58.808 | 22 |
| 274 | 199  | 472  | CTGCAAAGAAGAGTGGAGGC    | 60.134 | 20 |
| 238 | 8    | 245  | TTTCGTGTTTCTTTTGATTTTC, | 60.019 | 24 |
| 227 | 309  | 535  | ACTCAATGGACACATGCCAA    | 59.967 | 20 |
| 195 | 276  | 470  | TTTTACTTCCCCTCGTGCAT    | 59.569 | 20 |
| 176 | 733  | 908  | ACCCTTTTTGACTTTGCGTG    | 60.147 | 20 |
| 240 | 902  | 1141 | GGCCTGGGCCTACATAAGTT    | 60.34  | 20 |
| 275 | 712  | 986  | ACCAACATCACACTCGACCA    | 60.005 | 20 |
| 188 | 328  | 515  | GGCTTTTGGAGCTGTAGTCG    | 60.015 | 20 |
| 269 | 24   | 292  | GTGGTTATTAGGGGATGGTGA   | 58.634 | 21 |
| 223 | 1489 | 1711 | TTTCAAACGAGATCTCAGGG    | 57.865 | 20 |
| 192 | 270  | 461  | AAAGGCCACGATGGTTATT     | 60.562 | 20 |
| 114 | 1264 | 1377 | GGAATTC AATTGTTTATTTGTT | 59.706 | 25 |
| 237 | 1729 | 1965 | TGTGTCGTGTTTCGTGTCAA    | 59.751 | 20 |
| 229 | 1278 | 1506 | CTGGACGACGATACAAACGA    | 59.716 | 20 |
| 206 | 493  | 698  | GGCAACCCACTTGTGAAACT    | 60.012 | 20 |
| 278 | 103  | 380  | TTGATATTCTCACCATCCTACT  | 57.774 | 24 |
| 255 | 1456 | 1710 | TGGGACCCTAATACCCATCA    | 60.059 | 21 |
| 210 | 286  | 495  | CCAAAATTGGCGGATAACTG    | 60.315 | 20 |
| 246 | 16   | 261  | CAGAGCGCACTCGAAAAGTA    | 59.366 | 20 |
| 240 | 473  | 712  | AAATATCGGCCGTCAGATTG    | 59.923 | 20 |
| 204 | 24   | 227  | GGCCTCTTGACAAAAAGCTG    | 59.993 | 20 |
| 159 | 524  | 682  | AACCGGTATCGTATCACGGA    | 60.214 | 20 |
| 205 | 43   | 247  | AGCCATCCATTCCGAAATTA    | 59.369 | 20 |
| 279 | 681  | 959  | CATGGTGTGTGAGAGAGGGA    | 59.659 | 20 |
| 232 | 487  | 718  | CTCAGCTGGTATCTGCGGTT    | 60.419 | 20 |
| 188 | 675  | 862  | AATCACCAAACGTCACACGA    | 60.008 | 20 |
| 134 | 2110 | 2243 | CAGAAAGAGCCCATAGCCAC    | 59.836 | 20 |
| 212 | 297  | 508  | CAGCATGTTGCCATTAGGAA    | 59.688 | 20 |
| 269 | 16   | 284  | AAGGAGGTGTTATGAAGGGAT   | 58.028 | 22 |
| 269 | 2812 | 3080 | TCTTCTTCTGCCCCACCTAC    | 59.284 | 20 |
| 163 | 595  | 757  | ACCGACCAACATCACCTCTC    | 59.969 | 20 |
| 251 | 452  | 702  | ATGGGGTTCTTCTCCTTTCC    | 59.373 | 20 |
| 128 | 306  | 433  | AGGTGGCTTCTTTAGGGCTC    | 59.848 | 20 |
| 264 | 141  | 404  | TCAGCATGTTCCATGTTCAA    | 58.62  | 20 |
| 144 | 49   | 192  | CCCAAATCGATCCCTAGAA     | 58.971 | 20 |
| 272 | 573  | 844  | TTGGCCTCACGATAGCTCTAC   | 59.49  | 21 |

|     |      |      |                        |        |    |
|-----|------|------|------------------------|--------|----|
| 237 | 550  | 786  | GTGCCTGAACCACCAACTTT   | 60.012 | 20 |
| 222 | 261  | 482  | CACCGCTTATCATCAACGAA   | 59.688 | 20 |
| 125 | 393  | 517  | CACCACCTGCAATATCCACA   | 60.39  | 20 |
| 110 | 1637 | 1746 | ACACAACGAATTCCTACGGG   | 59.853 | 20 |
| 266 | 42   | 307  | TTCAAACCTTTGCCACTTCC   | 60.088 | 20 |
| 272 | 2639 | 2910 | TCAACGAGGAAATCGCTTCT   | 59.955 | 20 |
| 274 | 3391 | 3664 | AACCAACTCGTCAGACAGCA   | 59.467 | 20 |
| 158 | 877  | 1034 | CGCCCGTATGTTTCTCTCTC   | 59.836 | 20 |
| 132 | 77   | 208  | ACTCGAGCAAACCTGGCAAT   | 59.882 | 20 |
| 125 | 1000 | 1124 | AAGGGATGGTATCATTGATC   | 60.041 | 22 |
| 252 | 3617 | 3868 | GGTTGTCCGAGGCAAAAATA   | 59.938 | 20 |
| 213 | 221  | 433  | GAAAAGAGAGAGTGCATGCG   | 59.636 | 21 |
| 129 | 8    | 136  | TGTGTGAGTGTGTGTCTCGTG  | 59.352 | 21 |
| 276 | 137  | 412  | GTTTGAAGGAAAACCTCGTCCC | 59.969 | 21 |
| 167 | 276  | 442  | GTGCCTGCTCCACTTTCTTC   | 59.997 | 20 |
| 245 | 664  | 908  | CTGTGCAAGTTTCGTAGGCA   | 60.05  | 20 |
| 168 | 913  | 1080 | AAATGCAAGTTCGAGTTCAA   | 59.738 | 21 |
| 238 | 1700 | 1937 | TCTCAGCTCGATAAGTGGCA   | 59.697 | 20 |
| 277 | 144  | 420  | ATATCCTTTGAACCGGCACC   | 61.072 | 20 |
| 136 | 269  | 404  | TCGATCTGGGCTCTCTTGTT   | 59.95  | 20 |
| 223 | 190  | 412  | CGAGTGCTGTTGACGAAGAA   | 60.175 | 20 |
| 209 | 3583 | 3791 | TTGGAAGAGGAAAGTGGGTG   | 60.081 | 20 |
| 222 | 564  | 785  | CCACCATGATTTGATACACA   | 59.262 | 21 |
| 254 | 511  | 764  | CAATCATTACAGCCCTTCA    | 59.648 | 20 |
| 107 | 7    | 113  | GGTCCATAAGTGTTTTGAGTTA | 58.561 | 25 |
| 187 | 915  | 1101 | TGGTCTTGGTCACGATTCTC   | 58.643 | 20 |
| 216 | 293  | 508  | GATTTGGTGTGCTCAGTGGA   | 59.682 | 20 |
| 259 | 467  | 725  | ACCAAGCATGTGCAATTGTG   | 60.584 | 20 |
| 140 | 35   | 174  | ATTCAATGCGCGAGTTCTCT   | 59.985 | 20 |
| 133 | 807  | 939  | ATAAGGATCAACCGCCTGC    | 60.051 | 19 |
| 178 | 1209 | 1386 | CAGATGAAATCAAGCTGGCA   | 59.948 | 20 |
| 193 | 247  | 439  | AGCATCAGACCAATGTGCAA   | 60.272 | 20 |
| 270 | 1063 | 1332 | TGGTGCAGATGTCCTGGTTA   | 60.112 | 20 |
| 166 | 1261 | 1426 | CTACGCAGGGGCGTATGTAT   | 60.003 | 20 |
| 170 | 2995 | 3164 | GTGATCGCTGGTTCTTTCTG   | 60.263 | 20 |
| 278 | 3149 | 3426 | AGGTTGCGTCAGATTGGAAG   | 60.255 | 20 |
| 241 | 429  | 669  | GGCTTGGTCGGAGTTCTTC    | 59.794 | 19 |
| 221 | 611  | 831  | AATGATGTTAATCCAGCGGC   | 59.929 | 20 |
| 204 | 599  | 802  | CCACTCCATCACCATAACCA   | 59.215 | 20 |
| 165 | 2618 | 2782 | CATGCGTAAAGGCACAGTTG   | 60.316 | 20 |
| 256 | 36   | 291  | TGCGAGTATCAAAACCGAGC   | 61.304 | 20 |
| 205 | 193  | 397  | CAAGTATTCTCTCCCAGCC    | 58.741 | 20 |
| 272 | 77   | 348  | AAATGGTTCCCTCATGGACA   | 60.173 | 20 |
| 228 | 1379 | 1606 | TTCCACCTCAAAAACAAATGG  | 59.825 | 21 |
| 275 | 682  | 956  | GACAAATCACGCGAGGAAAT   | 60.081 | 20 |
| 187 | 3820 | 4006 | TTGGATATTGTTGGGCGAAT   | 60.153 | 20 |
| 231 | 3419 | 3649 | TTAATGGGATCATCACGCA    | 59.891 | 20 |
| 135 | 972  | 1106 | ATGGTGGTGTTCCTGTCT     | 60.431 | 20 |
| 273 | 263  | 535  | TTCCGGTACTTTCTTCCA     | 59.541 | 20 |
| 160 | 269  | 428  | CGCAGATCCCAGATTTGTTT   | 60.603 | 20 |
| 255 | 981  | 1235 | AATGTTGCTTGAAGGTGATCA  | 59.891 | 23 |
| 262 | 539  | 800  | ATATCAGGCCAAAAACGTGC   | 59.967 | 20 |
| 178 | 39   | 216  | GTTCAATGAGGTGTCTGCC    | 60.52  | 20 |
| 232 | 1785 | 2016 | CCCGAACTCCGAGTACAAAA   | 60.103 | 20 |
| 124 | 19   | 142  | TGCTGATCTATTTACATGCTTT | 60.158 | 25 |
| 144 | 423  | 566  | GAATGAAACCCTAGGGGGAA   | 60.124 | 20 |
| 250 | 591  | 840  | TCTGTCTGAAGTTCCTGGGG   | 60.229 | 20 |
| 278 | 1361 | 1638 | CATTGCCCTAACATCCCAC    | 60.192 | 20 |

|     |      |      |                         |        |    |
|-----|------|------|-------------------------|--------|----|
| 252 | 291  | 542  | AAAATAATGGTTTGAGCAAAT   | 59     | 24 |
| 200 | 1010 | 1209 | ATTGTTGTCCATACATTTTGA   | 58.612 | 24 |
| 198 | 2209 | 2406 | ACCCAAGTGGGTAACCCCTT    | 59.593 | 20 |
| 158 | 526  | 683  | GGGATGGATTGATGAAGATGA   | 59.7   | 21 |
| 274 | 578  | 851  | AAAATCCTTTCCACAACCCC    | 60.032 | 20 |
| 238 | 652  | 889  | GAGATGTGGGTGGTTTGCTT    | 59.973 | 20 |
| 104 | 10   | 113  | AGGGGTCCAAAAGCAGAAGT    | 60.11  | 20 |
| 122 | 199  | 320  | ATCGCAATCAACCATCCATT    | 60.163 | 20 |
| 239 | 253  | 491  | TTCTGCACAGATTTGATGGTCT  | 59.74  | 22 |
| 165 | 977  | 1141 | ACCGGGCAAGAAGAAAACCTT   | 60.11  | 20 |
| 257 | 515  | 771  | TTTGCCGTTCTTCATGAGC     | 59.94  | 19 |
| 278 | 931  | 1208 | GCTTCGATGTTGATGCTTGA    | 59.955 | 20 |
| 160 | 1227 | 1386 | TTTGCCATGTGTATCGTTGAG   | 59.6   | 21 |
| 257 | 9    | 265  | TCACCCAAAAATGGGTTATTA   | 59.753 | 24 |
| 216 | 735  | 950  | TAGCCCATACACACAAGGCA    | 60.134 | 20 |
| 113 | 2265 | 2377 | ATTGATGCCCTGGTTACAGC    | 59.962 | 20 |
| 254 | 1699 | 1952 | ATGCCAGAACTTACCGACCT    | 58.672 | 20 |
| 252 | 781  | 1032 | CCAAATTTTGATCAATTTCCA   | 57.478 | 21 |
| 272 | 905  | 1176 | TCCCTCTGTGTGTGATTTCC    | 58.482 | 20 |
| 205 | 1082 | 1286 | ACGAGGGGTTTCTCTCGTTT    | 60.11  | 20 |
| 274 | 403  | 676  | ATCTTGCATCGGCAAGAGAC    | 60.37  | 20 |
| 254 | 18   | 271  | AAAATCGATATTGAATTAAGT   | 59.114 | 26 |
| 149 | 1685 | 1833 | TTCACAAAGGGCTTTTCAGAC   | 59.345 | 21 |
| 135 | 85   | 219  | GGGTGGGGACATGCATAATA    | 60.414 | 20 |
| 275 | 6    | 280  | TCAACATCATCATCAACATAC   | 59.565 | 23 |
| 173 | 752  | 924  | AGCACTGCAACGCAACATAC    | 59.942 | 20 |
| 211 | 879  | 1089 | GCCTGCGAAAATCACAAGAT    | 60.221 | 20 |
| 137 | 16   | 152  | TAAGGGCGGTATCACCTGAA    | 60.46  | 20 |
| 245 | 2489 | 2733 | TGAACCGAAAATTGGGTAGG    | 59.795 | 20 |
| 277 | 616  | 892  | GAGCAAAGACAAAATGCCAA    | 58.895 | 20 |
| 280 | 514  | 793  | ATTGAGGAAGGGGTTTTTGG    | 60.159 | 20 |
| 243 | 428  | 670  | TGTTTTCGTTCTGAGAGGGG    | 60.224 | 20 |
| 158 | 432  | 589  | CTCGGCAAAAGTAGTGGACA    | 58.923 | 20 |
| 224 | 51   | 274  | CCGAAGCCCAAAAACAATA     | 59.937 | 20 |
| 253 | 511  | 763  | CATCAGCAGAGGCCAGATTT    | 60.362 | 20 |
| 183 | 139  | 321  | GTTTCACAGGAGGCGGTTTA    | 60.11  | 20 |
| 245 | 1153 | 1397 | TATCAGATTCAAAGACGGCG    | 58.869 | 20 |
| 257 | 2359 | 2615 | CTGAAACCTGGCATTACAA     | 59.691 | 20 |
| 210 | 48   | 257  | CCAGCCGTATTCTTTTCAA     | 60.067 | 20 |
| 213 | 276  | 488  | ATCGAACAATTCCTTCCACG    | 59.933 | 20 |
| 248 | 1596 | 1843 | CGCGAGATTCGATGGTAGAG    | 60.894 | 20 |
| 265 | 107  | 371  | ACTTCGATCACTTCGTTCCC    | 59.141 | 20 |
| 205 | 479  | 683  | TATATGTTGCAGGCCGAGAA    | 59.281 | 20 |
| 127 | 1986 | 2112 | CCCACACACAATGCAAGAAT    | 59.42  | 20 |
| 132 | 1097 | 1228 | ACCCCTTTTACCCTTTCCCT    | 60.048 | 20 |
| 275 | 694  | 968  | AAAATTTAGGGAACACGCCCC   | 60.184 | 20 |
| 232 | 431  | 662  | TTTCAGACATTTTCGATCCCAG  | 60.059 | 21 |
| 110 | 1606 | 1715 | GCAATGAGAAGAGGGACACC    | 59.661 | 20 |
| 248 | 1469 | 1716 | CAAGCCCAAATCAAGGAAAA    | 60.046 | 20 |
| 147 | 23   | 169  | CTCTCCTCTTTCTCCCTCTCC   | 58.627 | 21 |
| 172 | 522  | 693  | TAACAATGCAGTGGCTGACC    | 59.722 | 20 |
| 238 | 645  | 882  | CCCGAAAATTAATCCCACA     | 59.795 | 20 |
| 273 | 535  | 807  | CAATTCCAAACCATATCCA     | 58.133 | 20 |
| 227 | 445  | 671  | TCCTGTGAACCTTTTACGATTAC | 59.776 | 23 |
| 223 | 4    | 226  | CCTGCATGTGCAAATTGAAA    | 60.644 | 20 |
| 244 | 1838 | 2081 | GTTAATCCGACGGCTGAGAA    | 60.214 | 20 |
| 111 | 613  | 723  | TGTTGCGTCTTGTATTGGAGTT  | 59.677 | 22 |
| 267 | 226  | 492  | CAAACATTTATTTATGCACAC   | 58.489 | 26 |

|     |      |      |                        |        |    |
|-----|------|------|------------------------|--------|----|
| 239 | 3240 | 3478 | CCAATGATGGGTAACGGAAT   | 59.505 | 20 |
| 218 | 817  | 1034 | GTTTATGTTGCGAAATCGGC   | 60.465 | 20 |
| 227 | 950  | 1176 | TTCGCACAAATACAAATCGC   | 59.708 | 20 |
| 228 | 288  | 515  | ACATGCAATGAAAATGCCAA   | 59.937 | 20 |
| 277 | 344  | 620  | ATTCTATGGTGCCCCCTCTC   | 60.293 | 20 |
| 278 | 1326 | 1603 | CGAAAATTTTGCATATCGGTC  | 59.446 | 21 |
| 254 | 206  | 459  | GAATGATGCATGCTCTCACC   | 59.201 | 20 |
| 206 | 309  | 514  | GAAGGTGACGTGTTGCAGAA   | 59.88  | 20 |
| 211 | 123  | 333  | GCCTTTGGTGTGATTTTCCT   | 59.031 | 20 |
| 183 | 655  | 837  | ATGCCACCTAATTCTCTCGC   | 59.297 | 20 |
| 124 | 234  | 357  | TCCTTGAGCACCGACTAAT    | 59.694 | 20 |
| 267 | 203  | 469  | GAATGAGGGTTTTGTGGGA    | 59.767 | 20 |
| 265 | 1554 | 1818 | TTTCTGTGGACATTCAGGCA   | 60.24  | 20 |
| 245 | 203  | 447  | TCCCTGACCACCATCAATTT   | 60.173 | 20 |
| 238 | 700  | 937  | TGAGTGGATATATTGGGAAGG  | 60.034 | 22 |
| 234 | 1235 | 1468 | CTATCCAGACCACCCCTGAA   | 59.92  | 20 |
| 276 | 2072 | 2347 | TTTGAATTGGGGGATCTACG   | 59.756 | 20 |
| 127 | 279  | 405  | AAGCGATGCTCCAACCTTGAT  | 59.843 | 20 |
| 255 | 1115 | 1369 | GTTGATGCAGATGGTGGCTT   | 61.078 | 20 |
| 192 | 586  | 777  | CCAAGCATACGGTTATTGGG   | 60.202 | 20 |
| 161 | 732  | 892  | TCTCTCCCTTCTTCTGCTTCA  | 59.294 | 21 |
| 148 | 116  | 263  | GCGTGTGTTGTGCAAATTAAGG | 60.534 | 21 |
| 246 | 530  | 775  | CAAGATGGCATCATCCATTG   | 59.883 | 20 |
| 175 | 569  | 743  | ATTTGGCCTTGTCTGTCTGTT  | 59.598 | 20 |
| 129 | 582  | 710  | GCGAATTGTTCTTGTCCGTC   | 60.646 | 20 |
| 213 | 11   | 223  | TCACCAATTTGAATGGTTATCA | 57.873 | 22 |
| 210 | 2476 | 2685 | TCGGGTAAATTTGAGGTGGA   | 60.301 | 20 |
| 213 | 415  | 627  | TATGCTCGCTGGATTACGTG   | 59.856 | 20 |
| 231 | 273  | 503  | CTTGCAAGTTTCTCACCTCC   | 59.844 | 20 |
| 166 | 282  | 447  | TCGCTCTTGATGCAAGTTGT   | 59.596 | 20 |
| 227 | 2301 | 2527 | TGGAATTGGGATTGATGGAT   | 59.952 | 20 |
| 141 | 30   | 170  | GCACAACCACTCCACAAAGA   | 59.726 | 20 |
| 213 | 794  | 1006 | TTTGATAATGGTTTTGTACACA | 58.037 | 26 |
| 104 | 0    | 103  | GATCTAAGGGCCGAGATTTGT  | 59.568 | 21 |
| 257 | 1312 | 1568 | CTGTGCGGTGCATTTGATGAT  | 59.527 | 20 |
| 268 | 389  | 656  | GGTGGCAGTGGTGTCTCTTT   | 60.159 | 20 |
| 254 | 477  | 730  | TGCCTTGCCTCTTTCTCTGT   | 60.134 | 20 |
| 212 | 150  | 361  | TGCATACATGAATGGCTATGA  | 57.617 | 21 |
| 113 | 35   | 147  | GGCAGTCGTTTTGAGACGTT   | 60.299 | 20 |
| 233 | 175  | 407  | GCGGGAATCAACTTTATCGT   | 59.046 | 20 |
| 226 | 1125 | 1350 | TTTGTGTCGATCACCTGCAT   | 60.12  | 20 |
| 145 | 1727 | 1871 | TTCCTGAGTTGGTGAACACG   | 58.746 | 20 |
| 158 | 2365 | 2522 | AGGAGAGGTCGAAGGGGTAA   | 60.067 | 20 |
| 232 | 368  | 599  | TTGCTATTGAGAGGAAGCGA   | 58.747 | 20 |
| 270 | 781  | 1050 | GATGCTCGGTTACGCTTTTC   | 59.851 | 20 |
| 197 | 2886 | 3082 | TGCTGCTGCTGTAAACGAAC   | 60.203 | 20 |
| 247 | 9    | 255  | AGACAATGTTATCGATGGCG   | 58.6   | 20 |
| 202 | 680  | 881  | AATCCCCTCTCACCTTTGCT   | 60.074 | 20 |
| 259 | 1522 | 1780 | TCAAAAATCAGGCCAAATCA   | 59.087 | 20 |
| 166 | 1237 | 1402 | TTTCTGCATGATTTGGATGATT | 59.415 | 22 |
| 150 | 285  | 434  | TAAAATGAGCAGAGGCCGTT   | 59.845 | 20 |
| 191 | 1994 | 2184 | TGAGCTGGTTGATTCATTTTG  | 58.759 | 21 |
| 191 | 48   | 238  | GTGGGCGCAAGTAAAGAGAG   | 60.015 | 20 |
| 222 | 2165 | 2386 | TTGAACTTGTTCAAATCCATG  | 59.483 | 23 |
| 125 | 944  | 1068 | TTTGCTCTCTCACACATGCC   | 59.992 | 20 |
| 189 | 350  | 538  | GGAAATAATCGAACGGCAGA   | 60.038 | 20 |
| 261 | 805  | 1065 | ATCACCCCCTCTCCAAGAAT   | 59.755 | 20 |
| 253 | 8    | 260  | CGAACTTCCATCCTGCTTGT   | 60.255 | 20 |

|     |      |      |                         |        |    |
|-----|------|------|-------------------------|--------|----|
| 182 | 1294 | 1475 | CTGCTCTCATCTCACCACCA    | 59.98  | 20 |
| 147 | 47   | 193  | AATTGCCTTGTGTTTCTGGG    | 59.971 | 20 |
| 266 | 2487 | 2752 | TGCTGTGGAATACCTGGGTTA   | 60.372 | 21 |
| 203 | 694  | 896  | GGGCGTGATCTCTCAGTTTT    | 59.288 | 20 |
| 269 | 36   | 304  | GAGATATACGCGGTGGTGGT    | 59.843 | 20 |
| 202 | 6    | 207  | TGATTCTATTCTGTGCTTCGGA  | 59.845 | 22 |
| 189 | 1255 | 1443 | CCGATGGAAAATGGAAATTG    | 60.124 | 20 |
| 241 | 43   | 283  | TGCCAAGTGCTCAAATGACT    | 59.445 | 20 |
| 244 | 318  | 561  | CCTAGTGGGCCAAACCCTAT    | 60.2   | 20 |
| 226 | 1340 | 1565 | GTTGTTCCCAAGGATTGTGG    | 60.21  | 20 |
| 174 | 1320 | 1493 | ATCAGCTCTCGAGCCAGTGT    | 60.167 | 20 |
| 256 | 746  | 1001 | GGTTGATCGTAATGGGATGG    | 60.014 | 20 |
| 218 | 1487 | 1704 | CTCCTTCCGTTTGTGAGGA     | 60.224 | 20 |
| 269 | 310  | 578  | TATTGGGATTGTGCCCAAAG    | 60.692 | 20 |
| 242 | 1466 | 1707 | AATTGTTCAACCTCTCCGCT    | 58.792 | 20 |
| 249 | 1237 | 1485 | CATGTGGTTGAATTTCTGTTCA  | 59.43  | 21 |
| 113 | 4750 | 4862 | ACACGCAAAAGCAAGACACA    | 60.494 | 20 |
| 247 | 316  | 562  | AAACACGTTCTGTGAGTCGAA   | 59.339 | 20 |
| 203 | 228  | 430  | GTTTTTCCTTCCGTCCGAT     | 60.299 | 20 |
| 151 | 267  | 417  | CACATATAATCAGGGGCGGA    | 60.681 | 20 |
| 189 | 531  | 719  | TAGACGGGCGAGAAAGAGAG    | 59.711 | 20 |
| 221 | 811  | 1031 | TGCTCTCCGAAGATTCATCA    | 59.476 | 20 |
| 127 | 2516 | 2642 | AAAAACCAGCACCAATCCAG    | 59.971 | 20 |
| 259 | 208  | 466  | TTTTTCTCGACACATAGAGTCC  | 60.162 | 24 |
| 207 | 853  | 1059 | CCGATCATCATCCAAGTTCA    | 59.451 | 20 |
| 125 | 2376 | 2500 | GCTCCACTTCTTCTTGCTGC    | 60.285 | 20 |
| 266 | 253  | 518  | AATAATGGCGGGTACGTTGA    | 60.209 | 20 |
| 204 | 3815 | 4018 | AGCTTCGAGCCAAAGTCTTG    | 59.757 | 20 |
| 218 | 167  | 384  | GCGTCTCACCTAACCTCACC    | 59.727 | 20 |
| 260 | 295  | 554  | CTTGATTCCCAGAGCTTGA     | 60.331 | 20 |
| 190 | 3    | 192  | TTCCATGTAATAAAAAGTTTCC  | 58.876 | 24 |
| 216 | 203  | 418  | GGTCCAGATCATGGGTCCT     | 59.774 | 20 |
| 130 | 1    | 130  | TCCGATGGTTGTAGTGGAGTT   | 59.463 | 21 |
| 226 | 15   | 240  | CGTTTTCAGCACTCCAAGT     | 60.291 | 20 |
| 198 | 177  | 374  | CTGATAAGCCAGGGTATGGC    | 59.551 | 20 |
| 166 | 128  | 293  | GGACCAGCTCCAAATTCAAA    | 60.051 | 20 |
| 169 | 356  | 524  | ACTCAGAATTTGGCCGACTG    | 60.255 | 20 |
| 236 | 4442 | 4677 | ATGGCATGACTCTTGAGCCT    | 59.834 | 20 |
| 164 | 2249 | 2412 | TTCTGATATGGAAATGCCCC    | 59.722 | 20 |
| 247 | 1454 | 1700 | TATTACATCAGCCCGTGGGT    | 60.214 | 20 |
| 169 | 31   | 199  | CCAAAAACATCAAACCACCC    | 60.066 | 20 |
| 247 | 823  | 1069 | TTCGACGAGGCTTATGGACT    | 59.836 | 20 |
| 275 | 218  | 492  | TCGAGTTCAGACTCCAAAAAC   | 59.891 | 22 |
| 274 | 159  | 432  | ACCCTTGCATGCACATCATA    | 59.955 | 20 |
| 220 | 46   | 265  | AAAACACAGAAAGTTGCAGGC   | 59.415 | 21 |
| 215 | 211  | 425  | CCAGCTGACAATCCCCATAC    | 60.34  | 20 |
| 280 | 1723 | 2002 | TCCAAACTCCAACCTCCATAA   | 59.415 | 21 |
| 188 | 1112 | 1299 | GCATGATCAAAGAGGCCATT    | 60.043 | 20 |
| 242 | 824  | 1065 | TCCTTGGCATAACATTCTCTCTC | 58.411 | 22 |
| 141 | 463  | 603  | TCTACTTTAGCCGCCAAGGA    | 59.975 | 20 |
| 255 | 796  | 1050 | CCACCTTACCCATAGCAGC     | 59.717 | 20 |
| 276 | 991  | 1266 | AATGGGGGTATGTAACGACG    | 59.569 | 20 |
| 232 | 15   | 246  | CACAGCTGTCAATCAACAAGA   | 58.975 | 22 |
| 223 | 208  | 430  | CTGTCTCAGTCACCGTCGAA    | 60.022 | 20 |
| 246 | 224  | 469  | TTACTGTCAGTACGTCCGCC    | 59.935 | 20 |
| 274 | 1338 | 1611 | GACTTCTGGTGGACGACGAT    | 60.12  | 20 |
| 118 | 491  | 608  | CCTTACTCTTTCGCCGTTG     | 60.008 | 20 |
| 169 | 333  | 501  | TGCAAGAAGTTGCTCCTCT     | 60.134 | 20 |

|     |      |      |                        |        |    |
|-----|------|------|------------------------|--------|----|
| 237 | 0    | 236  | CCACCCTCCATTGCTCATAA   | 60.853 | 20 |
| 256 | 2061 | 2316 | TTTGCCTTTGATCGACACTG   | 59.84  | 20 |
| 163 | 692  | 854  | GGGATTTTCTCACAGCTTGG   | 59.67  | 20 |
| 278 | 1834 | 2111 | ACGCGTGTGACATGTTCTTA   | 60.183 | 20 |
| 237 | 466  | 702  | TATTGGCCTGGCCTAGTCTG   | 60.227 | 20 |
| 272 | 402  | 673  | TTGGCCTTGTCTCGTATAAA   | 59.595 | 21 |
| 269 | 1922 | 2190 | TCGATTGTATTTAAGCACGCA  | 59.365 | 21 |
| 275 | 47   | 321  | TGTTTTGTCACTGCACTACGAC | 59.047 | 22 |
| 250 | 1070 | 1319 | ACCCCTTTGTCTGATTCTCCT  | 59.935 | 20 |
| 188 | 241  | 428  | CCCATAAACCACACTAAAGAT  | 59.654 | 23 |
| 259 | 704  | 962  | CAAGGCAAGACTTGTGGTCA   | 59.873 | 20 |
| 272 | 337  | 608  | TCCCGTGAGGTAAACATCCT   | 59.405 | 20 |
| 174 | 144  | 317  | CAATACCTTAACCCCGACA    | 59.679 | 20 |
| 184 | 1682 | 1865 | CCTTCGGACAGCTCTTGAAC   | 59.989 | 20 |
| 167 | 359  | 525  | AGTGATCACACCTGCCATT    | 60.395 | 20 |
| 275 | 337  | 611  | AACATGGAATGAGTTAAGGGA  | 57.608 | 22 |
| 268 | 185  | 452  | GGTGTGCCTTGTCCAATTTT   | 59.836 | 20 |
| 238 | 409  | 646  | AAGAGGGCCAGGAACAAAAT   | 59.94  | 20 |
| 280 | 1542 | 1821 | TTTGAATGGATGAAATCTGCC  | 59.893 | 21 |
| 243 | 691  | 933  | TCAAACCATTATACCTACCGC/ | 59.385 | 22 |
| 270 | 897  | 1166 | GCTTATCTTTTCGGGCTGTG   | 59.845 | 20 |
| 110 | 568  | 677  | CTACGTAGCTCGGTTCTCCG   | 60.03  | 20 |
| 170 | 145  | 314  | AGAGTGGTCCTGCCTTTTT    | 60.11  | 20 |
| 232 | 135  | 366  | GAGTGGAGGATTCGGTGAAA   | 60.05  | 20 |
| 238 | 2992 | 3229 | GCAGATCCCAGTCTCTCTGC   | 60.104 | 20 |
| 255 | 6639 | 6893 | TGAGGCCAATTCCTCAGTGT   | 60.656 | 20 |
| 279 | 85   | 363  | ACTACCACCAGCACCTCCAC   | 60.033 | 20 |
| 271 | 59   | 329  | AACAAACGAAAGGGACCACA   | 60.388 | 20 |
| 215 | 728  | 942  | TCAGCAGCCATTGAGACATC   | 59.95  | 20 |
| 170 | 655  | 824  | ACAAAACAAAACAGGGGCAA   | 60.378 | 20 |
| 121 | 1    | 121  | CGAACCACGTTAAATCTCTGT( | 59.671 | 22 |
| 232 | 890  | 1121 | AGCTCATGGATTTCTGGTGG   | 60.073 | 20 |
| 196 | 57   | 252  | TAATCGTGTTCATTGCCTC    | 59.694 | 20 |
| 152 | 280  | 431  | TCGTGAGAGAGAGGCAGGTT   | 60.135 | 20 |
| 195 | 582  | 776  | TTTGGCGATATGCAATCAA    | 60.037 | 20 |
| 157 | 1642 | 1798 | TTAGGGCAGACACTGCATGA   | 60.413 | 20 |
| 160 | 778  | 937  | TGCTGAGACAGTGGAAGGTG   | 60.022 | 20 |
| 168 | 1423 | 1590 | GCGTGGTTGTGAGCGTATAA   | 59.759 | 20 |
| 251 | 8    | 258  | CCGATTGACAAATCCTCGTT   | 59.933 | 20 |
| 143 | 2631 | 2773 | CATGGCAGTTTACATTTGC    | 60.119 | 20 |
| 202 | 309  | 510  | TTTACAAGATCAATGGTCCCA/ | 59.315 | 22 |
| 159 | 11   | 169  | TTAACATCAACGGCTGCAAA   | 60.251 | 20 |
| 198 | 1432 | 1629 | GTCGACGTCTACAAAACGCA   | 59.911 | 20 |
| 252 | 589  | 840  | AGGAGGACGAGTGTGGTGAC   | 60.161 | 20 |
| 153 | 1635 | 1787 | CATTTTTAATTGCAAAATTAAT | 58.536 | 25 |
| 257 | 1064 | 1320 | ATAAAAATGGCACCCGACTG   | 59.823 | 20 |
| 101 | 18   | 118  | AAGGGTTATCACCTGATTTTCT | 57.73  | 23 |
| 268 | 2748 | 3015 | AAACGAAGCCACCTTTCAGA   | 59.853 | 20 |
| 214 | 522  | 735  | CCCAAAATCAACGTCCAGAT   | 59.79  | 20 |
| 188 | 3625 | 3812 | GCCTTGCCTTTTACGTCTTG   | 59.883 | 20 |
| 170 | 616  | 785  | CAGCCAGAGCATCAGATTCA   | 60.096 | 20 |
| 239 | 3636 | 3874 | CCACTGAATCGCACAAAAGA   | 59.84  | 20 |
| 278 | 172  | 449  | TCTGCGTTACTTGCTTTCCA   | 59.609 | 20 |
| 266 | 496  | 761  | TGAATATTGATTGGTCCATGC  | 58.296 | 21 |
| 196 | 1547 | 1742 | GTGCGAGATTCAACAACCG    | 60.31  | 20 |
| 216 | 3546 | 3761 | ATGTGCACAGCGAGGTATTG   | 59.746 | 20 |
| 157 | 831  | 987  | GGCCAGAACTGCTCAAAAA    | 60.365 | 20 |
| 279 | 2063 | 2341 | CCCCTATGAAGCCAGAAAA    | 61.291 | 20 |



|     |      |      |                        |        |    |
|-----|------|------|------------------------|--------|----|
| 179 | 13   | 191  | TTCCGGAAACTCACAAATCA   | 59.097 | 20 |
| 125 | 586  | 710  | AAGTGTGCAAATGGGTCTCC   | 59.973 | 20 |
| 250 | 865  | 1114 | GATTTGTTACCCTGGACGA    | 60.903 | 20 |
| 137 | 40   | 176  | GATTCTCACGCCATTCTCAA   | 60.207 | 21 |
| 246 | 493  | 738  | GCGTGGCATATTTCTGATGAT  | 59.944 | 21 |
| 212 | 561  | 772  | TCTGGACAAGAAGCCATTGA   | 59.369 | 20 |
| 108 | 1410 | 1517 | GTTTGTTCATTACGTTTCG    | 60.157 | 20 |
| 255 | 454  | 708  | TTTTATTATTTATTGCAAGTTT | 59.837 | 26 |
| 248 | 718  | 965  | GTCGGCAATTTCTTGATGCT   | 60.221 | 20 |
| 255 | 382  | 636  | TGTTGAACGTCTCCAACCTCC  | 58.697 | 20 |
| 264 | 1166 | 1429 | AGAAAAGGGGAGTTGAGGGA   | 60.045 | 20 |
| 149 | 565  | 713  | GCAGAACTTGCGGAGTCTT    | 59.621 | 20 |
| 170 | 950  | 1119 | CCGTGGTGATTCTTTGGACT   | 59.966 | 20 |
| 227 | 508  | 734  | AGTTAACCTTGCAAGCTGCC   | 59.522 | 20 |
| 240 | 565  | 804  | TCTTGCTCCTAATCGTCGGT   | 59.836 | 20 |
| 219 | 732  | 950  | GCCATGAACTATATTGATTTTC | 59.28  | 24 |
| 267 | 6061 | 6327 | TGCCTCAAATATCTGCTCCA   | 60.727 | 21 |
| 213 | 195  | 407  | ATTGGTTTGGCAAAGCCTC    | 61.339 | 20 |
| 272 | 1771 | 2042 | CCTTTCTCAAATGAAGAGAAA  | 58.971 | 24 |
| 177 | 770  | 946  | GTGCAGAGATTTGTGGCAGA   | 59.992 | 20 |
| 259 | 352  | 610  | TTTTCAGTGGTGGTTGTTGTTT | 57.248 | 22 |
| 223 | 1059 | 1281 | TATAAAAATGCAGCCAGGGG   | 59.922 | 20 |
| 230 | 3322 | 3551 | CGAAAGCACAAACATCATGC   | 60.265 | 20 |
| 225 | 1292 | 1516 | AAAAACGCGGAAATCACATC   | 59.945 | 20 |
| 110 | 1079 | 1188 | GTCGTCGTTTCCACCTCTGT   | 60.159 | 20 |
| 233 | 376  | 608  | GCGGCTCTGCAACTTTTAGT   | 59.66  | 20 |
| 267 | 1205 | 1471 | GATCAGGTTAGCCTTGCCG    | 59.694 | 20 |
| 260 | 966  | 1225 | GCCATTCTCCTTCAAACCA    | 60.051 | 20 |
| 254 | 341  | 594  | GCCCAAGATACTCCATCAA    | 59.894 | 20 |
| 240 | 3097 | 3336 | AGGCATTGGTTTGTGGAAG    | 59.971 | 20 |
| 249 | 17   | 265  | AAGGAGGTGTTATGAAGGGAT  | 58.028 | 22 |
| 229 | 3256 | 3484 | CGCTTGTTCCCTGGTAGGAG   | 59.869 | 20 |
| 274 | 70   | 343  | GGTTGATGTCATCGTCATGG   | 59.769 | 20 |
| 262 | 17   | 278  | ACGGCACAGATTACAGCACA   | 60.333 | 20 |
| 114 | 3225 | 3338 | AATGCAAATGGGCACTTCT    | 59.574 | 20 |
| 137 | 882  | 1018 | TGAAAGGTAGGGTTTTCGCA   | 60.608 | 20 |
| 240 | 513  | 752  | AAAATCGTCGTGCGTAGAGG   | 60.27  | 20 |
| 269 | 6259 | 6527 | TGAAGTTGACGAAGAAGATGA  | 59.906 | 23 |
| 189 | 541  | 729  | GGTTGAACTGTTGTCCTGTCTC | 59.664 | 22 |
| 275 | 453  | 727  | AATCTCCGGCTGAAACTGTC   | 59.288 | 20 |
| 144 | 338  | 481  | TGAATCATCGATGTGATGGG   | 60.291 | 20 |
| 238 | 2766 | 3003 | TCTGAAACTCTCAACAGATTCC | 59.743 | 23 |
| 196 | 14   | 209  | ACACTTAAGGGGGTTATTAGTC | 59.26  | 24 |
| 161 | 25   | 185  | TGGGAACACTCTTCAGGACA   | 59.23  | 20 |
| 197 | 965  | 1161 | TTCCGGATTTTTTCATTGGA   | 60.239 | 20 |
| 252 | 0    | 251  | CAGATTTGTTATGTGTTTTGAC | 57.29  | 25 |
| 213 | 1    | 213  | TGGTGGCTGAAATGCTTGTA   | 60.257 | 20 |
| 240 | 367  | 606  | TTCTGCCCTTAAGGCTGTTG   | 60.378 | 20 |
| 256 | 3985 | 4240 | ACCGAAAGAAGCATTGGCT    | 59.828 | 19 |
| 176 | 476  | 651  | GAGTCATCAAGAAGGCCAGC   | 59.957 | 20 |
| 136 | 33   | 168  | CCAGGATGGTGATACATTTGG  | 60.059 | 21 |
| 183 | 1130 | 1312 | GCTAGATGGCCGAAAATGAT   | 59.142 | 20 |
| 157 | 134  | 290  | AGCCTGTACGACTCCGACAC   | 60.329 | 20 |
| 270 | 145  | 414  | ATTTGAGGGGGAAAGGAGAG   | 59.508 | 20 |
| 204 | 856  | 1059 | GGCATAGGTTTGGGTTTCAA   | 59.801 | 20 |
| 195 | 196  | 390  | GAGGATCTGTGGGGTGGTAA   | 59.779 | 20 |
| 156 | 216  | 371  | GGAATTCCAGCAACCTCTTG   | 59.67  | 20 |
| 204 | 3424 | 3627 | TTCGAGGCGTTTTCTAGGTG   | 60.378 | 20 |

|     |      |      |                         |        |    |
|-----|------|------|-------------------------|--------|----|
| 266 | 200  | 465  | GTGTCAAATTCGCAACGAAG    | 59.322 | 20 |
| 236 | 1316 | 1551 | TTTGATGGGATGGTATGTTTAT  | 58.618 | 23 |
| 273 | 296  | 568  | TTAACCAACATCCCATCTCCA   | 60.177 | 21 |
| 121 | 9    | 129  | AAAAATCAAAGGCCCAAT      | 58.418 | 20 |
| 139 | 763  | 901  | CATGTGCCATCAAAAAGAGGA   | 59.648 | 20 |
| 204 | 21   | 224  | CACGAATGAAACAAGTTGGG    | 59.021 | 20 |
| 181 | 566  | 746  | TGATTTCAAGTTGGTAGCAGGA  | 59.747 | 22 |
| 205 | 1327 | 1531 | ACATGGCGTGCTACAATCAA    | 60.142 | 20 |
| 207 | 347  | 553  | TCTTCTTCCCAGTTTCCCCT    | 60.045 | 20 |
| 255 | 333  | 587  | GGGTTATCATTTGAACGCGA    | 60.837 | 20 |
| 139 | 53   | 191  | CCAAGCAAAAAGACGACACT    | 60.291 | 20 |
| 280 | 572  | 851  | GCTTTGGAAGTGAGGACCAA    | 60.232 | 20 |
| 200 | 397  | 596  | ATTTCTGTAATTGGCTACGG    | 59.96  | 20 |
| 256 | 454  | 709  | TCTTTTGCAGCCCTCCTTTA    | 59.953 | 20 |
| 137 | 747  | 883  | TCGAAAAATGTATGGGGTCG    | 60.692 | 20 |
| 278 | 1633 | 1910 | AGGGACTTAACAAGCCATCG    | 59.195 | 20 |
| 146 | 12   | 157  | TTTCTCATACAAAAGACATTT   | 58.494 | 26 |
| 225 | 281  | 505  | TTTGATGCTCACAAGCAACC    | 59.847 | 20 |
| 156 | 3088 | 3243 | ACCTTAGCAACGAAGGAGCA    | 60.015 | 20 |
| 235 | 1562 | 1796 | TACGGTTTTACCTCGGGTA     | 60.357 | 20 |
| 217 | 610  | 826  | TTGACTGTCATTTTACCTCTTT/ | 58.392 | 26 |
| 165 | 4275 | 4439 | TAGCTTGCTCACCAACCCAC    | 61.236 | 20 |
| 257 | 402  | 658  | CGGTTCTGACCACTAAACGAC   | 59.648 | 21 |
| 141 | 57   | 197  | TTTGGATCTGTTTGTGAGTTG   | 60.147 | 22 |
| 126 | 2260 | 2385 | GATAATCACCGGAAAAGCGA    | 60.038 | 20 |
| 149 | 1508 | 1656 | GTGACCCTTTGTGGGAAGAG    | 59.549 | 20 |
| 157 | 14   | 170  | GAAATAAGGAGGTGTTATGAA   | 59.323 | 24 |
| 265 | 514  | 778  | TTGAGCGAAAGGGAAAGGTA    | 59.817 | 20 |
| 252 | 110  | 361  | AATCCGAAAATCTGCAGTGG    | 60.074 | 20 |
| 178 | 668  | 845  | GGAGCTCATGAACGAACCTC    | 59.81  | 20 |
| 276 | 838  | 1113 | GGCATAAGCTGTCAGGTCT     | 59.313 | 20 |
| 277 | 192  | 468  | GCCCAAATATTTCCAATCC     | 58.368 | 20 |
| 217 | 269  | 485  | TAGCCCTCTATCGGGCAAGT    | 61.099 | 20 |
| 151 | 54   | 204  | GGTAGTAGAGCCACGAGCCA    | 60.419 | 20 |
| 204 | 2328 | 2531 | TTCACCTTCTTTCCCCTTCC    | 60.414 | 20 |
| 243 | 644  | 886  | GGATCGCCAATACGTGAGTT    | 59.962 | 20 |
| 199 | 3751 | 3949 | TAGCGCTGCAGAATTCAAGA    | 59.856 | 20 |
| 251 | 692  | 942  | GTAAATCACGAGACCGCCAG    | 60.657 | 20 |
| 262 | 249  | 510  | AGAAATCCAGCAACCAATCG    | 60.074 | 20 |
| 219 | 1096 | 1314 | TGGGTTTCTCACCTTCACT     | 59.549 | 20 |
| 267 | 234  | 500  | CGTGCAAAATAGCACCAAGA    | 59.872 | 20 |
| 248 | 108  | 355  | AATGATGTTAATCCAGCGCC    | 59.929 | 20 |
| 258 | 633  | 890  | CATGCGTTGTCTGCCTTG      | 59.978 | 18 |
| 273 | 221  | 493  | TAATGGCCCTGAATCTTTTCG   | 60.031 | 20 |
| 188 | 1089 | 1276 | ACGCCTCAAGCACTGATCTT    | 60.02  | 20 |
| 278 | 689  | 966  | GTGGGTGCTTTTCTTGCTCT    | 59.478 | 20 |
| 181 | 939  | 1119 | CTGCCCTATTTCTTGCTCA     | 60.066 | 20 |
| 244 | 747  | 990  | GTCCAACGATCTTGTTGTTCA   | 59.525 | 20 |
| 176 | 632  | 807  | CAGAGCGCACTCGAAGAGTA    | 59.49  | 20 |
| 209 | 609  | 817  | TTCCCCCTTTTATGGTCAA     | 59.246 | 20 |
| 189 | 2355 | 2543 | TTTATGCAGCCATCAGACCA    | 60.22  | 20 |
| 139 | 1910 | 2048 | TTCAAAAATGCCACTGCTTG    | 59.849 | 20 |
| 241 | 181  | 421  | TTGAGGAAGGATTTGAGGCT    | 58.861 | 20 |
| 237 | 24   | 260  | CGGTTATCACCGGATCGC      | 62.397 | 18 |
| 146 | 3720 | 3865 | CAGCATCTTGCCTCAACAA     | 59.988 | 20 |
| 267 | 963  | 1229 | TCAACAACGGTAAGTTGCTCT   | 58.951 | 22 |
| 187 | 1313 | 1499 | CCCAGCACTTTCCTGTCATT    | 60.111 | 20 |
| 203 | 3419 | 3621 | TCAAGAATCCCTTTAGCCGA    | 59.778 | 20 |

|     |      |      |                        |        |    |
|-----|------|------|------------------------|--------|----|
| 274 | 58   | 331  | CCCCATTACCATCTTTCTCG   | 59.382 | 20 |
| 113 | 234  | 346  | AGGGAGTTGCTAGGGTGTGA   | 59.721 | 20 |
| 118 | 920  | 1037 | GCAAAAAGCGTTTCTCACCTT  | 59.499 | 20 |
| 262 | 920  | 1181 | CTTCCCCTTCGCTCCTACTC   | 60.34  | 20 |
| 150 | 142  | 291  | TCAAAAACCGAAAACCGAAC   | 59.953 | 20 |
| 223 | 692  | 914  | ATTCTATTGTAGCGGCCAA    | 59.569 | 20 |
| 220 | 1072 | 1291 | GCATCGTAAGGAGCGTTGAT   | 60.243 | 20 |
| 265 | 319  | 583  | ATCAGCACCCAACCAAAGAG   | 60.111 | 20 |
| 198 | 263  | 460  | CATGTTTGCAGTGGATGGAC   | 59.967 | 20 |
| 174 | 1262 | 1435 | TTGTTAGGGTTTTTGTCTGGG  | 59.833 | 20 |
| 229 | 280  | 508  | TGGAAATGAAGCGAGTTTCC   | 60.192 | 20 |
| 177 | 26   | 202  | TAAGAGTTGTCCGGAGTCGG   | 60.246 | 20 |
| 258 | 345  | 602  | CTTGTTGAGAGGTGGCTGTG   | 59.461 | 20 |
| 238 | 238  | 475  | TCAACGCCTCTAAAATGTTCC  | 59.215 | 21 |
| 228 | 652  | 879  | AATTTGCGTAGTGCAGAGGG   | 60.27  | 20 |
| 277 | 2224 | 2500 | TTTTGGTATCAGGGTTTCAGC  | 59.077 | 21 |
| 258 | 534  | 791  | TCCACCACTGTCAGAAAGCA   | 60.44  | 20 |
| 178 | 204  | 381  | AACCAGCTGACCATGTGAAA   | 59.139 | 20 |
| 218 | 0    | 217  | AATTTCTTGCTCCAAACCTTTA | 57.172 | 22 |
| 231 | 961  | 1191 | AATCAAAGAGCAATGAGCCG   | 60.352 | 20 |
| 191 | 54   | 244  | CAACAAATGCCAACGCTATT   | 58.701 | 20 |
| 265 | 314  | 578  | TTGATGTGAGATGGGCTTGA   | 60.201 | 20 |
| 219 | 12   | 230  | CCTACCTAAGGAGGGAGGGA   | 59.526 | 20 |
| 240 | 557  | 796  | CCCCTACGCACTCGTTTTT    | 60.118 | 19 |
| 233 | 392  | 624  | CCTGCTGTTGATTTGATGGA   | 59.648 | 20 |
| 231 | 245  | 475  | GGCGAAATGTTTTGCACTTT   | 60.117 | 20 |
| 128 | 145  | 272  | GAAAAATTCGTAAGTGGCCG   | 59.586 | 20 |
| 213 | 90   | 302  | TAACTCAAGGCCATTCCAA    | 60.439 | 20 |
| 223 | 586  | 808  | TTTCGGTTTGACCTTCTTCG   | 60.22  | 20 |
| 189 | 377  | 565  | ACCAAACCCATTCTTGTTCCA  | 60.21  | 20 |
| 167 | 682  | 848  | TTGATGGATTTTTCAAGCCC   | 59.878 | 20 |
| 142 | 804  | 945  | TTTCTTCAAATTTGGGGTGG   | 59.772 | 20 |
| 222 | 295  | 516  | AGTGCAAGCAAAAAGACGAA   | 60.046 | 21 |
| 249 | 1306 | 1554 | GAGGGAGCTGCAACAAGAAA   | 60.517 | 20 |
| 100 | 560  | 659  | ATGGCCACAAATGGTTCTTA   | 60.192 | 20 |
| 235 | 0    | 234  | TGTGACCTCAATTGCAAAAC   | 57.15  | 20 |
| 276 | 505  | 780  | AGATGGAAAACCGTTCAAAA   | 58.592 | 21 |
| 246 | 1044 | 1289 | TATCAAAGTTTGC GTTGGA   | 60.251 | 20 |
| 257 | 279  | 535  | TGAGCTGCAGCATTCTCAC    | 60.296 | 20 |
| 119 | 194  | 312  | GGTCAGTTTCTTGCTTGCAG   | 58.65  | 20 |
| 128 | 1333 | 1460 | CGTGCATTACTCGTTACTTG   | 58.384 | 21 |
| 237 | 2967 | 3203 | GGAACCAATCTGGTGCATTC   | 60.326 | 20 |
| 213 | 118  | 330  | TCAGATCACCACCGGACATA   | 59.918 | 20 |
| 136 | 1562 | 1697 | CGCACACACCATCTGTGAAT   | 60.604 | 20 |
| 250 | 73   | 322  | GGGATTCAAACCCAAACTCA   | 59.767 | 20 |
| 209 | 269  | 477  | TGAGGCAGCCAATTACATGA   | 60.22  | 20 |
| 252 | 2063 | 2314 | GTGAATGGAAATGGAATCCG   | 60.133 | 20 |
| 228 | 560  | 787  | ACTTCAAGGATTTGAGCCGA   | 59.813 | 20 |
| 261 | 32   | 292  | GCTTCTTCTTGCTGTGAGTGG  | 60.186 | 21 |
| 263 | 312  | 574  | TCCATCCCTTTCAACCATTC   | 59.727 | 20 |
| 272 | 1277 | 1548 | GCCACTCAAATGCTCCAC     | 60.646 | 20 |
| 238 | 396  | 633  | TATTGTCACATGGTCCGCAT   | 59.805 | 20 |
| 266 | 1684 | 1949 | TGTGCCTTGATTCATTGAAAA  | 59.147 | 21 |
| 193 | 670  | 862  | TCAAGATTTTGTGTGGCTGC   | 59.847 | 20 |
| 140 | 344  | 483  | CACCCCTGAAACTCCATCAT   | 59.779 | 20 |
| 229 | 556  | 784  | TGGAGTGCTGGTGAAAGAAA   | 59.415 | 20 |
| 260 | 85   | 344  | AACGCGCATTTTAGGGTTTA   | 59.624 | 20 |
| 274 | 17   | 290  | TGTCGGTGGACTGATTTGTG   | 60.57  | 20 |

|     |      |      |                        |        |    |
|-----|------|------|------------------------|--------|----|
| 265 | 39   | 303  | CGTGAGAAGCGTTGATATGGT  | 60.147 | 21 |
| 189 | 407  | 595  | ATGGTCAGGTTACGACAAA    | 58.984 | 20 |
| 238 | 293  | 530  | TCTGCGTCCATTTCACTCAA   | 60.39  | 20 |
| 277 | 1515 | 1791 | AGACATGGAATTAGGGCTCAG  | 58.28  | 21 |
| 211 | 803  | 1013 | CACCAAATGTATGTGCATGAG  | 59.469 | 22 |
| 234 | 143  | 376  | GGGATGGGGTAAGTAATGC    | 60.399 | 20 |
| 235 | 325  | 559  | GTTCAACCGCCAGATTTTCT   | 59.174 | 20 |
| 153 | 75   | 227  | AATCAGCTGCCAAACCAAGA   | 60.776 | 20 |
| 128 | 602  | 729  | AAAGGTCCCTCACCAGTCAA   | 59.549 | 20 |
| 129 | 898  | 1026 | GCTGCTCCTGTCTCTTTGCT   | 59.898 | 20 |
| 188 | 671  | 858  | GGTGCTGCAACTGAACTGAA   | 60.032 | 20 |
| 203 | 273  | 475  | CCCCCTTCTCTGACAGTTCA   | 60.229 | 20 |
| 232 | 519  | 750  | TGGCTATAGGACATCGAGGG   | 60.051 | 20 |
| 226 | 324  | 549  | TTTGCATGGAATAAGAATTTTC | 59.858 | 24 |
| 166 | 328  | 493  | TTAACCGCCAAACTCAAACC   | 59.975 | 20 |
| 173 | 1502 | 1674 | AGGGCTATTGTCATTTGACC   | 60.334 | 21 |
| 174 | 3913 | 4086 | CCTCTGGCTGTTCTGGATTT   | 59.284 | 20 |
| 240 | 579  | 818  | GCCATTGTTGTCTCTGTCCA   | 59.682 | 20 |
| 261 | 52   | 312  | CATGAATTTTTGGGAAGCTGA  | 60.06  | 21 |
| 194 | 3677 | 3870 | TGCTGGAACATCGAAGAAGA   | 59.522 | 20 |
| 274 | 940  | 1213 | TTCAGAGAATGCTGGGTTTG   | 58.847 | 20 |
| 135 | 1299 | 1433 | GCCCCACATTCAATACAGT    | 59.676 | 20 |
| 254 | 321  | 574  | GCGTCACACGTGATTCAAAA   | 60.709 | 20 |
| 195 | 28   | 222  | TGTACGTGCGTACGTGTGTG   | 60.293 | 20 |
| 189 | 926  | 1114 | TCCTGTTTGATGAAATGCCA   | 60.049 | 20 |
| 201 | 14   | 214  | GTCTGAGCGAGAGTGTGTGC   | 59.771 | 20 |
| 248 | 326  | 573  | AAATGAGATTGGTTCGAGCTT  | 59.268 | 22 |
| 275 | 1065 | 1339 | ACAAAGGTTGGAATGGCTTG   | 59.971 | 20 |
| 187 | 656  | 842  | CGGGTTAGACTTTGATTCCG   | 59.564 | 20 |
| 138 | 308  | 445  | TCAGAAATCCATCCCACGTT   | 60.317 | 20 |
| 199 | 1603 | 1801 | TGAAAGAAACCCATGTGCAA   | 60.088 | 20 |
| 226 | 2858 | 3083 | CGCCTTTGCATCTCCTGTAT   | 60.235 | 20 |
| 218 | 21   | 238  | ACATTAAAATGTGTATGCACC  | 58.505 | 24 |
| 102 | 1848 | 1949 | TGTGCATTTCAACTTGGGAA   | 60.088 | 20 |
| 238 | 993  | 1230 | AAGGGGAAAAGAAAAGGGT    | 60.156 | 20 |
| 210 | 380  | 589  | ATATATGGCGGTGGAGATGTG  | 59.682 | 21 |
| 194 | 12   | 205  | CATTGTGGGCCTTTGATTTT   | 59.801 | 20 |
| 202 | 1549 | 1750 | GCGGAGGCAACTATAAACGA   | 60.23  | 20 |
| 215 | 446  | 660  | GCGGCCAGTTCAATACAAAT   | 59.967 | 20 |
| 212 | 537  | 748  | AGAGAGAAAAAGCTTCGGGG   | 59.955 | 20 |
| 108 | 688  | 795  | AAAAACATCAACTGGGACCG   | 59.83  | 20 |
| 272 | 2071 | 2342 | TACCTTAGTGCCACCGATCC   | 59.955 | 20 |
| 220 | 0    | 219  | AGACCGGACCGTTAGGTAAT   | 57.55  | 20 |
| 129 | 837  | 965  | ACCTCCCTCCTCCTCAGTGT   | 60.112 | 20 |
| 237 | 327  | 563  | AAATGAAAGGGAATGAAACTT  | 59.026 | 23 |
| 276 | 120  | 395  | TTCACACCAGTCACCTCTGC   | 59.872 | 20 |
| 126 | 213  | 338  | CAGTGTGCTCTGCCAATC     | 59.445 | 20 |
| 270 | 1181 | 1450 | TCTACGGATTTAACCCCAA    | 59.269 | 20 |
| 188 | 4330 | 4517 | TCGAAAGTCCAATTTCCACC   | 59.91  | 20 |
| 228 | 412  | 639  | AAGAGGTGAGGGCTGTGATG   | 60.261 | 20 |
| 206 | 394  | 599  | GTGCTCCCCTCATCTTTTGA   | 60.195 | 20 |
| 251 | 109  | 359  | CTTTGATTCCCACCTTCAA    | 59.903 | 20 |
| 227 | 772  | 998  | CGATACAAACTTTCCAAGGCA  | 60.117 | 21 |
| 262 | 564  | 825  | CCAATAGCTTTTCGGCAAATC  | 59.682 | 20 |
| 276 | 683  | 958  | CCGATGGAATGCAGAAAAAC   | 60.448 | 20 |
| 157 | 16   | 172  | CGCTTGTGGTGAAGAAGAGA   | 59.161 | 20 |
| 202 | 2452 | 2653 | TGTAGCGTTATGTTGGCAGC   | 59.902 | 20 |
| 164 | 482  | 645  | GGGATTGGACCCTCATTTTT   | 59.996 | 20 |

|     |      |      |                        |        |    |
|-----|------|------|------------------------|--------|----|
| 180 | 746  | 925  | AAACTCGGTTTGGGCTTTTT   | 59.98  | 20 |
| 169 | 831  | 999  | CGCTTGCCTGAGTTGTGAA    | 60.025 | 20 |
| 216 | 1980 | 2195 | AGTTGCCGATTGGTAAGCAC   | 60.14  | 20 |
| 264 | 491  | 754  | CTGGATCGCGACCCTAGATA   | 60.192 | 20 |
| 252 | 1645 | 1896 | CCATTTTGGCATTTCATTCC   | 60.132 | 20 |
| 238 | 74   | 311  | ATGTCAGTCTGCCAAAGGCT   | 59.874 | 20 |
| 275 | 604  | 878  | TGGTCTCAGGAATGGTCCTC   | 60.048 | 20 |
| 275 | 241  | 515  | TTCGTAAAACATGAACTTCTTT | 59.592 | 24 |
| 236 | 1062 | 1297 | TATTGTTTGTTCCTCCGCC    | 59.81  | 20 |
| 217 | 236  | 452  | GCTATCGAGGCTTTTCCCAT   | 60.551 | 20 |
| 137 | 60   | 196  | TCCACCTTGAAGCTCTCGAT   | 59.95  | 20 |
| 265 | 601  | 865  | ACCTCGTCCACATCCTTCA    | 60.51  | 20 |
| 172 | 697  | 868  | TCCACAGACAGATTTCCCAA   | 59.059 | 20 |
| 149 | 1099 | 1247 | ATTTACGCGTCAACTGGGAA   | 60.502 | 20 |
| 141 | 7502 | 7642 | CATCATCTTCGCTCCTCTCC   | 59.91  | 20 |
| 220 | 747  | 966  | TTAGCAAGAAACCCCATTTG   | 59.931 | 20 |
| 234 | 257  | 490  | ACCACAATGTAAGGAGCACA/  | 59.54  | 22 |
| 216 | 377  | 592  | TTCGCCTTGCATTGACATAA   | 60.215 | 20 |
| 278 | 721  | 998  | TTCAAGAAGGGAGAAGGGGT   | 60.045 | 20 |
| 192 | 1281 | 1472 | TAGTGACCCATTTTCGACCG   | 60.883 | 20 |
| 270 | 997  | 1266 | AAATTGCCTGCACCTCCAAT   | 61.759 | 20 |
| 268 | 224  | 491  | GAGAAATGGAGCAGCCTACG   | 59.978 | 20 |
| 182 | 870  | 1051 | TGGCGTTGTTATCGTTTGAT   | 59.041 | 20 |
| 254 | 1091 | 1344 | CCAAATTTCCAATACAAGGCA  | 59.818 | 21 |
| 242 | 600  | 841  | TCGACATATTTTCTTCCGCC   | 60.038 | 20 |
| 248 | 0    | 247  | GCGGGGTTGTTAAAGAAGAGT  | 59.645 | 21 |
| 229 | 416  | 644  | AATTC AACCTTGGATGCTACA | 57.23  | 21 |
| 227 | 392  | 618  | CCGGTTTGCACCAATTCTAT   | 59.823 | 20 |
| 204 | 226  | 429  | TGGGTCAATTCCAATCAAAA   | 60.153 | 21 |
| 181 | 438  | 618  | TTGTTGCCATGCTGTGAGAT   | 60.272 | 20 |
| 253 | 1045 | 1297 | ATTGCATGCCACAATTTCAA   | 59.937 | 20 |
| 103 | 1055 | 1157 | TGATATTCATTGCCTTTGCG   | 59.662 | 20 |
| 245 | 205  | 449  | TTCCAATTATCCATGTTTGCAT | 59.193 | 22 |
| 273 | 688  | 960  | GCATATTGGCAAGAAATAACA  | 60.012 | 23 |
| 153 | 722  | 874  | CCCCACAGACATATTGACTC   | 59.274 | 21 |
| 182 | 267  | 448  | AAATCTAATGCAAACATGGGA  | 57.121 | 21 |
| 148 | 1677 | 1824 | CGCTTCAAACAAAAGCAGAA   | 59.226 | 20 |
| 194 | 700  | 893  | CAGCAGTTGGGTTCTTCTCC   | 59.844 | 20 |
| 217 | 344  | 560  | ATCTTGTTCCGTGCATTTCC   | 59.939 | 20 |
| 247 | 1427 | 1673 | AACCCAAACCTTAATGCCCT   | 59.704 | 20 |
| 193 | 333  | 525  | CGATTTACGAGCATCCCATT   | 59.923 | 20 |
| 191 | 47   | 237  | CACCCTTAATGTCACCATCG   | 60.234 | 21 |
| 174 | 710  | 883  | TCCCCTTTCTTCTCAACTCG   | 59.401 | 20 |
| 255 | 819  | 1073 | GGAGCTGATTATACGCTGGC   | 59.835 | 20 |
| 262 | 10   | 271  | GGCCTCCAACGTTTTCAATA   | 59.938 | 20 |
| 239 | 317  | 555  | CGTCGTTGGTGCTATACCCT   | 60.015 | 20 |
| 280 | 3629 | 3908 | GGAACGCAGAGGATCAATTC   | 59.635 | 20 |
| 268 | 163  | 430  | ATCTGGGCTACCGATTTGTG   | 59.955 | 20 |
| 165 | 166  | 330  | TCTCCTCGCTTCGGATACAT   | 59.797 | 20 |
| 153 | 402  | 554  | GTGGCACCAAGAATCCCTAA   | 59.933 | 20 |
| 270 | 79   | 348  | AATTTGTTGCTTGTGGGGAG   | 59.971 | 20 |
| 239 | 1330 | 1568 | ACTCCATCCCTGCTCTCTCA   | 59.945 | 20 |
| 183 | 1715 | 1897 | TTGATGGGTGGAATGTAAAGG  | 59.671 | 21 |
| 145 | 59   | 203  | ATTAACGCACACACGTGACA   | 58.628 | 20 |
| 193 | 341  | 533  | GTGTGGCCTACCAAACACG    | 60.016 | 19 |
| 153 | 963  | 1115 | TTAAATGAATGAAGGGCGG    | 59.901 | 20 |
| 275 | 1346 | 1620 | GGTTCTCATTGAACGCACC    | 60.504 | 20 |
| 179 | 616  | 794  | CTGGGCTGCTAAGAAAGGAA   | 59.587 | 20 |

|     |      |      |                        |        |    |
|-----|------|------|------------------------|--------|----|
| 264 | 118  | 381  | TTGCTGATGCCATTGAAAGA   | 60.343 | 20 |
| 240 | 119  | 358  | CCGAATTCGGACCTAACAAA   | 59.931 | 20 |
| 206 | 1253 | 1458 | AGCGACAGTGAATGAGGGAT   | 59.685 | 20 |
| 277 | 2106 | 2382 | ATCAATCGGCAAATTCAGGA   | 60.414 | 20 |
| 215 | 1477 | 1691 | TCGGAAAAAGATTCCCATTG   | 59.872 | 20 |
| 249 | 1031 | 1279 | GGGGCTGAAAAATCAAAGGT   | 60.299 | 20 |
| 254 | 302  | 555  | CATGGCAGTATTGGCATCAC   | 59.955 | 20 |
| 236 | 2665 | 2900 | GCATAATGACCCGCTAAAGG   | 59.569 | 20 |
| 138 | 74   | 211  | TTGGTGCTGACTTCCAACAA   | 60.278 | 20 |
| 203 | 246  | 448  | TAATAGCGGCCGATCTGAAG   | 60.323 | 20 |
| 272 | 723  | 994  | ACGTCCTACTCGCCCACTT    | 59.736 | 19 |
| 178 | 3669 | 3846 | GCAGGTTTCCATATGTCGCT   | 60.103 | 20 |
| 268 | 2420 | 2687 | GTGAAAAGTGGCCAACATGA   | 59.547 | 20 |
| 227 | 358  | 584  | TGTATCCACCCACTGTCCCT   | 60.238 | 20 |
| 247 | 669  | 915  | ACGCCCCAGATTGTTTCTTA   | 59.569 | 20 |
| 237 | 14   | 250  | TTGCCTTGCTTTCTCTCTCC   | 59.694 | 20 |
| 179 | 225  | 403  | CGTTCGGGATCATAAAAACG   | 60.315 | 20 |
| 226 | 10   | 235  | CATGTCCATTGATCTGAAACA  | 58.476 | 22 |
| 197 | 97   | 293  | GAATCCCCTGGCAACTTACA   | 59.933 | 20 |
| 271 | 716  | 986  | GAACGGTGTTGCCATTATCC   | 60.199 | 20 |
| 124 | 393  | 516  | GTTGTGATGGGGGATTTGAT   | 59.464 | 20 |
| 214 | 682  | 895  | GCATGACCAATGCAGTACCA   | 60.549 | 20 |
| 142 | 959  | 1100 | TTGTTGGAATACGTGGGAAAG  | 59.847 | 21 |
| 249 | 985  | 1233 | TCTGGACAAAATTCATCAGGG  | 59.918 | 21 |
| 139 | 26   | 164  | GATGGGTTATCACCGGATCG   | 62.397 | 20 |
| 184 | 2018 | 2201 | TGGGATAGGGAAAAGCAAGA   | 59.64  | 20 |
| 263 | 816  | 1078 | TCTGCCATAAATTGTGTATGA  | 58.044 | 22 |
| 124 | 0    | 123  | TTTTCTTTTGGGCAGCAACT   | 59.861 | 20 |
| 109 | 400  | 508  | CCCTCCGGACTATTCTCTCC   | 60.03  | 20 |
| 259 | 1655 | 1913 | AAGAGCACAGTATTCCCCCA   | 59.55  | 20 |
| 183 | 75   | 257  | TGCACCTGTGGAGGTGTTAT   | 59.01  | 20 |
| 256 | 7    | 262  | TGGAATCCAAAGCTATTAGAC  | 59.977 | 23 |
| 120 | 418  | 537  | AAAGCCGACACCATCAGTTC   | 60.119 | 20 |
| 261 | 20   | 280  | TTCCTCCCTCTGCTAGATGC   | 59.532 | 20 |
| 184 | 959  | 1142 | CACAAATCGCCATTCAAAAA   | 59.538 | 20 |
| 215 | 718  | 932  | CAAAAACACACCCAAACCCT   | 59.728 | 20 |
| 159 | 290  | 448  | TGAGAATGGAACCTGCCTCC   | 60.195 | 20 |
| 140 | 518  | 657  | CGAATTCTTGATCATCGCCT   | 60.177 | 20 |
| 226 | 353  | 578  | AAAAGTAGAAACCCGTGGCA   | 59.609 | 20 |
| 177 | 966  | 1142 | TGACATGTGGTCCCAATACG   | 60.24  | 20 |
| 101 | 7    | 107  | AGGAAATAAGGAGGTGTTATC  | 60.131 | 25 |
| 202 | 674  | 875  | TTCGATACCGTACCAACGTG   | 59.464 | 20 |
| 279 | 335  | 613  | AAATTGACACACGCATGCAC   | 60.594 | 20 |
| 262 | 394  | 655  | AGCACATGTTCAAACACGCA   | 61.339 | 20 |
| 252 | 609  | 860  | AAAATGCCCTTGTATGCTGC   | 60.103 | 20 |
| 194 | 274  | 467  | TGTCACTCCCAACTCATCC    | 60.934 | 20 |
| 266 | 4275 | 4540 | CAACTTATGCAGGGATCGTG   | 59.148 | 20 |
| 277 | 911  | 1187 | AAAGAAAGGGATGTGAGCCA   | 59.67  | 20 |
| 181 | 159  | 339  | GCCACAAATGTCACAAATCAA  | 59.435 | 21 |
| 155 | 1421 | 1575 | CTCGTTGACCCAACCGTTAT   | 59.853 | 20 |
| 273 | 590  | 862  | AAAAGGCAGTCTACCCACC    | 60.361 | 20 |
| 269 | 133  | 401  | TGTGCAATTTGTAAGAAACAC  | 60.564 | 23 |
| 266 | 241  | 506  | GAAGGAGGCGTGGAAACTA    | 60.255 | 20 |
| 139 | 659  | 797  | ACGTAGCACGTCTGCACTTG   | 60.12  | 20 |
| 268 | 204  | 471  | TCCTGCATTTTGCATTTCTTC  | 60.203 | 21 |
| 261 | 712  | 972  | ACAACCTCGCGAGCGTAAATC  | 60.416 | 20 |
| 239 | 6316 | 6554 | TGTTAACGATGGGAGCATTG   | 59.542 | 20 |
| 280 | 14   | 293  | CGGATTTAAGGGTTATTACCTC | 59.9   | 25 |

|     |      |      |                        |        |    |
|-----|------|------|------------------------|--------|----|
| 267 | 47   | 313  | GGTTGAGAACAAGGGGTTGA   | 59.943 | 20 |
| 199 | 1501 | 1699 | GAATCATACCGCTTCTCGCT   | 59.439 | 20 |
| 184 | 2519 | 2702 | GATTTGGGTTGTTTGATGGG   | 60.029 | 20 |
| 255 | 131  | 385  | TCTACACCATCCACCTGCAC   | 59.551 | 20 |
| 264 | 599  | 862  | CGGGAAAAAGTCTCACAGTTG  | 59.76  | 21 |
| 266 | 410  | 675  | GCAACTGGCGTGATTATTGA   | 59.694 | 20 |
| 216 | 7    | 222  | TATGCCCGGATTTTTGTTTT   | 59.3   | 20 |
| 162 | 941  | 1102 | TAAACTTGAGCTCGTTTGCC   | 58.174 | 20 |
| 166 | 122  | 287  | CAGTGAGGATTCCCAGCATT   | 60.073 | 20 |
| 245 | 431  | 675  | TGATCATAATTTTCGCGCTT   | 58.396 | 20 |
| 133 | 996  | 1128 | AACAATAGGACCTTCAGGCAA  | 59.653 | 22 |
| 274 | 344  | 617  | TCCGTCATATAAATGCCACAA  | 58.901 | 21 |
| 194 | 27   | 220  | CGTTGGTCAAGGATAGCAAA   | 58.771 | 20 |
| 158 | 19   | 176  | ACACTCACGCCTTCCAAACT   | 59.769 | 20 |
| 174 | 350  | 523  | GCGTCCATTTTCACCAAATC   | 60.318 | 20 |
| 172 | 146  | 317  | GGCGCAGTCTACGAGGTAAC   | 59.904 | 20 |
| 177 | 1022 | 1198 | GATGACATCAGCACACGGAC   | 60.13  | 20 |
| 204 | 590  | 793  | ATGGCCACAAATGGTTCCTA   | 60.192 | 20 |
| 252 | 356  | 607  | TCGAGCAGATTGGAAGAGGT   | 59.95  | 20 |
| 268 | 1359 | 1626 | TGGGAGAGCTACCATAATTGC  | 59.196 | 21 |
| 222 | 297  | 518  | TGGGGAAGAACACATAAATTA  | 59.66  | 24 |
| 120 | 854  | 973  | AATGCTTGGTGGTTCGAGAT   | 59.556 | 20 |
| 258 | 297  | 554  | CTGGTTTCAGGTGGTGGTTC   | 60.399 | 20 |
| 204 | 94   | 297  | TCTCTACAAAACGAGACCAAT  | 59.732 | 25 |
| 130 | 1672 | 1801 | TCTCTCCCTCTCCA ACTCCA  | 59.913 | 20 |
| 243 | 938  | 1180 | CACGGTGCTAATGCAGTTGT   | 59.788 | 20 |
| 241 | 329  | 569  | TCAAATGACTTGGGCATGAA   | 60.049 | 20 |
| 275 | 752  | 1026 | TTCATCCAAAAGCAAAGGAAA  | 59.685 | 21 |
| 270 | 936  | 1205 | GTGTGTTTAAGCCCTTCCA    | 59.971 | 20 |
| 215 | 151  | 365  | CGAAGATTTATGCGGGGTTA   | 59.922 | 20 |
| 266 | 994  | 1259 | TTGTGGATAAACAAAATTGATC | 58.773 | 23 |
| 238 | 4969 | 5206 | CCCGGAATGAATTAGTTTGG   | 59.269 | 20 |
| 278 | 2089 | 2366 | ATTCGAGAAGCAGCGGTAG    | 59.615 | 20 |
| 233 | 915  | 1147 | ACGTCCAAAATACCTTTTATTC | 60.01  | 24 |
| 165 | 1125 | 1289 | GTGAACCCAGAAACAGCACA   | 59.726 | 20 |
| 240 | 1543 | 1782 | TCCCCCTCACTCATCCTCTA   | 59.606 | 20 |
| 255 | 1505 | 1759 | GCCATGGATGCGATAAAAGT   | 59.929 | 20 |
| 244 | 122  | 365  | ATCTAGGGGCCGAGATTTGT   | 59.925 | 20 |
| 143 | 9415 | 9557 | CGATTGTTGCGTGCATAAAC   | 60.14  | 20 |
| 149 | 443  | 591  | AACCCAAGCCATGGAGTAGA   | 59.55  | 20 |
| 245 | 984  | 1228 | TGAAGTCTAAAGGGAGACGGC  | 60.606 | 21 |
| 220 | 54   | 273  | CGACTTAAGCAAATTGCAAGC  | 60.034 | 21 |
| 193 | 280  | 472  | AGTTGGCACCGTATCACTCC   | 59.997 | 20 |
| 278 | 1158 | 1435 | GCAAGTTCTTGCAATTGGG    | 59.262 | 19 |
| 280 | 2676 | 2955 | AAGCAAACATTGTTCCAGGG   | 59.971 | 20 |
| 206 | 1250 | 1455 | AGGTACCCACATGAGAATCA   | 59.274 | 21 |
| 219 | 369  | 587  | GGCTCAATTATTTAGGCCCAT  | 59.33  | 21 |
| 273 | 1797 | 2069 | AATTGGACCGGACCATTAGT   | 58.24  | 20 |
| 111 | 20   | 130  | AGGGGGTTATCATGGGATCA   | 61.3   | 20 |
| 241 | 109  | 349  | GTTCTCTTCTTGCCACCG     | 59.989 | 20 |
| 158 | 1625 | 1782 | GTGCCGTAAGTGTGCTGAGA   | 60.056 | 20 |
| 198 | 2289 | 2486 | GGAGGAGTTGATCGTCGGT    | 60.064 | 19 |
| 109 | 971  | 1079 | CCCTTGGTATCAAAGGGGT    | 60.046 | 20 |
| 280 | 315  | 594  | CATTTTGCCCCTGTATGCTC   | 60.469 | 20 |
| 231 | 745  | 975  | TCCCACCACCTCTAATTCCA   | 60.309 | 20 |
| 269 | 378  | 646  | TGCATGCTAAGTGGGGAAAT   | 60.469 | 20 |
| 166 | 529  | 694  | GAAGAAATCCCTGCCTTTCC   | 60.017 | 20 |
| 236 | 563  | 798  | ACACAAGGATTGTTTTCCCG   | 59.83  | 20 |

|     |      |      |                        |        |    |
|-----|------|------|------------------------|--------|----|
| 194 | 727  | 920  | ACCTATTGCTTAAGACGACATC | 59.706 | 23 |
| 108 | 434  | 541  | CTCCATTGGTGAACGAGAT    | 59.927 | 20 |
| 171 | 893  | 1063 | TCAATATAATGGGCCCAAGC   | 59.757 | 20 |
| 191 | 215  | 405  | TGCAATTTATATGCTTTTGCAC | 57.955 | 22 |
| 265 | 152  | 416  | CATAACAAGTGGCGAAAGGG   | 60.493 | 20 |
| 250 | 1941 | 2190 | CCCGCAAATTGCATTATCT    | 59.928 | 20 |
| 244 | 66   | 309  | GGAGTCGGCCATGTAGCTTA   | 60.235 | 20 |
| 265 | 449  | 713  | GCACAATCGATTTACGTGGTT  | 59.881 | 21 |
| 240 | 527  | 766  | AAATTGTTTCGCAAGGCAAA   | 60.599 | 20 |
| 116 | 403  | 518  | CCCTTTGTTTGTGTGAGCCT   | 60.149 | 20 |
| 181 | 1927 | 2107 | TGAGTGCTGGAAGATTCACG   | 59.984 | 20 |
| 148 | 1480 | 1627 | GAATTCGGGGTGTTTTGAGA   | 59.91  | 20 |
| 189 | 119  | 307  | TGCGTTGTTTACCATTGGA    | 59.969 | 20 |
| 221 | 123  | 343  | CTCGTCCAGGACAAATCCAT   | 59.927 | 20 |
| 174 | 2603 | 2776 | CATTGCCGCAAGATCAAGTA   | 59.833 | 20 |
| 260 | 471  | 730  | CTGCATGTCTACGTCCCCTT   | 60.134 | 20 |
| 278 | 101  | 378  | TCCCAACCCCATTTACAAAA   | 60.024 | 20 |
| 220 | 29   | 248  | GTGGGTTTACCTAGAGCGCA   | 60.27  | 20 |
| 268 | 438  | 705  | GGTAGGAATGAAGTATGTGGA  | 58.904 | 23 |
| 279 | 693  | 971  | CGCCCTTTTAGTTAAACCTTG  | 59.246 | 22 |
| 264 | 206  | 469  | ACAATGGGTTTCATTTGCCAT  | 60.059 | 20 |
| 244 | 8    | 251  | ACCCCGTTTCGTTTCCTAAC   | 60.221 | 20 |
| 264 | 3120 | 3383 | TCCTCCAGCGAGTCGTAGTT   | 60.012 | 20 |
| 195 | 677  | 871  | TGTGAGTTGCCACTCTCCAC   | 59.872 | 20 |
| 267 | 645  | 911  | GCAGCCATGAATTTACCAG    | 61.588 | 20 |
| 270 | 3198 | 3467 | TCTTGATGGAAGGCAAGGT    | 59.67  | 20 |
| 213 | 1717 | 1929 | ATCACACACACCACCTCCCT   | 60.291 | 20 |
| 224 | 389  | 612  | CCTCACAGGCAAATATGCAA   | 59.688 | 20 |
| 240 | 908  | 1147 | CCGCCAGCTCAATTTTATTC   | 59.682 | 20 |
| 278 | 829  | 1106 | TTGAGCAATGTGGAGCTTGT   | 59.445 | 20 |
| 180 | 233  | 412  | GTTAGGCTTCCCATCCCCT    | 60.328 | 20 |
| 230 | 2655 | 2884 | TTTTCGCTCTGATATCCCA    | 60.544 | 20 |
| 146 | 1378 | 1523 | TATCCCGGTATGTAGCCCA    | 60.167 | 20 |
| 249 | 1706 | 1954 | CACACAATCAAGCCCACT     | 59.597 | 20 |
| 236 | 1133 | 1368 | CTCCACAAAGCTCTTGAAAT   | 58.449 | 21 |
| 138 | 143  | 280  | TAGTATTGGAGTTGGGGGC    | 61.061 | 20 |
| 150 | 1357 | 1506 | TGTGGCCAATTCCTTGTTGC   | 59.547 | 20 |
| 277 | 211  | 487  | TCGTTCTACTTTGTGGTGGA   | 60.535 | 21 |
| 273 | 1112 | 1384 | TATCGGGAGTGAGAGGGAAA   | 59.623 | 20 |
| 167 | 1660 | 1826 | TGTTAGATTTGGGGTTTCGG   | 59.795 | 20 |
| 206 | 20   | 225  | CCCGATTACCCTACCCATTT   | 59.903 | 20 |
| 177 | 543  | 719  | GGTCGTGATTGTATGCGAGA   | 59.679 | 20 |
| 241 | 40   | 280  | CCTAGCCACACACGGAATCT   | 60.134 | 20 |
| 280 | 1192 | 1471 | TGCCAATTTAAGTTCGAATGAC | 60.017 | 23 |
| 183 | 476  | 658  | AACCGTTTTGACCGATTTTC   | 61.08  | 20 |
| 246 | 426  | 671  | CTGCACCGGATAATACAGCA   | 59.712 | 20 |
| 242 | 316  | 557  | CCACAAGATCAGCTTTTCCC   | 59.67  | 20 |
| 102 | 8    | 109  | AAGTTTATATCAATAGTTTTGT | 58.261 | 27 |
| 172 | 901  | 1072 | TAGGACTGGAGGAGAGCGAG   | 59.697 | 20 |
| 231 | 437  | 667  | AGGAGTTTGAGAGGGGCAAG   | 60.756 | 20 |
| 265 | 2330 | 2594 | TTTCATTGCTGCTGCAGTTT   | 59.614 | 20 |
| 265 | 888  | 1152 | GTTACCACCAGCCTTGATAA   | 59.985 | 21 |
| 223 | 567  | 789  | AGGAAAACATCAGGCAATGG   | 59.933 | 20 |
| 276 | 1841 | 2116 | GGTTGAGGCGGATAAAGTCA   | 60.074 | 20 |
| 274 | 3152 | 3425 | GTTTCGTACCGAACACACC    | 60.277 | 20 |
| 122 | 998  | 1119 | CAAAGCTCAGCCGACCTAGT   | 59.639 | 20 |
| 109 | 1    | 109  | CTGCAAGAAAAACAAGCCCT   | 59.494 | 20 |
| 101 | 729  | 829  | TTTGATTTGTTGTCGCTGGA   | 60.234 | 20 |



|     |      |      |                        |        |    |
|-----|------|------|------------------------|--------|----|
| 196 | 233  | 428  | CGACTGAAAATTTTGGCTAATC | 57.958 | 22 |
| 144 | 2156 | 2299 | ACTCCCCACTGTGTGCTTTT   | 59.622 | 20 |
| 245 | 60   | 304  | CACGAGCTGTTAATCACCACA  | 59.773 | 21 |
| 234 | 193  | 426  | TGGGATTTGGATGGTTATGA   | 58.618 | 20 |
| 272 | 456  | 727  | TTAATCAGATGAGGGCAGGG   | 60.029 | 20 |
| 266 | 314  | 579  | ATGGACCACACCTATCATAAC  | 60.366 | 23 |
| 234 | 1419 | 1652 | AAGAACTCTGTGGGCGTCAG   | 60.444 | 20 |
| 262 | 2002 | 2263 | TGTTGGATTGGACATTGGGT   | 61.025 | 20 |
| 186 | 368  | 553  | TCCTGTATGTAGTGACACGAA  | 60.102 | 25 |
| 138 | 723  | 860  | TTTGGTTTTTGGTTTGCTCC   | 59.953 | 20 |
| 205 | 9    | 213  | CCAATTTGAATGGTTATCACCT | 60.457 | 23 |
| 252 | 1565 | 1816 | TCTTCCTGGGCTTTGTTTAC   | 60.232 | 20 |
| 254 | 1053 | 1306 | TGAGAGTTTCTGCGTTGGTG   | 60.025 | 20 |
| 158 | 113  | 270  | CCCATGTGTTGGCTTTTTGT   | 60.786 | 20 |
| 226 | 2365 | 2590 | CATCTTGATGTCCCCATTGA   | 59.296 | 20 |
| 265 | 76   | 340  | GGCACTTTTCTTCCAAACA    | 60.088 | 20 |
| 230 | 598  | 827  | TCATCAGCAAACCTCCCACA   | 60.24  | 20 |
| 259 | 454  | 712  | TGGATTTAGCCGATTCCAAG   | 60.031 | 20 |
| 273 | 302  | 574  | ATGATTGGTGATAGCTCGGC   | 60.066 | 20 |
| 178 | 54   | 231  | GCACTCTCCAGCAATGTTGA   | 59.992 | 20 |
| 112 | 430  | 541  | GGTGAAGAAAGTGGGCTTCA   | 60.232 | 20 |
| 261 | 1190 | 1450 | GCAGTGGAACGAGGAAGAAC   | 59.851 | 20 |
| 127 | 148  | 274  | CGCATTTCATCTGCTTTTCA   | 59.953 | 20 |
| 232 | 67   | 298  | TTTTATTGGGGGTGCAACAT   | 60.053 | 20 |
| 225 | 1059 | 1283 | TTCGCAGACAATGTTCCAAG   | 59.84  | 20 |
| 245 | 547  | 791  | TCACCGAATATTCCCAACTCA  | 60.316 | 21 |
| 265 | 766  | 1030 | TACTTTGAGGCCGTCATTCC   | 60.074 | 20 |
| 204 | 604  | 807  | GATAGCTCTGAGGCTGGTGC   | 60.127 | 20 |
| 212 | 484  | 695  | CCACTTCTCCCATTTCATT    | 59.933 | 20 |
| 263 | 0    | 262  | CCGTAGCTGTTATTGATGGAA  | 57.795 | 21 |
| 227 | 135  | 361  | AGGAGCGCACCAGAATTTAG   | 59.476 | 20 |
| 223 | 429  | 651  | CCGAATATCCCCAACTAAA    | 58.759 | 20 |
| 192 | 495  | 686  | TCGAAAAAGGAGTCTGCGTC   | 60.517 | 20 |
| 235 | 3408 | 3642 | AGCTGCTTGCCGTAATTCAT   | 59.873 | 20 |
| 237 | 1195 | 1431 | GAGTGCTAGAACCCCATCCA   | 60.073 | 20 |
| 152 | 1018 | 1169 | CGTCGTCTGTTTCATCATCG   | 60.263 | 20 |
| 234 | 1756 | 1989 | ATTTGTGGGAGATGGAGGTG   | 59.779 | 20 |
| 188 | 438  | 625  | ATCGATTAGGTCGCACAAGG   | 60.096 | 20 |
| 227 | 1301 | 1527 | TGCCTGCATCAAAGTACACC   | 59.722 | 20 |
| 130 | 1084 | 1213 | ACAATGGCTTTAAAGGGGGT   | 59.704 | 20 |
| 262 | 14   | 275  | AACTGGACCTCTGATCTGCAA  | 59.859 | 21 |
| 190 | 1980 | 2169 | CATTTTCGTCCGTCACACAA   | 60.552 | 20 |
| 222 | 444  | 665  | AAAAATGGTTGATTAGATTAC  | 59.68  | 24 |
| 175 | 457  | 631  | TCTCACGAGGATTTTCGATGT  | 59.685 | 21 |
| 236 | 887  | 1122 | AAAAAGGGCCTATATCCAATA  | 59.2   | 24 |
| 189 | 3157 | 3345 | TGCGAATTTGGAATTATCTGC  | 60.054 | 21 |
| 276 | 35   | 310  | GGGTTATCATGGGATCAAGT   | 59.895 | 21 |
| 125 | 108  | 232  | AACGCAGATCTGATGGCAC    | 59.81  | 19 |
| 249 | 4531 | 4779 | TACTCTGCCTGACGGGATTT   | 59.694 | 20 |
| 227 | 393  | 619  | ACAATGCAGTAGCTGGTTGG   | 58.802 | 20 |
| 236 | 965  | 1200 | TGGTGATTTTTGATTATAGGAA | 60.496 | 27 |
| 267 | 2    | 268  | GGAACAAAGACACCATTGATA  | 59.311 | 24 |
| 266 | 19   | 284  | TTTGATAACGTCAAATCCAAC  | 59.394 | 23 |
| 264 | 1130 | 1393 | ATCATTCCAATCATTCCCCA   | 59.952 | 20 |
| 182 | 624  | 805  | GACCCATTTCTCATCATTGG   | 57.775 | 20 |
| 276 | 1178 | 1453 | GCCCTCGAATGTTGTGAGTT   | 60.119 | 20 |
| 131 | 98   | 228  | TCCCAACTCACAATCCATGA   | 59.893 | 20 |
| 215 | 46   | 260  | TTCTGCATGCATTTATTGGG   | 59.52  | 20 |

|     |      |      |                        |        |    |
|-----|------|------|------------------------|--------|----|
| 101 | 1173 | 1273 | TTGCGGGGTTGTTAAGAAAT   | 59.451 | 20 |
| 207 | 1393 | 1599 | AGAGAGAAGTGGAGAGGGGG   | 59.801 | 20 |
| 106 | 976  | 1081 | GGATCCACGTCCACTATGCT   | 59.957 | 20 |
| 249 | 2822 | 3070 | CTCGTTAGCAAGCAATGCAC   | 59.638 | 20 |
| 260 | 248  | 507  | TTGAAAGAAGAGGGGCTCCAC  | 59.405 | 20 |
| 215 | 2987 | 3201 | TTTCCTGCAGCTGAAGAGGT   | 60.134 | 20 |
| 265 | 626  | 890  | GTGAGGATATGGCGAAAGGA   | 60.036 | 20 |
| 169 | 711  | 879  | CAATGTCAGAGTGGTGGTGG   | 59.997 | 20 |
| 266 | 1237 | 1502 | TCTTCTCGCATACCAAAGGT   | 57.422 | 20 |
| 241 | 405  | 645  | GCGTGGGGAATAATGAGAGA   | 60.036 | 20 |
| 206 | 1067 | 1272 | CTTCTTTCCCAAACCTTCCC   | 59.912 | 20 |
| 253 | 1456 | 1708 | AAATGGATGCTGATAAATGGA  | 57.059 | 21 |
| 233 | 1215 | 1447 | TGCATCTAAGTTTGCACCGA   | 60.401 | 20 |
| 248 | 1127 | 1374 | GAACGTGCGTAGAACGTGTG   | 60.37  | 20 |
| 226 | 262  | 487  | TTTCCCCTCCCTCATTTACC   | 60.124 | 20 |
| 259 | 705  | 963  | CCATTCCGTGTTGTAGGAA    | 60.883 | 20 |
| 211 | 1611 | 1821 | CGAAGAAGCCCTGAAATTGA   | 60.323 | 20 |
| 197 | 4229 | 4425 | TGCAACGTGAGTAGTACTCG   | 60.104 | 21 |
| 265 | 1097 | 1361 | ACCCTCTTCAACATGCAAGG   | 60.111 | 20 |
| 152 | 1867 | 2018 | CCAGACCCAAAGCAAATCAG   | 60.626 | 20 |
| 248 | 413  | 660  | GGGAAAAGCGTTATCGTTG    | 59.586 | 20 |
| 166 | 893  | 1058 | GTGCCAGAGATCGGAGAAAG   | 59.95  | 20 |
| 139 | 1578 | 1716 | CACCACAAAGCAATTGAAA    | 59.561 | 20 |
| 235 | 1177 | 1411 | TGGGTGCCATTTCTATCACA   | 59.924 | 20 |
| 153 | 424  | 576  | ATAAGGGCTTAATGAGGGGC   | 59.424 | 20 |
| 268 | 461  | 728  | TGATCTGGAAGTAAGGAATCC  | 59.657 | 25 |
| 145 | 2243 | 2387 | GCAAAGACCATTCTTGAGGC   | 59.82  | 20 |
| 274 | 619  | 892  | TCAATGGGGCTCTTGAGTTC   | 60.195 | 20 |
| 252 | 377  | 628  | GATGAGAGAGAGAGCGGTGG   | 60.096 | 20 |
| 209 | 462  | 670  | AAGTTCCCCAGCTCAAGACC   | 60.628 | 20 |
| 137 | 434  | 570  | AAGTTGCATGCCATTTACCA   | 59.041 | 20 |
| 183 | 1559 | 1741 | AATGCCCTCCTATTATGCC    | 60.137 | 20 |
| 280 | 713  | 992  | ATGGGTTATCACCGGATCG    | 60.554 | 19 |
| 223 | 292  | 514  | TACCAAATTGCGTGCAAAG    | 59.742 | 20 |
| 186 | 394  | 579  | GGATTTTGGATTGGTCGAGA   | 59.871 | 20 |
| 263 | 146  | 408  | CAATGTTGGTGACGTCTTGC   | 60.16  | 20 |
| 262 | 2506 | 2767 | TCACAGCTGGCATAACCAA    | 60.257 | 20 |
| 234 | 59   | 292  | TCACGGATTCACCAACTGAA   | 60.088 | 20 |
| 232 | 2227 | 2458 | TTGCAAACCTAATTGGTGCG   | 59.742 | 20 |
| 279 | 1060 | 1338 | CGTGATCCGGATAGAGTGATG  | 60.489 | 21 |
| 268 | 1020 | 1287 | GCCACCATTGTTGGTTCCTA   | 60.755 | 20 |
| 134 | 861  | 994  | TTCCTGATTGAGGGTGGAAAG  | 60.042 | 20 |
| 248 | 43   | 290  | AGAATTTCAAGGTAATGGGGA  | 57.54  | 21 |
| 230 | 36   | 265  | AAAATGCACGTCTCTCGGAC   | 60.263 | 20 |
| 153 | 953  | 1105 | CTCAAACCTACCACCCGAACA  | 60.016 | 21 |
| 130 | 2774 | 2903 | TTGCACTTAAGAGGAGTTTTG/ | 58.249 | 23 |
| 232 | 1054 | 1285 | GCATTGCAAGCTTCGATACA   | 59.983 | 20 |
| 225 | 876  | 1100 | TGGAAGGCCTCGTCGTATAG   | 60.227 | 20 |
| 109 | 89   | 197  | TTCCATCGCGAAGCTAATG    | 59.922 | 19 |
| 263 | 400  | 662  | GTTAAAGCCAAAAGTCGGGC   | 60.958 | 20 |
| 169 | 3501 | 3669 | CAGCAGCAAGCAATAACGAG   | 59.776 | 20 |
| 259 | 1114 | 1372 | CCAGGAGACGAATGCTTTTT   | 59.312 | 20 |
| 177 | 904  | 1080 | TTTGCACCTCCTGGAGAACC   | 60.232 | 20 |
| 252 | 473  | 724  | ATTTTGTGCGAGTTGATCCC   | 59.939 | 20 |
| 280 | 2706 | 2985 | CACACATGGAAAAGATCTCCA  | 59.971 | 22 |
| 185 | 1148 | 1332 | TGGACAGGGATATAAGCCGA   | 60.427 | 20 |
| 195 | 2544 | 2738 | GAAACAAGCATGATCACGGA   | 59.654 | 20 |
| 197 | 410  | 606  | AACACATTTCTCAACATTCAT  | 58.541 | 24 |

|     |      |      |                        |        |    |
|-----|------|------|------------------------|--------|----|
| 280 | 47   | 326  | TCAACGGTTCACATCGGTT    | 59.951 | 19 |
| 233 | 649  | 881  | TGGAGAACTCATTCTTACTGCC | 59.517 | 22 |
| 144 | 895  | 1038 | CACACGCACTCACAACACAC   | 59.818 | 20 |
| 138 | 1096 | 1233 | GGCCAGATTTTCGTCCCTATT  | 60.286 | 20 |
| 181 | 42   | 222  | TGTTTGACGTGAATAAGCC    | 59.735 | 20 |
| 217 | 21   | 237  | GGTTCAACCATTTTGTGGG    | 60.066 | 20 |
| 218 | 836  | 1053 | CGCCGACCAATCATGTAGA    | 60.637 | 19 |
| 225 | 3168 | 3392 | TTGTGGATGCCCTAACCAAT   | 60.192 | 20 |
| 261 | 1384 | 1644 | CACCCAAAGAAGAAAGCACC   | 59.711 | 20 |
| 234 | 405  | 638  | CCCATGAAATATGCCTTACTCT | 59.871 | 23 |
| 243 | 2451 | 2693 | TGAAAGAATTTGGGGGATCA   | 60.244 | 20 |
| 233 | 869  | 1101 | ATCTTTGGGCTGGAAACTCA   | 59.67  | 20 |
| 249 | 4136 | 4384 | ACCCTCACCCCTTTCTCTGT   | 59.968 | 20 |
| 187 | 610  | 796  | CATGTCGTGTCGTGTCAGAA   | 59.265 | 20 |
| 153 | 4444 | 4596 | TTTTCTGCCTTGTCAGACC    | 60.232 | 20 |
| 105 | 10   | 114  | TTGTGTGATCGAACCACGTT   | 60.008 | 20 |
| 253 | 1284 | 1536 | GTGTCCTTCCTCGGACAAAA   | 60.088 | 20 |
| 235 | 2204 | 2438 | TTGTTTTCCGAGGATCATGC   | 60.983 | 20 |
| 184 | 1251 | 1434 | AAGGGTCATGATCGTTCTGG   | 59.927 | 20 |
| 267 | 19   | 285  | TAGGGCTATGGGTGGTAGGA   | 59.406 | 20 |
| 198 | 580  | 777  | TTCAAGCAATAAAGCCCGTC   | 60.209 | 20 |
| 194 | 385  | 578  | GGTGACAGTGATGGTGATGG   | 59.801 | 20 |
| 152 | 0    | 151  | AGCCGTGAGATTTACTTTTAAC | 57.02  | 24 |
| 186 | 0    | 185  | GCGTTTTGACAATATATAAGTC | 59.394 | 27 |
| 269 | 973  | 1241 | CCAAACCAAAACTCATCAACC  | 59.322 | 21 |
| 251 | 372  | 622  | TCAATCCCATTACCCCTTC    | 59.727 | 20 |
| 278 | 946  | 1223 | GAGGATAACTGGCCAACCAA   | 59.933 | 20 |
| 188 | 1908 | 2095 | CAACTCCCCCGTAGTTTTCA   | 59.964 | 20 |
| 267 | 2317 | 2583 | TTGGTGTGCTGGGATTTT     | 60.344 | 20 |
| 212 | 1157 | 1368 | GTCGAGCTGAACGAAAGAGG   | 60.134 | 20 |
| 110 | 491  | 600  | CGTAATCCTTCAATGGCAGC   | 60.606 | 20 |
| 243 | 391  | 633  | ACCCAAAACAAAATGCATGA   | 58.869 | 20 |
| 218 | 423  | 640  | TATGGCAAAAACACCAACGA   | 59.969 | 20 |
| 238 | 357  | 594  | AACTCTGATCGGTGGGAGAA   | 59.655 | 20 |
| 224 | 558  | 781  | AGGAGATGGAGGGTTCAAGG   | 60.447 | 20 |
| 161 | 206  | 366  | GCATTCTCAGCATAACCGGA   | 59.83  | 20 |
| 148 | 1004 | 1151 | TGTGATATGGTGTGGGAGG    | 59.215 | 20 |
| 251 | 502  | 752  | AAACCAGAGAAATCCCCCAC   | 60.169 | 20 |
| 253 | 1393 | 1645 | CTCAATGCGTAGGCTTCTCC   | 59.978 | 20 |
| 230 | 941  | 1170 | AAACCGCACTTTAGCTCGAA   | 60.018 | 20 |
| 204 | 397  | 600  | ATTCCCTTGATGCTGCGTT    | 59.597 | 20 |
| 165 | 736  | 900  | CACGTCTCGTTTTATCGCAA   | 59.872 | 20 |
| 181 | 2457 | 2637 | GATTCTAGCATCGTGAGGGC   | 59.803 | 20 |
| 235 | 748  | 982  | ATTCCAACAATCTCAGCATCA  | 58.159 | 21 |
| 271 | 737  | 1007 | AAGTATTGATCGACGTGGGA   | 58.019 | 20 |
| 145 | 127  | 271  | CCGCAAATAGGATCGAAAAA   | 60.033 | 20 |
| 220 | 1402 | 1621 | TCAAACCTGCCTCCCTTGTTT  | 60.232 | 20 |
| 250 | 719  | 968  | TCCCTAATCATCTCCCTCC    | 60.228 | 20 |
| 265 | 523  | 787  | CCTAGAGCACACTCGAAGGG   | 60.005 | 20 |
| 272 | 2691 | 2962 | TCCTCCTTCCATAGCAGCAA   | 60.874 | 20 |
| 250 | 3334 | 3583 | TGATCAAAATCCACACCTCG   | 59.496 | 20 |
| 278 | 513  | 790  | CAGAGTTTGTTCGCAACCC    | 60.668 | 20 |
| 250 | 7    | 256  | ACTGGTGGAAACTGGATTGC   | 59.973 | 20 |
| 170 | 500  | 669  | CCACCTCTGCTCCACTTC     | 59.986 | 20 |
| 277 | 181  | 457  | GAACCCAAACCTCAAGCTCA   | 60.232 | 20 |
| 254 | 209  | 462  | AGGAAGCGAGGTAGGCTTTC   | 59.983 | 20 |
| 266 | 86   | 351  | CCAGATTCTCTGGTGGAGG    | 59.649 | 20 |
| 266 | 26   | 291  | CCTTCTCCATGGGCATCT     | 60.019 | 19 |

|     |      |      |                        |        |    |
|-----|------|------|------------------------|--------|----|
| 226 | 1215 | 1440 | TCGACTGCTGTGTGGTTAGC   | 60.056 | 20 |
| 201 | 1867 | 2067 | GGACAAAACGACCAAAAGGA   | 59.948 | 20 |
| 191 | 1114 | 1304 | TGTTTCTCTCACCTCCTCCC   | 59.228 | 20 |
| 243 | 248  | 490  | AGGGCCCAACAATTTCTTCT   | 59.94  | 20 |
| 219 | 201  | 419  | GCATATGCATGGTTCTCACG   | 60.104 | 20 |
| 259 | 462  | 720  | TTGGTCCACCATTCTTTTACTG | 58.994 | 22 |
| 197 | 19   | 215  | TTGAAATTAGATTAAGAAAA   | 57.335 | 27 |
| 280 | 2419 | 2698 | AAAGGCAGTCAGGTCTAAGGC  | 59.899 | 21 |
| 176 | 93   | 268  | CGAGTTAGGAAATAAGGAGGT  | 60.478 | 23 |
| 232 | 393  | 624  | GCAGCTCAAAAAGACAGTCC   | 60.565 | 21 |
| 241 | 264  | 504  | CACTTTTTGTGAAACCCCTCA  | 59.994 | 21 |
| 176 | 1043 | 1218 | GGGGATTCTGCAATTTTCT    | 60.265 | 20 |
| 241 | 261  | 501  | ATTCAAACCGCTAGTGTGGC   | 60.14  | 20 |
| 222 | 374  | 595  | AATCCCATCAGAACCACCTG   | 59.779 | 20 |
| 267 | 1025 | 1291 | ATTCGTGTGAAGCCTTGCT    | 59.882 | 20 |
| 202 | 14   | 215  | CCTAAGTCTTCCGTGTGCGT   | 60.312 | 20 |
| 217 | 516  | 732  | AAATTATTCAACTTGGATCACT | 57.303 | 25 |
| 263 | 368  | 630  | ACTTGTCAATGCCGGTAAGC   | 60.14  | 20 |
| 265 | 764  | 1028 | TCACAACGGGGTCAAATGTA   | 59.816 | 20 |
| 244 | 834  | 1077 | ATCAGGCTCGAGTCCATGTC   | 60.231 | 20 |
| 254 | 415  | 668  | TCGGCATGAGATGAGATGAG   | 59.9   | 20 |
| 159 | 227  | 385  | AACAGAGCAAGACGAGGCAT   | 60.02  | 20 |
| 251 | 1287 | 1537 | TCTGGTTGGAGTCTGCTTGA   | 59.545 | 20 |
| 213 | 17   | 229  | GCCAATCACTAACCAACACG   | 59.05  | 20 |
| 195 | 1452 | 1646 | ACTCCGCCCTCGTGTTTTAT   | 60.875 | 20 |
| 170 | 346  | 515  | CGTAGGCAGCATCCTTCATT   | 60.235 | 20 |
| 168 | 2422 | 2589 | CATTGCCATTGCAGAAGCTA   | 59.976 | 20 |
| 250 | 498  | 747  | TCCTTAAGGTGTCAGAGGCG   | 60.388 | 20 |
| 178 | 2347 | 2524 | TGATGCATTTTCCCAGTTCTT  | 59.56  | 21 |
| 256 | 2239 | 2494 | ACCAACCAGCTTAGCGAAAA   | 59.883 | 20 |
| 228 | 1461 | 1688 | CCCTCGTTGACCTTGCTAAA   | 60.241 | 20 |
| 259 | 1687 | 1945 | AAAAAGTCCCAGCCAATCT    | 59.94  | 20 |
| 273 | 259  | 531  | TCCCACTAACCTTGTCTCCC   | 58.989 | 20 |
| 254 | 761  | 1014 | GGTGTGCTCGGATCTTGATT   | 60.081 | 20 |
| 193 | 527  | 719  | AAGATTCTCTTGTAGGTTGT   | 59.72  | 25 |
| 114 | 717  | 830  | CACGGCAAAGCAAGTAATCA   | 59.872 | 20 |
| 205 | 1150 | 1354 | CGAGAACTTCAGCCCCATAG   | 59.83  | 20 |
| 221 | 101  | 321  | CACCCCTGGCTTCTTTTAT    | 60.312 | 20 |
| 186 | 5863 | 6048 | AGTCGCCTCCATTTTCTCCT   | 60.212 | 20 |
| 164 | 1343 | 1506 | AATCGTGAAATCAAACCAGAA  | 57.201 | 21 |
| 153 | 484  | 636  | TGCCACTACTTTTCTTGCCC   | 60.249 | 20 |
| 146 | 2022 | 2167 | TGTTGTCCGCTGTCAAGAAA   | 60.427 | 20 |
| 263 | 67   | 329  | AATCGAATTGTTCTGCTCG    | 60.214 | 20 |
| 247 | 42   | 288  | CACTGGATCTGCCGATGTTA   | 59.673 | 20 |
| 146 | 248  | 393  | CTTTTGCTTCAGACCCCCTT   | 60.601 | 20 |
| 204 | 666  | 869  | AGTCACGTCTATTCATCATTGA | 58.654 | 24 |
| 176 | 1014 | 1189 | AGGACTGATGATCCGGTGAC   | 59.928 | 20 |
| 117 | 60   | 176  | TTTAAGATGTGCATGCATTTGA | 59.217 | 22 |
| 217 | 3701 | 3917 | CGCAAACGATGGCAATAAT    | 59.534 | 19 |
| 204 | 639  | 842  | ATTTTGCACCGCCATATCAT   | 60.182 | 20 |
| 188 | 50   | 237  | GAACGCGAAGTAGCATGGTT   | 60.278 | 20 |
| 198 | 98   | 295  | ACGACGCAAAAATGGAAAAC   | 59.982 | 20 |
| 147 | 516  | 662  | ATGCCACCACTTCCCTGATA   | 60.34  | 20 |
| 280 | 2155 | 2434 | GGAGCAAACATGCTGCATAC   | 59.306 | 20 |
| 138 | 224  | 361  | TTCTAACGGCCCAGATTTTG   | 60.067 | 20 |
| 214 | 115  | 328  | CAAAAATCTAACGGGCCAAA   | 59.937 | 20 |
| 190 | 332  | 521  | CGCTTCATTATCAACCACACC  | 60.38  | 21 |
| 277 | 539  | 815  | TGCTCTCAATTAATACACCCC  | 59.912 | 23 |

|     |      |      |                        |        |    |
|-----|------|------|------------------------|--------|----|
| 234 | 416  | 649  | CGCTGCAACTGTTGGACTT    | 60.04  | 19 |
| 228 | 498  | 725  | TTCGAAGATCAACGGATGGT   | 60.461 | 20 |
| 278 | 1086 | 1363 | GCCATTATGGTGCATTGTTG   | 59.816 | 20 |
| 202 | 1313 | 1514 | CCACTCTCTTGCGCTTTTTTC  | 60.132 | 20 |
| 176 | 2338 | 2513 | CAAGATGATGAGGGCCAAAT   | 59.894 | 20 |
| 108 | 625  | 732  | GGAGACCAATTCTTGGCTGA   | 60.195 | 20 |
| 110 | 2594 | 2703 | CAATAAATTGGGGTCGGCTA   | 59.789 | 20 |
| 195 | 26   | 220  | TGGTTATTACTGGAACGCGA   | 59.182 | 20 |
| 193 | 301  | 493  | CGGCCTATCGTCTTCCTACC   | 60.968 | 20 |
| 257 | 5800 | 6056 | TCGATCATAGATGTGGTTCCA1 | 59.273 | 22 |
| 247 | 521  | 767  | TGCAACCACCACTGGAGATA   | 60.112 | 20 |
| 145 | 501  | 645  | GCAAAAAGTGCCTACTTCACCA | 60.298 | 21 |
| 262 | 597  | 858  | TGAAACCAACTATCTCGGTGC  | 60.125 | 21 |
| 131 | 984  | 1114 | CTGACCTGGTGTCCCATCTC   | 60.527 | 20 |
| 253 | 481  | 733  | GGCAATCTATCCCATAACAAGG | 58.406 | 21 |
| 136 | 155  | 290  | TCTTCTCTCAGGTGGGGGAT   | 60.991 | 20 |
| 203 | 471  | 673  | CAACCAATTCAACTTTCATTAT | 59.788 | 24 |
| 216 | 1125 | 1340 | ATCCGGATCATTGACATTTG   | 58.215 | 20 |
| 213 | 883  | 1095 | ATCTGTCTCCTGCCCATGAC   | 60.08  | 20 |
| 250 | 759  | 1008 | ACAGTGGCTAAAATGCACCG   | 61.08  | 20 |
| 199 | 2295 | 2493 | GGCTTTGTTGCTGGAGTATTG  | 59.761 | 21 |
| 256 | 508  | 763  | AACCTGCATCACAAAAGCAA   | 59.322 | 20 |
| 274 | 20   | 293  | TGACTGTGGATTTCCAATCAT  | 57.849 | 21 |
| 263 | 464  | 726  | TGTTGGTTTGTGAGGTCAGC   | 59.726 | 20 |
| 182 | 1156 | 1337 | AGTGTTTCATCTCCGCCATC   | 60.081 | 20 |
| 210 | 4965 | 5174 | TTGGTTGTTTCATCTGCGGTA  | 60.111 | 20 |
| 275 | 1749 | 2023 | GCATGCAAAGTTGCAAACAA   | 60.827 | 20 |
| 241 | 743  | 983  | TCAGACAGCCATCATGTTACG  | 59.731 | 21 |
| 270 | 447  | 716  | GATGAAGGCACAGAGCATCA   | 59.95  | 20 |
| 232 | 77   | 308  | GGTAGAGGAGCTGATGTGGC   | 59.834 | 20 |
| 273 | 569  | 841  | CATATGGTGTGAGGTTTGGG   | 58.695 | 20 |
| 226 | 548  | 773  | CATCAGTTGTAGCTGGGGGT   | 59.989 | 20 |
| 194 | 394  | 587  | TCATGTACGTGATGCAACCA   | 59.543 | 20 |
| 175 | 260  | 434  | AGACCAAACCTCAAGCATGG   | 60.111 | 20 |
| 218 | 1133 | 1350 | GGCCACTCAGTTACAAAGGTG  | 59.648 | 21 |
| 163 | 1546 | 1708 | TCACCTTTCCAACAGCTCAA   | 59.415 | 20 |
| 212 | 708  | 919  | GTGGTGGAAGTATTGGGAG    | 60.363 | 20 |
| 194 | 510  | 703  | AAAGTGCCTTGTGTGCACG    | 59.794 | 20 |
| 217 | 408  | 624  | TCCCTTCTTACATATGGCCC   | 58.857 | 20 |
| 200 | 459  | 658  | CGTCTGAGTACCCCGTCTTC   | 59.721 | 20 |
| 268 | 2579 | 2846 | GTGTGCGAGTGGTTTTTACG   | 59.245 | 20 |
| 262 | 356  | 617  | GCTGTGCAAAACAATGTCGT   | 59.77  | 20 |
| 231 | 961  | 1191 | TGGAGTTTTCAACGCAGACA   | 60.427 | 20 |
| 263 | 1639 | 1901 | ACTGCTCCTCTCATGGTCAAT  | 58.758 | 21 |
| 264 | 193  | 456  | AAAATCCAATTCGAATCCCC   | 59.963 | 20 |
| 236 | 2261 | 2496 | TTCCTCTTGCAATAATGGGG   | 58.89  | 21 |
| 257 | 56   | 312  | CAGGGGATCTCAAGCCTGTA   | 60.21  | 20 |
| 147 | 519  | 665  | AGATCAGATTCCCAAACCCC   | 60.133 | 20 |
| 140 | 306  | 445  | CAGCTGAACCAACCATCCTT   | 60.111 | 20 |
| 225 | 176  | 400  | CCACCATGATTTGACACAC    | 59.812 | 20 |
| 261 | 157  | 417  | GCGAGCAGACCAGAAGTCAG   | 61.3   | 20 |
| 193 | 473  | 665  | CGCTCACCACAAAGAGAAGA   | 59.161 | 20 |
| 264 | 724  | 987  | TCGTGAGAAATTAATGGAACA  | 59.885 | 24 |
| 273 | 1259 | 1531 | TGGAAAAAGGGAGGAATCAA   | 59.476 | 20 |
| 204 | 540  | 743  | CATGCACATCCCTCTTTCAG   | 59.241 | 20 |
| 172 | 2499 | 2670 | GCCAGTTCTTTTTTCATGGGA  | 60.051 | 20 |
| 252 | 788  | 1039 | CAAACACGCATCACCACCTA   | 60.574 | 20 |
| 204 | 1354 | 1557 | TTCCAATTTGAACTACCGGC   | 59.938 | 20 |

|     |      |      |                        |        |    |
|-----|------|------|------------------------|--------|----|
| 278 | 62   | 339  | CATGAACTCCATGAAGCATGA  | 59.664 | 21 |
| 223 | 1210 | 1432 | GATCACTTGTCCGAGGCACT   | 60.269 | 20 |
| 254 | 2122 | 2375 | AGTGAACCATGGGTCCGTTA   | 60.232 | 20 |
| 278 | 1136 | 1413 | GGCGGGAGCATATTTCTGTA   | 60.06  | 20 |
| 270 | 2248 | 2517 | GAAATTAATGCCGTCGCATC   | 60.432 | 20 |
| 280 | 41   | 320  | AAACCGAAAAACCGAAAACC   | 60.197 | 20 |
| 167 | 1074 | 1240 | AGAGCAACACATGCCAACAT   | 59.169 | 20 |
| 175 | 0    | 174  | TCATTTGTTAGAGTTTTGACC  | 58.663 | 23 |
| 240 | 482  | 721  | TACATCGGCTCAAACCTCAA   | 59.272 | 20 |
| 135 | 173  | 307  | GCTACTGCTGTCATAGCCCC   | 59.866 | 20 |
| 280 | 2    | 281  | TTGATGATATATAGGTGTTTTG | 57.297 | 26 |
| 254 | 203  | 456  | GTTTGTATTGGGGTATGGGA/  | 59.823 | 22 |
| 254 | 6125 | 6378 | GTCACCTGTCACCAGAGCAA   | 59.872 | 20 |
| 124 | 512  | 635  | TGGATCGTTGCATCATCATT   | 59.89  | 20 |
| 249 | 2464 | 2712 | TACATGCGTTCACGAAGAGG   | 59.864 | 20 |
| 280 | 2284 | 2563 | CGGACAAACACGACAACATC   | 60.008 | 20 |
| 279 | 373  | 651  | CCATGAGAAAATGCACTGCT   | 58.877 | 20 |
| 149 | 109  | 257  | GTA CTGCTCCATCTTCAACCG | 59.749 | 21 |
| 274 | 23   | 296  | CAAGAGTAGAGAAAATCCTCC  | 58.901 | 23 |
| 249 | 130  | 378  | TGATTCGCTTCGCTTTCTTT   | 60.096 | 20 |
| 164 | 2192 | 2355 | CAACTGACCAACAACAGCCA   | 60.757 | 20 |
| 153 | 138  | 290  | TTTCTCTCTCCTCTCGCTGC   | 59.973 | 20 |
| 273 | 171  | 443  | ATCTCGGCCTAGCTGGATTT   | 60.194 | 20 |
| 225 | 167  | 391  | TAGACCCAGGCTTCGAGGTA   | 59.83  | 20 |
| 213 | 558  | 770  | CCACCTAGCACTTCAAGGGA   | 60.246 | 20 |
| 143 | 1885 | 2027 | AGCAACCATGCAATTAAGGG   | 59.96  | 20 |
| 135 | 1599 | 1733 | AACGAAGAAACGCTGCAAAT   | 59.889 | 20 |
| 248 | 1909 | 2156 | GATGCCCTCCACATCAGATT   | 59.893 | 20 |
| 239 | 584  | 822  | GCCTGCTACATAGGGTTTTCC  | 59.979 | 21 |
| 269 | 1121 | 1389 | GAGAATCTGCAATGTGAAGGC  | 59.835 | 21 |
| 189 | 114  | 302  | ATCTTGACCGCTGATTTTGG   | 60.074 | 20 |
| 245 | 9246 | 9490 | TTCGAGGGGATTAATGATGG   | 59.717 | 20 |
| 221 | 1721 | 1941 | ATTGGCAATTTTTGAAACGC   | 59.95  | 20 |
| 279 | 914  | 1192 | GAAGAAACACCGAAGCAACC   | 59.717 | 20 |
| 219 | 2492 | 2710 | TTCCATCCCTCTCCAATGAG   | 60.003 | 20 |
| 259 | 409  | 667  | AGCAATGAGCAACATTCAGC   | 59.031 | 20 |
| 170 | 2    | 171  | TTTTAATTCACGCACAATTACA | 58.984 | 25 |
| 242 | 315  | 556  | GTGTTGAATGTTGTGCCTCG   | 60.16  | 20 |
| 254 | 103  | 356  | ACAACACGCAAACATGAGGA   | 60.16  | 20 |
| 216 | 2570 | 2785 | CACTGCGCTTCAGTCTGGTA   | 60.199 | 20 |
| 199 | 723  | 921  | AGGTTGCACCTCTGTTTTCG   | 60.291 | 20 |
| 154 | 167  | 320  | TCCAAC TACGTGGGTGGTTT  | 60.269 | 20 |
| 195 | 253  | 447  | AGCATCTTCCATCTGGCATT   | 59.658 | 20 |
| 279 | 417  | 695  | CACAGGGAGAAGACGAACTC   | 58.533 | 21 |
| 212 | 62   | 273  | TGTGTGTTGGTCTGAGAGGC   | 59.872 | 20 |
| 191 | 839  | 1029 | AGGTTTTTCAAGGAGTGCCC   | 60.476 | 20 |
| 100 | 1283 | 1382 | AGAGGACAGGAATGTTTCTGG  | 60.11  | 22 |
| 205 | 553  | 757  | TAAAGAATGCCCACTCCCAG   | 60.066 | 20 |
| 257 | 468  | 724  | CAGAAGGCACCGAACTTACC   | 59.734 | 20 |
| 185 | 5055 | 5239 | ATGCAACGTGAAGAAGAGGG   | 60.255 | 20 |
| 206 | 1198 | 1403 | TGAAAAGGCCATTCGAGACT   | 59.813 | 20 |
| 127 | 2319 | 2445 | GAAGCATTGTTGGAGGGAGA   | 60.195 | 20 |
| 244 | 1292 | 1535 | GCTTCACCAACCTTTTGAGC   | 59.859 | 20 |
| 217 | 8    | 224  | CGGCTTGGATTATTTCTATTT  | 60.169 | 23 |
| 207 | 9    | 215  | TTAGTTAGTACCGATTTCAGGC | 57.499 | 24 |
| 142 | 0    | 141  | CCGAAAATACAGGCGCATA    | 59.671 | 19 |
| 188 | 824  | 1011 | AAGGTTTCTTAACTCTGCGA/  | 59.433 | 22 |
| 149 | 41   | 189  | CAAAAACAACCTCAATATGGA  | 58.211 | 25 |

|     |      |      |                        |        |    |
|-----|------|------|------------------------|--------|----|
| 240 | 1733 | 1972 | TGGCTTCTGCACTTTCTTTT   | 59.993 | 20 |
| 279 | 13   | 291  | CCAATTTTCTCTTCGGGCTA   | 59.292 | 20 |
| 115 | 57   | 171  | TGATTGTACGAAAAACCCCG   | 60.722 | 20 |
| 187 | 502  | 688  | ATTGGTTTGTGTTTGGGCAAG  | 59.839 | 20 |
| 240 | 754  | 993  | CTCTCATTTTCGCCCCGATAC  | 59.668 | 20 |
| 235 | 1148 | 1382 | GTCTGATAGGATTGGCTCGG   | 59.653 | 20 |
| 244 | 531  | 774  | GGCAGAGATTTTCATCTCCA   | 60.158 | 20 |
| 228 | 1651 | 1878 | TCTAGCCGGTGTAGCCATCT   | 59.859 | 20 |
| 265 | 1510 | 1774 | ACTGTGGATGGAGTTCGGTC   | 59.969 | 20 |
| 126 | 1464 | 1589 | AATTGAGAGGCTCCAACGAC   | 59.288 | 20 |
| 231 | 218  | 448  | CCATGCACGTAAGCATGTTC   | 60.142 | 20 |
| 216 | 2153 | 2368 | TGCGTGATTTTGGCGTATTA   | 60.096 | 20 |
| 240 | 8300 | 8539 | GAGCTCTCTTTTCTCTCCA    | 60.081 | 21 |
| 207 | 800  | 1006 | CCCAACAAACCCTTTCTCAA   | 59.942 | 20 |
| 231 | 1635 | 1865 | CATGGCATGCAAAGAAGAGA   | 59.948 | 20 |
| 277 | 1113 | 1389 | AGATGCATAGGTGTCTGCC    | 60.104 | 20 |
| 229 | 2664 | 2892 | CTTCCATTCCATTCCACACC   | 60.173 | 20 |
| 272 | 838  | 1109 | CCTGGAAGAGCTTGAAAACA   | 59.48  | 21 |
| 128 | 297  | 424  | ATCCGACCTAATGAAAGCGA   | 59.668 | 20 |
| 234 | 260  | 493  | CGGAGAGAGATGCAAGGACT   | 59.555 | 20 |
| 245 | 3851 | 4095 | GGAAGTGGCAAACAGATTG/   | 60.103 | 21 |
| 223 | 319  | 541  | GGATGATTTGGAGAATGGGA   | 59.685 | 20 |
| 256 | 716  | 971  | TCATGTTTTCTCACTTGGGATG | 59.971 | 22 |
| 252 | 127  | 378  | AGCCACTGAACCAAGTGACC   | 60.159 | 20 |
| 222 | 477  | 698  | CGAATGAGATTTGCGTGTTG   | 60.257 | 20 |
| 261 | 579  | 839  | TGGCCTCTAATCAGTTCGCT   | 59.978 | 20 |
| 230 | 3371 | 3600 | TCCAAAAAGAGGATCCCAGA   | 59.6   | 20 |
| 221 | 507  | 727  | CGGAAAAGCTTAGCTCAGGA   | 59.724 | 20 |
| 119 | 1576 | 1694 | TGAAATTCAAAGCTGGGATG   | 60.06  | 21 |
| 188 | 891  | 1078 | GAGATTTAGTGCGCGAAAGG   | 59.982 | 20 |
| 267 | 2793 | 3059 | GGAAAAGGCATATTGTGGGT   | 58.765 | 20 |
| 220 | 186  | 405  | GGGAAGATGTGATGAGGGAG   | 59.46  | 20 |
| 117 | 1142 | 1258 | GCACCACCCTACCCTTCTTT   | 60.361 | 20 |
| 216 | 2694 | 2909 | GTGTGTTGGGTCTTCCAGGT   | 59.859 | 20 |
| 279 | 181  | 459  | TTGTCAACCAACACCTGCAT   | 60.008 | 20 |
| 203 | 1006 | 1208 | AATGTGCCAGAGAAGTTCG    | 60.255 | 20 |
| 260 | 224  | 483  | TTTCTCGCATTGGTCAATCA   | 60.197 | 20 |
| 272 | 52   | 323  | GGTGCTGTGTGATGATGGAG   | 60.121 | 20 |
| 180 | 316  | 495  | GCTCGCTTTCATTTACACA    | 59.995 | 20 |
| 239 | 1116 | 1354 | GCCCCATTTATACCCTTTCG   | 60.508 | 20 |
| 181 | 988  | 1168 | TGAGACGGAGGAGAAGAGGA   | 60.064 | 20 |
| 271 | 1055 | 1325 | GACTGAGGGGAATCCATGAG   | 59.46  | 20 |
| 137 | 1446 | 1582 | TGTTAAACGGACTGGCCAAC   | 60.924 | 20 |
| 142 | 783  | 924  | TCGTGTAGAATCGCCTTCT    | 59.836 | 20 |
| 203 | 1944 | 2146 | TTTGGGTTGGAGATGGTTTT   | 59.264 | 20 |
| 225 | 490  | 714  | CAAACGAAAAATTATCAACTG  | 59.853 | 26 |
| 256 | 4870 | 5125 | ACCAAGTTGAGGGCATTGAA   | 60.495 | 20 |
| 164 | 2258 | 2421 | CCTGACCGGATCTCTCACTC   | 59.792 | 20 |
| 248 | 3216 | 3463 | CTCTGTCCACTCTTCTCGCC   | 60.135 | 20 |
| 279 | 1209 | 1487 | AGGGGACTTTTTAACCAACCA  | 59.728 | 21 |
| 100 | 6    | 105  | TGTGAGTGTGTGTGCAATGA   | 58.12  | 20 |
| 265 | 456  | 720  | ATTCAGGTAATCCGCCATTG   | 59.784 | 20 |
| 274 | 572  | 845  | AATCGAACTGGAGGAGGCTT   | 60.212 | 20 |
| 226 | 245  | 470  | CTCAGTTGCACTGGTTTCCA   | 59.873 | 20 |
| 201 | 2038 | 2238 | ACAGGATAACGGATGCCTTG   | 59.955 | 20 |
| 172 | 1881 | 2052 | CAACTCACATACGGATGACCC  | 60.248 | 21 |
| 271 | 1314 | 1584 | CGCGTGTCACTTAGACCAG    | 59.465 | 20 |
| 133 | 545  | 677  | CTCCCTCTTTCTCGCTACA    | 59.569 | 20 |

|     |      |      |                         |        |    |
|-----|------|------|-------------------------|--------|----|
| 227 | 5715 | 5941 | GTCATCGAGCCTAATCGAGC    | 59.946 | 20 |
| 130 | 0    | 129  | GCGATTTTAACAAAAACGGG    | 59.472 | 20 |
| 248 | 1090 | 1337 | CATTTTCCCAAACCCACAAC    | 60.066 | 20 |
| 186 | 322  | 507  | GCAATCCAAGGGAGATGAAA    | 60.014 | 20 |
| 262 | 559  | 820  | TTCAAAAGCTTGCTTCCCAT    | 59.823 | 20 |
| 255 | 364  | 618  | ACTGTCCCCACGGTCTAATG    | 59.844 | 20 |
| 275 | 552  | 826  | CGCATTTGTCTCTCACCTCA    | 59.984 | 20 |
| 259 | 441  | 699  | AGACTGCACCTGCGGTAAC     | 59.937 | 20 |
| 213 | 1661 | 1873 | CCTGGTGTCCACTGTGTTTG    | 60.039 | 20 |
| 228 | 408  | 635  | GGGTTTGGATGAAGGAGGTT    | 60.169 | 20 |
| 198 | 995  | 1192 | CCACCTGAGGGAGTTGATGT    | 59.962 | 20 |
| 105 | 1909 | 2013 | CAAGGTCTGACGAAGTCGC     | 59.561 | 19 |
| 112 | 1869 | 1980 | CAGCCCTTGGCTCTTTTAGA    | 59.587 | 20 |
| 275 | 654  | 928  | AGAGGAAACGATCAAGCAGC    | 59.579 | 20 |
| 266 | 2708 | 2973 | CATCGATTGAACCAAACACC    | 58.824 | 20 |
| 170 | 224  | 393  | TTGAAAAATAAGTGCTGGGGA   | 59.573 | 21 |
| 265 | 35   | 299  | CCAACGTCAAAGTTGCTAGG    | 58.431 | 20 |
| 201 | 902  | 1102 | TTGTCTATGCCGGTTTTTGA    | 59.157 | 20 |
| 261 | 481  | 741  | AATTTTCGGTTACATGGCAGC   | 59.967 | 20 |
| 241 | 2    | 242  | TTGTTAGAGGTCTTGACGGGA   | 59.72  | 21 |
| 274 | 257  | 530  | TTTGGGGAGGAGAAAAGAGA    | 58.833 | 20 |
| 189 | 16   | 204  | ACTTATCCAACCTCAATTTATAT | 58.178 | 27 |
| 250 | 1045 | 1294 | ATGCGATGTGTGGTCAATA     | 59.955 | 20 |
| 229 | 36   | 264  | GGGTTATCACCTGATTACTACC  | 58.824 | 25 |
| 273 | 1021 | 1293 | TGTCGTGCGATGTATGATGT    | 58.517 | 20 |
| 176 | 600  | 775  | GGGAGGAAGATGCAACTCAG    | 59.803 | 20 |
| 217 | 2152 | 2368 | AAAGGCCACGTGTTAATTGC    | 60.003 | 20 |
| 207 | 863  | 1069 | TTTCCTTTATGATCCCCTGC    | 58.974 | 20 |
| 245 | 211  | 455  | GGAAACGATCGTAATACGCC    | 59.438 | 20 |
| 129 | 580  | 708  | TGAGACGATGTGCGATAGGA    | 60.376 | 20 |
| 163 | 560  | 722  | TACTAGGTTGTTGTGGCGGA    | 59.195 | 20 |
| 249 | 2282 | 2530 | TCATATATGTTCCCTGGCGGC   | 60.827 | 20 |
| 256 | 1973 | 2228 | TCGGGAGTCAGAAATCGAAG    | 60.331 | 20 |
| 206 | 186  | 391  | AATTCACATGGGACTTGCGT    | 60.384 | 20 |
| 141 | 70   | 210  | ATGTGGCTTGCTTGCTTCTT    | 60.022 | 20 |
| 150 | 274  | 423  | TCAACCCCATCTTCAACCTC    | 59.903 | 20 |
| 227 | 560  | 786  | TTGATTTTTAATGGGGCAAAA   | 59.313 | 21 |
| 200 | 1835 | 2034 | ACCTTGCTTGTGGTCCTTGT    | 59.622 | 20 |
| 277 | 1149 | 1425 | GGACTCTGCAGCATGTTCAA    | 59.992 | 20 |
| 264 | 565  | 828  | CATTAGGTGTTGGGGCTCAT    | 59.813 | 20 |
| 150 | 1033 | 1182 | ATTTGTGTTGGCTTCAGGGA    | 60.495 | 20 |
| 222 | 1529 | 1750 | GCGATCATTCTCGTGAAGAAA   | 60.346 | 21 |
| 265 | 248  | 512  | AATGCTTGTACCCGTAGCGT    | 59.66  | 20 |
| 241 | 1064 | 1304 | AAGCAGCGGTGAGAGCTAAG    | 59.92  | 20 |
| 132 | 1184 | 1315 | CATAATTGCCTAGCTGGCGT    | 60.251 | 20 |
| 265 | 391  | 655  | TTCCCACCATGACTTCAACA    | 59.935 | 20 |
| 196 | 242  | 437  | CCCCCAAATCTACAAAAGGG    | 60.525 | 20 |
| 261 | 577  | 837  | CGAGCAATCTGTAAGGTGAAC   | 59.517 | 22 |
| 279 | 901  | 1179 | TCTGCGGGATTTAGAGGATG    | 60.17  | 20 |
| 245 | 1396 | 1640 | GCCTTTGAATTGCTCCACAT    | 60.081 | 20 |
| 245 | 92   | 336  | GTCAACATCACCTCACCCA     | 59.367 | 20 |
| 241 | 1198 | 1438 | GTGTGGTCTGCAAAGTGTGG    | 60.203 | 20 |
| 115 | 318  | 432  | GCTGAACTGTTTTCCGAACC    | 59.717 | 20 |
| 271 | 1174 | 1444 | CAATTCAAATTGAGCCCGT     | 59.938 | 20 |
| 279 | 2083 | 2361 | GGCCAACATGATTAGCATCC    | 60.304 | 20 |
| 225 | 1492 | 1716 | TTGTCAGCGCGTTAATGAG     | 60.014 | 20 |
| 167 | 545  | 711  | TTGGTGGTTTTGCAGATGAA    | 60.088 | 20 |
| 261 | 5577 | 5837 | GGACACCACGTAAGCATTCA    | 59.572 | 20 |



|     |      |      |                         |        |    |
|-----|------|------|-------------------------|--------|----|
| 155 | 568  | 722  | GAGACATCAGCTGAGGGGAG    | 59.945 | 20 |
| 271 | 508  | 778  | ATTCATGGTGGTGGTTGGAT    | 59.91  | 20 |
| 232 | 19   | 250  | CTCGCTCGGAAAAGCAATAC    | 59.982 | 20 |
| 206 | 2149 | 2354 | GATTGTTGGGTTTTCCGATG    | 60.17  | 20 |
| 196 | 1248 | 1443 | TCTTTGGGATTCCCTCTCGAA   | 59.744 | 20 |
| 264 | 635  | 898  | GCCTTGTAACAAACCTCGGA    | 60.11  | 20 |
| 118 | 1232 | 1349 | CCTTCGAGACTCCATCGTTT    | 59.284 | 20 |
| 245 | 499  | 743  | TTTGAACTCCGTAGCAACCA    | 59.317 | 20 |
| 213 | 532  | 744  | GGATCTGCTAAGATCGCTCG    | 60.081 | 20 |
| 199 | 883  | 1081 | GTCCTCACCTGCATCGTCTT    | 60.269 | 20 |
| 217 | 642  | 858  | CTGCTCTCCAGAAGCAAACC    | 60.134 | 20 |
| 215 | 1394 | 1608 | CGGAGGCTGAGGCATTATAG    | 59.823 | 20 |
| 160 | 613  | 772  | CGCAGGATTGTACGGTTGTA    | 59.609 | 20 |
| 234 | 0    | 233  | TGAAGTTAGGAAATAAGGAGC   | 57.525 | 24 |
| 117 | 1277 | 1393 | TGTTGGCATGGTTGATGAGT    | 59.967 | 20 |
| 134 | 642  | 775  | GGATTGAGTTTTTGAACCA     | 59.054 | 21 |
| 125 | 73   | 197  | TGTTGGTTGAAAGATGAGGG    | 58.541 | 20 |
| 273 | 452  | 724  | TCGATTAACCTTGACAAGGTTTC | 60.037 | 24 |
| 215 | 3524 | 3738 | AGGCGTGTTTTGTTTGAAG     | 60.147 | 20 |
| 128 | 71   | 198  | TATGAGAGACGAGCTCACGC    | 59.297 | 20 |
| 181 | 238  | 418  | TTTGGTTATCATTITGTCACAG  | 58.935 | 25 |
| 247 | 784  | 1030 | GCCCACCATAACCACAATACC   | 59.939 | 20 |
| 167 | 60   | 226  | CTTGAGAAGGCATGGTAGCC    | 59.836 | 20 |
| 206 | 18   | 223  | AGCAACAGCGGAAGAAGAAG    | 59.757 | 20 |
| 121 | 2267 | 2387 | ACGCCTTTCCAAACTTTCAA    | 59.724 | 20 |
| 213 | 42   | 254  | AATTTGTTCAAATCCGCGA     | 60.436 | 20 |
| 261 | 518  | 778  | AACTTTGGAATCGACATTGCTT  | 60.007 | 22 |
| 220 | 1613 | 1832 | GTCGAGCAACAGCAGGTGTA    | 60.056 | 20 |
| 106 | 4    | 109  | GTTTACCCATAGCGCACTCG    | 60.658 | 20 |
| 144 | 626  | 769  | TTCTCCTCACAAATGCTTCCA   | 59.369 | 20 |
| 163 | 66   | 228  | GAGATGGCTTTGTGATGGGT    | 59.934 | 20 |
| 198 | 697  | 894  | TCCAAGAATGAAGCCACTC     | 60.195 | 20 |
| 208 | 687  | 894  | CCTTGTTGAATGCGAATGTG    | 60.111 | 20 |
| 275 | 675  | 949  | TGATGCCCCGTTAAACATCT    | 60.331 | 20 |
| 145 | 1015 | 1159 | GGATCCTGAGCCATCAATTC    | 59.445 | 20 |
| 137 | 502  | 638  | CCGTACATTCGGTAGATGG     | 60.206 | 20 |
| 267 | 635  | 901  | TTGAGCATTGATACAGTGGAG   | 58.379 | 22 |
| 179 | 1566 | 1744 | TCTCGATTCAACTCATCGGA    | 59.322 | 20 |
| 126 | 4974 | 5099 | CTCATTTGGAAGGAGCAAC     | 59.813 | 20 |
| 278 | 2351 | 2628 | TGTTAATGAAATTTACGCACAC  | 58.225 | 23 |
| 234 | 1621 | 1854 | AGGTGTAACCGTGGATCAGG    | 59.844 | 20 |
| 209 | 102  | 310  | GGGCTGTACTTCAGAGGCTG    | 60.012 | 20 |
| 191 | 1852 | 2042 | ACGCTCAGTGAGGTTTCAGGT   | 59.907 | 20 |
| 250 | 2842 | 3091 | TGTTCCACAAAAACAGGGT     | 60.246 | 20 |
| 142 | 123  | 264  | CGATTTAACCTCCCCTTGA     | 59.931 | 20 |
| 251 | 390  | 640  | CGGGGAGTAGATGAATCGAA    | 60.029 | 20 |
| 225 | 298  | 522  | GTGTGCGAATTTGAAAAGG     | 60.481 | 20 |
| 275 | 427  | 701  | GGGGGAAAGATTGCAAATTC    | 60.623 | 20 |
| 128 | 3913 | 4040 | CATCTTCACCGCTTCTCTC     | 59.95  | 20 |
| 247 | 1362 | 1608 | ATAAAAATGGTGCTCGGTGG    | 59.823 | 20 |
| 190 | 2139 | 2328 | GGAAGTTTCACCGGAAGATG    | 59.526 | 20 |
| 167 | 599  | 765  | GTGGCTTGTGTTTCCTTGGT    | 60.012 | 20 |
| 100 | 3093 | 3192 | CATTATGGACACATGACCCG    | 59.648 | 20 |
| 261 | 136  | 396  | TTGATTCTCGCCATGTACAAA   | 59.172 | 21 |
| 203 | 555  | 757  | CTGAGTAAGCCGGTGCATTT    | 60.27  | 20 |
| 175 | 48   | 222  | GGCGTGATGTTTTATCTGA     | 59.694 | 20 |
| 175 | 310  | 484  | GCCAGATTTTCTCTGCTG      | 59.78  | 20 |
| 239 | 446  | 684  | GATTTTGGCAATCAACGGT     | 59.807 | 20 |

|     |      |      |                        |        |    |
|-----|------|------|------------------------|--------|----|
| 245 | 4462 | 4706 | ATTCAATCGGATGCAAGAGG   | 60.036 | 20 |
| 248 | 369  | 616  | CGTCCCTTAGATTGGTGAGG   | 59.545 | 20 |
| 163 | 672  | 834  | TGAGAGCGAGCAAGGGTTAT   | 59.978 | 20 |
| 263 | 607  | 869  | TGATTA AAAACTGAACCGGAC | 59.492 | 22 |
| 181 | 1361 | 1541 | GGTGAAGGGAGCAATAAGCA   | 60.214 | 20 |
| 120 | 885  | 1004 | CACCGCCTCGTATCTTCATT   | 60.096 | 20 |
| 158 | 608  | 765  | GGGCTTGGTCAGAAAATTGA   | 60.051 | 20 |
| 213 | 2405 | 2617 | GTCGTGTTCTGTCGTCCTA    | 59.751 | 20 |
| 263 | 625  | 887  | TGATTTTATCGTGATTCATGCC | 59.801 | 22 |
| 179 | 3217 | 3395 | GGATCCCGGTCATATACGTG   | 60.036 | 20 |
| 114 | 640  | 753  | GTTCTCCTCAGCTCCTCCT    | 59.952 | 20 |
| 279 | 1127 | 1405 | TTGGATGCGTTGATTGAAAG   | 59.664 | 20 |
| 174 | 323  | 496  | TTTACCCAAATCACGAACA    | 59.941 | 20 |
| 278 | 1136 | 1413 | AACCCTGATCACCAAACGAG   | 59.966 | 20 |
| 221 | 2692 | 2912 | TTCGGTTGGTGAAGTTGTTG   | 59.585 | 20 |
| 259 | 612  | 870  | ACACGGATCGGAAATCCATA   | 60.155 | 20 |
| 150 | 601  | 750  | TCCAACGGAAATCCTTATACTC | 59.851 | 23 |
| 180 | 776  | 955  | AACCCACTTCCACAGAATGC   | 59.973 | 20 |
| 124 | 630  | 753  | TGCACATGCAAAGCTAAAGG   | 60.014 | 20 |
| 245 | 1203 | 1447 | TTCAAGCGCCTCTCTGTCTT   | 60.277 | 20 |
| 216 | 301  | 516  | GACCCAAAATCGCACAAATCT  | 59.939 | 20 |
| 177 | 1056 | 1232 | GCTGGGATATTTTGCCATGT   | 59.791 | 20 |
| 248 | 583  | 830  | GAATGTGTTTTCCGGGTAGC   | 59.434 | 20 |
| 270 | 452  | 721  | TGCCACTCACCTTAACCAAA   | 59.17  | 20 |
| 214 | 651  | 864  | GTGTTGGTGCTTGATGGCTA   | 59.722 | 20 |
| 212 | 627  | 838  | AGGTTGCCATTTGATGGAGA   | 60.461 | 20 |
| 275 | 221  | 495  | CGAATCCAGGTAAGGCTTGA   | 60.206 | 20 |
| 108 | 656  | 763  | GGCAGCAAGTTAAACAAGGC   | 59.889 | 20 |
| 156 | 4818 | 4973 | TCTCTCTTTCCCTCCTTT     | 59.252 | 20 |
| 272 | 12   | 283  | TCTCTCCCACTTTCTTCA     | 59.773 | 20 |
| 166 | 1147 | 1312 | GCCATTGCACTTATGCTCCT   | 60.243 | 20 |
| 235 | 401  | 635  | ATGGACTTGCTGAAACACCC   | 59.973 | 20 |
| 280 | 844  | 1123 | CGTTTTCCACCTTCAAGACAT  | 59.087 | 21 |
| 241 | 192  | 432  | TGCATGGCAGGTATGAGAAA   | 60.22  | 20 |
| 178 | 1459 | 1636 | CATGGGATAGTCGGTGAAT    | 59.629 | 20 |
| 185 | 2345 | 2529 | GGAGGAACTCCATCTCCCTC   | 60.012 | 20 |
| 226 | 3138 | 3363 | CGAATGCAGTTGCTTGAATG   | 60.401 | 20 |
| 123 | 104  | 226  | ATGGAGATCCGTGCTTCACT   | 59.685 | 20 |
| 181 | 693  | 873  | GGTGAAAGGCCATGTGAACT   | 59.973 | 20 |
| 186 | 1100 | 1285 | TGTCCCTGGTTACACACCAA   | 59.848 | 20 |
| 176 | 1360 | 1535 | TTTCGACCAATGAGAAAGGC   | 60.192 | 20 |
| 234 | 88   | 321  | TGGTCTGCCTAATTTACTGCA  | 59.779 | 22 |
| 161 | 1546 | 1706 | TCAGAGACTGTTCAAGGGCA   | 59.545 | 20 |
| 190 | 630  | 819  | TTGTCTTGACGCTGACAACC   | 59.88  | 20 |
| 264 | 3985 | 4248 | GCTTTGAGTTGTTCTTGGGC   | 59.859 | 20 |
| 117 | 1198 | 1314 | TCTGTCACATCCAGACGAGG   | 59.82  | 20 |
| 228 | 923  | 1150 | TTCCTGCTTTTCATCGCTCT   | 60.096 | 20 |
| 226 | 1670 | 1895 | GCACAGAAGGCTTGGAGATT   | 59.434 | 20 |
| 255 | 2280 | 2534 | TGGTGCTTTTCGAGGTAATACG | 60.138 | 21 |
| 212 | 4626 | 4837 | TGGGACTACTGACCCTCAC    | 59.962 | 20 |
| 148 | 272  | 419  | TTTTAAGTCGTGTTGCGTGC   | 59.918 | 20 |
| 219 | 1003 | 1221 | GCAGACATAGCAGGGGAATC   | 59.658 | 20 |
| 261 | 255  | 515  | AGGAAAATCCCAAACCGAAT   | 59.644 | 20 |
| 220 | 77   | 296  | AGGCGTAACGGCTCAAATTA   | 59.742 | 20 |
| 205 | 1115 | 1319 | GGGCTGTTGTA AACCTTG    | 59.471 | 20 |
| 204 | 9    | 212  | AAAGCAATCAGTCAAAGGGG   | 59.17  | 20 |
| 240 | 657  | 896  | AGAGAGCAAGCAACAATCCA   | 60.008 | 21 |
| 235 | 1406 | 1640 | GCCATCGATTGTGCTGATCT   | 61.192 | 20 |

|     |      |      |                        |        |    |
|-----|------|------|------------------------|--------|----|
| 253 | 1169 | 1421 | CTATATAGGTCCCCGTCCC    | 59.51  | 20 |
| 269 | 1787 | 2055 | CCTGCGTGGTTTTCTTTTG    | 60.639 | 20 |
| 176 | 4995 | 5170 | AGTCCTCCGCTCTAGCTCT    | 59.745 | 20 |
| 279 | 482  | 760  | GGTTGAGATTTTGGAGGAACA  | 59.017 | 21 |
| 268 | 2951 | 3218 | ACCAGGAGTGGTGAGAGGAA   | 59.682 | 20 |
| 199 | 685  | 883  | CCACTGGACCTCGATGGTAG   | 60.523 | 20 |
| 241 | 4375 | 4615 | GTATGACAAGCAGCAGTGCC   | 59.476 | 20 |
| 266 | 7    | 272  | CGGATTTAAGGGTTATTACCTC | 59.9   | 25 |
| 221 | 1453 | 1673 | TTTGGCTTGAACAGCACTTG   | 60.027 | 20 |
| 172 | 627  | 798  | TGGAGCCGAGAAGAGAAGAG   | 59.82  | 20 |
| 251 | 48   | 298  | GCGGATTATAATGGGTCTGAT  | 58.741 | 20 |
| 246 | 1398 | 1643 | GAATGTGGGCGATCTTGACT   | 60.081 | 20 |
| 268 | 630  | 897  | GCATATAAACCCGGAAACGA   | 59.795 | 20 |
| 196 | 670  | 865  | TTTTACCACTTCCATCCAAAA  | 58.518 | 22 |
| 216 | 1680 | 1895 | AGCACAAATTTTCAATTCACGT | 59.932 | 23 |
| 252 | 2107 | 2358 | ATGATGGTGTTCATGCTTT    | 59.005 | 20 |
| 250 | 405  | 654  | CCATTTAATTTCCAAAGGGTT  | 57.078 | 21 |
| 258 | 476  | 733  | GCTTACGTGTTTCAGGGCTC   | 59.882 | 20 |
| 195 | 61   | 255  | CCTTGCATATGATGGTTAGCA  | 58.664 | 21 |
| 233 | 1321 | 1553 | GCGCAAGAGCTTTTTCTGAG   | 60.407 | 20 |
| 233 | 739  | 971  | CACATTCTTTAAGCCATGGGA  | 59.946 | 21 |
| 189 | 705  | 893  | ATCCACGTTAGAACCCCTT    | 59.691 | 20 |
| 274 | 1154 | 1427 | TCCGATCTCTGTTTCGATTTG  | 60.199 | 21 |
| 228 | 1396 | 1623 | TGCAAATGGTACTAGGGACGA  | 60.508 | 21 |
| 172 | 90   | 261  | ACGGTTTCCCGCCTAGTTAT   | 59.856 | 20 |
| 132 | 1906 | 2037 | AAGGCCGGTATGTTCTGTA    | 59.452 | 20 |
| 278 | 758  | 1035 | TAAAGCCATTTGAACCCAA    | 60.294 | 20 |
| 193 | 1177 | 1369 | TAGCAACGCATCTTTGGAGA   | 59.566 | 20 |
| 130 | 638  | 767  | CCTCAATTTCTGCAGCCTTC   | 59.955 | 20 |
| 232 | 1126 | 1357 | TGGATGGGTTACTGGATCAAT  | 59.115 | 21 |
| 226 | 116  | 341  | ATATTTTATGGGACGGGGGA   | 60.219 | 20 |
| 270 | 4672 | 4941 | GTGCGTTTTTCGTCCAGAAAT  | 60.118 | 20 |
| 243 | 1890 | 2132 | TTCGATGAATGTGCTGCAA    | 59.931 | 19 |
| 274 | 1334 | 1607 | TTAGAGGTGTCCAACAGGGG   | 59.959 | 20 |
| 228 | 1528 | 1755 | CCACGCGCTCCTTAACTTAC   | 59.904 | 20 |
| 243 | 740  | 982  | TTGATGGCATCGATGAGGTA   | 60.033 | 20 |
| 275 | 1419 | 1693 | GCACGGCCAAGATAATAACG   | 60.476 | 20 |
| 237 | 1698 | 1934 | CACCCACATTTACACGAAG    | 60.001 | 20 |
| 203 | 616  | 818  | TGTTGAATGTAGGTCGGGGT   | 60.232 | 20 |
| 182 | 1078 | 1259 | ATTCATCACCACTCACCT     | 59.232 | 20 |
| 213 | 38   | 250  | TTCGTCTCTCCCTTTCCTT    | 60.183 | 20 |
| 184 | 286  | 469  | TCACGATTTACCGCAGTCAT   | 59.152 | 20 |
| 241 | 3176 | 3416 | TGTTACGTCATGGTCGTTT    | 60.008 | 20 |
| 228 | 100  | 327  | TTGGCAGAGTGGACTTCTCA   | 59.545 | 20 |
| 214 | 4492 | 4705 | GCCTGGTCCAAATAGCACTT   | 59.198 | 20 |
| 278 | 373  | 650  | GAGGCGCAATTGGCTATTTA   | 60.192 | 20 |
| 275 | 1176 | 1450 | AGGAAGAAATTA AAAACCCCC | 60.051 | 22 |
| 166 | 92   | 257  | GATTCTGGGATGGGAATGAA   | 59.685 | 20 |
| 277 | 629  | 905  | AATCCTCAAAGCAATAACGC   | 57.014 | 20 |
| 278 | 697  | 974  | TTGATGTTTCATAATTTGGGCA | 60.185 | 22 |
| 194 | 663  | 856  | TCAGGCTTACAGCCATCCTC   | 60.362 | 20 |
| 162 | 371  | 532  | TCATCCATTTCCAGTTCTCC   | 59.862 | 20 |
| 231 | 1880 | 2110 | CTCGCAGTAGGTAAAAGGCG   | 60.032 | 20 |
| 235 | 1717 | 1951 | CACAAAAGGATGGGAATTGG   | 60.162 | 20 |
| 199 | 678  | 876  | ACATTTTCAACGGCACGATT   | 60.374 | 20 |
| 125 | 2002 | 2126 | CGCACAGATCGCTTCATAGA   | 60.119 | 20 |
| 259 | 2192 | 2450 | CTGCACCCTGCAAAAAGTACA  | 59.904 | 20 |
| 102 | 727  | 828  | TCGATCATTTGACAAGTGGG   | 59.496 | 20 |

|     |      |      |                         |        |    |
|-----|------|------|-------------------------|--------|----|
| 280 | 1705 | 1984 | AGGTGGGATTGTTTGCTTTG    | 59.971 | 20 |
| 102 | 2    | 103  | TGCTAATCTTCGATGTATCAAC  | 58.287 | 23 |
| 257 | 219  | 475  | ACTGTCCAGCCTTGCATTGT    | 60.721 | 20 |
| 220 | 0    | 219  | TGACAGATGCACTGATCCAA    | 58.728 | 20 |
| 262 | 1343 | 1604 | TGCATGTGTGCATGTTTGT     | 59.595 | 20 |
| 185 | 2047 | 2231 | TGCATTTGAATCCTTGAAAAAC  | 59.101 | 22 |
| 207 | 1628 | 1834 | AAACGTCAAATTCTGGTTTATC  | 57.752 | 23 |
| 273 | 1076 | 1348 | CCGCAGCCTGAGTTGATTTA    | 61.292 | 20 |
| 160 | 1886 | 2045 | TGTGATGGAACGAGGATTTG    | 59.496 | 20 |
| 191 | 3149 | 3339 | TCACTTCTCCGAAGGCATCT    | 59.95  | 20 |
| 249 | 1278 | 1526 | CGCATGAACCATGAAATCAG    | 60.073 | 20 |
| 229 | 876  | 1104 | CTGCTGCAAATGCTTCTCAA    | 60.28  | 20 |
| 238 | 750  | 987  | AATATGGGGTTTTGCCATCA    | 60.016 | 20 |
| 248 | 140  | 387  | TTCTGCCATTCTTCCACTC     | 60.195 | 20 |
| 163 | 510  | 672  | AGCCCAATTTGTAAGGACC     | 60.187 | 20 |
| 234 | 378  | 611  | TGTTGGTCTCTATAGTGTTTTT/ | 59.05  | 27 |
| 228 | 1090 | 1317 | ACACCGAAATCGGAGTTAGC    | 59.198 | 20 |
| 228 | 210  | 437  | GCATAGGGAGATTTGCGGTA    | 60.06  | 20 |
| 151 | 54   | 204  | AATTCGGTGTATTTAGCCCCTT  | 60.095 | 22 |
| 170 | 650  | 819  | CAAAGACGAATTGGCTCCAC    | 60.636 | 20 |
| 280 | 4358 | 4637 | TTTAAACCGGAACGTGAACC    | 59.839 | 20 |
| 236 | 892  | 1127 | TTGGGGAAGAGGAGTGAGAA    | 59.773 | 20 |
| 182 | 5219 | 5400 | GATTGAAAAGGGTGGGTTT     | 60.032 | 20 |
| 280 | 276  | 555  | CCCACAATCAACTGCACAT     | 59.42  | 20 |
| 101 | 0    | 100  | AGAGATCACTGATTATCTTTTC  | 57.297 | 27 |
| 200 | 2002 | 2201 | TTTCAGCTGTAAGCAGGGCT    | 60.154 | 20 |
| 185 | 2089 | 2273 | CCATATCCTCCGAAAAGCAG    | 59.662 | 20 |
| 230 | 1277 | 1506 | TCGAATTGACATCTTCGTGC    | 59.805 | 20 |
| 260 | 1542 | 1801 | TTGTGCCAAACCACTCTTGA    | 60.278 | 20 |
| 139 | 1976 | 2114 | TTCTCATGCCCTTCAAATC     | 60.014 | 20 |
| 186 | 60   | 245  | ACATGGTGGTGGGTTTCAGAT   | 60.096 | 20 |
| 278 | 618  | 895  | TCGATTGAATTTTCGCCCTA    | 60.528 | 20 |
| 158 | 1857 | 2014 | CAATGAGACCATGTTGGTGC    | 59.967 | 20 |
| 266 | 2098 | 2363 | AACATTGGCTGGATTTTCAGG   | 59.933 | 20 |
| 116 | 5083 | 5198 | TGTGTCCGGTGGTCATCTTA    | 59.96  | 20 |
| 265 | 2106 | 2370 | CCTTCCACCGCTACTCTCAC    | 59.867 | 20 |
| 209 | 753  | 961  | TCCCCAGTCAATTTACACA     | 59.935 | 20 |
| 243 | 416  | 658  | CAGCGTTTTTGAGTCCATCA    | 59.84  | 20 |
| 212 | 708  | 919  | CGGTGGTGGAAAAGATGACT    | 59.966 | 20 |
| 178 | 372  | 549  | TGCATTGAAATTGACAGGGA    | 60.049 | 20 |
| 235 | 42   | 276  | TTTCCTAGAAATGCTCTTTTC   | 60.033 | 25 |
| 266 | 255  | 520  | CAGATCAGAAGCCACTCCCT    | 59.405 | 20 |
| 252 | 67   | 318  | TGTACCTGCTTGATTTTGTGG   | 60.032 | 22 |
| 130 | 767  | 896  | CGACTTGCCTAGAAATCGTT    | 60.543 | 20 |
| 228 | 1848 | 2075 | CCCATGATTTTCTTTCCTCG    | 59.5   | 20 |
| 272 | 320  | 591  | ACTTGAAAATTCGACGAGCA    | 58.502 | 20 |
| 209 | 1811 | 2019 | ATTCCTTGTCCTACTGCTTGC   | 60.263 | 20 |
| 133 | 279  | 411  | TCCACCGACGCTTTAATCTC    | 60.214 | 20 |
| 221 | 4885 | 5105 | ACATCCTACGCATTAACCCA    | 59.352 | 21 |
| 210 | 4060 | 4269 | GCCCCTGGTTTTGGTCTATT    | 60.187 | 20 |
| 220 | 293  | 512  | TACAGGCTTTCATCTGCTG     | 60.157 | 20 |
| 208 | 11   | 218  | AAGTTTTAATCGCTTCCGCA    | 59.853 | 20 |
| 204 | 1860 | 2063 | ACCTGAGGGAGTTGATGTGG    | 59.962 | 20 |
| 277 | 1458 | 1734 | TTGACAGCAAGCCAGATTGT    | 59.445 | 20 |
| 171 | 517  | 687  | AAACCACAGCAATCGACCAT    | 60.384 | 20 |
| 260 | 753  | 1012 | CCTGCAGATGACTGGCTACA    | 60.008 | 20 |
| 264 | 2750 | 3013 | TCATTTCAAGCAAAATCGCA    | 60.334 | 20 |
| 207 | 761  | 967  | TTGGCAATTTATGGTCACCT    | 57.944 | 20 |

|     |       |       |                        |        |    |
|-----|-------|-------|------------------------|--------|----|
| 232 | 760   | 991   | AGCTCAGGCTTACATGGGTG   | 60.277 | 20 |
| 201 | 5506  | 5706  | GGTTACCGCCTGTCTGCTAT   | 59.222 | 20 |
| 230 | 67    | 296   | CTTATGGTGGTATGGTGTAGA( | 57.59  | 23 |
| 171 | 106   | 276   | GCGGGTCAAGTTGAGGAATA   | 60.074 | 20 |
| 184 | 363   | 546   | TTCCCAGAATTTGCCTTCAA   | 60.555 | 20 |
| 278 | 3081  | 3358  | TGATTTTTGGAACCGTAGGC   | 59.938 | 20 |
| 194 | 1308  | 1501  | TGGTGGTGAATAGGGGACAT   | 60.05  | 20 |
| 274 | 1153  | 1426  | TGAGTTGGCTTTTTGGAGAAG  | 59.48  | 21 |
| 277 | 174   | 450   | TGGAGTTCTTCCACCAAACC   | 59.943 | 20 |
| 214 | 700   | 913   | CGAAACGAGAATAACCGGAA   | 60.067 | 20 |
| 213 | 1044  | 1256  | GGTGAAAACATGCACACAG    | 60.008 | 20 |
| 261 | 6834  | 7094  | GGAACCACAACCCATCACAT   | 60.497 | 20 |
| 257 | 28    | 284   | TAACGATGGACTAGGGGCTG   | 60.088 | 20 |
| 259 | 10352 | 10610 | CGTTGTCTCCAACCTCGGATT  | 60.111 | 20 |
| 274 | 143   | 416   | CCAAGTCCCTTCGTTTTCAA   | 60.081 | 20 |
| 280 | 835   | 1114  | TTGCTTTGGTCATACAAACATT | 57.253 | 22 |
| 249 | 770   | 1018  | TCAAGTTGTAGCCCTTTGGG   | 60.103 | 20 |
| 206 | 1654  | 1859  | CACGAGCACACAATTCCAAG   | 60.301 | 20 |
| 225 | 124   | 348   | AGAGTTAGGCGGAGGGTCAT   | 60.096 | 20 |
| 277 | 2885  | 3161  | AAGTCCACACTTCCAGCAT    | 59.579 | 20 |
| 246 | 560   | 805   | GGACGTGGTTAGCAGATGT    | 59.997 | 20 |
| 247 | 2209  | 2455  | GGCCTTGATGATATTTTGC    | 59.374 | 20 |
| 161 | 2786  | 2946  | AGGCACAATGGAGCAGAAAG   | 60.397 | 20 |
| 193 | 581   | 773   | GGTCGGGTTTTCAGCCTTAT   | 60.32  | 20 |
| 103 | 862   | 964   | AGTCAGTGCTCACCGGATCT   | 59.866 | 20 |
| 189 | 1149  | 1337  | TCCATTTATCGGAGTTACGGTT | 59.737 | 22 |
| 211 | 1709  | 1919  | CACTGTTTGCCACAGGAATG   | 60.152 | 20 |
| 246 | 100   | 345   | ATCGGGAATTTAGTTGGGC    | 60.15  | 20 |
| 218 | 3990  | 4207  | AATAAGCCTCCACACCCCTC   | 60.328 | 20 |
| 161 | 39    | 199   | ATCGATTGAACCAAACACCC   | 59.653 | 20 |
| 280 | 292   | 571   | GCCATGTGGAGGTTGATTTT   | 59.797 | 20 |
| 273 | 443   | 715   | AAGATTGATTCCCGACTGA    | 59.629 | 20 |
| 274 | 8     | 281   | TTTACTCCGCCACGGTTAAG   | 60.124 | 20 |
| 229 | 3484  | 3712  | ACAGGTGAAATGTCCAAGCC   | 59.973 | 20 |
| 268 | 781   | 1048  | GAAAATGTCGTGAATGCCAA   | 59.523 | 20 |
| 279 | 1042  | 1320  | TGTGTTGATGCAAGTTTGGAC  | 59.606 | 21 |
| 254 | 2570  | 2823  | TTGATTACGATTTACGCCGA   | 59.169 | 20 |
| 134 | 46    | 179   | AAGCCTCCCAAGTCTCCAAT   | 60.074 | 20 |
| 171 | 2     | 172   | AGCCCCGAAAAAGTAATGGT   | 59.835 | 20 |
| 212 | 2235  | 2446  | TTACCCCTGCCATTAACCA    | 60.181 | 20 |
| 261 | 105   | 365   | ATTGGGGTGGAGAGAAGTGA   | 59.505 | 20 |
| 164 | 2334  | 2497  | GGTGTGGACTTGGGTCATC    | 60.223 | 20 |
| 173 | 8     | 180   | TCAGTCTGCACAGCTGACAA   | 59.293 | 20 |
| 186 | 742   | 927   | ACGATGGCTTTGCTGTTCTT   | 59.882 | 20 |
| 213 | 1635  | 1847  | AAGGGCGTGCCTAATGGTAT   | 60.711 | 20 |
| 246 | 209   | 454   | TGAAGCCCATGTTGAATCTG   | 59.648 | 20 |
| 232 | 1874  | 2105  | TGTTTTGATGCCTCCTTGAA   | 59.247 | 20 |
| 159 | 34    | 192   | GGGTTATCATGGGATCAAG    | 59.055 | 20 |
| 270 | 44    | 313   | GGCCAGGAGATGAGTCAGAA   | 60.349 | 20 |
| 154 | 100   | 253   | CCAAGATCAATGGTTCCTAAG  | 59.879 | 23 |
| 254 | 47    | 300   | ATGAGGGAGAGGGAGAATGG   | 60.412 | 20 |
| 217 | 4301  | 4517  | AGATGAGCCGAGGAGCAATA   | 59.939 | 20 |
| 226 | 1627  | 1852  | AGCAAGGTCCAATCCGATA    | 59.528 | 20 |
| 221 | 432   | 652   | GGCTGCAAACATTTGAGGAT   | 60.081 | 20 |
| 242 | 223   | 464   | TCGTCGTTTCCAACATGAAG   | 59.691 | 20 |
| 170 | 859   | 1028  | GTTCCGATACGTCTGAAGGC   | 59.7   | 20 |
| 266 | 30    | 295   | GGTAGGAACTGCATGACCAA   | 59.985 | 21 |
| 133 | 0     | 132   | GGATAATCCAGAATCAACACA  | 60.082 | 24 |

|     |      |      |                         |        |    |
|-----|------|------|-------------------------|--------|----|
| 135 | 2677 | 2811 | TCTGGTTTATTCACGCAGGA    | 59.272 | 20 |
| 253 | 1744 | 1996 | TTCAACATTCAGCCGATCAA    | 60.197 | 20 |
| 197 | 5382 | 5578 | CTTTCTTCCACGCCTTTCAA    | 60.357 | 20 |
| 255 | 1761 | 2015 | GGACAAAGCAGATAGGGGGT    | 60.328 | 20 |
| 171 | 857  | 1027 | AGTGGGAAATGGTGAGCAAG    | 60.111 | 20 |
| 274 | 1267 | 1540 | TCTGAATCCGACACGTTTGA    | 60.24  | 20 |
| 227 | 68   | 294  | TTTTGAGTTGTGATGTTTGCAT  | 59.549 | 23 |
| 275 | 2369 | 2643 | AGCTAGAGCCAAGGACATGA/   | 59.091 | 21 |
| 280 | 3478 | 3757 | TTATGAGATCTCGCCATGACA   | 59.241 | 21 |
| 131 | 2367 | 2497 | ATCGCCCCTCAAACTTACC     | 60.32  | 20 |
| 255 | 897  | 1151 | AGCTAAATATGAGTTTCCTCTT  | 58.944 | 25 |
| 258 | 621  | 878  | AAAACGATGGTTTCTGGCAC    | 59.978 | 20 |
| 121 | 159  | 279  | GCCATCTATCTTGTTTCGTGACA | 60.14  | 22 |
| 242 | 2211 | 2452 | GCGTATTAATGCCACATGA     | 59.405 | 20 |
| 278 | 761  | 1038 | TCGAGGGGTTTAGTTGCATT    | 59.569 | 20 |
| 172 | 2751 | 2922 | AGCTTTTTCCGATGATCCCT    | 60.039 | 20 |
| 174 | 8    | 181  | TCCAGTCTTCTGCCAATCAA    | 59.369 | 20 |
| 254 | 538  | 791  | CGGCAAGTTCGAATTCATTT    | 60.074 | 20 |
| 260 | 2500 | 2759 | TTGCACTGAAGAGCCAAAAA    | 59.585 | 20 |
| 280 | 1537 | 1816 | GGAATCGGCTTAATCGACCT    | 60.419 | 20 |
| 272 | 185  | 456  | GGTCAGAATCACGGCAGTTT    | 60.119 | 20 |
| 277 | 1961 | 2237 | GTTTGATGACGTGGTTCGTG    | 60.008 | 20 |
| 241 | 3041 | 3281 | TGCCAACCTAACCTGGAAAA    | 60.472 | 20 |
| 278 | 1041 | 1318 | GTTACCAGCAACCATGTGGA    | 59.42  | 20 |
| 236 | 2000 | 2235 | CGGTTTCCTGTTTTCTCTG     | 59.705 | 20 |
| 260 | 224  | 483  | CTCCAGTGTCTTGCCAACAA    | 59.873 | 20 |
| 214 | 1688 | 1901 | AGTCGTTTCAGATACACCGGC   | 60.142 | 20 |
| 252 | 726  | 977  | CGTTGGTAATGCAACCAAAA    | 59.462 | 20 |
| 272 | 369  | 640  | GGATTGCAGACTCTTGGGAA    | 60.195 | 20 |
| 251 | 1331 | 1581 | CCACTGCATCACAACCATTC    | 59.967 | 20 |
| 260 | 746  | 1005 | CCAAGTTCGTA TAGCCAGC    | 59.898 | 20 |
| 224 | 720  | 943  | ATGTGGGGTTGAGATCTTCG    | 59.927 | 20 |
| 173 | 840  | 1012 | TGATGGCCCATGATTAAGA     | 58.917 | 20 |
| 265 | 95   | 359  | AGCTATTCCCCAAACCAACC    | 60.187 | 20 |
| 193 | 21   | 213  | AAATATGTGCTCTCATTTGATT  | 58.709 | 27 |
| 274 | 1963 | 2236 | TGGTGGTAATGGACTTGTGTG   | 59.324 | 21 |
| 117 | 579  | 695  | TTCTGGGCTTCTGAGTCATGT   | 59.859 | 21 |
| 280 | 3182 | 3461 | TGGCGAAGAACTTCAATGACT   | 59.867 | 21 |
| 252 | 1729 | 1980 | TTACAATTACGAACGCGTGG    | 59.625 | 20 |
| 211 | 1767 | 1977 | CATTCAGTTCATCATTTTCATG  | 59.329 | 23 |
| 226 | 208  | 433  | TTGACCGTCCAACAATTCAA    | 59.941 | 20 |
| 279 | 541  | 819  | TGAAACTGAAGCTTGCATGG    | 59.988 | 20 |
| 271 | 1341 | 1611 | ACCACGACCAATTCTTACAGC   | 59.115 | 21 |
| 271 | 269  | 539  | ATTCTCTCCAGCCCCTTCAT    | 60.037 | 20 |
| 234 | 340  | 573  | AACCGGTTTATGGATGAGGA    | 59.244 | 20 |
| 271 | 241  | 511  | TAATATCCAAAACGCGCACA    | 60.096 | 20 |
| 178 | 1364 | 1541 | TCATCATGTGATGCAGACCA    | 59.61  | 20 |
| 210 | 2135 | 2344 | TGCCTGTATGAAAAAGCATCA   | 59.315 | 21 |
| 170 | 382  | 551  | TGAATGGAACACACACACCA    | 59.376 | 20 |
| 243 | 1978 | 2220 | TTTGAGCCCATTTACATTTT    | 59.442 | 21 |
| 206 | 806  | 1011 | GTGGTGGAAGTTGTCACCCT    | 59.859 | 20 |
| 199 | 7    | 205  | GGCATTGAAAAGCTCATTTA    | 59.336 | 21 |
| 277 | 3774 | 4050 | TCCTCTGGTTTCTGTTTGCC    | 60.232 | 20 |
| 193 | 8    | 200  | GGCTAATTGTTGGCCTTTGA    | 60.074 | 20 |
| 154 | 2003 | 2156 | GATTTAGGGAGCGTGGGTTT    | 60.32  | 20 |
| 274 | 366  | 639  | TTGCAAAAACAAAGCACGATT   | 59.349 | 20 |
| 182 | 508  | 689  | GCCGTGAAGAGAATCTCCAG    | 59.95  | 20 |
| 134 | 372  | 505  | AAACAAGTCATCCATGTCCCT   | 59.735 | 22 |

|     |      |      |                          |        |    |
|-----|------|------|--------------------------|--------|----|
| 268 | 1100 | 1367 | ATGCCTCATCATTTCTTGCC     | 60.043 | 20 |
| 230 | 1882 | 2111 | TTACCTGCGTGTGTTTACAACCTG | 57.971 | 22 |
| 226 | 254  | 479  | CAACAAGCCCTAGGACTCCA     | 60.246 | 20 |
| 161 | 37   | 197  | GGCCATTGGGCTTATCCTA      | 59.87  | 19 |
| 238 | 1043 | 1280 | GTCGTCAGTAAACCCGAATGA    | 59.985 | 21 |
| 133 | 291  | 423  | ACCATGCACGTCAATGTTTT     | 58.903 | 20 |
| 223 | 3    | 225  | GCTTGAGTGTGGCACATTTAG    | 59.313 | 22 |
| 249 | 2623 | 2871 | AGCCAAAACATCCATCAAGG     | 59.933 | 20 |
| 274 | 897  | 1170 | TGTCCTGAGAGGCAGGAAAT     | 59.803 | 20 |
| 278 | 785  | 1062 | GATGGAATCGTTTGTCCACTT    | 58.9   | 21 |
| 254 | 2934 | 3187 | CTTTGCTGTTCGTGGTTCAA     | 59.881 | 20 |
| 241 | 946  | 1186 | CCATAGAAAACGGCCAGAAA     | 60.067 | 20 |
| 235 | 2014 | 2248 | GAAATTTTTAGCCATGGTCCC    | 59.672 | 21 |
| 276 | 785  | 1060 | CTACAGCGGGTTCTTCTTCG     | 60.008 | 20 |
| 207 | 185  | 391  | CACTGAATTTGCCTGAAAAATC   | 59.625 | 22 |
| 119 | 265  | 383  | GACCACTAATCCAACCCCT      | 60.052 | 20 |
| 278 | 783  | 1060 | ATGGGATGAAATTGATGGGA     | 59.952 | 20 |
| 203 | 1774 | 1976 | TCGCAAAAGTGATCTTCGTG     | 59.988 | 20 |
| 149 | 666  | 814  | ATGCGTGGGCGATATTATGT     | 60.203 | 20 |
| 138 | 4172 | 4309 | TCAACACCCATCAAGATGCT     | 59.09  | 20 |
| 268 | 118  | 385  | ATCCCGTTCTACCTCAGCCT     | 60.096 | 20 |
| 230 | 909  | 1138 | GACCCAAACGGAGCATCTAA     | 60.074 | 20 |
| 213 | 1088 | 1300 | TGTCCAGAAGCAGTGAAGCA     | 60.745 | 20 |
| 251 | 4990 | 5240 | TTTTCCACAGAAATGTTGGCT    | 59.601 | 21 |
| 224 | 4172 | 4395 | GAGTGCTCGCTCTAACGCTT     | 59.927 | 20 |
| 135 | 1913 | 2047 | TTAAATTGCAGGGCCTGTTT     | 59.586 | 20 |
| 265 | 2354 | 2618 | CTGTCACGGTCAGCACTTGT     | 59.94  | 20 |
| 233 | 979  | 1211 | ATCGGGGAATAATAAGGGA      | 59.468 | 20 |
| 271 | 3176 | 3446 | GTGGGTTTAGGGATTAGCTGC    | 59.979 | 21 |
| 222 | 2265 | 2486 | GTTTTCGCACTGAAAAAGGG     | 59.724 | 20 |
| 278 | 2369 | 2646 | CGAAGGGAACAACCTATCCA     | 59.926 | 20 |
| 141 | 982  | 1122 | CAAACACCCATTCAAACCT      | 59.688 | 20 |
| 254 | 907  | 1160 | TCCTTGAATCAGCCACACAA     | 60.24  | 20 |
| 235 | 2211 | 2445 | TGTGGATTTCGTGTCGGATTA    | 59.924 | 20 |
| 236 | 1720 | 1955 | GAACCTCCTCGTTAGCTCCC     | 60.212 | 20 |
| 102 | 1501 | 1602 | CTCTGCTTCCCATATTTTCGC    | 59.807 | 20 |
| 253 | 170  | 422  | TTCTTTTATGGGCCATGAGG     | 59.894 | 20 |
| 165 | 2179 | 2343 | GGGTATTCTCCAAGCCCTA      | 60.278 | 20 |
| 252 | 870  | 1121 | TTCGGTCAGATTATGTGGGG     | 60.713 | 20 |
| 231 | 1380 | 1610 | TGCTTCATGAACCGACAAAA     | 60.234 | 20 |
| 187 | 1868 | 2054 | GGAAGTGAAGCTTTGAGGGTG    | 59.844 | 20 |
| 211 | 1093 | 1303 | TGACCACAGTGTGCTTTTCC     | 59.726 | 20 |
| 229 | 522  | 750  | CACAGGAAAAGGAAACGGAA     | 60.081 | 20 |
| 170 | 258  | 427  | GGAATCCAGTCTGCTGATCC     | 59.617 | 20 |
| 232 | 3812 | 4043 | TGTCAAGTAACCATTCAGGGC    | 59.985 | 21 |
| 178 | 1217 | 1394 | ACCACCTGCCCAACTATCTG     | 59.989 | 20 |
| 238 | 61   | 298  | CAACAAGGTACTCGAAGAACA    | 59.337 | 23 |
| 274 | 1657 | 1930 | GCCTGTTCCAAATTTTCCT      | 60.299 | 20 |
| 251 | 131  | 381  | TCTGCTTAACCCCTCATTGC     | 60.214 | 20 |
| 165 | 484  | 648  | ACAATCGGAGTGCCATTTTC     | 59.939 | 20 |
| 273 | 1252 | 1524 | CAACCAAGCCTTTGCAATCT     | 60.249 | 20 |
| 274 | 731  | 1004 | CTCAGCCCTGAGTGGTTTTT     | 59.328 | 20 |
| 137 | 360  | 496  | GAGAGGGGTGTTTGGTGCTA     | 60.111 | 20 |
| 213 | 577  | 789  | TAGACAGTTGCACCCAGCC      | 59.846 | 19 |
| 108 | 8589 | 8696 | TTGGCTTTAATCAGGGCATC     | 60.038 | 20 |
| 236 | 872  | 1107 | AGTCGGGAGAAATCTCGTTG     | 59.284 | 20 |
| 127 | 430  | 556  | GAGGAGTAGAAGTCGGCGTG     | 60.012 | 20 |
| 215 | 3239 | 3453 | ATGACGCCATGGGTGTATCT     | 60.226 | 20 |

|     |      |      |                        |        |    |
|-----|------|------|------------------------|--------|----|
| 280 | 219  | 498  | GCAAGAGAAATGCAGTGGAA   | 59.002 | 20 |
| 105 | 6    | 110  | GAGGTGTTATGAAGGGATTAC  | 59.255 | 23 |
| 162 | 1837 | 1998 | GAGGTAAATGTGGAAGCCCA   | 59.933 | 20 |
| 278 | 1881 | 2158 | GCCATGATGCCTGTGAAGTA   | 59.679 | 20 |
| 207 | 397  | 603  | AGGAATTTAGACGATTGATCC  | 59.463 | 22 |
| 179 | 1264 | 1442 | TTCCACCAGATACGGAGACC   | 59.927 | 20 |
| 145 | 12   | 156  | CGGATTTATTGGTTATTACCTG | 58.742 | 25 |
| 220 | 519  | 738  | CGACACATACGAATTGCCAC   | 59.995 | 20 |
| 128 | 3453 | 3580 | CAGATACCCTGGTGGTCCAT   | 59.655 | 20 |
| 245 | 104  | 348  | TGAAATTTGGCTTGCATTTG   | 59.679 | 20 |
| 235 | 915  | 1149 | GCAATGTCAGTGTGAAATGTC  | 60.428 | 22 |
| 237 | 846  | 1082 | ATGCAAAAATTGGTCCAACG   | 60.732 | 20 |
| 228 | 2488 | 2715 | AAAGAAGGGGGATTGTTGCT   | 59.94  | 20 |
| 208 | 587  | 794  | AGGTCTTTCGAACCCCTTA    | 59.934 | 20 |
| 210 | 205  | 414  | ATTTGGCCACCATTTACCAA   | 60.053 | 20 |
| 259 | 143  | 401  | CGAGAAGGGAACATGGAAAA   | 60.044 | 20 |
| 213 | 742  | 954  | TCCCTTTTTCTCAAGGGAGG   | 60.54  | 20 |
| 202 | 68   | 269  | TTGGTGAAGGAGATTCCTCG   | 60.187 | 20 |
| 211 | 1174 | 1384 | TGTTTCATGGCTATCATTGCT  | 58.254 | 21 |
| 276 | 938  | 1213 | GCGGTGAACTCCACACATTA   | 59.572 | 20 |
| 177 | 129  | 305  | CTTCCCTTGGGGACTGTGAA   | 60.081 | 20 |
| 149 | 1036 | 1184 | CTAAACTCCGCCAACTGCTC   | 60.015 | 20 |
| 247 | 46   | 292  | TGAAACCCTTTTTGGACCAC   | 59.807 | 20 |
| 241 | 715  | 955  | AAAAGCCAAGAATACCACCG   | 59.087 | 20 |
| 207 | 2194 | 2400 | GGGTATCACCAATCTGCAAAA  | 59.815 | 21 |
| 259 | 1500 | 1758 | TATATCAGCATGCGTCGTGG   | 60.654 | 20 |
| 207 | 1057 | 1263 | CTCTGTTGCTTGGTGCAAGA   | 60.175 | 20 |
| 203 | 13   | 215  | ATTACGTCGATCCAACGGTC   | 59.82  | 20 |
| 228 | 1405 | 1632 | CTCGGTCGTATCCAAGTGCT   | 60.277 | 20 |
| 198 | 1950 | 2147 | CTTTTCCATTTCCGATCCAA   | 59.872 | 20 |
| 271 | 3055 | 3325 | ATGCACGTAGGCATGTTCAA   | 60.142 | 20 |
| 268 | 2380 | 2647 | AGATGTGCATTCAGAGGGTG   | 58.671 | 20 |
| 237 | 367  | 603  | CATCGTTAATGTTGATTTTTAT | 58.943 | 25 |
| 187 | 1903 | 2089 | AGCCCTCCACGATAACATTG   | 59.955 | 20 |
| 231 | 638  | 868  | CATTTCCACCAATTGCCATA   | 59.232 | 20 |
| 149 | 456  | 604  | AGCAGCCATTTGGACTAAG    | 59.476 | 20 |
| 238 | 1418 | 1655 | TTTGGAAATAGGGTTGGTGG   | 59.657 | 20 |
| 252 | 16   | 267  | CACGTATGGATAAGGCTAAAC  | 59.845 | 25 |
| 263 | 390  | 652  | GTCGGGTTTCGTATCATTGG   | 60.192 | 20 |
| 250 | 2118 | 2367 | TGTGCCTCCTCCTTTGTCTC   | 60.386 | 20 |
| 178 | 547  | 724  | ATGCCAAAGCAAAGGCATAA   | 60.588 | 20 |
| 257 | 1039 | 1295 | TCGATTCTTGTCATCCATGC   | 59.61  | 20 |
| 132 | 1123 | 1254 | GCCTAGCCGGTCAGTTACAC   | 59.763 | 20 |
| 239 | 1477 | 1715 | TTTCTGATGGGGTTGAGGAG   | 60.042 | 20 |
| 227 | 3734 | 3960 | TTGTGGAGCGAAGAAATACG   | 58.917 | 20 |
| 218 | 538  | 755  | TCAGAAACCACTCCCTCACC   | 60.088 | 20 |
| 270 | 1548 | 1817 | GGCAGCAACACCTTAAAAA    | 60.11  | 20 |
| 203 | 1828 | 2030 | CACATTTCCATTTCCATTGGT  | 59.537 | 21 |
| 245 | 322  | 566  | CACGCTTGCTAGACAACGAC   | 59.664 | 20 |
| 166 | 380  | 545  | AGGATTTTAGCGATTTGGGG   | 60.272 | 20 |
| 254 | 3628 | 3881 | TCTCCGAAAATGGACTGTT    | 59.526 | 20 |
| 278 | 2627 | 2904 | GATTTCTTGATGGCGGTAGG   | 59.528 | 20 |
| 264 | 1131 | 1394 | GGGTACACCCAATTAACCCA   | 59.406 | 20 |
| 223 | 2376 | 2598 | TTTGCTGAGCATGTCATGTG   | 59.409 | 20 |
| 220 | 5549 | 5768 | CAAGCTGAGCAAAGAAGCCT   | 59.898 | 20 |
| 214 | 340  | 553  | AGCTACAGAGCCGATCAAGC   | 59.746 | 20 |
| 232 | 4541 | 4772 | ATCTCTGCGTCCATCCTGAG   | 60.372 | 20 |
| 277 | 141  | 417  | TTAGTCCATCCAGGTCACCC   | 59.779 | 20 |



|     |      |      |                        |        |    |
|-----|------|------|------------------------|--------|----|
| 251 | 1971 | 2221 | AAAGGCCTCGATAAATCCGT   | 59.93  | 20 |
| 237 | 1012 | 1248 | TTCCGAAACAAACCCAACTC   | 59.948 | 20 |
| 276 | 1330 | 1605 | ATCCCATTCAGGCTTGAGGT   | 60.853 | 20 |
| 137 | 9    | 145  | TTAATCGGGATCCGGGC      | 62.966 | 18 |
| 276 | 2198 | 2473 | GAGCACTTGTAGGAGGAGGG   | 58.891 | 20 |
| 172 | 2929 | 3100 | AGCCTCCTCAAATGCAGAAA   | 59.955 | 20 |
| 240 | 457  | 696  | TGGTTGGTTGCTGCTACTGT   | 60.203 | 20 |
| 271 | 1460 | 1730 | CATTGGTGTTCCGGAATAGGG  | 60.184 | 20 |
| 154 | 40   | 193  | TCCGACCGGTTTTTAAATCA   | 60.294 | 20 |
| 278 | 362  | 639  | TCAACTAGTGCTGCGAATGC   | 60.165 | 20 |
| 245 | 3652 | 3896 | AAACTTAGTGCCCCAGTCCC   | 60.361 | 20 |
| 280 | 646  | 925  | AAGCAGCCTCACACAAGTCA   | 59.622 | 20 |
| 184 | 108  | 291  | CCAACGCATCCATATCATCA   | 60.307 | 20 |
| 208 | 2349 | 2556 | AGGAATCTGTTGCGTCGTCT   | 59.874 | 20 |
| 171 | 139  | 309  | AAGTGCCTCGCTACGACCT    | 60.081 | 20 |
| 182 | 16   | 197  | CACCACATTTAGTGGTTATCAT | 59.605 | 25 |
| 204 | 2215 | 2418 | CGAACGTAGGATTGGCAGAT   | 60.096 | 20 |
| 270 | 1041 | 1310 | ATTGGTCTCTCAAGCACGGT   | 59.727 | 20 |
| 161 | 550  | 710  | AATGAAACGGAATCCAGTCG   | 59.933 | 20 |
| 280 | 67   | 346  | TCGCTTCGCTTTTTGCTATT   | 60.116 | 20 |
| 271 | 403  | 673  | TGCACTTGCAAATTTAAGCTG  | 59.155 | 21 |
| 248 | 1183 | 1430 | CAGAGAGAAAATCGGTGGGA   | 60.187 | 20 |
| 182 | 3    | 184  | CGACTCCATGTTCCGACAC    | 60.105 | 19 |
| 168 | 2273 | 2440 | TGTTGGAGACCCTTCTTTGC   | 60.232 | 20 |
| 257 | 21   | 277  | CCAGACTTTTGGTCTCAATATA | 59.335 | 25 |
| 250 | 1154 | 1403 | GCAATTTGCGCTCTTGTCT    | 60.531 | 20 |
| 243 | 755  | 997  | AAGTACCAACCGGTTCCCTT   | 59.729 | 20 |
| 168 | 983  | 1150 | TACTGCGTGATTACCAACGG   | 59.609 | 20 |
| 266 | 1833 | 2098 | TTTTTGGCATCAGCAACAGA   | 60.379 | 20 |
| 106 | 5542 | 5647 | ATATGATTCGCTGCAAACCC   | 59.929 | 20 |
| 227 | 2375 | 2601 | GGATCTTCGAGGAGTGGTGA   | 60.199 | 20 |
| 180 | 1199 | 1378 | GAAGAAAAATGGGGGCTCTC   | 60.017 | 20 |
| 179 | 1159 | 1337 | TGTCGGAGTTTTGTGAGCTG   | 60.025 | 20 |
| 277 | 3576 | 3852 | CACCATCTTCTCACTGCCA    | 59.831 | 20 |
| 195 | 1756 | 1950 | CCTTCAAGGCCTCAAACCTCA  | 60.366 | 20 |
| 260 | 441  | 700  | ATATGATGCTGGACAAGTCGG  | 59.97  | 21 |
| 151 | 2936 | 3086 | TAGCTACCCAAGCCAATGCT   | 59.867 | 20 |
| 277 | 9341 | 9617 | TCTTTGATTTGGCTGCTTTG   | 59.037 | 20 |
| 259 | 1353 | 1611 | TGGATCTGGATCTGGGATTG   | 60.828 | 20 |
| 127 | 4109 | 4235 | TGTTGGTGTGATGGTTTTGG   | 60.255 | 20 |
| 262 | 627  | 888  | AAGCAACAAATGGCAGCTTT   | 59.889 | 20 |
| 219 | 3461 | 3679 | GGAGAAAGCAAAGAGCGAAA   | 59.708 | 20 |
| 103 | 1734 | 1836 | TTGCAGCAAATGGATCTGTC   | 59.805 | 20 |
| 139 | 2194 | 2332 | GGATCCTGCAAAACCAAGAA   | 60.051 | 20 |
| 146 | 2633 | 2778 | CCGGAAGGTTGAAAATGTTG   | 60.336 | 20 |
| 226 | 1127 | 1352 | CGAAAACCTAGATGCCGAACC  | 59.708 | 20 |
| 131 | 844  | 974  | CGATGTTTCTCGTCTCACCA   | 59.831 | 20 |
| 199 | 2234 | 2432 | TGCTTTGCCTAGGCCTATTAAC | 59.904 | 22 |
| 277 | 289  | 565  | AGGGGTGTAACATTCCATGC   | 59.676 | 20 |
| 268 | 2584 | 2851 | TTTCTTGCTTCCAGTTTCCG   | 60.357 | 20 |
| 224 | 1222 | 1445 | CGAAGCACACGATATTTCCA   | 59.688 | 20 |
| 168 | 2824 | 2991 | TCTGCTTGTCAAAGTCGCAC   | 60.183 | 20 |
| 230 | 1278 | 1507 | GCAAGAATACCAGCCCACAT   | 59.962 | 20 |
| 199 | 1355 | 1553 | TGAAAGCCTGTTCAAGCTCAG  | 59.314 | 20 |
| 254 | 2236 | 2489 | ATTGCTGAATGTTGATGGCA   | 60.08  | 20 |
| 260 | 940  | 1199 | TGTGCATGCTCATCTCTGTG   | 59.547 | 20 |
| 218 | 3969 | 4186 | GACAAAACAAGGGCAAGCAT   | 60.118 | 20 |
| 168 | 73   | 240  | CGTTAGAGGTTTTGACGGGA   | 60.103 | 20 |

|     |      |      |                        |        |    |
|-----|------|------|------------------------|--------|----|
| 213 | 3292 | 3504 | TGGTGAATATAGAAGGGCGG   | 59.916 | 20 |
| 164 | 4116 | 4279 | AAGCGCCAAATGTAAAATCG   | 60.095 | 20 |
| 234 | 73   | 306  | CACACGCTGGAAGTCTTTA    | 60.05  | 20 |
| 108 | 1833 | 1940 | ACTCCTCACAATTTCCCCCT   | 59.795 | 20 |
| 264 | 3302 | 3565 | GGGGCATCGTCTCAATAGTT   | 59.009 | 20 |
| 139 | 2780 | 2918 | ATAAAGTAGTAGGCCCGCCC   | 59.485 | 20 |
| 205 | 3636 | 3840 | ACAAGAAACGGTGAGAACCC   | 59.04  | 20 |
| 226 | 1310 | 1535 | CTGATGCAGATGCAGACAGT   | 57.466 | 20 |
| 194 | 5444 | 5637 | CAGCAAGAACTGATGGAGCA   | 60.136 | 20 |
| 266 | 534  | 799  | AAATGAAGTTGGGCAGTTCG   | 60.11  | 20 |
| 274 | 2215 | 2488 | TCCCTATAAACACATTTCCCCT | 59.962 | 23 |
| 268 | 3873 | 4140 | TCGACGTTTAAACAGCCGTAG  | 58.989 | 20 |
| 213 | 3409 | 3621 | TCGTGTTCTCAGGATGTTGC   | 59.837 | 20 |
| 210 | 24   | 233  | CGGTGTGTATGTGCAATGTG   | 59.457 | 20 |
| 270 | 2627 | 2896 | GGTTCGAGTTTCGATGAGGA   | 60.195 | 20 |
| 277 | 2476 | 2752 | TACCAAGGATAAAGCGCAGC   | 60.364 | 20 |
| 218 | 3167 | 3384 | CCAAGAAATCAAGGATCGGA   | 60.006 | 20 |
| 223 | 4635 | 4857 | CTTTGATGCCAAGGAACCTG   | 60.626 | 20 |
| 269 | 1256 | 1524 | AACGTGCTATTGTGTCGTCG   | 59.788 | 20 |
| 209 | 1324 | 1532 | GATGCATGACTTTTGGGGTT   | 59.797 | 20 |
| 258 | 713  | 970  | TGTTTGTGGTTGAGTACGCC   | 59.615 | 20 |
| 194 | 3140 | 3333 | GTTGAAACCCCGGTATCCTT   | 60.053 | 20 |
| 252 | 2107 | 2358 | TGTTCTTCAAATGGGATGTCA/ | 60.344 | 22 |
| 221 | 1348 | 1568 | CCCAAATCAATCAACTTTCCA  | 59.787 | 21 |
| 271 | 3888 | 4158 | ACTTGAGCTGGACGGACATT   | 59.727 | 20 |
| 226 | 2534 | 2759 | AGGCGTTGGAAAATGATTG    | 59.938 | 20 |
| 238 | 523  | 760  | GTTTTGCTTCCACTGCTTGA   | 59.05  | 20 |
| 165 | 1644 | 1808 | GCATGTTCCCAAACCCTAAC   | 59.292 | 20 |
| 258 | 1375 | 1632 | ATGGAGACTTATGGAGGGGG   | 60.147 | 20 |
| 276 | 2520 | 2795 | CAAAAAGCGAGATATACGCG/  | 60.361 | 21 |
| 234 | 4974 | 5207 | AACCTGTATTGGGACATCGC   | 59.82  | 20 |
| 193 | 3252 | 3444 | TCCTCCAATCTTCCACCTG    | 60.042 | 20 |
| 192 | 2037 | 2228 | TGCTCTTATTCATGGTCCCC   | 59.894 | 20 |
| 207 | 1635 | 1841 | TGAATTTGCATCTAAGGAGGA/ | 58.467 | 22 |
| 197 | 2791 | 2987 | ATCTCTGCCATTGTCTTGGC   | 60.226 | 20 |
| 274 | 397  | 670  | GTGTGGATGTCCATCACTGC   | 59.97  | 20 |
| 217 | 3222 | 3438 | AAATCTGCATGCACCTGTTT   | 58.726 | 20 |
| 226 | 777  | 1002 | TGTTCAAATTTTGTGGGCA    | 60.127 | 20 |
| 260 | 2926 | 3185 | TCACCACAGAAGAGGGAGAA   | 58.349 | 20 |
| 276 | 20   | 295  | GGGCCTCATCAAACTTGTC    | 59.532 | 20 |
| 230 | 1185 | 1414 | AGCAAACACCACAACACCAC   | 59.493 | 20 |
| 231 | 177  | 407  | ATATATTGTGAGCCCTGGCG   | 59.945 | 20 |
| 206 | 69   | 274  | GCTTCAAGAGGGAACTGGTG   | 59.844 | 20 |
| 240 | 801  | 1040 | TCTTCAATTTGCCTGTGGAA   | 59.247 | 20 |
| 209 | 1162 | 1370 | CAGAGTTTTCGCCTCTCAAGA/ | 60.019 | 22 |
| 100 | 103  | 202  | AACACGCACTCTTTCACACG   | 59.946 | 20 |
| 230 | 701  | 930  | TAATTGGGAACGGTGGTGTT   | 60.088 | 20 |
| 225 | 1772 | 1996 | GAATAAACGGCGGTAATGGA   | 59.795 | 20 |
| 236 | 142  | 377  | CGTCATCGTATTGGCTTCCT   | 60.096 | 20 |
| 163 | 2636 | 2798 | TTTTGGACCTCCCTTCTCT    | 60.045 | 20 |
| 251 | 4262 | 4512 | TCTCCTCCGTGGACGTAGAT   | 59.679 | 20 |
| 271 | 18   | 288  | GCTCTGATGCCAACTGTTG    | 59.445 | 20 |
| 248 | 1296 | 1543 | GTGGCAAATGAGGAGATGGT   | 59.934 | 20 |
| 262 | 2627 | 2888 | GGCCACTTGATTCACAATGA   | 59.502 | 20 |
| 236 | 1285 | 1520 | TGTCTGAGTTGTTCAATTCAGA | 60.089 | 25 |
| 242 | 1377 | 1618 | CAGTTTTTGAGTTATGATGCTT | 59.727 | 25 |
| 138 | 2    | 139  | CTCTCTCTCTAACACACAAAC/ | 59.707 | 27 |
| 251 | 740  | 990  | GACTCGATTGGGACATCAGG   | 60.475 | 20 |

|     |      |      |                        |        |    |
|-----|------|------|------------------------|--------|----|
| 203 | 3902 | 4104 | CATTTTGCCTTGCAGGAACA   | 59.849 | 20 |
| 181 | 2064 | 2244 | GACTACCGATCGGGCTACAA   | 60.096 | 20 |
| 240 | 2584 | 2823 | AAGCTGATGCCATATCCTCG   | 60.199 | 20 |
| 126 | 4089 | 4214 | CAGGTCGCTGGATTCAAAGT   | 60.255 | 20 |
| 168 | 5815 | 5982 | TCGATCCAAAAGGTCAACAA   | 59.097 | 20 |
| 179 | 6076 | 6254 | TCTCCTTGAAGGGAGGATCA   | 59.731 | 20 |
| 200 | 38   | 237  | GGGTTCCCGCGTAATAAAAA   | 60.999 | 20 |
| 228 | 561  | 788  | GAGGAGTGGTTGAGAGGTGG   | 59.682 | 20 |
| 200 | 1092 | 1291 | GTGGGTATGAGGGGAACACA   | 60.634 | 20 |
| 205 | 2224 | 2428 | AATGATTCTCCAAAGGCAA    | 59.505 | 20 |
| 232 | 1961 | 2192 | TGACCAAATTAGCAGCCTCC   | 60.214 | 20 |
| 129 | 20   | 148  | AAGGGGTTATCATGGGATCA   | 59.055 | 20 |
| 181 | 6950 | 7130 | ACTTGCGTAGCATCATCCAA   | 59.301 | 20 |
| 260 | 2230 | 2489 | ATCATCTCGTTCTGAACCGC   | 60.226 | 20 |
| 199 | 1930 | 2128 | ATTGCCAACCCATAAGCAAA   | 60.323 | 20 |
| 198 | 1798 | 1995 | TCGTCACGTGCGATTTAAC    | 59.735 | 20 |
| 242 | 1233 | 1474 | CCCAGTTCGTCGAGAAAGTC   | 59.844 | 20 |
| 176 | 479  | 654  | AAATCAGACCATCTGGGAACT  | 57.567 | 21 |
| 256 | 785  | 1040 | TGGGATCGAATAAATGGAGC   | 59.862 | 20 |
| 257 | 2734 | 2990 | CTGCATTTGGTGGTACTGGA   | 59.566 | 20 |
| 237 | 967  | 1203 | AAGAACGAAGATTCCAGCCA   | 59.813 | 20 |
| 202 | 712  | 913  | GCAATAAAAAGACCTTGCATT  | 60.019 | 23 |
| 241 | 1206 | 1446 | TCTCTTCCACAATCACGCTG   | 59.984 | 20 |
| 266 | 1741 | 2006 | CCAGGAAGACTCATTGATCC   | 60.974 | 21 |
| 278 | 8    | 285  | TCACACCCACATCCATCAGT   | 59.801 | 20 |
| 149 | 1767 | 1915 | ACCTATTGAAAGCCTCCCGT   | 59.962 | 20 |
| 277 | 596  | 872  | TGACGGCTTTCTCAACACCT   | 60.833 | 20 |
| 266 | 2532 | 2797 | GAGTTTGGATGCTTTGGAGC   | 59.82  | 20 |
| 197 | 330  | 526  | GGGGCTGCTTTCTTCTCT     | 60.096 | 20 |
| 271 | 2972 | 3242 | TACTGCAAATCCGCCTCTT    | 59.845 | 20 |
| 242 | 5322 | 5563 | TTGCACTTTACCATTGTATGGG | 59.758 | 22 |
| 267 | 715  | 981  | TATGCATCGCTCAGATTTG    | 59.937 | 20 |
| 188 | 643  | 830  | GGTACTGGTGGAACTGCCAT   | 59.851 | 20 |
| 250 | 9045 | 9294 | AATGTTTCTGCCACTCAA     | 58.201 | 20 |
| 229 | 7846 | 8074 | TCGAACCATAACAAGCAGTGG  | 59.716 | 20 |
| 280 | 911  | 1190 | GGAAACAAACTATCCCATTTG  | 59.722 | 22 |
| 219 | 408  | 626  | TGTGGAAACCATCAGCTCAA   | 60.24  | 20 |
| 246 | 2563 | 2808 | AAATAGGGACATCACGTGGC   | 59.82  | 20 |
| 161 | 2081 | 2241 | CAAGAACCGAAAATCCCAA    | 59.91  | 20 |
| 239 | 1403 | 1641 | TGCTGACATTTGAGTGACAGT  | 59.946 | 22 |
| 222 | 260  | 481  | GTTGAATCGATTGTACCGCC   | 60.339 | 20 |
| 197 | 641  | 837  | TTGGCCACATGCTCAATTAC   | 59.548 | 20 |
| 204 | 7    | 210  | TGAAGTTAGGAAATAAGGAGC  | 57.525 | 24 |
| 255 | 7392 | 7646 | GATCCTTCTCTCGTTATGGC   | 60.053 | 21 |
| 280 | 2078 | 2357 | TCGCGTAAACAACACGATCTA  | 59.382 | 21 |
| 266 | 292  | 557  | TTATCGGCTGTACTCTCTCGC  | 59.629 | 21 |
| 217 | 1979 | 2195 | TCCTACAACCTCCGGTTCCTG  | 60.103 | 20 |
| 255 | 2209 | 2463 | AAGATTTTTGTCCAGTCGGG   | 59.028 | 20 |
| 176 | 231  | 406  | CAGATCCCTTTCATCCCCTT   | 60.264 | 20 |
| 100 | 274  | 373  | TGGGTGTCATGTTTATGGGA   | 59.623 | 20 |
| 211 | 4456 | 4666 | GATTAAAGCACCTTTCGCGT   | 59.365 | 20 |
| 206 | 2264 | 2469 | TCATAGGTTTCGAGGCTCGTT  | 59.836 | 20 |
| 219 | 88   | 306  | CTGGTCCATTCAAACCTGCT   | 60.111 | 20 |
| 145 | 4685 | 4829 | CCGCATCTTCTAACGAGAGG   | 59.971 | 20 |
| 185 | 3260 | 3444 | GTCGCCGTCTCTCACAATA    | 58.877 | 20 |
| 255 | 1308 | 1562 | CTCTCTCCCTCCCTCAATCC   | 60.149 | 20 |
| 154 | 5112 | 5265 | CTCGAGGAAGTAATCGCAGG   | 59.971 | 20 |
| 126 | 38   | 163  | TTTTCGAGTTATGAAGTTAGCA | 58.926 | 24 |

|     |      |      |                         |        |    |
|-----|------|------|-------------------------|--------|----|
| 276 | 230  | 505  | CCCTCCCTTAAAATCGGAAA    | 60.245 | 20 |
| 278 | 154  | 431  | GCCAAGTTCACTAACCTTTTTTC | 59.724 | 24 |
| 162 | 1026 | 1187 | AACCAACATGCACAACCAAA    | 59.864 | 20 |
| 270 | 2900 | 3169 | GGGTTCTGCGTCATAAAAA     | 59.938 | 20 |
| 205 | 0    | 204  | GGAGAGAGAGTGTGGGTAG/    | 59.009 | 23 |
| 276 | 2253 | 2528 | AAGTCTGGGACTCAGCCAAA    | 59.844 | 20 |
| 135 | 20   | 154  | CGCCGGTGCCTATCATATTT    | 62.045 | 20 |
| 219 | 6770 | 6988 | AGGTGCAACCAGGATGAAAG    | 60.111 | 20 |
| 255 | 3140 | 3394 | CAGCAAATACTCTGCACCGA    | 60.011 | 20 |
| 280 | 1156 | 1435 | TATCCGAGTTTCATTTCGGG    | 59.894 | 20 |
| 227 | 2364 | 2590 | TTGGAAATTGAAGCTGTTGC    | 58.895 | 20 |
| 223 | 34   | 256  | CAGATGCTCGAACAAGTCCA    | 59.984 | 20 |
| 280 | 1697 | 1976 | GTTTATGTAGCGAAACCGGC    | 59.614 | 20 |
| 245 | 1642 | 1886 | GGCGACAGTGAAAGTTGACA    | 59.88  | 20 |
| 274 | 2238 | 2511 | TCAGTCGAAACATCATGGGA    | 60.048 | 20 |
| 106 | 3701 | 3806 | TTCAGGTGCGAATTCCTTTT    | 59.685 | 20 |
| 238 | 162  | 399  | TTTTCTAGAGAGGGAGGGG     | 59.64  | 20 |
| 256 | 2089 | 2344 | TCACTGTTTATCCCCCTTGC    | 59.933 | 20 |
| 262 | 558  | 819  | GGAGAAAGTTGATTTGTTGGG   | 60.332 | 22 |
| 204 | 1597 | 1800 | TGTTTGTTCCTTCTGATGC     | 59.847 | 20 |
| 240 | 854  | 1093 | GGCCAACCCATTTGACTTTA    | 59.801 | 20 |
| 243 | 58   | 300  | GGGTGGTATGGTGAAGAAA     | 59.647 | 20 |
| 215 | 594  | 808  | ATTTCTCCCGACATTCACCA    | 60.317 | 20 |
| 122 | 271  | 392  | CCCTTTGAGAATAATGACATT   | 59.724 | 23 |
| 131 | 289  | 419  | TTCCAGTGATGCACAAAAA     | 60.088 | 20 |
| 237 | 33   | 269  | TTTCTGGCTCTGCCACTGTA    | 59.591 | 20 |
| 275 | 646  | 920  | TTGAAATATGGCATGTGGGA    | 59.745 | 20 |
| 240 | 276  | 515  | AAAGCCTTCAAAAACCATGC    | 59.205 | 20 |
| 246 | 618  | 863  | GGTGTGATTCCAGCAGCTT     | 60.263 | 20 |
| 275 | 196  | 470  | CCCAAGACCCCAATTTGATT    | 60.91  | 20 |
| 247 | 55   | 301  | TTTCGTTGCCAGGGTAAATG    | 60.856 | 20 |
| 249 | 184  | 432  | TCCGTTACCCTCGACTTTGA    | 60.626 | 20 |
| 190 | 51   | 240  | AGTTGCAGCAGCATTCTCT     | 60.164 | 20 |
| 269 | 1819 | 2087 | CTGATCAAAACTGCTTCGGA    | 58.999 | 20 |
| 239 | 460  | 698  | ATCGGTGGATCTTGAAGTGG    | 59.927 | 20 |
| 140 | 74   | 213  | AGGATCGAGTAAGCGGAAAT    | 59.701 | 21 |
| 161 | 1333 | 1493 | GTGTTACCCGGTCCACTTTC    | 60.408 | 20 |
| 256 | 785  | 1040 | GCATCAAACGCACACAGAAC    | 60.319 | 20 |
| 257 | 4999 | 5255 | ATGCAGGGTTCTGATGGTGT    | 60.395 | 20 |
| 154 | 627  | 780  | GCTCATGTCAACGTTTTCTGG   | 60.684 | 21 |
| 269 | 1137 | 1405 | TCTGATCCCATGTTTTCTGC    | 58.645 | 20 |
| 221 | 306  | 526  | TCCCTATAACCGATACACCG    | 57.459 | 20 |
| 168 | 9    | 176  | TGGGTTTGAATTGGGCTTTA    | 60.294 | 20 |
| 182 | 448  | 629  | GGCTTTGGAAGTTATGGTCG    | 59.569 | 20 |
| 273 | 303  | 575  | ATGCTATCGGGTGGAGATTG    | 59.917 | 20 |
| 227 | 69   | 295  | ATCACCGGCAGCAGATTAAG    | 60.235 | 20 |
| 182 | 78   | 259  | TAAAGTGGCGGAGCTAGGG     | 60.35  | 19 |
| 175 | 3499 | 3673 | TGGAAAGGCGTAATTCTTGC    | 60.209 | 20 |
| 146 | 84   | 229  | CCACAGCATTGACATTAGGGT   | 59.867 | 21 |
| 115 | 1511 | 1625 | ACTGAAATCCCATTTCGCATC   | 59.9   | 20 |
| 242 | 8    | 249  | ATGTAGCCGACCCCAATTTA    | 59.297 | 20 |
| 251 | 478  | 728  | CGTTTTATCTGCGGATTTCA    | 58.769 | 20 |
| 261 | 2353 | 2613 | AGTTCGAAACCTGGACCATC    | 58.992 | 20 |
| 170 | 4    | 173  | CCCAAGACCCCAATTTGATT    | 60.91  | 20 |
| 203 | 1495 | 1697 | TGGACCCATGGATGTACTCA    | 59.762 | 20 |
| 195 | 22   | 216  | TCAATATCTTACAATATCACAA  | 58.479 | 26 |
| 263 | 156  | 418  | TGTTCCGACTGAACTGGTGA    | 60.285 | 20 |
| 102 | 91   | 192  | CGAGGCTGAATTTATGGCAC    | 60.606 | 20 |

|     |       |       |                         |        |    |
|-----|-------|-------|-------------------------|--------|----|
| 165 | 4317  | 4481  | CCTCATCAACCTCAGCAACA    | 59.831 | 20 |
| 126 | 59    | 184   | GGATGATGGATTTCGAGTGGA   | 60.839 | 20 |
| 187 | 1851  | 2037  | AATCGCCTTCGATTGTTTTG    | 60.074 | 20 |
| 217 | 17    | 233   | GAAGCTTCTCACGATTCTTGGT  | 59.892 | 22 |
| 112 | 161   | 272   | CCAATATTTTTGGTCTCACGG   | 59.325 | 21 |
| 119 | 1547  | 1665  | TTGTTTCGAGTGTTGTCCAC    | 59.571 | 20 |
| 159 | 407   | 565   | AGCAATGCGAGGATGAAGAT    | 59.803 | 20 |
| 196 | 12    | 207   | CTACCTCGCCTCGCTATTTG    | 59.996 | 20 |
| 254 | 1080  | 1333  | TTTATTAGAATGCCGGGGAA    | 59.389 | 20 |
| 267 | 78    | 344   | GAAAAAGATGGTAAAAACCTT   | 59.776 | 24 |
| 160 | 7     | 166   | CAGCCAAACATTGAGCAGTT    | 58.926 | 20 |
| 157 | 872   | 1028  | CCTCATTGCTCTGCCATGTA    | 59.823 | 20 |
| 251 | 268   | 518   | CAGAGCGCACTCGAATAACA    | 60.157 | 20 |
| 262 | 192   | 453   | TTCGAACCTTCTGCAAAATATA  | 58.036 | 23 |
| 271 | 30    | 300   | AAGAACATTTATGGCAAACAA   | 58.601 | 23 |
| 173 | 462   | 634   | TTCTACCACTGCCGAAAAC     | 60.11  | 20 |
| 176 | 5789  | 5964  | GCCTTTTTGAAGAGAGGCAA    | 59.569 | 20 |
| 242 | 1547  | 1788  | CCTCGTTTCTAGCCCACAAC    | 59.734 | 20 |
| 277 | 191   | 467   | AAATAATCAGGCTTCGTGCG    | 60.23  | 20 |
| 257 | 10    | 266   | CCTGAAACGAGTGATGCTCC    | 60.801 | 20 |
| 204 | 1876  | 2079  | CCGAACCGGAAAAGTCACTA    | 60.103 | 20 |
| 212 | 695   | 906   | GGAGCAACTCCAAAAGCAGT    | 59.478 | 20 |
| 104 | 1341  | 1444  | TTGGCTATCGGTTACTTGGG    | 59.953 | 20 |
| 265 | 12031 | 12295 | CCTTCTTGCAACCAACGTACA   | 61.092 | 21 |
| 262 | 2360  | 2621  | ATCGAACCGTGAACACCCTA    | 60.375 | 20 |
| 280 | 121   | 400   | AGGGGGAGAGTTCTCTTGGA    | 60.186 | 20 |
| 269 | 21    | 289   | ACAAAAATCCAACAAACCCG    | 59.702 | 20 |
| 228 | 641   | 868   | TTTGATGTGACCGTATTGCTTC  | 60.003 | 22 |
| 273 | 1353  | 1625  | CTATTCATCTGGCCGACCC     | 60.432 | 19 |
| 263 | 500   | 762   | TGTA CTGTGTTGGCTTCATGTT | 59.593 | 23 |
| 220 | 14    | 233   | TGGTTTTAATTGTGGGCTCTC   | 59.077 | 21 |
| 252 | 30    | 281   | GTTTTTCACGGTTGGAAAGG    | 59.448 | 20 |
| 197 | 5     | 201   | CAATCACCAATCAACACTTGA   | 58.528 | 22 |
| 268 | 397   | 664   | TGAAAACCAAGGTGATGTCAA   | 59.01  | 21 |
| 172 | 14    | 185   | CCAATTTATTGGGATTAAGGC   | 57.539 | 21 |
| 238 | 414   | 651   | CAGCAAAACAACCTTCATGTAC  | 60.214 | 23 |
| 279 | 684   | 962   | CAGGCACTCCAAAATCAGGT    | 60.111 | 20 |
| 140 | 13    | 152   | CGCCGTTAGCAAAGGAATTA    | 60.218 | 20 |
| 189 | 8     | 196   | TTTGGTTCATGTAGCCGACC    | 60.894 | 20 |
| 166 | 3     | 168   | TACAAATCAAGCACGCAAGC    | 60.021 | 20 |
| 260 | 57    | 316   | TGAATTGGGTTTGACAATCG    | 59.371 | 20 |
| 243 | 90    | 332   | GTGGATCAGCAGTGGCTTTT    | 60.263 | 20 |
| 253 | 1138  | 1390  | TAGCTTGGCCCTCGATAGTC    | 59.434 | 20 |
| 250 | 708   | 957   | TCTCCAACCTCCTGCACCTTT   | 59.844 | 20 |
| 206 | 753   | 958   | CACAAGTTATCACACCCCCA    | 59.262 | 20 |
| 277 | 298   | 574   | TTTACGTTGTACGAATCCTATC  | 57.585 | 25 |
| 273 | 10    | 282   | ACATCGCATACTGTATGTTTA   | 57.646 | 24 |
| 221 | 965   | 1185  | TGTCAACGACGAGATGGAAA    | 60.24  | 20 |
| 129 | 2029  | 2157  | ACGTGGGACCTTTCAGTCAC    | 60.009 | 20 |
| 226 | 185   | 410   | AATGCTGGAAATTCGATTGG    | 59.901 | 20 |
| 204 | 2002  | 2205  | CCACAATTGGCACTAGCCTT    | 60.132 | 20 |
| 188 | 149   | 336   | TCGGGTCAACCTTTGAACAC    | 60.934 | 20 |
| 100 | 17    | 116   | TGTGGGTTTATGTGATGCCA    | 60.79  | 20 |
| 168 | 95    | 262   | TTAAAAATCGGACCGGAGAC    | 59.019 | 20 |
| 231 | 166   | 396   | TCGTGCAATAAAACTCGTGC    | 59.879 | 20 |
| 191 | 364   | 554   | ATGTTGAGTCCGAGTCCCAG    | 60.112 | 20 |
| 186 | 84    | 269   | TGAAGGACCCGTCATACAACT   | 59.463 | 21 |
| 215 | 552   | 766   | CATGGGGCGCTTTAAAAATA    | 59.927 | 20 |

|     |      |      |                        |        |    |
|-----|------|------|------------------------|--------|----|
| 178 | 51   | 228  | TACGGCCGGGTAAATTACAT   | 59.212 | 20 |
| 166 | 2901 | 3066 | CGCAACAAACATTGATTTG    | 60.111 | 20 |
| 211 | 275  | 485  | AGGTGCGCTACAGTTGGAAT   | 59.763 | 20 |
| 151 | 35   | 185  | ATTCATGTAGCCGATCCCAA   | 60.296 | 20 |
| 129 | 638  | 766  | TGGCAACTCAAAAATGCTCA   | 60.379 | 20 |
| 242 | 34   | 275  | AATACCGATACCCACTCCCC   | 59.903 | 20 |
| 241 | 1456 | 1696 | CCACCAGCAGAACAAGAACA   | 59.873 | 20 |
| 222 | 568  | 789  | GCGACGGGTACATTCCTCTA   | 60.096 | 20 |
| 121 | 253  | 373  | CCCAGTTTTGGTCTACTGG    | 60.401 | 20 |
| 273 | 301  | 573  | ACCGTCCACGTCAGTATTCC   | 59.851 | 20 |
| 264 | 446  | 709  | CTTGCTTCCTCGCTTGTCTC   | 60.277 | 20 |
| 257 | 179  | 435  | CCTTGTTGAAAGAGCCTCCA   | 60.366 | 20 |
| 262 | 389  | 650  | CGCACACTTCTGTCCCGTAT   | 61.116 | 20 |
| 204 | 1754 | 1957 | TGTGCTTAGCTGTTGGGATG   | 59.864 | 20 |
| 244 | 202  | 445  | ACCCTACATAGCGGGGAAAG   | 60.332 | 20 |
| 102 | 219  | 320  | GAGGGGGAAAAGAGAGGATG   | 60.008 | 20 |
| 276 | 486  | 761  | AGATGGGCGTCCACTTGTAG   | 60.134 | 20 |
| 164 | 240  | 403  | TCGACCCAAATAGAAGACCG   | 60.066 | 20 |
| 125 | 414  | 538  | CAAGACCCCAAATGATTGGT   | 59.647 | 20 |
| 148 | 1475 | 1622 | TGCATCCCAGCCTCTTATCT   | 59.797 | 20 |
| 277 | 235  | 511  | CCCCATCTTCCACAAGGTTA   | 59.784 | 20 |
| 200 | 567  | 766  | TGGAGGAATAAAGGCTGGTG   | 60.066 | 20 |
| 274 | 2    | 275  | CTTCTGGATGCGGTGAGTTT   | 60.255 | 20 |
| 183 | 25   | 207  | TTTAACATCCAAGTTATTCACG | 59.782 | 24 |
| 107 | 73   | 179  | TCGATTTTTGGCCTACTGAT   | 59.528 | 20 |
| 248 | 1540 | 1787 | ATACATTGCTTGGGAATCCG   | 59.784 | 20 |
| 131 | 251  | 381  | ATCAAACACGCCAATCATCA   | 59.931 | 20 |
| 160 | 156  | 315  | ACGCAACCATTTTCATTGTGA  | 59.972 | 20 |
| 115 | 373  | 487  | AATGCGTAACCCTTGTTCGC   | 60.003 | 20 |
| 173 | 2014 | 2186 | GAGGTAGAAAAGAGTGGCCGA  | 59.43  | 20 |
| 258 | 6    | 263  | TTTGTGTCGATCAACTTGTGTG | 59.658 | 22 |
| 242 | 90   | 331  | TGGACGTCAACATGAACGAT   | 59.967 | 20 |
| 177 | 1239 | 1415 | CGAAATGGAGATCCAAATCCT  | 60.272 | 21 |
| 192 | 317  | 508  | GCCAATCTCCTCTCATCAGC   | 59.917 | 20 |
| 223 | 86   | 308  | CCGATATCCAGTTTCATCC    | 59.2   | 20 |
| 162 | 819  | 980  | TGTTCTTCTTCAACCCACA    | 59.109 | 20 |
| 201 | 534  | 734  | CGCCGAAGTCATTAGGTCTC   | 59.836 | 20 |
| 266 | 36   | 301  | TGATCCATGGGATGATGATG   | 60.096 | 20 |
| 193 | 1252 | 1444 | TGGTGGAAATTGCGGTATTTT  | 60.188 | 20 |
| 231 | 1609 | 1839 | TAAGGTTGGCTGTAATGCC    | 59.96  | 20 |
| 265 | 71   | 335  | CCAAAACCCCAATTTGATT    | 60.754 | 20 |
| 205 | 60   | 264  | CCACCCTTATTCTTTTGATTT  | 61.027 | 24 |
| 168 | 32   | 199  | TTTCGAATGTTGCTGCTCAA   | 60.523 | 20 |
| 232 | 963  | 1194 | AAAGAAGAGGGAAAAGCCCA   | 60.18  | 20 |
| 195 | 4    | 198  | CCCAAGACCCCAATTTGATT   | 60.91  | 20 |
| 250 | 59   | 308  | TTTCATGGGTACACATTTGAGC | 59.867 | 22 |
| 271 | 86   | 356  | GGGAAGGGGACAACATTTCT   | 60.169 | 20 |
| 254 | 290  | 543  | CTTTGGCCGGATCTCTTTCT   | 60.703 | 20 |
| 217 | 71   | 287  | TGATCACACACGAGTCCATTT  | 58.999 | 21 |
| 144 | 400  | 543  | CGTTGGTGAAGAACAACCTTG  | 60.182 | 22 |
| 250 | 583  | 832  | CCAAAGGGGAATCAAATCTGG  | 59.359 | 20 |
| 186 | 382  | 567  | CACGTGGCATGTTGATTTCT   | 59.572 | 20 |
| 223 | 3    | 225  | TTTGTTTCATTTAGCCGACC   | 59.938 | 20 |
| 255 | 205  | 459  | AGAAAGCCCACCTTTTTGCT   | 60.242 | 20 |
| 196 | 0    | 195  | AGGAGGATGACGACGATGAT   | 59.491 | 20 |
| 255 | 67   | 321  | CCACCAATGACAGCAATCAG   | 60.112 | 20 |
| 278 | 28   | 305  | CCACCATCGTCGTCTCATC    | 60.063 | 19 |
| 154 | 246  | 399  | TGGATTTCCACTCCACGTTT   | 60.353 | 20 |

|     |      |      |                        |        |    |
|-----|------|------|------------------------|--------|----|
| 162 | 44   | 205  | TCTACTTAGAGCAGGGCCGA   | 60.11  | 20 |
| 223 | 424  | 646  | TAACCTTGGCTGGCTCCTAA   | 59.839 | 20 |
| 222 | 2748 | 2969 | GATGGTGA AAAAGAGGCGAAG | 59.813 | 20 |
| 268 | 652  | 919  | AAAACCTTGGTGAACAGGCT   | 58.695 | 20 |
| 241 | 0    | 240  | TGTAGCCGACCCCAATTTAT   | 59.297 | 20 |
| 238 | 845  | 1082 | GCTTTGGAAGAGGTGTGGAG   | 59.844 | 20 |
| 226 | 514  | 739  | CCGTCAAGCTCTATGCTTCC   | 59.978 | 20 |
| 274 | 4319 | 4592 | CAAACCTAAGACCGGGATGA   | 59.926 | 20 |
| 188 | 7    | 194  | TTGGCTCGAATTACAAAAACC  | 59.111 | 21 |
| 278 | 698  | 975  | TGCACTGCTTATCAGATTCAAC | 59.057 | 23 |
| 245 | 293  | 537  | AAAGTTGAAATGCTTGCATGG  | 60.124 | 21 |
| 109 | 396  | 504  | TGCCTCAGACTCTTCCACCT   | 59.986 | 20 |
| 203 | 259  | 461  | GCTCCTCCACCTCTGTTCTG   | 59.986 | 20 |
| 262 | 1735 | 1996 | GTTGTGTGCCATCATCAAGC   | 60.128 | 20 |
| 209 | 10   | 218  | GAGCAAGAAGAAAGGGACGA   | 59.55  | 20 |
| 147 | 141  | 287  | TTCTCATCTCCAGTCTCCATGA | 59.803 | 22 |
| 193 | 3484 | 3676 | CCATGGAAGAACAGGGAGTT   | 58.989 | 20 |
| 200 | 455  | 654  | GATTCTGGTCGCTCCACAGT   | 60.269 | 20 |
| 244 | 154  | 397  | CACCCCTATTCTTTTTGCC    | 60.664 | 20 |
| 204 | 155  | 358  | GAAGATTTTTGCCACCCAAC   | 59.41  | 20 |
| 242 | 54   | 295  | TTCCATGACCCTCGACTTTG   | 61.034 | 20 |
| 250 | 705  | 954  | TTGCTGTCTCTGGCTCTTTC   | 58.315 | 20 |
| 184 | 12   | 195  | TTGCCCACTCCACCACTT     | 60.088 | 18 |
| 199 | 959  | 1157 | AATGCAGGTTGAAAAGGTG    | 59.971 | 20 |
| 279 | 2429 | 2707 | CCCTTTTCCAACCTACAACA   | 58.594 | 20 |
| 104 | 14   | 117  | TCACATGTTGTCAAATAGATTC | 57.753 | 25 |
| 162 | 869  | 1030 | CAATCGGTCATGAGTTCGAG   | 59.241 | 20 |
| 197 | 1811 | 2007 | ATGCCCAACTATTGGTGTT    | 59.174 | 20 |
| 179 | 0    | 178  | TGTAGCCGACCCCAATTTAT   | 59.297 | 20 |
| 274 | 330  | 603  | CTCGGATTCTATTAGTGATTCA | 58.084 | 25 |
| 108 | 318  | 425  | TCAAAATCATCACTCTCCACTC | 59.726 | 23 |
| 259 | 1916 | 2174 | TGGCTCATTACACAAAACG    | 57.291 | 20 |
| 255 | 1521 | 1775 | CCTTGCAGAAAAGGCTTAGG   | 60.362 | 21 |
| 272 | 186  | 457  | TGGCAAGATTTGTTTTGACAG  | 58.808 | 21 |
| 169 | 23   | 191  | ATTCAAGGCCAACAATCCAG   | 59.933 | 20 |
| 272 | 1230 | 1501 | TCACACATGGAGAACGAAGC   | 59.837 | 20 |
| 203 | 53   | 255  | TTGTGATGGAGTAGAGGGGC   | 60.073 | 20 |
| 106 | 2216 | 2321 | TTTTAGCCTCAGGCCTGTTT   | 58.973 | 20 |
| 210 | 0    | 209  | ATGTAGCCGACCCCAATTT    | 59.259 | 19 |
| 240 | 158  | 397  | TGGTTTTCCGATGTTTCGATT  | 60.309 | 20 |
| 254 | 288  | 541  | CGTACATCCCCAAAGTCCTG   | 60.366 | 20 |
| 187 | 2794 | 2980 | TCAGCAGCAACTGATCCAAC   | 59.992 | 20 |
| 189 | 57   | 245  | AACAAGGTAAAGTCTGGCCG   | 59.238 | 20 |
| 183 | 6    | 188  | CCCAAGACCCCAATTTGATT   | 60.91  | 20 |
| 230 | 2917 | 3146 | GACCCCAATTTGATTGGAAAT  | 59.881 | 21 |
| 268 | 768  | 1035 | TGTATGATTTGCTCGCAACG   | 60.807 | 20 |
| 278 | 66   | 343  | AACGGCTGGCATTGTTAGA    | 60.637 | 20 |
| 141 | 390  | 530  | CATATGCAAACATGCGAAGC   | 60.245 | 20 |
| 239 | 1484 | 1722 | ACGGGGCATAAAATTGATTG   | 59.66  | 20 |
| 179 | 2266 | 2444 | GATGCATGAAACTTTGTAAAA  | 60.27  | 24 |
| 215 | 155  | 369  | GATACCACGTCAAGCAACCC   | 60.384 | 20 |
| 221 | 304  | 524  | AGGATAAAAGAGGCAGGGGA   | 60.032 | 20 |
| 266 | 746  | 1011 | TGTAGCACGAGTGATGAGGC   | 60.016 | 20 |
| 182 | 104  | 285  | GCTTTGATGAGCCATAACCC   | 59.533 | 20 |
| 208 | 13   | 220  | CACTTTGACGCTGCTTGAAT   | 59.076 | 20 |
| 213 | 115  | 327  | CGGAGGTGATCTCAAATGGT   | 59.927 | 20 |
| 101 | 59   | 159  | CAAACCATGAATAAGCAATCC  | 59.832 | 22 |
| 157 | 22   | 178  | TTTGCTTACGGAAACAGCAA   | 59.486 | 20 |

|     |      |      |                        |        |    |
|-----|------|------|------------------------|--------|----|
| 251 | 325  | 575  | TTCCCCCTCCTCTCATCTTT   | 60.008 | 20 |
| 183 | 1482 | 1664 | CAGTTTCGGTTTTGGTGGAC   | 60.388 | 20 |
| 131 | 1701 | 1831 | CTGCTGGTGATGCTCAAAGA   | 60.136 | 20 |
| 263 | 107  | 369  | CCCAATTTCCGCATTTTT     | 59.759 | 19 |
| 260 | 32   | 291  | ATGTCCTTGAAGATGCTGGC   | 60.226 | 20 |
| 257 | 14   | 270  | ACTCACTGCGGTGGAAAATC   | 60.119 | 20 |
| 204 | 1473 | 1676 | CATCTCGGGATTCAAGTGGTT  | 59.927 | 20 |
| 269 | 63   | 331  | TATTCTCGCTTCTTCGCCAC   | 60.49  | 20 |
| 128 | 73   | 200  | ACGTCGCGACTCCTCTCTAA   | 60.156 | 20 |
| 275 | 2107 | 2381 | AAAGGACGGTCTCGGTATCC   | 60.328 | 20 |
| 221 | 929  | 1149 | TGATGGCATGTGTTCTGTTG   | 59.085 | 20 |
| 160 | 17   | 176  | TGGGCAGCCAAATATTGAGT   | 60.469 | 20 |
| 226 | 725  | 950  | TCGACTTTGTTGGTTCCGGT   | 60.529 | 20 |
| 102 | 2942 | 3043 | CGAGGATCCTTCACAACCAT   | 59.927 | 20 |
| 250 | 8745 | 8994 | TTTGTCTTTCCCTTTGATGCT  | 58.823 | 21 |
| 112 | 0    | 111  | ATGTAGCCGACCCCAATTTAT  | 59.585 | 21 |
| 182 | 1650 | 1831 | TTTCGGAGTCACAGAAGGCT   | 59.989 | 20 |
| 153 | 421  | 573  | GTTGTGCATGGGTTCAAAAA   | 59.42  | 20 |
| 111 | 360  | 470  | TCCATATAGCCGACCTCACA   | 59.101 | 20 |
| 150 | 489  | 638  | TCTGCAACCCTAATGGGTGT   | 60.375 | 20 |
| 110 | 8    | 117  | GCATTCTGATAAAGAAAATCG  | 60.449 | 23 |
| 266 | 153  | 418  | ATCTCGTCGGGTATGAGTGC   | 60.104 | 20 |
| 148 | 227  | 374  | TGTGATGTAGAGAAATGAAGC  | 59.317 | 25 |
| 175 | 309  | 483  | ATAGACGAATGGGCGAGATG   | 60.059 | 20 |
| 198 | 0    | 197  | ATTCGAAGGTGTTGATCCCA   | 60.317 | 20 |
| 218 | 783  | 1000 | GCACAAAATGTTGCTGCTCA   | 61     | 20 |
| 222 | 43   | 264  | ATTTCCGAAACCAAACACCA   | 60.206 | 20 |
| 269 | 16   | 284  | GGTGAGTTTGAAGCATTGCAT, | 60.138 | 22 |
| 106 | 2543 | 2648 | GGCCCAAAGATCTCAAACAA   | 60.051 | 20 |
| 242 | 1160 | 1401 | ATTGTCTGCAAACCCGAAAG   | 60.11  | 20 |
| 201 | 271  | 471  | TTCCTATCTATTCCGCGTGC   | 60.196 | 20 |
| 201 | 523  | 723  | TCAAATATACGAAAACGGTG   | 59.792 | 24 |
| 107 | 10   | 116  | TGGAAATCCAATTAATACAGT  | 60.572 | 25 |
| 234 | 123  | 356  | AAGGAGCATCCTTGGTTGAA   | 59.67  | 20 |
| 103 | 4    | 106  | ACCCTTGAGCTTGCATCTGT   | 59.874 | 20 |
| 176 | 32   | 207  | GTTGGCTTCGGTGCAGTC     | 60.412 | 18 |
| 188 | 437  | 624  | TGGAACCATTGCAGTCAAGA   | 60.24  | 20 |
| 223 | 11   | 233  | TGTAGCCGACCCCAATTTAT   | 59.297 | 20 |
| 224 | 406  | 629  | TGTGTACGTAGTTGAGCATGT  | 58.837 | 23 |
| 278 | 541  | 818  | AATGTCACGAGTTGCAGCAG   | 60.056 | 20 |
| 210 | 1272 | 1481 | GGTGCAGGCTAAAAATGTTG   | 58.294 | 20 |
| 202 | 5    | 206  | TGTAGCCGACCCCAATTTAT   | 59.297 | 20 |
| 260 | 293  | 552  | TCGATGGTTGATCTTGATTGTT | 59.434 | 22 |
| 149 | 470  | 618  | GATTAGCAAATTTCCGGGACG  | 59.547 | 20 |
| 173 | 32   | 204  | TGATGGATCGAATATTCTCAC  | 59.923 | 22 |
| 191 | 1941 | 2131 | ACACGATAGCCATAGCCGAC   | 60.125 | 20 |
| 232 | 5608 | 5839 | ACTCTCATGCTCCTCCTCCA   | 59.945 | 20 |
| 270 | 300  | 569  | GAAGTGGTGGCAGTCCATTC   | 60.52  | 20 |
| 147 | 101  | 247  | AGCAGCCCTCTTTTGAAT     | 60.208 | 20 |
| 163 | 338  | 500  | GAATCTGATTTAAACATGGTG  | 59.735 | 23 |
| 245 | 20   | 264  | TTCTTGTGAGACTGTTGTTCTG | 59.429 | 23 |
| 186 | 4    | 189  | CCCAAGACCCCAATTTGATT   | 60.91  | 20 |
| 270 | 4    | 273  | CCCAAGACCCCAATTTGAT    | 59.59  | 19 |
| 280 | 4    | 283  | CCCAAGACCCCAATTTGATT   | 60.91  | 20 |
| 115 | 471  | 585  | GATGGATGAAAACCCACACC   | 60.034 | 20 |
| 178 | 2    | 179  | CCCAAGACCCCAATTTGATT   | 60.91  | 20 |
| 119 | 230  | 348  | ATGTAGCCGACCCCAATTTA   | 59.297 | 20 |
| 100 | 23   | 122  | ATGATCGGATTTTGTGGAGA   | 60.194 | 22 |



|     |      |      |                        |        |    |
|-----|------|------|------------------------|--------|----|
| 135 | 3072 | 3206 | TGAATTAACTGGCACCCATC   | 59.815 | 21 |
| 269 | 1036 | 1304 | GAGGCTCAATGGGGAGATTA   | 59.08  | 20 |
| 178 | 37   | 214  | TGCATAGAGGAAATTGCATAG  | 59.371 | 22 |
| 187 | 703  | 889  | CCTATAATTGAAGCCGCCAA   | 60.054 | 20 |
| 163 | 3405 | 3567 | GGTGGAGGAGATCGAGAGTG   | 59.792 | 20 |
| 156 | 31   | 186  | TTGCAAAAAGTGATGTGACCG  | 60.699 | 20 |
| 189 | 19   | 207  | GGGCAGCCAAATATAGAGCA   | 60.196 | 20 |
| 229 | 7    | 235  | CCCAAGACCCCAATTTGATT   | 60.91  | 20 |
| 251 | 1527 | 1777 | CTCAACTTTCCAAGTATGGC   | 59.726 | 21 |
| 217 | 27   | 243  | AGCTGTGTCTCCAAACTCCC   | 59.305 | 20 |
| 220 | 1607 | 1826 | AGCTGAAGGAGAGGAGGAGG   | 60.088 | 20 |
| 247 | 3    | 249  | CAACGGTTTACAAGTGTGTTT  | 58.187 | 22 |
| 279 | 26   | 304  | GCTTAAAGGTGGAGGATAGTC  | 59.155 | 22 |
| 112 | 264  | 375  | CGTTTTTGTCAATGCGTCTG   | 60.293 | 20 |
| 154 | 7    | 160  | CCCAAGACCCCAATTTGATT   | 60.91  | 20 |
| 239 | 73   | 311  | TGTCTTGGATGGATCACCTG   | 59.473 | 20 |
| 170 | 3    | 172  | TGGGGTCTACAACAACTGAA   | 58.119 | 21 |
| 246 | 35   | 280  | TCAACATATCATAAAGATAAA  | 57.289 | 27 |
| 176 | 33   | 208  | CGAGCTGCATCGAGCTTT     | 60.399 | 18 |
| 168 | 7    | 174  | CCCAAGACCCCAATTTGATT   | 60.91  | 20 |
| 110 | 7    | 116  | CCATCAAAAAGCATGCAAAG   | 59.301 | 20 |
| 111 | 6    | 116  | AATTAAGTTCTACGAATTCATT | 58.046 | 27 |
| 142 | 1936 | 2077 | GCGGTGATTTCTGAGTGTT    | 60.119 | 20 |
| 101 | 313  | 413  | TTTGGCTCCAGCGACTTATT   | 59.845 | 20 |
| 198 | 69   | 266  | TGCAACACAATCATTATGGCT  | 59.055 | 21 |
| 265 | 303  | 567  | TTGATGAGCCATAACCCTCC   | 59.894 | 20 |
| 227 | 161  | 387  | TCCCAAAAAGGCAGAAACAG   | 60.22  | 20 |
| 179 | 772  | 950  | ACGAAATTTGGAAGTGCCTG   | 60.11  | 20 |
| 208 | 1409 | 1616 | TGATTTTGGATTTTAGGCGG   | 59.901 | 20 |
| 226 | 24   | 249  | AATGAATAAGTTTGCATTTAAG | 58     | 26 |
| 268 | 358  | 625  | GCTCGTGTCCAAATCAAACA   | 59.697 | 20 |
| 126 | 5633 | 5758 | GCAATGAACACTTAGCAGCG   | 59.638 | 20 |
| 104 | 20   | 123  | GTCAGTTTGACTTTTATTCTC  | 60.158 | 23 |
| 278 | 502  | 779  | GACCGAAATTAACGTGGAGG   | 59.429 | 20 |
| 257 | 2    | 258  | TCACAAACCGCTGTTGTTTC   | 59.74  | 20 |
| 109 | 16   | 124  | CAAAATAGCCCGAGGTTGAA   | 60.067 | 20 |
| 204 | 168  | 371  | TGTGTTGTTTGATGTCTTTGTG | 59.133 | 23 |
| 270 | 6    | 275  | TTTCTTTTTCTCAACAATTTCC | 59.647 | 23 |
| 168 | 913  | 1080 | CAGGTGAGGGTTCTTGAGGA   | 60.229 | 20 |
| 255 | 467  | 721  | GTTTTCTTGCCCTTCCCTT    | 59.571 | 20 |
| 111 | 6    | 116  | AATATGCGGGAAGAAAGCGT   | 60.949 | 20 |
| 275 | 1498 | 1772 | TCATGGCTGAGAGGAAAAGG   | 60.331 | 20 |
| 229 | 951  | 1179 | TGAGATGGAACCTGACGGTG   | 59.676 | 20 |
| 252 | 278  | 529  | AAGTTGTCGACGTGGAGGAG   | 60.298 | 20 |
| 141 | 1051 | 1191 | CCTATGAAAAATCCAGCCCA   | 59.894 | 20 |
| 222 | 1624 | 1845 | GATCGTACACGATGGCGAC    | 60.096 | 19 |
| 274 | 4    | 277  | GTTTTGTGTGTGTTTGCAACG  | 60.103 | 21 |
| 273 | 695  | 967  | CTGGACTTGGCGAGATCATT   | 60.218 | 20 |
| 264 | 3193 | 3456 | CGATTGTGGTGACGAAGATG   | 60.112 | 20 |
| 223 | 353  | 575  | TCGTTGTGAATTTGGGGAAG   | 60.863 | 20 |
| 250 | 18   | 267  | CGGTGCGGAGCTATTATCAC   | 60.626 | 20 |
| 103 | 18   | 120  | TTGGCATAACAAGCTAGGACA  | 58.789 | 22 |
| 123 | 0    | 122  | ATGTAGCCGACCCCAATTTA   | 59.297 | 20 |
| 149 | 2053 | 2201 | CGGTGGTTTAATGGAGTTGC   | 60.365 | 20 |
| 179 | 707  | 885  | TTCGATCGAGTTCGGTTCTT   | 59.813 | 20 |
| 266 | 2144 | 2409 | AACGAACGAAGCTGAGCAAT   | 60.022 | 20 |
| 191 | 4    | 194  | CCCAAGACCCCAATTTGATT   | 60.91  | 20 |
| 279 | 5    | 283  | ATGTAGCCGACCCCAATTTA   | 59.297 | 20 |

|     |      |      |                        |        |    |
|-----|------|------|------------------------|--------|----|
| 159 | 717  | 875  | ATGCAAAATTCGGCAGATTC   | 60.045 | 20 |
| 244 | 34   | 277  | AAATTTACTCGCTGGTCTATCT | 57.335 | 25 |
| 133 | 2    | 134  | ACCTGAGGTTCCAGGGTCCAT  | 60.77  | 20 |
| 243 | 292  | 534  | GATGAGATTCCCGAGGTTGA   | 60.011 | 20 |
| 101 | 22   | 122  | GAAATGCAAAGACCAAGAAC/  | 57.864 | 21 |
| 217 | 518  | 734  | TGTCAACCATAATATATGCATC | 60.127 | 25 |
| 211 | 6    | 216  | CCCAAGACCCCAATTTGATT   | 60.91  | 20 |
| 253 | 771  | 1023 | TACATCTGACGCCCAAGAC    | 61.067 | 20 |
| 221 | 29   | 249  | GCGAACACAGTTTTTCAGCC   | 60.817 | 20 |
| 264 | 25   | 288  | CTCTTGAAATTTTCTTATTGTT | 58.722 | 25 |
| 241 | 1527 | 1767 | TTGTGTCAGACTTGTTCCGGC  | 59.88  | 20 |
| 202 | 651  | 852  | CCCCAAACTTATTGACAAA    | 57.462 | 20 |
| 279 | 445  | 723  | TCAGCGAATTGTTGCAGAAG   | 60.134 | 20 |
| 277 | 4966 | 5242 | TTGCATTTTTCATAGCCCAA   | 59.146 | 20 |
| 255 | 726  | 980  | CCTCCTCAACCAGAGTCTCC   | 58.819 | 20 |
| 275 | 1790 | 2064 | GTATTCCACCACGCTCCTTAT  | 58.085 | 21 |
| 137 | 7    | 143  | CCCAAGACCCCAATTTGATT   | 60.91  | 20 |
| 166 | 752  | 917  | AGTGAATAGCTGCTGGTGGG   | 60.277 | 20 |
| 246 | 710  | 955  | CAACTGCCGATCAAACCTGTG  | 60.301 | 20 |
| 216 | 6    | 221  | GATGGATGGATCAGAACCGA   | 60.839 | 20 |
| 212 | 2642 | 2853 | CAATTCGTGTCATGGTCGAG   | 60.112 | 20 |
| 260 | 110  | 369  | CTTGCGGTCTTGAACATGAA   | 59.84  | 20 |
| 233 | 494  | 726  | GGCAGATTCCTTGATTTTG    | 59.505 | 20 |
| 184 | 13   | 196  | CAGAATGATTGAAGCAAACAT  | 60.124 | 23 |
| 254 | 467  | 720  | TGGGACGATAAGGGATAGTGT  | 58.398 | 21 |
| 225 | 29   | 253  | ATGAGATTTTTGGTGTCAGTGC | 58.958 | 22 |
| 240 | 127  | 366  | ACCCGGTTTGATCTGTGAAC   | 59.827 | 20 |
| 260 | 42   | 301  | CCGGTTAATGACCCATTTGT   | 59.546 | 20 |
| 218 | 1409 | 1626 | AATTGGAATTCAACATCAATGC | 58.671 | 22 |
| 274 | 2146 | 2419 | TCGAGATGTGAAGATTGAGGC  | 60.355 | 21 |
| 256 | 17   | 272  | CGGCTACTTTCTCCCTTCT    | 59.842 | 20 |
| 197 | 985  | 1181 | TACGCAAAGGCACTTCTCAA   | 59.609 | 20 |
| 138 | 18   | 155  | GAAGTACCTGCCTACTCGTCTC | 59.957 | 23 |
| 138 | 205  | 342  | GAGGGAGGCACTAAGAAATGC  | 60.082 | 21 |
| 184 | 135  | 318  | CCACCAACGTCTCTTGGTCT   | 60.151 | 20 |
| 128 | 1836 | 1963 | CGCAATTCATCACAACCTGCT  | 59.871 | 20 |
| 208 | 2658 | 2865 | CCCAGAAGCAGAAGAGGTTG   | 59.982 | 20 |
| 113 | 368  | 480  | CGAGATTGGGAAATTGGAGA   | 60.006 | 20 |
| 256 | 7    | 262  | ATGTAGCCGACCCCAATTTA   | 59.297 | 20 |
| 107 | 174  | 280  | CAGCCGAGAACATCATCAA    | 59.799 | 20 |
| 261 | 88   | 348  | GGTGGATTAGTTGTCGTTTTGA | 60.263 | 23 |
| 118 | 2    | 119  | TGTATATTCCTGAAGACGATGC | 60.346 | 23 |
| 280 | 869  | 1148 | GCATGCATAATGTGACACCC   | 59.812 | 20 |
| 195 | 38   | 232  | TGATGATTGAGTAAAAACGAC  | 57.385 | 23 |
| 223 | 3810 | 4032 | GCACACTTGATGTGACGGTT   | 59.603 | 20 |
| 224 | 9    | 232  | CCGTATCAAGCCACCAAGTA   | 58.649 | 20 |
| 207 | 231  | 437  | ATCTTGACGTCGAGGAAGGA   | 59.803 | 20 |
| 151 | 9    | 159  | CAAGACCCCAATTTGATTGA   | 58.395 | 20 |
| 271 | 628  | 898  | TCTTTGCGATGAGCTCCTTT   | 60.096 | 20 |
| 169 | 196  | 364  | AGAAACGTTGCTGTCAAGGC   | 60.44  | 20 |
| 245 | 12   | 256  | TTATAAACTGTTACTCCTGGGT | 58.698 | 24 |
| 205 | 2001 | 2205 | TGCCACCGATTTGAACATT    | 59.916 | 19 |
| 204 | 286  | 489  | GACGCTTGGTTGGATAGCTT   | 59.34  | 20 |
| 226 | 3311 | 3536 | CCGCCTCCGTAAATAAACAA   | 59.958 | 20 |
| 215 | 75   | 289  | GATTCGCTACCGTGTGGAGT   | 60.142 | 20 |
| 266 | 25   | 290  | CGGACAGAAGGATGGCTTTA   | 60.206 | 20 |
| 143 | 37   | 179  | ATTGTTTTATTGTGCTTTGTCA | 59.258 | 27 |
| 247 | 16   | 262  | CATAAACCACTTCGAACGGC   | 60.502 | 20 |

|     |      |      |                         |        |    |
|-----|------|------|-------------------------|--------|----|
| 100 | 4    | 103  | ATGTAGCCGACCCCAATTTA    | 59.297 | 20 |
| 171 | 410  | 580  | ACAGCTCTTCAAACCTGGGCA   | 60.975 | 20 |
| 233 | 519  | 751  | GCCACAACCTTAGAATCGCATC  | 59.728 | 21 |
| 278 | 263  | 540  | TGATGTTAAGAAACATTA AAAA | 58.601 | 26 |
| 254 | 161  | 414  | AGCCAAAAGATACTAACTTC    | 57.727 | 24 |
| 105 | 4757 | 4861 | ATGAATGCCATCATCCCAAT    | 59.982 | 20 |
| 130 | 82   | 211  | GATGATGATGCCACTCTTGG    | 59.04  | 20 |
| 221 | 828  | 1048 | TGATGAGCGGGAAGAAGATT    | 59.773 | 20 |
| 201 | 124  | 324  | AAGGATGAGCGAAATGAGGA    | 59.773 | 20 |
| 161 | 7991 | 8151 | GGAACCTATAACGGCGATCA    | 59.923 | 20 |
| 183 | 1    | 183  | TTCTTCGCTACACGGACCAT    | 60.657 | 20 |
| 138 | 640  | 777  | TAGGGCTAGCAGCTCCAGAA    | 60.249 | 20 |
| 113 | 45   | 157  | GGGCCGATCCTATCACTACA    | 59.917 | 20 |
| 276 | 3    | 278  | TCCCGAGACTGAGATGGATT    | 59.612 | 20 |
| 270 | 366  | 635  | TTCTGGTGGAGTTCATTGAGA   | 58.272 | 21 |
| 280 | 32   | 311  | CTCTTTCTCTCTGTGCTGATCG  | 59.377 | 22 |
| 213 | 4527 | 4739 | GGAGAGCTTCGACTTCTCCA    | 59.679 | 20 |
| 215 | 8    | 222  | CCCAAGACCCCAATTTGATT    | 60.91  | 20 |
| 280 | 1354 | 1633 | AACTACCCTCGCCCTCTCTC    | 59.84  | 20 |
| 175 | 10   | 184  | ATGTAGCCGACCCCAATTTA    | 59.297 | 20 |
| 230 | 7    | 236  | TCCCTTTAAGATAAAAATGAA   | 59.214 | 27 |
| 109 | 11   | 119  | CAAATAGCCCGAGGTTGAA     | 60.067 | 20 |
| 174 | 1217 | 1390 | ACAGATCCCAACCGGATTTT    | 60.558 | 20 |
| 223 | 18   | 240  | CCAACCTATTTGCCACTAA     | 59.982 | 21 |
| 188 | 572  | 759  | GATTAGCAAATTTGCGGACG    | 59.547 | 20 |
| 105 | 287  | 391  | GCGCCAAAATTTGGTAAAAC    | 59.477 | 20 |
| 229 | 13   | 241  | AAAATCAGACCAAACCTTTTC   | 57.078 | 23 |
| 275 | 922  | 1196 | AGCTAGTGAGGGTGGTTTGG    | 59.208 | 20 |
| 256 | 497  | 752  | CTGACCTCGTGAACCTGGCA    | 59.897 | 20 |
| 125 | 920  | 1044 | TTCCATGGGTACAGAGGAGC    | 60.073 | 20 |
| 154 | 203  | 356  | GAAGATGAAAAGACAAGCGG    | 57.546 | 20 |
| 142 | 26   | 167  | TGAAGAATTATGCATCAGGCA   | 60.588 | 22 |
| 270 | 1136 | 1405 | AGCAGCTACAACGGTAAGGC    | 59.545 | 20 |
| 175 | 1149 | 1323 | GTTTCTAAGGCCTGAAGGGG    | 60.068 | 20 |
| 237 | 964  | 1200 | TGAAGAGGAGGAGGAGGTGA    | 59.913 | 20 |
| 270 | 2501 | 2770 | TCCGTTTGGTGTAAATTGCTG   | 59.585 | 20 |
| 137 | 285  | 421  | TCCCAAGCATGGAATCAAAT    | 60.274 | 20 |
| 120 | 132  | 251  | ATCCACCACTTCTCCTTCCC    | 60.314 | 20 |
| 185 | 1339 | 1523 | ATGGGATCTATTTGATGAGGG   | 59.627 | 22 |
| 107 | 520  | 626  | GGTCTTGCTCTTTGTGAGCC    | 59.997 | 20 |
| 227 | 294  | 520  | CGCATCTTTTGGGATGATTT    | 59.901 | 20 |
| 169 | 3195 | 3363 | CCTATTTGGCATCAACCTCC    | 59.387 | 20 |
| 206 | 692  | 897  | CTTGATCGGGTCCGACTTTA    | 60.066 | 20 |
| 270 | 2593 | 2862 | CGGTTTCGTTTTAGACCCCT    | 60.345 | 20 |
| 211 | 177  | 387  | AATTAATAACCTCGCCGGA     | 58.583 | 20 |
| 180 | 1780 | 1959 | GGCTCGCCAAGGTAGATAAA    | 59.32  | 20 |
| 208 | 469  | 676  | GAAATGAAGCCAAACCCTCA    | 60.051 | 20 |
| 272 | 891  | 1162 | CGCACACTTGAGTTGAAAA     | 59.881 | 20 |
| 207 | 3    | 209  | TTGTGGAGAAAGGAATGGGA    | 60.43  | 20 |
| 274 | 43   | 316  | CCATGTAAGAAAAGTGGAAGC   | 59.865 | 22 |
| 210 | 47   | 256  | GCAAAAATTA AAAATGCCCCC  | 60.484 | 20 |
| 161 | 282  | 442  | GGAGGTGGTGGATTTGGATA    | 59.605 | 20 |
| 280 | 694  | 973  | CTCATTGAACTTGGCAAGCA    | 59.988 | 20 |
| 260 | 551  | 810  | CATGAGGCTGCTGAACCTCAC   | 59.577 | 20 |
| 233 | 3    | 235  | TGTAGCCGACCCCAATTTAT    | 59.297 | 20 |
| 173 | 403  | 575  | TCTCGGGGTTTCGAGTTCATA   | 60.594 | 20 |
| 117 | 736  | 852  | TTGCTGCCACACTCTCTCTG    | 60.333 | 20 |
| 113 | 992  | 1104 | AACATCATCCCCATCACCAT    | 59.869 | 20 |

|     |      |      |                        |        |    |
|-----|------|------|------------------------|--------|----|
| 244 | 34   | 277  | TGGTTGAGCTAAAATCTTTGAC | 59.453 | 24 |
| 273 | 2808 | 3080 | TGGTGGTTTTGGATGATGA    | 59.75  | 20 |
| 255 | 344  | 598  | TGCTAAACGATGAGCTTGGAT  | 59.859 | 21 |
| 264 | 349  | 612  | CGTCGTCGCTACATGAAGAA   | 60.011 | 20 |
| 228 | 1205 | 1432 | TAGATCGGTGGAGTTGGGTT   | 59.405 | 20 |
| 199 | 8    | 206  | CCCAAGACCCCAATTTGAT    | 59.59  | 19 |
| 241 | 1953 | 2193 | ACAAATGCGAAACCGATCTT   | 59.574 | 20 |
| 187 | 1105 | 1291 | ACGTGGAGCCTATTTGGATG   | 59.955 | 20 |
| 165 | 57   | 221  | TAAAAAGGCGCTCAAAAACC   | 59.363 | 20 |
| 248 | 282  | 529  | GTATGAAGGCCAAAGAAGCG   | 59.845 | 20 |
| 149 | 249  | 397  | AAATGGAGTCGAAGCAGCAT   | 59.843 | 20 |
| 213 | 1    | 213  | GGCGTCTCAAACGTATCTCC   | 59.7   | 20 |
| 255 | 1194 | 1448 | TTTGAAGCAAAAGTTTGGGC   | 60.223 | 20 |
| 272 | 820  | 1091 | GTGTGGCTGTTCAATCTTGG   | 59.139 | 20 |
| 116 | 2    | 117  | ATGTAGCCGACCCCAATTTAT  | 59.585 | 21 |
| 266 | 191  | 456  | GTGGTAGAGGCGTTATGGA    | 59.955 | 20 |
| 275 | 634  | 908  | TTTCAATCATATAGAATCTGCT | 58.155 | 26 |
| 100 | 388  | 487  | TATGAGAAGAGCAAACCCACA  | 59.747 | 22 |
| 165 | 6    | 170  | TCAACGTGATTTGTCATTTGTG | 59.488 | 22 |
| 186 | 132  | 317  | GGCACAGAAGGGGATAGGTT   | 60.328 | 20 |
| 224 | 207  | 430  | AGTGTGCGCTCTGATGACTG   | 60.211 | 20 |
| 115 | 2190 | 2304 | TTTTGGGGGTTGAAATGGTA   | 60.024 | 20 |
| 143 | 349  | 491  | TGAAACTCCCACAATCTCC    | 59.903 | 20 |
| 141 | 836  | 976  | ACACACGCATACACACACGA   | 59.649 | 20 |
| 177 | 2190 | 2366 | GTGTGAAACCTCCTTCATGG   | 57.971 | 20 |
| 274 | 375  | 648  | TTGCCTCTAATTTTGGCTCC   | 59.297 | 20 |
| 275 | 6    | 280  | TCTGGTCAACATCAATCTGAGC | 60.263 | 22 |
| 271 | 410  | 680  | CGTTGGCCAGTCGGTTAAT    | 60.899 | 19 |
| 223 | 307  | 529  | TCTAAATTGCAAAGCGCAA    | 59.602 | 20 |
| 218 | 151  | 368  | AACCATTCATCCATAGCGGA   | 60.296 | 20 |
| 157 | 1    | 157  | GTCCAGCCTTTACCTCTTTTTG | 59.304 | 22 |
| 156 | 2    | 157  | CCCAAGACCCCAATTTGATT   | 60.91  | 20 |
| 237 | 279  | 515  | AATGACTGGGGTAAGCTGGA   | 59.55  | 20 |
| 186 | 164  | 349  | TCTATCACAACCCAAGGCG    | 59.658 | 19 |
| 214 | 0    | 213  | TGTAGCCGACCCCAATTTAT   | 59.297 | 20 |
| 171 | 666  | 836  | GTTTTTCTGGCAGCCACTGT   | 60.299 | 20 |
| 259 | 272  | 530  | TAGCAGGGCATGAACAAACA   | 60.257 | 20 |
| 165 | 1523 | 1687 | AATGGCATTTTAACTTTGATCA | 58.109 | 24 |
| 246 | 1    | 246  | ATGTAGCCGACCCCAATTTA   | 59.297 | 20 |
| 151 | 86   | 236  | TAATTCGCTGAAGCAGCAAC   | 59.21  | 20 |
| 223 | 566  | 788  | AGCATGAAACTTGGAAATGGAA | 59.56  | 21 |
| 212 | 3222 | 3433 | TTGACGCGCATTTTTAGAGA   | 59.585 | 20 |
| 222 | 3872 | 4093 | ATAAAATGGGAGCGGAGAGG   | 60.411 | 20 |
| 229 | 45   | 273  | GGCATGAAACGGAATAGCAT   | 59.929 | 20 |
| 214 | 486  | 699  | GAAGAGGACCAGCACCAGAA   | 60.386 | 20 |
| 168 | 37   | 204  | TGTGAAATTCTCTGGGAGCA   | 59.369 | 20 |
| 280 | 1930 | 2209 | CTTGTTGTCGCGTTTAATGA   | 57.446 | 20 |
| 200 | 502  | 701  | TGCATGAAATCAAACCTCCA   | 60.049 | 20 |
| 100 | 21   | 120  | CCAACCTGAATTGCAAACCTGA | 58.808 | 21 |
| 139 | 105  | 243  | ATAATTGTTCTTCGTGGCCC   | 58.906 | 20 |
| 267 | 405  | 671  | TTAAGACGGAAATCCACACG   | 58.623 | 20 |
| 254 | 10   | 263  | GACAGGGGTCTCGCAAGATA   | 60.218 | 20 |
| 103 | 356  | 458  | GATCATCAAAGCCCCTCAAC   | 59.488 | 20 |
| 247 | 157  | 403  | TGTTTGTGTGTGTCTCCCA    | 58.508 | 20 |
| 245 | 15   | 259  | ACTCGGTCTTGACAGTGG     | 59.881 | 19 |
| 256 | 0    | 255  | AGTCCGTGTTCCGATGAGT    | 58.067 | 19 |
| 259 | 53   | 311  | TCGGCCACAGAGACATTGTA   | 60.263 | 20 |
| 240 | 285  | 524  | GCAACCTGAAAATTGAACATT  | 59.496 | 22 |

|     |      |      |                        |        |    |
|-----|------|------|------------------------|--------|----|
| 179 | 58   | 236  | CAGGTCAACTGAAATCTGAAA  | 59.799 | 24 |
| 181 | 768  | 948  | TCCCCTTTCTTGACCATCAG   | 60.042 | 20 |
| 247 | 488  | 734  | GGATTTGTTACGATGCCTT    | 59.939 | 20 |
| 237 | 31   | 267  | ATTGGTGCAAAATGTGTTGA   | 57.442 | 20 |
| 215 | 13   | 227  | ACTACAGTCCGTGTTCCGATG  | 60.043 | 21 |
| 167 | 237  | 403  | TCTTGGTGAGTGAGAAATGAG  | 58.969 | 23 |
| 225 | 526  | 750  | CCTTGATCATTCCCGAAAAA   | 59.872 | 20 |
| 152 | 610  | 761  | GTCTTGAATGCCACCCACTC   | 60.52  | 20 |
| 243 | 490  | 732  | TTCCAATGCAACCCATACAA   | 59.786 | 20 |
| 224 | 2613 | 2836 | TCTTGAAATTCCATGTTTGTGC | 59.982 | 22 |
| 280 | 1559 | 1838 | ACCTTGGGCTCCACCTCTAC   | 60.511 | 20 |
| 279 | 2160 | 2438 | TTGGAGAATTGAAAAGGCGT   | 59.685 | 20 |
| 250 | 1232 | 1481 | CGAGTGGCTGCTACCTGAAT   | 60.419 | 20 |
| 254 | 228  | 481  | TTGATGAGCCATAACCCTCC   | 59.894 | 20 |
| 128 | 522  | 649  | TGGATTCCCACAATTCCATT   | 59.991 | 20 |
| 245 | 982  | 1226 | TGGTTTGACCATCATTGCTC   | 59.502 | 20 |
| 220 | 352  | 571  | TGGATGGGTGCACATAATTG   | 60.197 | 20 |
| 275 | 52   | 326  | GTTGGGCAACTTGAAGATTAA  | 59.549 | 23 |
| 176 | 45   | 220  | CCCCCAAACCTTATTGACAAA  | 57.462 | 20 |
| 202 | 71   | 272  | GTTTCGGGAGAGAAAATGCAG  | 59.813 | 20 |
| 270 | 885  | 1154 | CATGCAGCAGCCAAGACTTA   | 60.157 | 20 |
| 236 | 121  | 356  | TTTCATTACAGCAGTTCAGGC  | 59.002 | 20 |
| 162 | 967  | 1128 | TGTAACCATGGGCCAAAAAT   | 60.053 | 20 |
| 199 | 20   | 218  | GAATTGGTAGGGTTTTCTGTCC | 59.871 | 22 |
| 177 | 678  | 854  | CACGTTGGTTTTTGCTTTGA   | 59.746 | 20 |
| 280 | 1550 | 1829 | AGTACGACCAGGGAAAAGCC   | 60.496 | 20 |
| 166 | 182  | 347  | CGTACGGAAATCTGATAGGAA  | 58.274 | 22 |
| 272 | 2    | 273  | CCAAATTTGTAAATGCAAACA  | 59.711 | 24 |
| 280 | 2149 | 2428 | CCAATGGGTGAAAGAATATGC  | 59.145 | 21 |
| 165 | 8    | 172  | ATGTAGCCGACCCCAATTTA   | 59.297 | 20 |
| 159 | 66   | 224  | TGCCAAATAATTCCGTCTCAC  | 59.952 | 21 |
| 267 | 1282 | 1548 | ACCTCTGAAAGCTCGGTTCA   | 59.989 | 20 |
| 174 | 6948 | 7121 | CCCTGTTGAGCATAACCCCT   | 59.989 | 20 |
| 142 | 50   | 191  | TCAGTTCGGTCTAGGCTTCAA  | 60.001 | 21 |
| 204 | 31   | 234  | ATCAGAGCCAGCGTTTGAGT   | 60.02  | 20 |
| 251 | 934  | 1184 | AGGTCATGTGTTTCGAGTTTCA | 59.639 | 22 |
| 257 | 415  | 671  | GATGCAAGGTGCATGTGTCT   | 59.714 | 20 |
| 144 | 212  | 355  | GGGAGTCTTGAATCTTGCA    | 60.195 | 20 |
| 132 | 560  | 691  | CGGAGATTCGCAAGTTCAGT   | 60.397 | 20 |
| 267 | 46   | 312  | CTCAAGGTGGTAAAATCCG    | 60.486 | 20 |
| 127 | 177  | 303  | TGGACCGAGTCATCTCTGTG   | 59.82  | 20 |
| 245 | 1475 | 1719 | GCAACGGAAACAACCTCTTT   | 59.218 | 20 |
| 120 | 107  | 226  | CTGGCCTGATCTACAGCCTC   | 59.973 | 20 |
| 186 | 27   | 212  | CTCTGCTCAGCCCCTTCAG    | 61.242 | 19 |
| 249 | 217  | 465  | GCTGTAGCTGACCCCAATTT   | 59.198 | 20 |
| 231 | 8305 | 8535 | GATGCGTTTGAAGGGAAAAA   | 60.053 | 20 |
| 273 | 992  | 1264 | CAGCATGCAATTTCAAGAGC   | 59.572 | 20 |
| 258 | 453  | 710  | ATAAGGATTCCGGGTTTTCG   | 60.143 | 20 |
| 267 | 17   | 283  | GGTTATTTATTAAGTTGGAGC  | 59.924 | 26 |
| 232 | 7    | 238  | AAAATTGCGTCTCCTATGGC   | 59.186 | 20 |
| 192 | 2507 | 2698 | ACCTATGCATGTTGCCGTC    | 59.542 | 19 |
| 205 | 718  | 922  | ACAACGGTCATCTGCTTTGA   | 59.293 | 20 |
| 273 | 1131 | 1403 | TTGATGCAAGGGCAATAGGT   | 60.469 | 20 |
| 271 | 65   | 335  | TGCAATGGACTAATTTGATTGC | 59.832 | 22 |
| 217 | 168  | 384  | CCAACCCTAACCCGTTTAT    | 59.939 | 20 |
| 246 | 4    | 249  | TCGCATCTGGGATAATGAAAC  | 59.915 | 21 |
| 274 | 111  | 384  | CAATTTGATTGGGAATATATTC | 60.467 | 24 |
| 250 | 959  | 1208 | GATGTAATCGAGCACCCACA   | 59.527 | 20 |

|     |      |      |                        |        |    |
|-----|------|------|------------------------|--------|----|
| 259 | 446  | 704  | AGGCATGTATTTATTATTGGAC | 59.038 | 25 |
| 260 | 5784 | 6043 | TACGCGCATCTAATGCAAAC   | 59.87  | 20 |
| 254 | 166  | 419  | GGTTCTCGCTCTAATCCTTCAA | 59.856 | 22 |
| 134 | 55   | 188  | GCATTATGTAAGCTCAAATAGC | 58.177 | 24 |
| 250 | 15   | 264  | CTCAAGATGCGAAGCAAACA   | 60.134 | 20 |
| 256 | 2322 | 2577 | AAGTCACGAAGACGGCAAGT   | 59.914 | 20 |
| 113 | 8    | 120  | TCGCTTTGATTATTAATCTTC  | 58.199 | 25 |
| 246 | 484  | 729  | TCTAAAAATGGCACCGAAGG   | 60.067 | 20 |
| 100 | 164  | 263  | CCAAGACCCCATTTTGATTG   | 60.162 | 20 |
| 208 | 8    | 215  | CACCGTTGGACCGTCTT      | 61.968 | 18 |
| 110 | 0    | 109  | CCTGATGGAGGTGATGATGA   | 59.425 | 20 |
| 205 | 72   | 276  | TGTGTTGGTTGCAGGTTTCAT  | 60.008 | 20 |
| 151 | 627  | 777  | CAGTTGACACTTGGGGGACT   | 60.002 | 20 |
| 275 | 1218 | 1492 | CGCAGCAGATATTGTTCCAA   | 59.833 | 20 |
| 243 | 61   | 303  | CAGAGGATGAAATCCCGAG    | 59.623 | 20 |
| 216 | 2051 | 2266 | TGTGGAACCAACACGATTTT   | 58.874 | 20 |
| 234 | 27   | 260  | TGGTGTGATAAAGGGGCTTC   | 59.933 | 20 |
| 166 | 645  | 810  | GGATCTTACGGAGTTGAGCG   | 59.836 | 20 |
| 102 | 27   | 128  | AAGTTGGTGCCAGAACAAA    | 60.529 | 20 |
| 225 | 417  | 641  | GAAGGCCCAAGCTATTCTC    | 60.173 | 20 |
| 189 | 410  | 598  | GTTTGGAGGTCAGGTGTTTCG  | 60.545 | 20 |
| 264 | 98   | 361  | CCTTGTGCAAATTAATCCCG   | 60.315 | 20 |
| 244 | 678  | 921  | TAGGAAAAGTCATCACGGC    | 60.074 | 20 |
| 156 | 80   | 235  | TGTTCTTGAATATCGGCGAA   | 59.257 | 20 |
| 271 | 4    | 274  | TGTAGCCGACCCCAATTTAT   | 59.297 | 20 |
| 123 | 1961 | 2083 | ACATCCATCATCATCAGCCA   | 59.882 | 20 |
| 220 | 37   | 256  | TCATTTTCTTCCACTTCGCC   | 60.192 | 20 |
| 236 | 1310 | 1545 | ATTATTGAATGGGCCCAAAA   | 59.124 | 20 |
| 169 | 24   | 192  | ATGGCTATCCTCAGCTGCTC   | 59.561 | 20 |
| 224 | 6006 | 6229 | TATATGTGGCCTTCTTCCCG   | 59.916 | 20 |
| 229 | 511  | 739  | CGACCTCGGCTACTTTGTGT   | 60.312 | 20 |
| 269 | 244  | 512  | AGCAACACCAACAGCAACAG   | 59.946 | 20 |
| 177 | 608  | 784  | TAGCTCTGTTGCAGCCGATA   | 59.735 | 20 |
| 160 | 43   | 202  | TAAAGCCAATTTTGGTGGGT   | 59.315 | 20 |
| 239 | 2499 | 2737 | TCCAATCACTTACCAAATGCA  | 59.867 | 22 |
| 175 | 16   | 190  | AATTACCTTGCCGAAATTG    | 58.943 | 20 |
| 122 | 2255 | 2376 | CTTTCCCAGCATCAACATT    | 59.933 | 20 |
| 272 | 802  | 1073 | AGAACTCGAGCTTGACCCAC   | 59.455 | 20 |
| 148 | 13   | 160  | TCAGAAGGGGTTATGTCCTCA  | 59.536 | 21 |
| 230 | 19   | 248  | CAAGTTCTTTCAAATTGGTGG  | 59.9   | 23 |
| 221 | 1218 | 1438 | ACACATGGCTCAGACGACAC   | 59.744 | 20 |
| 171 | 85   | 255  | CCAACCCTCCTCCTTTATCC   | 59.761 | 20 |
| 170 | 272  | 441  | ATCATGCCACCAAGGAGAGT   | 59.535 | 20 |
| 240 | 1793 | 2032 | CAACCTTGCCGTGAAATCT    | 60.255 | 20 |
| 241 | 41   | 281  | TGACCCTAGTGGTAACACGG   | 58.496 | 20 |
| 275 | 3    | 277  | CAGCCATGAATGAGAGTGGG   | 61.63  | 20 |
| 196 | 95   | 290  | TACTGCTCTCGCTGCTTCTG   | 59.64  | 20 |
| 193 | 29   | 221  | AATAAAACCTGCCGGAATCG   | 61.155 | 20 |
| 173 | 1423 | 1595 | GTGGAGATCGGAAAATTGGA   | 59.871 | 20 |
| 152 | 4602 | 4753 | ATAGGGCTGTGGATTGGATG   | 59.773 | 20 |
| 160 | 392  | 551  | GGGGGCCAAACAAATATACA   | 59.525 | 20 |
| 271 | 1404 | 1674 | TGTACTTGTTTCGTGTTGCC   | 59.615 | 20 |
| 176 | 170  | 345  | CTGAAAGGTCCCAGGTTCAA   | 60.081 | 20 |
| 200 | 3354 | 3553 | CCTTTTGCTGTGGCATTAT    | 59.96  | 20 |
| 239 | 587  | 825  | GCATATGCAAATGAAAAAGGC  | 59.446 | 21 |
| 101 | 321  | 421  | TATGGTAGCTGGCTCGACCT   | 59.859 | 20 |
| 250 | 68   | 317  | CGCCAACTTCTCTGATTTT    | 59.813 | 20 |
| 249 | 58   | 306  | GTTATGCCCGAATTTTCCCT   | 60.15  | 20 |

|     |      |      |                         |        |    |
|-----|------|------|-------------------------|--------|----|
| 162 | 317  | 478  | ATTACCTGGAATCGGTGGG     | 60.929 | 20 |
| 158 | 16   | 173  | CCTTCGCTTCATCCTTGCTA    | 60.481 | 20 |
| 133 | 90   | 222  | GAAATACATGCAGGGCTGAG    | 58.326 | 20 |
| 112 | 656  | 767  | AAGAACCTGTTGCCCCGTAGA   | 59.734 | 20 |
| 190 | 186  | 375  | TCCTCTTGGGTTGTTTCACC    | 59.943 | 20 |
| 209 | 59   | 267  | AGAAAAAGAAGAGGGAGCGG    | 59.955 | 20 |
| 181 | 144  | 324  | CTTGCCAATGCTCCACACTA    | 59.864 | 20 |
| 173 | 5    | 177  | ATCATCATCATGTCCACCGA    | 59.724 | 20 |
| 159 | 453  | 611  | ACAGTTTCTGGATCCCATCG    | 59.927 | 20 |
| 128 | 549  | 676  | GCTTTGCAACACACATTTGG    | 60.157 | 20 |
| 215 | 607  | 821  | ATAAATCGAACCTCCCCACC    | 60.017 | 20 |
| 116 | 583  | 698  | GCTCACAATGCAACCTGAAA    | 59.847 | 20 |
| 229 | 437  | 665  | AGTCAGAAAAGCCCACCTCA    | 59.844 | 20 |
| 161 | 128  | 288  | TAAGGCCGTATTAACCGTCG    | 59.979 | 20 |
| 196 | 4    | 199  | AGGCTACATCCAATGCTGGT    | 59.579 | 20 |
| 270 | 880  | 1149 | CCGATATTTTGGCCTTCGTA    | 59.922 | 20 |
| 201 | 1308 | 1508 | CCATTGAGACTCGAACCCAT    | 59.927 | 20 |
| 233 | 576  | 808  | CGATTTTGCCCAAGAATACC    | 59.411 | 20 |
| 224 | 3716 | 3939 | TCTCAATCACGGTGCTCAAC    | 59.837 | 20 |
| 160 | 7194 | 7353 | CACATTCAACTGGATGGCTG    | 60.112 | 20 |
| 236 | 65   | 300  | GCGCTGTACCAGTTTGAAT     | 60.14  | 20 |
| 238 | 674  | 911  | TATTGTGGCACTCTCCCCTC    | 60.073 | 20 |
| 269 | 873  | 1141 | GGACCAGTCGCTGGAAGTAG    | 59.867 | 20 |
| 202 | 324  | 525  | GAAGTCTCACCTCAGCCACC    | 59.841 | 20 |
| 259 | 75   | 333  | CGTGTTTCGTGTGCATATCCT   | 59.596 | 20 |
| 260 | 2    | 261  | ATGAGTCGGTTTGTGAGGC     | 60.119 | 20 |
| 232 | 97   | 328  | ATCTGCCCTAATTTTTGCC     | 60.28  | 20 |
| 215 | 211  | 425  | CAAATTCCTGTTCCATCAA     | 60.671 | 20 |
| 157 | 35   | 191  | CCTCGACGCTGAATGATCTA    | 58.976 | 20 |
| 227 | 567  | 793  | ACATGCAAATCCATTACCCA    | 58.697 | 20 |
| 246 | 201  | 446  | AACGTGGAGGACAGTGGTCT    | 59.604 | 20 |
| 275 | 41   | 315  | CCCAATTTCCCAACACTCAC    | 60.21  | 20 |
| 210 | 1    | 210  | CAGAAGATTCATATTGATTTG   | 58.292 | 25 |
| 249 | 729  | 977  | GGCGGTGTATTATGTCGGTT    | 59.713 | 20 |
| 267 | 341  | 607  | TGATCTCTCCCGTGAAAACAT   | 59.541 | 21 |
| 258 | 808  | 1065 | TTTTCTTGCCAAGTTCACCC    | 60.088 | 20 |
| 186 | 208  | 393  | CGTTTTTGCTTTCTTGCTCA    | 59.226 | 20 |
| 134 | 56   | 189  | TTTCCAACAATAACCCCGTG    | 60.587 | 20 |
| 199 | 1    | 199  | AGCTCGCTGGATCCCTAGAA    | 61.383 | 20 |
| 245 | 12   | 256  | TTGAAAACCGATTTCCCTT     | 57.113 | 19 |
| 104 | 252  | 355  | GCTGACCTGTTTCCAAGCAT    | 60.263 | 20 |
| 244 | 1051 | 1294 | GGTTCCAATTATATCCTTATGC  | 58.413 | 24 |
| 276 | 121  | 396  | TGTGATTTGGATGATGTGTAAC  | 59.881 | 23 |
| 159 | 3161 | 3319 | TTTTTGAATGGCCGTTTACC    | 59.81  | 20 |
| 194 | 11   | 204  | CAAGATTGGCTTCGTGTGAA    | 59.84  | 20 |
| 224 | 467  | 690  | TTCGGCTTTTGTACATGCTT    | 59.772 | 21 |
| 125 | 1    | 125  | AACATGCCCAACATTACAGC    | 59.517 | 19 |
| 267 | 909  | 1175 | CTTCCAAAATAGGGGGTTCC    | 59.639 | 20 |
| 271 | 3    | 273  | TTTTTGAATTAATGGTGAGAA   | 60.107 | 26 |
| 272 | 170  | 441  | TTTTGGGTTTATGTGTTTATCAC | 60.038 | 24 |
| 267 | 537  | 803  | ACCCTTGGCCATTAATTGTG    | 59.853 | 20 |
| 133 | 70   | 202  | GATGATTACCTCAAGGCTTGG   | 59.487 | 22 |
| 236 | 1048 | 1283 | GCCAACCTTGCTTGCAATTT    | 60.251 | 20 |
| 277 | 153  | 429  | GTTTAAATGTATCCGCCGTGA   | 59.846 | 21 |
| 242 | 43   | 284  | ATTTGAAGATCCGGAATTTGT   | 58.866 | 22 |
| 159 | 7    | 165  | GGATCGTAAAGCCTGGTGAA    | 60.074 | 20 |
| 170 | 160  | 329  | CACGGCTCGTAATGTGGATA    | 59.566 | 20 |
| 100 | 4    | 103  | ACAGTGGAGGAGCTCGCA      | 60.736 | 18 |

|     |      |      |                         |        |    |
|-----|------|------|-------------------------|--------|----|
| 264 | 300  | 563  | CTCGAACACGAGACCTCCAG    | 60.997 | 20 |
| 250 | 67   | 316  | GGACCAGACTCCAACCTTTTCC  | 59.965 | 21 |
| 222 | 462  | 683  | TATAGCCGACCCCACGTAGT    | 59.476 | 20 |
| 226 | 122  | 347  | GGGCATCAAAACCTCCAGTA    | 59.933 | 20 |
| 180 | 1    | 180  | TCATAGTACGCCACCCGTTT    | 60.386 | 20 |
| 188 | 21   | 208  | TTCCTCAATTTTGGGACCAG    | 59.903 | 20 |
| 221 | 170  | 390  | GATGTACGCACTTGGTGGTG    | 60.032 | 20 |
| 256 | 96   | 351  | CGTGACAATATCAAAGCCCA    | 59.542 | 20 |
| 162 | 354  | 515  | TCAAATTGTCGCCACAAGAA    | 60.234 | 20 |
| 140 | 1280 | 1419 | GTATGAACCGTGAACCGGAC    | 60.24  | 20 |
| 218 | 298  | 515  | AGGCCAACTGACATCTGGAA    | 60.656 | 20 |
| 207 | 3225 | 3431 | TCGGAGGCGATTTACATAGG    | 60.053 | 20 |
| 170 | 3861 | 4030 | TATGTGACGGCAACCAGAAA    | 60.111 | 20 |
| 148 | 26   | 173  | TTCATGTGTGCTTATTGTTTTCA | 58.277 | 23 |
| 191 | 0    | 190  | CGAGTAAGCGGAAATCAACA    | 58.917 | 20 |
| 204 | 189  | 392  | CTCTCCAACAAAATTTCCGGG   | 59.541 | 20 |
| 268 | 538  | 805  | GTCACCACGCTCCCTAAGTG    | 60.711 | 20 |
| 216 | 1135 | 1350 | GGATTGGATCGCATGTTTTT    | 59.768 | 20 |
| 180 | 1250 | 1429 | CCAGCGAGTCTTCTGAGCTT    | 59.891 | 20 |
| 158 | 558  | 715  | TTGTTCCGCGATTTGCATTTA   | 60.211 | 20 |
| 139 | 17   | 155  | CCCTGCTCAGTAGATTCCTTTC  | 60.254 | 22 |
| 176 | 2475 | 2650 | CGTCAGACTAAAGCCCCTCA    | 60.388 | 20 |
| 275 | 822  | 1096 | GCTGTTGAGAATAGCGAGCG    | 61.207 | 20 |
| 273 | 433  | 705  | GCCAAACTGATCAACAAGCA    | 59.847 | 20 |
| 199 | 199  | 397  | CCTGAAACGAGTGATGCTCC    | 60.801 | 20 |
| 278 | 1235 | 1512 | GTGTCTACGGCTGCCTCTTC    | 60.02  | 20 |
| 137 | 294  | 430  | CTGCAGCATTGAACCTAGCA    | 60.157 | 20 |
| 127 | 731  | 857  | CACCTGAATGTCTCCAACC     | 60.363 | 20 |
| 279 | 503  | 781  | ATTAACCTGCTCGCGTGATT    | 59.736 | 20 |
| 199 | 1109 | 1307 | TGTCTACATTCCCTTTCGGC    | 60.074 | 20 |
| 198 | 21   | 218  | AGGAGGTATACTTTGCTGCAG   | 60.546 | 23 |
| 253 | 19   | 271  | TTCAGCAAAGAGTAGTTTCCC   | 59.017 | 22 |
| 120 | 11   | 130  | GTTCCGAGTTGGGTAGTTGC    | 59.598 | 20 |
| 252 | 2374 | 2625 | ACCGACAAAAGCTAGGATCG    | 59.336 | 20 |
| 235 | 1422 | 1656 | CGGTAATATGGTTGGATGGG    | 59.894 | 20 |
| 251 | 252  | 502  | TCCTTCCATGCAAACCTAAA    | 59.247 | 20 |
| 129 | 135  | 263  | GGTGCTCTACATTCGGAAGC    | 59.843 | 20 |
| 277 | 1579 | 1855 | TCTGTCAAGGCTTCTCCACC    | 60.386 | 20 |
| 245 | 298  | 542  | GAAGCTGAGCAACGAGAAGG    | 60.277 | 20 |
| 249 | 1097 | 1345 | AAGGTAGGTCTGCCCCTGTT    | 59.994 | 20 |
| 254 | 52   | 305  | TCTCGTCTCTCCCTATTCCCT   | 59.29  | 21 |
| 133 | 374  | 506  | ACCAATCACACCGTTGAACA    | 59.855 | 20 |
| 136 | 93   | 228  | CCTCGCCTCTTACATCTGCT    | 59.598 | 20 |
| 270 | 1270 | 1539 | CGAAACATGTCAGGCAAAGA    | 59.84  | 20 |
| 269 | 548  | 816  | CGAAAATGATCAGTGCAACG    | 60.257 | 20 |
| 230 | 2367 | 2596 | GAGCAGGTTGAGGAGAATGC    | 59.957 | 20 |
| 270 | 187  | 456  | TGGGTCTAAAGATGTTGCCTC   | 59.184 | 21 |
| 217 | 14   | 230  | GTGACACAAACCAAAGGTGC    | 59.037 | 20 |
| 233 | 2326 | 2558 | TGCACAAAAGAGAACCGTCA    | 60.427 | 20 |
| 189 | 35   | 223  | ATTTTGAACGGTAACAGCCG    | 59.996 | 20 |
| 232 | 1617 | 1848 | TTGAAACTCCCAACCCATGT    | 60.21  | 20 |
| 265 | 57   | 321  | ACGTTCAAGGCCAAAAACAAT   | 59.476 | 20 |
| 184 | 2201 | 2384 | AGCATTGGCTTCAGCTGTTT    | 60.022 | 20 |
| 125 | 110  | 234  | GCCTGGTGCTAGTACATCCG    | 60.678 | 20 |
| 272 | 465  | 736  | GGTGATGGGGTATTTTGGTG    | 59.91  | 20 |
| 166 | 412  | 577  | ACTCCCCGTAATTCGGTA      | 60.553 | 20 |
| 175 | 33   | 207  | TAATTTGCAGCTCGGTTTCG    | 61.251 | 20 |
| 165 | 773  | 937  | CGGGAACAATAAATGCCAAG    | 60.315 | 20 |



|     |      |      |                        |        |    |
|-----|------|------|------------------------|--------|----|
| 120 | 10   | 129  | CAAACCGTGTAGTTTGGGC    | 60.399 | 20 |
| 277 | 309  | 585  | ACTCCGTGTTACCTTCTGC    | 60.307 | 20 |
| 193 | 27   | 219  | TGGAGTAATTGCATTACATTCC | 60.374 | 24 |
| 177 | 51   | 227  | TGAACATTAAGAATATCTACT  | 57.829 | 27 |
| 201 | 43   | 243  | GAATATTATGGCACCATGGGT, | 58.585 | 22 |
| 162 | 2282 | 2443 | TGTAGCCGACCCCATTTTAT   | 59.297 | 20 |
| 268 | 19   | 286  | GCAGCTTCAAAGTTTGGACA   | 59.05  | 20 |
| 201 | 792  | 992  | ACCGATTTCTCCCCTGAGAC   | 60.456 | 20 |
| 259 | 1097 | 1355 | TTGACGTATCATTTGGTGAGC  | 58.639 | 21 |
| 264 | 842  | 1105 | GCTTGATGGTTGTTGCCACT   | 61.107 | 20 |
| 182 | 1    | 182  | AATTGGGGTGTGGAACCTTG   | 59.688 | 20 |
| 157 | 232  | 388  | GAAAAAGGGAATAGGGCCAG   | 59.903 | 20 |
| 279 | 16   | 294  | GCAATCATGCATCACCACAT   | 60.371 | 20 |
| 149 | 763  | 911  | AGGCGTGTGTTTGCCTTAGT   | 59.803 | 20 |
| 173 | 297  | 469  | TCTTGGTCTCCAAAGTCCGT   | 59.697 | 20 |
| 127 | 39   | 165  | TTTGAAGATCCGGAAATTTGT  | 58.544 | 21 |
| 238 | 58   | 295  | TGAGGGTAGTTTACGCAGCC   | 60.27  | 20 |
| 275 | 95   | 369  | GAGATTGAGCCCGAAAATTG   | 59.645 | 20 |
| 141 | 271  | 411  | GAACCCTTCTTCGTTGGTCA   | 60.088 | 20 |
| 143 | 89   | 231  | GTGGCAGAAGGTGGCTATTG   | 60.657 | 20 |
| 224 | 7    | 230  | TTCTTTCGATGCTCCTCTCG   | 60.615 | 20 |
| 256 | 162  | 417  | GACTCCTGATGAACCCACA    | 60.934 | 20 |
| 277 | 11   | 287  | AGAGGCGTTTGGGAGAGTTT   | 60.247 | 20 |
| 185 | 9    | 193  | CTTGGCCCTCTCCATCTG     | 59.943 | 20 |
| 241 | 15   | 255  | TTTGGTTCATGTAGCCGACC   | 60.894 | 20 |
| 171 | 55   | 225  | GTGCAGAAGCATTATTCATCG  | 58.401 | 21 |
| 159 | 146  | 304  | GATGATGCTGGGAACCAATC   | 60.289 | 20 |
| 154 | 73   | 226  | TCTGCAGCCATCTGTTCTTG   | 60.136 | 20 |
| 164 | 269  | 432  | GGTTTTCCAAATGCTCCAAA   | 59.916 | 20 |
| 138 | 197  | 334  | CGATCCATAGGGCTCAGAGT   | 59.263 | 20 |
| 205 | 200  | 404  | TGAATCGTTCAATTCTGCCA   | 60.197 | 20 |
| 197 | 1    | 197  | AAGAAGATCCGGACGAGGAT   | 60.037 | 20 |
| 159 | 288  | 446  | TTTTGACGACGAAGCGATAA   | 59.443 | 20 |
| 260 | 7    | 266  | TCAGAAGGGTTATGTCCTCA   | 59.536 | 21 |
| 174 | 160  | 333  | GATCCCCTGCAAGTGTGACT   | 60.12  | 20 |
| 224 | 771  | 994  | GCATCTAAGGAACATGGATAC  | 57.787 | 23 |
| 236 | 25   | 260  | CCGGAAGAAAGAGTGGGTTT   | 60.467 | 20 |
| 101 | 10   | 110  | CAATATAAGAACATTTATGGC, | 59.649 | 27 |
| 268 | 16   | 283  | TGTGATTCGTTGTGTTTTGC   | 58.158 | 20 |
| 227 | 574  | 800  | TCCCAAACCTGAATCCTTCG   | 60.044 | 20 |
| 212 | 618  | 829  | CCCAAATTCTTGCAACACAA   | 59.561 | 20 |
| 276 | 226  | 501  | TAAGTGTGATCACGAAATGCG  | 59.744 | 21 |
| 212 | 28   | 239  | TGCAGCAACTTCCTCTCCTT   | 60.134 | 20 |
| 178 | 381  | 558  | GGTTCTCCCTACTCCCCCTC   | 61.195 | 20 |
| 162 | 82   | 243  | TGCCCACTGCTCAACTAA     | 60.449 | 20 |
| 172 | 24   | 195  | CATCATCAACGTTCTTGGGTT  | 59.845 | 21 |
| 194 | 6    | 199  | TGTAGCCGACCCCAATTTAT   | 59.297 | 20 |
| 243 | 634  | 876  | AATCCGTACCAAATCCCTCC   | 60.017 | 20 |
| 100 | 71   | 170  | ACGGTTAGAGTGACCGTTGG   | 60.028 | 20 |
| 150 | 33   | 182  | TTGGCAATTTCTTGGAGGAG   | 60.184 | 20 |
| 113 | 72   | 184  | TTAACGTCAAATGCGAATGG   | 59.562 | 20 |
| 146 | 10   | 155  | CCGAAGTGCTAGACCCAAAG   | 59.869 | 20 |
| 190 | 189  | 378  | CCCAAACCTTATTGACAAACG  | 59.366 | 21 |
| 172 | 84   | 255  | GCAGTACTTGAACCTTCGCC   | 59.882 | 20 |
| 231 | 67   | 297  | CTAAAACCTTGAAAACGCCGC  | 59.89  | 20 |
| 231 | 106  | 336  | TATCCAGCAGATAGCCCGT    | 59.691 | 20 |
| 109 | 259  | 367  | TTTTTCACGTTTTCTTGCCC   | 60.089 | 20 |
| 232 | 187  | 418  | GGGGAACACTCGAAAATCCT   | 60.306 | 20 |

|     |      |      |                        |        |    |
|-----|------|------|------------------------|--------|----|
| 266 | 1593 | 1858 | TGTGGACCATCAATCTCAATT/ | 57.944 | 22 |
| 154 | 76   | 229  | ACCCAGAACACCCAGTTCACA  | 58.992 | 20 |
| 214 | 3401 | 3614 | GCAAAAAGACAATGAAGGGGA  | 60.051 | 20 |
| 233 | 15   | 247  | TTTGTGGAGCGATGTTTGAC   | 59.697 | 20 |
| 195 | 466  | 660  | ACCGGCTACTAATTCGCTGA   | 59.867 | 20 |
| 279 | 308  | 586  | GGGTGAAGTGACCAGCTCAT   | 60.12  | 20 |
| 244 | 48   | 291  | TCTTCGTTCTCTACCACCG    | 61.39  | 20 |
| 226 | 36   | 261  | CAAACCCACAAAGGACCAAG   | 60.38  | 20 |
| 126 | 779  | 904  | GCCGCGCCTAAATAGTTTT    | 59.358 | 19 |
| 268 | 649  | 916  | ACATTCCCAAGGCTGAGATG   | 60.073 | 20 |
| 107 | 230  | 336  | CTAATTCGCTGAAGCAGCAAC  | 60.166 | 21 |
| 280 | 236  | 515  | TGCAGAAACCATGTATTTACTT | 59.95  | 25 |
| 130 | 483  | 612  | TTTGCCAGCCTTTCTTGACT   | 59.993 | 20 |
| 159 | 20   | 178  | CTGGGCAGCCAAACATAGAG   | 60.786 | 20 |
| 236 | 504  | 739  | CATGAAAGCATTAAACCGCC   | 60.456 | 20 |
| 234 | 1404 | 1637 | AGTGTTGCATGGTTCGATT    | 60.384 | 20 |
| 172 | 770  | 941  | CTCCCAGGGAAAAAGGTTA    | 60.284 | 20 |
| 239 | 397  | 635  | GATCGAGCGATTTGTACGGA   | 61.141 | 20 |
| 133 | 41   | 173  | CAGAGAGGCACTATACAGTTC  | 60.321 | 23 |
| 242 | 17   | 258  | TTTTAATTCCCCATATTACCA/ | 58.654 | 24 |
| 159 | 405  | 563  | AATGGGACAACCTCATCCTCG  | 59.927 | 20 |
| 173 | 9    | 181  | GATAGCCGTTGGTGGTTGAT   | 59.82  | 20 |
| 264 | 477  | 740  | CGTCTCTTTTCCGTCGACTC   | 59.989 | 20 |
| 165 | 44   | 208  | AGGTCCCTTTCTCCATTGT    | 59.795 | 20 |
| 119 | 305  | 423  | GGAACCCCTTCAGGATTCTC   | 59.874 | 20 |
| 151 | 4066 | 4216 | CGTTGGACAATCTGTAGCCA   | 59.716 | 20 |
| 227 | 57   | 283  | GAAATGCGGCTTCCATTTAG   | 59.682 | 20 |
| 221 | 20   | 240  | ATTACCTTCACTCGCCGGA    | 60.609 | 19 |
| 196 | 92   | 287  | CCAGATCTGCCAACGTTTTT   | 60.11  | 20 |
| 238 | 243  | 480  | CTTTTCTTTTCTTTTATGCTCG | 58.685 | 23 |
| 243 | 2269 | 2511 | TATAAGGCAATTTGCGAGGC   | 60.192 | 20 |
| 128 | 63   | 190  | TATCCTTCATCAGTTCGGCC   | 60.036 | 20 |
| 153 | 336  | 488  | TTGGGGTCCCTCCACAAGAAC  | 59.943 | 20 |
| 164 | 58   | 221  | GTCTTCGGAAGCGATCTCAA   | 60.483 | 20 |
| 228 | 67   | 294  | GTCATACCAGAGGAGCAGGC   | 59.834 | 20 |
| 187 | 1780 | 1966 | ATCGTTTGTTCATCACGTC    | 59.577 | 20 |
| 271 | 356  | 626  | GCGACAATTGCTCAAACG     | 60.395 | 19 |
| 250 | 2472 | 2721 | TGACCCACATAGTGGGAAAG/  | 60.36  | 21 |
| 136 | 48   | 183  | GATGCAGATGAGGACGTGAA   | 59.794 | 20 |
| 133 | 399  | 531  | CTTCTTCGCTACGGCTACGA   | 60.669 | 20 |
| 243 | 427  | 669  | AAAGGTTGAGAACCATGATGA  | 57.096 | 21 |
| 236 | 862  | 1097 | ATGCCGTGATTGAAACACAA   | 59.972 | 20 |
| 144 | 334  | 477  | AGCTTCCATGCTTTCGGTAA   | 59.845 | 20 |
| 208 | 9    | 216  | CCCTCCTCCTTCTTGCTCTT   | 59.95  | 20 |
| 117 | 14   | 130  | GAATCAAGTATCTGATCTGAG/ | 59.752 | 24 |
| 231 | 28   | 258  | CACTGAATTGCTGCTGCTTT   | 59.224 | 20 |
| 216 | 17   | 232  | GAAAACAAAAGATAGATGGAC  | 58.863 | 24 |
| 250 | 871  | 1120 | CTGGAGGAGCTGGAGAATTG   | 59.943 | 20 |
| 187 | 142  | 328  | ACGGTTATTGGGAAATGCAA   | 60.188 | 20 |
| 209 | 254  | 462  | GATTGCGACCACCCTTACAT   | 59.82  | 20 |
| 254 | 458  | 711  | GCGATTAAGGCTTTGGTGTT   | 59.229 | 20 |
| 119 | 385  | 503  | GGCGAAAGTGTAGATCTGGC   | 59.843 | 20 |
| 144 | 228  | 371  | GAGTTATTCAGCCCAGCACG   | 60.796 | 20 |
| 246 | 980  | 1225 | TTGCATTGTCGTGTCGTCTT   | 60.31  | 20 |
| 247 | 94   | 340  | CCCGCAGAATATAATTCCA    | 59.751 | 20 |
| 112 | 673  | 784  | TTTCTGGAAATAGGGGGACC   | 60.124 | 20 |
| 256 | 8    | 263  | TCATGTAGACGACCCCAATTT  | 59.302 | 21 |
| 222 | 801  | 1022 | CGATCTCGTTGTGTTTCGTG   | 60.301 | 20 |

|     |      |      |                       |        |    |
|-----|------|------|-----------------------|--------|----|
| 169 | 829  | 997  | CCTCTTCCTCGTACTCGGTG  | 59.861 | 20 |
| 247 | 1141 | 1387 | TGGCTCCACAATTCATAGCA  | 60.22  | 20 |
| 268 | 1236 | 1503 | CGTAGTTTGTGGCTCAAGG   | 58.431 | 20 |
| 148 | 40   | 187  | GAACCTGTGGTAGTACGGCG  | 60.571 | 20 |
| 202 | 3134 | 3335 | GGACCTTCTCACTGCTGGTT  | 59.305 | 20 |
| 242 | 2046 | 2287 | ATGATTTGACCCTAGCGAAA  | 57.306 | 20 |
| 279 | 102  | 380  | TCGAATCAAATCCATCAGGAA | 60.399 | 21 |
| 235 | 2042 | 2276 | GCATCAACTGCGGCTAACTT  | 60.416 | 20 |
| 229 | 3    | 231  | GATGATGATGCCACTCTTGG  | 59.04  | 20 |
| 260 | 296  | 555  | GGATTGGGGCGTGATAAATA  | 59.621 | 20 |
| 257 | 798  | 1054 | TTTTCGCGCCTTATTTGTTT  | 59.732 | 20 |
| 219 | 180  | 398  | AGCCGATTCTGAAGTTCCAA  | 59.813 | 20 |
| 105 | 593  | 697  | AGTTGGAGGATATGGGAGGG  | 60.147 | 20 |
| 256 | 40   | 295  | AGCACGATCATCCCTCATCT  | 59.642 | 20 |
| 273 | 360  | 632  | CACCCCGTATTTTCGAATGA  | 60.692 | 20 |
| 177 | 3719 | 3895 | GCATTGGCATTGCATGATAG  | 60.066 | 20 |
| 234 | 999  | 1232 | AGGCTTAATGGATCGTGTCTG | 60.096 | 20 |
| 224 | 707  | 930  | GATGTGGGCTTTTTCCGTTA  | 59.938 | 20 |
| 185 | 48   | 232  | GCGACGACTCTCCGTCTATG  | 60.966 | 20 |
| 264 | 285  | 548  | GATCATGCTGCTCCCTATCC  | 59.616 | 20 |
| 262 | 61   | 322  | CTGCCCTTAGCCGTTAGATG  | 59.861 | 20 |
| 277 | 141  | 417  | AAATTCAATTACCTGCCGGA  | 59.411 | 20 |
| 158 | 15   | 172  | ATGACGTCGGCGGTGATT    | 62.522 | 18 |
| 260 | 221  | 480  | CCAATCAACGGCTTGCTACT  | 60.27  | 20 |
| 273 | 1042 | 1314 | ATCCTTTCAATGGCAATCCA  | 60.274 | 20 |
| 209 | 802  | 1010 | GGTGGGAGTAGCCTCATCAT  | 58.969 | 20 |
| 169 | 20   | 188  | GAGAACAACAAGAAGAGA    | 59.436 | 26 |
| 276 | 329  | 604  | TTGTATGAGCAAGATGACGAA | 59.772 | 23 |
| 147 | 583  | 729  | TTGCACAGACATTATCGCATC | 59.709 | 21 |
| 122 | 174  | 295  | AAACCTCCACCAGAAATTA   | 58.259 | 23 |
| 278 | 112  | 389  | GGTTTCATACAACCGTATAGG | 60.141 | 23 |
| 257 | 32   | 288  | GTCCCAAGTAAGGTCGGTTG  | 59.449 | 20 |
| 182 | 2    | 183  | TTCGAGGACGAATCCTTTCC  | 61.46  | 20 |
| 203 | 479  | 681  | TCCCTACCCCAAATTTTCC   | 59.992 | 20 |
| 277 | 100  | 376  | GCAAATAATTGATCGCCTTG  | 58.253 | 20 |
| 222 | 34   | 255  | GCATTTCAAGGATATTA     | 59.378 | 25 |
| 129 | 669  | 797  | CGTTCATGGCATATTCAGGG  | 61.246 | 20 |
| 132 | 84   | 215  | ACGCTATGTACCTTGGGTCG  | 60.015 | 20 |
| 163 | 101  | 263  | CAAGGATCATGTGCGAGAAA  | 59.799 | 20 |
| 114 | 146  | 259  | GATTTAGACAGCCCCGACAG  | 59.694 | 20 |
| 187 | 276  | 462  | CGGGGAATTATATAAGTATGT | 57.343 | 25 |
| 201 | 30   | 230  | ACGAGGGTGATGTTGGAGAG  | 60.112 | 20 |
| 260 | 142  | 401  | TCAATGCTTTGCCTATGTTCA | 59.315 | 21 |
| 235 | 0    | 234  | TGTACCGGTATCATCCCCAC  | 60.461 | 20 |
| 177 | 69   | 245  | TGTGGAGACAGCCACACATT  | 60.162 | 20 |
| 242 | 363  | 604  | TTGGTTGACAAGACCCCTA   | 60.345 | 20 |
| 263 | 416  | 678  | GCCGGCTTATTTGAAATTGA  | 60.04  | 20 |
| 251 | 621  | 871  | TCAACGAATACCTGCTACCAA | 58.307 | 21 |
| 197 | 370  | 566  | CTGTAGCCGACCCCAATTTA  | 59.953 | 20 |
| 280 | 25   | 304  | CCACCATCGTCTCTCATC    | 60.063 | 19 |
| 143 | 1743 | 1885 | TTGGGGGAAGATTAGGGATT  | 59.6   | 20 |
| 206 | 1621 | 1826 | GGGTTCCATTTTGGAGACCA  | 59.767 | 20 |
| 253 | 79   | 331  | GATGATGATGCCACTCTTGG  | 59.04  | 20 |
| 116 | 45   | 160  | TGTGGGGCAGCCAAATATAG  | 60.846 | 20 |
| 172 | 3    | 174  | GCGTCCGACTCCTCAACTAT  | 59.313 | 20 |
| 192 | 202  | 393  | TTTGTTGGGAAGGTCGTAGC  | 60.11  | 20 |
| 263 | 39   | 301  | AGGCCTAGTTGGCTCTGGTT  | 60.268 | 20 |
| 268 | 160  | 427  | CGGTTAGTTCTCCACCTAGC  | 60.137 | 21 |

|     |      |      |                        |        |    |
|-----|------|------|------------------------|--------|----|
| 230 | 72   | 301  | ATGGTTGCCTTTGTTTGGAG   | 59.971 | 20 |
| 238 | 665  | 902  | CTGGCTCTAACGATGCCTTT   | 59.476 | 20 |
| 213 | 27   | 239  | ATGCAGTCAACACTCCACCA   | 60.162 | 20 |
| 232 | 271  | 502  | GATCGGAGTCACGCAGAACT   | 60.418 | 20 |
| 158 | 487  | 644  | TTCGTTACCCGAGTTGAGGT   | 59.592 | 20 |
| 277 | 1083 | 1359 | TGGGAATGTATTGGGTATGTT  | 59.451 | 22 |
| 225 | 225  | 449  | CAGTGTGGGTTTCGGTGTTC   | 60.843 | 20 |
| 179 | 1085 | 1263 | CAGGAGGAGGGAAATTGTGA   | 60.042 | 20 |
| 170 | 227  | 396  | GTTGAATCTCGGCTGCAAAT   | 60.221 | 20 |
| 191 | 660  | 850  | GGAGGGATGTCAAGATCAGC   | 59.617 | 20 |
| 167 | 693  | 859  | AGTATCCAGCATGAGGGGAA   | 59.508 | 20 |
| 173 | 618  | 790  | AGGTCATTGGTTTTTGGTGG   | 59.688 | 20 |
| 272 | 90   | 361  | CTCTATAGCCGCTGCATTT    | 59.479 | 20 |
| 185 | 2423 | 2607 | AACCCTCTTAGGGTGGCAAT   | 59.827 | 20 |
| 278 | 712  | 989  | TTGGAGTGCATAAATTGTGG   | 58.544 | 21 |
| 194 | 84   | 277  | ACAATGAATAAACGGGGCTG   | 59.823 | 20 |
| 141 | 1056 | 1196 | TAATATGGCAAAGGCTGCTG   | 58.936 | 20 |
| 158 | 6    | 163  | TTCAGGGGTTATGGTGAAG    | 59.784 | 20 |
| 121 | 6    | 126  | GCAGCAACTTCCTCTCCTTC   | 59.166 | 20 |
| 201 | 106  | 306  | TCTCCTGCCCTATCTGCATC   | 60.326 | 20 |
| 192 | 841  | 1032 | CCCAAGAATATCATGTGCC    | 60.155 | 20 |
| 181 | 2410 | 2590 | CTGTGAAAAATGGGATGCT    | 60.074 | 20 |
| 273 | 20   | 292  | GAACAACTGCTGCAAGGAA    | 59.946 | 23 |
| 174 | 269  | 442  | TGGGACAAGCTCTTGTGTTG   | 59.873 | 20 |
| 279 | 50   | 328  | CTTCTCAGCCTCAGCCTCTG   | 60.422 | 20 |
| 279 | 323  | 601  | GGCTCACAGTACGTGATCA    | 59.862 | 20 |
| 252 | 1189 | 1440 | ATTTGCAGGAATTGGTGAGC   | 60.081 | 20 |
| 192 | 4898 | 5089 | ACTAGCGCCCAAGTTAGCAG   | 59.677 | 20 |
| 171 | 34   | 204  | AGAATCTTCCGACAAACCGA   | 59.67  | 20 |
| 124 | 17   | 140  | AGTGGGTGAGGAGAGGGAGT   | 60.112 | 20 |
| 162 | 0    | 161  | GGAACCTGATTATGTATCTGAT | 58.072 | 26 |
| 213 | 286  | 498  | GCCCACCTTATTGTTGAGT    | 59.056 | 20 |
| 120 | 263  | 382  | CGCGAAGGTGACTGACATAG   | 59.465 | 20 |
| 120 | 50   | 169  | AGCATCATGAGGAGGAGCAT   | 59.792 | 20 |
| 216 | 41   | 256  | TTCCCTTCCCTCTATTTCCG   | 60.382 | 20 |
| 153 | 35   | 187  | GTCCAAGGACTTGTGCGTTC   | 59.555 | 20 |
| 179 | 458  | 636  | GCTCGTTGCAAGCATATGAA   | 59.983 | 20 |
| 141 | 0    | 140  | AGTTGGGAGTTGGGAGTCCT   | 59.968 | 20 |
| 269 | 277  | 545  | GATCCATGTGTCCACGTGTC   | 59.808 | 20 |
| 205 | 102  | 306  | CTCACTCTCCCTCCCTCC     | 60.336 | 20 |
| 122 | 1    | 122  | GTTGGGCAGCCTCATATTGT   | 59.962 | 20 |
| 246 | 603  | 848  | GGGTCCATCATTCCCTTTCT   | 60.133 | 20 |
| 264 | 213  | 476  | AACAAAGGATGGATTTGCCA   | 60.309 | 20 |
| 280 | 192  | 471  | GCTGGATCACTATTTGGTGG   | 58.019 | 20 |
| 274 | 307  | 580  | AATCGCCAGCGAATATGCTA   | 60.709 | 20 |
| 159 | 202  | 360  | TACATGCCTCCAACAATTCG   | 59.542 | 20 |
| 144 | 71   | 214  | ATCCCCGGACAAGGATCTTA   | 60.652 | 20 |
| 197 | 3    | 199  | TCCTTACTGAATTTGGGGTTGT | 59.741 | 22 |
| 255 | 99   | 353  | TTCGAAGGTGTTGATCCCAT   | 60.317 | 20 |
| 214 | 39   | 252  | GGTTTTGGAGTTTCCGTCAT   | 58.886 | 20 |
| 198 | 127  | 324  | TTCTCCTCCCTTGTGATTGG   | 60.042 | 20 |
| 258 | 36   | 293  | GCGGAGGCAATAGACAGAAG   | 59.978 | 20 |
| 262 | 10   | 271  | TCATCCTCGGAAGCAATCTC   | 60.303 | 20 |
| 256 | 836  | 1091 | AGTACCATTTGCGCCATTTG   | 59.823 | 20 |
| 207 | 18   | 224  | CGTCGACCACCATCTTAACAC  | 60.425 | 21 |
| 111 | 83   | 193  | GAAAATGGAGCGGAGTTCT    | 60.578 | 20 |
| 140 | 21   | 160  | TTTTTCGTTTCTGGTTTCGC   | 60.223 | 20 |
| 224 | 1136 | 1359 | AGACCTCGAGTCGGAGATGA   | 59.945 | 20 |

|     |      |      |                        |        |    |
|-----|------|------|------------------------|--------|----|
| 252 | 2365 | 2616 | TTGCCCTTCATTATCCCATC   | 59.722 | 20 |
| 268 | 2464 | 2731 | AAACGAGGGCGAACTGTAGA   | 59.875 | 20 |
| 100 | 8    | 107  | ATGTAGCCGACCCCAATTTA   | 59.297 | 20 |
| 214 | 5032 | 5245 | TTCCCTCCAAAGCCAGTAA    | 59.679 | 20 |
| 277 | 344  | 620  | TGTTGCAATTCGTGTTAAATCT | 57.397 | 22 |
| 102 | 100  | 201  | GCCATCCGTTCTTGAATCTC   | 59.635 | 20 |
| 208 | 498  | 705  | TCACCAACATGCCCGTATAG   | 59.42  | 20 |
| 100 | 390  | 489  | TCCTCTCGATCCTCGTTACAC  | 59.298 | 21 |
| 153 | 287  | 439  | GGCTTGCATTTGAAAGTACAG  | 59.406 | 22 |
| 185 | 231  | 415  | TATGAACGAATGCGATGCTC   | 59.799 | 20 |
| 199 | 0    | 198  | ATTGCCACCATCCGAACA     | 60.915 | 18 |
| 252 | 1058 | 1309 | CTTTGCTCGATCTATTCGGC   | 59.945 | 20 |
| 107 | 1038 | 1144 | AGCTTCTTTCAATCGCCTCA   | 60.096 | 20 |
| 212 | 37   | 248  | TTCAAATTTATACCTGCCGGA  | 59.442 | 21 |
| 172 | 6    | 177  | ATAATTCCCGGCGTCATCAT   | 61.42  | 20 |
| 252 | 231  | 482  | GGGATAGGATTTGGTGTCCA   | 59.605 | 20 |
| 160 | 674  | 833  | TCCTATTTTCCCATTGCACC   | 59.762 | 20 |
| 217 | 322  | 538  | GCAAATTGCCATCATCTTCA   | 59.628 | 20 |
| 213 | 3588 | 3800 | GAGATACCATCCCGTGGAGA   | 59.886 | 20 |
| 251 | 654  | 904  | TCGTGGTGCCTTGCATACT    | 60.333 | 20 |
| 270 | 12   | 281  | AGCAGATATGGGAGTGGTGG   | 59.95  | 20 |
| 269 | 48   | 316  | TGTTGAGTGGGTCTCTGCTG   | 60.022 | 20 |
| 131 | 874  | 1004 | CGAGACTCATCCACTTGCAG   | 59.571 | 20 |
| 113 | 134  | 246  | GCCTTTCCTGGGAACGTAGT   | 60.496 | 20 |
| 127 | 3    | 129  | GAACAAAATAAAAATTTGGGA  | 59.637 | 24 |
| 232 | 401  | 632  | GGCACTGGTAAGGTCTGAGC   | 59.874 | 20 |
| 137 | 23   | 159  | TTGCTTCCGTGTTTTATCCAT  | 59.465 | 21 |
| 217 | 1173 | 1389 | ATTTCTAGACTGCGGGGTCA   | 59.694 | 20 |
| 216 | 628  | 843  | AAGAAGAAGCTCCTCCCACC   | 59.817 | 20 |
| 122 | 9    | 130  | CGTTGGGGGTGACGTAGT     | 59.388 | 18 |
| 277 | 438  | 714  | ATGTGTGTGGCCATTTTCAA   | 59.823 | 20 |
| 172 | 1171 | 1342 | AACTGCCACCCCTTGAATG    | 60.908 | 19 |
| 254 | 79   | 332  | GATGCAGCAACTTCCTCTCC   | 59.957 | 20 |
| 215 | 3082 | 3296 | TTGTCACACCCACGCATATT   | 59.847 | 20 |
| 112 | 108  | 219  | TGTCTGCACTCCAGGGTATG   | 59.701 | 20 |
| 195 | 160  | 354  | CAGTTCAGCAGCGGAATTTT   | 60.386 | 20 |
| 271 | 225  | 495  | TCCTTCCCCTTGAGTTGTTG   | 60.081 | 20 |
| 200 | 3672 | 3871 | GCGGAATAGCATTACGTTT    | 60.103 | 20 |
| 245 | 764  | 1008 | AAACCATGCAATGAACACGA   | 59.972 | 20 |
| 269 | 2883 | 3151 | GGCGACATCAAACACAACAA   | 60.562 | 20 |
| 250 | 1548 | 1797 | GTCGCCAATTATTGATGCCT   | 59.929 | 20 |
| 153 | 767  | 919  | CCATCACAGGCCATTAGTTG   | 58.999 | 20 |
| 157 | 236  | 392  | TGGTTCCTTCTTGTCTTG     | 60.081 | 20 |
| 238 | 37   | 274  | GCGGTTTCGATGGACATAAC   | 60.339 | 20 |
| 274 | 456  | 729  | TCCATTTTTCTTCGTGCATTT  | 59.578 | 21 |
| 252 | 19   | 270  | CGTTCTGCAGGAGCTTGAG    | 59.864 | 19 |
| 122 | 104  | 225  | AGCACGATCATCCCACATCT   | 60.507 | 20 |
| 108 | 227  | 334  | TCCCGAGACTGAGATGGACT   | 59.792 | 20 |
| 268 | 162  | 429  | TCTTCAAACCTTTGTTCCGCA  | 59.439 | 20 |
| 239 | 47   | 285  | GGTAAGGTTGCGTACATCCG   | 60.386 | 20 |
| 117 | 2398 | 2514 | CGTGTGAAAATGAAATCGCA   | 60.644 | 20 |
| 151 | 978  | 1128 | ATCGAATGGTTGAGAATGCC   | 59.9   | 20 |
| 266 | 857  | 1122 | ATCGAATGATCCCTGAGTGG   | 59.886 | 20 |
| 189 | 1195 | 1383 | TTGGATCACGCTAATGCAG    | 59.833 | 20 |
| 267 | 1297 | 1563 | TTCCACGAACCAACCAAAT    | 60.206 | 20 |
| 277 | 393  | 669  | TCCTCGCTCCTAACTTGCAT   | 59.978 | 20 |
| 200 | 1724 | 1923 | AAACCGAGTGTTTTTGCCTG   | 60.147 | 20 |
| 263 | 105  | 367  | GGCACTATGCTATGGTTCGG   | 60.49  | 20 |

|     |      |      |                         |        |    |
|-----|------|------|-------------------------|--------|----|
| 232 | 734  | 965  | AAATGGAGGTGTTGAGAGCG    | 60.255 | 20 |
| 104 | 10   | 113  | AGGTGCACGTGACTCCAAC     | 59.728 | 19 |
| 271 | 345  | 615  | CCCCTCCCCCTCTCATATTT    | 61.36  | 20 |
| 176 | 809  | 984  | GATGTGCTCTCCCACGACTT    | 60.269 | 20 |
| 168 | 5    | 172  | CATTGAAGAGCTCGCTGGAT    | 60.504 | 20 |
| 219 | 0    | 218  | CGAAGGACCTGTCCACTCTC    | 59.835 | 20 |
| 111 | 1903 | 2013 | AAATTTGGGAAGGCCTTTGT    | 59.814 | 20 |
| 260 | 1796 | 2055 | TAGTACTGCAGGCGAAGCG     | 60.309 | 19 |
| 215 | 79   | 293  | TTTCTCTTGAATGGTTACGGC   | 59.215 | 21 |
| 278 | 70   | 347  | CTCCTTGGGGATAGTATGCTTC  | 59.98  | 22 |
| 206 | 24   | 229  | GTCATCCGGGTTCAAGTCAAT   | 59.786 | 20 |
| 258 | 1178 | 1435 | TCCTCATGTCAGGAATGCAC    | 59.637 | 20 |
| 112 | 149  | 260  | GGCTCACTTAGACAGCCTGC    | 60.164 | 20 |
| 106 | 344  | 449  | ATATAGGGCATGGCAAGTGG    | 59.807 | 20 |
| 101 | 25   | 125  | AGAGGTATTGGGGGATTTGAG   | 59.294 | 21 |
| 202 | 59   | 260  | AAATCTCTCAATCTTGCCTGC   | 59.467 | 21 |
| 276 | 214  | 489  | TAAGTACTGAGCTGGCGGACTCT | 60.156 | 20 |
| 267 | 8    | 274  | AGTCGGATTGCAAATTGGTT    | 59.434 | 20 |
| 167 | 11   | 177  | GTTTAGACGTACGCACAGC     | 59.52  | 20 |
| 181 | 40   | 220  | CTGTGTCTCCAAGCTCCCAT    | 60.261 | 20 |
| 215 | 1139 | 1353 | GGCGACATATGCTCCATACA    | 59.529 | 20 |
| 118 | 1    | 118  | GGCGGCTCCTCCTATGTAA     | 60.185 | 19 |
| 165 | 761  | 925  | GGTCCGATTGAGGAGATGAA    | 60.011 | 20 |
| 275 | 372  | 646  | GGGGTTTTCTGAAATCGTGA    | 59.91  | 20 |
| 210 | 582  | 791  | CAATCTCCACTCTTGCCTC     | 59.803 | 20 |
| 185 | 105  | 289  | TGTTCTTCGTGGACCGATTT    | 60.495 | 20 |
| 280 | 486  | 765  | CATTTGTATGCCTTGAGCCC    | 60.469 | 20 |
| 217 | 667  | 883  | ATGTTGAGCCCAACCCAA      | 59.893 | 18 |
| 272 | 82   | 353  | CGCTGCCTCTGTCAACAAT     | 60     | 19 |
| 234 | 601  | 834  | CTGTATCGAACGAGCATCCA    | 59.823 | 20 |
| 141 | 73   | 213  | CCAAATATTACAATAGCTCAC   | 57.479 | 25 |
| 217 | 49   | 265  | GTGAGAAAGTTTGCTTCGGG    | 59.853 | 20 |
| 193 | 58   | 250  | TTTTAATACCCCATTTTACCAA  | 58.695 | 24 |
| 189 | 24   | 212  | CCGAAGTGCTAGACCCAAAG    | 59.869 | 20 |
| 162 | 212  | 373  | GGAGTCACTCACGCTCTTGC    | 61.167 | 20 |
| 193 | 53   | 245  | TCAGCATGCAATACCAAACAA   | 60.126 | 21 |
| 209 | 43   | 251  | AGCTCCCTCCTCATCATCA     | 59.761 | 20 |
| 237 | 69   | 305  | TCCATACTTGGCATCGGTTT    | 60.331 | 20 |
| 156 | 5    | 160  | TGTAGCCGACCCCAATTTAT    | 59.297 | 20 |
| 164 | 0    | 163  | TGTTTTCTTAAGTTGTGATTTGT | 58.708 | 25 |
| 272 | 1056 | 1327 | TCCACTAATTATGACGCGCT    | 58.414 | 20 |
| 221 | 19   | 239  | TTGAGCTGCACTTGTTTTGTCT  | 60.096 | 22 |
| 256 | 775  | 1030 | TCGATCGAAAGGTGATTGGT    | 60.461 | 20 |
| 269 | 614  | 882  | TATCAGATGGGACCCACACA    | 59.762 | 20 |
| 267 | 1422 | 1688 | TCTCCTTTTCCCTCCACAAATTC | 59.571 | 22 |
| 188 | 22   | 209  | CCATCAAACCATCACCTCC     | 60.173 | 20 |
| 147 | 126  | 272  | TTTATTCCGTGACCCTCGAC    | 59.933 | 20 |
| 229 | 701  | 929  | TGAAAGTAATGCCCATGGAA    | 58.965 | 20 |
| 117 | 655  | 771  | TTTGTGGTGATTGTTGCAGG    | 60.552 | 20 |
| 100 | 266  | 365  | GTTAATACCGCTGATGGCAAC   | 59.492 | 21 |
| 257 | 67   | 323  | CACGTGCATTAATTATTGTTTT  | 59.015 | 24 |
| 177 | 3    | 179  | TAGCAGGCCAAAGAGGAAGA    | 60.088 | 20 |
| 202 | 536  | 737  | CTCCAAGTTCAATCCATGTT    | 58.898 | 21 |
| 203 | 1635 | 1837 | AGGCGACTTGCATATTCCAC    | 60.103 | 20 |
| 234 | 829  | 1062 | ATGCCTTATATGCCGGACAC    | 59.813 | 20 |
| 181 | 64   | 244  | CATTCTCTAAATGGTTTCCATT  | 60.076 | 24 |
| 221 | 1035 | 1255 | GATCTCGATCGTGACCCAAAT   | 59.893 | 20 |
| 276 | 104  | 379  | TGAGACGGACTGGGGATACT    | 59.53  | 20 |

|     |      |      |                        |        |    |
|-----|------|------|------------------------|--------|----|
| 256 | 183  | 438  | GTCCAAATAAATTGGGGTCG   | 59.135 | 20 |
| 248 | 124  | 371  | TAGTGTGCGTGATCGAGGAG   | 60.008 | 20 |
| 184 | 65   | 248  | CACCATTCTCTAAATGGTTTCC | 60.223 | 23 |
| 103 | 282  | 384  | AACCTCAGCCATCTCCACC    | 60.064 | 19 |
| 216 | 2220 | 2435 | TTGTCGCGAATTTTTCAATG   | 59.679 | 20 |
| 182 | 95   | 276  | CCAAACAAATGAAGCCCAAT   | 59.801 | 20 |
| 195 | 3974 | 4168 | CCTCTCACGGTTGGAAGAAG   | 59.837 | 20 |
| 243 | 2574 | 2816 | TTCGGTTTTCTACTAACCCGC  | 59.225 | 20 |
| 276 | 905  | 1180 | ACCCGGATTACTCCGATGAT   | 60.546 | 20 |
| 148 | 369  | 516  | TTCCCTGATTGGCTTCTAA    | 59.64  | 20 |
| 258 | 1817 | 2074 | GATCGAAGTTGTGCAAACCA   | 59.697 | 20 |
| 213 | 12   | 224  | TTGAAAGAGCATCGTGCAAC   | 59.995 | 20 |
| 166 | 0    | 165  | GTGGCTTCTATGGGCAATGT   | 59.962 | 20 |
| 145 | 335  | 479  | GGGCTGCAAATAGATGGAGA   | 60.177 | 20 |
| 109 | 5    | 113  | TGTAGCCGACCCCAATTTAT   | 59.297 | 20 |
| 244 | 547  | 790  | CTCTGCAAACAACCATTTG    | 59.317 | 20 |
| 265 | 407  | 671  | CGGATGAATTTTTGTTGCT    | 60.074 | 20 |
| 228 | 0    | 227  | TTGGCTGGAGCTAAAAAGATG  | 59.483 | 21 |
| 262 | 72   | 333  | GGGATCACCTTGGAGTTGTC   | 59.359 | 20 |
| 215 | 511  | 725  | GCTCAACACCTGGGAGGTTA   | 60.111 | 20 |
| 170 | 64   | 233  | AAGGGGGAGAGTTCTCTTGG   | 59.671 | 20 |
| 233 | 15   | 247  | GAGAGTCTTCCGACAAACCG   | 59.844 | 20 |
| 134 | 7    | 140  | TTTATTGGGATTAAGGCTTTG  | 59.375 | 22 |
| 277 | 672  | 948  | CCCCACTCGAAATTAACCAC   | 59.288 | 20 |
| 109 | 0    | 108  | CCCAAGACCCCAATTTGATT   | 60.91  | 20 |
| 180 | 2059 | 2238 | GGTCCTATATTGTGGTTTCCG  | 58.315 | 21 |
| 235 | 246  | 480  | AAACCTTAACGCCCTCACCT   | 59.998 | 20 |
| 156 | 1112 | 1267 | ACTCCGACATGGAGAACACC   | 59.969 | 20 |
| 259 | 836  | 1094 | CCCCCTTTCCTCCTTTCTTT   | 60.755 | 20 |
| 275 | 413  | 687  | CCATTTTCCAAGAAAGGTTGT  | 58.085 | 21 |
| 102 | 572  | 673  | TTCTTCAATCCTCCAAGAGCA  | 59.94  | 21 |
| 242 | 241  | 482  | CGATGATCACGTCAAAAACCT  | 59.985 | 21 |
| 108 | 279  | 386  | TCTCGGTTCCGATCTTCACT   | 59.803 | 20 |
| 219 | 15   | 233  | CCTGAAACGAGTGATGCTCC   | 60.801 | 20 |
| 108 | 97   | 204  | GGTGAAACTGCCCTGAAACT   | 59.187 | 20 |
| 276 | 276  | 551  | AAGTTGGCGTGGTGGTAGTC   | 60.035 | 20 |
| 159 | 2808 | 2966 | GTTTGCTGTTGGATGGGTTT   | 60.362 | 20 |
| 150 | 57   | 206  | TCCTGAAATGAGTGATGCTCC  | 60.211 | 21 |
| 132 | 4116 | 4247 | TCTCACGTGCAGAGGAAGAA   | 59.701 | 20 |
| 225 | 38   | 262  | ATGGTAGTATGGTGTGGGGG   | 59.405 | 20 |
| 151 | 99   | 249  | TCAGGTTTGCCTCCAGTGA    | 59.23  | 20 |
| 261 | 986  | 1246 | TTCTGATTTGAGCTTTCCC    | 59.387 | 20 |
| 174 | 2300 | 2473 | TTGGGCTTCATTTACCACC    | 59.933 | 20 |
| 279 | 38   | 316  | GACAACGGGACGGAAGATT    | 59.918 | 19 |
| 247 | 841  | 1087 | CTCGCTTGTGAAGAGTGACG   | 59.77  | 20 |
| 232 | 11   | 242  | GATCCCGAAGTGCTAGACCC   | 60.99  | 20 |
| 216 | 273  | 488  | TCTGTGCCGCTAAAAATGT    | 60.637 | 20 |
| 203 | 2139 | 2341 | TTTGCTTTGACTTTCGGGTC   | 60.227 | 20 |
| 280 | 1764 | 2043 | ATCTCCTGCAACACTCCCAC   | 60.12  | 20 |
| 237 | 1684 | 1920 | TTTTTCCAGATTCCGACAGC   | 60.192 | 20 |
| 242 | 166  | 407  | GTGTTGCTCGATCTTCCGAT   | 60.226 | 20 |
| 197 | 6    | 202  | TGTCACCCAACTTATAAAAGA  | 57.119 | 24 |
| 271 | 251  | 521  | GGATGCTCGACAGGGACTAC   | 59.685 | 20 |
| 129 | 323  | 451  | TGAATTCTTAATGGATTGGGG  | 60.489 | 22 |
| 224 | 328  | 551  | GCCACATGCTTTGTGTGAGT   | 59.758 | 20 |
| 265 | 655  | 919  | CCCATAATTTTATTGGGGGA   | 58.487 | 20 |
| 256 | 100  | 355  | TTTGTTGCTCATAGCGGGAT   | 60.606 | 20 |
| 117 | 3175 | 3291 | TTATGTTGTGGCCATTTC     | 59.786 | 20 |

|     |      |      |                         |        |    |
|-----|------|------|-------------------------|--------|----|
| 249 | 15   | 263  | TAGCCGACCCCAATTTAATG    | 59.789 | 20 |
| 144 | 141  | 284  | CAAGATGTTTGGCGATTGAA    | 59.664 | 20 |
| 247 | 2200 | 2446 | GAGACTGCTGATGGCCAGTT    | 60.418 | 20 |
| 278 | 1429 | 1706 | ACCACAAATTCCTCAACCCA    | 60.21  | 20 |
| 181 | 617  | 797  | TAAAATTGCCCTATTGCGCT    | 59.717 | 20 |
| 144 | 187  | 330  | TATCATCCTCGGAGGCAATC    | 59.998 | 20 |
| 114 | 18   | 131  | CATGAAACATTTCAAATATC/   | 58.726 | 25 |
| 204 | 147  | 350  | ATTGGGAAACCACCCGTATT    | 60.299 | 20 |
| 223 | 41   | 263  | AACGTAAAGAGGGGTAGGGG    | 59.344 | 20 |
| 182 | 47   | 228  | TGAATCAGAAAATCCCCTGC    | 60.014 | 20 |
| 192 | 4679 | 4870 | ACGGTTAGAATCGCGACAAC    | 60.14  | 20 |
| 153 | 10   | 162  | TCACACCTCACTAATTTCTTGT  | 57.077 | 24 |
| 212 | 300  | 511  | GACAGTGGATGAAATTCCTG    | 60.317 | 20 |
| 219 | 87   | 305  | TCTGAAAATTGGTGCTGCTG    | 59.988 | 20 |
| 113 | 11   | 123  | ATCGGCAGCAGATGTAGGAG    | 60.384 | 20 |
| 200 | 374  | 573  | TCAGAGCCACGTCAGCTTAG    | 59.339 | 20 |
| 241 | 5379 | 5619 | CCATCCTCATTTGCTCGATT    | 60.036 | 20 |
| 196 | 2136 | 2331 | TGCTTACTCCATCACCTCC     | 60.073 | 20 |
| 251 | 414  | 664  | TCAACAATTTACGGGCTTCC    | 59.938 | 20 |
| 168 | 111  | 278  | GAGGATGATGTAGGCATGGA/   | 59.909 | 21 |
| 199 | 273  | 471  | ACCCAAAACACATCAGAC      | 59.679 | 20 |
| 172 | 99   | 270  | TTGATGAGCCATAACCCTCC    | 59.894 | 20 |
| 173 | 1686 | 1858 | GATTTAACGGATATGCTTGGG,  | 60.168 | 22 |
| 279 | 656  | 934  | ATGTAGCCGACCCCAATTTA    | 59.297 | 20 |
| 189 | 132  | 320  | TGGGACAAGGTGACATAAAAT   | 59.724 | 22 |
| 169 | 186  | 354  | TGGTGTGAGCAGCCTATC      | 59.959 | 19 |
| 114 | 927  | 1040 | CTCTTTCGCAGCCTCCTCTA    | 59.853 | 20 |
| 161 | 22   | 182  | AGCCATGAGCAATAACAGCC    | 60.243 | 20 |
| 192 | 16   | 207  | CTCAGCCGAAATCTTCAAGC    | 60.096 | 20 |
| 163 | 3    | 165  | ATGTAGCCGACCCCAATTTA    | 59.297 | 20 |
| 206 | 963  | 1168 | GATAAGGCCCAAACCTAGCCC   | 59.93  | 20 |
| 267 | 2    | 268  | CCCAAGACCCCAATTTGATT    | 60.91  | 20 |
| 243 | 0    | 242  | GGCATTACATTTACGTTGGA    | 59.712 | 21 |
| 205 | 512  | 716  | CAGCCTCAGGACTCCTCATC    | 59.945 | 20 |
| 256 | 42   | 297  | CCCGTATGGTATCAGAGCCA    | 60.874 | 20 |
| 170 | 535  | 704  | TTATTTGGCGGGTTAATGGA    | 60.144 | 20 |
| 198 | 145  | 342  | TCCCGCCCTCTACCTTTATT    | 59.924 | 20 |
| 227 | 734  | 960  | TTCAAAAACCATGCCACTGA    | 60.088 | 20 |
| 218 | 535  | 752  | ACTCAGGTTCAAACCCTCCC    | 60.349 | 20 |
| 236 | 770  | 1005 | ACAGCTTCGGCAGATCACTT    | 60.02  | 20 |
| 173 | 849  | 1021 | CCTAAGATTTTGCAATCGCC    | 59.682 | 20 |
| 214 | 460  | 673  | TCCGTTTCTAATGGAGTGCC    | 60.074 | 20 |
| 166 | 227  | 392  | GTTTCTGCCACGTGCATTC     | 60.265 | 19 |
| 165 | 186  | 350  | CGCTTTGCTAGATTTTGGCC    | 59.985 | 20 |
| 263 | 4569 | 4831 | GGATGCATTCCAGAGTTGCT    | 60.226 | 20 |
| 167 | 4    | 170  | ACCGTAACCGCCAAACAC      | 59.42  | 18 |
| 278 | 573  | 850  | AAGAAGTGTCCCTCAACAAA    | 59.795 | 22 |
| 186 | 1574 | 1759 | TGGGAATGTAAGTACTGACTGCC | 59.985 | 21 |
| 167 | 83   | 249  | TCACCGGAAACAAATACATCA   | 58.881 | 21 |
| 103 | 15   | 117  | TTCTTCTGTACAATTAATGTCC, | 59.121 | 27 |
| 257 | 253  | 509  | GTCCGTTGGGTGTTTGA       | 59.867 | 20 |
| 161 | 278  | 438  | GGTAGCCAGTTTACCAATCA    | 59.985 | 21 |
| 223 | 796  | 1018 | TAACAATTACGTCTGGGGGC    | 59.823 | 20 |
| 178 | 631  | 808  | ATGCTGTGTTTGGAGCGACTG   | 60.056 | 20 |
| 268 | 17   | 284  | CCACCATCGTCTCATC        | 60.063 | 19 |
| 246 | 550  | 795  | TGTGATGAGATCGTGAACCTG   | 59.692 | 21 |
| 209 | 498  | 706  | TCCATTTAATCCCCCTTCTTC   | 59.257 | 21 |
| 233 | 856  | 1088 | CTTTCTCGGGCCTGGATATT    | 60.411 | 20 |



|     |      |      |                        |        |    |
|-----|------|------|------------------------|--------|----|
| 182 | 1674 | 1855 | AAGTTATGTAGCCGACCCCA   | 59.452 | 20 |
| 238 | 838  | 1075 | AAGTGATATTTTCGGCGGTG   | 59.96  | 20 |
| 184 | 2456 | 2639 | GGGAACCCAGTGA AAAATTGA | 59.767 | 20 |
| 234 | 261  | 494  | CAAGGCAGAGAAAAAGCCAG   | 60.125 | 20 |
| 162 | 1189 | 1350 | TCCGCTGCTAATTTGCTTTT   | 59.985 | 20 |
| 271 | 980  | 1250 | TTCAGGTTGAAGTCTTGGGC   | 60.232 | 20 |
| 181 | 52   | 232  | GCGACTTGTTTTCGTCCACT   | 60.299 | 20 |
| 194 | 1825 | 2018 | TGTATGGCACGAGTTCTTGA   | 57.836 | 20 |
| 246 | 1    | 246  | CTCGTCCTCCGTGGATATGT   | 59.95  | 20 |
| 233 | 823  | 1055 | GCGCAGTTGCCAAACTTATT   | 60.272 | 20 |
| 263 | 247  | 509  | TGTTCCGAGTTGCAATAAA    | 60.251 | 20 |
| 247 | 4887 | 5133 | GGATGGAGAGGAGGAAGGTC   | 60.012 | 20 |
| 271 | 58   | 328  | CGGAAGAAGCACAGACAACA   | 60.025 | 20 |
| 273 | 3882 | 4154 | AAAAGAAGATACGGCCCACC   | 60.32  | 20 |
| 227 | 422  | 648  | AGCCTGGATATCTTGCTCCA   | 59.797 | 20 |
| 266 | 1    | 266  | ATGTAGCCGACCCCAATTTA   | 59.297 | 20 |
| 222 | 4    | 225  | TGATATTTTCAATGATGGATCC | 57.46  | 22 |
| 267 | 4227 | 4493 | TCAAATGCAAATCTACCTGGG  | 59.946 | 21 |
| 206 | 793  | 998  | TTCGACGCGGAAGTAAATCT   | 59.845 | 20 |
| 233 | 2217 | 2449 | ATTGCCCATGCATACACATTT  | 60.096 | 21 |
| 230 | 1074 | 1303 | TTTTCGGTTACCATGTCTGTT  | 57.999 | 20 |
| 175 | 152  | 326  | AAGGATGAGGAAGGCAAGGT   | 60.074 | 20 |
| 248 | 467  | 714  | TCGAAATTCAAGCACACGAG   | 59.988 | 20 |
| 251 | 977  | 1227 | GAGAAAGAATCAACTGCGGC   | 59.962 | 20 |
| 252 | 728  | 979  | TCTTTTCTTTTCTTTCCCCCA  | 60.034 | 21 |
| 155 | 776  | 930  | TTGGTTACTCTGGGAATGGC   | 59.933 | 20 |
| 160 | 1101 | 1260 | CTCGATCTCTTG CAGAAGGG  | 60.088 | 20 |
| 262 | 2283 | 2544 | CGGGTTGAGACCCTTG TAAA  | 59.964 | 20 |
| 173 | 2    | 174  | GGTTCATGTAGCCGACCTCA   | 61.067 | 20 |
| 266 | 534  | 799  | GAGAAATTCGACTCAGGGGG   | 60.959 | 20 |
| 210 | 624  | 833  | TTATCCCACCATCACCGTT    | 60.051 | 20 |
| 239 | 16   | 254  | CGGAGAAATGGTTTCTGCAT   | 60.074 | 20 |
| 219 | 513  | 731  | GAAGCCGGTAATCCCCTTAC   | 59.799 | 20 |
| 143 | 1461 | 1603 | TTGCACCAAATGGACAGAG    | 59.691 | 20 |
| 258 | 164  | 421  | CCACCATCGTCTCTCATC     | 60.063 | 19 |
| 279 | 470  | 748  | AGGGCTTCCCACCTTCTTAC   | 59.576 | 20 |
| 228 | 65   | 292  | AAATCGGGGTCGAAAAATCT   | 59.777 | 20 |
| 100 | 962  | 1061 | CATGAAAATCCAACAAGCCA   | 59.518 | 20 |
| 239 | 1589 | 1827 | CCTATGGCTTTCTCCCACAC   | 59.55  | 20 |
| 262 | 253  | 514  | GCTCTTATCCATTCAACGCC   | 59.674 | 20 |
| 132 | 29   | 160  | GATTTTACACCTGCAAGGGC   | 59.574 | 20 |
| 214 | 1006 | 1219 | TATGACACAATGTCCCCTGG   | 60.24  | 20 |
| 255 | 623  | 877  | AACCAGGAACCAAACACCAA   | 60.246 | 20 |
| 185 | 196  | 380  | ATTAGCACGCTTGGATGTGA   | 59.301 | 20 |
| 143 | 26   | 168  | TCAAACCTTTCTCCAATTGCT  | 58.823 | 21 |
| 256 | 967  | 1222 | ATAGATCCGGAATGATCGGA   | 59.3   | 20 |
| 268 | 568  | 835  | GCCTACATACCGACGTGACC   | 60.406 | 20 |
| 152 | 276  | 427  | TAATTGTCGGAAATCTGCC    | 59.901 | 20 |
| 201 | 5712 | 5912 | CTGATCTACTCCGTCCCCAA   | 60.065 | 20 |
| 106 | 2447 | 2552 | CGACGAAAAGAACA AAAACGA | 58.939 | 20 |
| 154 | 618  | 771  | GAGGAGGAGTGTTGGAGGC    | 59.783 | 19 |
| 182 | 99   | 280  | GCTGTAAATGAACTGCTGTA   | 60.212 | 24 |
| 235 | 12   | 246  | CAGAGCGCACTCGAAGAGTA   | 59.49  | 20 |
| 187 | 43   | 229  | TTGTCATATGAATCATGAAATT | 58.012 | 25 |
| 174 | 835  | 1008 | GTTTCGCTGAGGCAACA ACTT | 60.44  | 20 |
| 147 | 468  | 614  | AGATCTGACTGCGCGACTTT   | 60.164 | 20 |
| 186 | 1057 | 1242 | CCGGGTATTACATCAAGGCA   | 60.712 | 20 |
| 144 | 44   | 187  | ATGCAGCTCATGTCTGATGC   | 59.982 | 20 |

|     |      |      |                         |        |    |
|-----|------|------|-------------------------|--------|----|
| 241 | 332  | 572  | AGCAAAAGGTCGTCCTGCTA    | 60.015 | 20 |
| 189 | 325  | 513  | CTTTAGGCCAAGTTGTACCCA   | 59.141 | 21 |
| 248 | 939  | 1186 | AGGGGAAATTCACGAGGAAA    | 60.797 | 20 |
| 162 | 102  | 263  | CCTTTATGATGGAGGCGGAT    | 61.165 | 20 |
| 237 | 252  | 488  | GGCGAAGCTATAGAGATCGG    | 59.046 | 20 |
| 133 | 32   | 164  | TTCCAAAGTTGGACTTATGTA   | 58.31  | 25 |
| 232 | 875  | 1106 | GAGCAACTGCCAAAACGTAA    | 58.967 | 20 |
| 117 | 505  | 621  | GAGAGAGAGAATGGCTGGCA    | 60.645 | 20 |
| 277 | 1    | 277  | CATTGCGTCATACGATGTATT   | 58.997 | 24 |
| 279 | 31   | 309  | CTAGCCCAGCATATTCCCAC    | 59.551 | 20 |
| 231 | 66   | 296  | ATCCCAAGCCATTACCATCA    | 60.155 | 20 |
| 238 | 1232 | 1469 | GATTTCTGCAGCTTTGAGCA    | 59.301 | 20 |
| 274 | 672  | 945  | TTCTTCTCCCTCTGCTACGC    | 59.717 | 20 |
| 188 | 647  | 834  | GCCAAAAGTGAAGCGAGAAG    | 60.132 | 20 |
| 262 | 477  | 738  | AGCCACTGACAGCCACAGTA    | 59.493 | 20 |
| 108 | 340  | 447  | CTCACACTCTCGCTCCCTCT    | 59.732 | 20 |
| 219 | 172  | 390  | GGCAAAATTA AAAATGCCCC   | 60.484 | 20 |
| 249 | 7    | 255  | GCATCTCCCAA ACTCAGCTC   | 59.957 | 20 |
| 194 | 962  | 1155 | AGACGTAAATGGGCGTGAAT    | 59.457 | 20 |
| 268 | 8    | 275  | CCTATTACTTCCTCGACTTTAA  | 58.761 | 25 |
| 153 | 639  | 791  | GGCAATAGAGCAAGAGCCAG    | 60.118 | 20 |
| 182 | 65   | 246  | TGGAGTTCTAGGTTCTGTTG    | 60.103 | 20 |
| 261 | 72   | 332  | CTAGAGGGCGGCACATTTAC    | 59.73  | 20 |
| 264 | 36   | 299  | TTGTTCTTCGTGGTTTCGTG    | 59.734 | 20 |
| 199 | 259  | 457  | AGCCGCTACTATTCGAGTGC    | 59.643 | 20 |
| 233 | 384  | 616  | AAATTTTGTAGGTAATAGCAA   | 58.623 | 26 |
| 173 | 470  | 642  | TCACCAAAAATCGAACACACA   | 59.996 | 21 |
| 208 | 2637 | 2844 | CGGGGCAGATGATCATAACT    | 59.917 | 20 |
| 233 | 2    | 234  | CCACATTTTCCACCTTAGCC    | 59.429 | 20 |
| 166 | 262  | 427  | CTCTTACGTGAGTCTGGCA     | 60.178 | 20 |
| 266 | 10   | 275  | CACCAACAGCTTGGTCTCAA    | 59.873 | 20 |
| 238 | 293  | 530  | AAGATTACGACGGCGATACG    | 60.117 | 20 |
| 250 | 587  | 836  | CTCCCATCATCCTTTTTCCA    | 59.864 | 20 |
| 233 | 156  | 388  | CCGAGCTTACACCAGGAGAC    | 59.867 | 20 |
| 100 | 232  | 331  | ACTCTAAGGGATGAATGCACG   | 59.208 | 21 |
| 237 | 17   | 253  | CATGCGCTCAGCATAAAGAA    | 60.118 | 20 |
| 273 | 6    | 278  | GGATCAGCAGTGGCTTTCTC    | 59.957 | 20 |
| 107 | 2604 | 2710 | TTATCGTTCATAGCCGACCC    | 59.923 | 20 |
| 232 | 388  | 619  | AAACTGCCAAGTCCAACAT     | 60.559 | 20 |
| 113 | 437  | 549  | AACCGTCTCAGTTGTTGCT     | 59.914 | 20 |
| 230 | 904  | 1133 | ACAAGACCTTTTTGTTGCTT    | 58.048 | 21 |
| 274 | 2085 | 2358 | AGGTTGAGCTACCGAAACA     | 59.875 | 20 |
| 172 | 273  | 444  | ACATGTAAGGGACTCCGAGC    | 59.166 | 20 |
| 191 | 374  | 564  | GAGAGGGAGAGAGAGGGGA     | 59.883 | 20 |
| 186 | 1080 | 1265 | TAATACCCCGAGTCTCCCCT    | 59.783 | 20 |
| 242 | 4383 | 4624 | CGGGAACCTACAGACGCTAC    | 59.757 | 20 |
| 197 | 938  | 1134 | ATGGAGGAGGAGGAAAAGGA    | 60.008 | 20 |
| 223 | 2527 | 2749 | TCTCGTTCAATTCACACACG    | 58.246 | 20 |
| 175 | 287  | 461  | ATTTGGGGGTTTGAGGGTTA    | 60.403 | 20 |
| 266 | 23   | 288  | GGTGGCTGAAGATAGGAATG    | 59.14  | 21 |
| 159 | 1272 | 1430 | GGTTAAATCGACACGATGGG    | 60.192 | 20 |
| 187 | 673  | 859  | CTGTGCGGAAGTAGCTTTGA    | 59.22  | 20 |
| 107 | 916  | 1022 | GAGCCATTGATGGCATTTTT    | 59.907 | 20 |
| 253 | 973  | 1225 | CAGAAAGCGCTTCGAGA ACT   | 59.898 | 20 |
| 178 | 752  | 929  | ATTCTCGAGGCTGAGATGGA    | 59.91  | 20 |
| 227 | 7    | 233  | TGTTTGGATTTTCATGAATTAGT | 58.5   | 27 |
| 153 | 332  | 484  | AACCTCAACGATGAAGGCAT    | 59.556 | 20 |
| 240 | 1453 | 1692 | TGTGGGTTTACTGACCACCA    | 59.848 | 20 |

|     |      |      |                        |        |    |
|-----|------|------|------------------------|--------|----|
| 117 | 13   | 129  | GCTCCTCCAAGAACAACCTCG  | 59.989 | 20 |
| 212 | 216  | 427  | CCTTTAAAGCGATTCCCCTC   | 60.034 | 20 |
| 178 | 433  | 610  | ACGAGCCCTTTCAAGAGTCA   | 59.989 | 20 |
| 267 | 447  | 713  | TTGACAAGGTCAATATGCGG   | 59.542 | 20 |
| 205 | 57   | 261  | TCCAATCCAATCCATCTCC    | 59.685 | 20 |
| 228 | 25   | 252  | ACCAACCAAATTGGACTTGTG  | 59.743 | 21 |
| 235 | 2591 | 2825 | AATTTTGAGCAAGGCCAATG   | 60.074 | 20 |
| 106 | 6    | 111  | CCCAAGACCCCAATTTGAT    | 59.59  | 19 |
| 172 | 2095 | 2266 | CGCTCTTGATTAACCTCCA    | 60.206 | 20 |
| 275 | 241  | 515  | TGGTCCCTTTCGAATCCAT    | 60.265 | 19 |
| 127 | 7    | 133  | AGGGTTAGTTATGGAACGATG  | 59.398 | 22 |
| 230 | 278  | 507  | CATGTCACAACATGGAATCTC, | 59.42  | 22 |
| 280 | 1731 | 2010 | CAGGATGGTTTCAAATGAGG   | 57.992 | 20 |
| 149 | 195  | 343  | TAATTTATCGATGGCGGACG   | 60.792 | 20 |
| 150 | 38   | 187  | TTGATTGCTTTAAATCCGGC   | 60.04  | 20 |
| 111 | 89   | 199  | GCAAGGTGATTCCTTGTTGTT  | 59.091 | 21 |
| 230 | 55   | 284  | GCCAAAATCTGTATACCCCG   | 59.297 | 20 |
| 155 | 276  | 430  | AGAACCTTTTTGAGCTCCGC   | 60.875 | 20 |
| 275 | 3873 | 4147 | CATGCATGACTTGGTGCTCT   | 59.862 | 20 |
| 157 | 936  | 1092 | ATGTAGCCCACCCCAATTTA   | 59.158 | 20 |
| 230 | 47   | 276  | CGCTGAACGAGCTAGAACTTG  | 60.332 | 21 |
| 130 | 12   | 141  | GGAGAGGAAGATACGATTTG/  | 59.531 | 24 |
| 191 | 1281 | 1471 | CCTCTCCATTCTGAATCCCA   | 60.003 | 20 |
| 199 | 352  | 550  | TCGTGGTTTCGTGTCTTTCA   | 60.278 | 20 |
| 275 | 3319 | 3593 | CAGGAATTGAAATGACGGGT   | 59.79  | 20 |
| 165 | 0    | 164  | TGCACAAAAATGTTTTAAAATT | 60.26  | 24 |
| 280 | 319  | 598  | GCCATCTCCTTGATCGAAAA   | 60.155 | 20 |
| 273 | 6089 | 6361 | GGAATCGGTTTTCGACTGAG   | 59.67  | 20 |
| 100 | 3    | 102  | CAGCCATGAATGAGAGTGGG   | 61.63  | 20 |
| 277 | 1    | 277  | ATGTAGCCGACCCCAATTTA   | 59.297 | 20 |
| 268 | 196  | 463  | TCATTTATTTCTTTTTATATGT | 59.326 | 27 |
| 221 | 126  | 346  | TCAAGTGTGCTTCCACCAA    | 60.278 | 20 |
| 276 | 2101 | 2376 | TAGCATTTCGTGTTCCAGCA   | 60.401 | 20 |
| 234 | 1    | 234  | CCCAAGACCCCAATTTGATT   | 60.91  | 20 |
| 228 | 166  | 393  | CCGATCCATTTTAGGAACGA   | 59.894 | 20 |
| 214 | 286  | 499  | CGAACCTAGGAAAAGTTGCG   | 59.876 | 20 |
| 231 | 0    | 230  | CTCCTCCCAAGTCAGGTTTG   | 59.691 | 20 |
| 208 | 574  | 781  | TTGATAAGCCAGCCACTTGA   | 59.42  | 20 |
| 133 | 795  | 927  | TGGGTAATGGCTTCAACTCC   | 59.933 | 20 |
| 173 | 1061 | 1233 | TCAGACCATGCTATTGTGCC   | 59.679 | 20 |
| 103 | 151  | 253  | AAACGTGAGAACGGATGGAG   | 60.111 | 20 |
| 262 | 39   | 300  | TCCGACACATGAGCTATTGG   | 59.673 | 20 |
| 191 | 542  | 732  | GCAGTTAATAACGAAAAACCA  | 58.393 | 24 |
| 126 | 201  | 326  | AAAGTCTCCTGCTCGCTCTG   | 59.891 | 20 |
| 107 | 8    | 114  | ATGTTCCACCTCCCAAGGTT   | 60.607 | 20 |
| 276 | 304  | 579  | GACGGGTGTGGGCTAAAAAT   | 61.099 | 20 |
| 195 | 230  | 424  | CGTGTGCATGTGAAATTTTTAT | 57.655 | 22 |
| 251 | 147  | 397  | TCCAATCGCTCAAACATTG    | 59.664 | 20 |
| 244 | 508  | 751  | CCTAGACTCCGACGAAAAGC   | 59.077 | 20 |
| 278 | 2    | 279  | CACTCTCCTCAATGGCGTC    | 59.356 | 19 |
| 139 | 2785 | 2923 | TGAGACTCAGATGAAATGTAG  | 59.438 | 24 |
| 200 | 108  | 307  | TTTATGCATTGCCGTGAAAA   | 60.074 | 20 |
| 134 | 3    | 136  | ATCAGGATCGAGTAAGCGGA   | 59.797 | 20 |
| 180 | 720  | 899  | ACTTGTGAGACAAAGAGAACA  | 57.292 | 24 |
| 206 | 475  | 680  | ACGTCCCTCATCACTACCCA   | 60.386 | 20 |
| 117 | 22   | 138  | ATTCACATTTACAACCTACATC | 59.227 | 24 |
| 271 | 1784 | 2054 | TTTCGATTTGATTTGGGTTT   | 57.08  | 20 |
| 114 | 351  | 464  | TTATATGCCACTCTTCCCGC   | 60.06  | 20 |

|     |       |       |                        |        |    |
|-----|-------|-------|------------------------|--------|----|
| 266 | 2444  | 2709  | CGAATGGTCGTTTACCGAAT   | 59.823 | 20 |
| 219 | 3138  | 3356  | CAACGGCCTTTCTTTAGCAG   | 60.011 | 20 |
| 174 | 1630  | 1803  | AGCACATTTCTTTGGGTGC    | 60.263 | 20 |
| 167 | 67    | 233   | CCCAAATGTGTAGGCCATTC   | 60.192 | 20 |
| 194 | 162   | 355   | CATTGGAAAATATTACTGGGG  | 59.458 | 22 |
| 234 | 397   | 630   | TAGAGTTCAAGCACCCCAG    | 60.246 | 20 |
| 254 | 3155  | 3408  | GGCGAAGAATGCACACTACA   | 59.871 | 20 |
| 103 | 3679  | 3781  | CCGAAACAAAGCACAATTCA   | 59.706 | 20 |
| 268 | 301   | 568   | TCTTCTATACATAGTGCTTCCG | 58.446 | 24 |
| 224 | 264   | 487   | GTTTCGGTCCGGTTTCAAAT   | 61.08  | 20 |
| 201 | 515   | 715   | ACTTCCACAGGCATTGGGTA   | 60.375 | 20 |
| 127 | 6     | 132   | CAAATCACCAATCAACAAAAC  | 59.225 | 22 |
| 279 | 5     | 283   | CCCAAGACCCCAATTTGAT    | 59.59  | 19 |
| 191 | 1509  | 1699  | AATTCCTGCAACTCCAACCA   | 60.495 | 20 |
| 274 | 126   | 399   | AGGGTTGAGTTGAGGGGAAT   | 59.795 | 20 |
| 192 | 254   | 445   | ACCCTCAGCAATATGCCAAT   | 59.415 | 20 |
| 231 | 448   | 678   | CGACAGAGTTGCAAAGAAGTT  | 60.088 | 22 |
| 138 | 88    | 225   | TGGCCGATGTATGTTGTCTT   | 59.002 | 20 |
| 181 | 121   | 301   | TCACGAGTTGGCTCTTTGTG   | 60.025 | 20 |
| 147 | 129   | 275   | GTCAACGCGTCTTTGAGGTT   | 60.299 | 20 |
| 150 | 4033  | 4182  | GAAGGCAGAGACCGTGAAAG   | 59.989 | 20 |
| 100 | 8     | 107   | CCGACTAGGACTAAGGGTCCA  | 60.493 | 21 |
| 110 | 1379  | 1488  | TTTGTACCACCACCACCAA    | 59.709 | 20 |
| 185 | 158   | 342   | CAGCAACCACCAAATACTCTT  | 59.671 | 22 |
| 195 | 461   | 655   | TCAGGGAAAAGGGAGCATAA   | 59.64  | 20 |
| 277 | 26    | 302   | GTGTTGGGCAGCCTCATATT   | 59.962 | 20 |
| 276 | 364   | 639   | CCTGTCAAGACCCAATACGA   | 58.569 | 20 |
| 220 | 18    | 237   | TCCAAAATTAGTACAAGCATC  | 59.168 | 25 |
| 170 | 25    | 194   | ATTTTCGCCTTCTTTTGCAG   | 59.474 | 20 |
| 232 | 4091  | 4322  | TGTAAGCAGCACGCCAACTA   | 60.599 | 20 |
| 203 | 231   | 433   | CTTCCACTTCTTCAGCTGGG   | 59.982 | 20 |
| 224 | 3575  | 3798  | CTGCACACCTGTATGTTCCG   | 60.175 | 20 |
| 276 | 586   | 861   | TTGAAATGAGTTGGAATGAGG  | 59.546 | 22 |
| 278 | 326   | 603   | CACTGAGGCAGAGATGGAGA   | 59.074 | 20 |
| 259 | 223   | 481   | CCATTCTCACGATTGTTGATG  | 58.987 | 21 |
| 260 | 489   | 748   | TGTGACGTCTAGCTCGATCC   | 58.987 | 20 |
| 218 | 331   | 548   | TTCCACAAAGCGTCGTACA    | 60.293 | 20 |
| 145 | 182   | 326   | GGTTTTCTCCATTTACGGCA   | 59.938 | 20 |
| 170 | 4278  | 4447  | CCACTGATTCCAGATGGTGA   | 59.473 | 20 |
| 199 | 10407 | 10605 | TAATGAAATTGGGTGGGAGC   | 59.762 | 20 |
| 270 | 495   | 764   | CCGACTCCACATAGTGGAAAA  | 59.978 | 21 |
| 252 | 70    | 321   | TTGGATGATTCTGGCCTCTT   | 59.629 | 20 |
| 185 | 479   | 663   | AAACCTCACCACAAACGGAG   | 60.005 | 20 |
| 213 | 0     | 212   | TGTTGTTGAAAAAGGCGACA   | 60.271 | 20 |
| 243 | 4272  | 4514  | TAGGGCTTTTGTGTGGTTCC   | 59.971 | 20 |
| 141 | 329   | 469   | TCTCGTGGTGACGTGGTAGA   | 60.463 | 20 |
| 258 | 71    | 328   | TTGTTGAGCAAGAAGGGTGT   | 59.766 | 21 |
| 254 | 118   | 371   | CCCAAATTTTCTTAAGCCCTG  | 59.951 | 21 |
| 241 | 11    | 251   | TGTAGCCGACCCCAATTTTA   | 60.315 | 20 |
| 253 | 442   | 694   | ATCGATCCATCCATGCATTT   | 60.126 | 20 |
| 182 | 1975  | 2156  | TCTTCTGTTCTTCTCCCCCA   | 59.773 | 20 |
| 260 | 4     | 263   | TGGTTCATGTAGCCTACCCC   | 59.813 | 20 |
| 248 | 1     | 248   | GAATGTCAAGATGAGAGATGC  | 59.598 | 24 |
| 277 | 682   | 958   | CCGAACAACACTCAACTCCA   | 59.72  | 20 |
| 121 | 22    | 142   | GGGTTGAGGCCACTATATCCT  | 59.321 | 21 |
| 102 | 338   | 439   | TACTCCTCGAAAACAGCCG    | 60.378 | 20 |
| 273 | 567   | 839   | AACGAAGCAATACACTTTTGA  | 59.391 | 24 |
| 148 | 384   | 531   | CAAGAGTGCAGGCAAGAACA   | 60.175 | 20 |

|     |      |      |                        |        |    |
|-----|------|------|------------------------|--------|----|
| 151 | 106  | 256  | GCTCTTTCAATAAACAGAATCC | 57.589 | 23 |
| 280 | 1118 | 1397 | CACAATTAATAATGCACCGC   | 59.077 | 20 |
| 231 | 2618 | 2848 | CTGGCAATTCAGCCAAAAGT   | 60.249 | 20 |
| 263 | 956  | 1218 | TCAAATTCACAAACACGGT    | 58.874 | 20 |
| 184 | 940  | 1123 | ATACCGCAGATCCCTTTCT    | 59.925 | 20 |
| 152 | 41   | 192  | TGAGCAATTGAGCAGCTTGT   | 59.746 | 20 |
| 158 | 198  | 355  | ACGTAGGCGGCTTACTGTG    | 60.326 | 20 |
| 134 | 200  | 333  | GACCAGAAAGGTGTTGGTGG   | 60.399 | 20 |
| 133 | 11   | 143  | CCCAAGACCCCAATTTGATT   | 60.91  | 20 |
| 233 | 65   | 297  | AGAGATTTTATCCGGACGGG   | 60.278 | 20 |
| 101 | 165  | 265  | CATCCACGATCTTTGCCTT    | 60.074 | 20 |
| 167 | 532  | 698  | TTGTTACTAAGGGTTGCGGG   | 59.99  | 20 |
| 270 | 17   | 286  | GAAGTTCATTTTGGGACGGA   | 59.91  | 20 |
| 196 | 689  | 884  | CCCCATTGCTAACAACATC    | 60.192 | 20 |
| 273 | 255  | 527  | TATCCCACCCGATCACTTGT   | 60.195 | 20 |
| 101 | 42   | 142  | TGCACAAATTGAAAGCACAC   | 58.317 | 20 |
| 271 | 435  | 705  | TTGGTATGATGGAATGGGGT   | 59.871 | 20 |
| 105 | 1    | 105  | CCCAAGACCCCAATTTGATT   | 60.91  | 20 |
| 217 | 246  | 462  | CAGCTGCTGTCATCATCGTT   | 60.016 | 20 |
| 206 | 105  | 310  | TATGAGGAGTTCCTTGC      | 59.894 | 20 |
| 146 | 416  | 561  | TCGGTGAGCCTACATCTGTG   | 59.855 | 20 |
| 206 | 200  | 405  | GCCGGTTAATATGCATTTGG   | 60.172 | 20 |
| 180 | 255  | 434  | CAGCCTCTCATTCTCTTCGG   | 60.088 | 20 |
| 277 | 22   | 298  | AAGGAGCAGCTGTCTTTTGTG  | 59.671 | 21 |
| 164 | 837  | 1000 | ACATGTGCAATTGGCAAAGA   | 60.119 | 20 |
| 234 | 1768 | 2001 | TCCGCCTCGAATTCTTGTAG   | 60.344 | 20 |
| 245 | 3029 | 3273 | AGCATTACGTTGCCTTGTA    | 59.347 | 20 |
| 223 | 82   | 304  | AATGTCCGGGCTACATTTCA   | 60.331 | 20 |
| 210 | 77   | 286  | TCGCAACTATCTGCACCATT   | 59.301 | 20 |
| 271 | 18   | 288  | ATGTTGAGCCCAACCCAAC    | 60.774 | 19 |
| 224 | 601  | 824  | AATCATTCGATTTGGCAAGC   | 60.045 | 20 |
| 243 | 78   | 320  | GGGAGTTTCGTCACACAGT    | 60.009 | 20 |
| 245 | 52   | 296  | ACCCCTAGCGCAATGTACC    | 59.97  | 19 |
| 176 | 1610 | 1785 | CAAACTCGAAGGTTGCACA    | 59.881 | 20 |
| 280 | 560  | 839  | GTGGGTTGCACCAATTAGGA   | 60.755 | 20 |
| 247 | 1    | 247  | TGGAGAATGATCTTGTGATC   | 59.56  | 23 |
| 204 | 218  | 421  | CTAGCTCTGAGATCCCGGC    | 60.065 | 19 |
| 126 | 0    | 125  | CTCGAACCCATGACCTTTTG   | 60.486 | 20 |
| 198 | 5049 | 5246 | ACGTCGGCATTGCTAAAATC   | 60.103 | 20 |
| 269 | 108  | 376  | TTACCGAAGCCAGGGAAAG    | 60.191 | 19 |
| 128 | 489  | 616  | CTGGACTCGGCATTTGAGTT   | 60.255 | 20 |
| 237 | 233  | 469  | ATGGCGTCGGTATGTTATGG   | 60.606 | 20 |
| 229 | 196  | 424  | TCGTCGCCCTCTTATTCTA    | 59.801 | 20 |
| 181 | 0    | 180  | GTTGCGTACATCTGACCCC    | 58.948 | 19 |
| 138 | 967  | 1104 | GCGGGACCTAGAATGTTGAA   | 60.074 | 20 |
| 249 | 20   | 268  | CTGCCCTTAGCCGTTAGATG   | 59.861 | 20 |
| 174 | 2648 | 2821 | TCCTTCTCACTGACCTGCAC   | 58.968 | 20 |
| 163 | 231  | 393  | TAATTTACGGCTCGTTTTCG   | 60.089 | 20 |
| 229 | 2019 | 2247 | AAATGGCCGAAGAGATTCCT   | 60.039 | 20 |
| 257 | 52   | 308  | TGTCGAATCTTGTGATGGGT   | 58.933 | 20 |
| 240 | 380  | 619  | GTGCCCTGTTCTCTCACTCC   | 59.841 | 20 |
| 155 | 402  | 556  | CCAAGTCCTCATCTCGTGGT   | 60.112 | 20 |
| 126 | 1057 | 1182 | TTCCTTGTGAAGCACAATCC   | 58.697 | 20 |
| 134 | 11   | 144  | CCCATACATTTGTGGGGATAG  | 59.03  | 21 |
| 242 | 687  | 928  | TCGTGACCAACCCAAACATA   | 59.816 | 20 |
| 197 | 597  | 793  | GAGACGATGTTTTGTTGCGA   | 59.847 | 20 |
| 104 | 11   | 114  | GTCTACCCCGCCAGATCC     | 60.439 | 18 |
| 170 | 321  | 490  | TCCTCGCCATACTCGTTTCT   | 59.836 | 20 |

|     |      |      |                        |        |    |
|-----|------|------|------------------------|--------|----|
| 201 | 202  | 402  | CTTTGATTCTGTCCTCCGCT   | 59.43  | 20 |
| 242 | 262  | 503  | TTAGGTTTTGCCAGGATTG    | 59.931 | 20 |
| 175 | 230  | 404  | CTCGGCTTCAATCTTTGTCA   | 58.999 | 20 |
| 215 | 89   | 303  | AACAAAGGTGACGAGAGCGT   | 59.914 | 20 |
| 137 | 211  | 347  | GGTTATATCCCCGTCTACCC   | 60.623 | 21 |
| 165 | 5781 | 5945 | TGACTTATGCGTGCATGTGG   | 61.713 | 20 |
| 146 | 92   | 237  | CCCAGCGGAGAGCTATACTG   | 59.993 | 20 |
| 121 | 13   | 133  | CCCCTCAACTATTCCTCCG    | 59.545 | 20 |
| 277 | 708  | 984  | GGATGTCATGCCAACCATTA   | 59.205 | 20 |
| 192 | 124  | 315  | GATAAGCGGCTGAAGGTGAA   | 60.352 | 20 |
| 259 | 84   | 342  | CAGCCGAGAACATCATCAA    | 59.799 | 20 |
| 274 | 1784 | 2057 | ATCCTGTGGTGGCATGTTTT   | 60.24  | 20 |
| 246 | 789  | 1034 | TTGAGCGCACTCGAAAAGTA   | 59.752 | 20 |
| 261 | 278  | 538  | CAACTTTAGTCGTCGTCATCAT | 58.781 | 23 |
| 153 | 252  | 404  | TTTCGCAGTATGCCTCAGTG   | 60.011 | 20 |
| 254 | 234  | 487  | AGCTCCTTTCAACACGCATT   | 59.882 | 20 |
| 245 | 536  | 780  | ACCCCATTCGGTTGAACAT    | 60.042 | 19 |
| 168 | 1537 | 1704 | CCGACAAGAACCACCACTCT   | 60.151 | 20 |
| 243 | 18   | 260  | TCACATTGCGAGGCAAATA    | 60.215 | 20 |
| 157 | 58   | 214  | TGAAACATCTTGAGAGTCGGG  | 60.239 | 21 |
| 241 | 157  | 397  | CACTCCATCGGATCCAAGAT   | 59.886 | 20 |
| 128 | 209  | 336  | TGATGTTTAGGCTGCAGGAA   | 59.42  | 20 |
| 173 | 55   | 227  | TCACAACATTTCCGTGGTGT   | 59.855 | 20 |
| 241 | 346  | 586  | TCAATTGATTTTCGTAATCCTG | 60.187 | 23 |
| 270 | 428  | 697  | TTCATAACGGGTGAAGGACC   | 59.79  | 20 |
| 169 | 1639 | 1807 | TGAATTGGGATCAGTCACGA   | 60.048 | 20 |
| 220 | 29   | 248  | TACCATCTCGGGATGCAGTT   | 60.483 | 20 |
| 142 | 1273 | 1414 | TGGGGCCTTACACCAACTAT   | 59.312 | 20 |
| 108 | 33   | 140  | CTCAATTTTTCCGGCGAAT    | 60.024 | 19 |
| 279 | 211  | 489  | GGA CTGTGATGGGCTAGGAA  | 60.073 | 20 |
| 101 | 636  | 736  | CAACCCTGCCGAAAAGACTA   | 60.241 | 20 |
| 210 | 3    | 212  | GAAACCAGCGACACATTGC    | 60.265 | 19 |
| 212 | 22   | 233  | CACAAATGGGGTTGACTTCC   | 60.21  | 20 |
| 246 | 41   | 286  | ACCAAACGATGCAGATTTCC   | 59.939 | 20 |
| 181 | 1739 | 1919 | AAGCAAATGAAATTCTCGAC   | 59.614 | 22 |
| 182 | 2369 | 2550 | GCCCTTACAAGACCATCCAC   | 59.41  | 20 |
| 246 | 132  | 377  | ATGCCGATCGAATAATCAG    | 59.885 | 20 |
| 278 | 232  | 509  | CAATATCTTCTCCCCTCCC    | 59.722 | 20 |
| 277 | 676  | 952  | TGTATGCCCTGCAAAACAAA   | 60.111 | 20 |
| 229 | 3086 | 3314 | TAGGCACAAATCTATCCGGG   | 59.916 | 20 |
| 231 | 6    | 236  | CCAATTTATTGGGATTAAGGC/ | 60.037 | 22 |
| 237 | 207  | 443  | CCTCATTTTGAACCCGAATG   | 60.301 | 20 |
| 236 | 2300 | 2535 | GAGCCATCATCACTCCCAAT   | 59.893 | 20 |
| 162 | 1037 | 1198 | GATCCTTGCGCAACTCTTGT   | 60.406 | 20 |
| 235 | 1430 | 1664 | CGTTTCCAACACCGACCTAT   | 59.853 | 20 |
| 233 | 40   | 272  | CATTGGAGATGCCCTTAGGA   | 60.029 | 20 |
| 263 | 3643 | 3905 | ATTCCGAAACCTGCTGTTTG   | 60.11  | 20 |
| 165 | 221  | 385  | TGCAAGATTGAGCGAGATTG   | 60.096 | 20 |
| 134 | 127  | 260  | TTTCAGCCCTGCTTTTCAAT   | 59.823 | 20 |
| 270 | 38   | 307  | CAATTCTCCTGAATGTCCCC   | 59.336 | 20 |
| 269 | 870  | 1138 | TCTCATCCAAACCTCAACCA   | 59.059 | 20 |
| 225 | 287  | 511  | TTCATGCCTGTATTTCAATCG  | 58.639 | 21 |
| 257 | 3245 | 3501 | AGTGGGCCTTATCTTGCCTC   | 60.599 | 20 |
| 272 | 3891 | 4162 | GCCTCTTCTTCAGCAGCATC   | 60.249 | 20 |
| 191 | 612  | 802  | GAATATATCTTGCCGTTGCCA  | 59.942 | 21 |
| 262 | 194  | 455  | TTCACGTTTCACGCTTCCTA   | 59.464 | 20 |
| 216 | 242  | 457  | CGGACCAGCCTAGAATTTGA   | 60.206 | 20 |
| 243 | 305  | 547  | GAGAATGGCGAAGAAGTGGA   | 60.34  | 20 |

|     |      |      |                         |        |    |
|-----|------|------|-------------------------|--------|----|
| 238 | 12   | 249  | CGAACCATAGTTGTTGGACG    | 59.047 | 20 |
| 265 | 93   | 357  | CATGCATAATCGAACTGGAGC   | 60.621 | 21 |
| 260 | 77   | 336  | CCGTGGCTTTAGAGAGGAAA    | 59.448 | 20 |
| 279 | 123  | 401  | GCCACCAAAAATCACACAAA    | 59.42  | 20 |
| 256 | 99   | 354  | GCCATAACTCCCACTCCAAA    | 59.933 | 20 |
| 276 | 292  | 567  | CATGACAACCCTCTAGTTCGC   | 59.749 | 21 |
| 151 | 14   | 164  | TGTGGAACCTCATCATCTAATCC | 59.443 | 23 |
| 158 | 930  | 1087 | CATCCCTGCCTCCCATTAT     | 61.034 | 20 |
| 203 | 550  | 752  | TCGTACAAAGGAACTTGGGC    | 60.11  | 20 |
| 218 | 59   | 276  | ATCCCCCTACCCCAAACATA    | 60.258 | 20 |
| 171 | 980  | 1150 | GGGTTTTACCGCCGTTATTT    | 60.076 | 20 |
| 279 | 90   | 368  | CGCACGAGTGTTGTCGTAAG    | 60.507 | 20 |
| 160 | 837  | 996  | TAGAGAAATGATCGCCGGAC    | 60.177 | 20 |
| 274 | 220  | 493  | TCTGGTGGGAGATCAAAGC     | 60.195 | 20 |
| 264 | 363  | 626  | AGCAAGGCTTGGATCAATGT    | 59.7   | 20 |
| 170 | 1069 | 1238 | GCTTCTGCTCCAGAACTGC     | 60.285 | 20 |
| 186 | 174  | 359  | GCGCGGGTGTAATCTAGTG     | 60.658 | 20 |
| 109 | 985  | 1093 | GAAAATGGGTGTGACTTGGC    | 60.362 | 20 |
| 235 | 241  | 475  | GCGGTGGATTTAGGATTTCA    | 59.901 | 20 |
| 168 | 18   | 185  | GGTTGCGTACATCTAACCCC    | 59.316 | 20 |
| 110 | 12   | 121  | CAAATACAAATTCAAGGATTA   | 59.247 | 27 |
| 161 | 2061 | 2221 | TTGAAGGCCGCAATCTTTTA    | 60.691 | 20 |
| 102 | 38   | 139  | AATTAACCCCAAACCAACTC    | 57.427 | 24 |
| 226 | 21   | 246  | TGTAGCCGACCCCAATTTAT    | 59.297 | 20 |
| 268 | 4003 | 4270 | GTTGCAAACGACTGGGAAT     | 59.978 | 20 |
| 231 | 46   | 276  | CATCGATGTCAAACACAGC     | 60.12  | 20 |
| 269 | 4725 | 4993 | TCCTCTTCTTGGGTGATGG     | 60.042 | 20 |
| 271 | 117  | 387  | GCGATTGTCGGTGAGGTAAT    | 59.962 | 20 |
| 170 | 1381 | 1550 | GGCACACAATCATGGTGAAG    | 59.967 | 20 |
| 224 | 3476 | 3699 | GGGAGAGAGAGGGGAGTGTC    | 60.198 | 20 |
| 201 | 403  | 603  | ATCATCGCAATCTCTCGGAC    | 60.189 | 20 |
| 132 | 194  | 325  | ATTGGGCCTGAGTTTTGATG    | 59.933 | 20 |
| 230 | 123  | 352  | CGCGGTTATTTATGTCCGTT    | 59.853 | 20 |
| 123 | 941  | 1063 | GTCTAGCATCCTTTGGCAGC    | 59.985 | 20 |
| 202 | 2    | 203  | TGTAGCCGACCCCAATTTAT    | 59.297 | 20 |
| 177 | 19   | 195  | GGGTTTGTCTAGTTCATCCCA   | 60.221 | 22 |
| 251 | 19   | 269  | CCGAGGCTGAGATGGACTAC    | 59.827 | 20 |
| 280 | 1583 | 1862 | GGTGTGAATGAAGGGAGGA     | 59.903 | 20 |
| 265 | 110  | 374  | TGATGGGTGAGTTTTATATGAT  | 60.102 | 24 |
| 279 | 1262 | 1540 | AGCTGCAGATCACAGAGCAA    | 59.887 | 20 |
| 228 | 232  | 459  | CTGTGTGACTATTTCCGGGCA   | 59.716 | 20 |
| 260 | 311  | 570  | ATGTAGCCGACCCCAATGTA    | 60.214 | 20 |
| 256 | 76   | 331  | CTCACATCAGAATCCCCAGA    | 58.586 | 20 |
| 110 | 577  | 686  | TGAAACCTTCTGCCCTCAAT    | 59.67  | 20 |
| 254 | 84   | 337  | AGCATGAGTACATACATTTCTA  | 57.669 | 26 |
| 224 | 5711 | 5934 | TGGTGAATTTTGAAGGGA      | 57.917 | 20 |
| 186 | 50   | 235  | AAATCCCCAAAAGAACATGG    | 58.738 | 20 |
| 113 | 66   | 178  | AGCCTTTTGTGAATGATGGC    | 60.081 | 20 |
| 205 | 2430 | 2634 | ACTGCTTTCTCACAACGCCT    | 60.058 | 20 |
| 187 | 54   | 240  | GGATTCGATGTCTGCCAACT    | 60.081 | 20 |
| 149 | 471  | 619  | GGTTCATCGGGTCTGAGTA     | 59.927 | 20 |
| 218 | 364  | 581  | ACTCAATATGCCCAAGGTGG    | 59.813 | 20 |
| 243 | 16   | 258  | GGCGTTTGACTCCCTACCT     | 59.151 | 19 |
| 257 | 860  | 1116 | AAAATGAGGGTTGAGTGCGT    | 59.598 | 20 |
| 280 | 723  | 1002 | GCAGAAAGCGTTTTAGGTCG    | 60.018 | 20 |
| 240 | 14   | 253  | TTGTCCAAGTGGGAGATTGTT   | 59.439 | 21 |
| 193 | 342  | 534  | TGGATGAAGGGTTGTTGAT     | 60.173 | 20 |
| 116 | 89   | 204  | TTCAAATACCTTGACCAACGA   | 58.134 | 21 |

|     |      |      |                        |        |    |
|-----|------|------|------------------------|--------|----|
| 196 | 422  | 617  | CAAGGCATATAAGCTGGGGA   | 60.053 | 20 |
| 255 | 992  | 1246 | CTTGTAGACGCTTTACGCC    | 59.904 | 20 |
| 241 | 50   | 290  | TGGAATTGGTATGTGTTGTATC | 59.644 | 23 |
| 203 | 168  | 370  | CACACCGCCTTAATTTCTCC   | 59.569 | 20 |
| 269 | 100  | 368  | CCTTTATGATGGAGGCGGAT   | 61.165 | 20 |
| 268 | 218  | 485  | CCATGTGATGCGTCAACTCT   | 59.707 | 20 |
| 201 | 2031 | 2231 | TGCCTCATGTAATGGTGGAG   | 59.522 | 20 |
| 193 | 4228 | 4420 | GGGTGGATTCAATGCTCTTG   | 60.461 | 20 |
| 220 | 1090 | 1309 | GTCGGGGTAATCCGACCTAT   | 60.039 | 20 |
| 253 | 3716 | 3968 | TTGACCGTACTGGTGTATGAC  | 59.78  | 22 |
| 271 | 691  | 961  | CTGTTTCTTGTCTGCCACCA   | 59.873 | 20 |
| 271 | 61   | 331  | CATCGAATCAAATCCATCAAG  | 59.901 | 22 |
| 152 | 876  | 1027 | CCATTTTCCCATCAACATCC   | 59.991 | 20 |
| 150 | 140  | 289  | TACTATGCGGACTGGGACC    | 59.955 | 20 |
| 238 | 71   | 308  | AAGGGAGCTACAACCTTTCAT  | 59.685 | 23 |
| 111 | 458  | 568  | CTTTCCACCACTGGGGTTTA   | 59.824 | 20 |
| 272 | 27   | 298  | GCTACGAGGCAGATAAACGG   | 59.867 | 20 |
| 228 | 538  | 765  | CATAGTACCGTGGGGCAGAT   | 59.836 | 20 |
| 208 | 228  | 435  | TGTGAATTCCATCGGTGTTG   | 60.367 | 20 |
| 272 | 586  | 857  | CGATTCAACCACCAAATGCT   | 60.894 | 20 |
| 254 | 929  | 1182 | AGCCGATGTTGTCTGAAAGC   | 60.406 | 20 |
| 113 | 24   | 136  | GAATGGCATGTGGATCTGTG   | 59.925 | 20 |
| 238 | 223  | 460  | TCCGCGACAAACATATGAAA   | 60.073 | 20 |
| 247 | 12   | 258  | TTACAGCTTGGTTTCGGAGG   | 60.241 | 20 |
| 247 | 969  | 1215 | TGCATAGGATATTTATTACACC | 59.27  | 25 |
| 167 | 3962 | 4128 | GCCCTCAAATCTGACCAAAA   | 60.051 | 20 |
| 251 | 480  | 730  | TCATCATCACCACCATGTCC   | 60.189 | 20 |
| 239 | 772  | 1010 | CAATTTGATTGTGCGATGGT   | 59.4   | 20 |
| 165 | 81   | 245  | TTTCTCTGCAATTCCTTGG    | 60.184 | 20 |
| 276 | 104  | 379  | AATTGGCCCTCATTTCCATT   | 60.511 | 20 |
| 221 | 15   | 235  | TGCTCATCAAAAAGTTCCCA   | 59.247 | 20 |
| 103 | 963  | 1065 | GGGTGGGATTACCATACCCT   | 59.766 | 20 |
| 269 | 253  | 521  | CGATGTACGGTGTAAATGCTTG | 59.122 | 21 |
| 241 | 376  | 616  | CTTGTAAATCCGCATCCTCGT  | 60.096 | 20 |
| 181 | 315  | 495  | TCTACCACTGCACCACGAGA   | 60.463 | 20 |
| 206 | 395  | 600  | ACAAGTATCCACCACTCGCC   | 59.997 | 20 |
| 246 | 2    | 247  | CCTCCTCTATTGCTGATTTAAG | 60.108 | 24 |
| 159 | 453  | 611  | GGCGTTTTCTTTGTTGAGAG   | 59.853 | 20 |
| 223 | 959  | 1181 | AATTGTGCTCCATTTCCAG    | 59.933 | 20 |
| 245 | 243  | 487  | TCATCGAATCAAATCCATCG   | 59.43  | 20 |
| 245 | 176  | 420  | GGTCCACTTCCAGCTTTCAT   | 59.141 | 20 |
| 227 | 108  | 334  | AGCATCATGAGGAGGAGCAT   | 59.792 | 20 |
| 210 | 996  | 1205 | AGGCTTGCTCAACCAAATCA   | 60.776 | 20 |
| 151 | 327  | 477  | CTGACGGTGTCTGGAAGTA    | 59.745 | 20 |
| 206 | 10   | 215  | CCAAGACCCCAATTTGATT    | 60.91  | 20 |
| 221 | 417  | 637  | TTCTCAGTGCTATTTTGTCCG  | 59.402 | 22 |
| 103 | 273  | 375  | CAGCGGAGGAGAAGAGAGAA   | 59.82  | 20 |
| 208 | 236  | 443  | CTCTTTCCGCCGTCTGTATT   | 59.336 | 20 |
| 270 | 548  | 817  | GGTGCATGCAAGACAACAAG   | 60.31  | 20 |
| 276 | 187  | 462  | TCCATCTGTCATCTCATCCATT | 59.366 | 22 |
| 216 | 308  | 523  | ACATTCACCATCAGACGCAA   | 60.12  | 20 |
| 272 | 455  | 726  | CGTTCTAAGGCGTGCGTATT   | 60.285 | 20 |
| 242 | 11   | 252  | AGCTTTGGTTCATGTAGCCG   | 60.27  | 20 |
| 229 | 318  | 546  | AAATTCGCAAAAACGAAAGG   | 59.231 | 20 |
| 155 | 241  | 395  | ATCTGCCGACAAAATTGAGC   | 60.221 | 20 |
| 110 | 8    | 117  | CGTCATCGTGACGCTGCTGC   | 59.981 | 18 |
| 156 | 337  | 492  | CTCGTGCACCAGGTCAAAA    | 59.72  | 20 |
| 257 | 27   | 283  | CGACCCACATAGTGGGAAAA   | 60.745 | 20 |



|     |      |      |                        |        |    |
|-----|------|------|------------------------|--------|----|
| 277 | 4    | 280  | CTCTTCCATCCAATAATTCCTG | 58.528 | 23 |
| 231 | 268  | 498  | GTGTGACTGCATAAAGGCCA   | 59.722 | 20 |
| 279 | 213  | 491  | CCACCAAGAATTTGTGCCTT   | 59.971 | 20 |
| 242 | 1139 | 1380 | TGTTTCCCTTTCCCTTCCTT   | 59.912 | 20 |
| 197 | 62   | 258  | TTTCAAAGATGAGCTACTAGC  | 57.65  | 24 |
| 212 | 204  | 415  | TGCCTTTAACCAAAAGTGCC   | 60.11  | 20 |
| 208 | 1321 | 1528 | GATTCTTGCTAACATCTCTGCC | 59.933 | 23 |
| 124 | 3227 | 3350 | GCCACAATAACTTGTGAAACC  | 59.904 | 22 |
| 274 | 39   | 312  | CCACGTTGGGATCTTGGTAA   | 60.745 | 20 |
| 221 | 483  | 703  | CCTTTTTCTGTTTCTTGCGG   | 59.855 | 20 |
| 275 | 569  | 843  | TGGGAAAAGAAAATGGGAAA   | 59.36  | 20 |
| 208 | 208  | 415  | CCCAAGGATCGTATGTAGGG   | 59.264 | 20 |
| 158 | 224  | 381  | GCAGGTTGAACCGAGATGTT   | 60.119 | 20 |
| 277 | 917  | 1193 | GCCTAGGGTTTAGGCACCAT   | 60.34  | 20 |
| 269 | 803  | 1071 | GCGATGAAGCAACCACAAAT   | 61.043 | 20 |
| 228 | 335  | 562  | GTCCGTGGATATAACTCGGC   | 59.415 | 20 |
| 274 | 1623 | 1896 | CCCCATATGAATCCTTTCCA   | 59.576 | 20 |
| 141 | 5    | 145  | TGTAGCCGACCCCAATTTAT   | 59.297 | 20 |
| 212 | 2150 | 2361 | AGCTGTTCATGCTGTTGTGG   | 59.905 | 20 |
| 262 | 83   | 344  | GGAGTAGGGTTGGGAAGAGG   | 59.928 | 20 |
| 173 | 326  | 498  | GGGTCCCTTGTCGTATAGCA   | 59.955 | 20 |
| 132 | 427  | 558  | TGCCTTCTGAATGATGGACA   | 60.201 | 20 |
| 264 | 23   | 286  | ATGTTCCAGATCCATTTGCC   | 59.756 | 20 |
| 160 | 52   | 211  | TTGATGTAGATATGGAGCGAT  | 59.073 | 24 |
| 273 | 1450 | 1722 | AAGGGCCAGTCTGCTTACCT   | 60.268 | 20 |
| 261 | 539  | 799  | GGGTAAGATCCGACCCCTTA   | 60.145 | 20 |
| 230 | 986  | 1215 | CCACCAATGACAGCAATCAG   | 60.112 | 20 |
| 257 | 1953 | 2209 | GGTAGCCGAGCAGCTTCTAA   | 59.752 | 20 |
| 236 | 5817 | 6052 | GGCAATCTTCAGTGGAGGAG   | 59.803 | 20 |
| 117 | 23   | 139  | GAAGCTCGGAGAAGTTACGC   | 59.222 | 20 |
| 247 | 1517 | 1763 | TCCTGCAGTTTTTGTGGTTG   | 59.734 | 20 |
| 184 | 122  | 305  | TTTGGAGGGGTTTAGGTTCA   | 59.401 | 20 |
| 277 | 233  | 509  | TCGGGCTTTGATTTCAAGAT   | 59.645 | 20 |
| 218 | 2192 | 2409 | CGTTCAGGATATGCTTCGT    | 60.096 | 20 |
| 138 | 1199 | 1336 | TGGTTCGGATTGACATGAAA   | 59.9   | 20 |
| 195 | 32   | 226  | TTCAGAATCATTTACTTCCAAG | 57.589 | 25 |
| 167 | 56   | 222  | TTCGAAGGTGTTGATCCCAT   | 60.317 | 20 |
| 121 | 244  | 364  | AGAGGAAGAAAGGCTGTCCG   | 60.892 | 20 |
| 256 | 1190 | 1445 | CGATGTTGCCACAATTTCT    | 60.894 | 20 |
| 277 | 41   | 317  | GGTGTAGATCTGGCGGGTAG   | 59.574 | 20 |
| 264 | 108  | 371  | GCCGACCATTTTTAGTGACC   | 59.434 | 20 |
| 137 | 212  | 348  | CAAAAAGGAACGCAAAAACA   | 58.839 | 20 |
| 234 | 45   | 278  | TATCAAAACTGGATTGGCCC   | 59.762 | 20 |
| 226 | 250  | 475  | GTGGATCAGCAGTGGCTTTT   | 60.263 | 20 |
| 198 | 1322 | 1519 | ACATGCAAGGAGTGAAAGGC   | 60.263 | 20 |
| 252 | 31   | 282  | GGGGCGTGACATTAACACTAC  | 59.373 | 21 |
| 185 | 43   | 227  | GCCGGAAGAAAAGACACAAG   | 59.853 | 20 |
| 220 | 209  | 428  | TCACCGTTTTATCCAAGCTC   | 60.074 | 20 |
| 253 | 259  | 511  | CCCCAACCTTTTACTCCTCC   | 59.799 | 20 |
| 216 | 34   | 249  | AATGTTGCGTACATCTGACCC  | 59.874 | 21 |
| 218 | 964  | 1181 | TGAATAATGTGGGCAAACCA   | 59.786 | 20 |
| 193 | 675  | 867  | AATGTTTCTACGCATTGGGG   | 59.823 | 20 |
| 107 | 3    | 109  | GCAAAATCTCAATTGTAGTGC  | 58.768 | 22 |
| 148 | 277  | 424  | ACATGTGGTGGCAGGTTACA   | 59.88  | 20 |
| 257 | 92   | 348  | GGCTGAAAAGGCTGAAACTG   | 59.993 | 20 |
| 229 | 39   | 267  | TACTGGGCTTCTCCGACCTA   | 59.83  | 20 |
| 127 | 568  | 694  | TGTTAGATTTTCCGACGCCT   | 59.708 | 20 |
| 194 | 2293 | 2486 | TGTAGCCCGTGACTIONTACCA | 60.175 | 20 |

|     |      |      |                        |        |    |
|-----|------|------|------------------------|--------|----|
| 269 | 4    | 272  | ACCCTCACTAGTTTCGGTTAG/ | 57.456 | 23 |
| 229 | 746  | 974  | ACAACCAAGCAGGTCCAAAA   | 60.529 | 20 |
| 127 | 24   | 150  | CGATACCCATAACGGGTGAG   | 60.206 | 20 |
| 205 | 4    | 208  | GGAGGAGAGAGAGAGGGGAC   | 59.489 | 20 |
| 218 | 385  | 602  | TGTC AATGCATCTGCCTCTC  | 59.95  | 20 |
| 276 | 6    | 281  | GAAAATGCTGGAAATGAGGA/  | 59.148 | 21 |
| 275 | 1114 | 1388 | ACGGCTAAAATCAGGAGCTG   | 59.476 | 20 |
| 173 | 730  | 902  | TAAATCCTTCGAGGTCACCG   | 60.066 | 20 |
| 133 | 17   | 149  | GAATCAGTGCTTGCCGATCT   | 60.37  | 20 |
| 255 | 80   | 334  | CTGTGGAAGCATCAAAGCAG   | 59.591 | 20 |
| 119 | 9    | 127  | GCGTTATCGTGACGTCGG     | 61.269 | 18 |
| 186 | 2615 | 2800 | CTTTTTGTTTTGGAGTGGGG   | 59.443 | 20 |
| 134 | 2465 | 2598 | TAGCAACTGCACCAGGATGA   | 60.413 | 20 |
| 123 | 59   | 181  | CCGGATCCACTACAAGTTCC   | 59.405 | 20 |
| 163 | 1113 | 1275 | TGCATCTGAATACACGAGGTT  | 58.242 | 21 |
| 261 | 895  | 1155 | TGCTCATTGTCAGTTTCCCA   | 60.24  | 20 |
| 125 | 1831 | 1955 | TCATCAATTGCAGCCAAAAG   | 59.809 | 20 |
| 172 | 312  | 483  | CTCAATAGCACATGGCCAAA   | 59.688 | 20 |
| 217 | 483  | 699  | TAGCCGACCCCAACTTATTG   | 59.953 | 20 |
| 203 | 372  | 574  | GTTGGCCCTCTCTGTGAAAC   | 59.703 | 20 |
| 276 | 1030 | 1305 | TGCACATTTTCCATTGAAGG   | 59.518 | 20 |
| 205 | 106  | 310  | CCAAGGCAGAGAAATATGATC  | 60.445 | 23 |
| 216 | 327  | 542  | ATTGGCATTTTGTAGGCTCA   | 58.241 | 20 |
| 181 | 11   | 191  | AGCTTTGGTTCATACAGCCG   | 60.27  | 20 |
| 260 | 1428 | 1687 | CACCCGGAACCTCGAAAAAT   | 59.918 | 19 |
| 228 | 2917 | 3144 | AGAAACAAAAGCAAACCGCT   | 59.02  | 20 |
| 155 | 575  | 729  | CTGCACATTCTTGCTGTGT    | 59.905 | 20 |
| 204 | 7    | 210  | ATGTAGCCGACCCCAATTTA   | 59.297 | 20 |
| 262 | 17   | 278  | GACCCCAATTTGATTGGAAA   | 59.599 | 20 |
| 188 | 269  | 456  | GAATCGATCCGACGACTCAT   | 60.042 | 20 |
| 175 | 138  | 312  | GTTGGTTCAGGGTTAGCAGC   | 59.74  | 20 |
| 278 | 15   | 292  | TTGTATTGCTTGATTGCAGGA  | 59.639 | 23 |
| 209 | 10   | 218  | GGTACGTTACTGTAAAACCTC  | 58.153 | 24 |
| 271 | 4    | 274  | CAGAGCGCACTCGAAGAGTA   | 59.49  | 20 |
| 245 | 4049 | 4293 | CAGAGGCACAGATTAGCAGC   | 58.777 | 20 |
| 161 | 592  | 752  | TACTGCTGATTCAAGTGGCG   | 60.011 | 20 |
| 274 | 8    | 281  | AGCTAACCATTTACTTGCACA  | 59.566 | 25 |
| 120 | 234  | 353  | AAAGCATTACGTAACGGGT    | 59.499 | 20 |
| 271 | 2481 | 2751 | AACACTATCCCACAAATCACC  | 59.218 | 22 |
| 174 | 17   | 190  | TCGATGTATTGTTTGGATAATA | 60.024 | 26 |
| 206 | 248  | 453  | ATTCGGATTGCATCCAAGAA   | 60.414 | 20 |
| 113 | 1760 | 1872 | TTTTCCCACTCTCATCCACC   | 59.903 | 20 |
| 228 | 30   | 257  | TGCATTCAACATCATTACAAAC | 59.952 | 25 |
| 244 | 5    | 248  | GGACTTTGGTGTGAGAAAATT  | 58.602 | 22 |
| 136 | 3    | 138  | GAATTTACCAATCGGGAGT    | 58.838 | 20 |
| 260 | 44   | 303  | TGAGATTCCCGCATCCTATC   | 59.998 | 20 |
| 278 | 1731 | 2008 | AGGTGGGATCTGAATGCTGT   | 59.535 | 20 |
| 197 | 718  | 914  | TGAAGATTCGTGCGATGTGT   | 60.272 | 20 |
| 201 | 417  | 617  | AGATTTTGGATTCGTGGCTG   | 60.074 | 20 |
| 279 | 3    | 281  | CCTCAAGACCCCAATTTGATT  | 60.173 | 21 |
| 228 | 993  | 1220 | ATGAACCGGGTCCCAAAT     | 59.987 | 18 |
| 154 | 714  | 867  | AAGCAGAAGAGAAGGTGGGA   | 59.014 | 20 |
| 241 | 15   | 255  | AACGAGAGAGAGAATGAGTG   | 59.93  | 23 |
| 229 | 49   | 277  | GTGGCCGATCGAGTTAGAGA   | 60.362 | 20 |
| 250 | 358  | 607  | TGTTGATGGTTGAGAGGTGTC  | 58.553 | 21 |
| 278 | 808  | 1085 | AGAATCACAATGCTCCTGGC   | 60.226 | 20 |
| 124 | 331  | 454  | AAAAATGATGATTCCGGGTC   | 58.691 | 20 |
| 190 | 475  | 664  | TCAATATGAATTGATCGCCG   | 59.478 | 20 |

|     |      |      |                         |        |    |
|-----|------|------|-------------------------|--------|----|
| 270 | 363  | 632  | TGCTCGATCCACCTCTTGTA    | 59.394 | 20 |
| 274 | 347  | 620  | AAATCAAATTGTGTCGAGGC    | 57.668 | 20 |
| 183 | 3242 | 3424 | GTCTAAAATTCGGCAGCGAC    | 59.851 | 20 |
| 246 | 1071 | 1316 | GGGATCCACCACTGAGTCAT    | 59.774 | 20 |
| 203 | 189  | 391  | TACGTTGTACTIONGACGCCCTG | 59.781 | 20 |
| 153 | 6    | 158  | TGAAGTTTCGAAGACTGGAAG   | 59.097 | 22 |
| 200 | 321  | 520  | AACGGTTTTTTCACCGTTGTC   | 59.875 | 20 |
| 100 | 461  | 560  | AATATTGGCTTCCCCAAACC    | 60.02  | 20 |
| 129 | 8    | 136  | TGTAGCCGACCCCAATTTAT    | 59.297 | 20 |
| 174 | 263  | 436  | TGAAAACGATTTAAACGTGGG   | 59.855 | 21 |
| 206 | 4486 | 4691 | TAATTCATGTAGCCGACCCC    | 59.784 | 20 |
| 253 | 718  | 970  | AGTTTCTAGGTCGGCCCTGT    | 60.132 | 20 |
| 258 | 815  | 1072 | TGCATACCAAGTTATTGGCG    | 59.585 | 20 |
| 126 | 977  | 1102 | CAAAACGCCTCCAATTTTGT    | 59.975 | 20 |
| 175 | 721  | 895  | TTTCTCATGGGTGTGGGATT    | 60.173 | 20 |
| 235 | 15   | 249  | CTGCCATCTGGTACAACACTGC  | 59.318 | 20 |
| 249 | 959  | 1207 | ACCTATGGATGCACCGGTTA    | 60.214 | 20 |
| 155 | 224  | 378  | CTCGTAAAATCCGGCAAAAA    | 60.068 | 20 |
| 271 | 8    | 278  | ATGTAGCCGACCCCAATTTA    | 59.297 | 20 |
| 209 | 49   | 257  | TGATCACAAACTTAGCGGACA   | 59.332 | 21 |
| 218 | 559  | 776  | TGCTTATTTGGATTGGCCTC    | 60.038 | 20 |
| 236 | 936  | 1171 | ATTGATCGAGACCGAACCAC    | 59.934 | 20 |
| 142 | 13   | 154  | AGTTCTAGTAGCCCGGAGCC    | 59.87  | 20 |
| 214 | 141  | 354  | CCTGAATTGCATTTTCGTCA    | 59.664 | 20 |
| 213 | 180  | 392  | GCAGACCTAACATAGTGGGA    | 59.552 | 23 |
| 223 | 40   | 262  | ATCCTCCTCCACCCGTCTAC    | 60.336 | 20 |
| 273 | 235  | 507  | GAATTCATGTCGGGTTAGCG    | 60.469 | 20 |
| 242 | 1217 | 1458 | ACAGGCTGGCTCTTTCAATC    | 59.434 | 20 |
| 251 | 42   | 292  | GGCTGCAGAAATGAGAGGAG    | 60.096 | 20 |
| 117 | 2    | 118  | GGCTAGACTTCACATTTTCA    | 58.378 | 22 |
| 262 | 710  | 971  | ATGCTTGCAAGGGTGTAAGA    | 58.379 | 20 |
| 242 | 18   | 259  | GTACCGATATCATCCCCACC    | 58.937 | 20 |
| 220 | 473  | 692  | AGGTCAGATCGAAGGTCTCG    | 59.405 | 20 |
| 257 | 108  | 364  | ACTGCATCTGGATCCTCCAC    | 60.08  | 20 |
| 183 | 3253 | 3435 | CAACACTGCAAAATTGGTCG    | 60.149 | 20 |
| 112 | 2998 | 3109 | AAGGGAAGTGTGGGGAAGAA    | 60.852 | 20 |
| 221 | 728  | 948  | ATCCCAATTTGGCAACTCAT    | 59.249 | 20 |
| 179 | 288  | 466  | CCTGAAAAGGTTGCTGAAG     | 59.846 | 20 |
| 268 | 323  | 590  | TCTGGTGGAGGTTATGGGAG    | 59.92  | 20 |
| 244 | 458  | 701  | TTCAGTCATTGCGTGCACCT    | 60.459 | 20 |
| 253 | 4    | 256  | CAGAAATGACAAAATTCATGG   | 59.456 | 22 |
| 198 | 60   | 257  | AGTCTCCCTCGCCAGAAAAT    | 60.212 | 20 |
| 276 | 959  | 1234 | CAAACATTATGCACCAAGCG    | 60.133 | 20 |
| 168 | 192  | 359  | CGCGCACTCAAATAGTAGCA    | 60.177 | 20 |
| 271 | 388  | 658  | TGAGAGAACCTCCCCCTTTT    | 60.045 | 20 |
| 146 | 1360 | 1505 | GCGGTTGAAGGTCTTATTGC    | 59.713 | 20 |
| 110 | 175  | 284  | AAGCCAACAATGGAGGAGTG    | 60.111 | 20 |
| 154 | 7    | 160  | ATGTAGCCGACCCCAATTTA    | 59.297 | 20 |
| 203 | 386  | 588  | GCCTTCTCGAATTTGTCTGC    | 59.962 | 20 |
| 139 | 1    | 139  | TGTAGCCGACCCCAATTTAT    | 59.297 | 20 |
| 210 | 1001 | 1210 | CCGCAATTTGATTGGGAATA    | 60.641 | 20 |
| 280 | 88   | 367  | TCACGGGTTTGGGAATTTAA    | 60.16  | 20 |
| 228 | 4452 | 4679 | AGAGAAGGTCCCCAAAGCTC    | 59.817 | 20 |
| 230 | 949  | 1178 | CCCAGCTCACGTTTACCCTA    | 60.125 | 20 |
| 245 | 57   | 301  | TTTTATCTTCGGTGCGGAAC    | 60.074 | 20 |
| 253 | 31   | 283  | GTTTCATCTGTAACGGGTGGG   | 60.232 | 20 |
| 182 | 57   | 238  | TCAGGTTGCCCTCCTTTTAA    | 59.679 | 20 |
| 217 | 24   | 240  | GGTGGTATGGTGTGGAGGAC    | 60.096 | 20 |

|     |      |      |                        |        |    |
|-----|------|------|------------------------|--------|----|
| 269 | 35   | 303  | TCTTCGTGTTTGTCCATTCG   | 59.691 | 20 |
| 279 | 815  | 1093 | ACGCCATTTTCGTGTTTAATGA | 60.37  | 21 |
| 119 | 441  | 559  | GATTTTCTCGGATTCCATGC   | 59.468 | 20 |
| 206 | 0    | 205  | CACAATTTGAGGTGTATGGCA  | 59.454 | 21 |
| 252 | 376  | 627  | TGCATTTGACAATCATGCAC   | 59.078 | 20 |
| 150 | 541  | 690  | TATCATCCCCAAAGCAAAA    | 58.082 | 20 |
| 209 | 48   | 256  | CGTAAAGAATGGGCTGGATT   | 59.043 | 20 |
| 210 | 295  | 504  | TTTGAACGTGGTCTTCATC    | 59.697 | 20 |
| 138 | 939  | 1076 | CAACTGTCCTTGGAAGAGGG   | 59.691 | 20 |
| 204 | 451  | 654  | GTGTGGAAAAGGGAGTGCAT   | 59.973 | 20 |
| 215 | 483  | 697  | CCACCTGCGAACCATAAAAT   | 59.823 | 20 |
| 251 | 292  | 542  | TTTTGGATTGCAACCTCCTT   | 59.546 | 20 |
| 127 | 865  | 991  | AATGGGTGGCCAAGTTAGTG   | 59.853 | 20 |
| 214 | 913  | 1126 | GGCTACAACTGCCATAA      | 59.96  | 20 |
| 277 | 272  | 548  | GAAATCCAGAACGCAGGTTT   | 59.174 | 20 |
| 137 | 506  | 642  | TGGAGTAAAAGATGGTGGGG   | 59.784 | 20 |
| 164 | 258  | 421  | TTTTGCATGATTTTTGTGGAA  | 59.039 | 21 |
| 123 | 265  | 387  | TTCTTTGCGCCATGACAAAT   | 60.448 | 20 |
| 155 | 892  | 1046 | CCCCGCACATAGTCAAGAAT   | 59.955 | 20 |
| 268 | 2824 | 3091 | TGTCCGGTGTGTTTTAATG    | 59.439 | 20 |
| 251 | 453  | 703  | GCTGCAATAATGGAGGGAAG   | 59.668 | 20 |
| 180 | 21   | 200  | GAGAATGGAGCGGAGTTCT    | 60.735 | 20 |
| 248 | 14   | 261  | AGGAGGGGAAGAGAGGAGAA   | 59.367 | 20 |
| 152 | 40   | 191  | TGACCAAGATACACCTTGCAT  | 58.09  | 21 |
| 186 | 2721 | 2906 | TGGAATGATGAGGTGGGTAAA  | 60.177 | 21 |
| 218 | 638  | 855  | AACCAATGGCGCATATAACC   | 59.688 | 20 |
| 251 | 12   | 262  | AAATCCCCCTTCTAGGGT     | 60.014 | 20 |
| 117 | 398  | 514  | TACTGCTCTGGGGCATCT     | 59.973 | 20 |
| 184 | 811  | 994  | ACATTCTGGTCCGTAGGTGG   | 59.844 | 20 |
| 262 | 259  | 520  | TTTTCCCCCTCATCTCATCA   | 60.395 | 20 |
| 140 | 8    | 147  | TGGCCCAACCTCAATATTCT   | 59.387 | 20 |
| 196 | 1171 | 1366 | GCGTGATACCAATGGATGTG   | 59.805 | 20 |
| 242 | 80   | 321  | ATCGGGGTCTTGGAAGGTTA   | 60.683 | 20 |
| 106 | 36   | 141  | CGGTTTTCCCTACTCTCCCT   | 59.571 | 20 |
| 176 | 5186 | 5361 | TTTTAGCTTCTGGTGGGCTG   | 60.378 | 20 |
| 265 | 71   | 335  | TTGCCGATCATCCACTACA    | 60.073 | 20 |
| 253 | 2    | 254  | TTCTGTCAATTTATGTGTTAAC | 58.056 | 27 |
| 163 | 77   | 239  | GCCATTGGAGTTCCAAAAG    | 59.546 | 20 |
| 148 | 206  | 353  | CTAGCCGAATTCTCCTCGAA   | 59.546 | 20 |
| 208 | 797  | 1004 | GGGGTTTTGGATGAACTTT    | 60.032 | 20 |
| 242 | 2286 | 2527 | CTTCATCCACCTTCACACCA   | 59.52  | 20 |
| 123 | 34   | 156  | AATAATTTACCGGCAATGGTG  | 58.751 | 21 |
| 270 | 123  | 392  | GAAAACCTGAGCCAACCCAAA  | 60.088 | 20 |
| 119 | 157  | 275  | CCGGTAATTCAACAAAACGA   | 58.531 | 20 |
| 279 | 1611 | 1889 | CCACGAATATGACGACAACG   | 59.988 | 20 |
| 261 | 1847 | 2107 | AAAAAGGGTCCAAAAGTGGG   | 60.193 | 20 |
| 208 | 1363 | 1570 | TGCCTTCTTTAACAGCCCAT   | 59.708 | 20 |
| 266 | 715  | 980  | TTCATCAGGCGTATGTGGTC   | 59.527 | 20 |
| 235 | 2126 | 2360 | TCCCACGAGGAATTTGAGTC   | 60.05  | 20 |
| 268 | 362  | 629  | GAGGTTATGGTCACGGTGGT   | 59.703 | 20 |
| 253 | 282  | 534  | ACAACCTCGTCTTCCGTGGAT  | 59.579 | 20 |
| 120 | 26   | 145  | GCCAGCCTATCTCCAGTTTG   | 59.836 | 20 |
| 213 | 140  | 352  | GCATGGGGTTATTCAAGAGG   | 59.387 | 20 |
| 122 | 209  | 330  | TTGGTTCGAGCCATTGTGTA   | 60.111 | 20 |
| 270 | 192  | 461  | AGTTTGGGTATCCGCTCCTC   | 60.464 | 20 |
| 269 | 1620 | 1888 | TAAAGCCGAATTCGTTACAAC, | 59.661 | 22 |
| 119 | 116  | 234  | CCGGTAATTCAACAAAACGA   | 58.531 | 20 |
| 218 | 971  | 1188 | GGACCGTCACAGTTAGTGCC   | 60.577 | 20 |

|     |      |      |                        |        |    |
|-----|------|------|------------------------|--------|----|
| 110 | 691  | 800  | CGTTGTAAACGCATACCACA   | 59.541 | 21 |
| 201 | 457  | 657  | AAATCCAGCAGCAAATCGAC   | 60.221 | 20 |
| 153 | 128  | 280  | CCGAGAGATGTCTCCCAGAA   | 60.34  | 20 |
| 245 | 44   | 288  | TTTCGGGAATTCAAAGCATC   | 60.016 | 20 |
| 267 | 726  | 992  | CTCCCACCCAAAATCTCAA    | 59.903 | 20 |
| 268 | 80   | 347  | TTGGGAGCAAATTTCAAGAGT  | 58.823 | 21 |
| 279 | 52   | 330  | AAATTGGTGCGGATGTCTCT   | 59.556 | 20 |
| 256 | 437  | 692  | CAAACCGACAGGGAAACACT   | 60.005 | 20 |
| 249 | 31   | 279  | ATTCGGTTGCTTTTGTCCACC  | 59.978 | 20 |
| 136 | 147  | 282  | ACTGTTGTTGCTGCTGTTGC   | 60.104 | 20 |
| 154 | 633  | 786  | AAACAGTTTCCCTGCAATCG   | 60.11  | 20 |
| 241 | 3776 | 4016 | CAGCTTGACCACAATGCTGT   | 59.905 | 20 |
| 186 | 313  | 498  | CAAGGAAGTGGCATGCTTTT   | 60.249 | 20 |
| 241 | 305  | 545  | GTTTTGCTATTGTGGTGTTC   | 59.088 | 23 |
| 277 | 1729 | 2005 | TGTGAACCTCCTCCAACAACA  | 59.172 | 21 |
| 185 | 1653 | 1837 | CCACCAAACCACCAGTACC    | 60.126 | 20 |
| 159 | 28   | 186  | GAATTTGGCCAAGTCGATTC   | 59.51  | 20 |
| 268 | 5474 | 5741 | CTTCGGGGCTGCATAGATAA   | 60.188 | 20 |
| 274 | 270  | 543  | TGTTGAGGCATGGCTATGAA   | 60.22  | 20 |
| 230 | 3121 | 3350 | ACAGTTCAGCTCCACAACCC   | 60.159 | 20 |
| 221 | 728  | 948  | CATGTGCATCAAACGGAAAC   | 59.972 | 20 |
| 168 | 1030 | 1197 | AGCCACCGAAACAAAAGAA    | 59.724 | 20 |
| 183 | 83   | 265  | TGAGATTCACCTGCCCTTC    | 60.195 | 20 |
| 190 | 2468 | 2657 | GAGGGCTCTTGTTCTCTCA    | 59.53  | 20 |
| 274 | 3241 | 3514 | TCTTCTTGACCAATAATAAAG  | 57.423 | 27 |
| 137 | 101  | 237  | CCAAACCAACCTCGCTCTTA   | 60.241 | 20 |
| 223 | 36   | 258  | AAGAGATAGGGGAAGGAGCG   | 59.805 | 20 |
| 143 | 207  | 349  | AGTTCTCCTATCCTTCGGGG   | 59.531 | 20 |
| 165 | 1    | 165  | CCAGACATCGAAGAAGCTGTT  | 59.487 | 21 |
| 269 | 8    | 276  | AGGAGCCACCTGATGAACAC   | 60.12  | 20 |
| 228 | 1554 | 1781 | GCTTGTCCCTCCACTTGAAGC  | 59.997 | 20 |
| 184 | 330  | 513  | GGGAGGTTTCGTCACACAGT   | 60.009 | 20 |
| 111 | 1    | 111  | TGTAGCCGACCCCAATTTAT   | 59.297 | 20 |
| 229 | 127  | 355  | ACAACCAGTTGGTTTCGAGA   | 60.545 | 20 |
| 165 | 56   | 220  | ACCTAAGCAATTGATAGTGCC  | 60.036 | 23 |
| 279 | 70   | 348  | GTTTTCCACCAAGGTTGCAT   | 59.836 | 20 |
| 160 | 1627 | 1786 | CGATCTTTTCTTCGCCATGT   | 60.214 | 20 |
| 279 | 187  | 465  | TCGGTTTATACAATAACCAATT | 57.809 | 27 |
| 252 | 21   | 272  | TGACATTCCTTTCCATTGGC   | 60.843 | 20 |
| 279 | 90   | 368  | AGTCACGGGTTCAATTTCA    | 60.495 | 20 |
| 174 | 36   | 209  | GCGAGTTTCTTGAGGTCGTC   | 59.997 | 20 |
| 270 | 351  | 620  | CTGTTGTCGGTGGTCATGTT   | 59.441 | 20 |
| 162 | 247  | 408  | TCGTGCAAGTTTTCAAGATCA  | 59.454 | 21 |
| 152 | 922  | 1073 | AGGTTGCGTACATCTGACCC   | 59.997 | 20 |
| 253 | 3200 | 3452 | AGGTGCTAGCAGCATGGAAT   | 59.866 | 20 |
| 173 | 327  | 499  | TCACGATCCTTCTGTCCCTT   | 59.655 | 20 |
| 200 | 295  | 494  | AAATCCCCTTCCCATCATT    | 59.959 | 20 |
| 240 | 479  | 718  | CGCTTCCATTGATTTAAGG    | 59.542 | 20 |
| 254 | 304  | 557  | TCAATTCAAAATCAAACCATG  | 59.816 | 22 |
| 167 | 514  | 680  | CTTGAATGTTACGGCAGAA    | 59.84  | 20 |
| 134 | 122  | 255  | TTGATACTACACGGTGGCGA   | 60.134 | 20 |
| 188 | 310  | 497  | TTAATGCATTTTGCCTGCAT   | 59.173 | 20 |
| 119 | 2149 | 2267 | ACTTGGCACGATCCAATTTT   | 59.434 | 20 |
| 118 | 889  | 1006 | CATCCCATGGCTGTTGTTCT   | 60.924 | 20 |
| 107 | 429  | 535  | TCTCCTGTACTTCGTTTAGACA | 59.377 | 25 |
| 239 | 245  | 483  | ACCTATGGATGCACCGGTTA   | 60.214 | 20 |
| 209 | 85   | 293  | ATGTTTCATGTTGGGTGCTGA  | 59.967 | 20 |
| 189 | 880  | 1068 | GGGATCCAAACCTCGACATA   | 59.75  | 20 |

|     |      |      |                        |        |    |
|-----|------|------|------------------------|--------|----|
| 162 | 768  | 929  | GACGTCGCAGAGGAGAACAT   | 60.418 | 20 |
| 262 | 13   | 274  | GTGGAGCTTATGTTGCATGG   | 59.152 | 20 |
| 182 | 56   | 237  | TGCCATGATTGTTGAAGGAA   | 60.049 | 20 |
| 189 | 1205 | 1393 | CCATGCATTTTCAGGTTTTCC  | 60.309 | 20 |
| 160 | 2407 | 2566 | CTCCAAAAGCTTGCACACAA   | 60.027 | 20 |
| 257 | 394  | 650  | TGGTGATTCCCTTGAATGTG   | 60.517 | 20 |
| 261 | 134  | 394  | TGACATTGTGACCTTCAGGC   | 59.682 | 20 |
| 279 | 10   | 288  | ACCATGAAACTAGCCAAGCA   | 58.379 | 20 |
| 136 | 3215 | 3350 | ATCTGGGATTTTCTGGCTCA   | 59.629 | 20 |
| 246 | 262  | 507  | AAAATCTTTTGGGGCGTTCT   | 59.945 | 20 |
| 218 | 612  | 829  | ATGTCTATCCCCTTGGGTCC   | 60.015 | 20 |
| 259 | 2165 | 2423 | GAAACCGAAACCCGACAAAT   | 61.08  | 20 |
| 265 | 1173 | 1437 | CTTCCCTAACCGTCCCTTGT   | 60.353 | 20 |
| 110 | 310  | 419  | GCATTTGTTGTTGTGGCATC   | 59.979 | 20 |
| 271 | 455  | 725  | ACAAAACACAACAACCCCGT   | 60.171 | 20 |
| 230 | 533  | 762  | TGCGGATGTTGTGGGTAATA   | 59.809 | 20 |
| 250 | 541  | 790  | TGTCAAGCTCTTGCATAGCAG  | 60.219 | 22 |
| 135 | 1587 | 1721 | CCGCATTGGGTTGTGTAATA   | 59.301 | 20 |
| 111 | 1231 | 1341 | CTGGGTCCAGACAACACAGA   | 59.705 | 20 |
| 158 | 958  | 1115 | AAGCGTTGAAGCAGCAAAGT   | 60.197 | 20 |
| 103 | 358  | 460  | CCAACCTCAGAATCATCTTTC  | 59.17  | 22 |
| 144 | 337  | 480  | TTGATCTCAGTCAGCCATGC   | 59.95  | 20 |
| 238 | 17   | 254  | TCAAACATTTAGTTGGCACA   | 58.601 | 23 |
| 181 | 274  | 454  | CTTTCTCCATCCTCAACCGA   | 60.187 | 20 |
| 246 | 6    | 251  | ATATAGGCCCAAATCTGGCA   | 59.392 | 20 |
| 190 | 17   | 206  | CTATCGGTACTCGGATGGGA   | 59.91  | 20 |
| 175 | 3093 | 3267 | GTATAGGGGCGTTGGCTTTT   | 60.332 | 20 |
| 181 | 459  | 639  | AACCCTCCCCTCTCCAAATA   | 59.761 | 20 |
| 120 | 54   | 173  | ACATCATATGGCGGAGGAGA   | 60.448 | 20 |
| 221 | 2046 | 2266 | ATTGGTCCAGTGCCCAGTAT   | 59.288 | 20 |
| 166 | 385  | 550  | CCGTGTTTCGATGACTACGTG  | 60.175 | 20 |
| 262 | 535  | 796  | TCTCGCAGAGGAGGTCAAAT   | 59.95  | 20 |
| 178 | 421  | 598  | TCATCAAGATTGAGATGGCG   | 59.756 | 20 |
| 184 | 1180 | 1363 | TGCGGGTAAAAACCCAATAA   | 60.178 | 20 |
| 113 | 1972 | 2084 | TAGACACATGCCAACTCCCA   | 60.112 | 20 |
| 233 | 655  | 887  | TGATGGTGACAACAGGAAGC   | 59.682 | 20 |
| 112 | 1183 | 1294 | GGGACAACGGGTTCTGATAG   | 59.405 | 20 |
| 206 | 142  | 347  | CCAGCAGACACGAAACAGAA   | 60.025 | 20 |
| 280 | 86   | 365  | GGTCTCAACTTCGCGATCAT   | 60.226 | 20 |
| 103 | 71   | 173  | ATGGTTTGGGAATAATTGGG   | 58.483 | 20 |
| 276 | 715  | 990  | GATTCGTGTCGGGTTAGCAT   | 59.962 | 20 |
| 243 | 65   | 307  | GGGTGGTTTATGGCCTTTTT   | 60.055 | 20 |
| 108 | 0    | 107  | CATTTGGGGGTATTACAATTTT | 58.2   | 23 |
| 278 | 130  | 407  | GCGTTTCTTAAACTGCCTGC   | 60.025 | 20 |
| 142 | 52   | 193  | AGCTGCACGACATGATTGAA   | 60.423 | 20 |
| 102 | 289  | 390  | GAAGGGGGAGACCGAAATTA   | 60.258 | 20 |
| 153 | 62   | 214  | TGCTCTTTTCACACCACCAG   | 59.873 | 20 |
| 163 | 625  | 787  | CGACCTTTTGTTGTGCTTGA   | 59.881 | 20 |
| 160 | 254  | 413  | GTGGAGGGGATTTGTGTTTG   | 60.21  | 20 |
| 248 | 15   | 262  | GTATTCGAGCAACCACCTCC   | 59.556 | 20 |
| 257 | 459  | 715  | AAAATATGGTGTGCATAACGA  | 58.579 | 23 |
| 199 | 126  | 324  | ACAGTCTTGCGCCACAAAAT   | 60.699 | 20 |
| 141 | 816  | 956  | TTTGATTGACAAGTCGGGT    | 60.353 | 20 |
| 254 | 1856 | 2109 | TATCGTCGTGGTGTGATCTTGC | 59.679 | 20 |
| 220 | 840  | 1059 | AGGTGCAGATGTGTCTGTCTG  | 59.897 | 20 |
| 206 | 1738 | 1943 | TACAAGAGGCCACCGAAACT   | 59.734 | 20 |
| 222 | 173  | 394  | AAAGAGGTTGTTTCCGTTGC   | 59.218 | 20 |
| 110 | 2958 | 3067 | ATGATGCCACAGGAAGAAGG   | 60.073 | 20 |

|     |      |      |                         |        |    |
|-----|------|------|-------------------------|--------|----|
| 149 | 504  | 652  | TGAGATTCACTTGCCCCTTC    | 60.195 | 20 |
| 192 | 1423 | 1614 | TGACCCAAGGTCCCAAGTAA    | 60.345 | 20 |
| 144 | 721  | 864  | ACCTGCACCACCAAG         | 60.59  | 18 |
| 228 | 250  | 477  | AATGATTGGGTGTCCATTGAA   | 60.044 | 21 |
| 204 | 3160 | 3363 | GCCCAAACAGCAATTCAAGT    | 60.118 | 20 |
| 225 | 1146 | 1370 | AAAAAGGTCCCCTTTCCAAG    | 59.433 | 20 |
| 254 | 99   | 352  | GTTGCAAGGAATCATTGGCT    | 60.081 | 20 |
| 197 | 125  | 321  | CCCATCTCTTGTTTTCTTCATC/ | 60.469 | 23 |
| 153 | 300  | 452  | TTTCGATTTCCACCTTCTCG    | 60.184 | 20 |
| 279 | 741  | 1019 | AGGCTTGCGGGTCTTACTTAG   | 59.92  | 21 |
| 175 | 972  | 1146 | CCTGAGCTCCTCTCGAATTG    | 60.088 | 20 |
| 248 | 1929 | 2176 | GCAATGTGGCATTCAATCCT    | 60.874 | 20 |
| 151 | 76   | 226  | TTTGCTGAATTTTCTTCGCA    | 59.562 | 20 |
| 275 | 2339 | 2613 | CAAGCACAAAATAGCGAATCA/  | 58.971 | 21 |
| 244 | 49   | 292  | TAGTGGGGGTCAGAACATGC    | 60.924 | 20 |
| 274 | 24   | 297  | CCACAACCTGGTCGGTATGGT   | 60.69  | 20 |
| 107 | 3    | 109  | GCAGCAGCAACATACAAACC    | 59.351 | 20 |
| 150 | 2162 | 2311 | TCTCCGCCATCAAATTCTTC    | 60.155 | 20 |
| 280 | 1437 | 1716 | TTGTTGTGGAGTTTCAGGTG    | 57.109 | 20 |
| 228 | 189  | 416  | TGCCTCCACAAGAATTGGAT    | 60.461 | 20 |
| 131 | 434  | 564  | GCAAGACTGTCGTCCTCCTC    | 59.993 | 20 |
| 261 | 6    | 266  | CCCAAGACCCCAATTTGATT    | 60.91  | 20 |
| 115 | 404  | 518  | TGTTGTGCGTGCTTTTCTTC    | 60.035 | 20 |
| 150 | 6    | 155  | TGTAGCCGACCCCAATTTAT    | 59.297 | 20 |
| 280 | 24   | 303  | TCGAACTCCACTGTTCCATTT   | 59.583 | 21 |
| 207 | 1958 | 2164 | CTCCTCAACCACGCAGTCTT    | 60.444 | 20 |
| 220 | 1078 | 1297 | AATTATGGCGTTGGGTGAAC    | 59.691 | 20 |
| 242 | 9    | 250  | TTCATGTAGCCAACCCCAAT    | 60.192 | 20 |
| 145 | 93   | 237  | GCTACCTCTCCCTCTCTCCC    | 59.396 | 20 |
| 147 | 1322 | 1468 | TTGAATGAAAAGAAGAGCTCC   | 59.835 | 22 |
| 255 | 42   | 296  | ACATCTGACCCACCCAAGAC    | 59.817 | 20 |
| 273 | 1236 | 1508 | AACAGATGGGGTTGCAGAAG    | 60.111 | 20 |
| 229 | 1107 | 1335 | CCCCACAATGTCTCGTCTTT    | 59.966 | 20 |
| 256 | 122  | 377  | CCATTATCGGACGTTTCCTG    | 60.323 | 20 |
| 271 | 235  | 505  | CGCCTTCTTTGCACCTACTC    | 60.015 | 20 |
| 148 | 859  | 1006 | GGATTTGGCCCTGTGTGTAT    | 59.676 | 20 |
| 221 | 15   | 235  | AGGAAAGGACATGGCATTGA    | 60.461 | 20 |
| 223 | 1000 | 1222 | GTTTCCAACGAAGTTCCCAA    | 59.948 | 20 |
| 278 | 66   | 343  | CCCAATTTGACTGGGAATA     | 59.617 | 20 |
| 187 | 494  | 680  | TAGATGGCTGGGAAAATTCG    | 60.031 | 20 |
| 247 | 89   | 335  | GGGCAGTATTGTCAAACCAGA   | 59.985 | 21 |
| 237 | 89   | 325  | TGCATCCCGAGAGGGTAGTA    | 60.615 | 20 |
| 236 | 107  | 342  | CGACCGAATAATCCTGTGGA    | 60.853 | 20 |
| 276 | 244  | 519  | TCAGTGCTGTCCAAACCTCA    | 60.44  | 20 |
| 189 | 1091 | 1279 | AGAAGGAAATGGGAATGGCT    | 59.903 | 20 |
| 266 | 126  | 391  | AAAATGGTGGCTTTCTTCCC    | 60.299 | 20 |
| 263 | 2629 | 2891 | GACAACATGGGGTTTTGGAC    | 60.073 | 20 |
| 110 | 66   | 175  | TAGACAGCCACACCAGCAAC    | 59.905 | 20 |
| 173 | 1182 | 1354 | TTTCCTCCAACATTGCTTCC    | 60.051 | 20 |
| 202 | 914  | 1115 | CCAAGTCACCCAAGAATTGC    | 60.495 | 20 |
| 222 | 148  | 369  | TTTGTGTGGGTTACCCGAT     | 60.088 | 20 |
| 255 | 6    | 260  | ATGTAGCCGACCCCAATTTA    | 59.297 | 20 |
| 244 | 122  | 365  | CTTTTACGTCGGGATTGTT     | 59.971 | 20 |
| 226 | 2424 | 2649 | CGGAGAAGGAAATAGGACCC    | 59.897 | 20 |
| 160 | 2136 | 2295 | ATCATGTCAAGGGCTCAAGG    | 60.073 | 20 |
| 243 | 148  | 390  | GATGCTGTCACAGACAGGGA    | 59.827 | 20 |
| 268 | 474  | 741  | CGAAACAAAATTGGGAGGAA    | 59.91  | 20 |
| 243 | 71   | 313  | GACGTGGTTTTGCAGGCTAT    | 60.14  | 20 |

|     |      |      |                        |        |    |
|-----|------|------|------------------------|--------|----|
| 146 | 647  | 792  | TATCCGTTCCGGCTGTACCTT  | 59.592 | 20 |
| 186 | 113  | 298  | GTC AATGGGAACAACCGTCT  | 59.827 | 20 |
| 176 | 2704 | 2879 | CACATCATTTTCCCCACACA   | 60.216 | 20 |
| 186 | 270  | 455  | ACCCCATCTCAACCAAATGA   | 60.173 | 20 |
| 265 | 610  | 874  | CCAATCATA CATGCAAAGTGC | 59.055 | 21 |
| 264 | 1635 | 1898 | ATTTGGGACCACTGTGGCTA   | 60.375 | 20 |
| 184 | 993  | 1176 | GCTGCTCCTCATTGTCATCA   | 59.95  | 20 |
| 218 | 1650 | 1867 | AAATGCCTGTCAACCTCCAC   | 59.973 | 20 |
| 112 | 29   | 140  | CAATCATGTACACCCGCTTC   | 59.002 | 20 |
| 258 | 28   | 285  | CAGCACCACCAGCGAGAA     | 62.247 | 18 |
| 113 | 161  | 273  | TGCGGATAATAACAATGGAGC  | 58.603 | 20 |
| 275 | 139  | 413  | AGTGGTGGCAGTCCATTCAT   | 60.395 | 20 |
| 243 | 66   | 308  | GGAAAAC TTTATCATTTCCTT | 59.743 | 24 |
| 257 | 6    | 262  | TGGCCTTTTAATAGGATGCG   | 60.054 | 20 |
| 206 | 4164 | 4369 | TTGGGAATTTCTTCCATGC    | 59.878 | 20 |
| 277 | 52   | 328  | AAGGGTCGGAAGTGTGAATG   | 59.966 | 20 |
| 200 | 45   | 244  | GTCCAAAAGCTTATCGGCTG   | 59.845 | 20 |
| 280 | 474  | 753  | TGAAATCCCTCAAATCTTACC/ | 59.83  | 23 |
| 206 | 100  | 305  | CCAGTGGGTTTGTCTGTT     | 59.861 | 20 |
| 230 | 83   | 312  | GCCCAGAATGGAATAGACGA   | 60.036 | 20 |
| 176 | 1316 | 1491 | CCCATCATAGGGAAAGGGAT   | 59.974 | 20 |
| 230 | 4796 | 5025 | CCGACCCCACTTAGTGAAAA   | 59.964 | 20 |
| 238 | 1467 | 1704 | AATGGAGGACATGATGAGCC   | 59.893 | 20 |
| 272 | 2829 | 3100 | TGGTTTATGTAGCCAACACAA  | 59.72  | 24 |
| 109 | 918  | 1026 | CTCGTGATT CAGTCTCCGT   | 60.261 | 20 |
| 211 | 82   | 292  | AGGTAATTAGCGCACCCACA   | 60.523 | 20 |
| 217 | 1210 | 1426 | ACAGGTGCAGGAGTAGGTGC   | 60.329 | 20 |
| 269 | 895  | 1163 | TCGTCTTGATTTTGTCTGCAT  | 59.752 | 22 |
| 234 | 135  | 368  | CCCGACTTCGTCTCTACGAC   | 59.867 | 20 |
| 278 | 487  | 764  | TCACAGACTCACAGTGTTGGC  | 59.931 | 21 |
| 222 | 2180 | 2401 | GGCATAAGAATTGGATGATGG  | 59.244 | 21 |
| 196 | 871  | 1066 | AAGGGAAAAGCCCCTATTTT   | 58.152 | 20 |
| 253 | 120  | 372  | TCATTTCTAAACCGGAACGG   | 59.931 | 20 |
| 252 | 120  | 371  | TCATTTCTAAACCGGAACGG   | 59.931 | 20 |
| 143 | 4    | 146  | AAAACACAAACCTTTTACACC, | 58.964 | 24 |
| 220 | 1327 | 1546 | TCGAAGTAGTGCCTCTTCCC   | 59.43  | 20 |
| 176 | 948  | 1123 | TCATGGCTTGACAAACTCGT   | 59.293 | 20 |
| 172 | 1943 | 2114 | GCTTCAACCATAGCACCCAT   | 59.962 | 20 |
| 264 | 13   | 276  | TTTGGTTCATGTAGCCGACC   | 60.894 | 20 |
| 163 | 133  | 295  | TTTGGTTCATGTAGCCGACC   | 60.894 | 20 |
| 249 | 2238 | 2486 | GGTGACGGAGTTGGATTCTG   | 60.51  | 20 |
| 163 | 139  | 301  | CGAGATTTATGAGAGCCCCA   | 60.17  | 20 |
| 277 | 469  | 745  | GTTGGTGGATTTTGGGAAGT   | 58.741 | 20 |
| 153 | 2664 | 2816 | TCTCGTGTAAACGAACAAGCAA | 59.521 | 21 |
| 197 | 127  | 323  | CGTTGCAGAAGTTTGCTTGA   | 60.172 | 20 |
| 278 | 104  | 381  | TCTTGCCTTTGTCTGGAGC    | 60.517 | 20 |
| 235 | 386  | 620  | CACCACAAGCGACAAGACTTT  | 60.341 | 21 |
| 183 | 457  | 639  | CAGTTGGTGTGAAGCGAAA    | 59.881 | 20 |
| 108 | 856  | 963  | CGTAAACCGAAACCATGGAG   | 60.357 | 20 |
| 222 | 1101 | 1322 | TCAGTTTATCCGTTCTCGC    | 60.214 | 20 |
| 144 | 12   | 155  | ACTGGTGGTCCCTTTTCT     | 59.834 | 20 |
| 193 | 207  | 399  | GGATGATGATGTT CAGATGGG | 60.15  | 21 |
| 236 | 450  | 685  | CATCCTTGCCAATTTCCATT   | 59.762 | 20 |
| 254 | 3    | 256  | ACCCCTTGCGGGGTAATA     | 60.148 | 18 |
| 240 | 1725 | 1964 | CACGAACACCCCTGCATATC   | 61.329 | 20 |
| 261 | 125  | 385  | GCTTATCTGGACAACCCAG    | 59.55  | 20 |
| 222 | 812  | 1033 | GGCAACCTCAATGTCCAAAA   | 60.874 | 20 |
| 191 | 334  | 524  | TATGGAGAAAATCCCTCCCC   | 60.089 | 20 |



|     |      |      |                         |        |    |
|-----|------|------|-------------------------|--------|----|
| 236 | 2089 | 2324 | AATCCGAGGTGTGTTGCATT    | 60.384 | 20 |
| 212 | 558  | 769  | TGCAATTATTGGGTTCCAAAG   | 59.818 | 21 |
| 169 | 949  | 1117 | CATAATCAGCAGCAGGAGCA    | 60.119 | 20 |
| 206 | 1492 | 1697 | TGCATTTTTCACGTGCATTTT   | 60.118 | 20 |
| 189 | 26   | 214  | TCGAAGCTGGAGATGTGACTT   | 60.005 | 21 |
| 252 | 267  | 518  | GGCAACGTGATTTCAGTTCAA   | 59.697 | 20 |
| 176 | 97   | 272  | GCCGAGGGTCAAATAGATGA    | 60.036 | 20 |
| 215 | 1    | 215  | TTCCACGTTTCCTTAAAATATG  | 60.01  | 24 |
| 269 | 734  | 1002 | TTTTTGCAACGGCTACAATG    | 59.742 | 20 |
| 167 | 142  | 308  | CCCGGATCAACTCACTCCTA    | 60.065 | 20 |
| 182 | 50   | 231  | TTGGTACTCACAAAACCCCC    | 59.688 | 20 |
| 123 | 405  | 527  | TCGCACCACTTCACTTTTAC    | 59.88  | 20 |
| 151 | 671  | 821  | TCGCAATTTTCACTGATGGA    | 60.197 | 20 |
| 244 | 411  | 654  | TTCTTGCAGGAGAATGCAGA    | 59.673 | 20 |
| 153 | 320  | 472  | TGGAATGTCTTCCATTAAGTGC  | 60.014 | 23 |
| 265 | 3523 | 3787 | AACTACCGAAAATGGGGACG    | 61.088 | 20 |
| 175 | 491  | 665  | TAATGGGGAAGTCCTAGGGG    | 60.138 | 20 |
| 235 | 355  | 589  | GCGGACAATATGGGATCCTT    | 61.044 | 20 |
| 192 | 209  | 400  | TCCACCACTGAATGCTACGA    | 60.263 | 20 |
| 171 | 1348 | 1518 | TTGGGCAAGAACGCTAATTC    | 60.209 | 20 |
| 215 | 24   | 238  | TTGCAAGAAAATTGTCCCGT    | 60.481 | 20 |
| 247 | 478  | 724  | CACCACCGCCCTACAAGTAT    | 59.875 | 20 |
| 160 | 329  | 488  | ATGATCCATACAGCCGACCT    | 59.39  | 20 |
| 243 | 474  | 716  | TAATTTCCCCCAATTTTCCC    | 59.833 | 20 |
| 243 | 1649 | 1891 | AACATCCCTCCACTCACTCG    | 60.112 | 20 |
| 168 | 704  | 871  | GCCTAAGAAGCCCAAATTCC    | 60.041 | 20 |
| 153 | 3    | 155  | TGAAGTCCGGATCAACTTACG   | 60.118 | 21 |
| 192 | 420  | 611  | CAGCCATGCTTCTTATGCAA    | 59.976 | 20 |
| 136 | 43   | 178  | CAGCGAAGTGACAACCTTGA    | 60.025 | 20 |
| 179 | 253  | 431  | TGCAAAAATCAAGTATACGTTTC | 59.098 | 23 |
| 245 | 116  | 360  | CAGCTTGTGCCTTGCAACTA    | 60.195 | 20 |
| 161 | 885  | 1045 | ACCCAACCTGATGTGGAGGAG   | 59.962 | 20 |
| 206 | 1888 | 2093 | ACTGGCGACCTAGCAAAATG    | 60.27  | 20 |
| 110 | 266  | 375  | ACATTAACCACAATGGAGGC    | 57.39  | 20 |
| 142 | 1429 | 1570 | CAAAACCAGAGCAAGGGAAA    | 60.22  | 20 |
| 218 | 791  | 1008 | GGATGCCATTTCTTCTCCAA    | 60.014 | 20 |
| 171 | 497  | 667  | ACTTCCGATTTTCTCGGATTC   | 59.546 | 21 |
| 223 | 165  | 387  | TCAAAACCAGCACACACACA    | 59.751 | 20 |
| 193 | 733  | 925  | GTTTCTTGGACAAAGCAGCC    | 59.859 | 20 |
| 105 | 0    | 104  | GTTGCGATTTTTAAGGACGG    | 59.586 | 20 |
| 108 | 82   | 189  | GAAGGGTGATGCTTTTGAGC    | 59.82  | 20 |
| 217 | 409  | 625  | AATGTCGCCATAAACCAAGG    | 59.823 | 20 |
| 122 | 1822 | 1943 | AGGCAAGAAAAGCTCGAATG    | 59.592 | 20 |
| 136 | 902  | 1037 | TCAATACATGGCATTGGTGG    | 60.197 | 20 |
| 279 | 1326 | 1604 | TCTGCAATCAATCAGCAAGC    | 60.104 | 20 |
| 251 | 102  | 352  | TTCTTGTGGTTGTTGGTGTG    | 59.495 | 21 |
| 252 | 311  | 562  | TAGCACCCGTAGTTGCTGTG    | 59.928 | 20 |
| 245 | 2186 | 2430 | GCCACACCTGGAGTTTCATT    | 59.973 | 20 |
| 123 | 5    | 127  | CCAATTTATTGGGATTAAGGC   | 57.539 | 21 |
| 197 | 560  | 756  | TCGCCCATTTTGAATTAACAC   | 59.824 | 21 |
| 226 | 48   | 273  | CACGCATCTTGCCAGTACAT    | 59.746 | 20 |
| 169 | 738  | 906  | TACCTCTTTTTCCACGCCAC    | 60.11  | 20 |
| 259 | 56   | 314  | CCAATCATCGGCCTTTTCTA    | 60.031 | 20 |
| 274 | 82   | 355  | GGGGACACATCACAGACCTT    | 59.817 | 20 |
| 263 | 822  | 1084 | GAGGTGAGGTTCCATCTCCA    | 60.048 | 20 |
| 244 | 478  | 721  | CACAAAAGATCGCAGCAGTC    | 59.596 | 20 |
| 209 | 146  | 354  | AGTTTATGACCATCAGCCGC    | 60.103 | 20 |
| 213 | 3484 | 3696 | CTTGCCATGAACCTCATTT     | 59.933 | 20 |

|     |      |       |                        |        |    |
|-----|------|-------|------------------------|--------|----|
| 120 | 1846 | 1965  | AAAAATGTTTCTGTAGTGGTTC | 58.647 | 25 |
| 117 | 569  | 685   | TCACCGTAACTCCATGATGC   | 59.527 | 20 |
| 269 | 24   | 292   | AACATGGACTGGAAGTTGCC   | 59.973 | 20 |
| 258 | 418  | 675   | TTTCGCCAAATTCTTCAACA   | 59.277 | 20 |
| 162 | 267  | 428   | TTTATTCCGTGACCCTCGAC   | 59.933 | 20 |
| 213 | 144  | 356   | GATTGGATTTAATTCCCCCG   | 60.329 | 20 |
| 169 | 873  | 1041  | GCACAGACTGAGCCATTTCA   | 59.992 | 20 |
| 168 | 1610 | 1777  | CTGCAGCGCTGTATAATTGC   | 59.636 | 20 |
| 151 | 339  | 489   | TTGGTCCCAAATCCCTACAA   | 60.162 | 20 |
| 195 | 630  | 824   | ACCAAGTTACGTGGCGTAGAA  | 59.685 | 21 |
| 121 | 1226 | 1346  | TTTGAACTCGATTTGTCCCC   | 59.91  | 20 |
| 279 | 2294 | 2572  | TCCCCTCCCATCAACTTC     | 59.903 | 20 |
| 224 | 579  | 802   | AGGAAGCAAAAGGGAAAACC   | 59.571 | 20 |
| 130 | 423  | 552   | ATTCCACAGACCAAAACCCA   | 60.21  | 20 |
| 275 | 9812 | 10086 | GGTCATTGCCTCGGATTA     | 59.901 | 20 |
| 182 | 341  | 522   | AATCCCCGTCCAATCATTTT   | 60.378 | 20 |
| 216 | 783  | 998   | TGGGACTTGGAACTAGGGTG   | 59.959 | 20 |
| 110 | 9    | 118   | TGATTCATCCTCCGTTGTGT   | 58.933 | 20 |
| 100 | 14   | 113   | TGATGATGATAATGAGGTTGC  | 59.974 | 23 |
| 232 | 3792 | 4023  | CGGTGTGTTGCATCTCTCAC   | 60.319 | 20 |
| 265 | 261  | 525   | GCTGAGCTGAAGGAGATCCA   | 60.645 | 20 |
| 219 | 93   | 311   | TTAGAGGTGTCAAACGGGC    | 60.11  | 20 |
| 119 | 377  | 495   | TAAATTCGCAAGGGGACAAC   | 59.938 | 20 |
| 120 | 11   | 130   | GGACTGGAGCAGGTGTGAAT   | 60.12  | 20 |
| 278 | 129  | 406   | CAATCAACAAAACAAGCCCC   | 60.344 | 20 |
| 159 | 1884 | 2042  | AATCACCTCGAATCAGTTTG   | 59.042 | 21 |
| 207 | 444  | 650   | GCATAGGAATGAATGGAGAAC  | 59.93  | 22 |
| 175 | 6    | 180   | TGGGTGAGAACGAGGAGAAT   | 59.655 | 20 |
| 177 | 219  | 395   | ATGCATATATTCCGTTCCGC   | 59.785 | 20 |
| 244 | 767  | 1010  | AAAACGGAATCTACTTAGGGG  | 58.99  | 23 |
| 248 | 138  | 385   | GTGGCTTCTGATGACGAGTG   | 59.42  | 20 |
| 280 | 1143 | 1422  | ACTAGAAGCATTGCGCCTC    | 59.62  | 20 |
| 182 | 118  | 299   | ATGTACACCCACTTCGGCTC   | 59.997 | 20 |
| 104 | 32   | 135   | TGGATTCCTCATTTTGGTCAC  | 59.782 | 21 |
| 171 | 132  | 302   | TTGAAGATGATACGTTGAACCA | 58.952 | 22 |
| 247 | 2472 | 2718  | GTTAAGGCGGTGGTGATTTT   | 58.952 | 20 |
| 270 | 606  | 875   | TGGCATAATGATGTTGATTTGC | 60.568 | 22 |
| 125 | 142  | 266   | AACAGGGGGAGAATGGAGAT   | 59.755 | 20 |
| 273 | 73   | 345   | GGGGTCGACTACATGAACCA   | 60.78  | 20 |
| 242 | 249  | 490   | ATCCTCAACTCCATCGCTTG   | 60.218 | 20 |
| 205 | 134  | 338   | AATCCAAATTCCGTGACCAA   | 60.17  | 20 |
| 208 | 134  | 341   | CCAAATTCGTGACCAAATC    | 60.17  | 20 |
| 185 | 65   | 249   | CCATCAAGCTCAAGTGCAAA   | 59.988 | 20 |
| 107 | 9    | 115   | AGCAAACCCTAATCGGCAG    | 60.22  | 19 |
| 267 | 513  | 779   | TAGAAGCAGCAGCAGTTTGC   | 59.517 | 20 |
| 211 | 10   | 220   | ATGTAGCCGACCCCAATTTA   | 59.297 | 20 |
| 244 | 50   | 293   | TGCTCAAGAAAATGAGAGCA   | 58.785 | 21 |
| 233 | 301  | 533   | TTCCATGCACTCTTTTGTGC   | 59.847 | 20 |
| 278 | 228  | 505   | GCGTAATCCCCTATTTGCCT   | 60.3   | 20 |
| 136 | 1313 | 1448  | TCACCTCAAACATTCCACA    | 59.935 | 20 |
| 225 | 90   | 314   | TCGTCTGTTTTGTGCGAGTC   | 60.032 | 20 |
| 278 | 54   | 331   | TGTTCAAATCTGTGAAGGCA   | 57.806 | 20 |
| 269 | 25   | 293   | TCCATGAAACATAAATCTTGCC | 58.946 | 22 |
| 227 | 938  | 1164  | TAGGTCACACTTGCAGTGCC   | 59.905 | 20 |
| 199 | 1055 | 1253  | TGTGAAAATCTCGGTTAATCC  | 59.729 | 23 |
| 239 | 616  | 854   | GGGTCAGATGTACGCAACCT   | 59.997 | 20 |
| 159 | 1    | 159   | TGGGTTCAATGCATTTACTTCT | 59.891 | 23 |
| 114 | 938  | 1051  | CAGCAATACACGAACTGGGA   | 59.716 | 20 |

|     |      |      |                        |        |    |
|-----|------|------|------------------------|--------|----|
| 181 | 2    | 182  | TGAAATTGAAAACCTTAAAAA  | 58.297 | 25 |
| 194 | 2816 | 3009 | TCCTTTTCAAGGTGCTTCATTT | 60.109 | 22 |
| 189 | 307  | 495  | GAGGACCTTCAAGGGTGTCA   | 60.088 | 20 |
| 136 | 927  | 1062 | AGATTGCTGTGATGTGGGTG   | 59.551 | 20 |
| 192 | 820  | 1011 | AGGCACAATATTCGACGAGG   | 60.096 | 20 |
| 148 | 1    | 148  | ATTTTCCTGATGCCGATCC    | 59.846 | 19 |
| 277 | 262  | 538  | CAAAAATGATCATCCAACGG   | 58.818 | 20 |
| 193 | 718  | 910  | GACCGGGACTGTAATCCTCA   | 59.927 | 20 |
| 110 | 1206 | 1315 | GTGTGGATGGTCTGAATGGA   | 59.318 | 20 |
| 245 | 175  | 419  | GCATCAAAACATTTTCAGCCA  | 59.67  | 20 |
| 274 | 61   | 334  | AGGGTAGGAAGCCCAAAGTG   | 60.488 | 20 |
| 165 | 115  | 279  | CCATCAGTTCCTTCTAGGGC   | 58.741 | 20 |
| 256 | 205  | 460  | TTTGGTTCATGTAGCCGACC   | 60.894 | 20 |
| 193 | 128  | 320  | TCATTGGCTCCTTTTTGGTC   | 60.051 | 20 |
| 125 | 136  | 260  | CGTTGCTGGTGTGAAGAGA    | 59.984 | 20 |
| 265 | 186  | 450  | TTCTTCAACATTCCTGGGCT   | 59.67  | 20 |
| 243 | 483  | 725  | CCATCGGGTGCAATGATTA    | 60.291 | 19 |
| 249 | 8    | 256  | CCCAAGACCCCAATTTGAT    | 59.59  | 19 |
| 270 | 642  | 911  | TAACGGGAGAAATGGTCCAA   | 60.301 | 20 |
| 229 | 256  | 484  | ATGGTATGGTGTGGAGGACC   | 59.511 | 20 |
| 171 | 147  | 317  | ACGGGGCGTGCATATATTAG   | 59.838 | 20 |
| 212 | 258  | 469  | ATCCTCCACAGAAATGCCAC   | 59.934 | 20 |
| 213 | 30   | 242  | GGGTTTAGGGTTTCCCATGT   | 59.919 | 20 |
| 235 | 8    | 242  | AGTTTCATACCCCCACCACA   | 60.088 | 20 |
| 278 | 295  | 572  | GAACACATTGCTGAGAGCACA  | 60.048 | 21 |
| 114 | 1797 | 1910 | TTTCTGATGTTGTTGCCGAC   | 59.697 | 20 |
| 261 | 99   | 359  | CATCTCATGTCCTCGCCTCT   | 60.372 | 20 |
| 163 | 7    | 169  | ATGTAGCCGACCCCAATTTA   | 59.297 | 20 |
| 127 | 59   | 185  | TGTTTTTGAGAAGAAACAAGA  | 59.141 | 24 |
| 250 | 222  | 471  | CCGTACTCCCAAGAACAAC    | 59.449 | 20 |
| 279 | 428  | 706  | TGATTAATAAACACTTTAATCT | 58.996 | 26 |
| 217 | 88   | 304  | TGTTGATGCTGTTGGAGCTA   | 59.478 | 21 |
| 130 | 472  | 601  | GATGTTGGAGCTGAAGAGCC   | 59.957 | 20 |
| 246 | 72   | 317  | CCTCCATCAGTTCTGTCTAGGC | 60.124 | 22 |
| 176 | 144  | 319  | CGGGGCTTGCATATATCAGT   | 59.945 | 20 |
| 251 | 71   | 321  | AAATGAAATCGTGCGAAAATG  | 59.957 | 21 |
| 175 | 985  | 1159 | TGAGGTGTGTGATTCCATGC   | 60.544 | 20 |
| 262 | 6    | 267  | CATTTTCATTTTCTTTGTTTTT | 57.143 | 24 |
| 270 | 231  | 500  | GGCACACTATTTTGGAGGGA   | 59.933 | 20 |
| 120 | 20   | 139  | TTTTTCGAATATTCGGGTGG   | 59.767 | 20 |
| 164 | 298  | 461  | AATAACATTAACCCTAAACCI  | 57.104 | 26 |
| 250 | 1744 | 1993 | TTTGATTGGGAATAATTGGG   | 57.289 | 20 |
| 147 | 461  | 607  | ATCCTCCATTTCCCATTTC    | 59.959 | 20 |
| 261 | 1077 | 1337 | TTAACTGGGCTGGCTAGGTG   | 60.262 | 20 |
| 262 | 156  | 417  | TTGCTGTGGAACACCAGAGA   | 60.44  | 20 |
| 276 | 703  | 978  | AGCCCGACTTGAAAATCAAA   | 59.685 | 20 |
| 174 | 1406 | 1579 | ACCTCATTCCTCCAATTCC    | 60.133 | 20 |
| 238 | 18   | 255  | TCACTGTTGCCGATCACTTC   | 59.837 | 20 |
| 157 | 759  | 915  | CATATTTTTCGTCGGAGGGA   | 59.894 | 20 |
| 201 | 366  | 566  | TAAAGAGATGCTTGGTCGCC   | 60.352 | 20 |
| 279 | 1109 | 1387 | GGGCCTCGTCTTTCAAACT    | 60.61  | 20 |
| 144 | 290  | 433  | AATTATCAAATTTCCGGGACGA | 58.437 | 21 |
| 219 | 2443 | 2661 | CCAATCAAATCCAATCCCAC   | 59.991 | 20 |
| 252 | 469  | 720  | GAGGATCTCGGGGAGCTAGA   | 60.832 | 20 |
| 172 | 237  | 408  | CCCGACAGGCCACAATATAC   | 60.214 | 20 |
| 230 | 1455 | 1684 | GTCGATCAAGGAACACATGC   | 59.093 | 20 |
| 163 | 1398 | 1560 | TTCCCCGACTCACACTTAGC   | 60.255 | 20 |
| 264 | 1579 | 1842 | CGAAAGCTGTCGGAAAGAAA   | 60.493 | 20 |

|     |      |      |                        |        |    |
|-----|------|------|------------------------|--------|----|
| 138 | 48   | 185  | GAAGGGGTAGGAACTGGACC   | 59.795 | 20 |
| 243 | 3494 | 3736 | ATGATGGACTTGCTTTTGGG   | 59.933 | 20 |
| 262 | 2    | 263  | TGAATTGCTTTAATTTGTTGCT | 59.278 | 24 |
| 221 | 291  | 511  | TTGAACGCCGTTAAGTTTGA   | 59.344 | 20 |
| 169 | 3656 | 3824 | CAAAGGGGCTGAGTTGAGAG   | 59.982 | 20 |
| 265 | 6780 | 7044 | TCAAATTTTGGCACTGTTGC   | 59.712 | 20 |
| 262 | 504  | 765  | TTCAGTTCGGTTTTCGGTTT   | 59.587 | 20 |
| 243 | 1440 | 1682 | ATCCGTGCAGTAAAATGAAAA  | 57.327 | 21 |
| 275 | 82   | 356  | GACGAAAGTCCTTCGGTCAA   | 60.232 | 20 |
| 137 | 466  | 602  | CTCTCATCTTCACCGCCACT   | 60.408 | 20 |
| 268 | 2618 | 2885 | CTCTGGTGCAACTCCATCAA   | 59.831 | 20 |
| 251 | 551  | 801  | ACTCAGCGAAGTGGCAATCT   | 60.02  | 20 |
| 131 | 218  | 348  | GAAGAAGGAGGAGGGGAAGA   | 59.749 | 20 |
| 201 | 1930 | 2130 | AAACCACTTTTGGCGTTTGA   | 60.514 | 20 |
| 240 | 802  | 1041 | TTAATGGGATGATAAGCGGC   | 59.892 | 20 |
| 213 | 99   | 311  | AGCTAAGTTGATTATGGTGGG  | 59.528 | 22 |
| 105 | 19   | 123  | CAGTTGCCCTTGGGATTAGA   | 60.066 | 20 |
| 180 | 898  | 1077 | CCCATCCGAAATCTCTACA    | 59.887 | 20 |
| 218 | 538  | 755  | GCATCTTCCCACAAGCAAAT   | 60.081 | 20 |
| 146 | 24   | 169  | TTTGCTGAATTTTCTTGGA    | 59.42  | 20 |
| 270 | 1427 | 1696 | GCAGCCACAAATGACAGAGA   | 59.992 | 20 |
| 250 | 182  | 431  | AACATGAAAAATCCTCAATCC  | 60.069 | 23 |
| 104 | 50   | 153  | TGCCAAACGTTTAGTCTACTT  | 60.554 | 23 |
| 166 | 0    | 165  | TGTTTCCATCTACACCTTGAGA | 58.754 | 23 |
| 250 | 170  | 419  | AATTCCAGCCCAACACCATA   | 60.192 | 20 |
| 250 | 94   | 343  | CGGCATCCACATAACATGAA   | 60.343 | 20 |
| 117 | 44   | 160  | TTCAATTGAGATCCATGGGG   | 60.66  | 20 |
| 213 | 63   | 275  | TTGATTTTGCCTTTGCATCG   | 59.819 | 20 |
| 189 | 440  | 628  | AATAAACATTGGGGGTGGGT   | 60.166 | 20 |
| 258 | 19   | 276  | TTTCGTTGAATGTGACTGGC   | 59.697 | 20 |
| 235 | 1219 | 1453 | GGAAAACGCATAATTCACCC   | 59.277 | 20 |
| 160 | 73   | 232  | AAGGATGAGGAAGGCAAGGT   | 60.074 | 20 |
| 183 | 1556 | 1738 | GCATTGCATCCTATCCCATT   | 59.751 | 20 |
| 169 | 243  | 411  | TGGAAATCTCTCAGTTCGGG   | 60.187 | 20 |
| 143 | 3851 | 3993 | AGGTTGCGTACATCTGACCC   | 59.997 | 20 |
| 115 | 284  | 398  | AAGAGTTCGGTTGCGTTGTT   | 59.78  | 20 |
| 145 | 347  | 491  | CCATTCTTAAAAGCCTCATTT  | 59.632 | 23 |
| 252 | 154  | 405  | TGTCTCCCTCACACCCTCTT   | 59.682 | 20 |
| 143 | 112  | 254  | AACAGGTTCAAACCAGTGGC   | 60.012 | 20 |
| 220 | 1016 | 1235 | ATCTTGAACCCACCATCAA    | 60.173 | 20 |
| 261 | 102  | 362  | TGGAAAATCGTTGTTGACCA   | 59.941 | 20 |
| 264 | 31   | 294  | TGAGAAGGTTTTCTGGGGAA   | 59.641 | 20 |
| 254 | 272  | 525  | GCCGCTAGCATCTATTACGG   | 59.859 | 20 |
| 194 | 206  | 399  | TGAGGCAACATGCTTTTGAA   | 60.379 | 20 |
| 130 | 28   | 157  | TACTCTCAAACGTAGGGGGC   | 59.195 | 20 |
| 178 | 2541 | 2718 | CCTTAAAATCAGTCCCGCAA   | 60.067 | 20 |
| 277 | 872  | 1148 | CGGCCCAATATTTAGGCATT   | 60.991 | 20 |
| 113 | 1    | 113  | ATGTAGCCGACCCCAATTTA   | 59.297 | 20 |
| 241 | 269  | 509  | AAATGCGTTAGAAACCGCTG   | 60.264 | 20 |
| 196 | 0    | 195  | CCAAGAGACTGAAAGCTCCAT  | 59.886 | 22 |
| 255 | 91   | 345  | GGTTTTAAATTCGTTGAAACCC | 59.67  | 23 |
| 193 | 185  | 377  | AACTTCAAATTTTACGCGGGA  | 59.685 | 20 |
| 210 | 451  | 660  | ACGAGGAATCCGAATCTGAA   | 59.629 | 20 |
| 270 | 364  | 633  | AAAGGCCGCATCCTTTGATA   | 61.795 | 20 |
| 139 | 23   | 161  | TAATCCTTGAACCTCGGTGGC  | 60.074 | 20 |
| 212 | 168  | 379  | AACAAGTCGGCAAAAATTGG   | 59.975 | 20 |
| 160 | 306  | 465  | GAGTAATCGTCTCCGCTTGC   | 59.985 | 20 |
| 229 | 89   | 317  | CTTGCCAGGTTGCAATTATG   | 59.182 | 20 |

|     |      |      |                         |        |    |
|-----|------|------|-------------------------|--------|----|
| 195 | 1320 | 1514 | GCATTTGAAACAATGCCAAA    | 59.543 | 20 |
| 134 | 591  | 724  | GCGATAGTCATGGCTGAAGG    | 60.765 | 20 |
| 278 | 1958 | 2235 | TCTGTGGTTGTTGGCATAGC    | 59.722 | 20 |
| 146 | 400  | 545  | ACCCTTCAGCCACTGACCTA    | 59.721 | 20 |
| 114 | 14   | 127  | CCATTGCACTCCGAATAGGT    | 59.955 | 20 |
| 136 | 310  | 445  | GCCAATTCTGTGGACCTCAT    | 59.934 | 20 |
| 243 | 13   | 255  | GGAAAGAAGCCAGCAGAGAA    | 59.694 | 20 |
| 214 | 1189 | 1402 | CTGGGTAAATCTACGGGCTG    | 59.587 | 20 |
| 138 | 16   | 153  | CTCAGATGATGAATCCGCAG    | 59.348 | 20 |
| 248 | 186  | 433  | ACGTGAGAAGATTGGGAGGA    | 59.655 | 20 |
| 274 | 1780 | 2053 | TCTGGCCTTCTTCGTGTTCT    | 59.989 | 20 |
| 164 | 483  | 646  | TTGGCCGTCTAACGGATAGT    | 59.592 | 20 |
| 279 | 23   | 301  | AAAATACCCGCAAAGTCGGT    | 60.721 | 20 |
| 275 | 397  | 671  | ACCCAGCCTCGATTATGTTG    | 59.955 | 20 |
| 220 | 212  | 431  | GGAATCCCAATCAGAGAAAAA   | 58.578 | 22 |
| 270 | 335  | 604  | CTTCAGCTTGGTTTTGGAGG    | 59.846 | 20 |
| 263 | 1428 | 1690 | TTGAAAATGACGACGTGGAA    | 60.088 | 20 |
| 156 | 186  | 341  | GCAATGTATATTGGGTCGCA    | 59.405 | 20 |
| 147 | 0    | 146  | ATCTACAACAGGCGGCGG      | 62.174 | 18 |
| 278 | 702  | 979  | TCTTCTCTAGCCTGGTGGGA    | 59.943 | 20 |
| 217 | 57   | 273  | AAAACCGCAAATTGAACGAG    | 60.11  | 20 |
| 261 | 64   | 324  | TCAAACCCATCATGAAATCC    | 58.187 | 20 |
| 178 | 238  | 415  | AATGCTCAAACGCTGACTGA    | 59.596 | 20 |
| 246 | 75   | 320  | CCCGATTCAGTTGTTCCAT     | 59.79  | 20 |
| 255 | 1879 | 2133 | TCACGCCTGTTTCTGTTGAA    | 60.427 | 20 |
| 237 | 17   | 253  | CATCTGGGTGTGTGAGTTGTG   | 60.055 | 21 |
| 192 | 426  | 617  | GTGTAATTTGGTTCACGGGG    | 60.088 | 20 |
| 161 | 504  | 664  | TTCGCGACGGTTCTAATAGC    | 60.364 | 20 |
| 171 | 5    | 175  | GGGTCCAACACTACGGATAATGC | 60.576 | 21 |
| 226 | 350  | 575  | TTCAAGCAACCTCGCTTTC     | 60.502 | 20 |
| 271 | 597  | 867  | AAAGAGCGGTAGTAGCAGCG    | 59.813 | 20 |
| 212 | 437  | 648  | CAGTGAGCTCTCCGAAAAGG    | 60.126 | 20 |
| 188 | 2349 | 2536 | CAACCACTTTTCGGTGCTTT    | 60.147 | 20 |
| 266 | 317  | 582  | TGATCGCCACTGAAAGAAAG    | 58.999 | 20 |
| 112 | 814  | 925  | AAGGGTCCCATCCCCTTAC     | 60.052 | 20 |
| 106 | 12   | 117  | CATTCAAAATAAAATGATGATC  | 57.394 | 27 |
| 108 | 347  | 454  | ACTCGACCAAAAAGGTGTCCG   | 60.149 | 20 |
| 240 | 981  | 1220 | CCGGAGTGGTACACAGGATT    | 59.844 | 20 |
| 169 | 1632 | 1800 | TAATGTCTTCAGCTTGGGGG    | 60.066 | 20 |
| 200 | 157  | 356  | TTGACTCGCGTAAAAGAATAT,  | 58.574 | 25 |
| 222 | 211  | 432  | CGAAATTAATTAAGGAAAAGA   | 60.089 | 26 |
| 194 | 310  | 503  | AATCCCCCTACTCCTCCAGA    | 59.89  | 20 |
| 182 | 3473 | 3654 | GATCTCGGAACCGCTGTTTA    | 60.214 | 20 |
| 220 | 729  | 948  | ACGACATGAAGCTTCTGCAA    | 59.596 | 20 |
| 230 | 1446 | 1675 | TCACAATAAACCTCCAGTTCC   | 60.221 | 22 |
| 278 | 407  | 684  | ATTTTGCTCACCCCTGCTCAT   | 59.7   | 20 |
| 130 | 601  | 730  | ATGGGGACATCAAGTTGGAA    | 60.173 | 20 |
| 244 | 345  | 588  | GTCTAATGTTTCCGCCTCCA    | 60.074 | 20 |
| 137 | 227  | 363  | ATTTTTATGGATTGTGCCGC    | 59.801 | 20 |
| 248 | 66   | 313  | TGTTTTTGACGGGTCCCTTA    | 60.336 | 20 |
| 261 | 417  | 677  | CGCAGTTGATCTTCTGTCCA    | 59.984 | 20 |
| 228 | 5    | 232  | TGTAGCCGACCCCAATTTAT    | 59.297 | 20 |
| 188 | 1677 | 1864 | ATTCCAAAATAATTCGGCCA    | 59.259 | 20 |
| 215 | 826  | 1040 | GCCCTGCCAATCTCTATCAA    | 60.177 | 20 |
| 266 | 704  | 969  | CGCATCTTCCGAGCTATCAT    | 60.339 | 20 |
| 123 | 34   | 156  | TGGGCTAGTAATCTGGGTCTT   | 59.969 | 21 |
| 274 | 628  | 901  | TCCTAGGAAATTGCTGTCCA    | 58.298 | 20 |
| 238 | 100  | 337  | TGTTGATGCTGTTTGGAGCTA   | 59.478 | 21 |

|     |      |      |                        |        |    |
|-----|------|------|------------------------|--------|----|
| 274 | 0    | 273  | CCTGTAAGTCGCGCCTAAAT   | 59.384 | 20 |
| 265 | 148  | 412  | CTCGATGCCATCTCCTGATT   | 60.181 | 20 |
| 186 | 14   | 199  | TGCTAAAAACAAATGCCAAGC  | 60.116 | 21 |
| 270 | 118  | 387  | AACGTGAAGTCAATTTCAATG, | 57.673 | 23 |
| 228 | 527  | 754  | GCATCATGCATGGTCTTACC   | 58.956 | 20 |
| 200 | 2    | 201  | AAAAATTGGTGCGGGTGC     | 61.826 | 18 |
| 277 | 2    | 278  | GGAAAATTGGGTCATATAGCT  | 60.057 | 23 |
| 267 | 483  | 749  | TTGTTGCAGTAGCCATGCTC   | 60.019 | 20 |
| 268 | 20   | 287  | TCATTCCCCCTACACCACTC   | 59.779 | 20 |
| 157 | 31   | 187  | TGTCAACGTAAAAGGAGGGC   | 60.11  | 20 |
| 164 | 164  | 327  | CCATTCATCGTCGAAGACCT   | 60.073 | 20 |
| 267 | 873  | 1139 | TGTTATTTGCACAATCATTTC  | 58.556 | 23 |
| 230 | 932  | 1161 | GCTTTGCTTCTTATGCGGTT   | 59.501 | 20 |
| 126 | 31   | 156  | GATCAGCAGTGGCGTTGTC    | 60.429 | 19 |
| 239 | 145  | 383  | CACAAGAGAAGGGAGCTTGC   | 60.134 | 20 |
| 267 | 113  | 379  | GCTTTTCAGTTGGCATTTTTG  | 59.75  | 21 |
| 226 | 93   | 318  | GGTTCCTGCGTCTTCAAAAA   | 60.227 | 20 |
| 276 | 345  | 620  | TTGGCAGCTAGTGCTCATTTT  | 60.032 | 21 |
| 137 | 4    | 140  | CCCAAGACCCCAATTTGATT   | 60.91  | 20 |
| 149 | 410  | 558  | CACCAATCAATAATGCACGC   | 59.96  | 20 |
| 174 | 31   | 204  | GGATAGAATGAGGGTTTTCCC  | 58.768 | 21 |
| 136 | 1686 | 1821 | CGTGCGTGTTGAATTCATGT   | 60.584 | 20 |
| 276 | 6    | 281  | CGTGCCAATAATGACACAAAA  | 59.476 | 21 |
| 131 | 615  | 745  | TGTGCTCTTGAAACTGGGC    | 59.976 | 19 |
| 209 | 1498 | 1706 | ATGCCAAAGTCGGAATTCAA   | 60.448 | 20 |
| 121 | 7    | 127  | GGATCAGCAGTGGCTTTTTTC  | 59.82  | 20 |
| 242 | 54   | 295  | CAGCCGGAATCTGAGAGAGA   | 60.634 | 20 |
| 135 | 872  | 1006 | AGAGCCATCAAAAAGCAGAGC  | 59.723 | 20 |
| 280 | 90   | 369  | CGCATACGATCTTGATTATGGT | 58.992 | 22 |
| 207 | 352  | 558  | TTGGGATTAAGGCTTTGGTG   | 59.931 | 20 |
| 262 | 298  | 559  | TGGTGAAAAATCAAATACTTG  | 59.763 | 24 |
| 204 | 300  | 503  | TGGTGAAAAATCAAATACTTG  | 59.763 | 24 |
| 217 | 376  | 592  | TGGAATAGCTTGATAAATGAT  | 60.207 | 26 |
| 256 | 502  | 757  | AATCATCACAAAGCCCCAAAG  | 59.933 | 20 |
| 136 | 31   | 166  | TAGCCGACCCCAACTTATTG   | 59.953 | 20 |
| 166 | 0    | 165  | GGGGGAGAAAAATAAAGAAA   | 57.789 | 22 |
| 267 | 841  | 1107 | TCGAGAACCAATAATGATGAG  | 59.186 | 22 |
| 163 | 1118 | 1280 | CGACGTGCGTTATTTTGGTT   | 59.861 | 20 |
| 257 | 1240 | 1496 | TCTTCCTTGTTTCTTCTTTGGA | 59.398 | 23 |
| 148 | 106  | 253  | TATGAACGAACAGAGGCAGC   | 59.028 | 20 |
| 188 | 13   | 200  | CTCTCCTCCTTCTCCCACC    | 60.186 | 20 |
| 257 | 160  | 416  | AACCTTGTTTCATGTAGCCG   | 59.993 | 20 |
| 128 | 85   | 212  | ATTGACAGCAGGGAGGTGAT   | 59.535 | 20 |
| 247 | 17   | 263  | TTGGTTCATGTAGCCGACCT   | 60.517 | 20 |
| 189 | 816  | 1004 | AGTACGCCTCGGTGGTAAAA   | 59.632 | 20 |
| 157 | 18   | 174  | GATGTTTCGTATTAATTACCGC | 58.746 | 23 |
| 275 | 570  | 844  | ATGGCAAAGGTAAATGAGCA   | 58.241 | 20 |
| 211 | 661  | 871  | ACCATTTAGAATTTTTCGGGA  | 57.623 | 21 |
| 257 | 511  | 767  | CCCACCTTAGATACCGTTTCG  | 59.448 | 20 |
| 230 | 433  | 662  | AAGTCCAGCACTCCCAATTT   | 58.646 | 20 |
| 224 | 102  | 325  | CACCACGACACACAGAGAGA,  | 59.924 | 21 |
| 204 | 1    | 204  | CCCAAGACCCCAATTTGATT   | 60.91  | 20 |
| 146 | 289  | 434  | AGGTTGATCGTGTTGAATTATC | 60.122 | 23 |
| 233 | 581  | 813  | AAGTGCCGTTACAATCACCC   | 59.859 | 20 |
| 217 | 123  | 339  | GACGATGGTTGCCTTTGTTT   | 59.978 | 20 |
| 146 | 257  | 402  | GGAGGAGATCTGCTTGTTGG   | 59.803 | 20 |
| 262 | 300  | 561  | AATGAGAGCAGTCCTTTTCCC  | 59.705 | 21 |
| 116 | 828  | 943  | TGGTTGGAGCAATGAGTTTG   | 59.691 | 20 |

|     |      |      |                        |        |    |
|-----|------|------|------------------------|--------|----|
| 204 | 271  | 474  | TCACCACATCAAAAATGAGCA  | 60.104 | 21 |
| 206 | 186  | 391  | ACCTCGACAAATCCCATTG    | 59.79  | 20 |
| 275 | 2267 | 2541 | CAAAGATGAGGGTTGGCAAT   | 59.933 | 20 |
| 210 | 2321 | 2530 | ACAGGAAAACCCAGAAGTGA   | 60.146 | 22 |
| 181 | 1060 | 1240 | CACCGCCATGTTCCCTAGTG   | 60.12  | 19 |
| 238 | 283  | 520  | AAAACCTCATAAACTGTCAT   | 57.456 | 25 |
| 183 | 172  | 354  | CTCTTGCTGCTTTTTCCACC   | 59.993 | 20 |
| 152 | 803  | 954  | AATTGGGGTGCAAACAAAG    | 59.839 | 20 |
| 267 | 2146 | 2412 | AGAACCCAAGAAGCAACATG   | 60.048 | 23 |
| 165 | 508  | 672  | GTAGGGTTCATGTCCGGTTG   | 60.232 | 20 |
| 255 | 61   | 315  | CGTTCCAAACTTCGAAGAAAA  | 59.366 | 21 |
| 256 | 1882 | 2137 | CATGCTTTTTGACAACATTGC  | 59.22  | 21 |
| 219 | 521  | 739  | GATTAGGAAGGTGCGTGCAT   | 60.103 | 20 |
| 162 | 258  | 419  | TCTCCAGCTATCCCGTTTTG   | 60.206 | 20 |
| 267 | 533  | 799  | GCAGTGGCGTTGAACTAACA   | 59.911 | 20 |
| 274 | 2225 | 2498 | CCTCACGCAAAAAGAGTCAA   | 59.047 | 20 |
| 175 | 730  | 904  | TGGTTCTTTTGGCATTGTGA   | 60.088 | 20 |
| 216 | 366  | 581  | AATAAAGAGGGGCAGGGGTA   | 59.793 | 20 |
| 252 | 454  | 705  | CTCACGGTTGATTGATACGC   | 59.152 | 20 |
| 262 | 23   | 284  | GTGACGGTTGAATATCCGGT   | 59.676 | 20 |
| 164 | 857  | 1020 | AGAAGAAAGGGGGAAAGCAA   | 60.18  | 20 |
| 272 | 525  | 796  | ACTTCTCCTTCCACCGCTCT   | 60.393 | 20 |
| 117 | 775  | 891  | GAGAACTGACTTCGGGGTGA   | 60.238 | 20 |
| 222 | 89   | 310  | CAGTAAAATGCTGCCAGGT    | 60.132 | 20 |
| 274 | 1396 | 1669 | ACTCAGATCACTCAACCCGC   | 60.269 | 20 |
| 170 | 6    | 175  | GAACGTGGGAGGTGAAGAGA   | 60.238 | 20 |
| 118 | 497  | 614  | TCGAGCTAGAACCTCCTCCA   | 60.088 | 20 |
| 209 | 1283 | 1491 | CAATGAGGACATCCGAGGAG   | 60.612 | 20 |
| 268 | 3603 | 3870 | ACAATTGTTTGTGCACCTCG   | 59.615 | 20 |
| 251 | 3343 | 3593 | AAGGGGTGAGAAAGCACAAA   | 59.711 | 20 |
| 148 | 12   | 159  | TGTGTGCGATTTAATCCTAACC | 59.013 | 22 |
| 169 | 42   | 210  | TCCATAAGCCATAGCTAAAAG  | 60.125 | 24 |
| 230 | 2103 | 2332 | TACAATTCGTGAGATGCCA    | 60.22  | 20 |
| 160 | 1069 | 1228 | TTCATAGCACGTTTTGATGCT  | 58.452 | 21 |
| 245 | 1725 | 1969 | TGCCATTGCCATTGCTACTA   | 60.237 | 20 |
| 138 | 15   | 152  | TTTGGTTCATGTAGCCGACC   | 60.894 | 20 |
| 280 | 90   | 369  | CCAATAACGAATAGCAGCC    | 59.569 | 20 |
| 200 | 3245 | 3444 | TCCTCCCATTCTTCACATCC   | 59.862 | 20 |
| 189 | 81   | 269  | ATTCGCAAGGTCAGTTCTCG   | 60.397 | 20 |
| 257 | 1105 | 1361 | TGAACTCGCTCCTTCCATCT   | 59.95  | 20 |
| 137 | 322  | 458  | GAGGAAAGCATGAGTGGAGG   | 59.803 | 20 |
| 188 | 19   | 206  | GTTCGAACCCCTTTCACCGT   | 59.958 | 19 |
| 260 | 3417 | 3676 | TCAAGCAAAATGTGTTGATTG  | 59.575 | 24 |
| 245 | 541  | 785  | ATCATTTTCGTTCCGGTCAAG  | 59.933 | 20 |
| 225 | 393  | 617  | AAATGCTGCTGTGTCGTGAG   | 60.056 | 20 |
| 278 | 81   | 358  | TCAGAGGTGCACTCGAAGTT   | 58.594 | 20 |
| 239 | 1433 | 1671 | GACCAGTTCACAAAAGTCCCA  | 59.997 | 21 |
| 267 | 281  | 547  | AATTACCCACCGACACATT    | 59.031 | 20 |
| 241 | 320  | 560  | CGACACACAAAAAGTCGCAT   | 59.764 | 20 |
| 231 | 72   | 302  | CAACTCGGCAAGATGAACTG   | 59.44  | 20 |
| 256 | 78   | 333  | CGTGCCCAATAAATCCTTTT   | 58.943 | 20 |
| 180 | 203  | 382  | GTTCAGGGATTGATTTGGA    | 59.871 | 20 |
| 226 | 385  | 610  | AAAATGAACGGCCAGGATTA   | 59.411 | 20 |
| 252 | 114  | 365  | GGGTTCTTGGGTGTCAGAGA   | 60.088 | 20 |
| 280 | 12   | 291  | CGTGTAGGATGGGAAATTGA   | 58.422 | 20 |
| 203 | 260  | 462  | TAGCCGATCTCACTTCGTGG   | 61.336 | 20 |
| 170 | 45   | 214  | CATGAAGAGGACGAAGCGTT   | 60.397 | 20 |
| 114 | 182  | 295  | GTTAACCGCATGTCCTTCG    | 59.199 | 20 |

|     |      |      |                        |        |    |
|-----|------|------|------------------------|--------|----|
| 159 | 436  | 594  | TGCACTGTGCGAGAATTCGAT  | 59.399 | 20 |
| 280 | 791  | 1070 | GCATGGATCTTTGGGAGAAA   | 60.014 | 20 |
| 269 | 762  | 1030 | TATCTCCACCACCACCATCA   | 59.762 | 20 |
| 120 | 94   | 213  | TTCCGTTGGCTTATTTTTGC   | 60.075 | 20 |
| 167 | 9    | 175  | TATTACGAGCCACGGCTACA   | 59.349 | 20 |
| 251 | 684  | 934  | AAATTCTTCCCCAATCCCAG   | 60.124 | 20 |
| 132 | 704  | 835  | TGTTATTAATCCTGCGGTATC  | 59.289 | 23 |
| 114 | 200  | 313  | GCACGTCCAGAGGAGACCTA   | 60.408 | 20 |
| 148 | 324  | 471  | GATAGGCGTTTGAAGGTGAC   | 59.7   | 20 |
| 262 | 624  | 885  | AGAGATCGAAACCTGTTGGC   | 59.288 | 20 |
| 187 | 972  | 1158 | TTCCATGTTCTGGAGAAGCC   | 60.195 | 20 |
| 171 | 794  | 964  | TTCCACCGGAAGGTCTTAAA   | 59.541 | 20 |
| 168 | 83   | 250  | GAAAACCCCACTCAACTCA    | 59.943 | 20 |
| 270 | 69   | 338  | CATCGAGACATATGCAAAAAC  | 58.701 | 22 |
| 262 | 1058 | 1319 | TGGAAAAGTATGGAATTATTG  | 59.24  | 25 |
| 208 | 49   | 256  | ATGTCCGGTGCTGTCTTTTC   | 60.119 | 20 |
| 239 | 245  | 483  | ACTCGAAAAGTAGCGGTTGC   | 59.522 | 20 |
| 238 | 890  | 1127 | GAACGTCAACGCTCGTACCT   | 60.321 | 20 |
| 277 | 1114 | 1390 | AACTGCTGCCAGAACCAACT   | 59.914 | 20 |
| 209 | 10   | 218  | TGCATAATCAACGGTCAATCA  | 59.945 | 21 |
| 203 | 413  | 615  | CAAAAATGGCATTCAAGCTG   | 59.301 | 20 |
| 196 | 708  | 903  | TCTTTTCAACATGTAGCGCAGT | 59.948 | 22 |
| 279 | 779  | 1057 | CCATGCCTTAGTGCAGTTTG   | 59.342 | 20 |
| 272 | 372  | 643  | GGCCCAAACCATCAACAATA   | 60.564 | 20 |
| 109 | 440  | 548  | CGTTGGAGCTGTTTCAATTT   | 60.249 | 20 |
| 279 | 811  | 1089 | AAATCAGCACTCCCATGTC    | 59.934 | 20 |
| 139 | 1376 | 1514 | AAATCCCAACCATTTCCCTC   | 59.996 | 20 |
| 241 | 126  | 366  | CGCCTTGAGTTTGGGTAAAA   | 60.103 | 20 |
| 158 | 1459 | 1616 | TGCAGATTGAATGTGGAACG   | 60.665 | 20 |
| 151 | 3803 | 3953 | CCAATTTTTGGCTCCATTGT   | 59.801 | 20 |
| 100 | 595  | 694  | TGTTCTGTTAAAACCTTCAATC | 58.848 | 26 |
| 265 | 229  | 493  | ATCGATCCGGGACTTCAAAT   | 60.662 | 20 |
| 176 | 29   | 204  | ACTTCAAATGAATCTTCAACAC | 59.177 | 24 |
| 238 | 178  | 415  | TGAAGCCCAACAGATTGATTT  | 59.56  | 21 |
| 126 | 11   | 136  | GAATTCTGAATGCATGGTTCTT | 58.188 | 22 |
| 277 | 81   | 357  | AGAGAGGTAGTGGTGACGGG   | 59.175 | 20 |
| 175 | 632  | 806  | GCAATGGCAATAGCAACTCA   | 59.839 | 20 |
| 209 | 307  | 515  | CGACCTCACATAGTGGGACA   | 59.545 | 20 |
| 252 | 1158 | 1409 | GTGCACATGTCAAGTTTGGG   | 60.008 | 20 |
| 103 | 846  | 948  | CTCGCCATCTCGGATAGAAC   | 59.797 | 20 |
| 154 | 364  | 517  | TTTCTGCTCTTCTCTCGGA    | 60.21  | 20 |
| 231 | 242  | 472  | GATTGCCTTGTTTACCCGTG   | 60.365 | 20 |
| 267 | 68   | 334  | ATGGAATCTGGGGTTCAACA   | 60.173 | 20 |
| 202 | 612  | 813  | GAGGAGTAGGGGATTACCG    | 59.783 | 20 |
| 153 | 347  | 499  | TGGGCGAAAATTCAACTAGG   | 60.067 | 20 |
| 176 | 6    | 181  | CCAAGACCCCAATTTGATT    | 60.91  | 20 |
| 257 | 417  | 673  | TGAGCGAGGTGAAGAGTCAA   | 59.701 | 20 |
| 140 | 9    | 148  | CCAATTTATTGGGATTAAGGC  | 57.539 | 21 |
| 247 | 795  | 1041 | CACGCGGATCTGTGTCTATT   | 58.751 | 20 |
| 280 | 999  | 1278 | TTGGTTCCATTCAAACGGT    | 60.206 | 20 |
| 125 | 21   | 145  | TTGCCTTTAATGCTGTGCTG   | 60.014 | 20 |
| 203 | 166  | 368  | GCCCCTCTCTCTCAATTCCT   | 59.778 | 20 |
| 251 | 2683 | 2933 | TCCCAAAATGAACTTGTAATA  | 59.763 | 24 |
| 273 | 58   | 330  | GGCCTTAACACCAACAACCA   | 60.786 | 20 |
| 238 | 490  | 727  | TGATTCATCGCATTTACGGA   | 60.035 | 20 |
| 191 | 2159 | 2349 | CCTACACAGGTACAACCCCG   | 60.282 | 20 |
| 261 | 334  | 594  | CTCCTTGGGGTATGCAGAAA   | 60.066 | 20 |
| 280 | 357  | 636  | ATTGCCACGTGTAATGGGTC   | 60.646 | 20 |



|     |      |      |                         |        |    |
|-----|------|------|-------------------------|--------|----|
| 227 | 311  | 537  | ATGGAAAACAAGAAGCAGCG    | 60.386 | 20 |
| 223 | 0    | 222  | TTGGTTCATGTAGCCGACCT    | 60.517 | 20 |
| 196 | 173  | 368  | TCAGCTCTTGTTCCTCCCAAG   | 60.366 | 20 |
| 256 | 1218 | 1473 | GCACGAACCCATGACCTATT    | 59.82  | 20 |
| 217 | 470  | 686  | GGAAATCGCTCCACAGACTC    | 59.81  | 20 |
| 266 | 4874 | 5139 | GCATAATGCACAAAAGGCA     | 59.708 | 20 |
| 259 | 1213 | 1471 | GCCGGTGCAGGTCTCTCTAT    | 61.72  | 20 |
| 178 | 858  | 1035 | ATGCATGCAAACCAGGATCT    | 60.492 | 20 |
| 190 | 268  | 457  | TCTACCGGAGGAAACCATGA    | 60.452 | 20 |
| 253 | 510  | 762  | CTTCCACCCTTGTTCCTCAA    | 59.942 | 20 |
| 170 | 258  | 427  | ATGGTGGTAAGGTGTGGAGG    | 59.697 | 20 |
| 215 | 144  | 358  | AGATCCCTCCCTCGCTACAT    | 60.059 | 20 |
| 233 | 4809 | 5041 | AAAAATTGATGAACGGGTGG    | 59.662 | 20 |
| 148 | 398  | 545  | CAAAACCTTCAATGGCCAAC    | 60.344 | 20 |
| 186 | 351  | 536  | CACCAATCCGTAGAGAAGGC    | 59.694 | 20 |
| 256 | 923  | 1178 | TTCTCTTGCAATGCTTCACG    | 60.134 | 20 |
| 177 | 61   | 237  | ATTTGAGGAGAGCAGCCACA    | 60.945 | 20 |
| 210 | 893  | 1102 | GGTGCGGGATAAAAATGTTG    | 60.188 | 20 |
| 268 | 175  | 442  | ATATCAGCTCGACAATCCC     | 60.066 | 20 |
| 197 | 5    | 201  | ATGTAGCCGACCCCAATTTA    | 59.297 | 20 |
| 279 | 478  | 756  | TTCCATTAACCTCATCGTTAAAA | 60.124 | 26 |
| 160 | 3    | 162  | TTAATCATAACTGGCCTCGC    | 59.225 | 21 |
| 269 | 1371 | 1639 | ACATATTCAGAGTCGTTTGAGC  | 58.548 | 24 |
| 155 | 282  | 436  | CCAATATCTGATGGATTGCG    | 58.943 | 20 |
| 238 | 1207 | 1444 | GAACTTTTTGTTCCTGCGATG   | 59.738 | 21 |
| 268 | 54   | 321  | CGAACAAGAAACGGGGATAA    | 59.931 | 20 |
| 218 | 436  | 653  | TGAAGGCTTTTCTCCTGCAA    | 61.021 | 20 |
| 106 | 4    | 109  | GGGGACATCTGAGTGTGTGA    | 59.502 | 20 |
| 151 | 1220 | 1370 | GCCAACCTTTGCCCTCTCTA    | 61.633 | 20 |
| 110 | 479  | 588  | GCAAATTTCTCCCCCTTCTC    | 60.017 | 20 |
| 209 | 3    | 211  | ATGTAGCCGACCCCAATTT     | 59.259 | 19 |
| 233 | 573  | 805  | TTGGCTAGTTGCATTATTTTGG  | 59.173 | 22 |
| 225 | 849  | 1073 | TGAACTATGACCGAGGAGCA    | 59.394 | 20 |
| 187 | 2339 | 2525 | TGGTCGGATATGGGTTGTTT    | 60.051 | 20 |
| 225 | 167  | 391  | AGCCTTTTGTGATGATGGC     | 60.081 | 20 |
| 210 | 198  | 407  | GCTGGGTCTGAAGCAGTAGC    | 60.164 | 20 |
| 254 | 481  | 734  | GAGGCTTTTGGTATGTCAGTC   | 59.242 | 22 |
| 224 | 1271 | 1494 | TGAGCATATTTTGTGTTGCTTG  | 58.89  | 22 |
| 214 | 1293 | 1506 | TTTAGTGGAATCACGGGAG     | 59.926 | 20 |
| 272 | 640  | 911  | ATAATCGTCTCCGTCGCTGT    | 59.723 | 20 |
| 255 | 857  | 1111 | AGCAGAGGATTGTTGACGCT    | 60.02  | 20 |
| 203 | 841  | 1043 | CACCCAACCCGAGTATCCTA    | 59.807 | 20 |
| 145 | 0    | 144  | CCCAGTTTATTGGGATTAATGT  | 59.443 | 24 |
| 221 | 970  | 1190 | GTCCTTGCATTAGGCAGAGC    | 59.985 | 20 |
| 271 | 2385 | 2655 | CCAAAAGGGAGGAGTGAAT     | 60.298 | 20 |
| 163 | 2377 | 2539 | GGACAATGCTGATCTCCTCC    | 59.617 | 20 |
| 197 | 838  | 1034 | TGACAATTCTCAGCCCCTTC    | 60.195 | 20 |
| 228 | 2345 | 2572 | TAATCCCACTGAATTTGGGC    | 59.762 | 20 |
| 109 | 14   | 122  | CGAGCTCGATCATGCAACTA    | 60.119 | 20 |
| 214 | 523  | 736  | TGGTGAAAAGTAAGCATGCAA   | 59.359 | 21 |
| 109 | 452  | 560  | GTCATTAATCCCACCGGAAA    | 59.79  | 20 |
| 273 | 1860 | 2132 | CGAATGCAACACTGGAGAAG    | 59.44  | 20 |
| 155 | 330  | 484  | TGACGAGCTTCCCTCTTGTT    | 59.989 | 20 |
| 179 | 1840 | 2018 | AAGATCGGACAACCCATCAA    | 60.317 | 20 |
| 213 | 1041 | 1253 | TTTGCTCACCCCTAACCACT    | 59.592 | 20 |
| 209 | 427  | 635  | TCTCCTCCATTTCCACCAAC    | 59.903 | 20 |
| 270 | 517  | 786  | AAAACATGCATCCACGAACC    | 60.765 | 20 |
| 272 | 1699 | 1970 | CCCCAAATGATCTACCAAGG    | 59.24  | 20 |

|     |      |      |                         |        |    |
|-----|------|------|-------------------------|--------|----|
| 109 | 347  | 455  | ACCCCAAACATGCAAAAC      | 59.836 | 20 |
| 223 | 1547 | 1769 | TTACCTAGCAAGGGTTTGGG    | 59.084 | 20 |
| 239 | 1235 | 1473 | AGAGAGACGGGGAAGAGGAC    | 59.945 | 20 |
| 263 | 671  | 933  | GCCCATAAAGCCATCAAATA    | 59.757 | 20 |
| 251 | 155  | 405  | AATGGAAAATAAGCAGGGGC    | 60.28  | 20 |
| 250 | 2899 | 3148 | AGCACACTTCTCCTGCAACC    | 60.453 | 20 |
| 268 | 197  | 464  | GGGAATCTTGTTTTAAGTATCC  | 59.762 | 24 |
| 248 | 52   | 299  | TGTTGATGCTGATGATGACG    | 59.197 | 20 |
| 171 | 2969 | 3139 | TTTTTGATGACGCAGGAACC    | 61.012 | 20 |
| 226 | 49   | 274  | GGAACCTCCTCTGTTCCCTC    | 60.05  | 20 |
| 208 | 918  | 1125 | AAAGGGTATGCAGCAGGATG    | 60.096 | 20 |
| 262 | 411  | 672  | GAGAATCCCGCAGATCAAA     | 60.155 | 20 |
| 129 | 1370 | 1498 | GCAGCCAAGTTTGGTTTGTT    | 60.154 | 20 |
| 279 | 58   | 336  | CCACCCCTTCTTTTTTCATT    | 60.159 | 20 |
| 232 | 415  | 646  | GGCATCAAGACGAATCCAAT    | 59.9   | 20 |
| 160 | 851  | 1010 | TATTGCATCTTGGCCCAACT    | 60.469 | 20 |
| 108 | 309  | 416  | AGGGCATGCATAGGTGTAGG    | 59.978 | 20 |
| 274 | 4409 | 4682 | TGAGCTCTGTTGGTCTTTGG    | 59.007 | 20 |
| 247 | 1088 | 1334 | TGATTGAAAGCACCGTCTTG    | 59.84  | 20 |
| 235 | 131  | 365  | TGAAGAGTGCCCAAATACA     | 59.123 | 20 |
| 108 | 1843 | 1950 | AACTCACATGGGGAACAAGG    | 59.82  | 20 |
| 247 | 1186 | 1432 | CAGCTCCAATGCAGTAGCAA    | 60.157 | 20 |
| 161 | 1275 | 1435 | TTTTCTCCTCCGGAAGTCATT   | 60.06  | 21 |
| 221 | 114  | 334  | AGATGGATGTTGAGTTGGG     | 59.927 | 20 |
| 235 | 505  | 739  | AGGCGAATTCTAAAGTGATCA   | 59.302 | 23 |
| 274 | 28   | 301  | ATTTTATGGGACGGAGGGAG    | 60.145 | 20 |
| 243 | 1015 | 1257 | TCAGTTTGCACACTTTCCCA    | 60.278 | 20 |
| 270 | 1940 | 2209 | CATTTTTCTTAACGGATTCTCC, | 59.507 | 23 |
| 271 | 149  | 419  | TCCATCGTACCGAGGCTAAC    | 60.096 | 20 |
| 153 | 171  | 323  | CCTCCGTCAGTGTGAGACA     | 59.864 | 20 |
| 204 | 2658 | 2861 | GCGTGGGAATTGTTTCAAGT    | 59.978 | 20 |
| 253 | 137  | 389  | CCGTGGTCACACCACTTTTT    | 60.843 | 20 |
| 136 | 18   | 153  | GGGTCCCTGTCTTATAGCG     | 60.836 | 20 |
| 259 | 2227 | 2485 | TGAAAGCAAGGAACGACTCC    | 60.375 | 20 |
| 269 | 1094 | 1362 | CGTATAGTCCCGAGCAGAGG    | 59.853 | 20 |
| 230 | 1810 | 2039 | TGCCTTGCGAATTGTGATTA    | 60.215 | 20 |
| 271 | 544  | 814  | CATCCCCACTTTTCGTTTA     | 59.795 | 20 |
| 252 | 1060 | 1311 | TAGCCCATAAAGCAACACGAA   | 59.325 | 20 |
| 245 | 306  | 550  | TGGGTGCGAACAACATTATTT   | 60.237 | 21 |
| 262 | 29   | 290  | TGCAGGCGATAAGCAGAAGT    | 61.071 | 20 |
| 178 | 3    | 180  | CCAAGACCCCAATTTGATT     | 60.91  | 20 |
| 229 | 1383 | 1611 | AGATCCAATCCAAATGCTGC    | 60.043 | 20 |
| 256 | 160  | 415  | GATTCCAACACTTGGGCTGT    | 59.973 | 20 |
| 268 | 10   | 277  | CGTGTAGGATGGGAAATTGAA   | 59.809 | 21 |
| 254 | 253  | 506  | ATAGTTGTTCAAAGCCGGG     | 61.217 | 20 |
| 225 | 231  | 455  | TTGGGAGTGAATGGGAGAG     | 60.042 | 20 |
| 193 | 443  | 635  | TCGCCTAGACGCAGAAAAT     | 59.982 | 20 |
| 260 | 1398 | 1657 | CCTGTGCCTGATTTGTTTCA    | 59.691 | 20 |
| 233 | 1031 | 1263 | CCACTCATGGAACCCAAAAC    | 60.21  | 20 |
| 225 | 3223 | 3447 | CCACCAGTTCTGATGCAAGA    | 59.831 | 20 |
| 272 | 1081 | 1352 | CCAAGTTCGACGAAACCATT    | 59.971 | 20 |
| 172 | 225  | 396  | GAGGAGACCGATCTGTTGGA    | 60.199 | 20 |
| 177 | 9    | 185  | CCAAGACCCCAATTTGATT     | 60.91  | 20 |
| 196 | 90   | 285  | CAATCAAATTGGGGTCTTGG    | 60.162 | 20 |
| 239 | 89   | 327  | AGCAGGCTCAGACCAAGAAG    | 59.745 | 20 |
| 255 | 7    | 261  | TCATCGAGTCCGCACATTAG    | 59.823 | 20 |
| 204 | 2323 | 2526 | TTGAACACGCTCAACAGGAG    | 60.025 | 20 |
| 143 | 1488 | 1630 | GGCCATTCGAGTTATGGAGA    | 60.036 | 20 |

|     |      |      |                        |        |    |
|-----|------|------|------------------------|--------|----|
| 255 | 7    | 261  | AATTGTTGCATCTATTTTCTAA | 57.91  | 27 |
| 212 | 339  | 550  | CAAGACCGTGACAGGCACTA   | 59.897 | 20 |
| 128 | 1268 | 1395 | ATTGTCCCTCCACACCACTT   | 59.279 | 20 |
| 225 | 404  | 628  | AATCGCATTTTCTCGACGAC   | 60.221 | 20 |
| 238 | 172  | 409  | GCCAAGAGCCCATAGTTCAA   | 60.214 | 20 |
| 141 | 572  | 712  | TTCCGATCAGAGCTTCTCGT   | 60.096 | 20 |
| 235 | 726  | 960  | AAATTTGTCCTTTCTACACGCA | 58.811 | 22 |
| 249 | 723  | 971  | CCATAGAGGTGTCAAAGGGC   | 60.719 | 21 |
| 148 | 9    | 156  | CCCAAGACCCCAATTTGATT   | 60.91  | 20 |
| 244 | 8485 | 8728 | CAGTTGGAGTTCCATCAGCA   | 59.831 | 20 |
| 191 | 1704 | 1894 | CATCCCGTTATCCAATGCTC   | 60.296 | 20 |
| 242 | 950  | 1191 | TAGGACCATGTGGGCAGAAT   | 60.34  | 20 |
| 191 | 4    | 194  | GATCCCACTCTCCTTCTCGC   | 61.284 | 20 |
| 137 | 2098 | 2234 | CCGTCATTAATCTCTTGGATCA | 59.043 | 22 |
| 140 | 3895 | 4034 | TACTGCCTCCAGATCCACCT   | 59.679 | 20 |
| 228 | 835  | 1062 | TCGATTTTGTTAGGCTCGC    | 60.343 | 20 |
| 238 | 444  | 681  | GAGCATGTTTCTGCGATTCA   | 59.955 | 20 |
| 103 | 1422 | 1524 | ATCAAAAACCAATTGATAGCA  | 58.556 | 23 |
| 191 | 555  | 745  | GAATTCTTTCCTCCATGCCA   | 60.014 | 20 |
| 151 | 353  | 503  | AGCAAAAATGATCCACACC    | 59.797 | 20 |
| 177 | 277  | 453  | GAGGCGCAAAACACTTCAAC   | 60.817 | 20 |
| 223 | 0    | 222  | GCAGGCCAAAGAGGAAGAGT   | 60.903 | 20 |
| 263 | 185  | 447  | GCTTTGACTCGGAGTTTGA    | 60.375 | 20 |
| 239 | 185  | 423  | CGTGAACATAACAATATTGCGA | 60.068 | 23 |
| 105 | 1137 | 1241 | GAACTCGAGCATTGCAACAA   | 59.995 | 20 |
| 280 | 1489 | 1768 | CAAGAAAGCGAAATGCTTCAA  | 60.494 | 21 |
| 171 | 83   | 253  | GGAAGCACTCGCAAGAAAAC   | 60     | 20 |
| 203 | 148  | 350  | CCCCCATACCCACATACTGA   | 60.452 | 20 |
| 251 | 140  | 390  | TTGGTTCATGTAGCCGACC    | 60.894 | 20 |
| 166 | 5    | 170  | AGGAGTGGGTGTCGGTTTTT   | 60.776 | 20 |
| 277 | 39   | 315  | AAAATACGAGTGGCGATGG    | 59.96  | 20 |
| 260 | 125  | 384  | TTGGGTTTTAAATTCGTTGAA  | 58.567 | 22 |
| 261 | 88   | 348  | AGAACCAGACCTGCTTGCAT   | 59.874 | 20 |
| 273 | 888  | 1160 | CGACCCACATAGTGGGAAAG   | 60.366 | 20 |
| 203 | 0    | 202  | TTCGACGTTTTCAAAGAAAAA  | 59.723 | 21 |
| 265 | 380  | 644  | TTTTGATTGGGAATAATTGGGT | 59.441 | 22 |
| 167 | 835  | 1001 | TGTTCTCCAGAGACAGCAC    | 60.03  | 20 |
| 260 | 457  | 716  | ATGTCTATCGTTTGGGCTGG   | 59.955 | 20 |
| 147 | 1504 | 1650 | ATGCTCTCCAAGACGTCCAC   | 60.269 | 20 |
| 155 | 480  | 634  | CAAGACAAGCTGAGCAGTCG   | 59.922 | 20 |
| 269 | 597  | 865  | GCCTCATCCAACTTGAATA    | 60.089 | 21 |
| 218 | 109  | 326  | AAAATTAAGGGGGATTGCC    | 59.167 | 20 |
| 245 | 370  | 614  | TGACATTGTTTCGGTTGCAT   | 59.972 | 20 |
| 218 | 346  | 563  | TCATGGTGGGGTGAGTTTTT   | 60.21  | 20 |
| 255 | 386  | 640  | GATTCTGGTTCGGTGATGCT   | 60.081 | 20 |
| 215 | 57   | 271  | GCTCGTACATCGAGTGATGC   | 59.43  | 20 |
| 276 | 170  | 445  | TAAAGGTGGAGCTGTGGTGG   | 61.084 | 20 |
| 279 | 1860 | 2138 | ATCCTATGTGCCACCACGACA  | 59.992 | 20 |
| 185 | 3099 | 3283 | AATGAGAAAATGAGGCGCAC   | 60.221 | 20 |
| 126 | 813  | 938  | TTATGGCCAAAGACCAACCT   | 59.429 | 20 |
| 129 | 628  | 756  | CGGATTGTTTTGGAAAGGA    | 59.91  | 20 |
| 182 | 287  | 468  | TTGGGGAGATCATTTTTGG    | 59.733 | 20 |
| 225 | 134  | 358  | CCGTCTCCATTCTCCACAA    | 61.034 | 20 |
| 276 | 988  | 1263 | AAGGCCCTCTCAAACCAAT    | 59.94  | 20 |
| 203 | 2688 | 2890 | ATTGAAGGGGCCATACAGTG   | 59.813 | 20 |
| 200 | 12   | 211  | CATCTGTGGCATGAGGAAAA   | 59.648 | 20 |
| 155 | 456  | 610  | ACCGCAGAAATTTAGGAGGCT  | 60.228 | 20 |
| 248 | 162  | 409  | TCTTATTAGGGGCTTGTGCG   | 60.223 | 20 |

|     |      |      |                        |        |    |
|-----|------|------|------------------------|--------|----|
| 256 | 3602 | 3857 | TCTCCTTTGGAGACGGTGAG   | 60.377 | 20 |
| 277 | 430  | 706  | TTTTGTTGTGGCGTCTCTTG   | 59.881 | 20 |
| 200 | 541  | 740  | GGAGATAGAGAGGGGGCCAAC  | 60.037 | 20 |
| 123 | 1517 | 1639 | TGATAAATCGTTGCTGGCTG   | 59.833 | 20 |
| 242 | 631  | 872  | AGATTCCACCGTGTGTGGT    | 60.284 | 20 |
| 216 | 325  | 540  | AACGTATTCTTCCCCCACT    | 59.691 | 20 |
| 242 | 5886 | 6127 | TTCCCCACCATTTTCATCATT  | 59.991 | 20 |
| 209 | 270  | 478  | CCATCTCAAGGGTCTACCGA   | 60.065 | 20 |
| 234 | 108  | 341  | TCTGTTACATTCTCCAAGCCA  | 59.747 | 22 |
| 165 | 708  | 872  | AATTGGTCTCCTCAATCCCC   | 60.133 | 20 |
| 255 | 60   | 314  | CCCCAAGACCCCAATTTTAT   | 59.882 | 20 |
| 232 | 116  | 347  | ACAACAACCTCCAAATTCCG   | 59.83  | 20 |
| 207 | 1576 | 1782 | GGCACCTCTCATGGATACT    | 58.969 | 20 |
| 277 | 1293 | 1569 | GTGTTTGTGATGGGCAACTG   | 60.008 | 20 |
| 128 | 828  | 955  | AAGTCGTCGTCATCATCCTCT  | 58.758 | 21 |
| 166 | 0    | 165  | GAGCATGCCTAGATGTTGCTT  | 59.495 | 21 |
| 140 | 47   | 186  | ATGGGTTGAGTCTCAATGG    | 59.927 | 20 |
| 109 | 1959 | 2067 | ATCCTCCTCAGATCCTTGGC   | 60.563 | 20 |
| 159 | 933  | 1091 | TTGCGGTTGTTCAAGCATT    | 60.251 | 20 |
| 197 | 258  | 454  | TCCAATGCTCCTCTACCGA    | 60.734 | 20 |
| 213 | 1069 | 1281 | TCGAAACCCTTGAGTTCGTC   | 60.232 | 20 |
| 122 | 173  | 294  | TGAGGTGAAAGGGTAGTCGG   | 60.103 | 20 |
| 259 | 647  | 905  | CGCGACAACCTCCAGTCCTA   | 59.992 | 19 |
| 241 | 1166 | 1406 | CACTTACGAAATGTCAAGACG  | 59.813 | 22 |
| 215 | 898  | 1112 | GGACTACCGGTCCGATTATTT  | 59.214 | 21 |
| 101 | 3022 | 3122 | CCGAATGATGAGAAGTGGGT   | 59.927 | 20 |
| 161 | 739  | 899  | AGGGAACCTTTGTGAACCCCT  | 59.834 | 20 |
| 253 | 402  | 654  | AGCTTAGGGCAACACGAGAA   | 60.015 | 20 |
| 196 | 411  | 606  | CAATTCTTTTGTGCGTGAGC   | 59.469 | 20 |
| 182 | 361  | 542  | TCCATAAGCCGACCTCACAT   | 60.483 | 20 |
| 263 | 189  | 451  | TGGACCCAATATGTCATAACC, | 59.938 | 22 |
| 267 | 10   | 276  | CGAAATTAACGTGGAGGACG   | 60.493 | 20 |
| 226 | 319  | 544  | TTTGTTGAGCGACCACAATC   | 59.697 | 20 |
| 186 | 602  | 787  | CATCATTTGATTGTGGTCCG   | 59.774 | 20 |
| 278 | 370  | 647  | CGAAATTGACACGATCCAAA   | 59.518 | 20 |
| 175 | 228  | 402  | AGGAGGTCGCCAAGAAGTT    | 60.247 | 20 |
| 124 | 762  | 885  | TTGTATCGAACGAGCATCCA   | 60.22  | 20 |
| 218 | 65   | 282  | CAGAGAGGCGGTGGTAAAAA   | 60.241 | 20 |
| 212 | 203  | 414  | CTCCATTTTGTGAGACCG     | 60.452 | 20 |
| 127 | 14   | 140  | TGTAGCCGACCCCAATTTAT   | 59.297 | 20 |
| 196 | 367  | 562  | CGCCTCTTCTTCTCTCCCT    | 60.088 | 20 |
| 277 | 2998 | 3274 | TTCCCTCTCAAAAACATCACA  | 58.187 | 21 |
| 244 | 1178 | 1421 | AGTCGTCTCCTATCCCATCG   | 59.116 | 20 |
| 278 | 36   | 313  | CACACACAGACGTTCCCATT   | 59.441 | 20 |
| 221 | 4452 | 4672 | CATGAATGTGTGGTTTCATCAT | 59.606 | 23 |
| 227 | 431  | 657  | TCGTAGCTCCCTTTGCATTT   | 59.845 | 20 |
| 201 | 310  | 510  | AGGCGTTTCATTGTTCTGCT   | 59.882 | 20 |
| 137 | 501  | 637  | CTGGTTTGGTTGAATTTCCG   | 60.336 | 20 |
| 231 | 435  | 665  | TGCATGAACGCTTCTCACTC   | 60.144 | 20 |
| 187 | 179  | 365  | AGGGGTAAAGTGCAAATCCC   | 60.187 | 20 |
| 140 | 1816 | 1955 | GACGGAATCGTGAACAATGA   | 59.502 | 20 |
| 217 | 248  | 464  | GTACCCTTGCCAGAATCAA    | 59.933 | 20 |
| 212 | 1452 | 1663 | TTCAGTTGGATGGTTGGACA   | 59.935 | 20 |
| 185 | 1025 | 1209 | ATTGTCCAGCCCAATCTGAA   | 60.461 | 20 |
| 184 | 8    | 191  | ATGTAGCCGACCCCAATTTA   | 59.297 | 20 |
| 195 | 120  | 314  | GTCGCCTCACCTTCATCTTC   | 59.81  | 20 |
| 246 | 217  | 462  | CCATTACCGATGCCTTACTTG  | 59.483 | 21 |
| 134 | 20   | 153  | GACAGCGGTTGGTTCAGC     | 60.412 | 18 |

|     |      |      |                        |        |    |
|-----|------|------|------------------------|--------|----|
| 195 | 101  | 295  | TAGGTTTGGGTTTCCACCTG   | 59.824 | 20 |
| 271 | 594  | 864  | GGTGAGCGATCAAAATCCAT   | 59.9   | 20 |
| 269 | 751  | 1019 | GTTCTTTTCTGATGAGGCGG   | 59.813 | 20 |
| 220 | 574  | 793  | AGAGGGGTGTTGAAGGTGTG   | 60.002 | 20 |
| 246 | 4168 | 4413 | TCCGGCGATTACTACAAACC   | 59.96  | 20 |
| 258 | 420  | 677  | TGGCTTCAGAAGAAACACCA   | 59.415 | 20 |
| 219 | 1866 | 2084 | TTGTGTCAGGACGGGTAGTCC  | 59.966 | 20 |
| 142 | 7    | 148  | TGTAGCCGACCCCAATTTAT   | 59.297 | 20 |
| 121 | 813  | 933  | AAATCGAAGTCTGAAGGAGCA  | 59.955 | 20 |
| 173 | 68   | 240  | TGAGGGTCCTAGCATGATGA   | 59.193 | 20 |
| 127 | 1003 | 1129 | GGTGTGCTGGAGATACCGAT   | 59.957 | 20 |
| 273 | 113  | 385  | TGCTCGCTATTTGGATGCTA   | 59.567 | 20 |
| 251 | 1104 | 1354 | GGTAACAACGGTGGAAATGG   | 60.088 | 20 |
| 246 | 997  | 1242 | TAAAGTGAACAACCTCCGGG   | 59.964 | 20 |
| 116 | 2    | 117  | TGTAGCCGACCCCAATTTAT   | 59.297 | 20 |
| 126 | 630  | 755  | TCACGAGGTGCATTGTGTTT   | 60.16  | 20 |
| 279 | 1779 | 2057 | TTCTGTTGCTTGGTCATGGA   | 60.24  | 20 |
| 200 | 412  | 611  | GGTGGATTGCTGACAAGTGA   | 59.682 | 20 |
| 259 | 537  | 795  | CGTTGCTCCTACATCATTGG   | 60.508 | 21 |
| 112 | 723  | 834  | TGTGAATAGGGGCATAGCCA   | 61.382 | 20 |
| 276 | 36   | 311  | TTTCTTGAGTTCGTCTTGGG   | 60.224 | 20 |
| 237 | 1482 | 1718 | TGCATGAAACATCTGCTGGT   | 60.272 | 20 |
| 119 | 5    | 123  | TGTAGCCGACCCCAATTTAT   | 59.297 | 20 |
| 232 | 338  | 569  | CATTTTGTACCCGAGCGA     | 59.673 | 19 |
| 223 | 205  | 427  | GGGATGAATCTGGCTGAAGA   | 60.158 | 20 |
| 171 | 399  | 569  | TCAAATACATAATTAGCACGG  | 59.504 | 25 |
| 149 | 1413 | 1561 | TGGATGCCTTGAAAAACCTC   | 60.051 | 20 |
| 200 | 397  | 596  | GGAGGTGACCGTTTGACAGT   | 60.009 | 20 |
| 215 | 675  | 889  | TGGAGCATCCAACATGAGAG   | 59.787 | 20 |
| 231 | 2291 | 2521 | TGGGGTGGACTAGAGATGCT   | 59.679 | 20 |
| 233 | 884  | 1116 | TGGGATTGTCATCCTCATCA   | 59.85  | 20 |
| 257 | 8    | 264  | CCCAAGACCCCAATTTGAT    | 59.59  | 19 |
| 233 | 132  | 364  | AAATGAAATCGTGCGAAAATG  | 59.957 | 21 |
| 162 | 438  | 599  | AGGTGGTGGAGGAGGAAAAT   | 59.795 | 20 |
| 148 | 2    | 149  | TGTAGCCGACCCCAATTTAT   | 59.297 | 20 |
| 230 | 192  | 421  | TCGCGAGAGAGAAAAGGAAA   | 60.206 | 20 |
| 202 | 585  | 786  | GCAATGCGATCCCTATGATT   | 59.891 | 20 |
| 183 | 1132 | 1314 | ACGGCAAAATTCATCCAGTC   | 59.939 | 20 |
| 195 | 1143 | 1337 | AGCACCTGACAAGACCAACC   | 60.159 | 20 |
| 198 | 570  | 767  | GAGTTCTCCGGTGATCTTGG   | 59.655 | 20 |
| 241 | 173  | 413  | CCAAAGCTTGAAGAAATGTTT  | 58.919 | 22 |
| 110 | 8    | 117  | GCAGACGAATTTAGTCGGGA   | 60.214 | 20 |
| 277 | 1124 | 1400 | TTTGTAGGCGTGGGCTAAAG   | 60.257 | 20 |
| 185 | 570  | 754  | ATCTCAAAAGACGCGAGGAA   | 59.955 | 20 |
| 162 | 1461 | 1622 | TCATTAGATTGGGAATAATTGC | 59.101 | 23 |
| 273 | 437  | 709  | GGTTCTGTTGGGACTCAGA    | 60.088 | 20 |
| 197 | 373  | 569  | CCTCCTCCTCCACATTTCAA   | 60.042 | 20 |
| 192 | 2515 | 2706 | AGCAACTCATTTCCAGCCAT   | 59.7   | 20 |
| 252 | 42   | 293  | TCCTTTTTCGTTTTATGTGC   | 58.819 | 20 |
| 233 | 1009 | 1241 | GGACTCGGGTGAGTCTCAAG   | 59.835 | 20 |
| 105 | 198  | 302  | ATAGGTCACGGTTCGAGTTG   | 59.989 | 20 |
| 267 | 519  | 785  | TGGGATAAAATCTCCGAAAAA  | 58.547 | 21 |
| 170 | 60   | 229  | TCGGGGATAATATTGCTGGA   | 60.247 | 20 |
| 257 | 243  | 499  | AAAACCGTTCCACCCCTTT    | 60.575 | 19 |
| 233 | 358  | 590  | CTGCAAACAACACACTTGCC   | 60.347 | 20 |
| 248 | 960  | 1207 | GAAACTCGATTGCTGCCCTA   | 60.352 | 20 |
| 264 | 679  | 942  | GTCCATGTCCTCGTCCTCAT   | 59.928 | 20 |
| 274 | 1077 | 1350 | CAAGCTTGGAAATGCCTGTT   | 60.249 | 20 |

|     |      |      |                        |        |    |
|-----|------|------|------------------------|--------|----|
| 238 | 1620 | 1857 | GGCTTCTCTGAAATCCTCCC   | 60.154 | 20 |
| 235 | 48   | 282  | AGCAGGCTGAGAGAATGAGC   | 59.857 | 20 |
| 261 | 1727 | 1987 | TGCACAGAAGATCCTGCAAC   | 59.992 | 20 |
| 269 | 902  | 1170 | TTAAATCCAACTCACACATAT  | 58.233 | 27 |
| 219 | 2821 | 3039 | ACGGTCTCGAACTCGCTTTA   | 60.015 | 20 |
| 206 | 155  | 360  | CCACTTCCCAAATTTCCCTT   | 60.159 | 20 |
| 228 | 1427 | 1654 | ATCCATGGGAATTGGACAAA   | 59.991 | 20 |
| 272 | 709  | 980  | TTCAATCAAACGGTTCATGC   | 59.523 | 20 |
| 154 | 210  | 363  | GCAAGATCATGCACCATCAA   | 60.641 | 20 |
| 199 | 2062 | 2260 | TTGTACAATGCATGCCGTTT   | 60.532 | 20 |
| 272 | 501  | 772  | ATTTCAACTACGACGGCCAC   | 60     | 20 |
| 177 | 3    | 179  | CACTCGAAGAGTAGCGGCTG   | 61.263 | 20 |
| 246 | 218  | 463  | TGTTTTTACCTGCGTATCTGTC | 59.698 | 23 |
| 235 | 1337 | 1571 | TGAAGATGAAGGTGGTCGTG   | 59.676 | 20 |
| 252 | 68   | 319  | AGTTTACCTGACTGGCGTGG   | 60.171 | 20 |
| 234 | 409  | 642  | GAGCACGAGGTGTTGATTT    | 60.263 | 20 |
| 197 | 334  | 530  | GTGCTTCGGTCTGGATGACT   | 60.269 | 20 |
| 105 | 358  | 462  | CAGAAAGGTCGGCATCATCT   | 60.218 | 20 |
| 187 | 14   | 200  | ATCTCCACTTGTTGTCTCCAA  | 57.211 | 21 |
| 254 | 106  | 359  | ATTCCTCGGGTTCTTGGAGT   | 59.935 | 20 |
| 238 | 192  | 429  | TGATTTAGTAAAGTTGGAGGT  | 59.098 | 24 |
| 119 | 430  | 548  | TCCCTCTTTCTTTTGGGTGA   | 59.641 | 20 |
| 232 | 114  | 345  | AGGTTATGGTGCGTCGAGTC   | 60.142 | 20 |
| 222 | 64   | 285  | TCAAATGTTTCGTCTTGCAGC  | 59.995 | 20 |
| 232 | 1027 | 1258 | TAATGACGCAGACGGAATTG   | 59.688 | 20 |
| 223 | 1    | 223  | GGTTCCTGCTGCAGATTCAT   | 60.226 | 20 |
| 120 | 38   | 157  | AATCGTCGAATTCGGTTTCA   | 60.448 | 20 |
| 195 | 552  | 746  | ACCATCGTGGCCAATAAAAA   | 60.188 | 20 |
| 148 | 14   | 161  | TGTAGCCGACCCCAATTTAT   | 59.297 | 20 |
| 247 | 613  | 859  | AAAGATTCAGCAATGGGTGG   | 59.933 | 20 |
| 217 | 5    | 221  | ATGTAGCCGACCCCAATTTA   | 59.297 | 20 |
| 269 | 178  | 446  | AATATGCAAGGGGGAGGAAT   | 59.627 | 20 |
| 221 | 740  | 960  | ACGGATTCGAGTTTCAACGA   | 60.636 | 20 |
| 216 | 1909 | 2124 | GAGGTCTAGCAGAGGGAGCA   | 59.703 | 20 |
| 226 | 510  | 735  | TGTAGTCATCGAGCAAGCCA   | 60.562 | 20 |
| 243 | 80   | 322  | TGACCAATCACCAATCAACAA  | 59.808 | 21 |
| 221 | 23   | 243  | AGTGCAAATGTTGACGGGTT   | 60.419 | 20 |
| 225 | 430  | 654  | GCTTAACTGGCGAACTGACC   | 59.882 | 20 |
| 176 | 2    | 177  | CCCAAGACCCCAATTTGATT   | 60.91  | 20 |
| 232 | 5    | 236  | CACGCCAACTTACAAACTATC  | 59.706 | 22 |
| 275 | 1953 | 2227 | GTCTCAGGTTTCAATCCCAC   | 59.511 | 20 |
| 213 | 1812 | 2024 | GCAGCTTCTGCCTCACTTCT   | 59.898 | 20 |
| 196 | 317  | 512  | ATTGTTGAGAGCCGAAATGG   | 60.074 | 20 |
| 101 | 0    | 100  | TTGGTTCATGTAGCCGACC    | 59.512 | 19 |
| 270 | 2100 | 2369 | TTGAACAAGGTGAAGGCTCC   | 60.232 | 20 |
| 167 | 773  | 939  | TTGCCAGTTCTTTTGTGTA    | 59.293 | 20 |
| 159 | 555  | 713  | TCTGTTTTATTTCCCGTGC    | 59.938 | 20 |
| 260 | 566  | 825  | GAACAATGCCTCGAAACGTA   | 58.773 | 20 |
| 107 | 418  | 524  | TGCATTTTCATCGCTTTATGC  | 59.809 | 20 |
| 252 | 90   | 341  | GCCGTCTGATTGGAGGATTA   | 60.036 | 20 |
| 189 | 365  | 553  | TGAAAATGAGTTGGGGGTGT   | 60.21  | 20 |
| 244 | 428  | 671  | TGAGCATGATGTGTCTTGAATI | 58.307 | 23 |
| 275 | 90   | 364  | ATCTCCTCCATTTCAACCCC   | 60.133 | 20 |
| 265 | 1017 | 1281 | AAATATTTTAGAAAGAACAGA  | 57.114 | 27 |
| 198 | 0    | 197  | GGAACAAACCCGACGTAAAA   | 59.839 | 20 |
| 202 | 36   | 237  | CCGACCTTCCAAATTGTTGT   | 59.83  | 20 |
| 269 | 137  | 405  | GGTTTCATCACAAAATTCTTCC | 60.21  | 23 |
| 167 | 8    | 174  | CAGTTCATGTCACAAACGC    | 60.16  | 20 |

|     |      |      |                        |        |    |
|-----|------|------|------------------------|--------|----|
| 192 | 150  | 341  | CCTTCGAGACAGCCGATAAA   | 60.344 | 20 |
| 278 | 45   | 322  | TCATTTCCGACAACCTCGATG  | 59.648 | 20 |
| 279 | 123  | 401  | ATCATTCCCTGCAATCCTCA   | 60.426 | 20 |
| 273 | 155  | 427  | CCATTGTAAACCCCTGCACT   | 59.853 | 20 |
| 185 | 342  | 526  | CCAGAACCATGGACACACAG   | 59.997 | 20 |
| 270 | 888  | 1157 | ACTTATTGGCACGAAAGTCGG  | 60.132 | 20 |
| 251 | 310  | 560  | CTGCTAGACCCAGTGGTGGT   | 60.174 | 20 |
| 266 | 547  | 812  | ATGTTTCTTCCGAGTGTGGG   | 59.966 | 20 |
| 188 | 318  | 505  | GATGAGCAGCTCGACAATGA   | 60.104 | 20 |
| 219 | 1    | 219  | GGCCACCAAGAATCTCAGAA   | 60.195 | 20 |
| 214 | 426  | 639  | GGGTTGTTAAGATTTAATGATT | 57.624 | 26 |
| 201 | 880  | 1080 | AGTGTCCCTTCGCCTATGTG   | 60.134 | 20 |
| 234 | 38   | 271  | TCAAAGAAAGTGAGTAGAATC  | 57.273 | 24 |
| 256 | 380  | 635  | TTGGTTCATGTAGCCGACTC   | 60.125 | 21 |
| 251 | 0    | 250  | TGTGTTTCATGTTTGTGTGAT/ | 58.06  | 24 |
| 251 | 31   | 281  | TGAAGTTTCGAAGACTGGAAG  | 59.097 | 22 |
| 261 | 320  | 580  | CCTCGATCCTGACCCAATTA   | 59.887 | 20 |
| 113 | 702  | 814  | TGAATATTGGGGTGGGAAAA   | 59.988 | 20 |
| 136 | 125  | 260  | AAATCACGGGACCAAAATGA   | 60.17  | 20 |
| 126 | 2347 | 2472 | CTCCAGAGCAAATCGACCTC   | 59.95  | 20 |
| 150 | 17   | 166  | TGCACATGTTAGCCAGAACTT  | 59.813 | 22 |
| 278 | 180  | 457  | CGATTGTATTTGTGCTGCAA   | 58.354 | 20 |
| 241 | 561  | 801  | TCATTCTCTTCACCGGAAGC   | 60.34  | 20 |
| 216 | 160  | 375  | AAGGTAACGGAAGGGTCTGG   | 60.353 | 20 |
| 211 | 0    | 210  | TGTAGCCGACCCCAATTTAT   | 59.297 | 20 |
| 250 | 348  | 597  | CCTCCATTTCCCAATAA      | 59.617 | 20 |
| 267 | 335  | 601  | ATTCCTGTTCTCTTCCCG     | 60.434 | 20 |
| 183 | 5    | 187  | CCCAAGACCCCAATTTGATT   | 60.91  | 20 |
| 226 | 493  | 718  | ATGCTCGATTCTTGTGGGAC   | 60.081 | 20 |
| 280 | 1449 | 1728 | CCCGTTCAGACCACCTTTTA   | 59.964 | 20 |
| 142 | 111  | 252  | GAGTCTCCATCCCCACAGAA   | 60.048 | 20 |
| 263 | 5    | 267  | CCCAAGACCCCAATTTGATT   | 60.91  | 20 |
| 237 | 594  | 830  | TGGGATGAGGAAAAACATGA   | 58.897 | 20 |
| 168 | 575  | 742  | TCGACGCATCAGAAGACAAC   | 59.992 | 20 |
| 261 | 746  | 1006 | CATGGTCTGGCTATTCCCAT   | 59.773 | 20 |
| 246 | 1173 | 1418 | TGGGATTTTATGCAGAAGGG   | 59.894 | 20 |
| 243 | 1197 | 1439 | TTCTATGAAGCCCTCAGCGT   | 59.978 | 20 |
| 188 | 740  | 927  | GCACTGCAGAAGGTCTCCTC   | 60.143 | 20 |
| 183 | 366  | 548  | ATGGTTGCCTTTGTTTGGAG   | 59.971 | 20 |
| 140 | 870  | 1009 | TCAACATTGCAAAATGGGAC   | 59.375 | 20 |
| 148 | 6    | 153  | CCAATTTATTGGGATTAAGGC  | 57.539 | 21 |
| 149 | 940  | 1088 | TTTACACGTGTGGGATATGGA  | 59.091 | 22 |
| 232 | 218  | 449  | TATCTGCAGCGCATCATCTT   | 59.553 | 20 |
| 172 | 211  | 382  | CACGTGAGGGAGGGTTTAGA   | 60.103 | 20 |
| 225 | 142  | 366  | ACCTATGGATGCACCGGTTA   | 60.214 | 20 |
| 125 | 3659 | 3783 | GGCAATTGACCACCGTAAAC   | 60.235 | 20 |
| 274 | 199  | 472  | GCCCAATGACAAAGAGGAAA   | 60.051 | 20 |
| 240 | 968  | 1207 | CGTTTAGTGGTGCAGGAAT    | 60.132 | 20 |
| 200 | 200  | 399  | ACCAGTAGTTTCCGGTGGTG   | 59.884 | 20 |
| 201 | 303  | 503  | TGAGGCGTAAGCAAATTTCA   | 59.443 | 20 |
| 258 | 95   | 352  | AGAGCGTCGCCTAAGTGTTG   | 60.592 | 20 |
| 212 | 384  | 595  | GACTATGGCCCAAACCGTA    | 59.823 | 20 |
| 243 | 334  | 576  | AACGAGGACATCGGTCTGAG   | 60.261 | 20 |
| 107 | 118  | 224  | TGATCCATATAGCCGACCCT   | 59.368 | 20 |
| 117 | 529  | 645  | GGTTCATGTAGCCGACCCTA   | 59.955 | 20 |
| 131 | 422  | 552  | ACCCACCACCATCTACAAT    | 60.096 | 20 |
| 173 | 1322 | 1494 | CAAATCAAATAATTGCAAAG   | 58.304 | 24 |
| 268 | 119  | 386  | TGGTTGAATTGGAAACGTGA   | 59.941 | 20 |

|     |       |       |                        |        |    |
|-----|-------|-------|------------------------|--------|----|
| 167 | 462   | 628   | TGGTTTCTTGCTTGATTAGCAT | 58.901 | 22 |
| 273 | 419   | 691   | GGAAGCCGTTGAAGATTTGA   | 60.192 | 20 |
| 268 | 797   | 1064  | CACGTCTCCGAAAGACAACA   | 59.873 | 20 |
| 256 | 467   | 722   | CTTTGCCTTTTCTGCCTCTG   | 60.125 | 20 |
| 150 | 2145  | 2294  | ATACGATCCATTTTGCCGAC   | 59.791 | 20 |
| 270 | 287   | 556   | AATCCTCAGTGCCATCAACC   | 59.934 | 20 |
| 208 | 1864  | 2071  | ATCTTGCTGTGTGATCCCT    | 59.685 | 20 |
| 155 | 196   | 350   | TTTCGAGGCTCGGTCAGTAT   | 59.836 | 20 |
| 246 | 10867 | 11112 | CAAGTATGGTCTCGCACAACA  | 59.773 | 21 |
| 163 | 346   | 508   | GCAAATAAATCGGCAGAGGT   | 59.186 | 20 |
| 270 | 456   | 725   | ATGAGGTCGGACATCTCGAA   | 60.622 | 20 |
| 159 | 9     | 167   | AATTTGATTGGGAATAATTGGC | 58.965 | 22 |
| 274 | 149   | 422   | AAACGCCTAGCTCTCCACAA   | 60.015 | 20 |
| 259 | 534   | 792   | GAGAATTGGGTAACCAGCCA   | 59.933 | 20 |
| 278 | 5649  | 5926  | GGGGGAGAGGTTAGATTGGA   | 60.264 | 20 |
| 220 | 157   | 376   | TTATTTGCTCCCAACGATCA   | 59.112 | 20 |
| 277 | 564   | 840   | TATTTTATCTCCTCCGCCCG   | 61.245 | 20 |
| 196 | 1041  | 1236  | GGGATGGGTAGAGTAACGTCC  | 59.705 | 21 |
| 176 | 408   | 583   | TGCAAGTTTGAGCGAGATTG   | 60.134 | 20 |
| 261 | 120   | 380   | ATCTCGTGGGGGAAGACTTT   | 59.935 | 20 |
| 209 | 904   | 1112  | GCATTTCCACGTTTCAAGAGGT | 60.119 | 20 |
| 186 | 22    | 207   | TTCAACACTATTCAACACGACT | 59.715 | 24 |
| 197 | 2337  | 2533  | CCGAATGGAATTGAAGCAAG   | 60.576 | 20 |
| 140 | 2409  | 2548  | TCTCACTCAGCTCGAAAGCA   | 60.008 | 20 |
| 150 | 736   | 885   | CGGCAGTTAAGGCTCAAAAG   | 60.011 | 20 |
| 271 | 557   | 827   | TGAAGGCCTTAAATCACCCAAA | 59.573 | 21 |
| 179 | 1028  | 1206  | TCCATATACCGACCCACAT    | 59.894 | 20 |
| 161 | 799   | 959   | TTTGTTTAGGGGCTTTGTGC   | 60.11  | 20 |
| 174 | 174   | 347   | GCTTTTTCTCTCCTTCCGT    | 59.827 | 20 |
| 151 | 2174  | 2324  | TTTCCTTGTCATTTTGCTC    | 58.895 | 20 |
| 201 | 28    | 228   | CAGCCGCTACTCTTCGAGTG   | 61.263 | 20 |
| 191 | 188   | 378   | TGAACGAATGGAGAAGGAGA   | 59.799 | 21 |
| 246 | 2005  | 2250  | ATTATCTCGCAGCATTGCCT   | 59.835 | 20 |
| 169 | 19    | 187   | GATTCAGGTGTGATCAATGAC  | 60.124 | 24 |
| 261 | 4347  | 4607  | TGCAACATCTGAACGCATTT   | 60.265 | 20 |
| 256 | 516   | 771   | TGTACACAGTGAGGTCATACT  | 57.473 | 25 |
| 198 | 154   | 351   | GTGGTGACATCCACTACCTGC  | 60.447 | 21 |
| 152 | 462   | 613   | AAATCAAAGGGTGGTGGTG    | 59.688 | 20 |
| 270 | 625   | 894   | AAATGTGCTGCTGGCTCAAT   | 60.807 | 20 |
| 202 | 1073  | 1274  | AAAATTAAGATGAGATTTGTC  | 59.826 | 27 |
| 241 | 593   | 833   | GAATTGCCAGAGAAGAAGCG   | 60.096 | 20 |
| 276 | 408   | 683   | AAGCATCATCCTCCCAACAG   | 60.073 | 20 |
| 166 | 1718  | 1883  | TCCTCCTCTCGTCTCCAGAA   | 60.064 | 20 |
| 167 | 69    | 235   | GCCATATCACGGTGGAAAAG   | 60.331 | 20 |
| 170 | 7     | 176   | TGTAGCCGACCCCAATTTAT   | 59.297 | 20 |
| 159 | 1253  | 1411  | AGCTATAGGTGGGGATGGGT   | 59.674 | 20 |
| 259 | 10    | 268   | TGGTTTACCCGATCTTGCTT   | 59.569 | 20 |
| 137 | 319   | 455   | AGTATCCTCGCAGTCGGAAA   | 59.836 | 20 |
| 148 | 2     | 149   | TGGTTCTCCAAATTCTTCTC   | 58.227 | 21 |
| 258 | 44    | 301   | AGGAATGGACGCAAGATCAC   | 60.081 | 20 |
| 134 | 387   | 520   | TACATCTCCCAAGACCCCAA   | 60.309 | 20 |
| 202 | 5     | 206   | GGTTCATGTAGCCGACCCTA   | 59.955 | 20 |
| 276 | 2001  | 2276  | TGCAGGAAACTGTCGTTTGA   | 60.427 | 20 |
| 251 | 571   | 821   | CTATTGCAATTGCTAGGGCG   | 60.73  | 20 |
| 184 | 853   | 1036  | CCGTTTTGTTACCATTTTGC   | 58.071 | 20 |
| 224 | 1908  | 2131  | AGGATACATGACACCCGTCC   | 59.661 | 20 |
| 154 | 351   | 504   | AAATCAAACCAACCCCAACA   | 60.066 | 20 |
| 271 | 2892  | 3162  | TCCCAAGTCTGAGCTTTTCTG  | 59.601 | 21 |



|     |      |      |                        |        |    |
|-----|------|------|------------------------|--------|----|
| 102 | 0    | 101  | CATCAAACCCAAACCAACCT   | 59.688 | 20 |
| 206 | 29   | 234  | CACATGATTTGGGTTTGTGC   | 59.823 | 20 |
| 272 | 17   | 288  | TGGTTCATGTAGCCGACCTC   | 61.067 | 20 |
| 267 | 32   | 298  | AATTGAGAGGTGGGACGATG   | 59.927 | 20 |
| 202 | 1652 | 1853 | TTCAACTTGCGCACTGTAT    | 59.347 | 20 |
| 143 | 1234 | 1376 | CAATTTCTTTTTCCCCCTCC   | 59.75  | 20 |
| 265 | 79   | 343  | TTTGGTGCAGAAATGATTTG   | 59.664 | 20 |
| 176 | 27   | 202  | TCGTCACTTTCCTTCTCCTCA  | 59.974 | 21 |
| 234 | 309  | 542  | CACGATAAAACAATTTTGGAA  | 60.108 | 24 |
| 230 | 975  | 1204 | AGATAGGGGGACAGCGTAGG   | 60.476 | 20 |
| 193 | 1059 | 1251 | ATGAATGGTTGGTCGCTTTC   | 59.939 | 20 |
| 260 | 818  | 1077 | GGGAGGAGTACGAAAACGGT   | 60.361 | 20 |
| 110 | 7    | 116  | TGTAGCCGACCCCAATTTAT   | 59.297 | 20 |
| 205 | 92   | 296  | ATTCAAAATCGACTGCGCTC   | 60.361 | 20 |
| 257 | 23   | 279  | AAAGAAAATTCAGGGGGTGG   | 60.159 | 20 |
| 207 | 662  | 868  | TGCCTGAGGTCTTACCCTTG   | 60.246 | 20 |
| 280 | 694  | 973  | CGTAATTTTCAACCCCAACC   | 59.178 | 20 |
| 143 | 2264 | 2406 | GGCAGTACATCGGAGCTTGT   | 60.285 | 20 |
| 167 | 1455 | 1621 | AAGGCGTTTTCTAAGGCACA   | 59.883 | 20 |
| 234 | 1979 | 2212 | TGCTGACTGGTCAAGGAATG   | 59.831 | 20 |
| 231 | 956  | 1186 | CTCTTCGCCTTCAACCTCAC   | 59.989 | 20 |
| 278 | 24   | 301  | TTCTCTGCCAACAATGAAATC  | 57.806 | 21 |
| 108 | 12   | 119  | ATGTAGCCGACCCCAATTTA   | 59.297 | 20 |
| 115 | 8    | 122  | TCGAAGTCATGCACCTCTTG   | 59.984 | 20 |
| 137 | 2267 | 2403 | GGCGTTCAATCCTATGGAGA   | 60.036 | 20 |
| 269 | 856  | 1124 | CCAATCAAATTGGGGTCAA    | 59.16  | 19 |
| 241 | 2233 | 2473 | GGGGAGAAAAACACGAACAG   | 59.569 | 20 |
| 275 | 297  | 571  | CTTGGGTTGTGCCAAAGTCT   | 60.149 | 20 |
| 203 | 35   | 237  | CCAGGTCGCTCAAATCTCTC   | 59.95  | 20 |
| 247 | 2828 | 3074 | TCCGTTACCACTTCTCCAG    | 60.103 | 20 |
| 118 | 2537 | 2654 | CGGTTTTGGGTGGTAAAAGA   | 59.833 | 20 |
| 199 | 1469 | 1667 | GAGGACTCCGTGGAATGTGT   | 59.969 | 20 |
| 218 | 3    | 220  | GTCTCAATGGGGACATCTGG   | 60.326 | 20 |
| 236 | 375  | 610  | CCCATCCTTGTGATATGCAAC  | 60.207 | 21 |
| 267 | 240  | 506  | TGTCACCACTCCCAAACCTCA  | 60.129 | 20 |
| 280 | 998  | 1277 | TGCCCTTCCCGATTATAGTG   | 59.916 | 20 |
| 205 | 535  | 739  | GGGTGATATTGATGGAGGGA   | 59.563 | 20 |
| 257 | 35   | 291  | GCGATGGATTTTTCTTTCA    | 60.016 | 20 |
| 163 | 31   | 193  | GAGTAGCACACCATCCCC     | 60.639 | 19 |
| 272 | 3263 | 3534 | AGGTGAAGCCCAGTCTGCTA   | 60.012 | 20 |
| 251 | 397  | 647  | GCCACCATTCTTTTGACAGC   | 60.646 | 20 |
| 279 | 17   | 295  | GTGAAGATTAGCTCCGCCTG   | 59.978 | 20 |
| 217 | 253  | 469  | ATTCCAATTCATTGCACACG   | 59.572 | 20 |
| 265 | 152  | 416  | TCGGAAACGAACTCTTCGAG   | 60.508 | 20 |
| 222 | 62   | 283  | GGATGAGTATTGCCTGACGAA  | 60.088 | 21 |
| 207 | 638  | 844  | TGTTTTCTGCCAAAAGTT     | 59.587 | 20 |
| 140 | 26   | 165  | TGATTTATGTAGCCGACCCC   | 59.784 | 20 |
| 207 | 803  | 1009 | GCAACTGAAAAACGGTTGGT   | 60.015 | 20 |
| 223 | 1202 | 1424 | CTGCACTGTATCGGGAACCT   | 60.134 | 20 |
| 261 | 158  | 418  | ACAGTAAAGCCCGTTGATG    | 59.993 | 20 |
| 278 | 261  | 538  | TGAGCACCAAATTTATTATCG/ | 58.687 | 23 |
| 207 | 937  | 1143 | GAGTGGTGGAGCAGAAAGGA   | 60.386 | 20 |
| 237 | 966  | 1202 | ACTTGCTCGGTATGCCATTT   | 59.597 | 20 |
| 170 | 68   | 237  | GACATGGTTGTGGTTTGTGC   | 59.862 | 20 |
| 102 | 719  | 820  | CTTGTGTAGGGGTGGGATTG   | 60.224 | 20 |
| 268 | 673  | 940  | TTGGCTTGATCTTTGAGATGG  | 60.199 | 21 |
| 189 | 835  | 1023 | CCGCCATCATCTCCATAATC   | 60.26  | 20 |
| 202 | 53   | 254  | GGAACCAACACAAACACACG   | 59.897 | 20 |

|     |      |      |                        |        |    |
|-----|------|------|------------------------|--------|----|
| 169 | 263  | 431  | AATCTTGGCGCCTCACTTTA   | 59.845 | 20 |
| 276 | 265  | 540  | GCCACATCACATCGAAAAGA   | 59.654 | 20 |
| 228 | 259  | 486  | CCACAGCTTCCCAAACAAT    | 59.971 | 20 |
| 230 | 348  | 577  | TGCAGAACCCATGTACATCAA  | 59.98  | 21 |
| 191 | 746  | 936  | CCATTTGCGACAAAAGACAA   | 59.706 | 20 |
| 199 | 236  | 434  | CATACAGTCGGCATCCAATG   | 59.948 | 20 |
| 278 | 72   | 349  | ACGCCATTTACGTCTTCGTT   | 59.637 | 20 |
| 167 | 712  | 878  | CAATTTGCGGGTGGTAAGAGC  | 59.569 | 20 |
| 277 | 706  | 982  | TTGTTCAATTCTCCCGAGTTG  | 58.695 | 20 |
| 267 | 680  | 946  | TTGTCCCGTCAAGAAAAAGG   | 60.081 | 20 |
| 224 | 57   | 280  | TTCGCCACTGATGACAAATC   | 59.654 | 20 |
| 136 | 492  | 627  | AAACGCGGTGATTTATCCAG   | 59.96  | 20 |
| 145 | 92   | 236  | CGTGATTTCTTTTTGGGCTC   | 59.685 | 20 |
| 109 | 1775 | 1883 | ATGGTCAGGCTCCAGGTATG   | 59.95  | 20 |
| 193 | 1914 | 2106 | TAGAATCGGATTTATCGCCG   | 60.019 | 20 |
| 230 | 461  | 690  | CCCTTGAGTAGCCAGCAGAG   | 60.149 | 20 |
| 223 | 4    | 226  | CCCAAGACCCCAATTTGATT   | 60.91  | 20 |
| 280 | 4    | 283  | TTTGATTGGGAATAATTGGG   | 57.289 | 20 |
| 220 | 1608 | 1827 | CCCCACCCTACAAGTATGA    | 59.665 | 20 |
| 246 | 215  | 460  | AAAACCGAGAGCAGAGTCCA   | 59.989 | 20 |
| 258 | 29   | 286  | CTTGTTGCTCAGCACAGTGG   | 60.651 | 20 |
| 272 | 1167 | 1438 | GTCGATTTCTTTCCAGCCT    | 60.578 | 20 |
| 280 | 1330 | 1609 | CCCAATTTGAAAACAAGCCA   | 60.836 | 20 |
| 119 | 473  | 591  | CCTTGCTAGGGCAGTACGAC   | 59.898 | 20 |
| 260 | 1024 | 1283 | TTGTGGACATCCCGGATACT   | 60.195 | 20 |
| 229 | 355  | 583  | GTCACCAAATACAAAGCCGC   | 60.511 | 20 |
| 206 | 159  | 364  | TATGAGAGGCTTGCGTGATG   | 59.972 | 20 |
| 141 | 400  | 540  | TAAGAATTGAATCGCAGGGC   | 60.175 | 20 |
| 140 | 57   | 196  | GGGTATACTTTTCCGGCCAC   | 60.562 | 20 |
| 176 | 1235 | 1410 | CTTCTTCCCTCCCAACTT     | 59.548 | 20 |
| 200 | 415  | 614  | ACCTCTAGCCCGGTGAACTT   | 60.132 | 20 |
| 183 | 7    | 189  | CCCAAGACCCCAATTTGAT    | 59.59  | 19 |
| 252 | 386  | 637  | TGATTTCCAAACATACGTTGTC | 60.271 | 23 |
| 110 | 9    | 118  | CCCAAGACCCCAATTTGATT   | 60.91  | 20 |
| 199 | 396  | 594  | AGCTCTCGACATCAAATCGG   | 60.362 | 20 |
| 272 | 25   | 296  | AAGCAAAGCATGGTTGGTT    | 59.615 | 20 |
| 177 | 1157 | 1333 | GATGATGCCGTTATGAGGT    | 59.78  | 20 |
| 115 | 47   | 161  | GCCGGATAAGCGATTTCTTT   | 60.536 | 20 |
| 181 | 68   | 248  | ACACCCAATTCCAAGGTTT    | 58.891 | 20 |
| 185 | 413  | 597  | ATTCAGCATCCCCAAGTTT    | 60.693 | 20 |
| 238 | 247  | 484  | GGGATGCATCAAAGTTGTCA   | 59.502 | 20 |
| 270 | 510  | 779  | TCCTTAGTCAAGGGGAAATGA  | 59.939 | 22 |
| 174 | 147  | 320  | AATGTGGCCATTCTGGAAAA   | 60.309 | 20 |
| 278 | 538  | 815  | ACTTTGAACCCATCTCACCG   | 59.966 | 20 |
| 254 | 399  | 652  | CTGGTTCGCAACACAGAAAA   | 59.881 | 20 |
| 187 | 492  | 678  | AGGATCCTAAAATTTGAAGGG  | 59.692 | 22 |
| 213 | 541  | 753  | CCCTAGCAAAGAGAGAGGG,   | 59.963 | 21 |
| 195 | 33   | 227  | GAGATCCGTGTGTGGGATT    | 59.786 | 20 |
| 174 | 3607 | 3780 | GCTATTGAGCAATATCAGAAA  | 59.67  | 24 |
| 250 | 1385 | 1634 | CAGCAAGAATAAAGTGTGCCA  | 58.978 | 21 |
| 264 | 762  | 1025 | AAGATTGCTCTCGCCTCAAC   | 59.579 | 20 |
| 162 | 3    | 164  | TGTAGCCGACCCCAATTTAT   | 59.297 | 20 |
| 257 | 56   | 312  | TGATTCTAAAATGAATCCAATC | 59.693 | 24 |
| 240 | 49   | 288  | GCCGACATGACCTTAGCAGT   | 60.285 | 20 |
| 257 | 154  | 410  | AACACAGACACGGACACGAA   | 60.203 | 20 |
| 189 | 542  | 730  | ACAAAATGGGCATGAACACA   | 59.823 | 20 |
| 253 | 589  | 841  | TCGTTAATTGGTTCCATTTTGA | 59.341 | 22 |
| 252 | 563  | 814  | GTGGGGTGAATTGTGTGTTG   | 59.701 | 20 |

|     |      |      |                        |        |    |
|-----|------|------|------------------------|--------|----|
| 168 | 83   | 250  | GGTGGAGACTTAGGTGGGG    | 59.365 | 19 |
| 207 | 175  | 381  | TGCAGCTTGCTGCTGTTACT   | 59.958 | 20 |
| 165 | 789  | 953  | TCATGCTTCTTGTTGGGAAA   | 59.247 | 20 |
| 267 | 143  | 409  | ATGAAATCCGAAACGCCAT    | 60.289 | 19 |
| 256 | 146  | 401  | TTGTCAAAGAACACGTTACACA | 58.266 | 23 |
| 257 | 3026 | 3282 | TTACGGAGTGGATGGTGGTT   | 60.232 | 20 |
| 190 | 420  | 609  | CCTTATACGTTACCCCAAG    | 57.1   | 20 |
| 250 | 429  | 678  | CAACCGAAATTTTTGGAAGG   | 59.424 | 20 |
| 187 | 735  | 921  | GATTCCGTTGATTGTTGCCT   | 59.939 | 20 |
| 178 | 606  | 783  | GCCCAGGGATTCAAAGTACA   | 59.933 | 20 |
| 156 | 4964 | 5119 | ACGCAAACGCTCTTTTAGGA   | 60.018 | 20 |
| 204 | 125  | 328  | TTGAGCCACTTATCATCTTTCA | 58.888 | 23 |
| 202 | 1083 | 1284 | CGGAGGTAGTTGGCATTGT    | 59.993 | 20 |
| 222 | 429  | 650  | AATGTAGAGCAGAGAGGCGG   | 59.598 | 20 |
| 127 | 191  | 317  | TTTGCCGACTTTCCTTCTGT   | 59.853 | 20 |
| 245 | 266  | 510  | CCATAAACCAATTGGTCCAACA | 60.466 | 21 |
| 200 | 19   | 218  | CAATAAATTGGGGTCGGCTA   | 59.789 | 20 |
| 262 | 9    | 270  | CCCAAGACCCCAATTTGATT   | 60.91  | 20 |
| 175 | 3790 | 3964 | CAATGGCTTTGAGGGGTAAA   | 59.931 | 20 |
| 132 | 683  | 814  | TTCTGCAGGTTTTCTCCAC    | 60.232 | 20 |
| 232 | 3076 | 3307 | ATAGTGCAGCAAGATTGGGG   | 60.096 | 20 |
| 146 | 596  | 741  | CATACCTGTCCCGACCATCT   | 59.803 | 20 |
| 250 | 201  | 450  | GGCTATGTCCACATGCAGAA   | 59.679 | 20 |
| 203 | 131  | 333  | AGAAGCAAGTGGAGAGGCAC   | 59.604 | 20 |
| 136 | 1594 | 1729 | TCCACTACTCCAATGTCTGCC  | 60.126 | 21 |
| 227 | 1293 | 1519 | ATTGTCTACCAATCGGGGTG   | 59.67  | 20 |
| 108 | 428  | 535  | GTCAAGTTTGAGACGTTGCG   | 59.49  | 20 |
| 163 | 563  | 725  | GCATGTCGGTCAATTGTAA    | 59.548 | 20 |
| 219 | 17   | 235  | GGTTGACTCACACGTGGAAA   | 59.571 | 20 |
| 117 | 343  | 459  | CCAGTAAATCAACGAAACGAA  | 59.162 | 22 |
| 231 | 2921 | 3151 | CGTTGAAATCTGTTCTCTCC   | 59.526 | 20 |
| 191 | 42   | 232  | ATGTAGCCGACCCCAATTTA   | 59.297 | 20 |
| 256 | 4791 | 5046 | AACCACCCATCAGCAATGTT   | 60.24  | 20 |
| 187 | 6    | 192  | ATGTAGCCGACCCCAATTTA   | 59.297 | 20 |
| 241 | 495  | 735  | CACGAAGTTTGGTGACAACC   | 59.034 | 20 |
| 172 | 1970 | 2141 | TACACACCGAGTGCAAATCC   | 59.572 | 20 |
| 204 | 617  | 820  | GGGTTTGCCTTTGATTTGTT   | 59.845 | 20 |
| 255 | 257  | 511  | TCTTTGGAATTGGAAGGACG   | 60.044 | 20 |
| 271 | 384  | 654  | GGAGAAGAGGGTATAGCGGC   | 60.194 | 20 |
| 220 | 818  | 1037 | AAATCCAAAATGGCCTACCA   | 59.273 | 20 |
| 165 | 112  | 276  | CATCTTCCCACGAGATTTTT   | 58.305 | 21 |
| 221 | 558  | 778  | TAGAACTGACGGGCAAATGAT  | 59.583 | 21 |
| 233 | 180  | 412  | TGCATTGACCGTGTGTTGACT  | 60.16  | 20 |
| 273 | 609  | 881  | GCGGGGAAAAATAAATTCAA   | 58.914 | 20 |
| 205 | 6    | 210  | ATGTAGCCGACCCCAATTTAT  | 59.585 | 21 |
| 150 | 991  | 1140 | TCTTCAACTTGCTCGGAACC   | 60.375 | 20 |
| 214 | 274  | 487  | CAAAAATGGTTGAGGGATGG   | 60.162 | 20 |
| 276 | 4728 | 5003 | GCATTGGCATCATCATCATC   | 59.855 | 20 |
| 170 | 0    | 169  | AATCATGAAAACCGAAACCA   | 57.916 | 20 |
| 224 | 320  | 543  | ACTACCACGCCAATTATGCC   | 59.851 | 20 |
| 279 | 86   | 364  | AAAAGAAAGAACCGAACCCG   | 60.455 | 20 |
| 162 | 651  | 812  | TAGCTGACATTCTGGCTCCC   | 60.362 | 20 |
| 228 | 529  | 756  | ATAACACTCGAACAAGCGGC   | 60.278 | 20 |
| 249 | 191  | 439  | CGGGTGTGACATGATTGTTT   | 59.812 | 20 |
| 249 | 477  | 725  | TGTGTACCACCAATCTCAATTA | 60.042 | 24 |
| 272 | 0    | 271  | CCAGCAGTTGGCTCTATTTT   | 57.125 | 20 |
| 274 | 1    | 274  | GTTTTGGCCGGAATTGAAC    | 60.303 | 19 |
| 137 | 68   | 204  | CATTCGGGAAAAAGGATCAA   | 59.872 | 20 |

|     |      |      |                        |        |    |
|-----|------|------|------------------------|--------|----|
| 225 | 1173 | 1397 | ACGCGTTAGAAACGTACGAA   | 58.515 | 20 |
| 246 | 461  | 706  | TTGTATCGAACGAGCATCCA   | 60.22  | 20 |
| 220 | 474  | 693  | CATGACACAATTCGTTCTGC   | 57.671 | 20 |
| 279 | 899  | 1177 | ATAAATTGGGGTCGGCTACA   | 59.297 | 20 |
| 277 | 8    | 284  | CCCAAGACCCCAATTTGAT    | 59.59  | 19 |
| 194 | 75   | 268  | TGTCCGGCAGAATACAAGGT   | 60.517 | 20 |
| 214 | 3390 | 3603 | AGACGCAGCAGAACTTGGAC   | 60.599 | 20 |
| 180 | 219  | 398  | TTTCATTCGTGTTTTTCGGC   | 60.98  | 20 |
| 276 | 3264 | 3539 | GCAAGAGGCATGTTTTATTTG/ | 59.537 | 23 |
| 176 | 1783 | 1958 | TGAAATTTGGGGGTGTGTTT   | 60.066 | 20 |
| 165 | 3545 | 3709 | AAAGCTTAAGCCACGTCCAA   | 59.883 | 20 |
| 209 | 3    | 211  | ATGTAGCCGACCCCAATTTA   | 59.297 | 20 |
| 272 | 697  | 968  | GTCGAAAACCTCAATGGGGAA  | 59.91  | 20 |
| 215 | 1597 | 1811 | AGTTGGTGTCAACCCTTGGAC  | 59.859 | 20 |
| 267 | 518  | 784  | TTGCCATTGAAAACCTCCACA  | 60.088 | 20 |
| 214 | 630  | 843  | GTGAGATCAAGAATTATGGCA  | 59.635 | 24 |
| 279 | 8218 | 8496 | AAAAAGGTCGATGCTTTCAA   | 57.487 | 20 |
| 258 | 712  | 969  | GTCTCGTAGCTTTGGCTGCT   | 59.786 | 20 |
| 273 | 174  | 446  | AAAAGCATATGGAAGAGCGG   | 59.32  | 20 |
| 272 | 540  | 811  | CTGAGGCAGCAACTTCAGTG   | 59.77  | 20 |
| 259 | 6185 | 6443 | GTGTGGAAAAGGGAGTGCAT   | 59.973 | 20 |
| 261 | 431  | 691  | GAGTTGAAAGGCATGCAAGA/  | 60.38  | 21 |
| 271 | 3    | 273  | ATGTAGCCGACCCCAATTTA   | 59.297 | 20 |
| 266 | 2321 | 2586 | TCCAAGCAAGCACATTTTTG   | 59.849 | 20 |
| 188 | 732  | 919  | CACCAACGAAGCCACCTATT   | 59.993 | 20 |
| 268 | 199  | 466  | GGTTCACGGTTTTGGGAATA   | 59.662 | 20 |
| 215 | 1004 | 1218 | TTTAGTGGGAGTCAAACGGG   | 59.964 | 20 |
| 252 | 253  | 504  | GGCTTAAAGACAACGGTGGA   | 60.11  | 20 |
| 186 | 428  | 613  | CTCTCCAATTCTGCCTCTG    | 59.943 | 20 |
| 246 | 663  | 908  | TGCATGGAAACATATGCACC   | 60.352 | 20 |
| 231 | 778  | 1008 | CGAATGACCAGCCAAGAATC   | 60.603 | 20 |
| 139 | 1410 | 1548 | GTTAGCAGGTCGGGTTTTGA   | 60.11  | 20 |
| 254 | 1656 | 1909 | GGTGAGGTCTGGTCAGGTGT   | 60.006 | 20 |
| 223 | 501  | 723  | ACAGATGAGATGAGGCTGGC   | 60.381 | 20 |
| 230 | 3607 | 3836 | GATCCTCAGCAAAGTCCGTC   | 59.81  | 20 |
| 248 | 2675 | 2922 | GCTATCACACACACTGCACG   | 58.899 | 20 |
| 168 | 220  | 387  | TTAAACCTCCACCAGTTGGC   | 59.971 | 20 |
| 219 | 64   | 282  | CTGTGGCGTTGTAATAGGAGC  | 59.783 | 21 |
| 110 | 5    | 114  | TGTAGCCGACCCCAATTTAT   | 59.297 | 20 |
| 243 | 572  | 814  | CGTTGTCGCCTACATCATT    | 59.152 | 20 |
| 215 | 4406 | 4620 | TGCGTCCTGGCTTCTTTTAT   | 59.845 | 20 |
| 125 | 681  | 805  | GTCTTCCGAGCAAGGAGCTA   | 59.717 | 20 |
| 160 | 509  | 668  | GATCCTCTGGGCCAAATGTA   | 59.894 | 20 |
| 103 | 281  | 383  | GATCCGAAATGAAAACCCAA   | 59.739 | 20 |
| 191 | 456  | 646  | CAAATCATCCACCGGAAAA    | 60.671 | 20 |
| 173 | 981  | 1153 | TGCTTAGGTTGCTGTGATGG   | 59.864 | 20 |
| 278 | 1260 | 1537 | GTTCGATGTGCAGATGAGGA   | 59.794 | 20 |
| 251 | 889  | 1139 | ATACCCGGTAGCGAAGGAAT   | 59.82  | 20 |
| 211 | 92   | 302  | CGCCGCCTAAATAGTCAAAA   | 60.218 | 20 |
| 185 | 452  | 636  | ATGCAGCAATTGGACATTGA   | 60.08  | 20 |
| 268 | 288  | 555  | CTCAACTTTCTTTCGAGCTGC  | 59.392 | 21 |
| 180 | 1298 | 1477 | TGTAGCCGACCCACAGTAT    | 60.397 | 20 |
| 157 | 151  | 307  | CAGTCGAGTCCGCACATTAG   | 59.465 | 20 |
| 156 | 237  | 392  | GGCAATTAGCCAAACCATGT   | 59.829 | 20 |
| 270 | 1076 | 1345 | AATTGTAACACCCCAATTTG   | 59.528 | 23 |
| 243 | 907  | 1149 | GATGGTCGCCACAGACCTAC   | 60.542 | 20 |
| 209 | 1    | 209  | TACCGCTCGTCCCTTACTTG   | 60.262 | 20 |
| 142 | 1248 | 1389 | GATTGGGGCATCATAGTCGT   | 59.78  | 20 |

|     |      |      |                          |        |    |
|-----|------|------|--------------------------|--------|----|
| 168 | 2181 | 2348 | AAGAAAGATGTGGGGGATCA     | 59.336 | 20 |
| 169 | 312  | 480  | ATGAAATGAAGCTTCCACCG     | 60.074 | 20 |
| 253 | 92   | 344  | AGAGAGAGTGGAGTGCCTGG     | 60.608 | 20 |
| 233 | 1269 | 1501 | TAGAAGCCCATGGAGGAATG     | 60.029 | 20 |
| 123 | 1890 | 2012 | ACTTGGTGCGTTGTGATTTG     | 59.615 | 20 |
| 158 | 719  | 876  | CTGTCACGTGTTGCAGTCCT     | 59.94  | 20 |
| 130 | 62   | 191  | CAAGGACGCTATTGAGAGGG     | 59.83  | 20 |
| 131 | 629  | 759  | AAACCTTAGGCTTCCTTGGC     | 59.725 | 20 |
| 269 | 424  | 692  | TCATGGAGAGAGGAGAGGGA     | 59.871 | 20 |
| 183 | 60   | 242  | CGGCTTAATACGTGTGTTGC     | 59.254 | 20 |
| 256 | 442  | 697  | GGTTCATTTAACCGACCCAA     | 59.662 | 20 |
| 232 | 186  | 417  | GTGGGCAATCTTGTTGTGTG     | 60.008 | 20 |
| 244 | 229  | 472  | GGGTAGCACTGCATCTGTCC     | 60.688 | 20 |
| 276 | 341  | 616  | AAACGGTGAAAAACATAATGC    | 60.276 | 23 |
| 224 | 5    | 228  | CCCAAGACCCCAATTTGATT     | 60.91  | 20 |
| 132 | 71   | 202  | CGTTTCTTCATCATCATCCG     | 59.075 | 20 |
| 180 | 3299 | 3478 | ACACCAAATGCATGAGACG      | 59.572 | 20 |
| 232 | 574  | 805  | GGGCAAAGGGAAGATAAAGC     | 60.041 | 20 |
| 211 | 2    | 212  | CCTTCTTTTCAAGCACTGGG     | 59.846 | 20 |
| 215 | 41   | 255  | GGGAGAGAGAACCGAAGAG      | 60.328 | 20 |
| 261 | 188  | 448  | GCTGGTTGATCTTAGCACGA     | 59.028 | 20 |
| 127 | 810  | 936  | GCAGGATTTTGCCTATCTGC     | 59.813 | 20 |
| 109 | 128  | 236  | ACTCCGAGGACCTCAATTCC     | 60.456 | 20 |
| 253 | 3733 | 3985 | AAACGCCCTCCTTCTCTAGC     | 59.983 | 20 |
| 154 | 11   | 164  | TCGGTCCGATTAATCAAGAAT    | 58.521 | 21 |
| 251 | 1951 | 2201 | AGCTGGTAGGCAAATGGTG      | 60.132 | 20 |
| 108 | 979  | 1086 | GAAAAATCACAGCGCCAAAC     | 60.626 | 20 |
| 133 | 3641 | 3773 | TTTTCCGAGCTTGTGTTGTG     | 59.881 | 20 |
| 232 | 127  | 358  | TGGATTCAGGTCAGTCGTCA     | 60.246 | 20 |
| 142 | 4    | 145  | ATGTAGCCGACCCCAATTTA     | 59.297 | 20 |
| 255 | 535  | 789  | CAAATGCGATTCAAGTGACCT    | 60.125 | 21 |
| 215 | 307  | 521  | TTTCGGACCATTGATATCTTTT   | 58.914 | 23 |
| 230 | 111  | 340  | GCCAAGGGAGTTGTTACGAA     | 60.11  | 20 |
| 233 | 2425 | 2657 | AAATGAACGTATGGCCTTGG     | 59.823 | 20 |
| 261 | 2185 | 2445 | AAGAGAGACGGAGGGAGGAC     | 59.945 | 20 |
| 116 | 841  | 956  | GAAGGCCATGTTTTGTATTGC    | 59.47  | 21 |
| 280 | 150  | 429  | TGTGGATGAAGATGAAGATTT    | 59.077 | 23 |
| 264 | 27   | 290  | TGATGGTGTGACTGAAAGCC     | 59.682 | 20 |
| 217 | 1409 | 1625 | TTTCTAGTTGGCCCTCCAAA     | 59.679 | 20 |
| 268 | 240  | 507  | CACAACAAAAACAATAAAAAGC   | 59.116 | 23 |
| 259 | 280  | 538  | CTCAACACGGCCTGGATACT     | 60.134 | 20 |
| 101 | 824  | 924  | CTTGGCATTTCGACATTTCT     | 60.074 | 20 |
| 113 | 1208 | 1320 | GGCGCAGTTCGATTATCTTC     | 59.813 | 20 |
| 208 | 141  | 348  | AAGATCACTGCAACAAGGGG     | 60.111 | 20 |
| 246 | 1180 | 1425 | TGTGTAACCCATCTGACGGA     | 59.96  | 20 |
| 257 | 350  | 606  | CATCGACAAAATCATAGTCCG    | 58.107 | 21 |
| 228 | 505  | 732  | CAGTGGGCAGCAGTTTGTAA     | 59.904 | 20 |
| 149 | 90   | 238  | ACCACCATCGACTGATAGCC     | 59.957 | 20 |
| 152 | 1749 | 1900 | ACCAGTTGTTGAGTCTGCCC     | 60.159 | 20 |
| 139 | 5008 | 5146 | TGCTTCAACACACCAAACA      | 58.729 | 20 |
| 210 | 226  | 435  | CTTTATTAATAATTTCTTTCACC/ | 57.99  | 27 |
| 110 | 13   | 122  | TTTGGTTCATGTAGCCGACC     | 60.894 | 20 |
| 125 | 2    | 126  | TCTATTGGGCCGTACCTCTC     | 59.15  | 20 |
| 165 | 364  | 528  | ACCATGCCAGACTTTGGTTC     | 59.973 | 20 |
| 214 | 416  | 629  | TGCAAATACCTAAAGGTTGGG    | 58.997 | 21 |
| 171 | 31   | 201  | CCCTACCCTCCTCAGGGTTAC    | 61.079 | 21 |
| 172 | 254  | 425  | TTTTGCATATCTCCATTCGGT    | 59.424 | 21 |
| 265 | 791  | 1055 | TGCTTTTCAGGGAGTTGGTC     | 60.232 | 20 |

|     |      |      |                        |        |    |
|-----|------|------|------------------------|--------|----|
| 227 | 251  | 477  | GTCATACGACCCGCAAAAAC   | 60.374 | 20 |
| 276 | 874  | 1149 | TCAATCACTTTTTCTCGACG   | 58.013 | 21 |
| 242 | 2652 | 2893 | AGCTCGAATATGCAACGACA   | 59.449 | 20 |
| 234 | 448  | 681  | GGAAGGGAAGCATTCCAAAC   | 60.807 | 20 |
| 252 | 13   | 264  | TTGGTTCATGTAGCCGACC    | 60.894 | 20 |
| 140 | 1080 | 1219 | GGGTTGACAAGACCAGCATT   | 59.973 | 20 |
| 185 | 1361 | 1545 | CCGTTGATATTTGGCCTGTC   | 60.331 | 20 |
| 277 | 331  | 607  | AGTGTTTTAACTGCGGCCAG   | 60.305 | 20 |
| 207 | 555  | 761  | TGGGTGTGTGAGTGGTGTTC   | 59.89  | 20 |
| 147 | 112  | 258  | AAATAGCCGATTGCATCACA   | 59.14  | 20 |
| 209 | 578  | 786  | TCAATCCCCGATACACAAA    | 58.818 | 20 |
| 120 | 543  | 662  | CGCTTCGTACGCTTTTAACC   | 59.911 | 20 |
| 212 | 1157 | 1368 | TTTTGTCGAGCTTCTTTGGG   | 60.357 | 20 |
| 135 | 989  | 1123 | TAGAGCTTTTTGCGGTGGTC   | 60.386 | 20 |
| 116 | 123  | 238  | CACCAGCATTTCCATCTCCT   | 60.073 | 20 |
| 273 | 812  | 1084 | ACATGCGATCTAGAGTGTGGT  | 60.201 | 22 |
| 246 | 1976 | 2221 | GGAGCGAGAGGGAGAAGATT   | 59.919 | 20 |
| 277 | 49   | 325  | CGAGAATTTCTCGGATTCA    | 60.148 | 20 |
| 214 | 81   | 294  | TCGAGTCTCCATCCTCGTTC   | 60.349 | 20 |
| 262 | 415  | 676  | CACTCCATCAAAGAGCAGGC   | 60.945 | 20 |
| 277 | 1638 | 1914 | TCAACTCATGCAAATGCAGC   | 60.969 | 20 |
| 280 | 1043 | 1322 | GCTCCGGAGTTTTGAATGAA   | 60.192 | 20 |
| 242 | 104  | 345  | CCTCACATGGTGGGAAAAAG   | 60.345 | 20 |
| 222 | 2470 | 2691 | AGGTTGCGTACATCTGACCC   | 59.997 | 20 |
| 118 | 2066 | 2183 | CACGGCAGAGCAATTCAATA   | 59.833 | 20 |
| 138 | 478  | 615  | CCGGATTGACACCCCTAATA   | 59.64  | 20 |
| 279 | 909  | 1187 | ACCCACTCCCCTTCTCAAC    | 59     | 20 |
| 263 | 92   | 354  | AGACCCACCAATCTCAGCAC   | 60.12  | 20 |
| 214 | 543  | 756  | TTGAATCCTCAGCGTGCATA   | 60.366 | 20 |
| 153 | 2331 | 2483 | TGCAAGGGTTTGAATAAGCC   | 60.074 | 20 |
| 268 | 53   | 320  | CACAACCTTGATCAAAATTGCA | 60.159 | 23 |
| 204 | 8    | 211  | ATGTAGCCGACCCCAATTTA   | 59.297 | 20 |
| 260 | 1470 | 1729 | AGTCAGGGTGAGGTCGAAGA   | 59.835 | 20 |
| 244 | 1324 | 1567 | ACCTGAAGCTGTCCCAGGTA   | 59.721 | 20 |
| 113 | 1656 | 1768 | GAAAACATCCAAAGGGCTTG   | 59.546 | 20 |
| 180 | 783  | 962  | GATAGATGCCTGTTGGGGTC   | 59.366 | 20 |
| 187 | 943  | 1129 | ATCCTGAGTTGCACACCCTT   | 59.579 | 20 |
| 254 | 1081 | 1334 | CGCGTCGCCTAAATAAAAAT   | 59.262 | 20 |
| 242 | 23   | 264  | ATGTAGCCGACCCCAATTTA   | 59.297 | 20 |
| 172 | 1008 | 1179 | TCTGGAATGGGAGTTTCAGC   | 60.195 | 20 |
| 229 | 665  | 893  | CAAACACTTCCACGCTGTTG   | 60.338 | 20 |
| 278 | 319  | 596  | ACATACGCGTGCTTCACAAG   | 59.935 | 20 |
| 278 | 1    | 278  | TGTAGCCGACCCCAATTTAT   | 59.297 | 20 |
| 259 | 260  | 518  | TGGAATCCTGTCCTCTGGTT   | 59.505 | 20 |
| 266 | 279  | 544  | TTCCGGCCCTTCAATAATC    | 59.848 | 19 |
| 245 | 2165 | 2409 | TGATGTTGGTATTTTGGCTACC | 58.878 | 22 |
| 173 | 0    | 172  | TGCAGCTCTTAACTCTATCGG/ | 59.271 | 22 |
| 161 | 4    | 164  | GCAATATCAATGTAAGATCAT/ | 57.778 | 27 |
| 229 | 462  | 690  | CTATACGTGTGAGGAGCCAGC  | 59.912 | 21 |
| 253 | 134  | 386  | TAAGGAGGCGAGAGAATGGA   | 59.91  | 20 |
| 270 | 1791 | 2060 | CTAAGCGAGATACCAAGCCG   | 59.996 | 20 |
| 266 | 313  | 578  | GGTTGGTTGTACAAAGAAACG  | 59.955 | 23 |
| 280 | 1880 | 2159 | TGCTTTGTCATTGGGATTTTT  | 59.442 | 21 |
| 272 | 355  | 626  | GATTCCATGCATTTCCAACA   | 59.33  | 20 |
| 222 | 319  | 540  | GAGAACCCTAAACCGAAGGG   | 59.934 | 20 |
| 182 | 301  | 482  | TCTACTCCAATGCTTCCCTTC  | 58.398 | 21 |
| 247 | 5639 | 5885 | CTAGGCCAATTTGATTGGGA   | 59.894 | 20 |
| 125 | 557  | 681  | CTCCCTCCACTTTCTACCA    | 60.229 | 20 |

|     |      |      |                        |        |    |
|-----|------|------|------------------------|--------|----|
| 227 | 1145 | 1371 | GCATTGCTTGACTGAGTTGC   | 59.602 | 20 |
| 146 | 669  | 814  | GGTCGTGCTATTAACCACCC   | 59.316 | 20 |
| 223 | 4    | 226  | CCCAAGACCCCAATTTGATT   | 60.91  | 20 |
| 266 | 364  | 629  | TGTCTCGACGGACTGACACT   | 59.442 | 20 |
| 256 | 567  | 822  | GGAGACCTAAGGATGCACCA   | 60.073 | 20 |
| 194 | 209  | 402  | GCTGTTCTGAGGTTGGTTGG   | 60.69  | 20 |
| 233 | 342  | 574  | TGGGTAGCTTACAAGTCCAGC  | 59.392 | 21 |
| 167 | 953  | 1119 | TGGATCATCATCTGGCTTTG   | 59.604 | 20 |
| 241 | 5924 | 6164 | CCGCTACAATCTTTGGTGCT   | 60.27  | 20 |
| 156 | 1806 | 1961 | TCAGAAGAGAGTTTGCCATTG  | 59.993 | 22 |
| 165 | 61   | 225  | ATTCAAAGCATATGCCCTCC   | 59.001 | 20 |
| 187 | 60   | 246  | GCCGTTTCGATTGTATTTTCTT | 59.525 | 22 |
| 161 | 1900 | 2060 | CCGTTTCTCCAGTTGACGTT   | 60.149 | 20 |
| 242 | 572  | 813  | AACCTAATCCATCCCAACTTTT | 57.96  | 22 |
| 250 | 622  | 871  | TAGAAGGAGATGGGTCCTGC   | 59.239 | 20 |
| 266 | 13   | 278  | CAAACAGCGATTTTGAGTCG   | 59.464 | 20 |
| 277 | 907  | 1183 | AGCTCATCGCAGGTTGGATA   | 60.765 | 20 |
| 270 | 2895 | 3164 | TTTAGGCGTGGAGGAGAAAA   | 59.817 | 20 |
| 112 | 589  | 700  | TGTCGAATAATTGACCGCAA   | 60.073 | 20 |
| 155 | 22   | 176  | TCACATCACTAGTCCGTGGG   | 59.545 | 20 |
| 228 | 538  | 765  | ATAAACGCAACTCAAACCCG   | 59.996 | 20 |
| 209 | 258  | 466  | CCCTACTTCTGCACTGCCTC   | 60.012 | 20 |
| 279 | 359  | 637  | GGGAACGTACAGATCCCCAT   | 60.97  | 20 |
| 128 | 3    | 130  | ATGTAGCCGACCCCAATTTAT  | 59.585 | 21 |
| 106 | 248  | 353  | CAAACCCACCAACAAACAAA   | 59.313 | 20 |
| 275 | 53   | 327  | GCGTGTTTTCCAGAATCCAT   | 59.939 | 20 |
| 230 | 427  | 656  | GGTGATGGTGATGGGTTTTTC  | 60.034 | 20 |
| 236 | 851  | 1086 | ACATGAGAGCCTTGATCCT    | 59.834 | 20 |
| 224 | 961  | 1184 | ACAAACGATTTCCCGTCTTG   | 59.971 | 20 |
| 254 | 3324 | 3577 | CACGACGGAAACATGTAGTGA  | 59.624 | 21 |
| 103 | 1654 | 1756 | ATAAGCTCGTTGGTTAGCCG   | 59.384 | 20 |
| 147 | 497  | 643  | CTTGATTGATCTTGGTGCGA   | 59.799 | 20 |
| 254 | 5    | 258  | TTTTAAACCGATCCCCTCC    | 60.123 | 20 |
| 126 | 213  | 338  | AGGAGGAGGAGGTGGTGACT   | 60.112 | 20 |
| 230 | 969  | 1198 | AGGGAAGTGGAATAAGCCC    | 59.42  | 20 |
| 219 | 2522 | 2740 | TGCGAACAATCTCTCCTCCT   | 59.95  | 20 |
| 215 | 30   | 244  | TTGGTTCATGTAGCCAACCTC  | 59.985 | 21 |
| 232 | 796  | 1027 | AAGCAAACAGCTCCCATCAT   | 59.7   | 20 |
| 263 | 848  | 1110 | GGGAAATGGCTTGATATAAAA  | 59.907 | 20 |
| 208 | 281  | 488  | AGGGTACAGGTGGATGGTAA   | 59.751 | 22 |
| 125 | 292  | 416  | GGTTTGACCCGATTACACT    | 59.859 | 20 |
| 274 | 463  | 736  | TCAGCCACACAAATTATCG    | 59.542 | 20 |
| 185 | 11   | 195  | GAATTGGAGGCGGAGGAG     | 60.703 | 18 |
| 272 | 16   | 287  | CCCCATCTCCTTAAAGCTCC   | 60.032 | 20 |
| 131 | 1935 | 2065 | AGGTCCCCGGATTTGTTATC   | 60.017 | 20 |
| 168 | 209  | 376  | GATGTATCATTGGGACCATGC  | 60.036 | 21 |
| 197 | 333  | 529  | ACGCCTCATCGTCAAACCTC   | 60.263 | 20 |
| 231 | 5162 | 5392 | CCTTATGCCAGGTTTTCTGG   | 59.564 | 20 |
| 193 | 535  | 727  | AAGCTATCCCAAGGTCTTGAA  | 57.943 | 21 |
| 244 | 716  | 959  | CCCAAACCTGATTTGCAACT   | 60.11  | 20 |
| 227 | 1098 | 1324 | CTTTGGAATCTTCCCTTCCC   | 59.875 | 20 |
| 251 | 1372 | 1622 | AAGAAGAGGGTTCGCTGTCA   | 59.989 | 20 |
| 228 | 893  | 1120 | TCGGCAAACCCCTTTTATCA   | 60.427 | 20 |
| 225 | 1532 | 1756 | CGAAGGGACCACAAAAGGTA   | 59.964 | 20 |
| 190 | 503  | 692  | GCGGAAATTGTGTTGTTGG    | 59.956 | 19 |
| 266 | 742  | 1007 | GCCAAGCTTATATTGGTGC    | 57.892 | 22 |
| 227 | 54   | 280  | GCTAACGACGTAAGGCAAATC  | 59.793 | 21 |
| 251 | 2927 | 3177 | ACCGAGTGCAACTTCCTCAC   | 60.307 | 20 |

|     |      |      |                        |        |    |
|-----|------|------|------------------------|--------|----|
| 168 | 854  | 1021 | GCCACGGTAATGTGAATCCT   | 59.82  | 20 |
| 261 | 1370 | 1630 | TTCGCTCTGTGTTTTCTCA    | 59.566 | 20 |
| 181 | 1389 | 1569 | CAATGAACTCCAAGGGGAGA   | 60.042 | 20 |
| 200 | 156  | 355  | GGTAATGTGCAAGAGGCTCG   | 59.836 | 20 |
| 263 | 11   | 273  | ATGTAGCCGACCCCAATTTA   | 59.297 | 20 |
| 250 | 1277 | 1526 | CCCAGACTGAGTTATTATTTGA | 59.335 | 25 |
| 233 | 276  | 508  | GGGAAACCCCAAAGTTCTA    | 60.159 | 20 |
| 247 | 29   | 275  | CCAGAGCGCACTCGAATAGT   | 60.559 | 20 |
| 132 | 607  | 738  | TGATGTTCTTTGGGTGCTGA   | 60.24  | 20 |
| 230 | 513  | 742  | AACAATAATATCGTCCGCCG   | 59.816 | 20 |
| 189 | 1224 | 1412 | AGCCACTGCTTTTGTGCTT    | 60.059 | 20 |
| 217 | 910  | 1126 | AGTGTCAACAAAGTGCGTGC   | 59.953 | 20 |
| 246 | 1330 | 1575 | TTGCTTCAGCACCTTGAAGA   | 59.716 | 20 |
| 263 | 793  | 1055 | CGCACAGCATTCTCCATAAA   | 59.833 | 20 |
| 271 | 33   | 303  | GCAAGGGTTTCTTCAACCAG   | 59.711 | 20 |
| 241 | 1001 | 1241 | GGCATGATTGCCACAAATTC   | 61.251 | 20 |
| 133 | 367  | 499  | CTGCTCAGCCTCAACTCCTT   | 59.745 | 20 |
| 210 | 511  | 720  | AATATGGCATGAGACGAGGC   | 60.066 | 20 |
| 209 | 288  | 496  | GGATCGTGTGTGGGATCAAT   | 60.61  | 20 |
| 170 | 87   | 256  | CTCAACCAGCATCGCTATCA   | 59.972 | 20 |
| 174 | 933  | 1106 | CCCCAAATCTGAATCCCTTT   | 60.124 | 20 |
| 167 | 711  | 877  | CAGCCTTCCAGTTGGGATAA   | 60.066 | 20 |
| 187 | 414  | 600  | ATCTCCTGTTACACCACCC    | 59.817 | 20 |
| 170 | 9    | 178  | CCAAGACCCCAATTTGATT    | 60.91  | 20 |
| 140 | 819  | 958  | CCCAGGTGTTGTTTTTTCAGC  | 60.529 | 20 |
| 242 | 1667 | 1908 | AAATGTATATTTGTTCTTTCTT | 57.286 | 27 |
| 249 | 64   | 312  | GAGCACGTTGTGTTCCACAG   | 60.357 | 20 |
| 232 | 614  | 845  | GATGCAGGGATACTGATTCCA  | 59.909 | 21 |
| 193 | 1187 | 1379 | ATGGCAAACAAAGGATGTCA   | 59.985 | 21 |
| 278 | 726  | 1003 | GAAAGGATCCCATAATTCCCA  | 59.971 | 21 |
| 214 | 691  | 904  | TGCTCACCCACATTACATT    | 59.967 | 20 |
| 203 | 2326 | 2528 | TCATATTTCCCCACCCATA    | 59.834 | 20 |
| 205 | 1066 | 1270 | ATGTGGTCACCTGGGGAATA   | 60.05  | 20 |
| 213 | 957  | 1169 | GGAACCACTGATCGCATTCT   | 60.081 | 20 |
| 241 | 767  | 1007 | AAAATCTTGCCGCCTTGTTA   | 59.72  | 20 |
| 274 | 111  | 384  | CGGAGGTGATACCCAACATT   | 59.67  | 20 |
| 118 | 258  | 375  | CTCCACGTTTTAACAACCGA   | 58.673 | 20 |
| 156 | 111  | 266  | TGAACAAGGTTTCGATCTATGC | 59.229 | 22 |
| 161 | 816  | 976  | GAGGATTGGGGTTTTTCATT   | 59.996 | 20 |
| 198 | 803  | 1000 | GGCATTATCAGAATTTGGCG   | 60.424 | 20 |
| 203 | 567  | 769  | TTATGCTGCATTGCTTGAAA   | 58.092 | 20 |
| 224 | 6    | 229  | CCAAGACCCCAATTTGATT    | 60.91  | 20 |
| 116 | 2517 | 2632 | TCCTTGGAActCTCAATCCA   | 58.201 | 20 |
| 242 | 283  | 524  | TTAACTTGTCCTCGTTGGTG   | 60.776 | 20 |
| 226 | 919  | 1144 | CACCTCATCTTGCTTCGTCA   | 59.984 | 20 |
| 257 | 359  | 615  | GCAACGAAAAATACAAGCCA/  | 60.123 | 21 |
| 182 | 1966 | 2147 | TACAGTGACGGTGTCTCCA    | 60.154 | 20 |
| 115 | 3440 | 3554 | TATTGGAGAGGGAAGCAGGA   | 59.767 | 20 |
| 279 | 0    | 278  | CCAAGACCCCAATTTGATT    | 60.91  | 20 |
| 251 | 46   | 296  | GTCAGAAGGTCCCCATCTC    | 60.86  | 20 |
| 275 | 4497 | 4771 | CGCCTCTTGAATAACCTCCA   | 60.206 | 20 |
| 206 | 198  | 403  | TTTCTCAGTATGCGGCAGTG   | 60.011 | 20 |
| 217 | 1681 | 1897 | CGAGGAAGACGATGTAACCC   | 59.55  | 20 |
| 148 | 9    | 156  | TAGCCGACCCCAACTTATTG   | 59.953 | 20 |
| 180 | 1835 | 2014 | TTTTAAAACGCCTGAAAAAGT/ | 57.409 | 23 |
| 277 | 406  | 682  | CGTGCGGCGATTTAAATAAC   | 60.464 | 20 |
| 213 | 962  | 1174 | GGCAAATTTGAATCGGTGAT   | 59.768 | 20 |
| 267 | 678  | 944  | GGCCCTACATTACAGCTTGC   | 59.736 | 20 |



|     |      |      |                        |        |    |
|-----|------|------|------------------------|--------|----|
| 207 | 69   | 275  | TTGATTCATGTAGCTGACCCC  | 59.947 | 21 |
| 276 | 666  | 941  | CGAAGGATCAACTTCATAGTC  | 59.666 | 23 |
| 259 | 391  | 649  | TCCCCACAACGTTATTCAT    | 60.051 | 20 |
| 238 | 252  | 489  | AATGTTGGCAGCAACTACGA   | 59.347 | 20 |
| 148 | 227  | 374  | TGTTTCCCGAGTTCTTTGCT   | 59.853 | 20 |
| 133 | 1359 | 1491 | GGTCATCAATTCAGGAAGCC   | 59.488 | 20 |
| 271 | 407  | 677  | CACACTATCAACCGAACCGA   | 59.566 | 20 |
| 224 | 991  | 1214 | TCAGAACCATGATCTGCCTG   | 59.787 | 20 |
| 227 | 196  | 422  | CCCATTATCACGACAGACGA   | 59.522 | 20 |
| 179 | 400  | 578  | TGACAAATAAAAACCTACAAA  | 59.231 | 26 |
| 227 | 648  | 874  | AAGAGGAGGACGAGCATGAA   | 59.95  | 20 |
| 165 | 370  | 534  | CATAGGGCAAGTACGGGAAA   | 59.953 | 20 |
| 232 | 487  | 718  | CACCGGTTTTGGATTTGACT   | 59.83  | 20 |
| 193 | 754  | 946  | CAAATTTAAGTGAGCTTTGCTT | 59.957 | 24 |
| 152 | 928  | 1079 | CCCGATTGGACTCTCAACAT   | 59.927 | 20 |
| 112 | 2141 | 2252 | CTGCACACTTTGGTCCATTG   | 60.152 | 20 |
| 197 | 67   | 263  | CCTACCGGAACTCAATAACCA  | 58.96  | 21 |
| 133 | 2444 | 2576 | TGCTTAGACTTGGCGTGAGA   | 59.74  | 20 |
| 141 | 439  | 579  | TGATCCATCAACTTGTCCCA   | 59.893 | 20 |
| 236 | 495  | 730  | TGGAATCAAGAACCCCAAAG   | 59.903 | 20 |
| 146 | 104  | 249  | CACATAGTGGGAAACGGCTT   | 59.993 | 20 |
| 176 | 697  | 872  | GCAAAAACAGCAAGGAGAGG   | 59.993 | 20 |
| 108 | 4843 | 4950 | GAGAAATGTTTCCGGCGATA   | 60.038 | 20 |
| 180 | 209  | 388  | AGTTCAGCGAGAACAAGGGA   | 59.989 | 20 |
| 270 | 436  | 705  | CATCAACATTCCTGGGCTCT   | 60.073 | 20 |
| 262 | 1360 | 1621 | TTGTTTCTTGAACCCCTTGG   | 59.942 | 20 |
| 261 | 17   | 277  | TTGGTTCATGTAGTCGACCC   | 59.845 | 21 |
| 267 | 1755 | 2021 | AACGAGCCAAGTGAAAGCAT   | 59.882 | 20 |
| 126 | 541  | 666  | ACATCCTCAACCATGGCAGT   | 60.395 | 20 |
| 186 | 1375 | 1560 | GGAATTGCCCGAAATACTGA   | 59.901 | 20 |
| 250 | 1864 | 2113 | CGTACGTTGTACGGGTTCATA  | 58.502 | 21 |
| 104 | 2536 | 2639 | GAGTGGTAAACTCCGCCAC    | 59.598 | 20 |
| 149 | 252  | 400  | ATTTTCTCCCTTCATCGGGT   | 59.766 | 20 |
| 119 | 1318 | 1436 | TCACCCGATTACTACCAGCC   | 59.955 | 20 |
| 176 | 0    | 175  | TATTTCCGACAATTCGGTCC   | 59.762 | 20 |
| 155 | 7    | 161  | TCACATTTTCAGTTTACTGGGA | 59.016 | 25 |
| 279 | 2179 | 2457 | GTTGGAACCTCGAGCATTGA   | 61.188 | 20 |
| 278 | 612  | 889  | GTGGCGACATGAATTTCCA    | 60.474 | 19 |
| 251 | 847  | 1097 | CATAATCTTGCACCTCCACG   | 59.148 | 20 |
| 255 | 196  | 450  | CAAACGACGAGCATCAAGAA   | 59.988 | 20 |
| 266 | 195  | 460  | TCATACACGTGGACACCTCAT  | 58.869 | 21 |
| 236 | 2519 | 2754 | AACAGAAGCAGAGGGACGAA   | 59.989 | 20 |
| 182 | 1550 | 1731 | CACCAATTTCCCTTTTCTT    | 60.159 | 20 |
| 237 | 660  | 896  | CATTTGGCTTGTTAGGAGGC   | 59.708 | 20 |
| 254 | 596  | 849  | CGAGGGAGGTGAGGGACTAT   | 60.468 | 20 |
| 223 | 678  | 900  | TTTTCAAAGCACCCGAATC    | 60.053 | 20 |
| 191 | 2276 | 2466 | TGTCTGAATTTGGTGGAGGA   | 59.059 | 20 |
| 150 | 1068 | 1217 | CTCTGTTGTTGGTCGTGGTG   | 60.194 | 20 |
| 113 | 2593 | 2705 | TCAAACCCAAACCAACCTTT   | 59.308 | 20 |
| 244 | 66   | 309  | TAGGTCTGAGGGTTGGATGG   | 59.92  | 20 |
| 208 | 1    | 208  | TCACGTTGTCCACGTTTCTA   | 60.152 | 20 |
| 199 | 2109 | 2307 | AGGCTTGGTTTTGATTGCAC   | 60.118 | 20 |
| 278 | 655  | 932  | TTTCCTTTTCTTTTGCTACCCA | 60.102 | 22 |
| 264 | 166  | 429  | TATGGTTTGGTCCGATGGAT   | 60.014 | 20 |
| 110 | 1104 | 1213 | GGGTGATTGAGTTTCTCCTC   | 59.927 | 21 |
| 109 | 2377 | 2485 | TGGCCTAATCGTTCCTCAAC   | 60.074 | 20 |
| 102 | 1884 | 1985 | TCTAAAGCCTCCACGAAGA    | 59.948 | 20 |
| 239 | 996  | 1234 | TGAAACCTAGCGAACCAAC    | 60.11  | 20 |

|     |      |      |                         |        |    |
|-----|------|------|-------------------------|--------|----|
| 280 | 1081 | 1360 | TTCGTTGTTCCACACTTCCA    | 60.128 | 20 |
| 170 | 152  | 321  | CTCTGTAGGCTTCTCCGCAT    | 59.598 | 20 |
| 193 | 1505 | 1697 | TCTTGGTGGTTCTGGTAGGG    | 59.959 | 20 |
| 276 | 7551 | 7826 | TGTCCACGCGTAATTCTCAG    | 59.864 | 20 |
| 228 | 203  | 430  | TCTCAGTTTTGGGTTTGGGT    | 59.425 | 20 |
| 100 | 463  | 562  | AGGACTAGGGAAAACGGCAC    | 60.496 | 20 |
| 170 | 9    | 178  | CAACAACCTCGTCACCCCTTT   | 60.005 | 20 |
| 223 | 104  | 326  | TGGAGCAACTTCTTCGATCA    | 59.522 | 20 |
| 248 | 89   | 336  | TGCACTGATCATAACACATGAC, | 60.05  | 23 |
| 243 | 6146 | 6388 | TTGGGGTCTTGGAGTCAGAT    | 59.505 | 20 |
| 112 | 0    | 111  | TGTAGCCGACCCCAATTTAT    | 59.297 | 20 |
| 203 | 44   | 246  | TGTAGCCGACCCCAATTTAT    | 59.297 | 20 |
| 187 | 940  | 1126 | GTGCAAGAGATTGGGTTGAAA   | 60.103 | 21 |
| 186 | 11   | 196  | AAGCAGAAATCGGGATTGAA    | 59.645 | 20 |
| 168 | 61   | 228  | GACGAGGACCAGATTTGCAT    | 60.081 | 20 |
| 173 | 95   | 267  | TTTTTGATTGGGAATAATTGGC  | 59.895 | 22 |
| 158 | 1516 | 1673 | TTCTTGCAAAAACGTGAGCC    | 59.98  | 19 |
| 167 | 1291 | 1457 | CGAAAAGATGTATGGCGAAA    | 58.769 | 20 |
| 278 | 632  | 909  | GGATTCGTGACTTTCAGGGA    | 60.05  | 20 |
| 189 | 7    | 195  | ATGTAGCCGACCCCAATTTA    | 59.297 | 20 |
| 129 | 584  | 712  | ACCAAAGCAAAAACATCCCA    | 60.344 | 20 |
| 276 | 54   | 329  | ACAATTTGCGTTTTGAGCTG    | 60.249 | 20 |
| 172 | 167  | 338  | TTTGCCATGAAAAACAAGGA    | 59.133 | 20 |
| 151 | 591  | 741  | TTAATCAACCACCACACCCA    | 59.667 | 20 |
| 279 | 2871 | 3149 | AAATCCTCCCTCGTGATTCC    | 60.272 | 20 |
| 272 | 2023 | 2294 | GCTGCCTCTGGACAACTCTC    | 60.143 | 20 |
| 109 | 2039 | 2147 | GAAGCTGCTGTTGCCGTAGT    | 60.602 | 20 |
| 103 | 577  | 679  | TGATCTCCTCTTTCTTGCCG    | 60.474 | 20 |
| 213 | 43   | 255  | ATCTCGGGTTGCAGTCGATA    | 60.624 | 20 |
| 268 | 1669 | 1936 | GGGAAGGGGGTACATGCTAT    | 60.039 | 20 |
| 149 | 411  | 559  | TCAGCAGCAGCAAATACAGC    | 60.31  | 20 |
| 263 | 2509 | 2771 | AGACAACGAGGGATGACGAC    | 60.12  | 20 |
| 242 | 2771 | 3012 | AGCTGTGATTTCTGCCACT     | 60.02  | 20 |
| 196 | 149  | 344  | TCACTCAGGGGCTTTACCAC    | 60.111 | 20 |
| 272 | 756  | 1027 | CGGGATGTAGTAGGAAAGCG    | 59.724 | 20 |
| 128 | 2    | 129  | TGTAGCCGACCCCAATTTAT    | 59.297 | 20 |
| 188 | 145  | 332  | ACCTCATGAGCACAATTCCC    | 59.934 | 20 |
| 188 | 33   | 220  | GGAAAATTTTTGGCCTCTCA    | 59.135 | 20 |
| 198 | 393  | 590  | AGGGCTTAAAACTTGCCACA    | 59.747 | 20 |
| 135 | 1549 | 1683 | TGCATGCACAATTATTTCCC    | 59.381 | 20 |
| 269 | 338  | 606  | ATGAATGAATGGTTCGACTCA,  | 59.434 | 22 |
| 267 | 1468 | 1734 | AACTGGACCATATTCGTGCGC   | 59.962 | 20 |
| 266 | 281  | 546  | TTTACCAAATTTCTGCCGCTT   | 59.72  | 20 |
| 244 | 835  | 1078 | ATTCTGGCAAATCATCGGAC    | 59.9   | 20 |
| 184 | 496  | 679  | CACCACCCTCTCATGTCCTT    | 59.962 | 20 |
| 262 | 661  | 922  | AGGAAATCACGACGGTGTTT    | 59.973 | 20 |
| 213 | 1382 | 1594 | CCCACACGTTTTTCTCATT     | 59.83  | 20 |
| 167 | 375  | 541  | GCAACTTTCAAGGAAGCCAA    | 60.365 | 20 |
| 185 | 495  | 679  | CTGGAACGTGTACGACAGGA    | 59.745 | 20 |
| 268 | 20   | 287  | GGTTCCACGTCATCAAAAA     | 60.734 | 20 |
| 245 | 3222 | 3466 | CCCCTTCATGCAGTTTCCT     | 60.111 | 20 |
| 271 | 897  | 1167 | ACTTGCATGTTGTGCCATGT    | 60.04  | 20 |
| 145 | 1061 | 1205 | AAACCCTTCCTTCTGCGATT    | 60.074 | 20 |
| 187 | 2089 | 2275 | TTTGGATTCGATATGGATTGA   | 57.895 | 21 |
| 198 | 85   | 282  | CCTCCAAACAAATACCCCT     | 60.046 | 20 |
| 234 | 1404 | 1637 | GATGCTCTACCACTGCACCA    | 59.862 | 20 |
| 135 | 626  | 760  | CAAGCAAACGCAAAAATCAA    | 59.858 | 20 |
| 280 | 206  | 485  | CTGACTGACGTGGTTTGCAG    | 60.5   | 20 |

|     |      |      |                        |        |    |
|-----|------|------|------------------------|--------|----|
| 240 | 719  | 958  | GCTGGGATCTGTCAACTTCC   | 59.661 | 20 |
| 238 | 525  | 762  | AACTCCCACCTTCCATCACA   | 60.363 | 20 |
| 250 | 102  | 351  | TTCCAATTGTGCGTAGCCTT   | 60.637 | 20 |
| 211 | 5    | 215  | CCAATTTATTGGGATTAAGGC  | 57.539 | 21 |
| 214 | 1268 | 1481 | CCTCCATGTAAAGAAAAAGAG  | 60.045 | 25 |
| 268 | 86   | 353  | TGCCGAATAAAGCTAAATCCT  | 58.055 | 21 |
| 170 | 36   | 205  | CTCAGCTCAATCCTTCGCTC   | 60.24  | 20 |
| 198 | 640  | 837  | CGTCGAATTTTCGCTGATCTT  | 60.352 | 20 |
| 204 | 446  | 649  | AAAGTCAAGTGCCGCTCATT   | 59.882 | 20 |
| 214 | 86   | 299  | TGACAATTCGAGCTTGATCCT  | 59.828 | 21 |
| 260 | 863  | 1122 | TAGGCGATGTACCTTGGGTC   | 59.955 | 20 |
| 262 | 812  | 1073 | TTGGAATGCGACAGAGACAG   | 59.984 | 20 |
| 250 | 272  | 521  | GACACCATTGACTGTGCTGG   | 60.162 | 20 |
| 265 | 7    | 271  | TGTAGCCGACCCCAATTTAT   | 59.297 | 20 |
| 239 | 19   | 257  | AGCAACAGGCACACTGGAAT   | 60.721 | 20 |
| 138 | 715  | 852  | GCAAACCTCGAAGAATAGCGG  | 59.982 | 20 |
| 218 | 397  | 614  | CTCCAAAGTCCCTTCTTCCC   | 60.045 | 20 |
| 133 | 942  | 1074 | TGAAATGCCAAATCAGTTGC   | 59.67  | 20 |
| 146 | 999  | 1144 | CAAATGCCAGCTCAAGATCA   | 59.948 | 20 |
| 190 | 200  | 389  | AGATTGTCGTCGTTCCATTGT  | 59.468 | 21 |
| 252 | 884  | 1135 | GGGAACCTTCTCTGTTCCCT   | 59.534 | 20 |
| 153 | 105  | 257  | CCAGTCCGGCTTGAAAATA    | 60.241 | 20 |
| 173 | 1156 | 1328 | CAGCAAGCAATTCAAGGACA   | 59.988 | 20 |
| 170 | 5    | 174  | CCCAAGACCCCAATTTGATT   | 60.91  | 20 |
| 163 | 462  | 624  | GTTTCATACTCACCTCCGGC   | 59.556 | 20 |
| 213 | 826  | 1038 | GCAGGAGAAGAGGTGGTCTG   | 59.986 | 20 |
| 280 | 458  | 737  | GAAAAGGGGAATGCAAATGA   | 59.878 | 20 |
| 161 | 10   | 170  | AGTGTGTCGAAATTGAGAAGA  | 58.048 | 23 |
| 248 | 1035 | 1282 | TGAGGGAGGAGGCTCAGTTA   | 59.943 | 20 |
| 278 | 572  | 849  | TCTCACACTCTCAAATGGCA   | 59.43  | 21 |
| 206 | 0    | 205  | TGTAGCCGACCCCAATTTAT   | 59.297 | 20 |
| 217 | 1205 | 1421 | CCCGACCCAACTCAGTAGAA   | 60.103 | 20 |
| 246 | 8    | 253  | TGTAGCCGACCCCAATTTAT   | 59.297 | 20 |
| 260 | 4337 | 4596 | AGTTTCGTGTTCTTTGTGACG  | 57.927 | 21 |
| 237 | 521  | 757  | TTCATGACGTGGAAGCAAAA   | 60.234 | 20 |
| 269 | 87   | 355  | CCATCTAGTTCCTCACCGGA   | 60.065 | 20 |
| 202 | 1200 | 1401 | TAAAACCCCTTCAAATCCC    | 59.992 | 20 |
| 264 | 863  | 1126 | TCATCTCAAGACCACCCTCC   | 60.048 | 20 |
| 162 | 474  | 635  | GTGAAATGGGAAGGACTTCAT  | 57.96  | 21 |
| 237 | 3691 | 3927 | CCACCTCCGTACCGTTACAC   | 60.291 | 20 |
| 189 | 1917 | 2105 | AAAAGTGTGATGGCGAAACC   | 59.978 | 20 |
| 205 | 507  | 711  | CAGGTTCAAATCCCACCAAC   | 60.21  | 20 |
| 128 | 53   | 180  | TGCATATACACACATGTTGAC  | 59.79  | 23 |
| 217 | 502  | 718  | GGCTGGGTAATAGCCTTTCC   | 59.93  | 20 |
| 164 | 155  | 318  | AGCTTAGCACAGCAGCATCA   | 59.918 | 20 |
| 209 | 476  | 684  | ACAGATCCGAATGTGCGTCT   | 60.688 | 20 |
| 201 | 160  | 360  | CCAATTCATTCCATGTTCA    | 59.175 | 20 |
| 115 | 1071 | 1185 | TCTTTGTGTAGCACCCCCTC   | 60.111 | 20 |
| 243 | 922  | 1164 | AAGGAGGGTCAGTGAGCAAA   | 59.844 | 20 |
| 263 | 224  | 486  | AGGTTTGAAGATGCCATTCG   | 60.074 | 20 |
| 148 | 2980 | 3127 | ATGGGTCTCTGCCTTTTCAA   | 59.67  | 20 |
| 137 | 1985 | 2121 | TACCTGGGACATGCCAGACT   | 60.533 | 20 |
| 201 | 2365 | 2565 | TTTCTTCAAACCTCCACCGT   | 59.569 | 20 |
| 243 | 847  | 1089 | TGATGGAACCTTGTGTGCATGT | 60.024 | 21 |
| 139 | 2977 | 3115 | CTCAGCTGCTGCTCTCAGTG   | 60.227 | 20 |
| 167 | 525  | 691  | ACTTTTCTGCCATGAGTGG    | 60.111 | 20 |
| 226 | 702  | 927  | CTCCTCTCTCATCCCCCT     | 59.76  | 20 |
| 234 | 557  | 790  | GCTTCCAGCAGAAATCATCC   | 59.78  | 20 |

|     |      |      |                        |        |    |
|-----|------|------|------------------------|--------|----|
| 271 | 2066 | 2336 | AATGCAGTCCGGGTTTCATAG  | 59.955 | 20 |
| 267 | 8    | 274  | ATGTAGCCGACCCCAATTTA   | 59.297 | 20 |
| 112 | 4    | 115  | CCCAAGACCCCAATTTGAT    | 59.59  | 19 |
| 182 | 6    | 187  | ATGTAGCCGACCCCAATTTA   | 59.297 | 20 |
| 233 | 2215 | 2447 | TTCGGGTAAACCTTTGCTGT   | 59.609 | 20 |
| 247 | 346  | 592  | TAGCATTTCGTTGGGACTGG   | 61.021 | 20 |
| 268 | 658  | 925  | CATTCAATTCGAAATTATGCAT | 60.102 | 24 |
| 214 | 759  | 972  | AGGATTTGCAGGGTTCCATT   | 60.693 | 20 |
| 220 | 283  | 502  | CTGCAAGTCACATTCCACCA   | 60.722 | 20 |
| 208 | 3603 | 3810 | CGAGTATGGTGTGGTGGTG    | 59.873 | 20 |
| 265 | 477  | 741  | GAGGGATCATCGGAGGTTCT   | 60.421 | 20 |
| 270 | 225  | 494  | TTCAAATCCGGGTCTCTCAC   | 60.05  | 20 |
| 199 | 2200 | 2398 | TTGTCGTGATGGGTGAATGT   | 59.812 | 20 |
| 265 | 3    | 267  | CGCATGACACTGATCTATCG   | 57.804 | 20 |
| 213 | 5    | 217  | CCCAAGACCCCAATTTGATT   | 60.91  | 20 |
| 269 | 1502 | 1770 | AACCCCAACTCACATCAACA   | 58.827 | 20 |
| 193 | 5760 | 5952 | TTCTTGTTTTCCCTCACTGGA  | 59.697 | 21 |
| 207 | 1107 | 1313 | TCCAGATTCAAGACCAAGCAC  | 60.248 | 21 |
| 227 | 1181 | 1407 | CGTCGCCAAAGTGTCAATA    | 59.729 | 20 |
| 257 | 422  | 678  | TATCAACACCCAGCATGAG    | 59.522 | 20 |
| 279 | 1069 | 1347 | TCGTGTTCCGCCACATATTTT  | 59.041 | 20 |
| 206 | 3750 | 3955 | TGGAACGATTGTGTGGAAAG   | 59.541 | 20 |
| 262 | 516  | 777  | GATGCAGAACAATTTGCGTG   | 60.265 | 20 |
| 108 | 3209 | 3316 | TTTTGGGTGGAGAAATGGAG   | 59.903 | 20 |
| 187 | 13   | 199  | TTTGTTTCATGTAGCCGACC   | 60.894 | 20 |
| 246 | 392  | 637  | CCCATGCCGAATGTTATTCT   | 59.784 | 20 |
| 200 | 624  | 823  | CATTATACCACGGAGGAAGGA  | 58.914 | 21 |
| 265 | 221  | 485  | CCCCACACACTCATCCTCTT   | 59.962 | 20 |
| 219 | 384  | 602  | TTGGGTTGGATTTGAGCATT   | 60.309 | 20 |
| 251 | 586  | 836  | TGAAACATCCATTCTCCAAAG  | 59.546 | 22 |
| 197 | 3346 | 3542 | TAGATAACAGGCAATGCCGC   | 61.124 | 20 |
| 263 | 678  | 940  | CTCTTCAGCTCCCACTCCAC   | 59.986 | 20 |
| 242 | 660  | 901  | GTTCTAGCTGTCCGCACTC    | 60.02  | 20 |
| 222 | 291  | 512  | AAAAGAGGGGGAAAAATTCG   | 59.415 | 20 |
| 272 | 1341 | 1612 | CATATAAAGAGGGCAGCCGA   | 60.188 | 20 |
| 225 | 1805 | 2029 | CCTGATGAGGCTAAGGATGG   | 59.647 | 20 |
| 234 | 728  | 961  | CCGAAAATGTCCTTCATTGC   | 60.448 | 20 |
| 165 | 756  | 920  | GAGGACCGGACTGACTTCAC   | 59.688 | 20 |
| 264 | 471  | 734  | CAGCATGAGGCAGATTGATG   | 60.376 | 20 |
| 180 | 308  | 487  | CGAATTCTGCTTCTCCAGG    | 59.948 | 20 |
| 258 | 563  | 820  | CCCCTTGGGATATGTGTTTG   | 60.044 | 20 |
| 171 | 285  | 455  | TCCAATAACCAGGGTTCCAG   | 59.784 | 20 |
| 276 | 3222 | 3497 | CTTGTCACTAAGCCAACACCA  | 58.837 | 21 |
| 244 | 1085 | 1328 | AGGAAATGATTGTTCTCCTAGC | 59.073 | 24 |
| 247 | 242  | 488  | TGTTTGCTTTTCTTCATGCG   | 59.992 | 20 |
| 280 | 3209 | 3488 | CATCAGTTTGCCCCTATCTCA  | 60.081 | 21 |
| 167 | 2004 | 2170 | GCTTTGCTTCGTGCTTGAAT   | 60.531 | 20 |
| 190 | 1398 | 1587 | AGGGGACTCGTCAGGAAACT   | 60.111 | 20 |
| 277 | 164  | 440  | TCTTTTTCCATTGCTCACGA   | 59.395 | 20 |
| 264 | 2979 | 3242 | TACTGCATCGGTGTCTCACA   | 58.813 | 20 |
| 277 | 291  | 567  | CACGACCGTATTCTCCACCT   | 59.989 | 20 |
| 179 | 710  | 888  | GGAGGAAGCATCTACGCAAC   | 59.843 | 20 |
| 223 | 601  | 823  | TAAAAGTGCCCGATTTACGC   | 60.209 | 20 |
| 225 | 125  | 349  | GTAAAGGAATCCGCCAACAA   | 59.938 | 20 |
| 105 | 1040 | 1144 | TGCACGATCCATATCTGCTG   | 60.801 | 20 |
| 259 | 3223 | 3481 | GGGCTGTTGGTTGTGAAGAT   | 59.973 | 20 |
| 268 | 1288 | 1555 | AACAAAATCCCTCCCCATTC   | 59.996 | 20 |
| 212 | 1243 | 1454 | TGCCTTAACACAAAGGGGAA   | 60.472 | 20 |

|     |      |      |                        |        |    |
|-----|------|------|------------------------|--------|----|
| 272 | 3    | 274  | AGCTTTGGTTCATGTAGCCG   | 60.27  | 20 |
| 268 | 2318 | 2585 | TACACGTTCAACTGTGCCC    | 59.751 | 20 |
| 231 | 248  | 478  | TGTTATTTGAAACTGGACCTGC | 58.994 | 22 |
| 219 | 933  | 1151 | AATCTCGTTGCCGTTGGTAG   | 60.132 | 20 |
| 269 | 567  | 835  | TCCTTCCTTTTCATTTCCCA   | 59.476 | 20 |
| 210 | 5720 | 5929 | CGTTTTGCTTCTGCACTTCA   | 60.172 | 20 |
| 215 | 5360 | 5574 | AGGGACAAGCTATCACACAGC  | 59.222 | 21 |
| 198 | 237  | 434  | CCCCAAGACCCAATTTGATT   | 60.91  | 20 |
| 204 | 1019 | 1222 | CACCTGGTCCTTCTCTTCA    | 60.229 | 20 |
| 263 | 441  | 703  | TGCTTAACACGTTACTCCTCCA | 59.807 | 22 |
| 271 | 1828 | 2098 | CTCCGGCTTATGTCCAAGT    | 60.647 | 20 |
| 257 | 38   | 294  | GCACTCGAAGAGTAGCGGTT   | 59.644 | 20 |
| 224 | 1153 | 1376 | TCTGGAAAAGAGAAGGCCAA   | 59.926 | 20 |
| 268 | 30   | 297  | TGTGGGAAAAACATCGATCA   | 59.9   | 20 |
| 277 | 1303 | 1579 | ATTCGGCAACTTTTGGAAGA   | 59.685 | 20 |
| 261 | 631  | 891  | TTTCTCGCCTAATGCCATGT   | 60.606 | 20 |
| 217 | 1393 | 1609 | TTCTACGTCGAGAGGCGAAT   | 59.978 | 20 |
| 208 | 2986 | 3193 | CCCTCAATTTTGTACCCGAA   | 59.795 | 20 |
| 239 | 6    | 244  | CCAAGACCCAATTTGATT     | 60.91  | 20 |
| 258 | 372  | 629  | GCCAAAAGTAAAGGAAGGGG   | 59.939 | 20 |
| 102 | 2017 | 2118 | TTTCAAAGTCATCCCCTGG    | 59.903 | 20 |
| 266 | 1133 | 1398 | AAGTCCGCAGAACAACAACC   | 60.156 | 20 |
| 210 | 867  | 1076 | CTCCAATCTCTCTCCACCA    | 60.191 | 20 |
| 156 | 2254 | 2409 | ATTTGAACGGTTCTGTTCGG   | 59.971 | 20 |
| 275 | 1    | 275  | CCAAGACCCAATTTGATT     | 60.91  | 20 |
| 174 | 1120 | 1293 | CCCATCCTCAGATTTACCGT   | 58.861 | 20 |
| 110 | 1193 | 1302 | TCTGGAAAAGAGAAGGCCAA   | 59.926 | 20 |
| 276 | 957  | 1232 | GCATTGCTTGACTGAGTTGC   | 59.602 | 20 |
| 217 | 1167 | 1383 | TACATCACCTCCCATCTGC    | 60.893 | 20 |
| 277 | 503  | 779  | CTTCCCTGCAACCAACTCAT   | 60.111 | 20 |
| 233 | 125  | 357  | TCCTCCAGCTGTTCTTTCGT   | 59.989 | 20 |
| 108 | 81   | 188  | AGTGAACAGCATGGTCTGGA   | 59.261 | 20 |
| 229 | 2277 | 2505 | TAAGGGGATTGATTGGCAGA   | 60.405 | 20 |
| 185 | 1071 | 1255 | AGCCACGAGAGAATTTGCAT   | 59.843 | 20 |
| 204 | 1132 | 1335 | TGCCCTCACAACAAATTCA    | 60.088 | 20 |
| 158 | 2070 | 2227 | AAGGATCTTGATCGCTGTGTC  | 59.303 | 21 |
| 279 | 556  | 834  | TTGCACACATCTCCCTCTCA   | 60.402 | 20 |
| 214 | 1749 | 1962 | TATGCTGATCCACCCTTTGA   | 59.075 | 20 |
| 142 | 521  | 662  | GCAGCTGAGCTAGGTGCATT   | 60.709 | 20 |
| 280 | 422  | 701  | TGGATTTGCAATTTTCAAGG   | 58.6   | 20 |
| 278 | 2496 | 2773 | ATCTCACTCGGACATGGGAC   | 59.928 | 20 |
| 236 | 2770 | 3005 | AGGCAAAGAATTTCCAGCAA   | 59.823 | 20 |
| 182 | 2241 | 2422 | TGCAAAAGAACACCAAAGCA   | 60.415 | 20 |
| 191 | 563  | 753  | AGGACTCGCCTTCACTGAGA   | 60.135 | 20 |
| 115 | 6    | 120  | TGTAGCCGACCCAATTTAT    | 59.297 | 20 |
| 259 | 293  | 551  | TCGGCATGTTGCTCTTTATG   | 59.833 | 20 |
| 280 | 981  | 1260 | GCGCTGAAAGAGGATGAGAT   | 59.537 | 20 |
| 234 | 2476 | 2709 | GTCCTCCTCGTCATCGTCAT   | 60.08  | 20 |
| 130 | 571  | 700  | TGCACTTGCACTCATTTTTGT  | 59.381 | 21 |
| 199 | 273  | 471  | TTGCAGAATGCAAGATGTGC   | 60.969 | 20 |
| 222 | 474  | 695  | CTCACCAGAACTCCCTTGC    | 59.844 | 20 |
| 270 | 1857 | 2126 | GGATGATTGGGAATAATTGGG  | 60.213 | 21 |
| 280 | 139  | 418  | ATAAGATTTGCACGCTGGGA   | 60.606 | 20 |
| 269 | 831  | 1099 | CGTTGCTTGGCAATTCTACA   | 59.872 | 20 |
| 268 | 193  | 460  | ACTCAGATCTGGCCTGGAGA   | 59.945 | 20 |
| 139 | 0    | 138  | TGGTAGATCTGCTCCTTGTAGT | 60.315 | 24 |
| 190 | 53   | 242  | CTGAAAGGGAGTTGGAAGCA   | 60.366 | 20 |
| 258 | 1    | 258  | CCAAGACCCAATTTGATT     | 60.91  | 20 |

|     |      |      |                        |        |    |
|-----|------|------|------------------------|--------|----|
| 241 | 967  | 1207 | ACGCCAATTTGGATTTTGAC   | 59.807 | 20 |
| 201 | 13   | 213  | GGTCCTTCGTCGCATATGAA   | 61.003 | 20 |
| 259 | 4978 | 5236 | CAAATGTCATATACCCGCC    | 60.038 | 20 |
| 267 | 2    | 268  | GCACAGGCAGCTAAGACACA   | 60.207 | 20 |
| 272 | 68   | 339  | CAAGTCCAATGCATCACCAT   | 59.374 | 20 |
| 205 | 12   | 216  | ATGTAGCCGACCCCAATTTA   | 59.297 | 20 |
| 202 | 1803 | 2004 | CAGGGAGCCCTTGGATTTAG   | 60.938 | 20 |
| 164 | 12   | 175  | TTGGGATTAAGGCTTTGGTG   | 59.931 | 20 |
| 234 | 433  | 666  | TGTATGTTTTGCGAGTGGGA   | 60.111 | 20 |
| 144 | 654  | 797  | AAATTGTGGGATAAAATCCCC  | 59.8   | 22 |
| 242 | 511  | 752  | CAGAGCAGTTGTAGACGGCA   | 60.199 | 20 |
| 263 | 2139 | 2401 | CAGTGCATGCAAGCTGATTT   | 60.019 | 20 |
| 167 | 1575 | 1741 | TGCAGATAGGGTTTTGGGAG   | 60.066 | 20 |
| 130 | 7    | 136  | GTTTATGTAGCCGACCCCAA   | 59.823 | 20 |
| 258 | 340  | 597  | CCGATAAGCAGAGCTCCATC   | 59.939 | 20 |
| 279 | 347  | 625  | TGGTGAAAAATCAAACACTTG  | 59.876 | 22 |
| 211 | 1301 | 1511 | AAACGATGATTTTGAACGGC   | 59.945 | 20 |
| 241 | 1615 | 1855 | TTTGATTAATCGGGCTATGA   | 57.306 | 21 |
| 164 | 646  | 809  | TTCTTCTCCGACGACAACT    | 59.844 | 20 |
| 158 | 359  | 516  | ATGCTTCTCCCCCTTGAAAT   | 59.903 | 20 |
| 204 | 1748 | 1951 | TCAGTTATAGCCGACCCAC    | 59.955 | 20 |
| 248 | 1729 | 1976 | CGTGACAGCATGCTCCAATA   | 60.834 | 20 |
| 240 | 4759 | 4998 | CCTCAGGATTCCTCATCCAA   | 60.003 | 20 |
| 136 | 1459 | 1594 | CTTGGAACAAACAACAAGCA   | 58.856 | 21 |
| 148 | 1065 | 1212 | TTTTGTTCTGGTCCGCTCTT   | 59.853 | 20 |
| 144 | 4460 | 4603 | CCCATTTTGACGCTCTGATT   | 60.074 | 20 |
| 275 | 433  | 707  | GATTGATTCCGGTAGGCAAA   | 59.901 | 20 |
| 280 | 4617 | 4896 | GACTCAGTTGAGCCCCTCAC   | 59.841 | 20 |
| 160 | 1579 | 1738 | GCATAACCCGAACCCAATAA   | 59.66  | 20 |
| 256 | 619  | 874  | TTGGGAAGATTCGTGTTTCA   | 59.097 | 20 |
| 238 | 5869 | 6106 | TGACAGATGAATGGACCAACA  | 59.951 | 21 |
| 126 | 4    | 129  | CCCAAGACCCCAATTTGATT   | 60.91  | 20 |
| 118 | 3768 | 3885 | CATTAGCTCCGTGATGCAGA   | 59.972 | 20 |
| 264 | 1608 | 1871 | CTTCGACCGTTTCGTGTTTC   | 60.668 | 20 |
| 154 | 459  | 612  | TATCCAATATAGGGCACGGC   | 59.779 | 20 |
| 259 | 1596 | 1854 | CGTTGATTCTTCAAATCCCA   | 59.924 | 21 |
| 214 | 4606 | 4819 | AGGCGAGGGAGACCATCTAT   | 60.059 | 20 |
| 277 | 495  | 771  | CAGCCCGTTTCTGAAAGACT   | 59.473 | 20 |
| 185 | 802  | 986  | ATTCCCACCACATTTTCAA    | 60.029 | 20 |
| 183 | 327  | 509  | ACTAGCGTGGCTTATTCCCA   | 59.73  | 20 |
| 184 | 356  | 539  | TTACCTCCGAAGGAACGAGA   | 59.807 | 20 |
| 261 | 5    | 265  | CCCAAGACCCCAATTTGATT   | 60.91  | 20 |
| 278 | 1818 | 2095 | CCATCACCATCACTTCCAGA   | 59.473 | 20 |
| 257 | 397  | 653  | GCGTACACGCGTATGACAAG   | 60.346 | 20 |
| 165 | 9    | 173  | CCCAAGACCCCAATTTGATT   | 60.91  | 20 |
| 280 | 1389 | 1668 | TCTCCCTCCTCCTCCTTTC    | 59.883 | 20 |
| 206 | 1202 | 1407 | CCTCCCTCTAAAACCCGAA    | 60.415 | 20 |
| 210 | 4    | 213  | TTCATGATACTTTGGGAGTTCC | 59.087 | 22 |
| 206 | 1675 | 1880 | GCGTATTATTTTTCTCTCAATA | 58.762 | 25 |
| 241 | 78   | 318  | TGATCATCCTCCTCATTCTCTG | 60.088 | 23 |
| 169 | 904  | 1072 | ACAAATCGGAAAAGAGCAGC   | 59.457 | 20 |
| 239 | 1927 | 2165 | TGAAGGTGAATACCGATTACG  | 59.474 | 22 |
| 255 | 1772 | 2026 | ATCGGAAGCTTCAAGTCCAA   | 59.813 | 20 |
| 108 | 1944 | 2051 | CTTCACATCATTCCCAGGCT   | 60.073 | 20 |
| 279 | 687  | 965  | CGGAGAGGAAGAGGAAGAAG   | 60.074 | 21 |
| 227 | 1963 | 2189 | GGTTAGATTGGAGATGCCGA   | 60.036 | 20 |
| 187 | 2578 | 2764 | AAGAAGCAACCATCAACCGT   | 59.598 | 20 |
| 208 | 907  | 1114 | CTGCAGAATCAACTGCTTGG   | 59.591 | 20 |

|     |      |      |                       |        |    |
|-----|------|------|-----------------------|--------|----|
| 225 | 1    | 225  | TTGGTTCATGTAGCCGACCT  | 60.517 | 20 |
| 276 | 4928 | 5203 | TTCGTCCATATCAAGGCTCA  | 59.226 | 20 |
| 220 | 309  | 528  | AAAATGGATGGGGTGATTGA  | 59.991 | 20 |
| 223 | 2948 | 3170 | TTGTTTGCAGTGTGTTGCCT  | 60.347 | 20 |
| 118 | 5314 | 5431 | AGTATTCTTGCCGTTGGGAG  | 59.195 | 20 |
| 156 | 6    | 161  | ATGTAGCCGACCCCAATTTA  | 59.297 | 20 |
| 230 | 1431 | 1660 | AAATTCGAACCAACGGTCAC  | 59.836 | 20 |
| 277 | 1672 | 1948 | GGAGGAAATTGGCATCAGAA  | 60.014 | 20 |
| 227 | 0    | 226  | AAACAGCTTCTCTCTCCGGG  | 60.892 | 20 |
| 181 | 837  | 1017 | AAAAATAATGATAACGGCGGC | 60.179 | 21 |
| 250 | 624  | 873  | TGGTGAGCTTGAGGAGGTCT  | 59.986 | 20 |
| 238 | 6    | 243  | TGTAGCCGACCCCAATTTAT  | 59.297 | 20 |
| 263 | 7    | 269  | CCGAGACCCCAATTTGATT   | 59.735 | 19 |
| 261 | 29   | 289  | TGTAGCCGACCCCAATAAAT  | 59.297 | 20 |
| 134 | 3    | 136  | ATGTAGCCGACCCCAATTTAT | 59.585 | 21 |
| 153 | 2    | 154  | TGTAGCCGACCCCAATTTAT  | 59.297 | 20 |
| 119 | 2994 | 3112 | AAACCATCTTTCCCAAACC   | 60.032 | 20 |
| 186 | 3154 | 3339 | CCTCCCTTCTTTTGTACCCA  | 59.024 | 20 |
| 199 | 635  | 833  | TGATTCGGGTTCGAATATCA  | 58.917 | 20 |
| 280 | 59   | 338  | CCCACATCCAGCTTTCGTAT  | 59.955 | 20 |
| 132 | 794  | 925  | CAGTTTCAAGGGGAATCGAA  | 60.044 | 20 |
| 231 | 3653 | 3883 | GTGAGGATGATGGTGGAGGT  | 59.774 | 20 |
| 170 | 1898 | 2067 | AAGCTGCATGAGGTGATTGA  | 59.399 | 20 |
| 263 | 5695 | 5957 | CCCGTACTACGTGCATGAGA  | 59.74  | 20 |
| 140 | 605  | 744  | CAAGGCCTGTGTGTTCTTGA  | 59.873 | 20 |
| 191 | 2121 | 2311 | AGCCGACTTCACATAGTGGG  | 60.134 | 20 |
| 250 | 1099 | 1348 | AGCTTCCAAGACGTAATCGG  | 59.336 | 20 |
| 153 | 904  | 1056 | AAATACAAAGCCAGCCAACG  | 60.131 | 20 |
| 273 | 8    | 280  | TGTAGCCGACCCCAATTTAT  | 59.297 | 20 |
| 192 | 30   | 221  | ACGTGTATTGGGTGGTCCAT  | 59.973 | 20 |
| 184 | 2227 | 2410 | GCAGAAGGCTCCACTCTTGT  | 59.604 | 20 |
| 170 | 1570 | 1739 | AACTTTTGCCTGAAACGCAT  | 59.752 | 20 |
| 234 | 717  | 950  | ACCATGAAGATGAAGCTGCC  | 60.226 | 20 |
| 177 | 675  | 851  | CTCGTTTTCTTCTCGGTGC   | 59.993 | 20 |
| 139 | 23   | 161  | TTGGGATTAAGGCTTTGGTG  | 59.931 | 20 |
| 114 | 2240 | 2353 | TATTTCTCATACGTGCCTGCC | 60.11  | 21 |
| 191 | 1065 | 1255 | TTACCAAGGACTGAGTCGCC  | 60.255 | 20 |
| 156 | 2835 | 2990 | GATGCGGGGGATTTAAAGTT  | 60.15  | 20 |
| 275 | 280  | 554  | AACCATTCCCAAGTCATCA   | 60.173 | 20 |
| 235 | 3769 | 4003 | ACTCTTACGAGGGACGGGTT  | 59.994 | 20 |
| 146 | 118  | 263  | AATAAAGTATGTGGGAAAGTC | 57.317 | 24 |
| 218 | 140  | 357  | GTGAAACACCATCTTTCCCG  | 60.353 | 20 |
| 151 | 6    | 156  | ATGTAGCCGACCCCAATTTA  | 59.297 | 20 |
| 150 | 217  | 366  | TTAGGGCTGTTATCGGATGC  | 60.06  | 20 |
| 164 | 226  | 389  | GATTCCCTATCTTGCTCCCC  | 59.866 | 20 |
| 226 | 3486 | 3711 | CGAGCGTCTTCATTCTCCTC  | 60.096 | 20 |
| 180 | 1755 | 1934 | AATCTATGCTTCCAATGCCG  | 60.06  | 20 |
| 226 | 3101 | 3326 | AAGAAAATGCCGTTGGTGAG  | 60.11  | 20 |
| 232 | 3804 | 4035 | TTGCGTACATTTGATTGGGA  | 59.93  | 20 |
| 242 | 2565 | 2806 | TTTTGCATGTTCAAGGAGCAG | 59.988 | 20 |
| 152 | 1770 | 1921 | TTAGGCTCTCAAAGGACGA   | 59.948 | 20 |
| 179 | 501  | 679  | CATTCGACCTCCACATCCT   | 59.927 | 20 |
| 116 | 3712 | 3827 | AGAGAAAGTTGTGGGGTGGTG | 60.002 | 20 |
| 217 | 2724 | 2940 | GGGGTTTGGTCAGCATTTT   | 59.782 | 19 |
| 201 | 612  | 812  | GATCAATGAAGGGGACATGC  | 60.289 | 20 |
| 267 | 3815 | 4081 | CATCGGCTGTTACTCCTTCC  | 59.694 | 20 |
| 238 | 502  | 739  | GGCTGAAAAGGATGCTCAA   | 60.331 | 20 |
| 239 | 20   | 258  | GTGTAAGTCGCGGTCTCGAT  | 60.285 | 20 |

|     |      |      |                        |        |    |
|-----|------|------|------------------------|--------|----|
| 155 | 1229 | 1383 | TCCATCAACCTAACAGCAACA  | 59.184 | 21 |
| 225 | 157  | 381  | TGGCAACGAAAATGAACAGA   | 60.234 | 20 |
| 200 | 784  | 983  | GACGGAGATCCCAATGAAGA   | 60.011 | 20 |
| 141 | 2    | 142  | TGTAGCCGACCCCAATTTAT   | 59.297 | 20 |
| 266 | 2779 | 3044 | CTCATTGACGACATCCAACG   | 60.112 | 20 |
| 156 | 3318 | 3473 | AGCGGGATAATGGAACAGTG   | 59.955 | 20 |
| 267 | 667  | 933  | ACTCGTCATTTAACGCGCTC   | 60.416 | 20 |
| 237 | 487  | 723  | TGCAACTTGAGGCTGAGAAA   | 59.716 | 20 |
| 260 | 134  | 393  | GTTTATGTAGCCGACCCCAA   | 59.823 | 20 |
| 157 | 1573 | 1729 | GATGCTTAGTTGCCATTTCG   | 60.606 | 20 |
| 279 | 1271 | 1549 | CTAGTGGCTCTGGTTTTTCGG  | 59.869 | 20 |
| 240 | 743  | 982  | GAGAAGGAGGGGATGGAGAG   | 60.149 | 20 |
| 241 | 2936 | 3176 | GCAGGAATGTGATTTTAGCCA  | 60.089 | 21 |
| 256 | 562  | 817  | AAATCCCAGAATTGGTTCGAT  | 59.658 | 21 |
| 157 | 2335 | 2491 | CCGTAGGTTTCGTCTTCGTC   | 59.734 | 20 |
| 256 | 140  | 395  | TAAGCTCAAATGGGGTTCCA   | 60.439 | 20 |
| 258 | 1781 | 2038 | CAACTGCACTTGGATCCTGA   | 59.831 | 20 |
| 189 | 497  | 685  | TTGAGGTATGGATGATCGGA   | 58.873 | 20 |
| 165 | 1310 | 1474 | TCTCCTACCCAAAACCTCCA   | 59.521 | 20 |
| 259 | 327  | 585  | CACATCCGGGTTTTTCATTCT  | 59.79  | 20 |
| 208 | 1913 | 2120 | CTTTTGGGGAAACCTGGACT   | 60.332 | 20 |
| 264 | 1012 | 1275 | GGGGCCCTGTCTAAAAATTG   | 60.664 | 20 |
| 197 | 1756 | 1952 | ATTGCATACATCTGACCCCC   | 59.635 | 20 |
| 123 | 604  | 726  | TCTCCTTCTCCCTCCTCACA   | 59.913 | 20 |
| 137 | 171  | 307  | CTACCCACAACAGCATGACG   | 60.175 | 20 |
| 223 | 5    | 227  | ATGTAGCCGACCCCAATTTA   | 59.297 | 20 |
| 242 | 10   | 251  | CCCAAGACCCCAATTTGAT    | 59.59  | 19 |
| 168 | 6    | 173  | TGTAGCCGACCCCAATTTAT   | 59.297 | 20 |
| 266 | 128  | 393  | TTTAAGTGGAGGCGGTGTTT   | 59.609 | 20 |
| 192 | 600  | 791  | CCATTTTTGGCGATTCTTGT   | 59.938 | 20 |
| 274 | 897  | 1170 | AACCGGGGAAATATCGTCTC   | 60.152 | 20 |
| 232 | 390  | 621  | TTGGTATGCGCAACAATGATA  | 59.972 | 21 |
| 233 | 5624 | 5856 | TGTGGTCTCATAACAAACCTG, | 58.132 | 22 |
| 199 | 2363 | 2561 | TGCCATGCGTAAACTAAAACC  | 60.013 | 21 |
| 259 | 3070 | 3328 | CACACCCTTACTTTCCCCAA   | 59.824 | 20 |
| 261 | 41   | 301  | AAAAGTGGCATTTTGCCCTA   | 59.586 | 20 |
| 237 | 2601 | 2837 | TGTGAATCCCAAATGCTTCA   | 60.049 | 20 |
| 275 | 18   | 292  | TTTTGGCATGAGAACTCCC    | 60.051 | 20 |
| 280 | 866  | 1145 | AAGGCGAATTCTTGGGAACT   | 60.074 | 20 |
| 229 | 1674 | 1902 | TTTGTTGACGACGGAActGA   | 60.278 | 20 |
| 164 | 2972 | 3135 | ACAAGAAGCTGAGAGGGCAA   | 60.134 | 20 |
| 157 | 2    | 158  | TTATAAAACCGACCCACCCC   | 60.773 | 20 |
| 279 | 734  | 1012 | TGGTCTTCTTGCATGTCTCG   | 59.984 | 20 |
| 258 | 16   | 273  | TTCTTATCTCTGCGCCGATT   | 59.945 | 20 |
| 279 | 311  | 589  | GCATTTTCCTCAAAAAGGGA   | 59.135 | 20 |
| 106 | 4    | 109  | ACGGAGTTGTGAAGGAATGA   | 58.129 | 20 |
| 184 | 21   | 204  | AGTCTAAGGGAGCACATGGTT  | 57.802 | 21 |
| 238 | 5    | 242  | ATGTAGCCGACCCCAATTTAT  | 59.585 | 21 |
| 188 | 86   | 273  | TTCTTCCACCAATTACCCCA   | 60.162 | 20 |
| 270 | 430  | 699  | AATTGGTGCTCAAGAATCCG   | 60.074 | 20 |
| 214 | 594  | 807  | GCACACTCGAACAAAGCAAA   | 60.035 | 20 |
| 241 | 2396 | 2636 | TTTTCACGCACAACACACAC   | 59.191 | 20 |
| 151 | 488  | 638  | AAGGCAAATGCAGAAAGCAT   | 59.851 | 20 |
| 266 | 687  | 952  | TGCAGTAAATCTGTGACCCG   | 59.716 | 20 |
| 240 | 2637 | 2876 | TTGGATAACTGATGAGGGGG   | 59.744 | 20 |
| 274 | 1265 | 1538 | CCGTAAGAGCATTGTTGGCTC  | 59.845 | 20 |
| 180 | 1699 | 1878 | TGGTCGGTTGGTAAGAAAGG   | 59.964 | 20 |
| 124 | 3224 | 3347 | AGGCTCAGTGGTCTTGGGA    | 59.986 | 20 |



|     |      |      |                         |        |    |
|-----|------|------|-------------------------|--------|----|
| 273 | 1164 | 1436 | AATTGTGCAGTCCGGCTAAG    | 60.27  | 20 |
| 257 | 1648 | 1904 | TTTCGATGTCTGAATTACAACA/ | 59.524 | 23 |
| 228 | 1193 | 1420 | ATGTCGATTTTATCCCTCGC    | 59.001 | 20 |
| 131 | 425  | 555  | GACATCATCCACCGAGAACC    | 60.335 | 20 |
| 257 | 1364 | 1620 | AAGGGAGGGAATGAAGTGGT    | 59.795 | 20 |
| 244 | 2070 | 2313 | CAAACGAAGGAGGAGGATGA    | 60.187 | 20 |
| 214 | 1297 | 1510 | TCAAAGAATTCCAACCCCAA    | 60.28  | 20 |
| 177 | 1904 | 2080 | AAACAAGCCATTCCAGCAAC    | 60.118 | 20 |
| 189 | 2138 | 2326 | AGGGCATTACCTTTGCATCA    | 60.469 | 20 |
| 137 | 13   | 149  | TGTAGCCGACCCCAATTTAT    | 59.297 | 20 |
| 257 | 3323 | 3579 | TGTAAGCTCACCAGCATTCTG   | 60.011 | 20 |
| 218 | 217  | 434  | CCAGCTTCAGGTTCTCTGTTG   | 60.036 | 21 |
| 148 | 2741 | 2888 | GGGGAGGAGAGAGGAGAGA/    | 59.883 | 20 |
| 128 | 1513 | 1640 | TGACTCATCACCACCACCAC    | 60.44  | 20 |
| 143 | 308  | 450  | CCCGAAGCGAATTTATTTCA    | 60.033 | 20 |
| 274 | 3711 | 3984 | AGTTGGGAAGGTAATTGGGG    | 60.046 | 20 |
| 272 | 2380 | 2651 | AGTCCAAGGAATGAGCATCG    | 60.218 | 20 |
| 257 | 371  | 627  | TACATCGCACAAAATCACGG    | 60.523 | 20 |
| 166 | 2660 | 2825 | AATTATTTGGGATTCACCCAT   | 59.702 | 23 |
| 268 | 2764 | 3031 | CCACTGTGTTGATGATGTGGA   | 60.433 | 21 |
| 261 | 9    | 269  | CCAAGACCCCAATTTGATT     | 60.91  | 20 |
| 274 | 26   | 299  | TTGGGATTAAGGCTTTGGTG    | 59.931 | 20 |
| 279 | 112  | 390  | CGATTAACCCGTGAAATACGA   | 59.84  | 21 |
| 210 | 1361 | 1570 | AAGAGGTGCATTTCAATCGG    | 60.074 | 20 |
| 168 | 4478 | 4645 | TCCGCCAAAATGGTAAGAAC    | 59.938 | 20 |
| 201 | 3171 | 3371 | GGCGTCAGAGAGATCGAAAG    | 60.096 | 20 |
| 238 | 1110 | 1347 | ATCAATGGGCATTGGATGAT    | 59.982 | 20 |
| 263 | 2595 | 2857 | CTTACCAAGCCGTTAAAGC     | 59.883 | 20 |
| 273 | 1155 | 1427 | CCTACACAAATGGATGACCG    | 58.847 | 20 |
| 227 | 533  | 759  | TTTTCGTCACCTTTTGAGGC    | 60.227 | 20 |
| 178 | 6    | 183  | ATGTAGCCGACCCCAATTTA    | 59.297 | 20 |
| 119 | 1078 | 1196 | TTGAAATTTTTGTGTGGCAA    | 57.666 | 20 |
| 114 | 3430 | 3543 | ACCATGCAGTCACAGATCCA    | 60.121 | 20 |
| 237 | 2776 | 3012 | AAAAGTCGTGACCAAACAAA/   | 59.445 | 23 |
| 173 | 142  | 314  | ATCTGGTGGATTCAGGCAAG    | 60.073 | 20 |
| 110 | 323  | 432  | CCGGAATCATGCTAACTGGT    | 59.955 | 20 |
| 212 | 837  | 1048 | TCAATGGTTGGGCTACACTTC   | 59.985 | 21 |
| 144 | 643  | 786  | ACACAGTACGATCCCGACCT    | 59.455 | 20 |
| 209 | 8    | 216  | CCAAGACCCCAATTTGATT     | 60.91  | 20 |
| 137 | 5246 | 5382 | CGACCTCACATAGTGGGAAA/   | 59.978 | 21 |
| 208 | 137  | 344  | AGCCAGGTAAACACCAATGC    | 60     | 20 |
| 256 | 2686 | 2941 | GAATGCATTTGAGGACCCC     | 60.274 | 19 |
| 219 | 2576 | 2794 | TTGAAAATGGGGTGGTTGAT    | 60.029 | 20 |
| 270 | 1685 | 1954 | TTATTGCCCGGGATAAGTTG    | 59.789 | 20 |
| 230 | 122  | 351  | TCCCTTTCAATTACATCGCA    | 59.112 | 20 |
| 153 | 692  | 844  | AGGTCGGTTGAAAAGATGGA    | 59.526 | 20 |
| 255 | 870  | 1124 | ATGGGTTTTGCCATCAATTT    | 59.138 | 20 |
| 229 | 1848 | 2076 | AAAGATCCAGTGTGGCAGG     | 60.111 | 20 |
| 280 | 3699 | 3978 | TTCAGAAAAATGGCGAGACC    | 60.192 | 20 |
| 250 | 6027 | 6276 | CAAGTGTTCGAAGACGGGTT    | 60.149 | 20 |
| 240 | 5    | 244  | TTTGATTGGGAATAATTGGG    | 57.289 | 20 |
| 161 | 1796 | 1956 | GAGAAAAACAGAGGAGCAAC    | 59.92  | 23 |
| 163 | 1898 | 2060 | GAAAAATGCTGCATCAACCA    | 59.67  | 20 |
| 199 | 1974 | 2172 | TCAAGGTGTCCTCGATTTGA    | 59.215 | 20 |
| 215 | 1513 | 1727 | TTCCAACATGCTGCCTAAAA    | 59.301 | 20 |
| 215 | 1060 | 1274 | AGAGGCCAACAAAGAGACGA    | 59.989 | 20 |
| 272 | 3803 | 4074 | CTGTTTCGCATGGTTGAAGAA   | 59.84  | 20 |
| 168 | 6    | 173  | ATGTAGCCGACCCCAATTTAT   | 59.585 | 21 |

|     |      |      |                        |        |    |
|-----|------|------|------------------------|--------|----|
| 245 | 462  | 706  | GGATTAAGAAAGACATTGGAC  | 59.493 | 23 |
| 246 | 148  | 393  | TCCCATATTTGGAGTCCAGG   | 59.744 | 20 |
| 147 | 2076 | 2222 | AGTTGGGATTTGCCAGTTTG   | 59.971 | 20 |
| 205 | 0    | 204  | TGTAGCCGACCCCAATTTAT   | 59.297 | 20 |
| 146 | 4419 | 4564 | ATTTGGTGTGCGCTAAATCG   | 59.96  | 20 |
| 100 | 12   | 111  | TTTGGTTCATGTAGCCGACC   | 60.894 | 20 |
| 264 | 3314 | 3577 | AAGCCTTTCATGTCACCAGG   | 60.111 | 20 |
| 261 | 5351 | 5611 | TACCTGATGGGCTATGGGAA   | 60.288 | 20 |
| 150 | 1581 | 1730 | CCATATAGCCAACCCACAT    | 59.528 | 20 |
| 280 | 8566 | 8845 | CGGAAAGAGTTTTGCTCAGG   | 59.986 | 20 |
| 175 | 7    | 181  | TGTAGCCGACCCCAATTTAT   | 59.297 | 20 |
| 198 | 1964 | 2161 | TCGAAAAAGTGCATCAG      | 59.988 | 20 |
| 218 | 2772 | 2989 | TATCCCTGTGCGGTTTAAT    | 60.476 | 20 |
| 163 | 2185 | 2347 | AAAGCCCTCCAATTCATTT    | 59.777 | 20 |
| 201 | 16   | 216  | GGAAGATGCTCCAACCTCTG   | 59.803 | 20 |
| 246 | 1028 | 1273 | TCTAACCCACCATTTCTGC    | 59.933 | 20 |
| 223 | 111  | 333  | ATAAGATCGGGGCTTGATT    | 59.761 | 20 |
| 248 | 955  | 1202 | AATGCTATGTGATGTTGGCTTC | 60.025 | 22 |
| 206 | 2434 | 2639 | AATCCGAAATGCAAACTCG    | 60.074 | 20 |
| 225 | 8    | 232  | TTTGGTTCATGTAGCCGACC   | 60.894 | 20 |
| 229 | 3093 | 3321 | ACACCCAGTTTGAATTTTAGC/ | 59.926 | 23 |
| 268 | 2874 | 3141 | GGTCCAAAACCTCAGGCAAG   | 59.711 | 20 |
| 206 | 4337 | 4542 | ACTGGGCAACATAATCCAGC   | 59.962 | 20 |
| 243 | 0    | 242  | TGTAGCCGACCCCAATTTAT   | 59.297 | 20 |
| 146 | 35   | 180  | AAAATTATGTAATAGTTTGCCC | 59.748 | 25 |
| 267 | 3229 | 3495 | CAAAGCGAGACCTAATGGCT   | 59.476 | 20 |
| 240 | 112  | 351  | ATATGTTTCGCCTCTCCCCT   | 59.925 | 20 |
| 221 | 316  | 536  | CGGAGATTATCCACCATTGC   | 60.296 | 20 |
| 276 | 521  | 796  | ATCCAGACGTGGAACCTCAC   | 60.12  | 20 |
| 252 | 818  | 1069 | GACCAAATCCAGCCATAAA    | 59.762 | 20 |
| 162 | 616  | 777  | AGCAGTGTCAATTTGCTCAA   | 59.445 | 20 |
| 166 | 1264 | 1429 | TCACATACCTGCAACCATGAA  | 59.98  | 21 |
| 225 | 1511 | 1735 | AATGCTCCAACCTTCGACTGG  | 60.255 | 20 |
| 162 | 755  | 916  | CACCTGGATTCGAATGGTTT   | 59.79  | 20 |
| 271 | 934  | 1204 | CACAGCACAAACTGATCGCT   | 60.056 | 20 |
| 271 | 263  | 533  | GGCCTTCAAAGCATAACCA    | 60.074 | 20 |
| 159 | 35   | 193  | GCACGAAACAAGGGTAATCG   | 60.502 | 20 |
| 217 | 1129 | 1345 | TTGTGGTCTCACTCCTCAA    | 59.23  | 20 |
| 269 | 1178 | 1446 | TGGTGTCTTGTGGTCTTGAAA  | 59.172 | 21 |
| 143 | 11   | 153  | GGTGTTTATTTGCGCTGGTG   | 60.365 | 20 |
| 245 | 594  | 838  | GATTGAGAATGACATGGGCA   | 59.456 | 20 |
| 245 | 385  | 629  | AGGGAGGAAGAGTTTCGGAT   | 59.139 | 20 |
| 259 | 2709 | 2967 | GACACGTGGATTTTAAATGGG  | 59.192 | 21 |
| 270 | 2282 | 2551 | GGTGCATAATGGCTCTGACA   | 59.679 | 20 |
| 184 | 1458 | 1641 | TCCACACACGTCTTCACATTT  | 59.049 | 21 |
| 144 | 1201 | 1344 | TCAGCATTATGTGCTCTGCC   | 59.979 | 20 |
| 259 | 997  | 1255 | TCAGCAGAGATCATCCACCA   | 60.363 | 20 |
| 271 | 261  | 531  | GAAGCACAAACCAACCAACCT  | 60.012 | 20 |
| 276 | 924  | 1199 | CGGTTTCATAAGGTTGTCGG   | 60.357 | 20 |
| 260 | 796  | 1055 | TACATTGTGCCTCCTCCCTC   | 60.073 | 20 |
| 145 | 739  | 883  | CCACTCATTTTTCCACACGA   | 59.541 | 20 |
| 269 | 3825 | 4093 | ACTCCTGGGCTCGAGTTGAT   | 61.192 | 20 |
| 255 | 322  | 576  | GATTTCTTCGGAATCGTTGG   | 59.505 | 20 |
| 213 | 130  | 342  | CCTATCGTTCACATGCCTT    | 59.955 | 20 |
| 107 | 378  | 484  | ACCACCCTCTTAGACGACGA   | 59.721 | 20 |
| 213 | 1337 | 1549 | AATTGTAGTCCTTAAATCCCG  | 58.165 | 23 |
| 186 | 322  | 507  | ATCGCACTCATGCAAGT      | 59.276 | 20 |
| 241 | 801  | 1041 | TGTTGCGAGCTTGTGTTGAG   | 60.025 | 20 |

|     |      |      |                        |        |    |
|-----|------|------|------------------------|--------|----|
| 146 | 576  | 721  | TCTCTCATTGGTGGCCCTTA   | 60.594 | 20 |
| 171 | 301  | 471  | CAACAAAGCAAACCAAACCA   | 59.603 | 20 |
| 163 | 504  | 666  | CCATGACACTGAATATCCCAG  | 59.813 | 22 |
| 260 | 20   | 279  | GTAGAAATCCCGTGCAGAG    | 59.836 | 20 |
| 228 | 106  | 333  | TTTCCCCTTGGTTTTGGAC    | 59.807 | 20 |
| 184 | 737  | 920  | TTTCTGTTAGTCAAATCGAGA  | 57.41  | 24 |
| 208 | 1357 | 1564 | GCGTATTGTTGTCTCGTTTCG  | 59.347 | 20 |
| 104 | 612  | 715  | TTGCACCTACAACATGCACA   | 59.746 | 20 |
| 104 | 1006 | 1109 | CCTAGCAAAAACCTTCCAGC   | 58.973 | 20 |
| 238 | 89   | 326  | TCTCAGATATGGGCGTCACA   | 60.225 | 20 |
| 260 | 719  | 978  | AAAACCAGCAGTTTTGGCAC   | 60.154 | 20 |
| 271 | 1985 | 2255 | TGTGGTTTGCCTCACTCTTCT  | 59.899 | 21 |
| 202 | 50   | 251  | TGGGTATGGGACTCAGTTGG   | 60.769 | 20 |
| 266 | 543  | 808  | TTGATTTGCAACTCCCTTTT   | 57.338 | 20 |
| 171 | 291  | 461  | TTTGGCCGAGTGACTAGAATT  | 60.129 | 22 |
| 174 | 798  | 971  | CGTGGAATGTGGATGATGTT   | 59.219 | 20 |
| 211 | 33   | 243  | GTATTTTTCCGACTTTGGCA   | 57.754 | 20 |
| 131 | 256  | 386  | TGGAATTGACGACTCCATTG   | 59.496 | 20 |
| 232 | 8    | 239  | CAAATTAATGCGCCACG      | 60.081 | 19 |
| 217 | 396  | 612  | CCGGATGGCTTATGAGTAGG   | 59.546 | 20 |
| 184 | 256  | 439  | TGGCGAGAAACTCAGATCC    | 60.34  | 20 |
| 198 | 337  | 534  | AAACACACGCAGGCAGAATA   | 59.347 | 20 |
| 242 | 8    | 249  | TGAAGATTGCTTCCTTATGAAT | 59.644 | 24 |
| 185 | 1611 | 1795 | TGCAGAGCAAATTCATGTCC   | 59.805 | 20 |
| 232 | 25   | 256  | TGTTGGAAGAAACAAAACCTGC | 59.9   | 23 |
| 177 | 4408 | 4584 | AAATCAAATGCGAATCGCTC   | 60.182 | 20 |
| 244 | 334  | 577  | GTCTTGGGAAGCGAAATGAA   | 60.192 | 20 |
| 184 | 253  | 436  | TTCTTTGAGCCTGTGGTGTG   | 59.873 | 20 |
| 180 | 865  | 1044 | TCTTGTTTTCTCCCAAACC    | 59.003 | 20 |
| 197 | 132  | 328  | TGGGCTTCTTCAGCTTCTTTT  | 60.489 | 21 |
| 280 | 381  | 660  | CCTTCTTGGTTTGAGCTTGC   | 59.993 | 20 |
| 253 | 2205 | 2457 | TGTTGCAATAATCAAGTTCAAC | 59.311 | 23 |
| 280 | 5772 | 6051 | CTCTCGTTTGGACTCTTGGG   | 59.837 | 20 |
| 258 | 1260 | 1517 | CCCCTATAACTCTCGGGGTG   | 60.694 | 20 |
| 264 | 871  | 1134 | GAAGTCTCGGATCTCGATT    | 59.39  | 20 |
| 254 | 755  | 1008 | GCAGAACATGAAACCCACAA   | 59.547 | 20 |
| 104 | 3060 | 3163 | TCCAATCTCATCCCCTCATC   | 59.821 | 20 |
| 200 | 6510 | 6709 | GAAGCAAGAGAGACGTTGGG   | 59.989 | 20 |
| 266 | 634  | 899  | GCCTTATCCAACACCACACC   | 60.24  | 20 |
| 118 | 1506 | 1623 | AGGAGGGTAGGTGGTCTGGT   | 59.848 | 20 |
| 226 | 5    | 230  | GCCTTCTTTTACGCATTTT    | 59.829 | 20 |
| 235 | 648  | 882  | ATATATGGGGGAGAGGGACG   | 59.996 | 20 |
| 147 | 389  | 535  | ACACCCGAAATGGTAGACA    | 60.232 | 20 |
| 228 | 11   | 238  | TACATGGCTGGCGTAGTTTG   | 59.752 | 20 |
| 147 | 196  | 342  | ATGGGTGTTACCGTCTCTGG   | 59.844 | 20 |
| 222 | 193  | 414  | GTCGAAGTTCCCGTGAAGAG   | 59.844 | 20 |
| 202 | 32   | 233  | TTATGAGCTTGGACTTGGGC   | 60.214 | 20 |
| 279 | 1929 | 2207 | GGCATAAGAAAGGATGAATGT  | 57.372 | 23 |
| 147 | 706  | 852  | GTATGGTGTGGAGAACCACG   | 58.854 | 20 |
| 169 | 349  | 517  | GATGAAGGCTGCATTTGTGA   | 59.805 | 20 |
| 251 | 2091 | 2341 | AAATAAAACCAAACCGGGG    | 59.923 | 20 |
| 196 | 118  | 313  | CTGAGAGGTCCCAGGTTCAA   | 60.229 | 20 |
| 277 | 533  | 809  | GCCCGATATTTATCAAGGCA   | 59.892 | 20 |
| 150 | 697  | 846  | GAGGGCATGTCGATTTCACT   | 60.081 | 20 |
| 270 | 2031 | 2300 | CACATGTCCCAAGTGATTTCA  | 60.786 | 22 |
| 209 | 168  | 376  | AAGCAACAAATGAATTGGGC   | 59.945 | 20 |
| 253 | 507  | 759  | TTTTGGGAGGGAAAACGACT   | 60.826 | 20 |
| 202 | 1858 | 2059 | AAATCTCCGAGGCAAGCATA   | 59.807 | 20 |

|     |      |      |                       |        |    |
|-----|------|------|-----------------------|--------|----|
| 273 | 79   | 351  | GGCTTGTCGTGGTTCAACTTA | 60.161 | 21 |
| 184 | 25   | 208  | TTTGCCTATTTAAAGCCCC   | 60.267 | 20 |
| 227 | 901  | 1127 | GGACGAAATTGATCGAAGGA  | 60.014 | 20 |
| 271 | 2500 | 2770 | CAGTGGATACGAGCAAGGGT  | 60.134 | 20 |
| 274 | 65   | 338  | GAGCAGACGATGATGCAGAG  | 59.688 | 20 |
| 103 | 42   | 144  | TGAAAAGAAAAGGCGTGAATC | 60.229 | 21 |
| 262 | 2650 | 2911 | TTAGGAAAGCAGGCAACCTT  | 58.973 | 20 |
| 239 | 610  | 848  | AGCACTAGCACCTCATGGCT  | 60.043 | 20 |
| 135 | 1732 | 1866 | GCCATTCACCATCTCTCGTT  | 60.081 | 20 |
| 221 | 375  | 595  | TCATCAAATTTGGGGGAAAC  | 59.599 | 20 |
| 265 | 1069 | 1333 | CAAATAATTGCCGGACCAAA  | 60.671 | 20 |
| 229 | 118  | 346  | CCCCATGAAAAGTCAAAAA   | 59.772 | 20 |
| 250 | 13   | 262  | CAAGTCAAATACCCGTGTCC  | 57.923 | 20 |
| 228 | 224  | 451  | TCAGCAATCACCGACCAATA  | 60.073 | 20 |
| 237 | 177  | 413  | CGTGTCATGTGCGACTCGTG  | 59.868 | 19 |
| 203 | 570  | 772  | TCTAAGTCCACCTTTCTCGCA | 60.001 | 21 |
| 269 | 1    | 269  | GACGCAGGTACGGATATTTGA | 59.974 | 21 |
| 253 | 109  | 361  | TCTTTTGTTCGGAAATCGG   | 60.046 | 20 |
| 108 | 460  | 567  | TGAGATTTGGTCAAGGGAGC  | 60.195 | 20 |
| 190 | 2685 | 2874 | GTCCAAGATGGGATTGGTTG  | 60.173 | 20 |
| 273 | 1431 | 1703 | TATCATTGCGCATTTCGGA   | 61.294 | 20 |
| 222 | 6802 | 7023 | TCAAATGCAAACCTGTGCGAA | 60.234 | 20 |
| 118 | 450  | 567  | TCCATTATCTGGCCCTTTTG  | 59.894 | 20 |
| 211 | 125  | 335  | AAAAAGCCAGGGCCTACCTA  | 60.089 | 20 |
| 162 | 528  | 689  | TGCAACCCTAAGAAAAGGGA  | 59.679 | 20 |
| 198 | 1067 | 1264 | GCTAGTAGGGCAAAGTTGATT | 57.418 | 24 |
| 254 | 786  | 1039 | AAATTGATTGGAGCATTGCC  | 59.907 | 20 |
| 164 | 965  | 1128 | TGCAATTCCACCAACTTTGA  | 60.088 | 20 |
| 120 | 227  | 346  | CCGGAATCTGAGAGAGATCG  | 59.903 | 20 |
| 245 | 1663 | 1907 | ACAAGCAATGGGGAATGAAA  | 60.309 | 20 |
| 247 | 5    | 251  | TTTGTCCCTAAACCCCTCT   | 59.799 | 20 |
| 207 | 227  | 433  | ACACATTTGGCTGGAAGGAC  | 59.973 | 20 |
| 264 | 1579 | 1842 | GGGAAAAGGACAATTCCTCG  | 60.797 | 20 |
| 125 | 0    | 124  | GCATTTACATGTAGAGTATAA | 57.153 | 27 |
| 247 | 184  | 430  | TGATTCCTGCTTCTCCCCTA  | 59.767 | 20 |
| 239 | 82   | 320  | TAGCACTTGGGATGAAGCGT  | 60.796 | 20 |
| 108 | 562  | 669  | GCAATTTCAATTAACAATCAC | 59.037 | 23 |
| 193 | 332  | 524  | ACTCTCCATGGACGTAGGTGT | 58.534 | 21 |
| 278 | 126  | 403  | GGAGGATTCGGATTTCTGT   | 60.272 | 20 |
| 220 | 76   | 295  | TGGGTTTGGTCCATCTTCAT  | 60.173 | 20 |
| 239 | 49   | 287  | TGTTTCTGCAGGTTGCAAAG  | 60.027 | 20 |
| 153 | 389  | 541  | AATATCCCCTGGAGCCATGT  | 60.546 | 20 |
| 234 | 1331 | 1564 | TGAGTCGGACTTGCAATTTGA | 60.39  | 20 |
| 161 | 647  | 807  | TTCCTAAACCAGCCCAACAG  | 60.103 | 20 |
| 237 | 1416 | 1652 | TCAATGTGCCATGATTTAGCA | 60.088 | 21 |
| 187 | 695  | 881  | CAATCCGCACTTGGATTTTT  | 59.938 | 20 |
| 172 | 13   | 184  | ACCCATTCCAAGAGATGCT   | 60.853 | 20 |
| 234 | 513  | 746  | GCATTTCTCACACGGGAAAG  | 60.636 | 20 |
| 278 | 307  | 584  | TCCTGTGCCAAGTTGAATAAG | 59.747 | 22 |
| 111 | 107  | 217  | GGTATACCCAAAGCGCACTC  | 59.597 | 20 |
| 259 | 877  | 1135 | CAACTCATGGTTGTGCGTTG  | 60.001 | 20 |
| 254 | 1387 | 1640 | GAAGAGCGTCCAATCTCCA   | 60.34  | 20 |
| 189 | 378  | 566  | ATACATGGCAACCTCGTCGT  | 60.406 | 20 |
| 196 | 1350 | 1545 | TCTGTTTATAGTCCCCCGGA  | 59.382 | 20 |
| 204 | 180  | 383  | GAAGTTTTGGGGATCCGAC   | 59.326 | 19 |
| 174 | 10   | 183  | TGAAGAAATCAAATCCCACAA | 59.429 | 22 |
| 233 | 1721 | 1953 | CCTGATTAGCCACAAGGGAA  | 60.066 | 20 |
| 247 | 337  | 583  | GTTGTGCTCGTACACTCGACA | 59.962 | 21 |

|     |      |      |                        |        |    |
|-----|------|------|------------------------|--------|----|
| 204 | 2517 | 2720 | TGTGGATGCTTGTATTTTGG   | 59.027 | 21 |
| 250 | 1348 | 1597 | GCACAAGAGGAGGCAACTTC   | 59.997 | 20 |
| 274 | 718  | 991  | AGTTTCTCCGGGTGGAAGAT   | 59.935 | 20 |
| 159 | 1036 | 1194 | GAATTGGTGAGGGCATCATT   | 59.756 | 20 |
| 132 | 0    | 131  | GAGTTCGTTGACTAATTAATA  | 57.683 | 25 |
| 158 | 0    | 157  | CAGAGCGCACTCGAAGAGTA   | 59.49  | 20 |
| 176 | 730  | 905  | ACAATCCTGTAATTCGCGTCT  | 58.734 | 21 |
| 273 | 0    | 272  | TTTTGCACCCGAATGGTTAT   | 60.188 | 20 |
| 248 | 323  | 570  | TGGAATTTGTCCACCATAACA  | 58.733 | 21 |
| 191 | 483  | 673  | ACATTTTACGTGCGAGAGGG   | 60.132 | 20 |
| 236 | 1177 | 1412 | GCAATGCATATTTAGGAAGTG  | 59.432 | 23 |
| 224 | 397  | 620  | GCGAAACGAAATTTGGGAA    | 60.936 | 19 |
| 149 | 712  | 860  | TTAAGTGAGTTAAGTTTTGACC | 58.424 | 25 |
| 252 | 160  | 411  | GTCATTTCTCGTTTCGCGTT   | 60.257 | 20 |
| 203 | 621  | 823  | TCCCATTCATCATGATTCCTT  | 59.19  | 21 |
| 265 | 686  | 950  | TATCCGCAATTAGCCTCGT    | 59.704 | 20 |
| 151 | 496  | 646  | ATGATGGCGTCATGTTTTCA   | 59.931 | 20 |
| 151 | 17   | 167  | TAAAATGTGCCACGTGGATT   | 58.895 | 20 |
| 181 | 187  | 367  | CTCGAACGAACACCCAATCT   | 60.111 | 20 |
| 278 | 534  | 811  | GCTGGCAACCAAGCTCTAAA   | 60.523 | 20 |
| 244 | 130  | 373  | CCAATTTTCAATCACCGGA    | 60.671 | 20 |
| 220 | 224  | 443  | GCCACGGATAAGTAACACCG   | 60.386 | 20 |
| 279 | 1740 | 2018 | AGCACGACCAGAAGCTGACT   | 60.205 | 20 |
| 144 | 248  | 391  | CCATTCCTGAGACCAAAGG    | 59.521 | 20 |
| 212 | 1189 | 1400 | ACGCTCAAGCCATTCAAGTC   | 60.406 | 20 |
| 138 | 2    | 139  | TGACGTACGATCGAGTCCAG   | 59.855 | 20 |
| 159 | 0    | 158  | TGGGAATTTAGGAATCGAGAG  | 60.034 | 22 |
| 184 | 232  | 415  | CATCTTCAAGTCTGCAACGG   | 59.44  | 20 |
| 271 | 1598 | 1868 | CTATTTGTTGGTGGGTCGGT   | 59.711 | 20 |
| 268 | 444  | 711  | TGATGGGAGGCAACTCATT    | 61.016 | 20 |
| 222 | 375  | 596  | TCACGTTGACAAGTCCAAGC   | 59.88  | 20 |
| 185 | 609  | 793  | CTCTTCTCCACAACCTGCC    | 59.844 | 20 |
| 275 | 38   | 312  | GACTATAATGGCCAGCACCG   | 60.49  | 20 |
| 227 | 585  | 811  | TGGCCTGATTAATTGTGTGG   | 59.395 | 20 |
| 274 | 592  | 865  | GTCAATTTCCCTCCAAAAA    | 58.855 | 20 |
| 237 | 1385 | 1621 | CAGGCGGAAGTAGAGAGGAA   | 59.569 | 20 |
| 272 | 229  | 500  | CCAGAAAGTCCAATTATGGTG  | 60.584 | 22 |
| 245 | 918  | 1162 | CGTCGCATGGATCTAGTTGA   | 59.823 | 20 |
| 175 | 2104 | 2278 | TAACGGGTAGGGCAGATCAT   | 59.41  | 20 |
| 237 | 2438 | 2674 | CGTTCTTCTCAGCTTCTGG    | 60.126 | 20 |
| 215 | 1136 | 1350 | GGAAAGATGAAATGCTGGGA   | 60.014 | 20 |
| 256 | 815  | 1070 | GGCAGCTCCACATACATTT    | 59.962 | 20 |
| 248 | 353  | 600  | TCTCGCAAATCAAGAAGCC    | 60.469 | 20 |
| 155 | 2446 | 2600 | TATCTGCCTGCATATGCCCT   | 60.594 | 20 |
| 230 | 6    | 235  | GGTCGGCTACATGAACCAAA   | 60.894 | 20 |
| 249 | 308  | 556  | CCGTCCACCTCTCAATCTCT   | 59.254 | 20 |
| 249 | 142  | 390  | CCTGGAAAAATGTGGGTGAA   | 60.724 | 20 |
| 265 | 549  | 813  | AGTTATTGGCCGAAAATCCA   | 59.411 | 20 |
| 148 | 1795 | 1942 | ATTGGCTTTCCCGAGAACTT   | 60.074 | 20 |
| 279 | 835  | 1113 | AGTCTTGTGGCCAGAGAAA    | 59.844 | 20 |
| 183 | 692  | 874  | GCTAGTAGGGCAAAGTTGATT  | 57.418 | 24 |
| 260 | 121  | 380  | TTGTTTGCCACTTGCTTCAC   | 59.888 | 20 |
| 210 | 4585 | 4794 | AGTGGGGAGTTTAGTTCCCG   | 60.353 | 20 |
| 157 | 222  | 378  | GCTGCAGATGGACTCACAAA   | 59.992 | 20 |
| 126 | 291  | 416  | TGTGTTATTTATATCTTTGTGC | 59.092 | 26 |
| 279 | 814  | 1092 | GACTTCGTGGGCTTGGACTT   | 61.59  | 20 |
| 229 | 115  | 343  | AAGTTTCTTTGGGACACCCC   | 60.204 | 20 |
| 207 | 37   | 243  | CGTGTGCTGGGCTATTTTCT   | 60.27  | 20 |

|     |      |      |                        |        |    |
|-----|------|------|------------------------|--------|----|
| 226 | 2882 | 3107 | TGGGTTTGAAGTAACTGC     | 58.749 | 20 |
| 235 | 219  | 453  | ACTGCGAGATTCAAAACGGT   | 59.74  | 20 |
| 158 | 253  | 410  | TATGCAAAGGGAAAAGCGAG   | 60.335 | 20 |
| 270 | 3272 | 3541 | AGATTGAAGAAAAAGGGGGC   | 59.532 | 20 |
| 271 | 949  | 1219 | GCGTCTCCGATGACATTCTT   | 60.226 | 20 |
| 134 | 3151 | 3284 | CTTCATGTATGCTTGGTCGG   | 59.148 | 20 |
| 222 | 507  | 728  | ATTATTCCGACGATCTCCCC   | 60.117 | 20 |
| 275 | 1086 | 1360 | ACAATTTCCAGATGGAACGG   | 59.79  | 20 |
| 181 | 233  | 413  | TGGTTTGACATGTGATGGGA   | 60.795 | 20 |
| 209 | 139  | 347  | AGCTGCACCATCCATATTCA   | 59.105 | 20 |
| 139 | 1682 | 1820 | CATAGCAAACCCCCACCTA    | 59.817 | 20 |
| 236 | 101  | 336  | GGGATGTGTGTACCTGAGGC   | 60.395 | 20 |
| 238 | 150  | 387  | TGGATTTTCTTCCCATGTCC   | 59.727 | 20 |
| 273 | 827  | 1099 | ATCCAAAATCTGGTTGCTTGA  | 59.56  | 21 |
| 209 | 719  | 927  | GATTGCTTCCATTTGTGAAGAT | 58.188 | 22 |
| 166 | 684  | 849  | CTCTCCATTTGGAGGCGTAA   | 60.206 | 20 |
| 245 | 56   | 300  | GCAGAATTCCGAATGACGAT   | 60.043 | 20 |
| 280 | 1443 | 1722 | AGTCTCCGGGGACAAATTCT   | 59.935 | 20 |
| 128 | 49   | 176  | CGTGCTTGAACAAAAGCAAA   | 60.029 | 20 |
| 182 | 5343 | 5524 | CTAGACAATGCACAGCCCAA   | 59.864 | 20 |
| 204 | 825  | 1028 | TCCACCATGGAACACAGAAA   | 59.935 | 20 |
| 249 | 201  | 449  | CACGAGAATTGGACCAGTCA   | 59.676 | 20 |
| 211 | 2175 | 2385 | CGAGCTGAAAAAGACCAAGG   | 59.986 | 20 |
| 271 | 1141 | 1411 | TTGAACGAAAATTGATGGTCC  | 59.793 | 21 |
| 158 | 399  | 556  | CTGTGGACCTTCATTGCTGA   | 59.831 | 20 |
| 193 | 616  | 808  | TTATTGGCCGCAAAAAGTTTC  | 60.075 | 20 |
| 265 | 1674 | 1938 | CGGATTGCCAAGCCTATTTT   | 61.281 | 20 |
| 137 | 3007 | 3143 | ACGCGTTTTAGTGGTGGAAAG  | 60.168 | 20 |
| 239 | 1406 | 1644 | GAAGGCAACAAGAGATGGGA   | 60.195 | 20 |
| 280 | 844  | 1123 | TGGTCTCTATTTGTAGAGAATT | 58.898 | 27 |
| 149 | 1129 | 1277 | AAACAAACCTGCAAAATGCC   | 59.982 | 20 |
| 256 | 6398 | 6653 | GGGATTTTCGTTTCGTTTGA   | 59.916 | 20 |
| 271 | 3241 | 3511 | AAATGGCTCAGTAAACAATGG  | 60.237 | 22 |
| 179 | 1079 | 1257 | AACCTCGATTCTGTGGATG    | 59.927 | 20 |
| 191 | 2130 | 2320 | TTGCATCTTCATGTGCAATTC  | 59.685 | 21 |
| 235 | 3    | 237  | TGCTCCCTCCAATTAAGACG   | 60.206 | 20 |
| 278 | 74   | 351  | AAAGCCTAAATCCGACCTCC   | 59.554 | 20 |
| 262 | 8    | 269  | CCGACTTTTATGGCTGCTGT   | 60.27  | 20 |
| 221 | 400  | 620  | TGCGAATTGAATAAGGCAAA   | 59.286 | 20 |
| 258 | 636  | 893  | GGCAACAACAGAATCCCAA    | 60.874 | 20 |
| 202 | 185  | 386  | AGCCGGGTCTAGTGAATGAA   | 59.694 | 20 |
| 172 | 5    | 176  | ATTTGGTTCGGTTCGGTTTT   | 60.573 | 20 |
| 251 | 43   | 293  | GAGTATTCATTGTACACAATA/ | 57.132 | 27 |
| 267 | 345  | 611  | TTGTCATGACTTCGGCTTGA   | 60.39  | 20 |
| 274 | 0    | 273  | CATGGGTAAAAATGATAAGTA  | 57.379 | 26 |
| 246 | 0    | 245  | TTTGAGGAGCTTTGCGTTTT   | 59.996 | 20 |
| 264 | 40   | 303  | AAAGAGCAATGTGGCATCAA   | 59.276 | 20 |
| 235 | 150  | 384  | TCAAACCAGGTTCTTCAATGG  | 59.956 | 21 |
| 227 | 1904 | 2130 | AATGACAACCAAACATGCC    | 60.624 | 20 |
| 217 | 1371 | 1587 | AGGAATAATGGAGGCGGAAG   | 60.411 | 20 |
| 170 | 0    | 169  | AAACGGGGTTGGGTTGTG     | 61.616 | 18 |
| 235 | 360  | 594  | AACGATAACGGTAACGATAAC  | 57.743 | 23 |
| 169 | 0    | 168  | GGAAGGAAAGCTAAAAAGGA   | 57.242 | 22 |
| 205 | 161  | 365  | TGCAAAAGCACTTTCCTGA    | 59.716 | 20 |
| 259 | 1202 | 1460 | TGGCATGCGAGTGCTATTAC   | 59.862 | 20 |
| 280 | 1868 | 2147 | GCAGACCATAATGCTTTTGTG/ | 60.138 | 22 |
| 264 | 960  | 1223 | GAAGAAGATGTCAAGCCGGA   | 60.34  | 20 |
| 150 | 72   | 221  | AGCTCAATCGCCATCTCAAT   | 59.803 | 20 |

|     |      |      |                        |        |    |
|-----|------|------|------------------------|--------|----|
| 233 | 81   | 313  | TCTGGAAGCCAGAAAACCAT   | 59.67  | 20 |
| 205 | 77   | 281  | GAGACCGAACCACTAAACGG   | 59.592 | 20 |
| 239 | 1241 | 1479 | TTGCAACAATTTTTGGTATATA | 58.562 | 27 |
| 250 | 201  | 450  | TATTGCACAGCTTCATGCCA   | 61.367 | 20 |
| 192 | 308  | 499  | AAAGCTTTGTCCCACATAGGA  | 60.001 | 22 |
| 224 | 174  | 397  | ACTAGTGGGACTGCTCCTGC   | 59.48  | 20 |
| 275 | 878  | 1152 | AAACATACCAACTCACCCTC   | 57.963 | 22 |
| 164 | 127  | 290  | GAGAAACTGCAGCAAAAGGC   | 60.14  | 20 |
| 116 | 316  | 431  | TCGAGTTGGCGTTATTGTGA   | 60.257 | 20 |
| 264 | 71   | 334  | TCAAGGATTTGGATGGGTTT   | 59.22  | 20 |
| 273 | 820  | 1092 | TTGGTCAGATCAAACCGAATC  | 59.925 | 21 |
| 101 | 47   | 147  | GACAATCCATCTCCATCTGGT  | 58.806 | 21 |
| 280 | 1118 | 1397 | TCTGGTTTTGGTTTTCTGC    | 60.088 | 20 |
| 272 | 335  | 606  | CCGATCGAATGGACCTTACA   | 60.853 | 20 |
| 221 | 1211 | 1431 | GCAACGTAAATCTGCCACTG   | 59.347 | 20 |

| REVERSE PRIMER3 (5'-3') | Tm(C°) | size | PRODUCT3<br>size (bp) | start (bp) | end<br>(bp) |
|-------------------------|--------|------|-----------------------|------------|-------------|
| TACCCCTACCCTTTGGGAAC    | 60.046 | 20   | 207                   | 1433       | 1639        |
| ACGATCCCCTTACCACCCTA    | 60.569 | 20   | 174                   | 21         | 194         |
| AAACACGACCATTTTCAGGC    | 59.978 | 20   | 243                   | 116        | 358         |
| TCTCATACTAAAAGGTCTTTCT  | 58.534 | 26   | 164                   | 23         | 186         |
| ATTTCCCGGCTTCTTGCTAT    | 60.061 | 20   | 133                   | 598        | 730         |
| ATGGGGTTTATTGGCTCTCC    | 60.152 | 20   | 188                   | 361        | 548         |
| CTATGCTTGCATTCACCCAA    | 59.688 | 20   | 257                   | 14958      | 15214       |
| ATAAACGTGCCAAAAACCGA    | 60.356 | 20   | 186                   | 19         | 204         |
| CCACGAAAACTGATACGCA     | 59.729 | 20   | 255                   | 485        | 739         |
| TGATTCTCCCTCTAATCTGTTTT | 57.985 | 24   | 273                   | 12         | 284         |
| GCGTCTACGGTGCAGAAAAT    | 60.278 | 20   | 227                   | 83         | 309         |
| TGCGTGAAAAACAGATGGTG    | 60.699 | 20   | 175                   | 18         | 192         |
| CATCGATTCTCTCTCCTCGG    | 59.903 | 20   | 208                   | 162        | 369         |
| CAATCTCGAAAATGGATGGC    | 60.414 | 20   | 208                   | 257        | 464         |
| CGTGAGAAGCAACCAAATGA    | 59.84  | 20   | 239                   | 254        | 492         |
| TTATCCTTACGCAATCCCAA    | 58.109 | 20   | 196                   | 414        | 609         |
| CCCACACCCTCATTCTCTCA    | 61.071 | 20   | 164                   | 437        | 600         |
| CAACACAAGAACTCACCTCCC   | 59.607 | 21   | 244                   | 381        | 624         |
| ATTTCCACCGGTGTTCTTGA    | 60.353 | 20   | 230                   | 6          | 235         |
| GAGATTGTTGGGGTTGAGGA    | 59.903 | 20   | 251                   | 16         | 266         |
| GCATGTATTTGGGCTAAGTGG   | 59.488 | 21   | 159                   | 13         | 171         |
| CCGATTGTTAAAATCCGGT     | 58.807 | 20   | 210                   | 16         | 225         |
| TGTTGACTTGCTTTCTTGGCT   | 60.045 | 21   | 113                   | 661        | 773         |
| GCTTAATCTTTCAACGCCGA    | 60.343 | 20   | 213                   | 29         | 241         |
| CAAATATGCTTTCTTGATCATC  | 58.646 | 25   | 241                   | 621        | 861         |
| GGTGCATGACACAGACCATC    | 59.97  | 20   | 265                   | 52         | 316         |
| AATGCCTAAGTGGCCATGAT    | 59.415 | 20   | 271                   | 3          | 273         |
| CTCCACTCACCTAAACCCGA    | 60.103 | 20   | 230                   | 8          | 237         |
| CCGCATATTTGAGAGTTGCAT   | 60.11  | 21   | 130                   | 14         | 143         |
| CGCGAACTTTACAGGGCTAC    | 59.904 | 20   | 236                   | 88         | 323         |
| ACGGTTGAAAATGGGTTTAC    | 59.694 | 20   | 209                   | 121        | 329         |
| CTCAGGGGCATATGTGTCAA    | 59.522 | 20   | 196                   | 13         | 208         |
| TCCAGCCAATTTTATCCCAA    | 60.26  | 20   | 209                   | 1          | 209         |
| GACTCGTAATGATCCCCCAA    | 59.75  | 20   | 124                   | 337        | 460         |
| GTTTTAACGGTTTTGGCCG     | 60.342 | 19   | 262                   | 214        | 475         |
| GCTTGATAGGGAGGAGAGGG    | 60.169 | 20   | 157                   | 66         | 222         |
| CTTTGGATGGATGAACTTGGA   | 59.918 | 21   | 176                   | 132        | 307         |
| CAAAACCAACAGCCGAGATT    | 60.11  | 20   | 258                   | 238        | 495         |
| ACCGATATGCTATGCTTTTGC   | 59.251 | 21   | 164                   | 76         | 239         |
| CCATGTTGTAATTAATGTAGGG  | 57.155 | 24   | 103                   | 2174       | 2276        |
| GGTCACGAGAACACGCATAC    | 59.169 | 20   | 187                   | 2294       | 2480        |
| CCACTCGCATCACAAAGTTC    | 59.293 | 20   | 170                   | 24         | 193         |
| TGATGGATTGCATTTGAGGA    | 60.009 | 20   | 246                   | 193        | 438         |
| ACGGAACAAGCAACTACAGC    | 59.438 | 21   | 147                   | 29         | 175         |
| ATGGATGCCGATATTTGAGC    | 59.891 | 20   | 125                   | 154        | 278         |
| TCCCAAATTTGTCCAAAGC     | 59.916 | 20   | 179                   | 1034       | 1212        |
| ACCCCACTAAACCCAAACTT    | 57.435 | 20   | 160                   | 28         | 187         |
| AAGCCATTTTCCAAGAGCTTA   | 58.151 | 21   | 275                   | 28         | 302         |
| AACGACACGAACGGTTTAGG    | 60.03  | 20   | 165                   | 132        | 296         |
| CTTGACTTCAAACCCCAACG    | 60.52  | 20   | 201                   | 331        | 531         |
| GAGGCATTCCATGAGGAAGA    | 60.158 | 20   | 163                   | 30         | 192         |
| TCAGTGGTTGTAACATTGGCA   | 60.019 | 21   | 241                   | 381        | 621         |
| CACCCGAAAACCGAATAAGA    | 59.931 | 20   | 101                   | 782        | 882         |
| AATGCAGGGTTTGCAAGAGT    | 59.74  | 20   | 149                   | 17         | 165         |
| GCGCAGATTGAGTGTGAGAG    | 59.733 | 20   | 270                   | 16         | 285         |



|                        |        |    |     |      |      |
|------------------------|--------|----|-----|------|------|
| TGAGGCTGGTTGTGAGAGAA   | 59.545 | 20 | 279 | 264  | 542  |
| ACAATCTGGATCGTTTGATACC | 57.928 | 22 | 164 | 0    | 163  |
| TCCAAAAATCAAAGCTTGAAG/ | 58.987 | 22 | 195 | 90   | 284  |
| ACGTCAGCATTACCCCAAC    | 59.859 | 20 | 272 | 951  | 1222 |
| CATTTTACGAACGAACCACG   | 59.083 | 20 | 275 | 136  | 410  |
| TGGTTGCACATGAATCATCC   | 60.339 | 20 | 237 | 1268 | 1504 |
| TTCTCTCCAACAACAACCC    | 59.943 | 20 | 207 | 3118 | 3324 |
| CCAAATCCCTCGTGTCTTC    | 59.526 | 20 | 176 | 8    | 183  |
| ACCGTCCATCTTAATGCAGC   | 60.103 | 20 | 199 | 914  | 1112 |
| CGATCCTTTGCGTTTGTTTC   | 60.617 | 20 | 188 | 0    | 187  |
| GGTTGTATGAAACCGTTAGTTC | 59.826 | 23 | 269 | 430  | 698  |
| TCAGAAACGCTATTACCAAGC/ | 59.911 | 22 | 278 | 166  | 443  |
| GTTTGTGGTGTTTCATGTGGC  | 59.862 | 20 | 248 | 1842 | 2089 |
| TTGGCGCTTCTTTTGTATCC   | 60.209 | 20 | 105 | 0    | 104  |
| CAAAATCCGAGGCAAGAGAC   | 59.813 | 20 | 131 | 12   | 142  |
| TCGAAGGATTTTATCTGCC    | 59.115 | 20 | 263 | 2467 | 2729 |
| ATTCAAGCATGGAATCGCTC   | 60.185 | 20 | 201 | 13   | 213  |
| CCCATTCCCAAATCCCTTAT   | 59.846 | 20 | 151 | 932  | 1082 |
| TCTTGCACGATTCTCCACAA   | 60.39  | 20 | 157 | 654  | 810  |
| CCTACCAACCAGCCAACATT   | 59.853 | 20 | 177 | 4195 | 4371 |
| CACATAAATGGGTTATCAATGC | 59.851 | 24 | 211 | 301  | 511  |
| TCCAACAATCTCCCACTTGA   | 59.059 | 20 | 139 | 148  | 286  |
| GATGTTTCGTCTTCGTCCTCC  | 59.661 | 20 | 213 | 59   | 271  |
| CTACGATCCCAACGGTATGC   | 60.352 | 20 | 185 | 61   | 245  |
| TCTCTCTCGGTTGCTACTGCT  | 59.391 | 21 | 155 | 25   | 179  |
| ACTGTGGCGAACGAGAGAAG   | 60.589 | 20 | 208 | 315  | 522  |
| CGGTTTTGGTTTGTTCCTACA  | 59.884 | 21 | 278 | 1137 | 1414 |
| TGAGCCTCGAACTGGTTTTT   | 59.853 | 20 | 172 | 33   | 204  |
| CTGGGGCAGATAAGGTGAGA   | 60.21  | 20 | 221 | 422  | 642  |
| ACATTTTTGTGTTGCTCCCC   | 59.836 | 20 | 194 | 481  | 674  |
| CCATACCTAACCTGTACCGTCC | 60.652 | 22 | 261 | 420  | 680  |
| ATCGAAACAACCCAGATGA    | 60.317 | 20 | 261 | 189  | 449  |
| CCTTTTTCTTGCAAGGATTGA  | 59.325 | 21 | 247 | 269  | 515  |
| CGACCTGAAGGAGGCTAGAG   | 59.183 | 20 | 169 | 1215 | 1383 |
| GGAACAGCAGATTGACAGCA   | 59.992 | 20 | 278 | 1546 | 1823 |
| TCATTAGCCATGTGTTCCCA   | 59.924 | 20 | 280 | 826  | 1105 |
| CATGAGCCGCTAGATTGACA   | 59.972 | 20 | 173 | 128  | 300  |
| TGCGTGCCATTTATAAAACA   | 57.749 | 20 | 104 | 9    | 112  |
| TATCAGCCGAAAGAAGCAGG   | 60.481 | 20 | 275 | 1394 | 1668 |
| TACGGGATCTCTTTGGTTTCG  | 60.066 | 20 | 272 | 855  | 1126 |
| TCCTCTTCTTCTCTCACGC    | 59.679 | 20 | 270 | 1    | 270  |
| TCACACTGACGTTTCTTGGG   | 59.72  | 20 | 166 | 225  | 390  |
| ATGTGCAAAGCTGCTGAAGA   | 59.746 | 20 | 259 | 294  | 552  |
| TGGACGTAAATACCCTTTTACC | 59.667 | 23 | 124 | 237  | 360  |
| GGAAACCCACAATCATCACC   | 60.034 | 20 | 238 | 12   | 249  |
| ATGCGCGCTGCTTAATAAT    | 59.873 | 20 | 108 | 40   | 147  |
| TACAGGGCTGCTTTGTCCTT   | 59.875 | 20 | 214 | 84   | 297  |
| TTTTGTTTGGGACAAAAATGAA | 60.115 | 23 | 280 | 90   | 369  |
| TTCGAGTGACACAAGGCAAG   | 60.025 | 20 | 240 | 20   | 259  |
| ACACTTGCGAGGTTGTCAA    | 59.339 | 20 | 196 | 714  | 909  |
| AGACGGCAGAAGGTGAGAAG   | 59.598 | 20 | 210 | 1263 | 1472 |
| ATGTCATTCTGTTGCGGGTT   | 60.384 | 20 | 228 | 10   | 237  |
| GAACCTCGAATCCAAAACCC   | 60.673 | 20 | 135 | 5018 | 5152 |
| TGAAGTTAGGAAATAAGGAGG  | 58.743 | 25 | 132 | 320  | 451  |
| TTTCTGGGCCCAAATCAATA   | 60.26  | 20 | 158 | 26   | 183  |
| TGGCCTTGCCATGTATATCTT  | 59.447 | 21 | 277 | 249  | 525  |
| GGGAAGCTATGATGGGGAAT   | 60.117 | 20 | 233 | 2155 | 2387 |
| TTGGGCTTTCATTTTCAGC    | 60.188 | 20 | 140 | 572  | 711  |

|                         |        |    |     |      |      |
|-------------------------|--------|----|-----|------|------|
| CAACAGTTTGGCATCAGAGC    | 59.445 | 20 | 203 | 30   | 232  |
| TGCAGCCTGAGTGAGAGGTA    | 59.726 | 20 | 265 | 2098 | 2362 |
| TTGGTTATGGACATACGGTCA   | 58.759 | 21 | 170 | 650  | 819  |
| ATGCATCTCGGATCACATCA    | 60.039 | 20 | 191 | 10   | 200  |
| CTCTCTCAATGTGGCAACGA    | 59.984 | 20 | 189 | 580  | 768  |
| ATTCCACCGTTGAAAGATCA    | 57.991 | 20 | 152 | 48   | 199  |
| GGAGTGGCTTTAGGTTGTCTG   | 59.734 | 20 | 212 | 621  | 832  |
| ATACGTGTGCGAAACAACCC    | 60.817 | 20 | 124 | 315  | 438  |
| ATTCCCTCCTCAACACCCTT    | 59.795 | 20 | 217 | 100  | 316  |
| CACCCCACTCCCTACATTTT    | 59.259 | 20 | 220 | 902  | 1121 |
| AGGAGATGACACCTAAACCCA   | 58.511 | 21 | 155 | 12   | 166  |
| TGGCTGTCATTATTTCTCATTTT | 59.188 | 24 | 150 | 368  | 517  |
| GGAAATAATAAACACAAACAC   | 59.233 | 24 | 251 | 884  | 1134 |
| TTGAACCATTCCATCATTTCA   | 58.806 | 21 | 113 | 149  | 261  |
| CGAAGACAAAACACAATGGG    | 59.021 | 20 | 280 | 76   | 355  |
| TCTACGTGGCATGTGGACTC    | 59.707 | 20 | 199 | 21   | 219  |
| TTTGAAGCTTGAATTGAATTGG  | 59.231 | 22 | 241 | 20   | 260  |
| GAGTATAACCGTCGGCTTGC    | 59.736 | 20 | 257 | 17   | 273  |
| TCATATCCACGAGAATGGCA    | 60.033 | 20 | 222 | 1237 | 1458 |
| GGTGTAAAGATGGAGGCAAGC   | 59.7   | 20 | 141 | 23   | 163  |
| CCCAAGACCCCAATTTGATT    | 60.91  | 20 | 255 | 69   | 323  |
| CATCGACACCACTCATCGTC    | 60.121 | 20 | 241 | 8    | 248  |
| TTTGCTGCAGTCTGTTCATGG   | 61.023 | 20 | 245 | 242  | 486  |
| CGCATGTACTGAACACGGTC    | 60.183 | 20 | 225 | 29   | 253  |
| GATGTTGGGTCTGCAGAGGT    | 60.12  | 20 | 189 | 614  | 802  |
| TCCTCATCTCCGTTGTAGCC    | 60.218 | 20 | 212 | 411  | 622  |
| TTAGCTTCACACCAGCAACG    | 60.05  | 20 | 280 | 14   | 293  |
| TGCCTAAAAGTTGCTCCCA     | 60.742 | 20 | 256 | 978  | 1233 |
| AAATTTACCGACGTCTCACCA   | 59.485 | 21 | 158 | 18   | 175  |
| GAAGGTGTCTTCAATGGAGGT   | 59.484 | 22 | 151 | 163  | 313  |
| GCCATAACTCGACCATGTCA    | 59.527 | 20 | 246 | 6    | 251  |
| TCAGATTTACGAGCAATAATTT  | 59.558 | 27 | 124 | 312  | 435  |
| AACTTAGCCCCAAGTTTTCA    | 59.987 | 21 | 271 | 314  | 584  |
| AAAGGCGACAAAACCATCAC    | 59.978 | 20 | 199 | 568  | 766  |
| TGATCACGAGTACCTCCACG    | 59.701 | 20 | 198 | 8    | 205  |
| TGACACAATCGTGGAGACAAA   | 60.144 | 21 | 166 | 1875 | 2040 |
| GGGAGCTGAACAAAAGGTGT    | 59.187 | 20 | 225 | 1248 | 1472 |
| CGGACCGTTTTAACGGATTT    | 61.055 | 20 | 272 | 166  | 437  |
| GGATCAGTAAAATAATAGGCA   | 59.934 | 26 | 239 | 542  | 780  |
| ATCCGTGCCCTATCAGGAAT    | 60.682 | 20 | 257 | 503  | 759  |
| CCACATCCTCAGCTCAGACA    | 59.98  | 20 | 169 | 201  | 369  |
| GCGATCCTCCTCCTTCACAT    | 61.542 | 20 | 245 | 1542 | 1786 |
| AAGGACTCAAGCCCCTCAAT    | 60.074 | 20 | 154 | 22   | 175  |
| CAGCAGAGGTGTGCATCAAT    | 59.862 | 20 | 199 | 96   | 294  |
| TGAAACGGAACAAGATTTGC    | 58.747 | 20 | 134 | 16   | 149  |
| CAACGCAGATCTAAAGACCCA   | 60.256 | 21 | 230 | 796  | 1025 |
| CGTGTCAACTGTGACGAGAAA   | 59.93  | 21 | 242 | 1809 | 2050 |
| GAAACCCTAACCTGATGCCA    | 59.933 | 20 | 264 | 435  | 698  |
| AGCTATGCATCAACGCACAA    | 60.432 | 20 | 254 | 409  | 662  |
| CCACTCCTTTGAGGCATTA     | 60.206 | 20 | 210 | 938  | 1147 |
| ATGGCTAACCATCAATTGCC    | 59.791 | 20 | 244 | 525  | 768  |
| GGCCTAAGGCACTCATGACA    | 61.208 | 20 | 236 | 221  | 456  |
| TTTGACTACCTTGCCAAGCA    | 59.464 | 20 | 169 | 1185 | 1353 |
| CACAATATCAAGAACCCCAA    | 59.671 | 21 | 277 | 9    | 285  |
| TTGCATCATCCAGGCATTTA    | 60.035 | 20 | 271 | 2060 | 2330 |
| ATTTACAGCACCCCAACA      | 59.893 | 18 | 108 | 1024 | 1131 |
| TAGCCCACTAATCCCAAACC    | 58.903 | 20 | 115 | 15   | 129  |
| GAACCTTCCATCTTCCACCA    | 59.903 | 20 | 157 | 2192 | 2348 |

|                        |        |    |     |      |      |
|------------------------|--------|----|-----|------|------|
| ACCCCAATTCTTGATAGCC    | 60.152 | 20 | 112 | 259  | 370  |
| GAGCTCCACATCAACACCAA   | 59.682 | 20 | 170 | 11   | 180  |
| TGCGTTTTGATGATATATAGGT | 57.703 | 24 | 214 | 561  | 774  |
| GGCCGTATTAGCAGCGTAAA   | 60.246 | 20 | 278 | 481  | 758  |
| AGCCACGTGTGTTCAATTGAG  | 59.751 | 20 | 237 | 519  | 755  |
| ATCTGCCATAGCACCAAACC   | 59.962 | 20 | 256 | 375  | 630  |
| CCAGATAGTTTGGCCCGTTA   | 59.953 | 20 | 259 | 495  | 753  |
| TGAAAGCCTACCTTGCTTCC   | 59.452 | 20 | 248 | 1    | 248  |
| CTCGTTGAGCTCGGATAAG    | 59.971 | 20 | 162 | 80   | 241  |
| CCTGACTTCGCTGTGGGTAT   | 60.134 | 20 | 168 | 2288 | 2455 |
| CCCACTCCTATTTCTCTCATCT | 59.975 | 23 | 143 | 175  | 317  |
| TCAATGCTCTTTTCAACCCT   | 57.393 | 20 | 164 | 19   | 182  |
| GTGGTATGGTGTGGAGGACC   | 60.096 | 20 | 139 | 106  | 244  |
| GGCATCAGAGCCAAGTTAGG   | 59.836 | 20 | 188 | 12   | 199  |
| GGCACGATTCAAAGTCACA    | 59.697 | 20 | 279 | 117  | 395  |
| TGACAAAGGGTGTGTTGGAA   | 59.976 | 20 | 135 | 93   | 227  |
| AACGAGGGGAGTGACACTTG   | 60.151 | 20 | 279 | 6    | 284  |
| TGTGAGCGTGTAGCCATTTT   | 59.871 | 20 | 153 | 47   | 199  |
| CTCCCATTGAGACTCGAAC    | 59.655 | 20 | 187 | 75   | 261  |
| AATGCCTCTCACATGCAACA   | 60.272 | 20 | 256 | 308  | 563  |
| CACGCAATCCACATCAAGTC   | 60.12  | 20 | 246 | 77   | 322  |
| GAGAATGTTTCGAGCGTGTGA  | 59.992 | 20 | 168 | 436  | 603  |
| TACGACTCTTTCAAGGGGA    | 59.665 | 20 | 234 | 1963 | 2196 |
| CATGCATTAACATAGTTGGGCT | 59.036 | 22 | 245 | 20   | 264  |
| CTGCTGGAGTTGGACTGGTT   | 60.298 | 20 | 185 | 1421 | 1605 |
| AAATCAAACAAATACTAACA   | 60.107 | 27 | 195 | 1073 | 1267 |
| TTGAGAGGATTTGAGTTGGC   | 57.864 | 20 | 251 | 157  | 407  |
| TTGCGACATGACACAATCAA   | 59.676 | 20 | 167 | 430  | 596  |
| TGATTTCTAGATACGGGGC    | 58.998 | 20 | 125 | 52   | 176  |
| TGCGAGAACTTAGTCAACGG   | 59.072 | 20 | 185 | 15   | 199  |
| AGAAGACACTTGGGCCTGAA   | 59.844 | 20 | 204 | 221  | 424  |
| CTCCTCTCTGCTGAGCCAGT   | 59.883 | 20 | 120 | 337  | 456  |
| GCCTAGCCTATTTGAACCCAG  | 60.102 | 21 | 163 | 233  | 395  |
| TTTTTAAGGTGGGGAGAATGT  | 57.596 | 21 | 276 | 1065 | 1340 |
| CAACCCAAGTTTACATGTGACC | 60.318 | 22 | 279 | 48   | 326  |
| TTGAAGAATGTTTCGGCTCA   | 59.395 | 20 | 253 | 9    | 261  |
| ACCATCCCGTTTCAAACCTCA  | 60.353 | 20 | 177 | 8    | 184  |
| ATTTTCATTTTCATGGGTTTCG | 57.399 | 20 | 176 | 15   | 190  |
| AACAACCCTCCCCTCATTTT   | 60.169 | 20 | 121 | 92   | 212  |
| TAGAGGAAATCATGCGGGTC   | 60.036 | 20 | 280 | 926  | 1205 |
| CCGCCATAGAACCAGGAAT    | 59.902 | 19 | 215 | 547  | 761  |
| CCGAAAGCTGCAAGTCCTAC   | 60.015 | 20 | 182 | 250  | 431  |
| GTGAACCCTCCAATTCOAAG   | 59.381 | 20 | 210 | 356  | 565  |
| CGACGGAGGAGAATGTGAGT   | 60.261 | 20 | 190 | 1128 | 1317 |
| GTGTGGGCTACCAAACACAG   | 59.06  | 20 | 192 | 765  | 956  |
| TGGTTCAACCTAGCATTCCC   | 59.933 | 20 | 162 | 84   | 245  |
| AGAGGTTAAGGGGGCAGACT   | 59.207 | 20 | 257 | 561  | 817  |
| CCACCTAGTCTTTCAGCAGCA  | 60.577 | 21 | 101 | 19   | 119  |
| GAATGAAGAATGGTTTGTCCG  | 60.228 | 22 | 254 | 690  | 943  |
| TCTGTTGCTTTCCTTTTCG    | 60.357 | 20 | 244 | 1842 | 2085 |
| TGATCAAACACCAATCGCTC   | 59.654 | 20 | 134 | 3643 | 3776 |
| CGGTTAAGATTTCAGCAAGCG  | 60.895 | 20 | 216 | 78   | 293  |
| ATACGCACTCACACACGCAT   | 60.215 | 20 | 210 | 2608 | 2817 |
| ATATCCCGCGGTCATTTTT    | 59.244 | 19 | 253 | 3    | 255  |
| ATGGTTCCGATGAGATCCTG   | 59.886 | 20 | 174 | 48   | 221  |
| GATAAAAATGGCACACGGCT   | 59.967 | 20 | 248 | 225  | 472  |
| GAAATCCCCTGCCAACTTT    | 59.031 | 20 | 277 | 82   | 358  |
| TGCACATTGAGACGACAAAA   | 58.835 | 20 | 272 | 428  | 699  |

|                        |        |    |     |      |      |
|------------------------|--------|----|-----|------|------|
| GCTGTCCC GTTCTCTCTCTG  | 60.135 | 20 | 278 | 3    | 280  |
| ATAAATAAATGCCGCCATGC   | 59.795 | 20 | 270 | 16   | 285  |
| TGAAGTTAGGAAATAAGGAGG  | 58.743 | 25 | 278 | 829  | 1106 |
| GTTGAGCTCGGATAAGCTGC   | 60.125 | 20 | 196 | 0    | 195  |
| GCCAAACTTCACTAAACGAGC  | 59.034 | 21 | 261 | 6852 | 7112 |
| CAACCCACACATTCAACAC    | 59.701 | 20 | 193 | 140  | 332  |
| TTTCTGTTGTGCTGCTGCTT   | 59.788 | 20 | 185 | 389  | 573  |
| TGCCATTAAGGCCAGGTTAG   | 60.089 | 20 | 253 | 25   | 277  |
| CCACCGAGCACCATGTATTA   | 59.42  | 20 | 170 | 38   | 207  |
| TGGTTGAATTTTGTCCACACA  | 59.792 | 20 | 258 | 1361 | 1618 |
| GGCTGTT CAGAGTGTGATGG  | 59.261 | 20 | 263 | 26   | 288  |
| GCCTTTCATCATCTTCCTCAA  | 59.259 | 21 | 131 | 112  | 242  |
| AAGTGGATAAACCCCTGCGAA  | 59.569 | 20 | 148 | 0    | 147  |
| GTCCTCATCATCGAACCCACC  | 60.335 | 20 | 209 | 15   | 223  |
| ACAAATTCCCACCCCTGTCT   | 60.607 | 20 | 215 | 23   | 237  |
| GGAGATCGAGAGGGAGAGGT   | 59.766 | 20 | 225 | 552  | 776  |
| ATAATGGGGTTTCAGTCCGA   | 59.244 | 20 | 256 | 158  | 413  |
| CAAAATCCTCTCCCTCTCCC   | 60.008 | 20 | 264 | 3541 | 3804 |
| TTTCTCCATCCCATCTCCAA   | 60.395 | 20 | 271 | 576  | 846  |
| CGATTTGAAGCCCGAGTAAG   | 59.839 | 20 | 119 | 1574 | 1692 |
| AGATGCAGTGCCAGATAGGC   | 60.393 | 20 | 250 | 172  | 421  |
| AGCCGTTTTGAGACGTTGTT   | 59.78  | 20 | 218 | 89   | 306  |
| ATGCTTAAAACAAAGGGGCA   | 59.586 | 20 | 139 | 28   | 166  |
| CCCCGTTTTCAATTTATAGCA  | 59.789 | 20 | 199 | 1    | 199  |
| AGGAGAGTACGAGAGTGAGG/  | 60.437 | 23 | 137 | 174  | 310  |
| CTACCGTCAAATCCTGGCTC   | 59.694 | 20 | 251 | 698  | 948  |
| TAGAGCCGGGTTTAAAGCAA   | 59.847 | 20 | 148 | 24   | 171  |
| TCCCCGTTTTTACTCGTCTG   | 60.103 | 20 | 169 | 24   | 192  |
| CCTCCAGAAATTGGGAGTGA   | 60.042 | 20 | 246 | 3371 | 3616 |
| TTGTTGGCGTCGAGTTAATG   | 59.729 | 20 | 223 | 282  | 504  |
| GATGAAAAAGGGAGCAAAAC/  | 59.192 | 21 | 275 | 40   | 314  |
| TCTCCACTCTCTCCACGAT    | 59.792 | 20 | 260 | 2963 | 3222 |
| TAACCACCTCTTGGGTCCAC   | 59.82  | 20 | 169 | 1475 | 1643 |
| GTATGGGCGGATACAATGGA   | 60.553 | 20 | 248 | 30   | 277  |
| GCTAATCCCGCTGAAAATGA   | 60.175 | 20 | 200 | 2    | 201  |
| TAGCTGCTGCTACCATCGTG   | 60.18  | 20 | 241 | 96   | 336  |
| CACCGTACGTGCAACACTTT   | 58.701 | 20 | 254 | 54   | 307  |
| CTTTAGGGCCCTTGATTTCC   | 59.903 | 20 | 169 | 197  | 365  |
| TCGACCTTAACCACCTCGAC   | 60.111 | 20 | 131 | 30   | 160  |
| CACAAAAGGACGATTGGGAT   | 59.79  | 20 | 203 | 267  | 469  |
| TCGAAAATGTCCGACTCTCC   | 60.195 | 20 | 222 | 28   | 249  |
| GGGCTTTGAGTAACTGAGGTG  | 58.851 | 21 | 258 | 331  | 588  |
| ACATAACTCTCCGGCCAATG   | 59.955 | 20 | 196 | 45   | 240  |
| TCTCGAAATGCAGTGGTTGA   | 60.39  | 20 | 247 | 4    | 250  |
| CGGAATATCGAGAAGGTTATT/ | 57.056 | 24 | 266 | 69   | 334  |
| ATGAAATCACCCCACTCGTC   | 59.786 | 20 | 264 | 151  | 414  |
| GAATCTTCCATCCATCGAGC   | 59.592 | 20 | 114 | 497  | 610  |
| TCAGGGTATGTCCGGTATGC   | 60.744 | 20 | 275 | 2944 | 3218 |
| CCACCACCTAATTCTCTGGC   | 59.55  | 20 | 170 | 1139 | 1308 |
| TCAAGACTAAAATTGGTAAAG/ | 58.241 | 27 | 185 | 363  | 547  |
| CGAGTGTGTACATGGGCATT   | 59.445 | 20 | 279 | 6001 | 6279 |
| GCAACGGAATACCACTCGTT   | 60     | 20 | 240 | 98   | 337  |
| TCTCCATTTTCAATCCTGTGC  | 60.066 | 21 | 101 | 9    | 109  |
| CAAGTTGATGCTAGTCTCCG   | 59.883 | 21 | 222 | 3219 | 3440 |
| CAAGCCGAAAATCGTCTCAT   | 60.214 | 20 | 258 | 429  | 686  |
| CCCCTTACTTAATGGGCGA    | 59.902 | 19 | 195 | 186  | 380  |
| TGGGAATGAAAAAGCCATGT   | 60.309 | 20 | 229 | 739  | 967  |
| CATTTCTTGGCTGGAGCAAT   | 60.214 | 20 | 246 | 453  | 698  |

|                        |        |    |     |      |      |
|------------------------|--------|----|-----|------|------|
| TCAATCCCAGCCATCAATTT   | 60.274 | 20 | 268 | 616  | 883  |
| ATCAAGCCCAATACGTGTC    | 59.962 | 20 | 228 | 409  | 636  |
| TCAAGGAATGGGGTACAACC   | 59.647 | 20 | 163 | 19   | 181  |
| CCCACTTTTTGGGTTATTAC   | 59.641 | 22 | 274 | 81   | 354  |
| TTGTGTGATCGAACTACGTTAA | 57.469 | 23 | 185 | 199  | 383  |
| TGGCGAGGTGTTGAGTTACA   | 60.301 | 20 | 279 | 255  | 533  |
| GCACTGCTGTTGGAATTTGT   | 58.777 | 20 | 235 | 203  | 437  |
| CTTTGCCCCCTTTCTCTCTT   | 59.821 | 20 | 207 | 374  | 580  |
| TTGAATCAAAGCATGTCATTTT | 57.752 | 22 | 196 | 919  | 1114 |
| TAGCCCAATTTTTGTACCC    | 58.807 | 20 | 240 | 236  | 475  |
| TGTCGGGTACGACAAAACAA   | 60.004 | 20 | 212 | 728  | 939  |
| CCGTAGGCTTCCATTACGAA   | 60.089 | 20 | 154 | 3    | 156  |
| ACCTCCTCCTCTTCTCTCCG   | 59.945 | 20 | 180 | 20   | 199  |
| CGAATTAACAACATGCAACCA  | 59.476 | 21 | 200 | 1    | 200  |
| AGGTTCTGCGACGGAATTTA   | 59.708 | 20 | 178 | 165  | 342  |
| TGACGGTGTAATATGGGTTTT  | 59.997 | 23 | 214 | 7    | 220  |
| GAGTTTGTTCATCATTCGGA   | 59.925 | 21 | 272 | 2    | 273  |
| TTTTATCCCATGTTTGTGCAT  | 59.234 | 22 | 261 | 226  | 486  |
| GTGCACACAAGACTTTGCCA   | 60.917 | 20 | 197 | 938  | 1134 |
| CAAACAAGAAAAGGAGTTAGT  | 60.529 | 24 | 222 | 59   | 280  |
| GGATGATCACCATTTCGAACC  | 60.143 | 20 | 143 | 1    | 143  |
| ATCGAGTTCCTTCCGTTTT    | 59.94  | 20 | 167 | 724  | 890  |
| ACTGACAAAATTTCCGGACG   | 59.971 | 20 | 252 | 22   | 273  |
| GGAGTGGCTCTGGCTAATTG   | 59.836 | 20 | 179 | 22   | 200  |
| GGACACCAGGGTGAGAATTG   | 60.363 | 20 | 278 | 280  | 557  |
| AACATGATACGGCCGAAAAC   | 59.829 | 20 | 166 | 1    | 166  |
| AACGTAGACCTGGCGTCTGT   | 59.792 | 20 | 273 | 426  | 698  |
| TCGACTTTTGATCGGGAAAA   | 60.555 | 20 | 195 | 20   | 214  |
| ATGCCCACTTCACAACCTA    | 60.375 | 20 | 176 | 49   | 224  |
| GAAGACAGTGTGGAGGAGGC   | 59.841 | 20 | 180 | 228  | 407  |
| GCGTGTATCCGCCAAAATA    | 60.831 | 20 | 251 | 49   | 299  |
| TACCCCAACCCACTAACACC   | 59.569 | 20 | 103 | 2    | 104  |
| ATGTCACCGGAAAATATCGC   | 59.791 | 20 | 246 | 18   | 263  |
| GCCAAACTCTCTCCCTCCTC   | 60.336 | 20 | 226 | 15   | 240  |
| TGAGGAACCAATTATCCCGA   | 60.266 | 20 | 266 | 17   | 282  |
| ATAAAGGACACGTTGGACCG   | 59.853 | 20 | 171 | 130  | 300  |
| CAATGATGGAACATGTAAAAA  | 58.785 | 24 | 203 | 1807 | 2009 |
| GGATGGTAAAAACTTCAACGT  | 60.263 | 23 | 164 | 569  | 732  |
| TCAGATAGCCCTCTCAGACCA  | 59.958 | 21 | 231 | 23   | 253  |
| TTCCATCTTTCAACCTCATCG  | 60.059 | 21 | 163 | 511  | 673  |
| TAAAGGGAATTTGACGGTGG   | 59.795 | 20 | 202 | 1365 | 1566 |
| CCGAAATGAAGAAATGAGTTC  | 59.945 | 22 | 232 | 1410 | 1641 |
| TGACGGGATTTAGGTGTTTTG  | 59.847 | 21 | 101 | 302  | 402  |
| TTGATGATGGAATGAAAATGA  | 59.291 | 23 | 278 | 43   | 320  |
| CAAGCATAAGGATTTTCGGA   | 57.845 | 20 | 230 | 3426 | 3655 |
| ACCAGAAGGTGCAGTGGTATG  | 60.043 | 21 | 214 | 3539 | 3752 |
| AAATCAACTGAGACCGTCCG   | 60.111 | 20 | 267 | 5779 | 6045 |
| GGAGGTGCCCTACTTCTTT    | 59.576 | 20 | 265 | 42   | 306  |
| CAACAGCATGATGAGAATTGT  | 59.541 | 24 | 277 | 368  | 644  |
| TATTTTTCCATGTGGCATCG   | 59.377 | 20 | 276 | 1995 | 2270 |
| ATGAGGGGCCTCACTAACAA   | 59.55  | 20 | 197 | 810  | 1006 |
| TGATGCTCCTCAGAAAGCAC   | 59.116 | 20 | 123 | 19   | 141  |
| CTTGGTGTGGCATGATGAAC   | 59.967 | 20 | 150 | 147  | 296  |
| TTGCCATTACCACAAACTGC   | 59.59  | 20 | 210 | 32   | 241  |
| TGTTGCGTAGGGGCTAATTT   | 59.609 | 20 | 272 | 176  | 447  |
| GGAGGTATATGCCACCTGGA   | 59.773 | 20 | 197 | 396  | 592  |
| ACGTTTACGGTCTTACCGA    | 59.494 | 20 | 166 | 447  | 612  |
| CTTGCAACTGGTCGAAATCA   | 59.84  | 20 | 223 | 1900 | 2122 |

|                         |        |    |     |      |      |
|-------------------------|--------|----|-----|------|------|
| GCCTTCTGCCTGTTTCTTG     | 59.993 | 20 | 251 | 306  | 556  |
| CAGCAACGGTTGTGATTTGT    | 59.615 | 20 | 133 | 432  | 564  |
| ATGGGGATGGTTATGCATGG    | 62.641 | 20 | 126 | 409  | 534  |
| AATGGCCACAAATGTTTCCT    | 59.292 | 20 | 110 | 739  | 848  |
| GTCCGCGGTTATCAGAACTT    | 59.198 | 20 | 242 | 23   | 264  |
| TTTATATCGCCGAAAATGCC    | 59.898 | 20 | 179 | 72   | 250  |
| TGCACCCACAAATGGAATAA    | 59.786 | 20 | 180 | 695  | 874  |
| TGTGGATTAATATAGTGGTTCA  | 57.953 | 26 | 187 | 191  | 377  |
| ATGAATGCACCGGATTTGTT    | 60.199 | 20 | 111 | 20   | 130  |
| AATCCAACCCCGAGACAAAT    | 60.558 | 20 | 193 | 1598 | 1790 |
| CTCGGATTCGTCACCTTTGT    | 60.111 | 20 | 273 | 71   | 343  |
| TTTGTGGTGACCTTGAGGAA    | 59.109 | 20 | 157 | 15   | 171  |
| TGTTTGATTCAATCCATTTCCA  | 60.167 | 22 | 261 | 1137 | 1397 |
| CACGACTTGCAATCCGTTTA    | 59.729 | 20 | 207 | 31   | 237  |
| TCCAATCCGGTTCATCAC      | 59.75  | 20 | 273 | 3165 | 3437 |
| TTTAGTAGCGGAATTTGCGG    | 60.218 | 20 | 202 | 2742 | 2943 |
| AATGCCCCGTTTTCTTGTA     | 59.451 | 20 | 279 | 47   | 325  |
| GGAAGATGAGTTCGTGGAGG    | 59.655 | 20 | 248 | 24   | 271  |
| TTGGAAACCCATGGGATATAG   | 58.634 | 21 | 258 | 843  | 1100 |
| GACCTTAGCTTGCGACTTGC    | 60.162 | 20 | 176 | 18   | 193  |
| TGGCATCAGTAAATCCTGGC    | 61.003 | 20 | 198 | 92   | 289  |
| TCTTGGGACTTGCCATATC     | 59.894 | 20 | 254 | 478  | 731  |
| CAGCGTAAGAAAATAATTGATC  | 59.557 | 24 | 238 | 4    | 241  |
| CTCTTTCCGCACCTTCACTTA   | 59.503 | 21 | 280 | 94   | 373  |
| GTGTGAAGTTGGTGATTGCG    | 60.16  | 20 | 173 | 96   | 268  |
| CGTTTGGATCCGATTTGGTA    | 60.692 | 20 | 214 | 584  | 797  |
| CAGAGCAAAAACGAGGCTCT    | 59.757 | 20 | 170 | 19   | 188  |
| AGCGATTTAATCTCCCGTG     | 59.182 | 20 | 122 | 8    | 129  |
| TCGATTGGTTTGTGAATTGTG   | 59.43  | 21 | 271 | 2823 | 3093 |
| TCCCTTTCGGTCTCCTAACA    | 59.665 | 20 | 280 | 57   | 336  |
| TTCTGCCTTCATTTCCATCA    | 59.2   | 20 | 122 | 132  | 253  |
| TCGGTTTTACCGTTTTGAC     | 59.839 | 20 | 180 | 14   | 193  |
| CCGCGAACTTAGAGGAGCTA    | 59.747 | 20 | 186 | 18   | 203  |
| GGATGAAGTTGAATTGTTGGG   | 59.278 | 21 | 255 | 60   | 314  |
| GTTTGGTGTGTTGCTGTTGGA   | 59.591 | 20 | 121 | 464  | 584  |
| CGTGGTTCGATCGTAATTGA    | 59.542 | 20 | 259 | 1    | 259  |
| ACCCAACCCTTGAGAACTTG    | 59.037 | 20 | 279 | 222  | 500  |
| TCTAAACGCCGGTGATGTAA    | 59.182 | 20 | 102 | 44   | 145  |
| TGCTGGGAGAGATTCAAAGG    | 60.331 | 20 | 184 | 245  | 428  |
| ATGTGTAAAGTTGGTGGGGG    | 59.569 | 20 | 243 | 2644 | 2886 |
| CCGGTGAAGTTGATTATCG     | 60.323 | 20 | 193 | 3062 | 3254 |
| TTGTGGAAAACCGTTCAA      | 59.034 | 20 | 251 | 245  | 495  |
| TCTCTCCCTTTCCACACTCG    | 60.377 | 20 | 167 | 61   | 227  |
| GCTAAACTTTAAAGGTGATGCC  | 59.692 | 23 | 222 | 85   | 306  |
| ATGGGAAGGGCATTTCAG      | 59.879 | 19 | 167 | 6    | 172  |
| TCCTTCAAGGCCAGATTGAG    | 60.331 | 20 | 245 | 74   | 318  |
| TTTCTCTCCAACCCACAACCTCT | 60.146 | 22 | 278 | 190  | 467  |
| TTCATCTCTTGCCCATTA      | 60.405 | 20 | 184 | 221  | 404  |
| TCAAAAACCGGTGAAAAACC    | 59.817 | 20 | 279 | 1498 | 1776 |
| TTGTTTCTCTCGTGGAAATCCT  | 60.281 | 22 | 232 | 379  | 610  |
| AAGATTTGATCATGGGCGTC    | 59.9   | 20 | 208 | 526  | 733  |
| TGAGTCGAACTCAATAATCAA/  | 59.569 | 25 | 196 | 1134 | 1329 |
| CAGACAAATCTTCGTTATCCCA  | 59.087 | 22 | 152 | 1049 | 1200 |
| GAGTCTCGCAAGTCACAACG    | 59.622 | 20 | 217 | 609  | 825  |
| TCAAATGGTAACCAATCACTA/  | 59.328 | 24 | 268 | 989  | 1256 |
| CACCTGAATCCACTCACCT     | 59.962 | 20 | 187 | 1427 | 1613 |
| TACCAAGGGCATTTTTGTCC    | 59.801 | 20 | 246 | 1684 | 1929 |
| TGAGTCATCTACAGGTCAATGC  | 57.671 | 22 | 228 | 483  | 710  |

|                        |        |    |     |      |      |
|------------------------|--------|----|-----|------|------|
| TATAGTGCCTCCAGCAGCAA   | 60.566 | 20 | 204 | 17   | 220  |
| GGTAGTGGGGAGTGGGATTT   | 60.052 | 20 | 159 | 449  | 607  |
| TCATGTACGTTGCTTATGGCA  | 60.148 | 21 | 228 | 31   | 258  |
| CATATGGGAAGGGCATTTC    | 59.23  | 20 | 214 | 1132 | 1345 |
| AACGGTTACCGTTTTGGATA   | 59.202 | 20 | 199 | 293  | 491  |
| AAATTCGTGAGAGTTCCTCC   | 60.306 | 20 | 252 | 71   | 322  |
| GCCTCCATCTTGGCACTATC   | 59.658 | 20 | 194 | 29   | 222  |
| CAGATCTGATGGCCAGATT    | 60.034 | 20 | 132 | 1    | 132  |
| ACTGACATTCACAGGCATTG   | 57.067 | 20 | 119 | 53   | 171  |
| AAAAAGTTGATGCCAAAATTAC | 59.605 | 25 | 146 | 252  | 397  |
| AATTCCTCCCAATTTCTGCAT  | 60.511 | 20 | 143 | 14   | 156  |
| AAACCCAAAACATGAAACGG   | 59.702 | 20 | 233 | 475  | 707  |
| CCATCACCAGCTTTGTTGTG   | 60.152 | 20 | 160 | 34   | 193  |
| ATTTTTGCCATGCATGAACC   | 60.711 | 20 | 275 | 834  | 1108 |
| ATTATCGCCACAAATCTGCC   | 59.929 | 20 | 205 | 929  | 1133 |
| GAGGGTCAACCAGGAAGTTG   | 59.549 | 20 | 135 | 26   | 160  |
| TTTCATGTTTCATCCCCCTT   | 59.22  | 20 | 195 | 67   | 261  |
| TCACGCTCGAGAAAGAGGTC   | 60.678 | 20 | 233 | 51   | 283  |
| AAATTTGGCCCCGTCTAAAA   | 60.645 | 20 | 239 | 87   | 325  |
| GCCAAAATTTCAAATGGGA    | 59.751 | 20 | 177 | 99   | 275  |
| TCTAAGAGATGATTGCACCTG/ | 58.986 | 23 | 131 | 486  | 616  |
| ACCCCAAATGGTTAACGGA    | 60.037 | 19 | 195 | 1553 | 1747 |
| AATATTGCTCCACGAATGCC   | 59.929 | 20 | 252 | 250  | 501  |
| CCCCATAACTCCTTTCCTG    | 60.674 | 20 | 142 | 548  | 689  |
| TTGAATCAACCCTTATCGCC   | 59.901 | 20 | 104 | 567  | 670  |
| CTGAAAGCCATGTTTCAGCA   | 59.988 | 20 | 220 | 491  | 710  |
| CACCCCTTAATCCCGATCTT   | 60.145 | 20 | 231 | 1900 | 2130 |
| TGATGAGTTTTGTGGGTCTTGA | 60.529 | 22 | 219 | 7    | 225  |
| CTGACATCCACTTGGCAAAA   | 59.691 | 20 | 268 | 8    | 275  |
| GGGTATATGCCACAGGATCG   | 60.177 | 20 | 259 | 100  | 358  |
| TTCGCATACTGAACCCAAAA   | 59.157 | 20 | 228 | 27   | 254  |
| GCCAGCCCAATAACTCAACC   | 61.759 | 20 | 160 | 12   | 171  |
| TCAGCGTGTGTAACGATTTG   | 59.784 | 21 | 236 | 5    | 240  |
| CCCTCGTATGCTGTGGTTTT   | 59.993 | 20 | 267 | 650  | 916  |
| GGGCCGAGATTTGTTAGAGG   | 60.949 | 20 | 216 | 715  | 930  |
| GCCACCTTCTCCGATGTCT    | 60.215 | 19 | 262 | 390  | 651  |
| AAAGCTGCTGTCCATTTTGG   | 60.249 | 20 | 235 | 14   | 248  |
| CCACTTCTCGCCACTACCAC   | 60.711 | 20 | 144 | 3    | 146  |
| GCATCAGAGCCACGGTTAG    | 59.41  | 19 | 165 | 151  | 315  |
| GAACGACGACGAAGAACGAT   | 60.263 | 20 | 201 | 28   | 228  |
| CATGGACCCACATGTCATA    | 60.048 | 20 | 173 | 21   | 193  |
| CAGATCCAACGGCCATAAGT   | 59.955 | 20 | 244 | 890  | 1133 |
| CAAAGGCCACAATGGTTAT    | 59.685 | 20 | 169 | 37   | 205  |
| ATGATTTTGGTGTGTTGGCA   | 59.823 | 20 | 157 | 311  | 467  |
| TTTTTCAGGGAGGGAGATGA   | 59.6   | 20 | 128 | 285  | 412  |
| ACCAAGCTTTGTGAATTTTTGA | 60.03  | 23 | 268 | 1271 | 1538 |
| TCAACTCTATCATATAAATTTT | 58.025 | 27 | 224 | 9    | 232  |
| ACCTATGGTGGTATGGCGTG   | 60.657 | 20 | 162 | 747  | 908  |
| GGATTCTGAACCCTCACACTT  | 58.992 | 20 | 211 | 11   | 221  |
| TTCCCGCTGATTTCTTCTCT   | 59.006 | 20 | 278 | 3538 | 3815 |
| TGGGTATCCAAAAACCAAAA   | 57.847 | 20 | 268 | 1540 | 1807 |
| CCAAAACATACGTTGCGCT    | 59.744 | 19 | 148 | 173  | 320  |
| GCGTGAAATTATTAAGCCGC   | 59.722 | 20 | 229 | 853  | 1081 |
| CGCTCATATAGGGCGAAGAA   | 60.323 | 20 | 270 | 973  | 1242 |
| CCCACACTCTCCACAATCCT   | 59.962 | 20 | 256 | 1349 | 1604 |
| GCATTGAAGTCTGCTGTGCT   | 59.195 | 20 | 231 | 20   | 250  |
| CACCACCGTCTCACTCAC     | 60.207 | 20 | 183 | 12   | 194  |
| ACCAAATCAAGAACCCCA     | 60.157 | 19 | 275 | 10   | 284  |

|                         |        |    |     |      |      |
|-------------------------|--------|----|-----|------|------|
| TCACCTCCGTCTAAATTGCC    | 60.074 | 20 | 234 | 42   | 275  |
| CGTAAAATTCCGGTGCAAT     | 59.832 | 20 | 146 | 812  | 957  |
| TAGAGGACACTTGGACCTGAA   | 57.374 | 21 | 100 | 6    | 105  |
| GTGCACATGCCCTAAAAACC    | 59.434 | 20 | 227 | 610  | 836  |
| AGCGAGACCTTCTATCACGC    | 59.603 | 20 | 191 | 7    | 197  |
| ACCGGACCGTTATGCAATTA    | 60.209 | 20 | 168 | 21   | 188  |
| AGGTACCCCCACACAAACAA    | 60.126 | 20 | 210 | 209  | 418  |
| TGACTCTTCTAGCTCCATTTGC  | 58.745 | 22 | 119 | 2843 | 2961 |
| TCTCAAGGGGTCAAAGAAGG    | 59.255 | 20 | 239 | 66   | 304  |
| CCTTTTCATTGGATGTAGCCC   | 59.387 | 20 | 191 | 545  | 735  |
| AGCCACTGAACCAATGACC     | 59.973 | 20 | 273 | 2102 | 2374 |
| CAGTGCCAGATGACGATGAC    | 60.279 | 20 | 195 | 2049 | 2243 |
| TTAGGGACGATAATGTGGGC    | 59.784 | 20 | 124 | 394  | 517  |
| TCCGTCATCTATTAGCACCATC  | 60     | 23 | 137 | 106  | 242  |
| CACTACTAGGGTTTGGGAGGG   | 59.866 | 21 | 207 | 105  | 311  |
| GATAAAAATGGCACCCGATG    | 60.153 | 20 | 264 | 176  | 439  |
| TCAATTCTTCATCGCTGCTG    | 60.096 | 20 | 278 | 1647 | 1924 |
| AGCGGTGAAGAAGAAATCCA    | 59.813 | 20 | 196 | 909  | 1104 |
| CTCCGCCTTGACTCCTTCTA    | 59.569 | 20 | 210 | 68   | 277  |
| GCAAGGATTTAGCCCCATCT    | 60.419 | 20 | 272 | 2127 | 2398 |
| TAAAAGTTCACTAAAACCTGCC  | 57.511 | 25 | 200 | 95   | 294  |
| TTGTGTGATCGAACACGTT     | 60.008 | 20 | 109 | 23   | 131  |
| AATCCAAAATCGCCATAGCA    | 60.424 | 20 | 134 | 1031 | 1164 |
| CCACCGAGCTTCTACACGTT    | 60.312 | 20 | 188 | 6    | 193  |
| ATGTTGGCTCCGATTGAAAC    | 59.939 | 20 | 278 | 27   | 304  |
| GCCCAAGTGGGAGATTGTT     | 59.918 | 19 | 207 | 149  | 355  |
| CCCAACAATTCCAATTCTCCTC  | 59.381 | 20 | 103 | 8    | 110  |
| CTTGAAGCCTTGTTCCCTTGC   | 59.993 | 20 | 210 | 167  | 376  |
| TAAGGTGGTGACGATAGGGC    | 59.955 | 20 | 222 | 377  | 598  |
| GACAGCTGTGATGAAGGCAA    | 59.992 | 20 | 186 | 2710 | 2895 |
| AGAGGAGAGGAGGTTGGAGC    | 59.952 | 20 | 250 | 8    | 257  |
| GAAGATTGTGGGGCGAGTAA    | 60.074 | 20 | 219 | 1725 | 1943 |
| TCATGGATCAGGAATCTGGA    | 58.958 | 20 | 261 | 442  | 702  |
| TTTGGTAAATACAACATAATTG  | 58.757 | 26 | 176 | 347  | 522  |
| ATTGCATTGCATGTGTGGAC    | 60.409 | 20 | 280 | 394  | 673  |
| AAGGAGGTGTTATGAAGGGAT   | 58.028 | 22 | 145 | 1419 | 1563 |
| CGCGACCACGAAGTACATAA    | 59.752 | 20 | 226 | 87   | 312  |
| TGAGCAAAAGTAATAAGAGCA   | 58.341 | 24 | 207 | 225  | 431  |
| CTCTACAACCCAAACGCATGT   | 60.045 | 21 | 203 | 229  | 431  |
| AATCCCAAAATCTATGGGGC    | 59.984 | 20 | 177 | 26   | 202  |
| GCAGCCACTATCCTTTCACC    | 59.7   | 20 | 199 | 677  | 875  |
| ACAATTTCAAGAACCCCCAA    | 59.264 | 20 | 241 | 5    | 245  |
| GAGAGTGCAGCAGCAAAAAG    | 58.952 | 20 | 120 | 2    | 121  |
| CCAAAATCCCAGAACGAAAA    | 59.91  | 20 | 180 | 129  | 308  |
| GCGGAAGAATGAATACGGAA    | 60.038 | 20 | 163 | 2    | 164  |
| CTCACACAGGCTAGACGCAC    | 59.648 | 20 | 177 | 33   | 209  |
| TCCATTTTCTCACCCATA      | 60.126 | 20 | 101 | 452  | 552  |
| TGGTAGGTGGGTTTAGGTGG    | 59.705 | 20 | 130 | 20   | 149  |
| GTGGTCAATTCACAATCCGA    | 59.348 | 20 | 266 | 71   | 336  |
| TTTTGAATCTTTGTCCCAA     | 58.039 | 20 | 223 | 285  | 507  |
| TCACCTAAACCACTTTTGAAGA  | 57.979 | 23 | 239 | 67   | 305  |
| CGTGGTTCGATCGTAATTGA    | 59.542 | 20 | 100 | 1    | 100  |
| ATGGGTTCCGAGTCTCAATGG   | 59.927 | 20 | 280 | 793  | 1072 |
| TCAATTGTCACACGTGATTGAC  | 59.615 | 22 | 189 | 1048 | 1236 |
| TCTGGACACATCCTTGTTTATC/ | 59.485 | 23 | 212 | 1073 | 1284 |
| TCATCTTTTGGGAATGGTTTG   | 59.787 | 21 | 243 | 216  | 458  |
| TCACCTCATGGGGAAATTTTAC  | 60.177 | 22 | 102 | 1    | 102  |
| CTCACTCACCCCTCTGTTCCAC  | 59.741 | 21 | 234 | 19   | 252  |



|                        |        |    |     |      |      |
|------------------------|--------|----|-----|------|------|
| GGTGGAGCATGGGAAAAATA   | 59.762 | 20 | 233 | 868  | 1100 |
| CTTTCCTCAACCGAGCTCAC   | 59.989 | 20 | 255 | 13   | 267  |
| GAGAAAGCCACAAATCTTTCCT | 58.894 | 22 | 262 | 3612 | 3873 |
| CAAAAGGCCACAATGGTTA    | 60.722 | 20 | 149 | 281  | 429  |
| TAGGGATCGCTCCAGAAAAA   | 59.778 | 20 | 278 | 1962 | 2239 |
| AAATGCGCAATTTTAAACCC   | 58.982 | 20 | 247 | 149  | 395  |
| TTCCACTCCCACCAACCTAC   | 59.82  | 20 | 244 | 257  | 500  |
| CTCATTTACACCGCCTCAAA   | 58.771 | 20 | 273 | 699  | 971  |
| TTAGTTTTGACATGAAAATTGA | 59.039 | 26 | 246 | 480  | 725  |
| TCCTTCATTCTAAATGATTAA  | 57.79  | 25 | 276 | 668  | 943  |
| CCGAATCCATCATCACAACA   | 60.33  | 20 | 271 | 39   | 309  |
| TGGAAAGGGCATTAAATGAAA  | 59.42  | 21 | 192 | 318  | 509  |
| GATCGACCGATCCACTTTTG   | 60.461 | 20 | 215 | 83   | 297  |
| AAAGTGGAAATTTGCTTCCCA  | 59.546 | 20 | 240 | 194  | 433  |
| TTGGTCCCTTTCTTTCTCCA   | 59.641 | 20 | 197 | 124  | 320  |
| CCCTGGGACACATAAGCCT    | 59.935 | 19 | 259 | 494  | 752  |
| AATCTTGGCCGTTTATTTTCG  | 59.078 | 20 | 267 | 171  | 437  |
| GGACGAGCCAAAATCAAATG   | 60.448 | 20 | 156 | 1138 | 1293 |
| TCGCATCATCAACCTTCTGA   | 60.353 | 20 | 256 | 561  | 816  |
| GAGAGGATGGAGTTGATCGG   | 59.612 | 20 | 259 | 223  | 481  |
| AGACTAGCACGTGACCGGAT   | 59.751 | 20 | 263 | 252  | 514  |
| CCAACCCAGAATTCGTCCTA   | 59.926 | 20 | 206 | 985  | 1190 |
| TGACGAAAACCTGCTTAAATCC | 57.064 | 21 | 142 | 4    | 145  |
| CACATCGACGACGCTACCTA   | 59.888 | 20 | 198 | 216  | 413  |
| CCATTTTCATCTTCAGCCCAA  | 60.972 | 20 | 196 | 813  | 1008 |
| AGGAAATAAGGAGGTGTTATG  | 60.131 | 25 | 187 | 1222 | 1408 |
| TGGACAAAATGAGTGGAGAGA  | 58.272 | 21 | 113 | 1145 | 1257 |
| CGTCGAGTCTCCTCCAACCTC  | 59.986 | 20 | 220 | 845  | 1064 |
| ATGGGTGTGGGTGTTAGTGG   | 60.545 | 20 | 126 | 272  | 397  |
| TTTGTCGGGTCATTGCTACA   | 60.111 | 20 | 175 | 836  | 1010 |
| GTAATGGTGATGCCAGGGTT   | 59.676 | 20 | 159 | 1220 | 1378 |
| GGGAATGAGGGATGGAATTT   | 59.959 | 20 | 146 | 2305 | 2450 |
| AAATTCAGCAGGTCCACGAC   | 60.119 | 20 | 253 | 100  | 352  |
| GTTGGTTGATGAGGTGGCTT   | 59.973 | 20 | 217 | 612  | 828  |
| CGTTAAATCTCTTGCGAGGC   | 59.982 | 20 | 161 | 132  | 292  |
| CCATCTCCAATTCGTCACCT   | 59.927 | 20 | 268 | 246  | 513  |
| TGGACAGGTGGCGTTAATCT   | 60.517 | 20 | 253 | 592  | 844  |
| CGTATACCCTCAAACATCCGA  | 59.831 | 21 | 179 | 787  | 965  |
| TGCATGGTTTTGAGTTTTGTGA | 60.142 | 21 | 142 | 35   | 176  |
| ACGGTACCACCCCAATACAA   | 59.971 | 20 | 196 | 2189 | 2384 |
| AATTGCCATCTTCAACCGAC   | 59.939 | 20 | 177 | 535  | 711  |
| CTCCTCTCCTATTCGCTCCC   | 60.306 | 20 | 264 | 147  | 410  |
| GCATACGCGCTCATAAATCA   | 59.832 | 20 | 199 | 18   | 216  |
| TCTCCATTTGTCTCCCTGCT   | 59.803 | 20 | 192 | 2251 | 2442 |
| GAACCACCACACCAAATTCC   | 60.073 | 20 | 223 | 395  | 617  |
| CATCTTGGCATTCTGTGCAT   | 59.679 | 20 | 204 | 118  | 321  |
| AACCCTTGACGTGAATGTCC   | 59.827 | 20 | 231 | 5    | 235  |
| CCAAAAAGAAGCCAAGGATG   | 59.679 | 20 | 212 | 60   | 271  |
| CACAAACCATCATTGCAACC   | 59.823 | 20 | 273 | 968  | 1240 |
| TGGACTGAACTGCAATGCTC   | 59.992 | 20 | 271 | 921  | 1191 |
| CAGAGTGATGCGTGAAGGAA   | 59.984 | 20 | 189 | 340  | 528  |
| ACCGAACCGATTTTGTCTTA   | 59.429 | 20 | 135 | 154  | 288  |
| AGAATAGTGGGCTTTGGCAC   | 59.198 | 20 | 119 | 1    | 119  |
| ACATCTGAAAATTTGACGCAT  | 57.226 | 21 | 258 | 157  | 414  |
| GGGGTTATCACTGGATCACG   | 60.195 | 20 | 104 | 592  | 695  |
| AACCATCTTCGGAGAGAGCA   | 59.95  | 20 | 116 | 248  | 363  |
| TCCATGACAGGAACCAAACA   | 59.935 | 20 | 174 | 1335 | 1508 |
| AAGCTCATCCATTGGTTTGG   | 59.933 | 20 | 147 | 344  | 490  |

|                        |        |    |     |      |      |
|------------------------|--------|----|-----|------|------|
| TGGCAGAAAGATTTTAGATATA | 59.31  | 26 | 133 | 214  | 346  |
| TTTCGAAGATCAACGAACGA   | 59.395 | 20 | 125 | 221  | 345  |
| AGACCGAAACCGTTCAAAAA   | 59.587 | 20 | 266 | 625  | 890  |
| AGACCACCAAGTCAGCACCT   | 59.756 | 20 | 246 | 1073 | 1318 |
| CGGCAAGGAGAAAAGAGGATA  | 60.214 | 21 | 271 | 82   | 352  |
| AACATGTAACCTGTAATCTGTA | 57.047 | 27 | 226 | 182  | 407  |
| TACCACTGCCATCCAATTCA   | 59.924 | 20 | 118 | 49   | 166  |
| TCAGTCGGCCTAAATATCCCT  | 59.938 | 21 | 267 | 763  | 1029 |
| ACGGGAGCATGAAATGAAAC   | 59.939 | 20 | 269 | 489  | 757  |
| CACCAATTTTCGATTTCTCC   | 59.363 | 20 | 274 | 0    | 273  |
| ACTGATTTTTGCGATGGAGG   | 60.074 | 20 | 236 | 1340 | 1575 |
| GCGGCCACGTATTCTCTTTA   | 60.23  | 20 | 188 | 567  | 754  |
| CATACATTCACACGGGGGAG   | 61.176 | 20 | 139 | 2374 | 2512 |
| TCATCGACCCCATCTCTTT    | 60.011 | 20 | 143 | 383  | 525  |
| GACTTGAGCACCAAGAATCCA  | 60.248 | 21 | 141 | 84   | 224  |
| CAAGCCCAGCCTAATGAAGA   | 60.344 | 20 | 152 | 414  | 565  |
| TCCTTCAAAATAGGCATAACCC | 60.317 | 22 | 154 | 46   | 199  |
| TCCAAAGGCTCCATCTATGC   | 60.177 | 20 | 223 | 15   | 237  |
| TGAATCGATTAGGCTTATCTTG | 58.055 | 23 | 203 | 30   | 232  |
| GAAGTTGGGGGTGGAATACA   | 59.647 | 20 | 272 | 392  | 663  |
| CGATGACCTTGAGTTTCGTT   | 60.111 | 20 | 209 | 3411 | 3619 |
| GATGTGATACCCGGAGTCGT   | 59.81  | 20 | 112 | 86   | 197  |
| AGGACACGTTGGACCTGAAG   | 60.151 | 20 | 106 | 23   | 128  |
| GTGGTTGTATGTCAATTAGCGG | 59.406 | 22 | 248 | 303  | 550  |
| GGCTTTCACATTAAGCCCTG   | 59.708 | 20 | 145 | 6498 | 6642 |
| ATGGTGGTATGGTGTGGGG    | 61.339 | 19 | 103 | 18   | 120  |
| TTTACCAAATAGGGTAAGCCG  | 58.212 | 21 | 244 | 1178 | 1421 |
| ATCGGGCATTTCGACTACAG   | 60.096 | 20 | 211 | 779  | 989  |
| GACAGCCCAAGATTGAGAGG   | 59.803 | 20 | 276 | 7    | 282  |
| TCCAAGGCAAATTGAACTCC   | 60.051 | 20 | 261 | 226  | 486  |
| CCAAAAGCGACAAAGTGTGA   | 59.881 | 20 | 174 | 120  | 293  |
| GAATTGGTGGAAAGATTTGAG  | 58.162 | 22 | 244 | 15   | 258  |
| GGCACTCTTATGGCCTTTGA   | 60.214 | 20 | 135 | 22   | 156  |
| CCCACCAACCCAGATCATAG   | 60.187 | 20 | 244 | 2483 | 2726 |
| AATCAATCCAGTCCAGCAT    | 59.658 | 20 | 149 | 2000 | 2148 |
| CAGCACGCGCACTACATAAT   | 59.925 | 20 | 270 | 148  | 417  |
| GGACCAATTGGCACTTTGAT   | 59.797 | 20 | 218 | 787  | 1004 |
| TCTCCCTTCTCTCTCGTG     | 59.525 | 20 | 168 | 443  | 610  |
| TTACCAAACACCCAAACCGT   | 60.125 | 20 | 149 | 1110 | 1258 |
| CTTCCCACCAGTAGTCTGCC   | 59.721 | 20 | 233 | 3447 | 3679 |
| TGCGAATTAGCAGCTTTGAA   | 59.725 | 20 | 250 | 873  | 1122 |
| CCCAACCAACAAGAACCCTA   | 59.824 | 20 | 131 | 441  | 571  |
| CCCAGTTGCTCACAAATGACA  | 60.722 | 20 | 211 | 363  | 573  |
| AATCCCAAATCTATGGGGC    | 59.984 | 20 | 193 | 26   | 218  |
| TGGTAGGGTGGTAAACCAGG   | 59.705 | 20 | 211 | 101  | 311  |
| CAATTCTCTCAACCAACCCC   | 59.381 | 20 | 193 | 28   | 220  |
| CATCATGTAGTAGCGGGCTG   | 59.322 | 20 | 144 | 44   | 187  |
| CGTCGTCAAACAAGACATGC   | 60.31  | 20 | 180 | 30   | 209  |
| GCTGGGTTTGGTGTGAATC    | 60.362 | 20 | 277 | 104  | 380  |
| TGGACCGTTGAAATACAGAAA  | 58.134 | 21 | 152 | 24   | 175  |
| GAGTTCGTGAGGTCATCGT    | 60.269 | 20 | 240 | 28   | 267  |
| CTCATCTCTCTCGCCACTCC   | 60.096 | 20 | 265 | 1686 | 1950 |
| AAGCCCACCTGATATGCTTC   | 59.154 | 20 | 183 | 24   | 206  |
| AACATTCGAACCAAATGCG    | 60.866 | 20 | 209 | 493  | 701  |
| TGACAAAATATGGAACCACAA  | 59.37  | 23 | 152 | 27   | 178  |
| AACAGTGCAGAACACGCATC   | 59.912 | 20 | 156 | 204  | 359  |
| GCGCGCAATCACTCTCTT     | 60.257 | 18 | 227 | 755  | 981  |
| ATGCGGTTCAAAGGTAGGAA   | 59.569 | 20 | 208 | 42   | 249  |

|                         |        |    |     |      |      |
|-------------------------|--------|----|-----|------|------|
| CATCCTCCTTTTCCAATCA     | 59.864 | 20 | 273 | 26   | 298  |
| GGTTGACACACTCGAACCAA    | 59.571 | 20 | 223 | 7    | 229  |
| TCAGGTCCGAATGCTGGTAT    | 60.483 | 20 | 162 | 3143 | 3304 |
| GGGGATTTGATTGATGATCG    | 60.096 | 20 | 278 | 99   | 376  |
| TAGACTGCGGATCACCACAC    | 59.707 | 20 | 241 | 256  | 496  |
| TTTGTCCCACAAATGTCCT     | 60.21  | 20 | 156 | 2464 | 2619 |
| CGATGATGGAGAGGAGGAAG    | 59.755 | 20 | 197 | 295  | 491  |
| CCCTTTAACAGACGCCACAT    | 59.993 | 20 | 153 | 4237 | 4389 |
| TGACATGTCCTTTCACTCCAA   | 59.124 | 21 | 228 | 3124 | 3351 |
| GCCTAACCGTGGCTCTGAT     | 60.233 | 19 | 128 | 64   | 191  |
| TCATTAACCCGAATCCGTC     | 59.762 | 20 | 107 | 583  | 689  |
| GGCACAGCTCCACTTTCTTC    | 59.997 | 20 | 197 | 118  | 314  |
| TTTCCAAATCTTTGTTCCGAG   | 59.188 | 21 | 228 | 321  | 548  |
| CAGAAAGTGCTTGTTCCAGCG   | 59.781 | 20 | 144 | 1182 | 1325 |
| CTCTGCGACGTAATCCCAT     | 60.096 | 20 | 277 | 79   | 355  |
| AAGAAAAACGTGTGAACCATC   | 59.517 | 22 | 136 | 439  | 574  |
| AATCGCGTAAAGGGTTTGAA    | 59.586 | 20 | 120 | 269  | 388  |
| CGTGTGTTTTGCTTGTTTCA    | 59.801 | 21 | 135 | 15   | 149  |
| TCTTGGGGGTTCAATGTACG    | 60.745 | 20 | 278 | 236  | 513  |
| GGAAGGATTAGGCGAAGGAG    | 60.166 | 20 | 223 | 13   | 235  |
| TGCATATCAAATGGTGTGG     | 59.291 | 21 | 204 | 96   | 299  |
| TTGGTTCACACAACCACTCC    | 59.415 | 20 | 179 | 70   | 248  |
| ATTTGATCTCTCGCTTTTCGC   | 59.556 | 20 | 159 | 3    | 161  |
| TGATTCTGGCACCTCCTCAT    | 60.622 | 20 | 191 | 1451 | 1641 |
| CTTGGAGCTGTTTTCTTGGC    | 59.993 | 20 | 237 | 2562 | 2798 |
| TGAAATACAAAAGGGTGCG     | 58.674 | 20 | 252 | 688  | 939  |
| ACATTTGGTCAAATGGGAGG    | 59.647 | 20 | 276 | 40   | 315  |
| GGAAAATGCACTTCTGGATCA   | 60.066 | 21 | 143 | 3    | 145  |
| AAAAACCCTTCATTGTGGAAA   | 58.454 | 21 | 277 | 44   | 320  |
| TTGTCAAAATCTCCTTCATTTG/ | 59.038 | 24 | 268 | 644  | 911  |
| GAGGTTTTGACGGGATTTAGG   | 59.822 | 21 | 265 | 924  | 1188 |
| CGGTACGGTAAGTGCGGTAT    | 59.904 | 20 | 137 | 592  | 728  |
| TCACACCATATTTTTCCCCC    | 59.481 | 20 | 220 | 754  | 973  |
| TGCGTGTCTAAATGTGCCTC    | 59.871 | 20 | 141 | 380  | 520  |
| TGGATTTTTCAATGGATGGC    | 60.649 | 20 | 154 | 21   | 174  |
| TGATCTTTTCGCCATTAGAGAG  | 58.605 | 22 | 112 | 204  | 315  |
| TCCCAGTCTAAAAGTCCATGC   | 59.184 | 21 | 175 | 201  | 375  |
| CCTTCTCTCCCGACACACAC    | 60.713 | 20 | 119 | 100  | 218  |
| TCAAGTCGCTACTCACCATCA   | 59.455 | 21 | 121 | 881  | 1001 |
| ACAATGGAACGAGATCCAGG    | 59.927 | 20 | 207 | 314  | 520  |
| TTTTCTTGCTTTTGCTGTGA    | 58.736 | 21 | 230 | 27   | 256  |
| GTCCCGACGAGAAGTACCTG    | 59.721 | 20 | 233 | 15   | 247  |
| CAAGCTCAGTCTCAATGGGG    | 60.791 | 20 | 133 | 232  | 364  |
| CTCTAGGGTTCAATTGGGCA    | 60.066 | 20 | 173 | 2928 | 3100 |
| TGCGATAGTTAACAGGCAGAA   | 58.595 | 21 | 161 | 359  | 519  |
| AAACGCTGCCTCAAAGCTA     | 60.152 | 20 | 234 | 689  | 922  |
| GTTTTGGTGTCTAATCCATTTG1 | 59.687 | 24 | 136 | 46   | 181  |
| CCCAAGGTACATTGCGTCAT    | 60.776 | 20 | 239 | 569  | 807  |
| TGAGAAACCGTAACCCAAGC    | 60.11  | 20 | 239 | 10   | 248  |
| GCTGCAGCAATAAAATTCCT    | 59.688 | 20 | 230 | 2704 | 2933 |
| TCGCTCTGAACCAAAAACCT    | 59.853 | 20 | 205 | 263  | 467  |
| GCACTCATCAGAGTTATCGGTC  | 59.763 | 22 | 160 | 3162 | 3321 |
| AATTCAAACACGAGTCGCAA    | 59.322 | 20 | 245 | 313  | 557  |
| TCACAGGAGGGTTCACACAA    | 60.129 | 20 | 128 | 230  | 357  |
| TTGGGGCTTGTAATAGCTGG    | 60.089 | 20 | 271 | 7153 | 7423 |
| CCATCTCCACAGCCAATTTT    | 59.933 | 20 | 256 | 318  | 573  |
| CACAGCAGCAATTC AACCAA   | 60.844 | 20 | 269 | 224  | 492  |
| CATGCCAACACAAAACACC     | 59.864 | 20 | 214 | 189  | 402  |

|                          |        |    |     |      |      |
|--------------------------|--------|----|-----|------|------|
| TGATTGATTACGAATCCTCGC    | 60.052 | 21 | 273 | 83   | 355  |
| TTAGTGTGGCCGGTTTAATTG    | 59.876 | 21 | 181 | 82   | 262  |
| CCGATATAAGCGCCATCCTA     | 60.04  | 20 | 185 | 297  | 481  |
| TGTTTGATTGCATTA AAAATCGG | 59.84  | 22 | 164 | 1050 | 1213 |
| TCAATCAGAGACGGTGAACG     | 59.831 | 20 | 230 | 2204 | 2433 |
| TGCAATTTGTTTCTCTCCA      | 59.247 | 20 | 199 | 1735 | 1933 |
| TGTGGATATGTAGATAATTTTT(  | 57.748 | 26 | 228 | 72   | 299  |
| TGGTAAAGGGACGGCATTAG     | 59.953 | 20 | 159 | 740  | 898  |
| TCCTTCTTCACTTTTGCTCACA   | 60.03  | 22 | 149 | 9    | 157  |
| GCCAAAAGGCCCTAAAGTA      | 60.432 | 20 | 226 | 1393 | 1618 |
| CGAATTTACTGAAATACCCCA    | 60.069 | 22 | 229 | 21   | 249  |
| TCACCCCATTTCAATCCTGT     | 60.173 | 20 | 160 | 0    | 159  |
| CCATGTCTCTGGACTGGGAT     | 59.92  | 20 | 255 | 3438 | 3692 |
| ATCTTTTATGTGCACAATGCG    | 58.715 | 21 | 171 | 359  | 529  |
| GCTCCACTACCTTTTTCGTT     | 59.645 | 21 | 162 | 77   | 238  |
| TCCTCCTCTTCCACTTCCAC     | 59.228 | 20 | 189 | 62   | 250  |
| ACCAGTAGATGCCCTCCTAA     | 59.969 | 21 | 279 | 450  | 728  |
| CCATGCTTCCATGTTTTCAA     | 59.518 | 20 | 249 | 6    | 254  |
| CAGCTCCGACTCCTTCCTTA     | 59.569 | 20 | 117 | 103  | 219  |
| TCGCATAATTTTTGTGAGAGG    | 57.913 | 21 | 241 | 56   | 296  |
| TCGTTGCTCTCCATATCCC      | 60.036 | 20 | 154 | 301  | 454  |
| TTGGA ACTCCGGTGAGAAAC    | 60.088 | 20 | 201 | 1443 | 1643 |
| TGTGACTGCTCTGGTTGAGG     | 60.022 | 20 | 102 | 19   | 120  |
| ATTTTGGTTTGTGCTGG        | 59.839 | 20 | 263 | 539  | 801  |
| TGAGTTGAACCCCTCTCAC      | 60.088 | 20 | 182 | 1525 | 1706 |
| TAAGGGCCGATCCTATCAA      | 59.502 | 20 | 242 | 2810 | 3051 |
| CATGCGCCTAGATAACGACA     | 59.856 | 20 | 247 | 681  | 927  |
| CGCAGATATGCGTTTCTCAT     | 58.897 | 20 | 153 | 33   | 185  |
| ATATACCGGTGCAAACGAGC     | 59.988 | 20 | 202 | 1170 | 1371 |
| ATTGGGGAAGAAAGGGAGAA     | 59.875 | 20 | 115 | 432  | 546  |
| CAGCAGAGCAGCCATATCAT     | 59.005 | 20 | 107 | 155  | 261  |
| CCTCAAATTGTTGAAAACCG     | 59.478 | 21 | 221 | 416  | 636  |
| CCGTCCATCTCAAAAATGAA     | 58.546 | 20 | 225 | 887  | 1111 |
| CAGCACCAGATTTGCACCTA     | 59.864 | 20 | 228 | 277  | 504  |
| TGAATTTAGTCATGGATTCTC    | 59.136 | 24 | 166 | 24   | 189  |
| CAGCATA CACTCCGCATT      | 59.746 | 20 | 241 | 5    | 245  |
| GGCCATTCAAATTTCAAATCA    | 59.765 | 21 | 232 | 310  | 541  |
| GGACGCTCCAGATTGTTTCT     | 59.288 | 20 | 167 | 1    | 167  |
| CCGAATATTCAGACGAAGCC     | 59.668 | 20 | 275 | 92   | 366  |
| AACGGGATTTACTGTTTGGACA   | 58.539 | 22 | 255 | 184  | 438  |
| AGCCCGTACCCGGTCTATAA     | 60.702 | 20 | 239 | 42   | 280  |
| GGTGCATTGATTTGCAAG       | 60.213 | 19 | 169 | 658  | 826  |
| ATCCCGACAAATTTT CACA     | 60.17  | 20 | 130 | 37   | 166  |
| GACAAATCCAAGTGGGAGGA     | 59.903 | 20 | 227 | 1803 | 2029 |
| ACCATTTTCATTTGCGGCTA     | 59.411 | 20 | 239 | 353  | 591  |
| TTATGATGGGAAGAGGGGGT     | 60.517 | 20 | 251 | 143  | 393  |
| CAGTCGGGGGTAACACTCTT     | 59.062 | 20 | 110 | 2153 | 2262 |
| CCCTAGCTTTGCCCTCTTTC     | 60.332 | 20 | 274 | 591  | 864  |
| TAAACCCTAAAAACGCGTGC     | 60.13  | 20 | 252 | 10   | 261  |
| TTTCCCTTTGCCCTCTATT      | 59.903 | 20 | 157 | 34   | 190  |
| TTTTCTGTTTTTGACAGCCG     | 58.939 | 20 | 183 | 5    | 187  |
| GCACTCTGCGAGTCTCCTTG     | 61.3   | 20 | 277 | 69   | 345  |
| TGAGGAGTGTGAGGATCGTG     | 59.82  | 20 | 212 | 9    | 220  |
| AATCGCTGTATCTCCATCGC     | 60.207 | 20 | 162 | 1503 | 1664 |
| TGTCGCAATCTCCGTACT       | 59.318 | 20 | 111 | 349  | 459  |
| GCAAGCACTTTTTGCCTTTT     | 59.519 | 20 | 275 | 344  | 618  |
| AAGGTGACGAAATGGGAATG     | 59.79  | 20 | 204 | 72   | 275  |
| CTAAGGTAGCAACCACCCCA     | 59.986 | 20 | 224 | 31   | 254  |

|                        |        |    |     |      |      |
|------------------------|--------|----|-----|------|------|
| GCCGAAAACAAAGTCCAGTT   | 59.218 | 20 | 278 | 24   | 301  |
| CCTTATTTCTATTCCCGCC    | 59.767 | 20 | 148 | 586  | 733  |
| TTCATATACACGTGCGTCTTTT | 57.425 | 22 | 158 | 586  | 743  |
| TGCTTTCTGGTTCATTGTGG   | 59.691 | 20 | 279 | 35   | 313  |
| GGTAGCAGCGATGAAGGAAC   | 59.843 | 20 | 230 | 1427 | 1656 |
| GCTTGTACCGGTGGAGAAA    | 60.11  | 20 | 188 | 35   | 222  |
| TTTTAAAATAATTCCTCACCCC | 59.494 | 23 | 127 | 988  | 1114 |
| TTGTGGGATTTGAATGTGGA   | 59.75  | 20 | 216 | 31   | 246  |
| CGCAGGAGGACAAAAGAAAG   | 59.986 | 20 | 226 | 2501 | 2726 |
| TTCAAAGGAGGATTGTGTTAAC | 59.527 | 23 | 133 | 60   | 192  |
| GACAGCCTTTTTGTTTTGCC   | 59.73  | 20 | 198 | 18   | 215  |
| TGTTTTGAGATTCAGTGGGGA  | 59.059 | 20 | 245 | 2669 | 2913 |
| GCAGTAAAATACGGCTGCGT   | 60.293 | 20 | 280 | 12   | 291  |
| CCCACGTAGCAATTGACAAA   | 59.585 | 20 | 263 | 684  | 946  |
| GATTACGTGATCCAACGGT    | 59.82  | 20 | 127 | 151  | 277  |
| ATGCTTTCCCTCTCCATCAA   | 59.629 | 20 | 192 | 0    | 191  |
| ATATTCGAGTCATCCGCAGC   | 60.207 | 20 | 261 | 2705 | 2965 |
| TTCCCGAGTTGATACCCAAG   | 59.926 | 20 | 150 | 169  | 318  |
| GTTGATTGATTGTGGTTGGG   | 58.67  | 20 | 180 | 91   | 270  |
| ACTTCGGCAAATACCACTCG   | 60.132 | 20 | 148 | 94   | 241  |
| TCAAAACTCACCGGAATCCT   | 59.526 | 20 | 260 | 1454 | 1713 |
| GATGCGATCACTGCCCTATT   | 60.066 | 20 | 210 | 664  | 873  |
| AGGTGGCATGCTATCTACCC   | 59.034 | 20 | 234 | 1745 | 1978 |
| CCTTTGTCAACTTGGGCAGT   | 60.149 | 20 | 137 | 3056 | 3192 |
| AAGACAGGGGTATAACGGTCA  | 59.762 | 22 | 190 | 1145 | 1334 |
| CCAGAAGGATTCTTCGGCTA   | 59.406 | 20 | 273 | 132  | 404  |
| ACCCGGGACCTTCAATTAC    | 60.053 | 20 | 142 | 779  | 920  |
| ACATGTGATTGCGCGTATGT   | 60.026 | 20 | 125 | 44   | 168  |
| TTTTGCCTTGCATGTTGAGT   | 59.322 | 20 | 228 | 1919 | 2146 |
| CGAGTGGTGTGTGAGGTGAG   | 60.358 | 20 | 245 | 70   | 314  |
| TTGGCAGAACCAGAAGATCA   | 59.369 | 20 | 262 | 194  | 455  |
| CGGGATTTGGTCTTTTCCTT   | 60.291 | 20 | 228 | 766  | 993  |
| TATGTGCGGCTTCTTACACG   | 59.895 | 20 | 237 | 197  | 433  |
| GAAACATGCCTCCACATCCT   | 59.934 | 20 | 261 | 312  | 572  |
| TTTGAAGTGTTCGGGGAAT    | 59.406 | 20 | 273 | 1281 | 1553 |
| GAGGCCTTGAGGCAGACTTA   | 59.574 | 20 | 278 | 846  | 1123 |
| GGCTGGTATCACCATAACGC   | 60.361 | 20 | 118 | 91   | 208  |
| AGGCTGTGAAAGCTCCATCT   | 59.043 | 20 | 145 | 43   | 187  |
| ATTGTTATATGGCTGGGGCT   | 58.419 | 20 | 162 | 177  | 338  |
| TGCAACACCAAGTAACCATCA  | 60.019 | 21 | 146 | 212  | 357  |
| TAGGCACAAGTTCGAAACCC   | 60.11  | 20 | 270 | 21   | 290  |
| ATTTCAATTCATGGGTTTCG   | 57.399 | 20 | 156 | 37   | 192  |
| CACGAGTGAGAAAGGGAGAG/  | 59.583 | 21 | 115 | 150  | 264  |
| GGTTCGGTTTTTCGGTTTTTC  | 60.683 | 20 | 204 | 178  | 381  |
| ATGCAGCAGAGCCAATTTTT   | 59.851 | 20 | 202 | 8    | 209  |
| CCTGCTTTCCAGTTTAGTTGC  | 59.031 | 21 | 270 | 449  | 718  |
| TCATGATGCTTGATGCAGGT   | 60.233 | 20 | 128 | 74   | 201  |
| TTTGGTTTTCTGGGTGTGTT   | 60.246 | 20 | 266 | 797  | 1062 |
| TGCTGAATCTTAACCGTCCC   | 60.074 | 20 | 134 | 760  | 893  |
| CGTTTTGCTTTAGGTTACAAGG | 59.722 | 23 | 259 | 224  | 482  |
| TCAACCACCAACATTGTTTCTC | 59.875 | 22 | 147 | 237  | 383  |
| TTTTCCCTCTTCTGGGATCA   | 59.6   | 20 | 276 | 384  | 659  |
| GTTGAGGAAGAAGAGCGGTG   | 59.989 | 20 | 177 | 141  | 317  |
| CATCATCCTCCTCTTCTCGG   | 59.755 | 20 | 231 | 311  | 541  |
| TATTCCTCAGACCACTCGC    | 60.218 | 20 | 274 | 825  | 1098 |
| AGCTGGTTACCTTCGAGCAA   | 60.015 | 20 | 193 | 29   | 221  |
| AATCTTGTTCAGGTTATCGTCT | 58.793 | 26 | 220 | 43   | 262  |
| CGATAAAAGCGAATTCGGAG   | 59.81  | 20 | 262 | 578  | 839  |

|                        |        |    |     |      |      |
|------------------------|--------|----|-----|------|------|
| GGGCTGCTTCAGCAAATAC    | 59.851 | 20 | 140 | 3573 | 3712 |
| GGATCATCCGGTGCTACAAT   | 59.78  | 20 | 160 | 592  | 751  |
| CAGCTTGCATGTAAGGTCCA   | 59.864 | 20 | 194 | 471  | 664  |
| GAAAACCCAAAACACATGCC   | 60.214 | 20 | 242 | 5    | 246  |
| TCATCAACATGCAACCATCA   | 59.469 | 20 | 221 | 88   | 308  |
| TCAAGTCAACATAAACATAAAA | 58.978 | 26 | 134 | 95   | 228  |
| GGCTCCGTATGCTTGGGAAT   | 60.051 | 19 | 139 | 18   | 156  |
| CGTGATTGCAACTCTGATT    | 58.877 | 20 | 274 | 71   | 344  |
| GTAATGTCAAATGCGCAACG   | 60.14  | 20 | 114 | 294  | 407  |
| ATGGGTTAGCGTGTGATCGT   | 60.406 | 20 | 268 | 194  | 461  |
| GTTCAAAAATCAAAGGTCGA   | 58.274 | 22 | 273 | 3    | 275  |
| GGGCCGAGATTTGTTAGAGG   | 60.949 | 20 | 165 | 1569 | 1733 |
| CATATATTTTCATTGGCCCCG  | 59.998 | 20 | 138 | 1460 | 1597 |
| AGCACTACATAAAATGAACAT  | 59.095 | 26 | 270 | 1530 | 1799 |
| CCACAAACCCTTCATCACCT   | 59.82  | 20 | 108 | 49   | 156  |
| TCGAATGTGGAGACGAGATG   | 59.787 | 20 | 178 | 1160 | 1337 |
| TTTATCTTGCCCATGGAACG   | 60.827 | 20 | 273 | 5585 | 5857 |
| GTCCAGCTCTTCCAACCAAA   | 60.232 | 20 | 159 | 316  | 474  |
| GGGTTTTAAATTGGGGATTTT  | 58.176 | 21 | 204 | 142  | 345  |
| TTAGCCGATGAGAGGAGGAA   | 59.91  | 20 | 273 | 4675 | 4947 |
| CTTTTTCTTCGTCACGGGTC   | 59.711 | 20 | 214 | 663  | 876  |
| TACGAAGGAGGCTTGAAAA    | 59.817 | 20 | 248 | 1020 | 1267 |
| AACAATCAACCAAGGATGACA  | 57.908 | 21 | 215 | 1765 | 1979 |
| AGATTCTCGCAGATCAACGG   | 60.362 | 20 | 240 | 549  | 788  |
| CAAACGCAACAACTGTTATC   | 60.082 | 23 | 273 | 354  | 626  |
| GTGAAGCAAGGGAACCATTT   | 59.031 | 20 | 273 | 545  | 817  |
| TGTGGCTATTTTAGCTCTTTGG | 58.589 | 22 | 156 | 8    | 163  |
| CAATATTACAATGGGCAAGAG  | 57.725 | 23 | 123 | 1665 | 1787 |
| CAAAATGCCTATGGAGGTTGA  | 59.946 | 21 | 254 | 0    | 253  |
| CCTTGCTATGCAATACGGAGA  | 60.237 | 21 | 278 | 96   | 373  |
| TCCTTCCTTGACCATCCAAG   | 60.042 | 20 | 280 | 199  | 478  |
| TGCTTGTTGGCACCAGTAGA   | 60.449 | 20 | 211 | 190  | 400  |
| CTGTGACGGTGCCTGTCTAT   | 59.776 | 20 | 160 | 135  | 294  |
| CTTTGAGGCGCAGAAAAGTT   | 59.632 | 20 | 260 | 2030 | 2289 |
| CCATGCACTTCTTTCTTTGC   | 58.502 | 20 | 264 | 231  | 494  |
| TCCTGTTATCTGCCAGAAG    | 57.894 | 20 | 178 | 719  | 896  |
| GGCAAGGACCACTAGCAAAA   | 60.249 | 20 | 267 | 1281 | 1547 |
| CAAGGCACCGACATCAAGTT   | 61.096 | 20 | 261 | 93   | 353  |
| GGGTGGGTTTGAAAAGAGT    | 60.204 | 20 | 259 | 597  | 855  |
| GCGTGTCTTGGTGTCTTG     | 59.339 | 20 | 219 | 88   | 306  |
| ACAAATTCGAGATCGAACGG   | 60.074 | 20 | 277 | 555  | 831  |
| AGCATCTGGAATGCAGGAAG   | 60.362 | 20 | 234 | 688  | 921  |
| TTTTGGGCTAATGGGATGAA   | 60.26  | 20 | 220 | 23   | 242  |
| AATAGGAGAATAGGGGCGTG   | 58.162 | 20 | 196 | 57   | 252  |
| CCTTCAGATGGAACAGTTGGA  | 60.096 | 21 | 218 | 121  | 338  |
| ATCCTCATCTTCACCATCGC   | 60.042 | 20 | 268 | 455  | 722  |
| GATGCAAATCCGAGTAGCTTG  | 59.859 | 21 | 244 | 226  | 469  |
| CGAAACAATAAGATGCTGTGT  | 60.18  | 23 | 210 | 60   | 269  |
| GATGGAATTGGGTGTTGGAT   | 59.464 | 20 | 153 | 24   | 176  |
| CACACAACCACTCCACAAAGA  | 59.626 | 21 | 119 | 274  | 392  |
| CACCCGTATGGGACAAAATC   | 60.051 | 20 | 176 | 232  | 407  |
| GGTGGAGGATTTTCCTTTCC   | 59.744 | 20 | 196 | 19   | 214  |
| CGTGGACAGTTTCCCAAAGT   | 60.005 | 20 | 204 | 49   | 252  |
| ATTACTCACACGCACACCCA   | 60.032 | 20 | 131 | 211  | 341  |
| GGAATAAAAGCCCCGATTTT   | 59.751 | 20 | 190 | 0    | 189  |
| CGTGTCTATCCTCACCCCAT   | 59.803 | 20 | 172 | 65   | 236  |
| TCTGGTGAAGATCGATGCAG   | 59.942 | 20 | 132 | 2658 | 2789 |
| TCACCACAAACCACCACAAC   | 60.309 | 20 | 276 | 396  | 671  |

|                        |        |    |     |      |      |
|------------------------|--------|----|-----|------|------|
| TCACCAAATTTGAGGGTTATTA | 59.149 | 25 | 230 | 147  | 376  |
| GAAGGGTATTTCTGGAATCA1  | 60.076 | 24 | 200 | 68   | 267  |
| TGGTAATTTTCGCACCCACT   | 60.365 | 20 | 275 | 150  | 424  |
| GCAAACACAGGTCACAATGG   | 60.008 | 20 | 205 | 1182 | 1386 |
| AAAGGGCATAATCTATGATCG  | 60.076 | 23 | 175 | 44   | 218  |
| TGTGTTTTTCAGTGTGTGGGA  | 60.033 | 21 | 157 | 49   | 205  |
| AATTGCACGGTAGTTGCAC    | 58.703 | 20 | 280 | 1578 | 1857 |
| CAGATGTGGACGGGTCACTA   | 59.545 | 20 | 279 | 20   | 298  |
| TTGCGATACGTGGCTGATTA   | 60.237 | 20 | 229 | 75   | 303  |
| TCAGACCCAGGCTTTTCAGT   | 59.844 | 20 | 218 | 158  | 375  |
| TGATGAAGAGAACAAGACTGC  | 60.045 | 23 | 260 | 107  | 366  |
| TGATGGTGGTTTTTCAGATGC  | 59.502 | 20 | 214 | 52   | 265  |
| CCTGCGTTGTCAAGATGAAA   | 59.84  | 20 | 206 | 157  | 362  |
| GATCGAAGCATTTCAGTTTGC  | 59.679 | 21 | 245 | 127  | 371  |
| GCCATTGTGAGGAAGGTTGT   | 59.973 | 20 | 176 | 4    | 179  |
| TGATCAACTGCTCTGTGGGA   | 60.402 | 20 | 228 | 3338 | 3565 |
| TTGCGTTGCTCTGATAATCG   | 59.976 | 20 | 273 | 549  | 821  |
| AGGCAGACAGATAAGGGCTG   | 59.454 | 20 | 246 | 428  | 673  |
| AAAAGATGCATGTGTTCCCC   | 59.797 | 20 | 154 | 366  | 519  |
| CCCTCACTTCTCTTCTGCGT   | 59.598 | 20 | 274 | 72   | 345  |
| CCTTCCCGTTTTGTACTCAT   | 58.909 | 20 | 267 | 429  | 695  |
| ACGGATTTAAGGGTTATTACCT | 57.667 | 23 | 208 | 682  | 889  |
| TAAATTGCACCCATCAACCA   | 59.786 | 20 | 226 | 881  | 1106 |
| CCAAGTACACTCCTCCTCCTG  | 58.804 | 21 | 256 | 3977 | 4232 |
| TGATTTGAGTGTAAACACGTCC | 58.688 | 23 | 156 | 100  | 255  |
| GAGCGAGTGGTTGTGAGGTT   | 60.307 | 20 | 104 | 7    | 110  |
| AAAATGGCACATGGGTTGTT   | 60.096 | 20 | 256 | 1652 | 1907 |
| TAAACCTCGTGCTTCCCTG    | 60.241 | 20 | 183 | 2272 | 2454 |
| AGCCGACTCCATTTATTGCT   | 58.814 | 20 | 277 | 1043 | 1319 |
| CCTGTGGCTCAAACCTGAAT   | 60.111 | 20 | 277 | 11   | 287  |
| AAGCCGATCGAGTTTGTGAG   | 60.397 | 20 | 159 | 32   | 190  |
| AGGGAGTGCTCTCACCTGAA   | 59.986 | 20 | 215 | 168  | 382  |
| AGATCCAACGGCTCACACTC   | 60.269 | 20 | 261 | 442  | 702  |
| TTTGCTTGATCCAATGGTGT   | 58.976 | 20 | 257 | 387  | 643  |
| GCTGGATAGTTGGGAAACGA   | 60.074 | 20 | 227 | 9    | 235  |
| GAGAGGAAGGTGTGGAGCAA   | 60.386 | 20 | 266 | 326  | 591  |
| TGAAAATATCATCGGCCACA   | 59.891 | 20 | 189 | 390  | 578  |
| AGCACTCTGCGAGTCTCCTT   | 59.355 | 20 | 280 | 70   | 349  |
| GGAATAAAGCCGTTTGAATTC  | 59.851 | 22 | 213 | 15   | 227  |
| TGCGTTTTGACAATATATAGGT | 60.083 | 26 | 180 | 61   | 240  |
| CCGTACACCACCCTTAATCC   | 59.17  | 20 | 273 | 1310 | 1582 |
| CAAAATTACAAATGGCCAAGA  | 60.342 | 23 | 132 | 51   | 182  |
| CCACTACATTCAGGGCCATT   | 59.813 | 20 | 142 | 842  | 983  |
| TGCTCACCACTCTTTTCG     | 60.025 | 20 | 204 | 226  | 429  |
| ATGAACGAATCAAGTTCCGC   | 60.081 | 20 | 110 | 238  | 347  |
| TCTGGCCACTTGTTTCTCCT   | 59.844 | 20 | 253 | 595  | 847  |
| CAACTCGCATACCCAAAAGA   | 58.771 | 20 | 232 | 26   | 257  |
| GCAAATTCGCCGTTCTTT     | 60.203 | 19 | 249 | 2008 | 2256 |
| TCCGTCTTATTGGTCCGTTT   | 59.429 | 20 | 280 | 402  | 681  |
| TCTGCAGGTTTCATGTTGCTT  | 59.445 | 20 | 180 | 632  | 811  |
| GCTGAGCATTTCAGTACCC    | 59.851 | 20 | 257 | 29   | 285  |
| CGCTGTATAATGGGGATCTCA  | 59.93  | 21 | 162 | 2339 | 2500 |
| CGCATGCTCGTTTTCTTTCT   | 60.523 | 20 | 182 | 40   | 221  |
| TTCCGACCATTCAAACCTCGT  | 60.495 | 20 | 191 | 4159 | 4349 |
| TTATCCTCACCCGTTTTTCG   | 59.931 | 20 | 272 | 288  | 559  |
| GTCCTCAACCTCTCAATCGC   | 59.81  | 20 | 170 | 73   | 242  |
| CATTAAATCCTGTCCACATACA | 58.008 | 24 | 170 | 579  | 748  |
| TGATGGTTGCAAGAGAATGG   | 59.648 | 20 | 236 | 1762 | 1997 |

|                        |        |    |     |      |      |
|------------------------|--------|----|-----|------|------|
| GCACTGCATACGGCTCAATA   | 59.862 | 20 | 230 | 12   | 241  |
| GGCAAATGGCATAACAAACC   | 60.196 | 20 | 198 | 331  | 528  |
| TCGGTACCATCATCTGTTTCTT | 58.579 | 22 | 258 | 138  | 395  |
| CTTTTCTTTTCTTTTATGCTCG | 58.685 | 23 | 161 | 22   | 182  |
| GCCTATTCATTGCAGCCTTC   | 59.813 | 20 | 161 | 1031 | 1191 |
| CTCATAGTTGACGCCCTTCG   | 60.786 | 20 | 170 | 10   | 179  |
| TGAAGACGATGCGATGAAGA   | 60.504 | 20 | 113 | 43   | 155  |
| GCAAATTGTGGCTCTGACAA   | 59.847 | 20 | 250 | 212  | 461  |
| TCGTTGTGAATTACCCAAGAA  | 59.492 | 22 | 156 | 133  | 288  |
| ACATGTGATTGCGCGTATGT   | 60.026 | 20 | 133 | 44   | 176  |
| ATGGGAGCTCATGAACGAAC   | 60.081 | 20 | 203 | 943  | 1145 |
| ATCGTGTTCCCTCAAGGTTGC  | 60.119 | 20 | 140 | 2557 | 2696 |
| ACTTCTCTCCCCCTCCCTTT   | 60.43  | 20 | 210 | 19   | 228  |
| CCTACCAACCCACCATGATT   | 59.526 | 20 | 174 | 33   | 206  |
| TGAGTGCTCAGGCACAGAAG   | 60.333 | 20 | 179 | 92   | 270  |
| ACATGGCATCACTTCAACCC   | 60.79  | 20 | 264 | 398  | 661  |
| CAATTTCTGCTCTAATAAATCC | 58.809 | 25 | 114 | 13   | 126  |
| CACATTCGTGCATGTTTTGA   | 59.124 | 20 | 259 | 3377 | 3635 |
| ATCATAGTTGACGCCCTTCG   | 60.096 | 20 | 103 | 2    | 104  |
| ACCGACCGGAATTTTTATCC   | 60.02  | 20 | 253 | 878  | 1130 |
| AACCTAATCCTTTCGCGGAG   | 60.573 | 20 | 184 | 1024 | 1207 |
| TTTTCGTTTTTCCGTTGAA    | 60.439 | 20 | 245 | 28   | 272  |
| ACATTGTCACGTCCTCCGTT   | 60.431 | 20 | 209 | 3    | 211  |
| TGCTCCCATTTAAACAACCC   | 59.801 | 20 | 274 | 707  | 980  |
| TTGGAAGAATCATAATCAAGA  | 58.395 | 25 | 105 | 183  | 287  |
| CTAACCGCAGAAAAGCCAAA   | 60.368 | 20 | 125 | 2225 | 2349 |
| AACCGTCCGCTTACTTCTGA   | 59.875 | 20 | 274 | 190  | 463  |
| ATGCCAAACTGTTGGGAAAC   | 59.836 | 20 | 181 | 45   | 225  |
| TTATCATGCCAATCCACCAC   | 59.205 | 20 | 184 | 334  | 517  |
| TTTCCCATGTTGTAATTAATGT | 58.388 | 25 | 193 | 15   | 207  |
| CTCGCACCCTCCTCTTTCT    | 59.598 | 20 | 279 | 4    | 282  |
| ATGCATGGCCAAGTGCAAC    | 61.947 | 20 | 279 | 109  | 387  |
| CTGGTGA CTCTTGCTCCTCCC | 59.682 | 20 | 203 | 155  | 357  |
| TGAGTTGGTTGTTAGTCCGGT  | 59.506 | 21 | 165 | 36   | 200  |
| TTGTCTGCTCGCGTTACTTG   | 60.195 | 20 | 204 | 179  | 382  |
| TGGTGA ACTCGTCTCCCTTC  | 60.238 | 20 | 227 | 73   | 299  |
| GAGCTGGAGTTGAGAAACGG   | 59.989 | 20 | 235 | 39   | 273  |
| GCCCGGAATTCTTAACAGTG   | 59.569 | 20 | 158 | 268  | 425  |
| AATCGCTTCCGCATTTAAGA   | 59.816 | 20 | 184 | 591  | 774  |
| CCCAAAAAGCAACAAACCAT   | 59.839 | 20 | 140 | 2425 | 2564 |
| GCAGGAGGTCTCAGGAAACA   | 60.386 | 20 | 168 | 363  | 530  |
| CGTCATGTTTTCAATCGCAG   | 60.257 | 20 | 253 | 18   | 270  |
| ATCTTGATCGACACTTGCC    | 60.081 | 20 | 179 | 16   | 194  |
| GGCTGGTTTCCAGACTTTTG   | 59.711 | 20 | 102 | 66   | 167  |
| CGGACATGGTACATTTTCTGC  | 60.38  | 21 | 176 | 578  | 753  |
| AAAGTTGATGGA AAAAGGGGG | 60.159 | 20 | 139 | 2043 | 2181 |
| TTTTTCTGCATTGTGGAAGAGA | 59.996 | 22 | 247 | 483  | 729  |
| TGAGGAAAAAGCCGATCAAA   | 60.692 | 20 | 271 | 105  | 375  |
| ATGCCAGTCAGATCCTGTCC   | 60.08  | 20 | 221 | 263  | 483  |
| CCGTTACCTTCATCCCCTTC   | 60.683 | 20 | 184 | 15   | 198  |
| TCTGTGTCAGCATGTGTGTGA  | 59.922 | 21 | 249 | 1879 | 2127 |
| GAGAGAGAAAGGCTACGGGG   | 60.34  | 20 | 147 | 89   | 235  |
| ATCTTTTGCACGAGATGCCT   | 59.843 | 20 | 210 | 8    | 217  |
| GGGATAAGTGAGCTCGGGAT   | 60.431 | 20 | 223 | 433  | 655  |
| TCCGGGTTTGATACCTGAAT   | 59.244 | 20 | 249 | 1216 | 1464 |
| CCCTCCTCCTTGCTAAAGA    | 60.694 | 20 | 158 | 169  | 326  |
| CTGTGCATGAAACATGGAGG   | 60.112 | 20 | 279 | 162  | 440  |
| ACTGAATGTCACGACCGACA   | 60.162 | 20 | 239 | 606  | 844  |



|                        |        |    |     |      |      |
|------------------------|--------|----|-----|------|------|
| CGAGGACATTTACTCATGGGA  | 59.94  | 21 | 234 | 464  | 697  |
| CTCGTCGTGAACCTCCTGAT   | 60.261 | 20 | 275 | 401  | 675  |
| CCATATACCCACCTCCTCCC   | 60.401 | 20 | 257 | 114  | 370  |
| TCAGAAACAACCTTGCCCTCA  | 59.415 | 20 | 229 | 29   | 257  |
| AATCGAGGAAGAGGGCAAAT   | 60.039 | 20 | 209 | 3089 | 3297 |
| TCTCTTTTGGTTGGTGAAGAAA | 58.856 | 22 | 227 | 1723 | 1949 |
| TGGGGTTGTCTATTTTTGGG   | 59.657 | 20 | 248 | 227  | 474  |
| AGACAGGGGTTGGGGTTAAG   | 60.218 | 20 | 234 | 62   | 295  |
| GTTTAGGATGGGATCGAGCA   | 60.036 | 20 | 241 | 27   | 267  |
| TATCCCTTGCAGTCCCTTTG   | 60.066 | 20 | 254 | 0    | 253  |
| AATGCATGCACCTGATTACAA  | 59.055 | 21 | 178 | 219  | 396  |
| CCATCCGGGATTTGTTAGAG   | 59.382 | 20 | 186 | 222  | 407  |
| TTTCGAAATTATGAGGCTCCA  | 59.668 | 21 | 189 | 37   | 225  |
| AGCAGATCAGGTCAGGGTTG   | 60.261 | 20 | 258 | 106  | 363  |
| CCAAATAATTTTGTTCACCA   | 59.974 | 23 | 123 | 98   | 220  |
| GACCGAAAACCGTTCAAAAA   | 59.953 | 20 | 105 | 105  | 209  |
| TCCTTCCACCCAACAAAAAG   | 59.942 | 20 | 280 | 1194 | 1473 |
| TACTGCATTGCGACCCTACA   | 60.28  | 20 | 244 | 326  | 569  |
| TTCCCCTTTTGTAAAGTCCCC  | 60.159 | 20 | 176 | 1    | 176  |
| AAACATCGATCAGTCCCACC   | 59.786 | 20 | 116 | 195  | 310  |
| AATGGCTGGATTTAGTCCCT   | 57.611 | 20 | 273 | 26   | 298  |
| CCAAGAAGTCGCATACCTCG   | 60.786 | 20 | 280 | 53   | 332  |
| TTTGGGAAATTCTTGCACCT   | 59.546 | 20 | 100 | 0    | 99   |
| ATTCCAAGATGGCAACTGCT   | 59.7   | 20 | 195 | 6    | 200  |
| ATTCAAGGGGCATTTTCGTC   | 61.184 | 20 | 177 | 511  | 687  |
| GGTCCAAAACCAAGCCTAT    | 60.187 | 20 | 137 | 3    | 139  |
| TGCCTGCTCAGGTCTCAAT    | 60.945 | 20 | 168 | 26   | 193  |
| ACCAACCAAGAAGTCGAACG   | 60.149 | 20 | 278 | 1841 | 2118 |
| CATCATCCATCTCTCCCTCA   | 58.53  | 20 | 120 | 170  | 289  |
| AAAATCGGACTGGACCATTG   | 59.79  | 20 | 269 | 246  | 514  |
| AAGAATGACGGAAATCACGC   | 60.081 | 20 | 171 | 492  | 662  |
| AAGGGTTGATTTTCGTCCCTA  | 59.822 | 21 | 169 | 89   | 257  |
| TGTCTTGAGTTTGTATCTAAGA | 59.365 | 27 | 193 | 167  | 359  |
| CAACTCACCTCACATTTCTCT  | 60.16  | 23 | 180 | 390  | 569  |
| AAATATTTCTAGCACATGAAAT | 57.859 | 25 | 232 | 59   | 290  |
| GGTGAGAGCTTGAAGAAGAGC  | 58.417 | 21 | 134 | 392  | 525  |
| ACTTACATCTCCACACCCG    | 59.844 | 20 | 264 | 554  | 817  |
| TTACCATATGTGCCGAGCTG   | 59.712 | 20 | 245 | 17   | 261  |
| GTCAACTTGGGCAGTGGAAAT  | 59.973 | 20 | 273 | 764  | 1036 |
| CCATTAACGCCCTGATTTA    | 59.789 | 20 | 172 | 247  | 418  |
| AGTCGGCATTCAAGTAGTCG   | 57.98  | 20 | 218 | 194  | 411  |
| GAAGTTGTAGCATGGGCTTGT  | 59.256 | 21 | 229 | 83   | 311  |
| AATTGAGCTGCTTGGTTTGC   | 60.395 | 20 | 258 | 363  | 620  |
| TGAAGCAGAATGCAAGCAAG   | 60.28  | 20 | 170 | 526  | 695  |
| CAGCCTGATAAATGGGACAA   | 58.572 | 20 | 211 | 177  | 387  |
| TAAAGCGCACGCCAATACTT   | 60.768 | 20 | 215 | 206  | 420  |
| TGTCCTTCTCCCACTCCTCT   | 58.819 | 20 | 200 | 164  | 363  |
| TCAAAACAACACCCAACCAA   | 59.834 | 20 | 251 | 94   | 344  |
| CAACAGCCTTGTCTCTGCAC   | 59.622 | 20 | 241 | 337  | 577  |
| TCATTGTACCGCAGCAAGAG   | 60.011 | 20 | 273 | 3743 | 4015 |
| TTGAAATTTCCCAACATTCG   | 58.454 | 20 | 172 | 392  | 563  |
| TCCCTACTGAAGCTCGAACC   | 59.43  | 20 | 241 | 78   | 318  |
| CATCTCTATCACTCCCCCA    | 59.879 | 20 | 154 | 339  | 492  |
| TCCACCACCTCCAAGTTTTT   | 59.425 | 20 | 257 | 455  | 711  |
| CCTCCTCACCTTTCCTTTC    | 60.045 | 20 | 103 | 50   | 152  |
| TTTTGAAAAAGTCGGCTGAAA  | 59.855 | 21 | 236 | 953  | 1188 |
| TGGTGGACGAATTTGGATTT   | 60.17  | 20 | 265 | 646  | 910  |
| AGCTTGACAAGGCAGTACCC   | 59.357 | 20 | 173 | 2    | 174  |

|                          |        |    |     |      |      |
|--------------------------|--------|----|-----|------|------|
| GCTCGGAAGCTTCTACACCA     | 60.538 | 20 | 152 | 3636 | 3787 |
| TCAATTTGTCATAGCCAACCC    | 59.815 | 21 | 228 | 364  | 591  |
| TCGTGCGACATAGTATGGGA     | 60.096 | 20 | 159 | 49   | 207  |
| CCTCCATTTCCAATCTGCTT     | 59.126 | 20 | 257 | 87   | 343  |
| ATGAAAAGATTGAGATGGGAT    | 58.781 | 22 | 261 | 842  | 1102 |
| TAGTGAACGTTGGGGACACA     | 60.001 | 20 | 184 | 102  | 285  |
| AAGAGGAAACAGGAGAGGGG     | 59.671 | 20 | 233 | 521  | 753  |
| GCATTCTCTTGTAAATCCCATAC, | 58.15  | 23 | 267 | 53   | 319  |
| TCCAGAGACCTACATGGGCT     | 59.679 | 20 | 217 | 1290 | 1506 |
| CCAGATATACCCCCACATGC     | 60.036 | 20 | 240 | 17   | 256  |
| TCTCAGGGCAAATAGGGACA     | 60.594 | 20 | 280 | 4152 | 4431 |
| GGCGCCTTACCAGTTAGATG     | 59.73  | 20 | 158 | 136  | 293  |
| AATGAAATCCTTTGGGGTCC     | 59.996 | 20 | 124 | 2513 | 2636 |
| CAATGGGGCTTGGTTTTCTA     | 59.931 | 20 | 268 | 1306 | 1573 |
| GACCCCAATTTCAACTGCTG     | 60.495 | 20 | 200 | 1628 | 1827 |
| GTGGACGTCCAGATTGTTT      | 59.827 | 20 | 141 | 1218 | 1358 |
| CGAGTAGATCACAACGGCAA     | 59.864 | 20 | 268 | 268  | 535  |
| AAGATCTTGGTTGTTGGGTTG    | 58.945 | 21 | 157 | 577  | 733  |
| TCTCTTCGAAACTCGAATCGT    | 59.066 | 21 | 159 | 2    | 160  |
| GTTGTAGATCAAAGGGCCGA     | 60.074 | 20 | 214 | 52   | 265  |
| TATATCAATGGCAGCCCACA     | 59.914 | 20 | 162 | 1906 | 2067 |
| CCGATACGAGCTAAAGCGAG     | 60.131 | 20 | 188 | 14   | 201  |
| AAATCGAAAGAGTTGACGAAT    | 58.378 | 22 | 251 | 88   | 338  |
| TGGTACCAAAATGCCCTTGT     | 60.227 | 20 | 212 | 393  | 604  |
| CCCGGCATACAAATAAGGATT    | 60.049 | 21 | 278 | 145  | 422  |
| CGGAACTGATAGGGATGGAA     | 59.887 | 20 | 137 | 230  | 366  |
| ACCTATCGTCTCCTCCCGAT     | 59.919 | 20 | 263 | 64   | 326  |
| ATCCCATACCCTAATTCGCC     | 60.006 | 20 | 263 | 343  | 605  |
| TATCGGGATTGGTGGAACAT     | 60.014 | 20 | 177 | 796  | 972  |
| TGTTCTCGCAAACAATGCTC     | 59.995 | 20 | 276 | 149  | 424  |
| CGAAAATTTAAGCCCCGAA      | 60.019 | 19 | 242 | 2165 | 2406 |
| GGAAAAACACTTGAAAGCGG     | 59.724 | 20 | 225 | 983  | 1207 |
| CAGCCTTCCTTCTCCTCAGA     | 59.673 | 20 | 163 | 418  | 580  |
| GATGGATAGCGCCACAATCT     | 60.066 | 20 | 190 | 176  | 365  |
| TTCGGGTTCGAATTTACCAG     | 59.931 | 20 | 259 | 1823 | 2081 |
| TCATGCTTCAGCAGCAGATT     | 59.704 | 20 | 247 | 950  | 1196 |
| AAAACATACTCAGCCACCGC     | 60.14  | 20 | 179 | 1348 | 1526 |
| ATGTAGGGTTCCTGTGGCTG     | 59.989 | 20 | 258 | 335  | 592  |
| AAAAGACCCTAAGCACTCACA    | 58.061 | 22 | 231 | 4325 | 4555 |
| TCGATTGTGTATGGCATTCTG    | 59.557 | 21 | 255 | 38   | 292  |
| CTCTCTTCCTTGCCTTGCTG     | 60.269 | 20 | 116 | 625  | 740  |
| ATTAACGGGTAACCTCGGGC     | 60.204 | 20 | 219 | 1934 | 2152 |
| GACACGTGGTAGCACGAGAAT    | 60.194 | 21 | 160 | 263  | 422  |
| GAGATGCAGCGTCAACAAGA     | 60.144 | 20 | 250 | 335  | 584  |
| CCGAAGCAGCTATTCCTCC      | 59.978 | 20 | 245 | 1270 | 1514 |
| AGCTTTAAATGTGTTACAAAAT   | 59.159 | 26 | 278 | 247  | 524  |
| GTAGTGGCTACGGTTTCCCA     | 59.993 | 20 | 136 | 3835 | 3970 |
| CCCATTTTTCTAGGCACCTTT    | 59.489 | 21 | 137 | 323  | 459  |
| TACGGTTCCACTTTTTCGGA     | 60.472 | 20 | 199 | 41   | 239  |
| CATGAGCGAGTAAACCACCA     | 59.716 | 20 | 131 | 53   | 183  |
| TGGCATCAAATCTAGCCATT     | 58.187 | 20 | 234 | 333  | 566  |
| GTGACACGTACACATTGGA      | 58.931 | 20 | 280 | 337  | 616  |
| TTCACGCATTTCCACACATT     | 59.972 | 20 | 100 | 39   | 138  |
| CACACAATACGCACACACCA     | 60.071 | 20 | 179 | 236  | 414  |
| AGCTCTCTATCGGGAGGACC     | 59.801 | 20 | 258 | 249  | 506  |
| GATTCTCCAAATCTGACGGC     | 59.635 | 20 | 191 | 284  | 474  |
| GGGGCCTTACCTTCAATACC     | 59.666 | 20 | 259 | 28   | 286  |
| CAACCGATATCCCCTCTCT      | 60.285 | 20 | 155 | 8    | 162  |

|                         |        |    |     |      |      |
|-------------------------|--------|----|-----|------|------|
| AAGGTGGGAATTGTGGAAGA    | 59.381 | 20 | 224 | 75   | 298  |
| TCCCCATTTTTCAAAGCAT     | 59.388 | 20 | 244 | 1544 | 1787 |
| TGCTAAGAGAAAGCCCTCA     | 60.088 | 20 | 202 | 545  | 746  |
| GTGGGAGACAGCAAAAGCTC    | 59.997 | 20 | 180 | 420  | 599  |
| AGCCACACATGTCACAAATGA   | 60.024 | 21 | 239 | 81   | 319  |
| CGTGAGGAACCCTAGTTTGG    | 59.587 | 20 | 199 | 232  | 430  |
| TTCGTCCGAAATACTCCAC     | 59.933 | 20 | 205 | 2    | 206  |
| GCACAACCACTCCACAAAGA    | 59.726 | 20 | 263 | 84   | 346  |
| CCGATTGGGCCTATCCTATC    | 60.623 | 20 | 196 | 99   | 294  |
| CCAAATGTGAGACCCTTAACC   | 58.423 | 21 | 124 | 48   | 171  |
| TGATGATCGGATGTTGATGG    | 60.291 | 20 | 211 | 205  | 415  |
| TCAATCTAAAACCCGTGCAA    | 59.157 | 20 | 172 | 204  | 375  |
| TTCAAGATTGTGCGAGCTGA    | 60.687 | 20 | 210 | 18   | 227  |
| ACCTGCACCAAAATGGAGAG    | 60.111 | 20 | 150 | 278  | 427  |
| CGTGGTTCGATCGTAATTGA    | 59.542 | 20 | 108 | 99   | 206  |
| AGGGTAGACATGGGTTTCCC    | 60.052 | 20 | 219 | 242  | 460  |
| GAGGCGGTAGGAAACCCTAA    | 60.443 | 20 | 210 | 15   | 224  |
| AAGATCCGGCTCACAGAATG    | 60.218 | 20 | 132 | 297  | 428  |
| GGCGTTGGACCACTGTAGAT    | 59.997 | 20 | 277 | 67   | 343  |
| GGATGACACGCATCAAATG     | 59.931 | 20 | 155 | 1298 | 1452 |
| CTCTTCATATGGGAAGGGCA    | 60.029 | 20 | 198 | 9    | 206  |
| AGCATTTTCATCCTCTTCCCA   | 59.629 | 20 | 107 | 544  | 650  |
| CTGCGAACCAACATCACTGT    | 59.751 | 20 | 149 | 132  | 280  |
| TTCTCAGCTCGGGTTCCTAA    | 59.948 | 20 | 244 | 146  | 389  |
| ATTAATGCGCCTCCCCTT      | 60.821 | 20 | 162 | 615  | 776  |
| CGGTCACATAAGCGTCTCT     | 60.277 | 20 | 241 | 630  | 870  |
| TGATGATGACAATGATATCGTC  | 60.217 | 24 | 174 | 72   | 245  |
| TTAGGCCATGTTTGTCTGCTT   | 59.761 | 21 | 218 | 198  | 415  |
| AAGGTCATCACCCACAGAGC    | 60.12  | 20 | 206 | 3022 | 3227 |
| TCAGCCGAAGTAACAAGACG    | 60.426 | 21 | 214 | 2104 | 2317 |
| ACTTGTGTCCCCATTTCCAGG   | 59.82  | 20 | 196 | 944  | 1139 |
| CGTCCACTTCATTGAATTTCTT  | 58.239 | 22 | 280 | 3919 | 4198 |
| ATTGCATTACATGCTCCCAT    | 59.314 | 21 | 248 | 225  | 472  |
| AATGCACACCAAAGTGAAACC   | 59.89  | 21 | 237 | 103  | 339  |
| CAACAAAGCATTGCAAAGTGA   | 59.903 | 21 | 224 | 0    | 223  |
| TCAAATACTAGCATATCGATGA  | 57.269 | 25 | 174 | 88   | 261  |
| ATGTGATCCACCACAAAGCA    | 59.967 | 20 | 267 | 86   | 352  |
| TTCCACCCATATTGCACTCA    | 59.924 | 20 | 128 | 87   | 214  |
| TGTGAGAACCATCTCGGTGA    | 60.246 | 20 | 117 | 23   | 139  |
| CCCAGATAGCAATAAGGGCA    | 60.053 | 20 | 161 | 730  | 890  |
| CATTGTCAGAAAGTGCCGAG    | 59.44  | 20 | 202 | 96   | 297  |
| TTTTCAAGAGCATTACGGA     | 59.395 | 20 | 237 | 2174 | 2410 |
| CGACAAAGACTTAACTACTTGT  | 60.049 | 27 | 279 | 852  | 1130 |
| TTGAGACCCACCAACCAAGT    | 60.399 | 20 | 277 | 642  | 918  |
| ATTTGTTTGATATTCAACCACTI | 57.224 | 24 | 103 | 268  | 370  |
| AACGAGTAGTGGTGGCCAGT    | 59.646 | 20 | 226 | 4467 | 4692 |
| GCGTGGAAGGCTGAATAAG     | 59.845 | 20 | 256 | 652  | 907  |
| TAACCCCAACTAACCACCCC    | 60.826 | 20 | 106 | 1    | 106  |
| TTGTCCAGCTCTTCCAAACA    | 59.415 | 20 | 190 | 365  | 554  |
| CCAGCCCAATAACTTGACCT    | 59.052 | 20 | 236 | 69   | 304  |
| CGGAAGAATTATACACGGCA    | 58.651 | 20 | 263 | 571  | 833  |
| TTATGGGTCCAAACAACCTTTT  | 59.625 | 22 | 170 | 257  | 426  |
| CGTGTTAATTCCTTCCAA      | 59.795 | 20 | 193 | 1497 | 1689 |
| CAAATTTGATAGCGGTCTAATC  | 58.344 | 23 | 170 | 1463 | 1632 |
| CTCAGGGACTAGTTGAGCGG    | 60.005 | 20 | 189 | 64   | 252  |
| TCGCACCCGATAATTACCTC    | 59.923 | 20 | 278 | 106  | 383  |
| ATTTTCCCTCCAGTTGACCC    | 60.169 | 20 | 195 | 4537 | 4731 |
| CACCTAGAAATGGCATGAGGA   | 60.081 | 21 | 276 | 647  | 922  |

|                         |        |    |     |      |      |
|-------------------------|--------|----|-----|------|------|
| TGCACAGAAAATGAAAAGCG    | 59.992 | 20 | 227 | 283  | 509  |
| GCCATGTGAGAGGGAGAGAG    | 59.945 | 20 | 253 | 91   | 343  |
| TCCAATGGATGTAATGAGTTAT  | 57.297 | 26 | 280 | 261  | 540  |
| AGCCGTCGTATTCTAAACGC    | 59.388 | 20 | 167 | 60   | 226  |
| TCAAAGAGCTTTCTCTGTTTGC  | 58.906 | 22 | 210 | 66   | 275  |
| GTTGGGTGAAGATCATGGCT    | 59.934 | 20 | 234 | 82   | 315  |
| CTCGTCCTAACCCATCCAAA    | 59.926 | 20 | 278 | 2936 | 3213 |
| GCTATGGTATGCTGTCTGCG    | 59.474 | 20 | 214 | 146  | 359  |
| TGCAGGACAATATCCATCACA   | 59.94  | 21 | 179 | 7    | 185  |
| CTCGTTTCAAGCCCAAAACT    | 59.355 | 20 | 148 | 35   | 182  |
| TGATGACGATCTTTTGAAACCA  | 60.481 | 22 | 233 | 18   | 250  |
| TTTGGGCTAAAGTGGGATGA    | 60.439 | 20 | 200 | 109  | 308  |
| TTAGGGTTTTAAAATCGCGCA   | 60.564 | 20 | 188 | 2366 | 2553 |
| GCAATGTAAATCCTCTGCCG    | 60.606 | 20 | 279 | 1072 | 1350 |
| TGTGCACAAGCTTGAAAAAAT   | 60.663 | 21 | 206 | 1578 | 1783 |
| GTGCTCGCCTTTTCATTTTCA   | 60.221 | 20 | 268 | 2202 | 2469 |
| GACCATGAGCACAGGATTTG    | 59.09  | 20 | 245 | 265  | 509  |
| TTAGATGGGGACGGATCACT    | 59.361 | 20 | 277 | 74   | 350  |
| ATGGAGGTATGGTGTATGGG    | 57.047 | 20 | 170 | 2555 | 2724 |
| GCATCCAAAGTGTGACCAAA    | 59.547 | 20 | 259 | 683  | 941  |
| TTGACGATATATAGTGTTTTGA  | 58.972 | 27 | 186 | 287  | 472  |
| CATGGGTGGTATGGTGTGG     | 60.517 | 19 | 151 | 10   | 160  |
| AGCTGTTAGGGTGTATAGTGA   | 57.436 | 27 | 133 | 370  | 502  |
| GCCTTTGCCCTTTTTCTCTC    | 60.32  | 20 | 112 | 315  | 426  |
| TCAAAAACGAATTTGGCGTT    | 60.468 | 20 | 177 | 231  | 407  |
| GCCATGCATGTAAGGTGCTA    | 59.718 | 20 | 161 | 1059 | 1219 |
| TCCTCTCGTGTTTCATCCTCA   | 59.34  | 20 | 175 | 40   | 214  |
| CGTCGATCTCAGTATCTTCGC   | 59.992 | 21 | 153 | 166  | 318  |
| GGTAAATGGTTACCGTTTTGG   | 60.33  | 21 | 245 | 18   | 262  |
| ATCACGTTGCAAAAATAGCG    | 58.844 | 20 | 273 | 46   | 318  |
| GTCATGGAATCTTGTGGGG     | 60.173 | 20 | 255 | 599  | 853  |
| GTGAGGCATCAAGATGGACA    | 59.637 | 20 | 148 | 166  | 313  |
| AGCCACCTCCTAGCCATCTC    | 60.756 | 20 | 112 | 340  | 451  |
| CCCATGTTTGTAAATTATTGTAG | 58.675 | 24 | 168 | 1909 | 2076 |
| GCCCATGATTCTGTAGTTTTGG  | 60.721 | 22 | 254 | 180  | 433  |
| TTTTGTGATTTCCCATGTTTGT  | 59.225 | 22 | 163 | 67   | 229  |
| TGGAAAGTGGTGTGTTTCGAG   | 59.72  | 20 | 268 | 203  | 470  |
| TTTGAAGGCCGGAATATGAG    | 60.031 | 20 | 135 | 90   | 224  |
| CGGAGATCAAATGAGTGAGC    | 58.388 | 20 | 122 | 3    | 124  |
| GTCATGCCCATTTTGAGACC    | 60.326 | 20 | 206 | 145  | 350  |
| ACTGACATTCACAGGCATTG    | 57.067 | 20 | 188 | 107  | 294  |
| CTCTCTCCTGGGATCTGTGG    | 59.785 | 20 | 197 | 187  | 383  |
| ACATGCATGATCAATGTTGTAA  | 59.411 | 24 | 159 | 7    | 165  |
| TCATGATAATGCATGTCTCTGA  | 59.614 | 24 | 101 | 429  | 529  |
| AGTGGGTTTCGCGTATTGAA    | 60.502 | 20 | 123 | 29   | 151  |
| GACTAGTTTTCTGCGACGGC    | 60.022 | 20 | 203 | 863  | 1065 |
| TGTTTTCTGCTCTCCCCTCC    | 61.67  | 20 | 264 | 108  | 371  |
| TCAACGCATCTACAGTTTGC    | 59.871 | 20 | 183 | 226  | 408  |
| TCCAATTGTTGTCTTCCATCTG  | 59.971 | 22 | 155 | 286  | 440  |
| CAGGTTTTGATGGTTGTGATTT  | 58.858 | 22 | 187 | 98   | 284  |
| TGTGGTTGATGAGTTGGCAT    | 59.967 | 20 | 279 | 4092 | 4370 |
| GCCTGAACAGTCGAGGTGAT    | 60.269 | 20 | 170 | 3    | 172  |
| TGCCAAAAAGATACAGTTGG    | 59.982 | 21 | 136 | 33   | 168  |
| TGGTCGTGAGATAGAGTGCG    | 60.008 | 20 | 204 | 3    | 206  |
| TGGCATCTTCTCTCAAATTCAA  | 59.823 | 22 | 223 | 328  | 550  |
| TGTTTCGATGTGCATGGAGT    | 60.12  | 20 | 128 | 253  | 380  |
| ACCTGTGAAAGCGATCGTG     | 59.846 | 19 | 220 | 2427 | 2646 |
| CAAAGGCCCAATGGTTAT      | 59.685 | 20 | 101 | 1700 | 1800 |

|                        |        |    |     |      |      |
|------------------------|--------|----|-----|------|------|
| TAAAAAGATGAGCCCACCCA   | 60.439 | 20 | 243 | 103  | 345  |
| TGGAATGTTATCAAGGGTGGT  | 59.16  | 21 | 272 | 42   | 313  |
| GAGCTCTGGTTCCCACAGAC   | 59.841 | 20 | 242 | 828  | 1069 |
| CGAAAATGCCCTTTTATGCT   | 59.212 | 20 | 235 | 1190 | 1424 |
| CATCAAGAGTCGGCTGTCAA   | 59.984 | 20 | 197 | 39   | 235  |
| AGAGGAAGAAGGGGGTGAAA   | 60.045 | 20 | 220 | 464  | 683  |
| TCATCCCGTTTCAAACCTCAA  | 59.097 | 20 | 154 | 43   | 196  |
| TGGCTTCCAAGCTCTCAACT   | 60.134 | 20 | 202 | 831  | 1032 |
| AACCCACCAAGTATCGGTCC   | 60.999 | 20 | 269 | 107  | 375  |
| TGATGAAAAACAATTGACCAA  | 59.372 | 23 | 219 | 5    | 223  |
| GCTCTGATACCATAAAAGGGG  | 61.005 | 22 | 159 | 95   | 253  |
| TCACACCTAAACCATTGCGA   | 60.111 | 20 | 102 | 100  | 201  |
| TGTTGCGATTTTCATTTTCC   | 58.601 | 20 | 203 | 33   | 235  |
| CCCTCATAACTCCTGACTGCT  | 58.417 | 21 | 191 | 592  | 782  |
| TTCAACCATCAACTCCACCA   | 59.935 | 20 | 256 | 238  | 493  |
| ACCATCGATGCATTACAAA    | 59.931 | 20 | 147 | 1700 | 1846 |
| CATGTTCCGTCCCAAGATTT   | 59.79  | 20 | 239 | 45   | 283  |
| TCAGTTTCGAGTTATGAAGTTA | 59.749 | 26 | 190 | 73   | 262  |
| CGCCGATTTGGAGATCTATG   | 60.564 | 20 | 269 | 39   | 307  |
| TTAAATGGCCTCGGTATTCCG  | 59.922 | 20 | 242 | 24   | 265  |
| CGAACTGGAAGAGTTGGGAG   | 59.837 | 20 | 171 | 30   | 200  |
| GGTGAAGGAGAGGGAGGAAG   | 60.186 | 20 | 227 | 73   | 299  |
| CATCCGCAATTCTGCTTACA   | 59.833 | 20 | 274 | 4547 | 4820 |
| TCTCGGGTCCAAAACAATTC   | 59.91  | 20 | 223 | 146  | 368  |
| TGGTTATCGTTGTTGGGGAT   | 60.051 | 20 | 199 | 3585 | 3783 |
| CGTCACGGTTATCCTTCGTT   | 59.993 | 20 | 110 | 226  | 335  |
| TTTAGCAGAGTTGGTGAATCA  | 57.952 | 23 | 226 | 566  | 791  |
| GTTTGGAAATTTTGGACGCAT  | 59.807 | 20 | 182 | 314  | 495  |
| GAGATTGGGGACTTGGTGAA   | 59.903 | 20 | 123 | 545  | 667  |
| GGTGGGGAGAATGTAACAGC   | 59.41  | 20 | 133 | 20   | 152  |
| ATGCACCAAAAATTGACACG   | 59.444 | 20 | 193 | 728  | 920  |
| GGTGATTGTATCGCCACCTC   | 60.348 | 20 | 254 | 2321 | 2574 |
| GACCGCTAAAAACCGTAAA    | 60.11  | 20 | 266 | 454  | 719  |
| TGATTGGGCTTTGTCTTTTTG  | 60.096 | 21 | 173 | 55   | 227  |
| AAAGCCGTACATGAAAGACAA  | 60.05  | 23 | 220 | 142  | 361  |
| GGGAGATTTGAAATGTGGGA   | 59.727 | 20 | 119 | 275  | 393  |
| CATAACCAGCTGCCATCTCC   | 60.624 | 20 | 236 | 2    | 237  |
| CTCAACTCAGAGCTCCATGC   | 58.699 | 20 | 167 | 610  | 776  |
| GCGAATGAAACCCAAGAAAT   | 59.022 | 20 | 187 | 205  | 391  |
| GATTTAGGCCAAGGCAATCA   | 60.038 | 20 | 228 | 50   | 277  |
| ATGCGAATCAATTATCCCAA   | 59.272 | 21 | 275 | 52   | 326  |
| GGGTGTTTTGACAATATCACGA | 59.73  | 22 | 234 | 1939 | 2172 |
| AAAGATCTCTGCAAGTCCGC   | 59.579 | 20 | 261 | 240  | 500  |
| GCTCTCAACCATACCTGGTCA  | 60.126 | 21 | 266 | 272  | 537  |
| AAATTTTCGTTTCATGCCCAA  | 60.302 | 20 | 219 | 218  | 436  |
| TGAGCTGTTATGCGTTTTGA   | 58.075 | 20 | 147 | 83   | 229  |
| TACATCCGATTAGCTCGCAA   | 59.425 | 20 | 257 | 215  | 471  |
| TTGGTGGGTTGAATGCTATG   | 59.395 | 20 | 204 | 442  | 645  |
| CAAACGAACTTCCAACGTGA   | 59.734 | 20 | 204 | 41   | 244  |
| TAACCCAAACCCACCCAATA   | 59.91  | 20 | 104 | 19   | 122  |
| AGCTGGATTGAGCTCAGGTG   | 60.555 | 20 | 213 | 14   | 226  |
| AGACGTCATGCAGTTCCTCC   | 60.269 | 20 | 235 | 461  | 695  |
| AGAACTTTTCGCCTGATCCC   | 60.578 | 20 | 270 | 1    | 270  |
| TGCAAGCATCCAAAAACAAC   | 59.712 | 20 | 193 | 46   | 238  |
| GCTCTCATTGTAATCTCTCCCA | 59.739 | 23 | 117 | 1    | 117  |
| CAGCTCCAATCCATCTCCAT   | 60.034 | 20 | 228 | 308  | 535  |
| TCTAGCACGGTTGCAATCAA   | 60.401 | 20 | 265 | 70   | 334  |
| GCTAATTCGGCAGCTTCTTG   | 60.117 | 20 | 148 | 437  | 584  |

|                        |        |    |     |      |      |
|------------------------|--------|----|-----|------|------|
| ACCCTGCAATGCTCTGATTC   | 60.226 | 20 | 278 | 1227 | 1504 |
| TTCAAAAATGAGTGGACCAGA  | 58.187 | 21 | 127 | 1215 | 1341 |
| CCAACCTGCTGCTCATGTAGG  | 59.465 | 20 | 176 | 999  | 1174 |
| CCTAAATGTGGGAAGTGGGA   | 59.784 | 20 | 168 | 1492 | 1659 |
| TGTGGAAGCAAATGGTTAGC   | 58.773 | 20 | 189 | 473  | 661  |
| TGGGACCACAGGATAGGAGT   | 59.38  | 20 | 246 | 4    | 249  |
| CACCTTTTCTCCCTCTTCCC   | 60.045 | 20 | 218 | 78   | 295  |
| GATGATCCGTTTCGCACTTCT  | 60.226 | 20 | 225 | 134  | 358  |
| GACGAAATTGATGTGTTGGC   | 58.979 | 20 | 227 | 228  | 454  |
| TCAGGGAAAAGAGGGTTCCG   | 60.172 | 19 | 261 | 968  | 1228 |
| TCCAACATCCAACCTCCATT   | 60.173 | 20 | 170 | 442  | 611  |
| TTCTGGTACCATACGCGAAA   | 59.182 | 20 | 226 | 188  | 413  |
| ATCAATCTTACGGACTGGCG   | 60.096 | 20 | 229 | 288  | 516  |
| GATCGTGCAAAAATTTGAAAAG | 57.444 | 21 | 247 | 28   | 274  |
| GGCGTTGAGATTTGTTCTT    | 59.174 | 20 | 110 | 12   | 121  |
| TCAGTTTGGTTTATGAGTAGGA | 59.15  | 25 | 263 | 946  | 1208 |
| CGTGGCAGGCTAATATCCAT   | 59.945 | 20 | 142 | 107  | 248  |
| ATGGAAGCTGCCACATCTA    | 60.624 | 20 | 157 | 31   | 187  |
| GCGCTTTTTGCCTGATATTT   | 59.349 | 20 | 212 | 559  | 770  |
| ATGTGTAAGTGTGCAGGGCAT  | 59.041 | 20 | 252 | 3928 | 4179 |
| TTGTGACGCACACATTTCCTT  | 60.16  | 20 | 278 | 140  | 417  |
| AGGAGGAGCAAGAGAGGACC   | 59.952 | 20 | 255 | 39   | 293  |
| TATGGGTCAGAAAAGCCCAC   | 59.933 | 20 | 243 | 187  | 429  |
| AAGAATTGATCATGCGCGTT   | 60.615 | 20 | 262 | 714  | 975  |
| TTTGGGGTGAGCTTCACAAT   | 60.495 | 20 | 237 | 241  | 477  |
| CATTGTGAGTGTGGGACAGG   | 59.997 | 20 | 182 | 2398 | 2579 |
| CGTTAAATCTCTGTGTTGAATC | 58.016 | 24 | 242 | 187  | 428  |
| CTTGTCACTTTCTCCCTCGC   | 59.989 | 20 | 188 | 6    | 193  |
| AAATGCATCGGAGGTGAAAG   | 60.074 | 20 | 215 | 51   | 265  |
| ATGGACCACCCACAAAATA    | 59.91  | 20 | 242 | 82   | 323  |
| TCATTCATCCATTCCCAACA   | 59.707 | 20 | 200 | 752  | 951  |
| TTGGGCTTTCACACACTTCA   | 60.278 | 20 | 164 | 314  | 477  |
| CCCGATTCCCTCTCTTTTTTC  | 60.011 | 20 | 139 | 507  | 645  |
| TTTGCTGCTGATGTTTGTCC   | 59.847 | 20 | 253 | 2    | 254  |
| TTGACTAAAACATGGAAATAA1 | 58.939 | 26 | 160 | 19   | 178  |
| GCAGTTTTGCTCCCCTCTCTC  | 59.997 | 20 | 153 | 1315 | 1467 |
| GGGATTTTTCGAATTTTGTTC  | 59.651 | 21 | 131 | 713  | 843  |
| GGTCGATACATCAGGCAACA   | 59.527 | 20 | 237 | 965  | 1201 |
| TGCATGATGAGGTCTTCGAG   | 59.942 | 20 | 197 | 6054 | 6250 |
| TTCGACTTAATCAATAAAGATA | 57     | 27 | 266 | 92   | 357  |
| TCCAATCTCCAATCCATGC    | 59.394 | 19 | 242 | 500  | 741  |
| CGTGGTTCGATCGTAAATGA   | 59.542 | 20 | 192 | 88   | 279  |
| GGGTACCGAAGGGATAGGAT   | 59.128 | 20 | 168 | 26   | 193  |
| GAACCTGCTGTTTTGGATGGA  | 60.103 | 21 | 160 | 97   | 256  |
| CACGAAATTGATGGAAGAGGA  | 60.059 | 21 | 197 | 345  | 541  |
| TGAATAAGAGTTCAATGAATTT | 59.912 | 26 | 223 | 48   | 270  |
| CGAAATAAGGAGGTGTTATGA  | 60.238 | 24 | 127 | 222  | 348  |
| ACACGCTTGTCAAACATTTCT  | 57.402 | 21 | 210 | 688  | 897  |
| TGTGCAGAGGGACTTTAATGC  | 60.264 | 21 | 113 | 384  | 496  |
| TAAGTTGATGTGTGCAGGGG   | 59.566 | 20 | 249 | 769  | 1017 |
| ACAAACTAATCAAGTTCCGCA  | 57.439 | 21 | 260 | 79   | 338  |
| AATTAATAATGATTGAATTGGC | 58.312 | 24 | 201 | 458  | 658  |
| GACATGATTACTCGTCCCCC   | 59.218 | 20 | 216 | 1401 | 1616 |
| TTTGAACAATGGTACCTCCTCC | 60.221 | 22 | 145 | 497  | 641  |
| GTTTGGGGTATGGAGAAGCA   | 59.933 | 20 | 137 | 701  | 837  |
| GACCAAGGGCTAGTTCACCA   | 60.111 | 20 | 193 | 5647 | 5839 |
| TTCTCTTCTATTTCTTTCTTT  | 58.425 | 27 | 256 | 57   | 312  |
| CGGACCGGGTGGTCTAAATA   | 61.972 | 20 | 102 | 2076 | 2177 |

|                         |        |    |     |      |      |
|-------------------------|--------|----|-----|------|------|
| CATTTGGATCCTCAAGTGGG    | 60.309 | 20 | 276 | 2469 | 2744 |
| GCCTGGTAATCCATTCTTCG    | 59.528 | 20 | 257 | 219  | 475  |
| TGTTGCCGTCAGTTCATGTC    | 60.733 | 20 | 159 | 1    | 159  |
| TGGGATATCCGTTTCTTGA     | 60.266 | 20 | 255 | 320  | 574  |
| AAACTTCTTTCCAACCGGAAT   | 58.991 | 21 | 229 | 34   | 262  |
| CATGATTTGAGTTTGAGTCTAC  | 60.055 | 24 | 273 | 491  | 763  |
| AATGACCGATCTCTCTATCCCA  | 59.925 | 22 | 100 | 344  | 443  |
| GTACTIONAACATCGAGCCGT   | 60.142 | 20 | 144 | 318  | 461  |
| ACAAAAGCTCGGTTTAATCTGC  | 59.799 | 22 | 249 | 149  | 397  |
| ATTGGGGATGAAAATTGGT     | 60.245 | 20 | 142 | 47   | 188  |
| AGGAATTGTCCCCTTCGTTT    | 59.805 | 20 | 244 | 104  | 347  |
| GCATGATCAGGGTAAAATCCA   | 59.776 | 21 | 278 | 470  | 747  |
| TCAGGGTTTTAGCCACAAGG    | 60.103 | 20 | 159 | 346  | 504  |
| GCTCCAATTCACGTTTTTCAA   | 60.103 | 21 | 231 | 0    | 230  |
| CGACTACGGAGAATCCGAAA    | 60.206 | 20 | 259 | 1    | 259  |
| CCCATTTCCCTTCCTTTCTC    | 59.875 | 20 | 230 | 2112 | 2341 |
| ATCGAACCCACGAGAGCTAA    | 59.836 | 20 | 266 | 2097 | 2362 |
| AAAATGCTGACATTGGAGGC    | 60.081 | 20 | 197 | 2475 | 2671 |
| TGAAGCAAAAAGAACCAGAATC  | 59.861 | 22 | 194 | 226  | 419  |
| CACCCACGAACTTTAAACCC    | 59.331 | 20 | 173 | 166  | 338  |
| ATGTTGTCACCCCTACCTGC    | 59.851 | 20 | 268 | 45   | 312  |
| TTGCTCAACTACCCAAACC     | 59.971 | 20 | 108 | 11   | 118  |
| CCGAACCACGTACATCCTCT    | 59.989 | 20 | 209 | 481  | 689  |
| CTAACAGGGTCGGCTCATTT    | 59.195 | 20 | 257 | 5    | 261  |
| GGCTATTTCCACAGTACGGG    | 59.452 | 20 | 275 | 393  | 667  |
| TCCCATTTGCTTTTCCTTTAT   | 59.922 | 21 | 279 | 5594 | 5872 |
| TATTGATGGCCTATTTGCC     | 59.757 | 20 | 186 | 579  | 764  |
| ATCATCCAACATCCACCCAT    | 59.869 | 20 | 107 | 429  | 535  |
| CAGTTTTCGAGTTATGAAGTTA  | 58.177 | 25 | 101 | 384  | 484  |
| GGCTCCGCAACCAACTAATA    | 60.096 | 20 | 236 | 657  | 892  |
| CCTAAGAGATTTGATTGAAAAAC | 59.236 | 25 | 167 | 39   | 205  |
| AATGCGCCTCCCACCTTAAT    | 60.821 | 20 | 239 | 101  | 339  |
| CCGAGCCCTCTCTCTTCTCT    | 60.23  | 20 | 260 | 454  | 713  |
| CAATGGTGCTGAAGTTGTGG    | 60.152 | 20 | 188 | 2    | 189  |
| TCGTTGCCGAATCTACCATT    | 60.469 | 20 | 231 | 1    | 231  |
| CGGGGTGTAACCTGCTTGAT    | 59.993 | 20 | 242 | 1050 | 1291 |
| TTTTGAGGTGAGAATTGCC     | 60.051 | 20 | 245 | 108  | 352  |
| GTTATGCGTTTTGACGGGAT    | 59.829 | 20 | 280 | 995  | 1274 |
| ACACTGAAACCGAACCGAGA    | 60.69  | 20 | 255 | 34   | 288  |
| GCGTGACTATCCACCGTTTT    | 60     | 20 | 112 | 44   | 155  |
| CACATGTACGCGCTTTGAT     | 59.895 | 20 | 165 | 13   | 177  |
| CAATCCCAATTAATTTGCGC    | 59.259 | 20 | 108 | 456  | 563  |
| CACCCTCAATCACTCACACG    | 60.154 | 20 | 163 | 369  | 531  |
| TCAAGGACGATGGCTTTTGT    | 60.636 | 20 | 191 | 598  | 788  |
| TGGATGGTGTTTGTGGCTT     | 59.951 | 19 | 149 | 171  | 319  |
| TGATCTTGGTGGGACAAGAA    | 59.059 | 20 | 201 | 12   | 212  |
| GGTAAACGAGACCCAGCAAT    | 59.056 | 20 | 279 | 776  | 1054 |
| TGTTCCCTGGCAGCTACTCT    | 60.012 | 20 | 240 | 400  | 639  |
| TTGTAGTTCCTAAGCAGCCA    | 59.89  | 21 | 260 | 104  | 363  |
| CAAAGGCCCAATGGTTAT      | 59.685 | 20 | 189 | 288  | 476  |
| AGAAAATATCGGCAAGTGGG    | 59.043 | 20 | 179 | 16   | 194  |
| AAATTGGGATTTGTGGCAAG    | 59.801 | 20 | 154 | 343  | 496  |
| AGGACTCGTAAACGACACGAA   | 59.788 | 21 | 105 | 9    | 113  |
| GGAGTTTCATGCCCTTTTT     | 60.299 | 20 | 210 | 435  | 644  |
| TTTTGCCCTCGAATGCTATC    | 60.175 | 20 | 197 | 688  | 884  |
| TTCTTGCTGGGTCCCTTTCTT   | 58.909 | 20 | 280 | 180  | 459  |
| TCATTTGCAACCAAAAATCCA   | 59.907 | 20 | 173 | 0    | 172  |
| CGGAAATTATTTTAAACCCCG   | 59.633 | 22 | 256 | 587  | 842  |

|                         |        |    |     |      |      |
|-------------------------|--------|----|-----|------|------|
| CGTGCAATTA AATTCAAATCTT | 59.476 | 24 | 251 | 216  | 466  |
| TGCGTTTTGATGATATATAGGT  | 58.933 | 25 | 121 | 520  | 640  |
| GAATAACAACAATGAAAGTGG   | 57.333 | 24 | 165 | 148  | 312  |
| GAAAGCCAGCATTGAAACCT    | 59.316 | 20 | 257 | 81   | 337  |
| TCGGGTAAACAAACATAGAT    | 57.292 | 23 | 274 | 773  | 1046 |
| TTGTTACGGAGATTGCCTCA    | 59.272 | 20 | 150 | 240  | 389  |
| TGAAATTTGGCCTTGAAAC     | 59.916 | 20 | 271 | 170  | 440  |
| ATCATTTATTTTCGGCAACGC   | 59.935 | 20 | 169 | 135  | 303  |
| GTTTTGAACGGTCTGGTTCCG   | 60.529 | 20 | 275 | 18   | 292  |
| GAAGAACAATTACAATGTTTAT  | 57.771 | 26 | 190 | 89   | 278  |
| GTACGTTGGAACACGTGGC     | 60.024 | 19 | 223 | 845  | 1067 |
| TTTGCAGGATTTTGGACAT     | 60.448 | 20 | 201 | 102  | 302  |
| CAATTGGATAAGTGAGTTAATT  | 57.84  | 25 | 137 | 135  | 271  |
| ATGGCGGTTACCTATCCTCA    | 59.41  | 20 | 206 | 13   | 218  |
| TAGCACTTCTGCCTGGGTTT    | 59.875 | 20 | 276 | 562  | 837  |
| TTTCGTGATTAAGCTTGCCC    | 60.209 | 20 | 280 | 6250 | 6529 |
| ATTAATGCGCCTCCCTCTT     | 60.061 | 20 | 155 | 186  | 340  |
| GAATTGAGTTTTTCAACTCTATC | 59.17  | 26 | 251 | 1547 | 1797 |
| ACCCAAAAGGGATAACATGC    | 60.068 | 21 | 241 | 1003 | 1243 |
| ACCCGCATCACTTGAACCTCT   | 59.727 | 20 | 239 | 9    | 247  |
| ATGATCTACGTCCACGGGAG    | 59.95  | 20 | 266 | 182  | 447  |
| TCAATTTGACGTGATTTAACGT  | 60.662 | 24 | 241 | 369  | 609  |
| GACCCTTCACTCTTTTCCCC    | 59.912 | 20 | 274 | 148  | 421  |
| GGAGGAATTGGGATTTTTGG    | 60.482 | 20 | 100 | 193  | 292  |
| TCAAAGAAGGGTTGTGGCTC    | 60.232 | 20 | 241 | 45   | 285  |
| TTTTCACCTTCAAATGTGCTC   | 59.738 | 21 | 219 | 453  | 671  |
| CCTCCATGTTCCCTCATCGTC   | 60.475 | 20 | 250 | 459  | 708  |
| CCGCCATGTTTCGATGATTA    | 61.747 | 20 | 270 | 2175 | 2444 |
| TCCCCATTTTTGATCACCTC    | 59.727 | 20 | 243 | 37   | 279  |
| AAAGAGGCCGAGTGAAAACC    | 60.61  | 20 | 142 | 203  | 344  |
| GGGGTTGTA CTCTGGGATA    | 59.67  | 20 | 264 | 86   | 349  |
| TTTTCCGGAGTTCACCTCAC    | 60.088 | 20 | 280 | 149  | 428  |
| AGGACTTCACAAAGGCCAAA    | 59.711 | 20 | 264 | 2280 | 2543 |
| ACCACACGTGTTGGCTAGGA    | 61.572 | 20 | 279 | 1312 | 1590 |
| ACCAATATTTTTCGGTTCGAT   | 59.301 | 20 | 268 | 32   | 299  |
| ATCTTGCTGCTCCAAGGTGT    | 59.874 | 20 | 130 | 161  | 290  |
| GTTGTATTCGGGCTGGTCTC    | 59.556 | 20 | 183 | 210  | 392  |
| CATGCTGCATATATAAATGTCT  | 57.652 | 27 | 100 | 107  | 206  |
| AATAGATTGTCCCTCGAACGC   | 60.465 | 21 | 219 | 37   | 255  |
| TCGGAGCGATAAGGAATCTG    | 60.309 | 20 | 274 | 9    | 282  |
| GGCGTCGCTGTAATAGTCCT    | 59.364 | 20 | 181 | 328  | 508  |
| CCCAATCACTCTCACCCATT    | 59.779 | 20 | 174 | 341  | 514  |
| ACGGACTCCCTTCCTCAACT    | 60.111 | 20 | 239 | 92   | 330  |
| ACCACTCACTTCCTCCGTCA    | 60.713 | 20 | 168 | 584  | 751  |
| AGGGCATCACTAGAAAGCCA    | 59.836 | 20 | 223 | 33   | 255  |
| TCATTTTCCGCACCCATATT    | 60.153 | 20 | 242 | 19   | 260  |
| CAAATTGATTATGAAGAAATTC  | 58.222 | 25 | 272 | 575  | 846  |
| GACATGGCTTTGCCATTAT     | 59.791 | 20 | 239 | 394  | 632  |
| AGCTAGGGTTTTTCTGGGGA    | 60.068 | 20 | 266 | 3    | 268  |
| CACACACTCTATAAAATGC/    | 60.501 | 26 | 230 | 304  | 533  |
| GGTGGTTCGTGATGTCCTTT    | 59.827 | 20 | 245 | 840  | 1084 |
| GAACGAGGAGAAGGACATGC    | 59.81  | 20 | 174 | 40   | 213  |
| TTGTCCACTTTGTTTCTGCTG   | 58.96  | 21 | 102 | 311  | 412  |
| ACCGCTTGCTTCACCTCTC     | 59.455 | 20 | 195 | 7    | 201  |
| TGCATATCTTGGTGAGTGTATG  | 59.897 | 23 | 150 | 331  | 480  |
| TGGGGTTCTGCCTATCAGAC    | 60.073 | 20 | 221 | 193  | 413  |
| TCATCGAATCACATGCTTGC    | 60.79  | 20 | 199 | 1469 | 1667 |
| ACGGTCAGCCACTCAATCTT    | 59.727 | 20 | 245 | 53   | 297  |



|                          |        |    |     |      |      |
|--------------------------|--------|----|-----|------|------|
| TTGGGAGAATTTTCAACTCTTG   | 58.352 | 22 | 199 | 69   | 267  |
| CACAAAGGCAGCACTTGTTCC    | 59.49  | 20 | 246 | 7    | 252  |
| AAATCAAATGGGAATGTCGG     | 59.622 | 20 | 128 | 24   | 151  |
| TTCTTTCCCTCCAAAACAA      | 59.518 | 20 | 253 | 811  | 1063 |
| GCCTTTGCCTCTTTCTCTATTTCC | 59.886 | 23 | 123 | 159  | 281  |
| CCACGGTTCCTTGGAATTG      | 60.22  | 20 | 208 | 489  | 696  |
| CGAGTGTGGAAAGGGAGAGA     | 60.377 | 20 | 158 | 59   | 216  |
| TTCGAATTATCTTCAGGCCG     | 60.167 | 20 | 278 | 9    | 286  |
| TTCCGGTCCAAACCAAATTA     | 60.16  | 20 | 244 | 119  | 362  |
| CATTGCCAAAGTCATCCTCC     | 60.461 | 20 | 248 | 1    | 248  |
| CGATACCATCATCCCAATCC     | 59.975 | 20 | 188 | 560  | 747  |
| GTTTGGTCCGGTGTGTTCT      | 59.867 | 20 | 264 | 247  | 510  |
| GTTGAGTCGAGGAAGATCGG     | 59.803 | 20 | 130 | 688  | 817  |
| ATTGGCAAATATGCGAGGAC     | 59.929 | 20 | 125 | 36   | 160  |
| ATCGGTTATCACCGGATCG      | 60.697 | 19 | 197 | 273  | 469  |
| CTCGAGTGAGACCGAAGTGAC    | 60.041 | 21 | 239 | 76   | 314  |
| TATTCAAAGGGCATTTCGTC     | 59.068 | 21 | 159 | 340  | 498  |
| TTTTTATACAAGGGCGGAA      | 59.429 | 20 | 149 | 72   | 220  |
| CTCTGCTGTGAGCATTTCGAT    | 59.143 | 20 | 138 | 69   | 206  |
| CATGTAAGGCCATAATCGC      | 60.31  | 20 | 132 | 699  | 830  |
| TGATAACCTTGAGGAAACTTGC   | 58.378 | 22 | 277 | 10   | 286  |
| AGGGTGGGTTTGGAAAAGAG     | 60.332 | 20 | 273 | 78   | 350  |
| AAATGCCAAATAAAGCTAAATC   | 57.912 | 23 | 153 | 2880 | 3032 |
| CTATGCATGGGTTCCGTTCT     | 59.955 | 20 | 166 | 24   | 189  |
| CAATGAAACATTGGCTGGTTT    | 59.853 | 21 | 143 | 80   | 222  |
| TTTCGCCCTTCTAGAGTCA      | 59.948 | 20 | 213 | 5    | 217  |
| GGGTCAAGGAGGGTGTATGA     | 59.779 | 20 | 270 | 5    | 274  |
| CCATGTTTGTATTATTGTAGG    | 58.388 | 25 | 135 | 60   | 194  |
| ACCTAGAAGTGGCCTCACGA     | 59.867 | 20 | 166 | 65   | 230  |
| GAGAGAGAGGCAGACATCGG     | 60.096 | 20 | 195 | 89   | 283  |
| GGCCCTATGCATGTGAAGTT     | 59.962 | 20 | 267 | 433  | 699  |
| TCACTCTCGAGCCTAACCGT     | 60.012 | 20 | 211 | 441  | 651  |
| ATGTTGAAACCCTTCCCAT      | 60.422 | 20 | 280 | 2976 | 3255 |
| TTTGCCAATTTGAGCTCCTC     | 60.331 | 20 | 100 | 116  | 215  |
| TGAGAACCCGGTTTGATTTCC    | 59.91  | 20 | 241 | 6533 | 6773 |
| CTTAGGGAATCGAACCTGGG     | 60.807 | 20 | 179 | 10   | 188  |
| GAATCACACCAACGCCTTTT     | 59.978 | 20 | 168 | 4057 | 4224 |
| AGGTTTTGACATAACTTAGGTG   | 60.129 | 27 | 120 | 0    | 119  |
| AAGAGCTTCTGCGTCTTTTCG    | 59.898 | 20 | 187 | 224  | 410  |
| TGCACCACGTCATCTTCTTC     | 59.837 | 20 | 154 | 1190 | 1343 |
| AGCCGAATGAAGGTGGAATA     | 59.528 | 20 | 176 | 10   | 185  |
| AAATTGGCATTGTGAAGCC      | 59.945 | 20 | 187 | 743  | 929  |
| CCCTAGATGACAACCTTCGG     | 59.545 | 20 | 155 | 64   | 218  |
| TTCTCACCAAGTCTGTCAACCA   | 59.294 | 21 | 244 | 1008 | 1251 |
| TGTGCGAGGAGAATCATCAG     | 59.942 | 20 | 171 | 0    | 170  |
| AAATGAGGGCTGCAAATTGA     | 60.585 | 20 | 268 | 972  | 1239 |
| CCTACCCGATAAAAATGGCA     | 59.789 | 20 | 265 | 134  | 398  |
| TGGCTACAATAACAACGCCAA    | 60.133 | 20 | 277 | 9    | 285  |
| AAAATCGTCCCAAATCCCTC     | 60.131 | 20 | 172 | 2    | 173  |
| TTCTGGTTTCCGTCAGATCC     | 60.05  | 20 | 153 | 85   | 237  |
| GGGTTTTGCTGTCTTTTCCA     | 60.088 | 20 | 164 | 19   | 182  |
| GGGGTTAAGATTTGGGGAAC     | 59.51  | 20 | 259 | 66   | 324  |
| GTCATAGGCTTGGGAAAGCA     | 60.214 | 20 | 279 | 408  | 686  |
| ATAAATGGTTGACGGCTTGG     | 59.823 | 20 | 227 | 233  | 459  |
| CCGACCTAGCATAGTGGGAA     | 60.088 | 20 | 139 | 1527 | 1665 |
| CCTCTGCAGCTTCCAAAGAC     | 60.134 | 20 | 152 | 1045 | 1196 |
| CGCATCATGTTGTTGGAAGT     | 59.572 | 20 | 161 | 1060 | 1220 |
| AATCTCACGGTCGGAACAAC     | 59.973 | 20 | 264 | 701  | 964  |

|                         |        |    |     |      |      |
|-------------------------|--------|----|-----|------|------|
| GTCACTTGCGGGTATTGGAC    | 60.384 | 20 | 148 | 44   | 191  |
| AGTTCATTCAAAAATGTCGAG/  | 57.927 | 23 | 207 | 689  | 895  |
| ATTTTAAACTGACGGCCGAG    | 59.225 | 20 | 163 | 68   | 230  |
| CATTGCGAGAATGACAAGGA    | 59.799 | 20 | 115 | 278  | 392  |
| CCCAAAAATTGAACATATCGA/  | 58.848 | 22 | 247 | 493  | 739  |
| GGGCTGGTTTGTGGTTGTT     | 59.875 | 20 | 173 | 249  | 421  |
| AGCCTTCTAGCATCTCTTGCTC  | 59.42  | 22 | 109 | 302  | 410  |
| GATGATGATTGCCCATTTT     | 59.587 | 20 | 125 | 307  | 431  |
| GCAAACGATCAATCCCTGTT    | 59.939 | 20 | 270 | 741  | 1010 |
| GGTTAAAGATCAAACCAAACA/  | 59.801 | 23 | 278 | 97   | 374  |
| TCCGCACACATGGATAGAAG    | 59.673 | 20 | 198 | 898  | 1095 |
| TTTGGATCCGAACATCCATT    | 60.133 | 20 | 234 | 1614 | 1847 |
| CTTCGGGCATACTCCAAAAC    | 59.569 | 20 | 270 | 42   | 311  |
| GCCATCCCAGATTTGAGAGA    | 60.158 | 20 | 219 | 12   | 230  |
| AACCTCATTGCTCTCCGCTA    | 59.978 | 20 | 149 | 318  | 466  |
| CGCCTTTATGTGACGTGGTA    | 59.609 | 20 | 257 | 2451 | 2707 |
| TAAGACTGGTGGGAGTTGGG    | 59.959 | 20 | 262 | 200  | 461  |
| GGCGGTGTTACAATTTACC     | 60.235 | 20 | 276 | 86   | 361  |
| CCGTCCAACCTCTACAAATCA   | 59.978 | 21 | 233 | 496  | 728  |
| CCAAAACCCCTCGTACTTCA    | 59.964 | 20 | 279 | 349  | 627  |
| GGACTTTTGGCCTTTGTAACC   | 59.864 | 21 | 173 | 332  | 504  |
| TCTCACGTCTCACACCCTTG    | 59.864 | 20 | 254 | 16   | 269  |
| CGTGTTCTATATTCCCGTATCG  | 58.543 | 22 | 101 | 957  | 1057 |
| TTGACCACAGCAGTACGACC    | 59.751 | 20 | 214 | 327  | 540  |
| GGGACCTTTCAGTCACCAGA    | 60.088 | 20 | 138 | 318  | 455  |
| CATGTCACAAGTCACTCGCC    | 60.319 | 20 | 207 | 211  | 417  |
| GGCGAGCCATATGTCATTTT    | 59.929 | 20 | 237 | 3480 | 3716 |
| TGTGGATCTTGGTTTGGTGTT   | 60.262 | 21 | 254 | 205  | 458  |
| GAGCATCAATCTCCTCCTGC    | 59.917 | 20 | 141 | 45   | 185  |
| CCCAACTGTTTCAGCCATTT    | 59.971 | 20 | 237 | 429  | 665  |
| TCATCGACGCCATATCTTTG    | 59.646 | 20 | 142 | 475  | 616  |
| TGGAGAGGGTTGTTGGTGAT    | 60.363 | 20 | 104 | 104  | 207  |
| GGGTATTTATGATATTTCCAAC/ | 57.935 | 26 | 238 | 1    | 238  |
| CCACTAGGGGTGGCAATCTA    | 59.948 | 20 | 226 | 1238 | 1463 |
| GGGCGAGTTAAGCTCGAATA    | 59.456 | 20 | 243 | 23   | 265  |
| GAACTCAAAGTGGTTGGGGA    | 59.943 | 20 | 246 | 331  | 576  |
| TTTATCCATGGCGCATTTTT    | 60.282 | 20 | 165 | 107  | 271  |
| GCTTGATTTTCCTTCCTCCC    | 60.017 | 20 | 168 | 21   | 188  |
| CCAGTCCGGTCCAGTCTAAA    | 60.103 | 20 | 266 | 32   | 297  |
| GGTTGAGAATGGCGAAGAAA    | 60.192 | 20 | 275 | 41   | 315  |
| TGTTTTCTAAAAATAGGACACA  | 59.056 | 25 | 236 | 143  | 378  |
| ATCAGGTCGTTGTGGTGTGA    | 60.005 | 20 | 144 | 34   | 177  |
| TGCGCCTCCTTCACTTTAAT    | 59.845 | 20 | 277 | 73   | 349  |
| AAGTTGGTTTCCACAGACG     | 60.005 | 20 | 162 | 114  | 275  |
| TCCAATTGCAGCATTTAACAA   | 59.359 | 21 | 176 | 486  | 661  |
| TTGGACAAAAGTACCAGGGC    | 59.971 | 20 | 274 | 1491 | 1764 |
| TGTCATCTCCGAGCTGTTTG    | 59.984 | 20 | 271 | 1522 | 1792 |
| GCACCACACCGAACTCAATA    | 59.572 | 20 | 208 | 37   | 244  |
| TCATATGTCACGTTAAGACATG  | 59.406 | 24 | 229 | 376  | 604  |
| GACGACAACGTTGGTGTGTTG   | 60.049 | 20 | 185 | 957  | 1141 |
| CCATGTGTATGCTGCTGGTC    | 60.144 | 20 | 188 | 323  | 510  |
| AAGAACTCCCTTGGGTGAGG    | 60.48  | 20 | 152 | 28   | 179  |
| GCCAACGCAAATCCTAACAG    | 60.637 | 20 | 258 | 1082 | 1339 |
| GGGGGAAGGAGAAGTAGTGG    | 59.928 | 20 | 190 | 31   | 220  |
| GGATGTCCGAGGTGGAGTAG    | 59.53  | 20 | 183 | 338  | 520  |
| AGACGGAATACGATTCGGAG    | 59.15  | 20 | 274 | 1    | 274  |
| CCAAACTCTCGTCTGGTCCT    | 59.3   | 20 | 190 | 213  | 402  |
| ATCTCTTTTATCATCGCCGC    | 59.281 | 20 | 136 | 21   | 156  |

|                        |        |    |     |      |      |
|------------------------|--------|----|-----|------|------|
| CTCTGTCACCCCAGAAAACC   | 59.549 | 20 | 102 | 1576 | 1677 |
| GCCCTCATGACTCTCAGCA    | 60.088 | 19 | 280 | 824  | 1103 |
| AACACCTTAAATGTCGCCG    | 59.996 | 20 | 222 | 77   | 298  |
| CATGTGTCTTATGTTTCGAGG  | 59.209 | 21 | 237 | 2509 | 2745 |
| GCTACCCTTTTTGACCTACGG  | 60.008 | 21 | 253 | 27   | 279  |
| AGTCGTCGAGATTTGGCAAT   | 59.7   | 20 | 227 | 48   | 274  |
| GAGTTTGGGAGTTGAGCTGG   | 59.844 | 20 | 230 | 568  | 797  |
| GCGGAGTTGCTGTTTCAGTT   | 60.44  | 20 | 274 | 5190 | 5463 |
| GGGTCTCGCATAAAATGGAA   | 59.901 | 20 | 142 | 1101 | 1242 |
| TCAAAGGCCCAACAATGGTTA  | 61.254 | 20 | 111 | 17   | 127  |
| TCCCCAGTGTACACAGACT    | 59.113 | 20 | 121 | 3    | 123  |
| AGTGACCACCCAACCACAAT   | 60.135 | 20 | 216 | 66   | 281  |
| CCACAAAATAGGGGGAAAAA   | 58.781 | 20 | 174 | 233  | 406  |
| CTCTCATCTCTCACCTCACC   | 58.06  | 22 | 255 | 142  | 396  |
| TCTTATGCCAACAAGACGAAA  | 58.426 | 21 | 178 | 25   | 202  |
| TATATGCTCGCGTTTCATGC   | 59.832 | 20 | 146 | 272  | 417  |
| AGCAATGTTGTTGGGTGGTT   | 60.277 | 20 | 136 | 1117 | 1252 |
| ATTCATCAATGCTTACCCGC   | 59.929 | 20 | 207 | 15   | 221  |
| AAATCGTGTTCGTGCATCA    | 60.119 | 20 | 126 | 296  | 421  |
| CTCTCTGTCCCCCTCTCC     | 60.336 | 20 | 179 | 81   | 259  |
| GATTTCTTTGGGCAGAACCA   | 60.051 | 20 | 256 | 608  | 863  |
| GTCGTCATCCATGGTCTGTG   | 59.962 | 20 | 118 | 6    | 123  |
| GGTCTTTTGTGTTAACATCATG | 58.553 | 23 | 206 | 309  | 514  |
| TTTGGCTATCAGCTGTCCCT   | 59.836 | 20 | 267 | 155  | 421  |
| GACGGAGGTGATTCTTTGGA   | 60.05  | 20 | 186 | 260  | 445  |
| AAATGAAATTGATCATTTGAGC | 57.621 | 23 | 253 | 56   | 308  |
| AGAGGCAACTTGGGAATTGA   | 59.67  | 20 | 274 | 2324 | 2597 |
| TTGACCGGATCGAAGCTCTA   | 60.874 | 20 | 266 | 406  | 671  |
| CCTTCCTTTTGCTTGTTGGA   | 60.22  | 20 | 177 | 98   | 274  |
| TCACCATAGGATTCTCTCAATC | 59.615 | 24 | 275 | 12   | 286  |
| GGGTTCCCACGTCATAAAAA   | 59.662 | 20 | 104 | 1412 | 1515 |
| TCTGCATTCTTGCAATACGG   | 59.792 | 20 | 161 | 1287 | 1447 |
| CTCAGCCTTATCTTTGCCG    | 60.11  | 20 | 197 | 16   | 212  |
| AATGGCTGTGGAGAATCCAG   | 60.073 | 20 | 209 | 181  | 389  |
| CTACGGTTCCAAATTGCTCC   | 59.569 | 20 | 247 | 357  | 603  |
| AGAACTTGAAGCCTCCAGA    | 59.162 | 20 | 276 | 76   | 351  |
| ACGCCAGCCTCACTCAAAA    | 61.934 | 19 | 131 | 3    | 133  |
| GTTTCGTGTGCGTGAGAGTGT  | 59.948 | 20 | 229 | 705  | 933  |
| ATTTACGTCACCCCTGCATC   | 59.82  | 20 | 230 | 246  | 475  |
| TTACGATATGTACCGTTCCCA  | 57.913 | 21 | 187 | 36   | 222  |
| ACCACGGGACCTAGTTCAGA   | 59.574 | 20 | 259 | 8    | 266  |
| TCGACCTCGTGCTAATGATG   | 59.823 | 20 | 216 | 193  | 408  |
| ACGGATCGGAAATCCATAAA   | 59.23  | 20 | 197 | 990  | 1186 |
| GCTAATTCGGCAGCTTCTTG   | 60.117 | 20 | 186 | 7    | 192  |
| AGCAGTTGCGATCAGCAGTA   | 59.77  | 20 | 141 | 328  | 468  |
| GCACAATTAATGCGCGATA    | 59.705 | 20 | 170 | 132  | 301  |
| CTGTCTCTCGGGGATAAGC    | 61.115 | 20 | 113 | 1595 | 1707 |
| GGTATCAGAGCCGAGGTTGA   | 60.218 | 20 | 147 | 7    | 153  |
| CTACAAAATGCGCGAGATCA   | 59.976 | 20 | 212 | 3423 | 3634 |
| CATGTTGCTTCACATGGGG    | 60.952 | 19 | 233 | 398  | 630  |
| CCGTTGAGCCGAATGTTTTA   | 60.989 | 20 | 279 | 45   | 323  |
| TGTGTGTGCTCCAATCTGCT   | 60.473 | 20 | 212 | 790  | 1001 |
| ACGAAATTGCCCTTGATGC    | 59.967 | 20 | 202 | 85   | 286  |
| ATCCTCCCCTTGCTGAAAAA   | 60.929 | 20 | 258 | 1    | 258  |
| CCACTCAAACCACCCTTTA    | 59.824 | 20 | 128 | 108  | 235  |
| TGGGCAGAGTAAGGAATTGG   | 60.066 | 20 | 221 | 1857 | 2077 |
| ATGCTATCGATGTGTTGGCA   | 60.104 | 20 | 198 | 246  | 443  |
| TGGATTTGCAGTGTTCTTGG   | 59.691 | 20 | 156 | 2347 | 2502 |

|                          |        |    |     |      |      |
|--------------------------|--------|----|-----|------|------|
| CAACCATCACGAAATGCAGA     | 60.665 | 20 | 266 | 1280 | 1545 |
| TGAAATTTGGAAATAAGGAGG    | 59.382 | 23 | 105 | 683  | 787  |
| TCTTTTCAGCACAAATGCGAG    | 60.134 | 20 | 239 | 3335 | 3573 |
| TCCAAATCTGAAGGCCGATA     | 60.544 | 20 | 271 | 907  | 1177 |
| CATGTGGACCATCGATCTTG     | 59.918 | 20 | 182 | 4    | 185  |
| GTCAGACCAGCTCCCCTTC      | 59.783 | 19 | 226 | 968  | 1193 |
| TTGACCAAGGTGAGAATTTGA/   | 59.587 | 22 | 118 | 125  | 242  |
| TGGATTTTCATCATCAAGTCTCC  | 58.984 | 22 | 208 | 51   | 258  |
| AACGGCAGCTTCTCTCATGT     | 60.02  | 20 | 214 | 816  | 1029 |
| ATTGATTGTTAGCGGATGGC     | 59.929 | 20 | 227 | 827  | 1053 |
| GCGGTTATACTATTCTGGCTTG   | 59.677 | 23 | 222 | 13   | 234  |
| AAAATCTCAAACCGTGAGATG/   | 59.645 | 23 | 187 | 962  | 1148 |
| TTTTCCGTTTGAACTTTTTCATTT | 59.098 | 23 | 279 | 194  | 472  |
| CGGATTTAAAGGTTATTACCTG   | 58.157 | 25 | 224 | 888  | 1111 |
| GCCTTTGCCCTTTCTCTAT      | 59.688 | 20 | 271 | 77   | 347  |
| TTTCCGAATATGAAAACCGC     | 59.907 | 20 | 258 | 103  | 360  |
| TGGATATGGTTTTTGCAGGG     | 60.692 | 20 | 169 | 88   | 256  |
| TCGTCCAACCAAATTGTTGAT    | 60.22  | 21 | 276 | 599  | 874  |
| TGACAATGTTATCGATGGCG     | 60.488 | 20 | 170 | 4    | 173  |
| GGAAAACAGAGCACCCCATATA   | 59.933 | 20 | 150 | 2171 | 2320 |
| TGTCGAGACAATCGTGGAGA     | 60.402 | 20 | 243 | 468  | 710  |
| GGGTTTAAATAGCGCGTTG      | 59.624 | 20 | 159 | 323  | 481  |
| AATTAAGATTTTCGGGAAATTAC  | 57.21  | 25 | 247 | 163  | 409  |
| ACCAGTGCACATCAAAATTCC    | 59.851 | 21 | 189 | 11   | 199  |
| GCAACTCCAATAAAGAATTTGC   | 59.512 | 23 | 253 | 26   | 278  |
| CGAACAAAGGGAAAACAATGG    | 60.336 | 20 | 263 | 277  | 539  |
| CAATCAACATGCAAGCATCA     | 59.232 | 20 | 174 | 24   | 197  |
| AAACAGCCGTTATCAGCCAC     | 60.14  | 20 | 247 | 87   | 333  |
| CCTTGGCTATAAAAAGGGGC     | 59.93  | 20 | 216 | 477  | 692  |
| AGCGGGTAAATATCAGTTTTTG   | 59.101 | 23 | 238 | 191  | 428  |
| TTTGTGATGCTCCATGCTTC     | 59.805 | 20 | 263 | 283  | 545  |
| ATTC AAGGGTTAGGGCTTGC    | 60.451 | 20 | 188 | 195  | 382  |
| AATTGAATGGCAAGGATTGG     | 59.762 | 20 | 148 | 2152 | 2299 |
| TGGA ACTCTTCTTCATCGCA    | 59.522 | 20 | 208 | 104  | 311  |
| TGGGTTCAAAGGGAATTCTG     | 59.903 | 20 | 272 | 57   | 328  |
| CTTCGGACAGCAAAAACCTC     | 59.853 | 20 | 230 | 238  | 467  |
| CTGGAAGTGCGGTAGAGAGG     | 60.005 | 20 | 116 | 561  | 676  |
| GTACGGTTGCTCATCAGCCT     | 60.285 | 20 | 276 | 1879 | 2154 |
| TTCCCACCGAAAGCTACAGT     | 59.734 | 20 | 254 | 2060 | 2313 |
| CTCTGAGCTTGGGAAACCAG     | 59.982 | 20 | 101 | 372  | 472  |
| CCCAAGACCCCAATTTGATT     | 60.91  | 20 | 247 | 394  | 640  |
| AGGAGTGAATCAATGAGAG      | 59.329 | 24 | 179 | 67   | 245  |
| TTTGTGCTTTGTGTTGGTGG     | 60.587 | 20 | 246 | 487  | 732  |
| TGTTTCATGTGTCCATGTTTCA   | 59.864 | 22 | 231 | 2571 | 2801 |
| AGATGAAACTGCGTTCAC       | 60.119 | 20 | 248 | 530  | 777  |
| ACAGGAGGGTTCACACAACC     | 59.859 | 20 | 170 | 53   | 222  |
| TGTACTGCATAGTTGTTTCATC   | 59.58  | 24 | 270 | 243  | 512  |
| TATGTTTTTTCGGATCCCTTCC   | 60.137 | 21 | 229 | 10   | 238  |
| AGTGGGGAGCCTTACCTTGT     | 59.994 | 20 | 258 | 187  | 444  |
| GCCCAAATAAGTTGGAGTGG     | 59.429 | 20 | 219 | 9    | 227  |
| AGGCCTAAAATGCAAGCTCA     | 59.982 | 20 | 190 | 2092 | 2281 |
| CTACCTATGGCCTGCTTCCA     | 60.227 | 20 | 237 | 2553 | 2789 |
| ATTCCAATTTCTTGCCTCCA     | 59.505 | 20 | 241 | 632  | 872  |
| CCGGGGTCAAGAACATGTAG     | 60.366 | 20 | 171 | 1366 | 1536 |
| TTGTCTCCACATTCATGGTT     | 60.225 | 21 | 179 | 632  | 810  |
| AAAGCCTACCTTGCTTCCGT     | 60.262 | 20 | 234 | 34   | 267  |
| GTCTTACCGGAGCTTGGTTG     | 59.734 | 20 | 261 | 23   | 283  |
| TGTGGATGAAATTTGGAAGAG/   | 59.546 | 22 | 272 | 10   | 281  |

|                        |        |    |     |      |      |
|------------------------|--------|----|-----|------|------|
| TCACCAAATCTATAGTTATCA  | 59.412 | 27 | 168 | 344  | 511  |
| GGAGGAGCAGCAAGAACAAG   | 60.134 | 20 | 257 | 770  | 1026 |
| AGAACATCAGCGGGCATATC   | 60.066 | 20 | 172 | 237  | 408  |
| ATTTCTACTGACTTGGGCG    | 60.255 | 20 | 103 | 195  | 297  |
| TTGTGTGTGCCAGTAGGGC    | 59.597 | 20 | 277 | 788  | 1064 |
| TAAACCCTAAAAACGCGCA    | 60.593 | 20 | 280 | 322  | 601  |
| ATGCAGTGGATTTTTGGTGA   | 58.976 | 20 | 214 | 1637 | 1850 |
| CGGCCGTGTAGTTAACCAAT   | 59.883 | 20 | 241 | 80   | 320  |
| AAACCCAGTAATCTCAGCCG   | 59.195 | 20 | 117 | 9    | 125  |
| TGTTTTATTGACGCGTTTTGG  | 59.603 | 20 | 227 | 134  | 360  |
| TGACGTGGCATTTCAGAGA    | 60.39  | 20 | 186 | 95   | 280  |
| CTTCGTTTGGCATGTTTGTG   | 60.149 | 20 | 268 | 296  | 563  |
| CATTGTACTACATGGATGAATC | 60.03  | 26 | 221 | 390  | 610  |
| TTGACGTTTACCTAACCCAC   | 59.883 | 21 | 208 | 258  | 465  |
| ATCACAGCAAGACCTCCACA   | 59.261 | 20 | 280 | 234  | 513  |
| TGAAAATCAAAAGGCCCTCA   | 60.555 | 20 | 142 | 3020 | 3161 |
| CGCTTCGGACAAATATGACA   | 59.688 | 20 | 213 | 466  | 678  |
| TATTTGAGAAATGGCACCC    | 59.901 | 20 | 275 | 141  | 415  |
| TGCGTTTTGACAATATATAGGT | 60.083 | 26 | 234 | 2845 | 3078 |
| CCACCTCAACCCTCATCTTC   | 59.505 | 20 | 271 | 775  | 1045 |
| CGGAGTAGATCTCAACACGC   | 58.47  | 20 | 238 | 43   | 280  |
| TAAACGCCGGTGAGGTAATC   | 59.96  | 20 | 175 | 277  | 451  |
| CTTAAACTTCAGCCCGTACCC  | 60.008 | 21 | 230 | 0    | 229  |
| TCGAAACACATCCCCAAAAT   | 60.17  | 20 | 221 | 352  | 572  |
| TCAACCTCGCAGATTGATTC   | 58.799 | 20 | 107 | 1216 | 1322 |
| AAAAACCAATGGTGGAGCAA   | 60.344 | 20 | 237 | 896  | 1132 |
| CTCAAATGCTCGAGGGCTAA   | 60.481 | 20 | 212 | 138  | 349  |
| TTGATCGATTGTTTTCTTGGC  | 60.067 | 21 | 149 | 666  | 814  |
| GCAATAAGTGAGTGACTTCCC  | 60.004 | 22 | 236 | 0    | 235  |
| TTGTGTTTTGAAGTGTTATGCC | 60.082 | 23 | 213 | 59   | 271  |
| TGAGTTATGAAGTGTTATGAAC | 59.11  | 25 | 167 | 174  | 340  |
| AAGCCGATCGAGTTTGTGAG   | 60.397 | 20 | 177 | 29   | 205  |
| CACTCTCCTGCTCCAGCTCT   | 59.883 | 20 | 185 | 25   | 209  |
| CGGTTAGTCCAGCCATCTCT   | 59.308 | 20 | 188 | 171  | 358  |
| ACCAATGGTGGTATGGTGTG   | 58.984 | 20 | 101 | 18   | 118  |
| ATTTCAATTCATGGGTTTCG   | 57.399 | 20 | 177 | 45   | 221  |
| TGCGCTAACAAGGTCCCTAT   | 59.73  | 20 | 151 | 214  | 364  |
| TTGAAGATCAACGGTCCACA   | 60.088 | 20 | 163 | 61   | 223  |
| TGGGTTGAAATGTTTACATGG  | 58.254 | 21 | 194 | 152  | 345  |
| GAAACGCCACTTCAAACCAT   | 59.978 | 20 | 121 | 307  | 427  |
| CACCAAATTTGAGGGTTATTAT | 59.905 | 25 | 258 | 189  | 446  |
| TTACGGATTTAAGGGTTATTAC | 59.633 | 25 | 215 | 36   | 250  |
| TGAAATTAGATTCGAAATTGCA | 57.936 | 24 | 184 | 151  | 334  |
| ACCCAACACAAACCCAAAAG   | 59.728 | 20 | 267 | 535  | 801  |
| CATTCTCAAGCCACTCCCTC   | 59.803 | 20 | 149 | 116  | 264  |
| CCGTTTTCGTGAGCTTTCTA   | 60.378 | 20 | 239 | 31   | 269  |
| ACAATTTCCCCTTGGTGATG   | 59.647 | 20 | 136 | 680  | 815  |
| ACGGGAGAGGCATACAAATG   | 59.955 | 20 | 211 | 2142 | 2352 |
| CGATCACACTCCAAATGCAC   | 60.12  | 20 | 242 | 768  | 1009 |
| CGAGGAGCGTGGTTTTAAGT   | 59.378 | 20 | 182 | 35   | 216  |
| TGGAACCATGGGTAACAA     | 58.719 | 20 | 228 | 141  | 368  |
| CCACACGACATACGATACACG  | 59.92  | 21 | 127 | 245  | 371  |
| ATGCAAACGGGATGTCAAAT   | 60.199 | 20 | 247 | 2095 | 2341 |
| TGTTACTTTTCATCGCACTCAA | 58.489 | 22 | 240 | 1258 | 1497 |
| TGCGTGATTTACACCCGATA   | 59.953 | 20 | 115 | 180  | 294  |
| CGGTGATCGTAATCGGAGAT   | 59.917 | 20 | 208 | 36   | 243  |
| TGGAATGGGGATTTTTCAAC   | 59.599 | 20 | 224 | 48   | 271  |
| ACTTGTCCACCCACATGACA   | 59.846 | 20 | 238 | 1126 | 1363 |

|                         |        |    |     |      |      |
|-------------------------|--------|----|-----|------|------|
| CCCATAAACAATCCCCTCAA    | 59.617 | 20 | 236 | 1148 | 1383 |
| ACCCAAGATTTTTGCCACAG    | 59.971 | 20 | 272 | 102  | 373  |
| TCACTCGCGCTAGATTCTCA    | 59.847 | 20 | 130 | 271  | 400  |
| TTGATTCTGGAATATCCCGC    | 59.862 | 20 | 242 | 2    | 243  |
| TCGTTGTAAACCCGTAAGGC    | 59.996 | 20 | 225 | 76   | 300  |
| CATCACACAAAACCAGTGGG    | 59.848 | 20 | 196 | 290  | 485  |
| CCGGTATGCTGACGATAACA    | 59.566 | 20 | 253 | 1001 | 1253 |
| CATCACCAAAGACAACCACG    | 60.001 | 20 | 261 | 189  | 449  |
| CAACATGACAGCAACCCTCA    | 60.722 | 20 | 238 | 7    | 244  |
| ACACTAATATGAAGCGGGCG    | 60.117 | 20 | 133 | 6    | 138  |
| GAGATGGTTGCACCATAACG    | 59.002 | 20 | 201 | 42   | 242  |
| TTTGTGACGAGATCATGGCT    | 59.245 | 20 | 169 | 99   | 267  |
| AAATATTTCTAGCACATGAAAT  | 58.583 | 26 | 114 | 1    | 114  |
| GGTTTTGACCATATTTACTGTTI | 59.631 | 26 | 188 | 278  | 465  |
| CATCACGCTTGCCCTAATTC    | 60.606 | 20 | 190 | 100  | 289  |
| GACTGTGGACTCCGGTTCAT    | 59.969 | 20 | 219 | 87   | 305  |
| CTGAAAAGCTTTGAGTGTGCC   | 60.045 | 21 | 159 | 657  | 815  |
| TTCGTTATACAAATATCAGGCA  | 59.061 | 25 | 157 | 693  | 849  |
| CAGCATATTCTTTGGACGGAA   | 60.081 | 21 | 242 | 129  | 370  |
| ATCGCTCCACATGACACGTA    | 60.144 | 20 | 245 | 130  | 374  |
| GTTGGTCCATTTGCCATTGT    | 60.624 | 20 | 218 | 46   | 263  |
| TGAAATTGTCATCTCCCCCT    | 59.336 | 20 | 212 | 68   | 279  |
| TCTTTTACTTTGCATGCTACTTT | 58.354 | 25 | 279 | 275  | 553  |
| GTCTGGAAAGATGGTGGCAA    | 61.046 | 20 | 280 | 248  | 527  |
| GAGGGAGGGAGGAGAGAGAA    | 59.883 | 20 | 218 | 244  | 461  |
| GAGACCCGGGTTTACCTCTC    | 59.935 | 20 | 135 | 85   | 219  |
| ACCATCGTTACCGATTCCA     | 60.192 | 20 | 192 | 33   | 224  |
| AATCAACACCATTCAACGCA    | 59.972 | 20 | 280 | 91   | 370  |
| AAAAACCCTGATGTGGATGC    | 59.797 | 20 | 272 | 29   | 300  |
| TTGGACCAAATAGCCTCCA     | 60.439 | 20 | 167 | 9    | 175  |
| GATTTCCACTCCTGCTTTTCG   | 59.813 | 20 | 268 | 3    | 270  |
| CCAAGTCTTGCAATTTGGTTGT  | 60.023 | 21 | 217 | 1568 | 1784 |
| CTTCCCAACTCAAGGACAC     | 59.549 | 20 | 260 | 356  | 615  |
| GAATCATGCTACTACACGTCGC  | 59.803 | 22 | 262 | 493  | 754  |
| CCCATTAATAGCGATATATGTA  | 58.562 | 27 | 144 | 147  | 290  |
| TGGACATGGACACCTAACCC    | 60.634 | 20 | 253 | 49   | 301  |
| TTACCGCTGGGATCATTTTC    | 59.901 | 20 | 251 | 28   | 278  |
| AGGATGGGTTATCACTTGAATA  | 59.65  | 24 | 103 | 153  | 255  |
| AATCCCTTCATAACACCTCCTT  | 58.028 | 22 | 274 | 352  | 625  |
| CCCTCCAAGGAATCTGATGA    | 60.003 | 20 | 157 | 96   | 252  |
| CAAGAAGTCCTGCGTCAACA    | 60.025 | 20 | 151 | 23   | 173  |
| AGGGATAATTAATGCGATTGTC  | 59.726 | 23 | 275 | 540  | 814  |
| AATTGAGATTTTGCCCATCG    | 59.901 | 20 | 136 | 47   | 182  |
| GCTCCTTGTCATCACTCAA     | 59.992 | 20 | 261 | 233  | 493  |
| GAAGTCTCAAGTCAATGTATGA  | 57.445 | 25 | 116 | 569  | 684  |
| AGAACGGAGAAAATATCACGA   | 59.175 | 23 | 238 | 576  | 813  |
| CGCTCCACAAAGATCTCACAA   | 59.984 | 20 | 200 | 781  | 980  |
| TCTCAGCTTCCCCACCATTA    | 60.594 | 20 | 271 | 1772 | 2042 |
| TCTTTTTGTTTGTGGCATGG    | 59.561 | 20 | 277 | 293  | 569  |
| TCGCCTTGCTAGTTGGTTTC    | 60.386 | 20 | 182 | 29   | 210  |
| TGATGAGAGGCATGAAGTGG    | 59.787 | 20 | 141 | 77   | 217  |
| TGCATCAAACGTGGAAGAAA    | 60.234 | 20 | 222 | 2    | 223  |
| CCATTTACCACCTCCATTC     | 60.173 | 20 | 276 | 65   | 340  |
| TCGGTCCACTAGCACAATGA    | 60.263 | 20 | 234 | 103  | 336  |
| TGTGGAAGGGTGTGTGATGT    | 59.846 | 20 | 276 | 1386 | 1661 |
| ATGATCTTCACCTTAAATCTGC  | 58.248 | 24 | 260 | 70   | 329  |
| AGTTTGGGGGAGGAGAAAAA    | 59.912 | 20 | 278 | 66   | 343  |
| AAGGAGGTGTTATGAAGGGAT   | 58.028 | 22 | 147 | 161  | 307  |

|                         |        |    |     |      |      |
|-------------------------|--------|----|-----|------|------|
| AAGGTTGGAGAGGGGACAAC    | 60.349 | 20 | 222 | 12   | 233  |
| GCTCGACGGAGGTTTGTAG     | 59.836 | 20 | 159 | 395  | 553  |
| ACCTCAACAAACCACCCAAA    | 60.246 | 20 | 205 | 25   | 229  |
| AAAATCACTAACCCACCCAC    | 59.969 | 21 | 191 | 34   | 224  |
| TATCCTCCCTCATTCCCTCC    | 60.228 | 20 | 258 | 318  | 575  |
| GTGCCCTGCCCTCTATATT     | 60.307 | 20 | 249 | 1144 | 1392 |
| ACCTATGGTGGTATGGTGTAG/  | 57.448 | 23 | 221 | 393  | 613  |
| TTGTGAGTGAAAGTGGTGGG    | 59.565 | 20 | 217 | 617  | 833  |
| AAGGAAACCCATTGTGGTCA    | 60.21  | 20 | 241 | 2392 | 2632 |
| GTCCATGAGAAATGGGGTTG    | 60.173 | 20 | 183 | 32   | 214  |
| TGCACAATACAAGCACCCAT    | 59.995 | 20 | 188 | 815  | 1002 |
| TCTCGTGTTTTATCCTCCCC    | 58.981 | 20 | 108 | 4    | 111  |
| ATGGTGGTTTTGGTGAAGAA    | 60.21  | 20 | 171 | 618  | 788  |
| ATTATGGCGCCGCTATTGTA    | 60.452 | 20 | 220 | 185  | 404  |
| CATTGCCTGCAAATCACATT    | 59.548 | 20 | 143 | 243  | 385  |
| TCCACGGTGATGCTAGAGTG    | 59.855 | 20 | 219 | 445  | 663  |
| TCCGTTTCGAACCTAAAACCTG  | 59.254 | 21 | 221 | 3    | 223  |
| TGTTCTGAAACATGATGGCG    | 60.665 | 20 | 241 | 1371 | 1611 |
| CCAAGTCAATTGTCGATGGTA   | 58.488 | 21 | 269 | 815  | 1083 |
| AGCTTCCATGGAGTTGATG     | 60.073 | 20 | 222 | 180  | 401  |
| TGGAAGCACTTTTTGAACGG    | 61.165 | 20 | 255 | 395  | 649  |
| TCAGCCGACTTTTTAATGGC    | 60.209 | 20 | 166 | 63   | 228  |
| TTTTTAAATGGACGGTGATGAT  | 59.616 | 23 | 117 | 14   | 130  |
| TCCCTTTCTCCCAACCTTTC    | 60.414 | 20 | 152 | 566  | 717  |
| CAGCAGAGCAAAAGGGTCTT    | 59.615 | 20 | 264 | 1757 | 2020 |
| GCATAAACACATACCCTCACAT  | 59.677 | 24 | 215 | 24   | 238  |
| GGGATGAGTTATCACTTGAATA/ | 59.765 | 25 | 158 | 348  | 505  |
| ACCTATGGTGGTATGGTGTGG   | 59.463 | 21 | 249 | 214  | 462  |
| CCTGCCTCAAGGCTAAACAA    | 60.378 | 20 | 250 | 44   | 293  |
| GAAAATTCCATTTTGCAGGG    | 59.388 | 20 | 164 | 751  | 914  |
| CATGAAAATCATGTTCCGCA    | 60.466 | 20 | 243 | 228  | 470  |
| TCCAAAATGGTGCAGTCCTT    | 60.495 | 20 | 203 | 423  | 625  |
| TGATGGATGTTGGATACACGA   | 59.79  | 21 | 142 | 177  | 318  |
| ACAAACAAGACCAAGTGGGG    | 59.861 | 20 | 220 | 195  | 414  |
| ACTTGTGTGGGAATGGATG     | 60.634 | 20 | 271 | 364  | 634  |
| ACCGACGTGCCTAACATAG     | 60.015 | 20 | 254 | 247  | 500  |
| CAAATGTTGCACAATCATTGAC  | 58.945 | 22 | 218 | 70   | 287  |
| GTTTGGATATCGAGATCGGG    | 59.344 | 20 | 149 | 64   | 212  |
| ATCATAGTTGACGCCCTTCG    | 60.096 | 20 | 104 | 18   | 121  |
| CACAACAATTCGCGAAACAA    | 60.677 | 20 | 223 | 79   | 301  |
| AGTTGACTGCTTTGGCTTGG    | 60.431 | 20 | 231 | 1103 | 1333 |
| TCGGAGTTCATCATGACACAA   | 60.104 | 21 | 191 | 341  | 531  |
| TGTGGTTCGATATTTTGTGG    | 59.736 | 22 | 148 | 192  | 339  |
| ATTGGCTTGCTGAACCAGAG    | 60.397 | 20 | 270 | 679  | 948  |
| TCCTAACTTCATAACTCGAAGA  | 58.246 | 25 | 279 | 0    | 278  |
| ATTAACCGTGAAAATGGCGA    | 60.323 | 20 | 195 | 290  | 484  |
| GCAAACCATACACGAACACG    | 60.035 | 20 | 227 | 85   | 311  |
| ACAGGATGGACTCGAACGAA    | 60.656 | 20 | 145 | 9    | 153  |
| TTTGTACAGTATTTTCATCATT  | 59.826 | 25 | 192 | 4755 | 4946 |
| ACCGTCTGCGCTGTAGATTC    | 60.428 | 20 | 136 | 259  | 394  |
| TATCACCCGCCGGAGATTAT    | 61.537 | 20 | 280 | 83   | 362  |
| AAGGCCGAGATTTGTTAGAGG   | 59.733 | 21 | 184 | 1779 | 1962 |
| ATGGCTTGGAAAAGATGGTG    | 59.933 | 20 | 270 | 926  | 1195 |
| AAATCCTGTCAATGAAAAGC/   | 58.742 | 22 | 272 | 89   | 360  |
| GCTTTGCCTAGTCAATGATGG   | 59.722 | 21 | 164 | 368  | 531  |
| TTGCAATGGACCTAAGCATTC   | 60.089 | 21 | 192 | 874  | 1065 |
| AGGTTGATCATTTCCATCGC    | 59.9   | 20 | 273 | 925  | 1197 |
| GAGATTCCAAGTGCTCTGGC    | 59.957 | 20 | 258 | 637  | 894  |

|                        |        |    |     |      |      |
|------------------------|--------|----|-----|------|------|
| CACCCATTCATTCCCTCATT   | 59.605 | 20 | 100 | 146  | 245  |
| GATTGAGCGACGGAGTTTCT   | 59.434 | 20 | 219 | 13   | 231  |
| AGTTGGAGCCCAACAAATGA   | 60.495 | 20 | 279 | 2124 | 2402 |
| TCTTCCCCAAATTGGTTTCC   | 61.023 | 20 | 139 | 247  | 385  |
| CCCCAAACGAAAATCAAGAA   | 59.91  | 20 | 217 | 484  | 700  |
| CATGGAATGGCTGTCAGATG   | 60.072 | 20 | 107 | 19   | 125  |
| AGGACGAATATGCCCTTGC    | 60.051 | 19 | 190 | 2    | 191  |
| AAAAGAAAAGAAAGGACCGA   | 59.282 | 22 | 245 | 17   | 261  |
| GGCTACGAGAAATGGATGGA   | 60.036 | 20 | 148 | 701  | 848  |
| GAAGGCATCAACGACGTGTA   | 59.722 | 20 | 113 | 69   | 181  |
| TCCCGTCTAATCTCCACAGC   | 60.218 | 20 | 237 | 20   | 256  |
| TTGTTTGACGGAAATGACCC   | 60.734 | 20 | 264 | 253  | 516  |
| GCAGCTACGTTTGTGTGCAT   | 59.942 | 20 | 177 | 1181 | 1357 |
| AGATCCATGTTTCTCCCC     | 58.741 | 20 | 152 | 65   | 216  |
| AGATGATCACGATGAAGCCA   | 59.197 | 20 | 173 | 77   | 249  |
| CCATTCTACAAGAACCCCCA   | 59.784 | 20 | 201 | 727  | 927  |
| TTGTGTACCCACATCCTCCA   | 59.806 | 20 | 180 | 364  | 543  |
| CACTATAGGAGGCATTATCACT | 59.949 | 26 | 275 | 349  | 623  |
| CATATGGTGAATGCCCTTT    | 59.645 | 20 | 187 | 230  | 416  |
| TCGGCGTGAATGAACTTACA   | 60.257 | 20 | 277 | 660  | 936  |
| CTGTTGGCCGTTGTTTTACA   | 59.627 | 20 | 256 | 1083 | 1338 |
| CATTGACACGCGAAAAATGA   | 60.644 | 20 | 280 | 145  | 424  |
| GCTTTCTTTGCGAAAAATGAT  | 58.509 | 21 | 250 | 29   | 278  |
| TATGGAATTCCGACGAGCAT   | 60.435 | 20 | 274 | 480  | 753  |
| TGTGCAACTTGTCTGGTCTCA  | 60.494 | 21 | 201 | 640  | 840  |
| CAGTTCTGGCCGTGCATT     | 60.84  | 18 | 205 | 660  | 864  |
| TGGAATCCGAGAAAATCAGG   | 60.006 | 20 | 190 | 895  | 1084 |
| CCTCCGATTTTTGGGTAGCA   | 59.953 | 20 | 204 | 1000 | 1203 |
| ATGTGCGCGTGTACTTATCG   | 59.782 | 20 | 272 | 585  | 856  |
| TATTGGGGGAAGAAGCACTG   | 60.066 | 20 | 155 | 2096 | 2250 |
| TTGAATCCATTGGTGAAGCA   | 60.049 | 20 | 200 | 222  | 421  |
| GAGAGAAACATTAATTCCTTCA | 59.9   | 25 | 181 | 47   | 227  |
| AAATGGGTGGTGGAAAGACC   | 60.979 | 20 | 279 | 0    | 278  |
| AATCAAATAGGGCAGGGGT    | 59.666 | 20 | 214 | 31   | 244  |
| CTTTTGCTGTGGCTTGTGAA   | 60.027 | 20 | 255 | 203  | 457  |
| GCCGGTCATTTGTCTTTTTG   | 60.481 | 20 | 166 | 2796 | 2961 |
| TACAGCCGCTCTTGGAACTC   | 60.538 | 20 | 125 | 74   | 198  |
| CTCCCTCACCTCAGGATTCA   | 60.191 | 20 | 207 | 188  | 394  |
| CCGTGTATTCTCATCCGCTT   | 60.096 | 20 | 276 | 3289 | 3564 |
| ACCATATTTAAGGGTTATCACC | 57.552 | 24 | 276 | 256  | 531  |
| CACTTGCTTCTTGTGGGGTT   | 60.149 | 20 | 188 | 1179 | 1366 |
| TGGAGGAAGGTGACAGTGTG   | 59.705 | 20 | 261 | 249  | 509  |
| AACCGAGAAAGAAACATTTCA  | 57.914 | 22 | 200 | 1102 | 1301 |
| TTGTTAGTGCGTGTTTGGG    | 59.627 | 20 | 181 | 27   | 207  |
| TAGAAGGGCCACTGTTCCC    | 60.058 | 19 | 229 | 20   | 248  |
| TCTTTTGGTTGGTGAAGGAAA  | 59.573 | 21 | 164 | 290  | 453  |
| CCTTGTGTGATCAAGGGTCC   | 60.363 | 20 | 245 | 1702 | 1946 |
| GCTAATGGTGCCACAGTTGA   | 59.722 | 20 | 263 | 38   | 300  |
| ATCAGGGCTTGAACCGAAT    | 60.826 | 20 | 272 | 97   | 368  |
| AACTTCTTGCTGGTTGAGGC   | 59.478 | 20 | 262 | 49   | 310  |
| GGTTATCACCGGATCACGA    | 59.311 | 19 | 207 | 603  | 809  |
| ACTCCCTCCCCATCTCAAT    | 59.755 | 20 | 279 | 1191 | 1469 |
| GTTAGCATGGGAAGGGGAGT   | 60.328 | 20 | 205 | 400  | 604  |
| AGGAGCTTAGGGGTGGAATG   | 60.455 | 20 | 110 | 263  | 372  |
| CCGTACCCACTTTTATGGGA   | 59.679 | 20 | 198 | 11   | 208  |
| TTTTAACGAATAAACATGTTCC | 57.778 | 24 | 107 | 103  | 209  |
| TTTTACGAATAAACATGTTAC  | 59.098 | 26 | 274 | 131  | 404  |
| ATCCATCATCTTCCGTGAGC   | 60.042 | 20 | 189 | 716  | 904  |



|                         |        |    |     |      |      |
|-------------------------|--------|----|-----|------|------|
| GGTTTTCAACCCATGTTTTTGT  | 60.001 | 22 | 273 | 1565 | 1837 |
| CTTCCGCGCGTATAGAAATC    | 59.838 | 20 | 162 | 1032 | 1193 |
| GGTTATTAGTTATTACGGATTT/ | 57.055 | 27 | 115 | 327  | 441  |
| TCCTTTCTGCAAACCTGACGA   | 59.566 | 20 | 272 | 91   | 362  |
| TCCCTTGTACACCACACAC     | 60.479 | 20 | 101 | 440  | 540  |
| TCTTCTCAAGTTGACCGAGTGA  | 60.028 | 22 | 251 | 3285 | 3535 |
| CGAGAAAACCTTATGCGGTGG   | 60.628 | 20 | 232 | 941  | 1172 |
| TAGCATCAAAACATGGCAGC    | 59.839 | 20 | 206 | 9    | 214  |
| CCGGATCAGCTCTCTTTCTC    | 59.116 | 20 | 180 | 1608 | 1787 |
| TCTGTCGTCTATCACCTTCCG   | 60.262 | 21 | 193 | 63   | 255  |
| TTGATTCCTTTTGTCCCTATTT  | 58.142 | 23 | 183 | 312  | 494  |
| AAGGGAGCTTCAGTCTTTCATC  | 58.991 | 22 | 120 | 14   | 133  |
| TTAGAGTTCCAAGAGGGGGC    | 60.569 | 20 | 203 | 5    | 207  |
| TCAACCTCACTCGAACCTA     | 59.44  | 20 | 260 | 418  | 677  |
| TCTACGACCGAAATTCCTCC    | 59.184 | 21 | 105 | 22   | 126  |
| ACGAACAAGGGAAAAACAATC   | 58.983 | 21 | 127 | 90   | 216  |
| AAGGGGAGAGAGGTCAATGG    | 60.447 | 20 | 265 | 425  | 689  |
| ATCAACTTTTTGACGGTCCGA   | 60.495 | 20 | 275 | 146  | 420  |
| CACGAACGATTTAGGATCGG    | 60.46  | 20 | 233 | 201  | 433  |
| TTCTGACTTTGTTTTTGTGCAG  | 58.135 | 22 | 197 | 26   | 222  |
| TGACTTTGATCAAGTGATAACA  | 60.287 | 27 | 174 | 386  | 559  |
| CGGATAATCTGAAAGCGAAGA   | 59.442 | 21 | 262 | 1083 | 1344 |
| ATGCAATCACCAACCAACAA    | 59.823 | 20 | 242 | 478  | 719  |
| CATGTCAAAAATGCCCTTC     | 60.309 | 20 | 267 | 484  | 750  |
| CCCTCCTCACCTCCTCTTT     | 59.801 | 20 | 265 | 931  | 1195 |
| ACCAAAATGGAGAGGAATAAT   | 57.132 | 22 | 280 | 31   | 310  |
| GACGAAGGAACAGCTTCACC    | 59.851 | 20 | 268 | 2765 | 3032 |
| TTGTGTTTCGGAGTGTGGG     | 59.585 | 20 | 249 | 150  | 398  |
| CCACTCCACAAAGATCTCACAC  | 59.622 | 22 | 104 | 212  | 315  |
| ATGTCCGTCGTTGGTTCTTC    | 59.973 | 20 | 174 | 23   | 196  |
| TGCAATGCTTCAATTCATCC    | 59.628 | 20 | 230 | 0    | 229  |
| ATTTGCCATCCAATTTTCCA    | 60.132 | 20 | 266 | 16   | 281  |
| GAGGGGAGTTGTTGGGTA      | 58.884 | 20 | 276 | 620  | 895  |
| TATGTTGGCGAACACAGGTC    | 59.572 | 20 | 164 | 169  | 332  |
| TCCCTTTTCTCTCCCATT      | 60.38  | 20 | 144 | 245  | 388  |
| TTGAATGGTTATCACCTGATCG  | 59.823 | 22 | 128 | 107  | 234  |
| GGAAATTACTTACAGCCATCGC  | 59.864 | 22 | 176 | 295  | 470  |
| GAATCCATGCAAACAGCAAA    | 59.67  | 20 | 152 | 2340 | 2491 |
| AATGCGCGTTTTTAGGGTTT    | 60.825 | 20 | 152 | 394  | 545  |
| CATGTTTGGTGACTTGGTTCG   | 60.001 | 20 | 253 | 7    | 259  |
| CCTCAACATCCAGGAACCAC    | 60.363 | 20 | 271 | 225  | 495  |
| CAGCCCCCATTTTTCATTTT    | 61.011 | 20 | 147 | 253  | 399  |
| TCTGCAGTCTCCGTTTTTCA    | 59.566 | 20 | 218 | 326  | 543  |
| CAAACTCCACTCCTCCGAA     | 60.224 | 20 | 257 | 298  | 554  |
| GGACCGACCGTTAGGTAAT     | 60.074 | 20 | 276 | 220  | 495  |
| TGGTTGGAGATTAAGTGGG     | 58.936 | 21 | 211 | 148  | 358  |
| GACGAGATTTAGGTGTTTTGAC  | 59.059 | 23 | 134 | 391  | 524  |
| ATGGTGGTATGGTGTGGAGG    | 60.51  | 20 | 190 | 167  | 356  |
| GAGCGAGTGGTTGTGAGGTT    | 60.307 | 20 | 118 | 189  | 306  |
| CGAAAATGAGCTTCCACACC    | 60.636 | 20 | 241 | 162  | 402  |
| TTTGATTCTTGAGTACACCATC  | 59.144 | 23 | 172 | 56   | 227  |
| TGAGTTACCCTTGAATCACCC   | 58.898 | 21 | 226 | 20   | 245  |
| TTATGGTACCAACGCCAACC    | 60.617 | 20 | 250 | 74   | 323  |
| TTTCATGTTTTGGAGCATGATT  | 59.456 | 22 | 210 | 302  | 511  |
| CGTTCCTCTCTCTCGGTG      | 60.127 | 20 | 169 | 58   | 226  |
| GGCTTGAAGAATGATGAAGAT   | 60.576 | 23 | 113 | 132  | 244  |
| CATCATTGTTTCGCAAGCAG    | 60.401 | 20 | 210 | 1006 | 1215 |
| TGTGGATTAATGTGTATCCCGA  | 60.074 | 22 | 183 | 698  | 880  |

|                        |        |    |     |      |      |
|------------------------|--------|----|-----|------|------|
| TGAGAGAGATGGGATTTTAGA  | 59.539 | 25 | 231 | 303  | 533  |
| ATGCGTTTTGACGGGATTTA   | 60.323 | 20 | 112 | 209  | 320  |
| CGGCCGGTTTGTAACCTT     | 60.883 | 18 | 259 | 2166 | 2424 |
| TGCACCCTTTGACATCAGTT   | 59.139 | 20 | 181 | 49   | 229  |
| TTTTTGTTTGTCCAGGTTG    | 59.862 | 21 | 102 | 24   | 125  |
| TCGTGTTCCGATCCTAGCTT   | 59.836 | 20 | 218 | 16   | 233  |
| AGCGGAAGGCATTTAAAACA   | 59.72  | 20 | 167 | 41   | 207  |
| TGGTGTGTACTTTTGTAGCAAT | 59.618 | 24 | 195 | 170  | 364  |
| CAAAAGAGCTGTGGGAGAGC   | 60.134 | 20 | 195 | 107  | 301  |
| GATGATGCATGTATACTATCAA | 57.305 | 26 | 246 | 1335 | 1580 |
| GGGAGGGTGGTTTGGTTAGT   | 60.088 | 20 | 259 | 24   | 282  |
| TCACACTCACGCACTCACAA   | 60.07  | 20 | 122 | 2    | 123  |
| TCGTAGCATGATTTAAATGGTT | 60.136 | 25 | 241 | 575  | 815  |
| CCAAGTGCACAAGTGTTTCC   | 59.187 | 20 | 274 | 295  | 568  |
| ATGATTGGGACACGTGTTTG   | 59.267 | 20 | 277 | 1537 | 1813 |
| GTGCAGTAGGGGTTGTCGTT   | 60.035 | 20 | 231 | 104  | 334  |
| AAGGAGGTGTTATGAAGGGAT  | 58.028 | 22 | 132 | 808  | 939  |
| CGCACAATTATTGCGAACTC   | 59.329 | 20 | 131 | 62   | 192  |
| TACGAAGGGTATTTTGGGAAA  | 58.483 | 21 | 180 | 208  | 387  |
| TAAACCGTCACCCCAAAACA   | 61.145 | 20 | 124 | 53   | 176  |
| ATTCCGTCGACAAGCTCAGA   | 60.945 | 20 | 193 | 4    | 196  |
| TGTATCACACAACGGTTCATCA | 59.888 | 22 | 244 | 243  | 486  |
| TAACCATAATCCCCACCAA    | 59.872 | 20 | 120 | 53   | 172  |
| GGGTGGTTATGGTTTGTAGGTC | 60.385 | 22 | 176 | 1332 | 1507 |
| CTCCGCCTTGACTCCTTCTA   | 59.569 | 20 | 110 | 307  | 416  |
| CGACCAAAATTTAAAAGTCCTA | 59.842 | 25 | 272 | 834  | 1105 |
| TGTGGATATGTAGATGATTTTT | 59.637 | 25 | 179 | 16   | 194  |
| GGAGGTCAGGATCTGGTCAA   | 60.048 | 20 | 159 | 800  | 958  |
| CCCATCACACTAACCTCCCT   | 58.866 | 20 | 260 | 150  | 409  |
| AAATATCGGCCGTGAGATTG   | 59.923 | 20 | 188 | 2    | 189  |
| CAAACCTTGGCACTTGCATA   | 59.729 | 20 | 103 | 91   | 193  |
| TTGTGGACAGTGCATAGGCT   | 59.318 | 20 | 237 | 108  | 344  |
| ATGGTGCATGAGACGAGAAT   | 58.1   | 20 | 164 | 177  | 340  |
| AATTGGAATTGGAACCAGCTT  | 59.828 | 21 | 274 | 88   | 361  |
| GAGAAGGTAGGGGGCTAAGG   | 59.191 | 20 | 201 | 8    | 208  |
| TGGAGTTGGAGCAACGTA     | 59.317 | 20 | 266 | 1015 | 1280 |
| TTGGCAAAGAAAATAAGTTC   | 60.038 | 24 | 153 | 219  | 371  |
| TGGTATTGGTCCACCTGTGA   | 59.806 | 20 | 211 | 356  | 566  |
| AAAGTCAGCCGAGAAATTC    | 58.962 | 21 | 109 | 786  | 894  |
| TGACAATATTTAGTGTTTTAC  | 57.78  | 26 | 186 | 63   | 248  |
| TGTCAAAATCTCATTCAATTC  | 60.01  | 24 | 125 | 50   | 174  |
| CACACGAGCCTTCTTCTTCC   | 59.989 | 20 | 275 | 69   | 343  |
| TGAGGACTTCTTGGGGTTCA   | 60.624 | 20 | 115 | 67   | 181  |
| GTCCTGGCACTTTGCTTGA    | 59.976 | 19 | 273 | 540  | 812  |
| GTCCTCCGAACCTCATGGTGT  | 59.969 | 20 | 161 | 91   | 251  |
| TGGGATACGCATCAACACAC   | 60.399 | 20 | 223 | 52   | 274  |
| TTAGGGTTGGTTTTGCAGC    | 60.11  | 20 | 277 | 1084 | 1360 |
| GCGGACTGCTCTCAACTCTT   | 59.751 | 20 | 277 | 200  | 476  |
| AAATTATCGAATGAGGGGGC   | 60.116 | 20 | 132 | 534  | 665  |
| GAAAGCCTACCTCGCTTCTT   | 59.983 | 20 | 174 | 646  | 819  |
| AACCGGTTAAAAACCGAAC    | 60.089 | 20 | 116 | 396  | 511  |
| AGGGAGATCTTGCAGGATAGG  | 59.682 | 21 | 257 | 6    | 262  |
| CATTCACCGGATGAAAAGG    | 60.301 | 20 | 270 | 67   | 336  |
| GACGACCGATATTTGCTCCT   | 59.154 | 20 | 153 | 924  | 1076 |
| TTCATGAAATCAAGCAAACCA  | 59.147 | 21 | 102 | 12   | 113  |
| TGAGTGAGGAGGGGGAGATA   | 59.606 | 20 | 116 | 339  | 454  |
| TCAAGACAACCGAGCAAGTG   | 60.025 | 20 | 159 | 191  | 349  |
| CCAACCCATTCTTACCAAC    | 60.21  | 20 | 205 | 191  | 395  |

|                        |        |    |     |      |      |
|------------------------|--------|----|-----|------|------|
| TGAAAAATGAGGAATGGGAA   | 60.244 | 20 | 268 | 225  | 492  |
| GACAGGGGTTTCGTTGTTAGC  | 59.598 | 20 | 273 | 284  | 556  |
| TTCCAGAGTTGTTACGCC     | 60.11  | 20 | 215 | 1143 | 1357 |
| TGGATCCCAATGAAAATGAA   | 58.742 | 20 | 276 | 390  | 665  |
| TGAAGAATGAAGGGAATGGG   | 59.864 | 20 | 161 | 773  | 933  |
| AAGAGCGAGAGATGGACGAT   | 58.995 | 20 | 212 | 75   | 286  |
| CAGAACTTGTCGTGGTGGTG   | 60.194 | 20 | 249 | 110  | 358  |
| CCGGCCATAGTTTCTCACAA   | 61.021 | 20 | 124 | 95   | 218  |
| AATTGATTGTGGATGGATTTTT | 57.355 | 22 | 270 | 582  | 851  |
| AAGAGGTGTTATGAAGGGACA  | 57.724 | 22 | 219 | 18   | 236  |
| GCACACAATAACCAAAGTATT  | 58.919 | 25 | 151 | 64   | 214  |
| CTCTCCCCTTGCTTGTTGA    | 59.007 | 20 | 189 | 39   | 227  |
| CCAGCTTCGAACGTTGTATGT  | 60.183 | 21 | 228 | 1904 | 2131 |
| TCAAGGAGTTGTACCTGATAG  | 59.666 | 23 | 244 | 1487 | 1730 |
| TTAGCAGCAGATGCAAAGGA   | 59.712 | 20 | 123 | 540  | 662  |
| CATGAAATCAGGCCATCTCC   | 60.426 | 20 | 223 | 7    | 229  |
| CTGTGCTGCTGGAAAATTGA   | 59.988 | 20 | 240 | 335  | 574  |
| CATCGTACATCGCAACCATC   | 59.955 | 20 | 202 | 23   | 224  |
| TGAGGGGGAAAAGAGAGGAT   | 60.008 | 20 | 186 | 183  | 368  |
| CTTCAGCTGACATTGGGTTG   | 59.288 | 20 | 270 | 1372 | 1641 |
| CATTATTGACGCAAATGTCCC  | 60.203 | 21 | 191 | 355  | 545  |
| TTGGGAAAGCACTATGGACC   | 59.933 | 20 | 208 | 86   | 293  |
| TCACTCATTCAAGAACATAGCC | 59.761 | 23 | 178 | 374  | 551  |
| TGACATGCTCTTAAGGATGGG  | 60.875 | 22 | 100 | 217  | 316  |
| CTCATAGTCAAACACGATTGCT | 58.464 | 23 | 175 | 79   | 253  |
| GGACATGAAGTAACTGCACAT  | 60.052 | 23 | 272 | 200  | 471  |
| AAGAAGTGGGTGTGTGCTGA   | 59.31  | 20 | 175 | 274  | 448  |
| TTCCAGGAAATCGGGAGAT    | 59.425 | 19 | 273 | 387  | 659  |
| ACGCGCAGAGGAGATCTATG   | 60.526 | 20 | 270 | 512  | 781  |
| ACATTGCACGTAATAACCAA   | 58.669 | 23 | 270 | 17   | 286  |
| GGGGTGAATGATCAAGATGG   | 60.135 | 20 | 181 | 7    | 187  |
| AGAAGGCGGATAAGGTTGGT   | 59.962 | 20 | 250 | 3639 | 3888 |
| CCCACTAACCCCTTCATCAC   | 59.259 | 20 | 260 | 171  | 430  |
| AGGGAGTTGTTTAATTGTCCG  | 58.111 | 21 | 275 | 97   | 371  |
| ATTTCCAAATCGGTACATGC   | 57.424 | 20 | 264 | 890  | 1153 |
| AAACCCATTTATAACGGCGA   | 59.323 | 20 | 197 | 272  | 468  |
| GACTTACGTTCCGCCAACTC   | 59.74  | 20 | 217 | 1961 | 2177 |
| CTCGTCAACAGCTCGGTACA   | 60.049 | 20 | 248 | 146  | 393  |
| CCATCTTCGTCCACCTCTTC   | 59.655 | 20 | 113 | 8    | 120  |
| CTAGGGTTAGCATGCTTGGG   | 59.724 | 20 | 164 | 58   | 221  |
| AGCTTCACATGACCTCCTCC   | 59.258 | 20 | 163 | 317  | 479  |
| TGCTGGGTAAAAGTGAATAAT  | 60.916 | 25 | 110 | 129  | 238  |
| TGCCTCTCCATCTCCATCTT   | 59.761 | 20 | 275 | 5    | 279  |
| GCAAACTTAGGAACGAAGCA   | 59.527 | 21 | 225 | 17   | 241  |
| ATCCTTGAACCGTGCATCA    | 58.933 | 20 | 148 | 150  | 297  |
| CCATCTCGGGTTGTAGTGCT   | 60.134 | 20 | 162 | 630  | 791  |
| GCTTTATGTTGTTGATCCGTCA | 60.003 | 22 | 132 | 50   | 181  |
| CAGCAGATGCTTTCATCCAA   | 59.948 | 20 | 134 | 920  | 1053 |
| CCGTCGTCGTTATGAAGAAAA  | 60.117 | 21 | 150 | 105  | 254  |
| GTGAAATTATTCGTTGATAAAC | 57.681 | 27 | 216 | 322  | 537  |
| TGGTGGGTTGAATGCTATGA   | 59.924 | 20 | 196 | 1492 | 1687 |
| ACATGGACGTCCCAGATTGT   | 60.246 | 20 | 133 | 0    | 132  |
| GGTAGGGTGGGGATGAGATT   | 60.015 | 20 | 261 | 121  | 381  |
| GAAGCGTGTACGTCCCTAA    | 60.132 | 20 | 272 | 210  | 481  |
| GTTTCATGACTCCGAAACCC   | 59.386 | 20 | 107 | 0    | 106  |
| CGTTTTCCCTATTTTGTGCATT | 60.232 | 22 | 251 | 81   | 331  |
| TAAAACAATAAGGTGCCCCG   | 59.958 | 20 | 248 | 864  | 1111 |
| GAATAGGCAGTGACGGATGG   | 60.483 | 20 | 269 | 99   | 367  |

|                         |        |    |     |      |      |
|-------------------------|--------|----|-----|------|------|
| GCGAGCGAGTAGGTTGTGA     | 60.152 | 19 | 110 | 2    | 111  |
| ATTCTATGGTGGGGCGATTA    | 59.254 | 20 | 198 | 830  | 1027 |
| ATGGTTCGCCATAAAAATGC    | 59.801 | 20 | 163 | 36   | 198  |
| TTCACCCCCTACTCCATCAC    | 59.779 | 20 | 265 | 393  | 657  |
| TCGCTATGCACACTTTCTGG    | 60.011 | 20 | 123 | 650  | 772  |
| GGATGAAGGTGTTCTGTTCA    | 60.95  | 21 | 269 | 201  | 469  |
| CGCGCCTCTACTTTTTAATTAC  | 60.473 | 23 | 169 | 818  | 986  |
| TCGACATTGTTTGAGTGCAAC   | 59.755 | 21 | 174 | 211  | 384  |
| GGGCGTCACAAATTTTCAA     | 59.509 | 19 | 229 | 1885 | 2113 |
| GCCATTTAAAAAGTCGGCTG    | 59.72  | 20 | 227 | 1108 | 1334 |
| CTGGTGAGTGAAGGCTACGG    | 60.843 | 20 | 190 | 82   | 271  |
| TAAACGGGCCAATTTAAACG    | 59.835 | 20 | 189 | 169  | 357  |
| AAATAATCGAGCTTGACCCC    | 59.186 | 20 | 177 | 0    | 176  |
| AACACTGACCATCCCCCTTA    | 59.259 | 20 | 124 | 3919 | 4042 |
| CTTCGCCACTGTTACCCTTC    | 59.734 | 20 | 274 | 767  | 1040 |
| CGTGTCCGAGTGTGTTGAAA    | 60.757 | 20 | 118 | 79   | 196  |
| CGGGTATTTTTCTGAGCCAA    | 60.067 | 20 | 269 | 810  | 1078 |
| CTGGGCTGAGATGACTTCGT    | 60.408 | 20 | 242 | 27   | 268  |
| CATGATGAGGTTTTCGGTGA    | 59.496 | 20 | 273 | 111  | 383  |
| CTATCGGATTAATGGAATAAC   | 58.656 | 24 | 101 | 9    | 109  |
| TCGGTGTATGCTGTAAACGAA   | 59.24  | 21 | 132 | 114  | 245  |
| CAGTCACGACTTGCCAAAAA    | 59.881 | 20 | 220 | 853  | 1072 |
| TCGTATGAATTTTTGTATGGAC  | 58.927 | 23 | 192 | 607  | 798  |
| TTTACCCATAGCGCACTCG     | 59.841 | 19 | 154 | 809  | 962  |
| CTCTACACTGAATGCGCGG     | 60.568 | 19 | 217 | 378  | 594  |
| TTGAATCCTCACAATATAACCT  | 59.283 | 27 | 224 | 95   | 318  |
| AGCCAAATTTGCAACCTCAG    | 60.249 | 20 | 243 | 1251 | 1493 |
| TCAATTATGTCATGAATGTTCA  | 57.148 | 24 | 235 | 65   | 299  |
| TTGTCTGGTTTCGGTATTCA    | 59.964 | 20 | 280 | 45   | 324  |
| ACTGACATCCACAGGCATTG    | 59.551 | 20 | 126 | 72   | 197  |
| CTGCTCCCCTCCTCTTCTTT    | 59.95  | 20 | 196 | 607  | 802  |
| TTTGCAAATCCAAAGGTCAA    | 59.133 | 20 | 130 | 7    | 136  |
| TGTACCTATCCAACGGGGTC    | 59.67  | 20 | 229 | 8    | 236  |
| AGGGCTCCACCGATAAATCT    | 59.925 | 20 | 255 | 1336 | 1590 |
| GCGAATCAAGTCATGAATGAA   | 59.713 | 22 | 277 | 260  | 536  |
| AATCAACGACCGCAATTTGT    | 60.374 | 20 | 143 | 320  | 462  |
| GCGAAGTGGCAAACCTTGATT   | 60.257 | 20 | 134 | 483  | 616  |
| GTTATCATAGGATCACCCCTCCC | 58.668 | 22 | 155 | 59   | 213  |
| AAATGCCCTGTATGCAGTC     | 59.962 | 20 | 278 | 642  | 919  |
| TCCAAATTACAATCGTCGCC    | 60.837 | 20 | 276 | 145  | 420  |
| ACGTTCCGGCTCGAGAGTAAA   | 60.015 | 20 | 235 | 13   | 247  |
| TGTCGACCTCGATGCATTT     | 60.217 | 19 | 274 | 818  | 1091 |
| TACGATTTTTCCCCCGTATG    | 59.655 | 20 | 248 | 608  | 855  |
| CGAACTTAGTCGACCTACATGC  | 59.595 | 23 | 260 | 398  | 657  |
| CAACCTCTGCAAACCCAAAT    | 59.971 | 20 | 273 | 375  | 647  |
| AAAGAGACGAACCGACCAAA    | 59.711 | 20 | 163 | 71   | 233  |
| GGCTTCCATGGTGGTTTAGA    | 59.933 | 20 | 104 | 15   | 118  |
| CATTCATCAACCATCCCAAA    | 59.175 | 20 | 164 | 333  | 496  |
| ATCGTTATCACCAGATCGC     | 59.923 | 20 | 154 | 30   | 183  |
| AGCCACTAAGCCACCTTCAA    | 59.875 | 20 | 278 | 589  | 866  |
| ACCAAATTTAAGGGTTATCACC  | 59.579 | 24 | 152 | 98   | 249  |
| AGAGAAGGGTTATCACTTGAA   | 57.097 | 25 | 150 | 70   | 219  |
| AATTCGGATGGGAAAACACA    | 60.17  | 20 | 258 | 81   | 338  |
| GCGGAATACGAAGAGTCACC    | 59.7   | 20 | 254 | 4    | 257  |
| CGAAGTAATGCTCACACGGA    | 59.864 | 20 | 208 | 110  | 317  |
| AAACACCGATTACATTGGC     | 60.765 | 20 | 166 | 269  | 434  |
| TTGCTGGTGGAAACTCCTTT    | 59.711 | 20 | 280 | 1697 | 1976 |
| TTGGCATCCATCGTAACAGA    | 60.073 | 20 | 168 | 12   | 179  |

|                        |        |     |     |      |      |
|------------------------|--------|-----|-----|------|------|
| TTGAGAAGTGCTTGGCAAAA   | 59.585 | 20  | 256 | 23   | 278  |
| ACTTGTTCTATTGCCAACGA   | 59.623 | 21  | 178 | 87   | 264  |
| TGTGTTTGCCAACAGTCCTC   | 59.726 | 20  | 273 | 1374 | 1646 |
| CTGAGATTTGTA CTGCGCCA  | 60.011 | 20  | 209 | 17   | 225  |
| CCCAAACCCATTCCCTAATC   | 60.37  | 20  | 189 | 158  | 346  |
| CGCTTTGTTTTCTGTGTTTGA  | 59.888 | 20  | 256 | 393  | 648  |
| ATTAGGGGTAGGCACGGTTC   | 60.208 | 20  | 274 | 441  | 714  |
| TGCGCGATTTTAAACCCTAA   | 60.564 | 20  | 174 | 5005 | 5178 |
| TGGTCTCAACGATATGCTCG   | 59.823 | 20  | 278 | 31   | 308  |
| CAACACAAGGACATCCATCG   | 59.96  | 20  | 233 | 796  | 1028 |
| AAAGGGCGATGACACAAAAC   | 59.978 | 20  | 259 | 9    | 267  |
| ATCACGAGATGGGGACTCAG   | 60.072 | 20  | 164 | 1304 | 1467 |
|                        | 372    | 372 | 372 | 372  | 372  |
| GAGACTCACCCACCATTGCT   | 60.12  | 20  | 248 | 999  | 1246 |
| TCGAGATCAAAACTCGCCTC   | 60.483 | 20  | 271 | 58   | 328  |
| TCCAATGGCCTAAGTTGGTC   | 59.933 | 20  | 227 | 55   | 281  |
| AATTGAGAAGGGGGAGAGGA   | 60.008 | 20  | 189 | 2    | 190  |
| AATCCTTTCCTCTTCCCCA    | 59.875 | 20  | 229 | 140  | 368  |
| CACCTCTCCGATTAACCCA    | 59.926 | 20  | 160 | 334  | 493  |
| TTTCTTTGAGTGGGATGCAA   | 59.247 | 20  | 267 | 113  | 379  |
| GGATGAGACATACTTACTTGCT | 58.964 | 26  | 221 | 5    | 225  |
| AAACGAAAAATTGGGGTTCA   | 59.292 | 20  | 219 | 37   | 255  |
| AAAACCGTAGTGGGTTAAAAT  | 60.041 | 24  | 278 | 0    | 277  |
| TTGGGTGATGTGCTTGAAGA   | 60.24  | 20  | 130 | 159  | 288  |
| AGAATAGCCATAGCCGATGC   | 59.305 | 20  | 147 | 352  | 498  |
| TCGTGTTCTTCGTGCTGTTTC  | 59.88  | 20  | 229 | 3483 | 3711 |
| GGAATGAAGGTGAAGGGAGA   | 59.065 | 20  | 101 | 108  | 208  |
| GAAGAAATTCCAATAGAGTTG/ | 57.932 | 25  | 253 | 19   | 271  |
| TGCCTAATTTATAGATAATGGA | 59.68  | 25  | 270 | 1074 | 1343 |
| AAAATATGATCTTACTCCCCT  | 60.035 | 26  | 201 | 615  | 815  |
| GGGGTAACTTGTATCCCCT    | 60.052 | 20  | 137 | 13   | 149  |
| TTATTGTCGCTGAAATCCTGG  | 60.081 | 21  | 183 | 192  | 374  |
| TTTGTCCAAACAAATGAAAAC/ | 58.097 | 22  | 189 | 321  | 509  |
| CTGTAATCCCGATTGCTGCT   | 60.235 | 20  | 117 | 806  | 922  |
| CTTCTTCGGTATGCTGACGG   | 60.786 | 20  | 207 | 149  | 355  |
| AGAAGACCGAGAGACACACA/  | 58.991 | 22  | 157 | 0    | 156  |
| GAGAAAAGACAATTCGGCCA   | 60.192 | 20  | 204 | 43   | 246  |
| GCACACGAGCTCTCACTCAC   | 59.771 | 20  | 232 | 415  | 646  |
| TAGCCGATAAAAATGGCACC   | 59.928 | 20  | 269 | 62   | 330  |
| CTCGCATCCAATAACAAGCA   | 59.833 | 20  | 254 | 274  | 527  |
| AATTTGTACACACGTCCACCA  | 58.813 | 21  | 241 | 90   | 330  |
| GTATGCTGATCCACCTGCAA   | 59.679 | 20  | 258 | 149  | 406  |
| CATGATCCAACCTTATTCCTCC | 59.666 | 22  | 206 | 65   | 270  |
| AGTCATGCGATCTGAACGTG   | 59.862 | 20  | 224 | 47   | 270  |
| GCATGCTCTGTTTTCTGCAA   | 60.142 | 20  | 280 | 1    | 280  |
| TCTGCAAATGATGAACCGT    | 59.127 | 20  | 200 | 304  | 503  |
| CAATTTTGTCTGCTGCATGG   | 60.257 | 20  | 179 | 426  | 604  |
| TTTGCAATATTCAACTACGAGC | 59.802 | 23  | 187 | 57   | 243  |
| TGCAGATCCTCGGTACCTTT   | 59.694 | 20  | 230 | 386  | 615  |
| TTACGAAAATACACGTTCCGGG | 59.876 | 21  | 124 | 110  | 233  |
| TCCCCAGTGTACACAGACT    | 59.113 | 20  | 255 | 262  | 516  |
| AGCCTCAATTCGGATGATTT   | 58.598 | 20  | 277 | 1101 | 1377 |
| TTTAGGATCGGAATATCGAGA/ | 57.857 | 22  | 280 | 5    | 284  |
| ACTTTGGCAAATCACACAGAT  | 57.186 | 21  | 168 | 272  | 439  |
| ATGTTTTGTGAAAGTCCCGC   | 59.978 | 20  | 113 | 527  | 639  |
| CATGGTAAAGAAACGGTGGA   | 58.475 | 20  | 161 | 122  | 282  |
| GATAATTAGTGGAGGCGGCA   | 60.06  | 20  | 101 | 1557 | 1657 |
| TGAAGAGAAGAGGTCGGGAA   | 59.92  | 20  | 212 | 31   | 242  |

|                        |        |    |     |      |      |
|------------------------|--------|----|-----|------|------|
| TCGTGTTTGGGCATTACTCA   | 60.111 | 20 | 280 | 779  | 1058 |
| TTGGTACCTCGAGGCATTTT   | 60.074 | 20 | 230 | 507  | 736  |
| ATTTCTCAGTCCCTGCCTCC   | 60.596 | 20 | 252 | 1293 | 1544 |
| TGTTCAATCTGCCACCAAAA   | 60.088 | 20 | 257 | 1077 | 1333 |
| ATGGTGGTATGGTGTGGAGG   | 60.51  | 20 | 188 | 86   | 273  |
| ACACAATCCCAACAAAAAGAA  | 59.78  | 23 | 239 | 2    | 240  |
| AACGAAGGGATAAAGCCGTC   | 60.451 | 20 | 139 | 153  | 291  |
| AGTTGCTTAGCGACCCATA    | 59.73  | 20 | 268 | 4016 | 4283 |
| GGTTCGGGTATTCACGTTGT   | 59.717 | 20 | 260 | 684  | 943  |
| GGAGTTGCAGTTTTGGATGAA  | 60.103 | 21 | 192 | 208  | 399  |
| CCAATTGTCTTGGGAGCCTA   | 60.066 | 20 | 182 | 23   | 204  |
| TGGAGACACCTAAGCCCATT   | 59.55  | 20 | 156 | 27   | 182  |
| CGGTTTGTGGCTAACAGGT    | 60.03  | 20 | 126 | 32   | 157  |
| CAAAAACCGAAAAACCGAAA   | 59.951 | 20 | 252 | 439  | 690  |
| ACCCACTAACCCAAACCCAT   | 60.34  | 20 | 134 | 63   | 196  |
| CCTAACCCCACTAATGACCC   | 58.24  | 20 | 155 | 645  | 799  |
| TTCGTGATTATTGCTGCTGG   | 59.833 | 20 | 137 | 517  | 653  |
| CCCCACAAAAGTCCAATA     | 59.824 | 20 | 260 | 138  | 397  |
| TATTACAGGGGCCAGTCGTT   | 59.452 | 20 | 242 | 2901 | 3142 |
| ACCACCATCTTCTACGACCG   | 59.989 | 20 | 154 | 370  | 523  |
| GAAGCCTCAAATCACAAACC   | 59.532 | 20 | 212 | 358  | 569  |
| CCAACTCTTGTAAAAACCGC   | 58.798 | 21 | 248 | 610  | 857  |
| AGCCATTTAAAAGTCGGCTG   | 59.361 | 20 | 107 | 77   | 183  |
| TGCTCTCTTGATTCATGGCT   | 58.544 | 20 | 251 | 1121 | 1371 |
| GAGGCTTCAAAATCCTCCATC  | 60.032 | 21 | 240 | 216  | 455  |
| CCCCATGCATGTAAACTGA    | 59.395 | 20 | 270 | 312  | 581  |
| CCTAGCTCCTTCCCCTCAC    | 60.204 | 20 | 178 | 1073 | 1250 |
| GGCGGCTACGAAAATAGGTT   | 60.459 | 20 | 233 | 162  | 394  |
| GAAGCATTATAACCACCGCAA  | 59.978 | 21 | 253 | 74   | 326  |
| GAGTAGGAGTCCGGAGCAAA   | 59.43  | 20 | 159 | 321  | 479  |
| TGACCGGACGAAAATACTCC   | 59.933 | 20 | 188 | 196  | 383  |
| TTGGCCTGTTACGACTCAAG   | 58.923 | 20 | 160 | 146  | 305  |
| TACAGTCGACCTCAGCTCCC   | 60.408 | 20 | 219 | 10   | 228  |
| AGCTGGAAGACAAGGTGTGG   | 60.298 | 20 | 210 | 21   | 230  |
| CATTTGAAAATCAATGGATG/  | 59.638 | 22 | 279 | 678  | 956  |
| TTCAATACTTTGAGGATAGATT | 59.474 | 27 | 276 | 11   | 286  |
| GTGTGTCACTCCCCGATCTT   | 59.969 | 20 | 157 | 64   | 220  |
| GGAGAGAAGTTTCGGTGGTG   | 59.697 | 20 | 205 | 10   | 214  |
| CCTCTTTCTGGGTGTTGTCC   | 59.549 | 20 | 268 | 274  | 541  |
| TTTGTCCAATACCGCTTCC    | 59.938 | 20 | 152 | 2858 | 3009 |
| AGCGGTTATTACCGGATCG    | 59.93  | 19 | 223 | 53   | 275  |
| TCACGCACTCACGATCTCTC   | 60.146 | 20 | 235 | 915  | 1149 |
| TGACTTGCCATTCGAACTACT  | 57.496 | 21 | 188 | 708  | 895  |
| GAGGGAGAGAGAGATAGGATC  | 58.526 | 22 | 107 | 176  | 282  |
| TCTCTGAACTCGGTGACGAA   | 59.545 | 20 | 205 | 4    | 208  |
| GTGATCTTGTTGGGGGAGAA   | 59.903 | 20 | 162 | 1091 | 1252 |
| AAGATTCGCCCTTTCACAAA   | 59.685 | 20 | 177 | 6    | 182  |
| CCGATCCCATCCCTTAATTT   | 59.978 | 20 | 256 | 249  | 504  |
| GTCAAATCACGTTACGCTC    | 59.297 | 20 | 241 | 26   | 266  |
| GATGGGCATTAAAGACGACG   | 60.469 | 20 | 149 | 31   | 179  |
| CATTCCTTTTTATGTGTTGTTT | 59.38  | 25 | 242 | 1125 | 1366 |
| GTGGGTTAGCATTTGATCGC   | 60.478 | 20 | 241 | 622  | 862  |
| TGTACCTCTCGCTGCTCTGA   | 59.88  | 20 | 266 | 494  | 759  |
| GGTAAAAACCGGACTGCAC    | 59.476 | 20 | 139 | 52   | 190  |
| CCACAATTTTAGGCAGTTTCG  | 59.634 | 21 | 166 | 480  | 645  |
| AGCCCTCTCCCATTTTCTC    | 59.651 | 20 | 150 | 224  | 373  |
| TCAAAATCTTACACCTGGAGCC | 60.483 | 22 | 278 | 232  | 509  |
| ATTTTTCGCCGAAGAGGATT   | 60.041 | 20 | 235 | 588  | 822  |

|                        |        |    |     |      |      |
|------------------------|--------|----|-----|------|------|
| TGGCTTACTGGTGTGTAGGA   | 59.671 | 22 | 271 | 181  | 451  |
| GCGTTTTGATGATATATAGATG | 59.327 | 27 | 182 | 313  | 494  |
| TCCATCTTAATGCAGCAACG   | 59.833 | 20 | 122 | 2921 | 3042 |
| AGGAAAATGTGTGCGAGAGGG  | 59.137 | 20 | 268 | 141  | 408  |
| TTTCCTCCCAACATTCGTGT   | 60.353 | 20 | 227 | 85   | 311  |
| TGAGGAGCGTTGATCTTGTG   | 59.984 | 20 | 205 | 266  | 470  |
| ACGGTATTGCCCTTCAGCTT   | 61.006 | 20 | 241 | 1175 | 1415 |
| ACAAGGGTGACCCATTTTGA   | 60.21  | 20 | 173 | 26   | 198  |
| AATTCTGCAAAAATGAACAAA  | 57.101 | 23 | 181 | 12   | 192  |
| CACGAGTGAAGAAAGGGAGA   | 58.001 | 20 | 143 | 41   | 183  |
| GTCCGCGAAGAAACACTCAT   | 60.263 | 20 | 197 | 175  | 371  |
| CGGTAACACAAAATTGCAGAA  | 58.736 | 21 | 242 | 2177 | 2418 |
| AACATGCTTCACCATATCCAAC | 59.781 | 23 | 280 | 928  | 1207 |
| CCTCTTGAGCTCTGCCTTGT   | 59.745 | 20 | 247 | 405  | 651  |
| ATATGTTACCAAGCCGCTC    | 60.103 | 20 | 226 | 6    | 231  |
| TGCTACGAGAATGCATGGTG   | 60.834 | 20 | 234 | 99   | 332  |
| CGCGAAGACAATGTTGAAAA   | 59.849 | 20 | 253 | 37   | 289  |
| CCTTGTTTTGTAAAGGGGTCG  | 60.727 | 21 | 249 | 845  | 1093 |
| TGCAAGAAAGTGGACTGCAA   | 60.574 | 20 | 186 | 530  | 715  |
| CTCTCAATGGACCAGCACCT   | 60.261 | 20 | 258 | 1472 | 1729 |
| CGACACAATTAACCAAAAACA  | 60.517 | 24 | 243 | 332  | 574  |
| TTTGTCTGCGTGGACAAGTT   | 59.339 | 20 | 225 | 232  | 456  |
| TTAATGCATTCGCCAACTGA   | 60.215 | 20 | 214 | 125  | 338  |
| TCGTGTCGCTTTCATCATA    | 60.366 | 20 | 167 | 2432 | 2598 |
| TCGAATGCACTCAAACCTCA   | 60.39  | 20 | 146 | 261  | 406  |
| GGTGCCCTACTTCTTTGGT    | 60.361 | 20 | 212 | 33   | 244  |
| TGTTGGCATTCAAATCAACC   | 59.375 | 20 | 232 | 659  | 890  |
| CGACGGATATTTGTTCTTGTG  | 58.161 | 21 | 262 | 91   | 352  |
| TCCCATCTAATCTCGTCCGT   | 59.508 | 20 | 182 | 746  | 927  |
| TTGGGAGACAAACACACTCTC  | 58.843 | 22 | 271 | 53   | 323  |
| CCACCCACACCTAAGGAAGA   | 59.959 | 20 | 120 | 1    | 120  |
| ACCCACTAACCCCAACTAA    | 58.292 | 20 | 103 | 1    | 103  |
| CATCATTGTGATGTGTGGGAA  | 60.232 | 21 | 221 | 874  | 1094 |
| CGACTTGTCGTTGTTTCGGTA  | 59.758 | 20 | 274 | 212  | 485  |
| GAGGGACAGCCTAGAACTTTG  | 59.886 | 22 | 135 | 293  | 427  |
| GTGCATCTCGGCTACGAAGT   | 60.428 | 20 | 180 | 38   | 217  |
| CCTTGAGAACTCCCACCTGA   | 60.229 | 20 | 277 | 218  | 494  |
| CCACACATTTGAGGGAAGAAA  | 59.956 | 21 | 233 | 253  | 485  |
| TTAACCAAAATTTTCGGGACG  | 59.805 | 20 | 221 | 350  | 570  |
| AAAATGACACGCAAAAAGGG   | 59.975 | 20 | 100 | 176  | 275  |
| CAATCTGACGGCCGATATTT   | 59.923 | 20 | 168 | 966  | 1133 |
| TTGTCACACATTTACACACACG | 58.016 | 22 | 223 | 134  | 356  |
| TGGACTTAACTGGTAGCCCG   | 60.125 | 20 | 270 | 96   | 365  |
| GTGGATGTGTAGATGATTTTTG | 60.116 | 24 | 170 | 43   | 212  |
| AGCGATCCTTACAGGCAGAC   | 59.459 | 20 | 229 | 61   | 289  |
| CACACACGATGGATCGAAAC   | 59.967 | 20 | 233 | 97   | 329  |
| GCATCTCTTGCTCTCTCATTG  | 57.78  | 21 | 160 | 1    | 160  |
| CCATTTTTACATGCCGCAAT   | 60.7   | 20 | 184 | 824  | 1007 |
| GGATAAGTGGGGTGAGGGAT   | 60.015 | 20 | 275 | 35   | 309  |
| ATGGTGGTTTGGTGGAAGAA   | 60.21  | 20 | 136 | 169  | 304  |
| AGGTGCTGTGTGATGTTGGA   | 60.162 | 20 | 203 | 45   | 247  |
| TTTCACCGTCCAAAACACAA   | 59.981 | 20 | 214 | 379  | 592  |
| GCATGCAGAAGATGTGGAGA   | 59.95  | 20 | 217 | 1568 | 1784 |
| ATGCAAGCTAACCGCTAGAAT  | 58.2   | 21 | 266 | 52   | 317  |
| ACACGTGTCAAAATTTGCTTG  | 58.739 | 21 | 247 | 91   | 337  |
| GGATGGGAGTACATTGGTGG   | 60.05  | 20 | 239 | 75   | 313  |
| GTTTGGGGGTGAGGTGTA     | 59.688 | 20 | 216 | 522  | 737  |
| CGTTTTGATGATATATAGGTGT | 59.637 | 27 | 155 | 384  | 538  |

|                         |        |    |     |      |      |
|-------------------------|--------|----|-----|------|------|
| GACTTTTGATTCCGGCTTGA    | 60.192 | 20 | 103 | 342  | 444  |
| CACTTAGCTCATTGATTTTCATC | 59.24  | 25 | 132 | 623  | 754  |
| AGAACTAGGGCACTCCATCG    | 59.308 | 20 | 276 | 80   | 355  |
| CGAACCACCACACCAAATTC    | 61.196 | 20 | 145 | 496  | 640  |
| CTCAACAGTCAACAAGCACAC   | 59.986 | 22 | 211 | 314  | 524  |
| TTTAAGGGTTATCACCTGATTT  | 58.625 | 25 | 278 | 55   | 332  |
| AACCAAGCTCTTGCGATGAT    | 59.843 | 20 | 129 | 2030 | 2158 |
| TCTGTAACCTCCCCAAAAGC    | 59.17  | 20 | 162 | 578  | 739  |
| CCATTCACACACACACTCAGAC  | 59.074 | 22 | 258 | 183  | 440  |
| CATGAAAATGGGGACACACA    | 60.216 | 20 | 132 | 355  | 486  |
| CCTCATCGTCGGATTTTAGG    | 59.523 | 20 | 280 | 79   | 358  |
| TGGCTGCTGTGTGAGGTAAA    | 60.449 | 20 | 221 | 171  | 391  |
| ATTTTCATTTTCATGGGTTTCG  | 57.399 | 20 | 108 | 11   | 118  |
| ACTCACACGCTTACACGCAC    | 59.977 | 20 | 116 | 1060 | 1175 |
| CGGTCGTCAGATTGAGAAAA    | 58.847 | 20 | 221 | 2067 | 2287 |
| GCCTCCTTTTCTCTTCTTGACA  | 59.998 | 22 | 192 | 2405 | 2596 |
| TGTATTTGGGCTAAAGTGGC    | 57.781 | 20 | 146 | 18   | 163  |
| TTTACCCGTTGCATGTGTGT    | 59.888 | 20 | 246 | 1418 | 1663 |
| ATCGAACAGCATGAAAACCC    | 59.939 | 20 | 270 | 157  | 426  |
| CAAATCCCATCAACCCAAAC    | 60.029 | 20 | 109 | 18   | 126  |
| GGAGAAGAGATCGGAGACGA    | 59.486 | 20 | 187 | 39   | 225  |
| TGCGAAGGTGTAGTCCATTG    | 59.716 | 20 | 262 | 846  | 1107 |
| GTGGCCTGAGATAGCCGTTA    | 60.235 | 20 | 181 | 30   | 210  |
| ATTTTCCCTCTGCTCCGTCT    | 60.212 | 20 | 156 | 2182 | 2337 |
| GGGGTTCAAGTGTGAGGAGA    | 60.088 | 20 | 223 | 476  | 698  |
| ACAAATGCATTCAAAGCCA     | 59.161 | 20 | 233 | 418  | 650  |
| GACCGCGAAGTTTACATGGT    | 60     | 20 | 211 | 80   | 290  |
| AGACTGGGGTGACAGACCAC    | 60.006 | 20 | 163 | 3649 | 3811 |
| TCTCCAATTAACGTTCCATTCA  | 59.451 | 22 | 228 | 2381 | 2608 |
| TTTCTACTCCCTTCCCCTGC    | 60.569 | 20 | 168 | 1079 | 1246 |
| GGTGGCTTCTCTTTCGTTT     | 58.525 | 20 | 221 | 10   | 230  |
| CTTCGACCCAACCATATTC     | 59.302 | 21 | 100 | 30   | 129  |
| TTTGTA AATTGGCGTAAACGG  | 59.883 | 21 | 266 | 5    | 270  |
| CATCTTGTCAATTCGCCAAT    | 59.952 | 21 | 187 | 204  | 390  |
| GAGCGGTTATTACCGGATCG    | 61.686 | 20 | 226 | 72   | 297  |
| ATCTAACGGCTGGCATTGT     | 59.597 | 20 | 237 | 7    | 243  |
| TTTGAGCTAATGCTCTCTCGC   | 59.881 | 21 | 100 | 99   | 198  |
| TATGGGTTATCACCGGATCG    | 60.544 | 20 | 279 | 639  | 917  |
| ATTAGGGTTCCTCCTCCCC     | 60.497 | 20 | 113 | 2    | 114  |
| TGATTTTAAAGCAGGATCTTTT  | 57.669 | 23 | 185 | 4    | 188  |
| ACCATCCCTCACACGCTTAG    | 60.134 | 20 | 268 | 96   | 363  |
| TATGGGTTATCACCGGATCG    | 60.544 | 20 | 210 | 216  | 425  |
| CTCTCTCACACCGAACACCC    | 60.713 | 20 | 107 | 778  | 884  |
| AACACACACGCACTCACACA    | 59.818 | 20 | 162 | 247  | 408  |
| TTGTCCAGTGTGTGTTTTGG    | 59.495 | 21 | 223 | 60   | 282  |
| GGGATCCCAAGCCACATACT    | 61.106 | 20 | 278 | 1242 | 1519 |
| ATGATGGTTTTCCGAAAGTGG   | 59.79  | 20 | 259 | 1689 | 1947 |
| TTGGGCTCAGTAAACTGCTCT   | 59.135 | 21 | 245 | 95   | 339  |
| CCCAAACATTTGAGGGTTGT    | 59.688 | 20 | 212 | 551  | 762  |
| TTTTATGTAAATTGTCGTGCGT  | 57.373 | 22 | 251 | 69   | 319  |
| GGTGCTTGGTGAAGGAAGTG    | 60.69  | 20 | 125 | 24   | 148  |
| TCCTTTATTTTGTAGCAAC     | 59.904 | 24 | 252 | 718  | 969  |
| CCTTTGATGTTATACACGACTT  | 59.958 | 24 | 205 | 534  | 738  |
| TGGAGGTCGGAGAGAGAGAA    | 60.064 | 20 | 268 | 28   | 295  |
| GTGGTGA CTTGAAGAAATTTGC | 60.379 | 23 | 160 | 50   | 209  |
| TTTAAGTGGGGTGTGGGTTT    | 59.191 | 20 | 100 | 76   | 175  |
| CGACCCAGATTCAAACCCTA    | 59.926 | 20 | 279 | 69   | 347  |
| ATGATTCCTTGGCACTTGA     | 60.461 | 20 | 159 | 490  | 648  |



|                        |        |    |     |      |      |
|------------------------|--------|----|-----|------|------|
| ATATGCTGAGAGCCACCAGG   | 60.24  | 20 | 279 | 446  | 724  |
| GTACCGGTCTGAAGTGCCTC   | 59.727 | 20 | 100 | 12   | 111  |
| GAATAATGGTGGCAGCTGTG   | 59.152 | 20 | 203 | 484  | 686  |
| TTCTTTTGGCGTAGTGAGG    | 60.241 | 20 | 165 | 13   | 177  |
| ATTGAATCTACGTCCACGGG   | 59.813 | 20 | 258 | 67   | 324  |
| GCAGCTTCTGCAGATTCTC    | 60.249 | 20 | 253 | 37   | 289  |
| CGCTCCACAAAGATCTCACA   | 59.984 | 20 | 116 | 179  | 294  |
| AGCTGAATTTCAAAGAGGCG   | 59.592 | 20 | 267 | 376  | 642  |
| GCCAATTTGTTAACCGGAAA   | 59.81  | 20 | 142 | 40   | 181  |
| TCTGCATGTACGCTACCTACC  | 57.946 | 21 | 218 | 42   | 259  |
| CGGAGTGATAAGGTGCTGTG   | 59.314 | 20 | 229 | 0    | 228  |
| ATTTCTGTCCCGTTTTCCCT   | 59.805 | 20 | 279 | 48   | 326  |
| AAGGAATGGTTTGATGGGTG   | 59.647 | 20 | 217 | 144  | 360  |
| AACTGCCCCGTTGGTAAGAGA  | 59.734 | 20 | 156 | 3313 | 3468 |
| GACAAATTGACAGCGATGGA   | 59.654 | 20 | 174 | 109  | 282  |
| AGGGGTTATCACCTGAATGC   | 58.864 | 20 | 166 | 474  | 639  |
| TGCAGTTGCTGGATTACAGG   | 59.864 | 20 | 210 | 5835 | 6044 |
| TGAGAGAAGACCAACTCGGC   | 60.533 | 20 | 119 | 12   | 130  |
| CATTGTTTCATGAAAGCGTGG  | 60.111 | 20 | 225 | 223  | 447  |
| ATCCGCCTACATTGGATGAC   | 59.78  | 20 | 247 | 1389 | 1635 |
| ACTGGCTCAAAGGTTGCAG    | 60.431 | 20 | 257 | 390  | 646  |
| GGGCACCTACTTGTGTGAA    | 60.023 | 21 | 268 | 22   | 289  |
| GCCTCGTCTGGTTAGTTGGT   | 59.212 | 20 | 225 | 29   | 253  |
| ATCCTCCTAAGTTGCCCAT    | 59.789 | 20 | 115 | 24   | 138  |
| TGCATTCACCTTCTCTTTGC   | 59.002 | 20 | 201 | 156  | 356  |
| TGGTGAATAATTTGGTTTCATC | 60.006 | 24 | 245 | 254  | 498  |
| GCCGTCGTGTTCTTTCCTAA   | 60.249 | 20 | 243 | 23   | 265  |
| GTTTACAACCTCACAACGCGG  | 59.245 | 20 | 215 | 100  | 314  |
| CCATATTTAAGGGTTATCACAT | 59.713 | 27 | 249 | 835  | 1083 |
| TTCTCCCTCGTTTTTCGAT    | 60.929 | 20 | 263 | 3296 | 3558 |
| TTTGTCTTCCCGTTTGTTC    | 59.948 | 20 | 277 | 147  | 423  |
| ATAACCCGGTCAACAAGCTG   | 59.993 | 20 | 255 | 19   | 273  |
| AAAATGTACCAAAGACGGGC   | 58.952 | 20 | 221 | 399  | 619  |
| TGTTGCAGTTGTGGGTGATT   | 60.008 | 20 | 180 | 354  | 533  |
| AGAGTTCATCCCACCAAAT    | 58.297 | 20 | 177 | 7    | 183  |
| CGTAGGACAACGACGGTTTT   | 60.03  | 20 | 127 | 3    | 129  |
| GGTTGCGTAAGTTTTGGTGC   | 60.543 | 20 | 263 | 168  | 430  |
| ATTGGCCCTAAAATAACCCG   | 60.036 | 20 | 253 | 244  | 496  |
| GAGCTGCGGTTTTGATCTGT   | 60.406 | 20 | 264 | 199  | 462  |
| TGCTGTGGGGAGTAAACACA   | 60.152 | 20 | 271 | 7    | 277  |
| TGCCTACCACCAATGTAAA    | 59.964 | 20 | 226 | 528  | 753  |
| CAGGCCCAATACCTTGACAT   | 59.813 | 20 | 135 | 20   | 154  |
| CCTCCGAACCTCATGGTGTTA  | 58.569 | 20 | 190 | 261  | 450  |
| CAGATGAGGATTGGGGCATA   | 60.822 | 20 | 212 | 29   | 240  |
| GTCAACTTGGGCAGTGAAT    | 59.973 | 20 | 169 | 182  | 350  |
| CATGCAAGCATCAAACAACA   | 59.28  | 20 | 181 | 3    | 183  |
| TCGTTTTAATTTTCGGGAAGC  | 60.415 | 21 | 235 | 613  | 847  |
| TGACTAAGGTCCCATCACGA   | 59.086 | 20 | 235 | 50   | 284  |
| CATCAACCGCCAGGATTATT   | 59.784 | 20 | 119 | 20   | 138  |
| AAATCTACCTCTGCCACCCC   | 60.328 | 20 | 221 | 214  | 434  |
| GTCACGAGGTTGAATTGTGC   | 59.143 | 20 | 180 | 1548 | 1727 |
| CGGAAGGAAGTAGAAAGGGG   | 60.061 | 20 | 139 | 121  | 259  |
| TCTGCTTTTTGAGAGAATGCC  | 59.583 | 21 | 155 | 143  | 297  |
| CCTGAATATGGCCGATCCTA   | 59.878 | 20 | 210 | 3    | 212  |
| TTTTGGCAATGTCAGGATCA   | 60.049 | 20 | 217 | 416  | 632  |
| CCCAAACCTTCGGGTTCAATA  | 59.795 | 20 | 106 | 2834 | 2939 |
| TGCACGTGACTTGCTTCTTC   | 60.183 | 20 | 117 | 232  | 348  |
| TTGAGCTTGATCCTTGCTTG   | 59.148 | 20 | 127 | 194  | 320  |

|                         |        |    |     |      |      |
|-------------------------|--------|----|-----|------|------|
| TGTTGAGTCATTGATTGAGCAC  | 58.926 | 22 | 181 | 2128 | 2308 |
| TTTGGGTGAAAAATGATTGAG   | 59.429 | 22 | 131 | 71   | 201  |
| TGATGCGAGGATCCTTTTTTC   | 60.155 | 20 | 180 | 164  | 343  |
| TGCGTTTTGACAATATATAGGT  | 60.083 | 26 | 264 | 37   | 300  |
| CACCACTCTTCGATGGAACC    | 60.51  | 20 | 250 | 80   | 329  |
| AGCGGTTATTACCGGATCG     | 59.93  | 19 | 231 | 146  | 376  |
| ATTTCTTACCCGTCGTCG      | 59.94  | 19 | 203 | 32   | 234  |
| TGCAATATTCAACTACGAGCAT  | 59.292 | 23 | 103 | 27   | 129  |
| AGTGCGGTTATTGGGTTTCAT   | 59.316 | 20 | 269 | 4    | 272  |
| TTCAGCCTAGTCGCGATTTT    | 59.982 | 20 | 277 | 195  | 471  |
| ATGAAAGTTTGTGGGGATGG    | 59.647 | 20 | 179 | 507  | 685  |
| CAACAGAGAATGCAAGCGAA    | 60.134 | 20 | 171 | 12   | 182  |
| TATGCACGAAGCCAATTCAC    | 59.694 | 20 | 266 | 1978 | 2243 |
| TCGTCCCATCTTTTACCCTC    | 58.981 | 20 | 249 | 344  | 592  |
| TTTTTGAACCTCTCGGCCTCT   | 59.052 | 20 | 251 | 79   | 329  |
| AACCGGCGGATTTAAAAAGT    | 59.844 | 20 | 222 | 2252 | 2473 |
| ATAAAATGTACGGGCGCTGT    | 59.501 | 20 | 157 | 23   | 179  |
| CGAGTGTGAGGCTGTGAGAG    | 59.757 | 20 | 132 | 59   | 190  |
| CACACGCACACACATCCATA    | 60.029 | 20 | 146 | 18   | 163  |
| TCTTACGGAATTCCACTGGG    | 59.926 | 20 | 262 | 44   | 305  |
| TCATAGTCAAAGCAACCGCT    | 58.529 | 20 | 279 | 72   | 350  |
| AGGGCCTGGTCATTCTTAG     | 60.455 | 20 | 263 | 1982 | 2244 |
| CGTAGCATTCAAAGGGCATT    | 60.096 | 20 | 179 | 126  | 304  |
| AACACTTGAGGAAGGATGATG   | 58.646 | 22 | 102 | 425  | 526  |
| GCTTTTTCGACTTTGATCCG    | 59.823 | 20 | 190 | 62   | 251  |
| CCCATTTTCGATCACCCCTTA   | 59.756 | 20 | 213 | 31   | 243  |
| TCGTCCGAAAATCCTTTCAC    | 60.051 | 20 | 272 | 246  | 517  |
| ATCGGTTATTACCGGATCGC    | 61.031 | 20 | 257 | 293  | 549  |
| ATGTTTGAAATATCGGGGCA    | 60.153 | 20 | 100 | 8    | 107  |
| TGGCACAATAGGAAAGCAAG    | 58.917 | 20 | 142 | 443  | 584  |
| ACAACTTATGGACCGCTGG     | 59.993 | 20 | 135 | 555  | 689  |
| GACGTCACCCACTTGGTAA     | 60.812 | 20 | 200 | 1708 | 1907 |
| TGAGGTTACGCCAAACATGC    | 62     | 20 | 235 | 64   | 298  |
| TATAACCGATCCCACCCCTT    | 60.391 | 20 | 127 | 93   | 219  |
| CTGGCAGTTGGGGAATTAGA    | 60.066 | 20 | 162 | 311  | 472  |
| TGGACGGTTTGTGAGAAATG    | 59.541 | 20 | 244 | 1135 | 1378 |
| CCATGTCTCATGTCTATGGCA   | 59.537 | 21 | 275 | 901  | 1175 |
| GCTACGACATTGCCCTATGAG   | 59.744 | 21 | 119 | 35   | 153  |
| TTGGATTAAATTAATAATTATGG | 58.805 | 26 | 265 | 3636 | 3900 |
| CCATGGATGTCAGTCATTGC    | 59.925 | 20 | 171 | 1606 | 1776 |
| CCGTGATTTCTAGTGTGG      | 59.618 | 21 | 191 | 392  | 582  |
| TTTTTCCGACTCAAGGCATC    | 60.192 | 20 | 249 | 186  | 434  |
| TCTTGCACATCTTGGTGAGTG   | 59.889 | 21 | 228 | 19   | 246  |
| ACCTGTAGAATCTCTTACTCTA  | 57.215 | 27 | 225 | 591  | 815  |
| GGGGTGAATGATCAAGATGG    | 60.135 | 20 | 187 | 5    | 191  |
| TAGCGATCGGCATCCTATTT    | 59.666 | 20 | 256 | 24   | 279  |
| TAGAAGGCCGATTGACGAAC    | 60.214 | 20 | 158 | 64   | 221  |
| TGAACCTTGAATCGAGTTTACA  | 57.814 | 23 | 179 | 16   | 194  |
| TGGGCAATCATTTGCTTGTA    | 60.073 | 20 | 247 | 3460 | 3706 |
| CACCACACATGGACCACTTT    | 59.283 | 20 | 156 | 320  | 475  |
| GACAGCGTACTCCCCACTGT    | 60.182 | 20 | 276 | 371  | 646  |
| TCAGCTCGTGAGGTTTCAGA    | 59.701 | 20 | 230 | 445  | 674  |
| GCCTCGGTTGCTTATTTGTT    | 59.229 | 20 | 280 | 377  | 656  |
| CTACGTCAACGGTGGTTTGA    | 59.609 | 20 | 182 | 44   | 225  |
| ACTCACCGTGCTCTCCTCAT    | 59.866 | 20 | 270 | 4176 | 4445 |
| TCCCGTTTTACCCTTGAATG    | 59.795 | 20 | 194 | 91   | 284  |
| CCTCACTCTTTTACGCCTTCC   | 60.248 | 21 | 101 | 17   | 117  |
| CCTGTTCTCCGCTGTATTCC    | 59.694 | 20 | 151 | 2770 | 2920 |

|                         |        |    |     |      |      |
|-------------------------|--------|----|-----|------|------|
| CATGCAAACATGGAACATTG    | 58.389 | 20 | 270 | 295  | 564  |
| TTGATCAAGACCTTTTGGGG    | 59.903 | 20 | 229 | 79   | 307  |
| CGACCCAACCTCCTACTCG     | 59.861 | 20 | 227 | 73   | 299  |
| GATGTTCCACAAAACCACCC    | 60.073 | 20 | 172 | 541  | 712  |
| GACCGCGAACTTAGAGGAGTT   | 59.899 | 21 | 269 | 107  | 375  |
| TGAAACAATGCCTGGAAACA    | 60.088 | 20 | 274 | 547  | 820  |
| GATGATTGCACCATAACGCA    | 60.498 | 20 | 144 | 483  | 626  |
| ATGTTGTCATAACAAAAATGAC  | 60.089 | 25 | 101 | 352  | 452  |
| AACCAACAATCAAGATCGCC    | 59.939 | 20 | 250 | 180  | 429  |
| GTTGAGCTCGGAATACCTGG    | 59.694 | 20 | 278 | 1    | 278  |
| GGTGTGGCCGAAAGTTTTA     | 59.975 | 20 | 158 | 16   | 173  |
| GATCGCATGTTGATTTTCCA    | 59.48  | 20 | 280 | 853  | 1132 |
| TCGGCATGACGTAGTTTGAA    | 60.257 | 20 | 225 | 1764 | 1988 |
| AGAACCATAACCGAGGAGCAA   | 59.694 | 20 | 280 | 106  | 385  |
| ACCATATTTAAGGGTTATCACC  | 57.552 | 24 | 269 | 309  | 577  |
| AGCACCACACAAATCACCAC    | 59.446 | 20 | 148 | 528  | 675  |
| AAGTCCCATTAAGATGTAA     | 57.81  | 25 | 280 | 229  | 508  |
| TCATAAGTTAACATAAACCAA   | 59.079 | 27 | 111 | 77   | 187  |
| AGGGTGGGTTTGGAGAAGAG    | 60.48  | 20 | 239 | 32   | 270  |
| AAAATACGACGGCGAAGAAA    | 59.72  | 20 | 241 | 25   | 265  |
| TTGGACTATCGGGTTCCAAA    | 60.301 | 20 | 236 | 38   | 273  |
| ACCGCCATTCACATTCCTTA    | 60.331 | 20 | 265 | 673  | 937  |
| CATCCCAGTTGTCTTGGGAG    | 60.501 | 20 | 180 | 19   | 198  |
| ATGTCACACCCTCCCAATA     | 60.05  | 20 | 165 | 239  | 403  |
| ACATCATGTAGTCGCGTGCT    | 59.349 | 20 | 163 | 829  | 991  |
| TTTTTCGAGTTTCTTGTCTCCA  | 60.255 | 23 | 247 | 321  | 567  |
| TCGAGAGCTGAGAGACAAAGA   | 58.044 | 21 | 278 | 535  | 812  |
| CCTCCTTCAGCCAAAATGA     | 60.184 | 20 | 242 | 1284 | 1525 |
| CACTTTTAACTCCAAACCAGGA  | 58.619 | 23 | 220 | 105  | 324  |
| CTTTCGTTGGCGATTTTCAT    | 60.074 | 20 | 212 | 64   | 275  |
| CAGACAACGCCATCATCATC    | 60.08  | 20 | 184 | 9    | 192  |
| AACGGTTATCACTGGATCGC    | 59.962 | 20 | 206 | 422  | 627  |
| ATACCGTTCGGTGTCTCTG     | 59.989 | 20 | 213 | 156  | 368  |
| ATTTGCTTAAAATGAATCAATG  | 57.325 | 23 | 154 | 312  | 465  |
| TTTGTTCATTAACAAGACCA    | 59.809 | 25 | 221 | 1066 | 1286 |
| TCCGTCATCGACCACTATCA    | 60.072 | 20 | 143 | 612  | 754  |
| CGGCCGGTTTTTAATGTTTA    | 59.835 | 20 | 209 | 2188 | 2396 |
| TGAGTGGAACGATCCATATAA   | 57.137 | 22 | 259 | 679  | 937  |
| CGGCTATTAGCACAAAGCCA    | 59.984 | 19 | 229 | 1163 | 1391 |
| AATAGGATGGGGCAGAAACC    | 60.152 | 20 | 257 | 265  | 521  |
| TGCAATGCAAATCTGACGAG    | 60.958 | 20 | 195 | 4    | 198  |
| TATGATAGGCCGGAAAGAGC    | 59.277 | 20 | 266 | 480  | 745  |
| CGCCTGCATTGTTTCTCATT    | 61.168 | 20 | 188 | 104  | 291  |
| CCCGTACCTCAATTAAGGG     | 59.719 | 21 | 264 | 715  | 978  |
| CCGAATTCCTCTACCGTCAA    | 60.066 | 20 | 199 | 386  | 584  |
| TGCACACTGTCACACTCCAA    | 59.905 | 20 | 134 | 2110 | 2243 |
| CTATTGGAGCAGCTGGGAAA    | 60.344 | 20 | 254 | 202  | 455  |
| CACCCTCACATCTCTTGCAT    | 58.671 | 20 | 115 | 228  | 342  |
| ATAAGAGGTATTTTGACAGTAT  | 57.206 | 25 | 115 | 98   | 212  |
| TGCTATCGATGTGTGGCAT     | 60.104 | 20 | 254 | 225  | 478  |
| CCACCCGTGTATGTCATGTG    | 60.722 | 20 | 223 | 400  | 622  |
| ACGAAATTGACGGAAGAGGA    | 59.67  | 20 | 243 | 103  | 345  |
| GCCGGATTTAGAGCAATCAA    | 60.175 | 20 | 214 | 182  | 395  |
| TGACGGAAAAAGGTAGTGGG    | 59.964 | 20 | 280 | 14   | 293  |
| GGATGAAAATCATTGTTTCGC   | 58.009 | 20 | 274 | 583  | 856  |
| TGGACTTCTCCAATCCATGC    | 61.016 | 20 | 229 | 244  | 472  |
| CCTGCAATTCCTTCTGAACC    | 59.67  | 20 | 234 | 108  | 341  |
| CTCGTTCTCTTCTTCATCTAAAC | 57.05  | 24 | 147 | 257  | 403  |

|                          |        |    |     |      |      |
|--------------------------|--------|----|-----|------|------|
| GCCTCAATAATTCGCTTCCA     | 60.175 | 20 | 267 | 213  | 479  |
| ATCATCAAATTGCCAGGGAC     | 59.756 | 20 | 241 | 3248 | 3488 |
| CAACACTCAATTATAGGAAAA    | 59.318 | 27 | 251 | 209  | 459  |
| TCCAATCAGAGGTAGACGGC     | 60.218 | 20 | 265 | 235  | 499  |
| GGGGAAGAGAATCAAGAGGG     | 60.008 | 20 | 109 | 363  | 471  |
| ACTGATTGCGACAAGGATTG     | 58.724 | 20 | 189 | 98   | 286  |
| AACATATCCATGGTCCCCA      | 59.871 | 20 | 111 | 4452 | 4562 |
| AAATGTGGCCTTTCCATTTG     | 59.801 | 20 | 259 | 1120 | 1378 |
| TGCATCACATTTGTTTCATATCG  | 59.448 | 22 | 254 | 29   | 282  |
| TCACTCTCGAGCTTGCTGAA     | 60.008 | 20 | 252 | 1004 | 1255 |
| TTTTTGCCCTTGTATGCTCC     | 60.074 | 20 | 275 | 3148 | 3422 |
| TGGGTTTTTACGAAAGGCAG     | 60.103 | 20 | 212 | 20   | 231  |
| CGTTCATTTTCGTACCTTTAGAA  | 60.307 | 26 | 229 | 5    | 233  |
| TTTTGGATTGTCGGAGTTGG     | 60.863 | 20 | 280 | 147  | 426  |
| AAGGAAGGCGTTGACATTTG     | 60.11  | 20 | 261 | 93   | 353  |
| ATGTTGTCCCGGACTCCTC      | 59.912 | 19 | 122 | 36   | 157  |
| TGGTAGTGAAATAAACATAAA    | 59.645 | 26 | 142 | 95   | 236  |
| AGGTTTTACGAACCACAATCC    | 60.623 | 22 | 131 | 151  | 281  |
| TACATTTCCCAACCACTCC      | 59.647 | 20 | 172 | 13   | 184  |
| AAAAATGGTTATTATTGGATCA   | 57.553 | 24 | 141 | 97   | 237  |
| GGAGGCGATTTTGTGTCAGT     | 60.119 | 20 | 243 | 1247 | 1489 |
| AGGCGGACGAATATACCCTT     | 59.82  | 20 | 211 | 166  | 376  |
| GGCATATGAGGCTTGGTCAT     | 59.923 | 20 | 177 | 177  | 353  |
| TCCTCACCTTTCAAATCATGG    | 59.918 | 21 | 209 | 734  | 942  |
| TGTTAGGTTCAATGCCACCC     | 60.755 | 20 | 248 | 88   | 335  |
| TGTTGCGTAATAGGCGAGAA     | 59.467 | 20 | 209 | 330  | 538  |
| ACGATTACAACGCAACATCG     | 59.614 | 20 | 111 | 372  | 482  |
| CCATTCAATTTAACTTCGGCA    | 59.95  | 21 | 128 | 186  | 313  |
| GTTGGCAACCAGATATGCCT     | 59.962 | 20 | 219 | 212  | 430  |
| TCCAATGGATGGAAATGGTT     | 59.991 | 20 | 274 | 293  | 566  |
| AAAGGACAGTAGGTGATCGGA    | 58.658 | 21 | 220 | 9    | 228  |
| GGTGAAATAGCATGCAAGG      | 60.469 | 20 | 255 | 585  | 839  |
| GATCAATGCCGCTGAACATA     | 59.652 | 20 | 174 | 684  | 857  |
| TTTCTGTCCCGTCTTCTTCG     | 60.366 | 20 | 171 | 13   | 183  |
| CCCTAATACCACTAACCCCAA    | 57.876 | 21 | 101 | 511  | 611  |
| CCTTCAACAAATGGTTCATGC    | 60.359 | 21 | 215 | 1693 | 1907 |
| TTCCAGGATCGAATTGAGAA     | 59.631 | 21 | 265 | 232  | 496  |
| TTCAAACCTGGTTCTCGTCC     | 60.088 | 20 | 244 | 69   | 312  |
| CCCTAGCTTTGCCCTCTTC      | 60.332 | 20 | 102 | 8    | 109  |
| TCATCATTTTCAATTTATAAGCTT | 58.806 | 25 | 188 | 107  | 294  |
| TGGTTGGTGGAAAGAAATCAA    | 58.947 | 20 | 261 | 13   | 273  |
| CAATGTTTCCATGTTCCGTG     | 59.816 | 20 | 262 | 1324 | 1585 |
| TCCATGGGAGGTTAAATCG      | 59.756 | 20 | 263 | 249  | 511  |
| GTCCGATTTGCCGTTCTATC     | 59.533 | 20 | 216 | 1027 | 1242 |
| TCCAGCATTTGTATGTCCCA     | 59.924 | 20 | 215 | 1440 | 1654 |
| CATGAACCTGAAACAGCGTG     | 60.301 | 20 | 228 | 2156 | 2383 |
| ACAAGAGCTGAAATGCCCTT     | 58.936 | 20 | 216 | 29   | 244  |
| TTGAATCATTTGCGTTGCAT     | 60.081 | 20 | 141 | 4439 | 4579 |
| GCCAAAAAGTCAAGGCGTTA     | 60.244 | 20 | 243 | 22   | 264  |
| GATGTCGAGATCCAACCCAT     | 59.744 | 20 | 240 | 354  | 593  |
| TTAGGTGTTTTGACATGTTCAC   | 58.225 | 24 | 220 | 181  | 400  |
| AAATTCAAACGCCCACTCAG     | 60.11  | 20 | 269 | 536  | 804  |
| TGTTGTAATGAGGCTTTTGGAA   | 59.625 | 22 | 230 | 22   | 251  |
| AATAGCGCTTTTTGCCAGAT     | 58.992 | 20 | 152 | 242  | 393  |
| TTTTCCCATCACCATCACT      | 60.173 | 20 | 168 | 111  | 278  |
| CAACCGCTGATTTGTTTCT      | 60.11  | 20 | 130 | 159  | 288  |
| CCACCAGGTTTTGTAGTTCTGG   | 60.792 | 22 | 251 | 5522 | 5772 |
| ACTTCCGTATATGTGCGCCG     | 59.982 | 20 | 244 | 290  | 533  |

|                         |        |    |     |      |      |
|-------------------------|--------|----|-----|------|------|
| ATACACAATGCCAAACATGGG   | 60.496 | 21 | 266 | 5399 | 5664 |
| CATGAATCATAGTTGGCCCC    | 60.155 | 20 | 110 | 6    | 115  |
| AATGGCGGTGAAGATGGTAA    | 60.331 | 20 | 274 | 100  | 373  |
| CCTTGGCGGTTTCATATCAGT   | 59.955 | 20 | 187 | 49   | 235  |
| GAGAAAGTTGTCGGTTTGGGA   | 60.088 | 20 | 165 | 687  | 851  |
| GGTAAAAACCACGGGACCTT    | 60.089 | 20 | 161 | 87   | 247  |
| CATACTCTACCAATCCCCG     | 60.331 | 20 | 143 | 2    | 144  |
| TCCCAGCATTCTTGAACACA    | 60.24  | 20 | 137 | 72   | 208  |
| ATCATGTTGCTACACGTTGCT   | 58.324 | 21 | 150 | 175  | 324  |
| CTCGGTAGTCAAGTTTGCTTT   | 59.82  | 22 | 256 | 20   | 275  |
| TGTACAAAAGCTTGTGGTGAA   | 59.836 | 23 | 182 | 94   | 275  |
| CATTTGCCTGTGCATTTGAC    | 60.119 | 20 | 268 | 1466 | 1733 |
| CACACTCGAAGAGTAGCGACC   | 60.066 | 21 | 215 | 776  | 990  |
| AAATACCAAAGTCGATTATCC   | 58.11  | 24 | 161 | 39   | 199  |
| TATGGGTTATCACCGGATCG    | 60.544 | 20 | 120 | 103  | 222  |
| AAAAAGCATTTCACACGTTCTG  | 60.089 | 23 | 179 | 294  | 472  |
| AAATAATTTCCGAAACCGCC    | 60.148 | 20 | 234 | 914  | 1147 |
| CACACGTTATATTTATAGTTTTG | 59.19  | 27 | 120 | 227  | 346  |
| GCGAATTCAGCTAGAACAACA   | 58.187 | 21 | 180 | 1836 | 2015 |
| TAGCTTATCACTATCACCCCTCT | 59.255 | 25 | 100 | 29   | 128  |
| ACGGTTCACATACTCCTGCC    | 59.997 | 20 | 230 | 155  | 384  |
| TGCAACCAACAAAAACAACA    | 58.626 | 20 | 184 | 31   | 214  |
| TCCTTGGAACCTAGAAATGGTT  | 59.001 | 22 | 231 | 34   | 264  |
| CATGGCCTCCTCTCTTTCAG    | 59.943 | 20 | 119 | 309  | 427  |
| ATCCTTTTCGCCATCTTGAA    | 59.645 | 20 | 191 | 126  | 316  |
| GATGGAATTGGGTGTTGGAT    | 59.464 | 20 | 116 | 132  | 247  |
| TCTAATAGCAAGAGAGACCGG   | 59.871 | 22 | 252 | 63   | 314  |
| TTTCAGCATTGAAACCAGCA    | 60.379 | 20 | 202 | 660  | 861  |
| TGATTTCCACCCCTTCTTCTT   | 59.926 | 21 | 212 | 53   | 264  |
| TGCCTCTAATGCACACAAGAA   | 59.775 | 22 | 279 | 67   | 345  |
| CGGAATCAACCCTCAAACCTC   | 59.526 | 20 | 215 | 1022 | 1236 |
| CAAGGGTGATTGTAGCCAGC    | 60.657 | 20 | 156 | 892  | 1047 |
| CTCGCTAACGGCACTAAACC    | 59.904 | 20 | 102 | 152  | 253  |
| GGTATTGTGCGGAACCTTCGCT  | 59.198 | 20 | 197 | 67   | 263  |
| TGCAGAAAGCAGGCAGTAGA    | 59.888 | 20 | 189 | 4389 | 4577 |
| AGACGATTGAGAGAAAGCGG    | 59.574 | 20 | 222 | 387  | 608  |
| AAATTTATTGTAATCTTCCCTCC | 59.594 | 26 | 188 | 604  | 791  |
| CCCAACCCACTAACCCATAA    | 59.541 | 20 | 114 | 11   | 124  |
| ATCAATGGTCCACATCGGTT    | 60.057 | 20 | 157 | 85   | 241  |
| TTCTCTTGTGCGCCATTTTT    | 59.685 | 20 | 279 | 320  | 598  |
| AACAATTACAATGTTTATGAAA  | 58.707 | 27 | 104 | 25   | 128  |
| TGGTTGTGTGAACCAACTCTG   | 59.626 | 21 | 216 | 197  | 412  |
| AGCTTCACCAAGCTTTTCCA    | 59.993 | 20 | 258 | 2    | 259  |
| TGCTCAATCATCTCCGTCAG    | 59.942 | 20 | 177 | 248  | 424  |
| CAAGCTCATTTTGTGTCCCA    | 59.691 | 20 | 251 | 1048 | 1298 |
| ATCGATGTGTTGGCATTCAA    | 59.931 | 20 | 215 | 9    | 223  |
| AATGAAAGCGATCGTATGCC    | 60.067 | 20 | 157 | 920  | 1076 |
| CTCTGATGGAAGGGACGAAG    | 59.797 | 20 | 203 | 18   | 220  |
| CTCCATCATCACACAGCACC    | 60.121 | 20 | 189 | 107  | 295  |
| AGAATTTGGAGAGGGAGGGA    | 60.008 | 20 | 104 | 27   | 130  |
| GAAAGGGATTACCTGCCTT     | 60.443 | 20 | 170 | 1151 | 1320 |
| TTGATCCTGCAATCTCTCGT    | 58.388 | 20 | 187 | 9    | 195  |
| GACTCTTCACAACCTTCTACACA | 57.679 | 26 | 275 | 822  | 1096 |
| AAACCAACTACCCAAACCC     | 59.955 | 20 | 165 | 5    | 169  |
| ATTTGCGTCGCCTAATGAAC    | 60.103 | 20 | 245 | 69   | 313  |
| TGCTGAGAGTGTGTTGGCAT    | 60.473 | 20 | 107 | 1219 | 1325 |
| GTCGTTAGCCCATACCAAA     | 59.823 | 20 | 199 | 498  | 696  |
| GATCCCGTGTGTGAACTGTG    | 60.005 | 20 | 180 | 17   | 196  |

|                        |        |    |     |      |      |
|------------------------|--------|----|-----|------|------|
| TTTGGTTCAATGGGTTATTCG  | 59.685 | 21 | 196 | 81   | 276  |
| GCATGATCAGGGTAAATCCA   | 59.776 | 21 | 195 | 42   | 236  |
| ACAGCCACCATAATCGAAGG   | 59.955 | 20 | 223 | 324  | 546  |
| AAGAACGGGCAGCAGTCTAA   | 60.015 | 20 | 159 | 58   | 216  |
| AGCTCGGACCTTCAGCATT    | 59.965 | 19 | 110 | 6    | 115  |
| ATCTCCTCTGCTCACCTTCG   | 59.555 | 20 | 222 | 47   | 268  |
| ATTTCTTGGTGGGAGGGAAT   | 59.629 | 20 | 242 | 1961 | 2202 |
| TGTGTTTTATCCCTCGCACA   | 60.111 | 20 | 164 | 83   | 246  |
| AGAACATGGTTTCCGAGCTG   | 60.255 | 20 | 166 | 98   | 263  |
| TCTCCCCCTCTTCCCTCTTA   | 60.139 | 20 | 233 | 4123 | 4355 |
| TCACCTTCTCTCCACTCTCTCA | 59.175 | 22 | 230 | 7    | 236  |
| CCTGCCTCAAGGCTAAACAA   | 60.378 | 20 | 248 | 128  | 375  |
| CAGAAATTGCCTCTGTTGTTT  | 57.468 | 21 | 259 | 22   | 280  |
| TAATTTGCGCCAACACCTTC   | 59.938 | 20 | 181 | 1379 | 1559 |
| TGCCTCAAGGCTAAACAAGG   | 60.378 | 20 | 261 | 85   | 345  |
| CCTCTCGTGTTTCTTCGTCC   | 59.844 | 20 | 117 | 43   | 159  |
| CGAAGGATATCCCCAAAACA   | 59.756 | 20 | 261 | 285  | 545  |
| CAAGTGTGTTTGTGAGTG     | 57.54  | 20 | 144 | 385  | 528  |
| TTTTGTCCGAAACATCCCTC   | 59.91  | 20 | 187 | 195  | 381  |
| AACTCTGCCGAGAATGTGT    | 59.727 | 20 | 233 | 1258 | 1490 |
| GATTCTGGATTATCCTGCGG   | 59.486 | 20 | 221 | 200  | 420  |
| GGTTAAATTTTGTCCCTAGTTA | 59.109 | 25 | 209 | 35   | 243  |
| ATTTCTTGGCGTGGTGTGT    | 60.419 | 20 | 191 | 442  | 632  |
| GAAGACACGTTGGACAAAAA   | 60.001 | 21 | 259 | 238  | 496  |
| TGTAGTGGTTCGTGGACTGC   | 59.751 | 20 | 210 | 41   | 250  |
| AGCTTCCATGGAGGTTGATG   | 60.073 | 20 | 128 | 61   | 188  |
| ATGGGCTCAAATATCGGACA   | 60.296 | 20 | 264 | 12   | 275  |
| GATCCGACCCGGATTTTAAG   | 60.633 | 20 | 207 | 276  | 482  |
| TCGTGGAGAACTATCCAAGG   | 59.998 | 22 | 244 | 762  | 1005 |
| CCCCTACGTTGAAATTGTCTG  | 60.357 | 20 | 231 | 369  | 599  |
| TTTCGTTGATTGAAACTCTAA  | 60.167 | 25 | 160 | 341  | 500  |
| TGACATCGGACCATTTTCTG   | 59.496 | 20 | 221 | 78   | 298  |
| TACCTCATCACCATCCCCAT   | 60.011 | 20 | 151 | 39   | 189  |
| TCCCGTTGTTGCTTCTCTC    | 60.375 | 20 | 147 | 261  | 407  |
| TAGGAAAATCATGCACGTCG   | 59.688 | 20 | 249 | 1259 | 1507 |
| AGGGGTTATCACCTGAATGC   | 58.864 | 20 | 247 | 269  | 515  |
| GTGGGCATAAGAGACGGAGA   | 60.218 | 20 | 178 | 2113 | 2290 |
| GCGGAGATAGAGACAAGGCA   | 60.504 | 20 | 196 | 185  | 380  |
| TTTATGAAGCAAGGGGGATG   | 59.894 | 20 | 240 | 20   | 259  |
| AATCAATCCAACCACATCTCG  | 59.805 | 21 | 126 | 9    | 134  |
| CATAGCGCCGGAATACTTGT   | 60.117 | 20 | 237 | 1895 | 2131 |
| CATTTCCCCCACTTCACAT    | 59.647 | 20 | 225 | 3    | 227  |
| ACTTTCTCGCCTGGATTTTG   | 59.312 | 20 | 142 | 137  | 278  |
| GCTGCGAATTTCCATTTTTC   | 59.666 | 20 | 274 | 187  | 460  |
| TTGATGGTTTTTGGACTCACA  | 59.01  | 21 | 162 | 145  | 306  |
| CGTGTTTCATGGAATTTGAAAG | 58.134 | 21 | 280 | 713  | 992  |
| GGAGATTGAGCATCAGGAGC   | 59.917 | 20 | 227 | 31   | 257  |
| GGGATGACTCGTGAGAAGA    | 60.199 | 20 | 274 | 209  | 482  |
| TTATTTGCCTCGTCCGAGAT   | 59.668 | 20 | 255 | 1669 | 1923 |
| GTGGAAGAGAAGATGCTCGG   | 59.95  | 20 | 178 | 33   | 210  |
| TTTGCTAGCGATTCCAACCTG  | 59.062 | 20 | 254 | 447  | 700  |
| GTAAAACCCGACACCTGCAA   | 60.924 | 20 | 244 | 88   | 331  |
| GGGAAAGATTATTGGAACCTC  | 58.864 | 22 | 216 | 0    | 215  |
| ATCGAAAATGCCAAAAATCG   | 59.907 | 20 | 185 | 3196 | 3380 |
| TCTTGCAATGAAGAACGTCTG  | 59.988 | 20 | 148 | 65   | 212  |
| GCAAGGCCAATGGAAATATG   | 60.289 | 20 | 156 | 1715 | 1870 |
| TCATCTTCAACCCCAACTC    | 59.903 | 20 | 250 | 1537 | 1786 |
| TGCTGGTGTGAATGGAAAA    | 60.088 | 20 | 160 | 338  | 497  |

|                          |        |    |     |      |      |
|--------------------------|--------|----|-----|------|------|
| AAACGCTCGTAGTGTCCAG      | 60.312 | 20 | 133 | 199  | 331  |
| TGCGTGGTTTACAGATTGAGTTAT | 59.637 | 22 | 280 | 1131 | 1410 |
| TCCTCATGTACGTTGTTTATGG/  | 59.393 | 23 | 136 | 92   | 227  |
| GTGATTGAGGGTGTATTGGTT    | 57.257 | 20 | 101 | 29   | 129  |
| CAGTCAACGTGCGCATTTAT     | 59.759 | 20 | 247 | 68   | 314  |
| CTACCCGATGCCAATTTTTG     | 60.315 | 20 | 257 | 216  | 472  |
| AACTCCCCACGAACTCC        | 59.896 | 18 | 100 | 42   | 141  |
| TTTGATGATATATAGGTGTTTTT  | 57.624 | 26 | 135 | 2035 | 2169 |
| ACGACTTGTTCGTGGTTTCGAT   | 60.577 | 20 | 243 | 233  | 475  |
| TCTCACCTCTTTTTCCAGCC     | 59.405 | 20 | 255 | 1    | 255  |
| GGCTGAAAATAGTGGTGGGA     | 59.933 | 20 | 237 | 34   | 270  |
| GCTGCCTGTACAGAGGATGA     | 58.987 | 20 | 278 | 667  | 944  |
| GGGATGGCTTGTTCACTCTC     | 59.661 | 20 | 214 | 19   | 232  |
| TTCAGCCGTTTGGTTTTGTT     | 60.514 | 20 | 273 | 312  | 584  |
| CGTTTTCCGACTACCCTTGAA    | 60.103 | 20 | 260 | 3    | 262  |
| TTTCGTCCAACCTGAATGGCT    | 60.636 | 20 | 278 | 393  | 670  |
| CGGGATCCCTTTGTATGTGT     | 59.67  | 20 | 203 | 1887 | 2089 |
| TATTTGCGTGAACAATGGTG     | 58.046 | 20 | 274 | 178  | 451  |
| CATGATAATGCATGTCTCCGA    | 59.514 | 21 | 231 | 1122 | 1352 |
| ATCTGTTGGCAAACACAGGTC    | 60.028 | 21 | 109 | 63   | 171  |
| TCACACACACGCACTGTCAC     | 60.437 | 20 | 115 | 17   | 131  |
| TGAACGGTACGAGCACAAAC     | 59.764 | 20 | 187 | 419  | 605  |
| TTGATCCTGTGTGCCTGTGT     | 60.162 | 20 | 141 | 70   | 210  |
| TGGCAGAAGTGGGAGTCTTT     | 59.844 | 20 | 192 | 19   | 210  |
| TGTGAAAATTTGGTTGCAGAA    | 59.192 | 21 | 187 | 198  | 384  |
| AAAATCAAAGGCCCAACAATG    | 59.801 | 20 | 218 | 104  | 321  |
| GAAGAAAGAGGGGGAGATGC     | 60.154 | 20 | 129 | 482  | 610  |
| CCAATATCCATGAGAAATGA(    | 59.843 | 23 | 103 | 0    | 102  |
| GGAATCATCACCATGCAACA     | 60.339 | 20 | 201 | 76   | 276  |
| GAAAACCTTCGGCTTGAAAA     | 59.315 | 20 | 279 | 60   | 338  |
| CCAATCTCAACAACACACGC     | 60.16  | 20 | 204 | 21   | 224  |
| GGACGCCACAAATTGTTTCT     | 59.978 | 20 | 246 | 49   | 294  |
| CAAATTGCCCCCGTATGTAG     | 60.202 | 20 | 208 | 453  | 660  |
| GTGGGGAAAGAGTTTGCCTA     | 60.11  | 20 | 116 | 84   | 199  |
| AGTCGCTGCAATTTCCAGTT     | 59.882 | 20 | 166 | 52   | 217  |
| GCAGGCAGCTGATATGTTCA     | 59.979 | 20 | 201 | 12   | 212  |
| CCCTAGCCTTTGCCTCTTTC     | 60.332 | 20 | 161 | 108  | 268  |
| TTTTTCGTGGCATCAATAAAT    | 57.219 | 21 | 207 | 53   | 259  |
| ATGATCGACCAACCCTGTTC     | 59.786 | 20 | 155 | 25   | 179  |
| CTCGAACCCATGACCTTTTG     | 60.486 | 20 | 134 | 839  | 972  |
| GCGACGTTACCCACTTTCA      | 59.707 | 19 | 129 | 82   | 210  |
| TGGCAACAAGATACCCACAA     | 59.964 | 20 | 126 | 569  | 694  |
| GGGAATCGGAAACCTTGCT      | 60.306 | 20 | 196 | 1191 | 1386 |
| ACAGTTGAACCAAACACCCC     | 59.721 | 20 | 279 | 280  | 558  |
| AGATGCGGGGATATATGTGG     | 59.628 | 20 | 278 | 403  | 680  |
| CAACGCCATGCATTTATCCT     | 60.857 | 20 | 153 | 16   | 168  |
| TCTGTTGCTCCAATCATTCA     | 59.262 | 21 | 236 | 1481 | 1716 |
| CTAACCTTGGGCTCTGATGC     | 59.836 | 20 | 135 | 77   | 211  |
| TGTCGCGTTGCAGATCTAGT     | 59.621 | 20 | 209 | 43   | 251  |
| GGGATGGGAAGAGCATTAAAG    | 59.917 | 21 | 277 | 1049 | 1325 |
| CGAAACATGTAGTCCGCCTC     | 60.657 | 20 | 273 | 132  | 404  |
| CGAGTTACAATGAGCTCGCA     | 60.157 | 20 | 238 | 684  | 921  |
| TTTGAAGGAATTCGAGTGGG     | 60.044 | 20 | 237 | 302  | 538  |
| CGGTATCACCCCTCCTTTTCA    | 59.926 | 20 | 129 | 86   | 214  |
| TCATTGGGGTGGTAGCTCTC     | 60.073 | 20 | 196 | 3663 | 3858 |
| TTCTCTTCTCACACCCTTTTCA   | 60.261 | 23 | 213 | 355  | 567  |
| TTACATTCTCCGACATGGGG     | 60.713 | 20 | 255 | 339  | 593  |
| GGTTCGTTTTCGTCGTGATT     | 59.978 | 20 | 112 | 485  | 596  |

|                          |        |    |     |      |      |
|--------------------------|--------|----|-----|------|------|
| CAGCAATTTTCGATTTCAACG    | 59.301 | 20 | 149 | 108  | 256  |
| CCCCAAACCATCTCATTAC      | 60.173 | 20 | 228 | 2075 | 2302 |
| TGGTCCCCCTTTCTCTCTCT     | 60.186 | 20 | 216 | 59   | 274  |
| CATGAATCCAACGTACGCAT     | 59.425 | 20 | 250 | 1406 | 1655 |
| CCTTATGCGGTTCTTGGAAA     | 60.067 | 20 | 257 | 1    | 257  |
| AGGTCGGAGTGTCTCTGTGC     | 60.467 | 20 | 259 | 795  | 1053 |
| TGAAGTTAGGAAATAAGGAGG    | 58.743 | 25 | 108 | 656  | 763  |
| TCAACATCCCCTTAAGCCC      | 59.879 | 19 | 112 | 2938 | 3049 |
| ATCTCCTCTGAATGCCTTGC     | 59.39  | 20 | 178 | 63   | 240  |
| TCAATGCATGATACGCCCTA     | 60.058 | 20 | 237 | 2147 | 2383 |
| AATGCTCGACTTATGCGGTC     | 60.243 | 20 | 276 | 414  | 689  |
| ACAAACCAAAGTTGCGATCC     | 59.978 | 20 | 185 | 702  | 886  |
| GATCGCTCATGCATCAAGAA     | 59.914 | 20 | 274 | 217  | 490  |
| TTACCATATTTAAGGGTTATCA   | 58.789 | 26 | 238 | 262  | 499  |
| TTGAAACATGAGGCCTTGCT     | 60.776 | 20 | 159 | 562  | 720  |
| AGTGGTATGGAGTGGGGGAC     | 61.032 | 20 | 139 | 45   | 183  |
| CGTGGATGCCCTAGATTGTT     | 59.955 | 20 | 258 | 371  | 628  |
| GGACCGTTAGACCGAATTT      | 60.187 | 20 | 123 | 268  | 390  |
| CCAAGGAGAGTGAGCCAAAA     | 60.366 | 20 | 222 | 4    | 225  |
| CGACACGGATTGAATCACAC     | 59.967 | 20 | 191 | 315  | 505  |
| CAAGGCATGCAATCAAATGT     | 59.548 | 20 | 261 | 498  | 758  |
| AGGCCGGCATAAATAAAAGC     | 60.417 | 20 | 185 | 223  | 407  |
| CCACAAATCATGATGAGCAAA    | 59.533 | 21 | 185 | 2680 | 2864 |
| CCTCAACACCATCCCCTTC      | 60.363 | 20 | 259 | 10   | 268  |
| GACACCATTGGCATTCTTCC     | 60.326 | 20 | 278 | 1393 | 1670 |
| TTCGAAAATCAATGGATGGG     | 60.64  | 20 | 229 | 1370 | 1598 |
| GAGCTCGGTTGTGGAAAAAT     | 59.174 | 20 | 122 | 51   | 172  |
| GTGTACTCTGCACTGAGGCG     | 59.648 | 20 | 150 | 189  | 338  |
| GGGAAGCAAAGGAGGTAGGT     | 59.576 | 20 | 135 | 189  | 323  |
| AGAAAATTCGGTTTACCGGC     | 60.312 | 20 | 271 | 26   | 296  |
| TCTTCCCCCTTTTCTCTCGT     | 60.183 | 20 | 169 | 869  | 1037 |
| AGTTGAAGGTGACGCTCAAAA    | 59.906 | 21 | 280 | 26   | 305  |
| CGTAAAATTCCGGTGCAAAAT    | 59.832 | 20 | 215 | 13   | 227  |
| GAAGTGTGGAAAGGGAGCTG     | 59.844 | 20 | 117 | 657  | 773  |
| AGCAAGTTCGATATATTA AAAAC | 57.104 | 24 | 203 | 31   | 233  |
| GCGATTCTCATTCCAATTCAA    | 60.031 | 21 | 110 | 704  | 813  |
| AAACCCCAAACCCATTCTCT     | 59.668 | 20 | 131 | 88   | 218  |
| ACGCCTATCACGGAATATCG     | 59.945 | 20 | 203 | 1001 | 1203 |
| TGCAAGAAGGATACAAGGCA     | 59.42  | 20 | 220 | 180  | 399  |
| GCGTTCACACCCTCATTTTT     | 59.978 | 20 | 191 | 27   | 217  |
| TTTCCACTCACTCATCCAAGAA   | 59.711 | 22 | 202 | 1    | 202  |
| ACAAACTAATCAAGTTCCGCA    | 57.439 | 21 | 216 | 347  | 562  |
| GTTATATCTATAGGGAGGGTTA   | 57.293 | 26 | 177 | 1243 | 1419 |
| TTCGATGATAACTATGGGTTTG   | 57.589 | 23 | 250 | 401  | 650  |
| ATGGAAGAAGGGAAAGTCAAF    | 57.773 | 21 | 258 | 1356 | 1613 |
| CGAGCCCTTCCTAGGACATT     | 60.59  | 20 | 233 | 26   | 258  |
| CCCAAGAACCGAAGAGTCAA     | 60.224 | 20 | 202 | 5    | 206  |
| TTCAAACCGAGCTTGAGATGT    | 59.867 | 21 | 255 | 42   | 296  |
| CACTTACACACGCACACACG     | 59.848 | 20 | 271 | 204  | 474  |
| AGCCCAACGGCTGATTATAC     | 59.07  | 20 | 138 | 49   | 186  |
| TCAGGATCTCACCTTCACCC     | 60.048 | 20 | 243 | 51   | 293  |
| TTCTCCTCCTCACACTGCT      | 59.986 | 20 | 203 | 696  | 898  |
| CTCTGACCTTGAGGGCTTTG     | 59.982 | 20 | 278 | 140  | 417  |
| ATTTGCGATTTATGATGGCG     | 60.802 | 20 | 265 | 1032 | 1296 |
| ACTCGTGAGGAAAAACCGTG     | 60.149 | 20 | 258 | 370  | 627  |
| GCTCAGCCCAACTTCCTAAAC    | 60.256 | 21 | 242 | 30   | 271  |
| AAAATGCACGCGAGACA ACT    | 60.837 | 20 | 128 | 239  | 366  |
| TTCTGTCCCGTCTTCTTCGT     | 59.844 | 20 | 175 | 19   | 193  |



|                        |        |    |     |      |      |
|------------------------|--------|----|-----|------|------|
| ATGGCCGAACATATCAGAGG   | 59.917 | 20 | 159 | 789  | 947  |
| TGTTTGCAGAGAAATGAAATG/ | 59.75  | 23 | 221 | 66   | 286  |
| TTTGCATGTGTTGCAAATGA   | 59.691 | 20 | 249 | 38   | 286  |
| TGGCTCCAACATCACAAAA    | 60.088 | 20 | 205 | 250  | 454  |
| AAGGAGGTGTTATGAAGGGAT  | 58.028 | 22 | 141 | 72   | 212  |
| CTCCGATTTCTTGGTGTGGT   | 59.966 | 20 | 198 | 101  | 298  |
| TGGTCCCAAGTAGGGCTAGA   | 59.688 | 20 | 226 | 1919 | 2144 |
| ATTACAGCTCCTACCCGCAA   | 59.73  | 20 | 231 | 296  | 526  |
| CGAAAAATTTAAAATCAAACG/ | 60.521 | 25 | 223 | 0    | 222  |
| GTCCCGGGAATGAAGAAGTT   | 60.306 | 20 | 264 | 326  | 589  |
| TTGGTGAGGTGGCATCATAA   | 59.924 | 20 | 182 | 235  | 416  |
| TGCAGATTGACGAAGGAAGA   | 59.522 | 20 | 140 | 969  | 1108 |
| TGGGAGGAGGCTTAGGATCT   | 60.169 | 20 | 112 | 3    | 114  |
| TAGGGGCAAGCCCTTAAAAT   | 59.93  | 20 | 158 | 920  | 1077 |
| CACTTATAGATGGGTTAGCGTC | 59.972 | 24 | 254 | 148  | 401  |
| AGCCTAACCTTGGGTTCTGA   | 58.789 | 20 | 246 | 150  | 395  |
| AATTTTCGACTTTGCCGTGT   | 59.615 | 20 | 240 | 15   | 254  |
| TGGAAATGAAGCACCAGAAA   | 59.247 | 20 | 107 | 18   | 124  |
| TTGTGAGGTGATGTTGGAGTG  | 59.581 | 21 | 159 | 17   | 175  |
| ATGTGGTTTTGGTCCCACAG   | 60.668 | 20 | 271 | 7    | 277  |
| CGGTAGCCATCACAATTTTT   | 57.635 | 20 | 264 | 436  | 699  |
| CTTGGTCCAATGGGTTTCATC  | 60.173 | 20 | 249 | 193  | 441  |
| GCCGATCATGTCCTCAAAGA   | 61.159 | 20 | 259 | 97   | 355  |
| CCACGCCAGTCAGGTAAACT   | 60.171 | 20 | 143 | 67   | 209  |
| CCAATGACACGACACAAACA   | 58.974 | 20 | 187 | 568  | 754  |
| GAGGCTTCAATCCGTCACTC   | 59.81  | 20 | 115 | 710  | 824  |
| TGGTGAAAAGGGGGTAAATG   | 58.727 | 21 | 226 | 145  | 370  |
| TGGACACCCCAGATTGTTTT   | 60.21  | 20 | 177 | 261  | 437  |
| TGCTTACTGTTGTATGGGGTGT | 59.424 | 22 | 238 | 166  | 403  |
| ATCGGATCTGCGATCTAACG   | 60.199 | 20 | 232 | 720  | 951  |
| TTGTCCCCAAACAACGAAAT   | 60.206 | 20 | 231 | 838  | 1068 |
| AATACGAGACCGAAAGGAAAA  | 59.163 | 22 | 210 | 2    | 211  |
| GTTTCATGACGGGCTAACCAT  | 59.82  | 20 | 180 | 3078 | 3257 |
| ACCAATCCACTGCATGAACA   | 59.967 | 20 | 180 | 74   | 253  |
| GAAGCAAATGGGGTGATGAG   | 60.461 | 20 | 239 | 2566 | 2804 |
| AGATTCAGACGCATTTTGGC   | 60.221 | 20 | 254 | 2109 | 2362 |
| GCCCCTACTACCCAGTTGCT   | 60.517 | 20 | 163 | 1113 | 1275 |
| TGATCTGGAATCTGCGATGT   | 59.197 | 20 | 191 | 24   | 214  |
| TTGAGGACATTTATTCGTCCG  | 59.946 | 21 | 160 | 406  | 565  |
| CACTCATACCCTCCCTCCAC   | 59.38  | 20 | 272 | 304  | 575  |
| TGCAACGCCAACTACAAAAG   | 59.911 | 20 | 165 | 9032 | 9196 |
| TGCCTAACGTTAAATGGGCT   | 59.609 | 20 | 248 | 1    | 248  |
| GGCTTCCAAAGCTTCCACTT   | 60.743 | 20 | 280 | 260  | 539  |
| CCACTAACCCAAACCCATCA   | 60.605 | 20 | 118 | 13   | 130  |
| TGCTGTGAATTGTCCAGCTC   | 59.992 | 20 | 248 | 915  | 1162 |
| ACTTAGCCAAAACCCCAAC    | 60.221 | 20 | 123 | 6    | 128  |
| AGAATTGGTGGAAGATTAGA/  | 57.58  | 24 | 267 | 7    | 273  |
| TTCTTCAATCCATGCAACA    | 60.049 | 20 | 205 | 513  | 717  |
| TCCCTGCATGTGTTTCAATA   | 59.924 | 20 | 269 | 150  | 418  |
| ACAACAAAAGGCAAAGGCTG   | 60.284 | 20 | 215 | 818  | 1032 |
| GGCTTGCCCTTAACCCTATC   | 59.93  | 20 | 225 | 405  | 629  |
| CCCCAAGAACACTCAAGAACA  | 60.133 | 21 | 274 | 317  | 590  |
| CCACCTTGATGCTTTTCCCA   | 60.103 | 20 | 219 | 1130 | 1348 |
| CACTTTTCCAGTCTGCTCCC   | 59.844 | 20 | 147 | 398  | 544  |
| ATCGGACCGGATCGTTAATA   | 59.254 | 20 | 209 | 134  | 342  |
| TAAACAAAGCGTGCAGACG    | 60.052 | 20 | 269 | 2511 | 2779 |
| GAAGATGTGGCGAAGGTTTG   | 60.636 | 20 | 192 | 112  | 303  |
| AGATTTTCGATTTCCCGAAC   | 60.265 | 20 | 194 | 208  | 401  |

|                         |        |    |     |      |      |
|-------------------------|--------|----|-----|------|------|
| TCCTTTGTTTGCCCCAGTAA    | 60.472 | 20 | 174 | 399  | 572  |
| CAATATTCTCCGAAGCGGTG    | 60.597 | 20 | 256 | 43   | 298  |
| TATCAGAGAAGGGCAGCACA    | 59.547 | 20 | 239 | 42   | 280  |
| TGATCCGTAGACATGCTGTTG   | 59.731 | 21 | 197 | 154  | 350  |
| GCCTCTCACCGAGTAAAAAC    | 59.851 | 20 | 249 | 87   | 335  |
| TTTGACCGAACCGTTGTGTA    | 60.004 | 20 | 189 | 2312 | 2500 |
| TGCTATGATGCAAATCACCTTC  | 60.103 | 22 | 276 | 105  | 380  |
| GTGGACGGCCATAAGAAGTC    | 59.556 | 20 | 220 | 233  | 452  |
| TCGGGGTATCAGAAATCGAG    | 60.029 | 20 | 234 | 12   | 245  |
| TAGGCTCGAAAAAGTGCTGG    | 60.514 | 20 | 232 | 48   | 279  |
| GGCGCCATCTTTTTCTTACA    | 60.209 | 20 | 158 | 625  | 782  |
| CAATTTTTCGATCATGTGGG    | 58.818 | 20 | 157 | 13   | 169  |
| TCGTGTGTGTGAATAAAATGA   | 58.136 | 23 | 259 | 103  | 361  |
| TATATATGGGTTATCACCTGAT  | 57.071 | 24 | 147 | 465  | 611  |
| CATTCTGTGTTCTCTGTTTTCGA | 59.696 | 24 | 267 | 909  | 1175 |
| GTGCATGGCGTTGTATTTGT    | 59.474 | 20 | 202 | 1999 | 2200 |
| AAGAAACCGAAAAATGTGCG    | 60.11  | 20 | 278 | 1323 | 1600 |
| CACCCTCTCTTCTGGTCAGC    | 59.986 | 20 | 230 | 537  | 766  |
| ACCTGCACCAAAATGGAGAG    | 60.111 | 20 | 134 | 52   | 185  |
| ACCTCCCAGCTCACGTTCTA    | 59.867 | 20 | 272 | 4    | 275  |
| CATTCCATGGTCCCGTTTAT    | 59.505 | 20 | 213 | 74   | 286  |
| TGCCGTATATGGTGCTCATT    | 60.358 | 21 | 280 | 202  | 481  |
| AAACTGCTTTCCTTCATGGG    | 59.17  | 20 | 204 | 100  | 303  |
| CCTTCAGCTGCTTCTCCTGT    | 59.745 | 20 | 257 | 252  | 508  |
| CCAACAGTTTGGCATCAGAG    | 59.288 | 20 | 252 | 87   | 338  |
| GTGACAGTGCGTGTGTGTGA    | 60.437 | 20 | 207 | 57   | 263  |
| TCACGTCAGGTTACCCATGT    | 60.005 | 20 | 214 | 229  | 442  |
| GAGAAGGGGAGAGGGACTGT    | 59.661 | 20 | 189 | 54   | 242  |
| TCAACAGAGAATGCAAGCAAA   | 59.6   | 21 | 164 | 80   | 243  |
| TTGAGTTCGGATTAGCCACG    | 61.157 | 20 | 264 | 174  | 437  |
| CTCCACTCCAAACCACCATT    | 59.82  | 20 | 210 | 371  | 580  |
| TTGTCCGTATTCATTCCGTG    | 59.395 | 20 | 263 | 511  | 773  |
| GGTAAGGGTAGGGTACGGGT    | 59.101 | 20 | 254 | 64   | 317  |
| CCTTAACATGTCCGGTTCGT    | 59.853 | 20 | 197 | 9    | 205  |
| TCCATTCCGAAAATCAAAGG    | 59.872 | 20 | 161 | 176  | 336  |
| GACTTCCGCCTTGTTCTTTG    | 59.853 | 20 | 205 | 239  | 443  |
| CGCTGAGGGAGACAAAAGAG    | 60.126 | 20 | 222 | 439  | 660  |
| CAATACGGGACACTTGACCA    | 59.415 | 20 | 257 | 717  | 973  |
| AAAATCAAAGGCCCAACAATG   | 59.801 | 20 | 116 | 1085 | 1200 |
| GACATCTCCCTCTCCGACC     | 59.583 | 19 | 273 | 249  | 521  |
| CTCTGTCTCTCGCTCTCGCT    | 60.182 | 20 | 276 | 428  | 703  |
| GACTGTGAGGAAACGTGCAA    | 59.88  | 20 | 258 | 465  | 722  |
| GGGGAGAATGTAATATCCCGA   | 59.992 | 21 | 222 | 24   | 245  |
| TAGCCCTAACTCGACCCAGA    | 59.83  | 20 | 224 | 41   | 264  |
| GCAGCCGTTAATCTTCGAGT    | 59.481 | 20 | 171 | 1109 | 1279 |
| TTGGAGGTGAAGAGAGGGAG    | 59.375 | 20 | 254 | 167  | 420  |
| CCGCCAAATGATATGGGATA    | 60.496 | 20 | 132 | 210  | 341  |
| AATTCAAGGATTCAAGCCCA    | 59.505 | 20 | 101 | 21   | 121  |
| GATGCCCAAAAAGAACACTCA   | 60.103 | 21 | 280 | 50   | 329  |
| AAAACCTCACACGGCACATGA   | 60.16  | 20 | 243 | 91   | 333  |
| CGTTAATGAAAGTGATTCCCC   | 58.43  | 21 | 183 | 6    | 188  |
| AGGAAATAAGGAGGCGTTATG   | 59.145 | 22 | 128 | 184  | 311  |
| GTTGGACTIONAAGTCATGCGA  | 59.837 | 20 | 181 | 273  | 453  |
| CCCCTTCATTCAACACCAAC    | 60.21  | 20 | 102 | 9    | 110  |
| ATGTCTCAGCCGATCGATTT    | 59.658 | 20 | 172 | 1955 | 2126 |
| GTGTGCAATGCAACAGGTTT    | 59.621 | 20 | 154 | 2217 | 2370 |
| TTGCCTTTAATCGATCCTGG    | 60.031 | 20 | 154 | 26   | 179  |
| CCGTACTIONGACGAACTC     | 59.898 | 20 | 250 | 513  | 762  |

|                         |        |    |     |      |      |
|-------------------------|--------|----|-----|------|------|
| GCTTGGTCAGTAGCCACCAT    | 60.142 | 20 | 214 | 285  | 498  |
| TGGTTTTGGATGATGGATGA    | 59.707 | 20 | 158 | 23   | 180  |
| CACTAACCCACCAACCCAAC    | 60.126 | 20 | 222 | 47   | 268  |
| CCCCTTGA ACTCCAGCAATA   | 60.066 | 20 | 205 | 199  | 403  |
| CAGCCACACTTTGTCCACTG    | 60.348 | 20 | 104 | 2886 | 2989 |
| CCAGTCTCCCCAAATGAAAAG   | 59.521 | 20 | 196 | 243  | 438  |
| AGGATTTTCCGACTCGCTTT    | 60.208 | 20 | 252 | 20   | 271  |
| CGAATTCTCTCTCTGCAAACC   | 59.066 | 21 | 104 | 288  | 391  |
| GCGCGCAGAGAGAGAGAATA    | 59.676 | 20 | 218 | 159  | 376  |
| TGTCCGAAAAGGCCAAAATC    | 60.053 | 20 | 173 | 25   | 197  |
| GAAAAATGGGTTCCCTACCA    | 59.767 | 20 | 280 | 302  | 581  |
| ACCCCGAACAGAGTCAAATG    | 59.966 | 20 | 276 | 599  | 874  |
| TGCTCATGAGGAATAACAAGC   | 57.985 | 21 | 261 | 1440 | 1700 |
| TTTGAATGGGCACTCTTG TG   | 59.691 | 20 | 267 | 1211 | 1477 |
| GTTAGCCACCAATGAGGCAT    | 59.962 | 20 | 108 | 606  | 713  |
| GTCTAGTGATGACGGGGAGG    | 59.53  | 20 | 199 | 0    | 198  |
| CTCCACTTGAATTCCTTCGG    | 59.665 | 20 | 232 | 320  | 551  |
| TTCTGGGA ACTTGA ACTTGGA | 59.697 | 21 | 250 | 351  | 600  |
| ACGTCTTTGTGTCGAAACCC    | 60.012 | 20 | 175 | 176  | 350  |
| TCGATAAAACTTTACCAACACC  | 58.6   | 23 | 250 | 15   | 264  |
| CAGCGGAGGAAGAAGATCAC    | 59.95  | 20 | 262 | 198  | 459  |
| GGACGTCTTTCTTGAGCAGC    | 60.142 | 20 | 201 | 6    | 206  |
| GAAAACAAAATGGGGAGCAA    | 59.916 | 20 | 242 | 18   | 259  |
| CACGACGCAACATGATTTTT    | 59.59  | 20 | 107 | 4    | 110  |
| AGGGGAAAAGAGGAGAGGATG   | 59.63  | 20 | 244 | 555  | 798  |
| TCCCATTTGTGTGTTCTTCG    | 59.541 | 20 | 101 | 10   | 110  |
| CAACTTCGGCAACGGAATA     | 59.673 | 19 | 154 | 42   | 195  |
| TGTGTTTTGACAATATTTAGTG  | 58.633 | 27 | 275 | 189  | 463  |
| ATTCTCGGTGATCATTTGGC    | 59.9   | 20 | 211 | 4527 | 4737 |
| GAGGACGTTGTGGTGGTCTT    | 60.009 | 20 | 187 | 200  | 386  |
| CTGCACTAACGCCATTCCTT    | 60.27  | 20 | 174 | 320  | 493  |
| AAATAAGGAGGTGTTATGAAG   | 59.323 | 24 | 133 | 95   | 227  |
| AATTGGGAGGGATAAATGGG    | 59.846 | 20 | 248 | 1358 | 1605 |
| TGTGGCTTGAGATCGTGATAG   | 57.933 | 22 | 245 | 136  | 380  |
| ATGATGGGCGATTGAACACT    | 60.348 | 20 | 210 | 159  | 368  |
| TTTTATGTAAATTGTCGTGCGT  | 57.373 | 22 | 225 | 210  | 434  |
| GTTTGCCCAAATGACCCTA     | 59.801 | 20 | 256 | 1    | 256  |
| GAGAGAAGAGACTGCGGTGC    | 60.292 | 20 | 271 | 1453 | 1723 |
| TTCAACCAGGCAAAGACCAC    | 61.075 | 20 | 190 | 135  | 324  |
| ACCGGAATAGCATCAGTTGG    | 59.955 | 20 | 222 | 6    | 227  |
| TGGCTGTCAGATGATGTAAGTT  | 59.256 | 23 | 174 | 355  | 528  |
| GCATTCGGTTGATTATGCAGT   | 59.981 | 21 | 243 | 953  | 1195 |
| TCAGATTGGCTCCATCCTCT    | 59.761 | 20 | 257 | 385  | 641  |
| GAACTCCCCTCTCTCGGT      | 59.807 | 20 | 192 | 17   | 208  |
| CTTTCTTCTTCATTTGCGCG    | 59.953 | 20 | 127 | 4    | 130  |
| AAACAGGTCCATGCATTGTG    | 59.42  | 20 | 257 | 534  | 790  |
| GCACTATCTCTCCCTCACCG    | 59.827 | 20 | 119 | 323  | 441  |
| ATGCAGTGGATTTGGTGGAT    | 60.203 | 20 | 194 | 179  | 372  |
| GAAGCCTCAAATCACAAGCC    | 59.82  | 20 | 141 | 107  | 247  |
| TGTTGCTCGAGAATATCCC     | 60.177 | 20 | 278 | 0    | 277  |
| ATGAGTCGTAGTTGACGCC     | 60.142 | 20 | 199 | 42   | 240  |
| CAAGAGCTGAAGATGTGATTG   | 60.022 | 22 | 193 | 264  | 456  |
| GTTCGAATGGATTTGTTGGG    | 60.17  | 20 | 158 | 393  | 550  |
| GTTGTCTGAAACCTTCCCA     | 59.943 | 20 | 114 | 246  | 359  |
| CAGCAAACCAGCTAAATGAAG   | 59.536 | 22 | 215 | 130  | 344  |
| GCGAAGAAGAGGGGAAGAAT    | 59.789 | 20 | 255 | 38   | 292  |
| TCTACAGCGAATGATGCC      | 59.772 | 19 | 228 | 844  | 1071 |
| AATCATTCATTCCCGATT      | 60.345 | 20 | 245 | 38   | 282  |

|                         |        |    |     |      |      |
|-------------------------|--------|----|-----|------|------|
| AAATAAGGAGGTGTTATGAAG   | 59.323 | 24 | 242 | 34   | 275  |
| TGGCAAACACAGGTCACAAT    | 60.008 | 20 | 134 | 34   | 167  |
| GGTCGTCGGATTTCAATTTG    | 60.309 | 20 | 257 | 2760 | 3016 |
| GTGTCGGAAACTCAGGCATC    | 60.667 | 20 | 262 | 1391 | 1652 |
| GGCTTCAACCTTGACGAAAC    | 59.717 | 20 | 211 | 4    | 214  |
| GATGAGCAGAAATGAGGCGT    | 60.37  | 20 | 152 | 14   | 165  |
| TGTAATACGGTCTGTGCATGT   | 59.46  | 23 | 183 | 289  | 471  |
| TGCTTTGATTTGATGGTTATGG  | 59.832 | 22 | 164 | 4300 | 4463 |
| TGGGGAAGAGACCAAGACAG    | 60.229 | 20 | 137 | 254  | 390  |
| AAAATAACCAAATCAGCATG    | 59.788 | 24 | 216 | 109  | 324  |
| ATAACCCGTGTGTGGGTTTA    | 57.729 | 20 | 243 | 89   | 331  |
| AGCCGTTTAAAGTGTGGGAA    | 59.609 | 20 | 219 | 32   | 250  |
| CCGTTGTCATAACCCACCTC    | 60.232 | 20 | 176 | 268  | 443  |
| GTGGAACCTTGTGTTGTACCCA  | 59.797 | 22 | 200 | 18   | 217  |
| CATGCGCAAGTACAACAACA    | 59.354 | 20 | 274 | 235  | 508  |
| AACTTGTATCACTGGAAGAATT  | 58.329 | 25 | 273 | 104  | 376  |
| CAATTTTCATTGCCCTCAC     | 60.309 | 20 | 153 | 69   | 221  |
| GACGAGAATGCCCTGTATG     | 60.483 | 20 | 201 | 330  | 530  |
| TAGCGATGGTGAGATGTTGG    | 59.673 | 20 | 170 | 2    | 171  |
| AGAGCCACGTTAGGCTCAAG    | 59.639 | 20 | 262 | 96   | 357  |
| TCAACAGAGAATGCAAGCAAA   | 59.6   | 21 | 152 | 45   | 196  |
| GGTCTGAGACCGGATAG       | 60.842 | 20 | 274 | 0    | 273  |
| AAGGAAGCGAGGTAGGCTTT    | 59.504 | 20 | 191 | 199  | 389  |
| GATCTTAGTGATTTTTCTTCGTC | 60.02  | 25 | 249 | 666  | 914  |
| AAACGTGCGCTACTACCCAT    | 59.66  | 20 | 252 | 571  | 822  |
| CGTGTGTCAGCGTGTCTCTC    | 60.685 | 20 | 133 | 1661 | 1793 |
| TGGTTCATGCCATTGTGAAT    | 59.781 | 20 | 123 | 40   | 162  |
| GAAATTCACGAAACAACGAA    | 59.877 | 23 | 253 | 304  | 556  |
| TCTTCCAAGATGGGAATGGA    | 60.395 | 20 | 188 | 111  | 298  |
| AACCGTCTGGTCATCCCTTT    | 60.746 | 20 | 262 | 558  | 819  |
| TTCTCTTTGGTTGGTGAAGAA   | 58.955 | 22 | 170 | 53   | 222  |
| CCCTCTGAAACCTCGTAGCA    | 60.388 | 20 | 236 | 1627 | 1862 |
| GGCCTAATATGCCTGCCT      | 57.733 | 18 | 269 | 429  | 697  |
| ATTCCAAGCTTTAATTGCGG    | 59.212 | 20 | 135 | 441  | 575  |
| TATCCCGTGGGTCAAATACG    | 60.576 | 20 | 242 | 954  | 1195 |
| TGGTTATCATGGATGCGAAA    | 59.891 | 20 | 197 | 596  | 792  |
| TTTACCACCGCCTTAATTC     | 59.938 | 20 | 250 | 27   | 276  |
| TTGATATCCCCATCCTCAA     | 60.088 | 20 | 218 | 3803 | 4020 |
| CCTTTACAGGCATTTAAGTGGAC | 60.122 | 22 | 275 | 1747 | 2021 |
| GGTTTCAAAGGGAGGGAGAC    | 59.912 | 20 | 246 | 879  | 1124 |
| TCAGTTTCTGAGTTTTGAGTTT  | 59.835 | 24 | 108 | 747  | 854  |
| TAACCCCGGAGTGAAGAAC     | 61.238 | 20 | 221 | 9    | 229  |
| ACCTCATTTATTGTCGGCCA    | 60.331 | 20 | 158 | 1333 | 1490 |
| GAGATGTGGTGGTGGTGATG    | 59.801 | 20 | 140 | 384  | 523  |
| AAAGTCCAAATGTTGGCGAG    | 60.11  | 20 | 128 | 1545 | 1672 |
| TAAATCACAAAACCCACGCA    | 59.969 | 20 | 131 | 347  | 477  |
| CCCAGCAACTGTTGGCTACT    | 60.312 | 20 | 259 | 285  | 543  |
| TTTTAGTAGGGTTTTCAAGTTC  | 59.564 | 26 | 266 | 355  | 620  |
| CATGCTTGAATGAAAACCACA   | 59.576 | 21 | 126 | 268  | 393  |
| TGTAGGGGCAATGATGTAAAA   | 59.363 | 22 | 228 | 29   | 256  |
| CAGCCCAATAACTCAACCTAC   | 59.892 | 22 | 145 | 0    | 144  |
| GGAGCCTCCGAACTTTGAA     | 60.324 | 19 | 187 | 57   | 243  |
| TCCACTGTCTTGTGCCTCAG    | 60.022 | 20 | 259 | 759  | 1017 |
| CGTGAGAGAGAGGCTGTGTG    | 59.757 | 20 | 202 | 9    | 210  |
| GGAAAGAAAGGGCGAGAAAG    | 60.312 | 20 | 160 | 765  | 924  |
| ATCCTTTGAATTGCAGCTCG    | 60.352 | 20 | 270 | 1127 | 1396 |
| TCTTGTGTGTGCATGTGTC     | 59.171 | 21 | 280 | 69   | 348  |
| TACGAATCTCAAGGGGCAAC    | 60.074 | 20 | 212 | 99   | 310  |

|                         |        |    |     |      |      |
|-------------------------|--------|----|-----|------|------|
| CGTAGTTTGTGGGGGAAATAA   | 58.862 | 21 | 280 | 915  | 1194 |
| ATCAATGGGTCCAAATGGTT    | 58.959 | 20 | 230 | 28   | 257  |
| AATTGACAGCGAGACCGAAT    | 59.7   | 20 | 115 | 2    | 116  |
| TGCGCAACCAATGTAATAGC    | 59.731 | 20 | 233 | 786  | 1018 |
| CGTGTCCGGTTTGTGTATTC    | 58.9   | 20 | 248 | 104  | 351  |
| CACATTGTCACCCTCACCAC    | 59.846 | 20 | 164 | 215  | 378  |
| TCGAAGGTGACTATCCCGAC    | 60.073 | 20 | 242 | 107  | 348  |
| GCAGCATCCTTCACCATTTT    | 60.081 | 20 | 217 | 17   | 233  |
| TTGAGTTTGCAGTAGGGTTGG   | 60.154 | 21 | 271 | 7    | 277  |
| TGAAACAACATGGTCCGCTA    | 60.111 | 20 | 270 | 679  | 948  |
| GCATAGAGGGCAAGAAGACG    | 59.978 | 20 | 194 | 425  | 618  |
| CGTTTTGATGATATATAGGTGT  | 59.637 | 27 | 237 | 378  | 614  |
| CCCTTAATCTTTGTGGTTGTGA  | 58.994 | 22 | 264 | 1905 | 2168 |
| TTTGAGTTTGCATCTAAGAAGG  | 59.828 | 24 | 148 | 804  | 951  |
| TTTGGTTTTATCGAAGAGGCA   | 59.707 | 21 | 255 | 850  | 1104 |
| GAGGGAATGGGAGGTGATTT    | 60.133 | 20 | 198 | 243  | 440  |
| ACAGGAGCACTACAGTTCACG   | 59.976 | 22 | 265 | 2128 | 2392 |
| CACGTGCTGTAATCTGTGCC    | 60.333 | 20 | 234 | 380  | 613  |
| ACATTCGGTTGAACCCTCAG    | 59.966 | 20 | 108 | 191  | 298  |
| GGATTGATGAATTTCCATTCG   | 59.221 | 21 | 192 | 1759 | 1950 |
| AAATCCCAAATGATGGGTCA    | 59.991 | 20 | 197 | 1977 | 2173 |
| TTGACCAAGATACACCTTGCAT  | 59.499 | 22 | 188 | 14   | 201  |
| GCTCTTTTATTTACCTTTTATGC | 60.067 | 26 | 213 | 337  | 549  |
| AATGACGGTTGTGGGACTGT    | 60.284 | 20 | 232 | 0    | 231  |
| GAGAAATTTTCGATGTTTCCACA | 59.067 | 22 | 269 | 735  | 1003 |
| TATGTTTCGGCCCGGTATTA    | 60.165 | 20 | 136 | 63   | 198  |
| GGGTTCAATTTGGACGTTTG    | 60.206 | 20 | 269 | 530  | 798  |
| ATGAATCTCATGTTATTGAGTG  | 58.057 | 26 | 207 | 671  | 877  |
| TTTTCAACGTTTGCCATCC     | 60.846 | 20 | 166 | 206  | 371  |
| CTGAATGCCCTCCAAATCTC    | 59.629 | 20 | 268 | 17   | 284  |
| CTTGTGAACTCCGATGGACA    | 59.676 | 20 | 155 | 449  | 603  |
| TCTCGAGCAACAGAGCTCAA    | 60.008 | 20 | 269 | 105  | 373  |
| GATGGTGGGTGAGAAAATGG    | 60.173 | 20 | 239 | 396  | 634  |
| TCGGCAGAAAAGAAGAAGGA    | 60.066 | 20 | 112 | 430  | 541  |
| GATGGCCCAGATTTGTTTTG    | 60.309 | 20 | 101 | 107  | 207  |
| GCGAACATGATGAATGAACT    | 59.954 | 21 | 279 | 24   | 302  |
| GAGAGAAGTAGCAAGCGCGA    | 60.955 | 20 | 182 | 9    | 190  |
| GCACACTTTTGGCCTTTGAT    | 60.118 | 20 | 176 | 3    | 178  |
| CACACAAGCCTCGCTCTTTT    | 60.571 | 20 | 222 | 658  | 879  |
| AAACCGTTCAAGAAAAGGGA    | 58.669 | 20 | 227 | 1855 | 2081 |
| CTATCGAGCGTGTGGCAATA    | 59.856 | 20 | 150 | 20   | 169  |
| CTTGTGGCTTGCAAACATCT    | 58.926 | 20 | 163 | 72   | 234  |
| TCCCCAAAATACCCTTTATGC   | 60.029 | 21 | 264 | 210  | 473  |
| GCATTTGAAAGGTTTTATATGA  | 60.438 | 27 | 200 | 451  | 650  |
| CTTACGGAATTCCACTGGGT    | 58.909 | 20 | 228 | 33   | 260  |
| TTGTATGCTTTCCGATGCTG    | 59.833 | 20 | 139 | 563  | 701  |
| AGGTGACCCATTCCACACTC    | 59.817 | 20 | 265 | 123  | 387  |
| TCAATGGAGGTTGGGTGTTT    | 60.21  | 20 | 247 | 267  | 513  |
| AGAGCGAAGAAAGCAGATGG    | 59.717 | 20 | 163 | 1337 | 1499 |
| AATGTGGAGCAACGTGAACA    | 60.16  | 20 | 265 | 2148 | 2412 |
| AAAATTCTGGCATGCCTCTG    | 60.214 | 20 | 168 | 4810 | 4977 |
| GGTGGTAAATGAAGAGGCTCC   | 59.954 | 21 | 187 | 5    | 191  |
| AAATGCTGGTAGAGGCAACG    | 60.27  | 20 | 238 | 341  | 578  |
| TGATACAGGTGTTCCAAACAA1  | 59.777 | 23 | 246 | 6311 | 6556 |
| AGGGAGAGGCTTTGGATGAC    | 60.596 | 20 | 236 | 35   | 270  |
| TGCATGTGTGGGGCTATTTA    | 59.953 | 20 | 220 | 1003 | 1222 |
| AAATTCGTTTTTGCCTTCC     | 60.292 | 20 | 179 | 197  | 375  |
| AGAAGTCGGCAACCCTGATA    | 59.694 | 20 | 159 | 1170 | 1328 |

|                         |        |    |     |      |      |
|-------------------------|--------|----|-----|------|------|
| TCGGGCAACTGGAGCTAATA    | 60.732 | 20 | 213 | 1    | 213  |
| TGCCACCCTAGATCCGTTAC    | 59.955 | 20 | 120 | 572  | 691  |
| AACAAAAATATAGCTAATGCG,  | 58.112 | 24 | 270 | 385  | 654  |
| GGTCAAGGGAATCCCATTCT    | 60.133 | 20 | 182 | 14   | 195  |
| GGGAGAGGATCAAGAGAGGA,   | 59.763 | 21 | 199 | 39   | 237  |
| TGTATCGCCCAAAGGAGAAC    | 60.074 | 20 | 223 | 2484 | 2706 |
| TGCTTCATAACTGCCTTCCA    | 59.42  | 20 | 277 | 453  | 729  |
| AATGGGACTGGCGATTGTAG    | 59.955 | 20 | 256 | 106  | 361  |
| ACCGGTTGGACTGGTTGTAA    | 60.269 | 20 | 270 | 1311 | 1580 |
| TGTGAATGGAGGACAAACCA    | 59.935 | 20 | 171 | 186  | 356  |
| CTGGCAACAAATATGACTGCA   | 60.025 | 22 | 117 | 341  | 457  |
| CGAGAAAGATGATTTGTTGGG   | 59.555 | 21 | 250 | 4000 | 4249 |
| TTATCTTTGAATTCAGCACGC   | 58.057 | 21 | 143 | 35   | 177  |
| TTTTGATGATATATAGGTGTTT  | 58.782 | 27 | 151 | 615  | 765  |
| CCGCAAGTACGAAAACAAGG    | 60.659 | 20 | 244 | 554  | 797  |
| TTCAAGAATTCGCCATCTC     | 60.155 | 20 | 132 | 1756 | 1887 |
| CCCATTTCTAACTACCCAAATC  | 59.962 | 23 | 211 | 232  | 442  |
| TGGCTTCTTAGGGCTCTTG     | 59.587 | 20 | 186 | 1103 | 1288 |
| AATGCCTCTGCAAAAAGCTG    | 60.523 | 20 | 213 | 2850 | 3062 |
| CCCACCCCACTACTCAAGAA    | 59.959 | 20 | 115 | 9    | 123  |
| GCTTTCCCATTTTGCTTTTAAAT | 59.88  | 23 | 280 | 646  | 925  |
| TTCAGATTTTGTGATTTGGTGTC | 59.89  | 23 | 257 | 247  | 503  |
| AAACGGCTTGGATTCTTTCC    | 60.431 | 20 | 148 | 397  | 544  |
| TATCCCTTGACGACGAACT     | 60.657 | 20 | 273 | 523  | 795  |
| GCTAAGTGGGGTGGAGGATT    | 60.328 | 20 | 196 | 1575 | 1770 |
| GCCTCTGCTATTACATGCCAC   | 59.75  | 21 | 210 | 967  | 1176 |
| TGGAGAAACGAACTGGAACC    | 60.088 | 20 | 253 | 204  | 456  |
| TGTGGCAGGTTATTCATGCT    | 59.152 | 20 | 200 | 432  | 631  |
| CACCATGACGGCAGATGTAT    | 59.399 | 20 | 260 | 627  | 886  |
| ACGGCTTACCAGTTTCTTTT    | 60.158 | 21 | 139 | 246  | 384  |
| TCGATCTTGCGAAATCAATG    | 59.769 | 20 | 114 | 27   | 140  |
| TCACACGTTCTTCCCAGAT     | 60.51  | 20 | 144 | 45   | 188  |
| TGCGCTCTGATGAAAAATCA    | 60.488 | 20 | 227 | 756  | 982  |
| GATGATTGCACCATAATGCG    | 59.921 | 20 | 166 | 2638 | 2803 |
| CCATGATGTGACCGAGATTG    | 59.918 | 20 | 235 | 1036 | 1270 |
| GTGCATCCATCTGAGCATTG    | 60.233 | 20 | 247 | 185  | 431  |
| GAAGTCGTTCTGAGCTGCCT    | 59.751 | 20 | 240 | 2257 | 2496 |
| CTATTTGAGGGTCCCACCAC    | 59.259 | 20 | 240 | 567  | 806  |
| TCCCTTAGACCTTACATAATGA  | 60.001 | 26 | 253 | 13   | 265  |
| AGATGCTGGAATCTTCGTGG    | 60.218 | 20 | 127 | 162  | 288  |
| ACTTCCAAAACCTGGGAACCA   | 59.425 | 20 | 143 | 325  | 467  |
| TCCATTAAGAATTTCCCATGC   | 58.888 | 21 | 180 | 1621 | 1800 |
| ACGGTTAAGATTCAGCACGC    | 60.278 | 20 | 198 | 21   | 218  |
| GAAGCTGGTGCAATTGTTTG    | 59.322 | 20 | 251 | 92   | 342  |
| CCAATTTTGAAACGGACGAG    | 60.472 | 20 | 148 | 1    | 148  |
| TGACGATGAGACGTGTAGGG    | 59.701 | 20 | 277 | 305  | 581  |
| CTTTCTTCACTACTGGAACTTT  | 57.353 | 25 | 223 | 53   | 275  |
| GATAAGAACTCTGGCTCCAAG   | 59.371 | 22 | 159 | 450  | 608  |
| GGGTCAGACAATTTGAACGG    | 60.353 | 20 | 231 | 184  | 414  |
| AAAAATCTCAGGGACGGGAC    | 60.306 | 20 | 260 | 3363 | 3622 |
| TGCTTCCACGGCTAAACCTA    | 60.762 | 20 | 265 | 1205 | 1469 |
| GTGTGATTGTGTTTCATGCC    | 59.975 | 20 | 223 | 61   | 283  |
| ATACTTTGGCCCAGTTCGTG    | 59.993 | 20 | 191 | 3050 | 3240 |
| TCGAGTGTTTCGTTAGTTAGTGA | 59.876 | 24 | 217 | 30   | 246  |
| CTACGTCCACGGGAGTTTGT    | 60.028 | 20 | 102 | 1    | 102  |
| TTCGAAGATCAACGGACGAT    | 60.603 | 20 | 204 | 195  | 398  |
| TTCCCATCGATTGAAACAAA    | 58.94  | 20 | 225 | 16   | 240  |
| CGTTCTTAATTAGCGCCGAA    | 60.347 | 20 | 111 | 1023 | 1133 |

|                        |        |    |     |      |      |
|------------------------|--------|----|-----|------|------|
| CGTCGATCTGGTCAAATCAA   | 59.648 | 20 | 250 | 385  | 634  |
| CGAGAGTGAGGAAAAGAGCG   | 60.269 | 20 | 193 | 1068 | 1260 |
| AGTCGGGAGAAATCCCTGT    | 59.935 | 20 | 162 | 35   | 196  |
| TGACGTTAAGAGAGTTTTACT  | 59.855 | 24 | 157 | 1026 | 1182 |
| TTTGGCAAGGGTTTAAAAAG   | 60.081 | 20 | 205 | 205  | 409  |
| CAATTCCGAGGAATCGAGTG   | 60.594 | 20 | 189 | 221  | 409  |
| AACATCACCTGATGGAACGG   | 60.78  | 20 | 254 | 58   | 311  |
| TTCCTCACACATTCAGCCCT   | 60.656 | 20 | 278 | 144  | 421  |
| CCACCTCTACGTGCCATCTT   | 60.134 | 20 | 209 | 191  | 399  |
| GCAAACGGTATAGGATCGGA   | 59.923 | 20 | 201 | 238  | 438  |
| TGGCTCTCACACTCACTCTCA  | 59.747 | 21 | 182 | 111  | 292  |
| CTGGCAGTTGGTTTGGAGTT   | 60.149 | 20 | 166 | 61   | 226  |
| TTGCAGAAGTCGAAATGGTG   | 59.84  | 20 | 254 | 417  | 670  |
| AACACGTGGAGATGACACCA   | 60.005 | 20 | 176 | 556  | 731  |
| TCACCCAGATTTTGCAAGTTT  | 59.601 | 21 | 208 | 158  | 365  |
| TCACACAGATTAACACTGAA/  | 60.128 | 26 | 223 | 597  | 819  |
| TGGAAATTTGACACGCTTTA   | 60.605 | 21 | 252 | 566  | 817  |
| CGCGAAGTACCTGCGTTAT    | 58.956 | 19 | 176 | 133  | 308  |
| AACTGCTGGACCTCCACAAC   | 60.159 | 20 | 194 | 308  | 501  |
| GACAATATCAGCCGAGGGAG   | 59.653 | 20 | 215 | 15   | 229  |
| ATGAATCAATCACGTTTCGC   | 58.575 | 20 | 219 | 14   | 232  |
| GCGGTGATGGTAAGGTGTTT   | 59.859 | 20 | 189 | 67   | 255  |
| CTAGTCTTTCTCCCGTGCCT   | 59.496 | 20 | 275 | 19   | 293  |
| CAGCAAGAAAAATACACCAGC  | 60.298 | 22 | 121 | 108  | 228  |
| CCTTGGCCTTCTGACATCAT   | 60.073 | 20 | 191 | 134  | 324  |
| GCCTGCCCTCCTATCTTCTT   | 59.811 | 20 | 205 | 740  | 944  |
| CGTTGGAGCGATGTATGTGT   | 59.596 | 20 | 230 | 84   | 313  |
| TACCTATTTGGAAGCCCGAG   | 59.315 | 20 | 277 | 285  | 561  |
| CCCCTTAACTACCACTTATGA  | 57.22  | 22 | 213 | 368  | 580  |
| TGGACTAAATCCCGTTCTGG   | 59.926 | 20 | 279 | 1635 | 1913 |
| AGGGATTTGGGACGATTTTC   | 60.131 | 20 | 148 | 199  | 346  |
| TGATCGGGTTAGAAACGGAG   | 60.066 | 20 | 148 | 14   | 161  |
| TGAGCCTATCTTGGAGCACA   | 59.547 | 20 | 187 | 413  | 599  |
| TCTTCCCTCTCATCTCTCTCG  | 58.703 | 21 | 121 | 87   | 207  |
| ATTGTTTCGGCGTTAGGAGAA  | 59.708 | 20 | 179 | 51   | 229  |
| GTTTCATCCCTCGCACATTT   | 59.939 | 20 | 263 | 197  | 459  |
| ACGTTAAGGAGGGGATCCAT   | 59.651 | 20 | 255 | 22   | 276  |
| CGTCCACGGAGAGGTTAGAG   | 59.861 | 20 | 249 | 184  | 432  |
| ACGAGCGCATAGCCTTTTTTA  | 60.006 | 20 | 119 | 1375 | 1493 |
| ACCTTAGTTGCGAAGACGGA   | 59.875 | 20 | 183 | 28   | 210  |
| GGTTTCTTACTCGGGCTCCT   | 59.713 | 20 | 216 | 212  | 427  |
| GAAAAATCAAAGGCCACAA    | 59.916 | 20 | 265 | 74   | 338  |
| GAGTTTATCAGCGGTCTCGC   | 59.985 | 20 | 231 | 3401 | 3631 |
| GGCTTTCTTAACTTGTTGGAAC | 60.376 | 23 | 207 | 1    | 207  |
| GTGATCAACATCCGTGATCG   | 59.925 | 20 | 123 | 663  | 785  |
| GAATTCGGGAGATGTTCCAG   | 59.483 | 20 | 172 | 190  | 361  |
| CCTGACCCTTTTTGAGATGG   | 59.521 | 20 | 208 | 71   | 278  |
| TATACTTACCCACTGCGCCC   | 59.982 | 20 | 239 | 254  | 492  |
| TTTTCTGGAACGTGAAAATCT  | 59.98  | 22 | 279 | 162  | 440  |
| TTGTACCTAAAAAGTTGTTCCC | 57.805 | 23 | 280 | 443  | 722  |
| CATCCACCTACCCACTCC     | 60.238 | 20 | 158 | 3416 | 3573 |
| CGTCACAGCCTCTTCAACAA   | 60.025 | 20 | 119 | 648  | 766  |
| GGTCTTTGTCGTGGTTTCGT   | 60.012 | 20 | 257 | 508  | 764  |
| TGAGCCCGTAAATCACACAA   | 60.111 | 20 | 178 | 298  | 475  |
| TTCTTCCACGTCCTCTAGGTG  | 59.338 | 21 | 158 | 228  | 385  |
| TCTCTCACGCACTCTCACAAA  | 59.76  | 21 | 167 | 65   | 231  |
| TTTCGTGTTTCATTGCAGTT   | 59.322 | 20 | 124 | 7    | 130  |
| AAGGAGGTGTTATGAAGGGAT  | 58.028 | 22 | 238 | 209  | 446  |

|                         |        |    |     |      |      |
|-------------------------|--------|----|-----|------|------|
| TCGAAAATTGAATGACAAGGA   | 58.201 | 21 | 180 | 255  | 434  |
| ATTCCAGCAATGAATGGCA     | 60.025 | 19 | 199 | 96   | 294  |
| TTTCTCATTGGCAGTCACCA    | 60.24  | 20 | 129 | 87   | 215  |
| TTACAGATCCGTTCCCATCC    | 59.75  | 20 | 139 | 14   | 152  |
| TTCGGACATGAGCAATTGAG    | 59.799 | 20 | 272 | 67   | 338  |
| TGTGTTTTCTTCCCCACACA    | 59.976 | 20 | 187 | 287  | 473  |
| CTTGGAGCTTTGATCCTTGC    | 59.955 | 20 | 153 | 26   | 178  |
| GGGGGCATTTTGCATATTA     | 59.795 | 20 | 239 | 259  | 497  |
| GCAACTTGCCATCTCCTCAT    | 60.226 | 20 | 195 | 420  | 614  |
| AAATTCAAGAATGCTGCCCA    | 60.585 | 20 | 268 | 247  | 514  |
| TCACTGGAATGCTATGGTGC    | 59.679 | 20 | 208 | 2    | 209  |
| ACGGATTTAAGGGTTATTACCT  | 59.498 | 25 | 117 | 136  | 252  |
| TTTGCGCATAAATATTGGTTTC  | 59.89  | 23 | 264 | 0    | 263  |
| GAGGCGTGACCGAACATAGT    | 60.142 | 20 | 245 | 29   | 273  |
| TTAGTTATATGTATGGGGATGG  | 57.868 | 27 | 154 | 75   | 228  |
| TCTTTTTCTGAACGATGAGC    | 59.443 | 21 | 273 | 1474 | 1746 |
| TTTCTTTCTTTGAGCATAACG   | 57.213 | 21 | 188 | 11   | 198  |
| GAAATGAGAGAGAGCTGCCG    | 60.24  | 20 | 144 | 379  | 522  |
| CCAGGCAAATAGCTACCGAG    | 59.861 | 20 | 201 | 133  | 333  |
| ATCAATCTTGGGCTCCTCCT    | 60.037 | 20 | 184 | 2995 | 3178 |
| ACTCGGAGGTGAAGGTGAGA    | 59.835 | 20 | 265 | 3    | 267  |
| GGATCTTAATTGGTTCGATTTTC | 58.914 | 23 | 154 | 665  | 818  |
| TTATGGTGGCTGCGGTTAAT    | 60.343 | 20 | 262 | 509  | 770  |
| TGAACTTTCTCAGCCACCCT    | 59.844 | 20 | 280 | 211  | 490  |
| CCTATGGTTGTATGGTTTGGAG  | 58.377 | 22 | 156 | 53   | 208  |
| CCATCCATTTGCAACCATAA    | 59.232 | 20 | 225 | 34   | 258  |
| AACTGGACCGAAAAATGCAC    | 59.978 | 20 | 212 | 460  | 671  |
| TTGTTCAAAATTCGTCCAAAA   | 58.175 | 21 | 242 | 175  | 416  |
| TTCTCTAACTGTCCCGTCCC    | 59.137 | 20 | 171 | 42   | 212  |
| AAGAGGTTATCCCTCGTCCA    | 58.594 | 20 | 246 | 457  | 702  |
| CAGCCCACTTTGACCAACTT    | 60.149 | 20 | 254 | 429  | 682  |
| AACCGCCTGCATTGTTTCTA    | 60.637 | 20 | 140 | 5    | 144  |
| CATTCGAACATCATCATCCG    | 59.883 | 20 | 251 | 362  | 612  |
| TTCCTTGGACCAAAATAGCC    | 59.019 | 20 | 187 | 38   | 224  |
| AATTGATCGCATTACAGGGAA   | 60.414 | 20 | 261 | 380  | 640  |
| AAACAATTTTCTGGCCATGC    | 59.945 | 20 | 258 | 137  | 394  |
| CTTCATACCATCCCACCAGC    | 60.34  | 20 | 133 | 154  | 286  |
| AGTTAAGGGCCATCAGGGAT    | 59.789 | 20 | 127 | 166  | 292  |
| CGCTGATGTGATCTCAATGG    | 60.225 | 20 | 244 | 96   | 339  |
| CTGGTGCTCAATGCTACTGG    | 59.465 | 20 | 279 | 602  | 880  |
| GGGTCAATCGGCAAAAATAA    | 59.773 | 20 | 218 | 492  | 709  |
| TAAATTGCTCCGTCTCCAGC    | 60.352 | 20 | 156 | 88   | 243  |
| GCCGTGCAAGATCGATAATA    | 58.748 | 20 | 198 | 1    | 198  |
| GGGTTGCCAGGTTGAATAAA    | 59.801 | 20 | 209 | 263  | 471  |
| TGTAAGCAGGTATCATCATAAC  | 58.854 | 24 | 111 | 109  | 219  |
| GATGCCGCCTAAAGTGAAAA    | 60.209 | 20 | 210 | 10   | 219  |
| TTACTACTCCACTCCCGTTC    | 59.966 | 20 | 277 | 277  | 553  |
| GTGTAAGCATGGGGAAGGA     | 59.933 | 20 | 198 | 350  | 547  |
| AAGGCATGAGGATTTTAGAAA   | 59.175 | 23 | 121 | 183  | 303  |
| CAAGGTACTCGCTACGAGCC    | 60.037 | 20 | 267 | 142  | 408  |
| TGCCCTCATATGTTGTGGTG    | 60.39  | 20 | 250 | 91   | 340  |
| AACTCGGATAACACGGGATG    | 59.813 | 20 | 193 | 55   | 247  |
| AATTGCCTTTCAAGGTTTGG    | 59.064 | 20 | 188 | 581  | 768  |
| TGACTCACTATGGGCACAGC    | 59.862 | 20 | 108 | 375  | 482  |
| GAGTGTATGGTGCTTGGTGG    | 59.01  | 20 | 191 | 35   | 225  |
| CGGTTTGTTCGTGTTTGA      | 59.603 | 20 | 158 | 509  | 666  |
| TGCCTACGCATCAAGACAAC    | 59.871 | 20 | 205 | 0    | 204  |
| CGAGGAGAGGAGAGACATCG    | 60.088 | 20 | 132 | 151  | 282  |



|                         |        |    |     |      |      |
|-------------------------|--------|----|-----|------|------|
| AAAACCGGAAAAGTGGAAGA/   | 59.967 | 21 | 194 | 348  | 541  |
| AGGTGGGCTTAGTTGAGGTG    | 59.208 | 20 | 191 | 41   | 231  |
| TCAATCAAACCAACGAAACAA   | 59.048 | 21 | 202 | 655  | 856  |
| TCAATGTAAATGCCAATCTCTT  | 57.835 | 23 | 197 | 298  | 494  |
| TGCCCTTATTTGCTGAGGAT    | 59.668 | 20 | 182 | 759  | 940  |
| CACATTCTGAGGATGGAAATC/  | 59.933 | 22 | 280 | 2118 | 2397 |
| TGGCAGTAGATTCATTCTATCT  | 57.69  | 25 | 250 | 7    | 256  |
| ACTTTCTGGCTCCCAAGTT     | 60.11  | 20 | 264 | 56   | 319  |
| AATCTCTGCCACCTTTCCCT    | 60.074 | 20 | 144 | 670  | 813  |
| TTCACAACCTCCACCTGACATAA | 58.132 | 22 | 174 | 547  | 720  |
| GATTATGGCATAACGTGTGGG   | 58.723 | 20 | 153 | 387  | 539  |
| CCATTATGTCGATATCCATCCA  | 59.507 | 22 | 234 | 104  | 337  |
| CCTATGGTTGTATGGTGTGGAC  | 59.238 | 22 | 174 | 37   | 210  |
| ATTCTGAACCAACTGGCACC    | 59.973 | 20 | 142 | 1827 | 1968 |
| AAAAGCAAGGAAAAAGCCAA    | 58.987 | 20 | 259 | 2819 | 3077 |
| ACAACAGGCCAACTTGCATA    | 59.199 | 20 | 249 | 5328 | 5576 |
| GTGGCCATTTGGTTCTGAAT    | 59.797 | 20 | 177 | 96   | 272  |
| AAGCAAATCCAAGATGACGA    | 59.699 | 21 | 271 | 4642 | 4912 |
| CAACCCTACCTCCTTCTCCC    | 59.928 | 20 | 170 | 900  | 1069 |
| AGTGCAACACAATTTGACCT    | 59.653 | 21 | 269 | 21   | 289  |
| AACACTATCACAAGGTTCCGA(  | 60.047 | 23 | 235 | 71   | 305  |
| CTCCCATTGTTCTACCCAA     | 59.784 | 20 | 261 | 4182 | 4442 |
| TTTCTGAGACCGGAAGGTTG    | 60.224 | 20 | 141 | 446  | 586  |
| ATGTTGTGAAGCACATGGGA    | 59.967 | 20 | 220 | 1008 | 1227 |
| CAAATCCCTCTTTTCTTATTCTC | 59.919 | 26 | 250 | 174  | 423  |
| TCTCCATTCCACCATCATCA    | 59.85  | 20 | 238 | 513  | 750  |
| TGCATTTATCAGCTTTATCAGC/ | 59.895 | 23 | 239 | 533  | 771  |
| GCCAAATTAAGACCATATTTT   | 58.556 | 24 | 215 | 2643 | 2857 |
| TGCATCCATGATATGGCG      | 59.988 | 18 | 214 | 386  | 599  |
| TGTA AACCGACCTCCC ACTC  | 59.966 | 20 | 169 | 1830 | 1998 |
| CAACGGTTTTGGTTTGTCC     | 60.241 | 20 | 212 | 1300 | 1511 |
| GGGAGAAAAGGGGAAATAAG    | 60.173 | 22 | 213 | 57   | 269  |
| TTGATGAACTCTTTGGGTGG    | 60.096 | 21 | 115 | 262  | 376  |
| CGACTACTCCCTGCTCCAAC    | 59.867 | 20 | 152 | 107  | 258  |
| TTCTCATTTCCCAAATGTCG    | 58.546 | 20 | 276 | 489  | 764  |
| AGGGTGTCTTCTCTGCATCA    | 58.287 | 20 | 250 | 31   | 280  |
| AAAATGGTGACGAGAGAGCG    | 60.397 | 20 | 188 | 321  | 508  |
| CTTCGCATGCTTATTTGGAA    | 58.912 | 20 | 195 | 41   | 235  |
| AAGCTGGAGTGCCTTCTCAA    | 60.134 | 20 | 179 | 528  | 706  |
| ACCGGGATAAAATAGGGCAA    | 60.508 | 20 | 234 | 1631 | 1864 |
| ATTATCATATTTAAGGGTTATC/ | 57.31  | 27 | 160 | 305  | 464  |
| TTTTACTCTTCACGTTTGCAC   | 60.326 | 22 | 183 | 10   | 192  |
| AAAACCCTAAACAACCAGTGA   | 58.663 | 23 | 252 | 49   | 300  |
| TCAAAATTGCGTCATTGCAT    | 60.081 | 20 | 215 | 232  | 446  |
| AACAACAATACAATCCCCTGC   | 59.744 | 21 | 249 | 3    | 251  |
| TTGCAAAAGTCACACTCTGTCA  | 59.534 | 22 | 247 | 53   | 299  |
| TGCGAAATCAACAAATCGAA    | 60.193 | 20 | 213 | 192  | 404  |
| GACCCAACCTACCAACCCAC    | 59.162 | 20 | 113 | 8    | 120  |
| TAAAGGATCACGTTGGGAGC    | 60.074 | 20 | 262 | 171  | 432  |
| CCGTTTATTTTTCACACGTTCA  | 59.904 | 22 | 177 | 1118 | 1294 |
| GGCTACTTCGCTGCAA ACTT   | 59.66  | 20 | 271 | 31   | 301  |
| CTGTGGCCACCACTACACAC    | 60.072 | 20 | 242 | 1244 | 1485 |
| ATTGTTGGGTGTGGGAAAAT    | 59.006 | 20 | 145 | 987  | 1131 |
| GATCTAAGGGCCGAGATTTGT   | 59.568 | 21 | 101 | 171  | 271  |
| ATTCGAATTCCTAAGCGCAA    | 59.816 | 20 | 130 | 230  | 359  |
| GTGGTACTTGACGCACATT     | 59.646 | 20 | 240 | 83   | 322  |
| AACATGTAGTCATGCGGGCT    | 60.547 | 20 | 225 | 313  | 537  |
| TGAGGTGAAGTGTGGAGTGTG   | 59.766 | 21 | 176 | 32   | 207  |

|                          |        |    |     |      |      |
|--------------------------|--------|----|-----|------|------|
| CGCTACGAGCCACAGCTAC      | 59.779 | 19 | 273 | 29   | 301  |
| CGATCCTGTGTGTCATTT       | 60.12  | 20 | 184 | 5    | 188  |
| TCCATTTATCGGAGTTACGGTT   | 59.737 | 22 | 204 | 252  | 455  |
| CCTCACGCACTCCACTAACA     | 59.897 | 20 | 233 | 8    | 240  |
| AAAATTGATGGAACGGGGAT     | 60.378 | 20 | 265 | 83   | 347  |
| TTGTCACATTTTTGGTGTTCAC   | 59.799 | 23 | 239 | 1619 | 1857 |
| GGGATTCTTGATGAATGGGA     | 59.685 | 20 | 126 | 47   | 172  |
| GATCCAAATTTCAACCCCG      | 60.118 | 19 | 165 | 1422 | 1586 |
| AGGCCTATAAATGCGTTTGGT    | 59.877 | 21 | 228 | 34   | 261  |
| AGAGAGACGACAGCGAGAGG     | 59.883 | 20 | 139 | 2602 | 2740 |
| TGCAAGCAGCACTTCAATTT     | 59.614 | 20 | 276 | 109  | 384  |
| GGTAGCTGGGAGGAGGAGAA     | 60.725 | 20 | 185 | 16   | 200  |
| GCGTAGTTTAATTGGCCGTG     | 60.508 | 20 | 271 | 137  | 407  |
| AATCATGAAATTGTTGGGGG     | 59.481 | 20 | 194 | 195  | 388  |
| TCTTCACCTATTATTTCAACAA   | 57.674 | 26 | 153 | 41   | 193  |
| TCTTCGAGTACGCTCTGGGT     | 60.012 | 20 | 213 | 13   | 225  |
| GTGCGTGACGGTTGGTATAAT    | 59.766 | 21 | 280 | 64   | 343  |
| GCCCCTGATTCTCAGCATAAC    | 59.658 | 20 | 199 | 15   | 213  |
| TGCACGTAGGCATGTTCAAT     | 60.142 | 20 | 166 | 158  | 323  |
| CTTGAGTTTGTGGGGGATGT     | 59.82  | 20 | 263 | 343  | 605  |
| CGATGTTTTCGAGGATGAGAA    | 60.199 | 21 | 265 | 204  | 468  |
| CATCGGCTACTTTGAAGGGA     | 60.206 | 20 | 239 | 228  | 466  |
| TGAATTGTTCTTGCACTTGTGA   | 59.366 | 22 | 274 | 1016 | 1289 |
| TGCCACAGCAGAAAACACTCAC   | 60.032 | 20 | 180 | 861  | 1040 |
| AAAATTTTTGGGCTTATCATGT   | 59.256 | 24 | 143 | 2982 | 3124 |
| GCTTTACGGGAGAAAAGTTG     | 59.853 | 20 | 253 | 2641 | 2893 |
| GGATCAATAACTGTCAGAATCC   | 59.376 | 24 | 204 | 37   | 240  |
| TTAAGGTTGGCTTGGGTTTG     | 59.968 | 20 | 187 | 2252 | 2438 |
| TCTTGAGGTTTCAGATCGCA     | 59.522 | 20 | 220 | 41   | 260  |
| TTAAGAGATAGTACCGGATCG    | 57.575 | 22 | 214 | 42   | 255  |
| CTGAGGTCGGGTTTCGTGTAG    | 60.701 | 20 | 129 | 17   | 145  |
| CCACTCTTTTGGGGCAATAC     | 59.429 | 20 | 190 | 73   | 262  |
| TCCACGCATGTTTCTGTCTAT    | 60.12  | 20 | 129 | 920  | 1048 |
| GGAAACCACTCACCGTGTCT     | 60.009 | 20 | 163 | 448  | 610  |
| TCCATAGCCGATAAAATGGC     | 59.892 | 20 | 256 | 1046 | 1301 |
| TCTGTACCACACTTGCTCGG     | 59.897 | 20 | 261 | 26   | 286  |
| TGCACTGCATAACAAGCGTA     | 59.086 | 20 | 237 | 29   | 265  |
| CGTATGAGCTCTGAGAGTGAG    | 60.138 | 24 | 233 | 1002 | 1234 |
| TAATGAGGGTCATGCGTGTG     | 60.539 | 20 | 180 | 231  | 410  |
| CTCTCCAACATCCAACCTCC     | 59.505 | 20 | 223 | 624  | 846  |
| TGGTGGGGCTTAATTAGGTG     | 59.817 | 20 | 276 | 1319 | 1594 |
| CACATTGGTAGAAGGCCGAT     | 59.955 | 20 | 238 | 398  | 635  |
| GCAGTTAGCAGGATAAGGGG     | 58.812 | 20 | 123 | 2    | 124  |
| TGGTTAACCGAAAACCGAAG     | 59.968 | 20 | 199 | 634  | 832  |
| TCTTTGAGGTAGGGCTGGAA     | 59.807 | 20 | 249 | 465  | 713  |
| AAAATTTACGGCAATGAGG      | 59.938 | 20 | 223 | 538  | 760  |
| GCCATGACCAACTTTCTTTTC    | 58.684 | 21 | 105 | 27   | 131  |
| AGACGAGCTTCTCGTTCCAA     | 60.134 | 20 | 247 | 928  | 1174 |
| TTGCTTCTTGAAAACCTTTCTTCA | 59.84  | 25 | 214 | 866  | 1079 |
| GAATAGCTTGTGTTGCAGCG     | 59.638 | 20 | 165 | 294  | 458  |
| AATTGCTTCAATGTCACCCC     | 59.797 | 20 | 270 | 119  | 388  |
| ACCCTCATATGCTGGGAGAT     | 58.421 | 20 | 237 | 0    | 236  |
| TGGAAAAGAATTCGTCTCTCG    | 60.184 | 20 | 217 | 83   | 299  |
| TGCATACACGAGTGGAAAGA     | 57.836 | 20 | 215 | 449  | 663  |
| TCGGAGATGGCTTCCTTATG     | 60.17  | 20 | 120 | 425  | 544  |
| GCCCCTTTGAGCTAAGGTAGT    | 58.927 | 21 | 274 | 110  | 383  |
| CTCTTATCGCAGCAAGGAGC     | 60.257 | 20 | 149 | 1868 | 2016 |
| CTTTGGCAAGTCGCTCTTCT     | 59.757 | 20 | 201 | 18   | 218  |

|                         |        |    |     |      |      |
|-------------------------|--------|----|-----|------|------|
| TTGCAAAACGATTCCTTCCT    | 59.685 | 20 | 258 | 61   | 318  |
| TCTTTGCACAGGTCCCTAGC    | 60.397 | 20 | 268 | 11   | 278  |
| TGAAATGAAGAAAAAGAAATT   | 57.512 | 23 | 143 | 103  | 245  |
| GGTGATGAATGGAGAAGGGA    | 59.862 | 20 | 191 | 191  | 381  |
| CCAATATCCAACGGCAAGAA    | 60.827 | 20 | 182 | 1278 | 1459 |
| TTTCAAAATCCCCACAAGC     | 59.916 | 20 | 175 | 2760 | 2934 |
| TGAAGGTTGGAGGAATGGAG    | 60.042 | 20 | 275 | 147  | 421  |
| ACCAGCTTGAAGGGGAGTCT    | 60.252 | 20 | 252 | 0    | 251  |
| TGTAGTGTGTCACGGGCAAT    | 60.032 | 20 | 257 | 590  | 846  |
| TATGGGTTATCACCGGATCG    | 60.544 | 20 | 150 | 750  | 899  |
| TGAAGTTAGGAAATAAGGAGG   | 58.743 | 25 | 180 | 341  | 520  |
| AATTGTATTCTCCCGAGCCC    | 60.286 | 20 | 224 | 589  | 812  |
| TGTAGCCGTTATAGTGTGGGA   | 58.187 | 21 | 264 | 12   | 275  |
| CCTGTTTCAGCTATCTTTTGCG  | 60.025 | 21 | 254 | 79   | 332  |
| TTTCGTCGGAAAAATTCACC    | 59.916 | 20 | 263 | 230  | 492  |
| TCACACTACCCTCCTCGTCC    | 60.112 | 20 | 213 | 72   | 284  |
| CAGGTAATGCTAGCCGAAAA    | 60.223 | 20 | 198 | 379  | 576  |
| TATAGAGACCGGCCGAGAAA    | 59.801 | 20 | 280 | 20   | 299  |
| ATTCCCTGATGTTGCGTTGT    | 60.384 | 20 | 259 | 2566 | 2824 |
| GTTAGGAAATAAGGAGGTGTT   | 57.059 | 25 | 229 | 94   | 322  |
| ATGGGTTATTTTGGCCATT     | 60.26  | 20 | 263 | 17   | 279  |
| TGCAAAATTGGCTGAGTTGT    | 59.322 | 20 | 100 | 709  | 808  |
| ATGCACGTGTTGGATGGAAT    | 61.2   | 20 | 157 | 79   | 235  |
| TGGGCTCATGGTGATTA CTG   | 59.522 | 20 | 247 | 770  | 1016 |
| TTAGATGAATGAAGTACGGCG   | 59.742 | 22 | 164 | 0    | 163  |
| TATCCTGTGGAGCGTGTGAG    | 59.855 | 20 | 223 | 429  | 651  |
| TTCTATTCTTTATAATTGCCATA | 57.525 | 26 | 270 | 6    | 275  |
| TTGCAGTTGCAGTTGGTGAT    | 60.31  | 20 | 186 | 820  | 1005 |
| GGGCACCGCTAATGTAGATG    | 60.49  | 20 | 143 | 80   | 222  |
| CTTTGTGCGTTTCTCCATCG    | 60.626 | 20 | 185 | 52   | 236  |
| CCAAGTTACTCCCAGCGAGA    | 60.388 | 20 | 116 | 1    | 116  |
| GCAAGAAATGGCTCCCTACA    | 60.214 | 20 | 257 | 797  | 1053 |
| ACCATAGATTGAAGGCCCAA    | 59.387 | 20 | 233 | 4    | 236  |
| TGAAGTCACAGCGAGTTTTG    | 60.025 | 20 | 107 | 5    | 111  |
| TGACGGTCAAGATTTGCTCA    | 60.39  | 20 | 131 | 0    | 130  |
| TCCATCCTTCTTTGCTGCTT    | 59.955 | 20 | 180 | 630  | 809  |
| TTAACCTCCCGTGGACGTAG    | 59.986 | 20 | 183 | 370  | 552  |
| TTGTCCATCTTTTCCGTCC     | 59.91  | 20 | 261 | 50   | 310  |
| TCCAATGGATGTGAATGGTT    | 58.617 | 20 | 268 | 73   | 340  |
| CCTGCTTTTGTGCATAGGTT    | 57.906 | 20 | 174 | 254  | 427  |
| AAATGATAGGGCACACAGCC    | 59.962 | 20 | 183 | 82   | 264  |
| AAGTCGCGCAA ACTTGAGAT   | 60.022 | 20 | 179 | 3812 | 3990 |
| AAACCTGGCTGGACTGATGT    | 59.579 | 20 | 217 | 1759 | 1975 |
| AAGTGAAACTGCTGTATGCTG   | 58.737 | 23 | 172 | 548  | 719  |
| TTGGGGATGAATCTGACGAT    | 60.281 | 20 | 212 | 9    | 220  |
| TAGCCGAAGCGAGCTGTTAT    | 60.138 | 20 | 120 | 71   | 190  |
| TAGCCTGGTCGTTTTGGAAG    | 60.241 | 20 | 278 | 990  | 1267 |
| AAATGCATGCACCTGATTACA   | 59.055 | 21 | 216 | 1    | 216  |
| CCCTACCTGAATCGCAACAT    | 59.955 | 20 | 100 | 1540 | 1639 |
| GCGTTTTGACAATATATAGGTG  | 58.944 | 26 | 104 | 290  | 393  |
| ATGGCTGGGCTCTGAAATTA    | 59.668 | 20 | 280 | 312  | 591  |
| TTGTGGATGAAAGCACGGTA    | 60.111 | 20 | 273 | 8    | 280  |
| CCCCACCACTTTCTCATCAC    | 60.363 | 20 | 174 | 1762 | 1935 |
| ATTACAAATGGCCAAGAGAGT   | 58.282 | 23 | 103 | 8    | 110  |
| TTTTTGACAGCGAAAGTCCC    | 60.227 | 20 | 269 | 4170 | 4438 |
| TTTCCCCTTTGCTCTCTATTT   | 58.887 | 22 | 210 | 200  | 409  |
| CAAATCAAATCGCCACACAA    | 60.501 | 20 | 252 | 35   | 286  |
| CAACTCCA ACTGAAGAACACG  | 60.326 | 22 | 262 | 1220 | 1481 |

|                         |        |    |     |      |      |
|-------------------------|--------|----|-----|------|------|
| ATCCATTCCGTACAAGGCAA    | 60.331 | 20 | 245 | 21   | 265  |
| ATCGACGCCTCAGATTTGTT    | 59.7   | 20 | 168 | 948  | 1115 |
| CCTCTAGCATCTCTTGCTCTCA  | 58.983 | 22 | 182 | 343  | 524  |
| AGCAAGATTGATCCTCCTCG    | 59.386 | 20 | 278 | 20   | 297  |
| GCAGGGCTGAGTACAGGGTA    | 60.277 | 20 | 221 | 17   | 237  |
| GAGCATATTTCCACGAAGCA    | 58.872 | 20 | 275 | 239  | 513  |
| TTCCAACACTATCCAAACGGC   | 59.938 | 20 | 212 | 672  | 883  |
| CACACTATTAGGGTTTGGGAGC  | 59.757 | 22 | 116 | 4    | 119  |
| AAAGATCCCCCGAAAAACC     | 60.117 | 19 | 261 | 2290 | 2550 |
| CGAGCTCGGACCTTCAGTAT    | 59.454 | 20 | 111 | 22   | 132  |
| GGCAAAAATAACCAACCCAC    | 59.182 | 20 | 270 | 83   | 352  |
| CCAAAAAGAGACGACCGAAC    | 59.711 | 20 | 119 | 1    | 119  |
| CATGGTGATGCCTTCTAATGTG  | 60.386 | 22 | 211 | 28   | 238  |
| CAATGGTGGCTTCATTTCT     | 59.933 | 20 | 201 | 561  | 761  |
| TCGTGTACAAAAGCCGTGAA    | 60.293 | 20 | 107 | 0    | 106  |
| TGCACGTAGGCATGTTCAAT    | 60.142 | 20 | 245 | 15   | 259  |
| GTTGGGGTCTTGCCGTAATA    | 59.993 | 20 | 109 | 17   | 125  |
| TAAGGGATGTTTGCACCTGA    | 59.123 | 20 | 162 | 50   | 211  |
| TGAAGTTAGGAAATAAGGAGG   | 58.743 | 25 | 160 | 949  | 1108 |
| GAGTTTTCATCTTACCTTGAGG  | 58.333 | 23 | 244 | 12   | 255  |
| TTGTGGGGTTGTGGTGAATA    | 59.667 | 20 | 188 | 34   | 221  |
| CAGATACAGTGCCCGGAGTT    | 60.134 | 20 | 275 | 43   | 317  |
| TTTTTAAAGAGCTGGGGGCT    | 60.197 | 20 | 185 | 981  | 1165 |
| AACAGCCAGAGGATTCGATG    | 60.218 | 20 | 199 | 0    | 198  |
| CTCATGCATTTCCCATCTC     | 60.426 | 20 | 240 | 899  | 1138 |
| CTGGCTATTTTGGTTTCTACAA  | 59.613 | 24 | 237 | 64   | 300  |
| TATCAGGCTTGATGATGGCA    | 60.182 | 20 | 267 | 227  | 493  |
| CGCAGCAGGTCAAGATTACA    | 60.011 | 20 | 263 | 539  | 801  |
| GAAGCATCGTTTGTGTTTTCA   | 58.81  | 21 | 270 | 6    | 275  |
| ATGGTTTATATTTTCGTTGATTC | 58.457 | 24 | 259 | 31   | 289  |
| TTAGGGGTGTTTCATGGTTTCG  | 60.745 | 20 | 278 | 31   | 308  |
| TCGAGTCCAATGTTGAAAGAA   | 59.724 | 22 | 277 | 441  | 717  |
| CTCACGAGATGGTGAAGCTG    | 59.571 | 20 | 190 | 22   | 211  |
| TCCTTTTTGTCATTCACCTTTGT | 59.9   | 23 | 232 | 488  | 719  |
| TGGACTGCGTTAGGGACTTT    | 59.734 | 20 | 195 | 189  | 383  |
| GTAGGTGGACTGACCAACCC    | 59.279 | 20 | 280 | 468  | 747  |
| ATGGGTTTGAACCTCGGACAT   | 59.263 | 20 | 175 | 2432 | 2606 |
| TCTCCTTCTCCTCCTCCTCC    | 59.883 | 20 | 280 | 716  | 995  |
| AATTGACGTGAAAAACGGGA    | 60.344 | 20 | 194 | 113  | 306  |
| CTCACACAATTTCACTCTTCAC  | 59.023 | 25 | 170 | 97   | 266  |
| CGAGTTCATGGACTTCGTCA    | 59.831 | 20 | 132 | 269  | 400  |
| GACGGAGCAGAAATGGAAAA    | 60.192 | 20 | 107 | 3075 | 3181 |
| GAGTGCGCATTCTTACTCC     | 59.843 | 20 | 224 | 23   | 246  |
| AAAAACCGCCACATCAGAAG    | 60.11  | 20 | 264 | 1883 | 2146 |
| GATTAAGGATGGGCCACTCA    | 59.894 | 20 | 154 | 18   | 171  |
| GTCAAACACGAGTAGAAAGGA   | 57.975 | 24 | 162 | 66   | 227  |
| CCTTCCTTTCTCCTTACCC     | 60.045 | 20 | 134 | 815  | 948  |
| AAATTTGGGCCCTTAGATCG    | 60.272 | 20 | 192 | 55   | 246  |
| TGAAGTTAGGAAATAAGGAGG   | 57.525 | 24 | 188 | 136  | 323  |
| TCTGATTCTGGGATTTTGGC    | 60.014 | 20 | 263 | 576  | 838  |
| GAACTCTCATGCCCTGGAAA    | 60.195 | 20 | 161 | 112  | 272  |
| CATTATTTAAAGCACGCGCA    | 59.872 | 20 | 219 | 449  | 667  |
| CAAAAATGGATGCAAATACGG   | 60.192 | 21 | 111 | 9    | 119  |
| ATGGTTTCGCTCTCTGTGGT    | 59.727 | 20 | 193 | 19   | 211  |
| TGCTCTTACCTTTGTGTGC     | 60.032 | 20 | 192 | 469  | 660  |
| TTAATCGTCCATTTCTGTCGG   | 60.827 | 20 | 267 | 244  | 510  |
| AGGGCCTCTTTTTGTCTGAA    | 58.909 | 20 | 205 | 11   | 215  |
| ATGCAATGACAAGCACTCCC    | 61.078 | 20 | 242 | 75   | 316  |

|                        |        |    |     |      |      |
|------------------------|--------|----|-----|------|------|
| TCACCATCACCATCCTCACA   | 60.982 | 20 | 151 | 1389 | 1539 |
| CCCTTCAATGGTGTTCCTG    | 60.345 | 20 | 127 | 439  | 565  |
| TAGGGGTCAAGTGTGGGTTGT  | 60.275 | 20 | 174 | 298  | 471  |
| GCACTGACCATTTCAACAAGG  | 59.139 | 20 | 258 | 764  | 1021 |
| TGAACACGTTGCCAAAACAT   | 60.011 | 20 | 118 | 78   | 195  |
| TAAAACTCGACCCGATGCT    | 59.708 | 20 | 145 | 143  | 287  |
| TCAATCAGGAAAACCCCTT    | 58.477 | 20 | 201 | 55   | 255  |
| TGTTTTTGGAGGGAAAATGG   | 59.772 | 20 | 123 | 37   | 159  |
| GGAAGGGCTCAACAACACAA   | 61.075 | 20 | 217 | 7    | 223  |
| CATGTTTTGTTGGCTGTGG    | 60.004 | 20 | 263 | 208  | 470  |
| CGGTTAGAAAATGGACCGTTA  | 59.893 | 22 | 279 | 11   | 289  |
| GGGGTGGGAATGATGTGATA   | 60.404 | 20 | 204 | 79   | 282  |
| TTTGATTTGTGTTGGCAAGG   | 59.561 | 20 | 108 | 359  | 466  |
| ACCACGAGATGGAGACCAAC   | 59.969 | 20 | 201 | 428  | 628  |
| GCTGAATCTTAACCGTTCGC   | 59.851 | 20 | 232 | 69   | 300  |
| TTGATACAGATGGTACGCCG   | 59.566 | 20 | 279 | 43   | 321  |
| TCAACAGAGAATGCAAGCAA   | 58.129 | 20 | 217 | 89   | 305  |
| TCAGCATTGCGAAAGGGTAT   | 59.528 | 20 | 185 | 43   | 227  |
| AGATGGCGGTAAACATGGAG   | 59.955 | 20 | 214 | 134  | 347  |
| CCCTAATTGAGTAGAAAACCA  | 57.399 | 23 | 261 | 1343 | 1603 |
| TGCTGACTTGATTTTCGAGC   | 59.152 | 20 | 187 | 0    | 186  |
| GAACCATTGGGCATGAAGTC   | 60.326 | 20 | 259 | 2    | 260  |
| TCACCCAAAAGGTTATTATTT  | 59.149 | 25 | 280 | 308  | 587  |
| AATTTACTCGCCTCTTCCGC   | 60.711 | 20 | 260 | 2428 | 2687 |
| TTTTCCACGCACATAATTCG   | 59.562 | 20 | 176 | 485  | 660  |
| TTGGTTATCGCTTGAACGAG   | 58.917 | 20 | 170 | 83   | 252  |
| GCGTTTTGACAGGATTTGCT   | 60.257 | 20 | 105 | 2    | 106  |
| TCTCAAAAGTCTCATTTTCACA | 59.799 | 24 | 179 | 2347 | 2525 |
| CCACACCTTGTCTCCCAAT    | 59.82  | 20 | 220 | 2314 | 2533 |
| CTTATTCGCCTCGATCTCCA   | 60.309 | 20 | 244 | 1654 | 1897 |
| TAAATTGCCCTCGGATGCTA   | 60.548 | 20 | 189 | 2434 | 2622 |
| GGCTTAGCTGTTGTTGGTTC   | 59.882 | 20 | 155 | 14   | 168  |
| ATCATATCATGGCCGAAACC   | 59.61  | 20 | 175 | 316  | 490  |
| CAACTCATTTTCGCAGACCAG  | 59.44  | 20 | 182 | 165  | 346  |
| GCGTTCACACCCTCATTTTT   | 59.978 | 20 | 228 | 499  | 726  |
| GCTGGAATACAACACTACCCAA | 60.237 | 22 | 272 | 1439 | 1710 |
| AGGCAAGCTCGATGTCTTATG  | 59.49  | 21 | 279 | 2078 | 2356 |
| TTAAGTTTGGGGGTGCAGAG   | 60.103 | 20 | 105 | 211  | 315  |
| GCCGTTGAATGTGATATCTTG  | 58.106 | 21 | 115 | 13   | 127  |
| GAGAAGGGGTGGGTTTTACG   | 60.714 | 20 | 175 | 3    | 177  |
| AAGTGGCGGACACTCATGTT   | 60.577 | 20 | 119 | 18   | 136  |
| TTTGTCAACCCTCTCCCAGTT  | 59.549 | 20 | 265 | 710  | 974  |
| TTTTTCTGACAAGGGTGGGA   | 60.465 | 20 | 275 | 1156 | 1430 |
| CTCGTGCTTGTCTTCCACAA   | 60.025 | 20 | 217 | 1134 | 1350 |
| CAAGAAGGCGTTGATGGAAT   | 60.074 | 20 | 154 | 622  | 775  |
| GGAACTTAGGATTAGCGCC    | 60.061 | 20 | 144 | 335  | 478  |
| AACAGAGGGATGGGGAGATT   | 59.755 | 20 | 113 | 156  | 268  |
| ACACACAGAAGTTGTGGGAGG  | 60.057 | 21 | 162 | 13   | 174  |
| CCTTTGAGGATGGATTGATGA  | 59.879 | 21 | 207 | 87   | 293  |
| CGCCTTGTCTGGGATATTTAA  | 59.922 | 20 | 228 | 295  | 522  |
| TTTTTCCGAGCAAATGAAAAT  | 58.728 | 21 | 239 | 1103 | 1341 |
| CCACCTAGCAATGGTTTCCA   | 60.883 | 20 | 264 | 4    | 267  |
| CCGAGGACCACCTTGTATGT   | 59.844 | 20 | 144 | 690  | 833  |
| AGCGTTCGAAGTTTGGTGT    | 59.78  | 20 | 204 | 78   | 281  |
| ACTGCAATGATCCCACCTCT   | 59.535 | 20 | 216 | 954  | 1169 |
| ACCTTGACGAGGTGGTTGAC   | 60.009 | 20 | 267 | 15   | 281  |
| TTCTCTTGGTTGGTGAAGAA   | 58.955 | 22 | 196 | 153  | 348  |
| AAGTGAGCCCAAATCTCCT    | 60.074 | 20 | 274 | 532  | 805  |

|                        |        |    |     |      |      |
|------------------------|--------|----|-----|------|------|
| CCGTTAGGTCCGTCTCGAT    | 60.081 | 19 | 127 | 44   | 170  |
| CCATGAAGCACATCACAGGA   | 60.688 | 20 | 235 | 1825 | 2059 |
| TGCCTTGACAAGCAGGTAGA   | 59.591 | 20 | 219 | 18   | 236  |
| TTCCGTCTACCCCTTTTCCT   | 59.934 | 20 | 177 | 838  | 1014 |
| ATTGCCTCTCAACCTCCAAA   | 59.67  | 20 | 175 | 0    | 174  |
| AAAAATAGAGTTATCACAGGA  | 58.199 | 26 | 135 | 216  | 350  |
| GTCACCCCGGGCTAGATATT   | 60.173 | 20 | 263 | 4162 | 4424 |
| CCCCTTAGGGCAAGGTAGAA   | 60.435 | 20 | 267 | 28   | 294  |
| TATGGGTTATCACCGGATCG   | 60.544 | 20 | 252 | 762  | 1013 |
| ATTGAACACAGCCCTCTTGG   | 60.111 | 20 | 220 | 361  | 580  |
| TTTGTTAGAGTTTTGAGGGGA  | 59.974 | 22 | 236 | 321  | 556  |
| CGCCCTAATAAACCTGCAAA   | 60.089 | 20 | 118 | 585  | 702  |
| GAGGCAAATTATTCGGATTTTC | 58.99  | 22 | 228 | 1198 | 1425 |
| CCCCATCAACCTCCATACTG   | 60.187 | 20 | 182 | 1270 | 1451 |
| CATCCCTTCCAAGTGTGTCA   | 59.52  | 20 | 203 | 41   | 243  |
| GCACTTCACAGGTACCACCA   | 59.597 | 20 | 246 | 3    | 248  |
| TGCTTTGTTTCCATCACGAA   | 60.234 | 20 | 236 | 149  | 384  |
| GGTCCACGTATTTTCCCAA    | 59.662 | 20 | 114 | 441  | 554  |
| TCTTTGCCGATGAAGAGGAG   | 60.474 | 20 | 266 | 18   | 283  |
| GGGTTATTACCTGATTACCTCC | 59.052 | 23 | 175 | 317  | 491  |
| GTGGTTCGGAGCAAAGAAAA   | 60.227 | 20 | 216 | 4    | 219  |
| GCTTCCACTGCCTACTTTGC   | 60.022 | 20 | 246 | 175  | 420  |
| AATTTGGCAGCTTCTTGTGC   | 60.395 | 20 | 121 | 68   | 188  |
| TCCTCCTCTTACGGCATGT    | 59.694 | 20 | 245 | 693  | 937  |
| TCCACCGTGGTTAGTTGACA   | 60.001 | 20 | 237 | 110  | 346  |
| TCAGCTCAGGGTGGAGAAAA   | 60.913 | 20 | 229 | 167  | 395  |
| ATGCATGGAAGTAAGAGGCG   | 60.235 | 20 | 187 | 59   | 245  |
| ATAGTTGGTGTGAGACGGGC   | 59.997 | 20 | 279 | 80   | 358  |
| CACAATATTTGAGGGTTATCAT | 58.787 | 25 | 195 | 466  | 660  |
| TGCGTAGAACAGAGAGCGAG   | 59.49  | 20 | 266 | 9    | 274  |
| AGGACATCGCGGAGAGTCTA   | 59.973 | 20 | 204 | 9    | 212  |
| ACGCTGGTAGGATTTCAACG   | 60.132 | 20 | 224 | 1168 | 1391 |
| GAGGCACTCGATTTTCTGTGA  | 60.39  | 21 | 202 | 62   | 263  |
| AAGGACTGTGCGAAAATGGGA  | 59.526 | 20 | 191 | 742  | 932  |
| CGGAAGAATTAGAAACGGCA   | 60.202 | 20 | 241 | 97   | 337  |
| TTCAAAGGCCGAGATTTGTT   | 59.685 | 20 | 145 | 140  | 284  |
| GGTCCAACAACCTAATCATCC  | 58.227 | 21 | 228 | 230  | 457  |
| CACTCCTTTCGGGACGACTA   | 60.246 | 20 | 235 | 1982 | 2216 |
| CAGGCTTCACATTTCCCATC   | 60.461 | 20 | 230 | 52   | 281  |
| ATTTTTGCGAGGGAGAATGT   | 58.647 | 20 | 126 | 0    | 125  |
| CGGACGATATCGGTTATTGG   | 60.167 | 20 | 123 | 0    | 122  |
| CCTGGTGAATGGCAAAGTCT   | 60.111 | 20 | 196 | 22   | 217  |
| TTTGGTTTCTGGTGGGATGT   | 60.21  | 20 | 188 | 616  | 803  |
| TATGGTGGTATGGTGTGGGG   | 61.296 | 20 | 242 | 158  | 399  |
| CTGGTGTACAACGGATGTC    | 60.005 | 20 | 193 | 41   | 233  |
| GTGGTTGCTCCAAGTGAACA   | 59.726 | 20 | 270 | 192  | 461  |
| CTTCTATTCCCTTCCCCACC   | 59.761 | 20 | 146 | 43   | 188  |
| GCGAGCATCATACGAGAA     | 59.979 | 20 | 253 | 2437 | 2689 |
| TTCTCAGTGCATCCATTTTCG  | 59.799 | 20 | 135 | 820  | 954  |
| GGAGTTTGCTGTTGAGACCC   | 59.703 | 20 | 230 | 331  | 560  |
| TGTCGTGGTTCGGATATTCA   | 59.924 | 20 | 276 | 16   | 291  |
| GCCTAAACACACACCTCA     | 57.137 | 20 | 102 | 105  | 206  |
| GCAAGGGGCAAGTGTTATTT   | 59.091 | 20 | 222 | 514  | 735  |
| CACATGCCATTGATCCAAAG   | 60.112 | 20 | 232 | 1794 | 2025 |
| GCTATAGAGCCGTTGTGGGA   | 60.235 | 20 | 132 | 1117 | 1248 |
| TGGCTAATATAATTTATCTCCA | 57.853 | 25 | 216 | 235  | 450  |
| GTCGCATTGGATCTCTGGTT   | 60.081 | 20 | 276 | 5744 | 6019 |
| AAAAGCAGGTTTCATGCCATC  | 60.081 | 20 | 152 | 778  | 929  |

|                         |        |    |     |       |       |
|-------------------------|--------|----|-----|-------|-------|
| GAAAGCCTACTTGGCGATCTT   | 59.87  | 21 | 115 | 440   | 554   |
| AGCCTACCTCGCTTCCGTAG    | 60.904 | 20 | 179 | 5     | 183   |
| TTATGATGGGAAGAGGGGGT    | 60.517 | 20 | 115 | 2109  | 2223  |
| TCCAAGAAACGTGGAATGTG    | 59.541 | 20 | 207 | 285   | 491   |
| TCTCTATCTTTTTGGTTGGTGA  | 59.203 | 24 | 230 | 4     | 233   |
| TGCTCAGCATACAGGAAGGA    | 59.547 | 20 | 172 | 12    | 183   |
| TGACTGTTGGACGGTTATCG    | 59.566 | 20 | 153 | 87    | 239   |
| GCGCGATTTTAAACCCTAAA    | 59.24  | 20 | 212 | 31    | 242   |
| CCGAAAATCTCCGTCAAGAA    | 60.184 | 20 | 184 | 266   | 449   |
| TGGTTTGGGTTTAAATTTGGG   | 59.537 | 20 | 230 | 8     | 237   |
| ATCACTTCGAACCTTCTGCAA   | 59.867 | 21 | 186 | 7     | 192   |
| CAAGCAGCAGCAGCAGTTAT    | 59.396 | 20 | 261 | 98    | 358   |
| CCAAAATTTATGGTTATCACAG  | 59.191 | 24 | 237 | 14    | 250   |
| CCCATGTGGGGAGATATGAT    | 59.44  | 20 | 118 | 874   | 991   |
| TTTTGTGGAAGATGCAGGTG    | 59.691 | 20 | 179 | 2897  | 3075  |
| TTCTCGCATGCCACTAAAAA    | 59.443 | 20 | 216 | 20    | 235   |
| GAAGTCGGATTGTGGATTGG    | 60.317 | 20 | 185 | 204   | 388   |
| TGGACAATAGAAAAACCACGC   | 59.989 | 21 | 184 | 159   | 342   |
| TCCCGTGTTGTTATTGCTGA    | 60.111 | 20 | 112 | 15    | 126   |
| AAAATTTACATATTTGATCGG   | 57.59  | 23 | 192 | 34    | 225   |
| TGCCCCATTACCACTAAACC    | 59.685 | 20 | 144 | 82    | 225   |
| AAATTCCAACAACACTGTCCGC  | 59.978 | 20 | 270 | 995   | 1264  |
| GGGGCTGCCAGAATAAAAAG    | 60.92  | 20 | 280 | 497   | 776   |
| TTGGTGATGCCAGAACAGAA    | 60.24  | 20 | 232 | 279   | 510   |
| ATTTAGGGGCTTTTGAGCGT    | 60.095 | 20 | 270 | 770   | 1039  |
| CGGTTTTGGTTTGTTCCTACA   | 59.884 | 21 | 149 | 76    | 224   |
| GGTGATGCCGAAGGTATTTT    | 59.391 | 20 | 184 | 370   | 553   |
| GACTCACGGTTTTTCGGAAG    | 59.711 | 20 | 250 | 487   | 736   |
| TGTTTCGATGCAAGTTTCGTT   | 59.322 | 20 | 160 | 94    | 253   |
| ATTGCATACGAGGGGCTAAA    | 59.569 | 20 | 208 | 396   | 603   |
| TGAACAATTGAACACCGGAA    | 59.941 | 20 | 180 | 64    | 243   |
| CGCGACAGAGTGGTATCAGA    | 60.008 | 20 | 253 | 369   | 621   |
| GGTGAATCTGTAAAAGGTCATC  | 59.885 | 23 | 236 | 336   | 571   |
| GAGAGCCATTTGTGGACGTT    | 60.119 | 20 | 254 | 12    | 265   |
| TGTGGAGAACGAACCTCGAAG   | 59.007 | 20 | 206 | 262   | 467   |
| ACATGTGCTGTGAGAGTGGG    | 59.738 | 20 | 262 | 501   | 762   |
| AAAACCGTTCCACATTCAA     | 57.972 | 20 | 165 | 1271  | 1435  |
| TCAAACAGAACACACCTTCCC   | 59.997 | 21 | 118 | 164   | 281   |
| CAACCGCATAGGCACAGTAG    | 59.366 | 20 | 122 | 14    | 135   |
| GCAAATTTCTTCGAGACCCA    | 60.192 | 20 | 110 | 175   | 284   |
| CAGTTTGACATCAGAGCCGA    | 59.984 | 20 | 179 | 12    | 190   |
| TTGAATGGTTATCACCTGATCT  | 59.376 | 24 | 111 | 230   | 340   |
| ATTAACGACTTGAACCCATTTT  | 58.084 | 23 | 280 | 305   | 584   |
| TAGACGTCAATCCTCGGCTC    | 60.362 | 20 | 160 | 21    | 180   |
| TGAATCGATTTTCGGTTTTCG   | 60.941 | 20 | 234 | 408   | 641   |
| TGTGATTTCTACCATTTATTCTT | 59.708 | 26 | 246 | 2     | 247   |
| GTTCTTGACGCACCATTTCA    | 59.697 | 20 | 148 | 50    | 197   |
| TTGTTTGCATCCCACACAAC    | 60.413 | 20 | 157 | 265   | 421   |
| TTGAGAATGTGAGACATCATC/  | 59.059 | 24 | 154 | 228   | 381   |
| ATTTACAGAACAACGATC/     | 58.132 | 22 | 261 | 10    | 270   |
| TTGATGATGAAATGACATGGA/  | 58.82  | 22 | 132 | 81    | 212   |
| TAGGAGAACCAAACCGCATT    | 59.569 | 20 | 218 | 1781  | 1998  |
| ACCACTCCCCACTGCAATAA    | 60.375 | 20 | 218 | 243   | 460   |
| TCTTTGCCAGAGCAAAAACA    | 59.585 | 20 | 123 | 1105  | 1227  |
| GTGTTCTCGTGAGAGTGCGT    | 59.051 | 20 | 206 | 4     | 209   |
| TTCAAACCTTTGTTCCGAG     | 60.081 | 20 | 228 | 823   | 1050  |
| TGGTTCTGTATGTCAACGGC    | 59.572 | 20 | 108 | 4     | 111   |
| TGATTAATATCAGGGGGCGA    | 60.247 | 20 | 272 | 10549 | 10820 |

|                         |        |    |     |      |      |
|-------------------------|--------|----|-----|------|------|
| TGAACAACGACTCCGATCAC    | 59.682 | 20 | 280 | 883  | 1162 |
| GAACAGCATGAAAACCCGAT    | 59.939 | 20 | 269 | 0    | 268  |
| AGGCCTTGATGTCCCTTCTT    | 60.074 | 20 | 138 | 177  | 314  |
| TCAGATTCGAACTCTTGCCA    | 59.522 | 20 | 173 | 249  | 421  |
| CTAAAGCACGATAGGGGCAC    | 59.73  | 20 | 266 | 17   | 282  |
| AGAACCCGGCAGAGAAAGAT    | 60.212 | 20 | 186 | 239  | 424  |
| TACGACAGTGGACAAGGGAA    | 59.135 | 20 | 232 | 88   | 319  |
| AGCATCAAGCCGAATTGAAA    | 60.721 | 20 | 103 | 490  | 592  |
| TCTGTTTGCCTTTCGAATCC    | 60.192 | 20 | 219 | 470  | 688  |
| GCAGACTTTAAGGCAGCCAA    | 60.523 | 20 | 271 | 5293 | 5563 |
| CGGGTCCACTCGTCATAAAA    | 60.883 | 20 | 262 | 373  | 634  |
| TGCTTCCTTTTGCTGCTACA    | 59.752 | 20 | 270 | 220  | 489  |
| GGTTTTCTCGCAATCCACTT    | 59.174 | 20 | 264 | 2250 | 2513 |
| TGCAGGTACCTTCGGAACTT    | 59.734 | 20 | 274 | 47   | 320  |
| AAAATAGGGGAAAAGGGGAA/   | 60.006 | 21 | 156 | 242  | 397  |
| ACGCAGTCTAGAGATATATGTT  | 57.442 | 26 | 242 | 300  | 541  |
| AATTTTTGATCGATCTCGGG    | 58.974 | 20 | 221 | 659  | 879  |
| TCGGACGTGAAGAATGAGTG    | 59.831 | 20 | 274 | 1499 | 1772 |
| CTGCCGTCCAATCCATTTAT    | 59.784 | 20 | 125 | 47   | 171  |
| TAACCAAAGGCTGAGTCGGT    | 59.734 | 20 | 221 | 87   | 307  |
| TAGCCGTTCCCTCGTTTTTA    | 59.715 | 20 | 177 | 2865 | 3041 |
| TCCTTCAACCCAGTTGTTCCC   | 59.943 | 20 | 180 | 68   | 247  |
| GCCAACTTTGGGTAAATGGA    | 59.801 | 20 | 214 | 188  | 401  |
| AACGATAACGATTAACGATAA(  | 57.033 | 24 | 100 | 591  | 690  |
| CCCTCCCATATCTTCCAGTTG   | 60.689 | 21 | 176 | 724  | 899  |
| TCTCCCTAAGGTGTGAGTCCA   | 59.706 | 21 | 273 | 541  | 813  |
| ACACGAGATTTACATGGTTCG/  | 59.781 | 23 | 108 | 1    | 108  |
| AGATTCCTCGTGGGATTGAA    | 59.483 | 20 | 271 | 48   | 318  |
| GATTGTAACGTTATTTGGCCG   | 59.376 | 21 | 134 | 1278 | 1411 |
| AGTTTTGAGGGAGAACTGCG    | 59.473 | 20 | 199 | 16   | 214  |
| AACTGAGTCCCCTACCCGAT    | 59.817 | 20 | 225 | 301  | 525  |
| TTTGAGGCGAATCGAAATCT    | 59.784 | 20 | 201 | 1047 | 1247 |
| TAAAAGTTCCCCACAGACG     | 59.964 | 20 | 128 | 75   | 202  |
| CTCGATCCAACGGTCTTGT     | 60.111 | 20 | 159 | 169  | 327  |
| ATGCACATGCTACTTCCACG    | 59.746 | 20 | 239 | 571  | 809  |
| GCCATTGCCGATAATAGAT     | 58.88  | 20 | 161 | 42   | 202  |
| ATATCTCCCTTTTCGGCCAT    | 59.761 | 20 | 184 | 16   | 199  |
| GTCAAGTCAAACTTGCCAAAC   | 57.373 | 21 | 253 | 960  | 1212 |
| GCATCAGAGAGTCCGGTGAGA   | 59.078 | 20 | 225 | 1112 | 1336 |
| TCTTCCCAACTACTTTCCAGT   | 59.144 | 22 | 280 | 264  | 543  |
| TACCCATTGGTGCTCAAACCTC  | 59.985 | 21 | 243 | 450  | 692  |
| TCTTCATTTGCTTCAGAGGTGA  | 59.993 | 22 | 167 | 250  | 416  |
| TCAATTCAAACCTGCTGCAACC  | 59.847 | 20 | 233 | 1105 | 1337 |
| GCGCGTGACCAAATAGAAGT    | 60.278 | 20 | 243 | 73   | 315  |
| CAGCCGTCAATCATTTAGGAA   | 60.081 | 21 | 144 | 6    | 149  |
| ATCCATCCATCTCCACCTCC    | 61.094 | 20 | 116 | 1902 | 2017 |
| AGATCATACAGTGGACGCC     | 60.956 | 20 | 280 | 147  | 426  |
| ACTTGACCGAACCATTTTGG    | 59.83  | 20 | 273 | 191  | 463  |
| GCATATACGAAGGGTATTTTGC  | 59.289 | 23 | 203 | 478  | 680  |
| CACACCGGGTACCAAAAAGTT   | 59.751 | 20 | 133 | 178  | 310  |
| AATTAATGTGGCATGGGGAA    | 60.016 | 20 | 238 | 62   | 299  |
| AATCAGCTCCATTTCTTGCC    | 59.273 | 20 | 211 | 289  | 499  |
| TCCGACAACGAAAGATGAAG    | 58.847 | 20 | 207 | 511  | 717  |
| AGCAGTAGTGCCCCTGAAGA    | 60.012 | 20 | 182 | 1088 | 1269 |
| CACTCTGTGTTGTTGGGAAA    | 57.109 | 20 | 268 | 72   | 339  |
| CGGGGCTTACCTAGTCTAA     | 59.331 | 20 | 220 | 144  | 363  |
| CTTTTGATTCCCCATTA AAAAG | 57.746 | 23 | 224 | 257  | 480  |
| AACAAGAATCGCCTGCAAAG    | 60.386 | 20 | 253 | 1152 | 1404 |



|                        |        |    |     |      |      |
|------------------------|--------|----|-----|------|------|
| CAAGATTTGATCATGGGCGT   | 60.864 | 20 | 159 | 35   | 193  |
| ACACACACGAGCAAGGATTG   | 59.751 | 20 | 178 | 694  | 871  |
| CTTCATTACCCATGAGCGAG   | 58.325 | 20 | 212 | 106  | 317  |
| TGCCCCTTAAACTCTCCTTG   | 60.589 | 21 | 265 | 382  | 646  |
| TCGAACTCATGCATTCATTTT  | 59.592 | 22 | 234 | 2082 | 2315 |
| CACCCGAAAACCGAATAAGA   | 59.931 | 20 | 129 | 156  | 284  |
| TGCAAGCTCAGCCTAATGAA   | 59.712 | 20 | 171 | 18   | 188  |
| CTAAACCACCCGTGAAGCAC   | 60.55  | 20 | 258 | 140  | 397  |
| GGCTCGTCACGATCTCTCTC   | 60.104 | 20 | 102 | 2005 | 2106 |
| GATTGGCATCATTTTACGGG   | 60.153 | 20 | 234 | 377  | 610  |
| ATATTGGGTGATGTGCAACG   | 59.276 | 20 | 165 | 1163 | 1327 |
| CGAAAAATGTATTGGGGCAT   | 59.66  | 20 | 179 | 5    | 183  |
| TTTCCCGTGGACGTAGAT     | 60.324 | 19 | 257 | 219  | 475  |
| ATCGGTTATTACCGGATCGC   | 61.031 | 20 | 151 | 234  | 384  |
| TCTGCCTTTCTACAGCGACA   | 59.74  | 20 | 123 | 414  | 536  |
| CCCCCATGCTATGAAGAAAC   | 59.387 | 20 | 242 | 16   | 257  |
| ACATTACACCACCCTTCCCA   | 60.088 | 20 | 202 | 332  | 533  |
| GAGGTTTCCAACCTGCTTCG   | 59.853 | 20 | 181 | 201  | 381  |
| TTGTGAGAACCAACTCGGTG   | 59.72  | 20 | 273 | 233  | 505  |
| GGGTTGTTGCCGCTTCTACT   | 61.557 | 20 | 265 | 0    | 264  |
| GAGATGGTTCGAGAACGAGG   | 59.803 | 20 | 112 | 476  | 587  |
| TGGAGAGGGGAGGTATTCAA   | 59.478 | 20 | 279 | 28   | 306  |
| TTTGGAGATAGAATGAGATAG  | 57.629 | 26 | 169 | 218  | 386  |
| CAACCCTACCTCCTTCTCCC   | 59.928 | 20 | 203 | 171  | 373  |
| CAAGAGCTCTCATTCTCTCCCT | 59.23  | 22 | 223 | 646  | 868  |
| GCATCAAATTCAAAGCGAG    | 59.846 | 21 | 269 | 382  | 650  |
| ATCCGGCCATGTTGCTATTA   | 60.31  | 20 | 243 | 1550 | 1792 |
| AAACCTAGCATTGGGGAAGG   | 60.312 | 20 | 244 | 55   | 298  |
| AATTGATGGAACGGGGATTT   | 60.378 | 20 | 156 | 9    | 164  |
| GACAAAACCTTCATGGGAGCG  | 60.636 | 20 | 275 | 317  | 591  |
| TTCATGATTCAAAGCATCAAA  | 59.595 | 23 | 138 | 64   | 201  |
| TTTTTCACATGCCATACACCA  | 59.841 | 21 | 184 | 25   | 208  |
| TCTCACCTTCGGTCAGAACC   | 60.238 | 20 | 261 | 291  | 551  |
| GGAAGAGAGAGAAGGGGTGG   | 60.186 | 20 | 272 | 193  | 464  |
| AATGGAAGGGACGAGTTTGA   | 59.526 | 20 | 134 | 293  | 426  |
| TTAAAAACCGAACTGGACCG   | 59.968 | 20 | 132 | 2874 | 3005 |
| TCCACTCTCCCTCTCAGTACTT | 59.823 | 24 | 279 | 95   | 373  |
| TGGAGATCGAAGGAGCTGAT   | 59.91  | 20 | 222 | 313  | 534  |
| GGGTTATCACTTGAACGCGA   | 61.032 | 20 | 218 | 54   | 271  |
| ATTTATAATCCCGGGTCCGA   | 60.349 | 20 | 280 | 9    | 288  |
| TGGAGCTCTTGTTCTCACA    | 59.545 | 20 | 136 | 72   | 207  |
| GAATACCCCTACTTTGCC     | 59.666 | 20 | 161 | 77   | 237  |
| AACAACCTTGAACCTGCGCT   | 59.92  | 20 | 217 | 18   | 234  |
| TCGTCTGGCTAGTTGGTTCC   | 60.255 | 20 | 235 | 1    | 235  |
| AGCTGGAGCTGAGAACATCG   | 60.7   | 20 | 119 | 10   | 128  |
| CAATATTGCAAATGGCCAAG   | 59.029 | 20 | 232 | 35   | 266  |
| CACCCAGATCGGTTTCTACG   | 60.508 | 20 | 244 | 49   | 292  |
| ACATGCATGGCCATAACTCA   | 59.955 | 20 | 272 | 166  | 437  |
| AGCAGATCTGGTGAGGCAAT   | 59.834 | 20 | 198 | 1861 | 2058 |
| GGCTCAACAGGTTTTTCCCT   | 60.476 | 20 | 179 | 27   | 205  |
| AGCATACACACCATCATTCTCC | 60.022 | 22 | 238 | 17   | 254  |
| ACACTCTCGTCTCTCTCGCC   | 59.738 | 20 | 237 | 0    | 236  |
| CACCTCACTCACTCACACG    | 60.358 | 20 | 106 | 106  | 211  |
| TTGTTAAGACCTCGTGGGGA   | 60.486 | 20 | 254 | 2263 | 2516 |
| ATAAGGAAGGATTCGCGACC   | 60.419 | 20 | 275 | 77   | 351  |
| TGTTGGGGTTGTTGTAGGGT   | 60.126 | 20 | 193 | 1801 | 1993 |
| ACAAAATTGTGCCCAAGGAG   | 59.971 | 20 | 184 | 23   | 206  |
| CTGATTCGCACAAATGATCG   | 60.22  | 20 | 169 | 98   | 266  |

|                        |        |    |     |      |      |
|------------------------|--------|----|-----|------|------|
| GGGACGAAAATAACCCTCGT   | 60.187 | 20 | 199 | 85   | 283  |
| GGCAACGTCCCTCTCACTTA   | 60.255 | 20 | 134 | 1884 | 2017 |
| TATCTGTGGCCGATGCTATG   | 59.67  | 20 | 255 | 2368 | 2622 |
| TCCAATTGCATGCCTCTAAA   | 59.257 | 20 | 206 | 2    | 207  |
| AACGGACGAACAACGAAAAC   | 60.015 | 20 | 228 | 327  | 554  |
| AAACGACATCCTGACGCAAC   | 61.107 | 20 | 274 | 225  | 498  |
| TTATCATTGCTCGTTTTGGG   | 58.625 | 20 | 255 | 190  | 444  |
| TGAGCATCATACCCTTTTGAGA | 59.708 | 22 | 242 | 39   | 280  |
| TATTGTGGTTTAGGGCCACC   | 59.685 | 20 | 224 | 30   | 253  |
| TTGCATCATCAAGTCTCCTCA  | 59.384 | 21 | 200 | 0    | 199  |
| TTCGAAGTTACAAAAGGGCG   | 60.236 | 20 | 260 | 552  | 811  |
| TCCTTGCACTCTTGCCCTAT   | 59.836 | 20 | 250 | 13   | 262  |
| TGTTTGAATCCGAGTTTCCC   | 59.91  | 20 | 229 | 53   | 281  |
| GAAGTTGAGCCATATTCATTTG | 59.989 | 23 | 181 | 440  | 620  |
| TTTCTTGGGAGGGAAAATGA   | 59.476 | 20 | 187 | 448  | 634  |
| CCTGTTGGACTTTTTGAGGG   | 59.563 | 20 | 254 | 615  | 868  |
| TCCAAAATGTTAGGGGTTGC   | 59.801 | 20 | 212 | 55   | 266  |
| TGAGATGAGGATGCAAGCC    | 59.891 | 19 | 237 | 3038 | 3274 |
| CTGATAAGCCAGGGTATGGC   | 59.551 | 20 | 258 | 98   | 355  |
| AAGCTGGTGGATTGAATGCT   | 59.7   | 20 | 178 | 169  | 346  |
| AATTCACCACCTTGTTTGT    | 60.455 | 20 | 208 | 90   | 297  |
| TTGGGCACATTGATAAACCA   | 59.786 | 20 | 228 | 434  | 661  |
| CAGGTCATATTTCTGCGCT    | 60.235 | 20 | 225 | 146  | 370  |
| TCAACGGCTCAAAAAGTTTC   | 57.999 | 20 | 158 | 260  | 417  |
| CTCGTGGTGCAGTGGTAGAG   | 59.487 | 20 | 254 | 28   | 281  |
| TTTGCATGAGCTAACATGCC   | 59.839 | 20 | 207 | 649  | 855  |
| CATTCCCATCATTTCCGGCTA  | 60.797 | 20 | 239 | 1799 | 2037 |
| AACGAATGTAACAATACGTAC/ | 57.736 | 25 | 214 | 401  | 614  |
| AGCACTCGTGGATTCTGGAC   | 60.269 | 20 | 209 | 905  | 1113 |
| TTACAAAAATGCCCTTTCGC   | 60.075 | 20 | 250 | 426  | 675  |
| GCAGCTTACATTTCCATGA    | 59.805 | 20 | 239 | 215  | 453  |
| AAGAACACAACGAGGATGGC   | 60.119 | 20 | 256 | 258  | 513  |
| GTTTTTCGATCCTGTGTGCC   | 60.504 | 20 | 136 | 293  | 428  |
| ATCAGTTCGTTGATTGGGCT   | 59.556 | 20 | 242 | 3767 | 4008 |
| CGATTTGGAATCGATAAGCA   | 58.721 | 20 | 268 | 561  | 828  |
| CTCTTCCACGGCCTCTATTG   | 59.83  | 20 | 128 | 85   | 212  |
| GGCCAATGGAATGGAGATAC   | 59.204 | 20 | 273 | 283  | 555  |
| AATCTCACCAAGATGCCCAA   | 60.461 | 20 | 100 | 8    | 107  |
| TGTAATGGAGGGGGAATCTG   | 59.744 | 20 | 106 | 292  | 397  |
| ACAACTTATGGACCGCTGG    | 59.993 | 20 | 173 | 488  | 660  |
| GTGCACGAAATTGGAGGAAG   | 60.636 | 20 | 181 | 2072 | 2252 |
| ACCTATGGTGGTATGGTGTGG  | 59.463 | 21 | 239 | 231  | 469  |
| CAGTGGCTCAAATGATCGAA   | 59.799 | 20 | 207 | 328  | 534  |
| AAAAATCGACAAATTATCAGT/ | 58.166 | 25 | 276 | 432  | 707  |
| CACCTTTGCAAAGGGAGAA    | 60.22  | 20 | 215 | 49   | 263  |
| TTGCAGCCTGAGTCAAGAAG   | 59.314 | 20 | 203 | 1291 | 1493 |
| CTTCTTCAAAGGCGATTTGG   | 59.817 | 20 | 235 | 1437 | 1671 |
| TGGATTCCAATTTTTCATGT   | 59.125 | 21 | 268 | 2247 | 2514 |
| TGGCGAATATTTTGTTTTGGAC | 59.025 | 22 | 145 | 281  | 425  |
| TTGCCTAGAAAATCCACACAA/ | 59.625 | 22 | 278 | 1138 | 1415 |
| AATTCAATCCCCAAAAACCC   | 59.867 | 20 | 183 | 449  | 631  |
| AAGCCACTTTTGTCAAGGTGA  | 59.766 | 21 | 234 | 1097 | 1330 |
| TCTACCAACCAACCAATCA    | 59.935 | 20 | 194 | 363  | 556  |
| AGGAATCAACCCCGACCTAC   | 60.19  | 20 | 233 | 28   | 260  |
| GGAGATGCTGATTGCCTTGT   | 60.226 | 20 | 211 | 46   | 256  |
| CTATGGTTCGATTGGGTGAGC  | 60.483 | 20 | 200 | 4617 | 4816 |
| AACAGAAAAATCCCCTTCATC  | 58.493 | 22 | 263 | 4454 | 4716 |
| GCGCATAGACAACGGTGATT   | 61.063 | 20 | 225 | 38   | 262  |

|                        |        |    |     |      |      |
|------------------------|--------|----|-----|------|------|
| AGGGTGGTAGAAAACCACGA   | 59.449 | 20 | 262 | 2162 | 2423 |
| TCACGCTAAAGAGGTGTTTTGA | 59.92  | 22 | 250 | 214  | 463  |
| TCGTGCTCATTGTGTTGGT    | 60.16  | 20 | 182 | 8    | 189  |
| GCCAGCCAGGAAAACACTAA   | 60.249 | 20 | 128 | 345  | 472  |
| AAAAATTCACGTGTTAGAGTTC | 59.112 | 26 | 233 | 911  | 1143 |
| CCGTGCTTACATCAAGCAGA   | 60.011 | 20 | 235 | 7    | 241  |
| ATCCCCTTCATTCAGCACAC   | 59.934 | 20 | 126 | 6    | 131  |
| TCAAGAGTTGCATGTGAGCC   | 59.992 | 20 | 264 | 1457 | 1720 |
| ACTGACATTCACAGGCATTG   | 57.067 | 20 | 198 | 63   | 260  |
| TTAAACCCTAAAAACGCGCA   | 60.593 | 20 | 241 | 104  | 344  |
| CATAAACAGCAAAGCAGCCA   | 60.014 | 20 | 250 | 375  | 624  |
| CCGAAAAGCTGAAAGAAACC   | 58.949 | 20 | 139 | 795  | 933  |
| CCTGTTGTGCCCATCAATTA   | 59.395 | 20 | 206 | 9105 | 9310 |
| TAGGATGATTGGCAACACGA   | 60.073 | 20 | 195 | 1    | 195  |
| TCCAATCAAGGCAAAGATCA   | 59.2   | 20 | 186 | 5483 | 5668 |
| GGGAGAAGGGCTGTGTGATA   | 60.073 | 20 | 192 | 105  | 296  |
| AGGGTTCACAGCGAATGAAA   | 60.636 | 20 | 123 | 700  | 822  |
| AACTCACCGGAGAAGGAGGT   | 60.111 | 20 | 227 | 1229 | 1455 |
| TTCCAAGTCTTCCCCTTCT    | 60.045 | 20 | 176 | 3    | 178  |
| TTTGTTCATCGTATTCCA     | 58.005 | 21 | 141 | 4093 | 4233 |
| ATACCCTTCCCTCGATGTCC   | 60.154 | 20 | 232 | 42   | 273  |
| GTGGAATTCGCCATAAACA    | 60.701 | 20 | 112 | 24   | 135  |
| CTAGGCATGGAATCCGAGAA   | 60.17  | 20 | 268 | 60   | 327  |
| GTTTGATATGGCAGGGGTTT   | 59.249 | 20 | 215 | 634  | 848  |
| CATGCAAGTGCATATCAATGA  | 59.59  | 22 | 137 | 1314 | 1450 |
| TGAGACATAGCGGACTGCAA   | 60.562 | 20 | 166 | 228  | 393  |
| GGTGGGTTGACGACAATAG    | 60.375 | 20 | 130 | 542  | 671  |
| TCAACTTCTTCAACAGGCCA   | 59.415 | 20 | 209 | 2221 | 2429 |
| CAACCTAGAATGAGCATTGGC  | 59.722 | 21 | 212 | 698  | 909  |
| CACGGGTCTTTCTTCTTCCA   | 60.224 | 20 | 201 | 9    | 209  |
| AAGCCAGTGCTGGTTGACTT   | 59.914 | 20 | 240 | 1155 | 1394 |
| TTGGATCTGCAATGTGGATG   | 60.481 | 20 | 262 | 233  | 494  |
| GCTTCTCCACGTATTCCAGC   | 59.843 | 20 | 267 | 176  | 442  |
| GCGTGATCTTGGTGTCTTG    | 59.293 | 20 | 275 | 1841 | 2115 |
| TCGATTGATTTCCCTACCGA   | 60.405 | 20 | 195 | 333  | 527  |
| TCCTCCGTTTTTGGATTCTG   | 60.044 | 20 | 274 | 358  | 631  |
| CCAAAACCGAACCGAATTTA   | 59.805 | 20 | 249 | 334  | 582  |
| TGTTGGAGTCTTGAACAAGGG  | 60.133 | 21 | 227 | 343  | 569  |
| TTGACTGTCACAATCCCGAA   | 60.088 | 20 | 249 | 1013 | 1261 |
| TTAGGGTTTTAAAATCGCGCA  | 60.564 | 20 | 214 | 7623 | 7836 |
| CAAGCCATGGGTCTTTGATT   | 59.933 | 20 | 234 | 186  | 419  |
| ATGAGATTGGTGGTTGTGGG   | 60.634 | 20 | 197 | 0    | 196  |
| CTTTGCAGTAAGAGACGGGG   | 59.869 | 20 | 239 | 650  | 888  |
| TCTTAATCCTTTGGCATTCAA  | 57.388 | 21 | 219 | 1117 | 1335 |
| GAGGGTGCACATCTCTTTCG   | 60.801 | 20 | 267 | 2    | 268  |
| CGCGGATGGTTAAGATTCAG   | 60.597 | 20 | 229 | 1397 | 1625 |
| CAAAATCAGGCACCAGCTAA   | 58.917 | 20 | 222 | 919  | 1140 |
| TCGAGTCTCCATCCTCGTTC   | 60.349 | 20 | 276 | 54   | 329  |
| TACCAAGGGCATTGTTGTC    | 59.801 | 20 | 210 | 24   | 233  |
| GCCTCAAATCCTATTCTATTTT | 59.549 | 24 | 246 | 77   | 322  |
| TCCGGGGAGGGTTCTATTAT   | 59.622 | 20 | 263 | 1333 | 1595 |
| CTACCACCGATCCCTCTGAA   | 60.065 | 20 | 199 | 1102 | 1300 |
| CCACACAGACGAAACGTCAC   | 60.203 | 20 | 185 | 21   | 205  |
| CACCCCTGAGCTCACTTTTC   | 59.844 | 20 | 279 | 583  | 861  |
| TGTCCACTGATGTGGCATT    | 59.967 | 20 | 228 | 258  | 485  |
| TGCTTGGCTCTATCCCTTTG   | 60.344 | 20 | 187 | 710  | 896  |
| ACTTGTTGAAATTCACCGGC   | 59.978 | 20 | 277 | 529  | 805  |
| TGAACTGGAAAATGGAACCC   | 59.767 | 20 | 159 | 987  | 1145 |

|                        |        |    |     |      |      |
|------------------------|--------|----|-----|------|------|
| CGGCATGTTTTATGTTTCAATC | 59.367 | 22 | 177 | 485  | 661  |
| CACTAAAGTGTGCTGTCATCGT | 57.969 | 22 | 184 | 19   | 202  |
| ACTCCCCTCGAAGTTTTGT    | 59.972 | 20 | 277 | 203  | 479  |
| TCATCAATTCTTTCTGCGCT   | 58.6   | 20 | 279 | 1240 | 1518 |
| AAATCTCCCGTAATTTGGCG   | 61.155 | 20 | 176 | 44   | 219  |
| TTATGCGTTTTGACGGGATT   | 60.323 | 20 | 199 | 514  | 712  |
| TCCCCCTTCTCCTTACCAT    | 59.89  | 20 | 173 | 324  | 496  |
| AAAGTAGAGAAGGGGAAGGG   | 59.948 | 21 | 170 | 469  | 638  |
| CGGTGAAGGTGTTTCGTTCTT  | 60.149 | 20 | 150 | 166  | 315  |
| GAAACTTGCTAGCCCATGAAA  | 59.352 | 21 | 245 | 665  | 909  |
| TTGGATTGAGAAAGCGATCC   | 60.155 | 20 | 279 | 14   | 292  |
| AGCCACAGAGTTGGAAAAA    | 59.711 | 20 | 102 | 1081 | 1182 |
| AAAATCAAAGGCCACAATG    | 59.801 | 20 | 127 | 11   | 137  |
| TTCAAATGTTTTGTAATTTCCC | 59.653 | 24 | 101 | 29   | 129  |
| TTCGCTCTAGCGGATCTT     | 59.316 | 20 | 199 | 1217 | 1415 |
| AATGTAGGTATAAGACTGTGA/ | 57.779 | 27 | 279 | 5    | 283  |
| TCCTGACCGGATCTCTCACT   | 59.792 | 20 | 254 | 133  | 386  |
| TACATTGATCTGCGTGCTGG   | 60.834 | 20 | 243 | 32   | 274  |
| TTCTCTCGTGTTCATCCC     | 60.05  | 20 | 179 | 22   | 200  |
| TTAGCCCATCAAAGTCCAGG   | 60.066 | 20 | 150 | 231  | 380  |
| TCGAATGGCCATAAGGAGAG   | 60.17  | 20 | 277 | 2736 | 3012 |
| AAATGTCCTTCATCACGCAA   | 59.127 | 20 | 190 | 21   | 210  |
| AACCTTATAGGATGTCCGGC   | 58.019 | 20 | 216 | 825  | 1040 |
| CCGAGTGCCTATTTTGCCTA   | 60.223 | 20 | 165 | 6863 | 7027 |
| CGCGTCTATCGATACTGATCC  | 59.705 | 21 | 255 | 3228 | 3482 |
| AAAAGGTCTGCCCTTGCTTA   | 58.973 | 20 | 132 | 364  | 495  |
| TTAGATAAAGGCGGTGGAGG   | 59.178 | 20 | 277 | 900  | 1176 |
| CACAGTCCACACATGAAGCC   | 60.162 | 20 | 177 | 1078 | 1254 |
| AGGGGTTATCATGGGATCAA   | 59.055 | 20 | 212 | 6    | 217  |
| TATTTCAAGTCCGGTCCGAT   | 59.387 | 20 | 266 | 380  | 645  |
| ACGAAGTTAGAAAATAAGGAG  | 57.269 | 24 | 153 | 115  | 267  |
| CTACTGCCTTCGTCCCATT    | 59.694 | 20 | 149 | 1336 | 1484 |
| TCGCGTCTGACTCCTCACTA   | 59.726 | 20 | 164 | 34   | 197  |
| GTCCACGGTGGTGTAGAGT    | 60.182 | 20 | 105 | 31   | 135  |
| GCAGGTCCATCTGAGGTAGG   | 59.679 | 20 | 135 | 937  | 1071 |
| AAAAGGGGAGAAAAGAACGG   | 59.566 | 20 | 232 | 41   | 272  |
| TCCTCAGCTGAAAAGGGCTA   | 60.088 | 20 | 103 | 488  | 590  |
| TTTCTCTCGTGCCATTCTCA   | 59.522 | 20 | 266 | 311  | 576  |
| TGGTAAACTCGAAGGATGGA   | 59.555 | 21 | 192 | 32   | 223  |
| TGTTGCACTTTTGAACAATGG  | 59.618 | 21 | 178 | 67   | 244  |
| GAGAGACGAAGGGGATGATG   | 59.612 | 20 | 280 | 224  | 503  |
| TCAGAACCGAGGTTGGACTC   | 60.238 | 20 | 141 | 235  | 375  |
| AAACATAAAAGCCACCTGCC   | 59.091 | 20 | 154 | 66   | 219  |
| TAGCATCGTGAGTAGCGTCG   | 60.18  | 20 | 152 | 15   | 166  |
| TGTGGCATCACATGGTCTCT   | 60.121 | 20 | 238 | 34   | 271  |
| GCCGATCGAGTTTTGGATAA   | 60.038 | 20 | 153 | 214  | 366  |
| AGGCAGAAAAGAGGAGGGAG   | 59.95  | 20 | 153 | 895  | 1047 |
| GAACACTATTCCCATCCCCC   | 60.388 | 20 | 169 | 5    | 173  |
| AATAGACCCAGACACGGGC    | 59.942 | 19 | 198 | 27   | 224  |
| TGCTCAATGAACTCCTTTGGT  | 59.726 | 21 | 138 | 11   | 148  |
| GCATTGTCCGGCTGAACTTTT  | 60.257 | 20 | 208 | 1213 | 1420 |
| TGCTTCATTTACCTTCCAA    | 59.247 | 20 | 160 | 12   | 171  |
| AAAGAAAAGGACGGGAGGAA   | 60.046 | 20 | 106 | 88   | 193  |
| GTTATGCGTTTTGACGGGAT   | 59.829 | 20 | 215 | 883  | 1097 |
| TGTGCGTGTAAGCTGGTTC    | 59.911 | 20 | 238 | 740  | 977  |
| TACTTTTGGGCAATCCTTGG   | 59.931 | 20 | 156 | 3158 | 3313 |
| TTGCCAAACACATTTTCA     | 58.573 | 20 | 268 | 1298 | 1565 |
| TGGTCTCAGGAAAGGTGCTT   | 59.844 | 20 | 213 | 12   | 224  |

|                                    |        |    |     |      |      |
|------------------------------------|--------|----|-----|------|------|
| CGCTTATCCATGGTTGGTTT               | 59.823 | 20 | 232 | 221  | 452  |
| TGCCTATTTTGAATTTTGGTGT             | 58.543 | 22 | 146 | 367  | 512  |
| GCTCATCCATTGATTTGGTTG              | 60.324 | 21 | 276 | 1096 | 1371 |
| TCGATCATAAGAGCATCCCC               | 59.998 | 20 | 261 | 367  | 627  |
| CGTCCCACAAAATATGTCCT               | 57.393 | 20 | 128 | 129  | 256  |
| CAGTGACATGGCCAAACTG                | 60.152 | 20 | 214 | 111  | 324  |
| CGCTTAAAAACCGGACCATA               | 59.958 | 20 | 163 | 878  | 1040 |
| ATGTTATGTGTATGCCGCGT               | 58.948 | 20 | 204 | 23   | 226  |
| ATGCAAGGGGGTGACCTTAT               | 60.578 | 20 | 196 | 0    | 195  |
| CGCATTAAAGCGGAAAAAAG               | 59.855 | 20 | 197 | 105  | 301  |
| TGCTATGATTTTCCCCAAA                | 60.26  | 20 | 239 | 230  | 468  |
| AAAATGCACCATTTCTTGCC               | 59.945 | 20 | 274 | 1245 | 1518 |
| TTCGGAGTGAGAGTTTTTCG               | 60.366 | 20 | 279 | 24   | 302  |
| GAGCGAGGGTTTTATTTTGC               | 58.833 | 20 | 265 | 38   | 302  |
| CCGGCTACTTCGAACTTTCT               | 58.602 | 20 | 260 | 565  | 824  |
| AACATGGGCAAGAAACAACC               | 59.836 | 20 | 256 | 870  | 1125 |
| CCTCAATTGTTGCATGGTGA               | 60.517 | 20 | 267 | 1039 | 1305 |
| TCATTGGAAAGTTAGGGCGT               | 59.569 | 20 | 132 | 365  | 496  |
| GAACAACCAAGGCAATTTTCAG             | 59.601 | 21 | 237 | 23   | 259  |
| CTGAATCGCGAAACATGAAA               | 59.809 | 20 | 276 | 400  | 675  |
| CCATGATGAATGTGAGGCAC               | 59.925 | 20 | 266 | 31   | 296  |
| TTATTGGAACAATACTATACAA             | 58.07  | 27 | 137 | 87   | 223  |
| TTCTTGATGTGTTGGCAAGC               | 59.847 | 20 | 139 | 169  | 307  |
| GGTCCATGGCCTGTTATGTC               | 60.203 | 20 | 258 | 248  | 505  |
| TTAGTGGGCTAAGTGGGGTG               | 59.986 | 20 | 178 | 199  | 376  |
| TTGCATCAAGTTTTAGAGCAGC             | 59.674 | 22 | 226 | 36   | 261  |
| ACTGAATCAGCGCTCCAGAT               | 59.981 | 20 | 154 | 204  | 357  |
| CTTCCCTGCACAAAAGTCGT               | 60.291 | 20 | 263 | 72   | 334  |
| AAGGTCAGGAAAACCCAAGG               | 60.332 | 20 | 250 | 2787 | 3036 |
| TACAGGTTACCCCTTCTGGG               | 59.959 | 20 | 222 | 114  | 335  |
| AAAGAAGGAAGGAAAGGGGG               | 60.755 | 20 | 111 | 252  | 362  |
| TCTTTTCTTTTCTTTCCATTTCA            | 57.27  | 23 | 274 | 101  | 374  |
| TGCAGGTTGTTTTCCATTTG               | 59.561 | 20 | 271 | 2214 | 2484 |
| CGGCTATTTGAGACGACATT               | 57.849 | 20 | 280 | 1    | 280  |
| ACCCTACCCACCCAAAATTC               | 59.919 | 20 | 190 | 184  | 373  |
| GTGGTGGGAGAAGAGAAGGA               | 59.228 | 20 | 205 | 84   | 288  |
| AAATGTCAGCCACACACGAA               | 60.16  | 20 | 135 | 351  | 485  |
| AGTGTGCGGAACGGTATAGG               | 60.154 | 20 | 234 | 79   | 312  |
| AAAATCAAAGGCCACAAATG               | 59.801 | 20 | 222 | 29   | 250  |
| ACAATGCTGTCTATGCCACG               | 59.746 | 20 | 214 | 449  | 662  |
| TGAGGCCAACTGAAAAACCA               | 59.293 | 20 | 261 | 308  | 568  |
| CGATCCCACAGAGATTGGTC               | 60.475 | 20 | 254 | 324  | 577  |
| CTGTGCATTTGCAGACCACT               | 59.905 | 20 | 144 | 459  | 602  |
| CAAGTTTGGGATTGCTCCAA               | 61.001 | 20 | 271 | 206  | 476  |
| CACCCCTTATCTTCCACAGC               | 59.55  | 20 | 256 | 148  | 403  |
| GTACCTGCACGTTGCGTAGA               | 59.935 | 20 | 252 | 4226 | 4477 |
| GGGCAAGTTGGCTATTTTCA               | 60.074 | 20 | 181 | 2577 | 2757 |
| ATCCTTTTGGACGAGCAATG               | 60.074 | 20 | 245 | 2315 | 2559 |
| TGATTGCATTATCAAGAACCA <del>A</del> | 59.485 | 23 | 224 | 18   | 241  |
| TTGCTCCTAGTTGGCACAAA               | 59.464 | 20 | 199 | 445  | 643  |
| AAAACCTCCTAAGCCCCCAA               | 59.939 | 20 | 161 | 710  | 870  |
| CCCAATTGTCGTGTGTGTTT               | 59.855 | 20 | 205 | 10   | 214  |
| CCACCTATCTGCATCCACCT               | 59.95  | 20 | 125 | 1480 | 1604 |
| GGCGGTGAAACGATAAACAT               | 59.829 | 20 | 233 | 224  | 456  |
| GACCCCAATGGATCGTAGG                | 60.142 | 19 | 280 | 162  | 441  |
| TTGGTGTGGTGTGTTGCT                 | 60.049 | 20 | 227 | 43   | 269  |
| TTCGTTTTTCTTCCCAGG                 | 60.029 | 19 | 139 | 51   | 189  |
| AGGTTGAGTCGGACGAGTTG               | 60.298 | 20 | 254 | 592  | 845  |

|                         |        |    |     |      |      |
|-------------------------|--------|----|-----|------|------|
| AGCATCAATGGAGTATTGAAA/  | 57.835 | 23 | 246 | 351  | 596  |
| CACCAACCCAACCCACTAAC    | 60.126 | 20 | 144 | 85   | 228  |
| GAGCTCGGATCAGTCCGATA    | 60.326 | 20 | 160 | 27   | 186  |
| TGGTAAATCACTAGACCCAAG/  | 59.879 | 23 | 238 | 49   | 286  |
| GCTAAAACTCCTGATTGCGG    | 59.845 | 20 | 165 | 60   | 224  |
| TGAATTCTGTGGGAAGAGCA    | 59.369 | 20 | 194 | 19   | 212  |
| TCATAATGGAGGACCAAGGC    | 59.894 | 20 | 219 | 87   | 305  |
| TGATGGATGGATGGTCTTGA    | 59.85  | 20 | 105 | 91   | 195  |
| TATGTATCGTCCGCGCTGTA    | 60.259 | 20 | 257 | 631  | 887  |
| TAGTGCCGTATTGTTTCCCC    | 59.823 | 20 | 258 | 76   | 333  |
| CTTTGCAGTTCGCTGATGTC    | 59.596 | 20 | 274 | 575  | 848  |
| TGAAGTAGGAAATAAGGAGGT   | 57.525 | 24 | 216 | 262  | 477  |
| AGCGTAAACACGTCCCCATA    | 60.386 | 20 | 230 | 156  | 385  |
| GCTTGCAGCCTTCTGTGTTA    | 59.224 | 20 | 226 | 2    | 227  |
| ATAACCCACCAACCTAGCC     | 60.074 | 20 | 103 | 28   | 130  |
| GGAGTATCACTTGAATGCACC/  | 60     | 22 | 204 | 91   | 294  |
| GTAGGCAGCAAGTTGGTGGT    | 60.179 | 20 | 153 | 115  | 267  |
| AGCTGATCCTGCGACATTG     | 59.959 | 19 | 207 | 415  | 621  |
| CAAAACACTCCCCGTAAAA     | 59.833 | 20 | 277 | 370  | 646  |
| TCGAACCACGTACATCTTGC    | 59.722 | 20 | 165 | 21   | 185  |
| CGTTTCATTCCCATCCTAAA    | 59.756 | 20 | 161 | 276  | 436  |
| GCCGTGTTAGCCAACGTAAT    | 60.025 | 20 | 188 | 115  | 302  |
| TGGAAGTGACAGCGAAGACA    | 60.593 | 20 | 166 | 284  | 449  |
| ACCTTTTGCATTGTCAGCAA    | 59.322 | 20 | 187 | 431  | 617  |
| ACCACAAGCAAGCATTTCCT    | 59.74  | 20 | 203 | 179  | 381  |
| GCTTCCGCATCGTTCTTACT    | 59.481 | 20 | 237 | 3    | 239  |
| TGCATACGGAATTCAGCAA     | 60.215 | 20 | 220 | 531  | 750  |
| ATTCGAAAATGCTCGTGAAA    | 58.361 | 20 | 195 | 1950 | 2144 |
| CAACAAAGCTGGAACGTGAA    | 59.881 | 20 | 158 | 82   | 239  |
| ATCTCCAAAACCCGACAACA    | 60.353 | 20 | 271 | 110  | 380  |
| TGTTATGCATTTTGACGGGA    | 59.93  | 20 | 264 | 5    | 268  |
| AAGGGGGTTATCATTGGAGT    | 57.316 | 20 | 204 | 99   | 302  |
| TCGTAAAACGACATGAACGG    | 59.585 | 20 | 267 | 158  | 424  |
| AGCCTCGGTGCTTGAAAATA    | 59.845 | 20 | 243 | 287  | 529  |
| TGGAGAGGACCTTGGAACAC    | 60.088 | 20 | 233 | 2566 | 2798 |
| CAAGCTGTTCCGGGAGAAAA    | 60.357 | 20 | 213 | 482  | 694  |
| AAAATTGAAGCGCCAGAAAG    | 59.474 | 20 | 266 | 104  | 369  |
| TCCGTAAAGCAGTAAAGACGA   | 57.733 | 21 | 194 | 435  | 628  |
| CCTACTCCACCCCTTCATCA    | 59.92  | 20 | 220 | 2682 | 2901 |
| CGCGTGTGAAACTCTAGCAA    | 60.195 | 20 | 136 | 195  | 330  |
| TGAATGAATCACAAAAGGGG    | 58.395 | 20 | 228 | 24   | 251  |
| TTTCAATTTTCGTGTGCCAAA   | 60.088 | 20 | 278 | 23   | 300  |
| AGCTCTTTCTCCACAGACGG    | 59.598 | 20 | 220 | 2189 | 2408 |
| TGAATCCTCCCGTTTTCTTG    | 60.044 | 20 | 221 | 182  | 402  |
| CCTTGTGGTTCTACAAAATAGC  | 59.613 | 24 | 130 | 168  | 297  |
| CACACCCACACGCACTTTAC    | 60.072 | 20 | 191 | 382  | 572  |
| GTACGCATGGAATGGACAGA    | 59.527 | 20 | 249 | 445  | 693  |
| CCGATCTTAATCTTCGCTGC    | 59.945 | 20 | 201 | 165  | 365  |
| GGAAATTGATGGATTTGGGA    | 59.558 | 20 | 196 | 665  | 860  |
| ATCTCAGATCCAAACGCCTAG/  | 60.228 | 22 | 170 | 199  | 368  |
| TTCGGGGCATACATGTGTTA    | 59.809 | 20 | 234 | 3054 | 3287 |
| TGTGTGATGTTGGAGTTGGG    | 60.416 | 20 | 177 | 120  | 296  |
| GCTCCTAAAATATTGGTTTCTA  | 58.015 | 26 | 146 | 406  | 551  |
| CAGCATTGCTTGCACTTCTAA   | 59.264 | 21 | 193 | 1104 | 1296 |
| TGTTTTGTAATTTCCCATGTTTG | 58.816 | 23 | 103 | 22   | 124  |
| CGAGTATTGGTTCAATAGAATT  | 60.143 | 26 | 276 | 309  | 584  |
| TGTGTACCGCAGTTCAGAGG    | 59.897 | 20 | 242 | 96   | 337  |
| TTTGATCTACCTCGGCCATC    | 60.036 | 20 | 250 | 2196 | 2445 |

|                        |        |    |     |      |      |
|------------------------|--------|----|-----|------|------|
| CCTACCTCGAGACCGAACAA   | 60.246 | 20 | 272 | 158  | 429  |
| TGAAAAGTCACACGAAAACGA  | 59.352 | 21 | 182 | 238  | 419  |
| TGGTTGTTGTGAGGGTTTCA   | 59.976 | 20 | 246 | 20   | 265  |
| AGAAACACCATTCAGTCCC    | 59.973 | 20 | 183 | 2222 | 2404 |
| GGGGTTATCATGGGATCAAGT  | 59.895 | 21 | 262 | 275  | 536  |
| GAACCAGAACTACCCACCC    | 60.607 | 20 | 202 | 1325 | 1526 |
| AGAACCGGAACCGGAATTAG   | 60.312 | 20 | 224 | 322  | 545  |
| TGTGTTTTGACAATATTTAGTG | 58.633 | 27 | 104 | 148  | 251  |
| GATCAGCCATCAACCCCTTA   | 59.894 | 20 | 179 | 0    | 178  |
| TCCGCACACCATATTCAGAC   | 59.527 | 20 | 255 | 555  | 809  |
| GCAAATATTGGCCGTCAGAT   | 59.929 | 20 | 245 | 380  | 624  |
| ATGGTGGTATGGTGTGGAGG   | 60.51  | 20 | 135 | 128  | 262  |
| TGATGGAACGGGGATTGTAT   | 60.014 | 20 | 269 | 538  | 806  |
| CTTGGGTCTACCCTTTTGCC   | 60.846 | 20 | 200 | 3383 | 3582 |
| GAGGCTGCTGAACATTCGTA   | 59.028 | 20 | 108 | 77   | 184  |
| GAGGTTTTGACGGGATTTAGG  | 59.822 | 21 | 111 | 367  | 477  |
| AGAACGAGAGAAATCGACGG   | 59.43  | 20 | 186 | 91   | 276  |
| CAGCCCCTTTTTCATTTTCA   | 60.046 | 20 | 258 | 183  | 440  |
| TGGACGTCCCAGATTGTTTT   | 60.353 | 20 | 163 | 3    | 165  |
| TGAGCTTGTTTTCAATTGCG   | 59.992 | 20 | 248 | 74   | 321  |
| CCTGAAACCCTAAGTTCCCC   | 59.799 | 20 | 199 | 1053 | 1251 |
| TCGACCTACGAGAGTGAGGG   | 60.399 | 20 | 271 | 371  | 641  |
| GCGAATGACACCTTTTGGTT   | 59.978 | 20 | 176 | 855  | 1030 |
| GGGATGAAATGAAGTGGGTG   | 60.173 | 20 | 157 | 507  | 663  |
| TCTTCGATGAACTCTGAAATGC | 59.457 | 22 | 169 | 301  | 469  |
| TGGCTACGGACAAACTCTCA   | 59.44  | 20 | 179 | 293  | 471  |
| TTTTCTTCAAATGCACAATAA  | 58.319 | 25 | 237 | 97   | 333  |
| CCATCGTCGCTATCACATTG   | 60.096 | 20 | 205 | 39   | 243  |
| TGCAACAAATGGATGGTTGT   | 59.823 | 20 | 119 | 17   | 135  |
| GGCATCAAAGTTGTGCATCAT  | 59.954 | 21 | 104 | 10   | 113  |
| ATCCCACATTGGTTGGAGAT   | 59.068 | 20 | 248 | 26   | 273  |
| CCCACCAACAAATTTGAACC   | 60.066 | 20 | 113 | 3669 | 3781 |
| TCGGTCACATTCAATAAGGC   | 58.574 | 20 | 243 | 1047 | 1289 |
| TGCAAACCCATGATTGACAC   | 60.376 | 20 | 170 | 676  | 845  |
| GTCTCAATGGGGACATCTGG   | 60.326 | 20 | 256 | 732  | 987  |
| CAGCCCCTTCTAAAACGGT    | 59.238 | 20 | 164 | 826  | 989  |
| TGGAGGAATGGGTAGAGGTG   | 59.92  | 20 | 243 | 0    | 242  |
| ATGATCCCAACGAAATCCTG   | 59.75  | 20 | 186 | 65   | 250  |
| AACCGATCATTTTCATCAGCC  | 59.9   | 20 | 232 | 2754 | 2985 |
| GAGGCCTCGATCTTCTGTCA   | 60.497 | 20 | 103 | 12   | 114  |
| CCGTGAAACCAATCTGATCC   | 60.317 | 20 | 253 | 250  | 502  |
| TGGGCTAATCACTCTCAGCA   | 59.547 | 20 | 179 | 10   | 188  |
| CAATTTGAGAATGGGATGGG   | 60.126 | 20 | 234 | 778  | 1011 |
| CGCACGTGAATGCATCTAAA   | 60.807 | 20 | 218 | 583  | 800  |
| AACATTGCGGACTTGGTACAC  | 59.912 | 21 | 265 | 774  | 1038 |
| TGAGATGATATTATGAACTGCA | 60.24  | 26 | 264 | 208  | 471  |
| CGTGATGCAACGCATTCTTA   | 60.807 | 20 | 250 | 225  | 474  |
| TCCGAGAATCTGTTAGAGGAG  | 59.491 | 23 | 256 | 102  | 357  |
| TCAACCTTTTGAAGCACTG    | 60.027 | 20 | 200 | 533  | 732  |
| TGAAAAGGGGTGAGAGGATG   | 60.042 | 20 | 275 | 101  | 375  |
| CAGCTCTCTACAATGGCGGT   | 60.419 | 20 | 147 | 51   | 197  |
| TTTGAATGGCAAGGATTGGT   | 60.309 | 20 | 240 | 344  | 583  |
| GGCATTCTCATCTCCACCAT   | 59.893 | 20 | 270 | 4473 | 4742 |
| TGCTAATGCAGATTGAGCGT   | 59.596 | 20 | 273 | 645  | 917  |
| TGGTTATTTGCCCGAAATTG   | 60.671 | 20 | 223 | 65   | 287  |
| GTACAAAGTCGCTGGCACAA   | 59.911 | 20 | 272 | 68   | 339  |
| TCAAAAATATCCTCGCTGCAT  | 59.696 | 21 | 124 | 8    | 131  |
| ACTATGCGCATGGGAGAGAG   | 60.384 | 20 | 227 | 103  | 329  |

|                        |        |    |     |      |      |
|------------------------|--------|----|-----|------|------|
| AATGACCGTCTCGACGAAAG   | 60.255 | 20 | 228 | 343  | 570  |
| GGCATGCAAAGATGAAGGTT   | 60.081 | 20 | 231 | 199  | 429  |
| TTGCGTATGATAGGGTTAGCAC | 59.298 | 22 | 240 | 26   | 265  |
| CATGCTACATTCCGTGATGG   | 59.948 | 20 | 246 | 547  | 792  |
| TTTCTTATTTCCCGGCTCCT   | 60.034 | 20 | 134 | 556  | 689  |
| AAGACGGTGAGTTGAGGGTG   | 60.151 | 20 | 226 | 593  | 818  |
| AATCCTTGCTCTGGCTGCTA   | 60.118 | 20 | 260 | 2    | 261  |
| AGGGATGTTTGTACCTGAATGC | 60.249 | 22 | 122 | 3    | 124  |
| ATAAAAATGGCACCTGGCTG   | 59.96  | 20 | 206 | 172  | 377  |
| CAAGAGGCAATCACGTTGAA   | 59.84  | 20 | 220 | 293  | 512  |
| TTCCTTGCGTGGCATTATTT   | 60.456 | 20 | 184 | 1027 | 1210 |
| TCAAGAGCAAGCAAAGATCTA  | 59.7   | 24 | 163 | 7    | 169  |
| TACTGACTTGTTGTGCGGGA   | 60.301 | 20 | 241 | 411  | 651  |
| AACCCGAAAACCGGTTAAAA   | 60.549 | 20 | 126 | 769  | 894  |
| GGAACCGGCTAAGATGATGA   | 60.036 | 20 | 231 | 240  | 470  |
| CCCGCATGTCATAACCACTA   | 59.42  | 20 | 272 | 270  | 541  |
| CCAATGGCGATATTTCTGT    | 59.784 | 20 | 191 | 190  | 380  |
| TGTGGTGTCTATGTATGGGTGC | 60.55  | 22 | 212 | 651  | 862  |
| TTTATTTGGACATGGAGCAAT  | 57.121 | 21 | 146 | 667  | 812  |
| ATAAATGCCTACGTCCACGG   | 59.845 | 20 | 215 | 167  | 381  |
| CACCCTCCTTCTCAAACAA    | 60.081 | 20 | 211 | 470  | 680  |
| AACAAAGGGGGTTGAGAAT    | 59.668 | 20 | 231 | 3178 | 3408 |
| CGCGTGCTCCTAACTCTTTC   | 60.154 | 20 | 119 | 28   | 146  |
| AGTTCGTCAAACCTCCCAA    | 59.569 | 20 | 226 | 146  | 371  |
| AAAACGGAAAACCAACATCG   | 59.839 | 20 | 205 | 46   | 250  |
| TCTCTTTTTTGGTAGGTCAATC | 57.564 | 23 | 260 | 144  | 403  |
| TGGATGGTTGAGACCCAAAT   | 60.173 | 20 | 156 | 23   | 178  |
| TGTGAAGTGTTGCTGATGTGA  | 58.855 | 21 | 228 | 1160 | 1387 |
| GCGGATCCCCCTTAATTTTT   | 61.291 | 20 | 280 | 302  | 581  |
| TCCACGAGATTTGAAAATTAG/ | 57.946 | 23 | 271 | 779  | 1049 |
| CGTGGTGTCCATTCAATTGTC  | 59.812 | 20 | 208 | 3006 | 3213 |
| TCCGGACGGAAAGATTACAC   | 59.933 | 20 | 184 | 76   | 259  |
| GACTCGTCAGTTCGTGGATT   | 60.12  | 20 | 223 | 1066 | 1288 |
| TAATTCCGATTTGGCAAGGA   | 60.395 | 20 | 189 | 430  | 618  |
| ATGGCGCCTTCTATTCTCCT   | 60.194 | 20 | 152 | 342  | 493  |
| ACCCGTACAATATCAACCACA  | 57.742 | 21 | 181 | 61   | 241  |
| GAAGTGTTATGCGTTTTGACAA | 58.249 | 23 | 234 | 1790 | 2023 |
| ATCTCACGATATCCCGCATC   | 59.884 | 20 | 273 | 63   | 335  |
| TCCAATTCACATTCTGATGA   | 58.912 | 21 | 268 | 14   | 281  |
| TGAGACGAAACTCATGCGAC   | 59.992 | 20 | 231 | 63   | 293  |
| CCACATATGCAAGATTTGAGC  | 58.254 | 21 | 124 | 50   | 173  |
| TCGATGAATCCATGTCTTGC   | 59.61  | 20 | 128 | 203  | 330  |
| TCTCAGCATTTGGGAAGGAT   | 59.629 | 20 | 187 | 23   | 209  |
| AATCCACACCCGAAATATGC   | 59.651 | 20 | 246 | 286  | 531  |
| CAAATGGTTTGGGGTTTTTG   | 60.06  | 20 | 267 | 120  | 386  |
| TGTTGATTAATCGGCATAGATG | 59.468 | 23 | 216 | 1453 | 1668 |
| CAACCGAAGCAATAAGAGGG   | 59.702 | 20 | 256 | 16   | 271  |
| TCAGTTGGTCCCTCACACTG   | 59.705 | 20 | 270 | 553  | 822  |
| AGAAAACCTCACCTGCCTCC   | 60.628 | 20 | 271 | 113  | 383  |
| TTTAAGGGTTATCACCTGATTT | 57.757 | 24 | 216 | 825  | 1040 |
| TTCGGTGAAGATTGGAGGAG   | 60.187 | 20 | 224 | 31   | 254  |
| AACCAAGATCAGGCTGCAAT   | 59.7   | 20 | 168 | 672  | 839  |
| GACGCCACGTGTAAAGACT    | 60.179 | 20 | 253 | 382  | 634  |
| GACTCGCAAAGACTTGAGGG   | 59.989 | 20 | 151 | 36   | 186  |
| GTGACGTGCTGGTTGTCCTA   | 59.751 | 20 | 217 | 1035 | 1251 |
| TGACAATTGCAAATATGGCG   | 60.474 | 20 | 218 | 2    | 219  |
| GCTGCATCGATGTATTGTGG   | 60.104 | 20 | 197 | 1931 | 2127 |
| ACCCTGACCATTTTCTCCCT   | 59.795 | 20 | 240 | 692  | 931  |



|                        |        |    |     |      |      |
|------------------------|--------|----|-----|------|------|
| ATCCAAAGCCTGGAGACCT    | 60.074 | 20 | 279 | 12   | 290  |
| ATCAAACACAGCGCTATCCC   | 60.103 | 20 | 210 | 3    | 212  |
| GCGACTTTTCAGTTCCAGC    | 60     | 20 | 224 | 733  | 956  |
| CATTTGCAGATGCTGATGCT   | 59.979 | 20 | 204 | 1078 | 1281 |
| GTAAATGCGTGTGAGTGCCT   | 59.794 | 20 | 200 | 47   | 246  |
| GCAAAATACCCTGAGTGGGA   | 59.933 | 20 | 176 | 284  | 459  |
| CTGACATGGAAAGCACCCCTA  | 58.722 | 20 | 267 | 266  | 532  |
| ATTCATCAAACCCAGTTCGC   | 59.939 | 20 | 220 | 29   | 248  |
| ATAGCCAAGGCAGCTCTCAA   | 60.118 | 20 | 268 | 1830 | 2097 |
| ACCCATGAGCTGGAAGACAA   | 60.656 | 20 | 208 | 263  | 470  |
| CTAGGCGGATCTAGGCAGGT   | 60.743 | 20 | 206 | 23   | 228  |
| CATCGCTCCCAAAAATGTCT   | 60.074 | 20 | 191 | 212  | 402  |
| AAAGCGGATTTTAAACCCT    | 60.095 | 20 | 236 | 2182 | 2417 |
| ATGGGACATTTTTAATTTTGCC | 59.972 | 23 | 233 | 1480 | 1712 |
| TTTTCGTGGATATAATTGGGC  | 58.817 | 21 | 174 | 64   | 237  |
| AGACCTCCGCCACCATCTAC   | 61.449 | 20 | 236 | 4779 | 5014 |
| GAAGGGAAAGAACCTTTGGG   | 59.912 | 20 | 257 | 1283 | 1539 |
| TCGCTCTTAACCCACAACCT   | 59.734 | 20 | 118 | 271  | 388  |
| GCATGCATCTGTCGGATCTA   | 59.788 | 20 | 169 | 338  | 506  |
| GGAAATAAGGAGTTGTTATGA  | 60.434 | 25 | 135 | 2767 | 2901 |
| TTATTTTCTCTGTTGCGGGC   | 60.209 | 20 | 254 | 53   | 306  |
| TTTTACTTTGGCCGAATTGTCT | 60.004 | 22 | 118 | 290  | 407  |
| TTAAATTTTCGAACGCCTGC   | 60.205 | 20 | 180 | 161  | 340  |
| ATTTTTGGCATTGAAGCTGG   | 60.074 | 20 | 234 | 98   | 331  |
| AGCTCCAATAGTTGCTTCGG   | 59.476 | 20 | 191 | 1    | 191  |
| ACTGCGCACACTTTGTTTTG   | 59.951 | 20 | 245 | 2114 | 2358 |
| GCCGATTTCTTCACTCCCT    | 60.578 | 20 | 140 | 120  | 259  |
| CAAAGGCCCAATGGTTAT     | 59.685 | 20 | 137 | 2168 | 2304 |
| GGAAACACGTTGTGGTAGGG   | 60.269 | 20 | 273 | 1444 | 1716 |
| TGGCTTTGGTAGGCTTTCAT   | 59.708 | 20 | 195 | 1702 | 1896 |
| CGTGGAAATATTTGCATTGCC  | 61.218 | 20 | 147 | 177  | 323  |
| CGTCATCTCATACTGTTGCCA  | 60.687 | 20 | 242 | 456  | 697  |
| TCACATTTGGATGGGAAACA   | 59.75  | 20 | 258 | 2010 | 2267 |
| TGCAAATGATTCCCACCTTT   | 60.309 | 20 | 250 | 3997 | 4246 |
| AAATGAAGATCGGTTGCCAG   | 60.074 | 20 | 214 | 21   | 234  |
| GCGGAAATTAACCACAACCA   | 60.732 | 20 | 148 | 7    | 154  |
| CGCGTTACGAATCCAAGTTT   | 60.131 | 20 | 192 | 607  | 798  |
| GCATGTTGTAACGACCCAAA   | 59.444 | 20 | 267 | 4    | 270  |
| GCGGAATCACATTAGCATT    | 59.929 | 20 | 217 | 281  | 497  |
| TTTCTCTTTTTGGTTGGTGAA  | 58.856 | 22 | 185 | 210  | 394  |
| GGACGCATCAGGTATAAAAAGG | 58.593 | 21 | 241 | 5    | 245  |
| CGCATCTGATTTTTGCAATC   | 59.261 | 20 | 240 | 1616 | 1855 |
| GAAGAAACCCCTTTTTCTTCTC | 59.682 | 24 | 250 | 590  | 839  |
| TCTTTATTTTAGCCGCACCC   | 59.212 | 20 | 127 | 333  | 459  |
| ATGGATGGTGGTATTCCAT    | 59.869 | 20 | 263 | 295  | 557  |
| TGTTCATAACGATTGGAAAAA  | 59.063 | 21 | 271 | 73   | 343  |
| TTGAACTCCCCTCTCTCTCG   | 59.525 | 20 | 164 | 117  | 280  |
| CGCCCCGTATTTTGAATTTAT  | 60.05  | 21 | 277 | 1431 | 1707 |
| AGTTTGGCCTTGCATTTGAT   | 59.574 | 20 | 162 | 1952 | 2113 |
| TCCACCAAGCTTACACAACA   | 57.736 | 20 | 176 | 608  | 783  |
| AAGCGTTGTCGTTTCTTTGG   | 60.284 | 20 | 239 | 252  | 490  |
| ATTGGCCTAGCCTTTTGTGA   | 59.708 | 20 | 272 | 1638 | 1909 |
| TTGCTTTCCGAATCTGTGA    | 59.395 | 20 | 251 | 540  | 790  |
| TCGTGTTTGTCTTGTGCGG    | 59.734 | 20 | 269 | 249  | 517  |
| CCCCCTAAACCGTAAATCAA   | 58.805 | 20 | 201 | 9    | 209  |
| TGAAGTTGATCAAGCAAGGG   | 58.847 | 20 | 213 | 1175 | 1387 |
| TCAACATTAATGGCGTCGAA   | 60.073 | 20 | 266 | 4526 | 4791 |
| CGATCGTAATTGATCTACGTCC | 61.213 | 23 | 264 | 93   | 356  |

|                        |        |    |     |      |      |
|------------------------|--------|----|-----|------|------|
| GTTGGTGCCAAAATTGCTCT   | 60.118 | 20 | 223 | 5    | 227  |
| ATTACGAGCCACGGCTACAG   | 60.292 | 20 | 234 | 66   | 299  |
| CGTAATCGGCAACTCATTCA   | 59.688 | 20 | 250 | 1081 | 1330 |
| GAAAAGCCGAATGCAGAAAG   | 59.96  | 20 | 172 | 1116 | 1287 |
| AGGATAAAGGGGGCGAATG    | 61.15  | 19 | 280 | 175  | 454  |
| GATAGAAAAGATGGCGACGG   | 59.668 | 20 | 113 | 58   | 170  |
| TGTTTGGGGCTTCTTCTCAT   | 59.67  | 20 | 185 | 3659 | 3843 |
| AAGGCTATCGTTGCTTCC     | 60.582 | 20 | 244 | 283  | 526  |
| TACAAGGCCCGACTTGAGTT   | 59.734 | 20 | 224 | 32   | 255  |
| GAACCAGTAGTTCCGAAGCG   | 59.875 | 20 | 265 | 499  | 763  |
| ACACCCTCACCTCCCCTC     | 59.888 | 18 | 173 | 90   | 262  |
| ATATAGAAGCAGGGCGCAA    | 59.838 | 20 | 272 | 388  | 659  |
| ATTACGTAAAAATGGGTTATTA | 57.717 | 27 | 165 | 491  | 655  |
| AACGTGACATGTTGCTGAGG   | 59.751 | 20 | 201 | 837  | 1037 |
| GGATCCGATGTGGGATCATA   | 60.514 | 20 | 122 | 358  | 479  |
| TTCGAAGATCAACGGACGAT   | 60.603 | 20 | 138 | 9    | 146  |
| AAATAAGGAGGTGTTATGAAG  | 59.323 | 24 | 253 | 120  | 372  |
| CCCATGTAAATAGCCGTTGG   | 60.202 | 20 | 253 | 24   | 276  |
| TGATTTGTTGGGGCTTTAGG   | 59.931 | 20 | 254 | 468  | 721  |
| AAACAAGAATTCGGCATCGT   | 59.574 | 20 | 181 | 283  | 463  |
| CCACCATCTTGTAGGTGCGT   | 60.134 | 20 | 145 | 1786 | 1930 |
| TGAGTTTGCATCTAAGGAGGT  | 59.378 | 22 | 272 | 500  | 771  |
| TGAGGATACTCGATTTACGG   | 60.081 | 21 | 233 | 264  | 496  |
| GAGAAGGGTTATCACTTGAAT  | 57.473 | 24 | 277 | 77   | 353  |
| CTGCAATAATGGCTGCATTG   | 60.237 | 20 | 278 | 2703 | 2980 |
| CGTTTAAGCCAATATCATTGTT | 60.247 | 24 | 278 | 478  | 755  |
| TCTCCTTCTGCGCACTTTT    | 60.132 | 20 | 200 | 269  | 468  |
| TGAGTCCATTCCGCATTTAA   | 59.112 | 20 | 200 | 120  | 319  |
| TCAGAGGAAAACAGAGGCTG   | 58.158 | 20 | 141 | 84   | 224  |
| ACCTTGATTTCTTTGTGGCG   | 60.11  | 20 | 236 | 109  | 344  |
| CGTTAGGCTCAGGAGTGAAGA  | 59.624 | 21 | 100 | 4    | 103  |
| CAGGATTCGTATCGCTTCC    | 59.668 | 20 | 234 | 5    | 238  |
| CCCAAATGAGCATCTCAGAAA  | 60.199 | 21 | 216 | 310  | 525  |
| TCTTTTGGGGCAGTGAATCT   | 59.67  | 20 | 194 | 577  | 770  |
| TGTTTAACTCCCCTAATGCAA  | 58.731 | 23 | 207 | 25   | 231  |
| TTTCCATTTCCATGGTACGTT  | 59.192 | 21 | 259 | 2248 | 2506 |
| GATGATAGAAGGGGGCATGA   | 59.854 | 20 | 247 | 1937 | 2183 |
| AATCCAGCAATTTGCCTTGT   | 59.574 | 20 | 158 | 2621 | 2778 |
| AATAGTTTGTACCCGCACC    | 59.859 | 20 | 190 | 343  | 532  |
| GTCCCAAACATGCAACTCC    | 60.362 | 20 | 274 | 773  | 1046 |
| ACAATTTGGTGATTGCATGG   | 59.251 | 20 | 239 | 1266 | 1504 |
| CATCTCATTCCAAGTCTCCCA  | 60.058 | 21 | 218 | 630  | 847  |
| ATGGTGGGAGCCTATAGCAA   | 59.551 | 20 | 255 | 18   | 272  |
| GCATTGGGACACCTAAGCAT   | 59.962 | 20 | 241 | 513  | 753  |
| CAATATTACAATGGCCAAGAG  | 57.725 | 23 | 154 | 93   | 246  |
| AGAAACTCCCTTGGGTGAGAG  | 59.725 | 21 | 126 | 314  | 439  |
| GGTTTGTTTTAGGCCACG     | 60.35  | 19 | 197 | 4    | 200  |
| TCTTGATGCATTTTGGAGCTT  | 59.837 | 21 | 212 | 37   | 248  |
| TGAAACGGACAAACGATGAA   | 60.088 | 20 | 228 | 77   | 304  |
| AAAAGGGAAAAACCCTCAGC   | 59.571 | 20 | 273 | 287  | 559  |
| CCCGAAATACCCTTCGTGTA   | 59.817 | 20 | 275 | 83   | 357  |
| AAGGGTGATGTCGCACTTCT   | 59.727 | 20 | 267 | 55   | 321  |
| GGATGATGCCTTCAAGGGTA   | 59.894 | 20 | 230 | 466  | 695  |
| CACCCAACCTCAGTCAAGGCT  | 60.298 | 20 | 236 | 587  | 822  |
| ACATGCTAGAGGTGACGTTTT  | 59.309 | 22 | 232 | 1631 | 1862 |
| TTTTGTCTTTTGGGATTCCG   | 59.91  | 20 | 208 | 2086 | 2293 |
| TGGCAATAAATCCAACCCAT   | 60.016 | 20 | 249 | 371  | 619  |
| ATGAGTAGCAGCAACGAGCA   | 59.77  | 20 | 143 | 592  | 734  |

|                         |        |    |     |      |      |
|-------------------------|--------|----|-----|------|------|
| TGGTGTACAGAGTGCATGTGA   | 58.719 | 21 | 195 | 258  | 452  |
| GCGAATATAACCCGCTCTGA    | 60.196 | 20 | 220 | 43   | 262  |
| CCTTGGGCGTTGATCTTAAA    | 60.067 | 20 | 131 | 87   | 217  |
| GCAGGAGAGATAGGGGGAAG    | 60.169 | 20 | 264 | 18   | 281  |
| TTCAGTTGGTCAGCAAAACG    | 59.881 | 20 | 150 | 42   | 191  |
| GCGCAGATCTAATGGTCCAG    | 60.765 | 20 | 178 | 205  | 382  |
| GGCAACATAATCAGCCATCC    | 60.304 | 20 | 145 | 9    | 153  |
| TTTCGCACGCATTAAATCAG    | 59.842 | 20 | 171 | 331  | 501  |
| TGTGTGATGTTGGAGTTGGG    | 60.416 | 20 | 187 | 94   | 280  |
| GAATCAGTGGCTTCCACGTT    | 60.119 | 20 | 243 | 239  | 481  |
| TTATATTTTCAGGGGGAGGGG   | 59.971 | 20 | 187 | 243  | 429  |
| CCTTCACTCCCCCTCTCTCT    | 59.801 | 20 | 219 | 1849 | 2067 |
| TTCTTATTTCTCACTTTAAGACC | 58.093 | 27 | 215 | 452  | 666  |
| AAAAACCCTTCTGAAACCCG    | 60.324 | 20 | 172 | 413  | 584  |
| TTTTGGGTGTTATGCACACG    | 60.415 | 20 | 245 | 71   | 315  |
| ATGGGATTCACCTGCCTTC     | 59.878 | 19 | 138 | 8    | 145  |
| TAAACAGGCTTCGGGCTAAA    | 59.847 | 20 | 269 | 200  | 468  |
| ACCCACCAACATCACCAAAT    | 59.95  | 20 | 218 | 58   | 275  |
| TATGGGGCGTTTTATTTCC     | 60.848 | 20 | 247 | 157  | 403  |
| ATAGTCCCGCTTGTGCTTGT    | 59.763 | 20 | 250 | 44   | 293  |
| TCGCCTAACTTATGCAATGAA   | 59.753 | 22 | 159 | 228  | 386  |
| GATGGTTACATCGTCCACCC    | 60.057 | 20 | 279 | 147  | 425  |
| TCGTGTGGTTTTGAAGCAAG    | 59.881 | 20 | 242 | 260  | 501  |
| ACCACCGGCTAAACCAGTC     | 59.981 | 19 | 211 | 14   | 224  |
| GATATGATTTTTGCGCGGAGT   | 60.067 | 20 | 225 | 33   | 257  |
| CAATTTTCGGCAGCATTACA    | 59.702 | 20 | 230 | 358  | 587  |
| AGGGGGTTATCACCTGATCG    | 61.095 | 20 | 135 | 1262 | 1396 |
| TAGAGTTCCAAGAGGGGGCT    | 60.204 | 20 | 199 | 14   | 212  |
| GGCAACAAGAAGAAAATCGC    | 59.829 | 20 | 252 | 391  | 642  |
| CACTACTCATCATCCTCTCTTC  | 57.758 | 25 | 165 | 883  | 1047 |
| CTGCAGACGTTTCAAGGTGA    | 60.025 | 20 | 216 | 731  | 946  |
| TCATTTATGAAGCAAGGGGG    | 59.894 | 20 | 106 | 32   | 137  |
| AAGTTGGGGATGTAGGGGTC    | 60.052 | 20 | 144 | 3881 | 4024 |
| AGCGAGATCTTCGTCCATTT    | 58.889 | 20 | 130 | 126  | 255  |
| AAATGGCGTCTGTTCCCTTA    | 59.569 | 20 | 201 | 23   | 223  |
| ATGATCATTGTTTCATGCCA    | 59.89  | 20 | 210 | 2461 | 2670 |
| TCTGAAAATTTTTGCCACC     | 59.916 | 20 | 205 | 39   | 243  |
| GGGGCCACAAAATATTCCTT    | 60.02  | 20 | 163 | 499  | 661  |
| TCATGATCGGTGAAGATTGG    | 59.451 | 20 | 215 | 10   | 224  |
| GCGAAAGACATACGGGGTTA    | 59.96  | 20 | 262 | 32   | 293  |
| ACTCGAAGAGTAGCGGCTGT    | 59.261 | 20 | 268 | 63   | 330  |
| ATCACGTGCACCGTCATCTA    | 60.144 | 20 | 184 | 321  | 504  |
| CCACGAGATCAAGAATGGAA    | 58.643 | 20 | 239 | 12   | 250  |
| CCTTTCAGTCAACAGGCCAT    | 60.111 | 20 | 273 | 1097 | 1369 |
| TTCAGCCCACATATGTTCCA    | 59.924 | 20 | 105 | 35   | 139  |
| CCCAACCCACGCAATAATTT    | 61.799 | 20 | 271 | 20   | 290  |
| CGGAGAACCTGAATTGATCTG   | 59.679 | 21 | 275 | 737  | 1011 |
| TGGATCTGGATCATCAATGC    | 59.409 | 20 | 245 | 117  | 361  |
| TTGGGTTGCTGAAAATAGGC    | 60.074 | 20 | 240 | 24   | 263  |
| AGGCCCCGAGCTAAAAACATT   | 60.095 | 20 | 151 | 57   | 207  |
| GAATATTGTGCCTAGGTGGCT   | 58.226 | 21 | 177 | 30   | 206  |
| TGTGATTCTGAAAAATAGATCC  | 57.059 | 24 | 203 | 321  | 523  |
| ATCGAAAGACGAACACGCTT    | 59.882 | 20 | 219 | 586  | 804  |
| GAAGATACTTCATGCTTGTA    | 58.527 | 25 | 172 | 371  | 542  |
| TTGTGGGACAAGCAAATGAA    | 60.088 | 20 | 273 | 474  | 746  |
| AACATGCACTTTCATTCGTGTT  | 59.545 | 22 | 231 | 47   | 277  |
| TAGCGGGGTCTTTGTGGATA    | 60.46  | 20 | 112 | 334  | 445  |
| AAGGGAATCCACAATGCAAG    | 59.933 | 20 | 248 | 202  | 449  |

|                         |        |    |     |      |      |
|-------------------------|--------|----|-----|------|------|
| CCTAACCCCACTAATGACCC    | 58.24  | 20 | 146 | 0    | 145  |
| ACATGGAACAACATTGACGC    | 59.425 | 20 | 256 | 146  | 401  |
| ATTTGGTCTCTTCCCCTCGT    | 59.935 | 20 | 271 | 678  | 948  |
| TGTTCCGAATCTTCGTCCAT    | 60.461 | 20 | 169 | 4    | 172  |
| ACCTCCGGATATCTGGTTCC    | 60.154 | 20 | 201 | 28   | 228  |
| CAGTCGGCCGTTGTTTATTC    | 60.502 | 20 | 160 | 269  | 428  |
| AAACCCTTGAAACAAATAAAA   | 58.86  | 25 | 259 | 45   | 303  |
| AGTTGGTGGAGGGTTTTCT     | 59.834 | 20 | 216 | 102  | 317  |
| TCGAATTGAAGTTAAAGCTTAC  | 59.062 | 26 | 132 | 275  | 406  |
| CACGTGATTTGCTTGGAGAA    | 59.84  | 20 | 132 | 47   | 178  |
| TGAAGCCTTTAAATGGGCAC    | 60.074 | 20 | 205 | 376  | 580  |
| CACCCATTCAATCCCTCATT    | 59.605 | 20 | 138 | 196  | 333  |
| GGACACAACAGAGGGGAGAA    | 60.088 | 20 | 240 | 349  | 588  |
| GGCGAATGCTATGCATTTTT    | 60.068 | 20 | 253 | 690  | 942  |
| TTCTTGGTGGCGGTAGGTAG    | 60.125 | 20 | 223 | 178  | 400  |
| GGTGTGGCCGAAAGTTTTA     | 59.975 | 20 | 101 | 6    | 106  |
| TGCTCTCTCATTGTAATCTCTCT | 59.688 | 25 | 229 | 760  | 988  |
| TTGTTGTGGTGCCTTTTCAT    | 60.011 | 20 | 235 | 415  | 649  |
| CATTGTCGAATCCTTCCGTT    | 59.933 | 20 | 132 | 1163 | 1294 |
| TGCTATTCTTGTGAGGGGGT    | 59.55  | 20 | 241 | 211  | 451  |
| TCACGCAACACAAACCCTAC    | 59.615 | 20 | 239 | 131  | 369  |
| GCCTTCCCCATTGCTAAGTT    | 60.451 | 20 | 157 | 13   | 169  |
| AAAGAGAGCTGCAAATGGGA    | 59.955 | 20 | 132 | 64   | 195  |
| ATTGGGGAGGATAAAGGACG    | 60.145 | 20 | 112 | 65   | 176  |
| CCTGGAAACAAAGAAGCACC    | 59.711 | 20 | 280 | 701  | 980  |
| CGTCGTTCTTCAGAGCCCTA    | 60.529 | 20 | 168 | 12   | 179  |
| CTCCAGCAATTCAGCTTCC     | 59.955 | 20 | 172 | 75   | 246  |
| ACACTTAAGGGGGTTATTAGTC  | 59.26  | 24 | 151 | 1203 | 1353 |
| GCTGCTGTATTAACCGAACG    | 59.793 | 21 | 257 | 511  | 767  |
| TAAGGGTTATCACCGGATCG    | 59.778 | 20 | 238 | 1    | 238  |
| TTTCTCAGTCAAAGTACAACCT  | 59.861 | 24 | 237 | 14   | 250  |
| TGGACGCACAAAGTATGGAA    | 60.111 | 20 | 243 | 49   | 291  |
| TGAGGGCAGTCAAAAATTCG    | 61.137 | 20 | 215 | 2    | 216  |
| GTGGTTGAAACCAGATCGAAA   | 59.963 | 21 | 276 | 1348 | 1623 |
| TCCACGGGAGAGAATGAGAG    | 60.34  | 20 | 177 | 5    | 181  |
| CCCCAAACAACGAAATGAAT    | 59.662 | 20 | 193 | 221  | 413  |
| AGAACGGAAAATAGGGCGAG    | 60.573 | 20 | 194 | 194  | 387  |
| TTGTGGCATTCTTGACCAA     | 60.088 | 20 | 176 | 232  | 407  |
| ATTTTATTGCAGCAACCCCA    | 60.323 | 20 | 194 | 732  | 925  |
| TCCCTCCACCCTCTATTT      | 60.264 | 20 | 280 | 322  | 601  |
| TTGTAATCGGACCGTTTTTC    | 59.801 | 20 | 237 | 360  | 596  |
| CACCTTCTGGACTCAGACGA    | 58.964 | 20 | 267 | 250  | 516  |
| GTTTACGGTTGGCGTTGTTT    | 59.904 | 20 | 138 | 240  | 377  |
| ATATCGGCCGTCAGATTGAG    | 60.059 | 20 | 270 | 271  | 540  |
| ATAGGGTCATGCGTGTGTA     | 59.992 | 20 | 193 | 74   | 266  |
| TGCGTTTTGACGATATATAGTG  | 60.194 | 26 | 169 | 1279 | 1447 |
| CCCAAATTTTCTACCGCCTT    | 60.305 | 20 | 243 | 1027 | 1269 |
| GAGCGATGTCGAATCACAAG    | 59.399 | 20 | 230 | 69   | 298  |
| AAGTAGTCCTTTCTCGGGC     | 59.713 | 20 | 242 | 124  | 365  |
| TAGCCGAGAAGAACCTTGA     | 59.948 | 20 | 182 | 80   | 261  |
| TCCTGCCACATGTAATGGAA    | 59.924 | 20 | 175 | 6012 | 6186 |
| AATCGCTCAATCACTTCATGG   | 60.088 | 21 | 240 | 2790 | 3029 |
| AACAAACAAGCCCCCTTTC     | 60.476 | 20 | 202 | 529  | 730  |
| TTGGCCTGTTACGAATCAAGT   | 59.623 | 21 | 161 | 12   | 172  |
| CTTTGCATCTTAGCGAGTTGG   | 60.025 | 21 | 254 | 936  | 1189 |
| ACCAACTATGGCCAACCAAC    | 59.717 | 20 | 260 | 237  | 496  |
| TGGAATTTGGTTTTTGTAATTC  | 59.797 | 24 | 250 | 267  | 516  |
| TTAGTAGCTTCGGGGTGCAT    | 59.73  | 20 | 239 | 196  | 434  |

|                        |        |    |     |      |      |
|------------------------|--------|----|-----|------|------|
| TCATCAAACCTGCACCAAAA   | 60.088 | 20 | 256 | 470  | 725  |
| CGAGGAATACGAAGAGTCGC   | 59.978 | 20 | 203 | 39   | 241  |
| CATCGAGCCCACCTTAGTGCT  | 60.419 | 20 | 249 | 990  | 1238 |
| TGAATTCTGTGGGAAGAGCA   | 59.369 | 20 | 200 | 19   | 218  |
| TCGTATGCATGTCATGGAGG   | 60.504 | 20 | 199 | 706  | 904  |
| GTTAGGAAATAAGGAGGTGTT, | 57.059 | 25 | 133 | 1309 | 1441 |
| GGTTTTCTTGCCAAAATGG    | 59.429 | 20 | 206 | 432  | 637  |
| TCGATCCATATGGCAAGAGAA  | 60.559 | 21 | 227 | 12   | 238  |
| TTCATTCCATTTTGTCCGAA   | 58.94  | 20 | 272 | 20   | 291  |
| TTGCGAATATAAAAATGAGAA/ | 59.158 | 25 | 237 | 22   | 258  |
| AAGTAGAGGCGGTTCGGAGTT  | 60.268 | 20 | 234 | 1398 | 1631 |
| GGTGTGTTGGCATTGCTAGA   | 59.722 | 20 | 194 | 1014 | 1207 |
| AAGGAGGTGTTATGAAGGGAT  | 58.028 | 22 | 199 | 235  | 433  |
| TTTTCTCTCCCCTCTTGGT    | 60.045 | 20 | 272 | 321  | 592  |
| CGCTGGTCTTGGAGATCAAT   | 60.218 | 20 | 254 | 1137 | 1390 |
| TCAATTACATTCCCGTGGGT   | 60.051 | 20 | 234 | 1253 | 1486 |
| TCAACAGCAATGAATTTGTGG  | 59.576 | 21 | 245 | 132  | 376  |
| TCAGCTGCGATGTCAATTC    | 59.955 | 20 | 174 | 30   | 203  |
| CGGTGACGGTTGAGAATGA    | 60.671 | 19 | 152 | 51   | 202  |
| TTGAAGTAGAGGGAGGGGCT   | 60.204 | 20 | 184 | 3737 | 3920 |
| AGCGTATTTCTTGATTGCCG   | 60.23  | 20 | 138 | 687  | 824  |
| AGCGTCCCTATTCCCACTC    | 60.464 | 20 | 196 | 657  | 852  |
| TGCGTCTCTCGACGTTACAC   | 60.056 | 20 | 226 | 64   | 289  |
| TGTGACGTGGAAGAGAGAGAA  | 59.64  | 22 | 256 | 2123 | 2378 |
| TCAGTGTATCGAGCCTCTCA   | 58.61  | 21 | 278 | 17   | 294  |
| CACTCAATCGGTTGTACCACAT | 59.78  | 22 | 229 | 220  | 448  |
| GAATGGAGGAGGATGCTTGA   | 60.158 | 20 | 227 | 4    | 230  |
| CCAAAACAAAACACACACGG   | 59.898 | 20 | 240 | 5852 | 6091 |
| TGAAAAGAGAAGCCCTCCAA   | 59.926 | 20 | 232 | 551  | 782  |
| ACGAAAAGCAAATTCATCA    | 59.578 | 21 | 274 | 9    | 282  |
| CGAGTGGTTTGGGAAGAAGA   | 60.224 | 20 | 262 | 0    | 261  |
| AGGGCCAGAAAACCAAGAT    | 59.94  | 20 | 272 | 345  | 616  |
| TGCTGGGATACACAGGTTT    | 60.375 | 20 | 171 | 97   | 267  |
| GCCCTTGATTTCCAAGATCC   | 60.777 | 20 | 125 | 16   | 140  |
| TTCATGATCAAATCTTATGAAC | 58.497 | 24 | 155 | 30   | 184  |
| GTTTGGTAGGCCGAGTCTGA   | 60.255 | 20 | 205 | 532  | 736  |
| TGTTGGTGGATTGTGCATTT   | 59.823 | 20 | 253 | 46   | 298  |
| ACCATATTTAAGGGTTATCACC | 57.552 | 24 | 218 | 569  | 786  |
| GGGCAAAACAAAGAAAGACG   | 59.724 | 20 | 279 | 3943 | 4221 |
| AGGTCTTGACAGGTTGTGGG   | 60.002 | 20 | 272 | 17   | 288  |
| GATGAGATCAATGCCCCAGT   | 59.893 | 20 | 137 | 3188 | 3324 |
| CCAGTTCAAAAGCATCACCA   | 59.691 | 20 | 235 | 1252 | 1486 |
| AAAAACAACATCCAGCCCAC   | 59.836 | 20 | 168 | 3047 | 3214 |
| TGCCATGTTCTGCTTCTCTT   | 58.597 | 20 | 239 | 1053 | 1291 |
| TTCAACCTTTTGTTTTGCCA   | 59.178 | 20 | 241 | 645  | 885  |
| CAAGTTTCACGAACGAATGC   | 59.322 | 20 | 271 | 886  | 1156 |
| CAGAACCCTCAAATCCCTCA   | 60.042 | 20 | 246 | 8135 | 8380 |
| TGAAGAAATGGGGTCGACAT   | 60.317 | 20 | 235 | 43   | 277  |
| CAACGAAGGATTTGGTGTTGT  | 59.883 | 21 | 274 | 3247 | 3520 |
| GATTGGACTTGTTTCTCGGC   | 59.676 | 20 | 227 | 31   | 257  |
| TCTTCCAAGAATGGAGCAGC   | 60.483 | 20 | 204 | 941  | 1144 |
| TCATTTGCCCCCGTATTTTA   | 60.144 | 20 | 176 | 1    | 176  |
| CCACGAATCATGATCGAAAA   | 59.474 | 20 | 230 | 2330 | 2559 |
| AAGATATATAATTCATTGAGCT | 57.982 | 27 | 104 | 176  | 279  |
| TGATTTGAGAGAAGCAGTAGGT | 59.517 | 22 | 117 | 234  | 350  |
| TTAACCCACCAGAACCGAAG   | 59.964 | 20 | 245 | 627  | 871  |
| AATGGAGGCACTGGAGAATG   | 60.073 | 20 | 100 | 1926 | 2025 |
| CACCTTAAGATCTGCTCCGC   | 59.978 | 20 | 238 | 127  | 364  |

|                         |        |    |     |      |      |
|-------------------------|--------|----|-----|------|------|
| GGCAGTCACTGGAAGGAAGA    | 60.386 | 20 | 268 | 1168 | 1435 |
| CACCCGAAAATGAGTTATTATT  | 60.438 | 25 | 130 | 278  | 407  |
| GGCATTGCAGAGTTGAGAAA    | 59.002 | 20 | 210 | 4712 | 4921 |
| TGCGTTTTGACGATATATAGTG  | 59.092 | 25 | 217 | 302  | 518  |
| AAATAGCTTATTGAATTTGATT  | 58.677 | 26 | 280 | 22   | 301  |
| CCAGATGTGAATGGGTCACT    | 58.349 | 20 | 183 | 130  | 312  |
| CCATTTCCATTTCCAAACCA    | 60.535 | 20 | 154 | 494  | 647  |
| CACCACGGAAGAGAGGTAGG    | 59.715 | 20 | 160 | 73   | 232  |
| TCCATTCAAATGCGAATACAA   | 59.018 | 21 | 275 | 1550 | 1824 |
| TTTTGCCTGATATTTGTATAACC | 57.88  | 24 | 272 | 891  | 1162 |
| TGGAGTAAGGAGGTTGAGGG    | 59.133 | 20 | 188 | 13   | 200  |
| GCTGACTAATCCACAATTGCC   | 59.588 | 21 | 234 | 9    | 242  |
| CTCTCCCTCTCTCTCTCGG     | 58.285 | 20 | 149 | 122  | 270  |
| TTAATCTTGCATTGGACGCA    | 60.215 | 20 | 122 | 2    | 123  |
| TGGAAGATCCGAGAACCACT    | 59.655 | 20 | 257 | 1129 | 1385 |
| TTGTTGAACCGTGTGCAAAAT   | 60.011 | 20 | 207 | 41   | 247  |
| GCTGACATGGCTTCGTATCA    | 59.83  | 20 | 180 | 1791 | 1970 |
| AACAACCTGCACCACACCGT    | 60.063 | 19 | 216 | 837  | 1052 |
| CTTCCATCTGCACCTTCCAT    | 60.073 | 20 | 217 | 51   | 267  |
| CTGTGTGCTTTATTGGAGCG    | 59.488 | 20 | 278 | 10   | 287  |
| CCGTTGAAACACGAGATGTG    | 60.152 | 20 | 120 | 217  | 336  |
| GAACCGCCGAAAAGAATTA     | 61.263 | 20 | 267 | 6    | 272  |
| ACACTTTTCAGCCATCTCCG    | 60.255 | 20 | 220 | 954  | 1173 |
| GCCTAAGTAATGGCGCAGAC    | 59.873 | 20 | 144 | 228  | 371  |
| GAAGCCGGGTGTCAAATAAA    | 59.938 | 20 | 266 | 518  | 783  |
| CAATGCCTAGTTTACCCCA     | 59.817 | 20 | 209 | 687  | 895  |
| TCCGGCCAAATTAAGAAA      | 59.538 | 20 | 102 | 781  | 882  |
| ACCAACCTCCATTGAAGAGC    | 59.141 | 20 | 224 | 66   | 289  |
| TATGCTCGCTGGATTACGTG    | 59.856 | 20 | 251 | 506  | 756  |
| TTCCGCTTTAGGCATGAGC     | 60.352 | 20 | 267 | 5    | 271  |
| AATCCCTTTCTCCTTTCCA     | 59.875 | 20 | 101 | 57   | 157  |
| GCCGTAAACAATGGTCGCTA    | 61.019 | 20 | 190 | 203  | 392  |
| CAGATGTGGACGGGTCACTA    | 59.545 | 20 | 219 | 30   | 248  |
| AACGCAATTATCCATTTGCC    | 59.801 | 20 | 257 | 226  | 482  |
| TGGTTGATCGTAATTGATCT    | 57.168 | 21 | 131 | 18   | 148  |
| TGAGATTTCTGGTTGCTCC     | 60.195 | 20 | 249 | 162  | 410  |
| GAGTTTGGCACTCTTGACACA   | 60.032 | 20 | 107 | 89   | 195  |
| ACCCAGGTCTCTTCAACCT     | 59.968 | 20 | 198 | 155  | 352  |
| TGCAACCATTTTGTGGAAA     | 59.946 | 20 | 241 | 43   | 283  |
| CGGATCGGAAATCCATAAAT    | 58.714 | 20 | 211 | 270  | 480  |
| CGATGGAGTTCCTCCTAGA     | 59.234 | 20 | 184 | 7    | 190  |
| ATGGGGTGAGACAAAGCAAG    | 60.111 | 20 | 251 | 142  | 392  |
| GAGTTCCCGCGTCATAAAAA    | 60.074 | 20 | 269 | 772  | 1040 |
| CCGACACAAGCTGAAGTGAG    | 59.616 | 20 | 151 | 43   | 193  |
| TCAAATCAGCGCATGAAATC    | 59.775 | 20 | 116 | 2854 | 2969 |
| GTTTTGGCATGCTAGTGGGT    | 60     | 20 | 145 | 71   | 215  |
| AGTCCCAATCTTTTCCACCC    | 60.169 | 20 | 148 | 86   | 233  |
| TTGACAAATTCCTGAAGAGC    | 60.192 | 20 | 263 | 49   | 311  |
| TTCTCTGTTCTGGCAGTGGA    | 59.545 | 20 | 207 | 106  | 312  |
| GGGCATGCCAAAATATCAC     | 60.161 | 20 | 273 | 969  | 1241 |
| CTGTGAAATTGCACGGCTTA    | 59.872 | 20 | 214 | 4    | 217  |
| TTCAAGTTTGGGGGTGTGAT    | 60.21  | 20 | 279 | 251  | 529  |
| TCAAGATTTAGGGGTTATCATT  | 58.508 | 24 | 112 | 171  | 282  |
| TTCACTTTCTTGGGGACTG     | 60.081 | 20 | 199 | 5224 | 5422 |
| TTTTGGCGGGAAAATAGC      | 60.026 | 19 | 257 | 224  | 480  |
| CTGAATTTGGAAGGAACGGA    | 60.044 | 20 | 276 | 495  | 770  |
| CCTATGGTGGTATGGTGTGG    | 58.569 | 20 | 268 | 32   | 299  |
| GTTCCATGTTACCCGTGGAC    | 60.096 | 20 | 157 | 63   | 219  |

|                         |        |    |     |      |      |
|-------------------------|--------|----|-----|------|------|
| GTATTGGGAGCAAGGCAAGA    | 60.214 | 20 | 275 | 195  | 469  |
| CACATCCTCACACACTCACAC/  | 60.697 | 22 | 242 | 2629 | 2870 |
| CCAACACAAATGAACCTGGA    | 59.389 | 20 | 213 | 21   | 233  |
| CCCACATCCCCTCTCTCTC     | 59.638 | 20 | 186 | 783  | 968  |
| CACGAACGGTATAACATCGG    | 58.917 | 20 | 270 | 708  | 977  |
| CCCTCGTATGCAATGAATCTG   | 60.475 | 21 | 254 | 369  | 622  |
| GAGGGGGTGACAGAAATGTG    | 60.363 | 20 | 266 | 39   | 304  |
| CTGATTGCTAGCTTCCCAC     | 59.978 | 20 | 118 | 21   | 138  |
| GGAACCAAGTCTTCAGATGC    | 57.288 | 20 | 237 | 67   | 303  |
| ACCGACAAAAGGTAGGCTCA    | 59.734 | 20 | 227 | 269  | 495  |
| GCATCGTGTGAAGCATTGAT    | 59.685 | 20 | 141 | 216  | 356  |
| AGTATGGATAGAAGGGGCGG    | 60.299 | 20 | 234 | 51   | 284  |
| AATGCGTCTTGGATTCCATC    | 59.9   | 20 | 170 | 60   | 229  |
| TCATTGGAATTTTCCGGGT     | 60.118 | 19 | 268 | 914  | 1181 |
| GAGCATTGATGGAGGATCG     | 60.57  | 20 | 242 | 27   | 268  |
| ACTGCCATTTTACCCTTTTT    | 58.919 | 21 | 112 | 866  | 977  |
| GCACACCACCATCGTTGTAA    | 60.436 | 20 | 235 | 102  | 336  |
| CCCACACTAATTCTAATTTTCG/ | 58.974 | 23 | 248 | 352  | 599  |
| GAAATTTTCTGGCGACGGTA    | 60.074 | 20 | 161 | 1833 | 1993 |
| AAACCACCTCCGAAAACCTTG   | 59.073 | 20 | 262 | 169  | 430  |
| TCCAATGATTGTTTGGTCA     | 59.75  | 20 | 215 | 748  | 962  |
| CACTCACAGCCAACAGGGTA    | 59.745 | 20 | 130 | 1286 | 1415 |
| TTCCAATTGCGAAAAGATTTG   | 60.061 | 21 | 165 | 77   | 241  |
| ACTCCAATGGATCGCTATG     | 59.917 | 20 | 189 | 58   | 246  |
| GCATAAGCATGGTTGAGGGT    | 59.962 | 20 | 135 | 1304 | 1438 |
| ATCTGGAAAACACGCCACA     | 60.104 | 19 | 209 | 168  | 376  |
| ATCCAAACGGCGAAGTGATA    | 60.469 | 20 | 192 | 55   | 246  |
| TCCGGCAATCTCCTTAATTG    | 60.031 | 20 | 153 | 297  | 449  |
| TCAATCCACCAATGCTTCTG    | 59.648 | 20 | 179 | 1444 | 1622 |
| TTGCAAACATTTTGAAGGACA   | 59.192 | 21 | 200 | 265  | 464  |
| ACTGGACGGAAATCGGAAG     | 60.058 | 19 | 140 | 391  | 530  |
| ACCACTGCATTCACTTTCCC    | 59.973 | 20 | 261 | 952  | 1212 |
| TTGCTCGCGAGATTTCTTTT    | 60.096 | 20 | 270 | 648  | 917  |
| CATGCCAAGTGGTGTGATCT    | 59.551 | 20 | 265 | 341  | 605  |
| GGATGAGGTTGTATTGAAACTC  | 59.891 | 23 | 142 | 59   | 200  |
| ACCCTAGCCTTTGCCTCTTT    | 59.371 | 20 | 165 | 190  | 354  |
| AGCGTTATTTTGAAGGTCTG    | 60.264 | 20 | 116 | 7    | 122  |
| AACACAGGCCACAAATGGAT    | 60.24  | 20 | 280 | 14   | 293  |
| GGGTGGCCCTCAATTTTATT    | 60.02  | 20 | 267 | 35   | 301  |
| AAGGGGAGCATTGAATGTGA    | 60.461 | 20 | 271 | 896  | 1166 |
| GAGCCTGACTTGCTTTCACC    | 59.997 | 20 | 175 | 380  | 554  |
| TTCTCTTGGTTGGTGAAGAA    | 58.955 | 22 | 210 | 22   | 231  |
| GCACCTATATACGCACGCAC    | 59.238 | 20 | 266 | 3    | 268  |
| TTGACCGATCTCATTTGAAAAA  | 59.564 | 22 | 253 | 61   | 313  |
| TCATAATCATCCAATCCAAAC/  | 57.817 | 22 | 270 | 6193 | 6462 |
| ACTTGCGGGGTTGTTAAAGA    | 59.609 | 20 | 218 | 657  | 874  |
| TGAAATAGTAACCGCCGACC    | 59.96  | 20 | 245 | 173  | 417  |
| GGAAGGATACAAAGGCTCGG    | 60.949 | 20 | 158 | 0    | 157  |
| TCAATGTTTGACGTCTCGAA    | 57.806 | 20 | 224 | 94   | 317  |
| AACCCAACCCACTACCCATT    | 60.34  | 20 | 147 | 0    | 146  |
| GGACTATTTGCCACCCAGAA    | 59.933 | 20 | 247 | 548  | 794  |
| TTGAGCGAAAAGCCAAAAGAT   | 59.96  | 20 | 192 | 3401 | 3592 |
| CGTATCAACTTTCGGAAGCG    | 60.762 | 20 | 117 | 8    | 124  |
| TTTCTGTCCCGTTTTCTTG     | 60.081 | 20 | 246 | 117  | 362  |
| CGAACATCGTTGCTGCTCTA    | 60.157 | 20 | 223 | 443  | 665  |
| GAGGACGCCCAATGATAAAA    | 59.901 | 20 | 219 | 925  | 1143 |
| ACCAAACATGCTTCTCATGCT   | 59.755 | 21 | 211 | 21   | 231  |
| ACTGGAAGAATTGGAGGGCT    | 60.074 | 20 | 208 | 104  | 311  |

|                        |        |    |     |      |      |
|------------------------|--------|----|-----|------|------|
| TTAAGCATGCACGACTCCC    | 59.814 | 19 | 261 | 745  | 1005 |
| CTTCTTCCCCGTTTTGTTCA   | 60.081 | 20 | 235 | 1026 | 1260 |
| ATTCTCCTTTTCAGCACCC    | 60.443 | 20 | 280 | 5    | 284  |
| TCCGTCTGCTTGGAGAACTT   | 59.989 | 20 | 235 | 863  | 1097 |
| CCACTCTCTCCTCTTTCTCTC  | 57.98  | 23 | 172 | 620  | 791  |
| CGTGCAGTTTCAGGAGCTTT   | 60.571 | 20 | 147 | 258  | 404  |
| TTCGCACGCTATAAAACAAGA/ | 59.916 | 22 | 128 | 670  | 797  |
| AGCAGCAGAAACCCCTTGTTG  | 60.431 | 20 | 268 | 1494 | 1761 |
| TGCCTCATTGTGTTAATTTGG  | 59.868 | 22 | 236 | 36   | 271  |
| AGGAAGATTGTGGTGGGGTT   | 60.607 | 20 | 182 | 73   | 254  |
| TGAATGGCGACAAGTTGATG   | 60.665 | 20 | 251 | 1611 | 1861 |
| TTGCGCCTAAGGAGGAGTTA   | 59.975 | 20 | 246 | 1939 | 2184 |
| GGATAGGCTAGATGACGTAGA  | 57.925 | 24 | 217 | 111  | 327  |
| TGCATTGGAAAAAGTTGTGG   | 59.561 | 20 | 238 | 311  | 548  |
| TGGAGTTTTTGCTTTCTGGG   | 60.22  | 20 | 137 | 1856 | 1992 |
| TCAGCATTTTTCGGGAGTCT   | 59.813 | 20 | 169 | 230  | 398  |
| GTTCTCATGCACCTTGGAT    | 59.934 | 20 | 259 | 859  | 1117 |
| TTGCAACATCTTGATCTCCATC | 60.081 | 22 | 260 | 98   | 357  |
| GTGTGGTGTGTTAAATGCGTG  | 59.943 | 21 | 276 | 3166 | 3441 |
| ACACCGTGCATTACAAGATGA  | 59.065 | 21 | 183 | 8    | 190  |
| CAACCCTACCTCCTTCTCCC   | 59.928 | 20 | 179 | 38   | 216  |
| TCTGAAGTTGTTCCCGAAATC  | 59.16  | 21 | 252 | 69   | 320  |
| GTACATGACCGTGTGGTCG    | 59.88  | 20 | 201 | 47   | 247  |
| TCTGAAAATCAAAGGCCAC    | 60.051 | 20 | 113 | 2115 | 2227 |
| TATTATGGGGGTGGTTCAGC   | 59.645 | 20 | 227 | 275  | 501  |
| CTGCGTCCTTCGTCGTTTAT   | 60.27  | 20 | 133 | 10   | 142  |
| AAAGAGGCATTGATCCTTG    | 59.269 | 20 | 187 | 248  | 434  |
| TCTCCATCATTGCTCCTCAA   | 59.322 | 20 | 162 | 2405 | 2566 |
| CTGTGTGATGTTGGAGGTGG   | 59.997 | 20 | 117 | 8    | 124  |
| CAAGGCTGCAGAAGTGTTGA   | 60.175 | 20 | 204 | 4485 | 4688 |
| CTGTTCAGCTATGTTTGCCG   | 59.488 | 20 | 145 | 88   | 232  |
| GTTGGGGGTTGGGTTATCTC   | 60.422 | 20 | 225 | 10   | 234  |
| CCCAAACCTGGGGAAGAAAT   | 60.159 | 20 | 241 | 680  | 920  |
| CGATCGTGAGAGGGAGAGAG   | 60.088 | 20 | 269 | 100  | 368  |
| GGTGGGTGCCTAGGTTTTCT   | 60.361 | 20 | 249 | 19   | 267  |
| ATACGAACACTGCACCACCA   | 60.032 | 20 | 218 | 430  | 647  |
| TCAAAATTAGTGTGAGCACCG  | 58.833 | 21 | 149 | 1493 | 1641 |
| ACTGAAGTCTCTCCTCCGCA   | 60.135 | 20 | 271 | 162  | 432  |
| CCATTCCATGTCACAAACGA   | 60.367 | 20 | 280 | 658  | 937  |
| CCATCGACGACAAAACAACA   | 60.552 | 20 | 110 | 492  | 601  |
| TTACCTGGACTCGAACTCGG   | 60.246 | 20 | 247 | 43   | 289  |
| AAGGGAAGGGGAAGTGAAGA   | 60.045 | 20 | 267 | 48   | 314  |
| GAAAGGAAGAATGCGAGTGG   | 59.813 | 20 | 256 | 236  | 491  |
| TAAGTTGGAGTGGAGTCGCC   | 60.255 | 20 | 226 | 19   | 244  |
| CGGGAAAAATCGAAGGAAAT   | 60.252 | 20 | 241 | 362  | 602  |
| TTAGCCTTAGCCCCAAAACA   | 59.715 | 20 | 252 | 231  | 482  |
| ATCACGAACAGGATTGGGAG   | 59.927 | 20 | 233 | 43   | 275  |
| TTCATGACGGCAAAGTCTTG   | 59.84  | 20 | 193 | 5    | 197  |
| GTCCCTAGTTAGCTCCTAGATA | 59.881 | 27 | 205 | 192  | 396  |
| CCCTCCAAGTGATGTCACAA   | 59.52  | 20 | 132 | 2759 | 2890 |
| GCACCACTGCAGAGATTTCA   | 59.992 | 20 | 151 | 16   | 166  |
| ACCTATGGTGGTATGGTGTAG/ | 57.076 | 23 | 177 | 101  | 277  |
| TTCACCCATTTCCACCAACT   | 60.21  | 20 | 203 | 42   | 244  |
| AGGGAAAAATAGCTACTCCCAT | 57.42  | 22 | 268 | 588  | 855  |
| TCTTGAAAACCTCAAGCCCA   | 60.745 | 20 | 120 | 16   | 135  |
| GGATTTACCTTTGGATGGA    | 59.727 | 20 | 162 | 18   | 179  |
| TTATTTGCACGCGCAGTAAT   | 59.379 | 20 | 252 | 37   | 288  |
| CACGCTTCTCTATCGGCTT    | 59.615 | 20 | 254 | 8    | 261  |



|                        |        |    |     |      |      |
|------------------------|--------|----|-----|------|------|
| CCTCACCACTCAAGCTTTC    | 59.844 | 20 | 200 | 118  | 317  |
| ACCCACGTTACCCACGTCTA   | 60.291 | 20 | 184 | 1094 | 1277 |
| CACCAACTGCTTTATTGCCA   | 59.729 | 20 | 236 | 468  | 703  |
| TGATGAACTCGTCAATTGGAA  | 59.112 | 21 | 242 | 429  | 670  |
| TGTTGGGTTGGTTTGACAGA   | 59.976 | 20 | 238 | 23   | 260  |
| CACGTGTGGACATCCATATCA  | 60.256 | 21 | 267 | 91   | 357  |
| TGCCGTGTAAATCCATCAAT   | 58.846 | 20 | 280 | 444  | 723  |
| CATTGCATACGATGGGCTAA   | 59.543 | 20 | 232 | 22   | 253  |
| TTCCTTGCCAAGAACAGACC   | 60.232 | 20 | 119 | 84   | 202  |
| GCAAACCCTACTTCACTCACCT | 59.682 | 22 | 246 | 52   | 297  |
| AGTTTCTTGTTTCCTACCCCC  | 58.5   | 21 | 133 | 2    | 134  |
| GGTGAAGAGCTGCCCTATCA   | 60.214 | 20 | 277 | 370  | 646  |
| GTGTTTTCGCCCCAGTAAAC   | 59.476 | 20 | 233 | 0    | 232  |
| TCGAAATCAGCATATCAAAAC/ | 59.616 | 23 | 271 | 39   | 309  |
| CTTTTGCTGGCACTTCCACT   | 60.431 | 20 | 144 | 1    | 144  |
| TTGTGTGCATGGAATTTTTG   | 58.018 | 20 | 243 | 3    | 245  |
| CACAAATTTGGGTTGCCAG    | 59.949 | 19 | 160 | 136  | 295  |
| GAATAAATGCAATCACGCCC   | 60.297 | 20 | 250 | 410  | 659  |
| GCAATGAATTAGCACCCACA   | 59.548 | 20 | 208 | 17   | 224  |
| CCAGGCTTGAGTTTCCTCAC   | 59.844 | 20 | 127 | 5    | 131  |
| AGGGAGTTGGCACCATATCA   | 60.34  | 20 | 137 | 597  | 733  |
| TTACATCAACCCGTCAACCC   | 60.615 | 20 | 276 | 797  | 1072 |
| CCCAGCGCAGACAGAATAC    | 59.41  | 19 | 280 | 41   | 320  |
| TATGATCGTCGTCTCCAAG    | 59.673 | 20 | 268 | 90   | 357  |
| AAGGTCACGGCTTTTGAAT    | 58.695 | 20 | 177 | 654  | 830  |
| AGCCAGAGACTCGGATTCAA   | 59.95  | 20 | 216 | 879  | 1094 |
| CACCAGGCAGCACTAAAAGA   | 59.072 | 20 | 141 | 1045 | 1185 |
| CCAACCTCCATTAACAACCC   | 59.146 | 20 | 231 | 4    | 234  |
| CCGATCGTGAGGCTTTTAGA   | 60.344 | 20 | 253 | 397  | 649  |
| GGAGCTGCTCTTTGAGATCG   | 60.24  | 20 | 256 | 1024 | 1279 |
| CCCGTATATTCACGACTCGTTT | 60.257 | 22 | 228 | 317  | 544  |
| AAATTATTCACACCCGCTGC   | 59.967 | 20 | 142 | 5421 | 5562 |
| TCGACACATTCAGGCAAATC   | 59.654 | 20 | 156 | 13   | 168  |
| GCCGTACGTAGCTTAATCGG   | 59.867 | 20 | 219 | 1977 | 2195 |
| CACCATTTTGTTGAGGGGTC   | 60.21  | 20 | 278 | 2458 | 2735 |
| TTTGCTTAAAATGGATCAATGG | 58.98  | 22 | 262 | 87   | 348  |
| CAAATTCTGCCCTCCTCAAC   | 59.67  | 20 | 225 | 219  | 443  |
| CTTATATACGGGGGCGGTTC   | 60.528 | 20 | 220 | 402  | 621  |
| CCAAGCCACACATCTCTCAA   | 59.831 | 20 | 261 | 246  | 506  |
| TTCCGCACCAAGATTTAACC   | 59.938 | 20 | 272 | 44   | 315  |
| TGCGTTTTGACGATATATAGTG | 59.092 | 25 | 101 | 658  | 758  |
| CCTTTGATTTGCGTTGATTG   | 59.157 | 20 | 206 | 12   | 217  |
| TTGCAGTAGCTTGTGAACGG   | 60.05  | 20 | 242 | 14   | 255  |
| TGATTGAAATATGCCACCGA   | 59.891 | 20 | 259 | 186  | 444  |
| AGGCAGCATACCCATCACTC   | 60.104 | 20 | 141 | 1983 | 2123 |
| GGAATCGTTCCATTCTTGTGA  | 59.925 | 21 | 162 | 96   | 257  |
| TCTACCCATGCAAATCAAGTG  | 58.637 | 21 | 120 | 65   | 184  |
| GATGGCTCATTTGTTCCGTT   | 59.939 | 20 | 265 | 45   | 309  |
| TGGATATTGTTGCCGTTTGA   | 59.93  | 20 | 264 | 1    | 264  |
| TTCACTCTCACACACGCACA   | 60.07  | 20 | 120 | 828  | 947  |
| ATGCCAACTTTTCCTCATGC   | 60.081 | 20 | 278 | 1772 | 2049 |
| CAGCATACAGCAGTTTCGTTT  | 58.121 | 21 | 198 | 997  | 1194 |
| ATTTACCAAGATGTCCAAGA   | 57.096 | 21 | 101 | 20   | 120  |
| AGCTTTTGCGAGTTTGGTG    | 60.42  | 20 | 204 | 50   | 253  |
| GGCAAGATATTTCCGATGC    | 59.512 | 20 | 195 | 185  | 379  |
| CGTTGCCGTTAAAGCTAGT    | 59.424 | 20 | 241 | 30   | 270  |
| GTGAGCACCCAGATTGTTT    | 59.973 | 20 | 239 | 1493 | 1731 |
| ATTTTATGGGACGGAGGGAG   | 60.145 | 20 | 249 | 368  | 616  |

|                         |        |    |     |      |      |
|-------------------------|--------|----|-----|------|------|
| AGAATCCAGAAGGGCAGTTG    | 59.284 | 20 | 183 | 3235 | 3417 |
| CGCGCGTTTTTAGGGTTTA     | 61.09  | 19 | 123 | 300  | 422  |
| CCTCGACTTGACAACCTTTGCT  | 59.529 | 21 | 280 | 105  | 384  |
| TTCAAACGATTGCCATAGAGG   | 60.081 | 21 | 190 | 702  | 891  |
| TCCGGTGAATACCTCTTTGG    | 59.926 | 20 | 261 | 2194 | 2454 |
| GCAATCATCCAACCACAATG    | 59.781 | 20 | 208 | 523  | 730  |
| TTTAAGGGTTATCACCTGATTT  | 57.757 | 24 | 145 | 71   | 215  |
| CCAATCTTGTTCCGGTTCTT    | 59.028 | 20 | 202 | 9    | 210  |
| TGAAAGCGATTGTAAGCGTG    | 60.014 | 20 | 242 | 80   | 321  |
| TGCGTTTTGACGATATATAGTG  | 59.092 | 25 | 272 | 1012 | 1283 |
| TACATTATTGCGCAGACGGA    | 60.237 | 20 | 217 | 3204 | 3420 |
| AAACTCCAAAGTCCAAACTCC   | 60.012 | 22 | 128 | 0    | 127  |
| CTTTCCCTCTCCATCTCTAGCA  | 59.976 | 22 | 264 | 1095 | 1358 |
| CAAAAGATTTGGCTTTCGGA    | 60.181 | 20 | 276 | 449  | 724  |
| CCATCGTCACCTTTCTCCAC    | 60.51  | 20 | 153 | 48   | 200  |
| CCCGTTTTTCCTATTTTCGTG   | 59.447 | 20 | 178 | 78   | 255  |
| AGGTGGTGGAGTGGTGTGA     | 59.984 | 19 | 227 | 111  | 337  |
| GAGGCCAGGAGAATCACAGA    | 60.349 | 20 | 221 | 539  | 759  |
| TTTTGATGATATAGGTGTTTT   | 58.782 | 27 | 230 | 404  | 633  |
| ACACGATAAGCGACGGAAGT    | 59.763 | 20 | 157 | 3243 | 3399 |
| TTTGAAAATCTTTGGTGGG     | 59.772 | 20 | 227 | 4254 | 4480 |
| CCTTTCTCACCTAATTACAAC   | 58.153 | 23 | 183 | 3349 | 3531 |
| TGCACGATTTGACTTGCCTA    | 60.401 | 20 | 243 | 645  | 887  |
| TCTACGACCACAATTTGTCCC   | 59.845 | 21 | 171 | 515  | 685  |
| AGTGTGCCAACAAAGCATCAG   | 59.905 | 20 | 143 | 481  | 623  |
| CAAATATTAGGCCAAAAACGC   | 58.687 | 21 | 209 | 2449 | 2657 |
| TGAATTTCCATCGTTGATTTG   | 58.468 | 21 | 141 | 133  | 273  |
| TGGAGGAGAGAGAGGTGACG    | 60.54  | 20 | 106 | 469  | 574  |
| TTTCATCATAATATTGATTTTTG | 58.504 | 26 | 118 | 896  | 1013 |
| CAAATAATAGCAATGGCCGA    | 60.102 | 21 | 136 | 3806 | 3941 |
| GGGATATCTCTTGGGGCTTC    | 59.866 | 20 | 218 | 1439 | 1656 |
| GGCTCAAAGACAAGTCCCA     | 60.232 | 20 | 211 | 163  | 373  |
| CGCAGTTAGCAGGATAAGGG    | 59.861 | 20 | 260 | 1137 | 1396 |
| GCCATCGTCACAGTTTTCTT    | 60.119 | 20 | 177 | 17   | 193  |
| ACTTGTTTTGTCGTCTCCGC    | 60.299 | 20 | 103 | 2433 | 2535 |
| ATTTTGTGAATTTGGCCGTT    | 59.32  | 20 | 143 | 353  | 495  |
| CCCCTCCACTAATTCTCCCT    | 59.392 | 20 | 219 | 589  | 807  |
| GAATCCAGGTTGAGGAGTGG    | 59.505 | 20 | 181 | 30   | 210  |
| AACCCAATTTACCATCCTTC    | 60.046 | 21 | 180 | 168  | 347  |
| TGAGGGGTGGTTGAAATGAT    | 60.173 | 20 | 174 | 70   | 243  |
| CCAACGGGTAGATACCCAAG    | 59.308 | 20 | 279 | 686  | 964  |
| GTTTGAGGTCGGAGATTGGA    | 60.05  | 20 | 173 | 570  | 742  |
| CCAATCCATCAAATCCAGG     | 60.126 | 20 | 188 | 82   | 269  |
| GGTTCGGAAAAGGTTAGGCT    | 59.593 | 20 | 226 | 78   | 303  |
| CGACTTGTCGTGGTTCGATA    | 59.716 | 20 | 264 | 62   | 325  |
| CGAGAAAAACAAAATTATACG   | 59.565 | 26 | 250 | 589  | 838  |
| GTTTTTGCGTGAGAACTCA     | 59.05  | 20 | 163 | 80   | 242  |
| TGAGGATGTTTGTGGGTCAA    | 59.935 | 20 | 134 | 1804 | 1937 |
| CAAGAGACGCATTAAGACGC    | 58.677 | 20 | 218 | 1326 | 1543 |
| TCCATTCACACCAAGAAGGG    | 60.892 | 20 | 209 | 108  | 316  |
| CTTCGCATTCTCTCATTCCC    | 59.773 | 20 | 202 | 83   | 284  |
| TGCGTGAATCGAAAGTGAG     | 59.988 | 20 | 186 | 465  | 650  |
| GCTCGAGTTTTAGTGTGGGG    | 59.734 | 20 | 273 | 149  | 421  |
| AAAATCGAATGTCAATCGG     | 59.901 | 20 | 239 | 26   | 264  |
| CACAAGAAAATTATTGTCGCTC  | 60.063 | 24 | 270 | 584  | 853  |
| GCCCATAGTGCCTTCAACTT    | 59.198 | 20 | 172 | 630  | 801  |
| TCTCCCTCCATTTTACAC      | 59.903 | 20 | 141 | 1551 | 1691 |
| GGTCTCACGGTGGTTTTTA     | 59.83  | 20 | 244 | 1558 | 1801 |

|                        |        |    |     |      |      |
|------------------------|--------|----|-----|------|------|
| CACCGCGTCTTTTCACTACA   | 59.904 | 20 | 245 | 2283 | 2527 |
| AATCATGGTGCACGAAATTG   | 59.4   | 20 | 182 | 412  | 593  |
| GGTTGTGGTGGAGCAAAGTT   | 60.012 | 20 | 156 | 4431 | 4586 |
| CTCTTGACTTCTGATCCGGC   | 59.95  | 20 | 223 | 26   | 248  |
| CGAGATTCTCTCTCGCTCTCA  | 59.981 | 21 | 148 | 343  | 490  |
| TGCCTCATCTGGATCACATC   | 59.591 | 20 | 229 | 2    | 230  |
| CGTTTCGATTTGCGGTTCTAT  | 60.096 | 20 | 209 | 585  | 793  |
| GTGTTGGTGCTTGATGGTTG   | 60.008 | 20 | 135 | 2022 | 2156 |
| CCAAACGACATTATGACGCA   | 60.523 | 20 | 265 | 176  | 440  |
| TTCAATATCCGCCAGAGTCC   | 60.036 | 20 | 199 | 2270 | 2468 |
| TGTGTCGCGAATTTTGAACA   | 61.233 | 20 | 211 | 9    | 219  |
| CCCATTTTTCTTCTCCTCTCA  | 58.372 | 21 | 279 | 100  | 378  |
| TAGCTTTTGTGCCGCTTGTA   | 59.648 | 20 | 242 | 43   | 284  |
| ATGTCACCTGCTCATGTTGC   | 59.714 | 20 | 205 | 268  | 472  |
| TGGCTCTGGTTTTTGGTAGG   | 60.103 | 20 | 276 | 0    | 275  |
| AATTCTTGGGGTTGATGACG   | 59.79  | 20 | 222 | 556  | 777  |
| AACACATCGTTTCCTGGGG    | 60.764 | 19 | 249 | 76   | 324  |
| GCCTTGACGCACTTCCTTC    | 59.882 | 20 | 271 | 954  | 1224 |
| CCCAACCCTTGATTACGTTG   | 60.22  | 20 | 132 | 19   | 150  |
| CAAAAGCACAAATTGGGAAA   | 58.649 | 20 | 234 | 53   | 286  |
| TTAACCTGCAACGGTCAAAA   | 59.202 | 20 | 218 | 1469 | 1686 |
| TGCTCAACACTCACGACTGC   | 61.258 | 20 | 272 | 88   | 359  |
| ACGTGGAGTTCCAATGCTC    | 60.119 | 20 | 272 | 1    | 272  |
| GTATGCCGTTTTTCTCCAA    | 59.938 | 20 | 277 | 1321 | 1597 |
| CTCCTCTCCGTCGCTAGTCA   | 60.69  | 20 | 250 | 2    | 251  |
| TCTCTCCCTTTTCTCACGGA   | 59.92  | 20 | 133 | 835  | 967  |
| GCATACCGCGTTTTCATTTA   | 60.831 | 20 | 189 | 784  | 972  |
| CGACTGGGAGGAGAAGAAAA   | 59.401 | 20 | 275 | 67   | 341  |
| CCCGGGTTTTCTTTTGT      | 60.19  | 20 | 200 | 1398 | 1597 |
| CCCCAAATGGAGACGATAAA   | 59.756 | 20 | 178 | 4641 | 4818 |
| AAGGTGACAATTGTGATAGCC, | 59.499 | 22 | 279 | 125  | 403  |
| ATTTGTACGGCGTTTCCTCA   | 60.502 | 20 | 260 | 555  | 814  |
| GGTCAACTTTCTGCACACCA   | 59.726 | 20 | 211 | 607  | 817  |
| GAGGTGGTGGTATTTGGTCC   | 59.116 | 20 | 263 | 31   | 293  |
| AACGCTCCAGATTTTCATGCT  | 59.843 | 20 | 269 | 436  | 704  |
| CAAGCAGACTAAGCATGGCA   | 60.157 | 20 | 235 | 83   | 317  |
| CGCTTTAACTCAAACCCACC   | 59.609 | 20 | 115 | 149  | 263  |
| TCCACCTCATATTTTCGCAGA  | 59.226 | 20 | 179 | 19   | 197  |
| ATTTTCCCAAATGCAAGCTG   | 60.074 | 20 | 256 | 246  | 501  |
| AACCCGCTTATATCGTGTCG   | 59.982 | 20 | 104 | 36   | 139  |
| CCACAGCTATGCCTAAGTGC   | 58.555 | 20 | 181 | 3276 | 3456 |
| GGCATTCAAATCAACCATTG   | 58.82  | 20 | 239 | 75   | 313  |
| GGTCGGCTACATGAACCAAA   | 60.894 | 20 | 107 | 41   | 147  |
| ATAGAGGAGGACGCGGAGAG   | 60.883 | 20 | 177 | 737  | 913  |
| TCAACAGCCGCAAAAATCTA   | 59.443 | 20 | 172 | 278  | 449  |
| TTGAGCAGTTATCACCGGAT   | 58.173 | 20 | 239 | 29   | 267  |
| AAAACGGGGCTAAGGATTGT   | 59.835 | 20 | 277 | 246  | 522  |
| GAACTCACAAAGTATGGGGCA  | 59.985 | 21 | 127 | 3    | 129  |
| AGGGATTCGAGTTGCTTTGA   | 59.813 | 20 | 264 | 5192 | 5455 |
| CCCCATGAAGCAGAGATGAT   | 60.034 | 20 | 133 | 741  | 873  |
| TATGCACGTGAATGCTTTATTT | 57.456 | 22 | 191 | 34   | 224  |
| ACATTCTGGAATGGTTCCCA   | 60.173 | 20 | 181 | 1251 | 1431 |
| CTTTTGGCATGACCATTGCT   | 61.032 | 20 | 176 | 1936 | 2111 |
| AGGACTCACTGAAGGAGGCA   | 59.986 | 20 | 278 | 663  | 940  |
| TGCGTTTGATTGTTGAGTT    | 59.322 | 20 | 224 | 367  | 590  |
| GGAGCAAGAACTTGAGGCAT   | 59.434 | 20 | 241 | 169  | 409  |
| CCGATTTTGTTCCTTTCAAAT  | 59.374 | 22 | 230 | 642  | 871  |
| TCAAATGTCCCTCGTCTCATT  | 59.541 | 21 | 238 | 317  | 554  |

|                         |        |    |     |      |      |
|-------------------------|--------|----|-----|------|------|
| GTGACATTTTTAGGCGGGAA    | 59.938 | 20 | 196 | 1182 | 1377 |
| TCGTATGTACCGAATGCGAG    | 59.712 | 20 | 184 | 17   | 200  |
| AAGCCTAACAAAGTGGATATTA/ | 58.116 | 26 | 164 | 1301 | 1464 |
| GATAGGCCCTAACTCGACCC    | 59.925 | 20 | 190 | 9    | 198  |
| CAGGTAAAACCTAAAATAGCG   | 60.36  | 23 | 236 | 4927 | 5162 |
| TGGTTACTTGGAACGCGA      | 59.182 | 20 | 182 | 1112 | 1293 |
| GGCATACTTGGTTGATCCGT    | 59.82  | 20 | 257 | 10   | 266  |
| ACACTAGGGCTTTGCTGCTG    | 60.592 | 20 | 162 | 2868 | 3029 |
| AGCACTCCCTTTTACCACCA    | 59.592 | 20 | 250 | 64   | 313  |
| TCTTCGATTGGAGTTCAGGC    | 60.34  | 20 | 242 | 551  | 792  |
| TCAACTCCATTTGTATACTTCA/ | 59.068 | 26 | 279 | 26   | 304  |
| CAGATCTGATGGCCCAGATT    | 60.034 | 20 | 106 | 17   | 122  |
| CCTTCTCTGGCTGTTGTTCA    | 59.007 | 20 | 102 | 1483 | 1584 |
| TGAACTAATCAAGTTCGCGT    | 59.761 | 21 | 182 | 41   | 222  |
| GAATTCACCCCTGATTCCAA    | 57.426 | 20 | 280 | 43   | 322  |
| TCTTCGCTGTCTCTCAGCAA    | 60.008 | 20 | 162 | 1292 | 1453 |
| AAAGGGAACCTCCTGTTTTAGC  | 58.034 | 22 | 201 | 66   | 266  |
| AACGAATCAAAACCTGAGCG    | 60.249 | 20 | 100 | 84   | 183  |
| ATCGGTTATTACCGGATCGC    | 61.031 | 20 | 151 | 79   | 229  |
| CCATCTGTCCACGCTTTTCT    | 60.255 | 20 | 163 | 159  | 321  |
| CCTCTCTGCAACACCATTCA    | 59.831 | 20 | 195 | 507  | 701  |
| ACCATCGAACCCACAAATA     | 60.051 | 20 | 210 | 20   | 229  |
| GGGGTGGGGGTATGTTAGTT    | 59.805 | 20 | 147 | 81   | 227  |
| ATCATCCCCACAATTGCATC    | 60.557 | 20 | 116 | 261  | 376  |
| CGAATCAGAAAGAACGTAGCC   | 60.025 | 21 | 179 | 32   | 210  |
| GCAAATCAAACCCTTGTCAA    | 59.967 | 21 | 248 | 682  | 929  |
| AACAACCTCCTCTGGCATCG    | 60.255 | 20 | 156 | 1045 | 1200 |
| AGCAGTTGGAGAGGGTGAGA    | 59.986 | 20 | 207 | 119  | 325  |
| TTGTTGCACCTTGTGCAGAT    | 60.31  | 20 | 179 | 598  | 776  |
| ACGGTTTGGGCTTAATTTTT    | 57.688 | 20 | 278 | 467  | 744  |
| AAATCAAAAGCCCACAATGG    | 59.801 | 20 | 124 | 68   | 191  |
| ACATGCACAGATTCCGTCAC    | 59.557 | 20 | 216 | 303  | 518  |
| TGCATGAAATTGGAGCAAGA    | 60.343 | 20 | 125 | 134  | 258  |
| GGCCATTCAAGAAAGCTACG    | 59.845 | 20 | 157 | 471  | 627  |
| ATGTGCGTGTGAGTGTTTCGT   | 60.236 | 20 | 211 | 93   | 303  |
| TCACATGAGATGATTAATTGGA/ | 59.343 | 24 | 181 | 64   | 244  |
| TGGAATAACCCAAGCCAAAG    | 59.931 | 20 | 266 | 2535 | 2800 |
| TGATTCGGAGGAATACGAGG    | 60.029 | 20 | 202 | 418  | 619  |
| AACAGCAAATCCGAGACACA    | 59.293 | 20 | 253 | 449  | 701  |
| CATTTTCAGGTCCTCACCAA    | 58.541 | 20 | 124 | 31   | 154  |
| GAGTCGGAGATCAGCTACGG    | 59.973 | 20 | 243 | 43   | 285  |
| TGAAACTGCTGTATGCTGAGTT  | 59.424 | 25 | 169 | 313  | 481  |
| TTTGCTTGATCCAATGGTGT    | 58.976 | 20 | 118 | 37   | 154  |
| TCACAAAGAAATCAGCACGAA   | 59.454 | 21 | 255 | 0    | 254  |
| TCAACGGTTTAAAATTGTTCT   | 57.74  | 22 | 169 | 131  | 299  |
| AAAACCTCGGGGAAGCAACT    | 60.11  | 20 | 131 | 342  | 472  |
| CCTCTTTCACTTCGATCCCA    | 60.187 | 20 | 132 | 65   | 196  |
| TGAGATTCTGGTTTCGGCTT    | 59.813 | 20 | 208 | 133  | 340  |
| AGTTGCCCAACTGGAGACAG    | 60.298 | 20 | 208 | 15   | 222  |
| CATTGGGTGGAAGTGTAAGA    | 59.914 | 23 | 172 | 540  | 711  |
| TTTGAGGAGGAAGAGGAGGAC   | 59.936 | 21 | 153 | 31   | 183  |
| TTGGTCAGTTTGTCCGAATCT   | 59.583 | 21 | 107 | 256  | 362  |
| CGCTGAAATTAGTTGAGGCAC   | 59.897 | 21 | 272 | 133  | 404  |
| CCCCACATGTCATAACCAC     | 60.903 | 20 | 268 | 283  | 550  |
| TTGGGTGTAAGACATAGAAGG   | 57.815 | 23 | 195 | 856  | 1050 |
| GCGAAAAACTCGAAAAACCA    | 60.223 | 20 | 264 | 1546 | 1809 |
| GAGGAAAACTACTGCTCTCTI   | 59.608 | 24 | 156 | 11   | 166  |
| TCCTATGGAAACTCAAATCCG   | 59.03  | 21 | 277 | 43   | 319  |

|                        |        |    |     |      |      |
|------------------------|--------|----|-----|------|------|
| TGATCTCAACGGTATGCTCG   | 59.823 | 20 | 239 | 490  | 728  |
| GAAAACCTGGAGTCAGCTCG   | 59.989 | 20 | 266 | 426  | 691  |
| GAGAGGAGAACTGCGTGAGG   | 60.135 | 20 | 162 | 73   | 234  |
| CGCTTCTTCGCTATGGCTAC   | 60.138 | 20 | 219 | 392  | 610  |
| GGGGGTTTTTAGTGCCATTC   | 60.542 | 20 | 240 | 3301 | 3540 |
| AAGCCGATCGAGTTTTTCCT   | 60.208 | 20 | 265 | 36   | 300  |
| GGAGAGCCACAAAACAAAGG   | 59.711 | 20 | 158 | 1310 | 1467 |
| ACAATAGCGTGTGTTTTGCG   | 59.799 | 20 | 274 | 587  | 860  |
| GCTTGATTATCCCGTTTTTG   | 59.411 | 20 | 161 | 450  | 610  |
| ACCCTCGAATGATATGCTGC   | 60.066 | 20 | 164 | 31   | 194  |
| CGGTAAAAATCGGACCAGA    | 59.931 | 20 | 245 | 208  | 452  |
| GCATGGCATGAAATTGTTGA   | 60.476 | 20 | 274 | 117  | 390  |
| TTCCCGGTGATGGATGAGTT   | 60.317 | 20 | 148 | 474  | 621  |
| TTGTCTAGCAATCTTCGAGTTT | 58.302 | 25 | 280 | 135  | 414  |
| CGACAATGTTAAAAATCAAAT/ | 59.631 | 27 | 170 | 65   | 234  |
| TCAAGGAGTCACAACGTGAAA  | 59.324 | 21 | 139 | 172  | 310  |
| CTGATGAACAAGCCGAACAA   | 59.84  | 20 | 231 | 579  | 809  |
| ACACGATCGTAAGGCGAAAT   | 59.597 | 20 | 106 | 4    | 109  |
| TTACCCAACCCACTAACCCA   | 60.081 | 20 | 172 | 136  | 307  |
| TCCCTTCATCACACTTTCAGC  | 60.248 | 21 | 132 | 0    | 131  |
| GTGCTGCAAATGCAATGACT   | 59.878 | 20 | 214 | 30   | 243  |
| AGCGGTTATTACCGGATCG    | 59.93  | 19 | 250 | 2230 | 2479 |
| AGGAATGTGAAAACAACCG    | 59.83  | 20 | 279 | 2251 | 2529 |
| CCAAGATCAATGGTTCCTAAGT | 59.879 | 23 | 136 | 1264 | 1399 |
| ACAATGCGAGTGCATTTTTG   | 59.735 | 20 | 185 | 112  | 296  |
| GTGCAGTGTGTTTGAAGGAA   | 59.888 | 20 | 208 | 79   | 286  |
| TTGGGCTCGAAAATTGAAGT   | 59.685 | 20 | 132 | 14   | 145  |
| GAACCCAGCTGAAAGGAGC    | 59.942 | 19 | 280 | 44   | 323  |
| TATATTTGCTCTGGCAGGGG   | 60.053 | 20 | 216 | 682  | 897  |
| AGCTCAAGGATTTTCGCAGA   | 60.096 | 20 | 246 | 28   | 273  |
| CGAAGAATTCTGTGCTGCTG   | 59.74  | 20 | 196 | 1248 | 1443 |
| TCATAGGTAAAGCCGCAACC   | 60.096 | 20 | 212 | 22   | 233  |
| AAATGTCACCCCACATGCTT   | 60.24  | 20 | 124 | 91   | 214  |
| GGCTCAACAACACAATTCCA   | 59.547 | 20 | 250 | 28   | 277  |
| CTTCATGAATGGCATGACTGAT | 59.962 | 22 | 246 | 44   | 289  |
| TTTGCCTCATTGTTTGGCT    | 60.617 | 20 | 111 | 1134 | 1244 |
| AAGAAACAAACAGGGTACGAC  | 59.56  | 22 | 162 | 364  | 525  |
| ACTTTGGTAGGGGTCAGCAC   | 59.065 | 20 | 228 | 115  | 342  |
| TTCGTTATTTGATTGGGGGA   | 60.124 | 20 | 188 | 1246 | 1433 |
| AGGTATCGTTCGCGCTGTAG   | 60.428 | 20 | 261 | 14   | 274  |
| AAGCAAGAAGGTTGCAACTGA  | 60.045 | 21 | 148 | 355  | 502  |
| TCATGTCAACTGTGCAAGGG   | 59.676 | 20 | 124 | 3    | 126  |
| CCTGTCTCAATCCGCTCACT   | 60.408 | 20 | 187 | 1434 | 1620 |
| TGGCTACTGTTCTTCAGCCC   | 60.397 | 20 | 156 | 2    | 157  |
| TTAGCCTAAGTCGGGACAGG   | 59.331 | 20 | 257 | 600  | 856  |
| GCATGATGCAGCCCTAGATT   | 60.207 | 20 | 240 | 1903 | 2142 |
| AGCGTGAGATTGAGAGAGCG   | 60.844 | 20 | 241 | 61   | 301  |
| TATCCTTCTTTTCCCTCCCG   | 60.382 | 20 | 234 | 8    | 241  |
| TCGACTTGTGCAATCAGTCC   | 59.837 | 20 | 228 | 771  | 998  |
| AAAAATGCCCTCGTATGCAG   | 60.096 | 20 | 239 | 22   | 260  |
| TTTTACCCTTCCGCTTAC     | 59.202 | 20 | 209 | 48   | 256  |
| GAAGAGGGGAAAGAAAACGT   | 60.096 | 21 | 190 | 193  | 382  |
| ATGTGTGTGTGCGTGAGTGA   | 59.772 | 20 | 179 | 433  | 611  |
| TTACTAGCCGTTGGTGGGAG   | 60.125 | 20 | 151 | 463  | 613  |
| CCACAACATATGTGGGGAAAA  | 58.325 | 20 | 208 | 405  | 612  |
| CACTCGAAAAAGGCATCCAT   | 60.074 | 20 | 198 | 2583 | 2780 |
| TCGTTTTAGTTGGCCATAATCT | 57.848 | 22 | 202 | 286  | 487  |
| TTTTTCAGCACCCTTCACA    | 57.867 | 20 | 169 | 126  | 294  |

|                        |        |    |     |      |      |
|------------------------|--------|----|-----|------|------|
| GCAGACCAGCTTTTACTGGG   | 59.875 | 20 | 190 | 456  | 645  |
| AGGGATGACAGAATGAATGTG  | 59.41  | 22 | 204 | 507  | 710  |
| CACGGGAGTTGGAGATTAACA  | 59.978 | 21 | 265 | 134  | 398  |
| ATCGTTTTCAAATCAGGCG    | 60.074 | 20 | 237 | 208  | 444  |
| ACAGCGCGGAAGTTACAGAT   | 59.904 | 20 | 241 | 25   | 265  |
| CTAAATGCCCTGCTGTAGGAA  | 59.37  | 21 | 211 | 372  | 582  |
| GTTGTGTTGTGCAGTGGAGG   | 60.203 | 20 | 254 | 1109 | 1362 |
| ATGCTTAATGTGCATGTGCG   | 60.697 | 20 | 143 | 2069 | 2211 |
| CGCTCACAATGATGGATACG   | 60.096 | 20 | 220 | 4937 | 5156 |
| ATTATGTTGTGGGGTCAGGG   | 59.526 | 20 | 140 | 468  | 607  |
| GAACAAATTACACAAACAAAA  | 59.299 | 25 | 128 | 521  | 648  |
| CAAGCAAACAACCAGCACAA   | 60.876 | 20 | 177 | 1587 | 1763 |
| TCGTGGAGTGAGTGGAAGTG   | 59.864 | 20 | 272 | 113  | 384  |
| TGGGAGAAGGGAGTTTCAGA   | 59.773 | 20 | 270 | 847  | 1116 |
| TATCGTCCCCTTTTCGATGAC  | 59.894 | 20 | 156 | 221  | 376  |
| TAATCCAAGCCATCCATTCC   | 59.722 | 20 | 128 | 24   | 151  |
| ACGTGTGCGATTAGGGTCA    | 60.128 | 19 | 105 | 28   | 132  |
| CAGGTGAGTGTTCCATGCAG   | 60.309 | 20 | 196 | 2967 | 3162 |
| GACAGCCACGTGGAATTGTA   | 59.572 | 20 | 207 | 20   | 226  |
| TGAGCCAAGTAAAACACACA   | 60.331 | 21 | 125 | 2843 | 2967 |
| ATGCGGACGGCATTATTTA    | 60.303 | 20 | 209 | 199  | 407  |
| GCTGAAACCAAGGCAAAGAA   | 60.365 | 20 | 225 | 302  | 526  |
| TCCCTGTCCTTTTCCCTTT    | 59.912 | 20 | 254 | 474  | 727  |
| TGCAAGCATCTTTTGTCTCG   | 60.134 | 20 | 214 | 12   | 225  |
| AGGAGCGGTTTGAACAATTC   | 59.174 | 20 | 114 | 19   | 132  |
| TAAGGGAGTTGGTAGGGCAA   | 59.564 | 20 | 229 | 46   | 274  |
| TTTGGTTGTGGTTTGGTTTCT  | 59.364 | 21 | 224 | 1    | 224  |
| ATCATCTCGGGTGCAATAG    | 59.917 | 20 | 215 | 17   | 231  |
| CGGGGTATTACATAAATGATGC | 58.285 | 22 | 192 | 41   | 232  |
| AGGTGGAGTTTTAGGCGGTC   | 60.496 | 20 | 272 | 5    | 276  |
| GAGTCTGCCACGTGTACCAA   | 59.751 | 20 | 158 | 414  | 571  |
| TTTTTGATGAGCTGGAGCCT   | 59.955 | 20 | 259 | 3988 | 4246 |
| GGGCCGAGATTTGTAGAGGT   | 60.464 | 20 | 147 | 189  | 335  |
| AAGAAGTGTGTGGGGGTGTC   | 59.859 | 20 | 204 | 994  | 1197 |
| GGGCTTAACAAAGTCACGGA   | 60.11  | 20 | 183 | 397  | 579  |
| AATGCGCGTCTTATTTCTT    | 58.857 | 20 | 236 | 970  | 1205 |
| AAAAATGAAATGTGGGGTGC   | 59.668 | 20 | 264 | 1949 | 2212 |
| TGGGTATCTCTCGCTGCTTT   | 59.978 | 20 | 279 | 805  | 1083 |
| GCCAGCTTGTTTTGGGATAA   | 60.074 | 20 | 199 | 255  | 453  |
| TGGTGTCTGAACAGCAGAGG   | 60.022 | 20 | 271 | 165  | 435  |
| TGACTTCGCCATTTTCCACT   | 60.636 | 20 | 280 | 215  | 494  |
| TGTCCCAAATCGTGTCTCA    | 60.088 | 20 | 265 | 14   | 278  |
| GGATAGGTTGAAACTGCCCA   | 59.933 | 20 | 279 | 48   | 326  |
| TGCGCATCTAGCTTGAGAGA   | 59.995 | 20 | 277 | 526  | 802  |
| TCCCCGATTCTTTTAGCCTT   | 60.034 | 20 | 148 | 121  | 268  |
| GCCTTTGGGTCAAATCTGT    | 59.031 | 20 | 226 | 1758 | 1983 |
| TTGTCTTTGCAAGGTCGG     | 59.968 | 19 | 245 | 1    | 245  |
| GGGTTTGCTTCGATGAAGAG   | 59.813 | 20 | 111 | 14   | 124  |
| CCCTCTTCAACCTTTTTCAGC  | 60.236 | 21 | 243 | 97   | 339  |
| CCTAAAACACGACAGGGGAA   | 59.964 | 20 | 261 | 60   | 320  |
| GACACGCATAAAGGGACCAC   | 60.384 | 20 | 238 | 249  | 486  |
| ACCCAATGACACGACACAAA   | 59.855 | 20 | 133 | 6    | 138  |
| TCGTTAGGAGGTGCCTGTCT   | 59.867 | 20 | 171 | 34   | 204  |
| AGATAACCGTTCGCTCTT     | 60.096 | 20 | 221 | 44   | 264  |
| CATAAAATGGACACGCACCT   | 58.502 | 20 | 172 | 39   | 210  |
| CACACACGCGCATATACAAA   | 59.211 | 20 | 106 | 1638 | 1743 |
| AAGTTAAGCGTGGTTCGCT    | 60.082 | 20 | 251 | 1235 | 1485 |
| TCGGATTTTATAGGCTTCTTC/ | 59.285 | 23 | 278 | 1344 | 1621 |

|                         |        |    |     |      |      |
|-------------------------|--------|----|-----|------|------|
| TCAATCATGAGCGTCCGTAA    | 60.22  | 20 | 145 | 7    | 151  |
| CGAAAATAGCCAAGTCGGAA    | 60.202 | 20 | 266 | 3    | 268  |
| GCTTTCAGGGTTTAAAATCGC   | 60.089 | 21 | 204 | 295  | 498  |
| TTCATGATAGGATGGGGCTT    | 59.344 | 20 | 225 | 2507 | 2731 |
| TGGAAGGAGAAACGATGACC    | 60.05  | 20 | 200 | 49   | 248  |
| CCACTTTTTCATTCCGACTC    | 59.526 | 20 | 151 | 41   | 191  |
| GTGAGAGCATCTCCAACGCT    | 60.564 | 20 | 196 | 418  | 613  |
| AACACAGCAGGTTTCGATCC    | 60.119 | 20 | 244 | 12   | 255  |
| ACTTCCCTTCATCAGCCCTT    | 60.074 | 20 | 249 | 1206 | 1454 |
| TGCGATCTGAACGTGTTTTTC   | 59.847 | 20 | 234 | 233  | 466  |
| CCATGGTAGAAACGCACAGA    | 59.716 | 20 | 172 | 414  | 585  |
| TGTTTCGGAATTGCACTCTCA   | 60.39  | 20 | 101 | 82   | 182  |
| TGGAGGATGGAGGTTGAATC    | 59.862 | 20 | 210 | 334  | 543  |
| TCGAATTTGTCGTTTGACCA    | 60.088 | 20 | 272 | 1004 | 1275 |
| TCGTCCTCCTTCGACACTTT    | 59.844 | 20 | 264 | 808  | 1071 |
| CGGGTTATTGTTGGAAATCCT   | 60.061 | 21 | 211 | 9    | 219  |
| CAAGCTTACCCGAGCTGAAC    | 60.015 | 20 | 243 | 16   | 258  |
| GACCGATCATTGCTATCCTCA   | 60.051 | 21 | 185 | 542  | 726  |
| TTTTCTCGAGTTTCACGCCT    | 59.993 | 20 | 178 | 4759 | 4936 |
| TTTTGGTTCAGGGGTGGATA    | 60.162 | 20 | 122 | 167  | 288  |
| CGTATCCCTCCTCCACACAT    | 59.803 | 20 | 160 | 1271 | 1430 |
| ACAAGTGTTGCGGGATCAAT    | 60.384 | 20 | 276 | 84   | 359  |
| TAAGTGCCTCTTTGCACCTG    | 59.072 | 20 | 220 | 14   | 233  |
| AATACCAGGCAAAGAAGCG     | 59.361 | 20 | 239 | 962  | 1200 |
| TTGAAACGGACGAACAATGA    | 60.088 | 20 | 155 | 23   | 177  |
| AGAATGTTGCCAATCGTGTG    | 59.572 | 20 | 186 | 45   | 230  |
| ACTGCACAAAAACAAACGCA    | 60.338 | 20 | 248 | 127  | 374  |
| ATGGAGGATCACACCACGAA    | 61.356 | 20 | 240 | 558  | 797  |
| AGCCCCATTTTTCATTTTC     | 60.13  | 20 | 213 | 974  | 1186 |
| GACATCACTTTTCGTCGCTGA   | 59.992 | 20 | 101 | 307  | 407  |
| GAGTCGCAAGACACAATTCG    | 59.445 | 20 | 137 | 1488 | 1624 |
| ACATGTGAGATTCCACGCTG    | 59.707 | 20 | 260 | 304  | 563  |
| AAAAATGACGAATGGGAGGG    | 61.042 | 20 | 124 | 235  | 358  |
| AAACTTGAGCAATGTTGGGC    | 60.118 | 20 | 265 | 431  | 695  |
| TTCGTATCTTGCCCATGGAT    | 60.296 | 20 | 248 | 242  | 489  |
| GGACAGTTTGTCCGAATCTTG   | 59.583 | 21 | 271 | 138  | 408  |
| AAGGAGGTGTTATGAAGGGAT   | 58.028 | 22 | 196 | 1222 | 1417 |
| CCAAACGGCCGATAAGAATA    | 59.922 | 20 | 184 | 16   | 199  |
| TGCACCAACATTCAGACAAAA   | 60.142 | 21 | 180 | 502  | 681  |
| AAATTTTGTTCACCAAAATA    | 58.744 | 23 | 107 | 280  | 386  |
| TTTGATCACCACCTCCATT     | 60.173 | 20 | 254 | 876  | 1129 |
| TGACTTGTTCCGGTATGCTG    | 59.716 | 20 | 118 | 0    | 117  |
| TTATCCCGTGTAGCCCATTT    | 59.297 | 20 | 236 | 4    | 239  |
| CCGCATTTATGTGTGCAAAA    | 60.508 | 20 | 279 | 39   | 317  |
| CTTCATCTTGATTGGAGGC     | 59.629 | 20 | 155 | 513  | 667  |
| CGACGTGCTTTTGGTAATTGT   | 60.046 | 21 | 139 | 1307 | 1445 |
| GGAATTTTGTGATTGGGTGG    | 60.029 | 20 | 251 | 1200 | 1450 |
| TTTTAGTTGATGCCTGATGA    | 59.262 | 21 | 187 | 1471 | 1657 |
| CTTCCAGAAACCTGAGCAGC    | 60.134 | 20 | 245 | 1910 | 2154 |
| ATGCCGTCTCACACATTAGAA/  | 59.637 | 22 | 165 | 2303 | 2467 |
| CCCACCAATTTTGGAGCGTT    | 59.83  | 20 | 263 | 69   | 331  |
| TTTAACGAATGCTCCAGCG     | 59.961 | 19 | 280 | 111  | 390  |
| CGCACTTGGCTCCTTTTGTAG   | 60.011 | 20 | 275 | 1009 | 1283 |
| AGTGTTTTGGACATGATTACTCG | 57.373 | 24 | 110 | 2138 | 2247 |
| CGATTTGGATTGCAATTTTGT   | 58.932 | 21 | 169 | 58   | 226  |
| GGTTTGCAGCATAAAAATGA    | 60.089 | 21 | 235 | 549  | 783  |
| AGGCCATGCAAAATAAACCA    | 60.323 | 20 | 261 | 11   | 271  |
| AGCGCACTCAAACAATAGCC    | 60.416 | 20 | 278 | 687  | 964  |

|                         |        |    |     |      |      |
|-------------------------|--------|----|-----|------|------|
| GCAATGCCTAGTTTACCCCC    | 60.692 | 20 | 243 | 0    | 242  |
| TTGAAGGTTACGGTGTGA      | 60.128 | 20 | 276 | 206  | 481  |
| ACACACACTCACGCACACATT   | 60.137 | 21 | 161 | 408  | 568  |
| TCTACCCAAAGTGCCCTTCA    | 60.626 | 20 | 201 | 19   | 219  |
| GCCATACATCCCACAAATGA    | 59.205 | 20 | 210 | 693  | 902  |
| CTAGGCATGGAATCCGAGAA    | 60.17  | 20 | 251 | 15   | 265  |
| ACCAACCTTGGCCACATAAC    | 59.717 | 20 | 235 | 3    | 237  |
| CCCACAATTAGGTCCCCTTT    | 60.046 | 20 | 165 | 257  | 421  |
| AGCGGTTATTACGGATCG      | 59.93  | 19 | 188 | 1608 | 1795 |
| GTGGCGACATCCGAATAACT    | 59.962 | 20 | 202 | 192  | 393  |
| CATAGCCGATAAAAATGGCG    | 60.424 | 20 | 200 | 79   | 278  |
| TTCGAAATCCCCTTTTTCAA    | 59.497 | 20 | 226 | 1029 | 1254 |
| CAATGTTGGCATTGGAGCTA    | 59.688 | 20 | 265 | 461  | 725  |
| AGAATATTCATGGGGTCCGA    | 59.2   | 20 | 193 | 1204 | 1396 |
| TTAACCCGGATCGGAAAAAT    | 60.489 | 20 | 276 | 835  | 1110 |
| GCGGCTAGAGTGGATAGTGG    | 59.859 | 20 | 258 | 323  | 580  |
| TGGGCACATTGCTCATTA      | 60.073 | 20 | 262 | 2809 | 3070 |
| TGTTTGTCTGGGCCTAAATA    | 58.162 | 20 | 264 | 547  | 810  |
| TCTTGATGTGTGATGCCTCC    | 59.637 | 20 | 263 | 710  | 972  |
| TTGTGATGCGTTTCGTGAAG    | 60.844 | 20 | 259 | 1468 | 1726 |
| GGTTCACGGTTGACCTATT     | 60.999 | 20 | 257 | 210  | 466  |
| CTACGTAGCCCCAAATCAA     | 59.953 | 20 | 205 | 217  | 421  |
| AGGGCAGTCAAGACCATCAT    | 59.535 | 20 | 239 | 11   | 249  |
| CACCAGTGGCAAACACAAAT    | 59.465 | 20 | 172 | 69   | 240  |
| CGAATATCCCCCAATTCAA     | 59.593 | 20 | 259 | 2295 | 2553 |
| GCCTGCCTATTAACCTCCCC    | 59.93  | 20 | 211 | 0    | 210  |
| TTTTGTATGATAGGATAAAA    | 60.04  | 27 | 260 | 466  | 725  |
| CACCATGCTCAGGAATGCTA    | 59.823 | 20 | 223 | 2212 | 2434 |
| AACCCTAACCCGACTCGTTT    | 59.864 | 20 | 211 | 87   | 297  |
| CTGTCCATTGTGAGAAGCCA    | 59.831 | 20 | 257 | 218  | 474  |
| CTCAATGATGAAACGGGGAT    | 59.75  | 20 | 135 | 80   | 214  |
| ACTCACCCACACACACACGA    | 61.157 | 20 | 273 | 4    | 276  |
| ATGGAGAAAAGGTACGCACG    | 60.132 | 20 | 160 | 6    | 165  |
| TGCGTATCTTGGCATTGTGT    | 60.142 | 20 | 189 | 1332 | 1520 |
| CATGAAAGGAAACAAAATCGA   | 59.098 | 22 | 119 | 762  | 880  |
| TTTGTATGCGTTTTGACGA     | 57.846 | 20 | 269 | 103  | 371  |
| CCTTCTTCCACCGTTCTTCA    | 60.224 | 20 | 117 | 4324 | 4440 |
| TCCAAAAATGCAAAATCCAA    | 58.98  | 20 | 239 | 7    | 245  |
| AGGCTCAGACCAAGATGACG    | 60.408 | 20 | 256 | 873  | 1128 |
| GGCTGCACACGAATGATTA     | 61.014 | 21 | 149 | 673  | 821  |
| GGGAGGATAAACCGAGGAAG    | 59.897 | 20 | 279 | 2145 | 2423 |
| TTCTCATCCACAGACCCCTC    | 60.048 | 20 | 142 | 1905 | 2046 |
| TCCAGCAAGAAAATCGGAAT    | 59.645 | 20 | 211 | 27   | 237  |
| TTTTTGGTTGAATAGGGGTGA   | 59.302 | 21 | 271 | 107  | 377  |
| TCCGAATTCCTACTCCATGC    | 60.036 | 20 | 202 | 198  | 399  |
| GCGATCAGCAAGGAACTGAT    | 60.37  | 20 | 181 | 1327 | 1507 |
| GGATGTGGGGTAAATTAGGA    | 59.896 | 21 | 247 | 1737 | 1983 |
| CCCAGAGCGTACTCGAAGAG    | 60.149 | 20 | 107 | 524  | 630  |
| TTTTTCAATCATACTTCCGGTTT | 60.107 | 24 | 221 | 57   | 277  |
| TTTTGACCAATCCTTTTGGG    | 59.772 | 20 | 274 | 258  | 531  |
| CGGCCAAATCAAAGAAAAA     | 60.047 | 20 | 212 | 374  | 585  |
| CCTCCATTCAAGCAGAAAGC    | 59.955 | 20 | 190 | 925  | 1114 |
| TTGCAATAGCATGCCAACAT    | 60.103 | 20 | 235 | 180  | 414  |
| TTCGGCATTATAGGAGGACG    | 60.053 | 20 | 273 | 40   | 312  |
| GCCGTAGATCTAACGACCGA    | 60.235 | 20 | 128 | 1313 | 1440 |
| TTCTTGATGTGTTGGCAAGC    | 59.847 | 20 | 277 | 63   | 339  |
| TAGATTTGGGCAGTGTGGTG    | 59.566 | 20 | 167 | 278  | 444  |
| CAATATGAGAATGGCCGAAAG   | 59.556 | 21 | 159 | 428  | 586  |



|                        |        |    |     |      |      |
|------------------------|--------|----|-----|------|------|
| GTGGACGTCCCAGATTGTTT   | 59.827 | 20 | 190 | 731  | 920  |
| CACGTGGCATTAACTGGTG    | 60.027 | 20 | 259 | 1216 | 1474 |
| AAGGGGAAGTTATTATTTGATC | 59.882 | 25 | 166 | 306  | 471  |
| GAACGGCGTACAAAAGGAAA   | 60.11  | 20 | 143 | 186  | 328  |
| CGTTGATGAAGCACCGTATG   | 60.134 | 20 | 168 | 663  | 830  |
| TTCTACGCACTCACATTAAGA  | 57.601 | 22 | 179 | 234  | 412  |
| CCCAAATGAAGAGGTTTGGGA  | 59.903 | 20 | 117 | 1325 | 1441 |
| CGATGACATTAACAATAACAA  | 60.095 | 26 | 280 | 270  | 549  |
| CACCCTTCGATACTCCGAAA   | 60.066 | 20 | 252 | 61   | 312  |
| CAGATCAATGGCCAGATTT    | 59.894 | 20 | 228 | 506  | 733  |
| CCAATCAAAGCAGATCCTCC   | 59.629 | 20 | 258 | 565  | 822  |
| CTTCTTCTTCCCCATCATGC   | 59.629 | 20 | 254 | 5    | 258  |
| CGCCTGCACATCTACAAAAT   | 58.799 | 20 | 225 | 6155 | 6379 |
| TCTGTGGTTCCATTCCATCA   | 59.893 | 20 | 212 | 508  | 719  |
| TCATTATCACAGGAGATTGGC/ | 60.469 | 22 | 237 | 487  | 723  |
| GCCTGAACCACCAACCTTGT   | 62.297 | 20 | 277 | 121  | 397  |
| ACCTCGCCTCCGTAGATACA   | 59.717 | 20 | 228 | 67   | 294  |
| ATCTATGACGCCGGTGAAG    | 60.096 | 20 | 261 | 1040 | 1300 |
| GCACCTAGGCCAAATTGAAG   | 59.708 | 20 | 195 | 59   | 253  |
| GGCTGGTTGAAGATCAACTG   | 58.287 | 20 | 259 | 2706 | 2964 |
| GAGAGGGGGTGAGGTTGTTT   | 60.349 | 20 | 270 | 258  | 527  |
| TGCAGTTTTTGCATGGTTCT   | 59.322 | 20 | 270 | 1428 | 1697 |
| TTCGAAGATCAACGGACGAT   | 60.603 | 20 | 122 | 34   | 155  |
| AGAGAGACGACGGATCGAAA   | 59.95  | 20 | 238 | 15   | 252  |
| GCAACGGAATACCACTCGTT   | 60     | 20 | 119 | 141  | 259  |
| AAACAAAAGGCAACTGATTCC  | 60.042 | 22 | 273 | 19   | 291  |
| ATGCCCAGACGCACTAAAAC   | 60.14  | 20 | 226 | 42   | 267  |
| TTGGAGGGGAGAAAATTGTGC  | 60.051 | 20 | 114 | 1236 | 1349 |
| ATTCTCAACAAGGGGCTGAA   | 59.67  | 20 | 220 | 229  | 448  |
| AATTGCCACGTTGAGGAATC   | 59.939 | 20 | 270 | 2    | 271  |
| GCGTTGGGATCGTGTTAAGT   | 60     | 20 | 194 | 3371 | 3564 |
| TGAGCTTCCAACGTAAGTTTCA | 60.176 | 23 | 178 | 3150 | 3327 |
| GCATGATACCAATGCTGCAC   | 60.112 | 20 | 243 | 46   | 288  |
| GGATTGGAACCTCCAAAACGA  | 59.91  | 20 | 279 | 348  | 626  |
| TCTGACGCCTCTGTAGTGGA   | 59.571 | 20 | 186 | 1396 | 1581 |
| CCCTTACATTCCCGTTGTGT   | 59.711 | 20 | 251 | 57   | 307  |
| CCAGAGCTCAGCACGGTTAT   | 60.419 | 20 | 113 | 583  | 695  |
| TAATTTGGCAAACCTCTGGGC  | 60.074 | 20 | 129 | 784  | 912  |
| CAACCCGTTTATATGCGGTC   | 60.209 | 20 | 158 | 67   | 224  |
| CCACGTCTTGTTTTCCATCTC  | 59.583 | 21 | 117 | 4438 | 4554 |
| AACATTGTTTGGGAAAAACCT  | 57.508 | 21 | 162 | 828  | 989  |
| TCGAAGGTCAATGGTTCACA   | 60.088 | 20 | 218 | 115  | 332  |
| GCGCGGAGTTTAAGAAATGT   | 59.365 | 20 | 185 | 344  | 528  |
| GCCATCAGATCTGCACTGAA   | 59.95  | 20 | 209 | 1231 | 1439 |
| CTCGTTTCTTGCTAGCTCGG   | 60.284 | 20 | 231 | 664  | 894  |
| GCAATATTACCATGACGGGC   | 60.182 | 20 | 275 | 2013 | 2287 |
| GCCGGCAACTCACTTAACTC   | 59.882 | 20 | 101 | 51   | 151  |
| TGATAAGGGGAGAATGTCGAA  | 59.514 | 21 | 141 | 264  | 404  |
| TTGCCGGAGAAGACTTTTGAT  | 59.813 | 20 | 254 | 101  | 354  |
| GATCTAACTAGGCCCGTCCC   | 59.925 | 20 | 245 | 159  | 403  |
| GAAAAACCCTAATCCGCCTC   | 59.909 | 20 | 211 | 10   | 220  |
| AGCAAACCCGTGTTCTTCAG   | 60.291 | 20 | 246 | 213  | 458  |
| GTCCATGAAAGATTGGGGTG   | 60.173 | 20 | 241 | 1734 | 1974 |
| AAGAACCACACAATCTGCC    | 59.973 | 20 | 188 | 1001 | 1188 |
| CACCCCGAGATAACTTTCCA   | 59.926 | 20 | 223 | 17   | 239  |
| CTGTTCAACCAAGTTCGCAAG  | 59.485 | 20 | 163 | 115  | 277  |
| TCATTGGGTTCAAATCGTCT   | 57.991 | 20 | 263 | 104  | 366  |
| CTACCATCTCGGGATGCAGT   | 60.096 | 20 | 241 | 1340 | 1580 |

|                        |        |    |     |      |      |
|------------------------|--------|----|-----|------|------|
| TGTGTAATTGTGTTGTGTCATG | 57.923 | 24 | 210 | 309  | 518  |
| GACAAACAACAGCGGATCAA   | 59.697 | 20 | 205 | 1223 | 1427 |
| GCTATGAGCATGTCATCAACA  | 57.291 | 21 | 123 | 2    | 124  |
| CCTTCCATTCCGAAAATCAA   | 59.872 | 20 | 142 | 1    | 142  |
| TGGGATCTCAACGATTACC    | 60.871 | 20 | 240 | 678  | 917  |
| CCTTGTAGATCGACAGCCTTG  | 59.883 | 21 | 212 | 59   | 270  |
| TGCATAACACGGGTGGAGTA   | 59.988 | 20 | 253 | 1363 | 1615 |
| GAGGTCACCCTTTGTCCGTA   | 59.966 | 20 | 262 | 217  | 478  |
| TTAAAATGTGCTGCTGGTGC   | 59.879 | 20 | 263 | 283  | 545  |
| GTAGATCTGGCGGGTAGGTG   | 59.574 | 20 | 277 | 373  | 649  |
| TTGACTTAACAAACCCCAAGG  | 58.98  | 21 | 257 | 88   | 344  |
| AGCTGAAATTGAGTTCGGGA   | 59.813 | 20 | 277 | 18   | 294  |
| TTGAAGTGCGGGGTATTACA   | 59.037 | 20 | 223 | 3    | 225  |
| TCTACGAATGTTGACGGAAAA  | 59.625 | 22 | 183 | 465  | 647  |
| GATACGTGATGCGTTGATCG   | 60.104 | 20 | 255 | 68   | 322  |
| TTAAATCTCCCCACAAACGG   | 59.795 | 20 | 223 | 29   | 251  |
| GGGTACAGAGCGAAAACGAG   | 59.875 | 20 | 245 | 193  | 437  |
| AAGCATGAGTTGTGTGCTGG   | 59.905 | 20 | 236 | 8    | 243  |
| AATGGTCCGAAAATGCTTCA   | 60.448 | 20 | 148 | 11   | 158  |
| GAGCGACCTTCAATGGTGAC   | 60.667 | 20 | 158 | 694  | 851  |
| AGTGTTATTACCGGATCGC    | 58.93  | 20 | 208 | 2694 | 2901 |
| TGATGGTGAATACGATTGGC   | 59.355 | 20 | 168 | 219  | 386  |
| ACGACGCGTGTAGTTGTTTG   | 59.829 | 20 | 275 | 203  | 477  |
| CTTCCCAGCAGAGAATCGAG   | 60.088 | 20 | 149 | 5    | 153  |
| CGGGGTAATCTCAAACCTG    | 59.424 | 20 | 246 | 540  | 785  |
| GGCCATTCTATTTCTTCC     | 59.74  | 20 | 145 | 409  | 553  |
| AGCCCATTCGTGATTTATGG   | 59.784 | 20 | 261 | 15   | 275  |
| CAGTTGGCGACATAATCTGC   | 59.301 | 20 | 256 | 18   | 273  |
| TGCAGCCCAATGTATGAGTT   | 59.152 | 20 | 233 | 205  | 437  |
| GCAGTTAGAAAGAGGAGCGG   | 59.218 | 20 | 224 | 3    | 226  |
| GGGAGAAACAACCACCATTG   | 60.21  | 20 | 240 | 612  | 851  |
| CATGAGCCTCCAAACCTAA    | 60.066 | 20 | 153 | 1054 | 1206 |
| AGCACGAGAAAAAGACCAGC   | 59.621 | 20 | 170 | 1624 | 1793 |
| AGCAAGAACTCACGCCTTTC   | 59.621 | 20 | 277 | 96   | 372  |
| TTTTGCTGTGGTCCCCTTAC   | 59.971 | 20 | 149 | 446  | 594  |
| TTTGGGTAGGCCTGAGTCTG   | 60.246 | 20 | 275 | 3282 | 3556 |
| AGCTTCAAACATTGATGGCA   | 59.276 | 20 | 252 | 238  | 489  |
| TGAAAGGTCTATCCGCTTCG   | 60.344 | 20 | 255 | 46   | 300  |
| CTCCAACCTGCCACAAAAT    | 59.971 | 20 | 189 | 2461 | 2649 |
| GGGATGTGTGGGATTGATTC   | 59.995 | 20 | 240 | 935  | 1174 |
| CACAGATCACGATTTTCGGA   | 59.648 | 20 | 260 | 1049 | 1308 |
| GTAGGGGTGAAAATTCGTGC   | 59.434 | 20 | 191 | 109  | 299  |
| TCGCGTAGAAATCCTTATGC   | 58.017 | 20 | 191 | 16   | 206  |
| TGAAAGAAAACAAGAAAGAAT  | 60.499 | 26 | 250 | 4228 | 4477 |
| TAGCGAGGGAATTAGGAGGA   | 58.879 | 20 | 258 | 2    | 259  |
| TCCAAAGAAATTGAGGTGCC   | 60.051 | 20 | 251 | 254  | 504  |
| AAATAAACATGTTTCGGGCA   | 60.188 | 20 | 275 | 946  | 1220 |
| TTATCTGTCCTCTGGCCTTGA  | 59.822 | 21 | 239 | 4    | 242  |
| TGCGTTTTGATGATATATAGGT | 60.054 | 26 | 261 | 1896 | 2156 |
| TGGGGGATTATTTGCAGAAC   | 59.762 | 20 | 190 | 3    | 192  |
| TGGGATCTGATCTTCAGCCT   | 59.761 | 20 | 183 | 11   | 193  |
| TTGCCTATTTTGGAGGATCG   | 60.031 | 20 | 220 | 51   | 270  |
| GGTTGTGAGAACCAACTCTGTC | 59.664 | 22 | 185 | 120  | 304  |
| CTGCTTATCGCCACTGTCAA   | 60.011 | 20 | 109 | 164  | 272  |
| CAACCACGTACAACCTGCAC   | 60.072 | 20 | 237 | 738  | 974  |
| CCTCCGAGGACGATAGTGGT   | 61.436 | 20 | 192 | 355  | 546  |
| CATGGTTGAATGGATATGGC   | 58.646 | 20 | 272 | 140  | 411  |
| GGGGCGTGACAAGGATACTA   | 59.955 | 20 | 265 | 64   | 328  |

|                        |        |    |     |      |      |
|------------------------|--------|----|-----|------|------|
| TAGGGAGCTGTCAATTTCCG   | 60.206 | 20 | 253 | 1066 | 1318 |
| ACAGATGGGAGGAGAGAACG   | 59.254 | 20 | 237 | 1    | 237  |
| AGGCAATATCAATCTCGGTGA  | 59.542 | 21 | 149 | 129  | 277  |
| AGGGGAAGCACAGTCTAGG    | 60.64  | 20 | 279 | 77   | 355  |
| GGTGTGTGTGATGTCGGAG    | 60.005 | 20 | 163 | 115  | 277  |
| GTTTAGTGATGGAACGGGA    | 59.79  | 20 | 147 | 44   | 190  |
| AATTCCTGATCCCACACCTG   | 59.779 | 20 | 224 | 112  | 335  |
| CTGAAGTGAGCGAGCAACAG   | 59.922 | 20 | 244 | 1663 | 1906 |
| TTCACCTCCATTTTCGATCC   | 59.871 | 20 | 198 | 31   | 228  |
| CAAAAATGCCACGTATCCCT   | 59.823 | 20 | 211 | 6    | 216  |
| ATCTCCAATCACGTTCCACC   | 59.786 | 20 | 258 | 783  | 1040 |
| TTGCAGGTGCTAACCAAAAA   | 59.344 | 20 | 124 | 19   | 142  |
| AAAATGACCCTCCTTCAGCC   | 60.443 | 20 | 262 | 76   | 337  |
| AGTGTCTCCAGTCTCCACCG   | 60.306 | 20 | 229 | 2946 | 3174 |
| GGGCTGAAAAGCCAATTTAA   | 59.189 | 20 | 279 | 10   | 288  |
| CCTTATGGCATTGGACATCA   | 59.35  | 20 | 193 | 72   | 264  |
| TTCGGCTCCTCAGACACTTT   | 59.989 | 20 | 224 | 105  | 328  |
| TCGACCGAAGAGCTATCCAT   | 59.797 | 20 | 217 | 313  | 529  |
| GTAGAGGCGGAGTGCTTTTT   | 58.604 | 20 | 231 | 2    | 232  |
| GCTGCTCTAAGGCGTGTTCT   | 59.786 | 20 | 248 | 2776 | 3023 |
| CAAACCGGACTGGACCATTA   | 60.745 | 20 | 273 | 7    | 279  |
| CAAACCGGACTGGACCATTA   | 60.745 | 20 | 268 | 8    | 275  |
| AATCTTTGAGGACCCCTTT    | 58.896 | 20 | 128 | 10   | 137  |
| CCTATGGTGGTATGGTGTGGA  | 60.501 | 21 | 259 | 53   | 311  |
| CTCTGCATGTTTGTTGGGTG   | 60.152 | 20 | 248 | 1832 | 2079 |
| TGGGCTAATCACTCTCAGCA   | 59.547 | 20 | 251 | 222  | 472  |
| AAAATCAAAGGCCCAACAATG  | 59.801 | 20 | 225 | 208  | 432  |
| GGGAGTTATCATTGGATCAAGC | 59.805 | 22 | 189 | 527  | 715  |
| GGTCGACATTAATCTTGGCA   | 59.952 | 21 | 186 | 659  | 844  |
| CCAAAGAACTGATATCCTCAC  | 57.668 | 22 | 145 | 525  | 669  |
| TTATCAAGGGCCCTACCTCC   | 60.278 | 20 | 211 | 598  | 808  |
| CTGACCACCCCAACATCTCT   | 59.962 | 20 | 261 | 89   | 349  |
| CTTTTTAATCCACCTGGCGA   | 60.067 | 20 | 203 | 15   | 217  |
| TCATGTGCCTGGATTGGATA   | 59.883 | 20 | 150 | 121  | 270  |
| TGAACGAGTAATTCTTGGTGAT | 57.814 | 23 | 279 | 558  | 836  |
| TTGGAGAACTGGTAGCGGTC   | 60.255 | 20 | 149 | 6    | 154  |
| TAGAGAAAACCCGGCTCGTA   | 59.839 | 20 | 241 | 184  | 424  |
| TTCAAACACTGCATTTCTGGGT | 59.601 | 21 | 249 | 641  | 889  |
| ACATGATTGCCATCCTCCTC   | 59.893 | 20 | 142 | 659  | 800  |
| AGAGCAAACCCATCAGTGG    | 60.111 | 20 | 103 | 1723 | 1825 |
| CAGCATGTGCGGTGACTAAG   | 60.472 | 20 | 228 | 0    | 227  |
| TGAGTGACAAGACCCTGCTG   | 60.022 | 20 | 240 | 597  | 836  |
| GTCAACATCGAAGGCAATGA   | 59.654 | 20 | 225 | 38   | 262  |
| CACGAGATTTACGTGGTTCCG  | 59.195 | 20 | 139 | 18   | 156  |
| GGCTTTAGGTCTGGCCTTCT   | 59.848 | 20 | 159 | 2757 | 2915 |
| GTGGGCTGTGGCTTTTGTAT   | 60     | 20 | 269 | 272  | 540  |
| GAAAGAAGGGTGCCGTGTTA   | 60.11  | 20 | 271 | 4147 | 4417 |
| TTGATCTGATGCACGAAAGG   | 59.799 | 20 | 148 | 1    | 148  |
| TTAATGGCCCCCAAGAAAAT   | 60.489 | 20 | 271 | 123  | 393  |
| AGCTGCATGCCTTCTCTTTC   | 59.723 | 20 | 253 | 4214 | 4466 |
| TCCATCCCATCACTACCCAT   | 60.011 | 20 | 194 | 110  | 303  |
| GTTTTCCCAAATTGGTTCC    | 60.391 | 20 | 251 | 209  | 459  |
| ATCCTCATCTTCCCAACC     | 60.133 | 20 | 146 | 1424 | 1569 |
| CTATCTCTCCCTCCACACG    | 59.673 | 20 | 100 | 1    | 100  |
| TAGTTGGGGTATTTTCGGC    | 61.029 | 20 | 238 | 49   | 286  |
| GAACACCCACCACACCTCAT   | 60.701 | 20 | 199 | 118  | 316  |
| AAATTGCCTCCATACCTCCC   | 60.152 | 20 | 226 | 258  | 483  |
| TCTCCTCCCCTTTTAATTCCT  | 58.212 | 21 | 220 | 49   | 268  |

|                                     |        |    |     |      |      |
|-------------------------------------|--------|----|-----|------|------|
| ATTCAGCAAGCATTAGGCGT                | 59.873 | 20 | 265 | 0    | 264  |
| GGTGAACCAAGCGGATAAGA                | 60.074 | 20 | 143 | 285  | 427  |
| CGTTAGGCTCGAGAGTGAAGA               | 60.04  | 22 | 161 | 3    | 163  |
| TTGGGGTTGGAATAGGTCAG                | 59.784 | 20 | 243 | 125  | 367  |
| CCCACCAGTGCCATACTTCT                | 59.989 | 20 | 113 | 660  | 772  |
| TCTTCAATCCTTCTCCCCA                 | 59.6   | 20 | 151 | 40   | 190  |
| TTCGAAAATGGAGGGATGAG                | 60.006 | 20 | 252 | 58   | 309  |
| TTCTGTAAATGGCCCTCGTC                | 60.074 | 20 | 127 | 753  | 879  |
| GCCCTCCCAAAAGTAACTCC                | 59.94  | 20 | 196 | 55   | 250  |
| CCAGTCCACTTTTGAATGGC                | 60.495 | 20 | 208 | 25   | 232  |
| CAGGCACATGCAAAAAGAAA                | 59.849 | 20 | 155 | 124  | 278  |
| TGTCTTCATCCCATTGACCC                | 60.725 | 20 | 266 | 112  | 377  |
| GGATTCCGATTGCAAGAAAA                | 60.016 | 20 | 278 | 282  | 559  |
| TCATCATCTTCCCTTTCTGCT               | 58.875 | 21 | 175 | 64   | 238  |
| CCATACTGCCAAAACGGAAC                | 60.365 | 20 | 248 | 228  | 475  |
| GTCTCTTCTGGGAGGGTTC                 | 60.05  | 20 | 123 | 32   | 154  |
| GGTCATTTTAGCTTGATCAACA              | 57.952 | 23 | 176 | 522  | 697  |
| GATTGTTTCTCGATAGCCCG                | 59.668 | 20 | 246 | 1913 | 2158 |
| TCGTTTTGAGAACCGGAGAT                | 59.67  | 20 | 216 | 9710 | 9925 |
| CACAAAGAATGCCCCATTTT                | 60.309 | 20 | 226 | 2480 | 2705 |
| GGTCGGCTACATGAACAAA                 | 60.894 | 20 | 158 | 1    | 158  |
| CGAAGGTGTTGATGAGCAAG                | 59.44  | 20 | 230 | 84   | 313  |
| CGCTTCTTCTTCTTGTTCGG                | 60.125 | 20 | 189 | 2773 | 2961 |
| AATTCCTCAAGCTCGTCACC                | 59.288 | 20 | 152 | 7    | 158  |
| AAGGAGGTGTTATGAAGGGAT               | 58.028 | 22 | 266 | 975  | 1240 |
| TTGATTCTGGAATATCCCGC                | 59.862 | 20 | 152 | 91   | 242  |
| GACCTAAGCCACTCGCTACG                | 60.037 | 20 | 237 | 297  | 533  |
| AAGTTGTGGCTGCAAATTCC                | 60.118 | 20 | 110 | 194  | 303  |
| TTCTCATTCTCTCGGCTCTAGG              | 60.11  | 22 | 142 | 1149 | 1290 |
| TTCTCATTGTTTGTGTGGAA                | 59.01  | 21 | 207 | 56   | 262  |
| CTGTAACCTCCCAAAAGCCA                | 60.103 | 20 | 200 | 986  | 1185 |
| TTGTAATTTCAAATCGGGG                 | 59.633 | 20 | 265 | 1    | 265  |
| GACGCTCCACATGATGACAC                | 60.13  | 20 | 154 | 229  | 382  |
| AAAACCTGCGAAATGAGGAAG <sup>A</sup>  | 58.962 | 21 | 205 | 202  | 406  |
| TTGCTACAAAACCAAGTGGCA               | 60.293 | 20 | 204 | 1061 | 1264 |
| CAGCAAGAGGCTCGATGTTT                | 60.538 | 20 | 237 | 73   | 309  |
| GAACGTCGTCATTGTACTTGGT              | 59.032 | 22 | 195 | 243  | 437  |
| CAGTCAAACCCACGAGCTTT                | 60.291 | 20 | 168 | 2319 | 2486 |
| AATTCCCACAAATCCAACCA                | 60.029 | 20 | 205 | 427  | 631  |
| GATTTTGGATCGGGTTTTGA                | 59.739 | 20 | 115 | 4045 | 4159 |
| TTTGCCCCTTCTGACTCTGT                | 59.844 | 20 | 232 | 193  | 424  |
| ACTGCCCAACAATGGCTTAC                | 60     | 20 | 192 | 3    | 194  |
| TCTCCATGATTTCTTTAATTCC              | 59.47  | 23 | 118 | 217  | 334  |
| TGTTTTGCCCGTACGTTGTA                | 60.029 | 20 | 249 | 190  | 438  |
| TTGAGCTGGCAGAGACCTTT                | 60.134 | 20 | 135 | 209  | 343  |
| TTAGGCCCTCCCTACATCT                 | 59.919 | 20 | 209 | 273  | 481  |
| CATATATGCACCCCAACCT                 | 59.528 | 20 | 234 | 1216 | 1449 |
| TCCAACAACGAAAAAGT                   | 57.25  | 20 | 172 | 1264 | 1435 |
| CGCTCTCTCATTGTAATCTCTC <sup>1</sup> | 58.83  | 24 | 124 | 357  | 480  |
| CACTTCGACGATGGAGAACC                | 60.656 | 20 | 242 | 736  | 977  |
| TGAAAATGTCAGGCTTGTGC                | 59.847 | 20 | 223 | 1678 | 1900 |
| TCCGTGAGTTTACCCAAAGC                | 60.11  | 20 | 136 | 1176 | 1311 |
| GAGGAGAGCGAGCTTGGAT                 | 59.652 | 19 | 208 | 118  | 325  |
| CATGGCAACAATGGATAGCA                | 60.488 | 20 | 133 | 409  | 541  |
| AAAATCCTTTGCACAACCCA                | 60.344 | 20 | 112 | 48   | 159  |
| TTCTTGGCAATCATGTCCCT                | 60.461 | 20 | 190 | 59   | 248  |
| TCACACTCACGCACTCACAA                | 60.07  | 20 | 121 | 15   | 135  |
| TTTGTACCAAAAAGTATATAAA              | 57.58  | 27 | 262 | 595  | 856  |

|                         |        |    |     |      |      |
|-------------------------|--------|----|-----|------|------|
| TCGTTCAAGTCGGTCACATT    | 59.139 | 20 | 206 | 35   | 240  |
| CAGATCTGATGGCCCAGATT    | 60.034 | 20 | 141 | 278  | 418  |
| CCCTCGACTCGAAATCAAAA    | 60.184 | 20 | 211 | 22   | 232  |
| CTTTTCCCCCTCTCCAGTC     | 60.045 | 20 | 270 | 64   | 333  |
| TAACCACCCAATCTTCGCTC    | 60.074 | 20 | 186 | 91   | 276  |
| TCGTGAGAGATAGATATGGAG   | 57.233 | 24 | 273 | 76   | 348  |
| AGGGGTCTGACATTGTAATAA/  | 59.685 | 24 | 274 | 31   | 304  |
| ACTCAAGCCCCAAATTCTGT    | 58.646 | 20 | 213 | 318  | 530  |
| GGGTGTATGTGAACCAACCA    | 59.112 | 20 | 205 | 626  | 830  |
| AATTTGGCTTGTTACAGCGG    | 60.131 | 20 | 250 | 566  | 815  |
| CCTCCATTATCCACTCTCGC    | 59.653 | 20 | 277 | 720  | 996  |
| TCTTCAAGAGCAGAAAGGGG    | 59.545 | 20 | 253 | 32   | 284  |
| TTAACAAATCGCCGTTCCAT    | 60.323 | 20 | 271 | 792  | 1062 |
| TGTCGAAATGGGAGTCACAA    | 60.088 | 20 | 180 | 1151 | 1330 |
| TCAGAACATGGGCAAATTCA    | 60.049 | 20 | 157 | 503  | 659  |
| AGGGACATCTTGGTGGGAAT    | 60.575 | 20 | 280 | 35   | 314  |
| GGGAACATTCGAGCCATAAC    | 59.391 | 20 | 168 | 36   | 203  |
| ATTGCGATGTGGAAGCTTTT    | 59.713 | 20 | 126 | 19   | 144  |
| ATTGGTCATGAAATCCGAGG    | 59.75  | 20 | 227 | 121  | 347  |
| ATCGTCCCCTCTCTTGAG      | 60.356 | 19 | 110 | 469  | 578  |
| TCAGTGTGTGAACCAGAGCC    | 59.872 | 20 | 155 | 48   | 202  |
| AGCCAATGGTAACATCTCTGC   | 59.212 | 21 | 236 | 303  | 538  |
| GGATAGGAATCTCAAGAGTAT   | 60.007 | 25 | 187 | 1011 | 1197 |
| TCTCTCTTTCTTGTTGGTGAA   | 58.955 | 22 | 208 | 124  | 331  |
| ATTCGGACATCGAGATTTGG    | 59.894 | 20 | 248 | 59   | 306  |
| CGAATACTCCAAATGACACCA   | 58.488 | 21 | 238 | 53   | 290  |
| TTGAATATGCAATCACCAAAG/  | 59.485 | 23 | 214 | 31   | 244  |
| GGTGCACCACCCCTATCTT     | 59.794 | 19 | 139 | 702  | 840  |
| GAAAACAGAGGTAGTGAATTG   | 57.489 | 24 | 229 | 287  | 515  |
| ATTATGCATGAATTGCAACATT  | 57.112 | 22 | 129 | 116  | 244  |
| TTCACCATGATTTTCGATACACA | 58.895 | 22 | 231 | 655  | 885  |
| CAGGTTCAATTCTTGCATGTG   | 59.184 | 21 | 169 | 798  | 966  |
| AGAGGGAAAACAGGGGTAGC    | 59.576 | 20 | 125 | 6    | 130  |
| ATAAGCAACGAAGGGAGTGC    | 59.34  | 20 | 216 | 275  | 490  |
| CGGACAAAAGAGTGGAGAGG    | 59.837 | 20 | 206 | 1585 | 1790 |
| TAAGGCACGCATAAAACACG    | 59.764 | 20 | 154 | 457  | 610  |
| TTTGCTGTTTGCACATGGAT    | 60.119 | 20 | 271 | 20   | 290  |
| TGGAAAATGTGGTGTGGAG     | 59.389 | 20 | 213 | 0    | 212  |
| ATCACCATAACGCACCCCTA    | 60.214 | 20 | 246 | 127  | 372  |
| CCAGGTGGAGTTACACCCAT    | 59.697 | 20 | 210 | 730  | 939  |
| TGGCCATGTTTTTGGATGTA    | 59.786 | 20 | 201 | 651  | 851  |
| GAATCACTTTGCAAGCACCA    | 59.847 | 20 | 184 | 220  | 403  |
| CAAACCGTTCCTCAGATCGT    | 60.111 | 20 | 200 | 66   | 265  |
| TGGAGTGTGAATTGAATCGC    | 59.654 | 20 | 134 | 194  | 327  |
| GCTGTCCAGGATTTGGGATA    | 59.894 | 20 | 248 | 5    | 252  |
| GAGCAAGCATGGTGTGAGAA    | 59.992 | 20 | 214 | 369  | 582  |
| TTTTGAACCCTAGAGGGGGT    | 59.799 | 20 | 195 | 805  | 999  |
| TGAGATTTTCCTGCCAAACC    | 60.051 | 20 | 233 | 1550 | 1782 |
| CTCTTCAGCTGCTCTCCGTT    | 59.891 | 20 | 242 | 306  | 547  |
| CGCTGTTTGTGGATGGCTA     | 59.872 | 20 | 172 | 39   | 210  |
| ACGGCATTGAAGAAATGAGG    | 60.074 | 20 | 272 | 52   | 323  |
| TGGGTAAAGTTGGGAACCA     | 60.198 | 20 | 200 | 836  | 1035 |
| CGACGCGATAGACTGCTGTA    | 60.18  | 20 | 258 | 717  | 974  |
| CTTTTCAAACACGACCGACA    | 59.734 | 20 | 228 | 1    | 228  |
| TTATCAGGGGTCAACTTCGC    | 60.074 | 20 | 152 | 917  | 1068 |
| ATACGGTTGCATACAAGGGC    | 59.851 | 20 | 238 | 3    | 240  |
| GAACCGTTTAAACAACCCGA    | 59.839 | 20 | 254 | 124  | 377  |
| CATCTCTTTGTCTCCCCAC     | 59.505 | 20 | 257 | 197  | 453  |

|                        |        |    |     |      |      |
|------------------------|--------|----|-----|------|------|
| AAAGAAGATTCCGGCGAAGT   | 60.208 | 20 | 219 | 229  | 447  |
| TACCGTGTGTGCATGTGT     | 59.486 | 20 | 103 | 1210 | 1312 |
| GAACACGAGGAACTTGGGAC   | 59.555 | 20 | 137 | 0    | 136  |
| GTCGGGAGAGAGGGGTAAAT   | 59.397 | 20 | 232 | 67   | 298  |
| TTTATGGGTACATCGGGGTG   | 60.439 | 20 | 258 | 486  | 743  |
| TGGCAATGTGGTGGTAAAGA   | 59.964 | 20 | 186 | 165  | 350  |
| CCATCGTTGTCGAAATCCTT   | 59.933 | 20 | 209 | 272  | 480  |
| ATGAATGGATTCCGGTCAAA   | 60.133 | 20 | 275 | 7    | 281  |
| TTGTGTATACTCCACGGCGA   | 60.134 | 20 | 225 | 28   | 252  |
| ACTTCCTCCATAGGATGCC    | 60.293 | 20 | 278 | 311  | 588  |
| TCCGTTGTTATTGCCTGAGA   | 59.272 | 20 | 271 | 83   | 353  |
| TTGGTTAGCACCAAATAGCCA  | 60.494 | 21 | 195 | 50   | 244  |
| GCACTTGCTTGGATTGTCAG   | 59.445 | 20 | 203 | 12   | 214  |
| CCCAGCTGAGAGCTATACCG   | 59.993 | 20 | 263 | 386  | 648  |
| AACACACAGAAGGGAGTGGG   | 60.002 | 20 | 219 | 656  | 874  |
| TCGTTTGCAAGAAAATGGGT   | 60.481 | 20 | 194 | 26   | 219  |
| ATTTCTTGGCCTTCTTCGT    | 60.074 | 20 | 207 | 1414 | 1620 |
| GTGAATCCCACTGTCCCATC   | 60.184 | 20 | 238 | 2444 | 2681 |
| AGGCAAACCTTGAAGAAGGG   | 60.601 | 20 | 254 | 816  | 1069 |
| TGGAGCAAACATTACCGAAT   | 58.093 | 20 | 241 | 551  | 791  |
| CCATGTCAAGGGTTCGAAGT   | 59.966 | 20 | 220 | 133  | 352  |
| AGTTCATCAGCAAAGGTGCC   | 60.263 | 20 | 103 | 1873 | 1975 |
| CATTTGTGTGGAAACCATCG   | 59.816 | 20 | 254 | 6    | 259  |
| ACTTCCCCATTCTTCATCC    | 60.133 | 20 | 252 | 256  | 507  |
| CTTAAACCCCTTGAGCCATGC  | 59.708 | 20 | 197 | 142  | 338  |
| AGAAATCCCCCAAGACCAG    | 60.298 | 20 | 276 | 1814 | 2089 |
| TGTGTTTGGTTTTGGCTGCT   | 61.636 | 20 | 219 | 94   | 312  |
| TGTGGTTGAAATCTAGCCCTT  | 58.707 | 21 | 149 | 10   | 158  |
| TGGTGCTTCTATGCACTGCT   | 59.621 | 20 | 212 | 270  | 481  |
| TGACACAGATTTGGTGCTTGT  | 59.202 | 21 | 238 | 385  | 622  |
| GAGGTGTCCGGTGTGTGTTT   | 60.047 | 20 | 247 | 761  | 1007 |
| TTTCATGCCACCTCCAATTT   | 60.309 | 20 | 125 | 134  | 258  |
| CACCCAGAAACACACGCATA   | 60.574 | 20 | 101 | 28   | 128  |
| GTGTTTTGACAATATTTAGTGT | 57.875 | 27 | 100 | 756  | 855  |
| GTTAGGGATACCGCTAGGCA   | 59.205 | 20 | 272 | 73   | 344  |
| TTCGCAATGCTTTGATTGAG   | 59.953 | 20 | 149 | 52   | 200  |
| GCTCAACTGTTCTGAATGCG   | 59.596 | 20 | 243 | 5    | 247  |
| TCAAAAGAGCACCTCCTGCT   | 60.134 | 20 | 199 | 9    | 207  |
| CCTCCCGAATTTCTGTGTGT   | 59.966 | 20 | 236 | 794  | 1029 |
| TCAATGGAGGGTGGGAGTTA   | 60.309 | 20 | 238 | 544  | 781  |
| GTTGGATGTTAAGGATGCCG   | 60.331 | 20 | 181 | 231  | 411  |
| AGCCAACAAAACCTTCCAGA   | 59.711 | 20 | 271 | 492  | 762  |
| GGGTTGTGGTGAAGGAGAGA   | 60.088 | 20 | 195 | 22   | 216  |
| GAGCGTCTGCTTAAAATGGG   | 59.845 | 20 | 227 | 169  | 395  |
| TCAATGACCACACAACCACA   | 59.376 | 20 | 271 | 124  | 394  |
| CACTAAATAAATATTTTGGCAT | 57.149 | 27 | 245 | 21   | 265  |
| TCAGATGAAAAGCCTACAGGA  | 58.973 | 22 | 136 | 214  | 349  |
| TCGCCATTGATTCTCTCTCC   | 60.303 | 20 | 253 | 251  | 503  |
| GTTGGGCCGACACTGTAAAT   | 59.859 | 20 | 141 | 65   | 205  |
| TGTGCATTTGTGTTCTTGTG   | 60.603 | 21 | 211 | 57   | 267  |
| AATCTCGCATCCCAATTCTG   | 60.036 | 20 | 122 | 71   | 192  |
| GCGACTGGCACCTTATCTTC   | 59.843 | 20 | 181 | 2074 | 2254 |
| TGGAACCCATCAACACAAAA   | 59.792 | 20 | 236 | 406  | 641  |
| ACGGGTTTCGCTATTCATCA   | 60.469 | 20 | 154 | 12   | 165  |
| GTTTTTAATCGTGGCCGCT    | 60.089 | 19 | 155 | 135  | 289  |
| AAACTTTTACGGGGAAGGA    | 59.808 | 20 | 193 | 81   | 273  |
| GGAGTGTTGGAGGAGGAGTG   | 59.682 | 20 | 276 | 6    | 281  |
| CGTGGTTCGATCGTAAATGA   | 59.542 | 20 | 256 | 75   | 330  |

|                        |        |    |     |      |      |
|------------------------|--------|----|-----|------|------|
| GAACAAGTCAAGGAGGGCAG   | 59.844 | 20 | 279 | 4    | 282  |
| TGCATTTATCCGATTTATCAAA | 58.561 | 23 | 240 | 781  | 1020 |
| GTCGTGGATATGGGCTGACT   | 59.957 | 20 | 195 | 1106 | 1300 |
| TCATGTTAATTGGTGGTATCAT | 59.898 | 25 | 214 | 3374 | 3587 |
| TGAAACTGAAGATTTGGGGC   | 60.051 | 20 | 167 | 1243 | 1409 |
| TCAATTTGTGACAGGGCTTG   | 59.691 | 20 | 262 | 1885 | 2146 |
| CCAGTTTTACCACCGCCTTA   | 59.99  | 20 | 173 | 802  | 974  |
| GTGTGTATGACCGTGCGTGT   | 60.52  | 20 | 157 | 81   | 237  |
| ATTTGTGCGAGTCTCGTGTG   | 59.905 | 20 | 242 | 704  | 945  |
| TTCCGGGACATTTCTCTCTC   | 59.213 | 20 | 137 | 510  | 646  |
| TCATGTGTCTTCCACCATGAA  | 59.951 | 21 | 188 | 5026 | 5213 |
| TCTTTCTTTCCCTTGCTCCA   | 59.926 | 20 | 223 | 121  | 343  |
| CCAATGCATTACGAGTTGGT   | 58.502 | 20 | 275 | 367  | 641  |
| TCCTAGCCCTCAATCTCGAA   | 59.91  | 20 | 257 | 603  | 859  |
| CCACGGAGAGACGACAAGAT   | 60.261 | 20 | 266 | 977  | 1242 |
| AGTACTAGCAACGGAGATGCG  | 59.553 | 21 | 216 | 41   | 256  |
| ACCCGACGTATTCGAGTTTG   | 59.993 | 20 | 248 | 176  | 423  |
| CTTCTTGCCGATGAAGATGAG  | 59.963 | 21 | 271 | 477  | 747  |
| TTCATCATCAGCTGCTGTCC   | 59.95  | 20 | 185 | 1070 | 1254 |
| TGCCACAGTTTCATCTTCCA   | 60.24  | 20 | 214 | 4586 | 4799 |
| GTTGAGGACTTAACGGTGGC   | 59.598 | 20 | 245 | 109  | 353  |
| CTGCCTGAGTTTTTGGGAAC   | 59.711 | 20 | 279 | 324  | 602  |
| CCGATTGTAGAAAAAGGATTA  | 59.098 | 23 | 203 | 14   | 216  |
| TTTGGGGGAGAATTGTTTGA   | 60.28  | 20 | 249 | 84   | 332  |
| CGAACCTGATTTTCGTTTCAA  | 60.096 | 21 | 238 | 113  | 350  |
| ATCATAATTGACGCCCTTCG   | 59.923 | 20 | 106 | 10   | 115  |
| ATGGACCCTTGTTGGTTTGA   | 60.21  | 20 | 253 | 192  | 444  |
| GTCAATCGTGTGAGGGGAGT   | 59.969 | 20 | 136 | 84   | 219  |
| CCGCACACCCCTATCTTTTA   | 59.953 | 20 | 232 | 353  | 584  |
| TGCTTTGACACCACCACAAC   | 60.616 | 20 | 277 | 47   | 323  |
| GACGAAAATTGCCCGTAAAA   | 59.943 | 20 | 245 | 105  | 349  |
| CCCCGAATTTCCATAACTC    | 60.502 | 20 | 144 | 25   | 168  |
| AGAACATCGACTCACTGTATTC | 58.344 | 25 | 167 | 233  | 399  |
| TCCTCAGCTTCTGCTTCACA   | 59.855 | 20 | 237 | 107  | 343  |
| ATGGGATCCCTCAAACAGA    | 59.336 | 20 | 213 | 663  | 875  |
| TTGCCCCCGTATACTACGAC   | 59.845 | 20 | 171 | 38   | 208  |
| TCCGACATCATTCTCGTTTG   | 59.648 | 20 | 279 | 24   | 302  |
| GTTGCACCGTGTGTTTCAAG   | 60.199 | 20 | 235 | 2    | 236  |
| AGTTGGAACGAGCGAAAAAG   | 59.494 | 20 | 238 | 87   | 324  |
| ATCTCCACATTCTCCCTCCA   | 59.46  | 20 | 201 | 594  | 794  |
| GGCCCAGTAGCATGAATATG   | 58.065 | 20 | 267 | 108  | 374  |
| AACGTAGTTGCTACATGTTAAA | 58.933 | 27 | 280 | 23   | 302  |
| CAAAGGCCCAATGGTTAT     | 59.685 | 20 | 272 | 2    | 273  |
| GCCCCAGCAAATAAAAAG     | 60.77  | 20 | 163 | 4425 | 4587 |
| TCTTTGACCCCAAGAGAGGA   | 59.773 | 20 | 269 | 15   | 283  |
| TCGTTTCTTCACTCCAACCC   | 60.088 | 20 | 254 | 149  | 402  |
| CAATATGAAAATGGGCGAGA   | 58.576 | 20 | 229 | 231  | 459  |
| TTGGGATTGAGCCCAATAA    | 60.26  | 20 | 280 | 13   | 292  |
| CCAATGACACGTTATGCTCAA  | 59.6   | 21 | 200 | 90   | 289  |
| GTTGTTTTTGTGCGGATTT    | 59.982 | 20 | 279 | 2    | 280  |
| ACAGAAATTTCTTGTTGCTC   | 59.637 | 22 | 168 | 262  | 429  |
| CGGGATTTAGGTGTTTTGACCT | 61.417 | 22 | 280 | 1935 | 2214 |
| ATCGATAATTCGCACCCAAG   | 59.923 | 20 | 232 | 962  | 1193 |
| TCATCGAAAATCTGATCTGGG  | 60.021 | 21 | 230 | 774  | 1003 |
| GAGGAGGAAGAGGGGAGATG   | 60.149 | 20 | 266 | 196  | 461  |
| GGCAATTTGTTAATTGTTTGA  | 58.236 | 23 | 233 | 222  | 454  |
| CTTTGAATTGCAGCTCGACA   | 60.134 | 20 | 268 | 655  | 922  |
| CCATTCCGAAAATCAAAGGA   | 59.872 | 20 | 191 | 67   | 257  |

|                        |        |    |     |      |      |
|------------------------|--------|----|-----|------|------|
| CCAAATGATTTCCCTTTGATG  | 59.26  | 21 | 221 | 68   | 288  |
| AAGATTTGGGGTTTAGGGGA   | 59.639 | 20 | 229 | 888  | 1116 |
| GCTGACGACAACCATCATCA   | 60.698 | 20 | 129 | 4    | 132  |
| ATGTAGGGAAAGATGGCACG   | 59.955 | 20 | 277 | 410  | 686  |
| TTTGAACACGGGTTCTAACAT  | 59.801 | 23 | 240 | 896  | 1135 |
| ATTGCTCTCCAACCCACAAC   | 59.973 | 20 | 262 | 125  | 386  |
| ATTTCGAAAATCAACGGACG   | 59.938 | 20 | 151 | 232  | 382  |
| TGGTGTTGGGAGAGAGATGA   | 59.18  | 20 | 210 | 507  | 716  |
| GATTACGTCGATCCAACGGT   | 59.82  | 20 | 136 | 2    | 137  |
| CCCAGTCGTATCACTTTGGC   | 60.517 | 20 | 202 | 21   | 222  |
| GCGAATGAAAAGACACAACG   | 59.322 | 20 | 261 | 131  | 391  |
| ACATTGAAAACCAGCCGTTT   | 59.978 | 20 | 145 | 114  | 258  |
| ACGGATTTGTCGATCGGTTA   | 60.331 | 20 | 233 | 1327 | 1559 |
| AGCCTCCGGCTTTGTCTACT   | 60.403 | 20 | 225 | 53   | 277  |
| ATCGTAGTTGACGCCCTTTG   | 60.132 | 20 | 171 | 92   | 262  |
| TGTAGGGAGTGGGATGTGTG   | 59.388 | 20 | 277 | 115  | 391  |
| GGGAAATTTCAAGTTGCAAACA | 59.967 | 21 | 251 | 1    | 251  |
| AAGTGCACAAGCACTCGCTA   | 59.812 | 20 | 126 | 17   | 142  |
| ACGTAGTGGGAAAAGGGCT    | 59.998 | 20 | 260 | 140  | 399  |
| CTTATTGCCTCCATCGTCGT   | 60.096 | 20 | 221 | 85   | 305  |
| ACTTGATTCATGGCACACCA   | 59.967 | 20 | 233 | 333  | 565  |
| AATTGGGGTGCAGTTCAAAG   | 59.971 | 20 | 182 | 108  | 289  |
| CACTTAGGGGGTTATTAGTGG/ | 57.22  | 22 | 279 | 7706 | 7984 |
| ACTCGTTCATGCAGACGAAA   | 59.445 | 20 | 169 | 2394 | 2562 |
| AAAACAAATATGGCCTCCCA   | 59.273 | 20 | 197 | 584  | 780  |
| ATGACAACCCACCAGAAAAGC  | 59.973 | 20 | 173 | 949  | 1121 |
| AGACCGAGCGCAATGAATTA   | 60.742 | 20 | 227 | 263  | 489  |
| GTAGCCAAACATGCGGTCAT   | 60.925 | 20 | 146 | 0    | 145  |
| TTAAATGCCGGTCAAAGCAC   | 60.999 | 20 | 266 | 150  | 415  |
| TAAGATCGAACGATCCAGCC   | 60.177 | 20 | 217 | 88   | 304  |
| GAAACTGACCACCACGGAAT   | 59.827 | 20 | 239 | 416  | 654  |
| GAAAAGAGAAAGAGGGCCGA   | 60.817 | 20 | 215 | 16   | 230  |
| AAAAACACGAAACTTGATTGT  | 58.71  | 23 | 270 | 102  | 371  |
| TTTATTTGCGGGAGCTGAAT   | 59.682 | 20 | 205 | 27   | 231  |
| TGTTTTGGTTGCTTGCTTGTT  | 59.366 | 20 | 207 | 1149 | 1355 |
| GGGGTCTTCTTTTGGGACTC   | 59.912 | 20 | 271 | 371  | 641  |
| TTGTTCCCGACAAGAAAAGA   | 59.71  | 21 | 278 | 2015 | 2292 |
| ACCAATTTGAATGGTTATTACC | 59.906 | 25 | 142 | 581  | 722  |
| TATGGATGACGAGGTCGAGA   | 59.193 | 20 | 255 | 91   | 345  |
| TTTGGTTCGGAAATAGGTGG   | 59.795 | 20 | 273 | 18   | 290  |
| GAGGAGCAATACTGCTTGTGG  | 59.89  | 21 | 147 | 10   | 156  |
| CAACTTGGGCTAAGGATTTTG  | 58.751 | 21 | 149 | 62   | 210  |
| CACCGAAATGTCCAGGCTAT   | 59.955 | 20 | 263 | 55   | 317  |
| CAATGGTAAAACAACGCTCG   | 59.226 | 20 | 265 | 1    | 265  |
| CTCTCCATCCACTGCAAACA   | 59.831 | 20 | 274 | 144  | 417  |
| TCGAGACTTCGGTTGGTTTC   | 60.232 | 20 | 167 | 1    | 167  |
| TTGTCTCCTGGGAGAATGGT   | 59.505 | 20 | 252 | 396  | 647  |
| GAGATGTGTGTGTGCGTGTG   | 59.772 | 20 | 262 | 985  | 1246 |
| ATCATTCCCAGCCACACATT   | 60.203 | 20 | 149 | 12   | 160  |
| AACCGTCAGATTTCAAACCG   | 59.971 | 20 | 234 | 380  | 613  |
| CACAACCGTCAAGACCATGT   | 59.441 | 20 | 226 | 22   | 247  |
| GGGAGAGAGAGCAGCAGAGA   | 59.969 | 20 | 249 | 233  | 481  |
| TCGGATGAACCCCCTACTT    | 59.405 | 20 | 257 | 1263 | 1519 |
| CACAAAATTGGGATTAGGCG   | 60.315 | 20 | 208 | 129  | 336  |
| GAACGATGCTGCCATGATTT   | 61.014 | 20 | 212 | 459  | 670  |
| TAGGCAGAGCAACAGCAGTG   | 60.347 | 20 | 246 | 6    | 251  |
| TTAACCGCCAAACTCAAACC   | 59.975 | 20 | 182 | 434  | 615  |
| AGATCATACACGTGGCCGTC   | 60.956 | 20 | 150 | 416  | 565  |



|                        |        |    |     |      |      |
|------------------------|--------|----|-----|------|------|
| CCCCATTTTTCATTTGCTT    | 61.011 | 20 | 259 | 0    | 258  |
| ATCATGGAAACATGACGTGC   | 59.379 | 20 | 230 | 38   | 267  |
| GGTAAAAATTGTGCGCTGCT   | 60.272 | 20 | 240 | 1087 | 1326 |
| TTGGGCCTGAATGGACTTTA   | 60.439 | 20 | 137 | 18   | 154  |
| GTCCACGGTGGTGTAGAGT    | 60.182 | 20 | 144 | 23   | 166  |
| CAGCTCATGCTTCCTCCTCT   | 59.703 | 20 | 221 | 1664 | 1884 |
| TTATCGTGGCCTCTTCACC    | 60.074 | 20 | 220 | 0    | 219  |
| GTGGGGGACTTATCTGTTAGA/ | 57.621 | 23 | 278 | 53   | 330  |
| CTATCATCGGTTGGTCGTGA   | 59.522 | 20 | 278 | 1005 | 1282 |
| GGTGGTATGGTGTAGAGGACC  | 58.242 | 21 | 236 | 70   | 305  |
| CCATTGGTATTGACAGCGTG   | 59.988 | 20 | 110 | 492  | 601  |
| GCACTCTCACGAGCTCACAC   | 59.771 | 20 | 136 | 886  | 1021 |
| TCATGCCTAAATGTTTTGATGC | 59.971 | 22 | 233 | 229  | 461  |
| GAGCTTGCCGAGAGAAAAGAG  | 59.454 | 20 | 158 | 180  | 337  |
| CTTCTCCAAGGCTTTTGCTG   | 60.125 | 20 | 241 | 132  | 372  |
| TGTGGCTTATGGAGGTTCAAA  | 60.487 | 21 | 132 | 172  | 303  |
| TGGGCCGCTTTAAAATATGA   | 60.405 | 20 | 253 | 375  | 627  |
| AAATTACGGCCACAACAAGC   | 60.003 | 20 | 176 | 2202 | 2377 |
| CACTCCACTACCGTCGACAA   | 59.745 | 20 | 161 | 78   | 238  |
| TGTCTGTGAGAATGGCCAAG   | 59.831 | 20 | 205 | 103  | 307  |
| CCAAGTCCAAGTCCGAAGAC   | 59.697 | 20 | 224 | 19   | 242  |
| GCTAAAAATGTGGTTGGCGT   | 60.003 | 20 | 280 | 1309 | 1588 |
| CTCCCCTCCTTGTTTTACA    | 60.081 | 20 | 126 | 429  | 554  |
| AGACCGAAAACCGTTCAAAA   | 59.587 | 20 | 225 | 221  | 445  |
| AAGGGATGATTGCACCTGAA   | 60.461 | 20 | 224 | 45   | 268  |
| ATAAAGGGTGGTTGGGTTCC   | 59.919 | 20 | 200 | 53   | 252  |
| GTCAGAAATGGATTGAGTGCG  | 59.245 | 20 | 140 | 87   | 226  |
| TTCCCTAACAAATCACACCG   | 59.847 | 21 | 113 | 142  | 254  |
| TGTCCAAACAAATAAAAACAT  | 60.139 | 24 | 187 | 15   | 201  |
| GAGCATGAGAAAATCCTCCC   | 58.667 | 20 | 112 | 18   | 129  |
| TGGGTGGTGGAAAAGAAGTT   | 59.425 | 20 | 197 | 40   | 236  |
| CACACACAATGTTGGGAGGA   | 60.416 | 20 | 131 | 27   | 157  |
| ATATTGTTTTCGGATCGTGC   | 59.791 | 20 | 220 | 4328 | 4547 |
| TGTGGTTGAAATCTAGCCCTT  | 58.707 | 21 | 153 | 10   | 162  |
| CGCATCACTCTTTTTAGCCA   | 59.062 | 20 | 262 | 467  | 728  |
| TATGCGTTTTGACGGGATTT   | 60.323 | 20 | 208 | 250  | 457  |
| GATTCGGAAGGTCGACAAC    | 59.141 | 20 | 143 | 7    | 149  |
| TCTGGATCTCACAGCTCACA   | 57.966 | 20 | 203 | 105  | 307  |
| CTTTTATCCCCAAAATGCC    | 60.489 | 20 | 214 | 406  | 619  |
| TGGAAAGCCATGATAAATCCA  | 60.274 | 21 | 274 | 40   | 313  |
| AAGCAATAATTTGTGCCATG   | 58.582 | 23 | 200 | 74   | 273  |
| CGCGGACACATCATGTAAC    | 59.995 | 20 | 277 | 10   | 286  |
| TCACACATAATTGAGTTATCAT | 59.685 | 26 | 266 | 52   | 317  |
| AACCGTAAGTGGTGGAGGTG   | 59.884 | 20 | 254 | 457  | 710  |
| ACCGTGTGCGATACACATGA   | 59.837 | 20 | 214 | 30   | 243  |
| GAGAGCATTCCCACAAACATT  | 59.045 | 21 | 106 | 643  | 748  |
| GCAAGGACGAATTCGAAGAG   | 59.813 | 20 | 254 | 1438 | 1691 |
| TCCCCTATCGGTATTTTCCC   | 59.978 | 20 | 236 | 61   | 296  |
| TCTGGTGGTTCATTTAGGGC   | 59.933 | 20 | 223 | 68   | 290  |
| AATTCTCCGCCACCTTTTCT   | 60.074 | 20 | 169 | 76   | 244  |
| CTTCACCCGTACGTTGCAC    | 60.167 | 19 | 168 | 526  | 693  |
| ACGATTTTGCCCTTGTATGC   | 59.967 | 20 | 214 | 6    | 219  |
| GGGAGAGAGAGACAGCGAAA   | 59.679 | 20 | 145 | 218  | 362  |
| CTCGAACTTGTACCCGAAGC   | 59.875 | 20 | 153 | 87   | 239  |
| GTGCACATTTCCCTTTCACC   | 60.362 | 20 | 114 | 358  | 471  |
| ACGTGCCCTATTCACATTTT   | 58.504 | 21 | 140 | 12   | 151  |
| GACCAACGTGGCCTAACCTA   | 59.993 | 20 | 251 | 442  | 692  |
| CATTGCAGATTTTGATGAGCA  | 59.824 | 21 | 252 | 2068 | 2319 |

|                        |        |    |     |      |      |
|------------------------|--------|----|-----|------|------|
| CGAAGGCATCTGCGATTTAT   | 60.196 | 20 | 155 | 136  | 290  |
| TTTGATCACACACGCACAAA   | 59.721 | 20 | 167 | 13   | 179  |
| TCCAACCTCATCTTTTCGGACC | 60.05  | 20 | 279 | 584  | 862  |
| CCCTAATTTATGAAAGAGTGGC | 58.576 | 23 | 183 | 325  | 507  |
| TTGTGTGGGTCGATTCTTGA   | 60.088 | 20 | 198 | 1228 | 1425 |
| AACACCAACCACGAACAACA   | 59.897 | 20 | 267 | 53   | 319  |
| TCCATCCTCCATAATCCTGC   | 59.854 | 20 | 221 | 95   | 315  |
| AGTCATCTCCAAATGCCTGC   | 60.226 | 20 | 260 | 2644 | 2903 |
| CCCAAAACATTACCCGGAA    | 60.54  | 19 | 132 | 98   | 229  |
| AGCATGCGACAACATGAATC   | 59.685 | 20 | 250 | 867  | 1116 |
| GGGACCGTGATGTCTAATGG   | 60.195 | 20 | 186 | 1696 | 1881 |
| TGTGGATGTGCGTGTITTTCT  | 60.16  | 20 | 222 | 620  | 841  |
| AGGCTAGACCATTGTAAGGGG  | 59.491 | 21 | 196 | 70   | 265  |
| TCCACGGATGTAAATTGTTCC  | 59.677 | 21 | 230 | 1621 | 1850 |
| CAAGAAAGAATGTGGACGCC   | 60.636 | 20 | 155 | 91   | 245  |
| ACATTTTTCCACACTCAGCG   | 58.775 | 20 | 279 | 262  | 540  |
| AGCATGGGAAGGGGAGTTAG   | 60.455 | 20 | 111 | 43   | 153  |
| TGACTCATACCATGGAGCACA  | 60.128 | 21 | 174 | 462  | 635  |
| ACCATAGAACCACACGGCTC   | 59.997 | 20 | 266 | 147  | 412  |
| ACCATAGAACCACACGGCTC   | 59.997 | 20 | 100 | 315  | 414  |
| TCGTCCGAAAGAAACCTTTG   | 60.22  | 20 | 257 | 35   | 291  |
| TCACAACCAAGTTTTGGACA   | 59.976 | 20 | 218 | 906  | 1123 |
| CAAGAGGATGAAGGCCAGAC   | 59.803 | 20 | 257 | 78   | 334  |
| GGCAGCTCTGTTCCAAGTGT   | 60.453 | 20 | 248 | 51   | 298  |
| TTACAGATAACCGTTCCTCCGC | 59.96  | 20 | 158 | 0    | 157  |
| GACAAAGTGGTGGCTTCTGGT  | 60.159 | 20 | 266 | 565  | 830  |
| AAATAGAGCAAGTGGGCAGG   | 59.336 | 20 | 258 | 2212 | 2469 |
| CCCCCTCTGTTTTACGTC     | 60.494 | 19 | 216 | 234  | 449  |
| TGCAACCTACTCAAAGACTTCC | 60.341 | 23 | 268 | 569  | 836  |
| GCTTACAAAGTTGATGCCCC   | 59.574 | 20 | 256 | 33   | 288  |
| GCTTACTGATGCAGAAGCCC   | 59.985 | 20 | 255 | 99   | 353  |
| ACCCCTCACATGCTCTTCAC   | 60.12  | 20 | 269 | 636  | 904  |
| TTCGTTGACCCCATATGTCA   | 59.774 | 20 | 202 | 450  | 651  |
| CAGCACCAGAATTGCTCCTA   | 59.024 | 20 | 197 | 131  | 327  |
| CCGACTGAACCTCATCCAAA   | 61.034 | 20 | 269 | 151  | 419  |
| AATCACCCAATCATCCAACC   | 59.464 | 20 | 186 | 543  | 728  |
| CACTCCATTCTTCGTCCCTC   | 59.655 | 20 | 112 | 9    | 120  |
| CAGTTAAAGCGTTCAGCAA    | 59.108 | 20 | 187 | 1056 | 1242 |
| CGATCGGTCAATCGAATTTT   | 59.901 | 20 | 161 | 450  | 610  |
| AAACCCTAGTTTCTGCTGCG   | 59.517 | 20 | 176 | 20   | 195  |
| GGTGCAAGGCATAAAATCAAA  | 59.957 | 21 | 224 | 2654 | 2877 |
| ATCATGGAAACATGACGTGC   | 59.379 | 20 | 232 | 38   | 269  |
| TGCCATCTCGTTGGAATTTT   | 60.448 | 20 | 152 | 12   | 163  |
| CCTTCAGAGGCATGGTTTGT   | 60.111 | 20 | 218 | 2    | 219  |
| GGGAGGGAGAGAGGGTATTTT  | 60.27  | 21 | 253 | 212  | 464  |
| CCATTCTTTTAGGGCCAACA   | 59.931 | 20 | 210 | 454  | 663  |
| CGATCCCTCTCTCACGTC     | 59.945 | 20 | 188 | 83   | 270  |
| AATGGATCGGAAGCAATGAG   | 60.036 | 20 | 169 | 799  | 967  |
| TCCAACCAATGACTTTCAA    | 58.947 | 20 | 276 | 3464 | 3739 |
| GACACCGTTACGCAGACTCA   | 59.905 | 20 | 136 | 1472 | 1607 |
| TCCCCTAATTCACGTGTTGAC  | 59.845 | 21 | 263 | 612  | 874  |
| GCCGATTCCTCCTTTCTCTC   | 60.293 | 20 | 211 | 4219 | 4429 |
| TCGTGATGATCGTATAGCAA   | 59.295 | 21 | 278 | 34   | 311  |
| AACACGCGTTTTTAGGGTTT   | 58.676 | 20 | 256 | 33   | 288  |
| GAGTGGGAGATTGTTGGGAA   | 59.903 | 20 | 275 | 36   | 310  |
| GGAAATGGGTTCTCTCTCCC   | 59.874 | 20 | 215 | 136  | 350  |
| ACGTGTGAGACTTCGTGTGCG  | 59.94  | 20 | 277 | 1097 | 1373 |
| TGCTGGACCTCCACAACCTT   | 60.69  | 20 | 140 | 101  | 240  |

|                        |        |    |     |      |      |
|------------------------|--------|----|-----|------|------|
| TGCCCCACCCAAGTATTTT    | 60.177 | 19 | 103 | 140  | 242  |
| TGCACGCATTATTCTAAGCA   | 58.119 | 20 | 224 | 32   | 255  |
| TCTTCCCACCTTACTCACGC   | 60.255 | 20 | 256 | 40   | 295  |
| CTTTCCCTTCTCCCTTTTGG   | 60.04  | 20 | 159 | 45   | 203  |
| CACACAAGCAACTTCCCTCA   | 59.873 | 20 | 253 | 626  | 878  |
| GCTTTTGCTTGCATTTGTTG   | 59.49  | 20 | 211 | 2416 | 2626 |
| CAACGAGCCTTCCTTTTGTC   | 59.853 | 20 | 280 | 333  | 612  |
| TGAAGAAGGAAGCTAAAATGC  | 60.03  | 23 | 166 | 6    | 171  |
| GCATTTGTTAGAGGTTTTGACC | 60.389 | 23 | 112 | 2364 | 2475 |
| TCGATCGATCCCATCTTGTT   | 60.426 | 20 | 178 | 80   | 257  |
| CGAGGAATGATAGAGCCGAT   | 59.249 | 20 | 272 | 309  | 580  |
| CATCTCTCCTTCTTTCTCGG   | 59.593 | 22 | 149 | 119  | 267  |
| AAAATGAAAACGTTACTTCTGC | 58.791 | 23 | 177 | 129  | 305  |
| GTGGACTCTTGGGGTTGAGA   | 60.088 | 20 | 228 | 19   | 246  |
| CCCTTTTCTCCTTCTCGTT    | 59.955 | 20 | 228 | 248  | 475  |
| GTCTCGATGGTGTGATCGG    | 60.063 | 19 | 151 | 22   | 172  |
| CATATATGGGGAGCGTACCG   | 60.188 | 20 | 274 | 4    | 277  |
| TATTCTGCCGAAAATACCCC   | 58.898 | 20 | 178 | 94   | 271  |
| ATGCTTGCCCAGACTTTCAA   | 60.776 | 20 | 280 | 56   | 335  |
| GGTGGTGGGCGAGTAATAAA   | 59.823 | 20 | 138 | 274  | 411  |
| AAGTCCACACAGGTGACTCG   | 58.725 | 20 | 149 | 213  | 361  |
| GATTGGCGAGGGGAGAGT     | 60.16  | 18 | 219 | 1415 | 1633 |
| TCAGCTCCAGCTCCTTGATT   | 60.096 | 20 | 267 | 1034 | 1300 |
| CCGGAAGGTCGACATTTATC   | 59.387 | 20 | 135 | 37   | 171  |
| TTCACGCATTTCCACACACT   | 60.16  | 20 | 140 | 10   | 149  |
| GGATTCTCCCTACTCCACCC   | 59.755 | 20 | 219 | 356  | 574  |
| AGGAAAGCCTTTGACCGAAT   | 60.074 | 20 | 270 | 144  | 413  |
| AGAGCAAACCTCCGATGGCTA  | 59.978 | 20 | 262 | 1302 | 1563 |
| AAGACACCTAGTTGCCCCCT   | 59.994 | 20 | 120 | 131  | 250  |
| AATTAGCCGAAATCCCCATC   | 60.116 | 20 | 212 | 1040 | 1251 |
| TGCAGGGTTCGATTCACATA   | 60.073 | 20 | 237 | 270  | 506  |
| GAAGCCTCATCTCGGGTTC    | 59.753 | 19 | 143 | 143  | 285  |
| TTCTCCCTGTTTCACGAAC    | 60.088 | 20 | 151 | 205  | 355  |
| GGTTCTGGGCCTAACTGTCA   | 60.111 | 20 | 250 | 176  | 425  |
| AAGCGTGCTTGTCTTCGAGT   | 60.201 | 20 | 277 | 44   | 320  |
| CGGTTATTAGTTATCACCCGAA | 59.322 | 23 | 238 | 738  | 975  |
| GCGTTTTAACTCGTCGTGGT   | 60.176 | 20 | 235 | 1094 | 1328 |
| GAGCTGAAGCACTTTGACCC   | 59.997 | 20 | 134 | 1642 | 1775 |
| ATCCGAAAATATGCAGTGGC   | 59.929 | 20 | 178 | 1812 | 1989 |
| GAACCTGAAATGCAAGGAGC   | 59.82  | 20 | 130 | 1257 | 1386 |
| GAAGTAGGCGAGAACGATGC   | 59.985 | 20 | 177 | 391  | 567  |
| GCTGCTTAGGAGGGTTTCCT   | 59.848 | 20 | 242 | 227  | 468  |
| ACGTAAGGAAATGCATGAA    | 59.898 | 23 | 188 | 264  | 451  |
| TGCCTTGACTCCCAAAGATT   | 59.67  | 20 | 207 | 99   | 305  |
| ACATGGTGGAGTGCATTGAA   | 59.967 | 20 | 164 | 66   | 229  |
| GTTGGCCCTTGATTGTTGTT   | 59.836 | 20 | 181 | 144  | 324  |
| AACTAAAGGGGAAGCTCTGC   | 57.695 | 20 | 229 | 557  | 785  |
| CTGGGTACGGCTAGAAGGAA   | 59.331 | 20 | 163 | 227  | 389  |
| AGGGTCGTTTCATGGATTACA  | 57.864 | 20 | 175 | 346  | 520  |
| GGATTTGGACAGACCACCAC   | 60.223 | 20 | 103 | 482  | 584  |
| AGAAGTGTAGAGCGGTCGGA   | 60.012 | 20 | 102 | 1825 | 1926 |
| GGAGGCCTAAGCCAGATAGC   | 60.327 | 20 | 174 | 68   | 241  |
| TGCTCCGAATTCTATTCCGT   | 59.668 | 20 | 272 | 48   | 319  |
| GATGCCTTTTTGCTTTGCTC   | 59.967 | 20 | 185 | 1921 | 2105 |
| TGTAAGTGGATTGCTAAGAAAT | 59.554 | 26 | 251 | 90   | 340  |
| GCATATCCAGCACGCTAACA   | 59.862 | 20 | 276 | 133  | 408  |
| TGTAGTGAAGTGCAGCCTGG   | 60.049 | 20 | 180 | 235  | 414  |
| TGCATGGGTCAAAGTGAGAC   | 59.682 | 20 | 262 | 8    | 269  |

|                         |        |    |     |      |      |
|-------------------------|--------|----|-----|------|------|
| GTTTGCCGGCTATTACGCTA    | 60.246 | 20 | 251 | 65   | 315  |
| GAAGATCGGGGAGTGACAGA    | 60.199 | 20 | 163 | 629  | 791  |
| CGTGTCCGCATCAAATAAA     | 59.562 | 20 | 248 | 127  | 374  |
| TGTTGGGATATGAAAATGACA   | 60.826 | 23 | 119 | 295  | 413  |
| CTCAGCATACGGGAAGGGTA    | 60.088 | 20 | 249 | 7    | 255  |
| GTCGACCCTGACCCTCATA     | 59.384 | 20 | 236 | 394  | 629  |
| TATAGTGCAACCCCCTCACC    | 59.813 | 20 | 241 | 69   | 309  |
| GCGTTGATCACGGTTAGATG    | 59.152 | 20 | 205 | 1573 | 1777 |
| TGCACTATGGGAACTGCAAC    | 59.722 | 20 | 148 | 600  | 747  |
| ATTCCACAACAAAATGCAA     | 58.869 | 20 | 251 | 396  | 646  |
| GTCAACAAGCTGTCAACCCA    | 59.726 | 20 | 274 | 42   | 315  |
| CAGCTGAACCATCAAGAGTCA   | 59.022 | 21 | 276 | 80   | 355  |
| TGGAAACAAGGGAAAAGTCAAT  | 58.54  | 21 | 218 | 0    | 217  |
| TTAAGAGGGAGGGAAAAGGC    | 59.661 | 20 | 195 | 832  | 1026 |
| CGACGTGTAATCACCCCTCAA   | 59.566 | 20 | 261 | 10   | 270  |
| AACGAGGATCAGTGAGCAGC    | 60.564 | 20 | 238 | 197  | 434  |
| TGCCACAATTATGGAGATATGC  | 59.682 | 22 | 237 | 16   | 252  |
| ATGTGAATGCACCTGAATACG   | 58.516 | 21 | 245 | 128  | 372  |
| GTAAGTGAAGTGCCACTGCC    | 60.721 | 20 | 264 | 6    | 269  |
| TGATTCACGCTAAAGCACAAG   | 59.948 | 22 | 226 | 8    | 233  |
| GATTCGTCGACTACTCATGCA   | 60.278 | 22 | 191 | 2401 | 2591 |
| TCCACCATTTAGCACTATCA    | 58.107 | 21 | 277 | 37   | 313  |
| AACCCAGCAATACACCGAAC    | 59.859 | 20 | 235 | 12   | 246  |
| TCAACAGAAACGCACACACA    | 59.912 | 20 | 242 | 27   | 268  |
| ACGGTGGTGCAAGAGTGATT    | 60.577 | 20 | 143 | 4    | 146  |
| GGGATCCCTCGTATCTTTCC    | 59.728 | 20 | 147 | 4536 | 4682 |
| GAGGGTGAGTTGGCATCATT    | 59.934 | 20 | 234 | 96   | 329  |
| TCGACTTTCAGTATTGCGATTG  | 60.264 | 22 | 262 | 359  | 620  |
| CCCTTGTCTTTCATCCCTCA    | 60.042 | 20 | 206 | 118  | 323  |
| GCACATATTTCAACGAGTGCC   | 60.526 | 21 | 264 | 8    | 271  |
| TGCATGCATTGCTTAAGTCT    | 57.126 | 20 | 249 | 209  | 457  |
| CATGGGGAGAGGAGTTAGCA    | 60.21  | 20 | 266 | 148  | 413  |
| TTACGGTTCCTCTACGTGC     | 60.132 | 20 | 223 | 190  | 412  |
| TTCATTAAGGGGAAAGACGTTGG | 59.871 | 22 | 273 | 27   | 299  |
| CAGTCAGGGCCAAGAGAAAC    | 59.844 | 20 | 211 | 1167 | 1377 |
| AAGCATTGATGTCTGAATTTGA  | 58.755 | 23 | 253 | 260  | 512  |
| CAACAGTTTGGCATCAGAGC    | 59.445 | 20 | 159 | 228  | 386  |
| TGTTGCCAGAAAAATTGTCG    | 59.706 | 20 | 249 | 21   | 269  |
| TCTGGTGAATGAGATCCAA     | 59.009 | 20 | 275 | 347  | 621  |
| CCTATGATGGTATGGTGTGGA   | 58.159 | 21 | 252 | 74   | 325  |
| AGGGGTGTTCAAAAATATCCG   | 60.061 | 21 | 170 | 53   | 222  |
| CACTCACCGTCAAATCGTGT    | 59.597 | 20 | 274 | 49   | 322  |
| CTGCCTGCTTCATGTCTTTG    | 59.591 | 20 | 228 | 115  | 342  |
| TGCTGATATCGTACAACTACAC  | 59.653 | 25 | 165 | 133  | 297  |
| CCTTATCGATGGGGCCTATT    | 60.13  | 20 | 220 | 20   | 239  |
| AAATCCCTCCCAAGTGTTT     | 59.668 | 20 | 150 | 347  | 496  |
| TTACATTGGTGCGTGCACTT    | 60.18  | 20 | 265 | 3211 | 3475 |
| CGTTTTGACAATATTTAGTGTTT | 57.129 | 25 | 134 | 996  | 1129 |
| CTCATATGACCACAACCCGA    | 59.369 | 20 | 244 | 37   | 280  |
| CACTCAATAATGCTGCTGCC    | 59.449 | 20 | 207 | 113  | 319  |
| GGCTCACCCAAATATGGAAC    | 59.249 | 20 | 216 | 2103 | 2318 |
| TGCTTGGGGCCTAAAATAGA    | 59.677 | 20 | 233 | 1207 | 1439 |
| AAAATCAAAGGCCCAACAATG   | 59.801 | 20 | 116 | 1044 | 1159 |
| CCATCTCCACGACGTTATCA    | 59.522 | 20 | 204 | 1572 | 1775 |
| CACCACCTTATCACACACGC    | 60.032 | 20 | 181 | 27   | 207  |
| ACGATCCATATTGGGTCAAA    | 57.735 | 20 | 212 | 9    | 220  |
| AGAGCAGGGAGGAAGCAAAT    | 60.349 | 20 | 154 | 1877 | 2030 |
| GATCAGTATGGCAGTTGGGG    | 60.34  | 20 | 138 | 54   | 191  |

|                         |        |    |     |      |      |
|-------------------------|--------|----|-----|------|------|
| CTGATCTGGGTTGGGAATTG    | 60.309 | 20 | 115 | 3    | 117  |
| ATGTGCTGGAGCCTTGCTTA    | 60.934 | 20 | 258 | 2116 | 2373 |
| GACCCACTGACCTCCGTA      | 59.966 | 20 | 266 | 339  | 604  |
| ACCCGGAGTATTCCGAAGTC    | 60.328 | 20 | 194 | 251  | 444  |
| CATGCAAGTTTGCTCCTACTG   | 58.592 | 21 | 277 | 2911 | 3187 |
| TTTTTCGAGGTCCATTTTCG    | 60.046 | 20 | 190 | 65   | 254  |
| CCAAAAATTCAAATCCAAAC/   | 58.869 | 22 | 242 | 39   | 280  |
| AGGGTGGTTTTCCCAAGTTC    | 60.204 | 20 | 217 | 394  | 610  |
| TCGCGGATTTTTGGATAAAC    | 59.907 | 20 | 224 | 2    | 225  |
| GCAGCAAATCGATCCATAACC   | 60.444 | 20 | 209 | 970  | 1178 |
| ACGGATTTATTGGTTATTACCTC | 58.008 | 24 | 183 | 469  | 651  |
| AACTGGGAAAGTGGGGAAGT    | 59.834 | 20 | 203 | 156  | 358  |
| GGTAGTTGATGAAAGCCGGA    | 60.074 | 20 | 175 | 35   | 209  |
| CACACTTTACACACACTGAAA/  | 59.163 | 25 | 118 | 423  | 540  |
| CATCAGAGCCCACGGTTAGT    | 60.134 | 20 | 248 | 139  | 386  |
| AGGGTTGTGTGCCCTATCAT    | 59.288 | 20 | 255 | 8    | 262  |
| TTTGTGGTTTTGGGACCTTA    | 60.198 | 20 | 186 | 4815 | 5000 |
| CTCGCTCAACCAAGTAAGTCG   | 60.06  | 21 | 202 | 362  | 563  |
| TTGGGAGGAGAGATTGTTGG    | 60.042 | 20 | 278 | 16   | 293  |
| CCTGATGCCCTCTCTTCTCA    | 60.488 | 20 | 135 | 2114 | 2248 |
| GCTAACACCACGCCACTACA    | 59.788 | 20 | 211 | 1245 | 1455 |
| GCAGTTATTGTGATGTGGGTG   | 58.914 | 21 | 250 | 20   | 269  |
| TTGCCTCATCTTGGTTGCTT    | 60.776 | 20 | 256 | 270  | 525  |
| AACTTGTGGTGGTGGCTTGT    | 60.466 | 20 | 230 | 118  | 347  |
| TTGTGCTTAATTTTGTCTAAT   | 58.884 | 25 | 176 | 148  | 323  |
| GTGTGGAGAGGATTTTGGGA    | 59.903 | 20 | 202 | 941  | 1142 |
| ATCCCAATTTACCAAACCC     | 59.756 | 20 | 173 | 29   | 201  |
| CGATCTGGTATCAGCGGTTT    | 60.096 | 20 | 199 | 344  | 542  |
| ATTTTTGGATGAGGCAGTGG    | 59.933 | 20 | 277 | 1231 | 1507 |
| TTTTCTGACCAACACCACCA    | 59.976 | 20 | 123 | 1368 | 1490 |
| ATCCAGCAAGGAGGAAGTGA    | 59.803 | 20 | 239 | 15   | 253  |
| TTGACAATATTTAGTGTTTTGAC | 58.99  | 27 | 139 | 350  | 488  |
| ACCTTTCTCTTGGCCTCCTC    | 59.817 | 20 | 192 | 338  | 529  |
| CGGGAGTATTTGGTCACACC    | 60.232 | 20 | 173 | 153  | 325  |
| TAACATGCAACTCCCAAACG    | 59.585 | 20 | 271 | 2413 | 2683 |
| CCTCAATCACCCCTTTTTGA    | 59.903 | 20 | 268 | 1137 | 1404 |
| CCACATTTAAGGTTATCACCT   | 59.654 | 23 | 101 | 232  | 332  |
| TTTGGGGTGTGGAGTTGT      | 60.246 | 20 | 156 | 211  | 366  |
| GGTGGGCTTGGTGTACTAACA   | 60.172 | 22 | 112 | 917  | 1028 |
| TAATAGGCCACACCACCTC     | 59.813 | 20 | 243 | 62   | 304  |
| TGTCGCCTGAAAAATATCCC    | 59.901 | 20 | 271 | 5    | 275  |
| TGTGAGGCCATCATACTTG     | 59.522 | 20 | 157 | 1365 | 1521 |
| CCAACCCTTCTCCTCCTCT     | 59.671 | 20 | 259 | 205  | 463  |
| TTCTGGATGGAATGTGCAA     | 60.049 | 20 | 250 | 77   | 326  |
| GGGTGTTTTGACAATATCACGA  | 59.73  | 22 | 178 | 241  | 418  |
| GCAGATGCCACAAAAGGATT    | 60.081 | 20 | 172 | 858  | 1029 |
| GGATTGCTGAAAAGTGGCTC    | 59.82  | 20 | 253 | 19   | 271  |
| AAACAGCTGGCATCTACGGT    | 59.763 | 20 | 127 | 1157 | 1283 |
| TACTACATCAACCGCCAGCA    | 60.28  | 20 | 100 | 548  | 647  |
| TGCTACACTCGACAGTCCGT    | 59.493 | 20 | 133 | 7    | 139  |
| GGAGGGATCGGATAGAAAGG    | 59.859 | 20 | 194 | 1415 | 1608 |
| CCACGTACCTTATCCCAT      | 59.67  | 20 | 216 | 1    | 216  |
| AACAACGTTATCTGCGACAAG/  | 59.813 | 22 | 202 | 520  | 721  |
| GGATCATTAGGGTTGCCAGA    | 59.894 | 20 | 163 | 264  | 426  |
| AATTTCTTGGCCTACACCGA    | 59.569 | 20 | 279 | 55   | 333  |
| GGTATGCACTCTGCAACCAA    | 59.722 | 20 | 109 | 963  | 1071 |
| TGTTACATTTGGCTCGGTGA    | 60.111 | 20 | 220 | 470  | 689  |
| TCTAGTCGATCCATCCCGTT    | 59.508 | 20 | 277 | 465  | 741  |

|                        |        |     |     |      |      |
|------------------------|--------|-----|-----|------|------|
| GGTGTCTGCAAAAGCATTCA   | 59.847 | 20  | 256 | 359  | 614  |
| AGAGGAGGGGTCCATGAAAG   | 60.447 | 20  | 126 | 845  | 970  |
| TGATTCCGGAAAGAAGATGG   | 60.006 | 20  | 141 | 984  | 1124 |
| GGCGCACTGAATTGTTGTTA   | 59.735 | 20  | 212 | 7    | 218  |
| CCAGATCCAAACGAGTTCTCA  | 60.239 | 21  | 219 | 0    | 218  |
| AAAATGCCCTTGTATGCTGC   | 60.103 | 20  | 147 | 20   | 166  |
| TAGGATTTGAACCTGCGACC   | 60.074 | 20  | 258 | 45   | 302  |
| TCTGCTGCAAATTTGGAAGTTA | 59.89  | 22  | 176 | 854  | 1029 |
| CCGTGCAATTTTTCAGGTTTTG | 60.472 | 20  | 187 | 104  | 290  |
| TGCAGAGGTGGCTCAGTTAG   | 59.187 | 20  | 279 | 29   | 307  |
| TTCATTCAAGCTACCCACTCTT | 59.317 | 23  | 161 | 107  | 267  |
| TGGCCATGTTGGTAGATTCA   | 59.924 | 20  | 153 | 24   | 176  |
| CTTCACTCAATCTGCGA      | 59.984 | 20  | 187 | 1080 | 1266 |
| AACGAGATCGAATGGAGAAAA  | 60.075 | 22  | 111 | 829  | 939  |
| TGTCCACTTGTGTCACGGAT   | 60.005 | 20  | 220 | 68   | 287  |
| TTCGAACGATAGCTCCCACT   | 59.836 | 20  | 139 | 695  | 833  |
| TCATCATTTTCGATCCTGTGG  | 59.451 | 20  | 149 | 0    | 148  |
| CCCTCGAAATGGGTTTTTCT   | 60.291 | 20  | 206 | 612  | 817  |
| TGGCAATTTGTCTTTCAATCC  | 59.93  | 21  | 191 | 28   | 218  |
| TTAGAGCATCTCCAATGCCA   | 59.375 | 20  | 205 | 14   | 218  |
| GTGGAACATTCATCCCACATC  | 59.995 | 20  | 187 | 1384 | 1570 |
| CAGCACTTTTCATGTTGTTGC  | 59.381 | 21  | 211 | 830  | 1040 |
| CGGATGACCGAGCTACTGAT   | 60.24  | 20  | 247 | 215  | 461  |
| CAGCAACGATTGGAGCATT    | 59.833 | 20  | 225 | 114  | 338  |
| TTTTGTGATGATATGGTTGTG  | 58.413 | 22  | 191 | 39   | 229  |
| TGTAACAAATAAATTAACGTAC | 57.577 | 27  | 166 | 1089 | 1254 |
| GCGTGTCTAGGTGTTCTTGG   | 59.788 | 21  | 226 | 125  | 350  |
| CTCATTGTAATCTCTCCCAAAG | 57.927 | 24  | 277 | 280  | 556  |
| CATGCATGATGTGATGTCAGTC | 59.999 | 22  | 165 | 42   | 206  |
| CCATTTACTAAGAACGACATGC | 60.404 | 24  | 277 | 1645 | 1921 |
| TTTTCGGATCGAAATTAGGTT  | 57.759 | 21  | 204 | 467  | 670  |
| TTTTCTTTTGCACGACTGC    | 59.087 | 20  | 155 | 14   | 168  |
| TCTCGGAAGGAATGAGATGC   | 60.303 | 20  | 251 | 4    | 254  |
| CCATGGTGAGAAAACAACGA   | 59.541 | 20  | 274 | 99   | 372  |
| CAGCGAGATCTTCGTCCATT   | 60.362 | 20  | 163 | 115  | 277  |
| CCATTGGCTCGTTTATTTTAGA | 58.331 | 22  | 280 | 171  | 450  |
| TCGGGTCTTGAGGGTAATTG   | 59.926 | 20  | 262 | 443  | 704  |
| CGGGCAGAAGAAGAACAAAT   | 59.312 | 20  | 263 | 506  | 768  |
| TGCATACAAAGGTAAGGAGGC  | 59.238 | 21  | 142 | 636  | 777  |
| GGGAGAAAGACACGTGGAAC   | 59.555 | 20  | 270 | 134  | 403  |
| GCAACATAGTTTATGCATCCCA | 59.859 | 22  | 213 | 81   | 293  |
| ATTGTGAACCGGTGGTTCTT   | 59.308 | 20  | 232 | 140  | 371  |
| CAATGAAATAAAGAAGCCGGA  | 59.199 | 21  | 238 | 266  | 503  |
| ACCTTACACCTCACACCCCA   | 60.275 | 20  | 169 | 456  | 624  |
| TTTCTTCATTCCCATTATGTC  | 57.923 | 22  | 256 | 398  | 653  |
| CGGCCAAATCTAACGAAATC   | 59.547 | 20  | 263 | 285  | 547  |
| ATTTCAAAAAGTGGGGTCCA   | 59.264 | 20  | 247 | 18   | 264  |
| GAAAGAAGAAGAGAGATAGAT  | 58.05  | 27  | 255 | 482  | 736  |
| CCATCGTCCTTATGGGCTAA   | 59.916 | 20  | 280 | 191  | 470  |
| CTCGTTTTCTCTCCCATCAA   | 60.187 | 20  | 186 | 9    | 194  |
| CAAACCTGACGCGCTATCCT   | 60.407 | 20  | 251 | 3    | 253  |
| GAAGACACCCAAGCCATAA    | 59.933 | 20  | 210 | 21   | 230  |
| TTCTCCTTGTTCGGTGGAC    | 60.088 | 20  | 278 | 67   | 344  |
| TGATTTGATTCTTCGCGTTG   | 59.809 | 20  | 106 | 2491 | 2596 |
| 595                    | 595    | 595 | 595 | 595  | 595  |
| GACCTTCCCAAACCTTCATCG  | 59.526 | 20  | 237 | 50   | 286  |
| CGCTTCAACTTTTCCACCAT   | 60.11  | 20  | 138 | 634  | 771  |
| TCCAGTACGCAGACTTTTCTT  | 60.295 | 22  | 280 | 34   | 313  |

|                          |        |    |     |      |      |
|--------------------------|--------|----|-----|------|------|
| TTAGGAATTTGTTCCCGTGC     | 59.938 | 20 | 272 | 59   | 330  |
| CGGCTTCTCCCTATCAAATG     | 59.662 | 20 | 109 | 496  | 604  |
| AAAAACCCCGACTCAAACCTT    | 57.697 | 20 | 225 | 308  | 532  |
| CTCGTGGACACCTTGTCAAA     | 59.72  | 20 | 121 | 27   | 147  |
| TTGACAATATTTAGTGTITTTGAC | 58.99  | 27 | 254 | 606  | 859  |
| CCCGATCCTAAGCAACTTCA     | 60.206 | 20 | 118 | 796  | 913  |
| GTTGCCCAAGTTTCGAGTT      | 60.156 | 20 | 167 | 363  | 529  |
| TGCAAAATGGGGATTTGATT     | 60.132 | 20 | 269 | 1013 | 1281 |
| CACTTGGACCAGAAAAGGGA     | 60.081 | 20 | 109 | 14   | 122  |
| AGACGTTGCATGTGCTTCTG     | 60.056 | 20 | 107 | 1840 | 1946 |
| TGCTGAGTTTTGAGTCACGAT    | 58.511 | 21 | 178 | 131  | 308  |
| AATCGAGGTGTAACGGGGAT     | 60.578 | 20 | 273 | 1861 | 2133 |
| TGCTCCTGTAAGTTTGCCATT    | 59.761 | 21 | 264 | 1161 | 1424 |
| GCTGATTCTGAAGGCATGGT     | 60.226 | 20 | 274 | 99   | 372  |
| GCTGATTCTGAAGGCATGGT     | 60.226 | 20 | 280 | 100  | 379  |
| CCAAACCAGAACCGTCAAAT     | 59.83  | 20 | 220 | 416  | 635  |
| CCAACCATAATTGTTTCGGG     | 60.046 | 20 | 248 | 296  | 543  |
| TAAACAGCCGGAATGGAAG      | 60.067 | 20 | 234 | 1034 | 1267 |
| CCCATAACCATGACAAACAATC   | 59.975 | 22 | 253 | 407  | 659  |
| CTGCTACAATGACGATGCCA     | 60.834 | 20 | 131 | 20   | 150  |
| AGGTTGGGATGGAATGAAAA     | 59.22  | 20 | 247 | 301  | 547  |
| AAAATCACTAGCATGCACGG     | 58.799 | 20 | 137 | 70   | 206  |
| TTCATAGTCGGCTCAATCCC     | 60.036 | 20 | 149 | 392  | 540  |
| CCTTGCTAGATGGCCAAAAA     | 60.202 | 20 | 279 | 319  | 597  |
| TTCCACCTCATATCATTCCCA    | 60.14  | 21 | 274 | 81   | 354  |
| TTGTCCTCCTGTCCCTTAC      | 60.088 | 20 | 175 | 706  | 880  |
| CCATTGCATGCGTCAGTATC     | 60.104 | 20 | 234 | 3516 | 3749 |
| TGCAGAGATGGTGATGGTGT     | 60.121 | 20 | 249 | 6    | 254  |
| CTCGTCGCCTCTTATTGGAC     | 59.836 | 20 | 254 | 13   | 266  |
| GAGCTTTGTATGCCCACTC      | 59.7   | 20 | 265 | 92   | 356  |
| CAAACGCCATCAACATCAAG     | 60.111 | 20 | 117 | 0    | 116  |
| AATGATTGAAGCTTCCCCCT     | 59.903 | 20 | 153 | 312  | 464  |
| TGTTGGATGCCTTTGATCTG     | 59.648 | 20 | 150 | 10   | 159  |
| CGAGTTGCTTCTATCGTCACC    | 59.89  | 21 | 219 | 680  | 898  |
| TTGGCATGTAATGCGAGTTT     | 59.186 | 20 | 243 | 1010 | 1252 |
| ACAAGACGGACAAGTTGGGT     | 59.474 | 20 | 264 | 240  | 503  |
| TTGGAAGCAATTGCATGATT     | 59.115 | 20 | 197 | 30   | 226  |
| CACGTCAGCTTCATCTCCAA     | 59.984 | 20 | 238 | 325  | 562  |
| TGCCCTTATTCAATTTCCA      | 60.26  | 20 | 177 | 415  | 591  |
| AGCACCGACTGAAAATGAGG     | 60.255 | 20 | 179 | 0    | 178  |
| TGCTGCTTCAATTCGTTTCC     | 61.285 | 20 | 277 | 49   | 325  |
| AACCCATCCTCTCATCGAAA     | 59.483 | 20 | 134 | 105  | 238  |
| GCATCGTCTCAACCCTTGTT     | 60.119 | 20 | 129 | 104  | 232  |
| AGCGATTCATGGAGATTGG      | 60.036 | 20 | 247 | 668  | 914  |
| GCACACAAATAATGGTTTCTTC   | 59.771 | 23 | 216 | 144  | 359  |
| CTGATTTGCACAGTGCCTCA     | 59.92  | 21 | 250 | 711  | 960  |
| TTTTTAAATGGATCGGCCTCT    | 59.922 | 21 | 270 | 2    | 271  |
| AAACGGGTGAGCAAGACAAC     | 60.156 | 20 | 262 | 1552 | 1813 |
| AAATGAACCGAACCAACCA      | 60.206 | 20 | 274 | 49   | 322  |
| CATGTTTTTGGATTTTGGGG     | 60.024 | 20 | 170 | 905  | 1074 |
| CTCGAACCACTTTCAAGCCT     | 59.473 | 20 | 274 | 130  | 403  |
| TTGGCTTGGTTGTTGTAGATTC   | 59.134 | 22 | 279 | 992  | 1270 |
| TGGGAAGATCTCCATTCTG      | 59.224 | 21 | 230 | 238  | 467  |
| TAGGGGTTATCACCTGAATGC    | 58.917 | 21 | 118 | 159  | 276  |
| CGAATTAATCCGTCCAATGA     | 58.429 | 20 | 247 | 764  | 1010 |
| GAATCACTTTGCAAGCACCA     | 59.847 | 20 | 243 | 156  | 398  |
| TGCAACCGAAAATTAGGGAA     | 60.427 | 20 | 181 | 138  | 318  |
| TCAAATTTTTCTCATGATATTT   | 59.012 | 25 | 229 | 517  | 745  |

|                        |        |    |     |      |      |
|------------------------|--------|----|-----|------|------|
| TTTGTTATGCGTTTTGACGA   | 57.846 | 20 | 184 | 358  | 541  |
| ACGTGCAACCAGATTCAAAA   | 59.174 | 20 | 141 | 82   | 222  |
| CAAAGTGCTTTAGGGGTGGA   | 60.103 | 20 | 126 | 116  | 241  |
| AAAACCCCTTCTGTCCTCCC   | 59.415 | 20 | 184 | 21   | 204  |
| GAAGCGAATCGTCGAGAAAC   | 59.962 | 20 | 217 | 292  | 508  |
| ATGATAGCCATGATCTCCCC   | 59.877 | 20 | 232 | 299  | 530  |
| AGAGGGCTATGCTGATTTGTT  | 59.752 | 22 | 260 | 47   | 306  |
| CCTTGTGTTGCCAAGTTTCA   | 59.734 | 20 | 157 | 120  | 276  |
| TCAAGGGACCAGAGGAATTG   | 60.042 | 20 | 262 | 66   | 327  |
| TCGGGGTATCAGAAATCGAG   | 60.029 | 20 | 269 | 45   | 313  |
| CCATATAACGATGCCATCCC   | 60.001 | 20 | 279 | 11   | 289  |
| ATGGTGCAGAGGATAGACGG   | 60.096 | 20 | 246 | 1271 | 1516 |
| CCCCACCAAACTCCAATA     | 59.824 | 20 | 245 | 15   | 259  |
| TTCACGTTCTTCCCCTCTA    | 59.948 | 20 | 139 | 292  | 430  |
| TCGCTTCCAGTTTTGTCCTC   | 60.375 | 20 | 264 | 8    | 271  |
| AACAACAACAACGTCGTCCA   | 60.049 | 20 | 200 | 4    | 203  |
| ACCACTCTTGCACTCTTTTCT  | 59.956 | 24 | 100 | 13   | 112  |
| GGCCGGATTGCTGATATAGA   | 60.023 | 20 | 141 | 934  | 1074 |
| CAAGCCTAACACCACAAGCA   | 59.904 | 20 | 274 | 490  | 763  |
| CTGCCACCATTGATGCTAGA   | 59.823 | 20 | 164 | 63   | 226  |
| CTCGTTCAGTCAGTTATCCG   | 60.023 | 21 | 159 | 11   | 169  |
| TACATTCATTGGGGTGTGGA   | 59.623 | 20 | 105 | 12   | 116  |
| TGGCAGATTTAATATTTACGTT | 59.847 | 26 | 212 | 167  | 378  |
| TGGAAGGGAAAAGAACCTCA   | 59.641 | 20 | 178 | 445  | 622  |
| GACCTGACACAACCCTCCAT   | 59.817 | 20 | 262 | 56   | 317  |
| GTGGACGCTCCAGATTGTTT   | 60.119 | 20 | 268 | 496  | 763  |
| GTAGACAACGGGGATCATGC   | 60.348 | 20 | 136 | 7    | 142  |
| TGATACAAGTGTTGAAGCCAA  | 58.688 | 23 | 203 | 444  | 646  |
| CACCTTCCCCTAAACCCTA    | 60.172 | 20 | 188 | 312  | 499  |
| CGGTGATAACTAGGAACAAAT  | 59.806 | 24 | 190 | 576  | 765  |
| CCCGGTATGCTGACGATAAT   | 59.807 | 20 | 201 | 1    | 201  |
| ATGGTTGCTTGATGGAGAGG   | 60.073 | 20 | 147 | 6838 | 6984 |
| GTCCAAATGGCACCAATTCT   | 59.797 | 20 | 201 | 1    | 201  |
| TGGGTCCAAGAAAACCAAAG   | 59.942 | 20 | 120 | 273  | 392  |
| ACACGGAGGTGATGCCTATC   | 59.957 | 20 | 220 | 541  | 760  |
| TGCGTTTTGACGATATATAGTG | 59.092 | 25 | 162 | 447  | 608  |
| TTGTCCCCAAACAACGAAAT   | 60.206 | 20 | 211 | 17   | 227  |
| GTGTAATCGAGGGAATCGGA   | 59.894 | 20 | 280 | 320  | 599  |
| TGCCTCTTCGGATGAACTTT   | 59.813 | 20 | 181 | 4574 | 4754 |
| TCCGTTGAGATTTTGCATCA   | 60.197 | 20 | 192 | 103  | 294  |
| TCATGGATGGGGACTTGATT   | 60.135 | 20 | 256 | 545  | 800  |
| TGTTGGGAAAGAAGAATGGA   | 58.117 | 20 | 270 | 31   | 300  |
| GCGAAATGAATGTACCGGAT   | 59.791 | 20 | 262 | 673  | 934  |
| GGCCATCGTTACTGGTTTTTC  | 59.434 | 20 | 207 | 40   | 246  |
| CCAACCAGGGCTACATTTTT   | 58.949 | 20 | 129 | 748  | 876  |
| CCAACACCACAACACCAAAC   | 59.745 | 20 | 242 | 22   | 263  |
| TGAAGCAAGAAAAGGGGCT    | 59.94  | 19 | 166 | 593  | 758  |
| AACATGAGACGCAACACCA    | 60.16  | 20 | 255 | 68   | 322  |
| CGCGTTACGAATCCAAGTTT   | 60.131 | 20 | 176 | 278  | 453  |
| AACCGAAAAATTAATCATCAC  | 57.085 | 22 | 202 | 158  | 359  |
| TTTTAAGGCGTTCAACTGGG   | 60.103 | 20 | 201 | 30   | 230  |
| GAGATTGGTGGTTGCAGGAT   | 59.934 | 20 | 266 | 251  | 516  |
| CGTGTATGTGTGTGAGTGATA  | 60.095 | 27 | 182 | 151  | 332  |
| AGTAGCGATGTCGGCAATTT   | 59.736 | 20 | 231 | 4300 | 4530 |
| CTTGCGATTAGGAATGGAGG   | 59.662 | 20 | 233 | 314  | 546  |
| CAAGAAAGTTGTGGGGTTGTG  | 60.429 | 21 | 277 | 11   | 287  |
| GCAACATCTAATGGTTGTGGG  | 60.242 | 21 | 214 | 126  | 339  |
| TAGGATTCTCACAGCCGTCC   | 60.218 | 20 | 260 | 4    | 263  |



|                        |        |    |     |      |      |
|------------------------|--------|----|-----|------|------|
| TCAAACATCGCATCCTCATC   | 59.61  | 20 | 248 | 268  | 515  |
| GGAATTTGATTCTTCCCA     | 60.995 | 20 | 272 | 636  | 907  |
| CCTGATTTTTTCATGTTTCGGA | 59.924 | 21 | 278 | 130  | 407  |
| AAGATGACACGGAGGTTTGC   | 60.119 | 20 | 245 | 106  | 350  |
| CGCAAGCATGTAAATTTTATTC | 59.213 | 23 | 270 | 143  | 412  |
| GAATGCATTTCCGGTGACTT   | 59.939 | 20 | 218 | 1276 | 1493 |
| AGTGAGAGAGAGGGCTGCTG   | 59.883 | 20 | 277 | 52   | 328  |
| TCTTCATCGTTGTAACCCCTCG | 60.118 | 21 | 240 | 88   | 327  |
| TGCAAAACGGATGAAAAACA   | 60.088 | 20 | 270 | 334  | 603  |
| TTGGAAAAGCCATGCAAGTA   | 59.301 | 20 | 215 | 52   | 266  |
| CAACACTTCACAGCTTCTCCC  | 59.899 | 21 | 210 | 436  | 645  |
| GGATGGGGTTAAGGAAGAG    | 59.761 | 20 | 218 | 69   | 286  |
| AACAAAGGGGCAATATGCTG   | 59.96  | 20 | 150 | 114  | 263  |
| AAGGAGGTGTTATGAAGGGAT  | 58.028 | 22 | 168 | 430  | 597  |
| GCGCCACACGTTAAAGTTC    | 59.336 | 19 | 237 | 12   | 248  |
| AAAGAGACAAAAGGCAGCAA   | 59.144 | 21 | 256 | 31   | 286  |
| TTGGGATTGGTCGTTTCAAT   | 60.17  | 20 | 217 | 701  | 917  |
| GCCATTGTGGGCCAGTAGTA   | 60.914 | 20 | 280 | 120  | 399  |
| CTTCATGAGGTGGCACAATG   | 60.112 | 20 | 217 | 766  | 982  |
| TTCAATTCCTTCCAACACCG   | 60.863 | 20 | 173 | 111  | 283  |
| CGTGTGTGTAACGTGTGTGTG  | 59.591 | 21 | 121 | 1212 | 1332 |
| AGAAAATAACCACGTGCCCT   | 58.579 | 20 | 189 | 96   | 284  |
| TCTTCCTCATTGGTAGGCGT   | 59.694 | 20 | 104 | 57   | 160  |
| CCCTCGAAGTTTCGTTTGAA   | 60.22  | 20 | 249 | 324  | 572  |
| TGCTTTTTATAACTCGCCCG   | 60.218 | 20 | 198 | 1333 | 1530 |
| ATTGATCGGTCCTTACCAA    | 60.317 | 20 | 205 | 49   | 253  |
| TTCCATGGCTATGCTTCTC    | 57.915 | 20 | 184 | 111  | 294  |
| CATGGGTTCTTTCCTCACAA   | 58.541 | 20 | 278 | 534  | 811  |
| TAGCAGCTGATATCCCGGT    | 59.691 | 20 | 135 | 102  | 236  |
| TGTGGATGTTGGTTTTGAGC   | 59.547 | 20 | 247 | 669  | 915  |
| TGCCTAAAGAACGTTACACGG  | 60.172 | 21 | 265 | 3    | 267  |
| GGAGAGACTCGAGATGCAATG  | 59.965 | 21 | 187 | 39   | 225  |
| CGAGGTAGCAAGTTGGACAAA  | 60.29  | 21 | 189 | 391  | 579  |
| GCCAATGAATTCACGAGGAA   | 60.983 | 20 | 249 | 66   | 314  |
| GGCCGGATCTACTAAATCA    | 60.036 | 20 | 165 | 2123 | 2287 |
| TTGATTTGTTTAATCTAATGGA | 57.304 | 26 | 276 | 776  | 1051 |
| GCGTTTTGATGATATATAGGTG | 58.907 | 26 | 186 | 123  | 308  |
| ATCGAAGTGACGATGGAAGC   | 60.226 | 20 | 266 | 3372 | 3637 |
| AATTTGCTTGCTGAGTTGGC   | 60.395 | 20 | 212 | 248  | 459  |
| AAGGTGACAACCGATCAAAA   | 58.048 | 20 | 279 | 235  | 513  |
| CAACTGCGACCAGATTCAAA   | 59.84  | 20 | 253 | 526  | 778  |
| ACTGTTATGAGGCGGGATTG   | 59.955 | 20 | 185 | 92   | 276  |
| GCAGGATCAAGGTGAATGAGA  | 60.211 | 21 | 225 | 54   | 278  |
| TGTTCTTCACGGTTCAATGC   | 59.697 | 20 | 262 | 32   | 293  |
| GAGGAGAGAGAGGGAGGGAG   | 59.489 | 20 | 231 | 251  | 481  |
| TAACCCCAAGTCTGGGACTG   | 59.959 | 20 | 187 | 21   | 207  |
| AGAGGATCGAGAGAGACGTG   | 59.142 | 21 | 267 | 82   | 348  |
| CCAGGGCAATCATCTCTAC    | 59.508 | 20 | 266 | 86   | 351  |
| TCGATTACTGCAAATCTCGG   | 58.869 | 20 | 210 | 79   | 288  |
| GGCCTCATGAACTCTGAATG   | 59.685 | 21 | 163 | 926  | 1088 |
| ATTTCCGTTTGGTATGGTGC   | 59.691 | 20 | 194 | 672  | 865  |
| CACACACTTCCACACGAACA   | 59.15  | 20 | 240 | 527  | 766  |
| CCAAGTCCACTACCCG       | 60.557 | 20 | 183 | 25   | 207  |
| GGTTATCACCGGATCGCT     | 58.462 | 18 | 193 | 1933 | 2125 |
| CCCAAACATCCAACCAATTC   | 60.029 | 20 | 263 | 217  | 479  |
| ACTCTATCTCTCACACAATC   | 57.487 | 27 | 164 | 270  | 433  |
| AAATAAGGAGGTGTTATGAAG  | 59.323 | 24 | 185 | 351  | 535  |
| CCATCTTTAGCTCCGTGTCC   | 59.694 | 20 | 254 | 223  | 476  |

|                         |        |    |     |      |      |
|-------------------------|--------|----|-----|------|------|
| GCTGTGGATAATGTGGAGGC    | 60.492 | 20 | 247 | 24   | 270  |
| TTCCTAAGTCGTGTTGCGTG    | 59.904 | 20 | 150 | 891  | 1040 |
| CAACAGCCCGTCAAAGTACA    | 59.758 | 20 | 264 | 382  | 645  |
| CGCCGTTTTAAGACCCATTA    | 59.958 | 20 | 187 | 834  | 1020 |
| GATATGCGAGATGGATGCCT    | 60.028 | 20 | 164 | 3538 | 3701 |
| TTCTCAGCATATGGGAAGGG    | 60.029 | 20 | 237 | 6    | 242  |
| TTTTGTTATGATAGGATCAAAC  | 57.769 | 25 | 177 | 1786 | 1962 |
| CGTGTGGGAAAGATATGCCT    | 59.955 | 20 | 258 | 920  | 1177 |
| TCATCGATTACGTTGAGATGAA  | 58.241 | 22 | 280 | 756  | 1035 |
| TCACCCACTCTCGTCACTTG    | 59.864 | 20 | 100 | 7    | 106  |
| ACAGTCATTCCTGTGCGCCTT   | 59.727 | 20 | 238 | 82   | 319  |
| TCAACCTCCTCCACCTGAAC    | 60.088 | 20 | 275 | 507  | 781  |
| CCTTATTTTTAACCCTAAAAAC  | 58.713 | 24 | 251 | 217  | 467  |
| TGCAACGCTTGTTTCAAGAC    | 60.035 | 20 | 191 | 1151 | 1341 |
| TTACGAGCTTGCGAGATTGA    | 59.712 | 20 | 231 | 163  | 393  |
| CACCCAACCACAGCAATTTT    | 60.786 | 20 | 250 | 22   | 271  |
| CTGAAAGAGAAGCAGCCGAG    | 60.41  | 20 | 252 | 66   | 317  |
| TCCACGTGGCACAGTAACTC    | 59.751 | 20 | 171 | 61   | 231  |
| CGGATTCGAGTTTTAATGGG    | 59.406 | 20 | 221 | 421  | 641  |
| TCTTTCATGCAATCGCTTTG    | 59.953 | 20 | 225 | 508  | 732  |
| CCAAGGGCAAGACAAACTTC    | 59.711 | 20 | 245 | 138  | 382  |
| TCCTCAATCTGGTGCTTGTG    | 59.831 | 20 | 151 | 1846 | 1996 |
| TGGTTTCCGTTTATATGACGA   | 58.031 | 21 | 198 | 9    | 206  |
| TTTCGTGGAAGGATACCGAC    | 59.933 | 20 | 267 | 24   | 290  |
| AATAGGGGCATCACGATGAG    | 59.917 | 20 | 234 | 2439 | 2672 |
| AGCAGGATAAGGGAGTTAGCA   | 58.111 | 21 | 204 | 401  | 604  |
| ATTCTGCAATAATCCCGTGC    | 59.929 | 20 | 253 | 14   | 266  |
| CTTGTGGGAGGAAGAAACCA    | 60.081 | 20 | 154 | 338  | 491  |
| TCCCATCCCTTAGTTTTGACC   | 60.173 | 21 | 220 | 113  | 332  |
| TGGGAAGAGAGCGAGAGAAA    | 60.21  | 20 | 213 | 11   | 223  |
| AATTCCAACCTTTGGGGTAATCT | 57.96  | 22 | 240 | 45   | 284  |
| ATGCGACGATGATGATACGA    | 60.065 | 20 | 140 | 251  | 390  |
| TTTGGACTGTATCGGTCTACCA  | 59.494 | 22 | 191 | 76   | 266  |
| AGTCATGAACTAATCAAGTTCC  | 59.123 | 25 | 258 | 93   | 350  |
| ATCTTGGTGGGACTACGTGC    | 59.997 | 20 | 155 | 275  | 429  |
| TGACATGACTCTGATGATTGCA  | 60.541 | 23 | 153 | 245  | 397  |
| TGGACCAGAGAGCCATTCTC    | 60.349 | 20 | 277 | 1259 | 1535 |
| CTCATTTTTGGAGCCATTGT    | 59.933 | 20 | 185 | 60   | 244  |
| CAGTGGGCAACTACAAGTGG    | 59.209 | 20 | 154 | 671  | 824  |
| ATTGGAATTTCTGGGAGTGG    | 58.836 | 20 | 272 | 2038 | 2309 |
| ACCTTGTCGATTTTGTATGGG   | 59.79  | 20 | 178 | 1968 | 2145 |
| CCGAATGTAGTGGATACGGC    | 60.352 | 20 | 107 | 330  | 436  |
| ACAAATGATGGCTGGCTAGG    | 60.096 | 20 | 229 | 282  | 510  |
| TTCCCAGCATGATGGTACAG    | 59.522 | 20 | 183 | 135  | 317  |
| TTGATTCAAGTTGCAGGTGG    | 59.691 | 20 | 182 | 41   | 222  |
| TCAATGTGGCGCAATTA AAA   | 60.074 | 20 | 278 | 289  | 566  |
| CCTCTTCAAACAGAGAGCCG    | 60.126 | 20 | 170 | 840  | 1009 |
| TATTTTATGGTCTTCCAACATTT | 57.343 | 25 | 272 | 108  | 379  |
| TGGTGCTCTTAGATTCATGGTG  | 60.132 | 22 | 199 | 349  | 547  |
| GCCTTGCCTTGTCCATATTC    | 59.533 | 20 | 268 | 140  | 407  |
| AAGGGTGAGTGGTGGGAAAT    | 60.607 | 20 | 279 | 250  | 528  |
| GGCTTTTTGGTCCAGTTCAA    | 60.088 | 20 | 229 | 3632 | 3860 |
| CCGGTGAGATTCTATTCATGG   | 59.396 | 21 | 264 | 101  | 364  |
| GACTTGAGCTTGTTCCGAGG    | 59.989 | 20 | 162 | 245  | 406  |
| GAGGACAGAACTGCTGGGAC    | 59.841 | 20 | 188 | 322  | 509  |
| TTTCCAAACAGTGCACGAGA    | 60.427 | 20 | 194 | 5557 | 5750 |
| AGGGACGACAAAAAGTTCCA    | 59.569 | 20 | 279 | 752  | 1030 |
| TTCGTCCATTGTAAACAGTTCC  | 58.997 | 22 | 176 | 132  | 307  |

|                         |        |    |     |      |      |
|-------------------------|--------|----|-----|------|------|
| GAAAAGGGATTTGGACGGTT    | 60.166 | 20 | 263 | 63   | 325  |
| TGGCTGATATGCATCAGAGG    | 59.781 | 20 | 152 | 1618 | 1769 |
| ATTGCGGCATTTTACGAGAT    | 59.574 | 20 | 234 | 86   | 319  |
| CTCTCAAACCTCACGGCCTTC   | 59.989 | 20 | 149 | 11   | 159  |
| AGACCGAGCCCATTCTTACA    | 59.694 | 20 | 255 | 3    | 257  |
| TGAGTTTGATGGAGCGAGGT    | 60.801 | 20 | 269 | 308  | 576  |
| ATCTTCACGAAGCAGCAGTG    | 59.191 | 20 | 167 | 0    | 166  |
| GCACTACTCTGGAACCCCTT    | 59.305 | 20 | 258 | 36   | 293  |
| TGGCAGCTCATAATCAGTGG    | 59.823 | 20 | 126 | 350  | 475  |
| GCAGCAGTGCAACTGAAAAG    | 59.788 | 20 | 113 | 5165 | 5277 |
| TTTTTGAATAATTTCCGCC     | 59.913 | 20 | 265 | 2    | 266  |
| TGCATTGAATGGACTTAGCC    | 58.723 | 20 | 243 | 25   | 267  |
| ATTTTTGTCCAAATGCACCC    | 59.668 | 20 | 233 | 28   | 260  |
| GGCTTGAGGGTTCCTTTT      | 59.691 | 20 | 168 | 300  | 467  |
| TCCAGCCCCAGTCTAACAGT    | 59.721 | 20 | 247 | 673  | 919  |
| GCGTGTTTTTGGCCTGATA     | 59.679 | 19 | 210 | 51   | 260  |
| ATTGCCCTTTCATGCATTTG    | 60.837 | 20 | 204 | 1251 | 1454 |
| GGAAAGGCTGTCGATTACCA    | 60.074 | 20 | 237 | 45   | 281  |
| TTCAACAACCTCATCCACATCA  | 59.024 | 22 | 277 | 1081 | 1357 |
| GAAAAGGTTCCCTTTCTCCT    | 59.934 | 21 | 264 | 289  | 552  |
| AAAAGAAAAAGTCGCTGCCA    | 59.996 | 20 | 276 | 57   | 332  |
| AGGTGTCTGGACGATGAAG     | 60.112 | 20 | 222 | 194  | 415  |
| GAGCAATTGTTGGACCGAGT    | 60.119 | 20 | 156 | 531  | 686  |
| ATTGCACCCCAGACCATTAC    | 59.676 | 20 | 140 | 24   | 163  |
| CCGACCAAAAATCAAACCAT    | 59.662 | 20 | 231 | 414  | 644  |
| TGGATCGACAATTAGCTGGA    | 59.226 | 20 | 168 | 326  | 493  |
| CTACCCCGTTGAAAAGAT      | 60.18  | 20 | 223 | 16   | 238  |
| TCCTTTGAATGGACTTGGCT    | 59.67  | 20 | 240 | 21   | 260  |
| TTTTAATCTTGGCCGCTGAT    | 59.682 | 20 | 230 | 1581 | 1810 |
| TGAAAATTTGAGGCTGCACA    | 60.379 | 20 | 238 | 3450 | 3687 |
| ATTTCACTTGGGAGGTGGTG    | 59.82  | 20 | 212 | 121  | 332  |
| TCCTTCAATGGAGGTTCAGG    | 60.042 | 20 | 252 | 291  | 542  |
| ACCGATTTTCCCCATTTTA     | 60.361 | 20 | 256 | 313  | 568  |
| GTGATTTGGTGAAAGCCCAA    | 60.874 | 20 | 110 | 104  | 213  |
| AAAGCAATGGAGGCTTGATG    | 60.214 | 20 | 169 | 5217 | 5385 |
| GCAACAATTCGAGTGGACAA    | 59.697 | 20 | 269 | 920  | 1188 |
| CCGACATAATACACCGCCTT    | 59.845 | 20 | 135 | 31   | 165  |
| CCTTATGGTGGCTTGTGGG     | 60.357 | 20 | 194 | 414  | 607  |
| ACTTCCCGGACAGCATTAGA    | 59.694 | 20 | 228 | 374  | 601  |
| GCGGCAGAATGAAGAAGAAA    | 60.469 | 20 | 122 | 278  | 399  |
| CCATCCATGCAAGTCCATTC    | 61.282 | 20 | 261 | 89   | 349  |
| ATCGGTTATCACCGGATCG     | 60.697 | 19 | 279 | 1299 | 1577 |
| CCGTGTCCGTGTACATTTG     | 58.394 | 19 | 270 | 138  | 407  |
| TCAACCATTTTTGTGCTCCT    | 58.201 | 20 | 152 | 259  | 410  |
| GCGCGCTGTATATCTAACGAC   | 59.916 | 21 | 153 | 62   | 214  |
| TTTTAGAGCATCCCCAGTGTG   | 60.118 | 21 | 279 | 213  | 491  |
| TGGCTCTGGTACCATGTTGA    | 60.112 | 20 | 220 | 4    | 223  |
| CCTTCACGAGTGGTGACAAA    | 59.72  | 20 | 128 | 655  | 782  |
| GTGTTTTGCGTGTGTGAGGT    | 59.648 | 20 | 236 | 25   | 260  |
| ACCGAACCCTTCTTACAGG     | 58.909 | 20 | 249 | 3    | 251  |
| AAGCGTTTACTTTTGGGACG    | 59.267 | 20 | 186 | 426  | 611  |
| TCTGGGATAAGGAGCATCAGA   | 59.782 | 21 | 251 | 920  | 1170 |
| GGGTTTGAATGTTAGCTGG     | 59.429 | 20 | 268 | 303  | 570  |
| GAAAGTGAGCCCATTTGGAA    | 60.051 | 20 | 210 | 644  | 853  |
| TTGCAGATCTTCATCCAACAA   | 59.262 | 21 | 242 | 34   | 275  |
| TCCTCAATTCGATCCTGGAA    | 60.538 | 20 | 180 | 48   | 227  |
| GAATTGCGGTCGTCTTCTTC    | 59.82  | 20 | 238 | 841  | 1078 |
| CAATTTGTTTCGAATTTTGTCTG | 59.64  | 22 | 185 | 244  | 428  |

|                        |        |    |     |      |      |
|------------------------|--------|----|-----|------|------|
| CCCTGCTTCTGAAACCCTAGT  | 59.759 | 21 | 141 | 684  | 824  |
| TCTTGGGAACCCTTGAGATG   | 60.042 | 20 | 257 | 965  | 1221 |
| AGGGAGTTTGCACCAGATCA   | 60.656 | 20 | 277 | 19   | 295  |
| TGAATCTGCATAGCCTCTACGA | 60.003 | 22 | 231 | 118  | 348  |
| GGAAGGGTCTCGTGTGTATG   | 58     | 20 | 273 | 486  | 758  |
| AGAGGATCTCAAGCCATTTCA  | 58.875 | 21 | 225 | 469  | 693  |
| TTGATCGACAGCATCCTAGC   | 58.979 | 20 | 230 | 328  | 557  |
| ATTTCTTGAGTCGGGGGAAT   | 59.766 | 20 | 278 | 580  | 857  |
| CGGAGGACGAGCTATTTATGG  | 60.943 | 21 | 280 | 247  | 526  |
| GACTGCGCCTAGAATTCGTC   | 59.985 | 20 | 233 | 259  | 491  |
| TGTGTGCAGATCTAATGGCA   | 58.81  | 20 | 176 | 154  | 329  |
| ACGCACGCACTCAGTTACAC   | 59.977 | 20 | 273 | 1196 | 1468 |
| TACCTCCCACCGCACTATTT   | 59.452 | 20 | 136 | 45   | 180  |
| TCGAATCCTTCGATTCTTGG   | 60.148 | 20 | 196 | 138  | 333  |
| AATTTGGAGCGACAACGAAG   | 60.249 | 20 | 235 | 32   | 266  |
| AAATGCCCTTGAATGCTACG   | 60.096 | 20 | 261 | 0    | 260  |
| CAGACCAGACTAGGGGCAAAA  | 60.246 | 20 | 192 | 228  | 419  |
| ATTTTTAATGGGGCAGGGAT   | 59.512 | 20 | 277 | 66   | 342  |
| AACCGAATGCACTCACACAA   | 60.16  | 20 | 145 | 516  | 660  |
| GCACCGGAGAAGAATACTACCA | 60.255 | 20 | 258 | 507  | 764  |
| TTTCTCAACCGAGCTCACC    | 58.945 | 19 | 125 | 286  | 410  |
| ATCCGCCCTTATCTCTGTT    | 59.925 | 20 | 218 | 260  | 477  |
| TTCCCTCGATTCTCGTGTCT   | 59.803 | 20 | 269 | 903  | 1171 |
| CCTCTGAGGTGTGCTGCTTT   | 60.589 | 20 | 266 | 84   | 349  |
| CGCCGAGTCAGTGAGTTGTT   | 61.45  | 20 | 244 | 507  | 750  |
| GATATTAACGAGCGGTGGC    | 59.574 | 20 | 273 | 708  | 980  |
| TCGCATCAGGAAGGGTATTT   | 59.528 | 20 | 272 | 457  | 728  |
| TTCCAATGAAAGGGGAAAAA   | 59.36  | 20 | 201 | 143  | 343  |
| ATTTACGTCGATCTGCGTCC   | 60.103 | 20 | 181 | 51   | 231  |
| TTGCACCGTGTGCAGTTATT   | 60.18  | 20 | 158 | 284  | 441  |
| ACCAGCTGCACCTGTAACAA   | 59.365 | 20 | 172 | 3366 | 3537 |
| TTCAAAGAGATGGGTCAGGG   | 60.042 | 20 | 169 | 1355 | 1523 |
| AAATGATCTACGTCCACGGG   | 59.813 | 20 | 224 | 438  | 661  |
| CGGTTAAAACCGGACCATTA   | 59.693 | 20 | 175 | 71   | 245  |
| TGTCACTTATAGGCGCATCTG  | 58.956 | 21 | 153 | 17   | 169  |
| CGGCTGTGGTTTCAAATTCT   | 60.11  | 20 | 253 | 376  | 628  |
| ACCATCGTAGGGTGTATGCC   | 59.7   | 20 | 239 | 13   | 251  |
| GAGCTATTGGATTCATCCGC   | 59.633 | 20 | 220 | 86   | 305  |
| ATATCAAAGGCGTGGATTGC   | 59.929 | 20 | 176 | 699  | 874  |
| GGTAGCCATTTGAGTCGCAT   | 60.103 | 20 | 204 | 323  | 526  |
| ATTCATCAACAGCCTCCTCG   | 60.218 | 20 | 128 | 2    | 129  |
| ACTTCATCCCATTGAGTCCG   | 59.927 | 20 | 103 | 2    | 104  |
| CGATCGAAGACTCCATCCAT   | 60.034 | 20 | 203 | 3040 | 3242 |
| TTGCTCTAACAATTCTGAAACG | 59.065 | 23 | 199 | 384  | 582  |
| CGCCAGGGGAATTGTATTTA   | 59.789 | 20 | 224 | 1162 | 1385 |
| GCAGCCATGGTATGGACTCT   | 60.104 | 20 | 280 | 547  | 826  |
| TGTGGTTTGGTCCGGTTAAT   | 60.088 | 20 | 140 | 21   | 160  |
| AGTGGATTTGGGGATGATGA   | 60.135 | 20 | 258 | 362  | 619  |
| CGTGGAGTCGACGACAATTA   | 59.716 | 20 | 181 | 1020 | 1200 |
| GCTGCTCTTCTTCTGCTGCT   | 60.187 | 20 | 198 | 597  | 794  |
| GCCAAATGCCTACAAATTGC   | 60.465 | 20 | 238 | 1190 | 1427 |
| TTGGCTTGTGCGAGCTTTTT   | 60.132 | 20 | 262 | 6192 | 6453 |
| GATGGAAATGGCAAAGCAT    | 59.907 | 20 | 140 | 323  | 462  |
| TTTTTGGCTCGTTGAGCTTT   | 59.996 | 20 | 247 | 2347 | 2593 |
| TGCAAAGCATACTAAAGATGC, | 59.463 | 23 | 221 | 349  | 569  |
| TGGAAGGAAGAAATCGGAGA   | 59.744 | 20 | 279 | 651  | 929  |
| CGCCAGCTTTTCCAAAATAA   | 60.198 | 20 | 266 | 1570 | 1835 |
| CTCGGTCTCCTTTGTCCAAC   | 59.697 | 20 | 160 | 293  | 452  |

|                        |        |    |     |      |      |
|------------------------|--------|----|-----|------|------|
| ATGAATAGTTGCGGATGCAC   | 58.602 | 20 | 179 | 156  | 334  |
| TTCCCCTTTGCCCTCTATTT   | 59.903 | 20 | 225 | 73   | 297  |
| ATTGAATATGCATCACGCCA   | 59.921 | 20 | 241 | 4    | 244  |
| ACGAACATGACACGACAGGA   | 60.162 | 20 | 248 | 1659 | 1906 |
| CACTACCAAGGGGTCTGCAT   | 59.989 | 20 | 131 | 340  | 470  |
| CCAATAATAGTTGGGAGCGG   | 59.429 | 20 | 256 | 81   | 336  |
| CCGGATATACAACTACAGGG   | 59.758 | 22 | 215 | 111  | 325  |
| GGGATGAATTTCCACCATGA   | 60.526 | 20 | 167 | 580  | 746  |
| AACCTACATGATGGAACGGG   | 59.67  | 20 | 159 | 2    | 160  |
| GCATCTCTCTTGTCTCTATT   | 60.665 | 23 | 108 | 372  | 479  |
| ATCGGTTATTACCGGATCGC   | 61.031 | 20 | 197 | 200  | 396  |
| GCTTGTCCGTAGAAAATGGG   | 59.569 | 20 | 228 | 543  | 770  |
| AGCCGTCGGATTTAACATTG   | 59.96  | 20 | 161 | 2369 | 2529 |
| AATGCTTGCCATGAGAATCC   | 60.043 | 20 | 278 | 769  | 1046 |
| TGACGGAATTTGCGGTGTTTT  | 60.344 | 20 | 118 | 435  | 552  |
| CAGTTGGTTTTGCATCATCG   | 60.111 | 20 | 134 | 4580 | 4713 |
| CCGCACTGCATTTCCATACTG  | 60.28  | 20 | 214 | 869  | 1082 |
| CGGGAGTAGTCTCGTTCCTG   | 59.861 | 20 | 252 | 39   | 290  |
| AGGATCAATCCCCACAAAAA   | 59.22  | 20 | 271 | 159  | 429  |
| GGAATTACCGAGGGAGAAGG   | 59.897 | 20 | 105 | 48   | 152  |
| GGGTGGGGATCGATTTTTAT   | 59.852 | 20 | 200 | 26   | 225  |
| AGGACATGCTCAATGTCTGCT  | 59.889 | 21 | 190 | 114  | 303  |
| CACAGAGAATCAAACCAACAC  | 60.06  | 23 | 160 | 282  | 441  |
| AATGGACCAGCCACTACAGG   | 59.989 | 20 | 276 | 1378 | 1653 |
| AACATCATCCAAATCCCAGC   | 59.756 | 20 | 220 | 626  | 845  |
| AAACTGTCCCTACCTGCCCT   | 59.994 | 20 | 258 | 1424 | 1681 |
| ATGAACCACTCCTCGCTCTC   | 59.41  | 20 | 242 | 37   | 278  |
| AGCGGCGAAACAAATAAAAA   | 59.732 | 20 | 279 | 3169 | 3447 |
| AACAGCCATAAGCACAAAGCTA | 59.101 | 22 | 157 | 1713 | 1869 |
| TCAAACATGCGATCCTTACA   | 57.702 | 20 | 186 | 381  | 566  |
| GAGTGGAGGATTCCGGTAAA   | 60.05  | 20 | 225 | 681  | 905  |
| GCCAATGGCCCAATAATTC    | 60.11  | 19 | 242 | 5    | 246  |
| GCAAGTGGTCACGTGAAATG   | 60.16  | 20 | 277 | 364  | 640  |
| GACGCCACATGTCTGCTAAC   | 59.323 | 20 | 220 | 251  | 470  |
| GGTTCTCTGGTTGCACCATT   | 59.973 | 20 | 201 | 989  | 1189 |
| CAAAACCCGTAAAGCGAAAA   | 60.102 | 20 | 177 | 915  | 1091 |
| GTTCGAATCCTCTCTTCCCC   | 60.015 | 20 | 279 | 94   | 372  |
| GGTAGCCTTTCAATCCCTCC   | 59.903 | 20 | 125 | 475  | 599  |
| CCACCAAGTCAAGACATCCC   | 60.363 | 20 | 255 | 269  | 523  |
| CTTGTCTCCATTCCATTGGC   | 60.461 | 20 | 224 | 92   | 315  |
| AGGCTATAAAGGAGCGAGAGT  | 57.926 | 22 | 274 | 915  | 1188 |
| ACATATTTATACGCATATAGCA | 57.577 | 27 | 196 | 1886 | 2081 |
| CCAGAGATTTGCTCGATTTC   | 59.917 | 20 | 109 | 838  | 946  |
| CCGTGATGCCTGTGAAGTAA   | 59.716 | 20 | 192 | 2298 | 2489 |
| GTGCGAGTGTTAACCGTTTT   | 58.283 | 20 | 261 | 0    | 260  |
| CGACAATTTTAGAGACAACGTC | 59.322 | 23 | 213 | 2507 | 2719 |
| CTTCTTCCAACGAAGCCAAC   | 59.853 | 20 | 266 | 937  | 1202 |
| TGTAGCCCGGTGCTAGAGTT   | 59.898 | 20 | 144 | 22   | 165  |
| ACGTTGGACCTGAAAGAGGA   | 59.697 | 20 | 209 | 166  | 374  |
| GGATGCCCAAAGTGTACGAT   | 59.82  | 20 | 233 | 8    | 240  |
| CTTGTGAAATCAATGCACCG   | 60.111 | 20 | 250 | 50   | 299  |
| AGTTCGTCAAACCTCCCAAA   | 59.569 | 20 | 183 | 259  | 441  |
| ACCCTAGCCCATGAACACAC   | 59.851 | 20 | 245 | 513  | 757  |
| CCACAGCAAACCTCGCTAGAA  | 59.22  | 20 | 230 | 8    | 237  |
| AGTTGTATACCGCCGAAGGA   | 59.592 | 20 | 209 | 103  | 311  |
| TTTGGTTGGGTAGCTTTGGA   | 60.472 | 20 | 277 | 406  | 682  |
| ACAATCGTCCGATTTTAGCG   | 60.096 | 20 | 177 | 2    | 178  |
| CGGATGGACCGGATGTATTA   | 60.544 | 20 | 252 | 11   | 262  |

|                        |        |    |     |      |      |
|------------------------|--------|----|-----|------|------|
| GCTCGGTATGCGAGAGAGAG   | 60.263 | 20 | 210 | 57   | 266  |
| TACGGCTGCGTAAACTACCC   | 60.152 | 20 | 273 | 14   | 286  |
| CCCTAGCCTTTGCCTCTTTC   | 60.332 | 20 | 115 | 287  | 401  |
| GCTTGTCTGGAGTTTGCTCA   | 59.165 | 20 | 276 | 65   | 340  |
| GCGTACCAATCATGTGCGAA   | 59.548 | 20 | 277 | 915  | 1191 |
| CACATGGAATTGCCTGAAGA   | 59.648 | 20 | 276 | 419  | 694  |
| GCCATGAACACATTGATTGG   | 59.781 | 20 | 254 | 150  | 403  |
| CACCCGAAAACCGAATAAGA   | 59.931 | 20 | 126 | 393  | 518  |
| CCATGTGCATTCTTGTTGATG  | 59.98  | 21 | 223 | 10   | 232  |
| TAATTAGGGTTGGCTCGGTG   | 59.953 | 20 | 193 | 136  | 328  |
| CATCCCAAGCCATACGAACT   | 59.955 | 20 | 252 | 54   | 305  |
| ACTTCCCAGCTTGGTCCTTT   | 60.11  | 20 | 257 | 1250 | 1506 |
| TTTGAGAGAAATGGACGAGGA  | 59.799 | 21 | 279 | 424  | 702  |
| GTTTCCTCCACAACGCTCTC   | 59.851 | 20 | 167 | 1970 | 2136 |
| TTGCAATAACAAAACCTCGGG  | 58.674 | 20 | 255 | 63   | 317  |
| TTCCTACTGGCTGTCTTCG    | 60.388 | 20 | 194 | 995  | 1188 |
| TTTCCTTCAGATGCTCCACC   | 60.195 | 20 | 265 | 149  | 413  |
| CAATAAGAAACACGCAACACA  | 58.796 | 22 | 200 | 221  | 420  |
| GGGTCCAGACTTGAGACCAA   | 60.088 | 20 | 199 | 698  | 896  |
| TGTGCGCTTGAGTGTGTGTA   | 60.096 | 20 | 160 | 680  | 839  |
| TGACGTTCTTGCTGCTATGG   | 60.011 | 20 | 147 | 1625 | 1771 |
| CACATGTCACGAATCGGTGT   | 60.45  | 20 | 263 | 119  | 381  |
| CACCGTAAACAACCATGTCTG  | 59.881 | 20 | 237 | 282  | 518  |
| GATCGACCAATTGTGTGACG   | 59.967 | 20 | 171 | 1003 | 1173 |
| TACGTCCATGGGAGAATGTG   | 59.369 | 20 | 229 | 68   | 296  |
| CAATTAGGGCCACATGATGA   | 59.35  | 20 | 258 | 60   | 317  |
| GCCCGTCTCTTGATATGAA    | 60.036 | 20 | 280 | 5580 | 5859 |
| ATTTCTCTCGTCACACGCCT   | 59.874 | 20 | 207 | 947  | 1153 |
| TGCATGTGATCGTTTTGACA   | 59.676 | 20 | 182 | 341  | 522  |
| TGGAGGAAGAAGACAAGATGC  | 59.42  | 21 | 187 | 51   | 237  |
| TCATCGGATGTCTGAGATGG   | 59.585 | 20 | 208 | 69   | 276  |
| TTTTGGTATCAGAGCCACGG   | 61.021 | 20 | 266 | 73   | 338  |
| TAGATCACATTTGGCACGGA   | 60.073 | 20 | 145 | 284  | 428  |
| GTCTTTGCGGGTGAAAAGTT   | 59.218 | 20 | 242 | 28   | 269  |
| TCCAAACCAACAACACCTGA   | 59.976 | 20 | 141 | 102  | 242  |
| GGCGTACGACAATGGTTAT    | 59.713 | 20 | 176 | 2707 | 2882 |
| AAGGGACATTTTCTGCTTGC   | 59.316 | 20 | 218 | 1782 | 1999 |
| ACCTCTCCCTCTCCTAGCCA   | 60.349 | 20 | 190 | 1267 | 1456 |
| AAACCACACCTCCACCTGTC   | 59.859 | 20 | 269 | 722  | 990  |
| GATACTCCGGCCAACTGAAA   | 60.074 | 20 | 168 | 1413 | 1580 |
| GAACCTAGCCGGAGAAGACA   | 59.43  | 20 | 235 | 32   | 266  |
| AAACCTAGCAATGGGGGAAG   | 60.312 | 20 | 119 | 2535 | 2653 |
| CTCTATCGCCCTTGCTTGAC   | 59.978 | 20 | 145 | 15   | 159  |
| GGTAACACAATAATTACATAT  | 57.217 | 27 | 132 | 107  | 238  |
| CTTGACCAGATTGTCCCTC    | 59.505 | 20 | 228 | 351  | 578  |
| GAAAAATATGTAAAATTCACC/ | 57.771 | 26 | 173 | 356  | 528  |
| ATCCATCCTACACAACCGGA   | 60.195 | 20 | 212 | 19   | 230  |
| TAGCATCAGTGTTCGCCGAA   | 60.401 | 20 | 262 | 1229 | 1490 |
| TCCCAATTTAAGGGTTATTACC | 59.555 | 24 | 146 | 1017 | 1162 |
| CTCGCTAATTGCATTCTCCC   | 59.807 | 20 | 276 | 268  | 543  |
| AGGGCCCTGCAAATTTCTAC   | 60.451 | 20 | 143 | 1043 | 1185 |
| CCATGAGCAGAAAATGTGGA   | 59.648 | 20 | 174 | 668  | 841  |
| GGTGTGATGATGAATCGTGG   | 59.769 | 20 | 172 | 42   | 213  |
| TGACTGCCACAGTTTCCTCA   | 60.44  | 20 | 237 | 1531 | 1767 |
| CCACTTGTCTACGGGACCTG   | 60.557 | 20 | 204 | 319  | 522  |
| TTGGAAAGCTGGGAAAGAGA   | 59.926 | 20 | 264 | 346  | 609  |
| AAGGACCAATGAGATGGGTG   | 59.779 | 20 | 224 | 90   | 313  |
| TGAAGGTGACGAGAATGGTG   | 59.676 | 20 | 120 | 697  | 816  |

|                         |        |    |     |      |      |
|-------------------------|--------|----|-----|------|------|
| GGTGTGTGAGGTGTGTGAGG    | 60.045 | 20 | 128 | 15   | 142  |
| TGCTCTCTCATTGTAATCTCTCT | 59.688 | 25 | 252 | 108  | 359  |
| AATTGAAATCAGGCTTGCCA    | 60.585 | 20 | 201 | 1789 | 1989 |
| TGCTGCTGAACTTCTTGTA     | 59.773 | 21 | 231 | 4751 | 4981 |
| TGCATATCTTCGTGTGTCAT    | 60.158 | 21 | 242 | 133  | 374  |
| GCTTCTCGAGTTCAAGCGTT    | 59.763 | 20 | 140 | 303  | 442  |
| GTTATGCGTTTTGACGGGAT    | 59.829 | 20 | 159 | 329  | 487  |
| CAAGATCCAAGGGCTGTGATA   | 60.081 | 21 | 187 | 708  | 894  |
| CGATCCGGTCTGATCCAAA     | 61.978 | 19 | 268 | 352  | 619  |
| TAGAGGAACAAAACACCCGC    | 60.11  | 20 | 125 | 1076 | 1200 |
| ACGAAAAAGGGCATGAAAAA    | 59.564 | 20 | 274 | 387  | 660  |
| TTCACACGAGAGTGCAGATTG   | 60.04  | 21 | 197 | 536  | 732  |
| GCCAGAAATAGTGGATTTTGC   | 58.709 | 21 | 239 | 2171 | 2409 |
| ATTTAAGGGTTATCACCTGATT  | 58.08  | 25 | 185 | 607  | 791  |
| TTTTAAAAGGAGACATTGCTGT  | 57.239 | 23 | 226 | 246  | 471  |
| TGTTGCAAGTAGTAAAGTAAAC  | 59.475 | 25 | 175 | 535  | 709  |
| AAGGTTATCACCGGATCGC     | 59.909 | 19 | 248 | 1159 | 1406 |
| TTGTAACCGCTGTTATCCCTC   | 59.101 | 21 | 156 | 674  | 829  |
| GGTTTCCACCACCATTGAAC    | 60.073 | 20 | 164 | 360  | 523  |
| AACGCATTCTCCATGCTCTC    | 60.37  | 20 | 128 | 59   | 186  |
| GTATGATGAGATGGTCCCCC    | 59.02  | 20 | 195 | 43   | 237  |
| GGCTGGGATGTCATTCATTT    | 59.756 | 20 | 280 | 133  | 412  |
| TCAAATGGTGTGGAAAAGGA    | 58.947 | 20 | 191 | 360  | 550  |
| CTGTCCCTGGCTTTGTGATT    | 60.111 | 20 | 257 | 347  | 603  |
| AGCTTCACCGGTTTGTTCAG    | 60.291 | 20 | 229 | 1408 | 1636 |
| ATGGCTGTTTTCCAATGAGC    | 60.081 | 20 | 172 | 523  | 694  |
| AACCGTTTGTTCGCCCTAA     | 59.492 | 20 | 232 | 109  | 340  |
| ATTCAAATCTTAACCGCCGA    | 59.547 | 20 | 268 | 1273 | 1540 |
| TTCCGTTTTCGACATCACTG    | 59.691 | 20 | 226 | 729  | 954  |
| CAACAGTTTGGCATCAGAGC    | 59.445 | 20 | 211 | 29   | 239  |
| ATCTCCAATAGCAACTGCC     | 59.154 | 20 | 148 | 582  | 729  |
| GTACAGTGGTGGTGTGCTCG    | 60.227 | 20 | 200 | 406  | 605  |
| GGCTAATTGTTGGCCTTTGA    | 60.074 | 20 | 216 | 32   | 247  |
| CAGAATGCAGATGCCTGTGT    | 59.862 | 20 | 156 | 307  | 462  |
| GCATTGGTAACTTCCCCCTT    | 60.187 | 20 | 275 | 18   | 292  |
| GCACAATAATGCTTCTGCT     | 59.536 | 21 | 254 | 146  | 399  |
| CAAGATTCAATCCCAGCCAT    | 59.894 | 20 | 138 | 346  | 483  |
| AGGTGATTGTGGTGGGTCC     | 60.649 | 19 | 136 | 54   | 189  |
| ATGCCAATGCCTCATCTAA     | 60.435 | 20 | 165 | 336  | 500  |
| TATCCAACAGGAGAATGGG     | 59.744 | 20 | 187 | 2420 | 2606 |
| TAACTTCCCATCTTGCCG      | 60.206 | 20 | 191 | 568  | 758  |
| ACGTAGGATATCACTAAATTG/  | 57.146 | 27 | 275 | 1171 | 1445 |
| GTGCAGCCTTATCTCTTGCC    | 59.985 | 20 | 206 | 94   | 299  |
| GGGTAGCATATGTCGATGGAA   | 59.799 | 21 | 160 | 68   | 227  |
| GCGTTTTGATGATATATAGGTG  | 58.907 | 26 | 186 | 555  | 740  |
| TCGTGCACAAAGTGAATGT     | 60.16  | 20 | 237 | 844  | 1080 |
| ACCCTTGAAGAACTCATCCCT   | 59.056 | 21 | 226 | 2837 | 3062 |
| TGGCAGAGTTGGGTAGAAG     | 60.246 | 20 | 215 | 18   | 232  |
| TCACTTTGGGAAGGTCGTTT    | 59.569 | 20 | 172 | 215  | 386  |
| TATATGCATTGCGCGTTTTT    | 59.705 | 20 | 272 | 69   | 340  |
| AGTTTTGTGGTGAAGGTGC     | 60.156 | 20 | 123 | 230  | 352  |
| CTCATTGACAAACCATGTCCA   | 59.405 | 21 | 198 | 200  | 397  |
| AAACCCGTGTTCTTCAGTCG    | 60.149 | 20 | 247 | 28   | 274  |
| GAGTGGGCATTATGGAGCAT    | 59.923 | 20 | 140 | 735  | 874  |
| TTTTGGCTGAGACGAATCAA    | 59.395 | 20 | 183 | 73   | 255  |
| GAGGGAAAGCCGATCAATTT    | 60.399 | 20 | 113 | 197  | 309  |
| ATCGGTTATTATCGGATCGC    | 58.88  | 20 | 263 | 1243 | 1505 |
| AATGCCCCATCTTCAGTTTG    | 59.933 | 20 | 280 | 54   | 333  |

|                        |        |    |     |      |      |
|------------------------|--------|----|-----|------|------|
| GTTAGCATGGGAAGGGAAGG   | 60.817 | 20 | 203 | 426  | 628  |
| TAGGAATCACACGTGGTGGG   | 61.777 | 20 | 242 | 168  | 409  |
| GAGGCCCTTACAAAGCATCA   | 60.214 | 20 | 241 | 1832 | 2072 |
| CAAGTTTGGCTCGATTACCC   | 60.636 | 20 | 214 | 1275 | 1488 |
| ACCAATCTCGCATAGAACCG   | 60.096 | 20 | 267 | 1304 | 1570 |
| CACAAATGGAGGTGATGTGG   | 59.806 | 20 | 250 | 318  | 567  |
| AGGATGCCCACTGTTTCATGT  | 60.395 | 20 | 158 | 0    | 157  |
| CCATCGTGAAGAACAGACCA   | 59.676 | 20 | 160 | 340  | 499  |
| TGACATGCCATTTTCTTGCT   | 59.276 | 20 | 279 | 1028 | 1306 |
| TCTCCCCACTTCACCACTTC   | 60.088 | 20 | 222 | 142  | 363  |
| TGCTCTCGCTCTGTCTCTT    | 60.431 | 20 | 266 | 121  | 386  |
| CCCGTAAGAAACCCATTTT    | 60.048 | 20 | 260 | 118  | 377  |
| TGGGAAGAAAGGACAGGATG   | 60.042 | 20 | 185 | 7    | 191  |
| TCGAGATGAAAACATTGGCA   | 60.197 | 20 | 218 | 113  | 330  |
| TCCACCCATATTGCACTCAA   | 59.924 | 20 | 155 | 13   | 167  |
| TGACTGGGTAAAACAATGCC   | 59.853 | 21 | 132 | 390  | 521  |
| TGCAGCTGCTCTAATCATGG   | 60.119 | 20 | 257 | 1255 | 1511 |
| GGGGAGTAAAACGACCGAAT   | 60.187 | 20 | 228 | 77   | 304  |
| ACAATGGGTGGTTTTTGGAA   | 60.066 | 20 | 279 | 357  | 635  |
| TCCAAAATGAGACCAATCTTG/ | 59.546 | 22 | 263 | 149  | 411  |
| GACCATGCACCAATTCCTTT   | 59.797 | 20 | 221 | 2032 | 2252 |
| TCCGGTTAAGTCCGTGATTC   | 59.933 | 20 | 208 | 1086 | 1293 |
| GAAACGTACGACGAGTGGGT   | 60.035 | 20 | 171 | 633  | 803  |
| CAACAATGCCTTTGGTCTCA   | 59.691 | 20 | 153 | 327  | 479  |
| TCCCAAGTCGAATATCTGCTG  | 60.22  | 21 | 180 | 875  | 1054 |
| CCGAAAGATTAGGTTTAGCCG  | 60.095 | 21 | 220 | 113  | 332  |
| CAGCCTCTTCTCTGGCTCAT   | 59.703 | 20 | 240 | 727  | 966  |
| ACCAACTGCAGAGTAACGCA   | 59.515 | 20 | 233 | 2267 | 2499 |
| AACTATTTTCATGAAGAGAATC | 59.156 | 26 | 198 | 1080 | 1277 |
| TCAGGTTTCGTGTCGTTTTCA  | 60.278 | 20 | 192 | 165  | 356  |
| GCCACTAATGCCATCACAAAG  | 59.152 | 20 | 125 | 2103 | 2227 |
| CCCGAATATTCTGTGCCAGT   | 59.955 | 20 | 239 | 2563 | 2801 |
| AGTCAGATGGCGAGAGCATT   | 59.981 | 20 | 258 | 2496 | 2753 |
| CCGCTGATGAAATGATCTGA   | 59.756 | 20 | 223 | 295  | 517  |
| CTGGAGCCATTTTTGTGGAT   | 59.933 | 20 | 255 | 19   | 273  |
| AAAACACTTCGTCCAATGCC   | 59.978 | 20 | 121 | 382  | 502  |
| TCGATTACTCCACCCTCACC   | 59.927 | 20 | 234 | 426  | 659  |
| CCACCCTCAAACAACACTCA   | 59.565 | 20 | 222 | 5    | 226  |
| TAATTACGTCCCGATCCCAA   | 60.146 | 20 | 203 | 2700 | 2902 |
| CACAGCAGAGGGAAACCCTA   | 60.246 | 20 | 271 | 681  | 951  |
| TGAAGTATCGACGCATTCACA  | 60.272 | 21 | 222 | 561  | 782  |
| AAACATTTTCAAAAACGCCA   | 58.187 | 20 | 198 | 70   | 267  |
| CCATCACCAACACACCACAT   | 60.138 | 20 | 206 | 49   | 254  |
| CCGAATCAAATAGCTCCGAT   | 59.138 | 20 | 205 | 165  | 369  |
| CTCTCGGTTCCGGTTGATAG   | 59.688 | 20 | 178 | 765  | 942  |
| GCGTGCTGAATCTTATCCGT   | 60.243 | 20 | 257 | 198  | 454  |
| TATGGAGCATGATTTGGCTG   | 59.646 | 20 | 265 | 78   | 342  |
| GCAAATGCTTCTTACCCATCA  | 60.089 | 21 | 261 | 60   | 320  |
| CCGGTAAAAACAATTCGCAC   | 60.356 | 20 | 139 | 113  | 251  |
| AGAGAGAGAGTGTGGAGAGAC  | 58.121 | 24 | 100 | 464  | 563  |
| TTATACCACCGCCACCCTTA   | 60.202 | 20 | 224 | 932  | 1155 |
| CTTTACGACCATCCCCAGTC   | 59.405 | 20 | 268 | 81   | 348  |
| AAAGCTTGCCGAAAAACTC    | 60.721 | 20 | 266 | 19   | 284  |
| AAATGTTTCGTGCGAATGTGA  | 60.119 | 20 | 133 | 443  | 575  |
| TCATTCAAAAATTGATCACCCA | 60.167 | 22 | 146 | 15   | 160  |
| TGCGTAAATGGATCCCTGAT   | 60.296 | 20 | 275 | 2091 | 2365 |
| AAAACGATGTATGGGATTGATC | 58.696 | 22 | 223 | 153  | 375  |
| AACAATCGTGCTGAAACGTG   | 59.764 | 20 | 280 | 20   | 299  |



|                         |        |    |     |      |      |
|-------------------------|--------|----|-----|------|------|
| CCCATAGACAAAAAGGCCAA    | 59.931 | 20 | 277 | 189  | 465  |
| CAAGTTGTATTCGGGTTGGG    | 60.22  | 20 | 107 | 119  | 225  |
| AACACCCTGTGTATCCCAGC    | 59.851 | 20 | 229 | 1    | 229  |
| AAAAACACCAACACTTCTTGCA/ | 59.961 | 23 | 276 | 2322 | 2597 |
| CCGTTGTACATAAGCGGGTT    | 59.883 | 20 | 271 | 154  | 424  |
| GACGAGGGAGAAGAAGAGGG    | 60.328 | 20 | 227 | 43   | 269  |
| ACTGCATCACTCTCAAGCCC    | 60.418 | 20 | 221 | 1019 | 1239 |
| AAAACCTCCGGTGTTCCATTG   | 59.83  | 20 | 110 | 380  | 489  |
| TTACGCTAGTCCGTGGGTTT    | 59.632 | 20 | 150 | 3    | 152  |
| AGCCCATGTTATGACCTCCA    | 60.34  | 20 | 198 | 2262 | 2459 |
| CCAGGTGTTATGACCCGAAC    | 60.232 | 20 | 199 | 310  | 508  |
| CACCACCATCACCTCTTCT     | 59.962 | 20 | 142 | 157  | 298  |
| TGCCACTTAGAAAAGTAAAAA(  | 60.101 | 25 | 229 | 329  | 557  |
| AGGTGAATCGTCAAACGTCAC   | 60.028 | 21 | 134 | 299  | 432  |
| CCGTACCGGAAATTAACGAA    | 59.826 | 20 | 253 | 243  | 495  |
| GGAAATTCTGCAGTTCGGAG    | 59.813 | 20 | 194 | 144  | 337  |
| GGGTCAGCTCTTGATTTCCA    | 60.195 | 20 | 250 | 216  | 465  |
| TAGTAGGGTGCAGGGGATTG    | 59.948 | 20 | 238 | 2378 | 2615 |
| CCGCTTTCCTAGAAACATC     | 59.845 | 20 | 279 | 1370 | 1648 |
| CCCTTTTGCTCCAAGACAAG    | 59.846 | 20 | 250 | 456  | 705  |
| AGTCACAGGATCCAAGAGCC    | 59.258 | 20 | 178 | 273  | 450  |
| CATTCCTCAACTCCCAAATTA   | 58.794 | 21 | 244 | 420  | 663  |
| AGAAGGAAGAAAGGGGGACA    | 60.045 | 20 | 160 | 992  | 1151 |
| ATGAAGCATGCAATTCGACA    | 60.228 | 20 | 236 | 59   | 294  |
| TCCACCCGAGCTTTAGTTTTT   | 60.116 | 21 | 179 | 1996 | 2174 |
| TGTCTTGTCTTGCCAGATCCT   | 59.859 | 21 | 263 | 2000 | 2262 |
| TTTGATGTTCGAAAATACCCCT  | 59.716 | 22 | 151 | 102  | 252  |
| ACATGCATGCTCGCAAATTA    | 60.245 | 20 | 134 | 30   | 163  |
| GCAGCGTCAAATCAATAACCT   | 59.242 | 21 | 280 | 266  | 545  |
| CGTGTGCAATGCATCTGGTA    | 61.713 | 20 | 198 | 97   | 294  |
| TGTGGCATCCTATCAACCCT    | 60.34  | 20 | 259 | 288  | 546  |
| CCCAACCAACCACAATAAAA    | 60.452 | 20 | 238 | 489  | 726  |
| GCCGAGATTTGTTATGCGTT    | 60.103 | 20 | 105 | 1391 | 1495 |
| TGTTTGCTTGTAGATGTTGGGT  | 59.54  | 22 | 182 | 799  | 980  |
| CATTTGCGCGACTTTAGAGC    | 59.845 | 20 | 211 | 2647 | 2857 |
| TGGCATGGGGAAGCTACTAT    | 59.551 | 20 | 229 | 81   | 309  |
| TTCTCCCCAAAAGCTAATCG    | 59.292 | 20 | 278 | 147  | 424  |
| GCGAAAACCTCTTCGATTGG    | 59.823 | 20 | 178 | 4    | 181  |
| TTCGAATCCGTGAAGGACC     | 61     | 19 | 280 | 138  | 417  |
| TTGTGTAATTGTGTTGTGTCGT( | 59.468 | 23 | 232 | 106  | 337  |
| TCGGACGGTCTGACCTATTC    | 60.073 | 20 | 229 | 18   | 246  |
| GTTCTCTCGAAGCCCCTAGC    | 60.484 | 20 | 267 | 1823 | 2089 |
| ATGAATTTGCATATAAGGAGG/  | 57.296 | 24 | 174 | 244  | 417  |
| TGGTGTGAGTTGTACGCATGT   | 60.088 | 21 | 245 | 233  | 477  |
| CCAAATTTAAGGGTTATCACCT  | 58.849 | 23 | 245 | 3668 | 3912 |
| TTTCGACCGACAAAAAGGAG    | 60.22  | 20 | 184 | 640  | 823  |
| CCAAAAGAAAATCTCCTGCG    | 59.817 | 20 | 202 | 700  | 901  |
| GCATCGAGCTTAACGGTCTG    | 60.934 | 20 | 234 | 112  | 345  |
| AAAATGCAACCAGCATTA AAA  | 57.417 | 21 | 269 | 492  | 760  |
| TACCCATTTGAAAATCCCCA    | 59.988 | 20 | 143 | 161  | 303  |
| TCATGAGGAGCGTCAATCAG    | 59.942 | 20 | 140 | 10   | 149  |
| AGTGCTGCCTCAAAGGGTAA    | 59.875 | 20 | 173 | 91   | 263  |
| CGATCCTGTGTGGCCTAAAT    | 59.955 | 20 | 172 | 160  | 331  |
| ATACTCACCTTAGCCGCACG    | 60.292 | 20 | 225 | 928  | 1152 |
| CACTTAGAGGGTGTTTTGACCT  | 57.404 | 22 | 209 | 914  | 1122 |
| TTCCAGATCCAAAATATCCACC  | 60.02  | 22 | 258 | 260  | 517  |
| TGGATCATGTAAGGAACAATG`  | 59.738 | 23 | 139 | 26   | 164  |
| TTCAAGGCATTTGAGATCCAC   | 60.066 | 21 | 279 | 2273 | 2551 |

|                        |        |    |     |      |      |
|------------------------|--------|----|-----|------|------|
| AGAAGAAAAGACATTCCGGC   | 58.386 | 20 | 120 | 275  | 394  |
| GTCAACCATCAGTCCCGAAG   | 60.51  | 20 | 182 | 250  | 431  |
| GGTGGATTGTCCTTGATGCT   | 59.934 | 20 | 142 | 864  | 1005 |
| AATGATTGAAGATCCCGGTG   | 59.75  | 20 | 160 | 15   | 174  |
| TAAACCCTAAAAGCGCACG    | 60.251 | 20 | 263 | 222  | 484  |
| CCCCTAATCCCTAAATCCC    | 60.678 | 20 | 132 | 1048 | 1179 |
| TTCATATGGGGAGCCATCTC   | 59.854 | 20 | 265 | 0    | 264  |
| ACGCAACCGTAAAGAACCTG   | 60.168 | 20 | 114 | 469  | 582  |
| CCCGATCACCATCACTATCC   | 60.158 | 20 | 280 | 119  | 398  |
| TGGTATCAGAGCCATGACGA   | 60.225 | 20 | 277 | 7    | 283  |
| GCACGAAGAAGGTTAAAAGGC  | 60.116 | 21 | 202 | 701  | 902  |
| TATCGTGCGCAATAGACGAG   | 59.999 | 20 | 215 | 1142 | 1356 |
| AACTCGATAGGAAAGGATGCA  | 60.095 | 22 | 121 | 836  | 956  |
| TCTTTGGGCGTGAGAGTAGG   | 60.388 | 20 | 137 | 5    | 141  |
| GTGCGTTGACCAGCATTTA    | 58.274 | 19 | 127 | 273  | 399  |
| GCAATCCCATAATGGAAGGA   | 59.722 | 20 | 268 | 8    | 275  |
| TTTTGGAGATCTATGGCTGTCA | 59.708 | 22 | 166 | 252  | 417  |
| TGGTTTCCACATTGTCTTGC   | 59.547 | 20 | 242 | 117  | 358  |
| AAGTGGGAGTTAGGGCACATT  | 59.878 | 21 | 218 | 62   | 279  |
| TTAGGTGTGTGCATCTTGGG   | 59.566 | 20 | 218 | 513  | 730  |
| GGTGAACTGCCTTTGCTCTT   | 59.478 | 20 | 232 | 1485 | 1716 |
| TGTGGTATACGTTGAGCGGA   | 60.134 | 20 | 156 | 31   | 186  |
| GCCGAGATTTTTCTTCCTT    | 59.666 | 20 | 266 | 1780 | 2045 |
| CGGTTATTAGTTATCACCCGAA | 59.322 | 23 | 150 | 2871 | 3020 |
| CATCATCACCTCGTCCCTCT   | 60.072 | 20 | 275 | 29   | 303  |
| CAACTGTCCACCCACACAG    | 60.039 | 20 | 264 | 120  | 383  |
| TCCTTCAATCTCAGCCTTTCA  | 59.94  | 21 | 238 | 975  | 1212 |
| ACAATTTCCGGCTGCCACTAA  | 60.637 | 20 | 188 | 145  | 332  |
| CATATGGGCACAGACACTGG   | 59.984 | 20 | 157 | 17   | 173  |
| CATATGGGCACAGACACTGG   | 59.984 | 20 | 157 | 17   | 173  |
| AAAGGAGCTTCTTGCCTGG    | 59.615 | 20 | 247 | 1646 | 1892 |
| TCCGAGAATATCGAAGGCAC   | 60.036 | 20 | 200 | 287  | 486  |
| AGGGTTTTGAGGGTTTGCTT   | 59.976 | 20 | 213 | 478  | 690  |
| AAATCCCAACAAATGACCCA   | 60.029 | 20 | 176 | 1155 | 1330 |
| ATGCAGACGAATAAGCGAGG   | 60.374 | 20 | 184 | 153  | 336  |
| GCATCCACCACCATCACATA   | 60.21  | 20 | 182 | 85   | 266  |
| CAAATGGGGTCCTGATCGTA   | 60.713 | 20 | 172 | 633  | 804  |
| TGAAAGCTAAAATTTGCAATCA | 60.892 | 25 | 118 | 12   | 129  |
| CAAAGGCCCAATGGTTAT     | 59.685 | 20 | 140 | 34   | 173  |
| GACAAAGCAGGCACACAAC    | 58.935 | 20 | 221 | 130  | 350  |
| TTGAACGGAATCATGGACAA   | 59.9   | 20 | 166 | 80   | 245  |
| TTTGTCTACCAGTTGCCCT    | 59.592 | 20 | 235 | 797  | 1031 |
| GGCATGATTCTGCTGGTTTT   | 60.081 | 20 | 214 | 1345 | 1558 |
| GTTCCGCACCAAGATTTGAC   | 60.504 | 20 | 169 | 157  | 325  |
| AATGGTCCCCTCATGAACAC   | 59.636 | 20 | 138 | 8    | 145  |
| CAACCAGCAAACAAAAGCAA   | 59.888 | 20 | 247 | 11   | 257  |
| TTTAGGAAGGATCGGGGC     | 59.968 | 18 | 229 | 171  | 399  |
| TCCATTCCGAAAATCAAAGG   | 59.872 | 20 | 155 | 742  | 896  |
| TTTTACACGGGACCGTCAAT   | 60.227 | 20 | 266 | 487  | 752  |
| AGATGTTGGATCTGCAGCCT   | 59.834 | 20 | 251 | 593  | 843  |
| CAAGCTGCTGTAATCCTCC    | 59.836 | 20 | 242 | 4235 | 4476 |
| CTTCTTTAACAACCCCGCAA   | 60.103 | 20 | 232 | 286  | 517  |
| TCTTCTTCCACTCGCATCGT   | 60.945 | 20 | 226 | 875  | 1100 |
| GCGTCCGACTCCTCAACTAT   | 59.313 | 20 | 101 | 73   | 173  |
| TCATGTGCAAATTGTTGGG    | 60.357 | 20 | 233 | 340  | 572  |
| CAATGATGCATGGTTATGGA   | 57.77  | 20 | 253 | 177  | 429  |
| TGTGTGTGTGCTCAGCAGTG   | 60.758 | 20 | 234 | 282  | 515  |
| GCAGGTAAATATCAATTTTCGA | 57.112 | 23 | 185 | 298  | 482  |

|                        |        |    |     |      |      |
|------------------------|--------|----|-----|------|------|
| TCCTCAGATCGATGCACTGT   | 59.372 | 20 | 275 | 17   | 291  |
| TACGCACGATGTTGGTGAAT   | 59.995 | 20 | 173 | 118  | 290  |
| TCCACTTCTGGGGATTGAAA   | 60.43  | 20 | 226 | 105  | 330  |
| CGTTGGAATTTTAGAGTTACGT | 60.274 | 24 | 110 | 578  | 687  |
| GTGGGCTTCGACTCTCAGAC   | 59.993 | 20 | 255 | 495  | 749  |
| GCGCGTTGATCTACCAAAAT   | 60.103 | 20 | 278 | 800  | 1077 |
| GTGCTGAGGCGTTTCTTGAC   | 60.986 | 20 | 256 | 32   | 287  |
| TGTTTCGATTTGGCGATTAT   | 60.289 | 20 | 277 | 218  | 494  |
| TCCCTTAATTCCTCACCCC    | 60.124 | 20 | 174 | 290  | 463  |
| TGGACTCCGTGTGTATGACTG  | 59.606 | 21 | 202 | 479  | 680  |
| TGGTTAATGCCTACGCTAAAA  | 58.868 | 22 | 153 | 1119 | 1271 |
| ACATGATTTGCAAGATGCCA   | 60.08  | 20 | 248 | 520  | 767  |
| ATCCGATGTGGGATCGTAAC   | 59.635 | 20 | 196 | 687  | 882  |
| TGGTCTTACATCTCCCAGGC   | 60.073 | 20 | 189 | 1513 | 1701 |
| AACACGGTAACAAAATATATTC | 58.491 | 27 | 148 | 214  | 361  |
| CGGTTTCACCAATGGAAATC   | 60.17  | 20 | 109 | 304  | 412  |
| GATCTCTTTTGTCAAGGGCG   | 59.813 | 20 | 117 | 6    | 122  |
| GCCTGTCCACAACAATACCC   | 60.24  | 20 | 241 | 48   | 288  |
| CCAACATAGGATTGTGCACTC/ | 60.944 | 22 | 264 | 198  | 461  |
| TTCCTCCTTTTCTTATGGG    | 59.536 | 21 | 271 | 138  | 408  |
| TCCCCGAATATTCCAACCTCA  | 60.266 | 20 | 164 | 162  | 325  |
| TGGTGAAAGGAGACGAAGGT   | 59.697 | 20 | 233 | 94   | 326  |
| TGAGTGAACATGTGTGTGCG   | 60.373 | 20 | 109 | 300  | 408  |
| ATCCAACCTCCTGCATTTTGC  | 60.081 | 20 | 274 | 9    | 282  |
| CGGTTAAAAATCGGACAGGA   | 59.931 | 20 | 264 | 1832 | 2095 |
| TACGGCACCATATAATCGGG   | 60.548 | 20 | 104 | 91   | 194  |
| AAAGTGGCCGACAAAAACC    | 59.963 | 19 | 172 | 662  | 833  |
| TAGAAATGGAGGTTGGGTGG   | 59.784 | 20 | 118 | 39   | 156  |
| TCTTTTCACTCGAGCCCAAC   | 60.375 | 20 | 250 | 93   | 342  |
| CGACTGGCAAATACAAAAGTT  | 57.007 | 21 | 248 | 381  | 628  |
| TGGCTCCATTCTTCTCCTA    | 59.767 | 20 | 241 | 162  | 402  |
| GGAATTGAAATCCCACCTGA   | 59.727 | 20 | 266 | 379  | 644  |
| GCCAAAGCAAACATCACAAG   | 59.322 | 20 | 223 | 206  | 428  |
| CTCTTTCTCCAATGAACCAA   | 59.157 | 21 | 228 | 1614 | 1841 |
| CTCGTAACATCCCCATCCAT   | 59.629 | 20 | 268 | 741  | 1008 |
| ATTGTTGAAACCGTCCAGA    | 60.353 | 20 | 199 | 316  | 514  |
| ACAATTGGCCTCTCCTCCTT   | 60.074 | 20 | 124 | 230  | 353  |
| AGCCTGCATTTGACTTTTGG   | 60.249 | 20 | 188 | 620  | 807  |
| AGGAAGGGCGAAAAAGAGAG   | 59.955 | 20 | 228 | 76   | 303  |
| TGTTTGGTTTGTGAATTGGG   | 59.268 | 20 | 154 | 1609 | 1762 |
| TTCTTCTCCTTTCCGCTGAG   | 59.688 | 20 | 259 | 281  | 539  |
| CCACCAAGCAGTGTTTATAGT/ | 59.308 | 24 | 212 | 160  | 371  |
| TATCCCCTCATGCATTCCTT   | 59.344 | 20 | 250 | 1640 | 1889 |
| GATTGGACCATTTGTCCTTCA  | 59.782 | 21 | 229 | 44   | 272  |
| TGGTCAATACCAGAAAAATCC/ | 59.315 | 22 | 277 | 177  | 453  |
| CCCCTTATTTGTGGTTCCAA   | 59.657 | 20 | 251 | 30   | 280  |
| CCCAACCAGAGGATTAAGTGC  | 59.55  | 20 | 266 | 56   | 321  |
| CTAGGCATGGAATCCGAGAA   | 60.17  | 20 | 249 | 107  | 355  |
| TCCACGAATTTGACACGAAA   | 60.088 | 20 | 159 | 1465 | 1623 |
| TGAATTTTGTTCACCAA      | 58.841 | 20 | 125 | 9    | 133  |
| TTTCAAAGAATTTGTGGTAGAA | 59.119 | 25 | 165 | 698  | 862  |
| TTGCTCCAGTTTCCTTTTGC   | 60.365 | 20 | 117 | 52   | 168  |
| GGTGGCACTGCACAAGTATG   | 60.183 | 20 | 205 | 66   | 270  |
| TAAACAAAGCCCCATTTTGC   | 59.943 | 20 | 253 | 3314 | 3566 |
| TGGGAAGGATGAAGTTTGGGA  | 60.43  | 20 | 118 | 1201 | 1318 |
| GGTGCCGGTCCATAAAATAA   | 59.66  | 20 | 261 | 807  | 1067 |
| CGTGAGTTTAGGTGGGGAGA   | 60.103 | 20 | 254 | 32   | 285  |
| AAAAGTTGAAAAGAGCGCTGA  | 59.28  | 21 | 112 | 62   | 173  |

|                         |        |    |     |      |      |
|-------------------------|--------|----|-----|------|------|
| AGATGGAGGCCGAGAGTTTT    | 60.212 | 20 | 108 | 1642 | 1749 |
| GGCAGCAATCAACGACAATA    | 59.694 | 20 | 261 | 226  | 486  |
| GGATATCCAAAATATCCGAAA   | 57.071 | 22 | 230 | 1052 | 1281 |
| AAAAACGATCATATCCAATTT   | 59.268 | 23 | 154 | 156  | 309  |
| TGCTCTGATCACTCCCACAG    | 59.98  | 20 | 239 | 867  | 1105 |
| GTCGGATCTGCGAGATAAGC    | 59.946 | 20 | 232 | 471  | 702  |
| ACCCTTGCAAATTATCGCAC    | 59.967 | 20 | 149 | 362  | 510  |
| TGCAATATGTCCTTGCACCT    | 59.152 | 20 | 235 | 2340 | 2574 |
| AACATGAGCGCACCAACAT     | 60.136 | 19 | 110 | 23   | 132  |
| TGTGACAGGAGATGGGACAC    | 59.502 | 20 | 216 | 13   | 228  |
| GGCTAATGTGTGGCAGGTTT    | 60     | 20 | 207 | 1537 | 1743 |
| TCATCATAACATCTCAAACATT  | 58.556 | 25 | 250 | 1757 | 2006 |
| ACGCCTCAACTAACCAAGGA    | 59.734 | 20 | 251 | 35   | 285  |
| GGACTTATTACCAATCATCCCA  | 58.164 | 23 | 149 | 729  | 877  |
| TCTCAGCTTTCTTGATGGGAA   | 59.94  | 21 | 191 | 1409 | 1599 |
| CCCCAAATTTTACAAGCCT     | 60.177 | 20 | 152 | 3185 | 3336 |
| TTGCCTTGGCCCATTTAATA    | 60.275 | 20 | 277 | 1281 | 1557 |
| CGTGTGTGTCATTCAATCCT    | 59.845 | 21 | 180 | 9    | 188  |
| TCAATTAACAATAGACTGACGC  | 58.335 | 23 | 109 | 390  | 498  |
| GGAAAGAGTGTGTGTTTGCG    | 59.339 | 20 | 219 | 409  | 627  |
| CCGTCGATTTTCCCAACAC     | 60.227 | 20 | 229 | 44   | 272  |
| TTGTAGCCCCTTTGAGCCTA    | 59.839 | 20 | 238 | 10   | 247  |
| ACAACCCCCACGGTTTTAC     | 59.559 | 19 | 264 | 68   | 331  |
| ACCATTGATTTGGTTGATTGAA  | 59.182 | 22 | 107 | 56   | 162  |
| GACATTGCTAGCACCGAACA    | 59.871 | 20 | 178 | 92   | 269  |
| AAAATGTAACAACCTTTTGATCC | 59.723 | 25 | 257 | 625  | 881  |
| GTGATGTGGCAGCTTTTCAA    | 59.847 | 20 | 135 | 114  | 248  |
| AAGAATGATAGGACGTGCCG    | 60.096 | 20 | 116 | 31   | 146  |
| ATCGGAGTTGATTTGATGCC    | 59.9   | 20 | 160 | 251  | 410  |
| TTGCGAAATAAATGCACCAG    | 59.702 | 20 | 189 | 989  | 1177 |
| ATGCGTTTTGATGATATATAGG  | 58.042 | 25 | 100 | 706  | 805  |
| AAACAATGAAATTTGGAACAA   | 59.68  | 24 | 180 | 3    | 182  |
| GGCTATCAGCAACAAAACCC    | 59.574 | 20 | 279 | 1010 | 1288 |
| CACCCTAAAATACGCCAACA    | 59.876 | 21 | 219 | 144  | 362  |
| TTGATGGGAGGAATTGAACC    | 59.727 | 20 | 168 | 4713 | 4880 |
| GGTTATCACCGGATCGCTA     | 58.534 | 19 | 200 | 117  | 316  |
| TCTTCGTGAACTGCTGTGG     | 60.025 | 20 | 260 | 986  | 1245 |
| AGCCGTATGATAGTCGCACA    | 59.326 | 20 | 253 | 131  | 383  |
| CCCTCTCATCTTTCGACACG    | 60.791 | 20 | 277 | 1350 | 1626 |
| ACAGATGAGTGGCAGTCGGT    | 60.746 | 20 | 139 | 98   | 236  |
| ATGTAATAGGGTTTGGGAAGG   | 57.006 | 21 | 200 | 819  | 1018 |
| CCCGAAGAAGCCATCAAGTA    | 60.206 | 20 | 225 | 83   | 307  |
| CATGACCACTCTTTCCTCCA    | 58.641 | 20 | 263 | 2343 | 2605 |
| AAGGCAAGTTTCAGACCACG    | 60.291 | 20 | 253 | 219  | 471  |
| AGCCATGGATACAAGCAAGG    | 60.096 | 20 | 110 | 1381 | 1490 |
| ATTACATGGCTCCATTTGCC    | 59.791 | 20 | 217 | 137  | 353  |
| GGTGACAAGCTTATGGACCG    | 60.517 | 20 | 219 | 132  | 350  |
| CGGTGTTGGATTGGTGAGTA    | 59.415 | 20 | 122 | 1120 | 1241 |
| AAGACGAAGACGACGACGAT    | 59.874 | 20 | 232 | 524  | 755  |
| ACTCCTTCACTCCCAGCTCA    | 59.986 | 20 | 204 | 810  | 1013 |
| GGCAGCTCATCAAGTTCACA    | 59.992 | 20 | 169 | 8    | 176  |
| ATTTCTGACGAAGGCTGTGG    | 60.255 | 20 | 279 | 10   | 288  |
| TCTTACCAACTGTACGCCA     | 60.301 | 20 | 125 | 751  | 875  |
| CAATTTGTTTCAGAACCCAAGA  | 60.362 | 23 | 246 | 4378 | 4623 |
| AAATGCATGCACCTGATTACA   | 59.055 | 21 | 158 | 143  | 300  |
| TCTTTTGCCGTAGCTTGTGA    | 59.609 | 20 | 245 | 42   | 286  |
| TTTCCTTTTCCACCAACGAA    | 60.452 | 20 | 213 | 19   | 231  |
| TCATATTCCGCCATCTCCAT    | 60.26  | 20 | 184 | 892  | 1075 |

|                         |        |    |     |      |      |
|-------------------------|--------|----|-----|------|------|
| TTTTGATTTTATTGGGATTTGTT | 58.024 | 24 | 279 | 14   | 292  |
| TCACGAGCCAAATCTTCCTT    | 59.813 | 20 | 257 | 177  | 433  |
| CGGTTATCACCGGATCGC      | 62.397 | 18 | 274 | 1198 | 1471 |
| CAATTGACTCCGTCCGTTTC    | 60.495 | 20 | 162 | 338  | 499  |
| CATCCAATTTGGGCCATTT     | 60.517 | 19 | 267 | 23   | 289  |
| CTTTCCGATGGTGTCTCT      | 60.111 | 20 | 197 | 100  | 296  |
| AACCCGACACGATATAAGCG    | 59.982 | 20 | 280 | 301  | 580  |
| CTGCCTCCATTTCTTGCTTC    | 59.955 | 20 | 242 | 383  | 624  |
| GAAGTGGATTGGAGACGGAA    | 60.05  | 20 | 241 | 40   | 280  |
| TTTGAAAACATGCAAAGGCA    | 60.229 | 20 | 187 | 67   | 253  |
| AGGGGTTATCACCTGAATGC    | 58.864 | 20 | 184 | 162  | 345  |
| GTGGACGTCCCAGATTGTTT    | 59.827 | 20 | 178 | 4    | 181  |
| TGTAAGCCCATCAACCTTCA    | 59.123 | 20 | 239 | 1416 | 1654 |
| TGAGCCATGAACACCAACTC    | 59.682 | 20 | 243 | 302  | 544  |
| CTTGGGTTATCTTGTGGCTCA   | 60.118 | 21 | 115 | 21   | 135  |
| TGTTCCGAAAAGGAAAATGA    | 58.187 | 20 | 166 | 1088 | 1253 |
| TTGAATGCAGGGTCTGATTG    | 59.648 | 20 | 137 | 786  | 922  |
| AAAAAGCCAAATGAATGGGG    | 61.011 | 20 | 128 | 21   | 148  |
| CCAAGCATTATATTCCCCGA    | 59.751 | 20 | 202 | 906  | 1107 |
| CGAGAGAAAGAGATGGAGCG    | 60.232 | 20 | 256 | 41   | 296  |
| TTTCATGTTTCGAGCATAATT   | 59.864 | 23 | 226 | 442  | 667  |
| TGAGAAACATTAATGCGGC     | 58.771 | 20 | 228 | 27   | 254  |
| AAGGGAAAAGGATAACAGCC/   | 59.952 | 21 | 142 | 290  | 431  |
| GCTGGTTGACTGTACCAGGG    | 60.567 | 20 | 246 | 86   | 331  |
| TCGATATTGTTGTTGCCGTG    | 60.523 | 20 | 277 | 573  | 849  |
| GGTGGCCATATGTGAATGCT    | 60.754 | 20 | 250 | 454  | 703  |
| CCGCCGTAAAGAAATCAATG    | 60.448 | 20 | 255 | 98   | 352  |
| TGTTCAACCTACCTTTGCCA    | 59.17  | 20 | 222 | 1323 | 1544 |
| TGGTGCTGATGACGATTCTT    | 59.245 | 20 | 228 | 124  | 351  |
| CGAGCTCGAGTTTGAATTTG    | 58.649 | 20 | 224 | 735  | 958  |
| CGCCCTCTCCACCTATCTC     | 59.77  | 19 | 169 | 17   | 185  |
| ATGGCAAAGAGCAAGTCAAA    | 58.502 | 20 | 253 | 90   | 342  |
| TTTGTGTGACCCATCTTCCA    | 59.935 | 20 | 202 | 2229 | 2430 |
| GCCATCCACTACACCAAAGAA   | 59.985 | 21 | 267 | 551  | 817  |
| AAATGTTCGAAATACCGGGG    | 60.902 | 20 | 101 | 277  | 377  |
| GAGACGTGAGAGGGAGATCG    | 59.945 | 20 | 241 | 422  | 662  |
| TAAGCTTGCTCCCCAATTA     | 59.677 | 20 | 166 | 2798 | 2963 |
| CAGAAACTACATCGCGCAAG    | 59.632 | 20 | 135 | 161  | 295  |
| TGGTCCTTGTATGCATTGCT    | 59.152 | 20 | 274 | 64   | 337  |
| ATGTGCATGCTGATAGGCAA    | 60.251 | 20 | 213 | 1339 | 1551 |
| AGGTGATGATGGTGGAGGG     | 60.756 | 19 | 105 | 66   | 170  |
| CAACATGCAAGCCCTGATAA    | 59.688 | 20 | 243 | 5    | 247  |
| TGTTGTTTGGAAAGTTGGAGG   | 59.994 | 21 | 236 | 642  | 877  |
| TTTCAAGTTAGAAACGGGGC    | 59.202 | 20 | 251 | 133  | 383  |
| TGATCTCATTAAATCAACGGCT  | 59.983 | 23 | 136 | 97   | 232  |
| GATCTACGTCCACGGTGGTT    | 59.851 | 20 | 148 | 38   | 185  |
| TTGGACCTGCCACCAATTAT    | 60.192 | 20 | 230 | 738  | 967  |
| AGCAATATCGATCTCGCAA     | 58.483 | 20 | 176 | 79   | 254  |
| CAGTTAATCGGGCAATCTCC    | 59.528 | 20 | 172 | 18   | 189  |
| CAAAGGCCCAATGGTTAT      | 59.685 | 20 | 146 | 403  | 548  |
| TGGCACACTGTGAGAAGAG     | 60.178 | 20 | 252 | 37   | 288  |
| ACACTCACGCACACACAAA     | 59.818 | 20 | 206 | 103  | 308  |
| TGAAGAGAGAGCTTCTGTCGG   | 59.876 | 21 | 239 | 216  | 454  |
| GTGTTGATACCGGGTTCTT     | 58.912 | 20 | 245 | 97   | 341  |
| ACACCCACCTCATTTTCAA     | 60.21  | 20 | 236 | 180  | 415  |
| TTGGTTTTGAGATGGAACCAC   | 59.822 | 21 | 168 | 6    | 173  |
| TGCAAATACGGAAAATTTGAC/  | 60.347 | 22 | 280 | 681  | 960  |
| CTTTCTACCATGCAAACCC     | 59.429 | 20 | 280 | 312  | 591  |

|                        |        |    |     |      |      |
|------------------------|--------|----|-----|------|------|
| CACCGGAGTTTTACGTGGTT   | 59.891 | 20 | 241 | 65   | 305  |
| TGATCCATTCCGACTTCCTC   | 60.011 | 20 | 248 | 119  | 366  |
| TCCTCCATCAAACCATTGTC   | 58.331 | 20 | 274 | 2329 | 2602 |
| TGAGCTATAGTTGGAGGGTAG  | 59.845 | 24 | 175 | 6284 | 6458 |
| TGGAGAAAAGGAGCTGGAAA   | 59.926 | 20 | 213 | 1316 | 1528 |
| TTAGGTGCATCTCTTGACGA   | 58.515 | 21 | 209 | 142  | 350  |
| GTGATTCATGGCCGAGGTA    | 59.466 | 19 | 246 | 52   | 297  |
| CTAATTTAAGCCCCATCCCC   | 59.637 | 20 | 235 | 168  | 402  |
| TCAATTACCCTCAAGACCCG   | 59.926 | 20 | 263 | 50   | 312  |
| GAGAGAAAACCGAGAAGCGA   | 59.694 | 20 | 258 | 43   | 300  |
| CTTAGTGAAGTAGCCGCCCA   | 60.399 | 20 | 221 | 2    | 222  |
| CAGATCGAGATCGATTGAAGC  | 59.931 | 21 | 260 | 21   | 280  |
| CGCGTCAGATTTGTTATGTGT  | 58.715 | 21 | 253 | 90   | 342  |
| CCTGGTGTGTTGGCATTCTA   | 59.566 | 20 | 186 | 0    | 185  |
| ATTTGCGCGTCAATTACGTT   | 60.517 | 20 | 247 | 1831 | 2077 |
| AGGGGTCAAACCTCCACTCT   | 59.968 | 20 | 210 | 129  | 338  |
| GCCAAAAATTGTCATCCACA   | 59.375 | 20 | 226 | 127  | 352  |
| AACTGGGCCATGATAGGTTG   | 59.813 | 20 | 243 | 3    | 245  |
| GACTCCCTTCCTCAACTCCC   | 60.05  | 20 | 223 | 524  | 746  |
| TACCTGGAACGCATCACAAA   | 60.111 | 20 | 279 | 3631 | 3909 |
| ATTCTCCGCTGCAAACATCT   | 59.843 | 20 | 166 | 707  | 872  |
| TACCTAATCTCCCGCCCTTT   | 59.924 | 20 | 278 | 147  | 424  |
| GGAGGAGATGAAACGACAGC   | 59.81  | 20 | 108 | 148  | 255  |
| CACATCAGAAGCAGTGGAGG   | 59.415 | 20 | 255 | 80   | 334  |
| CTTCTTGAGACACAGAAGCAT  | 59.671 | 23 | 266 | 107  | 372  |
| GTTCCGTGTCGGCATAGACT   | 60.142 | 20 | 142 | 2338 | 2479 |
| TGCATCTTGGAGGTGAGTAGG  | 60.262 | 21 | 231 | 25   | 255  |
| TGGTACCTCCAACAAGAGGG   | 59.959 | 20 | 195 | 171  | 365  |
| AAACTGCTGACTGAAGCG     | 59.239 | 20 | 263 | 509  | 771  |
| CACCCCTTTCCTTACCCAT    | 60.046 | 20 | 248 | 164  | 411  |
| GTTGTAGGCAAAAGGGCGTA   | 60.131 | 20 | 168 | 357  | 524  |
| TATTGTCATCCACGCAAAAA   | 57.635 | 20 | 266 | 104  | 369  |
| AAAAGACATTCCGATGTGGG   | 59.79  | 20 | 235 | 477  | 711  |
| TGTCATGTCCACCTCATTCA   | 58.389 | 20 | 181 | 501  | 681  |
| CATCCAAGACATGATCGCAC   | 60.08  | 20 | 244 | 43   | 286  |
| TAAACCCCAACACCTTCGAC   | 59.83  | 20 | 245 | 406  | 650  |
| CTGGAGTGTCAAGCTGGGAT   | 60.261 | 20 | 195 | 106  | 300  |
| TTCGAGGAAGTCGAGGATTG   | 60.331 | 20 | 222 | 25   | 246  |
| GGTCGGCGTCTATTTGAT     | 60.051 | 19 | 209 | 204  | 412  |
| AGATTATGTCGTGGATTTTGAA | 59.778 | 24 | 251 | 55   | 305  |
| CACCCCTTGAATTTGCCTC    | 59.546 | 20 | 137 | 151  | 287  |
| CCTGGGAGATTGCTTGAGAC   | 59.803 | 20 | 124 | 1    | 124  |
| TCTGAGAATTCAGCAACAAAC  | 59.934 | 24 | 276 | 320  | 595  |
| TGAAAAACATGGATCCGAAA   | 58.94  | 20 | 223 | 25   | 247  |
| AGGCACAATAGCCACGAATC   | 60.103 | 20 | 255 | 250  | 504  |
| CGAACTTGACACGAACACGA   | 60.906 | 20 | 269 | 357  | 625  |
| GAAGAGGGATATTCGGAGGG   | 59.859 | 20 | 212 | 389  | 600  |
| TTGGGGCTACGTGTTCTTC    | 60.11  | 20 | 248 | 45   | 292  |
| AGAGAACTGGAACCCCCAC    | 60.349 | 20 | 259 | 44   | 302  |
| CGTTATCACCGGATCGC      | 62.397 | 18 | 250 | 836  | 1085 |
| TAGCGCATTTTTGCCTGATA   | 59.447 | 20 | 229 | 903  | 1131 |
| TTTTGCATGCTCAATAAAATGG | 59.968 | 22 | 253 | 1266 | 1518 |
| AGGGGTGTGTTAATGATGGG   | 59.526 | 20 | 209 | 232  | 440  |
| GAATTTCCAGTTCCAACCA    | 59.767 | 20 | 137 | 865  | 1001 |
| TGCAAGATCCAATGGTTGTG   | 60.517 | 20 | 280 | 462  | 741  |
| TAAAGGTGGAATGTCGTCCC   | 59.79  | 20 | 181 | 1923 | 2103 |
| CTTGCCATCCTCCTCCAATA   | 60.029 | 20 | 222 | 1782 | 2003 |
| CAAGCAACAAATCGAGCATC   | 59.425 | 20 | 160 | 695  | 854  |

|                        |        |    |     |      |      |
|------------------------|--------|----|-----|------|------|
| TGGAGATTGAGGAAAATGGG   | 59.864 | 20 | 192 | 1048 | 1239 |
| AGTTTTGAATGGCTTGGTGG   | 59.971 | 20 | 248 | 585  | 832  |
| AGGGAGGTGGTTGATCAGAA   | 59.505 | 20 | 277 | 124  | 400  |
| ACGGCTGTGTAGTGTGTTCCG  | 59.819 | 20 | 143 | 598  | 740  |
| AAGCAAAGCTGAGGTGTCAA   | 60.045 | 21 | 247 | 11   | 257  |
| TAAAAATGACCCTCGTTCCGG  | 59.931 | 20 | 252 | 0    | 251  |
| CTTCAAGCCCGCATTAAAC    | 59.72  | 20 | 211 | 19   | 229  |
| TAGTCGGCCGATAAGTTTGG   | 60.089 | 20 | 203 | 822  | 1024 |
| GACCTACGTCCACTGTGCAA   | 59.751 | 20 | 278 | 27   | 304  |
| CGACGTGGAATTCATGGTT    | 60.755 | 20 | 225 | 18   | 242  |
| TCATGTCCGTCCATTTTGAA   | 59.9   | 20 | 227 | 659  | 885  |
| CCCTCCCCTCTCACTTTCTC   | 60.186 | 20 | 150 | 1755 | 1904 |
| AGGCAAGCCTGTGGTAGTTT   | 58.865 | 20 | 152 | 51   | 202  |
| AAATCCATCCCATCCACGTA   | 60.014 | 20 | 209 | 303  | 511  |
| CACAGCCAGCTAGTCGGTTT   | 60.453 | 20 | 167 | 161  | 327  |
| ATCGACCCTAATTCGAACCC   | 60.152 | 20 | 270 | 1196 | 1465 |
| TGCATGTGAGTTGCACTTGA   | 60.029 | 20 | 216 | 449  | 664  |
| TTTGATGCAGCAACCATAAG   | 57.383 | 20 | 279 | 57   | 335  |
| CATTGATTGATTCACAGCCCT  | 59.947 | 21 | 228 | 148  | 375  |
| GAAAGTATGGCTGCTCCTCG   | 59.978 | 20 | 248 | 1832 | 2079 |
| TTTGGGTGTTCTGTACACGG   | 59.46  | 20 | 233 | 114  | 346  |
| GGGTCTCGCATAAAGTGGAA   | 60.074 | 20 | 273 | 129  | 401  |
| TGATCTTGCTTGGTTGCTTG   | 59.988 | 20 | 158 | 2146 | 2303 |
| CACATGTGGAGAGCTTGTGC   | 60.473 | 20 | 207 | 559  | 765  |
| CGATGTCACCATCGTTGTTC   | 59.967 | 20 | 268 | 1746 | 2013 |
| AGCTTTGGGCAAACATCAAT   | 59.574 | 20 | 261 | 27   | 287  |
| TTGTTAAAGGTTTCGACGGG   | 59.968 | 20 | 102 | 10   | 111  |
| GCCAAGACTAGAGGCTGTGA   | 58.187 | 20 | 111 | 277  | 387  |
| AGTCTCGTGCGTCTCCAGTT   | 60.057 | 20 | 231 | 295  | 525  |
| TGCGCGATTTTAAACCCTAA   | 60.564 | 20 | 269 | 1579 | 1847 |
| TTGCAAATTTTCGGTAAGCA   | 59.328 | 20 | 131 | 407  | 537  |
| GAAGATGGAGAGACGGTGGT   | 59.105 | 20 | 275 | 220  | 494  |
| TGCCAATGGAATAGTGATCG   | 59.499 | 20 | 273 | 1660 | 1932 |
| CCCACACTCACATGTACAAAC  | 60.244 | 23 | 152 | 324  | 475  |
| ACTGGTTTTCTACCCCAGCC   | 60.361 | 20 | 273 | 36   | 308  |
| TCGAACATGTAGTGGTCAAAC  | 60.081 | 23 | 194 | 293  | 486  |
| TGAACAATGAGATCCACAATC  | 58.976 | 22 | 280 | 423  | 702  |
| TTTTACCTTCTCCAGGGCAA   | 59.679 | 20 | 263 | 4236 | 4498 |
| ATGTCACTGCCTTGCCTCTT   | 59.874 | 20 | 226 | 607  | 832  |
| CGACACCGAGGTAATGAACA   | 59.566 | 20 | 167 | 742  | 908  |
| CCACCGGATATACTCCTTCG   | 59.406 | 20 | 206 | 588  | 793  |
| ACCCGAATTACCACCCCTAC   | 59.94  | 20 | 272 | 1896 | 2167 |
| ACACACGAACACTCACCCAA   | 60.047 | 20 | 198 | 69   | 266  |
| CGGCTACCCGATTCATTAAG   | 59.564 | 20 | 173 | 60   | 232  |
| TTGCCTTTTGATTTTCGGTC   | 60.053 | 20 | 280 | 697  | 976  |
| TGCAACCAAGTTGTCAACCA   | 61.159 | 20 | 252 | 65   | 316  |
| TTGACTGAACTTCACCCATTT  | 57.16  | 21 | 123 | 251  | 373  |
| TCCTCCTCACGAGTTTGGAC   | 60.238 | 20 | 243 | 377  | 619  |
| AGACCGGAGTAGATGACCTTC  | 57.321 | 21 | 105 | 363  | 467  |
| GATTTTGACATCAAGATAAGGC | 58.262 | 23 | 220 | 408  | 627  |
| AGAAGTAAACCACGAGGCCA   | 59.734 | 20 | 227 | 33   | 259  |
| TGTCCTCAACTGAAAGAATGC  | 57.937 | 21 | 268 | 1679 | 1946 |
| TTCAATGCTTGTTGTCTGCC   | 59.697 | 20 | 231 | 76   | 306  |
| GATCGGAGCTGAGAAAGCAG   | 60.24  | 20 | 229 | 854  | 1082 |
| CGCCATTCTCTCTAACCTG    | 59.087 | 21 | 162 | 288  | 449  |
| ATGACCTTGAAACCCCTTGA   | 59.381 | 20 | 275 | 2717 | 2991 |
| CACCAACAGCTTGTGCAATG   | 60.301 | 20 | 161 | 1881 | 2041 |
| CAAGGGCCGAGATTTGTTAG   | 59.702 | 20 | 213 | 1366 | 1578 |

|                        |        |    |     |      |      |
|------------------------|--------|----|-----|------|------|
| ACCATCCATTCCGAAAATCA   | 60.133 | 20 | 182 | 176  | 357  |
| CTTGGCTCCGGGTTGTAGTA   | 60.125 | 20 | 277 | 322  | 598  |
| CATCGGTTTCATGTCACTTGG  | 59.96  | 20 | 186 | 4    | 189  |
| TCTGAGATGTACTGCGCC     | 60.016 | 20 | 156 | 21   | 176  |
| CGTAAAGCCCAATCGAGTTC   | 59.708 | 20 | 226 | 17   | 242  |
| TTTCTAAATGGTGGCCGAAA   | 60.427 | 20 | 173 | 445  | 617  |
| CAACGGCTATTTACATGGGG   | 60.202 | 20 | 255 | 692  | 946  |
| TGCATGCTATACGGCACTGT   | 60.31  | 20 | 222 | 2774 | 2995 |
| CTAATAGCAGGCAAAATGCG   | 58.609 | 20 | 240 | 3    | 242  |
| TCAATATTTCCCAAACCTCGGA | 59.397 | 21 | 195 | 11   | 205  |
| TGAAAAATTCAAATAGGAATA  | 59.643 | 25 | 257 | 14   | 270  |
| CAAAATTTGGGGCAAAAA     | 57.057 | 18 | 276 | 743  | 1018 |
| ATTTTTCTTTTCGGTTGGGG   | 60.157 | 20 | 123 | 6149 | 6271 |
| TCTTCCAACCTCCAGAGGAA   | 59.773 | 20 | 265 | 130  | 394  |
| CAATTCCCAATCGAGCTGTT   | 60.074 | 20 | 156 | 1788 | 1943 |
| TCAAAATCAAGTCTTCCTCCG  | 59.298 | 21 | 199 | 340  | 538  |
| TAATTGGACCTCGCGAAAGA   | 60.712 | 20 | 277 | 23   | 299  |
| GGCAAGACATGGTGTGTTT    | 58.47  | 20 | 277 | 833  | 1109 |
| TGTAGGGGACTCGTTCAAC    | 60.255 | 20 | 178 | 64   | 241  |
| GGGTTCCAGCGTCATAAAAA   | 59.938 | 20 | 278 | 316  | 593  |
| TGGGTGATCTGAGAGGAAAAA  | 59.656 | 21 | 249 | 517  | 765  |
| CCTCATCTGTTGTAACCACTAT | 58.2   | 24 | 270 | 390  | 659  |
| TGTTTTCGAGTGAGAAGGTG   | 60.025 | 20 | 243 | 1078 | 1320 |
| TCACGCTAAGGGGTGGTATC   | 59.955 | 20 | 163 | 395  | 557  |
| TCCGTGCATGAGAGAGAGAA   | 59.656 | 20 | 114 | 1666 | 1779 |
| AGTCTGCCATTCTTGCAACC   | 60.263 | 20 | 225 | 434  | 658  |
| GTTGCAGGTTGATCGAGGAT   | 60.081 | 20 | 211 | 83   | 293  |
| GAGGACACTTGGACCTGGAA   | 60.088 | 20 | 265 | 745  | 1009 |
| AGGCTTCGTGTCTGTGGT     | 59.907 | 20 | 205 | 90   | 294  |
| AATTGAGGGAAATGTCAGCG   | 60.074 | 20 | 188 | 1718 | 1905 |
| CTTTTCTGTATTGGGGCTGG   | 59.564 | 20 | 236 | 467  | 702  |
| GGTGGAGGAGGGTATTAAGAT  | 60.546 | 23 | 119 | 568  | 686  |
| CCTCTGGACCGACCATTTTA   | 59.926 | 20 | 210 | 463  | 672  |
| CGCAGAATCATGAGACACAAA  | 59.856 | 21 | 235 | 17   | 251  |
| GCTGCTGTGTTTGTCTTGGA   | 60.032 | 20 | 216 | 292  | 507  |
| TTGGGTGAGAGAAAGATAGAT  | 58.914 | 24 | 239 | 447  | 685  |
| AAATCCAGCAGGCAGATCAC   | 60.226 | 20 | 231 | 658  | 888  |
| TTGGTCCACCAATCTTGTGA   | 59.935 | 20 | 254 | 900  | 1153 |
| AAATCTGGGCCCTTAGATCG   | 60.411 | 20 | 214 | 19   | 232  |
| ATCGTGAGGAGCGTTGATCT   | 59.834 | 20 | 238 | 354  | 591  |
| TGATTTCAAACCCGCTGTT    | 60.481 | 20 | 264 | 265  | 528  |
| CATAATGCCTTCCCGTGACT   | 59.955 | 20 | 208 | 117  | 324  |
| ACAATGATGGACACATGGCA   | 60.829 | 20 | 142 | 539  | 680  |
| ACGCCATTGATGGAAGAAAG   | 60.074 | 20 | 154 | 134  | 287  |
| ATCCTTGCACCTCCTCTTGA   | 59.803 | 20 | 275 | 2184 | 2458 |
| CCACTGCTGTCAGCTCAGTC   | 59.764 | 20 | 241 | 270  | 510  |
| GCACAACAATCTGCAATCTCA  | 59.862 | 21 | 231 | 1054 | 1284 |
| CGCGTCCGACTCCTTAACTA   | 60.399 | 20 | 272 | 107  | 378  |
| TGAAGTTTGGCAAGGAAACC   | 60.088 | 20 | 227 | 138  | 364  |
| CTTGGCTCGTTAGACATGGG   | 60.647 | 20 | 206 | 95   | 300  |
| ATGCAATTTTTGTGGGCAAT   | 60.196 | 20 | 151 | 863  | 1013 |
| TCAGCATGATATTGCGGAGA   | 60.329 | 20 | 160 | 83   | 242  |
| CAACAAATTCCAATGAAAGGG  | 59.302 | 21 | 254 | 122  | 375  |
| TCACATTCAACCTCAGCGAA   | 60.39  | 20 | 247 | 1286 | 1532 |
| CTCTCTCCTGATGCAGCC     | 60.246 | 20 | 240 | 2651 | 2890 |
| TTATGTGCGAGGAGGACGCTC  | 60.362 | 20 | 241 | 3047 | 3287 |
| TGGGCTTTGTCAAGATTGTG   | 59.691 | 20 | 277 | 809  | 1085 |
| TTCCAGCAATGGAACCAAT    | 60.309 | 20 | 278 | 971  | 1248 |



|                         |        |    |     |      |      |
|-------------------------|--------|----|-----|------|------|
| TGCTGTGGACACGTTCAAAT    | 60.16  | 20 | 249 | 24   | 272  |
| TGGGAACATTATGATGGGAAA   | 60.002 | 21 | 218 | 632  | 849  |
| GCTCGAACGAGCCTATTGAA    | 60.49  | 20 | 214 | 1694 | 1907 |
| AAAAATGACACCCCGTTGAA    | 60.206 | 20 | 270 | 327  | 596  |
| CACGTGTAATTAATTCGGTTAC  | 60.057 | 24 | 267 | 28   | 294  |
| GGGAATTGGCCCAAATAAGT    | 60.02  | 20 | 261 | 52   | 312  |
| CATCAGTCTACAGCCAGGCA    | 60.008 | 20 | 243 | 740  | 982  |
| GCTGAAACCAAGGCAAAGAA    | 60.365 | 20 | 183 | 261  | 443  |
| TTGATTGGTCATTCTTTTCATT  | 58.418 | 22 | 159 | 103  | 261  |
| ACACATGTCGCCTTCTGGTT    | 60.577 | 20 | 198 | 34   | 231  |
| CGAGGAATTTGAAGAACAATT   | 58.88  | 22 | 250 | 1406 | 1655 |
| CACCCCAGATGGTAGACAT     | 59.803 | 20 | 216 | 163  | 378  |
| TTGAACTCACGATCTCACGC    | 59.992 | 20 | 159 | 31   | 189  |
| GCATAAATTGTGTTCCCCGA    | 60.701 | 20 | 276 | 175  | 450  |
| GTTGGAGGAGAGCTGTAGCG    | 60.156 | 20 | 233 | 28   | 260  |
| CAGGTGACGTTGGCAAATA     | 59.758 | 20 | 253 | 21   | 273  |
| ATGGGAAGAGGGGGTATGAG    | 60.147 | 20 | 240 | 1276 | 1515 |
| TGAGGGAAGGAGAGATCGAG    | 59.48  | 20 | 248 | 151  | 398  |
| GGTCAAATCGAGATGCACAA    | 59.654 | 20 | 202 | 778  | 979  |
| AGGAAGAAAGAAGGGGCAAA    | 60.18  | 20 | 180 | 81   | 260  |
| CATGGCTGGATCTTGCTGTA    | 59.823 | 20 | 230 | 2376 | 2605 |
| TGACGGACCTTCATTTTTCC    | 59.91  | 20 | 206 | 508  | 713  |
| TGAAAGGGACACGTGGAAT     | 60.353 | 20 | 126 | 1381 | 1506 |
| GGAATGGTGTGGGGAATATG    | 59.871 | 20 | 138 | 818  | 955  |
| CCGTAAAAGAAGTCGTTGCC    | 59.747 | 20 | 223 | 183  | 405  |
| TCACCATCACTGACTCTGCC    | 59.827 | 20 | 225 | 88   | 312  |
| GGCCCCTCTACTCTGTGAT     | 60.477 | 20 | 105 | 281  | 385  |
| TGTTTTCCGGCAACTTTATCA   | 59.157 | 20 | 199 | 410  | 608  |
| TGATTGATTAATTCGTTTGTTAC | 60.124 | 26 | 215 | 125  | 339  |
| CATGAAGGAAAAAGTCGGGA    | 60.044 | 20 | 240 | 79   | 318  |
| GCTTGCCCTCATTTCATGTTT   | 60.081 | 20 | 185 | 291  | 475  |
| AGCTGGCTCAACTACTCCCA    | 60.012 | 20 | 262 | 2677 | 2938 |
| GCTCTTGCCCCTTTCTCTCT    | 60.096 | 20 | 274 | 107  | 380  |
| TTGAAGAGAATCCACTCGCC    | 60.34  | 20 | 254 | 594  | 847  |
| TGTAAAGTGAACAATGGAAGC   | 58.346 | 22 | 215 | 4964 | 5178 |
| TTTTGCCCAACATGCTAGT     | 60.502 | 20 | 241 | 959  | 1199 |
| CCAATTTGAATGGTTATCACCT  | 60.457 | 23 | 122 | 1267 | 1388 |
| CTCAGTATGGACAGTGGCGA    | 59.855 | 20 | 174 | 241  | 414  |
| GTTTTCGTTGTTCCAGCCT     | 59.218 | 20 | 241 | 2201 | 2441 |
| TTCAGTAACTTCAGTGGGCAA/  | 59.785 | 22 | 252 | 4369 | 4620 |
| GTGGGGTAGAAGGCAATGAG    | 59.55  | 20 | 259 | 50   | 308  |
| AACATGCACACAAGCACACA    | 59.785 | 20 | 265 | 164  | 428  |
| GCACCATTGCTACCTCCAAA    | 61.032 | 20 | 151 | 270  | 420  |
| CAGTTGGACTTTTCGCTTCC    | 59.853 | 20 | 258 | 526  | 783  |
| GCTTCAGCAAGGAAGATGCT    | 59.723 | 20 | 145 | 1414 | 1558 |
| GAAACCCGTGAACTAAACGC    | 59.615 | 20 | 148 | 699  | 846  |
| TGTGAACCTTTTTAGCCGT     | 60.668 | 20 | 190 | 1442 | 1631 |
| ATCCAACGTTGTAACACACAC/  | 58.877 | 22 | 135 | 4    | 138  |
| GTCTCCACCTCCATTGAAGC    | 59.661 | 20 | 261 | 284  | 544  |
| GGAGGGGAGGAAAGAGAGAG    | 59.367 | 20 | 161 | 45   | 205  |
| GGCAACTTTTGATTCTTCTCG   | 58.962 | 21 | 255 | 4357 | 4611 |
| CCCAATAACTCGCAATAGTTTC  | 58.698 | 22 | 203 | 412  | 614  |
| TCACAATATTTGAGGGTTATCA  | 60.337 | 26 | 213 | 255  | 467  |
| TCCAATAACTCACAAAACTTTA  | 57.144 | 25 | 184 | 270  | 453  |
| ACTGACCTGCCCAACAGAAT    | 59.579 | 20 | 260 | 3220 | 3479 |
| CGTGTACTCTGCACTGAGGC    | 59.648 | 20 | 158 | 416  | 573  |
| ATCCCTCGACTTTCCCCTAA    | 59.897 | 20 | 188 | 1799 | 1986 |
| CATGTTCCCAATTAATAAATG   | 60.219 | 26 | 268 | 93   | 360  |

|                         |        |    |     |      |      |
|-------------------------|--------|----|-----|------|------|
| AAAGAAGGACCTCCCGTGAA    | 60.988 | 20 | 166 | 710  | 875  |
| TCTGGTTTTGCTGGTGATG     | 59.691 | 20 | 211 | 46   | 256  |
| TTGATGGTGGTGGATATTGG    | 59.049 | 20 | 207 | 450  | 656  |
| CAGTTTCGAGTTTTGAAGTTAG  | 60.193 | 25 | 167 | 150  | 316  |
| TACTTTGCCACACAAGGCTG    | 59.904 | 20 | 113 | 1028 | 1140 |
| TTGATAGGGCCGAAAACAAC    | 59.938 | 20 | 158 | 4    | 161  |
| AAACAATCTGGTGCCTCCAC    | 60.966 | 20 | 258 | 3    | 260  |
| GTGGCACCAATCAACTCCTT    | 59.973 | 20 | 190 | 435  | 624  |
| TTGGAGAACAGGTAGCGGTC    | 60.255 | 20 | 154 | 36   | 189  |
| TACGGGAATGCACCAAGAA     | 60.057 | 19 | 115 | 89   | 203  |
| GCCCACCATTTATCTAAACCTG  | 59.737 | 22 | 210 | 95   | 304  |
| TTTCATTTCCACCTTCCACC    | 59.767 | 20 | 166 | 387  | 552  |
| TCCCAAAAGAGTTGGGAATG    | 59.903 | 20 | 274 | 6    | 279  |
| GACAGTCAACCCACACATGC    | 60.013 | 20 | 220 | 627  | 846  |
| TGAACCTCCAGGGAAGAAAA    | 59.641 | 20 | 279 | 385  | 663  |
| AGCCAACACCTACACCAGGA    | 60.567 | 20 | 183 | 2977 | 3159 |
| TACGATCCGATCCAACGATT    | 60.296 | 20 | 175 | 3    | 177  |
| CCCAAATTCAGGCTGTTTAT    | 59.933 | 20 | 184 | 3    | 186  |
| CCTCCCCGTATCGATTATCA    | 59.739 | 20 | 280 | 50   | 329  |
| AAATGATCCTTCAGCAACCG    | 60.074 | 20 | 280 | 1102 | 1381 |
| GCGCCTTGCATGTATGATAA    | 59.691 | 20 | 249 | 16   | 264  |
| CTATCCGCTGAAAAGCATCC    | 59.807 | 20 | 203 | 79   | 281  |
| TGTCCACGGCTCCTAAAAGT    | 59.734 | 20 | 280 | 1160 | 1439 |
| TGGAACAACACTTCAACAACG   | 59.643 | 21 | 279 | 4149 | 4427 |
| TTGCTAGAGGGTTTTGTTAATA  | 59.891 | 27 | 115 | 1167 | 1281 |
| TTGGTGGGAGATTGCTAGAG    | 57.894 | 20 | 151 | 145  | 295  |
| TGTTTAATCAGGTAGAAAAGTTC | 58.854 | 25 | 234 | 1114 | 1347 |
| ATGCGGCGCCTTTTTAAT      | 60.557 | 18 | 272 | 142  | 413  |
| CTTCTTCCCAATCCTCCTC     | 60.008 | 20 | 249 | 1574 | 1822 |
| CATCCCATCACTACCCCATC    | 60.011 | 20 | 115 | 135  | 249  |
| TTTCCAAGGATCAGACGAC     | 60.05  | 20 | 258 | 1970 | 2227 |
| CTTGCTCGTTTTATCCCTCG    | 59.839 | 20 | 242 | 410  | 651  |
| GTCTTTGACAGTGGAAACCC    | 59.405 | 20 | 264 | 2    | 265  |
| AATTGGACACATAGTTCATGCC  | 58.839 | 22 | 155 | 49   | 203  |
| CAGAACTGCCCTCGGAATAC    | 59.694 | 20 | 237 | 115  | 351  |
| AAGCATCCCGAACTCTTTCA    | 59.813 | 20 | 244 | 104  | 347  |
| CATCTTCTCATCTCAACTCCCA  | 59.284 | 22 | 277 | 2    | 278  |
| ATGAGTGGCGTCTACGGAAT    | 59.579 | 20 | 182 | 58   | 239  |
| TGCCAAGTGTGTTGAACCAT    | 60.008 | 20 | 242 | 11   | 252  |
| TGTTGAAGAAGCACAGGCAA    | 60.574 | 20 | 246 | 101  | 346  |
| CGCGAGTTACTTCCATCGTC    | 60.796 | 20 | 133 | 227  | 359  |
| CCGGCATCATCTGCTTTTAT    | 60.06  | 20 | 224 | 90   | 313  |
| AACCCGAATTCGATACAACAA   | 59.329 | 21 | 135 | 65   | 199  |
| TTTACACAATGCCGACTCAAA   | 59.216 | 21 | 154 | 34   | 187  |
| ATGGTCCCTACAGCAACAGC    | 60.142 | 20 | 277 | 2202 | 2478 |
| GATCGTGAATGATCTACGTCC/  | 59.962 | 22 | 196 | 157  | 352  |
| AATTCCCATGACCCACAT      | 59.854 | 19 | 277 | 88   | 364  |
| GAAGAACACCCCATACGTGC    | 60.384 | 20 | 275 | 132  | 406  |
| TGTGCTAGGGTTTAGGTGGG    | 59.986 | 20 | 166 | 43   | 208  |
| TTTGGCTGATTGAATTTATGGA  | 59.433 | 22 | 186 | 669  | 854  |
| AATCGATTACTCCCGCCTTT    | 59.93  | 20 | 211 | 91   | 301  |
| GCGGTCCAGATCTGCTACTCT   | 60.938 | 21 | 178 | 313  | 490  |
| AAGTGAGGATCGTGGAAGGA    | 59.655 | 20 | 116 | 2    | 117  |
| TGCACACGAGCTCAATCTCT    | 59.733 | 20 | 226 | 211  | 436  |
| CATCTGCACCAGCAGTCTGT    | 60.055 | 20 | 234 | 711  | 944  |
| AAAGCAATGGCGGATACAAG    | 60.096 | 20 | 202 | 66   | 267  |
| TTTGCCCTTGTGGATTGATT    | 60.309 | 20 | 249 | 2243 | 2491 |
| TTTGGGCTTTTAGCCTTCAT    | 58.831 | 20 | 216 | 658  | 873  |

|                         |        |    |     |      |      |
|-------------------------|--------|----|-----|------|------|
| GGGATTTATTTTGGGGGTACA   | 59.774 | 21 | 123 | 341  | 463  |
| GGCCTTACACAGTGGCTCTC    | 59.874 | 20 | 213 | 114  | 326  |
| TGATTTCCCAGCAAAAATTGG   | 60.807 | 20 | 139 | 4    | 142  |
| GGGAGGTGGTTCGAGTTACA    | 59.966 | 20 | 264 | 188  | 451  |
| GCGGTCCAGATCTGCTACTCT   | 60.938 | 21 | 184 | 327  | 510  |
| TCCCTGGGATTTTCACTCTG    | 60.042 | 20 | 161 | 112  | 272  |
| CCAGTTGGTGGACCTAAAGC    | 59.592 | 20 | 224 | 1821 | 2044 |
| AGGCGTGGTGATTATTCCAA    | 60.331 | 20 | 223 | 854  | 1076 |
| AGGCTCTGCATGCTCTTTTT    | 59.222 | 20 | 168 | 13   | 180  |
| CAGTGACATGGCCAAAACCTG   | 60.152 | 20 | 194 | 3    | 196  |
| CGTAAAAATGGTTATTACTGGA  | 60.066 | 25 | 261 | 440  | 700  |
| TTTTGGCTGGGGAGATTAAG    | 59.155 | 20 | 223 | 117  | 339  |
| AACCACAGGATCGAAAAATGA   | 59.42  | 21 | 251 | 473  | 723  |
| CGATAAGGGCCTAGAAAAACA   | 58.397 | 21 | 111 | 15   | 125  |
| CCTTTTGTGAGGACTGAGGG    | 59.691 | 20 | 121 | 1588 | 1708 |
| TGGGTTTGATTCCCAAATGT    | 60.029 | 20 | 261 | 224  | 484  |
| AATTCATGGCTGCGACTTTC    | 60.221 | 20 | 273 | 260  | 532  |
| GGTTCGGTGAGATCAGCTTC    | 59.81  | 20 | 197 | 321  | 517  |
| CGCTTCCGGAGTGGATAATA    | 60.053 | 20 | 169 | 75   | 243  |
| ATCTCCGTTCAATGCTTCCA    | 60.603 | 20 | 261 | 0    | 260  |
| GGTGTGGGAGTTGCTGAGT     | 60.159 | 20 | 183 | 266  | 448  |
| ATCGGTCAAATTCAAACTCG    | 57.67  | 20 | 240 | 1332 | 1571 |
| TTGTTGGGTTGTTGGTGTTT    | 59.288 | 20 | 280 | 256  | 535  |
| AGGTCTAGGCCCTCAAATC     | 59.536 | 20 | 127 | 1140 | 1266 |
| ATCGAACTCTTGC GTTGCTT   | 60.022 | 20 | 130 | 45   | 174  |
| ACGTAATTTGGCGGTCTCAG    | 60.132 | 20 | 270 | 521  | 790  |
| TCCACAAAAGTGGGTGTGA     | 59.976 | 20 | 142 | 37   | 178  |
| CGACCTCCCATTTTCGTTTA    | 59.931 | 20 | 139 | 22   | 160  |
| GCTACCCCTCCCTACCCAT     | 60.212 | 20 | 214 | 589  | 802  |
| CTTTTCACACGAGGTCACGA    | 59.873 | 20 | 257 | 24   | 280  |
| GTGCAATCCAGTGA AAACTCTC | 59.78  | 22 | 191 | 48   | 238  |
| TCATGTTGCATATTATTTGGCA  | 59.256 | 23 | 242 | 59   | 300  |
| AATTTCCACCAAACAGCAA     | 60.344 | 20 | 192 | 533  | 724  |
| ATCCGGCGCTCTAGATACAA    | 59.829 | 20 | 124 | 234  | 357  |
| CGTGCTCACCATGAAACCTA    | 59.716 | 20 | 257 | 1109 | 1365 |
| GGAGTTGGCACCAGATCACT    | 60.12  | 20 | 276 | 1303 | 1578 |
| TCGTCACTATCTCGTCGTGG    | 59.855 | 20 | 231 | 1147 | 1377 |
| AGCGGTTATTACCGGATCG     | 59.93  | 19 | 156 | 486  | 641  |
| TGCACCTTCCACGAATCATA    | 60.073 | 20 | 153 | 27   | 179  |
| CAAGGCTTGAAGCTGGTAGG    | 60.008 | 20 | 247 | 81   | 327  |
| AACAACGGTATCACCTGAACG   | 59.906 | 21 | 203 | 3938 | 4140 |
| CCTTTTCGCGTGTCAGAGTTT   | 60.431 | 20 | 152 | 3    | 154  |
| CACGGTTAGGCTCGAGAGAG    | 60.149 | 20 | 184 | 51   | 234  |
| TGTGTGAAGGTTGAGTTGGC    | 59.726 | 20 | 253 | 15   | 267  |
| CGAACTGGGTACACTTGGG     | 60.401 | 20 | 218 | 11   | 228  |
| GGCTGGGTACCAACTACACC    | 59.333 | 20 | 163 | 478  | 640  |
| GCACGCGGAAGACTAAAAAC    | 59.889 | 20 | 275 | 20   | 294  |
| GGTCTCACGGCAGTTTTTTA    | 60.11  | 20 | 208 | 1882 | 2089 |
| TTCTATATAAAACGAGACCAA   | 58.838 | 27 | 172 | 160  | 331  |
| CGGCCTTCAACTCTACCTCA    | 60.388 | 20 | 207 | 2095 | 2301 |
| GGGAGAATCGAGATTTGTTTT   | 59.945 | 22 | 275 | 270  | 544  |
| GGGGTTCATCCATTCATCAG    | 60.135 | 20 | 231 | 22   | 252  |
| TTGTTGCCTGATCGATCCTA    | 59.226 | 20 | 119 | 369  | 487  |
| ACATGAAGCGCTGATTGTTG    | 59.871 | 20 | 206 | 1376 | 1581 |
| TGGTAAATATCCTCCGGTGC    | 59.784 | 20 | 197 | 91   | 287  |
| TAACTTCCAAAATGCCTCCC    | 59.019 | 20 | 259 | 799  | 1057 |
| GCCCGTGTGCATCACTACT     | 59.723 | 19 | 132 | 550  | 681  |
| GCACCAAATAATTCGACTTGC   | 59.605 | 21 | 274 | 163  | 436  |

|                         |        |    |     |      |      |
|-------------------------|--------|----|-----|------|------|
| CGAGCTTCAGGCATTAGCTT    | 59.752 | 20 | 186 | 772  | 957  |
| GCATTGATGGGATTCCACTT    | 59.756 | 20 | 207 | 1090 | 1296 |
| CTGCAGCTTCTTCACCTCCT    | 59.745 | 20 | 234 | 304  | 537  |
| GGTGGGTGCAACTTTCTAGC    | 59.74  | 20 | 166 | 7    | 172  |
| GGGTTTGGAGGGGTATCCTA    | 60.011 | 20 | 230 | 125  | 354  |
| CGACGGAACCACCAATTTTA    | 60.722 | 20 | 164 | 8    | 171  |
| GATTTGCGTGGTCCATTGAT    | 60.733 | 20 | 265 | 6    | 270  |
| TCAGCCTCCATCAATTATCAA   | 58.174 | 21 | 163 | 183  | 345  |
| AGGGGTGACTTCATGGAATG    | 59.779 | 20 | 228 | 1915 | 2142 |
| TCCGAGTTTTGTTGAGGACA    | 59.262 | 20 | 222 | 169  | 390  |
| CATGCTGCCGGAAGTAATTT    | 60.096 | 20 | 262 | 150  | 411  |
| TGGACATATGGAGGGAAGGA    | 60.272 | 20 | 257 | 829  | 1085 |
| TCCCTCTTGAGTGAGCTTTGA   | 60.119 | 21 | 272 | 2527 | 2798 |
| AAGAAGGGCGAGCTTAAAGG    | 59.98  | 20 | 183 | 1221 | 1403 |
| ACCAGGCATCAGATCAACAA    | 59.09  | 20 | 263 | 146  | 408  |
| ATGGACTCCGAGGATGATGA    | 60.439 | 20 | 224 | 33   | 256  |
| AATTCGGGTTTGAGCTGCTA    | 59.845 | 20 | 231 | 1760 | 1990 |
| TTGTCCGAAACTTCCCTCAC    | 60.088 | 20 | 274 | 1642 | 1915 |
| CCGACCTCGGTAATGCTTA     | 60.089 | 20 | 227 | 605  | 831  |
| TTGGTTGGGGTTTTGTTTGT    | 60.103 | 20 | 168 | 503  | 670  |
| TCCAATCGAAGATTCCGGAAC   | 60.014 | 20 | 206 | 94   | 299  |
| TTTGTAGAGATCTTGACGGGA   | 58.834 | 22 | 203 | 961  | 1163 |
| GTGTGTGTATGAGAGCCGCA    | 60.907 | 20 | 191 | 1350 | 1540 |
| TCTTGCAACTCCTTTGGAGC    | 60.517 | 20 | 265 | 3    | 267  |
| CTGGCACATCTGCAGTTCAT    | 59.862 | 20 | 251 | 264  | 514  |
| AGTCGAAGCTGTGGGAGATG    | 60.408 | 20 | 242 | 646  | 887  |
| GTGGATGGTCCTCAGCTGTT    | 60.12  | 20 | 192 | 279  | 470  |
| TGTGGAAATTATGGTTCGCC    | 60.701 | 20 | 248 | 796  | 1043 |
| TGCGTTTACATTCAAGCAGTG   | 59.926 | 21 | 100 | 43   | 142  |
| CTTCTGGCTTCTCTTGCCCT    | 61.027 | 20 | 112 | 36   | 147  |
| ATTTCGAAGATCAACGGACG    | 60.074 | 20 | 115 | 61   | 175  |
| GTCTGTTGATTCATCGCCAA    | 59.654 | 20 | 279 | 106  | 384  |
| CCCCATTAGCTTCATCCTCA    | 60.029 | 20 | 236 | 780  | 1015 |
| ACTTCAAATTTTGTGCCCA     | 60.344 | 20 | 133 | 191  | 323  |
| CAATACAACCTGCCGAGCTGA   | 60.011 | 20 | 106 | 80   | 185  |
| ATGATCGCTCTGTTCCGATT    | 59.658 | 20 | 274 | 682  | 955  |
| GCAACCAGTACTCATTGGC     | 60.526 | 20 | 165 | 776  | 940  |
| AACCCCAACGGACAGATTTA    | 59.288 | 20 | 173 | 1832 | 2004 |
| TTCCACCTGATCCTGGTTTC    | 59.903 | 20 | 168 | 2082 | 2249 |
| TTTTCAATTCATGTTTCGCCA   | 60.051 | 20 | 246 | 655  | 900  |
| GCACTGAGGCAGAGTACACG    | 59.648 | 20 | 133 | 1596 | 1728 |
| GATAAAACAGGGGAAAGGGC    | 59.777 | 20 | 152 | 167  | 318  |
| GGCATTGTATACCCGTTGG     | 60.074 | 20 | 177 | 101  | 277  |
| TCCATGCAAGGCTTTCTTCT    | 59.955 | 20 | 143 | 473  | 615  |
| TCCATGCAAGGCTTTCTTCT    | 59.955 | 20 | 139 | 325  | 463  |
| TCGACGATCACAAATTTGTCC   | 59.502 | 20 | 197 | 435  | 631  |
| CCCAAATTTTGACCATTTCT    | 60.041 | 21 | 176 | 0    | 175  |
| AAAACACATATGGTGACACGG   | 59.149 | 22 | 224 | 1285 | 1508 |
| TGGCTGGAGAAAGTAGGAGG    | 59.425 | 20 | 150 | 2593 | 2742 |
| CCCATAACTCCAAACCCAAA    | 59.657 | 20 | 275 | 46   | 320  |
| TCACATGGAAACATGTGGCT    | 59.967 | 20 | 186 | 181  | 366  |
| GGGAATTTAATTTCTGGCCC    | 59.621 | 20 | 143 | 2669 | 2811 |
| AGACCAAAAAGCTGGGTGAA    | 59.711 | 20 | 195 | 279  | 473  |
| TCTTAAAAGGGAGGGGCTAA    | 57.95  | 20 | 280 | 138  | 417  |
| TCGGTTTAGGTATTTTGATGTTI | 60.465 | 25 | 137 | 83   | 219  |
| TGTCCTTAAAATGCAACCCC    | 59.801 | 20 | 209 | 117  | 325  |
| TGGTTACAAGCAGTGGCGTA    | 60.316 | 20 | 163 | 3    | 165  |
| GACATGGATTGTGCATTCGAC   | 61.338 | 21 | 280 | 32   | 311  |

|                        |        |    |     |      |      |
|------------------------|--------|----|-----|------|------|
| AGGGGAGTGATCTCATGTGG   | 59.92  | 20 | 251 | 157  | 407  |
| TGCTGCTGATTCACATAGCC   | 59.979 | 20 | 279 | 45   | 323  |
| CCATGGCAGATTCATCCAG    | 60.015 | 19 | 196 | 165  | 360  |
| AATCCCACGATTTTTGAATCC  | 60.013 | 21 | 262 | 1561 | 1822 |
| GTATGTGTGGCTGTGGATGC   | 59.999 | 20 | 271 | 27   | 297  |
| CCTATGGTGGTATGGTGTGG   | 58.569 | 20 | 191 | 4    | 194  |
| TCTACCACTCCGAAACCTCG   | 60.246 | 20 | 181 | 139  | 319  |
| AGCGAGTGGGTGACAAAACCT  | 59.769 | 20 | 170 | 129  | 298  |
| TGGTACCTCCTCCTAATTTCT  | 58.163 | 22 | 181 | 258  | 438  |
| TATGATGGGAAGGGTGGGTA   | 60.006 | 20 | 262 | 1167 | 1428 |
| AGCGAATGTTGTGAGAAGCA   | 59.596 | 20 | 243 | 24   | 266  |
| CTCGACACAAATCTGCACAA   | 58.409 | 20 | 212 | 298  | 509  |
| GGTTTTTCGGTTTTTCGGTTT  | 60.197 | 20 | 183 | 178  | 360  |
| ACAACCTCTCAGCCATCACCC  | 60.12  | 20 | 259 | 627  | 885  |
| CTGCATACGAGCATGGAAGA   | 59.972 | 20 | 275 | 586  | 860  |
| TTGAGTGCCTGTGTGAGTGA   | 60.07  | 20 | 255 | 133  | 387  |
| GGAAAATTGGGAAGGGAATG   | 60.482 | 20 | 164 | 3705 | 3868 |
| CAAACGCTAAACGACACCAG   | 59.386 | 20 | 279 | 2    | 280  |
| AAGTTATGCTGGTGGTTGGG   | 59.853 | 20 | 262 | 345  | 606  |
| ATGCTATGGATGCGTTGACA   | 60.104 | 20 | 108 | 171  | 278  |
| TTTCAGGCAGTGGCATTAGA   | 59.42  | 20 | 166 | 167  | 332  |
| GTTAACTGGGTGATCGGACG   | 60.375 | 20 | 177 | 25   | 201  |
| CTCCATTTTCCCTCCTCCAT   | 60.264 | 20 | 278 | 470  | 747  |
| TGCATGATCGATATTGTAAGG  | 59.468 | 23 | 172 | 68   | 239  |
| CATGCGACAGCATGAAATCT   | 59.83  | 20 | 193 | 192  | 384  |
| TCCATTTCTTTTTCGATTCC   | 60.246 | 21 | 199 | 994  | 1192 |
| GATTTTAGGTTTACCGGGGC   | 59.68  | 20 | 253 | 14   | 266  |
| TTGACGGCCCTAAACAAAAC   | 59.975 | 20 | 215 | 173  | 387  |
| CTCCGCCTTGACACCTTCTA   | 60.388 | 20 | 163 | 0    | 162  |
| TGTGAATCAAGTACCCCGAA   | 58.973 | 20 | 192 | 159  | 350  |
| TCGAACCTGCCCTCATTATC   | 60.036 | 20 | 228 | 400  | 627  |
| AACACCATCGCTACCTCCAA   | 60.517 | 20 | 116 | 91   | 206  |
| TGAGCGTGTGTGTCAGTGTG   | 60.593 | 20 | 192 | 372  | 563  |
| GTGGGCCACTTTGGTGACTA   | 60.954 | 20 | 254 | 326  | 579  |
| CTCTGCTGGCCAAAAGTCAT   | 60.397 | 20 | 271 | 781  | 1051 |
| CATTACAGCCGTGAGAAGCA   | 60.011 | 20 | 263 | 4    | 266  |
| ATCGAACACGATGCAACTGA   | 60.272 | 20 | 269 | 1315 | 1583 |
| TGGCTTCATGCAAATTCAAG   | 59.809 | 20 | 159 | 288  | 446  |
| TTGTATATCGAGCAACCGGA   | 59.136 | 20 | 190 | 3828 | 4017 |
| GGAGGACCTAGACAGCCCTC   | 60.216 | 20 | 176 | 1367 | 1542 |
| CAGCCAAATGTTGGGTTAGC   | 60.502 | 20 | 269 | 97   | 365  |
| ATTGCCCATATCAGCACTCC   | 59.923 | 20 | 278 | 796  | 1073 |
| CCTCGACGTTTTCTTCTTG    | 59.846 | 20 | 216 | 1108 | 1323 |
| GAGATAGTACCGGAACGCGA   | 60.235 | 20 | 133 | 1211 | 1343 |
| TTGGATGTTCCAAATACAGGC  | 59.815 | 21 | 275 | 2555 | 2829 |
| TGGAAAAAGTCACCGAAAAA   | 60.452 | 20 | 276 | 49   | 324  |
| TTCCCTCCTTGACCTTGCTA   | 59.807 | 20 | 178 | 113  | 290  |
| TGGATTTTCTGAATTGTGGGT  | 59.278 | 21 | 254 | 846  | 1099 |
| TCATGCAACAAAACCACCTT   | 59.024 | 20 | 259 | 1918 | 2176 |
| AAGACCGAGGCTAGCAAGAA   | 59.218 | 20 | 234 | 79   | 312  |
| ATGCATCCGTTAGATCAGGG   | 59.917 | 20 | 236 | 101  | 336  |
| TGGTTTGCTTGGCCTATCTT   | 59.708 | 20 | 110 | 205  | 314  |
| TCTGAATCTGATTGCGTTGC   | 59.955 | 20 | 262 | 43   | 304  |
| CGAGGACACATAAGCCTCACT  | 59.367 | 21 | 280 | 163  | 442  |
| AAAATCGAAAGGCCCAAT     | 60.673 | 20 | 271 | 609  | 879  |
| AACACGCGTTTGTAGGGTTT   | 59.54  | 20 | 229 | 104  | 332  |
| TTCCACCTAAGCAAGGCTG    | 60.378 | 20 | 213 | 1319 | 1531 |
| TTAAAGTTCTTAAGTCCTGGCG | 57.792 | 22 | 277 | 655  | 931  |

|                        |        |    |     |      |      |
|------------------------|--------|----|-----|------|------|
| GATGGTTGCACCATAACGC    | 59.947 | 19 | 182 | 298  | 479  |
| TCAATATAAAGGCACCAATTCT | 59.871 | 24 | 152 | 266  | 417  |
| TGGTCGCCGTGTCTGTAATA   | 60.134 | 20 | 196 | 3851 | 4046 |
| CGACAGGTGGGAGAGTCATT   | 60.112 | 20 | 254 | 390  | 643  |
| CACCGTTGTCTTTAAGCCGT   | 60.168 | 20 | 247 | 708  | 954  |
| ATACGGATCTCTGCCTCTCG   | 59.41  | 20 | 157 | 1    | 157  |
| GAGGTTTGCTTTTGGTTGGA   | 60.088 | 20 | 256 | 265  | 520  |
| TCTTCCCTACCCCCAAAAC    | 60.159 | 20 | 258 | 203  | 460  |
| AAAACACGAGCAAAACGACA   | 59.366 | 20 | 253 | 95   | 347  |
| GGGAAGAGGAGGTATGAGGG   | 59.89  | 20 | 144 | 636  | 779  |
| AAATAAGGAGGTGTTATGAAG  | 59.323 | 24 | 161 | 291  | 451  |
| GATGTTTTCCGGCTCAGTGT   | 60.119 | 20 | 268 | 92   | 359  |
| GGTGACGGTTGAGAATGACG   | 61.527 | 20 | 270 | 183  | 452  |
| GGGCTCAACCACATTCACTC   | 60.52  | 20 | 221 | 39   | 259  |
| GAGTTTTCATCTTACCTTGAGG | 58.333 | 23 | 270 | 71   | 340  |
| CAAAACGCATAAATAGTGCAA  | 58.006 | 22 | 279 | 44   | 322  |
| GCTCACATCACGGAATTGAA   | 59.654 | 20 | 209 | 158  | 366  |
| TGTGTTGGGCTAAATTGGTG   | 59.439 | 20 | 202 | 4    | 205  |
| GTGGGTATGTGATGTGGATGA  | 59.078 | 21 | 203 | 943  | 1145 |
| GCATTTGCTGCTATCCCACT   | 60.243 | 20 | 204 | 1175 | 1378 |
| GTCACCTCAGCGTCACCTCA   | 60.03  | 20 | 276 | 123  | 398  |
| TTAGCAAGCACGCCTCTCT    | 60.292 | 20 | 277 | 1222 | 1498 |
| TGTTTCATGACATTTGAGGTTT | 59.89  | 23 | 267 | 411  | 677  |
| CTTCTACGCGAAGCACGTTT   | 60.575 | 20 | 275 | 1225 | 1499 |
| CCGTTGCAAGAGTAATGGCT   | 60.27  | 20 | 186 | 2772 | 2957 |
| AGCAGGCGAGGTGTTACAAT   | 59.763 | 20 | 205 | 94   | 298  |
| TGCGATTGATTAGTTCGTGC   | 59.839 | 20 | 280 | 386  | 665  |
| TTGCCATATTCACCTCCACC   | 60.723 | 20 | 194 | 1448 | 1641 |
| TTGGAGAGAGGATGTGGGT    | 59.505 | 20 | 278 | 705  | 982  |
| ACACACAAATGGTTTGCCCT   | 60.277 | 20 | 207 | 80   | 286  |
| TTCACCTACGGCAGTGGGTT   | 60.55  | 20 | 274 | 150  | 423  |
| TTACGGGTCAAAAGAAACCA   | 58.121 | 20 | 249 | 678  | 926  |
| CTTATCTCTTGCCGTGGCTT   | 59.476 | 20 | 198 | 67   | 264  |
| ACGAAACCCCGGATCTAAAA   | 60.664 | 20 | 176 | 40   | 215  |
| CAGTGGATATGCAATGTGGG   | 59.799 | 20 | 216 | 88   | 303  |
| ATTACCATCATTCTTGCCATT  | 59.576 | 22 | 245 | 169  | 413  |
| TTCTCACAATCCTGCAAACG   | 59.84  | 20 | 212 | 1499 | 1710 |
| TATCGGTTATCATCGGATCG   | 58.404 | 20 | 250 | 360  | 609  |
| GGAATTTCTTGATACACATAC  | 59.918 | 26 | 267 | 629  | 895  |
| ATGGGATCTACATGCTGGGA   | 60.303 | 20 | 137 | 134  | 270  |
| CTTAGATGCCATCAACCCGT   | 59.955 | 20 | 188 | 18   | 205  |
| CATCAAGAAGCTGCAGCAAG   | 59.888 | 20 | 263 | 775  | 1037 |
| AATCCCTATCGACACCCTCC   | 60.154 | 20 | 207 | 56   | 262  |
| GGGTATTTAAAGGCACGGGA   | 61.029 | 20 | 279 | 1087 | 1365 |
| CGTTAAGATCAACGCGGATA   | 58.794 | 20 | 207 | 2494 | 2700 |
| GAGATCGTACGTTTCGTCCAA  | 60.125 | 21 | 169 | 2001 | 2169 |
| GATCTCCGAAGCTCAAAACG   | 59.955 | 20 | 101 | 261  | 361  |
| TCCACAGTTTTGTACCCACTTT | 59.827 | 23 | 118 | 1604 | 1721 |
| TACACGCATATTCGCACACA   | 59.741 | 20 | 182 | 148  | 329  |
| CCGGTAAGAAACCCATTTT    | 60.048 | 20 | 116 | 442  | 557  |
| ATCAAGTCTCACACCGGACC   | 59.969 | 20 | 260 | 268  | 527  |
| GGGAAGTTGAGATAATGGCG   | 59.528 | 20 | 274 | 9    | 282  |
| TCTTGATGGCGGTAGGTAGC   | 60.235 | 20 | 234 | 288  | 521  |
| TATAATGCCGACCCTCGTGT   | 60.352 | 20 | 136 | 13   | 148  |
| GCTTCTGCTCCATCCTTTTG   | 59.955 | 20 | 248 | 1035 | 1282 |
| ACCTCCCCTGCTCCATATTT   | 59.789 | 20 | 103 | 284  | 386  |
| AACCATCCGTGCTCAGAAGT   | 59.727 | 20 | 253 | 130  | 382  |
| TTACGATCTTAATCCGCCG    | 60.054 | 20 | 212 | 23   | 234  |

|                        |        |    |     |      |      |
|------------------------|--------|----|-----|------|------|
| TTTGAATTCGTAACGGGGA    | 60.294 | 20 | 197 | 11   | 207  |
| TCGGGACGAAATTTTTGTATG  | 59.818 | 21 | 275 | 1    | 275  |
| GGCAACGGAACAACAACCTT   | 60.015 | 20 | 228 | 3197 | 3424 |
| GTCTGCCACACAGGGTTTCT   | 60.159 | 20 | 216 | 1192 | 1407 |
| CATCCCATCACTACCCCATC   | 60.011 | 20 | 255 | 18   | 272  |
| AACCGAATAACCGAACCAAA   | 59.315 | 20 | 240 | 20   | 259  |
| ATTCTTGGCCAAAACGTGTC   | 59.978 | 20 | 239 | 150  | 388  |
| CTCATCTGCACCTCCCTCAT   | 60.223 | 20 | 253 | 1291 | 1543 |
| AGAGCACCCCATTTTCATTTG  | 59.933 | 20 | 222 | 1228 | 1449 |
| AGTTTATCATTGGGCCGGT    | 60.562 | 20 | 136 | 25   | 160  |
| TTTCTTCACCGTTTTCTTGA   | 59.71  | 21 | 242 | 447  | 688  |
| AAATGACGACGATTCCAAGG   | 59.933 | 20 | 188 | 3077 | 3264 |
| CAACAGTTTGGTTGGCTGA    | 59.734 | 20 | 169 | 794  | 962  |
| AGGCATAAAATTCTCCCGCT   | 60.061 | 20 | 252 | 20   | 271  |
| GCTTCAGGGGGTGTGAAGTA   | 60.111 | 20 | 228 | 116  | 343  |
| CTCTCGCCCCAACTTAGAA    | 59.448 | 20 | 171 | 485  | 655  |
| TTACCTCCTCCACCATCGAC   | 59.927 | 20 | 254 | 291  | 544  |
| GCCGAATATTTTGGGCCTAT   | 60.135 | 20 | 223 | 415  | 637  |
| GAAAAGAAATGAACACCGGC   | 59.551 | 20 | 265 | 7    | 271  |
| TTGAAGGCAACAAGTGCAAG   | 60.027 | 20 | 257 | 585  | 841  |
| TACCCACCGACATTTTTGT    | 60.088 | 20 | 126 | 343  | 468  |
| TCCGTGAATATTTAACCCGC   | 59.795 | 20 | 190 | 1222 | 1411 |
| TGCAATCACCAAAGAAGTGA   | 57.806 | 20 | 116 | 342  | 457  |
| CAATGTCCCCTATTTGGACG   | 60.184 | 20 | 221 | 176  | 396  |
| CAGCTCCTTTCCCTGCAGTA   | 60.529 | 20 | 138 | 2176 | 2313 |
| CTGATGGCCCAGATTTGTTT   | 60.461 | 20 | 189 | 1360 | 1548 |
| GGTGCCTGAATTGGCTTAAT   | 59.967 | 20 | 202 | 165  | 366  |
| AGAGGGTTATCATGGGATCAA  | 59.307 | 22 | 163 | 470  | 632  |
| AAGCTTGTGGAGTACATGAGA  | 58.408 | 23 | 251 | 40   | 290  |
| TGGTCGCATGTTACGTGTTT   | 60.035 | 20 | 180 | 1341 | 1520 |
| AATTGCCAAGTTTGCGAGAT   | 59.713 | 20 | 262 | 619  | 880  |
| ATTGGCTGAAATGGAGTTGG   | 59.933 | 20 | 238 | 495  | 732  |
| GGGCAACCACGTTAGTTTA    | 59.861 | 20 | 234 | 449  | 682  |
| GAATACGTAGATGCCCGGTT   | 58.93  | 20 | 166 | 514  | 679  |
| GTCTGGGACAGACAACCGAT   | 59.969 | 20 | 172 | 87   | 258  |
| TCAATCCTTTGGAAACACTCC  | 59.017 | 21 | 170 | 163  | 332  |
| TGCGTTCACACCTTCATATTT  | 59.519 | 22 | 194 | 144  | 337  |
| CTCCACCAACTCGCCTACTC   | 59.867 | 20 | 160 | 445  | 604  |
| ATGCATACATGACTCGAGCG   | 59.854 | 20 | 127 | 69   | 195  |
| GATCGTACACGATGGCGATA   | 59.529 | 20 | 178 | 403  | 580  |
| CACCATCATCGACAATCACC   | 59.769 | 20 | 213 | 387  | 599  |
| ATTTAAGCTGCACTTTTATTCA | 57.118 | 25 | 244 | 136  | 379  |
| TTCCACGTTTCATGTTTCCA   | 59.941 | 20 | 139 | 65   | 203  |
| CAGGCCAATTCGTATGAACC   | 60.331 | 20 | 276 | 855  | 1130 |
| TCCCACTTCCCTTGAAACAG   | 60.081 | 20 | 205 | 437  | 641  |
| CCCTCGGATGCTATGCTAAA   | 60.188 | 20 | 258 | 324  | 581  |
| TCGTCTCTCTCGTCTCCTCC   | 59.663 | 20 | 176 | 28   | 203  |
| GGGATCGTGACATACATCTC   | 60.312 | 20 | 257 | 96   | 352  |
| AAACCCCTATATCCCCATGA   | 58.057 | 20 | 231 | 1301 | 1531 |
| GTTGGATTCGAGCAGCTCAT   | 60.37  | 20 | 277 | 122  | 398  |
| TGTTGAGAGAGATGGAGGCA   | 59.499 | 20 | 102 | 114  | 215  |
| AGTGGTATGATGTGGGGGAC   | 59.511 | 20 | 209 | 189  | 397  |
| TTTGGAAAAGAGGGAGAGCGA  | 60.066 | 20 | 114 | 2081 | 2194 |
| AAACTCTCCGCCCTTCTA     | 60.2   | 20 | 178 | 108  | 285  |
| AGGAATCCTGCCCAAGTAA    | 60.817 | 20 | 222 | 248  | 469  |
| TTGGTGTGGTGAATTGGTGT   | 59.701 | 20 | 273 | 71   | 343  |
| CTTACCATTTTCGTCCGTCC   | 59.429 | 20 | 184 | 2175 | 2358 |
| GCACCTCGTTGGAATTTTC    | 59.551 | 20 | 184 | 899  | 1082 |

|                         |        |    |     |      |      |
|-------------------------|--------|----|-----|------|------|
| CAATGTAAGGGGGAGCAGAA    | 60.066 | 20 | 222 | 156  | 377  |
| AACATGTTTGCTGGTGCTTG    | 59.764 | 20 | 241 | 3714 | 3954 |
| GGCAAGCGAGTAGGTTGTGT    | 60.321 | 20 | 170 | 233  | 402  |
| GGGTTGTTAAATGTCCACCC    | 60.326 | 21 | 155 | 607  | 761  |
| AAAAACCTTGGCAACAGTCG    | 60.147 | 20 | 241 | 40   | 280  |
| GTTTCATCAACGGACACGGT    | 60.823 | 20 | 278 | 477  | 754  |
| GGAGAAGACGGAGCTTGGTA    | 59.43  | 20 | 244 | 723  | 966  |
| ATGAACATGCTCCTATTTTAAT  | 57.053 | 26 | 280 | 734  | 1013 |
| ATTCCAGTGAGGTTGTGGA     | 60.363 | 20 | 133 | 1407 | 1539 |
| ACAAATTTAGGGCATGCGAA    | 60.456 | 20 | 191 | 314  | 504  |
| GGGACGAAAATAACCCTCGT    | 60.187 | 20 | 240 | 38   | 277  |
| CCCCCTCTACACATTGACA     | 59.974 | 21 | 216 | 2903 | 3118 |
| TTCTGCATCAGGCCTTAC      | 59.934 | 19 | 115 | 0    | 114  |
| TGCGTGAACCAGAGAAGAGA    | 59.701 | 20 | 199 | 414  | 612  |
| ACCGTTGACCCCGAATTAT     | 62.535 | 20 | 189 | 1254 | 1442 |
| TCCTCCTCTCCCTCTTCTCC    | 59.883 | 20 | 255 | 17   | 271  |
| TCACTTTCACCGAGGGTTTC    | 60.088 | 20 | 102 | 143  | 244  |
| CACGTTAGACCTGGAGGAGG    | 59.715 | 20 | 128 | 24   | 151  |
| GGCATTGTTAGAGCCCTTGA    | 60.214 | 20 | 220 | 200  | 419  |
| AGGTATTTTTGAGCAGCCCC    | 60.451 | 20 | 128 | 1044 | 1171 |
| GCGATTTCAATTCCGACTTT    | 59.162 | 20 | 230 | 1304 | 1533 |
| ATTTTCGGCCATGACTATCG    | 59.923 | 20 | 247 | 181  | 427  |
| GAAATGTTTCTGTTGGCTGG    | 58.201 | 20 | 217 | 2862 | 3078 |
| CAACGCCATAGGGAAGTGTT    | 59.993 | 20 | 264 | 1564 | 1827 |
| TAGTGGTGGGATCGGAAAAA    | 60.301 | 20 | 189 | 86   | 274  |
| TAATTGGGTGATCGAACGGT    | 60.192 | 20 | 269 | 10   | 278  |
| TGAGGGGTTTTATCCTCTG     | 60.042 | 20 | 232 | 74   | 305  |
| TCCATTCCGAAAATCAAAGG    | 59.872 | 20 | 118 | 18   | 135  |
| CGTCAGATGCCACCACTAGA    | 59.855 | 20 | 225 | 145  | 369  |
| AGCGACCATCAGACCAATGT    | 60.542 | 20 | 172 | 2561 | 2732 |
| TCATTGAACTCCCATCACA     | 59.893 | 20 | 244 | 1350 | 1593 |
| ACCTATGGTGGTATGGTGTGG   | 59.463 | 21 | 133 | 454  | 586  |
| CACGAAGCATTGCCACTAGA    | 60.011 | 20 | 223 | 580  | 802  |
| ATGATACTGACACCCGACCC    | 59.661 | 20 | 148 | 716  | 863  |
| AGTTAAAATCTCCACTTGGGA   | 58.259 | 23 | 135 | 265  | 399  |
| TTTTGGGTCTTTGTCTATCAA   | 59.492 | 22 | 186 | 1245 | 1430 |
| ACATTTAATGCCCCAGCAAA    | 60.323 | 20 | 202 | 420  | 621  |
| TGAACAGGTTGCATTTTAGATG  | 59.639 | 23 | 255 | 2016 | 2270 |
| CAACAAACAAAGATTCGGCA    | 59.706 | 20 | 184 | 519  | 702  |
| CGACAAGAGAAAGAGGGTCG    | 59.982 | 20 | 186 | 349  | 534  |
| GCGTGGGATTGAGAGAAAAG    | 59.813 | 20 | 223 | 900  | 1122 |
| GCTGCTCGAAATTTACCGAC    | 59.851 | 20 | 253 | 312  | 564  |
| ATTGGGTGGGATAGTGCTTG    | 59.813 | 20 | 192 | 308  | 499  |
| TAAGGGGCATTACCACATGC    | 60.721 | 20 | 191 | 517  | 707  |
| GAGATATTCTGTCGGATAGGTC  | 59.13  | 23 | 245 | 450  | 694  |
| CACCGTTAATCGCAACAAAA    | 59.603 | 20 | 268 | 185  | 452  |
| AACTGTGAGGAGCGTCGATT    | 59.874 | 20 | 167 | 15   | 181  |
| CCTATGGTGGTATGGTGTGG    | 58.569 | 20 | 193 | 24   | 216  |
| CAAGAAAGAAAATGCAGCCC    | 59.823 | 20 | 192 | 182  | 373  |
| ATCTTCCTTTTCTCGTTCACATA | 57.089 | 23 | 222 | 198  | 419  |
| TATGGGTTATCACCGGATCG    | 60.544 | 20 | 166 | 459  | 624  |
| TACGCAGTTGCTCGGAAGTA    | 59.632 | 20 | 266 | 39   | 304  |
| TCTTTGATCCAATGGCCCTA    | 60.405 | 20 | 196 | 1    | 196  |
| GTCGCCGATATTTGCTCCTA    | 60.196 | 20 | 125 | 334  | 458  |
| CACACCATGTGACGAAGGTT    | 59.441 | 20 | 271 | 627  | 897  |
| TCCACCAATTTGCCATTTAAC   | 59.69  | 21 | 226 | 36   | 261  |
| GGAGGCATTTCGATCTTTGTG   | 60.603 | 20 | 147 | 60   | 206  |
| GACCATGCCAAATTGTGTTG    | 59.823 | 20 | 189 | 129  | 317  |



|                        |        |    |     |      |      |
|------------------------|--------|----|-----|------|------|
| AGATCTCGTTGTGGAGGTGG   | 60.112 | 20 | 195 | 1007 | 1201 |
| TCGAAGATCAACGGACGATA   | 59.226 | 20 | 211 | 2224 | 2434 |
| TCGCTTATTGTA CTCTCCCGA | 59.853 | 21 | 111 | 47   | 157  |
| AAGCTTGCATTTTATCGGGA   | 59.682 | 20 | 219 | 249  | 467  |
| TGAGGAAGAAACCAAGTATCA  | 60.035 | 24 | 244 | 586  | 829  |
| TGACCGATTCAAAAAGTGCTG  | 59.84  | 20 | 258 | 480  | 737  |
| CTGCCAGGACGAACTTGTA    | 58.923 | 20 | 276 | 227  | 502  |
| ACGTTGTAGTTGAGGCCCTG   | 60.171 | 20 | 280 | 1064 | 1343 |
| TTCACGAATTCTTCTTTCTTT  | 59.786 | 24 | 276 | 951  | 1226 |
| TCAACTCAATAGTTTTTCGAGT | 59.732 | 25 | 197 | 9    | 205  |
| ATTTGGCACCATTTCTTCACC  | 59.797 | 20 | 267 | 330  | 596  |
| GTCAGACGTCCTCCTGGTGT   | 60.161 | 20 | 110 | 37   | 146  |
| GTCCGCGCTGTAGATTCAA    | 59.964 | 19 | 126 | 40   | 165  |
| ACTTGCGAGAGGCTGTAAGG   | 59.639 | 20 | 121 | 3909 | 4029 |
| GGTTGATGGATCTGCGTTTT   | 59.939 | 20 | 275 | 119  | 393  |
| AGGCTGAGATCTTTCCAACG   | 59.43  | 20 | 104 | 959  | 1062 |
| AGAGAACTCAACGGTGCGA    | 60.975 | 20 | 229 | 105  | 333  |
| CCACATATGCAAAATATCAGCC | 59.349 | 22 | 279 | 163  | 441  |
| AGGCCGAGGAGTAGGAAGAA   | 60.34  | 20 | 187 | 158  | 344  |
| TCTCCAGGAAAAGCATCAT    | 59.629 | 20 | 210 | 2039 | 2248 |
| GACGTGACGAAAGTGGAAT    | 59.973 | 20 | 205 | 2    | 206  |
| CTTCCCTGCCGATATCACAC   | 60.483 | 20 | 248 | 60   | 307  |
| TGGGGTGGGATTGAACTTAT   | 59.101 | 20 | 271 | 23   | 293  |
| AATAGATGCATGAAACATTTTC | 57.786 | 24 | 279 | 28   | 306  |
| CTTTGGAGATACAGGCGGAG   | 59.83  | 20 | 266 | 1465 | 1730 |
| ATAATGTTGCGCGTGCTTTA   | 59.379 | 20 | 159 | 246  | 404  |
| AGAAAATTGCAAAGCGGTGT   | 59.752 | 20 | 248 | 2    | 249  |
| TCCTAGCCCTCAATCTCGAA   | 59.91  | 20 | 234 | 253  | 486  |
| ATCCACCACTGCTTGGAGTT   | 59.579 | 20 | 215 | 280  | 494  |
| CAGCTGTGGAGCTGATGAAG   | 59.726 | 20 | 215 | 205  | 419  |
| CCCTTAGATCTACAACGCGG   | 59.724 | 20 | 203 | 171  | 373  |
| GTAAAACGCTAGAAGGCCCC   | 60.095 | 20 | 125 | 8    | 132  |
| AGGAACAATCCCAACTTCCC   | 60.169 | 20 | 206 | 315  | 520  |
| GGAACAAGGCAGTGGAAGA    | 60.232 | 20 | 272 | 1276 | 1547 |
| TGGGGGTTGGAATGTTAATG   | 60.418 | 20 | 235 | 473  | 707  |
| AGCAAATCCCCTTCTCTGCT   | 60.349 | 20 | 139 | 849  | 987  |
| CATGTTGCTTTTGCATGTGA   | 59.28  | 20 | 152 | 72   | 223  |
| CAGATGGGGATTTGCTTCAT   | 59.894 | 20 | 275 | 2585 | 2859 |
| AAGCAAACCTGAAGCCAAA    | 59.861 | 20 | 248 | 7    | 254  |
| CCGAAATATCCGGTTTTTATT  | 57.141 | 21 | 258 | 889  | 1146 |
| GGGAGGGTTTCATTCTATTT   | 59.275 | 21 | 275 | 54   | 328  |
| CTGGCTCCCTATAGTGCTGG   | 59.853 | 20 | 269 | 1362 | 1630 |
| CACATCCAGCATCAACCAAC   | 59.967 | 20 | 254 | 105  | 358  |
| TTGCTGTAGGCCTTTTGCTT   | 60.018 | 20 | 171 | 103  | 273  |
| TTGGGCAGCTGTAAAACCTT   | 59.747 | 20 | 252 | 154  | 405  |
| ACCTCCAGATTTGACAGGGA   | 59.505 | 20 | 262 | 80   | 341  |
| CGATTAGTGTAGTTGGGCTC   | 58.732 | 21 | 172 | 350  | 521  |
| TGAGCAGCCTAGATCAGCAA   | 59.847 | 20 | 188 | 140  | 327  |
| TGTTGATTTATGGCGGATTG   | 59.377 | 20 | 241 | 957  | 1197 |
| TTTCTCATTGGCAGTCACCA   | 60.24  | 20 | 271 | 540  | 810  |
| ACGGAATCTAGGGAGCTGG    | 60.59  | 20 | 271 | 127  | 397  |
| TTCCCACCCCTTCTCTCTCT   | 60.186 | 20 | 236 | 2825 | 3060 |
| TTTGTGCCTAAAATGCCCTC   | 60.074 | 20 | 237 | 405  | 641  |
| TTGTTGTCGCTTTAGCTCCC   | 60.386 | 20 | 268 | 430  | 697  |
| GGGTAAAAGAAACCCCAA     | 60.027 | 20 | 226 | 264  | 489  |
| TTCTTTGGACAAAATGCC     | 59.916 | 20 | 254 | 425  | 678  |
| TGGAATGGAATTCACCTCTAA  | 58.556 | 22 | 224 | 2847 | 3070 |
| ACTGCCGCTGAAGATGAGAT   | 59.981 | 20 | 234 | 1193 | 1426 |

|                         |        |    |     |      |      |
|-------------------------|--------|----|-----|------|------|
| ATGCGAAGAAGCTCAGAAGG    | 59.717 | 20 | 156 | 44   | 199  |
| GGCCTTTTTGCAATTTGTGA    | 60.98  | 20 | 231 | 1624 | 1854 |
| CGGCCAGTCTAATTGGTAA     | 59.953 | 20 | 256 | 2    | 257  |
| GCATTACGTGTGTGCGTTCT    | 59.794 | 20 | 264 | 55   | 318  |
| TCAATCGAGCTACAAACGTG    | 57.506 | 20 | 110 | 14   | 123  |
| AAGACGAGAACAATCGCTGG    | 60.397 | 20 | 278 | 5392 | 5669 |
| TTGTTGCATGTCATTGGTCA    | 59.516 | 20 | 223 | 261  | 483  |
| TTTTTCGAGATGGGTCTGAAT   | 59.505 | 20 | 179 | 675  | 853  |
| TTCTTGATTCGTGAATTATCCA/ | 59.851 | 24 | 163 | 414  | 576  |
| GCGTTGGAGATGGTCTTACAA   | 60.125 | 21 | 193 | 499  | 691  |
| CCAATGCGGATGCTCTTAAT    | 60.06  | 20 | 280 | 36   | 315  |
| AAGCCATGCAGGTAACCA      | 60.502 | 20 | 266 | 35   | 300  |
| GAGAGGGAGGAAAGACTGGG    | 60.186 | 20 | 188 | 608  | 795  |
| CTTAGGAGACCCCTACCCA     | 60.311 | 20 | 219 | 196  | 414  |
| AGGGGGTTATCACCTGATCG    | 61.095 | 20 | 111 | 448  | 558  |
| AGCCCTCAACTCTCCCTTTC    | 59.817 | 20 | 120 | 267  | 386  |
| CCACCCGTTGATTTTTCACT    | 59.83  | 20 | 253 | 375  | 627  |
| TGGGCCGAGATTTGTTAGAG    | 60.206 | 20 | 247 | 864  | 1110 |
| TGGTTCCATCGTTTGTGA      | 59.941 | 20 | 123 | 471  | 593  |
| GGCCGATATTTGCTCCTAGTT   | 59.606 | 21 | 271 | 146  | 416  |
| ACACCTGGGTGAAACCAAAC    | 59.721 | 20 | 163 | 312  | 474  |
| CACCTAAAATATTGGTTTCTAT  | 57.121 | 26 | 127 | 293  | 419  |
| GTCACGTGGCATCATGAGAA    | 60.698 | 20 | 204 | 331  | 534  |
| GCAAACAAGAAACATGCCCT    | 60.118 | 20 | 158 | 1622 | 1779 |
| AACAGTGGGCTTGCAGGTAT    | 59.621 | 20 | 272 | 2836 | 3107 |
| TGATGAGAAAGACGCCAAGA    | 59.522 | 20 | 269 | 916  | 1184 |
| CATGTACCCCGGATCTACCA    | 60.594 | 20 | 279 | 828  | 1106 |
| AAAAAGAAAAGAAAAGAAAG/   | 57.177 | 26 | 252 | 443  | 694  |
| GCAAGTTGAGGGAGAATGGA    | 60.195 | 20 | 264 | 260  | 523  |
| GGTCTTTGGCTATGACCCAC    | 59.41  | 20 | 260 | 163  | 422  |
| TGATTTTCATGTTTCGCGATT   | 60.45  | 21 | 215 | 82   | 296  |
| TTCTCACACGATTGAAACGC    | 59.847 | 20 | 235 | 2441 | 2675 |
| CATGCGTCATGAATGCTACA    | 59.259 | 20 | 264 | 88   | 351  |
| GGAAAGAACTCAATGTCGGC    | 59.676 | 20 | 268 | 126  | 393  |
| TCACACAGTTCATCTCCCGT    | 59.101 | 20 | 258 | 11   | 268  |
| TCTCCATTGCTGTTGGGAAT    | 60.461 | 20 | 238 | 3104 | 3341 |
| GGAATCCCTTGACACGAAGA    | 60.05  | 20 | 258 | 375  | 632  |
| CCTATAGTGGTATGGTGTGGGC  | 60.365 | 22 | 216 | 158  | 373  |
| GCAACCAAGGAGACTTGAGC    | 59.997 | 20 | 144 | 171  | 314  |
| GGCTAGCCTTTGAAGCAATG    | 59.982 | 20 | 149 | 23   | 171  |
| CGTTGCTTCCTTCTACTCC     | 58.934 | 20 | 205 | 185  | 389  |
| GTTTTTCCCATTGGGTTTT     | 59.903 | 20 | 186 | 162  | 347  |
| AAGAGGGGGTATGAGTGGAA/   | 59.813 | 21 | 101 | 126  | 226  |
| GCGTTTTGACAATATTTAGTGT  | 60.205 | 26 | 139 | 329  | 467  |
| TGCATATTTCTCGATCCCGT    | 60.435 | 20 | 250 | 5673 | 5922 |
| TCCTCCCATCTGCAACTAGC    | 60.362 | 20 | 223 | 966  | 1188 |
| GGCTTCCCTTGCTTTTCTC     | 60.32  | 20 | 174 | 525  | 698  |
| TGAACACCCCTACTTGAGCC    | 60.111 | 20 | 185 | 0    | 184  |
| GCGATTAAGAGCTCGTTGGA    | 60.49  | 20 | 225 | 0    | 224  |
| AGTTCCACGATAGGAGGGTG    | 59.014 | 20 | 274 | 759  | 1032 |
| GGTCCAATAGCCATGTTTACG   | 59.352 | 21 | 257 | 444  | 700  |
| CAACAAGATTCGATAGAAGCC.  | 59.361 | 22 | 152 | 761  | 912  |
| GATCTGCTGGCGGTCTTTAT    | 59.297 | 20 | 247 | 921  | 1167 |
| GGCTCCTTGGATTCATCTTG    | 59.629 | 20 | 276 | 68   | 343  |
| GCTGGCTGCTCAGTTCCTAT    | 59.603 | 20 | 119 | 9    | 127  |
| GAGACGCGAATGTTGAGACA    | 59.992 | 20 | 222 | 3484 | 3705 |
| CTTTGAGCTGATCTTGAAATGC  | 59.114 | 22 | 133 | 453  | 585  |
| CTCCCTCTCTAAAGGGACGC    | 60.34  | 20 | 110 | 389  | 498  |

|                        |        |    |     |      |      |
|------------------------|--------|----|-----|------|------|
| GCCAGTCTCTTTGGATCCTG   | 59.803 | 20 | 147 | 239  | 385  |
| TGGTATCCATAGCAAAGCGA   | 59.281 | 20 | 250 | 157  | 406  |
| TAAACGGATTGGATTGACGG   | 60.692 | 20 | 187 | 157  | 343  |
| TTCTTACTGCCACACAAAATCA | 58.346 | 22 | 247 | 457  | 703  |
| TGGTAAAAGTGCTCAAGACGA  | 58.566 | 21 | 268 | 102  | 369  |
| TATTCGCCGTGGTCTAAAG    | 60.089 | 20 | 279 | 133  | 411  |
| CACACGCACTCTCACTCTCC   | 59.603 | 20 | 155 | 1295 | 1449 |
| CAAACCTCGCTCAAAAAGACAC | 60.453 | 22 | 221 | 1974 | 2194 |
| GAGAAATCGCACATTCGTCA   | 59.805 | 20 | 245 | 11   | 255  |
| CGAATCAAGCACCCTCAAAA   | 59.84  | 20 | 180 | 257  | 436  |
| CGGAACCAGACCGAATATGA   | 60.853 | 20 | 191 | 28   | 218  |
| TCCGAAAATCCCAACAATAAA  | 59.287 | 21 | 268 | 271  | 538  |
| ACTGATCCGAGCGATTTGAC   | 60.226 | 20 | 238 | 3256 | 3493 |
| ATCTTCTAATCACCGCCCCT   | 59.925 | 20 | 220 | 203  | 422  |
| TTGTTTGAGGGAGAAGTGGG   | 60.081 | 20 | 218 | 3207 | 3424 |
| TTTGGAGGATCGACGTTACC   | 59.933 | 20 | 251 | 76   | 326  |
| TCATTCAAGGAATTCACCAA   | 58.052 | 21 | 213 | 918  | 1130 |
| CGAATTCAAACTCTCCCGAA   | 60.184 | 20 | 268 | 12   | 279  |
| CAGCTTCACAACAGGTTTCG   | 59.485 | 20 | 204 | 142  | 345  |
| ATGACTGCAAGCAACCTGTG   | 59.905 | 20 | 151 | 40   | 190  |
| CTCCACCCTGGTTCTAATGC   | 59.55  | 20 | 276 | 936  | 1211 |
| ATGCTGCGAAGAAAATACCG   | 60.23  | 20 | 244 | 164  | 407  |
| GACACGTTGGTGAAGCATTG   | 60.16  | 20 | 147 | 249  | 395  |
| TCCGCTATCGAAAATATAATCC | 60.469 | 23 | 273 | 112  | 384  |
| ACATCCACGGGAGAGAATGA   | 60.475 | 20 | 191 | 25   | 215  |
| AGAGGGAGGGATACACCTCTT  | 58.161 | 21 | 270 | 59   | 328  |
| TTCTTCACCCAACAACCACA   | 59.976 | 20 | 213 | 169  | 381  |
| AAGCAATCAAGATCCGAAGC   | 59.415 | 20 | 139 | 734  | 872  |
| CTAAAATGGAAAGGGCGTGA   | 60.067 | 20 | 129 | 456  | 584  |
| TGGGTGCCATATCCTCTACC   | 59.773 | 20 | 254 | 6672 | 6925 |
| ACGGGTATTACCTGATCGC    | 58.93  | 20 | 100 | 827  | 926  |
| TTCCCAACTCCAATTGATCC   | 59.727 | 20 | 207 | 1016 | 1222 |
| CAACCTTTTCACACCACCTTC  | 59.482 | 21 | 187 | 96   | 282  |
| CCTTCATCTTCAACGCCTTC   | 59.813 | 20 | 182 | 1340 | 1521 |
| ACAGAAGGAGCAAAGCTGGA   | 60.134 | 20 | 262 | 621  | 882  |
| CATGTGCAGGGAAGATCAAG   | 59.241 | 20 | 193 | 7    | 199  |
| GGGTGGAGTTATGGCTGAAA   | 59.933 | 20 | 237 | 148  | 384  |
| CCATTTCAAGAATGCAGGGT   | 59.933 | 20 | 195 | 1511 | 1705 |
| AGCCAAGGAAAATAATCCCA   | 58.508 | 20 | 230 | 1494 | 1723 |
| CAACACAAGAACTCACCTCCC  | 59.607 | 21 | 203 | 561  | 763  |
| GCTGCCGAATCTGCTCTATT   | 59.579 | 20 | 214 | 5760 | 5973 |
| TCTCGATCACTACAATCTTTGA | 59.445 | 25 | 273 | 159  | 431  |
| TGCCGTAACCTGTCATACCA   | 59.988 | 20 | 208 | 50   | 257  |
| ACGAAATGTAAATGCCCCAA   | 60.188 | 20 | 222 | 1449 | 1670 |
| GAAGGAACGCTTACACGGAG   | 59.875 | 20 | 126 | 10   | 135  |
| TTATCATTTTCGTCCCAAGG   | 59.756 | 20 | 160 | 116  | 275  |
| TCTGTCACGTCTTCGTGTGCG  | 61.092 | 20 | 131 | 300  | 430  |
| AACTGTCATCACCTTGGGA    | 60.363 | 20 | 259 | 1121 | 1379 |
| ATGGAGAGGGAAAAGAGGGA   | 60.008 | 20 | 279 | 18   | 296  |
| AGAAAGCCGGCAAACCTGTAA  | 59.883 | 20 | 221 | 139  | 359  |
| GCAGATGGCAGATTGGTACA   | 59.679 | 20 | 183 | 118  | 300  |
| AACTGCCCAATCTGGATGTC   | 59.934 | 20 | 270 | 1140 | 1409 |
| CAATTAGGTCATCTCCAACGC  | 59.583 | 21 | 257 | 1190 | 1446 |
| TTGCCCCACCTATGCACTAT   | 60.352 | 20 | 274 | 265  | 538  |
| TGAGTCCATTGTAGCGGTTG   | 59.716 | 20 | 253 | 96   | 348  |
| ATATCCACCCGAATTTTCCC   | 59.852 | 20 | 233 | 2336 | 2568 |
| GTCGCGTGCATAATTTGTA    | 59.731 | 20 | 236 | 156  | 391  |
| ACTCCTCGGGACGGTTTACT   | 59.994 | 20 | 274 | 115  | 388  |

|                        |        |    |     |      |      |
|------------------------|--------|----|-----|------|------|
| CTAAGGTCGGCGATAGCTTG   | 59.996 | 20 | 179 | 860  | 1038 |
| ATGGGTCCATCACTCCTCAA   | 60.326 | 20 | 181 | 308  | 488  |
| ATGCACGTGTGTAGGGTTTG   | 59.49  | 20 | 272 | 1006 | 1277 |
| TTGGAGTTTGGAGGGTCTGT   | 59.549 | 20 | 260 | 141  | 400  |
| ATAATGTTGCGCGTGCTTTA   | 59.379 | 20 | 132 | 87   | 218  |
| GGAACGAACCAAAAGTCCAA   | 59.948 | 20 | 218 | 562  | 779  |
| GCAGGAGAAATGGAGACAGC   | 59.957 | 20 | 197 | 668  | 864  |
| TATGGTCCTCACACCAACGA   | 59.96  | 20 | 166 | 2061 | 2226 |
| GCATCATCTTGTTGATTTCGTT | 59.532 | 23 | 210 | 15   | 224  |
| CCATTGTTTAATGAATGCGTG  | 58.947 | 21 | 242 | 574  | 815  |
| CCCTTGCTACCATCATCGTT   | 59.955 | 20 | 176 | 201  | 376  |
| CTGTATTGTGGAAGGACGGG   | 60.366 | 20 | 231 | 276  | 506  |
| TTGCAAATAACCATCACCCA   | 59.786 | 20 | 264 | 1806 | 2069 |
| GGGATGACTCCAAAAGGACA   | 59.903 | 20 | 235 | 171  | 405  |
| TCGAACCTTGAACCAAAAGG   | 60.081 | 20 | 174 | 9    | 182  |
| CCCCAAGCTAACCATTTCAA   | 59.931 | 20 | 126 | 4143 | 4268 |
| AGCCCCACATAATCCCACTT   | 60.578 | 20 | 211 | 99   | 309  |
| TGTACCGCACCAAGATTTGA   | 60.111 | 20 | 170 | 0    | 169  |
| AAAATACAGTGCTACGGCGG   | 60.152 | 20 | 146 | 174  | 319  |
| AAAAATTTAGTATGAGGTCAC/ | 59.925 | 26 | 271 | 621  | 891  |
| AAGGGAGTTCTCCCAAATCAA  | 59.926 | 21 | 163 | 37   | 199  |
| CATAAAGCCACCCCAACAAC   | 60.227 | 20 | 205 | 190  | 394  |
| TAGCCCACTAAATGACCCCA   | 60.323 | 20 | 226 | 196  | 421  |
| TCCTCTACCACCCGAAAGAA   | 59.665 | 20 | 211 | 342  | 552  |
| TCCCATTTGTGTGTTCTTCG   | 59.541 | 20 | 270 | 2342 | 2611 |
| AAGGTGGAGGCTTTGACTGA   | 59.844 | 20 | 137 | 889  | 1025 |
| TGGAGGAGGAGAAGGAACAA   | 59.773 | 20 | 136 | 398  | 533  |
| AGCTTCAAGTCCCACTGAC    | 59.305 | 20 | 231 | 57   | 287  |
| TGAGATTTGGACGTTATGATT  | 59.729 | 23 | 205 | 202  | 406  |
| GCGAACTCGGCTAGAACAAA   | 60.523 | 20 | 154 | 657  | 810  |
| TCCACTTCTCGGAGCATAGC   | 60.504 | 20 | 161 | 201  | 361  |
| CGAATCATCATGAGGTCGTT   | 58.516 | 20 | 238 | 529  | 766  |
| GTTTGCTACATGGCATCGTG   | 60.142 | 20 | 185 | 170  | 354  |
| TTTCTGGTTGCATTTTGCTG   | 59.849 | 20 | 241 | 1534 | 1774 |
| TTCTTTGAATCATCTTCCACCT | 59.123 | 23 | 223 | 268  | 490  |
| CGGTTGAGAAATGAGAGCGT   | 60.397 | 20 | 141 | 279  | 419  |
| CTATTTTCGCTGGCTTGGTG   | 60.762 | 20 | 278 | 211  | 488  |
| CCCTCTCCTCCCTCTTCAAT   | 59.63  | 20 | 221 | 194  | 414  |
| AAGGCGGTTTTTGATACGTG   | 59.996 | 20 | 265 | 356  | 620  |
| TTGTCTCAGAACTGTAACCC   | 60.198 | 24 | 261 | 2887 | 3147 |
| GATTTCCCAACAGCACCAAT   | 59.797 | 20 | 195 | 189  | 383  |
| ACACGTGGCAGATTTCAACA   | 60.16  | 20 | 279 | 624  | 902  |
| CCCTTGTTGCTGAACTCTCC   | 59.844 | 20 | 237 | 2458 | 2694 |
| GGACACGTTGGACCTGAAAG   | 60.545 | 20 | 153 | 37   | 189  |
| TCGAAGATCAACGGACGATA   | 59.226 | 20 | 244 | 423  | 666  |
| CATAAAAGCAAAAGACGGGG   | 59.581 | 20 | 225 | 3215 | 3439 |
| TTTGCCAGTAATTCACAACCC  | 59.853 | 21 | 219 | 448  | 666  |
| CAAGGGCTATGCAATAAAAG   | 60.114 | 22 | 276 | 83   | 358  |
| TGATGGCAATTCTATGACCCT  | 59.401 | 21 | 138 | 22   | 159  |
| CCCTTTGATTAACACCCCT    | 60.18  | 20 | 219 | 1088 | 1306 |
| CTGTGTGTGAACCTGCCTGT   | 59.782 | 20 | 268 | 795  | 1062 |
| ACCATATTTAAGGGTTATCACC | 57.552 | 24 | 168 | 772  | 939  |
| TGTGCATCGTGTCTTGTGTT   | 60.214 | 21 | 126 | 0    | 125  |
| GGGAAGGATGAAAGGGGTTA   | 60.124 | 20 | 101 | 180  | 280  |
| TGATGGTGACGTAGAACATTT  | 60.414 | 23 | 165 | 44   | 208  |
| CGTGTGTGGGAATGAAACAG   | 60.001 | 20 | 102 | 78   | 179  |
| CCTCCCCCTCCATCTCTATC   | 59.851 | 20 | 212 | 334  | 545  |
| CAAGTGAACCAACCCAGTC    | 59.482 | 21 | 265 | 214  | 478  |

|                          |        |    |     |      |      |
|--------------------------|--------|----|-----|------|------|
| TCATCTAGCATCTCTTGCTTTC/  | 59.261 | 23 | 179 | 395  | 573  |
| GTGGCAAGAATTGAGAGGGA     | 60.195 | 20 | 238 | 588  | 825  |
| GACCACAAAATGGGAGAACC     | 59.239 | 20 | 151 | 1    | 151  |
| CGGCGTAACTAACCTGGAT      | 59.111 | 20 | 254 | 30   | 283  |
| ATATCGTTGACCATTCCCGA     | 60.155 | 20 | 255 | 302  | 556  |
| CAGAAAGATCAGGGGCACAT     | 60.073 | 20 | 232 | 590  | 821  |
| TTAGACGATGGCGGATCTAAA    | 59.69  | 21 | 237 | 275  | 511  |
| GGAAAAACCAATCATGGCTC     | 59.368 | 20 | 257 | 909  | 1165 |
| CGACTTGTCGTGGTTCGATA     | 59.716 | 20 | 280 | 40   | 319  |
| AAGTGAATTCCTTCCCACC      | 60.169 | 20 | 239 | 854  | 1092 |
| GACCGAAATGCCCTTCTAT      | 60.286 | 20 | 243 | 651  | 893  |
| CGATTTGACCTCGGATAATCA    | 59.908 | 21 | 250 | 165  | 414  |
| TTTAGGAAATGACATGCCGC     | 60.971 | 20 | 196 | 3658 | 3853 |
| CACACCTCCTCCAAAGCACT     | 60.298 | 20 | 148 | 585  | 732  |
| CGGGAGGGAGAGGGAGTAT      | 60.419 | 19 | 110 | 371  | 480  |
| TGGTTGCCTTACGGAECTCT     | 59.734 | 20 | 270 | 138  | 407  |
| CGTCAATCGGCTTTGAAACT     | 60.249 | 20 | 239 | 2605 | 2843 |
| GAAGTGCATATGCGAGGTGA     | 59.83  | 20 | 134 | 739  | 872  |
| GAAAAACCTACGTTTGC GGA    | 60.11  | 20 | 204 | 107  | 310  |
| AACCCGTTTGAGGTTGAACA     | 60.388 | 20 | 271 | 7    | 277  |
| TCATGTATTCCCCTTGGTCC     | 59.605 | 20 | 224 | 2372 | 2595 |
| TAAGCCAAAATCCTGCGAAT     | 59.682 | 20 | 263 | 40   | 302  |
| AAATGAAGGTTGAGATGGG      | 58.836 | 20 | 193 | 2020 | 2212 |
| TCATTTTACCTTTCTGTTTTTGG, | 59.932 | 25 | 250 | 416  | 665  |
| ATTCCTTCCCACTGGATGGT     | 60.575 | 20 | 152 | 109  | 260  |
| TGTCAACCCTGTTGAGCCTAC    | 60.164 | 21 | 279 | 1856 | 2134 |
| CACAAAAGCAATGAGGCAAA     | 59.849 | 20 | 234 | 3461 | 3694 |
| GGTGCACACGTGGAGGTAG      | 60.17  | 19 | 280 | 409  | 688  |
| AATTTGAAAATTTAAAGGTCC    | 58.2   | 23 | 196 | 452  | 647  |
| CATCGCATTCTCGATTCAAA     | 59.769 | 20 | 253 | 1478 | 1730 |
| CACTGGCCAAGAATCAATCA     | 59.648 | 20 | 248 | 416  | 663  |
| TCCGTTGGATTTATCTTCTCCA   | 60.792 | 22 | 244 | 3503 | 3746 |
| TTTGCTCGAATTCATATTTTTAT  | 58.297 | 25 | 270 | 434  | 703  |
| GTAGCCCGAGTCAGATCGTC     | 59.834 | 20 | 274 | 182  | 455  |
| ACCACACACAGGGTTATCCA     | 58.697 | 20 | 101 | 169  | 269  |
| AAGGGATGTGTTTGGACGGT     | 61.572 | 20 | 149 | 817  | 965  |
| TCCATTCCATTGACCCATTT     | 59.991 | 20 | 274 | 114  | 387  |
| TGAAAACGTGAGGCTGAAATC    | 60.242 | 21 | 257 | 137  | 393  |
| ATTGATTTGGTTTTGGGGGT     | 60.278 | 20 | 253 | 12   | 264  |
| TGTGGCAGTAAAATTGTGGG     | 59.439 | 20 | 244 | 80   | 323  |
| CCTAGTGTGCCCCCTAGTTG     | 59.61  | 20 | 189 | 618  | 806  |
| CAAGAACCCGAAAGTGAAA      | 60.081 | 20 | 267 | 1568 | 1834 |
| AGGTTATGGCGGGTGTATG      | 59.708 | 20 | 118 | 446  | 563  |
| ACTCTCCATTCCATCAACGC     | 60.081 | 20 | 251 | 284  | 534  |
| CCATTCCGAAAAATCAAAGG     | 59.383 | 20 | 240 | 458  | 697  |
| CTGTTTGCATGCCTTGTACG     | 60.316 | 20 | 236 | 243  | 478  |
| TTTGAACATGGGACCTTTCAG    | 59.956 | 21 | 152 | 66   | 217  |
| CCCTGGATTTTGATTGAGGA     | 59.864 | 20 | 261 | 90   | 350  |
| AGCCAGGATCTCATCGGAAT     | 60.961 | 20 | 205 | 151  | 355  |
| TGACGGGATTTAGGTGTTTTG    | 59.847 | 21 | 240 | 375  | 614  |
| TTGTTTCGGTGTTGCTTCAG     | 59.881 | 20 | 266 | 356  | 621  |
| GCTCTTGTGGAGGTTGCTC      | 59.997 | 20 | 251 | 2119 | 2369 |
| TGAGTTGGCCAAGAGAGTGA     | 59.545 | 20 | 223 | 343  | 565  |
| GGAAAAATCAAACAAAACAC     | 58.566 | 22 | 257 | 1243 | 1499 |
| TATGGGCCCAAACAAAATC      | 59.638 | 20 | 245 | 382  | 626  |
| AATGCGATGTGAGGACATGA     | 60.08  | 20 | 243 | 1778 | 2020 |
| GAGGCAGAGTAGGGGGAATC     | 60.037 | 20 | 137 | 22   | 158  |
| CCTTCTGACAAAGGCGAAAG     | 59.986 | 20 | 204 | 2825 | 3028 |

|                        |        |    |     |      |      |
|------------------------|--------|----|-----|------|------|
| TGTGCCATTTCTTGCACTTC   | 59.847 | 20 | 181 | 2249 | 2429 |
| TTCTTCAACCGATCAATGAAA  | 58.201 | 21 | 279 | 843  | 1121 |
| TTTCTGGATTCAGTCCTCCTT  | 59.213 | 22 | 257 | 1466 | 1722 |
| TCTTATGAAATCCGCCATTCT  | 58.66  | 21 | 139 | 757  | 895  |
| GGGATTGGGATGAGAAGAGAC  | 60.022 | 21 | 272 | 49   | 320  |
| ACTCACGCCCTCTCACTCAC   | 60.467 | 20 | 266 | 41   | 306  |
| ATGCACAAGACTCGACACCC   | 61.146 | 20 | 190 | 99   | 288  |
| AGGATTTGACGATGGTGGAG   | 59.927 | 20 | 249 | 1441 | 1689 |
| CGGTGTTAAAAGATGCCCTC   | 59.569 | 20 | 257 | 2314 | 2570 |
| CCCCCTCTTTAACCTCCATT   | 59.28  | 20 | 252 | 193  | 444  |
| CGATCGATTTTAGGGTTTTCC  | 59.795 | 21 | 237 | 733  | 969  |
| CTTCTTTCCGCCTCTTTCT    | 59.955 | 20 | 255 | 35   | 289  |
| CATCAAGATCCAAGGGCTGT   | 60.073 | 20 | 201 | 4    | 204  |
| TAAACCCGAACCCGATTACA   | 60.181 | 20 | 201 | 16   | 216  |
| TTTCAACAAACACACACGCA   | 59.765 | 20 | 267 | 512  | 778  |
| AAAACCCATGGATGCAAAAA   | 60.167 | 20 | 274 | 469  | 742  |
| CCCCACAAAATAGGGAAAAA   | 58.781 | 20 | 121 | 361  | 481  |
| CTTGTCTCCGTTCTGCTTCC   | 59.989 | 20 | 277 | 1245 | 1521 |
| TGCACTCCCTGTCACCTAAA   | 59.288 | 20 | 205 | 966  | 1170 |
| TGGAAACAAATCAATTGACCA  | 58.855 | 21 | 153 | 246  | 398  |
| ACACAGCAGTAGGGTCCAAAA  | 59.648 | 21 | 157 | 7    | 163  |
| CCCACCCCAATATCAAAA     | 60.369 | 19 | 165 | 322  | 486  |
| TCCACTTCAAGATTGGGGAG   | 60.042 | 20 | 213 | 561  | 773  |
| TGCTCGCCTTATTTTGATCC   | 60.175 | 20 | 246 | 2977 | 3222 |
| GCACCATTTTTACTCCACC    | 60.362 | 20 | 115 | 59   | 173  |
| TACTCCCACCCCATGACATC   | 60.6   | 20 | 231 | 132  | 362  |
| CCAATCAACTAAACCCCAA    | 59.657 | 20 | 223 | 1113 | 1335 |
| CGGGGTACTGGTAGGTGAGA   | 59.982 | 20 | 235 | 361  | 595  |
| TGCAGTGGGTTTGATTGTGT   | 60.008 | 20 | 171 | 318  | 488  |
| TTTTCAGTTAATGAGGTAATGC | 57.967 | 24 | 199 | 22   | 220  |
| TGGAAAGAATCAGGAAGCCA   | 60.713 | 20 | 151 | 21   | 171  |
| GGATTGATAAATGCCGCAGA   | 60.942 | 20 | 254 | 14   | 267  |
| GAGGCTGGATTATAGTTGAATT | 58.318 | 25 | 260 | 2507 | 2766 |
| GCAGCCTCCTCCTCTCTCTT   | 60.238 | 20 | 200 | 7    | 206  |
| TTCTTCTAAGGTGCCCATCTG  | 59.322 | 21 | 243 | 2691 | 2933 |
| GCATTGGATTCTTTTTATCCG  | 60.63  | 21 | 193 | 501  | 693  |
| CGTTGCCAGGTCTTGAAAGT   | 60.291 | 20 | 243 | 604  | 846  |
| TTATGCCTATGTGGCTGCTT   | 58.414 | 20 | 279 | 551  | 829  |
| ATACAGCCCTTTGCCTCTCA   | 59.836 | 20 | 274 | 2    | 275  |
| AGATCACCAAACCAACCAGG   | 59.82  | 20 | 262 | 1670 | 1931 |
| TTGGTTTAAAAGTCGTTGTTGA | 57.43  | 22 | 268 | 219  | 486  |
| AATCTAACTAATGGCGCGGA   | 59.704 | 20 | 175 | 430  | 604  |
| TCCAGCAGTTTCAATCACCA   | 60.24  | 20 | 201 | 1339 | 1539 |
| GGGTGCTTCACTACTCTCAT   | 60.12  | 20 | 113 | 4    | 116  |
| GGGATGTAAAGCCTGCTCAA   | 60.214 | 20 | 155 | 153  | 307  |
| CAGCACCAAGAATGCAACAT   | 59.722 | 20 | 179 | 4674 | 4852 |
| CTAAGGTGCAAGCCACAGGT   | 60.312 | 20 | 276 | 62   | 337  |
| TGATTTGAAACAGTGCTTTTGT | 60.193 | 23 | 153 | 885  | 1037 |
| TGTGCAGATTTGTTGCACTTT  | 59.381 | 21 | 185 | 20   | 204  |
| TGGGATAAATCTTCAACACCG  | 59.809 | 21 | 234 | 198  | 431  |
| ACGTGCCGAAAAAGAAATA    | 59.586 | 20 | 199 | 731  | 929  |
| TTACAGTTTTCATTTGATCACC | 58.986 | 23 | 209 | 7    | 215  |
| AGTGTTTTGACATGATTACTCG | 57.373 | 24 | 249 | 1458 | 1706 |
| TCCCACCACTACACAAGTGC   | 59.597 | 20 | 269 | 121  | 389  |
| AATCAATATAAGGTTGCACGA  | 57.338 | 25 | 265 | 613  | 877  |
| TGGTTCGAATCCTCCACTACA  | 60.501 | 21 | 264 | 85   | 348  |
| CTATTGCTTCAACCTGCTGC   | 58.677 | 20 | 164 | 2162 | 2325 |
| TCGTCTTCTCTCATGTGCGT   | 59.577 | 20 | 230 | 127  | 356  |

|                        |        |    |     |      |      |
|------------------------|--------|----|-----|------|------|
| TTAGAGCCCTGCCAAACAAC   | 60.249 | 20 | 276 | 11   | 286  |
| TGGCATTCCAGTTTTGAACA   | 60.088 | 20 | 272 | 9    | 280  |
| TGCATTGTCAAAGTAGTAACT  | 59.027 | 26 | 152 | 348  | 499  |
| ATTCGTGCCAAGTTTATGCC   | 59.967 | 20 | 198 | 160  | 357  |
| GTGATTTGAAATAAAATTTGAC | 57.233 | 24 | 267 | 3473 | 3739 |
| AGAGGATGGCGTGATAGGTG   | 60.096 | 20 | 188 | 93   | 280  |
| CGAGTAAACCAAACACGTGAA  | 58.737 | 21 | 238 | 3099 | 3336 |
| AATGGCATGCAACTGTTTGA   | 60.119 | 20 | 262 | 245  | 506  |
| AGTTAAAATCGAACCGAACCA  | 58.616 | 21 | 244 | 306  | 549  |
| ATTTCAACCTTTGCCAACGA   | 60.481 | 20 | 276 | 882  | 1157 |
| ATCTCCACTCTGTGCGCAAC   | 60.269 | 20 | 275 | 302  | 576  |
| TCCTCACCCTGTACCCCTC    | 59.962 | 20 | 266 | 411  | 676  |
| CGAGATGGGGACAGTTGTTT   | 59.966 | 20 | 256 | 162  | 417  |
| GGACAGCCAGCTGAAGAAAC   | 59.997 | 20 | 235 | 1312 | 1546 |
| ATAGGCAAATTCGGAGGCTT   | 60.061 | 20 | 255 | 166  | 420  |
| ATAGGGTGACGAACGTCGAA   | 60.517 | 20 | 218 | 385  | 602  |
| GATCGAGTGGAGGAAGATGG   | 59.612 | 20 | 269 | 525  | 793  |
| TTTATTTGGAAGTGCAACCCA  | 60.342 | 21 | 109 | 1909 | 2017 |
| CACTCCAACCTTTGCAAGAACA | 58.96  | 21 | 193 | 1050 | 1242 |
| CTTCTGTTTACTCACGCGCA   | 60.195 | 20 | 187 | 11   | 197  |
| AGAAAGCTTGAACATCCCGA   | 59.813 | 20 | 275 | 2508 | 2782 |
| TACCACAGGCTTTTGGAGGT   | 59.592 | 20 | 252 | 444  | 695  |
| ATTGGAGAGAGAGGGTGGCT   | 60.216 | 20 | 150 | 140  | 289  |
| TAAAGGTCCCTCACCCGTC    | 59.911 | 19 | 227 | 1562 | 1788 |
| AAATACACAATTGAACCAACA  | 59.589 | 25 | 119 | 619  | 737  |
| CACAGATTTTCTGTGCGCAA   | 59.84  | 20 | 231 | 50   | 280  |
| CTCCTCACCACTTCATCG     | 59.257 | 20 | 267 | 530  | 796  |
| GGGCGAGCAATCTGTAAGTC   | 59.843 | 20 | 250 | 195  | 444  |
| CCATCCATTCCGAAAATCAA   | 60.64  | 20 | 274 | 49   | 322  |
| ATTGCATGTGCGAAAAGGAT   | 60.478 | 20 | 231 | 488  | 718  |
| GCAGGGTTGAATCTGAATTTCT | 59.598 | 22 | 280 | 165  | 444  |
| TCCATTTGTCATTCCGCATA   | 59.891 | 20 | 231 | 704  | 934  |
| CGAAGCGATCACACAGCTTA   | 60.157 | 20 | 159 | 2    | 160  |
| GGGCAGGTGGCTAATCACTA   | 60.096 | 20 | 136 | 1195 | 1330 |
| TGCATGCTCACGCAAAGTAT   | 60.432 | 20 | 275 | 1893 | 2167 |
| TGACCATTTTGCCCTTTTCT   | 59.546 | 20 | 235 | 385  | 619  |
| CCACGTGCTCCATACTTCT    | 60.134 | 20 | 246 | 482  | 727  |
| AAAGCCGACAGACAACAAGG   | 60.291 | 20 | 184 | 200  | 383  |
| ATGTCGTTGAAACGAACGAA   | 59.174 | 20 | 279 | 38   | 316  |
| CTCCATCCTCTTGCTTCGAG   | 60.088 | 20 | 273 | 1047 | 1319 |
| GAAACATGCCACCTGACAGA   | 59.682 | 20 | 204 | 470  | 673  |
| CCTACCTGCAATTGGACACA   | 59.566 | 20 | 261 | 4400 | 4660 |
| AAAAATAGGCCCTTTTGCCT   | 59.97  | 20 | 152 | 1671 | 1822 |
| AAAAATGAGTGGTTCATATTGC | 57.968 | 24 | 171 | 682  | 852  |
| TTAGGATCCCTTGTCCTTTT   | 59.652 | 21 | 224 | 268  | 491  |
| ACCCTTTGAAAGTTGATGGTTT | 58.914 | 22 | 269 | 200  | 468  |
| TTCGAGCAACATCTTGTTGGG  | 62.175 | 20 | 136 | 839  | 974  |
| ACGGATTCATGGAGTGAAG    | 59.927 | 20 | 225 | 437  | 661  |
| GTTTTCAATCACAGCCACCC   | 60.362 | 20 | 132 | 165  | 296  |
| CCAATTGTCCATATTTGCGC   | 60.153 | 20 | 210 | 341  | 550  |
| TCATGTGAAAAATTTGAGCAC  | 60.117 | 22 | 274 | 10   | 283  |
| TAGTCATTGGGGAAGGCAAC   | 59.933 | 20 | 185 | 678  | 862  |
| TGGAAAACAATGCCTAACAGC  | 60.124 | 21 | 269 | 121  | 389  |
| TCCTACATTATTTGGGGATTAA | 58.735 | 24 | 125 | 20   | 144  |
| TCCATTATCACGCGATCAGA   | 60.182 | 20 | 113 | 6    | 118  |
| TGACACGATTTGCAAAAAGA   | 60.379 | 20 | 218 | 946  | 1163 |
| GTGCAGTCGATATTTGCTCC   | 58.326 | 20 | 121 | 1    | 121  |
| CCCTTCTTTCCACAGCAGTC   | 59.844 | 20 | 271 | 33   | 303  |

|                        |        |    |     |       |       |
|------------------------|--------|----|-----|-------|-------|
| TTTCTCGCGGTTTTTCAGTTT  | 59.861 | 20 | 210 | 212   | 421   |
| TGGCCTTCCTCAATCTATGG   | 60.029 | 20 | 148 | 0     | 147   |
| AGCTTGCCCCTTGTAACCTTG  | 59.378 | 20 | 193 | 365   | 557   |
| GAATGTTCAAGGCCATGGTT   | 59.797 | 20 | 229 | 131   | 359   |
| CGATCACACAGAAAACACGA   | 58.246 | 20 | 100 | 14    | 113   |
| ATATTTTGGCATTGGAGCG    | 59.928 | 20 | 248 | 2019  | 2266  |
| CCAATTACACAAATCAACCTGC | 59.244 | 22 | 278 | 94    | 371   |
| TGCGTTTTGACAATATATAGGT | 60.083 | 26 | 163 | 313   | 475   |
| GGCATGTGTGGGAGAAGAA    | 59.621 | 19 | 171 | 7     | 177   |
| TGCCAGGGTTATCTTGATCC   | 59.894 | 20 | 108 | 261   | 368   |
| TGAGGAGGACAAGAGGTTGG   | 60.229 | 20 | 128 | 170   | 297   |
| GGGGAACAAACATGAGCAAT   | 59.797 | 20 | 255 | 955   | 1209  |
| TTTGTGGGGGTGTTGAGT     | 60.246 | 20 | 184 | 2717  | 2900  |
| GCACCTGAGGAGGTGTTATGA  | 60.126 | 21 | 128 | 1120  | 1247  |
| TCCATACTCAACACAAGTCGA/ | 58.283 | 22 | 280 | 367   | 646   |
| TGGAGAGGATTCTGTCCAG    | 60.191 | 20 | 229 | 3890  | 4118  |
| TACAAATCACGGGAACGACA   | 59.964 | 20 | 276 | 697   | 972   |
| TTATAATGATATTTTGAACGC. | 58.472 | 25 | 227 | 615   | 841   |
| TTCACGAGTGGTGACAAACG   | 60.757 | 20 | 194 | 274   | 467   |
| AGGGTTTGGGCAGTCATAAA   | 59.429 | 20 | 270 | 137   | 406   |
| ACACCATCAAGGAAAGACGC   | 60.119 | 20 | 211 | 386   | 596   |
| TCTGCCCTAAGATGAAACGG   | 60.206 | 20 | 174 | 103   | 276   |
| TGAATCAATCTTGTGCGTTGA  | 60.25  | 21 | 182 | 20    | 201   |
| ATCGCCATAATTGACTGCAA   | 59.14  | 20 | 109 | 18    | 126   |
| TGCAGTGCCTTTGGTAGTGT   | 59.365 | 20 | 224 | 141   | 364   |
| AATAGCGGCTGATCTGAAGG   | 59.434 | 20 | 200 | 390   | 589   |
| TAGATGATCGGAACGTGAAGC  | 60.228 | 21 | 212 | 686   | 897   |
| CATCTTCTCCACAAAGGAAA   | 59.157 | 21 | 277 | 1231  | 1507  |
| TAGACGGAACCCTCCAGATG   | 60.065 | 20 | 242 | 1108  | 1349  |
| ACCAGGCGTACAGTCAAAGG   | 60.171 | 20 | 209 | 180   | 388   |
| TATCATTGTTTCGCGAGCAG   | 59.976 | 20 | 244 | 204   | 447   |
| ATTGATTAGAAAAATGCGCGA  | 59.709 | 21 | 176 | 97    | 272   |
| CAGCTGCAGAGATGGAATCA   | 60.096 | 20 | 257 | 486   | 742   |
| CGCGTTACGAATCCAAGTTT   | 60.131 | 20 | 176 | 345   | 520   |
| CTCCATGGTGCATTTACAC    | 59.967 | 20 | 263 | 4     | 266   |
| TGGGTCACTCCTGTTTAGTGAA | 59.633 | 22 | 275 | 14873 | 15147 |
| CAAGATTGGCCATGTGAAAA   | 59.518 | 20 | 210 | 175   | 384   |
| AGCTCGGATATGTGGTAATCA/ | 59.877 | 23 | 271 | 226   | 496   |
| ATTGCGAATTCAGCCAGAAC   | 60.221 | 20 | 175 | 20    | 194   |
| GGCCTAGGCACCAAATCTTAT  | 59.476 | 21 | 188 | 1590  | 1777  |
| GGCACAAATGGGTTCAAAC    | 60.214 | 20 | 190 | 13    | 202   |
| GATCGCATGTAGGCACCATA   | 59.529 | 20 | 266 | 284   | 549   |
| AATCGTTGATGGGGTGTTC    | 59.653 | 20 | 250 | 1153  | 1402  |
| TGCAACCTTGCTCACTCTTC   | 59.165 | 20 | 262 | 1459  | 1720  |
| TGGTTTTATGTTTCTTTGGGA  | 59.865 | 23 | 252 | 1527  | 1778  |
| TTGAGGTTACATTAGCCGCC   | 60.096 | 20 | 252 | 144   | 395   |
| TCTGTGAATCAAGCTCAAGCA  | 59.731 | 21 | 166 | 221   | 386   |
| TTCTCTTTTTGGTGAAGAAA   | 58.098 | 22 | 256 | 213   | 468   |
| ACTGTGAAAGAGACCTCCGC   | 59.455 | 20 | 181 | 1164  | 1344  |
| CAGGTGAGGATTGTCGTCT    | 60.261 | 20 | 162 | 260   | 421   |
| GGAGTGCTAATTGTGTGGCA   | 59.722 | 20 | 165 | 178   | 342   |
| CCCTCATAATGTGTGGCTCAT  | 59.828 | 21 | 271 | 63    | 333   |
| AACAGACCAATCCAATTAATC  | 59.601 | 23 | 170 | 1339  | 1508  |
| TGAGTCCATGACCCAACCTT   | 57.971 | 20 | 175 | 753   | 927   |
| AGAGATCCGTGCTTCACTTG   | 58.029 | 20 | 164 | 1438  | 1601  |
| AAAGGCGGCTAAATCAATCA   | 59.682 | 20 | 269 | 283   | 551   |
| GCTTGAGAGTCTTCTCCTTGC  | 59.779 | 22 | 279 | 211   | 489   |
| TTCCCAAGCTTCTACAC      | 59.17  | 20 | 276 | 464   | 739   |



|                        |        |    |     |      |      |
|------------------------|--------|----|-----|------|------|
| TTGTTTCCACGCACTCACAT   | 60.16  | 20 | 181 | 60   | 240  |
| TGTTGACGTTGGATCTGTGAG  | 59.736 | 21 | 263 | 2325 | 2587 |
| TTAGCATTGACTACACTCCTC, | 58.151 | 24 | 233 | 225  | 457  |
| GTTGGAAATGCAGCAGAACA   | 59.847 | 20 | 219 | 984  | 1202 |
| TTTTCCCGAAAATAAAAAGAA/ | 59.457 | 24 | 114 | 339  | 452  |
| GATAACATGCCATCACACGC   | 59.963 | 20 | 277 | 865  | 1141 |
| CCCTCACACTATCTATCGCCA  | 60.103 | 21 | 224 | 199  | 422  |
| TGAACAGCCATCGAGCATAG   | 59.972 | 20 | 267 | 1203 | 1469 |
| ACCTTCCACGCAAACCTCAAC  | 60.156 | 20 | 249 | 1284 | 1532 |
| TGTGATTTTCATCCATTCGGA  | 59.859 | 20 | 225 | 264  | 488  |
| TCCTCCTATTTTCCGTCGAA   | 59.64  | 20 | 266 | 182  | 447  |
| CGACAAACCACCAATTTCTCT  | 59.83  | 20 | 182 | 102  | 283  |
| GCGCAGATCTAATGGTCCAG   | 60.765 | 20 | 196 | 9    | 204  |
| GGGTTTGCCTTTAGCCTCAT   | 60.451 | 20 | 240 | 130  | 369  |
| TGGCCCTTTTGTACACTTCA   | 59.17  | 20 | 131 | 317  | 447  |
| GTGCAGCACTAGGTCCATTG   | 59.318 | 20 | 280 | 124  | 403  |
| TCGCGAATTCAGCTAGAACA   | 59.712 | 20 | 122 | 24   | 145  |
| GCCGCATTTCTTCTAACCCCT  | 60.582 | 20 | 234 | 951  | 1184 |
| AATATTTGCATGGCTCTGGG   | 59.923 | 20 | 274 | 1266 | 1539 |
| GGGGCGTATAGACGCAAATA   | 59.95  | 20 | 179 | 627  | 805  |
| AATGGCATCTTGGAATCACC   | 59.756 | 20 | 175 | 1201 | 1375 |
| TGGGGTTATTAGTGGATCAAGC | 60.204 | 22 | 164 | 982  | 1145 |
| GTGCACCTCCTCTTCAACAA   | 58.854 | 20 | 258 | 1022 | 1279 |
| TGTTGCGCGTGCTTTAAATA   | 60.401 | 20 | 181 | 307  | 487  |
| GAGCAAAGTGTGAACCTCTCG/ | 59.942 | 23 | 120 | 8    | 127  |
| AGTGGCAGTGGGGGTTAAG    | 59.974 | 19 | 267 | 13   | 279  |
| TCGCCGTGTTTGTATTCTTG   | 59.729 | 20 | 259 | 813  | 1071 |
| AAACGCGCATTTTTAGGATT   | 58.764 | 20 | 274 | 356  | 629  |
| CAATCGGTAATTCAGCTCGG   | 60.597 | 20 | 175 | 609  | 783  |
| CGCTATGTGACCATCTGTGG   | 60.136 | 20 | 238 | 5170 | 5407 |
| GTTATACCCGTGCGTTCCAC   | 60.257 | 20 | 269 | 54   | 322  |
| CGATTGAATTGGTGGGTTTC   | 60.17  | 20 | 173 | 75   | 247  |
| AAGTTGCCGATCATCCAATC   | 59.9   | 20 | 184 | 1548 | 1731 |
| CGGTTGTTAGGGCAATCAAG   | 60.493 | 20 | 143 | 163  | 305  |
| GGGCAAAACTGTAATTGCTCA  | 60.124 | 21 | 261 | 4048 | 4308 |
| CACGAGATTTACGTGGTTTCG  | 59.195 | 20 | 109 | 131  | 239  |
| CATGGAATTGAAACTTTTCGGA | 59.924 | 21 | 170 | 2    | 171  |
| AACCTAAAACCCGACCCGAT   | 61.777 | 20 | 278 | 351  | 628  |
| CGGCAATTGTTGACCACATA   | 60.379 | 20 | 100 | 289  | 388  |
| GTTGGGGAATGGAAGAATGA   | 59.727 | 20 | 247 | 1032 | 1278 |
| TTGGCAAATTTTCTTGCACA   | 60.229 | 20 | 159 | 1027 | 1185 |
| TGTGGGTGTGTGAGTTGTGA   | 59.568 | 20 | 110 | 113  | 222  |
| CGATGCAGCAGAAAGACAAA   | 60.134 | 20 | 245 | 152  | 396  |
| AAGGGCTTTGTTGGTTTGTG   | 60.008 | 20 | 241 | 1080 | 1320 |
| TTCATTCTTTGCATCCCTCC   | 60.014 | 20 | 194 | 3728 | 3921 |
| GTGGTCCGAGAGTTGAGAGC   | 59.993 | 20 | 163 | 433  | 595  |
| GGCGCTCCAATCTGAAATTA   | 60.175 | 20 | 211 | 168  | 378  |
| GCTTCCGCATTTTCTTTTTG   | 59.832 | 20 | 280 | 982  | 1261 |
| ACCTGACACGAACACGACAC   | 59.63  | 20 | 267 | 850  | 1116 |
| GTGTGCTGGCATTGCTAGAG   | 59.621 | 20 | 133 | 43   | 175  |
| TCAAATCTTACCAGCCGCTT   | 59.845 | 20 | 238 | 719  | 956  |
| GCCCATCTGATGCATTCTCT   | 60.189 | 20 | 256 | 252  | 507  |
| CTGGTTTTGAACGTTTGCAG   | 59.362 | 20 | 169 | 602  | 770  |
| TGTTCTCGTATGATTACGCTCC | 59.252 | 22 | 270 | 1023 | 1292 |
| AGAGCAAGAAACCAGAGGCA   | 60.134 | 20 | 185 | 156  | 340  |
| TTGTTATTGAGAGGGCAGGC   | 60.214 | 20 | 162 | 67   | 228  |
| GATTGATGAGGGTTCCAAGC   | 59.488 | 20 | 254 | 93   | 346  |
| TTTGGGCCCTTTGATTCACTT  | 59.546 | 20 | 171 | 0    | 170  |

|                        |        |    |     |      |      |
|------------------------|--------|----|-----|------|------|
| CACACCTAGTGTGCTATCATCA | 57.854 | 23 | 209 | 75   | 283  |
| ATTTCCCGGAGAGGAGAAAA   | 60.011 | 20 | 267 | 1004 | 1270 |
| CCAAATTGCCCTTCTGTGTT   | 59.971 | 20 | 270 | 449  | 718  |
| CCAAGATTTGATCATGGCGT   | 60.864 | 20 | 271 | 585  | 855  |
| GCACAAAAATGCCTCTCGAT   | 60.221 | 20 | 275 | 27   | 301  |
| ATTGCATTGCATCTTCCCTT   | 59.533 | 20 | 165 | 503  | 667  |
| GTATTCGCTCTGCCACAACA   | 59.871 | 20 | 237 | 2586 | 2822 |
| AAAAACGTGAAGGAGACGAC/  | 59.766 | 21 | 203 | 378  | 580  |
| CCACACCCTCTTCTCTGAA    | 60.229 | 20 | 182 | 401  | 582  |
| TAGGGTTGAGGTTGGAGGTG   | 59.959 | 20 | 243 | 1437 | 1679 |
| TGTAAATCTGCCGAAAACC    | 59.938 | 20 | 123 | 80   | 202  |
| GGTTAACATTTTACGCGAGGC  | 59.713 | 20 | 180 | 5    | 184  |
| GGTTAATGAACGCAACCCAA   | 60.732 | 20 | 118 | 66   | 183  |
| TTCTCCGTCCCATAAAAATGTG | 59.809 | 21 | 246 | 824  | 1069 |
| TGGTGTACAGTAAGAGGCAAA  | 59.989 | 24 | 239 | 664  | 902  |
| TAAATCCTGCAATCATCACCC  | 59.776 | 21 | 235 | 259  | 493  |
| ACGAAATGAGGAAATCGACG   | 60.074 | 20 | 243 | 78   | 320  |
| AACCCGGACAATGAGCAATA   | 60.331 | 20 | 219 | 257  | 475  |
| GAAGAGGACCCCATTTGGTT   | 60.169 | 20 | 143 | 411  | 553  |
| ATCGATTGAACCAAACACCC   | 59.653 | 20 | 250 | 87   | 336  |
| TGAAATAAACATTGCCACCG   | 59.42  | 20 | 268 | 1001 | 1268 |
| CAAATCATGTGCGCTGAAAT   | 59.694 | 20 | 135 | 5535 | 5669 |
| GGTGGGAGTGTTCCTCGTGT   | 59.867 | 20 | 226 | 138  | 363  |
| GTCAAGTCGACCACCCTTGT   | 60.009 | 20 | 132 | 21   | 152  |
| TAGTTCGAGGTGGAACGAGG   | 60.246 | 20 | 156 | 385  | 540  |
| CCAATTTGAATGGTTATCACCT | 60.457 | 23 | 272 | 1210 | 1481 |
| TGATTACGAGATGTGGAAGCC  | 60.088 | 21 | 163 | 270  | 432  |
| CAACTCCTTCCCTGCATTTT   | 59.67  | 20 | 218 | 1958 | 2175 |
| TCATTTCAAAAATCAATGGATG | 59.291 | 23 | 241 | 2324 | 2564 |
| GTTTTGTAGCTCTCGTCGGC   | 60.022 | 20 | 241 | 1003 | 1243 |
| TTCTTGGTTAGCTGGTCTGGA  | 59.861 | 21 | 223 | 1900 | 2122 |
| CTTTTGAACAATGATACCTTCT | 58.271 | 24 | 216 | 36   | 251  |
| TCATGGTGCTTGAAATTGGA   | 60.049 | 20 | 168 | 14   | 181  |
| TGGTAACATAAAGGGCCGAA   | 60.315 | 20 | 237 | 146  | 382  |
| CGAACTACGGGGTGAATGAT   | 59.813 | 20 | 255 | 82   | 336  |
| GATTGGGATGGGCTAGGAA    | 59.839 | 19 | 280 | 7    | 286  |
| CTTACCACCATTACACCACC   | 60.088 | 20 | 236 | 722  | 957  |
| TACCAATGCCACAAAACGA    | 59.969 | 20 | 120 | 213  | 332  |
| TGCAAGTGCAGTTTACTCTG   | 60.229 | 21 | 262 | 29   | 290  |
| ACTATTGCCAGTGGCGTCTC   | 60.285 | 20 | 124 | 914  | 1037 |
| TGGAACTCGTCTTCTCAGT    | 57.416 | 20 | 214 | 776  | 989  |
| TCACGATCGAACCACGTAAA   | 60.111 | 20 | 171 | 1434 | 1604 |
| ACCTCTTTTCGGTTTGATGG   | 59.028 | 20 | 166 | 230  | 395  |
| CGAATGATCTGGTGATGGTG   | 59.918 | 20 | 201 | 179  | 379  |
| CAATGGATTAGGCCGAAAGA   | 60.031 | 20 | 183 | 1109 | 1291 |
| ACCTGGTCTCCAAGTGATGG   | 59.962 | 20 | 242 | 2464 | 2705 |
| TTCCGCCTAACTCTTGAAA    | 59.817 | 20 | 184 | 393  | 576  |
| CAGCCTGCCTTGAAACTAT    | 59.336 | 20 | 276 | 117  | 392  |
| AAACTTGCGGGAATGAGTTG   | 60.11  | 20 | 112 | 753  | 864  |
| GCTGCAGATCTAACGACCAAG  | 60.03  | 21 | 130 | 368  | 497  |
| TTAACGGTCCGGTCTTATGG   | 59.817 | 20 | 263 | 384  | 646  |
| TTAGACGTGAATTGCAAGCG   | 60.014 | 20 | 275 | 178  | 452  |
| AGGCCATCATACCACAGTC    | 59.81  | 20 | 169 | 953  | 1121 |
| CATTTTGTGGCCTGTGTTTG   | 60.004 | 20 | 204 | 2214 | 2417 |
| GCTCACCGGTTCTTTTGAGA   | 60.375 | 20 | 182 | 134  | 315  |
| CAACGATGTGCTAGTTGTGGA  | 59.773 | 21 | 126 | 99   | 224  |
| AACACAAAAGGGCTCATTCC   | 59.031 | 20 | 211 | 103  | 313  |
| GGTCGTGTTTAGCCAAGGAA   | 60.11  | 20 | 181 | 535  | 715  |

|                         |        |    |     |      |      |
|-------------------------|--------|----|-----|------|------|
| TTACGGCAATTTGCATCAGA    | 60.215 | 20 | 160 | 335  | 494  |
| ACTTTTCACGGACTGCCAAC    | 60.156 | 20 | 131 | 1997 | 2127 |
| TTCGAAAAGCCAAGATGGAAC   | 60.192 | 20 | 243 | 974  | 1216 |
| GCATTTTGAGCTCGCATTTT    | 60.351 | 20 | 185 | 471  | 655  |
| GTAGGAAACCCGCCATACAA    | 59.823 | 20 | 211 | 74   | 284  |
| GTTTCGCCAAGAACTTACCG    | 59.747 | 20 | 258 | 691  | 948  |
| CGCCAAAATGTCATCACAGA    | 60.665 | 20 | 144 | 134  | 277  |
| TCACCAATCTCCCAGCTTTC    | 60.195 | 20 | 278 | 662  | 939  |
| TGCAAGCATCAAAAATGGAG    | 59.809 | 20 | 218 | 757  | 974  |
| CAAGTCATACATCATGTTATCT  | 58.628 | 27 | 219 | 3    | 221  |
| TCATGATGCCAACTGAATTAAP  | 58.161 | 22 | 280 | 2    | 281  |
| CTCGATGAGGAATGGGAAGA    | 60.15  | 20 | 279 | 68   | 346  |
| TTGTGTGATTTTGACCCCAA    | 59.792 | 20 | 278 | 123  | 400  |
| GACTCAAATTCACATGGCGA    | 59.654 | 20 | 184 | 4    | 187  |
| CTATCGTTTTCTCCGCCTTG    | 59.839 | 20 | 174 | 351  | 524  |
| CCGATTA AAAACCGAACCCAG  | 59.447 | 20 | 232 | 231  | 462  |
| CGATTGTTTTGAATTCGCCT    | 60.074 | 20 | 215 | 12   | 226  |
| TGAAGGCTGGGAATCAGACT    | 59.803 | 20 | 194 | 1016 | 1209 |
| TGCATACAACACGCAATGA     | 59.716 | 20 | 249 | 2292 | 2540 |
| TTCGGAATTTATAATATGGGCA  | 58.4   | 22 | 277 | 98   | 374  |
| GCTCGTGTGTTACAGGGGAT    | 59.997 | 20 | 248 | 704  | 951  |
| AAATATGCCACCTATTGCCG    | 59.816 | 20 | 254 | 24   | 277  |
| AGCTGTTTGGCTACGGAAGA    | 60.015 | 20 | 257 | 159  | 415  |
| ACGGCCCTTTCTCTTGAGTT    | 60.247 | 20 | 277 | 70   | 346  |
| ATACCATGGCGTGAAGAGT     | 60.547 | 20 | 219 | 172  | 390  |
| GTGGGATTCACGTGGTTTTTC   | 60.218 | 20 | 218 | 207  | 424  |
| TTTGCATCAAACATGGCTTC    | 59.67  | 20 | 241 | 1238 | 1478 |
| CAACTACTCCCTTCGCCAAA    | 60.241 | 20 | 169 | 454  | 622  |
| TTCGATCTTCTTTCCTTTCCAA  | 60.177 | 22 | 104 | 8    | 111  |
| TACAGGGTTCTCCAACCGAT    | 59.405 | 20 | 176 | 138  | 313  |
| GGTGGAGAGAGAAAGGGAG     | 60.186 | 20 | 254 | 5491 | 5744 |
| AAAAAGGGATTATCACGGGG    | 60.013 | 20 | 132 | 1005 | 1136 |
| GTGGATGAATTTATGCCGGA    | 60.67  | 20 | 277 | 465  | 741  |
| ACGAGAAGCTCTGCAAATCC    | 59.579 | 20 | 148 | 1149 | 1296 |
| GGATTTTGATGTATGAGTTTGC  | 59.297 | 24 | 266 | 461  | 726  |
| CAACCCCGTCATTTCTCAAT    | 59.79  | 20 | 180 | 0    | 179  |
| ACCCTAATTGTTTCGGGCTT    | 59.835 | 20 | 197 | 212  | 408  |
| ATCATATGGGTTGGTGTGTCA   | 59.978 | 22 | 179 | 183  | 361  |
| TGTGTTTTCAAAGCCTAGACA   | 57.63  | 22 | 227 | 217  | 443  |
| CTCTAGATCGCGGGCAAGTA    | 60.502 | 20 | 110 | 9    | 118  |
| CTGAGAGCGATCGACCATTT    | 60.362 | 20 | 240 | 197  | 436  |
| CCGCCGTATCTCCTCACTAA    | 60.227 | 20 | 276 | 101  | 376  |
| CGAGGGCCATTTACCCTAGT    | 60.332 | 20 | 106 | 512  | 617  |
| TTGTAATAACCCTTATTTTCGTC | 58.619 | 24 | 266 | 69   | 334  |
| AAGAGGGGAGCTCGTACCAT    | 60.096 | 20 | 129 | 429  | 557  |
| CGAACAGTGGGCGAGAAATA    | 61.157 | 20 | 266 | 2104 | 2369 |
| TCCTTCGAGGAGGAGTCATT    | 58.816 | 20 | 226 | 498  | 723  |
| TGCTCTCAAGAACACGCACT    | 59.776 | 20 | 247 | 374  | 620  |
| ACAACGACAGAGGACGGAAG    | 60.298 | 20 | 127 | 5    | 131  |
| ACCTCCATGGGTTGTCTGTG    | 60.84  | 20 | 273 | 485  | 757  |
| CAAGAGCTTAGAACGGGTGG    | 59.869 | 20 | 158 | 3004 | 3161 |
| GTACGGCTGAGCCTGATTG     | 59.41  | 19 | 218 | 649  | 866  |
| TGTCCGATATCTAGGCCAAA    | 58.187 | 20 | 270 | 395  | 664  |
| GACATTTGTGGTGGATGTGG    | 59.656 | 20 | 184 | 185  | 368  |
| AGTTGGGGTTGAGTTGTGCT    | 59.622 | 20 | 195 | 570  | 764  |
| ATTAATCCGATGGCCCTCAT    | 60.499 | 20 | 211 | 615  | 825  |
| GTCTAGGAAAGGGCGAATCA    | 59.269 | 20 | 253 | 214  | 466  |
| TTTTCTTTTACCTGTATTCAAGA | 58.032 | 27 | 248 | 225  | 472  |

|                        |        |    |     |      |      |
|------------------------|--------|----|-----|------|------|
| CGCCATAGCTTCTTGGTCTC   | 59.978 | 20 | 225 | 115  | 339  |
| GAAAAGGGGAGGATCGGTTA   | 60.258 | 20 | 154 | 357  | 510  |
| CGGATCACCAGATCCGATAG   | 60.439 | 20 | 252 | 470  | 721  |
| TGAAAGAATATGAGTTTGAACC | 60.004 | 24 | 191 | 98   | 288  |
| CCAACCAAATCCGGTACTG    | 60.22  | 20 | 266 | 62   | 327  |
| AGGCCTTGCTCTCTCTGTTG   | 59.745 | 20 | 279 | 62   | 340  |
| CAGCCATGGTGGTGATAAGA   | 59.522 | 20 | 120 | 4    | 123  |
| ATCGAAAATGCCTCTCACCA   | 60.603 | 20 | 224 | 1218 | 1441 |
| GAGTTGGTGTGTTGGCATTG   | 60.008 | 20 | 163 | 394  | 556  |
| CGGTTGACAGCCGATTTTAT   | 59.96  | 20 | 270 | 567  | 836  |
| GGCTGGATAGTTTTGGCTCA   | 60.214 | 20 | 217 | 649  | 865  |
| TGCTCAAGTTCTTGCCATTG   | 59.988 | 20 | 276 | 493  | 768  |
| TGACGAGGAAACAAAGGGAG   | 60.224 | 20 | 108 | 659  | 766  |
| TGATGCAAATTGGGAAGCTA   | 59.257 | 20 | 240 | 121  | 360  |
| ATGTCAAATATGGGCATCCA   | 60.031 | 21 | 277 | 611  | 887  |
| GAAAGTTTGGGGTGGGTTTT   | 60.068 | 20 | 171 | 996  | 1166 |
| TTCATATATCACGTTAAGACAT | 58.031 | 26 | 233 | 410  | 642  |
| CCAAACGTATATGCCCTGGT   | 59.708 | 20 | 222 | 96   | 317  |
| GCGTCGTTTCTTGAATTAGGG  | 60.962 | 21 | 205 | 1272 | 1476 |
| TCAACAATACACGCCACACA   | 59.589 | 20 | 223 | 1279 | 1501 |
| AATGGTGCCCAAATTTGTCT   | 59.292 | 20 | 239 | 228  | 466  |
| TGCGTTTTGATGATATATATGT | 58.859 | 26 | 199 | 971  | 1169 |
| AGGGCAACCTCGAATCAATA   | 59.528 | 20 | 236 | 2961 | 3196 |
| TGAGAAAAGGTTGTACATGGC  | 60.534 | 22 | 221 | 72   | 292  |
| ATGTCCAAAGCTGGCAGAGT   | 59.874 | 20 | 166 | 547  | 712  |
| TGCATGCACGTGAATATGG    | 60.088 | 19 | 139 | 321  | 459  |
| TTTTCATGTTTTGGAGCATCA  | 59.147 | 21 | 172 | 370  | 541  |
| TTCCCACCATTCACATCTTG   | 59.343 | 20 | 256 | 482  | 737  |
| TGCATGTCTGCTGTCTGTGA   | 60.193 | 20 | 187 | 1729 | 1915 |
| TTATCACCTGATTTCTCCCT   | 57.599 | 21 | 208 | 595  | 802  |
| AAAAATCCTTATGCCCCCAA   | 60.489 | 20 | 237 | 12   | 248  |
| ACCCGGGTTTCGAAGTAGAC   | 60.361 | 20 | 188 | 1398 | 1585 |
| TCCTTGCCAACAAGATAGTGC  | 60.264 | 21 | 220 | 2609 | 2828 |
| AGCACAACCTGCACAAGCAGA  | 60.812 | 20 | 239 | 45   | 283  |
| TCGAAGGATGTGTTCAATTGTG | 59.556 | 21 | 249 | 1909 | 2157 |
| AGTTGGGACGGAGGGAGTAT   | 59.817 | 20 | 262 | 219  | 480  |
| CAAGCACCATAAAGTTCAACG  | 60.166 | 22 | 214 | 318  | 531  |
| CAACAGGTCTCACCAATCCA   | 59.52  | 20 | 135 | 973  | 1107 |
| TGACGAGTTAGAATGGCAAAG  | 59.883 | 22 | 108 | 12   | 119  |
| GTGGATCCAAGCTGACCAGT   | 60.12  | 20 | 178 | 3756 | 3933 |
| CGGAAGAATTAGACTCGGCA   | 60.344 | 20 | 265 | 38   | 302  |
| ATGCATATATTAGGGGAAAAA  | 58.112 | 27 | 278 | 896  | 1173 |
| CCTTTAACAAATTGGTGTAGTC | 57.414 | 24 | 194 | 216  | 409  |
| AGAAATTTGTGAATCGCCCA   | 60.448 | 20 | 228 | 802  | 1029 |
| TGAGAGGTCTAGGGTTCGGA   | 59.797 | 20 | 244 | 641  | 884  |
| TTTCATGTCCCTACTTCCGC   | 60.074 | 20 | 105 | 3    | 107  |
| ATGTGGATAGCAGAGGCGAG   | 60.384 | 20 | 162 | 47   | 208  |
| GTCCACGGTGGTTTGAGAGT   | 60.009 | 20 | 153 | 39   | 191  |
| TGTATGACATTTGGCTCCGA   | 60.073 | 20 | 230 | 496  | 725  |
| AATTCCAGCCATGTAGGTGC   | 59.962 | 20 | 173 | 824  | 996  |
| TTGAGTTACAAGTGAACCTACC | 60.089 | 24 | 253 | 1193 | 1445 |
| TGCCACTAATCTGTAAAGGGT  | 59.892 | 22 | 184 | 927  | 1110 |
| GTGGCGGTAGGTAGCTCTTG   | 59.898 | 20 | 204 | 170  | 373  |
| TCCGTGAACCGTTCTTCTTC   | 60.232 | 20 | 265 | 444  | 708  |
| GAGGCTGGGTGTGAGAGAAA   | 60.386 | 20 | 193 | 1558 | 1750 |
| TCCGTTCAATCAACGAGGTT   | 60.495 | 20 | 280 | 50   | 329  |
| CCATCGACAGTGTGCTCTG    | 60.463 | 20 | 211 | 719  | 929  |
| TCGAAAAAATCCTGAGTGA    | 58.414 | 20 | 182 | 380  | 561  |

|                         |        |    |     |      |      |
|-------------------------|--------|----|-----|------|------|
| GATGTGGTGTGACGGTGAT     | 59.239 | 20 | 174 | 130  | 303  |
| CCTGTAGCCATGTGATTGTTG   | 59.061 | 21 | 259 | 412  | 670  |
| GGGAACATGCTTCCTGAAAA    | 60.051 | 20 | 159 | 6    | 164  |
| CGTTCTTTCTGATTGCGCTC    | 59.955 | 20 | 147 | 486  | 632  |
| TGGGCAATACGTGGTTTAGG    | 60.742 | 20 | 277 | 97   | 373  |
| CTCCTCAACTGCAACTCG      | 59.616 | 20 | 199 | 207  | 405  |
| TCAGTTTTCGTCCCTTTTCG    | 60.22  | 20 | 206 | 852  | 1057 |
| CATTCCCGAGAATCCTTCAT    | 58.934 | 20 | 168 | 792  | 959  |
| GCAAAAGGTTTGAAGTCCTGA   | 59.345 | 21 | 237 | 895  | 1131 |
| GCATGTTATGGTGGTGCTTG    | 59.995 | 20 | 241 | 11   | 251  |
| AACATTAATCTCATACCCTCA   | 59.33  | 27 | 251 | 224  | 474  |
| CTGATCCTTTCTGGGAGTCG    | 59.797 | 20 | 195 | 210  | 404  |
| TCACTCCATCTTCACACCCA    | 60.088 | 20 | 148 | 2661 | 2808 |
| GTTAGAATGGCGCCGATAGA    | 60.196 | 20 | 160 | 1180 | 1339 |
| GCGGGGAAAAATAGGAAGAA    | 60.381 | 20 | 175 | 179  | 353  |
| TTCTCAATTTCTTCCACCCT    | 59.926 | 21 | 236 | 164  | 399  |
| ACTTTCCAAGCATCCAACCA    | 60.495 | 20 | 279 | 59   | 337  |
| TCCACTTCGGTACTTTTCGC    | 60.249 | 20 | 124 | 2873 | 2996 |
| AGAACCTATCTCGGTGAGCG    | 59.454 | 20 | 240 | 6    | 245  |
| GGTTTTGACCATATTTACTGTTI | 59.631 | 26 | 119 | 437  | 555  |
| TTAGTTAGTACCGATTTTCAGGG | 57.499 | 24 | 151 | 1179 | 1329 |
| GGAGAACGTGAAAGCCAAAG    | 59.853 | 20 | 188 | 9    | 196  |
| TGACCTTTAAGGCCGATGTT    | 59.569 | 20 | 252 | 782  | 1033 |
| TTGTTCTTTGGTTGCAGGAA    | 59.293 | 20 | 189 | 2814 | 3002 |
| CCAACAAGGCTAGCTAAGGG    | 58.994 | 20 | 171 | 34   | 204  |
| ACCCAAAACGTCCATTTTCC    | 60.949 | 20 | 275 | 572  | 846  |
| GGATTGAATGGATGTTTGGA    | 58.187 | 20 | 101 | 0    | 100  |
| TCACAAATACCCCTAAACCCA   | 59.188 | 21 | 146 | 358  | 503  |
| TGTCATGGCATTTTTGTATGTTI | 59.288 | 23 | 249 | 302  | 550  |
| TTGCCATCGAGCTAAAACAA    | 59.443 | 20 | 224 | 22   | 245  |
| AAGATTTGATCATGGGCGTT    | 59.391 | 20 | 234 | 377  | 610  |
| GCTGTAATATGTACCGTCCGC   | 59.515 | 21 | 236 | 241  | 476  |
| GGGCTGCCTCCTAATCCTAA    | 60.542 | 20 | 266 | 336  | 601  |
| TTATATGACCCCTCCCTC      | 59.974 | 20 | 232 | 1110 | 1341 |
| CTTAAGGCACACTGCACCAA    | 59.904 | 20 | 267 | 1191 | 1457 |
| GTTTGGAGGAGCAAGTGGAG    | 59.844 | 20 | 260 | 941  | 1200 |
| CCATCATTTTCATTCCCAACC   | 59.991 | 20 | 219 | 3589 | 3807 |
| CGACTTACGATCGTGTCTTGA   | 58.937 | 21 | 195 | 326  | 520  |
| GACAACACCCTCAAATGGCT    | 59.973 | 20 | 229 | 959  | 1187 |
| CCTTAACAAAAGCAAACCGC    | 59.758 | 20 | 250 | 704  | 953  |
| TTTCGAATGATTTTGCCCTC    | 60.016 | 20 | 218 | 0    | 217  |
| TTGTTTACACACGGTGCGAT    | 60.035 | 20 | 254 | 84   | 337  |
| ATTTTCCCAAATTTGTCCC     | 59.867 | 20 | 140 | 23   | 162  |
| CTTGAATTGCTCTCCCTCCA    | 60.331 | 20 | 259 | 153  | 411  |
| ACGTCCAAATTGCTCGGTAA    | 60.502 | 20 | 262 | 130  | 391  |
| GTCCGAGTGCTTGTATGCAG    | 59.47  | 20 | 264 | 201  | 464  |
| ATGCCACTCTTGTGCTTCT     | 59.874 | 20 | 169 | 9    | 177  |
| AAGCCACCTTCCTTTGCTTT    | 60.242 | 20 | 150 | 1059 | 1208 |
| TCCTTTCTTCTTACGGCACC    | 59.312 | 20 | 241 | 800  | 1040 |
| CGCGAACTCATAAATTGAACA   | 58.83  | 21 | 217 | 9    | 225  |
| ATGACCGTCCGTTTTGAAGA    | 60.495 | 20 | 261 | 276  | 536  |
| CCAAAAGTGTTATTTTTGTTCC  | 57.875 | 23 | 145 | 65   | 209  |
| TTGTTAATCAGTTTATGCATCTI | 59.484 | 25 | 150 | 24   | 173  |
| TGTCTCCATTAAGCAAGCC     | 60.214 | 20 | 115 | 0    | 114  |
| TGTGATGAGAGAGAGGGGCT    | 59.945 | 20 | 224 | 115  | 338  |
| CGAAGGTACGGTATGCGATT    | 59.982 | 20 | 187 | 47   | 233  |
| AGAATGCCGGCGATAAGAG     | 60.324 | 19 | 192 | 398  | 589  |
| GCAACTGCAAGTTCAAAGCA    | 60.18  | 20 | 267 | 514  | 780  |

|                         |        |    |     |      |      |
|-------------------------|--------|----|-----|------|------|
| ATTTTGGGAGAAGTATTGGGA   | 57.54  | 21 | 184 | 56   | 239  |
| CCAATTTGAATGGTTATCACCT  | 60.457 | 23 | 162 | 1853 | 2014 |
| GTTATGCGTTTTGACGGGAT    | 59.829 | 20 | 231 | 285  | 515  |
| TGCATGGATGCAAGTTGAAG    | 60.812 | 20 | 233 | 134  | 366  |
| AATAGCTTTGGGTGCATTGG    | 59.96  | 20 | 242 | 2814 | 3055 |
| AATTAATTTGGCCGTTTGG     | 60.876 | 20 | 238 | 13   | 250  |
| TTCCGAAAATATGCTCCACA    | 59.112 | 20 | 270 | 697  | 966  |
| AGAGGAGCCCATTTCATTCT    | 60.037 | 20 | 216 | 222  | 437  |
| TGGGTATGTCGATGTCGATG    | 60.353 | 20 | 207 | 3    | 209  |
| AGAGGTTTGTGCCATTTCGTC   | 60.119 | 20 | 236 | 154  | 389  |
| AGGGTCCCACCCTTTTGTTA    | 60.581 | 20 | 145 | 199  | 343  |
| TATGAACCCACCAGCATTCA    | 59.924 | 20 | 125 | 1963 | 2087 |
| CAGCTTGCTGAGTCCAATGA    | 60.136 | 20 | 260 | 327  | 586  |
| GCTAGAGGGTTTTGTTAATATG  | 58.796 | 27 | 173 | 325  | 497  |
| TTAAGGCCAACTTCCCTCCT    | 60.068 | 20 | 249 | 1542 | 1790 |
| AGGAATGATGGGATCTGCAA    | 60.426 | 20 | 240 | 2014 | 2253 |
| GGCGGCGTGACTTATTCTAA    | 60.23  | 20 | 263 | 207  | 469  |
| GGGGGAAAATTATAGTTAGGG   | 57.532 | 22 | 117 | 515  | 631  |
| CGATAGATTTCGATGAACCCC   | 59.344 | 20 | 227 | 664  | 890  |
| GCAGTGCAATTGAAGTTTTG    | 59.322 | 20 | 126 | 5    | 130  |
| GGGCCTATTGAGCCAAGACT    | 60.599 | 20 | 280 | 972  | 1251 |
| GAAAGTGCATTTTTGGGAGC    | 59.691 | 20 | 242 | 96   | 337  |
| CAGAAACATGTCAACGTGAGA   | 60.196 | 23 | 278 | 1114 | 1391 |
| TCTCCGAGTTCTTGCTCTCC    | 59.679 | 20 | 209 | 371  | 579  |
| CCTGGCTTCAAACCAATGA     | 61.001 | 20 | 210 | 714  | 923  |
| AATTGACCTTTGACGTTGGC    | 59.978 | 20 | 241 | 4    | 244  |
| TTTTATTTCAGGCAAACATTCTC | 58.796 | 23 | 205 | 311  | 515  |
| CGCTGGTTTTGGAGATCAAT    | 60.074 | 20 | 229 | 2293 | 2521 |
| TCCGGTCCGATTACAATTC     | 59.762 | 20 | 202 | 282  | 483  |
| CAGCATTCTTCAACTGCGA     | 60.134 | 20 | 100 | 1446 | 1545 |
| CTTCCAGAGGGATACCGTCA    | 60.065 | 20 | 199 | 633  | 831  |
| TCCGGATTGTCACACCTATG    | 59.369 | 20 | 223 | 90   | 312  |
| TGCGACCTTAAATTTGGTGAC   | 59.989 | 21 | 189 | 21   | 209  |
| TCACTTTTACAACCTCCACATG  | 58.721 | 24 | 204 | 96   | 299  |
| TGGAAAGAACTAAATGCCCG    | 60.067 | 20 | 165 | 137  | 301  |
| TGTGCATGTCTATTTTCGTTT   | 59.188 | 21 | 134 | 25   | 158  |
| AGCCATGGTTCAATCATCAAC   | 59.811 | 21 | 254 | 3115 | 3368 |
| TCACAAACCCATGTCCCTTT    | 60.21  | 20 | 245 | 1456 | 1700 |
| AAGGAAACATTCTTTTGGGGA   | 59.801 | 21 | 248 | 1914 | 2161 |
| TGAGGGACTTGAAGGGTTTGG   | 60.081 | 20 | 217 | 169  | 385  |
| AGATTGGGTACCCGACACTG    | 59.844 | 20 | 175 | 5    | 179  |
| AGATTCAAGGGCCGAGATTT    | 60.039 | 20 | 199 | 814  | 1012 |
| AAATTGAGCTCCATAGCCGA    | 59.807 | 20 | 226 | 6    | 231  |
| AAAATCAAAGGCCACAATG     | 59.801 | 20 | 145 | 5    | 149  |
| AACTGTTCTCGACTCAGGGC    | 59.455 | 20 | 242 | 20   | 261  |
| AAGGGTGAAGGTTGATTCC     | 60.169 | 20 | 156 | 456  | 611  |
| ATGTGAGTGGCACGTGATTC    | 59.557 | 20 | 210 | 1612 | 1821 |
| TATCATTTTTGCCAACCTCC    | 59.762 | 20 | 278 | 1234 | 1511 |
| GGATGGCAAGCTTTTAGCTG    | 59.982 | 20 | 193 | 520  | 712  |
| TATCGCTGTGAGTGTGGGTG    | 60.745 | 20 | 219 | 1042 | 1260 |
| GCCTTGATTGGAACATGGAA    | 60.843 | 20 | 251 | 102  | 352  |
| TGTAACCCAAACCAAGCACA    | 60.004 | 20 | 245 | 2097 | 2341 |
| AAAGAGAGGAGAGGCCGAAGG   | 60.088 | 20 | 192 | 6    | 197  |
| CCAGACCAACCAACTGACT     | 60.057 | 21 | 278 | 90   | 367  |
| GTTACTTGCGGCACTAAGCC    | 59.911 | 20 | 251 | 814  | 1064 |
| CTCTTTGCTTATTCGCCCTG    | 59.975 | 20 | 277 | 451  | 727  |
| CTTTGCCCTTTACTTGCTG     | 59.876 | 20 | 162 | 467  | 628  |
| CCACATTTTCAGAGTCCCCAC   | 60.363 | 20 | 230 | 692  | 921  |

|                         |        |    |     |      |      |
|-------------------------|--------|----|-----|------|------|
| TCAACCATTTGTTTTTGCCA    | 59.946 | 20 | 245 | 908  | 1152 |
| CCCGTGGACGTAGATTCATT    | 59.813 | 20 | 255 | 4    | 258  |
| TGGTGGAGCGTCTGTTTTAAT   | 59.623 | 21 | 280 | 31   | 310  |
| CTGGGAAAACCCTGTGTAGC    | 59.592 | 20 | 276 | 1943 | 2218 |
| GGAGCCATGATTAGCTCCTCT   | 59.825 | 21 | 265 | 246  | 510  |
| GACCGCAGGTTAATCCAGAA    | 60.074 | 20 | 197 | 1094 | 1290 |
| TGTCTCCATTCTATTGGCCC    | 59.894 | 20 | 267 | 199  | 465  |
| CCGAACATTTACAATCCCT     | 59.79  | 20 | 243 | 206  | 448  |
| ATTAGCGAACATGGAGGTGG    | 59.955 | 20 | 135 | 493  | 627  |
| AACCCTAACGCACAACCTCAA   | 58.283 | 20 | 160 | 30   | 189  |
| AAAATCAAAGGCCCAACAATG   | 59.801 | 20 | 277 | 379  | 655  |
| TTATTGTGTGGGGCAGAGGT    | 60.375 | 20 | 216 | 149  | 364  |
| GAAACGTTTTCCCTGAGCAC    | 59.717 | 20 | 184 | 404  | 587  |
| GATTCTGTATCCGCCATTGAA   | 59.915 | 21 | 249 | 619  | 867  |
| TGTGAAAGTCTTTGGATGGTTC  | 60.026 | 23 | 258 | 101  | 358  |
| GCTTCGTTGATGATGGAATG    | 59.079 | 20 | 244 | 474  | 717  |
| CCGCCGATGTGATTTAACT     | 59.96  | 20 | 198 | 317  | 514  |
| CACCAAATTCGACACGTA      | 59.439 | 20 | 186 | 637  | 822  |
| CATTTTTCTCATGGAATGGAT   | 60.02  | 22 | 188 | 1123 | 1310 |
| GCAGCTGCGAGAGTTTAAG     | 60.292 | 20 | 121 | 124  | 244  |
| ACGGAATACAATTCGACAGAA   | 59.891 | 23 | 277 | 1051 | 1327 |
| GAGGGGTGTTCCAGACAAA     | 59.943 | 20 | 246 | 57   | 302  |
| GTTGTTGAGGTGGTCTCCGT    | 60.009 | 20 | 227 | 626  | 852  |
| TTCCCGGCTGAATGTTACAA    | 61.389 | 20 | 177 | 10   | 186  |
| AGCTTTCAGGTAGGCACAGG    | 59.496 | 20 | 201 | 15   | 215  |
| ACGAAAATCTCTGCCCAATG    | 60.074 | 20 | 213 | 173  | 385  |
| AATTGCCACCCCTCACTACA    | 60.375 | 20 | 247 | 488  | 734  |
| TAAGGGTTATCACCGGATCG    | 59.778 | 20 | 124 | 384  | 507  |
| TGCCGATCAATGCAGTCTAC    | 59.83  | 20 | 273 | 842  | 1114 |
| CGGGTCGTGTCAGAAATTG     | 60.096 | 19 | 278 | 173  | 450  |
| TATGTGGCCCCAACTTTTTTC   | 59.801 | 20 | 268 | 87   | 354  |
| GGTCCCACCACCTAACATA     | 59.526 | 20 | 197 | 69   | 265  |
| TCACTCCAGTTTTTCACCCA    | 59.109 | 20 | 208 | 900  | 1107 |
| GGAAGCAAAAATGGCAGAAG    | 59.823 | 20 | 181 | 632  | 812  |
| TTGACTAAGTTGTGTGAGCAGC  | 59.966 | 23 | 265 | 739  | 1003 |
| ACGTAAAAATGGTTATTATTGG  | 59.092 | 26 | 255 | 909  | 1163 |
| ATGCTGATGTTAGTGCCTG     | 60.042 | 20 | 188 | 16   | 203  |
| ACCTTATCGCCCCACTCTCT    | 60.096 | 20 | 230 | 34   | 263  |
| GAAGGAGGACTCCAAAGGGA    | 60.565 | 20 | 185 | 605  | 789  |
| ATCGTCCATCTACGCAAACC    | 59.962 | 20 | 218 | 150  | 367  |
| AATTTCCAGATTCCTCGT      | 59.879 | 19 | 267 | 1424 | 1690 |
| TTGAGCTGTTATGCGTTTTGA   | 59.5   | 21 | 103 | 1557 | 1659 |
| TCTGCACGTGATTTTCTTGG    | 59.84  | 20 | 199 | 213  | 411  |
| AGGGGGTTATCACCTGATCG    | 61.095 | 20 | 190 | 533  | 722  |
| ATTTCTGCAATTGGGGTTCT    | 58.504 | 20 | 140 | 67   | 206  |
| ACCGTGACAAGACCTTTGAA    | 58.187 | 20 | 187 | 797  | 983  |
| CCACAACCCTTTCATCACCT    | 59.82  | 20 | 263 | 327  | 589  |
| CTCGCAAGCTTCGATTTCTT    | 59.73  | 20 | 178 | 147  | 324  |
| CAATTACACTGCATGGGCTG    | 60.134 | 20 | 165 | 78   | 242  |
| CGTGATTCCTGCGTCTTCT     | 60.397 | 20 | 277 | 118  | 394  |
| CGGTTCCAGATCTTTCGAG     | 59.807 | 20 | 166 | 2488 | 2653 |
| TGGCAGAAGTCGTTGAACTG    | 60.025 | 20 | 205 | 156  | 360  |
| TCGGAGCCATAATCATCACA    | 60.033 | 20 | 252 | 669  | 920  |
| TTGCTCATTGATATTCAATCATI | 57.735 | 24 | 220 | 213  | 432  |
| GTTTTCATTTGATCACGCC     | 60.318 | 20 | 114 | 16   | 129  |
| ATGAGTTCGAGGCTCAATGG    | 60.218 | 20 | 221 | 463  | 683  |
| CAAGCAGTGAGATTGGGACA    | 59.831 | 20 | 204 | 1667 | 1870 |
| CGTCCAGTTCACCTCATTGG    | 59.135 | 20 | 113 | 1166 | 1278 |

|                        |        |    |     |      |      |
|------------------------|--------|----|-----|------|------|
| CCTGAATTCTCCCCAACTCA   | 60.042 | 20 | 273 | 498  | 770  |
| GAGTTCGTCAAACCTCCCAA   | 60.088 | 20 | 256 | 138  | 393  |
| GAGGGAAATGGTGGGGTATT   | 59.881 | 20 | 162 | 1022 | 1183 |
| AATCTTTGAACAGCCGATGG   | 60.074 | 20 | 211 | 574  | 784  |
| GTTCGAACCCCTTCATCATCG  | 60.461 | 20 | 103 | 570  | 672  |
| CTCGTCCATTTCCCTTCAGA   | 60.187 | 20 | 227 | 390  | 616  |
| AGAGTGC GCGTTTTTCATCTT | 60.022 | 20 | 148 | 402  | 549  |
| TCACGACATTATTTCCCTCAAA | 59.451 | 22 | 156 | 3458 | 3613 |
| GTAGCCATGGAAGAATGCGT   | 60.103 | 20 | 205 | 354  | 558  |
| TGCTCCCACATTAGTAGCACC  | 60.147 | 21 | 109 | 388  | 496  |
| ACCCGAATCCGTTACAACAA   | 60.227 | 20 | 125 | 560  | 684  |
| TGAAGTTAGGAAATAAGGAGG  | 58.743 | 25 | 185 | 659  | 843  |
| AAATCATGTTTCACCGCCAC   | 60.765 | 20 | 133 | 2    | 134  |
| CCAATTGGCGTTGAGTACAA   | 59.585 | 20 | 246 | 144  | 389  |
| GTCTTCGAGACGGAACCACT   | 59.305 | 20 | 256 | 582  | 837  |
| TCTGTAGCCCAGTAGGCCAT   | 59.717 | 20 | 145 | 2889 | 3033 |
| CCACCACCAGAAGCAAACCTT  | 60.149 | 20 | 141 | 249  | 389  |
| GGCATTACAGAAAGTTCCGC   | 59.713 | 20 | 261 | 385  | 645  |
| GAACAAGGGTAAGATGAACCC  | 60.221 | 22 | 196 | 385  | 580  |
| GCGGCTTCATCTTTACTTGC   | 59.988 | 20 | 244 | 162  | 405  |
| TCTTCACTGCTGACCGTGTT   | 59.467 | 20 | 175 | 167  | 341  |
| CCAATTGTAAAGGGGGCAC    | 60.177 | 19 | 269 | 1643 | 1911 |
| TTCGATTCAAGGCACATCAA   | 60.197 | 20 | 181 | 251  | 431  |
| AGGCTGGATTTTCGTCCCTAT  | 59.925 | 20 | 167 | 483  | 649  |
| AAACGGTTGAAAAGCCCATA   | 59.451 | 20 | 248 | 17   | 264  |
| CATGAAGGCTGCGATTAGTG   | 59.444 | 20 | 233 | 94   | 326  |
| CGTCACGGTGGTTCTTCAT    | 59.535 | 19 | 277 | 555  | 831  |
| ACCCACACCAAATATTCCCA   | 59.91  | 20 | 267 | 721  | 987  |
| TCAAACCACAGCTGAAAACG   | 59.881 | 20 | 230 | 2448 | 2677 |
| TTGATGCACGAATTTGGAAG   | 59.664 | 20 | 187 | 239  | 425  |
| CAGACCGTTAGGGGTGTTCA   | 60.943 | 20 | 275 | 50   | 324  |
| CCACTTATGTCGAAGATTTTTG | 59.933 | 24 | 252 | 1598 | 1849 |
| TGCACTCTAAGGGATGATTGC  | 60.228 | 21 | 130 | 322  | 451  |
| AATGGCGCTATCTGGTTGTT   | 59.597 | 20 | 110 | 6947 | 7056 |
| AATTTGGGCCTCCATTATCC   | 59.984 | 20 | 215 | 414  | 628  |
| GTGATTGCTTCTTCATGGCA   | 59.805 | 20 | 193 | 155  | 347  |
| CTTTTTGGTTGCTGTTGGGT   | 60.008 | 20 | 208 | 6954 | 7161 |
| AACACACAAAGCCACCATCA   | 60.008 | 20 | 214 | 182  | 395  |
| AGTGGTTATTACCGGATCGC   | 58.93  | 20 | 192 | 751  | 942  |
| CGTGAGAAGCGTTGATCTTG   | 59.591 | 20 | 244 | 936  | 1179 |
| AGGAAAAACGTGGCAGTCAG   | 60.291 | 20 | 254 | 567  | 820  |
| TGCAGGGTATGCATGTTTGT   | 59.995 | 20 | 160 | 305  | 464  |
| CTGCGTGTGAGGGCTACTTT   | 60.453 | 20 | 172 | 780  | 951  |
| ACAAACAATGGGACCACAAAA  | 60.118 | 21 | 257 | 248  | 504  |
| AGTAAGAACC GCGAGCTGAA  | 60.154 | 20 | 240 | 251  | 490  |
| GTTTTAAACCAAGGCCTCCC   | 59.814 | 20 | 225 | 150  | 374  |
| GGCAATGGACATGGAAGAAA   | 60.843 | 20 | 242 | 1835 | 2076 |
| GACAAGCACTCATGTGATGGA  | 59.698 | 21 | 194 | 3082 | 3275 |
| CTCCTGATCCATTACCCGAA   | 59.887 | 20 | 258 | 205  | 462  |
| TGCAAGATTGCGACAGTACA   | 59.021 | 20 | 127 | 1155 | 1281 |
| GTGCCGTGTA CTTCCTCACC  | 60.577 | 20 | 244 | 83   | 326  |
| CAGTCATTGGATTGCATTGTG  | 59.98  | 21 | 142 | 359  | 500  |
| ATGAAAATACGCGGGGAAAT   | 60.517 | 20 | 273 | 84   | 356  |
| CAAAGGAAGTCGGTTGGTTC   | 59.569 | 20 | 167 | 16   | 182  |
| GTGCCAAA ACTACCGAAAA   | 59.975 | 20 | 261 | 3585 | 3845 |
| AAACCGAATCTTTTCGTGAATC | 59.485 | 22 | 243 | 25   | 267  |
| AGATGAGGGATTTGGGGAG    | 60.264 | 20 | 194 | 3273 | 3466 |
| CCAAGTAAAGCTCGAACCCA   | 60.241 | 20 | 268 | 1294 | 1561 |



|                        |        |    |     |      |      |
|------------------------|--------|----|-----|------|------|
| TTTCATGATCCAGATGGACG   | 59.451 | 20 | 236 | 140  | 375  |
| TGTGGAGCTACTCAGCCCAT   | 60.823 | 20 | 273 | 158  | 430  |
| TGCGAAAAATTTGGTTCTTG   | 58.792 | 20 | 280 | 165  | 444  |
| GTGGCACGATCATTGTTGTC   | 59.975 | 20 | 197 | 325  | 521  |
| GTGGCACGATCATTGTTGTC   | 59.975 | 20 | 197 | 314  | 510  |
| CATCACCTTCACCATCACCA   | 60.378 | 20 | 260 | 396  | 655  |
| CGTGCTCATGTCAGCAAGTC   | 60.627 | 20 | 186 | 1    | 186  |
| TCGAAGATCAATGGTCCACA   | 60.048 | 20 | 135 | 117  | 251  |
| TGCGTTTTGACAATATATAGGT | 60.083 | 26 | 135 | 1390 | 1524 |
| CTGGGAGCGATAACATGGAT   | 59.917 | 20 | 280 | 2377 | 2656 |
| GTTGGCATAAAATCCAACCA   | 58.335 | 20 | 225 | 531  | 755  |
| GCTATCAGGAACCTATGTTTGC | 57.774 | 22 | 217 | 1207 | 1423 |
| TTCAAACAAGGCATAAAACTTT | 58.412 | 23 | 146 | 213  | 358  |
| AAGAGGACAGGCATGCAGTT   | 59.874 | 20 | 188 | 876  | 1063 |
| GCAAAGAAGGGACGACTGAG   | 59.989 | 20 | 239 | 884  | 1122 |
| TCACGTGTCAGCACACAATTT  | 60.214 | 21 | 187 | 29   | 215  |
| ATTACAGCCCAGATTCCCAA   | 59.387 | 20 | 278 | 231  | 508  |
| TGATAGCGTTTTGCTGTATGCT | 59.938 | 22 | 202 | 418  | 619  |
| GAGGTTGGTGACAGTGGCTT   | 60.159 | 20 | 263 | 493  | 755  |
| ATCGTCTCTCTTCGCGAGA    | 60.235 | 20 | 273 | 222  | 494  |
| CCCCTGGTTGTTATCCTTGA   | 59.784 | 20 | 186 | 37   | 222  |
| TTTCGACCTTCGTAAGCCT    | 58.973 | 20 | 247 | 916  | 1162 |
| TCGATAGGACGTGTATGACGA  | 59.163 | 21 | 211 | 1692 | 1902 |
| GGAGAAATTTGATTTGTTGGG  | 58.405 | 21 | 274 | 205  | 478  |
| TAACCCTTGGATCTGAAGCA   | 58.298 | 20 | 268 | 49   | 316  |
| TACTCTTCGATCCCGCGTAT   | 59.691 | 20 | 153 | 151  | 303  |
| AGATGCTTTTTGTGCGGAAT   | 59.851 | 20 | 276 | 2433 | 2708 |
| CGCCGCCATTATCTCTACTC   | 59.829 | 20 | 173 | 103  | 275  |
| CCCACTTTTAAATTGCGAATG  | 59.481 | 21 | 280 | 709  | 988  |
| GATTGCGTAGTCGTGTGTGG   | 60.183 | 20 | 266 | 562  | 827  |
| TTAAACTACACATGTAATCCAT | 58.07  | 27 | 199 | 923  | 1121 |
| TGGTTTGGCGTTGATAAAT    | 60.188 | 20 | 256 | 115  | 370  |
| CGCGTTAACAGTGGAAAACA   | 59.769 | 20 | 240 | 96   | 335  |
| AAAGTTGGGATGGAGGGAGT   | 59.795 | 20 | 223 | 13   | 235  |
| ACACAGAATTCGCCAAAAC    | 59.978 | 20 | 223 | 231  | 453  |
| ACACCATCCACTACCCAAT    | 60.096 | 20 | 275 | 90   | 364  |
| TCTTTCTCATTCAACACCCCA  | 60.48  | 21 | 109 | 3    | 111  |
| GCTTAAGAATCGTGGCTTCG   | 59.982 | 20 | 197 | 222  | 418  |
| AGCAAAAATAAAGGGGCTGC   | 60.566 | 20 | 278 | 609  | 886  |
| GGCAAATTGGGAATTAGTGG   | 59.273 | 20 | 267 | 260  | 526  |
| ACGGCACATCAAACACCATA   | 59.847 | 20 | 190 | 4599 | 4788 |
| GATCACGCAATTCCTCCTGT   | 60.081 | 20 | 182 | 347  | 528  |
| GCGAAAATTGGGGTTTCTTT   | 60.292 | 20 | 133 | 2273 | 2405 |
| GCATCAAGAATCAAGCCTCC   | 59.78  | 20 | 265 | 711  | 975  |
| TGTATTTTGTCTGGCAGCGT   | 59.347 | 20 | 214 | 159  | 372  |
| TTATTCGAGCTGGTCAACCC   | 60.074 | 20 | 203 | 446  | 648  |
| CCTCTTCTTTCCCAAATCCC   | 59.875 | 20 | 109 | 1144 | 1252 |
| GATCCCAGACCTCTCATA     | 60.034 | 20 | 144 | 534  | 677  |
| AACCCAACGTCGGTTACAAA   | 60.262 | 20 | 208 | 840  | 1047 |
| ATCCCTAAAGTGCCCTCAA    | 60.817 | 20 | 189 | 20   | 208  |
| AATGGAGTGCACCTCCTCAA   | 60.656 | 20 | 248 | 1146 | 1393 |
| ATGGGGTGAATTTAAAGGGG   | 59.882 | 20 | 261 | 261  | 521  |
| ATTGACTAGGAGCACGCGAA   | 60.934 | 20 | 201 | 659  | 859  |
| GTCTGGGGCTTTGTTTGAGA   | 60.232 | 20 | 237 | 88   | 324  |
| TTGACACACTCTTCTCAGTGG  | 59.938 | 23 | 244 | 1020 | 1263 |
| TTCTTCCCGTAGTCCAGCAG   | 60.388 | 20 | 225 | 354  | 578  |
| TGGCATCACATGGTCTCTTG   | 60.688 | 20 | 132 | 380  | 511  |
| GTGCATGAGCTGTCTCTTGG   | 59.577 | 20 | 231 | 7    | 237  |

|                         |        |    |     |      |      |
|-------------------------|--------|----|-----|------|------|
| TTGACAATATTTAGTGTTTTGAC | 58.99  | 27 | 166 | 943  | 1108 |
| GCGCAATGGATAAACCTGAT    | 59.929 | 20 | 238 | 179  | 416  |
| GTCCCATCTACTGCCCAA      | 59.933 | 20 | 234 | 485  | 718  |
| CGTAAATCCGGCTTGAATTG    | 60.448 | 20 | 164 | 353  | 516  |
| GCCCTGTCACAACCTATCC     | 59.41  | 20 | 222 | 92   | 313  |
| GTAATTACATGGCCAACGGG    | 60.074 | 20 | 265 | 177  | 441  |
| TCTCATCCTTTGCCTTGTT     | 59.67  | 20 | 234 | 395  | 628  |
| GAAAATTGGCAGGATCCGTA    | 59.901 | 20 | 135 | 235  | 369  |
| TTCCACCATGATTTCAACA     | 59.75  | 20 | 219 | 1308 | 1526 |
| TGTTTTATGCCGTTGATACAAA  | 59.437 | 23 | 209 | 197  | 405  |
| AACAGCTAGCGCCATCTACG    | 60.564 | 20 | 211 | 215  | 425  |
| TTTCCTGCAACAATTTCAACC   | 59.967 | 21 | 242 | 625  | 866  |
| GGTTTGAACCATGATTTATTTG  | 59.491 | 23 | 186 | 451  | 636  |
| AATAGCCGTTGGGCTTTTGT    | 60.849 | 20 | 267 | 15   | 281  |
| TACCCGCAGTTGGCTAGTTT    | 59.769 | 20 | 230 | 497  | 726  |
| TTCGCTCATCATCCTCCTTT    | 59.773 | 20 | 197 | 1218 | 1414 |
| AACTCCAAATTTTGATGCATGT  | 58.493 | 22 | 242 | 383  | 624  |
| AATTGAGAGGCTGCCAAGTC    | 59.434 | 20 | 184 | 848  | 1031 |
| TATCCCCGAATGTGCCTAAC    | 59.784 | 20 | 219 | 844  | 1062 |
| TGTGATGAAGTTTACACAACA   | 58.163 | 25 | 209 | 1628 | 1836 |
| GGGGTAGGAGTTTGGTGTT     | 60.088 | 20 | 169 | 23   | 191  |
| TTTTCGCAGAGACCTGGAAT    | 59.813 | 20 | 196 | 259  | 454  |
| GGGGACTGTCAATTCATTTTGT  | 60.096 | 22 | 111 | 1388 | 1498 |
| TCACTGCAATTGTTCGTTC     | 59.697 | 20 | 180 | 90   | 269  |
| TGCCTACACAAATCCACCAA    | 59.964 | 20 | 134 | 920  | 1053 |
| ATTGAGCCAGGGAGAAGTGA    | 59.803 | 20 | 251 | 29   | 279  |
| TCACGCCTTCTCTCTCCAAT    | 59.95  | 20 | 238 | 636  | 873  |
| CCGTTATCTGCTTCGTTTCC    | 59.708 | 20 | 221 | 126  | 346  |
| AACCCTCAACCCTCTCCAAT    | 59.795 | 20 | 202 | 43   | 244  |
| GTGGCCCTCAGATTTAGAT     | 59.094 | 20 | 150 | 168  | 317  |
| TCGTTTCGGACCAATCTACA    | 59.123 | 20 | 269 | 214  | 482  |
| TGCTTCCCTCACAACAACAA    | 60.278 | 20 | 267 | 1784 | 2050 |
| CGTTTTTGGCCTGATATTTG    | 58.162 | 20 | 187 | 17   | 203  |
| TGCATCTGTGAATGGAAAGC    | 59.805 | 20 | 180 | 174  | 353  |
| CTGGGAGCATGTCAAGTGTG    | 60.309 | 20 | 220 | 767  | 986  |
| CTTACAATGTTGCCCCAAG     | 60.357 | 20 | 277 | 814  | 1090 |
| TTTTTGTAACCGCCTCGAT     | 59.586 | 20 | 195 | 582  | 776  |
| GGATTTTACAGGCCAAAGA     | 60.051 | 20 | 153 | 508  | 660  |
| CAGAGAAAAGTCGTCGGGAA    | 60.366 | 20 | 180 | 158  | 337  |
| GAGTCCC CGTCATAAAAA     | 60.074 | 20 | 265 | 489  | 753  |
| GCATTGAAGTTAGTGGGGGA    | 59.933 | 20 | 183 | 0    | 182  |
| TGATGAATGACGACACATGC    | 59.037 | 20 | 255 | 327  | 581  |
| AGAGGACAACGGGACAGCTA    | 59.867 | 20 | 137 | 765  | 901  |
| GCACGATCTCATGATTCCAA    | 59.61  | 20 | 255 | 21   | 275  |
| TAATTTGGCCGTTTCATTT     | 59.3   | 20 | 202 | 23   | 224  |
| CAATAAACGCCACATGAAA     | 59.42  | 20 | 280 | 357  | 636  |
| AAATTCCAAACTCCGACCAA    | 59.406 | 20 | 203 | 203  | 405  |
| CGAGTGCCGTA CTGAGAGA    | 59.187 | 20 | 212 | 213  | 424  |
| GCGCTATTTTAAACCCCAA     | 59.11  | 20 | 236 | 182  | 417  |
| TCTCCTTTTCCACCATTTGCT   | 59.67  | 20 | 259 | 980  | 1238 |
| TTGTCTTTGCATCACTCCCT    | 59.859 | 21 | 224 | 523  | 746  |
| ACACATGTGGCTTTGCTTTG    | 59.764 | 20 | 163 | 191  | 353  |
| ATTTCTCCCGCACTTTT       | 59.94  | 20 | 119 | 113  | 231  |
| GCACCATCTTCTCAACACCA    | 59.682 | 20 | 189 | 178  | 366  |
| GCTTTGTTTTCTCTGCGAC     | 60     | 20 | 273 | 609  | 881  |
| GTAAACGGTCCGGTATCACG    | 60.249 | 20 | 258 | 863  | 1120 |
| TCTTCGTGTTCTTCGTCTGTG   | 60.025 | 20 | 154 | 938  | 1091 |
| CAAATCATGTTGAAAGGAACC   | 59.839 | 22 | 272 | 728  | 999  |

|                        |        |    |     |      |      |
|------------------------|--------|----|-----|------|------|
| AAGTAGCCATTGGTGGGTTG   | 59.853 | 20 | 161 | 242  | 402  |
| TGGTCACATGCACTATCTGC   | 58.217 | 20 | 274 | 180  | 453  |
| GCCTCAAGACAGAACTTCGC   | 60.142 | 20 | 131 | 59   | 189  |
| TGTGAGGGACACAATTCTTGA  | 59.124 | 21 | 247 | 205  | 451  |
| TGGGGTGATTGGTAATAGCTC  | 58.917 | 21 | 175 | 140  | 314  |
| CATGAGCGTTCGTCAATTGTC  | 60.272 | 20 | 130 | 16   | 145  |
| GCTTTACGTTTCAACCCGAA   | 60.11  | 20 | 184 | 287  | 470  |
| TCTTAATGAGGGCCCCTACC   | 60.278 | 20 | 261 | 127  | 387  |
| ATTCCTATGGGTTTTGGGGT   | 59.397 | 20 | 224 | 74   | 297  |
| GGGAGAAATCGATAATGGGG   | 60.47  | 20 | 254 | 150  | 403  |
| AAAATCAAAGGCCCAACAATG  | 59.801 | 20 | 140 | 995  | 1134 |
| GCGCAATTGCATCTATTGAA   | 59.809 | 20 | 203 | 1985 | 2187 |
| TGGGTGTAGCAGCATTTTGA   | 60.257 | 20 | 169 | 263  | 431  |
| CTCAAACCCCAAGAATCGAA   | 60.044 | 20 | 217 | 490  | 706  |
| AATTAGCTTCTTCGTCGCGT   | 59.138 | 20 | 208 | 1458 | 1665 |
| GCGAGATCCAGAAGTCCAAT   | 59.243 | 20 | 261 | 1445 | 1705 |
| TAATCTGTTCCGGCCTCTTG   | 60.206 | 20 | 230 | 3245 | 3474 |
| TTTTGCTTGAATGCTTTCCC   | 60.188 | 20 | 155 | 719  | 873  |
| CAAAAGGTTTATCCCAGTCTCT | 58.333 | 23 | 129 | 3518 | 3646 |
| TCGAAGATGAATTTTTGGAAAT | 60.292 | 23 | 234 | 25   | 258  |
| TAAGACACCAGGCAGTTCCC   | 60.111 | 20 | 228 | 237  | 464  |
| ACACACACACGCACACACAC   | 60.177 | 20 | 244 | 307  | 550  |
| ATGAAGAAAATCTGGCGCTG   | 60.352 | 20 | 271 | 588  | 858  |
| TGAAGTCGTCGTAGGAAAGCA  | 60.948 | 21 | 224 | 735  | 958  |
| CAAAGCTCAAGCTGATGCAA   | 60.28  | 20 | 210 | 2994 | 3203 |
| GAATTCTCGACATTCCCCTC   | 59.488 | 20 | 277 | 340  | 616  |
| GTGATGATTCCGGCTCGTTTT  | 60.081 | 20 | 184 | 568  | 751  |
| CATTCAACGCATTACGAGGA   | 59.688 | 20 | 279 | 2773 | 3051 |
| TCGAAGCCATGGCCTATTTA   | 60.548 | 20 | 214 | 118  | 331  |
| TGACCCTTTGTACCGTTCCT   | 59.449 | 20 | 277 | 17   | 293  |
| AAGGAACGAACAAGTTTTCCA  | 58.73  | 21 | 246 | 678  | 923  |
| TGAATGTTGTCGTAGCCTGTC  | 58.79  | 21 | 215 | 1251 | 1465 |
| ATTGTCTCTCATTCCGAGCG   | 60.362 | 20 | 127 | 531  | 657  |
| GTGGCATGGGGAAGCTACTA   | 60.096 | 20 | 236 | 50   | 285  |
| GAGCACGCAGAGAAGCAATA   | 59.326 | 20 | 224 | 392  | 615  |
| TCCGGCCAAATTAAGAAA     | 59.538 | 20 | 271 | 196  | 466  |
| GTGGTGGAGATTTGGGTGTC   | 60.223 | 20 | 106 | 130  | 235  |
| TTTGTCTGATCAGCAGCCAC   | 59.871 | 20 | 268 | 4780 | 5047 |
| CAACATGTGGAGATCGAGGA   | 59.631 | 20 | 197 | 631  | 827  |
| TCTTTAACCGCCACCAAAAC   | 59.975 | 20 | 208 | 524  | 731  |
| TGAGAGCAGTTTCGGACATAA  | 59.883 | 22 | 278 | 142  | 419  |
| CGAAATGCACAAAACACGAG   | 60.293 | 20 | 137 | 428  | 564  |
| CTTCAGCAAACCAGCTCTCC   | 60.134 | 20 | 140 | 151  | 290  |
| TGCGAAGTTTGTCTTGTGTC   | 60.035 | 20 | 160 | 557  | 716  |
| TGGACGAGACGCACTAGAAA   | 59.591 | 20 | 242 | 3    | 244  |
| TTGGCTTTGCAATCTCATTTT  | 59.712 | 21 | 267 | 80   | 346  |
| TGTGAAAGTGAAAACACCC    | 58.442 | 20 | 240 | 512  | 751  |
| ACCATGTTTCTGCAAAGGCT   | 59.74  | 20 | 249 | 65   | 313  |
| AGCTCGGTCGGGTAGAAAGT   | 60.268 | 20 | 242 | 95   | 336  |
| GGGGTTATCATGGGATCA     | 60.352 | 19 | 267 | 2403 | 2669 |
| GAAAGTGAAGAATCGATTGGA  | 59.601 | 23 | 124 | 367  | 490  |
| CTTCACGCAAACAAATTCCA   | 59.706 | 20 | 162 | 242  | 403  |
| CCATCTGTTGTGTTGGCAAG   | 60.152 | 20 | 197 | 498  | 694  |
| CCCAACTTTCTCCCCTCTTC   | 60.045 | 20 | 241 | 3344 | 3584 |
| TGAAGCACAATGAAAACGGA   | 60.234 | 20 | 228 | 139  | 366  |
| GCAGAGAAAATTGAAACCCC   | 58.622 | 20 | 229 | 1564 | 1792 |
| TTCTCAACAGCGTTTTGGT    | 59.339 | 20 | 280 | 1318 | 1597 |
| AAATAGGTCGGGCTTTAGGC   | 59.593 | 20 | 191 | 311  | 501  |

|                        |        |    |     |      |      |
|------------------------|--------|----|-----|------|------|
| CTGAAATGAAATCATGCCCC   | 60.274 | 20 | 203 | 799  | 1001 |
| TGTTGTGTGCAAGTTCCCAT   | 60.008 | 20 | 218 | 583  | 800  |
| GTGCACAACAAATAGGCAAAA  | 58.738 | 21 | 225 | 225  | 449  |
| TACATTCCAATGGCAAAGCC   | 60.837 | 20 | 196 | 769  | 964  |
| ACAACCTATTGTCAACCGCA   | 60.16  | 20 | 100 | 685  | 784  |
| TTCCAAGATCAACGGACGAT   | 60.461 | 20 | 167 | 496  | 662  |
| AGGCTGATTGTGAACTCCAGA  | 59.859 | 21 | 257 | 2084 | 2340 |
| CATGTTACACGTGGACGCTC   | 60.183 | 20 | 134 | 2    | 135  |
| TCTCTTCCCAGCAAGAAAGG   | 59.545 | 20 | 270 | 95   | 364  |
| GGAATTGTTCAATTTGCAACG  | 59.016 | 20 | 275 | 802  | 1076 |
| TTAAATATTCATGGGCACGC   | 58.513 | 20 | 160 | 207  | 366  |
| CTCAGGCCTATCGAACCAAA   | 60.206 | 20 | 248 | 130  | 377  |
| TGACCCGCCTCATCTTCTAC   | 60.218 | 20 | 187 | 1168 | 1354 |
| CAGGTTTATCAACAAGGTTTTG | 59.795 | 23 | 141 | 23   | 163  |
| CATCGCCGATTACATTTCT    | 59.923 | 20 | 280 | 563  | 842  |
| ACCTCCTCCTTTTCCTTCCA   | 60.045 | 20 | 248 | 804  | 1051 |
| TGCGTAGAACAGAGAGCGAA   | 59.888 | 20 | 122 | 518  | 639  |
| CGAATTCTAGGCGATTCCTG   | 59.801 | 20 | 202 | 1282 | 1483 |
| CTGTCTCCTTGTCCCTCTCG   | 59.978 | 20 | 250 | 137  | 386  |
| GGTTGGAGAAAGCAAGTTGG   | 59.711 | 20 | 183 | 296  | 478  |
| CTTGAAAAGGGTTGCAAGGA   | 60.22  | 20 | 112 | 845  | 956  |
| AAACCCTGTGTATCCCAGCA   | 60.375 | 20 | 222 | 104  | 325  |
| GCCCCTCACATGCACTAAAA   | 61.032 | 20 | 223 | 3551 | 3773 |
| CAATCATGTTGGGTGCAGTC   | 59.967 | 20 | 200 | 248  | 447  |
| TACAAGCCTTGGACTTTGGG   | 60.103 | 20 | 164 | 1225 | 1388 |
| GAGGACGTTGATTTGTTGGG   | 60.353 | 20 | 202 | 170  | 371  |
| AACCATGTGCTTACACCACG   | 59.49  | 20 | 255 | 236  | 490  |
| GGTGGTCGGAGACTAGGGTT   | 60.371 | 20 | 274 | 228  | 501  |
| GAGCTCAGCTGAACCCAGAC   | 60.143 | 20 | 210 | 1001 | 1210 |
| CTGCATGCACATAGAGTATTGC | 58.346 | 22 | 273 | 381  | 653  |
| CAATATTCTTCGGAGCGAGG   | 59.801 | 20 | 251 | 1879 | 2129 |
| GGTACGTGGGGTATGGTCAA   | 60.495 | 20 | 276 | 610  | 885  |
| TTTTTCCAAACAAATGAGATAA | 58.586 | 25 | 278 | 115  | 392  |
| TCTTTCTGCATCCACCACAA   | 60.24  | 20 | 247 | 121  | 367  |
| TAGGCCATAAATGCTTCCA    | 60.415 | 20 | 250 | 38   | 287  |
| GGAGTGAGGATTTGAGGTGG   | 59.505 | 20 | 172 | 677  | 848  |
| CAACCTCCTTTCTCACCGAG   | 59.837 | 20 | 146 | 431  | 576  |
| GACAGAGTGGGCTCTCATGG   | 60.829 | 20 | 160 | 645  | 804  |
| TCCCTACGAGGAAGTCAGGA   | 59.797 | 20 | 257 | 123  | 379  |
| TTGGTTTTGTTGGGATTGA    | 58.841 | 20 | 234 | 163  | 396  |
| ATTTGTTGGAGGTTTGGTTCG  | 59.83  | 20 | 216 | 64   | 279  |
| TTTTTATTGTTTGCTCCGGG   | 59.937 | 20 | 175 | 11   | 185  |
| GGTATTGTAGCCATTGGGGA   | 59.645 | 20 | 152 | 371  | 522  |
| TCGATGTTTCCTTCCCATT    | 59.363 | 20 | 267 | 237  | 503  |
| GTGTGCTGGATGTCGTTGAT   | 59.557 | 20 | 139 | 19   | 157  |
| CCTTGTTCCCTCCATGAAAT   | 58.836 | 20 | 211 | 935  | 1145 |
| TGTTACCTTTTGGCCATT     | 60.344 | 20 | 193 | 32   | 224  |
| CTTTCTGGTCAACACTCACGA  | 58.917 | 21 | 223 | 212  | 434  |
| TGGGATAAAATAAGGGGTTTTC | 60.241 | 22 | 254 | 967  | 1220 |
| TTGGGCTGCAAAATGATAAAA  | 59.146 | 20 | 205 | 88   | 292  |
| CGTCTCCTCCCTCTACCTCC   | 60.208 | 20 | 244 | 843  | 1086 |
| ACAAGAGCAACACATGCCAA   | 60.31  | 20 | 233 | 2586 | 2818 |
| GTGGGGAAGACTGTGTGGAG   | 60.563 | 20 | 157 | 15   | 171  |
| GGGGCCAATCCAATTTAT     | 58.563 | 19 | 108 | 702  | 809  |
| TGAACCGAAAGGTCAACCAC   | 60.934 | 20 | 232 | 409  | 640  |
| TTCATCTTCACCCCTTTTCG   | 60.044 | 20 | 251 | 7    | 257  |
| ACTATGCTCACCCACTTGGC   | 60.142 | 20 | 270 | 5679 | 5948 |
| CGCCCCACATTGTTTCTTAT   | 59.823 | 20 | 120 | 69   | 188  |

|                         |        |    |     |      |      |
|-------------------------|--------|----|-----|------|------|
| CGAGACTGAGTCCTCCATCA    | 58.912 | 20 | 246 | 134  | 379  |
| AAAAATGAGCGGACCAAAT     | 58.557 | 20 | 256 | 1149 | 1404 |
| TCTTAATTGGGGTGAAAGCG    | 60.067 | 20 | 260 | 6    | 265  |
| CGACCATTAGCAGCCTCAGT    | 60.419 | 20 | 186 | 557  | 742  |
| TATCCTCCTTCCCAGACGAA    | 59.623 | 20 | 251 | 1685 | 1935 |
| GGGAAAAATCTTGATGTAGT    | 58.919 | 23 | 256 | 239  | 494  |
| TGGTTTGGAAATATACCGAAGTT | 60.115 | 23 | 147 | 4030 | 4176 |
| GCGTAAGGGTGTTCGTGAGT    | 60.179 | 20 | 119 | 101  | 219  |
| ATGCCATGACACGAACAATG    | 60.399 | 20 | 207 | 163  | 369  |
| GGCCGAATTATGCTTTTGAA    | 60.04  | 20 | 261 | 94   | 354  |
| TGTGTCATCTTACACTTTCCAC  | 58.201 | 23 | 135 | 21   | 155  |
| ACAATCTGCGAAACTGGGTC    | 60.119 | 20 | 106 | 18   | 123  |
| CTCGACAACCTTGCCCTATC    | 59.694 | 20 | 210 | 549  | 758  |
| GAGAGTGCCTCACTTTTGTGG   | 59.899 | 21 | 200 | 180  | 379  |
| CTGGGGTCCATGTTAACCAC    | 60.088 | 20 | 266 | 720  | 985  |
| CTTCAATTTCTTGGCGTGGT    | 60.11  | 20 | 236 | 424  | 659  |
| TCGAATTTTCATCGCCTCTC    | 60.296 | 20 | 271 | 46   | 316  |
| CATTTGCAATGGAAAAAGGG    | 60.294 | 20 | 152 | 1748 | 1899 |
| CGGTTATTACCGGATCGCT     | 59.93  | 19 | 197 | 60   | 256  |
| TGGAATACCACTGCGTTCAA    | 60.111 | 20 | 177 | 669  | 845  |
| TCAAAGTCAATAGCCCAACCA   | 60.487 | 21 | 239 | 320  | 558  |
| CGATTCTTTTGTACGTTTGAGC  | 58.945 | 22 | 169 | 29   | 197  |
| TCATTTAACCGCTGAGTCCC    | 60.074 | 20 | 132 | 16   | 147  |
| GCATCCTCGTGTGTGGATTA    | 59.527 | 20 | 272 | 260  | 531  |
| GGCAAGACTCGATCAGGAAG    | 59.95  | 20 | 158 | 179  | 336  |
| CCACTGTTCAAGTGGACGAA    | 59.72  | 20 | 211 | 122  | 332  |
| CCAAGCATTGTGGATGCTCT    | 61.208 | 20 | 108 | 600  | 707  |
| CCAATTTGAATGGTTATCACCT  | 60.457 | 23 | 158 | 412  | 569  |
| TCTCGTTTGGAGGAATTTGG    | 60.044 | 20 | 204 | 495  | 698  |
| CCTCGTTTGCAGCAGTTACA    | 60.05  | 20 | 234 | 992  | 1225 |
| GGCGTTACCGCATATGATCT    | 59.951 | 20 | 204 | 3193 | 3396 |
| TGTTTTTCCGATTTACCAA     | 58.987 | 20 | 178 | 32   | 209  |
| TCATATTTGATGGGACCTTACG  | 58.831 | 22 | 274 | 190  | 463  |
| CCCCCATATGCTATGCTTTG    | 60.302 | 20 | 236 | 369  | 604  |
| ATCCCAAATTCCCAACCTCT    | 59.629 | 20 | 110 | 582  | 691  |
| CGTGGCAGGCTAATATCCAT    | 59.945 | 20 | 244 | 9    | 252  |
| CCCCCTACATTTCTTCATGC    | 59.387 | 20 | 276 | 748  | 1023 |
| TCTTGTGGTAAGCAGCTCCA    | 59.591 | 20 | 211 | 1183 | 1393 |
| TATATCGGGGGCTGAGCATA    | 60.403 | 20 | 173 | 221  | 393  |
| CAAACCTCCACCATAACCGCT   | 59.993 | 20 | 238 | 547  | 784  |
| ACAATCTGCGAAACTGGGTC    | 60.119 | 20 | 108 | 18   | 125  |
| AGGGGACTTGCACAAACAGT    | 59.622 | 20 | 243 | 100  | 342  |
| CGATATTGTGCCGTTTTGA     | 60.473 | 19 | 271 | 90   | 360  |
| ACGGGTGAGAATAATTTAAAG   | 59.774 | 23 | 180 | 2224 | 2403 |
| CATCAGTTCACTGGCAAAA     | 59.691 | 20 | 277 | 1118 | 1394 |
| AGGTTGGCCAAGTAAGGTCA    | 59.592 | 20 | 245 | 15   | 259  |
| TCAATGCAGATGGGATTCAA    | 60.009 | 20 | 188 | 434  | 621  |
| GAATCAATGGTGGGCTTTGT    | 59.797 | 20 | 229 | 418  | 646  |
| TTCATAATTTTGTGCTTTTGC   | 57.131 | 22 | 273 | 1844 | 2116 |
| AAATCCCAGCCACACATTTT    | 59.797 | 20 | 140 | 497  | 636  |
| TCATGATCACTTAGGCACTTAG  | 58.415 | 23 | 280 | 547  | 826  |
| CAGAGGCATGGTCTCAGTCA    | 59.98  | 20 | 243 | 606  | 848  |
| GGGAGGACCATAGCTCATCA    | 60.034 | 20 | 131 | 523  | 653  |
| AAGGCAATGGAGTGGATGAG    | 60.073 | 20 | 239 | 466  | 704  |
| AGCCCACTCTTCTAACCGTC    | 59.765 | 21 | 127 | 511  | 637  |
| GCAGAAAAACCATGGGAGAG    | 59.67  | 20 | 104 | 453  | 556  |
| AAAGCAAGCCTGGACTACCA    | 59.875 | 20 | 262 | 199  | 460  |
| ATTTTCGATTTAGGGGCGAT    | 59.772 | 20 | 161 | 1481 | 1641 |

|                         |        |    |     |      |      |
|-------------------------|--------|----|-----|------|------|
| GGTTTTCAGATACACGTGCC    | 58.076 | 20 | 163 | 33   | 195  |
| AATGAGGAGGAGGAGTTGGG    | 60.447 | 20 | 225 | 3    | 227  |
| CAAAGGCCTAGAAGTGTTTTG/  | 58.562 | 22 | 148 | 694  | 841  |
| AGGAAATGCAGTGTTTTTCAA   | 57.411 | 21 | 260 | 215  | 474  |
| GACAGTTTTCATTTGATCAAGC  | 60     | 23 | 131 | 92   | 222  |
| TTGAAACGGACCAACAATGA    | 59.941 | 20 | 242 | 25   | 266  |
| AGTAGCACGACCAGATGGGT    | 59.604 | 20 | 247 | 869  | 1115 |
| TGTTATTTCAATTAAGTTGATT  | 59.719 | 26 | 262 | 242  | 503  |
| GAGAACCAAGGGTCAAGAAA/   | 59.61  | 22 | 204 | 334  | 537  |
| CAAAAATCCAACACCTCTCAG/  | 59.513 | 23 | 260 | 1278 | 1537 |
| TCACAATCGTCCATTTTTTCG   | 59.518 | 20 | 272 | 245  | 516  |
| TTGTGTGATCGAACCACGTT    | 60.008 | 20 | 205 | 92   | 296  |
| AATCTGATGGGCAGTAACCG    | 59.955 | 20 | 251 | 591  | 841  |
| GTGACTCAAGTCTTCAACCAAC  | 59.291 | 23 | 274 | 269  | 542  |
| CCCGTGCTTCAATCTCTCAT    | 60.218 | 20 | 273 | 1    | 273  |
| CGGTGGAATATGTATGGTTGTC  | 59.996 | 22 | 219 | 8    | 226  |
| CTTCCGTGTCCTCTCCAAAG    | 59.837 | 20 | 195 | 19   | 213  |
| GATCTGCCATACTTGCACCA    | 59.679 | 20 | 164 | 485  | 648  |
| GAGATTTCTCTTCCACAGG     | 60.059 | 21 | 154 | 609  | 762  |
| AAAAGAAAGAAATGCACACGC   | 59.397 | 21 | 224 | 1136 | 1359 |
| GAGTTGGCTGTCCCACTCAT    | 60.12  | 20 | 215 | 1128 | 1342 |
| ACCATATTTAAGGGTTATCACC  | 57.552 | 24 | 170 | 621  | 790  |
| GTTGAGGAATTGGGAATGGA    | 59.727 | 20 | 194 | 1462 | 1655 |
| ACGTTCTTCTCCATCCCCTT    | 59.935 | 20 | 182 | 215  | 396  |
| GTACTGGCGACAGCGATAACA   | 59.895 | 20 | 234 | 469  | 702  |
| TGAAATTAGGAAATAAGGAGG   | 58.625 | 25 | 246 | 345  | 590  |
| TGCATACGGAAAACAAACCA    | 59.969 | 20 | 278 | 484  | 761  |
| TCTGAGATTTTCATTTGTCCGT  | 59.994 | 23 | 198 | 713  | 910  |
| CTTCAATGCTCAAGGATCAA    | 57.958 | 21 | 252 | 1428 | 1679 |
| GGCTGTGTGATCATGTTTGG    | 59.967 | 20 | 242 | 961  | 1202 |
| GTACCTGCCGACAAATGGAG    | 60.517 | 20 | 105 | 90   | 194  |
| AGGCCACTGAGAGTGGTGAC    | 60.315 | 20 | 211 | 3555 | 3765 |
| TGGCTATAAAGGTCGCAGTT    | 57.543 | 20 | 263 | 799  | 1061 |
| TCATGCTTGAATCAAAACAAC/  | 59.206 | 22 | 194 | 0    | 193  |
| CCTGCTTCTCAGGTTGTCCT    | 59.45  | 20 | 107 | 2203 | 2309 |
| AACACACGCACACACTCTCA    | 58.876 | 20 | 226 | 361  | 586  |
| TTTTGCCATTTTCGAAATCC    | 59.886 | 20 | 255 | 1272 | 1526 |
| GAAATAAGGAGGTATTATGAA/  | 58.156 | 25 | 155 | 837  | 991  |
| ATTGCTTCCAATCGAACACG    | 61.032 | 20 | 147 | 3505 | 3651 |
| TAATTAGTTCACGAGCCGC     | 60.23  | 20 | 280 | 203  | 482  |
| GTGATGCAGTGTGCTGCTT     | 60.064 | 20 | 233 | 2259 | 2491 |
| TTTTGATCGTCTATCTTGCGAA  | 59.853 | 22 | 270 | 267  | 536  |
| TCTTTTACTTGCAATTTCTGTT/ | 59.4   | 25 | 279 | 1014 | 1292 |
| CGCTGTCAGACCCAGGTATT    | 60.134 | 20 | 240 | 836  | 1075 |
| TGCTCCATGACTTGCTTCTG    | 60.136 | 20 | 249 | 703  | 951  |
| TTGATCAGCAGCTATGGAACC   | 60.228 | 21 | 259 | 83   | 341  |
| TGATGGAAGCAATGCAACTT    | 59.276 | 20 | 173 | 171  | 343  |
| TTGGCAAACCCTATTCAGG     | 59.931 | 20 | 236 | 2838 | 3073 |
| GTTGGTTACGGGAATTGCAT    | 59.691 | 20 | 198 | 1257 | 1454 |
| AGCTGATCGAGCAGAGAAGG    | 59.851 | 20 | 265 | 2587 | 2851 |
| GGCCAAAACATTGCTCCTAT    | 59.046 | 20 | 271 | 2619 | 2889 |
| TGGACAAATATGGTGATGGC    | 59.205 | 20 | 247 | 185  | 431  |
| GTCCGATCCAAGTTCTGGAG    | 59.655 | 20 | 171 | 2305 | 2475 |
| CGATCGAGATGTGACGACAA    | 60.84  | 20 | 276 | 332  | 607  |
| TCATGGAAAAAGCAAGCAGTT   | 59.875 | 21 | 197 | 25   | 221  |
| AAGGTGATGGGTGTTGGAAA    | 60.21  | 20 | 188 | 251  | 438  |
| ATAGTTTTGTTTGGCCGACG    | 59.996 | 20 | 248 | 198  | 445  |
| CGAAGGTGGGTTCTTGAT      | 59.966 | 20 | 222 | 6    | 227  |

|                        |        |    |     |      |      |
|------------------------|--------|----|-----|------|------|
| GGGATCCATTGAGGATGTGT   | 59.593 | 20 | 268 | 2683 | 2950 |
| GGGAGGGAATCTATTGTGATTC | 59.666 | 22 | 197 | 578  | 774  |
| TTGGATGAGATGATGGCAAA   | 60.009 | 20 | 236 | 1    | 236  |
| CACCGCCCAACCATTTATAG   | 60.202 | 20 | 262 | 639  | 900  |
| GGCTGCATTTTTATCCCAA    | 59.907 | 20 | 231 | 535  | 765  |
| CGCCCTAGCAAAAGTGTTTC   | 59.883 | 20 | 269 | 474  | 742  |
| ACCCCGACTTCTCCTTGAT    | 59.935 | 20 | 260 | 1978 | 2237 |
| AAGAGGCGATTGCTTAGGTG   | 59.476 | 20 | 270 | 66   | 335  |
| TTCCAATGGCAAAGTTGTGT   | 59.024 | 20 | 189 | 200  | 388  |
| AGACCCAAGCCTACCGAGTC   | 60.649 | 20 | 214 | 951  | 1164 |
| TATACAAGCTGTGGCGGTTG   | 59.752 | 20 | 230 | 93   | 322  |
| TCGTCCAGTGCCTGTGAAT    | 60.263 | 19 | 259 | 2258 | 2516 |
| GGGTCGACAAGCTTGAGAAA   | 60.375 | 20 | 183 | 11   | 193  |
| GCAGAGAGGGAGGGAGAGTT   | 59.952 | 20 | 154 | 206  | 359  |
| GCACCCCTTTGTAATCATGC   | 60.339 | 20 | 268 | 1035 | 1302 |
| CCTTCAAGATTATGGTGGGG   | 59.24  | 20 | 277 | 878  | 1154 |
| CACGAATTCCTCCGACTTTTA  | 59.931 | 20 | 225 | 936  | 1160 |
| TCACCCGAATCTTTCGTTTT   | 60.051 | 20 | 206 | 497  | 702  |
| ATTCAAATCCGGTGGTTCAA   | 60.17  | 20 | 192 | 16   | 207  |
| TGTCCAAATAAATGAGGCC    | 59.762 | 20 | 252 | 116  | 367  |
| TGGAGCTGGAGTTACTTGG    | 60.246 | 20 | 156 | 14   | 169  |
| TCCCAAAGTTTCACACGTCA   | 60.128 | 20 | 214 | 503  | 716  |
| TGGGATTGATCCTACCCAAA   | 60.126 | 20 | 217 | 2504 | 2720 |
| CATGATTGCTGATCCACCAC   | 59.925 | 20 | 225 | 3037 | 3261 |
| ATTTAATTAGGTCCACGCGCT  | 60.003 | 21 | 104 | 123  | 226  |
| TCTTGACATTCCAAGAGCCC   | 60.195 | 20 | 216 | 179  | 394  |
| TTGGTAGGTGTCCGTGATGA   | 59.96  | 20 | 248 | 837  | 1084 |
| AGTTAGCATGGGGAAGGGTT   | 59.827 | 20 | 139 | 76   | 214  |
| TCATCCCAAGTCCAGAGCAT   | 60.622 | 20 | 247 | 2738 | 2984 |
| TGTACCCTACCGTGGGAAAG   | 59.846 | 20 | 276 | 690  | 965  |
| CCAGCAATAGCCCTCTGTGT   | 60.277 | 20 | 257 | 4399 | 4655 |
| TGCAAATGGTGATTGCTCAT   | 60.08  | 20 | 231 | 399  | 629  |
| GACCGTGTGCAATGAAACAG   | 60.16  | 20 | 251 | 126  | 376  |
| TGGCATGCAAACGACATTAG   | 60.665 | 20 | 106 | 2    | 107  |
| GCTGCAGATCTAAGGCCGAG   | 62.461 | 20 | 147 | 974  | 1120 |
| TTAAAAGTGCGGGGCATTAC   | 59.964 | 20 | 185 | 17   | 201  |
| AACATGATGAGAGTTGGGCA   | 59.09  | 20 | 273 | 33   | 305  |
| TGATGCCTCAAATCACAAGC   | 59.805 | 20 | 248 | 1600 | 1847 |
| TGGCGATTAATTTCCCTTCA   | 60.395 | 20 | 160 | 400  | 559  |
| AATGTCCAACCTCAAAGAGGAA | 59.165 | 23 | 262 | 130  | 391  |
| CCACCCGATAAGGCAAATAA   | 59.789 | 20 | 243 | 1620 | 1862 |
| GAGAGTCTGAGATTTGGCGG   | 59.95  | 20 | 206 | 911  | 1116 |
| TGCGGAGTTCAAGACTGATG   | 59.984 | 20 | 220 | 20   | 239  |
| CCGGAGATTCTCTCTCTCCC   | 60.292 | 20 | 216 | 26   | 241  |
| TTGTGCATCAAATAAACCCAF  | 60.218 | 22 | 145 | 1559 | 1703 |
| GTTCCCGACTTCTGAAAGCA   | 60.375 | 20 | 221 | 270  | 490  |
| TTGGGATTTACGAAAGATTG   | 59.924 | 21 | 234 | 11   | 244  |
| TTGCCGTTTTGTTTCATGTTT  | 59.062 | 20 | 235 | 1925 | 2159 |
| ATGGCTGAGGTGGCTAATTG   | 60.096 | 20 | 157 | 268  | 424  |
| CCGGATACGGATTATATCCAA  | 58.659 | 21 | 248 | 384  | 631  |
| ATGCATACATGGGGACAACA   | 59.654 | 20 | 228 | 371  | 598  |
| TGCACGTAGGCATGTTCAAT   | 60.142 | 20 | 262 | 8    | 269  |
| GTCGATTCGCCACCTTTAAC   | 59.574 | 20 | 201 | 227  | 427  |
| AATTGCCCGAAATACGGAGT   | 60.692 | 20 | 169 | 250  | 418  |
| AAGCCTACATTCACATCCCA   | 59.443 | 21 | 243 | 416  | 658  |
| TCCAGCGACTCATGTTGTTC   | 59.837 | 20 | 261 | 740  | 1000 |
| AATTTTCTTGAGATCGGGCA   | 59.645 | 20 | 189 | 251  | 439  |
| CCCAAGAATGGGTTATTATTTG | 59.14  | 23 | 271 | 656  | 926  |

|                        |        |    |     |      |      |
|------------------------|--------|----|-----|------|------|
| CGAAATGCATGATTGAGGTG   | 60.073 | 20 | 203 | 768  | 970  |
| GACCCCGAAACTTTAGCGTA   | 59.225 | 20 | 135 | 274  | 408  |
| GACATGGATTGTGCTTTCGAC  | 60.52  | 21 | 217 | 17   | 233  |
| GGAGGGATTGAACGTAGGTC   | 58.447 | 20 | 173 | 922  | 1094 |
| AAGGGTCTGCCCTTGCTTAT   | 60.096 | 20 | 273 | 502  | 774  |
| ATTTGCTGGAGGGAGAGGAT   | 60.037 | 20 | 258 | 390  | 647  |
| AGCGAAAGAAAATGTTTTGAA  | 58.865 | 21 | 279 | 5    | 283  |
| CGCCTTACGAAGCCAAATAC   | 59.742 | 20 | 178 | 157  | 334  |
| ACCTGCCGTCTGACATAAGC   | 60.285 | 20 | 177 | 459  | 635  |
| TGATAGTGGAGTTGTGAGCATC | 58.878 | 23 | 278 | 59   | 336  |
| TGACGACCGATAATTGCTCC   | 61.003 | 20 | 185 | 33   | 217  |
| TACTGCAGTGGAGTTGCCTG   | 60.049 | 20 | 255 | 1408 | 1662 |
| CACCAAAAAGTATAAATGATC  | 58.556 | 23 | 255 | 423  | 677  |
| TTTTTGGCCTTTGATCTTCG   | 60.181 | 20 | 219 | 138  | 356  |
| CGTGAATAGTGCTGCCTCGT   | 61.394 | 20 | 233 | 512  | 744  |
| AGTGACCCTTTGGTACGTGC   | 60.028 | 20 | 240 | 1643 | 1882 |
| TGATCTCCTTTCCCTTGGA    | 59.6   | 20 | 193 | 1025 | 1217 |
| CGGTCTCGTTTTGGAATCTA   | 60.066 | 20 | 268 | 135  | 402  |
| TGGGATAGTACCGGAACACG   | 60.766 | 20 | 187 | 877  | 1063 |
| CTCCTCTCCTATTCGCTCCC   | 60.306 | 20 | 193 | 118  | 310  |
| GAGGGAGGGAAGATATTCGG   | 59.859 | 20 | 272 | 1441 | 1712 |
| TTAGTCAAGGGGTGGAAACG   | 59.964 | 20 | 264 | 1038 | 1301 |
| AAAATCCGAGCCAGTTGTTG   | 60.11  | 20 | 245 | 224  | 468  |
| CGCTGCAACAAATACACACC   | 60.18  | 20 | 238 | 996  | 1233 |
| CTCCAACCTTGTTTTCCGA    | 60.081 | 20 | 228 | 573  | 800  |
| AAAACCTCCATCCAATCACCG  | 59.79  | 20 | 235 | 162  | 396  |
| ATAGGATTTACTGCCTGCG    | 60.235 | 20 | 241 | 146  | 386  |
| TTGCTTCTGGAAGGGATTTG   | 60.184 | 20 | 108 | 2699 | 2806 |
| ACCTGATTTTCTCCCTCCCT   | 58.997 | 20 | 223 | 1547 | 1769 |
| TGCACGCAGCATATTATGAA   | 58.88  | 20 | 218 | 576  | 793  |
| GCTTATGGTTTGAGCTGCCT   | 59.481 | 20 | 109 | 713  | 821  |
| ATTCCAAATCCAAACCACCA   | 60.029 | 20 | 228 | 156  | 383  |
| AGATTCTGCTCGATTCCCAA   | 59.773 | 20 | 155 | 1348 | 1502 |
| TTTGGAAAACAGAGCACCC    | 60.088 | 20 | 276 | 200  | 475  |
| GGCTTAATGGCCAAAACAA    | 59.943 | 20 | 239 | 3821 | 4059 |
| TGACATTTGTCTAACGATGGTG | 58.554 | 22 | 273 | 66   | 338  |
| ATGTGATGCTCAGCAGTGTTT  | 58.385 | 21 | 209 | 48   | 256  |
| ATACTGTTTGGTGCAGGGGA   | 60.375 | 20 | 236 | 21   | 256  |
| AAACGCGCTATTTTAAACCC   | 58.332 | 20 | 254 | 1    | 254  |
| CACTGCATTAACCTACTCCCT  | 59.209 | 23 | 262 | 3910 | 4171 |
| GTGGTCTGGCAGTCGTGTTT   | 61.176 | 20 | 273 | 2751 | 3023 |
| CAGACAATCCCGGAGGACTA   | 60.065 | 20 | 227 | 2616 | 2842 |
| TGACACGGTGATTTACGTGG   | 60.427 | 20 | 249 | 241  | 489  |
| TGAATCCTCCCCATTGTTA    | 60.126 | 20 | 271 | 1156 | 1426 |
| ATCTAATGCCCAACACAGC    | 59.962 | 20 | 237 | 1132 | 1368 |
| TGTGCGCTAAAGGTTTTCT    | 59.883 | 20 | 202 | 19   | 220  |
| ACTCCAACCCTTCTTTGGGT   | 59.834 | 20 | 258 | 5285 | 5542 |
| TATGATCGGCCGAGAATCTT   | 59.628 | 20 | 269 | 787  | 1055 |
| TATGTGTGTTGCATTGCGTC   | 59.155 | 20 | 166 | 383  | 548  |
| GCGAAACAGGAAAAATTAGGC  | 59.957 | 21 | 164 | 84   | 247  |
| GCCTGCTACACAGGGTTTTTC  | 59.74  | 20 | 199 | 26   | 224  |
| TTACAATGGCAAATCCCACA   | 59.786 | 20 | 191 | 546  | 736  |
| TGAGAAGAACACATAAATTCG  | 59.772 | 23 | 278 | 1612 | 1889 |
| GGTGGAGACAGGAGGGTGTA   | 59.962 | 20 | 217 | 53   | 269  |
| TCCAGCTGTTAAACCCACC    | 59.971 | 20 | 236 | 1000 | 1235 |
| TCGGAGTCTTCAGACAAATCA  | 59.853 | 22 | 264 | 1929 | 2192 |
| GCTTCAGTCCTTGCATCCTC   | 59.957 | 20 | 274 | 4899 | 5172 |
| TGGAATACCGGTGCAAAAAT   | 60.188 | 20 | 200 | 1558 | 1757 |



|                        |        |    |     |      |      |
|------------------------|--------|----|-----|------|------|
| CCCCTCCAAAAACCAATCTT   | 60.159 | 20 | 216 | 51   | 266  |
| TGGTCTTTTCAATCCGGTTC   | 59.91  | 20 | 248 | 213  | 460  |
| GCGGCATCATCTTCTTCTC    | 59.923 | 20 | 193 | 674  | 866  |
| TATTTGCAGAATTTGCCACG   | 59.702 | 20 | 233 | 198  | 430  |
| ACACCTGGGTGAGACCAAAC   | 59.859 | 20 | 159 | 764  | 922  |
| TGTTAGAATGGTCCAACCCC   | 59.647 | 20 | 222 | 185  | 406  |
| GGCTAGGCTTGTAGCAAAAGG  | 60.389 | 21 | 230 | 75   | 304  |
| CGCATTTTTGGCCTGATATT   | 59.928 | 20 | 232 | 765  | 996  |
| TATGCCACATCTCTCTCCC    | 60.034 | 20 | 158 | 795  | 952  |
| TCCTTAATTCATTAATACATA  | 57.288 | 26 | 163 | 441  | 603  |
| TGCAAACACAATGTCTGAAATC | 59.632 | 22 | 271 | 696  | 966  |
| CCCTCTCTCCCCTCACTCAT   | 60.605 | 20 | 197 | 101  | 297  |
| GTGTGATTGGCAGTGACAGG   | 60.162 | 20 | 147 | 1032 | 1178 |
| GCACGGCAGTGAAGAATA     | 59.814 | 19 | 277 | 1015 | 1291 |
| TCAGTACAATGGAGTGATGGC  | 58.585 | 21 | 167 | 606  | 772  |
| AAGTCAGCCGAGGAAATTCA   | 59.813 | 20 | 278 | 170  | 447  |
| CCTTTTGAACAAGGCCTCAA   | 60.22  | 20 | 200 | 248  | 447  |
| CGGCTGTCAACAGAAGTTCA   | 60.025 | 20 | 203 | 71   | 273  |
| GGCATGTGGGGGTATAGTTG   | 60.074 | 20 | 258 | 1531 | 1788 |
| TTTTGAGACACCCCAAGTCC   | 59.943 | 20 | 279 | 139  | 417  |
| TATTTTCGGTTTATTGGGCG   | 59.799 | 20 | 215 | 32   | 246  |
| TGGGACACTGTTTTCTTTGG   | 58.594 | 20 | 202 | 277  | 478  |
| TCCCTGCTTCTAAAACCCT    | 60.068 | 20 | 130 | 20   | 149  |
| TTTTCCCAACAATTCAGCA    | 59.133 | 20 | 249 | 223  | 471  |
| GAGAATGGTGAAGAAGCCA    | 60.195 | 20 | 260 | 442  | 701  |
| TGGAAACTTGGCTTGGTCT    | 59.711 | 20 | 109 | 941  | 1049 |
| GTGGGAATAATGTATGAATGA  | 59.487 | 24 | 272 | 943  | 1214 |
| CACGGTTGCCCTTGTACT     | 60.03  | 20 | 205 | 693  | 897  |
| TGTTTGTGATCCCAATTGAA   | 57.35  | 20 | 238 | 604  | 841  |
| TCCTCTCCCTTTCGTTTCT    | 60.183 | 20 | 122 | 3    | 124  |
| TCCAGTGTTGCTTGGCCATA   | 60.257 | 20 | 251 | 1193 | 1443 |
| AAGTCGAAATTTGGCAACAA   | 58.267 | 20 | 182 | 124  | 305  |
| ATGAGCACATGCCAAAATGT   | 59.005 | 20 | 203 | 1839 | 2041 |
| AGGCATGTTCAATTGGGAAA   | 60.309 | 20 | 271 | 189  | 459  |
| GCTAATGGGAAAAGCATTGG   | 59.547 | 20 | 118 | 1452 | 1569 |
| ACATGATAATGCTGATAAAAA  | 58.59  | 25 | 204 | 447  | 650  |
| TCTTTGGCTCAATGGAGGTC   | 60.195 | 20 | 263 | 790  | 1052 |
| GGAATCTGGACTCGGATTTG   | 59.483 | 20 | 223 | 15   | 237  |
| CCGGCAGCATTTTTACTTCT   | 59.361 | 20 | 213 | 3487 | 3699 |
| CGGGTGGGAATGTATTAGGTT  | 59.952 | 21 | 258 | 62   | 319  |
| ATAAAAAGGACTGGCCTGGG   | 60.312 | 20 | 214 | 60   | 273  |
| TTTGGTTGAAGGTGCATGTC   | 59.547 | 20 | 118 | 402  | 519  |
| CAGTCCCCACTGCCTTATC    | 59.55  | 20 | 123 | 279  | 401  |
| TGAGGCCACTGACTTGAATG   | 59.831 | 20 | 178 | 112  | 289  |
| CAAATAATGTGGCAATCCCC   | 60.016 | 20 | 151 | 35   | 185  |
| TTCATCTTGTAGCGTTTGAATG | 59.772 | 23 | 105 | 1    | 105  |
| AACAAATGCATCATCTGCCA   | 60.08  | 20 | 197 | 1438 | 1634 |
| TCCTGATGGACAACACTGACCC | 60.934 | 20 | 259 | 138  | 396  |
| ATTTACCCATAGCGCACTCG   | 60.117 | 20 | 214 | 62   | 275  |
| GGAATATGATCGGTCGCAA    | 59.445 | 19 | 239 | 2    | 240  |
| AAATCACAGGAGGACGATGC   | 60.081 | 20 | 183 | 849  | 1031 |
| TTATCAACCCAAAACCCCAA   | 60.024 | 20 | 168 | 113  | 280  |
| GCTAAAAGGGATTCTTGGGC   | 60.041 | 20 | 160 | 1149 | 1308 |
| ATTTTGGAGATGGACCGTGA   | 60.317 | 20 | 260 | 918  | 1177 |
| GGTGGTAGTTGGCGTTGACT   | 60.035 | 20 | 248 | 411  | 658  |
| GCTGACTAACCCATTCTTGTTC | 60.048 | 23 | 119 | 1038 | 1156 |
| ATCTGAACAAATGGGCTTGG   | 59.933 | 20 | 238 | 2861 | 3098 |
| GAATTCGGAAAGCGTACAA    | 60.074 | 20 | 239 | 1371 | 1609 |

|                         |        |    |     |      |      |
|-------------------------|--------|----|-----|------|------|
| TACCCAAACGTCCCAAACT     | 59.331 | 20 | 174 | 531  | 704  |
| AATGGTGGGGTAACAACAA     | 59.948 | 20 | 201 | 229  | 429  |
| TCTTTCTTGGAAACATCTCGTCA | 59.853 | 22 | 249 | 601  | 849  |
| GACCTGGTTCATTTCAAGGA    | 59.903 | 20 | 157 | 211  | 367  |
| AACACACAAACGAATGGCAA    | 60.011 | 20 | 212 | 467  | 678  |
| AGGAAACCTTAAAGGGCCAA    | 59.939 | 20 | 267 | 1124 | 1390 |
| CCATGAGTTTTTGTGCGATG    | 60.111 | 20 | 279 | 278  | 556  |
| TGAACATGCATCCAAAGGAA    | 60.049 | 20 | 253 | 175  | 427  |
| ACCTGGAACGCATATGGAG     | 59.955 | 20 | 260 | 2    | 261  |
| CCTTTTCTGCATTTGGTGCT    | 60.249 | 20 | 217 | 618  | 834  |
| GGGCTATCGACCTCTTTTCC    | 60.039 | 20 | 243 | 492  | 734  |
| CAATTTTCCGGTGGAGAGAG    | 59.665 | 20 | 215 | 355  | 569  |
| AAAATGGAGCAGAGCGAATC    | 59.415 | 20 | 246 | 228  | 473  |
| CTCACCTGCACACACATTAC    | 60.219 | 21 | 280 | 1181 | 1460 |
| ATGGGGCTGTTGTGAAAGAA    | 60.495 | 20 | 242 | 2085 | 2326 |
| TCAGTCAACCAACCAACTGC    | 59.726 | 20 | 219 | 14   | 232  |
| ATTGCACCTCGTAAACACCC    | 59.859 | 20 | 112 | 21   | 132  |
| AACGGTGTGTCATCATTGGA    | 59.812 | 20 | 157 | 1532 | 1688 |
| TTTACACCACAAAGTTGCCG    | 59.627 | 20 | 135 | 839  | 973  |
| AAAGTCCCTTCTCATTGGGC    | 60.443 | 20 | 143 | 25   | 167  |
| TGGTGTGTTGGACTTTACGG    | 59.46  | 20 | 211 | 22   | 232  |
| CAAACCTCAACAACCCGTGAA   | 59.585 | 20 | 227 | 94   | 320  |
| CGCGTGACAAATTCTTGAAA    | 59.849 | 20 | 217 | 212  | 428  |
| GAGAAGCCAGGCAGCATAAG    | 60.118 | 20 | 215 | 47   | 261  |
| CCAAGATCAATGGTTCCTAAGT  | 59.879 | 23 | 109 | 446  | 554  |
| TTGCAAATTACCAAGGGATT    | 57.108 | 20 | 124 | 162  | 285  |
| ACTGAAGCTCGAACCCCTCT    | 60.393 | 20 | 246 | 240  | 485  |
| GTGGCAGGAAGCATTCACTT    | 60.263 | 20 | 272 | 1157 | 1428 |
| ATGGGGAGGGGATATGGTAA    | 60.224 | 20 | 131 | 238  | 368  |
| CCAATCTCTTTCATCACTCTCG  | 59.765 | 23 | 169 | 68   | 236  |
| TGGTTGCATACTTGCACACAT   | 60.05  | 21 | 203 | 8    | 210  |
| TGTTGCTATCCTTGTTCCC     | 59.933 | 20 | 100 | 2913 | 3012 |
| TGTGCACTCGATGATGTTTG    | 59.248 | 20 | 236 | 2656 | 2891 |
| CAACTCCCTACCGAAAGTCG    | 59.728 | 20 | 228 | 481  | 708  |
| ACAAGCTCTTCATCGTTGG     | 60.255 | 20 | 265 | 334  | 598  |
| CTGATGCATGTGGTAGGAGC    | 59.271 | 20 | 221 | 4027 | 4247 |
| CCATACAAAAGCGCCAACT     | 60.131 | 20 | 122 | 2033 | 2154 |
| TTGTAGCTCCTCCTAATTTCTC  | 58.129 | 23 | 178 | 416  | 593  |
| AACCCAACATCATCCCTCAC    | 59.636 | 20 | 176 | 150  | 325  |
| AGAGTTCGAGGTGGGCTTTT    | 60.247 | 20 | 280 | 19   | 298  |
| AGCAGTTTTGATTGCTCCGT    | 59.882 | 20 | 150 | 2853 | 3002 |
| TACCTTACCTGTCTGCCGT     | 59.615 | 20 | 245 | 186  | 430  |
| CAAACCACGATCAAAATCCC    | 60.17  | 20 | 212 | 445  | 656  |
| AGGCGGTATGCACTCAAAGT    | 59.763 | 20 | 219 | 782  | 1000 |
| TTGGGTTTTGATGATTGCTTT   | 59.442 | 21 | 265 | 1016 | 1280 |
| CGTGCGCTTACGGATAAAAT    | 60.116 | 20 | 227 | 3223 | 3449 |
| TGTGGCCTTTTGTCACTTCA    | 60.278 | 20 | 243 | 168  | 410  |
| TGGGAGGACAAAGGAATCAA    | 60.43  | 20 | 212 | 368  | 579  |
| AAGGTTGGGGTAAGCTGGAG    | 60.488 | 20 | 263 | 832  | 1094 |
| ATACCAAGGACCCTCCCAAC    | 60.052 | 20 | 245 | 66   | 310  |
| GGACGTCCAAAACGGAAT      | 61.08  | 20 | 205 | 481  | 685  |
| TGTAAGCAATGACGAAGCCA    | 60.401 | 20 | 197 | 76   | 272  |
| CAAGTCAAATTGGATGGTGCT   | 59.985 | 21 | 227 | 347  | 573  |
| AGCTGCTGCGAGATTGAAGT    | 60.307 | 20 | 233 | 200  | 432  |
| GGTGCGGGATCAATAGGTTA    | 59.784 | 20 | 209 | 4264 | 4472 |
| AGGTGGGAGTGGAACACAC     | 59.859 | 20 | 155 | 642  | 796  |
| GTTGCTGTTCTGACCCGACT    | 60.307 | 20 | 102 | 503  | 604  |
| CGGCATGATGCAGTAAGAGA    | 59.972 | 20 | 103 | 3408 | 3510 |

|                        |        |    |     |      |      |
|------------------------|--------|----|-----|------|------|
| AATCCTGCCTTGTTCTCCT    | 60.074 | 20 | 234 | 61   | 294  |
| ATCGCTGACTTGTGGATTGA   | 59.245 | 20 | 205 | 619  | 823  |
| AAGGAGAGGAAGGGCTTTGT   | 59.323 | 20 | 276 | 947  | 1222 |
| CTGCCTCAACTTTGTGTGCT   | 59.086 | 20 | 265 | 1320 | 1584 |
| TTGACATGTGGCATTGTGTG   | 60.003 | 20 | 154 | 1949 | 2102 |
| CATCACCGGCCTACAAAAAT   | 59.823 | 20 | 210 | 2179 | 2388 |
| ACTCCCAATTCTGAAACGGA   | 59.526 | 20 | 225 | 225  | 449  |
| CCGGCTCCACATGTATTTTA   | 58.506 | 20 | 260 | 582  | 841  |
| TTCACGACTCGCTGTTATGG   | 59.864 | 20 | 191 | 397  | 587  |
| CACCATGGTTTCCAATGCTA   | 59.395 | 20 | 275 | 6    | 280  |
| ACCGTGATGGAACAACCTTC   | 59.827 | 20 | 134 | 76   | 209  |
| TTCACAAGCTCACAAAACGTA  | 59.326 | 23 | 242 | 483  | 724  |
| CCTAGCAAGGCTTCCATCTG   | 59.971 | 20 | 207 | 116  | 322  |
| AAGGTGAAAGAGACATCAACC  | 60.026 | 23 | 103 | 541  | 643  |
| TTCCGCAACTTGACAATGA    | 60.234 | 20 | 264 | 246  | 509  |
| CATTATCTCAAACGAGCGGC   | 60.742 | 20 | 249 | 163  | 411  |
| AAAGGGCAATGACCTATGA    | 59.387 | 20 | 151 | 210  | 360  |
| CGAACAAGAGTCTTCCGAGG   | 59.982 | 20 | 149 | 582  | 730  |
| TCACCTTGATTGGTGATGGA   | 59.893 | 20 | 222 | 2437 | 2658 |
| TCATCCACCTCGAAGACCTC   | 60.199 | 20 | 159 | 617  | 775  |
| ATTACAGGGATGGGTGGGTT   | 60.306 | 20 | 255 | 161  | 415  |
| TCCTAGGCGCTATTGAGGTG   | 60.365 | 20 | 192 | 176  | 367  |
| CACATAAGCGAAAACGCAA    | 59.88  | 20 | 250 | 3681 | 3930 |
| TTAGTTTCATGAATGGAAGTGA | 57.035 | 25 | 100 | 5    | 104  |
| TGATTCTCGACCAACCATGA   | 60.048 | 20 | 227 | 206  | 432  |
| GCATTGACGCAAGGACATATT  | 59.981 | 21 | 187 | 623  | 809  |
| TGTTGACGAACGAGACAAGG   | 59.873 | 20 | 197 | 91   | 287  |
| TTGACAAATCATTGCAACA    | 58.676 | 20 | 210 | 1310 | 1519 |
| CGAGCACAAGTTCTCCACAA   | 60.025 | 20 | 134 | 2553 | 2686 |
| AAGGCAGCATGCTTGAAACT   | 60.022 | 20 | 250 | 2013 | 2262 |
| GAGAAATGGAGTCGAACCGAA  | 60.195 | 20 | 221 | 225  | 445  |
| TTTGTGGGTGAGTTTGCCT    | 59.187 | 20 | 140 | 27   | 166  |
| TGGACCATTTGTGCACTTGT   | 60.008 | 20 | 275 | 1636 | 1910 |
| ATGCTGACGAAAATTCAGGG   | 60.074 | 20 | 208 | 387  | 594  |
| TTTGTGATTCAGGGTTCCG    | 59.481 | 19 | 279 | 221  | 499  |
| TTGGGGATGAGATGGGAATA   | 60.088 | 20 | 238 | 6614 | 6851 |
| ATGGCCCAGATTTGTTTTGA   | 60.309 | 20 | 144 | 30   | 173  |
| TCGAGAAAAGACAAAGAAGGC  | 60.345 | 22 | 104 | 1325 | 1428 |
| TGTGCATGAAGTGAAAGGGA   | 60.24  | 20 | 263 | 9    | 271  |
| CGTAGTTTAATTTTGCCGGG   | 59.489 | 20 | 203 | 877  | 1079 |
| CTTGCGAGCAACTTGTCAAA   | 60.172 | 20 | 225 | 279  | 503  |
| TGGAGTCCATGAGCATCAGA   | 60.363 | 20 | 267 | 36   | 302  |
| CACTCATGCTTGACCGAAAA   | 59.84  | 20 | 145 | 1424 | 1568 |
| TGGGAATGTTGAGAAGGAA    | 60.43  | 20 | 269 | 965  | 1233 |
| GGCATCAAAATTGGTAACGG   | 60.188 | 20 | 180 | 560  | 739  |
| AAGAGAGGACACCTCCGGTT   | 60.111 | 20 | 162 | 196  | 357  |
| GAGTTGCATGATGGCATGAG   | 60.233 | 20 | 255 | 113  | 367  |
| TTAGGGATTAAGCGGCAG     | 59.341 | 20 | 217 | 90   | 306  |
| GTTTGCCACATGGCATCATA   | 60.352 | 20 | 204 | 535  | 738  |
| CCCTCCACCGCCTTAATAAT   | 60.164 | 20 | 237 | 1129 | 1365 |
| CACGCATTTGTGATTTTGC    | 60.118 | 20 | 216 | 1    | 216  |
| CCTGACGAAGGAAGGTTCTG   | 59.837 | 20 | 116 | 262  | 377  |
| GACACAGTTCACCCCATTT    | 59.679 | 20 | 226 | 198  | 423  |
| AATTTTGAGGTGTGGCTGGT   | 59.454 | 20 | 242 | 214  | 455  |
| AATAGTCTGCAAACCACGCC   | 60.14  | 20 | 260 | 567  | 826  |
| GCCAGCAATAATCTCAGTGG   | 58.326 | 20 | 258 | 706  | 963  |
| ATAGAAAGGCGAGGCTTTGG   | 60.702 | 20 | 228 | 1    | 228  |
| TGCATGGCAAAGCTTCAATA   | 60.356 | 20 | 232 | 1033 | 1264 |

|                         |        |    |     |      |      |
|-------------------------|--------|----|-----|------|------|
| AGCCGATAAAAATGGCACAC    | 59.967 | 20 | 229 | 691  | 919  |
| AGGGTTTTGGAGATGAGGGT    | 59.795 | 20 | 261 | 335  | 595  |
| TGACAAGATGATGAAGGCCA    | 60.201 | 20 | 267 | 350  | 616  |
| CAGAAATGGTGGCAACAAAGA   | 59.691 | 20 | 241 | 478  | 718  |
| TCGGAGACGAGAGAGGAGAG    | 59.81  | 20 | 157 | 607  | 763  |
| TTTAAAACTTGTTGGCGG      | 59.972 | 20 | 197 | 458  | 654  |
| TCCATCTCCCTCACTTCACC    | 60.048 | 20 | 146 | 786  | 931  |
| CGGGGTCGTATCATATTTGG    | 60.031 | 20 | 115 | 475  | 589  |
| AATTTGATTGATGGTTTCGGA   | 59.264 | 21 | 221 | 14   | 234  |
| GTACCAGCAGAAGACTGGGG    | 59.721 | 20 | 238 | 1407 | 1644 |
| CGAATTCGAGCATCAGTGAG    | 59.547 | 20 | 177 | 934  | 1110 |
| CTTCGACTCCCTTGTGGAGA    | 60.377 | 20 | 278 | 251  | 528  |
| CAATCCTTTTTGTATTCAAACCT | 57.468 | 24 | 205 | 513  | 717  |
| AAATGACATGTGTCCGTCCA    | 59.812 | 20 | 175 | 3    | 177  |
| GTTTGGAGCCTGGAATCTGA    | 60.195 | 20 | 151 | 2397 | 2547 |
| TTTTTGACTTTTTATGGGGGT   | 57.539 | 21 | 258 | 204  | 461  |
| AATAAGGGGGTGCATGTGAG    | 59.813 | 20 | 119 | 281  | 399  |
| CCGATGTCCAGAGGAACAAC    | 60.51  | 20 | 171 | 146  | 316  |
| TTTGTGTCGCAAGGTGAGAG    | 60.025 | 20 | 235 | 2695 | 2929 |
| TTTCTTACCCAAATTTAATCG   | 58.176 | 22 | 275 | 487  | 761  |
| CGAAGAAGGTGTTGGTGGAC    | 60.545 | 20 | 262 | 197  | 458  |
| TGACAATATTTAGTGTTTTGAC  | 57.78  | 26 | 172 | 543  | 714  |
| ACGCGTAACTAACCGGGAT     | 60.741 | 20 | 263 | 1132 | 1394 |
| TGGGGAGATGTCAGTTGTGA    | 60.088 | 20 | 253 | 742  | 994  |
| AAGGCATGTTTCGAGTTTGG    | 60.11  | 20 | 235 | 313  | 547  |
| CGGTTAGAGCCAACCTCTCA    | 60.388 | 20 | 234 | 490  | 723  |
| TCCCATCCTTCAAAGTCTGC    | 60.195 | 20 | 232 | 2190 | 2421 |
| GGTTTCGTCATAAGGCGGTA    | 59.96  | 20 | 264 | 538  | 801  |
| TCTTCATCCCCACCCCTAAC    | 61.076 | 20 | 269 | 1652 | 1920 |
| AAACCCCTCTTAAGTCCTGA    | 59.088 | 21 | 263 | 283  | 545  |
| GCATGTTCTGTGTTGCCCTA    | 59.722 | 20 | 275 | 960  | 1234 |
| AACATTAGAAAACGCGCCAT    | 59.614 | 20 | 245 | 29   | 273  |
| ATTCATCCGCAACGAAAGAG    | 60.214 | 20 | 270 | 2942 | 3211 |
| TGCTCACTCATCCTCCAGTG    | 59.98  | 20 | 138 | 780  | 917  |
| ATTATCCAGTTTGGATTTTGTT  | 57.292 | 24 | 178 | 1853 | 2030 |
| GTGTACCCTGAGGGACGGTA    | 59.844 | 20 | 150 | 89   | 238  |
| TAATAGCGGCCGATCTGAAG    | 60.323 | 20 | 245 | 419  | 663  |
| TAATGCTTTTCCGTGGGTTT    | 59.938 | 20 | 191 | 2089 | 2279 |
| GTTTCATGGTTGTGCGAATTG   | 59.972 | 20 | 206 | 407  | 612  |
| ACCAGGAAAGCCAAAGTCCT    | 60.11  | 20 | 244 | 1859 | 2102 |
| TATAACCCAGACCGGACCAA    | 60.184 | 20 | 184 | 29   | 212  |
| TCATTCAACGGTATTGTCATGT  | 59.261 | 23 | 189 | 629  | 817  |
| CCAATTTGAATGGTTATCACCT  | 60.457 | 23 | 103 | 627  | 729  |
| CAGCTCATCGTGGATGCTAA    | 59.972 | 20 | 171 | 1186 | 1356 |
| ACCATAAGGCGCACAAAAAC    | 60.003 | 20 | 260 | 1074 | 1333 |
| GAGACAGGGGTTCGAATCAG    | 59.655 | 20 | 246 | 10   | 255  |
| CAATCTAATGCATCCAACGC    | 59.14  | 20 | 151 | 38   | 188  |
| TTTAACTAACTCCGGCCAC     | 59.087 | 20 | 174 | 739  | 912  |
| GTTTGGACAGATTGCCTGGT    | 59.973 | 20 | 237 | 1040 | 1276 |
| GGCATCAGGAGGATCAAGAA    | 60.158 | 20 | 252 | 2279 | 2530 |
| ACCAATGGTGGTATGGTGTG    | 58.984 | 20 | 176 | 137  | 312  |
| ACTCTTGGAGCGACTCCTCA    | 60.135 | 20 | 247 | 929  | 1175 |
| GTTTGCTGACGCAGGGTATT    | 60.14  | 20 | 212 | 499  | 710  |
| GGACAGTCATATTTGGGCTGA   | 59.947 | 21 | 152 | 2533 | 2684 |
| GGCACACATTATGGTTTGGGA   | 59.251 | 20 | 179 | 235  | 413  |
| CCACATCGGTGAAGGTAACA    | 59.415 | 20 | 147 | 263  | 409  |
| AATGGGGATTACACCTCAC     | 59.636 | 20 | 169 | 443  | 611  |
| ATGGATCGTCAACCACAGAA    | 58.933 | 20 | 193 | 1937 | 2129 |

|                         |        |    |     |      |      |
|-------------------------|--------|----|-----|------|------|
| TGAGTCAGCACTGTGGTTCC    | 59.872 | 20 | 264 | 300  | 563  |
| TTCCCTTACTTCTTCCCCC     | 59.393 | 20 | 113 | 647  | 759  |
| TACCTCCTCTGGGGACAAGA    | 59.649 | 20 | 231 | 1078 | 1308 |
| AGCAGCTCGATGGAGGTAGA    | 60.119 | 20 | 249 | 2150 | 2398 |
| GGGATAGTATCGGATCGCAA    | 59.885 | 20 | 128 | 70   | 197  |
| GAATGGGAATCGAGATGGAA    | 59.831 | 20 | 133 | 14   | 146  |
| TGCCACATTTTTCTGATTG     | 59.518 | 20 | 182 | 742  | 923  |
| TTCCTGCTATCATCAACCCC    | 59.894 | 20 | 204 | 429  | 632  |
| TGGGACGCTCTATTCTGGTT    | 59.694 | 20 | 106 | 258  | 363  |
| TCCGTCAACCAAACGTATTC    | 58.476 | 20 | 277 | 720  | 996  |
| CTTCCATCTTCCAACCTTCGC   | 59.813 | 20 | 213 | 95   | 307  |
| CCAAGCCAACCAAAGCTTAC    | 59.747 | 20 | 249 | 602  | 850  |
| TGCTCATGAAATATCGTTGGT   | 58.106 | 21 | 223 | 267  | 489  |
| TGTCGGAAATTTCTATGCCTG   | 60.081 | 21 | 249 | 1120 | 1368 |
| TTTAAATGGACGTAAATGGATT  | 58.012 | 23 | 125 | 15   | 139  |
| GAGCGCTGGAAGCTATTGAT    | 59.579 | 20 | 238 | 30   | 267  |
| TCGTTCTGGGCTATGATTT     | 59.528 | 20 | 183 | 2968 | 3150 |
| GGAGAGGAGAGTGGGACCTC    | 60.198 | 20 | 274 | 265  | 538  |
| GATGGAAACAAGTGGATAGTT,  | 59.799 | 25 | 116 | 863  | 978  |
| CGCAATTATATTAACCTTTCGCT | 60.375 | 24 | 264 | 1482 | 1745 |
| CCACGTGGAATTATGGGAGT    | 59.67  | 20 | 171 | 1714 | 1884 |
| AGAGACTGTTGAAGCTCGGC    | 59.751 | 20 | 245 | 28   | 272  |
| TCCTAGTGTCTTGTCTCCCACA  | 59.762 | 22 | 233 | 967  | 1199 |
| AATCGGCAAAAACCACAAAC    | 59.845 | 20 | 220 | 741  | 960  |
| AAACACCAACGTTTTTCAGGG   | 59.869 | 20 | 187 | 204  | 390  |
| CTACGCCGTTCTTTCGTGATT   | 60.27  | 20 | 243 | 1692 | 1934 |
| GTTCTGCTTTGTGGTGGAT     | 59.973 | 20 | 278 | 965  | 1242 |
| GTCCCAACTGAAGTTCCTCAA   | 59.943 | 20 | 244 | 205  | 448  |
| TCCACAATGGAAAATGCAA     | 59.907 | 20 | 210 | 2755 | 2964 |
| GATGCTGGTGATCAAGTGGGA   | 59.637 | 20 | 256 | 367  | 622  |
| CTGGAGCGGTAATCACAAGG    | 60.647 | 20 | 125 | 588  | 712  |
| ACCCGAGACAAAAACCACAG    | 60.005 | 20 | 172 | 1    | 172  |
| GTGAGGGAATGCTCTCCAAG    | 59.803 | 20 | 277 | 86   | 362  |
| GATCCAGAGTTGGACTTCG     | 59.655 | 20 | 225 | 2806 | 3030 |
| ATACCTTTCTTTTTCCCGCC    | 59.442 | 20 | 130 | 2283 | 2412 |
| AGACCAGAACCTAATCTTGGG,  | 59.101 | 22 | 271 | 536  | 806  |
| AAAAATCAAAGGCCCAAT      | 58.418 | 20 | 265 | 590  | 854  |
| TGTACAAGCTGCTGGAAACG    | 60.05  | 20 | 256 | 2625 | 2880 |
| TACTCAATCAGCTCCAGCCC    | 60.362 | 20 | 206 | 1988 | 2193 |
| CCCCTCATGTTGGTGGTAAT    | 59.526 | 20 | 268 | 258  | 525  |
| AACATCATCGAGGTCGGTTC    | 59.934 | 20 | 194 | 917  | 1110 |
| GAGACCAATTTTGCTATGTAAT  | 57.142 | 25 | 226 | 234  | 459  |
| GAAATAAGGATGTGTTATGAA   | 59.894 | 26 | 149 | 508  | 656  |
| AAAGAAAGCTTCAAGCAGCG    | 59.904 | 20 | 194 | 63   | 256  |
| CCAAGCCTGGAGACCTAAGA    | 59.425 | 20 | 221 | 19   | 239  |
| TGAGAATGGTGGGTGTGAAA    | 59.935 | 20 | 233 | 620  | 852  |
| AATGCAAACCAGTGAAAGGG    | 59.971 | 20 | 244 | 1080 | 1323 |
| CAGATTCTGGCACTGAGCAA    | 60.136 | 20 | 138 | 5493 | 5630 |
| CGACCTAGATCTGACCGGAA    | 60.21  | 20 | 223 | 237  | 459  |
| AATCTTGGGTCCAAACCTC     | 60.169 | 20 | 179 | 299  | 477  |
| ACCAGGTCTCCTGGGTTAAA    | 58.498 | 20 | 269 | 155  | 423  |
| CGTCCATGCTCTGTTCTTCA    | 59.984 | 20 | 137 | 884  | 1020 |
| AATTCAGCCTCCATTTACCTCA  | 59.966 | 22 | 257 | 2688 | 2944 |
| ATCGAGATGCTCTGATGCAAT   | 59.818 | 21 | 277 | 20   | 296  |
| TGTTTTCCACGAAAATTGAGC   | 60.103 | 21 | 267 | 931  | 1197 |
| AGGGGAACGAAAATCTCTCC    | 59.513 | 20 | 171 | 2839 | 3009 |
| GTGGGTGATCAGGAAAATCA    | 59.782 | 21 | 172 | 60   | 231  |
| TGCGAGTGTTGCATCTGAAT    | 60.423 | 20 | 235 | 315  | 549  |

|                         |        |    |     |      |      |
|-------------------------|--------|----|-----|------|------|
| CGAAGAACCTGGTTTGATCTG   | 59.72  | 21 | 274 | 866  | 1139 |
| GGAGGACACCATTTCTCTGC    | 59.661 | 20 | 177 | 7752 | 7928 |
| TTGAAGGGACCAAATGTGAA    | 58.947 | 20 | 275 | 672  | 946  |
| TGAAGTTAGGAAATAAGGAGG   | 57.525 | 24 | 276 | 558  | 833  |
| ACACAAGTATGACCAGGGGC    | 59.851 | 20 | 184 | 17   | 200  |
| AGAAAGTATCAGGCGCATCTT   | 58.111 | 21 | 186 | 26   | 211  |
| CCGAAGGCAACACCACTACT    | 60.171 | 20 | 112 | 2161 | 2272 |
| TGTTGAACGTGTACGTTGGG    | 60.463 | 20 | 227 | 591  | 817  |
| AAAGCACGTGTGAATATTGGG   | 59.875 | 21 | 257 | 299  | 555  |
| CAAGCTTATTCCTGCCCAGA    | 60.344 | 20 | 252 | 660  | 911  |
| TGCATGAGAATTATTGAGGGG   | 59.908 | 21 | 197 | 1600 | 1796 |
| TTAGTGGCTGGAACCGAAGT    | 59.734 | 20 | 219 | 517  | 735  |
| TGGCTCAAAAAGTTTCATATTT  | 57.534 | 23 | 119 | 1980 | 2098 |
| GTTTGCCATGGAGATTTTCGT   | 59.939 | 20 | 231 | 11   | 241  |
| TTGGGTTAATCCGTGTAATCG   | 59.707 | 21 | 232 | 359  | 590  |
| AAGGAGGAGGTGAAGAAGCC    | 59.817 | 20 | 271 | 17   | 287  |
| AATTGGAGAGTTGGGTACAAG   | 59.526 | 22 | 137 | 176  | 312  |
| TGCATGCCGCATACTATTAC    | 57.321 | 20 | 241 | 1620 | 1860 |
| TTTCCTCTTCCGATTTTTGGT   | 59.932 | 21 | 253 | 918  | 1170 |
| TGATGTATGTGCGATGGGAT    | 59.763 | 20 | 180 | 825  | 1004 |
| CCCCAATTTGTTTTACTCG     | 59.311 | 20 | 205 | 1399 | 1603 |
| CCTAATAAAATGGCCATGCG    | 60.295 | 20 | 224 | 1546 | 1769 |
| CTGCAGCTTTTTGTCAATGG    | 59.464 | 20 | 226 | 252  | 477  |
| GAGGGACGAAGCTTTTAGGC    | 60.34  | 20 | 274 | 213  | 486  |
| ACCGCTGACAAACATCATCA    | 60.12  | 20 | 231 | 5360 | 5590 |
| CTCGATCAAGACCCTATCGC    | 59.797 | 20 | 185 | 1071 | 1255 |
| CCTCGGATTAAGCTAGGGC     | 60.184 | 20 | 278 | 1051 | 1328 |
| GAAACGAATCTGTCGGTGGT    | 59.973 | 20 | 266 | 2695 | 2960 |
| CAAACAAAAGGGCCTTCTCA    | 60.22  | 20 | 230 | 968  | 1197 |
| AGCTGGTAGGTTTTGGAGGG    | 60.488 | 20 | 274 | 668  | 941  |
| CACTCGAACCAGTCAAACGA    | 59.873 | 20 | 154 | 806  | 959  |
| GACCACAACCAACCACATGA    | 60.27  | 20 | 161 | 827  | 987  |
| CTCACGCGAGGTCTTTCTTC    | 60.134 | 20 | 155 | 32   | 186  |
| AAATAGATCTTTTGTAAGCCC   | 58.02  | 23 | 165 | 2917 | 3081 |
| ACAAATTTGCAGATGGAGGG    | 59.933 | 20 | 199 | 40   | 238  |
| GGATGAGGAAGAAAGGGAGG    | 60.008 | 20 | 237 | 1027 | 1263 |
| ACGGTTGACAGCCGATTTTA    | 60.502 | 20 | 177 | 442  | 618  |
| GAGAGAGGGAGGGAGAGAGG    | 59.489 | 20 | 258 | 149  | 406  |
| GTCTCAACCCTTGATTGCGT    | 60.119 | 20 | 179 | 660  | 838  |
| CTCCCTCAAATCGTTGCTA     | 60.206 | 20 | 104 | 631  | 734  |
| TGATAGGGCACACAACCCTT    | 60.375 | 20 | 280 | 520  | 799  |
| TCCTTCCGTTTAAGTAATATGT  | 58.288 | 25 | 236 | 99   | 334  |
| TCGTCTTTTCGACATTCTCC    | 60.195 | 20 | 167 | 2051 | 2217 |
| GACTCCCATTCCCAAGCTCT    | 60.596 | 20 | 280 | 2373 | 2652 |
| TTCAAGTAAAATTTCCCGTTTCG | 60.329 | 22 | 242 | 634  | 875  |
| GTGCCTTCTTCTAACTGGCG    | 60.015 | 20 | 221 | 501  | 721  |
| CCTAGGGTTTCCCTCAGCTC    | 60.204 | 20 | 189 | 272  | 460  |
| TCATGTTGCTTGATGCACT     | 60.272 | 20 | 187 | 425  | 611  |
| TCCAAGTTGCCTTTCAACCT    | 59.711 | 20 | 185 | 611  | 795  |
| AATTTGCATTGGGTTTCGAG    | 59.938 | 20 | 132 | 255  | 386  |
| CTTCGAAGCGATGGAGTAGG    | 59.971 | 20 | 102 | 19   | 120  |
| GTCTCCATGCTTGAGCCAAT    | 60.226 | 20 | 261 | 447  | 707  |
| GATAATTAAGTCATAGAGCAG   | 60.655 | 25 | 102 | 24   | 125  |
| TCACGATAAGCCAACATGTGA   | 60.127 | 21 | 239 | 587  | 825  |
| AGGTGGAACAAGTAACGCAA    | 58.283 | 20 | 216 | 440  | 655  |
| TGAACCGGGTCTCTCGTAAC    | 60.111 | 20 | 105 | 2715 | 2819 |
| TGGAAATTAACCACAGCCCT    | 59.429 | 20 | 260 | 440  | 699  |
| TCGGTTGACCGAAAATAGGT    | 59.429 | 20 | 230 | 55   | 284  |

|                        |        |    |     |      |      |
|------------------------|--------|----|-----|------|------|
| TGGATGTTTCATTTTGCCTG   | 59.518 | 20 | 250 | 559  | 808  |
| GATCCTCCATTTCCACAAC    | 59.192 | 20 | 232 | 293  | 524  |
| GGCACATCGTGTGAATCAAG   | 60.12  | 20 | 163 | 241  | 403  |
| CGGACGTAAACGAAGGAAA    | 60.103 | 20 | 262 | 305  | 566  |
| TGTTGTAGTATGGCAAGATCCA | 59.167 | 23 | 198 | 383  | 580  |
| CCAAGGCGAGCTCTAAGTTT   | 58.743 | 20 | 200 | 139  | 338  |
| CAGTGTA AACCTTATTGGGGC | 59.641 | 22 | 268 | 123  | 390  |
| CAATGCTCTTTTCAACCCTTTT | 59.646 | 22 | 208 | 403  | 610  |
| TGGAAATCGCGAAATGTAAG   | 59.146 | 20 | 173 | 805  | 977  |
| GAGTAGCCATCGAGATTCGG   | 59.797 | 20 | 264 | 337  | 600  |
| TCCTGAAGAATTTTCGGCATC  | 60.155 | 20 | 161 | 339  | 499  |
| CCCCTAATCCGAACACAAAA   | 59.795 | 20 | 132 | 804  | 935  |
| ATTCCCTCCCCAAATATCCC   | 61.054 | 20 | 280 | 2457 | 2736 |
| TTCAATAGAGGCAGCGGATT   | 59.807 | 20 | 215 | 797  | 1011 |
| TCGAAGATGAAAAAGGGCAT   | 59.645 | 20 | 150 | 247  | 396  |
| GATCTAACGGCCGAGATTTG   | 59.668 | 20 | 260 | 577  | 836  |
| CGATTTCTACACCATTGTTCCA | 59.861 | 22 | 212 | 2362 | 2573 |
| GTTCCGGTGTGCAAAAATTC   | 60.352 | 20 | 278 | 358  | 635  |
| CGATGATGAGCATCAGAGGA   | 59.9   | 20 | 172 | 3    | 174  |
| CTCTTCCCTGCAGATGATGG   | 60.758 | 20 | 259 | 1463 | 1721 |
| ATGACTTCCAGTGCCAGGAC   | 60.12  | 20 | 238 | 831  | 1068 |
| GCTCCAAAATGATTACGTGGT  | 58.965 | 21 | 279 | 575  | 853  |
| CCCGACAATTTACCCATAC    | 60.051 | 20 | 236 | 237  | 472  |
| GTTTGTTCAATAGGCCCCAA   | 59.801 | 20 | 141 | 8    | 148  |
| TGACAGTACACTGCTCCTGG   | 57.367 | 20 | 238 | 309  | 546  |
| TTGACACGAATATGACACAAA  | 59.003 | 23 | 152 | 315  | 466  |
| CTGCATCACCTTGCTTCTCA   | 60.136 | 20 | 266 | 644  | 909  |
| ATGGCATCATCTCAACCCTT   | 59.366 | 20 | 248 | 902  | 1149 |
| AATGCTTCGGACTTGCTCAT   | 59.843 | 20 | 274 | 713  | 986  |
| AAATCCTCAATGCAAAAGCAA  | 59.712 | 21 | 189 | 327  | 515  |
| AAGACCCTTGAGTGGTGG     | 60.002 | 20 | 216 | 23   | 238  |
| GGCGGTTGAGATTTGTTCTT   | 59.174 | 20 | 216 | 1491 | 1706 |
| TTGTTGTGATGTGAAGAATTGT | 57.312 | 24 | 178 | 282  | 459  |
| AAAATCAAAGGCCCAACAATG  | 59.801 | 20 | 119 | 1264 | 1382 |
| CAACCAAACCAACCATCAAA   | 59.268 | 20 | 234 | 1730 | 1963 |
| CTCGATTTGGGTTTCTTCA    | 60.044 | 20 | 264 | 1245 | 1508 |
| ACGAATCATTGATCGGCTTT   | 59.533 | 20 | 225 | 493  | 717  |
| AAAACCGATGCAATTATGCC   | 59.801 | 20 | 279 | 102  | 380  |
| ACCGTTTGCAACAATTGAGA   | 59.174 | 20 | 247 | 1465 | 1711 |
| TCAACATGTCGGCATGATAAA  | 60.217 | 22 | 247 | 286  | 532  |
| GCATCGTTTATCCGATTGCT   | 60.067 | 20 | 250 | 14   | 263  |
| TGTA AAATCAATGCACCGGA  | 59.93  | 20 | 276 | 449  | 724  |
| CGTGTGCGTGAGAGAGAAAG   | 59.77  | 20 | 123 | 36   | 158  |
| CGCTGGTTTTGGAGATCAAT   | 60.074 | 20 | 122 | 561  | 682  |
| TATAAACGCTCGTCTGCTGC   | 59.234 | 20 | 200 | 48   | 247  |
| CAAGGGTAAGGGAGGTGACA   | 59.959 | 20 | 152 | 808  | 959  |
| ACCGATCTCACCCCTTTTCT   | 59.935 | 20 | 234 | 485  | 718  |
| CAAACGGGAGGAAAATTGAA   | 59.91  | 20 | 151 | 679  | 829  |
| AATCACGGATTTGGAGGACA   | 60.317 | 20 | 135 | 2110 | 2244 |
| CCTTCATTGGGCAGTTTTGT   | 59.971 | 20 | 214 | 298  | 511  |
| TGCTTTGGGTTCAAATGGTT   | 60.344 | 20 | 270 | 16   | 285  |
| CACTTCAACTCCCCACAA     | 59.565 | 20 | 266 | 2815 | 3080 |
| ATCGGTTATTACCGGATCGC   | 61.031 | 20 | 274 | 484  | 757  |
| TGGTTATCACCTGATCTTCTCC | 58.121 | 22 | 243 | 450  | 692  |
| TCGAGTTAGCGTGTGCTGTC   | 60.056 | 20 | 122 | 307  | 428  |
| GTGGAGGGGGAGTATGGATT   | 60.015 | 20 | 265 | 140  | 404  |
| CAAATGACAGAATCGCGGTA   | 59.688 | 20 | 278 | 63   | 340  |
| CAGTCAAAGGAGGAAGACGG   | 59.837 | 20 | 268 | 573  | 840  |

|                         |        |    |     |      |      |
|-------------------------|--------|----|-----|------|------|
| CAACCCTGAATGCCATTTTT    | 59.801 | 20 | 162 | 690  | 851  |
| GAAATGTTACACACGTCGG     | 60.008 | 20 | 145 | 338  | 482  |
| ATTGGCAATTAACCGTCAGC    | 59.967 | 20 | 244 | 274  | 517  |
| TATAGTTTCTGCCAGCCGT     | 59.73  | 20 | 257 | 1637 | 1893 |
| CTTCTCCTTGGGCAACTCAC    | 59.844 | 20 | 267 | 42   | 308  |
| TTCCGGCAAAAACCAATTA     | 60.287 | 20 | 241 | 2671 | 2911 |
| GTGGAGGGTTTTTGTCTCCA    | 59.943 | 20 | 275 | 3390 | 3664 |
| GTCTCCAACCTTGCAACCAT    | 59.973 | 20 | 124 | 971  | 1094 |
| TGCTGCTCTTTTCTGGGTTT    | 59.993 | 20 | 110 | 100  | 209  |
| AGCTTCAACGGTATCCAGTAA   | 60.069 | 23 | 126 | 1000 | 1125 |
| TTTGATATGATGCCAACGTCA   | 59.945 | 21 | 252 | 3625 | 3876 |
| TTGGCACGAAATTAGTTGTTTG  | 60.034 | 22 | 216 | 219  | 434  |
| TCCCCCTCTCTCCTTCTC      | 59.883 | 20 | 131 | 6    | 136  |
| TGTTGCAGCTCTTGCTCTTG    | 60.472 | 20 | 280 | 136  | 415  |
| AGCACACTCGAAAGGCAATC    | 60.406 | 20 | 168 | 276  | 443  |
| GGCCGTTTTAAAATCGAGTG    | 59.586 | 20 | 246 | 663  | 908  |
| AATGCATGCACCTGATTACAA   | 59.055 | 21 | 171 | 910  | 1080 |
| AGCTGTTATGCGTTTTGATGA   | 58.452 | 21 | 237 | 1700 | 1936 |
| GGTTTAACTTTTCAAATGGAAC  | 58.903 | 26 | 275 | 145  | 419  |
| GAGAGCTGCTGCCGTTTACT    | 59.786 | 20 | 155 | 271  | 425  |
| ATCACCTCATCACCGCCTAC    | 59.957 | 20 | 113 | 300  | 412  |
| AAATGAAACACCCCCAAACA    | 60.066 | 20 | 210 | 3583 | 3792 |
| ATCCGGAAGGTCCAAAACCT    | 59.805 | 20 | 180 | 605  | 784  |
| TCCAACACAAAACCTCTAAATTT | 59.821 | 25 | 233 | 532  | 764  |
| ACGTCGAGAGATGCAACGTA    | 59.47  | 20 | 107 | 8    | 114  |
| CCTCACGTGATATTTTTAGCAC  | 59.197 | 23 | 187 | 915  | 1101 |
| CGACGTTGCAAGAAAAGGTT    | 60.284 | 20 | 195 | 316  | 510  |
| TGCAATGTACAGCAGAAGTGG   | 59.92  | 21 | 260 | 466  | 725  |
| CCTTTCTCTCTTCCCCGT      | 59.811 | 20 | 133 | 60   | 192  |
| CCAATTTGAATGGTTATCACCT  | 60.457 | 23 | 129 | 808  | 936  |
| ATCCCCTTCTTTTCCCCGTA    | 59.897 | 20 | 172 | 1216 | 1387 |
| GCAACACATTGTGAAGCCAT    | 59.577 | 20 | 231 | 254  | 484  |
| TCCCCTTTTAAGGTTGATGGT   | 59.69  | 21 | 269 | 1063 | 1331 |
| GTTTGGGCAATTGAAGGAAT    | 58.882 | 20 | 138 | 1269 | 1406 |
| CATGACCACGCCAGACATAG    | 60.136 | 20 | 211 | 2995 | 3205 |
| TTCATGCAACCATGAAAACAA   | 59.961 | 21 | 279 | 3149 | 3427 |
| TGCCGGAAAACACCAAAATA    | 61.214 | 20 | 197 | 473  | 669  |
| TTGAAAGCCACGTGTCAGAA    | 60.427 | 20 | 232 | 611  | 842  |
| CCGGTTCTCCTATCCGATTT    | 60.278 | 20 | 174 | 629  | 802  |
| ATCGCGTCCACAAATACACA    | 59.995 | 20 | 164 | 2618 | 2781 |
| TAAAAGTGGCAAGCGACCTC    | 60.386 | 20 | 245 | 145  | 389  |
| ACGACTGCATCAGCAAACCTG   | 60.056 | 20 | 206 | 193  | 398  |
| TGGAATGAAGGGGTGAGATT    | 59.336 | 20 | 175 | 167  | 341  |
| TCGCTCATTTCACTCCATGA    | 60.353 | 20 | 221 | 1377 | 1597 |
| TCGCCCATTTTCTCAACTTC    | 60.192 | 20 | 276 | 681  | 956  |
| ATCGGTTATCACCGGATCG     | 60.697 | 19 | 273 | 3734 | 4006 |
| GGGATTCAGGAAACAGGACA    | 59.903 | 20 | 273 | 3377 | 3649 |
| GCCGCAAAGACTTAATCTCG    | 59.982 | 20 | 152 | 970  | 1121 |
| TGTTTCGTTTCAGTCGATTTG   | 59.691 | 20 | 265 | 311  | 575  |
| CAATCCGCAAACAAAGTCAA    | 59.706 | 20 | 266 | 269  | 534  |
| GAACCATCCGACCTTGAAGA    | 60.05  | 20 | 257 | 979  | 1235 |
| AAATATTGGCCGTTTATTTTCG  | 58.094 | 21 | 213 | 539  | 751  |
| GCATTGAATGAATGGAGGTTTC  | 59.382 | 21 | 172 | 36   | 207  |
| ACGGATTTAAGGTTATTACCT   | 59.498 | 25 | 232 | 1785 | 2016 |
| TCTGTCTGGAGGAAAGCACC    | 60.386 | 20 | 118 | 19   | 136  |
| TTTTACCCGACAAATCACA     | 59.941 | 20 | 176 | 391  | 566  |
| AACCTCATTGATTTGCAGGC    | 60.081 | 20 | 187 | 654  | 840  |
| CTGCATCTTGTGTCCTGGAA    | 59.831 | 20 | 235 | 1404 | 1638 |



|                        |        |    |     |      |      |
|------------------------|--------|----|-----|------|------|
| GAGATTTGGGCAAGCTTTTT   | 58.443 | 20 | 261 | 281  | 541  |
| TGAAATCCAAATAGGTTAGAA  | 59.664 | 25 | 199 | 1011 | 1209 |
| TCGTTTGGCACGTTTTGTAG   | 59.769 | 20 | 197 | 2209 | 2405 |
| CGCTGGTTTTGGAGATCAAT   | 60.074 | 20 | 156 | 528  | 683  |
| AACAGGGAAGGCAAGGAAAC   | 60.476 | 20 | 277 | 578  | 854  |
| AATTCTTGCACGCCATTTTC   | 60.081 | 20 | 239 | 651  | 889  |
| AACCCTAGCTCGGAGAAGGA   | 60.34  | 20 | 105 | 10   | 114  |
| TGATTCATTTTCTGCACGGA   | 60.197 | 20 | 185 | 136  | 320  |
| AATCGTGCTATTTTTGCCTGA  | 59.734 | 21 | 237 | 255  | 491  |
| TCCTTGGCTGACTAGGTGCT   | 60.012 | 20 | 163 | 978  | 1140 |
| AAAAATATGGCATCCCGGTT   | 60.389 | 20 | 262 | 510  | 771  |
| GAAGCTGAACCAGCGTTTCT   | 59.621 | 20 | 234 | 931  | 1164 |
| TGTAGCAGCGAAATGCAGTC   | 60.165 | 20 | 267 | 1120 | 1386 |
| TCTTCCGGATTTTAGGAGGC   | 60.522 | 20 | 259 | 7    | 265  |
| AGTGAACCCAGTGGGAGATG   | 59.962 | 20 | 229 | 722  | 950  |
| TCTTCCTCGTCACAGCTTCA   | 59.701 | 20 | 102 | 2265 | 2366 |
| TCTAGGGGGTTGTTGCTTTG   | 60.103 | 20 | 231 | 1698 | 1928 |
| TTCGGTTAATCCAATGGTCA   | 58.818 | 20 | 251 | 782  | 1032 |
| GACAAAGTTGTAATTTGCGGC  | 59.644 | 21 | 273 | 904  | 1176 |
| GCAAGAAACACAAGCCCAT    | 60.118 | 20 | 171 | 1116 | 1286 |
| TTATCGCACAAATATTTTGATT | 57.045 | 24 | 271 | 403  | 673  |
| TTGGAATGAATAAATGGAATG  | 58.357 | 23 | 255 | 17   | 271  |
| TATTTCAACCCCGCAACAGT   | 60.365 | 20 | 148 | 1685 | 1832 |
| TGCCGACTTTGTGGATGTAG   | 59.716 | 20 | 116 | 102  | 217  |
| ATAAAAATTTGGCGGCATTG   | 59.804 | 20 | 272 | 5    | 276  |
| CTCCAGCTTCCCACATCATT   | 60.073 | 20 | 175 | 752  | 926  |
| AGCGCAGATATGAAGGAGGA   | 59.939 | 20 | 210 | 879  | 1088 |
| TTCCAAGAACGAAGTCTTCCA  | 59.838 | 21 | 219 | 16   | 234  |
| TTTCTGTTTCGCAAAAATGGA  | 59.277 | 20 | 171 | 2476 | 2646 |
| TTCTCAGCAATCATCGCAAC   | 59.955 | 20 | 177 | 715  | 891  |
| TCCAAGTTTTGAAGATGACCTC | 58.293 | 22 | 268 | 526  | 793  |
| AGCTCCAGCAACGTTACCAC   | 60.321 | 20 | 137 | 428  | 564  |
| AGTGCGCTCTGGGTAAACTC   | 59.501 | 20 | 208 | 382  | 589  |
| TATGGTGGTATGGTGAGGGG   | 60.452 | 20 | 163 | 112  | 274  |
| ACGTGGATGTTATGCACGAA   | 59.995 | 20 | 122 | 642  | 763  |
| GTGCAATCCTTCCAATCCAG   | 60.461 | 20 | 184 | 139  | 322  |
| TGCATGACTGGATGAAGAGG   | 59.787 | 20 | 243 | 1150 | 1392 |
| AACCAGAGACGCAGCATTTT   | 59.882 | 20 | 258 | 2358 | 2615 |
| AGGAATGTCCACCGAGAATG   | 59.927 | 20 | 208 | 48   | 255  |
| TAATTTCCAGGTTGATCCCG   | 59.756 | 20 | 240 | 221  | 460  |
| TCTTTTTGGGATCAACGGTC   | 59.91  | 20 | 256 | 1596 | 1851 |
| TGGTACCTCCTAATTTCC     | 57.165 | 21 | 270 | 102  | 371  |
| GCCGGTAATTTTCGTGTAGGA  | 59.96  | 20 | 212 | 472  | 683  |
| CTCACCTCCCCAAATACCCT   | 60.183 | 20 | 122 | 1986 | 2107 |
| TGCTTCTGCTTACTGCCCTT   | 60.154 | 20 | 133 | 1097 | 1229 |
| CAAGATTACAAAGGGCCCAG   | 59.564 | 20 | 241 | 747  | 987  |
| TCCCGATTAAAGTTTCCATGA  | 59.397 | 21 | 232 | 431  | 662  |
| GGGAGTGATACGAGTGGAGTG  | 59.589 | 21 | 245 | 1481 | 1725 |
| TCAGTACTTCAGCACTGCG    | 60.199 | 20 | 143 | 1469 | 1611 |
| GTAGAGAGAAGTGGGCGGTG   | 59.867 | 20 | 148 | 22   | 169  |
| GGTGAGGCCAGATTATGTGC   | 60.492 | 20 | 156 | 522  | 677  |
| AGCTTTGATCTTCGCCATGT   | 59.843 | 20 | 234 | 645  | 878  |
| TCGCCTGTATAAATGCCTCG   | 61.113 | 20 | 273 | 536  | 808  |
| AGCACATGAAGAATGCAACA   | 57.834 | 20 | 258 | 341  | 598  |
| TCAAAGATCCAACGCAGAGA   | 59.522 | 20 | 205 | 17   | 221  |
| TCCATGTCTTTTTCCCTTCA   | 58.117 | 20 | 243 | 1839 | 2081 |
| TGAAGTTAGGAAATAAGGAGG  | 57.525 | 24 | 162 | 562  | 723  |
| CGCTTATAAGAGCGAGCAAGA  | 59.903 | 21 | 273 | 227  | 499  |

|                         |        |    |     |      |      |
|-------------------------|--------|----|-----|------|------|
| AAGCCCTCGTGAACATAGGA    | 59.694 | 20 | 240 | 3240 | 3479 |
| GGTTCGGTTTTACGGATTGA    | 59.801 | 20 | 214 | 817  | 1030 |
| CAGCCGAAAACCGAATAAGA    | 60.202 | 20 | 186 | 884  | 1069 |
| TCTCAAACAGAGTGGGGAGG    | 60.229 | 20 | 229 | 288  | 516  |
| GAAGCACTGGTTTTGGAAGG    | 59.711 | 20 | 274 | 344  | 617  |
| GGCTCCCATTGTTTCTCATT    | 58.984 | 20 | 274 | 1328 | 1601 |
| ACCATCATCACAAGATGCCA    | 59.925 | 20 | 255 | 206  | 460  |
| GGGACCATTTTTCCGTTAT     | 59.888 | 20 | 239 | 271  | 509  |
| TTGCACATTGCATTTGAGTTT   | 59.22  | 21 | 254 | 13   | 266  |
| TCGTGTGATGCCTTGAATA     | 60.073 | 20 | 216 | 622  | 837  |
| ACTTGCTTAGTTCATGGCCG    | 60.27  | 20 | 122 | 236  | 357  |
| TCGTTTCTTTGGATATTTTTGTC | 59.885 | 24 | 258 | 204  | 461  |
| TGCCTTGCCTTTAAGCACT     | 60.018 | 20 | 111 | 1707 | 1817 |
| TCGTTTCATCTTCTCTCGC     | 60.483 | 20 | 263 | 202  | 464  |
| AAGGGGGTTATTAGTGGATCA   | 57.801 | 22 | 236 | 700  | 935  |
| CCCACCCATGCCATTATTAG    | 60.031 | 20 | 241 | 1228 | 1468 |
| TTGTTGAAACGAATCCGACA    | 60.088 | 20 | 268 | 2080 | 2347 |
| CTTTTGCACCCTATTGGCTC    | 59.708 | 20 | 128 | 279  | 406  |
| TCGAGGATCAATCTCGGAGT    | 59.761 | 20 | 261 | 1109 | 1369 |
| TAAGTTTCTATTCGCCCCCG    | 61.27  | 20 | 256 | 522  | 777  |
| CCTTTGATGCTGAGGCATTT    | 60.214 | 20 | 164 | 732  | 895  |
| AAATATTGAGGTGGGGGTCC    | 59.881 | 20 | 128 | 136  | 263  |
| GGAATGGGGAGTGTGTGTT     | 59.679 | 20 | 237 | 530  | 766  |
| TATTGCCCTATCTATGCGG     | 59.907 | 20 | 172 | 572  | 743  |
| TTAGCATAAATTTAGCCACCG   | 57.12  | 21 | 134 | 577  | 710  |
| TAACGATGGACTAGGGGCTG    | 60.088 | 20 | 222 | 8    | 229  |
| CACCTCCCTGGGGATTTTAT    | 60.011 | 20 | 195 | 2491 | 2685 |
| ATGTAGCTTCGCCCATGACT    | 59.723 | 20 | 238 | 398  | 635  |
| CCGAAAGGGGTGGTCTAGTT    | 60.353 | 20 | 220 | 270  | 489  |
| TGGTTGTAATTGCACCAAATTT  | 60.045 | 24 | 167 | 281  | 447  |
| AGCGTGAGCTCATTTTCGAT    | 59.985 | 20 | 226 | 2302 | 2527 |
| GTTGGTCCATTGCCATTTCT    | 59.797 | 20 | 197 | 30   | 226  |
| ATGAGTTATCACCGGATCGC    | 59.923 | 20 | 212 | 795  | 1006 |
| CAACGACCTTCATTTCGATCA   | 59.648 | 20 | 104 | 0    | 103  |
| TTTCAATTGGCAACAAACCA    | 59.946 | 20 | 258 | 1312 | 1569 |
| TGGTGAAAACCCCAATAGA     | 60.162 | 20 | 214 | 443  | 656  |
| ATCGTACGTATCGCCGTCTC    | 60.125 | 20 | 246 | 484  | 729  |
| GCACTCCATTCCAAAATTTCG   | 60.448 | 20 | 255 | 106  | 360  |
| TGTCTGATTCTCCACCGTCA    | 60.246 | 20 | 210 | 35   | 244  |
| GTGCACTTGAAATTGCATCG    | 60.265 | 20 | 229 | 179  | 407  |
| TCAGAAACAATCTTTGTCTGTT  | 58.992 | 25 | 236 | 1115 | 1350 |
| ACACCAAGTGGGAAATAGTGC   | 58.972 | 21 | 146 | 1727 | 1872 |
| TCTACCACCGCCTCATCTTC    | 60.218 | 20 | 267 | 2380 | 2646 |
| ACTGGCATATTTGTGTTGGCT   | 59.513 | 21 | 234 | 368  | 601  |
| GGTAGAAGAATAGGTGCATGA   | 57.533 | 23 | 140 | 910  | 1049 |
| GGACCGTGATGGACTGACTC    | 60.537 | 20 | 193 | 2890 | 3082 |
| CGTATCATACAAGTATGCTGTC  | 59.985 | 25 | 251 | 5    | 255  |
| CTGAATTGGCTTGTGGGTTT    | 59.971 | 20 | 217 | 688  | 904  |
| GTTGAATTTTACCCCCGTA     | 59.662 | 20 | 212 | 1569 | 1780 |
| AAGGAGGTGTTATGAAGGGAT   | 58.028 | 22 | 166 | 1237 | 1402 |
| TTGCAACACAAAGCACGAAT    | 60.302 | 20 | 151 | 284  | 434  |
| TTAGTCCATTCTTTCCGCG     | 60.202 | 20 | 191 | 1995 | 2185 |
| AAAATTGCCCGACCTATCCT    | 59.799 | 20 | 222 | 48   | 269  |
| ATCTTTAATGGTGGCCTGGA    | 59.387 | 20 | 220 | 2165 | 2384 |
| GACCCAAAATGCAAGTGGTT    | 59.836 | 20 | 242 | 944  | 1185 |
| GAACATGGGGAAGGGAGTTT    | 60.169 | 20 | 204 | 211  | 414  |
| ATCTGCTCAAATCCTGCGAC    | 60.37  | 20 | 239 | 805  | 1043 |
| ATGTAATGCCTCGCCCTATG    | 59.945 | 20 | 250 | 11   | 260  |

|                        |        |    |     |      |      |
|------------------------|--------|----|-----|------|------|
| CCCAATACCTCCCCTCTCTC   | 59.89  | 20 | 241 | 1235 | 1475 |
| CATTCGGTACGAAAAATCGG   | 60.315 | 20 | 269 | 47   | 315  |
| GGTTCACGATTTGGGAAAAA   | 59.778 | 20 | 258 | 2487 | 2744 |
| CACCTCCATCTCCGATCATAA  | 59.902 | 21 | 135 | 762  | 896  |
| GTGAGGAATCCACTCTCCCA   | 60.048 | 20 | 266 | 39   | 304  |
| CTTTCAGGCTTCAAAAATCCA  | 59.325 | 21 | 203 | 6    | 208  |
| ACCGTTAAAGAAACCGGACC   | 60.221 | 20 | 152 | 1255 | 1406 |
| TTGATCGCGACATTTGATTT   | 59.115 | 20 | 236 | 48   | 283  |
| TGAGGCATCTCTCTCTCACA   | 57.05  | 20 | 249 | 313  | 561  |
| TGAGGCAGTGTTGTTCTTCG   | 60.025 | 20 | 237 | 1329 | 1565 |
| CTGCCAAGGAACCACAAAAT   | 59.971 | 20 | 187 | 1307 | 1493 |
| ACGGATTTAAGGGTTATTACCT | 57.667 | 23 | 256 | 747  | 1002 |
| TTGCAGAAGGGAAGAGACAG   | 60.119 | 21 | 253 | 1489 | 1741 |
| TGAAGCGTCAAATCACAAGC   | 59.995 | 20 | 273 | 306  | 578  |
| CCCTTCAGTGCATCTTTCCT   | 59.284 | 20 | 227 | 1466 | 1692 |
| ACCACCCGAGTAACAACGAC   | 59.891 | 20 | 247 | 1237 | 1483 |
| TCGTGTCTAGTGCAGCATGA   | 59.141 | 20 | 115 | 4748 | 4862 |
| TCTCATCCAACGAGCTGAAA   | 59.522 | 20 | 264 | 299  | 562  |
| GATCCTGTAAGCTCCACCCA   | 60.073 | 20 | 256 | 177  | 432  |
| GTAGCGAGATTCCGATGGAG   | 59.797 | 20 | 107 | 267  | 373  |
| GGATTCCGAGTTTTCGATCC   | 60.777 | 20 | 168 | 552  | 719  |
| GCTTGGTCATCCCTCTTGAA   | 60.195 | 20 | 241 | 859  | 1099 |
| CTTCGGAAGCAAAATTCACG   | 60.742 | 20 | 130 | 2516 | 2645 |
| TCAATTTCTCTCTCCTGCACC  | 59.42  | 21 | 260 | 207  | 466  |
| AAAGCAGCCGCAAGAAGATA   | 60.117 | 20 | 214 | 846  | 1059 |
| GCAATCGTGATAGGCAACCT   | 60.103 | 20 | 124 | 2376 | 2499 |
| ACGAACGCCAAGTTCTCCTA   | 59.875 | 20 | 255 | 252  | 506  |
| GATGGGTTATTGATCACGGG   | 60.014 | 20 | 146 | 3845 | 3990 |
| GCAATTTCTTGGACCTCCTGC  | 59.82  | 20 | 204 | 167  | 370  |
| ATCGAATCGGAAAGTTCCCT   | 59.903 | 20 | 265 | 290  | 554  |
| CCAAAAGTTCACATCACTCCAC | 59.633 | 22 | 189 | 4    | 192  |
| AAAGAACTTTCTCCTCTGGCA  | 58.187 | 21 | 218 | 200  | 417  |
| GTTAGGGGTGTGCACGATTC   | 60.384 | 20 | 271 | 4    | 274  |
| CAGGCAAATCCTTGGGATATA  | 59.823 | 22 | 220 | 20   | 239  |
| GGAGGCATTTCGATCTTTGTG  | 60.603 | 20 | 200 | 175  | 374  |
| ATTGCAGATGGATGTAGGGC   | 59.923 | 20 | 246 | 48   | 293  |
| TTTTTAGGCTCTCGGAGCTG   | 59.724 | 20 | 237 | 183  | 419  |
| ATCGTCCTTCGTGCAATCAT   | 60.492 | 20 | 199 | 4442 | 4640 |
| AAATGGACCCATCCTCAGGT   | 60.575 | 20 | 162 | 2249 | 2410 |
| TTGGAAAGGAAAGCTCGAAA   | 59.931 | 20 | 230 | 1470 | 1699 |
| GAAGTGAATCAAGTGATGGCT  | 58.794 | 22 | 158 | 41   | 198  |
| TGGAATGTCAAGTCAACACAA  | 57.556 | 21 | 139 | 931  | 1069 |
| TTCGTCGGAGCAGGAATAGT   | 59.836 | 20 | 280 | 213  | 492  |
| GTCATTGTATGGTGCGTTTCG  | 59.995 | 20 | 273 | 160  | 432  |
| AGTCCCATGTTGCTGCTTTT   | 59.74  | 20 | 227 | 39   | 265  |
| TAGAAGGCACTGGCTTGAT    | 59.836 | 20 | 219 | 211  | 429  |
| GAGGCTTGAACAAACATGAA   | 60.103 | 21 | 274 | 1724 | 1997 |
| TGCACAAACAGACCATCTCC   | 59.682 | 20 | 189 | 1112 | 1300 |
| TGAATGCTCTGAATGCTGCT   | 59.704 | 20 | 259 | 824  | 1082 |
| CATGGATTTTCTGGGTCTGC   | 60.461 | 20 | 143 | 461  | 603  |
| CAACCTCAAAAATGCCCACT   | 59.971 | 20 | 179 | 801  | 979  |
| TCGAACCACGTAAATCCTTTG  | 59.982 | 21 | 261 | 1006 | 1266 |
| CTCCAAAACACGCACACAC    | 60.199 | 20 | 184 | 15   | 198  |
| TCCCAGATGATGGTTGTGAA   | 59.893 | 20 | 275 | 208  | 482  |
| TGTGAAATCCGAAAATGGAG   | 59.924 | 21 | 245 | 224  | 468  |
| CACCTCCCCTGCAAAAATA    | 59.931 | 20 | 171 | 1338 | 1508 |
| CCCAAAATCCCAACTTCT     | 60.159 | 20 | 252 | 323  | 574  |
| CACAACAAAAGCAACCCAA    | 59.603 | 20 | 168 | 334  | 501  |

|                        |        |    |     |      |      |
|------------------------|--------|----|-----|------|------|
| TCTGTTGCGTGGAGCATTTA   | 60.401 | 20 | 229 | 0    | 228  |
| ACCATAACGCACCCAAGAAC   | 59.859 | 20 | 189 | 2129 | 2317 |
| TCTCGAGAAAACGGGATTTG   | 60.184 | 20 | 211 | 644  | 854  |
| AAATGGTGTGATCTTGGACCT  | 58.364 | 21 | 279 | 1834 | 2112 |
| CAACGTAACCTGGCAGCAGAA  | 60.05  | 20 | 124 | 577  | 700  |
| CGAAGAGTAGTGGCTGCACA   | 60.199 | 20 | 202 | 402  | 603  |
| TTCCGATAGCAGTTGTTCCA   | 60.401 | 20 | 259 | 1922 | 2180 |
| CTTTTAGCCAGCCCAGTTTG   | 59.876 | 20 | 279 | 43   | 321  |
| TGCTTCTTGTGGAGCTGAAA   | 59.716 | 20 | 276 | 1051 | 1326 |
| GAGTGAATGTGCATGGAGGA   | 59.637 | 20 | 190 | 241  | 430  |
| TGTTCCCTACGCACTCACATTA | 59.344 | 23 | 258 | 704  | 961  |
| CAGTGCAAGTGTGCAACAGA   | 59.642 | 20 | 274 | 338  | 611  |
| GCAAGTAACCTAGTGGCCAAG  | 58.917 | 21 | 188 | 130  | 317  |
| CACCTTCGAGATTGCTAGGC   | 59.978 | 20 | 182 | 1684 | 1865 |
| CGTTTACGTTTATCCATACCCA | 58.806 | 22 | 163 | 362  | 524  |
| AATTCGTTCCGGGATAGAGC   | 60.419 | 20 | 279 | 338  | 616  |
| GCAGTTCATGCGATTCATTG   | 60.228 | 20 | 247 | 185  | 431  |
| TGCCTACCATTTAGCACAA    | 60.257 | 20 | 234 | 409  | 642  |
| TGCAACGTTGAGACAAGAGG   | 60.025 | 20 | 250 | 1619 | 1868 |
| TTCCGTAGTTGGTTAGTTCTI  | 58.328 | 23 | 244 | 691  | 934  |
| ACCATCAGATTCATTGTGCG   | 59.527 | 20 | 269 | 898  | 1166 |
| CTCCAAACCCAATATCACGG   | 60.184 | 20 | 242 | 568  | 809  |
| AAGAAGCAATGGATCATGGAA  | 59.519 | 21 | 222 | 145  | 366  |
| TTTTGTTCCCTCCCTCCT     | 60.045 | 20 | 233 | 135  | 367  |
| GGCATCTCCTCTTGTCTTGG   | 59.803 | 20 | 233 | 2997 | 3229 |
| GACGTCCGCTATAAAGCCC    | 59.682 | 19 | 257 | 6640 | 6896 |
| AATAACCCCAACCATCACAA   | 59.91  | 20 | 143 | 88   | 230  |
| TTCCGGTTTCTGCAATTTTTG  | 58.792 | 20 | 271 | 58   | 328  |
| CTCAGACAGCTTCAAATCCC   | 57.451 | 20 | 215 | 728  | 942  |
| CTCAATCTCACACACCCACG   | 60.154 | 20 | 122 | 656  | 777  |
| AAGAAATGGCCAATGTCAGC   | 60.081 | 20 | 178 | 1    | 178  |
| CTCAATTACATCCAAGCCGC   | 60.606 | 20 | 211 | 760  | 970  |
| ACAATCGATTTCCCAACCAC   | 59.653 | 20 | 172 | 57   | 228  |
| TGATTCTGGGTTTCCAGTCC   | 59.903 | 20 | 153 | 336  | 488  |
| AAAAGCAGCCATAACTTGCC   | 59.365 | 20 | 196 | 583  | 778  |
| GGAATTCTATCCGAGCACCC   | 60.797 | 20 | 135 | 1664 | 1798 |
| TGTCTAGGCCCTGTAGCAT    | 59.717 | 20 | 152 | 778  | 929  |
| TCTCACCGCCAACCTCTCTCT  | 60.135 | 20 | 169 | 1423 | 1591 |
| CAACTTCAGTGCCTCCCATT   | 60.111 | 20 | 212 | 39   | 250  |
| GGAGAGTTCAGATGCGTGT    | 60.269 | 20 | 126 | 2688 | 2813 |
| ATGCCCTAAGGGGGAGGTAT   | 60.882 | 20 | 201 | 309  | 509  |
| CGACTTTTCACTATTCTCCGC  | 58.986 | 21 | 160 | 10   | 169  |
| AGGGGTCCCTCCGTCAAAAC   | 60.19  | 20 | 199 | 1431 | 1629 |
| TCCAACGACAATAATTCCATTT | 59.616 | 23 | 251 | 589  | 839  |
| AAATAAGGAGGTGTTATGAAG  | 59.323 | 24 | 151 | 1635 | 1785 |
| GAAAAGCTTGGGAATGGTGA   | 60.051 | 20 | 188 | 1133 | 1320 |
| GGGATAAGGCCGTCGATAAT   | 60.137 | 20 | 128 | 18   | 145  |
| GTTAGATGATGCCACTGCGA   | 59.83  | 20 | 274 | 2754 | 3027 |
| TCGTGCCTAGTTGAAACAA    | 59.317 | 20 | 213 | 522  | 734  |
| CTTCCCCTGCAATCAAAGAA   | 60.184 | 20 | 171 | 3643 | 3813 |
| TTGCTGAAAAGCAAGCCTCT   | 60.27  | 20 | 134 | 652  | 785  |
| CCCTCCTATGCACTCCAAAA   | 60.066 | 20 | 233 | 3642 | 3874 |
| TGCGCTATGCCTAACAAAAC   | 58.985 | 20 | 275 | 172  | 446  |
| CTCGCCATTTCCCCTAAAC    | 60.792 | 20 | 264 | 496  | 759  |
| TCTCCATTTCCAACCTGAG    | 60.042 | 20 | 177 | 1566 | 1742 |
| GCGCATAAAATCAAAGGGAA   | 60.04  | 20 | 196 | 3546 | 3741 |
| TTGCTTGTGGCATGTTCTTC   | 59.847 | 20 | 245 | 748  | 992  |
| TCAGATGAAGCCAAAGAGGG   | 60.331 | 20 | 276 | 2066 | 2341 |

|                          |        |    |     |      |      |
|--------------------------|--------|----|-----|------|------|
| TAGAGTAGCGGCTGCAGGTT     | 60.176 | 20 | 132 | 59   | 190  |
| AGGCAGCTGTATTCACGAGG     | 60.419 | 20 | 118 | 616  | 733  |
| CCAAACACCCCCTTAGTGTT     | 58.812 | 20 | 250 | 864  | 1113 |
| GGGATGTTTGGAGAGACGAA     | 60.05  | 20 | 137 | 40   | 176  |
| ATCAGCAGCAACCAAGTTGA     | 59.445 | 20 | 199 | 540  | 738  |
| ACACGACGAACTTTTCACTTCA   | 59.819 | 22 | 215 | 559  | 773  |
| GCCATTTATTCGTTGCTTGC     | 60.597 | 20 | 192 | 1436 | 1627 |
| TTCGAGTTGTGGTATGGCTG     | 59.716 | 20 | 271 | 453  | 723  |
| GATGACGTCAGCGAATGATG     | 60.233 | 20 | 174 | 813  | 986  |
| AAGTTTGGGGGAGGAGAAAA     | 59.912 | 20 | 255 | 382  | 636  |
| TTCTTCCAGAAGTGGGCATC     | 60.195 | 20 | 263 | 1167 | 1429 |
| CCTCTGAACCAAATCCAAA      | 59.903 | 20 | 144 | 567  | 710  |
| CTTCTCTCACCACCGCAAAT     | 60.255 | 20 | 130 | 947  | 1076 |
| CAACGGTTGCAATTTGATTC     | 59.016 | 20 | 227 | 507  | 733  |
| ACTCCATCTCTCTCCCGCTT     | 60.358 | 20 | 240 | 564  | 803  |
| GCAGGTGGAAGGAAGAGGA      | 60.333 | 19 | 222 | 732  | 953  |
| TGCCTGATGAATTTCTCCTG     | 58.797 | 20 | 268 | 6060 | 6327 |
| CAATGGTGAATATTATAAAGGC   | 58.513 | 25 | 216 | 192  | 407  |
| TGCACTTGTGCCCTAAAAT      | 60.502 | 20 | 269 | 1772 | 2040 |
| AATTTCCCCGCGTTATTTCT     | 59.808 | 20 | 176 | 769  | 944  |
| TGTA AAAAGGATTCCACGTATTT | 60.053 | 25 | 259 | 352  | 610  |
| TGACCAGCCTGACCTCAAAT     | 60.656 | 20 | 225 | 1059 | 1283 |
| AGAGCTCAGGATCTTGCGAA     | 60.24  | 20 | 238 | 3314 | 3551 |
| ATGTGGCATGGTGAGAAGC      | 59.653 | 19 | 231 | 1292 | 1522 |
| GCTTCTCTCTCGCTCCTCCT     | 60.38  | 20 | 130 | 1079 | 1208 |
| TAAAACGCGCTTTCATACCA     | 59.351 | 20 | 234 | 376  | 609  |
| AACTCATCCAATAAGCCGC      | 59.34  | 20 | 269 | 1203 | 1471 |
| ATGAACCTGCTTTTTGTGGC     | 60.118 | 20 | 253 | 973  | 1225 |
| GGAGAATCCGGTGGATAAAA     | 58.832 | 20 | 254 | 341  | 594  |
| TTGTTACCCACCTTTATCCTT    | 59.741 | 22 | 241 | 3097 | 3337 |
| TTTCGAGAATTTCTGTCCG      | 60.184 | 20 | 268 | 17   | 284  |
| TAAAGCAAGGGGATGACTCG     | 60.206 | 20 | 157 | 3328 | 3484 |
| ACCGGAGTGTGTTGATTTCC     | 59.827 | 20 | 275 | 70   | 344  |
| GGCGGCTTACATTGTTTCTC     | 59.713 | 20 | 263 | 16   | 278  |
| AACGTCAAACGGTCTATGCC     | 60     | 20 | 111 | 3228 | 3338 |
| GCTGACCGTTGGTAGCCTTA     | 60.27  | 20 | 232 | 882  | 1113 |
| CGACGCCTCAAATTTACTCC     | 59.708 | 20 | 207 | 520  | 726  |
| AAGAAATCAGGAGCTGCCAA     | 59.955 | 20 | 270 | 6259 | 6528 |
| CACGGTAAGTCCCACATTT      | 59.853 | 20 | 188 | 542  | 729  |
| AGTGCTCCTTTCAAGCAA       | 60.27  | 20 | 271 | 456  | 726  |
| GGTCGTTGCTGGTTAATGG      | 60.365 | 20 | 184 | 297  | 480  |
| TGCGTTCTGAGTTTGTTCG      | 60.027 | 20 | 240 | 2764 | 3003 |
| TTGAAAATTGTTTTATTCCACA   | 59.246 | 25 | 198 | 13   | 210  |
| ATCTGCTTCGGTACAATCCG     | 60.096 | 20 | 136 | 25   | 160  |
| TCAGTTATGCTCTTCTCCCCA    | 59.822 | 21 | 198 | 964  | 1161 |
| CGGCCGGATTCACTATTTTA     | 59.922 | 20 | 121 | 0    | 120  |
| GACTGATTCAATCTCCTCCCAT   | 59.401 | 22 | 212 | 2    | 213  |
| AATATTATTGTGGGTGGCGG     | 59.547 | 20 | 253 | 367  | 619  |
| GATCATGGGCTTGCAATCTT     | 60.043 | 20 | 275 | 3966 | 4240 |
| AGAAAGGAGAAGCAACAGCG     | 59.757 | 20 | 211 | 444  | 654  |
| CATCCTTCTGAACACCGGAT     | 59.927 | 20 | 173 | 33   | 205  |
| CCACAAGAAAGCAGTCCTCC     | 59.844 | 20 | 262 | 1085 | 1346 |
| GGTGAAAAGGGGGAGTCTA      | 60.298 | 20 | 176 | 161  | 336  |
| GAACACGACTCTTCGAGGG      | 59.844 | 20 | 269 | 145  | 413  |
| ACGAATAACTGCAAAGGCA      | 58.439 | 20 | 202 | 856  | 1057 |
| CGCACAATAGCTCCGATCTT     | 60.374 | 20 | 183 | 231  | 413  |
| GCCATTAGCCTTGGAGATGA     | 60.177 | 20 | 221 | 151  | 371  |
| GTCAAAGGGATCAAATTTCCC    | 59.636 | 21 | 203 | 3426 | 3628 |

|                          |        |    |     |      |      |
|--------------------------|--------|----|-----|------|------|
| TGAACGGTTAAAATAATTGCTC   | 58.731 | 23 | 277 | 189  | 465  |
| ACCCCTTGAGTATGTCCCATC    | 60.067 | 21 | 237 | 1316 | 1552 |
| TAGGAGGGAGGTTGCATTTT     | 59.126 | 20 | 278 | 296  | 573  |
| GCACCATATACTCCCAGCC      | 59.415 | 20 | 148 | 9    | 156  |
| CCATGTAGGCGTAAAAATAGG    | 58.224 | 22 | 144 | 758  | 901  |
| CGGCGATCATTTGATACCTC     | 60.435 | 20 | 267 | 19   | 285  |
| TGAAATGCCCTCTTCACCTT     | 59.67  | 20 | 210 | 566  | 775  |
| CTCACCCGGCCTCTTTATTT     | 60.443 | 20 | 134 | 1400 | 1533 |
| GGAGTCGCGAATCAAATTA      | 60.038 | 20 | 206 | 348  | 553  |
| TGAAAGATGAAGGTTTGGGG     | 59.903 | 20 | 247 | 333  | 579  |
| CACATGAGTCGATGATTGGC     | 60.08  | 20 | 140 | 53   | 192  |
| CCACGTTTTGGGGTCCAC       | 62.219 | 18 | 263 | 589  | 851  |
| GTCAAACAACGTGAATGAGCA    | 59.755 | 21 | 251 | 347  | 597  |
| TAACGAGCCAAATTGTGCAG     | 59.872 | 20 | 170 | 454  | 623  |
| TCGTGTTTCTATGCTTCTGG     | 60.256 | 21 | 140 | 745  | 884  |
| TTTCTCCCCTCTCTCTCGT      | 60.328 | 20 | 277 | 1633 | 1909 |
| TTTCTGTCTTCCGCGAATTT     | 59.823 | 20 | 147 | 12   | 158  |
| CCCATTTCAAGCTTGCTCTC     | 59.955 | 20 | 228 | 278  | 505  |
| CCCCACCCCAAATATTAC       | 60.123 | 20 | 254 | 3088 | 3341 |
| GTGGACGCTCCAGATTGTTT     | 60.119 | 20 | 272 | 1515 | 1786 |
| ACTGCCTGCATTGTTTCTCA     | 59.445 | 20 | 215 | 609  | 823  |
| ACCAGCCCTTTTCTTTCTCTC    | 59.691 | 20 | 268 | 4277 | 4544 |
| CACCAAATTTTCATCATTTTTAGT | 58.144 | 25 | 256 | 403  | 658  |
| AGATTCAAGGGCCGAGATTT     | 60.039 | 20 | 116 | 57   | 172  |
| TTTTGGTCTGGTCTGAGCCT     | 59.844 | 20 | 163 | 2223 | 2385 |
| GCAAGTTCAACCTTCTTGGG     | 59.711 | 20 | 152 | 1505 | 1656 |
| AATGCGTGCAACACACAAGT     | 60.23  | 20 | 161 | 9    | 169  |
| TTAAAAGGGAGCGAGAGCAA     | 60.089 | 20 | 216 | 635  | 850  |
| TGCACGTAGGCATGTTCAAT     | 60.142 | 20 | 256 | 105  | 360  |
| AGTCCGATTTCAACCAGGTG     | 59.966 | 20 | 202 | 644  | 845  |
| CATCCCCCAAAGAGAGTCTC     | 59.322 | 19 | 273 | 838  | 1110 |
| TGGTTATGCAAGTGGAACGA     | 60.111 | 20 | 222 | 246  | 467  |
| TTCATGAGCTCGCTTTTATTGA   | 59.985 | 22 | 232 | 254  | 485  |
| CCTATGGTAGTATGGTGTGGGC   | 60.365 | 22 | 146 | 59   | 204  |
| GAAGGGGCGGAATTATCTTC     | 59.873 | 20 | 130 | 2402 | 2531 |
| TGCGTTTTGACAATATATAGGT   | 60.083 | 26 | 245 | 642  | 886  |
| TCCCAAGCCAAACTCTCTCT     | 59.844 | 20 | 198 | 3751 | 3948 |
| TCTTGAATCTGGCCTTCGAT     | 59.773 | 20 | 253 | 692  | 944  |
| TAATGGCGATTGCAGTTCAG     | 59.833 | 20 | 270 | 249  | 518  |
| TCTCTCTCCGACCTCCGTTA     | 59.943 | 20 | 167 | 998  | 1164 |
| AGACATTGCCTTGCACCTTCA    | 59.445 | 20 | 271 | 235  | 505  |
| TGATTCCTATGCCTCGTGGT     | 60.483 | 20 | 251 | 105  | 355  |
| GGTCTCCGGTCCCTAAAATG     | 60.683 | 20 | 251 | 640  | 890  |
| TGGGGATGGGTCACTTTAAT     | 59.101 | 20 | 270 | 221  | 490  |
| GCTGCTGCTGATTTTTACAGG    | 60.032 | 21 | 278 | 962  | 1239 |
| CAAACCGGGAAGAACTACCA     | 59.964 | 20 | 235 | 688  | 922  |
| AGAAAAGGTGCTTTCCACA      | 59.711 | 20 | 121 | 939  | 1059 |
| TCATGTTTTCTCTGTTGCGA     | 60.39  | 20 | 274 | 717  | 990  |
| GCGTTGAAAATCTCCATTG      | 60.448 | 20 | 175 | 632  | 806  |
| GTTGTTGGAGCTCATGGACA     | 59.682 | 20 | 207 | 609  | 815  |
| GCCGATGGAATCAAGAAAAA     | 60.016 | 20 | 190 | 2354 | 2543 |
| CTTTTGAACCGGGAACCTTCA    | 60.081 | 20 | 218 | 1910 | 2127 |
| GCACTCGAAGAGTAGCGGTT     | 59.644 | 20 | 280 | 55   | 334  |
| TTAGCTGGCAGGCATACAA      | 59.467 | 20 | 235 | 24   | 258  |
| TCCCTCCCTCTTTAAAATCACA   | 59.939 | 22 | 176 | 3690 | 3865 |
| TCTCAAGCCCGCGTTATTAG     | 60.356 | 20 | 269 | 963  | 1231 |
| CAACAGTTTTTCTGGGGCTC     | 59.711 | 20 | 278 | 1313 | 1590 |
| GCATGCTTTTGTCTTTTCA      | 58.895 | 20 | 209 | 3419 | 3627 |

|                        |        |    |     |      |      |
|------------------------|--------|----|-----|------|------|
| CAATGGTGGAGCAGTTTTCC   | 60.495 | 20 | 106 | 58   | 163  |
| GGCATAAAATGGGTGCTGAT   | 59.791 | 20 | 125 | 234  | 358  |
| CACTAAGTTGAGCGTTGCGA   | 60.195 | 20 | 113 | 925  | 1037 |
| CAAAATGGTCATGAAACACGA  | 59.43  | 21 | 261 | 920  | 1180 |
| ACCAAATTTGCAAAACCGAA   | 60.335 | 20 | 260 | 142  | 401  |
| TTGCAAACGTCAAACAAAATG  | 59.634 | 21 | 222 | 693  | 914  |
| GCCGTCTGATTGGGAGAAT    | 60.026 | 19 | 278 | 1016 | 1293 |
| CATAAGATGCACCTGCGAAA   | 59.833 | 20 | 252 | 321  | 572  |
| ATTGACGGGGTTCACAGTTC   | 59.827 | 20 | 199 | 262  | 460  |
| CAGACCTCCAAAAGCAGGAG   | 59.982 | 20 | 211 | 1225 | 1435 |
| GAATCCGAAAAATAAGGGGG   | 59.616 | 20 | 230 | 279  | 508  |
| CATCTCCCCTCTCTCTCAA    | 59.329 | 20 | 173 | 26   | 198  |
| TCAATGAACAAATAGGTCACA  | 58.922 | 24 | 257 | 344  | 600  |
| ACCCGAGACAAAACACGAAC   | 60.012 | 20 | 206 | 270  | 475  |
| ACAAAGAGGAGGAGCGTGAA   | 59.989 | 20 | 272 | 730  | 1001 |
| TTGTCTAGTTGCAACCCCCT   | 59.592 | 20 | 279 | 2221 | 2499 |
| TCGAACATTTCCATAGCCCT   | 59.528 | 20 | 205 | 533  | 737  |
| TGTTTCATCCATGTTTTGGGA  | 59.75  | 20 | 175 | 207  | 381  |
| CATGCTGTTGGCCTGTAGTG   | 60.324 | 20 | 106 | 0    | 105  |
| TCGGTTCATAAAGATCACCGA  | 60.454 | 21 | 231 | 961  | 1191 |
| AATACGACGACGAAGCCAAC   | 60.14  | 20 | 187 | 55   | 241  |
| GAGAGGTGGGACCCTGAAAT   | 60.314 | 20 | 254 | 313  | 566  |
| AGATGCAGAGGACCAGGGTA   | 59.679 | 20 | 150 | 12   | 161  |
| TCTGAGGAGATTTTGGCAGG   | 60.331 | 20 | 242 | 556  | 797  |
| CCGTGGGTATTCCCTACTCC   | 60.569 | 20 | 221 | 392  | 612  |
| TCATGGGAATTCACGAAACA   | 59.9   | 20 | 190 | 284  | 473  |
| CCAAGCATGCTCATGTCAAT   | 59.679 | 20 | 126 | 145  | 270  |
| CTGAGGTGACCTGGACCATT   | 59.962 | 20 | 268 | 35   | 302  |
| TGCATGAAAACCTCCCTCACA  | 60.24  | 20 | 216 | 593  | 808  |
| TTGAGCCCAAGAGGAAAGTG   | 60.366 | 20 | 208 | 377  | 584  |
| TGAAAATCGCCCAAAGATTC   | 60.016 | 20 | 168 | 682  | 849  |
| TCCATCAAATCCAGGTTGGT   | 60.173 | 20 | 155 | 786  | 940  |
| GGCTAGCTGTCCATACAATGC  | 59.75  | 21 | 223 | 294  | 516  |
| GATTAACATGCGGTCCGATT   | 59.791 | 20 | 257 | 1305 | 1561 |
| AAGCTAGCACGTAAATGGGG   | 59.248 | 20 | 120 | 540  | 659  |
| CCATCGTTCCCATATACCCA   | 60.405 | 20 | 227 | 2    | 228  |
| TATTTTGGGCCTGAATGGAC   | 59.762 | 20 | 206 | 484  | 689  |
| TGAGAATGTGCTCAGACCGT   | 59.42  | 20 | 269 | 1021 | 1289 |
| GATTCGATTGCTTGCATCAC   | 59.234 | 20 | 258 | 278  | 535  |
| GCCACCCTCTCTCGTAGTGT   | 59.33  | 20 | 279 | 196  | 474  |
| TCGGTCAACATTGCTTTCAA   | 60.234 | 20 | 126 | 1334 | 1459 |
| ACTGGTGCTCATGCTTTGG    | 59.846 | 19 | 234 | 2967 | 3200 |
| ACACGTGGAGACAACGTGAA   | 60.203 | 20 | 222 | 112  | 333  |
| TCTCCATGCAAACCTCACCA   | 60.24  | 20 | 200 | 1562 | 1761 |
| AGGGAATGGAATGAGCATGA   | 60.426 | 20 | 278 | 45   | 322  |
| TAACGGAACCGTGGGATAAA   | 60.181 | 20 | 162 | 316  | 477  |
| GCACTCGAAGAGTAGCGGTT   | 59.644 | 20 | 259 | 2058 | 2316 |
| AGGACGTGAGGGAGAGAAT    | 60.216 | 20 | 207 | 559  | 765  |
| GCTTGGCCACTTATGAATCG   | 60.606 | 20 | 262 | 32   | 293  |
| CCTCCCCATGGCTAGACTAA   | 59.146 | 20 | 193 | 381  | 573  |
| TTGCTCCATGTTATGCAATG   | 58.145 | 20 | 246 | 1303 | 1548 |
| CATGCAACAAACCAACCAAA   | 60.393 | 20 | 237 | 397  | 633  |
| GATATTGGAGAAGATATGAAA  | 57.823 | 27 | 260 | 1684 | 1943 |
| ACAACAAGATGCCAAAATAAA  | 59.822 | 24 | 187 | 670  | 856  |
| CTTCTGAGTTGACCGATCC    | 59.655 | 20 | 136 | 344  | 479  |
| CATCCCCATTACCTTAGTTAGC | 59.424 | 23 | 264 | 523  | 786  |
| TCTGACGACCGATATGTGCT   | 59.271 | 20 | 250 | 97   | 346  |
| GTGAGGCGAGGAAATCAGAG   | 59.95  | 20 | 278 | 17   | 294  |

|                         |        |    |     |      |      |
|-------------------------|--------|----|-----|------|------|
| TTTCCTTTCATTACACGTGCC   | 59.989 | 21 | 266 | 39   | 304  |
| TTGATGCAATGATCTCATTCTT  | 59.976 | 24 | 246 | 351  | 596  |
| TGCACAAGCATGTTTTTCATT   | 59.22  | 21 | 240 | 291  | 530  |
| TGTA AACAGGCTAGGTCGGA   | 58.379 | 20 | 280 | 1512 | 1791 |
| TTTTTGGGAATTGAAATGGC    | 59.751 | 20 | 219 | 803  | 1021 |
| TCTGTTTTTGTGGTTGCC      | 60.004 | 21 | 232 | 145  | 376  |
| GCTAAAGCCATCTCCAATGC    | 59.813 | 20 | 237 | 323  | 559  |
| CCTGGCAGCTTTTGATCTGT    | 60.397 | 20 | 155 | 73   | 227  |
| ATTTCCCCAGTTTGTGTGCT    | 59.454 | 20 | 129 | 602  | 730  |
| TGTTCTAGCAAAGCCCAACC    | 60.249 | 20 | 152 | 880  | 1031 |
| CATCTCTTCTCCTCGCCCTA    | 59.526 | 20 | 185 | 671  | 855  |
| GATGACAGAGCAATCGGGTT    | 60.081 | 20 | 232 | 321  | 552  |
| TGGTGGAGGGTTTGTGGAT     | 60.21  | 20 | 146 | 519  | 664  |
| TCTTGCACCAGTTGTTGAGG    | 59.873 | 20 | 169 | 324  | 492  |
| TCTGGAGATCAACTCCTCGG    | 60.34  | 20 | 191 | 370  | 560  |
| ACCGATTGCGATGCTTAACT    | 59.736 | 20 | 222 | 1372 | 1593 |
| AAGAAATTGGACAGTGGCGT    | 59.598 | 20 | 168 | 3918 | 4085 |
| ATCTTCAACCCCCACCTCTT    | 59.795 | 20 | 176 | 642  | 817  |
| TGCAATCCAAAAGGGAAAAA    | 60.407 | 20 | 256 | 52   | 307  |
| GGGAAAAAGGGCTTGTGTT     | 60.332 | 20 | 185 | 3686 | 3870 |
| TTTGAACACTCAATGCGCTC    | 59.995 | 20 | 270 | 944  | 1213 |
| TCAGTGTTGCTTCGATCTGG    | 59.984 | 20 | 280 | 1177 | 1456 |
| ATCGTGCCACTTTTCTGTCC    | 60.119 | 20 | 252 | 335  | 586  |
| TGTGGAGATAAGCAGCGAGA    | 59.697 | 20 | 235 | 28   | 262  |
| AACTGAAGATGACATCCCCG    | 59.927 | 20 | 191 | 926  | 1116 |
| ACTCTTCCACCGACCTCTCC    | 60.648 | 20 | 210 | 14   | 223  |
| TGGGAATCCGGACACTAACT    | 59.405 | 20 | 245 | 327  | 571  |
| TTTCTTTTCTTCCCCACCT     | 59.912 | 20 | 273 | 1065 | 1337 |
| CACCAGACCGGCTCATTTA     | 59.658 | 19 | 280 | 563  | 842  |
| TACCCACCTCGAATATCCCC    | 60.901 | 20 | 138 | 310  | 447  |
| CAACTAGGGGGTCTGAGGT     | 60.363 | 20 | 148 | 1599 | 1746 |
| TCACGTGACTTATTTGGTGGAA  | 60.399 | 22 | 227 | 2858 | 3084 |
| TCATGAATCATCAATTCGAAAC  | 59.849 | 24 | 229 | 20   | 248  |
| TAAATTTGCTTGGCCCTCTG    | 60.202 | 20 | 216 | 1834 | 2049 |
| TCAATTCGCCAATCTTCTC     | 60.155 | 20 | 242 | 993  | 1234 |
| TGTTTAATTTTTGTTAAGCATGC | 59.958 | 25 | 211 | 379  | 589  |
| TAAATGAAACCGGGGTATGC    | 59.66  | 20 | 198 | 17   | 214  |
| GACAAGGAAAAAGAGCGCAG    | 60.132 | 20 | 184 | 1566 | 1749 |
| AAATGCGTGAAGATAGTGATG   | 59.171 | 23 | 218 | 446  | 663  |
| TAGGTGCTTGGTTGGGAAAC    | 59.971 | 20 | 209 | 537  | 745  |
| TCCTGCTTCTCCACATCTT     | 59.803 | 20 | 116 | 669  | 784  |
| TGCTGAGGTGGAGCAGTAGA    | 59.726 | 20 | 278 | 2071 | 2348 |
| CCGTGTTTTGACCTTTGAC     | 60.388 | 20 | 278 | 0    | 277  |
| AGTGGAGTGGTGGAGCAAGT    | 59.756 | 20 | 142 | 825  | 966  |
| TGAGACTTTGGTACGGGAGC    | 60.255 | 20 | 225 | 339  | 563  |
| GCGACTTGTGAGACAACGAG    | 59.622 | 20 | 140 | 300  | 439  |
| GGAATTCATCCATCTCGAA     | 59.831 | 20 | 120 | 219  | 338  |
| GGCATCCATACTTGCCACTT    | 59.962 | 20 | 273 | 1178 | 1450 |
| CATGCATACAAAACCAAACG    | 57.57  | 20 | 159 | 4358 | 4516 |
| TCCTGCAATCTCTGAACCAA    | 59.369 | 20 | 269 | 371  | 639  |
| GCATCATAGGACCCCAAAAA    | 59.762 | 20 | 210 | 390  | 599  |
| CATTGACCGTCTTGTATGC     | 59.002 | 20 | 230 | 108  | 337  |
| CGCAATATGAAATGGCACAC    | 59.96  | 20 | 268 | 788  | 1055 |
| TGTTT CAGCACACAGAACTTC/ | 59.534 | 22 | 260 | 566  | 825  |
| TTTTTCTTTGGGTCATGTGATG  | 59.839 | 22 | 262 | 697  | 958  |
| ATTTGATCCCCCAATTCAA     | 59.067 | 20 | 155 | 18   | 172  |
| ATTCACCAGCTCCTCCAATG    | 60.073 | 20 | 255 | 2333 | 2587 |
| ATTGGTGCATGATTGCATTG    | 60.352 | 20 | 159 | 511  | 669  |



|                         |        |    |     |      |      |
|-------------------------|--------|----|-----|------|------|
| ACATGGGATTCATGGGTCAT    | 59.869 | 20 | 211 | 746  | 956  |
| CTTCTTTTGGCTGTGCTGGT    | 60.431 | 20 | 163 | 831  | 993  |
| TCTCCAACAACCTGGTCAGCA   | 60.44  | 20 | 218 | 1980 | 2197 |
| CGGAGCAAATTTATCCTTTTGA  | 60.421 | 22 | 127 | 683  | 809  |
| GAGTTCAATAACGTTTTTAATA  | 59.561 | 27 | 280 | 1568 | 1847 |
| AAGTTTCCATTCTGCCGTGT    | 59.598 | 20 | 152 | 74   | 225  |
| GCACGAGCTGTGTTGCAG      | 60.357 | 18 | 229 | 470  | 698  |
| TTGATGTTTGTATATGTTTCGTT | 58.542 | 25 | 277 | 240  | 516  |
| AATGAGGTCAATGGTCAGCC    | 59.934 | 20 | 151 | 1147 | 1297 |
| GTGTGGCGTGCTAACTGCTA    | 60.081 | 20 | 217 | 239  | 455  |
| TTATGAATGAAAGCCACCCC    | 59.762 | 20 | 153 | 60   | 212  |
| CTGCTGTCCATTCTCCAAT     | 60.073 | 20 | 279 | 624  | 902  |
| TATTATCTCCCGCAACACCC    | 59.784 | 20 | 213 | 697  | 909  |
| CCGTTCCATCAAGCATTTTT    | 59.938 | 20 | 151 | 1097 | 1247 |
| AAAAGGCGGTGGAAGAACT     | 60.11  | 20 | 108 | 7502 | 7609 |
| CACCCCACGAGACAACCTTTT   | 60.005 | 20 | 113 | 742  | 854  |
| ACTAGTGGCAGCCATGTCCA    | 61.688 | 20 | 235 | 256  | 490  |
| GCCGTTTTGCTTTGGTTTTA    | 60.109 | 20 | 240 | 377  | 616  |
| CAACTGTGATGTTCTTGTTTTGC | 59.707 | 23 | 279 | 720  | 998  |
| TGCCATCGTTCACCTTACCA    | 60.111 | 20 | 202 | 1271 | 1472 |
| CAAGCTTCTCCACCAATC      | 59.67  | 20 | 271 | 996  | 1266 |
| TAGTGGTCGACGGCTTTAG     | 60.262 | 20 | 264 | 227  | 490  |
| TCCAGTGTAGTTTACCCGGC    | 59.993 | 20 | 181 | 871  | 1051 |
| CCATGTCCAGACCCATCAAT    | 60.6   | 20 | 250 | 1091 | 1340 |
| GCCACGTCATACGAACCTCT    | 60.142 | 20 | 257 | 595  | 851  |
| ATTCTGCTATTCCCAGGGT     | 59.925 | 20 | 225 | 0    | 224  |
| ATCCGTTCCGGTCTTCTACA    | 59.55  | 20 | 229 | 417  | 645  |
| CTGATGAACCCTACCAACCAA   | 59.838 | 21 | 254 | 392  | 645  |
| ACTTGCAAATATAAACGTAATC  | 59.169 | 26 | 205 | 226  | 430  |
| AGCTCCCAAGTCTGAGTGGA    | 59.986 | 20 | 178 | 441  | 618  |
| CAAAACAATTGCTCACGCAT    | 59.735 | 20 | 119 | 1029 | 1147 |
| AGAGCTGTCCATCCCATTGA    | 60.622 | 20 | 120 | 1050 | 1169 |
| ATAATATGGGGCGTCCACCT    | 60.419 | 20 | 242 | 205  | 446  |
| ATGTCTGCCAGCAGAGAAC     | 60.418 | 20 | 279 | 682  | 960  |
| ATGCACAATCATCACACATAAC  | 59.634 | 23 | 154 | 722  | 875  |
| AGGAACGGGAGATTTTGCTT    | 60.074 | 20 | 194 | 259  | 452  |
| TTCCGGAGCATTACCCTATG    | 59.916 | 20 | 277 | 1679 | 1955 |
| AGGTGAGCCAGATGTAGCGT    | 59.898 | 20 | 156 | 738  | 893  |
| GCGGACAGAAAGAGATAGCG    | 60.118 | 20 | 187 | 335  | 521  |
| TGTGTTGAAACCCTCATCCA    | 59.935 | 20 | 249 | 1425 | 1673 |
| CTGGTTGCCAGCTTACTGCT    | 60.592 | 20 | 201 | 326  | 526  |
| TTGTCATGATTTGCGGGTTA    | 59.93  | 20 | 189 | 49   | 237  |
| GGGAAGAGAGTGAGAGTTTTG   | 59.507 | 22 | 115 | 769  | 883  |
| GGATCTCAAATCTGACGGA     | 60.011 | 20 | 217 | 840  | 1056 |
| GGTTCGATTCTCATTTCCCA    | 59.871 | 20 | 254 | 10   | 263  |
| TGTATTCGGTTGAATTTGATGG  | 59.699 | 22 | 123 | 317  | 439  |
| GCTTTGACAATATTTAGTGTITI | 59.901 | 27 | 279 | 3629 | 3907 |
| CACACATCCATGTTCTGTCT    | 60.604 | 20 | 265 | 163  | 427  |
| TCCTTGTAGAAGCCTTGGGA    | 59.807 | 20 | 278 | 53   | 330  |
| GGCAGACAAGCCATCATTTTT   | 60.081 | 20 | 154 | 401  | 554  |
| TGATTGTGGACCAACAGCAT    | 59.967 | 20 | 182 | 167  | 348  |
| TGAAGGTGTGTGGGGTGTTA    | 59.848 | 20 | 240 | 1329 | 1568 |
| CGAAGGAATATGGACAAGGG    | 59.382 | 20 | 184 | 1724 | 1907 |
| ATTTCCAGCGTCAAGACAT     | 59.7   | 20 | 162 | 59   | 220  |
| CTCAATTAGGTGTCCCACCG    | 60.366 | 20 | 198 | 337  | 534  |
| GCCCTTCCCAACTCAAAGA     | 60.18  | 19 | 133 | 963  | 1095 |
| TTCTTCACTCTCCACCTCG     | 60.377 | 20 | 217 | 1404 | 1620 |
| GGGTTCAAACCTCACTCAACA   | 59.997 | 21 | 178 | 617  | 794  |

|                        |        |    |     |      |      |
|------------------------|--------|----|-----|------|------|
| TGTGTGCATTTGTTTTGTTAGC | 59.464 | 24 | 263 | 119  | 381  |
| TCTGGACGATCCTCATCCTT   | 59.612 | 20 | 222 | 119  | 340  |
| CGTTGTAATGCCCCGTAAT    | 59.72  | 20 | 182 | 1277 | 1458 |
| TGGAGTTCAAGCCCAAAAAT   | 59.546 | 20 | 280 | 2107 | 2386 |
| GGGTCCTCCCAGTATGTGTG   | 60.238 | 20 | 205 | 1477 | 1681 |
| CTAGGCCCATGCAAGAAAA    | 60.202 | 20 | 272 | 1033 | 1304 |
| CAATCTGCAAAAGAACAGGGA  | 60.234 | 21 | 253 | 302  | 554  |
| TTATCCTGTGCTTTTGCACG   | 59.872 | 20 | 237 | 2664 | 2900 |
| TCTCCTTCTCCATTCCCTT    | 60.008 | 20 | 140 | 74   | 213  |
| GCATGCTCTCCACCTTTGAT   | 60.226 | 20 | 193 | 246  | 438  |
| TGCGTTTTGATGATATATAGGT | 58.933 | 25 | 271 | 724  | 994  |
| TCTTTCCATCTTGGACCACA   | 59.059 | 20 | 183 | 3669 | 3851 |
| TTATTCTCGCAAACAGTGCC   | 58.92  | 20 | 279 | 2410 | 2688 |
| TCTTGGATTTGGAGGAATGG   | 59.864 | 20 | 212 | 354  | 565  |
| CCCTCGTATGCAGTGGTTTT   | 59.993 | 20 | 228 | 679  | 906  |
| TCTGCTGAAGCCCTTCTCAT   | 60.096 | 20 | 240 | 12   | 251  |
| TGGGAATGTGGTGTAGATTTG  | 58.338 | 21 | 185 | 221  | 405  |
| ATCATGAATGACACATGGCG   | 60.362 | 20 | 225 | 11   | 235  |
| TCACAAGGGTGAAAGGGAAC   | 59.943 | 20 | 232 | 71   | 302  |
| ACCACAGTGGCATTACACGA   | 60.032 | 20 | 258 | 728  | 985  |
| CTTTGCCGTTCTTATGCTGC   | 60.905 | 20 | 130 | 403  | 532  |
| TGGAGGTTCCCATTAATCCTC  | 60.138 | 21 | 160 | 683  | 842  |
| GAATAGGAATGGGGGAGAGC   | 59.866 | 20 | 221 | 959  | 1179 |
| TGGTTGGAGGGTAACATCGT   | 60.232 | 20 | 204 | 1029 | 1232 |
| GCGAAGCGACATCACATAAA   | 59.839 | 20 | 141 | 24   | 164  |
| AACTTGTGTTGGTGGCTTCA   | 59.187 | 20 | 246 | 1904 | 2149 |
| TCAATCTCGTTGAAAAATGGTT | 58.605 | 22 | 261 | 818  | 1078 |
| CCCTCCTAAGGACCCCTTCT   | 60.797 | 20 | 119 | 0    | 118  |
| CGCTCGACTTTCTCGAAGAT   | 59.717 | 20 | 226 | 283  | 508  |
| TAGGGAGTCACTTCCGTTCC   | 59.137 | 20 | 265 | 1649 | 1913 |
| AACATTATTGCGAGCGAACA   | 59.329 | 20 | 184 | 74   | 257  |
| TCTGCTTGACAAGTGGCATT   | 59.445 | 20 | 244 | 7    | 250  |
| GGCCAACAAATCGTCAATCT   | 59.939 | 20 | 242 | 292  | 533  |
| CGCTCAACAACCACAACAGT   | 59.794 | 20 | 205 | 76   | 280  |
| CCATCGAAGCTCACTGTCAA   | 59.984 | 20 | 168 | 969  | 1136 |
| TGATGTTATAGTAAGCAAACCA | 57.922 | 25 | 217 | 716  | 932  |
| ATGCTGAAGGAGCCAAAAGA   | 59.955 | 20 | 159 | 289  | 447  |
| CCGTTGCCTTACCTTTTTCA   | 60.103 | 20 | 255 | 492  | 746  |
| GGACACCACGTTAGCATTCA   | 59.572 | 20 | 225 | 354  | 578  |
| TGGGGGAGATTTTTGTTTTG   | 59.772 | 20 | 238 | 959  | 1196 |
| ATCAAGAGCTCTACCCACG    | 60.408 | 20 | 102 | 6    | 107  |
| AAACTACCACTGCGTCCCAC   | 60.035 | 20 | 187 | 751  | 937  |
| ACGAGCTCTCCCCTTATCC    | 59.674 | 20 | 280 | 335  | 614  |
| GCACCTCTGTTAGCGAGAA    | 60.538 | 20 | 264 | 392  | 655  |
| CCATGATTTCGGACACACAC   | 59.812 | 20 | 251 | 603  | 853  |
| TCCATACAGACACAACCCCC   | 60.634 | 20 | 187 | 281  | 467  |
| TGTCTGGAATGGAATGTGGA   | 59.893 | 20 | 277 | 4264 | 4540 |
| CCCCTACATTGGGAGTCAAA   | 59.784 | 20 | 225 | 896  | 1120 |
| AACATGATACCGCCGAAAAT   | 59.301 | 20 | 226 | 159  | 384  |
| CCATCCCAAACCAAACCTA    | 59.657 | 20 | 273 | 1291 | 1563 |
| TGGAAAGCAACTCAATTTTGG  | 60.096 | 21 | 149 | 559  | 707  |
| TGGTCGAATGAGGAGTGAAA   | 59.215 | 20 | 256 | 133  | 388  |
| GCCTCTGCTTACCAATTTT    | 59.316 | 20 | 261 | 245  | 505  |
| TGCAGACGAAACTCACAAGG   | 60.025 | 20 | 141 | 657  | 797  |
| GAAGGTGGTGTGCTGTGAA    | 59.726 | 20 | 271 | 201  | 471  |
| TTATCACAAAAGGAGGGGTT   | 59.69  | 21 | 265 | 711  | 975  |
| GAAATGAGGGAGAAGGGGAA   | 60.38  | 20 | 244 | 6310 | 6553 |
| TGGCATCTTAAAATCCCTCAC  | 59.033 | 21 | 248 | 14   | 261  |

|                         |        |    |     |      |      |
|-------------------------|--------|----|-----|------|------|
| TGCCTCTATTGGGATTGAGC    | 60.177 | 20 | 119 | 47   | 165  |
| TGTCGCTTCACTGGTATTCG    | 59.864 | 20 | 244 | 1501 | 1744 |
| ATGTGATGTGAGCCACGAAA    | 60.12  | 20 | 182 | 2520 | 2701 |
| TGGTTCCATCTTCGAACTCC    | 60.05  | 20 | 257 | 131  | 387  |
| AACACGGCTGTTTACGTGGT    | 60.474 | 20 | 265 | 599  | 863  |
| TTTTACGTGTAGGAGCCAA     | 59.317 | 20 | 265 | 410  | 674  |
| CGGTTTGATTTGGTCCATTT    | 59.662 | 20 | 212 | 7    | 218  |
| GCATGCGTTGTCCAAATAAA    | 59.567 | 20 | 180 | 921  | 1100 |
| CTTTGGGCATTGTTCTCTGA    | 58.847 | 20 | 264 | 85   | 348  |
| TTTGGTCTCGTTGTATGAACAA  | 59.544 | 23 | 243 | 433  | 675  |
| AACATGGGTACTGTTTCGCA    | 59.05  | 20 | 135 | 996  | 1130 |
| AAATTCATGTGTTTCGTAATGAT | 60.135 | 24 | 275 | 344  | 618  |
| TGGAGATGGTGTAAACCGTGA   | 59.96  | 20 | 203 | 28   | 230  |
| GAAAGGGGAAGGAGAAGTGG    | 60.045 | 20 | 130 | 20   | 149  |
| CCACGCTTGGCATTAGATA     | 58.794 | 20 | 169 | 355  | 523  |
| AATCCCATGTTGCTGCATTT    | 60.339 | 20 | 163 | 154  | 316  |
| AATTCTCCTCCTCAGCCCTC    | 59.778 | 20 | 233 | 1022 | 1254 |
| TTTTGGGAACAACCGTTCAT    | 60.206 | 20 | 278 | 613  | 890  |
| TGGCAACTCCATGAACAATTT   | 60.359 | 21 | 254 | 354  | 607  |
| TGTGACGAGGTTGTGGAGAG    | 59.864 | 20 | 214 | 1523 | 1736 |
| CAATCCAAAACCTCTACATTTTC | 59.06  | 25 | 280 | 305  | 584  |
| TGAAGTTAGGAAATAAGGAGG   | 58.743 | 25 | 172 | 802  | 973  |
| CCACACCCACACTCTCTCT     | 60.153 | 20 | 256 | 299  | 554  |
| TTTTGCATGGATTAACAGCG    | 59.702 | 20 | 204 | 95   | 298  |
| GAAAAATTGGCCTCACCTCA    | 60.051 | 20 | 145 | 1672 | 1816 |
| GAAAAGGGGTGACCACAAAA    | 59.807 | 20 | 256 | 897  | 1152 |
| TTCCACGAATACAAGCGTTCT   | 59.761 | 21 | 240 | 330  | 569  |
| TTGGGTCTTCCACCACTTA     | 60.486 | 20 | 271 | 752  | 1022 |
| AGGTTACATTATGTGGCCCG    | 59.708 | 20 | 279 | 909  | 1187 |
| ACAGCCAGAAGAAACCCAGA    | 59.844 | 20 | 207 | 151  | 357  |
| ACCGTCGATGAAAAATCTGG    | 59.933 | 20 | 267 | 991  | 1257 |
| GGAGCAGGTTCGAAGTGAGA    | 60.533 | 20 | 220 | 4969 | 5188 |
| GGCCTGGCTATCTTGGTAAA    | 59.182 | 20 | 276 | 2084 | 2359 |
| TCCAATATTTATGGCGATCTAA  | 59.744 | 24 | 225 | 914  | 1138 |
| AACATTGTGAAGGAGGCTGC    | 60.263 | 20 | 264 | 1121 | 1384 |
| TATCGGGTAAAGTCCGCATC    | 59.923 | 20 | 279 | 1688 | 1966 |
| TCTTCAAAGTTGCAGCCTCA    | 59.716 | 20 | 266 | 1505 | 1770 |
| CCAAAATTGCCCTTTCATGT    | 59.801 | 20 | 240 | 122  | 361  |
| ATTTGCCCCACACAACCTGAT   | 60.24  | 20 | 146 | 9415 | 9560 |
| TACGAATCACACTATGGGCA    | 57.572 | 20 | 150 | 442  | 591  |
| AAAGAAGGGTTGGCGATGTA    | 59.569 | 20 | 244 | 984  | 1227 |
| CCAATTTTCATTGATAACTCACC | 58.865 | 23 | 219 | 51   | 269  |
| GAGGAAGGATTTTGGTGGGT    | 60.169 | 20 | 256 | 282  | 537  |
| GCCTGTTGAAGCAAACAGTCT   | 59.534 | 21 | 277 | 1158 | 1434 |
| GTGCTGATGATTTTGAGCCA    | 59.805 | 20 | 169 | 2676 | 2844 |
| TTTGACATGAGCTTTTCCA     | 60.379 | 20 | 208 | 1249 | 1456 |
| TCACACAAGTCCGTTGGAAA    | 60.128 | 20 | 229 | 369  | 597  |
| GCCCGTGTCCATAACACAAT    | 60.646 | 20 | 274 | 1796 | 2069 |
| TGCTTCTCACCAATCAGTGC    | 59.992 | 20 | 113 | 18   | 130  |
| CCATGGTGGTCACAATTCAC    | 59.656 | 20 | 213 | 109  | 321  |
| CCAGAATTTTGAACCTCCAA    | 60.044 | 20 | 155 | 1628 | 1782 |
| GGAAGGCCTAGATTTGTCTTGA  | 59.725 | 22 | 201 | 2285 | 2485 |
| CAGGACTTGTAACCTTGGGG    | 59.444 | 20 | 164 | 915  | 1078 |
| TGGATTTTTGCCCTTGTTTT    | 59.429 | 20 | 272 | 322  | 593  |
| GGCAAACAACAGTTGCAAAA    | 59.752 | 20 | 156 | 820  | 975  |
| ACACACATGGGCTAGCTGAA    | 59.318 | 20 | 255 | 384  | 638  |
| AATTGGTTTTGAGACCACGG    | 59.83  | 20 | 229 | 447  | 675  |
| GCATGGGGTTGGTTCCTATT    | 60.94  | 20 | 228 | 563  | 790  |

|                        |        |    |     |      |      |
|------------------------|--------|----|-----|------|------|
| ATGCACATTGTGTCCCAAAA   | 59.823 | 20 | 195 | 726  | 920  |
| GATTTGGACCCCACCCTACT   | 60.052 | 20 | 109 | 434  | 542  |
| TGACAAGATTCAATAAAGCCA  | 59.639 | 23 | 237 | 827  | 1063 |
| CAGAGGAGTCCTTCACAGGG   | 59.828 | 20 | 159 | 215  | 373  |
| TCTCTTGAATTTCCCAACG    | 60.044 | 20 | 128 | 152  | 279  |
| TGGTGTTTGATTGCGAGAAG   | 59.84  | 20 | 246 | 1941 | 2186 |
| CCATCGCCACCTTTTGTAA    | 59.823 | 20 | 184 | 66   | 249  |
| GGAGCGCACGAGAATTTTAC   | 59.851 | 20 | 240 | 450  | 689  |
| AAATGCATCTCAATTTTGGGA  | 57.239 | 21 | 233 | 534  | 766  |
| AATATCACCAAGAGATGCCCA  | 59.401 | 21 | 274 | 247  | 520  |
| GCAACGAGAAATGGAGTGGT   | 60.119 | 20 | 256 | 1855 | 2110 |
| TCCCAAGAGTCCAGAACCAG   | 60.229 | 20 | 149 | 1480 | 1628 |
| CAAAAGCTATGCTTTCACAAAC | 57.853 | 23 | 184 | 119  | 302  |
| GGAGGTACCCTAGGCGAGAG   | 60.225 | 20 | 222 | 123  | 344  |
| TCTGGTATGCTGCTTCTCCC   | 60.362 | 20 | 176 | 2603 | 2778 |
| GTCGATGGGGCAGAAAAGTA   | 60.074 | 20 | 140 | 591  | 730  |
| CGAGTATCGCTCCGACTTTC   | 59.978 | 20 | 275 | 101  | 375  |
| CCGATTTGATGAGAAGTGCC   | 60.603 | 20 | 221 | 29   | 249  |
| ATCTCTCAGCATTAGCCCCA   | 59.797 | 20 | 273 | 434  | 706  |
| GAAATAAGGAGGTGTTATGAA  | 59.323 | 24 | 280 | 693  | 972  |
| TCTCCAAAGCCCAACAACAT   | 60.495 | 20 | 197 | 239  | 435  |
| TTCAGGACGCTTTACCGAGT   | 59.875 | 20 | 280 | 141  | 420  |
| ACTAACCAATGCGGATGCTC   | 60.103 | 20 | 267 | 3121 | 3387 |
| TATCACCAACCTCTGCACCA   | 60.112 | 20 | 110 | 677  | 786  |
| CCTTCGTCACCAACGAAGTT   | 60.149 | 20 | 269 | 643  | 911  |
| CAGGTGATTGAACTCAAAGCC  | 59.726 | 21 | 272 | 3202 | 3473 |
| CCGGGCATCAGAACAATTTA   | 60.827 | 20 | 273 | 1781 | 2053 |
| GGCCACAAGCCATTAGTGAT   | 59.962 | 20 | 191 | 389  | 579  |
| GGTGAAGCATGCAAAGATGA   | 59.805 | 20 | 241 | 907  | 1147 |
| CCTAAAGTGACCCCATTCCA   | 59.784 | 20 | 277 | 830  | 1106 |
| TAAGTGCATGGAGGTGGTTG   | 59.566 | 20 | 209 | 232  | 440  |
| CATCTATGCTCGCACATTCCG  | 60.388 | 20 | 231 | 2654 | 2884 |
| TGGGGTCTTCCTCAGATACG   | 60.065 | 20 | 123 | 1378 | 1500 |
| TATCAAGCTTGTCAGCCCCT   | 59.836 | 20 | 225 | 1729 | 1953 |
| GTTGTGATGCAATTTGAGCC   | 59.131 | 20 | 237 | 1131 | 1367 |
| GAAGGTGATGGGGCTATGTG   | 60.34  | 20 | 135 | 143  | 277  |
| CCCTGTAACAGTTGGTGCCT   | 60.028 | 20 | 264 | 1243 | 1506 |
| CCCTTGATTTAAGAGATCCAAT | 59.004 | 23 | 278 | 210  | 487  |
| TTCAGAAATGCAATAAATTCCC | 59.11  | 22 | 270 | 1115 | 1384 |
| AGCGCCTCCATATCAGAAGA   | 59.939 | 20 | 257 | 1655 | 1911 |
| TGTTTCGCACAGGTGAATCAT  | 60.12  | 20 | 214 | 12   | 225  |
| GGCCGTTTGTTTTATTGGAA   | 59.81  | 20 | 165 | 555  | 719  |
| CAAATAGGTGGGTGGTGGTT   | 59.569 | 20 | 234 | 46   | 279  |
| TTCTCGCAGAGCATGTGTAT   | 57.013 | 20 | 280 | 1192 | 1471 |
| CCTTGCTAAGGGGAATCAAG   | 58.785 | 20 | 243 | 476  | 718  |
| CTCGAGATGGTAGATGCCCT   | 59.263 | 20 | 259 | 425  | 683  |
| AGAATAGCCCAGTGGTGGA    | 59.55  | 20 | 243 | 312  | 554  |
| TTGTGTTTTGACGTTTGCATT  | 59.122 | 21 | 100 | 7    | 106  |
| GACCGCAGGATAATCCAGAA   | 60.036 | 20 | 165 | 908  | 1072 |
| TTGTTAGTTTTGGATGGTACGA | 59.817 | 24 | 227 | 441  | 667  |
| TGCAGGGAAAAAGCATGAAT   | 60.585 | 20 | 262 | 2329 | 2590 |
| TGTGATCAAAGAAGAAAAATG  | 59.549 | 25 | 266 | 887  | 1152 |
| TAGTAAACCGGACGTGGCAT   | 60.386 | 20 | 235 | 555  | 789  |
| TCCTGCATATTGGAAAGGGA   | 60.405 | 20 | 274 | 1850 | 2123 |
| ATGGTGTCCATCCCTCTCAA   | 60.326 | 20 | 275 | 3152 | 3426 |
| GCACGTATCGACATTGCTTA   | 57.41  | 20 | 121 | 998  | 1118 |
| AGCTAGGAGGAAGGGCTGAC   | 59.979 | 20 | 213 | 0    | 212  |
| GCATCCAGCAGTGTAGGTGA   | 59.862 | 20 | 235 | 720  | 954  |

|                        |        |    |     |      |      |
|------------------------|--------|----|-----|------|------|
| GCCGGAGTGATGCAGTAGTT   | 60.285 | 20 | 196 | 234  | 429  |
| GCTCAATTTTAGTTGTGAAATC | 60.065 | 26 | 130 | 2170 | 2299 |
| GCGCACAAACACTCTCACTC   | 59.628 | 20 | 107 | 60   | 166  |
| CGATTACGCCTCTAAGAAAAC  | 58.589 | 22 | 211 | 222  | 432  |
| CAATCGTATGGTCTCCCCAG   | 60.331 | 20 | 271 | 456  | 726  |
| TCCTGTATCGATTATCATTTTC | 57.736 | 24 | 266 | 313  | 578  |
| TCTCAGACAAAACCTTCGCC   | 60.375 | 20 | 236 | 1417 | 1652 |
| GCTGATGTGCAAACAAAGAAA  | 59.797 | 22 | 264 | 2000 | 2263 |
| TGGCTAGAGAGATTCCACGA   | 58.543 | 20 | 182 | 372  | 553  |
| AAGACCGGCCATTCTACAGTT  | 60.012 | 21 | 135 | 723  | 857  |
| AACCCAGTGAATGATAAGGGG  | 60.06  | 21 | 204 | 12   | 215  |
| CGATATGTTACGTAGGATGACC | 59.374 | 24 | 224 | 1593 | 1816 |
| AAATGTGTTCCATTGCGGTT   | 60.235 | 20 | 255 | 1053 | 1307 |
| TCTCAATAGCCCGTTTGTC    | 60.074 | 20 | 158 | 106  | 263  |
| CGAAAATCAAAAAGCCCACA   | 60.97  | 20 | 225 | 2365 | 2589 |
| GAGAGAGGGTGCCATTACCA   | 60.073 | 20 | 274 | 138  | 411  |
| TCTACGTCAGCACACGCTTC   | 60.207 | 20 | 248 | 577  | 824  |
| CTGATTGGGTGCAACTGAGA   | 59.831 | 20 | 260 | 454  | 713  |
| ACCGTTCCACAACCTACTG    | 59.884 | 20 | 240 | 335  | 574  |
| ACAGCCAGCATTGTTTCTCA   | 59.445 | 20 | 171 | 58   | 228  |
| TGCACACACAAACCCTCACT   | 60.203 | 20 | 111 | 430  | 540  |
| GAATGTCGTTTCAAATAAAAC  | 60.107 | 24 | 259 | 1192 | 1450 |
| ACATTGCTGACATGATTGCC   | 59.533 | 20 | 128 | 148  | 275  |
| TCCGAAAAGGCGATAAAATG   | 60.033 | 20 | 233 | 67   | 299  |
| TGGGTATGGGCTTAAATGC    | 59.795 | 20 | 159 | 1125 | 1283 |
| AATTGTGAACAGGTGGCAAG   | 58.623 | 20 | 246 | 546  | 791  |
| CCCCTGATCAAGTCCATCAC   | 60.326 | 20 | 183 | 835  | 1017 |
| GATACATGCGGAACTCAAG    | 59.449 | 20 | 199 | 602  | 800  |
| GCCTCAGGCGTAGTCATTGT   | 60.285 | 20 | 209 | 484  | 692  |
| AACGCACACCTCTTCTCGTT   | 59.914 | 20 | 160 | 0    | 159  |
| CAAGCGGATTTGATGGATTT   | 59.901 | 20 | 246 | 128  | 373  |
| AATCCCAAATCCCATCACTG   | 59.605 | 20 | 223 | 429  | 651  |
| TACCCATCTCTTTGCTGTCG   | 58.874 | 20 | 203 | 484  | 686  |
| AAGGTCCGTAGTCCATCACG   | 59.989 | 20 | 271 | 3372 | 3642 |
| ACTAAATGTGCGTAGGGCCA   | 60.523 | 20 | 227 | 1118 | 1344 |
| TAGGCTCCTGGTTTTTGTGC   | 60.249 | 20 | 204 | 966  | 1169 |
| AGCGACGCATGACCTTATTC   | 60.243 | 20 | 263 | 1727 | 1989 |
| AAATAAATTGGGCGACAAGG   | 58.943 | 20 | 249 | 438  | 686  |
| TGCTCTCAGATCCGGCTTAT   | 59.939 | 20 | 161 | 1379 | 1539 |
| ATGGGTTATCACCAGATCGC   | 59.78  | 20 | 129 | 1085 | 1213 |
| CGATTTACACACGCGCAC     | 59.859 | 18 | 276 | 0    | 275  |
| CGCGGAGTTTAAGGAATGTT   | 59.225 | 20 | 187 | 1983 | 2169 |
| CCCGATTGACATCCCTAATG   | 60.148 | 20 | 227 | 439  | 665  |
| TTTGTGGTGGAGAGGTTGTG   | 59.565 | 20 | 224 | 459  | 682  |
| AGGCTGAGACTGAAACCACG   | 60.444 | 20 | 237 | 886  | 1122 |
| GGCCAGAACCATGAGAGAAA   | 60.195 | 20 | 185 | 3131 | 3315 |
| GTTCTGCTTTGTGGTGGAT    | 59.973 | 20 | 234 | 35   | 268  |
| GTGGCACCTTTTCATCCATT   | 59.797 | 20 | 182 | 108  | 289  |
| CCCCAAATTCCTAAGAACC    | 59.639 | 20 | 233 | 4538 | 4770 |
| ATCAAATGACAAAACGCCA    | 59.016 | 20 | 227 | 394  | 620  |
| AAAAATCCGTCACTAAATGGG  | 57.988 | 21 | 237 | 964  | 1200 |
| TCTAGTACGCGGGCCAATTA   | 60.599 | 20 | 269 | 2    | 270  |
| GGCCGTCTAGTGACACGAAT   | 60.142 | 20 | 148 | 20   | 167  |
| TGTGTTAACCTTTGGCTCCC   | 59.971 | 20 | 181 | 1213 | 1393 |
| TTTTCCAGACGTGTCAT      | 58.201 | 20 | 264 | 486  | 749  |
| TGTTGGCATTCAAATCAACC   | 59.375 | 20 | 263 | 1192 | 1454 |
| ATTGCTTGCTTTCCAGCCT    | 58.936 | 20 | 127 | 101  | 227  |
| GATTTTGGGATGGACTTGA    | 59.727 | 20 | 155 | 111  | 265  |

|                        |        |    |     |      |      |
|------------------------|--------|----|-----|------|------|
| TTTAAGGGTTATCACCTGATTT | 57.757 | 24 | 271 | 1003 | 1273 |
| ATCTACCCCTCATTCCCGAC   | 60.154 | 20 | 215 | 1360 | 1574 |
| ACGCCTCTCTCCCTCTCTCT   | 59.709 | 20 | 200 | 854  | 1053 |
| AAGGCTGGCTCTGATCTTCA   | 60.096 | 20 | 250 | 2822 | 3071 |
| TTTGAAGCATGTGTTAATTGCC | 60.006 | 22 | 262 | 246  | 507  |
| ATGCACAAACAATCCACGAA   | 59.972 | 20 | 223 | 2978 | 3200 |
| CTACAATGGGCAAGGCATTT   | 59.96  | 20 | 260 | 631  | 890  |
| CCACTGTATCCCGAGATGGT   | 59.803 | 20 | 210 | 711  | 920  |
| TCAGGCCACTTACGTTCTTACA | 59.807 | 22 | 259 | 1237 | 1495 |
| AGGGTTGAACTTTGAAGGGC   | 60.476 | 20 | 202 | 409  | 610  |
| TGAAGCTGCATTCACTCTGC   | 60.296 | 20 | 255 | 1018 | 1272 |
| GGCTCCAAACTTTTGGGTCTA  | 60.469 | 21 | 246 | 1456 | 1701 |
| ATTCTAGCTTGTCGCAGCAC   | 58.283 | 20 | 222 | 1145 | 1366 |
| GGAAATTTTCGGGTGAACCT   | 60.166 | 20 | 208 | 1167 | 1374 |
| GCTATGTTTGGATCGGCATT   | 59.929 | 20 | 103 | 262  | 364  |
| CAAGGAAAGCCCGTGATTAG   | 59.702 | 20 | 256 | 701  | 956  |
| CTGTCTTAATGGGAAGGGCA   | 60.066 | 20 | 268 | 1690 | 1957 |
| TGCGTTGTGTGTATGCAA     | 60.801 | 20 | 229 | 4229 | 4457 |
| AGCTTGTGGAATTGTTTGGC   | 60.118 | 20 | 187 | 1175 | 1361 |
| CCGCTTCTACAGTACTCCG    | 59.891 | 20 | 149 | 1870 | 2018 |
| TCGTCGAGAGTGAGGAGGAT   | 59.945 | 20 | 242 | 440  | 681  |
| TCCTCTCACGCACTCTCAA    | 59.701 | 20 | 267 | 710  | 976  |
| GGAAAATTTGTGGTTGTCG    | 60.206 | 20 | 137 | 1578 | 1714 |
| GGTTTGAATGCGGTTTAAGG   | 59.451 | 20 | 226 | 1177 | 1402 |
| TTGGCAGAGGTGTGAGAGTG   | 60.022 | 20 | 161 | 416  | 576  |
| TTTCAGGCGAGGAAGAGACT   | 59.162 | 20 | 267 | 461  | 727  |
| CACTCTCACAAGTTCCCGT    | 60.151 | 20 | 115 | 2276 | 2390 |
| TGGGAATATTGGCATTTTTGA  | 60.137 | 21 | 278 | 615  | 892  |
| AAGAGAAGCAGCAGCAAACC   | 59.763 | 20 | 243 | 392  | 634  |
| TTTCTGGTGAAACCGACCTC   | 60.088 | 20 | 212 | 459  | 670  |
| GGATGCATGGCTCATTGATT   | 60.843 | 20 | 203 | 434  | 636  |
| AGATAACGCAACGTCGATGG   | 61.052 | 20 | 155 | 1550 | 1704 |
| GGTTCCCGCGTCATAAAAT    | 59.776 | 19 | 199 | 794  | 992  |
| TTATGAAAACCGCAGCAGTG   | 59.872 | 20 | 225 | 290  | 514  |
| ACATTATCATTTCACCGCC    | 59.651 | 20 | 188 | 394  | 581  |
| AAGTTGTGGGGCTGGAGATA   | 59.55  | 20 | 264 | 146  | 409  |
| GCCTCTGATGCAAGTCCTTC   | 59.957 | 20 | 263 | 2505 | 2767 |
| ATCGCAAACGATTTGGATGT   | 60.339 | 20 | 198 | 59   | 256  |
| TGTTCTAAAAACATGCCCA    | 59.013 | 20 | 264 | 2227 | 2490 |
| GGTCTTCGGGTCTGGGTATT   | 60.19  | 20 | 184 | 1155 | 1338 |
| ATGTCGGCATTCAAGTTTTT   | 59.434 | 20 | 251 | 1037 | 1287 |
| TCAAAGCTTGAAGGCCTAGC   | 59.73  | 20 | 213 | 782  | 994  |
| GGCTTCACTTTCAAACCCA    | 60.088 | 20 | 271 | 43   | 313  |
| TCAAACCTCAAATGGTGCAA   | 60.088 | 20 | 248 | 31   | 278  |
| TTACGTAAAAATGGGTTATTAT | 57.411 | 26 | 154 | 952  | 1105 |
| ATATGGGACGTCCAAAAACG   | 59.685 | 20 | 129 | 2775 | 2903 |
| CCTCCAGATCTAATGGCCT    | 60.422 | 20 | 157 | 1133 | 1289 |
| TAGGCGGATTGTTTTTGAC    | 59.938 | 20 | 211 | 890  | 1100 |
| ACCTTCCATAGGTTGGGAGC   | 60.328 | 20 | 118 | 80   | 197  |
| CGACGGAGAGCTAAATCGTT   | 59.476 | 20 | 211 | 400  | 610  |
| CCTCTGTATGCAAATGCAGC   | 59.449 | 20 | 139 | 3502 | 3640 |
| GATCATTACTGGCCATGGGT   | 59.635 | 20 | 254 | 1120 | 1373 |
| TTGTGTTCAAACCTTTGCGG   | 59.746 | 20 | 212 | 903  | 1114 |
| GGCATTGGCATAGTCCTGAG   | 60.624 | 20 | 251 | 479  | 729  |
| CCCAATTTGCTTGTACTTACTC | 59.11  | 23 | 271 | 2706 | 2976 |
| TCCCATTTCTTTTGTCCCA    | 60.28  | 20 | 171 | 1162 | 1332 |
| TTTTCTGCCACCCAGAAATC   | 60.051 | 20 | 190 | 2562 | 2751 |
| TCTTTTTGCAGGATATTCGATC | 59.263 | 23 | 194 | 410  | 603  |

|                        |        |    |     |      |      |
|------------------------|--------|----|-----|------|------|
| TAGGTCACCGAATTCCATCG   | 60.853 | 20 | 278 | 47   | 324  |
| CAAGAGCATTGTTGCTGGAA   | 59.988 | 20 | 272 | 649  | 920  |
| AGGGAGGAATAGAGCCGAAA   | 60.166 | 20 | 254 | 785  | 1038 |
| GTCGTTGTTTCACCATTGGA   | 59.394 | 20 | 164 | 1096 | 1259 |
| CAACGGTATGCTCGGATTTT   | 59.96  | 20 | 182 | 42   | 223  |
| CTTTTCGTTCTTTCTCAATTCG | 59.441 | 23 | 203 | 36   | 238  |
| CACCAAATATTAGGGTTATCAC | 60.706 | 25 | 219 | 836  | 1054 |
| TTGAGTTTGCATCTAAGAAGGT | 58.575 | 23 | 175 | 3217 | 3391 |
| AGAGGGTGAGAGGGGACCTA   | 60.066 | 20 | 262 | 1383 | 1644 |
| CGTAGATCCCTGTCGGGTAG   | 59.569 | 20 | 278 | 361  | 638  |
| GGTTGTGGATTTGTGAATAAAA | 57.971 | 23 | 240 | 2453 | 2692 |
| ATGGGCCCTCTAATCTCCAT   | 59.75  | 20 | 269 | 790  | 1058 |
| AACAAGGAGAGGAGCAGCAA   | 60.134 | 20 | 102 | 4224 | 4325 |
| GTCCAGGTCTCCCTCTCTCC   | 60.198 | 20 | 142 | 610  | 751  |
| CCCTTTTTTCATGGTGGTTGT  | 59.688 | 20 | 154 | 4443 | 4596 |
| TTCTAAGACCGGGATAGGCA   | 59.662 | 20 | 121 | 10   | 130  |
| GGCCATAAAACATTGCAAACA  | 59.824 | 21 | 210 | 1225 | 1434 |
| TTTTCGAACAAACATTGCGAC  | 59.712 | 20 | 260 | 2179 | 2438 |
| TGGGACCCGTCTTCTTATTG   | 59.926 | 20 | 168 | 1267 | 1434 |
| TCGTAGTAGGAGCACGAAAAC  | 59.941 | 22 | 268 | 18   | 285  |
| GTAGCTCCTGAATCCCCTCC   | 60.037 | 20 | 255 | 574  | 828  |
| CCCCCTAACATATCCACGTTT  | 59.952 | 21 | 163 | 416  | 578  |
| GGCCCTTCCCTCTGTTTT     | 60.428 | 19 | 273 | 0    | 272  |
| TAAAGAACGAAAACACACGC   | 60.018 | 21 | 191 | 0    | 190  |
| TTAGGGCCCATCCTATCACA   | 60.288 | 20 | 272 | 973  | 1244 |
| TGGGGGTGGGAGTTTAAGAT   | 60.549 | 20 | 156 | 466  | 621  |
| TGTAGTTGCTGGATTGCAGG   | 59.864 | 20 | 223 | 1036 | 1258 |
| AGATCCACTTGCCTTGATGC   | 60.226 | 20 | 189 | 1908 | 2096 |
| ATACATGCGTGTGCGTTCAT   | 60.026 | 20 | 268 | 2316 | 2583 |
| TTACCAATCCGGGTGATGTT   | 60.051 | 20 | 213 | 1156 | 1368 |
| ATCCCTGCTCCACTTTCTCA   | 59.803 | 20 | 235 | 368  | 602  |
| TGATTTGTGCTAACCCCTCGTT | 59.623 | 21 | 240 | 392  | 631  |
| AGGATGGAGCAACTCCAGAA   | 59.803 | 20 | 148 | 420  | 567  |
| GCAATACCCTAATCCAGCCA   | 59.923 | 20 | 217 | 361  | 577  |
| GTCCGGTAGGGTGCATAAAA   | 59.823 | 20 | 226 | 557  | 782  |
| TGGATTGAAATAAGGGGTCCG  | 59.756 | 20 | 214 | 153  | 366  |
| GAAATCAGCACGAATCACACA  | 59.713 | 21 | 150 | 1002 | 1151 |
| CCATCAAGAGGAAGAGGCAG   | 59.943 | 20 | 256 | 502  | 757  |
| ACCATGGCGTCTTCTGTCAT   | 60.542 | 20 | 247 | 1394 | 1640 |
| ATGTCATCCAGCACTGCAAA   | 60.272 | 20 | 253 | 941  | 1193 |
| GCTGAGCGGATTTAATCGTG   | 60.742 | 20 | 207 | 394  | 600  |
| CACAAACATTCCAATGCAGC   | 60.119 | 20 | 225 | 780  | 1004 |
| GAATATGGCTGCTTGGCTTC   | 59.813 | 20 | 163 | 2446 | 2608 |
| GAATTTGTTGACGAATGGGG   | 60.17  | 20 | 278 | 747  | 1024 |
| CTGCGAGGATCTACGGACA    | 59.951 | 19 | 269 | 737  | 1005 |
| GCCGTTGTGTCGTTTTCTTT   | 60.154 | 20 | 189 | 83   | 271  |
| ATCTCATCAGCAAGGCCAGA   | 60.914 | 20 | 226 | 1397 | 1622 |
| TTGGTCAAATCGAGAACAACC  | 59.963 | 21 | 253 | 718  | 970  |
| GGATGGTGCATTTTGTGATG   | 59.781 | 20 | 261 | 523  | 783  |
| TCTGTCATCGGTCCAGAGAA   | 59.34  | 20 | 278 | 2690 | 2967 |
| TCAGAAATTCAGGTTTCCACC  | 59.017 | 21 | 257 | 3334 | 3590 |
| AGCCATGGCCAAGAGTCTTAT  | 60.11  | 21 | 280 | 513  | 792  |
| CTGCTTCCAATGGTTGCATA   | 59.688 | 20 | 249 | 9    | 257  |
| AAGCTACCAATTGACGACGG   | 60.132 | 20 | 120 | 501  | 620  |
| TGTAGCCGACCCCAATTTAG   | 59.953 | 20 | 279 | 181  | 459  |
| ACAGGTAATTTTCGGTCGCAC  | 60     | 20 | 257 | 208  | 464  |
| CCACCACCATCTTACAAGCA   | 59.566 | 20 | 264 | 88   | 351  |
| TCCTCAATAGCACCAGCGAT   | 60.765 | 20 | 265 | 26   | 290  |

|                        |        |    |     |      |      |
|------------------------|--------|----|-----|------|------|
| TGCACCTTGAAGTTGTGGTT   | 59.187 | 20 | 216 | 1225 | 1440 |
| GTCCCTCCAACATAAGGCAA   | 59.933 | 20 | 277 | 1872 | 2148 |
| AACATGATGAAGGTCCGAGG   | 59.927 | 20 | 192 | 1113 | 1304 |
| CTGTGCTTTGAGCAACTCCA   | 60.175 | 20 | 244 | 248  | 491  |
| AATGCAGTCCCAAACAAGC    | 60.118 | 20 | 222 | 201  | 422  |
| TCAATCCCCCACCAACTTA    | 60.162 | 20 | 260 | 461  | 720  |
| ATAACGGGATTGAAGGAGGG   | 60.145 | 20 | 198 | 18   | 215  |
| GCCTACATCCACTGGTCAAGA  | 60.126 | 21 | 255 | 2444 | 2698 |
| TGTTTTCGCGAGCAGAAAATA  | 59.585 | 20 | 177 | 86   | 262  |
| ATCAGACCCACTTCGTGAGG   | 60.112 | 20 | 265 | 394  | 658  |
| GCCTGATTTCCCCTTCCTAA   | 60.391 | 20 | 266 | 264  | 529  |
| TAGTTGGGACCCCTTTCACA   | 60.345 | 20 | 178 | 1044 | 1221 |
| CGAACCTGAAATGGGAAAAA   | 59.91  | 20 | 176 | 241  | 416  |
| CCCCAGTTTTCTTCCATTT    | 60.159 | 20 | 212 | 382  | 593  |
| TGGAGTGTTGGATCTGTTGC   | 59.682 | 20 | 151 | 1141 | 1291 |
| GCCCAAAGTTAGATGTGACCA  | 59.985 | 21 | 211 | 5    | 215  |
| CGAAAGCGGAGTTGAAAGAA   | 60.493 | 20 | 248 | 484  | 731  |
| AATTTCAATGCCATCGGAAC   | 59.768 | 20 | 267 | 368  | 634  |
| TCCCTCCTCTCTCTCCCT     | 59.489 | 20 | 266 | 764  | 1029 |
| GATTCGAACGCTTGATTTGG   | 60.585 | 20 | 223 | 834  | 1056 |
| GACTAGCAAATTCGGGACG    | 59.708 | 20 | 256 | 414  | 669  |
| GGAAGCAAAGAGGCTGAAGA   | 59.694 | 20 | 215 | 227  | 441  |
| GCAGAGGTGTATTCTGTTGCC  | 59.755 | 21 | 189 | 1349 | 1537 |
| TGCCTTCCTTCTTACTCCCTC  | 59.835 | 21 | 148 | 18   | 165  |
| TTTGCAAGACATCCAACATCA  | 60.104 | 21 | 198 | 1450 | 1647 |
| TGACAATCACTTGCCACCAT   | 59.967 | 20 | 176 | 340  | 515  |
| GTCCCTGTGCAATCACTCAA   | 59.682 | 20 | 170 | 2422 | 2591 |
| CCCTCATTTGTACGGACTTGA  | 59.978 | 21 | 258 | 490  | 747  |
| TAGGGACATCTGGGTGTGTG   | 59.388 | 20 | 176 | 2349 | 2524 |
| AAAGGGATGTCTCAGGTCCA   | 59.505 | 20 | 237 | 2238 | 2474 |
| TCCTTGAACTTCTTCGGTGG   | 60.224 | 20 | 198 | 1491 | 1688 |
| ACACGCCAATTCAATCATCA   | 59.931 | 20 | 260 | 1687 | 1946 |
| TGGTAAAAGCGCTCGTACA    | 59.509 | 20 | 274 | 258  | 531  |
| ACTTGGATGGGCATTAACCA   | 60.192 | 20 | 255 | 761  | 1015 |
| ATTCTGTTTTGAGGGGGAGT   | 59.795 | 20 | 189 | 527  | 715  |
| TCACTCTCCGACTTCCGAT    | 59.803 | 20 | 111 | 720  | 830  |
| CTCCTCTCCAGCCATCTCCT   | 60.891 | 20 | 157 | 1198 | 1354 |
| TGCTGCTTCTGGTTGATGAC   | 59.992 | 20 | 250 | 72   | 321  |
| ACAAAGCTCGAGTGGCATGT   | 60.865 | 20 | 213 | 5836 | 6048 |
| TCAAACTATCGACCTTTTCGG  | 60.462 | 22 | 272 | 1236 | 1507 |
| TGAAGTTTCCCCGAATTTTG   | 59.91  | 20 | 163 | 474  | 636  |
| CAGAGTGCCTCTCTGGGAA    | 60.523 | 20 | 139 | 2029 | 2167 |
| GTTTGGGTGGAATTTGAGGA   | 59.91  | 20 | 268 | 62   | 329  |
| TCATCTTGAGAGAGCGCCTT   | 60.24  | 20 | 245 | 42   | 286  |
| ACCGCCAAAGTAAGGCTAT    | 59.987 | 20 | 170 | 220  | 389  |
| AAGGTTTAAGCTCAACGGCA   | 59.883 | 20 | 169 | 666  | 834  |
| ACCATCTCTCGCTCTGCAAT   | 59.981 | 20 | 177 | 1013 | 1189 |
| CGGCAGGATTAAGTCCCTAGT  | 59.623 | 21 | 116 | 60   | 175  |
| CACAAATGTCCCTAACATGACC | 60.284 | 22 | 249 | 3720 | 3968 |
| AAATGGTGTTCCTTTTTTGC   | 60.257 | 22 | 203 | 641  | 843  |
| TGCCGGATACAGATATGCAA   | 60.058 | 20 | 190 | 48   | 237  |
| TGAAGAGGAGCAAATGGGAG   | 60.331 | 20 | 103 | 192  | 294  |
| TTCTGACCCCTTCAGTCAC    | 60.088 | 20 | 175 | 516  | 690  |
| GCCCTGATTCTCGAGTTTTG   | 59.813 | 20 | 280 | 2165 | 2444 |
| TTGATTTGACATTTTGGAGAG, | 58.729 | 23 | 139 | 224  | 362  |
| TTGAGATTGGGGATTGAAGG   | 59.864 | 20 | 248 | 115  | 362  |
| TTTGAGTTGGGGGAATTTTG   | 59.772 | 20 | 240 | 335  | 574  |
| TTTTCAGTTTGAATCAGTTAGC | 57.644 | 23 | 277 | 539  | 815  |



|                        |        |    |     |      |      |
|------------------------|--------|----|-----|------|------|
| CATCCACGGTTGTTGAAGTG   | 60.001 | 20 | 255 | 442  | 696  |
| TCTAGGCATCGAGATGCAGTT  | 59.992 | 21 | 140 | 586  | 725  |
| CTATCATGGGCTGGAGGTGT   | 59.95  | 20 | 276 | 1087 | 1362 |
| TAGAGTGCGGGAGAAGGAGA   | 60.088 | 20 | 230 | 1303 | 1532 |
| TGACTCCAGGGTATTCCAGG   | 59.92  | 20 | 174 | 2338 | 2511 |
| TGTTCTCTAGCTGTGCCCT    | 60.012 | 20 | 109 | 625  | 733  |
| TGCGTTTTGATGATATATAAGT | 58.254 | 26 | 110 | 2594 | 2703 |
| AGGCATGAATCGGTTTACT    | 59.556 | 20 | 151 | 26   | 176  |
| AAATGTCACGCAAGATGCAA   | 60.265 | 20 | 197 | 302  | 498  |
| ACTGGGCATCACTTCCCATA   | 60.34  | 20 | 278 | 5813 | 6090 |
| CCAATCAGCATTAAACGGGT   | 59.823 | 20 | 245 | 505  | 749  |
| CGAACCGCAGCAAATTAAGTA  | 60.265 | 21 | 133 | 501  | 633  |
| TGCTGGAGCTACGATTAACCA  | 60.777 | 21 | 265 | 595  | 859  |
| ATTCCTCAAGCATCATTCCG   | 60.036 | 20 | 132 | 983  | 1114 |
| AACGGAGATTTGTCAAACGG   | 59.971 | 20 | 244 | 480  | 723  |
| TAGGGTTGTCACGGCTAGGA   | 60.647 | 20 | 280 | 159  | 438  |
| CGTGTTCAGTAGGGGTTT     | 60.03  | 20 | 200 | 471  | 670  |
| GGGTTTAATTTCTCGCATGG   | 59.411 | 20 | 218 | 1123 | 1340 |
| CTTTGCTGTGCGTCGATTT    | 60.003 | 19 | 224 | 876  | 1099 |
| ATGTGGATGGACGGATTTTC   | 59.611 | 20 | 251 | 759  | 1009 |
| TTGGGATTAAGGCTTTGGTG   | 59.931 | 20 | 189 | 2305 | 2493 |
| GACTATGAAGGCTTGTGCGC   | 59.843 | 20 | 226 | 506  | 731  |
| AACCTCTTCTCCTGCACCAA   | 59.844 | 20 | 270 | 25   | 294  |
| CAGATCCAAGATCGCAAACA   | 59.799 | 20 | 250 | 464  | 713  |
| TAACACCGTTAGCCACCCAC   | 60.807 | 20 | 268 | 1048 | 1315 |
| TCCTTGTGCTTTGGCTTTTT   | 59.861 | 20 | 186 | 4988 | 5173 |
| TTGATCTGGTTTTCCCATC    | 59.727 | 20 | 200 | 1749 | 1948 |
| GTCCCCTCTGCAGAACTTTG   | 59.844 | 20 | 262 | 889  | 1150 |
| ATTTACGGGTTTGTGCTTGC   | 60.003 | 20 | 269 | 448  | 716  |
| CATCCCCATTGTTCTACCCA   | 60.572 | 20 | 236 | 25   | 260  |
| TGGGTGAGCCAATCACTAGA   | 59.241 | 20 | 267 | 569  | 835  |
| ATGTGAGTGCATGCAAGTGG   | 60.756 | 20 | 228 | 548  | 775  |
| TGTTTGCAATTATTTCTGTTG  | 57.176 | 20 | 145 | 443  | 587  |
| TGAAGAGTTCTTTTCTGTTG   | 59.978 | 21 | 274 | 260  | 533  |
| ATCGACATCCACCTGCAAA    | 60.064 | 19 | 246 | 1133 | 1378 |
| GGCTGGTTTGCTTGAACATT   | 60.118 | 20 | 169 | 1540 | 1708 |
| GCATCAGAGCAAACGACAA    | 59.995 | 20 | 212 | 706  | 917  |
| CGACCCAACACACACATTCT   | 59.441 | 20 | 193 | 509  | 701  |
| TTGCATGATTGCTCCATGTC   | 60.641 | 20 | 217 | 409  | 625  |
| AAGCTATTGGCGGAGTATGC   | 59.347 | 20 | 279 | 380  | 658  |
| CCTCGCGTAAACCCTTGTTA   | 60.124 | 20 | 260 | 2587 | 2846 |
| GTTTCATCTCAACCACGGGAG  | 60.51  | 20 | 242 | 373  | 614  |
| CGATTGGGCCTATCCTATCA   | 59.878 | 20 | 255 | 937  | 1191 |
| ACCATGACCCTGAACAATGA   | 58.774 | 20 | 264 | 1639 | 1902 |
| TGGAAACTGACGAAAAGGCT   | 59.853 | 20 | 258 | 191  | 448  |
| ACAAGGCATCACTTACACG    | 59.751 | 20 | 207 | 2290 | 2496 |
| AGATTGGTGGGAGGTTAGG    | 60.183 | 20 | 113 | 56   | 168  |
| TTAACCCACCAAAAAGGTGC   | 59.839 | 20 | 211 | 455  | 665  |
| ACCTAGCCCTAACCCACACC   | 60.247 | 20 | 142 | 330  | 471  |
| TTATCCGAATCTTTTCTGTTG  | 59.533 | 21 | 227 | 178  | 404  |
| TTGAGGCTACCATGGGAAAG   | 60.066 | 20 | 260 | 157  | 416  |
| TGGAGATTACCGGTTTTGT    | 59.288 | 20 | 252 | 414  | 665  |
| AAATCAAGCCATTTCCGAGA   | 59.645 | 20 | 263 | 724  | 986  |
| GCCATTACGGGTGAGGAATA   | 59.784 | 20 | 270 | 1262 | 1531 |
| GGCGAGATCAATGTTTGGAT   | 59.9   | 20 | 202 | 540  | 741  |
| CTGAGCTGTCCGGAGACTTT   | 59.598 | 20 | 175 | 2499 | 2673 |
| TTTTGAGTTGGGATCTTCGG   | 60.044 | 20 | 271 | 791  | 1061 |
| TCCTCTCTCTCTCCATCACA   | 59.127 | 22 | 238 | 1320 | 1557 |

|                        |        |    |     |      |      |
|------------------------|--------|----|-----|------|------|
| TGAACGAGTTGCAGCTTGAC   | 60.183 | 20 | 249 | 62   | 310  |
| TGCCTTATCTGTCAGTCCCC   | 60.073 | 20 | 207 | 1214 | 1420 |
| GGGAGGGGAGAGTTTGAATC   | 59.874 | 20 | 255 | 2122 | 2376 |
| CCTCCCTCACCTCCACACTA   | 60.104 | 20 | 121 | 1293 | 1413 |
| ATCAAACAATGGCATCGTCA   | 59.931 | 20 | 169 | 2407 | 2575 |
| CGAATTTGCAAACCGAAAT    | 59.943 | 20 | 277 | 44   | 320  |
| TACGAGCACATAGCGCTCAA   | 60.708 | 20 | 241 | 1075 | 1315 |
| AAGGGCGCGACAGTTATAGA   | 59.867 | 20 | 177 | 0    | 176  |
| TGGATGTGAATAGGGTGGAAA  | 60.177 | 21 | 241 | 481  | 721  |
| TCCTGTGAGCAGAAGGGAGT   | 59.986 | 20 | 125 | 183  | 307  |
| GCGTAAATTTTGAAAGAAGCA  | 57.304 | 21 | 279 | 3    | 281  |
| CAAGCGTGATTAGCCATCAA   | 59.833 | 20 | 255 | 202  | 456  |
| TTGGTGTGTTGTTTGCGAGT   | 60.199 | 20 | 178 | 6125 | 6302 |
| AATGCAACGGTTTTAGTCGG   | 59.996 | 20 | 177 | 456  | 632  |
| TTCATGTTTGCTTAGCCGTG   | 59.872 | 20 | 254 | 2459 | 2712 |
| TGCAAAGTCATGGCTAAAGAA  | 58.57  | 21 | 279 | 2284 | 2562 |
| GACCATTGGATGGATGGTTC   | 59.995 | 20 | 108 | 555  | 662  |
| CGAACACAGGGCAATAGTGA   | 59.716 | 20 | 148 | 110  | 257  |
| TCCATTGATTGCTTGATCCT   | 58.088 | 20 | 272 | 23   | 294  |
| AGAAATGGAAGATGCCATGC   | 60.043 | 20 | 137 | 188  | 324  |
| CCAAAAGCTCCTGCACTTCT   | 59.615 | 20 | 166 | 2192 | 2357 |
| GGTTCGTCGGATGAAAAAGA   | 60.051 | 20 | 156 | 138  | 293  |
| AAATCCAGTCAGCAAAACG    | 60.11  | 20 | 223 | 171  | 393  |
| ACTCGAGTTCGGCCTATTTAGT | 59.717 | 23 | 226 | 167  | 392  |
| TTCCAATAAGTCATCGGGG    | 59.926 | 20 | 273 | 510  | 782  |
| CGTTTTGACGATATATAGTGTT | 59.375 | 27 | 157 | 1871 | 2027 |
| ATTGCTGGAATCAGACGACC   | 60.081 | 20 | 244 | 1604 | 1847 |
| CCGTCGCCGACTTAAATACT   | 59.248 | 20 | 246 | 1909 | 2154 |
| TTATGTCACTGGGGAAACGA   | 58.973 | 20 | 262 | 559  | 820  |
| GGAGTTAAAAGCACCATGAG   | 60.001 | 22 | 279 | 1109 | 1387 |
| ATGATGACGCCATGTTTCAA   | 59.931 | 20 | 190 | 114  | 303  |
| AATTTCCACAATGAGATTGCC  | 58.895 | 21 | 259 | 9295 | 9553 |
| AAGGCAACATTCGCACTCTT   | 59.882 | 20 | 248 | 1773 | 2020 |
| CGGACCGTTAGGATTAGCAT   | 59.067 | 20 | 247 | 946  | 1192 |
| TTGAGTTTGCATCTAAGAAGGT | 58.575 | 23 | 213 | 2497 | 2709 |
| GCTGATCGTTGCAGTAGGGA   | 61.348 | 20 | 241 | 409  | 649  |
| GGAAGTGGACACCTCCTTCA   | 60.088 | 20 | 261 | 2    | 262  |
| TGAGTTTGGTGTGTTGGCAT   | 60.008 | 20 | 242 | 314  | 555  |
| TGATAATGCAATGGCCGATA   | 59.882 | 20 | 218 | 113  | 330  |
| TGTGTAGTCCTGTTCTGCG    | 59.897 | 20 | 211 | 2575 | 2785 |
| TGAGATGGTCACCCTTCCTC   | 60.048 | 20 | 214 | 722  | 935  |
| CAGACGGCCCTCTAAGAAAA   | 59.448 | 20 | 144 | 167  | 310  |
| TTGGTCATCGCAATTCGTAG   | 59.688 | 20 | 110 | 338  | 447  |
| TTTGCTGCCCAAAAAGAAAA   | 60.701 | 20 | 280 | 417  | 696  |
| TGCTAGAATGACCTGATGCG   | 59.972 | 20 | 157 | 60   | 216  |
| CAGAAGACGGGTTTCGATAGG  | 59.688 | 20 | 242 | 839  | 1080 |
| TATATAAGAAACGGCGGCCA   | 60.424 | 20 | 110 | 1273 | 1382 |
| CTTGTTGGGAAGGAGAACA    | 60.081 | 20 | 180 | 553  | 732  |
| CGTCAAGCAATGCCAGATAA   | 59.833 | 20 | 256 | 469  | 724  |
| ATGATGCAACATCCCTTGTTG  | 59.374 | 20 | 270 | 4970 | 5239 |
| TGTCAAATTGTCAACCACACG  | 60.456 | 21 | 188 | 1200 | 1387 |
| GAAAAATGGCAGAGTGCTCC   | 59.82  | 20 | 157 | 2289 | 2445 |
| CCTGGGTTCTTGTTTTGAA    | 59.942 | 20 | 239 | 1297 | 1535 |
| TTAAATCCAAGGAGGCGAGA   | 59.778 | 20 | 219 | 8    | 226  |
| ATGGAGGGAAACATGCACTT   | 59.41  | 20 | 143 | 9    | 151  |
| TTCCACAAAATCTGGGGTC    | 59.767 | 20 | 145 | 0    | 144  |
| TGCTGTTTGCATTTAAGATGA  | 60.186 | 24 | 187 | 825  | 1011 |
| CACCCATTAATGCTGGTTGA   | 59.395 | 20 | 134 | 41   | 174  |

|                        |        |    |     |      |      |
|------------------------|--------|----|-----|------|------|
| ACACAATGGGCGTAATTCGT   | 60.257 | 20 | 195 | 1769 | 1963 |
| TTCAGGACGGAGGAGTTGAC   | 60.238 | 20 | 278 | 13   | 290  |
| AAAGGTTTTGATTTCCGGC    | 60.292 | 20 | 117 | 55   | 171  |
| ATGGGCTTTAGTCCCCTGTT   | 59.827 | 20 | 207 | 482  | 688  |
| TGGCTTCTGTTTCTCCATCA   | 59.369 | 20 | 252 | 742  | 993  |
| GTCACACCGAATCTTGCCTT   | 60.119 | 20 | 188 | 1148 | 1335 |
| CACCGTTCTCTGCAACAAAA   | 59.881 | 20 | 275 | 500  | 774  |
| CGGTTGGAGAAGTCATGTCA   | 59.676 | 20 | 237 | 1619 | 1855 |
| CACTTGCAGGACATCAATCG   | 60.263 | 20 | 272 | 1505 | 1776 |
| GACGTAGCAAACGCAAGGTT   | 60.313 | 20 | 255 | 1523 | 1777 |
| CTCCATTTCCATCCAAGCAT   | 59.894 | 20 | 147 | 218  | 364  |
| CTGGCCATTGATTCTCCCTA   | 60.029 | 20 | 201 | 2138 | 2338 |
| GTGTGTGCATGCTCTTGTC    | 59.436 | 20 | 269 | 8334 | 8602 |
| ACACATGCCTGGAGCATAACA  | 60.144 | 20 | 208 | 800  | 1007 |
| ATTCGCCAGTCCACGACTAC   | 60.142 | 20 | 210 | 1635 | 1844 |
| TCACTGCACTCGGTGATGAT   | 60.279 | 20 | 266 | 1220 | 1485 |
| CCCAATTTGGTCGTTTTTGT   | 59.702 | 20 | 227 | 2664 | 2890 |
| AACGCTGGAAGAATGTGACC   | 60.119 | 20 | 231 | 879  | 1109 |
| GATCTTTGCTCAGTCTGCCC   | 59.957 | 20 | 262 | 296  | 557  |
| CACAGAGCGCACTCAAAGAG   | 59.922 | 20 | 208 | 304  | 511  |
| TTTGCATCCCAATTAGTCC    | 59.901 | 20 | 172 | 3986 | 4157 |
| CTATCCGCAGGCCAAGATAG   | 59.823 | 20 | 206 | 337  | 542  |
| CAGCATGAATCAAACAACCAA  | 59.576 | 21 | 207 | 765  | 971  |
| TCGTCTTTCAATCCCACACA   | 60.088 | 20 | 273 | 126  | 398  |
| TCACTGCGCTCATTGTAAGG   | 60.011 | 20 | 225 | 496  | 720  |
| GAAGGTGGGTCGATGGTGTA   | 60.78  | 20 | 177 | 580  | 756  |
| GAAGTTTTTGCAGGAATG     | 60.752 | 20 | 233 | 3370 | 3602 |
| TAGCCGATAAAAATGGCACC   | 59.928 | 20 | 157 | 571  | 727  |
| CCATTCCATTCTCACCTCA    | 60.86  | 20 | 121 | 1574 | 1694 |
| CACTCCCATTTGTGCTTCAA   | 59.691 | 20 | 190 | 891  | 1080 |
| TGCGTTTGTCTAACTTTATCAC | 59.734 | 24 | 267 | 2793 | 3059 |
| CAGGGGGACTTTAATGGGAT   | 60.011 | 20 | 267 | 139  | 405  |
| GTTCCAAGTGATCGGTGGAT   | 59.786 | 20 | 115 | 1142 | 1256 |
| GCGAGCAAACCTCGGTTAAAG  | 60.018 | 20 | 201 | 2709 | 2909 |
| TGCTGCCTAAAACATGTGG    | 59.729 | 20 | 242 | 227  | 468  |
| TGTAATGCCTCCTTTCAGCA   | 59.42  | 20 | 265 | 944  | 1208 |
| CGCTCTCCCTCTATCTTCCC   | 60.306 | 20 | 248 | 224  | 471  |
| CGCAGGGCTGAGTACAAAAT   | 60.27  | 20 | 255 | 53   | 307  |
| TTCGGGGCGAATAGAGACTA   | 59.801 | 20 | 180 | 317  | 496  |
| GGGATTAATTCCAGCATGA    | 59.722 | 20 | 222 | 1133 | 1354 |
| GCCACGCTCTTTCATTTTCA   | 60.221 | 20 | 183 | 986  | 1168 |
| ATTGCATTCTTGGTGTGTGC   | 59.577 | 20 | 246 | 1080 | 1325 |
| TTTAACGATGGATCATGTAAGC | 58.508 | 23 | 174 | 1408 | 1581 |
| ATTTCACTTTGCCAGCAACC   | 60.118 | 20 | 141 | 784  | 924  |
| TTGGTCCGGGAGGATTTATT   | 60.502 | 20 | 154 | 1945 | 2098 |
| TCTGATGGCCAGATTTGTT    | 60.461 | 20 | 110 | 490  | 599  |
| TCAGTTTTAGTTGTTAGGTGTT | 60.333 | 26 | 257 | 4870 | 5126 |
| GCACAATCAAACCTTGCCTT   | 60.118 | 20 | 165 | 2257 | 2421 |
| GAAAAGAGAGGGAGATGGGG   | 60.008 | 20 | 268 | 3196 | 3463 |
| TCAACTCTTGTGGATAACTATT | 59.968 | 26 | 280 | 1208 | 1487 |
| CTGGATGGTATTCTGGAGCC   | 59.508 | 20 | 225 | 6    | 230  |
| TTGCACAGCTCTAACAAACAC/ | 59.578 | 22 | 226 | 495  | 720  |
| TTCTCAGTGCTGATGTTGGC   | 59.992 | 20 | 275 | 571  | 845  |
| CTTGAAGCGCCTGTTTCTCT   | 59.757 | 20 | 111 | 362  | 472  |
| TCCTTGTTACCTTTGCCAGA   | 58.352 | 20 | 209 | 2038 | 2246 |
| AAGAACCACGCGTAATCGAG   | 60.27  | 20 | 279 | 1774 | 2052 |
| TGCGTTTTGATGATATATAGGT | 60.054 | 26 | 270 | 1315 | 1584 |
| CAAAGTATTTCCGGCGTGT    | 59.996 | 20 | 228 | 607  | 834  |

|                         |        |    |     |      |      |
|-------------------------|--------|----|-----|------|------|
| GGCTTATCTGAAAGGAGGGG    | 60.032 | 20 | 271 | 5715 | 5985 |
| AAATCGCAAATCTCCCACAC    | 59.939 | 20 | 219 | 0    | 218  |
| TGTCGGAGAGGAGCTGGTAT    | 59.827 | 20 | 251 | 1090 | 1340 |
| ACCCGAGAGAGAGATCGTGA    | 59.945 | 20 | 122 | 386  | 507  |
| ATGATAACAGTGAGGCCGGA    | 60.483 | 20 | 260 | 561  | 820  |
| TTATGATGCCTAGTGGTTGGC   | 59.974 | 21 | 256 | 363  | 618  |
| GTCTACTGGCCATGGAGGAA    | 60.073 | 20 | 185 | 552  | 736  |
| ACTTGGATTGAAGCTCAGCA    | 58.597 | 20 | 261 | 441  | 701  |
| AGCAAACGACTTGTTCCAGA    | 58.497 | 20 | 209 | 1661 | 1869 |
| CAGATAATGGTGGGCCAAAT    | 59.645 | 20 | 218 | 418  | 635  |
| TTCAAATGCCAGTTTTACG     | 59.706 | 20 | 200 | 993  | 1192 |
| TTTTTGGAGGAGATTCTTCG    | 57.007 | 20 | 102 | 1910 | 2011 |
| GCGAAATCAATGCACCAGAT    | 61.014 | 20 | 142 | 1869 | 2010 |
| CGTTTATCGATTAGCACCCG    | 60.468 | 20 | 136 | 793  | 928  |
| TTTGC GTGAACATCAACC     | 60.562 | 20 | 266 | 2708 | 2973 |
| ATGCAACGTCGAGGTTTTTC    | 60.118 | 20 | 197 | 270  | 466  |
| GCATAGGAATGCCAATTCAA    | 58.577 | 20 | 264 | 36   | 299  |
| TGGAGTAGGCAAGCCAGATT    | 59.836 | 20 | 172 | 901  | 1072 |
| ACTTCCCAACCATCTACCCA    | 59.259 | 20 | 259 | 481  | 739  |
| AAAATCAAAGGCCACAATG     | 59.801 | 20 | 130 | 2    | 131  |
| GATTCTTTGAATCATATTCCAC  | 58.865 | 25 | 275 | 256  | 530  |
| CTCTCTCTTCCTACCAAGCA    | 59.73  | 21 | 191 | 15   | 205  |
| TTAATGGTTGATGGGAGGGA    | 60.126 | 20 | 156 | 1045 | 1200 |
| GTTGGGCCCGTTAGGTTTAT    | 60.075 | 20 | 198 | 36   | 233  |
| CCTCGGTCTATCTCATTTTTATC | 58.715 | 24 | 274 | 1020 | 1293 |
| ATGCCCTTATGATTGGGATG    | 59.605 | 20 | 185 | 600  | 784  |
| AAATGGAGCAGTTTCATCGC    | 60.221 | 20 | 204 | 2152 | 2355 |
| CTAAGAGCTGTGCACCCCAT    | 60.277 | 20 | 175 | 903  | 1077 |
| CGTACATGTTGATTGCCACC    | 59.847 | 20 | 244 | 211  | 454  |
| TACATTCCATTGTTTCGGCA    | 59.93  | 20 | 128 | 581  | 708  |
| TGCAAATGAGAATTGGGACA    | 60.049 | 20 | 155 | 559  | 713  |
| TCTCATCTTCGGCCTCTCTC    | 59.636 | 20 | 128 | 2282 | 2409 |
| ACGGATTACCCAGAACAAGC    | 60.119 | 20 | 250 | 1979 | 2228 |
| AGTCAACATTTGGCCACAC     | 60.823 | 20 | 173 | 219  | 391  |
| TATGCATTTTGTGTGTGGGG    | 60.234 | 20 | 168 | 68   | 235  |
| TGGTGAGAAAATGGCAATCA    | 60.049 | 20 | 240 | 327  | 566  |
| CAAAATGCGAAATTTAAGCCA   | 60.082 | 21 | 232 | 560  | 791  |
| CCTTTGGACTAAACCACCCA    | 59.824 | 20 | 190 | 1848 | 2037 |
| AATTCCCGTATTGGCTAGGG    | 60.164 | 20 | 275 | 1207 | 1481 |
| GTAATCGAATCTCGCCCTCA    | 60.177 | 20 | 179 | 551  | 729  |
| GGCCAACAACATGAAACTCA    | 59.547 | 20 | 195 | 1034 | 1228 |
| AGCATGATCCAGCATGACAC    | 59.669 | 20 | 268 | 1529 | 1796 |
| CAACTGGCCCTGATGGTAAT    | 59.813 | 20 | 258 | 245  | 502  |
| ACATCCATTCTCGATCTGCC    | 60.042 | 20 | 201 | 1087 | 1287 |
| TTGTTTTGTGCGTTATGTGGA   | 60.022 | 21 | 133 | 1183 | 1315 |
| CTTTCGGAAGCGTACATCAA    | 58.917 | 20 | 267 | 391  | 657  |
| TTCAATGCACGGTTCTTCAG    | 59.84  | 20 | 268 | 177  | 444  |
| AAGGTGGAAAAGGGTTGCTT    | 59.976 | 20 | 260 | 578  | 837  |
| CCGATCAAAGCCTTCTCTTG    | 59.948 | 20 | 151 | 901  | 1051 |
| ACGGAAATTTCACTATGCCG    | 59.96  | 20 | 250 | 1391 | 1640 |
| AAGCAAAATGGATAGCGTGG    | 60.096 | 20 | 142 | 195  | 336  |
| TTCGAACTCCAATGGGGTAG    | 59.926 | 20 | 243 | 1198 | 1440 |
| GGAAGTGGTCCCAGTTTGAA    | 59.943 | 20 | 185 | 322  | 506  |
| TTGATTTGATTTGTAGTTTTGCC | 59.204 | 23 | 278 | 1012 | 1289 |
| TGTGACACGGAAATTTGAGA    | 57.642 | 20 | 190 | 2083 | 2272 |
| TGTTGGATTTGGGATCCTCT    | 59.336 | 20 | 223 | 1494 | 1716 |
| ATTTGCACATCAAACCTCCCC   | 59.797 | 20 | 166 | 546  | 711  |
| GCCTTCTCGCTCTCCCTAT     | 59.947 | 20 | 260 | 5578 | 5837 |

|                        |        |    |     |      |      |
|------------------------|--------|----|-----|------|------|
| CTCTTCGGTGGGGGTTATCT   | 60.319 | 20 | 224 | 505  | 728  |
| AAAAACGGATGAGAAAGCGA   | 59.823 | 20 | 162 | 620  | 781  |
| ATTTGAGAGGGAATTTGGGG   | 60.124 | 20 | 277 | 19   | 295  |
| GCGTGTATATGCTCGAGATGG  | 60.641 | 21 | 201 | 2155 | 2355 |
| GGAGCTTCTTCTTCTTCAAG   | 60.135 | 23 | 190 | 1246 | 1435 |
| CTGCCACTCTGCAGGTACAA   | 60.049 | 20 | 277 | 623  | 899  |
| CCCTTAGCTACCCAAAAGCC   | 60.089 | 20 | 101 | 1249 | 1349 |
| GTTTCACACACGCACACACA   | 60.26  | 20 | 252 | 498  | 749  |
| CAACTTCCGCTTCTCCAAC    | 59.853 | 20 | 143 | 602  | 744  |
| GGGGCCAAGAAAAGAGTAG    | 60.068 | 20 | 203 | 880  | 1082 |
| TGATGGAACGTCGAAAGTTG   | 59.691 | 20 | 251 | 642  | 892  |
| TCCTTGCCGCAATTACTTTT   | 59.72  | 20 | 157 | 1369 | 1525 |
| AATTCCAGTTGTCTCGCAC    | 60.119 | 20 | 155 | 613  | 767  |
| ATCAATGACCACCCAACCAT   | 59.91  | 20 | 197 | 0    | 196  |
| CGTCCAATTCTCTCCACTCC   | 59.655 | 20 | 163 | 1218 | 1380 |
| CCTGTTTGTGATGCCTGAGA   | 59.831 | 20 | 214 | 642  | 855  |
| ACAGTTGAGGCCCTTAGT     | 59.994 | 20 | 127 | 71   | 197  |
| CCGATGAAAGGAATTTGCAC   | 60.448 | 20 | 263 | 452  | 714  |
| AGCATGGCCCTGTCAATTAG   | 60.096 | 20 | 210 | 3530 | 3739 |
| ACGTCTTTGATGGATAGGCG   | 60.096 | 20 | 253 | 71   | 323  |
| CATGGACCCACATGTCATA    | 60.048 | 20 | 182 | 237  | 418  |
| CACAACAGGGGAACCATAACC  | 60.088 | 20 | 224 | 786  | 1009 |
| GACATTCGTCGTTGAGGTGA   | 59.682 | 20 | 212 | 15   | 226  |
| TTCGAAAAAGGAAAAATAAAA  | 59.468 | 25 | 204 | 21   | 224  |
| TTTCGAAGATCAATGGACGA   | 59.2   | 20 | 120 | 2268 | 2387 |
| GCACAATGCACATACAAGGG   | 59.995 | 20 | 107 | 41   | 147  |
| AAAGGAGACTAGTGGCTGCG   | 59.639 | 20 | 260 | 519  | 778  |
| GGATTGGCCTAATTTTGTGTG  | 59.329 | 21 | 223 | 1613 | 1835 |
| TCATACTGAGCTGAATAGTTAC | 57.707 | 24 | 103 | 5    | 107  |
| AGCAGGATGGAGTGCTTCAG   | 60.555 | 20 | 147 | 626  | 772  |
| AAAAACATGAAGTCGGGCAC   | 59.978 | 20 | 205 | 24   | 228  |
| CGACGGTGGGTTGTTAAGTT   | 59.891 | 20 | 196 | 697  | 892  |
| TACTTCGCACTTTTCCGTTG   | 58.964 | 20 | 156 | 736  | 891  |
| CCACCCACTGCATTCTCTCT   | 60.261 | 20 | 187 | 763  | 949  |
| CGAGGTTTGTACCGTTCAATTT | 60.269 | 22 | 181 | 979  | 1159 |
| TTTATCGTCCTGAGGCATGG   | 60.992 | 20 | 261 | 502  | 762  |
| CAAAAACAATAAAGCAATGCC  | 60.002 | 22 | 216 | 635  | 850  |
| ACATCTTATAGCGTGCGGGT   | 59.62  | 20 | 177 | 1566 | 1742 |
| ATCGACACAACATGACACGC   | 60.614 | 20 | 119 | 4973 | 5091 |
| TTGGTGGATTGGAGATGGTT   | 60.173 | 20 | 279 | 2351 | 2629 |
| ACCGTTGAGACAGTTGGGAG   | 60.151 | 20 | 255 | 1600 | 1854 |
| GAGAATGTTGTCCCGGACTC   | 59.511 | 20 | 250 | 102  | 351  |
| TGCGTCTGCTAATCTCCCTT   | 59.978 | 20 | 187 | 1856 | 2042 |
| AATGTTCTTCAAGGTTGGCG   | 60.11  | 20 | 251 | 2841 | 3091 |
| GAATGAACACTACGGCTTGGGA | 60.074 | 20 | 205 | 125  | 329  |
| GCCCTAACAGACCTTGACCA   | 60.111 | 20 | 248 | 392  | 639  |
| TTGGCCAGGAACCTTAGAAGC  | 59.452 | 20 | 233 | 290  | 522  |
| TGTTGAGATGCCTCAATCAAA  | 59.262 | 21 | 275 | 426  | 700  |
| ATACGCGAGTTTGACCGAAA   | 60.637 | 20 | 237 | 3913 | 4149 |
| TGGATTGGTTGAGAAGGGAG   | 60.042 | 20 | 280 | 1224 | 1503 |
| TTGCCATTTTCAATGATCCA   | 59.867 | 20 | 188 | 2141 | 2328 |
| GGGTGTTTTCAAGAAGCCAA   | 60.088 | 20 | 165 | 599  | 763  |
| TTTGTTTTGTAAATGGTGCTTG | 59.562 | 23 | 133 | 3061 | 3193 |
| GCTCAAGTTGATTGTAGCGGT  | 59.397 | 21 | 260 | 136  | 395  |
| CCGGGATATACATCTCCTCC   | 58.281 | 20 | 191 | 554  | 744  |
| AGCAGGTGGTCATATGGAGG   | 59.95  | 20 | 237 | 48   | 284  |
| TGATCTGTTTCTGGCTTCCA   | 59.369 | 20 | 224 | 261  | 484  |
| TGCTCTGCTTTGATCAGCTC   | 59.425 | 20 | 238 | 448  | 685  |

|                        |        |    |     |      |      |
|------------------------|--------|----|-----|------|------|
| ATCTTCTCGTTCCCAAACCC   | 60.306 | 20 | 233 | 4370 | 4602 |
| GACGGGGTTTCACTTTTTGA   | 59.948 | 20 | 108 | 494  | 601  |
| GGTAATCCGATTGGCTGTTG   | 60.331 | 20 | 159 | 673  | 831  |
| GTCGAACCGAATCCATGTT    | 59.797 | 20 | 265 | 607  | 871  |
| AAATAAAGCGGCAACCACTC   | 59.229 | 20 | 230 | 1312 | 1541 |
| GAATGCAGCCGACTCTTTCT   | 59.579 | 20 | 121 | 885  | 1005 |
| AATTGCAAGTATTCTCTTCGCA | 59.036 | 22 | 227 | 541  | 767  |
| ACAAATTTGCCCTCGTATGC   | 59.967 | 20 | 260 | 2445 | 2704 |
| GGGTTTATTTGCTGGCTAGG   | 58.718 | 20 | 271 | 616  | 886  |
| TACTTGCCGCATCATCACTC   | 59.83  | 20 | 229 | 3185 | 3413 |
| CCCGTTGATGATGAATACC    | 60.014 | 20 | 160 | 629  | 788  |
| TGGCCTGCACAAACTAAAAA   | 60.635 | 21 | 280 | 1126 | 1405 |
| TCTCGATTCAAGTTTCCCCAC  | 60.05  | 20 | 176 | 323  | 498  |
| ACTTTCCAAGCCACTCCTCA   | 59.844 | 20 | 137 | 1210 | 1346 |
| CCATTTCAAATCCTGGCTC    | 59.505 | 20 | 223 | 2691 | 2913 |
| GCCAGAATGTTGTTCTGCTG   | 59.293 | 20 | 260 | 612  | 871  |
| TTGAATATATTATCAAATCCAA | 57.918 | 26 | 151 | 601  | 751  |
| TGCGTTACGGTTTTCTCTT    | 59.747 | 20 | 172 | 776  | 947  |
| TGGATCATGGATGGTAAATCA  | 58.632 | 21 | 123 | 630  | 752  |
| GTGAGAGGGAAAACGATGGA   | 60.05  | 20 | 108 | 1265 | 1372 |
| TGAAATGGGCTGTGAATGAA   | 60.049 | 20 | 215 | 302  | 516  |
| CTTTCCCATCCATACGCACT   | 59.955 | 20 | 185 | 1056 | 1240 |
| GCTCCGTTTGACGAGCTAAA   | 60.523 | 20 | 211 | 673  | 883  |
| TCACACACACTCACACGCAT   | 59.772 | 20 | 135 | 587  | 721  |
| CCATATCTTGCCAATGTAGAGA | 58.287 | 23 | 280 | 654  | 933  |
| CACGACGGATATTTGGCATA   | 59.401 | 20 | 280 | 623  | 902  |
| TTTTAGTGTTTCGGGCCAACT  | 59.609 | 20 | 269 | 224  | 492  |
| AATGATGCAGTTCCCAGAGG   | 60.073 | 20 | 229 | 656  | 884  |
| GAAAAAGAGTGGCTTTTGCG   | 59.996 | 20 | 159 | 4816 | 4974 |
| GAATGCCGGTCTGAAAACAT   | 59.939 | 20 | 278 | 9    | 286  |
| TGGGCCATTTGCTCTATTTG   | 60.961 | 20 | 167 | 1147 | 1313 |
| CAGCTGCTAGGTTTGCGAAT   | 60.543 | 20 | 236 | 401  | 636  |
| GGCATATTTGGGGAGAGGTT   | 60.152 | 20 | 279 | 845  | 1123 |
| TTTCCTGCTTTTCTTCGTGG   | 60.357 | 20 | 249 | 48   | 296  |
| GTTCTAGCCCAAACCTGCCA   | 60.249 | 20 | 172 | 1467 | 1638 |
| CTGTCCGAGGTTTCGTCTTC   | 59.844 | 20 | 186 | 2345 | 2530 |
| TAGAAAAGGTTCCGCCATCCC  | 61.303 | 20 | 166 | 3214 | 3379 |
| CTTCACCACCGTTGATTCTT   | 59.966 | 20 | 103 | 105  | 207  |
| GACCAATGCACCGAGAAAAT   | 59.939 | 20 | 145 | 693  | 837  |
| TCATGCAAGAAAACGTGGTT   | 59.174 | 20 | 277 | 1007 | 1283 |
| AGCATCCACGTCAGCTTTTT   | 59.882 | 20 | 163 | 1360 | 1522 |
| TGGAAAACCGTTTAGGGACA   | 60.336 | 20 | 275 | 88   | 362  |
| TCACAAACCCTTGCTTTTCC   | 60.088 | 20 | 165 | 1542 | 1706 |
| TTGAGGATGAAGTAGCGTTGG  | 60.256 | 21 | 186 | 635  | 820  |
| CCTCAAGCTTTCCCTTCCTT   | 59.821 | 20 | 214 | 3901 | 4114 |
| TAATGTCCTTGGAGATGGGG   | 59.744 | 20 | 263 | 1058 | 1320 |
| CTCGTCGCCTCTTTTCAAC    | 60.134 | 20 | 232 | 922  | 1153 |
| CGTATTCAATAGACACATTGCC | 59.903 | 23 | 229 | 1667 | 1895 |
| CCAATTTTCCCAACTCAA     | 59.772 | 20 | 248 | 2287 | 2534 |
| AAGCAAGAAACCGCTTGAGA   | 60.132 | 20 | 207 | 4630 | 4836 |
| GCACCTGCTAGTGTACGGGT   | 60.201 | 20 | 251 | 237  | 487  |
| ATCTGTCAGCATTTGGACCC   | 59.934 | 20 | 211 | 1008 | 1218 |
| CATTTGAAAGAATACAAAACG  | 58.295 | 24 | 224 | 311  | 534  |
| TTTGTTCCACCACTCCATCA   | 59.935 | 20 | 241 | 56   | 296  |
| AGATGAGTGAGGCTGGAAGC   | 59.56  | 20 | 206 | 1114 | 1319 |
| GGGAGAGGGAATTGAGGGTA   | 60.264 | 20 | 224 | 9    | 232  |
| CACCAAATTCAAGCAATGGA   | 59.518 | 20 | 239 | 656  | 894  |
| TTACATCATGTGGTCGCGT    | 59.995 | 20 | 213 | 1428 | 1640 |

|                        |        |    |     |      |      |
|------------------------|--------|----|-----|------|------|
| TTGGTACCGAAGTTGTCATCC  | 59.845 | 21 | 227 | 1169 | 1395 |
| ATAAAAATTGCATGCACCTGA  | 58.174 | 21 | 269 | 1788 | 2056 |
| ATCTCGCACGCGATAAAAAAT  | 59.71  | 20 | 175 | 4996 | 5170 |
| GGCTGTTGCTGAGTGTGAGA   | 60.187 | 20 | 276 | 485  | 760  |
| GAGTATCGGCTGTGGGTTTC   | 59.556 | 20 | 275 | 2940 | 3214 |
| GCCACACCTGACATTGCATA   | 60.549 | 20 | 202 | 677  | 878  |
| TTCTTTTCTTGGGTGGATG    | 59.903 | 20 | 260 | 4375 | 4634 |
| CTAATAAGTGCTCCGACTCCG  | 59.007 | 21 | 268 | 7    | 274  |
| TTGGAGCATTGCCATTGTAG   | 59.688 | 20 | 249 | 1453 | 1701 |
| TGTACTGAATGCATCAAACCC  | 59.867 | 22 | 168 | 631  | 798  |
| CCCCATTCCCTCTCTCTCTC   | 60.149 | 20 | 250 | 48   | 297  |
| GGCTCTCCTCTCTCTCCACA   | 59.663 | 20 | 257 | 1398 | 1654 |
| GTGGGAGAAATGGGGAGAAT   | 60.133 | 20 | 271 | 627  | 897  |
| CGTGCAATAGGTAGAGAAAAG  | 59.407 | 24 | 204 | 664  | 867  |
| TGTTATTATTGGAACAGCACCC | 58.878 | 22 | 217 | 1679 | 1895 |
| TGTTGACTCCCACATGTTTCA  | 59.992 | 21 | 251 | 2108 | 2358 |
| ATCACGCACAGTGGTACACG   | 60.662 | 20 | 258 | 406  | 663  |
| TCACCATCGATCTCTGCTTG   | 59.942 | 20 | 258 | 478  | 735  |
| TTAAGTCAATTCCGTATGACAA | 59.048 | 25 | 196 | 62   | 257  |
| GCAAAAAGTTCTCCGGCTTT   | 60.721 | 20 | 231 | 1321 | 1551 |
| GGAAAACTGCTGCCTTTTG    | 59.861 | 20 | 236 | 739  | 974  |
| CATCTGCACCCATTTCCCTT   | 59.933 | 20 | 187 | 707  | 893  |
| AGAAAGCCGAGGAGAACTCTT  | 60.022 | 22 | 275 | 1154 | 1428 |
| TGTACTGCCACTTGGGTGTC   | 59.597 | 20 | 154 | 1396 | 1549 |
| TGGATTCTCCAAAAATTCC    | 59.739 | 20 | 137 | 125  | 261  |
| GGCCAGATTAATTCTTTGCG   | 59.682 | 20 | 101 | 1937 | 2037 |
| TCATTTGCGCTTGTCAATTC   | 59.816 | 20 | 277 | 759  | 1035 |
| GGGCGCTATCCATTATGAAA   | 59.892 | 20 | 191 | 1179 | 1369 |
| TCTTTTCCATGGGGTAGCAC   | 59.933 | 20 | 129 | 638  | 766  |
| TCGGCATTCTATTGTGTGAA   | 57.702 | 20 | 233 | 1126 | 1358 |
| CTCATTTATGCATCACTAATTC | 57.532 | 25 | 230 | 111  | 340  |
| GTTTCACGTTCACTCTCGCA   | 60.032 | 20 | 272 | 4672 | 4943 |
| GTGGACAAGAATGGTTTGGG   | 60.21  | 20 | 244 | 1891 | 2134 |
| CCATCTCCCACAAACAGTCC   | 60.363 | 20 | 260 | 1334 | 1593 |
| TGAAACTCTCATCGCACACC   | 59.837 | 20 | 226 | 1528 | 1753 |
| CATTCGTTTTCACTTTGCCA   | 59.706 | 20 | 160 | 740  | 899  |
| AAGCGAGAAGAAAGAGCGTG   | 59.898 | 20 | 272 | 1422 | 1693 |
| CGCTTTTGGATTAGCAAACA   | 58.958 | 20 | 269 | 1519 | 1787 |
| CGATTTGGATTCGAATTCTGT  | 59.033 | 21 | 206 | 613  | 818  |
| GGCGATGCAAATAGAGGAGA   | 60.318 | 20 | 181 | 1079 | 1259 |
| GCCGACTACCAACTTTCTC    | 59.851 | 20 | 214 | 37   | 250  |
| TCTGACTCGCTTTGATGTGCG  | 60.136 | 20 | 178 | 292  | 469  |
| GATCCAACGGCTGAAAATGT   | 59.939 | 20 | 242 | 3175 | 3416 |
| CACTCTCTGTTGCCCAATCT   | 57.87  | 20 | 229 | 99   | 327  |
| TGTGAAAACGTTGGTTGTGAA  | 60.035 | 21 | 212 | 4494 | 4705 |
| CTATGGACGCAATCCTTTCC   | 59.528 | 20 | 120 | 531  | 650  |
| CAAGACTGGACTCCACCA     | 59.705 | 20 | 115 | 1175 | 1289 |
| CGGGAGAGCAAGTTTTGAAC   | 59.853 | 20 | 170 | 88   | 257  |
| ATGATGTTGATAAACTGATAA  | 57.746 | 26 | 280 | 627  | 906  |
| TCATCCAATGGTTTGGTTTG   | 59.222 | 20 | 279 | 696  | 974  |
| TGTACTGTGAAAGGTGCCCA   | 60.152 | 20 | 276 | 663  | 938  |
| TTCTTTGGTTGGAGGAGACG   | 60.224 | 20 | 168 | 371  | 538  |
| AGTGCCGATTGAAGTGCTG    | 60     | 19 | 232 | 1879 | 2110 |
| TGAAGTTACGAAATAAGGAGG  | 59.526 | 25 | 235 | 1717 | 1951 |
| CTGGTTTTTGCACGATAGCA   | 59.872 | 20 | 200 | 678  | 877  |
| GCTACAGCAGCCATTGATGA   | 59.979 | 20 | 124 | 2003 | 2126 |
| GGTCGACAATCAAGTTGCAG   | 59.293 | 20 | 260 | 2192 | 2451 |
| GATAAATTAATCGCTGGCTGG  | 58.73  | 21 | 241 | 588  | 828  |

|                         |        |    |     |      |      |
|-------------------------|--------|----|-----|------|------|
| TGGAGGGAAAGTGGCAAAT     | 61.728 | 20 | 275 | 1706 | 1980 |
| TGAATGGTAAATGAACCGCA    | 59.93  | 20 | 108 | 3    | 110  |
| TACAAAACCATAACACGCGG    | 59.486 | 20 | 265 | 211  | 475  |
| TTTCCTTGCAAGTTCGGTTT    | 59.724 | 20 | 220 | 0    | 219  |
| AGTCCCTTGTTGGGCAGTAA    | 59.592 | 20 | 261 | 1343 | 1603 |
| TCCACCCTCAGAAATTCAA     | 58.117 | 20 | 185 | 2047 | 2231 |
| CTTGCAGCATGGTCAAAGC     | 60.555 | 19 | 143 | 1692 | 1834 |
| TTCAATCACCACAACCAAACA   | 59.849 | 21 | 279 | 1075 | 1353 |
| TTGCTCTCATTGTAATCTCCAC  | 60.497 | 23 | 162 | 1886 | 2047 |
| GCGGTTATCACCGGATCG      | 62.397 | 18 | 133 | 3207 | 3339 |
| TGGATCTCCTACTGGGTTGC    | 60.073 | 20 | 241 | 1318 | 1558 |
| TCTGTGCGCCTTGAATGATTG   | 59.799 | 20 | 230 | 875  | 1104 |
| TTTTTGGTACTTCATCATTTAAA | 59.354 | 27 | 257 | 733  | 989  |
| TGCAGCAGGAACAAGAACAC    | 60.032 | 20 | 241 | 144  | 384  |
| TAGGGCCCTTAGTTCGTGTG    | 60.125 | 20 | 202 | 471  | 672  |
| GGAGCATATCTTGCAAACACA   | 58.787 | 21 | 174 | 297  | 470  |
| TCCCTTACGGTCAATGTGGT    | 60.232 | 20 | 190 | 1087 | 1276 |
| TTTGCCATAGATATGCACCG    | 59.543 | 20 | 230 | 210  | 439  |
| GAGCTTTGGTGGAAACATCC    | 59.532 | 20 | 151 | 54   | 204  |
| ATGAACAGGTCCGCGAATA     | 59.09  | 19 | 260 | 559  | 818  |
| GGTTCCAATTTTCGTGTTGGT   | 59.694 | 20 | 202 | 4329 | 4530 |
| AAAAGAGTGGTGGTGGATGG    | 59.82  | 20 | 245 | 774  | 1018 |
| CACCCATCTCCCATTTGAAC    | 60.173 | 20 | 198 | 5219 | 5416 |
| ATCGGGTAAGCAACATGACC    | 59.82  | 20 | 278 | 276  | 553  |
| ACATGTCATTGACCAGACCC    | 58.186 | 20 | 103 | 0    | 102  |
| CTTGTTGCCACGTATCCTCA    | 59.716 | 20 | 216 | 1986 | 2201 |
| CGTGAAGAGTTTCCCACCAT    | 59.966 | 20 | 256 | 2045 | 2300 |
| CAACCCACGGATGGTTAAGA    | 60.745 | 20 | 274 | 1277 | 1550 |
| GGCAACAGTGGGATAATGCT    | 59.962 | 20 | 261 | 1541 | 1801 |
| CAGCAGCAGCTTCTTGTTCA    | 60.472 | 20 | 126 | 1976 | 2101 |
| GAAACATTAAGCCTCTGGCG    | 59.845 | 20 | 235 | 66   | 300  |
| CTCAACCAAGGAAGTGTGG     | 58.187 | 20 | 274 | 621  | 894  |
| AGCAAATTTGGTCTAGAGAAT   | 59.278 | 27 | 159 | 1857 | 2015 |
| CGCATGTGCTTCTCAATCAG    | 60.562 | 20 | 265 | 2098 | 2362 |
| GACGAGCTTGTCTCGCTCT     | 59.898 | 20 | 276 | 5083 | 5358 |
| CTTTTGCTGGGGAGGAGTT     | 59.269 | 19 | 260 | 2106 | 2365 |
| TTCGTCAAATAATCCAAGCAA   | 58.291 | 21 | 208 | 753  | 960  |
| ATTATTTGTGGCGTCTGGCT    | 59.597 | 20 | 250 | 416  | 665  |
| TCGAGTTTCTTGCAGTTGA     | 59.716 | 20 | 178 | 709  | 886  |
| ACGAACAACAGTTTCTGGCA    | 59.339 | 20 | 194 | 372  | 565  |
| AGGAGGGTCCCTTGCATAAG    | 60.455 | 20 | 233 | 41   | 273  |
| TTGATTGATTTCTCTCCGCC    | 60.155 | 20 | 266 | 276  | 541  |
| TGTAGCAGGAACAAATGCCA    | 60.257 | 20 | 249 | 75   | 323  |
| GAGAAGGGCTGAAAGAAGGC    | 60.464 | 20 | 127 | 767  | 893  |
| ATCGGTTATTACCGGATCGC    | 61.031 | 20 | 223 | 1853 | 2075 |
| CACCACTCCCCTCTTGTTCT    | 59.149 | 20 | 280 | 282  | 561  |
| TATGGAACACATCGGACCAA    | 59.774 | 20 | 246 | 1811 | 2056 |
| GGTCACCCTAATGGCAGAAA    | 59.933 | 20 | 181 | 231  | 411  |
| CGGAAATTTTCAACCAATTCA   | 59.797 | 21 | 238 | 4868 | 5105 |
| TGGTAGAGGCCCTGTGTTTC    | 60.111 | 20 | 225 | 4060 | 4284 |
| AACACCCCATTTTGCTGTTC    | 59.836 | 20 | 234 | 282  | 515  |
| TGGATTTCGGGTATGTTGCTT   | 60.331 | 20 | 148 | 8    | 155  |
| TGCCAGTCTTCACGGTTATG    | 59.716 | 20 | 196 | 1862 | 2057 |
| CCCATTTCCAATTCCATCAT    | 59.605 | 20 | 276 | 1457 | 1732 |
| GAATTAGGGTGGGCGAAAAT    | 60.15  | 20 | 148 | 540  | 687  |
| TACAAATAGCATCGGCACCAA   | 60.096 | 20 | 280 | 753  | 1032 |
| AGTGTTTTGACATGATTACTCC  | 57.599 | 26 | 261 | 2750 | 3010 |
| AGCATCGAGAGCTTCCAAAA    | 60.096 | 20 | 253 | 803  | 1055 |



|                        |        |    |     |       |       |
|------------------------|--------|----|-----|-------|-------|
| TTGCATCTCTTTTGTGCGCTC  | 59.152 | 20 | 176 | 759   | 934   |
| TGAAGTTAGGAAATAAGGAGG  | 58.743 | 25 | 224 | 5483  | 5706  |
| CCAAGTTCGAGTCCGAAGAC   | 59.844 | 20 | 231 | 67    | 297   |
| GTTGAGGAAGCCGAACAAAA   | 60.227 | 20 | 169 | 106   | 274   |
| GTGTTTCTGCGGTGGAGAAT   | 60.119 | 20 | 183 | 364   | 546   |
| ACGTCAGGGTTAGAGTCCC    | 60.371 | 20 | 190 | 3169  | 3358  |
| CCAGCAAGGGAAAATTAGCA   | 60.202 | 20 | 153 | 1308  | 1460  |
| ACATTCAGGCTCAAAGCAA    | 58.502 | 20 | 211 | 1158  | 1368  |
| AGCAAGCATGTTCTCCCTTG   | 60.397 | 20 | 229 | 143   | 371   |
| CCACCATACCACACACCTT    | 60.545 | 20 | 168 | 703   | 870   |
| AGGTGTGAGAGGGTGGTGAG   | 60.153 | 20 | 180 | 1075  | 1254  |
| GGAAGGGAGCAAAGGTGTTT   | 60.476 | 20 | 264 | 6831  | 7094  |
| AAACCCTAATTGTTTCGGGC   | 60.184 | 20 | 259 | 28    | 286   |
| TCTAATCCTCTCCCCTGTCG   | 59.234 | 20 | 210 | 10401 | 10610 |
| ACTTGGGGTTGAGTCCTTCC   | 60.349 | 20 | 271 | 150   | 420   |
| GGGTACAAAGAGCTCAGCGA   | 60.538 | 20 | 212 | 835   | 1046  |
| GTGCGTGCATTTTTACGTGT   | 59.662 | 20 | 261 | 755   | 1015  |
| TTTCAAAGCCATGCTGTCTG   | 59.988 | 20 | 259 | 1670  | 1928  |
| GGGCTTTTGAATTTGGGAT    | 60.13  | 20 | 221 | 124   | 344   |
| GGTTGGGACGGATAATCGTA   | 59.645 | 20 | 199 | 2955  | 3153  |
| GCCTTCTCAAGATGCAATCC   | 59.78  | 20 | 170 | 560   | 729   |
| AAAGCAGCAAAAACCCACAG   | 60.284 | 20 | 241 | 2215  | 2455  |
| GCACTGAAGTGGTGAGTGGA   | 59.872 | 20 | 189 | 2758  | 2946  |
| TCAAATTTAACAGGCCGACAT  | 59.465 | 21 | 189 | 585   | 773   |
| CTGGCTCGAGGACTCATCTC   | 60.096 | 20 | 104 | 862   | 965   |
| TACCAAAGCCGCTCCTAATG   | 60.223 | 20 | 249 | 1149  | 1397  |
| AGTTCTTCTGGATGCTGGGA   | 59.803 | 20 | 214 | 1751  | 1964  |
| AAAGCTAACCTCCCCACCTC   | 59.576 | 20 | 251 | 95    | 345   |
| GGCATGTGGCATACTCTCT    | 60.104 | 20 | 207 | 3991  | 4197  |
| GGAAGACAAATATGGGACGG   | 59.244 | 20 | 166 | 34    | 199   |
| TCCATGCATTTTTTATTATGTG | 58.42  | 22 | 279 | 292   | 570   |
| TCATTGGATAACAACCGCAA   | 59.93  | 20 | 267 | 449   | 715   |
| CATCTCCGTTGTTGCTGGTA   | 59.716 | 20 | 251 | 8     | 258   |
| CAGTTCACTGCGAAGCTTGA   | 60.324 | 20 | 234 | 3484  | 3717  |
| CCAGAGCCTGCCTCTACTGT   | 59.622 | 20 | 265 | 781   | 1045  |
| CTGCCTGGAAATGCCTTAAC   | 59.708 | 20 | 274 | 1042  | 1315  |
| CCCTTGGTGCTGTTATGACC   | 60.375 | 20 | 260 | 2564  | 2823  |
| CATCGGCTGGAGAAGAAGTC   | 59.95  | 20 | 191 | 46    | 236   |
| CGGAAATAGTGCCTGTGATG   | 60.134 | 20 | 244 | 0     | 243   |
| GGTCAAACATTGACCATATTT  | 59.949 | 26 | 213 | 2234  | 2446  |
| GGTGTGGAAGGCGAATTAGA   | 60.074 | 20 | 260 | 104   | 363   |
| ACATGCCTCTTCCACAACCT   | 59.579 | 20 | 165 | 2333  | 2497  |
| CTGGAAGAGCCGTTGTTTTT   | 59.853 | 20 | 172 | 8     | 179   |
| AATTCATGGGCGTTTCTTGA   | 60.448 | 20 | 185 | 742   | 926   |
| TAGCTGTTTGTGCGATGACC   | 59.871 | 20 | 214 | 1634  | 1847  |
| ATTTCTGGTGTTCGGCGTAG   | 60.132 | 20 | 246 | 226   | 471   |
| GGTCAGCCTCGACTACTTGG   | 59.867 | 20 | 259 | 1993  | 2251  |
| CGAAATCAAATCATTCCCCT   | 59.762 | 20 | 166 | 34    | 199   |
| TCTTGCCCGCATTTTGTAT    | 60.456 | 20 | 275 | 44    | 318   |
| GGAGGCACAAAAGACGCTAT   | 59.34  | 20 | 143 | 100   | 242   |
| CAGGCGCACAAACAGAAATA   | 59.872 | 20 | 260 | 33    | 292   |
| AAGAGTGCACCACACCACCT   | 60.631 | 20 | 201 | 4300  | 4500  |
| GGTTTTCATAATGAGGGCGA   | 59.901 | 20 | 249 | 1620  | 1868  |
| AGACATAAAAAGGGCTGGGG   | 60.312 | 20 | 219 | 432   | 650   |
| GTTTCTCGCAGAAGGTGGAT   | 59.288 | 20 | 213 | 255   | 467   |
| CAGATTTGCCCTGTATGCT    | 60.096 | 20 | 164 | 859   | 1022  |
| AAAAGCCTCCAAAGCATGAA   | 59.823 | 20 | 267 | 30    | 296   |
| CTTCACTCAGCATGCCATC    | 59.399 | 20 | 129 | 2     | 130   |

|                        |        |    |     |      |      |
|------------------------|--------|----|-----|------|------|
| GCCGTACCATTCTGCATTCT   | 60.103 | 20 | 250 | 2720 | 2969 |
| AAACAAGAGCCGAAAAGGGT   | 60.11  | 20 | 252 | 1745 | 1996 |
| CAACAAACGTTGTCAATGGG   | 59.857 | 20 | 205 | 5381 | 5585 |
| ACCATATTTAAGGGTTATCACC | 57.552 | 24 | 253 | 1763 | 2015 |
| GAGGCTGGAGCAAGAGAAGA   | 59.827 | 20 | 256 | 772  | 1027 |
| TTGGCTTCCATTTCTGTTCC   | 60.051 | 20 | 228 | 1313 | 1540 |
| CAAAAGGTTGGGGAGTTCAA   | 59.942 | 20 | 228 | 67   | 294  |
| TTCTTGCCACTTTCTCCGAT   | 59.813 | 20 | 164 | 2368 | 2531 |
| GGAACACCCTTGCTTGAGTA   | 57.797 | 20 | 280 | 3477 | 3756 |
| TTATCCCTTCGCTTTCTCCA   | 59.778 | 20 | 156 | 2342 | 2497 |
| TTGCACATACACGCAGCATA   | 59.892 | 20 | 256 | 896  | 1151 |
| CGCAACTGAAAAACCAAACA   | 59.746 | 20 | 157 | 720  | 876  |
| AAGTGTAGTTCGGGGGAGT    | 59.856 | 20 | 122 | 159  | 280  |
| TGGGCAGTGATTGCTTGTA    | 60.257 | 20 | 243 | 2205 | 2447 |
| TATTCGACGATGCTCTGCAC   | 59.979 | 20 | 191 | 853  | 1043 |
| TTACAATGCAATCGCCTCAC   | 59.694 | 20 | 213 | 2709 | 2921 |
| ACTGCAGATATGGCGGGTTA   | 60.49  | 20 | 242 | 9    | 250  |
| CTGGTTCAGCTCCAATCTC    | 59.803 | 20 | 181 | 611  | 791  |
| CCACGATAAATGCTTCGGTT   | 59.96  | 20 | 178 | 2582 | 2759 |
| TCAGTTTTTGTATGATAGGATC | 57.035 | 25 | 275 | 1499 | 1773 |
| ATCAAGGGCGTTTTTATATTTG | 58.97  | 23 | 269 | 189  | 457  |
| CATCGTTTTACCTTTTGCGG   | 60.48  | 20 | 278 | 1961 | 2238 |
| AAGTACATTGAACGCCCTGC   | 60.14  | 20 | 229 | 3053 | 3281 |
| TGTCAGTTGCAACATTGCTT   | 57.896 | 20 | 269 | 1025 | 1293 |
| TCACTTCAAACGTCGTCCAA   | 60.278 | 20 | 237 | 2000 | 2236 |
| AATGAATCGAAAATGCTCGG   | 60.038 | 20 | 263 | 228  | 490  |
| TTCCGTCGTTGAAATCTGTG   | 59.691 | 20 | 253 | 1608 | 1860 |
| GAATGTGGAGTTTGGTGGTG   | 58.827 | 20 | 246 | 731  | 976  |
| CCAGCGTAAGTCCAACACAA   | 59.758 | 20 | 172 | 293  | 464  |
| TGGGCTCTTCATCACTACCAC  | 60.126 | 21 | 252 | 1331 | 1582 |
| GCTGCAGCAATGAATCTGAA   | 60.104 | 20 | 262 | 744  | 1005 |
| TTTTCCGATTTGTGTTGGTT   | 57.972 | 20 | 213 | 730  | 942  |
| TCACAATAAGGCCCTCCATC   | 59.894 | 20 | 183 | 840  | 1022 |
| GATCCCGCACAAATGAGATT   | 59.9   | 20 | 232 | 95   | 326  |
| CCTGTCTGGAAGTGAAGGA    | 60.229 | 20 | 275 | 20   | 294  |
| AAATGAAACCAACACACCCC   | 59.55  | 20 | 249 | 1870 | 2118 |
| GCGTGTGGACTCCGTTTATT   | 60     | 20 | 234 | 491  | 724  |
| GAGAGGCATTATCCAGGTCAC  | 58.609 | 21 | 280 | 3182 | 3461 |
| ACCAAAATCCCTTCTTTGTCTT | 59.874 | 23 | 253 | 1729 | 1981 |
| TTCAATTCCTCGATAGCAAGAA | 59.75  | 23 | 209 | 1767 | 1975 |
| CCCAACATGCTGGTCTTTCT   | 60.111 | 20 | 248 | 208  | 455  |
| TGCAAAAAGAAGCACAACCT   | 58.554 | 20 | 154 | 478  | 631  |
| CAAATTAGGCATCCACAACG   | 59.037 | 20 | 279 | 1340 | 1618 |
| ACGGATTCAACAGAAAACGG   | 59.971 | 20 | 193 | 269  | 461  |
| CACTGGTGGTGGTAGTGGTG   | 59.907 | 20 | 243 | 338  | 580  |
| AAAACCCACCCTTTTTGAC    | 60.068 | 20 | 148 | 407  | 554  |
| ACATCATCGCATCGATTTCA   | 60.041 | 20 | 177 | 1364 | 1540 |
| AAAATCTTTACCGCATACACAC | 58.699 | 24 | 214 | 2135 | 2348 |
| TGGTGCAGCAACCAACTAAA   | 60.293 | 20 | 252 | 382  | 633  |
| GATAGACGCCTACGACCCAA   | 60.096 | 20 | 262 | 2078 | 2339 |
| GCATCCAAGCAGCGTTAAA    | 59.968 | 19 | 273 | 880  | 1152 |
| CTTTCGGCATTGTAAGGTC    | 59.708 | 20 | 199 | 8    | 206  |
| TAGAGGCGGATCCAGGATTT   | 60.92  | 20 | 268 | 3774 | 4041 |
| TTCGGCCATATCATGTTTCA   | 59.891 | 20 | 280 | 21   | 300  |
| GTGGTTGGAGTGGGAGACAT   | 59.817 | 20 | 198 | 1959 | 2156 |
| CAAACTGTGACGTAGTTCCG   | 58.349 | 21 | 265 | 367  | 631  |
| CCGCATCCACTAAACCCTAA   | 59.953 | 20 | 175 | 515  | 689  |
| GGGCTTCTTTCTGGCTTTT    | 59.835 | 20 | 133 | 373  | 505  |

|                         |        |    |     |      |      |
|-------------------------|--------|----|-----|------|------|
| TGGCAAATGCTTTGTGTTTC    | 59.712 | 20 | 144 | 1087 | 1230 |
| TGTGCTATTCATCTCATTGCC   | 58.738 | 21 | 231 | 1883 | 2113 |
| TCTTGGATTGTGCGTCAGAG    | 59.984 | 20 | 277 | 231  | 507  |
| ATGACAGTGGAGGGAGAGAG/   | 59.871 | 22 | 162 | 37   | 198  |
| CCCTATGTCAAAAGTGTGGGA   | 59.838 | 21 | 239 | 1042 | 1280 |
| GCATTGGCTTTGCTTACTCC    | 59.851 | 20 | 264 | 160  | 423  |
| CCCAGACTTCGACATAGGCT    | 59.308 | 20 | 220 | 3    | 222  |
| GGGATGGTGCTACTTTTGA     | 59.933 | 20 | 242 | 2630 | 2871 |
| TCACATGTCCCAACATCTCG    | 60.534 | 20 | 269 | 897  | 1165 |
| TCGACTGCCTTCAAGTAAAGC   | 59.646 | 21 | 280 | 783  | 1062 |
| TGATCGCTTATGCATTCTT     | 58.336 | 20 | 253 | 2934 | 3186 |
| TGTTCTGTGGATGGTGGTA     | 59.806 | 20 | 240 | 946  | 1185 |
| GCTGTGTTTTGTGGCATGTT    | 59.621 | 20 | 238 | 2011 | 2248 |
| ACGAGAAGACTTCGCCAACA    | 60.975 | 20 | 132 | 770  | 901  |
| CTCGTTTTATTGCCATACA     | 59.542 | 20 | 204 | 187  | 390  |
| TTTGTATAGTTGGGCGAGGC    | 60.096 | 20 | 181 | 265  | 445  |
| TTGGGGGACCATTTTTGTTA    | 60.024 | 20 | 142 | 919  | 1060 |
| TTGAGGGGAGAAAACAAACG    | 60.081 | 20 | 193 | 1774 | 1966 |
| AAAGTGCAACGGAACGGTC     | 60.156 | 20 | 148 | 666  | 813  |
| GGAGGACTGGCAGAGAGATG    | 59.945 | 20 | 223 | 4172 | 4394 |
| TTTTATCAATTCGGGGCTTG    | 59.901 | 20 | 202 | 184  | 385  |
| TTGGTGAGTTGGAGGAGAGG    | 60.229 | 20 | 260 | 909  | 1168 |
| CCCTGAACAGGTATGGATAAG   | 59.72  | 22 | 215 | 1086 | 1300 |
| TGGCAGCCAGTTTGTCTATA    | 60.257 | 20 | 238 | 4990 | 5227 |
| TCCAACACACAAAACCTTGC    | 59.591 | 20 | 242 | 4050 | 4291 |
| GTGGACGTCCCAGATTGTTT    | 59.827 | 20 | 229 | 1819 | 2047 |
| AGCCCAAACACTACCGAATCAA  | 59.569 | 20 | 267 | 2353 | 2619 |
| ACGCGTATGCATTGGTCATA    | 59.983 | 20 | 234 | 978  | 1211 |
| AAAAGGGCCTGAAAATCCAT    | 59.777 | 20 | 278 | 3175 | 3452 |
| TATTAACACAAATCCGGGGC    | 59.66  | 20 | 241 | 2246 | 2486 |
| ATGAGTGGCAGGGCAGATTA    | 60.624 | 20 | 149 | 2499 | 2647 |
| TGACTCATAAACACCCGACG    | 59.566 | 20 | 178 | 985  | 1162 |
| CAGCACTGCACTTCTGAGAG    | 57.4   | 20 | 254 | 907  | 1160 |
| TTGCATCTGATGATGCCAATA   | 60.05  | 21 | 234 | 2212 | 2445 |
| AGTTTTGGGAGTATGGTTGGAA/ | 59.741 | 22 | 237 | 1720 | 1956 |
| TTGCGGAGTTTTTCATTTTCC   | 60.053 | 20 | 154 | 1515 | 1668 |
| TTTTCGGATTCGATGCCTTA    | 60.528 | 20 | 255 | 170  | 424  |
| CCGAAAATCCCAAAGATGAA    | 59.872 | 20 | 116 | 2228 | 2343 |
| TTGCATAAATGGGCCTTGA     | 60.02  | 19 | 258 | 870  | 1127 |
| AAAAAGGGAATGAAGCAGCA    | 59.823 | 20 | 232 | 1380 | 1611 |
| GTCTCCCTCTGCAAAAATCCA   | 60.195 | 20 | 192 | 1868 | 2059 |
| TGATGGCATTCTTCTGGTTG    | 59.518 | 20 | 148 | 1156 | 1303 |
| CTCACCTCGAGATGGTAGGC    | 59.827 | 20 | 214 | 539  | 752  |
| GCAAGCCATCAGATTCCAGT    | 60.226 | 20 | 263 | 210  | 472  |
| TTCAAGGCGTTATCTGGAGC    | 60.352 | 20 | 270 | 3812 | 4081 |
| AGGAGGTGGATGGAGTGTC     | 60.527 | 20 | 179 | 1217 | 1395 |
| TCCGAGGCTATTCTTTTTGC    | 59.433 | 20 | 225 | 61   | 285  |
| ATTTCTTTTTCCCACCAAC     | 60.032 | 20 | 279 | 1658 | 1936 |
| ATGTATGGGCCCTTAATCCC    | 59.873 | 20 | 238 | 120  | 357  |
| TCTGAACTTTGCCAGTGCAT    | 59.445 | 20 | 163 | 484  | 646  |
| TCTTGTGGCTGTACTCCGTT    | 58.37  | 20 | 260 | 1268 | 1527 |
| GATGCACTTAGTGGTGCCAG    | 59.318 | 20 | 276 | 729  | 1004 |
| GATTTTGGGAGTAATGGGGC    | 60.511 | 20 | 136 | 360  | 495  |
| CAAGAACCAGGGGATGACTAA   | 59.926 | 20 | 211 | 579  | 789  |
| CATGTGTATAATAACAACCGCC  | 59.674 | 23 | 160 | 8535 | 8694 |
| TGCATATTGACCCACTTGTCTC  | 60     | 22 | 243 | 869  | 1111 |
| AGGTTTTGGGTTAATGGGC     | 60.055 | 20 | 128 | 430  | 557  |
| ACCCCTCTTTTCCACCATC     | 60.169 | 20 | 207 | 3239 | 3445 |

|                        |        |    |     |      |      |
|------------------------|--------|----|-----|------|------|
| TGCTATGTTCTCATTGTTTTGC | 60.272 | 22 | 274 | 208  | 481  |
| TGAATTGAAAGCTGAATCATGT | 60.124 | 23 | 237 | 23   | 259  |
| ATCACCATAGCGTCCACTCC   | 59.957 | 20 | 177 | 1828 | 2004 |
| TTCTGGTAACAAGGAATGCAA  | 58.28  | 21 | 206 | 1881 | 2086 |
| TTTTCTTCTCTTTGCAGCC    | 59.569 | 20 | 208 | 396  | 603  |
| AAGGGTGGTGTTTGTGGAG    | 59.861 | 20 | 273 | 1264 | 1536 |
| TGTCGTCTGACATTGCCTACA  | 60.317 | 21 | 144 | 13   | 156  |
| AGGACTTGGGAGTCTGGGAT   | 59.929 | 20 | 237 | 520  | 756  |
| CCACCATTGCTAATCGTCCT   | 59.955 | 20 | 139 | 3442 | 3580 |
| TGCAGTTTTAGGCATATCGAAC | 59.279 | 22 | 245 | 104  | 348  |
| ATGCATGCAGCAAGTTGTTC   | 59.878 | 20 | 204 | 946  | 1149 |
| AGGTTTTCAATGCAAGGGCT   | 60.987 | 20 | 235 | 846  | 1080 |
| AAGAACAAACGACTTCCACCA  | 59.624 | 21 | 230 | 2487 | 2716 |
| TCTTTGATTCCAACCCCAAG   | 59.903 | 20 | 207 | 587  | 793  |
| GAAGGCTGGTAACCCATCAA   | 59.933 | 20 | 200 | 218  | 417  |
| TGTGTGTGGCCACTAAAATGA  | 60.019 | 21 | 242 | 160  | 401  |
| CGCTTGAATTGAGGGTTCAT   | 60.074 | 20 | 236 | 741  | 976  |
| CCTACAATGCCACACCTCCT   | 59.989 | 20 | 134 | 136  | 269  |
| TTGTGGTGTGGAAGATCTGG   | 59.52  | 20 | 209 | 1176 | 1384 |
| ATTCCCTTTTGTCCCTTTCG   | 60.291 | 20 | 223 | 993  | 1215 |
| ATTCAATCTGCACCTCCTGG   | 60.073 | 20 | 129 | 192  | 320  |
| GAGGTTGAGGGTGGCTGTAA   | 60.111 | 20 | 143 | 1036 | 1178 |
| ATCGTGGATACGTTGAAGGC   | 59.962 | 20 | 271 | 9    | 279  |
| CAAAAAGCGCTACAAGCACA   | 60.191 | 20 | 243 | 708  | 950  |
| ATTGCGCTCAAAGATATGGC   | 60.203 | 20 | 203 | 2198 | 2400 |
| CCAAAATTACATGGTTCGGTG  | 60.096 | 21 | 233 | 1526 | 1758 |
| TCTGGTAACCGAATTGCCTC   | 60.074 | 20 | 209 | 1055 | 1263 |
| TCAGGTTTATCAACATCATTTA | 57.667 | 25 | 202 | 14   | 215  |
| GCCCATTTGCAGAATCCTAA   | 60.038 | 20 | 106 | 1527 | 1632 |
| GCCATCTGTATGGCTTGACC   | 60.492 | 20 | 187 | 1950 | 2136 |
| TGAAGTTAGGAAATAAGGAGG  | 58.743 | 25 | 272 | 3054 | 3325 |
| AAACAGCACCCAGCTTCAGGT  | 59.914 | 20 | 219 | 2380 | 2598 |
| TCCACTTTTTGTTTTGGAGCA  | 60.634 | 21 | 238 | 367  | 604  |
| AGCCCAACCTATTCTCACCC   | 60.328 | 20 | 137 | 1903 | 2039 |
| GATTGGTCCAGCAGGTTTGT   | 59.973 | 20 | 276 | 594  | 869  |
| TGCATCTCCTCCACCTATCC   | 60.034 | 20 | 151 | 454  | 604  |
| GCACAGCATGTGGAGTGAAG   | 60.473 | 20 | 252 | 1403 | 1654 |
| TTGTTGCGCAATGAAGACTC   | 59.995 | 20 | 251 | 17   | 267  |
| CATCATTCCCCTCCTTGA     | 60.003 | 20 | 256 | 397  | 652  |
| CATCCGTCCATTTCCAAGAT   | 59.75  | 20 | 246 | 2121 | 2366 |
| TTGGGATCTTGCATGAACAA   | 60.049 | 20 | 234 | 491  | 724  |
| CCCAACCCAATCACAACAAT   | 60.474 | 20 | 242 | 1039 | 1280 |
| CACAGCGGTCTCGTCAACTA   | 60.049 | 20 | 232 | 1116 | 1347 |
| GATGTGGAGCTTGACAAAAA   | 59.847 | 20 | 231 | 1477 | 1707 |
| CCGCAAAAATCCTTCACAAT   | 59.938 | 20 | 257 | 3704 | 3960 |
| TCAGCAATCAAATTGGCAAC   | 59.67  | 20 | 275 | 538  | 812  |
| TGCCTTTCCATGAACAAAAAC  | 59.967 | 21 | 253 | 1565 | 1817 |
| TTCAATATTGGGCAGAGGG    | 59.894 | 20 | 206 | 1828 | 2033 |
| GATCCCGGACTGAGTGAATG   | 60.475 | 20 | 246 | 322  | 567  |
| AACAAGAAGGCCGGAAGAAC   | 60.61  | 20 | 234 | 325  | 558  |
| GGCGTGACACTTTTTCGATT   | 60.118 | 20 | 252 | 3630 | 3881 |
| CAACAATTAATTACCGCCGC   | 60.335 | 20 | 253 | 2616 | 2868 |
| TATAAATTTGGCGCCGTTG    | 60.797 | 20 | 267 | 1128 | 1394 |
| CAACCCAAACATTTATTCCCC  | 60.279 | 21 | 226 | 2376 | 2601 |
| CGAACAAAGCACACATGAGG   | 60.301 | 20 | 225 | 5544 | 5768 |
| TGGCACAACAAAAGTAGAGAC  | 59.562 | 22 | 247 | 307  | 553  |
| CCGAATTTCTCCCAACTCAA   | 60.044 | 20 | 208 | 4547 | 4754 |
| TCCACATCTTTGGGATAGGG   | 59.744 | 20 | 247 | 135  | 381  |

|                        |        |    |     |      |      |
|------------------------|--------|----|-----|------|------|
| CCGGAGAGAAAAAGACACGA   | 60.366 | 20 | 252 | 1969 | 2220 |
| CGCTATGTACACGGTGTTGC   | 60.203 | 20 | 146 | 1102 | 1247 |
| GTTTGCTTTGGGGTTGTGTT   | 59.875 | 20 | 278 | 1329 | 1606 |
| GGAATATTTGCCTCAATCCG   | 59.369 | 20 | 119 | 9    | 127  |
| TCATACTCTGGCTGCTCGAA   | 59.697 | 20 | 241 | 2233 | 2473 |
| TGTGCATGCTTCAGTCTTGTC  | 60.048 | 21 | 207 | 2892 | 3098 |
| GAAGCCCATATGGCATGAGT   | 59.923 | 20 | 239 | 457  | 695  |
| CATCGTGTAGTGCATCCTGC   | 60.296 | 20 | 236 | 1502 | 1737 |
| GTGAATCTTGGTGGCTTCAA   | 58.697 | 20 | 153 | 40   | 192  |
| GGCATTGGGAATGAGTTTGG   | 60.309 | 20 | 231 | 362  | 592  |
| AATCACAGAATAAACGCCCG   | 59.96  | 20 | 255 | 3642 | 3896 |
| TAGCAGCAGTGTGGAAGTGG   | 60.049 | 20 | 276 | 646  | 921  |
| GGAGACGGTGACAAAAGCAT   | 60.119 | 20 | 221 | 108  | 328  |
| AAGGACCTCAGCCTGCAGTA   | 60.012 | 20 | 191 | 2347 | 2537 |
| ATATGGTGGTATGGTGCAGA   | 61.003 | 20 | 132 | 176  | 307  |
| ATGCTTGATAGTGGGCATGTT  | 59.471 | 21 | 184 | 16   | 199  |
| GCTGCATCCCGATATGGTAG   | 60.457 | 20 | 202 | 2217 | 2418 |
| AGAAGCTGAGCACGCCTAAA   | 60.292 | 20 | 270 | 1029 | 1298 |
| GGAACCTAACGTCCTCCCGTT  | 60.361 | 20 | 163 | 550  | 712  |
| TTCGACTTTTCAAGTTATTTTC | 59.74  | 26 | 253 | 94   | 346  |
| TTAGGCGATGCCCTCTATTG   | 60.188 | 20 | 206 | 403  | 608  |
| TGGATGTTTACTATGGGGTGT  | 59.531 | 23 | 249 | 1183 | 1431 |
| AGCAACCTCAAACCACAAGG   | 60.149 | 20 | 181 | 4    | 184  |
| TCCCAGTTACCTACCACCCA   | 60.224 | 20 | 121 | 2271 | 2391 |
| AGGTCAGGCTACCCAACAGA   | 59.721 | 20 | 258 | 21   | 278  |
| TGCCATCAAATGCAAGTTTC   | 59.67  | 20 | 251 | 1153 | 1403 |
| TATTGTTGCTGCTGATCCCC   | 61.003 | 20 | 242 | 756  | 997  |
| CCCATCAGACCAGTTGACAC   | 58.94  | 20 | 237 | 914  | 1150 |
| GGAAACCCTGAAGAAACGAA   | 59.146 | 20 | 267 | 1832 | 2098 |
| ATTC AATCTCTGGGCTGTGG  | 60.073 | 20 | 163 | 5485 | 5647 |
| AGCAGCATTAGCCAGAAAGG   | 59.615 | 20 | 147 | 2375 | 2521 |
| CTTCTCTCACATCCATCGCA   | 59.942 | 20 | 216 | 1164 | 1379 |
| TGAATTTCAATACACGCCCA   | 59.93  | 20 | 269 | 1211 | 1479 |
| TCCCATTTCCTCCAAATTCA   | 60.244 | 20 | 115 | 3738 | 3852 |
| GCAACACTAGGCAACAGCAA   | 60.058 | 20 | 239 | 1705 | 1943 |
| TTGAGCTCATGTCAGCTGGT   | 59.577 | 20 | 260 | 440  | 699  |
| GCCTGCTCAACCTCAATTCT   | 59.434 | 20 | 259 | 2827 | 3085 |
| AACTGGTGTGTGTGGCTGTC   | 59.63  | 20 | 274 | 9341 | 9614 |
| TGCATGTGGTGATTGGTAGA   | 58.486 | 20 | 269 | 1343 | 1611 |
| CTCTGCTTTTTAGAGAGAGGG  | 59.811 | 24 | 128 | 4109 | 4236 |
| GCTTCTCATCCTGCGAACTC   | 60.104 | 20 | 257 | 633  | 889  |
| ACCCAAGATGGAAGACAAA    | 59.381 | 20 | 278 | 3461 | 3738 |
| TCCTTTTGCTTATGCCGTTT   | 60.209 | 20 | 213 | 1734 | 1946 |
| TTCCTAGCTCTCCCCCTCTC   | 59.912 | 20 | 229 | 2236 | 2464 |
| TCTAACACGCAGCATCAAGG   | 60.011 | 20 | 228 | 2551 | 2778 |
| TTGCCTTTATTTCTTGGCAGA  | 59.84  | 21 | 225 | 1128 | 1352 |
| TTAATGCAGAGCAGCCAAGA   | 59.712 | 20 | 129 | 844  | 972  |
| CGAGGCATATCATGTTCCGG   | 60.041 | 19 | 198 | 2234 | 2431 |
| TGCTACCTCGCATTGTTGAG   | 60.011 | 20 | 237 | 327  | 563  |
| CCCATCACCAAACAAAACCT   | 59.688 | 20 | 277 | 2575 | 2851 |
| TGCAATCGACGGAAACAATA   | 60.073 | 20 | 219 | 1194 | 1412 |
| CAAGTTTGAAGTGCAGCATGA  | 60.042 | 21 | 197 | 2802 | 2998 |
| TGTCAAGAGTCTTGCACCG    | 60.025 | 20 | 181 | 1191 | 1371 |
| ATTC AACTCCAGACGCCATC  | 60.081 | 20 | 277 | 1435 | 1711 |
| AGTGGGCTTCTACTTTCCC    | 59.576 | 20 | 271 | 2236 | 2506 |
| GCATACGGCTCACTCTACGG   | 60.817 | 20 | 180 | 1019 | 1198 |
| CCCATTCCAACCATAGCAGT   | 59.813 | 20 | 227 | 3960 | 4186 |
| GGCATTACGCATTACCACAC   | 58.923 | 20 | 167 | 73   | 239  |

|                        |        |    |     |      |      |
|------------------------|--------|----|-----|------|------|
| CACGACCTGAATGCAAGAAA   | 59.84  | 20 | 222 | 3292 | 3513 |
| TTGTTTCGTGTTCCAAAGGAAG | 60.132 | 21 | 277 | 4002 | 4278 |
| TGGTTTGTGAATTGGGTTTTG  | 60.613 | 21 | 230 | 73   | 302  |
| TGAGCTGTGTTTAGGGCTGA   | 59.591 | 20 | 107 | 1834 | 1940 |
| TGATGGTGAGGATGCTGCTA   | 60.376 | 20 | 269 | 3297 | 3565 |
| TTGTGTCCCAATAACACAAA   | 58.783 | 21 | 138 | 2780 | 2917 |
| TCCATAGCCAAGCACAAACAT  | 59.152 | 20 | 204 | 3636 | 3839 |
| CAGTTGGAGTTGCTTTTGA    | 58.897 | 20 | 223 | 1310 | 1532 |
| TCTGTGGGACCAACTTCCTT   | 59.549 | 20 | 128 | 5510 | 5637 |
| ACCCACAAAAGAAAACACCA   | 60.246 | 20 | 231 | 534  | 764  |
| GCCCAAATTAAGCACAAAA    | 59.943 | 20 | 229 | 2251 | 2479 |
| CGTTTCTTGGTAGTTTGCC    | 59.609 | 20 | 269 | 3872 | 4140 |
| TTTAAAGAAGGCCAAGCATTT  | 58.079 | 21 | 216 | 3401 | 3616 |
| GCGTTGTCTTGTGTGGTGAT   | 59.603 | 20 | 120 | 14   | 133  |
| TTGTTAGAGGTTTTGACGGGA  | 59.595 | 21 | 276 | 2627 | 2902 |
| AGCATTA AAAAGGCCATCCA  | 59.547 | 20 | 112 | 2641 | 2752 |
| TTCACTCACATTGCTTTGCC   | 59.847 | 20 | 188 | 3167 | 3354 |
| TGTGCAAATGCTACAGGTGA   | 60.309 | 21 | 228 | 4630 | 4857 |
| TAGCCGTGGTTTGTCAAGTG   | 59.758 | 20 | 223 | 1256 | 1478 |
| CATCATCGACTCGTCCCTTT   | 60.073 | 20 | 228 | 1318 | 1545 |
| ACCAACAGTTGAATATGCCTAC | 60.302 | 23 | 262 | 710  | 971  |
| CGGAGATGGTTGTTTGAGA    | 61.034 | 20 | 227 | 3107 | 3333 |
| CTGAAGCAGAAGCCCATCTC   | 60.096 | 20 | 256 | 2107 | 2362 |
| CGGAGAGAGCGAATGAGTCT   | 59.703 | 20 | 255 | 1348 | 1602 |
| AGCACACCAATCCGAAAATC   | 59.939 | 20 | 275 | 3885 | 4159 |
| CAAGAACAATAATCGGTGCAG  | 60.131 | 22 | 223 | 2536 | 2758 |
| CGCTTTGGTGCATCATCTATT  | 60.11  | 21 | 239 | 522  | 760  |
| TTGGAGAAAATTTTGTGGGC   | 59.916 | 20 | 279 | 1530 | 1808 |
| GAATCCAGCACACCAAGACA   | 59.682 | 20 | 253 | 1373 | 1625 |
| GGAATCGGAACCCTTTTAGC   | 59.909 | 20 | 257 | 2539 | 2795 |
| ATTGCACCCAGAGATGGAAG   | 60.073 | 20 | 229 | 4974 | 5202 |
| TCACTCATGGCTTACGTTT    | 59.837 | 20 | 246 | 3199 | 3444 |
| GGGAGACCTCCAAAGCTAGG   | 60.204 | 20 | 154 | 2032 | 2185 |
| ACTTTAAGGCGAATTAGCACC  | 57.615 | 21 | 222 | 1635 | 1856 |
| CCCAAGCTGGTGGTTATGAT   | 59.813 | 20 | 188 | 2799 | 2986 |
| GACTCGTGTTCCAACATTCA   | 57.033 | 20 | 273 | 397  | 669  |
| GTAAGGGACCATTCACTGGC   | 59.41  | 20 | 223 | 3222 | 3444 |
| GAGAAACGCCACACACACAC   | 60.211 | 20 | 156 | 772  | 927  |
| GGTAGCTGAAGGATTTCCA    | 59.41  | 20 | 259 | 2927 | 3185 |
| TTTGAGCTCCCGAAAATGAC   | 60.192 | 20 | 276 | 54   | 329  |
| CGTTGGCCCGATATTTAGAG   | 59.564 | 20 | 228 | 1187 | 1414 |
| GTGGATGCTTATCGCAGTGA   | 59.83  | 20 | 214 | 177  | 390  |
| GCTGCTGCTGTCTAAATCCA   | 59.178 | 20 | 252 | 23   | 274  |
| TGAAGATGGCACCTTGAGTG   | 59.831 | 20 | 239 | 802  | 1040 |
| CAATGAAGTCGTGCATCACA   | 59.248 | 20 | 226 | 1154 | 1379 |
| GTCATCTCGACATCCTGCAA   | 59.794 | 20 | 197 | 103  | 299  |
| CCACTTTCACCAACTACCA    | 59.565 | 20 | 274 | 701  | 974  |
| CGACAGATCCCCTCTCTCTG   | 59.937 | 20 | 254 | 1772 | 2025 |
| CAAACCACAAAGCAGCACTC   | 59.49  | 20 | 233 | 142  | 374  |
| TTTAAGCTCAATGCCTGGGT   | 59.708 | 20 | 179 | 2636 | 2814 |
| GGGCATTTTGTGACTTCACT   | 59.045 | 21 | 184 | 4262 | 4445 |
| TGACCATGTATCGGTCTTTCA  | 58.987 | 21 | 271 | 18   | 288  |
| CGTGTTTGGTGGCTTTTCTT   | 60.147 | 20 | 242 | 1297 | 1538 |
| TGCGTTTCTGCGTTTTTATG   | 59.88  | 20 | 272 | 2617 | 2888 |
| CATTCACGGAAAACACTGCACA | 60.699 | 20 | 243 | 1281 | 1523 |
| ACATGAGCTCGGTTTCAAAT   | 59.7   | 20 | 251 | 1377 | 1627 |
| ATCTTGGCAATCCAAAGCTG   | 60.214 | 20 | 139 | 1    | 139  |
| TAAATCTTCGTCTTCGGCGT   | 59.845 | 20 | 252 | 740  | 991  |

|                        |        |    |     |      |      |
|------------------------|--------|----|-----|------|------|
| AAAACAACCCAGTCACGCTC   | 60.156 | 20 | 249 | 3902 | 4150 |
| CTTCGTGGAGCTGCAAACCTT  | 60.571 | 20 | 184 | 2061 | 2244 |
| TGGAAACAGCCATTACAGAG   | 60.24  | 20 | 257 | 2556 | 2812 |
| GATGATTTATCACCGAATCGC  | 59.387 | 21 | 272 | 3943 | 4214 |
| CCACCATGATTTGACACAC    | 59.812 | 20 | 225 | 5756 | 5980 |
| AAAATCATTGGAATCAGCCG   | 59.901 | 20 | 219 | 6001 | 6219 |
| CCTCGATGTTTAAAACCAGA   | 60.096 | 21 | 156 | 81   | 236  |
| GTGCATGTGTGTGTGGAA     | 60.053 | 20 | 229 | 560  | 788  |
| GCAACATGCTGATGGTGGTA   | 60.549 | 20 | 166 | 1126 | 1291 |
| ACGATCATCACATGAACCGA   | 59.925 | 20 | 172 | 2257 | 2428 |
| CGAAACGATTAGTTGAATGTG  | 59.652 | 22 | 193 | 2000 | 2192 |
| CGGAACACAATTGACAGAA    | 59.691 | 20 | 130 | 19   | 148  |
| TAAGCCAAGCACACATGAGG   | 59.864 | 20 | 180 | 6951 | 7130 |
| TCATGGCTCTCATCCAAACA   | 60.201 | 20 | 269 | 2209 | 2477 |
| CCAGTCAAAGTCACCAGGAA   | 58.695 | 20 | 194 | 1935 | 2128 |
| ATTCCTCACCCAAAATGGTG   | 59.647 | 20 | 249 | 1798 | 2046 |
| AAACTTGCAGAGTCGGGTGA   | 60.833 | 20 | 243 | 1233 | 1475 |
| CTGAATTTGTGGTGGCAGTG   | 60.152 | 20 | 180 | 475  | 654  |
| AGGTTCTACTCTCTCAGCC    | 59.249 | 22 | 271 | 771  | 1041 |
| GACGATAATTCGTCCGTTGG   | 60.331 | 20 | 256 | 2735 | 2990 |
| CCACCCACTCTCCCCTTAAC   | 60.736 | 20 | 217 | 987  | 1203 |
| TTTAAGCGAAGAACAGGGGA   | 59.817 | 20 | 225 | 712  | 936  |
| CTGATACCGAGGCAAACACC   | 60.517 | 20 | 240 | 1215 | 1454 |
| GTCAAAACAAATGCTGTGGGT  | 59.89  | 21 | 266 | 1741 | 2006 |
| TGTGACCAATATCACAGATTCC | 58.502 | 22 | 276 | 10   | 285  |
| TGCATAGCTGATATGTCCCA   | 57.67  | 20 | 152 | 1763 | 1914 |
| TCGGAAGGCAAGATCACTAGA  | 59.963 | 21 | 280 | 593  | 872  |
| CAAATAATGCAGAGAGCGAGC  | 60.131 | 21 | 262 | 2433 | 2694 |
| ACCTTCCAATTGCTCTGTGC   | 60.263 | 20 | 241 | 330  | 570  |
| AGGAAACCTTGCAAATGCTG   | 60.249 | 20 | 263 | 2972 | 3234 |
| GGAATGAATGGAGCGTGAGT   | 60.081 | 20 | 256 | 5304 | 5559 |
| TCTGGAATTCTCGTGCTTCA   | 59.522 | 20 | 231 | 718  | 948  |
| TCGTCCCTCTCCACAAAATC   | 60.05  | 20 | 191 | 643  | 833  |
| GCTTGGTACAATGGCTGGAG   | 60.657 | 20 | 251 | 9045 | 9295 |
| CTTCGCTTTTCGCGATTTTA   | 60.456 | 20 | 231 | 7844 | 8074 |
| ATGTCCAAAATTGTTGTCGCT  | 59.49  | 21 | 280 | 912  | 1191 |
| ACTCGGCCTAGTTCGTTGAA   | 59.875 | 20 | 269 | 358  | 626  |
| AAACATGTTGGCCAATTTCA   | 58.869 | 20 | 234 | 2464 | 2697 |
| GATCCCTTCTTCTCAGCGA    | 59.508 | 20 | 216 | 2007 | 2222 |
| GCTTCAGTTGGCAGGTATCC   | 59.7   | 20 | 101 | 1541 | 1641 |
| ATTCCGAACCTGAAGCACAG   | 60.255 | 20 | 250 | 335  | 584  |
| TGCTGTACTTGCATTGGAGG   | 59.864 | 20 | 257 | 639  | 895  |
| CGGTATGGTGTGTCGACCGAT  | 60.657 | 20 | 199 | 7    | 205  |
| TGCACAAAACAGTTCCACCT   | 59.187 | 20 | 269 | 7392 | 7660 |
| TTTCACCCACAAAATCATCA   | 57.35  | 20 | 279 | 2078 | 2356 |
| CAGGCGGCATTCTCTAATTC   | 59.807 | 20 | 267 | 292  | 558  |
| ATTGGTGTTCTGGGTGGAAA   | 60.21  | 20 | 220 | 1979 | 2198 |
| TTGTTGTTGGTGGAACTTGG   | 59.435 | 20 | 271 | 2194 | 2464 |
| TGAGAAAACAAAAGTGGCCC   | 60.088 | 20 | 261 | 202  | 462  |
| AGAGTCGGAAGGCATATGTGA  | 59.708 | 21 | 114 | 261  | 374  |
| TGGGGAATGACTCACCCTA    | 58.93  | 20 | 212 | 4455 | 4666 |
| GATTCGAGTTTTGCTTCCCA   | 60.192 | 20 | 153 | 2317 | 2469 |
| TGAGCCTCCATGCTCCTATT   | 59.797 | 20 | 222 | 88   | 309  |
| TGTGTTTTGACAATATTTAGTG | 58.633 | 27 | 152 | 4685 | 4836 |
| TGGGAATAGCGATTTTCCTTT  | 59.922 | 21 | 186 | 3259 | 3444 |
| CACGCACACAAAATTCACA    | 60.204 | 20 | 257 | 1306 | 1562 |
| TGAATCACCACCCATCTGAA   | 59.893 | 20 | 199 | 5080 | 5278 |
| TTGACTCCCCACTGTTAGCC   | 60.111 | 20 | 113 | 38   | 150  |

|                         |        |    |     |      |      |
|-------------------------|--------|----|-----|------|------|
| CGGAAAAGAAAACCCACTTG    | 59.581 | 20 | 224 | 281  | 504  |
| TGTTAGCGAATTTTTGGTGG    | 58.674 | 20 | 265 | 166  | 430  |
| TAACATGCCCCAGACTGA      | 60.112 | 20 | 226 | 1026 | 1251 |
| CACCCGATTCGAGTAGCTGA    | 61.336 | 20 | 272 | 2900 | 3171 |
| GCGCCACCTCAAAGTAAAA     | 60.244 | 20 | 203 | 1    | 203  |
| CACCTGGAATGATAATGGGG    | 60.006 | 20 | 250 | 2307 | 2556 |
| ATTGGTGCGTGCATGTATGT    | 59.878 | 20 | 135 | 20   | 154  |
| AAAGCTCAGTTCGATCCCT     | 60.212 | 20 | 271 | 6718 | 6988 |
| CGATCTCCTGTTTCTTCCGT    | 59.284 | 20 | 223 | 3140 | 3362 |
| GCTTTTTGCCTCCTTTCATTT   | 59.729 | 21 | 265 | 1156 | 1420 |
| CAACAAAAATCAAGCCATGC    | 59.161 | 20 | 266 | 2362 | 2627 |
| TGCTTTTGCTCTCCAACAGA    | 59.716 | 20 | 232 | 14   | 245  |
| ACCTCAAACCCTTCTGCGTA    | 59.734 | 20 | 142 | 1835 | 1976 |
| GAAGCCGAGAAACAAAGACG    | 59.993 | 20 | 155 | 1760 | 1914 |
| CACCCCTACCCCTACCCTAC    | 59.571 | 20 | 275 | 2238 | 2512 |
| GCTTCAAACCTGGCTCTCGAT   | 59.579 | 20 | 228 | 3579 | 3806 |
| CGGGTCTGCTCAAGTTTCTT    | 59.473 | 20 | 236 | 162  | 397  |
| TCCTTTCGATTCATTCCTGC    | 60.155 | 20 | 190 | 2083 | 2272 |
| ATGAATTTGCCTTTGTACATTTT | 59.355 | 24 | 263 | 558  | 820  |
| GAATAGCCCAAGACGAGTGC    | 59.843 | 20 | 194 | 1701 | 1894 |
| CGGATTGGATCGGAGATATG    | 60.252 | 20 | 238 | 854  | 1091 |
| GTGGGGTGATATAAGATGATG   | 58.278 | 22 | 244 | 58   | 301  |
| CGAGAGGTGGGAAAAGTGAA    | 60.224 | 20 | 225 | 583  | 807  |
| CTTTGGTTCATGTAGCCGAC    | 58.228 | 20 | 124 | 271  | 394  |
| CAATATGGGAACCTTCGCGTT   | 59.96  | 20 | 247 | 173  | 419  |
| ATGAGTTCTTGATCGGTGGG    | 59.927 | 20 | 218 | 137  | 354  |
| TAGCTTCGCATCAAGTCCCT    | 59.978 | 20 | 267 | 666  | 932  |
| GGAAGCTGCTCTTGAGTTGG    | 60.134 | 20 | 242 | 274  | 515  |
| TTTTGCCCGATAGAAATCA     | 60.395 | 20 | 265 | 615  | 879  |
| GGTTGCACACTCCAACACATA   | 59.48  | 21 | 275 | 196  | 470  |
| TTCCATGATGCCTAGCATTG    | 59.646 | 20 | 100 | 53   | 152  |
| TGGAATGATCAGCAGAGGAA    | 59.499 | 20 | 250 | 183  | 432  |
| TCCTCGCCTCTTACATCTGC    | 60.504 | 20 | 174 | 51   | 224  |
| TGGCATTGTCTTGGTTGTTC    | 59.547 | 20 | 269 | 1820 | 2088 |
| GCCAATCCTAGCGATGAGAA    | 60.318 | 20 | 237 | 462  | 698  |
| CAGGACGGTTCCTCTCTTGA    | 60.377 | 20 | 141 | 73   | 213  |
| GCCAAAGAGTTGTTGGAAGC    | 59.859 | 20 | 251 | 1244 | 1494 |
| ATAGGCGGTCTGGAGAGTGA    | 59.827 | 20 | 178 | 821  | 998  |
| TAGAAGCATCTCCGAGGGAA    | 59.91  | 20 | 252 | 5007 | 5258 |
| CTCCAAGACCCCAATTTGAT    | 58.836 | 20 | 243 | 539  | 781  |
| TCCAACCCATCTCCCATTTA    | 60.126 | 20 | 271 | 1135 | 1405 |
| ATGGTTGGATATTTCCCCCT    | 59.356 | 20 | 222 | 306  | 527  |
| AAACAGGGTTGGGAAGAAGC    | 60.476 | 20 | 118 | 51   | 168  |
| TGCCATTGCAGCTAGTCTTG    | 60.157 | 20 | 183 | 447  | 629  |
| ACCACCGCGTACCACCTT      | 61.403 | 18 | 273 | 298  | 570  |
| GGGAATTGGGCTGAGATTTT    | 60.265 | 20 | 210 | 67   | 276  |
| GGGCAAAAATGCCACTCTTA    | 60.074 | 20 | 143 | 79   | 221  |
| TTTGTGCGAATTAGGGATGC    | 59.901 | 20 | 127 | 3547 | 3673 |
| TTGTTGCACCGTGGAGATTA    | 60.111 | 20 | 153 | 84   | 236  |
| AATAGCAGCCAAGGCAGAAA    | 59.982 | 20 | 218 | 1510 | 1727 |
| ATGCCGTTTGTGATCATTTG    | 59.4   | 20 | 241 | 7    | 247  |
| TTGGTAAAGATAAATGCATCTC  | 58.244 | 25 | 246 | 359  | 604  |
| TTGGCAGCAACTACTACCATA   | 58.053 | 23 | 258 | 2356 | 2613 |
| TGTGGTTGATTTGTGGGTGT    | 59.701 | 20 | 113 | 4    | 116  |
| TGTAGCCGACCCCAATTTAT    | 59.297 | 20 | 228 | 1469 | 1696 |
| TTTCGGGATGTTGCTAATGG    | 60.827 | 20 | 162 | 23   | 184  |
| CTTGGTCTCGGGTTATGTTTT   | 59.871 | 22 | 264 | 156  | 419  |
| GAAATTTTGTAGCCGACCC     | 60.673 | 20 | 105 | 91   | 195  |



|                         |        |    |     |       |       |
|-------------------------|--------|----|-----|-------|-------|
| CGATGCCCTTGAGAATCAAT    | 60.036 | 20 | 249 | 4233  | 4481  |
| CCCACCAAGTATTAATATGCTC  | 59.335 | 24 | 184 | 0     | 183   |
| CACGCTCCTCTCCTCCATAG    | 59.966 | 20 | 260 | 1772  | 2031  |
| CCAGCCTAAATTCATCACC     | 59.387 | 20 | 217 | 17    | 233   |
| TTATCAGAGTCGAGCAAGCG    | 59.322 | 20 | 167 | 106   | 272   |
| CCAATTTATTGGGATTAAGGC   | 57.539 | 21 | 202 | 1464  | 1665  |
| GGAGAAGCAGCAGAAATCGT    | 59.579 | 20 | 165 | 407   | 571   |
| CGGTTGTATGAAACCGTTAGAT  | 60.63  | 23 | 201 | 7     | 207   |
| GTTTGCTGTGCTTGTTGAG     | 59.64  | 20 | 250 | 1081  | 1330  |
| GTTGAGCCGATTGACCAGTT    | 60.119 | 20 | 164 | 79    | 242   |
| CTGCAGCCATCTGTTCTTGA    | 60.136 | 20 | 159 | 7     | 165   |
| TGATGGGGAAATGGTTGAAT    | 59.991 | 20 | 247 | 782   | 1028  |
| GTTTATTGCACCCAATTAGGAT  | 58.456 | 24 | 249 | 268   | 516   |
| GAATTTGGGAAGAAATTTGAGT  | 59.033 | 25 | 261 | 192   | 452   |
| TTCCAAGTTGGTTCATGTGC    | 59.547 | 20 | 256 | 30    | 285   |
| CTTCACTTCCATCCTCTGCC    | 59.803 | 20 | 118 | 460   | 577   |
| TTTAGACGGGCTCTTCTTGG    | 59.448 | 20 | 263 | 5702  | 5964  |
| TCGACAACATCTCCGATCAC    | 59.637 | 20 | 247 | 1542  | 1788  |
| ACATTTGCACGTGTTTCCCT    | 60.419 | 20 | 230 | 191   | 420   |
| CAGCATCAGTGAAGCCTTTG    | 59.591 | 20 | 270 | 11    | 280   |
| TAGATGCACCGTTAGGAGG     | 60.088 | 20 | 277 | 1849  | 2125  |
| TTCTGTTGGTCATTTTCCCC    | 59.767 | 20 | 280 | 627   | 906   |
| CGCACTATGTTTTCCGATCA    | 59.688 | 20 | 132 | 1331  | 1462  |
| TGAAATACCATCCAGTCTGTCC  | 58.912 | 22 | 264 | 12032 | 12295 |
| ACTTGCCTTGTGACTAGCGTC   | 59.558 | 21 | 261 | 2360  | 2620  |
| ACACCAGCCGAGAACATCAT    | 60.542 | 20 | 194 | 207   | 400   |
| AGCTCAACCAAACAACCCAA    | 60.529 | 20 | 235 | 21    | 255   |
| CGTACCACACGATGTTACCG    | 59.904 | 20 | 186 | 687   | 872   |
| GCATATCTCACGCAAAGAACC   | 59.728 | 21 | 278 | 1353  | 1630  |
| AAGCTGATCCGTTCCAAAAA    | 59.685 | 20 | 261 | 501   | 761   |
| CAAAGCAACGAAACCACAAA    | 59.746 | 20 | 213 | 13    | 225   |
| GGTTGAAAATGTAAAGGAAAT   | 58.2   | 24 | 167 | 29    | 195   |
| AGGCCTGCACTCAAAGAAA     | 59.993 | 20 | 200 | 2     | 201   |
| GCGGACCGGCTATATACTTG    | 59.592 | 20 | 272 | 391   | 662   |
| TCGATTGCTTAGATTGGTGG    | 58.721 | 20 | 171 | 14    | 184   |
| GGATACATTGCATTTGGGAA    | 58.282 | 20 | 237 | 414   | 650   |
| CCGGATACTGAAGATGAGGG    | 59.502 | 20 | 250 | 687   | 936   |
| ATGAGTTGCAACCAAACCA     | 59.024 | 20 | 112 | 42    | 153   |
| TCAAAATGGAAACGTGGACA    | 59.941 | 20 | 197 | 0     | 196   |
| CCTCAAAACCACCGAGTCAT    | 59.966 | 20 | 157 | 3     | 159   |
| ATCATTCTCTTGAATTTGGTG   | 59.828 | 23 | 260 | 58    | 317   |
| GATCGGGTTTTTCGGGTATT    | 60.02  | 20 | 245 | 88    | 332   |
| GTGGATGAGAGGGTTTACCG    | 59.405 | 20 | 249 | 1142  | 1390  |
| GCCAACCCACCAAAGAAATA    | 59.801 | 20 | 263 | 615   | 877   |
| TGTGATGTGATTGGGAGAAATC  | 59.797 | 22 | 205 | 754   | 958   |
| ATCCATTTACACCGGAGAC     | 59.786 | 20 | 273 | 299   | 571   |
| TTCTCGTTCTCTTTCCTTCCC   | 59.813 | 21 | 243 | 10    | 252   |
| TCTCCTTGCCGAAAATATG     | 60.031 | 20 | 122 | 965   | 1086  |
| TGCACATGCTTTAGTCCCAA    | 60.257 | 20 | 132 | 2025  | 2156  |
| AGGAACATCGTTGTTGGATG    | 59.845 | 21 | 226 | 184   | 409   |
| CTGATGGTGATGGTGTTCG     | 59.96  | 20 | 268 | 1938  | 2205  |
| GCACCCCACTTACTTTCT      | 60.361 | 20 | 270 | 67    | 336   |
| CCCAAGACCCCAATTTGATT    | 60.91  | 20 | 111 | 6     | 116   |
| ACATTGGCTTGTGAGTTTCG    | 58.775 | 20 | 168 | 96    | 263   |
| ATGGCATTGATGATGAACCA    | 59.738 | 20 | 230 | 166   | 395   |
| CGGAGGTAGTTGGCATTGT     | 59.993 | 20 | 229 | 326   | 554   |
| GCGTAGTGAATTTACGCC      | 59.614 | 20 | 271 | 84    | 354   |
| TGCTTAATTCTTAATGTAATATC | 59.009 | 26 | 180 | 587   | 766   |

|                         |        |    |     |      |      |
|-------------------------|--------|----|-----|------|------|
| TAAGCCCCAGAATCCTTTT     | 59.903 | 20 | 150 | 51   | 200  |
| TCCTCCAAATTTCTCTCCA     | 59.6   | 20 | 263 | 2804 | 3066 |
| GTGAGGTGCATGTGGATCAG    | 60.121 | 20 | 246 | 240  | 485  |
| TTTTTCACACCAGAAACCAAA   | 58.161 | 21 | 154 | 32   | 185  |
| GGGTATGTATACTTGTGCCCG   | 59.238 | 21 | 142 | 638  | 779  |
| GGGAAAAGAGAGAGGTGGT     | 59.534 | 20 | 254 | 21   | 274  |
| TGGAGTCGATGTTGATGGAA    | 60.048 | 20 | 170 | 1456 | 1625 |
| TCGAACAAGTCCTCCAATGA    | 59.215 | 20 | 219 | 568  | 786  |
| TTGGGCAGCCAAATATTGA     | 60.02  | 19 | 119 | 254  | 372  |
| GCGTTGCTATCCCGTCTATT    | 59.209 | 20 | 270 | 301  | 570  |
| ATCGCTGATGTTTGGATGTG    | 59.527 | 20 | 255 | 451  | 705  |
| CCCAAGACCCCAATTTGATT    | 60.91  | 20 | 263 | 173  | 435  |
| CCTCAACCAGCTTAAACCGA    | 60.241 | 20 | 261 | 406  | 666  |
| AATGTGTGCACGAAGAGCTG    | 60.056 | 20 | 124 | 1799 | 1922 |
| TGAAATCTGTCAACCCTCCA    | 59.059 | 20 | 238 | 202  | 439  |
| AATCGAACCTCTCCACCTCA    | 59.655 | 20 | 103 | 219  | 321  |
| GCGATTGCTTCAAATCTA      | 60.31  | 20 | 278 | 484  | 761  |
| ATGATCAGTTTCCGGAGCAG    | 60.218 | 20 | 171 | 240  | 410  |
| TTGGAGGATAAAATTTGTAACA  | 59.351 | 24 | 126 | 414  | 539  |
| TGTAGCCGACCCCAATTTAT    | 59.297 | 20 | 108 | 1514 | 1621 |
| GATGCTACTCCCACAAACCC    | 59.41  | 20 | 226 | 286  | 511  |
| AGTAGATTCCGGGCCATTTTC   | 60.286 | 20 | 202 | 564  | 765  |
| AAGGAAACACATCTAACCTG    | 59.817 | 24 | 268 | 8    | 275  |
| TGCCCTATTTTTCCTCCTCA    | 59.64  | 20 | 191 | 17   | 207  |
| TCGATCCCACGTATTGTGAA    | 59.924 | 20 | 105 | 75   | 179  |
| CGATGCTCCTGTGTCAAAAA    | 59.84  | 20 | 193 | 1595 | 1787 |
| CATGGGTAAGGTTGCGTACA    | 59.464 | 20 | 140 | 249  | 388  |
| TCCTCATCCCCATCAACATT    | 60.135 | 20 | 161 | 155  | 315  |
| AATGTTGAGCCCAACCCAAC    | 62.071 | 20 | 269 | 220  | 488  |
| CCAAATCACACGCAATCAAA    | 60.501 | 20 | 224 | 1955 | 2178 |
| GGTATTGGCTTTACAACCTGGG  | 58.503 | 21 | 259 | 6    | 264  |
| ATAACAGTCCTCGGCGTTTG    | 60.132 | 20 | 130 | 238  | 367  |
| TTCGAAATTTGGTGTTAGCCT   | 58.753 | 21 | 177 | 1239 | 1415 |
| TCTGAACAATTTGCAGCTCG    | 60.134 | 20 | 189 | 320  | 508  |
| TAGGGTTTTGGAGGGGAGTT    | 59.799 | 20 | 189 | 86   | 274  |
| CCCAAGACCCCAATTTGATT    | 60.91  | 20 | 200 | 781  | 980  |
| AGTTGAATCACTTGCTCGGG    | 60.255 | 20 | 267 | 534  | 800  |
| CGTCGGGTAGACCAATGACT    | 59.989 | 20 | 243 | 59   | 301  |
| TGTAGCCTACCATTCCGTAGAA  | 58.787 | 22 | 187 | 1258 | 1444 |
| GGTTGAAGATTCGGACGATG    | 60.461 | 20 | 174 | 1609 | 1782 |
| TCGGCATAAAAAATTGGTCAAG  | 59.95  | 21 | 266 | 71   | 336  |
| TTGATTGCTAATTCAATTTTTAT | 59.326 | 27 | 142 | 124  | 265  |
| TGCAGACACTTCAAAGTTCCA   | 59.475 | 21 | 170 | 30   | 199  |
| CCGGATCGGTCTTAACTCTG    | 59.688 | 20 | 233 | 962  | 1194 |
| GGTGCAAAGGACATCGGTAG    | 60.517 | 20 | 196 | 4    | 199  |
| AAATGCAGTATTGAATTAATTTT | 59.834 | 25 | 253 | 59   | 311  |
| GTGGCCTGATCTACAGCCTC    | 59.834 | 20 | 269 | 86   | 354  |
| TGGATGATCAAGGCTCTCAA    | 59.322 | 20 | 238 | 306  | 543  |
| CTCGCGCTAAATTTGAAAG     | 59.979 | 20 | 219 | 71   | 289  |
| ATCAAGCAAGCGGAACCTCAC   | 60.406 | 20 | 136 | 400  | 535  |
| TGGCAACTGTACAAACAATTC   | 59.132 | 22 | 251 | 582  | 832  |
| ACATGTCAATTAAGAAAGG     | 57.538 | 25 | 253 | 315  | 567  |
| TTTCGTCCCTTACCCTTTGTT   | 59.858 | 21 | 224 | 3    | 226  |
| CTTGCAAGGGAAGACGAAAG    | 59.986 | 20 | 215 | 245  | 459  |
| ACTGCTAGACCCAGTGGTGG    | 60.174 | 20 | 197 | 0    | 196  |
| ATTGAAATCAGACCGCCATC    | 59.9   | 20 | 280 | 98   | 377  |
| GGTTGGGTTTAGGGTTGTCA    | 59.688 | 20 | 280 | 28   | 307  |
| TGAATATCACAGAATTTGGGAC  | 60.19  | 23 | 161 | 239  | 399  |

|                        |        |    |     |      |      |
|------------------------|--------|----|-----|------|------|
| TGATGTTTCCATTGAGCGTC   | 59.654 | 20 | 152 | 44   | 195  |
| ATGCATGGTGTAGGATCACG   | 59.399 | 20 | 224 | 423  | 646  |
| GCCAAGGGTAAGAGAAACCC   | 59.94  | 20 | 205 | 2765 | 2969 |
| CCCAAGACCCCAATTTGATT   | 60.91  | 20 | 267 | 653  | 919  |
| ATATAGCCAGCCCAGCCCTA   | 60.93  | 20 | 237 | 1    | 237  |
| CGCTGACACAGATGTTCCCTC  | 59.42  | 20 | 277 | 758  | 1034 |
| CCTTCAGCAATTCTTCCTGC   | 59.955 | 20 | 228 | 513  | 740  |
| TGATGGAGAATTTGGAGGCT   | 59.629 | 20 | 273 | 4320 | 4592 |
| ACTTCCTGGCCAGACCTTTT   | 60.11  | 20 | 190 | 5    | 194  |
| ATTGTGCAATGGGAATGGAT   | 60.021 | 20 | 278 | 698  | 975  |
| TGCAAAGCGAAGAGAGACAA   | 59.864 | 20 | 248 | 290  | 537  |
| GCATGGATTCCTTGTTTCGAT  | 59.9   | 20 | 110 | 397  | 506  |
| CTACCCGGACTTGGATGTGT   | 59.844 | 20 | 202 | 260  | 461  |
| ATGTAGCCGACCCCAATTTA   | 59.297 | 20 | 262 | 1736 | 1997 |
| GAGAGAAGCCAGGGATGACA   | 60.349 | 20 | 190 | 29   | 218  |
| AAACAAATGAACGATGCCGT   | 60.374 | 20 | 102 | 141  | 242  |
| TGTAGCCGACCCCAATTTAT   | 59.297 | 20 | 275 | 3402 | 3676 |
| ATTCTTCGGTTGGAGGTGTG   | 59.966 | 20 | 201 | 454  | 654  |
| AATCAATGGAGCTGCAAAGG   | 60.214 | 20 | 101 | 154  | 254  |
| TCAATCACCAATCAACAAAAC  | 59.708 | 22 | 203 | 156  | 358  |
| TCGAATGAGAAAACTGGGG    | 60.044 | 20 | 245 | 52   | 296  |
| CGACGGATTGATGCTAATTG   | 59.136 | 20 | 250 | 705  | 954  |
| ATCAAAAAGGTCATGGGTTTCG | 59.79  | 20 | 125 | 13   | 137  |
| ATGATAGTTCCGGTGACCCA   | 60.195 | 20 | 202 | 959  | 1160 |
| ATGTAGCCGACCCCAATTTA   | 59.297 | 20 | 241 | 2467 | 2707 |
| TGTAGCCGACCCCAATTTAT   | 59.297 | 20 | 105 | 13   | 117  |
| GGTGTTTTCTAGAGGCACG    | 59.734 | 20 | 163 | 869  | 1031 |
| CAAGTAAATGCTCGGCACTG   | 59.488 | 20 | 188 | 1820 | 2007 |
| TTGTGGGCTTTTAGTGCCTT   | 59.747 | 20 | 181 | 0    | 180  |
| TGGACAGTAGCAAAGCCACA   | 60.449 | 20 | 277 | 329  | 605  |
| AGCAAATTGTTTGTGTTCTG   | 59.183 | 24 | 109 | 318  | 426  |
| TCAATGGAATCATTGAGGAGG  | 59.879 | 21 | 268 | 1915 | 2182 |
| TAAAGAGACAAGCCAACGCA   | 59.609 | 20 | 269 | 1521 | 1789 |
| TTGGAACCGCTTCTCAACTC   | 60.375 | 20 | 276 | 186  | 461  |
| CATTGTCAATTTGAGCAGCG   | 60.401 | 20 | 246 | 23   | 268  |
| AAGAACTTGCCACACCATC    | 59.973 | 20 | 266 | 1230 | 1495 |
| GAAGGGCAGTTGATGGAAGA   | 60.195 | 20 | 199 | 53   | 251  |
| TCCCCGAATGTCACAACATA   | 59.774 | 20 | 104 | 2208 | 2311 |
| ATGAAATTTCCCGATAAGTTGG | 60.855 | 23 | 212 | 0    | 211  |
| GGGATTGTTATCGTGATGGC   | 60.163 | 20 | 246 | 152  | 397  |
| CAGAAGAACCATGCCAAAGA   | 58.847 | 20 | 254 | 288  | 541  |
| ATAGGTGAGACCGGGGAAAC   | 60.19  | 20 | 120 | 2796 | 2915 |
| TGAAATATCATGTCCAGGTTTC | 57.62  | 23 | 241 | 5    | 245  |
| TCAATTTCTCCAAGCTGATGC  | 60.346 | 21 | 185 | 6    | 190  |
| ATGGAAAAATTTGCAGAGCG   | 60.209 | 20 | 229 | 2918 | 3146 |
| TTATCGGTTTAGCCAGCACA   | 59.325 | 20 | 274 | 762  | 1035 |
| AATATGATGGTGCGGTGGTC   | 60.613 | 20 | 274 | 70   | 343  |
| CCCAAGACCCCAATTTGATT   | 60.91  | 20 | 140 | 391  | 530  |
| TTAAACCTACCCCTTCGCCT   | 59.96  | 20 | 221 | 1502 | 1722 |
| ATCCGCCCTTGATACAGGT    | 59.376 | 19 | 181 | 2264 | 2444 |
| CCTCCATCCTGGAATTGAAA   | 59.864 | 20 | 280 | 156  | 435  |
| GATTGATGCAATGGGTGAGA   | 59.456 | 20 | 253 | 304  | 556  |
| GGTGTGAACAACCAGACATA   | 57.512 | 22 | 266 | 746  | 1011 |
| TCAGCAGCCATCTGTTCTTG   | 60.136 | 20 | 244 | 43   | 286  |
| CACCCGTGTTGAAGTTTTGA   | 59.585 | 20 | 197 | 21   | 217  |
| TCGACCCGTGATACCAGACT   | 60.533 | 20 | 212 | 115  | 326  |
| ACCATCACTCTGTGAACCGAC  | 60.025 | 21 | 129 | 59   | 187  |
| CATTTTATGCAGCGAATGTTGT | 60.027 | 22 | 164 | 22   | 185  |

|                        |        |    |     |      |      |
|------------------------|--------|----|-----|------|------|
| TCTGGTGGGGCGAAATAATA   | 60.281 | 20 | 170 | 326  | 495  |
| TCGATCAAATAACACCATTGC  | 59.838 | 22 | 239 | 1426 | 1664 |
| GATTTTCGAGTTGCAGAGGC   | 59.962 | 20 | 184 | 1648 | 1831 |
| CAGAAGGGGTTATGTCTCA    | 57.582 | 20 | 262 | 107  | 368  |
| AGGTGGTGTTCACATCC      | 59.679 | 20 | 235 | 32   | 266  |
| GGCAGCCTAATATTGAGCAGT  | 59.784 | 22 | 228 | 43   | 270  |
| GCTCTTCAGGTGTTGGACCT   | 59.305 | 20 | 233 | 1458 | 1690 |
| ACCAATGGTGGTATGGTGTG   | 58.984 | 20 | 130 | 202  | 331  |
| AGGAGATGGGAGGTGGTCTT   | 59.929 | 20 | 183 | 20   | 202  |
| CAAACCGGTGCTCCTTGAT    | 59.993 | 20 | 254 | 2133 | 2386 |
| GCACAATGCCAAGTAGCAGA   | 60.019 | 20 | 249 | 901  | 1149 |
| ATCTGCAAAGTGCTGCTGTG   | 60.207 | 20 | 138 | 17   | 154  |
| CGATATTCCTAGCTAGCTTTCC | 59.101 | 23 | 232 | 725  | 956  |
| TAGTCTGTGAGTGCCTGGGA   | 59.415 | 20 | 278 | 2942 | 3219 |
| TCACTCATGCATCTCCACA    | 58.728 | 20 | 249 | 8745 | 8993 |
| CCTACTTGCAATTGTGCTCCA  | 59.864 | 20 | 112 | 0    | 111  |
| AAAGTCGCAATCAGCAACAA   | 59.469 | 20 | 180 | 1651 | 1830 |
| TCTTTTACAAGGTGGGTGGC   | 59.971 | 20 | 147 | 427  | 573  |
| CCTGTCAAAGGAGCAATGGT   | 60.111 | 20 | 185 | 351  | 535  |
| TGTAGCCGACCCCAATTTAT   | 59.297 | 20 | 140 | 498  | 637  |
| CCCAAGACCCCAATTTGAT    | 59.59  | 19 | 109 | 9    | 117  |
| GATGGACGTCGACGATTTCT   | 60.081 | 20 | 261 | 158  | 418  |
| GTAACCAGCAGTCCCCAAAA   | 59.971 | 20 | 146 | 230  | 375  |
| CGACGAGAAAGTCGTGTCAA   | 60.025 | 20 | 222 | 262  | 483  |
| CAGCCGAGAACATCATCAA    | 59.799 | 20 | 267 | 0    | 266  |
| GTTGGAAATTGCCTGCATTC   | 60.457 | 20 | 246 | 782  | 1027 |
| CTTCCCTCTCAAACCATCG    | 59.665 | 20 | 233 | 32   | 264  |
| CCTTTAGAACTTGCTCCACCAT | 59.653 | 22 | 268 | 16   | 283  |
| GAGAAACAGAAGTTGCAGCAC  | 57.743 | 21 | 105 | 2543 | 2647 |
| TCAAATTATCTGCTTCCCGC   | 60.175 | 20 | 138 | 1264 | 1401 |
| ACGTAGGGTTACCGGAGCTT   | 60.019 | 20 | 193 | 270  | 462  |
| TGATGCAGACTCGAGGTACG   | 60.008 | 20 | 244 | 480  | 723  |
| CCCAAGACCCCAATTTGATT   | 60.91  | 20 | 108 | 9    | 116  |
| CACCCTACATGGTCTCTGCC   | 60.533 | 20 | 225 | 121  | 345  |
| GGGAAGATTGGTGGTTGATG   | 60.173 | 20 | 204 | 4    | 207  |
| ACCTCCTTCCACCACCTTCT   | 59.968 | 20 | 202 | 0    | 201  |
| AACGGAAAAGCTTCGTTTGA   | 59.861 | 20 | 187 | 437  | 623  |
| CCTTCATACCGAACCTTGA    | 59.926 | 20 | 235 | 12   | 246  |
| TGTTCCAATTACCTCGAACCTT | 59.871 | 22 | 191 | 406  | 596  |
| CCCAAGACCCCAATTTGAT    | 59.59  | 19 | 235 | 584  | 818  |
| CCAATTCTTTTATGTGGGTTGC | 60.577 | 22 | 228 | 1258 | 1485 |
| ACACTTCCTTGCATTCTGCA   | 59.293 | 20 | 205 | 5    | 209  |
| TTGATGGAGGCCTTATTTGC   | 60.038 | 20 | 259 | 294  | 552  |
| GTGAGGACGGCAGAAGGTAG   | 59.867 | 20 | 219 | 469  | 687  |
| ACAACCCCTACTCTTTTCTTCC | 59.941 | 24 | 174 | 32   | 205  |
| AAACAGAAAAGGATGCCAGC   | 59.316 | 20 | 154 | 1941 | 2094 |
| TGAAGGACCTCCTGATTCGT   | 59.655 | 20 | 231 | 5609 | 5839 |
| ACAATGGATGAAATTCCTCGA  | 60.133 | 20 | 269 | 300  | 568  |
| TTCCAGTCTCTGTCTGTTT    | 59.697 | 20 | 146 | 101  | 246  |
| ATTTTATTCTTTTCTCCTTT   | 58.618 | 23 | 167 | 335  | 501  |
| ACCTCATCGCCACCTAAATG   | 59.955 | 20 | 252 | 19   | 270  |
| GCACTAGTAGATAGTGGTGCA  | 59.364 | 26 | 200 | 4    | 203  |
| TGCCTGATGAACATCCAAAA   | 60.049 | 20 | 268 | 4    | 271  |
| GAGGCACGGTCTTTATTGTGA  | 60.125 | 21 | 247 | 4    | 250  |
| GACGTGGTTTGCAGGCTATT   | 60.14  | 20 | 103 | 471  | 573  |
| TTTCACATTTTCAAGCGGAA   | 59.277 | 20 | 187 | 2    | 188  |
| CAATCGATGCGCAAATAAAA   | 59.677 | 20 | 124 | 229  | 352  |
| CCCAAGACCCCAATTTGATT   | 60.91  | 20 | 100 | 23   | 122  |

|                        |        |    |     |      |      |
|------------------------|--------|----|-----|------|------|
| TTTTGCATCTGGGTTCTTC    | 60.051 | 20 | 133 | 3068 | 3200 |
| CCACCATGAAAGTCCCCTAA   | 59.784 | 20 | 200 | 1140 | 1339 |
| TTCCCTAATGCTGCCTTTGT   | 59.708 | 20 | 179 | 37   | 215  |
| GCTTTGGCAATCAAAACCTC   | 59.691 | 20 | 139 | 703  | 841  |
| CAGCGAAGAAATTCACCCAT   | 60.074 | 20 | 240 | 3402 | 3641 |
| ACAAGGGCGAGTCTCAAGAA   | 59.989 | 20 | 159 | 31   | 189  |
| TCTCCTCTCTGCAGCCATCT   | 60.246 | 20 | 168 | 20   | 187  |
| TCGATCGCTTGGATCTTAGAA  | 59.93  | 21 | 227 | 7    | 233  |
| CCCTTATCCCGTGTTTTGAA   | 59.795 | 20 | 235 | 1526 | 1760 |
| AATTACAGCATGAGCAGTCCG  | 60.285 | 21 | 202 | 27   | 228  |
| TATAAGCCTACAAGGGGGCA   | 59.564 | 20 | 143 | 1586 | 1728 |
| ATTGACAATGTACGCACGGA   | 59.995 | 20 | 249 | 3    | 251  |
| AGATCTATGGCTCCGCTTG    | 59.434 | 20 | 280 | 27   | 306  |
| CCATAAATGCATGCAACGTC   | 59.96  | 20 | 114 | 264  | 377  |
| GCAAAAATCGGCACTAACCA   | 60.999 | 20 | 162 | 7    | 168  |
| CCGAAGTGCTAGACCCAAAG   | 59.869 | 20 | 130 | 122  | 251  |
| GTCCAAACTGCGATTCTTC    | 59.676 | 20 | 244 | 33   | 276  |
| TGGAGTGATTAATATGCAATTT | 60.563 | 26 | 249 | 31   | 279  |
| ATCCTCGAGATGGGAAGAGC   | 60.703 | 20 | 126 | 31   | 156  |
| TGCTTTCTTCAGCATGTTGTC  | 59.065 | 21 | 169 | 7    | 175  |
| CCCAAGACCCCAATTTGATT   | 60.91  | 20 | 100 | 17   | 116  |
| CCCAAGACCCCAATTTGATT   | 60.91  | 20 | 110 | 7    | 116  |
| CCCTGAATTTGATCCTGGTG   | 60.309 | 20 | 232 | 1846 | 2077 |
| CTGCTTTCTTGCCTCGTCC    | 59.989 | 20 | 161 | 253  | 413  |
| CAACAACAATTAGCAATCGAA  | 60.048 | 23 | 274 | 69   | 342  |
| CCATAATTACCGGCGTCATC   | 60.175 | 20 | 193 | 303  | 495  |
| TCTGCACATCTGAATTTACAAA | 57.528 | 23 | 226 | 162  | 387  |
| AATTCCGAACCTCGAGTCTT   | 60.074 | 20 | 181 | 770  | 950  |
| ATGATCGGTTTCAAGGGTTG   | 59.79  | 20 | 205 | 1409 | 1613 |
| CCTCTTCGGTTGGTTTTGAC   | 59.569 | 20 | 225 | 24   | 248  |
| CGCAGTATACCTCTCCGTCC   | 59.717 | 20 | 278 | 358  | 635  |
| GCTAAGGGGGAGAATGGTTC   | 59.903 | 20 | 142 | 5633 | 5774 |
| TGGAGGACTAGATTTGGGGA   | 59.478 | 20 | 105 | 19   | 123  |
| AACTTTGTTGAATGAGCCCC   | 59.031 | 20 | 280 | 500  | 779  |
| ATCCTTGGCCCTTTTCTGTC   | 60.443 | 20 | 256 | 2    | 257  |
| GGAAAGTGATCCTTGGGATG   | 59.336 | 20 | 116 | 9    | 124  |
| GCATAGTGCAAGACCCCAAT   | 59.962 | 20 | 160 | 168  | 327  |
| AGCAGCTGACTAGTGGTGGG   | 60.466 | 20 | 266 | 6    | 271  |
| AATGATGACCTCATCTCCGC   | 60.042 | 20 | 146 | 935  | 1080 |
| CCCAAGACCCCAATTTGATT   | 60.91  | 20 | 265 | 457  | 721  |
| CCCAAGACCCCAATTTGATT   | 60.91  | 20 | 109 | 8    | 116  |
| GCTGCATCAATGGAGCTTCT   | 60.514 | 20 | 276 | 1497 | 1772 |
| CCTTGAAATCGAACTCTCGC   | 59.955 | 20 | 213 | 954  | 1166 |
| GGTGATGTTGCCAGACCTTT   | 59.973 | 20 | 246 | 362  | 607  |
| TTACGCTAGTCCGTGGGTTT   | 59.632 | 20 | 168 | 1039 | 1206 |
| TCCAATGAGACACACTCCCA   | 60.088 | 20 | 220 | 1627 | 1846 |
| TTCTGTGCATTGCCATTGAT   | 60.08  | 20 | 275 | 3    | 277  |
| TAACTGACCTGCAGCGGAAT   | 60.796 | 20 | 279 | 689  | 967  |
| CACCAAACCTCAACCATGCAA  | 60.552 | 20 | 280 | 3193 | 3472 |
| AAATGGTTCGTAACCTGCCCA  | 60.365 | 20 | 221 | 354  | 574  |
| GGGTTTAGACGTATGCACA    | 59.572 | 20 | 222 | 46   | 267  |
| CCCAAGACCCCAATTTGAT    | 59.59  | 19 | 104 | 17   | 120  |
| CACCATGGATGATGGTGAC    | 59.611 | 20 | 107 | 0    | 106  |
| AAAGCTTCGTAATATGGGCG   | 59.234 | 20 | 151 | 2053 | 2203 |
| TGGGAGTCAACTGATTGCTTC  | 60.248 | 21 | 212 | 673  | 884  |
| GTGAGACGGGACTGTGAATA   | 60.126 | 21 | 267 | 2144 | 2410 |
| GATGGGCACATACTGGTGAA   | 59.374 | 20 | 175 | 4    | 178  |
| CGATCGAGCTGAGAAAAGC    | 60.235 | 20 | 279 | 4    | 282  |

|                        |        |    |     |      |      |
|------------------------|--------|----|-----|------|------|
| GATTTTCTTGGATCTCATGCCT | 59.559 | 22 | 262 | 614  | 875  |
| CGCACTTCAAATTCATCC     | 59.064 | 19 | 241 | 35   | 275  |
| CCCAAGACCCCAATTTGAT    | 59.59  | 19 | 134 | 1    | 134  |
| CAGCAGCCATCTGTTCTTGA   | 60.136 | 20 | 242 | 292  | 533  |
| CCCAAGACCCCAATTTGATT   | 60.91  | 20 | 100 | 23   | 122  |
| TCGTGTAAATTGGGTGGTCC   | 60.615 | 20 | 223 | 518  | 740  |
| TGCAGCGCAAAGTCTACATC   | 60.165 | 20 | 206 | 6    | 211  |
| TTTGCCGGTTCGATAACTCTC  | 60.214 | 20 | 264 | 759  | 1022 |
| TCGTGTATGGCAAGGTTCTG   | 59.716 | 20 | 260 | 29   | 288  |
| TGTCTTGTGCTGAAGATGGTTC | 60.299 | 22 | 263 | 26   | 288  |
| ACAAGGTGGTGGCTCAAAAG   | 60.149 | 20 | 250 | 1527 | 1776 |
| AAGCAATTGGAAGATGGTGC   | 60.081 | 20 | 213 | 651  | 863  |
| GCCCATTTTGATCACCATCT   | 59.756 | 20 | 246 | 446  | 691  |
| GGCTTATCCCAAGTCTCCT    | 59.536 | 20 | 198 | 4966 | 5163 |
| AATCCGTTATTTCTCCCGGT   | 59.666 | 20 | 258 | 723  | 980  |
| GAGCTGATGGAAACACTTCG   | 58.443 | 20 | 276 | 1789 | 2064 |
| TCCCATCTCAATCGTCACAA   | 60.048 | 20 | 274 | 7    | 280  |
| AAAATCGCACGACGAATACC   | 59.967 | 20 | 167 | 751  | 917  |
| CCTTCAATTGCCCTTCACAT   | 59.933 | 20 | 186 | 768  | 953  |
| TTCCGACCCTTCAATAATCA   | 58.011 | 20 | 214 | 6    | 219  |
| GGAAGATTGGAATAGGAACGC  | 60.054 | 21 | 214 | 2644 | 2857 |
| CTTCCAGCCACAATGTGTA    | 59.566 | 20 | 250 | 110  | 359  |
| AGGCTGGTCTAAAGCGCATA   | 60.003 | 20 | 232 | 495  | 726  |
| ATCTGATGTGAAATGTGTGGAT | 57.865 | 24 | 179 | 19   | 197  |
| TGTAGCCGACCCCAATTTAT   | 59.297 | 20 | 253 | 467  | 719  |
| GCATTTTCACTTAGCCGAGA   | 59.488 | 21 | 226 | 28   | 253  |
| GGGTGAGGGAGAAAAAGGAA   | 60.414 | 20 | 237 | 130  | 366  |
| GAGGATCGACTGCTCTGGTA   | 57.97  | 20 | 247 | 55   | 301  |
| AATATAGTTATCACAGGATCAC | 58.111 | 27 | 212 | 1406 | 1617 |
| GGATTTTCATCCAAAAACCTGA | 58.868 | 21 | 274 | 2145 | 2418 |
| GAGCAACTTCTTGGCTCGTT   | 59.621 | 20 | 113 | 160  | 272  |
| AGTAGATCCATGTGGCCGTT   | 59.434 | 20 | 196 | 985  | 1180 |
| CAGCATCTTCATCTGCCAGT   | 58.987 | 20 | 141 | 18   | 158  |
| TCGAGTCGAGTGTGATACATTC | 58.802 | 22 | 132 | 205  | 336  |
| GTTTCGATCGTTTGTCTCTCGT | 60.119 | 20 | 192 | 127  | 318  |
| GTACGAAGGCTCATGAAGGG   | 59.694 | 20 | 172 | 1837 | 2008 |
| TGTTTCATGTCAGAGTGGGGA  | 60.088 | 20 | 279 | 2658 | 2936 |
| GAGCAAAAAGACCAAACCCA   | 60.088 | 20 | 265 | 340  | 604  |
| GCTGCACATATTATGCTTTGCT | 59.437 | 22 | 257 | 6    | 262  |
| ATTCGAAGGTGTTGATCCCA   | 60.317 | 20 | 209 | 174  | 382  |
| ATGATCTGAAGAAGCGTGGC   | 60.37  | 20 | 260 | 89   | 348  |
| ATCCCACCCTTCACCATTTT   | 60.422 | 20 | 117 | 2    | 118  |
| CCCAAGACCCCAATTTGATT   | 60.91  | 20 | 183 | 870  | 1052 |
| TCACAAAAATATTTCCCGGC   | 59.773 | 20 | 195 | 38   | 232  |
| GAACAAAACATTTCGGGGTG   | 60.206 | 20 | 161 | 3872 | 4032 |
| GGTAAAGGGCAGGGTGAAGT   | 60.361 | 20 | 207 | 9    | 215  |
| TTCCCGTTCTCAGGCTCTCTC  | 59.38  | 20 | 209 | 222  | 430  |
| AATAAAATGTCGTGAGCCCG   | 59.96  | 20 | 149 | 11   | 159  |
| ATTGCAGGGTCTTGCAATTCT  | 59.7   | 20 | 230 | 628  | 857  |
| GTGGTGGTCGCAGAGTTTTT   | 60.156 | 20 | 127 | 159  | 285  |
| GGCGTGTGGGATGTTTAC     | 60.235 | 20 | 216 | 10   | 225  |
| ATTTGGCATCCATGTACGGT   | 60.081 | 20 | 167 | 2002 | 2168 |
| GCTTCTGCCTGAATTTGGAA   | 60.331 | 20 | 207 | 286  | 492  |
| TCCAGATGCAAACCATGCTA   | 60.22  | 20 | 128 | 3311 | 3438 |
| CAGAGTTGGGATGCCTCAAT   | 60.073 | 20 | 167 | 74   | 240  |
| AGCCAAGAAAGCGCAATAAG   | 59.63  | 20 | 224 | 25   | 248  |
| GCCAAGTTGACACACACAGG   | 60.203 | 20 | 145 | 35   | 179  |
| GGGACCCTGTTTTCCAGAGT   | 60.349 | 20 | 260 | 16   | 275  |

|                        |        |    |     |      |      |
|------------------------|--------|----|-----|------|------|
| ATGTGTCATTGTTTCGTGGAA  | 58.888 | 21 | 101 | 3    | 103  |
| CAAAAGGTTTTTACTCTTACC  | 60.077 | 25 | 172 | 409  | 580  |
| TGGGCTTTTAAGGAAGACGA   | 59.817 | 20 | 230 | 522  | 751  |
| ATTGCGTTGCTTAATGGGAG   | 60.096 | 20 | 275 | 263  | 537  |
| GCAGCCAAATACACTCAAAAC  | 60.173 | 22 | 254 | 161  | 414  |
| ATAGCCGACTCCGCATAGTG   | 60.257 | 20 | 236 | 4632 | 4867 |
| TGTTTGAAATTCCTGCCTCA   | 59.247 | 20 | 230 | 82   | 311  |
| AATCGAGAATGTGGACGGAG   | 60.073 | 20 | 203 | 846  | 1048 |
| GAGCGTGCGGAGCTAGTATC   | 60.147 | 20 | 197 | 128  | 324  |
| GGTAGGCTGGTAAGGGCTTC   | 60.096 | 20 | 199 | 7953 | 8151 |
| GGTGGTATGCTGTGGAGGAC   | 60.395 | 20 | 131 | 54   | 184  |
| CCCAAGACCCCAATTTGATT   | 60.91  | 20 | 248 | 530  | 777  |
| TGCTTCCGTGTTTTATCCATC  | 59.952 | 21 | 111 | 46   | 156  |
| CTGCAGCCATCTGTTCTTGA   | 60.136 | 20 | 202 | 5    | 206  |
| TGGTGCTGGAGGTGACAATA   | 60.112 | 20 | 269 | 367  | 635  |
| CAGACGCCAATTACAGGTGA   | 59.716 | 20 | 236 | 28   | 263  |
| CAAAAACGAAAGCAAGCTCA   | 59.226 | 20 | 153 | 4587 | 4739 |
| TTGTTGTATGCGGTGATGGT   | 59.847 | 20 | 191 | 8    | 198  |
| GCTTCAGCGATCAACAAACA   | 59.995 | 20 | 213 | 1321 | 1533 |
| CCTCGCCTTCATCGTAAAAA   | 60.202 | 20 | 198 | 9    | 206  |
| AACCGTGTGCCCTAAAAAT    | 60.593 | 20 | 232 | 6    | 237  |
| GGAAAGTGATCCTTGGGATG   | 59.336 | 20 | 116 | 4    | 119  |
| CCCAAGACCCCAATTTGATT   | 60.91  | 20 | 247 | 1144 | 1390 |
| GCCATCGAGCTCCTTTTATG   | 59.807 | 20 | 196 | 32   | 227  |
| ATGGGGTGTGAGGAAATGAG   | 59.779 | 20 | 188 | 571  | 758  |
| AATTCGAAAGTTTGCCAAAAA  | 58.773 | 21 | 180 | 213  | 392  |
| GGCCGATATTTTGGCCTTTA   | 61.096 | 20 | 205 | 37   | 241  |
| TAAAGTTTGGTGACGCCGC    | 61.06  | 20 | 270 | 927  | 1196 |
| CGTTTGACAAAAAGCGTCAG   | 59.507 | 20 | 225 | 496  | 720  |
| TCATCATCAGGGGGAGTAGG   | 59.879 | 20 | 126 | 920  | 1045 |
| AATGGAGTAGATTTTCCCATGA | 57.552 | 22 | 152 | 205  | 356  |
| CCCAAGACCCCAATTTGATT   | 60.91  | 20 | 104 | 16   | 119  |
| GCATGTAACCTCATGTGTCCCT | 57.525 | 21 | 268 | 1136 | 1403 |
| GGATTCGCAAGATCGACAAT   | 60.043 | 20 | 216 | 1108 | 1323 |
| AGTAAAGGGTTTGCCTTGA    | 59.883 | 20 | 265 | 936  | 1200 |
| ACGAATTAGCGTTTGATGGC   | 60.103 | 20 | 267 | 2504 | 2770 |
| GCTCCTGCACCAGAACTCTC   | 60.143 | 20 | 245 | 178  | 422  |
| AAACATCTTGCCACAGGAGG   | 60.111 | 20 | 278 | 66   | 343  |
| TCCAAATGTAACCTGACCCA   | 58.973 | 20 | 186 | 1338 | 1523 |
| AGCAACTTCTTGGCTCGTTG   | 60.571 | 20 | 280 | 346  | 625  |
| TTGGAAAGGCTGAAATGGAC   | 60.051 | 20 | 276 | 294  | 569  |
| CCCATCACCCACCACATAAT   | 60.317 | 20 | 194 | 3170 | 3363 |
| TGAAAATCCCGCTGCTCTAT   | 59.807 | 20 | 235 | 691  | 925  |
| CCACCCCTAGCAAAGTTGAA   | 60.103 | 20 | 222 | 2615 | 2836 |
| AGATTCGTCCCAAAAACACG   | 59.971 | 20 | 207 | 178  | 384  |
| AGAACTTGATGCTGGTCGC    | 60.406 | 20 | 181 | 1780 | 1960 |
| CTGACTCTTACCCATCTTGG   | 59.997 | 21 | 208 | 466  | 673  |
| CGGCGACCCTGATACTTTAG   | 59.724 | 20 | 185 | 918  | 1102 |
| TAAGCAGCTCTTGCATCCAG   | 59.322 | 20 | 100 | 2    | 101  |
| TTCGAGGGGAGTGTTGAAGT   | 59.697 | 20 | 275 | 43   | 317  |
| TGAAATGGTAGAAATCGCCG   | 60.961 | 20 | 213 | 46   | 258  |
| TGGATTATGTAGCTGACCCA   | 60.337 | 21 | 150 | 293  | 442  |
| TAGAAGGAAACCGAGAGCGA   | 60.088 | 20 | 225 | 749  | 973  |
| ACAGAGGTGGAGCAGAGAGC   | 59.738 | 20 | 276 | 551  | 826  |
| ATGGAGCAAAAGTGGACGAG   | 60.255 | 20 | 260 | 4    | 263  |
| ATAGGGCAGGCCTAAGGTGT   | 59.983 | 20 | 249 | 400  | 648  |
| GCCACACGAGGAATAGGAAA   | 60.074 | 20 | 223 | 735  | 957  |
| GATCCGACACAGAGCCAAAT   | 60.081 | 20 | 171 | 996  | 1166 |

|                         |        |    |     |      |      |
|-------------------------|--------|----|-----|------|------|
| CAAAAGTTATTTTCGAGGACG/  | 58.432 | 22 | 242 | 34   | 275  |
| CATCCCAATTTACCTTTCC     | 59.22  | 20 | 274 | 2809 | 3082 |
| GGTCATGCGTTCAAGGTTTT    | 59.978 | 20 | 254 | 344  | 597  |
| GATTTGATGCCACAGTTGGA    | 59.502 | 20 | 268 | 349  | 616  |
| CATACGATTACGGGACCCAC    | 60.074 | 20 | 275 | 1214 | 1488 |
| AGCTCGAAGTGGAAGACGAG    | 59.745 | 20 | 222 | 8    | 229  |
| ATGATCCATATAGCCGACGC    | 59.914 | 20 | 245 | 1949 | 2193 |
| CCTTCAGCAGCCTTTGTCTC    | 60.134 | 20 | 189 | 1104 | 1292 |
| AGGGTTAAAGAAGCCGAAGC    | 59.856 | 20 | 267 | 45   | 311  |
| TCGGAAGCTTCAAGTCCAAT    | 59.813 | 20 | 269 | 260  | 528  |
| TAGGAACCGGATACAGCCAC    | 59.955 | 20 | 148 | 249  | 396  |
| AGAGGCCGGATGATCTACAA    | 59.653 | 20 | 217 | 1    | 217  |
| GTTGCCTGAGGACTGATGGT    | 60.12  | 20 | 239 | 1214 | 1452 |
| AAGGACAGGACAGCCGTATG    | 60.134 | 20 | 268 | 820  | 1087 |
| GGTGAAAACCCGAGTTCAA     | 59.948 | 20 | 116 | 2    | 117  |
| AAAATGCCCTCTTCTCCAC     | 60.443 | 20 | 206 | 251  | 456  |
| AACCCTAAATCTTCATCACACC  | 58.124 | 22 | 276 | 633  | 908  |
| TTCATGTAGTCGACCCCAATTT  | 60.593 | 22 | 100 | 389  | 488  |
| AAAAGATTTTACGTGTTTCACG  | 57.937 | 23 | 109 | 61   | 169  |
| CTCATTATGATGCTCCGCCT    | 60.199 | 20 | 176 | 142  | 317  |
| CCTCTTGCATATTGTGGCCT    | 60.096 | 20 | 227 | 204  | 430  |
| TTGTTTTTCCACAGGAAGG     | 59.942 | 20 | 162 | 2194 | 2355 |
| TAGGGGAAGTCTCGGTCTGA    | 59.797 | 20 | 229 | 349  | 577  |
| CAGCGCTATAGTTGCTCAAT    | 59.532 | 21 | 139 | 836  | 974  |
| CCCAAGACCCCAATTTGATT    | 60.91  | 20 | 178 | 2189 | 2366 |
| ATAGTGCATCGTGGTTAGCG    | 58.824 | 20 | 249 | 375  | 623  |
| GTCCCCAGAGATGAAAGAGC    | 58.818 | 20 | 205 | 6    | 210  |
| GACAGGAGGAAATAATGAGAT   | 59.867 | 25 | 268 | 412  | 679  |
| ATGTAGCCGACCCCAATTTA    | 59.297 | 20 | 224 | 307  | 530  |
| TGACTACAACGACGATTCGG    | 59.716 | 20 | 252 | 117  | 368  |
| TGATACTTCGCATCTCACGG    | 59.823 | 20 | 158 | 0    | 157  |
| GGCTACATACATCCGCCACT    | 59.985 | 20 | 155 | 2    | 156  |
| TTTGATTGGGAATAATTGGG    | 57.289 | 20 | 231 | 285  | 515  |
| GGCCTGAGCAATGGAATAAA    | 60.038 | 20 | 266 | 165  | 430  |
| TGCACATAATAGCTGCGTTTG   | 59.916 | 21 | 225 | 0    | 224  |
| TCCCGGTACGACGAAATTAG    | 59.953 | 20 | 228 | 608  | 835  |
| CTTTGTTGCACTAAGTTCCAAA  | 57.586 | 23 | 260 | 270  | 529  |
| TCGATTGTCCACAATTGCAT    | 59.931 | 20 | 168 | 1520 | 1687 |
| CGGCTAAAATCGGTCAAAC     | 59.586 | 20 | 248 | 0    | 247  |
| TGATGAGGATTCTGTGGTGC    | 59.637 | 20 | 170 | 67   | 236  |
| TGTGGATATTCTTTAATTTGTGC | 59.318 | 24 | 206 | 565  | 770  |
| CCAGCCTTCCAAATTACCCT    | 60.312 | 20 | 238 | 3196 | 3433 |
| ACAGATTGAGGCTACCGTG     | 60.277 | 20 | 175 | 3872 | 4046 |
| AACCCGGATTGACACTCCTA    | 59.405 | 20 | 231 | 45   | 275  |
| CCAGCTCTTTCTGAACCCTG    | 59.982 | 20 | 216 | 484  | 699  |
| TGATGTTCTGAAACGAGTGA    | 59.278 | 21 | 172 | 37   | 208  |
| TTGGGACAAAAGAAGCTGAA    | 58.475 | 20 | 279 | 1931 | 2209 |
| AGTGAAGGGAATGGAGGGTC    | 60.314 | 20 | 220 | 502  | 721  |
| TTTTAAGGAATGTGCAATTTGG  | 59.022 | 22 | 200 | 26   | 225  |
| GGTTATGGTTTTTGCACCCA    | 60.597 | 20 | 157 | 87   | 243  |
| CCCAAGTTGAATTGTTAGTATC  | 60.928 | 24 | 280 | 381  | 660  |
| CTGTAATGCATGGGGGAGAG    | 60.474 | 20 | 227 | 38   | 264  |
| GGTCCATGAACCCTGGACTT    | 61.152 | 20 | 102 | 357  | 458  |
| TGCCAAATAATTCCGTCTCA    | 59.112 | 20 | 258 | 158  | 415  |
| TGCAGATATGGAGCAATTTTT   | 57.413 | 21 | 239 | 20   | 258  |
| AGCATTGAACAGCCCAAGTT    | 59.74  | 20 | 207 | 0    | 206  |
| CCCAAGACCCCAATTTGATT    | 60.91  | 20 | 132 | 180  | 311  |
| ACTCTTCTCCCGTGGACGTA    | 59.721 | 20 | 245 | 288  | 532  |



|                        |        |    |     |      |      |
|------------------------|--------|----|-----|------|------|
| CGT TACTTGCTGGAGCTAAAA | 57.442 | 21 | 158 | 58   | 215  |
| GAGGTGTTTTCCACGTCAT    | 59.827 | 20 | 182 | 768  | 949  |
| GGAAGAGTGGGGGAGAAGAC   | 60.05  | 20 | 143 | 595  | 737  |
| CCAGCAGCAGACCAGAAAAT   | 60.397 | 20 | 231 | 30   | 260  |
| TGCTCATTATTTGATTGGCG   | 59.662 | 20 | 216 | 12   | 227  |
| ACGATGCACAAGACATGAGG   | 59.707 | 20 | 260 | 144  | 403  |
| GCAAGACAAGCACAAATCCA   | 59.847 | 20 | 160 | 533  | 692  |
| ACAGGCATAAGCTTCCCCTC   | 60.599 | 20 | 267 | 491  | 757  |
| TTATCATCACTTTTGCCGGG   | 60.827 | 20 | 180 | 413  | 592  |
| CCCAAGACCCCAATTTGATT   | 60.91  | 20 | 203 | 2634 | 2836 |
| GGTCACAACGGAACAACCT    | 59.867 | 20 | 229 | 1610 | 1838 |
| TTTGATGCTCAACTTCCCAA   | 59.247 | 20 | 280 | 2136 | 2415 |
| AACCCCTCGTGTGTTTCAT    | 59.308 | 20 | 246 | 1235 | 1480 |
| TCTCCTCTCAGCAGCCATCT   | 60.246 | 20 | 262 | 228  | 489  |
| TTTGTTACATGCGGAACCAG   | 59.585 | 20 | 127 | 523  | 649  |
| TTTTGGTTTTCGGTTATGCAA  | 59.05  | 20 | 228 | 1080 | 1307 |
| GAGGGGCTGATTGGTGTAAG   | 59.933 | 20 | 256 | 417  | 672  |
| ATTTCCACCGTTCAGACAGG   | 59.966 | 20 | 276 | 51   | 326  |
| TAGCAGGCCAAAGAGGAAGA   | 60.088 | 20 | 150 | 45   | 194  |
| AATCAGAATGGTTGGTTGGC   | 59.797 | 20 | 193 | 80   | 272  |
| GGGCCTGTGCTCATAGAGAG   | 59.973 | 20 | 271 | 883  | 1153 |
| AAAAGAGATGCCAGGAAGGG   | 60.569 | 20 | 264 | 63   | 326  |
| GCTAGTTGCACCCCTGTCTC   | 59.874 | 20 | 161 | 968  | 1128 |
| TGTAGCCGACCCCAATTTAT   | 59.297 | 20 | 102 | 20   | 121  |
| GGAAACCCCATCCAGAAGAT   | 60.133 | 20 | 200 | 655  | 854  |
| AAAGCTCGAACTTGTGGCAT   | 59.882 | 20 | 270 | 1560 | 1829 |
| TCCTTAGCCCAAGTTGTACCC  | 60.359 | 21 | 167 | 182  | 348  |
| GACATCACTTGTGAAACCCG   | 58.984 | 20 | 242 | 2    | 243  |
| GGACTTTTGATGTCCAATGGT  | 58.755 | 21 | 253 | 2150 | 2402 |
| TGGGAATCTTTTCATCGACA   | 59.049 | 20 | 162 | 8    | 169  |
| TGGGAATTACGGAGATTA     | 60.266 | 20 | 125 | 98   | 222  |
| CCTTCGTTTATTGGGGATCA   | 59.756 | 20 | 268 | 1281 | 1548 |
| CATCCAGACAACGCACTCAT   | 59.707 | 20 | 274 | 6892 | 7165 |
| TCATCCCTGTGCATTAATTTTT | 60.194 | 23 | 240 | 50   | 289  |
| TCTTACCATGCTCACCCCTGA  | 59.241 | 20 | 203 | 23   | 225  |
| CCAACCTGCTAGCCTCATCA   | 59.024 | 20 | 257 | 933  | 1189 |
| GCAAACAGAAAATGAGGGGA   | 60.051 | 20 | 258 | 414  | 671  |
| ACCAGCGCTAACACGAAATC   | 60.278 | 20 | 280 | 76   | 355  |
| GTCCCACCAATTTGTCCTAAA  | 58.798 | 21 | 133 | 560  | 692  |
| ACTCAGAATCCGATCGTGG    | 60.073 | 20 | 204 | 72   | 275  |
| CTCTGGTATGGACTTGGGGA   | 59.92  | 20 | 151 | 177  | 327  |
| AATCCACAAACGGAACAC     | 59.694 | 20 | 184 | 1475 | 1658 |
| GCACCTCTTCTATTGCTGACTT | 60.438 | 23 | 115 | 108  | 222  |
| AGAAGAGGATGTTGGCGATG   | 60.218 | 20 | 186 | 27   | 212  |
| TCCTGCATTTGTGTTCTGA    | 60.24  | 20 | 196 | 217  | 412  |
| TGAAGAAGCCCCTACAAGGA   | 59.807 | 20 | 238 | 8305 | 8542 |
| GCTTGGGTGGTTGTGTACCT   | 59.891 | 20 | 212 | 1075 | 1286 |
| GTCTCCAACGGCATCTCAA    | 59.778 | 19 | 259 | 453  | 711  |
| CGGCTACAGGCTACTCGCTA   | 60.689 | 20 | 240 | 17   | 256  |
| ACGTCAGCCTGTGGGTTTAC   | 60.035 | 20 | 108 | 13   | 120  |
| CGTGCAACGAGAACTTCATT   | 58.926 | 20 | 187 | 2510 | 2696 |
| GTAGTGGTATGGTGTGGGGG   | 59.966 | 20 | 276 | 647  | 922  |
| CAAAATTCATGACAACCGA    | 59.371 | 20 | 181 | 1223 | 1403 |
| AACCGACACTTGCAAAAACA   | 59.22  | 20 | 274 | 52   | 325  |
| TCAAGCTGATAGCTCCGACA   | 59.697 | 20 | 209 | 181  | 389  |
| ACCTTCGTCAAGGCAGAAGA   | 59.989 | 20 | 214 | 4    | 217  |
| ATGGGGTGATGTGATTCTT    | 59.218 | 20 | 274 | 108  | 381  |
| TGATCCACCCTATTTTGCATT  | 59.287 | 21 | 264 | 944  | 1207 |

|                         |        |    |     |      |      |
|-------------------------|--------|----|-----|------|------|
| TGAATTCTTGCACGTTCTCG    | 59.988 | 20 | 255 | 450  | 704  |
| TGTAGCCGACCCCAATTTAT    | 59.297 | 20 | 204 | 5840 | 6043 |
| TGTTTTCAATTTGAATAAATACG | 58.972 | 26 | 249 | 171  | 419  |
| TTGATTTCGTGAACATTAGGCTC | 60.143 | 23 | 135 | 55   | 189  |
| AACTCGAATATCTTGCCGGA    | 59.668 | 20 | 266 | 15   | 280  |
| TGATGGCGAAGATGCTTATG    | 59.792 | 20 | 253 | 2230 | 2482 |
| GCGATATAATCTCTGACGATTC  | 60.102 | 23 | 112 | 9    | 120  |
| TTGCTTCAGCACCTTGAAGA    | 59.716 | 20 | 184 | 410  | 593  |
| TCACTGGAATGTCAAGGCAG    | 59.831 | 20 | 102 | 163  | 264  |
| CTTGTGAGCTACATTCGCCG    | 60.796 | 20 | 199 | 8    | 206  |
| AGCGTTCTTTCCCGAGTCTT    | 60.382 | 20 | 100 | 10   | 109  |
| ATGTAGCCGACCCCAATTTA    | 59.297 | 20 | 206 | 72   | 277  |
| AACAGAGTTTTCGCCAAGGAA   | 59.853 | 20 | 207 | 627  | 833  |
| GCCGAGACCAACTCTCTACG    | 60.012 | 20 | 202 | 1194 | 1395 |
| CCCAAAGACGAATAACAGCC    | 59.569 | 20 | 260 | 60   | 319  |
| TACGCGGCCATCTCTATTTT    | 60.196 | 20 | 213 | 2051 | 2263 |
| CCGGCAGTTACATATTCGCT    | 60.117 | 20 | 244 | 17   | 260  |
| GCGTATCACCATTGCTGTTG    | 60.142 | 20 | 107 | 645  | 751  |
| AGGTTGCGTACATCTGACCC    | 59.997 | 20 | 101 | 28   | 128  |
| TGAAACGGCTCCTTAACTGG    | 60.241 | 20 | 274 | 231  | 504  |
| ACAAACAATTCATTGGTGTTCT  | 60.182 | 24 | 179 | 410  | 588  |
| TCTCTTGCATCACTATGGGAAA  | 59.708 | 22 | 262 | 98   | 359  |
| ACGGACATGGCGTATTTCTC    | 59.962 | 20 | 271 | 678  | 948  |
| GTTGGGCAGCCAAATATTGA    | 60.837 | 20 | 160 | 76   | 235  |
| GATGCCATATGCGATGATGA    | 60.427 | 20 | 270 | 5    | 274  |
| TGTAGCCGACCCCAATTTAT    | 59.297 | 20 | 122 | 1961 | 2082 |
| ATTGACATCGAAATCCTGGG    | 59.75  | 20 | 232 | 25   | 256  |
| TCTCGTTTCAGCACCAAATC    | 58.85  | 20 | 236 | 1310 | 1545 |
| AGCTTCAGCTCCTCACCAAA    | 60.134 | 20 | 173 | 23   | 195  |
| CAAAATCAACACCATGTCCG    | 59.816 | 20 | 234 | 6006 | 6239 |
| CAAGTTGAATCAGAACGGCA    | 59.84  | 20 | 205 | 535  | 739  |
| GGTTCAAGTGTTGGGAGGA     | 59.943 | 20 | 168 | 345  | 512  |
| GAGATGACCTACAAGGAAATT   | 58.694 | 24 | 171 | 608  | 778  |
| TGGTCTCTGTCCATTGTGCT    | 59.261 | 20 | 161 | 42   | 202  |
| CATCCAACATGAGGGAAGAGT   | 59.003 | 21 | 202 | 2499 | 2700 |
| AACCGAGGTTTTTGCTTGC     | 60.242 | 19 | 183 | 21   | 203  |
| GCAAGCGGAAATCACCAG      | 60.353 | 18 | 121 | 2255 | 2375 |
| AGGAAGGACCTAGGCCTGAA    | 60.204 | 20 | 222 | 884  | 1105 |
| TTGTTAAAATCTTCAAGCAATA  | 59.215 | 26 | 160 | 13   | 172  |
| TCTGATCCCCAAGACCC       | 60.835 | 18 | 110 | 19   | 128  |
| CGAACCAGGCCGACTAATAC    | 59.592 | 20 | 221 | 1217 | 1437 |
| ACTTTGAAGCTCGGAAACGA    | 59.993 | 20 | 217 | 39   | 255  |
| CCGCATCGGCCTATTTACTA    | 60.075 | 20 | 150 | 280  | 429  |
| AGTCACGAGCATGTTTGCAG    | 60.056 | 20 | 235 | 1792 | 2026 |
| TTCCCTGTAGAGGCAATGGA    | 60.594 | 20 | 242 | 41   | 282  |
| TTGCCAAGATTTTTGCTCCT    | 59.823 | 20 | 276 | 3    | 278  |
| TCGTTGATTGTACGAGTCGC    | 59.871 | 20 | 200 | 91   | 290  |
| GGTAACGTTTTCCGACCAAA    | 59.839 | 20 | 194 | 28   | 221  |
| GCGAAAGTTTTGGAAATCA     | 60.053 | 20 | 184 | 1412 | 1595 |
| TCAGTCTCCGGAGTTCCATT    | 59.655 | 20 | 267 | 4443 | 4709 |
| TCTTCCACAGATTTCCCATGA   | 60.445 | 21 | 171 | 392  | 562  |
| TGACAATGATCCCCAATGTT    | 60.044 | 21 | 270 | 1403 | 1672 |
| CCCACTTCCCCATTCAATAA    | 59.617 | 20 | 214 | 170  | 383  |
| AGGTTGCGTACATCTGACCC    | 59.997 | 20 | 212 | 3342 | 3553 |
| TGTAATCAATGAAATAGGGTG   | 57.629 | 24 | 250 | 576  | 825  |
| TTTTAGCCGACCCCAATTTAT   | 59.7   | 21 | 100 | 321  | 420  |
| TGTCACACGTATTTTGCAGC    | 59.79  | 21 | 249 | 69   | 317  |
| TCGAGGCAGAGAGGAGAGAG    | 59.962 | 20 | 252 | 55   | 306  |

|                         |        |    |     |      |      |
|-------------------------|--------|----|-----|------|------|
| TGTAGCCGACCCCAATTTAT    | 59.297 | 20 | 176 | 302  | 477  |
| TACAGTCCGTGTTCCGATGA    | 60.112 | 20 | 129 | 45   | 173  |
| ATGTAGCCGACCCCAATTTA    | 59.297 | 20 | 133 | 91   | 223  |
| CGCTTGAAGAGCAGTCAGTG    | 59.922 | 20 | 146 | 628  | 773  |
| GTGATTTGGGGTGGATTCAG    | 60.173 | 20 | 202 | 186  | 387  |
| GAATCCCAACACATACGGT     | 59.532 | 20 | 197 | 59   | 255  |
| CAATGTACCTTGGGTCGCA     | 60.523 | 19 | 187 | 154  | 340  |
| GACCCTGGGGGCTATCTAGT    | 59.42  | 20 | 176 | 3    | 178  |
| GCTCCACCACAACCAAT       | 59.318 | 18 | 101 | 511  | 611  |
| GTCTCCTTCCATTCTTGGG     | 60.822 | 20 | 135 | 549  | 683  |
| GCTGTGGCAGAAAAGAGAGG    | 60.134 | 20 | 214 | 607  | 820  |
| AGCCGACTTCACATAGTGGG    | 60.134 | 20 | 122 | 577  | 698  |
| AGGTCAAGGACTCGAAACCA    | 59.697 | 20 | 240 | 436  | 675  |
| TGAGGACTGACGATGAGGTG    | 59.82  | 20 | 138 | 74   | 211  |
| TTCTTGCCCGACTTCTGAAT    | 59.813 | 20 | 198 | 2    | 199  |
| TTTTCGATCTTAGTCGGTCCA   | 59.693 | 21 | 272 | 881  | 1152 |
| GACGTTGGTGGGATTTGAAC    | 60.218 | 20 | 204 | 1308 | 1511 |
| TCGAAGTTTTGACGGGATTT    | 59.546 | 20 | 183 | 575  | 757  |
| AGAATTCGGTAAGCCCAAT     | 59.799 | 20 | 177 | 3763 | 3939 |
| TTCATGTAGCCAACCCCAAT    | 60.192 | 20 | 158 | 7196 | 7353 |
| CCCAAGACCCCAATTTGATT    | 60.91  | 20 | 247 | 54   | 300  |
| GCAACAACAGCAGCAACAGT    | 60.104 | 20 | 240 | 674  | 913  |
| AGAGCAGAGCAAAGCAGCTC    | 60.187 | 20 | 174 | 974  | 1147 |
| AGTTGCGTACATCTGACCC     | 59.997 | 20 | 108 | 317  | 424  |
| TTTATTGGGGGAGAATTCTTGA  | 59.782 | 22 | 280 | 54   | 333  |
| CATGTGAACATGGTGCATTT    | 57.804 | 20 | 147 | 2    | 148  |
| GACATGGAGGAGGGACGG      | 61.494 | 18 | 114 | 213  | 326  |
| AATGCTGTTAGGTGCATTGAA   | 58.307 | 21 | 204 | 222  | 425  |
| GATGATGATGCCACTCTTGG    | 59.04  | 20 | 156 | 36   | 191  |
| GAGCGAAGAACAAGCACACA    | 60.183 | 20 | 237 | 567  | 803  |
| TGCTTGAAAATGCCGTTGTA    | 60.251 | 20 | 244 | 200  | 443  |
| ACGGTAGGGGGCAAAAATAC    | 60.075 | 20 | 266 | 50   | 315  |
| ATGGCTTGATTTAGCCCATTT   | 59.821 | 21 | 211 | 1    | 211  |
| TTTCTCAACCTCGTATTCTTAC  | 60.02  | 24 | 258 | 731  | 988  |
| TTTGATGTATGCGTCGCTGT    | 60.288 | 20 | 266 | 341  | 606  |
| TGAAAAATGTGCGAAGTGCT    | 59.469 | 20 | 259 | 808  | 1066 |
| GTTGTTGCTCCTCCTTCAGC    | 59.997 | 20 | 254 | 45   | 298  |
| TCGCAACGGAAACAATCTCT    | 60.776 | 20 | 133 | 56   | 188  |
| TAACCCAATCGCAGATTTCC    | 59.901 | 20 | 200 | 0    | 199  |
| TTGCATACCTTCCGATCAAA    | 59.112 | 20 | 243 | 12   | 254  |
| TGCAGATTGCGATGGATAAA    | 60.179 | 20 | 113 | 242  | 354  |
| TCCAGCACTCATCTGTTTTC    | 60.248 | 21 | 240 | 1054 | 1293 |
| GTGCCTAATACTGTTTTACGTA  | 58.872 | 26 | 277 | 121  | 397  |
| TTTGGTTCATGTAGCCGACC    | 60.894 | 20 | 167 | 3161 | 3327 |
| TTGAATGCACAGAGAGATGGA   | 59.384 | 21 | 190 | 15   | 204  |
| TGCCATGCTATCCTAGTATTCC  | 59.257 | 22 | 226 | 465  | 690  |
| AGTTGCGTACATCTGACCC     | 59.997 | 20 | 116 | 2    | 117  |
| TGTGCGTTTTTGGCATAGTG    | 60.698 | 20 | 262 | 909  | 1170 |
| TAATCCCAAACCTCCCAACA    | 60.162 | 20 | 277 | 2    | 278  |
| AGGCATGATCAATCAGCTTGT   | 59.714 | 21 | 258 | 184  | 441  |
| CAGCAATCGCAACTTCAGTC    | 59.596 | 20 | 268 | 536  | 803  |
| TAGGCAAAAAGGAAGCATGG    | 60.202 | 20 | 183 | 20   | 202  |
| ATGACGCGGGTGTCTTATC     | 59.962 | 20 | 191 | 1093 | 1283 |
| TTTAAGTTTATTCATTTATGTTG | 57.211 | 27 | 278 | 152  | 429  |
| GGCATCATCAATAGCTTGGG    | 60.435 | 20 | 244 | 41   | 284  |
| AGGCTGGGAACCAATAATCC    | 60.152 | 20 | 160 | 7    | 166  |
| TTCCCAAATCATCTTACCC     | 59.727 | 20 | 147 | 183  | 329  |
| GCACTCCATGCTACCCCTCAT   | 60.104 | 20 | 190 | 4    | 193  |

|                         |        |    |     |      |      |
|-------------------------|--------|----|-----|------|------|
| AGCAAGCACGAGTGGAGTTT    | 60.058 | 20 | 151 | 364  | 514  |
| CTTTTGGGCAAAGGATCAAA    | 60.046 | 20 | 265 | 68   | 332  |
| CCAAATCCCCTTTTGACATTT   | 60.041 | 21 | 116 | 568  | 683  |
| TGAGAGATAAAGCCGGGAGA    | 59.91  | 20 | 276 | 166  | 441  |
| TTGTCATATGAATCATGAAATT  | 57.088 | 24 | 186 | 3    | 188  |
| AGGCCGAAAAGTACAAGGCT    | 60.262 | 20 | 179 | 21   | 199  |
| GTTTGAACCATGGACAGGCT    | 59.973 | 20 | 247 | 171  | 417  |
| TCGATGCCAAAATGTAGCAA    | 60.215 | 20 | 253 | 100  | 352  |
| GATCCTCATCCTCCTCCTCC    | 59.973 | 20 | 217 | 299  | 515  |
| TTTGGATAAAGTTATCAAGCTC  | 59.326 | 26 | 258 | 1163 | 1420 |
| CCGAAAAGGGAAAAGAAGT     | 59.566 | 20 | 233 | 298  | 530  |
| AGCAGTTCCCGAACCTGATA    | 59.694 | 20 | 174 | 3237 | 3410 |
| TGTGGCAAGGTTTTAGGAGG    | 60.103 | 20 | 172 | 3859 | 4030 |
| GGTTTACCACACAATTCAATCA  | 58.776 | 23 | 146 | 27   | 172  |
| TTTCCCAACCTCAACATTC     | 59.767 | 20 | 126 | 69   | 194  |
| GGTGACCAAGTGGCATTCTT    | 59.973 | 20 | 205 | 188  | 392  |
| TGACATTTTTATGCTAGTTTGAC | 60.189 | 25 | 267 | 539  | 805  |
| TTTCGAAAGGCACAAGATCA    | 59.395 | 20 | 266 | 1085 | 1350 |
| GGAACCCCGCTACAAAAGAT    | 60.32  | 20 | 258 | 1176 | 1433 |
| TTGTTCTTTCAACTTGAGCCA   | 58.54  | 21 | 276 | 563  | 838  |
| TGTGCCGTTGAAATGATAAGA   | 59.172 | 21 | 130 | 17   | 146  |
| ATACGTGCGACAATGACCAA    | 59.995 | 20 | 195 | 2456 | 2650 |
| TTCTTGATGGGTATTGCTT     | 58.241 | 20 | 276 | 821  | 1096 |
| TCCGAAGTCTCAGTTGGGTT    | 59.697 | 20 | 269 | 436  | 704  |
| CTACCCTGGGTTTGTTCCTG    | 59.444 | 20 | 126 | 272  | 397  |
| TACGGCTGCCTCTTGACTCT    | 60.156 | 20 | 254 | 1243 | 1496 |
| AACACGATGGCGATGTATGA    | 59.955 | 20 | 250 | 180  | 429  |
| ACTACAGTCGGAGGAGCAA     | 59.867 | 20 | 161 | 632  | 792  |
| CTTCATACGCGAGGGCTTTT    | 61.599 | 20 | 261 | 486  | 746  |
| CATCATCGGGAGGAGTAGGA    | 60.027 | 20 | 182 | 1126 | 1307 |
| TGTTAATAGGGCAAATGCCA    | 60.321 | 21 | 200 | 20   | 219  |
| CACAATTTCAAGAACCCCA     | 60.724 | 20 | 256 | 18   | 273  |
| AACTCAAACGATAATCTCAATC  | 59.06  | 24 | 173 | 11   | 183  |
| AAGAAGCTGGAGCTAAGGGC    | 60.117 | 20 | 255 | 2374 | 2628 |
| CCCCTTTGTCTCCTTTGTCA    | 60.081 | 20 | 250 | 1415 | 1664 |
| CGCATCCAAATACTTGTTTCG   | 59.182 | 20 | 247 | 256  | 502  |
| GAGCAACTTCTTGCTCGTT     | 59.621 | 20 | 227 | 37   | 263  |
| CACGGGCACATAATGAACTG    | 59.988 | 20 | 231 | 1637 | 1867 |
| GTGCAGTGATCGGTTCTTCA    | 59.837 | 20 | 246 | 298  | 543  |
| TTCTCAGAAATGGCCCGTAG    | 60.206 | 20 | 256 | 1097 | 1352 |
| GGATTCTTGAGCCAAAACG     | 59.685 | 20 | 256 | 50   | 305  |
| GTTTCAGGGCAGACTTGCTC    | 59.997 | 20 | 131 | 376  | 506  |
| AAGAAGAAGCTCCTCCACC     | 59.817 | 20 | 145 | 110  | 254  |
| TGTAGCCGACCCCAATTTAT    | 59.297 | 20 | 269 | 1270 | 1538 |
| TCCATGACCTTCGACTTTGA    | 59.215 | 20 | 275 | 574  | 848  |
| CCTCTCGACTGGGTTTTAC     | 59.697 | 20 | 273 | 2409 | 2681 |
| GGCGATGGTGTGTCTGTTA     | 59.572 | 20 | 260 | 186  | 445  |
| CCTGAAACGAGTGATGCTCC    | 60.801 | 20 | 220 | 10   | 229  |
| TGTTGAAATTGGACCAGCAA    | 60.088 | 20 | 261 | 2298 | 2558 |
| GGACGGATCGGATATGAGTG    | 60.303 | 20 | 216 | 35   | 250  |
| GGGGCTGCTGATAGTGTGAT    | 60.104 | 20 | 233 | 1616 | 1848 |
| AGGCTTAACCAATTTGGGA     | 58.556 | 20 | 258 | 64   | 321  |
| GCGGTGACATTCTCCAGAT     | 60.081 | 20 | 173 | 2202 | 2374 |
| CAAAATAGCCCGAGGTTGAA    | 60.067 | 20 | 127 | 108  | 234  |
| GCATGTGAGGGTGGTTGAGT    | 60.999 | 20 | 177 | 560  | 736  |
| TCGTGATTAATTCCGACCG     | 60.827 | 20 | 163 | 415  | 577  |
| CTGCAGCCATCTGTTCTTGA    | 60.136 | 20 | 202 | 6    | 207  |
| AGACCAGTTTTGCCCTGGTA    | 59.592 | 20 | 173 | 763  | 935  |

|                         |        |    |     |      |      |
|-------------------------|--------|----|-----|------|------|
| TCAACGACGAGCTGCTTAGA    | 59.888 | 20 | 118 | 12   | 129  |
| AGTGTGGGTTCTTTTATTAATTC | 60.101 | 27 | 278 | 309  | 586  |
| GGAATTGTTGTAATCTCGCACC  | 60.731 | 22 | 254 | 27   | 280  |
| TTTTGTACGGGTCGGGTTT     | 60.213 | 19 | 176 | 51   | 226  |
| ATTTGCTTACGAAACAGCAA    | 59.772 | 21 | 203 | 43   | 245  |
| CGCAATTTACAACCATTATCTT  | 58.625 | 23 | 163 | 2280 | 2442 |
| TGTTTCATCCGTGTTACCCAA   | 59.816 | 20 | 263 | 51   | 313  |
| CGACTGGTCCGAATCTGAGT    | 60.261 | 20 | 117 | 876  | 992  |
| GCGACATTTAAGAGTTGGGG    | 59.569 | 20 | 263 | 1093 | 1355 |
| CCAAGTTCAGTCTTCTTCATCC  | 60.646 | 23 | 260 | 774  | 1033 |
| TGGAAATTCTCCTCCCTTC     | 58.161 | 20 | 177 | 1    | 177  |
| GGCAAGGTTTCGAGAAAATGA   | 60.192 | 20 | 211 | 178  | 388  |
| CCACCAATTTCTATTTCTTGC   | 59.844 | 22 | 220 | 16   | 235  |
| TGTAGCCGACCCCAATTTAT    | 59.297 | 20 | 149 | 762  | 910  |
| ATTTGCACTCCAAGACACC     | 60.119 | 20 | 177 | 298  | 474  |
| ACACCAAAGCCTTAATCCCA    | 59.429 | 20 | 129 | 38   | 166  |
| TGAACACAATCAGTATCGTAA/  | 60.514 | 27 | 143 | 153  | 295  |
| TTGCCAACCTCATTTGTTTT    | 58.12  | 20 | 276 | 94   | 369  |
| TGTAGCCGACCCCAATTTAT    | 59.297 | 20 | 154 | 257  | 410  |
| GTACGCAATCATGCATCACC    | 59.963 | 20 | 135 | 101  | 235  |
| AGATGATCCGAACGCAAAC     | 60.081 | 20 | 230 | 5    | 234  |
| GCCGCGTACTCTTGTCTCAT    | 60.428 | 20 | 257 | 161  | 417  |
| TCATGTAGTCGACCCCAATTT   | 59.302 | 21 | 276 | 12   | 287  |
| GAATCTGAAGAAGCCATCCG    | 59.773 | 20 | 159 | 9    | 167  |
| GAGCTTCTCGATCGGTTCCAG   | 60.096 | 20 | 165 | 15   | 179  |
| TGTGTTGATGGAGCAAGAGG    | 59.831 | 20 | 172 | 54   | 225  |
| AGGGGGAGAGTTCTCTTGGA    | 60.186 | 20 | 235 | 110  | 344  |
| ACTCCACCAGCACGATTAT     | 59.434 | 20 | 201 | 26   | 226  |
| GCTGGAGCAAACCTTCTGG     | 60.134 | 20 | 154 | 279  | 432  |
| CATTGATCGTATTTGGGATCTT  | 59.693 | 23 | 236 | 99   | 334  |
| TCAGGATTGAGTAAGCGGAAA   | 59.831 | 21 | 278 | 65   | 342  |
| CGTGGCTGCCATCAGTATAG    | 59.322 | 20 | 198 | 0    | 197  |
| GATCTCCTTACCACCTCCA     | 60.048 | 20 | 161 | 286  | 446  |
| GGCCATTGCCATCAACTT      | 59.456 | 18 | 262 | 7    | 268  |
| GGAGCTAAGGGCTTCCAGAT    | 59.811 | 20 | 166 | 160  | 325  |
| CCCTAGGCACGATGGTACTG    | 60.529 | 20 | 255 | 772  | 1026 |
| ATCATGTGCAACTGTGTATGC   | 57.059 | 21 | 236 | 25   | 260  |
| GATCATCAAAGCCCCTCAAC    | 59.488 | 20 | 100 | 10   | 109  |
| TTCCACTTGCTCGACTCTGA    | 59.701 | 20 | 268 | 16   | 283  |
| ACAGGAACAAAATGGTGGC     | 59.836 | 20 | 175 | 574  | 748  |
| AAGTCTGCTTGATGTGGCCT    | 59.874 | 20 | 276 | 554  | 829  |
| TTGATTTGCAATATGGTTTGA   | 60.315 | 22 | 275 | 226  | 500  |
| TCCCATCTCCTTTGATGAGG    | 60.003 | 20 | 179 | 30   | 208  |
| ACAACATGCAACACCAAACAA   | 59.92  | 21 | 182 | 381  | 562  |
| TGGTGAAACCGGAGTCTAGC    | 60.255 | 20 | 204 | 83   | 286  |
| TCCTGAAACGAGTGATGCTC    | 58.96  | 20 | 173 | 24   | 196  |
| GTGGTCTAAACGGTGATCCG    | 60.375 | 20 | 218 | 6    | 223  |
| GCGGTGAAGCTGACGTTTAT    | 60.278 | 20 | 159 | 634  | 792  |
| TTTTGAGGATTCTGGATGCC    | 60.014 | 20 | 101 | 70   | 170  |
| ATCCCCGGACAAGGATCTTA    | 60.652 | 20 | 105 | 82   | 186  |
| CACACGCAGTGTATGTTGG     | 60.081 | 21 | 107 | 66   | 172  |
| ACTTGTCCCATCAAAATCGG    | 59.79  | 20 | 150 | 10   | 159  |
| GATGAGGAAGATGAGCCGAA    | 60.303 | 20 | 191 | 189  | 379  |
| AGGAGCATCATGAGGAGGAA    | 59.761 | 20 | 159 | 85   | 243  |
| AGGACCTCGAGAACGATGAA    | 59.803 | 20 | 100 | 38   | 137  |
| CTCTGCACTTCGTCTCCTC     | 60.135 | 20 | 267 | 67   | 333  |
| TGTAGCCGACCCCAATTTAT    | 59.297 | 20 | 115 | 253  | 367  |
| GAGGCGGGAAGGTTGAC       | 62.969 | 18 | 231 | 188  | 418  |

|                          |        |    |     |      |      |
|--------------------------|--------|----|-----|------|------|
| TTTTTCTTATTTTATCCCGATTTI | 57.886 | 25 | 268 | 1591 | 1858 |
| CATATCTCTCTTTCTCCTTCTCT  | 59.63  | 27 | 155 | 75   | 229  |
| ACCCACATAGTGGGAAAAA      | 59.146 | 20 | 242 | 3372 | 3613 |
| GTGGGAAAATGAGATGGAT      | 58.641 | 20 | 232 | 16   | 247  |
| GATTCTGTGGTACGTGCCCT     | 59.997 | 20 | 183 | 478  | 660  |
| GTTGGGCAGCCAAATATTGA     | 60.837 | 20 | 265 | 322  | 586  |
| CGAGCCTGGATTCTTCTCTG     | 60.088 | 20 | 259 | 63   | 321  |
| TTTCGAAATTGGGGGTTTT      | 60.5   | 20 | 230 | 32   | 261  |
| GCCCCTCGTATATACTAAAG/    | 59.539 | 26 | 125 | 780  | 904  |
| TAGTTACCGGCGTCATTGTG     | 59.609 | 20 | 163 | 734  | 896  |
| TGGAGAAGTTAACCAAGGGG     | 59.024 | 20 | 107 | 229  | 335  |
| GGGATGAGTTCTCTGGAGTTTC   | 60.11  | 22 | 277 | 417  | 693  |
| CCCCAGTGAACGAAAATTA      | 59.795 | 20 | 243 | 370  | 612  |
| CCATAATTACCGGCGTCATC     | 60.175 | 20 | 100 | 20   | 119  |
| TGCCGATAAGACCTCTATGTG/   | 59.73  | 22 | 237 | 503  | 739  |
| GAAGATGAAGTGTCGTTGCG     | 59.445 | 20 | 227 | 1412 | 1638 |
| TTGGGATTAAGGCTTTGGTG     | 59.931 | 20 | 216 | 726  | 941  |
| TCGCTCGTTCTGATTTTCTG     | 59.148 | 20 | 143 | 488  | 630  |
| CATTAGGGCAAAAGCCAAAG     | 59.715 | 20 | 118 | 54   | 171  |
| CACGAACGGTTTTGATTCG      | 60.096 | 19 | 238 | 17   | 254  |
| GTTGTTTTCCATTCCGTGACC    | 60.218 | 20 | 155 | 405  | 559  |
| TAATCATTAGAGCCAGCC       | 60.177 | 20 | 269 | 9    | 277  |
| ACTGTGAGGAAAATGGTGGG     | 59.82  | 20 | 230 | 608  | 837  |
| AGAGGTCGTGGACGAGGTAG     | 59.325 | 20 | 138 | 68   | 205  |
| TTGTATGCCTTGGAGGAAGC     | 60.214 | 20 | 265 | 304  | 568  |
| CATGTAACCGACCCCAATTT     | 59.546 | 20 | 163 | 4052 | 4214 |
| CTGGTCGAACAACGAGTGTG     | 60.348 | 20 | 201 | 56   | 256  |
| CAGTTTTGTGCGAGTTTGA      | 59.881 | 20 | 213 | 20   | 232  |
| GGGTTTAGACGTCATGCACA     | 59.572 | 20 | 241 | 92   | 332  |
| AGGAAATGATCACAGGCCAT     | 59.366 | 20 | 237 | 244  | 480  |
| CCCTTTAATTGGTTGGTTGGT    | 59.967 | 21 | 243 | 2269 | 2511 |
| CTAGCCGGAGACCCTTTTG      | 59.815 | 19 | 137 | 47   | 183  |
| AACAACCGAGCAGAAACCAG     | 60.291 | 20 | 149 | 338  | 486  |
| CGGAGATGGAGGATGTGAAG     | 60.612 | 20 | 167 | 56   | 222  |
| TAGCAAAAAGGTGTCCTGCC     | 60.249 | 20 | 182 | 43   | 224  |
| CCCAAGACCCCAATTTGATT     | 60.91  | 20 | 175 | 1792 | 1966 |
| CGTTACTCCCACATGCACAC     | 60.032 | 20 | 267 | 358  | 624  |
| TGACAATTTATCATTTCTGT/    | 59.207 | 27 | 250 | 2472 | 2721 |
| CCCTATCTCCGGAAGAACT      | 59.531 | 20 | 135 | 48   | 182  |
| CTATGGTGGATTGGTGTGGA     | 59.215 | 20 | 134 | 398  | 531  |
| AAAACCAAACATGCTTCCACA    | 60.393 | 21 | 240 | 427  | 666  |
| GGGGGAATTCATGGAAGGTA     | 60.881 | 20 | 230 | 862  | 1091 |
| CCGGTACATGACTTCGAGGA     | 61.055 | 20 | 105 | 373  | 477  |
| ACCAAGATTTCCGAAACCAA     | 59.406 | 20 | 214 | 4    | 217  |
| CCTGAGAAAACCTGATGTTCCCTC | 58.837 | 22 | 107 | 14   | 120  |
| TGCACTTCATTTCAATTTATGC   | 59.167 | 23 | 240 | 20   | 259  |
| AGATTTTGTGTGGCGGGTTA     | 60.365 | 20 | 215 | 19   | 233  |
| GCCCAATTTGTGAGAGTGGT     | 59.973 | 20 | 203 | 905  | 1107 |
| CAAACATGGGAGGGTTTTGT     | 59.688 | 20 | 196 | 83   | 278  |
| GCAGCTCCATGTCCTTGTTT     | 60.263 | 20 | 260 | 197  | 456  |
| CAGGTTGACCTGTTTATGCAA    | 58.687 | 21 | 236 | 459  | 694  |
| GTATTCAGGCTCGGACGACA     | 61.208 | 20 | 110 | 391  | 500  |
| CCGTTTGAAGAGTTATGTGCA/   | 60.166 | 22 | 109 | 261  | 369  |
| ACCATGAACTTCAAATGGTGA    | 57.908 | 21 | 242 | 984  | 1225 |
| TTTTTGCCACATTCCCTCTC     | 60.051 | 20 | 274 | 67   | 340  |
| CCGGTTAATGCACATCCCTA     | 60.712 | 20 | 248 | 530  | 777  |
| TACGCTGCGCTGACTAATA      | 60.706 | 20 | 254 | 10   | 263  |
| CTGAAATAGGGGGAATGCAC     | 59.387 | 20 | 220 | 803  | 1022 |

|                         |        |    |     |      |      |
|-------------------------|--------|----|-----|------|------|
| GGCGAAAAATATTTCCAGCAA   | 61.24  | 21 | 194 | 805  | 998  |
| ATTTGAGAACATTGAGGCGG    | 60.074 | 20 | 229 | 1141 | 1369 |
| TCATGATGCATACGAATGATA   | 59.373 | 24 | 237 | 1267 | 1503 |
| ATGATGCCACTCTTGCGG      | 60.806 | 18 | 139 | 57   | 195  |
| AGGAATACCGACGGACAGAA    | 59.55  | 20 | 279 | 3190 | 3468 |
| TGGAAACCTCTATGCCATCA    | 59.075 | 20 | 244 | 2108 | 2351 |
| TAGCAGGCCAAAGAGGAAGA    | 60.088 | 20 | 277 | 104  | 380  |
| GGAAATGGACCCACAACATC    | 60.034 | 20 | 233 | 2044 | 2276 |
| AAATCCTGTCGTATCGCAGC    | 60.243 | 20 | 256 | 3    | 258  |
| ATGGTTTGATGTAACATTCCGA  | 59.205 | 22 | 260 | 297  | 556  |
| AATAGAGATTGCACTCGGGC    | 59.297 | 20 | 258 | 797  | 1054 |
| TCTAGCTCAATCCCAACGG     | 60.206 | 20 | 199 | 181  | 379  |
| TTTTCCCTAACTCTCATCCTTTT | 57.568 | 23 | 254 | 444  | 697  |
| TCAGCAGCCATCTGTTCTTG    | 60.136 | 20 | 196 | 101  | 296  |
| GCATCATCATCAAGCATC      | 59.049 | 21 | 271 | 361  | 631  |
| TTCTCAAGAATTTGGCACCC    | 60.051 | 20 | 178 | 3718 | 3895 |
| AGGTTGCGTACATCTGACCC    | 59.997 | 20 | 232 | 1001 | 1232 |
| AGATGACCTCTGTCGTGCAA    | 59.42  | 20 | 235 | 709  | 943  |
| CTCGATCCAAACCACGACTT    | 60.111 | 20 | 263 | 48   | 310  |
| GGTGAATCAGCAGGGTTTA     | 59.933 | 20 | 182 | 248  | 429  |
| CCTGCTATCGCTTGAGAAG     | 60.11  | 20 | 211 | 105  | 315  |
| ACGCGAGTTCAAAGCTGTTT    | 60.059 | 20 | 166 | 141  | 306  |
| AATTTGAGTTTCGGGCTTT     | 60.075 | 20 | 159 | 15   | 173  |
| TCCAACCCTATCTATGGCTCC   | 60.293 | 21 | 229 | 252  | 480  |
| GTAGGCGATTAGTGGAAGCG    | 59.867 | 20 | 272 | 1043 | 1314 |
| TTTTCTTGAAAGTACGTACACT  | 57.088 | 26 | 242 | 768  | 1009 |
| ATGGCATGTATGGGTTGGAT    | 59.9   | 20 | 194 | 4    | 197  |
| GGAGAAGGAGAAGCAGCAAA    | 59.694 | 20 | 161 | 444  | 604  |
| AGAGGCAGCTTCTTCGTCAA    | 60.277 | 20 | 149 | 583  | 731  |
| GGGTTTTTGTCGCCATTTATT   | 59.943 | 21 | 114 | 174  | 287  |
| GAGATGGACGATGATGTGGA    | 59.431 | 20 | 172 | 172  | 343  |
| CCTGTAAGCTCTGGAACGGA    | 60.388 | 20 | 259 | 32   | 290  |
| CTCGGGATCAATGACATTCC    | 60.281 | 20 | 183 | 1    | 183  |
| AGAGTACCCACACGAAGACA    | 59.631 | 21 | 216 | 469  | 684  |
| GAGTGGCCGACATTGAAGAT    | 60.081 | 20 | 260 | 101  | 360  |
| GCCGAACCCACTGTGATATT    | 59.82  | 20 | 221 | 35   | 255  |
| CACTGATCGTACACGATGGC    | 60.144 | 20 | 127 | 671  | 797  |
| AACCCGAATAAAAGAACCCG    | 60.177 | 20 | 162 | 84   | 245  |
| AACCAAGGGGATCGTAAAGC    | 60.32  | 20 | 269 | 0    | 268  |
| ATATGTGGGGATAGGGGTGG    | 60.652 | 20 | 150 | 110  | 259  |
| CAATTCCTTACTGAATTTGGGG  | 59.711 | 22 | 187 | 276  | 462  |
| GTGATCCGTCCCCATCTAAG    | 59.361 | 20 | 270 | 30   | 299  |
| TGTGGGACGGACCAAAAT      | 59.737 | 18 | 261 | 142  | 402  |
| GGGGGCTATCTTGTGAGTTG    | 59.55  | 20 | 234 | 0    | 233  |
| GGAATTGGAGTGGTCTGTGG    | 60.363 | 20 | 142 | 104  | 245  |
| TTTATGTAGATATGGAGCGATT  | 57.561 | 25 | 238 | 367  | 604  |
| TTCATCGACTCTCGCATCAG    | 60.096 | 20 | 238 | 440  | 677  |
| ACAGCTCGCAAGATGAGACC    | 60.564 | 20 | 249 | 621  | 869  |
| ACAACCTCAGGCTGCAAAAT    | 59.74  | 20 | 214 | 489  | 702  |
| AACACGAACTTGCCGATTTTA   | 59.639 | 21 | 279 | 25   | 303  |
| AATTGCAGGGGAACACAAAG    | 59.971 | 20 | 144 | 1742 | 1885 |
| TTTTGTAACCTGAGCAATTTATC | 59.966 | 26 | 199 | 1628 | 1826 |
| CTCAGTAATCGCCTGATGGC    | 60.765 | 20 | 252 | 79   | 330  |
| CGCCCAGTTTTGGTCATACT    | 59.993 | 20 | 141 | 44   | 184  |
| TTTGATGAAATCAGTTGTTTGA  | 59.355 | 26 | 174 | 3    | 176  |
| AGCCGGAAAAAGGAAAAGAA    | 60.177 | 20 | 256 | 202  | 457  |
| GCGTGCACAAAATGGTAAAC    | 59.09  | 20 | 260 | 42   | 301  |
| ATTTAAAACCGATCCCACCC    | 59.888 | 20 | 274 | 163  | 436  |

|                        |        |    |     |      |      |
|------------------------|--------|----|-----|------|------|
| CGAGAAGATCTTGAGGTCGC   | 60.096 | 20 | 102 | 72   | 173  |
| TCGTTCAATCACGTAGAAGTTC | 59.799 | 23 | 239 | 664  | 902  |
| TTCAGCGGATTGAGTGTCA    | 58.88  | 19 | 217 | 23   | 239  |
| AGCTGGATTACCAGTGCCTC   | 60.285 | 20 | 209 | 293  | 501  |
| AGTTGCTTTTGTGGAGCG     | 60.42  | 20 | 159 | 486  | 644  |
| GTCTAGGATCTCTTTCGCCG   | 59.031 | 20 | 263 | 1104 | 1366 |
| CGAAAGAAACACACGTGAGA   | 60.318 | 22 | 226 | 224  | 449  |
| CATCAACTCAACAAAGCCGA   | 59.84  | 20 | 114 | 1150 | 1263 |
| AGCCTCCCTCTTTAGCCATC   | 59.811 | 20 | 221 | 176  | 396  |
| TTGAATCCCAGATTGCATCA   | 60.009 | 20 | 208 | 633  | 840  |
| GCAACGGAAACAACCTCTTT   | 59.218 | 20 | 169 | 691  | 859  |
| TCCCATAGCATTTTTAGCC    | 60.038 | 20 | 205 | 610  | 814  |
| TCCACATTGGGTAACCTTCTAG | 59.471 | 24 | 261 | 90   | 350  |
| TGTGTGCATGTATTGACAGGA  | 58.558 | 21 | 171 | 2436 | 2606 |
| TCGAACCTTCTGCAAAATAATC | 59.253 | 22 | 279 | 712  | 990  |
| ATGGGCATAGGATTTGGGT    | 60.399 | 20 | 193 | 84   | 276  |
| GGCAAGAATCCTCACCAAGA   | 60.195 | 20 | 186 | 1011 | 1196 |
| TTTTACACGTTTCGCATTC    | 59.712 | 20 | 155 | 30   | 184  |
| CTCCTGCACTCCAATGTCCT   | 60.261 | 20 | 272 | 6    | 277  |
| CCTGAAACGAGTGATGCTCC   | 60.801 | 20 | 204 | 103  | 306  |
| ATGTAGCCGACCCCAATTTA   | 59.297 | 20 | 167 | 866  | 1032 |
| GGGTTTAGACCGATGTCGTG   | 60.375 | 20 | 184 | 2406 | 2589 |
| ATCTTGGAAGTTGGAATGGC   | 58.984 | 20 | 276 | 20   | 295  |
| TGGTGAACGAGAGCAATGA    | 60.39  | 20 | 198 | 279  | 476  |
| AGTACGCCTCGGTGGTTAAA   | 59.632 | 20 | 207 | 50   | 256  |
| TCGTAAACGAGTGTTGGAAAA  | 59.663 | 22 | 271 | 330  | 600  |
| TATTCGGGCATCCCATAAAG   | 59.751 | 20 | 262 | 1189 | 1450 |
| GACAACACTGGAGCTGTGGA   | 59.872 | 20 | 149 | 4941 | 5089 |
| GGAGTGCATGCTCCAGACTC   | 60.989 | 20 | 112 | 93   | 204  |
| GCAGACGTAGGAACGGAGAG   | 60.012 | 20 | 139 | 3    | 141  |
| GGTTTACTCGCTCTTGCTCG   | 60.154 | 20 | 163 | 0    | 162  |
| TTGTCATATGAATCATGAAATT | 57.088 | 24 | 210 | 289  | 498  |
| ACTATCATCCTCGGAGGCAA   | 59.653 | 20 | 232 | 153  | 384  |
| GGCAGTACTTGAACCTTCGC   | 59.882 | 20 | 155 | 15   | 169  |
| ACAGGAAACGTAAAGGCCG    | 60.118 | 19 | 218 | 39   | 256  |
| GAGCGCATGTTCCAGACTTT   | 60.406 | 20 | 106 | 4    | 109  |
| GCCTTTGGTCTTGTCCGTAA   | 60.11  | 20 | 120 | 458  | 577  |
| GAATGTTAGCGACCCAGCAT   | 60.103 | 20 | 142 | 0    | 141  |
| ATGTAGCCGACCCCAATTTAT  | 59.585 | 21 | 269 | 277  | 545  |
| ACTCACCGGAGAAAACCTCA   | 59.697 | 20 | 205 | 103  | 307  |
| CCATAATGTCCGGCTGAATC   | 60.296 | 20 | 101 | 22   | 122  |
| AAATGGTGGCAATAACGGAG   | 59.823 | 20 | 265 | 600  | 864  |
| CCCGAACACTAGTGGGGTTA   | 59.846 | 20 | 278 | 199  | 476  |
| CACTCGTTTAATGTTACACTTC | 58.053 | 26 | 280 | 192  | 471  |
| TTTGTATCGTTTCCGTGTTTT  | 59.809 | 23 | 189 | 393  | 581  |
| CCCGAACGATGTACGTACCT   | 59.989 | 20 | 163 | 168  | 330  |
| TGGGATGAAATTCAAAAGGG   | 59.733 | 20 | 148 | 67   | 214  |
| TGGAATCCGAGAAAATCAGG   | 60.006 | 20 | 196 | 4    | 199  |
| AAAAGTTTCCACACTTGCCG   | 60.147 | 20 | 254 | 100  | 353  |
| TTCAAATATTCGACTCCGGC   | 60.038 | 20 | 213 | 40   | 252  |
| GAGAGTCTTCCGACAAACCG   | 59.844 | 20 | 199 | 127  | 325  |
| CGGTGGTCATTTTGGGGATA   | 62.75  | 20 | 181 | 114  | 294  |
| TCCGACACATGAGCTATTGG   | 59.673 | 20 | 264 | 10   | 273  |
| TTTTGGATCCACACCTTCAA   | 58.947 | 20 | 258 | 836  | 1093 |
| CCACCCCAACCAATAAAAA    | 59.537 | 20 | 204 | 19   | 222  |
| TCCCACTAAGCTAGCTCCCC   | 60.723 | 20 | 132 | 63   | 194  |
| TATTTGTGCCTCGTTTCGTG   | 59.729 | 20 | 205 | 20   | 224  |
| TCGACCTGCTCCTTTTCAAT   | 59.813 | 20 | 224 | 1137 | 1360 |



|                        |        |    |     |      |      |
|------------------------|--------|----|-----|------|------|
| ATAGCCGATCCCACAGAGTG   | 60.096 | 20 | 202 | 2387 | 2588 |
| TTGATGAAGGCGGGAATATG   | 60.797 | 20 | 268 | 2462 | 2729 |
| AGCGTAGCTTCAAGGATTCTG  | 59.615 | 20 | 114 | 7    | 120  |
| TACATAGCTGTGGCCTGTGG   | 59.74  | 20 | 172 | 5033 | 5204 |
| CATGCCGAGTTTTTCTCATT   | 59.215 | 21 | 276 | 344  | 619  |
| CTGGGCAGCCAAACATAGAG   | 60.786 | 20 | 146 | 59   | 204  |
| AACAGGGATTTTGAAGGTGCT  | 59.99  | 21 | 163 | 498  | 660  |
| CCGACTAGGACTAAGGGTCCA  | 60.493 | 21 | 100 | 390  | 489  |
| CTTACATCACATGCCCCACA   | 60.39  | 20 | 154 | 287  | 440  |
| AAGAGATGGGGTCAAGGAC    | 60.314 | 20 | 187 | 234  | 420  |
| CGTCATCCCCCTAGTTCATC   | 59.361 | 20 | 196 | 1    | 196  |
| CCCCTTCAACTCACACCAAG   | 60.536 | 20 | 256 | 1058 | 1313 |
| TTTTCTTGCAGGTGTGTTTCG  | 59.881 | 20 | 265 | 1038 | 1302 |
| ATTCGTCAGTTCACCGAAA    | 60.495 | 20 | 216 | 36   | 251  |
| TACAGCTTGGTTTCGGAGGT   | 59.734 | 20 | 125 | 6    | 130  |
| GGAAAAAGTGACTGGGCTTG   | 59.711 | 20 | 251 | 232  | 482  |
| TTTGGTGGTTAGGGAGCTTG   | 60.103 | 20 | 165 | 669  | 833  |
| ATTGTCAAACCAGCGAGAGC   | 60.406 | 20 | 186 | 353  | 538  |
| ATCATGTTGTCCCTTCTCG    | 59.927 | 20 | 274 | 3578 | 3851 |
| CATTTTACGTGACCCTATTGA  | 59.861 | 22 | 251 | 653  | 903  |
| TTTACGTCGGAGGGTTCAAT   | 59.429 | 20 | 260 | 26   | 285  |
| GCTGCTGTCCATGAAGTTGA   | 59.992 | 20 | 272 | 45   | 316  |
| TTTGGTTCATGTAGCCGACC   | 60.894 | 20 | 140 | 874  | 1013 |
| TTGGTTAATGTAGCCGACCC   | 59.823 | 20 | 203 | 47   | 249  |
| CAGACCAGCTTCCCCTGTAG   | 59.861 | 20 | 208 | 3    | 210  |
| CAGATCGGTTTACCACGACA   | 59.566 | 20 | 134 | 405  | 538  |
| GTGTTCCGATAATCGCCAGT   | 59.962 | 20 | 138 | 22   | 159  |
| AACAACATTAACAATCATGCC/ | 59.288 | 23 | 213 | 1177 | 1389 |
| CTCCCAAACCTCACCTCCT    | 60.48  | 20 | 215 | 644  | 858  |
| CCCCTAAGCTAGCTCCCCT    | 59.864 | 20 | 124 | 7    | 130  |
| TTTATGTTAACGCACAATATTC | 58.556 | 24 | 277 | 438  | 714  |
| GGTGTGTTTCAAGGCAAATTC  | 59.467 | 21 | 254 | 1089 | 1342 |
| TGAGGATTCTGTGGTTCGTG   | 59.676 | 20 | 166 | 77   | 242  |
| TCTGATCTCCGGTCGACAAT   | 60.622 | 20 | 216 | 3081 | 3296 |
| GCACAACAACCACTAATCCG   | 59.05  | 20 | 177 | 42   | 218  |
| CAACTTGGCTACCCCTATCG   | 59.587 | 20 | 198 | 160  | 357  |
| TTGAACCCGATTTCTTGTC    | 59.097 | 20 | 175 | 321  | 495  |
| TTAGCAATGTTGGTGGCAAA   | 60.111 | 20 | 210 | 3672 | 3881 |
| AATTGCCGTGTGAAACCAAT   | 60.235 | 20 | 238 | 769  | 1006 |
| GCATGTTTGTGTCGCCCTAC   | 60.384 | 20 | 262 | 2885 | 3146 |
| AATTGCTGCAAAAATCAGGG   | 60.074 | 20 | 203 | 1548 | 1750 |
| GCAGAAGCACGATGCTCTTA   | 59.326 | 20 | 154 | 766  | 919  |
| CACTATGCAAATCAGTGCCG   | 60.28  | 20 | 160 | 236  | 395  |
| CCTGTTTCAAATTCCTGCCT   | 59.17  | 20 | 236 | 56   | 291  |
| GCAAATCCAATCATCTCCCA   | 60.812 | 20 | 273 | 456  | 728  |
| AGGGCTAAGAGGAAAGACCG   | 59.842 | 20 | 249 | 22   | 270  |
| CCATAATTACCGCGTCATC    | 60.175 | 20 | 124 | 102  | 225  |
| TTCCATAATTACCGGCATC    | 59.621 | 20 | 107 | 228  | 334  |
| CGTCAGAATATTTATTCCATGT | 57.195 | 24 | 270 | 160  | 429  |
| GGCGTAAACTAACTGGTGGG   | 59.494 | 20 | 240 | 47   | 286  |
| ATGTAGCCGACCCCAATTTAT  | 59.585 | 21 | 118 | 2398 | 2515 |
| CCGCTTCTTTGATACCAAT    | 59.043 | 20 | 161 | 1033 | 1193 |
| ATCCCGGAAGAAGAACGAGT   | 60.074 | 20 | 263 | 860  | 1122 |
| TGTAGCCGACCCCAATTTAT   | 59.297 | 20 | 152 | 1231 | 1382 |
| CTCCGCCAGTGACTGTATTG   | 59.314 | 20 | 264 | 1299 | 1562 |
| TTCCCAACTTCTTCTCCT     | 60.045 | 20 | 278 | 393  | 670  |
| TTTCCAAGGCCAATGCTAAC   | 60.074 | 20 | 231 | 1689 | 1919 |
| TTTCTAAATCATGATGGTGAA  | 59.123 | 26 | 210 | 159  | 368  |

|                        |        |    |     |      |      |
|------------------------|--------|----|-----|------|------|
| GGTTCGAAAACCGTTGTTGT   | 59.875 | 20 | 219 | 747  | 965  |
| CTCGGATTGGATTCCTCAC    | 59.483 | 20 | 107 | 10   | 116  |
| TGGGGGAATGTAATATCATTG/ | 60.261 | 23 | 271 | 345  | 615  |
| CTTGGCTCATTGCAAGCATA   | 59.976 | 20 | 162 | 823  | 984  |
| TTGTGTCCGACCTTGTTTCC   | 59.571 | 20 | 167 | 5    | 171  |
| CTCCCCGACTTCTCCAACCT   | 60.619 | 20 | 143 | 51   | 193  |
| GTTTCGAGTCTCAATGGGGAA  | 60.05  | 20 | 112 | 1902 | 2013 |
| CTGTCTAATTTTGGTTCGGCA  | 58.771 | 20 | 275 | 1796 | 2070 |
| GAAGCGTGGGAGAAGCTAAA   | 59.592 | 20 | 266 | 28   | 293  |
| GTAGATTTTCGGGCCATTTCC  | 60.642 | 20 | 279 | 69   | 347  |
| ACCAATGGTGGTATGGTGTG   | 58.984 | 20 | 149 | 81   | 229  |
| GCCATTGCCACGATGAATAC   | 61.27  | 20 | 247 | 1189 | 1435 |
| TCTTCGGGATTCTCCATGAC   | 60.011 | 20 | 225 | 36   | 260  |
| GCGGGCAAATTTCTTTTTCT   | 60.547 | 20 | 102 | 348  | 449  |
| GTCTTCTTGACGCCGCTC     | 59.663 | 18 | 101 | 25   | 125  |
| CTAATGTTTCCTCCACCGCT   | 59.195 | 20 | 202 | 58   | 259  |
| AGACTAAGGCGGAGTGAGCA   | 60.156 | 20 | 269 | 215  | 483  |
| ATGTGAACCAAGTACCCCGA   | 60.232 | 20 | 273 | 33   | 305  |
| GACGACGTACAGCTAAAGCG   | 58.752 | 20 | 175 | 9    | 183  |
| ATGAGCCATAACCCTCCCTC   | 60.293 | 20 | 178 | 40   | 217  |
| AAAACCCAGTTCCTCTTGAT   | 59.668 | 20 | 150 | 1134 | 1283 |
| GATGTCGTTTTGACATCCCA   | 59.348 | 20 | 254 | 1    | 254  |
| GATCTGGAGTCGTCGGTGAT   | 60.08  | 20 | 265 | 761  | 1025 |
| CGATTCCACATATCTCCACAAA | 59.823 | 22 | 259 | 387  | 645  |
| TGTGAAACTTGACGGAATGG   | 59.541 | 20 | 209 | 583  | 791  |
| TGGGTACAGGTTGTGGGTTT   | 60.126 | 20 | 196 | 94   | 289  |
| TCCTGCATGGCTGTAAACAC   | 59.722 | 20 | 260 | 499  | 758  |
| TGGGTTGCAAAATTAATCCG   | 60.671 | 20 | 217 | 667  | 883  |
| CCACCGAAATCTTGGGTTTA   | 59.795 | 20 | 238 | 108  | 345  |
| TCCTCGCTCTCTCTCTCAC    | 59.817 | 20 | 133 | 701  | 833  |
| CACAAAATTAAGCGCAAGCA   | 60.017 | 20 | 175 | 73   | 247  |
| CCCAAGACCCCAATTTGAT    | 59.59  | 19 | 218 | 48   | 265  |
| TGTCATGGGAGCTTAAGTTAGC | 60.136 | 23 | 183 | 58   | 240  |
| AAACACTAGCAATGACACTTC  | 59.265 | 24 | 188 | 24   | 211  |
| CAGCTCAGGGGAGTTCACAT   | 60.261 | 20 | 191 | 211  | 401  |
| CCCACTAACACCCCTCACAT   | 59.697 | 20 | 191 | 54   | 244  |
| ATCGGAGGTTGAGTCTGGTG   | 60.112 | 20 | 275 | 43   | 317  |
| AGGTGCGAGGGAGATTATGA   | 59.653 | 20 | 238 | 69   | 306  |
| CGTTCATCATTAACCCCCAC   | 60.051 | 20 | 138 | 6    | 143  |
| ACCAGGTTTGAAGTTGTCGG   | 60.005 | 20 | 163 | 1    | 163  |
| CCTCTCTTTCACAGCCTTGC   | 60.134 | 20 | 237 | 1144 | 1380 |
| CAACTTGATCCCTATCACGC   | 58.173 | 20 | 222 | 18   | 239  |
| CAGGGCGTGACAGTAACTCA   | 59.897 | 20 | 258 | 773  | 1030 |
| GGAGTTCAGTGTGGGATCGT   | 59.969 | 20 | 273 | 609  | 881  |
| AACGCCTTCTCGGTTGAGT    | 59.859 | 19 | 269 | 1424 | 1692 |
| CGGGGAGGAATAGAATGCTT   | 60.411 | 20 | 168 | 35   | 202  |
| CCTCAGCAAAGTAATCCCG    | 59.702 | 20 | 248 | 128  | 375  |
| CAACAGAAGACCCGAGCCTA   | 60.388 | 20 | 231 | 701  | 931  |
| AAAAGCAGGAGATGACAGCC   | 59.434 | 20 | 247 | 525  | 771  |
| TCATAACATCGATGAGTGTGG/ | 59.874 | 23 | 100 | 266  | 365  |
| AGAAATGGGGCTTTTTAGGG   | 59.437 | 20 | 261 | 67   | 327  |
| GGCCAACTGAAATTTGAAAGA  | 60.451 | 22 | 176 | 3    | 178  |
| CAAATCGGCATTATTAATGGA  | 60.052 | 23 | 175 | 563  | 737  |
| TTGGCTTATTGGTCTGGAGG   | 60.066 | 20 | 261 | 1583 | 1843 |
| GCACATTTGGATTTACCGAGA  | 59.952 | 21 | 200 | 829  | 1028 |
| CCGTCTAGGGCTTCAACTTCT  | 59.893 | 21 | 179 | 66   | 244  |
| TCCAATTTATAACACACTAAT  | 59.917 | 26 | 213 | 1035 | 1247 |
| CCATCAAACCATCACCTCC    | 60.173 | 20 | 160 | 212  | 371  |

|                         |        |    |     |      |      |
|-------------------------|--------|----|-----|------|------|
| TTTTTGTC AATGTGGGATTGAT | 59.182 | 22 | 263 | 176  | 438  |
| ATGTTGCCTTTGTTGGAG      | 59.971 | 20 | 141 | 227  | 367  |
| ATCAGTCCCGTCTAGGGCTT    | 60.096 | 20 | 181 | 65   | 245  |
| CGAGAAAGAGAGAGATGGGG    | 58.963 | 20 | 177 | 207  | 383  |
| CTAGTCCGGTCCAAACCAA     | 59.964 | 20 | 181 | 2209 | 2389 |
| CAAGACCCCAATTTGATTGC    | 60.309 | 20 | 186 | 58   | 243  |
| GAAGAGCGCCAGTATGGGTA    | 60.235 | 20 | 199 | 3971 | 4169 |
| GTTTCATGTAGCCGACCCAAT   | 59.82  | 20 | 186 | 2631 | 2816 |
| AAGCTCCGCTCCATGAACT     | 59.965 | 19 | 238 | 905  | 1142 |
| GAGAACCAGATTGTAGCGGC    | 59.843 | 20 | 115 | 402  | 516  |
| TAGTGGATTGGGGAGGATGA    | 60.272 | 20 | 238 | 1814 | 2051 |
| CTTTTGAGATAGGCGCTGCT    | 59.752 | 20 | 253 | 16   | 268  |
| CATGCGGATCACCACATAGT    | 59.399 | 20 | 154 | 0    | 153  |
| TCAAGCCAAATCAAGAAGCC    | 60.331 | 20 | 259 | 335  | 593  |
| CCTTGCGCCCTTTAAAATA     | 59.381 | 20 | 107 | 6    | 112  |
| GTTGACGAGAGAACTGGGC     | 59.851 | 20 | 260 | 564  | 823  |
| GTCAGAAACCGGTGTTCCAT    | 59.827 | 20 | 268 | 407  | 674  |
| CAATCAACCATCACATCCCA    | 60.177 | 20 | 218 | 10   | 227  |
| TCAGAAATCCGATCCTGGAC    | 60.011 | 20 | 276 | 65   | 340  |
| ACCCCAATTTACTGGGATCA    | 59.101 | 20 | 198 | 529  | 726  |
| GCTGGGAACCAATCATCCTA    | 59.894 | 20 | 208 | 26   | 233  |
| ACTCACCTCTCCCTCGACCT    | 60.258 | 20 | 234 | 14   | 247  |
| TGATGCTTGGGATCTTAGGG    | 60.029 | 20 | 190 | 4    | 193  |
| AGGTGAATTTGGTCCTTCAA    | 58.54  | 21 | 279 | 671  | 949  |
| AGATGTGGCACCTCCTGATT    | 59.535 | 20 | 108 | 0    | 107  |
| AGATTACACGTTGGGCCTTC    | 59.056 | 20 | 182 | 2059 | 2240 |
| TGAAAATAGTTGTGCCTGGGT   | 59.485 | 21 | 208 | 246  | 453  |
| TTCCAATTCTCTGGGTCAGG    | 60.042 | 20 | 154 | 1112 | 1265 |
| AGGGATATGTGGGTGGTGAG    | 59.655 | 20 | 139 | 853  | 991  |
| TCTTCGGGATCACAATTTGG    | 60.832 | 20 | 275 | 413  | 687  |
| TTCCACGATGACGAGAGATG    | 59.787 | 20 | 159 | 572  | 730  |
| GGGTTATCACCTGATTACTACC  | 60.567 | 25 | 242 | 241  | 482  |
| AACTTTGGTTCATGTAGCCG    | 57.757 | 20 | 107 | 280  | 386  |
| GTGACACAAACCAAAGGTGC    | 59.037 | 20 | 222 | 16   | 237  |
| ACCAATGGTGGTATGGTGTG    | 58.984 | 20 | 203 | 2    | 204  |
| ATCTCAGCTTCACCTCCGAA    | 59.95  | 20 | 250 | 276  | 525  |
| CGTTGTGTGCACCTCCATA     | 60.574 | 20 | 250 | 2714 | 2963 |
| TCATCAACGTTCTTGGGTTT    | 58.543 | 20 | 160 | 57   | 216  |
| AGCCTTATTTCCACCCACT     | 59.827 | 20 | 134 | 4114 | 4247 |
| TGGCCACATCGTACTTCTGA    | 60.263 | 20 | 194 | 38   | 231  |
| ATTGGCTGGATGTATTAGGATA  | 57.193 | 24 | 148 | 102  | 249  |
| TGCGTCCTCATTGTTTATGC    | 59.694 | 20 | 268 | 974  | 1241 |
| GAAATGGTGGTTCATTTGGG    | 60.029 | 20 | 175 | 2300 | 2474 |
| ATGTAGCCGACCCCAATTTA    | 59.297 | 20 | 280 | 38   | 317  |
| AGTCTGTTGAGCAGCAGCAA    | 59.929 | 20 | 266 | 822  | 1087 |
| AACACTGGTAATGACGCTTCG   | 60.183 | 21 | 237 | 7    | 243  |
| TTTGTATGCTTGTAGTGGTTCC  | 59.162 | 24 | 215 | 274  | 488  |
| ATCCGTTTAGGCAAAGGCTC    | 60.582 | 20 | 216 | 2140 | 2355 |
| GAGGTGGAGCTGAAATTTGG    | 59.67  | 20 | 242 | 1802 | 2043 |
| ATTCCTTCCCGTCATCTCT     | 59.896 | 20 | 218 | 1703 | 1920 |
| CTCCTCGCCTCCTACATCTG    | 59.966 | 20 | 263 | 145  | 407  |
| ATGGTAGAAATCGCCGCC      | 60.973 | 18 | 196 | 6    | 201  |
| TCCACCAATTTCTCCTCTGG    | 60.042 | 20 | 200 | 325  | 524  |
| CCACAAGTTATCACACCCCC    | 60.088 | 20 | 210 | 243  | 452  |
| GATGAGTTTTGGGTGATGGG    | 60.173 | 20 | 264 | 328  | 591  |
| GGAAATTGAATAGGGGGACC    | 59.47  | 20 | 225 | 656  | 880  |
| GTGTAGCCGACCCCAATTTA    | 59.823 | 20 | 100 | 256  | 355  |
| GTTTACGGAAGCATGATGGG    | 60.331 | 20 | 157 | 3134 | 3290 |

|                        |        |    |     |      |      |
|------------------------|--------|----|-----|------|------|
| GCCGGATTCTCTTCGGTAT    | 60.419 | 20 | 233 | 15   | 247  |
| GTCTGTGAAGTCTTCCGCGT   | 60.453 | 20 | 269 | 40   | 308  |
| CGCAATGGAAACAACCTCTT   | 60.11  | 20 | 270 | 2177 | 2446 |
| TGGAGACGGCGATAGAGTTT   | 59.836 | 20 | 270 | 1437 | 1706 |
| GAAATGGAATGGTACGAGGG   | 59.244 | 20 | 146 | 617  | 762  |
| GTTTCCGGAGATCACACAGG   | 60.51  | 20 | 141 | 187  | 327  |
| TTTTGTCCACCCCTCAATTC   | 59.767 | 20 | 265 | 18   | 282  |
| ATAATAGTGCCCCGAAAGGG   | 60.164 | 20 | 207 | 144  | 350  |
| GCCGAATCTTGACTGTCCTC   | 59.81  | 20 | 209 | 41   | 249  |
| GATTTTGTATTGCCCGTTGG   | 60.188 | 20 | 181 | 47   | 227  |
| TGGAGTTGCAGATTTTTGGA   | 59.247 | 20 | 145 | 4726 | 4870 |
| TTCAATGTTCTGTGGAACGC   | 59.697 | 20 | 150 | 10   | 159  |
| TCTGCAGCCATTTGTTCTTG   | 59.988 | 20 | 263 | 250  | 512  |
| TTGATGAGCCATAACCCTCC   | 59.894 | 20 | 239 | 87   | 325  |
| ATGTAGGCAAAGGCTGCTGT   | 59.904 | 20 | 119 | 3    | 121  |
| TCCAGAAAATTCTTTTCCTTTC | 59.943 | 23 | 224 | 350  | 573  |
| ATGGGAGGATTCCGTCTTTT   | 59.766 | 20 | 243 | 5379 | 5621 |
| TTGCTCCTTAAAGCTCCTGC   | 59.73  | 20 | 209 | 2123 | 2331 |
| AGCTTCAGCTCCAGGGTTTT   | 60.382 | 20 | 253 | 414  | 666  |
| CACTTTGTGTTAATTTAAAGGT | 57.158 | 24 | 226 | 53   | 278  |
| AGTGGTGAGCGAAGGTGGT    | 60.729 | 19 | 224 | 275  | 498  |
| GCGTCTCCAAGATCCCATAG   | 59.653 | 20 | 189 | 82   | 270  |
| ATGTAGCCGACCCCAATTTA   | 59.297 | 20 | 176 | 1684 | 1859 |
| TGAAGGTTTTGAATTCATTGA  | 60.21  | 23 | 280 | 656  | 935  |
| TGACAATTCCTATGCTTAAACT | 58.032 | 24 | 188 | 132  | 319  |
| CCTTTTCAAAGTGGACTATCAA | 59.472 | 25 | 170 | 185  | 354  |
| AGAATTGTGCACCACGTTTG   | 59.615 | 20 | 253 | 927  | 1179 |
| TCCGAATCCGTAATGATCAAC  | 59.776 | 21 | 240 | 22   | 261  |
| CGTCCTAGTTCTTGATCAAGT  | 58.941 | 25 | 195 | 11   | 205  |
| CGCCTAAAAAGTTGTTCCCA   | 60.103 | 20 | 197 | 3    | 199  |
| TGGGGGATAAAGATGCAAAG   | 59.894 | 20 | 213 | 956  | 1168 |
| ATTTTCGCTAATGCGAGTGGT  | 59.736 | 20 | 215 | 2    | 216  |
| ATGCGTGCAATGAACAAGAA   | 60.265 | 20 | 224 | 0    | 223  |
| ATCTTGAATGGGCTTCTGGA   | 59.629 | 20 | 227 | 512  | 738  |
| CAACGGCTGGTCCTTGATT    | 59.993 | 20 | 267 | 31   | 297  |
| CACGGGAATAAATTGTTGGAC  | 59.192 | 21 | 169 | 535  | 703  |
| CAATCATGTACACCCGCTTC   | 59.002 | 20 | 197 | 147  | 343  |
| TCTGGAGCTGGATGATGATG   | 59.743 | 20 | 228 | 733  | 960  |
| TGAATGTACTTTAACCACTGCA | 60.327 | 24 | 233 | 535  | 767  |
| GTAGCCGACCCCAATTTGTT   | 61.099 | 20 | 247 | 766  | 1012 |
| TTCTGGGAGGTATCTGCTGG   | 60.21  | 20 | 140 | 882  | 1021 |
| GTGGATCATCAAGGTGAGGG   | 60.326 | 20 | 204 | 469  | 672  |
| TAGTTGACCCCGCATAGTGG   | 60.904 | 20 | 159 | 229  | 387  |
| TGCAATGGCTTTTCATTGTTT  | 60.482 | 21 | 227 | 186  | 412  |
| TGTGTGTCCCATATTCGCTT   | 59.002 | 20 | 227 | 4603 | 4829 |
| TCTCCCCAATTTGTACAGG    | 59.784 | 20 | 168 | 4    | 171  |
| CGCAATGTACCTTGGCTATG   | 59.206 | 20 | 147 | 704  | 850  |
| GGGGCTCAATTCTAAAAGCC   | 60.041 | 20 | 170 | 1591 | 1760 |
| CGTTACTTGCTGGAGCTAAAA  | 59.64  | 23 | 177 | 83   | 259  |
| CCCGTGATTTTTACCCATTG   | 60.046 | 20 | 248 | 15   | 262  |
| ACACCATTATCTCCAGCTCCA  | 59.565 | 21 | 256 | 253  | 508  |
| CATCAAACCCAAACCAACCT   | 59.688 | 20 | 160 | 281  | 440  |
| TGTAGCCGACCCCAATTTAT   | 59.297 | 20 | 209 | 809  | 1017 |
| TCCAAACAAATCAGCTGCAA   | 60.379 | 20 | 173 | 631  | 803  |
| GCACTCGAAGAGTAGCGGTT   | 59.644 | 20 | 200 | 17   | 216  |
| CAAGAAGGCGTTGGTGAGAT   | 60.255 | 20 | 278 | 550  | 827  |
| TTTTTGGAACGGGATTTCGAT  | 61.524 | 20 | 212 | 498  | 709  |
| AGCCCCTTCGGTAAAAATGT   | 59.835 | 20 | 216 | 867  | 1082 |

|                        |        |    |     |      |      |
|------------------------|--------|----|-----|------|------|
| CGAAATCTCACGACGCATTA   | 59.833 | 20 | 110 | 1673 | 1782 |
| CCGTGTACACCCCTACCACT   | 59.762 | 20 | 260 | 814  | 1073 |
| CCCAAGACCCCAATTTGATT   | 60.91  | 20 | 188 | 2452 | 2639 |
| CCTTGCTCGAGATCCCAATA   | 60.17  | 20 | 233 | 265  | 497  |
| TCAGATTGAAGAAAAGCCGC   | 60.469 | 20 | 141 | 1167 | 1307 |
| TGTCGGTCAGGATTCTTTT    | 60.776 | 20 | 267 | 980  | 1246 |
| AATTCAATTACCTGCCGGA    | 58.024 | 19 | 202 | 31   | 232  |
| TGGAGGGAAGGAAGTTGTTG   | 60.081 | 20 | 186 | 1826 | 2011 |
| GTGGAGATTGACGATGCCTT   | 60.081 | 20 | 227 | 2    | 228  |
| AACAAAGGATGGATTTGCCA   | 60.309 | 20 | 247 | 823  | 1069 |
| AAGCAGAAGAGTGCATTAATC  | 59.471 | 23 | 237 | 273  | 509  |
| CTCTGAACTCAACCCCAACC   | 59.549 | 20 | 136 | 4887 | 5022 |
| CCCCATACTTATTGATAAACG  | 59.88  | 24 | 245 | 65   | 309  |
| CAGACAAATCTCAACGGGCT   | 60.255 | 20 | 262 | 3826 | 4087 |
| CAGTACCCATCTGCCAAGT    | 60.277 | 20 | 228 | 421  | 648  |
| CATGCAACAGAAAATGCCAC   | 60.119 | 20 | 267 | 1    | 267  |
| TGCAAAGCATACTTACAGAAA  | 61.017 | 24 | 223 | 4    | 226  |
| TCCGCTGAGATAATGCTCGT   | 60.905 | 20 | 269 | 4226 | 4494 |
| ATCAATGCACCAAGTGCAAA   | 60.119 | 20 | 171 | 792  | 962  |
| TTTAATTAGTTCCACGCGCC   | 60.095 | 20 | 247 | 2216 | 2462 |
| CAATTTGGAACGTATTTTTACA | 58.246 | 24 | 198 | 1074 | 1271 |
| TCGAGCTGTCCTTCAACAGA   | 59.701 | 20 | 166 | 152  | 317  |
| CTCTCACCCCAATCCCCTAT   | 60.147 | 20 | 205 | 502  | 706  |
| TGAATTGTGTCTGCTTCGGA   | 60.39  | 20 | 250 | 977  | 1226 |
| ACAGCTACAACGAGCCCACT   | 59.937 | 20 | 255 | 728  | 982  |
| AGATCATTGCGCAACACCTC   | 60.081 | 20 | 151 | 789  | 939  |
| ATGGTGACAATCGTGCTGTC   | 59.557 | 20 | 161 | 1100 | 1260 |
| TGCTCGTCAATGATTTTTGC   | 59.816 | 20 | 260 | 2218 | 2477 |
| TGAGAGGACACCCAAGTGGT   | 60.563 | 20 | 170 | 5    | 174  |
| TGAGAATTAGCAATTGAAGTTC | 57.791 | 24 | 263 | 537  | 799  |
| TTGCTGGCAGTGAAGCTCTA   | 59.888 | 20 | 215 | 619  | 833  |
| GGAGGCCCTACAGAGGAAAC   | 60.074 | 20 | 225 | 16   | 240  |
| CCCTAATCTCCCTGACCTCC   | 59.89  | 20 | 271 | 527  | 797  |
| TGCTTGTGGACCAAAGATTG   | 59.691 | 20 | 142 | 1462 | 1603 |
| CCCCATCCCTAAGAACATCA   | 59.744 | 20 | 228 | 193  | 420  |
| TGTTGGTGTGCTATTCCCA    | 59.964 | 20 | 184 | 364  | 547  |
| GTGACAACGATGGATACCCC   | 60.057 | 20 | 230 | 65   | 294  |
| AGGCCACGTAAATACGAACG   | 60.018 | 20 | 258 | 804  | 1061 |
| TGCTTTCTCTCTCCTCCCAA   | 60.065 | 20 | 223 | 1616 | 1838 |
| GGAGGTGGGCTCTCATGTAA   | 60.073 | 20 | 243 | 272  | 514  |
| GTGTTGCGGGCTAAATGTGGT  | 59.859 | 20 | 129 | 29   | 157  |
| TGGGCCGATCCTATCAATAA   | 60.247 | 20 | 158 | 1006 | 1163 |
| GACCACCTGCATTCACAGAA   | 59.682 | 20 | 256 | 622  | 877  |
| ATTTGGAACCTTGTGCGTGT   | 60.419 | 20 | 186 | 195  | 380  |
| TTCCCTCAACCTAGACCTCG   | 59.28  | 20 | 143 | 26   | 168  |
| CGTAGTGCATGTCTGATTCTGA | 59.95  | 23 | 255 | 967  | 1221 |
| ATGCCACATAACGCATTCAA   | 59.96  | 20 | 267 | 569  | 835  |
| ACCAGCATTTTCAGAGCCAC   | 60.263 | 20 | 188 | 240  | 427  |
| CAGCAACCACGTACCATGAC   | 60.032 | 20 | 203 | 5712 | 5914 |
| CCCAAGACCCCAATTTGATT   | 60.91  | 20 | 176 | 2377 | 2552 |
| GGAAACATCAACACACGCAT   | 59.425 | 20 | 247 | 523  | 769  |
| TGAGTGCCTTTGTAACAACC   | 58.84  | 21 | 181 | 99   | 279  |
| TCTGGATAAACCCACGGACT   | 59.405 | 20 | 234 | 12   | 245  |
| AAACGCATTTTGGAGTTTGT   | 57.275 | 20 | 186 | 43   | 228  |
| GCTCTCACTGCCATGAATGA   | 59.95  | 20 | 184 | 835  | 1018 |
| AGGCGGGACTGTGAATAATG   | 59.955 | 20 | 151 | 464  | 614  |
| CAATGAAGACTGAATCTCGGA  | 59.312 | 22 | 182 | 1061 | 1242 |
| TGAAAAATCTCGAAGCAGGG   | 60.323 | 20 | 256 | 44   | 299  |

|                         |        |    |     |      |      |
|-------------------------|--------|----|-----|------|------|
| GCACCAAGACCTACTGAGCC    | 59.874 | 20 | 244 | 332  | 575  |
| GATATCCGGTTTTGCTCACC    | 59.391 | 20 | 189 | 324  | 512  |
| TCATCAACTCCCCTCCATTC    | 59.862 | 20 | 249 | 944  | 1192 |
| CGTGTAAAGTTGTTAACCAATA  | 59.456 | 25 | 171 | 93   | 263  |
| TGCACCAAAGGAGGTTCTCT    | 59.844 | 20 | 238 | 251  | 488  |
| ACACGTGTGGAGTGGTGAAG    | 59.623 | 20 | 227 | 31   | 257  |
| GTGCACAATCACCAAGATCG    | 60.12  | 20 | 233 | 876  | 1108 |
| GATTTTGTAAACTGCCCGGA    | 59.938 | 20 | 114 | 508  | 621  |
| GCATATCTTGGGGGCATAAA    | 59.757 | 20 | 275 | 1    | 275  |
| ATACTTGCCGTGCGCTATGT    | 59.62  | 20 | 278 | 31   | 308  |
| CTGACTGACGTGGTTTGCAG    | 60.5   | 20 | 241 | 62   | 302  |
| AGGTTGCGTACATCTGACCC    | 59.997 | 20 | 250 | 1220 | 1469 |
| TTTCTGTTGTCAGCCCACTG    | 59.873 | 20 | 233 | 672  | 904  |
| TTTTGTGGATATTTGTTTATTGT | 60.054 | 27 | 175 | 661  | 835  |
| TATGCGATGATTGCAAGGTT    | 59.14  | 20 | 264 | 477  | 740  |
| TAGGCATGGATTGCATTTGA    | 60.035 | 20 | 114 | 334  | 447  |
| CAACATTGGATTGAAAGGG     | 60.301 | 20 | 219 | 171  | 389  |
| TGAATGGAGCTACGGTGAAG    | 59.272 | 20 | 118 | 17   | 134  |
| TCCAATTTTCTCGCCTAAAA    | 57.52  | 20 | 185 | 962  | 1146 |
| CGGTGATATAGCCGAAATTTT   | 59.428 | 23 | 276 | 9    | 284  |
| CCGTGTGATAGGAACCATCC    | 60.195 | 20 | 199 | 593  | 791  |
| GATCTTGATGTTGTCGCTCG    | 59.399 | 20 | 187 | 169  | 355  |
| AGATGCACCGGTTAGGAAGA    | 59.694 | 20 | 176 | 80   | 255  |
| CCAATATGGTTTAAAATTCTTC  | 59.976 | 24 | 253 | 47   | 299  |
| ATCTCACATACATATAATTGAG  | 57.101 | 27 | 241 | 217  | 457  |
| TGGAAGTAGCAGATTGCGAA    | 59.566 | 20 | 232 | 385  | 616  |
| TCAAATCAGCTTCTTGTTGC    | 60.38  | 21 | 252 | 478  | 729  |
| CAGGATACTGGCAAACAGCA    | 59.864 | 20 | 260 | 2585 | 2844 |
| CCCAAGACCCCAATTTGATT    | 60.91  | 20 | 125 | 3    | 127  |
| GACGATCACCGTTCCTTGAT    | 59.934 | 20 | 164 | 264  | 427  |
| CCTGAGGATGAAGTGGAGGA    | 60.191 | 20 | 190 | 86   | 275  |
| CCTTCGCACCACTTCACTTT    | 60.291 | 20 | 237 | 293  | 529  |
| CCTCAGCGTCTTGAAAATCC    | 59.813 | 20 | 251 | 587  | 837  |
| GTCGCCTCACCTTCATCTTC    | 59.81  | 20 | 264 | 46   | 309  |
| GATGATCCACGCAACTCAAA    | 59.654 | 20 | 102 | 232  | 333  |
| TGGCATATTTATCGGGCATT    | 60.137 | 20 | 233 | 17   | 249  |
| CCATAGGTGGGGATCTGCTA    | 59.91  | 20 | 167 | 6    | 172  |
| GCCCAATACGTCCATTTGAA    | 60.701 | 20 | 134 | 2577 | 2710 |
| GAGCTTTCCCACTGTATCCG    | 59.694 | 20 | 254 | 388  | 641  |
| GTTCCATGCTTGTCTGCTCC    | 60.812 | 20 | 109 | 438  | 546  |
| GCGGATTTACAATTCGTGCT    | 60.103 | 20 | 230 | 903  | 1132 |
| AAATCGGCTGAAGTCTGCAC    | 60.406 | 20 | 272 | 2084 | 2355 |
| TGTAGCCGACCCCAATTTAT    | 59.297 | 20 | 103 | 341  | 443  |
| CCTCCCTCTGCATTCTCAAC    | 59.803 | 20 | 276 | 374  | 649  |
| GGGAATAGCCCACCAAACCTT   | 60.187 | 20 | 185 | 1080 | 1264 |
| AAAGGTCAGATATTGAACATC/  | 59.647 | 25 | 175 | 4388 | 4562 |
| TGTAAATCCGGAAGTGGAGC    | 60.074 | 20 | 229 | 938  | 1166 |
| AAATTTTACCCGCAAAGAA     | 59.564 | 20 | 224 | 2525 | 2748 |
| TACCGACAATTTTGTCTCCG    | 60.989 | 20 | 179 | 283  | 461  |
| TAACCCAGGCCATATACCGA    | 60.167 | 20 | 201 | 23   | 223  |
| GACACACACCATTCCCAACA    | 60.27  | 20 | 196 | 1289 | 1484 |
| CATTAGGCTTGGGAGACGAA    | 60.206 | 20 | 196 | 670  | 865  |
| GGTGACAAGTGTGGAGGGAG    | 59.607 | 21 | 108 | 916  | 1023 |
| GAGCTTCTTGATTCCATGTCA   | 57.878 | 21 | 252 | 973  | 1224 |
| GGTCGTAAGTGGTGCCTGAAG   | 60.711 | 20 | 226 | 704  | 929  |
| CCCCAGGATCAAATAAACCA    | 59.617 | 20 | 182 | 7    | 188  |
| TGGTGGTAATGCCAAGAGAG    | 58.722 | 20 | 239 | 246  | 484  |
| TCGAACCTGTTTCAGGCACAC   | 59.88  | 20 | 249 | 1444 | 1692 |

|                         |        |    |     |      |      |
|-------------------------|--------|----|-----|------|------|
| GACACAGAGGCTGACGATGA    | 59.988 | 20 | 115 | 15   | 129  |
| CCGCCTCTATTTCCGTAACC    | 60.811 | 20 | 265 | 163  | 427  |
| CATCTCCGGAATCTCGACTG    | 60.758 | 20 | 221 | 287  | 507  |
| GGAAATAAATGGATTTTCGTGA  | 57.992 | 22 | 271 | 442  | 712  |
| TGTTCCCTTACCAGAGGCGT    | 59.734 | 20 | 170 | 92   | 261  |
| GATCCGTAAAACACCGTTGG    | 60.227 | 20 | 238 | 24   | 261  |
| TGAGCTGGTAATTGCCACAG    | 59.864 | 20 | 243 | 2591 | 2833 |
| CCATTGGTACAAAAGTTTGCC   | 59.37  | 21 | 110 | 6    | 115  |
| GATGTACGCAACCGTACCCT    | 59.882 | 20 | 171 | 2095 | 2265 |
| GGCACTGTCACCGGATTATT    | 59.82  | 20 | 273 | 243  | 515  |
| TGTAGCCGACCCCAATTTAT    | 59.297 | 20 | 127 | 6    | 132  |
| AGAAATGGATCCGAATGAGAA   | 59.909 | 22 | 231 | 278  | 508  |
| TTTGATTGGGAATAATTGGGT   | 58.163 | 21 | 280 | 1731 | 2010 |
| GAAGAATTAGTGGAGGGGCA    | 59.126 | 20 | 163 | 195  | 357  |
| ATCGTGTGGTTCGAATATGAA   | 59.343 | 22 | 151 | 38   | 188  |
| CAAATGGGACAATCCATTCC    | 59.991 | 20 | 175 | 37   | 211  |
| TGACCTTATGGGGTACTGGG    | 59.665 | 20 | 232 | 55   | 286  |
| TGTAGCCGACCCCAATTTAT    | 59.297 | 20 | 156 | 274  | 429  |
| AGGAAGTGGGTTCTGTCCAA    | 59.549 | 20 | 275 | 3874 | 4148 |
| GCCAACTAAGCGATCCATGT    | 60.103 | 20 | 158 | 935  | 1092 |
| GATGATGTTTGGTGGAGAGGA   | 59.918 | 21 | 187 | 47   | 233  |
| ACCCTGGCCATCTTCTTTCT    | 60.074 | 20 | 133 | 9    | 141  |
| GCCAGAGCTCTTTCACAAGG    | 60.134 | 20 | 177 | 1307 | 1483 |
| ATAGTGGTATGGTGTGGGGG    | 59.405 | 20 | 190 | 361  | 550  |
| GCCTGCATGATTTTTATGGG    | 60.289 | 20 | 273 | 3320 | 3592 |
| CTTTCACACTGTTGCACCTCA   | 59.93  | 21 | 129 | 0    | 128  |
| GCCATAGCTGATATAGCGGG    | 59.688 | 20 | 234 | 282  | 515  |
| CTCCACTTTTCGAATGTCCC    | 59.526 | 20 | 266 | 6096 | 6361 |
| CACAAGAAAATCCATCGCCT    | 60.074 | 20 | 101 | 3    | 103  |
| AAAGCCATATGCGGTAGGTG    | 59.982 | 20 | 277 | 0    | 276  |
| AGAATACCAACAATAAATAC    | 58.064 | 26 | 267 | 196  | 462  |
| TGCACCGTGTGCAGTTATTT    | 60.18  | 20 | 219 | 127  | 345  |
| ACCAGCTCACCACCCTTTC     | 60.159 | 20 | 264 | 2104 | 2367 |
| TTAGTTAGCCCTTTGAGCCTT   | 58.653 | 22 | 232 | 1    | 232  |
| CCTTTTGACACAAGAAAACCC   | 58.589 | 21 | 224 | 169  | 392  |
| CGACCTCCACCTCCTGTTAG    | 59.715 | 20 | 187 | 286  | 472  |
| AAACGAGAACTATGAAGCACC   | 58.906 | 22 | 227 | 4    | 230  |
| GAACGTTTCTGGCAATCTCC    | 59.676 | 20 | 211 | 574  | 784  |
| TTCTTCTCCCTTGCTTCCA     | 59.926 | 20 | 197 | 794  | 990  |
| GGTCCAGATGTACGCAACCT    | 59.997 | 20 | 262 | 972  | 1233 |
| AATCCACATTATTTCTCACTCA  | 58.455 | 24 | 220 | 34   | 253  |
| TCATCCTCGGAAGCAATCTC    | 60.303 | 20 | 264 | 37   | 300  |
| TTTAGATAAGCATAACCATCA   | 59.08  | 26 | 187 | 545  | 731  |
| ACGTCAAGCTGGCATATCCT    | 59.723 | 20 | 168 | 201  | 368  |
| GGGTAAACCCACGGACTAGC    | 60.743 | 20 | 111 | 8    | 118  |
| ATCTCCACCCCTTACAAGCA    | 59.55  | 20 | 232 | 304  | 535  |
| ACAGGCACCAACCAAGAGAT    | 59.579 | 20 | 195 | 231  | 425  |
| TTCCGGTCTCACAGTTTTCC    | 60.088 | 20 | 259 | 147  | 405  |
| CACACGTTCTTGAGGGAATC    | 58.129 | 20 | 238 | 509  | 746  |
| AGGAGGTGGTGGTGAAGAA     | 60.77  | 20 | 126 | 2    | 127  |
| ATTTTACGTCACACAACCTCGAA | 57.364 | 22 | 139 | 2785 | 2923 |
| TCAATGGTTAAATTGGTATTTG  | 57.935 | 25 | 199 | 108  | 306  |
| ACTGCACCTGAATTGCATTG    | 59.722 | 20 | 197 | 3    | 199  |
| AATCCATTTTGATCCGTCA     | 60.133 | 20 | 234 | 720  | 953  |
| ACTCGCTCGATCGTTGTTCT    | 60.02  | 20 | 205 | 476  | 680  |
| CCGAGACCCCAATTTGATT     | 59.735 | 19 | 119 | 20   | 138  |
| GAATGCAGCATCATCACACA    | 59.202 | 20 | 261 | 1794 | 2054 |
| GAATGCAGGTGGAAATGAGG    | 60.461 | 20 | 110 | 351  | 460  |

|                        |        |    |     |       |       |
|------------------------|--------|----|-----|-------|-------|
| TCATTGAAGTGACCCAACCA   | 59.935 | 20 | 235 | 2475  | 2709  |
| ACTGCAACCCGTAAATGGAA   | 60.365 | 20 | 218 | 3138  | 3355  |
| CATCCCAACCACGTTAGCTT   | 59.993 | 20 | 185 | 1619  | 1803  |
| CTCATGTGTCAAATTGGCGT   | 59.572 | 20 | 125 | 163   | 287   |
| TCCAATCAAGTCGACAAACG   | 59.691 | 20 | 133 | 163   | 295   |
| TGTAGCCGACCCCAATTTAT   | 59.297 | 20 | 170 | 460   | 629   |
| CTTCATCATCCTCATCCCC    | 61.604 | 20 | 248 | 3159  | 3406  |
| AGGTCATTGCAAGGAATGCT   | 59.7   | 20 | 273 | 3509  | 3781  |
| CGGTTGTTTCAGACTTCGTG   | 59.335 | 20 | 276 | 301   | 576   |
| ACCAGAGAAGAGTGAGGCGA   | 60.135 | 20 | 231 | 264   | 494   |
| CCTGTGTCAGGGCTAGCTTC   | 60.012 | 20 | 201 | 514   | 714   |
| CAGCGACTGGAAATCAAGG    | 59.379 | 19 | 122 | 7     | 128   |
| GCGGTGTATGTCCCTCAACT   | 59.997 | 20 | 249 | 5     | 253   |
| TGCAGAGATGGACGTGTTGT   | 60.319 | 20 | 149 | 1551  | 1699  |
| ATAATCCGGTCCCTTCCAAA   | 60.502 | 20 | 245 | 155   | 399   |
| CTTGCTCGAATTCTTAGCCG   | 60.11  | 20 | 167 | 255   | 421   |
| CCAACCCGCCTTATCTAAAAA  | 60.304 | 21 | 230 | 448   | 677   |
| GGAACCTGCGAAAATGGAAG   | 59.685 | 20 | 152 | 65    | 216   |
| AATAGCGCTTGATGGGAGG    | 60.185 | 19 | 199 | 121   | 319   |
| TCACTTCATAAAGTCCGCC    | 60.074 | 20 | 153 | 123   | 275   |
| TTCCGTCGTCTTTCTTTGCT   | 59.993 | 20 | 151 | 4033  | 4183  |
| TCCTCTCGATCCTCGTTACA   | 58.387 | 20 | 103 | 8     | 110   |
| TGTTGCTCATGACAAATTCAAT | 59.996 | 23 | 135 | 1354  | 1488  |
| GGATCGACACGGTAAGGACA   | 60.924 | 20 | 270 | 158   | 427   |
| GGGTCACACGAAAGTTTACAA  | 58.675 | 22 | 190 | 465   | 654   |
| CTAGGCTCCCATAGTGACCG   | 59.711 | 20 | 111 | 48    | 158   |
| CGTTCAAATCACCAACATCG   | 59.964 | 20 | 276 | 364   | 639   |
| GCAAGTTGGAAGCCTTGACA   | 61.355 | 20 | 224 | 18    | 241   |
| GGGGAGAAATGAAAAAGGGA   | 60.237 | 20 | 173 | 21    | 193   |
| AAGGTTTTAACAGTCTCCGAT  | 59.453 | 23 | 227 | 4096  | 4322  |
| AACTGAGACTTCTGGCGAGG   | 59.598 | 20 | 273 | 72    | 344   |
| AATGCCAAGAGCAAGACGAC   | 60.406 | 20 | 160 | 3643  | 3802  |
| CCAAATGAGCTCGGTTGATA   | 58.721 | 20 | 277 | 585   | 861   |
| GAGCAAAGACTCACGAGCAA   | 59.318 | 20 | 280 | 326   | 605   |
| ATTCCACACGTTCCCATTA    | 60.051 | 20 | 201 | 223   | 423   |
| CAGCCATGAATATCAGTCGAA  | 60.096 | 22 | 235 | 489   | 723   |
| CACATTAGAGCACATGGAGGA  | 58.736 | 21 | 217 | 331   | 547   |
| CATGCTTTTCGTCTCGCATA   | 59.976 | 20 | 135 | 188   | 322   |
| GCTAAAGTGCCTCGTGCTTC   | 60.162 | 20 | 169 | 4279  | 4447  |
| TACATGGATTTCCAGCAGCA   | 60.22  | 20 | 149 | 10407 | 10555 |
| CGAAAGGGAGATTTGAGCCT   | 60.703 | 20 | 268 | 495   | 762   |
| TGCACTGCATTTCTTCGTA    | 60.401 | 20 | 196 | 126   | 321   |
| CCACCATCATCTTCCCATTC   | 60.135 | 20 | 279 | 479   | 757   |
| TTTCAGGTTGGGATGAAAGG   | 59.903 | 20 | 215 | 0     | 214   |
| TGCATGCGATTAAGTAGCCA   | 60.378 | 20 | 274 | 4272  | 4545  |
| GCCAATTCGTCTCGTGATTT   | 60.081 | 20 | 193 | 273   | 465   |
| ATTCTCTCTTCTTCGCCACG   | 59.574 | 20 | 262 | 67    | 328   |
| TGGTCCCAAATCGACGTA     | 59.909 | 19 | 253 | 120   | 372   |
| CAAATCCACCGTCCAAAAGT   | 59.83  | 20 | 239 | 11    | 249   |
| TGATCAAAATCGAGAAAGCG   | 58.991 | 20 | 260 | 438   | 697   |
| TGAAAATGAATTGGGGTGGT   | 60.029 | 20 | 276 | 1880  | 2155  |
| CAGCCCTTAAGTCCAAAGA    | 60.378 | 20 | 258 | 3     | 260   |
| TTCCATCTAAGGCTCCCAAG   | 59.264 | 20 | 251 | 1     | 251   |
| CTTTGCACATGAACAATCACA  | 58.172 | 21 | 278 | 682   | 959   |
| GCCATTGAAATTACCTGCAAA  | 59.957 | 21 | 121 | 22    | 142   |
| AAACTGCTGAGACGGAGGTG   | 60.444 | 20 | 100 | 338   | 437   |
| TTCTCGCCCTCTAAGGTTTTC  | 59.843 | 21 | 274 | 566   | 839   |
| GATTCTTTCGTGGAGTCCGA   | 60.195 | 20 | 134 | 398   | 531   |



|                        |        |    |     |      |      |
|------------------------|--------|----|-----|------|------|
| CAATCCAACCCAAGGTGAGT   | 59.82  | 20 | 153 | 107  | 259  |
| TGAGGGGGAAAAGAGAGGAT   | 60.008 | 20 | 279 | 1119 | 1397 |
| CCCCAATAAACCAAAAACCC   | 60.265 | 20 | 271 | 2585 | 2855 |
| TTTTCCATTGGCATAGTTGAA  | 58.148 | 21 | 262 | 957  | 1218 |
| ATGAGCTTTGGCTTCTTGGA   | 59.955 | 20 | 183 | 940  | 1122 |
| AACTCAACCCAACGCAAATC   | 59.978 | 20 | 144 | 49   | 192  |
| TATTTGCATACTGCATGGGC   | 59.549 | 20 | 191 | 199  | 389  |
| CAGAGCGCACTCGAAGAGTA   | 59.49  | 20 | 153 | 181  | 333  |
| CAACATACCCAATTATCCCAA  | 58.606 | 22 | 132 | 11   | 142  |
| TCCTCCATAACTTTTTCTCAC/ | 59.987 | 23 | 236 | 62   | 297  |
| AAGAACTCGCAGGTTCTTG    | 59.473 | 20 | 102 | 164  | 265  |
| CGGTTTGGTGAGAAGTACGC   | 60.689 | 20 | 175 | 530  | 704  |
| GCAAGAGAATTGAAGAGCGG   | 60.096 | 20 | 274 | 12   | 285  |
| TCTTCCCCAAAAGTCACCTG   | 60.081 | 20 | 260 | 625  | 884  |
| TCGTTGCCGAAAATGAATA    | 61.319 | 20 | 261 | 258  | 518  |
| ATGTAGCCGACCCCAATTTA   | 59.297 | 20 | 103 | 41   | 143  |
| TGAGGAGGAGGAGAGTGGAG   | 59.503 | 20 | 179 | 435  | 613  |
| ATCCGTGTGCATTTGTGTCA   | 61.013 | 20 | 107 | 1    | 107  |
| TCCACATCTTCCAATCCAT    | 60.135 | 20 | 170 | 246  | 415  |
| AGCCCATGTTTTGAGAAATTG  | 59.077 | 21 | 214 | 98   | 311  |
| TTGGGAGAAGGGTTTGTGTC   | 59.943 | 20 | 154 | 412  | 565  |
| CGGCTTCTCTGTCTCCACTT   | 59.598 | 20 | 213 | 200  | 412  |
| GGAGAAGCACCTCCTCTGTG   | 59.986 | 20 | 244 | 238  | 481  |
| CCCAGTGCCACTCAAATCTT   | 60.111 | 20 | 158 | 22   | 179  |
| CAGCCTCCAGCAAGTTATC    | 59.836 | 20 | 108 | 893  | 1000 |
| TAAAAATGAAACCGGCCAAA   | 60.287 | 20 | 219 | 1783 | 2001 |
| AGGTTGCGTACATCTGACCC   | 59.997 | 20 | 227 | 3047 | 3273 |
| CTGTGGTGGAGGAGGAAGAG   | 59.828 | 20 | 237 | 38   | 274  |
| GGCTTGTATGGTTTGGGAAA   | 59.801 | 20 | 211 | 76   | 286  |
| TTTCAACATTCAAATTTGGTAT | 59.665 | 25 | 273 | 18   | 290  |
| TTTTTATTAGCATTTAAACCAC | 57.364 | 26 | 220 | 601  | 820  |
| TCTGGCCTGATCTACAGCCT   | 59.973 | 20 | 244 | 78   | 321  |
| CATGCAGACCACTTTTGGTG   | 60.152 | 20 | 273 | 26   | 298  |
| GCCTCGATCCTAACGTGTGT   | 60.142 | 20 | 241 | 1545 | 1785 |
| TCACCCCTCATTACATCAA    | 59.893 | 20 | 217 | 560  | 776  |
| CAACACCTAATCAAGAACAAA  | 59.577 | 24 | 159 | 75   | 233  |
| GAAGGGGTGGAGATACAGCA   | 60.073 | 20 | 110 | 308  | 417  |
| CGGTTGTCATAAGACCACTTCA | 60.03  | 22 | 110 | 16   | 125  |
| AATTCGCTCACGAGTTTGGT   | 59.74  | 20 | 170 | 5069 | 5238 |
| AGGGGTAGGGGGTAGACCTT   | 60.068 | 20 | 120 | 103  | 222  |
| AGGACTGCCGACCTCTTTCT   | 60.393 | 20 | 134 | 483  | 616  |
| AAAAACATTAATCAAATGT/   | 57.811 | 26 | 228 | 242  | 469  |
| AAGGGAGCTACAACCTTTCAT  | 58.783 | 22 | 225 | 200  | 424  |
| GAATATATCCCGGCACGATG   | 60.139 | 20 | 153 | 0    | 152  |
| AGAGTCATTAAGTGTGGTCTCC | 59.69  | 23 | 140 | 967  | 1106 |
| TAGACAAAGGCTCTGCCCAT   | 59.836 | 20 | 250 | 20   | 269  |
| CCCAAGACCCCAATTTGATT   | 60.91  | 20 | 175 | 2647 | 2821 |
| TTCTTGAATCTCGGCGAACT   | 59.955 | 20 | 150 | 231  | 380  |
| GAAGCACGAGTGCTGTGATG   | 60.627 | 20 | 230 | 2019 | 2248 |
| TGCTGTTTTGTTATAACCCCG  | 59.876 | 21 | 125 | 184  | 308  |
| TGCTTCTGGTAGCAATGGTG   | 59.864 | 20 | 262 | 382  | 643  |
| GAATGAATTCGAAGTTTGGGA  | 59.945 | 22 | 149 | 408  | 556  |
| TGTAGCCGACCCCAATTTAT   | 59.297 | 20 | 125 | 1057 | 1181 |
| TTGAACAATGGTACCTCCTCT  | 59.864 | 22 | 134 | 11   | 144  |
| TTATAACGTGGGAACCAGCA   | 59.037 | 20 | 241 | 688  | 928  |
| AGAATCAAGCAATGGATGCC   | 60.043 | 20 | 199 | 595  | 793  |
| TAACAAAGGGGCCAAAAGG    | 59.917 | 19 | 280 | 11   | 290  |
| AGGAAATGCGAGAGGGATTT   | 60.039 | 20 | 240 | 253  | 492  |

|                         |        |    |     |      |      |
|-------------------------|--------|----|-----|------|------|
| TGAAGGCGGAGGTTTCATAG    | 60.206 | 20 | 270 | 132  | 401  |
| CACAGACATCTCTGCATCGG    | 60.426 | 20 | 273 | 262  | 534  |
| AGTGCGGGGTAAAAATGTTG    | 59.861 | 20 | 202 | 237  | 438  |
| CTTTGTTTGGAGCGCGTG      | 61.555 | 18 | 256 | 48   | 303  |
| TCTAAGGCAAAATAATGATGG   | 58.634 | 24 | 210 | 211  | 420  |
| AGACTCGTTCAAATCCTGCC    | 59.288 | 20 | 219 | 5781 | 5999 |
| CGTTTGGTAGGCTCGAAAT     | 59.225 | 20 | 218 | 59   | 276  |
| TGGGATTATGTTTGGATTCA    | 57.804 | 21 | 131 | 1    | 131  |
| AATGCCGCAATTTCAAGTTT    | 59.592 | 20 | 245 | 685  | 929  |
| AAGTCATTCCCTCGTCTCCA    | 59.655 | 20 | 193 | 124  | 316  |
| CTCCTGCTTACCTCGAGTC     | 60.135 | 20 | 271 | 15   | 285  |
| CTGAGAGCAATACCGATGGC    | 60.765 | 20 | 276 | 1784 | 2059 |
| GTGGGAAGAATGCGAAGTGT    | 60.119 | 20 | 245 | 788  | 1032 |
| CCGGCTCAAAGGACAGATAG    | 59.83  | 20 | 263 | 277  | 539  |
| GGATACGACCTTGCTCCAAA    | 60.074 | 20 | 242 | 228  | 469  |
| TCCACAACCTCTCATCTCCC    | 60.048 | 20 | 110 | 378  | 487  |
| TCCTCACTGAGTCTTGATATTG  | 57.06  | 24 | 272 | 509  | 780  |
| GAGAACAATCAGCACCGTCA    | 59.837 | 20 | 169 | 1566 | 1734 |
| GCGATATCACGTTTAAACGGC   | 60.485 | 20 | 173 | 88   | 260  |
| ACCTTCCAATCAGCCTGCTA    | 59.836 | 20 | 168 | 47   | 214  |
| ACACAATAACCATTCTGTTCTCA | 57.154 | 22 | 241 | 157  | 397  |
| GAGAGGGAGAGAGATCGGAA    | 59.904 | 21 | 129 | 206  | 334  |
| TGTGCAATGCAACAAGATGA    | 59.833 | 20 | 176 | 52   | 227  |
| TTGGAATTGAGCAGCCTTTT    | 59.823 | 20 | 242 | 346  | 587  |
| AACAATGGCTGCTGTTAGCC    | 60.278 | 20 | 211 | 375  | 585  |
| GAATAGCCCAAGGGAGGAAG    | 60.032 | 20 | 211 | 1616 | 1826 |
| TGAGACTCGAACCTGTGAGC    | 59.129 | 20 | 231 | 18   | 248  |
| CCTGAAATTTGGTAGGCGTG    | 60.493 | 20 | 220 | 1274 | 1493 |
| TACCTGCCGGAATGTTGC      | 60.631 | 18 | 108 | 33   | 140  |
| TCGCTAGAATCTCATCCAGTTG  | 60.276 | 23 | 280 | 211  | 490  |
| GATGTACGCACTTGGTGGTG    | 60.032 | 20 | 157 | 579  | 735  |
| CCACAAAATAATAAGGCGGC    | 59.455 | 20 | 209 | 4    | 212  |
| AACATCCACAAATCATGCGA    | 59.931 | 20 | 215 | 23   | 237  |
| CCAGCTCCGAGCAAGTTATC    | 59.978 | 20 | 247 | 41   | 287  |
| TTGTTTAGCCGGATCCTGAG    | 60.206 | 20 | 248 | 1846 | 2093 |
| CCGATCTCACAAGCCAGAGT    | 60.408 | 20 | 181 | 2369 | 2549 |
| TTCCCATCATTACGACAA      | 59.9   | 20 | 245 | 132  | 376  |
| CTGAGCCATCGAGGTATGGT    | 60.096 | 20 | 279 | 231  | 509  |
| TACCAAACAGCCCACTCCA     | 60.096 | 19 | 277 | 676  | 952  |
| CTTGGCCTGCACTACTCTT     | 59.496 | 20 | 254 | 3048 | 3301 |
| TCCCTCCAATTTCACTTGA     | 60.43  | 20 | 229 | 6    | 234  |
| AGCTTGATGGTGGATGTTTG    | 58.57  | 20 | 238 | 207  | 444  |
| ACCGTACTCCGAATGAATGC    | 59.962 | 20 | 175 | 2361 | 2535 |
| CGGGACCGTGAATAATGACT    | 59.813 | 20 | 158 | 1041 | 1198 |
| GAGATGATGGCGGATGGTAT    | 59.739 | 20 | 243 | 1430 | 1672 |
| GCATGAAGCAGAATTGTCCA    | 59.805 | 20 | 217 | 40   | 256  |
| ATTGTTTGTGAGCTTCCGCT    | 59.882 | 20 | 259 | 3647 | 3905 |
| ATTGTGCTATTATCTGCGCC    | 57.897 | 20 | 141 | 244  | 384  |
| TGTAGCCGACCCCAATTTAT    | 59.297 | 20 | 167 | 93   | 259  |
| TGCATGCATCTTTTTCTTTTT   | 59.013 | 22 | 273 | 35   | 307  |
| TTCAATGAGGACAATCTGCG    | 59.799 | 20 | 149 | 868  | 1016 |
| AACCCACGACCACAAGGTTA    | 60.269 | 20 | 231 | 287  | 517  |
| GACAGGCCTGAGTTCGGTAG    | 59.867 | 20 | 248 | 3254 | 3501 |
| CTTGGCATCCTCATGGAAGT    | 60.073 | 20 | 268 | 3951 | 4218 |
| TGTAAGAATGCATTGAGTCAA   | 57.003 | 23 | 195 | 612  | 806  |
| TTTCTTTTGGCCAATGTTGA    | 59.133 | 20 | 263 | 193  | 455  |
| CAAGAATGTTGACCAAGAGCA   | 60.284 | 22 | 215 | 242  | 456  |
| GCTCTTACCCCATCCGAAA     | 60.074 | 20 | 245 | 303  | 547  |

|                        |        |    |     |      |      |
|------------------------|--------|----|-----|------|------|
| TGTGTCAACAAACCGGGATA   | 59.816 | 20 | 216 | 12   | 227  |
| GGGTGTCCTCGACATTTTTTC  | 59.386 | 20 | 268 | 90   | 357  |
| GGGAGGGGATGATTTGAACT   | 60.133 | 20 | 210 | 235  | 444  |
| CTGCAACTTTCCATACGGCT   | 60.27  | 20 | 275 | 123  | 397  |
| AATTACCTTCACTCACCAGAAA | 57.008 | 23 | 266 | 89   | 354  |
| AATTACAAACCCGCATCCAT   | 59.162 | 20 | 209 | 417  | 625  |
| CGAGGAGTTATGGGAGCAGA   | 60.353 | 20 | 149 | 14   | 162  |
| TGCAGATGGAAGATGAGCAG   | 60.096 | 20 | 186 | 892  | 1077 |
| ACTTGATATGGATCCGAGGCT  | 59.939 | 21 | 203 | 550  | 752  |
| GGGGATGAGTTTGTGAGGTT   | 58.842 | 20 | 216 | 58   | 273  |
| AAAGTGACCTCTGAAGCGGA   | 59.989 | 20 | 168 | 980  | 1147 |
| GAAAATTGGGGATCACATCG   | 60.133 | 20 | 226 | 96   | 321  |
| CCGTTTGATTCATCGGAAAC   | 60.309 | 20 | 149 | 798  | 946  |
| GGACTTGATTTGCACTCCGT   | 60.119 | 20 | 183 | 336  | 518  |
| CCCGACCACAAAGGAATTAT   | 58.762 | 20 | 261 | 363  | 623  |
| GATTCAAGCCCCAAAGTCAA   | 60.051 | 20 | 142 | 1101 | 1242 |
| TGTAGCCGACCCCAATTTAT   | 59.297 | 20 | 148 | 212  | 359  |
| ATTGATTATCATGTCGCTCGC  | 60.081 | 21 | 112 | 983  | 1094 |
| CTGATTGTACACGATGGCGA   | 60.687 | 20 | 236 | 241  | 476  |
| GCGGATAAGCTCGAACAGTC   | 59.985 | 20 | 169 | 17   | 185  |
| CCACATTTACTTGATGCATTCT | 59.457 | 24 | 110 | 11   | 120  |
| TGTCAGGATATTGACAAGTGC  | 60     | 22 | 165 | 2057 | 2221 |
| TGAATATCGGTTTCATCGCA   | 60.035 | 20 | 100 | 40   | 139  |
| ACCCAACACCAAATTATGCC   | 59.551 | 20 | 246 | 1    | 246  |
| GGGTCTGTGGATCGGAATAC   | 59.218 | 20 | 275 | 4003 | 4277 |
| ATTTAATCCCGTGCAACGC    | 60.852 | 19 | 230 | 47   | 276  |
| ACTTCAGGGCCAAATGTGAG   | 60.111 | 20 | 271 | 4724 | 4994 |
| TTCAATTTTCACAAAATAACGC | 59.542 | 23 | 272 | 117  | 388  |
| TAAGGCTGTTGGGGTATTGC   | 59.96  | 20 | 214 | 1333 | 1546 |
| CAGGCAGATTCTGGTTCACA   | 59.831 | 20 | 279 | 3478 | 3756 |
| GTTCCGGTTGTGAAATTGGCT  | 59.978 | 20 | 204 | 400  | 603  |
| TAGCATGTCCGATTGACACC   | 59.527 | 20 | 115 | 194  | 308  |
| TCTATCGCCCTTGCTTGA     | 59.978 | 20 | 195 | 123  | 317  |
| TGAAGATCGGGA           | 60.187 | 20 | 116 | 941  | 1056 |
| GTCAAGACCTTTTGGCGAAC   | 59.717 | 20 | 246 | 3    | 248  |
| TTGAAAAGGATGGTGAAGGG   | 59.903 | 20 | 158 | 19   | 176  |
| CCCAGTTTTGGTCGTA       | 60.401 | 20 | 225 | 19   | 243  |
| CTAGGGTTGACCCACCTCAC   | 59.425 | 20 | 174 | 1689 | 1862 |
| TTTGGTTCGATCACGCCTA    | 60.204 | 19 | 262 | 110  | 371  |
| GCTCAAGGTTTGA          | 60.75  | 22 | 278 | 1261 | 1538 |
| TAGTCTCTGCCAAGTGGGCT   | 60.012 | 20 | 186 | 274  | 459  |
| TTTTCCAAGACCGGAAACAA   | 60.452 | 20 | 262 | 310  | 571  |
| AGAAGGCTTTCGCCTTTTTTC  | 59.966 | 20 | 249 | 85   | 333  |
| ATCAATGGCGAAGGCAGTAT   | 59.556 | 20 | 113 | 577  | 689  |
| AATGTTGTTTAGGTTCTCAATT | 57.821 | 27 | 264 | 84   | 347  |
| TGGGCGTAAAATAGAGGTGC   | 60.096 | 20 | 224 | 5711 | 5934 |
| CATTCCAATGCTTGAAGCTG   | 59.42  | 20 | 261 | 50   | 310  |
| GCTAGATCGCTCCTCCAAGA   | 59.676 | 20 | 116 | 66   | 181  |
| TCAACCCTTCGGATGAAGAA   | 60.572 | 20 | 204 | 2430 | 2633 |
| TGCAGATCATTACATGTTTCA  | 60.119 | 22 | 184 | 55   | 238  |
| CTTCGATGTATTGTTGGATAAT | 59.692 | 25 | 217 | 404  | 620  |
| ATGCAATCACAGACTGCCCT   | 60.688 | 20 | 230 | 352  | 581  |
| GCTCGGCGATACTTGTCTTC   | 59.985 | 20 | 225 | 35   | 259  |
| GCCCTCTGCTTTCAAATTCA   | 60.331 | 20 | 105 | 1007 | 1111 |
| CCATCACCATCACCATCATC   | 59.565 | 20 | 256 | 744  | 999  |
| AACACTAACCTGAAGCCATGA  | 60.178 | 23 | 241 | 14   | 254  |
| GGGCTCGGAGGATAACTCAT   | 60.431 | 20 | 271 | 354  | 624  |
| CCCAAATGGATTGGGTTCTA   | 59.617 | 20 | 114 | 90   | 203  |

|                         |        |    |     |      |      |
|-------------------------|--------|----|-----|------|------|
| CCGATTTGCCGTTCTATCAT    | 59.923 | 20 | 179 | 439  | 617  |
| CCCCTTTTCGGTGTAGACAAA   | 59.964 | 20 | 274 | 973  | 1246 |
| CCCGAGGGAGTCACAATTTA    | 59.926 | 20 | 247 | 44   | 290  |
| CGCACGTTTGTATTTTTATTTTT | 57.532 | 23 | 110 | 261  | 370  |
| ATTACGCATCAGCACAATCG    | 59.718 | 20 | 278 | 91   | 368  |
| GTTACATCCCACCGGATTTG    | 60.051 | 20 | 229 | 257  | 485  |
| ACACGTCTAGATGGCAAGCA    | 59.47  | 20 | 210 | 2031 | 2240 |
| CTTCAATCAATCCCCCTGAA    | 59.864 | 20 | 249 | 4172 | 4420 |
| AAATGCACTGGTTAGGAGGGT   | 59.878 | 21 | 195 | 1090 | 1284 |
| TGAGCAAATAAATTACAACG/   | 58.142 | 24 | 252 | 3716 | 3967 |
| CCATGGCTTTTCAACCAGAT    | 59.933 | 20 | 191 | 771  | 961  |
| TAGCAGGCCAAAGAGGAAGA    | 60.088 | 20 | 270 | 62   | 331  |
| TGTGAGGTTGAGGATTGCAG    | 59.831 | 20 | 111 | 876  | 986  |
| CTCTCCCTCTCTCGTGCTTG    | 60.275 | 20 | 136 | 140  | 275  |
| ATTTTCGTCGCCCTCTTAT     | 59.93  | 20 | 228 | 71   | 298  |
| GGTGGTATGGTGTGCAGAAA    | 59.42  | 20 | 247 | 326  | 572  |
| AAGTAGGGTCAAACACGTGAA   | 57.253 | 21 | 262 | 37   | 298  |
| GCCCATCTGACGATAGAAGA    | 57.834 | 20 | 174 | 592  | 765  |
| ACTCCTTTTCGTTGCCAAATG   | 60.11  | 20 | 256 | 180  | 435  |
| CTAGATCATCAAATGCGCCA    | 59.792 | 20 | 262 | 597  | 858  |
| TTTGGTTCATGTAGTCGACCC   | 59.845 | 21 | 160 | 1023 | 1182 |
| AATGTTTCGATAAACGGGGA    | 59.273 | 20 | 180 | 24   | 203  |
| GCGACGATTGAATGGTATCAA   | 60.852 | 21 | 226 | 235  | 460  |
| TCTGCAGCCATCTGTTCTTG    | 60.136 | 20 | 186 | 11   | 196  |
| TCGAAATCATGGTTCGTCAA    | 60.049 | 20 | 254 | 968  | 1221 |
| GGCCAGTGATGACACAGAAA    | 59.682 | 20 | 141 | 3962 | 4102 |
| TTATCCAACCCAGCCAACAT    | 60.192 | 20 | 239 | 492  | 730  |
| CTGTCTAATGTTTCCGCCG     | 59.282 | 19 | 237 | 773  | 1009 |
| GGTAGCTACTTCAGTGGCGG    | 59.898 | 20 | 195 | 51   | 245  |
| GCATCGGCTGGTGAATTATC    | 60.444 | 20 | 272 | 104  | 375  |
| ACTTTGATGCTTCGTCCAGC    | 60.406 | 20 | 233 | 15   | 247  |
| TCCCAAAGAGCAAACAGCTT    | 59.993 | 20 | 187 | 879  | 1065 |
| TCGGCCTCCGTCATTATTAG    | 60.053 | 20 | 271 | 250  | 520  |
| GGCTGTGCTCATCCGTAGTT    | 60.285 | 20 | 217 | 399  | 615  |
| ATGTAGCCGACCCCAATTTA    | 59.297 | 20 | 194 | 302  | 495  |
| ATCTTCTTCTCCGCCGTCTT    | 60.349 | 20 | 169 | 395  | 563  |
| ACTGTTGTTGCTGCTGTTGC    | 60.104 | 20 | 244 | 2    | 245  |
| CAGCTTCCCCCAATACTCAA    | 60.066 | 20 | 141 | 452  | 592  |
| TTCCCCGTACACAGTGATTTT   | 59.345 | 21 | 225 | 959  | 1183 |
| GGCCAAAGAGGAAGAGTACG    | 58.934 | 20 | 241 | 243  | 483  |
| TGTTCCAAGCTTTTCTCCTCA   | 59.978 | 21 | 217 | 178  | 394  |
| TCACATTGCTCTGCAAGTCC    | 59.992 | 20 | 156 | 173  | 328  |
| GCCCTGCCACGTTCTATTAC    | 59.597 | 20 | 209 | 996  | 1204 |
| GGCAGCAGCCTCTTAATCAC    | 59.985 | 20 | 152 | 326  | 477  |
| GATACCACAACCTGGGCAACC   | 60.24  | 20 | 270 | 10   | 279  |
| TTTGGGAAATATGGATCGAACT  | 59.68  | 22 | 221 | 417  | 637  |
| CCTGCGAACTTTCTAGCAC     | 60.015 | 20 | 146 | 230  | 375  |
| AGCAGAGGAGGACGATGAAG    | 59.555 | 20 | 209 | 246  | 454  |
| CCGCACTTGACTACTCAGCA    | 60.199 | 20 | 271 | 547  | 817  |
| TCGGGATCTTGATGGTTCTT    | 59.483 | 20 | 275 | 187  | 461  |
| CCAAGAAAGTGGAGAAGCGA    | 60.508 | 20 | 279 | 245  | 523  |
| AGAACTGTGGAAGTGCAGGG    | 60.298 | 20 | 274 | 453  | 726  |
| CTCGCCCAAGTACTGAGAT     | 60.408 | 20 | 121 | 11   | 131  |
| TACCTTGTGCGTAAATCGCC    | 59.96  | 20 | 180 | 367  | 546  |
| GGGCTAATAATGCCCAAGGT    | 60.171 | 20 | 142 | 253  | 394  |
| ATCATCGGGCTTTGATGAGT    | 59.513 | 20 | 210 | 9    | 218  |
| CACCATACACGGTCACGTCT    | 59.467 | 20 | 160 | 336  | 495  |
| TAAAGTGCCCGACTGGATT     | 59.569 | 20 | 246 | 27   | 272  |

|                        |        |    |     |      |      |
|------------------------|--------|----|-----|------|------|
| GGCCAAAGTGGTGAATCAAG   | 60.495 | 20 | 278 | 3    | 280  |
| ATGTAGCCGACCCCAATTTA   | 59.297 | 20 | 233 | 267  | 499  |
| AACACAAATATGCCATGCAAG  | 59.411 | 22 | 269 | 223  | 491  |
| TTCGATAGCAAACCTTTCCG   | 60.202 | 20 | 220 | 1163 | 1382 |
| GGAAGCTGTTGGAGCTGAAG   | 60.134 | 20 | 192 | 62   | 253  |
| GTCAATCCCAATGACCATCC   | 59.995 | 20 | 213 | 202  | 414  |
| TCCCATGCAAACCTGAATCCT  | 60.461 | 20 | 220 | 1309 | 1528 |
| ACGAGGGAACCTACCACCTT   | 59.856 | 20 | 164 | 3227 | 3390 |
| TGAATTAGAACCGATGAGCAA  | 59.72  | 22 | 280 | 40   | 319  |
| AGTGAAGCTAGTTGCTCGGC   | 59.786 | 20 | 252 | 483  | 734  |
| GAAGTTAGAGGAGGTGGGGC   | 60.074 | 20 | 273 | 569  | 841  |
| TCCAATTAGGACAATCAAACCC | 60.055 | 22 | 194 | 222  | 415  |
| TTCTTGGCTCGTTCCTTAC    | 60.375 | 20 | 202 | 180  | 381  |
| CATGTGTGGGTGGTTCATGT   | 60.138 | 20 | 206 | 990  | 1195 |
| TCGTGCGAGAGCTAGTGAAG   | 59.49  | 20 | 250 | 821  | 1070 |
| AAACAGCAATTGGAACCTACTC | 59.286 | 22 | 232 | 332  | 563  |
| TGGACAAGATTTTCCACCTCA  | 60.48  | 21 | 259 | 1623 | 1881 |
| AAAACAAACATATGCTTTCCCA | 59.775 | 23 | 143 | 5    | 147  |
| TAGCCAAGACCCCAATTTGA   | 60.439 | 20 | 210 | 2152 | 2361 |
| AACACGCGAGTTTAAGGGAG   | 59.378 | 20 | 218 | 127  | 344  |
| CCAGTTCAACCCATGAAACC   | 60.21  | 20 | 195 | 326  | 520  |
| AGAGCCGTTGAATATCGGTG   | 60.096 | 20 | 196 | 427  | 622  |
| TGCTAGCACCTCCTCTATTGC  | 59.629 | 21 | 206 | 81   | 286  |
| AAGGCCCCCTGTCAAATAC    | 60.187 | 20 | 162 | 51   | 212  |
| AACACAATAACGGTACCCGC   | 59.752 | 20 | 270 | 1453 | 1722 |
| TTTCCCTTAGCCATGAATCG   | 60.031 | 20 | 265 | 484  | 748  |
| GGATCAGCAGTGGCTTTCTC   | 59.957 | 20 | 225 | 991  | 1215 |
| GCCCTGAGTATGGAAAGCAA   | 60.214 | 20 | 277 | 1947 | 2223 |
| CTCTTCCACCTGTCTCACCG   | 60.85  | 20 | 210 | 5843 | 6052 |
| AGGTTGCGTACATCTGACCC   | 59.997 | 20 | 102 | 38   | 139  |
| CTGAGTCTGATGCTTTTGCG   | 59.74  | 20 | 266 | 1505 | 1770 |
| GATTGTTAACCATTCCCACA   | 59.537 | 21 | 187 | 121  | 307  |
| AAAAGAGTTGACAGGGGCAA   | 59.711 | 20 | 276 | 233  | 508  |
| TGGCTGTTGTTGAAGTTCGAG  | 60.025 | 20 | 248 | 2173 | 2420 |
| TCTCCCTCGATCCTTATCCC   | 60.367 | 20 | 125 | 1201 | 1325 |
| TCTTGATATCTTGGGCAATTGT | 59.541 | 24 | 195 | 32   | 226  |
| CCTCTCATTACCCTCATCC    | 59.46  | 20 | 195 | 28   | 222  |
| CTCTCTTCTCCCTCGGCT     | 60.23  | 20 | 120 | 245  | 364  |
| CCTTTCTGGACATGGATCGT   | 59.927 | 20 | 255 | 1191 | 1445 |
| GTATTCAGGCTCGGACGACA   | 61.208 | 20 | 105 | 41   | 145  |
| AACCCACATACTCGAGGCAC   | 59.997 | 20 | 147 | 225  | 371  |
| ATACGTAAGGCCGAGAGCAA   | 59.867 | 20 | 136 | 212  | 347  |
| GTAATGTGGAGGCCTTCGAG   | 59.694 | 20 | 160 | 34   | 193  |
| CGTGTTCGTTCCCTAGCTTCC  | 59.875 | 20 | 159 | 317  | 475  |
| ATCGGAGATGGTGACGATG    | 59.441 | 19 | 209 | 1310 | 1518 |
| TACACTTTGAGTGGCGATGG   | 59.716 | 20 | 252 | 31   | 282  |
| TAAAGACCGACGCTCCTCTC   | 59.574 | 20 | 207 | 43   | 249  |
| CTCGGGATCAATGACATTCC   | 60.281 | 20 | 273 | 162  | 434  |
| TGACCTGAAATCAGCAAACG   | 59.84  | 20 | 203 | 259  | 461  |
| AACAAATCATATGGCCCGTC   | 59.651 | 20 | 245 | 13   | 257  |
| ATGCGCTCTAACTTTCGCAT   | 60.01  | 20 | 241 | 928  | 1168 |
| GCAGGACACAAACGAATCAC   | 59.143 | 20 | 189 | 675  | 863  |
| CGTGCACATTTGTTATGGACA  | 60.43  | 21 | 103 | 4    | 106  |
| AGTGTGCAGTGTGCTTGGAG   | 60.096 | 20 | 276 | 277  | 552  |
| TCATGATGGTCCTGATGGAG   | 59.425 | 20 | 123 | 226  | 348  |
| ACCAATGGTGGTATGGTGTG   | 58.984 | 20 | 230 | 38   | 267  |
| TTTCTTTTCCCGTCTCTCT    | 60.046 | 20 | 195 | 500  | 694  |
| CAGGACTTGAAATGGGAGA    | 60.042 | 20 | 178 | 2293 | 2470 |

|                         |        |    |     |      |      |
|-------------------------|--------|----|-----|------|------|
| TGTGGACAAAATTTCAAAGTGC  | 59.876 | 22 | 271 | 4    | 274  |
| TTTGAAGTCATGTGCCTCCAT   | 59.454 | 22 | 230 | 746  | 975  |
| AATTTGATTGGGAATAATTGGC  | 58.965 | 22 | 129 | 24   | 152  |
| ACATTCGGGGGAGAAGGTAT    | 59.651 | 20 | 197 | 12   | 208  |
| ACGATGTTGGGTTTGTGGAT    | 60.096 | 20 | 194 | 402  | 595  |
| AAGCCACCTACAAGAATGCC    | 59.198 | 20 | 278 | 6    | 283  |
| AGCAACATCCATCGAATTGT    | 58.019 | 20 | 270 | 1114 | 1383 |
| AATTTGATTGGGAATAATTGGC  | 58.965 | 22 | 175 | 730  | 904  |
| AGTTGCTTCGGATGCTTCAT    | 59.843 | 20 | 114 | 17   | 130  |
| GCAACCGAGCTCTAACAAGC    | 60.162 | 20 | 251 | 78   | 328  |
| TTCCCGAGACTGAGATGGAC    | 60.199 | 20 | 148 | 8    | 155  |
| TGCTTCAAGCTACTCGGAAAA   | 60.138 | 21 | 184 | 2615 | 2798 |
| GTTTTTGAATGGCAGTGGGT    | 59.836 | 20 | 198 | 2465 | 2662 |
| CTGGCTCTGAATCACCCACT    | 60.261 | 20 | 276 | 59   | 334  |
| AAGGTGTAGATCTGGCGGG     | 60.081 | 19 | 161 | 1113 | 1273 |
| CTCGTGCAATTTCTTGACA     | 59.84  | 20 | 217 | 939  | 1155 |
| GATCTTCATTGCGGGGATTA    | 59.862 | 20 | 130 | 1826 | 1955 |
| TGAGGTGGAAGCACTTGTGT    | 59.31  | 20 | 156 | 323  | 478  |
| TGTGACTTTCATTTGTTAGCCC  | 59.134 | 22 | 219 | 483  | 701  |
| CAGCCCCGATAATGAGAAAA    | 60.031 | 20 | 212 | 358  | 569  |
| TGCACAAAACCTTTTCCCAT    | 60.344 | 20 | 270 | 1034 | 1303 |
| GCAAATCCATTTCTCTCCGA    | 60.155 | 20 | 139 | 57   | 195  |
| TTTCGTAATCCTGGATCGCT    | 59.668 | 20 | 257 | 328  | 584  |
| CTACCTCCATGTGTGCGCTA    | 59.888 | 20 | 156 | 11   | 166  |
| TGCGCCATAGGAACTATTTG    | 58.794 | 20 | 249 | 1435 | 1683 |
| TAGTTATTCCGCAACGGAGG    | 60.089 | 20 | 235 | 2910 | 3144 |
| CTCAAAACCGAATGGAGGAA    | 60.044 | 20 | 161 | 569  | 729  |
| AATGGACATGATTTGGAGGG    | 59.605 | 20 | 206 | 6    | 211  |
| TTTGTTGTTGACTGGAGGCTT   | 59.766 | 21 | 260 | 17   | 276  |
| AGCTGCAATCCTTGCTGTTT    | 60.022 | 20 | 270 | 269  | 538  |
| AGCGACTAGTGCTGTAGAAGG   | 60.233 | 22 | 183 | 131  | 313  |
| ATGGTGTCAACACATTGGGA    | 59.656 | 20 | 279 | 14   | 292  |
| AGGCCGAACCACCTATTTCT    | 59.962 | 20 | 219 | 0    | 218  |
| CAACTCCCTCCCACATTCAC    | 60.363 | 20 | 138 | 4    | 141  |
| TCTATTGTGCCGATTCCCTT    | 59.528 | 20 | 248 | 4050 | 4297 |
| GCTGATGGATGTGGATGATG    | 59.882 | 20 | 159 | 592  | 750  |
| GGACGATTGCGTCACTGTTA    | 59.722 | 20 | 275 | 7    | 281  |
| TTCATGTAGCCGATCCCAAT    | 60.296 | 20 | 118 | 234  | 351  |
| TACAACCAGTCTAAGCGGCA    | 59.488 | 20 | 273 | 2481 | 2753 |
| ACCCTGCATGTCAAATTGCT    | 60.526 | 20 | 171 | 21   | 191  |
| CAATGTCGCATATATTACTTTC  | 58.176 | 24 | 208 | 245  | 452  |
| AATTCACAAGCCCAAACGAC    | 59.978 | 20 | 220 | 1767 | 1986 |
| AACATGCGCTTCTTATATTTTGC | 59.695 | 23 | 230 | 30   | 259  |
| TCCTCATGTCTTTGGCCTCT    | 59.803 | 20 | 240 | 5    | 244  |
| TGAAGGATGCATCTTGCTGA    | 60.504 | 20 | 133 | 6    | 138  |
| TTATCGATTGTTGCCCTCAA    | 59.112 | 20 | 260 | 43   | 302  |
| TCAACTGGGAAAACCTGGTC    | 59.943 | 20 | 100 | 1899 | 1998 |
| TGGTCGTGTCGAAGTTTGAA    | 60.278 | 20 | 188 | 722  | 909  |
| CCGACGACCAAATGGATAAC    | 60.192 | 20 | 200 | 417  | 616  |
| CCTGTGCTGCCATCATATTTT   | 59.974 | 21 | 268 | 3    | 270  |
| TCAATTCATGATGGTCATTTCA  | 58.82  | 22 | 240 | 982  | 1221 |
| TAGTCGTGGCACACAGGAAC    | 59.751 | 20 | 164 | 704  | 867  |
| AGGGACGCTATCGATTTGTG    | 60.096 | 20 | 255 | 1    | 255  |
| CACAAAACATGCATCAGCCT    | 59.722 | 20 | 274 | 3    | 276  |
| ATAGCAGGCTCGACCAAGAA    | 59.978 | 20 | 207 | 359  | 565  |
| CAGGGCTGCTGAATGATATG    | 59.251 | 20 | 275 | 808  | 1082 |
| ATGGCCAAGTCAAAGTCACC    | 59.973 | 20 | 163 | 330  | 492  |
| AAATGCAACATGTGATCTCAA/  | 59.94  | 24 | 221 | 475  | 695  |

|                        |        |    |     |      |      |
|------------------------|--------|----|-----|------|------|
| TAGAGGCTGCGAATTTCCAT   | 59.807 | 20 | 276 | 365  | 640  |
| AGCCATCTCAAGAGTCGTGG   | 60.408 | 20 | 274 | 347  | 620  |
| TGTTTTGGAGCGGGAATATCT  | 59.528 | 20 | 146 | 3246 | 3391 |
| CCAAGAATCTCGATTCCCAA   | 60.006 | 20 | 207 | 1133 | 1339 |
| CATCATGTTTAACTGGATTGTG | 59.397 | 23 | 268 | 124  | 391  |
| CAATAAATTGGGGTTCGGCTA  | 59.789 | 20 | 134 | 6    | 139  |
| GGAAGTGGGGTTCGGTATAA   | 60.929 | 20 | 207 | 314  | 520  |
| GGAGAAGGGCAATTGGGTAT   | 60.152 | 20 | 210 | 366  | 575  |
| GATTGCTGGAAGTGGTGTCA   | 59.682 | 20 | 118 | 8    | 125  |
| CCTTGGTTTTTGGCCTTTTT   | 60.317 | 20 | 198 | 263  | 460  |
| TCCTTCCAAAGCCTGACTGT   | 59.844 | 20 | 260 | 4551 | 4810 |
| ATCAAGCAAGCATCTCAGCA   | 59.704 | 20 | 170 | 801  | 970  |
| TAAACTGGAGCACAAACCGA   | 59.317 | 20 | 259 | 815  | 1073 |
| AATTTGAAGACGTGGCTGCT   | 59.882 | 20 | 136 | 1000 | 1135 |
| GGTCGTTGGTAATTGGACGA   | 60.755 | 20 | 173 | 723  | 895  |
| AATTCTCGCTGAAAAATGCC   | 59.301 | 20 | 245 | 15   | 259  |
| TGGCTTGCAGAATCAAGAAA   | 59.542 | 20 | 252 | 956  | 1207 |
| GTGGTCATTTTAGGGGATGC   | 59.249 | 20 | 168 | 211  | 378  |
| CCTACCCACCCAGGTCATC    | 60.183 | 19 | 272 | 8    | 279  |
| TGTGAGCCATCTGCAACATT   | 60.272 | 20 | 206 | 49   | 254  |
| TCCGTTTTTGTGTCCAATG    | 59.415 | 20 | 263 | 544  | 806  |
| TGTCATAACCGGCACAAGTTT  | 59.05  | 20 | 206 | 928  | 1133 |
| AACCCAATACCCAAACCCAT   | 60.166 | 20 | 143 | 13   | 155  |
| TGCAATGGCTTTTCATTGTT   | 59.161 | 20 | 164 | 191  | 354  |
| GACCAATTTGAACGGTTTGG   | 60.206 | 20 | 214 | 180  | 393  |
| GCGGAGGCGACTTATACTTG   | 59.867 | 20 | 156 | 37   | 192  |
| TCCAAGAATCCCTTCCAAAA   | 59.476 | 20 | 230 | 277  | 506  |
| CGAAGACGTCAATTTGGTCA   | 59.691 | 20 | 245 | 1214 | 1458 |
| TTTTTAAGGTGGGGAGAATGT  | 57.596 | 21 | 252 | 41   | 292  |
| TGTAGGCATAACTATGATTGGC | 59.768 | 24 | 115 | 4    | 118  |
| TCCAACTTATTGCATGTTGAAC | 58.688 | 23 | 259 | 711  | 969  |
| GATCCGTTCTCGCATAGGAA   | 60.177 | 20 | 273 | 18   | 290  |
| TGATGTTGGTGGGATTTGAA   | 59.75  | 20 | 223 | 473  | 695  |
| TTTTGCGTCCTTCTGCTATG   | 59.062 | 20 | 261 | 105  | 365  |
| CCTCCCTTCACCTTCAAACA   | 60.081 | 20 | 196 | 3240 | 3435 |
| TCCGCGTGTGCAATAAATAA   | 60.096 | 20 | 111 | 2997 | 3107 |
| ATTTAACGTGTGACCATGCG   | 59.469 | 20 | 194 | 719  | 912  |
| ACCTCAGGTTGCTCCGAACT   | 61.219 | 20 | 270 | 197  | 466  |
| TTACATATTTCTTGC GGCCA  | 59.169 | 20 | 217 | 374  | 590  |
| CAGGGCCCTAGAAATTAGCA   | 59.315 | 20 | 254 | 448  | 701  |
| ACGGGCTGATGTAGAGGAGA   | 59.827 | 20 | 203 | 55   | 257  |
| GGCATATGCGAGTTCCTGAT   | 60.066 | 20 | 222 | 60   | 281  |
| TTTATCAAGGGCTGGGGTTA   | 59.406 | 20 | 272 | 959  | 1230 |
| AAGGAGATCCACTCTCGCAA   | 59.95  | 20 | 128 | 232  | 359  |
| GGATGAGCTACTGGAGCGAG   | 60.119 | 20 | 273 | 388  | 660  |
| GACGTTCGACTTCTTTCCGA   | 60.375 | 20 | 256 | 1242 | 1497 |
| TCAACGCTCACCTTCACATC   | 59.837 | 20 | 205 | 80   | 284  |
| TGCGGTTGCTACTTCAATCA   | 60.401 | 20 | 193 | 7    | 199  |
| CTGGCCAACTCTCCCTTCT    | 59.39  | 19 | 204 | 386  | 589  |
| TCCTGTGAAATGTCCTCAACC  | 59.958 | 21 | 268 | 2    | 269  |
| ATGTAGCCGACCCCAATTTA   | 59.297 | 20 | 140 | 1001 | 1140 |
| TTGGTTGGTGAATTTGGGTTT  | 60.066 | 20 | 279 | 88   | 366  |
| CAGCATTCTATCTGGGCCAT   | 60.059 | 20 | 256 | 4424 | 4679 |
| ACATTCAGGCAGAAAATGGG   | 59.933 | 20 | 280 | 903  | 1182 |
| AAGTCAGACACAGCATCCCC   | 60.12  | 20 | 190 | 61   | 250  |
| TACTTCTGACCCCGCAAGAC   | 60.255 | 20 | 254 | 30   | 283  |
| CCCAAATCAGAAACGCCTTA   | 60.067 | 20 | 246 | 58   | 303  |
| CAATTCGAAGCCCAAATCAT   | 59.901 | 20 | 143 | 23   | 165  |

|                        |        |    |     |      |      |
|------------------------|--------|----|-----|------|------|
| ATTTGAACGTGGGAGGTGAA   | 60.353 | 20 | 276 | 35   | 310  |
| GGGATAGCACGTCAATAATGC  | 59.452 | 21 | 280 | 814  | 1093 |
| TTTTCTTGACCAAATAGGTT   | 57.875 | 22 | 124 | 436  | 559  |
| CCGCTTACCTAGATGGGAGC   | 61.099 | 20 | 217 | 0    | 216  |
| AAAAGTCGCCGTTACTGGTG   | 60.168 | 20 | 253 | 375  | 627  |
| CCCGAGAAATTGGTCTCAAA   | 60.044 | 20 | 223 | 540  | 762  |
| TGCAAGGTCTTCTCCAACCT   | 59.844 | 20 | 208 | 49   | 256  |
| GGACCCTCAAGCCACTTAAA   | 59.17  | 20 | 202 | 295  | 496  |
| GTGTGTTGTCACGGAGAGCC   | 61.77  | 20 | 137 | 939  | 1075 |
| ATTGTCCGAGTCCGAAGACA   | 60.656 | 20 | 215 | 451  | 665  |
| TCATCGAACAAGTCTCCAA    | 59.215 | 20 | 259 | 449  | 707  |
| GGGAAATGTGCCAGTTAGA    | 59.933 | 20 | 252 | 291  | 542  |
| AATTTGGATTGAAAATGAGAG/ | 57.344 | 24 | 186 | 806  | 991  |
| TGAATGCCAACTGCAGAAC    | 59.847 | 20 | 236 | 860  | 1095 |
| TCAGGGTTTCAACATTTCAGC  | 60.103 | 21 | 279 | 271  | 549  |
| CCCTCAGTTGGCATTGAGTT   | 60.111 | 20 | 194 | 506  | 699  |
| GGGGAATTGATGGACATGAT   | 59.42  | 20 | 270 | 135  | 404  |
| TGATGCTCTACCACTGCACC   | 59.862 | 20 | 217 | 172  | 388  |
| CCGATGAAAGAAGAGCCAAA   | 60.323 | 20 | 254 | 892  | 1145 |
| TCCCTTTCCCTGAATGTCTG   | 60.042 | 20 | 191 | 2824 | 3014 |
| GCCCCTGTTTGAATGTAAT    | 59.829 | 20 | 240 | 464  | 703  |
| TGGTTGGTCTGATGATTGTGA  | 59.951 | 21 | 198 | 3    | 200  |
| TCCTCACCCCCTCTCTTTTT   | 60.045 | 20 | 248 | 13   | 260  |
| AACTTTGACTGCTATGCCGC   | 60.416 | 20 | 158 | 41   | 198  |
| GAAGAGCAAGAAAGCATGGG   | 59.955 | 20 | 187 | 2721 | 2907 |
| TCAGTCCCACCAATCACAAA   | 59.935 | 20 | 200 | 647  | 846  |
| AGAGAGGGCTTAGAGACGGG   | 59.972 | 20 | 252 | 11   | 262  |
| GGAGACCGGGTAGAGGTGAT   | 60.336 | 20 | 228 | 371  | 598  |
| GGATCAGCAGTGGCTTTCTC   | 59.957 | 20 | 207 | 788  | 994  |
| ATTCTTCGCATCAATCCCAC   | 59.9   | 20 | 265 | 256  | 520  |
| TGCTCTCGTTTGCCTTGTTT   | 60.944 | 20 | 253 | 8    | 260  |
| CGACTCAAGTGAAGCAGCAA   | 60.324 | 20 | 271 | 1171 | 1441 |
| GCTTCTCATGCCTCTAGGGT   | 58.5   | 20 | 232 | 90   | 321  |
| GGTTTTGGTGTATGTATGTGGC | 60.111 | 21 | 104 | 37   | 140  |
| TTGAACTGAAAAAGTGGGCA   | 59.293 | 20 | 148 | 5185 | 5332 |
| AGGGTTCGACTTCTTATGGC   | 58.267 | 20 | 266 | 71   | 336  |
| AAACTTATTTTGCATGTGATAT | 60.036 | 26 | 256 | 2    | 257  |
| TTGTATGGGTCGGTTTCAGC   | 60.894 | 20 | 182 | 41   | 222  |
| GAACCCGATGAGGAAGATGA   | 60.011 | 20 | 206 | 148  | 353  |
| AGCAACACCACAAACCCAAT   | 60.277 | 20 | 210 | 797  | 1006 |
| GTCTATGCTGGGATCACCGT   | 59.957 | 20 | 241 | 2283 | 2523 |
| AGGGAGAATTAGTGGAGGGG   | 59.392 | 20 | 137 | 33   | 169  |
| TCATTTCCCGAAATAGCCAG   | 60.031 | 20 | 274 | 123  | 396  |
| TTCGGAAACACCTAGAACGG   | 60.103 | 20 | 118 | 158  | 275  |
| TGCAAAGTTCACATTCAGTCA  | 57.882 | 21 | 183 | 1599 | 1781 |
| GGGCGAAATGACAAAAATTG   | 60.302 | 20 | 174 | 1928 | 2101 |
| GGAATCGTGTTTGCTCAGGT   | 60.119 | 20 | 146 | 1363 | 1508 |
| TTTTAGGAGTCCCGAACCA    | 59.541 | 20 | 257 | 724  | 980  |
| AAAGTGCACCTGAGCCATTC   | 60.263 | 20 | 234 | 2126 | 2359 |
| ACGGAGGTCTCTGGGTTTT    | 59.972 | 20 | 235 | 395  | 629  |
| TGTGTGATTGTTGTGGCAA    | 59.563 | 20 | 255 | 282  | 536  |
| TTCTTCTTTCCATTCACCCG   | 60.044 | 20 | 233 | 30   | 262  |
| GCGCAGTTCGATCAGTTTTT   | 60.395 | 20 | 207 | 140  | 346  |
| CCGGTACATGACTTCGAGGA   | 61.055 | 20 | 224 | 107  | 330  |
| GGAACCATTTGTTAAAATTAT  | 59.929 | 26 | 269 | 192  | 460  |
| GGTCCAATAAATGTGGGCCT   | 60.94  | 20 | 271 | 1618 | 1888 |
| TTCGGAAACACCTAGAACGG   | 60.103 | 20 | 118 | 117  | 234  |
| TGGTCTGGGAGAACTCCA     | 59.682 | 20 | 222 | 967  | 1188 |



|                        |        |    |     |      |      |
|------------------------|--------|----|-----|------|------|
| TCACATTTAACCTATGAGTCTG | 59.565 | 24 | 117 | 684  | 800  |
| CTGCTCGTGAAGGAGCAAAT   | 60.538 | 20 | 239 | 459  | 697  |
| AATTTGATTGGGAATAATTGGC | 58.965 | 22 | 155 | 128  | 282  |
| TTGTTTTGCGCAGTTATGGA   | 60.251 | 20 | 249 | 41   | 289  |
| TGGTACCACGAGGAGGAAAA   | 60.486 | 20 | 223 | 657  | 879  |
| TCACCCAAGTCCAATCTATTCA | 59.429 | 22 | 268 | 80   | 347  |
| AACGGGGAAAAACAAATTCA   | 59.292 | 20 | 277 | 53   | 329  |
| TTGTCTACCATCTCGGGTGC   | 61.067 | 20 | 252 | 455  | 706  |
| GGTTGAGCCACCCATTTTTA   | 59.801 | 20 | 236 | 83   | 318  |
| CCAGCACCTCCTCTATTGCT   | 59.454 | 20 | 265 | 18   | 282  |
| GCATTTTCAGAGGTTGCGTT   | 60.257 | 20 | 121 | 661  | 781  |
| CCTTGAGGAGCAATGGAGAC   | 59.803 | 20 | 268 | 3783 | 4050 |
| GGTCTCTGGATCAGGTTGAGA  | 59.243 | 21 | 187 | 312  | 498  |
| ATCACAATGCCATCACCTCA   | 59.925 | 20 | 242 | 304  | 545  |
| CCCAAGACCCCAATTTGAT    | 59.59  | 19 | 276 | 1730 | 2005 |
| ACGTTAGAGGGAGTCAGGCA   | 59.867 | 20 | 195 | 1644 | 1838 |
| CCGCCAAATGTGGATAGATT   | 59.784 | 20 | 215 | 28   | 242  |
| GAGGTGATCGGTTCAATTGGT  | 59.786 | 20 | 218 | 5524 | 5741 |
| ACGTGTCTATTGAAACGATGA/ | 59.939 | 24 | 275 | 270  | 544  |
| TGATTGTGCCTCTCTCCCTT   | 59.803 | 20 | 235 | 3121 | 3355 |
| ATTGTTGAAATCGCTTGCT    | 59.713 | 20 | 136 | 728  | 863  |
| CGAGGGTGATGAAGGAGCTA   | 60.353 | 20 | 279 | 919  | 1197 |
| TTCTAAAGTGCAGGATGGCA   | 59.42  | 20 | 184 | 83   | 266  |
| TGTAGCCGACCCCAATTTAT   | 59.297 | 20 | 231 | 2427 | 2657 |
| CACCTCGAACCTTCTGCAA    | 59.968 | 19 | 272 | 3240 | 3511 |
| GGTATATTTAAGCACCGCCG   | 59.477 | 20 | 194 | 101  | 294  |
| CAATGATCCTCACATTGCCA   | 60.481 | 20 | 168 | 36   | 203  |
| AAGAGAAGCTCGAAGGGGTC   | 59.957 | 20 | 144 | 236  | 379  |
| AGCTTATGCAGGACAAACCC   | 59.198 | 20 | 231 | 1    | 231  |
| TGCAGGTGAGACTTGCCATA   | 60.413 | 20 | 190 | 5    | 194  |
| TCCGGTTGGTCTCTTAATGG   | 59.926 | 20 | 233 | 1554 | 1786 |
| AAGGTCTCCTGTTACGCTG    | 60.444 | 20 | 170 | 330  | 499  |
| TCCAATCCAATCTTCGAGGT   | 59.483 | 20 | 123 | 2    | 124  |
| AAACGTGAGGTTTTGACGAGA  | 59.766 | 21 | 226 | 130  | 355  |
| AAGAAAGCCCACCTGATCACT  | 60.125 | 21 | 167 | 55   | 221  |
| TCATCTGTATTGACTTCTCCA  | 57.422 | 22 | 279 | 69   | 347  |
| AAAAAGTGCCTCCCTCGATT   | 60.074 | 20 | 233 | 1554 | 1786 |
| ACGTTCCAGTGGTTCAAGTCT  | 58.709 | 21 | 280 | 187  | 466  |
| AGCGAAACACGCATCTTTATG  | 60.278 | 21 | 249 | 21   | 269  |
| ACCAACAGCACAAAGAAACGC  | 61.275 | 20 | 173 | 89   | 261  |
| CTACCACCACCAACATCAA    | 59.262 | 20 | 175 | 36   | 210  |
| CTCATGGATCTTCATCGGCT   | 60.181 | 20 | 275 | 377  | 651  |
| CGCCATGGAAAGGTAATG     | 60.315 | 20 | 212 | 247  | 458  |
| TGCATCATGCTTTCCATACTC  | 58.738 | 21 | 141 | 934  | 1074 |
| TGCCAACCAACAAGCATAAT   | 59.041 | 20 | 252 | 3200 | 3451 |
| ATAATTGCAACCAAACCCCA   | 60.053 | 20 | 139 | 325  | 463  |
| GTGCAAAGTGCCTGAGCCT    | 60.453 | 20 | 175 | 295  | 469  |
| TGTAGCCGACCCCAATTTAT   | 59.297 | 20 | 210 | 508  | 717  |
| ACATGGGGTCTGCTATCAT    | 59.243 | 20 | 255 | 304  | 558  |
| TTCTTGATACATGGGCGTCA   | 60.073 | 20 | 168 | 513  | 680  |
| TCCTATCGAATACCCCGACA   | 60.288 | 20 | 186 | 95   | 280  |
| ACCGGGATCCTTTTCAACTT   | 59.805 | 20 | 186 | 312  | 497  |
| ACACCTCCATGGCAGACTTC   | 60.12  | 20 | 258 | 2149 | 2406 |
| ATTGATGACGATGACGTGGA   | 59.925 | 20 | 120 | 887  | 1006 |
| AAACTTCAAATGAATCTTCAAC | 57.089 | 24 | 106 | 429  | 534  |
| TCCTAGAATTCCAATACGTGGT | 58.941 | 23 | 248 | 236  | 483  |
| CCAAGCAAGAGATTATCACTC  | 57.956 | 22 | 207 | 85   | 291  |
| GTGCTGACTGTGGAAGACCA   | 60.03  | 20 | 270 | 880  | 1149 |

|                        |        |    |     |      |      |
|------------------------|--------|----|-----|------|------|
| TCAGGATTCCGGAAAAGTTTA  | 58.681 | 21 | 206 | 768  | 973  |
| TGGATTGTTGATTTTTGCCA   | 59.907 | 20 | 269 | 9    | 277  |
| AAAAAGCCCGAACCTGACTT   | 60.11  | 20 | 185 | 56   | 240  |
| AGCTGTCTTGATTTACCTTCAC | 59.833 | 23 | 207 | 1188 | 1394 |
| GGCTTCCTGTCTCTGTCAGC   | 60.143 | 20 | 169 | 2413 | 2581 |
| AATGGTCACACCCTACAACAA  | 57.841 | 21 | 164 | 490  | 653  |
| TGTAGTCCTTCCTCACAAAGAC | 59.72  | 24 | 260 | 134  | 393  |
| GGCACGTAGGCTACAGCTTC   | 60.044 | 20 | 280 | 9    | 288  |
| CAAAAGGTGGAAAGTCACCAA  | 59.994 | 21 | 243 | 3108 | 3350 |
| TCAGGGAACATACATCGTCG   | 59.522 | 20 | 277 | 261  | 537  |
| CGTGTTTGTCACCCAGAGAA   | 59.72  | 20 | 277 | 537  | 813  |
| CCCAAGACCCCAATTTGATT   | 60.91  | 20 | 251 | 2173 | 2423 |
| TTCAGAACAAGGAAGCCACA   | 59.415 | 20 | 200 | 1236 | 1435 |
| GCTGCACCATCTAGGAGAGG   | 59.973 | 20 | 151 | 310  | 460  |
| TAGGAGAGTGGGAGTGGTGG   | 60.104 | 20 | 187 | 455  | 641  |
| TCGGAAATCTGGTCATTGAA   | 59.049 | 20 | 228 | 534  | 761  |
| TTCTGTGGTTTGGGTTTTGA   | 58.995 | 20 | 255 | 541  | 795  |
| TGATTTAAATAAAAATATGTTG | 57.023 | 25 | 100 | 1622 | 1721 |
| AGCATCAAGCCTGCTCAACT   | 60.164 | 20 | 105 | 1237 | 1341 |
| CCACTGAACAACCTGCAAGGA  | 59.873 | 20 | 112 | 996  | 1107 |
| TAAACTGGAACCGAAGGCAA   | 60.608 | 20 | 146 | 358  | 503  |
| GGATGGCCTAAGATCAGCAA   | 60.177 | 20 | 207 | 337  | 543  |
| TTTGAAACCGTTGATGACA    | 59.941 | 20 | 254 | 19   | 272  |
| TCGAATCAAGATTTCTCACGC  | 60.346 | 21 | 137 | 318  | 454  |
| CACACATCCTTCTCTCCGTG   | 59.257 | 20 | 244 | 6    | 249  |
| AGGCAAGACTGGTTCCAAAA   | 59.711 | 20 | 200 | 9    | 208  |
| CGAACTAGCTCACGAGTCGAA  | 60.715 | 21 | 261 | 3007 | 3267 |
| TCATGTATACCCCGTGAGCA   | 59.948 | 20 | 276 | 459  | 734  |
| AAGCCTCCTCCGTTTTAGT    | 60.247 | 20 | 261 | 100  | 360  |
| CAGTGGGCAAACCAGATTTT   | 59.971 | 20 | 222 | 2045 | 2266 |
| GACACCTCCGTCAACACCTT   | 60.009 | 20 | 167 | 385  | 551  |
| CCCATACGATATCACCGACC   | 60.036 | 20 | 263 | 535  | 797  |
| TTCTTGGCTGTGGAATCCTT   | 59.67  | 20 | 212 | 472  | 683  |
| CCAATGATTGTGGAATGAATG/ | 60.564 | 22 | 181 | 1183 | 1363 |
| CTTGAACATCCGAAAGAGGC   | 59.813 | 20 | 112 | 1972 | 2083 |
| GAATCTGAGCTGGAGTTGGG   | 59.803 | 20 | 161 | 728  | 888  |
| CCGCACAAAGAAAATGATGA   | 59.664 | 20 | 110 | 1184 | 1293 |
| GTGGTGGTTATGGAGGAGGA   | 59.779 | 20 | 207 | 142  | 348  |
| ATGCCCTCGATGATGATGTT   | 60.312 | 20 | 268 | 98   | 365  |
| TCTCCGCAATTCGAAAAATC   | 60.153 | 20 | 263 | 70   | 332  |
| CTCTCCGACGATGAGGAAAT   | 59.239 | 20 | 106 | 905  | 1010 |
| ACAAGGGAACCACAATGTCA   | 58.827 | 20 | 252 | 65   | 316  |
| CACAGATGCCCTGAGTCAA    | 59.831 | 20 | 238 | 0    | 237  |
| GGCTAGTAGTAGTGGGAGGAC  | 59.049 | 24 | 277 | 130  | 406  |
| AGTCGGTTAGCGTTGCTTGT   | 59.943 | 20 | 140 | 55   | 194  |
| AAACCTTGAAGGAACCCAGG   | 60.332 | 20 | 241 | 150  | 390  |
| CTTGA AAAATCTCGAAGCGG  | 59.953 | 20 | 188 | 26   | 213  |
| AGCAATTTCTTGCTCGTTG    | 60.386 | 20 | 229 | 559  | 787  |
| GTCTCCACCACCTCCACCTA   | 59.962 | 20 | 161 | 253  | 413  |
| TTTCCAATCCAATTCCTTGAA  | 59.374 | 21 | 117 | 146  | 262  |
| ACGCGATATCCGTGTAGCAT   | 60.52  | 20 | 244 | 453  | 696  |
| AACTTCTGCTTATCGCCTGC   | 59.62  | 20 | 192 | 133  | 324  |
| TCATGAAAATGAAAAACGCAA  | 59.179 | 21 | 139 | 818  | 956  |
| GCCGGTCCCATAAACAAGTAA  | 59.823 | 20 | 161 | 1949 | 2109 |
| CCATATTGCACCCAGAGCTT   | 60.096 | 20 | 227 | 838  | 1064 |
| CCCAAGGCTGATGATCTTTT   | 59.126 | 20 | 212 | 1732 | 1943 |
| ATTGCTGGATCTGATCTGTGG  | 60.088 | 21 | 224 | 173  | 396  |
| TCGTTCTTAAAAGTTATGGCAC | 59.569 | 23 | 104 | 2964 | 3067 |

|                         |        |    |     |      |      |
|-------------------------|--------|----|-----|------|------|
| TGCCGGATTTGGATAGATTC    | 59.862 | 20 | 132 | 521  | 652  |
| CCCAAGACCCCAATTTGATT    | 60.91  | 20 | 183 | 1432 | 1614 |
| GGAGGTGGAGGATTAGGAGG    | 59.89  | 20 | 177 | 721  | 897  |
| TGTAGCCGACCCCAATTTAT    | 59.297 | 20 | 227 | 250  | 476  |
| ACACATTTACAACCCGGCAT    | 60.118 | 20 | 210 | 3154 | 3363 |
| TCCCGACCCAATAAAAAACA    | 60.16  | 20 | 252 | 1144 | 1395 |
| CTCAAGATGCGAAGCAAACA    | 60.134 | 20 | 238 | 115  | 352  |
| ATGACTTCTGGTACACCCCG    | 59.844 | 20 | 208 | 125  | 332  |
| TAGCATGGAGTTGTGCATGG    | 60.687 | 20 | 236 | 217  | 452  |
| GGGATTCTACAAGAAGCA      | 59.126 | 20 | 280 | 740  | 1019 |
| GGATTGGATACCAAAGGGG     | 60.37  | 20 | 267 | 879  | 1145 |
| GCATTACAATGAACCACCGA    | 59.4   | 20 | 246 | 1931 | 2176 |
| CTCAAACACCAGAATTGCC     | 60.495 | 20 | 152 | 76   | 227  |
| CGAGGAATAGCTTGAGTGGG    | 59.83  | 20 | 213 | 2401 | 2613 |
| GTCGTTTTGTGCATCCCAA     | 59.394 | 20 | 112 | 49   | 160  |
| GCATGTCAATTGTGCAGCTTT   | 60.272 | 21 | 273 | 25   | 297  |
| GTGCTTGGATGTTGGGATTT    | 59.797 | 20 | 131 | 3    | 133  |
| CAATCTTGGAGCTCTCAGCC    | 60.096 | 20 | 260 | 2185 | 2444 |
| TGTAGCCGACCCCAATTTAT    | 59.297 | 20 | 279 | 1438 | 1716 |
| AGTCCGCATAGTTTCGATGT    | 59.579 | 20 | 225 | 191  | 415  |
| GGCCATGGAACCAGAATAAA    | 59.762 | 20 | 153 | 446  | 598  |
| GCATGATTAATCCGTTGCATT   | 59.815 | 21 | 237 | 6    | 242  |
| GAATCAATTCCTCAATCCCT    | 59.959 | 20 | 118 | 403  | 520  |
| CAAATTCGAATCCCACCAAC    | 60.17  | 20 | 120 | 7    | 126  |
| GACCGGGAAAATTACATAAAC   | 60.01  | 24 | 280 | 26   | 305  |
| TGTAGCCGACCCCAATTTAT    | 59.297 | 20 | 279 | 1885 | 2163 |
| ATTGAACAACACCTCCTCCC    | 58.842 | 20 | 266 | 1078 | 1343 |
| AAACTCGAAAACCCAATCCC    | 60.166 | 20 | 180 | 9    | 188  |
| GTGGGATTGGATTTGATTGG    | 59.991 | 20 | 143 | 93   | 235  |
| GTTTCATATAGCCGACCCCAA   | 59.784 | 20 | 164 | 1302 | 1465 |
| AAACGCATTCCCATCCATAA    | 60.153 | 20 | 112 | 51   | 162  |
| CAGCCATTCCCCTAAAGTCA    | 60.066 | 20 | 280 | 1229 | 1508 |
| GCAAGGTTTGTTCGTGCTCT    | 60.44  | 20 | 183 | 1107 | 1289 |
| TTTGATGATGTTGCCTGGAG    | 59.648 | 20 | 252 | 126  | 377  |
| ACTTGCCGGAAAATCAAGAA    | 59.685 | 20 | 272 | 235  | 506  |
| GCGGAGAAGAACATCCTCAG    | 59.95  | 20 | 149 | 859  | 1007 |
| GAGTTGGTCCATTTGCCATT    | 59.797 | 20 | 277 | 15   | 291  |
| ACTCGAGCTTGACACAACGA    | 59.622 | 20 | 203 | 1000 | 1202 |
| TTTTGCTCATCTTGTCTGGG    | 58.847 | 20 | 273 | 71   | 343  |
| AAAAACCTGGTCTTGCCAGT    | 58.695 | 20 | 162 | 494  | 655  |
| TTGCCATCATCTTCAATGGT    | 58.926 | 20 | 224 | 112  | 335  |
| TTGCCATCATCTTCAATGGT    | 58.926 | 20 | 226 | 100  | 325  |
| ACATACCGTATCCCGCAATC    | 59.674 | 20 | 102 | 107  | 208  |
| TTGCATATTGAATACAATGTCTG | 59.675 | 25 | 278 | 243  | 520  |
| GGCCAGTCTCAAGCTGCTAA    | 60.678 | 20 | 164 | 1091 | 1254 |
| GCCCTCAATTTTATACTCGAAA  | 58.292 | 23 | 265 | 126  | 390  |
| GTGGTGGATCTTGTGAGCA     | 59.682 | 20 | 262 | 2629 | 2890 |
| ATCGTTATTGCCGGATCCAT    | 61.42  | 20 | 133 | 43   | 175  |
| TGGCTAAGCCCATGAAAAAG    | 60.202 | 20 | 168 | 1182 | 1349 |
| TCTGTGCACCATCAAACCTCAA  | 60.294 | 21 | 202 | 914  | 1115 |
| CAAGAGAGGGCCAAGTCAAT    | 59.284 | 20 | 219 | 148  | 366  |
| GCAAGGGTGGTGTCTTATT     | 59.198 | 20 | 256 | 5    | 260  |
| CAAGGAGCATGTGGGTCAG     | 60.253 | 19 | 261 | 109  | 369  |
| CTTCCTCATTCTCCGCAGTT    | 59.43  | 20 | 190 | 2461 | 2650 |
| CCATTGAAGCTGCACTGTTT    | 58.926 | 20 | 241 | 2133 | 2373 |
| CATCATCATCCTGTTGTCGG    | 59.918 | 20 | 172 | 219  | 390  |
| TATCGATGCACAAGATTCGC    | 59.799 | 20 | 232 | 510  | 741  |
| TTTTCTATGACGCGGAAACC    | 60.074 | 20 | 231 | 83   | 313  |

|                        |        |    |     |      |      |
|------------------------|--------|----|-----|------|------|
| TTGCTTGCCTCGTTTAATTTG  | 60.245 | 21 | 147 | 647  | 793  |
| CTTTTCCCCTAAGCACAGCA   | 60.378 | 20 | 180 | 113  | 292  |
| GCAACCGAGAGGTTATCGAC   | 59.7   | 20 | 271 | 2601 | 2871 |
| TCAAGCACAAATCTCGATTACC | 59.229 | 22 | 188 | 269  | 456  |
| CAAATTCATGTGTCGCCTAT   | 59.837 | 21 | 262 | 610  | 871  |
| CGTGGGTGTGAAGCTTGTA    | 59.758 | 20 | 257 | 1669 | 1925 |
| TGCATTCCATGCCAGTCCT    | 60.624 | 20 | 186 | 993  | 1178 |
| TGTAGCCGACCCCAATTTAT   | 59.297 | 20 | 213 | 1654 | 1866 |
| TCCCAAACATCACCTCCTC    | 59.903 | 20 | 111 | 28   | 138  |
| TTCTATAATGCCCTCGC      | 60.009 | 19 | 120 | 28   | 147  |
| CAAAGAAATCATTACATTCGC  | 59.451 | 22 | 114 | 160  | 273  |
| GGAGGTGTTGGACAGCCTAA   | 60.111 | 20 | 255 | 134  | 388  |
| CCAATGACCAATACCCATGA   | 59.049 | 20 | 237 | 67   | 303  |
| TATGGCGGGTGACCTAATTC   | 59.784 | 20 | 261 | 6    | 266  |
| TGATTCTGTTGATGCCAAATCT | 59.574 | 22 | 203 | 4164 | 4366 |
| TGTAGCCGACCCCAATTTAT   | 59.297 | 20 | 249 | 80   | 328  |
| AAATGGTTTCCATTCTTCCT   | 58.813 | 21 | 200 | 45   | 244  |
| TTTTTCGTTGTTCCCTTGGA   | 60.452 | 20 | 262 | 474  | 735  |
| GCACTGATAACTTCTCCCGC   | 59.843 | 20 | 165 | 138  | 302  |
| TGCACGTAGATGTCAGAGGG   | 59.855 | 20 | 247 | 66   | 312  |
| CGATTCGGTGATTCCAAAT    | 59.762 | 20 | 212 | 1316 | 1527 |
| CCTAAATCCCAATTACGGGA   | 58.759 | 20 | 229 | 4796 | 5024 |
| GGGACCTTTCAGTACCAGA    | 60.088 | 20 | 136 | 1569 | 1704 |
| AGTCGGCATACTAATGATAATC | 59.022 | 25 | 273 | 2829 | 3101 |
| TGGTGCCATCTTCTCACAA    | 60.24  | 20 | 145 | 881  | 1025 |
| GGTTGCACAAAGTAGCTTCA   | 60.347 | 22 | 216 | 77   | 292  |
| ATGGGCTTTTCTCACCCTTT   | 59.94  | 20 | 220 | 1207 | 1426 |
| CGTAATCCGAAGTTCCATTCA  | 59.946 | 21 | 266 | 895  | 1160 |
| CGCGGATAGGATCTCTGTGT   | 60.24  | 20 | 258 | 128  | 385  |
| TCTCGAGCATGTGGTGGTT    | 60.263 | 19 | 279 | 487  | 765  |
| TGTGGAGCTTGATACGACGA   | 60.413 | 20 | 233 | 2169 | 2401 |
| TGAATCCCTATTGTCGAGAGC  | 59.283 | 21 | 191 | 876  | 1066 |
| GTGAAACTGCGAGTTCAATCA  | 58.914 | 21 | 156 | 218  | 373  |
| GTGAAACTGCGAGTTCAATCA  | 58.914 | 21 | 156 | 217  | 372  |
| TTGAAAAACCCTGGTCCTTG   | 59.942 | 20 | 112 | 12   | 123  |
| AAAACCGTAATTTACCCCC    | 59.924 | 20 | 247 | 1300 | 1546 |
| TGAAATCGATCCCGATTATTCT | 59.772 | 22 | 175 | 949  | 1123 |
| CTTTCCGATGCGAACAAAAG   | 60.742 | 20 | 242 | 1878 | 2119 |
| TTAATGGCTTGTGAATACGGC  | 59.978 | 21 | 272 | 5    | 276  |
| ATATCATTCCCCGAGAGGCT   | 59.888 | 20 | 171 | 125  | 295  |
| CAAACCTCACCCAACCACTT   | 59.861 | 20 | 155 | 2323 | 2477 |
| CAAGGGTAAGGTTGCGTACA   | 58.699 | 20 | 191 | 139  | 329  |
| AATTTGCGCCACCATTGTTA   | 60.188 | 20 | 279 | 469  | 747  |
| TGACCCCCAGACTCGATAAC   | 59.927 | 20 | 151 | 2664 | 2814 |
| TTAAAGGTCCATCAATGCC    | 59.762 | 20 | 200 | 127  | 326  |
| AGTGCGTGAAGCAAGTACGA   | 59.664 | 20 | 261 | 121  | 381  |
| TCGTGGGTAAACACACCAAA   | 59.857 | 20 | 233 | 388  | 620  |
| AGGTGGTGTGGTTTCAGGAG   | 60.002 | 20 | 224 | 416  | 639  |
| GCAAATCGAAACCCTTTTCA   | 60.053 | 20 | 260 | 879  | 1138 |
| TTGTTTAGGGTTTTGGGCTG   | 59.968 | 20 | 191 | 1205 | 1395 |
| CACAACAAGGACTTGCATGG   | 60.152 | 20 | 107 | 49   | 155  |
| GATTTCCAAAACACATTGTTTC | 60.128 | 24 | 188 | 207  | 394  |
| ATGTGCTAACCCTGGCTTT    | 60.875 | 20 | 181 | 450  | 630  |
| GTTGGGAGTTCGACCTGT     | 59.953 | 19 | 247 | 3    | 249  |
| AAATATGGCCAAGTTCACCG   | 59.823 | 20 | 278 | 1725 | 2002 |
| TCACGAAACAGGCAACAAAA   | 60.271 | 20 | 161 | 125  | 285  |
| ATACGGCGAGGATTAGGAGG   | 60.431 | 20 | 218 | 812  | 1029 |
| GCATTTGATACCGTAGCAGTTC | 59.706 | 23 | 191 | 334  | 524  |

|                        |        |    |     |      |      |
|------------------------|--------|----|-----|------|------|
| ACTCGCAATCTTGAACAGGG   | 60.255 | 20 | 268 | 2158 | 2425 |
| CTTACGTAGCGGAAAAACGG   | 59.774 | 20 | 200 | 563  | 762  |
| GCGAATTTTCATCCGTTTTTG  | 60.436 | 20 | 181 | 937  | 1117 |
| TCTGCATGCATGGCAATAAT   | 60.066 | 20 | 157 | 1492 | 1648 |
| GAGGCTACTACATTTTGCCCC  | 59.979 | 21 | 191 | 26   | 216  |
| CCCAAGTCGGTTTCAACTTTT  | 60.371 | 21 | 213 | 306  | 518  |
| TCATCATTGGCTCCCATTTT   | 60.274 | 20 | 177 | 97   | 273  |
| TCAGTATGTGATCCGCCTTTT  | 59.583 | 21 | 216 | 0    | 215  |
| CACGGATTTCGAATTGTCTTCT | 59.184 | 21 | 252 | 751  | 1002 |
| AACGGAAACAACCTCTTTGC   | 59.218 | 20 | 267 | 42   | 308  |
| CGATGTTTCGCTTCCACTACA  | 59.864 | 20 | 280 | 50   | 329  |
| TAGCGAATGATCGACCTGAA   | 59.375 | 20 | 137 | 456  | 592  |
| AACCCCAAAGACCTTAATTTGA | 58.907 | 22 | 102 | 706  | 807  |
| ACTACCCGAGCTTCTCCCAT   | 60.096 | 20 | 241 | 414  | 654  |
| AGATACGACCTTGCTCGCTC   | 59.603 | 20 | 154 | 320  | 473  |
| TGTGCTCTGAATAGGACCGA   | 59.394 | 20 | 243 | 3508 | 3750 |
| CACAGACACAAGCCTTCCAA   | 59.873 | 20 | 137 | 491  | 627  |
| TTTTACGCTTAAACTGGCCG   | 60.251 | 20 | 249 | 361  | 609  |
| ATTCTCCCATGCCCATCAC    | 60.708 | 19 | 195 | 206  | 400  |
| GCAAGAGATTCTTTGTGC     | 59.962 | 20 | 172 | 1347 | 1518 |
| ACCTTCATAATTCTCGAAAGGT | 59.104 | 24 | 216 | 24   | 239  |
| GGAGGAGGAGGTGGTGATTC   | 60.86  | 20 | 190 | 478  | 667  |
| TCAAACCTCGTGTGAACCCAA  | 60.128 | 20 | 147 | 342  | 488  |
| CTGTCTTCACTGTCGCCAAG   | 59.616 | 20 | 155 | 474  | 628  |
| CTGAACCAGAAGAGCCGAAG   | 60.126 | 20 | 248 | 1637 | 1884 |
| TTGGTGTGAGTGGAGTTGGA   | 60.129 | 20 | 203 | 704  | 906  |
| TCTTCTTTAACCGACCACCA   | 58.201 | 20 | 152 | 3    | 154  |
| AAAAACAGATTCCATGGGCA   | 60.309 | 20 | 198 | 420  | 617  |
| CCGCTATCCCCTCCTTTTTA   | 60.393 | 20 | 252 | 55   | 306  |
| ACGAGGGATCGCATATGATT   | 59.372 | 20 | 195 | 254  | 448  |
| GTCTCAGGGAAGAGGCAGTG   | 59.986 | 20 | 231 | 130  | 360  |
| ACCCAATTGTTGTGGATGCT   | 60.24  | 20 | 163 | 883  | 1045 |
| CACCAAACCTTAGGGCTCAA   | 60.103 | 20 | 278 | 1889 | 2166 |
| AGTCCAAATTCGTGTAAGAAA  | 59.101 | 24 | 111 | 266  | 376  |
| GACGTGGATCGATGTGATTG   | 59.925 | 20 | 276 | 1295 | 1570 |
| TGATTCGTACCGGGTCTCTC   | 60.073 | 20 | 135 | 791  | 925  |
| TTTGGTCACTTTGCACCTAAAA | 59.663 | 22 | 172 | 496  | 667  |
| CCACCACCCACTCCAATACT   | 59.697 | 20 | 219 | 169  | 387  |
| CTGGATGGAGAAGGTCTGGA   | 60.191 | 20 | 194 | 733  | 926  |
| TGGGGAACCACCATGTTTAC   | 60.474 | 20 | 171 | 11   | 181  |
| ATTGAAGAGCGATTCCGAGA   | 59.917 | 20 | 117 | 73   | 189  |
| AATTTTCGCCATTTGCTTGT   | 59.592 | 20 | 234 | 392  | 625  |
| GCATGGACAAGACGGGTAGT   | 59.997 | 20 | 163 | 1831 | 1993 |
| ATCGACATTGAGGTCAACCC   | 59.786 | 20 | 137 | 901  | 1037 |
| TCGATTGCCTCTGCAACATA   | 60.366 | 20 | 277 | 1328 | 1604 |
| TGCCATAACGGCTAGTCTCA   | 59.444 | 20 | 252 | 100  | 351  |
| TGGCCGTGACATGAAATACA   | 60.936 | 20 | 158 | 396  | 553  |
| GGCTATTGAGGAAGATGCGA   | 60.318 | 20 | 274 | 2169 | 2442 |
| GAGGAGTCAGACGCGAGAAG   | 60.284 | 20 | 145 | 5    | 149  |
| GAAGCGAGTCACCCAAGATG   | 60.801 | 20 | 183 | 560  | 742  |
| CGGGAAGACCAAAAAGTCAA   | 60.081 | 20 | 252 | 27   | 278  |
| TGGCCATTTTTGAATTTGT    | 60.167 | 20 | 155 | 738  | 892  |
| TTTGCATTTTTATGGGGGA    | 60.294 | 20 | 269 | 47   | 315  |
| TTAGCTACAGGTGGGGTTGG   | 59.986 | 20 | 254 | 102  | 355  |
| GAAAGTGGAAGCGAAGGACA   | 60.375 | 20 | 259 | 822  | 1080 |
| TTTTACGCAAATCCGAAGGA   | 60.56  | 20 | 245 | 477  | 721  |
| TGTTTCGTGGAAGCAAAGAA   | 59.439 | 20 | 173 | 146  | 318  |
| CACCTCGTGAGAAAAAGGGA   | 60.224 | 20 | 210 | 3480 | 3689 |

|                        |        |    |     |      |       |
|------------------------|--------|----|-----|------|-------|
| CTTGGACACGTACACTTGCG   | 60.361 | 20 | 121 | 1846 | 1966  |
| AGAGGAGGTGGAGGTGGATT   | 59.929 | 20 | 268 | 564  | 831   |
| AGAAGGGCCTTGTCTTCCTC   | 59.817 | 20 | 270 | 24   | 293   |
| AATTCTTCTTGGTGGGCTT    | 59.94  | 20 | 260 | 416  | 675   |
| AGAAAATGCTGGAAATGAGGA  | 60.075 | 22 | 161 | 269  | 429   |
| GATTTAGCCTTCCGGCTCTT   | 59.82  | 20 | 208 | 118  | 325   |
| GGATGTATCAGGTGGTGGGT   | 59.511 | 20 | 255 | 787  | 1041  |
| ACTGGAAGCGATCAATCCAC   | 60.081 | 20 | 256 | 1522 | 1777  |
| AGGGATCAAAGCCAACCTT    | 59.94  | 20 | 150 | 339  | 488   |
| ACATTTCAATTGCCATTTCCA  | 58.82  | 20 | 196 | 629  | 824   |
| GAAGTTTTGATAAATACGATT  | 59.382 | 25 | 130 | 1220 | 1349  |
| GTCGCAGATGAATCCCTTGT   | 60.081 | 20 | 277 | 2294 | 2570  |
| CGGGGATCAAATGAAATCAA   | 60.64  | 20 | 227 | 576  | 802   |
| TGTGGGAGAATCAAAGAGGC   | 60.195 | 20 | 248 | 422  | 669   |
| CTGATTGTACATGGTGGCGA   | 60.539 | 20 | 274 | 9812 | 10085 |
| ATGTAGCCGACCCCAATTTA   | 59.297 | 20 | 214 | 309  | 522   |
| ATGAGAGGGGAGAATGGGTT   | 59.755 | 20 | 215 | 783  | 997   |
| GCAACGGAAACAACCTCTTT   | 59.218 | 20 | 150 | 12   | 161   |
| AGTTCATGTGGTTGTTGGCA   | 60.008 | 20 | 103 | 11   | 113   |
| TGCCAAAGTCTCCCATTTTC   | 60.051 | 20 | 203 | 3828 | 4030  |
| TGGCGGCTAAAACCTAATA    | 59.581 | 20 | 264 | 261  | 524   |
| CGTGTCCCCGTCATGTAAAG   | 61.343 | 20 | 193 | 93   | 285   |
| CAGAGCGCACTCGAAGAGTA   | 59.49  | 20 | 117 | 379  | 495   |
| CCTCTTCATTGACTGGTGCC   | 60.656 | 20 | 153 | 11   | 163   |
| CGCCTCCGATGTTTAAAGTTC  | 59.708 | 20 | 231 | 129  | 359   |
| CCTTAGTGCCTCTTGGCATC   | 59.836 | 20 | 276 | 1884 | 2159  |
| AGCATGCACAATAAAAAGCA   | 59.952 | 22 | 208 | 444  | 651   |
| AGGTTGCGTACATCTGACCC   | 59.997 | 20 | 171 | 10   | 180   |
| ATATCACCACCTCCACCACC   | 59.511 | 20 | 272 | 124  | 395   |
| ACATGCAATGTTGGGCACTA   | 59.995 | 20 | 273 | 767  | 1039  |
| CCCCGAACAATTTTTCTTTT   | 60.157 | 20 | 233 | 153  | 385   |
| CGCCTTATGAGGTTACCCC    | 60.467 | 19 | 274 | 1143 | 1416  |
| TGGGTTGGTGGTTTGGATAC   | 60.474 | 20 | 180 | 118  | 297   |
| AGGTTGCGTACATCTGACCC   | 59.997 | 20 | 117 | 40   | 156   |
| TTTGTGTTGTCCCATCAAAG   | 59.825 | 21 | 170 | 132  | 301   |
| TTAGTTCCAAATTGTGCCCT   | 57.217 | 20 | 245 | 2476 | 2720  |
| GGAGGGTGTTGAGTTTGAGG   | 59.549 | 20 | 271 | 605  | 875   |
| AAAAGCGTTGGAAAGCTGAA   | 59.996 | 20 | 159 | 108  | 266   |
| ACCATGGAAAGTGCTTGTCG   | 61.096 | 20 | 270 | 74   | 343   |
| GCTCTCCTTCAACCTCCTCC   | 60.336 | 20 | 243 | 249  | 491   |
| TGGATATCATTGTCGCTGCT   | 59.256 | 20 | 210 | 129  | 338   |
| TGGATATCATTGTCGCTGCT   | 59.256 | 20 | 210 | 132  | 341   |
| GTCCTTTTCTTCATCCTCATCC | 59.037 | 22 | 100 | 150  | 249   |
| AGTCGACGGTCAATTTCCAG   | 60.111 | 20 | 108 | 8    | 115   |
| TCGCCGCTTCCAGATATTAC   | 60.196 | 20 | 155 | 625  | 779   |
| ACACGACAACCCAACACAAA   | 59.897 | 20 | 213 | 9    | 221   |
| TGTTTCATCTGCTTGTTCCG   | 59.84  | 20 | 121 | 173  | 293   |
| CAACAATTATTGCGCTCGAA   | 59.842 | 20 | 238 | 301  | 538   |
| CGGTTGACCTCACCACGTAT   | 60.833 | 20 | 221 | 285  | 505   |
| GAATTCGAGCTCCGGTAGTG   | 59.836 | 20 | 143 | 1313 | 1455  |
| ATTACCTTCTCTCGCCGGAA   | 61.08  | 20 | 227 | 87   | 313   |
| TACATTAGCCGTAAACCGGG   | 59.847 | 20 | 269 | 54   | 322   |
| TGAAAAGTTTGGATAATTCACC | 58.664 | 23 | 267 | 26   | 292   |
| TCATTCCACAATCACAACCC   | 59.193 | 20 | 202 | 1042 | 1243  |
| TCATTCTCGGAGTTGAGCG    | 60.08  | 19 | 208 | 1055 | 1262  |
| TCGAAGCATAGATGCCATA    | 59.236 | 20 | 217 | 636  | 852   |
| CAAGTTTGGGAGGTTGGATG   | 60.345 | 20 | 164 | 0    | 163   |
| GGAGTCTTCTGCATTTGGTTG  | 59.726 | 21 | 166 | 885  | 1050  |

|                         |        |    |     |      |      |
|-------------------------|--------|----|-----|------|------|
| AGCCACACAACCCACAAAAT    | 60.277 | 20 | 150 | 2    | 151  |
| CCCAAGACCCCAATTTGATT    | 60.91  | 20 | 193 | 2817 | 3009 |
| TGGATTCCTTGTTTCGATTCC   | 59.871 | 20 | 186 | 307  | 492  |
| CCAGTTTTCTTGTCGAGGGA    | 60.224 | 20 | 162 | 927  | 1088 |
| TATACACCATCATGACCGCC    | 59.23  | 20 | 152 | 860  | 1011 |
| GCAACTTCAGCAGCAACAGT    | 59.243 | 20 | 145 | 1    | 145  |
| TACAGAGTCGGACGATGACA    | 57.745 | 20 | 280 | 257  | 536  |
| ATTGCGTAAACCTGACCCC     | 59.805 | 19 | 187 | 722  | 908  |
| CCCAAGACCCCAATTTGATT    | 60.91  | 20 | 111 | 1205 | 1315 |
| TTGGATAGTAGGATATGATAAC  | 57.698 | 26 | 246 | 175  | 420  |
| TGGCCAAAACGATTCTCTAA    | 58.361 | 20 | 270 | 62   | 331  |
| CTCCTAGCTGGAGACCCCTT    | 59.834 | 20 | 174 | 115  | 288  |
| TAAGGTTAGCAGTTTGGCCG    | 60.257 | 20 | 264 | 197  | 460  |
| TCCAATCACGAGAACACGAG    | 59.831 | 20 | 248 | 73   | 320  |
| CGCCACATTGCTTACAGAAC    | 59.347 | 20 | 129 | 127  | 255  |
| TGTAGAACCTTCCAATCCGC    | 60.074 | 20 | 267 | 185  | 451  |
| GCTTACCGGCGACTATCTCA    | 60.374 | 20 | 225 | 482  | 706  |
| GCCATGAAATTCCCATCACT    | 59.756 | 20 | 248 | 8    | 255  |
| ATGTGCACCGACAGTTTTTG    | 59.615 | 20 | 272 | 642  | 913  |
| CCAATTCGAAGCCCAAATTA    | 59.901 | 20 | 198 | 258  | 455  |
| ACCCAGAAAAACGAAACACG    | 60.008 | 20 | 275 | 30   | 304  |
| CAAGCCACAGCTGTTTCAGAG   | 59.77  | 20 | 207 | 306  | 512  |
| TGACAATTGGTTTCAGGCAA    | 60.088 | 20 | 240 | 30   | 269  |
| TCACTTTCCTTTTTTCGGACG   | 60.22  | 20 | 242 | 7    | 248  |
| TTTGAAGGTGGAACCTCAT     | 59.381 | 20 | 280 | 295  | 574  |
| CGAGGTGATTTGGACCAGTT    | 59.966 | 20 | 111 | 1798 | 1908 |
| TCATAACAGTCTTCGACTAGCT  | 58.036 | 25 | 262 | 98   | 359  |
| GATGATGTATGCCTGTGGGA    | 59.327 | 20 | 165 | 7    | 171  |
| TGTGTGGAAAAGGGGAAAGA    | 60.465 | 20 | 279 | 59   | 337  |
| GGTGACCAAAGAGGTGGGTA    | 59.82  | 20 | 249 | 223  | 471  |
| GCATGGTCTTATTGACGTGC    | 59.156 | 20 | 240 | 584  | 823  |
| AGTTTAAACCCTCCCAACCC    | 59.191 | 20 | 216 | 89   | 304  |
| TCAAAAGATGAGCTACGAGCA   | 60.152 | 22 | 242 | 375  | 616  |
| AGGATCACCAAAGGGACACA    | 60.363 | 20 | 247 | 72   | 318  |
| CCTAACCTGCGTTGGAACAT    | 59.993 | 20 | 189 | 126  | 314  |
| TTTGAGCAGGAATGTTCTTCA   | 58.488 | 21 | 251 | 70   | 320  |
| TCCTCAATAATCAAACCTCGG   | 59.03  | 21 | 176 | 985  | 1160 |
| TGAATTTGCGACATTATTCATT  | 59.854 | 23 | 255 | 13   | 267  |
| AAGTTCACATTGAAATCGACAC  | 60.042 | 24 | 269 | 231  | 499  |
| TTACAGTTGCCGAAAAATGC    | 58.819 | 20 | 125 | 16   | 140  |
| TTCAAACCTCCATCGCTGAAA   | 59.395 | 20 | 171 | 298  | 468  |
| TTGTGTTAATTATGTTTCAGTTT | 57.115 | 26 | 249 | 1744 | 1992 |
| AGGGAAGAGAGAGATCGCC     | 60.096 | 20 | 219 | 461  | 679  |
| TCCACAAAACCAAACACAA     | 59.834 | 20 | 263 | 1075 | 1337 |
| TTTCATCAAAGCCTGAAGCA    | 59.542 | 20 | 196 | 222  | 417  |
| CTCGGGATCAATGACATTCC    | 60.281 | 20 | 271 | 708  | 978  |
| GTCGGAGTTGGAGTTCTTGC    | 59.851 | 20 | 175 | 1406 | 1580 |
| TGGGTTCAATTCAAGAATTGC   | 58.946 | 22 | 241 | 15   | 255  |
| GGGTTTTAGAGGGGAGTTGG    | 59.799 | 20 | 156 | 760  | 915  |
| TGGCAGAACCAACCCTAAGA    | 60.626 | 20 | 245 | 366  | 610  |
| AGCATGTGACATTTCCCGTT    | 60.384 | 20 | 271 | 1115 | 1385 |
| GAAAATGAGGTGGGATGTCG    | 60.317 | 20 | 169 | 291  | 459  |
| TCTCTGAATCCGGCCTAGAA    | 59.91  | 20 | 220 | 2442 | 2661 |
| CTTCATATTGGGGCCCATC     | 60.103 | 19 | 253 | 468  | 720  |
| TGCCCTAATCACACATTTCT    | 59.443 | 21 | 191 | 218  | 408  |
| AACAACATAAGGGAAGGGG     | 60.046 | 20 | 231 | 1453 | 1683 |
| AAGACCGTGGCGAAAATATG    | 59.96  | 20 | 147 | 1359 | 1505 |
| GTGGGACCTTGCTACTGAGC    | 59.874 | 20 | 260 | 1583 | 1842 |

|                        |        |    |     |      |      |
|------------------------|--------|----|-----|------|------|
| GTGACAACGATGGATACCCC   | 60.057 | 20 | 140 | 48   | 187  |
| ACCTCCATCACCAGGCATAC   | 59.81  | 20 | 215 | 3494 | 3708 |
| ATTA AAAATGGTGCGAATGGG | 59.66  | 20 | 260 | 4    | 263  |
| GGGATGGAGAGGATTGGTTT   | 60.133 | 20 | 185 | 290  | 474  |
| GAGAGAGGGGAAGCAGAAGG   | 60.468 | 20 | 117 | 3656 | 3772 |
| ATCAGCCTTCGCCACTACTC   | 59.459 | 20 | 267 | 6780 | 7046 |
| ACAATTGCACGATGTTTGGA   | 59.972 | 20 | 263 | 503  | 765  |
| TTTTCAACCCTCATACCATATT | 58.384 | 24 | 237 | 1439 | 1675 |
| GCAGTTGTTGCGGATAGTGA   | 59.871 | 20 | 252 | 105  | 356  |
| GTGCGTGTGTAACCGAGAGA   | 59.905 | 20 | 279 | 406  | 684  |
| CCAAGGAACTTTTCTCCCAA   | 59.143 | 20 | 270 | 2615 | 2884 |
| CCCTAGCCCTACCGGAACTA   | 60.455 | 20 | 247 | 553  | 799  |
| CTCTCCCACTATTCCCACCA   | 59.92  | 20 | 137 | 212  | 348  |
| TTTGCCAAGAGACACGACAC   | 59.88  | 20 | 204 | 1927 | 2130 |
| TCACGTAAAGCACAACGCAT   | 60.324 | 20 | 241 | 802  | 1042 |
| CGAATTGAATTAATTTTATGAA | 59.807 | 26 | 213 | 98   | 310  |
| CCCCACCAGAAAAAGGATAG   | 58.502 | 20 | 103 | 20   | 122  |
| GGATTAAGGGGTTGAGGAGG   | 59.761 | 20 | 181 | 898  | 1078 |
| ACATGAAGCTGAACTCGCTG   | 59.191 | 20 | 207 | 538  | 744  |
| CGTGTCTTATCGGATCGAC    | 60.483 | 20 | 173 | 24   | 196  |
| ACAGAAACACAGCGGGAATC   | 60.119 | 20 | 269 | 1427 | 1695 |
| TCGTTGATGATGCAAAGAATG  | 59.679 | 21 | 252 | 180  | 431  |
| GAACCAAACTTGCTGACCC    | 59.574 | 20 | 101 | 49   | 149  |
| TCCAAGTCCCCCTCATACAA   | 60.309 | 20 | 167 | 0    | 166  |
| GACATCTGGCCCATTTTCAC   | 60.326 | 20 | 251 | 169  | 419  |
| ATGAGACTAGATGGCGGGTG   | 60.096 | 20 | 266 | 94   | 359  |
| AGGTTGCGTACATCTGACCC   | 59.997 | 20 | 119 | 42   | 160  |
| GGGCTTCGTTTGATGACTGTA  | 60.125 | 21 | 214 | 62   | 275  |
| ACACGGGTGGAAGTGAGAGT   | 59.604 | 20 | 190 | 439  | 628  |
| CATCCACAGTGAAGACCACG   | 60.154 | 20 | 232 | 45   | 276  |
| CCTCTCCATCAGCTCCTCAC   | 59.945 | 20 | 240 | 1219 | 1458 |
| TGAGAGGAAGATCCTCGGAA   | 59.879 | 20 | 247 | 72   | 318  |
| TCATTGACTATTCTTTAACTTT | 59.262 | 27 | 204 | 1556 | 1759 |
| CTTGGGAGTTGCTTCGTAGG   | 59.869 | 20 | 271 | 141  | 411  |
| TGGGTCCTATCCAGTTTGGT   | 59.259 | 20 | 150 | 3843 | 3992 |
| GGAGAGGCGTGCAATAGTA    | 60.235 | 20 | 121 | 278  | 398  |
| TGCCATAACAACCACTTGC    | 60.584 | 20 | 143 | 349  | 491  |
| TTGGGCACTGAGATTCTTGA   | 59.369 | 20 | 241 | 154  | 394  |
| AGCACGTCCAGAGGAGACAT   | 59.866 | 20 | 168 | 112  | 279  |
| GACCGTACAAGATTGCGACA   | 59.722 | 20 | 217 | 1016 | 1232 |
| TTGGTCTCAGGAATGGTGCT   | 60.656 | 20 | 279 | 102  | 380  |
| GGAACACTGCAAATGAGCA    | 59.847 | 20 | 263 | 31   | 293  |
| TCCGGTCAAAAACAGAAACC   | 59.948 | 20 | 161 | 365  | 525  |
| CCTTCTTTAGAGTTGGGGTG   | 59.977 | 21 | 193 | 207  | 399  |
| TTGGTATCTTCCTTGCCGTC   | 60.074 | 20 | 125 | 48   | 172  |
| TGCGACCACTAAGCAACAAC   | 59.911 | 20 | 179 | 2541 | 2719 |
| CGATCCTTTATGGATTGGATCA | 61.002 | 22 | 276 | 872  | 1147 |
| CAACTTGACATAGCATTCCCA  | 58.637 | 21 | 113 | 1    | 113  |
| CTCTCTGCTCACGCTCTTCC   | 60.431 | 20 | 190 | 320  | 509  |
| CCCAAGACCCCAATTTGATT   | 60.91  | 20 | 195 | 1    | 195  |
| AAAACCAATTGACAATGAGAG  | 59.864 | 23 | 253 | 95   | 347  |
| AAGAGTGCAGCCATCGTACA   | 59.47  | 20 | 145 | 224  | 368  |
| TGCCCTAGATCTCACACACG   | 59.855 | 20 | 195 | 466  | 660  |
| TGGTGATATTATTGTGATTCCC | 59.801 | 23 | 271 | 363  | 633  |
| CCATTTAGCAAACCCACAT    | 59.685 | 20 | 136 | 23   | 158  |
| AAATTTTCATTTTACTTACGCC | 59.89  | 26 | 217 | 166  | 382  |
| GACACTTTGGCGCTCGTAAT   | 60.278 | 20 | 151 | 306  | 456  |
| TTATGATTCGGGTGTGTGGA   | 59.774 | 20 | 165 | 89   | 253  |



|                        |        |    |     |      |      |
|------------------------|--------|----|-----|------|------|
| ACCTTTTCTCCATTTTCCCG   | 60.291 | 20 | 171 | 1320 | 1490 |
| AGAGACGGTGACGTATTGCC   | 60.142 | 20 | 237 | 488  | 724  |
| TCTGGGTTTTATTTTGGCG    | 59.937 | 20 | 279 | 1958 | 2236 |
| TCTCCAAAATCGCAAACCTC   | 60.192 | 20 | 147 | 399  | 545  |
| CAAAAGGACAAGGGTTCGAG   | 59.705 | 20 | 118 | 15   | 132  |
| ATCCCTAGAAGCGCACGAGT   | 61.306 | 20 | 170 | 277  | 446  |
| CAGCAGTCTGGATCTCCCTC   | 59.945 | 20 | 241 | 15   | 255  |
| TAAAAATGAACGAGTCGCC    | 60.074 | 20 | 213 | 1190 | 1402 |
| GACCACCTTTCTTTCCACCA   | 59.943 | 20 | 141 | 13   | 153  |
| TTCTATTTTTTCAGAGTTGAAC | 59.203 | 24 | 250 | 185  | 434  |
| TTGGGTTTGGAGTGAAAACAA  | 60.363 | 21 | 273 | 1781 | 2053 |
| CACCTTGAATTGACTGCCATT  | 59.985 | 21 | 206 | 439  | 644  |
| CTTTCTCATACCCTCGTGGC   | 59.694 | 20 | 277 | 23   | 299  |
| CGGTCATGTGTACTGGG      | 59.873 | 20 | 247 | 420  | 666  |
| TGCCAGAACACATAAATTTGA  | 59.524 | 23 | 219 | 213  | 431  |
| TCAGCAGCCATCTGTTCTTG   | 60.136 | 20 | 245 | 335  | 579  |
| AACAAACCCATCACTCCGAC   | 59.827 | 20 | 125 | 1566 | 1690 |
| TCTCATTCTTACGAGTGCCGT  | 59.89  | 21 | 217 | 186  | 402  |
| GGATGAAGAGGGAGGGTTTG   | 60.822 | 20 | 144 | 0    | 143  |
| TGGTGATGGGATGACTTCAA   | 59.893 | 20 | 231 | 730  | 960  |
| GCTTGAAGTAGTGGGGATCG   | 59.694 | 20 | 136 | 131  | 266  |
| CCTTTGAACAAAGAGTGGGG   | 59.563 | 20 | 260 | 65   | 324  |
| TGTAGCCGACCCCAATTTAT   | 59.297 | 20 | 172 | 243  | 414  |
| GGAGGCATAAAAACCCCAAT   | 60.02  | 20 | 244 | 77   | 320  |
| TATATGCAGGTGTGCCTTGC   | 59.718 | 20 | 252 | 1882 | 2133 |
| GGTGAAGAATTTCCCAAAA    | 59.916 | 20 | 235 | 17   | 251  |
| CACAGGGCTTAGGAATGGAA   | 60.066 | 20 | 239 | 379  | 617  |
| TTGACCCCTTCACTATCTCCA  | 59.536 | 21 | 274 | 346  | 619  |
| GGTCCTTGCTAAATTGCAC    | 59.574 | 20 | 169 | 5    | 173  |
| ATGTTTGGTTTTGAGGGCAA   | 60.344 | 20 | 227 | 350  | 576  |
| TGCCACCACTCTTACCC      | 60.111 | 20 | 170 | 698  | 867  |
| AGCAGAGTTTGTTCGTCCGT   | 59.914 | 20 | 258 | 437  | 694  |
| TGTAGCCGACCCCAATTTAT   | 59.297 | 20 | 180 | 2356 | 2535 |
| TTACGCCTAATTAACCATTG   | 59.044 | 22 | 270 | 314  | 583  |
| ATAAAGGTGGCATGAGCAGG   | 60.096 | 20 | 173 | 764  | 936  |
| AGCTCAGGTTGTGCACGATAA  | 60.842 | 21 | 106 | 12   | 117  |
| CATTATCTAATGATTAACAGTT | 57.748 | 26 | 159 | 296  | 454  |
| TCAATGATCCAATCCCCACT   | 60.135 | 20 | 278 | 943  | 1220 |
| TCTGTGTTGTGGGTTGCAGT   | 60.203 | 20 | 136 | 1665 | 1800 |
| AGGGTCCCTCCTTATTGACA   | 58.446 | 20 | 201 | 156  | 356  |
| TATTCCTTGCCAACGTTTT    | 59.451 | 20 | 170 | 211  | 380  |
| GGTCGAGTAGAAGAACCCCC   | 59.935 | 20 | 145 | 358  | 502  |
| GCGCAAAACAAAACACATTG   | 60.155 | 20 | 224 | 3431 | 3654 |
| TTTGGTTCATGTAGCCGACC   | 60.894 | 20 | 228 | 729  | 956  |
| TCAATGAAACACGCTTTGGA   | 60.234 | 20 | 196 | 1446 | 1641 |
| CGACATCGCATCTGGAAAT    | 59.62  | 19 | 274 | 407  | 680  |
| TTGGGGATTGAACCCAGATA   | 60.126 | 20 | 130 | 602  | 731  |
| CGGTGGCTGTTATCGAAGG    | 61.577 | 19 | 246 | 344  | 589  |
| CGATGCCGTTTGAAGGTA     | 60.132 | 20 | 264 | 227  | 490  |
| GAGTTGGCTCACGATACGGT   | 60.142 | 20 | 242 | 70   | 311  |
| TGAAGGAACAGAAGAAGCGG   | 60.508 | 20 | 262 | 417  | 678  |
| GTGCAGCTCCTCAAAAAGGT   | 59.478 | 20 | 228 | 6    | 233  |
| TGGGGGTGCATTTAATGTTT   | 60.053 | 20 | 178 | 1687 | 1864 |
| CAGAGCGCACTCGAAGAGTA   | 59.49  | 20 | 258 | 783  | 1040 |
| AACGTGGGGTGTACGTTGTA   | 58.825 | 20 | 265 | 704  | 968  |
| TGTGTGAGTTTGGTTAGCCG   | 59.758 | 20 | 123 | 34   | 156  |
| GCAATAAATTTCTATGTTGCTC | 59.562 | 24 | 274 | 628  | 901  |
| AGTTTAAACCCCTCCCAACCC  | 59.191 | 20 | 237 | 101  | 337  |

|                        |        |    |     |      |      |
|------------------------|--------|----|-----|------|------|
| TGGGACAGAGAAAGAATGCC   | 60.195 | 20 | 163 | 111  | 273  |
| TGTAGCCGACCCCAATTTAT   | 59.297 | 20 | 261 | 151  | 411  |
| ACACGTGACAATGAAAAGGG   | 58.469 | 20 | 187 | 14   | 200  |
| GGAGCTTGCCTTGTCTTC     | 60.142 | 20 | 280 | 152  | 431  |
| TGTGTAGGAAGATGTTGGCG   | 59.716 | 20 | 181 | 660  | 840  |
| ACACAAAAGCAAAAGGCTG    | 60.284 | 20 | 272 | 2    | 273  |
| TTGCTCAAATATTTCAAAAAGC | 60.126 | 24 | 277 | 2    | 278  |
| ACCTCCCGAAAGAGGAGACT   | 59.295 | 20 | 264 | 483  | 746  |
| AGCGATTCTCTTCGAGCAAG   | 59.859 | 20 | 157 | 131  | 287  |
| ACAAATATGCCCTTCTCCCC   | 60.152 | 20 | 113 | 31   | 143  |
| ATTTGGAGGGCAGCAAGTAA   | 59.708 | 20 | 202 | 164  | 365  |
| AAAAAGCCACGACCTCTTCA   | 59.853 | 20 | 267 | 873  | 1139 |
| TCATCCCTTCCAACCTCTGC   | 60.195 | 20 | 222 | 940  | 1161 |
| GGAGATTTCCGCAATTCAGTG  | 60.603 | 20 | 162 | 31   | 192  |
| CGTAAAAACCCGAGAAATCG   | 59.581 | 20 | 177 | 81   | 257  |
| TCGCATTCTACTCCATTTTCCT | 60.095 | 22 | 267 | 113  | 379  |
| AATGAAGACTTTGGGGAAGGA  | 59.926 | 21 | 227 | 245  | 471  |
| GCCGATTTGTAAATTTGAGG   | 57.255 | 20 | 275 | 345  | 619  |
| CAATGGTCCAATTTCCACCT   | 59.647 | 20 | 251 | 4    | 254  |
| TAAGGCTTACGTATTGGCGG   | 60.109 | 20 | 127 | 432  | 558  |
| CTCGAATTCAAACCCTCCAC   | 59.526 | 20 | 101 | 32   | 132  |
| AATTTGATTGGGAATAATTGGC | 58.965 | 22 | 138 | 1686 | 1823 |
| AAACAGACCCACCAAGAACA   | 58.03  | 20 | 275 | 6    | 280  |
| TGTAGCCGACCCCAATTTAT   | 59.297 | 20 | 119 | 618  | 736  |
| TTCCATTATTGCTTCCACCC   | 59.762 | 20 | 170 | 1538 | 1707 |
| GATTGTTGAAGGCCGACAGT   | 60.119 | 20 | 247 | 9    | 255  |
| GCAAAGTTTTCCGATCAAA    | 60.053 | 20 | 222 | 74   | 295  |
| ATCGGGAAAACGAGGAAGTT   | 59.94  | 20 | 140 | 867  | 1006 |
| GTAGAGGTGTCAAACGGGC    | 59.598 | 20 | 279 | 91   | 369  |
| ACCGAATCGGATTGTTTCAA   | 60.309 | 20 | 172 | 352  | 523  |
| GACGTGCATGAAAGTTGCTC   | 59.45  | 20 | 261 | 298  | 558  |
| GGCAAACCACCTTTTCTTTA   | 60.33  | 21 | 205 | 299  | 503  |
| AATAAGCAGCAGGGCATGAA   | 60.742 | 20 | 216 | 376  | 591  |
| GCACATGCATTGAATTTGGT   | 59.405 | 20 | 176 | 503  | 678  |
| CTTAAGCGAGAAAAGCGGC    | 60.237 | 19 | 135 | 31   | 165  |
| CAGAACACGTTTTAAATGTTGC | 59.085 | 23 | 154 | 0    | 153  |
| TTTTACTGGCGTGTGGATGA   | 60.111 | 20 | 275 | 840  | 1114 |
| TCGAGTCCACTGTGCAAGAT   | 59.42  | 20 | 175 | 1105 | 1279 |
| TTGAAGGGACCCGTGAGTAA   | 60.486 | 20 | 248 | 1248 | 1495 |
| TGGCCTCTCAGAAGGAGAA    | 60.065 | 20 | 151 | 103  | 253  |
| ACCTCAAACACAAAACCCG    | 59.869 | 20 | 273 | 13   | 285  |
| AGGTCATCTCTCCCAAGTCAA/ | 60.11  | 22 | 258 | 160  | 417  |
| CTCTTTTCTCTCCCCGTTT    | 59.685 | 20 | 127 | 85   | 211  |
| TCCACGTGGCTTATGGAGAT   | 60.483 | 20 | 269 | 18   | 286  |
| TTCTCAGCCTCAGCTTCTGG   | 60.812 | 20 | 199 | 804  | 1002 |
| GCTCAAATCGGAATTCAAACA  | 60.067 | 21 | 169 | 6    | 174  |
| CGACTGGGCCTATCCTATCA   | 60.051 | 20 | 272 | 571  | 842  |
| ATGGGCCCAACACCAGATA    | 61.143 | 19 | 210 | 662  | 871  |
| AAAATCCTGTGTAGCAGGGCT  | 60.144 | 21 | 257 | 511  | 767  |
| TTCCAAGGTTTGGGTTTCAT   | 59.264 | 20 | 234 | 428  | 661  |
| TTTGATGCGCTCTAGTTGGA   | 59.566 | 20 | 266 | 60   | 325  |
| CCCAAGACCCCAATTTGAT    | 59.59  | 19 | 204 | 1    | 204  |
| AATCAACGAAATGAAACCGC   | 59.945 | 20 | 166 | 269  | 434  |
| ATCCGAGCAGCCTAATGAGA   | 59.939 | 20 | 245 | 553  | 797  |
| GTTCGAAGGGTTGAGGATGA   | 60.05  | 20 | 265 | 119  | 383  |
| TCTCCACTCTCCTCAATGGC   | 60.349 | 20 | 105 | 243  | 347  |
| TTTCATTTGATATTTCCAGAGA | 58.566 | 24 | 265 | 297  | 561  |
| GGGAGGCTATTTTGGAGAGG   | 60.032 | 20 | 219 | 777  | 995  |

|                        |        |    |     |      |      |
|------------------------|--------|----|-----|------|------|
| CGTATCGGATTAATGACTCGC  | 59.583 | 21 | 269 | 345  | 613  |
| AAATTGGGCACCAGAATCAG   | 59.933 | 20 | 159 | 233  | 391  |
| CTGGACAGACAACTGGCAAA   | 59.873 | 20 | 103 | 2437 | 2539 |
| ATGTAGCCGACCCCAATTTA   | 59.297 | 20 | 212 | 2320 | 2531 |
| CCCAAGACCCCAATTTGATT   | 60.91  | 20 | 165 | 1076 | 1240 |
| GAAAAATACAGCTAATCGGTC  | 59.786 | 24 | 239 | 283  | 521  |
| AGTGCAGCAATACCAAACCC   | 60     | 20 | 184 | 172  | 355  |
| TCATCAATGGGATCTGTTGC   | 59.456 | 20 | 157 | 803  | 959  |
| ACGTGAGTTGGAGGAGTTGG   | 60.151 | 20 | 268 | 2145 | 2412 |
| TGAGGCAAGACATCCTCCTT   | 59.803 | 20 | 273 | 508  | 780  |
| TTGCATGCCTAAAGGGAGAC   | 60.214 | 20 | 268 | 61   | 328  |
| GCTTTAGTGGGACATCCGAG   | 59.694 | 20 | 262 | 1874 | 2135 |
| TACAATGGCCTGAGCAAGTG   | 59.864 | 20 | 233 | 507  | 739  |
| CTCTTCGAGCGAGTTCAAGC   | 60.419 | 20 | 153 | 256  | 408  |
| CTTTTTGCCCTATTTTCCCC   | 59.782 | 20 | 253 | 534  | 786  |
| AGCTTTGCCGGTGTCTATAAT  | 59.597 | 20 | 270 | 2228 | 2497 |
| ATTCATTGGTTCTCCATCGG   | 59.75  | 20 | 267 | 579  | 845  |
| TTTGGGATACGACCTTGCTC   | 60.074 | 20 | 217 | 365  | 581  |
| GCCGTTATCACTCAGTTTTTCG | 59.761 | 21 | 257 | 460  | 716  |
| AGTTTTAGGCGGGAAAGCTG   | 60.731 | 20 | 256 | 29   | 284  |
| CACCGCAAATATACGAAGCA   | 59.725 | 20 | 167 | 854  | 1020 |
| CATCTGATCCACCGCTCTCT   | 60.372 | 20 | 263 | 525  | 787  |
| ATGCTGCATGCACTATTTGG   | 59.718 | 20 | 113 | 779  | 891  |
| CGACTGACCCTTGTTGTGTG   | 60.194 | 20 | 171 | 90   | 260  |
| TCGAGCAGGAAATGTGGATA   | 59.226 | 20 | 273 | 1396 | 1668 |
| ACTGGGACAGGCTCTTGTGT   | 59.756 | 20 | 158 | 21   | 178  |
| GATCGGCAGTGGCATTIT     | 59.61  | 18 | 113 | 502  | 614  |
| ATGGAAGAACCCAAAAAGCC   | 60.299 | 20 | 116 | 1283 | 1398 |
| GGATTTTCATGGGTCGTGTC   | 60.181 | 20 | 280 | 3691 | 3970 |
| CGGAACAACCTATCAGGCAT   | 59.955 | 20 | 174 | 3429 | 3602 |
| TCTTGCACTACTATGGGAAA   | 59.42  | 20 | 146 | 12   | 157  |
| TGAAAACGGTTGATTGCAGA   | 60.234 | 20 | 264 | 42   | 305  |
| TTCATATTCCTGGCGAATCC   | 59.862 | 20 | 119 | 2214 | 2332 |
| GTTTTAATGCATCGGCTGG    | 59.126 | 19 | 280 | 947  | 1226 |
| GGTGGTGTCTCAAATCCTAA   | 59.933 | 20 | 103 | 1843 | 1945 |
| TTGGGGACAAAGCAAATTC    | 59.916 | 20 | 146 | 7    | 152  |
| TTCCCGAGACTGAGATGGAC   | 60.199 | 20 | 226 | 192  | 417  |
| CAGAAAGGGGCAGATTCTTG   | 59.807 | 20 | 203 | 3242 | 3444 |
| ATGTCCCACCAATTTGTCT    | 59.116 | 20 | 191 | 12   | 202  |
| TCCCTCATTGAACAAAACG    | 58.597 | 20 | 255 | 1106 | 1360 |
| CAAAATGAAGCAGACTGCCA   | 59.988 | 20 | 138 | 321  | 458  |
| ACATCAGATCTCCGTCAGCA   | 59.372 | 20 | 193 | 14   | 206  |
| TGATCTTGAAACCGTGATGG   | 59.496 | 20 | 264 | 3413 | 3676 |
| TAGGGGCTCGGGATTCTTAC   | 60.411 | 20 | 242 | 477  | 718  |
| TTTATGCATGCGTTCACTCC   | 59.694 | 20 | 276 | 400  | 675  |
| TTGCTGTGCATTTAACCACG   | 60.698 | 20 | 223 | 81   | 303  |
| TTACATGCAACCTCCTGCTTC  | 60.264 | 21 | 243 | 1433 | 1675 |
| TGAGACGAGAGAGGGGGTAA   | 59.797 | 20 | 266 | 280  | 545  |
| TGGTTTTGGCAAACCTGTGAG  | 59.734 | 20 | 129 | 431  | 559  |
| TTGCAAGAAAACCTGTCCCGT  | 60.668 | 20 | 233 | 71   | 303  |
| TGCAGGAACACCTGAATCAA   | 60.24  | 20 | 255 | 79   | 333  |
| CCGCAGAGGCGATCTCTA     | 60.201 | 18 | 166 | 217  | 382  |
| AATGGGGTAGCCTGGAATTT   | 59.666 | 20 | 252 | 347  | 598  |
| CCGTTTTCTGAATTTGATGG   | 60.301 | 20 | 273 | 107  | 379  |
| CCAACCGAACTAGCAGAAAA   | 58.027 | 20 | 280 | 12   | 291  |
| CCATTGCTTAAGCTCCCTTG   | 59.839 | 20 | 207 | 256  | 462  |
| AAATTAATTTGGGAGCGGG    | 60.142 | 20 | 274 | 46   | 319  |
| CACAACCATGTCAGCCGTTA   | 60.574 | 20 | 120 | 178  | 297  |

|                                     |        |    |     |      |      |
|-------------------------------------|--------|----|-----|------|------|
| CATCGCATTCAATTACCCAA                | 59.377 | 20 | 189 | 408  | 596  |
| CCAATTTATTGGGATTAAGGC               | 57.539 | 21 | 279 | 791  | 1069 |
| CATATCCATGGGTACGGAGG                | 60.029 | 20 | 223 | 908  | 1130 |
| CTCGACGTTGCAGAAGTTTG                | 59.634 | 20 | 108 | 111  | 218  |
| GGTGGTATGGTGTGGAGGAC                | 60.096 | 20 | 103 | 74   | 176  |
| AAGTGGTAGGCGGATTCCTT                | 59.962 | 20 | 240 | 691  | 930  |
| TGATTGGTTAGAGAGTATGTG <sup>A</sup>  | 59.971 | 27 | 279 | 557  | 835  |
| TAATGGGGGTTTGAAGTTGG                | 59.657 | 20 | 274 | 42   | 315  |
| TCGGGTTCAATTCTGGTTCAT               | 60.317 | 20 | 149 | 324  | 472  |
| TCACAACCAGTAAATATTGTAC              | 58.64  | 26 | 203 | 640  | 842  |
| CCAAACCCACAGAACGAGAT                | 59.966 | 20 | 173 | 972  | 1144 |
| TTCTTGCTTTTTGCCATGTG                | 59.849 | 20 | 170 | 796  | 965  |
| GAGATGCGCTGGATAAGGAG                | 59.939 | 20 | 166 | 84   | 249  |
| CGAAAGAGCAAATGGGAGTT                | 59.312 | 20 | 268 | 69   | 336  |
| TATGCATGGATGGTGTACCG                | 60.22  | 20 | 252 | 1068 | 1319 |
| GAAACGATCGCCTACGAGAA                | 60.352 | 20 | 214 | 46   | 259  |
| CAATTGCAAGGAATTTCCCA                | 60.807 | 20 | 237 | 247  | 483  |
| TGTTTTAAAAGTTTCTGCACAA              | 57.571 | 22 | 240 | 888  | 1127 |
| GCATCTTCTTTTGGGGATCA                | 60.014 | 20 | 117 | 1119 | 1235 |
| TGTCCTGGGGTTTTGAAAGT                | 59.425 | 20 | 277 | 10   | 286  |
| GGGCATGTTTGGGAGTAGAA                | 59.933 | 20 | 254 | 413  | 666  |
| CGCCGATCCCTACTTTTCTC                | 61.08  | 20 | 196 | 708  | 903  |
| CTGCTCCAAGACCAAGAACC                | 59.844 | 20 | 230 | 837  | 1066 |
| AAAAGTACGTGGGTCGTTGC                | 60.037 | 20 | 248 | 344  | 591  |
| TTCAAATTAGCAACAAAATG <sup>A</sup>   | 58.007 | 24 | 244 | 305  | 548  |
| ATCGAGCATAGAAAGGTGGC                | 59.297 | 20 | 203 | 743  | 945  |
| GGTAGTTCTGGTCTCTGGCG                | 59.867 | 20 | 140 | 1376 | 1515 |
| GAAGGATGCCAATGCCATAA                | 60.807 | 20 | 245 | 126  | 370  |
| TCCTCTTCTGCCATTTACGC                | 60.483 | 20 | 160 | 1457 | 1616 |
| TGGCAGATGATCAAAGGATG                | 59.604 | 20 | 200 | 3752 | 3951 |
| CTCAGGGAGTTCATGACTCT                | 58.327 | 21 | 101 | 595  | 695  |
| AAAAAGCGACGAAGAACGAA                | 59.996 | 20 | 270 | 228  | 497  |
| AAAATTTTCATCAGTTATTTGC <sup>T</sup> | 58.388 | 25 | 178 | 27   | 204  |
| CATAAGGGCGGGAATAAACC                | 60.508 | 20 | 261 | 178  | 438  |
| CATTTCGTTGTTGGAGCCTCT               | 60.255 | 20 | 109 | 11   | 119  |
| CTTCTCCCCGTAGAAGCCAC                | 61.142 | 20 | 268 | 91   | 358  |
| AAACACCTCCTCCCATAACC                | 60.052 | 20 | 235 | 572  | 806  |
| TTGTTGCTTGGGAGCTTGAT                | 60.776 | 20 | 210 | 307  | 516  |
| TCCATCTCCTCAAAGCACCT                | 59.803 | 20 | 253 | 1158 | 1410 |
| TGCATGCTCATAATGCCATA                | 58.679 | 20 | 214 | 733  | 946  |
| GTGTCAAGGATGGGGACACT                | 59.817 | 20 | 220 | 373  | 592  |
| ACACCCTTGCGAATCTGAAA                | 60.636 | 20 | 224 | 242  | 465  |
| CCCAAGACCCCAATTTGATT                | 60.91  | 20 | 153 | 64   | 216  |
| TTACTGGCTCGTTCATGCAG                | 60.011 | 20 | 200 | 614  | 813  |
| GCAACGGAAACGTCTTTGTA                | 58.822 | 20 | 153 | 347  | 499  |
| ATGAGACAGGTTCTCGTCGAA               | 59.859 | 21 | 177 | 6    | 182  |
| AGTTGCCTACAAGTTTCGCT                | 59.008 | 20 | 267 | 418  | 684  |
| TGAGGGATGCATTAATAATAGG,             | 59.824 | 23 | 133 | 9    | 141  |
| AGGTCAGAGGTGACGGTTTG                | 60.151 | 20 | 245 | 797  | 1041 |
| AAAAATTTAGGGCGTTACGAA               | 57.906 | 21 | 270 | 1009 | 1278 |
| TCAAACATTCTCCTTCCAAA                | 57.325 | 21 | 121 | 24   | 144  |
| AAACGGAAACAGATTCACCG                | 59.971 | 20 | 187 | 270  | 456  |
| AAGTCCCAACATTTAGGCC                 | 60.187 | 20 | 227 | 2683 | 2909 |
| GACAAAAATTTGGCGATGCT                | 60.081 | 20 | 270 | 61   | 330  |
| TGATCGATGATCACCCACAT                | 59.724 | 20 | 240 | 490  | 729  |
| GGGTCGTTAGCCCAATCTAA                | 60.074 | 20 | 278 | 2072 | 2349 |
| ATGTAGCCGACCCCAATTTA                | 59.297 | 20 | 251 | 344  | 594  |
| TTCTCTTTGGCTTTTGCAGG                | 60.493 | 20 | 279 | 358  | 636  |

|                         |        |    |     |      |      |
|-------------------------|--------|----|-----|------|------|
| TTCCTGACGCTGAGGAAGTT    | 59.989 | 20 | 241 | 297  | 537  |
| TTGGAGGTTTGTGGTGTTTTT   | 59.364 | 21 | 219 | 1    | 219  |
| TCCGAATATTCATTGCCCTC    | 59.862 | 20 | 276 | 175  | 450  |
| ACATCGAATTCTTTGGCGAG    | 60.214 | 20 | 261 | 1218 | 1478 |
| CCCACTATTTCCCCTGAACA    | 59.784 | 20 | 245 | 442  | 686  |
| CCCAAGACCCCAATTTGATT    | 60.91  | 20 | 126 | 5014 | 5139 |
| TCGCTAACATGGTTCGTTTTT   | 59.639 | 21 | 272 | 1227 | 1498 |
| TTACGACCACTTGCTCCCTT    | 59.734 | 20 | 179 | 858  | 1036 |
| ATGTAGCCGACCCCAATTTA    | 59.297 | 20 | 192 | 267  | 458  |
| TTCTTTTCTTAAGCTTGTGAAC  | 57.936 | 24 | 193 | 510  | 702  |
| CCGAAGACCTAAGCCACAAG    | 59.869 | 20 | 171 | 258  | 428  |
| CAAAGGTTTCGCCTTCAATC    | 59.685 | 20 | 218 | 144  | 361  |
| TTGTCAACCCAACGCTACAC    | 59.615 | 20 | 246 | 4795 | 5040 |
| TTGAGCTTCTTCATCCACCC    | 60.195 | 20 | 160 | 398  | 557  |
| ACACAAACCCAATTTCCGAG    | 59.83  | 20 | 237 | 351  | 587  |
| TCATGAAGCTTCTGTGCGCC    | 60.088 | 19 | 255 | 923  | 1177 |
| TCATCCAAGTTCGTGTGAAATC  | 59.978 | 22 | 223 | 15   | 237  |
| CCAAAATCTCGGCTTCAATC    | 59.645 | 20 | 207 | 893  | 1099 |
| AGATTTTTTCATGGCCCTTTG   | 59.019 | 20 | 271 | 175  | 445  |
| ACCATAGCTCGGAACACCAT    | 59.434 | 20 | 219 | 5    | 223  |
| TCTGATCCTTTGCATTTAGCA   | 58.52  | 21 | 280 | 477  | 756  |
| GTTGCCTGCACCAAGTAAT     | 60     | 20 | 117 | 46   | 162  |
| ATGTCCTTTATCTGTTATGTTTT | 57.249 | 27 | 280 | 1370 | 1649 |
| TGGTGATCTACATCTTCCCA    | 59.55  | 22 | 197 | 240  | 436  |
| TTTTGGAGGATTTGGAATGC    | 59.878 | 20 | 211 | 1208 | 1418 |
| AGCAAGGTGATTCCTTGTTGTT  | 60.04  | 22 | 208 | 54   | 261  |
| TCCTAAACAGATCGGACAACA   | 59.609 | 22 | 215 | 450  | 664  |
| ACCACGTCAGCCAGGTA AAC   | 60.035 | 20 | 201 | 9    | 209  |
| CCCAAGACCCCAATTTGATT    | 60.91  | 20 | 138 | 1233 | 1370 |
| GGAAGAGAGAGAGGCGTTCA    | 59.679 | 20 | 200 | 385  | 584  |
| CCGTCTGCGCCTTAAGTTAG    | 60.032 | 20 | 209 | 3    | 211  |
| TCACGGAAAACCTAAGTGGC    | 60.11  | 20 | 225 | 582  | 806  |
| ACGCTTCATTTTCATCCATC    | 59.9   | 20 | 228 | 843  | 1070 |
| TATCGATGGAGCAGCAATCA    | 60.329 | 20 | 189 | 2337 | 2525 |
| CTCGTCTTCCGTGGATAAGC    | 59.836 | 20 | 143 | 249  | 391  |
| AAAGGAAATCCCCTCACCTG    | 60.298 | 20 | 204 | 204  | 407  |
| TTCAGGTTGAAGTCTTGGGC    | 60.232 | 20 | 280 | 468  | 747  |
| TCGACCGGCTTCATTTATTT    | 59.547 | 20 | 221 | 1272 | 1492 |
| CGACTTTGGGGCAATAATGA    | 60.827 | 20 | 206 | 1293 | 1498 |
| GAATTCAAGCCGGTTTCTGA    | 60.192 | 20 | 207 | 705  | 911  |
| AGTAAAAACAGGCGAGGCAA    | 59.883 | 20 | 248 | 863  | 1110 |
| ATGAGAACCCAAATCACGGA    | 60.317 | 20 | 212 | 836  | 1047 |
| AAAAGGATGTTCCAAAGGGC    | 60.299 | 20 | 116 | 0    | 115  |
| CCCAATACCCCAATTTGA      | 60.369 | 19 | 223 | 968  | 1190 |
| TGGTGGAGCGAGATAAGAGG    | 60.353 | 20 | 259 | 2385 | 2643 |
| AAACCAGCTCATTTGTTGGC    | 60.118 | 20 | 164 | 2376 | 2539 |
| ACGCGGATTTGAAAATGAAA    | 60.436 | 20 | 210 | 825  | 1034 |
| CGTATTCTTGGGTGAGCAAAA   | 60.117 | 21 | 268 | 2304 | 2571 |
| TGATCGCATGCCTTAACAAA    | 60.215 | 20 | 104 | 14   | 117  |
| ATTCTATTGGGGCGGGATTA    | 60.478 | 20 | 279 | 523  | 801  |
| AGGATTTTGAGGATGCGTTG    | 60.074 | 20 | 107 | 454  | 560  |
| CTGATCGGCCAAAACTAGC     | 59.845 | 20 | 271 | 1862 | 2132 |
| TGATAAATTAACGTAAGTGAC   | 58.343 | 26 | 152 | 331  | 482  |
| CACCAGCTTCGACACACAGT    | 59.94  | 20 | 180 | 1839 | 2018 |
| TTGAGTATGGATCCACCGAA    | 58.923 | 20 | 259 | 1042 | 1300 |
| GGGAGTGGCTGAGCTTGTAG    | 60.012 | 20 | 113 | 448  | 560  |
| CAATCAAACCCCAAGACACA    | 59.389 | 20 | 199 | 588  | 786  |
| TTGTCTGGATCCTTTTGCCT    | 59.67  | 20 | 262 | 1685 | 1946 |

|                        |        |    |     |      |      |
|------------------------|--------|----|-----|------|------|
| CCTCCGCCTAGACTCCTTCT   | 59.972 | 20 | 279 | 345  | 623  |
| GTTGGGAAACTCACGATGCT   | 60.119 | 20 | 142 | 1547 | 1688 |
| CTCCGAATCAGAGCCTTGTC   | 59.95  | 20 | 238 | 1235 | 1472 |
| GTTTGTCTGAAAAATCGGCG   | 60.617 | 20 | 269 | 671  | 939  |
| AGCAAAAAGTTGGCGATCAT   | 59.713 | 20 | 248 | 155  | 402  |
| GGTGCCGACCAGTAATACGA   | 60.914 | 20 | 249 | 2897 | 3145 |
| TGCTAACAAATATGCATTCCA  | 58.25  | 22 | 267 | 197  | 463  |
| TTCACGTTCAATCCCTCACA   | 60.088 | 20 | 115 | 185  | 299  |
| TGATATTCTTCGCGAGCTGA   | 59.67  | 20 | 193 | 2969 | 3161 |
| ACCCTTGTGAACAAACTCGG   | 60.005 | 20 | 227 | 48   | 274  |
| AATACGCACGAACATGAGCA   | 60.288 | 20 | 209 | 918  | 1126 |
| CGGATTCCCTTGGTTTTGAGA  | 60.044 | 20 | 261 | 411  | 671  |
| GTCGGGACTCTGGTGGTAGA   | 60.112 | 20 | 121 | 1361 | 1481 |
| GTGAAGCGAAAAGTGAACGTC  | 59.912 | 21 | 280 | 58   | 337  |
| ATCCCCTCAAATTCCAAAC    | 59.996 | 20 | 229 | 418  | 646  |
| TGCTTTCATCACTGGCAGAC   | 59.992 | 20 | 161 | 850  | 1010 |
| CCAAATGTCTCCCGAGTTTG   | 60.486 | 20 | 113 | 307  | 419  |
| CAACCTCAATTACCTCCCCA   | 59.784 | 20 | 278 | 4410 | 4687 |
| CCAAGGTTCTGGGCTGTAAC   | 59.592 | 20 | 269 | 1070 | 1338 |
| CATGAGCTCCGTGTTGAAAG   | 59.44  | 20 | 233 | 131  | 363  |
| CCCATACCCACATTTCCAAG   | 60.044 | 20 | 129 | 1823 | 1951 |
| GGCTAGTCGTCTCGGCATAC   | 59.866 | 20 | 228 | 1186 | 1413 |
| TGTAGCCGACCCCAATTTAT   | 59.297 | 20 | 152 | 1283 | 1434 |
| TTCCCAAGCCATCAATTTTC   | 59.878 | 20 | 267 | 114  | 380  |
| AAAATCCTAATTGCTTTGCACC | 59.525 | 22 | 236 | 504  | 739  |
| ATAATTTATCCCGCAAGGGG   | 60.002 | 20 | 266 | 36   | 301  |
| AGACTCGTTGCCAAGGGATA   | 59.694 | 20 | 250 | 1015 | 1264 |
| AAATGGAGGAACATGCCAAC   | 59.797 | 20 | 276 | 1940 | 2215 |
| TGTGTGGGAAAGGACAGTGA   | 60.129 | 20 | 224 | 186  | 409  |
| AACCGACTTGAAACCTAGCG   | 59.378 | 20 | 274 | 50   | 323  |
| AAGTCACCGGAAGCCATTTA   | 59.569 | 20 | 200 | 2658 | 2857 |
| GATTGTTGAAGGCCGACAGT   | 60.119 | 20 | 280 | 265  | 544  |
| AGGCAGAAATCAACCACGTC   | 60.119 | 20 | 131 | 18   | 148  |
| TCCAGATGAGAAAGATGGGG   | 60.003 | 20 | 195 | 2356 | 2550 |
| TGAGGAGTGGGTGTGATTT    | 60.51  | 20 | 264 | 1095 | 1358 |
| AAACACCCAACAGAAATGCC   | 59.836 | 20 | 245 | 1810 | 2054 |
| GATTGGTGGGAAGATGATGG   | 60.135 | 20 | 261 | 544  | 804  |
| TGACACAATACCCCTGGTCA   | 59.806 | 20 | 256 | 1059 | 1314 |
| AAGCTACACGCCAATGGTTT   | 59.637 | 20 | 209 | 306  | 514  |
| ATGCTAACTCCCCTTCCCAT   | 59.789 | 20 | 262 | 28   | 289  |
| TGTTTTGGGTGAACTGGGAG   | 60.923 | 20 | 185 | 3    | 187  |
| TGGAGAAAAATCAAAATCCCA  | 59.374 | 21 | 216 | 1383 | 1598 |
| CGAGTTGCAAGAACCCTCAT   | 60.255 | 20 | 262 | 160  | 421  |
| ACGCTTATTTTTGTAATGGAAT | 59.73  | 25 | 267 | 12   | 278  |
| CGACCTCACATAGTGGGAAAA  | 59.978 | 21 | 253 | 253  | 505  |
| CAGCATCTCGATACCACAGG   | 59.267 | 20 | 239 | 232  | 470  |
| TTGCTTCAACACAAATTTACA  | 59.25  | 22 | 194 | 442  | 635  |
| AGCCAAAATTTCTCCAAGG    | 60.423 | 20 | 247 | 1411 | 1657 |
| TCCGACATCAATGGCAGTAA   | 60.073 | 20 | 229 | 1035 | 1263 |
| CACTGGGACTAAGCGAGAGG   | 60.005 | 20 | 254 | 3193 | 3446 |
| GCGTGGTAGAGCGTCTTCAT   | 60.428 | 20 | 209 | 1010 | 1218 |
| TTATTTTCGCGGATCCAAGTC  | 60.038 | 20 | 162 | 282  | 443  |
| CTTCGTTGAATTTGGAACCC   | 59.406 | 20 | 164 | 9    | 172  |
| TCGCCCTTAGAAGAGGTTT    | 60.2   | 20 | 194 | 91   | 284  |
| GCTTCAACCCTTGTTTGCAT   | 60.118 | 20 | 235 | 89   | 323  |
| TAAGGCAAGGAAAGCTCGAA   | 60.089 | 20 | 121 | 32   | 152  |
| CCCAAGACCCCAATTTGATT   | 60.91  | 20 | 277 | 2250 | 2526 |
| ACCCCCTCCACACTCTCTCT   | 60.112 | 20 | 266 | 1446 | 1711 |

|                        |        |    |     |      |      |
|------------------------|--------|----|-----|------|------|
| TCGTATTCCTCATTAAGCCCC  | 60.286 | 21 | 256 | 7    | 262  |
| TGCTTTGAACTTTTCCCTGG   | 60.22  | 20 | 217 | 339  | 555  |
| CCCGAGATGGTAGCACATTT   | 59.955 | 20 | 121 | 1269 | 1389 |
| TCGACTACCAAGTCCGGAAG   | 60.246 | 20 | 235 | 404  | 638  |
| ACTAGGGAAGTTGGGAGGGA   | 59.928 | 20 | 236 | 174  | 409  |
| TTCCGCTCCCCTAAATATCC   | 60.24  | 20 | 126 | 577  | 702  |
| GAGGCATGGTTAGGTTTGGGA  | 59.933 | 20 | 219 | 727  | 945  |
| CCAAAATCTCGGCTTCAATC   | 59.645 | 20 | 278 | 687  | 964  |
| TGCCAATTCAAATCTCCACC   | 60.843 | 20 | 149 | 9    | 157  |
| TTTGGGATGATGGTTTGGTT   | 60.029 | 20 | 131 | 8598 | 8728 |
| CCCAAGACCCCAATTTGATT   | 60.91  | 20 | 130 | 1765 | 1894 |
| AGGAACAAAAGGGAATCGGT   | 59.805 | 20 | 233 | 938  | 1170 |
| CTCCAAATGTGATGTCACCG   | 59.96  | 20 | 154 | 41   | 194  |
| CATGTAGCCGATCCCAATTT   | 59.784 | 20 | 243 | 1992 | 2234 |
| GGGATACGTATTCGTGGTCCG  | 60.214 | 20 | 204 | 3851 | 4054 |
| GGCTTACGCTTCACGACTTC   | 60.022 | 20 | 264 | 835  | 1098 |
| CAAAGAGTTGTTTTACAGACCA | 59.626 | 25 | 269 | 413  | 681  |
| CATGCGTTGTCCATCATCTC   | 60.08  | 20 | 156 | 1421 | 1576 |
| AGAAGCCAAAGGAGGAGGAG   | 59.95  | 20 | 185 | 555  | 739  |
| GTGCTGCACAAGAATGGAGA   | 59.992 | 20 | 280 | 322  | 601  |
| CCATTTTTCCACTCCTCCCT   | 60.298 | 20 | 176 | 277  | 452  |
| ACAGGCCAACTGAAATCTGAA  | 59.726 | 21 | 224 | 0    | 223  |
| TGAGCACTCAGAGTTGCGAT   | 59.733 | 20 | 227 | 185  | 411  |
| TGCAGCTAGTCCCTGCTTTT   | 60.154 | 20 | 279 | 145  | 423  |
| TGCTCAGCTTCTCCATCTCA   | 59.812 | 20 | 160 | 1077 | 1236 |
| GCATAGTTTCGAAGGACAATAT | 58.287 | 23 | 280 | 1489 | 1768 |
| ACCCAGAGTCCATTCCACTG   | 59.962 | 20 | 170 | 83   | 252  |
| TGATGTCAAAGCGTTCTCG    | 59.988 | 20 | 199 | 152  | 350  |
| CAATCGACCACCCGATATGT   | 60.603 | 20 | 260 | 131  | 390  |
| ATTCTATGCCTTCAGCAAATG  | 57.031 | 21 | 165 | 4    | 168  |
| CCGTCTTTGGAGCATGAAAT   | 60.074 | 20 | 123 | 193  | 315  |
| CCAATTGACAATGAGAGGAGA  | 57.723 | 21 | 256 | 125  | 380  |
| CCGTGTATAAAGCTGCACGA   | 59.895 | 20 | 214 | 88   | 301  |
| CCATCGTTTTTCAGGGAGAAG  | 59.665 | 20 | 270 | 888  | 1157 |
| GAGGGAGGAAACTTGACCCT   | 59.534 | 20 | 201 | 1    | 201  |
| TGTGGTCACACACTCCATGA   | 59.518 | 20 | 264 | 381  | 644  |
| GTGGTGCAGTTGGATGACTG   | 60.162 | 20 | 191 | 816  | 1006 |
| GGAAATTGTCGTGTAGTGGTG  | 57.994 | 21 | 259 | 457  | 715  |
| ATCCAAACCAGAAATGGCAG   | 59.933 | 20 | 102 | 1557 | 1658 |
| GGTCATAGGAATTCGAGGCA   | 60.036 | 20 | 219 | 415  | 633  |
| GTTGCAACTTCCCACCTGAT   | 59.973 | 20 | 264 | 602  | 865  |
| TGATTCATTCATTTGTCAACAC | 60.777 | 23 | 238 | 90   | 327  |
| TGCAGTATGTTACCGCGTTC   | 59.759 | 20 | 230 | 383  | 612  |
| GTCCTGCAGCCCACCTTTTAA  | 60.249 | 20 | 201 | 347  | 547  |
| TTCTCTCTGATGAGGCGAT    | 59.91  | 20 | 225 | 386  | 610  |
| TTGTTGCAGAAAAGGGGAAG   | 60.22  | 20 | 214 | 57   | 270  |
| TTCTCGCGAAATTAGCATT    | 59.816 | 20 | 280 | 165  | 444  |
| AGCCTTTCCTGGTAGTGGC    | 59.357 | 20 | 185 | 1920 | 2104 |
| CGATCCTTCGATCTTTGAGG   | 59.767 | 20 | 236 | 3099 | 3334 |
| TCATGTAGCCGACCCAATTT   | 60.331 | 20 | 127 | 810  | 936  |
| TAAACCCCGTCACCTTATGC   | 59.823 | 20 | 160 | 628  | 787  |
| TGATATTCCTTGCCTTCTT    | 59.966 | 22 | 263 | 206  | 468  |
| CAATAACGGGTCTCTCTCGC   | 59.836 | 20 | 266 | 134  | 399  |
| CCCTCGAAATATCCTCCTCC   | 59.859 | 20 | 277 | 988  | 1264 |
| TCAATCATCACACATACCCA   | 59.697 | 22 | 277 | 2584 | 2860 |
| GGTGTGAAAAAGAGGGTGGGA  | 59.943 | 20 | 195 | 4    | 198  |
| AACCTCGTGCAAAAATTCCA   | 60.481 | 20 | 261 | 351  | 611  |
| TCCTCGATTCCGATTTTCTG   | 60.148 | 20 | 276 | 162  | 437  |

|                        |        |    |     |      |      |
|------------------------|--------|----|-----|------|------|
| TTTTCTCATGAACCATCCCC   | 59.727 | 20 | 251 | 3607 | 3857 |
| CTTGAGGACATACATAGTGAA  | 57.462 | 24 | 248 | 457  | 704  |
| GTCACCTCCACCTCAGTGGCT  | 60.315 | 20 | 210 | 541  | 750  |
| AACTGCTCCGTCTGCATCAT   | 60.833 | 20 | 139 | 1501 | 1639 |
| GCAGGGTTTTTCGACAAAAGA  | 60.227 | 20 | 214 | 659  | 872  |
| TTGCTTAATTCCTCATCCGA   | 58.308 | 20 | 217 | 325  | 541  |
| GGAAGGAAGGAGGGTGAGAG   | 60.186 | 20 | 197 | 5886 | 6082 |
| CTCGTCCTTTTTCTCGAACG   | 59.986 | 20 | 206 | 276  | 481  |
| CCCAAGACCCCAATTTGATT   | 60.91  | 20 | 215 | 24   | 238  |
| GCTCTTCGACGACCTCAATC   | 59.957 | 20 | 116 | 757  | 872  |
| TGAGAAACCCATTTTGGCTG   | 61.001 | 20 | 254 | 60   | 313  |
| CCATTTCTCCTTGCATCGTT   | 60.074 | 20 | 278 | 70   | 347  |
| TCAATTACGATCGAACACG    | 59.542 | 20 | 271 | 1575 | 1845 |
| CAGAGCCATGGTTCAGGAAT   | 60.073 | 20 | 267 | 1290 | 1556 |
| AGGTTGGTAGTGGAGCTGGA   | 59.721 | 20 | 129 | 828  | 956  |
| GAAAACCCTGTGTAGCAGGC   | 59.74  | 20 | 180 | 0    | 179  |
| TCGAATGCTCACGTTGAAAA   | 60.379 | 20 | 148 | 38   | 185  |
| GATGGGGTGTTTTGAGAGGA   | 59.903 | 20 | 154 | 1959 | 2112 |
| AATTCGACAGCCATTCAACC   | 59.939 | 20 | 226 | 873  | 1098 |
| ATTCTCGTTTTCCACATGCC   | 59.939 | 20 | 198 | 257  | 454  |
| GTCATCGAGTGCTGCAAAAA   | 59.995 | 20 | 107 | 1176 | 1282 |
| TCACCATGTTGATGAAGCGT   | 60.12  | 20 | 135 | 160  | 294  |
| TGGAGTTCACGTAGCAAAACA  | 59.376 | 21 | 274 | 632  | 905  |
| TTTGGTTCATGTAGCCGACC   | 60.894 | 20 | 249 | 1166 | 1414 |
| CACCTCTTGCGGGGTATTAT   | 58.928 | 20 | 212 | 901  | 1112 |
| GGGCACGTACAAAAGAGACC   | 59.598 | 20 | 253 | 3022 | 3274 |
| AGCCCTTGCTTCCACCAGTA   | 59.875 | 20 | 253 | 741  | 993  |
| CAACATCATTCCCATCACCA   | 60.177 | 20 | 256 | 402  | 657  |
| CCATCCACGTATTTGCTCC    | 60.331 | 20 | 201 | 411  | 611  |
| TGACCAATGAGTCGACTTGC   | 59.837 | 20 | 181 | 362  | 542  |
| TTGCCGTATTTCTATGCCAC   | 58.653 | 20 | 265 | 190  | 454  |
| TATTGTGGTTGGATGGTTGG   | 59.097 | 20 | 262 | 22   | 283  |
| ATTCGTCGATGGATGACTCC   | 59.893 | 20 | 228 | 317  | 544  |
| ATTGGCATTGATGTATATTGG  | 58.273 | 23 | 185 | 602  | 786  |
| CCCGAGATCTATCATGGTGC   | 60.448 | 20 | 124 | 371  | 494  |
| CTCAGTCTTCTCCGCCTCAG   | 60.275 | 20 | 227 | 135  | 361  |
| TCCTCGCTCTCTCCTCTCAC   | 59.817 | 20 | 130 | 755  | 884  |
| CCATCCTTTAAGTACTTTGACT | 59.504 | 27 | 217 | 66   | 282  |
| CCCCAAATTCGACAAACAAT   | 59.662 | 20 | 214 | 201  | 414  |
| ATTCGGCTCTTCTTCTGCAA   | 60.096 | 20 | 270 | 14   | 283  |
| ACCACAAATTAATCGGGCAC   | 59.691 | 20 | 207 | 356  | 562  |
| TGGAATAAGGCAAAAAGGAAA  | 58.726 | 21 | 276 | 2999 | 3274 |
| TGCCAGAAAATGTTGCTTCA   | 60.379 | 20 | 209 | 1178 | 1386 |
| CCTCGTTCCTCAAAGCATTGT  | 60.11  | 20 | 137 | 221  | 357  |
| TGCGTGTTCATCCATTAT     | 59.96  | 20 | 220 | 4453 | 4672 |
| TTCTTGGCCTGATTTTCTG    | 60.184 | 20 | 141 | 463  | 603  |
| TTCCGTGAACATAGCTTGAA   | 58.426 | 21 | 193 | 332  | 524  |
| TGCATTTGACAATCGCATT    | 60.081 | 20 | 176 | 429  | 604  |
| ACCTCCCTCTCCTCGAAAAC   | 59.676 | 20 | 234 | 437  | 670  |
| GGAGCAGATCCAATCTCCAA   | 60.158 | 20 | 268 | 92   | 359  |
| ACGTTATACTCACGCCCTGC   | 60.162 | 20 | 275 | 1681 | 1955 |
| CGATGGGCAACAATAACCTT   | 59.823 | 20 | 158 | 354  | 511  |
| AATGTTGAGCCCAACCCAAT   | 61.497 | 20 | 215 | 1452 | 1666 |
| CAGCTGTCTCGACAAGTTC    | 59.776 | 20 | 186 | 1024 | 1209 |
| TCGAACCACAGCAAAAATCA   | 60.234 | 20 | 137 | 7    | 143  |
| AGGACTACCCGGACTTGGAT   | 59.817 | 20 | 198 | 120  | 317  |
| ATTGGCCAAGGACATAACCA   | 60.192 | 20 | 247 | 217  | 463  |
| GGCAAAGGCTTGTGTTTCTC   | 59.859 | 20 | 135 | 20   | 154  |



|                       |        |    |     |      |      |
|-----------------------|--------|----|-----|------|------|
| TGTGGAGTGGACCTCATTCA  | 60.088 | 20 | 192 | 104  | 295  |
| CTTCGCACAAGTTCTCAGCA  | 60.324 | 20 | 240 | 594  | 833  |
| GGTTCAAGTGTGGGAGGA    | 59.943 | 20 | 270 | 750  | 1019 |
| TCACATCAATGCGATGAAGAA | 60.213 | 21 | 230 | 574  | 803  |
| GGTATGTGGGATGGCACTTC  | 60.203 | 20 | 242 | 4170 | 4411 |
| TGACCCCAAATCAGCCTTTA  | 60.439 | 20 | 245 | 420  | 664  |
| ATGAGCACCTTGACAATCCC  | 59.934 | 20 | 250 | 1835 | 2084 |
| TAATTGAAGAAAGCCGCACA  | 59.443 | 20 | 142 | 8    | 149  |
| ACACTCCCCACAACCTCTTG  | 60.002 | 20 | 280 | 654  | 933  |
| TTTGGTCGAGGACCAGAATC  | 60.05  | 20 | 278 | 75   | 352  |
| TTCTTCCAATGCAGAGTCCC  | 60.195 | 20 | 137 | 1003 | 1139 |
| CCAATCAAGGTCAATGCAGA  | 59.648 | 20 | 270 | 115  | 384  |
| TCCATCATTCCCTTTCTTGG  | 59.864 | 20 | 252 | 1103 | 1354 |
| TGGGCATTTCAGTGGGATTAT | 60.155 | 20 | 245 | 997  | 1241 |
| TTTCTGCATTAGGGTTAGGG  | 58.262 | 21 | 114 | 3    | 116  |
| CCAGTTGCTTTCTTCCAGC   | 59.993 | 20 | 269 | 487  | 755  |
| TGATGTTCCAATGGAGGAGA  | 59.009 | 20 | 241 | 1820 | 2060 |
| GCCATTTACATCATTGGG    | 60.016 | 20 | 156 | 455  | 610  |
| GGAGTGGACAACGTAGGGAA  | 59.966 | 20 | 257 | 539  | 795  |
| ACAAAAGGAAATAGGCGGG   | 60.305 | 20 | 122 | 713  | 834  |
| CACAGCCGATCACACATTTT  | 60.12  | 20 | 176 | 41   | 216  |
| AAAAGGAAACAAAGCAGCCA  | 59.861 | 20 | 236 | 1483 | 1718 |
| TGAATTGTGGAAACACCTCG  | 59.541 | 20 | 120 | 5    | 124  |
| TGCAAACAAACCCGTACAAG  | 59.627 | 20 | 231 | 338  | 568  |
| CAGAAAAATAAAAGACATACG | 57.384 | 26 | 221 | 209  | 429  |
| CGCTTTCATGTCAGACGTTT  | 59.445 | 20 | 162 | 399  | 560  |
| ACCCCATATAGCGGGAAAAA  | 60.508 | 20 | 146 | 1415 | 1560 |
| TTCCAGCTGAACTGTGAGATT | 58.983 | 22 | 191 | 405  | 595  |
| TTCAAAGCATCCCTTCTTAC  | 60.243 | 23 | 216 | 675  | 890  |
| GCGCATTGCAGAGATTGATA  | 59.944 | 20 | 236 | 2286 | 2521 |
| CACCATGGGGGATCTTCTAA  | 59.744 | 20 | 154 | 1037 | 1190 |
| TTGCAAGTACTCCATTTTGT  | 57.364 | 22 | 258 | 8    | 265  |
| TTTGAGCAGGAATGTTCTTCA | 58.488 | 21 | 233 | 131  | 363  |
| ATACAATGACGAAAACGCC   | 59.829 | 20 | 147 | 453  | 599  |
| ATAGCCGCCTCTTTTCCATT  | 60.061 | 20 | 201 | 3    | 203  |
| CATCGAGTGATCCATTGTGG  | 59.918 | 20 | 219 | 203  | 421  |
| ACATCGGATTCCAACCTCTCG | 60.073 | 20 | 279 | 506  | 784  |
| CCCAAGACCCCAATTTGATT  | 60.91  | 20 | 118 | 1197 | 1314 |
| GCCCTGTCATTTTTGAGCAT  | 60.081 | 20 | 223 | 1115 | 1337 |
| CCACTTCTAACCTCCGTGC   | 59.734 | 20 | 208 | 546  | 753  |
| GCTGCAGCGTTTGTACTCAA  | 60.203 | 20 | 165 | 173  | 337  |
| TGGTTGGCAGGGTATCATT   | 60.192 | 20 | 158 | 8    | 165  |
| TTCAAATCTCGCCTACACCC  | 60.074 | 20 | 197 | 1107 | 1303 |
| TTTCACTGCTGGCTCCTCTT  | 60.134 | 20 | 247 | 571  | 817  |
| AACAGCTTTCTCGGATGGAA  | 59.813 | 20 | 163 | 1461 | 1623 |
| GTTCCCCAGAACGTCACACT  | 60.009 | 20 | 196 | 514  | 709  |
| TTTCTGTGATCTCTCCGCCT  | 59.95  | 20 | 274 | 373  | 646  |
| CGTAAGCCAATGCAGTGAGA  | 60.011 | 20 | 273 | 2521 | 2793 |
| ACCCACATATTCTTCAAGCGA | 59.583 | 21 | 253 | 42   | 294  |
| CACTCAATTTTCTCGGCCTC  | 59.813 | 20 | 189 | 1009 | 1197 |
| TAGGCCAAAGGCCTTCTACA  | 59.839 | 20 | 178 | 190  | 367  |
| TTTCTCCATTCGTTACTGCAT | 57.379 | 21 | 266 | 520  | 785  |
| TGGGTGCCTTTGTTCTTTTC  | 60.088 | 20 | 124 | 120  | 243  |
| GTTGAACGGGAACGGAECTA  | 59.971 | 20 | 258 | 242  | 499  |
| GAGGCGTATGAGATGGAGGA  | 60.181 | 20 | 138 | 453  | 590  |
| TCGATGAAGGGAAGAAGGAA  | 59.744 | 20 | 210 | 997  | 1206 |
| AGAACATCGAAGCTTTTGGC  | 59.457 | 20 | 265 | 679  | 943  |
| CCCAAGACCCCAATTTGATT  | 60.91  | 20 | 275 | 1076 | 1350 |

|                        |        |    |     |      |      |
|------------------------|--------|----|-----|------|------|
| AATCCCTCTTCTCCTCCACC   | 59.492 | 20 | 239 | 1619 | 1857 |
| AAGCACAAGAAAGAAACCCCTC | 60.275 | 22 | 237 | 48   | 284  |
| ACATGCCCAGCAGGTTAGAT   | 59.579 | 20 | 269 | 1727 | 1995 |
| GCGCACTCGAAGAGTAGCTG   | 61.413 | 20 | 278 | 902  | 1179 |
| ATTTCCCAAATCCCGTCTTT   | 59.644 | 20 | 231 | 2808 | 3038 |
| GCAATCTCTCAAAAGCAGCC   | 60.103 | 20 | 179 | 155  | 333  |
| AAGCTAGCAAGGCAGCATGT   | 60.183 | 20 | 222 | 1427 | 1648 |
| AGTTGGGCCTCTTCCAACCTT  | 60.11  | 20 | 242 | 742  | 983  |
| GCGGCGGAGATAGTCTACTG   | 60     | 20 | 136 | 228  | 363  |
| ATTCCACTCCACCACCTACG   | 59.844 | 20 | 120 | 2114 | 2233 |
| GAGTAGACTCCACCGCCTTG   | 59.867 | 20 | 274 | 501  | 774  |
| ATTTGGTGCTTGCCTGCTAA   | 60.772 | 20 | 179 | 3    | 181  |
| TTCGGTATATAAGTCATGTGTT | 59.262 | 25 | 260 | 218  | 477  |
| CCTTGGTCGATCTCATCACA   | 59.631 | 20 | 264 | 1308 | 1571 |
| TCGAGTTGATCTTGCCTTTG   | 58.999 | 20 | 253 | 67   | 319  |
| GGAAGAAAAGTGCGATGACG   | 60.776 | 20 | 272 | 371  | 642  |
| TGGCCGTTGATAAAGAATCC   | 59.901 | 20 | 264 | 335  | 598  |
| GATGAGGGAGGCACTAGACG   | 59.827 | 20 | 110 | 353  | 462  |
| ACACGTGTCGCATTTTGTGT   | 60.08  | 20 | 215 | 14   | 228  |
| AAAATGACTAATCTTGAACATC | 59.582 | 24 | 256 | 106  | 361  |
| CTACTCGCTACGAGCCACG    | 59.773 | 19 | 249 | 192  | 440  |
| TGCACTCATTAATTGTTTCGG  | 58.688 | 21 | 200 | 349  | 548  |
| CCAGCTTAAGCCTGCATTTTC  | 59.982 | 20 | 233 | 113  | 345  |
| TCGGGTGGTGTAGTTGAT     | 58.854 | 20 | 221 | 64   | 284  |
| TGTAGCCGACCCCAATTTAT   | 59.297 | 20 | 246 | 1012 | 1257 |
| ATACAGTCGCCGTGGAAAAC   | 60     | 20 | 153 | 23   | 175  |
| GGCGACAAAACCTTGGTAACG  | 60.534 | 20 | 121 | 38   | 158  |
| ATGTAGCCGACCCCAATTTA   | 59.297 | 20 | 191 | 557  | 747  |
| AAAATCATCCAATTCCCAAC   | 59.881 | 21 | 147 | 15   | 161  |
| TAATGGTTCGAGGGATACCG   | 59.778 | 20 | 241 | 490  | 730  |
| GTGGAAGGCGGAAAGATACA   | 60.074 | 20 | 217 | 4    | 220  |
| CTGCTCCAGCGCTTTTCTAT   | 59.752 | 20 | 256 | 182  | 437  |
| GAAGAGTTGAGAAGGCGGGT   | 59.989 | 20 | 220 | 740  | 959  |
| TCATTGGGAAAATGATTTGG   | 58.255 | 20 | 225 | 1900 | 2124 |
| GAAGGAAGATGGATCGTGGA   | 60.011 | 20 | 221 | 508  | 728  |
| ACTTCTGAAACCAGCGAACG   | 60.431 | 20 | 111 | 81   | 191  |
| TCCTTTTGAGCCTGGACAAT   | 59.67  | 20 | 217 | 23   | 239  |
| TCGTTTCGAATAGCGGTAGG   | 60.223 | 20 | 239 | 340  | 578  |
| TGACAACCTTGTCTGGGTGC   | 59.726 | 20 | 191 | 2    | 192  |
| TTGAACAGGGAAAGCAGGAG   | 60.366 | 20 | 239 | 5    | 243  |
| CCCTCATTCCCTCCTTCATT   | 60.264 | 20 | 254 | 1971 | 2224 |
| GTGAAAGCGCCATTCTTCTT   | 59.457 | 20 | 209 | 1847 | 2055 |
| TGGTTGAGGAAGGAGAGCAT   | 59.803 | 20 | 198 | 317  | 514  |
| GAAAGGGGCAGTAAAAATCG   | 59.957 | 21 | 104 | 0    | 103  |
| ACAGGCAATCTGCTTAGCCA   | 60.934 | 20 | 223 | 2147 | 2369 |
| ATGTAGCCGACCCCAATTTA   | 59.297 | 20 | 168 | 773  | 940  |
| AGATGGAGGAGAGGTCTGTA   | 59.792 | 20 | 166 | 555  | 720  |
| TGCAACACCTCCATCATCTC   | 59.637 | 20 | 257 | 569  | 825  |
| TTTTAGGAGTCGTGGGTGGT   | 59.449 | 20 | 108 | 418  | 525  |
| GAACCAGCCCATCCCTTTAT   | 60.152 | 20 | 253 | 90   | 342  |
| AGCTGAACCCCAACCAAAAT   | 60.723 | 20 | 210 | 341  | 550  |
| CAATTTAGCTGAAATCTCAACC | 58.119 | 24 | 243 | 429  | 671  |
| GTTTATGCAGCCGAGGATGT   | 60.103 | 20 | 237 | 223  | 459  |
| TGTCCATGTGGCATGAAAAG   | 60.517 | 20 | 271 | 1017 | 1287 |
| TCCCTCACCTTTCTCTCCT    | 60.186 | 20 | 199 | 0    | 198  |
| TCGGGAATCGACATTCTCTC   | 60.158 | 20 | 141 | 37   | 177  |
| GGGAATCAACCCCAAGTTTT   | 60.032 | 20 | 273 | 219  | 491  |
| CACACTTCCCCCTCTTTGAA   | 60.081 | 20 | 110 | 8    | 117  |

|                        |        |    |     |      |      |
|------------------------|--------|----|-----|------|------|
| TCAACACATTCAGCAGGCTC   | 59.992 | 20 | 277 | 65   | 341  |
| TCAATCGCAACTGCAAAAAC   | 59.856 | 20 | 278 | 44   | 321  |
| AACGTTGCTCCAAACAATC    | 60.118 | 20 | 278 | 124  | 401  |
| AGGCATGTGGGAGCATAGTT   | 59.579 | 20 | 182 | 158  | 339  |
| TAGCAATGGACCTCGCATAA   | 59.281 | 20 | 186 | 342  | 527  |
| CTCTCTCCTAGGTCCGTCCC   | 60.208 | 20 | 186 | 972  | 1157 |
| ACGATGAGGAGGATGACGAC   | 60.08  | 20 | 202 | 311  | 512  |
| CAGGTTTGGAGGAAAGCAAG   | 59.846 | 20 | 236 | 582  | 817  |
| GCTATCGGTGGGGTCTGATA   | 59.917 | 20 | 116 | 315  | 430  |
| CCGGAAGATGGACAGGTAGA   | 60.065 | 20 | 172 | 1    | 172  |
| AATCACGTGTCTACATTTTTAA | 58.63  | 25 | 229 | 426  | 654  |
| TTGGGATTAAGGCTTTGGTG   | 59.931 | 20 | 129 | 952  | 1080 |
| GTCTTCCGCGTGCGTATAAT   | 60.124 | 20 | 226 | 38   | 263  |
| GCCGATAAATGAATTCGAGC   | 59.649 | 20 | 247 | 379  | 625  |
| CCCTGACTTGTTGATGGCTT   | 60.111 | 20 | 143 | 0    | 142  |
| CAATAAATTGGGGTTCGGCTA  | 59.789 | 20 | 127 | 26   | 152  |
| TCGAATTCAAAAACCTCCCAA  | 58.187 | 20 | 225 | 355  | 579  |
| CAGCAGATTGATGGCTCAAA   | 59.948 | 20 | 175 | 702  | 876  |
| GCTCCATTGTACGTTTCCCT   | 59.056 | 20 | 136 | 124  | 259  |
| GTTCAACAGGAGGTGAAGCC   | 59.703 | 20 | 125 | 2348 | 2472 |
| TTGAGTGGCGCACATTAGAC   | 59.871 | 20 | 157 | 16   | 172  |
| AGGCTTACTCGTTCGGT      | 59.998 | 20 | 278 | 180  | 457  |
| CCAATGTCTCGTACCCACCT   | 59.844 | 20 | 232 | 561  | 792  |
| CACCATAAGATCCCGAACCA   | 60.713 | 20 | 252 | 115  | 366  |
| TCAGAAACAATACACACCTAC  | 60.341 | 25 | 121 | 0    | 120  |
| CTGTGATGCAAGCAGCAACT   | 60.207 | 20 | 249 | 349  | 597  |
| AACCGGAACATAAGTGCCAA   | 60.365 | 20 | 268 | 335  | 602  |
| TCCAAGCTCGACAACCTCTGA  | 59.701 | 20 | 179 | 5    | 183  |
| CAGAGCAAGAAAACATGCCA   | 59.988 | 20 | 190 | 529  | 718  |
| AGGCCATTGTTGTTGAGCTT   | 59.74  | 20 | 240 | 1449 | 1688 |
| TGCGAACCCAGATGCATTATC  | 59.652 | 20 | 143 | 111  | 253  |
| GTTTTCTGTTTTGTTCTCCTGC | 59.338 | 23 | 264 | 5    | 268  |
| ACGTCGATCACTTCAACCTTT  | 58.709 | 21 | 228 | 604  | 831  |
| CGAGATTGAGGAGAAGCAGG   | 60.088 | 20 | 245 | 576  | 820  |
| GGTGGCATCATCAACAACAA   | 60.376 | 20 | 251 | 756  | 1006 |
| TCTTCCAAGATCACACAGCCT  | 59.859 | 21 | 263 | 1156 | 1418 |
| AGTCCTTCCCTCTGCAACA    | 59.844 | 20 | 221 | 1198 | 1418 |
| CGTGATAGCAGAGAAAGGGC   | 59.978 | 20 | 126 | 736  | 861  |
| TCCGTGGTGAACAAGTTGAA   | 60.128 | 20 | 239 | 366  | 604  |
| GCGTGGTGGGGATTTAAGTA   | 59.823 | 20 | 141 | 869  | 1009 |
| CAGTGAGAGCCACCACATTG   | 60.309 | 20 | 172 | 6    | 177  |
| TTCTTTCTTAAGCTTGTGAAC  | 57.936 | 24 | 150 | 939  | 1088 |
| TGTTCTCGCTTAGATGCACG   | 60.157 | 20 | 179 | 213  | 391  |
| AAAAGTGTGTCGTGGATGAGGC | 60.119 | 20 | 235 | 211  | 445  |
| CACAAAAGGGCCTCTGAATC   | 59.67  | 20 | 234 | 133  | 366  |
| CGGAAGAGGTATCGCTCAGA   | 60.495 | 20 | 233 | 3659 | 3891 |
| TCTGTAGCTGATCACCGTTTG  | 58.937 | 21 | 280 | 108  | 387  |
| CTCCCTCTCCCCTTCAAAC    | 60.045 | 20 | 243 | 968  | 1210 |
| GGGGTGTTCGAGACTTGAGA   | 60.238 | 20 | 237 | 201  | 437  |
| TATGCCACAGACCACAGTGC   | 60.756 | 20 | 207 | 300  | 506  |
| CAAACCGCCAAATTCAGATT   | 59.938 | 20 | 273 | 80   | 352  |
| AATGGTGCTAGCGTGATGAA   | 59.301 | 20 | 221 | 384  | 604  |
| AATTAACAAGCCCCTGCCT    | 59.966 | 20 | 247 | 330  | 576  |
| TTCCATGCACATGTAAGTTTT  | 58.601 | 23 | 105 | 119  | 223  |
| GTACCTTTGCGGGTAAATCG   | 59.474 | 20 | 122 | 529  | 650  |
| GGAGGAGAGGGGTAGAATGG   | 59.89  | 20 | 144 | 409  | 552  |
| ATGTAGCCGACCCCAATTTA   | 59.297 | 20 | 171 | 1325 | 1495 |
| TTCTTACAGTTGGCTGCGAG   | 59.22  | 20 | 231 | 49   | 279  |

|                        |        |    |     |       |       |
|------------------------|--------|----|-----|-------|-------|
| ACTGTCCAACCAATGCACCT   | 60.431 | 20 | 176 | 454   | 629   |
| ACCTGATCGGTGCGATTAAC   | 59.962 | 20 | 269 | 423   | 691   |
| CCATCCCATCATTCCATCTC   | 60.096 | 20 | 153 | 912   | 1064  |
| GCTTCGGTGGTTAAATTCCA   | 59.938 | 20 | 164 | 467   | 630   |
| CACCCTTGCCTTCATAGGAG   | 59.688 | 20 | 137 | 2145  | 2281  |
| GCTCCTCATCCTCCTCATCA   | 60.312 | 20 | 269 | 287   | 555   |
| CATACCTCATCCCGCAGATT   | 59.917 | 20 | 271 | 1801  | 2071  |
| CGTGAAGGGTGACTTGAAT    | 59.966 | 20 | 157 | 194   | 350   |
| GCTGACCTCACATATTGGGAA  | 59.947 | 21 | 252 | 10861 | 11112 |
| AGGGAGAATTAGTGGAGGGG   | 59.392 | 20 | 150 | 347   | 496   |
| TCGGGGAGAGTCAAGAGTTG   | 60.377 | 20 | 225 | 499   | 723   |
| TTCGTCTCCAAGGAAAAAGC   | 59.429 | 20 | 100 | 68    | 167   |
| CTGTTTGTGCTGCAGTTGG    | 60.485 | 20 | 275 | 149   | 423   |
| GTGGGCCAATTGAGTTTTTC   | 59.41  | 20 | 201 | 534   | 734   |
| CCCAAGACCCCAATTTGATT   | 60.91  | 20 | 102 | 5825  | 5926  |
| TGCAAATACATCGAGCGTAGA  | 59.481 | 21 | 173 | 204   | 376   |
| CATGAACCTTTGGAACAGGG   | 60.345 | 20 | 154 | 693   | 846   |
| AAGTATCAGCCGAGGATTG    | 60.218 | 20 | 246 | 1050  | 1295  |
| TCCGCCGAAATTTTGTA      | 60.005 | 18 | 213 | 370   | 582   |
| AAAGGATATATTCACTGGGTTG | 58.472 | 23 | 271 | 120   | 390   |
| ACCGAGAGAGAGGGGCATAG   | 60.746 | 20 | 219 | 904   | 1122  |
| AATTGGAAGGCAACTGCTCA   | 60.776 | 20 | 187 | 22    | 208   |
| CCCAAGACCCCAATTTGATT   | 60.91  | 20 | 199 | 2335  | 2533  |
| ATTGTAGAAAGGGCGCAGAA   | 59.845 | 20 | 112 | 2384  | 2495  |
| TGGATCTGGAACATCAGCAA   | 60.201 | 20 | 195 | 736   | 930   |
| ATCTAGCTGTGAGATGTCTCTT | 59.219 | 24 | 272 | 557   | 828   |
| TGCATCCACTTGGTGAGAAA   | 60.24  | 20 | 178 | 1029  | 1206  |
| CCTTCCTTCGTGATGTTGT    | 60.111 | 20 | 165 | 795   | 959   |
| GCAAAGGAAATTCACGAGGA   | 60.192 | 20 | 186 | 162   | 347   |
| GGTTCATGTAGCCGAAACCA   | 60.894 | 20 | 114 | 2210  | 2323  |
| TGTCGTTTGCTCCTCTTTCC   | 60.375 | 20 | 225 | 4     | 228   |
| ATTGGGTACCATGTGGCAGT   | 60.119 | 20 | 265 | 246   | 510   |
| TTCTATCGAAGACCGCATCC   | 60.177 | 20 | 235 | 2016  | 2250  |
| CGGAAGTGATCACAAGGGTT   | 59.966 | 20 | 171 | 17    | 187   |
| GTCCTGATTAGGGATGCCAG   | 59.508 | 20 | 269 | 4339  | 4607  |
| AGGGAAATTTGAGTGGATGCT  | 59.954 | 21 | 256 | 516   | 771   |
| CGTCGTCGTCGTCATCTTC    | 60.419 | 19 | 200 | 152   | 351   |
| TGTTTGAACGACTGCCTTTG   | 59.881 | 20 | 242 | 372   | 613   |
| GCCGACCCATACTAATCCA    | 59.784 | 20 | 266 | 629   | 894   |
| CGGTATTCTCAAATGCACGA   | 59.688 | 20 | 203 | 1072  | 1274  |
| TGGTGTTGATTGTGGTGGTT   | 59.701 | 20 | 242 | 593   | 834   |
| TTTTCCCAATGGGGTTTGT    | 60.014 | 19 | 274 | 410   | 683   |
| TTAGGTGAAGCCAACATCCC   | 59.933 | 20 | 163 | 1721  | 1883  |
| TTCCTGGAGGAGTTGTGACC   | 60.088 | 20 | 218 | 69    | 286   |
| GGAAGGAAACCCTTGCACTA   | 59.17  | 20 | 140 | 7     | 146   |
| GGAGGAGGAGCATCATAACG   | 59.653 | 20 | 187 | 1250  | 1436  |
| GATGGACTCCGATGACGATT   | 59.893 | 20 | 267 | 7     | 273   |
| CCTCTCTCTTCGTTCAATCCG  | 59.943 | 20 | 222 | 235   | 456   |
| AAAATTCAAAGATTTGGGGGA  | 59.645 | 21 | 148 | 1     | 148   |
| GAGGATCCCTCCAAGATCC    | 59.835 | 20 | 265 | 43    | 307   |
| GCACATGCGGTCTGTATCAC   | 60.152 | 20 | 131 | 388   | 518   |
| TTGAGAAGACGCGAAGTGTG   | 60.175 | 20 | 261 | 5     | 265   |
| TGGCTGAGTTAGATGCCCTT   | 59.836 | 20 | 258 | 2019  | 2276  |
| TTTGCAGCCGAACACTGAA    | 59.609 | 20 | 263 | 559   | 821   |
| TTTGGTTCATGTAGCCGACC   | 60.894 | 20 | 191 | 854   | 1044  |
| ACGACAAAGCTGAGGCTGTT   | 60.058 | 20 | 222 | 1907  | 2128  |
| GATGCTAGCCGGAGATGTTT   | 59.803 | 20 | 155 | 350   | 504   |
| CTTCTGGGGGTTTGGATCTT   | 60.298 | 20 | 259 | 2970  | 3228  |

|                         |        |    |     |      |      |
|-------------------------|--------|----|-----|------|------|
| ATAATGGAACGAGGGTGACG    | 59.813 | 20 | 238 | 0    | 237  |
| CAAGGGTAAGGTTGCGTACA    | 58.699 | 20 | 234 | 29   | 262  |
| TGGCATAAACTGAAGTGACA    | 59.245 | 22 | 270 | 19   | 288  |
| AGCCACAAAAACACTTAGGCA   | 59.799 | 21 | 268 | 32   | 299  |
| TCCAGTTAAACCAACCTCGC    | 60.11  | 20 | 203 | 1651 | 1853 |
| GAAAGAGAGAGAAAGGGGCG    | 60.455 | 20 | 144 | 1234 | 1377 |
| TTCCATGCAACTTTCTACCAA   | 58.28  | 21 | 267 | 77   | 343  |
| GAATGGAAGATCCTTGCACC    | 59.488 | 20 | 167 | 27   | 193  |
| TGTGATGCAATGCGGTATTC    | 60.498 | 20 | 231 | 310  | 540  |
| CCCGGGATTTCTAAATGGAT    | 59.978 | 20 | 238 | 967  | 1204 |
| GAAGAAGAATCTGAGCCAGCA   | 59.708 | 21 | 192 | 1060 | 1251 |
| GAGGAAACAGAAGCACTGCC    | 59.997 | 20 | 121 | 949  | 1069 |
| GGAAGTGAAGTCGGACGAAA    | 60.232 | 20 | 109 | 7    | 115  |
| GCGACTCACTTAAGGTTGTG    | 59.788 | 21 | 136 | 161  | 296  |
| TGTAGCACAATTGCCTCTGC    | 60.019 | 20 | 200 | 80   | 279  |
| CAATCATTTGAAAATTGACTCG  | 59.428 | 25 | 255 | 662  | 916  |
| GCAAAACATTTACCTAGCCA    | 60.124 | 21 | 279 | 694  | 972  |
| ACACGATTAACTGCCTCGCT    | 59.904 | 20 | 141 | 2266 | 2406 |
| CCCCAATTAGTCGTAGCCCT    | 60.332 | 20 | 169 | 1453 | 1621 |
| TGCTGAAACTGGTGGAGTTG    | 59.873 | 20 | 202 | 1892 | 2093 |
| TGCCACCAATTTCTCATCCT    | 60.461 | 20 | 245 | 935  | 1179 |
| AAAAAGTTTAGGGCTCCAC     | 57.352 | 20 | 278 | 24   | 301  |
| GTGGAGTGGTCAAGAAAGCA    | 58.854 | 20 | 100 | 12   | 111  |
| ACGTCTCTCGCACTCCTCAT    | 60.017 | 20 | 122 | 1    | 122  |
| CCTGCCTCACAAAATGGAAT    | 59.933 | 20 | 182 | 2254 | 2435 |
| TTCCGGACCAAACCTTTAATGTA | 59.441 | 23 | 270 | 856  | 1125 |
| GGAAGAAATCACGAAATGCC    | 59.51  | 20 | 267 | 2191 | 2457 |
| TTTTCAAGCAAATTTCAATTA   | 59.911 | 25 | 275 | 298  | 572  |
| GATAATGTGGCGGAGTTTGG    | 60.331 | 20 | 125 | 40   | 164  |
| TCTGGTTCTTTTGCTCCTGC    | 60.517 | 20 | 231 | 2828 | 3058 |
| TGTAGCCGACCCCAATTTAT    | 59.297 | 20 | 168 | 2486 | 2653 |
| GTTAGGGGAGCTGCAACAAG    | 59.875 | 20 | 246 | 1422 | 1667 |
| AAATAGCGCATTTTCGTGTT    | 57.483 | 20 | 103 | 3    | 105  |
| GATCGTCCAAATCGTCATCC    | 60.289 | 20 | 221 | 378  | 598  |
| TGAGGGAGCACTAAAAGGGA    | 59.807 | 20 | 254 | 240  | 493  |
| TGCCCAACTGTGACAAGTA     | 60.152 | 20 | 206 | 998  | 1203 |
| AAACCCATGCATTTGATTCC    | 59.628 | 20 | 269 | 471  | 739  |
| GCCACATGGGAAAAAGAAGA    | 60.051 | 20 | 253 | 36   | 288  |
| GGATCTAGTGCGGTTACCA     | 59.955 | 20 | 179 | 33   | 211  |
| GACGAGGATGAGAGGAATCG    | 59.761 | 20 | 237 | 3263 | 3499 |
| TGAGTTTTGGGAGCAAATTACA  | 59.625 | 22 | 250 | 398  | 647  |
| CGCCTTCACTGCCAAAATA     | 59.818 | 19 | 108 | 17   | 124  |
| TCCAATGCTGGCATGTGTAT    | 59.955 | 20 | 171 | 253  | 423  |
| CAGCCCAAGAAAAGATCTGC    | 59.955 | 20 | 221 | 141  | 361  |
| AAGGGGAATGAAATGGAACC    | 59.996 | 20 | 230 | 54   | 283  |
| AATGTAGCCAAACGCCTCC     | 60.088 | 19 | 198 | 646  | 843  |
| CTGAAATCCGGTTCAGTGTT    | 59.966 | 20 | 148 | 25   | 172  |
| TTGCTTGGGGTTAGTTTTG     | 59.968 | 20 | 134 | 794  | 927  |
| CTGAGCAGGTGGAAAAGTGC    | 60.975 | 20 | 224 | 1202 | 1425 |
| ACTCTGGACTACTGCCCCCT    | 60.133 | 20 | 214 | 182  | 395  |
| AGCCCCAATGAAGAATCAA     | 59.505 | 20 | 275 | 262  | 536  |
| AGTGGTCTTCCTAGGTGGCA    | 59.721 | 20 | 131 | 1013 | 1143 |
| ATGGTTTGTGCCTGCAAAC     | 60.559 | 20 | 230 | 973  | 1202 |
| GGCATGGGCCTTTAATTTTT    | 60.148 | 20 | 154 | 68   | 221  |
| AAATGTTCTCATCATCCCG     | 59.75  | 20 | 100 | 724  | 823  |
| GTTGATTTGGATCAAGGCGT    | 59.939 | 20 | 269 | 671  | 939  |
| AGTTTTTGGAGTCCACCCCT    | 59.834 | 20 | 177 | 835  | 1011 |
| GTCATCAGAGCCATCCCATT    | 59.893 | 20 | 146 | 53   | 198  |

|                        |        |    |     |      |      |
|------------------------|--------|----|-----|------|------|
| TGATGCTGCGGAGTCAATAG   | 59.972 | 20 | 168 | 264  | 431  |
| TGATGAAGTAAAATAGTGAGT  | 57.311 | 27 | 151 | 265  | 415  |
| CGTGGAGAGTGGTGGATTCT   | 60.112 | 20 | 197 | 259  | 455  |
| TTATGGATCGAACATTCACGA  | 58.98  | 21 | 196 | 257  | 452  |
| CATCGCTTGCTTTCCATTTT   | 60.209 | 20 | 188 | 747  | 934  |
| CCAAATCCGGTCATTCTCAT   | 59.75  | 20 | 190 | 227  | 416  |
| AGACTGGTGTGCTGCTGTG    | 60.096 | 20 | 275 | 75   | 349  |
| AATGGGCGGTGTAAAAGAAA   | 59.451 | 20 | 163 | 712  | 874  |
| GGATACGCTGGAATGTTGC    | 60.478 | 20 | 278 | 705  | 982  |
| ACTTGTTGGGTTGGTTTTG    | 59.728 | 20 | 264 | 680  | 943  |
| AAAAACGTGGTCAAATTCAGG  | 60.249 | 22 | 225 | 57   | 281  |
| TTCATGATTTCTGTTCCGGA   | 59.049 | 20 | 253 | 492  | 744  |
| TGATGGATCAACAACACATCG  | 60.383 | 21 | 172 | 72   | 243  |
| GGGTGACCCAGAAGTTTTGA   | 59.943 | 20 | 240 | 1644 | 1883 |
| GGAATTCATCGAGCAATGG    | 60.414 | 20 | 257 | 1863 | 2119 |
| ATGGCCCTAAACACAGCAAG   | 60.132 | 20 | 272 | 419  | 690  |
| GCGTGATGCTGGATGTAGTTT  | 60.154 | 21 | 210 | 4    | 213  |
| TCTTCTTTATCCCTGGTGTCG  | 59.181 | 21 | 270 | 17   | 286  |
| GGCGGTGGTGATTTGTAAC    | 60.235 | 20 | 242 | 1586 | 1827 |
| AAATCCAATTCATGCATCCC   | 59.587 | 20 | 240 | 216  | 455  |
| TCATGTATTTGAATCGGCCA   | 59.891 | 20 | 260 | 29   | 288  |
| CGGTTTGAAGGGGATTTAT    | 60.013 | 20 | 223 | 1216 | 1438 |
| TGTCTCCCTCTTACCATCTCAA | 58.789 | 22 | 259 | 1317 | 1575 |
| GTAAACCCTCCCGGTAAAGC   | 59.835 | 20 | 220 | 473  | 692  |
| CCAGTCAGGCACTCCAAAAT   | 60.111 | 20 | 263 | 1021 | 1283 |
| GAGGTCAACGATTTTGGCAT   | 59.939 | 20 | 245 | 422  | 666  |
| TAACCCAGCCCATTAGCATT   | 59.433 | 20 | 134 | 238  | 371  |
| TTGGAAAGCAAACCCTGGTA   | 60.472 | 20 | 211 | 400  | 610  |
| GAGTGTGTCTGGCAACATGG   | 60.162 | 20 | 191 | 2    | 192  |
| CAACCTCCTTGCTCGGAATA   | 60.206 | 20 | 247 | 1235 | 1481 |
| CCCTTCTTTTCAAGCACTGG   | 59.846 | 20 | 202 | 415  | 616  |
| GACACATGCTCGAAAGGGAT   | 60.081 | 20 | 180 | 7    | 186  |
| ATGGGTAGGGAGTTTACCA    | 59.259 | 20 | 244 | 395  | 638  |
| AAGGGGAGCAAGAGGAAGAA   | 60.319 | 20 | 111 | 9    | 119  |
| ACTCCTTGATTCTTGCACCG   | 60.255 | 20 | 200 | 396  | 595  |
| GTCAGGTTTCTGATCCGAGC   | 59.81  | 20 | 271 | 26   | 296  |
| TGCTCATCAACACTGCCTTC   | 59.992 | 20 | 239 | 1095 | 1333 |
| TGGAATAGGTTTCTTTGGAGAC | 59.987 | 23 | 116 | 46   | 161  |
| AACCAACATGATGAGTGACCC  | 59.694 | 21 | 184 | 66   | 249  |
| GTCTTCGTCACTGCCGTCTC   | 61.021 | 20 | 113 | 486  | 598  |
| ACAACATTCGCGGACTCAT    | 58.407 | 20 | 166 | 247  | 412  |
| ACTTGGTCATTTAATGGGATCA | 58.303 | 22 | 270 | 511  | 780  |
| CCCAAGACCCCAATTTGATT   | 60.91  | 20 | 177 | 144  | 320  |
| TTCCGGTAAGCATAACAACC   | 59.823 | 20 | 280 | 548  | 827  |
| CGCTTTAGCGGATTGATGTT   | 60.23  | 20 | 261 | 372  | 632  |
| GTTTATGTAGCCGACCCCAA   | 59.823 | 20 | 185 | 491  | 675  |
| GGGTTATCTATGGATCACTACC | 58.734 | 24 | 212 | 542  | 753  |
| GAGGAGGGGTGGTTTGAGAT   | 60.314 | 20 | 215 | 13   | 227  |
| ATGTAGCCGACCCCAATTTAT  | 59.585 | 21 | 175 | 3607 | 3781 |
| GCAAGTAGGTGGATTCCCAA   | 59.933 | 20 | 245 | 1513 | 1757 |
| AATAATGAGCATTCCCGTG    | 59.784 | 20 | 279 | 760  | 1038 |
| AGAGGATTCACCACCACCAA   | 60.363 | 20 | 116 | 4    | 119  |
| TCGAATCAGTTACCATACCA   | 58.987 | 21 | 256 | 56   | 311  |
| CTTGAGCACAGAAAATCCGC   | 60.914 | 20 | 249 | 49   | 297  |
| TCGATCCAGTTCTTGGCTCT   | 59.95  | 20 | 259 | 228  | 486  |
| TTCCAGAAGTGATGCAGGTG   | 59.831 | 20 | 249 | 537  | 785  |
| AAATGATTGCTTGGCTTGAA   | 58.361 | 20 | 252 | 589  | 840  |
| TTTTCTTTTCTTCTTGTATC/  | 59.307 | 24 | 240 | 576  | 815  |

|                         |        |    |     |      |      |
|-------------------------|--------|----|-----|------|------|
| CACCCAAAAATCCTCTTCCA    | 59.903 | 20 | 169 | 82   | 250  |
| TGAAATTGGGGTGACTGGAT    | 60.173 | 20 | 206 | 175  | 380  |
| ACCCACATAGTGGGAAAAA     | 59.146 | 20 | 163 | 790  | 952  |
| TCTCTCATTCTCCATTGCCA    | 59.322 | 20 | 274 | 136  | 409  |
| GACGGCGTCGTTTTCTTG      | 60.39  | 18 | 256 | 146  | 401  |
| GACGGTGAAGCGTTTAGCAT    | 60.278 | 20 | 258 | 3025 | 3282 |
| GGTAGCCGACCCCAATTTAT    | 60.041 | 20 | 217 | 393  | 609  |
| ACCACGATTTTGACTGGGAT    | 59.263 | 20 | 241 | 429  | 669  |
| GATCGTTCTCGGATGCATAAA   | 60.052 | 21 | 240 | 677  | 916  |
| GCCACTGCAGGTGTACTION    | 59.905 | 20 | 103 | 614  | 716  |
| GTAATTTTCAGCGGGGAACAA   | 59.938 | 20 | 234 | 4886 | 5119 |
| GACACCTCATGCGAGTCAAT    | 58.673 | 20 | 199 | 125  | 323  |
| CAAGGAGTAATCGGGGAGTG    | 59.545 | 20 | 263 | 1083 | 1345 |
| TTGAAATGGCGGAGAGATTC    | 60.155 | 20 | 212 | 429  | 640  |
| AGCTTTTGACCAAGGAAGCA    | 59.993 | 20 | 211 | 141  | 351  |
| ATCCAAGTCCATCTCCTCCC    | 60.278 | 20 | 225 | 286  | 510  |
| ATCCATCCTCAAGGGTTCT     | 59.755 | 20 | 207 | 12   | 218  |
| AAAACCTTCGACCCCTGGAAC   | 60.34  | 20 | 257 | 9    | 265  |
| AGGTTGCGTACATCTGACCC    | 59.997 | 20 | 254 | 3711 | 3964 |
| ATGTAGCCGACCCACATAG     | 59.836 | 20 | 127 | 688  | 814  |
| CACCGAGCTCAGATTGGTTC    | 60.801 | 20 | 234 | 3070 | 3303 |
| CCCATGTGACACTTCAGCAG    | 60.309 | 20 | 143 | 599  | 741  |
| TGACGGTGAAAAATAGCGAA    | 59.301 | 20 | 255 | 194  | 448  |
| CCCAAGACCCCAATTTGATT    | 60.91  | 20 | 154 | 180  | 333  |
| GGTTTTTGGCTGGTTTTGAG    | 59.587 | 20 | 137 | 1594 | 1730 |
| CGCACCAAAGTTGTTTGTC     | 59.22  | 20 | 239 | 1281 | 1519 |
| TTTCATTTCTTTGACTTGCG    | 60.229 | 21 | 110 | 427  | 536  |
| TTTCAATATTTAACTGAATTAAC | 57.55  | 26 | 162 | 563  | 724  |
| AAGAGGGCCACAAACCCTAT    | 59.827 | 20 | 220 | 17   | 236  |
| TCGAGAGTTTCGGATTTTTGAA  | 59.809 | 21 | 116 | 344  | 459  |
| CCCAAGACCCCAATTTGATT    | 59.59  | 19 | 130 | 3022 | 3151 |
| CTACCGTATGAAAGGGGCAC    | 59.452 | 20 | 190 | 41   | 230  |
| CCCAAGACCCCAATTTGATT    | 60.91  | 20 | 253 | 4794 | 5046 |
| AAGTCATGGGTATGCAGGGA    | 60.34  | 20 | 189 | 6    | 194  |
| TTGTGTTTTGAGCACTTCGC    | 60.035 | 20 | 251 | 485  | 735  |
| CCCAAGACCCCAATTTGATT    | 60.91  | 20 | 180 | 1962 | 2141 |
| ATGGTGTCCACTTTCCACCT    | 59.279 | 20 | 192 | 628  | 819  |
| TTTTGAGAAGGTTCTTAATTC   | 59.227 | 26 | 255 | 256  | 510  |
| ATTAGCAAATTTCGGGACGA    | 59.547 | 20 | 269 | 385  | 653  |
| TCACAACAAGAGCGTGCTTC    | 60.183 | 20 | 130 | 915  | 1044 |
| CCTCAAAAACCAATAAATGAA   | 60.871 | 24 | 271 | 7    | 277  |
| TGCTGACAATGATATGTGTTCA  | 58.039 | 23 | 223 | 556  | 778  |
| TGGCATCCAATCAACAAGAA    | 60.049 | 20 | 273 | 140  | 412  |
| TTGAAATTTTCGAGTTGGACG   | 58.745 | 20 | 257 | 626  | 882  |
| TGGCCAAATACCCGAATTTAT   | 60.385 | 21 | 206 | 5    | 210  |
| ATGTAGCCGACCCCAATTTT    | 60.562 | 20 | 165 | 976  | 1140 |
| TGGAAGTTTTACGAGAGCCG    | 60.378 | 20 | 213 | 275  | 487  |
| AACCCAGCGTAGAGGAGGTT    | 60.132 | 20 | 263 | 4741 | 5003 |
| TTTTTCGCGACAGTCAAAGA    | 59.585 | 20 | 173 | 0    | 172  |
| GCCGACCTCACATAGTTGAA    | 58.724 | 20 | 223 | 320  | 542  |
| GTTTCTGCCCGTGGACATAG    | 60.517 | 20 | 280 | 86   | 365  |
| TCCTAATCCCCGAAATACC     | 59.978 | 20 | 165 | 651  | 815  |
| TAGGTCAGTGGGGTGGTCAT    | 60.238 | 20 | 134 | 529  | 662  |
| TGGGGTGATTATGGTGGTTT    | 59.91  | 20 | 201 | 239  | 439  |
| ACACTTTCGAGATATAAATTCA  | 57.327 | 27 | 251 | 475  | 725  |
| TGTTTATGTTTGATGTTATGTAT | 58.499 | 27 | 278 | 0    | 277  |
| TGGTTGCAAGCTTTGGTTG     | 59.734 | 20 | 273 | 2    | 274  |
| CATGAAGATGAAGCTGCCCT    | 60.362 | 20 | 159 | 68   | 226  |

|                         |        |    |     |      |      |
|-------------------------|--------|----|-----|------|------|
| TTGTGGCTCTGTGCCTCTTA    | 59.591 | 20 | 161 | 1173 | 1333 |
| CTCCTCGCTCTCTCCTCTCA    | 59.962 | 20 | 131 | 577  | 707  |
| GCACGTGCGTAGAGGGTAGT    | 60.343 | 20 | 222 | 472  | 693  |
| AAAATGACATGCAAGGAAAAA   | 57.299 | 21 | 226 | 952  | 1177 |
| TCTCCTTGTTTGGGAAGTGG    | 60.081 | 20 | 153 | 8    | 160  |
| TGAAAAGTGCCTCCACACTG    | 59.873 | 20 | 248 | 75   | 322  |
| CCCAAGACCCCAATTTGATT    | 60.91  | 20 | 211 | 3393 | 3603 |
| ACTAACTGAGCTTGAGCGCC    | 59.786 | 20 | 189 | 210  | 398  |
| TTTCACCTATGCATTTGCCA    | 60.073 | 20 | 275 | 3265 | 3539 |
| ATTCATTCCCATCCGTCAA     | 60.133 | 20 | 196 | 1783 | 1978 |
| ACATCAGTGTGTTCCGGTGA    | 60.005 | 20 | 253 | 3474 | 3726 |
| GAACGTGCAGCTCAACAGAA    | 60.183 | 20 | 188 | 2    | 189  |
| TCGATTAACGAAGTCTCTCCCT  | 59.371 | 22 | 274 | 695  | 968  |
| ACCATCAGAGCACGACAAAA    | 59.293 | 20 | 269 | 1543 | 1811 |
| ATTCACGACGTGCAAACCTGT   | 59.217 | 20 | 264 | 430  | 693  |
| AACTCCGCAATCACTTTGCT    | 59.882 | 20 | 209 | 629  | 837  |
| TTACTTACCACCCAACCCCC    | 60.826 | 20 | 235 | 8278 | 8512 |
| GCCTCAGTTTTCAGCTTTGG    | 59.993 | 20 | 260 | 710  | 969  |
| ACCTACTAAGGCCTTCCCCA    | 59.955 | 20 | 277 | 170  | 446  |
| CCACTACCATACTGGGCGTT    | 59.875 | 20 | 213 | 540  | 752  |
| CAAAGACCTAAGGCACCAGG    | 59.728 | 20 | 258 | 6185 | 6442 |
| ATGTAGCCGACCCCAATTTA    | 59.297 | 20 | 262 | 431  | 692  |
| GCTCCCCTTACAATAACCA     | 59.933 | 20 | 268 | 2    | 269  |
| ATGTAGCCGACCCCAATTTAT   | 59.585 | 21 | 267 | 2321 | 2587 |
| ACCACAGGTCGTTTGAAGC     | 60.156 | 20 | 216 | 731  | 946  |
| TTCCAATCTCAAGGGGATGA    | 60.395 | 20 | 263 | 205  | 467  |
| TGCATGTTGATGTGTCTGCTT   | 60.326 | 21 | 271 | 948  | 1218 |
| TCTCCGACCCATCTACCAAG    | 60.065 | 20 | 255 | 253  | 507  |
| TGGAGGAGGACCGAGATATG    | 60.027 | 20 | 273 | 247  | 519  |
| TCTACTGGGATAGTTGCGGC    | 60.235 | 20 | 198 | 657  | 854  |
| TGTTGGCGAAACCCTATGAT    | 60.331 | 20 | 241 | 778  | 1018 |
| AATGCTCCACCCAATGACTC    | 59.934 | 20 | 140 | 1409 | 1548 |
| CTGCATGCATTTATTGGACG    | 60.096 | 20 | 259 | 1656 | 1914 |
| CCAAGTTAGGGTTTCTGACAC/  | 59.142 | 22 | 149 | 502  | 650  |
| GAGCCTGCTTTTTAGTGGA     | 60.523 | 20 | 280 | 3520 | 3799 |
| AATTGGTTTGAATTACGCGA    | 59.485 | 21 | 265 | 2659 | 2923 |
| TCCACCTTTTCCCTCACAA     | 60.081 | 20 | 167 | 220  | 386  |
| TTAACTGGCAGAGCAGCCTT    | 60.154 | 20 | 220 | 63   | 282  |
| TGATCGACAAATGAATCCCC    | 60.67  | 20 | 111 | 6    | 116  |
| ACGACCAATTGCTTCGTTTC    | 60.118 | 20 | 212 | 603  | 814  |
| CAGCAAGATGAGATCACCGA    | 59.942 | 20 | 216 | 4405 | 4620 |
| AGTGGCTGGTACGGAATACG    | 60.015 | 20 | 159 | 689  | 847  |
| GAGAGGAATCAAGCCTGGTG    | 59.803 | 20 | 221 | 509  | 729  |
| ACATCCCAGAACAAGGACCA    | 60.363 | 20 | 104 | 281  | 384  |
| TGTCCTTAAAACCACCGGAC    | 59.83  | 20 | 119 | 462  | 580  |
| TCACCTCCATTGCTTTTTCC    | 60.051 | 20 | 199 | 948  | 1146 |
| AGGAAGGCCTTAGTTGGGAA    | 60.068 | 20 | 278 | 1259 | 1536 |
| CTGAGAGAAGTCTGGGAGCG    | 60.275 | 20 | 196 | 944  | 1139 |
| GTGCCTAGCTTGTGTTAAATTG  | 60.199 | 23 | 197 | 107  | 303  |
| CTTTCACCGTCTCATCGACA    | 59.831 | 20 | 229 | 412  | 640  |
| GCACATTTGGGGTTGTGAAT    | 60.624 | 20 | 270 | 287  | 556  |
| TGACAATTAGCAACCCACCA    | 59.964 | 20 | 179 | 1299 | 1477 |
| CGAACTTCGTGACGTGAACA    | 60.906 | 20 | 151 | 157  | 307  |
| TGTTCCATGTAGTTGAGGCG    | 59.716 | 20 | 273 | 237  | 509  |
| GCACAACAATGATTTTTCAGTC  | 60.032 | 23 | 272 | 1074 | 1345 |
| TGAATATTTAAAGGGATTGTTT, | 60.006 | 26 | 263 | 887  | 1149 |
| TCAATGACAAAGGAAAACGAT   | 59.975 | 22 | 201 | 10   | 210  |
| ACCGTAAGGTTGCGAACATC    | 60     | 20 | 184 | 1206 | 1389 |



|                         |        |    |     |      |      |
|-------------------------|--------|----|-----|------|------|
| CCCATTGCATTCTCCACTAA    | 60.118 | 21 | 158 | 2191 | 2348 |
| GATGAAGGAAAAGTGCGAAGG   | 59.813 | 20 | 111 | 312  | 422  |
| TAAAAGCAAAAAGGGCATGG    | 60.068 | 20 | 251 | 94   | 344  |
| CAAGATTGGTTTTGTGCATACT  | 59.602 | 24 | 233 | 1269 | 1501 |
| CCCAAGACCCCAATTTGATT    | 60.91  | 20 | 275 | 1738 | 2012 |
| TCTTCTAGGGGTGCTTCTGC    | 59.574 | 20 | 161 | 719  | 879  |
| CAGTTCTTGCCTTCCCTTG     | 59.846 | 20 | 175 | 17   | 191  |
| CGGAGACTGGAGGTGACTA     | 60.252 | 20 | 166 | 629  | 794  |
| TCAGCACCCACTGTGAAAAC    | 59.726 | 20 | 265 | 424  | 688  |
| GAAGGACCGAGTTGCAAGAA    | 60.375 | 20 | 184 | 59   | 242  |
| ACATGTTAAACAACCCACCTI   | 59.543 | 22 | 257 | 442  | 698  |
| CATTTTCATGATCACCAATTTGC | 60.196 | 22 | 237 | 186  | 422  |
| CTGGATTCAAACCCTCTCCA    | 60.042 | 20 | 246 | 228  | 473  |
| TCTGGAATGTTTTGAGTTAATG  | 58.311 | 23 | 237 | 511  | 747  |
| TACGCATTGGTTCGTAATGG    | 59.443 | 20 | 268 | 5    | 272  |
| AGAGATACCACCGTTGCCTG    | 60.134 | 20 | 251 | 71   | 321  |
| TTTCACGTGTGCTATTTTCGG   | 59.729 | 20 | 181 | 3299 | 3479 |
| TGTAGTGTGAGCAGCAGCCT    | 59.801 | 20 | 121 | 694  | 814  |
| ACCTTAGCCCGGTGAACTT     | 60.132 | 20 | 210 | 3    | 212  |
| GGAGACCGAATTGGTAGCCT    | 60.464 | 20 | 229 | 12   | 240  |
| AAAAGCGAAGAGAGCGAATG    | 59.73  | 20 | 260 | 189  | 448  |
| ATCGAATTACCCGTTTGTGC    | 59.829 | 20 | 248 | 689  | 936  |
| CAATCGGCCAAAATGTATCC    | 60.153 | 20 | 235 | 2    | 236  |
| CGAGGGCGCATGTACTATCT    | 60.257 | 20 | 181 | 3733 | 3913 |
| GAATCCACGACAAGGTGGTT    | 59.827 | 20 | 149 | 12   | 160  |
| ATGGAACAGTGCACAAAATG    | 59.572 | 20 | 258 | 1944 | 2201 |
| TGGAGGATGTAGAAGGTGGC    | 60.073 | 20 | 214 | 939  | 1152 |
| GAGCTCCTTGTGCTGAGCTT    | 59.751 | 20 | 135 | 3641 | 3775 |
| TCATACGCATGAGGGATAAAA   | 58.122 | 21 | 230 | 134  | 363  |
| AGGTTCTTCGTCAAAAAGGCA   | 59.853 | 20 | 153 | 3    | 155  |
| TGGTGTAGATTAACACAACCTC  | 57.939 | 27 | 254 | 536  | 789  |
| TTTGGTTCATGTAGCCGACC    | 60.894 | 20 | 223 | 307  | 529  |
| AAACGGCACCGAATACAAAC    | 59.867 | 20 | 187 | 122  | 308  |
| TGTTTTAAGACAAGGGGCGT    | 59.609 | 20 | 232 | 2425 | 2656 |
| TCTTCCTCTTCTTGCCTTGC    | 59.694 | 20 | 256 | 2145 | 2400 |
| CCACGGTCATTTCTAGGGAA    | 59.926 | 20 | 262 | 695  | 956  |
| GCCCCTTGATTAACATCCAT    | 58.717 | 20 | 279 | 150  | 428  |
| TCAAATCCTCCCTACCCTGA    | 59.478 | 20 | 274 | 26   | 299  |
| GTGATGAAGCGTGTGAGGTG    | 60.319 | 20 | 126 | 1403 | 1528 |
| ATCAAAACAGGGGATTTGAAG   | 59.814 | 22 | 268 | 241  | 508  |
| GAAGGGCCTTGTCTTCCTCT    | 59.817 | 20 | 257 | 281  | 537  |
| GGTTTTCTTCTGGTTCTGCG    | 59.853 | 20 | 156 | 745  | 900  |
| AATGAACGGGAATAGCTGGA    | 59.528 | 20 | 149 | 1236 | 1384 |
| GAGCTGCAACTAAGGCCAAC    | 60.022 | 20 | 222 | 127  | 348  |
| TTTTAATCACTATACCCGATTC  | 58.455 | 24 | 252 | 1174 | 1425 |
| TGTTAGCCACATTGGATGA     | 59.924 | 20 | 269 | 392  | 660  |
| TGGGACCAGAAAGATGAAGG    | 60.042 | 20 | 225 | 508  | 732  |
| AGAGAACAAGTGGGTGCTCG    | 60.444 | 20 | 200 | 39   | 238  |
| AAAAGGAGGAAAAGGGACGA    | 60.046 | 20 | 168 | 1749 | 1916 |
| CAATCTTGCACCACATTTGC    | 60.119 | 20 | 142 | 5005 | 5146 |
| ATATTGGGACATAGCCCGGT    | 60.419 | 20 | 245 | 226  | 470  |
| CGAGTTTATGACCATCCGGT    | 59.813 | 20 | 118 | 5    | 122  |
| GGTGAACCTTCCATCATTC     | 59.192 | 20 | 126 | 1    | 126  |
| GGCACAGATTTGAGGTAGC     | 59.843 | 20 | 166 | 364  | 529  |
| GGAAAACGCGTTGCTATGTAA   | 60.143 | 21 | 201 | 417  | 617  |
| GAAACCGTCGGAATTAATGG    | 59.429 | 20 | 174 | 30   | 203  |
| AAGTTCACACCCGAATCCAA    | 60.353 | 20 | 174 | 254  | 427  |
| ATTCCACATCATGCAAGGCT    | 60.492 | 20 | 269 | 790  | 1058 |

|                        |        |    |     |      |      |
|------------------------|--------|----|-----|------|------|
| TGACATGATGGGGGAAGAAT   | 60.135 | 20 | 232 | 243  | 474  |
| ATAGAAGGGGGATCGGTTTG   | 60.145 | 20 | 228 | 875  | 1102 |
| AAAGCGAATGCCCTTTGTAA   | 59.72  | 20 | 246 | 2651 | 2896 |
| CGCCTTTGCTGGTGTTTATT   | 60.131 | 20 | 234 | 447  | 680  |
| ACGGAGAATGGAGATTCACG   | 60.073 | 20 | 260 | 5    | 264  |
| TCTGCTGCTTCATCTGCATT   | 59.704 | 20 | 218 | 1001 | 1218 |
| TGTCGGTGTTACCCCAATCT   | 60.232 | 20 | 169 | 1363 | 1531 |
| CAAAACATCATTACGACGC    | 60.119 | 20 | 268 | 313  | 580  |
| TGGGTTTATTGATGCACCTG   | 59.395 | 20 | 206 | 556  | 761  |
| TTCATCAAGAGATTACGTTTTA | 58.427 | 27 | 146 | 114  | 259  |
| TGATATCGGGCTTTGAGCTT   | 59.807 | 20 | 197 | 587  | 783  |
| GTTGTCGTCGGAGGAAGAAG   | 59.844 | 20 | 208 | 462  | 669  |
| CAAGAAAACAGTGGGGGAGA   | 60.081 | 20 | 170 | 1203 | 1372 |
| CGCATGTCATCACTCGCTAT   | 59.854 | 20 | 126 | 998  | 1123 |
| ACGAAACCCCTTCCACTGTT   | 60.776 | 20 | 129 | 122  | 250  |
| CTGGGTAAACCCACGGACT    | 59.829 | 19 | 276 | 809  | 1084 |
| CTCTCCAAATCCCACCAAGA   | 60.042 | 20 | 210 | 2014 | 2223 |
| ACGGGGGTGTTAGTTCAGAAT  | 59.743 | 21 | 273 | 49   | 321  |
| TCCCTCGAAGGTAAGAGCAA   | 59.948 | 20 | 187 | 108  | 294  |
| AACCTTGACGAGGAGCTTGA   | 59.989 | 20 | 252 | 474  | 725  |
| TAGCAAGGAGGAAGGAAGCA   | 60.088 | 20 | 270 | 1638 | 1907 |
| AAAAATAAGCGCCACGTCAC   | 60.138 | 20 | 279 | 1044 | 1322 |
| GCTTGGAGAGAAGGAAGCAA   | 59.694 | 20 | 243 | 105  | 347  |
| AATGCAGCTTGGTCGAGTTT   | 59.882 | 20 | 165 | 2501 | 2665 |
| GGAATCCTCTGTTTCCGCTT   | 60.578 | 20 | 262 | 1911 | 2172 |
| TCGTGCCTGTCCTAACAATG   | 59.716 | 20 | 130 | 486  | 615  |
| CCAACACTTGTGCAAACCTCA  | 59.79  | 21 | 280 | 908  | 1187 |
| ATTCGATCGTAAACAGCGG    | 60.096 | 20 | 252 | 103  | 354  |
| GCCCTGTTACATATTTCCAC   | 59.614 | 22 | 213 | 543  | 755  |
| GGACTCCGTCATCCTCTTGA   | 60.199 | 20 | 243 | 2331 | 2573 |
| ACACCCACTCCTCCCTCTCT   | 60.112 | 20 | 244 | 53   | 296  |
| TGCTAAAAATATGATGAATGC/ | 57.474 | 23 | 203 | 7    | 209  |
| AATACGACGAGGCGGTTTTA   | 59.609 | 20 | 259 | 1471 | 1729 |
| CGAACAAATTTCAAACGGCT   | 60.11  | 20 | 245 | 1323 | 1567 |
| GTAAATGGCCGAATCAGGAA   | 59.901 | 20 | 149 | 1650 | 1798 |
| GCAGTGCGACAAGCATTAAA   | 60.021 | 20 | 180 | 781  | 960  |
| GTGATGATGGTGACGAAAG    | 60.272 | 20 | 174 | 943  | 1116 |
| AATAGTACAGTGGGTTTTGCTA | 57.832 | 24 | 215 | 1119 | 1333 |
| CCACTCCGTCTTCTTTTGA    | 60.224 | 20 | 242 | 22   | 263  |
| TTTGATTGGGAATAATTGGG   | 57.289 | 20 | 170 | 1010 | 1179 |
| CTTCAACTTGGCGCACTGTA   | 60.05  | 20 | 262 | 632  | 893  |
| GAAACGCGTCCTGATAGGAAT  | 60.465 | 21 | 218 | 282  | 499  |
| TAATGCAGGTCACCAGTCGT   | 59.165 | 20 | 276 | 2    | 277  |
| CCAATTCAAGTCAGTGTTCTT  | 58.227 | 22 | 257 | 262  | 518  |
| GGGTCAGATGTACGCAACATT  | 59.874 | 21 | 269 | 280  | 548  |
| AATGGGCCAACTACAGTGAAT  | 58.45  | 21 | 250 | 2160 | 2409 |
| TTCGATTTTGGGAGTTAGGG   | 59.016 | 20 | 145 | 0    | 144  |
| ACATTCGTGGCATTGGTTT    | 60.235 | 20 | 160 | 4    | 163  |
| GGTGATAAAAATGCCCAATCA  | 59.652 | 21 | 274 | 375  | 648  |
| AGCACATGCTGCTCACAAC    | 60.064 | 20 | 236 | 134  | 369  |
| CATCCTCCATCTCCATCCAC   | 60.288 | 20 | 218 | 1847 | 2064 |
| AAAAGTCCATCCCAAGAAAAA  | 57.71  | 21 | 253 | 325  | 577  |
| TACCCACTGGAGGTGAAAGG   | 59.959 | 20 | 268 | 1885 | 2152 |
| ACCCTACGAAGGGGAGACAT   | 59.817 | 20 | 279 | 348  | 626  |
| GGGCTTCATTTCTTGCTGC    | 59.82  | 20 | 204 | 345  | 548  |
| CTAATTTTACAAATTTAACGAG | 57.347 | 27 | 187 | 296  | 482  |
| GCCTGTCTTTGGAACCCAT    | 59.973 | 20 | 118 | 5697 | 5814 |
| AAGCCATCTTCTCTCCTCC    | 59.778 | 20 | 205 | 557  | 761  |

|                         |        |    |     |      |      |
|-------------------------|--------|----|-----|------|------|
| TTCCTATGGTTGTTGGCGTT    | 60.365 | 20 | 226 | 1145 | 1370 |
| TGGAGGAAAAGTTCTTTCAATT  | 59.988 | 24 | 276 | 526  | 801  |
| ACACCTACCATAACGGCGTG    | 60.827 | 20 | 110 | 4    | 113  |
| ACATCAAAAAGTTTTCCAACATC | 59.793 | 24 | 264 | 364  | 627  |
| CTCGAGCGATTCAACTTGC     | 59.688 | 19 | 255 | 567  | 821  |
| GCCTTCATCATCTTCTTCGC    | 59.923 | 20 | 231 | 172  | 402  |
| AAAAGAGCGGAAACAGAGCA    | 60.132 | 20 | 236 | 342  | 577  |
| GATTCTCCACTCTCCCCTTTTT  | 59.947 | 22 | 173 | 949  | 1121 |
| GGACAGTTCACATGCAACAAT   | 58.485 | 21 | 240 | 5924 | 6163 |
| TTGTGCACGATTTACGCATT    | 60.14  | 20 | 155 | 1810 | 1964 |
| AATCAGCCAAGTCGAAGGAA    | 59.813 | 20 | 150 | 61   | 210  |
| TCCAATCATTACCCTTGGCT    | 59.387 | 20 | 230 | 16   | 245  |
| GCAAGTTATCAAACCGCCTC    | 59.713 | 20 | 134 | 1900 | 2033 |
| ATGTAGCCGACCCCAATTTAT   | 59.585 | 21 | 242 | 572  | 813  |
| CGAAACCCTCGTTACACCAC    | 60.41  | 20 | 188 | 622  | 809  |
| GTTCAAGTTTTGACAATGGGC   | 59.467 | 21 | 257 | 23   | 279  |
| AAAAGCAAAGCGAAAAAGCA    | 60.13  | 20 | 271 | 908  | 1178 |
| CTAAATGTAGGGGCACCGTC    | 59.452 | 20 | 218 | 2837 | 3054 |
| AACGGCGTTTTGAATACTGG    | 59.996 | 20 | 111 | 590  | 700  |
| AGGTCAAGTTCACACCAAACA   | 58.102 | 21 | 124 | 52   | 175  |
| TCTTGGGCTTTCAAAAATGG    | 60.046 | 20 | 156 | 533  | 688  |
| TGTGGATGAATGCAAGGAAA    | 60.049 | 20 | 200 | 317  | 516  |
| TTCGCGATGAAGGTTCTTTT    | 59.823 | 20 | 180 | 566  | 745  |
| ACACAATCAGCACAGTGCAA    | 58.871 | 20 | 128 | 3    | 130  |
| TCGTTTCTGTCTTCTGCG      | 60.136 | 20 | 116 | 248  | 363  |
| AGCATGCACAAAACGAGTTC    | 58.929 | 20 | 142 | 56   | 197  |
| GGTGAAAAGAGGGGAAGCTC    | 60.19  | 20 | 161 | 506  | 666  |
| CAATGCTTATGTTCCCTCCCT   | 60.326 | 21 | 235 | 851  | 1085 |
| TGGTTCCTATGTTGTCCAAA    | 60.213 | 21 | 224 | 961  | 1184 |
| GGCTTTCAGCTATTGCAGC     | 60.124 | 20 | 252 | 3325 | 3576 |
| TAGGGAGATGATGAGGTGCC    | 60.034 | 20 | 274 | 1513 | 1786 |
| GAGACGAGCCATTGTTGGAT    | 60.081 | 20 | 149 | 498  | 646  |
| TTTGCAAATCAATTGGACG     | 59.538 | 20 | 190 | 22   | 211  |
| TTACGTTTACAAATCGCCCC    | 59.832 | 20 | 219 | 235  | 453  |
| TGCTTTTTCCATTTTGCCATT   | 60.436 | 20 | 237 | 969  | 1205 |
| AGAGAAGGTGCCCTGTTGAA    | 59.844 | 20 | 221 | 2522 | 2742 |
| TGCTTCTGAAGGTTCTGCCT    | 60.134 | 20 | 182 | 30   | 211  |
| TGGAGGCATCAATCTTGTGT    | 59.09  | 20 | 236 | 792  | 1027 |
| GGAGGCGTCAGCTTACATTG    | 60.796 | 20 | 267 | 848  | 1114 |
| GGAGCCATGAGACTAGACGG    | 59.827 | 20 | 209 | 280  | 488  |
| TTTTGCAATTTTCATTGGCTT   | 59.595 | 21 | 110 | 307  | 416  |
| TGAGTTCAAAATGTCAAAGT/   | 60.614 | 26 | 245 | 460  | 704  |
| CCTGAACCACCACCTAAACC    | 59.304 | 20 | 178 | 11   | 188  |
| GTAGGTACAACACCATGCCG    | 58.926 | 20 | 199 | 1    | 199  |
| CACCAGCTTCTGAACCCATC    | 60.656 | 20 | 113 | 1948 | 2060 |
| GGCCGCCTCATACTTTGTAA    | 60.096 | 20 | 172 | 188  | 359  |
| TAGATCCCCCTGTCCCTTTT    | 59.761 | 20 | 195 | 333  | 527  |
| AAGCGCAAATATATCCCGTG    | 59.95  | 20 | 232 | 5161 | 5392 |
| ATTGTTTTCCGCCATTCTTG    | 59.938 | 20 | 241 | 492  | 732  |
| CTCCCTCCTCATTCTACCA     | 60.191 | 20 | 119 | 832  | 950  |
| CGTCTACGAGGACGTGCTAA    | 59.097 | 20 | 228 | 1097 | 1324 |
| TCCTTTGTCAGGTTTGGCT     | 59.711 | 20 | 227 | 1397 | 1623 |
| CAAATGTCGTGTTGAGTGGC    | 60.16  | 20 | 227 | 893  | 1119 |
| AACTCGAAGCCTTGACCTGA    | 59.989 | 20 | 226 | 1532 | 1757 |
| TATCGGAGGAGGATGTGGAG    | 60.027 | 20 | 199 | 596  | 794  |
| TTTTCCTTGGGTAAATTGCG    | 59.937 | 20 | 266 | 743  | 1008 |
| TTGCCGGTACATACATGGAG    | 59.42  | 20 | 225 | 54   | 278  |
| GTTCTTGGTTGGGAGGTGAA    | 59.943 | 20 | 249 | 2929 | 3177 |

|                                    |        |    |     |      |      |
|------------------------------------|--------|----|-----|------|------|
| TTCAAGCAATTTCTGCCAAA               | 59.42  | 20 | 255 | 767  | 1021 |
| ACATCTTTACTGCACCACCAG <sup>A</sup> | 59.662 | 22 | 262 | 1370 | 1631 |
| CCATCTTTCTTTCTCGACGG               | 59.807 | 20 | 177 | 1389 | 1565 |
| TCCATGGACGGAAGAAGAAC               | 60.05  | 20 | 196 | 156  | 351  |
| AGGAAGGGAATGGTTTCACA               | 59.381 | 20 | 192 | 11   | 202  |
| CACGCGCATTTAATTTTGTG               | 60.131 | 20 | 267 | 1277 | 1543 |
| GAATTGGCCTTGCTTGCTTA               | 60.343 | 20 | 231 | 278  | 508  |
| CAGCATACCTAAACCTCCCTG              | 58.73  | 21 | 260 | 16   | 275  |
| CCAATTTGGACCAAGTCACA               | 59.389 | 20 | 135 | 608  | 742  |
| ATTTTACGGTGGCAACTTGG               | 59.861 | 20 | 118 | 513  | 630  |
| AAATCTGGATCCATCAAGCG               | 60.036 | 20 | 195 | 1224 | 1418 |
| TCCTTTGTTCTTTCTGTAGCCTC            | 59.078 | 23 | 268 | 817  | 1084 |
| TTGATTTCCAGTCCCCATTC               | 59.727 | 20 | 229 | 1353 | 1581 |
| GGTTCATGTAGCTGACCCCA               | 60.924 | 20 | 175 | 815  | 989  |
| AATTGCCAATACCCAATCCA               | 60.016 | 20 | 273 | 31   | 303  |
| AAAATGACGTGAAGTATGAAG              | 59.557 | 23 | 251 | 991  | 1241 |
| GGAACAAGAGATTTTCGCAGC              | 59.962 | 20 | 166 | 334  | 499  |
| GCACGGGTTGAGTTCTTGTT               | 60.156 | 20 | 205 | 511  | 715  |
| ATAGCAACATGTGCAAGCCA               | 60.288 | 20 | 171 | 288  | 458  |
| GTTAATTTGAGCGCTGGAGG               | 59.845 | 20 | 185 | 97   | 281  |
| AATGGCGATGAAGGAGAAGA               | 59.773 | 20 | 254 | 926  | 1179 |
| AAAGGAGAACGTGGGTTGGT               | 60.776 | 20 | 161 | 711  | 871  |
| TTCCGCTGTTACTGTTGCTG               | 60.05  | 20 | 244 | 414  | 657  |
| TTTGGTCGAAAAGTACGCAA               | 59.344 | 20 | 172 | 9    | 180  |
| AGGAATCCCTCTTTCTCCCA               | 60.008 | 20 | 277 | 682  | 958  |
| TGCTGAGCTTAGGCTTAGTGG              | 59.799 | 21 | 243 | 1666 | 1908 |
| AAAATGTTTGTCTCGGCTG                | 60.11  | 20 | 264 | 64   | 327  |
| CCTTCTCCCTCTCTCCCACT               | 59.801 | 20 | 192 | 614  | 805  |
| CAGGGACTGCTAAAGGCAAA               | 60.378 | 20 | 196 | 1186 | 1381 |
| GAGAACATGTGCAGTGTCCG               | 60.319 | 20 | 277 | 727  | 1003 |
| GGAAATGGAGGCACTGATCT               | 59.094 | 20 | 274 | 691  | 964  |
| CCACATAGCAACGAAGCAGA               | 60.011 | 20 | 252 | 2313 | 2564 |
| GACCCACATAGTGGGAAAA                | 59.647 | 20 | 154 | 1066 | 1219 |
| TTCCGGTTTTACAATTCACA               | 59.941 | 20 | 123 | 1045 | 1167 |
| TTCGAAATCGTGACCTAAA                | 59.301 | 20 | 238 | 767  | 1004 |
| AGGCTTGTTGACCGCTTAGA               | 60.015 | 20 | 251 | 134  | 384  |
| AACGTAGGTGACGATGAGGG               | 59.989 | 20 | 138 | 258  | 395  |
| TTCGTCTTCTGCCTCTTCGT               | 60.134 | 20 | 246 | 118  | 363  |
| CAGCTCCTCCTCCTCCTT                 | 60.088 | 20 | 230 | 730  | 959  |
| AGGCAAAGCAGGATGAAGAA               | 59.955 | 20 | 121 | 803  | 923  |
| AACAGGGTCCCTTCGTTTTT               | 59.842 | 20 | 210 | 563  | 772  |
| TCATTTCAAGTTTGCCTAAGCC             | 60.302 | 23 | 224 | 6    | 229  |
| TGTTGGTTCAAACCTAATCCAA             | 57.617 | 23 | 116 | 2517 | 2632 |
| CCTAGGCTCTCAGACACACG               | 58.621 | 20 | 241 | 284  | 524  |
| ATGAATGCCAAAGAAGTGGC               | 60.081 | 20 | 216 | 919  | 1134 |
| ATTGCCTTTTGGATGAAGCA               | 60.585 | 20 | 235 | 359  | 593  |
| GCACTCGGGATTACTTGAGC               | 59.843 | 20 | 245 | 1903 | 2147 |
| GGTACGTTCGATGGCTAGAGG              | 59.717 | 20 | 110 | 3440 | 3549 |
| TGGGGAAAGACCACTCTAGC               | 59.284 | 20 | 271 | 0    | 270  |
| CACGATTCATATGTGCTTCCA              | 59.557 | 21 | 264 | 31   | 294  |
| AGGATCAAGTGGGCAAAGAA               | 59.67  | 20 | 279 | 4497 | 4775 |
| CCCACGTACGATCTCAGGTT               | 59.989 | 20 | 221 | 183  | 403  |
| TCGATCCCATGGAAGAAGAC               | 60.011 | 20 | 215 | 1681 | 1895 |
| GGAGAAGCTGATTGTGACCC               | 59.661 | 20 | 149 | 9    | 157  |
| GGGTAAGCAAATGGTCAGC                | 59.574 | 20 | 216 | 1759 | 1974 |
| GAGCTGGCCGTAGTTTCCTA               | 59.476 | 20 | 198 | 485  | 682  |
| TTTGCATGTGAAAAATGGTTT              | 58.057 | 21 | 206 | 968  | 1173 |
| TGAGGAAAATGGGTGGAAAG               | 59.903 | 20 | 260 | 685  | 944  |

|                         |        |    |     |      |      |
|-------------------------|--------|----|-----|------|------|
| AGCAATCTCTACAAGCGGGA    | 59.978 | 20 | 210 | 67   | 276  |
| GCTGTGCATTATCACCTACCTC  | 58.747 | 22 | 275 | 666  | 940  |
| GCAAGCATTTCACCACCTT     | 60.118 | 20 | 260 | 390  | 649  |
| GCCTGAATAACGAATGTTGGA   | 59.952 | 21 | 139 | 351  | 489  |
| AAAAACAACAAACAACCACTT   | 58.621 | 23 | 168 | 207  | 374  |
| GTCCATCGACTTCACCACCT    | 59.969 | 20 | 101 | 1359 | 1459 |
| TCACTTGCCTTGTTTTGCTT    | 59.912 | 21 | 225 | 407  | 631  |
| TTGGAGAAACAGTGCTGCTG    | 60.175 | 20 | 195 | 988  | 1182 |
| AGGGCTCTGCTAAAACGACA    | 60.015 | 20 | 266 | 142  | 407  |
| TTTTAAATTAAGAGCCACCCAT  | 58.286 | 24 | 178 | 400  | 577  |
| CATGTTCTCGGAATCACCT     | 59.927 | 20 | 228 | 647  | 874  |
| CGAAGCCCGAGCCTAATAAT    | 60.547 | 20 | 199 | 370  | 568  |
| AAACCAACATTACACCACCTT   | 58.331 | 21 | 231 | 487  | 717  |
| AATTTATTGGGATTAAGGCTTT  | 57.79  | 23 | 192 | 754  | 945  |
| TCAAACCAGATGACCCAACA    | 59.935 | 20 | 133 | 947  | 1079 |
| ATGTAGCCGACCCCAATTTAT   | 59.585 | 21 | 112 | 2141 | 2252 |
| GCTGCTGTCCACATAGCTGA    | 60.168 | 20 | 186 | 63   | 248  |
| CGTCTCTCCGTTGTGTTTGA    | 59.873 | 20 | 280 | 2487 | 2766 |
| GATTTACAGCCATGGTTGCTT   | 60.081 | 20 | 272 | 383  | 654  |
| GCACCCTAAGATGGCAGAGA    | 60.362 | 20 | 229 | 496  | 724  |
| AGGCAGCATTGAGGATTGAT    | 59.658 | 20 | 174 | 104  | 277  |
| GCTAAGGCTGAAAGCAATGG    | 59.982 | 20 | 180 | 693  | 872  |
| AAATCCCTCCCTTTCTTCA     | 59.875 | 20 | 266 | 4843 | 5108 |
| TTACGCTAGTCCGTGGGTTT    | 59.632 | 20 | 207 | 182  | 388  |
| AGCCGATGTTTCGTGAGAAAG   | 60.397 | 20 | 261 | 436  | 696  |
| GATCTCAACTTGGGCTTTGC    | 59.82  | 20 | 219 | 1336 | 1554 |
| CAGGCATAACCATTGCCTCT    | 60.096 | 20 | 260 | 17   | 276  |
| TGCAATTCCTGGAACCTTCT    | 59.67  | 20 | 261 | 1768 | 2028 |
| AGGATGAAAGGGAGGTTTCGT   | 59.935 | 20 | 135 | 534  | 668  |
| TGTAGCCGACCCCAATTTAT    | 59.297 | 20 | 231 | 1329 | 1559 |
| CCCAAGACCCCAATTTGATT    | 60.91  | 20 | 250 | 1864 | 2113 |
| TTGCCTCCTTACACTTATTTATC | 59.631 | 26 | 203 | 2437 | 2639 |
| TTTACACGGTTATCTGCCTC    | 60.074 | 20 | 138 | 241  | 378  |
| CCGCCTCTCCTCCTCTCTAT    | 59.935 | 20 | 255 | 1182 | 1436 |
| ATCCATATAGCCGACCCCA     | 60.126 | 19 | 176 | 0    | 175  |
| AGGCAACACGCTTCATTACC    | 60.14  | 20 | 161 | 3    | 163  |
| TTGCAAGCTGATAGGTGTTCA   | 59.478 | 21 | 278 | 2180 | 2457 |
| GCTCTCATGCGTACAAGCCT    | 60.569 | 20 | 277 | 613  | 889  |
| GCTCCGTCACTGCTACATAGTC  | 59.965 | 22 | 261 | 837  | 1097 |
| TCAATATGACGACGGCTCTG    | 59.823 | 20 | 263 | 192  | 454  |
| TGTGAACGGCACGACATATAA   | 60.006 | 21 | 265 | 196  | 460  |
| GGGCATTTTCACAGACGATT    | 59.939 | 20 | 235 | 2520 | 2754 |
| AGCGGAAGTACAAATGGACG    | 60.132 | 20 | 200 | 1532 | 1731 |
| GCAACATCATCCAGATTGGT    | 58.36  | 20 | 236 | 661  | 896  |
| TACACGTGAAAAGGTTGCCA    | 60.149 | 20 | 266 | 596  | 861  |
| TTATCCGATCGTAAGTGGGG    | 59.778 | 20 | 277 | 530  | 806  |
| AGTACAGGCTGGCATCCCTA    | 59.717 | 20 | 192 | 2276 | 2467 |
| TGGCCTACGTTACTCAACCC    | 59.993 | 20 | 198 | 1020 | 1217 |
| TGCTATGCTTGGAAGTTATGTG  | 59.793 | 23 | 110 | 2596 | 2705 |
| ATTACAGTCAAGGCATGGG     | 59.813 | 20 | 277 | 66   | 342  |
| TTCCCTTGATTTTTCCTGTG    | 57.643 | 20 | 150 | 59   | 208  |
| CCCAAGACCCCAATTTGATT    | 60.91  | 20 | 210 | 2098 | 2307 |
| CCAGCACAAAACAAAATGCT    | 58.822 | 20 | 280 | 654  | 933  |
| CTAGCCTTAATTTGCGACGG    | 59.868 | 20 | 251 | 166  | 416  |
| CCCAAGACCCCAATTTGATT    | 60.91  | 20 | 109 | 1105 | 1213 |
| TTCAATTCTTTGGTCGGGTT    | 59.406 | 20 | 110 | 2377 | 2486 |
| CTGCCAGAGAACTTGAAGC     | 60.134 | 20 | 100 | 1884 | 1983 |
| AAAAAGCAGCACCAGCAACT    | 60.059 | 20 | 152 | 996  | 1147 |

|                        |        |    |     |      |      |
|------------------------|--------|----|-----|------|------|
| TGTGATTCGTTAGGTCTCCAA  | 59.609 | 22 | 244 | 1080 | 1323 |
| TTTCCAAGTACGGGTTTCGAG  | 60.103 | 20 | 248 | 152  | 399  |
| CACAGCACCCATTCTTCTCA   | 59.831 | 20 | 146 | 1505 | 1650 |
| TGCTAAGGTGACGCAAAATGT  | 59.347 | 20 | 264 | 7536 | 7799 |
| GGAACCGTGCGATTTTCTTA   | 60.074 | 20 | 172 | 245  | 416  |
| CATTGGCATGTAGTGATGGC   | 59.955 | 20 | 144 | 464  | 607  |
| GCATTTTATTAACGTGGGCG   | 60.335 | 20 | 174 | 13   | 186  |
| TGAGCTTCCACCTCTTTGGT   | 59.844 | 20 | 215 | 104  | 318  |
| ATGGACTGTGGTGCTGCATA   | 60.144 | 20 | 275 | 62   | 336  |
| TGGGCTAATAATGGAGCTGG   | 60.053 | 20 | 272 | 6117 | 6388 |
| TTTTCGACGACGACAGTTTG   | 59.881 | 20 | 139 | 0    | 138  |
| CCGTTACGATTGCCCTAAAA   | 59.958 | 20 | 109 | 44   | 152  |
| CCCAAGACCCCAATTTGATT   | 60.91  | 20 | 186 | 941  | 1126 |
| AAACACAACCTGGCATCCCTC  | 59.973 | 20 | 181 | 16   | 196  |
| TGAGAGTACGCACAGCAAGG   | 60.199 | 20 | 170 | 59   | 228  |
| AAAAATAAAATATATATGGGG  | 58.563 | 27 | 174 | 95   | 268  |
| TTTTTGGATGGAAAAATGGC   | 59.751 | 20 | 156 | 1518 | 1673 |
| TGTAGCCGACCCCAATTTAT   | 59.297 | 20 | 166 | 1291 | 1456 |
| CCTCCACCGTTACCTCCATA   | 59.807 | 20 | 218 | 632  | 849  |
| GTCACTGCACCACAAGATGG   | 60.162 | 20 | 194 | 7    | 200  |
| TTTTGAGGTTAGTTTGGCCG   | 60.103 | 20 | 128 | 585  | 712  |
| ACCGTCTCATAGCCCATGTC   | 59.957 | 20 | 214 | 54   | 267  |
| TCTTGTGTTTTCCCTTTTGC   | 60.227 | 20 | 176 | 164  | 339  |
| GTGTTGCGAAAAGAGGCAAA   | 60.227 | 20 | 253 | 460  | 712  |
| AGGATCACCAAACTCCCA     | 60.363 | 20 | 277 | 2875 | 3151 |
| GAAGGAACCGTCAGCAATGT   | 60.119 | 20 | 272 | 2131 | 2402 |
| CAAATTAATCAATCTCCTCCTC | 58.164 | 23 | 110 | 2038 | 2147 |
| TTGTTCAAGCAATTCCTCCC   | 60.051 | 20 | 270 | 382  | 651  |
| CTGAATTACGGCGTGGATTT   | 59.96  | 20 | 256 | 0    | 255  |
| GAGTTCCTCCGAGCTGTTGA   | 60.533 | 20 | 248 | 1669 | 1916 |
| CGTGTGGAAGGAGGGTCTAA   | 60.103 | 20 | 146 | 408  | 553  |
| ATGGATGCGTTGCAAATCTA   | 59.14  | 20 | 267 | 2494 | 2760 |
| CCTCAAGGTTCAATTGACTGC  | 59.726 | 21 | 245 | 2771 | 3015 |
| GAGAGGTGAAGAGGTGGACG   | 59.835 | 20 | 249 | 149  | 397  |
| TTCAGACAATGAGGGCTGTG   | 59.831 | 20 | 161 | 867  | 1027 |
| ACGCAACCAAAGAAGGTTGT   | 59.639 | 20 | 107 | 3    | 109  |
| ACAGCGAATCACAGAGGTC    | 60.269 | 20 | 111 | 144  | 254  |
| GGGAGAAGAATTCACGAGCA   | 60.34  | 20 | 228 | 25   | 252  |
| ATGTTGCATGTGAGGTGCAT   | 59.999 | 20 | 265 | 326  | 590  |
| GCATGCATGTGATGTCTGAA   | 59.202 | 20 | 110 | 1533 | 1642 |
| CATGTGGAAGTGTGGAATGG   | 59.806 | 20 | 267 | 340  | 606  |
| TTTGCAAAATGACACACGAA   | 58.728 | 20 | 268 | 1468 | 1735 |
| TGCCACCAAGGAGAGTACAA   | 59.288 | 20 | 133 | 414  | 546  |
| GTGCCATGAATATCGTTCCC   | 60.163 | 20 | 150 | 835  | 984  |
| CTTCTTGCATGTCTGGAGCA   | 60.136 | 20 | 188 | 496  | 683  |
| TCGTCACAATTTGCTTCCAA   | 60.234 | 20 | 260 | 662  | 921  |
| CCCAAGACCCCAATTTGAT    | 59.59  | 19 | 201 | 1394 | 1594 |
| CCTCAAGACCCCAATTTGATT  | 60.173 | 21 | 167 | 375  | 541  |
| ATCAGAAGATCCAGCATGGG   | 60.034 | 20 | 186 | 494  | 679  |
| TGATTAATTGAAGTTGAGATC  | 59.891 | 25 | 210 | 20   | 229  |
| AGGTTGCGTACATTTGACCC   | 59.859 | 20 | 246 | 3222 | 3467 |
| CTCGGAAAATTCCAACGAAA   | 60.046 | 20 | 227 | 941  | 1167 |
| AATGATTGATGAGAACCGCC   | 59.9   | 20 | 248 | 958  | 1205 |
| ATTCTTGCGTGCTCACCTTT   | 59.882 | 20 | 191 | 2090 | 2280 |
| ACGGGTAACACGGACATGAT   | 60.119 | 20 | 205 | 87   | 291  |
| CTCAGCCCTATTGTAGGCCA   | 60.227 | 20 | 253 | 1385 | 1637 |
| ATCTTCATCCTCCCACCTCC   | 60.278 | 20 | 155 | 626  | 780  |
| ACCACAAGCTTCCACCAATC   | 59.973 | 20 | 217 | 269  | 485  |

|                         |        |    |     |      |      |
|-------------------------|--------|----|-----|------|------|
| AGTGG AATGTGGGGAGAGTG   | 59.962 | 20 | 125 | 834  | 958  |
| ATGCAGTCGGCTCTCTCAAG    | 60.7   | 20 | 258 | 525  | 782  |
| TTGATTCGTGAACATTAGGCTC  | 59.229 | 22 | 251 | 101  | 351  |
| TCCCCCAATTGACAATGACT    | 60.173 | 20 | 196 | 5    | 200  |
| GCATTAAATCTATGTTCCATTCC | 57.748 | 23 | 240 | 1256 | 1495 |
| ACGGGCGGTTTTTAATGTTT    | 60.577 | 20 | 237 | 86   | 322  |
| GAATAAGGAATTTCGCACCGA   | 60.038 | 20 | 171 | 35   | 205  |
| CCTCCAATCCATCCTTACCA    | 59.744 | 20 | 248 | 640  | 887  |
| TGCATTAAGGGTTGGAGACA    | 59.123 | 20 | 205 | 445  | 649  |
| TTCGAAACCACTCAACCCAT    | 60.353 | 20 | 213 | 86   | 298  |
| ACGTTCTTCATCGCCTTCAT    | 59.7   | 20 | 118 | 863  | 980  |
| GACGACGTTCTGAGGGAGTC    | 59.841 | 20 | 176 | 812  | 987  |
| CAGATTCAAGGCGGAATGTT    | 60.074 | 20 | 212 | 272  | 483  |
| TTGGGAGTGCATTTTCCTTT    | 59.546 | 20 | 262 | 8    | 269  |
| GGAGGCTACTCTTCCAGCA     | 59.574 | 20 | 228 | 17   | 244  |
| AGATTCAGTCGGTTTGTCCG    | 60.111 | 20 | 243 | 715  | 957  |
| TACTACCCCATCTTCGCACC    | 59.955 | 20 | 193 | 422  | 614  |
| GGTTTCGCCTTGTCTTGTGA    | 60.11  | 20 | 254 | 942  | 1195 |
| CAAGAGCATCCCACCTCACA    | 59.831 | 20 | 272 | 873  | 1144 |
| TGCCGATCGCAGTTATGTTA    | 60.237 | 20 | 190 | 200  | 389  |
| CGAGAAGATCTTGAGGTCGC    | 60.096 | 20 | 263 | 884  | 1146 |
| TGAGCACATCGGAGAAAGTG    | 59.984 | 20 | 278 | 113  | 390  |
| TGTTGTAGCACTCCGTCAGG    | 59.897 | 20 | 266 | 1134 | 1399 |
| ATAGAGGAGGTGCCGTCGTA    | 59.717 | 20 | 199 | 5    | 203  |
| ACCGTGTAGTTGGCTATGGG    | 59.875 | 20 | 215 | 462  | 676  |
| AATAATGGCTGCTGCAAAGG    | 60.23  | 20 | 210 | 827  | 1036 |
| GGTCTCGTGGTGGCTAGAAAG   | 59.867 | 20 | 180 | 558  | 737  |
| TCCATGAAACATAAATCTTGCC  | 58.946 | 22 | 159 | 11   | 169  |
| AGCTGCATGAGCAGGAATTT    | 59.985 | 20 | 185 | 1098 | 1282 |
| CGGTGATGGTGAACCTTGTTG   | 60.001 | 20 | 262 | 739  | 1000 |
| CAGGTTATGTTCCACGGTGA    | 59.415 | 20 | 203 | 1    | 203  |
| GGGAAGCTTGTGGAGTTGTG    | 60.69  | 20 | 218 | 1205 | 1422 |
| TCACCATATGTTCAACCTGTCA  | 59.772 | 23 | 245 | 9    | 253  |
| AACGTAAATAGTTGCGCCTCA   | 59.793 | 21 | 249 | 4348 | 4596 |
| TTTGTGGTCTGCTGATACCG    | 59.716 | 20 | 167 | 601  | 767  |
| CCCTGTA CT CATGAACGGGT  | 59.844 | 20 | 202 | 87   | 288  |
| ACCGTTCATCAAAGACCTG     | 59.966 | 20 | 203 | 1200 | 1402 |
| AAGCTTCAATTCCCCTGACA    | 59.67  | 20 | 254 | 863  | 1116 |
| CCTCCAGCATCCGAATATGT    | 59.917 | 20 | 161 | 475  | 635  |
| GGTGGTGGGGAAGAGTAGTG    | 59.425 | 20 | 238 | 3691 | 3928 |
| TCCTTGCAACTCATTACCA     | 60.24  | 20 | 149 | 1930 | 2078 |
| TGCTTCAAAAATTCAGCCAA    | 59.42  | 20 | 139 | 573  | 711  |
| AGAAACATCATCATGCCGTG    | 59.527 | 20 | 144 | 53   | 196  |
| ATGGGCCTCCTCCTTAAGAC    | 59.536 | 20 | 277 | 502  | 778  |
| GTTGCTTATCTGGTTGCCGT    | 60.14  | 20 | 278 | 155  | 432  |
| ATTCGACACCAATTTCTCCG    | 59.933 | 20 | 212 | 501  | 712  |
| CTCCTTCCAGCACCTATGA     | 60.21  | 20 | 280 | 235  | 514  |
| TAACCCCTGCATCCTGAGAC    | 60.073 | 20 | 113 | 1071 | 1183 |
| ACGACAATCACAAAGTCCCC    | 59.827 | 20 | 216 | 1000 | 1215 |
| TCCACACCTCCACCTCCTAC    | 59.962 | 20 | 155 | 331  | 485  |
| CCCAAGACCCCAATTTGATT    | 60.91  | 20 | 149 | 2979 | 3127 |
| CACCTTAGTTGT CAGGGGGA   | 59.959 | 20 | 180 | 1942 | 2121 |
| TGGCATAGTGAACGGAAACA    | 60.111 | 20 | 256 | 2365 | 2620 |
| CCCGATATGGTAGACGGTTT    | 58.787 | 20 | 243 | 847  | 1089 |
| GTTTTGGGACACTGCTCCTC    | 59.703 | 20 | 136 | 2977 | 3112 |
| TCCATGGCCTAATTGGTCTC    | 59.894 | 20 | 264 | 409  | 672  |
| GTAACATCCGCGTTTTTCGT    | 60.003 | 20 | 217 | 767  | 983  |
| ATCTGGTGGATCTTCGGTGA    | 60.475 | 20 | 232 | 557  | 788  |

|                        |        |    |     |      |      |
|------------------------|--------|----|-----|------|------|
| CAGAGGACGAGTTGGATCGT   | 60.261 | 20 | 267 | 2066 | 2332 |
| TTCAACTAATGAAAACGGCAG, | 59.758 | 22 | 145 | 7    | 151  |
| CATGCAATAAGTTGAGAAAAA  | 59.585 | 25 | 111 | 4    | 114  |
| GGTTTTGGAGAAATTCAGGCA  | 60.051 | 20 | 255 | 6    | 260  |
| TCAAATTTCCCAGCAGGACT   | 59.67  | 20 | 234 | 2214 | 2447 |
| CAGAGAAGTGGAAAATCCCG   | 59.665 | 20 | 124 | 469  | 592  |
| CCATGGTGCACGAGTTGTAA   | 59.566 | 20 | 266 | 658  | 923  |
| TTGTGCCCTTACCCAGTAGG   | 59.986 | 20 | 222 | 751  | 972  |
| AGATGTACTGACGGATCGGG   | 59.95  | 20 | 215 | 288  | 502  |
| GCTGTTGATCAATGGGTGTG   | 59.967 | 20 | 177 | 3634 | 3810 |
| GCACTCCCTCAAATGACC     | 59.532 | 20 | 108 | 650  | 757  |
| ATGGCAATGCTCATCAGGTT   | 60.492 | 20 | 270 | 226  | 495  |
| TTGATTCATGTAGCCGACCC   | 60.864 | 20 | 206 | 2200 | 2405 |
| GCCTTAATTTCCACCCACT    | 60.187 | 20 | 270 | 3    | 272  |
| TGGGATATGATGTTTGTGGG   | 59.049 | 20 | 226 | 5    | 230  |
| TGGTGGCTCTTTCAATTGCT   | 60.776 | 20 | 255 | 1516 | 1770 |
| GGGAAATTCTGACAATGACAA  | 58.554 | 22 | 187 | 5765 | 5951 |
| TGTTGGACGGAATCCAAGAT   | 60.317 | 20 | 209 | 1107 | 1315 |
| CTGGTGGAAAGGTTTGCAAGT  | 60.149 | 20 | 155 | 1181 | 1335 |
| AGCTTGTTGCTTCGACAGT    | 60.201 | 20 | 217 | 462  | 678  |
| CCAAGGCTTGACCCCTACTA   | 60.262 | 20 | 277 | 1074 | 1350 |
| CCCAAGACCCCAATTTGAT    | 59.59  | 19 | 122 | 3834 | 3955 |
| TTGTCAATTTTGAGTCCCAGG  | 59.956 | 21 | 252 | 526  | 777  |
| TGGGAAAGAGATATCGTGGG   | 59.887 | 20 | 141 | 3209 | 3349 |
| AGTTGGCATCCCAAAGTCAT   | 59.41  | 20 | 196 | 4    | 199  |
| TTTGGTTCATGTAGCCGACC   | 60.894 | 20 | 254 | 392  | 645  |
| TGTCGTGATAGCCAAGTCCA   | 60.263 | 20 | 224 | 624  | 847  |
| GTTTGGTGAATCGTCATCG    | 58.976 | 20 | 257 | 227  | 483  |
| GCAGCGGACTGTAAGTTTCC   | 59.882 | 20 | 217 | 385  | 601  |
| CAATTTGGCACCATGAGAGA   | 59.648 | 20 | 270 | 586  | 855  |
| GTTTCATGTAGCCAACCCCAA  | 60.755 | 20 | 200 | 3346 | 3545 |
| GGAGCTCTTCGTCGAGATTG   | 60.096 | 20 | 261 | 679  | 939  |
| TCCATTCGTGTAACAACCCA   | 59.816 | 20 | 117 | 660  | 776  |
| ACAAAATGGATTATGGGCAA   | 59.18  | 21 | 227 | 287  | 513  |
| TTCGTTGGCTTTGCATATTG   | 59.702 | 20 | 267 | 1339 | 1605 |
| TGATGAGTTTGAAAGGCGTG   | 59.84  | 20 | 230 | 1805 | 2034 |
| TTGAGGTGGATGTGGAGTTG   | 59.52  | 20 | 268 | 728  | 995  |
| ACTGCTAGGCATCAAGGCAT   | 59.866 | 20 | 166 | 758  | 923  |
| TCCTCCAACAGGAGTTTGG    | 60.081 | 20 | 267 | 471  | 737  |
| CAGAAATCCGAAGCACGATA   | 58.869 | 20 | 179 | 309  | 487  |
| CACGATGGTGATGAAGATGG   | 59.918 | 20 | 257 | 563  | 819  |
| CTCCCCTATCTCCGCATACA   | 60.051 | 20 | 109 | 347  | 455  |
| CCATCATGCATTTTTCTTTCA  | 58.613 | 21 | 276 | 3221 | 3496 |
| AAGGGCCATAAATTGTGGAA   | 59.273 | 20 | 245 | 1084 | 1328 |
| TTTCTCTTTCAACGCACACG   | 60.027 | 20 | 205 | 284  | 488  |
| TCCACAGTCTCAAAGTGCAAA  | 59.475 | 21 | 223 | 3265 | 3487 |
| GTTGTACGTGAGGCCGTAT    | 60.022 | 20 | 160 | 2011 | 2170 |
| AACAATTCCGTCATCCCAAC   | 59.653 | 20 | 135 | 1398 | 1532 |
| CACCATGGCTGTGAGAGAGA   | 59.98  | 20 | 153 | 164  | 316  |
| ATGTAGCCGACCCCAATTTA   | 59.297 | 20 | 265 | 2979 | 3243 |
| GACTCTACCAGGAACGGGGT   | 60.371 | 20 | 276 | 102  | 377  |
| AAAATGGGAGTGGAGTGGTG   | 59.82  | 20 | 207 | 710  | 916  |
| TACTTTACCGCGTTTCTGC    | 60.264 | 20 | 105 | 642  | 746  |
| TACTACTCCGTCCAACCCG    | 59.986 | 20 | 193 | 108  | 300  |
| ATCAACTCCGAAGAAGCCA    | 59.813 | 20 | 188 | 1012 | 1199 |
| AACCAAGACCCCAATTTGATT  | 59.563 | 21 | 223 | 3259 | 3481 |
| CATGGCCTTGCTGGAGATAC   | 60.624 | 20 | 273 | 1288 | 1560 |
| CAAACCAGCAACCTGGAAT    | 59.971 | 20 | 213 | 1243 | 1455 |



|                        |        |    |     |      |      |
|------------------------|--------|----|-----|------|------|
| CGATGTTCAATTTGCACTGGA  | 60.665 | 20 | 155 | 3    | 157  |
| ATCAAGCAGCCCTTTGTCAT   | 59.7   | 20 | 184 | 2318 | 2501 |
| TTGTATCACCTCCGCCGTAT   | 60.352 | 20 | 237 | 241  | 477  |
| TTTCCTGTGCGTGAATTTTG   | 59.706 | 20 | 220 | 933  | 1152 |
| TTTCCTTCTTCCATGGTTGC   | 60.051 | 20 | 254 | 582  | 835  |
| TTGACATTCTTGGCAGTTGG   | 59.691 | 20 | 232 | 5720 | 5951 |
| ATGTAGCCGACCCCAATTTA   | 59.297 | 20 | 217 | 5359 | 5575 |
| AGACCATGCAAGTGGTTTGT   | 58.058 | 20 | 116 | 319  | 434  |
| GAAGATGGTGGCGGAGAG     | 59.291 | 18 | 163 | 1060 | 1222 |
| CCCAAGACCCCAATTTGATT   | 60.91  | 20 | 234 | 470  | 703  |
| CGCGTGGGCTGTTAGTTTTA   | 61.166 | 20 | 276 | 1824 | 2099 |
| TCTTGAGGAAAACCAGGAGC   | 59.405 | 20 | 254 | 44   | 297  |
| TGCAGCTCCTGTGAATTCTG   | 60.136 | 20 | 107 | 1153 | 1259 |
| CCATCTGGGTTTTGGTACT    | 59.82  | 20 | 142 | 30   | 171  |
| CACTTGTGGCTTTTGGAGGT   | 60.149 | 20 | 278 | 1302 | 1579 |
| TGAACAAGTGACCTCTGGTGC  | 60.066 | 22 | 243 | 635  | 877  |
| GAAGAGTAGCAACTGCGGGT   | 59.501 | 20 | 263 | 1238 | 1500 |
| TAACCCGTTTACGTTAAATTTA | 58.178 | 25 | 244 | 2986 | 3229 |
| TGCATGAGCCTCGTACAAAA   | 60.401 | 20 | 232 | 6    | 237  |
| CCAATGCTGTTGTTGAAACG   | 60.149 | 20 | 188 | 372  | 559  |
| GGTTCATTTAGTCGACCCCA   | 59.79  | 20 | 101 | 2017 | 2117 |
| CAGGTTTACGGGGCAGAATA   | 59.953 | 20 | 227 | 1172 | 1398 |
| GCAGCATTTGATCACGAAGA   | 59.955 | 20 | 157 | 900  | 1056 |
| ATGGAACCTCCAAAAGGGGAC  | 60.169 | 20 | 249 | 2161 | 2409 |
| TGCAATGTAGCCCTTAAACTT  | 60.511 | 23 | 277 | 1    | 277  |
| ATATTTTGGGGAAAGGGGTG   | 59.882 | 20 | 171 | 1123 | 1293 |
| AGAAAACAGTTGCAGCACCC   | 60.299 | 20 | 227 | 1193 | 1419 |
| CACGAGCCTCAAATCATCA    | 59.799 | 20 | 274 | 957  | 1230 |
| AGTCGATTGCTTGGGAACAG   | 60.255 | 20 | 187 | 1193 | 1379 |
| ACTGATTGAGAGGGCACACA   | 59.261 | 20 | 273 | 507  | 779  |
| GCTGGGGATATTTCCAATGA   | 59.722 | 20 | 270 | 126  | 395  |
| TGGAGAGTGCAGAGATGTCG   | 60.138 | 20 | 107 | 82   | 188  |
| CACAAACGACACAAGTCCGT   | 59.641 | 20 | 227 | 2279 | 2505 |
| GCTCATTCCTGGATTGCTA    | 60.177 | 20 | 255 | 1071 | 1325 |
| GCACTTATCGGAAATCGAGC   | 59.813 | 20 | 234 | 1132 | 1365 |
| CAGGCTTGCTTCACATCTC    | 60.945 | 20 | 250 | 1979 | 2228 |
| GAGCTTGGCAGGAACTATGC   | 59.985 | 20 | 188 | 668  | 855  |
| CCCAAGACCCCAATTTGATT   | 60.91  | 20 | 215 | 1748 | 1962 |
| CGTAATCTTTCCTTGCCTGC   | 59.845 | 20 | 208 | 521  | 728  |
| CGAGGTTGCGTCCAAAATA    | 59.673 | 19 | 267 | 415  | 681  |
| CCTCAAAATTCGCCAAGAAA   | 60.181 | 20 | 124 | 2567 | 2690 |
| TGTCCTTTGGGTTTCGTAAGG  | 59.964 | 20 | 235 | 2771 | 3005 |
| TCTGCAGAAGTCGTGAAACAA  | 59.624 | 21 | 145 | 2278 | 2422 |
| CCCAAGACCCCAATTTGATT   | 60.91  | 20 | 179 | 575  | 753  |
| CGAAGCGAGATAGCCAAAAG   | 60.11  | 20 | 119 | 7    | 125  |
| CCAGGTAACCCCAAGTTCT    | 60.218 | 20 | 227 | 293  | 519  |
| CCATTTGCTTGAAACGTCCA   | 61.968 | 20 | 280 | 981  | 1260 |
| CTAAATCTGCCACCCGAGAG   | 59.83  | 20 | 212 | 2487 | 2698 |
| TCGCTGTGTATGCATGAGTG   | 59.436 | 20 | 131 | 570  | 700  |
| CAGGTCATGACATAGTGGCG   | 60.136 | 20 | 220 | 267  | 486  |
| GCCAAAACCCACAACCTTA    | 59.839 | 20 | 267 | 429  | 695  |
| AGGCATGTGCCATAATCACA   | 59.955 | 20 | 182 | 2003 | 2184 |
| TCGAGAGCAAACTTTTGGAA   | 59.982 | 21 | 279 | 140  | 418  |
| TTGATTCAATATTAGCCGTCCC | 60.168 | 22 | 273 | 828  | 1100 |
| TTGAAAACCTTTGGGATGGGA  | 60.28  | 20 | 249 | 213  | 461  |
| AAATGACAGCCCCTATGCAG   | 60.096 | 20 | 152 | 0    | 151  |
| TGCAACCCTTCTCTCTCCAG   | 60.523 | 20 | 189 | 53   | 241  |
| TTGCGGAACCGTCCTAGTTA   | 60.628 | 20 | 259 | 1    | 259  |

|                        |        |    |     |      |      |
|------------------------|--------|----|-----|------|------|
| GTCTTCCCGCTCATCATCA    | 59.734 | 19 | 250 | 967  | 1216 |
| AGGAGGCTTGTACGGACCTT   | 60.132 | 20 | 260 | 13   | 272  |
| AACAAGGGTAGGGGAAGACC   | 59.299 | 20 | 260 | 4977 | 5236 |
| GATCTCCTTACGGGATCAA    | 60.011 | 20 | 248 | 123  | 370  |
| GAGGTTGAGGTGTGCAAGGT   | 60.159 | 20 | 269 | 81   | 349  |
| CCGTGGTACAATATTCGCT    | 59.845 | 20 | 177 | 11   | 187  |
| AAGGCTTGCAGGACAAGAA    | 59.993 | 20 | 203 | 1801 | 2003 |
| GGTCCATCCATTCAAGGTGT   | 59.636 | 20 | 124 | 36   | 159  |
| TTATGTCCCGGAAAAGCCTA   | 59.542 | 20 | 218 | 506  | 723  |
| CCCAAGACCCCAATTTGATT   | 60.91  | 20 | 145 | 653  | 797  |
| ACGATGATGATGAAGGAGGC   | 60.042 | 20 | 197 | 542  | 738  |
| GCTGAGGAGAGTGATGGTGG   | 60.829 | 20 | 228 | 2176 | 2403 |
| GTGGGTAGTATGCCGTGCTT   | 60.022 | 20 | 197 | 1592 | 1788 |
| TCTGTGGCCAGGATTCTTCT   | 59.803 | 20 | 279 | 7    | 285  |
| ACCGTTCTCAAAAACCCCTC   | 60.34  | 20 | 269 | 338  | 606  |
| GCCTTTTAGTGGTCCGAGG    | 59.679 | 19 | 280 | 347  | 626  |
| CCAGATCCATCTTTCCTCCA   | 60.003 | 20 | 167 | 1345 | 1511 |
| CTCATTTTGAAGGAATGCGT   | 60.214 | 20 | 236 | 1615 | 1850 |
| AGCAATAAGGCAGCAGCAAT   | 60.01  | 20 | 166 | 644  | 809  |
| TCCACGACTGCTTTGTTGAC   | 59.88  | 20 | 156 | 359  | 514  |
| GTAATGTCAGGGTGGCTGCT   | 60.142 | 20 | 211 | 1748 | 1958 |
| CCCAAGACCCCAATTTGATT   | 60.91  | 20 | 234 | 1743 | 1976 |
| ATTTGCATCTTGAATGGGCT   | 59.533 | 20 | 230 | 4775 | 5004 |
| AGAAACAGATTGGGTGGGTG   | 59.82  | 20 | 144 | 1457 | 1600 |
| CCATGGATGCAACAATGACT   | 59.374 | 20 | 242 | 971  | 1212 |
| AAACCGGATGCCCTATTCTC   | 60.286 | 20 | 254 | 4460 | 4713 |
| GAAAAACAAACGGCCAAGAA   | 60.089 | 20 | 227 | 433  | 659  |
| TGATGTTTGCATTTTAAGATGA | 59.143 | 25 | 277 | 4620 | 4896 |
| ATTTGTCGGGTCAAATTCCA   | 60.17  | 20 | 268 | 1579 | 1846 |
| CCATTTTTGTTGAAGCCCAT   | 59.801 | 20 | 256 | 617  | 872  |
| TTCTTTATGGGGAGCTGGGT   | 60.817 | 20 | 236 | 5869 | 6104 |
| TAAGCATAAAAGGCATCGCTC  | 59.49  | 21 | 127 | 4    | 130  |
| AAATGAAAGGTGACCATGCC   | 59.797 | 20 | 238 | 3768 | 4005 |
| GACCGCCGGTATAACTCTCA   | 60.096 | 20 | 161 | 1711 | 1871 |
| GCCTTGACTTGTTGTGCGAT   | 60.119 | 20 | 130 | 459  | 588  |
| AACCACGACTTATTCATTGCG  | 60.011 | 21 | 261 | 1596 | 1856 |
| ATCCAGGATGGTGGAAATCA   | 60.135 | 20 | 205 | 4616 | 4820 |
| GAAGCGAAAAGCATTGACC    | 59.829 | 20 | 278 | 494  | 771  |
| GCCAAGATCAGCAGATCACA   | 59.95  | 20 | 242 | 745  | 986  |
| TGCAACATGGTCAAACCTGG   | 60.552 | 20 | 209 | 301  | 509  |
| GCAATCGACACTCCCCTTT    | 60.119 | 20 | 186 | 356  | 541  |
| AATGTGGCCAATCTTTTGT    | 59.758 | 22 | 260 | 5    | 264  |
| GCCCATCTGCATATTCTTCAA  | 60.052 | 21 | 188 | 1818 | 2005 |
| GCAATACGCTGAATGCAAAG   | 59.472 | 20 | 256 | 397  | 652  |
| GATGGTGCTTTTGTCTGGT    | 60.263 | 20 | 161 | 9    | 169  |
| TGTGTGGACGGAAAACAGAG   | 59.72  | 20 | 267 | 1389 | 1655 |
| TGAGAGAGGTGGTGCAGATG   | 59.98  | 20 | 204 | 1202 | 1405 |
| GCTGGAAGAGTGCGGATAAT   | 59.297 | 20 | 197 | 9    | 205  |
| GAGACATCTGGTGAGGGGAG   | 59.638 | 20 | 208 | 1675 | 1882 |
| CGGCATCCATCTCAATCTTT   | 60.036 | 20 | 223 | 96   | 318  |
| TCACTCCTCTCACTCGCAGA   | 59.846 | 20 | 167 | 904  | 1070 |
| TGACAGCTGAATCAGTCGGA   | 60.557 | 20 | 279 | 1887 | 2165 |
| AAGCCCGTGAAAAAGGAAAT   | 59.945 | 20 | 256 | 1771 | 2026 |
| CTTCGCTTTTGGCTATCTCG   | 60.11  | 20 | 229 | 1823 | 2051 |
| AACTGCCACATGGACCGTAT   | 60.263 | 20 | 191 | 876  | 1066 |
| CTTTGGTTCAGGTAGCCGAC   | 59.734 | 20 | 248 | 1952 | 2199 |
| CCCAAGACCCCAATTTGATT   | 60.91  | 20 | 188 | 2577 | 2764 |
| TTCACGAATTTTTTCATTAGGT | 59.871 | 23 | 208 | 906  | 1113 |

|                        |        |    |     |      |      |
|------------------------|--------|----|-----|------|------|
| ATGCTTTAGCAACACCAGCC   | 60.278 | 20 | 229 | 1    | 229  |
| TTTCATTCGCTTCCATTATC   | 60.031 | 21 | 279 | 4928 | 5206 |
| CCTACCCACCGAATTGAACA   | 60.745 | 20 | 171 | 312  | 482  |
| TGTAGCCGACCCCAATTTAT   | 59.297 | 20 | 243 | 2927 | 3169 |
| TTGACACACTCCCTCTGCTG   | 60.022 | 20 | 143 | 5315 | 5457 |
| TTTTCAAGTGAAAGGTGCAATC | 59.248 | 22 | 155 | 6    | 160  |
| GTCCAAATCCGACAGATGCT   | 60.081 | 20 | 113 | 1520 | 1632 |
| CACCGAGAATGACACGACAC   | 60.162 | 20 | 278 | 1672 | 1949 |
| CATGCAAGGAGCAGCAGTAA   | 60.157 | 20 | 144 | 0    | 143  |
| TTTCTGGATCCCATCTGAGG   | 60.003 | 20 | 152 | 836  | 987  |
| TAGGGATCGCTGCTGAGAGT   | 60.119 | 20 | 243 | 624  | 866  |
| TCAAATGGCAGACAAAACG    | 59.706 | 20 | 239 | 6    | 244  |
| TTGATGGGTCTTCCCTGATT   | 59.336 | 20 | 264 | 7    | 270  |
| ACGACGACCAAAGGAATGAG   | 60.111 | 20 | 258 | 30   | 287  |
| TCAATGCAGCATCCTGAAAC   | 59.805 | 20 | 134 | 3    | 136  |
| AGTTGAAGCAACCAACCTGC   | 60.299 | 20 | 265 | 3    | 267  |
| CCCAAGACCCCAATTTGAT    | 59.59  | 19 | 120 | 2993 | 3112 |
| AACCAACAGGAGGCAGACAG   | 60.298 | 20 | 194 | 3248 | 3441 |
| TGCATACCCAAGATTGTCTCC  | 59.947 | 21 | 269 | 524  | 792  |
| TGGCCACGAAGAATTAACCTG  | 60.117 | 21 | 269 | 63   | 331  |
| TATGCTTTCCGAGTGCTTGA   | 59.566 | 20 | 239 | 794  | 1032 |
| ATGTGATTGCACCGACAAAA   | 59.972 | 20 | 239 | 3650 | 3888 |
| CCGGAGAGGGCATCATAGTA   | 60.051 | 20 | 169 | 1899 | 2067 |
| CCCAAGACCCCAATTTGATT   | 60.91  | 20 | 159 | 5799 | 5957 |
| ATTCCATCACCATGATCCGT   | 60.018 | 20 | 152 | 561  | 712  |
| AACCTGCCTCGACATAGCAG   | 60.419 | 20 | 188 | 2121 | 2308 |
| ACGTTGCCTTGTATTTGCC    | 60.003 | 20 | 258 | 1192 | 1449 |
| CCTGGCTACTCACCTTCTG    | 59.861 | 20 | 154 | 904  | 1057 |
| TGAGCACAATCTTCAGGTGG   | 59.831 | 20 | 261 | 9    | 269  |
| TTTTGGGCAAAGGATCAAAAT  | 59.388 | 20 | 190 | 30   | 219  |
| TTTGTCTCCTGGTGTGGAC    | 59.997 | 21 | 180 | 2231 | 2410 |
| AAAAGTGGTGGAATTGACGG   | 59.83  | 20 | 128 | 1570 | 1697 |
| AAGTTGGGTGGAAGATGCAG   | 60.111 | 20 | 263 | 697  | 959  |
| CCGTACCCTCCTCCTAGACC   | 59.95  | 20 | 179 | 673  | 851  |
| TCGTTTCCTTTTGGAGGTGT   | 59.569 | 20 | 248 | 23   | 270  |
| TGTGAAAAACACGTGACATCA  | 60.05  | 22 | 117 | 2239 | 2355 |
| GCAGAAGGAGCCAAAGAAGA   | 59.694 | 20 | 195 | 985  | 1179 |
| GGTTAAATTAGGCGGGTCGT   | 60.204 | 20 | 237 | 2835 | 3071 |
| AGTTAGGAACGAACACGGCA   | 60.689 | 20 | 243 | 250  | 492  |
| CCCAGAACAAAACCATTGCT   | 59.971 | 20 | 156 | 3770 | 3925 |
| GAACCTTGTATCCGAAAACGC  | 59.691 | 20 | 268 | 118  | 385  |
| TGTAGGCCCATAGCCACATA   | 59.016 | 20 | 219 | 138  | 356  |
| GTCAGCTCAAATGGCAGGAT   | 60.226 | 20 | 209 | 6    | 214  |
| TGGAACAGCACAGACTGGAG   | 60.022 | 20 | 153 | 214  | 366  |
| CATAGGGGCTCTTTGGTTCA   | 60.066 | 20 | 249 | 226  | 474  |
| CCTTCACACCAAACCTGCAAA  | 59.734 | 20 | 249 | 3462 | 3710 |
| ACGCGGTGATAAAATCTTGG   | 59.96  | 20 | 188 | 1747 | 1934 |
| CCTCCGTCCCTCTCTCTCTT   | 59.945 | 20 | 223 | 3104 | 3326 |
| GCTAGATGCTCACCTCTGCC   | 60.127 | 20 | 278 | 3803 | 4080 |
| CCTCAGAGGAATCCACCTCA   | 60.191 | 20 | 252 | 2626 | 2877 |
| CAAGCAAACCTGGTAGCCTCC  | 59.875 | 20 | 256 | 1770 | 2025 |
| TCAGTTGCCTCTTTAGCCT    | 60.134 | 20 | 260 | 501  | 760  |
| CAATACCCGAATCCATCACA   | 59.2   | 20 | 117 | 3717 | 3833 |
| ATTAACACCGGCATTGCTCT   | 59.597 | 20 | 217 | 2724 | 2940 |
| AATCCCAATCCCAATCACA    | 59.991 | 20 | 111 | 702  | 812  |
| CCAATTTATTGGGATTAAGGC  | 57.539 | 21 | 268 | 3814 | 4081 |
| TCATATGACGCAATGCACCT   | 60.104 | 20 | 250 | 503  | 752  |
| GGAATGCAACTCAAACCACA   | 59.547 | 20 | 159 | 20   | 178  |

|                        |        |    |     |      |      |
|------------------------|--------|----|-----|------|------|
| AAAAACGAGCATTGGCTGTC   | 60.257 | 20 | 170 | 1229 | 1398 |
| TCCTAATACGACTGCCACC    | 59.955 | 20 | 219 | 163  | 381  |
| AGAAGGCGAAGAGGAGCAAT   | 60.484 | 20 | 199 | 781  | 979  |
| CTGCACATTTACAACCAACAA/ | 59.953 | 23 | 141 | 3    | 143  |
| CCGATTCCCTTGAATTTCCCT  | 60.258 | 20 | 280 | 2779 | 3058 |
| ATGTAGCCGACCCCAATTTAT  | 59.585 | 21 | 157 | 3318 | 3474 |
| AAATCATAGCTCCGCCATTG   | 60.06  | 20 | 224 | 648  | 871  |
| CGGATATTCGCCCTTATCT    | 60.26  | 20 | 177 | 487  | 663  |
| TGGTCACTAGAAACCCAGC    | 60.111 | 20 | 101 | 134  | 234  |
| GTCCGTTGTTGCTGATCCTT   | 60.119 | 20 | 159 | 1573 | 1731 |
| TCCAAAGAAAAAGCAAAGGA   | 57.609 | 20 | 274 | 1276 | 1549 |
| CGGAAGTAGGAAAACACCCA   | 59.964 | 20 | 241 | 742  | 982  |
| GCTATACCACGCCCTCAATC   | 59.556 | 20 | 255 | 2897 | 3151 |
| AACCATGCTCTTCCACCAG    | 60.111 | 20 | 255 | 563  | 817  |
| CCACTTCCATTCTTCCCA     | 60.042 | 20 | 149 | 2343 | 2491 |
| GCCCAAGTGTAAGAGTCGGT   | 59.212 | 20 | 176 | 220  | 395  |
| ACCCTCCAAGATGACACCAC   | 59.817 | 20 | 209 | 1781 | 1989 |
| GAGGGAAGTGGAGGTGATGA   | 60.048 | 20 | 190 | 496  | 685  |
| TTGCTTGATCATTGCTGCTT   | 59.572 | 20 | 193 | 1310 | 1502 |
| GCAGCAACAACCATTGAAGA   | 59.847 | 20 | 193 | 232  | 424  |
| CCGACCCCAATTTATTTGAA   | 59.633 | 20 | 200 | 1921 | 2120 |
| TGCGTACATCTGACCCTCAA   | 60.263 | 20 | 260 | 1012 | 1271 |
| TCAGTCAAACCACTCGGTCA   | 60.285 | 20 | 200 | 1753 | 1952 |
| CTCCCAAAGTCACCTGCATT   | 60.111 | 20 | 228 | 536  | 763  |
| GCTGCGTTTGATTTCTTCC    | 59.829 | 20 | 124 | 148  | 271  |
| CCCATGTGCTGTGATGAACT   | 59.551 | 20 | 222 | 4    | 225  |
| AACGAGATGCTCTCGAATGAA  | 59.97  | 21 | 242 | 10   | 251  |
| TGGAGTAGGGGTCATTCCAA   | 60.309 | 20 | 166 | 7    | 172  |
| AATGATAAGATCAAGGCCGA   | 57.244 | 20 | 277 | 117  | 393  |
| GTTCTGCAAAGAAAAGGCG    | 59.996 | 20 | 195 | 597  | 791  |
| TTCCATGTCGAGTTTGTTCG   | 59.691 | 20 | 256 | 915  | 1170 |
| CAAAATCAACCATATTTTCGCC | 60.533 | 22 | 232 | 391  | 622  |
| CATTCTAAACAATTGGCTGCTG | 59.779 | 22 | 237 | 5622 | 5858 |
| CGTAACATGCCACCAGTGAG   | 60.175 | 20 | 200 | 2362 | 2561 |
| GAGGAGAATGCGAAGGAGAA   | 59.508 | 20 | 261 | 3070 | 3330 |
| TGACGACTGTCACGGACTTT   | 59.31  | 20 | 241 | 41   | 281  |
| CTCTTCGAACCCCTTGTTCA   | 60.224 | 20 | 259 | 2601 | 2859 |
| TGGAAATGGAATGTGAACGA   | 59.9   | 20 | 198 | 13   | 210  |
| ACTTCCCGTGTCCAGTCTTG   | 60.151 | 20 | 234 | 905  | 1138 |
| AACTGCAAGATTCAGCGACA   | 59.596 | 20 | 229 | 1672 | 1900 |
| TGTAGCCGACCCCAATTTAT   | 59.297 | 20 | 206 | 2930 | 3135 |
| AGCCTCAAGATTGCAACCAC   | 60.263 | 20 | 158 | 2    | 159  |
| CCATTCAACTCCACAACCAA   | 59.389 | 20 | 227 | 731  | 957  |
| TGCTGCGGACAAATAACTGA   | 60.401 | 20 | 252 | 20   | 271  |
| TTGAGTTGAGGTATGAGAAAA( | 59.658 | 26 | 280 | 311  | 590  |
| CTTGAAGCATGCACGATGAC   | 60.423 | 20 | 105 | 5    | 109  |
| TCAATGCAGGATGATTGCATA  | 60.05  | 21 | 177 | 25   | 201  |
| ACTGTTGCGTTATCCAAGCC   | 60.14  | 20 | 238 | 5    | 242  |
| GCGTCGCTAACTTCTGCTTC   | 60.3   | 20 | 131 | 156  | 286  |
| CTGGCTCCCAAGAATTACA    | 60.066 | 20 | 187 | 513  | 699  |
| CTCTGTCCCCCTCGTTCTTA   | 59.28  | 20 | 211 | 595  | 805  |
| GGAAAGTTCTTCGTTGCTGC   | 60     | 20 | 262 | 2397 | 2658 |
| TTCCGACCTCCATTTCTAC    | 60.074 | 20 | 228 | 410  | 637  |
| CTCCCGAATACTTCTCCGAA   | 59.264 | 20 | 236 | 706  | 941  |
| TCTTCCACCCGAAATTGAC    | 59.91  | 20 | 256 | 2621 | 2876 |
| AGACCAACAATTCCAGGTGC   | 59.973 | 20 | 275 | 1264 | 1538 |
| GTGGCAGTTATAGCGGTGGT   | 60.022 | 20 | 173 | 1703 | 1875 |
| CTGCTAGCACTGCCCTTTTT   | 59.654 | 20 | 148 | 3199 | 3346 |

|                         |        |    |     |      |      |
|-------------------------|--------|----|-----|------|------|
| CGACTAGCCACGTTCAATCA    | 59.864 | 20 | 274 | 1163 | 1436 |
| CTTTTACCTTAATCTTCACCCTT | 57.662 | 25 | 257 | 1648 | 1904 |
| AAAGAGGTTGTTCCGTTGC     | 59.218 | 20 | 232 | 1189 | 1420 |
| AATCATCGCCACATCGTGTA    | 59.955 | 20 | 131 | 426  | 556  |
| TGATCGTATCTGGTTGAAAGTT  | 59.144 | 23 | 261 | 1364 | 1624 |
| TGCTTGATGTGCTCAGCTCT    | 59.887 | 20 | 203 | 2088 | 2290 |
| TTGATTCCACCTCTTCACCC    | 59.903 | 20 | 215 | 1296 | 1510 |
| CCCTACATAGGGGGAAAAGG    | 59.655 | 20 | 130 | 1951 | 2080 |
| GAGGGGTAGTGGGAAAAGG     | 59.799 | 20 | 138 | 2138 | 2275 |
| CCGACCATTCAAATTTCCAC    | 60.17  | 20 | 129 | 14   | 142  |
| TTGGCAGGAAATCACACAAA    | 60.088 | 20 | 256 | 3323 | 3578 |
| CCAATAAAATTTTGCCCAA     | 59.648 | 20 | 218 | 216  | 433  |
| TAATCACCATGGACTTCCCC    | 59.605 | 20 | 191 | 2698 | 2888 |
| CTGGGGGTGAATTTTGGTTA    | 59.657 | 20 | 144 | 1497 | 1640 |
| GATTGGCCATGAAAATGGAG    | 60.274 | 20 | 194 | 293  | 486  |
| CACCTTTGACTCGCATTTCA    | 59.84  | 20 | 270 | 3710 | 3979 |
| TCGAGAGCTCTGGTGTTTTG    | 59.161 | 20 | 221 | 2431 | 2651 |
| AACGCGAGGAGAAAAATGAA    | 59.823 | 20 | 250 | 371  | 620  |
| CCTACAAAATGGGTCTCTTTGA  | 58.238 | 22 | 167 | 2658 | 2824 |
| TCTTCAGAAGCTTGCTGTGC    | 59.47  | 20 | 258 | 2774 | 3031 |
| TACCTCCATGAGCAATCCGT    | 60.483 | 20 | 267 | 9    | 275  |
| TCATGCAGATTTAACCGACAA   | 59.172 | 21 | 128 | 24   | 151  |
| TGTGAGGCGTGTGTTTCTC     | 59.88  | 20 | 240 | 217  | 456  |
| TATGTTCCGGTATAAGGCCGC   | 59.95  | 20 | 142 | 1361 | 1502 |
| TGGTTCATGTAGCACATCCC    | 59.374 | 20 | 156 | 4490 | 4645 |
| TGCATCCTTCCATCTTGGTT    | 60.461 | 20 | 199 | 3171 | 3369 |
| CACTCACACAGCCAGACACA    | 59.454 | 20 | 242 | 1110 | 1351 |
| GGGATACAAATGAGTGTTTAGC  | 58.944 | 23 | 270 | 2588 | 2857 |
| TAAATGTGGAAATCGCATGG    | 59.377 | 20 | 273 | 1173 | 1445 |
| TTGAAGAGTCGTGCAGTTCCG   | 60.175 | 20 | 269 | 446  | 714  |
| CCACCCCAAATTCTCATCAC    | 60.173 | 20 | 180 | 6    | 185  |
| AAAATGAAAGGAGGGGTGCT    | 59.94  | 20 | 124 | 1079 | 1202 |
| TTGGTTCATGTAGCCGACCT    | 60.517 | 20 | 115 | 3429 | 3543 |
| CCACGGTCTCCCAATTCTTA    | 59.926 | 20 | 275 | 2777 | 3051 |
| CTGCCAAATCTGGGACTGTT    | 60.111 | 20 | 169 | 146  | 314  |
| GGGTGAGGGGATGTCTATCA    | 59.737 | 20 | 101 | 331  | 431  |
| ATATCTACCGTTTCCGGTCCG   | 58.928 | 20 | 227 | 837  | 1063 |
| CGGTCTCTCAGTTAAGTCTATC  | 59.98  | 25 | 143 | 644  | 786  |
| AATAATGCTACACGCCTCCCT   | 60     | 21 | 209 | 8    | 216  |
| CATTATGCAGGAACTCGCAA    | 59.833 | 20 | 136 | 5247 | 5382 |
| AGGTCATACGGGATGTGGAA    | 60.195 | 20 | 225 | 125  | 349  |
| TTTTCGATTTTCATCCTCATAGC | 58.337 | 22 | 255 | 2687 | 2941 |
| AGGCTCGCAGACAACAGAAT    | 60.02  | 20 | 220 | 2575 | 2794 |
| GATCCATATAGCCGATCCCA    | 59.705 | 20 | 143 | 1623 | 1765 |
| CAGGTTGAACACCCGTTGTA    | 59.46  | 20 | 226 | 122  | 347  |
| AGGATACGTGGATGGAGACA    | 57.94  | 20 | 154 | 692  | 845  |
| TGTTTGGTATGTGACCCCAA    | 59.667 | 20 | 254 | 870  | 1123 |
| TTGCACAAAGTTTTGTTTCCAT  | 59.536 | 22 | 230 | 1848 | 2077 |
| TAGGGCTACCGGACACTACG    | 60.147 | 20 | 259 | 3720 | 3978 |
| CCAAGGCAGAGAAGTTGAGG    | 59.982 | 20 | 207 | 6027 | 6233 |
| CGACCATCCTTCCCTGATAA    | 59.887 | 20 | 150 | 5    | 154  |
| GGGGGAGAGAGATGAGGAAG    | 60.149 | 20 | 235 | 1796 | 2030 |
| CCCAAGACCCCAATTTGATT    | 60.91  | 20 | 168 | 1893 | 2060 |
| CACTCATCCACATGCTCGTT    | 59.707 | 20 | 197 | 1974 | 2170 |
| GTCCTACACACCAAGTTCATCA  | 57.574 | 22 | 214 | 1513 | 1726 |
| TTCACAAGATTTGGTTGGCA    | 60.088 | 20 | 131 | 1060 | 1190 |
| AGGATGGTACAGTTGGCTGG    | 59.989 | 20 | 252 | 3823 | 4074 |
| TGCCTCGAGAGTAAGAACCC    | 59.43  | 20 | 168 | 6    | 173  |

|                        |        |    |     |      |      |
|------------------------|--------|----|-----|------|------|
| CGCACGAATTGCTACCCTAC   | 60.658 | 20 | 225 | 466  | 690  |
| TGCTCATTTGTCAACCAGTCA  | 60.294 | 21 | 218 | 148  | 365  |
| CCCAAGACCCCAATTTGAT    | 59.59  | 19 | 152 | 2071 | 2222 |
| TCCTGCAGCAAGAAGAAAA    | 58.771 | 20 | 200 | 0    | 199  |
| CACTCTCCGCCCTCTCTACA   | 60.545 | 20 | 182 | 4354 | 4535 |
| TGGTGTAGATTGTGAATAAAA  | 59.016 | 25 | 108 | 4    | 111  |
| CAAAGAAATCAAAGGACCCAA  | 59.05  | 21 | 262 | 3314 | 3575 |
| TTGATCATTTGGGAACACCA   | 59.75  | 20 | 258 | 5354 | 5611 |
| CCATTTGCAATGGACAAAA    | 59.396 | 20 | 146 | 1585 | 1730 |
| CGGGTAACTTCATCATGGGT   | 59.67  | 20 | 269 | 8588 | 8856 |
| TAACAGTTTCCGCCATCTC    | 60.074 | 20 | 184 | 7    | 190  |
| AGAAGGTGGGCAGTAAGGCT   | 60.268 | 20 | 192 | 1965 | 2156 |
| TCATTGAAACCTCCTCCTCG   | 60.187 | 20 | 213 | 2777 | 2989 |
| GTTTGAATACGTTTGGCGGT   | 59.867 | 20 | 144 | 2146 | 2289 |
| CAAAGCTAAAACCGCACAAA   | 59.003 | 20 | 255 | 23   | 277  |
| GACGACGAGTTTAGGACGA    | 60.255 | 20 | 230 | 1028 | 1257 |
| GAGTTTTGTGGCGGATTGTT   | 59.978 | 20 | 224 | 120  | 343  |
| GTATTCACGGCAGTGGAGT    | 59.997 | 20 | 250 | 953  | 1202 |
| TCTCCCGGGATGTTAAAGC    | 60.021 | 19 | 166 | 2567 | 2732 |
| CGTTTCTCTCATTTGCAGG    | 60.766 | 20 | 233 | 0    | 232  |
| GCTTGTTAGTTTGGTTATGTGC | 60.076 | 23 | 228 | 3094 | 3321 |
| TGCAGTCAGCAGCAAAAAGTT  | 59.788 | 20 | 267 | 2874 | 3140 |
| ACAGATGGTTCACCAGTCCC   | 59.817 | 20 | 164 | 4387 | 4550 |
| TCAATGACATCTACACCGCC   | 59.527 | 20 | 258 | 1    | 258  |
| TCTATGGTTCACATGGTGCC   | 59.374 | 20 | 173 | 35   | 207  |
| CAACTAAATTGCCCATGCT    | 59.96  | 20 | 266 | 3230 | 3495 |
| CCAGTCTTCTAGGGCTGCTG   | 60.149 | 20 | 191 | 112  | 302  |
| ACACACCCAATTCTTCAGCC   | 59.973 | 20 | 130 | 410  | 539  |
| ACGCTTTCACTGTTGTCGTG   | 59.946 | 20 | 235 | 561  | 795  |
| TCATTTCAATTCGAACGCAG   | 59.809 | 20 | 250 | 820  | 1069 |
| GCATGCCCTTACAACGAAGT   | 60.14  | 20 | 161 | 617  | 777  |
| GTATGCCACCCTTACAAGCC   | 59.457 | 20 | 157 | 1264 | 1420 |
| CTAGAAACACCTTTCGCGCT   | 59.517 | 20 | 224 | 1511 | 1734 |
| CAAGATAGGCCCGAAATCTG   | 59.662 | 20 | 163 | 754  | 916  |
| GGCCTTCAAAGCATAACCA    | 60.074 | 20 | 232 | 971  | 1202 |
| CACAGCACAAACTGATCGCT   | 60.056 | 20 | 232 | 265  | 496  |
| AAATCTCCAAGTCCCGTTCA   | 59.526 | 20 | 184 | 10   | 193  |
| GAACGAATTGAAAGTTCCGC   | 59.691 | 20 | 263 | 1129 | 1391 |
| ACGGCAAATTAATGCGTC     | 59.971 | 20 | 266 | 1181 | 1446 |
| ACAAATTTGCCCTCTCCCTC   | 60.443 | 20 | 156 | 0    | 155  |
| GAGACTGTGGATGGGGAAGA   | 60.048 | 20 | 218 | 594  | 811  |
| GATGAAGACTGAAGTTGGTG   | 58.695 | 22 | 247 | 382  | 628  |
| TGTTTTCGGATCAAAAGTTGG  | 59.961 | 21 | 250 | 2724 | 2973 |
| AATGCCTTTTTCTGCCATGA   | 60.585 | 20 | 269 | 2283 | 2551 |
| CAATATTGCTGAATCGAGCG   | 59.425 | 20 | 194 | 1458 | 1651 |
| GTTGGTCGGAGATGATGGTC   | 60.335 | 20 | 169 | 1201 | 1369 |
| GGTCCGAATACCAACACCAC   | 60.096 | 20 | 258 | 996  | 1253 |
| TCCAGAGAGAGAAATGCCC    | 59.486 | 20 | 273 | 261  | 533  |
| TGCTTCTTGATCAAATCCG    | 58.843 | 20 | 275 | 926  | 1200 |
| GATATGACAACCATCCGCGT   | 60.754 | 20 | 266 | 798  | 1063 |
| ACACAAGAGGGAACACCCAC   | 59.859 | 20 | 109 | 739  | 847  |
| GGGAGGGAGTTTTTGTTC     | 59.783 | 20 | 276 | 3818 | 4093 |
| GCTGTTTGGTTTGGCAACTA   | 58.822 | 20 | 253 | 324  | 576  |
| ATTTACCGCAGCAAACTT     | 59.752 | 20 | 263 | 128  | 390  |
| CCGAGGAGAAATCAAATCGAA  | 60.148 | 20 | 240 | 329  | 568  |
| AATGTGGAAATACCCTAAATTC | 58.269 | 23 | 215 | 1337 | 1551 |
| TTCCTACCTTCACTAGTTTTCA | 59.946 | 25 | 129 | 380  | 508  |
| TCATACGTGGCTTCTCTCCC   | 60.218 | 20 | 210 | 801  | 1010 |

|                         |        |    |     |      |      |
|-------------------------|--------|----|-----|------|------|
| CGAAGGCCTTTTCGAAGTC     | 59.94  | 19 | 146 | 576  | 721  |
| TGAATCTGCAATTTTCTTGTTG/ | 59.75  | 23 | 145 | 327  | 471  |
| AGGAGGTAGAAACATGGCCC    | 60.328 | 20 | 149 | 505  | 653  |
| CACACAAAATTGTGCCTTGC    | 60.157 | 20 | 262 | 18   | 279  |
| CGGTTGATTTTGAAGTGGCT    | 60.11  | 20 | 231 | 103  | 333  |
| TAAACAATTATTTGAGGCGCA   | 58.375 | 21 | 186 | 737  | 922  |
| GGGATGGTGGGAAGAGCAGTA   | 60.073 | 20 | 200 | 1365 | 1564 |
| TGCTCTACATTCCGGTGGAAA   | 59.272 | 20 | 255 | 460  | 714  |
| CGGTAACCAAGAAGGCACAG    | 60.679 | 20 | 279 | 813  | 1091 |
| ACCCCGTATTTTCACAAATAAA  | 57.523 | 22 | 238 | 89   | 326  |
| TTGTTAATGGGGTGGGGATA    | 59.872 | 20 | 267 | 712  | 978  |
| CATTATGGACGGTTCGGTCT    | 59.813 | 20 | 274 | 1985 | 2258 |
| CCCGTATTTTCTTCGGGTTT    | 60.177 | 20 | 183 | 67   | 249  |
| TCTCCTGTTTATTTCCCCCA    | 59.359 | 20 | 270 | 544  | 813  |
| TGGTGTGTGGGTGATGAA      | 60.829 | 20 | 254 | 208  | 461  |
| ACATGGGGTTCGAGAATGAA    | 60.317 | 20 | 173 | 800  | 972  |
| AAGGGAAATTCAAGACGTGG    | 59.028 | 20 | 100 | 29   | 128  |
| TGCAGTACAAATTTAGCTGGAC  | 60.082 | 24 | 130 | 257  | 386  |
| GAATCAAACGCTGGATTTGG    | 60.448 | 20 | 262 | 8    | 269  |
| CCCCCTGCCTTTCTTTCTAC    | 60.068 | 20 | 148 | 465  | 612  |
| GACGATCGACGGAATTTAGG    | 59.528 | 20 | 182 | 256  | 437  |
| CGCAGTCTCCTTTTTCTTGG    | 59.986 | 20 | 195 | 340  | 534  |
| GGCGTTGTTCTGTACTTGG     | 60.55  | 20 | 243 | 8    | 250  |
| AGAAACGATCTCGTGCCAAC    | 60.263 | 20 | 265 | 1611 | 1875 |
| TCGGAGAGCTAACAGAGGGA    | 60.088 | 20 | 231 | 26   | 256  |
| TGCGCGTATGCATAAGGTAG    | 59.886 | 20 | 170 | 4415 | 4584 |
| CAGAGCGCACTCGAAGAGTA    | 59.49  | 20 | 242 | 336  | 577  |
| AAAACACCTGGGACCACAAT    | 59.162 | 20 | 275 | 162  | 436  |
| GTGGGCAGATAATGGGTGTT    | 59.676 | 20 | 198 | 865  | 1062 |
| GGATTCAGCTGGAAAAACCA    | 60.051 | 20 | 183 | 132  | 314  |
| TGATCATCCTCAGTTGTTGATT( | 59.985 | 23 | 279 | 382  | 660  |
| TAGTTCCGAAATGATTGCC     | 59.901 | 20 | 254 | 2204 | 2457 |
| CCGCCCTCAAGCCTAGTTAT    | 60.593 | 20 | 237 | 5815 | 6051 |
| AATATGTTTGAGGCTGCGCTA   | 59.888 | 21 | 261 | 1260 | 1520 |
| GCCTTTCTCCTTTTCTTTAACCA | 60.114 | 23 | 164 | 971  | 1134 |
| TCTTCCGTAAAGCGAAGGAA    | 59.953 | 20 | 252 | 759  | 1010 |
| ATCATTACCAACACGCAAA     | 59.972 | 20 | 113 | 3050 | 3162 |
| TCGTCTCCCGTTGAAAAAGT    | 59.711 | 20 | 201 | 6515 | 6715 |
| TGTTGCAGATGTTTCTTCGG    | 59.84  | 20 | 272 | 671  | 942  |
| AGCCCTTTGGAGGTAGGTTG    | 60.488 | 20 | 121 | 1506 | 1626 |
| AGGGGTAAGCGAGGGTATGT    | 59.848 | 20 | 193 | 12   | 204  |
| CGGTCAACCGATTCCCTAT     | 59.759 | 19 | 246 | 637  | 882  |
| TTTGTGGACCTAACGCATGA    | 60.111 | 20 | 141 | 395  | 535  |
| GTTGGATGAAATAGTGCCGC    | 60.478 | 20 | 159 | 11   | 169  |
| CAGGGACGGTGCTATTTAGG    | 59.587 | 20 | 148 | 196  | 343  |
| TCCGAGCCTGAGTCAATTCT    | 59.95  | 20 | 217 | 198  | 414  |
| CAATTTGGTTGGGTGCTTCT    | 59.971 | 20 | 215 | 20   | 234  |
| ACGGATGAGATGCAAGAAAAA   | 59.699 | 21 | 279 | 1930 | 2208 |
| GAACCACTGAACCACGGAGT    | 60.009 | 20 | 101 | 708  | 808  |
| TTCAGCAGGCGTAGACATTG    | 60.011 | 20 | 166 | 352  | 517  |
| TTTTTATTGCGGACGTCAAA    | 59.189 | 20 | 176 | 2172 | 2347 |
| AATGGGTTGTCCCCTTTTTC    | 60.032 | 20 | 210 | 104  | 313  |
| TGCACCCTGAGCAATAACAT    | 59.152 | 20 | 274 | 533  | 806  |
| TTGAAGACTGCGTTGTGCGAG   | 60.175 | 20 | 263 | 613  | 875  |
| GGGGGCAATGGATTATTAGG    | 60.349 | 20 | 189 | 2031 | 2219 |
| CATGTTGTTAGAGTGGCCGA    | 59.716 | 20 | 211 | 166  | 376  |
| TTTGGGTCAATCATTTTGGTT   | 59.168 | 21 | 251 | 509  | 759  |
| CACGACCCAAATCAACTATTC/  | 59.861 | 22 | 279 | 1781 | 2059 |

|                        |        |    |     |      |      |
|------------------------|--------|----|-----|------|------|
| ACGTTGTCCTTTACAAGGCG   | 60.168 | 20 | 251 | 101  | 351  |
| AATTTGAGCAGGGAGCAAGA   | 59.955 | 20 | 183 | 25   | 207  |
| TCACCCCTTTCTCTTTCTCG   | 59.401 | 20 | 146 | 898  | 1043 |
| CTTTGTTTTCCAATGTCGGT   | 59.971 | 20 | 272 | 2499 | 2770 |
| TCCGTGTGGCTAACAAATCA   | 60.111 | 20 | 275 | 64   | 338  |
| TTTGGCATTCTTTTTTCAGC   | 60.188 | 20 | 109 | 38   | 146  |
| CATGATTTTGGCCTTTTCAGC  | 60.585 | 20 | 263 | 2650 | 2912 |
| TCTGGCACGAATGGTGAATA   | 60.073 | 20 | 236 | 608  | 843  |
| ACATCATGCGGGTAAGGAAA   | 60.331 | 20 | 136 | 1732 | 1867 |
| TGCAATCTGCTCCATTTAACA  | 59.315 | 21 | 232 | 364  | 595  |
| TCTCGTCTCTCAAGTTCGCC   | 60.678 | 20 | 267 | 1074 | 1340 |
| GCTTCCAAATAATGGCTTCAA  | 59.202 | 21 | 227 | 118  | 344  |
| CATACATTTTATCATCCATTGC | 58.405 | 23 | 249 | 13   | 261  |
| TGTGAGCGTGTGTGAGTGAA   | 60.07  | 20 | 238 | 257  | 494  |
| TTGGCATAATCTGGACTAAACA | 59.42  | 24 | 236 | 177  | 412  |
| AAAATACCATTAACACGCAGG  | 58.567 | 22 | 245 | 533  | 777  |
| TAACTACCAACCAGCCGCTC   | 60.27  | 20 | 242 | 48   | 289  |
| AAGAAAGGAAGAAACCGGCA   | 61.088 | 20 | 254 | 109  | 362  |
| TTGACAACAACCTTTGCCAGC  | 59.888 | 20 | 109 | 459  | 567  |
| CGTGCAGAGGCACATGATTA   | 60.834 | 20 | 181 | 2685 | 2865 |
| TGGGGAGAATGTAATAGCCG   | 59.916 | 20 | 280 | 1424 | 1703 |
| TGATGACCTGGAGTTGTGGA   | 60.088 | 20 | 190 | 6834 | 7023 |
| CAAATCGCACACATAACCAGC  | 60.142 | 20 | 116 | 450  | 565  |
| CCATATTTGTGTTTCTCATTG  | 59.293 | 24 | 207 | 127  | 333  |
| GGCTGGTCCAACGGTATTTA   | 59.823 | 20 | 248 | 528  | 775  |
| TCTATCTCGGATCCAATGGC   | 59.998 | 20 | 223 | 1068 | 1290 |
| GGATCGCCCATCAGATGTAT   | 59.739 | 20 | 233 | 786  | 1018 |
| TCTTGATGTTTAGCAGCAGCA  | 59.767 | 21 | 212 | 965  | 1176 |
| CCAGTTCCTCCCTACTCAC    | 58.591 | 20 | 120 | 227  | 346  |
| TAGTATTGTCCCTCCACCCG   | 59.807 | 20 | 280 | 1628 | 1907 |
| TCATAAGGATTTCGGCCAGAC  | 60.036 | 20 | 246 | 6    | 251  |
| ATTTTCAATGCCAAGCGAAT   | 59.552 | 20 | 216 | 226  | 441  |
| ACAAGTGCTTGAGTCCGCTC   | 60.599 | 20 | 252 | 1579 | 1830 |
| TCGTACCAAAATGTGCAACAA  | 60.022 | 21 | 123 | 3    | 125  |
| TTTCCCCTTCATGTCCTACG   | 59.926 | 20 | 147 | 284  | 430  |
| TGACGGTGAGGATTTGTGAA   | 60.088 | 20 | 258 | 82   | 339  |
| TTCTCAGCAGAAGGTGTTGA   | 57.071 | 20 | 223 | 563  | 785  |
| TGGAATTTTCCAATCTGGCT   | 60.788 | 21 | 193 | 332  | 524  |
| TCCCATGTATGTAGATTGCTTC | 60.218 | 23 | 273 | 131  | 403  |
| TCTCGTCTGACAACTTCAAC   | 59.377 | 22 | 214 | 82   | 295  |
| CTCCTCTTGCGAGAAGTTGG   | 60.126 | 20 | 241 | 49   | 289  |
| CGCCTTCAAGATCCACATTT   | 60.074 | 20 | 149 | 391  | 539  |
| TGGTGAGTTTTTAAGCAACCAT | 58.676 | 22 | 239 | 1349 | 1587 |
| TCACCTTATTTGCAATTTTCA  | 59.603 | 22 | 155 | 653  | 807  |
| CGTAGGCTTCAGGTCGTAG    | 60.168 | 20 | 231 | 1416 | 1646 |
| GGACCCAAAATGCCTATTCA   | 59.762 | 20 | 184 | 697  | 880  |
| GGTAGCCAGTTCCTCAAATCA  | 59.933 | 20 | 166 | 13   | 178  |
| CCCATTTGAATCAACCCCTA   | 59.617 | 20 | 230 | 517  | 746  |
| GGTTGTTCTCTGGAACTGTTG  | 60.554 | 23 | 273 | 312  | 584  |
| CAATGTCACATCCCAAGCAC   | 59.967 | 20 | 108 | 109  | 216  |
| CGGTTTATGATATTGGGGAC   | 60.014 | 20 | 260 | 877  | 1136 |
| CCCCAAAATTTCCCATTTCT   | 59.992 | 20 | 277 | 1364 | 1640 |
| GGGGGAATTTATCCCGACTA   | 59.978 | 20 | 122 | 445  | 566  |
| CTATCTGCCGGAGACACCAC   | 60.678 | 20 | 222 | 1348 | 1569 |
| CGCTGAGGAAGAAGCTGAAT   | 59.717 | 20 | 274 | 180  | 453  |
| TTAAAAATAAAACCGGCGGA   | 59.45  | 20 | 141 | 11   | 151  |
| ATGACCAAATCAAGGGGCTA   | 59.387 | 20 | 236 | 1721 | 1956 |
| TGTCCACATTGGAAAAACA    | 59.792 | 20 | 248 | 336  | 583  |



|                           |        |    |     |      |      |
|---------------------------|--------|----|-----|------|------|
| GGAACATTACAGTTGGCAAGC     | 59.629 | 21 | 276 | 2482 | 2757 |
| CAACACCGTTGTCTTTCACC      | 59.034 | 20 | 182 | 1355 | 1536 |
| AGGTTTGAGGGCCATGACTA      | 59.55  | 20 | 205 | 787  | 991  |
| GCTTGTTACACCACACTGGG      | 59.06  | 20 | 241 | 954  | 1194 |
| GACGCCACGTGTAAAGACT       | 60.179 | 20 | 129 | 4    | 132  |
| TGAGGTGTCCCATACGGACT      | 60.386 | 20 | 156 | 0    | 155  |
| TGTAGGCAATTCAAGAAGCA      | 57.1   | 20 | 177 | 729  | 905  |
| GGTGAATTTCTTTTTGGCACA     | 59.967 | 21 | 272 | 0    | 271  |
| ACCTCGAATGATGTCCGTTT      | 59.934 | 20 | 247 | 323  | 569  |
| GCAAATATTGCAGTCAGCCA      | 59.839 | 20 | 280 | 394  | 673  |
| GTTTTGTCAGAGGCCACCAT      | 59.973 | 20 | 186 | 1177 | 1362 |
| TTCGAGTTTAGTTCTTCTGTAAT   | 57.073 | 26 | 224 | 397  | 620  |
| CAACTAGGGGTGTTACCGGT      | 59.884 | 20 | 206 | 710  | 915  |
| CGGGACGAAATTTTTCAAAG      | 59.559 | 20 | 250 | 160  | 409  |
| GGCGAATTAATAACACCACG      | 59.376 | 21 | 204 | 620  | 823  |
| TGCATTCTAAACTGCCAACG      | 59.872 | 20 | 100 | 798  | 897  |
| TTTTTGGGAAATCCTTGAC       | 59.916 | 20 | 159 | 496  | 654  |
| GCTTCCATGTATGAAGATCGC     | 59.688 | 21 | 175 | 23   | 197  |
| GGATCGAAAGGTTGTGGAAA      | 59.91  | 20 | 179 | 189  | 367  |
| TGGTGATTTTTGCCGTGATA      | 59.93  | 20 | 237 | 574  | 810  |
| TGCGGCCCATATAGTTGTAA      | 59.053 | 20 | 243 | 130  | 372  |
| AATTCCTCCTCCCCATTCTG      | 60.264 | 20 | 224 | 224  | 447  |
| CCATTTGATCTTGCCATGACT     | 59.947 | 21 | 277 | 1729 | 2005 |
| AAATAGCAAGTTGATGGCGG      | 60.096 | 20 | 121 | 271  | 391  |
| CCATGTGCTTACAAGTTTTGGA    | 60.032 | 22 | 211 | 1189 | 1399 |
| GCAGGAGGGTTTCTAATCCG      | 60.949 | 20 | 139 | 2    | 140  |
| GAGCCATGATTCACCATCAA      | 59.456 | 20 | 149 | 0    | 148  |
| GCATTGTTACCACCACATC       | 59.819 | 20 | 277 | 232  | 508  |
| CCCATGTCTTAAATACTCTGCC    | 60.369 | 23 | 270 | 1597 | 1866 |
| GGTTTGGGAGAAAAGCATCA      | 60.051 | 20 | 264 | 445  | 708  |
| CCCACTGACTCCTTCCATATCT    | 59.461 | 22 | 238 | 359  | 596  |
| AGGAAGGGGGAAAAGGAAAT      | 60.122 | 20 | 199 | 595  | 793  |
| TGGCACTTCCAATCTGACAA      | 60.24  | 20 | 229 | 38   | 266  |
| AGAATCGACAGTTTGGACGG      | 60.111 | 20 | 228 | 584  | 811  |
| GCAATTTTGTGTTTTGTAAACT    | 59.539 | 25 | 227 | 639  | 865  |
| CTCAAACCTCCTCATGGC        | 59.803 | 20 | 238 | 1385 | 1622 |
| GCAGTTGATTGTTGATTACAAA    | 58.614 | 24 | 279 | 213  | 491  |
| GGATTCCTCCAATGACGATG      | 60.281 | 20 | 267 | 865  | 1131 |
| TTCCAGAAATTGTGTTGGCA      | 60.088 | 20 | 174 | 2105 | 2278 |
| ACCTGAGACGTCACCAGACC      | 60.161 | 20 | 219 | 2446 | 2664 |
| ACATGGCTAATGGACTTCACA/    | 59.499 | 22 | 263 | 1089 | 1351 |
| ATAACCGCCGATTTTGAAT       | 60.517 | 20 | 236 | 817  | 1052 |
| AAAAGTCGCGTATTTTTCGTG     | 59.307 | 21 | 258 | 345  | 602  |
| ATTGATGTGCTGTGTTGGCT      | 59.169 | 20 | 137 | 2440 | 2576 |
| AGGTTTCGTGTCATGCCAAT      | 60.384 | 20 | 236 | 6    | 241  |
| TCCAATTAATCCTAAACCACAT    | 57.985 | 24 | 233 | 324  | 556  |
| GTTGGGGTCTTGCCGTAATA      | 59.993 | 20 | 251 | 142  | 392  |
| TCTTTTTGACTTTTGTGAGCAGATC | 58.687 | 23 | 266 | 547  | 812  |
| CTGCTTTACACCCCTCCAAA      | 60.103 | 20 | 163 | 1795 | 1957 |
| TCGATTTTTCACAGTAGCAGC     | 58.187 | 21 | 280 | 835  | 1114 |
| CAGTGTTGAATCACCTAATGC     | 59.007 | 23 | 182 | 692  | 873  |
| CGACAATCAACTGGGTTTCC      | 60.353 | 20 | 178 | 121  | 298  |
| TTTTTGTTCCATGTTATTGCCA    | 60.218 | 22 | 213 | 4585 | 4797 |
| AGGGTTCAGGGCGATTAAT       | 59.962 | 20 | 197 | 222  | 418  |
| GAAGTTTTGGAGATCCGACG      | 59.67  | 20 | 126 | 291  | 416  |
| AGGGGCAATTTGTAGACACG      | 59.993 | 20 | 280 | 813  | 1092 |
| CGACTTGCCACTGGAATTTT      | 60.11  | 20 | 234 | 115  | 348  |
| CCATTGTTAACCCAAAACGC      | 60.223 | 20 | 133 | 37   | 169  |

|                         |        |    |     |      |      |
|-------------------------|--------|----|-----|------|------|
| ATTAACGCGCGCCATATATTA   | 59.511 | 21 | 226 | 2883 | 3108 |
| AGTGAGACTGAATGATATG,    | 58.279 | 24 | 239 | 215  | 453  |
| TTGTGAATTCATCGAGCCA     | 60.197 | 20 | 158 | 254  | 411  |
| TCGACCAGCACAGTGAAGAC    | 60.03  | 20 | 272 | 3272 | 3543 |
| CCTTTATGGGAAGTGGCAGA    | 60.066 | 20 | 154 | 1107 | 1260 |
| TTGTTATTTTCATTAAGTTATTA | 57.628 | 27 | 133 | 3152 | 3284 |
| ATCGTGAATGGAAGGACTCG    | 60.073 | 20 | 112 | 507  | 618  |
| CACAGCCACAACCTACGAAA    | 59.758 | 20 | 129 | 1086 | 1214 |
| GCAGCTTTAGCAGAGGAAA     | 59.73  | 20 | 278 | 233  | 510  |
| TCTGCCATCATCCACCATTA    | 59.883 | 20 | 183 | 165  | 347  |
| TTTCGGATGTAACACAGGCA    | 60.111 | 20 | 135 | 1686 | 1820 |
| AATTAAGGTTTGCCCTTGCC    | 60.312 | 20 | 185 | 62   | 246  |
| ATTCCTTCCCTCTGGATGGT    | 59.755 | 20 | 243 | 149  | 391  |
| TAATAGAAGCGGAGGAAGCG    | 59.586 | 20 | 226 | 826  | 1051 |
| TTGGAATTAACACCGAGCCA    | 60.427 | 20 | 213 | 716  | 928  |
| CAATCCAATTCCTGTATGGAAA  | 60.062 | 23 | 229 | 621  | 849  |
| ACTAGCAACTCGCTCTCCCA    | 60.156 | 20 | 200 | 103  | 302  |
| ACGACTCGAAATGGAAGC      | 60.263 | 20 | 195 | 1443 | 1637 |
| AGCAAACACCCCAAGATTTT    | 59.031 | 20 | 129 | 49   | 177  |
| TGTGGGATGCAATGAATCTG    | 60.481 | 20 | 279 | 5246 | 5524 |
| AAGGATGAGGGAGGGAAGTC    | 59.492 | 20 | 253 | 825  | 1077 |
| TTGATGGAATTAAGCTGCGA    | 59.401 | 20 | 245 | 206  | 450  |
| CTCCAATCTTCTCCACCTGC    | 59.803 | 20 | 209 | 2175 | 2383 |
| GATTTCAACTCGGGCTTGTT    | 59.174 | 20 | 235 | 1141 | 1375 |
| GCAGGCATACACTCCCACTT    | 60.142 | 20 | 152 | 405  | 556  |
| GTTGGCCCCCTTAGATCATT    | 60.152 | 20 | 199 | 610  | 808  |
| GGAGATCAAGTTCGCTCTAGC/  | 61.025 | 22 | 257 | 1674 | 1930 |
| CAGCCAATCAGAAAAGTCGG    | 60.766 | 20 | 177 | 2970 | 3146 |
| TGCTTAATTACCATAAATGCTG  | 57.673 | 24 | 239 | 1405 | 1643 |
| TGGAAATAATGGAAGGAGCG    | 60.031 | 20 | 229 | 996  | 1224 |
| TCAGGTTCCAGTGGTCAGAA    | 59.23  | 20 | 238 | 1124 | 1361 |
| AAAAATGTCAAATAAATTCTCC  | 59.359 | 25 | 200 | 6454 | 6653 |
| TATCATTAACGCCCGTAGGC    | 59.95  | 20 | 275 | 3240 | 3514 |
| CTTTCCAAATCCCTATGCGA    | 60.031 | 20 | 131 | 1127 | 1257 |
| CACAACAATTCACCTCGCAA    | 60.699 | 20 | 193 | 2130 | 2322 |
| TGCCACCCCTAACAATAAT     | 59.158 | 20 | 233 | 3    | 235  |
| AATTGCAGTTAATCCCGACG    | 59.96  | 20 | 149 | 211  | 359  |
| TCGTGATTCGTTTCGTGTTT    | 59.174 | 20 | 267 | 13   | 279  |
| TTCCACCCTCTCCTTTTCTGT   | 60.096 | 21 | 219 | 402  | 620  |
| GCAAATCTGGTTTCGCTGAT    | 60.221 | 20 | 264 | 638  | 901  |
| CCAATGGTGGTATGGTGTGA    | 60.088 | 20 | 215 | 172  | 386  |
| GGTCCATATCACCAACACCC    | 59.91  | 20 | 198 | 5    | 202  |
| TCAATACCCGAGAATTGCATA   | 58.122 | 21 | 253 | 41   | 293  |
| AACTCCCACCGACAGTTTCA    | 60.545 | 20 | 267 | 346  | 612  |
| ATGCAAAAATACGAAACGC     | 59.971 | 20 | 263 | 11   | 273  |
| TGGGTCAGTTTGTTTCCACC    | 60.791 | 20 | 193 | 0    | 192  |
| ACCTTTAATGCCTATCGGGG    | 60.164 | 20 | 206 | 41   | 246  |
| CGAAATTGGAGCAAGGAAAA    | 60.181 | 20 | 165 | 142  | 306  |
| GCAGCCCGAGAATTGTCTAC    | 59.843 | 20 | 228 | 1903 | 2130 |
| CCGAAAGAAACGGTGGTAAA    | 59.968 | 20 | 247 | 1341 | 1587 |
| GATTTGAACCCACGCCATAA    | 60.701 | 20 | 175 | 0    | 174  |
| TCACATATGGTTTCCTTCATGC  | 59.829 | 22 | 242 | 360  | 601  |
| TAAGCCAAAATGATCGGCAT    | 60.424 | 20 | 170 | 0    | 169  |
| GGAGTGCAATCGAACAAAGA    | 58.85  | 20 | 204 | 161  | 364  |
| TATCCGAGGCTTGGAACAT     | 59.528 | 20 | 232 | 1201 | 1432 |
| CCTTAGTGGATTTTCATGGGCT  | 60.326 | 21 | 280 | 1868 | 2147 |
| TCCGTGGAATGAAATTGAGT    | 57.991 | 20 | 258 | 960  | 1217 |
| TGTCCAATCAAGAGGCAACA    | 60.24  | 20 | 107 | 115  | 221  |

|                        |        |    |     |      |      |
|------------------------|--------|----|-----|------|------|
| TCGTTTCGACATCCGTTACA   | 60.111 | 20 | 164 | 150  | 313  |
| GAGTTCGGTGGGTATGGATG   | 60.195 | 20 | 241 | 40   | 280  |
| CCCTCCAGCATACCTGCTTA   | 60.227 | 20 | 227 | 1240 | 1466 |
| CGCATGTTACGTAAATCGTTAA | 59.149 | 23 | 249 | 202  | 450  |
| ACCCGGTCTACACCACAAAG   | 59.884 | 20 | 204 | 308  | 511  |
| CCTTTCTTTTGACTGATGTGGA | 59.215 | 22 | 243 | 154  | 396  |
| TGGAGTGGCATTGCAAGA     | 59.908 | 18 | 168 | 878  | 1045 |
| ATGAAAGAAAGTCAGCCCCA   | 59.67  | 20 | 216 | 127  | 342  |
| TCGCTATTGTATTTAGGCAGG  | 57.163 | 21 | 107 | 325  | 431  |
| CACCCTTGAGGTGTTTCATCA  | 59.52  | 20 | 180 | 155  | 334  |
| CATTGGCGGTTGATGATAGTC  | 60.346 | 21 | 270 | 818  | 1087 |
| TCTCCATCTCCAACCTCCACC  | 60.048 | 20 | 156 | 48   | 203  |
| TAAAATGGGCGAGAGTGAGG   | 60.206 | 20 | 118 | 1118 | 1235 |
| AAGTTCACCTTCGGAGATCG   | 59.284 | 20 | 270 | 337  | 606  |
| ACTACAGGAGGGGGTAGGGA   | 59.811 | 20 | 194 | 1305 | 1498 |

Supplementary Table 3. Details of primers used for SSR marker verification

| No.      | ID                  | SSR nr. | SSR type | SSR       | size | start | end  |
|----------|---------------------|---------|----------|-----------|------|-------|------|
| McSSR_1  | scaffold493143_16.2 | 1       | p2       | (TC)7     | 14   | 4550  | 4563 |
| McSSR_2  | scaffold493642_17.4 | 1       | p2       | (AT)7     | 14   | 585   | 598  |
| McSSR_3  | scaffold686296_14.2 | 1       | p3       | (ATT)5    | 15   | 744   | 758  |
| McSSR_4  | scaffold739713_15.6 | 1       | p3       | (CAA)5    | 15   | 872   | 886  |
| McSSR_5  | scaffold739704_16.3 | 1       | p3       | (ATA)5    | 15   | 146   | 160  |
| McSSR_6  | scaffold99474_16.4  | 1       | p2       | (GA)8     | 16   | 176   | 191  |
| McSSR_7  | scaffold714629_18.4 | 1       | p3       | (CCG)6    | 18   | 592   | 609  |
| McSSR_8  | scaffold254351_14.4 | 1       | p2       | (CT)10    | 20   | 604   | 623  |
| McSSR_9  | scaffold279605_16.0 | 1       | p2       | (AG)10    | 20   | 515   | 534  |
| McSSR_10 | scaffold280650_16.7 | 1       | p4       | (AAAT)5   | 20   | 91    | 110  |
| McSSR_11 | scaffold362989_10.1 | 1       | p4       | (CTCC)5   | 20   | 948   | 967  |
| McSSR_12 | scaffold50981_15.0  | 1       | p3       | (TGA)8    | 24   | 2952  | 2975 |
| McSSR_13 | scaffold639648_15.0 | 1       | p2       | (CT)13    | 26   | 2166  | 2191 |
| McSSR_14 | scaffold675038_10.1 | 1       | p2       | (AT)13    | 26   | 542   | 567  |
| McSSR_15 | scaffold171052_12.6 | 1       | p4       | (ATAA)7   | 28   | 1459  | 1486 |
| McSSR_16 | scaffold278700_12.7 | 1       | p2       | (AG)14    | 28   | 326   | 353  |
| McSSR_17 | scaffold507988_16.9 | 1       | p3       | (TCA)10   | 30   | 1005  | 1034 |
| McSSR_18 | scaffold124671_15.1 | 1       | p4       | (TACA)5   | 20   | 276   | 295  |
| McSSR_19 | scaffold708632_12.3 | 1       | p4       | (TACA)5   | 20   | 175   | 194  |
| McSSR_20 | scaffold734892_16.5 | 1       | p4       | (TATG)5   | 20   | 1168  | 1187 |
| McSSR_21 | scaffold552987_14.6 | 1       | p4       | (TATT)5   | 20   | 1778  | 1797 |
| McSSR_22 | scaffold742712_16.0 | 1       | p4       | (TATT)5   | 20   | 1039  | 1058 |
| McSSR_23 | scaffold1551_14.8   | 1       | p4       | (TCAA)5   | 20   | 1304  | 1323 |
| McSSR_24 | scaffold559721_10.4 | 1       | p4       | (TCAA)5   | 20   | 242   | 261  |
| McSSR_25 | scaffold37946_16.9  | 1       | p4       | (TCAT)5   | 20   | 728   | 747  |
| McSSR_26 | scaffold716555_15.0 | 1       | p4       | (TCAT)5   | 20   | 2539  | 2558 |
| McSSR_27 | scaffold534298_14.9 | 1       | p4       | (TCGA)5   | 20   | 954   | 973  |
| McSSR_28 | scaffold434282_14.6 | 1       | p4       | (TCTT)5   | 20   | 6551  | 6570 |
| McSSR_29 | scaffold600130_20.2 | 1       | p4       | (TGTA)5   | 20   | 298   | 317  |
| McSSR_30 | scaffold662814_16.2 | 1       | p4       | (TTAA)5   | 20   | 1866  | 1885 |
| McSSR_31 | scaffold730642_15.6 | 1       | p4       | (TTAA)5   | 20   | 849   | 868  |
| McSSR_32 | scaffold180742_17.8 | 1       | p4       | (TTGG)5   | 20   | 1030  | 1049 |
| McSSR_33 | scaffold424746_14.9 | 1       | p4       | (TTTA)5   | 20   | 1082  | 1101 |
| McSSR_34 | scaffold633212_11.7 | 1       | p4       | (TTTA)5   | 20   | 423   | 442  |
| McSSR_35 | scaffold661552_12.7 | 1       | p4       | (TTTA)5   | 20   | 202   | 221  |
| McSSR_36 | scaffold684812_15.2 | 1       | p4       | (TTTA)5   | 20   | 296   | 315  |
| McSSR_37 | scaffold666666_15.3 | 1       | p4       | (TTTC)5   | 20   | 2541  | 2560 |
| McSSR_38 | scaffold659643_17.5 | 1       | p4       | (AAAT)6   | 24   | 1425  | 1448 |
| McSSR_39 | scaffold717962_15.3 | 1       | p4       | (AAAT)6   | 24   | 460   | 483  |
| McSSR_40 | scaffold743044_16.1 | 1       | p4       | (ATAA)6   | 24   | 6543  | 6566 |
| McSSR_41 | scaffold529630_12.6 | 1       | p4       | (ATAG)6   | 24   | 545   | 568  |
| McSSR_42 | scaffold736148_16.3 | 1       | p4       | (ATTT)6   | 24   | 1740  | 1763 |
| McSSR_43 | scaffold60885_12.5  | 1       | p4       | (CATC)6   | 24   | 1265  | 1288 |
| McSSR_44 | scaffold65330_12.7  | 1       | p4       | (TAAT)6   | 24   | 317   | 340  |
| McSSR_45 | scaffold448298_14.4 | 1       | p4       | (TGTA)6   | 24   | 800   | 823  |
| McSSR_46 | scaffold670842_10.7 | 1       | p4       | (TTCT)6   | 24   | 925   | 948  |
| McSSR_47 | scaffold732762_14.6 | 1       | p4       | (TTCT)6   | 24   | 2925  | 2948 |
| McSSR_48 | scaffold437080_10.1 | 1       | p5       | (ACACG)5  | 25   | 85    | 109  |
| McSSR_49 | scaffold574523_12.8 | 1       | p5       | (CCTAA)5  | 25   | 186   | 210  |
| McSSR_50 | scaffold78862_14.0  | 1       | p5       | (GCGGG)5  | 25   | 1209  | 1233 |
| McSSR_51 | scaffold733662_13.5 | 1       | p5       | (TGCTT)5  | 25   | 144   | 168  |
| McSSR_52 | scaffold171052_12.6 | 1       | p4       | (ATAA)7   | 28   | 1459  | 1486 |
| McSSR_53 | scaffold554235_20.7 | 1       | p6       | (ATCGGG)5 | 30   | 204   | 233  |
| McSSR_54 | scaffold576716_13.1 | 1       | p6       | (GATTTT)5 | 30   | 908   | 937  |

|          |                     |      |           |    |      |      |
|----------|---------------------|------|-----------|----|------|------|
| McSSR_55 | scaffold652042_14.8 | 1 p6 | (TTCTGG)  | 30 | 72   | 101  |
| McSSR_56 | scaffold722193_18.0 | 1 p6 | (GATTGG)  | 30 | 1163 | 1192 |
| McSSR_57 | scaffold708599_14.5 | 1 p5 | (AAAAT)5  | 25 | 254  | 278  |
| McSSR_58 | scaffold419361_15.9 | 1 p5 | (AATAA)5  | 25 | 767  | 791  |
| McSSR_59 | scaffold404725_15.9 | 1 p5 | (AATAC)5  | 25 | 527  | 551  |
| McSSR_60 | scaffold567385_10.3 | 1 p5 | (ACAAA)5  | 25 | 64   | 88   |
| McSSR_61 | scaffold437080_10.1 | 1 p5 | (ACACG)5  | 25 | 85   | 109  |
| McSSR_62 | scaffold720454_13.9 | 1 p5 | (ACCTA)5  | 25 | 1226 | 1250 |
| McSSR_63 | scaffold588661_14.1 | 1 p5 | (AGATA)5  | 25 | 2021 | 2045 |
| McSSR_64 | scaffold129996_14.2 | 1 p5 | (ATAAA)5  | 25 | 2190 | 2214 |
| McSSR_65 | scaffold652062_16.1 | 1 p5 | (ATAAT)5  | 25 | 407  | 431  |
| McSSR_66 | scaffold741994_15.2 | 1 p5 | (ATATT)5  | 25 | 227  | 251  |
| McSSR_67 | scaffold737970_18.1 | 1 p5 | (ATCTA)5  | 25 | 227  | 251  |
| McSSR_68 | scaffold209057_14.9 | 1 p5 | (ATTTT)5  | 25 | 28   | 52   |
| McSSR_69 | scaffold281552_10.3 | 1 p5 | (CAGGC)5  | 25 | 240  | 264  |
| McSSR_70 | scaffold436901_11.6 | 1 p5 | (CCAAG)5  | 25 | 228  | 252  |
| McSSR_71 | scaffold574523_12.8 | 1 p5 | (CCTAA)5  | 25 | 186  | 210  |
| McSSR_72 | scaffold346597_11.5 | 1 p5 | (CTTTT)5  | 25 | 41   | 65   |
| McSSR_73 | scaffold740060_14.4 | 1 p5 | (CTTTT)5  | 25 | 123  | 147  |
| McSSR_74 | scaffold549972_10.6 | 1 p5 | (GATGG)5  | 25 | 81   | 105  |
| McSSR_75 | scaffold502759_17.3 | 1 p5 | (TAAAA)5  | 25 | 49   | 73   |
| McSSR_76 | scaffold450612_11.1 | 1 p5 | (TTAGG)5  | 25 | 74   | 98   |
| McSSR_77 | scaffold732293_13.2 | 1 p5 | (TTTTG)5  | 25 | 1908 | 1932 |
| McSSR_78 | scaffold740879_14.0 | 1 p4 | (AAAT)7   | 28 | 1280 | 1307 |
| McSSR_79 | scaffold722963_14.3 | 1 p4 | (ATTT)7   | 28 | 368  | 395  |
| McSSR_80 | scaffold314358_14.9 | 1 p4 | (TTGC)7   | 28 | 1703 | 1730 |
| McSSR_81 | scaffold498369_13.7 | 1 p5 | (AATCT)6  | 30 | 470  | 499  |
| McSSR_82 | scaffold733459_14.0 | 1 p5 | (TATCT)6  | 30 | 1080 | 1109 |
| McSSR_83 | scaffold741982_15.1 | 1 p5 | (TTTAT)6  | 30 | 1285 | 1314 |
| McSSR_84 | scaffold736788_12.7 | 1 p6 | (CAAAAT)6 | 30 | 540  | 569  |
| McSSR_85 | scaffold156626_11.2 | 1 p6 | (CCAACA)6 | 30 | 252  | 281  |
| McSSR_86 | scaffold502162_13.7 | 1 p6 | (TAGTAT)6 | 30 | 215  | 244  |
| McSSR_87 | scaffold339935_15.1 | 1 p6 | (TCCACA)6 | 30 | 903  | 932  |
| McSSR_88 | scaffold740076_14.2 | 1 p6 | (TGTGGT)6 | 30 | 1359 | 1388 |
| McSSR_89 | scaffold97925_17.0  | 1 p6 | (TTGGAC)6 | 30 | 420  | 449  |
| McSSR_90 | scaffold634405_15.1 | 1 p5 | (TCGGG)7  | 35 | 1527 | 1561 |

| FORWARD PRIMER1 (5'-3') | Tm(C°) | size | REVERSE PRIMER1 (5'-3') | Tm(C°) | size |
|-------------------------|--------|------|-------------------------|--------|------|
| AACTGACGGGTGATCAAAGG    | 59.966 | 20   | GGCTGCAGAAGTGTGATGA     | 59.992 | 20   |
| TGCGTTCGAGTTCAGAGTTG    | 60.175 | 20   | ATACGAACACTGCACCACCA    | 60.032 | 20   |
| GTCCATGTCCTCGTCCTCAT    | 59.928 | 20   | AACATCGAAGCTTTTGGCTG    | 60.386 | 20   |
| CAGTTTCAAGGGGAATCGAA    | 60.044 | 20   | TATGCTTTCCGAGTGCTTGA    | 59.566 | 20   |
| CCCACATCCAGCTTTCGTAT    | 59.955 | 20   | GGATTAATGGCCACGAAGAA    | 59.901 | 20   |
| GGCCTGATTTGCAATACTGTG   | 60.517 | 21   | TTCTTGTTGGTGTGTGGCAT    | 60.008 | 20   |
| GATCCTCTGGGCCAAATGTA    | 59.894 | 20   | GAGAGGAATCAAGCCTGGTG    | 59.803 | 20   |
| TACTGCTCTTGAACTCGCCA    | 59.74  | 20   | CAAGGAACATGGACTTGCTG    | 59.288 | 20   |
| TGGAAGGATGTGAGATGGTG    | 59.473 | 20   | CCGAATTCCTCTACCGTCAA    | 60.066 | 20   |
| CAAATTAATAATGCGCCACG    | 60.081 | 19   | ATTTGACGAAGAACGGCTTG    | 60.249 | 20   |
| TCTTGTTTTCTCCCAAACC     | 59.003 | 20   | GTGGGCAGATAATGGGTGTT    | 59.676 | 20   |
| AGACCCCAATTTGATTGGAA    | 59.22  | 20   | ATGGAAAAATTTGCAGAGCG    | 60.209 | 20   |
| ATGCTTTCCAGCCAAGAGAA    | 59.955 | 20   | TTTCCCAAGGATCAGACGAC    | 60.05  | 20   |
| GTTGCTATTGCGGGCTTTAC    | 59.748 | 20   | ACGGATTCATGGAGTGGAAG    | 59.927 | 20   |
| TGACAAAAATTGAGGCGTTG    | 59.706 | 20   | GGGATGGTGGAAAGAGCAGTA   | 60.073 | 20   |
| CGAGCGAGAGGAGAGAGAAA    | 59.966 | 20   | AGACGAGGAAGAACAACGGA    | 59.844 | 20   |
| AATTGTGCTCCATTTCCAG     | 59.933 | 20   | TCCCCGTACACAGTGATTTTT   | 59.345 | 21   |
| CCTATCGTTCCACATGCCTT    | 59.955 | 20   | ATTTACCCGCAGCAAAACTT    | 59.752 | 20   |
| GACTATAATGGCCAGCACCG    | 60.49  | 20   | CCCTATCAAACCCAGCAAGA    | 60.066 | 20   |
| CAATTTCCAGATGGAACGGT    | 59.79  | 20   | TCGTACACGAGGAGATGCTG    | 60.008 | 20   |
| GCCATTCACCATCTCTCGTT    | 60.081 | 20   | ACATCATGCGGGTAAGGAAA    | 60.331 | 20   |
| AATCATGCAACCACAACAATT   | 57.953 | 22   | TCCACTCCATTGGTTCTTTTT   | 58.54  | 21   |
| TCACATACCTGCAACCATGAA   | 59.98  | 21   | GCTGTGAAAGTATGCCACCC    | 60.526 | 20   |
| CCCCCATGAAAAGTCAAAAA    | 59.772 | 20   | TTGCTTCCAAATAATGGCTTC   | 59.202 | 21   |
| GCACTTTCACGGGAGTTGAT    | 60.119 | 20   | GAGACTGTGGATGGGGAAGA    | 60.048 | 20   |
| CGTCATGTCGTTCTTCCTCA    | 59.831 | 20   | ATTGTCTCCACCTGAGACG     | 60.112 | 20   |
| GGACGAAATTGATCGAAGGA    | 60.014 | 20   | CCTTGAATCTCAGCACCACA    | 59.831 | 20   |
| GAAGCAAGAGAGACGTTGGG    | 59.989 | 20   | TCGTCTCCCGTTGAAAAAGT    | 59.711 | 20   |
| CCGGAATCTGAGAGAGATCG    | 59.903 | 20   | CCCCAGTTCCTCCCTACT      | 60.312 | 19   |
| CCTGATTAGCCACAAGGGAA    | 60.066 | 20   | TGACCAAATCAAGGGGCTAA    | 60.439 | 20   |
| GACTTCGTGGGCTTGGACT     | 60.253 | 19   | AGGGGCAATTTGTAGACACG    | 59.993 | 20   |
| CCTAGCAAAAACCTTCCAGC    | 58.973 | 20   | CGGTAACCAAGAAGGCACAG    | 60.679 | 20   |
| GTCTTGGTTGCCATCTCCAT    | 59.934 | 20   | GCCTTCTCCTTTTCTTTAACCA  | 60.114 | 23   |
| CTCTCCATGGACGTAGGTGT    | 57.578 | 20   | TGGAATTTTCCAAATCTGGCT   | 60.788 | 21   |
| GAAGTTTTGGGGATCCGAC     | 59.326 | 19   | CGCTGAGGAAGAAGCTGAAT    | 59.717 | 20   |
| GTCATTTCTCGTTTCGCGTT    | 60.257 | 20   | TTCGGGACGAAATTTTCAA     | 60.407 | 20   |
| TGTGGATGCTTGATTTTGGAA   | 59.027 | 21   | GGAACATTACAGTTGGCAAGC   | 59.629 | 21   |
| TCTGTTTATAGTCCCCCGGA    | 59.382 | 20   | CTATCTGCCGAGACACCAC     | 60.678 | 20   |
| AATCAAGAAGCCTCTGCACG    | 60.538 | 20   | AAAGTCGCGTATTTTTCGTGA   | 59.772 | 21   |
| GCATCGACCTTGGACAAAAT    | 59.939 | 20   | AAAATGTCAAATAAATTCTCCG  | 59.359 | 25   |
| TTTGGGAGGGAAAACGACTA    | 59.541 | 20   | TTTGGGTCAATCATTTTGGTT   | 59.168 | 21   |
| TAACCATAGCAAAAACCCCA    | 60.181 | 20   | TTTCGGATGTAACACAGGCA    | 60.111 | 20   |
| TCAGCATTATGTGCTCTGCC    | 59.979 | 20   | GGTCGGAGATGATGGTCCTA    | 59.886 | 20   |
| AGAAGCACAAACCAACCAACC   | 60.012 | 20   | CAGAGAGAGAGAATGCCCCA    | 60.488 | 20   |
| GCCTTATCCAACACCACACC    | 60.24  | 20   | TGTTGCAGATGTTTCTTCGG    | 59.84  | 20   |
| AGGGGTAGCGGTGTGTGTAG    | 60.051 | 20   | AGGTTTGAGGGCCATGACTA    | 59.55  | 20   |
| TGGGTTTGAAGTAAACTGC     | 58.749 | 20   | TTAACGCGCGCCATATATTA    | 59.233 | 20   |
| ATTTGGTTCGTTTCGTTTTT    | 60.573 | 20   | GGTCCATATCACCAACACCC    | 59.91  | 20   |
| TCAAACCAGGTTCTTCAATGG   | 59.956 | 21   | ATCAAGTCAATCCGAGTCCG    | 60.073 | 20   |
| TCAAGCAAAAATATTCCGCC    | 60.04  | 20   | CTTCCAAATCCCTATGCGA     | 60.031 | 20   |
| ACCAAGAGAGAGAAAGGGGC    | 59.817 | 20   | TGTCCAATCAAGAGGCAACA    | 60.24  | 20   |
| TGACAAAAATTGAGGCGTTG    | 59.706 | 20   | GGGATGGTGGAAAGAGCAGTA   | 60.073 | 20   |
| GAGAGTTCAACTTGGCGGAT    | 59.288 | 20   | CACCCTTGAGGTGTTTCAATCA  | 59.52  | 20   |
| GGTCAGATCAAACCGAATCA    | 58.489 | 20   | ATTAGCATTGGCGGTTGATG    | 60.857 | 20   |

|                        |        |                            |        |    |
|------------------------|--------|----------------------------|--------|----|
| AGACAATCCATCTCCATCTGG  | 59.824 | 22 TCTCCATCTCCAACCTCCACC   | 60.048 | 20 |
| TCTGGTTTTGGGTTTTCTGC   | 60.088 | 20 TTGTGCCCCCAAGATTACAT    | 60.192 | 20 |
| TGCAAAAAGCACTCTTCCTGA  | 59.716 | 20 CAGACCGAATAGGAGTGCAA    | 58.874 | 20 |
| GGCAACAAACAGAATCCCAA   | 60.874 | 20 GGTTTCGCTGATTTTGTGGT    | 59.978 | 20 |
| TGCGAATTGAATAAGGCAAA   | 59.286 | 20 TTCCACCCTCTCCTTTTCTG    | 59.255 | 20 |
| AAAGAGCAATGTGGCATCAA   | 59.276 | 20 CCACTTTTGTGGGTTCTCGT    | 60.005 | 20 |
| ATTTGGTTCGGTTCGGTTTT   | 60.573 | 20 GGTCCATATCACCAACACCC    | 59.91  | 20 |
| TGGCATGCGAGTGCTATTAC   | 59.862 | 20 GGGAGAGTGGATGTGTAGGC    | 59.535 | 20 |
| CAATGACAACCAAACATGCC   | 59.823 | 20 GCAGCCCGAGAATTGTCTAC    | 59.843 | 20 |
| TTGCATCTTCATGTGCAATTC  | 59.685 | 21 CACAACAATTCACCTCGCAA    | 60.699 | 20 |
| AACGATAACGGTAACGATAAC  | 57.743 | 23 TGGTTTCCTTCATGCTTTTTTC  | 59.192 | 21 |
| TTATTGCACAGCTTCATGCC   | 59.839 | 20 CGCATGTTACGTAAATCGTTAA/ | 60.289 | 24 |
| TTCTCTTGGAATGGGATTGG   | 59.864 | 20 TCGTTTCGACATCCGTTACA    | 60.111 | 20 |
| TGCTCCCTCCAATTAAGACG   | 60.206 | 20 TTGCCACCCCTAACAATAA     | 60.181 | 20 |
| GCGCCATAAAAATGAAATG    | 60.282 | 20 TGGTTAGGGGTGTCAAGAGG    | 59.959 | 20 |
| GCCGGGTCTAGTGAATGAAA   | 60.074 | 20 CCAATGGTGGTATGGTGTGA    | 60.088 | 20 |
| TCAAACCAGGTTCTTCAATGG  | 59.956 | 21 ATCAAGTCAATCCGAGTCCG    | 60.073 | 20 |
| CCGACTTTTATGGCTGCTGT   | 60.27  | 20 TTTTCGTGTTTAGCCTTTTCGC  | 60.376 | 20 |
| GTTCGAACCGAACCATGAAC   | 60.362 | 20 GAGTTCGGTGGGTATGGATG    | 60.195 | 20 |
| TTTGAGGAGCTTTGCGTTTT   | 59.996 | 20 ACTCGACTTGATTGCGAACC    | 60.263 | 20 |
| TCTAAAAACATGGGTAAAAAT  | 57.432 | 26 ATGCAAAAATACGGAAACGC    | 59.971 | 20 |
| GAGTATTCATTGTACACAATA/ | 57.132 | 27 TCAATACCCGAGAATTGCAT    | 58.038 | 20 |
| GCAGACCATAATGCTTTTGTG/ | 60.138 | 22 CCTTAGTGGATTTTCATGGGC   | 59.387 | 20 |
| TTGAACGAAAATTGATGGTCC  | 59.793 | 21 CTGTTGGATTTCAACTCGGG    | 60.486 | 20 |
| TCCGTCCACCTCTCAATCTC   | 60.199 | 20 TCCAATTAATCCTAAACCACATI | 57.985 | 24 |
| TGCAGAGCAAATTCATGTCC   | 59.805 | 20 TTTGATGGATTGTCCGCATA    | 59.891 | 20 |
| TTTGTTCATGACTTCGGCTTG  | 59.84  | 20 AACTCCCACCGACAGTTTCA    | 60.545 | 20 |
| GAAGAAGATGTCAAGCCGGA   | 60.34  | 20 CCGTGGAAATGAAATTGAGTCT  | 59.042 | 21 |
| TGCAACAATTTTTGGTATATAT | 58.929 | 27 CCCTCCAGCATACTGCTTA     | 60.227 | 20 |
| TCCGATCGAATGGACCTTAC   | 59.894 | 20 AAGTTCACCTTCGGAGATCG    | 59.284 | 20 |
| CACTGCTGCTGAGGAGTTTG   | 59.77  | 20 CCTTTCTTTTACTGATGTGGA   | 59.215 | 22 |
| GAGAACTGCAGCAAAAAGGC   | 60.14  | 20 ATGAAAGAAAGTCAGCCCCA    | 59.67  | 20 |
| AAACATACCAACTCACCACTC  | 57.963 | 22 AAAGATGGGTGGAGTGAGAAA/  | 59.976 | 22 |
| CGCCTCGATTGAATCTTCTC   | 59.917 | 20 TATATTTGAGGCGGAGGAA     | 59.638 | 20 |
| AAAGCTTTGTCCACATAGGA   | 60.001 | 22 AAACCTGCCATGCACACCATA   | 59.995 | 20 |
| TTGGCGGAAGCCATAATATC   | 59.892 | 20 CCGAAAGAAACGGTGGTAAA    | 59.968 | 20 |

| PRODUCT1<br>size (bp) | start (bp) | end (bp) |
|-----------------------|------------|----------|
| 201                   | 4485       | 4685     |
| 218                   | 430        | 647      |
| 263                   | 679        | 941      |
| 239                   | 794        | 1032     |
| 276                   | 63         | 338      |
| 266                   | 82         | 347      |
| 221                   | 509        | 729      |
| 265                   | 484        | 748      |
| 199                   | 386        | 584      |
| 237                   | 8          | 244      |
| 198                   | 865        | 1062     |
| 230                   | 2918       | 3146     |
| 258                   | 1970       | 2227     |
| 225                   | 437        | 661      |
| 223                   | 1342       | 1564     |
| 271                   | 202        | 472      |
| 224                   | 959        | 1182     |
| 263                   | 128        | 390      |
| 280                   | 38         | 317      |
| 274                   | 1087       | 1360     |
| 136                   | 1732       | 1867     |
| 280                   | 844        | 1123     |
| 166                   | 1264       | 1429     |
| 229                   | 118        | 346      |
| 278                   | 534        | 811      |
| 237                   | 2438       | 2674     |
| 230                   | 898        | 1127     |
| 201                   | 6515       | 6715     |
| 122                   | 227        | 348      |
| 235                   | 1721       | 1955     |
| 280                   | 813        | 1092     |
| 279                   | 813        | 1091     |
| 278                   | 857        | 1134     |
| 192                   | 333        | 524      |
| 274                   | 180        | 453      |
| 252                   | 160        | 411      |
| 276                   | 2482       | 2757     |
| 222                   | 1348       | 1569     |
| 249                   | 353        | 601      |
| 255                   | 6398       | 6652     |
| 250                   | 510        | 759      |
| 139                   | 1682       | 1820     |
| 166                   | 1201       | 1366     |
| 272                   | 260        | 531      |
| 272                   | 671        | 942      |
| 274                   | 718        | 991      |
| 225                   | 2883       | 3107     |
| 198                   | 5          | 202      |
| 243                   | 142        | 384      |
| 179                   | 1079       | 1257     |
| 150                   | 72         | 221      |
| 223                   | 1342       | 1564     |
| 264                   | 71         | 334      |
| 273                   | 820        | 1092     |



|     |      |      |
|-----|------|------|
| 157 | 47   | 203  |
| 280 | 1118 | 1397 |
| 215 | 161  | 375  |
| 256 | 638  | 893  |
| 219 | 402  | 620  |
| 263 | 41   | 303  |
| 198 | 5    | 202  |
| 260 | 1201 | 1460 |
| 229 | 1902 | 2130 |
| 193 | 2130 | 2322 |
| 235 | 360  | 594  |
| 250 | 201  | 450  |
| 279 | 35   | 313  |
| 234 | 3    | 236  |
| 251 | 74   | 324  |
| 214 | 173  | 386  |
| 243 | 142  | 384  |
| 257 | 13   | 269  |
| 204 | 77   | 280  |
| 249 | 0    | 248  |
| 271 | 3    | 273  |
| 253 | 41   | 293  |
| 280 | 1868 | 2147 |
| 241 | 1141 | 1381 |
| 234 | 323  | 556  |
| 208 | 1611 | 1818 |
| 268 | 345  | 612  |
| 257 | 960  | 1216 |
| 226 | 1241 | 1466 |
| 271 | 336  | 606  |
| 223 | 174  | 396  |
| 216 | 127  | 342  |
| 275 | 878  | 1152 |
| 268 | 1211 | 1478 |
| 278 | 308  | 585  |
| 219 | 1369 | 1587 |

Supplementary Table 4. Identification of allelic fragments in the same horizontal position for genetic similarity

|          |        |         | <i>M.</i><br><i>chinensis</i><br><i>Benth MX</i> | <i>M.</i><br><i>chinensis</i><br><i>Benth TW</i> | <i>M.</i><br><i>chinensis</i><br><i>Benth ZC</i> | <i>M.</i><br><i>chinensis</i><br><i>Benth ZC</i> | <i>M.</i><br><i>chinensis</i><br><i>Benth XU</i> |
|----------|--------|---------|--------------------------------------------------|--------------------------------------------------|--------------------------------------------------|--------------------------------------------------|--------------------------------------------------|
| loci.    | Marker | Control | lane 1                                           | lane 2                                           | lane 3                                           | lane 4                                           | lane 5                                           |
| McSSR_1  | 1      |         | 1                                                | 0                                                | 1                                                | 1                                                | 1                                                |
|          | 2      |         | 1                                                | 0                                                | 1                                                | 1                                                | 1                                                |
|          | 3      |         | 1                                                | 1                                                | 1                                                | 1                                                | 1                                                |
|          | 4      |         | 1                                                | 0                                                | 1                                                | 0                                                | 0                                                |
|          | 5      |         | 1                                                | 1                                                | 0                                                | 1                                                | 1                                                |
|          | 6      |         | 1                                                | 1                                                | 1                                                | 1                                                | 1                                                |
|          | 7      |         | 1                                                | 1                                                | 1                                                | 1                                                | 1                                                |
|          | 8      |         | 1                                                | 1                                                | 1                                                | 1                                                | 1                                                |
|          | 9      |         | 0                                                | 0                                                | 1                                                | 1                                                | 1                                                |
|          | 10     |         | 0                                                | 1                                                | 0                                                | 0                                                | 0                                                |
|          | 11     |         | 0                                                | 1                                                | 0                                                | 0                                                | 0                                                |
|          | 12     |         | 0                                                | 0                                                | 0                                                | 0                                                | 0                                                |
|          | 13     |         | 0                                                | 1                                                | 0                                                | 0                                                | 0                                                |
|          | 14     |         | 0                                                | 0                                                | 0                                                | 0                                                | 0                                                |
|          | 15     |         | 0                                                | 0                                                | 0                                                | 0                                                | 0                                                |
|          | 16     |         | 0                                                | 0                                                | 0                                                | 0                                                | 0                                                |
|          | 17     |         | 0                                                | 0                                                | 0                                                | 0                                                | 0                                                |
|          | 18     |         | 0                                                | 0                                                | 0                                                | 0                                                | 0                                                |
|          | 19     |         | 0                                                | 0                                                | 0                                                | 0                                                | 0                                                |
|          | 20     |         | 0                                                | 0                                                | 0                                                | 0                                                | 0                                                |
|          | 21     |         | 0                                                | 0                                                | 0                                                | 0                                                | 0                                                |
|          | 22     |         | 0                                                | 0                                                | 0                                                | 0                                                | 0                                                |
|          | 23     |         | 0                                                | 0                                                | 0                                                | 0                                                | 0                                                |
|          | 24     |         | 0                                                | 0                                                | 0                                                | 0                                                | 0                                                |
| McSSR_5  | 1      |         | 1                                                | 0                                                | 1                                                | 1                                                | 1                                                |
|          | 2      |         | 1                                                | 1                                                | 1                                                | 1                                                | 1                                                |
|          | 3      |         | 1                                                | 1                                                | 1                                                | 1                                                | 1                                                |
|          | 4      |         | 1                                                | 1                                                | 1                                                | 1                                                | 1                                                |
|          | 5      |         | 1                                                | 1                                                | 1                                                | 1                                                | 1                                                |
|          | 6      |         | 1                                                | 1                                                | 1                                                | 0                                                | 0                                                |
|          | 7      |         | 1                                                | 1                                                | 1                                                | 1                                                | 1                                                |
|          | 8      |         | 0                                                | 1                                                | 0                                                | 1                                                | 1                                                |
|          | 9      |         | 0                                                | 0                                                | 0                                                | 1                                                | 1                                                |
|          | 10     |         | 0                                                | 1                                                | 0                                                | 1                                                | 1                                                |
| McSSR_11 | 1      |         | 0                                                | 0                                                | 0                                                | 1                                                | 1                                                |
|          | 2      |         | 0                                                | 0                                                | 1                                                | 1                                                | 0                                                |
|          | 3      |         | 0                                                | 0                                                | 0                                                | 1                                                | 1                                                |
|          | 4      |         | 0                                                | 0                                                | 1                                                | 0                                                | 1                                                |
|          | 5      |         | 0                                                | 0                                                | 1                                                | 0                                                | 1                                                |
|          | 6      |         | 0                                                | 0                                                | 0                                                | 0                                                | 1                                                |
|          | 7      |         | 0                                                | 0                                                | 0                                                | 0                                                | 0                                                |
|          | 8      |         | 0                                                | 0                                                | 0                                                | 0                                                | 0                                                |
|          | 9      |         | 1                                                | 0                                                | 0                                                | 0                                                | 0                                                |
|          | 1      |         | 0                                                | 0                                                | 0                                                | 0                                                | 1                                                |
|          | 2      |         | 0                                                | 0                                                | 1                                                | 1                                                | 0                                                |
|          | 3      |         | 1                                                | 0                                                | 1                                                | 1                                                | 1                                                |
|          | 4      |         | 1                                                | 0                                                | 1                                                | 1                                                | 1                                                |

|          |   |   |   |   |   |   |
|----------|---|---|---|---|---|---|
| McSSR_15 | 5 | 1 | 0 | 1 | 1 | 1 |
|          | 6 | 1 | 0 | 0 | 6 | 0 |
|          | 7 | 1 | 0 | 0 | 0 | 0 |
|          | 8 | 1 | 0 | 0 | 8 | 0 |
|          | 9 | 1 | 0 | 0 | 0 | 0 |

| loci.    | Marker | Control | lane 1 | lane 2 | lane 3 | lane 4 | lane 5 |
|----------|--------|---------|--------|--------|--------|--------|--------|
|          | 1      |         | 0      | 0      | 0      | 1      | 0      |
|          | 2      |         | 1      | 0      | 0      | 0      | 0      |
|          | 3      |         | 0      | 0      | 0      | 0      | 1      |
|          | 4      |         | 0      | 0      | 0      | 1      | 0      |
|          | 5      |         | 1      | 0      | 0      | 0      | 1      |
|          | 6      |         | 0      | 0      | 0      | 0      | 0      |
|          | 7      |         | 0      | 0      | 1      | 1      | 0      |
|          | 8      |         | 0      | 0      | 0      | 0      | 0      |
|          | 9      |         | 0      | 0      | 0      | 1      | 1      |
|          | 10     |         | 0      | 0      | 0      | 1      | 1      |
|          | 11     |         | 0      | 0      | 0      | 1      | 1      |
|          | 12     |         | 0      | 0      | 1      | 0      | 0      |
|          | 13     |         | 1      | 0      | 0      | 1      | 0      |
|          | 14     |         | 1      | 0      | 0      | 1      | 0      |
|          | 15     |         | 1      | 0      | 1      | 0      | 0      |
|          | 16     |         | 1      | 0      | 0      | 0      | 1      |
|          | 17     |         | 0      | 0      | 1      | 0      | 0      |
|          | 18     |         | 0      | 0      | 0      | 0      | 0      |
|          | 19     |         | 0      | 0      | 0      | 0      | 1      |
|          | 20     |         | 0      | 0      | 0      | 0      | 0      |
|          | 21     |         | 0      | 0      | 0      | 1      | 0      |
|          | 22     |         | 0      | 0      | 0      | 0      | 1      |
|          | 23     |         | 1      | 0      | 0      | 0      | 1      |
|          | 24     |         | 1      | 0      | 0      | 1      | 1      |
|          | 25     |         | 0      | 0      | 0      | 0      | 1      |
|          | 26     |         | 0      | 0      | 0      | 0      | 1      |
|          | 27     |         | 0      | 0      | 0      | 1      | 1      |
|          | 28     |         | 0      | 0      | 0      | 1      | 0      |
|          | 29     |         | 1      | 1      | 0      | 0      | 0      |
| McSSR_16 | 30     |         | 0      | 0      | 1      | 0      | 0      |
|          | 31     |         | 0      | 0      | 0      | 0      | 1      |
|          | 32     |         | 1      | 0      | 0      | 1      | 0      |
|          | 33     |         | 0      | 0      | 0      | 1      | 0      |
|          | 34     |         | 0      | 0      | 0      | 0      | 0      |
|          | 35     |         | 1      | 0      | 0      | 0      | 0      |
|          | 36     |         | 0      | 0      | 1      | 0      | 0      |
|          | 37     |         | 1      | 0      | 0      | 0      | 0      |
|          | 38     |         | 1      | 0      | 1      | 0      | 0      |
|          | 39     |         | 0      | 0      | 1      | 0      | 0      |
|          | 40     |         | 1      | 0      | 1      | 1      | 0      |
|          | 41     |         | 0      | 0      | 0      | 0      | 0      |
|          | 42     |         | 0      | 0      | 0      | 0      | 0      |
|          | 43     |         | 0      | 0      | 0      | 0      | 1      |
|          | 44     |         | 0      | 0      | 0      | 0      | 0      |
|          | 45     |         | 0      | 0      | 0      | 0      | 0      |
|          | 46     |         | 0      | 0      | 0      | 0      | 0      |
|          | 47     |         | 0      | 0      | 0      | 0      | 0      |
|          | 48     |         | 0      | 0      | 0      | 0      | 0      |
|          | 49     |         | 0      | 0      | 0      | 1      | 0      |
|          | 50     |         | 0      | 0      | 1      | 1      | 0      |
|          | 51     |         | 0      | 1      | 1      | 0      | 0      |

|    |   |   |   |   |   |
|----|---|---|---|---|---|
| 52 | 1 | 0 | 0 | 0 | 0 |
| 53 | 0 | 0 | 1 | 0 | 0 |
| 54 | 0 | 0 | 1 | 0 | 0 |
| 55 | 0 | 0 | 0 | 0 | 0 |
| 56 | 0 | 0 | 0 | 0 | 0 |
| 57 | 0 | 0 | 0 | 0 | 0 |
| 58 | 0 | 0 | 0 | 0 | 0 |
| 59 | 0 | 0 | 0 | 0 | 0 |

|          | loci. | Marker | Control | lane 1 | lane 2 | lane 3 | lane 4 | lane 5 |
|----------|-------|--------|---------|--------|--------|--------|--------|--------|
| McSSR_17 | 1     |        |         | 0      | 0      | 1      | 1      | 1      |
|          | 2     |        |         | 0      | 0      | 0      | 1      | 1      |
|          | 3     |        |         | 1      | 1      | 1      | 1      | 1      |
|          | 4     |        |         | 0      | 0      | 1      | 0      | 0      |
|          | 5     |        |         | 1      | 1      | 0      | 1      | 1      |
|          | 6     |        |         | 0      | 0      | 0      | 0      | 0      |
|          | 7     |        |         | 0      | 0      | 0      | 0      | 0      |
|          | 8     |        |         | 0      | 0      | 0      | 0      | 0      |

|          | loci. | Marker | Control | lane 1 | lane 2 | lane 3 | lane 4 | lane 5 |
|----------|-------|--------|---------|--------|--------|--------|--------|--------|
| McSSR_18 | 1     |        |         | 0      | 1      | 1      | 1      | 1      |
|          | 2     |        |         | 0      | 1      | 1      | 0      | 0      |
|          | 3     |        |         | 0      | 0      | 0      | 3      | 0      |
|          | 4     |        |         | 0      | 1      | 0      | 0      | 0      |
|          | 5     |        |         | 0      | 0      | 1      | 0      | 1      |
|          | 6     |        |         | 0      | 0      | 0      | 0      | 1      |
|          | 7     |        |         | 0      | 0      | 0      | 1      | 1      |
|          | 8     |        |         | 0      | 0      | 1      | 0      | 0      |
|          | 9     |        |         | 1      | 0      | 0      | 0      | 0      |

|          | loci. | Marker | Control | lane 1 | lane 2 | lane 3 | lane 4 | lane 5 |
|----------|-------|--------|---------|--------|--------|--------|--------|--------|
| McSSR_23 | 1     |        |         | 1      | 1      | 1      | 1      | 1      |
|          | 2     |        |         | 1      | 1      | 1      | 1      | 1      |
|          | 3     |        |         | 1      | 1      | 1      | 1      | 1      |
|          | 4     |        |         | 0      | 1      | 1      | 0      | 1      |
|          | 5     |        |         | 0      | 0      | 0      | 0      | 0      |
|          | 6     |        |         | 0      | 1      | 0      | 0      | 0      |
|          | 7     |        |         | 0      | 1      | 0      | 0      | 0      |
|          | 8     |        |         | 0      | 1      | 0      | 0      | 0      |
|          | 9     |        |         | 0      | 1      | 0      | 0      | 0      |
|          | 10    |        |         | 0      | 1      | 0      | 0      | 0      |

|          | loci. | Marker | Control | lane 1 | lane 2 | lane 3 | lane 4 | lane 5 |
|----------|-------|--------|---------|--------|--------|--------|--------|--------|
| McSSR_24 | 1     |        |         | 1      | 0      | 1      | 1      | 0      |
|          | 2     |        |         | 0      | 0      | 1      | 1      | 1      |
|          | 3     |        |         | 1      | 0      | 1      | 0      | 1      |
|          | 4     |        |         | 0      | 0      | 1      | 0      | 0      |
|          | 5     |        |         | 0      | 0      | 1      | 0      | 0      |
|          | 6     |        |         | 0      | 0      | 1      | 1      | 0      |
|          | 7     |        |         | 0      | 0      | 1      | 1      | 1      |
|          | 8     |        |         | 0      | 0      | 1      | 0      | 0      |
|          | 9     |        |         | 0      | 1      | 1      | 0      | 0      |
|          | 10    |        |         | 0      | 1      | 1      | 0      | 0      |
|          | 11    |        |         | 0      | 0      | 1      | 0      | 0      |
|          | 12    |        |         | 0      | 0      | 0      | 0      | 0      |
|          | 13    |        |         | 0      | 0      | 0      | 0      | 0      |
|          | 14    |        |         | 0      | 0      | 0      | 0      | 0      |
|          | 15    |        |         | 0      | 0      | 0      | 0      | 0      |

|    |   |   |   |   |   |
|----|---|---|---|---|---|
| 16 | 0 | 0 | 0 | 0 | 1 |
| 17 | 0 | 0 | 0 | 0 | 1 |
| 18 | 0 | 0 | 0 | 0 | 0 |
| 19 | 0 | 0 | 0 | 0 | 0 |

|          | loci. | Marker | Control | lane 1 | lane 2 | lane 3 | lane 4 | lane 5 |
|----------|-------|--------|---------|--------|--------|--------|--------|--------|
| McSSR_25 | 1     |        |         | 1      | 1      | 0      | 0      | 1      |
|          | 2     |        |         | 0      | 0      | 1      | 1      | 1      |
|          | 3     |        |         | 1      | 1      | 1      | 1      | 0      |
|          | 4     |        |         | 0      | 0      | 1      | 0      | 1      |
|          | 5     |        |         | 1      | 0      | 0      | 1      | 0      |
|          | 6     |        |         | 0      | 0      | 0      | 0      | 0      |
|          | 7     |        |         | 0      | 0      | 0      | 0      | 0      |
|          | 8     |        |         | 0      | 0      | 0      | 0      | 0      |
|          | 9     |        |         | 0      | 0      | 0      | 0      | 0      |
|          | 10    |        |         | 0      | 0      | 0      | 0      | 0      |
|          | 11    |        |         | 0      | 0      | 0      | 0      | 0      |
|          | 12    |        |         | 0      | 0      | 0      | 0      | 0      |
|          | 13    |        |         | 0      | 0      | 0      | 0      | 0      |
|          | 14    |        |         | 0      | 0      | 0      | 0      | 0      |
|          | 15    |        |         | 0      | 0      | 0      | 0      | 0      |

|          | loci. | Marker | Control | lane 1 | lane 2 | lane 3 | lane 4 | lane 5 |
|----------|-------|--------|---------|--------|--------|--------|--------|--------|
| McSSR_29 | 1     |        |         | 0      | 0      | 1      | 0      | 0      |
|          | 2     |        |         | 1      | 0      | 1      | 0      | 0      |
|          | 3     |        |         | 1      | 1      | 1      | 1      | 1      |
|          | 4     |        |         | 1      | 1      | 1      | 1      | 1      |
|          | 5     |        |         | 1      | 1      | 1      | 0      | 0      |
|          | 6     |        |         | 1      | 1      | 1      | 0      | 0      |
|          | 7     |        |         | 1      | 0      | 1      | 0      | 0      |
|          | 8     |        |         | 1      | 0      | 0      | 0      | 0      |
|          | 9     |        |         | 1      | 0      | 0      | 0      | 0      |
|          | 10    |        |         | 1      | 0      | 1      | 0      | 0      |

|          | loci. | Marker | Control | lane 1 | lane 2 | lane 3 | lane 4 | lane 5 |
|----------|-------|--------|---------|--------|--------|--------|--------|--------|
| McSSR_52 | 1     |        |         | 0      | 1      | 1      | 0      | 1      |
|          | 2     |        |         | 0      | 1      | 1      | 0      | 1      |
|          | 3     |        |         | 1      | 1      | 1      | 0      | 1      |
|          | 4     |        |         | 1      | 1      | 1      | 0      | 1      |
|          | 5     |        |         | 1      | 1      | 1      | 0      | 1      |
|          | 6     |        |         | 1      | 1      | 1      | 1      | 1      |
|          | 7     |        |         | 1      | 1      | 1      | 0      | 1      |
|          | 8     |        |         | 1      | 1      | 1      | 0      | 1      |
|          | 9     |        |         | 1      | 1      | 1      | 0      | 1      |
|          | 10    |        |         | 1      | 1      | 1      | 0      | 1      |
|          | 11    |        |         | 1      | 1      | 1      | 0      | 1      |
|          | 12    |        |         | 1      | 1      | 1      | 0      | 1      |
|          | 13    |        |         | 0      | 0      | 0      | 0      | 1      |
|          | 14    |        |         | 0      | 0      | 0      | 0      | 1      |
|          | 15    |        |         | 0      | 0      | 0      | 0      | 1      |

|          | loci. | Marker | Control | lane 1 | lane 2 | lane 3 | lane 4 | lane 5 |
|----------|-------|--------|---------|--------|--------|--------|--------|--------|
| McSSR_56 | 1     |        |         | 1      | 0      | 0      | 0      | 0      |
|          | 2     |        |         | 1      | 0      | 1      | 1      | 1      |
|          | 3     |        |         | 0      | 0      | 0      | 0      | 0      |
|          | 4     |        |         | 1      | 0      | 0      | 0      | 1      |
|          | 5     |        |         | 1      | 0      | 0      | 0      | 1      |
|          | 6     |        |         | 0      | 0      | 0      | 0      | 1      |

|   |   |   |   |   |   |
|---|---|---|---|---|---|
| 7 | 0 | 0 | 0 | 0 | 0 |
| 8 | 0 | 0 | 0 | 0 | 0 |
| 9 | 0 | 0 | 0 | 0 | 0 |

|          | loci. | Marker | Control | lane 1 | lane 2 | lane 3 | lane 4 | lane 5 |
|----------|-------|--------|---------|--------|--------|--------|--------|--------|
| McSSR_59 | 1     |        |         | 1      | 0      | 0      | 1      | 0      |
|          | 2     |        |         | 1      | 1      | 0      | 0      | 1      |
|          | 3     |        |         | 1      | 1      | 1      | 1      | 0      |
|          | 4     |        |         | 1      | 1      | 1      | 0      | 1      |
|          | 5     |        |         | 0      | 0      | 1      | 1      | 0      |
|          | 6     |        |         | 0      | 1      | 0      | 0      | 1      |
|          | 7     |        |         | 0      | 0      | 0      | 1      | 0      |
|          | 8     |        |         | 0      | 1      | 1      | 1      | 1      |
|          | 9     |        |         | 0      | 0      | 1      | 1      | 1      |
|          | 10    |        |         | 0      | 0      | 0      | 1      | 0      |
|          | 11    |        |         | 0      | 0      | 0      | 1      | 0      |

|          | loci. | Marker | Control | lane 1 | lane 2 | lane 3 | lane 4 | lane 5 |
|----------|-------|--------|---------|--------|--------|--------|--------|--------|
| McSSR_60 | 1     |        |         | 0      | 0      | 1      | 1      | 1      |
|          | 2     |        |         | 1      | 0      | 1      | 1      | 1      |
|          | 3     |        |         | 1      | 0      | 0      | 0      | 0      |
|          | 4     |        |         | 1      | 0      | 0      | 0      | 0      |

|          | loci. | Marker | Control | lane 1 | lane 2 | lane 3 | lane 4 | lane 5 |
|----------|-------|--------|---------|--------|--------|--------|--------|--------|
| McSSR_61 | 1     |        |         | 0      | 0      | 0      | 1      | 1      |
|          | 2     |        |         | 1      | 0      | 1      | 1      | 1      |
|          | 3     |        |         | 1      | 0      | 1      | 1      | 0      |
|          | 4     |        |         | 1      | 0      | 1      | 1      | 0      |
|          | 5     |        |         | 0      | 0      | 1      | 1      | 0      |
|          | 6     |        |         | 0      | 0      | 0      | 0      | 1      |
|          | 7     |        |         | 0      | 0      | 1      | 0      | 0      |
|          | 8     |        |         | 0      | 0      | 1      | 0      | 0      |
|          | 9     |        |         | 0      | 0      | 1      | 1      | 0      |
|          | 10    |        |         | 1      | 0      | 0      | 1      | 0      |
|          | 11    |        |         | 1      | 0      | 1      | 1      | 1      |
|          | 12    |        |         | 1      | 0      | 1      | 1      | 1      |
|          | 13    |        |         | 1      | 0      | 1      | 0      | 1      |
|          | 14    |        |         | 1      | 0      | 1      | 1      | 0      |
|          | 15    |        |         | 1      | 0      | 1      | 1      | 1      |
|          | 16    |        |         | 1      | 0      | 0      | 1      | 1      |
|          | 17    |        |         | 1      | 0      | 1      | 1      | 1      |
|          | 18    |        |         | 1      | 0      | 0      | 1      | 1      |
|          | 19    |        |         | 1      | 0      | 0      | 1      | 1      |
|          | 20    |        |         | 1      | 0      | 0      | 1      | 1      |
|          | 21    |        |         | 0      | 0      | 0      | 1      | 1      |
|          | 22    |        |         | 0      | 1      | 0      | 1      | 1      |
|          | 23    |        |         | 1      | 1      | 1      | 1      | 1      |
|          | 24    |        |         | 0      | 1      | 1      | 1      | 1      |
|          | 25    |        |         | 0      | 0      | 1      | 1      | 0      |
|          | 26    |        |         | 0      | 0      | 1      | 0      | 0      |
|          | 27    |        |         | 0      | 0      | 0      | 1      | 0      |
|          | 28    |        |         | 1      | 0      | 0      | 0      | 0      |
|          | 29    |        |         | 1      | 0      | 0      | 1      | 1      |
|          | 30    |        |         | 1      | 0      | 1      | 1      | 0      |
|          | 31    |        |         | 1      | 0      | 1      | 0      | 0      |
|          | 32    |        |         | 1      | 0      | 1      | 1      | 1      |
|          | 33    |        |         | 1      | 0      | 1      | 1      | 1      |
|          | 34    |        |         | 1      | 1      | 1      | 1      | 0      |

|    |   |   |   |   |   |
|----|---|---|---|---|---|
| 35 | 1 | 1 | 1 | 1 | 1 |
| 36 | 1 | 0 | 0 | 1 | 1 |
| 37 | 1 | 1 | 1 | 0 | 0 |
| 38 | 0 | 0 | 1 | 0 | 0 |
| 39 | 0 | 0 | 0 | 1 | 0 |
| 40 | 0 | 0 | 0 | 0 | 0 |
| 41 | 1 | 0 | 0 | 1 | 0 |
| 42 | 0 | 0 | 1 | 0 | 1 |
| 43 | 1 | 0 | 0 | 0 | 0 |
| 44 | 1 | 0 | 0 | 1 | 1 |
| 45 | 0 | 0 | 0 | 1 | 1 |
| 46 | 0 | 0 | 0 | 1 | 1 |
| 47 | 0 | 0 | 0 | 1 | 1 |
| 48 | 0 | 0 | 0 | 1 | 1 |
| 49 | 0 | 0 | 0 | 0 | 1 |
| 50 | 0 | 0 | 0 | 0 | 1 |
| 51 | 0 | 0 | 0 | 0 | 1 |
| 52 | 0 | 0 | 0 | 0 | 1 |
| 53 | 0 | 0 | 0 | 0 | 0 |
| 54 | 0 | 0 | 0 | 1 | 0 |
| 55 | 0 | 0 | 0 | 1 | 0 |
| 56 | 0 | 0 | 0 | 1 | 1 |
| 57 | 0 | 0 | 0 | 0 | 1 |
| 58 | 0 | 0 | 0 | 0 | 1 |
| 59 | 0 | 0 | 0 | 0 | 1 |
| 60 | 0 | 0 | 0 | 0 | 1 |

| loci.    | Marker | Control | lane 1 | lane 2 | lane 3 | lane 4 | lane 5 |
|----------|--------|---------|--------|--------|--------|--------|--------|
|          | 1      |         | 0      | 1      | 0      | 1      | 0      |
|          | 2      |         | 0      | 0      | 0      | 0      | 0      |
|          | 3      |         | 1      | 0      | 1      | 1      | 1      |
|          | 4      |         | 1      | 0      | 1      | 1      | 1      |
|          | 5      |         | 0      | 1      | 0      | 1      | 1      |
|          | 6      |         | 1      | 0      | 0      | 1      | 1      |
|          | 7      |         | 0      | 0      | 1      | 1      | 1      |
| McSSR_62 | 8      |         | 0      | 0      | 1      | 1      | 1      |
|          | 9      |         | 0      | 0      | 0      | 1      | 1      |
|          | 10     |         | 0      | 0      | 0      | 1      | 1      |
|          | 11     |         | 0      | 0      | 0      | 0      | 1      |
|          | 12     |         | 0      | 0      | 0      | 1      | 0      |
|          | 13     |         | 0      | 0      | 1      | 1      | 1      |
|          | 14     |         | 0      | 0      | 1      | 1      | 1      |
|          | 15     |         | 0      | 0      | 1      | 0      | 1      |

| loci. | Marker | Control | lane 1 | lane 2 | lane 3 | lane 4 | lane 5 |
|-------|--------|---------|--------|--------|--------|--------|--------|
|       | 1      |         | 1      | 1      | 1      | 1      | 1      |
|       | 2      |         | 0      | 0      | 0      | 3      | 0      |
|       | 3      |         | 0      | 0      | 0      | 0      | 1      |
|       | 4      |         | 0      | 0      | 0      | 1      | 1      |
|       | 5      |         | 0      | 0      | 0      | 1      | 1      |
|       | 6      |         | 0      | 0      | 0      | 1      | 1      |
|       | 7      |         | 0      | 0      | 1      | 1      | 1      |
|       | 8      |         | 0      | 0      | 1      | 1      | 1      |
|       | 9      |         | 0      | 1      | 1      | 1      | 1      |
|       | 10     |         | 1      | 0      | 0      | 0      | 1      |
|       | 11     |         | 1      | 1      | 0      | 1      | 0      |
|       | 12     |         | 1      | 0      | 0      | 1      | 1      |
|       | 13     |         | 1      | 1      | 0      | 0      | 0      |

|          |    |  |  |   |   |   |   |   |
|----------|----|--|--|---|---|---|---|---|
|          | 14 |  |  | 1 | 0 | 0 | 1 | 0 |
|          | 15 |  |  | 1 | 0 | 0 | 0 | 1 |
|          | 16 |  |  | 1 | 0 | 0 | 0 | 1 |
|          | 17 |  |  | 1 | 0 | 0 | 0 | 0 |
|          | 18 |  |  | 1 | 0 | 0 | 0 | 1 |
|          | 19 |  |  | 0 | 0 | 0 | 0 | 0 |
| McSSR_74 | 20 |  |  | 0 | 0 | 1 | 0 | 0 |
|          | 21 |  |  | 0 | 0 | 1 | 1 | 0 |
|          | 22 |  |  | 0 | 0 | 1 | 1 | 0 |
|          | 23 |  |  | 1 | 0 | 1 | 1 | 0 |
|          | 24 |  |  | 1 | 1 | 1 | 1 | 0 |
|          | 25 |  |  | 1 | 0 | 1 | 1 | 0 |
|          | 26 |  |  | 0 | 0 | 0 | 1 | 0 |
|          | 27 |  |  | 0 | 0 | 0 | 1 | 1 |
|          | 28 |  |  | 1 | 0 | 0 | 0 | 1 |
|          | 29 |  |  | 1 | 1 | 0 | 0 | 1 |
|          | 30 |  |  | 0 | 1 | 0 | 0 | 1 |
|          | 31 |  |  | 0 | 0 | 0 | 0 | 1 |
|          | 32 |  |  | 0 | 0 | 0 | 0 | 1 |
|          | 33 |  |  | 0 | 0 | 0 | 0 | 1 |
|          | 34 |  |  | 0 | 0 | 0 | 0 | 0 |
|          | 35 |  |  | 0 | 0 | 0 | 0 | 0 |
|          | 36 |  |  | 0 | 0 | 0 | 0 | 0 |
|          | 37 |  |  | 0 | 0 | 1 | 0 | 0 |
|          | 38 |  |  | 0 | 0 | 1 | 0 | 0 |
|          | 39 |  |  | 0 | 0 | 0 | 1 | 0 |
|          | 40 |  |  | 0 | 0 | 0 | 0 | 1 |

|          | loci. | Marker | Control | lane 1 | lane 2 | lane 3 | lane 4 | lane 5 |   |
|----------|-------|--------|---------|--------|--------|--------|--------|--------|---|
|          |       | 1      |         | 0      | 0      | 0      | 0      | 0      | 0 |
|          |       | 2      |         | 0      | 0      | 0      | 0      | 0      | 0 |
|          |       | 3      |         | 0      | 0      | 0      | 0      | 0      | 0 |
|          |       | 4      |         | 0      | 0      | 0      | 0      | 0      | 0 |
|          |       | 5      |         | 1      | 0      | 1      | 0      | 0      | 0 |
|          |       | 6      |         | 1      | 0      | 0      | 0      | 0      | 1 |
|          |       | 7      |         | 0      | 0      | 0      | 1      | 0      | 0 |
|          |       | 8      |         | 1      | 1      | 0      | 0      | 0      | 1 |
|          |       | 9      |         | 0      | 1      | 1      | 0      | 0      | 1 |
|          |       | 10     |         | 0      | 0      | 0      | 1      | 0      | 0 |
|          |       | 11     |         | 0      | 1      | 0      | 1      | 0      | 1 |
|          |       | 12     |         | 0      | 0      | 1      | 1      | 0      | 0 |
| McSSR_64 |       | 13     |         | 0      | 1      | 1      | 0      | 0      | 0 |
|          |       | 14     |         | 0      | 1      | 0      | 0      | 0      | 0 |
|          |       | 15     |         | 1      | 0      | 0      | 0      | 0      | 0 |
|          |       | 16     |         | 1      | 0      | 0      | 0      | 0      | 0 |
|          |       | 17     |         | 0      | 1      | 0      | 0      | 0      | 0 |
|          |       | 18     |         | 0      | 1      | 1      | 0      | 0      | 0 |
|          |       | 19     |         | 0      | 0      | 0      | 0      | 0      | 0 |
|          |       | 20     |         | 0      | 0      | 1      | 0      | 0      | 1 |
|          |       | 21     |         | 1      | 0      | 0      | 0      | 0      | 1 |
|          |       | 22     |         | 1      | 0      | 0      | 0      | 0      | 1 |
|          |       | 23     |         | 0      | 0      | 0      | 0      | 0      | 0 |
|          |       | 24     |         | 0      | 0      | 0      | 1      | 0      | 0 |
|          |       | 25     |         | 0      | 0      | 0      | 1      | 0      | 0 |
|          |       | 26     |         | 0      | 0      | 0      | 1      | 0      | 0 |

|  | loci. | Marker | Control | lane 1 | lane 2 | lane 3 | lane 4 | lane 5 |   |
|--|-------|--------|---------|--------|--------|--------|--------|--------|---|
|  |       | 1      |         | 0      | 0      | 0      | 0      | 0      | 0 |



|          |    |  |  |   |   |   |   |   |
|----------|----|--|--|---|---|---|---|---|
|          | 2  |  |  | 0 | 0 | 0 | 0 | 0 |
|          | 3  |  |  | 0 | 0 | 1 | 1 | 0 |
|          | 4  |  |  | 0 | 0 | 0 | 1 | 1 |
|          | 5  |  |  | 0 | 1 | 1 | 1 | 1 |
|          | 6  |  |  | 0 | 0 | 0 | 0 | 1 |
|          | 7  |  |  | 1 | 0 | 0 | 1 | 1 |
|          | 8  |  |  | 0 | 0 | 0 | 1 | 1 |
|          | 9  |  |  | 1 | 1 | 1 | 1 | 1 |
|          | 10 |  |  | 0 | 1 | 1 | 1 | 0 |
|          | 11 |  |  | 0 | 0 | 1 | 1 | 0 |
|          | 12 |  |  | 0 | 0 | 0 | 0 | 0 |
|          | 13 |  |  | 0 | 0 | 1 | 1 | 0 |
|          | 14 |  |  | 1 | 0 | 1 | 1 | 1 |
|          | 15 |  |  | 0 | 1 | 1 | 0 | 1 |
|          | 16 |  |  | 0 | 1 | 1 | 1 | 0 |
| McSSR_67 | 17 |  |  | 0 | 0 | 1 | 1 | 1 |
|          | 18 |  |  | 1 | 1 | 0 | 0 | 1 |
|          | 19 |  |  | 0 | 1 | 0 | 1 | 1 |
|          | 20 |  |  | 0 | 1 | 1 | 1 | 1 |
|          | 21 |  |  | 0 | 1 | 1 | 1 | 0 |
|          | 22 |  |  | 1 | 0 | 0 | 1 | 1 |
|          | 23 |  |  | 0 | 1 | 1 | 1 | 1 |
|          | 24 |  |  | 1 | 1 | 1 | 1 | 0 |
|          | 25 |  |  | 1 | 1 | 1 | 1 | 0 |
|          | 26 |  |  | 1 | 1 | 1 | 1 | 1 |
|          | 27 |  |  | 1 | 1 | 1 | 1 | 1 |
|          | 28 |  |  | 1 | 1 | 1 | 0 | 1 |
|          | 29 |  |  | 0 | 0 | 1 | 1 | 0 |
|          | 30 |  |  | 1 | 0 | 0 | 1 | 1 |
|          | 31 |  |  | 1 | 0 | 0 | 0 | 1 |
|          | 32 |  |  | 0 | 0 | 0 | 1 | 0 |
|          | 33 |  |  | 0 | 0 | 0 | 1 | 0 |
|          | 34 |  |  | 0 | 0 | 0 | 1 | 0 |

|          | loci. | Marker | Control | lane 1 | lane 2 | lane 3 | lane 4 | lane 5 |
|----------|-------|--------|---------|--------|--------|--------|--------|--------|
|          |       | 1      |         | 0      | 0      | 0      | 0      | 0      |
|          |       | 2      |         | 0      | 0      | 1      | 0      | 0      |
|          |       | 3      |         | 1      | 1      | 0      | 0      | 0      |
|          |       | 4      |         | 1      | 0      | 0      | 0      | 0      |
|          |       | 5      |         | 1      | 0      | 1      | 1      | 0      |
| McSSR_68 |       | 6      |         | 0      | 0      | 1      | 0      | 1      |
|          |       | 7      |         | 0      | 0      | 0      | 0      | 0      |
|          |       | 8      |         | 0      | 0      | 0      | 0      | 0      |
|          |       | 9      |         | 0      | 0      | 0      | 1      | 1      |
|          |       | 10     |         | 0      | 0      | 0      | 1      | 0      |
|          |       | 11     |         | 0      | 0      | 0      | 0      | 1      |

|          | loci. | Marker | Control | lane 1 | lane 2 | lane 3 | lane 4 | lane 5 |
|----------|-------|--------|---------|--------|--------|--------|--------|--------|
|          |       | 1      |         | 0      | 0      | 0      | 0      | 0      |
|          |       | 2      |         | 0      | 0      | 0      | 0      | 0      |
|          |       | 3      |         | 1      | 0      | 0      | 0      | 0      |
|          |       | 4      |         | 1      | 0      | 0      | 0      | 0      |
|          |       | 5      |         | 0      | 0      | 0      | 0      | 0      |
| McSSR_69 |       | 6      |         | 1      | 0      | 1      | 0      | 1      |
|          |       | 7      |         | 1      | 0      | 1      | 0      | 1      |
|          |       | 8      |         | 1      | 0      | 0      | 1      | 0      |
|          |       | 9      |         | 0      | 1      | 0      | 0      | 0      |
|          |       | 10     |         | 0      | 0      | 0      | 0      | 0      |

|          | loci. | Marker | Control | lane 1 | lane 2 | lane 3 | lane 4 | lane 5 |   |
|----------|-------|--------|---------|--------|--------|--------|--------|--------|---|
| McSSR_70 |       | 1      |         |        | 1      | 0      | 0      | 1      | 0 |
|          |       | 2      |         |        | 1      | 0      | 0      | 0      | 1 |
|          |       | 3      |         |        | 1      | 0      | 1      | 0      | 1 |
|          |       | 4      |         |        | 0      | 0      | 0      | 1      | 1 |
|          |       | 5      |         |        | 0      | 0      | 0      | 0      | 1 |
|          |       | 6      |         |        | 0      | 0      | 0      | 0      | 1 |
|          |       | 7      |         |        | 0      | 0      | 0      | 1      | 0 |
|          |       | 8      |         |        | 0      | 0      | 0      | 0      | 0 |
|          |       | 9      |         |        | 0      | 0      | 0      | 0      | 0 |
|          |       | 10     |         |        | 0      | 0      | 0      | 0      | 0 |
|          |       | 11     |         |        | 0      | 0      | 0      | 0      | 0 |

|          | loci. | Marker | Control | lane 1 | lane 2 | lane 3 | lane 4 | lane 5 |   |
|----------|-------|--------|---------|--------|--------|--------|--------|--------|---|
| McSSR_72 |       | 1      |         |        | 1      | 0      | 1      | 1      | 1 |
|          |       | 2      |         |        | 1      | 0      | 1      | 1      | 1 |
|          |       | 3      |         |        | 0      | 0      | 1      | 1      | 1 |
|          |       | 4      |         |        | 0      | 0      | 1      | 1      | 1 |
|          |       | 5      |         |        | 0      | 0      | 1      | 0      | 1 |
|          |       | 6      |         |        | 0      | 0      | 0      | 1      | 1 |
|          |       | 7      |         |        | 0      | 0      | 0      | 0      | 1 |
|          |       | 8      |         |        | 0      | 0      | 0      | 0      | 1 |

|          | loci. | Marker | Control | lane 1 | lane 2 | lane 3 | lane 4 | lane 5 |   |
|----------|-------|--------|---------|--------|--------|--------|--------|--------|---|
| McSSR_73 |       | 1      |         |        | 0      | 0      | 1      | 1      | 1 |
|          |       | 2      |         |        | 1      | 0      | 0      | 0      | 1 |
|          |       | 3      |         |        | 0      | 0      | 0      | 0      | 1 |
|          |       | 4      |         |        | 1      | 0      | 0      | 1      | 0 |
|          |       | 5      |         |        | 1      | 0      | 0      | 1      | 1 |
|          |       | 6      |         |        | 0      | 0      | 1      | 1      | 1 |
|          |       | 7      |         |        | 0      | 0      | 0      | 0      | 1 |
|          |       | 8      |         |        | 0      | 0      | 0      | 0      | 1 |
|          |       | 9      |         |        | 0      | 0      | 0      | 0      | 1 |
|          |       | 10     |         |        | 1      | 0      | 0      | 0      | 0 |
|          |       | 11     |         |        | 0      | 0      | 1      | 0      | 0 |

|          | loci. | Marker | Control | lane 1 | lane 2 | lane 3 | lane 4 | lane 5 |   |
|----------|-------|--------|---------|--------|--------|--------|--------|--------|---|
| McSSR_74 |       | 1      |         |        | 1      | 1      | 0      | 1      | 1 |
|          |       | 2      |         |        | 1      | 0      | 0      | 1      | 1 |
|          |       | 3      |         |        | 0      | 0      | 0      | 1      | 0 |
|          |       | 4      |         |        | 1      | 0      | 1      | 0      | 0 |
|          |       | 5      |         |        | 1      | 0      | 1      | 0      | 0 |
|          |       | 6      |         |        | 1      | 0      | 1      | 0      | 0 |

|          | loci. | Marker | Control | lane 1 | lane 2 | lane 3 | lane 4 | lane 5 |   |
|----------|-------|--------|---------|--------|--------|--------|--------|--------|---|
| McSSR_75 |       | 1      |         |        | 1      | 0      | 0      | 0      | 0 |
|          |       | 2      |         |        | 1      | 0      | 0      | 0      | 0 |
|          |       | 3      |         |        | 0      | 0      | 0      | 1      | 1 |
|          |       | 4      |         |        | 1      | 0      | 0      | 1      | 1 |
|          |       | 5      |         |        | 1      | 0      | 0      | 0      | 0 |
|          |       | 6      |         |        | 1      | 0      | 1      | 0      | 1 |
|          |       | 7      |         |        | 0      | 0      | 0      | 1      | 1 |
|          |       | 8      |         |        | 0      | 0      | 1      | 1      | 1 |
|          |       | 9      |         |        | 0      | 0      | 1      | 0      | 0 |
|          |       | 10     |         |        | 0      | 0      | 1      | 0      | 1 |
|          |       | 11     |         |        | 0      | 0      | 0      | 1      | 1 |

|    |   |   |   |   |   |
|----|---|---|---|---|---|
| 12 | 1 | 0 | 0 | 0 | 1 |
| 13 | 0 | 0 | 0 | 0 | 0 |
| 14 | 0 | 0 | 1 | 0 | 0 |
| 15 | 0 | 0 | 0 | 0 | 0 |
| 16 | 0 | 0 | 0 | 1 | 0 |

|          | loci. | Marker | Control | lane 1 | lane 2 | lane 3 | lane 4 | lane 5 |
|----------|-------|--------|---------|--------|--------|--------|--------|--------|
| McSSR_76 | 1     |        |         | 0      | 0      | 0      | 0      | 0      |
|          | 2     |        |         | 0      | 0      | 0      | 0      | 0      |
|          | 3     |        |         | 0      | 0      | 1      | 0      | 1      |
|          | 4     |        |         | 0      | 0      | 1      | 1      | 1      |
|          | 5     |        |         | 0      | 0      | 1      | 1      | 1      |
|          | 6     |        |         | 0      | 0      | 1      | 1      | 1      |
|          | 7     |        |         | 1      | 0      | 0      | 0      | 0      |
|          | 8     |        |         | 1      | 0      | 0      | 0      | 0      |
|          | 9     |        |         | 1      | 0      | 0      | 0      | 0      |
|          | 10    |        |         | 0      | 0      | 0      | 0      | 0      |
|          | 11    |        |         | 0      | 0      | 0      | 0      | 1      |

|          | loci. | Marker | Control | lane 1 | lane 2 | lane 3 | lane 4 | lane 5 |
|----------|-------|--------|---------|--------|--------|--------|--------|--------|
| McSSR_77 | 1     |        |         | 0      | 0      | 1      | 0      | 1      |
|          | 2     |        |         | 0      | 0      | 1      | 1      | 1      |
|          | 3     |        |         | 0      | 0      | 1      | 0      | 1      |
|          | 4     |        |         | 1      | 0      | 1      | 1      | 0      |
|          | 5     |        |         | 1      | 1      | 1      | 1      | 0      |
|          | 6     |        |         | 1      | 0      | 1      | 1      | 1      |
|          | 7     |        |         | 1      | 0      | 1      | 1      | 1      |
|          | 8     |        |         | 1      | 0      | 1      | 0      | 1      |
|          | 9     |        |         | 1      | 0      | 1      | 1      | 1      |
|          | 10    |        |         | 1      | 1      | 1      | 1      | 1      |
|          | 11    |        |         | 1      | 1      | 1      | 0      | 1      |
|          | 12    |        |         | 1      | 0      | 1      | 1      | 0      |
|          | 13    |        |         | 1      | 0      | 0      | 1      | 0      |
|          | 14    |        |         | 1      | 0      | 0      | 1      | 0      |
|          | 15    |        |         | 1      | 0      | 0      | 0      | 0      |
|          | 16    |        |         | 1      | 0      | 1      | 0      | 0      |
|          | 17    |        |         | 1      | 0      | 1      | 0      | 0      |
|          | 18    |        |         | 1      | 0      | 0      | 0      | 0      |
|          | 19    |        |         | 1      | 0      | 1      | 0      | 0      |
|          | 20    |        |         | 1      | 1      | 1      | 0      | 0      |
|          | 21    |        |         | 0      | 1      | 1      | 0      | 0      |
|          | 22    |        |         | 0      | 1      | 1      | 0      | 0      |
|          | 23    |        |         | 0      | 1      | 1      | 0      | 0      |
|          | 24    |        |         | 0      | 1      | 0      | 0      | 0      |
|          | 25    |        |         | 0      | 1      | 0      | 0      | 0      |
|          | 26    |        |         | 0      | 0      | 0      | 0      | 0      |
|          | 27    |        |         | 0      | 1      | 0      | 0      | 0      |
|          | 28    |        |         | 0      | 1      | 0      | 0      | 0      |

|  | loci. | Marker | Control | lane 1 | lane 2 | lane 3 | lane 4 | lane 5 |
|--|-------|--------|---------|--------|--------|--------|--------|--------|
|  | 1     |        |         | 0      | 0      | 0      | 1      | 0      |
|  | 2     |        |         | 0      | 0      | 1      | 0      | 1      |
|  | 3     |        |         | 1      | 0      | 1      | 1      | 1      |
|  | 4     |        |         | 1      | 1      | 1      | 1      | 1      |
|  | 5     |        |         | 0      | 1      | 1      | 1      | 1      |
|  | 6     |        |         | 0      | 1      | 0      | 0      | 1      |
|  | 7     |        |         | 0      | 1      | 1      | 0      | 0      |
|  | 8     |        |         | 0      | 1      | 1      | 1      | 0      |

|          |    |  |  |   |   |   |   |   |
|----------|----|--|--|---|---|---|---|---|
|          | 9  |  |  | 0 | 1 | 0 | 0 | 1 |
|          | 10 |  |  | 0 | 0 | 1 | 0 | 0 |
|          | 11 |  |  | 0 | 1 | 0 | 0 | 1 |
|          | 12 |  |  | 0 | 1 | 0 | 0 | 1 |
|          | 13 |  |  | 0 | 1 | 0 | 0 | 0 |
|          | 14 |  |  | 0 | 1 | 1 | 1 | 0 |
| McSSR_78 | 15 |  |  | 1 | 1 | 1 | 1 | 1 |
|          | 16 |  |  | 0 | 1 | 0 | 0 | 1 |
|          | 17 |  |  | 0 | 0 | 0 | 0 | 0 |
|          | 18 |  |  | 0 | 1 | 0 | 1 | 0 |
|          | 19 |  |  | 0 | 0 | 1 | 1 | 1 |
|          | 20 |  |  | 0 | 1 | 1 | 1 | 1 |
|          | 21 |  |  | 0 | 1 | 0 | 0 | 1 |
|          | 22 |  |  | 1 | 0 | 0 | 0 | 0 |
|          | 23 |  |  | 0 | 0 | 1 | 0 | 0 |
|          | 24 |  |  | 1 | 1 | 1 | 0 | 0 |
|          | 25 |  |  | 1 | 1 | 1 | 0 | 0 |
|          | 26 |  |  | 1 | 0 | 0 | 0 | 0 |
|          | 27 |  |  | 1 | 0 | 0 | 0 | 0 |
|          | 28 |  |  | 1 | 0 | 0 | 0 | 0 |
|          | 29 |  |  | 0 | 0 | 0 | 1 | 0 |
|          | 30 |  |  | 1 | 0 | 0 | 0 | 0 |

|          | loci. | Marker | Control | lane 1 | lane 2 | lane 3 | lane 4 | lane 5 |
|----------|-------|--------|---------|--------|--------|--------|--------|--------|
|          | 1     |        |         | 0      | 0      | 0      | 0      | 0      |
|          | 2     |        |         | 1      | 0      | 0      | 0      | 1      |
|          | 3     |        |         | 1      | 0      | 0      | 0      | 1      |
|          | 4     |        |         | 0      | 0      | 0      | 0      | 1      |
| McSSR_80 | 5     |        |         | 0      | 0      | 0      | 0      | 1      |
|          | 6     |        |         | 0      | 0      | 0      | 0      | 0      |
|          | 7     |        |         | 1      | 0      | 0      | 0      | 0      |
|          | 8     |        |         | 0      | 0      | 0      | 0      | 1      |
|          | 9     |        |         | 0      | 0      | 0      | 0      | 1      |
|          | 10    |        |         | 0      | 0      | 1      | 0      | 0      |

|          | loci. | Marker | Control | lane 1 | lane 2 | lane 3 | lane 4 | lane 5 |
|----------|-------|--------|---------|--------|--------|--------|--------|--------|
|          | 1     |        |         | 1      | 0      | 1      | 0      | 1      |
|          | 2     |        |         | 1      | 1      | 1      | 0      | 1      |
|          | 3     |        |         | 0      | 0      | 0      | 0      | 1      |
|          | 4     |        |         | 0      | 0      | 0      | 1      | 1      |
|          | 5     |        |         | 0      | 0      | 0      | 1      | 0      |
|          | 6     |        |         | 1      | 0      | 1      | 0      | 0      |
|          | 7     |        |         | 0      | 0      | 1      | 0      | 1      |
|          | 8     |        |         | 1      | 0      | 1      | 0      | 1      |
| McSSR_82 | 9     |        |         | 0      | 0      | 0      | 0      | 1      |
|          | 10    |        |         | 1      | 0      | 0      | 0      | 1      |
|          | 11    |        |         | 0      | 0      | 0      | 0      | 1      |
|          | 12    |        |         | 1      | 0      | 0      | 0      | 0      |
|          | 13    |        |         | 1      | 0      | 0      | 0      | 1      |
|          | 14    |        |         | 1      | 0      | 0      | 0      | 0      |
|          | 15    |        |         | 0      | 0      | 0      | 0      | 1      |
|          | 16    |        |         | 0      | 0      | 0      | 0      | 1      |
|          | 17    |        |         | 0      | 0      | 0      | 0      | 1      |
|          | 18    |        |         | 0      | 0      | 0      | 0      | 1      |

|  | loci. | Marker | Control | lane 1 | lane 2 | lane 3 | lane 4 | lane 5 |
|--|-------|--------|---------|--------|--------|--------|--------|--------|
|  | 1     |        |         | 0      | 0      | 0      | 0      | 1      |
|  | 2     |        |         | 0      | 0      | 0      | 1      | 1      |

|          |    |   |   |   |   |   |
|----------|----|---|---|---|---|---|
|          | 3  | 0 | 0 | 0 | 1 | 0 |
|          | 4  | 0 | 0 | 0 | 1 | 0 |
|          | 5  | 0 | 0 | 1 | 0 | 1 |
|          | 6  | 0 | 0 | 0 | 0 | 1 |
|          | 7  | 0 | 0 | 0 | 0 | 1 |
|          | 8  | 0 | 0 | 0 | 0 | 1 |
|          | 9  | 0 | 1 | 0 | 1 | 1 |
|          | 10 | 0 | 0 | 0 | 1 | 1 |
|          | 11 | 1 | 1 | 0 | 0 | 1 |
|          | 12 | 1 | 1 | 0 | 1 | 1 |
|          | 13 | 1 | 1 | 0 | 1 | 1 |
|          | 14 | 1 | 1 | 1 | 1 | 0 |
|          | 15 | 1 | 1 | 1 | 1 | 1 |
|          | 16 | 1 | 1 | 1 | 1 | 1 |
|          | 17 | 1 | 1 | 1 | 1 | 1 |
|          | 18 | 1 | 1 | 1 | 1 | 1 |
|          | 19 | 1 | 1 | 1 | 1 | 1 |
|          | 20 | 1 | 1 | 1 | 1 | 1 |
|          | 21 | 1 | 1 | 1 | 1 | 1 |
|          | 22 | 1 | 1 | 1 | 1 | 1 |
|          | 23 | 1 | 1 | 1 | 1 | 1 |
| McSSR_83 | 24 | 1 | 1 | 1 | 1 | 0 |
|          | 25 | 1 | 1 | 1 | 1 | 0 |
|          | 26 | 1 | 1 | 1 | 0 | 0 |
|          | 27 | 1 | 1 | 1 | 0 | 0 |
|          | 28 | 1 | 1 | 1 | 0 | 0 |
|          | 29 | 1 | 1 | 1 | 0 | 0 |
|          | 30 | 1 | 1 | 1 | 0 | 0 |
|          | 31 | 1 | 1 | 1 | 0 | 0 |
|          | 32 | 1 | 1 | 1 | 0 | 0 |
|          | 33 | 1 | 1 | 1 | 0 | 0 |
|          | 34 | 0 | 1 | 1 | 0 | 0 |
|          | 35 | 0 | 1 | 1 | 0 | 0 |
|          | 36 | 0 | 1 | 0 | 0 | 0 |
|          | 37 | 0 | 0 | 0 | 0 | 0 |
|          | 38 | 0 | 0 | 0 | 0 | 0 |
|          | 39 | 0 | 0 | 0 | 0 | 0 |
|          | 40 | 0 | 0 | 0 | 1 | 0 |
|          | 41 | 0 | 0 | 0 | 1 | 0 |
|          | 42 | 0 | 0 | 0 | 1 | 1 |
|          | 43 | 0 | 0 | 0 | 0 | 1 |
|          | 44 | 0 | 0 | 0 | 0 | 0 |
|          | 45 | 0 | 1 | 0 | 0 | 0 |
|          | 46 | 0 | 0 | 0 | 0 | 0 |
|          | 47 | 1 | 0 | 0 | 0 | 0 |

|          | loci. | Marker | Control | lane 1 | lane 2 | lane 3 | lane 4 | lane 5 |
|----------|-------|--------|---------|--------|--------|--------|--------|--------|
|          | 1     |        |         | 1      | 0      | 0      | 0      | 1      |
|          | 2     |        |         | 1      | 0      | 0      | 0      | 1      |
|          | 3     |        |         | 0      | 0      | 1      | 1      | 0      |
|          | 4     |        |         | 0      | 1      | 1      | 0      | 0      |
|          | 5     |        |         | 1      | 0      | 0      | 0      | 0      |
|          | 6     |        |         | 0      | 0      | 0      | 0      | 1      |
| McSSR_84 | 7     |        |         | 1      | 1      | 0      | 0      | 1      |
|          | 8     |        |         | 0      | 1      | 1      | 1      | 1      |
|          | 9     |        |         | 0      | 0      | 0      | 1      | 0      |
|          | 10    |        |         | 1      | 0      | 0      | 0      | 0      |
|          | 11    |        |         | 0      | 1      | 0      | 0      | 0      |

|    |   |   |   |   |   |
|----|---|---|---|---|---|
| 12 | 0 | 0 | 1 | 0 | 0 |
| 13 | 1 | 0 | 0 | 0 | 0 |
| 14 | 0 | 0 | 0 | 1 | 0 |

| loci. | Marker | Control | lane 1 | lane 2 | lane 3 | lane 4 | lane 5 |
|-------|--------|---------|--------|--------|--------|--------|--------|
| 1     |        |         | 1      | 0      | 1      | 1      | 0      |
| 2     |        |         | 1      | 0      | 1      | 1      | 1      |
| 3     |        |         | 1      | 0      | 1      | 0      | 1      |
| 4     |        |         | 0      | 0      | 1      | 1      | 1      |
| 5     |        |         | 0      | 0      | 0      | 1      | 1      |
| 6     |        |         | 0      | 0      | 1      | 0      | 1      |
| 7     |        |         | 1      | 0      | 0      | 0      | 0      |
| 8     |        |         | 0      | 0      | 0      | 0      | 1      |
| 9     |        |         | 0      | 0      | 0      | 0      | 1      |
| 10    |        |         | 0      | 0      | 0      | 0      | 0      |
| 11    |        |         | 0      | 0      | 0      | 0      | 0      |
| 12    |        |         | 0      | 0      | 0      | 0      | 0      |
| 13    |        |         | 0      | 0      | 0      | 0      | 0      |

| loci. | Marker | Control | lane 1 | lane 2 | lane 3 | lane 4 | lane 5 |
|-------|--------|---------|--------|--------|--------|--------|--------|
| 1     |        |         | 1      | 0      | 1      | 1      | 1      |
| 2     |        |         | 1      | 0      | 0      | 0      | 1      |
| 3     |        |         | 1      | 0      | 1      | 1      | 1      |
| 4     |        |         | 1      | 0      | 1      | 1      | 1      |
| 5     |        |         | 1      | 0      | 1      | 1      | 1      |
| 6     |        |         | 0      | 0      | 1      | 1      | 1      |
| 7     |        |         | 1      | 0      | 1      | 1      | 1      |
| 8     |        |         | 1      | 0      | 1      | 1      | 1      |
| 9     |        |         | 1      | 0      | 1      | 0      | 1      |
| 10    |        |         | 1      | 1      | 1      | 0      | 1      |
| 11    |        |         | 0      | 0      | 1      | 0      | 1      |
| 12    |        |         | 1      | 0      | 1      | 0      | 1      |
| 13    |        |         | 0      | 0      | 0      | 0      | 1      |
| 14    |        |         | 0      | 0      | 0      | 0      | 1      |
| 15    |        |         | 0      | 0      | 1      | 0      | 0      |
| 16    |        |         | 1      | 0      | 0      | 0      | 0      |
| 17    |        |         | 1      | 0      | 0      | 0      | 0      |
| 18    |        |         | 0      | 0      | 0      | 0      | 1      |
| 19    |        |         | 0      | 1      | 0      | 0      | 1      |
| 20    |        |         | 0      | 0      | 0      | 0      | 0      |
| 21    |        |         | 1      | 0      | 0      | 0      | 0      |
| 22    |        |         | 1      | 0      | 0      | 0      | 0      |

| loci. | Marker | Control | lane 1 | lane 2 | lane 3 | lane 4 | lane 5 |
|-------|--------|---------|--------|--------|--------|--------|--------|
| 1     |        |         | 0      | 0      | 0      | 0      | 0      |
| 2     |        |         | 0      | 0      | 0      | 1      | 0      |
| 3     |        |         | 0      | 0      | 0      | 1      | 0      |
| 4     |        |         | 0      | 0      | 0      | 1      | 0      |
| 5     |        |         | 0      | 0      | 0      | 1      | 0      |
| 6     |        |         | 1      | 0      | 1      | 0      | 0      |
| 7     |        |         | 1      | 0      | 1      | 0      | 0      |
| 8     |        |         | 1      | 0      | 0      | 1      | 0      |
| 9     |        |         | 1      | 1      | 0      | 1      | 1      |
| 10    |        |         | 0      | 1      | 1      | 0      | 1      |
| 11    |        |         | 0      | 0      | 0      | 0      | 1      |
| 12    |        |         | 0      | 0      | 0      | 0      | 1      |
| 13    |        |         | 0      | 0      | 0      | 0      | 0      |
| 14    |        |         | 1      | 1      | 0      | 0      | 0      |

|    |   |   |   |   |   |
|----|---|---|---|---|---|
| 15 | 1 | 1 | 1 | 0 | 0 |
| 16 | 1 | 0 | 1 | 0 | 0 |
| 17 | 0 | 0 | 1 | 0 | 0 |
| 18 | 0 | 0 | 0 | 0 | 1 |
| 19 | 0 | 0 | 0 | 0 | 1 |
| 20 | 0 | 0 | 0 | 0 | 0 |
| 21 | 0 | 0 | 0 | 0 | 0 |
| 22 | 0 | 0 | 1 | 0 | 0 |
| 23 | 0 | 0 | 1 | 0 | 0 |

y analysis

| <i>M. chinensis</i><br><i>Benth XU</i><br>lane 6 | <i>Mentha haplocalyx</i><br>lane 7 | <i>M. spicata;</i><br>lane 8 | <i>Prunella vulgaris</i><br>lane 9 | <i>Salvia miltiorrhiza</i><br>lane 10 | <i>Scutellaria indica</i><br>lane 11 | <i>S. barbata.</i><br>lane 12 |
|--------------------------------------------------|------------------------------------|------------------------------|------------------------------------|---------------------------------------|--------------------------------------|-------------------------------|
| 1                                                | 1                                  | 1                            | 1                                  | 1                                     | 1                                    | 1                             |
|                                                  |                                    | 1                            | 1                                  | 0                                     | 1                                    | 1                             |
| 1                                                | 1                                  | 1                            | 1                                  | 1                                     | 1                                    | 0                             |
| 1                                                | 1                                  | 0                            | 0                                  | 0                                     | 1                                    | 0                             |
| 1                                                | 1                                  | 1                            | 1                                  | 1                                     | 1                                    | 1                             |
| 1                                                | 1                                  | 0                            | 1                                  | 1                                     | 1                                    | 1                             |
| 1                                                | 1                                  | 0                            | 1                                  | 1                                     | 1                                    | 1                             |
| 1                                                | 0                                  | 1                            | 1                                  | 1                                     | 1                                    | 0                             |
| 1                                                | 0                                  | 1                            | 0                                  | 0                                     | 1                                    | 1                             |
| 1                                                | 1                                  | 1                            | 1                                  | 1                                     | 1                                    | 1                             |
| 0                                                | 1                                  | 1                            | 1                                  | 1                                     | 0                                    | 1                             |
| 1                                                | 1                                  | 0                            | 0                                  | 1                                     | 0                                    | 0                             |
| 1                                                | 1                                  | 0                            | 0                                  | 0                                     | 1                                    | 1                             |
| 0                                                | 1                                  | 1                            | 0                                  | 0                                     | 0                                    | 1                             |
| 0                                                | 1                                  | 1                            | 0                                  | 0                                     | 1                                    | 0                             |
| 0                                                | 0                                  | 0                            | 0                                  | 0                                     | 0                                    | 1                             |
| 0                                                | 1                                  | 1                            | 0                                  | 0                                     | 0                                    | 1                             |
| 0                                                | 1                                  | 0                            | 0                                  | 0                                     | 1                                    | 0                             |
| 0                                                | 1                                  | 0                            | 0                                  | 0                                     | 1                                    | 0                             |
| 0                                                | 1                                  | 0                            | 0                                  | 0                                     | 1                                    | 1                             |
| 0                                                | 1                                  | 0                            | 0                                  | 0                                     | 1                                    | 1                             |
| 0                                                | 0                                  | 0                            | 0                                  | 0                                     | 1                                    | 0                             |

| lane 6 | lane 7 | lane 8 | lane 9 | lane 10 | lane 11 | lane 12 |
|--------|--------|--------|--------|---------|---------|---------|
| 1      | 0      | 0      | 0      | 1       | 0       | 0       |
| 1      | 0      | 0      | 0      | 2       | 0       | 0       |
| 1      | 0      | 0      | 0      | 0       | 0       | 0       |
| 1      | 0      | 0      | 0      | 0       | 0       | 0       |
| 1      | 0      | 0      | 0      | 0       | 0       | 0       |
| 1      | 0      | 0      | 0      | 0       | 0       | 0       |
| 1      | 0      | 0      | 0      | 0       | 0       | 0       |
| 1      | 0      | 0      | 0      | 0       | 0       | 0       |
| 1      | 0      | 0      | 0      | 0       | 0       | 0       |
| 1      | 0      | 0      | 0      | 0       | 0       | 0       |

| lane 6 | lane 7 | lane 8 | lane 9 | lane 10 | lane 11 | lane 12 |
|--------|--------|--------|--------|---------|---------|---------|
| 0      | 0      | 0      | 1      | 0       | 1       | 1       |
| 0      | 0      | 0      | 1      | 0       | 0       | 0       |
| 0      | 0      | 0      | 0      | 0       | 0       | 0       |
| 1      | 0      | 0      | 0      | 0       | 0       | 0       |
| 1      | 0      | 0      | 0      | 0       | 0       | 0       |
| 1      | 0      | 0      | 1      | 0       | 0       | 0       |
| 0      | 0      | 0      | 0      | 1       | 0       | 0       |
| 1      | 0      | 0      | 0      | 0       | 0       | 0       |
| 1      | 0      | 0      | 0      | 0       | 0       | 0       |

| lane 6 | lane 7 | lane 8 | lane 9 | lane 10 | lane 11 | lane 12 |
|--------|--------|--------|--------|---------|---------|---------|
| 1      | 0      | 1      | 1      | 1       | 1       | 0       |
| 1      | 0      | 1      | 0      | 0       | 0       | 0       |
| 1      | 0      | 0      | 0      | 0       | 0       | 0       |
| 1      | 0      | 0      | 0      | 0       | 0       | 0       |



|   |   |   |   |   |   |   |
|---|---|---|---|---|---|---|
| 1 | 0 | 0 | 0 | 0 | 0 | 0 |
| 0 | 0 | 0 | 0 | 0 | 0 | 0 |
| 0 | 0 | 0 | 0 | 0 | 0 | 0 |
| 0 | 0 | 0 | 0 | 0 | 0 | 0 |
| 9 | 0 | 0 | 0 | 0 | 0 | 0 |

| lane 6 | lane 7 | lane 8 | lane 9 | lane 10 | lane 11 | lane 12 |
|--------|--------|--------|--------|---------|---------|---------|
| 1      | 0      | 0      | 0      | 0       | 0       | 0       |
| 1      | 0      | 0      | 0      | 0       | 1       | 0       |
| 1      | 0      | 0      | 0      | 0       | 0       | 0       |
| 0      | 0      | 0      | 0      | 0       | 0       | 0       |
| 1      | 0      | 1      | 0      | 0       | 0       | 1       |
| 0      | 0      | 1      | 0      | 0       | 0       | 1       |
| 0      | 1      | 1      | 0      | 0       | 0       | 0       |
| 0      | 1      | 1      | 0      | 0       | 0       | 0       |
| 0      | 0      | 0      | 0      | 0       | 1       | 0       |
| 1      | 0      | 0      | 0      | 0       | 1       | 0       |
| 0      | 0      | 0      | 0      | 0       | 1       | 0       |
| 0      | 1      | 0      | 0      | 0       | 1       | 0       |
| 1      | 0      | 1      | 0      | 0       | 1       | 1       |
| 1      | 0      | 1      | 0      | 0       | 1       | 0       |
| 1      | 0      | 0      | 0      | 0       | 0       | 0       |
| 0      | 0      | 0      | 0      | 0       | 0       | 0       |
| 0      | 0      | 1      | 0      | 0       | 0       | 0       |
| 1      | 1      | 0      | 0      | 0       | 0       | 0       |
| 1      | 1      | 1      | 1      | 1       | 0       | 0       |
| 1      | 1      | 1      | 1      | 0       | 0       | 0       |
| 0      | 1      | 1      | 0      | 0       | 0       | 1       |
| 0      | 1      | 1      | 1      | 1       | 0       | 1       |
| 1      | 0      | 0      | 0      | 0       | 0       | 1       |
| 0      | 0      | 0      | 0      | 0       | 1       | 1       |
| 0      | 1      | 0      | 0      | 0       | 1       | 1       |
| 1      | 1      | 1      | 0      | 0       | 0       | 0       |
| 0      | 1      | 0      | 1      | 0       | 1       | 0       |
| 1      | 0      | 1      | 0      | 0       | 1       | 0       |
| 1      | 1      | 0      | 0      | 0       | 1       | 1       |
| 1      | 1      | 0      | 0      | 0       | 1       | 0       |
| 1      | 1      | 0      | 0      | 0       | 1       | 0       |
| 0      | 0      | 0      | 0      | 0       | 1       | 0       |
| 0      | 0      | 0      | 0      | 0       | 1       | 0       |
| 1      | 0      | 0      | 0      | 0       | 1       | 0       |
| 1      | 1      | 0      | 0      | 0       | 0       | 0       |
| 1      | 0      | 0      | 0      | 0       | 0       | 0       |
| 0      | 0      | 0      | 0      | 0       | 0       | 0       |
| 0      | 0      | 0      | 0      | 0       | 0       | 0       |
| 0      | 0      | 0      | 0      | 0       | 0       | 0       |
| 0      | 1      | 0      | 0      | 0       | 0       | 0       |

|   |   |   |   |   |   |   |
|---|---|---|---|---|---|---|
| 0 | 0 | 1 | 0 | 0 | 0 | 1 |
| 0 | 0 | 0 | 0 | 1 | 0 | 1 |
| 1 | 1 | 0 | 0 | 1 | 0 | 1 |
| 0 | 0 | 0 | 0 | 1 | 0 | 0 |
| 1 | 0 | 0 | 0 | 0 | 0 | 0 |
| 0 | 1 | 0 | 0 | 0 | 0 | 0 |
| 0 | 1 | 0 | 0 | 1 | 0 | 0 |
| 0 | 0 | 0 | 0 | 1 | 1 | 0 |

| lane 6 | lane 7 | lane 8 | lane 9 | lane 10 | lane 11 | lane 12 |
|--------|--------|--------|--------|---------|---------|---------|
| 1      | 1      | 0      | 0      | 0       | 0       | 0       |
| 1      | 0      | 1      | 0      | 0       | 0       | 1       |
| 1      | 0      | 0      | 1      | 1       | 1       | 0       |
| 1      | 0      | 1      | 0      | 0       | 0       | 0       |
| 1      | 0      | 0      | 0      | 1       | 0       | 0       |
| 1      | 0      | 0      | 0      | 0       | 1       | 0       |
| 1      | 0      | 0      | 0      | 0       | 0       | 1       |
| 1      | 0      | 0      | 0      | 0       | 1       | 0       |

| lane 6 | lane 7 | lane 8 | lane 9 | lane 10 | lane 11 | lane 12 |
|--------|--------|--------|--------|---------|---------|---------|
| 1      | 1      | 0      | 0      | 0       | 0       | 0       |
| 2      | 0      | 0      | 0      | 0       | 0       | 1       |
| 0      | 0      | 0      | 0      | 0       | 0       | 0       |
| 1      | 1      | 0      | 0      | 0       | 0       | 1       |
| 1      | 0      | 0      | 0      | 0       | 0       | 1       |
| 0      | 0      | 0      | 0      | 0       | 0       | 0       |
| 0      | 0      | 0      | 0      | 0       | 0       | 1       |
| 0      | 0      | 0      | 0      | 0       | 0       | 0       |
| 0      | 0      | 0      | 0      | 0       | 0       | 0       |

| lane 6 | lane 7 | lane 8 | lane 9 | lane 10 | lane 11 | lane 12 |
|--------|--------|--------|--------|---------|---------|---------|
| 1      | 1      | 1      | 1      | 1       | 1       | 1       |
| 1      | 1      | 0      | 0      | 0       | 1       | 1       |
| 1      | 0      | 1      | 0      | 0       | 1       | 1       |
| 1      | 1      | 1      | 0      | 0       | 0       | 1       |
| 0      | 0      | 0      | 0      | 0       | 1       | 0       |
| 0      | 0      | 1      | 0      | 0       | 1       | 1       |
| 0      | 0      | 0      | 0      | 0       | 1       | 1       |
| 0      | 0      | 0      | 0      | 0       | 0       | 0       |
| 0      | 0      | 0      | 0      | 0       | 0       | 0       |
| 0      | 0      | 0      | 0      | 0       | 0       | 0       |

| lane 6 | lane 7 | lane 8 | lane 9 | lane 10 | lane 11 | lane 12 |
|--------|--------|--------|--------|---------|---------|---------|
| 0      | 1      | 0      | 0      | 0       | 0       | 0       |
| 0      | 1      | 0      | 0      | 0       | 0       | 0       |
| 0      | 1      | 0      | 0      | 0       | 0       | 0       |
| 1      | 1      | 1      | 0      | 0       | 0       | 0       |
| 0      | 0      | 0      | 0      | 0       | 1       | 0       |
| 0      | 1      | 1      | 0      | 0       | 0       | 0       |
| 1      | 0      | 0      | 0      | 0       | 0       | 0       |
| 1      | 0      | 0      | 0      | 0       | 0       | 1       |
| 1      | 0      | 1      | 0      | 0       | 1       | 0       |
| 1      | 1      | 0      | 0      | 0       | 1       | 0       |
| 0      | 0      | 0      | 0      | 0       | 1       | 0       |
| 0      | 1      | 0      | 0      | 0       | 0       | 0       |
| 0      | 1      | 1      | 0      | 0       | 0       | 0       |
| 0      | 0      | 1      | 0      | 0       | 0       | 0       |
| 1      | 0      | 0      | 0      | 0       | 0       | 0       |

|   |   |   |   |   |   |   |
|---|---|---|---|---|---|---|
| 0 | 1 | 0 | 0 | 0 | 0 | 0 |
| 0 | 0 | 0 | 1 | 0 | 0 | 0 |
| 0 | 0 | 1 | 0 | 0 | 0 | 0 |
| 0 | 0 | 1 | 0 | 0 | 0 | 1 |

| lane 6 | lane 7 | lane 8 | lane 9 | lane 10 | lane 11 | lane 12 |
|--------|--------|--------|--------|---------|---------|---------|
| 0      | 0      | 1      | 1      | 1       | 1       | 0       |
| 1      | 1      | 1      | 1      | 1       | 1       | 0       |
| 1      | 1      | 1      | 0      | 1       | 1       | 1       |
| 1      | 1      | 0      | 1      | 1       | 1       | 1       |
| 0      | 1      | 1      | 1      | 1       | 1       | 1       |
| 1      | 0      | 1      | 1      | 1       | 0       | 0       |
| 0      | 1      | 0      | 1      | 1       | 1       | 0       |
| 0      | 1      | 0      | 1      | 1       | 1       | 0       |
| 0      | 1      | 0      | 1      | 1       | 1       | 9       |
| 0      | 1      | 0      | 0      | 1       | 1       | 0       |
| 0      | 0      | 0      | 0      | 1       | 0       | 0       |
| 0      | 0      | 0      | 0      | 1       | 0       | 0       |
| 0      | 0      | 0      | 0      | 1       | 0       | 0       |
| 0      | 0      | 0      | 0      | 1       | 0       | 0       |
| 0      | 0      | 0      | 0      | 1       | 0       | 0       |
| 0      | 0      | 0      | 0      | 1       | 0       | 0       |

| lane 6 | lane 7 | lane 8 | lane 9 | lane 10 | lane 11 | lane 12 |
|--------|--------|--------|--------|---------|---------|---------|
| 1      | 0      | 0      | 0      | 0       | 0       | 0       |
| 0      | 0      | 0      | 0      | 0       | 0       | 1       |
| 1      | 1      | 1      | 0      | 0       | 0       | 0       |
| 1      | 0      | 0      | 0      | 0       | 0       | 0       |
| 0      | 0      | 0      | 0      | 0       | 0       | 0       |
| 0      | 0      | 0      | 0      | 0       | 0       | 0       |
| 0      | 0      | 0      | 0      | 0       | 0       | 0       |
| 0      | 0      | 0      | 0      | 0       | 0       | 0       |
| 0      | 0      | 0      | 0      | 0       | 0       | 0       |
| 0      | 0      | 0      | 0      | 0       | 0       | 0       |
| 0      | 0      | 0      | 0      | 0       | 0       | 0       |
| 0      | 0      | 0      | 0      | 0       | 0       | 0       |
| 0      | 0      | 0      | 0      | 0       | 0       | 0       |
| 0      | 0      | 0      | 0      | 0       | 0       | 0       |
| 0      | 0      | 0      | 0      | 0       | 0       | 0       |

| lane 6 | lane 7 | lane 8 | lane 9 | lane 10 | lane 11 | lane 12 |
|--------|--------|--------|--------|---------|---------|---------|
| 1      | 0      | 0      | 0      | 0       | 0       | 0       |
| 1      | 0      | 0      | 0      | 0       | 0       | 0       |
| 1      | 0      | 0      | 0      | 0       | 0       | 0       |
| 1      | 0      | 0      | 0      | 0       | 0       | 0       |
| 1      | 0      | 0      | 0      | 0       | 0       | 0       |
| 1      | 0      | 0      | 0      | 0       | 0       | 0       |
| 1      | 0      | 0      | 0      | 0       | 0       | 0       |
| 1      | 0      | 0      | 0      | 0       | 0       | 0       |
| 1      | 0      | 0      | 0      | 0       | 0       | 0       |
| 1      | 0      | 0      | 0      | 0       | 0       | 0       |
| 0      | 0      | 0      | 0      | 0       | 0       | 0       |
| 0      | 0      | 0      | 0      | 0       | 0       | 0       |
| 0      | 0      | 0      | 0      | 0       | 0       | 0       |
| 0      | 0      | 0      | 0      | 0       | 0       | 0       |
| 0      | 0      | 0      | 0      | 0       | 0       | 0       |

| lane 6 | lane 7 | lane 8 | lane 9 | lane 10 | lane 11 | lane 12 |
|--------|--------|--------|--------|---------|---------|---------|
| 0      | 0      | 0      | 0      | 0       | 0       | 0       |
| 0      | 0      | 0      | 0      | 0       | 1       | 0       |
| 0      | 1      | 0      | 0      | 0       | 1       | 0       |
| 0      | 0      | 1      | 0      | 0       | 0       | 1       |
| 0      | 0      | 0      | 0      | 0       | 0       | 1       |
| 0      | 0      | 0      | 0      | 0       | 0       | 0       |

|   |   |   |   |   |   |   |
|---|---|---|---|---|---|---|
| 0 | 0 | 0 | 0 | 0 | 1 | 1 |
| 1 | 0 | 0 | 0 | 0 | 0 | 0 |
| 1 | 0 | 0 | 0 | 0 | 0 | 0 |

| lane 6 | lane 7 | lane 8 | lane 9 | lane 10 | lane 11 | lane 12 |
|--------|--------|--------|--------|---------|---------|---------|
| 1      | 0      | 1      | 0      | 0       | 0       | 1       |
| 1      | 0      | 0      | 0      | 1       | 0       | 0       |
| 1      | 0      | 0      | 0      | 0       | 0       | 1       |
| 0      | 0      | 0      | 1      | 1       | 0       | 0       |
| 1      | 0      | 1      | 0      | 0       | 0       | 0       |
| 1      | 0      | 1      | 0      | 1       | 0       | 0       |
| 1      | 0      | 0      | 0      | 0       | 0       | 0       |
| 0      | 0      | 0      | 0      | 1       | 0       | 0       |
| 0      | 0      | 0      | 0      | 0       | 0       | 1       |
| 0      | 0      | 0      | 0      | 0       | 0       | 0       |
| 0      | 0      | 0      | 0      | 0       | 0       | 0       |

| lane 6 | lane 7 | lane 8 | lane 9 | lane 10 | lane 11 | lane 12 |
|--------|--------|--------|--------|---------|---------|---------|
| 1      | 0      | 0      | 0      | 0       | 0       | 0       |
| 1      | 0      | 0      | 0      | 0       | 0       | 0       |
| 0      | 0      | 0      | 0      | 0       | 0       | 0       |
| 0      | 0      | 0      | 0      | 0       | 0       | 0       |

| lane 6 | lane 7 | lane 8 | lane 9 | lane 10 | lane 11 | lane 12 |
|--------|--------|--------|--------|---------|---------|---------|
| 0      | 0      | 0      | 0      | 0       | 0       | 0       |
| 0      | 0      | 0      | 0      | 0       | 0       | 0       |
| 0      | 0      | 0      | 0      | 0       | 0       | 0       |
| 0      | 0      | 0      | 0      | 0       | 0       | 0       |
| 0      | 0      | 0      | 0      | 0       | 0       | 0       |
| 0      | 0      | 0      | 0      | 0       | 0       | 1       |
| 1      | 1      | 1      | 1      | 1       | 1       | 0       |
| 0      | 1      | 1      | 0      | 1       | 1       | 0       |
| 0      | 1      | 1      | 1      | 1       | 1       | 0       |
| 0      | 1      | 1      | 0      | 0       | 0       | 1       |
| 0      | 1      | 0      | 1      | 1       | 1       | 1       |
| 1      | 1      | 0      | 1      | 1       | 0       | 0       |
| 0      | 1      | 1      | 0      | 1       | 1       | 1       |
| 0      | 1      | 1      | 0      | 0       | 1       | 1       |
| 0      | 1      | 1      | 0      | 0       | 0       | 1       |
| 0      | 1      | 1      | 0      | 0       | 1       | 0       |
| 0      | 1      | 1      | 1      | 1       | 1       | 0       |
| 0      | 0      | 0      | 1      | 0       | 0       | 0       |
| 0      | 0      | 0      | 0      | 0       | 0       | 0       |
| 1      | 0      | 0      | 1      | 1       | 0       | 0       |
| 1      | 1      | 0      | 1      | 1       | 0       | 1       |
| 1      | 1      | 1      | 0      | 0       | 0       | 0       |
| 0      | 1      | 0      | 1      | 0       | 0       | 0       |
| 0      | 1      | 0      | 0      | 1       | 0       | 1       |
| 0      | 1      | 1      | 0      | 0       | 0       | 1       |
| 0      | 1      | 1      | 1      | 1       | 1       | 1       |
| 0      | 0      | 1      | 1      | 1       | 1       | 1       |
| 0      | 1      | 1      | 1      | 1       | 0       | 0       |
| 1      | 1      | 0      | 0      | 0       | 1       | 0       |
| 1      | 1      | 1      | 0      | 0       | 1       | 0       |
| 0      | 1      | 1      | 0      | 0       | 0       | 0       |
| 0      | 0      | 0      | 1      | 0       | 1       | 0       |
| 1      | 1      | 0      | 1      | 1       | 1       | 0       |
| 1      | 1      | 0      | 0      | 0       | 1       | 1       |
| 1      | 0      | 1      | 1      | 0       | 0       | 0       |



|   |   |   |   |   |   |   |
|---|---|---|---|---|---|---|
| 0 | 0 | 0 | 0 | 0 | 0 | 0 |
| 1 | 0 | 0 | 0 | 0 | 0 | 1 |
| 1 | 0 | 0 | 0 | 0 | 0 | 0 |
| 0 | 1 | 0 | 0 | 0 | 0 | 0 |
| 0 | 0 | 0 | 0 | 0 | 0 | 0 |
| 1 | 0 | 0 | 0 | 0 | 0 | 0 |
| 1 | 0 | 0 | 0 | 0 | 0 | 0 |
| 1 | 0 | 0 | 0 | 0 | 0 | 0 |
| 1 | 0 | 0 | 0 | 0 | 0 | 0 |
| 1 | 0 | 0 | 0 | 0 | 0 | 0 |
| 1 | 0 | 0 | 0 | 0 | 0 | 0 |
| 0 | 0 | 0 | 0 | 0 | 0 | 1 |
| 0 | 0 | 0 | 0 | 0 | 0 | 0 |
| 0 | 0 | 0 | 0 | 0 | 0 | 0 |
| 0 | 0 | 0 | 0 | 0 | 0 | 0 |
| 0 | 0 | 0 | 0 | 0 | 0 | 0 |
| 0 | 0 | 0 | 0 | 0 | 1 | 0 |
| 0 | 0 | 0 | 0 | 0 | 0 | 0 |
| 0 | 0 | 0 | 0 | 0 | 0 | 0 |
| 0 | 0 | 0 | 0 | 0 | 0 | 0 |
| 0 | 1 | 1 | 0 | 0 | 0 | 0 |
| 0 | 1 | 1 | 0 | 0 | 0 | 0 |
| 0 | 0 | 1 | 0 | 0 | 0 | 0 |
| 1 | 0 | 0 | 0 | 0 | 0 | 0 |
| 0 | 0 | 0 | 0 | 0 | 0 | 0 |
| 0 | 0 | 0 | 0 | 0 | 0 | 0 |
| 0 | 0 | 0 | 0 | 0 | 0 | 0 |

| lane 6 | lane 7 | lane 8 | lane 9 | lane 10 | lane 11 | lane 12 |
|--------|--------|--------|--------|---------|---------|---------|
| 1      | 0      | 0      | 0      | 0       | 0       | 0       |
| 1      | 0      | 0      | 0      | 0       | 0       | 0       |
| 1      | 0      | 0      | 0      | 0       | 0       | 0       |
| 1      | 0      | 0      | 0      | 0       | 0       | 0       |
| 1      | 0      | 0      | 0      | 0       | 0       | 0       |
| 1      | 0      | 0      | 0      | 0       | 0       | 0       |
| 1      | 0      | 0      | 0      | 0       | 0       | 0       |
| 0      | 0      | 0      | 0      | 0       | 0       | 0       |
| 1      | 0      | 0      | 0      | 0       | 0       | 0       |
| 1      | 0      | 0      | 0      | 0       | 0       | 0       |
| 0      | 0      | 0      | 0      | 0       | 0       | 0       |
| 0      | 0      | 0      | 0      | 0       | 0       | 0       |
| 0      | 0      | 0      | 0      | 0       | 0       | 0       |
| 0      | 0      | 0      | 0      | 0       | 0       | 0       |
| 0      | 0      | 0      | 0      | 0       | 0       | 0       |
| 0      | 0      | 0      | 0      | 0       | 0       | 0       |
| 0      | 1      | 0      | 0      | 0       | 0       | 0       |
| 0      | 1      | 0      | 0      | 0       | 0       | 0       |
| 1      | 0      | 0      | 0      | 0       | 1       | 0       |
| 0      | 0      | 0      | 0      | 0       | 0       | 0       |
| 0      | 0      | 0      | 0      | 0       | 0       | 0       |
| 1      | 0      | 1      | 0      | 0       | 0       | 0       |
| 1      | 0      | 1      | 0      | 0       | 0       | 0       |
| 1      | 0      | 0      | 0      | 0       | 0       | 0       |
| 0      | 0      | 0      | 0      | 0       | 0       | 0       |

| lane 6 | lane 7 | lane 8 | lane 9 | lane 10 | lane 11 | lane 12 |
|--------|--------|--------|--------|---------|---------|---------|
| 0      | 0      | 0      | 1      | 0       | 0       | 0       |

|   |   |   |   |   |   |   |
|---|---|---|---|---|---|---|
| 0 | 0 | 0 | 0 | 0 | 0 | 0 |
| 1 | 0 | 1 | 1 | 0 | 1 | 0 |
| 1 | 1 | 1 | 1 | 0 | 0 | 0 |
| 1 | 1 | 0 | 0 | 1 | 0 | 0 |
| 1 | 1 | 1 | 1 | 0 | 0 | 0 |
| 1 | 1 | 1 | 1 | 0 | 0 | 0 |
| 1 | 1 | 1 | 1 | 1 | 0 | 1 |
| 0 | 1 | 1 | 1 | 1 | 1 | 0 |
| 1 | 1 | 1 | 1 | 0 | 0 | 1 |
| 0 | 1 | 1 | 1 | 1 | 0 | 0 |
| 1 | 1 | 1 | 0 | 1 | 0 | 1 |
| 1 | 0 | 1 | 1 | 0 | 1 | 0 |
| 1 | 1 | 0 | 0 | 0 | 1 | 0 |
| 1 | 1 | 1 | 1 | 1 | 0 | 0 |
| 1 | 1 | 1 | 1 | 1 | 1 | 1 |
| 0 | 1 | 1 | 1 | 1 | 1 | 0 |
| 0 | 1 | 1 | 0 | 0 | 1 | 0 |
| 1 | 1 | 0 | 0 | 0 | 0 | 1 |
| 0 | 0 | 1 | 0 | 1 | 1 | 0 |
| 0 | 1 | 0 | 0 | 0 | 0 | 1 |
| 0 | 1 | 0 | 0 | 0 | 0 | 1 |
| 1 | 1 | 1 | 0 | 0 | 1 | 1 |
| 1 | 1 | 1 | 0 | 0 | 0 | 1 |
| 0 | 1 | 0 | 0 | 1 | 0 | 0 |
| 0 | 1 | 0 | 0 | 1 | 0 | 1 |
| 0 | 1 | 1 | 0 | 0 | 0 | 0 |
| 0 | 1 | 1 | 0 | 0 | 0 | 1 |
| 0 | 0 | 1 | 0 | 0 | 0 | 0 |
| 0 | 0 | 0 | 0 | 1 | 0 | 0 |
| 0 | 0 | 0 | 0 | 1 | 0 | 0 |
| 0 | 0 | 0 | 0 | 0 | 0 | 0 |
| 0 | 0 | 0 | 0 | 0 | 0 | 0 |
| 0 | 0 | 0 | 0 | 0 | 0 | 0 |
| 0 | 0 | 0 | 0 | 0 | 0 | 0 |
| 0 | 0 | 0 | 0 | 0 | 0 | 0 |

| lane 6 | lane 7 | lane 8 | lane 9 | lane 10 | lane 11 | lane 12 |
|--------|--------|--------|--------|---------|---------|---------|
| 0      | 0      | 0      | 0      | 1       | 0       | 0       |
| 0      | 0      | 0      | 0      | 0       | 0       | 0       |
| 0      | 0      | 0      | 0      | 0       | 0       | 0       |
| 0      | 0      | 0      | 0      | 0       | 0       | 0       |
| 1      | 0      | 0      | 0      | 0       | 0       | 0       |
| 0      | 0      | 0      | 0      | 0       | 0       | 0       |
| 1      | 0      | 0      | 0      | 0       | 0       | 0       |
| 1      | 0      | 0      | 0      | 0       | 0       | 0       |
| 1      | 0      | 0      | 0      | 0       | 0       | 0       |
| 1      | 0      | 0      | 0      | 0       | 0       | 0       |
| 0      | 0      | 0      | 0      | 0       | 0       | 0       |

| lane 6 | lane 7 | lane 8 | lane 9 | lane 10 | lane 11 | lane 12 |
|--------|--------|--------|--------|---------|---------|---------|
| 1      | 0      | 0      | 0      | 0       | 0       | 0       |
| 1      | 0      | 0      | 0      | 0       | 0       | 0       |
| 1      | 0      | 0      | 0      | 0       | 0       | 0       |
| 0      | 0      | 0      | 0      | 0       | 1       | 0       |
| 1      | 0      | 0      | 0      | 0       | 0       | 0       |
| 1      | 0      | 0      | 0      | 0       | 0       | 0       |
| 1      | 0      | 0      | 0      | 0       | 0       | 0       |
| 1      | 0      | 0      | 0      | 0       | 0       | 0       |
| 1      | 0      | 0      | 0      | 0       | 0       | 0       |
| 0      | 0      | 0      | 0      | 0       | 0       | 0       |
| 0      | 0      | 0      | 0      | 0       | 0       | 1       |

| lane 6 | lane 7 | lane 8 | lane 9 | lane 10 | lane 11 | lane 12 |
|--------|--------|--------|--------|---------|---------|---------|
| 0      | 0      | 0      | 0      | 0       | 0       | 0       |
| 1      | 0      | 0      | 0      | 0       | 0       | 0       |
| 1      | 0      | 0      | 0      | 0       | 0       | 0       |
| 1      | 0      | 0      | 0      | 0       | 0       | 0       |
| 1      | 0      | 0      | 0      | 0       | 0       | 0       |
| 1      | 0      | 0      | 0      | 0       | 0       | 0       |
| 1      | 0      | 0      | 0      | 0       | 0       | 0       |
| 1      | 0      | 0      | 0      | 0       | 0       | 0       |
| 1      | 0      | 0      | 0      | 0       | 0       | 0       |
| 1      | 0      | 0      | 0      | 0       | 0       | 0       |
| 1      | 0      | 0      | 0      | 0       | 0       | 0       |

| lane 6 | lane 7 | lane 8 | lane 9 | lane 10 | lane 11 | lane 12 |
|--------|--------|--------|--------|---------|---------|---------|
| 1      | 0      | 0      | 0      | 0       | 0       | 0       |
| 1      | 0      | 0      | 0      | 0       | 0       | 0       |
| 1      | 0      | 0      | 0      | 0       | 0       | 0       |
| 1      | 0      | 0      | 0      | 0       | 0       | 0       |
| 1      | 0      | 0      | 0      | 0       | 0       | 0       |
| 1      | 0      | 0      | 0      | 0       | 0       | 0       |
| 1      | 0      | 0      | 0      | 0       | 0       | 0       |
| 0      | 0      | 0      | 0      | 0       | 0       | 0       |

| lane 6 | lane 7 | lane 8 | lane 9 | lane 10 | lane 11 | lane 12 |
|--------|--------|--------|--------|---------|---------|---------|
| 1      | 0      | 0      | 0      | 0       | 0       | 0       |
| 0      | 0      | 0      | 0      | 0       | 0       | 0       |
| 1      | 0      | 0      | 0      | 0       | 0       | 0       |
| 1      | 0      | 0      | 0      | 0       | 0       | 0       |
| 1      | 0      | 0      | 0      | 0       | 0       | 0       |
| 0      | 0      | 0      | 0      | 0       | 0       | 0       |
| 0      | 0      | 0      | 0      | 0       | 0       | 0       |
| 0      | 0      | 0      | 0      | 0       | 0       | 0       |
| 0      | 0      | 0      | 0      | 0       | 0       | 0       |
| 0      | 0      | 0      | 0      | 0       | 0       | 0       |
| 0      | 0      | 0      | 0      | 0       | 0       | 0       |

| lane 6 | lane 7 | lane 8 | lane 9 | lane 10 | lane 11 | lane 12 |
|--------|--------|--------|--------|---------|---------|---------|
| 1      | 0      | 0      | 0      | 0       | 0       | 0       |
| 1      | 0      | 0      | 0      | 0       | 0       | 0       |
| 0      | 0      | 0      | 0      | 0       | 0       | 0       |
| 1      | 0      | 0      | 0      | 0       | 0       | 0       |
| 0      | 0      | 0      | 0      | 0       | 0       | 0       |
| 0      | 0      | 0      | 0      | 0       | 0       | 0       |

| lane 6 | lane 7 | lane 8 | lane 9 | lane 10 | lane 11 | lane 12 |
|--------|--------|--------|--------|---------|---------|---------|
| 1      | 0      | 0      | 0      | 0       | 0       | 0       |
| 1      | 0      | 0      | 0      | 0       | 0       | 0       |
| 1      | 0      | 0      | 0      | 0       | 0       | 0       |
| 1      | 0      | 0      | 0      | 0       | 0       | 0       |
| 1      | 0      | 0      | 0      | 0       | 0       | 0       |
| 1      | 0      | 0      | 0      | 0       | 0       | 0       |
| 0      | 0      | 0      | 0      | 0       | 0       | 0       |
| 0      | 0      | 0      | 0      | 0       | 0       | 0       |
| 0      | 0      | 0      | 0      | 0       | 0       | 0       |
| 0      | 0      | 0      | 0      | 0       | 0       | 0       |
| 0      | 0      | 0      | 0      | 0       | 0       | 0       |
| 1      | 0      | 0      | 0      | 0       | 0       | 0       |





|   |   |   |   |   |   |   |
|---|---|---|---|---|---|---|
| 1 | 0 | 0 | 0 | 0 | 0 | 0 |
| 1 | 0 | 0 | 0 | 0 | 0 | 0 |
| 1 | 0 | 0 | 0 | 0 | 0 | 0 |
| 1 | 0 | 0 | 0 | 0 | 0 | 0 |
| 0 | 0 | 0 | 0 | 0 | 0 | 0 |
| 0 | 0 | 0 | 0 | 0 | 0 | 0 |
| 1 | 0 | 0 | 0 | 0 | 0 | 0 |
| 1 | 0 | 0 | 0 | 0 | 0 | 0 |
| 1 | 0 | 0 | 0 | 0 | 0 | 0 |
| 1 | 0 | 0 | 0 | 0 | 0 | 0 |
| 1 | 0 | 0 | 0 | 0 | 0 | 0 |
| 1 | 0 | 0 | 0 | 0 | 0 | 0 |
| 1 | 0 | 0 | 0 | 0 | 0 | 0 |
| 0 | 0 | 0 | 0 | 0 | 0 | 0 |
| 0 | 0 | 0 | 0 | 0 | 0 | 0 |
| 0 | 0 | 0 | 0 | 0 | 0 | 0 |
| 0 | 0 | 0 | 0 | 0 | 0 | 0 |
| 0 | 0 | 0 | 0 | 0 | 0 | 0 |
| 0 | 0 | 0 | 0 | 0 | 0 | 0 |
| 0 | 0 | 0 | 0 | 0 | 0 | 0 |
| 0 | 0 | 0 | 0 | 0 | 0 | 0 |

| lane 6 | lane 7 | lane 8 | lane 9 | lane 10 | lane 11 | lane 12 |
|--------|--------|--------|--------|---------|---------|---------|
| 1      | 0      | 0      | 0      | 0       | 0       | 0       |
| 1      | 0      | 0      | 0      | 0       | 0       | 0       |
| 1      | 0      | 0      | 0      | 0       | 0       | 0       |
| 0      | 0      | 0      | 0      | 0       | 0       | 0       |
| 0      | 0      | 0      | 0      | 0       | 0       | 0       |
| 1      | 0      | 0      | 0      | 0       | 0       | 0       |
| 1      | 0      | 0      | 0      | 0       | 0       | 0       |
| 0      | 0      | 0      | 0      | 0       | 0       | 0       |
| 0      | 0      | 0      | 0      | 0       | 0       | 0       |
| 0      | 0      | 0      | 0      | 0       | 0       | 0       |

| lane 6 | lane 7 | lane 8 | lane 9 | lane 10 | lane 11 | lane 12 |
|--------|--------|--------|--------|---------|---------|---------|
| 0      | 0      | 0      | 0      | 0       | 0       | 0       |
| 0      | 0      | 0      | 0      | 0       | 0       | 0       |
| 0      | 0      | 0      | 0      | 0       | 0       | 0       |
| 0      | 0      | 0      | 0      | 0       | 0       | 0       |
| 0      | 0      | 0      | 0      | 0       | 0       | 0       |
| 0      | 0      | 0      | 0      | 0       | 0       | 0       |
| 0      | 0      | 0      | 0      | 0       | 0       | 0       |
| 1      | 0      | 0      | 0      | 0       | 0       | 0       |
| 0      | 1      | 0      | 0      | 0       | 0       | 0       |
| 1      | 0      | 0      | 0      | 0       | 0       | 0       |
| 0      | 0      | 0      | 0      | 0       | 0       | 0       |
| 0      | 0      | 0      | 0      | 0       | 0       | 0       |
| 0      | 0      | 0      | 0      | 0       | 0       | 0       |
| 0      | 0      | 0      | 0      | 0       | 0       | 0       |
| 0      | 0      | 0      | 0      | 0       | 0       | 0       |
| 0      | 0      | 0      | 0      | 0       | 0       | 0       |
| 0      | 0      | 0      | 0      | 0       | 0       | 0       |
| 0      | 0      | 0      | 0      | 0       | 0       | 0       |

| lane 6 | lane 7 | lane 8 | lane 9 | lane 10 | lane 11 | lane 12 |
|--------|--------|--------|--------|---------|---------|---------|
| 1      | 0      | 0      | 0      | 0       | 0       | 0       |
| 1      | 0      | 0      | 0      | 0       | 0       | 0       |



|   |   |   |   |   |   |   |
|---|---|---|---|---|---|---|
| 0 | 0 | 0 | 0 | 0 | 0 | 0 |
| 0 | 0 | 0 | 0 | 0 | 0 | 0 |
| 0 | 0 | 0 | 0 | 0 | 0 | 0 |

| lane 6 | lane 7 | lane 8 | lane 9 | lane 10 | lane 11 | lane 12 |
|--------|--------|--------|--------|---------|---------|---------|
| 1      | 0      | 0      | 0      | 0       | 0       | 0       |
| 1      | 0      | 0      | 0      | 0       | 0       | 0       |
| 1      | 0      | 0      | 0      | 0       | 0       | 0       |
| 1      | 0      | 0      | 0      | 0       | 0       | 0       |
| 1      | 0      | 0      | 0      | 0       | 0       | 0       |
| 1      | 0      | 0      | 0      | 0       | 0       | 0       |
| 0      | 0      | 0      | 0      | 0       | 0       | 0       |
| 0      | 0      | 0      | 0      | 0       | 0       | 0       |
| 1      | 0      | 0      | 0      | 0       | 0       | 0       |
| 1      | 0      | 0      | 0      | 0       | 0       | 0       |
| 1      | 0      | 0      | 0      | 0       | 0       | 0       |
| 1      | 0      | 0      | 0      | 0       | 0       | 0       |
| 1      | 0      | 0      | 0      | 0       | 0       | 0       |

| lane 6 | lane 7 | lane 8 | lane 9 | lane 10 | lane 11 | lane 12 |   |
|--------|--------|--------|--------|---------|---------|---------|---|
| 1      | 0      | 0      | 0      | 0       | 1       | 0       | 1 |
| 1      | 1      | 0      | 0      | 0       | 1       | 0       | 0 |
| 1      | 0      | 0      | 0      | 0       | 1       | 0       | 1 |
| 1      | 1      | 0      | 0      | 0       | 1       | 0       | 0 |
| 1      | 0      | 0      | 0      | 0       | 1       | 0       | 1 |
| 1      | 0      | 1      | 0      | 0       | 1       | 0       | 0 |
| 1      | 0      | 0      | 0      | 0       | 1       | 0       | 0 |
| 1      | 0      | 0      | 0      | 0       | 0       | 0       | 0 |
| 1      | 0      | 0      | 0      | 0       | 0       | 0       | 0 |
| 1      | 0      | 0      | 0      | 0       | 0       | 0       | 0 |
| 1      | 0      | 0      | 0      | 0       | 0       | 0       | 0 |
| 1      | 1      | 0      | 0      | 0       | 0       | 0       | 0 |
| 1      | 0      | 0      | 0      | 0       | 0       | 0       | 0 |
| 0      | 0      | 0      | 0      | 0       | 0       | 0       | 0 |
| 0      | 0      | 0      | 0      | 0       | 0       | 0       | 0 |
| 0      | 0      | 0      | 0      | 0       | 0       | 0       | 0 |
| 0      | 0      | 0      | 0      | 0       | 0       | 0       | 0 |
| 0      | 0      | 0      | 0      | 0       | 0       | 0       | 0 |
| 0      | 0      | 0      | 0      | 0       | 0       | 1       | 0 |
| 1      | 1      | 0      | 0      | 0       | 0       | 1       | 0 |
| 0      | 0      | 0      | 0      | 0       | 1       | 1       | 0 |
| 0      | 0      | 0      | 0      | 0       | 0       | 0       | 0 |
| 0      | 0      | 0      | 0      | 0       | 0       | 0       | 0 |

| lane 6 | lane 7 | lane 8 | lane 9 | lane 10 | lane 11 | lane 12 |   |
|--------|--------|--------|--------|---------|---------|---------|---|
| 0      | 0      | 0      | 0      | 0       | 0       | 0       | 1 |
| 0      | 0      | 0      | 0      | 0       | 0       | 0       | 0 |
| 0      | 0      | 0      | 0      | 0       | 0       | 0       | 0 |
| 0      | 0      | 0      | 0      | 0       | 0       | 0       | 0 |
| 0      | 0      | 0      | 0      | 0       | 0       | 0       | 0 |
| 1      | 0      | 0      | 0      | 0       | 0       | 0       | 0 |
| 1      | 0      | 0      | 0      | 0       | 0       | 0       | 0 |
| 0      | 0      | 0      | 0      | 0       | 0       | 0       | 0 |
| 0      | 0      | 0      | 0      | 0       | 0       | 0       | 0 |
| 1      | 0      | 0      | 0      | 0       | 0       | 0       | 0 |
| 0      | 0      | 0      | 0      | 0       | 0       | 0       | 0 |
| 1      | 0      | 0      | 0      | 0       | 0       | 0       | 0 |
| 1      | 0      | 0      | 0      | 0       | 0       | 0       | 0 |
| 1      | 0      | 0      | 0      | 0       | 0       | 0       | 0 |
| 1      | 0      | 0      | 0      | 0       | 0       | 0       | 0 |

|   |   |   |   |   |   |   |
|---|---|---|---|---|---|---|
| 1 | 0 | 0 | 0 | 0 | 0 | 0 |
| 0 | 0 | 0 | 0 | 0 | 0 | 0 |
| 0 | 0 | 0 | 0 | 0 | 0 | 0 |
| 0 | 0 | 0 | 0 | 0 | 0 | 0 |
| 0 | 0 | 0 | 0 | 0 | 0 | 0 |
| 0 | 0 | 0 | 0 | 0 | 0 | 1 |
| 0 | 0 | 0 | 0 | 1 | 0 | 0 |
| 0 | 0 | 0 | 0 | 0 | 0 | 0 |
| 0 | 0 | 0 | 0 | 0 | 0 | 0 |

Supplementary Figure 1

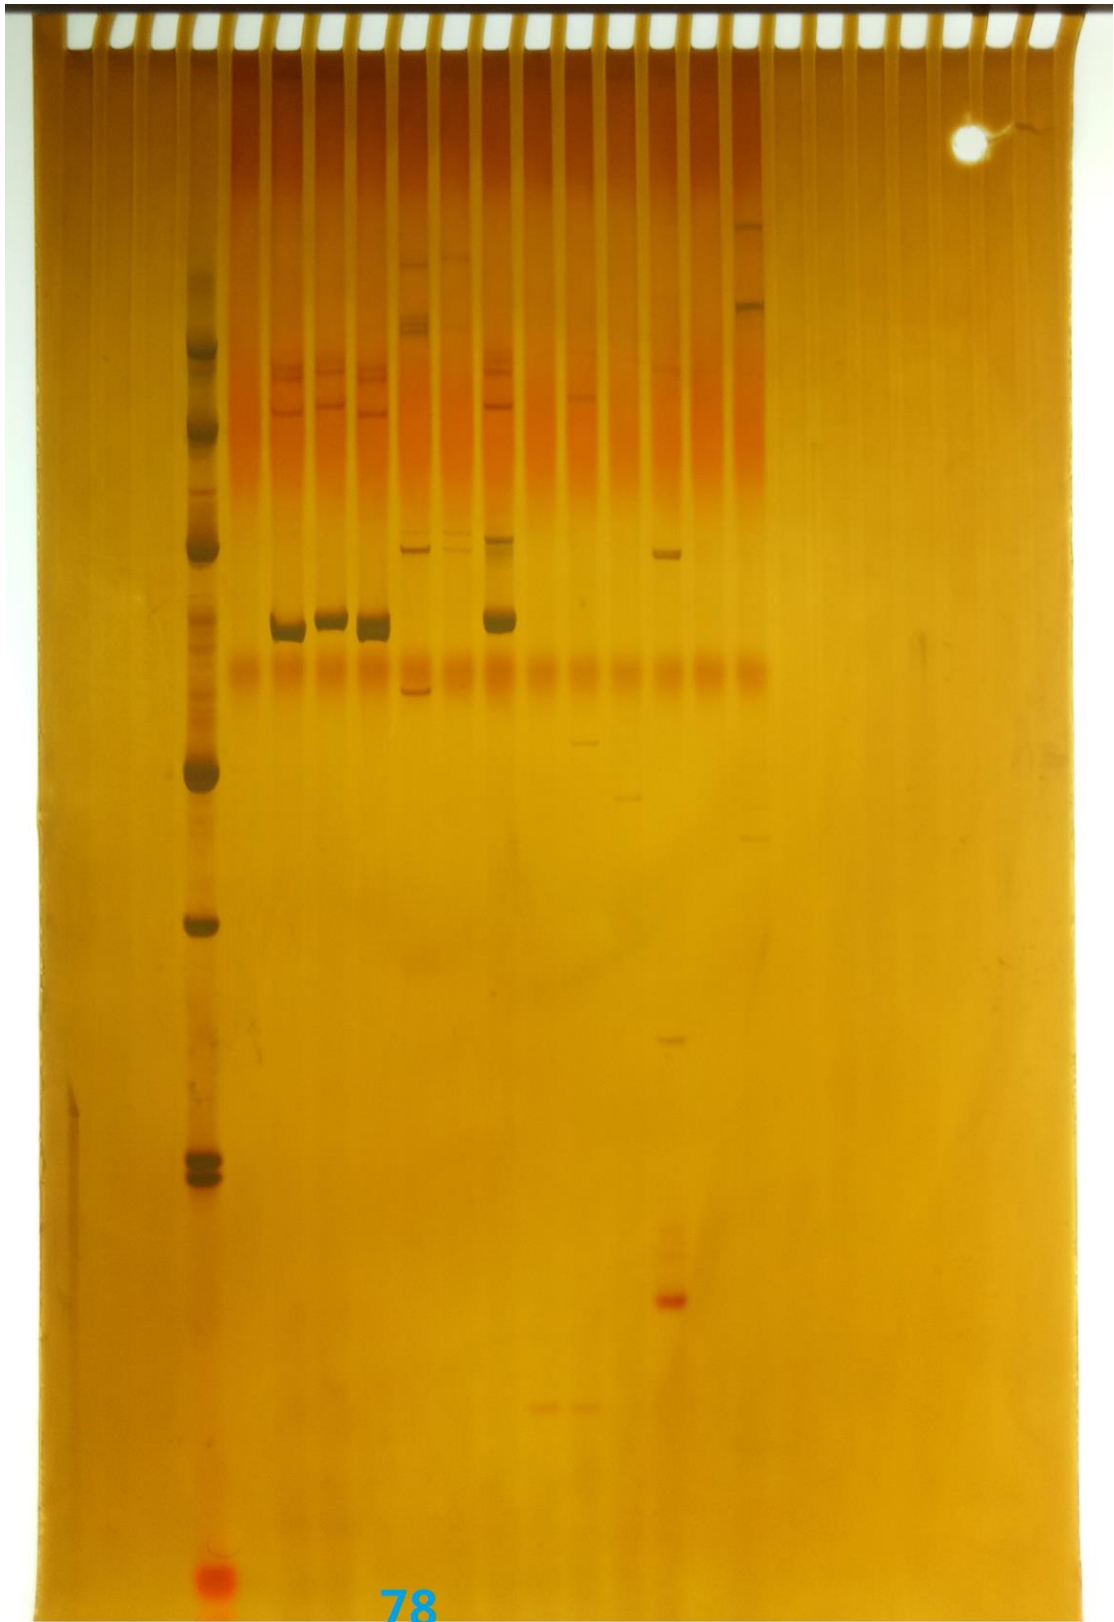

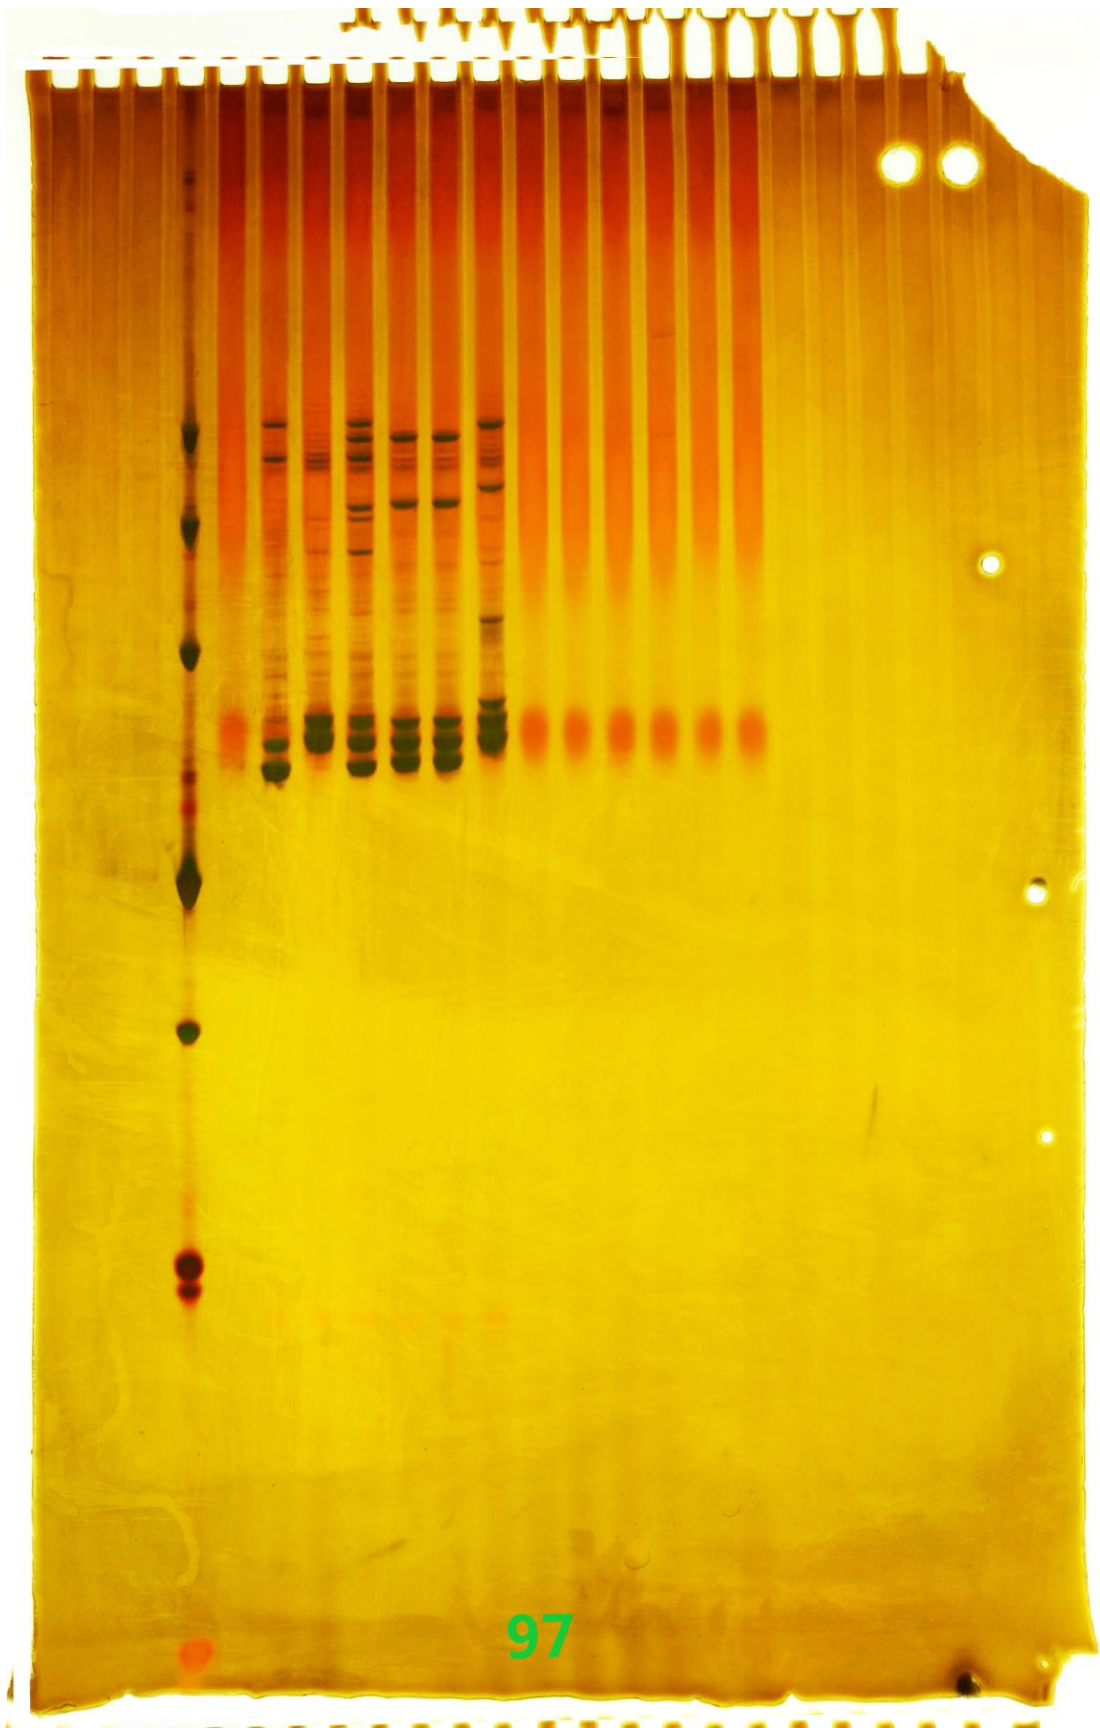

97
